# Supplementary material
Source: PubMed Central journal article supplement (PMC3134637)
Supplement: NIHMS300940-supplement-Supplementary_Information.pdf [file NIHMS300940-supplement-Supplementary_Information.pdf]

# Supplementary Information

## Supplementary Methods and Discussion

### Normalization

Because the raw intensity varies from cluster to cluster and based on position within the flow cell during sequencing, we tested several possible strategies to normalize for these factors before settling on using the mean intensity measured during the sequencing cycles. Reasoning that clusters containing TGASTCA motifs should have similar GCN4 binding intensity, we evaluated potential quantities for normalization by their correlation with GCN4-binding intensity in these clusters:

| Normalization quantity                                                        | Pearson correlation with GCN4-binding intensity |
|-------------------------------------------------------------------------------|-------------------------------------------------|
| Mean sequencing cycle intensity                                               | 0.6993                                          |
| Mean sequencing cycle intensity, sum of the four channels rather than highest | 0.6149                                          |
| Median sequencing cycle intensity                                             | 0.6991                                          |
| Last sequencing cycle intensity                                               | 0.5636                                          |
| Maximum sequencing cycle intensity                                            | 0.5574                                          |

If each intensity measurement is noisy, resulting in cycle-to-cycle variability, using all of the measurements rather than the last cycle or the maximum cycle provides a more accurate estimate of cluster size.

The background intensity is calculated as the median normalized intensity over all clusters and is then subtracted from the normalized intensity of each cluster to yield the normalized intensity above background. The intensity reported in all figures is the normalized intensity above background, corrected for photobleaching.

### Technical corrections

To determine the corrections needed for mapping normalization, photobleaching, and other factors, we performed a set of pilot experiments using various lengths of random oligomers.

We focused on the intensity of sequences containing the canonical GCN4 binding motif (TGASTCA, where S = C or G), reasoning that most of the variation in the intensity of these clusters would be due to technical rather than biological reasons. Variables correlating with the intensity of these clusters should therefore be corrected for.

First, we examined whether the motif position in the sequence correlated with intensity due to accessibility of different parts of the DNA. We observed no correlation between the position of the motif within the cluster sequence and the distribution of raw intensities for motif-containing clusters of size 25 (Supplementary Figure 1).

Additionally, the raw intensity of motif-containing clusters was similar for clusters containing 20-mers and 15-mers. Therefore, we performed future analyses using 25mers.

In contrast, we found that intensity of motif-containing clusters was strongly influenced by position within a particular imaging tile (data not shown). For each tile, a different spatial pattern of average intensity was observed. Therefore, we investigated normalization based on the average sequencing intensity of a cluster or the fluorescent intensity of a labeled primer. The average sequencing intensity correlated better with Gcn4p fluorescent intensity for motif-containing clusters ( $R^2 = 0.48$ ) than the intensity of a labeled primer with Gcn4p intensity ( $R^2 = 0.30$ ). One interpretation of this data is that the intensity measurements are inherently noisy, and that averaging over dozens of sequencing cycles provides a better measurement of cluster size and brightness than a single measurement. As a result we proceeded with analysis based on protein intensity normalized by the average sequencing cycle intensity, reducing noise due to technical reasons.

To determine the efficiency of washing and photobleaching, we performed an experiment in which we imaged a bound flow cell twice in a row without washing, and in a separate experiment imaged after washing. We found that the second round of imaging without washing reduced fluorescent intensity of TGASTCA clusters by roughly 35%, presumably due to photobleaching. The washing reduced intensity of an average cluster by roughly 65%. When we sequentially flow on increasing concentrations of Gcn4p, we do not completely wash off the protein on the flow cell, and some of what remains will be photobleached. Therefore, we correct the intensity at concentration  $i$  ( $C_i$ ) using the equation:

$$C_{i,\text{corrected}} = C_i + C_i - 1 \times (1 - 65\%) \times (35\%)$$

This equation assumes that the fraction of Gcn4p remaining after washing and photobleaching will remain bound in the next set of imaging. We believe this to be a reasonable assumption, given that without this correction we observe decreasing Gcn4p signal for TGASTCA clusters at the highest concentration. This assumption is also supported by kinetics experiments showing that the off-rate of Gcn4p is quite low<sup>1</sup>.

While 65% of intensity is washed away on average, the proportion of intensity washed away is not the same for all motifs. For example, clusters with the strongest binding 8mer, ATGACTCA, had intensity reduced by only 43%. However, because we increase the protein concentration by 5-fold at each step, after accounting for photobleaching this would affect the measured intensity by less than 3%.

### **Dissociation constants**

The dissociation constant was first determined for the canonical motif, defined as TGACTCA for 7mers, ATGACTCA for 8mers, ATGACTCAT for 9mers, or

TATGACTCAT for 10mers. Dissociation constants were calculated by least squares fit with the hill coefficient constrained between 1 and 2 and the maximum intensity constrained to be positive, using the equation:

$$\phi_B = [\text{Gcn4p}]^h / ([\text{Gcn4p}]^h + K_d^h) \times s$$

Where  $\phi_B$  is the fraction of DNA bound,  $[\text{Gcn4p}]$  is the Gcn4p concentration,  $K_d$  is the dissociation constant of Gcn4p to the sequence,  $h$  is the Hill coefficient of binding, and  $s$  is a scaling factor for the maximum intensity. For the remaining  $k$ -mers, dissociation constants were calculated as before but with  $s$  fixed at the value determined for the consensus  $k$ -mer. The  $K_d$  was constrained to be at most 1  $\mu\text{M}$  because the highest concentration of Gcn4p tested was 625 nM. Dissociation constants were determined separately for each lane, and the geometric mean and standard deviation were calculated, treating each lane as a technical replicate. To remove binding artifacts, only  $k$ -mers having a  $K_d$  less than 1  $\mu\text{M}$  in at least three lanes were assigned a mean  $K_d$  of less than 1  $\mu\text{M}$ .

### Quality filter for lanes

We observed that one concentration value (25nM) seemed to fail for two of the lanes examined (3 and 5), because clusters containing the TGASTCA motif had no signal above background for these lanes, although strong binding was observed for the other 5 lanes. As a result, lanes 3 and 5 were not used for  $K_d$  calculations.  $K_d$  values calculated with and without lanes 3 and 5 were relatively similar (generally within 30%).

### Iterative motif finding

In order to estimate  $K_d$  values for short  $k$ -mers, e.g. 8mers, from longer sequences, e.g. 25mers, one must be able to assign binding intensity to the proper  $k$ -mer. Because the oligonucleotides clustered on the flow cell were relatively short (25 nt) in our experiments, it is extremely rare for a specific  $k$ -mer sequence to occur in a cluster more than once (roughly 0.1% of the time for 7mers). Because of this fact, we employed an iterative algorithm to assign binding intensities to  $k$ -mers: For each sequence of size  $k$ , we calculated the median intensity at a Gcn4p concentration of 125nM over all clusters containing that  $k$ -mer or its reverse complement. We selected the  $k$ -mer with the highest median intensity at 125nM, determined its dissociation constant based on the median intensities, and removed all clusters containing this  $k$ -mer or its reverse complement from further calculations. We repeated this procedure iteratively until all remaining  $k$ -mers had  $K_d$  values greater than 1  $\mu\text{M}$ , selecting sequences with affinity that could not be explained by occasional overlap with stronger binding sites. Due to computational limitations, we only performed the iterative removal of clusters for 9-mers containing 8mers that had  $K_d$  values less than 1  $\mu\text{M}$ . Likewise, we only performed iterative removal of clusters for 10-mers containing 9-mers that had  $K_d$  values less than 1  $\mu\text{M}$ .

Thus, we made the assumption that all of the intensity of the clusters containing the top  $k$ -mer comes from binding to that  $k$ -mer itself, and not to others. In the case of 8mers, for example, 95% of the time there will be not be two 8mers having  $K_d$  less than  $1\mu\text{M}$  in the same cluster. After removing clusters containing this  $k$ -mer, we make the same assumption for the  $k$ -mer with the next highest median binding intensity in the remaining clusters.

Although this algorithm makes reasonable assumptions for this dataset, if the sequencing library contains longer inserts or the analysis were performed on shorter  $k$ -mers, the assumptions would not be reasonable. In this case, an expectation-maximization approach would be a more appropriate solution. The intensity of a cluster would be partitioned among its constituent  $k$ -mers in proportion to their binding affinity, and then the  $k$ -mers would be assigned an affinity based on the median binding intensity of clusters, in an iterative process. Such an algorithm could be initialized either using the iterative procedure we describe, or simply using the uncorrected median intensities.

### Electrophoretic mobility shift assays

The double stranded DNA was reconstituted by mixing equimolar amounts of the two single stranded DNA molecules (Operon) in TEN buffer (10mM Tris.HCl and 1mM EDTA, pH 8.0), heating up at  $90^\circ\text{C}$  for 5 minutes and progressive cooling to room temperature. The dsDNA was labeled in a PNK (N.E.B.) reaction with  $\gamma$ - $^{32}\text{P}$ -ATP (Perkin Elmer). mOrange-Gcn4p dilutions were incubated for 45 minutes with labeled dsDNA at a final concentration of 1.4nM in binding buffer (1xPBS, 200 ng/mL competitor dna(Poly (I)·Poly(C), 2mg/mL BSA, 0.05% TWEEN and 10% glycerol) and resolved on a Novex 6% DNA retardation gel (Invitrogen). The gels were read on a Typhoon 9000 scanner (GE Healthcare) and the intensities of the bands measured using the ImageQuant software.

The mOrange-Gcn4p dilutions used (nM): 0, 1, 2.5, 5, 10, 25, 50, 125, 250, 1000.  
DNA sequences used (the variable decamer in bold):

|           |                                    |
|-----------|------------------------------------|
| GCN4BS1-F | 5' -GGGAA <b>TATGACTCATA</b> AGGG  |
| GCN4BS1-R | 5' -CCCT <b>TATGAGTCATAT</b> TCCC  |
| GCN4BS2-F | 5' -GGGAAC <b>CATGACTCATG</b> AGGG |
| GCN4BS2-R | 5' -CCCT <b>CATGAGTCATG</b> TTC    |
| GCN4BS3-F | 5' -GGGAA <b>TATGACTAATA</b> AGGG  |
| GCN4BS3-R | 5' -CCCT <b>TATTAGTCATAT</b> TCCC  |
| GCN4BS4-F | 5' -GGGAA <b>TATGACTGATA</b> AGGG  |
| GCN4BS4-R | 5' -CCCT <b>TATCAGTCATAT</b> TCCC  |
| GCN4BS5-F | 5' -GGGAA <b>TATGACACATA</b> AGGG  |
| GCN4BS5-R | 5' -CCCT <b>TATGTGTCATAT</b> TCCC  |



|            |                           |
|------------|---------------------------|
| GCN4BS6-F  | 5' -GGGAATAAGACTCATAAGGG  |
| GCN4BS6-R  | 5' -CCCTTATGAGTCTTATTCCC  |
| GCN4BS7-F  | 5' -GGGAATATGACCCATAAGGG  |
| GCN4BS7-R  | 5' -CCCTTATGGGTCATATTCCC  |
| GCN4BS8-F  | 5' -GGGAACCTTGACTCAAGAGGG |
| GCN4BS8-R  | 5' -CCCTCTTGAGTCAAGTTCCC  |
| GCN4BS9-F  | 5' -GGGAATATGTCCCATAGGG   |
| GCN4BS9-R  | 5' -CCCTTATGGGACATATTCCC  |
| GCN4BS10-F | 5' -GGGAACCCGGGCGAACAGGG  |
| GCN4BS10-R | 5' -CCCTGTTGCGCCGGGTTCCC  |

EMSA values tended to underestimate the  $K_d$  somewhat relative to HiTS-FLIP, (Fig. 1f), possibly because dissociation within the gel reduces the dynamic range of the EMSA assay<sup>2</sup>.

#### Datasets: Sequences, PBMs, PWMs, microarray data

Yeast promoter sequences were intergenic regions as annotated in the *Saccharomyces* Genome Database (SGD), up to a maximum of 500 nucleotides upstream of each gene. PBM data was downloaded from the supplementary information of reference<sup>3</sup>. A PWM was taken from reference<sup>4</sup>. Microarray data was downloaded from GEO<sup>5</sup>, ArrayExpress<sup>6</sup>, the Rosetta Inpharmatics web site (<http://www.rii.com/publications/2001/mcb2001Marton.html>,<sup>7</sup>), or the DREAM3 website (with permission of N. Clarke, <http://wiki.c2b2.columbia.edu/dream/index.php/D3c3>). Data for transgenic GCN4 expression<sup>5</sup> was renormalized relative to time zero and so that the mean fold change at each time point was zero. Data for the amino acid starvation timecourse was renormalized so that the mean fold change at each time point was zero.

#### Occupancy scores

HiTS-FLIP promoter occupancy predictions were calculated as in<sup>8</sup> by assuming that the concentration of potential binding sites is so high relative to protein that the protein is essentially always bound to some sequence. Thus, the probability of a potential binding site being occupied by a single molecule of protein is the affinity ( $1/K_d$ ) of the site divided by the sum of the affinities of every sequence in the genome. PBM occupancies were calculated as in<sup>3</sup>, by summing the PBM binding intensity above median intensity for each 8mer in the sequence having enrichment score  $\geq 0.35$ . PBM binding intensities and enrichment scores were taken from the supplemental data of<sup>3</sup>.

When boxplots are used, red lines indicate medians and blue boxes indicate quartiles. Red outliers are points beyond  $q_3 + 1.5(q_3 - q_1)$  or  $q_1 - 1.5(q_3 - q_1)$ , where  $q_1$  and  $q_3$  are first and third quartiles, respectively. Black whiskers extend to the furthest points that are not outliers.

For Figure 3C, genes were ranked and distributed into 40 evenly spaced bins for each gene set. Induction plotted is the mean of the  $\log_{10}$  fold-change of the genes<sup>7</sup> in each bin, averaged over all bins within 5 in either axis for smoothing purposes.

### **Classification and correlation**

Area under the curve (AUC) analysis (Fig. 3A) was performed by ranking each gene based on the predicted occupancy of its promoter and recording systematically for all occupancy score cutoffs the sensitivity and specificity. For each dataset, we defined true positives as genes that were reported as bound (in the case of the ChIP data and Ty5 data) or were induced > 2-fold (amino acid starvation data or transgenic GCN4 data). True negatives were defined as all remaining yeast genes. For the Pearson correlations (Fig. 3B), we used the top quintile of genes ranked by each respective method and correlated the predicted occupancy to the fold-change in microarray signal.

### **Mismatch analysis**

Mismatches were considered in a 9mer context (ATGACTCA) unless otherwise stated.  $\Delta\Delta G$  values for mismatches were calculated by comparing the binding affinities ( $1/K_d$ ) of the  $k$ -mers with and without the mismatch using the formula  $\Delta G = -RT \ln(K_{eq})$ , with T set to 296.13 degrees Kelvin (23 degrees Celsius).

### **Gene ontology analysis**

Gene ontology analysis was performed using NCBI's DAVID (<http://david.abcc.ncifcrf.gov/home.jsp>), limiting to level 4 or 5 GO categories. The background was genes with expression level in the top 50% at time zero in the amino acid starvation timecourse data<sup>9</sup>. False discovery rates reported are Benjamini-Hochberg corrected.

### **Washing and equilibrium**

During our experiments we performed a relatively gentle wash step for 2 minutes before imaging Gcn4p bound to the DNA clusters, which should not substantially affect the equilibrium level of bound protein due to its low off-rate<sup>1</sup>. However, for proteins with faster dissociation rates, a wash step could considerably perturb the binding equilibrium. To address this potential issue, we sought to take advantage of the GA's illumination system, which is based on total internal reflection fluorescence using evanescent wave excitation<sup>10</sup>. To test the feasibility of eliminating the wash step altogether, we performed a proof-of-concept experiment in which we skipped the wash step and imaged the clusters bound by GCN4 at 100nM. Clusters containing the top 7mer motif TGACTCA had a median intensity 13.5-fold higher than that of all the clusters, and, ranking of the top  $k$ -mers was well preserved. All 8 of the highest-affinity 7mers were shared between the experiment having a wash step and the experiment without a wash step. This observation suggests that HiTS-FLIP can detect binding at true equilibrium without a wash step at a comparable level of data quality. This property of the method differs from the PBM approach, which requires several wash steps and one dry step before the imaging is performed.

### **Promoter occupancy calculation**

Because PBMs do not measure  $K_d$  values, it is not possible to directly apply the same calculation for promoter occupancy that was used for the HiTS-FLIP affinities. In fairness to the authors of Zhu et al. (2009), we used the same estimates for promoter occupancy that the authors used, which are presumably well-suited to their dataset. However, we sought to verify whether our method, based on the model of Stormo & Fields, would be more appropriate for PBM data as well. Under a simple model of binding on PBMs, the intensity measurements might be inversely proportional to their  $K_d$  (as assumed in Fordyce et al., Nature Biotech. 28, 970.). After converting PBM intensities to  $K_d$  estimates using this approach, we could directly compare occupancies predicted by the Stormo & Fields formalism between PBMs and HiTS-FLIP. Performing this test, the predictive accuracy of PBMs decreased from that reported in figure 3A and 3B. For example, the AUC for predicting bound genes in the Harbison et al. ChIP-Chip data fell from 0.84 to 0.68, and the AUC for predicting genes induced after amino acid starvation (Natarajan et al.) fell from 0.67 to 0.58. These observations may not be surprising, since they apply a model that assumes equilibrium binding to data collected following stringent washes.

## Supplementary Tables

**Supplementary Tables 1-5.** HiTS-FLIP dissociation constants for 8mers through 12mers, respectively. Columns represent  $k$ -mer,  $K_d$  (nM), and log-standard deviation of  $K_d$ . Released as accompanying tab-separated value files.

**Supplemental Table 6.** Comparison of Gcn4p  $K_d$  measurements from literature versus  $K_d$  as measured by HiTS-FLIP for 10mer sequences.

| Sequence           | Literature $K_d$ , nM (citation)                  | HiTS-FLIP $K_d$ , nM |
|--------------------|---------------------------------------------------|----------------------|
| AP-1 (GATGACTCAT)  | $90 \pm 60$ (Hollenbeck & Oakley) <sup>11</sup>   | $12.4 \pm 1.50$      |
| CRE (ATGACGTCAT)   | $140 \pm 30$ (Hollenbeck & Oakley) <sup>11</sup>  | $65.2 \pm 6.49$      |
| CREHS (GATGACAGCT) | $800 \pm 200$ (Hollenbeck & Oakley) <sup>11</sup> | $716 \pm 50.0$       |
| CRE (ATGACGTCAT)   | $\sim 2$ (Cranz et al.) <sup>1</sup>              | $65.2 \pm 6.49$      |

**Supplementary Table 7.** Predicted promoter occupancies using 8mer  $K_d$  values or PBM data. Columns represent systematic gene identifier, occupancy predicted by HiTS-FLIP (probability of a binding given a single Gcn4p molecule) and occupancy score calculated using PBM data<sup>3</sup>. Released as an accompanying tab-separated value file.

**Supplementary Table 8:**

Enrichment of GO categories in promoter sets. Enrichment analysis was done through NCBI's DAVID webserver, using the GOTERM\_BP\_4, GOTERM\_BP\_5, GOTERM\_MF\_4, GOTERM\_MF\_5 annotations and a Benjamini-Hochberg multiple-test correction. The FDR for each enrichment is in parentheses.

| <b>High-affinity sites only (n=396)</b>                         | <b>Both high- and lower-affinity sites (n=104)</b>             | <b>Lower-affinity sites only (n=396)</b> |
|-----------------------------------------------------------------|----------------------------------------------------------------|------------------------------------------|
| Cellular amino acid metabolic process ( $4.3 \times 10^{-21}$ ) | Cellular amino acid metabolic process ( $1.2 \times 10^{-7}$ ) | Monosaccharide metabolic process (0.29)  |
| Cellular amine metabolic process ( $1.3 \times 10^{-18}$ )      | Cellular amine metabolic process ( $2.7 \times 10^{-7}$ )      | Carbohydrate catabolic process (0.50)    |
| Carboxylic acid metabolic process ( $3.3 \times 10^{-17}$ )     | Carboxylic acid metabolic process ( $5.9 \times 10^{-7}$ )     | Nuclease activity (0.50)                 |
| Organic acid biosynthetic process ( $2.3 \times 10^{-15}$ )     | Nitrogen compound metabolic process ( $3.3 \times 10^{-6}$ )   | Glucose metabolic process (0.61)         |
| Nitrogen compound metabolic process ( $4.7 \times 10^{-14}$ )   | Organic acid biosynthetic process ( $5.9 \times 10^{-7}$ )     | Aspartic-type peptidase activity (0.75)  |

## Supplementary Figure Legends

**Supplementary Figure 1. Binding intensity is independent of position in the sequence.** For clusters containing TGASTCA, raw intensity before normalization is plotted against the starting position of the TGASTCA motif in the sequence. Low starting positions are closer to the flow cell; high starting positions are further from the flow cell. Red line indicates median, blue lines indicate quartiles. Whiskers and outliers are as explained in methods.

**Supplementary Figure 2. Effects on binding of nucleotides flanking the 7mer consensus.** 11mer sequences centered on the canonical 7mer match TGACTCA were divided into three categories, KRTGACTCAYM (strongest), MYTACTCAYM (weakest), and the rest (typical), where K = T or G, R = A or G, Y = T or C, and M = A or C. The  $K_d$  values for each group of 11mers are plotted. Red lines indicate median, blue lines indicate quartiles, and whiskers and outliers are as explained in methods.

**Supplementary Figure 3. Gcn4p can accommodate variable spacing of half-sites.** Normalized intensity is plotted for sequences containing reverse-complement half-sites (solid lines) or tandem half-sites of equivalent sequence and spacing (dashed lines). Orientation of half-sites is shown above and below sequences (blue for forward, red for reverse-complement). Overlapping halfsites (red) show the strongest binding, but only when in reverse-complement orientation. Adjacent but non-overlapping half-sites (green) still exhibited stronger binding in reverse-complement orientation compared to tandem orientation, suggesting cooperative binding as a dimer. In contrast, half-sites with a single nucleotide spacer (blue) were not bound more strongly in reverse-complement orientation, suggesting that it is impossible for the dimer to bind this sequence.

**Supplementary Figure 4. EMSA experiments.** Ten different dsDNA oligonucleotides (left side) with different affinities for Gcn4p were tested. The experiments were done in duplicate and the gels for both replicates are shown (right side). For all experiments, the following concentrations of mOrange-Gcn4p were used (from left to right, in nM): 0, 1, 2.5, 5, 10, 25, 50, 125, 250, 1000.

**Supplementary Figure 5. Individual pairs of mismatches reveal non-independent effects of half-site binding.** As in Fig. 2C and 2D, except that blue bars correspond to a 7mer having a T<sub>1</sub> to A mismatch from consensus (A), a T<sub>5</sub> to A mismatch (B), or a C<sub>6</sub> to A mismatch (C). Significance of differences was not assessed.

**Supplementary Figure 6. Comparison between HiTS-FLIP  $K_d$  measurements and PBM enrichment scores.** Each 8mer appears as a point in this plot with its enrichment score reported by<sup>3</sup> and the  $K_d$  estimated by HiTS-FLIP.

**Supplementary Figure 7. HiTS-FLIP identifies SPT15 (TBP) as a target of Gcn4p following amino acid starvation.** A) Schematic of TBP promoter with strongest Gcn4p binding site candidate underlined, with mismatches to the consensus 7mer sequence in red. The percentile of the TBP promoter is compared when ranking by HiTS-FLIP predicted occupancy, PBM predicted occupancy, or PWM scores. B) TBP expression timecourse following 3-aminotriazole (3AT) addition, causing amino acid starvation, as measured by replicate microarray experiments<sup>9</sup>.

**Supplementary Figure 8. Expression following amino acid starvation is predicted by promoter occupancy.** A) All yeast genes are binned by predicted promoter occupancy using HiTS-FLIP, and boxplots indicate induction after amino acid starvation<sup>7</sup>. Red lines indicate median, blue box indicates quartiles, black whiskers indicate non-outlier extremes, and red dots indicate outliers. Predicted occupancy corresponds to probability that the promoter is bound at any one time at a concentration of exactly one molecule of Gcn4p per haploid genome. B) As in (A) except that occupancy is predicted using only lower-affinity  $k$ -mers ( $1\mu\text{M} > K_d > 400\text{nM}$ ).

**Supplementary Figure 9. No significant difference in strong sites between high-affinity and high- and lower- affinity promoter classes.** For genes in the high-affinity only class in figure 3D ( $n=396$ ), high- and lower- class ( $n=104$ ), or all others, the occupancy of each promoter was predicted with a model using only high-affinity 8mers ( $K_d < 400\text{nM}$ ). Red lines are median values, blue lines are quartiles, and whiskers and outliers are as explained in the methods.

**Supplementary Figure 10. Lower-affinity Gcn4p binding sites predict induction of genes following amino acid starvation and transgenic Gcn4p induction.** Genes were scored with a model using only 8-mers having  $K_d < 400\text{nM}$  (high-affinity) or  $400\text{nM} < K_d < 1\mu\text{M}$  (lower-affinity) and were partitioned into sets ranking in the top 500 of the high-affinity model but not the lower-affinity model, the lower- but not higher-affinity model, in both models, or in neither. A) The mean log fold change following amino acid starvation<sup>7</sup> plotted for each set of genes. Error bars represent  $\pm$  one standard error. B) The mean log fold change following induction of transgenic Gcn4p<sup>5</sup> for selected timepoints is plotted. Error bars represent  $\pm$  one standard error.

**Supplementary Figure 11. Induction of genes with lower-affinity Gcn4p binding sites is GCN4 dependent.** As in figure 3D, except that only genes having lower- but not higher-affinity Gcn4p binding sites were compared for induction after amino acid starvation in wild-type cells or GCN4 knockout cells. Error bars represent  $\pm$  one standard error. Difference at 30 minutes is significant ( $p = 0.027$ , paired t-test).

## Supplementary References

1. Cranz, S., Berger, C., Baici, A., Jelesarov, I. & Bosshard, H.R. Monomeric and dimeric bZIP transcription factor GCN4 bind at the same rate to their target DNA site. *Biochemistry* **43**, 718-727 (2004).
2. Hellman, L.M. & Fried, M.G. Electrophoretic mobility shift assay (EMSA) for detecting protein-nucleic acid interactions. *Nat Protoc* **2**, 1849-1861 (2007).
3. Zhu, C. et al. High-resolution DNA-binding specificity analysis of yeast transcription factors. *Genome Res* **19**, 556-566 (2009).
4. Maclsaac, K.D. et al. An improved map of conserved regulatory sites for *Saccharomyces cerevisiae*. *BMC Bioinformatics* **7**, 113 (2006).
5. Chua, G. et al. Identifying transcription factor functions and targets by phenotypic activation. *Proc Natl Acad Sci U S A* **103**, 12045-12050 (2006).
6. Harbison, C.T. et al. Transcriptional regulatory code of a eukaryotic genome. *Nature* **431**, 99-104 (2004).
7. Natarajan, K. et al. Transcriptional profiling shows that Gcn4p is a master regulator of gene expression during amino acid starvation in yeast. *Mol Cell Biol* **21**, 4347-4368 (2001).
8. Stormo, G.D. & Fields, D.S. Specificity, free energy and information content in protein-DNA interactions. *Trends Biochem Sci* **23**, 109-113 (1998).
9. Prill, R.J. et al. Towards a Rigorous Assessment of Systems Biology Models: The DREAM3 Challenges. *PLoS One* (2010).
10. Toomre, D. & Manstein, D.J. Lighting up the cell surface with evanescent wave microscopy. *Trends Cell Biol* **11**, 298-303 (2001).
11. Hollenbeck, J.J. & Oakley, M.G. GCN4 binds with high affinity to DNA sequences containing a single consensus half-site. *Biochemistry* **39**, 6380-6389 (2000).



|          |                  |                    |
|----------|------------------|--------------------|
| ATGACTCA | 21.8644484538395 | 0.129042004955712  |
| ATGAGTCA | 28.406657890244  | 0.161861652847058  |
| GTGACTCA | 37.7827915823589 | 0.194733295221878  |
| GTGAGTCA | 45.5360883474567 | 0.129389630339638  |
| ATTAGTCA | 57.777722098695  | 0.200643099198452  |
| ATGACTAA | 64.9373625942055 | 0.0965733022203616 |
| GAGTCATA | 73.4262575681568 | 0.113302573167841  |
| AGAGTCAT | 79.1804061208765 | 0.600071693072022  |
| CTGACTCA | 86.9023516331532 | 0.110952029992689  |
| GAGTCATC | 95.6441382920301 | 0.122624710808301  |
| GTGACTAA | 103.390733344826 | 0.115888576800859  |
| ATGACTGA | 104.678732054573 | 0.141533298109791  |
| CTGAGTCA | 115.796106292894 | 0.132633013055871  |
| ATGACACA | 121.320879611407 | 0.104750274353206  |
| AAGAGTCA | 123.970867438816 | 0.136367888416328  |
| ATGACGCA | 124.176573880999 | 0.129794972214114  |
| ATTACTCA | 125.831308029229 | 0.11375317624354   |
| AATGACTC | 127.11608765136  | 0.143258734210261  |
| AGGTGACT | 128.431854028219 | 2.12738954152854   |
| TGACTCAA | 140.76768106475  | 0.132803061155984  |
| TAGTCATA | 154.890809529787 | 0.114624325151128  |
| GAGTCACA | 161.457585713251 | 0.115861851866885  |
| ATCAGTCA | 166.131457255091 | 0.115887047325558  |
| ATGACTCC | 179.247966585719 | 0.144570277038886  |
| CAGTCATA | 180.010489733759 | 0.133699678503007  |
| GAGTCACC | 183.396061507682 | 0.101107477074341  |
| ATGAGTAA | 192.378154959104 | 0.140423541980712  |
| ATGACTGC | 196.422161517356 | 0.980649329468519  |
| ATGTGTCA | 197.073281441975 | 0.106546483995354  |
| ATGACTCG | 198.588248617304 | 1.51234406834803   |
| CATGACTC | 206.909051012609 | 0.164073584613787  |
| AAGTCATT | 210.104414864765 | 2.4731591142331    |
| GTGACTGA | 212.211554010986 | 0.130014588807051  |
| GATGACTA | 213.763375084661 | 0.133243441337376  |
| GTGACGCA | 222.776752194523 | 0.130755589911147  |
| ATGACTAG | 235.896748557248 | 0.892582691009629  |
| ATGATTCA | 239.42677436425  | 0.120693337404513  |
| ACAGTCAT | 242.808776710635 | 0.122383242473975  |
| GGAGTCAC | 247.819470359761 | 0.1523145663465    |
| CTGACTAA | 254.291849853215 | 0.120477315260346  |
| AATGACTA | 254.933656367432 | 0.150968764900308  |
| AGTGACTC | 264.648724874272 | 0.180860485941539  |
| GTTAGTCA | 273.652346638821 | 0.295662394081117  |
| GTGACACA | 273.942836504841 | 0.112237282818107  |
| ATGACGTG | 276.59997541996  | 0.116433211830189  |
| AGAGTCAC | 279.682018756105 | 0.0659583909588879 |
| AGTCATAC | 280.594792601908 | 0.124493108133798  |
| CGTGACTC | 284.298430050168 | 0.107693756024814  |
| ATGCGTCA | 287.000431756365 | 0.11471381294074   |
| GTGTCATA | 288.498504421965 | 0.118299428691835  |
| ATGACGTA | 299.417020718205 | 0.144310917706827  |
| AGTCATCG | 302.404209558662 | 0.108702163038728  |
| CAGTCATC | 306.918785742984 | 0.120001379262697  |
| ATGAGTCG | 320.118967554173 | 0.433319305892026  |

|          |                  |                    |
|----------|------------------|--------------------|
| TGACGTCA | 320.241153652732 | 0.127525283681657  |
| TAGTCACA | 323.342111390264 | 0.146820583065609  |
| GACTCATA | 332.55143123129  | 0.188057830707038  |
| ATGACTTC | 345.324623960128 | 1.37065818812377   |
| ATGACTTA | 347.84410626119  | 0.156916371043311  |
| CAGTCACC | 349.250377906648 | 1.21248011809826   |
| GAGTCAGA | 350.529355097339 | 0.124753143944316  |
| ATGACGAA | 362.863443840624 | 0.155778488891739  |
| GGTGACTA | 367.720346547914 | 0.146740624208771  |
| AATGACTG | 368.05939935115  | 0.158015996740095  |
| GTGAGTAA | 369.93114217834  | 0.116486791515502  |
| ATGACTGG | 372.552011711787 | 0.773229197112863  |
| AATAGTCA | 378.063060955901 | 0.0419733423473979 |
| ATGACCCA | 381.458378884366 | 0.116718198966354  |
| AGTCATAA | 383.086393392554 | 0.120320475571984  |
| ATAGTCAT | 383.177710468769 | 0.353119184452578  |
| ATGACTAC | 389.943286797305 | 0.110844258559257  |
| GCGTCATA | 391.143737350165 | 0.0931690074162251 |
| ATGACCAA | 393.712187314867 | 0.110899735560769  |
| GATGACAC | 395.584911452418 | 0.118573822104771  |
| AGACTCAT | 396.095601048526 | 0.529202750684472  |
| ACAGTCAC | 403.406584460104 | 0.12441109548902   |
| ATGAATCA | 405.12007891595  | 0.111005607266771  |
| GTATGACA | 408.981263406916 | 0.0764065943198506 |
| GACTCATC | 416.255334351816 | 0.144252250231611  |
| ATGACAAA | 419.034527692401 | 0.154839899381237  |
| AGTCATCA | 424.920158666314 | 0.122344430014057  |
| TAGAGTCA | 427.754133255181 | 0.129520487320395  |
| AGTCACCC | 427.817733993418 | 1.17735678845206   |
| AGTCATAT | 428.21079278445  | 0.104275035736746  |
| CATGACTA | 436.628796609329 | 0.119316668174801  |
| AATGAGTC | 451.685719428009 | 0.119198801807458  |
| CAGTCACA | 456.288240270028 | 0.181128766073973  |
| GATGACGC | 460.170756935851 | 0.121112204952119  |
| ACACGTCA | 476.619132087559 | 0.0915614512397426 |
| AGTCATAG | 482.965969394908 | 0.108027222576589  |
| AAGACTCA | 497.824928275729 | 0.0752266685641462 |
| CTGACTGA | 498.593373009337 | 0.130276489113362  |
| AGTGACTA | 509.311029701731 | 0.117727627447226  |
| GTAGTCAC | 512.895273666152 | 0.093734383551713  |
| TCGAGTCA | 515.699171225436 | 0.143267899572609  |
| TGACTAAA | 523.633024991856 | 0.0891219275555081 |
| CTATGACA | 524.3434794867   | 0.135101192337958  |
| GTGACGTA | 526.359223971239 | 0.103204070704297  |
| ATGACGGA | 527.872523662104 | 0.168862517314566  |
| AATGACAC | 528.131665552003 | 0.124962456246698  |
| TATGACGA | 530.208311137467 | 0.147256031973467  |
| ATGACATA | 534.387802365613 | 0.109355057228111  |
| AGTCATTC | 534.431500957218 | 0.143045979890745  |
| ATGACAGA | 542.912756741897 | 0.137556001375482  |
| AAAGTCAT | 545.15636505904  | 0.713424746079329  |
| AGTGTCAT | 553.075773232047 | 0.148966949625719  |
| ATGACCGG | 555.428624210607 | 0.137371857092069  |
| CTAGTCAC | 561.905391651741 | 0.129859207690651  |

|          |                  |                    |
|----------|------------------|--------------------|
| GTGATTCA | 568.047473805092 | 0.0832552106917636 |
| AGTCACAC | 570.29494815925  | 0.105299757653161  |
| GAGTCAGC | 570.982506510692 | 0.0779052593639758 |
| AGTCACGG | 572.389307256382 | 0.801005763769608  |
| ACGTCATA | 573.361188477406 | 0.121131342474153  |
| TTAGTCAA | 576.644952432428 | 0.112126918379558  |
| ATGACGCC | 579.413355924258 | 0.910116225385948  |
| AAATGACT | 580.180578804361 | 0.119146896653001  |
| ATGAGTAC | 585.986020136333 | 0.121250964852337  |
| AGTCATCC | 589.285971789429 | 0.129283664684799  |
| TGTCATAA | 589.620046859717 | 0.145370222537261  |
| CGTCATAC | 596.502040751607 | 0.167317705073128  |
| ATTGCTCA | 608.111521677397 | 0.112556279725165  |
| ACGAGTCA | 609.385271084293 | 0.144495578639619  |
| CAGTCATG | 611.178895345187 | 0.0922691551285804 |
| ATTGCTCA | 612.867798160481 | 0.122890301894589  |
| ATAGTCAC | 616.282170627576 | 0.134006236500995  |
| GTGACTTA | 626.439618614035 | 0.0890341577923072 |
| AATGACGC | 630.064403730887 | 0.127769239956875  |
| AGTCATTG | 633.771060731198 | 0.115071053909552  |
| GATGACGA | 639.793603717721 | 0.106221320870081  |
| AGATGACT | 642.034958269282 | 0.112718694021848  |
| GTGTCACA | 645.245227382817 | 0.10907918630053   |
| TATGACAA | 647.661842069432 | 0.192740524206903  |
| ATGTCATA | 653.738349466206 | 0.0223666507093017 |
| ACGTCATC | 654.439249777533 | 0.126063276427766  |
| GTGACCAA | 657.553933449469 | 0.114132736493213  |
| AGGAGTCA | 657.590023725375 | 0.105238179095007  |
| GTGTGTCA | 657.928720748185 | 0.118137721639461  |
| AGTCACCG | 658.19649727451  | 0.132076110719758  |
| CGACTCAC | 662.290516861376 | 0.155032296292913  |
| CGATGACA | 670.654080162047 | 0.0885796022346006 |
| TATGACCA | 671.520892785536 | 0.109448369456235  |
| GACTCACA | 677.794408812415 | 0.113177320944834  |
| CTGACGCA | 680.441951776902 | 0.0780767459686693 |
| GTCAGTCA | 682.670377261168 | 0.255347397572946  |
| GCAATCAC | 686.14344009205  | 0.0919860352828554 |
| AGTCACAT | 690.099191685878 | 0.116255057807548  |
| CACGTCAC | 699.824138301482 | 0.146842366018229  |
| AGTCATGC | 718.176634281308 | 0.122465741205003  |
| TGATGACA | 720.225831587322 | 0.101938267868007  |
| AGTCACAG | 721.994826387612 | 0.112851738623559  |
| AATGACGA | 724.506706790127 | 0.167031909152733  |
| ATATGACA | 726.59779533229  | 0.105525406296763  |
| AGTGACTG | 727.560466866407 | 0.0838274463059529 |
| GTGACCCA | 733.456550768156 | 0.0679737633403197 |
| GACTCACC | 737.963051658313 | 0.0226912458741671 |
| AGTCATTA | 739.726566314915 | 0.107593807118618  |
| AGTCACCA | 752.84879746971  | 0.111797823410397  |
| CCAGTCAC | 760.73617028738  | 0.104194927708504  |
| AGTCACAA | 761.431285870895 | 0.0983090332703683 |
| GATGACAA | 763.546838733437 | 0.119236671797485  |
| TAGTCAGA | 773.785714104038 | 0.110192133877535  |
| AACAGTCA | 774.348035179551 | 0.0985773340045095 |

|          |                  |                    |
|----------|------------------|--------------------|
| ATGAGCAA | 774.770639128742 | 0.105672728927496  |
| ATTACTAA | 777.003105561257 | 0.094388533428731  |
| GTGCGTCA | 781.583788660351 | 0.152465029381033  |
| GTGACAAA | 783.956280470834 | 0.163129854484022  |
| AATGACGT | 785.3139379063   | 0.135988946269992  |
| AGTGTCAC | 788.623309045876 | 0.0878933563427238 |
| GGATGACA | 790.877554391685 | 0.0801047223263876 |
| AGTCATGA | 797.048393676577 | 0.0974558376177513 |
| GGTGACAC | 797.549753321279 | 0.102009760670791  |
| GTGACGAA | 798.750453951227 | 0.0818950666673505 |
| TACTCATA | 802.606863356859 | 0.0984835224717441 |
| GTTACTCA | 816.653978577874 | 0.0991174674460887 |
| ATGACACG | 818.367267675433 | 0.0979525027227709 |
| CGTCATAG | 825.11185514715  | 0.109522381459354  |
| ATGTCATC | 828.896939524903 | 0.0733990905593687 |
| AGTATGAC | 829.625316365166 | 0.22287563269735   |
| GTGTGACA | 830.465283611617 | 0.0796304576176792 |
| TGACTGAA | 833.309803453558 | 0.0903347449656682 |
| ATACTCAT | 835.532900800385 | 0.127789114152535  |
| ATCCGTCA | 836.432700458011 | 0.0985670167762073 |
| CTGACACA | 842.605419664912 | 0.0762709076840584 |
| AGATGACA | 848.203019590072 | 0.0876959577567928 |
| ACATGACT | 855.902435677757 | 0.0977749965774764 |
| GAATGACA | 858.586662439217 | 0.115662316036696  |
| GAGTCAAC | 864.663197373339 | 0.115495504212895  |
| ATGAGCCA | 868.774643089965 | 0.100604481405433  |
| CTGACTCC | 878.073428895943 | 0.10758508454899   |
| AGACTAAT | 885.627935967865 | 0.0870705431281352 |
| CGATGACG | 888.30077168168  | 0.131886907637179  |
| ATCTGTCA | 893.002533074358 | 0.114920952287593  |
| CGTCATAA | 893.736411368756 | 0.107551437830961  |
| AGTCACTG | 898.618377232263 | 0.0826798596067988 |
| AGACTCAC | 904.239742189171 | 0.0742808097022835 |
| AATGACAA | 907.787753973889 | 0.0920351528808636 |
| ATGACACC | 910.778152024733 | 0.0905541864490247 |
| GTGAATCA | 913.605506465445 | 0.0907629518790831 |
| CGCGTCAC | 914.670270584355 | 0.11703197253184   |
| GCGTCACC | 916.059128134818 | 0.0411077643358621 |
| ACGTGACT | 917.20687531501  | 0.074335141770258  |
| GTGACATA | 917.365722517471 | 0.0806062509731729 |
| ATTACGCA | 917.568662750245 | 0.0916039042531537 |
| ATTAGTCG | 924.386736226508 | 0.0778665615155749 |
| GATGACCA | 926.770091665121 | 0.0819827891713414 |
| GCGTCACA | 929.458493080778 | 0.0336026399887249 |
| ATATGACG | 930.651665811334 | 0.072096747245294  |
| AGCGTCAT | 933.572835277489 | 0.0722588466171575 |
| ATTGACTC | 933.959093880438 | 0.0661263029058407 |
| CAGTCAGA | 934.996591615929 | 0.0744736864119784 |
| ATGACCGA | 935.382137733252 | 0.0801499555152789 |
| AAATGACA | 947.231509425629 | 0.069232042148487  |
| ACTGACTC | 949.013515691162 | 0.0588155531255323 |
| AATGAGTA | 952.3147095385   | 0.0532287718131597 |
| ATACGTCA | 953.928190229654 | 0.0516842772877449 |
| GATGAGTA | 954.742562929659 | 0.0573314006908369 |

|          |                  |                    |
|----------|------------------|--------------------|
| CGTCATCA | 962.259401842982 | 0.0382344157347738 |
| AGTCATGG | 966.369116707202 | 0.049354311843211  |
| 1000     | 0                |                    |

|           |                  |                    |
|-----------|------------------|--------------------|
| ATGACTCAT | 14.8203225677069 | 0.189593951217938  |
| GTGACTCAT | 16.6882023787683 | 0.153030846207832  |
| ATGACTCAC | 17.5903243020817 | 0.187000895142395  |
| TATGACTCA | 19.030536350374  | 0.211461601654983  |
| GTGACTCAC | 22.9677440999336 | 0.192986986466138  |
| ATGACTAAT | 26.8935097343643 | 0.151677666235491  |
| TATGAGTCA | 28.2968102715578 | 0.265866058933075  |
| TGAGTCATC | 28.6278279364238 | 0.199350971088554  |
| AATGAGTCA | 28.7980578110843 | 0.230360069004761  |
| GATGAGTCA | 31.1938121244659 | 0.188243214184212  |
| TGTGACTCA | 34.0408981787831 | 0.227202654771957  |
| GTGACTAAT | 34.4313160977397 | 0.16769994374312   |
| AATGACTCA | 34.5539433801296 | 0.130328283320715  |
| CTGAGTCAT | 35.586862556227  | 0.171990372780408  |
| AAGAGTCAT | 37.4804714109033 | 0.172417433169244  |
| TGACTCACA | 41.1206148033116 | 0.233063530351033  |
| TGAGTCACC | 41.4655929175951 | 0.316326958887223  |
| ATGACTCAA | 43.2905378580451 | 0.242258560077251  |
| TCTGACTCA | 45.9723470591627 | 0.243302033322098  |
| AGTGACTCA | 47.1440640569809 | 0.23038697951061   |
| GGTGAGTCA | 47.5185178138377 | 0.154435560887765  |
| CATGAGTCA | 48.420152613998  | 0.189448490064463  |
| GTGAGTCAG | 48.6945051615184 | 0.242872932086983  |
| AAGAGTCAC | 50.6330678255885 | 0.210229420906458  |
| GTGACTCAA | 50.8046604256254 | 0.186921939468359  |
| TTAGTCATA | 51.5225598080943 | 0.294331857764221  |
| ATGACTGAT | 53.5409044037736 | 0.211914669798225  |
| AGTGAGTCA | 53.5508086704383 | 0.221589819830552  |
| ATGACTAAC | 54.7928672952632 | 0.164793208434919  |
| CGTGACTCA | 56.3988152830774 | 0.0330805128500843 |
| ATGACACAT | 56.8910682606447 | 0.159710683134288  |
| ATTACTCAT | 57.9221717808574 | 0.199858758954246  |
| ATGACGCAT | 65.4520508344371 | 0.200192211272149  |
| ATGACTAAG | 66.6399405086025 | 1.25920421571349   |
| GTTAGTCAC | 67.8474409691636 | 0.16905351839925   |
| CGTGAGTCA | 67.9028533908539 | 0.154706476409532  |
| TCTGAGTCA | 69.353086938736  | 0.215237298579984  |
| TATTAGTCA | 69.5119018873955 | 0.163722602672956  |
| TAGAGTCAT | 69.8592203628686 | 0.19425941716111   |
| GATGACTAA | 71.8783838438064 | 0.165818736258566  |
| AATAGTCAT | 74.4422190025223 | 0.162166672267667  |
| GATTAGTCA | 75.4255084773344 | 0.143482854125636  |
| TATGACTGA | 76.8318154409427 | 0.163661437629142  |
| AATTAGTCA | 76.9568885529188 | 0.408546140190326  |
| GGAGTCATA | 78.0221079144922 | 0.164593983698892  |
| GTGACTGAT | 78.9931842597134 | 0.155612331572926  |
| AATGACTAA | 82.5048688832322 | 0.173209831679712  |
| GAGTCATAC | 83.9728617192716 | 0.223123274252186  |
| CGAGTCATA | 85.2432319509395 | 0.153146624202953  |
| ATTACTCAC | 88.0645058786125 | 0.181856094518667  |
| ATGTGTCAC | 88.6779560486446 | 0.154050726401484  |
| ATTAGTCAG | 90.1414235272865 | 0.408596727581917  |
| TTAGTCACA | 90.67113763689   | 0.107054536579518  |
| TATGACACA | 91.2429013782746 | 0.149555598902394  |

|           |                  |                   |
|-----------|------------------|-------------------|
| GAGTCATCG | 92.0576442010792 | 0.241541436600395 |
| TATGACGCA | 93.0515400824498 | 0.231640643061297 |
| ATGAATCAT | 93.8464888023083 | 0.219099140903037 |
| ATGAGTCAG | 94.2688939021489 | 1.59454445780244  |
| GAGTCATAA | 95.0129939980734 | 0.239196791958888 |
| ATGACTAAA | 95.5733310021772 | 0.286526357547599 |
| GAGTCATAG | 97.6095762199619 | 0.227405988671515 |
| TGACTCAAT | 98.4025041511822 | 0.201054432186459 |
| GCTGACTCA | 99.0608105326037 | 0.317780849721743 |
| GTGACGCAT | 103.500738777769 | 0.231396738569256 |
| GGTGACTAA | 104.59814753116  | 0.192338848884736 |
| CATGACTAA | 105.012219488425 | 0.161521154123144 |
| GTCAGTCAT | 105.471784215433 | 0.206385742282872 |
| ACTGACTCA | 105.565702609681 | 0.250292002875201 |
| TCGAGTCAT | 105.929889169483 | 0.227556319048627 |
| GATGACTCC | 106.786743586915 | 0.175911484927281 |
| GCTGAGTCA | 109.003219659746 | 0.285809287999991 |
| TAAGAGTCA | 109.184519208049 | 0.3209231039375   |
| ATGACTCGT | 112.534548472904 | 0.289024431724832 |
| AAGACTCAT | 112.711049742924 | 0.194246802442903 |
| TAGAGTCAC | 114.719029573012 | 0.189398735666546 |
| AAGAGTCAG | 115.142633103364 | 0.187460580427657 |
| GAGTCATAT | 116.073283595932 | 0.302412749028913 |
| TGACTCAAC | 116.126527184687 | 0.200418618683105 |
| AACAGTCAT | 118.728194937128 | 0.176371543158322 |
| ACTGAGTCA | 119.68358633632  | 0.179853639976064 |
| ATGACTCCT | 122.188659900572 | 0.213654509296884 |
| ATGACTGAA | 122.283216948293 | 0.342763082186382 |
| ATGAGTAA  | 125.375871237265 | 0.226855292525409 |
| TCTGACTAA | 125.990934462922 | 0.195489430676062 |
| ATGATTCAC | 130.337604343619 | 0.189504495748952 |
| AATAGTCAC | 130.624853459496 | 0.191814230937886 |
| GTGTGTCAT | 131.414703504856 | 0.202624513020297 |
| GTGACTAAA | 132.926355987879 | 0.242156248076214 |
| ACACGTCAT | 133.825230848042 | 0.1939142268945   |
| GTCAGTCAC | 136.305021688214 | 0.217974632245506 |
| GTGATTCAT | 137.299835228509 | 0.180446821912837 |
| AGTGACTAA | 140.253278332637 | 0.208755049167776 |
| CTGACTCAA | 140.560082660239 | 0.290489681907375 |
| AGAGTCATC | 140.935018193693 | 0.223840439012512 |
| AATGACTCC | 142.509241996411 | 0.140984293184047 |
| TATGACTAC | 142.879869344521 | 0.2144465648177   |
| GAGTCACAC | 142.905480054381 | 0.158983127964653 |
| ACAGTCATA | 145.911320750534 | 0.230136383648486 |
| TCAGTCATC | 147.031286478016 | 0.229252159935904 |
| GATGACGCA | 147.443380080141 | 0.200266588076903 |
| CTGACTCAG | 147.711474349062 | 0.254969124280911 |
| TGACTCAAA | 147.72144432632  | 0.22471242287938  |
| GTGACTAAG | 148.642437752734 | 0.182541005794807 |
| TAGTCATAC | 149.378266947827 | 0.175038363584464 |
| AGGAGTCAC | 150.167565739557 | 0.211120276030041 |
| ATGACGTCA | 151.638379756532 | 0.171181417723175 |
| TCGAGTCAC | 154.079709570871 | 0.209008579915041 |
| ATGACGTAT | 155.590054467085 | 0.235665826794624 |

|           |                  |                    |
|-----------|------------------|--------------------|
| GAGTCATCT | 156.023105670271 | 0.263065188575184  |
| GAGTCATCA | 156.301065968352 | 0.803180325555759  |
| AATGACGCA | 156.36730639564  | 0.2890485674306    |
| CCTGAGTCA | 157.126561447133 | 0.196201642190309  |
| TATGAGTAA | 158.235887214434 | 0.19603651935723   |
| ATGACTTAT | 159.686479122562 | 0.22367200577405   |
| ATGACGCAC | 159.822526916434 | 0.242733635455158  |
| ACGAGTCAC | 159.855309686048 | 0.213307136929823  |
| GAGTCATTC | 160.238342635426 | 0.217745334714638  |
| ATGACCCAT | 161.770707204308 | 0.217590692146838  |
| GATGACACA | 162.065723793565 | 0.218295515517961  |
| ATGACGAAT | 163.97265810164  | 0.207885865788931  |
| AATCAGTCA | 164.652240933722 | 0.354492480769322  |
| TATAGTCAT | 164.781510091719 | 0.162216458918557  |
| ATGACCAAT | 166.236378155551 | 0.221991452386487  |
| ATGACGTAA | 167.323171338669 | 0.202998430453262  |
| ATGAGTCAA | 168.686253962169 | 1.16984565167165   |
| CTGACTGAT | 171.380576607585 | 0.1866691245198    |
| TCAGTCACA | 171.486637614844 | 0.22052545456852   |
| ATTAGTCAA | 173.706666873703 | 0.144764197841357  |
| AAATGACTC | 175.518431574727 | 0.176174776196997  |
| AATGACTCG | 178.18549018701  | 0.0987645684949505 |
| GAGTCATCC | 178.247090604899 | 0.196512515029853  |
| GTGTGTCAC | 178.621583471078 | 0.177785255505404  |
| ATGAGTCGT | 181.672122013934 | 0.194578009313151  |
| AATGACTGA | 182.01343206942  | 0.218753644585606  |
| GGAGTCACC | 182.042557027875 | 0.213019352825079  |
| GATGAGTAA | 183.032439889884 | 0.201613431547537  |
| GTGACTGAA | 183.378933215657 | 0.245415444027666  |
| AAGACTCAC | 184.687871219344 | 0.203418880005522  |
| GAGTCATTG | 185.255305704871 | 0.124496981183335  |
| GGAGTCACA | 186.617236652324 | 0.297575795074651  |
| CAGTCATCG | 187.044466458421 | 0.878261816618941  |
| GATGACTAC | 187.997386647908 | 0.23637097475496   |
| TATGACTAG | 189.957448080644 | 0.20747700159105   |
| ATGACAAAT | 191.347490809929 | 0.226453523960973  |
| TAGTCATCG | 191.847117330657 | 0.244183223148761  |
| TATTACTCA | 192.993855182231 | 0.176323507122795  |
| TAGTCATAG | 193.552037469888 | 0.253506953638829  |
| TAGTCATAA | 194.348628125941 | 0.265191200118502  |
| ATGAGTCGA | 196.010068806586 | 0.219280311078909  |
| CAGTCATAC | 196.021990075527 | 0.250221736350101  |
| AATGACACA | 196.131133341577 | 0.203984376630051  |
| CCATGACTC | 197.895946296416 | 0.762090603280867  |
| AAGAGTCAA | 198.939151177208 | 0.20212309153541   |
| ATGACGTGG | 199.401868206903 | 0.215239072785213  |
| TAATGACTC | 202.758348195683 | 0.230694424190732  |
| CTGACTAAC | 204.144676639614 | 0.212755485547149  |
| ATGACTCCA | 204.398716592555 | 0.248749196924785  |
| ATGTGTCAG | 204.550130477051 | 0.197918115212844  |
| GTGACGCAC | 204.675639327694 | 0.208672642497501  |
| ATGACTCCC | 205.290582472626 | 0.238635987118664  |
| ACAGTCATC | 205.664107614322 | 0.204327390775437  |
| GTGATTCAC | 207.29664019944  | 0.183182140258561  |



|           |                  |                   |
|-----------|------------------|-------------------|
| ATGACTACA | 207.742260484626 | 0.262304340192068 |
| AAGTGTCAT | 208.59996631868  | 0.210970959513103 |
| ATGACTGGT | 213.764318515562 | 0.175889986828666 |
| CAGAGTCAT | 215.004474916791 | 0.299695050151642 |
| AATGAGTAA | 215.399251642048 | 0.234266854667835 |
| TGATGACTA | 219.351459010176 | 0.164947649320215 |
| CAGTCATAG | 222.637937577772 | 0.341511706255557 |
| ATGACTGCA | 222.741234443607 | 0.213186736327314 |
| AAGTGACTC | 222.825500621383 | 0.984361764483446 |
| AACAGTCAC | 223.568720977711 | 0.232394187630475 |
| GATTACTCA | 224.42557480242  | 0.264308504845078 |
| CGAGTCACA | 225.340660158579 | 0.158799762268388 |
| GTTACTCAC | 229.200486082601 | 0.160670982056392 |
| GAGTCACAA | 230.166415388605 | 0.198539536422123 |
| GAGTCACAG | 230.527127736467 | 0.228826682462938 |
| TGTGACGCA | 230.605158976152 | 0.220291862166815 |
| GCATGACTC | 231.262512628182 | 0.198208865016759 |
| GAGTCACAT | 231.861819789138 | 0.286341049549651 |
| GAGTCACCG | 232.156570623737 | 0.105424171656424 |
| ATGAGCAAT | 232.251553051384 | 0.215476259659683 |
| ATTACTAAT | 232.532140899812 | 0.225902328515794 |
| GATGACTAG | 236.580422969305 | 0.224817445396736 |
| GAGTCACCA | 238.475766865125 | 0.101008759973454 |
| AATGTGTCA | 239.961451097101 | 0.256036284389588 |
| AGAGTCACC | 240.110318829509 | 0.25011311701856  |
| GAATGACTA | 243.918180635683 | 0.219493455790113 |
| TGTTAGTCA | 244.380114627677 | 0.231470425954821 |
| GGATGACTA | 245.901243617708 | 0.228524126283594 |
| ACACGTCAC | 246.727942706671 | 0.180682744981484 |
| AAATGACTA | 248.882163550253 | 0.192219139377746 |
| ATGACATAT | 248.966048645552 | 0.219113739594398 |
| GTGACGTAT | 250.707305417759 | 0.202107191989007 |
| TGTGTCACA | 250.896899552203 | 0.170926754008462 |
| ATGACAGAT | 252.050699461718 | 0.214546272414916 |
| TATGACTTA | 252.679613572452 | 0.202831577888241 |
| GTGACGCAA | 253.733500047687 | 0.287444906451931 |
| TTGACTCAA | 256.651416411603 | 0.20592168169178  |
| ATGACACAA | 258.088977950785 | 0.148029894847913 |
| ACATGACTC | 258.909647362698 | 0.39698569046001  |
| GATCAGTCA | 258.957245323303 | 0.17092444978113  |
| TATGACGTA | 259.771718837518 | 0.19746446557409  |
| TAGTCACAC | 260.316844115137 | 0.198620352853926 |
| AATGACTAC | 260.517990572096 | 0.134167895809093 |
| GGTGACTGA | 260.787740873637 | 0.171760534861443 |
| GAGTCATGA | 262.24459473091  | 0.260045795533825 |
| ATGACTGCT | 263.053685589023 | 0.234453743039636 |
| GGTGACACA | 263.091370431663 | 0.183774372693453 |
| GACTCATAC | 263.934047994012 | 0.221848218815086 |
| TGACTAAAT | 264.18935669155  | 0.223706094137571 |
| TCTGACTGA | 267.365140349328 | 0.181518695657934 |
| TAGACTCAT | 267.77470887178  | 0.245567171203025 |
| GGTTAGTCA | 268.052645729335 | 0.180001720041011 |
| ACAGTCATT | 268.905332230433 | 0.226841154132944 |
| AATTACTCA | 269.929214862435 | 0.206651487113864 |

|           |                  |                    |
|-----------|------------------|--------------------|
| GTGACCAAT | 270.173681368541 | 0.249884038164824  |
| AATGACTAG | 270.731077446876 | 0.177216955651738  |
| TATGCGTCA | 274.642061471406 | 0.147895226182332  |
| TATGTGTCA | 276.908745727765 | 0.204487842861562  |
| ATGACTTCC | 277.325604078887 | 1.85007097389713   |
| ATGACGCAG | 277.462056570898 | 0.32700968919735   |
| TATAGTCAC | 278.433140589014 | 0.210579918806133  |
| AGTCATACA | 278.871951228284 | 0.223930728620163  |
| AGTGACTCC | 279.709793514546 | 0.167046614409181  |
| TGGAGTCAC | 280.037500928912 | 0.297398575780141  |
| AGTCATCGT | 280.09651725224  | 0.207114495970256  |
| TAGAGTCAG | 280.441748133151 | 0.266214760505191  |
| CAGTCATAA | 283.309772518266 | 0.38081572360165   |
| ATGCGTCAG | 284.100856460828 | 0.510265047504826  |
| AGTCATAAT | 284.131707221471 | 0.255349957695451  |
| TGTAGTCAC | 284.333140931643 | 0.15867693091141   |
| GTGACTTAT | 284.873087102685 | 0.140603952450007  |
| AGTATGACT | 286.546706357841 | 0.161476063745441  |
| GTGTCATAC | 287.829867933124 | 0.148166780263139  |
| TATGACGAA | 288.997112512338 | 0.230078738322776  |
| AGTCATCGG | 289.624509462044 | 0.134190022839304  |
| AATGCGTCA | 290.266607469708 | 0.195758145550039  |
| GTGACGTAA | 291.369708523377 | 0.2095037717071    |
| TATGACCAA | 292.111133837436 | 0.206761892535418  |
| TAATAGTCA | 292.843405156783 | 0.232613003659992  |
| ATTGTCAC  | 293.563752899414 | 0.216350129272488  |
| ATAGTCATA | 295.272398559322 | 0.0692857862412148 |
| GATGCGTCA | 297.021987578408 | 0.0939206289202886 |
| GAGTCACCT | 297.165797195097 | 0.248310352258904  |
| TATGACCCA | 298.417726706153 | 0.178932500762474  |
| CGCGTCATA | 299.461100171658 | 0.18125102268617   |
| GGTGACGCA | 299.565353701491 | 0.187557559210036  |
| GGGAGTCAC | 301.563032575207 | 0.259316999598171  |
| CCAGTCATA | 301.939603814685 | 0.133069601493918  |
| GATGTGTCA | 302.761355046127 | 0.189051043013679  |
| TATGATTCA | 303.377644620573 | 0.167250900740384  |
| ATCCGTCAT | 305.783455758393 | 0.151969838828055  |
| CGACTCATA | 307.030526089184 | 0.239784390957678  |
| GTGACCCAT | 307.110763501226 | 0.182700946682208  |
| AGTTAGTCA | 307.544703884385 | 0.212916084231298  |
| TGACGTCAC | 308.113486425181 | 0.192426025848688  |
| CTATGACAC | 308.623926770892 | 0.175000305280767  |
| ATGACGCAA | 312.140369685841 | 0.664832452514545  |
| AGTCATAGC | 313.933330165473 | 0.229425581373028  |
| ATGAGTACA | 314.155225775925 | 0.187705971667814  |
| ATGAGCCAT | 316.229762985347 | 0.19364751345474   |
| TAAAGTCAT | 316.635437034316 | 1.12139263951849   |
| TAGTGACTC | 316.858788152733 | 0.195633234988585  |
| ACGTGACTC | 317.679916105713 | 0.18171588270926   |
| GATGACGTA | 317.874514462212 | 0.21810191442228   |
| AATGAGTCG | 318.122197594007 | 0.167633822493801  |
| ATGACTAGT | 318.127600369524 | 0.0957339783407615 |
| AGTCATACC | 318.336663702724 | 0.209097704673556  |
| CATGACACA | 319.738655511281 | 0.227516287012026  |

|           |                  |                    |
|-----------|------------------|--------------------|
| CAGAGTCAC | 320.142930033187 | 0.264572968515884  |
| CAGTGACTC | 321.040634827495 | 0.194096353883451  |
| AGTCATCGA | 322.197197074241 | 0.219812672253468  |
| GATGACTAT | 322.314083563799 | 0.109986846604835  |
| TATGACAAA | 324.445577920096 | 0.165991312970709  |
| CGGAGTCAC | 324.677953148474 | 0.110698393118019  |
| AGTCATAAC | 325.27515428655  | 0.123496555148818  |
| GTGACACAA | 326.162320277136 | 0.195068447116363  |
| GAGTCACCC | 327.076559367856 | 0.0325802836648871 |
| AGTCATACG | 328.273501481414 | 0.101424494136105  |
| ATGACTCGC | 330.288044698209 | 0.664578587119734  |
| ACAGTCACA | 333.706964429035 | 0.207116777658476  |
| GCGTCATAC | 334.89935381038  | 0.149728798467809  |
| GAGTCAGAG | 335.16167778372  | 0.207271606225039  |
| AGTGACTGA | 335.23966820112  | 0.152606524012208  |
| ATGACTACT | 336.551340596328 | 0.172687168705864  |
| AGAGTCACT | 338.82540233141  | 0.169636895287778  |
| GTGACAAAT | 338.977088819464 | 0.186522778493255  |
| GAGTGACTC | 339.492143206822 | 0.19806543361137   |
| TGTGAGTAA | 339.72895207332  | 0.166028293884315  |
| GAGTCAGAC | 339.763085514288 | 0.113331005744043  |
| AGTCACATA | 341.232208050042 | 0.797873609595566  |
| ATGACACGT | 341.298992101805 | 0.219387176393203  |
| AGTCATAGT | 341.706851265637 | 0.160789428836376  |
| TAGTCATTG | 342.952203058717 | 0.0306245099514875 |
| GGTGAGTAA | 343.182957577736 | 0.180863835944666  |
| GCTGACTAA | 344.707261102641 | 0.236257924002871  |
| ATGACGCGT | 345.391646502824 | 0.168774470910659  |
| TAGTCACCG | 345.475651151266 | 0.212195477618198  |
| GTGTCATAA | 345.715106513225 | 0.141210852101564  |
| TGACTGAAT | 346.932006985585 | 0.167750715776321  |
| CAGTCATCC | 350.682932459722 | 0.225317052986715  |
| CCACGTCAC | 352.097018611444 | 0.179553191620574  |
| AGTGACGCA | 352.683613201452 | 0.193331775135572  |
| AGCGTCATA | 352.815212087911 | 0.144883463665629  |
| TATGACGTG | 353.506415571337 | 0.10848856683655   |
| CACAGTCAT | 354.010568759614 | 0.148268490399207  |
| TAGTCACCA | 355.553156899261 | 0.223970308085836  |
| AGTGCATA  | 356.833714620903 | 0.262158913348977  |
| TATGACATA | 357.456507711404 | 0.190048723768071  |
| AGTCATATT | 357.866517304667 | 0.185692175042374  |
| GAGAGTCAT | 358.641114719546 | 0.619281500721657  |
| GATGACTTA | 359.717617142483 | 0.226734328111044  |
| CGACTCATC | 359.911323682793 | 0.182501530655441  |
| AAGTGTCAC | 361.344296324102 | 0.168207548696061  |
| GTAGTCACA | 361.797921353701 | 0.236025828472362  |
| TATCAGTCA | 364.581176717215 | 0.212323651477373  |
| AATAGTCAG | 365.010122749478 | 0.153518549336703  |
| GTGACTGAG | 366.427583527473 | 0.0855386574078568 |
| GATGATTCA | 367.210073550974 | 0.184403291047402  |
| TAGTCACAT | 367.245327534323 | 0.197301062019125  |
| AGTATGACA | 367.639649804622 | 0.121362476509024  |
| GCGTGACTC | 369.153634376897 | 0.240813848913945  |
| TCGTGACTC | 369.75543921633  | 0.131604612604765  |

|           |                  |                   |
|-----------|------------------|-------------------|
| GAATGAGTC | 370.862807205763 | 0.188566448730222 |
| TATGACGGA | 371.44005434271  | 0.189530648984761 |
| TGCAGTCAC | 372.253599082843 | 0.189368893132488 |
| TCTGACGCA | 373.216357842925 | 0.17805653979024  |
| AGTCATAGG | 373.754238200693 | 0.157932785571269 |
| AAGGGTCAT | 373.90624289053  | 0.1982910720237   |
| TATGACAGA | 376.53182761472  | 0.247408374062543 |
| GAATGACTG | 376.888903998901 | 0.187456924413598 |
| GTAGTCACC | 379.186223450984 | 0.174067015452904 |
| AAGACTAAT | 379.277626621091 | 0.192677667820652 |
| CATAGTCAT | 380.413555609184 | 0.361442142655059 |
| CGATGACAC | 381.106187323293 | 0.338962765318919 |
| TACAGTCAT | 382.417675118575 | 0.129801079538772 |
| GGTGCATA  | 382.60973911525  | 0.15303874089155  |
| AATGACGTA | 382.646075678815 | 0.205311744306067 |
| CTAGTCACC | 384.68130994441  | 0.211235795528645 |
| GATGACGAA | 385.339783776992 | 0.216862381007102 |
| AGTCATCAT | 386.494702144638 | 0.121803880747993 |
| TCTGACACA | 390.037672900547 | 0.158320930400247 |
| GATGACTGG | 390.630299719429 | 0.18544769492295  |
| ATTGCTCAC | 392.485525796362 | 0.214825550589743 |
| ATGAGTAAG | 393.556195913489 | 0.187517334749906 |
| ACCAATCAC | 393.766140553224 | 0.204256037273296 |
| CTAGTCACA | 395.905899690218 | 0.194660496400083 |
| ACGACTCAC | 396.218169299556 | 0.16893856133537  |
| ACTGACTAA | 396.341082251575 | 0.174129669325739 |
| CAGTCATCA | 396.975061016524 | 0.249883657427682 |
| CGTGACTCG | 398.156610442362 | 0.219553760541329 |
| ATGACTGAG | 398.291796291825 | 0.498344282962041 |
| GACTCATCG | 398.573553359466 | 0.195627154824366 |
| GGAGTCAGA | 398.932563681107 | 0.22390330126283  |
| CAGTCATCT | 401.934291748237 | 0.153720823426999 |
| AGTGAGTAA | 403.46009918659  | 0.188425385444522 |
| ACAGTCACC | 403.510707942204 | 0.188298234877449 |
| CAGTCACAC | 404.15052111064  | 0.174643755783859 |
| GTCGAGTCA | 405.935044618322 | 0.117795469377096 |
| AGTGACACA | 406.123774276753 | 0.143105562332985 |
| TAGTCATGC | 408.041029935679 | 0.206402558376963 |
| AGTCATCAG | 409.722593198693 | 0.270397600651353 |
| GATGACACC | 410.374474782253 | 0.149827742944341 |
| AGTCATATC | 410.791679958971 | 0.209481974054958 |
| GACTCATCA | 411.943567937574 | 0.140798248246458 |
| AAATGACTG | 413.44601143667  | 0.172967673003485 |
| TATGAATCA | 414.480613212088 | 0.152055558595075 |
| ATGACTTAA | 415.703143084012 | 0.220976057007715 |
| TAGTCATTA | 416.140805629005 | 0.276802470511833 |
| AAATGAGTC | 418.916782863882 | 0.115429583583692 |
| GTGACGCAG | 420.149423588682 | 0.260640186956772 |
| TCGACTCAC | 422.116242524216 | 0.201822586936736 |
| GGGTGACTA | 422.656810392444 | 0.262923882565644 |
| AATGACTGG | 423.066224239059 | 0.173705670492792 |
| AGTCATAAA | 424.311004143471 | 0.19157178432233  |
| GGTGACTAT | 424.817362623279 | 0.14306533116592  |
| GATGACAAA | 425.568385274453 | 0.181002455694962 |

|            |                  |                    |
|------------|------------------|--------------------|
| GATGACCAA  | 425.697834009654 | 0.18433497362656   |
| AGCAGTCAC  | 425.73595877361  | 0.219161093203471  |
| GTATGACGA  | 425.907224165995 | 0.158740102602641  |
| GGACTCATA  | 427.651609036817 | 0.122553066022435  |
| TAAGACTCA  | 429.136817819563 | 0.133771713894339  |
| CGTGACACA  | 429.575336516346 | 0.273140783382794  |
| ATGACTCCG  | 429.811351535273 | 0.774642219266845  |
| AGTAGTCAC  | 430.019265539322 | 0.18432252492016   |
| GACTCATCC  | 430.580420805461 | 0.165210529081499  |
| GTGACATAT  | 431.741519202843 | 0.139549267958607  |
| ATGAATCAG  | 431.780216638777 | 0.223468324623985  |
| GATGACGCG  | 433.111057295351 | 0.199301129144545  |
| AAGTCATAA  | 433.953934531036 | 0.126212592824767  |
| AGTGTTCATC | 434.113259287502 | 0.165834392607933  |
| CGAGTCAGA  | 435.336167213653 | 0.417461193475014  |
| ATGACTAGA  | 437.210400045467 | 0.188098508097357  |
| AGTCATCAA  | 438.103944711867 | 0.161590399200198  |
| ATATGACAC  | 439.500163913962 | 0.216956453350736  |
| CTGACTGAC  | 442.875096679683 | 0.218859787624149  |
| CATGAGTAA  | 444.115182509435 | 0.178374726824018  |
| ACTAGTCAC  | 444.507767480156 | 0.149126051717762  |
| ACAGTCATG  | 445.151083552049 | 0.0871408067959675 |
| TAGTCACAA  | 447.355761298548 | 0.186629210787698  |
| GACTCATAG  | 447.756527732069 | 0.26930283089437   |
| TGATGACAC  | 448.678236352923 | 0.218359479435614  |
| GATGACCCA  | 449.815114931643 | 0.180313623049362  |
| ATGACCGAT  | 451.83750538121  | 0.198807997849242  |
| AGTGACTCG  | 452.195456272318 | 0.501564167934222  |
| ATCTGTCAC  | 453.044377299984 | 0.16464563253766   |
| TACAGTCAC  | 454.256505666097 | 0.18130661309577   |
| AGTCATCGC  | 455.509598750848 | 0.0981447680849391 |
| ATTACTCAG  | 456.810172236836 | 0.138808959299086  |
| AGTCATGAC  | 458.26426603334  | 0.187295396960134  |
| ATGACATAA  | 458.343341772721 | 0.152013757396158  |
| AAGTCACTG  | 458.906152232193 | 1.51521891723791   |
| AGTCATCAC  | 461.456300566797 | 0.150619856656116  |
| GATGACGCT  | 462.534679747309 | 0.152205430847954  |
| GATGACGTG  | 462.875863033764 | 0.171267561897026  |
| AGTCATATA  | 463.122718937303 | 0.0768041684296487 |
| AAAATGACT  | 463.921076669767 | 0.21341050058161   |
| ACGAGTCAG  | 465.06348777282  | 0.149951710893653  |
| GAGTGACTA  | 465.328419314461 | 0.200782097272331  |
| TTAGAGTCA  | 466.069312603169 | 0.222288910452064  |
| ATAGAGTCA  | 466.283186273809 | 0.200578885747624  |
| AATACTCAT  | 466.763825066295 | 0.190477200875667  |
| AGTCATTCA  | 466.848407689566 | 0.24111044123703   |
| AGTCATTGG  | 468.493820873668 | 0.906400009246318  |
| ATCGAGTCA  | 470.717552894627 | 0.21104726928584   |
| AATGATTCA  | 471.750255515117 | 0.139573493587285  |
| GAGGAGTCA  | 472.420479443548 | 0.177500071051032  |
| GTAGAGTCA  | 472.668891557703 | 0.141228037252027  |
| ACGTCATAC  | 475.23585789966  | 0.14396053664674   |
| GAGTCACGG  | 475.668298793999 | 0.237882695105456  |
| GGACTCATC  | 478.196117817012 | 0.131976873861753  |

|           |                  |                    |
|-----------|------------------|--------------------|
| GACACGTCA | 478.626169038998 | 0.179878409884512  |
| AATGACGAA | 482.6354344327   | 0.211729679713988  |
| GACTCATAA | 484.393947254032 | 0.171227915489646  |
| ATTACGTCA | 485.26601776586  | 0.229500443759327  |
| CTATGACAA | 486.202329692641 | 0.212556430264908  |
| TATGACGAT | 486.648973618362 | 0.235442371652513  |
| ATCCGTCAC | 488.825157228026 | 0.195920143626185  |
| GAGTCAGAA | 494.227182570963 | 0.285577228688161  |
| GAATGACAC | 495.140234266401 | 0.14916127279011   |
| AAGCGTCAT | 495.191957328413 | 0.136006807237303  |
| CATGTCATA | 495.314941911596 | 0.199252233706224  |
| GAATGACGC | 498.337112697898 | 0.247380841807939  |
| TTAGTCAAC | 498.953260613474 | 0.221089170964582  |
| CACAGTCAC | 500.550264494002 | 0.202534016481206  |
| GCGTCATAG | 501.217065095163 | 0.20520683845206   |
| GATGACAGA | 502.211026696863 | 0.208683161524788  |
| AGTCATTCT | 503.052617884626 | 0.153957252759169  |
| GTATGACAA | 504.387576316244 | 0.139698566739103  |
| GATGACATA | 505.798911932784 | 0.165962407893481  |
| TATGACAAC | 506.497074515007 | 0.149769748101182  |
| AGTCATATG | 507.437429598369 | 0.394310576567327  |
| GACTCATAT | 508.169406309248 | 0.150647136414139  |
| AGACTCATC | 508.295775119535 | 0.278251091838742  |
| ACGTCATAA | 508.984117336955 | 0.25732065513671   |
| ATGAGTCGC | 509.679315638593 | 0.553828247097079  |
| AGTCATCCG | 509.704489464223 | 0.164969511188842  |
| AAGTCATAT | 510.590006408511 | 0.0896896204701007 |
| GGATGACAC | 511.083492929198 | 0.103246073913564  |
| AACGTCATA | 512.217737554939 | 0.159294233004383  |
| TGTCATAAT | 512.669854121721 | 0.189962551414245  |
| ATGTGTAAT | 513.708134337108 | 0.196833105675915  |
| ACGTCATAG | 513.838685590296 | 0.567697308818634  |
| ATGACTTAG | 514.653800425584 | 0.952261291708741  |
| AGTCATCCA | 516.016386134626 | 0.235401454837548  |
| AATGACGCG | 516.099804067138 | 0.370377910569027  |
| TGTGACTTA | 517.702463748713 | 0.126937471057949  |
| TGACTAAAC | 518.011045937457 | 0.295914281887977  |
| CAATGAGTC | 519.079295094998 | 0.132107726474574  |
| TAGACTCAC | 519.155961976572 | 0.146861586744432  |
| AGTCATTGT | 520.719660199645 | 0.177278367268952  |
| TCTAGTCAC | 521.82808190349  | 0.184204162840265  |
| TAGTGTCAT | 522.257431996711 | 0.141075747785413  |
| ATCAGTCAA | 523.564801162459 | 0.179495929026648  |
| TAGTCACAG | 525.57525154959  | 0.169241764679602  |
| CCTGACTAA | 527.23363215628  | 0.323451491495932  |
| ATCACTCAT | 531.07848214708  | 0.158511617548254  |
| CATTACTCA | 531.724602313308 | 0.163988844885264  |
| AGTCATTCT | 538.534168830795 | 0.2145098655094    |
| TTAGTCAAT | 539.568774460703 | 0.150514358132586  |
| AGTCATGCA | 540.456781274372 | 0.151949237637878  |
| CTATGACAG | 540.648335751989 | 0.165266481898531  |
| TGTGACGTA | 542.707389017473 | 0.133003030936304  |
| ATGACTACG | 544.055075922038 | 0.387385123138735  |
| GACTCATCT | 544.638583843383 | 0.100200069013664  |

|           |                  |                    |
|-----------|------------------|--------------------|
| ACTATGACA | 545.142259180156 | 0.23621938554697   |
| TCGTCATAG | 548.056444250354 | 0.103662726254956  |
| AGTCATCCT | 549.121244131573 | 0.202273006225209  |
| TGTATGACA | 550.045965951117 | 0.160164311623729  |
| CGATGACGT | 550.780127983502 | 0.225401276086645  |
| AGTCACACA | 552.211043459055 | 0.241599112310933  |
| ATTACGCAT | 552.508940465487 | 0.209461125662107  |
| ATGACTGGA | 552.947728694815 | 0.425101890738123  |
| CGATGACGA | 553.071410526399 | 0.238495501199636  |
| AATGACGTG | 553.315647006821 | 0.280415388015714  |
| GCGTCATAA | 553.426195593809 | 0.157036968723663  |
| ATGACGGAA | 553.750836567544 | 0.336767189027725  |
| AAACAGTCA | 553.899167180116 | 0.278306092626445  |
| ATGACATCA | 554.068023610832 | 0.122579106974545  |
| GAGTCAGCG | 555.391228956654 | 0.251404788713495  |
| CGATGACGC | 556.660565493181 | 0.291079832491294  |
| AATGACTTA | 556.774857339792 | 0.342877084581597  |
| AAATGACAC | 558.466497428942 | 0.197642480557915  |
| ATGACCCAC | 559.884860640152 | 0.173360429140547  |
| GTGTGACAC | 560.121686034995 | 0.146615193539828  |
| AGTATGACG | 561.127441211264 | 0.183685958567077  |
| AATGACAAA | 561.90251672144  | 0.206565633593715  |
| ATGACTAGG | 562.07944164929  | 0.423952538004334  |
| ATGACGTAC | 562.190986033635 | 0.195721626705908  |
| AATGACACC | 563.404081267962 | 0.172598581147339  |
| CAGTCATAT | 565.707249087475 | 0.331557296171945  |
| ATTACGTAA | 566.050541557008 | 0.140258551536437  |
| GATGACGAT | 566.099376389108 | 0.157507753447689  |
| CAGTCACCG | 566.82777298908  | 0.156948584971132  |
| GATGACAAC | 568.1753816522   | 0.148404183363888  |
| TAGGAGTCA | 568.303963994773 | 0.182711477806626  |
| TATGAGTAC | 568.651534619779 | 0.235832682466846  |
| CATAGTCAC | 569.40355747834  | 0.185684745094488  |
| GGTGACGTA | 570.946731569743 | 0.179545893741514  |
| TGTGACCAA | 571.44520777658  | 0.123607537732942  |
| AGTCACACT | 574.751936316123 | 0.199902030783766  |
| TATGACAAT | 577.134736607751 | 0.0487316035488936 |
| GTGAGTAAG | 577.777034620102 | 0.132263031258304  |
| AAGAGTAAT | 578.054303090527 | 0.174073738231706  |
| GGTATGACA | 578.672092660401 | 0.173004805916091  |
| AGTCATTAT | 578.994594163177 | 0.208123470777479  |
| ATGACGAAA | 579.597702555232 | 0.301114061617453  |
| ACAGTCACT | 579.773296625317 | 0.133178538119049  |
| AGTCAGTCA | 580.092495703574 | 0.183003610820219  |
| CAGATGACT | 580.77616761214  | 0.195456279627416  |
| TATGAGCAA | 581.692220492238 | 0.129845590740762  |
| TGTGCGTCA | 583.98641104606  | 0.09537869446289   |
| TATGACGAG | 586.374870225825 | 0.193017463236713  |
| TGACTGAAC | 587.183030052241 | 0.21296665634201   |
| ACACGTCAG | 587.543759409923 | 0.203616882646855  |
| AGTCACACG | 590.086762101836 | 0.157484572545045  |
| ATGGCTCAC | 590.376135484536 | 0.145264744283144  |
| GGTGATTCA | 590.992936532831 | 0.131050267169346  |
| AGTCACCGA | 591.035734251803 | 0.125880733311755  |

|           |                  |                    |
|-----------|------------------|--------------------|
| GGTGACTTA | 591.081754045332 | 0.175100044976496  |
| CAGTCACAG | 591.115090331371 | 0.154682468689674  |
| AAGACTCAG | 592.248597412088 | 0.155351315468289  |
| AGTCATTGA | 593.117203526614 | 0.138138662299338  |
| AATGAGTCT | 595.252740177286 | 0.0736647208211051 |
| GCTGACTCC | 597.209193014479 | 0.0732437084995239 |
| TACGAGTCA | 597.290487435772 | 0.190901634344142  |
| TATGACCAC | 597.525989304092 | 0.156060921517579  |
| TGATGACGC | 597.669041850347 | 0.364516522246373  |
| GACAGTCAT | 598.443649060554 | 0.332064812352662  |
| CAGTCATTA | 598.750272403533 | 0.0542968012815645 |
| AATGACCAA | 599.477634424287 | 0.171443598021787  |
| ATGACCAAA | 599.61307136357  | 0.0994870044214343 |
| TTCGAGTCA | 599.90031672982  | 0.165288437127922  |
| GATGACGGA | 600.89263814191  | 0.154394097076877  |
| TAGATGACT | 602.446012591298 | 0.156944122367977  |
| GCGTCATAT | 602.533479317781 | 0.148347071593513  |
| GATGACGAG | 603.150454453588 | 0.0679678308095174 |
| GTATGACAG | 603.964126254073 | 0.0744192677727194 |
| TTATGACAA | 605.257783133456 | 0.122913064475379  |
| AGTCACATT | 605.313118873985 | 0.204791053810428  |
| CATGCGTCA | 605.461757717667 | 0.179228268397937  |
| CATGTGTCA | 606.479444847451 | 0.128549009036449  |
| ATGACTACC | 606.726886917823 | 0.317506711621205  |
| ACGCGTCAC | 609.14935247243  | 0.12916247675945   |
| TGTCAGTCA | 609.212484716228 | 0.204034289047002  |
| AGATGACAC | 610.471400137005 | 0.182451075102557  |
| TCGTCATAA | 613.724302223025 | 0.133685870003092  |
| TGTGATTCA | 613.79089931947  | 0.223050420354346  |
| CATGACTAT | 613.834127066304 | 0.1082585652021    |
| GAATGACGA | 615.613845216382 | 0.172038598552414  |
| AGTCATTAC | 615.6610044655   | 0.170863634097885  |
| AAGATGACT | 616.093210337347 | 0.130161351131027  |
| AGTCATAGA | 617.682488446523 | 0.163907002601581  |
| TAAATGACT | 618.663259728488 | 0.132173802368427  |
| CATGACTGG | 619.834081555011 | 0.132615578920211  |
| ATGAGCCAC | 620.219102226749 | 0.172514576932076  |
| GAAATGACT | 620.364440517763 | 0.170415183391428  |
| TGACTAAAA | 620.448289755641 | 0.192510988605358  |
| AGTCACAAT | 621.460170516013 | 0.111800210684269  |
| AATGAGTCC | 621.761823819809 | 0.313096225168774  |
| ATGACACCA | 621.92759284914  | 0.0677589690751919 |
| TGTTACTCA | 623.245700382447 | 0.159116796483934  |
| GTGAGTAAA | 623.611741547665 | 0.14559084234137   |
| TGTGTGTCA | 626.255362298314 | 0.106127174307246  |
| AGTGACTAC | 626.985029550905 | 0.132637371571143  |
| GTTAGTCAA | 628.730626821936 | 0.165100503526044  |
| GACGAGTCA | 629.289801181597 | 0.189192533486508  |
| CGTAGTCAC | 630.783496386366 | 0.152030743453412  |
| CAAATGACT | 631.155452044109 | 0.146299848536735  |
| TCGAGTCAG | 631.457366456272 | 0.426038306843702  |
| AAATGACGC | 632.802802838379 | 0.0758843859515723 |
| CTGACTCCT | 634.354906434254 | 0.218856253221238  |
| TAGTCATGA | 634.480041920383 | 0.0947514554422961 |



|           |                  |                    |
|-----------|------------------|--------------------|
| ATGACTGCG | 636.105811932821 | 0.289640530991239  |
| GGTTACTCA | 636.892948817846 | 0.127955669500893  |
| CGTGACTTA | 636.941988338695 | 0.829300498705349  |
| AATGACATA | 637.297940737214 | 0.174771442592208  |
| AAGTCATTC | 638.345128329484 | 0.0952041705323893 |
| CGATGACAA | 638.418036228372 | 0.162169657001135  |
| AGTCACCGT | 638.560618522329 | 0.173239552202884  |
| GTATGACCA | 639.153142776141 | 0.284896307419199  |
| AACGTCATC | 639.25531747619  | 0.159312551303831  |
| ATTAGTAAC | 639.890630668247 | 0.188434158484269  |
| CGATGACAG | 640.406770081793 | 0.0574106020013651 |
| GGATGACGC | 640.810103482816 | 0.179038778646895  |
| ACGTGTCAC | 641.737135284705 | 0.187164428381787  |
| CCAGTCACA | 643.474015107397 | 0.286670011020553  |
| ACACGTAAT | 644.6658424463   | 0.163855824513482  |
| AATGACACG | 646.09056964794  | 0.138121729437558  |
| AGTCACAGT | 646.713794308673 | 0.156107617639998  |
| TGTCATAAC | 647.170113972362 | 0.303381510084713  |
| AATATGACA | 647.230768177489 | 0.169090336782479  |
| CCTATGACA | 647.326738645444 | 0.123871660464119  |
| CTGTCATAA | 648.079234198523 | 0.170864578113599  |
| GACATGACT | 648.187568424776 | 0.13698134785261   |
| GGAGTCAAC | 648.303745408521 | 0.192453935360601  |
| AAATAGTCA | 649.741471610603 | 0.205285808191256  |
| GATGAGTAC | 649.875393053349 | 0.198853525140246  |
| TAGCGTCAT | 651.795378137169 | 0.218047133893675  |
| ATGACGCCA | 652.176231626643 | 0.308217632896868  |
| TAGTCACTG | 652.220958456291 | 0.181792932229684  |
| CAATGACAC | 653.304722147188 | 0.108870468785451  |
| TGTGACGAA | 653.806650281067 | 0.15765134050711   |
| GAATAGTCA | 654.148605719645 | 0.107747389993212  |
| GTGAATCAG | 655.742149940341 | 0.150830369758184  |
| ACGTCATAT | 657.054030319288 | 0.190308525859807  |
| CAGTCACCA | 657.406683366929 | 0.177166877774941  |
| TGTGACAAA | 658.50661611452  | 0.133564694395196  |
| AGTGACGTA | 658.801624818608 | 0.146865930916018  |
| AAGGGTCAC | 659.058262037904 | 0.153630886003479  |
| AGTCACCGG | 660.453089313773 | 0.192106703352992  |
| AATGAGTAC | 661.71488410759  | 0.272883815722736  |
| AGTCACTCA | 661.98565146097  | 0.101750328363615  |
| ACAGTCAGA | 662.169996187145 | 0.203643700435426  |
| ATGATTCAG | 663.687673500063 | 0.107994064449166  |
| ATGATGACA | 664.660213789253 | 0.127363515314001  |
| GTGACTTAA | 666.175958545261 | 0.187638976193043  |
| GACAGTCAC | 668.149210584262 | 0.130021832343928  |
| GCGACTCAC | 669.650439383518 | 0.18597444146714   |
| ATGACTGGC | 669.766662128003 | 0.318118211356852  |
| TAGTCAGAG | 669.84615816095  | 0.167537128028623  |
| CAGTCACCT | 670.123945251205 | 0.181036239306516  |
| GCCACGTC  | 671.020687218432 | 0.10555581739826   |
| AACATGACT | 671.214623547198 | 0.178344674193571  |
| CCTAGTCAC | 671.463113473857 | 0.126962619744047  |
| TACTCATAC | 671.837462540986 | 0.160491594524761  |
| CAAAGTCAT | 672.092618550729 | 0.475739638742278  |

|           |                  |                   |
|-----------|------------------|-------------------|
| AACGAGTCA | 673.415169161292 | 0.217623997155666 |
| TCTATGACA | 673.47665930403  | 0.161328765331064 |
| AGATGACGC | 674.574029414846 | 0.211291043394409 |
| GAATGACGT | 674.908216948757 | 0.147751620415455 |
| AAATGACTT | 675.921033904224 | 0.237775560514193 |
| ACGATGACA | 676.200015489035 | 0.151627758733632 |
| GGTGACCAA | 676.514961227581 | 0.168920324562297 |
| GGTGACGAA | 677.6842787503   | 0.147648051899619 |
| GAGTCAGAT | 678.068796198674 | 0.139744624154134 |
| GGATGACGA | 679.295824163268 | 0.156982460861493 |
| CGTATGACA | 679.551493446558 | 0.108806545925664 |
| CCGATGACA | 679.721089818124 | 0.118458682029301 |
| TCGTCATCA | 680.247153557457 | 0.157351406498958 |
| AACAGTCAG | 681.254935536887 | 0.15545537484851  |
| GCTATGACA | 681.712439220185 | 0.235416478916392 |
| CTGACACAC | 682.265770449653 | 0.263097161129241 |
| TATACTCAT | 683.995894788589 | 0.147087639793843 |
| TCGATGACA | 684.310932413673 | 0.238456090831104 |
| GTGATTCAG | 685.318617928541 | 0.151910669531152 |
| ACATGTCAT | 685.395227568173 | 0.166878163214121 |
| AGGATGACA | 686.448279554806 | 0.147352091208485 |
| GATGAGCAA | 687.476381370848 | 0.145800659414185 |
| GACTCACAC | 688.112704703248 | 0.186959825290314 |
| AGTCACCAG | 688.294947579951 | 0.11506389964418  |
| AGTCACCAT | 688.333564873169 | 0.153958518172149 |
| ATTGTCAG  | 688.75772103886  | 0.205710124993081 |
| GTGACCCAC | 689.729286305891 | 0.142544007279136 |
| AGTCACATC | 692.601963602002 | 0.23397942105047  |
| AATGACAGA | 694.321995825268 | 0.23186075943856  |
| GATGACCAC | 694.589195116629 | 0.147821086241318 |
| GAGTCAGCA | 696.098415427092 | 0.177540120833671 |
| AGTCATTAA | 697.581095946255 | 0.109162255678401 |
| ATGACGAAG | 699.07703560194  | 0.18666450890857  |
| TATGACGAC | 700.350687014271 | 0.145799827524761 |
| AGTCACATG | 700.355253717313 | 0.146196739554516 |
| ATTAGTCGT | 701.49658204886  | 0.209645619629676 |
| GTTACGTCA | 702.378453796021 | 0.171836904603131 |
| AGTCACAGC | 703.097851301926 | 0.227538889779109 |
| ATTGTGTCA | 703.517203072399 | 0.191710799847649 |
| TATGACCAT | 704.106114926349 | 0.165525322587927 |
| ACGTCATCA | 705.28555507905  | 0.294123781439603 |
| ATACGTCAG | 705.900706670708 | 0.197394284663467 |
| ATTAGTCGA | 708.209160125719 | 0.211557396054216 |
| GGTGACACC | 708.68067023826  | 0.112939686817171 |
| GCGTCACAC | 709.238966400964 | 0.108913589781761 |
| AGTCATGAT | 713.642440901748 | 0.146309191384252 |
| AGATGACTT | 713.706933666108 | 0.192560772564903 |
| TCAGAGTCA | 713.765937284275 | 0.182507654962956 |
| AGATGACGA | 715.176615441993 | 0.134949657986515 |
| ACGTCATCC | 717.580627203945 | 0.174788834910307 |
| AAATGACGA | 718.93191737471  | 0.1701467572365   |
| TGTGACATA | 719.55098653784  | 0.160793749317932 |
| AAGTCACAC | 719.563469570317 | 0.124803807115455 |
| AGTCATTGC | 720.646606881783 | 0.124110308965585 |

|           |                  |                    |
|-----------|------------------|--------------------|
| AATCGTCAT | 723.757670528443 | 0.186429416672763  |
| ATTGACTCC | 723.794623635525 | 0.162190151461142  |
| AATGACGCT | 724.008181223035 | 0.373253933506374  |
| CCAGTCACC | 724.294195585179 | 0.118285414765175  |
| ATGACGTGC | 725.469062235554 | 0.20006894581514   |
| CTGACGTAA | 726.080170735162 | 0.186848143446403  |
| AGGGTCATA | 727.074000930386 | 0.144590426259182  |
| ATGAGTGAC | 729.571089872501 | 0.123853518450373  |
| CGTCATACA | 729.717690352894 | 0.192330150072904  |
| TGGATGACA | 730.357168148337 | 0.149074638726641  |
| ATGAGTACT | 731.110108121409 | 0.30006030387199   |
| GGTGACAAA | 731.996233654813 | 0.158987372193306  |
| CATGTCATC | 732.307254085808 | 0.202801483638871  |
| ACTGACGCA | 734.118527060421 | 0.185440081395614  |
| CGTCATAAT | 736.910312456922 | 0.251610721308762  |
| AGTCACCAA | 737.541895416142 | 0.154539641026922  |
| AATGACGAT | 737.779844721189 | 0.210382378873383  |
| GTAGTCACG | 738.085974835273 | 0.178795490186085  |
| GATGTCATA | 738.677122313774 | 0.101835242044179  |
| GTGATGACA | 740.603853336909 | 0.139986511497153  |
| TCCAGTCAC | 741.2236615686   | 0.165970837534023  |
| CTGACGCAC | 741.697693306594 | 0.119854790701362  |
| ATGACGTAG | 741.770116288774 | 0.22102480240236   |
| AGTCATGCT | 741.902463421491 | 0.223857183146154  |
| TATATGACA | 742.071307183356 | 0.134182063262535  |
| ATTGCGTCA | 742.665053303116 | 0.199498717625158  |
| AATGACACT | 743.181181894355 | 0.0916226196841519 |
| ATATGACAG | 747.192358779816 | 0.150136370586456  |
| ATGACACCT | 747.707487759213 | 0.136498862546235  |
| CGGTGACAC | 748.066438012257 | 0.163365791766909  |
| AGTCACAGG | 748.780719629897 | 0.154643365329808  |
| AGTCATGCC | 749.98877315774  | 0.366334229211751  |
| CAGTCACCC | 750.018832160406 | 0.0754028255864198 |
| TATTACACA | 750.740564345937 | 0.148686597357825  |
| AATGACGGA | 751.366479164154 | 0.205289168714103  |
| ATTACTAAC | 751.648023653691 | 0.206436707397473  |
| CACGTCACA | 753.268495986763 | 0.118201146651562  |
| GTGTCACAG | 754.185989393968 | 0.204036508845321  |
| AAATGACGT | 755.285955670339 | 0.169390737468007  |
| ACGTGACTA | 755.423007846317 | 0.166505571207337  |
| GATGAATCA | 755.428899651496 | 0.145273499683381  |
| ACGTCATCT | 756.764426319965 | 0.10895543825429   |
| CATGACTTA | 757.28717585808  | 0.229246705296278  |
| ATCAGTAAT | 757.529508568259 | 0.190800052542907  |
| GGTGTGTCA | 757.63268027849  | 0.188888331071561  |
| TAGTGACTA | 758.300657785982 | 0.194329336189723  |
| GACGTGACT | 759.184645705356 | 0.456140352670957  |
| AATGACAAC | 759.839100664332 | 0.190850946697926  |
| CGTCATACC | 759.982300379654 | 0.092649584413692  |
| AGTCACAAC | 760.727972055695 | 0.129658641297554  |
| CGTCATAGT | 760.879531763217 | 0.118321391233753  |
| CGCAGTCAC | 761.152753780469 | 0.151104286003298  |
| TGACTGAAA | 761.70319091776  | 0.183819692411568  |
| AAGATGACA | 762.448102478822 | 0.153842089538844  |

|            |                  |                    |
|------------|------------------|--------------------|
| TAGTCAGAC  | 763.932547675301 | 0.231487998002188  |
| GGTGTACACA | 765.52798366627  | 0.203540177546468  |
| TGTCATAAG  | 769.469699094703 | 0.225786671706818  |
| AGAATGACA  | 770.659806083202 | 0.171835332953892  |
| AATGACTGC  | 770.789534952617 | 0.195081276872877  |
| AAGTCACAT  | 771.655504705686 | 0.132184130479741  |
| TAGTCATGG  | 771.676686206755 | 0.139137296463103  |
| ATTCCGTCA  | 772.488329493575 | 0.160665691067647  |
| ATGACGCGG  | 772.495682434013 | 0.172085120689049  |
| ACTGACTCC  | 772.55887468705  | 0.166277249937103  |
| GTGACATCA  | 773.376765176506 | 0.101816186234693  |
| GATATGACA  | 773.888249083302 | 0.109424292324319  |
| CAGGTGACT  | 774.698938535868 | 0.182563636518696  |
| AGTCACAGA  | 774.742972388782 | 0.144501363615141  |
| ATAGTCACG  | 775.035977117854 | 0.119322251808299  |
| ATGATACAT  | 775.045515873514 | 0.162072628509977  |
| TATGACAAG  | 775.065634748555 | 0.196635842551137  |
| TGGTGACAC  | 777.307081749601 | 0.10095607058996   |
| ATGACAAAC  | 777.475578179612 | 0.17470137023641   |
| GGTGCCTCA  | 777.673867577034 | 0.15744491919049   |
| CGGATGACA  | 778.030614705763 | 0.131500134985123  |
| ATGACAAAA  | 778.737763944151 | 0.136740192933307  |
| ACTGGTCAT  | 779.372530323383 | 0.208220407201755  |
| GAGTGACTG  | 779.668247596749 | 0.104922898614967  |
| GTAGTCAGA  | 779.835966330985 | 0.145926474831649  |
| GTGAGTACA  | 780.119098489656 | 0.113929759039837  |
| TGATGACAA  | 780.125994582397 | 0.101886798500743  |
| AGTCACAAA  | 781.03344849427  | 0.16945320319882   |
| CGTGTACACA | 782.366082205496 | 0.165185496301348  |
| CATGAGTCG  | 782.619256955818 | 0.150858164305221  |
| AAGCGTCAC  | 783.873311284463 | 0.15975710091243   |
| CGACTCACA  | 784.312852402016 | 0.133922417064741  |
| AGTCACTGA  | 786.052381193071 | 0.180169695833154  |
| AGGACTCAT  | 787.071400859432 | 0.194059086154576  |
| AAGTCATGC  | 787.109164832747 | 0.0745719393569873 |
| TTAGTCAAA  | 787.19468195134  | 0.154912567389349  |
| CTATGACCA  | 788.976174864536 | 0.159706383777584  |
| TGAATGACA  | 789.007934874178 | 0.109919032612318  |
| AAAGACTCA  | 789.245321082666 | 0.109386004599158  |
| AGTGTGACA  | 790.735496667833 | 0.143886271742692  |
| AGTCATGCG  | 791.939918709194 | 0.156317748157915  |
| TATGACCGA  | 792.740798163094 | 0.166986414440225  |
| CGTCATAGA  | 792.948022513287 | 0.156663100527641  |
| AGTCATCCC  | 793.189036249857 | 0.0804218475798933 |
| GCTGACTGA  | 794.766407426767 | 0.144777726342935  |
| AACTGTCAT  | 795.056922430895 | 0.141211094782762  |
| AATGGTCAT  | 795.456962931928 | 0.146427572831523  |
| AGTCACCCA  | 796.12422994071  | 0.264960881989359  |
| ATAGGTCAT  | 796.177002293747 | 0.192041895935763  |
| AAGTATGAC  | 798.655756091221 | 0.138295668360013  |
| ATCGGTCAC  | 798.786561237225 | 0.173943733476229  |
| GACTGACTC  | 800.782914829651 | 0.185290817954543  |
| GAGTCAGCC  | 801.169504011759 | 0.163266709489595  |
| AATGACGTT  | 801.292952348906 | 0.169491079926908  |

|            |                  |                    |
|------------|------------------|--------------------|
| CGACTCACC  | 802.02581825319  | 0.134483647661835  |
| GTGACACCA  | 802.989098327706 | 0.185625385694047  |
| ATAAGTCAG  | 803.005590499844 | 0.144938969145254  |
| GCTGACGCA  | 803.261087736421 | 0.1728693485704    |
| ATTGGTCAG  | 803.526989168599 | 0.159183967891976  |
| TATTACGCA  | 805.010902085616 | 0.131181084099017  |
| GATAGTCAC  | 805.937786158793 | 0.158240485266141  |
| AGTCACCCG  | 805.983323554326 | 0.156879613742699  |
| ATGACGCGA  | 807.025619608956 | 0.118105545218313  |
| ATGATTAAT  | 807.13113860923  | 0.144272861005067  |
| CATGATTCA  | 808.224784471455 | 0.0447911486310476 |
| CAGTGTCAT  | 808.871115330114 | 0.195329424763134  |
| TGTGACCCA  | 809.511597035176 | 0.207181199073885  |
| AAACGTCAT  | 812.846504992385 | 0.156601177583168  |
| AGTCACTCG  | 812.935613671315 | 0.135162139349867  |
| CTTAGTCAA  | 816.224592873625 | 0.211014674008583  |
| TAGTGACTG  | 816.858758657997 | 0.167095432152185  |
| ATGACACGA  | 816.956300356771 | 0.0850067694075852 |
| ATGACATAC  | 817.245769455309 | 0.147941840631711  |
| GATGACAAT  | 817.305952723734 | 0.180384427265558  |
| TAGTGTCAC  | 817.46043006849  | 0.182122245176991  |
| AATTGTCAT  | 817.970415955083 | 0.210684380762294  |
| ATTAGTACA  | 818.016516323362 | 0.158267489253985  |
| AGTCACGCA  | 821.098881805891 | 0.1415294944509    |
| ATGTCATAA  | 821.604465374428 | 0.151626268152637  |
| TATTACTAA  | 822.104947101886 | 0.180396930483129  |
| GGGTGACAC  | 823.793121982427 | 0.129209304574713  |
| CGCGTCACA  | 825.543908986635 | 0.16630794056987   |
| AGTTACTCA  | 825.702382413934 | 0.177041087653369  |
| AGTCATGAA  | 826.461558305065 | 0.127060743303979  |
| ATGATGTCA  | 826.549759466919 | 0.127319184670785  |
| TCTGAGTAA  | 826.580082895549 | 0.164957877656485  |
| AATATGACG  | 828.117005943307 | 0.122978886054168  |
| CACGTCACC  | 828.811263179542 | 0.141995681892428  |
| TCCGTCACA  | 831.624956957429 | 0.135938419567892  |
| TGATGACAG  | 831.895259789658 | 0.170481156650294  |
| AGTGTACACA | 832.8469278647   | 0.153249383696238  |
| AGGGTCATC  | 834.290893507829 | 0.172278618994754  |
| GTGACCAAA  | 834.822709926018 | 0.176568723175468  |
| AATGACGAC  | 835.528213641357 | 0.158410335587232  |
| AAACGTCAC  | 835.72849934765  | 0.137139451696451  |
| ACATGTCAC  | 836.431313630984 | 0.141249445667781  |
| AAGTCACAG  | 836.615475209267 | 0.141413866435824  |
| AACGTGACT  | 836.648025934317 | 0.11660975078524   |
| GTGTCACAT  | 838.974752629196 | 0.0613731445407174 |
| CAATGACGA  | 839.687058463911 | 0.075339335931822  |
| AGTGCGTCA  | 840.930117267691 | 0.136010774124348  |
| AGTCATGGC  | 840.946579120572 | 0.178754305077835  |
| AATGAGCAA  | 841.344925042763 | 0.165652783489341  |
| ACGTCACAC  | 842.116597490377 | 0.159180333670988  |
| TATTAGTAA  | 842.275495607531 | 0.1690840010452    |
| ACCCGTCAT  | 842.435507157584 | 0.156383846033168  |
| AGTGTGTCA  | 842.61362174785  | 0.141016094883253  |
| TAATGACGA  | 842.923518793526 | 0.148893799037713  |

|           |                  |                    |
|-----------|------------------|--------------------|
| AGCGTCACC | 845.647724757609 | 0.1206938512487    |
| CGTCATACG | 846.022881846279 | 0.122847449512496  |
| TACGTGACT | 846.600978295352 | 0.155875102018612  |
| AGTCACCGC | 847.204207491262 | 0.181105977965882  |
| AGCGTCACA | 848.880473347361 | 0.183663473879467  |
| ATGAGACAT | 849.010391424379 | 0.170360688129695  |
| AAGTCATGA | 850.050039145331 | 0.0747112412969882 |
| ATGTCATCG | 850.339317134419 | 0.0439564348020318 |
| ATGACCAAC | 851.122215473182 | 0.128084794858363  |
| CGTCATCAT | 851.813601378661 | 0.14485429312916   |
| AGTCACCAC | 852.114854214997 | 0.152284819582125  |
| AGTCACTGT | 852.449026609621 | 0.128332974370004  |
| AATGACCCA | 852.607085292074 | 0.123167289157718  |
| TAGTCAGAA | 853.134066426027 | 0.148591088545429  |
| CTGACGCAA | 853.533117438314 | 0.128132581852705  |
| GCGATGACA | 854.45453214485  | 0.122995708003021  |
| TATGAGTGA | 854.548852124291 | 0.118940173844214  |
| ATGACAGAA | 854.629686520583 | 0.196077299762736  |
| CATGACGAA | 854.785081575179 | 0.149735091274597  |
| AGTCACAAG | 855.94478053624  | 0.122772634057999  |
| CTGACACAA | 856.614325195847 | 0.147921627821604  |
| GGTCAGTCA | 857.139284500289 | 0.138463731440997  |
| GATGTCATC | 857.259547375273 | 0.174861222783346  |
| CGTCATAGC | 857.430780049985 | 0.16267614958692   |
| CGTCATAAC | 857.511264019505 | 0.133057662182514  |
| TATGGCTCA | 858.397213391768 | 0.143222192052047  |
| ACCTGTCAT | 858.445268532754 | 0.151990635614758  |
| AATACTCAC | 858.480676741332 | 0.135393810209264  |
| CAAGTCATT | 858.714858059437 | 0.125362246681614  |
| AATCGTCAC | 858.806244596967 | 0.147972200589682  |
| TATATGACG | 859.29695084517  | 0.110531144559444  |
| ATGACACCG | 859.455691865876 | 0.0899686295350092 |
| CTGACTATA | 859.750778419353 | 0.141157208365758  |
| ATTTACTCA | 860.030874902519 | 0.120386431771929  |
| AAAATGACA | 860.962565729895 | 0.152245178074291  |
| GGTGACATA | 861.28459819534  | 0.144478857426637  |
| ATAACTCAT | 861.509408236205 | 0.125104731341534  |
| CGCGTCACC | 862.198464556885 | 0.130935880881521  |
| CCACGTCAG | 862.482092434471 | 0.142142019832588  |
| ATGACCCTA | 862.500382614143 | 0.115194577128634  |
| GTGACTTAG | 862.631291296145 | 0.136339967148537  |
| ACGATGACG | 863.128800250849 | 0.135961442915607  |
| ATGACCCAA | 864.576056211252 | 0.199090136173463  |
| AATGGTCAC | 866.359852757698 | 0.148848258962128  |
| AAGACTCAA | 867.125487086758 | 0.12904708429362   |
| ATGACCAAG | 867.472525981599 | 0.140796673405104  |
| GACTCATGC | 869.842866100672 | 0.145803076381201  |
| GGGTCATAC | 869.863872481417 | 0.121198063446452  |
| TCTGTCACA | 870.705980303919 | 0.144599810939894  |
| AGTGACTTA | 872.305932496626 | 0.110922853115271  |
| CAATGACGC | 873.380499810477 | 0.145261894173488  |
| GTGACGAAA | 873.758575108364 | 0.114787490867726  |
| ACTCGTCAT | 873.978359449771 | 0.0822149539023972 |
| TCTGCGTCA | 874.011835105091 | 0.121296277939111  |

|           |                  |                    |
|-----------|------------------|--------------------|
| CGTCATAGG | 874.52632256362  | 0.183634033144496  |
| AGAATGACG | 874.654655501654 | 0.136691408044061  |
| ATTACATCA | 875.834917929281 | 0.157489590060527  |
| TATTAGTCG | 876.284338981177 | 0.0850414754666845 |
| AACCGTCAT | 876.461922820523 | 0.118611230459919  |
| GACACGTAA | 876.917449827367 | 0.149900305084619  |
| TAGGTGACT | 877.501046544815 | 0.16512838012532   |
| TGTGTGACA | 878.064910678179 | 0.11316630215161   |
| ATGACGATA | 879.076898681562 | 0.129100236560949  |
| AATAAGTCA | 879.283524997983 | 0.12149836714596   |
| AGTCATGGA | 879.48712818691  | 0.128104049278052  |
| ACAAGTCAC | 879.739007936498 | 0.152676606186589  |
| CAGTCAGAG | 880.88311857122  | 0.113026102834952  |
| AGTCACTTA | 881.279571799856 | 0.125563154421968  |
| GGTGACACT | 881.81808716549  | 0.0664277294556047 |
| GTGACGTAC | 881.984405356699 | 0.100868600650041  |
| AGTCACTAA | 882.346749788824 | 0.125272082640066  |
| ACTTGTCAT | 882.835211217536 | 0.130746500877368  |
| GGTGACAGA | 883.349363820971 | 0.131119833242606  |
| GTGACGAAG | 883.929656793959 | 0.133509401002588  |
| AGTCACGAT | 883.948766571469 | 0.102956399099916  |
| AGAGTAATC | 884.323855544993 | 0.124099863487691  |
| CGAATGACA | 884.391827725618 | 0.10735003196117   |
| ATGACGACA | 884.617215330947 | 0.0730724832575806 |
| CGACTCACT | 885.35346705176  | 0.124266815254872  |
| ATGGGTCAG | 885.505721275135 | 0.1211396617981    |
| GAATGACAT | 885.730178698076 | 0.125760517623877  |
| ATGTAGTCA | 885.774500275365 | 0.114398280304613  |
| GATGACCAT | 886.331081426326 | 0.119951511632004  |
| ATTTGTCAG | 887.185341005985 | 0.122977532645224  |
| CTGACTCCA | 887.640060013866 | 0.116104796458474  |
| TCGATGACG | 888.18056213813  | 0.120820770451044  |
| CAGACTCAT | 888.44285608511  | 0.112175206779147  |
| GAATGAGTA | 888.600063529821 | 0.116786494917183  |
| AAGTGACTG | 890.40034472855  | 0.0891299109421645 |
| AGTCACTAT | 890.512781673786 | 0.141636684686537  |
| TACGACTCA | 890.93986430188  | 0.126406986437224  |
| GTACAGTCA | 891.098212312884 | 0.132119646510757  |
| AATCACTCA | 891.598164100655 | 0.106708477127504  |
| AGATGACAG | 893.128149616399 | 0.108648651988749  |
| GCCAGTCAC | 893.173448812868 | 0.0878796898103164 |
| GATTACACA | 893.194729132797 | 0.10372886015536   |
| CTGACTCCC | 893.664369998981 | 0.118644668596384  |
| CACATGACT | 894.742151647402 | 0.101020089497294  |
| GACTCACCG | 894.841485849779 | 0.116849621575279  |
| AAGTCACAA | 895.257452607752 | 0.12038407551348   |
| GTGACGGAA | 895.286260607716 | 0.119102112671571  |
| ACTGACTCG | 895.324044010858 | 0.107216790163139  |
| TAATGACGT | 895.581656494406 | 0.165543402833927  |
| AGATGACAA | 896.300828378219 | 0.138254271915965  |
| CGTGACGTA | 896.630944918785 | 0.153299019452375  |
| TATGAGCCA | 897.894759370112 | 0.136716669276651  |
| CAGAGTCAG | 898.804491651623 | 0.144465996294947  |
| CAGCGTCAT | 898.896713230357 | 0.111804415868102  |

|           |                  |                    |
|-----------|------------------|--------------------|
| CGATGACCA | 898.945803859673 | 0.186995588066124  |
| GTCGACTCA | 899.126817940158 | 0.0955870241189941 |
| GACTCACAT | 899.669440121062 | 0.135680365369147  |
| CTGACTGAG | 900.152562972979 | 0.127336364005842  |
| ATGACCACA | 900.807314599637 | 0.0892899571708538 |
| ACTCGTCAC | 901.314978007996 | 0.105468049107993  |
| GTCATGACA | 901.335217154547 | 0.0792851764036245 |
| ATCACTCAC | 901.648752296256 | 0.0978039288944309 |
| AATGACATG | 902.420068066646 | 0.113508066450151  |
| GAGTCAGCT | 903.465755499964 | 0.127371472990524  |
| GTGACCAAC | 903.54777517094  | 0.112625790264768  |
| ACAATGACA | 903.560654789106 | 0.0935795686217991 |
| GATTGACTC | 903.718438083196 | 0.108103748402371  |
| TAAATGACA | 904.970917362726 | 0.124521479908736  |
| ATATAGTCA | 905.048209344139 | 0.113108356833292  |
| GAGTCAACG | 905.795100599219 | 0.142226875753223  |
| GAGTCAACA | 905.862977537871 | 0.101830579171522  |
| AGGACTCAC | 907.176380557311 | 0.132111585337082  |
| GTGACGCTA | 907.181461810217 | 0.11733037456734   |
| GTGACATAA | 907.620378507127 | 0.121704413764612  |
| GACTCACCT | 907.886283509321 | 0.0931337773165834 |
| TCAATGACA | 909.446590147649 | 0.0829019185810941 |
| AAATGAGTA | 909.700700184009 | 0.103241161688443  |
| AGTGTGACG | 909.70227961186  | 0.0986118722209874 |
| AGGATGACG | 911.034247669102 | 0.100162236073342  |
| AATTGTCAC | 911.435495938578 | 0.104402679986104  |
| AATGAATCA | 912.212787312132 | 0.117036071460003  |
| TGAGTGACA | 912.497297766883 | 0.0954310602135826 |
| CACGTGACT | 912.563319342477 | 0.0739493300838572 |
| GGACTCACC | 913.975479626577 | 0.082139562519786  |
| AATTGGTCA | 914.24783689863  | 0.12317810391628   |
| TCTTACTCA | 914.42089743307  | 0.0930034396056654 |
| GACTCATGA | 914.577391595719 | 0.0978948933532063 |
| GTGTGACGA | 914.631551895558 | 0.0864281784167451 |
| GAGTGACAC | 915.373206886595 | 0.0992456114625703 |
| GAGTAATAC | 915.663039321983 | 0.105221210374062  |
| GCGATGACG | 915.728397773097 | 0.0681306787997255 |
| GACTCACAA | 915.86461859924  | 0.100279650465085  |
| ACCACGTCA | 916.363847457526 | 0.10768579087009   |
| GCGTCACCG | 916.681196310347 | 0.116600325894088  |
| AGTCACTGG | 917.156373633886 | 0.0779377939453396 |
| GTTACGTAA | 917.267063726109 | 0.127207308104274  |
| ACAGGTCAT | 917.376196609559 | 0.0830040933115181 |
| CGATGAGTA | 918.047840204357 | 0.10323776132697   |
| AGTGATTCA | 918.507435832883 | 0.0843305940246711 |
| GGATGACAG | 920.343451926454 | 0.114247373010298  |
| AAGTCATTA | 920.673655701697 | 0.0684055862566117 |
| AGGTGTCAC | 921.134938083598 | 0.0804278954205511 |
| ATGTACTCA | 921.371327327311 | 0.0679196179160274 |
| ACCGTCATC | 922.54641294491  | 0.0821291458205607 |
| TAGACTAAT | 922.676918694626 | 0.0873276448347926 |
| AAGTGTGAC | 922.691923096169 | 0.111353553376574  |
| ACATGAGTC | 923.168996136111 | 0.0786455717544908 |
| GGATGAGTA | 923.619453959224 | 0.0997858245797332 |



|           |                  |                    |
|-----------|------------------|--------------------|
| AGTGACTGG | 923.791041126732 | 0.0725844616620263 |
| AACTGTCAC | 924.148116084397 | 0.0836045072907473 |
| ATTGACGCA | 924.310965758808 | 0.10227645985266   |
| AATTTGTCA | 924.472059284565 | 0.0845397863272868 |
| CAATGACGT | 924.523292479283 | 0.0791391933052731 |
| CTGACTACA | 924.96087956209  | 0.0775650254753511 |
| AGTCACGAA | 925.109749311413 | 0.0923424595500051 |
| GGTGACGGA | 925.31046845221  | 0.0948060132561854 |
| ATGACAGCA | 925.363771205477 | 0.0791641194294529 |
| CACTGACTC | 925.88682328563  | 0.0838244661399295 |
| AATGACAGT | 926.001064135766 | 0.0980004451826859 |
| ACTGGTCAC | 927.062873707529 | 0.0952870937334671 |
| CGTGACCAA | 927.662102431513 | 0.0758199590512184 |
| AAAGTGACT | 928.047882406119 | 0.138020283194804  |
| ATTACGTGG | 928.217538522408 | 0.0820813297137892 |
| TAGTATGAC | 928.349902953153 | 0.0981630173871052 |
| AATGACAAT | 929.827407637857 | 0.0817763048403217 |
| ATGACATAG | 929.880415322891 | 0.092907945754334  |
| AATGACAGC | 930.187128557287 | 0.0686490663604943 |
| GTGACGACA | 930.608357266032 | 0.0559231153312572 |
| GAGTGACGC | 930.756128627099 | 0.115795705809071  |
| ATGACAACA | 930.98495251549  | 0.0737816196043211 |
| CCCAGTCAC | 931.052324064215 | 0.091677893894645  |
| TAATACTCA | 931.439394132118 | 0.0681137703629639 |
| CCGTCATTC | 931.665737455893 | 0.0701173087684718 |
| AGTTGTCAT | 931.841698099129 | 0.0966312894772976 |
| GATTCGTCA | 932.10582329839  | 0.0788185940285652 |
| ATGACACGC | 932.388076743412 | 0.0740050988288381 |
| TGATGAGTA | 933.469525809007 | 0.0845154371555353 |
| GTTGACGCA | 934.058567024513 | 0.0661928425703074 |
| GTGACAGAA | 934.066791953759 | 0.0820600077137689 |
| TATGGGTCA | 934.434332023692 | 0.123679894748458  |
| GTTGCGTCA | 935.252410987861 | 0.0833679225497251 |
| GGTGTGACA | 935.423136384959 | 0.0823885634477987 |
| TACTCATAG | 935.489307799818 | 0.0861818320981032 |
| TTATGACCA | 935.94174689869  | 0.112898583998831  |
| ATGATGCAT | 936.424837653485 | 0.0847960210634355 |
| GACTCACAG | 937.364556333889 | 0.0731915821267112 |
| ATTGACTCG | 940.82350034013  | 0.0767712019689735 |
| AAGGTCAT  | 941.001509627899 | 0.0584993363825417 |
| GTGACAACA | 942.225230182444 | 0.0711148675234708 |
| AATTAGTAA | 942.413364979568 | 0.0724260192789616 |
| TAAGTCAGA | 943.982873147674 | 0.0658935300465921 |
| CAGTCAGAC | 945.326884085096 | 0.0876761212365547 |
| CGGATGACG | 945.888505741696 | 0.0933768419123025 |
| GATGAGTGA | 946.608874307421 | 0.0798718902932602 |
| TCTGACCAA | 947.51799454733  | 0.0661380098897481 |
| ATCGTCACA | 948.241300059451 | 0.0652667732578968 |
| ATGACATGG | 949.081682845703 | 0.0589920260020943 |
| CTACTCATA | 949.386250531805 | 0.0615612188274269 |
| TCTCAGTCA | 949.72815411992  | 0.0638966603108481 |
| CGCTGACTA | 950.314888913357 | 0.0716455885600341 |
| TACGTCAGA | 950.482313873327 | 0.0624442630065458 |
| AACGTCACA | 950.719040207531 | 0.0507445082949675 |

|           |                  |                    |
|-----------|------------------|--------------------|
| AAGGAGTCA | 951.620015857962 | 0.0690703040675801 |
| GATTAGTAA | 952.334142545821 | 0.0642618000730491 |
| GGAGTCAAA | 952.728755567686 | 0.0580315800223006 |
| GACTCACCC | 953.051643625998 | 0.0644352803099369 |
| CTAGTCAGA | 953.986594001082 | 0.0289132767107913 |
| ATTCTGTCA | 955.016688438247 | 0.0709338209386573 |
| CGTCATGAC | 955.264135880639 | 0.0503420128334974 |
| GTTCCGTCA | 955.640907002449 | 0.0662618048796548 |
| GACACATCA | 956.438617093371 | 0.0446326607157912 |
| CGTCATCAC | 956.485201011454 | 0.0601894289755804 |
| AGTGACACC | 957.769919522539 | 0.056306227315023  |
| GACTCACCA | 957.941276259449 | 0.0651665550339659 |
| GGTGACCAC | 959.381863350566 | 0.0601532782877452 |
| GTGACCACA | 961.973046905164 | 0.0528537581306824 |
| GTCACTCAC | 962.009228295441 | 0.0543586281701392 |
| GCTGACTAC | 962.175008427196 | 0.0526642260962307 |
| GAACAGTCA | 962.491090657237 | 0.0485431676882419 |
| CGTCATCCA | 962.566527503046 | 0.0514925346259594 |
| TGACTATAA | 964.946379460525 | 0.0405361572252596 |
| ATGACGGTG | 965.303894230722 | 0.0538075144463928 |
| CGATGACCC | 965.990982462011 | 0.0440355426740026 |
| GAGTATGAC | 966.711929031951 | 0.0369005954453625 |
| ATGAGTCCA | 969.720982912478 | 0.0351885727861528 |
| GTATAGTCA | 970.702360980863 | 0.0567070409869675 |
| AAAATGACG | 971.156363508532 | 0.0454083454592746 |
| GTTGTCACA | 972.39313525633  | 0.0341980663761477 |
| AACGGTCAT | 972.801494982152 | 0.0564842558056916 |
| AGTGTCACT | 977.683675005767 | 0.0398849678867641 |
| TATTGGTCA | 979.866517415861 | 0.0352417667499649 |
| AACTAGTCA | 982.04476128177  | 0.0252018569136272 |
| CGTCATTCA | 983.146626287939 | 0.021139055772915  |
| TATTCGTCA | 993.450435160061 | 0.0100420037272828 |
| 1000      | 0                |                    |

|            |                  |                    |
|------------|------------------|--------------------|
| TATGACTCAT | 11.4422528151398 | 0.104229133524425  |
| ATGAGTCATC | 12.4298557179751 | 0.22740078499371   |
| TATGAGTCAT | 13.8763910151018 | 0.15514050477141   |
| ATGACTCATC | 14.288868887367  | 0.245801791844273  |
| TATGACTCAC | 14.5116998325458 | 0.13557273859245   |
| ATGACTCACA | 15.3306811918119 | 0.118229657235448  |
| GTGACTCATA | 16.2857340940589 | 0.155318530869133  |
| GTGACTCATC | 16.4006458806201 | 0.12120193917559   |
| TGTGACTCAT | 16.4827208190975 | 0.24385197695329   |
| GTGAGTCATC | 16.9289282136624 | 0.0965540613938044 |
| ATGACTCACT | 16.9999006680066 | 0.208524650988033  |
| AATGACTCAC | 17.7079422360124 | 0.169370805015415  |
| GTGACTCATT | 17.9532367668755 | 0.342493428937802  |
| TGAGTCATAC | 18.7194832150625 | 0.102677937983454  |
| TGTGACTCAC | 18.9406660268316 | 0.136748943270191  |
| GGTGAGTCAT | 18.942330763454  | 0.127840517010113  |
| TCTGACTCAT | 20.0205376682854 | 0.105757328269662  |
| CTATGACTCA | 20.5323278077324 | 0.20837914811336   |
| CATGAGTCAT | 20.7563201839415 | 0.432919902553639  |
| GTGACTCACA | 21.7227080810819 | 0.233571794053259  |
| GGTGACTCAT | 22.0308186426515 | 0.406897328342272  |
| ATTAGTCATA | 22.0599605104359 | 0.144669199522034  |
| TCTGAGTCAT | 22.9456603423292 | 0.176227322788851  |
| AGTGACTCAT | 23.3538587642004 | 0.368587680204237  |
| TGAGTCATAA | 24.2055322964043 | 0.516673396920552  |
| AGTGAGTCAC | 24.5431930095981 | 0.264324394443788  |
| ATATGACTCA | 26.0954755644595 | 0.169714190738426  |
| ATATGAGTCA | 26.1220633918835 | 0.289664348584038  |
| GTATGAGTCA | 26.8980514798747 | 0.256192389764205  |
| AGTGACTCAC | 27.2710876247977 | 0.197100121264189  |
| TATTAGTCAT | 28.1171591449768 | 0.240510693059422  |
| TATTAGTCAC | 28.4818651591597 | 0.212024449710784  |
| TGAGTCATCG | 28.6511874587489 | 0.301941202450534  |
| GATGACTAAT | 28.6852471197302 | 0.18098788324793   |
| GAATGAGTCA | 29.1374942316665 | 0.202023712170175  |
| AAATGAGTCA | 29.1643827547053 | 0.0859218302741415 |
| TCTGACTCAC | 29.2160773339908 | 0.224953120103007  |
| TAATGAGTCA | 29.3463390193112 | 0.204396694501147  |
| ATGACTCAAT | 29.534931719169  | 0.183673172097965  |
| TGAGTCACCG | 29.5684527400721 | 0.126578553278612  |
| ACTGAGTCAT | 30.5441336625983 | 0.199977697549673  |
| TGAGTCATCT | 30.5645326410819 | 0.322018897038776  |
| ACTGACTCAT | 30.6765655566977 | 0.209087704982132  |
| ATGACTAATT | 30.8670871198872 | 0.342763522026736  |
| AAGAGTCATA | 30.992302377658  | 0.191536105966497  |
| CGATGAGTCA | 31.2611379160245 | 0.353167011098455  |
| AGATGAGTCA | 31.2850754060783 | 0.264310368885446  |
| TATGACTCAG | 31.4008124960214 | 0.148650072892273  |
| TGATGAGTCA | 31.6122548968416 | 0.620045702982835  |
| GGTGACTCAC | 31.9394253175071 | 0.227394319273346  |
| GATTAGTCAC | 32.249747684717  | 0.225357235957658  |
| GGATGAGTCA | 32.4643659319898 | 0.588268290646128  |
| CGTGACTCAT | 32.7075882428816 | 0.357060142439074  |
| TAAGAGTCAT | 33.1236477071602 | 0.219505962213889  |

|             |                  |                    |
|-------------|------------------|--------------------|
| CAATGAGTCA  | 33.2602517022011 | 0.229588066502632  |
| TATGACTCAA  | 33.3976399493797 | 0.125174459482097  |
| CTATGAGTCA  | 33.6483723222803 | 0.280935278742319  |
| TATGAGTCAG  | 34.0317032898738 | 0.40932392701186   |
| AAGAGTCATC  | 34.3358070826552 | 0.183218829268585  |
| AATGACTAAT  | 34.4661065190448 | 0.292617039582237  |
| ATGTGACTCA  | 35.1886510997201 | 0.253111170488716  |
| CATGACTCAC  | 35.4256111124458 | 0.675072318888812  |
| AATTAGTCAC  | 35.5498700200574 | 0.278215645020322  |
| GTGTGACTCA  | 35.5813176061805 | 0.165298462766416  |
| GATGAGTCAA  | 35.7132785167397 | 0.0847143686440709 |
| TTGTGACTCA  | 35.9419421158169 | 0.21152338009511   |
| GATGAGTCAG  | 35.9841465950294 | 0.172648502937794  |
| GAATGACTCA  | 35.9970718574861 | 0.581697485343938  |
| GCTGAGTCAT  | 36.0080582251782 | 0.343317209382043  |
| TTATGAGTCA  | 36.5787674227853 | 0.468732113841293  |
| CTGAGTCATC  | 37.5290495112672 | 0.0513004721763115 |
| ACATGACTCA  | 38.041485782928  | 0.385783534429293  |
| GTTAGTCATA  | 38.5266254152267 | 0.252945983369087  |
| CTGTGACTCA  | 38.5347776285271 | 0.446170005391442  |
| TGAGTCATCA  | 39.2118512681141 | 0.58034075271627   |
| TCATGAGTCA  | 39.6974175029863 | 0.237545658343582  |
| ATGACTCAA   | 39.8466291488169 | 0.227720193135931  |
| ATGACTCAAC  | 40.1259338151266 | 0.165829174717699  |
| TCATGACTCA  | 40.5840212186279 | 0.195743875967912  |
| GTGACTCAAT  | 41.0791159452033 | 0.143137859814912  |
| ATGACTCAAC  | 41.0891780754355 | 0.298578664199839  |
| GATGACTCAA  | 41.2120931991534 | 0.426599769781275  |
| AATGACTCTT  | 41.5402442953046 | 0.221218531801853  |
| TGTGACTCAA  | 42.1717641174469 | 0.446726337537882  |
| CAATGACTCA  | 42.3323087820313 | 0.724357772932027  |
| TGTGACTAAT  | 42.7772807018346 | 0.267917134144989  |
| GTGACTCAAC  | 44.1478332277207 | 0.175232885248177  |
| CAGTGACTCA  | 44.4051288014065 | 0.161947277886283  |
| ATGACTGATT  | 44.570993730118  | 0.280509448696908  |
| GATTAGTCAT  | 45.1668639457127 | 1.07732895472965   |
| TATGACTGAT  | 45.1786731848596 | 0.258898842548386  |
| TATGAGTCAA  | 45.3105166840752 | 0.404570577476155  |
| TGTGACTCAG  | 45.7695673666788 | 0.287139759595376  |
| ACTGAGTCAC  | 45.9367884597541 | 0.30766905683634   |
| GCTGACTCAC  | 46.2814640645018 | 0.472742250020649  |
| TGACTCACAA  | 46.4705635775374 | 0.259283816453703  |
| AACAGTCAGT  | 46.5404324792123 | 0.332046331351398  |
| AGGTGAGTCA  | 46.7369563097462 | 0.213927188248383  |
| TGGTGAAGTCA | 47.0200653686813 | 0.211204390271731  |
| AAGAGTCACA  | 47.0286670884128 | 0.172867407416338  |
| GGTGAAGTCAC | 47.0629756794628 | 0.650800409541633  |
| GTGACTCAAC  | 47.1194656987924 | 0.276320234698745  |
| AAGAGTCATG  | 47.4551942372755 | 0.219616465788704  |
| TAAGAGTCAC  | 47.9228069976817 | 0.109367474236519  |
| AAGAGTCACC  | 47.9408619239273 | 0.172892657024805  |
| TGAGTCACCA  | 48.5634786927679 | 0.151336449377456  |
| TATTACTCAT  | 48.8647379670354 | 0.277375154266078  |
| GTGAGTCAGT  | 48.9790396904407 | 0.200371174123114  |

|            |                  |                   |
|------------|------------------|-------------------|
| GGTGACTAAT | 49.0804220738365 | 0.237845973062337 |
| GCTGAGTCAC | 49.4813279447552 | 0.329553335040967 |
| TGACTCACAC | 49.6433795569052 | 0.2459374775399   |
| GTGAGTCAAT | 49.6541963777057 | 0.245587104650553 |
| GTGACTCAA  | 50.0540527660325 | 0.251367104216713 |
| CGGTGAGTCA | 50.5816946681469 | 0.382759186818223 |
| TGAGTCACCT | 50.6323769441114 | 0.348270917241283 |
| CGTGACTAAT | 50.6387193468149 | 0.213853547736003 |
| ATGACTGATC | 50.7144991978656 | 0.163311204357689 |
| AGTGAGTCAG | 50.8889279972328 | 0.23226236708752  |
| ATGACTAAAT | 51.0199224763629 | 0.234180368321705 |
| CATGACTAAT | 51.1257548089471 | 0.161582546719494 |
| TGAGTCATCC | 51.1618095790884 | 0.440614493152543 |
| AATGAGTCAT | 51.2616303540613 | 1.50503364050954  |
| AAATGACTCA | 51.3850386875021 | 0.47544087634824  |
| CAGTGAGTCA | 51.5020546576525 | 0.102986974201217 |
| GGTGAGTCAG | 51.5780255204768 | 0.162235064355963 |
| GATGACTAAC | 51.7816458372931 | 0.15628284338938  |
| TATGACACAT | 51.8468233197809 | 0.269344339548118 |
| TCTGACTAAT | 51.8754828510174 | 0.309156978044643 |
| TGACTCACAG | 52.31342798603   | 0.157585180689892 |
| ATGACACATT | 52.6956247264087 | 0.357633396364832 |
| TAGTGACTCA | 52.8017202842127 | 0.351891235561377 |
| AGTGACTAAT | 52.8816596643356 | 0.256070993321625 |
| CTGACTCACA | 53.0022179588735 | 0.422885714642182 |
| ATGACTAACA | 53.6769087104694 | 0.278462003743009 |
| TGACTCACAT | 53.8322346515272 | 0.263939113426281 |
| CCATGAGTCA | 54.0675840049296 | 0.345022024149373 |
| GATTACTCAT | 54.1339048876634 | 0.284781463841662 |
| GGTGAGTCAA | 54.3432450829461 | 0.231754817573286 |
| GTGAGTCAA  | 55.3388529118548 | 0.358186497634405 |
| GTGACTAATG | 56.497001504649  | 0.287769349840475 |
| TTCTGACTCA | 58.3841484400223 | 0.150401527122763 |
| GAGTGAGTCA | 58.5908537165221 | 0.302733834781084 |
| AATTAGTCAG | 58.6077899197365 | 0.104839766788548 |
| AAGAGTCACT | 58.6555220146787 | 0.251100423241767 |
| ATGACTGAAT | 58.6898510136248 | 0.199158228020474 |
| GTCTGACTCA | 58.7201228986031 | 0.153641430781155 |
| AATGAGTCAG | 58.784055805218  | 1.58844910044847  |
| GAGTGACTCA | 59.02881350663   | 0.342014723596201 |
| TATGACGCAT | 59.3593515983391 | 0.455816890422536 |
| GTTAGTCACA | 59.4196179183985 | 0.305906293584082 |
| CATGAGTCAG | 59.5550210012816 | 0.234685874946149 |
| TCTGAGTCAC | 59.7318759888867 | 1.28096967533445  |
| CTCTGACTCA | 59.7619173815425 | 0.225016337652897 |
| TAATAGTCAT | 60.2160255482533 | 0.261511162792784 |
| TTAGTCATAA | 60.2339162075679 | 0.146014401126543 |
| TTAGTCATAG | 60.6356899829819 | 0.285096581686207 |
| TATTAGTCAG | 60.8205922635218 | 0.163550566203121 |
| ATGACTAACT | 61.1311002478186 | 0.23223549949145  |
| GTAGAGTCAT | 61.3021429837413 | 0.180590825936878 |
| ATGACTAAGA | 61.3654270474392 | 0.143379630825981 |
| AAGTGACTCA | 62.9105426860026 | 0.268330231946344 |
| AAGAGTCACG | 62.9356485031664 | 0.189802646123656 |

|            |                  |                   |
|------------|------------------|-------------------|
| ATGACGCATA | 62.9381323148392 | 0.188309570531569 |
| TATGAGTAAT | 63.5668106556071 | 0.197635576727581 |
| GTGACTGATT | 63.6315043600254 | 0.242405937856154 |
| AAAGAGTCAC | 63.8105043945576 | 0.214600818336082 |
| GTGACTGATC | 63.9741132164715 | 0.127060722234794 |
| TGTTAGTCAC | 64.2611868103195 | 0.296985013785416 |
| AATAGTCATA | 64.3236149889612 | 0.148670035120084 |
| AGGAGTCATA | 64.4215746573673 | 0.161660124517704 |
| ACGTGAGTCA | 64.5055966594904 | 0.286443510170622 |
| TCGAGTCATA | 64.5098770689688 | 0.176336098035198 |
| TTAGTCATCG | 64.5447753959131 | 0.103867429358915 |
| GTCTGAGTCA | 64.8969604096533 | 0.179890826344537 |
| ATGACGTCAT | 65.178840704028  | 0.21226087404486  |
| ATGACACATA | 65.413959190428  | 0.170471465415203 |
| ATAGAGTCAT | 65.7078351898723 | 0.175581316900661 |
| GAAGAGTCAC | 65.8642269042112 | 0.174567719350219 |
| ATGACTAACC | 65.9033625239096 | 0.150619884671991 |
| AATGAGTCAA | 66.161282293517  | 1.52967969887242  |
| ATGACACATC | 67.0273874330895 | 0.26639704511955  |
| ACGTGAGTCA | 67.0791246692354 | 0.687791449025137 |
| TATTACTCAC | 67.1043815930785 | 0.201853771034343 |
| AATGACTAAC | 67.2986365533863 | 0.270952486779519 |
| TTAGAGTCAT | 67.4733327198272 | 0.236376144084733 |
| CAATTAGTCA | 67.492037158449  | 0.11749694625171  |
| GCATGACTCA | 67.5986307441812 | 0.253170422104752 |
| CCATGACTCA | 67.8642222127866 | 0.712490287464081 |
| TAGTGAGTCA | 67.9229924893732 | 0.357700404934126 |
| ATGACTGATA | 69.0526286890667 | 0.321700198428173 |
| CCGTGAGTCA | 69.1062652736178 | 0.864236859850692 |
| AAGTGAGTCA | 69.2167733951089 | 0.159991869156013 |
| AGTGACTCAG | 69.4753582154951 | 0.165276565064911 |
| GTATTAGTCA | 69.6060785120722 | 0.146610771015084 |
| GCTGACTCAT | 69.9361859343779 | 1.43091518883352  |
| GTGACTAAAT | 69.9403611747551 | 0.162489014918862 |
| GCATGAGTCA | 70.0467732224472 | 0.151271658135997 |
| GATTAGTCAG | 70.4547744480377 | 0.251686640551245 |
| TCGTGACTCA | 70.7381078935605 | 0.874427201872402 |
| GAGTCATACT | 71.4272984004052 | 0.189473141293715 |
| TCTGACTCAG | 71.5684225571954 | 0.349525823168135 |
| CGTGACTCAG | 71.7899070091153 | 0.111556410903282 |
| CGTGAGTCAC | 72.1243956607861 | 0.985640622059188 |
| ATGAGTCAAA | 72.4366425808443 | 1.51778944955774  |
| TATGACTCGT | 72.6221421582115 | 0.163228022999624 |
| GAATTAGTCA | 72.9628501425635 | 0.170828932274719 |
| AATTACTCAT | 73.2749719423937 | 0.474874555216685 |
| GACACGTCAT | 73.7019752969636 | 0.205913550548565 |
| GTCAGTCATA | 74.2433187434741 | 0.250610098754068 |
| ATGACTAAAC | 74.4038543475664 | 0.231300798125417 |
| GATTACTCAC | 74.4757356568113 | 0.190747173337773 |
| ATTACTCATC | 75.3167574469458 | 0.222488907735617 |
| GCGTGACTCA | 75.3189409794919 | 0.669072632075205 |
| AAGAGTCAGA | 76.1854652597539 | 0.206521302479489 |
| AGTTAGTCAC | 76.5912406679346 | 0.308411589195265 |
| TTAGTCATAT | 76.7855020486357 | 0.287883187590979 |

|            |                  |                    |
|------------|------------------|--------------------|
| GATGACTGAT | 77.3947098306996 | 0.0201423336214536 |
| AAATTAGTCA | 77.5989642071957 | 0.213714947720107  |
| ATGACGCATC | 77.7633767339487 | 0.297770376606793  |
| TGTGACTGAT | 77.7835559987583 | 0.183042503309984  |
| TAGAGTCATA | 77.994132362951  | 0.479534042678141  |
| TATGACTAAG | 78.4292147494455 | 0.212371553038114  |
| GTTAGTCACC | 78.5193472876418 | 0.182046572353694  |
| AATGTGTCAC | 78.5673664006431 | 0.173312638521007  |
| ATGAGTCAAT | 78.5886882415209 | 1.47301567052766   |
| ATGAATCATA | 78.8063584107658 | 0.303788088977082  |
| TTAGTCATAC | 79.0141725618189 | 0.408749300697113  |
| CGTGAGTCAG | 79.5343185208252 | 0.344440939366059  |
| GTGACTCAAG | 79.6229350703257 | 0.292635951248602  |
| GTGTGTCATA | 79.7685933306202 | 0.182508243179463  |
| TATGAATCAT | 79.9768574539998 | 0.184682774554994  |
| ATGACGCATT | 80.3969986800335 | 0.369992211022235  |
| ATATTAGTCA | 80.4300709113424 | 0.0515262813288931 |
| TTCTGAGTCA | 80.4424697573633 | 0.301176472630153  |
| TATGTGTCAC | 81.0775982546923 | 0.217012716692433  |
| CGATTAGTCA | 81.310268350004  | 0.199014272569227  |
| TCTGAGTCAG | 81.7131327218327 | 0.461449775526312  |
| CTCTGAGTCA | 82.2443830162918 | 0.447969918328132  |
| GTGACGCATA | 82.3492920746575 | 0.203336660370007  |
| GATGACTCCT | 82.3623714525333 | 0.206564371493287  |
| GAGTCAGATG | 83.7130318815367 | 1.41025520413101   |
| CTATTAGTCA | 83.9104375298428 | 0.21441035059558   |
| AGATTAGTCA | 84.1223598766361 | 0.161373883105607  |
| TCTGACTCAA | 84.2508749655814 | 0.244506563104739  |
| ATCTGAGTCA | 84.3440421123772 | 0.287105273174073  |
| TAAGACTCAT | 85.0098768551132 | 0.184904039923359  |
| ATGACTAAAA | 85.0605115549946 | 0.355960497870438  |
| AGCTGACTCA | 85.1370753571771 | 0.149915853932934  |
| AACAGTCATA | 85.2755086231513 | 0.169322258924218  |
| CGCTGAGTCA | 85.6303330620887 | 0.337630985559385  |
| TAATGACTCA | 85.9061209744316 | 1.39375864202281   |
| AAATAGTCAT | 86.3266645474782 | 0.234773008992453  |
| AATGACTGAT | 86.3287812239575 | 0.394465676542069  |
| AGTGACTCAA | 86.4650351840221 | 0.561671797671049  |
| AATTACTCAC | 87.885888035661  | 0.207362256921967  |
| ATAGAGTCAC | 88.2460607524535 | 0.248262934674     |
| ATGACGTCAC | 88.4200489706569 | 0.237488632817999  |
| GTGACTGATA | 88.420842183885  | 0.188551300906199  |
| GGTTAGTCAC | 88.5341378024214 | 0.308492098440372  |
| TATGACGCAC | 88.7332291761722 | 0.375333037854807  |
| GGAGTCATAG | 89.4525542682801 | 0.158153087964505  |
| GAATAGTCAT | 90.3181133279038 | 0.127176051010542  |
| GTCAGTCATC | 90.5035395864211 | 0.169525023544717  |
| ACGTCATATG | 90.5777454685035 | 1.29120528626627   |
| GTAGAGTCAC | 90.6631393967952 | 0.201732783442088  |
| ATGACTAAGT | 90.7819026139362 | 0.298779322168062  |
| GATGACGCAT | 90.8675539250433 | 0.200210377104776  |
| GGATTAGTCA | 91.4739616259669 | 0.119960419617733  |
| GAGTCATACA | 91.4999848887347 | 0.265798830339936  |
| ATGACTGAAC | 91.6812648785518 | 0.266620427236491  |

|            |                  |                    |
|------------|------------------|--------------------|
| ATGACTCGTA | 91.8844117253598 | 0.318396589175915  |
| CGCTGACTCA | 92.411377327987  | 0.416074815238694  |
| GATGTGTCAC | 92.6016579713849 | 0.132530788228959  |
| GAGTCATAGT | 92.6044365345808 | 0.323012616937533  |
| TCAGTCATAG | 92.9132357679764 | 0.0162898747033653 |
| ATTACTCATT | 93.0958299124878 | 0.368241638196177  |
| CATGACTGAT | 93.2302582136054 | 0.168186376722427  |
| AGATGACTAA | 93.5795419934375 | 0.239637648889961  |
| TGCTGACTCA | 93.8976805637299 | 0.301617351425527  |
| AAGACTCATA | 93.9800437307771 | 0.355113047391994  |
| GGAGTCATAA | 94.1390264180902 | 0.305963913227164  |
| GAGTCATCGT | 94.6067825965577 | 0.132501281740204  |
| GTGACTAAGA | 94.7719871685458 | 0.218175242136659  |
| GTGACTGAAT | 94.845878439849  | 0.320916356160518  |
| TGATGACTAA | 94.9715565765535 | 0.332371604148939  |
| ATGACGTAAT | 95.1925491818228 | 0.274569694482915  |
| TTAGAGTCAC | 95.2625913417405 | 0.199540982193912  |
| GTGACTAAAC | 95.6238829981169 | 0.133572659692841  |
| TTAGTCACAC | 95.9957580339028 | 0.374461583169493  |
| TAATAGTCAC | 96.1507831697916 | 0.204678800614649  |
| GTGATTCATA | 96.2316496999292 | 0.176927298709659  |
| TTTAGTCATA | 96.5016035527768 | 0.743360111458318  |
| TTGAGTCACC | 96.5165541433229 | 1.38870408671177   |
| GATGACACAT | 96.6913202368633 | 0.571943429165659  |
| AATGACACAT | 96.7731844778788 | 0.409864989429404  |
| TCAGTCATAC | 96.9797179409041 | 0.416577953308594  |
| ATGTGTCACA | 97.6683746149716 | 0.465752993647675  |
| GATGATTCAC | 97.9282897230306 | 0.193581448746943  |
| GACTGACTCA | 98.0827394896285 | 0.312205083100402  |
| GAGTCATAAC | 98.6838443351122 | 0.144687860752008  |
| TATGACTACA | 98.7627730036325 | 0.214848205446932  |
| TATGACTGAA | 99.2939435609904 | 0.391385078140026  |
| GAGTCATAGC | 100.26832967597  | 0.325338434305792  |
| ATTAGTCAGC | 101.000734358712 | 0.325237477197034  |
| TATGATTCAC | 101.187068058414 | 0.199386445733122  |
| ATGACGTAAC | 102.158640636733 | 0.147431303527612  |
| TCAGAGTCAT | 102.324588469198 | 0.448497280226492  |
| TATGACGCAA | 102.370556695811 | 0.151228929409702  |
| GATGAATCAT | 102.417356503158 | 0.258240716955794  |
| GTGACTAAAA | 102.581794930151 | 0.290893811176008  |
| AAGAGTCAGC | 102.802199019953 | 0.217770891810185  |
| TAAGAGTCAG | 102.803270515009 | 0.261975215917878  |
| GAGTCATAAT | 102.861046686913 | 0.0669128876366243 |
| ATGAGTAACA | 102.979452583538 | 0.28579919235764   |
| TCTGACTAAC | 102.983980736633 | 0.215719775110808  |
| AATGACTCCT | 103.699542953179 | 0.134716445807633  |
| AATGACGCAT | 103.979258868673 | 0.340490107154991  |
| CTGAGTCATG | 104.049416917032 | 1.09019910664963   |
| ATGACTAACG | 104.505443770401 | 0.300190239798742  |
| TCTGACTGAT | 104.812467384857 | 0.206861106066134  |
| TATGACTCCA | 104.873803595459 | 0.277098296898895  |
| GTGACGCATC | 105.021522817157 | 0.240814862102749  |
| TATGACACAA | 105.606124821152 | 0.14349504471832   |
| CTATGACGCA | 106.046213927699 | 0.331185829181463  |



|            |                  |                    |
|------------|------------------|--------------------|
| GATGACGCAC | 106.076974604447 | 0.212812969582713  |
| AACACGTCAT | 106.18795733281  | 0.191614091119994  |
| CGTGAGTCAA | 106.271165155486 | 0.287863443053491  |
| AGTGACTAAC | 106.581717103527 | 0.216931860366869  |
| TAATTAGTCA | 106.804357011995 | 0.22037888900018   |
| GTGACGCATT | 107.116619087166 | 0.286606487094105  |
| TGTGACGCAT | 107.235859049663 | 0.330450180030291  |
| TGATTAGTCA | 107.355833611278 | 0.280457559995356  |
| CTGACTCAAT | 107.898427063002 | 0.504052837704526  |
| GGTGACTGAT | 108.349494436841 | 0.27610046922968   |
| ATCGAGTCAT | 108.813084127479 | 0.351855345092801  |
| GATGACTCGT | 109.054166464195 | 0.405126738676184  |
| GATGACACAC | 109.118737326131 | 0.157563494591226  |
| GATGACTAAA | 109.135119243296 | 0.378241514633925  |
| TTATTAGTCA | 109.228578507897 | 0.241554437534545  |
| TGACTCAATG | 109.303741192644 | 0.167048215065452  |
| TCTGAGTCAA | 109.355658617532 | 0.207571431265566  |
| TTCGAGTCAT | 109.697982873302 | 0.452838156083392  |
| ATGACGTGGC | 109.792570118223 | 0.260457723456078  |
| ATGAGTAACC | 110.468362823601 | 0.241330892400747  |
| TATGAGTAAC | 111.114602709835 | 0.158378637936936  |
| GTGACTAAGT | 111.2273676645   | 0.143155706065628  |
| CGAGTCATAG | 111.441806715182 | 0.11943926194964   |
| AAGACTCATC | 111.784813833343 | 0.204908690731427  |
| CTGACTCAGC | 111.840316134195 | 0.210623776873335  |
| GAGTCATAAA | 111.986132361259 | 0.376914002375934  |
| AGAGTCATAA | 112.329363921295 | 0.258006358097849  |
| AAGACTCATT | 112.525173573231 | 0.234067213615119  |
| GAGTCATCGA | 112.634067468483 | 0.427808908550216  |
| TGACTCAATA | 112.701929989191 | 0.0834508866433525 |
| TATGACTTAT | 113.204491815736 | 0.21030565279025   |
| GAGTCATAGG | 113.455188272866 | 0.192244123929377  |
| GAGTCATAAG | 113.560597386861 | 0.120957729490776  |
| CTATGACACA | 113.971692089434 | 0.175836722062349  |
| GAATAGTCAC | 114.161202701468 | 0.194578004808845  |
| GATGACTAAG | 114.644954262167 | 0.352634834022162  |
| AGAGTCATAC | 115.014928860672 | 0.26552892249425   |
| AAATGACTAA | 115.031776153439 | 0.175753508161004  |
| GAGTCAGATT | 115.080108151569 | 0.4906113534173    |
| GGAGTCATAC | 115.181704559936 | 0.281584622431772  |
| AAACAGTCAT | 115.284719794589 | 0.188049988778898  |
| TTATGACACA | 115.516153902148 | 0.323792552087725  |
| TATGACCAAT | 115.531326760751 | 0.247875924712885  |
| AGGAGTCACC | 116.194646538206 | 0.266427554923159  |
| ATGACTAATG | 116.234347701137 | 1.31031366072928   |
| AGTCAGTCAT | 116.738389228033 | 0.230707270171918  |
| GTATGACGCA | 117.02773158571  | 0.355159918082901  |
| GTATGACACA | 117.184361744511 | 0.111551862352515  |
| TAGAGTCATC | 117.380545495865 | 0.361922790993056  |
| AGGAGTCACA | 117.388555088254 | 0.149741699341094  |
| AATAGTCATC | 117.940278477372 | 0.461806755483599  |
| GTGTGTCATT | 118.05222866925  | 0.291003510225405  |
| GAATGACTAA | 118.078821928789 | 0.33754984263661   |
| TATGACCCAT | 118.244038435178 | 0.187778501183375  |

|            |                  |                    |
|------------|------------------|--------------------|
| ATGACTCCTC | 118.308423082993 | 0.280581878013963  |
| GATGACTCCC | 118.443106617369 | 0.174932060379071  |
| TCGAGTCATC | 118.59504090385  | 0.2388170494842    |
| CGGTGACTAA | 119.201569108454 | 0.392461805882991  |
| GTGACTGAAC | 120.195375483501 | 0.190415971309417  |
| ATGACACAAT | 120.2194413086   | 0.172314534702004  |
| ATGACTCGTT | 120.436989542904 | 0.315687934325442  |
| AGAGTCATAG | 120.607458094625 | 0.230534363137144  |
| ATGACTAGGT | 121.03723183815  | 1.22177462267098   |
| TGACTCAATC | 121.162950267535 | 0.31103970073485   |
| ACTGACTCAG | 122.370578796256 | 0.426764206565003  |
| GTCGAGTCAT | 122.688128904608 | 0.516490707648938  |
| AAGAGTCAAC | 122.778230306865 | 0.248089561161037  |
| TATGACGTAT | 122.837999388526 | 0.231172051643942  |
| TACGAGTCAC | 123.036579453936 | 0.16851026767121   |
| GATGACTCCA | 123.261925883007 | 0.295665536763036  |
| GAGTCATAGA | 123.352926287344 | 0.436256720674243  |
| CTGACTCAAC | 123.560484370084 | 0.282632350120576  |
| TAGAGTCATT | 123.673486976036 | 0.203865193876555  |
| ATGACTAAGC | 123.789138545688 | 0.287569564202472  |
| GTCGAGTCAC | 123.818981777114 | 0.260506958355011  |
| CATGAGTCAC | 124.015414389556 | 1.64815004351927   |
| TCGAGTCATT | 124.110057149883 | 0.288285298103062  |
| GGAGTCATCA | 124.852826247221 | 0.254033851753031  |
| TATAGTCATA | 124.887679921827 | 0.311765114647085  |
| AAATAGTCAC | 125.025594611332 | 0.212806434727506  |
| GCTGACTCAA | 125.496791420811 | 0.460236736042417  |
| TAAGACTCAC | 125.734876629874 | 0.212846680959711  |
| TGCTGAGTCA | 126.126737495699 | 0.115273800001246  |
| TATGACTGAG | 126.647075354472 | 0.127613494373961  |
| ATTACTCACA | 126.726428902503 | 0.184997735048437  |
| CTGAGTCAAT | 126.860852771667 | 0.488602639467764  |
| TCAGTCATCG | 126.911779325507 | 0.319859030513699  |
| GAGTCAGATC | 127.370274385698 | 1.26839249439432   |
| ATGACTGAAA | 127.380379080118 | 0.495275762915321  |
| AGATGACTCC | 127.497284130947 | 0.0469181246308097 |
| GGAGTCATCG | 127.568752680266 | 0.574845202242053  |
| ATGAGTCGTA | 129.12973552439  | 0.216604067901273  |
| TAGTCATACT | 129.189824251649 | 0.199476532338873  |
| TGACTCAACG | 129.220672748914 | 0.423863899574466  |
| GAGTCATACC | 129.318563813411 | 0.380861173984886  |
| ATGACTCCTA | 129.958640368975 | 0.26144906520169   |
| CACTGAGTCA | 130.202377290687 | 0.282639342200238  |
| ATGAGTCAAG | 130.251711898399 | 1.18045717835853   |
| CAATGACTAA | 130.562164791722 | 0.46544861915945   |
| AGAGTCACAT | 130.783174860587 | 0.831257599744846  |
| TTAGTCACAG | 130.872080363501 | 0.489874546237917  |
| AGAGTCATCG | 130.972484253159 | 0.514655854090873  |
| ATGACTCGTC | 131.582761220543 | 0.329759629410094  |
| TGACTCAATT | 131.653372070012 | 0.49047636629564   |
| GTGACTCAGG | 131.84719381059  | 0.919447333153115  |
| GAGTCATCGG | 132.255454881249 | 0.260179258910055  |
| TGACTCAACC | 132.328827244852 | 0.209727595205857  |
| GAACAGTCAT | 132.582195660847 | 0.255929597024364  |

|            |                  |                    |
|------------|------------------|--------------------|
| ATATAGTCAT | 132.586495020064 | 0.346568426778803  |
| AATGACGCAC | 132.667249877555 | 0.24305808783071   |
| GAGTCATATT | 133.361031118518 | 0.310448982404001  |
| AGTGACTGAT | 133.492427320564 | 0.270629570669712  |
| CTGAGTCAAC | 133.645286444178 | 0.276568674234244  |
| AGAGTCATAT | 133.699000887962 | 0.231350093692081  |
| TACACGTCAT | 133.752245334319 | 0.204155887689839  |
| TACAGTCATA | 133.938509509177 | 0.230058383183871  |
| TATGACAAAT | 134.618666165969 | 0.214599164762803  |
| ATCGAGTCAC | 134.859441367505 | 0.284832408326471  |
| TGACTCAACA | 135.541324733426 | 0.292495837804086  |
| ATGTGTCAGA | 135.983460523986 | 0.238582128173597  |
| GTGACGTAAT | 136.170900219149 | 0.26780143839398   |
| CATGAGTCAA | 136.26297703764  | 0.498258831437328  |
| CGATGACACA | 136.448601966554 | 0.352058827184555  |
| GTAAGAGTCA | 136.518672155532 | 0.322860953675912  |
| GGGAGTCATA | 136.695475908063 | 0.182197989596195  |
| GACACGTCAC | 136.811964870665 | 0.178080731878931  |
| GAGTCATATA | 137.031793743335 | 0.306178801935724  |
| ATGAGTCGAC | 137.103702444134 | 0.287737759183061  |
| TATGACGAAT | 137.332346025128 | 0.374353483896754  |
| TCGAGTCACA | 137.379614418101 | 0.377941709559167  |
| GTGACGTCAC | 138.02660899983  | 0.122158984084658  |
| GTCAGTCACC | 138.251621943702 | 0.267184234047154  |
| GTCAGTCACA | 138.283681849588 | 0.355356445820152  |
| GTATGACTAC | 138.550892447561 | 0.118865231846424  |
| TGACTCAACT | 140.031381804253 | 0.118269943434833  |
| AAGAGTCAGT | 140.076796409874 | 0.158308852678233  |
| AGTCAGTCAC | 140.167218025089 | 0.248801874247326  |
| GGCTGAGTCA | 140.383318791286 | 0.166870629942561  |
| AATGATTCAC | 140.453995073845 | 0.148891530737139  |
| AGGTGACTAA | 140.557780875705 | 0.16860905178607   |
| TATGACTACT | 140.710024916656 | 0.164708803148292  |
| AATGACGCAA | 140.946360578423 | 0.128017706874669  |
| AATGACTCGT | 141.153221644987 | 0.212734742422771  |
| GAGTCATTCT | 141.230957792088 | 0.271877321695944  |
| AGCTGAGTCA | 141.812707661002 | 0.0819852429934672 |
| ATGACTCAAG | 142.034149240222 | 1.16114215352736   |
| TTCAGTCATC | 142.146397069283 | 0.243408063216731  |
| TATGACTGCA | 142.148900664568 | 0.238483605032144  |
| AATGAATCAT | 142.24410158234  | 0.49262641272367   |
| TTCGAGTCAC | 142.554366397269 | 0.231421577244993  |
| GCGTGAGTCA | 142.839919270259 | 1.12429418633925   |
| GAGTCACACT | 143.268099683202 | 0.285933170224047  |
| ATGAATCATT | 143.596711071369 | 0.393199156073679  |
| ATTACTACC  | 143.741034062789 | 0.140838207084686  |
| GATGACCCAT | 143.842238976698 | 0.196843223455746  |
| TTATGACGCA | 144.000596790348 | 0.346524861760227  |
| ATTAGTCAAT | 144.656397151211 | 0.499985685651651  |
| TTATAGTCAT | 144.956492096815 | 0.380292600194309  |
| GTATGAGTAA | 145.151141925196 | 0.198388343104693  |
| ATGACGTGGT | 145.575726193761 | 0.271718035071522  |
| GACTGAGTCA | 145.815635340047 | 0.352285501024566  |
| TGTGATTCAT | 146.350892413147 | 0.349490277298054  |

|            |                  |                    |
|------------|------------------|--------------------|
| TGACTCAAAC | 146.449106185066 | 0.0712364414297955 |
| AAGTGTCATA | 146.455835770697 | 0.233789420074889  |
| TATGACTAGT | 147.189021269485 | 0.247699546774946  |
| CGATGACGCA | 147.372401276826 | 0.426863914117072  |
| TGTCAGTCAC | 147.589234888395 | 0.319071351005996  |
| ATGAATCATC | 147.829633985952 | 0.246976034777246  |
| GAGGAGTCAC | 148.441189245371 | 0.250891486300138  |
| GAGTCATCCA | 148.695881720289 | 0.10971263634854   |
| GATGACGCAA | 148.699761710445 | 0.252305733354308  |
| ATCTGACTCA | 148.997393583922 | 1.0868196542498    |
| GATGACTCGC | 149.091281831002 | 0.242611809090105  |
| TGTGACTAAG | 149.183988689252 | 0.226522967971261  |
| ATGTGTCACC | 149.465763880995 | 0.192346313622793  |
| CAGTCATACT | 149.665248807539 | 0.286961967865895  |
| GAGTCATTCA | 149.726302183297 | 0.340504595445406  |
| GATGACTACA | 149.821860822902 | 0.387429805241765  |
| ATGACGAATT | 150.07369269088  | 0.297313250483973  |
| ATGACTCCTT | 150.13332631053  | 0.155208146255249  |
| GTATAGTCAT | 150.546688484266 | 0.223794612450302  |
| ATGACTGATG | 151.019536526785 | 0.317085681488756  |
| CATGACGCAT | 151.392342909825 | 0.816013334110957  |
| GCGAGTCATA | 151.681821985319 | 0.151625671462112  |
| GTCAGTCACG | 151.885585112255 | 0.104044708964477  |
| TAGAGTCACC | 151.933634126827 | 0.27127978194454   |
| AAAGAGTCAG | 152.154519274541 | 0.177197228895727  |
| TGTCAGTCAT | 152.241737820193 | 0.542363768998114  |
| GGATGACACA | 152.693629444271 | 0.0682504247804122 |
| GAGTCATCTA | 152.860913453932 | 0.220472555918636  |
| TGTGACGCAC | 152.862445781358 | 0.173934570182338  |
| AATCAGTCAG | 152.869032725095 | 0.30516177283884   |
| TAGGAGTCAC | 152.923367786703 | 0.223058549676879  |
| GTGACTAAGC | 153.130997532651 | 0.223736253646003  |
| GAGTCATCGC | 153.315456605803 | 0.22698088494032   |
| CGTGACTGAT | 153.345713722807 | 0.413928192511253  |
| AACTGAGTCA | 153.504222791779 | 0.275011740811352  |
| ACCTGACTCA | 153.762449406677 | 0.448511976015757  |
| AAGTGTCATC | 153.763100161958 | 0.262973057368403  |
| GAGTCATTGT | 154.481935672029 | 0.167878988864792  |
| ATTACTCACT | 154.53856641069  | 0.235639595065229  |
| GATGAGTAAC | 154.730410960726 | 0.20575617709039   |
| GATGACTACT | 154.862039903263 | 0.221930536061824  |
| GACGAGTCAC | 155.019343645816 | 0.28961958537468   |
| CGAGTCATAA | 155.118716019402 | 0.452987441906985  |
| AAACAGTCAC | 155.579449437365 | 0.222013039865974  |
| TAGTCACAGG | 155.662590516794 | 1.42808329724152   |
| GTATTACTCA | 155.805251655894 | 0.267643895876244  |
| GCCTGACTCA | 156.1290586922   | 0.39710549242898   |
| ATTAGTCAAC | 156.161301975807 | 0.246422014195053  |
| AAATGACTCC | 156.454553111412 | 0.0936443797972812 |
| GATGACTTAT | 156.592310893985 | 0.25921192217937   |
| TAGTCATAGT | 156.689382125465 | 0.21741228572274   |
| GAAGGGTCAT | 156.926697576218 | 0.732778429457808  |
| ATGACGTGGA | 157.04235624596  | 0.216769108797195  |
| AACTGACTCA | 157.115270939229 | 0.943669539232912  |

|            |                  |                    |
|------------|------------------|--------------------|
| TCAGTCATCA | 157.146063626146 | 0.287228135853008  |
| GTGATTCATC | 157.148421102913 | 0.219058998145924  |
| GAGTCATATG | 157.294387063525 | 0.181257483980474  |
| GCCACGTCAC | 157.498592222604 | 0.19622672955923   |
| GATGACCAAT | 157.523330728491 | 0.262972683631614  |
| GAGTCATCTT | 157.732142119106 | 0.19142668234918   |
| AAGAGTCAAT | 157.811836358316 | 0.226652203214043  |
| TATGACTGGT | 157.914584390293 | 0.0910121418837517 |
| CTGACTCAA  | 158.051904998938 | 0.254662151907475  |
| AATGACTCCA | 158.512646730397 | 0.220270952563683  |
| GTGACGCAAT | 158.66071737847  | 0.277933197555067  |
| ATGTGCTACT | 158.710776941439 | 0.292736405591088  |
| TCAGTCACAG | 158.858060813697 | 0.169995016615044  |
| ATGACGAATA | 158.862444874993 | 0.257583317494096  |
| ATTACTCATG | 159.998570787767 | 0.243268006385723  |
| AACGAGTCAC | 160.37783465569  | 0.300659807432442  |
| AATAGTCATT | 160.749402904096 | 0.475321586350211  |
| GGTGATTCAT | 160.987127415691 | 0.250943564735397  |
| GAGTCATCCG | 161.18272984988  | 0.404586079707505  |
| AATTAGTCAA | 161.266997484248 | 1.06111944485632   |
| ATTAGTCAGT | 161.446236265578 | 1.0433135198523    |
| AAAGACTCAT | 161.502486541998 | 0.115515230147665  |
| ATGAGTCGAA | 161.958689706563 | 0.350530774281348  |
| AAGAGTCAGG | 162.494911984972 | 0.220477106919398  |
| CACAGTCATA | 162.501069852737 | 0.180254891341506  |
| GAGTCATATC | 162.712414877862 | 0.473568580438659  |
| CGGAGTCATA | 164.266901349456 | 0.397414186103605  |
| GAGTCAGCAT | 164.512926276925 | 1.03983624347664   |
| GAGTCATCAT | 164.617661919911 | 0.35398111897548   |
| GTGACTGAAA | 165.313167681779 | 0.25536178160484   |
| TAGTCATAAT | 165.360171319084 | 0.268789111544765  |
| TAATGACTAA | 165.39673388216  | 0.164763384580839  |
| ATGACTGGTT | 165.504046115575 | 0.292493911324803  |
| TATGACAGAT | 165.514322617094 | 0.239591279178893  |
| TAAAGTCAT  | 165.869076641567 | 0.179776489186996  |
| GAGTCACACA | 165.950220303653 | 0.366689794329391  |
| GTCAGTCATT | 166.063440776264 | 1.01490935610831   |
| CGTGACTAAG | 166.27967205696  | 0.285261707359759  |
| AAGACTCACA | 166.57546734166  | 0.156313511579815  |
| TCAGTCATCT | 166.76450103425  | 0.190933989456438  |
| TTAGACTCAT | 166.801656446566 | 0.273811667370087  |
| AATGAGTAAC | 166.813911309008 | 0.453984200932165  |
| TCAGTCATCC | 167.050403929987 | 0.205932192287753  |
| TAGAGTCAGA | 167.156838190474 | 0.280436632273233  |
| GGTGACTAAA | 167.253264226246 | 0.348232792997978  |
| GCTGACTAAC | 167.259545263228 | 0.276353826472478  |
| GAGTCATCAG | 167.261687000028 | 0.329060559397827  |
| AGTGACGCAT | 167.577207746436 | 0.208348364024486  |
| CTGACTCAGT | 167.682530309249 | 0.63762498612837   |
| ATGCGTCAGA | 167.762222449472 | 0.192854316044658  |
| TCATGACTAA | 168.04892543309  | 0.730670898270936  |
| ATGACGTATT | 168.454166218832 | 0.484693673127496  |
| GAGAGTCATC | 168.797242071571 | 0.374465589677275  |
| GAGAGTCATG | 168.797986756289 | 1.15081056447381   |

|            |                  |                   |
|------------|------------------|-------------------|
| ATAGACTCAT | 168.859239446278 | 0.23988011931355  |
| GAATGACGCA | 168.992309663564 | 0.30028743585541  |
| ATTGACTCAA | 169.198731048881 | 0.457945932371485 |
| ACAGTCATAG | 169.242252116688 | 0.185452350231873 |
| ATGACGAATC | 170.3473100713   | 0.361178193206412 |
| ACTGACTCAA | 170.443649613003 | 0.398392024179888 |
| TACTGAGTCA | 170.673907048374 | 0.396191452690103 |
| ATAAGAGTCA | 170.954771334787 | 0.241595654876005 |
| TAAATGACTC | 171.390825469248 | 0.265834549935726 |
| CGATGAGTAA | 172.699417995353 | 0.215194268032002 |
| TATGACTGCT | 172.85001436971  | 0.152852610596342 |
| ATGACGCACA | 173.060719559473 | 0.158293345793262 |
| TGACTCAAAA | 173.138267407857 | 0.205756460154036 |
| CTAGAGTCAT | 173.36462350261  | 0.181807509820933 |
| GTGATTCATT | 173.576490047277 | 0.269796661631349 |
| GATGACGTAT | 173.599825259646 | 0.176596056533041 |
| ACACGTCATA | 173.736046891756 | 0.521136810510397 |
| TTAAGAGTCA | 173.899165501621 | 0.147222433121359 |
| GCATGACTAA | 173.979872837362 | 0.428921815776378 |
| GGTGACGCAT | 174.408643539562 | 0.416215102689647 |
| TAGTCATACC | 174.790984607072 | 0.163531832447788 |
| GAGTCAGATA | 175.166902811936 | 0.741697854242876 |
| TCAGAGTCAC | 175.216440464572 | 0.412247035007089 |
| TAGTCATAGC | 175.576999305873 | 0.20566962733964  |
| TAGAGTCACA | 175.890483016364 | 0.204938885727783 |
| CAATGACGCA | 176.111940108797 | 0.218223123799422 |
| GGAGTCACCT | 176.194228940467 | 0.109420804739892 |
| TCTGACTAAA | 176.484305711083 | 0.299168890003668 |
| GTAGTCATCG | 176.888116384783 | 0.32499712896738  |
| AGTGTGTCAT | 176.930933414475 | 0.213695527719761 |
| GTGTGTCACC | 177.227465271953 | 0.161660897818962 |
| TATGACATAT | 177.592405641725 | 0.310154819444008 |
| ATTACGTAAT | 177.666178891411 | 0.222025971651884 |
| TATTACTAAT | 177.785695008434 | 0.200883856265044 |
| TCCTGACTCA | 178.22665261767  | 1.00489553942266  |
| GCTGAGTCAA | 178.296580490426 | 0.235694587788007 |
| GTGACACAAT | 178.408123558153 | 0.109776366512245 |
| GGTCAGTCAT | 178.52453361493  | 0.286564605792195 |
| TGTGTGTCAT | 178.849730385097 | 0.202565719218195 |
| TGATGACACA | 178.974666867407 | 0.24076029880379  |
| GTGATTCACA | 179.736146234432 | 0.190369508340544 |
| ATGATTCACA | 179.755304536136 | 0.595867976703469 |
| GTGTGTCACA | 179.921241740619 | 0.28502380349327  |
| GGTCAGTCAC | 180.011400421813 | 0.370111636497186 |
| ATGAGTAACT | 180.105588456836 | 0.338829099434094 |
| TCAGTCACAC | 180.12179530582  | 0.241762469359293 |
| TGTGTGTCAC | 181.219763711742 | 0.339384703722379 |
| AATGACTAAG | 181.839087364257 | 0.997685123337778 |
| CTATGACTAC | 181.878763390716 | 0.191684231541016 |
| CATCCGTCAT | 182.009251519189 | 0.954033375868357 |
| GAATGACTGA | 182.312703577915 | 0.182367889252035 |
| TATTACTCAG | 182.612808768269 | 0.221316828033671 |
| TATGACTACG | 182.772691640071 | 0.177881818129283 |
| GTGACGTAAC | 182.963214391701 | 0.249708276830731 |

|            |                  |                   |
|------------|------------------|-------------------|
| AGAGTCATCT | 183.046311561706 | 0.139872161417764 |
| GAGTCATTGC | 183.08887522665  | 0.231223749822396 |
| TGGTGACTAA | 183.358300061132 | 0.388681215428246 |
| ATGACTGGTC | 183.367686955056 | 0.25858908493366  |
| TAGTCATACA | 183.475040941052 | 0.21833337979454  |
| TGTTACTCAC | 183.692980319339 | 0.17544557329705  |
| CACTGACTCA | 183.699805737099 | 1.00561510441079  |
| CGAGTCATCG | 183.778856755    | 0.349439454514817 |
| GGTGCGTCAT | 183.963317038122 | 0.168342196994321 |
| AAATCAGTCA | 184.043727310844 | 0.334242005939936 |
| GATCAGTCAG | 184.090446117289 | 0.194038162884496 |
| ATGACGCAGA | 184.170118445401 | 0.370210163905446 |
| CGAGTCATCA | 184.273308404136 | 0.273049353390344 |
| ATGACTCCCT | 184.328306550845 | 0.28531763593567  |
| ACAGTCATCG | 184.431991216476 | 0.4057395634311   |
| GGATGACGCA | 184.550465384159 | 0.300063337610247 |
| TGATGACGCA | 185.060860292913 | 0.342230588705011 |
| GTTGACTCAA | 185.367798212242 | 0.430106953020818 |
| TTAGTCACAT | 185.377222123601 | 0.242531912451515 |
| CGATTACTCA | 185.846853398015 | 0.387608290395205 |
| ATGACTCCCA | 186.148234340533 | 0.370595873088452 |
| TAGAGTCACT | 186.247211913711 | 0.209750016063976 |
| TATGAGCAAT | 186.665155665713 | 0.245174885722763 |
| AACACGTCAC | 186.68960832029  | 0.237800091112224 |
| GTGACGCAAC | 186.775917613774 | 0.357113517052548 |
| ATGACGTATC | 186.889356752578 | 0.322671703454049 |
| AAATGACTGA | 187.077207259739 | 0.181067381077181 |
| GAGTCATTGA | 187.132220467011 | 0.449978748302565 |
| TATGAGTAAG | 187.679654923634 | 0.186826071437123 |
| ACAGTCATAA | 187.727112121158 | 0.209640301419132 |
| ATGACCCATA | 188.148777416055 | 0.20663668473737  |
| TATGACGGAT | 188.609476973411 | 0.222954191329662 |
| CTGAGTCAA  | 188.78072918282  | 0.56333531300971  |
| TATGACTTAA | 188.814272575664 | 0.199308678481031 |
| TGACTCAAAG | 189.066280068916 | 0.641312987969594 |
| CATGACACAT | 189.216827693962 | 0.376477047351873 |
| TAGTCATAAC | 189.306914069319 | 0.225759442567345 |
| TAGTGACTAA | 189.396347995232 | 0.289062136165547 |
| GTACAGTCAT | 190.429558284427 | 0.292343342670186 |
| ATGAGTCGAT | 190.657640387718 | 0.157223179827672 |
| ATGACTTATT | 190.709989411084 | 0.36269873489929  |
| GGTGTGTCAC | 191.332178862687 | 0.172219704671628 |
| GAATCAGTCA | 191.874946084536 | 0.442008178189714 |
| GAGTCATTGG | 191.911267756162 | 0.448111031265607 |
| ATATAGTCAC | 191.989005275153 | 0.227855038108338 |
| CTATGAGTAA | 192.433030905557 | 0.233952369016884 |
| TGGAGTCACC | 192.923133694307 | 0.209948943433726 |
| AGTGCATCAT | 193.226519324401 | 0.144974723398164 |
| TGGAGTCACA | 193.480065927125 | 0.198209646265679 |
| GGTGTGTCAT | 193.786635310708 | 0.250238039794823 |
| ATGACGTATA | 194.134116112218 | 0.303390426535641 |
| ATGTGTCACG | 194.178060919912 | 0.173427341303083 |
| TAATGACTCC | 194.496843068731 | 0.319015660631904 |
| TTATGACTGA | 195.035890241565 | 0.948353260231375 |

|            |                  |                    |
|------------|------------------|--------------------|
| GAGTCATCCT | 195.220661723092 | 0.197400416145148  |
| GATGACTGCT | 195.352263813105 | 0.248492782676988  |
| AAGAGTCAAA | 195.375947342386 | 0.235659497267434  |
| ATGACTACAT | 195.393797309492 | 0.315577312460692  |
| ATGACGGATT | 195.63131616534  | 0.17303745609065   |
| GAGTGACTAA | 195.642104678995 | 0.227281805208249  |
| GGGAGTCACC | 195.944871292707 | 0.20287553310994   |
| GGATGAGTAA | 196.074870409853 | 0.208861054873564  |
| CAGTCATAAT | 196.991094385123 | 0.30712414102344   |
| GAGTCACCGT | 197.158995044454 | 0.416618936245988  |
| GTCTGACTAA | 197.826548957928 | 0.226997491586664  |
| GATGAGTAAG | 198.246277685932 | 0.183400758508668  |
| CCAGTCATCT | 198.471564290205 | 1.34591379148477   |
| TGTTAGTCAG | 198.476105951779 | 0.323223108401263  |
| GATGACACAG | 199.157446717334 | 0.250177456578969  |
| ATGACGCATG | 199.495949244117 | 0.143535047307621  |
| GAATGAGTAA | 199.85531495163  | 0.231494272891786  |
| CAATGACTGA | 200.153233926005 | 0.258710040837468  |
| AATGTGTCAG | 200.617373699444 | 0.104478517538699  |
| GAAGACTCAC | 200.632704892733 | 0.199671024536902  |
| GTGAGTAAAC | 200.682312743186 | 0.0848798251899304 |
| ATATGACTGA | 201.077787315247 | 0.553963069189051  |
| TGTGATTCAC | 201.261252797061 | 0.184092867259262  |
| TAATGACTGA | 201.46263332729  | 0.175539501993253  |
| CTAGTCATAG | 201.658706054516 | 0.129314932251665  |
| GATGACTGCA | 201.802363511107 | 0.222930564633466  |
| TGTGACCAAT | 201.995837323455 | 0.287075773355158  |
| TATGACGTAA | 202.502131368731 | 0.0680665746240258 |
| GTGTGACGCA | 202.647115898356 | 0.210581974302025  |
| GGATGACTCG | 202.683569704907 | 0.104579166287103  |
| TTATTACTCA | 203.203701150202 | 0.182207336818943  |
| CATTACTCAC | 203.396586039402 | 0.150876901268357  |
| GACAGTCATA | 203.438015535876 | 0.533579749014732  |
| AGAGTCACAC | 203.52104624262  | 0.396700391039673  |
| AAGACTCATG | 203.724181321116 | 0.148379370645816  |
| TCGTGACTAA | 203.767957370238 | 0.282557370991769  |
| ATGACACAAC | 204.096267255147 | 0.240825355327279  |
| AGTGACTAAG | 204.124606610548 | 0.204140511087213  |
| ATGACAAATT | 204.241598930844 | 0.369144513700618  |
| ATGACGAAAC | 204.472029668111 | 1.15058508892635   |
| ATGACTCCAC | 204.534463607402 | 0.276805841537726  |
| ACGAGTCACA | 205.088794697889 | 0.458198226733253  |
| CCTGACTCAG | 205.395457533301 | 0.951215005972953  |
| CGAGAGTCAT | 205.508819484112 | 0.414954143166637  |
| ATGAGTCGTT | 205.801661121069 | 0.154075558317062  |
| AAGGAGTCAC | 205.831618104953 | 0.262901404400505  |
| CGTCAGTCAC | 206.057508439847 | 0.0704647695065104 |
| ATGACTAGTT | 206.126013050874 | 0.287270991102828  |
| ACAGTCATAT | 206.20948741555  | 0.143589386775098  |
| GGAGTCACAG | 206.307749080486 | 0.294325980689044  |
| GTAGACTCAT | 206.568932637689 | 0.194753258892798  |
| GAGTCACAGC | 206.573318938152 | 0.156726742379032  |
| GGAGTCACCG | 206.626773572645 | 0.296684638326634  |
| ATGATTCACC | 207.059926338139 | 0.166744792954587  |



|            |                  |                    |
|------------|------------------|--------------------|
| GTGATTCACC | 207.07120636061  | 0.261529214481507  |
| TAGTCATCGA | 207.108230607841 | 0.245607339630533  |
| CGAGTCATTC | 207.390942837953 | 0.17542302627845   |
| CATAGTCATA | 207.399863772007 | 0.206186033572109  |
| AATGACTACA | 207.508296568837 | 0.290267272490887  |
| ATAGTCATCG | 208.05973751318  | 0.133440513569059  |
| TAGTCATATT | 208.06742150801  | 0.244012606247366  |
| GTGACGTATT | 208.210957542191 | 0.206629125153357  |
| ATGACAAATA | 208.458044079416 | 0.322721044183573  |
| CAATGACTCT | 208.469195192476 | 0.053619219876647  |
| AACAGTCATC | 208.618733757393 | 0.542591805079238  |
| GGTGACGCAC | 208.620299917555 | 0.1430604605258    |
| ATATGACGCA | 209.067464227553 | 0.200037054543768  |
| TATGACGTCA | 209.114256553283 | 0.0721159290203415 |
| AGATGAGTAA | 209.131863726573 | 0.24361048611888   |
| CTAGTCATCG | 209.566102488547 | 0.42643982398706   |
| GAAATGACTC | 209.89972906228  | 0.140037019381258  |
| GGTGATTCAC | 210.520326665649 | 0.32627375926955   |
| GAGTCATCTC | 210.606812680233 | 0.37318642753931   |
| GATGACGTAA | 210.677526773022 | 0.248528985354804  |
| TAGTCATCGT | 210.970857416354 | 0.281746628051478  |
| AAAGACTCAC | 211.112796174711 | 0.268529772167233  |
| AATAGTCACC | 211.823328378749 | 0.189586366458361  |
| TATGACTAGA | 211.887598821243 | 0.256457379694322  |
| GTATAGTCAC | 212.165433448539 | 0.251396569680567  |
| TTATGAGTAA | 212.445190459653 | 0.123164590734355  |
| GAACAGTCAC | 212.620399251111 | 0.438467001255561  |
| ATGAGCAATA | 212.774194389785 | 0.286552449797831  |
| GTGTGTCATG | 213.125861559195 | 0.122590794429482  |
| AGAGTCACAA | 213.157284631209 | 0.0897334178187588 |
| ATGACTCCAT | 213.245317111702 | 0.394460264615293  |
| GTGACGTATC | 213.338312049661 | 0.19172096122394   |
| ATGACCAATT | 213.544837634163 | 0.421385060243666  |
| ATGAATCATG | 213.822334563179 | 0.361498680674667  |
| TACACGTCAC | 213.839719007036 | 0.184294575207983  |
| ATGACAGATT | 214.131127943233 | 0.272060272647522  |
| GAATGACACA | 214.304187780986 | 0.250382138797186  |
| TCCTGAGTCA | 214.377091803018 | 0.134727675936202  |
| AATAGTCAGA | 215.177479680599 | 0.178210391280184  |
| TAGTCATAGG | 215.198876294574 | 0.207652131433816  |
| GCGTGACTAA | 215.74176048502  | 0.526474958842767  |
| ATATGACACA | 215.943935941082 | 0.279894503620032  |
| TAGTCATGAG | 216.128785404626 | 0.786054386279467  |
| AAATGTGTCA | 216.277002294547 | 0.268182093505158  |
| GAATGACTCT | 216.345143110684 | 0.400577649211236  |
| GAGTCACAGT | 216.439653911576 | 0.318004254812873  |
| TATGACACGT | 216.469997143716 | 0.268369632613884  |
| AATGACTCGC | 216.491759958821 | 0.346458193067646  |
| GTGCGTCATG | 216.686534678988 | 0.21198188522479   |
| ATGACTTATA | 216.801517939454 | 0.261617239698691  |
| CAGAGTCACA | 216.889533198374 | 0.384062791630091  |
| GAGTCATCAC | 217.184192271249 | 0.792472358711957  |
| ATGTAGTCAC | 217.21185675769  | 0.194789839649692  |
| GTGTTAGTCA | 217.859109643281 | 0.15307047406491   |

|            |                  |                    |
|------------|------------------|--------------------|
| GAGTCACAAT | 218.166865414867 | 0.302836039265969  |
| TTATAGTCAC | 218.227244824199 | 0.138293591728771  |
| TATAGTCATC | 218.642150747188 | 0.340701810769482  |
| GGTGACCAAT | 218.822543684046 | 0.149310453455114  |
| ATACAGTCAT | 218.901155861371 | 0.307779641493958  |
| ATTAGTCAGG | 218.957916745064 | 0.897190346555814  |
| GCAGAGTCAT | 219.003170389743 | 0.225107936815197  |
| GAGTCACACG | 219.148757926833 | 0.224863745457193  |
| CTGACTGATA | 219.594793411981 | 0.30164604451994   |
| TGCATGACTC | 219.88775808583  | 0.61724033522485   |
| TACAGTCATC | 220.555571304199 | 0.277070921482207  |
| ATGACAAATC | 220.615761377626 | 0.329709856697132  |
| GATTACTAAT | 220.684755128643 | 0.443413530644085  |
| GTGACGCACA | 220.850831387239 | 0.294805108357478  |
| TGTGACTTAT | 221.012455351201 | 0.199399466736938  |
| CTGACTAAAT | 221.035664319476 | 0.277937430767366  |
| ACCACGTCAC | 221.977800747706 | 0.237687557311918  |
| ATATTACTCA | 222.426471851539 | 0.109598962632654  |
| ATGAGCCATA | 222.673663473466 | 0.192688576767404  |
| TTAATGACTC | 222.691070461008 | 0.255395039368833  |
| GGAGTCACAA | 223.134598657463 | 0.278520328280013  |
| ATGACTTATC | 223.219887996931 | 0.263850709655017  |
| GATGACGTCA | 223.264971447247 | 0.125921547559239  |
| AGATGACACA | 223.622112079747 | 0.100581188137495  |
| AGTCATACTC | 223.664895559708 | 0.0843905966853558 |
| AAATGAGTAA | 223.80771460645  | 0.201895606732036  |
| TGAGAGTCAT | 223.896488519118 | 0.178484815509836  |
| GCAAGTCATC | 223.952976655344 | 0.357617138549974  |
| GTAATGACTC | 224.13299107258  | 0.240959123229623  |
| AAAAGAGTCA | 224.136744824624 | 0.237875545156301  |
| ATGACATCAC | 224.178987527197 | 0.379307623428957  |
| ACGTGACTAA | 224.603365980603 | 0.249750344983027  |
| ATGAGTCGTC | 224.859946032648 | 0.534022787323033  |
| AGGATGACTA | 225.273914275736 | 0.204263400506672  |
| TCGGAGTCAC | 225.454255304842 | 0.178522660820951  |
| TAATGACGCA | 225.49044268544  | 0.353395538231774  |
| GAGTCATGAC | 225.506128517128 | 0.135119690580358  |
| ACAGTCATCA | 225.720314658879 | 0.260908904140512  |
| AAATGACTCG | 225.798523491549 | 0.343298001523634  |
| ACACGTCATC | 225.848244887298 | 0.204902228918808  |
| AATAGTCACA | 226.240624694446 | 0.285970663288951  |
| TAATAGTCAG | 226.342355158039 | 0.303020611499929  |
| TGGATGACTA | 226.412426148157 | 0.203548831848165  |
| ATGACACATG | 226.685129363625 | 0.649640383696037  |
| GTGATGACTA | 226.831908633944 | 0.143962728124928  |
| TCAGTCACAT | 226.908226404809 | 0.216181364639945  |
| CATGACTCCT | 226.947326863821 | 0.169938908008736  |
| AGAGTCACAG | 226.996297094129 | 0.110028726484407  |
| TAAGAGTCAA | 227.068234642605 | 0.281350954859802  |
| TAATGACTCG | 227.182066342144 | 0.348581764555263  |
| AGTGTGTCAC | 227.210379596273 | 0.279045672563798  |
| GAGTCACATA | 227.321879402671 | 0.430556542055093  |
| AAAATGACTC | 227.671783632702 | 0.295996594112736  |
| CAGTCATCGG | 227.807040040269 | 0.078408944725677  |

|            |                  |                    |
|------------|------------------|--------------------|
| GGTTAGTCAG | 227.980078524086 | 0.195374358951452  |
| AATGACTGAA | 228.061666934891 | 0.840112007440873  |
| TGGTGACTGA | 228.446923083244 | 0.351866603139603  |
| TATGACTAGG | 228.577632428374 | 0.182543685112163  |
| AATGACTACT | 228.724663546709 | 0.1954820131483    |
| GGAGTCACAT | 229.467982040571 | 0.217267537635263  |
| AAATGACTCT | 229.951817424228 | 0.560371282973742  |
| TGATGAGTAA | 229.955706747602 | 0.255025452787229  |
| CCATGACTAA | 229.98166963517  | 0.536062222169858  |
| GTGACGCACC | 230.030759638819 | 0.225051532919221  |
| AATTCGTCAC | 230.302689558939 | 0.233099055621881  |
| ATGATGACTA | 230.308792378523 | 0.164212371064658  |
| TTGACTCAAA | 231.076683929556 | 0.350456725317466  |
| AGTGATTCAT | 231.099457264211 | 0.145504954137631  |
| CAGTGACTAA | 231.242833247526 | 0.678632220654086  |
| ATGACGCAGC | 231.500207553402 | 0.289045770106809  |
| GAGTCACCAC | 232.135718473753 | 0.247179621487596  |
| TGTAGTCACA | 232.265323847649 | 0.17109125619293   |
| TGATGTGTCA | 232.397838033944 | 0.395018902927418  |
| TTATGACTAG | 232.627456672143 | 0.210422767339936  |
| GAGTCACAAA | 232.652105955367 | 0.103448445012166  |
| AAAGTGTCAT | 233.441147243141 | 0.161469776598656  |
| TATGACGTAC | 233.476656337261 | 0.250115649322346  |
| TATGACCCAC | 233.783053264946 | 0.195352440075277  |
| CTCTGACTAA | 233.949598192122 | 0.705729497476849  |
| CTCTGACTGA | 234.219751838084 | 0.274756172494247  |
| ACGCGTCATA | 234.376286641403 | 0.195385717576602  |
| CCAGTCATAG | 234.853406622517 | 0.350717315507852  |
| ATGACTCCAA | 234.983262084778 | 0.334999357003952  |
| AAGTGACTAA | 235.169088544922 | 0.191871327953981  |
| CTGACTAACT | 235.173913845648 | 0.265548587549041  |
| GCATGACTCC | 235.233890983561 | 0.248945704814106  |
| TGTGTCACAC | 235.981478249553 | 0.178154598892953  |
| TCTGACTAAG | 236.335961467159 | 0.323469336473952  |
| CGATGTGTCA | 236.460070805492 | 0.153155515291739  |
| AGAATGACTA | 236.675997748548 | 0.227513636805282  |
| CGGTGACTGA | 236.857785849782 | 0.195616096922525  |
| GTGACTTATT | 237.013485168425 | 0.409617081079179  |
| AATGAGTAA  | 237.278010350569 | 0.0785613716422215 |
| AACAGTCATT | 237.42538253519  | 0.226851560243352  |
| ATGACTACAA | 237.506803688634 | 0.247946257468291  |
| AGTCATTATT | 237.654441119464 | 0.516597720463934  |
| TTCTGACTAA | 237.699062983692 | 0.811416180797803  |
| GTGACGCATG | 237.901977997087 | 0.240768509488685  |
| GATGACTAGT | 237.959666953135 | 0.330967838157365  |
| AAATGACACA | 238.104419047243 | 0.154625429958911  |
| ATGAGCAATC | 238.172477930488 | 0.321225244460095  |
| ATGACATATT | 238.291661708263 | 0.365999658404378  |
| CACAGTCATC | 238.315834176833 | 0.281729942671312  |
| CTATTACTCA | 238.444111638724 | 0.208240692081897  |
| TAGTCATAAG | 238.714985126491 | 0.261167351871865  |
| GGATGACTCC | 239.247002428267 | 0.957705272668936  |
| TAGTCATCGC | 239.249276580278 | 0.161253484392848  |
| TAGTGTCATA | 239.315560260485 | 0.207684944346778  |

|            |                  |                    |
|------------|------------------|--------------------|
| ACAGTCATTT | 239.317188067287 | 0.0840931049975336 |
| TTGTAGTCAC | 239.320446726155 | 0.268986161638683  |
| AAGCGTCATA | 239.338079663706 | 0.130111231493701  |
| AGATGACGCA | 239.763271769451 | 0.699025415577803  |
| ATGACGCAAT | 239.807520439469 | 0.83363157337222   |
| AATGAGTCGA | 239.851165877461 | 0.133654040917502  |
| CTGACTGAAT | 240.348781795024 | 0.282914600403859  |
| GAGTCATCTG | 240.533668969709 | 0.222835670807422  |
| CGGTGACACA | 240.647911291731 | 0.246336247873918  |
| GTATGACTTA | 241.026892654371 | 0.156600096204339  |
| CAATCAGTCA | 241.310662218811 | 0.247257341007939  |
| AAAATGACTA | 241.321147158594 | 0.22178612018773   |
| TAACAGTCAC | 241.382339335351 | 0.293196849714286  |
| GAGTCATGAT | 241.501998854094 | 0.236440756555956  |
| GAGTCACATT | 241.973508834457 | 0.57727194150204   |
| ATGACCCATT | 242.418650194745 | 0.280228298678866  |
| ATGACGCAGT | 242.587689311889 | 0.253028393696384  |
| ACAGTCATAC | 242.706789908449 | 0.708202351203021  |
| TAGTCACACT | 242.828728511591 | 0.216112588882848  |
| TAAGTGTCAT | 243.079223295278 | 0.26201381401161   |
| CGAGTCACAT | 243.463816796451 | 0.199562040649629  |
| AGTGATTCAC | 243.601393955846 | 0.18192547719877   |
| AGTCATACAT | 244.321785113358 | 0.394971347065278  |
| AACAGTCACA | 244.712881153843 | 0.137492242005816  |
| TGATCAGTCA | 244.734225071748 | 0.358355196324313  |
| ATTAGTCAAA | 244.752110635201 | 0.798324356173559  |
| AAGACTCACT | 244.845772176741 | 0.382977625825758  |
| CAATGAGTAA | 245.488577798558 | 0.136225854472705  |
| CCGTGACTAA | 245.888432201108 | 0.381449919649229  |
| GAATGTGTCA | 245.89970230205  | 0.137324667542352  |
| AAGATGACTA | 246.07917566953  | 0.241387236486314  |
| ATAGTCATAG | 246.13197416285  | 0.124762936171655  |
| TCATGACTGA | 246.333323577751 | 0.494176745071258  |
| ATGCGTCAGC | 246.573696145164 | 0.186409302740995  |
| AAGTATGACT | 246.666286993275 | 0.252930399155629  |
| GATGACGTAC | 246.934874274285 | 0.043612073412572  |
| ACACAGTCAT | 247.178119833995 | 0.276743311865581  |
| AATGACTGCA | 247.310075872161 | 0.322500238383081  |
| TTAGTCACAA | 247.661168125684 | 0.70482671461066   |
| TATGCGTCAG | 247.675639943893 | 0.222616140062986  |
| GTGACACAAC | 247.715026601786 | 0.281371627022929  |
| TGGTGACTTA | 247.780825268482 | 0.923367763394863  |
| ATGATTCACT | 247.816289036551 | 0.264148258149064  |
| GTATGACGTA | 248.026483383313 | 0.22161613404227   |
| GGGAGTCACA | 248.07191101283  | 0.387549501292673  |
| CATGACTAAG | 248.253863485139 | 0.286113374592018  |
| AGTCATAATT | 248.376451316381 | 0.302812388973     |
| ACAGTCATCC | 248.884142027276 | 0.173699580544121  |
| TAGTCATAGA | 248.96545355918  | 0.233301515526959  |
| AATTACTCAG | 249.195232263035 | 0.253149331497542  |
| TCCAGTCATA | 249.438662355531 | 0.220108578048354  |
| GACTCATACT | 249.765193960354 | 0.219747358823362  |
| AGTCATCGTT | 250.019079457417 | 0.355111510044242  |
| AGCATGACTC | 250.328210671    | 0.283485739305272  |

|            |                  |                    |
|------------|------------------|--------------------|
| CAAATGACTC | 250.560386247322 | 0.796829878316693  |
| GTGGAGTCAC | 250.703196183454 | 0.252252000986625  |
| GTATGTGTCA | 250.811645944334 | 0.102204277952607  |
| GTATGACGAA | 251.620192983021 | 0.293912528328537  |
| AAGACTCACC | 252.055756930313 | 0.229284199123754  |
| GGATTACTCA | 252.476860486185 | 0.24800228051196   |
| ATGACCAATA | 252.480926211456 | 0.312070006640725  |
| GTACAGTCAC | 252.492304571796 | 0.287513136912859  |
| GTATGCGTCA | 252.942841971819 | 0.280933281501877  |
| CGACTCATA  | 252.968737895118 | 0.37225595043815   |
| TATGACCAAA | 253.820361240758 | 0.248194579605253  |
| ACTGACTAAC | 253.908073724822 | 0.238913923367752  |
| TAATGACACA | 254.15734174636  | 0.340210992341079  |
| TATTCGTCAC | 254.170106729895 | 0.210822001393719  |
| TAATGACTCT | 254.28562351691  | 0.262186381226901  |
| CGTGACTAAC | 254.354309065383 | 0.645350113196273  |
| AAGTGTCATT | 254.84418373433  | 0.242572501532864  |
| ATGAGTACAA | 255.489823212475 | 0.202219122553159  |
| ATGACCCATC | 255.549122878258 | 0.18099568071042   |
| AACATGACTC | 255.656752470239 | 0.325282565717395  |
| ATGTTAGTCA | 255.666126858739 | 0.258644788370451  |
| ATGACGTGAG | 255.827900131628 | 0.702724486084727  |
| TATGTGTGAG | 256.280215273265 | 0.197453810047508  |
| TATGAGTAAA | 256.411146137282 | 0.215199732784804  |
| GAGTCACAAC | 256.816659430024 | 0.377469984573227  |
| GCGAGTCACA | 257.287323005175 | 0.185147324767122  |
| TGGGAGTCAC | 257.525799878337 | 0.147039822242513  |
| GCGACTCATA | 257.573737158236 | 0.25975837945868   |
| GGAGTCACCC | 258.035512669737 | 0.274166728008701  |
| CAGTCATAGT | 258.548742008195 | 0.394193592147822  |
| GTGAGTAACT | 258.57374989123  | 0.236795935244062  |
| AGTGACGCAC | 258.697595040135 | 0.346745234899911  |
| GGGTGACTAA | 258.948931475982 | 0.389949354081234  |
| AAGGGTCATA | 258.984758100032 | 0.204855564727984  |
| GATGACTAGA | 259.147922760865 | 0.225141548795939  |
| CTCAGTCACA | 259.290204030954 | 0.266510676195695  |
| AATGACTTAT | 259.818028537632 | 0.367645083172177  |
| CATTAGTCAA | 259.95697038597  | 0.107654956897375  |
| ATGACTCCCC | 260.645364867786 | 0.230095241837115  |
| TCTGACTGAC | 260.669547714636 | 0.22895625819673   |
| GATGTGTGAG | 260.706984216746 | 0.107880599938434  |
| GGAGTCATGA | 260.84656706352  | 0.289839897248974  |
| TGTGACGTAT | 260.909708101861 | 0.44864526157529   |
| GTGTCATACT | 260.999130171529 | 0.263847983223316  |
| ATGACTAGTC | 261.093008086271 | 0.243389138772088  |
| GAGTCACATG | 261.117470909512 | 0.366691048685824  |
| CGAGTCATAC | 261.265227237928 | 0.832624534751888  |
| GAGTCACCAA | 261.304855430225 | 0.141484056931096  |
| GATGACAAAT | 261.355874181012 | 0.0885990627546951 |
| AGTCATACTA | 261.440091043521 | 0.214920418675429  |
| GACATGACTC | 261.658256849608 | 0.318196570065179  |
| GAGAGTCACC | 261.689121329888 | 0.305513259069998  |
| TCGAGTCACG | 261.75249080677  | 0.189850471042965  |
| AATGACTCTG | 261.984249509168 | 0.139457358877497  |

|            |                  |                   |
|------------|------------------|-------------------|
| TGGTGACACA | 262.487542315637 | 0.362529387542812 |
| TAGACTCATA | 262.981825606861 | 0.181377355826683 |
| GATCCGTCAT | 263.099647359749 | 0.197339328391058 |
| AATAGTCACG | 264.143786593063 | 0.220742877686982 |
| AGTCATCGGA | 264.189894104745 | 0.163186785547151 |
| GTCGACTCAC | 265.179409140545 | 0.258281050358656 |
| GCTGACTGAT | 265.422948740702 | 0.392517844426329 |
| ACGAGTCACC | 265.7616712381   | 0.220652099820626 |
| AAATTACTCA | 265.866926619957 | 0.181329750354135 |
| TGATGACTAC | 265.984375169664 | 0.237972978887292 |
| GGTGACTGAA | 266.094116142325 | 0.219984483039516 |
| GATTCGTCAC | 266.490788444571 | 0.27209450920612  |
| ATGAATCAGA | 266.894167329374 | 0.214958949302385 |
| AGGTTAGTCA | 266.94630207093  | 0.249283760331001 |
| TGTGTCACAT | 267.958466915243 | 0.244926446406893 |
| AATGAGTCGC | 268.007244736438 | 0.139387443560622 |
| CAGTCATAGG | 268.294906233841 | 0.181721049081174 |
| GTGACCCATA | 268.424331419995 | 0.268062125372438 |
| AATGACGTAT | 268.662502474194 | 0.435741871895663 |
| GATGACACAA | 268.954043558655 | 0.33460807037061  |
| ATGAGCAATT | 269.262987338012 | 0.372427063225394 |
| CATGACTCGT | 269.279923681868 | 0.278071322664348 |
| TTATGACTAC | 269.37951552896  | 0.524853104876968 |
| GCGTCATACT | 269.62752465952  | 0.21100699998949  |
| AAATGACTTA | 269.666286144176 | 1.08862057735951  |
| AATGACGCAG | 269.72856220944  | 0.125553774843375 |
| ACAGTCATTC | 269.873127174344 | 0.306231929378075 |
| CGAGTCACAA | 270.291366774115 | 0.287146163461799 |
| GGATCAGTCA | 270.344715389264 | 0.169458301896773 |
| GAGTCATTCG | 270.376121797149 | 0.783466795780648 |
| AAGACTAATA | 270.810025180028 | 0.183932702366741 |
| GATGACGAAT | 270.866450307399 | 0.18800329192931  |
| CGGTTAGTCA | 270.910096629701 | 0.46733057835379  |
| TCCACGTCAC | 270.934987127958 | 0.177259412769793 |
| GAGTCACCGG | 271.276297843715 | 0.368281526288796 |
| CAATGACTCG | 271.649997780035 | 0.358044244970071 |
| TAGAGTCACG | 271.786513306197 | 0.210326041152437 |
| CGAGTCACAG | 272.199825507053 | 0.125174659479986 |
| CAGTCATATT | 272.27472243907  | 0.285638296017597 |
| ATGACTCGCT | 272.781854210992 | 0.203691976456552 |
| GGAGTCACAC | 273.260813204167 | 0.731922283716153 |
| AGGTGACTGA | 273.434761434296 | 0.15471705539872  |
| ACACGTCATT | 274.219371224291 | 0.261303561132501 |
| GATGAGTCGA | 274.263518702628 | 0.234036966168875 |
| AGTCATACGT | 274.338228882206 | 0.257976719963812 |
| ATGACTGCAA | 274.796709652947 | 0.327491516440405 |
| ATACAGTCAC | 275.256896947918 | 0.225114066763845 |
| CCATGACTGA | 275.776920058626 | 0.134960304987126 |
| GATGACTGGT | 275.910171541732 | 0.200484118869236 |
| AGTCATAGCA | 276.081374024395 | 0.160752910776603 |
| TATGAGCCAT | 276.173967615817 | 0.261599526612184 |
| ATTACTAATA | 276.629739068889 | 0.263714241710909 |
| TAGTCACACA | 276.666569923206 | 0.177180107465674 |
| AATGACTGCT | 276.806848571081 | 0.283364739547264 |

|            |                  |                   |
|------------|------------------|-------------------|
| ACGAGTCACG | 276.841933456681 | 0.376420795833353 |
| GCAGAGTCAC | 276.94483221943  | 0.287954079269196 |
| TGATTACTCA | 277.034866891226 | 0.313079505194831 |
| AGATCAGTCA | 277.19983629532  | 0.228035492517636 |
| GGAATGACTA | 277.368787387424 | 0.194268521941783 |
| GAAAGAGTCA | 277.536429374747 | 0.150309242968025 |
| TAGCGTCATA | 277.661459795758 | 0.204232672875898 |
| CAGTCATCGA | 277.885683417987 | 0.185162584389059 |
| GGAGTCACCA | 278.001088196359 | 0.545421397911666 |
| AAAGTGACTC | 278.103111994544 | 0.219563788610808 |
| GAGTCACCAG | 278.30672854121  | 0.666884844916752 |
| GTGTCATAAT | 278.385666467276 | 0.192521658300872 |
| AGTCATCGGC | 278.547655033832 | 0.132223328549892 |
| AAGACTCACG | 278.756065437274 | 0.240853284533127 |
| TACAGTCATT | 279.014504165347 | 0.299713076125261 |
| ACATGACTGA | 279.220879394814 | 0.15740658123905  |
| GTATGATTC  | 279.28892139412  | 0.22954771773834  |
| GGAGTCATTG | 279.462020003373 | 0.762120360660789 |
| GTATGACCAA | 279.893872295289 | 0.247073421292555 |
| AATGACGTAA | 279.932438452142 | 0.359083814461332 |
| GTGACCAATT | 279.9746506215   | 0.193174646201499 |
| GAATGACTAG | 280.421518054876 | 0.235040337874482 |
| GCACAGTCAT | 280.423899326258 | 0.278244457639269 |
| ACCTGAGTCA | 280.57943952225  | 0.801281688284087 |
| CGCTGACTAA | 280.693457337808 | 0.281077739530068 |
| ACATGACTCC | 281.067506407834 | 0.396184254475755 |
| AAGAGTCAAG | 281.261523251223 | 0.184674505784209 |
| CGAGTCATCT | 281.284742534738 | 0.14136320246688  |
| GTAGTCATAT | 281.429361603633 | 0.507084832383606 |
| AGTCATAGTT | 281.975510764581 | 0.12732169047461  |
| AGAGTCACCG | 282.053748559719 | 0.4097713291903   |
| TGTGAGTAAC | 283.110667892703 | 0.284734603704842 |
| AAAGTGTCAC | 283.12042731657  | 0.269460304554212 |
| GATGAGTCGT | 283.488070226855 | 0.167362890243441 |
| ATGACTAGTA | 284.137249173463 | 0.250207466969506 |
| CGTCAGTCAT | 284.219408065841 | 0.786728906536093 |
| GCATGACTCT | 284.668983194434 | 0.14777999726637  |
| AGTAGTCACC | 284.737871810396 | 0.165496993000242 |
| TGAATGACTA | 284.814337537019 | 0.398867806539873 |
| ATGGAGTCAC | 285.591998207615 | 0.407832742780557 |
| ATGACCAATC | 285.62672282419  | 0.238775344732049 |
| CTATGTGTCA | 285.941967563985 | 0.144638927555157 |
| GAATTACTCA | 286.154079479874 | 0.324581584740716 |
| TAGTCATAAA | 286.357206277052 | 0.343834324206256 |
| GTGACGTATA | 286.482730537319 | 0.380160977955679 |
| AGTCATAATC | 286.65470290368  | 0.258995099455864 |
| GTGACTGAGC | 286.703486598314 | 0.274327256553035 |
| GTAGTCACAC | 286.777030519355 | 0.269499465360347 |
| AGATGACTAC | 286.87238253083  | 0.12876779117665  |
| ATGACTTAAT | 286.88524538441  | 0.265961950157418 |
| AAGACTAATC | 286.949180583515 | 0.283688625136383 |
| GAGTCACAGA | 287.081041023302 | 0.325861812720586 |
| GAGTCACCAT | 287.311075745628 | 0.449950367001395 |
| ATGACTACTA | 287.403745725567 | 0.105217813371481 |

|            |                  |                   |
|------------|------------------|-------------------|
| GATGACGGAT | 287.48369461348  | 0.226646414675663 |
| CGCATGACTC | 287.889591099566 | 0.361043671287275 |
| AACCAGTCAC | 288.218072157128 | 0.213458141646939 |
| ACAGTCACAC | 288.381213194081 | 0.199161213268881 |
| GTGACTGAGT | 288.968694283634 | 0.239983321267912 |
| GAGTCACCTA | 288.991266413738 | 0.558896696181278 |
| TGGTTAGTCA | 289.161532510865 | 0.11121314239433  |
| AGATTACTCA | 289.430729666426 | 0.1923979407729   |
| AGTCATACAG | 289.550260739884 | 0.184463398784477 |
| ACGAGTCACT | 289.615632544932 | 0.289199209671366 |
| CAGTCATACG | 289.868971842259 | 0.17707982677309  |
| ATGAGTACAT | 289.991708509668 | 0.464344355151185 |
| GCGACTCATC | 290.14705121817  | 0.14186022696638  |
| TTCAGTCACA | 290.564886014313 | 0.652134627364627 |
| ATGACAGATC | 290.586581074076 | 0.317930025466128 |
| AGGAGTCAGA | 290.996292069857 | 0.211572720779047 |
| ATAATGACTC | 291.017298731021 | 0.519609769617369 |
| GTGACGAAA  | 291.157993583308 | 0.307024136376434 |
| AGTCATACCG | 291.383811353577 | 0.256217553694203 |
| AATGACCAAT | 291.461718631598 | 0.516398327881924 |
| TAATCAGTCA | 291.584327877864 | 0.286800776202607 |
| GAGTCACCCA | 291.732868986409 | 0.235722584107617 |
| TAGACTCATC | 291.818652874787 | 0.26034255938898  |
| GTGACGCACT | 291.863405647196 | 0.381687288911265 |
| TTGGAGTCAC | 292.063590566283 | 0.502359295141715 |
| TATGACATCA | 292.069867065154 | 0.346697234967296 |
| GAGTCACCGA | 292.210271445457 | 0.42844924546779  |
| AGTCATAGTC | 292.591892629063 | 0.26321318171696  |
| TCATAGTCAT | 292.90040010631  | 0.239845045048548 |
| GTGACCAATC | 292.948269534978 | 0.334781013598109 |
| CGCAGTCATA | 293.626004355483 | 0.243955761010667 |
| TATGACCGAT | 293.735373895343 | 0.173271122026038 |
| TAGTCATTGT | 293.891429127529 | 0.329665819610887 |
| TACGACTCAC | 293.958982222483 | 0.171289700507291 |
| AATAGTCATG | 293.986199923437 | 0.381022800531081 |
| ACGAGTCAGA | 294.139797832656 | 0.196509902536501 |
| TATGAGTACA | 294.182475352551 | 0.383555206716801 |
| CAATGACACA | 294.245132753542 | 0.306944603236742 |
| CTGTTAGTCA | 294.286497910818 | 0.359769325885705 |
| GTGTGCTACT | 294.34497009659  | 0.41586957768524  |
| CATGACTCCG | 294.372338752914 | 0.167175700755459 |
| ACATGACTCG | 294.650765271827 | 0.240583823061247 |
| TCGAGTCAGA | 294.767316475893 | 0.362081314347099 |
| GTATGACAAA | 295.248341511458 | 0.185264670580297 |
| ACAGAGTCAT | 295.303916583326 | 0.76945744608925  |
| CTGTGACGCA | 295.340288954247 | 0.60830377817364  |
| TATGACATAA | 295.602323356098 | 0.164240160630025 |
| GAGTTAGTCA | 295.706649208882 | 0.194328175095819 |
| ATGACGCAAC | 295.713196726606 | 0.688383790043147 |
| AGTCATCGGT | 296.248156596094 | 0.231206394139335 |
| GGAGAGTCAT | 296.248715163792 | 0.288016112223441 |
| TGCAGTCACA | 296.275635280576 | 0.184315864651822 |
| AGTCATACAC | 296.280400351767 | 0.238157241979623 |
| ACGACTCATA | 296.354212873225 | 0.257665671582065 |



|             |                  |                    |
|-------------|------------------|--------------------|
| AGTCATAACT  | 296.788142833846 | 0.169197190426533  |
| AGGGAGTCAC  | 296.895290019781 | 0.197489338031039  |
| ATGTGTCAGC  | 297.413793305133 | 0.569854393875443  |
| TATGACGTGG  | 297.521233730771 | 0.287985364784811  |
| AATGACTAGA  | 297.636070716101 | 0.218012750501786  |
| AAGGGTCATC  | 297.823518116689 | 0.179746208182148  |
| CTATGACTTA  | 297.929472223962 | 0.24972304197581   |
| AGTGTCCATC  | 297.983351317319 | 0.151993332898299  |
| ATGACTGCAT  | 298.043550521366 | 0.384184433239749  |
| GATGACATAT  | 298.330202093896 | 0.313046316424739  |
| CAGTATGACT  | 298.569519661041 | 0.162987027674664  |
| TGGTGACGCA  | 298.583752893081 | 0.171997959987127  |
| AATGCGTCAG  | 299.154914977255 | 0.263080101404249  |
| ATGACGCGTG  | 299.358895133305 | 1.22787387834628   |
| GAGTCAGACT  | 299.365476442622 | 0.167008465699684  |
| AGTCATCGAT  | 299.382140286186 | 0.225255764109434  |
| TGACTAAATG  | 299.495023339691 | 0.342675957759001  |
| GACAGTCATC  | 299.764287876468 | 0.159268659830779  |
| GGAGTCAGAG  | 299.986829030878 | 0.206248300425927  |
| AAGACTAATT  | 300.041567245967 | 0.229875430228786  |
| AGTCATATCG  | 300.452054357739 | 0.223489725976105  |
| AAGTGTCCACC | 300.580626153527 | 0.158053202514906  |
| AGTCATTCTT  | 300.710310173394 | 0.878350153871082  |
| GTATCAGTCA  | 300.793982640024 | 0.344298937668813  |
| TAGAGTCAGC  | 300.990256608269 | 0.425103307840893  |
| AGTCATACAA  | 301.138058852856 | 0.170745092942991  |
| TATGACGGAA  | 301.372987185434 | 0.319587634502029  |
| AACTAGTCAC  | 301.673405983545 | 0.246611313206012  |
| GTGATTCACT  | 301.774809682893 | 0.154738438432758  |
| CAATTACTCA  | 301.856102465556 | 0.304374031310283  |
| AGAGTGACTC  | 301.93313518294  | 0.342463664465745  |
| TCGACTCATA  | 301.992974540735 | 0.312365364788368  |
| CTGATGACTA  | 302.001777294784 | 0.0641445211246273 |
| AGTAGAGTCA  | 302.073694015349 | 1.13545273130556   |
| AGCGTCATAC  | 302.147125700876 | 0.225123028452611  |
| TGTGACCCAT  | 302.231054805939 | 0.254722673644897  |
| GTGACTGAGA  | 302.304765199805 | 0.179284157274334  |
| GTGACAAATT  | 302.677120143818 | 0.262011540906453  |
| GAGTCATGAA  | 302.689019750667 | 0.240011330232037  |
| CGATCAGTCA  | 302.784142110129 | 0.196538009012346  |
| ACTGACTGAT  | 302.969256232013 | 0.38966294112706   |
| GTTACTCACC  | 302.985607544126 | 0.20777497978529   |
| AATGACACAG  | 303.296231577283 | 0.703557007961411  |
| ATGACGCGTA  | 303.445270424077 | 0.130447965547786  |
| TATGATTCAG  | 303.480211838997 | 0.249317192886511  |
| AGTAGTCACA  | 303.533630882524 | 0.298735616996146  |
| AGTCATCGTC  | 303.616869038247 | 0.263659621094141  |
| CATGACTGAA  | 303.629337756161 | 0.183821728491718  |
| GATGAGCAAT  | 303.770197538687 | 0.321001418821169  |
| ACCATGACTC  | 303.901450354033 | 0.241068658766422  |
| AGTCATACCT  | 303.907484809455 | 0.264214832968586  |
| AGTCATCGAA  | 304.409607604238 | 0.238728169914375  |
| AGTCATCGCA  | 304.664332788083 | 0.164937383410428  |
| CGATGCGTCA  | 304.669182315587 | 0.133067165855674  |

|            |                  |                    |
|------------|------------------|--------------------|
| ATGACTACAC | 304.68467071664  | 0.327169837011527  |
| ATGACTGGTA | 304.735591556097 | 0.391230300507656  |
| TAATGAGTAA | 304.776192361891 | 0.126116328187388  |
| TCGAGTCACT | 304.980101243836 | 0.233958873355386  |
| TAGTCATATA | 305.185228863241 | 0.235933066102527  |
| TTGATGACTA | 305.288249849111 | 0.167002610924138  |
| ACATGACTAA | 305.657018392121 | 0.757821355814349  |
| GATGACGTGG | 305.902182226782 | 0.229949163984972  |
| ATAGACTCAC | 305.928253052013 | 0.152527215045749  |
| CGGTGACGCA | 306.568037987841 | 0.249852836046819  |
| TTTGACTCAA | 306.818180214158 | 0.356250457273556  |
| TGGTGTCATA | 307.074889642317 | 0.276570971841087  |
| ATGACAGATA | 307.132964666581 | 0.365413071114866  |
| CTGACGTCAC | 307.269542318866 | 0.325911459107906  |
| GAGTCACAGG | 307.328690192461 | 0.117292630133937  |
| CCATGACTCC | 307.442696231097 | 0.114264976233225  |
| TAATGTGTCA | 307.632779237863 | 0.182507278648776  |
| AAGTGTCACA | 307.889955040516 | 0.246348942479934  |
| TAGTCACACC | 307.912317924383 | 0.207445409986359  |
| TTAGTGACTC | 308.078930139259 | 0.304638984861172  |
| CAGTCATAAG | 308.371017344908 | 0.220627797567434  |
| AGGACTCATA | 308.449650360569 | 0.16893356923224   |
| CGACTCATAG | 309.458661980268 | 0.218571717916054  |
| AATGACGAAT | 309.520432852587 | 0.231437216944201  |
| ATAGAGTCAG | 309.813085477743 | 0.20252121329492   |
| GAGTGACTGA | 310.033494094814 | 0.16492682002876   |
| TCGTGACTGA | 310.211210358097 | 0.19116440950553   |
| TTATGTGTCA | 310.224488750621 | 0.216937745289183  |
| GTGACCCATT | 310.738137352565 | 0.281241531806771  |
| TGTAGTCAAC | 310.876020970609 | 0.0810684139928606 |
| GGACTCATAC | 310.908226816631 | 0.0821150117151196 |
| GTGACGCAGA | 310.986860391628 | 0.308307822735139  |
| AGTCATAATG | 311.034613439118 | 0.238154351113594  |
| GAAGACTCAT | 311.277906943188 | 0.680242632775332  |
| ATTACTCAGA | 311.380330389918 | 0.131669920592529  |
| TAAATGACTA | 311.610482818908 | 0.325240727574852  |
| GATTACTCAG | 312.081147365284 | 0.696785795304561  |
| GGGTGACACA | 312.184465038071 | 0.153196271123184  |
| CTCGAGTCAT | 312.282352735246 | 0.751463800330428  |
| AGTCATATTT | 312.433315285468 | 0.248810900318564  |
| CTGACTAAAC | 312.629541115845 | 0.184567536272563  |
| CGAGTCAGAG | 312.764250654713 | 0.240781095374839  |
| ACTATGACAC | 313.057273022135 | 0.348167626985617  |
| GGGTTAGTCA | 313.114176535552 | 0.169048093615459  |
| CAATAGTCAC | 313.328798976713 | 0.259550743140549  |
| ATGAGTAAGA | 313.381889710664 | 0.323629119012727  |
| TAGTCATATG | 313.655690255249 | 0.666686395854284  |
| CACAGTCATT | 314.087265849917 | 0.0553257476598033 |
| GATGACCCAC | 314.438114671265 | 0.189634185954484  |
| GTGTGAGTAA | 314.46528454934  | 0.196902654404754  |
| AATGACTAGG | 314.603011647463 | 0.278708449804046  |
| GGTGACCCAT | 314.733737330094 | 0.39925786671278   |
| GAGTCACACC | 314.984516037272 | 0.51928784508274   |
| TCTGACTGAA | 315.27427318578  | 0.342122664303382  |

|            |                  |                    |
|------------|------------------|--------------------|
| GTGACAAATC | 315.683563284846 | 0.317062726254738  |
| ATTACTAATC | 315.776815097831 | 0.238645059789714  |
| AATTACTAAT | 316.474378532808 | 0.40482793636898   |
| AGTCATCGTG | 316.490139376844 | 0.141070787982901  |
| GCATGACTGA | 316.538266308749 | 0.325685736385933  |
| ATTCGTCACA | 316.648935521842 | 0.53062707633037   |
| GAAATGACTA | 316.751202782112 | 0.255599109121811  |
| AGTGACTGAA | 316.780221981502 | 0.275073992293268  |
| TTATGCGTCA | 316.874910722826 | 0.389008437540082  |
| ATGCGTCAAT | 317.222447431857 | 0.443642504087357  |
| TAATGACTTA | 317.899042021213 | 1.05951897557948   |
| CTATGACGTA | 317.947302889365 | 0.283938325826854  |
| AGTCATAGCT | 318.017584619475 | 0.257928432105703  |
| GTGACAAATA | 318.105043587622 | 0.163249888393753  |
| ATGACTCGCC | 318.187607426936 | 0.317273798342701  |
| AGTCATCGTA | 318.204814131524 | 0.274450861898332  |
| TCGAGTCACC | 318.30478085362  | 0.730299725857008  |
| GAGTCACAAG | 318.339792886647 | 0.622848995152713  |
| TGATGACTAT | 318.523551292939 | 0.389602366785369  |
| GAGTGACGCA | 318.94934923292  | 0.194327195174505  |
| ATGACACAAA | 319.001437881633 | 0.31373772332015   |
| CTATGACGAA | 319.314178358425 | 0.25597719783346   |
| TTAGAGTCAG | 319.322516672775 | 0.30101695383461   |
| CAATGTGTCA | 319.507084846499 | 0.209992965942655  |
| ATGACTAAAG | 319.847421296654 | 0.702713864369551  |
| CAGTCATCCT | 319.906794633129 | 0.218710556135268  |
| TCAGTGACTC | 320.298541843015 | 0.321787612864705  |
| GATGCGTCAG | 320.451892785794 | 0.189689634813731  |
| AGAGTCACCC | 320.577752551784 | 0.407548001866378  |
| AGTCATACGA | 320.61023367502  | 0.0854392618999451 |
| ATAGTGTCAT | 321.6038935612   | 0.281310126757063  |
| CGGTGAGTAA | 321.677350794305 | 0.209761307229089  |
| TCCATGACTC | 321.792607624546 | 0.226939558608095  |
| ATGACATATC | 322.110470461203 | 0.287938232197487  |
| AGGTGTCATA | 322.114082337507 | 0.193343207324493  |
| CCTGACTGAT | 322.138512486754 | 0.316468809228369  |
| TATGAATCAG | 322.339842670416 | 0.23892536129912   |
| TATAGTCACA | 322.467119612945 | 0.513570617823372  |
| AGTCATAACA | 322.57614958284  | 0.240452260315209  |
| TACAGTCACA | 322.622058352512 | 0.17503732808287   |
| GCATAGTCAT | 322.784308366443 | 0.30077104115582   |
| GAATGCGTCA | 323.270131098178 | 0.288532485733319  |
| GCACAGTCAC | 323.661739597379 | 0.116755004073874  |
| AAATGAGTCG | 323.668851497219 | 0.184675818475226  |
| CGATGATTCA | 323.743366518655 | 0.0611978259494182 |
| TGTGACGCAA | 323.789997757636 | 0.66014164703151   |
| TTATGACGTA | 323.792827893416 | 0.168412788169021  |
| CATGACTTAT | 324.169334305989 | 0.296646377436832  |
| CGAGTCACAC | 324.441043897018 | 0.786876280918215  |
| GTGACACAAA | 324.482118403391 | 0.243685605119992  |
| TTCGACTCAC | 324.53399283781  | 0.197009291726429  |
| GGCGTCATAA | 324.727958561461 | 1.17099581366446   |
| AGATGACGTA | 324.841905090561 | 0.175118581292594  |
| TGAGAGTCAC | 326.088209245092 | 0.333129417901655  |

|             |                  |                    |
|-------------|------------------|--------------------|
| AATCTGTCAC  | 326.184540729497 | 0.2092962515373    |
| AGATGTGTCA  | 326.600138699845 | 0.211957753590378  |
| TTACAGTCAT  | 326.859660429355 | 0.244445988159941  |
| AGAGTCATCC  | 326.920498487247 | 1.15578320296846   |
| GGTGACACAG  | 326.933237503195 | 0.0675066111632813 |
| GGTGACGCAG  | 326.999933653065 | 0.184866977556365  |
| GAGTCATCAA  | 327.25417446776  | 0.900987378924443  |
| GTGACTTATA  | 327.275159342327 | 0.0641775560565229 |
| GGATGCGTCA  | 327.534444514051 | 0.0274004149367868 |
| GAGTCACCTT  | 327.674172837662 | 0.280289734055711  |
| TTGTGACGCA  | 327.733810532792 | 0.183220028310485  |
| ACATGTCATA  | 327.92261857285  | 0.176570422180459  |
| AAGTTAGTCA  | 327.99872959837  | 0.193103566274565  |
| ACTAGTCACA  | 328.105774409897 | 0.233923684438967  |
| TGTGTCACAA  | 328.18104586854  | 0.192392714182673  |
| ATTACGTAAC  | 328.186350671344 | 0.252659455098918  |
| ATGATTCACG  | 328.333516498463 | 0.272116071975338  |
| GACCAGTCAC  | 328.384744267986 | 0.253109776524778  |
| TTATCAGTCA  | 328.642406980591 | 0.190998557308051  |
| CTATGACACC  | 328.93837949687  | 0.187458351047325  |
| CGTGATTCAAT | 329.25338572453  | 0.30615156957271   |
| CTATGACCAA  | 329.379144370198 | 0.17252978018074   |
| CCAGTCATAC  | 329.486369009455 | 0.145662898861025  |
| TAGTTAGTCA  | 329.502414369697 | 0.325287828362155  |
| CGCGTCATAG  | 329.765818134965 | 0.152252090971924  |
| CAGATGACTA  | 329.982196087161 | 0.410387130508787  |
| ACAGTCATTA  | 329.982498060732 | 0.251807896388839  |
| GAATGAGTCG  | 329.997913495494 | 0.195211150229541  |
| AGTGACTCCT  | 330.103582977113 | 0.223972679911612  |
| ATGACGCGTC  | 330.632937085218 | 0.296506112357493  |
| GTAGAGTCAG  | 330.753325739175 | 0.220761271477289  |
| AGAATGAGTC  | 330.966530217284 | 0.208654837363218  |
| CAGTCATCAT  | 331.172713399875 | 0.173799895789249  |
| AATGAGTCGT  | 331.205708419967 | 0.629950648764489  |
| GACGTGACTC  | 331.527595203081 | 0.105041988236998  |
| TAGACTCATT  | 331.92080378704  | 0.250250080165579  |
| CGGATGACTA  | 332.033344785526 | 0.620047938411581  |
| CAGTCATCCA  | 332.125017100574 | 0.373008535208708  |
| CGTGTGTCAAT | 332.252134890143 | 0.667349502805064  |
| TATGACGAAA  | 332.296979171564 | 0.289301155734302  |
| CGCGTCATAA  | 332.317069983944 | 0.20889569355978   |
| TGCGTGACTC  | 332.856340790534 | 0.233341321766336  |
| CGTGACTGAA  | 333.198516565019 | 0.295238061838378  |
| GTGACCAATA  | 333.905999247214 | 0.249364369478044  |
| TGACTAAATA  | 334.132191204003 | 0.303688402317297  |
| TGACTAAATC  | 334.184726784328 | 0.129712088125514  |
| ACGACTCACA  | 334.806793851366 | 0.187367239264157  |
| TGACTAAATT  | 335.182389783742 | 0.385951262223575  |
| GAGTCAGCGT  | 335.314497835214 | 1.07226168820156   |
| AATGACGCCA  | 335.540983069715 | 1.20912173308335   |
| TAGTAGTCAC  | 335.773682711679 | 0.229410638126702  |
| CTATGATTCA  | 335.783565096485 | 0.245425227153774  |
| TGTGACAAAT  | 335.946121432262 | 0.414663809275875  |
| AATGACCCAT  | 335.993881119652 | 0.385165908452789  |

|            |                  |                    |
|------------|------------------|--------------------|
| CCATGACTCG | 336.059171321577 | 0.233075947274898  |
| GCGAGTCACC | 336.26322286375  | 0.306206213900251  |
| GCCATGACTC | 336.306405966965 | 0.133224310556398  |
| ATATGACGTA | 336.395135483008 | 0.205905235377155  |
| TGGTGAGTAA | 336.425425053701 | 0.123953052092594  |
| TGATGCGTCA | 336.463032644744 | 0.464794116446787  |
| CGATGACTTA | 336.530055246511 | 0.236916262515985  |
| ATGACACGTA | 337.082742244362 | 0.0851361078661871 |
| ATGACACGTC | 337.29993118916  | 0.208644941952704  |
| ATGACGCAAA | 337.39349806441  | 0.618992823566289  |
| ATGACTACGG | 337.665686073192 | 1.20718596206579   |
| CTATGACACG | 337.748675271688 | 0.152174032981961  |
| CTAGTCACAC | 338.085622904921 | 0.181793687854572  |
| CAGTCATCCG | 338.264174107154 | 0.0969835618043043 |
| ATGCGTCAGT | 338.310583792287 | 0.508314405618581  |
| AACGTGACTC | 338.480690084301 | 0.578754206838598  |
| GATGACACCA | 338.729333558115 | 0.174134328899936  |
| GAGTCACCCT | 338.828630763441 | 0.629544057464162  |
| GAAGTGTCAT | 338.992903268051 | 0.215502273521979  |
| AAATGACTAT | 339.464478729765 | 0.390397055401262  |
| CGACTCATAT | 339.827357555697 | 0.179990064233066  |
| AATAGTCAGC | 339.937019158077 | 0.220914827710433  |
| AGTCATAACG | 339.980047641737 | 0.0820844290458511 |
| AGGTGACGCA | 340.167495311284 | 0.0563338895693268 |
| TATAGTCATT | 340.173266540742 | 0.39020940100676   |
| AGGAGTCACG | 340.227377754403 | 0.221674300030584  |
| AGTCATATTG | 340.573682586122 | 0.166873468565918  |
| CGACTCATAA | 340.727040369837 | 0.164680868743968  |
| CGCGTCATAC | 340.843694558275 | 0.271472386444713  |
| GAATGACTAC | 341.019940379281 | 0.58653319080036   |
| TAGTCACCGT | 341.506589357922 | 0.258802523768484  |
| TGCTGACTAA | 341.776433014381 | 0.44558478638322   |
| GACTCATACC | 342.194183133946 | 0.161603562200815  |
| GTCGAGTCAG | 342.64160146094  | 0.251438857952948  |
| TGACGTCACA | 342.76578684989  | 0.205775213263839  |
| GACACGTCAG | 342.809222185445 | 0.235250416103717  |
| CTATGACAAA | 343.143259694796 | 0.164678751054388  |
| AGAGTCACCT | 343.283495708416 | 0.624356848233254  |
| TACATGACTC | 343.376428472855 | 0.416103095040647  |
| TATGACAAAC | 343.5858024178   | 0.194794293469767  |
| GTGACCCATC | 343.745593144126 | 0.185436194515253  |
| TATAGTCACC | 344.153214362526 | 0.225883026382796  |
| AATGACTAGT | 344.163048477686 | 0.321391523435854  |
| ACATAGTCAT | 344.579103651295 | 0.3259318307657    |
| GGTGACGCAA | 345.044685267979 | 0.0822844986240396 |
| AGTCATACCA | 345.360530994387 | 0.178793806050691  |
| TATGACTTAG | 345.389985238757 | 0.387171348255684  |
| GGGGAGTCAC | 345.611400745657 | 0.229808026511431  |
| ATCGACTCAC | 345.620121294868 | 0.178536650282152  |
| AGTCATAATA | 345.831148665797 | 0.361708878507878  |
| CCAGTCATAA | 345.940850895304 | 0.345824383914016  |
| TTGCAGTCAC | 346.219868828175 | 0.256551147912599  |
| AATGACTACG | 346.266050881453 | 0.0873537283185282 |
| AAGTATGACA | 346.367302719467 | 0.182639885019603  |

|            |                  |                   |
|------------|------------------|-------------------|
| GGTGACGTAT | 346.444281006873 | 0.244338015156134 |
| AGTCATAGGA | 346.516070000995 | 0.21452257202586  |
| GGTGACACAA | 346.603292091297 | 0.390908501221524 |
| AAATGACTAG | 346.609541057332 | 0.212941628774935 |
| AGAATGACTG | 346.626365565394 | 0.220564618309656 |
| CAGTCATTAG | 346.70653579377  | 0.853391586473499 |
| AATGACTGGT | 346.898724315303 | 0.293848276905809 |
| ATATGACTAG | 346.920996955193 | 0.594551299398424 |
| GCCTGAGTCA | 347.003120265198 | 0.685245049076523 |
| GTAATAGTCA | 347.149642314848 | 0.156193338097473 |
| GATGACTGGA | 347.49089163806  | 0.18963194437354  |
| AGTATGACTT | 347.523816648748 | 0.292441301131828 |
| GGTGACGTAA | 347.609507107486 | 0.250905798783498 |
| ATGACTACTT | 347.935442610277 | 0.191860560351452 |
| CGAGTCAGAC | 347.986129223172 | 0.358101947195983 |
| TAGTGACTCG | 348.270099174126 | 0.266565777642675 |
| CCGATGACAC | 349.076210684819 | 0.195012857832828 |
| ATGCAGTCAC | 349.083444707678 | 0.263196438037715 |
| TATGACAGAA | 349.902068513814 | 0.22082587316003  |
| AGAGTACCA  | 349.94081907787  | 0.542335909083975 |
| AAATGCGTCA | 350.426090852172 | 0.183308724834971 |
| TCGCGTCATA | 351.807520927892 | 0.341848589899931 |
| ATTGCTCAC  | 352.245271731558 | 0.245867095199116 |
| TAATTACTCA | 352.360404523466 | 0.290672549332831 |
| GAGTCACATC | 352.507813267952 | 0.294301524981491 |
| GAGATGACTA | 352.55708960643  | 0.207324172225436 |
| AGTCATAGGC | 352.825234140268 | 0.19661742176891  |
| CAGAGTCATG | 352.872289146571 | 0.108701570062005 |
| GGTGTCATAC | 353.037912667601 | 0.279220682502818 |
| AATGACGTAC | 353.282809546958 | 0.124168810203086 |
| GATGACTATG | 353.553160751849 | 0.333817276855947 |
| GGAGTCAGAC | 353.751905252345 | 0.127344093488462 |
| ACAGTACCCG | 354.305014177237 | 0.150080257508763 |
| AGTATGACGA | 354.526330787818 | 0.178918351698325 |
| TCATGACACA | 354.528268337774 | 0.335343288465853 |
| ATGACACGTT | 354.585017518632 | 0.241556020532234 |
| GTATGACAGA | 354.844392495061 | 0.227490596525597 |
| AAGTCATCGG | 355.149198115953 | 0.12540093180388  |
| TATTGCTCAC | 355.286325310547 | 0.142389790670358 |
| TCTGACACAC | 355.67924114432  | 0.219360388329856 |
| GGTGACTTAT | 355.721684934142 | 0.239019905460113 |
| TGACGTCACC | 356.049925650313 | 0.160561094489202 |
| CGTGACTAAA | 356.171914999722 | 0.434458118335477 |
| TTAGACTCAC | 356.722557453491 | 0.24349853900107  |
| CTATGACGTG | 357.985639612512 | 0.104876513181118 |
| CAGTGTCATA | 358.086946108589 | 0.188280651056226 |
| GTATGACGTG | 358.63980298854  | 0.154669844492727 |
| AGTCATAGGT | 358.675790997273 | 0.212193873512943 |
| GTGTCATACA | 358.9213634899   | 0.427308131554604 |
| GTATGACATA | 359.700477162411 | 0.220821822763035 |
| CTGACTCAAG | 359.735093381583 | 0.440782574826212 |
| GTATGACGGA | 359.908310996684 | 0.14447582647239  |
| ACATGTCATC | 359.996226037477 | 0.237914478115057 |
| ATGACATATA | 360.385029500257 | 0.068857137024251 |

|             |                  |                   |
|-------------|------------------|-------------------|
| TGATGACGAA  | 360.6473321996   | 0.188876408802891 |
| ATGACATAAT  | 361.083204143133 | 0.300656820512451 |
| TGAGTGACTC  | 361.198743767499 | 0.473281779012041 |
| TAGTCACATT  | 361.600162827378 | 0.210215709048134 |
| ATATCAGTCA  | 361.66574085265  | 0.178419962876488 |
| GGATGTGTCA  | 361.757964553816 | 0.157838546628679 |
| TCATGACGCA  | 361.848614204939 | 0.455848509400565 |
| AGCGTGACTC  | 361.976790578553 | 0.279908543503159 |
| TATGACGATT  | 362.243912775432 | 0.367119144730584 |
| TTGTGTCA    | 362.27256932722  | 0.672758337650561 |
| GGGTGACTGA  | 362.298186086986 | 0.167000745615293 |
| GATGACGTAG  | 362.417977551245 | 0.148314240117292 |
| CGTGTGTAC   | 362.466934099615 | 0.3621884481987   |
| AACAGTCACT  | 362.616271902445 | 0.149765287507715 |
| ACGTGACTCT  | 362.724033062735 | 0.125611326188281 |
| GATGATTACAG | 363.150259799284 | 0.221994373190334 |
| CTGACTAAGA  | 363.473577192622 | 0.300136174835357 |
| GTGACATATC  | 363.996682740677 | 0.143464438508318 |
| AGCAGTCACA  | 364.36940288298  | 0.305461499519478 |
| TTATGACAAA  | 364.562573088174 | 0.229090359816061 |
| TACGTGACTC  | 364.666763359118 | 0.147605898745699 |
| ATATGACTTA  | 364.719512114982 | 0.190533463932364 |
| GTAGTACCG   | 364.824427291393 | 0.210928585809784 |
| AATGACTTAA  | 364.981921880133 | 0.233049460214273 |
| TAGTCACCAC  | 365.009322709906 | 0.20802897177813  |
| AAGTCATACA  | 365.168226668403 | 0.200823674328146 |
| AGTCATGACT  | 365.658450908259 | 0.698342279940769 |
| GATGACAGAT  | 365.723636736258 | 0.293109250942006 |
| CGATGACACT  | 365.880732449094 | 0.176440102361424 |
| ACGACTCACC  | 366.20736875519  | 0.164911643618258 |
| ATCTGTCACA  | 366.428570018792 | 0.197825272363533 |
| AATGACGTCA  | 366.550486148499 | 0.34815721981702  |
| TAGTCACATA  | 366.67899012726  | 0.182445705777878 |
| TAGTCACCAT  | 366.734955331285 | 0.270726998961904 |
| CAGTCATCGT  | 366.841454893554 | 0.516942840302718 |
| ATGACGCGTT  | 367.051733834745 | 0.428169864354467 |
| TAGTCATTGC  | 367.222298087945 | 0.296133372600435 |
| GATGAGTACA  | 367.261377029377 | 0.226997080108841 |
| GATGACACCT  | 367.788968843271 | 0.213121714335731 |
| AATCCGTCAC  | 368.130560113906 | 0.229199699737736 |
| ATGACTGCTA  | 368.519880071016 | 0.39395384177664  |
| GGATGACTAC  | 368.819078540304 | 0.142583688582725 |
| AGTCATCAAG  | 369.281984908592 | 0.386102735675701 |
| TGTTAGTCAA  | 369.318053122907 | 0.290977623562639 |
| AAGACTCAGA  | 369.374439813321 | 0.203814452477868 |
| AGTCATCGCG  | 369.437139738248 | 0.299496056365036 |
| GACTAGTCAC  | 369.439380126241 | 0.216194571292909 |
| TAGTGACTGA  | 369.55598900224  | 0.202124479885441 |
| AGTGACGTAT  | 369.585128564927 | 0.275527213960724 |
| TATGTGTCAA  | 369.936739752996 | 0.208570405508079 |
| AGTCATAAAT  | 370.286067003728 | 0.141453782509227 |
| AGGACTCATC  | 370.372019182705 | 0.142637313878443 |
| GATGACGATT  | 370.848155361232 | 0.12635260257776  |
| AACACGTCAG  | 371.271121511797 | 0.219238161814102 |

|            |                  |                    |
|------------|------------------|--------------------|
| AAACGTCATA | 371.62725046082  | 0.153660202189892  |
| ACTAGTCACC | 372.087412098416 | 0.252402593168343  |
| TTATGACTTA | 372.282145872486 | 0.216663279792066  |
| CCTATGACAC | 372.632846062361 | 0.139949490960015  |
| TATGACTTAC | 372.754306783699 | 0.213408931410314  |
| CTCTGACGCA | 372.760257056449 | 0.324300860702922  |
| ATAGTCATAT | 372.938630536815 | 0.295930918381358  |
| GACGACTCAC | 373.137929954474 | 0.216823895166008  |
| AGTCATAGCC | 373.348860245139 | 0.290804817796846  |
| TTATGACCAA | 373.546674973673 | 0.286877938271554  |
| ATGTGACGCA | 373.681972040775 | 0.328688107899862  |
| TAAGGGTCAT | 373.79666545275  | 0.252758274833724  |
| GAATGACGTA | 374.096016275981 | 0.193787878419531  |
| ATATGATTCA | 374.125970035459 | 0.258004657746473  |
| AGTCATCGAG | 374.198437552953 | 0.201004597654934  |
| AGTCATCATT | 374.463425921342 | 0.164602815885397  |
| GTGACTTATC | 374.742304854919 | 0.18296264530869   |
| TGATGACTTA | 374.760209869333 | 0.047146812767682  |
| GGATGACTAT | 374.892337505061 | 0.516680852299767  |
| GTAGACTCAC | 374.967874379855 | 0.198529285373504  |
| CGATGACAAA | 375.00475633843  | 0.259610518604529  |
| ATGACATAAC | 375.058738884896 | 0.238756843755892  |
| TGCAGTCACC | 375.110484783058 | 0.197839973743133  |
| GTAAGACTCA | 375.237572539882 | 0.183464256084766  |
| GATGACGCTT | 375.419866574087 | 0.176279559039966  |
| GCGTCATACA | 375.568503791794 | 0.0671736765817357 |
| CAGTCATCAC | 375.662364842628 | 0.132027691694419  |
| GGTGAGTAAA | 375.95839468866  | 0.182434972354443  |
| AATGACTGGC | 376.229918319706 | 0.205080267190015  |
| ATAGTGACTC | 376.271992874117 | 0.652558941507798  |
| AACAGTCAGA | 376.451468669573 | 0.250601400926335  |
| CAGTCACACT | 376.804673962885 | 0.235045434163152  |
| GATGACTATC | 377.16368688141  | 0.253676825193923  |
| ACGATGACAC | 377.219357037894 | 0.486652906431394  |
| AATACTCATA | 377.64679735031  | 0.211865840005436  |
| TAGTCATATC | 377.667896584723 | 0.347688938515787  |
| ACACGTCATG | 377.977847042079 | 0.229219700968785  |
| CCAGTCATAT | 378.343777479488 | 0.173505418192     |
| TTACAGTCAC | 378.364404343164 | 0.239919890108058  |
| TTATGACGAA | 378.81285323106  | 0.141229059264861  |
| CTGACTAAGT | 379.144295515    | 0.119585756953104  |
| CATGACACAG | 379.379856384226 | 0.277201497566559  |
| ACAGTCATTG | 379.607343908025 | 0.114025043808154  |
| TAGTCACCGA | 379.623506501748 | 0.272149403770731  |
| AGTCATCACA | 379.937781460087 | 0.101394722158051  |
| GATGACTTAC | 379.951648809505 | 0.155919769324581  |
| ATGACTGCTT | 380.043686951809 | 0.181052206259979  |
| AGTGACGTAA | 380.085715941319 | 0.129463437900507  |
| GAAGTGACTC | 380.194653298268 | 0.109933692555781  |
| GACTCATAAT | 380.304963966772 | 0.0756757036576978 |
| AATTGCTCAC | 380.327114492022 | 0.376796317059217  |
| AATGAGTACA | 380.75684262005  | 0.262861203240527  |
| TAGTCATGAC | 381.047765993311 | 0.210204361683074  |
| CAATAGTCAT | 381.644619218022 | 0.836904603352451  |



|             |                  |                    |
|-------------|------------------|--------------------|
| CACAGTCACA  | 381.66332161014  | 0.298132606272055  |
| CCATGACACA  | 382.131549490442 | 0.110932339715886  |
| TGATGATTCA  | 382.26833611186  | 0.351516557383201  |
| CTGACTGACA  | 382.295994204543 | 0.2301111108608633 |
| AGGTGAGTAA  | 382.338934195506 | 0.19843017921865   |
| TGTGACGTAA  | 382.536138923178 | 0.275149201398423  |
| AAGTCATCGT  | 382.717074336239 | 0.243009679155284  |
| AGAGTCATGA  | 382.727734077689 | 0.200936318420221  |
| TCACAGTCAT  | 382.768639933364 | 0.0606967299275908 |
| GTGAATCAGA  | 383.130256671132 | 0.165117540130391  |
| TGACTGAATT  | 383.691710239583 | 0.306477165021942  |
| ATGCGTCAAC  | 383.695536894187 | 0.580434003585658  |
| GTGACGCAGT  | 383.703263646091 | 0.459334027625717  |
| AGTCATAACC  | 383.783379258329 | 0.156378008492351  |
| TAGTGACGCA  | 384.004223376214 | 0.155136816726029  |
| ATGACTCGCA  | 384.027626245788 | 0.7351522039867    |
| CGATGACGTA  | 384.030082767191 | 0.372027488282527  |
| TATGACGAAG  | 384.148628129696 | 0.236491005165136  |
| CAGTGACGCA  | 384.28437345669  | 0.174508766014616  |
| ACACAGTCAC  | 384.345480042686 | 0.243831775633466  |
| AGAGTCACTC  | 384.35638866265  | 0.118214278208516  |
| CCATGACGCA  | 384.589940664457 | 0.363453040776449  |
| AGAGTCACTA  | 384.889310532356 | 0.0838777220722236 |
| CAGTCATAAA  | 385.064016846321 | 0.155460335958415  |
| AGTCATACGG  | 385.140330110862 | 0.168091877944183  |
| GGGAGTCACT  | 385.325749204262 | 0.383734306099422  |
| CAGTCATAAC  | 385.546749592412 | 0.705952833333461  |
| ATGACTTAAC  | 385.682173721972 | 0.289930725207362  |
| AGTCATACGC  | 385.712557176696 | 0.162423253814108  |
| ATGAATCAGC  | 386.058560044566 | 0.268327877980999  |
| ATCGTGACTC  | 386.111354445418 | 0.240036014989268  |
| AAGTGTCATG  | 386.393657626418 | 0.187946391710252  |
| ACGGAGTCAC  | 386.931397675808 | 0.317403372747981  |
| ATAGTCACAC  | 387.152328510333 | 0.161521103275543  |
| AGTCATCAGA  | 387.22607039706  | 0.313025828739579  |
| AGTCATCATA  | 387.551349817953 | 0.154223710522888  |
| TATGACCAAG  | 387.598801838875 | 0.203919552113692  |
| AAGAGTAATC  | 387.804787907945 | 0.244842951995946  |
| AGTGAGTAAAC | 387.898008202751 | 0.243570393855918  |
| GCAAGTCATAA | 388.734947410494 | 0.556149761787935  |
| AGCAGTCACC  | 388.737994927475 | 0.166315669163808  |
| TGACTGAATC  | 388.920941433899 | 0.198846249418358  |
| CTATGACATA  | 389.111889706663 | 0.180294717235071  |
| AAATGACTAC  | 389.131379947284 | 0.514351036505832  |
| TAGATGACTA  | 389.416136985736 | 0.19212716472905   |
| AACAGTCACC  | 389.625935575379 | 0.362112571749131  |
| GATGACTACC  | 389.710690773013 | 0.334396827328727  |
| CAGTCATACA  | 389.712508148279 | 0.597055661388728  |
| ATTACGTCAG  | 389.76439670625  | 0.27438266777247   |
| AAGTGACTCG  | 389.861480912986 | 0.206361633993413  |
| ATGTGTAATA  | 389.86929590855  | 0.191695154527993  |
| ACCAGTCACA  | 390.149526677045 | 0.329083156529927  |
| AGTTAGTCAA  | 390.41987774773  | 0.352791776056988  |
| GATGAGCCAT  | 390.516100341866 | 0.229007001720858  |

|            |                  |                    |
|------------|------------------|--------------------|
| CGACTCATCC | 390.688821689549 | 0.159205408147853  |
| TACTAGTCAC | 390.878986750082 | 0.185909997301167  |
| TCTAGTCACC | 390.974218843079 | 0.21226456304081   |
| GATGACTTAA | 390.992338057265 | 0.436672442415012  |
| CTGACTAAAA | 391.149697714103 | 0.234597833125845  |
| AAGTGACGCA | 391.419237251989 | 0.107744220401277  |
| CTATGACAGA | 391.717652374666 | 0.319180200411858  |
| CGACTCATCA | 391.803524696591 | 0.248780767908327  |
| GGATGACGTA | 391.86539344666  | 0.376067919410044  |
| TAAGCGTCAT | 391.984660317539 | 0.23586960836608   |
| TATGACCACA | 392.202035251422 | 0.212938258109692  |
| TCTGACGCAC | 392.271154771016 | 0.150372562972093  |
| CGATGACGAA | 392.615265176868 | 0.300106136778616  |
| GGGTGAGTAA | 393.029124082273 | 0.207967654371636  |
| TAATGAGTCG | 393.165060030382 | 0.0913774914496711 |
| CGTGACTCGC | 393.496546508373 | 0.189909596393861  |
| GAGGAGTCAG | 393.740587016321 | 0.146449673661348  |
| TCGACTCACA | 393.772625881463 | 0.381058186567627  |
| TGTGAGTAAG | 393.923114901975 | 0.115478206382532  |
| AGTCATGACA | 393.974916940293 | 0.658449948590722  |
| GATTGCTCAC | 394.127210323515 | 0.120758352107995  |
| GTGTAGTCAC | 394.269092819916 | 0.238414804257031  |
| CGAATGACTG | 394.364915505771 | 0.316408506386686  |
| GCAGTCATCC | 394.483999285076 | 0.315794064945368  |
| AAGCAGTCAC | 394.626582689856 | 0.176607393108069  |
| CGATGACCCA | 394.780142680231 | 0.374973681228112  |
| ACAGTCACCA | 395.317883258409 | 0.148056150798011  |
| GATGACTAGG | 396.105506697293 | 0.192579384825622  |
| GATGACGCTA | 396.156950624902 | 0.145901859923084  |
| GTGTCATAAC | 396.285710106236 | 0.118174907305693  |
| AGTCATAGTG | 396.287683399928 | 0.163348857466637  |
| TATAGTCATG | 396.388384377869 | 0.195489445289193  |
| GGGTGACGCA | 396.452026330939 | 0.329068259848738  |
| AAAATGACTG | 396.580749525185 | 0.212853421663688  |
| AGTCATTCTG | 396.687821607205 | 0.205136807790456  |
| CAGTCATCTT | 396.73877889774  | 0.253722637605123  |
| GTGACATATT | 397.138466719801 | 0.15232714566221   |
| TAGTCATGCA | 397.200910029202 | 0.140493455387689  |
| TGATGACGTA | 397.357137706718 | 0.155697264295883  |
| GAGTCACCCG | 397.779609895711 | 0.416309151366812  |
| AGTCATATTC | 397.876456577333 | 0.134551893386013  |
| CAGCGTCATA | 398.080716242214 | 0.177443450717569  |
| ACGAGTCAGC | 398.46954406893  | 0.1177676663538    |
| AGAATGACGC | 398.65875851573  | 0.188431820409999  |
| AGTCATCGAC | 398.666157043059 | 0.417412775480097  |
| ATATGACGTG | 398.68937187139  | 0.177455477449249  |
| ATGTGTCAGT | 399.051812356514 | 0.70220112849045   |
| ATTACTAATT | 399.222540605824 | 0.340304322788547  |
| GCTATGACAC | 399.369806227923 | 0.273846555473179  |
| TGTGAGTCA  | 399.67666315239  | 0.221803210994267  |
| GATGACGAAA | 399.812945967942 | 0.157171371812802  |
| GTTAGTCAAC | 399.910899512348 | 0.423988509917829  |
| ATGTGAGTAA | 400.092054682122 | 0.279687768545943  |
| AAGTCATACC | 400.409136712222 | 0.186620267574983  |

|             |                  |                    |
|-------------|------------------|--------------------|
| AGTGACTCGC  | 400.571459076495 | 0.626820094193507  |
| GATGACGCGT  | 400.57475342503  | 0.253847105091798  |
| ATGACGGAAC  | 400.590909794105 | 0.312373292435768  |
| ATTAGAGTCA  | 400.819845891563 | 1.06626196647262   |
| TAGTCATTGA  | 400.973281759606 | 0.396219117950691  |
| GACTCATCGG  | 401.021274450567 | 0.217506766575828  |
| AGTCATCACG  | 401.222797920332 | 0.239626254392125  |
| TAATACTCAT  | 401.328435566813 | 0.206893059217798  |
| GATGACACGT  | 401.465139189159 | 0.486010292058686  |
| GACTCATCCT  | 401.967131563191 | 0.0895710564199502 |
| AGAGTCACTG  | 402.000315313211 | 0.159459936115272  |
| AGTCATCAAT  | 402.441296584053 | 0.642595956544337  |
| GACTCATCAT  | 402.622562031324 | 0.343940677726172  |
| ACGTGACGCA  | 402.838052165135 | 0.291043681988714  |
| AGGTGACACA  | 403.329395798651 | 0.237177301375904  |
| ACAGAGTCAC  | 403.370988507865 | 0.265734993715036  |
| TCTAGTCACA  | 403.637324235193 | 0.187318984559477  |
| CGACTCATCT  | 403.719408980497 | 0.215970099981188  |
| GTATGACAAC  | 404.164325727103 | 0.176097024529524  |
| TATCAGTCAA  | 404.278647922097 | 0.190618865552741  |
| AGTCATAGCG  | 404.57687164957  | 0.231833148532869  |
| TAGTCATGCT  | 404.611216858981 | 0.226261922633001  |
| TATGACATAC  | 404.678176472507 | 0.239581973182123  |
| TAAGTGTCAC  | 404.970221799488 | 0.243570461844472  |
| TATGACAAAAG | 405.271304741783 | 0.19794131415506   |
| GATGACCAAA  | 405.305356120772 | 0.257274372267829  |
| CTATGCGTCA  | 405.563315976227 | 0.237038500356403  |
| AGTAGTCACT  | 405.585395723462 | 0.183377929191134  |
| GACTCATACA  | 405.616822064859 | 0.284424984713218  |
| CGATGACGCT  | 405.6736580311   | 0.184782033999365  |
| TGTGACTTAA  | 405.801687679779 | 0.133791640760548  |
| GTCTGACGCA  | 406.111842748506 | 0.484254801664488  |
| AATGACTCCG  | 406.224341277799 | 0.738243097049917  |
| TATGACGTGA  | 406.609827114608 | 0.140867042029986  |
| TATGACACGA  | 406.707516815816 | 0.221224053719149  |
| GAGTCAGAGT  | 407.071254612063 | 0.304335367379732  |
| CAAGTGACTC  | 407.107207945514 | 0.352777587844032  |
| AATGACGAAA  | 407.205237885777 | 0.117655676135143  |
| GTGTCATACC  | 407.252093386378 | 0.172358014723451  |
| GATGACGAAG  | 407.692811189944 | 0.306353013942012  |
| CGATGACGCG  | 407.991463776283 | 0.189921154204785  |
| AAGAGTAATA  | 408.281296614885 | 0.196274952583348  |
| ACATGACGCA  | 408.341992621791 | 0.54371122443013   |
| AGTCATCACT  | 408.974585054424 | 1.06472514368439   |
| CCCAGTCATA  | 409.265413610288 | 0.183330187939222  |
| CGTAGAGTCA  | 409.332463426757 | 0.23658736858531   |
| ATGACTAGGA  | 409.730523191412 | 1.01144176862353   |
| CAATGCGTCA  | 409.776157515948 | 0.365681046053878  |
| ATAGTCATGC  | 409.803293404649 | 0.587584471147454  |
| AAAATGAGTC  | 409.866836043439 | 0.170790365654587  |
| GAGTGAGTAA  | 409.954485148713 | 0.225224235550599  |
| ATGACGCCAC  | 410.077457629211 | 0.412322922479715  |
| AGTCATAAGA  | 410.631941019605 | 0.257328427262426  |
| GAGTCAGACC  | 410.662612438031 | 0.241341076591106  |

|            |                  |                    |
|------------|------------------|--------------------|
| GAGTCAGAGA | 411.104331178133 | 0.488569092348114  |
| TATGACCCAA | 411.577960134783 | 0.147685964538967  |
| AAATGACGTA | 411.727149295478 | 0.19086327361903   |
| TATGACAAAA | 412.029045254972 | 0.122633608049013  |
| AATGACGTGG | 412.189804667305 | 0.294162599228657  |
| GAGTCAGAGC | 412.340522696698 | 0.220240467362026  |
| ATGAGTAAGT | 412.360774136973 | 0.260892852058266  |
| ACGTGACTGA | 412.472731372527 | 0.318468498093955  |
| GTATGAATCA | 412.62626699916  | 0.29726228045678   |
| GAGTCAGACA | 413.483226138252 | 0.379919396434935  |
| AATGAGCCAT | 413.737075696227 | 0.214531968376397  |
| AGTCATATAC | 413.837801661268 | 0.246085699739506  |
| AGTGACGCAA | 414.046151540663 | 0.358603507016983  |
| ATGACTACAG | 414.192105901726 | 0.319684358796971  |
| ATGACTACTC | 414.214558820451 | 0.205552201928477  |
| TAGTCATTAA | 414.257825362471 | 0.212495033254804  |
| CCCATGACTC | 414.341780031392 | 0.318754723386288  |
| CAGTGACTGA | 414.719310636797 | 0.475144752584537  |
| TATGACGATA | 414.747963475915 | 0.162400818055294  |
| CGGTGTCATA | 414.772399191304 | 0.255529009934214  |
| CAGTCATCAG | 415.313989818196 | 0.174688073797684  |
| ATCCGTCATT | 415.479528070549 | 0.364617475795928  |
| ATGACTGCAC | 415.490905312502 | 0.25919184918351   |
| AGATGACTAG | 415.819409416781 | 0.445809575320675  |
| AGTCATCAGT | 416.04149793419  | 0.233999989585128  |
| TAGTCATTAT | 416.118136891064 | 0.172814872658217  |
| GACTCATCGA | 416.689148568139 | 0.166127016723556  |
| GAGTGACTCC | 416.835496067806 | 0.473565311064526  |
| GTGACATATA | 416.966665605688 | 0.174372199410846  |
| GAAGTGTCAC | 417.021555112428 | 0.155209149574848  |
| GCGGAGTCAC | 417.605756748921 | 0.215474788654571  |
| AGTCATAAAC | 417.7837252613   | 0.251703694511262  |
| TATGACAACA | 417.896231511726 | 0.288432579216415  |
| GTGTGATTCA | 417.944279243186 | 0.179098642810689  |
| GATGACTTAG | 418.062220194193 | 0.215948086138975  |
| ATGACGGAAA | 418.218952292745 | 0.216523422113518  |
| CAGTCACACA | 418.551537591209 | 0.232955727497735  |
| TCGATGACAC | 418.644872488666 | 0.173092065284005  |
| AATCGAGTCA | 418.894054125366 | 0.20571404970208   |
| TGGAGTCACT | 419.269769585662 | 0.263001470720273  |
| AAATGACTGG | 419.31547895641  | 0.21624895019356   |
| AGTCATATAT | 419.405434977032 | 0.506956276663175  |
| TACCAGTCAC | 419.539053997961 | 0.125815276738633  |
| TATGACGAAC | 419.699715903453 | 0.340938943494943  |
| TCATAGTCAC | 419.929884901987 | 0.293950086395028  |
| ACAGTCACAA | 420.194690449228 | 0.245091992324509  |
| GGCCACGTCA | 420.351111578001 | 0.222690343198127  |
| CATGACCAAT | 420.98558755614  | 0.263291661617774  |
| CGAGTCACCT | 421.174943833463 | 0.233991111416125  |
| AGTCATAGTA | 421.500287180415 | 0.204239817958622  |
| AGTCATTGTC | 421.763446178084 | 0.0831335195239352 |
| CTGACTGACT | 421.955169168788 | 0.250992598689688  |
| AGTCATATCT | 422.033337107616 | 0.283624364388943  |
| TAAGACTCAG | 422.49285688835  | 0.0630556695640576 |

|            |                  |                    |
|------------|------------------|--------------------|
| CGTCGAGTCA | 422.58683207175  | 0.187758110575872  |
| TGATGACGTG | 422.738934260137 | 0.201712871755092  |
| CAAGATGACT | 423.079293095547 | 0.265976813282973  |
| GACTCATCGC | 423.337413126133 | 0.149602837594639  |
| TGATGACTGG | 423.760319821891 | 0.165147825200111  |
| TAGTGAGTAA | 423.92832429277  | 0.229097726174907  |
| GTAGTCACCA | 424.017834770518 | 0.426339659762938  |
| CGATGACTGG | 424.334211488953 | 0.717876197770162  |
| CCGACTCATA | 424.335180677358 | 0.11382515991551   |
| ATCCGTCACA | 424.485712601365 | 0.184488598794058  |
| AACAGTCATG | 424.558920494676 | 0.553887504038267  |
| AAATGATTCA | 424.886598566413 | 0.230914341047733  |
| AAAGCGTCAT | 425.203558933679 | 0.150693248823238  |
| AGTGTCATAA | 425.283588885608 | 0.164004751236334  |
| GTGAGTAAGA | 425.429931943771 | 0.133580992961763  |
| CGATGACCAA | 425.603156261188 | 0.237652216845982  |
| AATGACAGAT | 426.495415634312 | 0.451111384612711  |
| TGATGACGCT | 426.641226489069 | 0.0634995400039012 |
| CCGCGTCATA | 427.148171645525 | 0.221654876280321  |
| GACTCATCCA | 427.285678965352 | 0.211696055893878  |
| ACGTGACTCC | 427.488358827953 | 0.527518335569346  |
| AGTGAGTAAG | 427.934178289381 | 0.205445862338196  |
| GTGACGCAGC | 428.618561136562 | 0.377433183470774  |
| CGTGACTTAT | 428.817597196682 | 0.13761647984475   |
| AGTCATCATG | 429.030560119418 | 0.149097407690806  |
| GAGTCACCTC | 429.163586007449 | 0.601032735122918  |
| AGTGTCATCA | 429.284903272407 | 0.100600130225537  |
| CTCTTAGTCA | 429.377896691343 | 0.276054190616056  |
| GTAGGAGTCA | 429.539223606029 | 0.168747856101864  |
| ATGACTAGAC | 429.666930590738 | 0.146394844415416  |
| TGAGTGACTA | 429.780678414916 | 0.146388580483067  |
| TTATGACATA | 429.925262384475 | 0.284176677023649  |
| GTAGTCATGC | 430.101113054039 | 0.413932099989411  |
| ACAGTCACAT | 430.165822466854 | 0.269103928342567  |
| ATGACTCGCG | 430.801461315101 | 0.575489098108728  |
| GTGAATCAGC | 431.042601825703 | 0.156914056188399  |
| TGACATGACT | 431.205058351291 | 0.096253784272519  |
| GATGACATAA | 431.429964484874 | 0.130504981683146  |
| GCCAGTCATA | 432.106992070601 | 0.49606376065024   |
| GAATGACTAT | 432.35128473571  | 0.22868814988948   |
| ATGTGTAATC | 432.382892455917 | 0.160704118181747  |
| GATGACCGAT | 432.572452457888 | 0.343961866229723  |
| ATCGAGTCAG | 433.155069351756 | 0.237719613031385  |
| GAGTCACTGT | 433.169660077221 | 0.295829582000427  |
| TACAGTCACC | 433.305113421267 | 0.21447873583976   |
| AATATGACAC | 433.316656625117 | 0.319043460592183  |
| ATATGACCAA | 433.389596076382 | 0.305286175499782  |
| TGATGACACG | 433.432009107234 | 0.0781412343457521 |
| CTGTGTCACA | 433.439029629359 | 0.262369278896425  |
| GATCTGTAC  | 433.60631673349  | 0.332902521924509  |
| TCACAGTCAC | 433.728419361503 | 0.227092212051217  |
| GCGCGTCATA | 433.770489325366 | 0.0703277729103236 |
| GGATGATTCA | 434.390802733153 | 0.0881404628535482 |
| GATCGAGTCA | 434.638935031475 | 0.158495587130844  |

|            |                  |                    |
|------------|------------------|--------------------|
| AGTCATTATA | 434.748403312102 | 0.588152436930416  |
| GACATGTCAT | 434.752822523154 | 0.171375453661913  |
| CGTGATTCAC | 434.995970757461 | 0.467588924379204  |
| TAGTATGACA | 435.032289945286 | 0.227298512821995  |
| CTGACTGAAC | 435.186692176895 | 0.148379847961093  |
| AACATGTCAT | 436.500614005499 | 0.191341920523325  |
| TGCTGACTCC | 436.703834434263 | 0.0709563020361752 |
| AATGACACAA | 436.718490894336 | 0.4953949097831    |
| AGTCATAAGT | 436.722767831057 | 0.179465855652003  |
| ACACGTCACC | 436.91392704914  | 0.173585146517508  |
| TGATGACAAA | 437.009933140536 | 0.162684267979586  |
| AATGACGCGT | 437.114177175526 | 0.0834629329981674 |
| GACTTAGTCA | 437.189055679175 | 0.218375991299977  |
| ACATGACACA | 437.750497344489 | 0.113616226261097  |
| GATGACCAAC | 437.890801253805 | 0.218026800267422  |
| CGAGTCACCG | 438.122044699214 | 0.499896652597213  |
| AATGAGCAAT | 438.160382906085 | 0.268419465411964  |
| TCTATGACAC | 438.236578747417 | 0.159673467973998  |
| CTATGAATCA | 438.354028202367 | 0.277478716413386  |
| GATGACATCA | 438.579698472385 | 0.240311117237286  |
| TGAATGAGTC | 439.25836195325  | 0.270754226534189  |
| AGTCATAAGC | 439.656140274445 | 0.172899013507851  |
| CTGTGAGTAA | 439.940384014527 | 0.156763523129511  |
| TAGTGTCATC | 440.145867054348 | 0.255247632292818  |
| AGATGACGTG | 440.373924354448 | 0.166304515113145  |
| AAGTCATAAC | 440.63953845093  | 0.156262754823896  |
| GACATGACTA | 440.6687011914   | 0.582618174087491  |
| ATGAGTAAGC | 440.838893361517 | 0.301576911188734  |
| TCTGACGCAA | 441.549491520508 | 0.240681745141944  |
| CCGAGTCACA | 441.571992695328 | 0.527595991420363  |
| ACTATGACAA | 441.577958409951 | 0.341988221446331  |
| AAATGACGCG | 441.585286210619 | 0.17107621205431   |
| GTGACGCACG | 441.665035433497 | 0.400144066398616  |
| GCTGACTGAC | 441.878699027156 | 0.177011149077851  |
| GGAGTCAGAA | 442.007847916459 | 0.179137794739527  |
| CCGTGACTCG | 442.083972219356 | 0.218490700898355  |
| TAATGACGTA | 442.233824491124 | 0.218244375175888  |
| AATGACAAAT | 442.646539702023 | 0.339239251524455  |
| GAATGATTCA | 443.06590678477  | 0.32791421600597   |
| CAGTCATCTA | 443.256912370216 | 0.298965084750133  |
| ATCACTCATA | 443.411433368412 | 0.186245249949847  |
| CTCTGACACA | 443.541830367953 | 0.346257790943469  |
| GATTACGTCA | 443.780462465577 | 0.389800572665078  |
| TATGACAGAC | 443.837679536791 | 0.112611355535758  |
| AGTCATATTA | 444.09027356938  | 0.207662606890698  |
| CAATGAGTCG | 445.103192949034 | 0.189818553856883  |
| AAGTCATCGA | 445.196560401965 | 0.302518436481318  |
| GCGTGACACA | 445.208056635599 | 0.18838381568562   |
| GAAATGACTG | 445.270802406306 | 0.122410809094522  |
| AATCACTCAT | 445.329435976779 | 0.171260137525399  |
| GGCATGACTC | 445.599695997978 | 0.361343620627877  |
| TGGACTCATA | 445.838802770833 | 0.157110519842202  |
| ATGACTAGAT | 446.542010333565 | 0.16671091344958   |
| ACACGTCACA | 446.753255290111 | 0.181165774976362  |

|             |                  |                    |
|-------------|------------------|--------------------|
| CGCCACGTCA  | 446.890526609519 | 0.114721550574688  |
| GATAGAGTCA  | 447.120870857912 | 0.222414043555384  |
| GCGTGACTCT  | 447.487593266077 | 0.312113735473278  |
| CAGTCATTGT  | 447.865309068171 | 0.307804466609208  |
| CGATGACATA  | 448.078262069103 | 0.231507482622809  |
| GGAATGACTG  | 448.245728271961 | 0.117542882477812  |
| TAAGTGACTC  | 448.379028330017 | 0.227024236661551  |
| AGTGACACAG  | 448.459165480988 | 0.133991874962043  |
| CTATGACGGA  | 448.490698095346 | 0.26329975092942   |
| GAGAGTCACT  | 448.615591502499 | 0.401734577899218  |
| TTATGACGTG  | 449.217120400844 | 0.135424670219009  |
| AGTCATATCA  | 449.234736067317 | 0.316036443742814  |
| GAATGACGAA  | 449.538876092928 | 0.146283121875372  |
| CGATGACACC  | 449.566074623191 | 0.400349784656706  |
| ATTCGTCACC  | 449.578501337532 | 0.188482789843022  |
| AAATAGTCAG  | 449.628142080847 | 0.212684798369222  |
| GTTTCGAGTCA | 449.720706112652 | 0.203843900548261  |
| AGACTCATCC  | 449.732052417894 | 0.167870499308984  |
| AGATGCGTCA  | 449.994927725363 | 0.17937048687073   |
| TTAAGACTCA  | 450.171679753224 | 0.215799035076251  |
| ATATGACAAA  | 450.217615587223 | 0.231053645415289  |
| ATGACGGAAT  | 450.452166054223 | 0.219286731025424  |
| CAGTCATATC  | 451.039652476139 | 0.717322475427164  |
| GCAAGTCATCA | 451.379844177236 | 0.0668232412941802 |
| GTGTGACTTA  | 451.515376596598 | 0.220110066027758  |
| CTGACACACC  | 451.571780742697 | 0.31515438087842   |
| TTTAGAGTCA  | 451.595782769355 | 0.270363228723671  |
| ACGTCATACT  | 451.832395283839 | 0.183649549810449  |
| CTTCGAGTCA  | 452.277740009955 | 0.153020136269311  |
| TAGCAGTCAC  | 452.375747484042 | 0.268265772409221  |
| GGATGACACC  | 452.460656744838 | 0.132959252141398  |
| CGGTGACTAT  | 452.53444224667  | 0.489287078624624  |
| CAATGACTAC  | 452.817966688218 | 0.380639337139428  |
| GATCCGTCAC  | 453.002557009707 | 0.16581154219365   |
| TAATGCGTCA  | 453.177277565768 | 0.197538803924322  |
| ATTGCTCACA  | 453.475870785511 | 0.429188919473846  |
| GGTGACTATG  | 453.480833954492 | 0.215910335940121  |
| CAGTCATAGA  | 453.483211343264 | 0.48430778260902   |
| CTGAGTCAAG  | 453.80958747402  | 0.417511619015459  |
| GGTAGAGTCA  | 454.142035216025 | 0.0785619377162803 |
| AATGACATAT  | 454.158174372075 | 0.455505455346908  |
| CGAATGAGTC  | 454.210142224497 | 0.446777726676001  |
| ACGTCATATC  | 454.384748526849 | 0.70236247327251   |
| ACCTAGTCAC  | 454.642971297369 | 0.184763045034644  |
| TTGTGAGTAA  | 454.649191723827 | 0.129404709552687  |
| ATTCGTCAGA  | 454.776966809072 | 0.156038149150195  |
| GATGACGCGG  | 455.109738532999 | 0.183282568742022  |
| GCGTGACTGA  | 455.771575027166 | 0.402224533931904  |
| CTATCAGTCA  | 455.938326358355 | 0.272923663346251  |
| TCGTGACTCT  | 456.281895481621 | 0.411308118878166  |
| AGTGTATAT   | 456.342981282381 | 0.286795062627327  |
| GATGACGCGA  | 456.406235892069 | 0.194342072968898  |
| TATGGCTCAC  | 456.445693954935 | 0.299224880756688  |
| ATGTATGACA  | 456.62495204402  | 0.273248628305151  |

|            |                  |                    |
|------------|------------------|--------------------|
| CACGTGACTC | 456.657000937519 | 0.379999619072211  |
| TATAGTCACT | 456.731010195902 | 0.225361716385174  |
| AAGTGAGTAA | 456.826963985427 | 0.169510048803738  |
| AGTCATAAAA | 456.947059013235 | 0.288134435971124  |
| AAGTCATAGG | 457.425950477164 | 0.0934323864987452 |
| CAGTGAGTAA | 458.393365036757 | 0.205522916036705  |
| CTAGTCATGC | 458.487170673989 | 0.15492619721862   |
| AGTCATCGGG | 458.830930332079 | 0.449952396554995  |
| AAAACAGTCA | 459.211189413383 | 0.212899148138809  |
| ATGATGACAC | 459.434108161596 | 0.163641377075218  |
| GTTAGTCAAT | 459.697450209702 | 0.404429013275496  |
| AGTCACAATA | 460.370760900661 | 0.281897153931418  |
| GAATGACTGC | 460.782189350521 | 0.30187749925191   |
| GATGACACCG | 461.071714431667 | 0.226223974032365  |
| TGTAGTCACT | 461.24276640857  | 0.146528132303004  |
| TACGAGTCAG | 461.538547433095 | 0.192887965211791  |
| TCGTGACTCG | 461.59086524046  | 0.345072738995347  |
| GGATGACAAA | 461.800464368421 | 0.140579074052769  |
| TGATGACCAA | 462.231894400524 | 0.31947295331802   |
| TGTAGAGTCA | 462.391640380134 | 0.0899600252816833 |
| CTTGACTCAA | 462.800137927012 | 0.281561062076537  |
| AGTCATATAA | 463.033209420113 | 0.117880065652382  |
| TATCCGTCAT | 463.147424706866 | 0.246411236269258  |
| ATGACTTAAA | 463.573784796213 | 0.220647584607518  |
| AAGCGTCATT | 463.590322668115 | 0.251257422897146  |
| TGAATGACTG | 463.771827923783 | 0.282360019369758  |
| ATGACTGCTC | 463.940810893404 | 0.191016275589644  |
| ATGAGTAACG | 464.34762947805  | 0.565328781362136  |
| GGATGACGAA | 464.433866720195 | 0.223374090208741  |
| TAAATGAGTC | 464.507480124506 | 0.203268679514273  |
| ATTACTCAGT | 464.814256116082 | 0.111689551959735  |
| AAGTCATACG | 465.203372468754 | 0.230889602170602  |
| GATGACAACA | 465.287407186885 | 0.168839213906704  |
| ACGTGACACA | 465.298746821869 | 0.365922158335278  |
| AGTCATCAGG | 465.419727685722 | 0.300037271434954  |
| GATGACAAAG | 465.636480018336 | 0.153409172532457  |
| GTATGACGAT | 465.678577237989 | 0.136292092742645  |
| TTAAATGACT | 466.014214597507 | 0.288607097566247  |
| GTGCAGTCAC | 466.295632448846 | 0.300061584138961  |
| GTGTCATAAA | 466.584917641285 | 0.255196504214165  |
| AGTGTCATCC | 466.844341422699 | 0.175073672687259  |
| GATGACAAAC | 466.8927435551   | 0.158048969643284  |
| AGAGTGACTA | 467.319838218595 | 0.201335912665718  |
| TTGATGACAC | 467.702037120225 | 0.241791637481127  |
| GTAGTCATTA | 467.921338557922 | 0.186951911323769  |
| CAGTCATCGC | 468.258781785186 | 0.197353765516334  |
| ATATGCGTCA | 468.369153692487 | 0.295144682025026  |
| GGTGACAAAT | 468.398106114784 | 0.329864065893516  |
| AACGTGTCAC | 468.451543727433 | 0.200460320243666  |
| GGAATGAGTC | 468.85102947053  | 0.258305525476366  |
| GAAAATGACT | 469.237223176627 | 0.147773959172551  |
| AGAGAGTCAC | 469.807001019053 | 0.220972682094791  |
| GATATGACAC | 469.996532557668 | 0.270675484605013  |
| CGATGACAGA | 470.330465030167 | 0.207774600078006  |



|            |                  |                    |
|------------|------------------|--------------------|
| AATGACTTAG | 470.410334972417 | 0.0987996194113331 |
| CAGTCATGAC | 470.42800512558  | 0.0941468916807918 |
| GTCTGACTGA | 470.522207342135 | 0.194706057780135  |
| GGACACGTCA | 470.843228537255 | 0.290592422022022  |
| ATGACTGCAG | 471.227112575761 | 0.174890009841552  |
| ACGTGACTCG | 471.799871544777 | 0.450132072249702  |
| GAGTCAGAAT | 472.571265121602 | 0.264601140687331  |
| ATCCGTCACC | 472.677372231018 | 0.193134246489051  |
| GCGTCATACC | 472.93846584963  | 0.263007514645903  |
| AATGAGTAAA | 473.780340040526 | 0.683450587255158  |
| TAACGTCATA | 473.85264851782  | 0.158544585951074  |
| GAATGACGCG | 473.941701578568 | 0.185370481813838  |
| GCAGTCATAG | 473.968242519056 | 0.459825216639266  |
| GAAATGAGTC | 474.174918685215 | 0.177753549041343  |
| GCAGTCATCT | 474.38497364424  | 0.0779844918449545 |
| GAGTCAGAGG | 474.506329666628 | 0.214475253921987  |
| ATGAGCAAAT | 474.52783274383  | 0.277021539758985  |
| TATGACATAG | 474.659128840574 | 0.197426851978581  |
| ACAGTCAGAG | 474.681093864248 | 0.293906900107099  |
| AGTGACTTAT | 474.960146631696 | 0.344476461833629  |
| GAATAGTCAG | 475.099171036981 | 0.247904960532716  |
| GGTGACATAT | 475.281474328953 | 0.19045008339226   |
| AATGACACGT | 475.858266898164 | 0.159356331299014  |
| TTAATAGTCA | 475.999361602205 | 0.245040566673123  |
| ACGTGTCACC | 476.249867521908 | 0.200410663122099  |
| GAGTGACACA | 476.775496415795 | 0.331985962868063  |
| ATGACGAAAA | 476.784034123271 | 0.643053534618617  |
| AAATACTCAT | 476.98381198025  | 0.257360285533746  |
| GTGTGCGTCA | 477.107260680455 | 0.224241553142537  |
| GTATGACCCA | 477.114387970289 | 0.317221489689489  |
| ATGACCGATT | 477.433751046173 | 0.296797349428742  |
| TGACTAAACC | 478.140714804276 | 0.143700978895113  |
| AGTCATAAGG | 478.351273206259 | 0.106592100124134  |
| ACGTGTCACA | 478.456620211378 | 0.325677763030533  |
| TAAGATGACT | 478.506067011732 | 0.24038781487426   |
| TCAATGAGTC | 478.720387650067 | 0.417439372833209  |
| CTAATAGTCA | 479.013353453924 | 0.302242970954456  |
| GAATGAGTCC | 479.057124335622 | 0.277606513094538  |
| GCAATGAGTC | 479.157824234502 | 0.106670333238931  |
| GTATGACAGT | 479.369837271384 | 0.563341063653759  |
| AATGACTGGA | 479.390611463292 | 0.447741931997652  |
| CTAGTCACCG | 479.770046067834 | 0.771124899534333  |
| CATGACCCAT | 479.97900791161  | 0.244789009889136  |
| ATATACTCAT | 480.758326540457 | 0.201688720728806  |
| AGAATGACAC | 481.218556840744 | 0.10952999032467   |
| GACAGTCACC | 481.647195808529 | 0.359812624057776  |
| GATGACCACA | 482.087275093999 | 0.141622934833755  |
| GACTGACTAA | 482.486028109326 | 0.354788714386767  |
| TATTACGCAT | 482.819955258644 | 0.175818960674463  |
| GCGTCATAAC | 482.911220792335 | 0.25199278839277   |
| ATGACTCCAG | 482.957758204147 | 0.603999352751401  |
| AGATGACGAA | 483.119133650073 | 0.0907450547551331 |
| TGTGACGTAC | 483.391909321761 | 0.155392971175412  |
| TAGTCATTAG | 483.903407346521 | 0.13338394595914   |

|             |                  |                    |
|-------------|------------------|--------------------|
| CAATGACTGG  | 483.981656861156 | 0.237945268859919  |
| GGAGTCACTG  | 483.983368299562 | 0.554694834312396  |
| CGAGTCACCC  | 484.285342919883 | 0.25467113526684   |
| GTAGTCACAT  | 485.292551046426 | 0.373040358065681  |
| GTAGTGTCAT  | 485.309281498643 | 0.212788085385092  |
| TATGACTTCA  | 485.560556763744 | 0.240228979322721  |
| TATGACAACG  | 485.698651179028 | 0.261052354451673  |
| TGATGACGCG  | 485.806190101586 | 0.222968918659628  |
| GATGACAGAA  | 485.820880830935 | 0.212769031234882  |
| AAGTCATTAA  | 485.889633066936 | 0.123204357531325  |
| TTGTCATAAT  | 486.06490405027  | 0.161038271001388  |
| TATGACACGC  | 486.469952758874 | 0.357374013697159  |
| ACAGTCACAG  | 486.626367324238 | 0.266254700482736  |
| AAGTCATATG  | 487.077460684534 | 0.198452478062777  |
| TGGATGACAC  | 487.222432498248 | 0.124229125864957  |
| GTAGTGACTC  | 487.249965694381 | 0.692601316093449  |
| ACAGTCATGC  | 487.283962096512 | 0.193769078482328  |
| AAGTCATCAA  | 487.794215580195 | 0.26710520041683   |
| AAACGTCATC  | 487.86710960532  | 0.268643405626267  |
| GAGTCAGCGG  | 488.04085043424  | 1.02524322289156   |
| ATGACTACGA  | 488.163677434232 | 0.209144431794288  |
| AGTCATAGGG  | 488.253197763624 | 0.144103520997871  |
| AGAGTCAGAG  | 488.272001089525 | 0.0490765074530873 |
| GCATGACACA  | 488.429791722397 | 0.266643126288336  |
| GGGATGACTA  | 488.698545031046 | 0.256215351425302  |
| CAATGACGTA  | 488.933255921657 | 0.188730816579094  |
| AAGTAGTCAC  | 489.152046005867 | 0.16208113031523   |
| GCGACTCACC  | 489.162519957429 | 0.189998611307854  |
| TAGTCACATC  | 489.364079150592 | 0.332330751692784  |
| AATGACCCAC  | 489.691953577851 | 0.207674196831629  |
| GCATAGTCAC  | 489.804196207202 | 0.168136315461531  |
| ACGATGACGC  | 489.954840877544 | 0.260410444652679  |
| TCGTGACACA  | 490.026874945425 | 0.470023428683215  |
| AGGTATGACA  | 490.041502742481 | 0.17112267585993   |
| CTGTAGTCAC  | 490.27886440938  | 0.160468528229759  |
| AGACTCATAC  | 490.301212290357 | 0.29987259537375   |
| CGGTGATTCA  | 490.417391345332 | 0.183109170053848  |
| AGTCGAGTCA  | 490.445397130249 | 0.169813651619261  |
| TAGTCACCAA  | 490.522424497305 | 0.323931877675065  |
| ATAAATGACT  | 490.703352654344 | 0.21795026379394   |
| GACTCATATA  | 490.743431496282 | 0.140155667924144  |
| GACTCATCGT  | 490.990533819595 | 0.358384605542317  |
| TTATGACAGA  | 491.001134797609 | 0.442633149663884  |
| GTCTTAGTCA  | 491.024721575813 | 0.168319147466661  |
| CTATGACAAAC | 491.356807614984 | 0.15953910081719   |
| ATGAGCCACA  | 491.502652153699 | 0.111966251991593  |
| CTCGTGACTC  | 491.632061700592 | 0.420527853933672  |
| GACTCATCAG  | 491.983824015292 | 0.233926051375588  |
| TAGACTCACA  | 491.994272406222 | 0.176101213563612  |
| ACGTCATACA  | 492.186887303495 | 0.34507553355905   |
| AATGACATCA  | 492.190520871112 | 0.142851036649765  |
| ATTACGCATA  | 492.474840295147 | 0.20787875263069   |
| CCAATGAGTC  | 492.784065904489 | 0.23355848864605   |
| ATAGCGTCAT  | 492.879823210997 | 0.304624826515028  |

|            |                  |                    |
|------------|------------------|--------------------|
| GGATGACTGG | 492.930442399987 | 0.115076718586457  |
| CTATGACGAT | 493.063344337231 | 0.15617173317429   |
| AGTGTCATAG | 493.533168099651 | 0.197742109007575  |
| TATCTGTCAC | 493.655569704471 | 0.195496596975031  |
| TTATGACACG | 493.839149354257 | 0.179527489074767  |
| TAGTCATACG | 493.93369910803  | 0.730445266185896  |
| AACAGTCACG | 494.117928476441 | 0.218942241228332  |
| TGGACTCATC | 494.218051038124 | 0.143465775527602  |
| CGATGACGTG | 494.236711984535 | 0.148336066100232  |
| GGATGACTTA | 494.451164541807 | 0.383836386381241  |
| TGTGACATAT | 494.531214486599 | 0.383157807564355  |
| GATGATTCAA | 494.560141495105 | 0.206559441247231  |
| TAGTCATTAC | 494.925945760549 | 0.25084176524964   |
| AGAGAGTCAT | 494.928745798673 | 0.452920940286706  |
| GATGACGTGA | 495.342823904582 | 0.191423803112668  |
| ATGGCTCACC | 495.733280967259 | 0.184916836866515  |
| GGACTCATAA | 495.772903797575 | 0.125722070505235  |
| GGTCGAGTCA | 496.100995815906 | 0.118824862838292  |
| GTCGTGACTC | 496.123254978047 | 0.283514810870353  |
| AGTCACATTA | 496.218793247839 | 0.322105563384136  |
| GAGTCAGCGA | 496.222768986847 | 0.158831351893576  |
| GTGACCCACC | 496.257101040655 | 0.219372970356465  |
| GAATGACACC | 496.373972264986 | 0.171507076081729  |
| TATGATTCAA | 496.413689646628 | 0.176456760633376  |
| AAATGACGAA | 496.866305492649 | 0.115969489221901  |
| GTAGTCACCT | 497.457545333382 | 0.237230837751121  |
| GGCGTCATAT | 497.485038034707 | 0.160842274028245  |
| GATGACATAC | 497.744109404112 | 0.136154988701512  |
| ATAGTCACCA | 498.001799536072 | 0.297734236139344  |
| GGTGACGTAC | 498.352066773323 | 0.232575956036929  |
| GACTCATAGA | 498.380242164172 | 0.112711974598489  |
| GACTCATATT | 498.688476089446 | 0.329755313161904  |
| CATGAGTAAA | 498.737044692162 | 0.122663198838941  |
| ATAGTCATTG | 498.84521247293  | 0.296843948021812  |
| TGAATGACAC | 499.821649181492 | 0.0611750518490411 |
| ACCTGACTAA | 500.326680073923 | 0.347576486076187  |
| AAATGAGTCT | 500.370377660343 | 0.180136795271183  |
| GCATGAGTAA | 500.947843112886 | 0.239702081762733  |
| TTATGACGGA | 500.957900583381 | 0.260260188230895  |
| GATGAATCAG | 501.187065327435 | 0.279129781832692  |
| GTATGAGTAC | 501.188787557111 | 0.126331059552535  |
| ATTACTCAGC | 501.561585855111 | 0.153386554072769  |
| GACACGTAAT | 501.731131525194 | 0.228382405765004  |
| AACGAGTCAG | 501.749172911128 | 0.191009565657605  |
| TCTGACACAA | 501.944732620163 | 0.216867459261995  |
| TGATGAGTAC | 502.082446643286 | 0.162898391660415  |
| GAGTCACTGG | 502.352658948104 | 0.208652192849883  |
| CTGACTAAGC | 502.697726377186 | 0.271681585815116  |
| TGAATGACGC | 502.743178111458 | 0.14071435674983   |
| AAGTCATCCG | 502.780843912051 | 0.167225554711223  |
| TTGACTAAAC | 502.975605746656 | 0.202885091393211  |
| CAGTCATCTC | 502.990989554766 | 0.340941832405089  |
| GTATGACCAC | 503.575735964814 | 0.241638086576976  |
| CGAGAGTCAC | 503.604887861586 | 0.391145376236358  |

|             |                  |                    |
|-------------|------------------|--------------------|
| TAGTCACAAT  | 503.697617999423 | 0.308511544809989  |
| GGTATGACAA  | 504.00361133545  | 0.120148221081416  |
| ATGATGACGC  | 504.042852724254 | 0.166283496696804  |
| GTGTGACGTA  | 504.110520979743 | 0.165790268673128  |
| CCATGTCATA  | 504.113301281413 | 0.268416155388669  |
| CAGTCATTAA  | 504.134587677813 | 0.358998700649639  |
| GGATGACCAA  | 504.366019327878 | 0.121812738322449  |
| AATGACACCA  | 504.382710164557 | 0.194450876488462  |
| GAAACAGTCA  | 504.481704464089 | 0.311903372380883  |
| GATGACGCCA  | 504.588385930558 | 0.311394303242545  |
| TCATGAGTAA  | 504.863618719081 | 0.240313091955841  |
| CAAAATGACT  | 505.296623746078 | 0.230167777364646  |
| ACTGACTGAC  | 505.472080879312 | 0.218964039293225  |
| AGAGTCAGAC  | 505.821085829016 | 0.220598868711941  |
| GGACTCATAG  | 505.948107242271 | 0.402738595598504  |
| AATAGAGTCA  | 506.129191570195 | 0.272024723730635  |
| TGGAGTCAGA  | 506.367954036887 | 0.277741944323419  |
| GACGAGTCAG  | 506.670150027031 | 0.270574127645143  |
| CGAGTCAGAA  | 506.865049113102 | 0.191714177692383  |
| AGGATGACAC  | 507.022637040654 | 0.263429676727461  |
| AACTATGACA  | 507.323321255718 | 0.109704950440766  |
| CACAGTCAAC  | 507.332303483633 | 0.164327918351291  |
| AAGTGCTACT  | 507.529984224355 | 0.118356981724105  |
| AAGTCATCGC  | 507.71293665538  | 0.175626738975546  |
| AGAGGAGTCA  | 507.727122724982 | 0.161520024053054  |
| TGACGCTACT  | 507.792140549775 | 0.272446868567202  |
| CGAGTGACTA  | 507.951037069396 | 0.294748623951179  |
| ACGATGACGT  | 508.491749441752 | 0.239156266928556  |
| ACCGATCAAC  | 508.541048643357 | 0.366078276779163  |
| GCGTCATATC  | 508.774066386437 | 0.280327839664905  |
| CATCAGTCAA  | 508.823130079904 | 0.0582429951448544 |
| ATAGATGACT  | 509.296056084697 | 0.304356882240085  |
| CTATGACCCA  | 509.620071158712 | 0.155956698613397  |
| GGAGTCAGCG  | 509.766302598721 | 0.194551804224529  |
| GGAGGAGTCA  | 510.104936289191 | 0.175683301181076  |
| GGTGACTTAA  | 510.229258325622 | 0.268742187361882  |
| GCGTCATAGT  | 510.521753648906 | 0.324171106501795  |
| AGGGTGACTA  | 510.553547682718 | 0.233666790942967  |
| GGAGAGTCAAC | 510.721564264193 | 0.132565936465311  |
| ACAATGAGTC  | 511.268832353578 | 0.0566169520819501 |
| AATACTCATC  | 511.37509152698  | 0.19511696959268   |
| TTAGTCAACG  | 511.629411561798 | 0.410509123178114  |
| CTAGTGACTC  | 511.86642788567  | 0.345129969848935  |
| GAATGAGTCT  | 512.212200308836 | 0.203398124801502  |
| AGTGTGACAC  | 512.62416598361  | 0.13218637976224   |
| GGTTACGTCA  | 512.841749490561 | 0.265603536566324  |
| AATAGTCAGT  | 512.887586002108 | 0.396313923814243  |
| GTCACGTCAC  | 512.937024049338 | 0.0906560991561877 |
| TTAGATGACT  | 512.969113608817 | 0.209388174245116  |
| TGTGACCAAA  | 512.998401358403 | 0.123139159170344  |
| TTAATGAGTC  | 513.072223284267 | 0.0277854877309587 |
| CAGACTCATC  | 513.134848780604 | 0.250124976923188  |
| TATGACGATG  | 513.191819587305 | 0.223924266007328  |
| TTCTGACTGA  | 513.424253959829 | 0.347574213545926  |

|             |                  |                    |
|-------------|------------------|--------------------|
| GGTGACCCAC  | 513.519461612895 | 0.0986749664666888 |
| TCTATGACAA  | 513.586465966882 | 0.248150228957279  |
| CAATGATTCA  | 513.928981464396 | 0.047071497741208  |
| GAGTGACTAG  | 514.061172306533 | 0.145614660778766  |
| GTAGTCACAG  | 514.099663981118 | 0.278633132124327  |
| AAGTCATTCA  | 514.135540482317 | 0.323969669491208  |
| ATGACGTCAA  | 514.168522046734 | 0.239292260980881  |
| TATGACAGAG  | 514.738749310449 | 0.166680843382561  |
| TGACTGAATA  | 514.758176855359 | 0.227142079312156  |
| AAGGGTCACA  | 514.909331046443 | 0.141133950173224  |
| GATGACGTGC  | 515.086549706928 | 0.153685400287826  |
| CTAGTCACCT  | 516.18531352547  | 0.102622912462279  |
| AGATGACTTA  | 516.220336588528 | 0.309359584899384  |
| TTAGTGTCAT  | 516.488898573111 | 0.172963023680073  |
| TATAGAGTCA  | 516.653258239459 | 0.261512633813681  |
| ATGACTGGAA  | 517.312639237113 | 0.358935489773322  |
| AGTCATAAAG  | 517.437410161507 | 0.204732204649993  |
| CAGTCATTAC  | 517.475973444339 | 0.606246160762995  |
| CTTAGTCAAC  | 517.584726607208 | 0.16794340987011   |
| TGTCATAATG  | 517.643488348411 | 0.171061972735917  |
| GAGTCACGGC  | 518.124246580487 | 0.47993363172593   |
| CTAAGACTCA  | 518.590222160094 | 0.166244316639095  |
| TAAATGACGC  | 518.910159282873 | 0.242906918768612  |
| ATGATTCAGA  | 519.049059596487 | 0.145160509595173  |
| TGATGACAGA  | 519.173959088944 | 0.124700148493086  |
| TGACTGAATG  | 519.257923094505 | 0.0773153735690529 |
| GAATGACAAA  | 519.284213129039 | 0.282381957608654  |
| GGACTCATCG  | 519.591381188637 | 0.382638221253539  |
| TATATGACAC  | 519.989994266336 | 0.0661381470740873 |
| TAATGACTGG  | 520.017933592346 | 0.292843926505081  |
| TTAGAGTCAA  | 520.029419202507 | 0.280778530409817  |
| ATTAGTAACA  | 520.083246393692 | 0.151352230427483  |
| GGGACTCATA  | 520.313537094351 | 0.105818313701763  |
| AGTGACGCAG  | 520.385077973917 | 0.329371756720147  |
| TGTATGACGA  | 520.626045687997 | 0.224444031454733  |
| TACGTGTAC   | 520.981508024802 | 0.121495814104459  |
| GCAATGACTG  | 521.298958167911 | 0.375721009152748  |
| CGAGGAGTCA  | 521.323168288632 | 0.249155865192643  |
| ATAATGAGTC  | 521.45122115645  | 0.168249590203907  |
| AAGTCATCAC  | 522.140565426831 | 0.0770028771056277 |
| GGGAGTCACG  | 522.293241572726 | 0.219915422658542  |
| GCTGACTAAG  | 522.538320064386 | 0.43763879845974   |
| TACATGTCA   | 522.624852181329 | 0.282512918047747  |
| GACTCATAGG  | 523.068934120403 | 0.371380442710433  |
| ATGACTAGCC  | 523.59308143107  | 0.840045119823755  |
| CAGTCATCTG  | 523.782096824818 | 0.335063010217248  |
| AGTCATTGTA  | 523.815782853204 | 0.173501791061655  |
| GACTCATCCC  | 524.107686701771 | 0.252087278251869  |
| GGAAATGACGC | 524.626970292113 | 0.330026316605914  |
| AAGTGACTGA  | 524.910044624569 | 0.156699451077338  |
| GTTAGAGTCA  | 524.919460512262 | 0.168589797761452  |
| GGATGACCG   | 525.269316419446 | 0.199712754922531  |
| TAGTGACACA  | 525.293375534529 | 0.235464923786711  |
| CGAATGACAC  | 525.357904584121 | 0.16447952745906   |

|            |                  |                   |
|------------|------------------|-------------------|
| GTGTTACTCA | 525.531892396851 | 0.101281971638067 |
| ATCTAGTCAC | 525.85179001508  | 0.183004067289727 |
| TAGACTCACC | 525.942189103675 | 0.194656070446398 |
| TTAGTCAATA | 525.974358778875 | 0.235318597068985 |
| ATCACTCATC | 526.150808186743 | 0.162975180814179 |
| GATGCGTCAA | 526.152766277818 | 0.288068283858875 |
| ATGAGCCATC | 526.209491869387 | 0.305271380440845 |
| TCGTGACTCC | 526.662681116511 | 0.248039495638911 |
| AACGACTCAC | 526.916513427311 | 0.283796213858127 |
| ATCTTAGTCA | 527.00737666998  | 0.345266324180411 |
| ACTATGACAG | 527.294243797295 | 0.1255914223347   |
| AACGTCATAC | 527.334846751038 | 0.175066157640094 |
| ACGCGTCACA | 527.436616348017 | 0.158242751382384 |
| CGATGACACG | 527.78275416487  | 0.232961474482968 |
| CATGACGTAA | 527.885443891685 | 0.101033111484127 |
| ACAAGTCATC | 528.21020552021  | 0.149579363157402 |
| AAGGGTCATT | 528.57051672221  | 0.198455848340716 |
| CGATGACAAC | 528.59094361545  | 0.146617340588987 |
| TTAGTCAACA | 528.593155540114 | 0.336784715034693 |
| GTGTGACAAA | 528.816694622365 | 0.103494750351965 |
| AAGTCATTGT | 528.936643503364 | 0.153870751407202 |
| TCTATGACAG | 529.025385924361 | 0.192752455122573 |
| CAGTCACACC | 529.049596634461 | 0.242373114271285 |
| CCTATGACAA | 529.208235302717 | 0.199003275425945 |
| CTGACTGACG | 529.237106569112 | 0.19152808409459  |
| GTCGAGTCAA | 529.338683423571 | 0.114281881173153 |
| TATGACCACG | 529.563569076948 | 0.310933902980749 |
| TATGACAATA | 530.388755526333 | 0.192983393908906 |
| TGACTAAAAG | 531.032462888481 | 0.343951562271987 |
| AAAGATGACT | 531.056599904754 | 0.320997734907657 |
| ATGATGTAAC | 531.154699160557 | 0.175527862834117 |
| GTGAGTAAAA | 531.21946369873  | 0.23747325138405  |
| GTATGAGCAA | 531.578878411048 | 0.183523971997998 |
| TAGGAGTCAG | 531.647651515949 | 0.229159667780695 |
| ATGGCTCACA | 531.702836165709 | 0.179073691404263 |
| CGTGACACAG | 531.798769365836 | 0.188104110841316 |
| GATGACAAAA | 531.84149012028  | 0.248597423165101 |
| AGAATGACGA | 532.333357321102 | 0.130079099904661 |
| TATACTCATC | 532.704186674663 | 0.222992721070676 |
| AGTCATCAAC | 533.109634044198 | 0.786140765621858 |
| TAAATGACTG | 533.110947094214 | 0.200728253143059 |
| TATGAGCAAA | 533.163012556697 | 0.140353528980657 |
| GAATGAGTAC | 533.186502442114 | 0.128372324568257 |
| ATTACGCAAT | 533.190963653099 | 0.16567606270356  |
| CCTAGTCACA | 533.684379520585 | 0.210239082953928 |
| TGTATGACAA | 533.930917000297 | 0.148491486615027 |
| GAGTATGACA | 534.016466904672 | 0.163740945389949 |
| TAGTCATTGG | 534.024983698775 | 0.262198002530379 |
| AGTCATGACG | 534.261186435387 | 0.384719298577127 |
| AGTATGACAT | 534.781457935141 | 0.292209824663276 |
| CACTATGACA | 535.243329709078 | 0.208168142888753 |
| CATGACTACG | 535.40867760601  | 0.203404467363695 |
| GGGAGTCAGA | 535.584485347151 | 0.114812438270181 |
| TATGAGTACC | 535.752177293666 | 0.239847395236847 |

|             |                  |                    |
|-------------|------------------|--------------------|
| GGTATGACGA  | 535.773649397009 | 0.214957006035085  |
| CTCGTCATAG  | 535.830190595077 | 0.212113874956842  |
| GATGACGATA  | 535.945413309678 | 0.156905833344098  |
| CTGACTAACG  | 536.011001831851 | 0.533083977518106  |
| AAGAGTAATT  | 536.368622254474 | 0.149112356940339  |
| GCGTCATAGA  | 536.815364425183 | 0.147060167722466  |
| TTATACTCAT  | 536.826956130879 | 0.188380474284375  |
| GATGTCATAC  | 537.170507683166 | 0.0546492992032204 |
| GTGTCATACG  | 537.27168395698  | 0.471336708199657  |
| TGTTACTCAG  | 537.308882714415 | 0.196771513410948  |
| CAATGACGAA  | 537.517460507097 | 0.262806632606702  |
| TAAGGGTCAC  | 537.705602958948 | 0.37275670909787   |
| GACTCATAGT  | 537.731688841572 | 0.142979633166654  |
| AGACACGTCA  | 538.059568969023 | 0.373239359704344  |
| ACACGTAATA  | 538.324820359418 | 0.196405508021251  |
| AAAATGACAC  | 538.375707821544 | 0.174952843213112  |
| AGCGTCATAA  | 538.39333856849  | 0.114921234137715  |
| AGTATGACAA  | 538.519258973005 | 0.32384048215979   |
| CGGATGACAC  | 539.157299722661 | 0.30490735063354   |
| AAAATGACGC  | 539.167548298283 | 0.224294670971465  |
| AAACAGTCAG  | 539.619565639713 | 0.178201348875981  |
| AAGTATGACG  | 539.750475800938 | 0.150004932871678  |
| CGTGACCAAT  | 540.140265114821 | 0.475064561600997  |
| CGATGACGGA  | 540.452175307728 | 0.166021547408966  |
| TTCGTGACTC  | 540.487253807813 | 0.382276049407986  |
| AACGCGTCAC  | 540.524456569391 | 0.184496985331049  |
| GGCGTCATAG  | 540.575496540742 | 0.222287912669292  |
| ACGTCATAAT  | 540.72937317687  | 0.312387394590646  |
| TAATGATTCA  | 540.86274471713  | 0.0982160160914949 |
| CGCTTAGTCA  | 540.912159992276 | 0.52345473995178   |
| TAAAATGACT  | 541.243322720463 | 0.150982426126524  |
| CGATGACGAC  | 541.260267601283 | 0.344125363677171  |
| ATAAGACTCA  | 541.506672010521 | 0.422967871433966  |
| TGTCATAACA  | 541.556937937654 | 0.2230485610924    |
| GAGTCAGAAC  | 542.243570971366 | 0.216044200687585  |
| CTAGTCACAG  | 542.642289471668 | 0.168659348201562  |
| TGCGACTCAC  | 542.920023454616 | 0.122030255844177  |
| GCGACTCACA  | 543.232937177201 | 0.205755779328217  |
| GTGATTGACA  | 543.381109937759 | 0.223583776219912  |
| AATGACAAAC  | 543.4214544056   | 0.263394149727961  |
| GACGTCATAC  | 543.450566786656 | 0.0688933335029753 |
| ATCTGACTGA  | 543.84337002851  | 0.251870535400844  |
| GCTGACACAC  | 544.199667189926 | 0.222570031987339  |
| CGCGTGACTC  | 544.871041195396 | 0.409501238899918  |
| TACTGACTAA  | 544.993948840011 | 0.261964175412356  |
| ACATTACTCA  | 545.241347339801 | 0.263984518265928  |
| AAATGAGTCC  | 545.316062985294 | 0.277522126064618  |
| ATGACTTACA  | 545.371653153726 | 0.305133108703467  |
| GGTAGTCACA  | 546.272674862886 | 0.216174728199706  |
| AGTGAGTAAA  | 546.5206551323   | 0.0182078977156286 |
| CGTATGACAA  | 546.534056407252 | 0.0414886799593503 |
| ATTAGTCGTA  | 546.594427641604 | 0.171453638152246  |
| GGATGACATA  | 547.059324589866 | 0.159812273685962  |
| ACACGCTCACT | 547.120058785798 | 0.216255128400533  |

|             |                  |                    |
|-------------|------------------|--------------------|
| TGTGCGTCAG  | 547.178827132148 | 0.157640936539045  |
| AGGAGTCAAC  | 547.298806245773 | 0.202467487946817  |
| AAGACTCAGC  | 547.683978884412 | 0.307713440856604  |
| TGTGAATCAG  | 547.942780922098 | 0.252006168231833  |
| ACATGACTAC  | 547.965128309387 | 0.167383604931003  |
| CCGATGACGA  | 548.110761072318 | 0.192878440522571  |
| AAATGACACC  | 548.214028037243 | 0.190150597066292  |
| GCCACGTCAG  | 548.487120936732 | 0.364620309339504  |
| AGTCATCAGC  | 548.756886299878 | 0.412884589021811  |
| CTGTCATAAT  | 549.201245464206 | 0.16117917894098   |
| ATGACGCAGG  | 549.686439843903 | 0.600908487380041  |
| ATGCGTCAAA  | 549.696682239509 | 0.361277392160809  |
| GATGACGGAG  | 550.07206420301  | 0.226801091649351  |
| ATAACGTCAT  | 550.113217415085 | 0.205740075837601  |
| CTGATGACAC  | 550.250513646866 | 0.255411393132399  |
| TATGAGCAAC  | 550.637269271252 | 0.208127005650268  |
| GAGTCATGAG  | 550.692156999266 | 0.356090316750739  |
| CCAGTCACAC  | 550.892851580106 | 0.0806269884382869 |
| AAGTGTCACG  | 550.925638753667 | 0.132827165900542  |
| TGACACGTCA  | 551.003006185484 | 0.293276838301647  |
| CAATGACGTG  | 551.007557109265 | 0.424321431307355  |
| CCACGTCACA  | 551.04471096367  | 0.213437351422383  |
| CACTTAGTCA  | 551.121454112955 | 0.571498368272278  |
| AAGGGTCACC  | 551.299843147016 | 0.136610132805907  |
| GAGTCAGAAA  | 551.542111792149 | 0.212377580103298  |
| TATGACGGAG  | 552.068487755844 | 0.196344874932402  |
| ATAGTCACAA  | 552.087529579319 | 0.226205579030274  |
| GCGTCATAGC  | 552.360119701032 | 0.408790321456068  |
| AATGACCAAA  | 552.374419452705 | 0.183265865632493  |
| ATAGTCATTA  | 552.397538375263 | 0.344648585105908  |
| TGCAGTCACT  | 552.703885400608 | 0.0810345627410193 |
| ATGAATCAGT  | 553.450412961719 | 0.324295611415773  |
| AAGTCATATA  | 553.921241130649 | 0.0600997014396807 |
| GCCTAGTCAC  | 554.012852076965 | 0.246673680512102  |
| ACGTCATACC  | 554.022170090903 | 0.174553342483059  |
| ACGATGACGA  | 554.381071604033 | 0.263675911731161  |
| GGTGACTTAC  | 554.547865423335 | 0.193051741445666  |
| GGGACTCATC  | 554.705672146763 | 0.276802510678825  |
| TCGTGACGCA  | 554.768976047422 | 0.531019359557538  |
| GCAAGTCACAC | 554.94877000372  | 0.382081704521315  |
| GAATGACTACT | 554.966442297077 | 0.316476479592557  |
| GAGTCAGCGC  | 555.121860958656 | 0.358904233441733  |
| ACATAGTCAC  | 555.296799299146 | 0.137676542912937  |
| ACGTCATAGT  | 555.380402863905 | 0.12021129051084   |
| GTGTGACCAA  | 555.428593913954 | 0.11076076181228   |
| AAGTCATGCA  | 555.560522220435 | 0.141507524996739  |
| GTCTGACACA  | 555.675263830875 | 0.270124642923178  |
| TAATAGTCAA  | 555.783831697874 | 0.026755565833397  |
| CTTAGTCAAT  | 555.83658122343  | 0.159544500662977  |
| GATGACGAAC  | 556.701230076413 | 0.121951372380678  |
| TTCGAGTCAG  | 556.712738944359 | 0.480526673708478  |
| AGTCACATAT  | 556.729418559029 | 0.202057675266707  |
| ATCTGTCAAC  | 556.987872860161 | 0.371317028604507  |
| ATACTGTCAAT | 556.997606037738 | 0.171905865661593  |



|             |                  |                   |
|-------------|------------------|-------------------|
| AGTCAGTCAA  | 557.02171895262  | 0.207454241575078 |
| CAGTCATATA  | 557.023343561443 | 0.386091729829689 |
| ACGTAGTCAC  | 557.162338196679 | 0.364863330245127 |
| AAATGACGTG  | 557.718399683972 | 0.17357866912251  |
| CATGACTAGG  | 557.727304505779 | 0.401094091935769 |
| TGACTAAGAA  | 558.244635144019 | 0.357090772386356 |
| GTGACTACCA  | 558.269884394971 | 0.167329886860338 |
| CATGCGTCAG  | 558.471512452801 | 0.145921555998745 |
| CGGTATGACA  | 558.513193529481 | 0.169950176961782 |
| GATGACGCTG  | 558.604842822436 | 0.118675601130988 |
| CAACGTCATA  | 558.787612190168 | 0.117164801056921 |
| CGAAATGACT  | 558.913291798191 | 0.27722627325582  |
| GAAGATGACT  | 559.200579611404 | 0.228472403883167 |
| CTAGGAGTCA  | 559.203573920244 | 0.263954031349953 |
| TATTACGTCA  | 559.250536430601 | 0.24296282203281  |
| ATGACTAGCA  | 559.404904427413 | 0.912505611812249 |
| CCGTGACGCA  | 559.456848528492 | 0.396466595369458 |
| CAATGAGTCC  | 559.858521649783 | 0.113587832431206 |
| AATGACGAAG  | 559.959833531803 | 0.417449521555345 |
| TATGACAATG  | 560.157143129518 | 0.210431860855532 |
| AGAATGACGT  | 560.475279404797 | 0.233203520609105 |
| TTAGCGTCAT  | 560.487880657855 | 0.412395967509333 |
| TATGACAACCT | 560.527506298778 | 0.264828131920395 |
| GGATGACAGA  | 560.663752704531 | 0.21682773366273  |
| GGTAGTCACC  | 561.875731810724 | 0.403941425730663 |
| AAGTGACACA  | 562.332325747437 | 0.149206024574222 |
| GTGTGACACC  | 562.83424117637  | 0.208003041458318 |
| CATGACTACT  | 563.068084885873 | 0.304509337417769 |
| GTGTGTGTCA  | 563.495360130485 | 0.19777614477977  |
| GGGTGATTCA  | 563.63943393708  | 0.25771006212622  |
| GAGCAGTCAC  | 563.954703809705 | 0.235351046731794 |
| ATTTGCTCAC  | 564.575153317031 | 0.192351177918581 |
| GACTATGACA  | 564.770844305379 | 0.159708442257608 |
| AATGATTGAG  | 564.975821266777 | 0.343851133403183 |
| CTGATGACGC  | 565.612903114037 | 0.340266725430128 |
| TATGAGCCAC  | 565.776770897864 | 0.215251173246969 |
| GGAATGACAC  | 565.8175333543   | 0.204381401200476 |
| GGTGATTGAG  | 566.2104415075   | 0.271570878349378 |
| ACACGTCAGA  | 566.61756769238  | 0.174070601031403 |
| AGACTCATAT  | 566.662227945926 | 0.16923332055057  |
| ATGACGAAGA  | 566.802896027167 | 0.177129789802692 |
| CGACTCATCG  | 567.206605641519 | 0.474933725439747 |
| AAGATGACAC  | 567.258450650466 | 0.181606145772536 |
| AAACATGACT  | 567.343317661449 | 0.203856884638945 |
| ATACGAGTCA  | 567.357890612622 | 0.275759540552271 |
| TCGATGACGA  | 567.395822130149 | 0.138744295126925 |
| TGATGACACC  | 567.411441647279 | 0.334720636121439 |
| CACATGACTC  | 567.528739064767 | 0.511068578207494 |
| CGCAGTCACA  | 567.772921042361 | 0.226601488403161 |
| AACTTAGTCA  | 567.828715424991 | 0.366918752663085 |
| TATCGAGTCA  | 568.016559259515 | 0.221356397661481 |
| ATGTCAGTCA  | 568.144896494154 | 0.245405765373612 |
| AGATGACCGG  | 568.662844672642 | 0.436749914471581 |
| ACTGACTAAG  | 569.236723353117 | 0.346875493077434 |

|            |                  |                    |
|------------|------------------|--------------------|
| CGTGTGACAC | 569.284992165412 | 0.0838071098559925 |
| AGGTGACTAT | 569.597207706265 | 0.0693910394857062 |
| GATGACAGAG | 569.811314717828 | 0.229192881417491  |
| GACTCATCCG | 569.814267022358 | 0.391219524943152  |
| GGTGACGTAG | 570.158815833297 | 0.192361305432898  |
| CATGACTACC | 570.334901615191 | 0.106426733062432  |
| CGTAGTCACG | 570.645103394191 | 0.0548397779372283 |
| CTAGTCATTG | 570.808501888931 | 0.436294950191028  |
| CGTAGTCACA | 571.071961323656 | 0.398064984110301  |
| TAAGAGTAAT | 571.078417316063 | 0.26332742729185   |
| GAAATGACGC | 571.273659033757 | 0.290475410896659  |
| GTATGACGAG | 571.361231119647 | 0.201850672250738  |
| TCGATGACGT | 571.512078448369 | 0.246636304077649  |
| CGGATGACGC | 571.7922620259   | 0.389056785990694  |
| ATTAGTCGTC | 571.842184737446 | 0.203677369877658  |
| GTATACTCAT | 571.926559377054 | 0.224196740768718  |
| CCAGATGACT | 572.174042522933 | 0.18915273975808   |
| GGACTCATCC | 572.396004117717 | 0.220879774877627  |
| ACCAGTCACG | 572.960682072445 | 0.0501370226319949 |
| ACATGAGTAA | 572.973492704642 | 0.228919322898766  |
| TATCCGTCAC | 573.948737721635 | 0.147542862334955  |
| GAAGCGTCAT | 574.160865480555 | 0.110924520584684  |
| AAATGACCAA | 574.240288506613 | 0.150238354618804  |
| CGATGAGTAC | 574.436449460028 | 0.111077226607458  |
| ATTACGCATC | 574.537227675627 | 0.30325123447397   |
| CATGAGTCGT | 574.659789617028 | 0.166578275903933  |
| CAGTCACATT | 574.660498554324 | 0.344061233810528  |
| TCAAATGACT | 574.84124117596  | 0.14084868462805   |
| ACAATGACAC | 575.081920252309 | 0.208623908591121  |
| GATGAGCCAC | 575.247889959149 | 0.285741941350864  |
| AATGACGTGA | 575.41782683262  | 0.256474298575957  |
| GTGTGACGAA | 575.942109309421 | 0.194791182851217  |
| GTAGCGTCAT | 576.043905445539 | 0.24981928604131   |
| CTATGACAGC | 577.220930079818 | 0.153535758834234  |
| CAGTCACTCA | 577.693646394395 | 0.175792803169229  |
| GATGACATAG | 577.765497759366 | 0.183284945802179  |
| TCGTCATAGT | 577.948184232713 | 0.235709840434796  |
| AGACTCATCA | 579.179534134199 | 0.319284098742026  |
| TCGTCATAGA | 579.213850749197 | 0.131274947385217  |
| ATAGTCACAG | 579.43776667591  | 0.174905291595631  |
| GCAATGACAA | 579.442742628081 | 0.132247404639999  |
| AATGTGTAAT | 579.957367945222 | 0.246823039423446  |
| TCGATGACAA | 579.958373570483 | 0.116216300262054  |
| AATGACGGAA | 580.255313149862 | 0.352101407775611  |
| CTATGAGTAC | 580.495514185266 | 0.252673506333884  |
| AGCGTCATAG | 580.659354761402 | 0.0877387865467423 |
| AAGGGTCATG | 580.880028157054 | 0.175083466419433  |
| GATGACGGAA | 581.209022667178 | 0.167759986820717  |
| CAGTGTCATC | 581.304790261142 | 0.320756896673652  |
| AAGTCATCCA | 581.31550018849  | 0.315697307116445  |
| TCAGATGACT | 581.498000899846 | 0.242929926920056  |
| AATGACGTGC | 581.573957472764 | 0.355781686133085  |
| AACAGTCACG | 581.838839129314 | 0.331008140797686  |
| AAGTCATTCT | 582.010119520209 | 0.180963144369971  |

|             |                  |                    |
|-------------|------------------|--------------------|
| GAGTAGTCAC  | 582.053612785286 | 0.180097952049621  |
| AACACGTAAT  | 582.296736746859 | 0.137786902789893  |
| GATGACAACT  | 582.782483587786 | 0.0609390006828841 |
| CGTGACCCAT  | 584.273094720134 | 0.0856959913673509 |
| GACGCGTCAC  | 584.278686679675 | 0.183918276073448  |
| ACAAATGACT  | 584.366881551812 | 0.323788879201954  |
| TTCTGACGCA  | 584.528911091005 | 0.336434130603919  |
| CAGTCACCTA  | 584.909183866183 | 0.154989843211291  |
| GTGATGACAC  | 585.116126544375 | 0.361780228201449  |
| TGTCATAATA  | 585.492368411543 | 0.140947230488155  |
| GCGTCATAAA  | 585.657923433963 | 0.108504848192711  |
| AATTAGTAAC  | 585.815788409228 | 0.266654970028563  |
| ATGTTACTCA  | 586.169175549915 | 0.25442834819459   |
| AATGACGCGG  | 586.281520400404 | 0.325902956419203  |
| GCAATGACAC  | 586.665877073516 | 0.324778320895999  |
| TGATGACATA  | 586.819466878368 | 0.207565518144112  |
| ACAGTCATGA  | 586.959303121819 | 0.0595319320320023 |
| TAGTCAGAGC  | 587.386858272451 | 0.20646559859853   |
| GACGTGTCAC  | 587.598112401448 | 0.137504369027418  |
| GCGTGACTCG  | 587.902170704806 | 0.557764077440825  |
| TATTAGTAAC  | 587.935758737286 | 0.25734574694607   |
| CTATGACAAT  | 588.324050626768 | 0.27694763811531   |
| AATTACGTCA  | 588.629261697772 | 0.299179708893186  |
| GTAATGAGTC  | 588.952687381101 | 0.254651013218244  |
| ACTGACTCCT  | 589.021041244869 | 0.122043897614788  |
| ACGCGTCACG  | 589.376311789896 | 0.897273142664255  |
| AGTATGACCA  | 589.635250602966 | 0.291246317469853  |
| CATGACTGGA  | 589.719830835105 | 0.325817013853984  |
| GCATGACGCA  | 589.906020894455 | 0.491458041645249  |
| ATGTGACTTA  | 590.155662518117 | 0.159227868676092  |
| GTCTAGTCAC  | 590.506040939095 | 0.184147800934133  |
| ATTGCTCACT  | 590.568969108003 | 0.194660338424703  |
| TATGATGACA  | 591.126386193719 | 0.282946306649847  |
| TGTGACCAAC  | 591.242113545493 | 0.146020709666358  |
| AGTCATCATC  | 591.428434990438 | 0.0700624045382473 |
| AAGTCATCCT  | 591.531152563263 | 0.19948452203116   |
| AGGATGACGC  | 592.171760902187 | 0.215409401937178  |
| CATGACGTAC  | 592.196037172645 | 0.220601482625548  |
| AAATGAGTAC  | 592.224363907454 | 0.198615441178543  |
| ATCGATGACA  | 592.324323621344 | 0.213810581255532  |
| AAGTCATTCTG | 592.357900237088 | 0.293203384864414  |
| ATGAGTCGCA  | 592.849611292011 | 0.0774247309152921 |
| CATGACATCA  | 592.912341040182 | 0.0791244710246185 |
| TGTGACCCAC  | 593.111829800993 | 0.165187864933926  |
| GAGTGTCATC  | 593.323331224233 | 0.194875500676775  |
| TGACTAAACG  | 593.420046052826 | 0.279918261119371  |
| AAATATGACA  | 593.748475309341 | 0.18165090984491   |
| CATGACTGCT  | 594.069507383335 | 0.254540926243302  |
| GAATGACGCT  | 594.071688380348 | 0.325509274408306  |
| ATGTGTAATT  | 594.664414311853 | 0.194206178754609  |
| AGCTGACTAA  | 594.820902190266 | 0.570376322164838  |
| GCTGACTCCA  | 594.982063240663 | 0.167772992951724  |
| TGTCATAATT  | 595.160189840413 | 0.153640529104489  |
| ATGACGAATG  | 595.2595573767   | 0.318967132468203  |

|             |                  |                    |
|-------------|------------------|--------------------|
| CATGACAGAT  | 595.27232957734  | 0.0742748056499791 |
| GCGATGACAC  | 595.327145181353 | 0.120668802643568  |
| AATGACCAAC  | 595.378972947364 | 0.16630259313097   |
| GTACACGTCA  | 595.45256165113  | 0.302811684996636  |
| CAGTCATATG  | 595.550040874922 | 0.192247632001489  |
| CAGTCATTGG  | 595.84274538944  | 0.133427678839785  |
| GGTGACGAAA  | 595.935509811685 | 0.134750019706575  |
| ATGTGACGTA  | 596.468839724025 | 0.164470175619679  |
| CCGATGACGT  | 596.613116695714 | 0.280954214234988  |
| ATGACCGATA  | 596.696982056254 | 0.360368250603751  |
| ACAGATGACT  | 596.699883430778 | 0.15678039240746   |
| ACGCGTCACC  | 596.733323936153 | 0.127104020434656  |
| TTATGAATCA  | 597.111316443362 | 0.296239350056945  |
| AACATGACTA  | 597.178317330325 | 0.351034389989136  |
| GAGTCAGAAG  | 597.254516254209 | 0.1790588561513    |
| ATGTGTCAGG  | 597.389832159913 | 0.296968776609947  |
| AATGACAAAA  | 597.487599425809 | 0.21512955194609   |
| CATGACTATC  | 597.492273166785 | 0.158505033215918  |
| TGAAATGACT  | 597.499158050838 | 0.21722845503745   |
| ATGACCGAAT  | 597.860891073609 | 0.242764741405853  |
| GGTGACAAA   | 597.882903170413 | 0.161425425226941  |
| AATGAGTCGG  | 597.972158699121 | 0.477309855388178  |
| AGTCATGACC  | 598.18989432332  | 0.203909714840769  |
| ATGACTTAGT  | 598.197220837626 | 0.352412597125024  |
| GCGTCATACG  | 598.630835816464 | 0.191525711566122  |
| TGATGACAAAC | 598.632620250254 | 0.129041915251755  |
| GGTTACTCAG  | 598.67075420349  | 0.297113979639214  |
| ATATGAGTAC  | 598.762970985142 | 0.132206761983425  |
| AGGTGACTTA  | 599.579021487265 | 0.125025786914285  |
| ACTGTCATAA  | 599.800806295207 | 0.118758779968906  |
| GTGACCCACA  | 599.954617047967 | 0.153859346249393  |
| AAATGACAAA  | 600.0073481248   | 0.136288355109826  |
| TTATGAGTAC  | 600.151290803005 | 0.278701330412518  |
| CCTATGACAG  | 600.290286354057 | 0.135915667830639  |
| ATGAGCCATT  | 600.403370840576 | 0.426807336594275  |
| TAATGAGTAC  | 600.466046748726 | 0.255017892836246  |
| AATGACGCGA  | 600.54726708524  | 0.288899191905002  |
| GATGACCAAG  | 600.640054494056 | 0.18302090358992   |
| AAGTCATTAT  | 600.765299164446 | 0.196772359598705  |
| AGTCATTCAT  | 601.031285076981 | 0.218823905597091  |
| CATGTCATAG  | 601.294918949343 | 0.287919976447327  |
| GTGTGTC AAC | 601.740543360733 | 0.197674718198499  |
| TAAGACTAAT  | 601.803178234421 | 0.201353479540474  |
| TAGTCATGCG  | 601.92247367618  | 0.367471842602557  |
| AAGTCACACA  | 602.098351577765 | 0.252006797671771  |
| TGTGTGACAC  | 602.215199531435 | 0.212960256046572  |
| GACTCATAAA  | 602.250454153321 | 0.242903494687084  |
| ATGTCATAAT  | 602.375150273272 | 0.379098400311012  |
| GGATGACGAT  | 602.40733866864  | 0.131120703452349  |
| TCGTGACTTA  | 602.665478993532 | 0.89949774556261   |
| CATTACTCAA  | 602.955795461165 | 0.227328838659862  |
| CGGTTACTCA  | 603.081741544991 | 0.258003032888284  |
| GGTGT CATAA | 603.165109941252 | 0.242708751283561  |
| GGATGACGCT  | 603.32716967055  | 0.384334437700428  |

|             |                  |                    |
|-------------|------------------|--------------------|
| ACAGTACCC   | 603.453927089022 | 0.213344321793933  |
| GACTCATAAC  | 603.496170507384 | 0.176855058701031  |
| CAGTGACTAC  | 603.509551031277 | 0.159813489545001  |
| GCAAATGACT  | 603.60633720856  | 0.288815019722182  |
| AATTACGCAT  | 603.99724800059  | 0.31087838638719   |
| CATGTCATAC  | 604.108375839788 | 0.339976248777557  |
| TGTGACAAAC  | 604.450352129088 | 0.174406580330805  |
| ATGTGTGTCA  | 604.768400281061 | 0.230825031495446  |
| AGGTGACGTA  | 605.171692234578 | 0.170070735009081  |
| ACATGACTAT  | 605.825382526685 | 0.134301233530766  |
| CGATGACGCC  | 605.848117260965 | 0.0921661300564349 |
| ACTGACACAC  | 605.944209510437 | 0.190585744676047  |
| ATGACTTGTC  | 607.819834197812 | 0.162724739676943  |
| CTGTGATTCA  | 608.037413148936 | 0.274471485744652  |
| TGACTAAACA  | 608.306102526398 | 0.336121246837036  |
| GACAGTCATG  | 608.523680172247 | 0.377637585014074  |
| ATTTCGAGTCA | 609.172065959097 | 0.274009268025397  |
| GTGACGTATG  | 609.262076390592 | 0.173904301975401  |
| CAATGACCGG  | 609.355982061684 | 0.146925529053734  |
| AATGACATAC  | 609.823084520819 | 0.239674468428875  |
| TGTATGACAG  | 610.16046165533  | 0.365328266866382  |
| TACAGTCACT  | 610.361403710665 | 0.166277993618045  |
| AATTCGTCAG  | 610.368212358832 | 0.268323281661323  |
| CAGTCACAAAT | 610.594353248614 | 0.230672550361936  |
| CCGATGACAA  | 610.925756379582 | 0.219867594471595  |
| GTCGTCATAA  | 611.068691014247 | 0.193066002182712  |
| TGTGACGAAA  | 611.14957181975  | 0.187827294554235  |
| GATGGCTCAC  | 611.24732979577  | 0.151928475018283  |
| AGCTGTCATA  | 611.469273256723 | 0.265045850286228  |
| ACCGTCACT   | 611.652507707535 | 0.17383105037231   |
| TCGACTCACC  | 612.028065668107 | 0.193687301673084  |
| AAGTCACCGA  | 612.415324752938 | 0.146132502040371  |
| GACTCAGTCA  | 612.447427852754 | 0.227892853460094  |
| GTGTATGACA  | 612.928386477171 | 0.221543240229345  |
| CATCGAGTCA  | 612.952623710474 | 0.232432431396148  |
| GATGAGTACC  | 613.045251666619 | 0.219738836801007  |
| TATAGTCACG  | 613.295570777246 | 0.40815822623924   |
| TAGTCACCGG  | 614.048209391284 | 0.246830920988359  |
| TATGACGAGG  | 614.344198791227 | 0.231799750250242  |
| CGAGTCAGCG  | 614.649760624441 | 0.0575067525235419 |
| GTATGACAAAT | 615.079087448828 | 0.201677495999805  |
| ACGTCATACG  | 615.16608880824  | 0.2699002359244    |
| CCATGACTAC  | 615.303822794309 | 0.142378550276396  |
| CATGACTGGG  | 615.358581653062 | 0.318624279698138  |
| GTGAGTCTGA  | 615.582431197196 | 0.153523760683961  |
| ATTAGTAACC  | 615.64842527199  | 0.148945471422499  |
| TGTCATAATC  | 615.899399196565 | 0.265304525110089  |
| CGGATGACGA  | 616.466146088157 | 0.223063561148089  |
| GTTACTCACG  | 616.690497147752 | 0.304208492243744  |
| CGGTGACTTA  | 616.71881721007  | 0.143355749974708  |
| GCAGTCATCG  | 616.85266273595  | 0.367826019719673  |
| GGCTGACTCC  | 616.902057682202 | 0.15976769511184   |
| ACAGTCACTC  | 617.197319248251 | 0.258133179615055  |
| GATTACGCAT  | 617.340090045338 | 0.181272282567194  |

|            |                  |                    |
|------------|------------------|--------------------|
| AATGACTTAC | 617.356502121861 | 0.215764876855129  |
| TACGCGTCAC | 617.58146453506  | 0.118281993482118  |
| TGGGTGACTA | 618.048151988484 | 0.239398901614542  |
| GTATGACAGC | 618.161546571153 | 0.364694281794709  |
| AATATGACAG | 618.572792456077 | 0.24093214392364   |
| CAGTCACCGA | 618.603391330562 | 0.187501471888637  |
| AGTCATATCC | 618.895700030099 | 0.187109782495183  |
| ATAGTCACAT | 619.227871966067 | 0.114030742472959  |
| AGTCATCACC | 619.693527457614 | 0.22466652602164   |
| CGGGTGACTA | 620.410325803309 | 0.0352665780514985 |
| GGCTGACTAA | 620.478179166161 | 0.290881985252396  |
| ACAGTCATGG | 620.685734681344 | 0.041317325597853  |
| ATGACGTACA | 620.80249695533  | 0.290403418706938  |
| CAGTCACAGT | 621.183648648727 | 0.381979298614908  |
| AATGACACCG | 621.52306862882  | 0.376336527721821  |
| GAATGACATA | 621.525654082629 | 0.181130958199372  |
| AGATGACGAT | 621.639749529952 | 0.19192996190985   |
| TAGTCACTGA | 621.829238080305 | 0.114620338587077  |
| GGGTGACGTA | 621.83379787082  | 0.153874877643662  |
| TTATGACAAC | 621.958322851744 | 0.233721158079485  |
| AAAGACTCAG | 622.055544036224 | 0.137776038130185  |
| ACCAGTCAGA | 622.24709968418  | 0.174058567941264  |
| GTGTGACACG | 622.946973985152 | 0.179948936434359  |
| AAGTCACACG | 622.954018916402 | 0.150882083207547  |
| AGATGACGCC | 622.964979383548 | 0.325545839400684  |
| GAGTGACTAC | 622.977997010413 | 0.123342708027497  |
| GTGACGTAAG | 623.075846743898 | 0.15748681371312   |
| TCATTACTCA | 623.216105043126 | 0.291099215707284  |
| CGATGACGTC | 623.286300856964 | 0.188795351096539  |
| AAGTCATTGA | 623.296808623247 | 0.177465134383626  |
| AGTCATTGGA | 623.669813604847 | 0.172722598921556  |
| GTCGTCATCA | 624.158335723797 | 0.135645174652277  |
| TGATGACCCA | 624.291547782352 | 0.208595106540708  |
| GCTGACTCCC | 624.602011384082 | 0.122839485893963  |
| CTATGACAGT | 625.093638050068 | 0.205693660914426  |
| CGACATGACT | 625.642744153414 | 0.164009901289575  |
| TTATGACAAT | 625.726493816213 | 0.150801696716704  |
| CCATGAGTAA | 625.771108652632 | 0.428888115894432  |
| TGACTGAACA | 626.118819649004 | 0.150745037184403  |
| ATGAGTCGGA | 626.766970061849 | 0.326249942634164  |
| ATGACCCACA | 627.2440494249   | 0.0949431956583641 |
| ATTGACACAC | 627.247034733092 | 0.187672237258668  |
| AAGACTCAGT | 627.265893703323 | 0.172343688010701  |
| GATGACTGGC | 627.314600092873 | 0.361353458804103  |
| TGATGACGCC | 627.458961884659 | 0.226800453785522  |
| GTGAGTCGGA | 627.485564147486 | 0.186353242469924  |
| AACGATGACA | 628.241862050232 | 0.206782757751464  |
| TACGAGTCAA | 628.483255221802 | 0.19132512631949   |
| GCTGTCATAA | 628.511202039002 | 0.209714842105187  |
| CATAGTCATG | 628.560695446527 | 0.054445015759208  |
| GAACACGTCA | 628.656325024315 | 0.214566717460401  |
| AGTGACGTAC | 628.720365708988 | 0.169754230635473  |
| TGACATGTCA | 628.735968793664 | 0.194666315059599  |
| ATGACGTGAC | 628.743545883234 | 0.401766115831132  |

|             |                  |                    |
|-------------|------------------|--------------------|
| TACACGTCAG  | 628.784911135155 | 0.28890346230149   |
| AGTCACCTTG  | 628.817640731853 | 0.242624255574279  |
| ACTCATGACT  | 628.942890316107 | 0.208180505427496  |
| TTAGTCAACT  | 629.243989402928 | 0.320207234563473  |
| TGAATGACGA  | 629.285166619268 | 0.210156164756177  |
| ACGCGTCACT  | 629.392571288389 | 0.822127134743898  |
| TCGTCATAAC  | 629.480981308125 | 0.145973686100783  |
| AGTGACCAAT  | 629.875571749309 | 0.325827566168167  |
| TAGTCACAAA  | 630.043293652385 | 0.280343998675612  |
| GGGTGACTAC  | 630.125618247876 | 0.124891828659693  |
| AACCATGACT  | 630.264574156659 | 0.0924049738362399 |
| AACAAGTCAT  | 630.752670178697 | 0.199257307698525  |
| AGACTCATAG  | 630.771337887216 | 0.299511464867785  |
| TTGTGACTTA  | 630.829443475505 | 0.201558505472817  |
| GCGATGACGA  | 630.938108170672 | 0.176767821136201  |
| ATGACATCAA  | 631.61288884701  | 0.397816995560966  |
| CTATGACAGG  | 631.62718089718  | 0.129457850348556  |
| GAACATGACT  | 631.863362421974 | 0.272215496163016  |
| TAGAGTCAGT  | 632.469634559372 | 0.494683796436153  |
| TCGATGACAG  | 632.51619726372  | 0.311750107098208  |
| CTATGAGCAA  | 632.591197788339 | 0.190440013888185  |
| GTTACGTCAG  | 632.709336892979 | 0.516316674666313  |
| TAACGTCATC  | 632.79900471143  | 0.133214536364     |
| GTAGTCAGAG  | 633.521465153869 | 0.121076899564332  |
| ATCACTCATT  | 633.609988504709 | 0.204064025032822  |
| CGACTCACAC  | 633.650471655209 | 0.193901892367352  |
| AAGTCATTAC  | 633.716866322696 | 0.186361216522245  |
| CGAGTCAGAT  | 633.844838044235 | 0.240356720945547  |
| AGCGTCATAT  | 633.934178776616 | 0.294879059211241  |
| CCAGTCACCG  | 634.68586555342  | 0.199978571528535  |
| ATGTGCGTCA  | 634.821635821848 | 0.125952327029238  |
| AAATGACACG  | 635.261111107495 | 0.304690109255554  |
| CAATGACACC  | 635.340931042388 | 0.146738223831357  |
| GCATGACGTA  | 635.344305094091 | 0.212483309023458  |
| CAGTCACAGC  | 635.937122273337 | 0.511943953119977  |
| AAGTCACATT  | 636.564631419491 | 0.219841071284987  |
| TGTGCGTCAA  | 636.668629064626 | 0.0538904299733585 |
| AAGATGACGC  | 636.94531302156  | 0.258644892278017  |
| ATATTGTCAT  | 637.105655971426 | 0.204663554556072  |
| CATGACGTAT  | 637.497906262839 | 0.3029849957102    |
| AGGATGACAG  | 637.70036540102  | 0.0739481321442811 |
| AGATGACACG  | 637.779621283827 | 0.247466457238372  |
| ACGTCATAGC  | 638.144151360009 | 0.210765180365355  |
| ACAGTCACTG  | 638.257310297708 | 0.224802754725584  |
| AAATGACTGC  | 638.962653197786 | 0.0713183911087955 |
| AATGATTCAA  | 639.965152019461 | 0.302469770474533  |
| GCGTCATATA  | 640.410084613705 | 0.303794391167722  |
| CGGTGACGTA  | 640.473007149257 | 0.268031134167823  |
| CGTATGACAG  | 640.603673995826 | 0.117905853292661  |
| GTGACACAAAG | 640.850062995449 | 0.305641401069434  |
| ATGAGTCGCG  | 641.573112232857 | 0.432986445564508  |
| ATGAGCCACC  | 641.773645155958 | 0.173435644742799  |
| GGATGAGTAC  | 641.938048240619 | 0.15618378908148   |
| CAATGACAAA  | 642.413060128002 | 0.148916552357118  |

|             |                  |                    |
|-------------|------------------|--------------------|
| ATCCGTCATG  | 642.604827251188 | 0.273184901661782  |
| ATACTCATAC  | 643.072436660867 | 0.121456610791058  |
| AATGACGAAC  | 643.216004832743 | 0.410340379494209  |
| GAGTGACTAT  | 643.321863596057 | 0.231718921203058  |
| CTGACTGACC  | 643.419168321574 | 0.208835452285368  |
| CCAGTCACAG  | 644.71879732895  | 0.0947929062990949 |
| CCAGTCACAA  | 644.847294300396 | 0.280328481291206  |
| TCGTCATCAC  | 644.939857672586 | 0.146459612586575  |
| GGATGACAAC  | 644.974800041394 | 0.212779881512996  |
| GGTGACTTAG  | 644.977984244332 | 0.235258495549992  |
| AGATGACGGA  | 645.597189194871 | 0.167017714586331  |
| AATGACACGA  | 645.637048408339 | 0.166479091540404  |
| GTTAGTCAAA  | 645.73715351207  | 0.152882858320321  |
| AATGAGCCAC  | 646.137847118477 | 0.163967250783587  |
| GACGAGTCAA  | 646.145684734564 | 0.200761573512397  |
| TGCAGTCACG  | 646.749382970793 | 0.270029708265047  |
| GGATGACGGA  | 647.586474368049 | 0.135128991290175  |
| CTAATGAGTC  | 647.661848659203 | 0.165059372283356  |
| TAGTCACAAC  | 647.802907735255 | 0.286104718255081  |
| TGATGACCAC  | 648.043093814095 | 0.155102349941474  |
| ACATGACTGG  | 648.102704981265 | 0.159116844911267  |
| GTGTGACTCT  | 648.137614208537 | 0.210617117620402  |
| TTCGAGTCAA  | 648.256620908536 | 0.157708155631777  |
| AGTATGACAG  | 648.268633467696 | 0.232131610426008  |
| TTATGACGAG  | 648.378428109706 | 0.13883436704159   |
| GAGTGACGTA  | 648.560495543642 | 0.173082204136212  |
| AGTCATACCC  | 648.95713856009  | 0.52220713406812   |
| GGATGACACG  | 649.12934030507  | 0.0469070749105794 |
| GGATGACCAC  | 649.466025291691 | 0.149679527271228  |
| CTAGTCACAA  | 649.83003639486  | 0.339245854297953  |
| GTGTCACAAC  | 650.525988161662 | 0.082126457703446  |
| CAATATGACA  | 650.922697221407 | 0.214873235937894  |
| TGAGGAGTCA  | 651.083364437532 | 0.16515239357415   |
| AACTTGTCAC  | 651.392128482386 | 0.180608262383441  |
| AGTGACTACG  | 651.612454117542 | 0.254231908848721  |
| ACATGTGTCA  | 651.66164834696  | 0.213998345147336  |
| AGGTTACTCA  | 652.018546016779 | 0.193491206641725  |
| AAATGTCATA  | 652.34007817049  | 0.252753273832948  |
| GCAAGTACCCG | 652.457603304402 | 0.335399019895206  |
| ATGACTGCGA  | 652.468491836907 | 0.352823236646025  |
| AGTCATCAAA  | 652.550183656188 | 0.409501986512787  |
| AGGTGATTCA  | 652.736868127583 | 0.116142415901502  |
| CTGTCATAAC  | 653.034773054954 | 0.246006537378053  |
| GAATGACCAA  | 653.101760900053 | 0.160244178653088  |
| GTAATGACT   | 653.571353000097 | 0.254584707203347  |
| AAAGGGTCAC  | 653.625100463138 | 0.202749860578539  |
| TAAATGACAC  | 653.738947677457 | 0.238903111942552  |
| ATAGGAGTCA  | 653.894098614985 | 0.215918278086731  |
| GGTTACTCAA  | 653.9537642622   | 0.220714946197862  |
| CCATGACTAT  | 654.032668019085 | 0.218144551861041  |
| TAGGAGTCAA  | 654.455960682235 | 0.209529733033612  |
| TGTATGACCA  | 654.491740594599 | 0.300485256635655  |
| GTGACGTAAA  | 654.557117816867 | 0.192415858682685  |
| AAGTCACAA   | 654.780999633008 | 0.134589516063514  |



|            |                  |                    |
|------------|------------------|--------------------|
| TAGGATGACA | 654.932144109851 | 0.251431155493932  |
| GATGAGCAAA | 655.168182955778 | 0.150222080939754  |
| GTCGTCATAG | 655.621808700512 | 0.141254652189228  |
| GGTATGACAG | 656.107106067456 | 0.0992075641149893 |
| ATATGACGAG | 656.141635535603 | 0.151915291716224  |
| AATGAGTACC | 656.638336573907 | 0.297618763845691  |
| CATGACCCAC | 657.218876172112 | 0.187982142042219  |
| AGCTATGACA | 657.535127040244 | 0.30119069562317   |
| CATGACCAAA | 657.546682668933 | 0.0968450965281272 |
| CGCAGTCACC | 657.974728941216 | 0.176806841207105  |
| CAGTCACATA | 658.764585563728 | 0.103277037895705  |
| ATGACTTGTA | 659.218629973748 | 0.214640736496002  |
| TCGTCATAAA | 659.799203992089 | 0.18507010614597   |
| AATTAGTCGT | 659.856344024618 | 0.250638695483545  |
| TTATGACAAG | 659.994194389187 | 0.266498664088661  |
| TAAAGTCATA | 660.174195056106 | 0.213448768075193  |
| AAGTCATTGC | 660.371667099677 | 0.0842153409318759 |
| GAATAGTCAA | 660.86622776143  | 0.15036747351705   |
| GAGATGACAC | 661.149172349046 | 0.130860085839637  |
| CACAGTCATG | 661.172523597233 | 0.252959093981618  |
| AAGTCATTCC | 661.587520724457 | 0.126288406535439  |
| GGTGTCATAT | 661.590949792115 | 0.199186586472748  |
| AGCCACGTCA | 661.773903155592 | 0.177055000894066  |
| ACAGTCATGT | 661.829092323775 | 0.311403308850649  |
| CCACGTCACC | 662.095743015674 | 0.263071606714571  |
| GACTCATCTC | 662.401744040936 | 0.288372827109737  |
| ACCTATGACA | 662.412578970331 | 0.227721193722568  |
| GGTGACCAAC | 662.561837435937 | 0.2000664569539    |
| TGTCAGTCAA | 662.669628447222 | 0.193386561998899  |
| AATGGCTCAC | 662.732237200977 | 0.192573015118433  |
| ATGACGTTAC | 662.843596128948 | 0.129562919439828  |
| GGCGACTCAC | 663.454348317383 | 0.229349698354825  |
| ACTAGTCACG | 663.608988851784 | 0.109481587463791  |
| ATGACACCAA | 663.827435067181 | 0.148747635643064  |
| TAATGAGTCC | 664.019356955855 | 0.237644424294193  |
| AGCTGACTCC | 664.252525730393 | 0.152778845662188  |
| AGATGACAGA | 664.309797449246 | 0.250911905655612  |
| CCAGTCACAT | 664.675880388996 | 0.210076925736035  |
| TACATGACTA | 664.958248923804 | 0.336727409018871  |
| TTATGACCCA | 664.977766371883 | 0.304959851571846  |
| AATGATGACA | 665.132116073534 | 0.146738184059164  |
| TAGACTCACT | 665.498887997143 | 0.160211193472181  |
| ATGAGTCGCT | 665.710905752044 | 0.281281604021778  |
| ATATGACACG | 665.842001709508 | 0.386253775348532  |
| ACAGTCAGAC | 666.353885403874 | 0.206687175253971  |
| AGAGTCAGCG | 666.497115698957 | 0.1137023140942    |
| TCATGTCATA | 666.555424827765 | 0.261306776766237  |
| AGTGACTACC | 666.603931197864 | 0.201595094153343  |
| GGATGACCCA | 666.818593823017 | 0.19555182547706   |
| AAGTCATAGA | 666.870100813358 | 0.151900184370493  |
| CCTAGTCACG | 667.105270435867 | 0.110908292861318  |
| ATGACTTGGA | 667.227419567192 | 0.248505984322701  |
| TTCTGACACA | 667.389498961074 | 0.191854479135281  |
| AAGTGACTAC | 667.544098746733 | 0.131587902429657  |

|             |                  |                    |
|-------------|------------------|--------------------|
| TATTAGTCGT  | 667.704826593997 | 0.161707677698364  |
| AATGACTGCC  | 668.086354817575 | 0.215391319563792  |
| GAGTCACCTG  | 668.770268320081 | 0.36988491785493   |
| CACACGTAC   | 669.021695884754 | 0.198580764909293  |
| TGACCAGTCA  | 669.108880347546 | 0.170106826858833  |
| CGATGAGCAA  | 669.122900952689 | 0.168151473859949  |
| GAATGACAGA  | 670.03288699151  | 0.170973648777694  |
| CGTATGACGA  | 671.228439200368 | 0.320806004079225  |
| CAGTGACGTA  | 671.363415101973 | 0.294389529623688  |
| ATGGCGTCAC  | 671.491170470449 | 0.114099038402615  |
| CGATGACGTT  | 672.869124177409 | 0.0587952937356847 |
| GGGAGTCAAC  | 672.925753865586 | 0.213064571026983  |
| GATGACCCAA  | 673.01636026555  | 0.257672073970476  |
| CTATGACCAC  | 673.079142370436 | 0.136798256612026  |
| ATTGCTCAGC  | 673.129247997536 | 0.328415006952838  |
| ATGTGATTC   | 673.2144535487   | 0.17005650475749   |
| AGTCACATAA  | 673.402871947856 | 0.115118486933165  |
| ACCGATGACA  | 673.753211012103 | 0.12946616248977   |
| AGGATGACGA  | 674.264180906689 | 0.194835149108646  |
| CTGTGACTTA  | 674.640618720125 | 0.229195926853157  |
| GCAGTCACAT  | 674.644073525298 | 0.21725790661802   |
| CCAGTCACCA  | 674.788699254421 | 0.173188016531539  |
| GACGTCATAT  | 674.827594701725 | 0.269542333590936  |
| GACTCATCTT  | 675.132485528319 | 0.0521544805206687 |
| AGCTTAGTCA  | 675.221625557229 | 0.360217155078328  |
| CGTGACTGAG  | 675.423941064572 | 0.287367518028641  |
| GGTGATTCAA  | 675.475392956751 | 0.159559049211209  |
| CAATGACTGC  | 675.560391852164 | 0.150588752890879  |
| TAGTCATGAA  | 675.741340756365 | 0.167959809641538  |
| CTACAGTCAT  | 675.879595098729 | 0.315279730051664  |
| ATGACTTGGC  | 675.966900659368 | 0.15269965511894   |
| ACAGTCACTA  | 676.159261462804 | 0.204832403888944  |
| TGACAAGTCA  | 676.561447092583 | 0.173779448480124  |
| TGTGACTTAC  | 676.726424197756 | 0.253505139902213  |
| GACAGTCACG  | 676.754598836517 | 0.155541266581906  |
| GACTCATAAG  | 676.99813587515  | 0.237225543033433  |
| AAAGAGTAAT  | 677.122013132947 | 0.119498627287775  |
| GAGACTCATC  | 677.283549368884 | 0.353644680414198  |
| CATGTCATAA  | 677.512219030412 | 0.27797529501528   |
| GCGATGACGT  | 677.575353522291 | 0.260030044604742  |
| AATGACACGC  | 677.662277156487 | 0.142032462682322  |
| ATACCGTCAT  | 677.796003609367 | 0.250653923214913  |
| CTGTATGACA  | 677.995910785081 | 0.246750476599333  |
| ATATGACAAC  | 678.168330111081 | 0.344551700730238  |
| GCAGTCACCA  | 678.181327595428 | 0.180665971008155  |
| CTTATGACAA  | 678.336275734313 | 0.0909786604468373 |
| AAATAGTCAA  | 678.49247277773  | 0.210022550001803  |
| AAGTCACAGT  | 678.665357878306 | 0.175106384236659  |
| GTCATCGTCA  | 679.736709043199 | 0.392182174289319  |
| AGAAATGACT  | 679.875898335406 | 0.360374468115409  |
| CAATGACACG  | 679.894063527076 | 0.0524023254052491 |
| ACGATGACAA  | 680.050675664187 | 0.228768450032018  |
| GGAAATGACGA | 680.299869096537 | 0.178866132330667  |
| CATGACTGGC  | 680.315248963301 | 0.2276860158428    |

|            |                  |                    |
|------------|------------------|--------------------|
| AGCAGTCACT | 680.356020793933 | 0.126712822478392  |
| AAGGATGACA | 680.521134238535 | 0.158836507032036  |
| AAATGACATA | 680.59630120297  | 0.196812987635152  |
| CTGTGACGTA | 681.296256157891 | 0.0974268390444576 |
| TAGTGTCATT | 681.759183821522 | 0.23329225281579   |
| CTGTGTGTCA | 681.914601813145 | 0.241081446485614  |
| AAGTCACCGT | 681.926452236278 | 0.190425832334484  |
| GAAATGACAC | 681.977769703366 | 0.12996382576202   |
| ACAGTCACGC | 682.062399761602 | 0.22950332502524   |
| AAGTGACTCC | 682.267178083116 | 0.246539241779155  |
| AATGACAGAA | 682.309235805165 | 0.232472360695189  |
| CAATGACCAA | 682.591595220248 | 0.0592160155012768 |
| AGATGAGTAC | 682.758949332031 | 0.20090791216023   |
| CGGACTCATA | 683.196278277173 | 0.233351793685829  |
| TCGTCATAGC | 683.243072066158 | 0.233351391578271  |
| TGTGTGTCAA | 683.264678770097 | 0.0883880944249987 |
| CAACGTCATC | 683.385811458265 | 0.139126151737308  |
| CCGATGACGC | 683.863025192275 | 0.18745314796597   |
| ACACGTAATC | 683.968485680566 | 0.26805564559655   |
| ATGACTTAGC | 683.971222847595 | 0.249345003328515  |
| ACGTGTCCAG | 684.060375399509 | 0.159883063848312  |
| CTGTTACTCA | 684.123493983352 | 0.180688394410706  |
| GGAGTCAACC | 684.399954745252 | 0.119205515209792  |
| AACGTCATCA | 685.166141090077 | 0.246253065791558  |
| TCCTAGTCAC | 685.889049695456 | 0.151575343624612  |
| ATGATGCAAT | 685.894156601286 | 0.194368884347787  |
| AAGTCACTCA | 685.974756204563 | 0.0896422050043879 |
| AATGAATCAG | 686.031445914103 | 0.236615579275577  |
| CCACGTCACT | 686.708089897495 | 0.181716373573702  |
| GACAGTCACT | 687.096343910424 | 0.173077796572274  |
| CATGACTGCG | 687.179010440667 | 0.197143627138319  |
| ATATGACGGA | 687.373480900692 | 0.30319393727966   |
| CATGACGTAG | 687.501323465173 | 0.0586935068778527 |
| GATGACACCC | 688.036427507327 | 0.189065990225948  |
| GAGTCACGGA | 688.192428317971 | 0.392406582568909  |
| AGTCATTGTG | 688.457142911167 | 0.163547806611896  |
| CATGACGAAA | 688.487894118552 | 0.14589798052112   |
| CTACTCATAC | 689.404153093002 | 0.15233351725526   |
| ATGTGACCAA | 690.123149894049 | 0.244464844687021  |
| CGATGACAAG | 690.181061657476 | 0.268316168117175  |
| TGTGTGTGAG | 690.592854543766 | 0.224375575668786  |
| TACTATGACA | 690.627198374106 | 0.143412984271803  |
| TGACTGAACG | 690.665252356696 | 0.19558946746285   |
| GATTAGTAAC | 690.933695876485 | 0.188931167860548  |
| GGGTATGACA | 691.002290697117 | 0.174664264715792  |
| TGTGACAAAA | 691.4849648901   | 0.0881008297924644 |
| CATGACACCA | 691.569246443172 | 0.0990262998962009 |
| ATAGTCACTG | 691.60077091959  | 0.243295007370227  |
| TGATGACGAT | 692.168690680582 | 0.117914919355381  |
| GATGACTTCA | 692.237713469462 | 0.231118402148728  |
| ATCGCGTCAC | 692.317777377634 | 0.147154213726353  |
| ACACTGTGAT | 693.002280988213 | 0.180087649548639  |
| ATGACAGTAC | 693.126077502012 | 0.0699470164732952 |
| AAGTCACCCG | 693.210461470147 | 0.174577070844142  |

|            |                  |                    |
|------------|------------------|--------------------|
| AAGTCACATC | 693.303440890994 | 0.198994496893776  |
| TGAATGACGT | 693.425723148436 | 0.281818617146116  |
| ATATGACCCA | 693.67149644879  | 0.216939030274306  |
| CATGTGTCAA | 693.754860112996 | 0.195215056869278  |
| AATGACCGAT | 693.783340815175 | 0.199271662136737  |
| ACAGTCACGA | 693.99027097634  | 0.139457146340847  |
| CACATGACTA | 694.603623525652 | 0.236670431373136  |
| ATGACGGAGC | 694.622587368506 | 0.2841411927493    |
| GGAGTCAACA | 694.914137764665 | 0.245781377962569  |
| TGTGATTGAG | 695.029077263995 | 0.212550116274605  |
| CGTGACTTAA | 695.030596328427 | 0.149101237277235  |
| CGATTACTAA | 695.226716410726 | 0.20575171953601   |
| AAATTCGTC  | 695.292002756836 | 0.247474009234577  |
| TATGACGAGA | 695.376121398843 | 0.329504401388281  |
| AAGTCACACT | 695.669509370816 | 0.242639616178395  |
| AATGACCAAG | 695.834598664479 | 0.227389253371224  |
| ATAGAGTCAA | 695.849965924212 | 0.135861151142026  |
| GGTGACGAAG | 695.919132986102 | 0.199216707669629  |
| AATATGACGA | 696.100224035042 | 0.268913994540156  |
| CATGAGTCGA | 696.121510263511 | 0.125633301473712  |
| ATGAATCAAC | 696.128710614506 | 0.209557316188368  |
| GATGACAACG | 696.226595583962 | 0.209789882726781  |
| ATGACATGAC | 696.913028239792 | 0.135838165559562  |
| GGAGTCAGAT | 696.950623046017 | 0.183339266661655  |
| GAGTATGACG | 697.035475506968 | 0.304543332600648  |
| TAGACTCATG | 697.146647796345 | 0.257317820010527  |
| TGACTAAGCA | 697.644333648947 | 0.249915097628519  |
| ACGTGACTGG | 698.399398420997 | 0.128025492783132  |
| CACAGTCAGA | 698.48176129271  | 0.0958175101647845 |
| GGATGACGAG | 699.01206257691  | 0.164895722101142  |
| CCGATGACAG | 699.229575408679 | 0.159503105911858  |
| ATATGAATCA | 699.257770636951 | 0.367617639319321  |
| GGTGACTATC | 699.324146549438 | 0.375888707631841  |
| CTGTGACCAA | 699.471337826534 | 0.178470484777519  |
| CGGTGACGAA | 699.494044317889 | 0.145428443689335  |
| GACGTCATAG | 700.19917771042  | 0.149232132867749  |
| GTCATAGTCA | 700.824688770667 | 0.356910651127021  |
| GAGTCACGGT | 701.19293698327  | 0.347276409161665  |
| CGGTGACCAA | 701.266872422667 | 0.183284514000219  |
| ATGACAAATG | 701.824027631311 | 0.330223641250745  |
| AAGTGACGTA | 701.965658945078 | 0.150601809443324  |
| GCCGACTCAC | 702.048854509027 | 0.142877701408916  |
| ATTGGGTCAC | 702.457215757722 | 0.140250073745036  |
| TATACTCATA | 702.568656942236 | 0.191405180913788  |
| GGGATGACAC | 703.270101253379 | 0.229913936269861  |
| ATGAGCAACA | 704.296434532153 | 0.209161797426795  |
| ACGAGTCAGT | 704.685888984271 | 0.272440870438877  |
| GGAGTGACTC | 704.746451041915 | 0.18720757602872   |
| AACGAGTCAA | 704.967001922257 | 0.235793068864114  |
| AGTCATTGGC | 705.538840548422 | 0.312819745139461  |
| GACTCATCAA | 705.571230668562 | 0.271006491350121  |
| AGTCACCTTA | 705.646192371231 | 0.238041817886872  |
| CGATGACCAC | 705.855344267872 | 0.207283237815475  |
| CCAGTCACCT | 706.015045195488 | 0.185591861418142  |

|            |                  |                    |
|------------|------------------|--------------------|
| AGATGACGAG | 706.174590537156 | 0.163968169970392  |
| TGTGATTCAA | 706.281091434278 | 0.234155369537251  |
| AATACTCATT | 706.314595643259 | 0.300144153373959  |
| AAGTGTCAGA | 706.863783963502 | 0.161128351057918  |
| GAACAGTCAG | 706.886325110085 | 0.108863326188347  |
| ACCGACTCAT | 707.045638346468 | 0.224009946509279  |
| ATGACGGTAC | 707.148476785345 | 0.221037537237109  |
| AAATGACGCC | 707.223186032852 | 0.207552349809672  |
| GGATGACGCC | 707.336156635342 | 0.200794518124345  |
| AGTCATTGGT | 707.922230181752 | 0.230346298293375  |
| ACCGCGTCAC | 708.34250871285  | 0.158497350179542  |
| ATGACGGCAT | 708.691473996728 | 0.238359667263401  |
| TGTGACGTAG | 708.754979603525 | 0.137506236948024  |
| ATGACTTAGA | 708.812632953142 | 0.141303325493996  |
| GAATGACGAG | 709.724945738855 | 0.200524552509819  |
| CGTGAGTAAA | 710.184695336547 | 0.110276578845832  |
| AGTGACAAAT | 710.285851966249 | 0.115257425343902  |
| AGTCACATAC | 710.593038190297 | 0.240090652623664  |
| CAAATGACAC | 711.117456227346 | 0.0982495667984728 |
| GTCAGACTCA | 711.318409617496 | 0.217374431648387  |
| CATGACACGT | 711.675216142144 | 0.0896886204081228 |
| TGACGTCACG | 711.702613777025 | 0.182374145673528  |
| CCTAGTCACC | 711.771405192759 | 0.192020218584746  |
| AGGTAGTCAC | 711.784386069955 | 0.162021182016899  |
| ACGTCATATA | 711.865701056515 | 0.119367618803026  |
| GAATGACGAC | 711.920969389478 | 0.25605164373588   |
| GGAGTCAACG | 712.133073287474 | 0.26578184047493   |
| CTAGTCATGA | 712.372617282472 | 0.102895381323417  |
| AGTCATGGTC | 712.90724477744  | 0.241895286678404  |
| AAAATAGTCA | 713.139616157993 | 0.175134277344211  |
| GTATGACAAG | 713.440097822749 | 0.17598099038296   |
| ATGACAATAC | 713.528852000627 | 0.2379147540645    |
| GACTCACTCA | 713.812666400938 | 0.109771512184052  |
| GATGATGACA | 713.870734324911 | 0.168907441528806  |
| ATTGAATCAC | 713.942496688744 | 0.105803863677572  |
| TGTTACTCAA | 714.668684955737 | 0.124354312396429  |
| AAATGACAGA | 714.775903578158 | 0.132220013545461  |
| CGATGACGAG | 714.841308343615 | 0.166369966983981  |
| GGCGTGACTC | 714.994184614589 | 0.316256114500012  |
| CATGATGACA | 715.855757015206 | 0.2034885101597    |
| AATGACATAG | 715.910127564915 | 0.177587897545757  |
| AGCTGTCATC | 716.076535589517 | 0.150769714217909  |
| TCGACTCACT | 716.194698753908 | 0.169244023965816  |
| ATGATGACAG | 716.226751388265 | 0.113497646049564  |
| AGTGATTCAG | 716.811444135364 | 0.151801434851098  |
| CGACGTCATC | 717.06296427669  | 0.109819877177784  |
| AGTTACGTCA | 717.118431751394 | 0.0792558530814037 |
| TAACATGACT | 717.801854369379 | 0.201137050821999  |
| ACGATGACAG | 717.902685327395 | 0.117464566101399  |
| AAACGAGTCA | 718.221832799922 | 0.264099901705471  |
| ATATGACGAC | 718.463371774478 | 0.188832435524292  |
| AACTGACTAA | 718.509065031616 | 0.482491224252223  |
| ATTACGCAAC | 718.582966936685 | 0.254533283049834  |
| GGAATGACGT | 719.247185607813 | 0.123050793211229  |

|            |                  |                    |
|------------|------------------|--------------------|
| GAGGAGTCAA | 720.008909502509 | 0.286031039914751  |
| AGTATTAGTC | 720.526582479291 | 0.143223762610516  |
| ATCACGTCAT | 720.569819857449 | 0.272684168004773  |
| GAATATGACA | 720.703141624396 | 0.163967162251758  |
| ATGATGACAA | 720.79121159137  | 0.156501789314788  |
| ATGAGTATGA | 721.111120025268 | 0.151916774805376  |
| GTTATGACAA | 721.307070320714 | 0.227682425112841  |
| ATATCGTCAC | 721.650826069844 | 0.171239240052537  |
| AGACGTCATC | 722.162470171618 | 0.190419774837957  |
| GTCGCGTCAC | 722.359052067214 | 0.127640047706207  |
| CCTGACTCCT | 722.38318890729  | 0.197971218775243  |
| CGTGACATAT | 722.667541066491 | 0.118652815090616  |
| GACTCACACA | 723.109929530396 | 0.211498649511453  |
| TACGATGACA | 723.181253958944 | 0.205275714652338  |
| ATGTCATAAC | 723.187777266844 | 0.232983496772706  |
| ATGACGGAGA | 723.323535550266 | 0.207812513179907  |
| AGACGAGTCA | 723.425504422335 | 0.174088556776753  |
| TAATGACTAG | 724.291639967929 | 0.272356157961801  |
| AGTCACCCTG | 724.338049901997 | 0.13941671228793   |
| CAACATGACT | 724.452812683967 | 0.248596967405546  |
| AGAGTCAGAT | 724.704001541138 | 0.142630230403306  |
| AAGTCACCAG | 725.015956897326 | 0.131329433123714  |
| GCGAGTCAGA | 725.189268351461 | 0.164465039005308  |
| CGATGACAGC | 725.491163136835 | 0.190929150862416  |
| TAGCGTCATG | 725.705205825902 | 0.292524488840566  |
| TGACTAAAAC | 725.918068489836 | 0.204521223305622  |
| TGACGTGACA | 725.989393735078 | 0.156596389489547  |
| ACTCCGTCAT | 726.001979525979 | 0.20378091771039   |
| ACGACGTCAT | 726.03865698864  | 0.130000685960461  |
| CGCTGACACA | 726.07458880149  | 0.245058781095048  |
| TAGTCAGAGA | 726.384498549464 | 0.194287795248539  |
| GCCATGTCAC | 726.62921731751  | 0.135385036170738  |
| TAATGACACC | 727.185622403544 | 0.258508706203693  |
| AACGTCATCC | 727.337946194863 | 0.112004279708203  |
| ATGACCGATC | 727.610023248154 | 0.151663086135519  |
| TGTGACGAAC | 727.906803020288 | 0.136798016319301  |
| CTGACTCCGA | 728.035086297902 | 0.198606879323442  |
| CTACAGTCAC | 728.049734836639 | 0.199441160849     |
| CACCAGTCAC | 728.28063254584  | 0.165693763534021  |
| GTCACCGTCA | 728.689425178346 | 0.189169966693702  |
| TACAGTCAGA | 729.128859137469 | 0.0923718719594615 |
| GTATGACCAG | 729.621857709958 | 0.183912197220153  |
| GACTCATCTA | 729.794908287568 | 0.280015789308781  |
| ATGACGTTGC | 729.811302138189 | 0.219369556202503  |
| ATGACTTACT | 730.059337436925 | 0.20629284016051   |
| TAATGTCATA | 730.254450380497 | 0.158801667296413  |
| ATCTGTCAGA | 730.262094821921 | 0.125456145863112  |
| TCTGACGTCA | 730.383590826231 | 0.1761386477625    |
| AGAATAGTCA | 731.033657907944 | 0.0888191893128081 |
| ACCTCGTCAT | 731.291905043656 | 0.221980630850509  |
| ATATGTCAGA | 731.880574989922 | 0.163261342375363  |
| GATATGACGA | 731.995000622216 | 0.256834122441744  |
| GATGACCACG | 732.097187148869 | 0.235948976397582  |
| GGTGTGACAC | 732.139183290464 | 0.0909702652526165 |

|             |                  |                    |
|-------------|------------------|--------------------|
| CGTGAGTAAG  | 732.191220262589 | 0.190222985585146  |
| TCTGACTGCA  | 733.505253849413 | 0.2132716352255    |
| AGAGTCAGCA  | 733.923666791924 | 0.114534092486832  |
| AATGACGCGC  | 734.044815706798 | 0.263217414007222  |
| AAGTCACATG  | 735.551315526068 | 0.138659087155728  |
| GGGTGACGAA  | 735.911064284468 | 0.205295301732712  |
| GGGTGACTTA  | 736.514074574769 | 0.161202271949744  |
| CTGTGACGAA  | 736.540238360148 | 0.139285433888223  |
| AGTCATTGGG  | 736.565979053344 | 0.31880331240446   |
| GCAGATGACT  | 737.160305772065 | 0.211229483386853  |
| TTATGACGAT  | 737.257650898753 | 0.232972535261307  |
| ATGATGTGGC  | 737.724021798159 | 0.186815214023372  |
| ACTCTGTCAT  | 737.76460841962  | 0.23639989138254   |
| TGGAGTCAAC  | 737.855769528835 | 0.129361063176708  |
| TATGACGGCA  | 738.031411579582 | 0.134650389440241  |
| GCGATGACAA  | 738.405545526966 | 0.137378050393187  |
| AACTACTCAT  | 738.457124428584 | 0.2098701368932    |
| GACTTGTAC   | 738.939915164165 | 0.198766577597686  |
| CGAATGACGA  | 739.076115181112 | 0.16410471365282   |
| AGTGAATCAG  | 739.236474332236 | 0.140611078574649  |
| CGATGACAGG  | 739.730003531788 | 0.193356601512728  |
| TAATGAGTCT  | 739.799618326145 | 0.204111791748632  |
| TATGTGTAAT  | 739.864835248463 | 0.35382001534748   |
| ACGTCATAAC  | 740.191923405699 | 0.307078971849081  |
| CACTGTCATA  | 740.29331113096  | 0.229160961558728  |
| TCTGACGCA   | 740.539837628949 | 0.279032119306258  |
| TTATGAGCAA  | 741.222531310798 | 0.0905135825618971 |
| GAATGACGCC  | 741.391286100232 | 0.21073236544667   |
| ACAAGTCATG  | 741.531972753999 | 0.13792638218678   |
| TATTCGTCAG  | 741.734222938898 | 0.187288088293731  |
| ACATGACTAG  | 741.910628601127 | 0.313993402118238  |
| GATGAGTACG  | 741.924779687699 | 0.0815043903550862 |
| GATGAGCAAC  | 741.979990564517 | 0.156377928959791  |
| AGATGACAAC  | 742.030254651033 | 0.176500376631825  |
| CAGTCACCAA  | 742.262743983736 | 0.209920455993695  |
| AATGTATGAC  | 742.514412261074 | 0.30929334995794   |
| ATGACTTTTC  | 742.596887639098 | 0.31254676152889   |
| ACTTTGTTCAT | 742.957808130777 | 0.276061119359474  |
| GTCACAGTCA  | 743.047707344279 | 0.28048473618026   |
| CATTCGTCAC  | 743.214111808326 | 0.176173905652255  |
| ATGACATATG  | 743.297632764981 | 0.287298737849104  |
| AGATGAGCAA  | 743.332547425803 | 0.164688191138105  |
| AGGTGACCAA  | 743.43773383305  | 0.20783522049422   |
| GACTCATATC  | 743.458209601893 | 0.294892467963889  |
| GGTGACCAAG  | 743.613267516344 | 0.272130688163332  |
| CGCTATGACA  | 744.136715829194 | 0.279592356881291  |
| CGAATGACGT  | 744.944900257313 | 0.219643858115176  |
| GGCTTAGTCA  | 745.434680348308 | 0.274791799010545  |
| GATGACGAGG  | 745.477700123331 | 0.159804113589986  |
| GTCCACGTCA  | 745.563809645257 | 0.166500471406132  |
| TAACAGTCAG  | 745.774958265431 | 0.124697473677563  |
| CAAATGACGC  | 745.829951847515 | 0.181169208570938  |
| TTAGTCAACC  | 745.876818411496 | 0.221900798530069  |
| GTGATTCAAC  | 746.078782649966 | 0.107963182073739  |

|             |                  |                    |
|-------------|------------------|--------------------|
| AAGTCACAGC  | 746.14337384619  | 0.208206597099504  |
| TCCGATGACA  | 746.234422874453 | 0.116689118819676  |
| ACATCGTCAT  | 746.725478728516 | 0.208813498001655  |
| CGTTAGTCAA  | 746.897582607105 | 0.187638038892176  |
| ACGACTCAGA  | 746.917653672433 | 0.186648168589934  |
| ACCGACTCAC  | 747.152766463867 | 0.117002745449577  |
| CGTGACACAA  | 747.478390669173 | 0.342968855501293  |
| GGACTCACAC  | 747.723125208632 | 0.16648017631415   |
| AAGCGTCATG  | 748.013214395605 | 0.136348199718321  |
| GAGTCACGGG  | 748.02314356481  | 0.407082689073675  |
| AATGACAGAC  | 748.104706775489 | 0.203774232091453  |
| ATCACGTAC   | 748.310614075433 | 0.141347191943279  |
| GGCACGTAC   | 748.394406814659 | 0.121702669885406  |
| CCAAATGACT  | 748.570685874685 | 0.181458173080868  |
| CAATGACATA  | 748.659343604659 | 0.117816602818617  |
| AGTGACCCAT  | 748.826373877345 | 0.171500201183749  |
| ATGACAGTGC  | 748.846939405237 | 0.185290682579246  |
| CCTGTCATAA  | 749.223431743973 | 0.215520334660626  |
| AGCGACTCAC  | 749.397538824299 | 0.169975594815802  |
| CTAAATGACT  | 750.111187017955 | 0.0735212785208055 |
| GAATGACACG  | 750.252724526335 | 0.273930880307518  |
| GGTATGACCA  | 750.49797087599  | 0.203485438921122  |
| AATGACATAA  | 750.529003729802 | 0.181703318158482  |
| CTAGTACCA   | 751.12356299843  | 0.269487200738059  |
| ATGACGAACA  | 751.225429431997 | 0.251692378835605  |
| GTGACCCACG  | 751.322786024096 | 0.11031906685841   |
| GATTCGTACG  | 751.450898053721 | 0.0908877526246924 |
| AGTCATGAGA  | 751.916628890924 | 0.191361246121492  |
| CGCGTGACTA  | 752.214406672714 | 0.190606834522459  |
| ACGTCATAAG  | 752.417905589475 | 0.21138184898262   |
| GATGACGGAC  | 752.538156372004 | 0.0844202168489437 |
| TCAATGACAC  | 752.71165719315  | 0.218432581664399  |
| AGGTGACGAA  | 752.785078615416 | 0.152598982701306  |
| ATCTATGACA  | 753.351285500349 | 0.183319587678543  |
| CATGATTCAG  | 754.176626404881 | 0.16874766705576   |
| AGCATGACAC  | 754.224294851233 | 0.193541942849161  |
| ATGAATCAAT  | 754.8222979532   | 0.109729321935676  |
| ATGACATAAA  | 754.853795187295 | 0.179220004527905  |
| CTATACTCAT  | 755.131994799773 | 0.154962492561405  |
| AGCGTGACTA  | 755.209180667486 | 0.367714752344837  |
| GGATGAGCAA  | 755.348913504499 | 0.146660765916229  |
| CAGTATGACG  | 756.435326221198 | 0.252012450902404  |
| GAGTCAGTAA  | 756.571932907756 | 0.167824985352863  |
| TTCGATGACA  | 756.697300630097 | 0.251804781006069  |
| CAGTCACAGA  | 757.206363878891 | 0.371993287035817  |
| GTGTCATGCA  | 757.241106981438 | 0.17049207285402   |
| TATGACGCC   | 757.453086734232 | 0.107031681351275  |
| ACAACGTACAT | 757.900147833682 | 0.177223341578864  |
| AGTCAGAGCC  | 757.916890492884 | 0.217568177749768  |
| ATATGACAAAT | 757.968822572303 | 0.21843948791041   |
| CAGTCATGCA  | 758.173333861601 | 0.244596264632282  |
| GATCACTCAT  | 758.230163823169 | 0.209637371663467  |
| ATGACCTAAT  | 758.367600016742 | 0.188016806394111  |
| TAGTCACAAG  | 758.947611402242 | 0.195753182043834  |



|            |                  |                   |
|------------|------------------|-------------------|
| GAGTCAGCAA | 759.759716467418 | 0.169153881503142 |
| ATGTGACGAA | 759.771253672827 | 0.192183778500213 |
| AGAGTCAGCC | 760.616427575377 | 0.135991753694285 |
| GCTGACTCCG | 761.013461445815 | 0.10950756078054  |
| ACTACTCATC | 762.038353893649 | 0.186482559160082 |
| AACGTGACTG | 762.594418715529 | 0.283939921703996 |
| AAGTCACCAT | 762.911911753531 | 0.214595891038844 |
| TCCTATGACA | 763.22905143852  | 0.188034532271576 |
| ACCAAGTCAT | 763.585064573299 | 0.335794786354448 |
| CCATGACTGG | 765.117214720788 | 0.144687455160064 |
| GACGATGACA | 765.605098203526 | 0.342627736983806 |
| ACGTCATAGA | 765.64593763715  | 0.239586697856444 |
| GATGAGCAAG | 765.887063853747 | 0.173315600178081 |
| TGTGACAAAG | 766.132902253548 | 0.217495337198264 |
| GGACTCATCA | 766.922905309737 | 0.267444712565001 |
| TATGACCTAA | 767.19258110271  | 0.110327705596103 |
| CTATGACAAG | 767.405093638654 | 0.245150722651757 |
| CCAATGACAC | 767.59628032758  | 0.146731116268619 |
| GCGTAGTCAC | 767.824753248272 | 0.235986099256374 |
| ATGACTTAGG | 767.864975488135 | 0.351301589230062 |
| CTGTCATAAA | 767.942218247009 | 0.193400255424317 |
| TACTCATACA | 768.024644203544 | 0.172596090082147 |
| CACATGTGAT | 768.251040904389 | 0.202558366838083 |
| ATGACAAAGA | 768.508780393399 | 0.211800386241445 |
| AGTCATGAGG | 768.700431929508 | 0.138249506655866 |
| ATGAGTCGCC | 768.707791412234 | 0.278696399350888 |
| ATATGGTCAT | 768.720336817578 | 0.175445478088656 |
| CAGTCACCGC | 769.001549947748 | 0.19496907227167  |
| GTCATACCTA | 769.078826283407 | 0.113652683425722 |
| TACTGTCATA | 769.385374554313 | 0.201511677608629 |
| GTGAATCAGG | 769.694157053644 | 0.192917614027956 |
| CATGACGTGG | 771.287468090136 | 0.129125976644277 |
| ATTGCTCAGA | 771.851066925911 | 0.213886642501009 |
| AAATTATGAC | 772.310358942018 | 0.168091374897527 |
| ATTAGTAAGA | 772.338172154983 | 0.171281522678046 |
| CAATGAGTCT | 773.216064985903 | 0.225321465652014 |
| TTATGACCAC | 773.26206969473  | 0.165154403957253 |
| ACCTGTCACA | 773.74881267886  | 0.139723218854429 |
| TTGACTGAAC | 773.899264873858 | 0.102147574082939 |
| TAGTCACATG | 774.03259938674  | 0.280192419889478 |
| GCATGACACC | 774.194851413825 | 0.169606427466889 |
| AAACTGGTCA | 774.336535179211 | 0.136188436849194 |
| ATGAGTGAAT | 774.55143210555  | 0.174164068171701 |
| TAAGACTCAA | 774.603642176965 | 0.395617165015079 |
| AGTCATGCAG | 775.115403140912 | 0.147798770346256 |
| ATCTTGTGAT | 775.581281599622 | 0.16807067535025  |
| AGCAGTCAGA | 775.726863551223 | 0.159738136884039 |
| AAGAGTCTTA | 775.774266845164 | 0.142816081860655 |
| GATGACCCAG | 775.832420829482 | 0.184192518793702 |
| CGTCACGTCA | 776.686091678223 | 0.181291293936745 |
| ACTCGAGTCA | 776.815407140094 | 0.305765595873504 |
| CTGTGCGTCA | 777.003414249059 | 0.222834442806108 |
| ATGACCGAAC | 777.062661398893 | 0.161596414176836 |
| GATGTATGAC | 777.094863761905 | 0.164916128961811 |

|             |                  |                    |
|-------------|------------------|--------------------|
| AAGACTAATG  | 777.668738435981 | 0.149879409325971  |
| GTGACAAACA  | 777.857944034131 | 0.148669600765215  |
| AAACTGACTC  | 777.912636464577 | 0.140508651611933  |
| ATCTGTCACT  | 778.001059135733 | 0.17831565137984   |
| TGATGACGAG  | 778.092659882074 | 0.135508294726043  |
| ATTGCTCACT  | 778.470411056648 | 0.154118476429207  |
| AGTGACCCAC  | 778.814808169793 | 0.128256503726986  |
| ACACGTCAGC  | 778.846211385443 | 0.254493483171661  |
| ATATGACCAC  | 778.910126957118 | 0.233371816879454  |
| CGTATGACCA  | 779.04579932771  | 0.0186198651498479 |
| GCATGTCATA  | 779.057706724112 | 0.185620592650231  |
| AGTATGACCG  | 779.067514274149 | 0.13027139269263   |
| ATGAGCAAGA  | 779.19303728623  | 0.173640617600397  |
| GGTGTCAAAA  | 779.612893057929 | 0.160726445963192  |
| GTGACACTGA  | 779.664199728596 | 0.202521719015017  |
| AAGTCACACC  | 779.880111912528 | 0.0993405893051369 |
| GGCTATGACA  | 780.383915267729 | 0.332337600619045  |
| ATGACGTGCA  | 780.395857221006 | 0.181664527265841  |
| CAATGAGTAC  | 780.541226399032 | 0.134405005378345  |
| ATGACGATGA  | 780.594785603656 | 0.184181958464639  |
| GGACATGACT  | 780.852852812016 | 0.244771759738094  |
| AGTGACTTAA  | 781.100425833822 | 0.197971891031659  |
| GAATACTCAT  | 781.175953365728 | 0.371644330232648  |
| TAATGACAAA  | 781.335538644842 | 0.180252718184066  |
| AGTGACGTAG  | 781.470229083475 | 0.132662730692884  |
| ATGAGTCGGC  | 782.06521897738  | 0.228232533797398  |
| ACGCTGTCAAT | 782.074963449474 | 0.126003377878005  |
| ATGTCATACG  | 782.652175683399 | 0.307279168497531  |
| ATCATGACAC  | 783.254762404826 | 0.143019521728271  |
| CTAGTCACTG  | 783.352361853571 | 0.162258617070645  |
| ATCCGTCACT  | 783.512845088221 | 0.21911486643021   |
| AGTCATGAGC  | 783.807609124884 | 0.148415300705271  |
| ACATGACGTA  | 784.155858659616 | 0.143884352256318  |
| AGGATGACAA  | 784.218896061511 | 0.124995370380561  |
| TAATATGACA  | 784.430069917165 | 0.16903637859067   |
| TGTATGACAT  | 784.93610407607  | 0.150867971294553  |
| AATGACACGG  | 785.099372740384 | 0.220876108739968  |
| ATTACGTAAG  | 785.297222384238 | 0.181677893535017  |
| CACTGTCACTC | 785.391901791445 | 0.159496289563719  |
| GGATGACGAC  | 785.406789415329 | 0.11248512350226   |
| AAAATGTCAAT | 785.76374199176  | 0.158214368451934  |
| ACTAATGACG  | 785.895172086204 | 0.201828213628831  |
| CATGAGCAAT  | 786.131136147064 | 0.0643066229426759 |
| GAATGACCAC  | 786.274337637296 | 0.149600539858262  |
| AACCAGTCAG  | 787.07369750922  | 0.253131272163479  |
| ATGACAGCGA  | 787.485312358617 | 0.176588854907834  |
| ACGTGTGTCA  | 787.586747380846 | 0.218680934970143  |
| TGTGACGAAG  | 787.894152069789 | 0.145875247699809  |
| CTCGGAGTCA  | 788.156157523243 | 0.220183018295279  |
| AGTGACTCGG  | 788.471584321184 | 0.249278248640954  |
| GTGACGCGGA  | 788.651994172551 | 0.119826751967249  |
| TACTTAGTCA  | 788.661846345876 | 0.186283473463966  |
| TGGCGTCACA  | 788.922978335474 | 0.170059853184637  |
| AACTCAGTCA  | 788.949378358869 | 0.156025230855067  |

|            |                  |                    |
|------------|------------------|--------------------|
| GATGTGTAAT | 789.453107345791 | 0.267074961463593  |
| TGACTAGTCA | 789.592930799013 | 0.34489980827839   |
| TTCTATGACA | 789.634798597738 | 0.156506060920886  |
| CATGACGCGT | 789.739991861701 | 0.19610196598592   |
| ATGAGCAAAC | 790.381901731621 | 0.193779535666065  |
| GTCACGTGAC | 790.522311397916 | 0.167756670853857  |
| ACGTGACTTA | 790.977760399106 | 0.115406587512241  |
| TCGACTCAGA | 791.093309198397 | 0.118698396165897  |
| CAGAGTCAGC | 791.722506453225 | 0.150584034249996  |
| GAAGGGTCAC | 791.72630206057  | 0.17274761747732   |
| AAATGTCATC | 792.216495795446 | 0.0774152166246177 |
| CGTGTACAAA | 792.364839484943 | 0.221603893627835  |
| TCAGATGACA | 792.78327794426  | 0.172468100925326  |
| AAACTTGTC  | 792.799053966248 | 0.217830889100374  |
| TGCTATGACA | 793.172030439903 | 0.154070915143075  |
| ATAATGTCAT | 793.364932647555 | 0.176022038447334  |
| ATTATTCATA | 793.457356006202 | 0.141382795528283  |
| GAGTGACGAA | 793.488668528282 | 0.135586596054744  |
| ATGACTGGTG | 793.555532932149 | 0.291679335734723  |
| ATGAGCCACG | 793.684486066597 | 0.182827281173639  |
| ATCTGACACA | 793.726672290176 | 0.168756970812574  |
| AATGACTTCA | 793.938817869379 | 0.210807963800102  |
| ACGTCATAGG | 794.271494730735 | 0.278626878237244  |
| ATCTCGTCAT | 794.543644715782 | 0.139449116875895  |
| ATGACTTACC | 794.630572504989 | 0.194200216339201  |
| CTGTGACAAA | 794.826609652779 | 0.177557823385763  |
| GTCACATGAC | 794.940050137733 | 0.313322450398667  |
| AAGTCATGGT | 794.994502078806 | 0.129140135600076  |
| ATACAGTCAG | 795.090790825762 | 0.10731930252209   |
| CATGACGAAG | 795.091101940845 | 0.179771782959486  |
| CTCGATGACA | 795.149941702437 | 0.13760119864737   |
| TTGACTAAAA | 795.419987088595 | 0.216981455730392  |
| ATGACGCGCA | 795.621097649454 | 0.255103388117555  |
| ATGACTGCCA | 796.129184435158 | 0.226757374910167  |
| GTGACTTACA | 796.137126410092 | 0.178751041876574  |
| CCTGACACAC | 796.377709953031 | 0.173394352154721  |
| ATGACTCTCA | 796.419570601859 | 0.176480260691148  |
| GTGGTCACAC | 796.598933342298 | 0.197384976225599  |
| ACAGTCAGAA | 796.692935133375 | 0.169373559980654  |
| CTCGTGACTA | 797.432164615749 | 0.115125074427819  |
| ACGACTCACT | 798.000852842436 | 0.177901738756804  |
| AGATGACCAC | 798.079996986907 | 0.146163297357073  |
| CATTACTAAT | 798.17664423772  | 0.199981563030552  |
| GGGTAGTCAC | 798.307605433135 | 0.155225064875424  |
| GATGACGCTC | 798.827742773588 | 0.172287200593299  |
| ATGACACGGC | 798.855021995891 | 0.211538666202716  |
| CAGATGACAC | 799.100782751404 | 0.190176390861257  |
| ATGAGTAGTC | 799.303340252179 | 0.132636831361357  |
| GTCGGAGTCA | 800.360433270026 | 0.151851802136444  |
| GCGACTCACG | 800.980592060601 | 0.249738561641315  |
| CATGTATGAC | 801.251434905691 | 0.28783622436451   |
| AATAGTCAGG | 801.406668652409 | 0.137322218138874  |
| ATGACAGTAA | 801.560969987105 | 0.182045747173248  |
| AAAGGTGACT | 801.688232657075 | 0.0962324608434066 |

|            |                  |                    |
|------------|------------------|--------------------|
| ATGAGTAGTA | 802.382565325512 | 0.179715006991121  |
| GACGTGACTG | 802.559755935262 | 0.230904662635461  |
| CGTCATTGAC | 802.704022944406 | 0.16234082671067   |
| GTGACGTGCA | 802.723523769022 | 0.159707598289028  |
| GGTGAATCAG | 802.814625264702 | 0.162869033876553  |
| ACCTTGTCAT | 803.136000997061 | 0.155479689467495  |
| GCCGCGTCAC | 803.229137033987 | 0.152031023432779  |
| GTTGACTCGA | 803.265654888183 | 0.190349868084883  |
| CTAGAGTCAG | 804.119262660222 | 0.186119073616324  |
| TTGTGACCAA | 804.307022743992 | 0.238036934991495  |
| CCCTGACTGA | 804.437588368603 | 0.144308084835018  |
| GCGATGACAG | 804.473813890935 | 0.14123162905482   |
| GACGTCATAA | 804.484439907199 | 0.180581684810707  |
| CGAGTCAGCA | 804.561869974964 | 0.110260105940938  |
| AATGACGTCT | 804.568918127665 | 0.158285632780606  |
| ATGAGTTGTC | 804.608764695334 | 0.13763677929898   |
| AGTCAATGAC | 804.615129944981 | 0.186479366704754  |
| GGGGTGACTA | 804.773729611126 | 0.187276452190473  |
| AAAAGATGAC | 805.049407767238 | 0.160101874627845  |
| ATGACAAGAC | 805.174140747337 | 0.135749083576112  |
| CCCGATGACA | 805.347230024347 | 0.196543064315143  |
| AAGTCACTGA | 805.361537325901 | 0.178412788512568  |
| CAGTAGTCAC | 805.421158309751 | 0.234174682571837  |
| GGTTACTCA  | 805.505861438962 | 0.198179962976658  |
| ATAACGTCAC | 805.545211883742 | 0.181037509909512  |
| AGTCACCCTA | 806.142997525456 | 0.15429216488183   |
| CTGACGTGAG | 806.297892655906 | 0.30921839592316   |
| ACGTTGTCAT | 806.30272455428  | 0.159752556533052  |
| GTGGGAGTCA | 806.359836689045 | 0.188063575270107  |
| TGCTGACACA | 806.762614757435 | 0.232755481910126  |
| GTCATGTCAC | 806.940858288716 | 0.178491192806326  |
| CAATGTCATA | 807.04569977002  | 0.180148392905065  |
| AAGGGTCACT | 807.52501672135  | 0.0671248816306536 |
| CAGATGACGC | 807.935649218613 | 0.238982414388793  |
| GTAGATGACT | 808.412721524959 | 0.258981123547839  |
| GTCATCCATA | 808.43263783884  | 0.127981336103851  |
| ATGACAAAGC | 808.951025112058 | 0.14655381442644   |
| AATGAGTAGT | 809.262989500634 | 0.149124304693935  |
| AATATGACAA | 809.353455207979 | 0.218169519526079  |
| CACTAGTCAC | 810.442481818    | 0.147904850154754  |
| GCCTATGACA | 810.46905529671  | 0.244913846564769  |
| AAGCTGTCAT | 810.931551027514 | 0.191506627931281  |
| GTCATGACCA | 811.113598581613 | 0.145037667248261  |
| CTAGATGACT | 811.292512608962 | 0.156770115229801  |
| ATCATGTCAT | 811.649027276315 | 0.170780332327302  |
| GTGACAAATG | 811.792381900688 | 0.15273972194976   |
| AGTATGACGG | 811.89457559116  | 0.148360311721672  |
| ACCCATGACT | 812.024151502563 | 0.145639557376978  |
| ATGACAGCTA | 812.136028190378 | 0.13144248250942   |
| CACGATGACA | 812.722803560117 | 0.177549738466624  |
| ATGACAGTGA | 812.784849039429 | 0.162081901610658  |
| ATATTGTCAC | 813.086610448294 | 0.170244563215339  |
| GATTAGTCGT | 813.308588264293 | 0.116781844184172  |
| GCAGACTCAC | 813.703198825685 | 0.131038055328128  |

|             |                  |                    |
|-------------|------------------|--------------------|
| ACCGTGA     | 813.862170611892 | 0.12320504770406   |
| CTCA        | 814.307855399541 | 0.189845656898162  |
| ACATTGTCAT  | 814.360216529494 | 0.129066384142867  |
| AGACATGACT  | 814.409369139543 | 0.136801854637514  |
| CGCTGTCATC  | 814.695133969324 | 0.173075559273793  |
| ATAGTCAGAG  | 814.819707173813 | 0.138571351221908  |
| ATGACATTAC  | 814.937707985052 | 0.106299693582155  |
| AGTCACTCAA  | 814.954607711929 | 0.243875816693807  |
| GTGTGTCAAA  | 815.228158126121 | 0.175866018019264  |
| GCCAAGTCAC  | 815.2935810225   | 0.188690852778549  |
| AAACTCGTCA  | 815.78132442638  | 0.2079737236952    |
| GTCTATGACA  | 815.952849551625 | 0.248887629512009  |
| GTGTCACCTA  | 816.366659551181 | 0.186006289538085  |
| GACTCACACC  | 816.422679694471 | 0.139516041309928  |
| ATGCTGTCAC  | 816.470505406486 | 0.152495051518826  |
| AATTACGTAA  | 817.72055578625  | 0.206653831076508  |
| CCATGACGTA  | 817.939555483746 | 0.158004218774212  |
| ACCGTCATAA  | 818.104391890262 | 0.18347944085454   |
| TTAGTCAATC  | 818.303668537391 | 0.230671409820246  |
| ATGACGGACA  | 818.54474014694  | 0.183214891718851  |
| ACAGTGTAC   | 819.479273186374 | 0.170093226856531  |
| AATGAGTACG  | 819.773355619106 | 0.190811800990401  |
| GTCATTGTCA  | 819.91749760875  | 0.13157227170179   |
| ATGTGACAAA  | 820.330832237193 | 0.151846762080527  |
| GCATGACCCA  | 820.368747279571 | 0.196355410170696  |
| GGGTGACCAA  | 820.446374850239 | 0.125570722302224  |
| CCATTACTCA  | 820.771692295999 | 0.143005260270894  |
| TAAGTCACTG  | 820.821375842356 | 0.158282358611903  |
| CCCTGTCATA  | 821.179444153648 | 0.205681236514555  |
| TCGTCATCAA  | 821.413058360022 | 0.156998062835488  |
| AGTTCGTCAT  | 821.732652007256 | 0.134674788532015  |
| TCCTGACGCA  | 821.744430445644 | 0.094899074857938  |
| ACGTCACCTCA | 821.878857835332 | 0.148677696441257  |
| ATGACGTTAA  | 821.934776831193 | 0.188193392365552  |
| AAAGTGAGTC  | 821.960080118147 | 0.150730118811282  |
| ATCGTGTAC   | 821.987112097892 | 0.120473174066562  |
| TGACATGACA  | 822.373849278101 | 0.0630554256548687 |
| ATGAGCAAAA  | 822.604799876974 | 0.114189462222882  |
| GAGGATGACA  | 822.672550435136 | 0.0950966124774102 |
| AAACCAGTCA  | 823.159210677138 | 0.269455225415191  |
| GTAACGTAC   | 823.186047518602 | 0.132040428120598  |
| AGAAAGTCAT  | 823.276246995618 | 0.240243926018081  |
| ATGACAATAA  | 823.721767540726 | 0.177881996999949  |
| GAGTGACCAA  | 824.137293225567 | 0.165462943117727  |
| CGTTGACACA  | 824.304441589279 | 0.199201094912944  |
| TGACGACTCA  | 825.856164251311 | 0.1948130723242    |
| ATGACGTTGA  | 825.893137308913 | 0.166996809578016  |
| GAGTCAATGA  | 826.29013649865  | 0.162892391382987  |
| AGAGTCACTT  | 826.776426187869 | 0.2685188010591    |
| TACACGTAAT  | 826.991895896911 | 0.146157961328751  |
| ACCTACTCAT  | 827.242364913574 | 0.149600625020241  |
| AGACTCACAC  | 827.922034168654 | 0.0918313647310675 |
| AAGACGTACAT | 828.037025360702 | 0.120604533643074  |
| ATGACCGAAA  | 828.081895883024 | 0.224344585491079  |

|            |                  |                    |
|------------|------------------|--------------------|
| ACATACTCAT | 828.181886100803 | 0.157835507362109  |
| GATGACAGTA | 829.025671395993 | 0.109207145773595  |
| CACGTGTCAC | 829.170336852516 | 0.117097354687934  |
| AGTCACTCCG | 829.277919363429 | 0.176421095977484  |
| AGGGTATGAC | 829.344082483865 | 0.13403449209464   |
| ATGATGCAAC | 830.570545075454 | 0.171316005878212  |
| AGCTAGTCAT | 830.586921098273 | 0.201042445655392  |
| GGTGACGCCA | 830.887322810276 | 0.13240442800882   |
| ACATGTCATG | 831.015000032675 | 0.206565849693838  |
| GGCAGTCACC | 831.085367967153 | 0.196871685863925  |
| ATACTGACTC | 831.325757993172 | 0.124817284558259  |
| AGTTTGTAC  | 831.469439415317 | 0.171019477813762  |
| CGCGACTCAC | 831.57607964859  | 0.174138199236778  |
| GGCTAGTCAC | 831.968160351849 | 0.174411564792533  |
| ACGTGACTGC | 832.123388124319 | 0.192634850117245  |
| CAGGTATGAC | 832.644650978863 | 0.0618770965220411 |
| ATGAATAATA | 832.924577929345 | 0.156203084126983  |
| GTAATAATAC | 833.047117836463 | 0.167826687637421  |
| ACGTCATAAA | 833.109497347175 | 0.111608448136729  |
| AGGGTGACGC | 833.160587590944 | 0.0929690071859299 |
| AATGACAGAG | 833.449484607174 | 0.196691605017586  |
| CTAGTCAGAG | 833.950901891073 | 0.166535191985625  |
| TGACGTATCA | 834.452651657475 | 0.256027813520767  |
| ATGAGTATGC | 834.526491727715 | 0.162602295900249  |
| GCAGTGTCAC | 834.72102051226  | 0.112217875123688  |
| CTGGAGTCAC | 834.841724604045 | 0.15385226199247   |
| GTGCGTCAAA | 834.87695637256  | 0.158263102180784  |
| ACCGTGTGAT | 835.149024694366 | 0.122012647900385  |
| GTGAATCAAC | 836.162134337203 | 0.123736675578379  |
| GAGTCAGTAC | 836.439636508627 | 0.16170081667377   |
| ATGACGCCGA | 836.501193123116 | 0.220699579307102  |
| AGTCACTCTG | 837.00936542588  | 0.153221707328271  |
| TATGATGCAA | 837.030281474559 | 0.134813193311378  |
| ACTTGTCACA | 837.125904483324 | 0.133519233367733  |
| GAGAGTCAGC | 837.55351733197  | 0.16290580786127   |
| GTATCGTCAC | 837.6861438166   | 0.137938293798146  |
| CCAAGTCATC | 837.868446915024 | 0.173755509110311  |
| ATACACGTCA | 837.972008288995 | 0.206403688819464  |
| CGACTAATCG | 838.060140311693 | 0.14447682725977   |
| CGCTGTCATA | 838.258332060783 | 0.154342226203882  |
| AGTCAGTAAT | 839.799302796961 | 0.137082264158907  |
| GCGTCATGCA | 839.856268921497 | 0.175823306318954  |
| GATGACCGAA | 839.922273449277 | 0.190293571127125  |
| AATATGACCA | 839.933372213611 | 0.146881005043255  |
| AATTTGTCAC | 839.950833666009 | 0.184185712004687  |
| ATGACCACGA | 840.313365802747 | 0.115739903042187  |
| ATGACAATGA | 840.858617131314 | 0.184913894499275  |
| GCCTGACTAA | 841.102895932151 | 0.131903915245184  |
| AAGATTCATA | 841.521271614753 | 0.128135833946342  |
| TATCACTCAT | 841.804787379095 | 0.198201453224281  |
| AAGATATGAC | 841.966616547467 | 0.112123589790786  |
| ATTAGTCGCA | 842.0788008688   | 0.132518199228094  |
| AAGACTCAGG | 842.181885383393 | 0.103499268605763  |
| AGCACGTAC  | 842.294817714936 | 0.0956526882131681 |

|             |                  |                    |
|-------------|------------------|--------------------|
| AATTTGCTCA  | 842.467743192564 | 0.176778550839111  |
| ATGAATAATC  | 842.537244671319 | 0.122945232909813  |
| AAGTTATGAC  | 842.613392130575 | 0.187140440344114  |
| ATCCGTCAGA  | 842.630523823555 | 0.142618306477763  |
| ATATGAGCAA  | 842.80716016483  | 0.117599358958908  |
| AAGACTCTTA  | 843.073551837164 | 0.113392272163697  |
| GGAAATGACT  | 843.227858622775 | 0.153298318528773  |
| CGTCATTGTA  | 843.457071945282 | 0.109138406815083  |
| TACCGTCATA  | 843.518949441642 | 0.12960730951093   |
| CGTGACTTAG  | 843.883910490402 | 0.13167182675096   |
| GTCATCCGTA  | 844.018428944825 | 0.197113894196055  |
| ATGATATGAC  | 844.480242376268 | 0.162140327177741  |
| GCCGATGACA  | 844.56606355528  | 0.2253033529682    |
| GTCGTGTCAC  | 844.79534244583  | 0.108331102464779  |
| TGACTACTCA  | 845.163824180937 | 0.110339571722029  |
| ATTACACACA  | 845.303364351325 | 0.155283338943842  |
| TGACGGAAAA  | 846.329374704835 | 0.187460793488759  |
| ACGTGCGTCA  | 846.750338458877 | 0.122045687150009  |
| GTGTCACAAA  | 846.939092627572 | 0.155892623628799  |
| AGTCATGGTA  | 847.148753314065 | 0.115968157589323  |
| AACGTCATAT  | 847.368716544336 | 0.117286351920453  |
| GGTGACCCAA  | 847.770878579812 | 0.154562373423521  |
| ATGACGATGC  | 849.129988595681 | 0.247267642904624  |
| GACCGAGTCA  | 849.272114999447 | 0.222631529472759  |
| CAGCAGTCAC  | 849.424836457299 | 0.0550542361077132 |
| CTGACTATGA  | 849.677937093167 | 0.152264391308491  |
| CACAGTCACG  | 850.236379317726 | 0.14112640175448   |
| AGAAGATGAC  | 850.365876930698 | 0.121149071976995  |
| TCGTCACCTCA | 851.000600916023 | 0.129353253954731  |
| ATCTGTCACG  | 851.528700805635 | 0.133532281301528  |
| ACGGGTCATA  | 851.636200165067 | 0.118833582626461  |
| CTAGTCACGA  | 851.976352291279 | 0.177855356211491  |
| AGTGTCACAA  | 852.058316994271 | 0.158326319187944  |
| AGTCACTTCG  | 852.218192793164 | 0.124348468329686  |
| GTGCGAGTCA  | 852.305237198663 | 0.122804711264857  |
| ATGAATCTTA  | 852.361415065441 | 0.103054478873597  |
| ATGACGCCAA  | 852.672268920353 | 0.281793648505344  |
| GTGACACCGA  | 852.710854841682 | 0.138221332030225  |
| TCGTGCGTCA  | 852.853127030861 | 0.0433671137136602 |
| ATGACCACTA  | 853.645952067934 | 0.146764619617306  |
| TCAGTCAACA  | 854.384071528771 | 0.133963153331888  |
| GTGAGCCACA  | 854.391348440784 | 0.106392041383322  |
| TAGACTCAGA  | 854.635106970488 | 0.124201557936312  |
| GCCTGACGCA  | 854.705560416983 | 0.150766139679649  |
| ATGACATTTA  | 854.716700709042 | 0.134848672775831  |
| CTGACTGGTC  | 854.859535350056 | 0.147524647144624  |
| TATTGACACA  | 854.949241452792 | 0.108117550004217  |
| TTCTAGTCAC  | 854.99325762517  | 0.146632282345138  |
| ACGAGTCAGG  | 855.111351955071 | 0.15328962682076   |
| ATTATGAGTA  | 855.325952437601 | 0.14771411278372   |
| GTATACGTCA  | 855.594735640077 | 0.162981499861141  |
| AAGGTATGAC  | 856.087720275892 | 0.130634584598957  |
| CATTACGTCA  | 856.446228680197 | 0.115229169818195  |
| ATGCGTCAAG  | 856.881672826716 | 0.178511403633571  |

|            |                  |                    |
|------------|------------------|--------------------|
| CATGACGCCA | 857.029450616708 | 0.12911450418849   |
| ATCCACGTCA | 857.514475497634 | 0.124907668563076  |
| ATTGAGTAAC | 857.718854437377 | 0.142185858610705  |
| CGTAGACTCA | 857.941063520173 | 0.168297273473101  |
| CAGTGACGAA | 858.249950431905 | 0.130866659688769  |
| TGACCCGTCA | 858.395508908495 | 0.141059447587663  |
| AAGAGTGACT | 858.62918143616  | 0.151811185731849  |
| CCCTATGACA | 858.854660552666 | 0.127036786545245  |
| TGGGTCACCA | 858.924190507457 | 0.184101678165325  |
| CGCATGACAC | 859.231777410555 | 0.0929305806826672 |
| ATGACTTAAG | 859.579311709679 | 0.138605623927427  |
| CTTGTCATCC | 859.777297729913 | 0.133883046795587  |
| GATTACGCAC | 859.784278643903 | 0.19825552745972   |
| TGCTGTCACA | 860.129948101422 | 0.10790759329616   |
| AAGTCACTGT | 860.835534247905 | 0.100486730109534  |
| ATGACCTCAT | 861.091958986292 | 0.113498714849435  |
| ATACGTAATC | 861.370173677396 | 0.137701292033099  |
| GAATACGTCA | 861.882470452356 | 0.162180238181384  |
| ATGAGTTGGC | 862.015440179385 | 0.158892232665059  |
| ACCTGACGCA | 862.062760392224 | 0.116212613023014  |
| ATTGTGACGC | 862.499530004761 | 0.116014318775307  |
| ACATTGACTC | 862.746258431525 | 0.123666731316051  |
| AGTTGTCAAC | 862.76553513017  | 0.11462462961897   |
| ACGTGTGACA | 863.071292832545 | 0.133359103674098  |
| ATGGGAGTCA | 863.100065692376 | 0.140421717384569  |
| ACCGGTGACA | 863.288645205038 | 0.118253042589358  |
| AAAGTGTCAG | 863.415485068336 | 0.13848945852077   |
| GGTGACGAAC | 863.577251736863 | 0.148698004054361  |
| AATGACGTCG | 863.638259244321 | 0.183121584817535  |
| ACTAGTGACT | 864.053699807263 | 0.110946409020789  |
| GAACTCGTCA | 864.204512169955 | 0.198237889577164  |
| ACAGTATGAC | 864.505588044441 | 0.112332667528316  |
| ACGAGTCAAC | 864.640466015515 | 0.158462336999949  |
| CCAGATGACA | 864.720774056828 | 0.103568132296922  |
| CAGTCACGAC | 865.051285920138 | 0.149844491971753  |
| ACGTCACCGG | 865.251012600571 | 0.154254244632751  |
| AGTCACTCCA | 865.368687393111 | 0.19565507768115   |
| AGAGATGACA | 865.644373263659 | 0.116699452058978  |
| AACGGTGACA | 865.663352599908 | 0.090629526873406  |
| AATAATGACG | 865.832969000233 | 0.132235821343705  |
| AACTGTGACA | 866.445276534965 | 0.133436291210521  |
| ATGATTAGTC | 866.54001073466  | 0.176023154985765  |
| CAGGATGACA | 866.716356263068 | 0.152516331146129  |
| ATACTGTAC  | 867.226174865479 | 0.139536258786304  |
| CAATTGACTC | 867.486633533687 | 0.132634726463706  |
| ACAGATGACA | 867.592909661726 | 0.179462000294645  |
| ATGACTAGAG | 867.607529486323 | 0.124314115253533  |
| TAGTCACGGA | 867.616983732445 | 0.119655757959997  |
| ACTGAGTAAC | 867.714948315014 | 0.130215654716332  |
| GCCACGTCAA | 868.257535380144 | 0.113106961279889  |
| GAATGACGTC | 868.355175002319 | 0.135621099811176  |
| AAACACGTCA | 868.865912531375 | 0.155701136273952  |
| GACGTATGAC | 869.055120761004 | 0.13409081782102   |
| GATACAGTCA | 869.229872429826 | 0.0731131127425005 |



|            |                  |                    |
|------------|------------------|--------------------|
| GTCATCATTA | 869.354362744387 | 0.103285045375981  |
| CCGTGACTTA | 869.503769861299 | 0.131394078251581  |
| GCAGTCACCC | 869.881697562738 | 0.166358442342818  |
| AATACAGTCA | 870.09948385839  | 0.16993780324652   |
| CTCCGAGTCA | 870.242118219116 | 0.12339051025768   |
| AATATATGAC | 870.291698603649 | 0.119910336361609  |
| GAGTCAATGC | 870.448380322398 | 0.131824888597867  |
| GTGACGCTGA | 870.552347938181 | 0.105532280077102  |
| ATGGTGACGC | 870.830457234205 | 0.136728984800724  |
| GATTACGCAA | 870.964270349302 | 0.180192584979047  |
| AGTCACTACA | 871.002390559226 | 0.124250401526676  |
| AACAGTCAGG | 871.501296716616 | 0.121788062636511  |
| ATGACAATGC | 871.850293384732 | 0.194336925142506  |
| ACGTCACCGA | 871.90903214319  | 0.16497038618644   |
| GTGAGTCCGA | 871.934309432142 | 0.131080142573108  |
| GCGTGACTTA | 871.93848826844  | 0.131786273658035  |
| AACCTGTAC  | 872.118532888153 | 0.130117023488784  |
| TGAGTCGGCA | 872.131701273444 | 0.128129433208342  |
| AGAAATGACA | 872.29818010157  | 0.12588681750653   |
| AATGTGACGC | 872.300978246995 | 0.147850957168372  |
| CACAGTCACT | 872.308107948261 | 0.149237130029961  |
| ACCGTCATAT | 872.461232468494 | 0.125904481156104  |
| ATGAGTCCGA | 872.537623958181 | 0.0912080503899803 |
| AATCGGTGAC | 872.676331297264 | 0.147035314102886  |
| GTCGATGACA | 872.847283409496 | 0.14094311640465   |
| CAAGTCATCC | 873.121925398696 | 0.0738304030283024 |
| TGACGTGTAA | 873.125378508306 | 0.164724283437517  |
| CGATGACCGA | 873.239895141858 | 0.216983305141911  |
| TATGTCATGA | 873.446459459187 | 0.14094546550915   |
| ATGACAGTCA | 873.575908160685 | 0.106597197198021  |
| ACTCACTCAT | 873.676684563663 | 0.118917705580277  |
| AGCATGACGC | 873.754344733144 | 0.131305171575083  |
| CATTGACACA | 873.822573074477 | 0.123361864338356  |
| GCTAGTACC  | 873.948170562644 | 0.0918698808037589 |
| CTGACTCGCA | 873.966144285934 | 0.131244379785718  |
| TCTTGACTAA | 874.018778858123 | 0.177631651091625  |
| GTTGGAGTCA | 874.289603902366 | 0.158448536822386  |
| ATGACGACGA | 874.371892058561 | 0.174550505681943  |
| CATAATGACG | 874.742344417755 | 0.121871756768876  |
| ACTTGCTCAT | 875.10009422809  | 0.144058196279374  |
| AAGGGTCACG | 875.397239486939 | 0.0909853391765199 |
| ACTAATGACA | 875.619276617465 | 0.15386709049208   |
| ATGAGCCATG | 875.945400221426 | 0.127997282941437  |
| CTCTATGACA | 876.229754901846 | 0.0838909159262042 |
| GAACTGGTCA | 876.757304123087 | 0.0959326723205757 |
| ACCAAGTCAC | 876.937676347746 | 0.125235268505579  |
| ATCCTGACTC | 877.056168730393 | 0.132235279745852  |
| AACATGACAC | 877.45121543641  | 0.134278968983346  |
| ATGACAAGGC | 877.523355425593 | 0.0962237525151139 |
| GTGACTAGCA | 877.72909470845  | 0.145727509417138  |
| GACAGTCAGA | 877.780950533611 | 0.1305480792122    |
| ACTTGTCACC | 878.072684463969 | 0.122594243782197  |
| AGAGTGAGTC | 878.074692717506 | 0.146150482227204  |
| GGTAAGTCAC | 878.301484392633 | 0.143286005084636  |

|            |                  |                    |
|------------|------------------|--------------------|
| GTGACATACA | 878.35567926969  | 0.136547057498943  |
| GTGACACTCA | 878.640576406332 | 0.164647064473014  |
| GGCTGTCATA | 878.706157156506 | 0.148505287005442  |
| ATGAGCAAGC | 878.725335748895 | 0.128427589257859  |
| CAATGACAGA | 878.993194018507 | 0.0578820615802645 |
| GCATGACATA | 879.006479810892 | 0.121019988349168  |
| AAATTGACTC | 879.308294900248 | 0.151726710742123  |
| GCTGAGTAAC | 879.703081690528 | 0.127744091925304  |
| ATGATGACCA | 879.843220078153 | 0.129725360930168  |
| GTCGTGACTA | 879.850969210851 | 0.134264216786156  |
| CAGACTCATG | 879.905473197072 | 0.120465499591719  |
| AGACTCACTC | 880.035527455242 | 0.0853023994892256 |
| AGTCATGGTG | 880.062730975378 | 0.0862666863418825 |
| AAGCTATGAC | 880.222818540743 | 0.0696089103302621 |
| CCTTGTCATC | 880.425652787722 | 0.129281739157506  |
| AGTGACTAGC | 880.581098891742 | 0.116841558302393  |
| CGATTACGCA | 880.612365089935 | 0.117377034425047  |
| GTGACTGCCA | 880.776898161614 | 0.104919690887247  |
| CCCACGTCAC | 880.929157333337 | 0.145945271734625  |
| ATCCCGTCAT | 881.10372341505  | 0.12076893898371   |
| CATAGTCACT | 881.126566254766 | 0.118737859206501  |
| CGGAGTCAAC | 881.337916600761 | 0.129515646978086  |
| CAGACTCACA | 881.707020849478 | 0.143529674122764  |
| GCGTCACCCA | 881.708486215193 | 0.114277909125673  |
| ATGACGGTAA | 882.472135441241 | 0.139747228779455  |
| AGATTGGTCA | 882.703610972012 | 0.149427091083449  |
| GTTGTCACCA | 882.76850508319  | 0.126099253864973  |
| ACTCTGTAC  | 883.048492216341 | 0.116899891572759  |
| AGGTCTGACT | 883.148108322403 | 0.14467790592499   |
| GAGTCAGTTA | 883.321460112953 | 0.13530049358843   |
| GTCCGACTCA | 883.606430998358 | 0.133866796218598  |
| ATGACACGGA | 883.733810255484 | 0.0928076606538442 |
| AGTATGTAC  | 884.061180113287 | 0.0939242727541794 |
| CGGTGACCCA | 884.217967323807 | 0.16652392686157   |
| AACAATGACG | 884.268667891068 | 0.123636377366864  |
| CACTCAGTCA | 884.308114221063 | 0.106740854017496  |
| ACGTGTCAGA | 884.311759295193 | 0.147510993729742  |
| GTGACGCCAC | 884.714981382988 | 0.10193450733277   |
| GTAAGATGAC | 884.817668874692 | 0.0778639716569439 |
| CTGACTCGCC | 885.111388611527 | 0.140353650738358  |
| CACGACTCAC | 885.725481054641 | 0.115844358835133  |
| CATCCGTCAC | 885.73334935155  | 0.1304670499422    |
| ATTGTCACAC | 885.971880170516 | 0.101007487972753  |
| TAGAGTAATA | 886.301573784179 | 0.111768825788353  |
| ACCTGTGACA | 886.418408467938 | 0.148367622482582  |
| ATTGGAGTCA | 886.493969607426 | 0.124360449860016  |
| ACAGCGTCAC | 886.539830917286 | 0.125750487050219  |
| GCGTGCGTCA | 886.72743229497  | 0.136330971791673  |
| TGAGTCGAAA | 886.778498660738 | 0.120470643533768  |
| ATTGCGTAAC | 886.802405655338 | 0.127095288995806  |
| ATGACAGACA | 887.008571815531 | 0.145040518985193  |
| AAGTGATGAC | 887.201585435859 | 0.109883072984626  |
| AGTCACTAGG | 887.246580713834 | 0.131812209275794  |
| GATTTGCTCA | 887.281265407695 | 0.127390099117327  |

|            |                  |                    |
|------------|------------------|--------------------|
| AATTACGCAA | 887.374962407516 | 0.111573090012715  |
| AAGATGAGTA | 887.667503499312 | 0.112061249074764  |
| AGTAAGTCAC | 887.723981724234 | 0.139859174253857  |
| GACCTGTAC  | 887.732569444663 | 0.136126890653052  |
| CGTTGACTGA | 887.745740052405 | 0.0869918824962042 |
| GAAATGACAA | 887.78863421077  | 0.111755437525883  |
| CGAAATGACA | 888.023285802556 | 0.111625281377526  |
| GACCGACTCA | 888.419438844118 | 0.127940738209915  |
| ATGACGAACG | 888.463414662515 | 0.176751419837701  |
| AGCGCGTCAT | 888.634582352239 | 0.155183286959694  |
| ACCCTGTAC  | 888.822144958444 | 0.107699138807679  |
| GGTGAGCCAC | 888.954433331457 | 0.112057851585277  |
| ATCGGTGACA | 889.132274220563 | 0.111685434063706  |
| GAGTCAGGCA | 889.263732274596 | 0.114818475559464  |
| ACGTCGTCAT | 889.61400131715  | 0.159415028047168  |
| AGTCAGACTC | 889.702122954498 | 0.158888244352433  |
| AAGATGACTT | 889.910339949436 | 0.101724818304949  |
| GGTGAGGTC  | 889.954534432373 | 0.120482235488637  |
| GAAAGATGAC | 890.457491823195 | 0.115707772474299  |
| AGGGGAGTCA | 890.566022495768 | 0.116309434386274  |
| GGTTTGTAC  | 890.618304268788 | 0.117394499254675  |
| GATGACGGCA | 890.678458136798 | 0.107877321537139  |
| TAGTGACGAA | 890.818149358678 | 0.116139425098612  |
| AATAATGACA | 891.054018135139 | 0.107373000152132  |
| AATGACCACT | 891.187839467976 | 0.112272560830598  |
| TAAACAGTCA | 891.92468208754  | 0.12399044280208   |
| AAGACTGATT | 891.933068989649 | 0.11024831724197   |
| CTAGCGTCAT | 891.956937317412 | 0.125387549021286  |
| ACGGTGTAC  | 892.024265689433 | 0.0716106091372645 |
| GCTGACGTCA | 892.024915746997 | 0.207220869705463  |
| GACATGACAC | 892.032897341409 | 0.129409763178927  |
| AGTCACTACG | 892.072202805388 | 0.0793953745492689 |
| GTCATCTTCA | 892.086469711122 | 0.121755924575883  |
| CAAAGATGAC | 892.292189987387 | 0.0984743893535174 |
| GTCATATGAC | 892.348801426732 | 0.118628698518344  |
| GATGACGCC  | 892.734658462509 | 0.131664280190916  |
| CAAGGATGAC | 892.905945638554 | 0.162524018372126  |
| CTTTGACGCA | 893.061096451571 | 0.112620232440579  |
| ATTACTAAAT | 893.138592830181 | 0.113894951491715  |
| CGGTAGTCAC | 893.227639476777 | 0.194319325831571  |
| ATACGTAATA | 893.235799515446 | 0.0960361518995597 |
| GTCATAATTA | 893.430690228474 | 0.103159941583532  |
| AAGTTGTAC  | 893.602288060257 | 0.0795172612839719 |
| TGATTACTAA | 893.894326442689 | 0.0989017794596789 |
| ATGACGGCAC | 894.208428368311 | 0.11690169004885   |
| ATGACCCAGA | 894.225878361328 | 0.0727728990657063 |
| ATGACGAGAC | 894.405230448477 | 0.130421235101074  |
| CCATTGACTC | 894.421487743181 | 0.11140153958248   |
| ATGAGTAGGC | 895.294455730706 | 0.100998188778568  |
| TGACAGATCA | 895.374167746904 | 0.152204313639183  |
| ATAATGACAA | 895.384841814116 | 0.115527197681227  |
| GCCACGTAAC | 895.626603828872 | 0.0836109934075915 |
| AAGTCTGACT | 895.77262551769  | 0.123485890935415  |
| CCAAATGAC  | 895.773724589956 | 0.0695037861768034 |

|             |                  |                    |
|-------------|------------------|--------------------|
| TGACTGAGCA  | 895.815490615898 | 0.0960341976145466 |
| ATTACTATTA  | 895.844650813213 | 0.155062667832508  |
| ATGTGTGACG  | 896.037280996326 | 0.123902725390473  |
| ACTGGGTCAT  | 896.143836529881 | 0.120323759825845  |
| CGAAGATGAC  | 896.219841029039 | 0.127414950758554  |
| AAGGGTGACT  | 896.249554135688 | 0.133046836213995  |
| GTATTACTGA  | 896.323762268176 | 0.119594397253404  |
| AGTGTCATGC  | 896.351164948057 | 0.115931769575833  |
| ACTGCGTCAG  | 896.568441269783 | 0.126812970535888  |
| AGTAATGACA  | 896.751809748771 | 0.10916798916375   |
| ACTATGTCAC  | 896.963021972329 | 0.0955873838639493 |
| AGTCATGGGC  | 897.103006098954 | 0.0983319818320285 |
| ATCGGAGTCA  | 897.242009745324 | 0.118417651553474  |
| ATGAGCCAGA  | 897.447739546058 | 0.077313382952025  |
| TAGTGACCAA  | 897.747489069731 | 0.123884526383994  |
| ACTTGCTCAC  | 897.957050180681 | 0.100627725312003  |
| AGTCACGCTG  | 897.996008920066 | 0.103216041582935  |
| ACAAGTGACT  | 897.99807875334  | 0.0682034386178123 |
| TGTGTCAACA  | 898.047349879138 | 0.104741724197855  |
| ATGACGAACC  | 898.122437887929 | 0.097402030451765  |
| CATAGTCAGA  | 898.40972817098  | 0.163479036501486  |
| ACCGAGTCAG  | 898.595525108727 | 0.104446441138398  |
| ACGCGTGACT  | 898.852749762683 | 0.117132493479987  |
| CTGACTACTA  | 898.88092020572  | 0.115045430342037  |
| GACTGCGTCA  | 899.036736731957 | 0.109478946770657  |
| GATGACTTCG  | 899.311020138295 | 0.141320081080486  |
| ATTGCTCAGG  | 899.39189218987  | 0.112915144861674  |
| ATGGTATGAC  | 899.416212559088 | 0.163481083358417  |
| GTAATCGTCA  | 899.503050709715 | 0.113739544561019  |
| CGTGAATCAG  | 899.512339597143 | 0.0981834208795329 |
| ATGACCATAA  | 899.672677193032 | 0.124242453329848  |
| AAATGTCATT  | 899.709159471518 | 0.104222074521158  |
| GAGTCAATTA  | 899.752504342636 | 0.147873471797619  |
| AAAGGATGAC  | 899.763829483909 | 0.118021237828749  |
| GTATTGCTCA  | 899.828907996109 | 0.107052402545889  |
| CACTGACACA  | 899.949525507475 | 0.0569097710433441 |
| CACTGTGACA  | 900.003195636373 | 0.103340050403574  |
| AATGTGTGAC  | 900.126434346316 | 0.119168013867814  |
| GTCACTGTCA  | 900.138429092199 | 0.113671863700695  |
| TGAGTGACCA  | 900.260247027577 | 0.139589999002333  |
| TCTAGTCACG  | 900.272497608946 | 0.131486840955695  |
| CAGATATGAC  | 900.538725665648 | 0.131043531153783  |
| AATCCGTCAG  | 900.542967074852 | 0.11920884993898   |
| GAGTCAATAC  | 900.76766095584  | 0.137244587117716  |
| ACCAATGACG  | 900.787607636485 | 0.101551753121721  |
| ATTGGATGAC  | 900.814403221644 | 0.0980547690669032 |
| AAATGACAAAG | 900.938798825806 | 0.0967714913600044 |
| GTTACTCAAC  | 900.939543867191 | 0.10998233675215   |
| GTGACCCAAC  | 900.940154566473 | 0.0989413390621836 |
| ACCGTGTGAC  | 901.006766226157 | 0.0984224502317687 |
| GGCGTGACTA  | 901.123599036557 | 0.115080479924313  |
| CACGGTGACA  | 901.308122376005 | 0.14370184282371   |
| GTCATTCTGA  | 901.827363174547 | 0.112445061609792  |
| AGTTGTGTCA  | 901.873291782516 | 0.104542417979098  |

|             |                  |                    |
|-------------|------------------|--------------------|
| GCGTCACCTA  | 902.001325490335 | 0.104597365545989  |
| GATCCAGTCA  | 902.219539805035 | 0.107816038539471  |
| GTCATCTTTA  | 902.241819698891 | 0.0696337539801186 |
| ACGTCACCAT  | 902.36808605869  | 0.128816987437641  |
| GCGTCACCAC  | 902.433239809682 | 0.111796343800454  |
| GAGTGATGAC  | 902.709719701211 | 0.0961552455364804 |
| GTGATGTAAC  | 902.922705152434 | 0.0729815856529473 |
| TGATGCATCA  | 902.96665990535  | 0.0952983780614941 |
| GCTCGAGTCA  | 903.169559317001 | 0.134103050406002  |
| GACTGTCATA  | 903.224296856166 | 0.142134948204367  |
| GTCATAATCA  | 903.580119495769 | 0.184450189579317  |
| GCGAGTCAAC  | 904.290538249619 | 0.0982319679588318 |
| TGAGTCGGAA  | 904.307202323417 | 0.119896529687324  |
| GTCATGGTCA  | 904.677783033343 | 0.136219029121085  |
| GATGGATGAC  | 904.693030942634 | 0.0934523347005545 |
| AAAAGTGTCA  | 904.717968755066 | 0.119682130902238  |
| AAGTGTCAGC  | 905.075966211024 | 0.0981377826177678 |
| TGACAGGTCA  | 905.143511675715 | 0.0982289444328757 |
| GACGGATGAC  | 905.370032908692 | 0.174465382847085  |
| ATGACCGAGA  | 905.403849322367 | 0.0926681584494608 |
| TATGATTCTGA | 905.552317914926 | 0.0966844800628653 |
| AACTGCGTCA  | 905.617654358617 | 0.0986683544898202 |
| TGACGAGTAA  | 905.634250515269 | 0.0899194544222695 |
| CAAATGACAA  | 905.832103204578 | 0.102945664339737  |
| GATTGACACA  | 905.861683630282 | 0.103269730749599  |
| ATGACCTGGC  | 905.876090432161 | 0.0981450628969079 |
| AGGATGACCA  | 906.310880424725 | 0.107068950967984  |
| CTGACTCTCA  | 906.40076547262  | 0.0947406017654719 |
| AACGGATGAC  | 906.420178038576 | 0.125422534021046  |
| AGCCTGACTC  | 906.666721907093 | 0.0734177561275852 |
| AAATTAGTCG  | 906.756221160065 | 0.123655967388077  |
| GTCATACATA  | 907.02457644971  | 0.144102986742466  |
| ATTACGCACA  | 907.307535119432 | 0.0951389959134338 |
| TGATGTGACA  | 907.332016726412 | 0.104727313066829  |
| AGTCACGGAT  | 907.380505941775 | 0.0949592918167022 |
| GCGTGTCACC  | 908.084145118587 | 0.0825897559545224 |
| GTGAGCAAAA  | 908.582908031196 | 0.128598558565208  |
| GAACTTGTCA  | 908.589195101592 | 0.115487357334942  |
| GCAAGTCACGA | 908.650461038647 | 0.077379316368315  |
| ATGACCATAC  | 908.653621377857 | 0.133852095203344  |
| ATGACGGACC  | 908.763853574606 | 0.124978779009152  |
| ATGAATCAAA  | 908.803215966831 | 0.0945436537031723 |
| GTCATCGTTA  | 908.870821956128 | 0.0990812310926782 |
| GTGATACATA  | 908.906919524272 | 0.123012470187882  |
| ATATTGACTC  | 909.02352786454  | 0.0594825212372334 |
| ACGTCATGCA  | 909.046308157644 | 0.09254757412739   |
| ATGACGAGGA  | 909.149795511679 | 0.0951201597438199 |
| ATTAGTCTGA  | 909.150269567744 | 0.103344372004869  |
| ATGCATGACA  | 909.342284880436 | 0.0893087716271795 |
| GCGTGATTCA  | 909.379296658384 | 0.153533744530816  |
| GTCATCCGCA  | 909.447235190483 | 0.120226534822562  |
| AGTCTGTCA   | 909.481776033614 | 0.169266098501128  |
| CCCGTCATAA  | 909.625038415554 | 0.123293161120204  |
| TGACTCGCCA  | 909.856892903448 | 0.0971993443851725 |

|             |                  |                    |
|-------------|------------------|--------------------|
| CACAATGACG  | 909.936417079872 | 0.0840725396814282 |
| AAATGGTGAC  | 910.175733552535 | 0.104435273863     |
| GGTATGACAT  | 910.324093678061 | 0.0759778380636514 |
| GTGAGAGTCA  | 910.40626541408  | 0.0896191829635833 |
| CGAGTGAGTC  | 910.629163382654 | 0.110942007431278  |
| GCCGTGTCAC  | 910.684035542535 | 0.0893191423580195 |
| ATCGTCACCG  | 910.781061859295 | 0.104464754021542  |
| ATGATGTGAC  | 910.943907882596 | 0.0890169778058493 |
| GTGGCTCACA  | 911.021274242136 | 0.0971112396830653 |
| AGTATATGAC  | 911.066136198031 | 0.0906911184358677 |
| GGTGTGATGA  | 911.929111142143 | 0.107632912801741  |
| GTAATCACAC  | 912.072181681948 | 0.0892241838070482 |
| AATAGTCAAC  | 912.142535871729 | 0.101253483185297  |
| CGGTGACAAC  | 912.3368313323   | 0.117908671161286  |
| AAGCGTGACT  | 912.584619628638 | 0.0978301921310173 |
| AATGAGTATG  | 912.855804935316 | 0.103792510191197  |
| ACGTCACCCCT | 912.999440886042 | 0.0928878482930346 |
| CGGATATGAC  | 913.160224655065 | 0.165161164004929  |
| GTGACAGAGA  | 913.179378768927 | 0.0965609218592757 |
| TGTCACCGAA  | 913.483130970617 | 0.0898417990309135 |
| ACAACGTGAC  | 913.495839290139 | 0.0875452856004946 |
| ATGACAAGGA  | 913.632830894324 | 0.0967578728007043 |
| TGACCAATCA  | 913.692660081913 | 0.108515990854217  |
| ATGACGGGGC  | 913.790615433536 | 0.0824092130380184 |
| ACCTGTCACC  | 913.818374546971 | 0.0858637921249004 |
| AATTGTGACA  | 913.95598818422  | 0.0874064139073332 |
| AATGTCATCA  | 914.090407258856 | 0.11771832507429   |
| GCATGACGCC  | 914.64018972024  | 0.0905124704975143 |
| CTTGATGAC   | 914.947697720238 | 0.0987621029164062 |
| CTGCATGACA  | 915.269328854761 | 0.0927342804579361 |
| ATAGTGACGC  | 915.45130628382  | 0.112830057726952  |
| CAGTGACAAA  | 915.706554567234 | 0.0919516180519529 |
| GCGTCACCAA  | 915.904956299834 | 0.0592202743512425 |
| GTGACGGAGA  | 916.201037004667 | 0.0800902270746345 |
| ATGACATCGA  | 916.287866625892 | 0.104468191272664  |
| GTGACAAGTA  | 916.331663163576 | 0.0815132017625758 |
| GTGTGAGCAA  | 916.343273821781 | 0.0848237967516537 |
| CTAATGACAA  | 916.366686363142 | 0.0918520553164476 |
| GTGACCACTA  | 916.525897240407 | 0.0960428860719063 |
| ATTGGTGACA  | 916.592521696341 | 0.0877114349371695 |
| GCTCCGTGAC  | 916.611205987592 | 0.105402493473273  |
| CGTCATTACA  | 916.742617620106 | 0.087999556561898  |
| GAGGGAGTCA  | 917.160785589065 | 0.107350676873828  |
| GAATTGACTC  | 917.339497943338 | 0.113010299413709  |
| TGGACTCACA  | 917.436435984994 | 0.0786896662935688 |
| AATGGTGACA  | 917.563037187616 | 0.159265957483579  |
| CTATGACCTA  | 917.579855441687 | 0.0915412103360937 |
| GTGACCAAGA  | 917.773492113669 | 0.0934987983403413 |
| ATCAATGACG  | 917.832545648474 | 0.151531315696559  |
| ATGACAGGGC  | 917.956023175372 | 0.0857156776464464 |
| GTCATAAAC   | 918.20440422199  | 0.0821037275279404 |
| CGTTGTGTC   | 918.243929378989 | 0.100469995972379  |
| CGTCATTGAG  | 918.371781376225 | 0.0800305081020827 |
| TGACTCCACA  | 918.578366128344 | 0.0913699784108793 |

|            |                  |                    |
|------------|------------------|--------------------|
| GCGTCATGCC | 918.62170053437  | 0.0900381146020918 |
| ATGACAACGA | 918.747880762787 | 0.115992446144509  |
| AATTAGTCGC | 918.808543531142 | 0.122960751998106  |
| CAGGTGTGAC | 919.015423210317 | 0.0873377410432751 |
| CGGGTATGAC | 919.07796786375  | 0.0676477500187944 |
| AAACGATGAC | 919.209929092252 | 0.0988584045990325 |
| ATTGATTCAC | 919.648025943048 | 0.0920836109669357 |
| GATTACTGAC | 920.001594522413 | 0.0816198126926505 |
| CTTGACTCA  | 920.134660746707 | 0.0883079184912233 |
| ATCCTGTCAT | 920.144587919789 | 0.106165173996369  |
| AGTGTGACCA | 920.169036181803 | 0.0880022288941883 |
| AGATGATGAC | 920.277136370835 | 0.0998836037791807 |
| AACCTGACTC | 920.479454931295 | 0.0855299061328881 |
| ACGGGTCATC | 920.700314813117 | 0.0775232454364899 |
| AGTGTCAGAG | 920.914330037994 | 0.115514194397697  |
| ATAAATGACG | 920.946506403678 | 0.0935055333568896 |
| ACGGTGACGT | 921.100179335157 | 0.0703144785759307 |
| AATGGAGTCA | 921.386544420911 | 0.0846822535232371 |
| AATGAGTAGG | 921.484858512692 | 0.0778543854393903 |
| AGTCACGCCA | 921.59519492473  | 0.107702530014216  |
| ATGACGACTA | 921.703320918106 | 0.086147179543997  |
| TCATGACCCA | 921.811574672062 | 0.083834147731055  |
| ATGACTGCCT | 921.814332676709 | 0.0954933782592618 |
| AGTCACGACT | 921.907267019479 | 0.12131929382784   |
| GTGAGTACTA | 921.916239979109 | 0.0780815385560701 |
| CTGACGTGAC | 921.951924392384 | 0.0883277804863905 |
| GGTTGTGTCA | 922.039809553086 | 0.0774795930338928 |
| ATGACGTGCG | 922.163978881142 | 0.0924068670212439 |
| GAGTGACAAA | 922.189350275671 | 0.0819934590806914 |
| AGTCACCTCA | 922.246681674372 | 0.0765481418630749 |
| GTGACACGCA | 922.288809860815 | 0.103653289654279  |
| AGTGACGCGC | 922.408011812132 | 0.106884262168646  |
| TGTGTCAAAA | 922.469892989339 | 0.0796893864997746 |
| ACGGTGACAA | 922.50354057951  | 0.0786867680749473 |
| AATATGTGAC | 922.507481482956 | 0.0510909937906872 |
| AGATACGTCA | 922.525851215512 | 0.0928408390466267 |
| CATTTGCTCA | 922.776664773562 | 0.096962346445008  |
| AGATTATGAC | 922.820636567256 | 0.0889999974750178 |
| ATAAGATGAC | 923.060318443802 | 0.0790833725212855 |
| AATGTATCAC | 923.516259843448 | 0.0752396235437606 |
| GATGACAAGA | 923.683505413841 | 0.0852305593663844 |
| ATGATTCGAC | 923.76833283894  | 0.0823025226695714 |
| GATATATGAC | 923.785072078928 | 0.0870390729795693 |
| CCTAATGACG | 924.091887028527 | 0.0716414181218211 |
| AGTGACATAT | 924.506850903907 | 0.0860717822660128 |
| CCAAATGACA | 924.57880790718  | 0.0776001077650785 |
| AATCTGTGAC | 924.86780865972  | 0.0800095803213833 |
| ATCGAATGAC | 925.169752886424 | 0.10068547904803   |
| CCCTGACGCA | 925.179940271549 | 0.087065047662131  |
| CGGACTCATC | 925.512525846937 | 0.0947691933796404 |
| GTCATTTGCA | 925.540425550479 | 0.0807061797073512 |
| AAAATATGAC | 925.549120215779 | 0.130064146266801  |
| AGTCACGGAA | 925.552958111272 | 0.1071440232058    |
| GTGAGTCCAA | 925.583994226102 | 0.082077480620793  |

|            |                  |                    |
|------------|------------------|--------------------|
| ATAGGTCACA | 925.64087494318  | 0.0932139723570204 |
| TATGACGGGA | 925.71817579096  | 0.0736812799016485 |
| AATGACATCG | 926.116488252883 | 0.075400302219045  |
| ACAGACTCAC | 926.174048446095 | 0.100395539752111  |
| GATTTTCGTA | 926.212990655084 | 0.0810202444457178 |
| AGGGGTCATA | 926.300067874059 | 0.0703324847122427 |
| CTGACTCGGA | 926.554890453147 | 0.0925868166889031 |
| ACGGCGTCAT | 926.556556764543 | 0.0737098151851339 |
| AAGGGTCAGA | 926.698792623905 | 0.0792444483632943 |
| CAATTACGCA | 926.907142203682 | 0.0776578741374884 |
| TCGGTCATCA | 927.029065683769 | 0.128572432090625  |
| GTGAGCAAGA | 927.238725534239 | 0.0770945926362095 |
| CCCCGTCATA | 927.251870723212 | 0.0708547942166811 |
| ATTAGCAATA | 927.312690002001 | 0.103554412864065  |
| GTCAGATGAC | 927.35936196028  | 0.0715802778853484 |
| ATACGGTGAC | 927.656386452734 | 0.0896142562957676 |
| GATGGAGTCA | 927.718668035377 | 0.0760120116008367 |
| ATGAGTGAGC | 927.826732597641 | 0.0854146159269533 |
| TATGACCGCA | 927.921770572614 | 0.0977680944439184 |
| ATTGCTAATA | 927.924988449021 | 0.100877053980136  |
| ATGACCCTGA | 927.980717608866 | 0.0982957902350647 |
| CGTCATTGCA | 928.104293672501 | 0.0866338455612045 |
| CCCTAGTCAC | 928.412429150767 | 0.0686177216011252 |
| TATTACTCGA | 928.492083021096 | 0.0932180732611689 |
| GTCAGCGTCA | 928.512717543211 | 0.0778754673802834 |
| AGTCATGGGA | 928.606524467531 | 0.102567381763042  |
| AGTCACGCCA | 928.647291314812 | 0.0705718162561375 |
| CGGGGAGTCA | 928.654870726771 | 0.0750252588189596 |
| GTCATATCTA | 928.935132929185 | 0.0785663457301303 |
| CTATTGACTC | 929.151401173297 | 0.0751622376159695 |
| CTTGGTGACA | 929.450147650618 | 0.0883206477029615 |
| TCATGTGACA | 929.459469971103 | 0.0894136579930481 |
| ATGATATCAT | 929.491649444693 | 0.0922356914349464 |
| CTAGACTCAC | 929.493350083122 | 0.0680943485817474 |
| TATGACAGGA | 929.658592658504 | 0.0921243910259477 |
| ATATGACGGG | 929.801211114341 | 0.0675862285697621 |
| GGATTATGAC | 929.943945693635 | 0.116569134352583  |
| TAGTGACAAA | 930.207662442374 | 0.0726664442554981 |
| GCATGACAGA | 930.295459290447 | 0.0703171079572633 |
| ATGACGCGCC | 930.315483041985 | 0.125061058321982  |
| CGAAATGACG | 930.39936887786  | 0.0928449617178591 |
| CATTTTCGTA | 930.479439969645 | 0.0907351626272136 |
| AACGTATGAC | 930.858308162696 | 0.0770694794138492 |
| AGACCAGTCA | 930.939629726815 | 0.0873984905628707 |
| ACGGTGACGA | 931.127723273745 | 0.0856807852682808 |
| GTCACACATA | 931.491469509639 | 0.0700965844243661 |
| ATGATACAAT | 931.543716466258 | 0.0655708082917331 |
| CATTGACTGA | 931.550415833564 | 0.0663532238737291 |
| GTGAGTCCAC | 931.572878905425 | 0.0790127414776446 |
| ATGTCACCAC | 931.661076147223 | 0.0776670447446686 |
| TATGATGTAA | 931.829113163048 | 0.0885265349039944 |
| CGATACGTCA | 931.940927620735 | 0.0921821312480008 |
| AGTCAGAGCA | 932.051830877685 | 0.094993200973494  |
| AAGAGTAATG | 932.17710392516  | 0.0687609214661248 |



|             |                  |                    |
|-------------|------------------|--------------------|
| GAACGTCATC  | 932.20289328235  | 0.110548703860038  |
| AACACATCAT  | 932.283365528575 | 0.0827042143766673 |
| AGTCACATAG  | 932.591421944962 | 0.110652824872041  |
| GTACTIONGCA | 932.736515165191 | 0.0882981733811496 |
| GACTAATGAC  | 932.788799723072 | 0.0963692453177717 |
| CGACTAATTA  | 933.123385107118 | 0.105544907754575  |
| AGTCAGTGAC  | 933.273312997392 | 0.113605858961934  |
| AGTCAGACAT  | 933.42006130328  | 0.0716505904153534 |
| AATACGTAAT  | 933.660483878381 | 0.0660192179582946 |
| CAGTCAGAAC  | 933.755003890495 | 0.0887547758201401 |
| ATGTCATTTT  | 933.859139069074 | 0.0963512630407691 |
| GTCATCGCAA  | 933.882766587838 | 0.0869071984459867 |
| GGAAAATGAC  | 933.978289310244 | 0.0774382362607104 |
| AAGATGTCAT  | 933.99397382769  | 0.0625389050591032 |
| AGTGGATGAC  | 934.015896788314 | 0.0770605434277998 |
| AATTATGAGT  | 934.029723861882 | 0.0676986590493872 |
| GTGACAGGTA  | 934.299997367443 | 0.0637255784462157 |
| CGGTGAATCA  | 934.30615369601  | 0.0935973906061125 |
| AAGTCATGGG  | 934.442347460388 | 0.0879461036791868 |
| CCATGTCACA  | 934.569847592757 | 0.058050877116756  |
| TACGGTGACA  | 934.587943828933 | 0.0846080549362343 |
| ACGATGTCAT  | 934.86995391232  | 0.0957591245136333 |
| ACTGACTGTA  | 935.102309070944 | 0.0864988056393888 |
| CGTCATGTCA  | 935.140482397413 | 0.0798265037491437 |
| GTCATTACTA  | 935.222642112361 | 0.0766550959110514 |
| CGTCATTTAG  | 935.429213073699 | 0.0446927924045774 |
| AGTCAGAAGC  | 935.604155982583 | 0.0620501468109996 |
| ATGAGCCAAC  | 935.659224959631 | 0.0719923007481695 |
| AGTCACCCCA  | 935.733715895706 | 0.1079486256669    |
| CATAATGACA  | 935.838927872609 | 0.0752341171088693 |
| CGCGTCACTA  | 935.901489442644 | 0.0709209912093874 |
| GTAATATGAC  | 935.99820913553  | 0.0837863733627168 |
| GAAATATGAC  | 936.084277690126 | 0.0664770347645225 |
| TCGTGACAAA  | 936.089848491906 | 0.0667535378281371 |
| AGGTTATGAC  | 936.760154474743 | 0.0776125262604445 |
| GAATGATGAC  | 937.016048387646 | 0.0750692123742119 |
| ATATGTGACA  | 937.259788656381 | 0.108837836675955  |
| CTCGAGTCAA  | 937.321684294387 | 0.067526624461642  |
| CGTCATTATA  | 937.43432303174  | 0.0618732902510421 |
| GATGACTTGC  | 937.46690234556  | 0.0779740068170504 |
| AGTCACTCTA  | 937.712800080696 | 0.0867390951851242 |
| ACGGTCATAC  | 937.81082352598  | 0.0664613199447838 |
| AGGGATGACG  | 937.874135458817 | 0.103154359984568  |
| AGCTAGTCAC  | 937.879419848983 | 0.106161585244438  |
| ACGAATGACG  | 937.89450858424  | 0.0443162647329272 |
| TGACTCCCCA  | 938.203153188461 | 0.0837296582319131 |
| CGTCATCTAG  | 938.203906799939 | 0.0806834686259938 |
| GACTAATACC  | 938.416738105704 | 0.08438912375762   |
| CCTACTCATC  | 938.427500055328 | 0.0643729001061734 |
| ACGTCACATA  | 938.596078765903 | 0.0687173831326152 |
| CGTCATCTAA  | 938.860613735254 | 0.117020268634916  |
| CTTTGACACA  | 939.005926793222 | 0.0649500705222532 |
| AGTCACCCCT  | 939.089888367346 | 0.0884019287665864 |
| ACACATCATA  | 939.144795548598 | 0.0796153641291553 |

|            |                  |                    |
|------------|------------------|--------------------|
| TGACAAATCA | 939.256441941254 | 0.0835929033168531 |
| GTATGATGCA | 939.380807190284 | 0.0658016024592182 |
| GACCCAGTCA | 939.563078638223 | 0.0797574056716203 |
| GATGAATGAC | 939.763826773363 | 0.0680333354344436 |
| GAACCAGTCA | 939.841514209362 | 0.0794410324038882 |
| CTACTGACTC | 940.015256151193 | 0.0678424584571918 |
| ACCCCGTCAT | 940.044017366756 | 0.0580136457745848 |
| AGTCACTTGA | 940.075553445438 | 0.0456934632043429 |
| AAGAAATGAC | 940.350395872716 | 0.0730947780151964 |
| ATGACGAGGC | 940.396083080096 | 0.106845562343089  |
| GTGACGCGAA | 940.445486560152 | 0.0827571121558428 |
| ATTACGTGAC | 940.680551525645 | 0.0727164317578539 |
| AAGGGAGTCA | 940.817270890099 | 0.0587388910944887 |
| GTCACACCTA | 940.873816033149 | 0.0705181591084871 |
| GAACTGACTC | 940.993674008493 | 0.0822172442302573 |
| CAGGGATGAC | 941.270932239928 | 0.0656509442520237 |
| CGTGGTCACA | 941.293796427087 | 0.0832258761757309 |
| CAGACTCACC | 941.356028683283 | 0.0589961053320988 |
| AATGAATGAC | 941.449763039084 | 0.086417235029171  |
| GAGTCAGGCC | 941.606840915466 | 0.0618649734360066 |
| AAGGTGACAC | 941.623067139289 | 0.056155602777289  |
| ATTAGTAAAT | 941.66566662779  | 0.0576435784212483 |
| GTCAGTAATA | 941.675105732144 | 0.0856904033417156 |
| TATCCAGTCA | 941.771746346765 | 0.0719307911567971 |
| AGTGAATGAC | 941.829494647675 | 0.0761524313990409 |
| CATGTGTGAC | 941.83223447897  | 0.0689182097482449 |
| TCCAATGACA | 941.881100036752 | 0.0854082260416248 |
| ATGACATTC  | 941.922255402915 | 0.0572786182401704 |
| CAGTGACACG | 941.967160268923 | 0.092111524742193  |
| ACATGACACC | 942.011586656037 | 0.0600925218733261 |
| CGTCATCAGA | 942.069051767467 | 0.0733009039928258 |
| TGATTAATCA | 942.092318169965 | 0.0969647095420132 |
| AATTACGCAC | 942.386294132204 | 0.0824980523303062 |
| TGACTCGGAA | 942.456526166307 | 0.0777342113640086 |
| CGCTGAGTAA | 942.596720479552 | 0.0637461289227389 |
| GGCGCGTCAC | 942.636303906367 | 0.09081284774239   |
| GAGTCAGGGC | 943.080603835091 | 0.0556066482480719 |
| CGTCATCTGA | 943.165462917981 | 0.0999524508608969 |
| CCCTGTCATC | 943.207809767125 | 0.0604339255906589 |
| ATGAGTAGAC | 943.270797365486 | 0.0576360158826477 |
| GTTAGTCTTA | 943.400006139029 | 0.105908641315961  |
| CCCGTCATCG | 943.413727426071 | 0.0543614465501532 |
| CGTCATTA   | 943.752668590712 | 0.0744791523147296 |
| GAACTATGAC | 943.977657170158 | 0.0804021482858832 |
| GTATGAGTTA | 944.009025778351 | 0.0620149953084931 |
| GACTAATACA | 944.184749480536 | 0.0733039482975403 |
| AGTGACGTGC | 944.256112335773 | 0.0772241763366897 |
| GTGTCACGCA | 944.45729056493  | 0.0759641624975762 |
| ACGCGTCAGA | 944.782576879673 | 0.0615402928987022 |
| GACTCTGTCA | 944.893515626611 | 0.0832708586035802 |
| GTTAGACTCA | 945.048596383596 | 0.0777059816322741 |
| ATGGACTCAC | 945.089415968184 | 0.0548721348046841 |
| GCAGTCACGC | 945.191325535745 | 0.110328445342549  |
| CGAGATGACA | 945.635542554983 | 0.0802408351756068 |

|            |                  |                    |
|------------|------------------|--------------------|
| GATGACATTA | 945.637599585378 | 0.0571894860870421 |
| AAATATGAGT | 945.687462595152 | 0.0616184833043852 |
| AAGGTGTGAC | 945.703037856813 | 0.0545496748468395 |
| AGGTGATGAC | 945.794237867403 | 0.0556659611514389 |
| ACGGAATGAC | 945.837355249747 | 0.0597314545569229 |
| ATGACAGCTC | 945.848168695118 | 0.0696446309274154 |
| CGTGATTGAC | 945.866999381981 | 0.0379623506412824 |
| AATTCTGACT | 945.927116147312 | 0.0955460013189566 |
| GTTACTCTTA | 946.080727759198 | 0.0563735592377618 |
| CCATATGACG | 946.115814779132 | 0.043624310626321  |
| AAAAGGTGAC | 946.310709579064 | 0.0755141110952605 |
| ATGACGGCAA | 946.378374961908 | 0.0699116458395248 |
| AACTATGAGT | 946.429996906479 | 0.0658408660420081 |
| GCTTGGTCAC | 946.532563633739 | 0.0760007007941738 |
| AGACTAATAC | 946.546997577824 | 0.0668976144874496 |
| AAGTCACTGG | 946.619302445283 | 0.0642764868740679 |
| TGACACAACA | 946.664512315162 | 0.073864802105452  |
| TACTGTGACA | 946.793141994128 | 0.047203392851617  |
| GTGACTTGGA | 946.801798124326 | 0.0530977407820568 |
| AACCGAGTCA | 946.844835565459 | 0.0764641035773849 |
| GACTAATTC  | 946.969926200796 | 0.0730026129233395 |
| ATTATTAGTC | 947.379278235678 | 0.0702537590740066 |
| GCAACGTGAC | 947.544179721009 | 0.0618765840716689 |
| TGTCATGCAA | 947.6032298728   | 0.049653244512951  |
| CATGGTGACA | 947.655008086    | 0.0625042606177145 |
| TCGTGACGAA | 947.883943277305 | 0.0569323780608886 |
| GCCATGACAC | 947.949647548067 | 0.0665427450882464 |
| CTTGTCACAC | 947.979843772146 | 0.065803504971969  |
| TGACTACAAA | 948.027833514258 | 0.0749906914003794 |
| CTCCGACTCA | 948.224473803892 | 0.0573935056907248 |
| TACTCAGTCA | 948.363613691488 | 0.0663942241535094 |
| ATGACAGGAC | 948.507462280603 | 0.0537596973222543 |
| CACGTATGAC | 948.546435901851 | 0.0612510468788462 |
| GTTGACTACA | 948.631221829949 | 0.0850076637697624 |
| ATGACGGGAC | 948.632527789617 | 0.0495802734593856 |
| GTCATCCAAC | 948.74519026193  | 0.0524141454571265 |
| ATCGAATCAT | 949.179771957437 | 0.0505360944761914 |
| CACGTCACTG | 949.213453716862 | 0.038872862383318  |
| TGAGTCTGAA | 949.269800896208 | 0.0892649957659173 |
| ACGTCACAAC | 949.477338710318 | 0.0863105454553525 |
| ATAGATGACG | 949.569284654368 | 0.0697272128845102 |
| AGTGTCATGA | 949.61861501336  | 0.0543384858987698 |
| ATGACGGAGG | 950.040953399015 | 0.0692975064170457 |
| ATCGTCATGC | 950.317845283584 | 0.0687581816219879 |
| GTGACAATA  | 950.529195757216 | 0.0718333463784407 |
| ACTTCTGACT | 950.558695207456 | 0.0766726982318238 |
| TCTAGAGTCA | 950.602383673261 | 0.0727490607730022 |
| AAATGACCAC | 950.661732521734 | 0.0739327362355008 |
| GTCATCACGA | 950.764110323526 | 0.0536496668598677 |
| CTCTGACAAA | 950.884604011211 | 0.0650101098445685 |
| GACCCGTGAC | 950.973105070626 | 0.0505276492425073 |
| AGTGGTGACA | 951.183140169996 | 0.0592536184973394 |
| ATATACTCAC | 951.41914409541  | 0.0458120285761647 |
| CGCTGACTC  | 951.482974945979 | 0.0905128748435236 |

|             |                  |                    |
|-------------|------------------|--------------------|
| ACTGTGACGC  | 951.520664024625 | 0.0624722925952714 |
| TACCGAGTCA  | 951.670386426368 | 0.0915216792776122 |
| TGAAATGACA  | 951.757220211028 | 0.0560486013017093 |
| GGTGAGCAAA  | 951.909998716586 | 0.062167213437046  |
| GGTGACGATA  | 951.973884699651 | 0.051447101249083  |
| AGTCAGAAGA  | 952.246865939032 | 0.0685107144102606 |
| TGGTCATCAA  | 952.300869798243 | 0.0556580204814937 |
| CGTCATTCGC  | 952.32412772442  | 0.0480562082551968 |
| GTAATGACAA  | 952.410970195868 | 0.0757804221440041 |
| CTATGATGAC  | 952.4935595565   | 0.0454750579112139 |
| ACCATGTCAC  | 952.542895855022 | 0.0841398238799279 |
| CCTGGTGACA  | 952.557807803777 | 0.070412907240147  |
| CTTGATGTC   | 952.637792045744 | 0.0708772386468081 |
| ATTGTCACCG  | 952.821057387816 | 0.0529549554248045 |
| GTGACATAGA  | 952.84041582998  | 0.0522604618105793 |
| CTGAGTCGAA  | 953.199169922854 | 0.0628216959885354 |
| AGCAATGACA  | 953.305620729765 | 0.0468639881894682 |
| TGACAACCTCA | 953.333996367245 | 0.0637928343165816 |
| AATGACAAGG  | 953.556923857379 | 0.0463396405755618 |
| AGTGTGTAAT  | 953.944367897805 | 0.0684446189634952 |
| GTTGACTGAA  | 954.005671467434 | 0.0481076455890997 |
| GGCGTGTAC   | 954.114584441183 | 0.0649296284348149 |
| CAATTAGTCG  | 954.177530560639 | 0.0546854239062278 |
| ACCCTGACTC  | 954.233459988008 | 0.0429635048915407 |
| GTGACACGGA  | 954.296325873054 | 0.055062827708249  |
| ACGTGATTCA  | 954.617285490741 | 0.0482358359027341 |
| GTCATTCGCA  | 954.74580635675  | 0.0668054106843111 |
| GACATGACGC  | 954.790167631655 | 0.056225437763927  |
| GTCATTCCTA  | 954.796777056031 | 0.0677216418360644 |
| AACAGTCAAC  | 954.797658242661 | 0.0494013325614517 |
| CTGACTGCTA  | 954.961857319525 | 0.0693461851207503 |
| GTAGGATGAC  | 955.003177366996 | 0.0574828134812115 |
| GGTTCGTAC   | 955.300302795825 | 0.0629560948430414 |
| ACCGGATGAC  | 955.327503794975 | 0.0649187960334921 |
| TAACTGGTCA  | 955.371802188849 | 0.0652369624976514 |
| CAATTAATA   | 956.008328807219 | 0.0716977658343033 |
| AATGAGTAGA  | 956.485149846385 | 0.0494104333210526 |
| CGTAATGACA  | 956.587965652152 | 0.0509117955128485 |
| CCTAATGACA  | 956.972426005622 | 0.0581550582862365 |
| ACAATGTGAT  | 957.019937319993 | 0.0668957157657014 |
| AAGGTGACGC  | 957.259181341264 | 0.0443099424507599 |
| CAACTGACTC  | 957.268171709023 | 0.0610599111448422 |
| AGCTTGTGAT  | 957.658492804541 | 0.0592729190720241 |
| TATTGACTGA  | 957.860261274269 | 0.041197288551136  |
| AGTGACGCCA  | 958.424424497736 | 0.046759196636247  |
| ACTAGTCAGC  | 958.444882482136 | 0.0582388913351168 |
| CACGTGACTG  | 959.052315786105 | 0.0411875142660177 |
| GGCATGACAC  | 959.062027541604 | 0.0542264402032421 |
| ACTGGTGACA  | 959.183350041355 | 0.0282166825154321 |
| CTGACTAGTA  | 959.274500316576 | 0.0484064012491296 |
| AGGGTGACAT  | 959.502843684903 | 0.0500720285638671 |
| AGAGATGACG  | 959.650574034084 | 0.053638304169778  |
| AGACTAATTC  | 959.875854174099 | 0.0608715275451322 |
| ATCATAGTCA  | 959.906414457946 | 0.0445121300998931 |

|             |                  |                    |
|-------------|------------------|--------------------|
| AGTGGAGTCA  | 960.041643987088 | 0.0394135539114488 |
| ATGACAATAG  | 960.054916666326 | 0.0547632264310562 |
| AAGAATGAGT  | 960.355885553351 | 0.040443203868574  |
| CTGACACTTA  | 960.725674055711 | 0.0443253219966202 |
| AAGCGATGAC  | 960.773625948961 | 0.0523003332143571 |
| GTA CTGTCAC | 960.785420663752 | 0.0388626931122744 |
| GTCATACCGA  | 960.924613789298 | 0.0376479020117617 |
| CGTCATTTAA  | 961.143189202322 | 0.0495547064512104 |
| ATACTCGTCA  | 961.154148693801 | 0.0330445997387111 |
| CTCGACTCAC  | 961.44266423071  | 0.0504888383650224 |
| CATGACTTGG  | 961.485514156041 | 0.0390617399769839 |
| AACGGGTCAT  | 961.488231534817 | 0.0397974382275668 |
| GACTGACACA  | 961.519059361731 | 0.0359435586176937 |
| GATGAGTAGA  | 961.63589212461  | 0.0492663431132062 |
| CGCAATGACA  | 961.782472770971 | 0.041269213441559  |
| TGGGAGTCAA  | 961.870293754803 | 0.0431439567501518 |
| GTGACATGGA  | 962.083258686641 | 0.040043691728024  |
| AGGAATGACG  | 962.144863147649 | 0.0518654420175561 |
| CTGACTAGTC  | 962.668242934749 | 0.0666938888846454 |
| ACGGAGTCAG  | 962.751091535127 | 0.0420234553789029 |
| ATTACGTATA  | 963.21301128704  | 0.0569716096015775 |
| GATGACAAGC  | 963.383124275187 | 0.0442701365908139 |
| ACTTTGACTC  | 963.470867603881 | 0.0413069271199333 |
| AACTGTGTCA  | 963.502113996857 | 0.0326357270859593 |
| CTAGTGTCAT  | 963.583838936233 | 0.0538321360958338 |
| GTCTGACCCA  | 963.713420707881 | 0.0673100146663258 |
| AGGAGTAATA  | 963.745605258283 | 0.0439661045683818 |
| ATGTATCACA  | 964.019188798947 | 0.0703696273148769 |
| AAGACTAACA  | 964.020538606917 | 0.039862689275526  |
| AGCGAGTCAG  | 964.055590174318 | 0.0460019533166509 |
| ATGATGTGTA  | 964.080080239912 | 0.0618561255775177 |
| GTCATCGCTA  | 964.243196563693 | 0.0454306505811072 |
| GAGTCAGGAA  | 964.408837731979 | 0.036916344328508  |
| AAGATTCATC  | 964.940008564105 | 0.0348829943975248 |
| ACGTCATGCG  | 965.038709911414 | 0.0740923637382304 |
| GTCATAATGA  | 965.060361618601 | 0.0484862912223907 |
| ACGAGATGAC  | 965.627568757786 | 0.0625667186060416 |
| ACTCCGTCAC  | 965.72192428845  | 0.0385429374980696 |
| AAGTGACGAA  | 965.768438116905 | 0.0361294437558686 |
| AAGAGATGAC  | 965.806215956745 | 0.0457752503753452 |
| GAATCATGAC  | 965.845893234536 | 0.0334379350322649 |
| GCTATGTCAC  | 966.021688158088 | 0.0494613676517929 |
| CGTCATTTAC  | 966.088082086873 | 0.0562961001872573 |
| AGTGTCACGC  | 966.185893209596 | 0.0354390891817197 |
| ATGAGTAGGA  | 966.380903807351 | 0.0366909952705009 |
| AACAGTCAAT  | 966.554599593021 | 0.0332312407541986 |
| GTGTCATGGA  | 966.956729758368 | 0.0457523700234991 |
| ATGACGACGC  | 967.037358276805 | 0.0440219923424273 |
| CTGTCAATTC  | 967.102095267311 | 0.0388326314044684 |
| CGACGTCACA  | 967.207014842404 | 0.0332736378616073 |
| GCGTCACATA  | 967.243977065052 | 0.0452122574449417 |
| CTCTGACGAA  | 967.248143358642 | 0.0389591018104539 |
| AAGGGTGACA  | 967.327283639566 | 0.0425251898923085 |
| AATGACAGGG  | 967.515009845752 | 0.0513708475062018 |

|            |                  |                    |
|------------|------------------|--------------------|
| AATAGATGAC | 967.549569231352 | 0.033618666089333  |
| ACAAATGACA | 967.831382229495 | 0.033220178190707  |
| AGGGAATGAC | 968.200868990056 | 0.0458961242698452 |
| AGTCTGTAC  | 968.214879987876 | 0.0362129269155865 |
| CGTCATCAAG | 968.334024037024 | 0.0321729907035163 |
| TCGGAGTCAA | 968.362928234129 | 0.033933951247417  |
| AATGACATTA | 968.403523164211 | 0.0373839162733184 |
| CGTCACCGAG | 968.455911196411 | 0.0581394084591385 |
| CGTCATTAGA | 968.521729782011 | 0.033397841899265  |
| ACCGAGTCAA | 968.698449181651 | 0.0511765003168678 |
| ACGTGTGACG | 968.98036338994  | 0.0518467284051949 |
| AACGTGAGTC | 969.364088875956 | 0.0612995041891698 |
| AACCGTGACT | 969.637764523938 | 0.0346919015115466 |
| CATATGACCA | 969.674384623061 | 0.0322938111402075 |
| CAGGGAGTCA | 969.778408787962 | 0.0577294629278977 |
| AGTGGTGACA | 969.817418034222 | 0.0480439285350001 |
| AGTCTATGAC | 971.182373519099 | 0.0361598450929893 |
| TGAATGACCA | 971.31972591443  | 0.0286289979191866 |
| ACCGACTAAT | 971.46379388031  | 0.0518025131849897 |
| ATTACACAAT | 971.539810035413 | 0.0322287669398716 |
| CTTGAGTCA  | 972.209862358868 | 0.0328373092427751 |
| ACATGACCCA | 972.495337103143 | 0.0395192912864958 |
| CGACTCAGAG | 972.596390184332 | 0.0370367540162511 |
| GTATGATACA | 973.10141962688  | 0.0304696286113974 |
| GTTATGAGTA | 973.135416871885 | 0.0469184642329085 |
| ACTGTGACAA | 973.468761020805 | 0.0427643215927387 |
| CGACTAATCC | 973.565173795948 | 0.0374232952996807 |
| CTGACTGCAA | 973.79555454656  | 0.0351164043970691 |
| CATGACAGAG | 973.831717262409 | 0.0364479713028178 |
| ATGACAGGGA | 974.406314096678 | 0.0391624746324067 |
| GACATATGAC | 974.908446955008 | 0.0346998084384411 |
| AGAGAATGAC | 975.428029406775 | 0.0246431814700879 |
| ACACATCATC | 975.549849117631 | 0.0301516791794719 |
| ACAGTCAGCG | 975.948395961393 | 0.0336202872441964 |
| ACGGATGAGT | 976.113749938801 | 0.0309587705605117 |
| ACGACTCAAT | 976.225838773976 | 0.028898642271844  |
| ACATGATGAC | 976.839426456566 | 0.0523962567604267 |
| GACGGAGTCA | 977.466873588325 | 0.0312871989710632 |
| CTGACTGTGC | 977.69168984853  | 0.0288998123022865 |
| GTCATAAATA | 978.326142323803 | 0.0477186300401596 |
| AACATGACGC | 978.358286944215 | 0.0280795500279228 |
| TGACCCATCA | 979.502882886794 | 0.0206004404906214 |
| CCCGTCATCA | 979.820353249827 | 0.021426231313826  |
| AAATGTCACA | 979.936168619284 | 0.0193322586425467 |
| TCGGGTGACA | 980.404525087586 | 0.0260780690371839 |
| CTGGTGACAA | 980.686264207381 | 0.0213309008703973 |
| AAGACTGATC | 981.678317687429 | 0.0200028451173719 |
| CGGACTCACA | 981.963853013801 | 0.0250735293841584 |
| AGTTGACACA | 982.290285317691 | 0.0255898271423985 |
| ACGTGACATA | 982.997692090022 | 0.0383437122378511 |
| GAGTGACATA | 983.056919409468 | 0.0211546618662935 |
| AGATCTGACT | 983.430031208903 | 0.0373614085013792 |
| GGCGGATGAC | 983.463621435254 | 0.0372850839877921 |
| ACTATTACTC | 983.548178801748 | 0.0175795283570764 |

|            |                  |                    |
|------------|------------------|--------------------|
| AGCCGTCATA | 984.236096332006 | 0.0275293587254809 |
| GTCATTCACA | 984.556385606526 | 0.0308733747529605 |
| ACTCATTCTA | 986.06855641836  | 0.0264981347434169 |
| AAGTCACTTG | 986.348213266296 | 0.013098772069098  |
| AAATGTGACG | 986.922689887757 | 0.0211101027366007 |
| GTCACCGATA | 987.433938161081 | 0.022632396754918  |
| GGCGTCACCC | 988.61842992319  | 0.0154802302243258 |
| ATGTCACATA | 989.714205660528 | 0.0163805609317406 |
| TGATGATACA | 995.009890965527 | 0.0109207932141587 |
| 1000       | 0                |                    |

|             |                  |                    |
|-------------|------------------|--------------------|
| TATGACTCATA | 10.7925720560375 | 0.131313077855337  |
| TATGACTCATC | 11.5909498437653 | 0.049327848923901  |
| TTATGACTCAT | 11.817696491459  | 0.138140152816173  |
| GTATGACTCAC | 12.61592674519   | 0.113510159941361  |
| TATGAGTCATC | 13.1094058785463 | 0.372839957945775  |
| TGATGAGTCAT | 13.7202908722633 | 0.08112136469454   |
| ATATGAGTCAC | 13.9226549768285 | 0.305120796767825  |
| GTATGAGTCAT | 14.0558827455612 | 0.323503055731411  |
| GTGAGTCATCA | 14.07790898316   | 0.209127509744059  |
| CATGAGTCATA | 14.3951134375681 | 0.19542249860683   |
| TTATGACTCAC | 14.4349661778776 | 0.16751770523474   |
| TTATGAGTCAC | 14.6292143654657 | 0.187702145736575  |
| GGATGACTCAT | 14.6514582985218 | 0.335534785446037  |
| ATGACTCACAT | 14.6716379055313 | 0.168303251592367  |
| ACATGAGTCAT | 15.0681245678832 | 0.218175306328856  |
| AGTGAGTCATC | 15.1307336888255 | 0.216657004057344  |
| TGTATGACTCA | 15.1341810606185 | 0.339741371153521  |
| TATGAGTCATT | 15.244418492482  | 0.392568923026674  |
| ACTATGACTCA | 15.3349031506431 | 0.128507819867623  |
| AGTGACTCATC | 15.4509961738689 | 0.119687338487127  |
| TATGACTCACT | 15.6384247591468 | 0.381488500920606  |
| GTGTGACTCAT | 15.6934114639653 | 0.287576670737379  |
| ATGACTCATCC | 15.706272602876  | 0.22700228245418   |
| CTATGAGTCAC | 15.8047191524518 | 0.320376934819707  |
| ATGACTCACTA | 15.8150607533164 | 0.0616739596349203 |
| CTATGACTCAT | 16.0439499450551 | 0.327980587528124  |
| GTGACTCATCA | 16.104775704492  | 0.575169696579507  |
| ATGACTCATCG | 16.473314004392  | 0.425262887793627  |
| CATGAGTCATC | 16.6055338858753 | 0.210382652838012  |
| GGTGACTCACA | 16.6380375144686 | 0.187187943389972  |
| TATGACTCACA | 16.6804156297528 | 0.191842063917762  |
| ATGACTCACTG | 16.7030445801216 | 0.124224864143544  |
| CTGTGACTCAT | 16.7295616639952 | 0.383684218834906  |
| GGATGACTCAC | 16.8121352581706 | 0.151895067563442  |
| CATGACTCACA | 16.8680984854395 | 0.176888896866684  |
| AGGTGAGTCAT | 16.9964323249319 | 0.197300604661936  |
| ATGACTCATTC | 17.1239709553481 | 0.579652276615029  |
| ACGTGACTCAT | 17.1309037198066 | 0.117444691183942  |
| GATATGACTCA | 17.1980001103569 | 0.354461546427163  |
| ACTATGAGTCA | 17.2021651179371 | 0.426875368323339  |
| TATGACTCACG | 17.3177709270527 | 0.26368576211911   |
| GCTATGACTCA | 17.4585486263386 | 0.247162184362864  |
| ATGACTCATAA | 17.7376996743018 | 0.268110668522811  |
| ATGACTCACTT | 17.7899862276563 | 0.2371108525078    |
| GTGTGACTCAC | 17.8319730274633 | 0.126362481579395  |
| TCATGACTCAT | 17.8419215404479 | 0.0953188701609667 |
| TGGTGAGTCAT | 18.536831677108  | 0.207810045976242  |
| ATGACTCACAA | 18.5449601421751 | 0.491799407005408  |
| GTGACTCATAC | 18.820111342762  | 0.316955262958618  |
| AATGACTCACT | 18.9648478997163 | 0.475412067060365  |
| ATGACTCATT  | 19.0950966291281 | 0.49202714742071   |
| GTCTGACTCAT | 19.1416558938779 | 0.108992601769377  |
| GGTATGACTCA | 19.3378721805941 | 0.102883539367704  |
| GAGTGACTCAT | 19.5077821746626 | 0.277519336663418  |



|             |                  |                    |
|-------------|------------------|--------------------|
| AATGAGTCATA | 19.6827315854228 | 0.504792228586562  |
| CTTATGACTCA | 19.6912764227708 | 0.354207528216132  |
| GAATGACTCAT | 20.5009627433876 | 0.469653704354612  |
| TATGACTAATC | 21.2121997042233 | 0.126206447017178  |
| ATAATGACTCA | 21.2842879939516 | 0.286558404007334  |
| GTGAGTCACCC | 21.6131401404656 | 0.439533410703563  |
| TATGAGTCACT | 21.8328442937756 | 0.640104609581178  |
| AATGACTCACC | 21.8725243636091 | 0.132327002329668  |
| CTCTGAGTCAT | 21.9068358091768 | 0.229495743528933  |
| TATGAGTCAGC | 22.151531384848  | 0.151899635221608  |
| TCTGAGTCATC | 22.1764575748052 | 0.194258680847973  |
| CCGATGAGTCA | 22.1823364483478 | 0.303412005213618  |
| GATGAGTCATG | 22.3690620571359 | 0.506954529710078  |
| GATGACTAATC | 22.403271345824  | 0.165964152351441  |
| ACATGACTCAC | 22.4192853467043 | 0.183670146805313  |
| TAGTGACTCAC | 22.5722756276627 | 0.443682903931659  |
| ATGACTCACAC | 22.6667896296536 | 0.423003144245412  |
| CGATGACTAAT | 22.6807447148087 | 0.133785577386313  |
| TAATGACTCAC | 22.8541790950597 | 0.373783234030968  |
| AATGACTAATC | 22.9490897903486 | 0.419777467382274  |
| CACATGACTCA | 23.0156999385622 | 0.143968176795686  |
| ATGACTCACAG | 23.0593122077689 | 0.237665647287007  |
| GGGTGACTCAT | 23.0638678243353 | 0.677315780547143  |
| TGTGACTCACG | 23.1055333081001 | 0.0516363321220039 |
| TATGACTCAGA | 23.167571392777  | 0.41737983273489   |
| ATGTGACTCAT | 23.199981896713  | 0.60112325206153   |
| TATGACTCAAC | 23.4358554824804 | 0.239537624926138  |
| TGAGTCATCAA | 23.4902022751412 | 0.104615119221347  |
| ATGACTCACCG | 23.8479778615551 | 0.341561204469687  |
| AATGACTAATT | 23.8636651666618 | 0.362036458334553  |
| CAATGACTCAC | 23.9086989291481 | 0.333795172668209  |
| CCTATGAGTCA | 24.1424372727466 | 0.19676861763902   |
| GTGACTCACTG | 24.1602372506616 | 0.189206757216485  |
| GTGACTCATTT | 24.4942998569728 | 0.549051134930721  |
| ATATGACTCAT | 24.6413643137888 | 0.408829010790473  |
| TTATGAGTCAG | 24.6500127782584 | 0.582964777763602  |
| AGGTGACTCAC | 24.6916605606698 | 0.254062519654818  |
| CATATGAGTCA | 24.7542429851449 | 0.125427821389511  |
| ATGACTCACGT | 24.8178500416259 | 0.408249262571612  |
| AATGACTAATA | 24.936403382304  | 0.06532068171761   |
| CGTATGACTCA | 25.0927039325166 | 0.829919620707806  |
| GAATGAGTCAC | 25.3054436925508 | 0.866984830615794  |
| GTATGAGTCAG | 25.3278403148958 | 0.300907079497673  |
| AATGAGTCAGC | 25.4626641929709 | 0.297042072391717  |
| ACTGTGACTCA | 25.4960574374517 | 0.279924582208606  |
| ATGACTAAATG | 25.5596178790906 | 0.592263252929699  |
| TGTGACTCAGA | 25.6572234337031 | 0.154773720567216  |
| TGATGACTCAT | 26.1865431841944 | 0.486547131146142  |
| ATGACTAATTA | 26.1890271041405 | 0.10397099494383   |
| GTCTGAGTCAT | 26.1993631224211 | 0.382835112720841  |
| ATGACTCATGC | 26.2968878392481 | 0.598406167384815  |
| ATGACTAATTG | 26.3821053577091 | 0.226630208972571  |
| TGAGTCATCTT | 26.4364578021715 | 0.346857348055853  |
| AGAATGAGTCA | 26.716716441974  | 0.144347270468806  |

|             |                  |                    |
|-------------|------------------|--------------------|
| TAGATGAGTCA | 26.7181709533448 | 0.405468097767769  |
| GATGAGTCAGT | 26.7943326808335 | 0.250372576847846  |
| GTATGACTCAA | 26.8980775094318 | 0.107806092923193  |
| TAAGAGTCATA | 26.9917291928957 | 0.312691222647956  |
| ATAATGAGTCA | 26.995914497484  | 0.248516743065334  |
| ATATGACTCAA | 27.2422507936768 | 0.543509993952926  |
| CGAATGACTCA | 27.3440368581487 | 0.24953031012074   |
| GGTGACTAATT | 27.4003442505136 | 0.248830679240118  |
| ATGACTAATAC | 27.4095724264301 | 0.470259341589042  |
| ATGACTCAATT | 27.4178973385599 | 0.218290958349263  |
| TATGACTCAAT | 27.4516018242648 | 0.122653539817643  |
| ATGACTAATTC | 27.7544280988384 | 0.343185640071891  |
| TTCTGACTCAC | 27.7577726902651 | 0.106992162749032  |
| CCTATGACTCA | 27.8891648400173 | 0.529030506604733  |
| ATATGAGTCAG | 27.9268734729237 | 0.136849396591793  |
| TTTATGACTCA | 28.0243750642119 | 0.961480484094138  |
| AGGTGACTCAT | 28.0333414013496 | 0.811032295154718  |
| TCTGAGTCATT | 28.1074941206114 | 0.327956638307375  |
| CTGAGTCATAC | 28.2042854255431 | 0.252610744334936  |
| GCAATGACTCA | 28.2667011855447 | 0.201126717368325  |
| GATGACTCAAT | 28.2879536350206 | 0.244366085904827  |
| TAATGAGTCAG | 28.3239868310857 | 0.493720731462169  |
| TGAATGAGTCA | 28.4053644388971 | 0.239786676192524  |
| AAATGACTCAC | 28.6443264658728 | 1.50276086487305   |
| TCTGACTCATA | 28.7677361788737 | 0.947180559571336  |
| GTGACTAATCG | 28.7705118022838 | 0.26740237019771   |
| TGATGAGTCAA | 28.8372603655598 | 0.102839230155319  |
| TAAGAGTCATT | 28.849149602356  | 0.0856316270591775 |
| TGAGTCATCTG | 28.9502988515264 | 0.352987737408691  |
| GCTATGAGTCA | 29.0244571113135 | 0.457215833490916  |
| GTGACTAATAC | 29.0308608395593 | 0.295355875810978  |
| AGAATGACTCA | 29.0496600442217 | 0.209027544088567  |
| GTGACTCACGA | 29.0641981589081 | 0.239678338723375  |
| AAGAGTCATAC | 29.0701505818229 | 0.352565067451539  |
| ATATGACTCAC | 29.1789707026657 | 1.03426880997702   |
| GGATGACTAAT | 29.1927593815388 | 0.230670836495568  |
| AATGACTCAAT | 29.2641610830731 | 0.101828143247426  |
| TGAGTCATCCG | 29.4223683465735 | 0.449061785582356  |
| ATGACTCAATA | 29.4413678380179 | 0.210810684973098  |
| TATGAGTCACG | 29.4657801132139 | 0.376977822159828  |
| TATGACTCAAA | 29.4936504411876 | 0.361157190314505  |
| CTATGAGTCAG | 29.5148209532448 | 0.232711515159616  |
| GGTGTGACTCA | 29.5552821133295 | 0.148159905608328  |
| ACAATGACTCA | 29.6595189799211 | 0.369281435134319  |
| ATGACTCAATC | 29.7110657250592 | 0.316945603734994  |
| ATGTGACTCAC | 29.7875639259999 | 0.275051359932452  |
| CTGGTGAGTCA | 29.8039662844702 | 0.219139750634276  |
| CGAATGAGTCA | 29.8093314643619 | 0.23804026489675   |
| AGTGACTCACG | 29.9487002205883 | 0.0987204550294796 |
| AGGTGAGTCAC | 29.9626763770815 | 0.708943966708202  |
| GTGACTCACGT | 29.9889593162001 | 0.250271236612726  |
| AACTGAGTCAT | 30.0114871049345 | 0.294787845927409  |
| GTAATGACTCA | 30.0293152908235 | 0.317965944853736  |
| AGATGAGTCAC | 30.2496951161322 | 0.695615978499253  |

|             |                  |                    |
|-------------|------------------|--------------------|
| CATATGACTCA | 30.2537622971905 | 0.471675262325161  |
| CTTATGAGTCA | 30.4609317516861 | 0.397613888478814  |
| ATGACTAATTT | 30.5565198443986 | 0.262025722426904  |
| AATGTGACTCA | 30.6431815315191 | 0.200038025418677  |
| ATGACTCAATG | 30.6551994297503 | 0.186160118572553  |
| TCGTGACTCAC | 30.6633316436829 | 0.168347736570692  |
| ATGACTAATAG | 30.7088819574109 | 0.176884710042009  |
| TGCTGAGTCAT | 30.7977567589401 | 0.173415844639311  |
| CCATGACTCAT | 30.8224166352107 | 1.14231202741429   |
| CTGAGTCATCT | 30.8820512697504 | 0.27180706172273   |
| TGGATGAGTCA | 30.9879469502649 | 0.399706259265448  |
| TGTGTGACTCA | 31.0507684141538 | 0.300493774412912  |
| TTATGACTAAT | 31.0635147439966 | 0.749149066080737  |
| AGGATGAGTCA | 31.0835880682317 | 0.159572352408332  |
| CAATGACTAAT | 31.311618996114  | 0.257153984290095  |
| ATGTGACTAAT | 31.3609702660705 | 0.198106983445785  |
| AAGAGTCATAA | 31.4236916009013 | 0.259704918767376  |
| ACGATGAGTCA | 31.4586637018083 | 0.434711853682368  |
| TCTGACTCATG | 31.4843875592724 | 0.600779440309416  |
| GTAATGAGTCA | 31.4943838276286 | 0.263573512047185  |
| TGTGACTCATA | 31.5148940066682 | 1.94428574430122   |
| GAAATGAGTCA | 31.5541337558177 | 0.266000592890949  |
| TTGATGAGTCA | 31.5577322826435 | 0.604645453369437  |
| GTGACTAATTC | 31.6062907641277 | 0.415645977029194  |
| AGTATGAGTCA | 31.6613864652223 | 0.124669653424466  |
| AATGACTCAAC | 31.7973971525631 | 0.0779405671689966 |
| TATGACTAATG | 31.8618990737145 | 0.143060069471505  |
| TCGATGAGTCA | 31.9083951242219 | 0.498930087123956  |
| CTCTGACTCAT | 31.9289892065108 | 0.588227823557754  |
| CACTGAGTCAT | 32.2033504293047 | 0.212408691906041  |
| AACATGAGTCA | 32.2451854336496 | 0.184022825229871  |
| GAATGACTAAT | 32.2573548329146 | 0.26779407369844   |
| GGTGACTAATA | 32.2736597089135 | 0.169858192809226  |
| AAAGAGTCATC | 32.3166773597903 | 0.268470695449251  |
| TGTGACTCATG | 32.3872650745153 | 0.77077995807938   |
| TGATGACTAAT | 32.5218025088429 | 0.383517918699552  |
| CGGTGACTAAT | 32.6289434959944 | 0.150985987007906  |
| TCTGACTCACT | 32.6406465092034 | 0.251209934721513  |
| CATGAGTCACC | 32.6881187952344 | 0.718316919080508  |
| GTAAGAGTCAT | 32.7234144702863 | 0.183518911314316  |
| AGTGACTCACT | 32.7433506313943 | 0.347054214153159  |
| CATGACTCATT | 32.8295229464238 | 1.53156563684876   |
| TGTGACTAATC | 32.9840285599365 | 0.216186685301011  |
| GATGACTAATT | 33.1827144157385 | 1.13005904570867   |
| GTGAGTCAGCA | 33.2485394821671 | 0.300921590448509  |
| CTATGACTCAA | 33.2519129147306 | 0.232985783329423  |
| TGAGTCATCGT | 33.3208729874068 | 0.491123071482662  |
| CGTATGAGTCA | 33.5598330776461 | 0.279966143249914  |
| CTGAGTCACCG | 33.5740044793758 | 0.154888500677409  |
| AATGAGTCAGG | 33.5868787412484 | 0.118568643093248  |
| CTCTGACTCAC | 33.7957774356795 | 0.404836669252091  |
| GCTCTGACTCA | 33.8063276701373 | 0.892949326310102  |
| GAAGAGTCATA | 33.8342239721312 | 0.234443189005157  |
| GTGACTCAGAC | 33.8490743997151 | 0.127325525512412  |

|             |                  |                    |
|-------------|------------------|--------------------|
| CTGAGTCATCG | 33.8762866395517 | 0.672243401598666  |
| TGAGTCATCGC | 34.0275721226992 | 0.468088201696271  |
| ATCATGAGTCA | 34.1083363750074 | 0.218159763622278  |
| TTAATGACTCA | 34.1637340204925 | 0.474010301059179  |
| AAGAGTCATCG | 34.2070045476703 | 0.251840508611198  |
| AGATGACTAAT | 34.2114663133723 | 0.435257935278014  |
| GTGAGTCAGAC | 34.4037088197182 | 0.394092421683119  |
| ATGACTAATCT | 34.4339348990207 | 0.400376280034719  |
| CATGACTCACT | 34.4448083300555 | 0.941438334370502  |
| AATATGAGTCA | 34.4804610173694 | 0.401753492119519  |
| ATGACTAATCC | 34.4887217785888 | 0.303144602470447  |
| TCTATGAGTCA | 34.5845312170752 | 0.48932621617113   |
| GTGACTAATAG | 34.6578364061842 | 0.339427429589507  |
| AAATGAGTCAT | 34.6771355597703 | 1.94333048189202   |
| GTTAGTCATAC | 34.759003349688  | 0.101482907246437  |
| TTAAGAGTCAT | 34.8994072998758 | 0.325276600333368  |
| ATAAGAGTCAT | 34.9178069171108 | 0.267380926838383  |
| TCAATGACTCA | 35.0767046345932 | 0.847689132558036  |
| GTGACTAATCT | 35.1538554267356 | 0.278125263024569  |
| CATGACTCAAT | 35.176199566247  | 0.252363582130176  |
| TAATGACTAAT | 35.3002603296413 | 0.480986414732185  |
| GTGACTAATTG | 35.3241282087982 | 0.22168799010914   |
| TGAGTCACCGT | 35.4965494884205 | 0.274645809491926  |
| ACAATGAGTCA | 35.5030227604734 | 0.386859644950043  |
| GTGACTCAACT | 35.6059262341902 | 0.222994033528903  |
| TGACTCACATT | 35.62085926135   | 0.0996395824798764 |
| GAATGAGTCAA | 35.7436818833574 | 0.311007633822601  |
| TCCTGAGTCAT | 36.0838255363562 | 0.320552115873566  |
| AAGAGTCATAG | 36.2573267251363 | 0.32507326444952   |
| GTGACTCAACG | 36.4668136963743 | 0.346673886200642  |
| TTGTGACTCAC | 36.7338682614834 | 0.968225163795011  |
| AAGATGAGTCA | 36.7397130637108 | 0.201406596336819  |
| CAAATGACTCA | 36.7804423706172 | 0.46958450273675   |
| TAAATGAGTCA | 36.9112830592497 | 0.325571986904872  |
| TATATGACTCA | 36.9298668634637 | 0.972617046439878  |
| TCTGACTCACA | 37.0175305398943 | 0.480944212451947  |
| CACATGAGTCA | 37.1651557580608 | 0.25388396388167   |
| CGAGTGAGTCA | 37.3059777894898 | 0.110040781850376  |
| TATGTGACTCA | 37.3209655267293 | 0.639024781150764  |
| ATGTGACTCAG | 37.3705370017493 | 0.185153206580427  |
| TTAGTGACTCA | 37.4379693223765 | 0.676627595122495  |
| CAATGAGTCAG | 37.5972984349686 | 0.434747363496098  |
| TGAATGACTCA | 37.6924328506056 | 0.837109714698585  |
| ACTGAGTCATG | 37.7041576300702 | 0.320285193256654  |
| AAGAGTCATAT | 37.7564160563945 | 0.331982980264891  |
| CATGACTAATA | 37.7961694187942 | 0.280421708575485  |
| CAAATGAGTCA | 37.8344866202346 | 0.163012624351423  |
| ATGACTGATTC | 37.8815899653332 | 0.102053917551453  |
| ATATGAGTCAT | 38.0697502949065 | 1.89878972484197   |
| CGGTGAGTCAG | 38.3928961399041 | 0.0783428175976444 |
| AAAATGACTCA | 38.4117445055657 | 0.579302286806251  |
| TAATGAGTCAA | 38.5748888470484 | 0.244882599440534  |
| GAATGAGTCAG | 38.5914642384588 | 0.223557049143707  |
| ATGACTAATGT | 38.6576647046423 | 0.47346024543015   |

|             |                  |                     |
|-------------|------------------|---------------------|
| AGTGACTAATT | 38.7326659277098 | 0.338413910493322   |
| ATTTAGTCATA | 38.8081854985903 | 0.251459492670455   |
| AAGTGACTCAC | 38.8181464947006 | 0.688013473937639   |
| CATGAGTCATT | 38.8316998323802 | 1.58651261554422    |
| TTGTGACTAAT | 38.8727809220124 | 0.352134004475632   |
| AAGAGTCATCA | 38.9160181505143 | 0.225723858315402   |
| TATGACTGATC | 38.9649156122108 | 0.290313065095742   |
| AAAGAGTCATA | 39.1649046694451 | 0.192228948109742   |
| TGTGACTCATT | 39.1727860784078 | 1.91321909070792    |
| GTGACTAATTA | 39.2126877442527 | 0.308718217777185   |
| CTATGAGTCAA | 39.2258037780198 | 0.271302393294843   |
| TGAGTACCAT  | 39.3634358787855 | 0.335177761338896   |
| GCCATGACTCA | 39.3688717764153 | 0.482301435889213   |
| CGGATGAGTCA | 39.4277531232064 | 0.493072458376388   |
| GTGACTCATTG | 39.5628992533778 | 1.82540578151074    |
| TAAGTGACTCA | 39.6072396928216 | 0.149196955690925   |
| TTAATGAGTCA | 39.6139546951234 | 0.614426819632297   |
| AAAAGAGTCAT | 39.6310307231784 | 0.201610040059762   |
| GGTGAGTCAAC | 39.6387821970405 | 0.364163471384219   |
| ATGATGAGTCA | 39.6525664071683 | 0.36704159157757    |
| AGTTAGTCATA | 39.6686110668835 | 0.279071901567941   |
| CAGGTGAGTCA | 39.7595704569906 | 0.266474352408008   |
| AGATGAGTCAA | 39.9130492665877 | 0.37998543104673    |
| AAGAGTCACAC | 39.9245638811406 | 0.236258350014489   |
| ATCATGACTCA | 39.9511233055947 | 0.422280336516461   |
| TGTGACTCAAT | 40.0528324371112 | 0.233232900984807   |
| GTGAGTCAGCC | 40.086658187176  | 0.304404837342386   |
| TATTACTCATA | 40.2445040055268 | 0.217715809561255   |
| AGTGACTCAGC | 40.244957970216  | 0.00299409299235737 |
| TTCTGAGTCAT | 40.3352536842344 | 1.50364525651107    |
| TATGACTGATT | 40.4717455988571 | 0.507370731023215   |
| GTGACTCAATG | 40.491673486616  | 0.416278684115045   |
| ACTGAGTCATA | 40.7241433622286 | 0.412842904095035   |
| CTTGTGACTCA | 40.974155866534  | 0.548700612908502   |
| AATGAGTCACT | 41.0957481040433 | 1.27253561606551    |
| GAGATGAGTCA | 41.2715281730975 | 0.309120040433305   |
| CTCGTGAGTCA | 41.3431635055355 | 0.651600146056026   |
| AGTGACTAATC | 41.367178510254  | 0.632955338209518   |
| TAAGAGTCACA | 41.4151199388593 | 0.403766825311687   |
| CTATGACTAAT | 41.5008773353881 | 0.934004777000787   |
| ATGACTCAAAT | 41.5101779307933 | 0.262264193527811   |
| CCATGACTAAT | 41.5554984587913 | 0.262262691115095   |
| CGTGAGTCAGA | 41.5900743745312 | 0.300850559201579   |
| TGACTCACACT | 41.6509804366837 | 0.335431234453851   |
| TGACTCACAGT | 41.6749786669695 | 0.170347319879581   |
| AAAGAGTCATT | 41.6776174473475 | 0.222026733347943   |
| GGTGACTCATC | 41.7756326066938 | 1.83519313935719    |
| CGTGACTAATC | 41.8271756079541 | 0.300164469723958   |
| CTGAGTCATAA | 41.9247533524831 | 0.853295038748668   |
| GTTGACTCACA | 42.04130622696   | 0.295458082954054   |
| GATGACTCAAC | 42.1922455530262 | 0.282557223680852   |
| TGCATGAGTCA | 42.2114907725561 | 0.249508218968768   |
| ACTGAGTCATC | 42.2644046705812 | 0.610299592228294   |
| CTGAGTCATAG | 42.4810844002165 | 0.51277584091781    |

|              |                  |                    |
|--------------|------------------|--------------------|
| ATGACTAACAG  | 42.5806688122895 | 0.297432918473692  |
| ATCTGAGTCAT  | 42.6815320519588 | 0.414390697082149  |
| TAAGAGTCATG  | 42.7397426955278 | 0.237088798167236  |
| GTGAGTCAGAT  | 42.8891655197058 | 0.438875439796002  |
| AAGAGTCATTG  | 42.9404937567    | 0.256319035941316  |
| GTAAGAGTCAC  | 43.0172446400847 | 0.262011541887424  |
| TGAGTCATCCT  | 43.0376463436772 | 0.290348311965774  |
| TATGACACATT  | 43.0882839175514 | 0.369890425438141  |
| GACATGACTCA  | 43.1365902906184 | 0.743478220930486  |
| AAGAGTCATCC  | 43.2536496114515 | 0.279639046282227  |
| TAAGTGAGTCA  | 43.3650188408825 | 0.240123631833417  |
| CATGAGTCAAC  | 43.39054067449   | 0.261241903708859  |
| TATGACTGATA  | 43.4362919384416 | 0.252461922200496  |
| CGAAGAGTCAT  | 43.5456963140364 | 0.215495965455387  |
| TTGACTCACAT  | 43.5565395257344 | 0.0959596836379781 |
| TTTGACTCACA  | 43.7063479832624 | 0.0920328207677173 |
| TGATGACTAAC  | 43.9654505409959 | 0.267340432659069  |
| TCGGTGAGTCA  | 44.0595937875254 | 0.259212885290353  |
| CAAAGAGTCAT  | 44.4112615247003 | 0.16806964237443   |
| TGTGACTCAGC  | 44.4470164789749 | 0.461836010851646  |
| GTCATGAGTCA  | 44.491418062626  | 0.321588837792013  |
| TGACTCACAGG  | 44.5466498575622 | 0.344898019809707  |
| GGTGACTCAC   | 44.5660816821469 | 0.694756367310341  |
| ATAAGAGTCAC  | 44.5912015088544 | 0.139284554692431  |
| AAAGTGAGTCA  | 44.6301275527756 | 0.328193311839548  |
| AAATGACTCAT  | 44.6405046307273 | 1.60904606038017   |
| GAAGAGTCATC  | 44.7676901339739 | 0.254577014606764  |
| TGACTCACACA  | 44.9439151352997 | 0.238114887763291  |
| AGTGAGTCAGC  | 45.0332446810109 | 0.359100156535891  |
| AGATGAGTCAG  | 45.1316071671752 | 1.0117593009076    |
| GGTGACTCAAA  | 45.252101232091  | 0.343917978783067  |
| AAGAGTCACCG  | 45.3334102060155 | 0.204183629150767  |
| AAGAGTCATCT  | 45.4103351037049 | 0.359257829178139  |
| GGTGACTCAAT  | 45.4361154699233 | 0.336571415223096  |
| TGTTAGTCACC  | 45.6363184652924 | 0.35967489274444   |
| TATGACGCATC  | 45.6579845130956 | 0.279886658920756  |
| GATGAGTCAGG  | 45.7147046045753 | 0.394767125984435  |
| TGTGACTCACA  | 45.7522152325906 | 1.60896371812692   |
| AATGACTCACA  | 45.7824511854641 | 1.78319665019004   |
| TGACTCACAAAG | 45.7847158636464 | 0.339323482417647  |
| TTAATAGTCAT  | 45.8675329945339 | 0.387378109727943  |
| TAATAGTCATA  | 45.880251281046  | 0.152805596386006  |
| CCAGTGAGTCA  | 45.9317653078278 | 0.288646532289734  |
| TGAGTCACCAA  | 45.9343408710321 | 0.160119665466195  |
| TGACTCACATG  | 45.9386705175808 | 0.42136478660955   |
| GTCGTGACTCA  | 45.9484002946973 | 0.215607006954299  |
| AGTGAGTCAAC  | 45.9855654937361 | 0.348396106394814  |
| AGGGTGAGTCA  | 46.0117262039476 | 0.4889160526817    |
| TCAATGAGTCA  | 46.0473647739107 | 1.06831219259349   |
| TGCGTGACTCA  | 46.2433887579855 | 0.205517065384941  |
| TATGACACATC  | 46.3358366046148 | 0.173371008081849  |
| CCTGAGTCATA  | 46.4008510824291 | 0.619188074000243  |
| TGTGAGTCATC  | 46.5219428010461 | 1.19550614369097   |
| TATGAGTCAGT  | 46.5839618788593 | 0.700581518714473  |

|              |                  |                   |
|--------------|------------------|-------------------|
| AGTGACTCAAA  | 46.5851059246611 | 0.281525629357987 |
| TATGACTAATT  | 46.6529199458736 | 1.51904694545198  |
| AAGAGTCATTT  | 46.6784529722265 | 0.283832276141446 |
| TGACTCACACG  | 46.7147051636689 | 0.375281602409428 |
| AAAATGAGTCA  | 46.7473304807333 | 0.801621886105584 |
| GATGACTAACC  | 46.8191053213643 | 0.333803915224108 |
| TACATGACTCA  | 47.0173954262111 | 0.907880307679231 |
| AAGAGTCATGC  | 47.1592907794863 | 0.344885249420324 |
| CATGAGTCAAT  | 47.2856340835764 | 0.164987793109203 |
| GGTGAGTCAAT  | 47.3642040927711 | 0.24586532407424  |
| GAATGACTCAA  | 47.4611280187414 | 0.571657426624774 |
| GATTACTCATC  | 47.5385176552109 | 0.299400122588316 |
| CAATGAGTCAA  | 47.5823050125509 | 0.435493070391556 |
| CGTGACTAATA  | 47.7281557217811 | 0.527871935299531 |
| CCGGTGAGTCA  | 48.0548653579686 | 0.408017602079005 |
| TCATGAGTCAG  | 48.1157877228507 | 0.322002122826811 |
| TGACTCACAAAT | 48.1291089457871 | 0.475562011973762 |
| GTGAGTCAGCG  | 48.1574441178501 | 0.378567958106608 |
| GTGAGTCAGTC  | 48.1858613358831 | 0.169230807138739 |
| TGAGTCACCTA  | 48.2017507486706 | 0.475590170162232 |
| CTATGAGTGAT  | 48.3140338615972 | 0.440877714396283 |
| GATGACTAAAT  | 48.386745534975  | 0.546537181749601 |
| TCCATGAGTCA  | 48.5373164981392 | 0.19680087915805  |
| TATGAGTCAAA  | 48.5627592494141 | 0.414714469081836 |
| AAGAGTCACAT  | 48.5748165826712 | 0.28117262839221  |
| CACGTGACTCA  | 48.5919432832038 | 0.119662315666245 |
| ACGTGACTCAC  | 48.6058756041972 | 1.06915597975215  |
| TGAGTGAGTCA  | 48.6192549072802 | 0.27228723202477  |
| TTAGTCATAAC  | 48.6854097325805 | 0.146489136395483 |
| AAGAGTCATTC  | 48.8600592494055 | 0.495255146715178 |
| TGTTAGTCACA  | 48.8971343272585 | 0.253408560427488 |
| ACAGTGAGTCA  | 49.0741997194706 | 0.244966492069322 |
| AAGAGTCATTA  | 49.2075419918881 | 0.360242842798433 |
| CTGTGACTCAA  | 49.320977482262  | 0.587798098813152 |
| GTGAGTCAGTA  | 49.347621218298  | 0.170770171555571 |
| AGAAGAGTCAT  | 49.4289610233448 | 0.256222773852706 |
| AAGAGTCACCA  | 49.5410858614868 | 0.477063599565905 |
| GTGACTCAATT  | 49.5574843899939 | 0.382854194589937 |
| TGATGAGTCAG  | 49.638249008985  | 0.25343543289096  |
| GATGACTAACA  | 49.7029835862665 | 0.199953256907519 |
| TCTGACTCAGA  | 49.8085793619991 | 0.226763861756711 |
| GATGAGTCAAA  | 49.8610426269839 | 1.0401351527779   |
| ATCTGACTCAT  | 50.0492579485682 | 0.584338051055282 |
| TAAAGAGTCAT  | 50.0945913095911 | 0.262382339158039 |
| AGTGAGTCAGT  | 50.1266897980218 | 0.169024959404913 |
| TGTATGAGTCA  | 50.2001958918264 | 1.70478461076142  |
| TCTGTGACTCA  | 50.2771035230412 | 0.817646788664367 |
| TATTAGTCAGA  | 50.3805901639709 | 0.39854148042922  |
| GATGAGTCAAG  | 50.4851675993904 | 0.37209330627574  |
| AAGAGTCATGA  | 50.6004545764632 | 0.358915043700334 |
| CTGACTCACAT  | 50.643946479825  | 0.439634613147128 |
| TGCATGACTCA  | 50.7429230404266 | 0.783304724383584 |
| GTGACTCAATC  | 50.84622148155   | 0.635101000101169 |
| GTGACTCAAAA  | 50.8571695400064 | 0.319224797929941 |

|             |                  |                    |
|-------------|------------------|--------------------|
| ATAGAGTCATC | 50.9644008598386 | 0.320898010852873  |
| GTGACTCAGTC | 51.1010855006682 | 0.466221054562641  |
| CAGTGACTCAG | 51.1550049777962 | 0.196594391021132  |
| GTGTGACTAAT | 51.2415094454589 | 0.648462484072019  |
| ATGACGCATAA | 51.3222544786711 | 0.320494962849904  |
| CATGAGTCAGT | 51.4134703764541 | 0.379980716376602  |
| GTAGAGTCATA | 51.4466323124298 | 0.247465207488274  |
| GTCATGACTCA | 51.4694483903638 | 0.843165318834984  |
| GTTCTGACTCA | 51.4917067840187 | 0.548427780526502  |
| GAAGTGACTCA | 51.5850062048569 | 0.306870567620588  |
| GAGTGAGTCAG | 51.5986306967208 | 0.384840064586352  |
| AAGAGTCATGG | 51.70587135577   | 0.251033042367413  |
| TGAAGAGTCAT | 51.7285878129529 | 0.184021936776093  |
| TATTACTCATT | 51.7629955270366 | 0.392374991317345  |
| ATGACGCATAC | 51.8673255217146 | 0.39393362930831   |
| ATTCTGAGTCA | 52.1752132357842 | 0.170038470347434  |
| AAGAGTCACAG | 52.2280166931569 | 0.286123319331207  |
| ATGACACATAC | 52.3038135815889 | 0.327681719105969  |
| AGGTGAGTCAA | 52.3078788447407 | 0.175215289307699  |
| AGGTGACTAAT | 52.319023496674  | 0.482001265388198  |
| CAAGTGAGTCA | 52.3245200341208 | 0.253974079425515  |
| TCAGTGACTCA | 52.330951826787  | 0.164219203992665  |
| TTAGTCATATA | 52.3412316365515 | 0.297377626522958  |
| TCTTAGTCATA | 52.3447688844822 | 0.207877756101389  |
| GTTAGTCATAT | 52.3509461643273 | 0.368001066494459  |
| GTGAGTCAGTG | 52.7202035827005 | 0.170366059976216  |
| TCATGACTCAG | 52.7910955692564 | 0.303457208976396  |
| TACGTGACTCA | 52.8704879442444 | 0.243490944749494  |
| AGGAGTCATAC | 52.985606659506  | 0.241175797141673  |
| GAAGAGTCACC | 53.0219190458642 | 0.275278387601417  |
| ATGACTAACCT | 53.0492159917966 | 0.0704272622730223 |
| CCAATTAGTCA | 53.2336270409875 | 0.246753285957335  |
| GTGACTCAGTG | 53.2444070535837 | 0.339487229171763  |
| TGACTCACAGC | 53.2735261520387 | 0.351747374969261  |
| TTTATGAGTCA | 53.2776142398627 | 1.24267962026619   |
| AAAGAGTCACA | 53.3961308082378 | 0.174632170880446  |
| TATTACTCATC | 53.3966068188875 | 0.527453345740632  |
| GCGATTAGTCA | 53.5380421973107 | 0.17759856695307   |
| AATTAGTCAGA | 53.5413930585136 | 0.350421011946125  |
| ACTATTAGTCA | 53.7166384628419 | 0.394209696983549  |
| GTGACTGATCA | 53.8801974761864 | 0.295984393499882  |
| ATAGTGACTCA | 53.929383623796  | 0.806507563621092  |
| AAAGAGTCACC | 53.9460749248455 | 0.22062541923266   |
| TGAGTCACCGC | 53.9607351446825 | 0.791136237922656  |
| GTAGAGTCATC | 54.0607683922949 | 0.314622696865479  |
| GATGACACATT | 54.0738659377747 | 0.287288332831021  |
| TGGTGACTAAT | 54.1028872531158 | 0.431057064335734  |
| TAGTGACTAAT | 54.3103104676485 | 0.817787018154358  |
| AAGAGTCACAA | 54.3211640813099 | 0.385899580016349  |
| AACATGACTCA | 54.4147953665605 | 0.868731128929409  |
| GTGAGTCAATG | 54.4964063426033 | 0.437838053419064  |
| AATGAGTCAAC | 54.6635765786484 | 1.64886611451157   |
| CATGACTAATG | 54.7099686436857 | 0.497226799194325  |
| AGCTGAGTCAT | 54.7639711613929 | 0.103289744470105  |



|             |                  |                    |
|-------------|------------------|--------------------|
| TCATGACTCAC | 54.8768005787379 | 1.64715901026989   |
| GATGACACATA | 54.8844242821717 | 0.243266455007664  |
| TTAGAGTCATA | 54.94397877215   | 0.469284406682671  |
| GAAGTGAGTCA | 55.0202104745726 | 0.37210348474128   |
| GTATGACTGAT | 55.0540225022469 | 0.366703201269831  |
| GAAGAGTCACT | 55.1512548997447 | 0.283193441670547  |
| TTAGTCATATG | 55.1732124504142 | 0.208744225862807  |
| GAATTACTCAT | 55.2146471145089 | 0.314642490012784  |
| AAGTGACTAAT | 55.2594283363925 | 0.425437638784236  |
| TAAGAGTCACT | 55.3472080556147 | 0.235235326231794  |
| ACATGACTCAA | 55.3552133173183 | 0.525576879123241  |
| GAAGAGTCACA | 55.3773319070947 | 0.209112391536158  |
| ATGACTGATAC | 55.5342515353583 | 0.348078212188918  |
| AATGACTAACA | 55.5385836944252 | 0.167383980292626  |
| GTGACTCATCG | 55.6802637726104 | 1.71275539604712   |
| TATGACACATA | 55.8547652572635 | 0.533355695691715  |
| GGTGACTCACT | 55.886431422291  | 1.70771221127701   |
| CATGACTAACA | 55.9141607200047 | 0.205535822967105  |
| GTGACTAATCC | 55.9149685780174 | 0.906838856345074  |
| ACCGTGACTCA | 55.9598616558991 | 0.495892428338213  |
| TCGTGAGTCAG | 55.9638313294596 | 0.397187802543906  |
| GATGACTAAAC | 55.9787999126188 | 0.24634178139151   |
| AAGAGTCACTG | 55.9989160532668 | 0.340137126600334  |
| GAGGTGAGTCA | 56.0752896473838 | 0.333209662761466  |
| TTCTGACTCAT | 56.0833272677099 | 1.63938306471296   |
| TTAGTCATAAA | 56.1000616381832 | 0.295289520268358  |
| ATGACTCAAGT | 56.1827004700337 | 0.44841593790108   |
| CGCATGAGTCA | 56.402296679578  | 0.460101822463028  |
| AAGAGTCATGT | 56.4071678354693 | 0.333291236707833  |
| TAGAGTCATAG | 56.4193558001224 | 0.0603900732106401 |
| GTGACTCAGAA | 56.4951821144229 | 0.597314559047525  |
| GGATTAGTCAG | 56.5016319115217 | 0.267732832574774  |
| AAATAGTCATC | 56.5802928050528 | 0.0297450523106352 |
| CCGCTGAGTCA | 56.7506344325267 | 0.949363835437761  |
| GATGACACATC | 56.8245902802662 | 0.502624171021726  |
| CGGTGAGTCAA | 56.8540557375975 | 0.263277129698573  |
| GAAATGACTCA | 56.9355456373568 | 0.44027769510086   |
| CGCGTGAGTCA | 56.9452832309028 | 0.241931106995246  |
| GGATGACTCAA | 57.1227991843567 | 0.609291165137312  |
| TAGAGTCATAA | 57.1287730066731 | 0.488832003812302  |
| TTAGTCATAAG | 57.1768853024281 | 0.62857954057946   |
| TGGTGAGTCAA | 57.1883459203279 | 0.236657925004983  |
| TTGAGTCACCA | 57.2624907921883 | 0.316973651083807  |
| CTGAGTCATTT | 57.292555565269  | 0.788609793963627  |
| CGTGAGTCAGC | 57.2945420670669 | 0.219829595297618  |
| GTGAGTCATCT | 57.3406024099261 | 0.929681496942072  |
| GTGAGTCAGTT | 57.3423850077712 | 0.318869181388299  |
| AAATTAGTCAG | 57.3778307339042 | 0.254222035943161  |
| AATGACTAACT | 57.4024946503798 | 0.453444864842375  |
| TTGGTGAGTCA | 57.4479419491296 | 0.343480824582502  |
| TTAGTCATAGA | 57.467222920187  | 0.326903229016591  |
| CTGAGTCATGT | 57.5120924247705 | 0.543808090649196  |
| TTCATGACTCA | 57.7277259304061 | 0.626675245497826  |
| GCTGAGTCATC | 57.7297680423267 | 0.429324204361602  |

|             |                  |                    |
|-------------|------------------|--------------------|
| GTGGTGAGTCA | 57.7363065984892 | 0.534891999297354  |
| TATGAGTCAAC | 57.8701722054573 | 1.22888393400403   |
| GAGGAGTCATA | 58.1267835841321 | 0.214256764660174  |
| ATGACTGATCA | 58.1291995170488 | 0.336357506612722  |
| ATGACACATTT | 58.1947101270222 | 0.361395568513314  |
| ATGACTAACAT | 58.2178399169786 | 0.498742461461993  |
| AGTGACTCAGT | 58.2476663061422 | 0.554552325925422  |
| TGAAGAGTCAC | 58.3209560985648 | 0.334636901453164  |
| ATGACACATCT | 58.4928235550919 | 0.319850992736703  |
| TATGACTCAAG | 58.5075002044427 | 0.861118340965653  |
| CTATGACGCAT | 58.5852820923982 | 0.268753068843341  |
| TGAGTCACCTC | 58.6599623548516 | 0.388734400104848  |
| GTGACTCAGCG | 58.702066388609  | 0.489938815330427  |
| ATGACACATTC | 58.7252348863981 | 0.2363163061648    |
| ATGACTCGTAC | 58.7808912404094 | 0.328748915757303  |
| AAATGACTAAT | 58.8083752361267 | 0.815125635868505  |
| CATGACTAATC | 58.8289055013164 | 0.526802216224314  |
| GGTGAGTCACT | 58.9421501881135 | 0.388808898258476  |
| TCATGAGTCAC | 59.0601031629383 | 1.60040040893123   |
| GTATTAGTCAG | 59.0611152001794 | 0.0956704707583373 |
| CGAGTCATACT | 59.394459794517  | 0.56907970813774   |
| AAAGAGTCACG | 59.5790454061437 | 0.0730546676833062 |
| CATGACTCAAG | 59.6030498116914 | 0.241314282979402  |
| GTGATGAGTCA | 59.6537245328866 | 0.368888952342144  |
| GCAATGAGTCA | 59.6598959006036 | 0.671197098706158  |
| GGAATGACTCA | 59.7331659114843 | 0.261326812920494  |
| ATTACTCATAC | 59.7620266592875 | 0.311481091095872  |
| GTGACTGATTC | 59.7970040626674 | 0.558987602356967  |
| GTGAGTCAATT | 59.8336673300396 | 0.358830027356027  |
| TGAGTCATCAC | 59.9916658006675 | 0.588235443444924  |
| AGAGTGACTCA | 60.0465766345197 | 0.624926503586724  |
| AAAGTGACTCA | 60.0847702452674 | 0.44235321682466   |
| CGGGTGAGTCA | 60.2178143189936 | 0.684425546191053  |
| ATGACGCATCG | 60.3129713986039 | 0.127223299377947  |
| AATGACACATA | 60.3657269974172 | 0.156664850374242  |
| AGTGACTCAAT | 60.4130319084161 | 0.338281982151396  |
| AGTATTAGTCA | 60.4844540233961 | 0.577357148197251  |
| AAGGTGAGTCA | 60.4963766282662 | 0.401487857628909  |
| GTGACTAATGT | 60.5026753759499 | 0.550767675759607  |
| AGTGAGTCAAT | 60.5724730409604 | 0.332394572726607  |
| GGTGACTCAGT | 60.5739935351961 | 0.418768029481176  |
| TATTAGTCAGC | 60.6055246247371 | 0.238752427266854  |
| CGATGACACAT | 60.6263194046756 | 0.591546753662195  |
| TGAGTCACCCT | 60.6365250236805 | 0.518721123951224  |
| GTGACGCATAC | 60.6805028707982 | 0.251129590381973  |
| TATGACTGACA | 60.7276964326896 | 0.185935289620605  |
| TTGTTAGTCAC | 60.7590790203528 | 0.222087858065344  |
| ACAAGAGTCAT | 60.7743161732338 | 0.362108859084968  |
| GAATAGTCATA | 60.7778473413738 | 0.226781038464254  |
| TGAGTCATCCA | 60.8023142061328 | 1.11322093165192   |
| TTATTACTCAT | 60.8064205404706 | 0.308851611411857  |
| AGTGTGACTCA | 60.8231068013446 | 0.950694048993911  |
| TATGAGTCAAT | 60.9479131811054 | 1.26186528598269   |
| CGTCTGACTCA | 60.9810592768261 | 0.452620823758028  |

|             |                  |                    |
|-------------|------------------|--------------------|
| TGTGACTCAAC | 61.0127334417245 | 1.57744208422233   |
| GTCAGTCATCG | 61.0251164423421 | 0.452368527807923  |
| GTTATGAGTCA | 61.0939177735902 | 1.12138560292191   |
| CGATGAGTCAG | 61.1621317244801 | 1.58409361454822   |
| GATGACTGATC | 61.1772131564883 | 0.680231182355132  |
| TTAAGAGTCAC | 61.1872738585392 | 0.527657461507264  |
| GTTAGTCACAA | 61.3226269137914 | 0.315942253291693  |
| TTATTAGTCAG | 61.7003085854779 | 0.394561293445092  |
| TTTTAGTCATA | 61.7700082689674 | 0.768821954774732  |
| GTGAGTCAAAG | 61.7810914602105 | 0.216000718577085  |
| CTATGACTGAA | 61.792160012116  | 0.19012447675289   |
| AAATAGTCATA | 61.907650892494  | 0.254366874695566  |
| TGGTGAGTCAC | 61.9085701140885 | 1.58186098749764   |
| ACAATTAGTCA | 61.9284070317602 | 0.31485520835318   |
| AGGAGTCATAA | 61.9565350471586 | 0.205517938182313  |
| TTAGAGTCATC | 62.0048111727244 | 0.395387106403123  |
| AAGACTCATCG | 62.1424976063349 | 0.159538802200503  |
| ATGACTCAACG | 62.2585190013901 | 1.6162378568252    |
| TTGTGACTGAT | 62.2728600576378 | 0.403800687732452  |
| GAATAGTCATC | 62.2748947218298 | 0.366814123049171  |
| GTGAGTCAACA | 62.2885361878024 | 0.487588946059263  |
| ATATTACTCAT | 62.2922675177445 | 0.239422775791074  |
| GGTCTGACTCA | 62.4682723587614 | 0.0960698510849075 |
| GTGTGAGTCAG | 62.4852841869033 | 0.423507793333455  |
| ATGACTAACTC | 62.5474526013613 | 0.393405720980996  |
| GTATGAGTCAA | 62.5687368224202 | 0.894938617714204  |
| CATGACTCAAC | 62.6242889328314 | 0.699681259874595  |
| ATAGAGTCATA | 62.6278308683342 | 0.861021844577158  |
| CGAATTAGTCA | 62.6381395412782 | 0.46633739520237   |
| AATGACTAAAT | 62.6953187747671 | 0.278787828703234  |
| GTGACTAATAA | 62.7047760031348 | 0.550491230296693  |
| ACGTGACTAAT | 62.790357521567  | 0.390115877340015  |
| AAGAGTCACGT | 62.8035783347464 | 0.223779323326866  |
| GATGACGCATA | 62.8288141100669 | 0.185934128531806  |
| GAGTGACTCAC | 62.8301091807525 | 1.60185894007245   |
| CTATGACACAT | 62.8697887392376 | 0.562530836655475  |
| AATGACTCATC | 62.9545137042099 | 1.56001234032374   |
| TCATGACTCAA | 63.0147999078497 | 0.854564929690164  |
| ATTATGAGTCA | 63.0260147824376 | 1.36590373050572   |
| AATGAGTCACC | 63.039181040897  | 2.00722169870168   |
| AATTACTCATA | 63.0873744194814 | 0.379442581181437  |
| GTCTGACTCAA | 63.0990716625077 | 0.130808974755546  |
| AATAGTCATAA | 63.1157094178387 | 0.389761697950041  |
| ATGACTAACTT | 63.1184509860738 | 0.277841545933669  |
| CTGTGAGTCAG | 63.2943862842744 | 0.189253365199666  |
| CGGTTAGTCAC | 63.3515651390547 | 0.114803647069622  |
| TAATAGTCATC | 63.3785537492884 | 0.349366169997607  |
| ATGACTCATAG | 63.3905477963146 | 1.59483974821438   |
| ATGACTAACAC | 63.4292535834596 | 0.443312324230323  |
| AATAGAGTCAT | 63.4554451783489 | 0.310707121467342  |
| ATGACACATAT | 63.46974253917   | 0.26561560349444   |
| GTCGAGTCATC | 63.4890471156159 | 0.311904545665848  |
| GATTAGTCAGA | 63.6815290918503 | 0.550688165949003  |
| CAGTGACTAAT | 63.6831877423188 | 1.19223694161564   |

|              |                  |                    |
|--------------|------------------|--------------------|
| GATGACTCAAG  | 63.6838136963385 | 0.66687592796321   |
| CGTGACTGATC  | 63.7207433259456 | 0.26537234002158   |
| AATGACTGATC  | 63.7371030729358 | 0.478197454176943  |
| ACATGAGTCAG  | 63.8726830095454 | 0.26508829286632   |
| GCATGAGTCAA  | 63.9282712228833 | 0.258231060216116  |
| CGATGACTAAA  | 64.0549558404194 | 0.258317290071773  |
| AAGAGTCACTT  | 64.146025677523  | 0.223206216008546  |
| TATTAGTCAGT  | 64.1690588970324 | 0.317416562985382  |
| AATGACGCATA  | 64.195272400717  | 0.288128054299224  |
| AGAATTAGTCA  | 64.2089494446031 | 0.407240878377419  |
| TTTGTGACTCA  | 64.2143428622435 | 1.20834620952199   |
| CGTGAGTCAGT  | 64.2247435820374 | 0.254960589775405  |
| AAGAGTCACTC  | 64.2321655068321 | 0.297235854023959  |
| CGTATTAGTCA  | 64.2763840928509 | 0.292248610025801  |
| GAAATTAGTCA  | 64.2953152320937 | 0.374593649370564  |
| GTAATAGTCAT  | 64.3274633759995 | 0.497784988779677  |
| TTATGAGTCAA  | 64.5211108821544 | 0.662762832855601  |
| GTGACTGATCC  | 64.5364195312004 | 0.302261727458838  |
| TATATTAGTCA  | 64.5446038069289 | 0.208448189276981  |
| AATGAGTCAAAA | 64.5686478790472 | 1.54026259208647   |
| ATGAATCATCG  | 64.5995044888732 | 0.431248783586866  |
| TGTGACTAATA  | 64.637350007221  | 0.492446372861337  |
| TCGTGACTAAT  | 64.6446813469863 | 0.673799841335509  |
| ATGACACATCA  | 64.6866486564642 | 0.116500238463619  |
| CGTGACTCAAT  | 64.7959444966758 | 0.458667511427836  |
| ACATGACTAAT  | 64.7976073232412 | 1.00288567230324   |
| ATGACTGAACA  | 64.8549079703308 | 0.236754137473062  |
| TGAGTCATCAT  | 65.0856707450509 | 1.59978580898512   |
| AATATGACTCA  | 65.1011709853272 | 1.65226433036991   |
| TTAGTCATACG  | 65.1157462758611 | 0.416943893147484  |
| TAGGTGAGTCA  | 65.13512655204   | 0.63008007402652   |
| GATGAGTCAAT  | 65.1811174981497 | 1.53169729018306   |
| TCGAGTCATAG  | 65.2908583076879 | 0.254935464114655  |
| AATGACACATC  | 65.3024218165463 | 0.327609676258966  |
| ATATGACACAT  | 65.3929912622671 | 0.477632717627355  |
| ATGACTAAGTT  | 65.5442301288676 | 0.419180350751917  |
| ATGACACATCG  | 65.710993036244  | 0.380429537216853  |
| CTAATAGTCAT  | 65.780420570759  | 0.166006965636757  |
| AGTAGAGTCAT  | 65.7906612329745 | 0.276451251520855  |
| GGATGAGTCAG  | 65.8807273437191 | 0.310799928228418  |
| GATGTGTCACC  | 65.885929238564  | 0.348888997001848  |
| TGATGACACAT  | 66.1228424580412 | 0.46051410908691   |
| TTAGAGTCATT  | 66.1312723523055 | 0.0626489333054689 |
| TTGAGTCACCG  | 66.19702935292   | 0.325615273948963  |
| AGAAGAGTCAC  | 66.2043028234743 | 0.252253689669914  |
| ATGACACATTG  | 66.3076249757179 | 0.29822644302263   |
| TGAGTCACCCG  | 66.316164060925  | 0.47465570283998   |
| GTATTACTCAC  | 66.3847805563521 | 0.41600193473435   |
| CGTGAGTCACC  | 66.4332330887404 | 1.19958672092672   |
| GTGAGTCAAAA  | 66.549358230906  | 0.434291877542826  |
| AGTGACTGATT  | 66.6289802161555 | 0.261308596083319  |
| AAAAGAGTCAC  | 66.6466862673829 | 0.272841597647866  |
| ATGACTGATAT  | 66.6938191390317 | 0.307700232175904  |
| ATGACTAAGAG  | 66.7350784382934 | 0.288912136102215  |

|             |                  |                    |
|-------------|------------------|--------------------|
| TATTACTCACC | 66.7677629708404 | 0.336263532257669  |
| TTAGTCATAGC | 66.8579787905305 | 0.23860810094301   |
| ACAGTGACTCA | 66.8754356369288 | 0.960776658644198  |
| GTATGACACAT | 66.9685398820115 | 0.209263414428919  |
| AGGTGAGTCAG | 67.0027419415015 | 0.665873112541215  |
| TGTGACTCAGT | 67.0710202601664 | 0.572995181355449  |
| ATTACTCATAA | 67.1725708942113 | 0.0808990324708339 |
| ATGACGCATAT | 67.382297602279  | 0.390741538404324  |
| TTCGAGTCATA | 67.3877438591081 | 0.361799481785198  |
| CGAAGAGTCAC | 67.5485290559096 | 0.316689518735876  |
| GTGACGCATCA | 67.6127453735821 | 0.421031476309688  |
| TCGAGTCATAA | 67.6190476014298 | 0.247653362852078  |
| TCATGACTAAA | 67.6646589603597 | 0.170799510164813  |
| ATTCTGACTCA | 67.6737231001377 | 0.868702839755889  |
| GTTAGTCACCT | 67.6931643365304 | 0.114094559486811  |
| AAGAGTCACGA | 67.7140059684079 | 0.278026410861703  |
| TTCATGAGTCA | 67.7780140930011 | 0.238661752885725  |
| CTGACTCAATC | 67.793753271845  | 0.576018307175822  |
| AGCGTGACTCA | 67.8030133287537 | 0.958596386895082  |
| ACGTGAGTCAG | 67.9063881099974 | 0.353876959285344  |
| ATATGACGCAT | 67.9656252555134 | 0.413982203892453  |
| GTGACTCAACA | 68.118047600905  | 0.630365804902378  |
| AAATGAGTCAA | 68.1417817480312 | 0.954046672945748  |
| CGTGACTCAGG | 68.1722259201244 | 0.0591361999895987 |
| ATGACTAACCA | 68.1974109951537 | 0.61207103024506   |
| CGATGACTAAG | 68.3672710015027 | 0.135858184696063  |
| TATGAATCATC | 68.3910352152389 | 0.150189088532339  |
| ATGAATCATAC | 68.4329452648716 | 0.363558782036244  |
| TGAGTCATCTA | 68.4507044872825 | 1.21117436534589   |
| GAGTGACTAAT | 68.4792279150174 | 0.66551063467407   |
| CTGAGTCATCA | 68.4817618171366 | 1.22666678992336   |
| TATGAATCATA | 68.6973270539507 | 0.321196123932095  |
| TAGGAGTCATA | 68.8422272660869 | 0.339175122923979  |
| GCCATGAGTCA | 68.857515471707  | 0.470679481330214  |
| TGCGTGAGTCA | 68.9518351603075 | 0.491176561963451  |
| ATGACTCAACT | 68.9560911144758 | 1.57472645627414   |
| AAGATTAGTCA | 69.0005984134521 | 0.212465767415294  |
| TCGTGACTCAA | 69.0064164708044 | 0.62274382450792   |
| GGTGAGTCAAA | 69.0866773735122 | 1.00844220873914   |
| AATAGTCATCA | 69.1333150401999 | 0.369931850252283  |
| GATGACTAATG | 69.1741902423432 | 1.2160915948393    |
| TGACTCACATA | 69.1962269413311 | 0.76650146840681   |
| AAAATTAGTCA | 69.217042949374  | 0.385395651564538  |
| AATGTGTCACC | 69.2175711913993 | 0.175012424907819  |
| CTGTGACTGAT | 69.2764425994415 | 0.41429087158919   |
| GGATGACTAAC | 69.284079911573  | 0.461617993992207  |
| GAATTAGTCAG | 69.4722454186332 | 0.432112698163872  |
| ATGACTAATGA | 69.4947239085769 | 1.08114807545383   |
| CGCTGAGTCAT | 69.5263344498333 | 0.881144512260869  |
| ATTATGACTCA | 69.6490938796317 | 1.5702058109856    |
| CTATTACTCAC | 69.6622668568612 | 0.277882135319224  |
| GTGAGTCAGGT | 69.6634084728432 | 0.437451494009151  |
| ATGATTCACCG | 69.6777029321649 | 0.160966469400903  |
| AATTACTCATC | 69.6831548055268 | 0.396571736024018  |

|              |                  |                    |
|--------------|------------------|--------------------|
| TCTCTGACTCA  | 69.6923647862449 | 0.57272821437956   |
| TATGACGCATT  | 69.7036258697704 | 0.722862218053021  |
| TTGAGTCATCA  | 69.7729502436492 | 0.820888852093123  |
| ATTACTCATCA  | 69.8260817231057 | 0.371835430498413  |
| GTGACTCAAAC  | 69.8353067403027 | 0.51616389959244   |
| AGTCTGAGTCA  | 69.8425861383717 | 0.5156236810639    |
| GATTACTCACA  | 69.8450179504466 | 0.142273331430774  |
| TATCTGAGTCA  | 69.9114541055906 | 0.224662344089208  |
| CAGATTAGTCA  | 69.9205938117887 | 0.315093526723668  |
| AAGACTCATTT  | 69.9509174440604 | 0.303301849765535  |
| TGTCTGACTCA  | 70.0468316510238 | 0.095571625685889  |
| CCTATTAGTCA  | 70.0560956326267 | 0.798531623639316  |
| AGTGACTCACA  | 70.0579896641858 | 1.61984209731223   |
| AGATGAGTCAT  | 70.0610796977524 | 2.31633994284281   |
| GTGAGTCACCA  | 70.1347199097185 | 1.46219430985738   |
| AGTGACTGATC  | 70.1966932505899 | 0.22799080842787   |
| AATGTGTCACA  | 70.2030480717376 | 0.375783858423225  |
| GGTGACTAATC  | 70.3734319039758 | 1.47834642635022   |
| ACGAGTCATAA  | 70.4385431133655 | 0.195241446710787  |
| CTATTACTCAT  | 70.4597344982812 | 0.259714071894127  |
| CGTTAGTCACA  | 70.5875606017415 | 0.141643975982534  |
| TAAAGAGTCAC  | 70.6680392294745 | 0.258308896047189  |
| GTTAGTCACAC  | 70.6727250304608 | 0.503911174724973  |
| TTTCTGAGTCA  | 70.6844642286856 | 0.213821521619666  |
| AGTGAGTCAAAA | 70.6928101816493 | 0.188896117401511  |
| TGACTCACAAA  | 70.7171422951807 | 1.49442322989992   |
| CGATTACTCAT  | 70.7173158414648 | 0.516318497055682  |
| GTATGAATCAT  | 70.7261261168592 | 0.547357544456316  |
| ATCTGAGTCAG  | 70.7983391741523 | 0.123762929245273  |
| ATTACTCATCG  | 70.9270794670038 | 0.295348586938327  |
| ATGACTGATCC  | 71.1086907511026 | 0.682282732549076  |
| CGTATGACTGA  | 71.1766611989588 | 0.0867180048593959 |
| GTGACTCAGGT  | 71.1775784974664 | 0.471697455608529  |
| TAGAGTCACCC  | 71.2222767115314 | 0.335678359073901  |
| GTGACTCAAGT  | 71.347074038539  | 0.240848165388141  |
| TAGAGTCATAC  | 71.3768684889306 | 0.418399969276759  |
| AAGGAGTCATA  | 71.4117546678551 | 0.251886726144092  |
| ATGACTAAATA  | 71.4951420994853 | 1.46497148496022   |
| TCTGACTCAAT  | 71.5074555779657 | 0.298297076600987  |
| AGTGACTAATG  | 71.5581296621014 | 0.486200942096278  |
| TTATGACACAT  | 71.5591433457116 | 0.44692911363912   |
| CAGTGAGTCAA  | 71.6670284681331 | 0.497123532255343  |
| AAACAGTCATA  | 71.6728001381048 | 0.261628928989964  |
| AAGAGTCACGC  | 71.7032646559645 | 0.362226663227493  |
| GTGATGACTCC  | 71.7052757688333 | 0.47047489738619   |
| ATGAATCATAG  | 71.8368078436043 | 0.438938484889942  |
| GTGACGCATCG  | 71.8542520745451 | 0.872125608343329  |
| GCAGTGAGTCA  | 71.9505652416167 | 0.316835456307094  |
| TATGACGCAAT  | 71.9817509800327 | 0.198456153246858  |
| CGATTACTCAC  | 71.9978733906981 | 0.377901983253227  |
| ATGACTAAGAT  | 72.0179214768154 | 0.285956793162551  |
| TTTCTGACTCA  | 72.1373667230355 | 0.717145798594453  |
| ATGACGCATTG  | 72.2450561051584 | 0.381715100486557  |
| GAATTACTCAC  | 72.2517094612581 | 0.32951724584787   |

|             |                  |                    |
|-------------|------------------|--------------------|
| AAGACTCATTC | 72.3387626230329 | 0.632794001541117  |
| TTAGTCATAGT | 72.3649340309547 | 0.563792884513468  |
| ACTCTGAGTCA | 72.3713247869021 | 0.465595040895247  |
| GGTATTAGTCA | 72.4067160405925 | 0.305051968441588  |
| ATTATTAGTCA | 72.4546594108267 | 0.343233981348609  |
| TAGAGTCACAC | 72.4701174070227 | 0.550120435928871  |
| GCTATTAGTCA | 72.5185907850822 | 0.331077713588189  |
| TAAATGACTCA | 72.5642066841535 | 0.375838681418268  |
| TTCTGACTCAA | 72.5856295680274 | 0.366154299509498  |
| GTCGAGTCATA | 72.6017529078449 | 0.464238088199215  |
| GTATGTGCAC  | 72.6736588387511 | 0.420286677519584  |
| GCATGACTCAT | 72.7247194711418 | 1.10227021656723   |
| TTTGAGTCATC | 72.7394717700257 | 1.52439419034681   |
| GGAATTAGTCA | 72.78515350849   | 0.375476747099448  |
| TATGACACACC | 72.8099297690227 | 0.263656657578673  |
| GTGACTAATTT | 72.8634863891663 | 1.52405194735883   |
| TGTTAGTCACT | 72.9109766429544 | 0.441455117743313  |
| AGTTAGTCACA | 72.960430630676  | 0.371127551259293  |
| ACGAGTCATAG | 73.0373286797156 | 0.343335628051546  |
| ATGTGTCACAC | 73.3030953182731 | 0.27392478776387   |
| TATGACACACA | 73.3184020015923 | 0.396156642056448  |
| TCGATTAGTCA | 73.4340994085952 | 0.483541765007782  |
| TAGTGAGTCAG | 73.4723675297993 | 0.929354997638096  |
| GATAGAGTCAT | 73.6668980926839 | 0.167522114202644  |
| TATGACTGAGA | 73.7104516753731 | 0.185638402567155  |
| TGGTGAGTCAG | 73.8590765572373 | 0.329906792185678  |
| AACGAGTCATA | 73.9041734054344 | 0.244213395002665  |
| AAGAGTCAGAG | 73.9331708384424 | 0.26603609867331   |
| AATGACTGATA | 74.0986986132091 | 0.530271765221843  |
| TTCTGAGTCAG | 74.1259633898444 | 0.260176592269232  |
| ATGACTGATCT | 74.1486365575367 | 0.421166902536517  |
| AAGTTAGTCAC | 74.2422818210465 | 0.401476917968882  |
| TCGAGTCATCC | 74.3406337614248 | 0.23216719325091   |
| TATTACTCACA | 74.3440198901155 | 0.532340600282509  |
| AAGACTCATAC | 74.3853829093573 | 0.221916710077726  |
| CAATTAGTCAG | 74.4446856740871 | 0.158250778474709  |
| AAATTACTCAT | 74.7307381368212 | 0.499445585961489  |
| AGTAAGAGTCA | 74.8152231711393 | 0.295299527276678  |
| TGAGTCATCGA | 74.8923718157258 | 1.98819306201392   |
| AGATTAGTCAG | 74.909916375437  | 0.521571469295342  |
| TATGACTGACG | 75.0144413752999 | 0.245571957900501  |
| TTCTGACTCAG | 75.0515175034709 | 0.51068317687546   |
| TATGACTGATG | 75.0841080285388 | 0.182596491296153  |
| GATGTGTCACA | 75.2967118269711 | 0.501284930744289  |
| TCTGACTCAAC | 75.3757680740432 | 0.116298884364826  |
| GATTACTCACC | 75.4654636067518 | 0.285435093070787  |
| TCTGAGTCAGC | 75.466446637206  | 0.529252027334425  |
| CTTAGTCATAG | 75.5753550566556 | 0.489242031017026  |
| GTAGTGAGTCA | 75.5919281605004 | 0.321406622276581  |
| GATTACTCACG | 75.6411776207306 | 0.0271742825547964 |
| ATAGAGTCACC | 75.6672858927388 | 0.395077579365522  |
| GATATGAGTCA | 75.6761297278412 | 0.598553884459732  |
| ATGACTAAGTC | 75.6824360652326 | 0.32193569476934   |
| GTGTTAGTCAC | 75.7525901986262 | 0.588788043478817  |

|             |                  |                    |
|-------------|------------------|--------------------|
| ATTACTCATTT | 75.7878029537519 | 0.478420494379326  |
| TCTGAGTCAGG | 75.8890314534761 | 0.245821059064812  |
| GGTGACTGATC | 75.9271567205796 | 0.204810652926525  |
| TATGACGCACC | 75.9288798512563 | 0.248745902170614  |
| AAGAGTCACGG | 75.9343714803979 | 0.326714293889181  |
| TGTGACGCATA | 76.1254797086966 | 0.37208438871355   |
| ATTACTCACCG | 76.1600595800013 | 0.168231241067043  |
| ATCGAGTCATA | 76.37144860243   | 0.36299868014261   |
| CCTGAGTCATC | 76.4099324108308 | 0.71471421686241   |
| ATGACTAACAA | 76.4830620273653 | 0.510532232447175  |
| GATGACTAAGA | 76.557294785819  | 0.553414060624337  |
| TGGTTAGTCAC | 76.5770817960487 | 0.152381023519128  |
| ATGACTGATTT | 76.5871761440206 | 1.45871551256188   |
| TGGATTAGTCA | 76.6585400619506 | 0.476623854440568  |
| TATGTGTCACA | 76.6948385923003 | 0.206978490389068  |
| ATTACTCATTG | 76.7266013650666 | 0.463330428440977  |
| TTAGTCACACG | 76.7316458689321 | 0.623964343150103  |
| TTATTACTCAC | 76.734571522189  | 0.339880373889775  |
| TACGAGTCATA | 76.779303099389  | 0.979012712884735  |
| GATGTGACTCA | 76.7821252778023 | 1.44790625903656   |
| GAATGTGTCAC | 76.8069382002922 | 0.3084722524794    |
| TGATGACTGAA | 76.9142201718305 | 0.503001017203615  |
| GAGTCATCGGC | 76.9293814833178 | 0.992284642348029  |
| ATAGAGTCACA | 76.99592697781   | 0.198559683508721  |
| AAATGACTGAT | 77.0904859559177 | 0.403102101238369  |
| AAGAGTCACTA | 77.3014215470576 | 0.471447886979981  |
| TCTTAGTCACA | 77.3874025125231 | 0.344136547397456  |
| CAAATTAGTCA | 77.3958032307367 | 0.413144440978958  |
| AGTCAGTCATC | 77.5000126657768 | 0.161603115087779  |
| ATAAGACTCAT | 77.5981843649529 | 0.715948325304708  |
| GATGACTGAAC | 77.6601297829008 | 0.331489868012633  |
| CTTCTGACTCA | 77.7117730442756 | 0.217934401918733  |
| AATAGTCACAC | 77.7265028904765 | 0.138640652862878  |
| CGCTGACTCAA | 77.7336725483116 | 0.227036987963975  |
| CGTGACTAATG | 77.7751194442749 | 0.594155195542352  |
| GAGTCATCGTC | 77.7892434989058 | 1.07210579142746   |
| AAGTGACTCAG | 77.8606821671647 | 0.483693707803355  |
| CTATGAATCAT | 77.97880614463   | 0.325071762612414  |
| GTGAGTCAATA | 77.998771190097  | 0.415693427283314  |
| GTGACTAATGA | 78.0312635639204 | 0.917412255457601  |
| AAGACTCATCT | 78.0387833327903 | 0.262146980043309  |
| ATGAATCATCC | 78.1737063028075 | 0.233380005451451  |
| AAGAGTCACCT | 78.1952193094919 | 0.356544300072643  |
| GCATGACACAT | 78.2622241001911 | 0.450311954457565  |
| GGAGTCATACC | 78.3239548858533 | 0.135143976948498  |
| AAATGTGTCAC | 78.3389339004927 | 0.320544425643249  |
| TGAGTCACCCA | 78.3415785221878 | 0.126217395236847  |
| CATGAGTCAGC | 78.3779631717916 | 0.0252808753046532 |
| ATTACTCACAC | 78.4778439861065 | 0.307857354059831  |
| GATGAGTCAGA | 78.5296955094847 | 1.19627931215991   |
| ATGATTAGTCA | 78.6153790869053 | 0.28790601846457   |
| AATGAATCATA | 78.6769927442051 | 0.491212763367896  |
| GAGTGACTGAT | 78.7534476738321 | 0.229716844087901  |
| TTAGTCACACC | 78.7916966175032 | 0.136945910392658  |



|              |                  |                    |
|--------------|------------------|--------------------|
| TTGATGACTCC  | 78.7978847314722 | 0.291115694832072  |
| AAGAGTCAGAA  | 78.8372503562444 | 0.330631404175677  |
| ATTTAGTCACA  | 78.8462120910305 | 0.186144840480836  |
| ATGACTAAGTG  | 78.8741418881073 | 0.514272278836348  |
| GATGAATCATA  | 78.8921452488175 | 0.404177676114373  |
| GTAGAGTCACA  | 78.945234431299  | 0.319052806360428  |
| TATGACACAAT  | 78.9458004567565 | 0.209807058412117  |
| TCTGACTCAGC  | 79.0082097309797 | 0.20673225648258   |
| TCTGAGTCAAT  | 79.038970071625  | 0.443501926518536  |
| GACGAGTCATA  | 79.0509174180643 | 0.256939753333099  |
| GTGTGACTCAA  | 79.0894113426171 | 1.42925313251139   |
| CTCTGACTCAA  | 79.1538477007703 | 0.49943717965453   |
| CATGAGTCACT  | 79.218773753486  | 1.1062357189396    |
| CTGAGTCATTG  | 79.2866097834492 | 1.24333155855645   |
| ATGACTAAGAC  | 79.3315511646562 | 0.0438154954744724 |
| CTATGACTGAC  | 79.3390324904879 | 0.268222607509624  |
| CTAGTGACTCA  | 79.3662774440718 | 0.0898103091950655 |
| TAATAGTCATG  | 79.367591632537  | 0.315741916059352  |
| AGGAGTCATCG  | 79.3938453463369 | 0.282725428032924  |
| TATGTGTCACC  | 79.447805842471  | 0.454914060372046  |
| ATGAGTAAACCG | 79.4608392550825 | 0.177486231355464  |
| TTATGTGTCAC  | 79.4752686236629 | 0.0976607638250122 |
| TTAGTCATAGG  | 79.5293924105488 | 0.771655817047217  |
| GTATGACGCAA  | 79.5611080092535 | 0.1672735224206    |
| TAGAGTACCA   | 79.6355248768708 | 0.119272263541879  |
| TATGACACACG  | 79.6893893796197 | 0.368265385541037  |
| TTGAGTACCCC  | 79.7212391363534 | 1.15191343990578   |
| ATGACGCATCA  | 79.8908879452978 | 0.455782031085889  |
| CCTATGACTGA  | 79.9360788305184 | 0.443189266893674  |
| GGTGACTAAAC  | 80.1013849749218 | 0.391281646714118  |
| TAAGAGTCAGA  | 80.1192157057235 | 0.415012107785304  |
| GTATGACGCAT  | 80.2271655368621 | 0.305959508490441  |
| TCGAGTCATAC  | 80.2554191795892 | 1.03656307367089   |
| TGGTGACTAAA  | 80.2612559260527 | 0.44606467674762   |
| GTGACTGATAA  | 80.3932621767987 | 0.237726445235422  |
| GAGTGAGTCAA  | 80.4477934482408 | 0.667709851332591  |
| AAGACTCATAT  | 80.4970664456717 | 0.615802593439428  |
| GCAAGAGTCAC  | 80.5874209495143 | 0.086497795465982  |
| CTGATGACTAA  | 80.6147722537014 | 0.364551758124479  |
| CTAGTGAGTCA  | 80.6153457991026 | 0.535336830209221  |
| TGATGACTGAT  | 80.7452007314027 | 0.238599637207227  |
| TCATGACTGAA  | 80.7929305196382 | 0.422393508566804  |
| GAGTCATAAGG  | 80.8156080243174 | 0.835693362513744  |
| AACAGTCATAG  | 80.8476633854548 | 0.12308529436744   |
| AACGTGACTCA  | 80.9061183506307 | 1.46434448978041   |
| CATAGAGTCAT  | 80.9151979935455 | 0.388940645920682  |
| TATATGAGTCA  | 80.9256846092942 | 1.49861764569648   |
| TTAAGACTCAT  | 80.9613830299338 | 0.414588371040702  |
| TCATGACTAAT  | 80.9638116941434 | 1.43955252954232   |
| TCTGACTAACA  | 81.1545434490644 | 0.472928127953823  |
| CCAGTGACTCA  | 81.2232165308278 | 1.49453483036614   |
| TATGACTGACT  | 81.2636997593469 | 0.47534609852617   |
| CTCATGAGTCA  | 81.43128432479   | 0.44952919571451   |
| GACTGAGTCAT  | 81.4425845686788 | 1.67181008953147   |

|              |                  |                   |
|--------------|------------------|-------------------|
| ATGACTCACGG  | 81.5720592397778 | 1.49188076889115  |
| CTTCTGAGTCA  | 81.9651034822327 | 0.796747552647903 |
| ACTGACTCACA  | 82.1421895602355 | 0.983611272353528 |
| AAGAGTCAGAC  | 82.1448862362287 | 0.302782145211932 |
| ATATTACTCAC  | 82.265185396689  | 0.360808016850673 |
| TTTAGAGTCAC  | 82.3512320559011 | 0.262162729445763 |
| ATGACTAACTA  | 82.3644646936676 | 0.178463301470417 |
| TTGACTCAACG  | 82.3928752262845 | 0.266131853033847 |
| GTGTGACTGAT  | 82.4203771967497 | 0.538347028769595 |
| AGATTACTCAC  | 82.5774649711677 | 0.376578956836879 |
| ATGAGTAAACAC | 82.6861626076675 | 0.281810533534153 |
| AAGACTCATCA  | 82.7394795279845 | 0.293640971950542 |
| GTGACGCATAA  | 82.8440162648976 | 0.281069727761776 |
| GTGACTCAGCT  | 82.9123425164375 | 0.533021867067977 |
| GTCAGTCATCA  | 83.006296854532  | 0.344161835263589 |
| ACTGACTCAAT  | 83.0704345655123 | 0.232843380551378 |
| TTATGACTGAT  | 83.1012498706217 | 1.05757976559574  |
| AACAGTCATAC  | 83.1541658019114 | 0.445274165294353 |
| GAGTCATCGAA  | 83.2019240194255 | 0.359477161303258 |
| CGTGACTGATT  | 83.2147929672369 | 0.60371645906819  |
| CTATGACACAC  | 83.2175474924623 | 0.272458990201099 |
| TAGTGACTCAA  | 83.2276313668047 | 0.533984739891195 |
| CAGAGTCATAG  | 83.2601248816857 | 0.235309547338555 |
| GTTAGTCACCG  | 83.2849634860138 | 0.287585807605056 |
| TTAGAGTCACC  | 83.2897017949573 | 0.60970377334604  |
| GATGACGCATC  | 83.3167759200642 | 0.561879419136201 |
| AATGAGTCAAG  | 83.3355473220257 | 1.40186898148351  |
| TTCGAGTCATC  | 83.3796236074796 | 0.247313443823377 |
| GAAATAGTCAT  | 83.3926093347351 | 0.419444270629765 |
| GTTCTGAGTCA  | 83.4242374638009 | 0.246974216135302 |
| AGTATGACTGA  | 83.4708841318309 | 0.343320442928577 |
| AGAGTCATCGC  | 83.5723154843608 | 0.183432805301902 |
| TGTGACTGATA  | 83.603846654321  | 0.291587219609275 |
| TGTGAGTCAAG  | 83.6061318303612 | 0.351758470165848 |
| GGAGTCATACT  | 83.6955699427832 | 0.310424465797168 |
| CTCTGAGTCAA  | 83.7301837490591 | 0.24698212435198  |
| AAGTGAGTCAA  | 83.826958457919  | 0.279302508917735 |
| TTATGACGCAT  | 83.8443541356384 | 0.334681533004785 |
| GTATTACTCAT  | 83.8510113884586 | 0.762899931949397 |
| GTGAGTCAGCT  | 83.9113116445785 | 0.355208091248778 |
| TAGAGTCACCG  | 83.9341595513834 | 0.39138736686268  |
| CTAATAGTCAC  | 83.9344692437226 | 0.208461201438007 |
| CGTGACTGATA  | 84.0089879128812 | 0.527579029234795 |
| CTATGACGCAC  | 84.0170026761926 | 0.376918560655026 |
| GATGACTCGTA  | 84.0495767706316 | 0.47010719031294  |
| CGATGAGTCAA  | 84.1029220366713 | 1.04806823802742  |
| AGATGACTAAA  | 84.138985860681  | 0.190789913005315 |
| AGGATTAGTCA  | 84.1455563185867 | 0.756048915684967 |
| ACCTGAGTCAT  | 84.198181105004  | 1.38571826678388  |
| CTGAGTCATTA  | 84.2430778369913 | 1.13577964893197  |
| CGTGACTCACA  | 84.2600934787807 | 1.39187275253084  |
| TGTGACTGATG  | 84.3569704690526 | 0.217886514231749 |
| ATTACTCATAG  | 84.3630551746055 | 0.422156648487443 |
| ACATTACTCAT  | 84.5132671845776 | 0.411994929109545 |

|              |                  |                    |
|--------------|------------------|--------------------|
| ATGACTGAAAC  | 84.540729754854  | 0.33950258497852   |
| GCAATTAGTCA  | 84.6095269572108 | 0.541839871674335  |
| GTTAGTCACTG  | 84.7103748415951 | 0.217311207889723  |
| GATGATTACC   | 84.7129039369533 | 0.467862601969599  |
| TATTAGTCAAT  | 84.7255893287714 | 0.352414639522498  |
| GGGAGTCATAC  | 84.7784055343409 | 0.285332095185523  |
| TCTCTGAGTCA  | 84.8441001804509 | 0.767952338427998  |
| TACTGAGTCAT  | 84.8494053311356 | 0.769580073134886  |
| GAGTTAGTCAC  | 84.9390628296502 | 0.457810808970009  |
| AGATGTGTCAC  | 84.9398258830425 | 0.0733619377591092 |
| ATGATTCACAC  | 85.0005481798647 | 0.317984736652196  |
| ACACTGACTCA  | 85.0423081485942 | 0.449235705478381  |
| GTTTCGAGTCAT | 85.1190672636067 | 0.355589499793653  |
| TAGATGACTCC  | 85.1500006797574 | 0.23605878444739   |
| AATAGTCATCG  | 85.309167425937  | 0.899409698950214  |
| CTGTGACGCAT  | 85.4624795120235 | 0.334520549905829  |
| TGGGTGAGTCA  | 85.5052186748525 | 0.635430621928785  |
| ATATGACTGAC  | 85.505874403693  | 0.439796226471126  |
| TATGACGCACA  | 85.5365770247563 | 0.579418315026515  |
| ATGACTAATGC  | 85.6602911896122 | 1.44885204353267   |
| TGTCAGTCAATC | 85.6868094071659 | 0.25944385247458   |
| ATGACTCGTAA  | 85.7392752599933 | 0.364677759701057  |
| ATAGTGAGTCA  | 85.8292994555159 | 1.12016453737352   |
| GATGACTCGTC  | 85.8464781117232 | 0.346225266940733  |
| TTGAGTCACCT  | 85.8516139687355 | 1.34170361163265   |
| AGGCTGACTCA  | 85.9094568192348 | 0.305373685079846  |
| GTAGAGTCAAC  | 85.9305918032997 | 0.304363228733159  |
| CAACTGACTCA  | 86.0085406946402 | 0.453654710374598  |
| ACGAGTCATCG  | 86.0343025126179 | 0.378601738400858  |
| TTAGAGTCACA  | 86.0402685587158 | 0.35995190942029   |
| TTAGTCACAGG  | 86.0559454336464 | 0.454635617887898  |
| GTGACGCATAG  | 86.0677995249728 | 0.314551155694925  |
| TGTCGAGTCAT  | 86.1083156260943 | 0.400778108664123  |
| TGAATGACTAA  | 86.1156597429559 | 0.364370354641304  |
| AATAGTCACCA  | 86.1921631189261 | 0.356449189005457  |
| GCGCTGAGTCA  | 86.2287362103076 | 0.587319975983953  |
| AGTGACTGATA  | 86.2570295599245 | 0.262531772750944  |
| TATGACGCAAC  | 86.2597877561057 | 0.185595339503609  |
| GGTTAGTCATA  | 86.2792144849935 | 1.42995047461908   |
| TATGAGTAACC  | 86.4097141058047 | 0.44237532471587   |
| TGGGAGTCATA  | 86.5636668498226 | 0.279665577346846  |
| TTCGTGACTCA  | 86.5695893830938 | 1.4141633068481    |
| CGGATGACTAA  | 86.5904684192696 | 0.532399961028629  |
| ATGTGACGCAT  | 86.666874392038  | 0.446130661888406  |
| CCCTGAGTCAT  | 86.6957166980262 | 0.48316805212238   |
| AGAGTCATCGA  | 86.7172539808967 | 0.0740734182996397 |
| AGAGTCATACA  | 86.7344027030584 | 0.298055134832201  |
| GGTGACTAAGA  | 86.7868948471701 | 0.354917179061074  |
| GTATGATTCAC  | 86.8477171457349 | 0.255590811245552  |
| TCGAGTCATCA  | 86.9118992683016 | 0.385042539756081  |
| GTAAGAGTCAG  | 86.9869926115713 | 0.241782165622058  |
| AATAGTCATAG  | 86.9876996632338 | 0.366238061587187  |
| TAATGACTAAC  | 87.0249949837932 | 0.499011919273687  |
| TATGACTGAAC  | 87.0693855562828 | 0.41348145438641   |

|             |                  |                    |
|-------------|------------------|--------------------|
| AAGTGAGTCAG | 87.1651984561569 | 0.158256864571324  |
| AGTCTGACTCA | 87.2392485614699 | 1.39922622729179   |
| ATGACTGAACC | 87.2533124629334 | 0.513486026282138  |
| TGAGTCACCTT | 87.2720333039527 | 1.02104920280644   |
| AAGACTCATCC | 87.2761444693891 | 0.396937288219999  |
| AGCTGAGTCAG | 87.3359320387593 | 0.154016521358681  |
| AATGACTAAAA | 87.3665222254603 | 0.274610035689718  |
| GTGAGTCAGGA | 87.3893102440756 | 0.720264706229724  |
| TGATGACTCGT | 87.4108928462034 | 0.863264297742684  |
| TTGACTCACAG | 87.4780707641781 | 0.656359232138834  |
| CGAGTCATAGA | 87.588409419608  | 0.245461027632469  |
| ATTACTACAA  | 87.5898235191565 | 0.156187196115376  |
| GGTAGAGTCAT | 87.6675288378218 | 0.339362083312761  |
| TCGTGACTCAT | 87.6741404997248 | 1.49406601581981   |
| AAGACTCATAA | 87.6978854551914 | 0.371406825692848  |
| CAATGACTAAA | 87.776971751085  | 0.307005809946469  |
| GTGACTGATAC | 87.9265170843563 | 0.585877989821842  |
| TATGACTGAGC | 87.9568639846253 | 0.383420448951692  |
| TTAGTGAGTCA | 87.990015886894  | 1.47564483644955   |
| CCATGAGTCAG | 88.0113437419678 | 0.727077712330915  |
| TATGACGCATA | 88.0891527546507 | 1.40299196114709   |
| GTCAGTCATCC | 88.1231572011066 | 0.263743070661343  |
| AGATGACTGAT | 88.2634446088285 | 0.451527193313343  |
| ATGACTGATCG | 88.4957335165765 | 1.29082439736535   |
| ATGACTGATGC | 88.5491769527994 | 0.314759447004371  |
| GAACAGTCATA | 88.6493377023267 | 0.392853424367927  |
| ATGTGTCACAT | 88.6555561667463 | 1.00386771502215   |
| CAGCTGACTCA | 88.7416130734004 | 1.20641337573143   |
| ATGACTAAAAT | 88.7590434177961 | 0.654141559993911  |
| TTAATAGTCAC | 88.7869367247816 | 0.204435596395402  |
| AAATTACTCAC | 88.9754681298074 | 0.340588521952755  |
| GTGACTAATGG | 89.0273529933529 | 0.273018097186563  |
| GTATGACTGAA | 89.0477427715396 | 0.57779332759085   |
| GAGTGACTCAA | 89.1665126266872 | 0.300239927881365  |
| GCGTGACTCAA | 89.2120787957625 | 0.263207169278898  |
| CAATGAGTCAT | 89.2182197180913 | 1.9680857066109    |
| AATGTGTCACG | 89.2725522090732 | 0.113286199482736  |
| GGAGTCATACA | 89.2927596488758 | 0.265536948130393  |
| GATGACGCATT | 89.3151791188943 | 0.912512557429703  |
| ATGACTCATGA | 89.3389577454402 | 2.23644568287112   |
| TATTAGTCAGG | 89.4252339986128 | 0.509254103893705  |
| GTTAGTCATAG | 89.4786530404424 | 1.44225554742456   |
| CGCTGAGTCAG | 89.5261276901297 | 0.0156098841502275 |
| AAAACAGTCAT | 89.5538539608603 | 0.307330606501579  |
| AAATAGTCATT | 89.557597166223  | 0.308349039034533  |
| AAACTGACTCA | 89.5715521016045 | 0.493199733086261  |
| AAGTCAGTCAT | 89.6386587643269 | 0.140731968886367  |
| ATGACTCACGC | 89.7603428043985 | 1.7992261587416    |
| GGTGACTCAAG | 89.8288939474268 | 0.734905073089112  |
| AATAGTCACCG | 89.8635789665352 | 0.473565105529578  |
| TAGAGTCATCG | 89.9051996317323 | 0.285917664235498  |
| ATAATAGTCAT | 89.9175444812403 | 0.433614338037466  |
| GAAGAGTCAGA | 89.9761816318323 | 0.358122722529932  |
| CGATTAGTCAG | 90.0636706474123 | 0.284582554844143  |

|             |                  |                    |
|-------------|------------------|--------------------|
| TTTAGTCATAG | 90.1754892484512 | 0.223766940767409  |
| ACGAGTCATAC | 90.2005200210082 | 0.425817736773709  |
| GATTAGTCAGG | 90.2745990358833 | 0.313131720607893  |
| TTATGACACAC | 90.3276267933774 | 0.247841847727465  |
| TAATTACTCAT | 90.3845099337959 | 0.0583242970503376 |
| TTCTGACTAAC | 90.5002702212948 | 0.195898928242778  |
| TCGTGAGTCAA | 90.5156010748163 | 0.390011731686265  |
| ACCATGACTCA | 90.5168693241049 | 1.40082647847416   |
| GCTGACTCAAC | 90.5718574378413 | 0.513147773626379  |
| GTAGAGTCATT | 90.6026529752333 | 0.24857520170178   |
| ATTACTCACAG | 90.6141839821665 | 0.416513478377393  |
| GGAGTCATAAT | 90.6306584589733 | 0.203908168353943  |
| GTCGTGAGTCA | 90.6385244612677 | 0.83895739279784   |
| CTGAGTCATGG | 90.6631686947329 | 0.685184990300634  |
| GGGATTAGTCA | 90.720969582373  | 0.253045518568679  |
| ATGACTCAACA | 90.7642393352316 | 1.36270845424982   |
| TCCATGACTCA | 90.8044362587666 | 1.32213057632906   |
| TTGAGTCATCT | 90.8267311710966 | 0.701023166320559  |
| ACGTGACTCAG | 90.8375474769253 | 0.767006181874468  |
| GATTAGTCAAT | 90.8507368911329 | 0.433562453700006  |
| GTGTGTCATCA | 90.8694046333398 | 0.295868127142147  |
| AAGAGTCAGAT | 90.9893944667305 | 0.308005302891828  |
| AGCTGACTCAG | 91.070077882332  | 0.375533402821003  |
| GTGAGTCAACG | 91.0778137780962 | 0.428143345531814  |
| CATATTAGTCA | 91.0919750901351 | 0.203185759676157  |
| TCGGAGTCATA | 91.1085685594192 | 0.322361136996695  |
| CATTAGTCAGA | 91.1642979415114 | 0.395117409339228  |
| GTGTGACGCAT | 91.2282302075626 | 0.693085373169191  |
| ACTTAGTCACA | 91.2481308400303 | 0.329326116361379  |
| AAACAGTCATC | 91.2611927079463 | 0.31241112125585   |
| GAAGACTCATC | 91.3230956827122 | 0.5566558369988    |
| TGATGATTCAC | 91.3999761249456 | 0.270503770641931  |
| TAAGAGTCAGC | 91.415555157551  | 0.782023335630587  |
| ATGAATCATCA | 91.5556227595837 | 0.242830098518726  |
| CTTAGTCACAC | 91.6260636597243 | 0.30792325819661   |
| ATGACTCGTCC | 91.6294971165915 | 0.31657795678042   |
| GATGAGTCAAC | 91.6873387181958 | 1.12029526341319   |
| AGAGTGAGTCA | 91.7482397038152 | 1.08019969766248   |
| ATGTGTCACCA | 91.829918518171  | 0.357762233845042  |
| CAATGTGTCAC | 91.870580007888  | 0.246017960622     |
| AATCGAGTCAT | 91.9357946739632 | 0.455368868253645  |
| GTGACTCAACC | 91.9775983479995 | 0.917205800955742  |
| CTATGACGCAA | 92.0183254560122 | 0.257737374600754  |
| GGAGTCATAGG | 92.047223423785  | 0.272229695443097  |
| TTGATGACTAA | 92.1535077472749 | 0.302980832769981  |
| ATGATGACTCC | 92.1975706378762 | 0.473824274161747  |
| GTGAGTCAAGT | 92.2296037539334 | 0.411777411947299  |
| CAGTGACTGAT | 92.2454876234071 | 0.333477036417669  |
| ATGTTAGTCAC | 92.3135474701781 | 0.513562795218847  |
| ATGACTCAAAA | 92.322996794489  | 1.37845109150023   |
| CAGTGAGTCAG | 92.3714727129411 | 1.3594522200261    |
| GGAGTCATCGA | 92.3901819835313 | 0.328439557741131  |
| ATTACTCATCT | 92.434267919083  | 0.302289669420822  |
| AGTGACGCATA | 92.4350059509474 | 0.341060758321551  |

|             |                  |                   |
|-------------|------------------|-------------------|
| CTAAGACTCAT | 92.5029793458818 | 0.262444615080397 |
| TGATTACTCAT | 92.5989936832568 | 1.33746626551278  |
| ACGATTAGTCA | 92.6149640156429 | 0.152450700052753 |
| ATGAATCATAA | 92.6483140363135 | 0.377101316863524 |
| TATGACGCACG | 92.6941114308707 | 0.363056563207749 |
| AGTGACGCATC | 92.7303215523658 | 0.55125998780394  |
| TAATGACACAT | 92.7684367006621 | 0.556998062921443 |
| ACTGACTCAGC | 92.7745592184166 | 0.592118494024001 |
| GTATGAGTAAC | 92.8368056498307 | 0.36644296697843  |
| TGGAGTCATCG | 92.856096911866  | 0.277452607452074 |
| CGGTGACTAAA | 92.858542005245  | 0.458562146211077 |
| GGTTAGTCACT | 92.8871974700682 | 0.195124395771222 |
| CTAAGAGTCAC | 92.8964835663853 | 0.206197122950956 |
| TCGAGTCATCG | 92.9363074647179 | 0.273911205956483 |
| CAGATGACTAA | 93.0549580003603 | 0.201077175072596 |
| TCTATGACTGA | 93.0993267689609 | 0.237705978180287 |
| TGGAGTCATAC | 93.1123144735926 | 0.252828652211849 |
| GGAGTCATAAA | 93.1998082553297 | 0.384248220357791 |
| CATGACTAACG | 93.4538103268253 | 0.342743524994746 |
| ATGATGACTAA | 93.467777849583  | 0.195691054551664 |
| AATGACTCGTA | 93.492561924467  | 0.363049631166101 |
| ACTATGACGCA | 93.5033034015414 | 0.321737878803357 |
| GCATGACTGAT | 93.5261705603758 | 0.180853638426178 |
| TAATAGTCACA | 93.5469525440954 | 0.434976079351464 |
| ATGAGTAACAG | 93.5514731482731 | 0.321065506017525 |
| TGGATGACTCC | 93.5663145763373 | 0.407531193195977 |
| GGTGACGCATA | 93.6080694314628 | 0.311674569734083 |
| TGATGACTCCC | 93.6937749146828 | 0.41323003918699  |
| TGTGACTCAAG | 93.6964408843882 | 0.573311818586514 |
| ATGATTCACCA | 93.7622343205893 | 0.538979545592814 |
| ACATGAGTCAA | 93.7846030278007 | 1.34645563368946  |
| GGATTACTCAT | 93.8207621759032 | 0.733415271835269 |
| GTTAGAGTCAT | 93.9019026282505 | 0.262271444649688 |
| CAATTAGTCAA | 94.1302509028945 | 0.575111975070011 |
| CTTAGAGTCAT | 94.157519389534  | 0.391096053842732 |
| GTTAGTCACCC | 94.1961158875658 | 0.117478214650289 |
| GAATAGTCACC | 94.2318407138361 | 0.199243332676062 |
| TGACTCAATTT | 94.249941488499  | 0.550003663858073 |
| CGTCGAGTCAT | 94.2826521128513 | 0.491916792947162 |
| AATGACGCATT | 94.336009786921  | 0.222500231720157 |
| TTATGACTGAA | 94.3761726025688 | 0.128172030483471 |
| GGTTAGTCACG | 94.3793447154056 | 0.405461851697538 |
| TAAGACTCATC | 94.3799700067405 | 0.37401006701825  |
| CACGAGTCATA | 94.4631347242625 | 0.204445544305752 |
| AAAGACTCATA | 94.6250220062231 | 0.433748408125499 |
| AAGACTCATAG | 94.7792728605439 | 0.609151267672346 |
| GTGTGTGTCAT | 94.8842070265352 | 0.413115861329069 |
| CGATGATTCAC | 94.9273814088262 | 0.181899300164231 |
| GCTGACTCAAT | 94.9878244283477 | 0.353447440605098 |
| GAAGTACTCA  | 95.0230973004664 | 0.107691466813253 |
| GTATGACGCAC | 95.0632813483323 | 0.470380428846661 |
| AAGAGTCAGCG | 95.2782066533079 | 0.320723545062153 |
| ATATTAGTCAA | 95.3969073420362 | 0.168668674717577 |
| GAGTCATCGAT | 95.4977089570257 | 1.44555806909129  |

|             |                  |                    |
|-------------|------------------|--------------------|
| TGTGTGTCATC | 95.5612653724277 | 0.195158224261041  |
| ACTATGACTGA | 95.6174188354351 | 0.388899954245508  |
| GAATGACTAAA | 95.654330441573  | 0.53805451554811   |
| TTTAGAGTCAT | 95.9258969486249 | 0.212737857153069  |
| TTAGTCACAAG | 95.938478926289  | 0.202970541886498  |
| TAGATGACTAA | 96.0266805613717 | 0.222671984843609  |
| GGTGACTGATA | 96.0545533717396 | 0.273014354831534  |
| CGATGTGCAC  | 96.0662830269676 | 0.491567230704334  |
| GATGAGTAAAC | 96.1538959663545 | 0.344881581864929  |
| AAGAGTCAGCA | 96.2321949747795 | 0.125987683377694  |
| GATGAGTAACC | 96.3206103874403 | 0.45358008694986   |
| ATATGAGTAAC | 96.4028161047546 | 0.13667819067025   |
| AGGAGTCATAG | 96.4077590483155 | 0.23808223600646   |
| ATAAGAGTCAG | 96.4093535259742 | 0.317448857465373  |
| GATAAGAGTCA | 96.4277993313384 | 0.290695679230927  |
| AATAGAGTCAC | 96.4452570512202 | 0.456956868056007  |
| AGATTACTCAT | 96.5382905646167 | 0.754659610462917  |
| TTATGACTAAG | 96.5779800678151 | 0.800275981089984  |
| GTGACTCACGC | 96.6681805558223 | 1.40322319106222   |
| TAATTAGTCAG | 96.6951423223948 | 0.56293964489085   |
| CGGTGACGCAT | 96.7007066454523 | 0.485500620738538  |
| TGCTGAGTCAA | 96.7397094133484 | 0.311362630875902  |
| GTTGACTCAAC | 96.7799143422682 | 0.2064451998444    |
| CTGATGACTCC | 96.8122606341843 | 0.284536774358709  |
| CGAGTCATAGC | 96.8411484053344 | 0.185560931528554  |
| GTGAGTCAAAC | 96.8459945527935 | 1.32930296473074   |
| GTGGAGTCATA | 96.9484037757504 | 0.272376439209484  |
| AATGACTCCTA | 96.9636627163004 | 0.372549329591346  |
| CGATGACTAAC | 96.9993846708984 | 1.38082237183792   |
| GTGAGTCATCG | 97.0085058007832 | 1.88638411059272   |
| GTGACTGATAT | 97.088408452652  | 0.206705897693967  |
| AAAGAGTCAGA | 97.1726699407671 | 0.245211308159321  |
| GTATGACTAAG | 97.2811546979396 | 0.251255838631426  |
| CTAATTAGTCA | 97.5135046177676 | 0.0233672195896316 |
| GATGACTCCCA | 97.5307230050447 | 0.424219360301205  |
| CAATTACTCAC | 97.5396537448525 | 0.306902897866271  |
| AACAGTCATCA | 97.5892837892745 | 0.192683992899189  |
| ACTGACTCAAA | 97.7442404995073 | 0.170749324578497  |
| AAGATGACTAA | 97.8789602430141 | 0.192513575251321  |
| TAAGAGTCAAC | 97.9079316984191 | 0.413480983327623  |
| ATGAGTAAACA | 98.0728738072005 | 0.306964253161882  |
| GGATTACTCAC | 98.2445589758882 | 0.259868021892689  |
| GTGACTGATTG | 98.2719238359282 | 0.106925579547407  |
| GCGAGTCATAC | 98.2888257039047 | 0.219353657512037  |
| CCGCTGACTCA | 98.3421430788189 | 0.542460578035006  |
| TTGTGAGTCAG | 98.3619020793138 | 0.23650086827054   |
| CGTAAGAGTCA | 98.3923718626403 | 0.187357423565225  |
| CAGAGTCATAA | 98.4027531490974 | 0.316507832718245  |
| GAATAGTCATT | 98.4104513556444 | 0.244828591418829  |
| CCTATGACGCA | 98.4287238616457 | 0.536744678591019  |
| TATGATTCACA | 98.5711209087729 | 0.413578037710835  |
| CGAGTCATCGA | 98.5712337124009 | 0.242805373671352  |
| GGATTAGTCAA | 98.6626629767923 | 0.226646307000986  |
| ATGATTCACAG | 98.6734182147609 | 0.363355483411964  |

|              |                  |                    |
|--------------|------------------|--------------------|
| ATGACTAACGT  | 98.743458885274  | 0.439602806268007  |
| GTCAGTCATGA  | 98.9472530080621 | 0.282080092776933  |
| AATTACTCACC  | 98.9501610023054 | 0.22743326038058   |
| GGTGACTAAAA  | 98.960128087571  | 0.285410316820971  |
| AAGTGACTCAA  | 98.9638422469841 | 0.164075295469305  |
| GAACAGTCATC  | 99.0830484652162 | 0.350909960334988  |
| CACTGACTCAG  | 99.1136086546398 | 0.603753903054776  |
| GTTGACTCAAT  | 99.1532105087687 | 0.259207860900462  |
| CCACTGACTCA  | 99.2148926808547 | 0.525523711459338  |
| GCATGACTCAA  | 99.2665441310467 | 1.31560498320567   |
| ATTGACTCAAC  | 99.2903285805535 | 0.586604538442605  |
| GAATTAGTCAA  | 99.5373818206745 | 0.560107525040552  |
| AAAAGACTCAT  | 99.5447484067973 | 0.298021313633775  |
| GTATTAGTCAA  | 99.5549866836887 | 0.385290592787723  |
| GGAGTCATAGT  | 99.6335003730399 | 0.210595878657793  |
| GCTGAGTCAAC  | 99.9427463891047 | 0.218622093381405  |
| ATATGACTGAT  | 100.192827455874 | 0.621956256732095  |
| TATGACGCAAA  | 100.264272561429 | 0.270956777689795  |
| GTGAGTCAACT  | 100.367679362083 | 1.30441747603968   |
| GAATGACTGAT  | 100.480640309428 | 0.590609755900519  |
| CTATGTGTAC   | 100.78916277254  | 0.39177796067166   |
| GGTCTGAGTCA  | 100.978352299086 | 0.192104187681313  |
| GACGTGACTCA  | 101.041033546783 | 0.88722093509207   |
| ATAGAGTCATG  | 101.052520349972 | 0.20281101010429   |
| GCGCTGACTCA  | 101.110769757843 | 1.24504990613514   |
| GGAGTCATATC  | 101.167093738753 | 0.322615768669991  |
| CATGTGTACACA | 101.316353445944 | 0.0772951137123841 |
| TGACTCAATGG  | 101.359989592312 | 0.551150293759863  |
| AGGTGACTGAT  | 101.417874758199 | 0.282266255856336  |
| ATGAGTAACCC  | 101.441465490837 | 0.354862942583259  |
| AATGACTAAGT  | 101.509098361709 | 0.368082909180626  |
| CTAGAGTCATA  | 101.538894034259 | 0.408465584795367  |
| AAATGACTAAC  | 101.578757555863 | 0.903646958880877  |
| GATGAATCATC  | 101.597615293821 | 0.492604035770171  |
| TAATAGTCACC  | 101.625211275247 | 0.259045260125504  |
| AATGAGTAACC  | 101.737424586824 | 0.502780439311175  |
| TAGAGTCATCA  | 101.745556531808 | 0.511305640039084  |
| GATGACTCCAC  | 101.881870044424 | 0.497803569412483  |
| CCTGACTCAAT  | 101.93535246004  | 0.292258078172044  |
| GATGACTGAAA  | 101.949936937047 | 0.404004044080924  |
| TGATTACTCAC  | 101.978202620976 | 0.623460420367034  |
| GATGAATCATG  | 102.054048378755 | 0.194076698004117  |
| TAATGACTCCT  | 102.10102561122  | 0.276692687070459  |
| TATGTGTACAG  | 102.245741948612 | 0.278626235088821  |
| TGTAGAGTCAC  | 102.280302952474 | 0.365861697478388  |
| TTGTGACTCAG  | 102.450162420629 | 1.26798805844851   |
| ATGACTAAGCG  | 102.460123630229 | 0.589369358325658  |
| GAGTCATACGC  | 102.488987270282 | 0.593204317805897  |
| ATGACTGATTG  | 102.520948045042 | 0.542518217874565  |
| TTAGTCATAAT  | 102.59817036332  | 0.743920772742373  |
| CATAAGAGTCA  | 102.608829524189 | 0.497944897599661  |
| CGTGACTCACC  | 102.770574705357 | 1.38863208703542   |
| GAATGACACAT  | 102.785019279429 | 0.291392581337606  |
| TGACTCAACGG  | 102.785121931093 | 0.43825909530388   |



|             |                  |                   |
|-------------|------------------|-------------------|
| GAGTCATCGCA | 103.047797695931 | 0.334684222261013 |
| CGTCAGTCATC | 103.081172356183 | 0.472922684100585 |
| GATAGAGTCAC | 103.11655643436  | 0.223772884031935 |
| TATCGAGTCAT | 103.249439708497 | 0.41389729437579  |
| AATTACTCACA | 103.249692411652 | 0.153249998323668 |
| ACAATGACTAA | 103.269867961549 | 0.330357392672676 |
| GTGACTCAGTT | 103.802995443677 | 1.26923474956712  |
| GATTACTCATT | 103.832208956916 | 1.31114137041521  |
| TGGTGAGCAT  | 103.883714347517 | 0.393058231927609 |
| GGAATAGTCAT | 103.963022801913 | 0.531347688040834 |
| ACATGACTAAA | 104.005098587231 | 0.405866260007729 |
| AGGTTAGTCAC | 104.027276899416 | 0.42240184313309  |
| CGAGTCATAGG | 104.031300316777 | 0.483896629701488 |
| CATGACGCATA | 104.035228181259 | 0.409737549868221 |
| TGATGAGCAT  | 104.03631919158  | 0.292855926770217 |
| ATTACTACCA  | 104.070931498172 | 0.302655632952406 |
| GGTGTGTCATC | 104.115286578962 | 0.211684446802423 |
| AAATGAATCAT | 104.142493110339 | 0.489018149426575 |
| AGGGAGTCATA | 104.149543705191 | 0.546330792243849 |
| ATGTGTCACAG | 104.23652580274  | 0.55291437889365  |
| GTGACTCAAGC | 104.266145065664 | 0.176457360393101 |
| ATGTGTCACCG | 104.332569155202 | 0.711802230544355 |
| ATGATTCACGA | 104.335574168688 | 0.452309057890633 |
| ATGACTGATAA | 104.386841469331 | 1.30419369693766  |
| GAGATGACTAA | 104.436899041346 | 0.146650446113722 |
| GGAGTCATCGG | 104.508608040397 | 0.419188097270208 |
| CGAGTCATAAG | 104.605677338091 | 0.255684360139049 |
| TATTACTCACG | 104.658453868226 | 0.257525800616884 |
| CGTAGAGTCAT | 104.700675357296 | 0.684646552922837 |
| GATGAGTCAG  | 104.754062983059 | 0.867840492952602 |
| TATGACTCAGC | 104.785989656267 | 1.18643092704005  |
| ATGGAGTCATA | 104.808672639627 | 0.32975848305133  |
| CGGATTAGTCA | 104.874983936265 | 0.493486095173493 |
| TAGAGTCATTC | 104.948787043627 | 0.279237979412815 |
| TGTGACTGATC | 105.11639307984  | 1.28463195815654  |
| TCATGAGTCAA | 105.129763809399 | 0.94764175355909  |
| TCTGACTAAGA | 105.270540701477 | 0.276846601961481 |
| TTATGACACAA | 105.303359500757 | 0.157075854470191 |
| GTGACGCATCC | 105.324447168426 | 0.354008764304696 |
| AAGAGTCAGCC | 105.399141143308 | 0.413129867680349 |
| TGATGTGTCAC | 105.510085812768 | 0.296654111737372 |
| ATGACTAAGCA | 105.740426286804 | 0.36232215863334  |
| CGAGTCATAAA | 105.791798082578 | 0.468837053704448 |
| AAATGACTCCT | 105.988831584527 | 0.271698078233274 |
| AATGACTAAGA | 106.036851537094 | 1.25568089718766  |
| ATGTGTCACCC | 106.04506603683  | 0.183897462623713 |
| AATAGTCATGG | 106.112574807315 | 0.400796252777365 |
| ATATTAGTCAG | 106.137647372924 | 0.805854788430663 |
| TTATGACGCAA | 106.148025117169 | 0.551999911531693 |
| ATTACTCATAT | 106.197837759361 | 0.568525025955301 |
| CCTATGACACA | 106.366491103149 | 0.346366909559994 |
| TGCGAGTCATA | 106.405364934721 | 0.235229999916384 |
| GCCGAGTCATA | 106.596587143078 | 0.290631041837961 |
| GGTAAGAGTCA | 106.597390274504 | 0.307211655686996 |

|             |                  |                   |
|-------------|------------------|-------------------|
| ATGACTCAAGG | 106.679530976315 | 1.41692848303702  |
| CATGAATCATA | 106.899518427366 | 0.16636211204289  |
| GCTATGACACA | 106.926484361906 | 0.142100835243699 |
| GAATGACTCCT | 106.961359912671 | 0.374186182175514 |
| GCTGACTCAAA | 107.022538102237 | 0.407341119449493 |
| TAAATGACTAA | 107.094459455946 | 0.195006585101876 |
| GGGAGTCATAA | 107.117029332645 | 0.528975750815642 |
| GTATTGACTCA | 107.128699555858 | 0.554915207780796 |
| CATCGAGTCAT | 107.164937681436 | 0.348566695496796 |
| ACTGACTCAAC | 107.190729266201 | 0.245885078419667 |
| ATCGAGTCATC | 107.274055491558 | 0.349824751759562 |
| ACATGACTAAG | 107.314128144996 | 0.119968368491576 |
| ATGTGTCACAA | 107.362585565614 | 0.933695775451967 |
| AGTATGACACA | 107.419193470981 | 0.254005379836955 |
| TAATGTGTCAC | 107.422049471617 | 0.285251942241769 |
| GAGTCATACAG | 107.463793783555 | 0.309712656659836 |
| CCGAGTCATAC | 107.480565958413 | 0.277302869296064 |
| CTGACTCAATA | 107.480994258079 | 0.365983500294302 |
| CATGACTGATC | 107.549848485299 | 0.719577980080855 |
| GGGAGTCATAG | 107.716794190046 | 0.21490680494602  |
| TATGATTACC  | 107.749411678812 | 0.379138757558404 |
| CCTCTGACTAA | 107.803183144546 | 0.349683136649932 |
| ATTGACTCACA | 107.809631210284 | 1.35092124035669  |
| AAGTGACTCAT | 107.84612778131  | 0.966372450470006 |
| CATGACTAAAC | 107.876748040127 | 0.544159209595626 |
| AATGACTCCTC | 107.88234439418  | 0.259064623356299 |
| TTAGAGTACG  | 107.962373622986 | 0.33265650356945  |
| CGAATAGTCAT | 108.056317641188 | 0.524631641632041 |
| TTCTGAGTCAA | 108.149827659752 | 0.306390711983101 |
| AAATGACTCGT | 108.154212289906 | 0.210489751536226 |
| GATGACTAAGT | 108.201031317775 | 0.422576659640154 |
| TCTGAGTCAAA | 108.207287649303 | 0.494784296501891 |
| AGTGTGTCATC | 108.284794694961 | 0.365835759088854 |
| GTGTCAGTCAT | 108.543699052916 | 0.900801459235464 |
| CTATGATTCAC | 108.569894509795 | 0.357251497519267 |
| TGGTGACTAAG | 108.637605765901 | 0.324497421069258 |
| TTAGTCATACA | 108.647441376376 | 0.530946492146931 |
| ACGTCAGTCAT | 108.72347579241  | 0.536131234236199 |
| CGATGACTGAA | 108.779267404794 | 0.411208167987599 |
| CTTCGAGTCAT | 108.803967156304 | 0.329660884533386 |
| ATTACTCATTC | 108.831387291124 | 0.327573252022473 |
| AGATGAATCAT | 108.985440527631 | 0.368499398528492 |
| CACGTGAGTCA | 108.987722297485 | 0.341868305311811 |
| TATGACTGAAA | 109.04086944097  | 1.17936108730996  |
| TGACTCAATCA | 109.294366041622 | 0.392998423264681 |
| AGATGACTCCA | 109.32217494832  | 0.291866219271789 |
| ATTACTACCC  | 109.524933024869 | 0.241774256897811 |
| TGATGACTAAA | 109.548568254395 | 0.715141696413245 |
| AAGACTCATTG | 109.61447275742  | 0.22124672819794  |
| ATGACACATTA | 109.643676391565 | 0.564566668911417 |
| TGCTGACTCAG | 109.712064198611 | 0.290681669584378 |
| TGACTCAATAG | 109.718739699386 | 0.315728576069291 |
| GATATTAGTCA | 109.746891667134 | 0.757253676448561 |
| GCACTGACTCA | 109.754414882874 | 0.592618854006271 |

|             |                  |                   |
|-------------|------------------|-------------------|
| GAGTCATAGAG | 109.859517478024 | 0.437162142898577 |
| TAGTGACTGAT | 109.895335407339 | 0.232193413129459 |
| TTATGAGTAAC | 109.920887368541 | 0.793880772822429 |
| TGAGTCACCTG | 109.925676126526 | 1.38837906825988  |
| CTATGACACAA | 109.951946815256 | 0.276147798138759 |
| AAAATGACTAA | 110.058223946183 | 0.415139565068059 |
| ACTCTGACTCA | 110.059459481452 | 1.00482426326233  |
| GGGAGTCATCG | 110.066388419903 | 0.297010290440369 |
| CTCTGACTAAC | 110.122507032201 | 0.278646802609743 |
| AAAGAGTCAGC | 110.236186797686 | 0.374888352830698 |
| ATATGACGCAC | 110.278850936024 | 0.422388419475077 |
| GAGTCATAGTA | 110.339452824204 | 1.11210286456036  |
| GTAAGACTCAT | 110.349449518012 | 0.524136381841652 |
| GGTGACGCATC | 110.487146810474 | 0.470723271178004 |
| TTTTAGTCACA | 110.595064209623 | 0.284401080928871 |
| AGCGAGTCATA | 110.648326042862 | 0.278072578753849 |
| ACTATGACACA | 110.913871261956 | 0.442293752593177 |
| TTAAGAGTCAG | 110.933405881797 | 0.349343838422081 |
| CAATGACTCCT | 110.989045296889 | 0.215970995782276 |
| GTGACGCATGC | 111.150426068534 | 0.395659862724228 |
| AGTAGAGTCAC | 111.21484764437  | 0.358887249938004 |
| CGTGACTAAGA | 111.252572220303 | 0.271224911394013 |
| GTCTGACTCAG | 111.441717068193 | 0.665619350449429 |
| ATATGACACAC | 111.508403020763 | 0.402802761160934 |
| AAGGTGACTAA | 111.677166056602 | 0.245411978535718 |
| ATGAGTAACAA | 111.748068176846 | 0.394798335018116 |
| AACAGTCATAA | 111.778324674765 | 0.297457554658853 |
| GTTAGAGTCAC | 111.830425447675 | 0.603048613031507 |
| ATGACGCATGA | 111.875935583029 | 0.690478780294344 |
| GAGTCATACCT | 111.950554858851 | 0.39821582211069  |
| GGAGTCATAAC | 112.062904581686 | 0.636612555010921 |
| GATGACTGATA | 112.068719152647 | 0.819351486948154 |
| AGGTGACTAAA | 112.090398195323 | 0.407408216334267 |
| ACCATGACTAA | 112.092504579398 | 0.981021079078602 |
| GGTCAGTCATC | 112.136986637803 | 0.532285311966302 |
| GAAGACTCATA | 112.2031682041   | 0.43146429448996  |
| GGTAGAGTCAC | 112.207660559232 | 0.31193289752649  |
| TTATGACTGAC | 112.267154247852 | 0.543923039678076 |
| GGGGAGTCATA | 112.332991314833 | 0.159086380674605 |
| AAAGACTCATC | 112.439153697307 | 0.22809226912462  |
| CCATGACTAAA | 112.591110467641 | 0.313477013869669 |
| GATCGAGTCAT | 112.600806834759 | 0.362968877370844 |
| TATGACACAAA | 112.735283146685 | 0.307997173992661 |
| CGTGACTCAGA | 112.833315599219 | 1.32953856703331  |
| TATGACTGAAT | 112.86999014156  | 1.25563805646447  |
| TATGACTGAGT | 112.879077999321 | 0.122864985004073 |
| CTCGAGTCATA | 112.933232010582 | 0.494643398867169 |
| ATTACTCATGG | 112.945864982008 | 0.687149247378943 |
| ATGAGTAACGC | 112.961517122779 | 0.158615546651823 |
| GTGACTCAGGC | 113.080868258488 | 1.32496250838059  |
| TTATGAATCAT | 113.166646443291 | 0.54873123925654  |
| CAGCTGAGTCA | 113.240984426007 | 0.96297643718552  |
| GAGTCATCGTA | 113.244299164885 | 1.01196348566699  |
| AGAGTCATAGA | 113.333432603941 | 0.334289363865665 |

|             |                  |                    |
|-------------|------------------|--------------------|
| AAATTAGTCAA | 113.382858557463 | 0.444670353397843  |
| GATGTGTCCT  | 113.795781537281 | 0.0558955483281338 |
| ATAGAGTCACG | 113.816643035796 | 0.540155313619298  |
| ATGATTCACAA | 113.818999820411 | 0.210717246114723  |
| ATCTGACTCAG | 113.822059469898 | 0.653358290008721  |
| AAAAGAGTCAG | 113.833412577822 | 0.286427443869685  |
| TACTGAGTCAA | 113.956810863603 | 0.50152583511858   |
| TAGTCAGTCAT | 113.959157638312 | 0.527068248175452  |
| AGCTGACTCAA | 113.994630001717 | 0.47520757638386   |
| GGAGTCATCGC | 114.078381338629 | 0.111498697354522  |
| ATTGACTCAAT | 114.122687885099 | 0.228610669370128  |
| CATGACTCCTC | 114.140583442669 | 0.302821475784553  |
| ATGACGCATCT | 114.258675881407 | 1.00692171734518   |
| CCGAGTCATAG | 114.312208553248 | 0.229089095740924  |
| AGGTGACTAAG | 114.374222113463 | 0.392068638832377  |
| CGATGAATCAT | 114.388173064627 | 0.363596090049931  |
| ATGATTCACCC | 114.390696588672 | 0.30945770442937   |
| GAAATGACTAA | 114.443953055674 | 0.196897764690509  |
| TCTGACTAACC | 114.483791781838 | 0.364915919653172  |
| CGTGACGCATA | 114.488685159726 | 0.360167596303425  |
| TATTAGTCAAA | 114.541122372356 | 0.493471733354197  |
| GAGAGTCATAA | 114.625241379239 | 0.286019743506784  |
| TCTGAGTCAAC | 114.666936195622 | 1.2688865476605    |
| AATAGTCATAT | 114.927369799836 | 0.480130810982941  |
| CAATGACTGAT | 114.94767111193  | 0.862162781583567  |
| TCAAGAGTCAT | 114.983979428878 | 1.24870148233567   |
| AGGCTGAGTCA | 114.991114720182 | 0.381997944084724  |
| GCTGAGTCAAA | 115.120891291272 | 0.377263006291576  |
| GTCTGACTAAC | 115.284868275694 | 0.466456040662483  |
| CTTAGTCACAA | 115.358571424615 | 0.144327119343061  |
| TAGAGTCACGA | 115.427082459792 | 0.355361879534385  |
| GTTAGTCACGT | 115.55539496834  | 0.674130923140233  |
| AAATAGTCACA | 115.569127320188 | 0.479122020831164  |
| AGTGACTAAAA | 115.617254977632 | 0.430484034180402  |
| CCGTGACTGAT | 115.621122024551 | 0.924221183834941  |
| TCATGACACAT | 115.648589615299 | 0.594824174526306  |
| TAGAGTCACAA | 115.761810510778 | 0.275914424064674  |
| TATATGACTGA | 115.961592660548 | 0.246817175138314  |
| GAAGAGTCAGC | 115.982080941399 | 0.288202380124415  |
| ATGACTGATGT | 116.062579749612 | 0.483692039640849  |
| CTGTTAGTCAC | 116.079025776145 | 1.22970949380215   |
| GAAACAGTCAT | 116.121142456434 | 0.238154858032573  |
| AGAGTCATAAA | 116.142667217996 | 0.277020167989215  |
| CAGTCAGTCAT | 116.424475280711 | 0.245830100405234  |
| AGAGTCATAAC | 116.429953668567 | 0.433617920252187  |
| CGTATGACGCA | 116.467810623938 | 0.61664226425833   |
| CACTGACTCAA | 116.48679921173  | 0.272493898109976  |
| TTTGACTCAAT | 116.535207629586 | 0.400781113836868  |
| ACCGAGTCATA | 116.596844726786 | 0.167747443481929  |
| AACAGTCATCC | 116.622267096608 | 0.448387858658312  |
| GAGTCATCGGA | 116.665785371867 | 0.236694287305157  |
| GGGTTAGTCAC | 116.668228953546 | 0.56970254218465   |
| GAGAGTCATAG | 116.696955604481 | 0.33969374152526   |
| TGTGACGCATC | 116.87169316239  | 0.354332477740036  |

|             |                  |                   |
|-------------|------------------|-------------------|
| TATGACACAGA | 116.901544958344 | 0.392784781330067 |
| TAGTGACTCAG | 116.946476690414 | 0.819740498826266 |
| CATGACTAAAA | 116.96636703634  | 0.473100618863327 |
| TTAATTAGTCA | 116.975415606694 | 0.322723851280404 |
| CGGTGACTGAT | 117.095017918482 | 1.02614533247703  |
| GAGTCAGTCAT | 117.096091901565 | 0.229719832460962 |
| AGACTGACTCA | 117.121073589274 | 0.548008299379646 |
| ATATGATTCAC | 117.312622107442 | 0.332367755765692 |
| CAACTGAGTCA | 117.527801639966 | 0.124660172410897 |
| AATGACTCGTC | 117.535232265243 | 0.320353334931412 |
| AAGAGTCAGTA | 117.599857787887 | 0.28066053453761  |
| AATGACTGAAC | 117.623367172486 | 0.52246397613952  |
| TTGACTCAATC | 117.650492424148 | 0.325690817707829 |
| TGGTGACTGAT | 117.732899537209 | 1.27461710074747  |
| CGCTGAGTCAA | 117.745272090547 | 0.546439212154782 |
| AATGACACATT | 117.759539752437 | 1.28273069704841  |
| AAGAGTCAGTC | 117.773486547843 | 0.258599097316616 |
| TTTGACTCAAC | 117.780336703271 | 0.207988010596348 |
| CCTGACTCAAC | 117.880884965548 | 0.2994141349794   |
| AGTTAGTACC  | 117.92541048563  | 0.705049060607968 |
| AGATGACTCGT | 118.001479712708 | 0.492272415705604 |
| CATTACTCATC | 118.035639716003 | 0.461087935405579 |
| CGTGACTAAAC | 118.093262442445 | 0.345967164940926 |
| AAGAGTCAGCT | 118.094250041879 | 0.22552791578889  |
| AAGAGTCACCC | 118.146411564418 | 1.27680865114319  |
| GATGATTACA  | 118.284923112054 | 0.60535201773923  |
| ATGACGCATTT | 118.325118001461 | 1.19694298900489  |
| CAGAGTCATCG | 118.37295487012  | 0.199263408925644 |
| GTCTGAGTCAG | 118.379644085932 | 0.877987063000978 |
| AGGGTGACTAA | 118.515175619947 | 0.268841128638951 |
| AGATTAGTCAA | 118.576135092099 | 0.372494424225125 |
| ATAATTAGTCA | 118.646299036201 | 1.06197216468536  |
| TAGAGTCACAG | 118.775842844961 | 0.654113490435037 |
| GAGGTGACTAA | 118.809254025827 | 0.246717986689745 |
| ATGTGACTGAT | 118.850293426897 | 1.17101808720039  |
| GTATGACACAC | 118.862646337516 | 0.589883038082205 |
| GAGATGACTCC | 118.96477654739  | 0.286247200170425 |
| ACTAAGAGTCA | 119.008086282251 | 0.510763690894659 |
| GCGGTGACTAA | 119.065989618537 | 0.357290295331254 |
| GTTAGTCACGA | 119.091019025427 | 0.316919670534893 |
| AGAGTCATAGC | 119.161084481043 | 0.453707794309539 |
| CGATGAGTAAC | 119.251256710343 | 0.372553527729327 |
| AAGCTGACTCA | 119.262971309448 | 0.505180119232099 |
| TAAACAGTCAT | 119.38021863857  | 0.415237842179616 |
| ATGACTAACTG | 119.553897764734 | 1.02791528871455  |
| TTATGACGCAC | 119.673354546263 | 0.402330771369043 |
| GAATGACTCGT | 119.736463341297 | 0.31166503371204  |
| AGTGAGTCAGG | 119.758170636837 | 1.23269410725697  |
| AGTATGACGCA | 119.819339158702 | 0.746303724209311 |
| ATGACTCAAAG | 119.911843006534 | 0.696807816401796 |
| ACATGTGTCAC | 119.946435093348 | 0.362411240959131 |
| AATTACTCATT | 119.968416212961 | 1.21560638068642  |
| AAATGACTAAA | 120.039358213831 | 0.457466051695035 |
| TAGTGACGCAT | 120.071035971912 | 0.400440575630471 |

|             |                  |                    |
|-------------|------------------|--------------------|
| GTGACTGATGA | 120.096352765469 | 0.47569202957549   |
| GAACTGAGTCA | 120.106517812362 | 0.0637942729638994 |
| GAGTCATACCG | 120.122360313183 | 1.03158209665688   |
| TTAGTCATACT | 120.165098390191 | 1.24431966918413   |
| AATGACGCATC | 120.17116763873  | 1.27189854029401   |
| ATTATGACACA | 120.34853248798  | 0.44504155943406   |
| CAATTGACTCA | 120.648513044058 | 1.51113166120937   |
| CGCGTACTAA  | 120.701172542926 | 0.0462152043653911 |
| AATAGTCATTG | 120.851073198039 | 0.520126174556331  |
| ATATGAATCAT | 120.890810541503 | 0.481922805233164  |
| GGTGACTCAGC | 120.940252359125 | 1.61906949087145   |
| GGTCGAGTCAT | 120.968301631107 | 0.512237262784886  |
| TAAGACTCATG | 120.988299566867 | 0.715315623017057  |
| GATGACTAAAA | 120.995558535016 | 1.21914257027186   |
| GCTGACTCAGC | 121.043639636639 | 0.491211257473482  |
| TTGTGACGCAT | 121.109904266034 | 1.20857577137566   |
| GGCTGACTCAA | 121.155652149109 | 0.166175112077678  |
| GTTAGTCACAG | 121.294906672463 | 0.483601053946216  |
| CGGTGACTAAG | 121.297154769466 | 0.587056342181285  |
| ACTGAGTCAAC | 121.299953454666 | 0.320027724894535  |
| AATGAGTAACA | 121.316448447746 | 0.588770921138301  |
| CACTGAGTCAA | 121.407405604604 | 0.165649897963395  |
| GGTGACTAAGC | 121.485638060373 | 0.434855626738082  |
| ATGACTAAGGC | 121.700027139272 | 0.365957349510426  |
| TAAGACTCATA | 121.727998722719 | 0.805024069666739  |
| AAGACTCATT  | 121.755579750927 | 0.421917180548563  |
| GCGGAGTCATA | 121.76050821218  | 0.318421666987964  |
| CTGAGTCATTC | 121.786971215293 | 1.04886489954676   |
| GTTTAGTCACA | 121.856645897454 | 0.604700324172974  |
| GATTAGTCAAA | 121.916612549947 | 0.300743648393151  |
| TTGACTCAATA | 122.01920039064  | 0.329957335659834  |
| GAGAGTCATAC | 122.094298679824 | 0.390079383414512  |
| CGGAGTCATCG | 122.113650905043 | 0.311913269583622  |
| CGTGACTCAAC | 122.147585305442 | 1.19660259520856   |
| AAAATAGTCAT | 122.188371040231 | 0.646551162895601  |
| TTAGTCACAGC | 122.315223118551 | 0.277097871130136  |
| GAATGACGCAT | 122.365875940843 | 0.412295881713994  |
| AATCTGACTCA | 122.45633811977  | 0.986081599071667  |
| AATAAGAGTCA | 122.541088857949 | 0.453904765681072  |
| TGGATGACTAA | 122.543257093358 | 1.0068193679061    |
| AATTAGTCAAC | 122.54532008581  | 1.22249215149468   |
| AGATGACTCCC | 122.619660542721 | 0.126373231514553  |
| ACGGTGACTAA | 122.690420793825 | 0.288490753349612  |
| ATTGAGTCAT  | 122.804448128094 | 0.66076372873344   |
| GTTAGTCACAT | 122.90219284305  | 1.27390349020376   |
| ATGACTAAGCC | 123.25073929296  | 0.208058576701556  |
| GTGACGCATGA | 123.36960156191  | 0.309426278152925  |
| TCAGTGAGTCA | 123.4114876386   | 0.668804288109879  |
| TATGAATCATG | 123.685610024158 | 0.235900315363045  |
| ATGACGCATCC | 123.913950715803 | 0.928509248329501  |
| TGACTCAATAC | 123.940609988871 | 0.205590388511005  |
| CGTGAGTCAAT | 123.949044089889 | 1.36576154118645   |
| CAATGAATCAT | 124.016223019128 | 0.269031814235756  |
| GGATGACTGAA | 124.022293077209 | 0.301297665504297  |

|             |                  |                   |
|-------------|------------------|-------------------|
| GTGTGTCATGA | 124.026220489621 | 0.133855571529783 |
| AATGAATCATC | 124.134629808431 | 0.435929506501401 |
| GTCAGTCATGC | 124.293503030193 | 0.518108434768777 |
| TGACTCAACAC | 124.321727600509 | 0.301371816472021 |
| TGACTCAATAA | 124.485117238666 | 0.549107209373555 |
| GTAATAGTCAC | 124.605670062148 | 0.292288081032823 |
| GAGTCATACAC | 124.618104200098 | 0.566159708708117 |
| TGATGACTAAG | 124.647396033978 | 0.934047318002746 |
| GAATAGTCACA | 124.734616729409 | 0.411423379441248 |
| TCGAGTCATGA | 124.7859999408   | 0.590042884725253 |
| ATGACTAATCA | 124.792229319204 | 1.90591500587551  |
| AATGACTCAGT | 124.796699679965 | 1.90976553958554  |
| TATTAGTCATA | 124.813133144382 | 1.25601068724143  |
| ATGACTAACGA | 124.912494662133 | 0.750056340176259 |
| ACTCTGACTAA | 125.108623359256 | 0.261087180858611 |
| GGATGACGCAT | 125.288444462175 | 0.683407811704298 |
| ACGGAGTCATA | 125.399600093311 | 0.305404845591061 |
| CGAGTCATAGT | 125.479190874225 | 0.546966102240135 |
| TCGAGTCATAT | 125.505940213682 | 0.38645865470039  |
| AAGAGTCAGTG | 125.540958017659 | 0.264670856037241 |
| ATGACACATAG | 125.571373727961 | 0.77888809087806  |
| GAGTGACGCAT | 125.661377512325 | 0.289525150105121 |
| AATATGACGCA | 125.699603924358 | 0.394907127099548 |
| GCGAGTCATCG | 125.70676225714  | 0.225007567845239 |
| GTGATGACTAA | 125.760741714247 | 0.603755722892656 |
| ATTAGAGTCAT | 125.790067159229 | 0.567315728455676 |
| ACGTGACTAAA | 125.854867498308 | 0.288667526355177 |
| GGATGACTCCC | 125.867577174387 | 0.481947302320551 |
| AATGATTACC  | 126.091742926472 | 0.470280495292496 |
| AATAGTCACCC | 126.15396241259  | 0.464648450446212 |
| GTTAGTCACTA | 126.258309016331 | 0.476092584149547 |
| GTGTGTCATCC | 126.545888652938 | 0.39962011860432  |
| TAGAGTCACGG | 126.611117453818 | 0.430524872196216 |
| ATGACTGATAG | 126.805247582885 | 0.50259850166689  |
| TAATGACGCAT | 126.845050842356 | 0.606412267169385 |
| AAAATAGTCAC | 127.037580416418 | 0.42722725287173  |
| TATAGAGTCAC | 127.042519419113 | 0.768167713856765 |
| GACTGACTCAG | 127.086750551883 | 1.23350644646268  |
| GGATGATTCAC | 127.177802829338 | 0.330737081790937 |
| ATGACTGAAAA | 127.178531328823 | 0.397893100767803 |
| TGAAGAGTCAG | 127.437043408677 | 0.232717476593124 |
| CAATGACTCAA | 127.531168610216 | 1.09003842780123  |
| ATTAGAGTCAC | 127.537400921035 | 0.431393960471319 |
| GGATGACTCCA | 127.590749265922 | 0.348677324214607 |
| TGGAGTCATAG | 127.648330924252 | 0.753648479828558 |
| TGACTCAATGA | 127.660548952729 | 0.648745853604348 |
| CGTATGACACA | 127.804441528122 | 0.42250780908345  |
| TATGAGTAAAC | 127.877880263112 | 0.841018414015463 |
| CATGACGCATC | 127.897575008228 | 0.502976983154709 |
| GTGAGTCAATC | 127.919207526342 | 1.455269764878    |
| ACGTGACTGAT | 127.933804020409 | 0.518003707026028 |
| AGAGTCATATA | 127.95939939063  | 0.384426286219614 |
| TGAAGACTCAT | 128.201046019551 | 0.688772340549056 |
| TGACTCAATCC | 128.21877651507  | 0.377260284599163 |

|             |                  |                    |
|-------------|------------------|--------------------|
| GGATGAATCAT | 128.438867660229 | 0.435925108630722  |
| TCTGACTCAAA | 128.460363146809 | 0.810823122134727  |
| TGACTCAACAA | 128.57638658126  | 0.611612696771015  |
| GGAATAGTCAC | 128.720995615562 | 0.320569989080579  |
| GCTGAGTCATG | 128.757405108464 | 0.987798783082724  |
| AGTGACTAAAC | 128.777271645776 | 0.11179988209346   |
| TAATGACTGAA | 128.810377377343 | 0.751859446027541  |
| CTATGAGTAAC | 128.88123966583  | 0.468812232907063  |
| TCATGACTCGT | 128.890405054336 | 0.24598250045643   |
| CAGATGACTCC | 128.994156224778 | 0.306110731914958  |
| CATAGAGTCAC | 129.098254072798 | 0.505877689903738  |
| ATGATTCACGC | 129.109231910496 | 0.224542987451757  |
| AAATAGTCACC | 129.135283801699 | 0.497270049878575  |
| ATAATAGTCAC | 129.16736782226  | 0.581475500024672  |
| GGAATGACTAA | 129.257322155716 | 0.207102488836622  |
| ATGTCAGTCAT | 129.257873589648 | 0.615598221348249  |
| TGAGTACCAC  | 129.270060834979 | 1.23561242141813   |
| GATGACTCCGC | 129.498362017382 | 0.485805439724419  |
| TCATGACTGAT | 129.730611302732 | 0.226413113532749  |
| CGGTCAGTCAT | 129.744419604563 | 0.653458962002656  |
| AACTGAGTCAA | 129.843923479577 | 0.257866324488567  |
| GAAAGACTCAT | 129.930935088632 | 0.414813519674248  |
| AATGATTCACA | 129.9519108117   | 0.299572148883972  |
| ATGTGTCACGT | 130.313585283587 | 0.0418673712963113 |
| AGTCGAGTCAT | 130.368665888975 | 0.431091947266939  |
| GTGTGTCATCG | 130.429590670738 | 0.429586814567685  |
| AACTGACTCAA | 130.440189781472 | 0.22409444666103   |
| TGTCTGAGTCA | 130.455224414568 | 0.259459599001805  |
| TAGAGTCATCT | 130.498828772397 | 0.446649234255601  |
| TCTGACTCAAG | 130.561309740501 | 0.503707888512267  |
| AATAGTCACGA | 130.567753264591 | 0.373541045610832  |
| GATTAGTCAGC | 130.594498894289 | 0.958400241620372  |
| GAAATAGTCAC | 130.619386304685 | 0.348505023532487  |
| CCTCTGACTCA | 130.645305279606 | 1.19492184169222   |
| GATGACTCCAA | 130.68225484706  | 0.582894116610702  |
| GGATGACTGAT | 130.748475519808 | 0.439800152422109  |
| AAATGATTCAC | 131.02248046678  | 0.297071909698911  |
| CGATGACGCAT | 131.195454497681 | 0.981460021018254  |
| CTAAGAGTCAG | 131.319898992646 | 0.604966906443645  |
| CGACTGACTCA | 131.382064008225 | 0.465761903761773  |
| GGTTAGTCACA | 131.385527024807 | 1.20731808744202   |
| AAGAGTCAGGT | 131.537781966371 | 0.277745430683226  |
| GTGACTGATAG | 131.677225196918 | 0.82701525179633   |
| GCCTGAGTCAT | 131.75437799488  | 1.87621168977687   |
| TTAACAGTCAT | 131.838183232032 | 0.520053918945309  |
| TAGAGTCATCC | 131.919504505166 | 0.641914562160758  |
| CTGACTCAACA | 132.131522607663 | 0.28428404083043   |
| AAGACTCATGA | 132.2324170905   | 0.200046923108089  |
| GTGACTAATAT | 132.263536433415 | 1.77402180819083   |
| CCGGTGACTAA | 132.382530973433 | 0.372220113683832  |
| GGATGACTCGT | 132.476769638411 | 0.546940334884217  |
| AATAGTCACAG | 132.621575419255 | 0.514004634373829  |
| ACATGACACAT | 132.856758489111 | 0.39501700987532   |
| TACTGACTCAG | 132.883496245605 | 0.333338971217749  |



|             |                  |                   |
|-------------|------------------|-------------------|
| TTGACTCAACC | 132.936078074484 | 0.29372697574825  |
| GCATGACTAAC | 133.058119138813 | 1.16555286598555  |
| TATGAGTAACG | 133.067948934558 | 0.440875121102888 |
| ATATGACGCAA | 133.076086906366 | 0.145188075408071 |
| TTAGTCACAAA | 133.106295379713 | 0.45836762126971  |
| GTGACTCACTT | 133.201095415279 | 1.59592164276323  |
| GAGCTGAGTCA | 133.246292927362 | 0.431255715735758 |
| AGCTGAGTCAA | 133.27682222344  | 0.309419784500849 |
| CGAGTCATCGC | 133.377968001755 | 0.184496522726352 |
| AGCATGAGTCA | 133.43313484389  | 0.763394228161476 |
| ACTGAGTCAGG | 133.612148457797 | 0.672848229286216 |
| CGAATGACTAA | 133.691440847516 | 0.727292151167571 |
| TCATTGACTCA | 133.721050784351 | 0.841445486048697 |
| CATTAGTCAGT | 133.798458037453 | 0.303471167236456 |
| GAGAGTCATAT | 133.802692387001 | 0.363168668929719 |
| ACTTAGTCATA | 133.877649162692 | 1.15696948030534  |
| GTCGAGTCATG | 134.064106338578 | 0.733552939278916 |
| ATTAGTCAGAA | 134.076690588234 | 1.16686448792269  |
| CAGGTGACTAA | 134.151602836445 | 0.457814393920447 |
| CATGACTCCTA | 134.261150410173 | 0.265457639840252 |
| AATGAGTCAGT | 134.288623967972 | 1.87180960350111  |
| TAATTGACTCA | 134.47706506118  | 0.395582918194979 |
| CTTAGAGTCAC | 134.530743335141 | 0.256465924464737 |
| AATAGTCACGG | 134.587114109464 | 0.622238758498077 |
| TAGATTAGTCA | 134.601579712075 | 0.810568530361412 |
| GCGAGTCATAG | 134.605784523744 | 0.577955160237602 |
| AGAATAGTCAC | 134.725809983506 | 0.408197036804397 |
| TAGAGTCATTT | 134.905017258958 | 0.402559341012012 |
| ACTGAGTCAAA | 135.078756616766 | 0.281044915219846 |
| TTATGATTCAC | 135.219909646352 | 0.273771428974401 |
| AACGTGAGTCA | 135.263965485048 | 1.16536991027696  |
| CTATGACGCAG | 135.306057688562 | 0.414825574847851 |
| GGTCAGTCATG | 135.560187234858 | 0.235199044326054 |
| ATAGAGTCATT | 135.671696376617 | 0.945440728468982 |
| TAATTACTION | 135.69933622834  | 0.769514966948089 |
| CAGTGACTCAA | 135.717079877564 | 0.691605732863884 |
| GAGTCATACCA | 135.739141247551 | 0.519886899772733 |
| CTCGAGTCATC | 135.859290562693 | 0.435972536190596 |
| ACGCTGAGTCA | 136.033852757586 | 1.37098849589904  |
| GCTAAGAGTCA | 136.114878090842 | 0.436283489509522 |
| AGATGACTAAG | 136.136720439472 | 0.462790891178592 |
| GCTCTGAGTCA | 136.162151453358 | 1.33329081460895  |
| ATTTTACTCA  | 136.327259560886 | 0.416258885373444 |
| AATATTAGTCA | 136.460858303302 | 0.7063065467581   |
| AAGTGACGCAT | 136.505005629852 | 0.397260366539736 |
| TAAGAGTCAAT | 136.556713925505 | 0.426653315135798 |
| ATAACAGTCAT | 136.566346534038 | 0.692139030362885 |
| AAGAGTCAGTT | 136.569258030516 | 0.304348364961684 |
| AATAGTCACGC | 136.691761079511 | 0.554051423001658 |
| AATGACTGAAA | 136.701429659061 | 0.395444901019612 |
| TTCTGACTAAA | 136.715352489435 | 0.341771217025185 |
| ATGACTAAGAA | 136.7238749291   | 0.414809702344202 |
| CATGACTCGTA | 136.741843284641 | 0.495340981964191 |
| AAACTGAGTCA | 136.765255526339 | 0.249837137887814 |

|             |                  |                   |
|-------------|------------------|-------------------|
| GGCTGAGTCAA | 136.796844902241 | 0.522021478385687 |
| GATGACTCCGA | 136.816613334631 | 0.637379302936443 |
| AGATGACACAT | 136.868046414691 | 0.380882447520215 |
| GAGTCATACTG | 136.968425343777 | 1.46559119122341  |
| AGATGATTCAC | 136.994053380101 | 0.442909564046638 |
| TCGTCAGTCAT | 137.115858089171 | 0.633149263264137 |
| CGATTAGTCAA | 137.118028487965 | 0.926063369620304 |
| GTCAGTCATGG | 137.181310310583 | 0.382210376121905 |
| CCTGTGACTCA | 137.206099341227 | 1.81440784872831  |
| ACGTGACGCAT | 137.421015150784 | 0.266464227334705 |
| GGACTGACTCA | 137.443875498933 | 0.674692383009581 |
| TTTAGTCATAA | 137.546671530385 | 1.24030868605146  |
| CAGAGTCATAT | 137.576244017418 | 0.592127814163874 |
| CAATGACTGAA | 137.632457496355 | 0.222571379233245 |
| AATATGACTGA | 137.714765238906 | 0.449228000945091 |
| CGGGTGACTAA | 137.794845475523 | 0.281195333813143 |
| CCTAAGAGTCA | 137.873349730901 | 0.589517091788327 |
| CGTCAGTCATG | 137.970847871685 | 0.353355499552849 |
| GCCATGACTAA | 138.035517156152 | 0.634503737473417 |
| TCATTAGTCAG | 138.061772246535 | 0.298727907255033 |
| CATGACTCGTC | 138.208316099395 | 0.362582149926728 |
| GATGACTGATG | 138.216620734747 | 0.58077433290131  |
| CATCTGAGTCA | 138.228938271969 | 0.185443224845089 |
| TATGACGCAGA | 138.25192249387  | 0.954519673800075 |
| AGATGACTGAA | 138.685256036737 | 0.236880502224764 |
| GCTGAGTCAGG | 138.698596216498 | 0.359464124666594 |
| AAATAGTCACG | 138.7948253927   | 0.457198308182903 |
| TAAGAGTCAGG | 138.967425295121 | 0.443508909552141 |
| AAGAGTCAGGA | 139.00884375032  | 0.337394766953092 |
| AGGATGACTAA | 139.092656551423 | 0.322551630262315 |
| AAATGAGTAAC | 139.148700897143 | 0.369193630274857 |
| ATTACTCACAT | 139.166481196789 | 0.299415799234862 |
| TAGAGTCACGC | 139.175090546527 | 0.724383471201272 |
| GCCGTGACTCA | 139.26891861576  | 0.632955826030067 |
| TAAGAGTCAGT | 139.402116355337 | 0.667172858004813 |
| TCGAGTCATGG | 139.5266810782   | 0.444485245931228 |
| GGAGTGACTCA | 139.580252811672 | 0.617074356591179 |
| TGACTCAACCC | 139.586833807656 | 0.369765509990607 |
| TAAATAGTCAT | 139.756348343581 | 0.620895709426459 |
| CATGACTAACT | 139.933983752293 | 0.973125686349978 |
| GTAGAGTCACG | 140.038508518006 | 0.431953555925119 |
| AACAGTCATCG | 140.055744263197 | 0.851400359999999 |
| TGAGTCATCGG | 140.118899796503 | 1.9358400800407   |
| AGAACAGTCAT | 140.173677376149 | 0.390848668249523 |
| AGAGTCATATC | 140.486868208398 | 0.626005919357231 |
| GTGAGTCAGGC | 140.586844039845 | 1.60482060814201  |
| TCTGACTAAAC | 140.613837235687 | 0.384754811322833 |
| TAGTGTGTCAT | 140.948707976958 | 0.780679366727291 |
| AATGACTAAAC | 140.976963473709 | 1.11637030942712  |
| CAATGACGCAT | 141.44161853348  | 0.451247561374857 |
| GATGATTCACG | 141.60236635954  | 0.381063443153015 |
| GAGTGACTAAA | 141.857966684869 | 0.289129709500576 |
| TGATGAGTAAC | 141.966638196588 | 0.322030062814656 |
| CCCGTGACTAA | 142.272201690406 | 0.410163166615278 |

|             |                  |                    |
|-------------|------------------|--------------------|
| ATGACTGATTA | 142.35216538816  | 1.18841178724008   |
| GTCATTAGTCA | 142.362531836041 | 0.54262758727377   |
| TTGTGTGCAT  | 142.373517689622 | 0.380706819718178  |
| TGAATAGTCAC | 142.542530218489 | 0.233338064702849  |
| TCTGACTCAGG | 142.579914561536 | 1.23219146310352   |
| ATGGTGAGTCA | 142.709368748022 | 1.46978345215065   |
| TAAGAGTCAAA | 142.824825273302 | 0.339991285862704  |
| AAGACTCATGT | 142.836188676654 | 0.225869963702851  |
| TGACTCAATGC | 142.851100143619 | 0.219762824338944  |
| GGATGTGCAC  | 142.932944355344 | 0.456511987335383  |
| CGTGACGCATC | 143.097578955655 | 0.212757359350861  |
| TATTAGTCAAC | 143.101329447592 | 1.14970172999395   |
| TAATGACTCAA | 143.176172504919 | 0.657901429383354  |
| AATAGTCACAA | 143.375839261071 | 0.414709209426051  |
| AAGCTGAGTCA | 143.421094311376 | 0.508011278257654  |
| TTGACTCAATG | 143.512095785783 | 0.438481061336855  |
| GAGAGTCATCG | 143.674971694333 | 0.663014558363216  |
| AGAATAGTCAT | 143.686224787092 | 0.427378867298894  |
| ACTTTGACTCA | 143.820112500713 | 0.466475419599953  |
| TGATTAGTCAG | 143.917592268388 | 0.387723269822593  |
| AGAATGACTAA | 144.173641038813 | 0.37560446095004   |
| CGACTGAGTCA | 144.288016080837 | 0.889232803454074  |
| AAGATGACTCC | 144.414276934332 | 0.197339009121944  |
| AAATGACTAAG | 144.465038725125 | 0.161088719605522  |
| TGGTGTGCAT  | 144.473526902912 | 0.0753165111366249 |
| ATGAATCATTC | 144.535371752873 | 0.370128896149877  |
| AGATGACGCAT | 144.640153603202 | 0.937669661761968  |
| GTTAGTCACTC | 144.673162966928 | 0.920336295908178  |
| CATGACTGAAC | 144.81766878181  | 0.613752991332429  |
| ATGTGTCACTC | 144.827132050392 | 0.0834981335974971 |
| CGTGACTAAAA | 144.987437344131 | 0.5932296308672    |
| TCTATTAGTCA | 144.998379765743 | 0.463267705055136  |
| GTGACTCAGTA | 145.315549670605 | 0.833740630596541  |
| ATGACGCATGT | 145.328812920627 | 0.6912006860066    |
| TTAGTCACAAT | 145.341416528531 | 0.295712398643587  |
| TATGAGTCAAG | 145.754567795798 | 1.16290256890751   |
| TGAGTCAATAA | 145.845761535047 | 0.60562495729591   |
| ATCGTGACTCA | 145.846696383929 | 1.39055185729781   |
| TTTATGACGCA | 145.961986786134 | 0.407313433738614  |
| GATGACTCCCC | 146.013855456235 | 0.201218236363912  |
| TCTGACTCAGT | 146.045726360872 | 0.723788670003742  |
| CATATGACTGA | 146.25093240796  | 0.66096086953551   |
| GTGACTCAGGA | 146.257534704993 | 0.908686704863799  |
| CATCTGACTAA | 146.308779166018 | 0.252280297595987  |
| GATGTGTCACG | 146.428421001132 | 0.217502643794366  |
| GGACTGAGTCA | 146.629041702293 | 0.369442394085427  |
| TAACAGTCATA | 146.677567139124 | 0.498220165023358  |
| TGACTCAACGA | 146.693254064413 | 0.780938534585252  |
| GTGACTGATGT | 146.715205929746 | 0.403377328953998  |
| ACGTGACTAAG | 146.871431215923 | 0.331956669429935  |
| CAACAGTCATA | 147.018293520644 | 0.333662205989649  |
| GGAGTCATATA | 147.024290247592 | 0.243563005898377  |
| TGACTCAACCA | 147.037698236544 | 0.402276312811569  |
| CATGACTAAGA | 147.104741684052 | 0.376144529017782  |

|             |                  |                    |
|-------------|------------------|--------------------|
| GGATGAGTAAC | 147.134504630206 | 0.282678206138462  |
| AACGTGACTAA | 147.159223212338 | 0.349380316843247  |
| GATGACTAAGC | 147.542889755443 | 1.12610419389733   |
| TTAAGAGTCAA | 147.62548053679  | 0.473854591372713  |
| GAATGACTGAA | 147.690818092704 | 0.448852767236579  |
| TCCGAGTCATA | 147.850995899024 | 0.663455529833373  |
| TCATGACTCCT | 148.092519845619 | 0.250087329352022  |
| GATGACTGAAG | 148.126236481618 | 0.477923731247921  |
| CGCATTAGTCA | 148.348393025765 | 0.47635281707557   |
| GAATGATTAC  | 148.716839155083 | 0.322439061413042  |
| ATCTGACTAAC | 148.805712275789 | 0.39166058738141   |
| AATTACTCATG | 148.900572727207 | 0.431090914592046  |
| CCGTGACGCAT | 148.987589860869 | 0.224456153050108  |
| TGATGAATCAT | 149.086405534202 | 0.888370736035859  |
| AACATTAGTCA | 149.13521545005  | 0.421817343232696  |
| ATGACTGATGA | 149.44027251863  | 1.09901542491763   |
| CCTAGAGTCAT | 149.78636942599  | 0.208963478722577  |
| AAGTGTGTCAT | 149.855617484885 | 0.19796445940348   |
| GGGCTGAGTCA | 149.919351646926 | 0.583944498092149  |
| ACATGACGCAT | 150.047699198758 | 0.23970007751331   |
| CCTTAGTCACA | 150.258570779971 | 0.446549598184142  |
| CATGAGTCAAA | 150.44681690471  | 1.21236543664241   |
| TCATGACGCAT | 150.746377091396 | 0.820087299785518  |
| TAGTGACTAAA | 150.929283433241 | 0.0679343039818832 |
| CGTGAGTCAAG | 151.052768765924 | 0.631194935797734  |
| AGTGACTCAAC | 151.19954268595  | 1.43057112788898   |
| AGATGACTAAC | 151.428462313384 | 1.26549156019296   |
| TAATGACTCGT | 151.444100200235 | 0.253596168549037  |
| GCGTGAGTCAA | 151.454374446113 | 0.783071891824784  |
| GGGATGACTCC | 151.50763949988  | 0.744690204978267  |
| ATTACTCACCT | 151.603392242472 | 0.282739366897358  |
| CAATGATTAC  | 151.691287332796 | 0.193243137552957  |
| GCATGACTCCT | 151.803587406452 | 0.274467804967786  |
| CAGTGTGTCAT | 151.80510528493  | 0.297302458631584  |
| TATGATTACG  | 151.968569155973 | 0.332272507271162  |
| TATTACTCATG | 152.119563410577 | 0.651149572217532  |
| ACGTGTGTCAT | 152.145676446268 | 0.335779579002162  |
| TTTCGAGTCAT | 152.229327984933 | 0.625548221193979  |
| CCATGACTGAA | 152.264423869479 | 0.336733162111605  |
| TAGAGTCATGC | 152.291115890194 | 0.478446237902039  |
| AGTCTGACTAA | 152.468465008502 | 0.55896498597492   |
| TATGACACAGT | 152.477245073694 | 0.363497161830078  |
| GATTAGTCAAC | 152.965623914425 | 0.517199014043797  |
| ATATGACACAA | 153.003044029998 | 0.487358136208855  |
| TATATGACACA | 153.199674630783 | 0.383028474898831  |
| TGTATGACGCA | 153.215772941668 | 0.994828051879218  |
| ACTCGAGTCAT | 153.269608975561 | 0.583774298917995  |
| ATTACTCACTA | 153.314893407056 | 0.413170781513175  |
| AAATGACTGAA | 153.340120698715 | 0.587315341761952  |
| CGGCTGAGTCA | 153.347139056815 | 0.687353446191845  |
| GACTGACTCAA | 153.435216805418 | 0.296590975124769  |
| AGTTTGACTCA | 153.447581697885 | 0.175788476981549  |
| AATAGTCATCT | 153.474750984753 | 0.62624248593538   |
| ATCGTGAGTCA | 153.647335723121 | 1.05375597534552   |

|              |                  |                   |
|--------------|------------------|-------------------|
| AAGAGTCAGGG  | 153.833075266987 | 0.302088082987046 |
| AAGTGACTGAT  | 153.838425748502 | 0.537207063462917 |
| GGAACAGTCAT  | 153.839861408145 | 0.282662662294643 |
| GGAGTGAGTCA  | 153.94723508236  | 0.906138378802019 |
| AATGACTAACC  | 154.0265359242   | 0.760807985481665 |
| TGTCAGTCATG  | 154.047571128142 | 0.741635168155944 |
| AATCTGAGTCA  | 154.159660888742 | 0.519178373217024 |
| AGAGTCATAAC  | 154.522433266307 | 0.643509140101548 |
| GAGTCATACGT  | 154.612765093997 | 1.09301896845118  |
| AAGTGACTAAA  | 154.765323977591 | 0.2529004703771   |
| CTCATTAGTCA  | 155.033200468604 | 0.161791623146886 |
| AGTGACTCAGA  | 155.141249432014 | 1.76237886793255  |
| ATTACTCACTG  | 155.625469524094 | 0.207407343669386 |
| ATTACTCATT   | 155.879936057712 | 0.49782825525235  |
| GAATGAATCAT  | 155.907540959233 | 0.409940864672563 |
| CATTACTCATA  | 155.910626699963 | 0.602512665085947 |
| GGGTGACTAAA  | 156.067618278821 | 0.569676895800062 |
| ATGACACATCC  | 156.152369108284 | 1.07262144028019  |
| TTGTGACTCAA  | 156.262997362635 | 1.15583273841027  |
| GATCTGAGTCA  | 156.280775050023 | 0.681921029695024 |
| TTGGTGACTAA  | 156.44097647886  | 1.52062576120025  |
| ATATTGACTCA  | 156.488284148986 | 0.356555040337081 |
| TAATGAGTAAC  | 156.493619254966 | 0.304145368972692 |
| CAATTAICTCAT | 156.53997498748  | 1.69815960186708  |
| GTAAGAGTCAA  | 156.690409904104 | 0.350801347084268 |
| AGGTGACGCAT  | 156.970567508172 | 0.459952607439716 |
| CTCTGAGTCAG  | 157.065332962235 | 1.11301121163055  |
| CTTTTGACTCA  | 157.204876478383 | 0.191790420544608 |
| CGAGTCATATA  | 157.312456931024 | 0.471740674023837 |
| GTTAGTCACGC  | 157.632450319476 | 0.746294695244892 |
| TGACTCAACAG  | 157.647304474423 | 0.435238318245335 |
| GGGTGACTAAG  | 157.730027252208 | 0.263479916123575 |
| AAGAGTCAGGC  | 157.853870052588 | 0.353953028890853 |
| CAGTGACTAAA  | 158.321666354938 | 0.614042272652057 |
| GACTGAGTCAG  | 158.395152189269 | 1.05389284340143  |
| ACATGACTCCT  | 158.566148530341 | 0.4058684963489   |
| ACATGACTAAC  | 158.724710742646 | 1.08146779667428  |
| GAGTCATAGTT  | 158.78551148478  | 1.14897411122515  |
| CTAGAGTCACC  | 159.091092447563 | 0.345976637558095 |
| TGATGACTCCA  | 159.156521078972 | 0.109211830269025 |
| GTAACAGTCAT  | 159.19416675927  | 0.491159658626993 |
| CGAAGAGTCAG  | 159.376481952297 | 0.322908470528454 |
| AATGACTCCTG  | 159.518183038449 | 0.205930527401926 |
| GCTGACTCAAG  | 159.816137908245 | 0.976609424476378 |
| GACTGAGTCAA  | 159.952899328497 | 0.127854347496083 |
| GGAGTCATATT  | 160.077670014444 | 0.218178854470923 |
| ATCATTAGTCA  | 160.221636940751 | 0.518071547911454 |
| CAATAGTCACC  | 160.27019201209  | 0.327911955972539 |
| GACATGAGTCA  | 160.796693838007 | 1.19442656044765  |
| ATGACTAACCG  | 160.828505021543 | 1.67193084577805  |
| TACGTGAGTCA  | 161.007568195429 | 0.871480008302094 |
| GAAGAGTCAGG  | 161.302282877929 | 0.255681694917527 |
| GAGTCATCGTT  | 161.372193313415 | 0.493444782233296 |
| TGGAGTCATAT  | 161.406439249771 | 0.239837560062669 |

|              |                  |                   |
|--------------|------------------|-------------------|
| CAATGACTCGT  | 161.425642066023 | 0.456315478821023 |
| TATGACACAAC  | 161.482372670015 | 1.06505118276689  |
| AGAAGAGTCAG  | 161.681378403543 | 0.270493490590223 |
| GTAATTAGTCA  | 161.985502645777 | 1.09060886213844  |
| TGGTCAGTCAT  | 162.061672364949 | 0.736899152937771 |
| AACTGACTCAG  | 162.159115078873 | 0.284332227754531 |
| CTTATGACGCA  | 162.597636428435 | 0.182758531897988 |
| TTGACTCAACA  | 162.94184062268  | 0.660868334269844 |
| GATGACTCGTG  | 162.983772313641 | 0.59472704846247  |
| AGCGTGACTAA  | 163.097747812192 | 0.410079444585538 |
| GAATAGTCACG  | 163.308227634005 | 0.643115461846897 |
| CAGGAGTCATA  | 163.567262992721 | 0.317453125850678 |
| GAAAGAGTCAG  | 163.568692405623 | 0.284272536620338 |
| AGCATGACTCA  | 163.659603983286 | 1.67253321133859  |
| GTGACGCATTA  | 163.659939955603 | 0.256390175654496 |
| CGAATAGTCAC  | 163.931914955681 | 0.376873291979806 |
| ATGAGTAAAAG  | 164.30147262283  | 0.277640604116896 |
| AGTGAGTCAAG  | 164.620576745721 | 1.0632432365745   |
| ACGGTGAGTCA  | 164.724823135678 | 1.79002490765287  |
| ATTAGTCAGGG  | 164.895305547598 | 0.315506987104488 |
| AGGTGTGTCAT  | 164.945641298187 | 0.442794410427795 |
| ATAAGAGTCAA  | 164.947568978374 | 0.314963543858245 |
| TGACTCAACCG  | 165.076428586631 | 0.379513503339418 |
| ATGACTAAGCT  | 165.113060744127 | 1.115873737809    |
| GTGACTGATTT  | 165.261472148724 | 1.18157096038275  |
| CGAAGACTCAT  | 165.365541671701 | 0.386508871132083 |
| AAATGACACAT  | 165.392293429998 | 0.834995829266404 |
| AACTGAGTCAG  | 165.540191782584 | 0.839483915152778 |
| ATTACTCATGA  | 165.550619047258 | 0.445570704626992 |
| CCGTCAGTCAT  | 165.614239079411 | 0.23808298357653  |
| ATGACGCATTC  | 165.690392795772 | 0.948003774452495 |
| CCATGACTCCT  | 165.703645417974 | 0.261417256486824 |
| TATGACTGAAG  | 165.802298006099 | 0.633706312611108 |
| TTGTCAGTCAT  | 165.838644186844 | 1.02647648133593  |
| CGTAGAGTCAC  | 165.906958389906 | 0.696448965390915 |
| CTGTGTGTCAT  | 166.243425694012 | 0.307682199115989 |
| GCGTTAGTCAC  | 166.71969157689  | 0.677522198698337 |
| CAATGAGTAAC  | 166.780106461278 | 0.434829526664808 |
| GATGACTCCCG  | 167.347269016071 | 0.205254092183276 |
| AATTAGTCAAAA | 167.371709911598 | 1.03944822141133  |
| CATGACTGAAA  | 167.599713173467 | 0.407914775985247 |
| GGATGACTCCG  | 167.601548561978 | 0.511484650378831 |
| GGTGACTCAGA  | 167.725945947819 | 1.30654073924959  |
| TAAATAGTCAC  | 168.086352898722 | 0.828304888664445 |
| CACTGAGTCAG  | 168.113477476315 | 0.834446684639082 |
| AGATGACTCCG  | 168.278559960867 | 0.532489239074523 |
| GCATGACTAAG  | 168.284910951069 | 0.338732659792655 |
| GGGTCAGTCAT  | 168.326201714287 | 0.33810667730208  |
| CATGACGCATG  | 168.489048802351 | 0.287625905042635 |
| AGGTCAGTCAT  | 168.600334960544 | 0.236042184624507 |
| GACGTGACTAA  | 168.661647842602 | 0.550963275434577 |
| TGTGACTAATG  | 168.90937528992  | 1.41439581335155  |
| CTAGAGTCACA  | 168.986959456504 | 0.368288408407801 |
| CTCTGACTAAA  | 169.240917373897 | 0.427163794011705 |

|              |                  |                    |
|--------------|------------------|--------------------|
| AGGATGACTCC  | 169.380881835727 | 0.654744056697342  |
| GCACTGAGTCA  | 169.467941054137 | 0.603052729299714  |
| AAATTGACTCA  | 169.827478599223 | 0.520087693979233  |
| ACATGACTCGT  | 169.897164188004 | 0.522577077647056  |
| CCGAGTCATCG  | 169.939153868656 | 0.381909083825457  |
| GGCTGAGTCAG  | 170.328237691502 | 0.713230982744783  |
| GAGTCATACGG  | 170.335612210859 | 0.195946276808333  |
| ATGACTCAAGA  | 170.433950051823 | 1.08641101126948   |
| GAGTCATCGAC  | 170.658333051928 | 1.13007986668837   |
| AGATGAGTAAC  | 170.795293064332 | 0.242319296452907  |
| TGTGACGCATG  | 170.826069608693 | 0.186314728285362  |
| CCATGACTAAC  | 170.985820886846 | 0.729679854314688  |
| GATCTGACTCA  | 171.155746245618 | 1.58448890066017   |
| GGGTGAGTCAG  | 171.362808917562 | 0.891237985247076  |
| CATTACTACT   | 171.413415112747 | 0.0729227231073838 |
| TCCGTGACTCA  | 171.442263888233 | 1.66494869845812   |
| TCTATGACACA  | 171.516167941693 | 0.0461504940714032 |
| TCTCGAGTCAT  | 171.53395702526  | 0.630311603196244  |
| GCTCTGACTAA  | 171.899434104002 | 0.61269499787418   |
| ACATTACTCAC  | 172.028053440057 | 0.191707514841324  |
| AGTTTACTCAT  | 172.052971537141 | 0.301520607002883  |
| GAATGAGTAAC  | 172.062488425117 | 0.536320954116494  |
| TAGTTAGTCAC  | 172.182891837526 | 1.08911033283523   |
| CATGAGTAACA  | 172.362912279753 | 0.281537485583258  |
| GTGAGTCAAGC  | 172.514153211326 | 1.20505252356156   |
| ATCTGAGTCAA  | 172.604891047668 | 0.89673565514854   |
| ATTACTCACTT  | 172.911521298651 | 0.327531240055027  |
| GCCGTGACTAA  | 173.368675943838 | 0.472021097982311  |
| TCTGACTAAGC  | 173.603198836551 | 0.17711230475326   |
| GGCATGAGTCA  | 173.617363771591 | 1.0944041019719    |
| CAAGACTCATA  | 174.120196571459 | 0.47662274193341   |
| CGTGTGTCATC  | 174.169626398384 | 0.402234102536555  |
| AATAGTCATGT  | 174.223375978194 | 0.547543636626     |
| CATGACACATA  | 174.408762520611 | 1.14740602641807   |
| ATGAAGAGTCA  | 174.551450951174 | 0.232392383068006  |
| AAATGACGCAT  | 174.599017521843 | 0.64238575200183   |
| TAAAGAGTCAG  | 174.965602155438 | 0.200851198261772  |
| AGAAGACTCAT  | 174.997961474864 | 0.310013186437462  |
| CATGACTGATA  | 175.465647788773 | 0.868008005309843  |
| AAATGACTCAA  | 175.733100124336 | 1.4635746924837    |
| AATAGTCATAC  | 175.959133468977 | 0.856645965202058  |
| ATGTGTGTCAT  | 176.231211948601 | 0.755420692344173  |
| AGTCAGTCATG  | 176.304709483678 | 0.251892480199214  |
| TCAAGACTCAT  | 176.352395259123 | 0.524262608053065  |
| CACATTAGTCA  | 176.449904663826 | 0.250415454995874  |
| TAAACAGTCATC | 176.45336267076  | 0.357563433762776  |
| GGGGTGACTAA  | 176.984982680416 | 0.152259469958293  |
| GAGTGTGTCAT  | 177.303026329632 | 0.35914438917585   |
| TTAATGACTAA  | 177.452580103919 | 1.07706086643845   |
| TGGCTGACTCA  | 177.460830301662 | 0.271088007328529  |
| GCGTCAGTCAT  | 177.649185716889 | 0.361404388526343  |
| CCATGACTCGT  | 177.653690156664 | 0.441234709831892  |
| ATGACTCTTAA  | 177.67556945279  | 0.119570086755378  |
| CCGTGACTAAA  | 178.145627103384 | 0.198866020077928  |

|              |                  |                   |
|--------------|------------------|-------------------|
| TTATGCGTCAA  | 178.188008804174 | 0.334892194781788 |
| TAATGATTCAC  | 178.62701457743  | 0.437586645437563 |
| ATGACTCAAAC  | 179.025151991135 | 1.0898679450074   |
| CACGTGACTAA  | 179.11675401284  | 0.810995984891969 |
| AGTGACTCAGG  | 179.166391250182 | 1.11008959269055  |
| CAAAGACTCAT  | 179.378869210849 | 0.505407241717948 |
| CGAGTCATAAC  | 179.445604106444 | 0.908106543080972 |
| TTATTAGTCAA  | 179.449911676633 | 0.289668610552192 |
| AGTGTGTCATG  | 179.471441402866 | 0.344073925089304 |
| ACTGACTCAAG  | 179.590044421418 | 0.362375604119633 |
| CCTTTGACTCA  | 179.63344843537  | 0.400492303387589 |
| GTCTGACTAAG  | 179.655803973003 | 0.344249301509413 |
| TTCGAGTCATG  | 180.578924376875 | 0.722901333832711 |
| GTGAGTCAAGA  | 180.645672714719 | 1.03646398630085  |
| TCGTGACGCAT  | 181.02444101137  | 0.557225107778657 |
| GGTATGACGCA  | 181.077930616366 | 0.454267078240822 |
| ATGTGTCCACGC | 181.433124757301 | 0.644743814501273 |
| ACCATTAGTCA  | 181.840566246103 | 0.172524336149114 |
| GCGTGACTCAG  | 181.864197657474 | 0.391575307239837 |
| TGATGACTCCG  | 181.907327921151 | 0.706450132253246 |
| TTGGAGTCATA  | 182.088288237346 | 0.478128060368948 |
| TCAATTAGTCA  | 182.110796736753 | 0.928440075629499 |
| ACGTTAGTCAC  | 182.287116494368 | 0.93298232679267  |
| GGTGACTAAG   | 182.356697852327 | 0.388696499206204 |
| CGAGTCATATT  | 183.094389946267 | 0.2528684183098   |
| CAACAGTCATC  | 183.400864563405 | 0.352494559322588 |
| AGCGTGAGTCA  | 183.656856506833 | 1.17232683495083  |
| TTTAGTCACAG  | 183.748429521308 | 1.11912802010186  |
| CATGAGTCAAG  | 184.020224251151 | 1.03141323921549  |
| CTGTCAGTCAT  | 184.154566156112 | 0.963326699223922 |
| CGGATGACTCC  | 184.255863674616 | 0.404518621667278 |
| GGAAGAGTCAG  | 184.487931690026 | 0.334555606266778 |
| AAAGAGTCAGG  | 184.882422184816 | 0.412988195961203 |
| ATTATGACGCA  | 185.097870650141 | 0.503462978238775 |
| TGAATAGTCAT  | 185.557031400027 | 1.15614870897042  |
| TGTATGACTGA  | 185.631180182667 | 0.682218137278243 |
| ATGAGTAAACG  | 185.729403818468 | 0.29260434546422  |
| ACAAGACTCAT  | 185.759886713614 | 0.160215277473803 |
| TATGACACAGC  | 186.084612664668 | 0.731676707231641 |
| ATGACTAAAGG  | 186.101367560777 | 1.14238705579102  |
| AGAACACGTCA  | 186.138825246924 | 0.434573825587108 |
| ATGAATCATGG  | 186.206143068866 | 1.00878113187538  |
| GGAAGACTCAT  | 186.29428058305  | 0.185386148226525 |
| GGTATGACACA  | 186.365914300905 | 0.422883051526461 |
| CGGTGTGTCAT  | 186.607823369234 | 0.185130713462298 |
| ATGATTCACGG  | 186.754818562244 | 0.316749915282915 |
| GTAATGACTAA  | 187.177528168008 | 0.682492817885983 |
| CCATGACTAAG  | 187.385849359033 | 0.120708179396104 |
| ATGAGTAAACC  | 187.633833515059 | 0.389452931113368 |
| CTATGACACAG  | 187.799334306687 | 0.480791303592284 |
| GCTGACTCACA  | 187.999903383086 | 1.08998810450154  |
| GATTACTCATA  | 188.288916471964 | 0.740268187787918 |
| TCGTGACTAAA  | 188.337043710108 | 1.06829822321238  |
| ACATTAGTCAG  | 188.823971499952 | 0.606541486067357 |



|             |                  |                    |
|-------------|------------------|--------------------|
| GGTGAGTCAAG | 188.930232810293 | 0.99236724931555   |
| ATGAGTAACGA | 188.939263854856 | 0.559950084361519  |
| GTATGACACAA | 189.247011703754 | 0.951556839916851  |
| ATGAGTAACGG | 189.547095171343 | 0.389580502379699  |
| CAGTGACGCAT | 189.664043778537 | 0.821192810280511  |
| ATGAGTAAAC  | 189.796538263572 | 0.135845485723598  |
| TTAGTCACATT | 189.906172979912 | 0.67280652131966   |
| GCTGAGTCAAG | 189.951649505018 | 0.373770309741445  |
| CGGAGTCATAC | 189.983090356192 | 0.836721668052168  |
| ATTATGACTGA | 190.079591950996 | 0.43831879314898   |
| ATGACACATGT | 190.121904828788 | 1.03606727259121   |
| ACCGTGACTAA | 190.570877027853 | 0.980440932617604  |
| CTTATGACTGA | 190.604509368403 | 0.871044937878806  |
| AGGTGACTCAG | 190.970453594291 | 1.35546727241706   |
| GTATGCGTCAA | 190.972012151159 | 0.350450254141361  |
| GTCCGAGTCAC | 191.391421092343 | 0.48924340862108   |
| GCGTGAGTCAG | 191.55597119383  | 0.622623371535937  |
| CATGACACATC | 191.713258455311 | 0.967036782316686  |
| CAATGACTAAG | 192.016369134532 | 0.979007276013074  |
| TCGTGACTAAG | 192.15059382087  | 0.345406985471247  |
| GCATGACTCGT | 192.261172798152 | 0.680600841244602  |
| TATGACTAAGC | 192.368353918087 | 0.954174826456375  |
| GGTTTGACTCA | 192.517594019696 | 0.589915040767068  |
| GAGCTGACTCA | 192.61236780913  | 0.883391174694523  |
| AATCTGACTAA | 192.798252969536 | 0.246414670999549  |
| TGACTCTTCAA | 194.611112375826 | 0.42653225708751   |
| AATGACTCGTG | 194.664710723043 | 0.375650404916559  |
| ATCGAGTCATG | 194.700161335303 | 0.648572173616494  |
| AGACTGAGTCA | 194.826954557225 | 0.249536717398575  |
| TGACTCACATC | 194.926740433667 | 1.43514725869281   |
| ACTGACTCAGG | 195.180628134677 | 0.341855753550638  |
| ATGAATCATGC | 195.38900533915  | 0.965750195686314  |
| CCTAGAGTCAC | 195.793007689232 | 0.437611944965538  |
| CTAATGACTAA | 195.91538496993  | 0.340964291928226  |
| GAGTCATAGAA | 196.360509995573 | 0.0920350952956895 |
| TGAACAGTCAT | 196.45372002165  | 0.744539891755125  |
| CGGAGTCATAT | 196.469098443728 | 0.236916905389549  |
| CGAGTCATATC | 196.776365757933 | 0.396366107073438  |
| CCATGACACAT | 196.816510035939 | 0.330180922256903  |
| TCTAGAGTCAC | 197.188838013101 | 0.264682936882103  |
| CAAAGAGTCAG | 197.538599164139 | 0.298967556117168  |
| AAACAGTCATG | 197.595538970628 | 0.142970963837887  |
| CATATGACGCA | 197.660745180817 | 0.923747265532172  |
| GCGTGTGCAT  | 197.750524665263 | 0.370049057991271  |
| TTCTGACTAAG | 197.968392297692 | 0.412511051141952  |
| GGCGTGACTAA | 198.030592755881 | 0.333991186801466  |
| AGCATTAGTCA | 198.194356481304 | 0.741941497449009  |
| CGGTGACTCAC | 198.227916930673 | 1.74045564351301   |
| GGGTGACTCAG | 198.426589079875 | 0.863027918663049  |
| TAGAGTCATGG | 198.583662697625 | 0.532275702269093  |
| GAATGACTAAC | 198.636429120797 | 1.14301067152217   |
| TATGTGTCACT | 198.725704900618 | 0.663939169027753  |
| GCGTGACTAAA | 198.730372058097 | 0.724853337526065  |
| GCGTGACTAAG | 198.803799882076 | 0.611348043747817  |

|             |                  |                   |
|-------------|------------------|-------------------|
| TCGAAGAGTCA | 199.004516826575 | 0.331629226785865 |
| GGTGACGCATG | 199.616869411724 | 0.59648288433397  |
| CAAGACTCATG | 200.243123681914 | 0.258947232567043 |
| TGTGTGTCATG | 200.316127032956 | 0.237381285742584 |
| ATGTGTCACTT | 200.645182303194 | 0.297791537707497 |
| TCCTTGAGTCA | 200.689271789536 | 0.356076942410646 |
| AAGACTCATGG | 200.895127797476 | 0.537352183563629 |
| GGGCTGACTCA | 201.027763674202 | 0.68885313053999  |
| CTATTGACTCA | 201.028988151822 | 0.396087645185451 |
| GAGTCATACCC | 201.205585832963 | 0.91778127851331  |
| CATGATTACC  | 201.480737695729 | 0.310083100173234 |
| TTAGAGTCATG | 201.502970790255 | 1.00424020790283  |
| CTAACAGTCAT | 201.724664775708 | 0.332527173258055 |
| CTCTGACTAAG | 201.811383062899 | 0.39745194292266  |
| TACATTAGTCA | 201.896247206105 | 0.257607886976843 |
| TTTAGTCACAC | 201.977760391127 | 1.08401218569478  |
| GCATGACGCAT | 202.023358194441 | 0.924530145345211 |
| GATGACTCCAG | 202.066895408699 | 0.265765147456095 |
| CTGAAGAGTCA | 202.230521592481 | 0.627751720689857 |
| GCATTACTCAC | 202.308554884521 | 0.429160126911531 |
| CAAGACTCATC | 202.421205264758 | 0.294951905231763 |
| GCTAGAGTCAT | 202.42209873228  | 0.228735601038934 |
| TGAACACGTC  | 202.744177717268 | 0.585963048389872 |
| CCATGAATCAT | 203.192831291171 | 0.924582464435104 |
| CAAATAGTCAC | 203.246962095984 | 0.167716353686717 |
| CAGAAGAGTCA | 203.272754353413 | 0.446684556281687 |
| TCATGACTAAC | 203.907198670696 | 1.0024975886412   |
| GTGAGTCAACC | 204.191127776059 | 0.868315589782093 |
| ACATTGACTCA | 204.585562311343 | 1.07953682886249  |
| ATTACTCACGA | 204.636040043944 | 0.776120623933937 |
| GCATGACTAAA | 205.067856793934 | 0.974433898006601 |
| TTAGTCACAGA | 205.531851734422 | 1.00007902628684  |
| AGAGTCATACT | 205.671782143466 | 0.966180721200692 |
| ATTAGTCAGGT | 205.688226946468 | 0.552099049906159 |
| AATTAGTCAAT | 205.792801409989 | 1.45311906086673  |
| GGGTGACGCAT | 205.806828258963 | 0.686594500366545 |
| ATTGTGACTCA | 205.97841178311  | 1.4840072521009   |
| CTTGACTCAAC | 206.060300053543 | 0.198673673922529 |
| TAAAGACTCAT | 206.384809085845 | 0.692372853554447 |
| ACTAGAGTCAC | 206.621897537429 | 0.455337398095047 |
| GTGATTAGTCA | 207.327959529796 | 1.01200190807387  |
| ATCTGACTCAA | 207.391723321786 | 1.02250801514782  |
| CATTACTCACA | 207.694543999509 | 0.732753337252676 |
| TCATGAGTAAC | 208.268701357195 | 0.428184487966708 |
| CGTCTGAGTCA | 208.749930347414 | 1.28233928020673  |
| GACCGAGTCAC | 208.913893706653 | 0.417679241780613 |
| CGAGTCATCGT | 209.086006553136 | 1.1341323844091   |
| TAGAGTCATTG | 209.275960107251 | 0.330626410491688 |
| TCGTGTGTCAT | 209.797407730637 | 0.238242118088478 |
| ATGTGTCACTA | 210.084708051578 | 0.963444033122205 |
| GGTGACTAAGG | 210.483410767176 | 0.412122200391861 |
| ATTACTCATGT | 210.50561583619  | 0.926073373778176 |
| CACTTGAGTCA | 211.3563113157   | 0.34444987831258  |
| CAAGAGTCAGC | 211.383327710414 | 0.427699090386924 |

|              |                  |                   |
|--------------|------------------|-------------------|
| TATATGACGCA  | 211.732200989726 | 0.419649989521967 |
| CATGATTCACA  | 212.076671050711 | 0.57332779575637  |
| CGTTTGACTCA  | 212.178154715869 | 0.779706860712989 |
| GTGTGTCATGC  | 212.179096166683 | 0.403703748117862 |
| GGCATGACTCA  | 212.198311172248 | 1.06451919335326  |
| TTAGTCACATC  | 212.223716017618 | 0.476147841214167 |
| TCTGACTAACG  | 212.306300195317 | 0.955441196402781 |
| GCTGACTCAGT  | 212.520058782132 | 0.904482264802913 |
| CGAACACGTC   | 212.525748392317 | 0.279358820121759 |
| CAATAGTCATC  | 212.562288874317 | 0.783045698063419 |
| CAAACAGTCAT  | 212.683056279898 | 0.467615348337942 |
| CTTGACTCAAT  | 213.255709896559 | 0.727524625088005 |
| TATGACGCATG  | 213.991972458969 | 0.896424304871079 |
| GTGACTCATT   | 214.085823356807 | 1.2578178413698   |
| GATGCGTCAAC  | 214.694661577292 | 0.469557550623043 |
| GATGAGTAAACG | 215.025995906057 | 0.520928266511942 |
| CTATGACTGAG  | 215.139367009629 | 1.02047732793894  |
| TATGACGCAGC  | 215.223341457575 | 0.703863597456861 |
| TCTTTGACTCA  | 215.61817476951  | 0.525124383220386 |
| GCATGATTCAC  | 216.058855413433 | 0.125383140279234 |
| CTAAGAGTCAA  | 216.17432924937  | 0.305604652712723 |
| ATGAGTAAACA  | 216.44280373068  | 0.441370842976864 |
| ACATGACTGAA  | 216.893813631596 | 0.372276975671321 |
| GAACAGTCATG  | 217.522798622974 | 0.379736656167306 |
| AGTGACTAAAG  | 218.266597589266 | 0.26385679233474  |
| AAAACACGTC   | 218.588680814731 | 0.384186388261708 |
| CCATTACTCAT  | 218.609991985245 | 0.900818053555438 |
| CCATGACTGAT  | 218.687377238645 | 1.05434140821524  |
| TGACTAAGTCA  | 219.18275399607  | 0.650946518169108 |
| AAGACTCATGC  | 219.23381699719  | 0.297120221351806 |
| GAAGACTCATG  | 219.525871764128 | 0.632726227841768 |
| TAAGAGTCAAG  | 219.608650578126 | 0.198883164941041 |
| GTCATAATGAC  | 219.676717447673 | 0.311318664817613 |
| TATGACGCAAG  | 219.790992807495 | 0.520928033358009 |
| ACAACAGTCAT  | 220.308439796074 | 0.450707761681811 |
| AACTTGAGTCA  | 220.567908134602 | 0.405953418987692 |
| CCATGAGTCAA  | 221.023411688582 | 0.626589700999458 |
| ACTCTTAGTCA  | 221.160996403843 | 0.568374501629395 |
| TCTGACTAAAA  | 221.190742069354 | 0.704591238374724 |
| TAATGAATCAT  | 222.244479466033 | 1.15397737939445  |
| CGTGACTAAGG  | 222.47770724023  | 0.569903690883682 |
| CCGAAGAGTCA  | 223.124145022457 | 0.404155546906751 |
| GCATTGACTCA  | 223.696794017665 | 0.898111990265963 |
| TGACGTGTAA   | 223.948928529424 | 0.255991152229343 |
| TGACTCAACGC  | 224.672217663227 | 0.436916773535702 |
| CTGTGACTAAT  | 224.993935861299 | 1.58872198945154  |
| CGCTGACTCAG  | 225.277407506225 | 0.90225245068578  |
| GATATGACGCA  | 226.111068995687 | 0.933998094512381 |
| GTTAGTCACTT  | 226.285858091169 | 0.927316705074407 |
| AATGACTAATG  | 226.487842512093 | 0.908231979786477 |
| CAATAGTCACA  | 226.504397825277 | 0.346705597335523 |
| AATAGTCATTT  | 226.723634216523 | 1.18576975716934  |
| CATGACTAAGG  | 226.826646736863 | 0.283011488027968 |
| ATATGACTAAG  | 227.04342551754  | 1.15856509325523  |

|             |                  |                   |
|-------------|------------------|-------------------|
| CTGATTAGTCA | 227.053077752395 | 0.877452959667518 |
| CATGAGTAACC | 228.138611244607 | 0.679662264363926 |
| GCTAGAGTCAC | 228.241645052405 | 0.42701038707676  |
| GCGTGACGCAT | 228.78236710136  | 0.933661525401125 |
| ATGAATCATGA | 228.810940824517 | 0.726751673044406 |
| ATTACTCAATG | 229.104615994504 | 0.383454790276262 |
| CCGAGTCATAA | 229.24822219711  | 0.535559273169996 |
| CCGTTAGTCAC | 229.445654538675 | 0.332760202635516 |
| GAATGACTAAG | 229.594642647762 | 0.554475997011024 |
| ATGAGTAAAAT | 230.447425013153 | 0.378126432549832 |
| ATCTGACTAAG | 230.562950258429 | 0.410773835089524 |
| CGTTAGTCACT | 230.683125838499 | 0.536269677414409 |
| GGCATTAGTCA | 230.915642024117 | 0.518780855239007 |
| GTCTGACTAAA | 231.821297435632 | 0.537853074492033 |
| TAATGACTGAT | 231.822293905206 | 1.10009321176258  |
| TTAGTCATATT | 231.974243233396 | 0.902267036432765 |
| ACATGATTCAC | 232.11325565419  | 0.328514340635105 |
| GTGACTGATGC | 232.120994435177 | 0.921623734085125 |
| CCTCTTAGTCA | 232.234490028055 | 0.552955762813866 |
| ATGACTGGGTC | 232.490109506763 | 0.494108233878524 |
| GTTATGACACA | 233.563666419305 | 0.474903461023995 |
| TGACGTGTACA | 233.749442966497 | 0.305011532694008 |
| TGACTAATGAA | 234.06500022518  | 0.229401726741717 |
| ATGTGTCAACG | 235.045515272905 | 0.243338843385643 |
| AAGAAGAGTCA | 235.293475996509 | 0.296441961704563 |
| ACGCTGACTCA | 235.816741870763 | 0.88972927615935  |
| ATGTGTCAACA | 236.012701364632 | 0.264750391935427 |
| TAATGCGTCAA | 236.64667817888  | 0.637836104213461 |
| CATATGACACA | 236.744200817348 | 0.871008113817431 |
| ATCTGACTAAA | 237.047102111967 | 0.394592830478596 |
| GCATGACTGAA | 237.077848433774 | 0.450068512333262 |
| ACTAGAGTCAT | 237.657224703846 | 0.609677023012534 |
| GCCATTAGTCA | 237.708464656052 | 0.371508789111125 |
| ATCCGAGTCAC | 238.780630392312 | 0.145849560280908 |
| GTGACTCGCAA | 238.809397939822 | 0.295816586752677 |
| TATTAGTCAAG | 238.850483774049 | 0.365335308538096 |
| GCGAAGAGTCA | 239.362264125054 | 0.350174531223039 |
| CCTCGAGTCAT | 239.718989237912 | 0.332895274797863 |
| CTCCGAGTCAC | 239.856058312847 | 0.286923421339546 |
| CTGATACGTCA | 240.387747704695 | 0.408704683499065 |
| ATGACACATGC | 241.020356158066 | 1.11526570448672  |
| GTGAGTCAAGG | 241.151397787543 | 0.640820317844387 |
| GACTTGACTCA | 241.334631754567 | 0.593681556675582 |
| ACTGAGTCAAG | 241.54381604618  | 0.674643274990443 |
| ATGAGTCGGAC | 241.612336107059 | 0.273603174121371 |
| CTAGAGTCATG | 241.741701642145 | 0.37554778399955  |
| AATGACTAAGC | 242.022359972739 | 1.28615603054308  |
| ATGTGTCACGA | 242.084219307313 | 0.870637856643964 |
| GTGACTCGGAA | 242.435770540113 | 0.368035788216976 |
| GTCTGAGTCAA | 243.012877412696 | 0.68946017540089  |
| ATTACTCACGT | 243.224310842239 | 0.807794833995528 |
| TTTAGTCATAC | 243.519788046511 | 1.34060216769607  |
| GCATTACTCAT | 243.892946752054 | 0.905549770684767 |
| TAGAGTCATGA | 243.94141491299  | 0.903752910469483 |

|             |                  |                    |
|-------------|------------------|--------------------|
| TGACTAATGCA | 244.582258199337 | 0.394388970656995  |
| CCAATGACTCA | 244.719108039155 | 0.845597203876438  |
| GTGAAGAGTCA | 244.939375567333 | 0.312482398183088  |
| GCAACAGTCAT | 245.017439143252 | 0.176453102858095  |
| AGTCCACGTC  | 245.089430214776 | 0.522380480970454  |
| GAGTCATACAA | 245.155382300867 | 1.19032106353715   |
| CGTTAGTCACC | 245.187960287254 | 1.21941996664379   |
| GGTATGACTGA | 245.27867576149  | 0.348043191552177  |
| GTCATACGTC  | 245.374586987215 | 0.550717100656999  |
| GGTCTGACTAA | 245.560306237051 | 0.224013022789548  |
| ATGCGTCAACC | 245.618780424646 | 0.493206310675107  |
| ATTAGTCAGTA | 245.861421585773 | 0.313814538114297  |
| CATGACTCCTG | 246.292466959829 | 0.394791174263181  |
| GCGAGTCATAT | 246.438978893334 | 0.0714454584254093 |
| AATAGTCATTC | 246.510181534766 | 0.291897800811457  |
| TACTTGAGTCA | 247.528066689494 | 0.274237010792785  |
| CAATGACACAT | 248.634972758428 | 0.948499634596794  |
| GAGAAGAGTCA | 249.200545768094 | 0.325996373577403  |
| TCGAGTCATGC | 249.303161689421 | 0.301844085291308  |
| CCATGAGTAAC | 249.692502599211 | 0.291824528072507  |
| GCATGAATCAT | 249.827078950205 | 0.657137208585395  |
| TCTCCGAGTCA | 250.079048686145 | 0.35334925410868   |
| ACAATAGTCAC | 250.163245974384 | 0.221937546018603  |
| GTCCTGAGTCA | 250.739789853147 | 0.481991178300303  |
| GTTATGACTGA | 250.771945839861 | 0.457297470342064  |
| CCGTGTGTCAT | 250.889249068132 | 0.529947948869804  |
| GTATGACTGAG | 250.947024010587 | 0.654860728483064  |
| GCTCTTAGTCA | 251.081966219623 | 0.285070951905044  |
| ATGTGTCAATG | 251.395018801883 | 0.312692764809678  |
| AGCTTGAGTCA | 251.48102695245  | 0.624889391509069  |
| TGACTCTTCCA | 251.494960826686 | 0.274277819559047  |
| GTGACTCGCCA | 251.505334988732 | 0.315928655965659  |
| GATATGACACA | 251.581831353407 | 0.388824432572772  |
| ATTACTCAACG | 252.312798862955 | 0.308085771390044  |
| GGGTGTGTCAT | 252.384278680591 | 0.243392791816132  |
| TAAACACGTCA | 252.507931710355 | 0.382185794501114  |
| AACAAGTCATA | 252.51449707762  | 0.437013104834036  |
| AATGCGTCAAC | 252.735810647623 | 0.395042029468142  |
| CGTGACTCAGT | 252.965947086345 | 0.894835963878115  |
| GCAATAGTCAC | 253.010206278774 | 0.431363628127677  |
| GGTGTGTCATG | 253.26882343088  | 0.284786615419296  |
| AACCGAGTCAC | 253.84482645254  | 0.360027184857218  |
| TCCGTGAGTCA | 254.190334357273 | 1.214198711045     |
| ATGACTGATGG | 254.318437032326 | 0.657795646514122  |
| GGATGACACAT | 254.456569483689 | 0.929013781789352  |
| CATTTGACTCA | 255.109507649737 | 0.901251428210874  |
| GTAGAGTCATG | 255.287029104445 | 1.26364959739279   |
| AGGAAGAGTCA | 255.443877168895 | 0.240170868834007  |
| ATGACTAACGG | 255.508872593899 | 1.27732992846542   |
| ATGAGTCGGTC | 255.579957285082 | 0.290831592242409  |
| TCCATTAGTCA | 255.611635396708 | 0.326436053819742  |
| AATGACTGAAG | 255.853939927769 | 0.776987400966573  |
| ATGCGAGTCAC | 256.111652009189 | 0.408913371257478  |
| AGTCTTAGTCA | 256.117187505294 | 0.524430035709568  |

|              |                  |                   |
|--------------|------------------|-------------------|
| ATGTGTCAATC  | 256.151405078188 | 0.283913411307091 |
| TAGAAGAGTCA  | 256.200682621469 | 0.374304116450368 |
| TAGAGTCATTA  | 256.336696396453 | 0.514968299775848 |
| CGTGTGTCATG  | 256.394568066643 | 0.245480283896187 |
| TATGCGTCAAC  | 256.743225412006 | 0.513488423642702 |
| GCATGTGTCAC  | 256.810422268274 | 0.803334147568692 |
| AACCCAGTCAT  | 256.982217115019 | 0.232162301062611 |
| GTGACACAGAA  | 256.99917026756  | 0.303386339597918 |
| CGCGTACTCA   | 257.066003665848 | 1.03577509394108  |
| AAAGACTCATG  | 257.156287260084 | 0.26208356646395  |
| AACAGTCATGG  | 257.901837851769 | 0.560604100478722 |
| CGAGTCATAAT  | 257.962222546449 | 0.78530860678801  |
| CGTGACTAAGC  | 258.106463458067 | 0.820936924487349 |
| ATTAGTCAGGA  | 258.122203624093 | 0.885254283743076 |
| TTTATGACTGA  | 258.348469748272 | 1.25318562961393  |
| GCTCGAGTCAT  | 259.372327160528 | 0.774503308800607 |
| ATGTGTCAATA  | 259.927631367516 | 0.214081482626417 |
| GACAAGTCATA  | 260.889291779562 | 0.248304320119818 |
| GCATTAGTCAG  | 261.022362782524 | 1.12940061041745  |
| TGACGCAGTCA  | 261.031042559638 | 0.376783479806748 |
| TGACTGTATCA  | 261.687868436796 | 0.455470403927701 |
| TATGACGCAGT  | 261.854172178421 | 0.275421933335273 |
| ACGAAGAGTCA  | 261.854874706495 | 0.46369215271146  |
| AACAGTCATGA  | 262.00852719353  | 0.565138445879144 |
| ATGCGTCAACA  | 262.981311373808 | 0.624986536305647 |
| CGTGACTAAGT  | 263.158447341251 | 0.368075960188801 |
| AGTACACGTCA  | 263.502270886863 | 0.606632932119428 |
| AACTGTGTCAC  | 263.880893877299 | 0.467317817895665 |
| GTGACTCGGTA  | 263.979488159893 | 0.1505791761668   |
| TGACACAGTCA  | 264.002147291528 | 0.228314096074478 |
| CCACTGAGTCA  | 264.017089640294 | 0.48243363848715  |
| CATGACTAAGC  | 264.480728271845 | 0.415152373981486 |
| CATTACTCATT  | 264.797434611111 | 1.21435897871049  |
| CATGACTCGTG  | 265.357873667601 | 0.481890303980718 |
| GGCTTGACTCA  | 265.358530534574 | 0.701475338480997 |
| GATTAGTCAAG  | 265.541821901432 | 1.07127503760267  |
| TGAGTCAAGCA  | 265.665732540264 | 1.2948300098274   |
| GGAGTCATAGC  | 265.757298333912 | 1.35919100481351  |
| AACTTGACTCA  | 266.064247992677 | 0.95190608899454  |
| GACTGTGTCAC  | 266.28254798573  | 0.256084582880736 |
| AAAAGGTGACT  | 268.725657137155 | 0.401446797295705 |
| ATTACTCAACA  | 268.89393763935  | 0.332403486571597 |
| GTGACTCGCAC  | 269.515779709659 | 0.255111827132952 |
| ATGACGATGAC  | 270.072128066399 | 0.413540844756076 |
| CTCTGACGTCA  | 270.091305770623 | 0.380216644699067 |
| TGAGTCATCCC  | 270.299732919902 | 1.7332955407526   |
| CATGACACATG  | 271.215488854596 | 0.495474190132666 |
| AGTTGAGTAAT  | 271.542257181615 | 0.219411315192896 |
| TCATGATTCAC  | 272.247746957424 | 0.351402420616563 |
| TAATAGTCACG  | 272.375180650725 | 1.08956003883997  |
| GATGACTAAAG  | 272.582161493986 | 0.709580749336971 |
| AATGAGTAAACG | 272.675661005367 | 0.833692795548461 |
| ATCTTGAGTCA  | 273.146063446231 | 0.493779624642439 |
| TGACTGAGTAA  | 273.52185850414  | 0.2077597584493   |

|             |                  |                   |
|-------------|------------------|-------------------|
| TCATGTGCAC  | 273.693377288102 | 0.747002679297219 |
| ATTACTCAATC | 274.47001378495  | 0.293588120118877 |
| GAATTGACTCA | 276.102395653996 | 0.414884702796145 |
| GTCATGACTAA | 276.158027422634 | 0.533355730766564 |
| GTTTTGACTCA | 276.606971358444 | 1.07058592159196  |
| AATCCACGTC  | 276.950369295875 | 0.354626671808219 |
| ACATGAGTAAC | 277.394938301104 | 0.362239091940612 |
| ACAATAGTCAT | 277.556896448807 | 0.824774292423911 |
| ATGACTAAAGA | 277.904353382508 | 0.893018723893662 |
| GGAGTCATACG | 278.346522871272 | 1.09608205026261  |
| AGACTCAGTCA | 278.347635353587 | 0.360556003582604 |
| CCATTGACTCA | 278.413829594825 | 1.05171545419255  |
| GATCTGACTAA | 278.451415601468 | 0.531564406267001 |
| TGACTCAAGAA | 278.57656480145  | 0.419356848061756 |
| ATGACTGGGCC | 278.736259934725 | 0.293663033256199 |
| ATTACTCAATA | 278.969771070865 | 0.454306412810092 |
| GCATGAGTAAC | 279.045783578574 | 0.373106565465918 |
| CCCATTAGTCA | 279.141577746143 | 0.551086509454155 |
| AATAGTCATGA | 279.141950717702 | 0.829536440215322 |
| CATCTTAGTCA | 279.192700044861 | 0.479290783614049 |
| AATTGACACAT | 279.411844138017 | 0.523907021855879 |
| CATGACTGAAG | 279.902292008912 | 0.307769697110051 |
| CGACTCAGTCA | 280.12243795558  | 0.253270724933879 |
| GCGTGACTGAT | 280.275161285105 | 1.14146373126165  |
| CCAAGACTCAT | 280.333620911473 | 0.425738501774532 |
| TATCTTAGTCA | 280.487770479581 | 0.455455268036944 |
| GGGCGAGTCAC | 280.609542075779 | 0.325790508667707 |
| CGAACAGTCAT | 280.887852451612 | 0.513413280265374 |
| GATTTGACTCA | 281.030635163727 | 0.278744416539447 |
| CGGAAGAGTCA | 281.150591389828 | 0.329152723583548 |
| GAGCGAGTCAC | 281.236918305014 | 0.206227331224261 |
| GCAAGACTCAT | 281.277690796127 | 0.103735797132585 |
| GGAGTCATATG | 281.38473413336  | 0.370383949089415 |
| GGGAAGAGTCA | 281.559090177398 | 0.301901625015236 |
| TGACTCGGAAA | 282.749243941659 | 0.504277950970979 |
| GAGTCATACAT | 283.538411308192 | 1.01091093722988  |
| TTGACTCAATT | 283.620949759329 | 0.557734866766472 |
| GTCTGTGCAC  | 283.925389045248 | 0.424593464980578 |
| TATACACGTCA | 284.176944387295 | 0.424715293986629 |
| ATGACTGGGTG | 284.342984480303 | 0.327038532334293 |
| ATGAGTCGGAA | 284.762120346011 | 0.370820219448456 |
| GCCGTGAGTCA | 284.85098105227  | 1.02175012961906  |
| CTTACACGTCA | 284.936987595552 | 0.51263014521498  |
| ATGACGCATGC | 284.973239923989 | 0.877890707062682 |
| AATCTTAGTCA | 285.430962099182 | 0.505440615983989 |
| CCATTAGTCAG | 285.901893372059 | 0.744253700927315 |
| TTAGTCACATA | 286.276398359099 | 0.818661608664528 |
| GGAACACGTCA | 287.412454081983 | 0.5213327149587   |
| CATGACTAACC | 287.592055169922 | 1.24744167984796  |
| TGACGTGGACA | 287.726046103989 | 0.321493324262557 |
| AGTTGACACAT | 288.515531289681 | 0.321666863372933 |
| AATACACGTCA | 288.611349329162 | 0.491178042497921 |
| ATTACACGTCA | 288.712388972818 | 0.373047098726561 |
| ATGTGTCAAAG | 288.759752879157 | 0.298692120625254 |

|             |                  |                   |
|-------------|------------------|-------------------|
| CAAATACGTC  | 288.850330115483 | 0.431998237287345 |
| GTGACTCGGCA | 288.931650024116 | 0.297521591345977 |
| GACTTGAGTCA | 288.999416737748 | 0.321903635660637 |
| TGACTCAAGCA | 289.166154984197 | 0.397432698965334 |
| CGGCTCAGTCA | 289.239851029603 | 0.547180818582214 |
| CGACTTAGTCA | 289.679538789221 | 0.475111843522047 |
| TGACTAAGACA | 289.764790691866 | 0.43368490623947  |
| AGGCGAGTCAC | 289.840968077741 | 0.286952964115618 |
| AAGCGAGTCAC | 289.874411378425 | 0.253808570283181 |
| GTA         | 290.63268278955  | 0.294471743153475 |
| ACCTCGAGTCA | 290.837187316763 | 1.14468582335729  |
| ATGAGTCGGAG | 291.19898580579  | 0.263594695328012 |
| CGTGACTAAAG | 291.234188123456 | 0.682932985394336 |
| TGATGCGTCAA | 291.376768608633 | 0.397718715185107 |
| GTCATACATGA | 291.45124767282  | 0.330700985729453 |
| AGTGACTGATG | 291.928907922855 | 0.694453123050147 |
| ACACTTAGTCA | 292.356998207605 | 0.636914750150043 |
| AGCTTGACTCA | 292.575491795375 | 1.00361919193587  |
| CTAGAGTCACG | 292.949852079684 | 0.359734384474193 |
| ATGACGTGACA | 293.030738947611 | 0.356586485832924 |
| ACATGAATCAT | 293.499337751363 | 0.933087614387896 |
| TGACTTACTCA | 293.873044600374 | 0.413456731985216 |
| TCACTTAGTCA | 294.107366309044 | 0.537197030742717 |
| TGACGTCAGAA | 294.331093316143 | 0.47472551374681  |
| GTCATCATGAC | 295.241949228845 | 0.360946335164396 |
| AATTGAGTAAT | 295.459878776141 | 0.223679396986861 |
| CGTCATATGAC | 295.552382957928 | 0.290861470765102 |
| GTGACTCGCTA | 295.937465673823 | 0.233930076973068 |
| CGGGAGTCATA | 295.980113979062 | 0.913697416265231 |
| GTCATACCTGA | 297.488914295971 | 0.499017143920705 |
| TATGCGTCAAA | 297.554546413892 | 0.530634136554852 |
| GGTACACGTCA | 297.638085406577 | 0.49482181051106  |
| ATGAGTCGGCA | 298.15304051861  | 0.24650802641991  |
| TCATTA      | 298.252165030366 | 0.784541882809656 |
| ATGAGCAAATC | 298.307625715049 | 0.480690479503836 |
| GTTCTTAGTCA | 298.534019252527 | 0.410590913918059 |
| ACAAGTCATAC | 298.577834114327 | 0.438905362807323 |
| TCCTTGACTCA | 298.633326466981 | 0.431842041664165 |
| CAACAGTCATG | 299.565751300466 | 0.508648431954131 |
| CATGGTATGAC | 299.696943050609 | 0.41704551311522  |
| AGCTGTGTCAC | 299.723351357713 | 0.240848575524405 |
| AACAGTCATGC | 300.096739636819 | 0.408259911765512 |
| AAATAGTCATG | 300.262735265882 | 0.669974574080801 |
| ATAATGACTAA | 300.558590809558 | 0.381128526461897 |
| CCATGATTCAC | 300.646446045554 | 0.282683571383685 |
| CAAATAGTCAT | 301.2797404239   | 0.600230821733184 |
| TTAGTCACATG | 301.593470148329 | 0.245820797708561 |
| CGAGTCATCGG | 301.602911397473 | 1.15834428397103  |
| GCAAGAGTCAG | 301.626682652308 | 0.312245109537341 |
| GCACTTAGTCA | 301.626717492918 | 0.56692517375652  |
| GGTCTTAGTCA | 301.851843923678 | 0.256655678226062 |
| ACAAGTCATAG | 302.072826158829 | 0.35360292478289  |
| CGCTTGACTCA | 302.074884960809 | 0.762992881923431 |
| ATGACTGGGCA | 302.187720526838 | 0.149384839004511 |



|              |                  |                   |
|--------------|------------------|-------------------|
| CGCTGTGCAC   | 302.245506314987 | 0.25374022551133  |
| AGACTTAGTCA  | 302.315544729504 | 0.300253110084847 |
| ATTAGTCAGTG  | 302.466711896642 | 0.738967044941805 |
| GCCAAGTCATA  | 302.721005254614 | 0.361062200376246 |
| TAAATTCGTC   | 303.776885276012 | 0.383488525917215 |
| TACTTGACTCA  | 303.94564909926  | 0.415037999086143 |
| CATATACGTCA  | 304.086750616996 | 0.431216542741262 |
| ATCCGACTCAT  | 304.095037339327 | 0.333883049973511 |
| GGCTTGAGTCA  | 304.270328319291 | 0.215484896927634 |
| CAAATTCGTC   | 304.452629961597 | 0.432951549132278 |
| ATGACGTGACC  | 304.525338586508 | 0.403395793792109 |
| ACCTTGAGTCA  | 304.781868483094 | 0.619468898816905 |
| AGCCGAGTCAC  | 304.923545393034 | 0.296425750170704 |
| GATGACTCCGG  | 305.933926381444 | 0.192020579240837 |
| GGATGACTAAG  | 306.50401826361  | 0.874604667550462 |
| ATAATTCGTC   | 306.618113729301 | 0.424411704640298 |
| GATGCGTCAAA  | 306.658632925412 | 0.288190319248471 |
| ATCTTGACTCA  | 306.684902820961 | 0.236582263897156 |
| ATTACTCACGG  | 307.069620565274 | 0.839853885260567 |
| ATGACTAGCAT  | 307.718718288082 | 0.198885347679034 |
| AGCCCAGTCAT  | 308.517721266988 | 0.294106162171401 |
| TATGACTTGGA  | 308.742231718868 | 0.230727475082951 |
| CAGCGAGTCAC  | 309.344154955071 | 0.369555370540118 |
| ACAAGAGTCAG  | 309.414205677866 | 0.206707701581374 |
| CGTCCACGTCA  | 310.418544430209 | 0.334881734603592 |
| GTGACACAGCA  | 310.531752431647 | 0.368964359877051 |
| GGCGTGACTCA  | 310.805389936849 | 1.42028746129778  |
| ATTACTCATGC  | 310.841396726692 | 0.531891525096335 |
| ATGACGACTCA  | 311.180172275229 | 0.362604422299238 |
| GTCACAATGAC  | 311.529743668847 | 0.269814019608605 |
| TGACTGAGCAA  | 311.595681955163 | 0.471602928864692 |
| TCAATAGTCAC  | 312.167605127534 | 0.481313048685982 |
| CTCTGTGCAC   | 312.500044133956 | 0.188655054839792 |
| GTCATCTATGA  | 312.542978944699 | 0.413067173011993 |
| TGACGTATACA  | 313.121849287171 | 0.142063587437976 |
| ACTTGAGTCA   | 313.236943871528 | 0.353937298295899 |
| CACATACGTCA  | 313.480542878835 | 1.18097325918554  |
| GACATTAGTCA  | 313.674999806459 | 0.95354626422385  |
| CTTCTTAGTCA  | 313.952588756682 | 0.564602572515702 |
| GTCATAAGTCA  | 314.287410027897 | 0.309495737933081 |
| ATGCGTCAACG  | 314.535995295169 | 0.932991623317481 |
| CCACTTAGTCA  | 314.879311522321 | 0.49675146299327  |
| GTCATCGATGA  | 314.948619297988 | 0.686251251579443 |
| TGACTGTGACA  | 315.015867297563 | 0.372305452068894 |
| CTAACACGTCA  | 315.078692123772 | 0.31074621341753  |
| CCTCGGAGTCA  | 315.542410105343 | 0.420608009563615 |
| TAAACAGTCATG | 315.644527085701 | 0.47347573744007  |
| ATGACTAAGGA  | 315.912665576902 | 1.00624803295086  |
| ACTCATAGTCA  | 316.030054851042 | 0.261364215017751 |
| GACAAGTCATC  | 317.013147827308 | 0.213299231672035 |
| TAAATACGTCA  | 317.064304145674 | 0.675337993099445 |
| CGCCGAGTCAC  | 317.251934829499 | 0.305783530661133 |
| GTCACGATGAC  | 317.445196581448 | 0.543228344148887 |
| ATCATCAGTCA  | 317.741689243076 | 0.381203619895477 |

|               |                  |                   |
|---------------|------------------|-------------------|
| TCACTGCGTCA   | 318.594464110086 | 0.264744357235986 |
| TCTCTTAGTCA   | 319.344863232875 | 0.572009913516658 |
| TGACGTGTA AAA | 319.599917014015 | 0.384627117613943 |
| CTATGCGTCAA   | 319.884752129776 | 0.44884685845653  |
| CATGTGTCACC   | 320.772801637936 | 0.607099702405695 |
| GTCATTCGTC A  | 320.780537205326 | 0.576438550358697 |
| CACTTGACTCA   | 321.235918732036 | 0.533144020376494 |
| ATGACGTGACG   | 321.473734212839 | 0.318744007213393 |
| ATGACAATGAC   | 321.558426321312 | 0.511395305406588 |
| TGACGTGGAAA   | 322.210999376614 | 0.475199349640497 |
| ATATGCGTCAA   | 322.308743577585 | 0.437170363023673 |
| TATGACGCAGG   | 322.60683431049  | 0.880623349328628 |
| AAACAAGTCAT   | 322.622074360173 | 0.291310749101823 |
| ATCTGTGTCAC   | 323.798274106544 | 0.276272873106586 |
| CCCTTGACTCA   | 323.799029713398 | 0.403205878697818 |
| ATGACTGGGAC   | 324.067309090924 | 0.395267321516152 |
| AACCGACTCAT   | 324.627982739146 | 0.28092587428783  |
| GTCATGACCCA   | 325.060438460286 | 0.316684974147909 |
| CATTGTATGAC   | 325.318606159298 | 0.631628551964413 |
| ATACTCAGTCA   | 325.522984044087 | 0.272433415186614 |
| ATGACTTGTCA   | 326.165520976123 | 0.281233621819944 |
| GTCACTATGAC   | 326.168806524024 | 0.348664884012881 |
| GGCGAGTCATA   | 326.169632744535 | 1.07452465500121  |
| CCAATAGTCAC   | 326.28782687413  | 0.297265125680379 |
| CACTGTGTCAC   | 326.670370268438 | 0.314232892132565 |
| CCAACAGTCAT   | 327.144602175541 | 0.435830782999795 |
| ATTCTTAGTCA   | 327.188519013794 | 0.441197303988908 |
| ATAACACGTCA   | 327.809018966502 | 0.428367796986049 |
| GTAATTATGAC   | 328.643669875292 | 0.230892781961686 |
| TGACTCTTGCA   | 328.794016212005 | 0.252794056761369 |
| TGAGTCAAGAA   | 328.988729599754 | 0.217156285373766 |
| AGTCACCTTAG   | 329.450748518136 | 0.30451219578508  |
| AATGCGTCAAA   | 329.598294017817 | 0.2304877450771   |
| CTGCTCAGTCA   | 330.063343556656 | 0.288236358727207 |
| CTGCGAGTCAC   | 330.222500617786 | 0.418278151679701 |
| CAACCGAGTCA   | 330.276422025376 | 0.473261118445143 |
| CCGATACGTCA   | 330.299941193092 | 0.498893179932196 |
| CTCTTGACTCA   | 330.352731511461 | 0.56682398188631  |
| GAAACACGTCA   | 330.967567179628 | 0.726118992445101 |
| CTGACTATGAC   | 330.990164960298 | 0.280823252120227 |
| AACTTTGTCAT   | 331.1363296756   | 0.301786311795137 |
| CAA ACTATGAC  | 331.433315990934 | 0.338532091452996 |
| GGTGACTGATG   | 332.224684616699 | 1.19620967921667  |
| AAATGCGTCAA   | 332.920149173888 | 0.244959029772905 |
| AAATGTATGAC   | 333.01132042528  | 0.252688947401542 |
| TGACTAAGAAA   | 333.082093238417 | 0.495913833867008 |
| ATTATACGTCA   | 333.618127109488 | 0.215398913440136 |
| TATGCGTCAAG   | 333.620868480959 | 0.21767365153313  |
| TCATGACTAAG   | 333.939952022445 | 0.952089263248634 |
| GTCATTTGTCA   | 334.1094052406   | 0.337521911182534 |
| TCAAGAGTCAG   | 334.137511578341 | 0.26454345441012  |
| ATGAGTCGGCC   | 334.248739593327 | 0.312760714864604 |
| ATGAGTAAAGC   | 334.286959454968 | 0.219690356413218 |
| AATTTGCTCAT   | 334.301945551762 | 0.237390028552653 |

|               |                  |                    |
|---------------|------------------|--------------------|
| TCATACAGTCA   | 334.377332059556 | 0.455958305740717  |
| CCGGGTATGAC   | 334.412196634379 | 0.274445558882932  |
| ATTACTCAACC   | 334.77589707831  | 0.248737553592635  |
| ATACTGTCATA   | 335.21818953928  | 0.339557770869101  |
| ATGTGTCAACC   | 335.91800690391  | 0.368867562127087  |
| CAATGCGTCAA   | 336.811997069492 | 0.297565682690507  |
| ACTACTAGTCA   | 337.365796499495 | 0.237017644733599  |
| TATCCACGTCA   | 337.640767726647 | 0.221281859364441  |
| AGCCGACTCAT   | 337.879911767909 | 0.425861864408339  |
| ATTACTCACGC   | 339.915624275334 | 0.569287795528922  |
| AACATCAGTCA   | 340.10083088332  | 0.236635868441549  |
| AGTCACCCTGA   | 340.12876367172  | 0.209381739574428  |
| TCATGAATCAT   | 340.501624493626 | 0.792754515583672  |
| CATCCGATGAC   | 340.643587945505 | 0.345308219797822  |
| CGTCACAGTCA   | 341.045917440198 | 0.277193938511831  |
| GTGACGCATGT   | 341.514277985814 | 0.750543306542591  |
| CTTGCGAGTCA   | 341.611010772758 | 0.606151749197261  |
| GTA CT CAGTCA | 341.875555543764 | 0.544717006144761  |
| TGACACAGAAA   | 341.984536691926 | 0.383065363165128  |
| GTCATCCGTCA   | 342.00053473357  | 0.0981634791644103 |
| CCCTTGAGTCA   | 342.108084042262 | 0.549725534825698  |
| ATGACTTGTAC   | 342.111649055622 | 0.111896376187767  |
| AAAATTCGTCA   | 342.123291688837 | 0.519169224178833  |
| CGTACACGTCA   | 342.160864987817 | 0.555841639674941  |
| CAAGGTATGAC   | 343.837855496742 | 0.245233615226726  |
| ATTTGACTCA    | 344.199369533699 | 0.398915637486626  |
| ATTACTCAAAG   | 344.561366890545 | 0.154828997196135  |
| GCGCTTAGTCA   | 344.619414703174 | 0.317417452417055  |
| CAAATCTGTCA   | 344.66051603999  | 0.322319126117383  |
| CACCGAGTCAC   | 345.304496447444 | 0.273306131046814  |
| CGCGAGTCATA   | 345.50702184957  | 0.773580619920602  |
| GACTCGATGAC   | 345.859855226805 | 0.322362633795668  |
| AAATGTGACGC   | 345.973302400198 | 1.2162938252463    |
| CGTCTTAGTCA   | 346.220753992858 | 0.507503892652327  |
| GTCATAGATGA   | 346.611631408764 | 0.351709991885744  |
| ATAGGTATGAC   | 346.691005919222 | 0.350673422223057  |
| TCTGACTAAAG   | 347.270554762911 | 0.295059359397265  |
| AAACTTAGTCA   | 347.523258645859 | 0.500575257885766  |
| ATGACGTGATC   | 347.617101389169 | 0.223459763746324  |
| GCTTTGACTCA   | 348.011378352887 | 0.667178554795005  |
| CCAATTCGTCA   | 348.288884736759 | 0.362899452048599  |
| CATACGATGAC   | 348.863546215333 | 0.372405794277321  |
| GTGACTCAAGA   | 348.98534405834  | 0.692660117358578  |
| AAAGGTGACT    | 349.321622907446 | 0.254150275226694  |
| ATGAGTCGGTG   | 349.566058021148 | 0.400414093570939  |
| GCAACACGTCA   | 349.707387566759 | 0.505009841484465  |
| TGACATAGTCA   | 349.728075474396 | 0.286564045741189  |
| TCACAGAGTCA   | 350.600195329538 | 0.11540058730012   |
| GAATGCGTCAA   | 351.229211563261 | 0.327527830405346  |
| AGCGTTAGTCA   | 351.323159161566 | 0.486110254529937  |
| TGACTAACGCA   | 351.675011095066 | 0.447051901211287  |
| GGCCGAGTCAC   | 351.749689417396 | 0.396283378647283  |
| GTA ACT ATGAC | 351.850964669239 | 0.35730206284117   |
| TAATACAGTCA   | 351.960407061    | 0.666828675180869  |

|              |                  |                   |
|--------------|------------------|-------------------|
| GTAATACGTC   | 352.736594305626 | 0.50881809445244  |
| CTAGGTATGAC  | 353.052362557659 | 0.24745158038386  |
| ACCGTGAGTCA  | 353.152071347078 | 1.03492270549077  |
| CAAGTTATGAC  | 353.157512391136 | 0.273496212422393 |
| ATGACGTTATC  | 353.259760423452 | 0.217192042924077 |
| CAAATTATGAC  | 353.809752376054 | 0.372005603163892 |
| AATCACGTCAT  | 353.855844818082 | 0.403163768045636 |
| CATGATTCACG  | 354.578465975241 | 0.589614000346358 |
| CCTTGATGTC   | 354.677172883084 | 0.132916396245186 |
| CTCGGTATGAC  | 354.838544467001 | 0.315961006254092 |
| CATCCGAGTCA  | 355.100776172078 | 0.398209162271004 |
| GGTCCACGTC   | 355.302479112025 | 0.40726317996497  |
| CGAACTATGAC  | 355.906324717598 | 0.644556510726381 |
| TCAATACGTC   | 356.131442791244 | 0.173456076703887 |
| ACGCTTAGTCA  | 356.504015089414 | 0.454393328895419 |
| ATTCCGAGTCA  | 356.997946515231 | 0.440830093282136 |
| AGTCACCTTTG  | 357.059536091314 | 0.242754507633264 |
| AAAACCTATGAC | 357.136871822768 | 0.616215494691222 |
| GCTTTTACTCA  | 357.455432857361 | 0.195533349935196 |
| ATGACTGGGTA  | 357.549503790147 | 0.22273613252595  |
| ACTTTACTCAT  | 357.585739719569 | 0.289500928501629 |
| ATATGTATGAC  | 357.599094105822 | 0.47348355712048  |
| ATGACTAGCAC  | 357.800601513973 | 0.305787368693233 |
| GTGACACAGTA  | 358.383212590466 | 0.282382682845198 |
| CCGATTTGTCA  | 358.535426058476 | 0.248547753650003 |
| TCTTGATGTC   | 358.893764556181 | 0.467470868897607 |
| TGACGTAGTCA  | 359.158834801972 | 0.364398802990514 |
| AGAACTATGAC  | 359.204448501513 | 0.256092882329212 |
| ATCCCAGTCAT  | 359.594052147064 | 0.390737699542763 |
| GTTACACGTC   | 359.919654233687 | 0.464161907637977 |
| TGAGTCAAACA  | 360.18920615632  | 1.33820339809799  |
| GTCATACCTAA  | 360.309021609109 | 0.227856202907897 |
| ACTTAGACTCA  | 360.610199070032 | 0.29660609261443  |
| ATGCGTCAAAA  | 361.451953471785 | 0.346883405577983 |
| ATGTGTCACGG  | 361.491829285845 | 1.01959565575181  |
| AATTTGACTCA  | 361.540962514121 | 0.940746425466453 |
| TGACGAATTAA  | 361.585319395711 | 0.413009075001763 |
| TAACTTAGTCA  | 361.626358768903 | 0.302368815613159 |
| ATGAGTAAAGA  | 361.796496880318 | 0.288460899759087 |
| GCCTTGAGTCA  | 361.947753249759 | 0.594250676469626 |
| ACAATTATGAC  | 362.606943724622 | 0.338324092342637 |
| GATTCGATGAC  | 362.768912201714 | 1.26590320123622  |
| CTGCTTAGTCA  | 363.103578495873 | 0.570473485986658 |
| AAGCTGTCATA  | 363.818891665488 | 0.228249771879935 |
| TACAAGTCATA  | 364.032269514126 | 0.43485089574133  |
| ATGTGTCAAAA  | 364.211059129153 | 0.282833548191052 |
| AATAGTCATTA  | 364.394015872682 | 1.06423208622269  |
| TGACTGGTAAA  | 364.475981607227 | 0.304780293568151 |
| ACGCTGACACA  | 364.822732662818 | 0.303213462012085 |
| TCATAGACTCA  | 364.993597815634 | 0.382858221394967 |
| TGACGTATTAA  | 365.14356983238  | 0.209047128435666 |
| AAACTCAGTCA  | 365.77379158204  | 0.478838738062414 |
| GAACCTACTCA  | 366.119450462264 | 0.190712138186542 |
| TAACTCAGTCA  | 366.282413536017 | 0.347740397395684 |

|               |                  |                   |
|---------------|------------------|-------------------|
| AATCACAGTCA   | 366.346381903651 | 0.254385455246154 |
| ATGAGTCGGTA   | 366.717563127917 | 0.283731346136746 |
| TTTAGTCACAA   | 366.898299492437 | 0.990046694456678 |
| GTCACACGTC    | 367.376396683806 | 0.479065212777854 |
| ACACTCAGTCA   | 367.428067602342 | 0.238930191541853 |
| AATAACGTCAT   | 368.039795781935 | 0.434323509340407 |
| GTATGACACAG   | 368.080598786989 | 0.671184685446338 |
| TCATCGACTCA   | 368.215347148347 | 0.236000324784004 |
| ATCTTTGTCAT   | 368.432110824001 | 0.3097369455706   |
| CCTCCGAGTCA   | 368.487186638561 | 0.313050378526585 |
| GTCATAGTTCA   | 368.885593795726 | 0.143048564575044 |
| TCAACAGTCAT   | 369.205651060842 | 0.569442492131361 |
| AATGATTCACG   | 369.292298226978 | 0.382567633900011 |
| TGACGTATAAA   | 369.336528514914 | 0.316130501453862 |
| CTTCCGAGTCA   | 369.670936952932 | 0.293216428656553 |
| ATGACAAAGAC   | 369.673414682127 | 0.216919110039232 |
| ATGACTTGTC    | 369.676268377779 | 0.176396925089539 |
| TCAATTCGTC    | 369.948367940252 | 0.383671405980492 |
| CGAATACGTC    | 370.367164026188 | 0.402385838267635 |
| ATGACTTGTT    | 370.592130670815 | 0.26452996438853  |
| TGTATGACACA   | 371.27980833642  | 0.611984056794329 |
| ATGAGTCGGCG   | 371.334953060749 | 0.295375224876335 |
| TGACTCGGCAA   | 371.488175320418 | 0.529378185620968 |
| AGTCACCTTTA   | 371.761987595703 | 0.328873074792634 |
| ATTCCACGTC    | 371.799110108402 | 0.266479686523777 |
| ATGAGTAAAGG   | 371.941385307744 | 0.275156908556445 |
| ATGACTGGGCG   | 371.969193858544 | 0.355416325497578 |
| ACGGCGTCATA   | 372.139707259172 | 0.310980045372567 |
| TAAACCAGTCA   | 372.13970782666  | 0.173697873050603 |
| GCACTTACTCA   | 372.241657658164 | 0.402591126279235 |
| TCACTCAGTCA   | 372.37194436064  | 0.315425376779349 |
| AAGCTAGTCAT   | 372.851053161564 | 0.302847644905712 |
| CGAATTCGTC    | 372.912960909146 | 0.623051722683603 |
| CAATGTATGAC   | 372.965765659874 | 0.476323900684454 |
| GTCACCAGTCA   | 373.02645525127  | 0.280474778485518 |
| ATGAGCAAATG   | 373.187644741039 | 0.241104951142894 |
| CATACTATGAC   | 373.197587986376 | 0.340277529808405 |
| GTCTGACGTC    | 373.280100213358 | 0.345858541719221 |
| ACAAGTCATCG   | 373.407216839673 | 0.291535204013488 |
| AGTCACCCTTG   | 373.515940208435 | 0.233626362937368 |
| CAACTCAGTCA   | 373.71528406862  | 0.278146347523069 |
| ACGCGAGTCAC   | 373.786682318269 | 0.411300090548068 |
| GTCATACCTTA   | 374.147541772561 | 0.266014567094111 |
| AGTCACCCTTA   | 374.164323500759 | 0.227570104390607 |
| CAAAAGATGAC   | 374.681445148866 | 0.149118145089585 |
| CTGCCGATGAC   | 374.877972235906 | 0.471957235284086 |
| GTA CTGT CATA | 374.918369835071 | 0.287264557594536 |
| CAAGAGTCAGG   | 375.298646569121 | 0.302068691602864 |
| ATGAGTCCGAC   | 375.418032255947 | 0.132947728804555 |
| ATTATTGCTCA   | 375.851997765629 | 0.298131968996481 |
| CCCGTGACTCA   | 375.934985612397 | 0.583150821045721 |
| GTCAGAATGAC   | 376.18129289474  | 0.453366291821843 |
| GAGTCAATGAC   | 376.342395005138 | 0.280585982381756 |
| GTCATAACTGA   | 376.382360730617 | 0.478826561849265 |

|             |                  |                    |
|-------------|------------------|--------------------|
| GTCATACATCA | 376.435637813757 | 0.234891123954008  |
| ACAGGTATGAC | 376.558193724553 | 0.298896247004207  |
| CGTATACGTC  | 376.592246362036 | 0.457942718963856  |
| TCTACACGTC  | 376.827989837841 | 0.340882352302441  |
| GATGACTTGTA | 377.087726110608 | 0.256687954760734  |
| TGACTGGTACA | 377.088052370827 | 0.462805440185936  |
| GCAATAGTCAT | 377.239325322513 | 0.961235367579721  |
| GTCATACATTA | 377.673309261883 | 0.353714338126252  |
| GTCATAATACA | 377.677170151484 | 0.52736251888682   |
| TGACTCGGTAA | 378.105008362275 | 0.322858229617571  |
| TGACTGAAGAA | 378.558511639058 | 0.285834639631149  |
| AATAGTCAACG | 379.050059593431 | 0.324129658680268  |
| ACACTGCGTCA | 379.222828840469 | 0.300945670150186  |
| GTCATACATAA | 379.650743765497 | 0.392350416175841  |
| CGGATACGTC  | 379.672054366616 | 0.372079064726993  |
| TGACCGAGTCA | 379.967662499028 | 0.506674881095443  |
| ATTACTCAAAT | 380.021640706738 | 0.15824066600252   |
| CTTATACGTC  | 380.954818298763 | 0.406210898738891  |
| CGGCGAGTCAC | 381.204021211247 | 0.553852450667013  |
| TGAGTCGATAA | 381.349107831854 | 0.336915355870671  |
| TGAGTCGATCA | 381.443814180575 | 0.169169392702388  |
| TCATCTAGTCA | 381.485666373964 | 0.0842935547586731 |
| ATGACGCGCAC | 381.496315092058 | 0.354558383513081  |
| AATCGTATGAC | 382.223823526322 | 0.377814410305616  |
| CACAAGAGTCA | 382.292571887689 | 0.41046736543      |
| TATCCGAGTCA | 382.661741096126 | 0.296384703972431  |
| GTCATCAGTCA | 382.745577418499 | 0.640573786285462  |
| ATCATTATGAC | 382.848479704993 | 0.270584466133862  |
| TCGCTCAGTCA | 383.002132649082 | 0.260187894694479  |
| ATGTGTCAAAT | 383.085133201864 | 0.276342882416375  |
| ATGCGTCAAAC | 383.481768149452 | 0.197429427128935  |
| CGTCCGAGTCA | 383.489251385097 | 0.711311268892581  |
| CCAAGTCATAG | 383.510230427889 | 0.323736745650012  |
| GTCATCGTATA | 383.658622703508 | 0.238565703991979  |
| GTCATCCATGA | 383.932060390213 | 0.571791829322116  |
| GTCATACGTAA | 384.023798219148 | 0.403440067594714  |
| CCTTTTACTCA | 384.356124616869 | 0.294306925110408  |
| GAGTCATCGGG | 384.550561509788 | 0.190870426712613  |
| GTGACTCGCGA | 384.990841206995 | 0.126269958431181  |
| TCTTTTACTCA | 385.645609525483 | 0.401968017689209  |
| GTAGGTATGAC | 385.868717027207 | 0.217232780087505  |
| AAAACCAGTCA | 386.091046670938 | 0.274705944174277  |
| GTCATAATTCA | 386.240530873853 | 0.516171000942743  |
| TATGACAGTCA | 386.436625542491 | 0.207542599787329  |
| CCACTCAGTCA | 386.635249860298 | 0.329959604796611  |
| ATGACTTGGCC | 386.746640559456 | 0.33019362032162   |
| CACATCAGTCA | 386.77288598136  | 0.440411320419571  |
| ATTACGATGAC | 386.988592195161 | 0.548109020611098  |
| AGTACTATGAC | 387.108413421662 | 0.148456409022864  |
| GAGTCATAGAT | 387.668880871246 | 0.293086839934473  |
| CTGTTTCGTC  | 387.818607276723 | 1.28600055127713   |
| ACAATACGTC  | 388.311464124663 | 0.291371664699956  |
| CCAAGTCATAC | 388.522695622573 | 0.211976219809821  |
| CAACTTAGTCA | 388.741646630873 | 0.255879523422906  |

|              |                  |                   |
|--------------|------------------|-------------------|
| TGACTGATGCA  | 389.141919330402 | 0.343677188872918 |
| GAGTCATCGTG  | 389.195603787853 | 0.254537289882482 |
| CTCTTGAGTCA  | 389.2894778784   | 0.459817746348788 |
| CGCTGACGTC   | 389.407484504129 | 0.456894605411776 |
| AGTCACCTTAT  | 390.131727932429 | 0.315042952583384 |
| ATGACAAAGTC  | 390.499475403143 | 0.38213429461848  |
| ATTATTTGTCA  | 390.831968468051 | 0.457872913456321 |
| GTCATAGTCAA  | 391.183689960174 | 0.324649389556949 |
| TGAGTCGTC    | 391.381734528087 | 0.410869867305697 |
| CATGAGTAAACG | 391.413655752283 | 0.512923464086369 |
| GTCATACCGAA  | 391.429448247369 | 0.253551777129502 |
| ACACTTACTCA  | 391.815497648177 | 0.249772514617396 |
| ATTACTCAAAC  | 391.892955241413 | 0.29535596644457  |
| ATATGACACAG  | 391.940280930211 | 0.827414726150558 |
| GTCATAGGTCA  | 392.154979104371 | 0.458709518792649 |
| CATGAATCATT  | 392.49483740402  | 1.02476807599751  |
| TCAGTCAGGAA  | 392.88480472467  | 0.275871417232598 |
| AAAATCCGTC   | 393.136102578667 | 0.333066558424504 |
| CCATGACTCAA  | 393.614230306363 | 1.05940179606085  |
| TAACTAGTCA   | 393.814270488685 | 0.221526824266152 |
| CATACTAGTCA  | 393.901882813273 | 0.243681539505589 |
| CTGTAGACTCA  | 393.906900718029 | 0.616665532190095 |
| ATGAGTGAGTC  | 393.920032934696 | 0.276505635964297 |
| AGTCACCTTTC  | 393.943696750963 | 0.240279182678691 |
| TATTTGACTCA  | 393.992498764752 | 0.677515185329513 |
| TCTAGTAGTCA  | 394.021155824594 | 0.302573727070663 |
| TGACGCACGAA  | 394.061112742026 | 0.281242155689087 |
| TGTGTCAGCAA  | 394.132077005692 | 0.331642159513561 |
| TAACTTACTCA  | 394.179167476331 | 0.245845697646718 |
| AGTTCGACTCA  | 394.645801961091 | 0.427969680526779 |
| AACGTTAGTCA  | 394.767265776322 | 0.302747675388695 |
| GTCATAACTTA  | 394.785961655319 | 0.698168590578115 |
| TGACAGAGTCA  | 394.858174078167 | 0.615409702140049 |
| ATTGCGTAATC  | 395.097568357277 | 0.30983759274231  |
| ACATGTATGAC  | 395.175419229574 | 0.449457402792173 |
| ATGACTAGCCG  | 395.243910799459 | 0.629476981057698 |
| GCAATTATGAC  | 395.323392506477 | 0.419844847524673 |
| GTCATCGGAAA  | 395.632976135453 | 0.327620271717272 |
| AACTCTGTCAT  | 396.12726899929  | 0.348386744480931 |
| ATGATACGTCA  | 396.418794874235 | 0.596911747444432 |
| CTGACTAGTCA  | 396.582642329383 | 0.25489405679599  |
| ATCGTGCGTCA  | 396.606405724813 | 0.455488201614988 |
| CGAATTATGAC  | 396.618467331469 | 0.320721368284725 |
| CGATGTATGAC  | 396.713179363901 | 0.452912310655315 |
| GCAATACGTCA  | 396.916698405031 | 0.167650476560877 |
| CTGGAGTCATA  | 396.983654372113 | 0.824557838898478 |
| AGTCACCTCTA  | 396.988619477501 | 0.236279796496749 |
| GAATCAGTCA   | 396.992829874076 | 0.675158507278437 |
| AATATGACACA  | 397.035649675054 | 0.942838649681536 |
| ATGAGCAACAC  | 397.1793481063   | 0.355851897958857 |
| GCAATTCGTCA  | 397.214795910231 | 0.452166927825118 |
| CGATACAGTCA  | 397.500610366434 | 0.465202018480996 |
| AGTCAGACTCA  | 397.959763303483 | 0.293227352753156 |
| GCACTCAGTCA  | 398.092358193354 | 0.504536898452046 |

|              |                  |                   |
|--------------|------------------|-------------------|
| GTGACTGATTA  | 398.257139711066 | 0.525983152616482 |
| ATGACGTGATG  | 398.42729691219  | 0.264875448368064 |
| ATGACGTGAAC  | 398.504713898268 | 0.396350155055125 |
| TGACTAAGCA   | 398.652254554207 | 0.562479131707641 |
| GCTACACGTC   | 398.748472234291 | 0.49805250857046  |
| CGGATTATGAC  | 398.748841274394 | 0.197964489100813 |
| ATGACAAAGCA  | 398.819331107624 | 0.299072779584765 |
| GATATGACTGA  | 398.861594934294 | 0.583998540045789 |
| AGTATTATGAC  | 399.20551270327  | 0.350058226871094 |
| ATGCGTCAAAG  | 399.349570482312 | 0.321485113112554 |
| TGACTAAGTAA  | 399.43725041721  | 0.318583365538711 |
| GTCATATTTGA  | 399.77168579214  | 0.415822485375433 |
| CCTATACGTC   | 399.954297715005 | 0.392182010178786 |
| ATCTTGCCTCA  | 400.192405347838 | 0.306129709736732 |
| ATCGTTAGTCA  | 400.71970548881  | 0.539182426658032 |
| GTAACACGTC   | 401.04294162274  | 0.737581535043473 |
| ATGAGCAAATA  | 401.178574886834 | 0.243929086605852 |
| AGTCACCCTAT  | 401.300463135283 | 0.292240206453148 |
| CATACACGTC   | 401.350592155729 | 0.5961199799233   |
| TGAGTCGAAAA  | 401.510947949646 | 0.396079698137305 |
| ATGTGTATGAC  | 401.555748842989 | 0.283984286095147 |
| AAGACGTCATC  | 401.702644892447 | 0.411392365846133 |
| TGAGTCGAACA  | 401.719662626773 | 0.583357529201778 |
| GGATGCGTCAA  | 401.779687506672 | 0.19627005618552  |
| CCGATTGCTCA  | 401.804049698092 | 0.244355736290942 |
| GTCATGAATCA  | 401.863770798268 | 0.213534572694372 |
| CTAATACGTC   | 402.149543826332 | 0.334147648473338 |
| AGACCGATGAC  | 402.54180578615  | 0.287919628422634 |
| CAATGCAGTCA  | 402.670964220227 | 0.43734625835508  |
| GATACACGTC   | 403.170056407189 | 0.518448365717695 |
| ATGACACGGTC  | 403.215876545809 | 0.313820122045316 |
| GTCATCTGTCA  | 403.322105023386 | 0.334995675840053 |
| ATGACAGTATC  | 403.605977792961 | 0.475187197823707 |
| TGACGCAAGAA  | 403.812678702039 | 0.219324803433171 |
| ACGTAGACTCA  | 403.986533664479 | 0.249356713463463 |
| ATGACTTGTGCG | 404.061125238808 | 0.392452832605244 |
| GTCATGTATGAC | 404.192570440573 | 0.449910511587579 |
| GGAACATGAC   | 404.207046235716 | 0.219563466751939 |
| AATATACGTC   | 404.236219621847 | 0.576409417613244 |
| TCTCTGTGTCA  | 404.490784526391 | 0.398085426681311 |
| CATATAAGTCA  | 404.602633561472 | 0.456957273699053 |
| TCACTTACTCA  | 405.030301087353 | 0.25935344951784  |
| CCGCTTAGTCA  | 405.152994130978 | 0.54603765856577  |
| CGTTCGACTCA  | 405.295957863808 | 0.585115094799473 |
| GTCATAACTCA  | 405.380873910806 | 0.475285170478442 |
| GTCATAGCTGA  | 405.439144526481 | 0.237493586570464 |
| GTCATACCTCA  | 405.553918145581 | 0.321748996783933 |
| GTCATAGTTGA  | 405.619090386598 | 0.17519930249207  |
| CCTCTGTGTCA  | 405.739663140201 | 0.25136321445548  |
| CACGTGCGTCA  | 405.761416975485 | 0.226753514482483 |
| CGAGGTATGAC  | 405.895726369359 | 0.283765084549139 |
| AGTCACCTCTG  | 406.364492661349 | 0.173398897930177 |
| CCAGGTATGAC  | 406.516066583194 | 0.538387181437798 |
| CTTCCACGTC   | 406.753709787136 | 0.217216237363202 |



|              |                  |                   |
|--------------|------------------|-------------------|
| CTTTGTAGTCA  | 406.839459951003 | 0.560016630128136 |
| AATGACTAAAG  | 407.1277983824   | 1.06194895834118  |
| GTCATATGTCA  | 407.178587585932 | 0.440220688644884 |
| ACTGTTATGAC  | 407.214054360902 | 0.349103222654132 |
| TGACAAATAAA  | 407.227617352498 | 0.277706344966752 |
| GGACCTATGAC  | 407.385510581517 | 0.302509087584852 |
| GATGACTAAGG  | 407.394112036833 | 0.610890812305861 |
| GGCAAGAGTCA  | 407.564069553447 | 0.107304183348209 |
| GAAATTATGAC  | 407.700462244774 | 0.311316502943026 |
| CGACCGATGAC  | 407.769336476397 | 0.474719961931397 |
| AGAGGGTGACT  | 408.006061696715 | 0.247954584184701 |
| ACTATTGCTCA  | 408.604830492943 | 0.359492509807578 |
| AGGACGTCATC  | 408.934291039469 | 1.29929582479236  |
| CGCATCAGTCA  | 409.093267897687 | 0.244765904026952 |
| CGTATTTGTCA  | 409.326662126102 | 0.253277601480793 |
| ATGACAGAGTC  | 409.344846309212 | 0.419014729121485 |
| AACCAAGTCAT  | 409.478439912716 | 0.319411308225068 |
| CTATGTATGAC  | 409.541698056329 | 0.303985385287024 |
| ACAAGGTGACT  | 409.673138620921 | 0.326188781660527 |
| TGACCTAGTCA  | 409.993002490931 | 0.369669089878444 |
| ACTTTTACTCA  | 410.386270270958 | 0.305751273146056 |
| CAATGTGTGAC  | 410.644885002499 | 0.66912030678669  |
| ACGATACGTCA  | 410.898956581896 | 0.536756614889157 |
| ATGACTGGGAA  | 411.065656581939 | 0.434996229959555 |
| ATGACGTTATA  | 411.312667360602 | 0.32965917714035  |
| AGAATTCGTCA  | 411.469748070394 | 0.395640572085535 |
| CGTCTGACTAA  | 411.87618769232  | 0.855489393549691 |
| TGACTGGTCAA  | 411.980700498366 | 0.390728033362561 |
| GTCATACACGA  | 412.107072474087 | 0.356390194644696 |
| TAGCACAGTCA  | 412.125357617747 | 0.547133337032371 |
| GAAATTCGTCA  | 412.129041791391 | 0.323148444871932 |
| GTCATCGGTAA  | 412.175350838821 | 0.2408964324593   |
| AGAGTCAATGA  | 412.288967274328 | 0.233665811360129 |
| ATGACGAACAC  | 412.68223921129  | 0.282329446573205 |
| AGTCACCC TTC | 412.691950896941 | 0.267416321484964 |
| CTAATTCGTCA  | 412.695378936835 | 0.40306797319413  |
| CGCACGAGTCA  | 413.010995749548 | 0.316427029033286 |
| ATACAAGTCAT  | 413.463633165913 | 0.362921830416263 |
| CGACACAGTCA  | 413.619071923502 | 0.484038605000272 |
| CTCTTACGTCA  | 413.956085180919 | 0.269182156278963 |
| CTCATACGTCA  | 414.044337593693 | 0.239622272878823 |
| ACTATACGTCA  | 414.101501953404 | 0.481768996118645 |
| TCTCGGAGTCA  | 414.25635388864  | 0.272252185970065 |
| AGTGACTCAAG  | 414.259818485957 | 1.15867219087941  |
| AGAGTCAATTG  | 414.324187412559 | 0.288246101590721 |
| AACAAGTCATC  | 414.356197391793 | 0.25898616941111  |
| ATGAGTCCGAG  | 414.486516573826 | 0.435781660129678 |
| AATCCGATGAC  | 414.511896378787 | 0.282190536146703 |
| TGACGCAAACA  | 414.529917983166 | 0.303049927321219 |
| GTCATCCGTAA  | 414.73566140893  | 0.337477507334509 |
| GTATGTATGAC  | 414.7856363529   | 0.444135516502405 |
| CAGGGTATGAC  | 415.105781772484 | 0.346685806501364 |
| GTCAGACTCAC  | 415.287053624074 | 0.254768526872011 |
| ATCCTGACTGA  | 415.334118998676 | 0.452019908440775 |

|             |                  |                   |
|-------------|------------------|-------------------|
| CTGCTGCGTCA | 415.642567345514 | 0.243627614398834 |
| CATCCACGTCA | 415.866720815558 | 0.14915448246861  |
| GTCATACACTA | 415.878454570812 | 0.452622942114062 |
| TATTTGTGTCA | 416.070712641957 | 0.385611488089142 |
| GTCATCGTCAC | 416.293727793538 | 0.291011393635745 |
| TGACTAGGTAA | 416.315423252316 | 0.271900023094124 |
| TCGACCAGTCA | 416.37913876872  | 0.341623487684098 |
| TGAGTAAGTAA | 416.427816071104 | 0.428476403390855 |
| AGAAGGTGACT | 416.539690243151 | 0.262867206006271 |
| CATATGATGAC | 416.699880951509 | 0.465867983185555 |
| CTACCGAGTCA | 416.946561804927 | 0.173527363477752 |
| AGATGCGTCAA | 417.041422542761 | 0.183713820160055 |
| ATATTTATGAC | 417.044746164451 | 0.369320064383081 |
| CCTTTGCGTCA | 417.347799048054 | 0.426140440628367 |
| ACCAAGTCATA | 417.43297146139  | 0.275652227903652 |
| TATTGTAGTCA | 417.857803156902 | 0.339693674327462 |
| GATCCACGTCA | 418.419451767696 | 0.334617643275464 |
| CACGTGATTCA | 418.477677094396 | 0.502653604081116 |
| ACAATCTGTCA | 418.626834053555 | 0.246305757227882 |
| CGTGGTATGAC | 418.733365479609 | 0.373605273933363 |
| AAAGGTATGAC | 418.841255693895 | 0.103458009330517 |
| GGACTTAGTCA | 419.447055702596 | 0.200812289414013 |
| ATGACGAACAT | 419.692073551334 | 0.278012785427756 |
| GTCATCCGTGA | 419.743102194572 | 0.345826991661626 |
| AGACAAGTCAT | 419.823459206835 | 0.25990379313854  |
| ACAATTCGTCA | 419.914583487833 | 0.329838219986436 |
| AGGCTTAGTCA | 420.009388738773 | 0.198352959971103 |
| AAAATTATGAC | 420.034138407224 | 0.350258038110587 |
| ATGACAAAGAA | 420.526590993008 | 0.240501029980747 |
| AGTATACGTCA | 420.647134408318 | 0.421940108111799 |
| AACGTGCGTCA | 420.774945110102 | 0.526874418836885 |
| ATCGGACTCAT | 420.952066248947 | 0.296781877205803 |
| GATGCTATGAC | 420.958808420631 | 0.450657694128901 |
| ATGAATCATCT | 421.020773565597 | 0.237409696664274 |
| CGAATCCGTCA | 421.675016231329 | 0.212102325083685 |
| CGATGCGTCAA | 421.677269898875 | 0.623257776777105 |
| TGACTGTATAA | 421.796673045525 | 0.294249612196752 |
| GCTCTGTGTCA | 421.800646700914 | 0.465817189141145 |
| GGCATCAGTCA | 421.803379963427 | 0.448952761718738 |
| TGACTGCAAAA | 421.939652611463 | 0.239891322844656 |
| AGTAACGTCAT | 422.033896675333 | 0.220217933238136 |
| ATTACGCAATA | 422.056208357509 | 0.24117237962739  |
| GTCACCGATGA | 422.295498214638 | 0.358345449193072 |
| ATGACAAAGTG | 422.457817301494 | 0.301119576179572 |
| ATGATGTAACC | 422.82714037276  | 0.322933553261485 |
| TCAACACGTCA | 422.852321594031 | 0.404496401949428 |
| AAGGCGTCATA | 422.939010949301 | 0.2486475503289   |
| CCGATAAGTCA | 423.082286939076 | 0.497391482681455 |
| GGTCATAGTCA | 423.193945026336 | 0.455936483190913 |
| ATAAATATGAC | 423.287923333863 | 0.399727778639801 |
| CTTTTGTGTCA | 423.49462665907  | 0.282637696092261 |
| AGTCACTCTGA | 423.843212233062 | 0.291809523692541 |
| ACTCCGAGTCA | 423.878238490967 | 0.327174797029096 |
| ATACTTAGTCA | 423.905955641886 | 0.516827271399037 |

|             |                  |                   |
|-------------|------------------|-------------------|
| AGACTTACTCA | 424.003969356234 | 0.326803061171723 |
| ACTCTGTGTC  | 424.139993417437 | 0.29586811509412  |
| ACACGTATGAC | 424.307258429107 | 0.257090466854078 |
| GGCTGTGTCAC | 424.328666047729 | 0.429875244084523 |
| AGTCACCTTGA | 424.464902217281 | 0.246083259582655 |
| ACGCTCAGTCA | 424.743551333011 | 0.192440554253967 |
| TAGTTTACTCA | 425.025175604337 | 0.302822753751993 |
| AGTCACCCTAG | 425.14164530722  | 0.323326813496499 |
| GACGTTAGTCA | 425.142790812195 | 0.344842559617123 |
| TCACCGAGTCA | 425.367833127607 | 0.276934400513971 |
| CAAAGGATGAC | 425.59544789528  | 0.250234361765696 |
| ACATCGACTCA | 425.749352121226 | 0.404972603434464 |
| CTCATCAGTCA | 426.03715006592  | 0.392769224946988 |
| ATGACAAAGAG | 426.321621772635 | 0.297605755584833 |
| AACCGTGTGTC | 426.385661935552 | 0.268018503897955 |
| AGGCTAGTCAT | 426.4376169475   | 0.207262140176428 |
| AACCGTATGAC | 426.510859628528 | 0.233681949123272 |
| TACGTGCGTCA | 426.562827860741 | 0.396105906454056 |
| GAACCTAGTCA | 426.781374316609 | 0.167954114885672 |
| GTTCTGTGTC  | 427.091696719976 | 0.656452686596854 |
| AAGATTATGAC | 427.142357354456 | 0.27259039559394  |
| TGACTGATGAA | 427.414888267855 | 0.378967748821563 |
| TGACGTAAGAA | 427.468280869814 | 0.271621395458383 |
| ATTATGATGAC | 427.532630481754 | 0.313682169710428 |
| TGAGCAATAAA | 427.914589697513 | 0.173768683431601 |
| ATGACTTGAC  | 427.928523413896 | 0.402840831584965 |
| ACCGTTAGTCA | 428.08228257777  | 0.513808050557587 |
| ATCTGACGTC  | 428.211155185    | 0.243835613859656 |
| CACTTACGTC  | 428.766295267879 | 0.291651500893233 |
| CCGATGATGAC | 428.845541181372 | 0.42926082575742  |
| ATGCACAGTCA | 428.894838967029 | 0.537695209470711 |
| ATGACGTGATA | 428.985193083682 | 0.245944541148331 |
| GTTATGACGCA | 429.151486209908 | 0.820955813149866 |
| TGACTGAGCCA | 429.277006729897 | 0.471431319511035 |
| CAACGTATGAC | 429.352285849825 | 0.337518592216256 |
| GTCATCCGCGA | 429.562248997459 | 0.457017152359029 |
| AGCATCAGTCA | 430.009625503859 | 0.51867012727713  |
| TAATCGACTCA | 430.053729401724 | 0.51945968058734  |
| TAACTGCGTCA | 430.066035691431 | 0.392323950933967 |
| AGTCACCCTAA | 430.20633392138  | 0.290378386514298 |
| TCAGTCAGGCA | 430.210387412144 | 0.454163971069017 |
| ATGTGTCAAAC | 430.281915982654 | 0.218824557827144 |
| GCTCCGAGTCA | 430.468529865924 | 0.41014844751702  |
| ATGACTGGGAG | 430.604576166669 | 0.25639408396343  |
| ATAACTATGAC | 430.74658409058  | 0.404886191241789 |
| TGAATTCGTC  | 430.842828584228 | 0.385636697372321 |
| CTTATTGCTCA | 430.90376315832  | 0.331328490833269 |
| TACTCGAGTCA | 431.134264345602 | 0.358062919947916 |
| TATATTGCTCA | 431.344292418844 | 0.296031296513595 |
| ATGACTAGCAA | 432.186854509291 | 0.254541875070729 |
| ACAACTATGAC | 432.214437007356 | 0.346364266695687 |
| CTACTTAGTCA | 432.260157499944 | 0.340074148665817 |
| AAGGGTATGAC | 432.337907498728 | 0.217551712000877 |
| GTCATAGTCGA | 432.386932697125 | 0.46159806440104  |

|             |                  |                   |
|-------------|------------------|-------------------|
| TGACTCGGACA | 432.444943444711 | 0.345840357887875 |
| AGTAATATGAC | 432.611620075185 | 0.240898010135906 |
| GTCATTAATAA | 432.699118333198 | 0.455901506928123 |
| CATTGACTCA  | 432.893563413472 | 0.325297968349953 |
| AACAGTGTGAC | 433.099272305505 | 1.33980778003065  |
| GTCATCGGACA | 433.120993782637 | 0.472649627900057 |
| ACACTGTCATA | 433.246802322699 | 0.271446214016952 |
| AGTCACCTTGG | 433.427972729485 | 0.29694088214912  |
| TCCAAGAGTCA | 433.574361383542 | 0.615598617155897 |
| ACGCTTACTCA | 433.620901832514 | 0.238902710857219 |
| CTTGGTATGAC | 433.856574513174 | 0.353147717064825 |
| CGGTTTACTCA | 433.985670972789 | 0.437538768319083 |
| CGTATTGCTCA | 434.004166888154 | 0.676617867430242 |
| CAGTTTACTCA | 434.145616790404 | 0.412865603812736 |
| GTCATATTTAA | 434.323796725491 | 0.388219199899107 |
| TGAATCCGTC  | 434.400268754616 | 0.372831823173874 |
| TATGAGTCTCA | 434.461366965684 | 0.431980306196088 |
| GTCATTGGTCA | 434.521723054683 | 0.34667805656781  |
| GAAATACGTC  | 434.78964495069  | 0.378727625694506 |
| ATGACTAGCCC | 434.802266262307 | 0.324239700037597 |
| GGCAGTGTGAC | 435.175516573313 | 1.32716420394986  |
| GTCATCGTTCA | 435.24647496884  | 0.293325384575447 |
| TGACGTGTGCA | 435.385194657099 | 0.449230573089193 |
| ATGACTAGCAG | 435.487939187817 | 0.215955741606157 |
| CCTAGTAGTCA | 435.488961009534 | 0.642067287633002 |
| ATACCGATGAC | 435.537776577006 | 0.401551633894616 |
| ACGAGGTGACT | 435.649686091547 | 0.261208869504443 |
| ACCGTGCCTCA | 436.139245815032 | 0.31182060519487  |
| TGACTGTGTAA | 436.180620600626 | 0.182635409422424 |
| CGATCGATGAC | 436.496473274742 | 0.43496121380393  |
| ATGAGACTCAT | 436.572267620833 | 0.423984834806222 |
| GACTGTATGAC | 436.640369536374 | 0.550083052915678 |
| CCGATTATGAC | 436.999727130144 | 0.449076369082202 |
| GTCACGAGTCA | 437.009349473796 | 0.168415344123153 |
| CCGCTGACACA | 437.177941041597 | 0.315011946403147 |
| AATTCGACTCA | 437.260899438723 | 0.342811206420494 |
| GTCATGCATGA | 437.35322263541  | 0.441240810003679 |
| TCGACGACTCA | 437.573640600736 | 0.454660686465452 |
| CGAAATATGAC | 437.75388673523  | 0.283513667009231 |
| AAACTTACTCA | 437.883796312201 | 0.384984384836125 |
| CAAGTGATGAC | 438.095299607771 | 0.239120780283116 |
| GTAGTTATGAC | 438.301439608753 | 0.367673019688533 |
| CTGACGACTCA | 438.535282271293 | 0.232433363581791 |
| ACCTGTGTCAC | 438.553381183225 | 0.238309623525446 |
| TCTGACTCTCA | 438.61518475541  | 0.249656202897981 |
| CCTTGGAGTCA | 438.765081474196 | 0.355361272479    |
| TGAGTCTATAA | 439.070876001286 | 0.571344602760168 |
| CTACTCAGTCA | 439.128634323743 | 0.248455098580546 |
| AGTCACCTCTC | 439.204626577901 | 0.250046060712365 |
| TGAGTCTAAAA | 439.523110195692 | 0.296162725941074 |
| GACACTATGAC | 439.650839919325 | 0.199407196659133 |
| TAAATTGCTCA | 439.664992509875 | 0.541454157759703 |
| ATTCTGTGTC  | 439.68248199601  | 0.422889467791995 |
| GCGCTTACTCA | 439.748210906324 | 0.456100507111361 |

|              |                  |                    |
|--------------|------------------|--------------------|
| AACCTCGTCAT  | 439.814568339296 | 0.277538959592443  |
| GTTACATCATA  | 440.271882538552 | 0.312132148988918  |
| ACTGTGAATCA  | 440.273552156045 | 0.273090776732145  |
| GTCATCGGCAA  | 440.406047428304 | 0.348646816485327  |
| CTGATTGGTCA  | 440.431067046066 | 0.534903825548316  |
| CTTTTGCCTCA  | 440.775546814336 | 0.392648745348215  |
| TAACTGTGTCA  | 440.968624653783 | 0.49521764943945   |
| TAGGCGTCATA  | 441.224977121239 | 0.207690435231137  |
| AACATACGTCA  | 441.236808160588 | 0.365014822092224  |
| GATCTTAGTCA  | 441.246329058636 | 0.358861879360972  |
| CGCAAGAGTCA  | 441.523745764249 | 0.29849955445032   |
| ACTATTATGAC  | 441.562281507561 | 0.409049530263351  |
| AGATGTATGAC  | 441.577957897852 | 0.0760107194894397 |
| GTCATCGGTCA  | 441.64126068653  | 0.434922320310994  |
| TCAATCTGTCA  | 441.729749779489 | 0.267464417691199  |
| AGTCTGTGTCA  | 441.787090746702 | 0.498756012699874  |
| TCACCTAGTCA  | 441.797117022366 | 0.196229471153983  |
| AACTTGACTAA  | 441.873688707476 | 0.297209804558707  |
| ATACTGTCATC  | 441.929016495228 | 0.159429624502712  |
| GAAACTATGAC  | 441.935306866401 | 0.422583418373511  |
| ACTTGGAGTCA  | 442.033175485114 | 0.480056005358147  |
| CATATTTGTCA  | 442.096324375757 | 0.102664902516481  |
| ATCTTACGTCA  | 442.169812145213 | 0.370212969852716  |
| GAATTTATGAC  | 442.204846298121 | 0.543981764376174  |
| GTCATACCGCA  | 442.280774647334 | 0.333707927484603  |
| TGAGTAAAACA  | 442.469280115027 | 0.217053644780816  |
| GGTTCGACTCA  | 442.490418661493 | 0.370511380673824  |
| CATGCGTCAAG  | 442.519303937942 | 0.762718706201533  |
| ATGACTAGCCA  | 442.544105224339 | 0.32880455248993   |
| CCAATTATGAC  | 442.826741504994 | 0.2572322140024    |
| CGACCGAGTCA  | 443.260645422635 | 0.528903290346195  |
| CGCTTACGTCA  | 443.700432448947 | 0.425677445669764  |
| GAAGCTATGAC  | 443.836476454565 | 0.399648603017993  |
| GTCATCGGTGA  | 443.901721935334 | 0.216492669767651  |
| TAGATACGTCA  | 444.02902480463  | 0.355312437411953  |
| TCTTCGACTCA  | 444.069052418229 | 0.358269343352311  |
| GTCATCACTCA  | 444.165665622948 | 0.228092165107747  |
| TGATTCACAAA  | 444.453747919346 | 0.764178093605829  |
| TCAACCGTCA   | 444.485885045308 | 0.446394971261195  |
| TCAGTCAGGGA  | 444.631446515363 | 0.365394736890837  |
| CCTTAGACTCA  | 444.769529023191 | 0.314901882371554  |
| TGACTCGAGCA  | 444.789097082872 | 0.335280133486954  |
| CACAGAATGAC  | 444.796615375705 | 0.490618412255772  |
| AAACCGAGTCA  | 444.822664608521 | 0.318214411058483  |
| CCTTTGTGTCA  | 444.862972843572 | 0.3081882069436    |
| AAGAGGTGACT  | 444.944806328752 | 0.24125974352992   |
| CAAACGATGAC  | 445.001620175003 | 0.216385078550899  |
| GTAATGATGAC  | 445.021886652696 | 0.321291786340807  |
| AGTCAACCCTGG | 445.382695984073 | 0.285505714122648  |
| GGACTTACTCA  | 445.418254587147 | 0.317331573009936  |
| GTCATATTTCA  | 445.420056312902 | 0.207387059129905  |
| ATGACAAAGCG  | 445.580445092324 | 0.266944353345027  |
| TACATCAGTCA  | 445.587298003716 | 0.420854115760711  |
| ACATAGACTCA  | 445.622942338714 | 0.453162927545544  |

|             |                  |                   |
|-------------|------------------|-------------------|
| GTTCCACGTC  | 445.654774339416 | 0.198046347080581 |
| AGAGAGTGACT | 445.842309755899 | 0.262111477774474 |
| CAATACAGTCA | 445.890347671841 | 0.359795817125978 |
| TGAGCAATACA | 445.975031640396 | 0.607571060135252 |
| GTCATCTTATA | 446.48041091588  | 0.193585547942902 |
| TGAGTGAATCA | 446.518394598337 | 0.388873975140175 |
| GTCATAGTACA | 446.584213314491 | 0.579865008494119 |
| CACGGTATGAC | 446.596346192015 | 0.515213134562801 |
| AGTCACTCTTA | 447.032812077389 | 0.337416641295909 |
| AACCAGTCAGA | 447.035029842973 | 0.314516108527386 |
| AAGCTTAGTCA | 447.037297061364 | 0.266838947874755 |
| GTATCCAGTCA | 447.1039265006   | 0.195048137403616 |
| GTCCTGACTGA | 447.191622551078 | 0.303730545645963 |
| CTCTTGCCTCA | 447.599990606092 | 0.330063961440459 |
| ATGATCTGTCA | 447.636311251835 | 0.325274058100167 |
| AAAATGATGAC | 447.827980891248 | 0.340613076920045 |
| CTGAATATGAC | 447.852899314494 | 0.206773601630166 |
| GTCATAGTTTA | 447.872739704155 | 0.395889616418714 |
| AGAATTATGAC | 447.947503537493 | 0.259199331584782 |
| TCACTGTGTCA | 447.99636077205  | 0.134257810058307 |
| AGCAAGAGTCA | 448.002693485124 | 0.242555892271205 |
| GTCATCGGAGA | 448.007651550241 | 0.42064259406107  |
| TGTGTCAGTAA | 448.046409108541 | 0.289898445029501 |
| GTCAGTATGCA | 448.177853794648 | 0.255440164836089 |
| GAAGGTATGAC | 448.216029430717 | 0.31661299243284  |
| TATCGGAGTCA | 448.352905163942 | 0.326679874504661 |
| TCGCTTAGTCA | 448.405742419936 | 0.201949002825971 |
| GTCATCGTTTA | 448.41548712765  | 0.617183072646669 |
| ATGACTTGCCA | 448.604490254074 | 0.306296710182666 |
| CATAAGATGAC | 448.615288420981 | 0.22998932692435  |
| AAGTTCGTCAT | 448.623096976564 | 0.293683715974697 |
| ATGACTAGCTA | 448.647088883375 | 0.531491861373729 |
| GTCATATATGA | 448.712136902453 | 0.651622973289079 |
| GTCATCGCTGA | 448.846671850389 | 0.565430113305729 |
| GTCATACCGGA | 448.944211890267 | 0.456945393157529 |
| ACCGGTATGAC | 448.949678239133 | 0.216563225729177 |
| CTGTGTATGAC | 449.022319143486 | 0.560341298442056 |
| ATGGTAGTCAC | 449.218370429998 | 0.344734908129231 |
| GTCATCTCTGA | 449.291345484879 | 0.341872673186106 |
| CGACGTATGAC | 450.140352068473 | 0.159541377095329 |
| ACCTTGACTCA | 450.213153292781 | 0.56561094276086  |
| CCTATTGCTCA | 450.238784249867 | 0.244391499547302 |
| TGACGCAGCAA | 450.279271799868 | 0.215678725367824 |
| ATCACTATGAC | 450.53308368485  | 0.395130501223724 |
| TACGTGATTCA | 450.660762727631 | 0.297680897367215 |
| CTGACTGTGAC | 450.742850311649 | 0.234299903955806 |
| AGAGGTATGAC | 450.748658436559 | 0.329234902153731 |
| AGTCACCTTAC | 450.759575934394 | 0.199075049836002 |
| TACCTGACTGA | 450.89937438439  | 0.325973767062401 |
| ACGCTGTCATA | 450.997095846016 | 0.27260858703468  |
| GAACCGATGAC | 451.163283214799 | 0.429981214603739 |
| GTCATCGTTGA | 451.278012306063 | 0.260814998559656 |
| ATTCTGAATCA | 451.375068181605 | 0.468985039756893 |
| GCTATTGCTCA | 451.499305195244 | 0.507258750163548 |

|             |                  |                   |
|-------------|------------------|-------------------|
| CATTGTAGTCA | 451.590890978866 | 0.234321198844711 |
| AAGACTATGAC | 451.643937720756 | 0.273052019449026 |
| TGACTAGATAA | 451.708499614956 | 0.600173646783163 |
| ACGTAGTGACT | 452.085131814247 | 0.286190459437782 |
| AAATCGACTCA | 452.170621205353 | 0.399846068513548 |
| ATCCAAGTCAT | 452.258633757855 | 0.246358867651449 |
| ATGCGTCAAGG | 452.261595328382 | 0.2590712824608   |
| ACGGGTATGAC | 452.298635047846 | 0.376318896619608 |
| ATGAGTCCCAC | 452.459606510998 | 0.256933204446945 |
| CGACCTAGTCA | 452.471835017324 | 0.470421375065585 |
| AATACGATGAC | 452.570108257232 | 0.37259811199224  |
| TATTTGCGTCA | 452.713880934819 | 0.306262675099343 |
| ATTGGTATGAC | 452.748608136155 | 0.402090585106454 |
| ATTTGGATGAC | 452.778407477748 | 0.222389831553249 |
| ACTCTGAATCA | 453.384213866115 | 0.433496093906403 |
| AAAACGATGAC | 453.397782457225 | 0.341516081901121 |
| AGTCACCCTCA | 453.594072149903 | 0.352500456626614 |
| ACACCGAGTCA | 453.601392258963 | 0.256342697522188 |
| AGTCACCTCGA | 453.814707162305 | 0.261341931218278 |
| CAGATTATGAC | 453.898708140684 | 0.49152148854512  |
| ATTATTATGAC | 453.92428959682  | 0.478316494605758 |
| TATACTAGTCA | 454.010037351039 | 0.342245433011567 |
| AGTCTACGTC  | 454.086986945207 | 0.244812834618708 |
| ACCCTGACTGA | 454.117038181553 | 0.230531343624877 |
| TGACGGATTAA | 454.129689201108 | 0.49215637910086  |
| GTAATTCGTCA | 454.21873614187  | 0.434745305341036 |
| GTCATTGCTCA | 454.242491187527 | 0.489687877099209 |
| TCAATAGTCAT | 454.597870882467 | 0.847403461471893 |
| AGCCAAGTCAT | 454.684224216604 | 0.158984052783702 |
| GAGGCGTCATA | 454.741459434928 | 0.264581226256468 |
| ATTACTCAAAA | 454.803737159836 | 0.358799433741673 |
| TGAATCACGAA | 454.839045859781 | 0.336779453514892 |
| AGTCACCTTCA | 454.868207004078 | 0.310996487132921 |
| AAACGTATGAC | 455.12129441899  | 0.179229392066625 |
| TGACTAGTCAA | 455.409230370449 | 0.282585487334131 |
| CACTTGCGTCA | 455.41454648988  | 0.422863147173898 |
| ATAATGATGAC | 455.415354519511 | 0.280891440936225 |
| ATGACAAAGCC | 455.613503454701 | 0.199732158133446 |
| ATGACAGTGAC | 455.616444727014 | 0.341755955462758 |
| GTCATCGATTA | 455.677914030379 | 0.377655675346117 |
| CACGTCACTCA | 455.839704031447 | 0.424926456757804 |
| TCGTTTACTCA | 455.860977670247 | 0.268318393698662 |
| CATGCGTCAAC | 455.940675521438 | 0.462910558789924 |
| TCATTTGCTCA | 456.014400237102 | 0.335518055916644 |
| AATTGGATGAC | 456.117274950266 | 0.421106980711557 |
| CTTTAGACTCA | 456.40750869118  | 0.390460367940225 |
| CTGTTGTGTC  | 456.504553800038 | 0.400668871588228 |
| ATGATGTAACA | 456.682873573495 | 0.324346603817432 |
| GATGACTTGGC | 456.730048893479 | 0.289278121940019 |
| CACGTCACTTA | 456.829279475035 | 0.257663848916257 |
| ATGACGAACAA | 456.87978357323  | 0.342517934214114 |
| ACTTCGACTCA | 457.032487958834 | 0.22627354036967  |
| ATCCGATGACG | 457.199603376545 | 0.243889711124176 |
| TCTTTGCGTCA | 457.255840246115 | 0.157720991809916 |

|             |                  |                   |
|-------------|------------------|-------------------|
| ACGACGACTCA | 457.308187915999 | 0.236545518348872 |
| GTCACAGTGAC | 457.323026468105 | 0.253425387115755 |
| ATGATTATGAC | 457.406600758271 | 0.399834492887952 |
| GTCATAACA   | 457.70500305282  | 0.367575469469026 |
| ATGACTTGTTA | 457.811540377186 | 0.435678161749546 |
| GAGTCTATGAC | 457.921442290573 | 0.46381714358533  |
| GTCATACACCA | 457.962236788188 | 0.240382744836345 |
| AAAGCTGTCAT | 458.060813604191 | 0.385204097000885 |
| CTAGTGAATCA | 458.249067496655 | 0.219740735574367 |
| GTACGGATGAC | 458.50992919735  | 0.268866122277352 |
| AGCCGTGTCAT | 458.66854892029  | 0.268821859615114 |
| TAACCGAGTCA | 458.690466747457 | 0.458310997131547 |
| CAGCTTAGTCA | 458.811905932328 | 0.543112558319956 |
| GTGACGACTCA | 458.886895026209 | 0.32479473609037  |
| ACTAAGATGAC | 458.936147235272 | 0.328359341806465 |
| AAAGAGTGACT | 458.948130406465 | 0.306343038308338 |
| ATGACAGAGCC | 459.044192359917 | 0.246088467625524 |
| CCGCGAGTCAC | 459.069652286814 | 0.255518773322529 |
| GCGGCGTCATA | 459.138457428257 | 0.174195179091892 |
| GTCATACCATA | 459.349499170286 | 0.416825155213354 |
| AAAATCTGTCA | 459.583503429675 | 0.291763111466611 |
| GACACGTGTCA | 459.783763941342 | 0.392792245812833 |
| TAGCTCAGTCA | 459.795869183821 | 0.349505460222226 |
| TCATGCGTCAA | 459.868704882426 | 0.560186181099969 |
| CACTGACGTCA | 459.889738039471 | 0.435408913581473 |
| CTTCTGAATCA | 459.963910936953 | 0.231012677567129 |
| ATAGTGATGAC | 459.994014007053 | 0.204907581854472 |
| TCACACAGTCA | 460.022545741373 | 0.312778826545502 |
| GTCATAATGCA | 460.172822007705 | 0.426628123167026 |
| TGACAGATCAA | 460.407645126087 | 0.283352564281773 |
| GTCATACAAA  | 460.680212938924 | 0.455919628337918 |
| ATACTTACTCA | 460.800979998685 | 0.241431893953521 |
| GTCTACAGTCA | 460.872019150998 | 0.203717182660524 |
| GTCATAGGTGA | 460.879253057804 | 0.305245823232313 |
| GTATATATGAC | 461.090347275195 | 0.372238331424127 |
| AACATTATGAC | 461.132729608239 | 0.444632572888165 |
| ATTTTGCCTCA | 461.317322427962 | 0.441413880895574 |
| GATGACTTGGA | 461.428512588223 | 0.264037574943874 |
| AGTGTGAATCA | 461.442320567316 | 0.267760347221122 |
| TGACTATAGAA | 461.491240726542 | 0.483712795237391 |
| ACTACACGTCA | 461.638205150749 | 0.480580554524246 |
| CCTATTTGTCA | 461.800582342297 | 0.175859646839484 |
| AAAATACGTCA | 461.883901821401 | 0.322887467675021 |
| AACTCCGTCAT | 462.04382639069  | 0.26932893964345  |
| TCTATTTGTCA | 462.060734668737 | 0.250631936278479 |
| GAATGTATGAC | 462.225450792336 | 0.257907176283662 |
| AAATCGATGAC | 462.296520196149 | 0.398228398403987 |
| ATGACACTCAT | 462.307108213261 | 0.25101297348407  |
| ATGAGTCCGAA | 462.356703337265 | 0.417897744113773 |
| TGACTAAGCAA | 462.433360484712 | 0.377537025373479 |
| TGACTACAGAA | 462.482823046186 | 0.192375984126732 |
| CGTCATCGGAG | 462.593239061309 | 0.38922974847825  |
| CTGACGATGAC | 462.743529115896 | 0.496223377961074 |
| ACAGGGTGACT | 463.079842978609 | 0.27894088543289  |



|              |                  |                   |
|--------------|------------------|-------------------|
| TATGACGCCGA  | 463.193192565593 | 0.311975618259045 |
| ATCACGATGAC  | 463.24361733514  | 0.513596456964318 |
| TCTCCACGTC   | 463.359299750761 | 0.258059072254232 |
| ACGCACAGTCA  | 463.374030965904 | 0.452100807480233 |
| ACTTTGTGTCA  | 463.407007741732 | 0.254801566983934 |
| CTGATTTGTCA  | 463.427231579468 | 0.477463187208928 |
| CCACGTATGAC  | 463.628223318548 | 0.240650468330801 |
| GTCATAAGTGA  | 463.748962480307 | 0.380263535030904 |
| CTTCTGATTCA  | 463.820354976365 | 0.265347158976926 |
| ATATCGACTCA  | 463.915266426565 | 0.401905738054667 |
| CAATTGATGAC  | 464.023068475287 | 0.43832004130472  |
| TGAGTAAACCA  | 464.20483336393  | 0.566486359663898 |
| ATCCGTGTCAT  | 464.260880612362 | 0.205086534950053 |
| ATACGGATGAC  | 464.316442932145 | 0.401226233015622 |
| GTCATATATCA  | 464.346406168074 | 0.435700412021042 |
| GAAATCCGTC   | 464.69935168224  | 0.211425023506753 |
| ACGATTTGTCA  | 464.731019342314 | 0.350922245686325 |
| TGACGCGTAAA  | 464.753891857528 | 0.259999351632214 |
| AGCTGTATGAC  | 464.865719547251 | 0.419650147176985 |
| TCGATTTGTCA  | 464.880799509862 | 0.466185867290587 |
| GTCATACAATA  | 464.969811046242 | 0.322658592147651 |
| TATATACGTC   | 465.01179782424  | 0.382457398284519 |
| TCGATACGTC   | 465.205350898655 | 0.206083456806009 |
| ACTTGACACAT  | 465.215422090934 | 0.313036133980095 |
| AAGGCGTCATC  | 465.269751701829 | 0.236254591535456 |
| GGATCGATGAC  | 465.474578718191 | 0.275010110916646 |
| CTTATTATGAC  | 465.493047483405 | 0.306642412867969 |
| CACGATATGAC  | 465.719899065453 | 0.44156207111661  |
| CCTTCGACTCA  | 465.744089900845 | 0.328576581202449 |
| AGAATACGTC   | 465.824121570603 | 0.330732779052808 |
| GTCATCGCTAA  | 465.863690824486 | 0.252462423585542 |
| ACATGACTGAT  | 466.163525175254 | 0.967142832298092 |
| CGTGCTATGAC  | 466.267880867541 | 0.607659650377914 |
| CATGCTATGAC  | 466.309588452239 | 0.556845661906266 |
| GTCAAGTCATA  | 466.530248357463 | 0.308351793146152 |
| GAAACCAGTCA  | 466.561132025903 | 0.38388331473416  |
| GATGATGTAAC  | 466.700220475547 | 0.205859790669904 |
| TGAGTCTGACA  | 466.784733383296 | 0.498433043295779 |
| ATGAGTACCAT  | 466.860210653075 | 0.395617408764899 |
| CAGAGGATGAC  | 466.923446865107 | 0.401054094529287 |
| CGTTAGACTCA  | 466.971695424492 | 0.583666591821146 |
| CTAATATGTCA  | 467.335831208857 | 0.264865729218011 |
| CGCATACGTC   | 467.34181799884  | 0.641487189051841 |
| GTGACTACCAC  | 467.714921240036 | 0.338465976592921 |
| TCTGACTAAGG  | 467.790066371597 | 0.367231896862853 |
| GTCATAGCACA  | 467.845364337251 | 0.383472836559339 |
| ATGACGTTGTC  | 467.883782477707 | 0.339758878577585 |
| CCGTTGTGTCA  | 467.885489794081 | 0.604255075147719 |
| CCTACTAGTCA  | 468.296673910724 | 0.337842669291793 |
| GATTTGCTCAC  | 468.374061018083 | 0.244080383688726 |
| CGTCCGATGAC  | 468.378791378501 | 0.476437916559197 |
| TGACTCGAGAA  | 468.389072413101 | 0.375901991621513 |
| ATGTGTCAAAGG | 468.413161966443 | 0.221668302418979 |
| CAAACCAGTCA  | 468.459232117264 | 0.353500768572318 |

|             |                  |                   |
|-------------|------------------|-------------------|
| GTCATACGTTA | 468.577656849978 | 0.499222464780666 |
| ACAATTGCTCA | 468.828911565737 | 0.463645073424164 |
| CGTCATCGGGA | 468.879052793816 | 0.269508932059644 |
| ACGCTAGTCAT | 468.923746582584 | 0.317215168735551 |
| TCATCCAGTCA | 469.051874593915 | 0.28756521056629  |
| GTCATAATCAC | 469.130216057973 | 0.390227886960097 |
| ATGAGTACGTC | 469.20789267988  | 0.47763715120155  |
| AGTACCAGTCA | 469.476208216178 | 0.265458515665447 |
| GAACCTATGAC | 469.512625054769 | 0.429583694371252 |
| ACTATTTGTC  | 469.673078546348 | 0.306999284956851 |
| ACATACAGTCA | 469.686793799    | 0.25237750107869  |
| ATGAGTCCGTC | 469.718012185842 | 0.126515015495868 |
| GCACGTATGAC | 470.290186833036 | 0.405155822810568 |
| TCGCTGACACA | 470.30103752679  | 0.265630256766364 |
| GGAATTATGAC | 470.343450182668 | 0.222536031085451 |
| TCGATTGCTCA | 470.363528995424 | 0.207233105474674 |
| GTCATACGACA | 470.490909417291 | 0.576447482399797 |
| ATGACGCGCAT | 470.735682169774 | 0.256520691896387 |
| CTTTCGACTCA | 471.028430858885 | 0.330586596416581 |
| GTCATACGCAA | 471.161177487581 | 0.229706090061464 |
| ATGACTAGCTC | 471.245529317767 | 0.464774983926843 |
| TAATTTGCTCA | 471.297921077661 | 0.385441545782798 |
| CAATGAATGAC | 471.370636377136 | 0.504693451808751 |
| CCACTGCGTCA | 471.380386321335 | 0.297359683538809 |
| AGTGACGTGAC | 471.397603903441 | 0.280805021814214 |
| TCCTCGAGTCA | 471.723296781426 | 0.430006822583886 |
| ATGACGAGATC | 471.741905251807 | 0.199527019680081 |
| CACAGATGACG | 471.748002211375 | 0.387928280460826 |
| AGTATTGCTCA | 472.003374496067 | 0.319659976502957 |
| TAGACCAGTCA | 472.087154872429 | 0.230696559059662 |
| CAATCTAGTCA | 472.230769649223 | 0.387501751611666 |
| ACGTTTACTCA | 472.241173546133 | 0.386212644364115 |
| CACTCGAGTCA | 472.331914767424 | 0.459172395650471 |
| CAACACAGTCA | 472.75168924405  | 0.50450536165482  |
| ATGACATGACA | 472.766578930026 | 0.193419901281023 |
| CCGCATAGTCA | 472.839422549224 | 0.339315337853046 |
| GAGCTGTCATA | 472.940547006261 | 0.318177521600136 |
| ATAATGTCATA | 472.975663822749 | 0.231173812214157 |
| AACGTGATTCA | 472.999960156043 | 0.479364450813197 |
| CATATTGCTCA | 473.224247758767 | 0.417780535516768 |
| ACTCCAGTCA  | 473.335024508657 | 0.325797939772688 |
| CACGTTAGTCA | 473.359938348771 | 0.503718218945373 |
| GTCATACCGAC | 473.429526000582 | 0.315969449259    |
| TGACGTATCAA | 473.479484625966 | 0.530972081297477 |
| CGGTGTATGAC | 473.912154837305 | 0.491080085985396 |
| GCAACCAGTCA | 473.913095381693 | 0.250748051028431 |
| TCTGTGAATCA | 473.927412125693 | 0.488327721519515 |
| CCGATTGGTCA | 474.047619552955 | 0.41755554362375  |
| TCGCTGACTCA | 474.230386468507 | 0.840901789364488 |
| ACTTCGATGAC | 474.242601451706 | 0.258166745827033 |
| GATTGTATGAC | 474.289183657293 | 0.327123538760101 |
| ATCAACGTCAT | 474.345389327265 | 0.208235584436841 |
| TGACTCCGAAA | 474.433553120808 | 0.520366977086139 |
| ATTAAGTCAGC | 474.444207512722 | 1.38699862524705  |

|              |                  |                   |
|--------------|------------------|-------------------|
| ATGACGAACTA  | 474.525314446055 | 0.246957467401616 |
| ACAATGATGAC  | 474.898250501089 | 0.278791077235168 |
| AGTCACCCTAC  | 475.111175220106 | 0.34015764148575  |
| CGGACTATGAC  | 475.427255681853 | 0.348061808165371 |
| ACTACTATGAC  | 475.54882289931  | 0.38865333104035  |
| CCTAAGATGAC  | 475.810334688956 | 0.241307965020152 |
| AATACTATGAC  | 475.81274906011  | 0.374026178744655 |
| GACTGAATGAC  | 475.865596033903 | 0.253328489695496 |
| AGTCGGAGTCA  | 476.068301712151 | 0.294412109630162 |
| ACCGTGATTCA  | 476.081750669223 | 0.40855649297445  |
| CACGTCACTAA  | 476.207823955246 | 0.296482165396463 |
| GCTCACAGTCA  | 476.385560574126 | 0.41479334259565  |
| GTAATATGAC   | 476.475915095783 | 0.236810242154164 |
| AGGACTATGAC  | 476.485897840115 | 0.456330325228221 |
| GTCATCGTTAA  | 476.520280337493 | 0.447826168594595 |
| GTCATATATTA  | 476.544046997494 | 0.241832567438926 |
| CTTATTTGTCA  | 476.705259481703 | 0.342969377252424 |
| CGAACCAGTCA  | 476.720103005804 | 0.327699458591812 |
| GTCATAGATAA  | 476.988338246902 | 0.387366604055408 |
| CTGGTAGTCAC  | 477.10450737369  | 0.295962195281588 |
| AAGATACGTCA  | 477.112216241729 | 0.40259136378582  |
| AGTCACCCCTA  | 477.196504101672 | 0.305695568590664 |
| TCTTAGACTCA  | 477.343560590945 | 0.314797977172103 |
| CAGAAGATGAC  | 477.63252612721  | 0.314494015646886 |
| CCATGTATGAC  | 477.763310427092 | 0.572421177759342 |
| GTTTCGACTCA  | 477.81479298625  | 0.223658441617493 |
| ACTAGGATGAC  | 477.877385548203 | 0.216324013169617 |
| ATAATACGTCA  | 478.117072207222 | 0.349311011556014 |
| TGAATACGTCA  | 478.13452910437  | 0.353151559067921 |
| ATATCGATGAC  | 478.266645058721 | 0.260892013507347 |
| CTAATGATGAC  | 478.300390332472 | 0.284573817616679 |
| CACGTGATGAC  | 478.613492773312 | 0.443466209806596 |
| TGACAGACTCA  | 478.62859289451  | 0.455401588205237 |
| CGTGTTATGAC  | 478.667842776629 | 0.363376071625639 |
| ATGAGTAGTCA  | 478.966263914428 | 0.298647541625369 |
| ATATAAATGAC  | 479.006715251555 | 0.41729187600015  |
| TCCATCAGTCA  | 479.077893667233 | 0.232527962992452 |
| ACGTTGTGTCA  | 479.128550964802 | 0.380838606129922 |
| ATGAATATGAC  | 479.166722947949 | 0.218713442310278 |
| CATTGGATGAC  | 479.251793843269 | 0.285619482506518 |
| GTCATTAGTAA  | 479.342401346641 | 0.404195058363535 |
| TGACTGCGAAA  | 479.346424168644 | 0.320988242629821 |
| CTGATTATGAC  | 479.5146006546   | 0.525775773389827 |
| GGTCATATGAC  | 479.542921682049 | 0.356218868917925 |
| CGTTTTACTCA  | 479.568096495428 | 0.130458883433775 |
| ATGACTAGCGA  | 479.576278190346 | 0.225985382269818 |
| ATGAGTCTCAA  | 479.654906825652 | 0.351618996159698 |
| ACAGTTATGAC  | 479.72586267154  | 0.347010122631976 |
| AGGTTTCGCAT  | 479.8841392586   | 0.145763930563084 |
| ATGTGTCAAAGA | 479.932602109181 | 0.298984839300219 |
| ACTTGTATGAC  | 479.980777526707 | 0.368227700159381 |
| GATAGGATGAC  | 479.985129836692 | 0.246929598942121 |
| GTAGTGATGAC  | 480.102077328264 | 0.222055511788709 |
| CCTACACGTCA  | 480.138693334743 | 0.460021008166245 |

|             |                  |                    |
|-------------|------------------|--------------------|
| ATGACAGTATA | 480.156480105896 | 0.132752030100804  |
| CGAGCTATGAC | 480.206732516414 | 0.212611798321756  |
| GTCATACACAC | 480.218183448084 | 0.0657200053728032 |
| CGAATGATGAC | 480.415484424356 | 0.284795202985178  |
| CGTCATCAGAG | 480.541794604215 | 0.376719189586981  |
| CTAACCAGTCA | 480.675188273165 | 0.239611373527482  |
| AAAATGTCATA | 480.842454993439 | 0.308588802904589  |
| ATGACAAAGTA | 480.935664719634 | 0.310547954403858  |
| AACGGTATGAC | 480.950723362863 | 0.351950994542843  |
| ATGATGATGAC | 481.265529905037 | 0.230578124942492  |
| GACTGGATGAC | 481.336311816684 | 0.262141431414161  |
| CCTATTATGAC | 481.420911462739 | 0.258682143834734  |
| AGATCTATGAC | 481.487097550558 | 0.270620639052019  |
| ATCACGAGTCA | 481.595903716259 | 0.471579472300322  |
| TATTCGACTCA | 481.660787336438 | 0.263014768704015  |
| TGACTGTGCAA | 481.671020197128 | 0.403877206113847  |
| ATTTGCTCACC | 481.779387830987 | 0.249371261228197  |
| ATCGTGACGTG | 481.790844282018 | 0.15523900585438   |
| GCTTGTATGAC | 481.88233306602  | 0.116221317697562  |
| TCTTGCAGTCA | 481.931473136969 | 0.468553146766067  |
| GTCAGGATGAC | 482.019668341233 | 0.299205630283976  |
| AATACTAGTCA | 482.29787275228  | 0.256328366777592  |
| AGGTCTATGAC | 482.33246368101  | 0.40469368087614   |
| CAAATATGTC  | 482.344969624951 | 0.542863905841083  |
| CGCTTGAGTCA | 482.448985613249 | 0.64125504441948   |
| AAAAGGATGAC | 482.743032896393 | 0.209932171528617  |
| CCGCTCAGTCA | 482.764487469855 | 0.360652653882876  |
| ATTACTAGTCA | 483.090581730884 | 0.406874932434309  |
| GTCATATCGAA | 483.148737043129 | 0.309060482928512  |
| GTAGATATGAC | 483.178172441974 | 0.217939144401009  |
| AGTCACCTTGC | 483.195675536251 | 0.223153394636371  |
| GTCATCCGTTA | 483.345943048034 | 0.279426714415493  |
| GTCATCCATTA | 483.452261830681 | 0.327501633119305  |
| GGTATTGCTCA | 483.466028583608 | 0.52074516881459   |
| ATTACCAGTCA | 483.490659618333 | 0.293789513572874  |
| CAAGATATGAC | 483.532805869197 | 0.543688759592153  |
| GTCATCGACCA | 483.559060141408 | 0.230999155210432  |
| GCGCGAGTCAC | 483.646401138399 | 0.156169898844664  |
| GTTCCGAGTCA | 483.774376127989 | 0.475401381281229  |
| GTCATCAGTAA | 484.139094902772 | 0.537943468359731  |
| ATACCTATGAC | 484.158630215026 | 0.395194908341991  |
| CCGTGGAGTCA | 484.216565906445 | 0.234659069982572  |
| CTTACGATGAC | 484.231733656227 | 0.388497549174033  |
| CGGACGACTCA | 484.351924753075 | 0.550691423115585  |
| GTCATCAATGA | 484.368974818549 | 0.404187125517613  |
| CACGTCACTGA | 484.575507125269 | 0.343487238579561  |
| GATGACAGTCA | 484.708656993918 | 0.214707156345029  |
| CCGTTTACTCA | 484.73233752681  | 0.366243975288297  |
| GTAATGTCATA | 484.778093193577 | 0.26544449163412   |
| GAGCTTAGTCA | 484.830885457868 | 0.374947095834998  |
| CCACTTACTCA | 485.043734562522 | 0.231835331949011  |
| AGAGTCAATGG | 485.14356433836  | 0.307556205493383  |
| AATACCAGTCA | 485.24941071252  | 0.585486959974537  |
| GTCATCGTACA | 485.47488801206  | 0.196923698485142  |

|             |                  |                   |
|-------------|------------------|-------------------|
| GTCACCTGGCA | 485.519345792532 | 1.39424963168959  |
| TATCTGTGTCA | 485.597864923969 | 0.488213570445167 |
| GTGACTACCAA | 485.616663417893 | 0.356568626235995 |
| CCAACTATGAC | 485.83896362585  | 0.350009101415512 |
| AGTCACTCCGA | 485.902076291606 | 0.389193397837995 |
| GTCATAGCCTA | 485.975508843514 | 0.260576001010664 |
| CAATATATGAC | 486.164786285002 | 0.211904077174467 |
| AGAAATATGAC | 486.16608811267  | 0.211010219675424 |
| CGACTTACTCA | 486.27117056436  | 0.23376272007168  |
| TCGATCCGTC  | 486.371448273323 | 0.476438238407243 |
| TGATTCAGAAA | 486.400559199938 | 0.202250756308482 |
| ATTACTGACTC | 486.649388659459 | 0.283377330104952 |
| ATGCGTCAAGA | 486.791131991323 | 0.576337838092392 |
| GTCATACCCGA | 487.024991309584 | 0.149276618952842 |
| ATTCGTATGAC | 487.342309443476 | 0.399371607386171 |
| GTCATCGAAGA | 487.527802859518 | 0.319266824696718 |
| CTAACTATGAC | 487.665378045446 | 0.290781458880799 |
| AAACGGATGAC | 487.734043299669 | 0.396889932795108 |
| GTGTCACGTCA | 487.892652382301 | 0.289454219401068 |
| AGTCACCTCAG | 487.934486061547 | 0.311720198668813 |
| AGTCGTGACTG | 488.334992123155 | 0.337275811055713 |
| CAATTTATGAC | 488.638242608366 | 0.4545803597642   |
| CTGTTGACTGA | 488.675463619576 | 0.323157546710162 |
| AGTCACCTTCC | 488.69969261634  | 0.218740451916041 |
| CAACGGATGAC | 488.797193216675 | 0.253900987371844 |
| GCACTGTGATA | 488.845765266746 | 0.179617190730866 |
| AAAGTTATGAC | 488.913169443255 | 0.232347615551874 |
| CTAATCTGTCA | 488.95193246365  | 0.33190489142261  |
| CCGTAGACTCA | 489.081944870534 | 0.534784352603152 |
| ATACTGCGTCA | 489.212085445993 | 0.425802669614466 |
| CTAATTATGAC | 489.490408961421 | 0.303208193070861 |
| AGAGTGATGAC | 489.806368250304 | 0.220737615664235 |
| ATGACGTTGAC | 489.833632018376 | 0.194374969856584 |
| CTTAGTAGTCA | 489.904391312268 | 0.461796376317961 |
| AGAACGATGAC | 489.917462562857 | 0.285758263236377 |
| ACGCTGTGTCA | 489.987079435758 | 0.282350347582739 |
| CCCCTGACTGA | 490.070542914719 | 0.322647644709632 |
| AATAGTCAACA | 490.211987925135 | 0.397927255423683 |
| CAACTTACTCA | 490.228064218523 | 0.217142384424685 |
| CTAAGGATGAC | 490.421799959284 | 0.241297343189437 |
| AAATCTAGTCA | 490.434591779445 | 0.309432665036606 |
| GAACACGTAAC | 490.618036102843 | 0.320325532129044 |
| GTCATAGATTA | 490.690724537905 | 0.471999937295718 |
| CGAAAGATGAC | 490.722440121559 | 0.330698190100542 |
| GTCCTTAGTCA | 490.841423167053 | 0.412095757462891 |
| AGACTAATTCG | 491.214671475492 | 0.299881324120925 |
| ACTATTAGTCT | 491.277462556922 | 0.105034525768916 |
| GTCATATTTAA | 491.45995114537  | 0.373458651857995 |
| CAGCTCAGTCA | 491.562957966704 | 0.143075646287867 |
| ACGAATATGAC | 491.570568382031 | 0.351381896534754 |
| ATGTATATGAC | 491.572348336001 | 0.299345659141731 |
| GTCATAATCTA | 491.712053288998 | 0.179038817292844 |
| AATATTATGAC | 491.749046893674 | 0.267283500937227 |
| CCTCTGATTCA | 491.814466375992 | 0.257705060483291 |

|             |                  |                    |
|-------------|------------------|--------------------|
| ATGACGGAGAC | 491.844259694464 | 0.266410298380663  |
| AAGTGTATGAC | 491.966901063604 | 0.230928569595303  |
| GTATAGATGAC | 491.994460927636 | 0.210562792057694  |
| CAATAGTCACG | 492.072997633838 | 0.554475490429704  |
| GTCATAGCTAA | 492.194272483247 | 0.302534248125952  |
| TGACAAATCAA | 492.255243217852 | 0.413314396417012  |
| GTGCTTAGTCA | 492.284730613936 | 0.187932933304989  |
| ATGACGATGCA | 492.286920457546 | 0.343177065505116  |
| CTCTCGAGTCA | 492.518337648988 | 0.275275090826062  |
| CCATTACTCAC | 492.528312829411 | 0.588366847455285  |
| TAGCTGTCATA | 492.5600580798   | 0.291232343856131  |
| CGTACGATGAC | 492.724883830602 | 0.185470211627986  |
| TGACTCGTGAA | 492.786683706648 | 0.59771373950259   |
| TGACGTATGAA | 492.809199699138 | 0.281103979579603  |
| AACCGATGACG | 492.818277459185 | 0.320170925670875  |
| AATCTCGTCAT | 492.860673148305 | 0.347949185050771  |
| TAATTAAGTCA | 492.940376686974 | 0.150711172247742  |
| ACACCGATGAC | 492.959113441596 | 0.410835264526653  |
| AGACTAATAAT | 493.084912857868 | 0.161597215596956  |
| ACACTGACACA | 493.098838675742 | 0.293020193522526  |
| CGTTACAGTCA | 493.236552383053 | 0.310013798307318  |
| ATGAGTCTCAC | 493.239765278168 | 0.0716300125498637 |
| CAGATACGTC  | 493.251999233273 | 0.379316342448108  |
| TCTTACAGTCA | 493.506607751348 | 0.401526915135603  |
| TGAACAGTCA  | 493.663961048585 | 0.373208365097665  |
| CAAACGACTCA | 493.699582593854 | 0.334104123551272  |
| CAAATCCGTC  | 493.83644677922  | 0.280461266788552  |
| CATAGATGACG | 493.858624668046 | 0.283193119142573  |
| ATGACAGACAC | 493.861010510247 | 0.311887056003441  |
| GGCGTTAGTCA | 493.920186460119 | 0.258584646922262  |
| GTCATCCTATA | 493.926842210214 | 0.188805190121603  |
| CACCGATGACG | 493.975856698559 | 0.330319483745631  |
| AAAAGTGAGTC | 493.980383189329 | 0.384646047415643  |
| GGAATTCGTC  | 494.092095686093 | 0.386894896360606  |
| ATGACACTCAC | 494.179125494464 | 0.179125212462056  |
| AAACTACGTC  | 494.186514061894 | 0.678302942955013  |
| ATGACTTGTA  | 494.949204767222 | 0.255253577122668  |
| ACCCGATGACG | 494.972444567179 | 0.204906411087596  |
| TCAGACTCACA | 494.987056779162 | 0.311777417929527  |
| CTATACAGTCA | 495.013964861943 | 0.219597491790791  |
| AGATCGACTCA | 495.11748377116  | 0.353857816873498  |
| CTGACCAGTCA | 495.212682322729 | 0.325129221268951  |
| GTCATTCGTAA | 495.387592442354 | 0.352673979818371  |
| GTCATCTATCA | 495.41494195466  | 0.388672696465502  |
| GCCCTGACTGA | 495.435420621361 | 0.391490769331387  |
| ATACCGAGTCA | 495.600548566232 | 0.565470356070634  |
| GCCTGTGTCAC | 495.732214046689 | 0.268194787947562  |
| CTTCGGATGAC | 495.798971197284 | 0.353557407000987  |
| CATGTTATGAC | 495.884739030402 | 0.539550856651382  |
| AACCTGTGTC  | 496.083196750473 | 0.329697831600828  |
| CTGTTGATGAC | 496.134721978224 | 0.264706568808688  |
| AATTTGCGTCA | 496.191544010501 | 0.262204394364376  |
| ATCTGAATGAC | 496.36909755095  | 0.41544804535276   |
| TACACGAGTCA | 496.377719017709 | 0.433816915327951  |

|             |                  |                   |
|-------------|------------------|-------------------|
| GTCATCGAAAC | 496.484201185315 | 0.469579841854547 |
| TATATTTGTCA | 496.559994463909 | 0.208256537130134 |
| GAGGCGTCATC | 496.782706866173 | 0.318785747959767 |
| CAGCCGATGAC | 496.852112792254 | 0.480520253375266 |
| ATTCACAGTCA | 497.029173190086 | 0.249999428101802 |
| AATTTGCTCAC | 497.042823560657 | 0.260128941067735 |
| CAACTGTGTCA | 497.204009546591 | 0.597973996663288 |
| TAAATCCGTCA | 497.224254039802 | 0.25664457310751  |
| TACTGTAGTCA | 497.338954635704 | 0.430767048920748 |
| AGTGTCATGCG | 497.405447133802 | 0.20817016050483  |
| GTCATAACCTA | 497.55433028223  | 0.286037306344216 |
| GTCATCCTTGA | 497.696086844467 | 0.264344812770282 |
| ATCAAGTCATA | 497.75808679588  | 0.332361515201047 |
| ATTGCGATGAC | 497.975683848089 | 0.338513513855924 |
| CCTGCGAGTCA | 497.992298861847 | 0.217007249653929 |
| CGGATCCGTCA | 498.014176035551 | 0.360313112606179 |
| AGACTACTCA  | 498.024838188873 | 0.332946688167397 |
| CTCACGAGTCA | 498.137296096941 | 0.232563585561521 |
| TCCGTTAGTCA | 498.419806369747 | 0.633357053377304 |
| AGTTACATCAT | 498.475519423859 | 0.208560695725838 |
| GTCATAGTCA  | 498.514403770037 | 0.47749528624988  |
| GTACGTATGAC | 498.633233864111 | 0.353425809538877 |
| GTCATACAAGA | 498.696544904167 | 0.456132426675948 |
| GATGACGCCTA | 498.744657632914 | 0.320403770821493 |
| GTCACATGACA | 498.798512384293 | 0.382947494242763 |
| CCAAGAGTCAG | 498.799146300682 | 0.145653175785681 |
| ACGTGTATGAC | 498.825852499392 | 0.229781149895061 |
| CTCTCAGTCA  | 498.833248841029 | 0.289964242138969 |
| CCTTGGATGAC | 498.893688839132 | 0.227801604202242 |
| GTCATAACAGA | 499.033099894516 | 0.3271962673581   |
| ATGACGTCTTA | 499.122565214169 | 0.320464360026048 |
| AGCTGACGTCA | 499.123366239797 | 0.576539291414991 |
| AGTCACTCTAT | 499.180477042235 | 0.376736998084566 |
| AATATTGTCAT | 499.216910812996 | 0.327009069549015 |
| ATTACTCAAGC | 499.557105606345 | 0.264535932046674 |
| GCCTTGACTCA | 499.638021762325 | 0.319167719505694 |
| AGTCATGGTCA | 499.768824336354 | 0.338781488030864 |
| ATGGGTATGAC | 499.782828394238 | 0.32666469791305  |
| AATAGGATGAC | 499.790202764672 | 0.317732789504469 |
| GTGACGTGACA | 499.797862655144 | 0.253000859030819 |
| CACAGGATGAC | 499.8482521905   | 0.211596973693516 |
| CCAATTGCTCA | 499.957067667066 | 0.24225345816112  |
| CTCGTGTGTCA | 500.051451767935 | 0.502793573735951 |
| CAACTGCGTCA | 500.130412604516 | 0.263534598929164 |
| GTGATACGTCA | 500.176483578129 | 0.280920921841208 |
| CTCCTGACTGA | 500.216432804451 | 0.31648872769365  |
| CGTACCAGTCA | 500.344139943069 | 0.322920528078115 |
| TGACTGCGTAA | 500.347373151894 | 0.535252178438991 |
| GTCATAATAAC | 500.395781047288 | 0.335403181513403 |
| CTGAAAATGAC | 500.413497185863 | 0.502363712162125 |
| CTGTCGATGAC | 500.428026947286 | 0.216007144620928 |
| GTCATCGATAA | 500.467943000035 | 0.269021750795144 |
| AACACGAGTCA | 500.497552736365 | 0.398511290623953 |
| ATGACAATATC | 500.503391151488 | 0.397305686236785 |

|             |                  |                   |
|-------------|------------------|-------------------|
| AGTCACTCTTG | 500.55487301207  | 0.252429035033242 |
| CACGCGATGAC | 500.768432518597 | 0.575277779968712 |
| GACATTATGAC | 501.047011358867 | 0.346188291200003 |
| CTAACGATGAC | 501.071212235087 | 0.304139750350249 |
| GGTATACGTC  | 501.083865952401 | 0.324706901655478 |
| ACTCATATGAC | 501.107286400648 | 0.389547708085388 |
| GGACTCAGTCA | 501.174939238091 | 0.373551859419537 |
| GACTTTATGAC | 501.179680178676 | 0.158412520921531 |
| ACAACACGTC  | 501.27965910544  | 0.456086198200627 |
| TCCATGAATCA | 501.390346018115 | 0.453362237190986 |
| GTCACCGTGAC | 501.44332046162  | 0.437084328352884 |
| AGTGGGAGTCA | 501.460101511281 | 0.159740531972603 |
| TCAAAGTGTC  | 501.541182921176 | 0.486827707504358 |
| CAGATCTGTCA | 501.546447338358 | 0.540907733232364 |
| ATTATCCGTCA | 501.623548098172 | 0.330544895220447 |
| CTATAGACTCA | 501.745282860437 | 0.219573340588136 |
| ATGACTAGCGC | 501.760206965069 | 0.363204854715511 |
| GAATATATGAC | 502.022923924752 | 0.270726580476261 |
| CGTCATTATGA | 502.025321526623 | 0.299172280367626 |
| GTCATCACGTA | 502.202184947665 | 0.351996027792363 |
| GTCATCATCTA | 502.237625474052 | 0.184966857893725 |
| GTCATTGACTA | 502.292282259585 | 0.413574320984191 |
| ATTCATAGTCA | 502.365277960324 | 0.516207053110679 |
| GTCATAATTGA | 502.40395534866  | 0.408486057893723 |
| TACGTGTGTCA | 502.512523946459 | 0.421790766603523 |
| ATGACCGAATC | 502.6002365859   | 0.317260265673312 |
| TAATCTAGTCA | 502.607250297161 | 0.655745476144561 |
| GGTCACAGTCA | 502.695645702187 | 0.21643937021337  |
| AGTCACCTCAT | 502.767545155635 | 0.262807082942778 |
| AAACTTGTGAC | 502.946525701385 | 0.257767372392969 |
| TAGACTAGTCA | 502.996241267435 | 0.424462102216215 |
| AATCATAGTCA | 503.117863878421 | 0.436465436733113 |
| AGTCACCCCAT | 503.185158545961 | 0.268102270229276 |
| ATGACGGAGCC | 503.209376670393 | 0.283808185686279 |
| TCTATAAGTCA | 503.37548027572  | 0.262058022387681 |
| ATGATGTGTAC | 503.396966997815 | 0.394023016441821 |
| CATAGGATGAC | 503.534522450427 | 0.391736145295276 |
| AGTCACCTTCG | 503.587714413967 | 0.379827501287565 |
| CACAAGTCATA | 503.620542399864 | 0.399009600158186 |
| AGGTGTATGAC | 503.625332525565 | 0.348132585933379 |
| GTAACAGTCA  | 503.788200478102 | 0.281996200672867 |
| CACACGATGAC | 503.86454951274  | 0.373666340046826 |
| TGACTAGATCA | 503.972620692956 | 0.532568539036289 |
| ATGTTGTGTCA | 503.990316791974 | 0.1330418965187   |
| ATAATCCGTCA | 504.051955518525 | 0.369133981538291 |
| CAAGCTATGAC | 504.066674276363 | 0.444857884403939 |
| GACCTTAGTCA | 504.271211482847 | 0.630917515128647 |
| CTCTATAGTCA | 504.551860869244 | 0.470317840284326 |
| CCAGATATGAC | 504.650975377725 | 0.163707630935696 |
| ATGACTTGTC  | 504.675489705949 | 0.250418763469442 |
| GCAACGATGAC | 504.690497890893 | 0.519558928516484 |
| AACACACGTC  | 504.889490075074 | 0.452219431572675 |
| ATAATTATGAC | 504.951215080491 | 0.534130741272628 |
| GAACTTGTGAC | 505.102855701669 | 0.367548067251282 |



|              |                  |                   |
|--------------|------------------|-------------------|
| TCAGTCAACGA  | 505.113656129811 | 0.206799116819609 |
| GCAGGTATGAC  | 505.1768247528   | 0.178844894279599 |
| AAATATATGAC  | 505.196755865671 | 0.356241002234083 |
| ATGACAGAGTG  | 505.270858894886 | 0.260431549138126 |
| CGCATTATGAC  | 505.29005436265  | 0.389669809334959 |
| ACCATTATGAC  | 505.323753824261 | 0.267024938514792 |
| AGACCGAGTCA  | 505.630772811529 | 0.18873656462291  |
| ACTCTGATTCA  | 505.634396418222 | 0.327412597414752 |
| GTCATACCACA  | 505.682813911695 | 0.322901063136713 |
| ACATGGATGAC  | 505.726161463964 | 0.23979505637686  |
| GTCATCCAATA  | 505.916938298009 | 0.284890251913845 |
| AACTTACGTC   | 505.981637233386 | 0.371852510467774 |
| AACTTCAGTCA  | 505.99163643302  | 0.446164126979241 |
| AGTGTTCATGCA | 506.047656378207 | 0.184514362283889 |
| AGTCACCTTAA  | 506.095241069922 | 0.347114086945065 |
| TGACACAGTAA  | 506.098482952751 | 0.416130176819769 |
| CCAATACGTC   | 506.117788829146 | 0.22971963184337  |
| CTGGGTATGAC  | 506.189783027342 | 0.437203865493176 |
| CATATTATGAC  | 506.311395156702 | 0.304368871908393 |
| CAATGGATGAC  | 506.332238767842 | 0.451857538824033 |
| CGTCATCGGTA  | 506.442248651497 | 0.244995173232649 |
| GTCATACCCAA  | 506.46560029763  | 0.279946237503967 |
| CGAACGATGAC  | 506.576309461404 | 0.362625680763837 |
| GTCATACCAGA  | 506.576591663024 | 0.527993132855901 |
| GGATCTATGAC  | 506.593985030983 | 0.181479296034151 |
| TCAATTGCTCA  | 506.659245834365 | 0.51917509852194  |
| GAAGTTATGAC  | 506.675005202582 | 0.204502639477142 |
| GCTCCACGTC   | 506.758563380591 | 0.203504887179012 |
| CCAAATATGAC  | 506.759362022358 | 0.313867236982304 |
| AGTCACCTCAC  | 506.818167469188 | 0.313854236246955 |
| ACACGGATGAC  | 506.82857921627  | 0.431858228516281 |
| CAGTCAACCGG  | 506.974572489346 | 1.41416803415401  |
| CTTTGACTCGA  | 507.000097898462 | 0.220634076452949 |
| GTCATATTTTA  | 507.030858708462 | 0.460764240431461 |
| CTCATTATGAC  | 507.045993590428 | 0.290316105795697 |
| AGTCACTCTAG  | 507.07771759557  | 0.283873845610915 |
| GTCATCCGGTA  | 507.078218636472 | 0.473208325952455 |
| GTCACACATGA  | 507.130731445185 | 0.408812641973164 |
| TGAGTAAGCCA  | 507.133410912226 | 0.201947657786221 |
| ATACGTATGAC  | 507.219598872769 | 0.272275573441268 |
| TGAACGACTCA  | 507.221282949696 | 0.374247770498216 |
| CTTAATATGAC  | 507.386493164859 | 0.242108108456816 |
| TGACGTAGCAA  | 507.484036292072 | 0.350484595312667 |
| ATATATATGAC  | 507.488864833681 | 0.569800306126448 |
| CGTCATATGAG  | 507.776366870238 | 0.20508374636135  |
| ATCATTCTGTC  | 508.002881405216 | 0.223221274612797 |
| ACTATCTGTCA  | 508.051571789724 | 0.431357787304668 |
| TGAGTCTAACA  | 508.108440371665 | 0.717827608602933 |
| AGTGTATGAC   | 508.251599805893 | 0.271639407070983 |
| AACAAGAGTCA  | 508.410554338159 | 0.304604976336806 |
| TGACACAGCAA  | 508.452531726774 | 0.248931567740715 |
| GACTAATATAA  | 508.497654477498 | 1.41781621617704  |
| ATGACAGACAT  | 508.506504921024 | 0.317267937619536 |
| CCATACAGTCA  | 508.510171538639 | 0.346165922083007 |

|             |                  |                   |
|-------------|------------------|-------------------|
| GTCATCGGAAC | 508.539610306447 | 0.336854577019562 |
| TGACGGATACA | 508.60459647059  | 0.36481775903018  |
| GTCATCCGAGA | 508.71746902184  | 0.354527385579479 |
| TATCACAGTCA | 508.845081317509 | 0.220447369907366 |
| CTAAATATGAC | 509.060129488386 | 0.236949547301081 |
| GTCATAAATGA | 509.061744953128 | 0.429329070244163 |
| ACCTGTATGAC | 509.139633132124 | 0.255462123109967 |
| AGGAGGTGACT | 509.167842490951 | 0.199744291924776 |
| CCTCCGATGAC | 509.24563572654  | 0.340938075605773 |
| GTCATAGCAAA | 509.512990662337 | 0.325286354884389 |
| ACTCGGATGAC | 509.563890310581 | 0.247768825901724 |
| GTACCGTCATA | 509.784192162188 | 0.369772019307948 |
| ATGACGCGCCA | 509.824683973163 | 0.539668086920306 |
| AATACTGTCAT | 510.078571039293 | 0.395929709213739 |
| ACCCATGACTG | 510.114829621449 | 0.172033598151855 |
| GCACCGAGTCA | 510.2540825258   | 0.538742535952138 |
| GTCATACAAAC | 510.271523915608 | 0.169816766258046 |
| CCGTTGACTGA | 510.571660339484 | 0.383197870836546 |
| TAATGCAGTCA | 510.588791204534 | 0.225892208617558 |
| AGTCATGGTTA | 510.622195390407 | 0.316475951969509 |
| CATTTTACTCA | 510.638697530113 | 0.204370537976091 |
| CATCGGATGAC | 510.686123078545 | 0.317019014438471 |
| CTCGCGATGAC | 510.810935396846 | 0.354257864329843 |
| GTCATAATCGA | 510.830429215451 | 0.292300318804319 |
| TGACTAACGAA | 510.840782469709 | 0.366714231767794 |
| GAAAAGATGAC | 510.931111320234 | 0.40898591172119  |
| GTCATATCTCA | 511.059815550865 | 0.329227163436431 |
| ACGATTATGAC | 511.223095501519 | 0.299802802404234 |
| ACGCTGCGTCA | 511.245867643437 | 0.452389968710235 |
| CACTAGATGAC | 511.257018603658 | 0.622707419011118 |
| GTCATAGTGTA | 511.267151158602 | 0.203547564276633 |
| GTATGACTTGA | 511.282796404965 | 0.411722578116135 |
| GTCATCGACGA | 511.284931346511 | 0.310937190395106 |
| GTCATAATCCA | 511.3090362222   | 0.241914400234817 |
| TGCATGACCCA | 511.383635792773 | 0.182615348705558 |
| ATGACACGGCC | 511.635383830959 | 0.297157270951645 |
| ATAACGACTCA | 511.754710533824 | 0.594037856832971 |
| CTCGTGCGTCA | 511.773161501937 | 0.187396676696889 |
| AGACCTATGAC | 511.807503643767 | 0.357410001630045 |
| GACTCGAGTCA | 511.816798427464 | 0.719267726168962 |
| AAGGGTGACGT | 511.859936808432 | 0.259464977616055 |
| CGCTCGAGTCA | 511.888968431716 | 0.441230069873427 |
| GTCATAGATCA | 511.898281349665 | 0.452079539129179 |
| CGTCATCGGAA | 511.964382752437 | 0.230972080231674 |
| ACGCGTGACTA | 511.999477672408 | 0.290702198215721 |
| CTGCTGACACA | 512.011469930728 | 0.391650887240372 |
| ATAAGGATGAC | 512.115241521498 | 0.245601051944722 |
| AACACTATGAC | 512.190896669802 | 0.340674004768524 |
| ATGATCCGTCA | 512.281367100901 | 0.366875331826061 |
| ACGATCCGTCA | 512.30861343456  | 0.357625180363049 |
| ATGACTAGCTG | 512.324048445707 | 0.1503508638717   |
| TACGTTAGTCA | 512.447680582268 | 0.476203855300157 |
| GTACCTAGTCA | 512.68432247617  | 0.450883997376654 |
| GATCGTATGAC | 512.710146775875 | 0.242117378353494 |

|             |                  |                   |
|-------------|------------------|-------------------|
| CTATCGACTCA | 512.786076634146 | 0.261208584703471 |
| ACGACTATGAC | 512.797015118574 | 0.30053895647089  |
| CGCACGATGAC | 512.927582398435 | 0.409895709733463 |
| CTGACATGTCA | 512.954597383786 | 0.327980554866993 |
| GTCATAGTTAA | 513.088979409218 | 0.158985051506695 |
| AATCTGTGTCA | 513.168362880035 | 0.229766756169379 |
| ATGACTTGTTG | 513.26649606075  | 0.341004662646309 |
| CGTCATCAGTA | 513.29316856722  | 0.322100684670247 |
| AAAGCGATGAC | 513.302039815406 | 0.343142066871646 |
| AAGCTCAGTCA | 513.326762758707 | 0.357393916187461 |
| CGTCGTATGAC | 513.463924962564 | 0.185224503267697 |
| TGACTAGGCAA | 513.477231647012 | 0.197461910057274 |
| CTGAAGATGAC | 513.629533573487 | 0.301736607692505 |
| TGAGTAACGCA | 513.877266809989 | 0.343243663994844 |
| GTCATCTGACA | 513.89056909784  | 0.354764968462592 |
| ATGACGAGGTC | 513.896664541203 | 0.183316111603129 |
| AGCGTGCGTCA | 513.925104016953 | 0.405647645104007 |
| CCGCTTACTCA | 513.965491664148 | 0.311872955833391 |
| ATGACTTGCGG | 514.071711487371 | 0.196071094039006 |
| GATACTATGAC | 514.220054780571 | 0.306580508689942 |
| GTATAGACTCA | 514.292609730016 | 0.243564731239324 |
| TCTCATAGTCA | 514.480251689852 | 0.567205164824273 |
| AACCTGACTGA | 514.50335443294  | 0.16246158242725  |
| CTTGTGAATCA | 514.816665270382 | 0.443866744459733 |
| GAGATTATGAC | 514.889327681203 | 0.255363804861185 |
| ATGACGAACCA | 514.919486109926 | 0.250665946955706 |
| GCATCTAGTCA | 514.922824965221 | 0.449858536552641 |
| CATCTGTGTCA | 514.965392449364 | 0.203969998583364 |
| ATAGCGATGAC | 515.003932203623 | 0.470147694144493 |
| ACAGAGTGACT | 515.107265579971 | 0.34265973292445  |
| ACGTCAATGAC | 515.108310438048 | 0.165509775763323 |
| GACATACGTCA | 515.171338407157 | 0.38003771330244  |
| ACGTCACGTCA | 515.175049381582 | 0.215847956488146 |
| CGGAATATGAC | 515.179010230145 | 0.278561994431246 |
| AAATTCGTCA  | 515.188752661737 | 0.332483299280587 |
| CATACGGTGAC | 515.28055100767  | 0.501597266826908 |
| AGACTAATCGG | 515.333154675144 | 0.282506001152141 |
| AGTCACCTCCA | 515.419027485414 | 0.355937756218989 |
| AGTCACTCTG  | 515.475854228151 | 0.300673071287154 |
| GTCATATGTTA | 515.494816297605 | 0.464414382927186 |
| TATGACAGTGA | 515.616007284248 | 0.399139424512462 |
| ACAAGGATGAC | 515.798654719449 | 0.360038999781397 |
| AGTCACTCTCG | 515.884840798571 | 0.192765705235593 |
| GTCATTATTCA | 515.936372982067 | 0.537051264559212 |
| GTCATACACAA | 515.996533529617 | 0.255407518666531 |
| TGACGCAGCCA | 516.015746764392 | 0.614118661768469 |
| TGCTTGACTAA | 516.069447670003 | 0.110939613672308 |
| CCGCTGTGTCA | 516.109765413429 | 0.199952848287192 |
| ATGACGGAGAA | 516.116181408331 | 0.294656047002    |
| CATCGGAGTCA | 516.134282558481 | 0.389873825413124 |
| GTCATAGTCTA | 516.243211171007 | 0.476298675926463 |
| GCTATTTGTCA | 516.27721943668  | 0.475181951353318 |
| ATAATCTGTCA | 516.521889897108 | 0.39650561436001  |
| ATCATGATGAC | 516.706703643387 | 0.392753872193684 |

|             |                  |                   |
|-------------|------------------|-------------------|
| CCTATCTGTCA | 516.819261862721 | 0.31310967492417  |
| GCACGGATGAC | 516.868133469809 | 0.300846887382511 |
| GCCGTGATTCA | 516.924244697986 | 0.444390851903997 |
| AGCAACGCAT  | 516.998959751043 | 0.365206487291485 |
| CATACCAGTCA | 517.01279208377  | 0.580260506368728 |
| CTGATTGCTCA | 517.047995014017 | 0.409699331110738 |
| AAACCGATGAC | 517.065282183026 | 0.430154375546292 |
| GATGCGTCAAG | 517.068948113898 | 0.504120613698947 |
| GTCATGACCGA | 517.105945134137 | 0.255701937041723 |
| ACAGATATGAC | 517.109507329231 | 0.318071303294967 |
| AACATCGTCAT | 517.130819145621 | 0.259753870254746 |
| GCTTACAGTCA | 517.145674388374 | 0.482097767470304 |
| ATTTGCTCACA | 517.279256492375 | 0.358235223750335 |
| AACACGATGAC | 517.65970210748  | 0.400953095692478 |
| ACTTGAGTAAT | 517.672629813005 | 0.268307899627647 |
| CTTAAGATGAC | 517.724952691471 | 0.222536020054623 |
| AAATACAGTCA | 517.776297730593 | 0.524378301112581 |
| AATGGTATGAC | 517.879423680662 | 0.324855877039503 |
| CACTTCAGTCA | 517.882695679096 | 0.301436782507512 |
| CGTCATCGGGC | 517.948064530403 | 0.273888889415397 |
| TCTCTGATTCA | 517.982522666435 | 0.396206354836131 |
| ACTGTGATGAC | 517.983623178753 | 0.324394308417407 |
| CTTTGTATGAC | 518.084107212688 | 0.232923753703355 |
| GTCATAGTAAA | 518.157536807385 | 0.387951598660101 |
| GTCATCAGGAC | 518.202728340712 | 0.190998347456113 |
| CCGGTTATGAC | 518.257739555042 | 0.343958756201785 |
| AATATCCGTC  | 518.346905568083 | 0.35547166765887  |
| TCGCTGCGTCA | 518.366125482855 | 0.382223823198125 |
| ACGATGATGAC | 518.604192675318 | 0.31178787836773  |
| TCTCTGAATCA | 519.017104597957 | 0.207007634554662 |
| GTCATACCCTA | 519.042439742252 | 0.385267519373694 |
| GCACCGATGAC | 519.0603698775   | 0.428543940084812 |
| CATTTGTGTCA | 519.152611734579 | 0.602326278345395 |
| GTCATCACTA  | 519.170485327892 | 0.161445614913708 |
| TCGCAGAGTCA | 519.187785803859 | 0.423920953629954 |
| ACGTCACCACT | 519.195308035216 | 0.297674653439867 |
| CAGACCAGTCA | 519.228196206556 | 0.223354592498533 |
| CACATTATGAC | 519.313381924668 | 0.428836680019181 |
| TAACACAGTCA | 519.329225704164 | 0.441706290303576 |
| ATGACTTGAA  | 519.378821923305 | 0.187127473005157 |
| GGTCGGAGTCA | 519.451543757944 | 0.235235134968397 |
| TCATTGACACA | 519.45678557319  | 0.136313427826253 |
| AGTCATGAGTA | 519.580979926081 | 0.316816182420671 |
| AATTGTGACGT | 519.651301098799 | 0.25812813067622  |
| GACTCTATGAC | 519.751816729028 | 0.465339435453998 |
| AATTGTATGAC | 519.822800689448 | 0.457465799605579 |
| AAGTTTACTCA | 519.922568275128 | 0.426987933868941 |
| ATCATCGTCAT | 519.999723236248 | 0.2886208367245   |
| ATAGTTATGAC | 520.018042647191 | 0.342758250582155 |
| CACAAGATGAC | 520.083568666684 | 0.316436385880593 |
| CCACTGTGTCA | 520.159283257024 | 0.26217287249666  |
| CTGGTGACCCA | 520.342016389645 | 0.429371983501993 |
| GTCACACATCA | 520.563289810413 | 0.180655743928465 |
| AGTCACCTCG  | 520.602783658037 | 0.307479326976987 |

|             |                  |                   |
|-------------|------------------|-------------------|
| AACATGATGAC | 520.609158020053 | 0.319664327028512 |
| GTCATCATTGA | 521.019240039525 | 0.168912850494843 |
| ACATCGATGAC | 521.140754748282 | 0.18831736085059  |
| AGTGCGATGAC | 521.348848909847 | 0.348702958843073 |
| AGTCACCTCAA | 521.348904098085 | 0.112613406302303 |
| CAAACACGTCA | 521.384097977101 | 0.465485175383734 |
| ATGGCGTCACA | 521.438237944103 | 0.212657217568368 |
| ATCAGAATGAC | 521.543347074651 | 0.133834729863804 |
| AATAGTCAACT | 521.590313037005 | 0.236202905860317 |
| ACTCATACTTG | 521.597164506837 | 0.259380007334284 |
| ATGACGTTATG | 521.774255140678 | 0.285992009882288 |
| ATGCTCAGTCA | 522.10397568587  | 0.276152489471126 |
| ATTACGCAATC | 522.137073273856 | 0.334155217262092 |
| ATGACGATGTG | 522.13769434988  | 0.254745498911399 |
| GTCATCGAAAA | 522.258763323318 | 0.167026455935796 |
| AACAACGTCAT | 522.270784256323 | 0.400532556096132 |
| TATTAGACTCA | 522.280689186099 | 0.253426917482446 |
| GTCATATCTTA | 522.314772718568 | 0.145711296806868 |
| AAATAGATGAC | 522.36514722369  | 0.28467901223477  |
| GCCAAGTCACA | 522.394885570549 | 0.36233695348917  |
| GTCATCGTCTA | 522.403325223022 | 0.577143287189364 |
| AGACTAATGAC | 522.428213881356 | 0.157532695600058 |
| TCACTGACACA | 522.453689685127 | 0.183204138825298 |
| GTCATCCGAAA | 522.459204484368 | 0.287342470999979 |
| CTGTTTACTCA | 522.531805098129 | 0.275950219665798 |
| GTACATATGAC | 522.66962708527  | 0.138761138349082 |
| CTGCACAGTCA | 522.788136863784 | 0.303826458635584 |
| GTCATTAATGA | 522.932079213525 | 0.44140811660092  |
| ATGACCATGAC | 522.933819916872 | 0.278588531191749 |
| CTCGTGATTCA | 522.981710627378 | 0.350533800696202 |
| CACAAGACTCA | 522.990540191542 | 0.166980574711933 |
| GCATCGACTCA | 523.052229755255 | 0.272234887422764 |
| CGTAATATGAC | 523.234884916019 | 0.359002679682151 |
| ATCTTGACTAA | 523.299295131963 | 0.240679741781807 |
| CTTCTGTGTCA | 523.314844614601 | 0.292557044583735 |
| AAATGGATGAC | 523.351315370467 | 0.332299857081247 |
| ATGCTGACACA | 523.490906456139 | 0.623679619056874 |
| ACACTGTGTCA | 523.54240387773  | 0.237924211334823 |
| GTCATTAATGA | 523.572039364383 | 0.192102729512945 |
| TCCGTGATTCA | 523.678253020969 | 0.191345882297999 |
| GATGACAGTAC | 523.7497999704   | 0.170603220470924 |
| AAGCGTGACTA | 523.868538131941 | 0.388529566714313 |
| GTAATCCGTCA | 523.883620116319 | 0.259379718384504 |
| ATGACGCGCAA | 523.952186905473 | 0.329399067540182 |
| ACCTGACGTCA | 523.998152575006 | 0.27296573134162  |
| GAATCGATGAC | 524.05460503637  | 0.43984416524241  |
| CGCGGTATGAC | 524.056754541023 | 0.365926714524045 |
| GAATCCAGTCA | 524.058408503929 | 0.338862014601765 |
| GTATCGACTCA | 524.059544986494 | 0.193224383430936 |
| TCTATACGTCA | 524.169387800651 | 0.292369361969508 |
| ATACTGTGTCA | 524.44551444064  | 0.428100380335562 |
| GACATCAGTCA | 524.498830745662 | 0.252861439183049 |
| TGACTAGTACA | 524.510069710444 | 0.40233518314798  |
| TGACGCACGCA | 524.5136130428   | 0.177333810871302 |

|             |                  |                   |
|-------------|------------------|-------------------|
| GACTTCAGTCA | 524.539460542603 | 0.573638761578045 |
| ATTTAGACTCA | 524.661273918045 | 0.191920557274325 |
| ACCAAGTCATC | 524.705833746106 | 0.3672080787571   |
| ACTCATAGTGA | 524.815734556944 | 0.21193571532687  |
| GTCACACCTGA | 524.875268494664 | 0.466885829137802 |
| AATCATGTCAT | 524.945080639233 | 0.279012972391636 |
| GTCATTTCTGA | 524.992251806134 | 0.206860153113284 |
| AAAGATATGAC | 525.018972591148 | 0.281979727381582 |
| ATGACGTTACA | 525.043268123211 | 0.298630383357565 |
| CTACTTACTCA | 525.142889033771 | 0.207735765777047 |
| TAGACGACTCA | 525.180097897194 | 0.311514838915168 |
| AGTCACCCCTC | 525.202111351933 | 0.279972910760522 |
| GTCATAGTAGA | 525.213967748069 | 0.161871279670418 |
| ATTACGCGTCA | 525.259017568226 | 0.276552227720052 |
| GATCTGATGAC | 525.470377353708 | 0.296852491224521 |
| AGCCGATGACG | 525.498530017634 | 0.579019376255916 |
| AAGTCTATGAC | 525.554666359806 | 0.05276471970547  |
| CGTAGAATGAC | 525.735101404031 | 0.338543676512694 |
| CAGACGATGAC | 525.768948494209 | 0.194054392688008 |
| AAGCGCGTCAT | 525.779980007726 | 0.265858560450302 |
| CTTCACAGTCA | 525.807934205032 | 0.307140149442399 |
| TCGCACAGTCA | 525.906128646604 | 0.345906957887069 |
| GCCCCGAGTCA | 525.932731102029 | 0.212044514518798 |
| AGACGTATGAC | 525.942562806892 | 0.137679284590797 |
| GCAATCCGTC  | 526.01171379492  | 0.534010612042734 |
| TATAACAGTCA | 526.054206028765 | 0.211048754040484 |
| TGACTGGTTAA | 526.092856450337 | 0.379723685714001 |
| ATGACGGAGCA | 526.09583339497  | 0.235857938044682 |
| GTCATCCGGAA | 526.101613366763 | 0.32938078309306  |
| ACACACAGTCA | 526.119194257733 | 0.282894509414157 |
| GCAAGGATGAC | 526.284607902755 | 0.110644830896471 |
| GTCATCTTTCA | 526.345222682828 | 0.374427012407132 |
| AAAGGTGACGT | 526.43888114578  | 0.26738646219114  |
| ATCTCCGTCAT | 526.443741488281 | 0.230942318743568 |
| GTGACAAGTCA | 526.457837190572 | 0.356651907477878 |
| TGAGTCTACAA | 526.505941388913 | 0.607259637529406 |
| GAACCTAGTCA | 526.506691256478 | 0.10034030970514  |
| ACTCGGAGTCA | 526.565434527566 | 0.185963718658126 |
| GCGACAGTCA  | 526.653810939786 | 0.532637790718572 |
| ATTACTCAAGA | 526.657740084828 | 0.428783626590638 |
| CATAATATGAC | 526.661530947046 | 0.503301136271459 |
| AAGCTCTGACT | 526.715091251175 | 0.412560364073889 |
| CATTCGATGAC | 526.884232937631 | 0.586136452659486 |
| CGCGTTAGTCA | 526.991457186178 | 0.529664001302286 |
| AAAGCGTGACT | 527.040615632359 | 0.267429279973956 |
| CAGAATATGAC | 527.066693327561 | 0.485069096078434 |
| TAAACGACTCA | 527.205297062442 | 0.437366600941481 |
| TGACTGGATCA | 527.336454458274 | 0.325291510594356 |
| AGTAACAGTCA | 527.628908134415 | 0.31517394561291  |
| TGACCGACTCA | 527.682054794746 | 0.454637069197778 |
| CCGAAGTGTC  | 527.804770479185 | 0.535708574570143 |
| ATAACGATGAC | 527.817150361288 | 0.412969482528673 |
| CAGTGGATGAC | 527.831285094058 | 0.347044451093932 |
| CGTACTAGTCA | 527.879523280078 | 0.465661954546076 |

|              |                  |                    |
|--------------|------------------|--------------------|
| AGTCACCCCTG  | 527.948494436807 | 0.34235357800341   |
| ATGAGTACCAC  | 527.952284303778 | 0.475996315863847  |
| TGAGTGACGAA  | 527.967934604044 | 0.122531837721322  |
| CTATGGAGTCA  | 527.990444679719 | 0.275147120679295  |
| GTCATCTTTAA  | 528.318077948111 | 0.594040965514435  |
| CTCATTGACTC  | 528.391636744506 | 0.307976048121708  |
| TGACTAGACAA  | 528.399783821344 | 0.440760575107169  |
| CCATCGATGAC  | 528.418716428106 | 0.16717532651484   |
| CTCTGTATGAC  | 528.493648248794 | 0.242749088289634  |
| ACAAGTCATCC  | 528.540965751797 | 0.229453067943276  |
| GTCATAACGAC  | 528.554626515601 | 0.313607916809409  |
| AACATATGACG  | 528.572476515572 | 0.22322458481103   |
| GATTCGACTCA  | 528.618584859698 | 0.0589091551763054 |
| GTCATCAGAAC  | 528.709933264455 | 0.671639209391384  |
| CATGATATGAC  | 528.812220153747 | 0.308297737153495  |
| GTCATAATTA   | 528.884906026347 | 0.372579741546067  |
| GTCATAACTAA  | 528.922488554527 | 0.344765822779921  |
| AGTTGTATGAC  | 528.931197753372 | 0.400141563420895  |
| ATGAGCAAGTC  | 528.933632634558 | 0.317831722514145  |
| AGTATTTGTCA  | 528.992234515042 | 0.273955829381971  |
| CCGGTGAATCA  | 528.995685698341 | 0.553128017057535  |
| GACCCGATGAC  | 528.999370530987 | 0.441167700375167  |
| GTTTCATAGTCA | 529.010552757614 | 0.395745906431112  |
| GCAAGTCATAC  | 529.421579712428 | 0.39017151462644   |
| CAGGCTATGAC  | 529.474203974324 | 0.288306925641362  |
| TGACTAAGGAA  | 529.547655221074 | 0.577031491575878  |
| ATACATATGAC  | 529.562877135833 | 0.413365011803814  |
| GATATTATGAC  | 529.572116681469 | 0.333385105932787  |
| CCTTGTATGAC  | 529.601466128741 | 0.474732576305057  |
| ACGGTTATGAC  | 529.642670501419 | 0.419950983409251  |
| ACATTTCTGTC  | 529.73405234576  | 0.403794345708747  |
| ATGACGAACTC  | 529.755964969941 | 0.153795742487571  |
| GACACACGTCA  | 529.81244380927  | 0.444910572478694  |
| TGAATCACGCA  | 529.820640485927 | 0.286967923987085  |
| ATATACAGTCA  | 529.829811671024 | 0.351710738612145  |
| ATGCTTAGTCA  | 529.909949209133 | 0.538020735153595  |
| AGGATTATGAC  | 529.941365839277 | 0.216058921288085  |
| AATCCGAGTCA  | 529.963285358774 | 0.345754243389645  |
| TGACTAGTAAA  | 530.001165316979 | 0.544803664865959  |
| CATAACAGTCA  | 530.035847530318 | 0.432680612742901  |
| CACTTGACTAA  | 530.089490706198 | 0.13406585260987   |
| ACTAGATGACG  | 530.252896811819 | 0.261762031178521  |
| TACAAGAGTCA  | 530.389468474813 | 0.358739564796736  |
| ACGATTACTAA  | 530.570232932638 | 0.345938703376165  |
| ATGACTTGAG   | 530.652467231899 | 0.212536636357416  |
| CGCCTGACTGA  | 530.688950362204 | 0.18650984859365   |
| AAGTAGTGACT  | 530.709331468315 | 0.273955968183966  |
| AGAGTAATGAC  | 530.725173845141 | 0.296067528093239  |
| ATGAGCAAAAG  | 530.747174105375 | 0.266944178450914  |
| AGATGGATGAC  | 530.77358812312  | 0.235510904481212  |
| AACGGTGACGT  | 530.78426121546  | 0.286074949546628  |
| GTCATATCGGA  | 530.808227094268 | 0.335986337112053  |
| CGTCGGATGAC  | 530.902795579743 | 0.634824538864703  |
| AGACGGATGAC  | 530.948907859172 | 0.225409454887612  |

|              |                  |                   |
|--------------|------------------|-------------------|
| CGTTTACGTCA  | 530.999393902486 | 0.277664147439159 |
| CGTCTACGTCA  | 531.139904518269 | 0.480376429670534 |
| CAATCGATGAC  | 531.160876154708 | 0.483961410970174 |
| CAACCGATGAC  | 531.169286120043 | 0.372974227577743 |
| ACAGCGATGAC  | 531.241153702438 | 0.363522657340497 |
| CGTCATCTATA  | 531.277881558245 | 0.169357088013113 |
| ACGCGTATGAC  | 531.388880092891 | 0.361269189759179 |
| ATCAAGAGTCA  | 531.429413334919 | 0.197248921318066 |
| ATGACAGAGAC  | 531.610099490669 | 0.202267028754858 |
| GTCATAATTTA  | 531.634495309799 | 0.108448937087546 |
| AAAACCTCGTCA | 531.696367984544 | 0.546671789328323 |
| GTC AATATGAC | 531.77146892476  | 0.249079603131013 |
| TGACTGTGAAA  | 531.88658017373  | 0.385968397135126 |
| CATTGAATGAC  | 531.88892225372  | 0.194899336067189 |
| GTCATCATTCA  | 532.027671430609 | 0.223236339113909 |
| AAATCTATGAC  | 532.075145650707 | 0.37780855943801  |
| ATACCTAGTCA  | 532.185748758798 | 0.242749264000937 |
| TGACTGTAAAA  | 532.189998030881 | 0.425245452758462 |
| TCCGTGCGTCA  | 532.260196771552 | 0.279676049640854 |
| AGAGTGACGTG  | 532.323435710061 | 0.162931291438949 |
| ATGATGTGCC   | 532.430044060803 | 0.340639064154309 |
| GACTGACGTCA  | 532.660065804242 | 0.258128271483582 |
| TCATTTGGTCA  | 532.696403852943 | 0.278411632117561 |
| AAGGTTATGAC  | 532.810904887398 | 0.184528320598991 |
| GTCATCGCATA  | 532.898524522562 | 0.434981011705845 |
| AAGCTGTATC   | 533.062023473973 | 0.268879066931846 |
| ACTAACAGTCA  | 533.26020865099  | 0.377426220910874 |
| ACTTGGATGAC  | 533.536022441524 | 0.389218678673436 |
| ACGTCACCGAT  | 533.555018652616 | 0.245209502046173 |
| AGTCATGAGTG  | 533.602989349712 | 0.327291768526304 |
| CTTATAAGTCA  | 533.732115146062 | 0.33748539699523  |
| CTCCCGATGAC  | 533.793026443998 | 0.230222609869789 |
| AAACATATGAC  | 534.016666278033 | 0.197089439671834 |
| ACGATCTGTCA  | 534.063126488145 | 0.437700249581949 |
| ATGAGTCGGGC  | 534.221797485342 | 0.371113477481397 |
| CTCAGAATGAC  | 534.277851590003 | 0.452099070600215 |
| AAGAAGATGAC  | 534.299146085919 | 0.218501151930768 |
| CTACTGTGTCA  | 534.30219132046  | 0.32327146367807  |
| ATGACATGACG  | 534.350944033282 | 0.419393692543306 |
| AGGTTTACTCA  | 534.458165873933 | 0.578417844751812 |
| CGCAGGATGAC  | 534.58682847611  | 0.341298089904507 |
| AGTCACTACTC  | 534.610057537915 | 0.300461437912511 |
| ATGACGGAGTC  | 534.618919362213 | 0.275539069124477 |
| ATGACGTTACC  | 534.680903451417 | 0.276753256008237 |
| GACAGAATGAC  | 534.71217417277  | 0.311770235121711 |
| ATTGTGAATCA  | 534.767475914254 | 0.239233057325953 |
| ATGGTTATGAC  | 534.780502608617 | 0.328735902067599 |
| GCGATTATGAC  | 534.815988401972 | 0.311648562048141 |
| AAGCGTGACTG  | 534.839269884691 | 0.303476096296804 |
| CACGTCACGAA  | 534.857610036853 | 0.3836147575491   |
| TGAGTCGTTAA  | 534.888702446687 | 0.257897428847418 |
| ATCGGTATGAC  | 534.936091937381 | 0.159715639600344 |
| AAGAATATGAC  | 534.965947800424 | 0.335042148902561 |
| TGACTGGACAA  | 535.039521827603 | 0.303644319617386 |



|             |                  |                   |
|-------------|------------------|-------------------|
| ATAGCTATGAC | 535.13911341204  | 0.280230293430889 |
| GTCGTTAGTCA | 535.149431772063 | 0.35834852670324  |
| ATCGACGCAT  | 535.182827032128 | 0.320989382675988 |
| TAGCGTGACTA | 535.187615592642 | 0.319480806289286 |
| CATGTGATGAC | 535.250985279244 | 0.474246504566708 |
| GCGACTATGAC | 535.336283402954 | 0.319880278623867 |
| ATTATAAGTCA | 535.339003892504 | 0.63882319267709  |
| CCCGGTATGAC | 535.353567452178 | 0.390861972755178 |
| AAACTGATGAC | 535.414342825389 | 0.284842017443532 |
| ATGAGTGTGAC | 535.484902176124 | 0.272033542275264 |
| CTTCTGATGAC | 535.518397908438 | 0.44080979502226  |
| CACGTAATGAC | 535.559044235155 | 0.556431861875319 |
| CAATCTATGAC | 535.8714108516   | 0.329099354451213 |
| GTATTTATGAC | 536.009938609424 | 0.187365579027479 |
| GTGACTACCTA | 536.03971232303  | 0.245040419733643 |
| CTATGAATGAC | 536.074434245111 | 0.404645358774522 |
| CAAAATATGAC | 536.108518342664 | 0.417627548133118 |
| ATCGTGATTCA | 536.111093517324 | 0.459575682449212 |
| TGACACAGACA | 536.204413843879 | 0.365590929746511 |
| TATGACAGTAA | 536.208999646018 | 0.124582077343008 |
| GGATACAGTCA | 536.242919571762 | 0.199437373419803 |
| GACAGGATGAC | 536.611822744528 | 0.300984789945646 |
| TGACCAAGTCA | 536.628004135055 | 0.21478226834766  |
| CAGCACAGTCA | 536.633346475476 | 0.197264211984974 |
| TCGATCTGTCA | 536.712547255641 | 0.257600063789318 |
| GCACCTAGTCA | 536.849296000137 | 0.258192575246098 |
| AAATTTATGAC | 536.909101467101 | 0.474322527228331 |
| ATGACGAGGAC | 536.988406292943 | 0.293628800510177 |
| AGTCACCCTGC | 537.01249026024  | 0.208619225888734 |
| GTCATCTTTTA | 537.030687821429 | 0.293990714720085 |
| CTTACTATGAC | 537.073766514618 | 0.371485404917236 |
| CTATGACTTGA | 537.083131036583 | 0.246283034126866 |
| GTCTTGACTCA | 537.173921413483 | 0.471347802091648 |
| AATCGGAGTCA | 537.25841441021  | 0.231123486806773 |
| TAGTCACGCGA | 537.26516234398  | 0.183343086872247 |
| ATGACGATGAA | 537.273163010271 | 0.248725528281202 |
| GACTGTAGTCA | 537.277502686449 | 0.127041732930124 |
| AGTCCGAGTCA | 537.295300802372 | 0.289921339458785 |
| GCTCCGATGAC | 537.329846147835 | 0.234977783124679 |
| ATGACAGTGTC | 537.357862026061 | 0.345463224307574 |
| CGGCTTAGTCA | 537.379330911252 | 0.467629723437295 |
| GCTACCAGTCA | 537.475818816369 | 0.199877321966209 |
| AGTCACTTCTG | 537.586958504982 | 0.367789583425683 |
| TCGATAAGTCA | 537.629818134234 | 0.298977631277824 |
| ATGATTTGTCA | 537.738668600955 | 0.405702383452932 |
| CCGATTAATAA | 537.803448876639 | 0.46270034618397  |
| AGACTAATCGA | 538.02199996409  | 0.317940301586332 |
| CTACAGAGTCA | 538.308415297503 | 0.374551848281247 |
| CTACACAGTCA | 538.334158707634 | 0.158063983162834 |
| CGACTGACACA | 538.444909605396 | 0.31291605778088  |
| ATACTTATGAC | 538.515475811329 | 0.379711524342128 |
| CGATATATGAC | 538.568533449586 | 0.196144540297788 |
| GCAAAGATGAC | 538.622980199877 | 0.258871045969954 |
| ATGAGTCCGCA | 538.635414022598 | 0.359858473673976 |

|              |                  |                   |
|--------------|------------------|-------------------|
| TCAGCGAGTCA  | 538.636437504898 | 0.611913332132622 |
| GTGTCATGTCA  | 538.723360414548 | 0.168282312225654 |
| AAACTACTCAT  | 538.747725887461 | 0.289468375005437 |
| CACGTCACCTCG | 538.76809968814  | 0.195444261774359 |
| CACTGTATGAC  | 538.786427213824 | 0.428930306744639 |
| GCGTGTATGAC  | 538.828724249035 | 0.333801459591258 |
| TGACTAGGACA  | 538.828787923884 | 0.393887564393418 |
| AAAAGTACTC   | 539.087898676913 | 0.449396310772277 |
| GTCATCAAAGA  | 539.106259669103 | 0.483106109509516 |
| GTTATTGCTCA  | 539.135946783085 | 0.440296236442113 |
| CGATTTATGAC  | 539.212296969312 | 0.12304235063058  |
| GAATCGACTCA  | 539.325221083624 | 0.321184958609773 |
| ATGCATGACAC  | 539.330845900997 | 0.32002311079308  |
| CCGTGTATGAC  | 539.383453602821 | 0.182743716002211 |
| GTCATCGCGAA  | 539.456958115463 | 0.436965640816556 |
| GTCATGAGCCA  | 539.555627818831 | 0.29352871952697  |
| AAGGGGTGACT  | 539.581678377062 | 0.299893078012026 |
| AGTCACTCCTA  | 539.62396981023  | 0.24505070350899  |
| AGTCATGAGAT  | 539.68641003535  | 0.369801188401858 |
| ATTCCGATGAC  | 539.761427889762 | 0.169124323196997 |
| CGGTGGATGAC  | 540.04572033851  | 0.28231993042314  |
| ATGACACGGTG  | 540.059957480488 | 0.402313186491247 |
| CGTCATCGGTC  | 540.13099969736  | 0.211752782706024 |
| TCCAGTAGTCA  | 540.159580926225 | 0.478751402628646 |
| ATGCCGTACATA | 540.251660897209 | 0.240645635322202 |
| ATGAGTACCAG  | 540.264262739427 | 0.386447511834951 |
| AACGGCGTCAT  | 540.274059910081 | 0.284235684171384 |
| GTCATCGCAGA  | 540.338406510851 | 0.404383871496827 |
| CATTTGCGTCA  | 540.406062055343 | 0.443595561088238 |
| GTATGGATGAC  | 540.512726100752 | 0.226403765586314 |
| CTTACCAGTCA  | 540.530169866694 | 0.354560646382862 |
| ATTACTATGAC  | 540.590805133909 | 0.312089245873409 |
| ATGACGTTACG  | 540.706193732044 | 0.358768530528033 |
| GTCATCCTTTA  | 540.71372067244  | 0.204202705429212 |
| AGACTAATCAT  | 540.732838523127 | 0.361618797193689 |
| CGAGTTATGAC  | 540.965417386704 | 0.441557883224713 |
| GTCATCCTAAC  | 540.991320594231 | 0.273463941562979 |
| ATAGATATGAC  | 541.101138724317 | 0.455431884722448 |
| GTCATAGCCAA  | 541.148782757967 | 0.568968294657882 |
| GTCATCTCTTA  | 541.225000263915 | 0.239002773600666 |
| AGATCGATGAC  | 541.253816549968 | 0.178661777663527 |
| ATCCTGTCATA  | 541.296815857833 | 0.236022054434548 |
| AGAGACTCATA  | 541.304076507929 | 0.221390594908548 |
| ATCCGTATGAC  | 541.33605115659  | 0.201514500824231 |
| AGAATCTGTCA  | 541.403009878818 | 0.278279639427571 |
| AAATGTGTGAC  | 541.46957673986  | 0.174346862932007 |
| AGAGCTATGAC  | 541.515876490413 | 0.491876649311842 |
| GTCATAACAAA  | 541.65670558564  | 0.251863013769679 |
| GCAGCTATGAC  | 541.766510179126 | 0.511037550534098 |
| AGTCACCTCGG  | 541.785375746151 | 0.476105908359382 |
| CATTGACGTCA  | 541.797284451325 | 0.347440695077258 |
| ATGAGTTGTCA  | 541.854306846451 | 0.273621322644625 |
| AAATGGAGTCA  | 541.887586342835 | 0.385372660520198 |
| GTCATACCCAC  | 542.085254333114 | 0.296383695492309 |

|             |                  |                   |
|-------------|------------------|-------------------|
| AGTTGATTCAT | 542.094724938689 | 0.295423459176801 |
| ATACCGTCATA | 542.108107124962 | 0.284300626258788 |
| CATCTGATTCA | 542.19329854286  | 0.152625246288267 |
| GTCATCACATA | 542.226231316694 | 0.123599283260282 |
| CTGACTCCGAC | 542.316648529743 | 0.253004382021526 |
| GAGACTATGAC | 542.332009183432 | 0.154530794457166 |
| GCAACTATGAC | 542.360229162368 | 0.390329102737145 |
| CCTACGATGAC | 542.427899209107 | 0.233489843707979 |
| CTGACGCGTCA | 542.461694568884 | 0.147442911795458 |
| GCTATGATGAC | 542.535323436163 | 0.277866797525033 |
| GATACGATGAC | 542.541554422552 | 0.409933487684656 |
| GTATCGATGAC | 542.548323682738 | 0.419010735879326 |
| AGAATCCGTC  | 542.627144435289 | 0.135941746380663 |
| ATGACACGAC  | 542.651003280357 | 0.339549844524953 |
| CGACCCAGTCA | 542.778369232652 | 0.42653194210551  |
| CGATTATGTCA | 542.863843871365 | 0.35265838289616  |
| GCCTATATGAC | 542.871227776848 | 0.39852961707385  |
| ACACCTAGTCA | 542.944905017972 | 0.43818045581079  |
| CGCTAGAGTCA | 543.00384262656  | 0.465458717259413 |
| CTGACTGGTCA | 543.014866285732 | 0.206970725109291 |
| GTCATCAGTGA | 543.10642631368  | 0.302571166793269 |
| AACTAGTGACT | 543.152582022483 | 0.220521781212336 |
| TGATTCACACA | 543.222634957548 | 0.555543444458657 |
| GCAATTCGTC  | 543.290884367973 | 0.379770664270214 |
| AAATTGACTCT | 543.350380133567 | 0.25196974257046  |
| ATGACAGTACC | 543.372645753937 | 0.183571868767384 |
| GCTTTACGTC  | 543.426814463163 | 0.391274730726311 |
| GTCATCAACAA | 543.467021859874 | 0.409893262604306 |
| TGACGAAGTCA | 543.503121974101 | 0.388129388069196 |
| ATTCCGTCATC | 543.505650201548 | 0.379274790264461 |
| GTCATCGTGAA | 543.571390549049 | 0.422872287929072 |
| CCGACCACTCA | 543.623570538685 | 0.344404149172034 |
| CATGTGAATCA | 543.725357295491 | 0.565334618249612 |
| GTCATCGGTTA | 543.812213453786 | 0.289790361829098 |
| CCATCTAGTCA | 543.925315597767 | 0.144343377651644 |
| ATGAGTCCGTA | 543.956746747102 | 0.239712048139391 |
| CACTATAGTCA | 543.963577704319 | 0.35232040370908  |
| TGACAGATTAA | 544.070735521069 | 0.421872198614253 |
| ACCTGATGACG | 544.159422989566 | 0.249307397375442 |
| ATGACGACGAC | 544.333887676805 | 0.330501141163425 |
| ATGCGTCAAGC | 544.419884476923 | 0.508382584870501 |
| CGTGACGTGAC | 544.572784452624 | 0.101061380690231 |
| ACGGTGATGAC | 544.585892952068 | 0.233331284238414 |
| AGTCAGATGAC | 544.619257136411 | 0.195482218606332 |
| ATGAGTACGAC | 544.62345976     | 0.390418472368484 |
| GTCATTCCTGA | 544.811257793501 | 0.510909575181414 |
| GACTCGACTCA | 544.845718875117 | 0.257301289303847 |
| GTCATCGTAAC | 544.846226341282 | 0.616308773112279 |
| CATCACAGTCA | 544.928579026721 | 0.232323531350712 |
| ATGAGCAAGAC | 544.984507756301 | 0.190563516166339 |
| AAGTATTAGTC | 545.083886375925 | 0.237365640323359 |
| TCGTCACGTCA | 545.112965260846 | 0.172102398948174 |
| ATATCTATGAC | 545.140131955109 | 0.383616067965432 |
| CCTTACAGTCA | 545.158355368377 | 0.228552187222512 |

|               |                  |                   |
|---------------|------------------|-------------------|
| AATCCGTCAGA   | 545.222067456216 | 0.249140591264015 |
| TGAGTGACCAA   | 545.240751349658 | 0.34987143977406  |
| GTATCTATGAC   | 545.279595202237 | 0.30656141625057  |
| CCGATGGGTCA   | 545.311830630119 | 0.398872815290228 |
| ACGTTGATGAC   | 545.536339332241 | 0.290598784223168 |
| CCTCATAGTCA   | 545.612862481696 | 0.247742799656285 |
| ATGACTGGGGC   | 545.673590700388 | 0.208784216409482 |
| TATTGGAGTCA   | 545.742593999516 | 0.276466723273727 |
| ACGGGTGACGT   | 545.882684412055 | 0.38480252315552  |
| GAAAATATGAC   | 545.900404798209 | 0.208069587535188 |
| TATGACAGCGA   | 545.972448081689 | 0.11755544311299  |
| AGTAGGATGAC   | 545.990775440874 | 0.262416701883437 |
| ATGACAGAGAA   | 546.133401942758 | 0.382685794770243 |
| GTCATTTTGTGTA | 546.13910534562  | 0.420719750365292 |
| TGACTACAACA   | 546.254515841639 | 0.293383170302614 |
| AACTGATGACG   | 546.420889816519 | 0.357303368719148 |
| AGTCACTTCTA   | 546.48156532028  | 0.3024705974791   |
| CACGTCACCTC   | 546.486211695567 | 0.27068608762408  |
| ATGTAAGTCAC   | 546.59744947578  | 0.192124044208054 |
| GTCATATCTGA   | 546.602718964019 | 0.391858035087247 |
| GTCATAGTATA   | 546.659805511493 | 0.316246738874391 |
| GTCATATCACA   | 546.664963998386 | 0.321068494165472 |
| CTTATGATGAC   | 546.74956776365  | 0.381485157458233 |
| GTCATAGGGAC   | 546.880683845378 | 0.223879106877265 |
| TAAAAGTGTC    | 546.881359685838 | 0.211877300219207 |
| CATTACAGTCA   | 547.052934539096 | 0.306888611168037 |
| AACCTCAGTCA   | 547.074025141411 | 0.147169582147182 |
| CTAATTGCTCA   | 547.175433553952 | 0.288850440185431 |
| AGTCACCCCGA   | 547.256591805738 | 0.315983344584403 |
| ATTTGTATGAC   | 547.259523651413 | 0.289881779228278 |
| CCCGTTAGTCA   | 547.514270892168 | 0.136564791379801 |
| GGTATTATGAC   | 547.553244988008 | 0.284028241971815 |
| ACGACTAGTCA   | 547.607003762147 | 0.202134617439015 |
| CGCATGAATCA   | 547.608147752798 | 0.244213462082937 |
| ATGACGATGTC   | 547.750423695611 | 0.266787973415948 |
| GACCATGACAC   | 547.775307475293 | 0.267203220342484 |
| GTCACACTGAC   | 547.868803047821 | 0.323532539143432 |
| TAGTTGACACA   | 547.892259116926 | 0.356751742725    |
| AATGCGTCAAG   | 547.900865840589 | 0.439494446872719 |
| AAAATATGTCA   | 548.000031293553 | 0.102633967294269 |
| AGCGTGACTAG   | 548.029006637088 | 0.246764866843645 |
| TAAATGTCATA   | 548.029752127991 | 0.287067683263752 |
| ATGTTTACTCA   | 548.031995337867 | 0.239181505196773 |
| CAACCTAGTCA   | 548.054759583287 | 0.318859344910706 |
| GTCATCTATAA   | 548.058100903973 | 0.647636899327763 |
| AGTCACGCTTC   | 548.176668547766 | 0.423590515122596 |
| CATACAATGAC   | 548.264672780051 | 0.483746509366543 |
| TGACGGATCAA   | 548.264709286476 | 0.401949518891258 |
| AACGTTGTCAT   | 548.298391083787 | 0.349153304037693 |
| CGTTGTATGAC   | 548.327621421338 | 0.239142825589047 |
| ACGACCAGTCA   | 548.345873709443 | 0.519153028982646 |
| AGTCACTCTCA   | 548.380984792461 | 0.133338317154735 |
| GTCATCCTCTA   | 548.444938767552 | 0.278636081311162 |
| AGTATTGTCAT   | 548.498960092933 | 0.181640509433615 |

|             |                  |                   |
|-------------|------------------|-------------------|
| GTCATTCATTA | 548.515528334673 | 0.420851601527638 |
| CTGATCTGTCA | 548.527830938517 | 0.508275350258267 |
| GTAAGGATGAC | 548.560666966908 | 0.219963886978912 |
| CACGTCACTAC | 548.605380946175 | 0.299589404051324 |
| ACGCCTAGTCA | 548.657450728749 | 0.309280268291525 |
| GTGTCATGCAA | 548.671672421206 | 0.347044237554715 |
| TAGTCACGCCA | 548.743554773652 | 0.274677800989861 |
| ACTACCAGTCA | 548.789160931357 | 0.345799015169549 |
| TGACGGATAAA | 548.885359437374 | 0.22552598272517  |
| AGTCACTTCAT | 548.958382056998 | 0.298425566608698 |
| TCTAAGTGTC  | 549.032842847994 | 0.274754555360912 |
| ACTCATACTTA | 549.115346995548 | 0.246540217778203 |
| CGTCAGACTCA | 549.217465084755 | 0.39338265517405  |
| GTCATACAGCA | 549.241686180883 | 0.283558824779565 |
| CGATAGATGAC | 549.25245048949  | 0.442543472208127 |
| CGTCATATGTA | 549.261509519446 | 0.409189523089753 |
| CCAATGATGAC | 549.26212998855  | 0.225964521221325 |
| CGGACTAGTCA | 549.315793980069 | 0.506310422677949 |
| AATTCGATGAC | 549.519996646858 | 0.241884586978381 |
| GTCATACGCAC | 549.54150467528  | 0.268365699255868 |
| ATCGCTATGAC | 549.586141584701 | 0.265214179617111 |
| TGACGTCAGCA | 549.598898189138 | 0.380144819781408 |
| GTCACGACTCA | 549.627444255392 | 0.306528552570771 |
| AGTCTCGTCAT | 549.67513903707  | 0.325908215126568 |
| GTGCTTACTCA | 549.805697667486 | 0.466977959095196 |
| AGTCACCCCAA | 549.832722719006 | 0.228062020643803 |
| TGACTGCATCA | 549.933562537904 | 0.344323265655408 |
| ATGAGTGAATC | 549.981099077572 | 0.15252880833788  |
| TGACCCAGTCA | 550.060635335188 | 0.452051853071415 |
| CCTGTGAATCA | 550.092797832531 | 0.442474829276038 |
| CGCGTGCCTCA | 550.140670786629 | 0.310421437828632 |
| CAGTGTATGAC | 550.256195754115 | 0.216303574398613 |
| GTCATCACTGA | 550.266540153198 | 0.15029180408336  |
| ACACGTAGTCA | 550.373761955476 | 0.617678784614384 |
| GTCATACCAAC | 550.53849292797  | 0.157820361444397 |
| AAACTTATGAC | 550.547711542373 | 0.315562833178356 |
| ACGTGGATGAC | 550.629415779263 | 0.17441980710836  |
| GTCATATTAAC | 550.663339195684 | 0.307540178588184 |
| AGTACTAGTCA | 550.756608210057 | 0.202378891908155 |
| AACTTGTACC  | 550.763891259703 | 0.292948985668452 |
| CGTCTGATTCA | 550.764765535407 | 0.218421923568035 |
| TAAATATGTCA | 550.773562357494 | 0.346412570387438 |
| GTAAGTACACA | 550.782737798019 | 0.371144996558861 |
| GACGGTATGAC | 551.032876588363 | 0.196276554112046 |
| AATTGAATCAC | 551.061319170738 | 0.242323262387981 |
| ATAAAGATGAC | 551.155571697615 | 0.202067765913105 |
| CTTGTGATGAC | 551.378952819031 | 0.240280200901008 |
| CGAGTGTGAC  | 551.504509103632 | 0.341857801990762 |
| GCCTTCAGTCA | 551.514103478777 | 0.380227277477585 |
| CAGTCGATGAC | 551.688688045465 | 0.578774011135136 |
| GGTGAGTCTGA | 551.698436720465 | 0.257571928860639 |
| ACCCGAGTCAC | 551.74682711358  | 0.204539913276415 |
| CAGAAAATGAC | 551.892094507465 | 0.264549843175447 |
| GTCATAACGGA | 551.901514371599 | 0.322596493817005 |

|             |                  |                   |
|-------------|------------------|-------------------|
| CGGATCTGTCA | 551.957921444559 | 0.377518161060185 |
| AGATACAGTCA | 552.04093016263  | 0.217355633012831 |
| ATGTCTATGAC | 552.067636343603 | 0.391487066907129 |
| GAGGTAGTCAC | 552.08646246791  | 0.319657844181506 |
| GTACTIONTCA | 552.115400139631 | 0.226939403955679 |
| TACTTGACTAA | 552.237713505198 | 0.249266914307772 |
| TCATAGTCAGA | 552.333080330868 | 0.364893139411761 |
| CTGTCTAGTCA | 552.338368100814 | 0.300168822034618 |
| ATGACGAACCG | 552.415645354773 | 0.435289917104174 |
| CGTCACGTCAC | 552.481881278695 | 0.145751135992092 |
| ACTCATACTCA | 552.508262243171 | 0.269533704664187 |
| GTCATTCTGCA | 552.527898347519 | 0.500381669925026 |
| AGAGTCAATAA | 552.596180296125 | 0.44116058288067  |
| ATGATGTGTTC | 552.627245271275 | 0.279102071899908 |
| AGAATGATGAC | 552.690752904284 | 0.170780290345107 |
| GTCACATGTCA | 552.843698938553 | 0.31958202931504  |
| AAGCTTACTCA | 552.853161334213 | 0.367605989080966 |
| ATACTGACACA | 552.864466947297 | 0.443029900783448 |
| GTAGCTATGAC | 552.905137189218 | 0.230965220027091 |
| ACGTCCAGTCA | 552.925563787932 | 0.399359829262943 |
| GAATCTATGAC | 552.940354966301 | 0.4135406607547   |
| ATCTTCAGTCA | 553.045591272058 | 0.379197894581086 |
| CGTATGATGAC | 553.086291175061 | 0.450953985503434 |
| GCCTGTATGAC | 553.119387777547 | 0.343032988907344 |
| TGACTAAGCCA | 553.249914775323 | 0.479774935978101 |
| ATGACGTTGTA | 553.280228588333 | 0.23844940559188  |
| GCTACTATGAC | 553.281985356198 | 0.2625685464517   |
| ATGCCGATGAC | 553.410462092776 | 0.533581053347111 |
| ACGAAGATGAC | 553.410636161032 | 0.316375376159558 |
| TGTGTCAACAA | 553.431859674239 | 0.248447073073616 |
| CGCGTGATTCA | 553.505719055096 | 0.440636671433945 |
| ATGAGCAACAT | 553.546716859131 | 0.260287079754593 |
| TGAGTAAACAA | 553.643962271769 | 0.271977369607525 |
| AACTCATGACT | 553.756499522678 | 0.226474186170241 |
| AGTCACCCTCC | 553.860365689298 | 0.234378984565429 |
| TCGCTTACTCA | 553.909520513319 | 0.211278265700531 |
| ACAACGATGAC | 553.940612074754 | 0.484736289332871 |
| AGAAAGATGAC | 554.055488448371 | 0.241618707776219 |
| GTAATCTGTCA | 554.104278608819 | 0.430891758931741 |
| ACCTTACGTCA | 554.307897770739 | 0.319855778303976 |
| GTCATCACCTA | 554.360764810504 | 0.407702247615412 |
| ATTTGTAGTCA | 554.387155193619 | 0.354071088046943 |
| GCTGGTATGAC | 554.398910921612 | 0.197575604160398 |
| GATTTTACTCA | 554.426646453298 | 0.227726207127153 |
| CTCTGTAGTCA | 554.48776132938  | 0.267076460321837 |
| ATGAGCAACAA | 554.492608733778 | 0.206167488322046 |
| CATATATGTCA | 554.533552048015 | 0.253499841444854 |
| ACGTTGACACA | 554.576551170928 | 0.429257745984324 |
| GACCGTATGAC | 554.658085067865 | 0.322751066698037 |
| AGAACCAGTCA | 554.664491162626 | 0.302949949485702 |
| AGGTAGTGACT | 554.789200109139 | 0.243951518458309 |
| ATGACAATATG | 554.904840429299 | 0.212859082531935 |
| AAAGTGACGTG | 554.921301562674 | 0.215230045039088 |
| CATTTGATGAC | 554.996053968647 | 0.421018529215902 |

|             |                  |                    |
|-------------|------------------|--------------------|
| CGGTATATGAC | 555.018690870147 | 0.228069593606022  |
| CTTCCGATGAC | 555.188588259621 | 0.161891063901261  |
| AAAGTGTCAGA | 555.247162635905 | 0.168956738895495  |
| ATGCTTACTCA | 555.454927949008 | 0.390509451539246  |
| TGACTGTAAAA | 555.507732726778 | 0.3944234097406    |
| TCGGTGACCCA | 555.551559929057 | 0.19196344333677   |
| ATGGCGTACC  | 555.637423064601 | 0.275964537682721  |
| ATCGAAATGAC | 555.637602832887 | 0.301134954846651  |
| CAGCAGAGTCA | 555.863831687474 | 0.490262137054615  |
| GTAAGATGAC  | 555.883599010821 | 0.153035621833722  |
| GCGTCACGTCA | 555.982277775367 | 0.504479642544797  |
| CTCACGATGAC | 556.026772792395 | 0.428615346502892  |
| CCGAAATGACG | 556.071830168685 | 0.248544607832146  |
| GTCATCGTCAA | 556.093183032834 | 0.422641306208834  |
| GTCATCGACAA | 556.271671714523 | 0.456490031354699  |
| CCACCTAGTCA | 556.272373700215 | 0.390034037539245  |
| AATCGAATGAC | 556.371505149346 | 0.176233794977082  |
| GATGACGCCGA | 556.44175648084  | 0.437117882683689  |
| AATATGATGAC | 556.572334120206 | 0.218189077818211  |
| AATATCTGTCA | 556.623204020096 | 0.373547575676008  |
| AGCACTATGAC | 556.65517622124  | 0.0947828831936247 |
| ATGAGTCCGCG | 556.657220486809 | 0.325807020184179  |
| ATGACGAACAG | 556.713374170765 | 0.350045304167499  |
| CGATCTAGTCA | 556.833514194995 | 0.240641995311394  |
| TAACTGACACA | 556.93092784792  | 0.242679113258196  |
| GTCATAAATAA | 556.948915850619 | 0.408447599664015  |
| TCGTTGACACA | 556.955954540555 | 0.320417080421103  |
| AGTCACGCGTC | 556.998520259205 | 0.215836069731582  |
| GTCATAATGAA | 557.034007027739 | 0.483751007404057  |
| GTCATAGCTCA | 557.0495617124   | 0.148214868192461  |
| GTCATCATCAC | 557.076495572561 | 0.265354879626129  |
| CCAGGAATGAC | 557.247645060872 | 0.285072153953694  |
| GTCATCAGTTA | 557.249406943779 | 0.158088548379726  |
| ATGACGTTAAT | 557.258025514166 | 0.161902193829668  |
| GCTTCGACTCA | 557.260039703399 | 0.169824551654851  |
| AGACCTAGTCA | 557.27336533247  | 0.360088506725485  |
| ATCTGTATGAC | 557.27866937883  | 0.365592995785965  |
| ATGACGAACTG | 557.361474965361 | 0.189002435855933  |
| ATGACGTGAAA | 557.386526785115 | 0.346730704285907  |
| CCTACCAGTCA | 557.419506428882 | 0.232454117734089  |
| AGTCACTCTTC | 557.446837874779 | 0.230509679532313  |
| CCAGTTATGAC | 557.49510264793  | 0.268669765431614  |
| CGTCTGTGTCA | 557.498718432871 | 0.423374879849431  |
| AAAAGTCATAC | 557.59238393563  | 0.297169660425525  |
| AGAGTTATGAC | 557.685492448971 | 0.215679520493071  |
| CAGTATTAGTC | 557.694618648217 | 0.42551735933252   |
| ATGTCGATGAC | 557.745313874868 | 0.327300674967404  |
| GTCATACGCGA | 557.762945057208 | 0.374331249984426  |
| GGTCCGAGTCA | 557.803866225527 | 0.256510238360355  |
| TCACTGAATCA | 557.809691676562 | 0.323348119262173  |
| GTCCGACTCAC | 557.862894736646 | 0.321486613684943  |
| CTATGCAGTCA | 557.933447226075 | 0.42993930057717   |
| AAATCCAGTCA | 557.943836001624 | 0.223158786865802  |
| ATGAGTCCCAA | 557.976980619827 | 0.269004238258846  |

|              |                  |                    |
|--------------|------------------|--------------------|
| AAAATGGGTCA  | 558.103034929019 | 0.327958966143291  |
| GAAGATATGAC  | 558.20856687541  | 0.198944412254985  |
| GTCACATGTGA  | 558.232081364346 | 0.424793884018723  |
| TCTAACAGTCA  | 558.242482424586 | 0.308238933308213  |
| TGACTACAAAA  | 558.268330629296 | 0.236639042705002  |
| ACGTATATGAC  | 558.352745257526 | 0.447701760198103  |
| GACCTTACTCA  | 558.559297474326 | 0.25965139904659   |
| ATGACAATACA  | 558.58993781104  | 0.359461594037746  |
| GCAATGATGAC  | 558.597681164039 | 0.41652830942235   |
| CCAATCTGTCA  | 558.602328379082 | 0.326411047104105  |
| ACACATATGAC  | 558.629703176441 | 0.148616663899404  |
| TAGATATGTCA  | 558.665440324802 | 0.329282706422904  |
| GTCATTAGTGA  | 558.790048154265 | 0.410730851650521  |
| GTCATACGAA   | 559.003345081696 | 0.13374453045489   |
| GTCATCCTAGA  | 559.04826393296  | 0.240452912585047  |
| TCTCACAGTCA  | 559.075356340585 | 0.386086900045782  |
| CCGGATATGAC  | 559.083442921733 | 0.412447097220762  |
| AGGCGTGACTA  | 559.196712103072 | 0.301568726755935  |
| TGACTGTGCCA  | 559.245306328676 | 0.394474893289052  |
| GTCATATAACA  | 559.317679030845 | 0.536685422639625  |
| ACAGTGATGAC  | 559.34560648737  | 0.407005455620417  |
| CCCTATAGTCA  | 559.393630023395 | 0.324614400158127  |
| CGTACGCGTCA  | 559.470675474957 | 0.205452213552206  |
| TGGCTGACACA  | 559.486097578568 | 0.342803121248137  |
| GAAAGGATGAC  | 559.516529864991 | 0.359765508661896  |
| TGACTCCATCA  | 559.557925690583 | 0.321775512517993  |
| GTCATCACTAA  | 559.733574446862 | 0.366980172260811  |
| GTCATCCTGCA  | 559.770070070681 | 0.286545160105858  |
| CGATAGACTCA  | 559.784523146176 | 0.272997672732586  |
| TGACAGATCCA  | 559.845493227578 | 0.211633814898049  |
| CACAAATGACA  | 559.910234815561 | 0.221457363984459  |
| AGGATACGTCA  | 559.930204944829 | 0.253048775987504  |
| CATTTACGTCA  | 559.947861680755 | 0.269909866272869  |
| GATGTTATGAC  | 559.978201748316 | 0.0924002792136087 |
| CGTTGTAGTCA  | 559.997549030195 | 0.220709888183991  |
| TGACTGTCAACA | 560.149204614797 | 0.440006280502651  |
| ATGAGTCCCAT  | 560.165563521463 | 0.351868852949185  |
| GTCACCTTATGA | 560.169936325606 | 0.454703779156029  |
| ACTCGTATGAC  | 560.294909839716 | 0.283011555627294  |
| GTCACCCGTCA  | 560.547674464066 | 0.0982092217565913 |
| CCCATCAGTCA  | 560.592669009775 | 0.304047936368927  |
| AAGTCTGTCAT  | 560.727455145486 | 0.270962919387137  |
| AACGGACTCAT  | 560.728067540621 | 0.290045112222948  |
| ACGTTGACTGA  | 560.761188411334 | 0.315974588695642  |
| AAACTGCGTCA  | 560.770005950043 | 0.431082597763315  |
| CAATTCGTCA   | 560.878009323671 | 0.334764321168545  |
| CAAATGATGAC  | 560.9026877573   | 0.380459408490599  |
| ATGTGTCAAGC  | 560.937235546381 | 0.327374854180296  |
| CCTCTGAATCA  | 561.03789073847  | 0.29018283442308   |
| ATGACGCGCTC  | 561.134713303541 | 0.29739349852416   |
| ATTGATATGAC  | 561.153372129963 | 0.369308623442927  |
| CACATATGACG  | 561.37137028928  | 0.276181169884683  |
| AGACTGATGAC  | 561.462303329072 | 0.263309448982636  |
| ATGAGTCTCAG  | 561.487815292188 | 0.348561193284877  |



|             |                  |                    |
|-------------|------------------|--------------------|
| CAGGTGATGAC | 561.490221501406 | 0.236642552507938  |
| AGCTTTGTCAT | 561.554067103953 | 0.308336443067117  |
| ACTACGATGAC | 561.624855181059 | 0.2116538042313    |
| ATTCTGATTCA | 561.697344945776 | 0.361709226148365  |
| CGGACCAGTCA | 561.701403592824 | 0.549245621262021  |
| CCGACTAGTCA | 561.702430590984 | 0.23072514579731   |
| ACAATTAGTCT | 561.894440892912 | 0.100978306007671  |
| AGCATTATGAC | 561.916808777238 | 0.377152126979689  |
| ACGATTAGTCT | 561.930270771538 | 0.395325265774741  |
| GCGACGACTCA | 561.993833896556 | 0.386690352450016  |
| GTCATCGGGAC | 562.034748696367 | 0.452118630822234  |
| CGGCACAGTCA | 562.066723326751 | 0.0588253723987704 |
| GCTCTGATTCA | 562.087290930269 | 0.362826372017349  |
| AGTCACGCTAT | 562.143447265564 | 0.35448122088248   |
| AGTCACTACAT | 562.183701905346 | 0.192320702876379  |
| AGACTAATATG | 562.195452131855 | 0.337293772735148  |
| CGATGGATGAC | 562.212822396238 | 0.382735882343298  |
| ACGACGATGAC | 562.33429564492  | 0.333804935956712  |
| ATTGCATCATA | 562.352733555144 | 0.334737282211642  |
| AACATAAGTCA | 562.394313906375 | 0.276661828072859  |
| ACGCGTGACTG | 562.430494223608 | 0.395441890293248  |
| ACCAAGATGAC | 562.434350685555 | 0.400110251440063  |
| ACGTCGATGAC | 562.52663151844  | 0.29771279898762   |
| GTCATTCGTGA | 562.539778240081 | 0.428139763157186  |
| GAAATGTCATA | 562.551988121422 | 0.259153030716204  |
| TAACATAGTCA | 562.558302771979 | 0.246546088313012  |
| CTCGGAATGAC | 562.620881595528 | 0.334008131165675  |
| CGACGGATGAC | 562.670385131348 | 0.529301095643879  |
| CAGACTATGAC | 562.797376239616 | 0.221975159364417  |
| AGTCATGAGCC | 562.807731492261 | 0.411449466755526  |
| AGTCGTATGAC | 562.890148284473 | 0.337923615699432  |
| GATTGACACAC | 562.93378847411  | 0.176707162828609  |
| CAGTCACGCTA | 562.978429119142 | 0.298537091082905  |
| GGATGTATGAC | 563.120771750482 | 0.101875212128537  |
| GTCACGCGTCA | 563.178026539219 | 0.217149193917581  |
| GAGGGTATGAC | 563.208141336958 | 0.210066785449074  |
| AATAGTCAATG | 563.367393917836 | 0.340602601781537  |
| GTCACAAGTCA | 563.398565286598 | 0.12214437061244   |
| AGCTTTAGTCA | 563.484319332683 | 0.147829126436916  |
| CTAGTGATGAC | 563.497530087651 | 0.272610936496697  |
| AGTCACTTCCA | 563.570689579846 | 0.393858990758031  |
| ATCCCGATGAC | 563.576389839827 | 0.26983086571988   |
| GAATCTAGTCA | 563.607625688273 | 0.601278040910282  |
| CATAGAATGAC | 563.67355352958  | 0.370444169635453  |
| AGTCACTCTGC | 563.682503917133 | 0.2483183024012    |
| GGAGAGTCAGA | 563.703655744592 | 0.225406007683862  |
| CCGAAGATGAC | 563.73902558679  | 0.466623589277224  |
| AATGATATGAC | 563.815847379767 | 0.170781688727069  |
| GTCAATGTGAC | 563.847850272423 | 0.0989068968440799 |
| TGATTATGAA  | 563.84912263399  | 0.571884817864395  |
| TGACTTAATAA | 563.859144938361 | 0.365378882407415  |
| GTCATACAAAA | 563.911167935092 | 0.503664533411505  |
| AGCGGTATGAC | 564.006922517589 | 0.259370354910452  |
| GTGACGCATTT | 564.038675587981 | 0.322144913601345  |

|              |                  |                    |
|--------------|------------------|--------------------|
| ACACAGAGTCA  | 564.048481766118 | 0.435211225638445  |
| ATCGTACTCAT  | 564.087463281272 | 0.300560641257841  |
| AGTCACTCTAA  | 564.174255971463 | 0.180556875611123  |
| TGACGCGTCAA  | 564.175796016324 | 0.174631039585819  |
| AGTCACGCCTA  | 564.369032671037 | 0.297519276729537  |
| CATTGGAGTCA  | 564.38134525155  | 0.377136078297065  |
| TGACAACGTCA  | 564.416478328828 | 0.369977322804672  |
| CCCGATATGAC  | 564.422745370283 | 0.274868536369483  |
| CTTCGGAGTCA  | 564.427411694461 | 0.301090165084404  |
| AACACTGTCAT  | 564.451508793765 | 0.339072704676487  |
| GACCAGTCAGA  | 564.5526721767   | 0.334721335071896  |
| ATCGAAGTCAT  | 564.617030395359 | 0.206066376245916  |
| CTGCCGAGTCA  | 564.860978383289 | 0.276594702797668  |
| GTCACCGATTA  | 564.871743838031 | 0.358328180265716  |
| CACTGTGTGAC  | 564.90382913794  | 0.236331791520157  |
| CTTGCTATGAC  | 564.912469379599 | 0.319104632910784  |
| CAGTATATGAC  | 564.970268602397 | 0.491819710254757  |
| GAGCGTGACTA  | 565.171554993059 | 0.209289404648985  |
| ACCTGGATGAC  | 565.190166523061 | 0.331938404970091  |
| AGCATGACCCA  | 565.224463690538 | 0.274883482581187  |
| ACAATCCGTCA  | 565.297731069279 | 0.224597492759701  |
| CAAGTGACGTG  | 565.311755392363 | 0.101076293041201  |
| ATGACGATGAG  | 565.360176599566 | 0.352033629078061  |
| AGGATGATGAC  | 565.444520533391 | 0.258140672847062  |
| TCATGGAGTCA  | 565.563215512687 | 0.358869689686059  |
| CAGTCATGGTA  | 565.571220321346 | 0.36444712293881   |
| ATATGGATGAC  | 565.612307806585 | 0.222840850085627  |
| ATGACAGAGCG  | 565.710489201702 | 0.267396005669387  |
| CGTCATTGTCA  | 565.746601271643 | 0.181077555112987  |
| AGTCACTCTAC  | 565.797589767234 | 0.274958437982257  |
| CTATGGATGAC  | 565.836115335211 | 0.278902026073428  |
| AAAGGTGACAC  | 565.857936553672 | 0.263840585922311  |
| TGAGCAATCAA  | 565.95315812364  | 0.631680406728621  |
| GTCATCACGGGA | 566.010271361016 | 0.309432465197134  |
| GCATATATGAC  | 566.058687109764 | 0.37439307883025   |
| TGACTGGGCAA  | 566.081437198891 | 0.0884450505308925 |
| GCCTCGAGTCA  | 566.190737341937 | 0.268065033061098  |
| CCGACGACTCA  | 566.198768790669 | 0.129794744116903  |
| GTCATAGACTA  | 566.26846467373  | 0.466692608988072  |
| GTCATATCTAA  | 566.310634235157 | 0.378054161117049  |
| GTCATCGAGTA  | 566.320313113823 | 0.313365828456205  |
| AGACTAATTTA  | 566.345424690842 | 0.311903484045612  |
| GACACAATGAC  | 566.347750782552 | 0.383370274350346  |
| GTCATCTTCTA  | 566.37129911387  | 0.308369965626897  |
| GTCATCCAAGA  | 566.398117096437 | 0.208617740269513  |
| ATAACTGACTC  | 566.42790682717  | 0.208721673640869  |
| GACGATATGAC  | 566.438851318011 | 0.434720529017316  |
| TAATCCAGTCA  | 566.499298333383 | 0.144197188161117  |
| AGTGCGAGTCA  | 566.508912437169 | 0.206837265500583  |
| GAGTCAATTAA  | 566.621974202566 | 0.380583903991182  |
| AGTCACTACTG  | 566.676097447779 | 0.275226313682921  |
| CCTGGGATGAC  | 566.768534379951 | 0.410716324794361  |
| ACACTGTATC   | 566.770772112682 | 0.278884365206068  |
| AGACTAATACA  | 566.78295273345  | 0.26733576171363   |

|             |                  |                    |
|-------------|------------------|--------------------|
| TGACGTCAACA | 566.857853436573 | 0.495678776307464  |
| GGAATACGTCA | 566.875580174585 | 0.438760135156091  |
| AGTCACTCTCG | 566.884927158575 | 0.345186287480803  |
| GTCATAGTCCA | 566.88573723707  | 0.209283473499223  |
| GTTATCTGTCA | 566.919533809545 | 0.339011054247704  |
| ATGAGTAGTAC | 566.988770149245 | 0.35930506410659   |
| GGTTTTACTCA | 567.003010983907 | 0.309751888727085  |
| GACTCACTCAA | 567.040108191528 | 0.31700172023881   |
| TGACGCAGTAA | 567.094833161594 | 0.188448709084113  |
| CTTACTAGTCA | 567.107310628668 | 0.154494709005669  |
| TATTACAGTCA | 567.13524883732  | 0.167117612577392  |
| GCTTCGATGAC | 567.192788867042 | 0.310466034925341  |
| ACAATTGACTC | 567.244334516307 | 0.396190551325123  |
| GTCATTACGCA | 567.314911402073 | 0.190303079289277  |
| CGCGTGTGTC  | 567.359962274669 | 0.367894350879973  |
| TAACCCAGTCA | 567.41650543155  | 0.232354663175391  |
| ATGACGTCGAC | 567.506973575088 | 0.229562720068881  |
| GCGTAGACTCA | 567.547000663904 | 0.219844458550322  |
| ATCTCGAGTCA | 567.557760385994 | 0.350475528770659  |
| GATTACGCAAC | 567.633779849007 | 0.350955749198055  |
| GTCATTGACAC | 567.650613803141 | 0.346463494457842  |
| GAAACGATGAC | 567.653617763509 | 0.283732203728564  |
| TGACTATAGCA | 567.695901150671 | 0.484582135782766  |
| CCAACCAGTCA | 567.711070187889 | 0.291704920062165  |
| TCAATCCGTC  | 567.773473403647 | 0.420423895571423  |
| ATGACCCAGTC | 567.77904442124  | 0.190929467802462  |
| AACTTGCTCAT | 567.783401618729 | 0.176493648515844  |
| GTCATCGAGCA | 567.8225639754   | 0.350503313583877  |
| TCTATTGCTCA | 567.870651191994 | 0.200487348360661  |
| CCTTCGATGAC | 567.87442734499  | 0.295699437876649  |
| GCCGTTAGTCA | 567.932418739959 | 0.283700505073444  |
| TGAATCAGAAA | 567.973893884597 | 0.277984441815027  |
| ATACGAATGAC | 568.032979592551 | 0.162241033671859  |
| GTCATATTGCA | 568.055520840692 | 0.422275168887624  |
| AGTCGTGACTA | 568.134904512369 | 0.162185444968768  |
| CTGGTGATGAC | 568.182032370386 | 0.295894606974403  |
| ACCGGTGACGT | 568.225853344628 | 0.356210036882743  |
| ATCGTTGTCAT | 568.247911660721 | 0.23447132648781   |
| AATGTTATGAC | 568.258115726739 | 0.297306541487953  |
| GTCATACGATA | 568.2776797271   | 0.155489110919055  |
| TTAGTCAAGAA | 568.372306905297 | 0.287911817579117  |
| TGACTCCGACA | 568.442615801356 | 0.347932474821974  |
| GCTGCTATGAC | 568.442896143937 | 0.248213477620081  |
| GTCACGTCAGA | 568.505297876089 | 0.316292792731022  |
| AGTGTGATGAC | 568.506657987221 | 0.186930908789989  |
| AATAGTCAATT | 568.53764446036  | 0.258204195969858  |
| CAAATTGCTCA | 568.572831661265 | 0.240096036277452  |
| GTGTGTCACA  | 568.600092201989 | 0.0929706600047574 |
| ATGCGGATGAC | 568.624102085317 | 0.363234848389709  |
| AAGATTGGTCA | 568.689912609875 | 0.126352195382615  |
| CTACGTATGAC | 568.6905984521   | 0.29995563457433   |
| ACTCGTGACTA | 568.775523762706 | 0.242925976610333  |
| ATGAGGATGAC | 568.812731832226 | 0.258868954149267  |
| ACGTCACCCTA | 568.815514139996 | 0.245589666284358  |

|                |                  |                   |
|----------------|------------------|-------------------|
| GAATGGATGAC    | 568.870554312725 | 0.294136405996578 |
| GTCATCGTGCA    | 568.9012036507   | 0.348358394726256 |
| GTCATACGAGA    | 568.934514101264 | 0.220870185200689 |
| CCCTTGACTAA    | 569.069560052786 | 0.214921097679458 |
| GCTCATAGTCA    | 569.098606244077 | 0.310328796028619 |
| ATTAGGTCATA    | 569.110753799746 | 0.22892437056884  |
| ACTGGTATGAC    | 569.152986588972 | 0.23201227232826  |
| AGTGTCATGAA    | 569.165942253135 | 0.25072834930788  |
| CTCATGAATCA    | 569.267967199194 | 0.548256698754553 |
| GTCATAGGTAA    | 569.281130020026 | 0.291060923086675 |
| GTACTIONTATGAC | 569.32187831516  | 0.202012395360803 |
| GTCATCCTGTA    | 569.348670656167 | 0.307807212792684 |
| ATTAGGATGAC    | 569.401761518181 | 0.278384874526783 |
| ATGACGAGACC    | 569.50521009939  | 0.359501602631628 |
| CTTTTCGATGAC   | 569.53814521689  | 0.351377783207045 |
| CTATCTATGAC    | 569.545233563064 | 0.267969885540623 |
| GAACGGATGAC    | 569.573879081995 | 0.264582533015041 |
| AGTCACGCTAC    | 569.601199336136 | 0.253422498414733 |
| ACGTCACCACT    | 569.608644009817 | 0.334576365663723 |
| GTCACCATGAC    | 569.615811504691 | 0.143180507803611 |
| GTTACCAGTCA    | 569.684911168707 | 0.479423853829965 |
| GTCCTCAGTCA    | 569.697618164896 | 0.307547866976563 |
| AGAGTCAATAT    | 569.756903410643 | 0.346851828845658 |
| GCCGGTATGAC    | 569.761408953919 | 0.309714693526591 |
| ATGACGGACAC    | 569.798101157535 | 0.142071045625402 |
| GTGAGTCTGAA    | 569.812237893792 | 0.205681293870268 |
| CGTCATTAGTA    | 569.882613840627 | 0.358355262384187 |
| ACGTTTCGTC     | 569.899757629774 | 0.143940132177982 |
| CTTTGGAGTCA    | 569.902851625717 | 0.245816669816813 |
| CAATCGACTCA    | 569.903777483329 | 0.255991258999855 |
| CCACCGAGTCA    | 569.942951469863 | 0.17258591819429  |
| CAGAGATGACG    | 569.973959109816 | 0.369251961218781 |
| CGTAAGATGAC    | 570.008969101498 | 0.304684368211493 |
| AGTATGATGAC    | 570.02144901646  | 0.304108715567694 |
| ACTTTGCGTCA    | 570.041849850576 | 0.292856630109127 |
| GTCATCATAGA    | 570.044682588498 | 0.174771007887309 |
| CACACTATGAC    | 570.539784182877 | 0.292843406527497 |
| CACTAATGACG    | 570.63173208094  | 0.345630445901912 |
| GTTATACGTCA    | 570.650212728994 | 0.242093631711939 |
| AGCACTGTCAT    | 570.695812427379 | 0.218822292984298 |
| AATGCTATGAC    | 570.713001691347 | 0.20119755357829  |
| AATAGTCAATC    | 570.76819553899  | 0.306181430398337 |
| CACGAATGACG    | 570.776532676444 | 0.26224215760496  |
| GTCATCGATCA    | 570.798091145306 | 0.417807944446563 |
| TCCAAGACTCA    | 570.815663205059 | 0.155373432157664 |
| GTCATATTCAA    | 570.857132868955 | 0.240252412799004 |
| ATGACAGTACG    | 570.930202819095 | 0.198672947963394 |
| AGACAGAGTCA    | 570.94278499175  | 0.204723045848464 |
| AGTTTGCTCAT    | 570.963256091097 | 0.152582941644337 |
| TCGATTACTAA    | 571.016019414573 | 0.453750096891135 |
| AATCTTGTCAT    | 571.05081186188  | 0.338722728042905 |
| GTCATACCGTA    | 571.09893687465  | 0.40271081822924  |
| CTAGCTATGAC    | 571.149333496142 | 0.327645691656181 |
| AATAATATGAC    | 571.158230197057 | 0.380584333994666 |

|              |                  |                   |
|--------------|------------------|-------------------|
| CGCACACGTC   | 571.24340292742  | 0.217402735394573 |
| TGCCTGACACA  | 571.293961746374 | 0.403835798507261 |
| GGCCCTATGAC  | 571.317002746448 | 0.33533585833544  |
| GTCATCCGATA  | 571.406145267569 | 0.224516124049058 |
| CGTCATCGGCA  | 571.428854030402 | 0.525926438373768 |
| CGTTCTAGTCA  | 571.445118450761 | 0.496723014994983 |
| ACTATGATGAC  | 571.468316025582 | 0.186638197771065 |
| TGACTATGCAA  | 571.527158318804 | 0.448349783361082 |
| CACAATATGAC  | 571.528980613683 | 0.197421996641665 |
| TGATTCACCAA  | 571.661933296492 | 0.246905940453555 |
| GTCATCCTACA  | 571.722313316494 | 0.119234612969353 |
| AATTCGGTCAT  | 571.74165596799  | 0.361241926323865 |
| GTCACAGTTGA  | 571.848069883397 | 0.358577702770526 |
| GAAATCTGTCA  | 571.921362656669 | 0.380035038050094 |
| AACCTTACTCA  | 571.942252951474 | 0.292484290871044 |
| GTCATCGCCGA  | 571.973639550191 | 0.443647588670976 |
| CCTAATATGAC  | 572.009137914137 | 0.403592159123048 |
| AAACACAGTCA  | 572.021272193952 | 0.563912249156825 |
| AAAGTATGAGT  | 572.16884802994  | 0.275557338474345 |
| ATCTGATGACG  | 572.174635364653 | 0.365756398754294 |
| ATGACTTGTAG  | 572.278088793286 | 0.357729792266283 |
| AATGGTGACGT  | 572.334243735319 | 0.330888337551376 |
| CCATAGACTCA  | 572.376344293421 | 0.345485127039795 |
| GTACCTATGAC  | 572.38014853839  | 0.195757050642565 |
| GACCGACTCAC  | 572.485906610039 | 0.26957039619582  |
| AAGAGGATGAC  | 572.667463106435 | 0.216145599399112 |
| ATGACGATGCC  | 572.721889201609 | 0.29527436298117  |
| CAGCGTATGAC  | 572.762218818521 | 0.282959692624016 |
| ACACCTATGAC  | 572.845181570146 | 0.209848407073799 |
| CTGGCTATGAC  | 572.859120367941 | 0.371154744285082 |
| ACATATATGAC  | 572.923574534657 | 0.45515984860001  |
| ATGACACGGTA  | 573.019973999578 | 0.182172192695975 |
| ACCATGAATCA  | 573.030834833635 | 0.475779862668708 |
| ACACAGATGAC  | 573.068184746776 | 0.382134851770255 |
| ATGACGTCTTC  | 573.095404150557 | 0.187242331318925 |
| GTAATAATGAC  | 573.208815985074 | 0.332269961624851 |
| TACTGACGTCA  | 573.289773699372 | 0.264939217120751 |
| ATGAGTACCAA  | 573.385308445628 | 0.272642463874665 |
| ACGTTGTCAT   | 573.430907140608 | 0.502380133493246 |
| ATTTCGGAGTCA | 573.44752204701  | 0.300058429011045 |
| TGACAGATAAAA | 573.478233316189 | 0.297533289285462 |
| GTCATAGACAC  | 573.498952098476 | 0.440844038565211 |
| CGAATCTGTCA  | 573.515688245997 | 0.303048187815488 |
| AAAGTCGTCAT  | 573.624107144907 | 0.185449407712021 |
| GTCATCGTAAA  | 573.6478538556   | 0.175003050651678 |
| AGAAGGATGAC  | 573.666271791255 | 0.358832726758208 |
| AACTCGAGTCA  | 573.733875592421 | 0.536066300469555 |
| AGCATCGTCAT  | 573.749969960836 | 0.262831545696373 |
| CACCTGCGTCA  | 573.768465201764 | 0.232572286656663 |
| GACGCTATGAC  | 573.829628314913 | 0.413947552857597 |
| GTGACACAGGA  | 573.830586538217 | 0.207590607025799 |
| GATGGTATGAC  | 573.91020620478  | 0.137361205931902 |
| TGACTCCAAACA | 573.916513316631 | 0.471512475045478 |
| AACTGTATGAC  | 573.964474261466 | 0.278208351680922 |

|              |                  |                    |
|--------------|------------------|--------------------|
| TGAGCAATTAA  | 574.028994235302 | 0.239746300030689  |
| ATGACAATGTC  | 574.030259013296 | 0.226941818238448  |
| AGCAATATGAC  | 574.052322350859 | 0.06690669808308   |
| ATGACGTTGAA  | 574.089593154751 | 0.348695933056512  |
| CTGGTTATGAC  | 574.120323845824 | 0.391067523365449  |
| AACTACAGTCA  | 574.378734325353 | 0.351692918072071  |
| GGACCGATGAC  | 574.394179297881 | 0.0928676233259421 |
| ATTAGAATGAC  | 574.409586378825 | 0.341106571103266  |
| CGGGTTATGAC  | 574.454594022024 | 0.263136862854734  |
| TCGTTGTGTC   | 574.527237373988 | 0.29189825334359   |
| GAGTCAATTAC  | 574.575826344745 | 0.0903983164969521 |
| ATAACCAGTCA  | 574.611554853425 | 0.284541093660658  |
| GATCCGATGAC  | 574.67288377074  | 0.34453680662363   |
| TGACCGCTCA   | 574.689353143323 | 0.302164467708681  |
| CTCAAGACTCA  | 574.89336464054  | 0.124868800623274  |
| GTAGACTCAGA  | 574.920176404785 | 0.220325150984888  |
| GCCTAGATGAC  | 574.923962755368 | 0.385379172147682  |
| TAAATCTGTCA  | 574.933502057525 | 0.361001222312175  |
| GAGACGATGAC  | 575.060859629098 | 0.267060721802366  |
| ATGACGTTAAC  | 575.076434700147 | 0.238767169159726  |
| AAACAATGACG  | 575.106059943448 | 0.489108207394778  |
| CAATAAATGAC  | 575.177725109065 | 0.273190715282815  |
| AATATTAGTCT  | 575.227247040555 | 0.354411616921547  |
| CATTAGATGAC  | 575.368194090066 | 0.352598748119341  |
| ATGACCCAGAG  | 575.41741717564  | 0.203472187655809  |
| ATCCTCAGTCA  | 575.447185736189 | 0.322374600962495  |
| CATCAATGACG  | 575.453919548335 | 0.323239114348108  |
| CGTAGGATGAC  | 575.645048580281 | 0.205172458595969  |
| AGTCATGAGCA  | 575.695312028435 | 0.293238766143016  |
| AGCCTGACTGA  | 575.698369886709 | 0.389173335914146  |
| CGGTTTATGAC  | 575.702790404654 | 0.347388475406815  |
| CCTTTGACTGA  | 575.757058931757 | 0.242020796744507  |
| GCGGGTATGAC  | 575.840273964565 | 0.335847338616418  |
| ACATTTATGAC  | 575.93174563411  | 0.239868027626411  |
| ATGACAATATA  | 575.994118214787 | 0.339611476571847  |
| ATTTTCGATGAC | 576.030035378973 | 0.231865632865713  |
| TGACCATGACA  | 576.089010335206 | 0.388631045428683  |
| CTGATGATGAC  | 576.138000642571 | 0.314015492981892  |
| CGTCATGTGAC  | 576.152617716327 | 0.338493083885524  |
| ATGACAGAGTA  | 576.176967831572 | 0.278972799804154  |
| GAACGTATGAC  | 576.21849660175  | 0.258054035619052  |
| CGAACGACTCA  | 576.254357234744 | 0.454922355486147  |
| GTGTTTACTCA  | 576.282257204428 | 0.586729658194416  |
| CCAAAGATGAC  | 576.310312312001 | 0.194865700633779  |
| CAGTCAGTGAC  | 576.317454603004 | 0.287994822484537  |
| ATTACTGTGAC  | 576.407038761863 | 0.44119555756033   |
| TAAGATTGATA  | 576.419883764378 | 0.190215835062425  |
| TACATACGTCA  | 576.442736033304 | 0.331019393451173  |
| CCAAGTCATCG  | 576.463813401007 | 0.383592528950367  |
| ACTATAAGTCA  | 576.499726719844 | 0.32716621913775   |
| ATGACGAGGTA  | 576.508104552782 | 0.210989217280466  |
| ACTCACGTCAT  | 576.537502995166 | 0.234565453931647  |
| ACGCTGATTCA  | 576.554433760884 | 0.224579651138849  |
| CTAATCCGTCA  | 576.72758011614  | 0.273159898502023  |

|             |                  |                    |
|-------------|------------------|--------------------|
| CGACTGCGTCA | 576.804543979509 | 0.225204153883684  |
| CCCGTGATTCA | 576.849363423787 | 0.259289656673448  |
| AACACTAGTCA | 576.853269964319 | 0.463335246848769  |
| CACGTTATGAC | 576.953969013091 | 0.17878849153021   |
| CTAGCGATGAC | 576.9611070069   | 0.226769248681024  |
| GTCACCGCTGA | 577.065105098951 | 0.443341192464514  |
| ACCCCAGTCAT | 577.158420108966 | 0.246569385591034  |
| TGAGTCGTCCA | 577.250584836563 | 0.164816352259402  |
| GCCATTATGAC | 577.265260288355 | 0.302506667903763  |
| AGTCACGCTCA | 577.502872546299 | 0.25258807216139   |
| CCATTGATGAC | 577.557416032036 | 0.237779063560197  |
| GTAACGATGAC | 577.637597123565 | 0.444561206010566  |
| ACGTCACCTAT | 577.649594101023 | 0.352619500329304  |
| ACGACGTCATC | 577.676950915358 | 0.254382301633493  |
| ATGACTTGTA  | 577.72967574512  | 0.315063266705638  |
| GTCATAGCGAC | 577.785153965907 | 0.512357190722573  |
| GTCATACGGAC | 577.800954943477 | 0.231494843617014  |
| ATGACGAGGTG | 577.838404820218 | 0.300538367494661  |
| CCAATCCGTC  | 577.896562746463 | 0.320300897335867  |
| AAAGGCGTCAT | 577.901632165137 | 0.180672717293     |
| TGACTTATACA | 577.970775590799 | 0.417510117540837  |
| GCAGTTATGAC | 577.99987171174  | 0.333918097611517  |
| CGTACTATGAC | 578.007997988281 | 0.387786430958797  |
| ATGACAGTATG | 578.11052062281  | 0.287542211643753  |
| AGATATATGAC | 578.214173163097 | 0.366348368260669  |
| ATATGTGACGC | 578.230031789807 | 0.251895749361017  |
| ATCGGCGTCAT | 578.260491571632 | 0.254600435817211  |
| GCGCTGACACA | 578.304472683964 | 0.173027641506554  |
| ATCTCTGTCAT | 578.412516339843 | 0.313490860959228  |
| GCTCGTATGAC | 578.512001378426 | 0.0716038218952735 |
| GTTATTTGTCA | 578.670089550092 | 0.308078640261262  |
| CTTATCTGTCA | 578.706272414556 | 0.15305398035959   |
| GACCCGCTCAC | 578.781756836034 | 0.279398854466243  |
| AATGTGAATCA | 578.834862035776 | 0.485540255329388  |
| TCTGAGTCTAA | 578.896619477945 | 0.34990761864543   |
| CAGTCAGAAC  | 578.898851997361 | 0.398086210287076  |
| CGCCTTAGTCA | 578.902664527948 | 0.689893176089643  |
| ATATTGATGAC | 579.143142512684 | 0.205927513696348  |
| CAGTCACGCGG | 579.197616685949 | 0.317672687345927  |
| AAGACGATGAC | 579.371980996545 | 0.270518005753385  |
| GAGTGTATGAC | 579.381619976277 | 0.318176280417722  |
| TAATAGACTCA | 579.393561075065 | 0.139688221863537  |
| CCCTGTAGTCA | 579.394044301083 | 0.449569080461937  |
| CGGCTTATGAC | 579.435924670998 | 0.342368533738976  |
| AGTTGTAGTCA | 579.506377481788 | 0.18459514750718   |
| GGTGGTATGAC | 579.585576543152 | 0.261871130338375  |
| GTCATCCGCAA | 579.68277856583  | 0.458106699171674  |
| AGAGTCAATAC | 579.764041134819 | 0.225131366203155  |
| TAAGTGTGACA | 579.798332114108 | 0.267267093171339  |
| CAAGCGATGAC | 579.821816664039 | 0.363130880509368  |
| AATGTGATGAC | 579.832005313063 | 0.39543123114336   |
| CCACTGACACA | 579.909500492536 | 0.24860312402502   |
| AAGGCGTGACT | 579.915961953199 | 0.28315464623888   |
| TAGATCCGTC  | 579.958440302275 | 0.226831085316684  |

|              |                  |                   |
|--------------|------------------|-------------------|
| TGACAAAGTCA  | 579.96102186646  | 0.388987420182163 |
| GTCATTTTCGA  | 580.020405030212 | 0.403543713604818 |
| GTCATTTTATTA | 580.12829750305  | 0.302332084418609 |
| ATGACAATACC  | 580.137726493194 | 0.305979511561248 |
| ATGACACGGCG  | 580.159421787132 | 0.342039424160604 |
| AGGGTAGTCAC  | 580.169328984557 | 0.201121095890024 |
| AGTCACTACTA  | 580.200576803719 | 0.222484295178687 |
| AATGATGTAAC  | 580.388427092179 | 0.256916794392381 |
| AAAATTGACTC  | 580.443557652133 | 0.250201562009338 |
| AATTGCGTAAT  | 580.515279940051 | 0.202392610669352 |
| ATGACAGACTC  | 580.521945061479 | 0.204721305035    |
| AGACTAATAGG  | 580.549453614413 | 0.26673658102236  |
| ACACGTGTGAC  | 580.552581504879 | 0.32721805728829  |
| CATATCTGTCA  | 580.77661899956  | 0.182386132142328 |
| CGCTTGACTAA  | 580.849911611617 | 0.410933257119243 |
| ATCAAGATGAC  | 580.865682700407 | 0.319441556139229 |
| ATGACGCGCAG  | 580.906638729546 | 0.293731311461542 |
| ACGCAGAGTCA  | 580.963232652568 | 0.193791916644835 |
| CTCGGAGTCAG  | 581.089615419641 | 0.228331158701243 |
| TGAATCAGTAA  | 581.116693751103 | 0.32319832009618  |
| CGACCTATGAC  | 581.21441020425  | 0.510390282426278 |
| GACAATATGAC  | 581.282114022776 | 0.44771691364305  |
| CCATGTGTGAC  | 581.288201123271 | 0.413215276716248 |
| AATGGGAGTCA  | 581.299730760093 | 0.370811709696498 |
| CGTAACAGTCA  | 581.331554499283 | 0.305698908260452 |
| GTACGAATGAC  | 581.49126491053  | 0.22829620765     |
| CAGATGATGAC  | 581.535829703442 | 0.357579189240919 |
| GTCATGTGACA  | 581.540687105214 | 0.266938947386806 |
| AGATTGATGAC  | 581.614443407389 | 0.20412139836404  |
| ATGACAGCTAA  | 581.736582035149 | 0.26864604403864  |
| ATGGTGACCCA  | 581.739329649523 | 0.283057512660536 |
| CGTCATCTGAC  | 581.799559589182 | 0.224155859456394 |
| GACTTGACTAA  | 581.833636573208 | 0.485637935235232 |
| CGTTTGCCTCA  | 581.861608238075 | 0.570797250074501 |
| AGTCACGCTTG  | 582.067377036878 | 0.226082925989545 |
| ATGACAGAGAG  | 582.131069941437 | 0.323741191391651 |
| CATTGAATCAC  | 582.188406515123 | 0.24344801062905  |
| GATGCGATGAC  | 582.295371100943 | 0.199591970059197 |
| CATTCTATGAC  | 582.40622918173  | 0.267146014140632 |
| GCATCGATGAC  | 582.410512129797 | 0.635868488879179 |
| AGTGATATGAC  | 582.478352091927 | 0.355513007327411 |
| GTCATAATATA  | 582.714415607201 | 0.438147432904039 |
| GTCATTCTCTA  | 582.737136070357 | 0.256037908968876 |
| ACGTGAATGAC  | 582.761273539288 | 0.307954862307321 |
| CCGTCTAGTCA  | 582.7859233135   | 0.299459777311457 |
| CGTCATCTAGA  | 582.845199191058 | 0.259764190678511 |
| TATTGCAGTCA  | 582.890376072361 | 0.492006717077771 |
| CGTCATCAATA  | 582.905547212213 | 0.241754078147211 |
| CAACTGATGAC  | 582.998333599025 | 0.389201012184016 |
| ACTAATATGAC  | 583.031987983284 | 0.124710836454325 |
| CCGGTGATGAC  | 583.05419340698  | 0.134485054764889 |
| TAGTTGTGTCA  | 583.143533548806 | 0.159101444070017 |
| CCGAGATGACA  | 583.161487661854 | 0.353118781934493 |
| ATGACGGAGAG  | 583.170858007277 | 0.232356017848822 |



|             |                  |                    |
|-------------|------------------|--------------------|
| GCTACTCTGAC | 583.173250566944 | 0.319529492254273  |
| AGTGTCATGAT | 583.210787479765 | 0.252456807683879  |
| CCTCCACGTCA | 583.288295101353 | 0.193535053765502  |
| AACAATATGAC | 583.326814142756 | 0.311162653810281  |
| GTCACCGGTCA | 583.327032373951 | 0.383567625892262  |
| AGTGGTATGAC | 583.356225554684 | 0.239513496211447  |
| CCAAGGATGAC | 583.385858467252 | 0.410644313536284  |
| ACCACGATGAC | 583.395094458035 | 0.307650892680615  |
| AGTTTTACTCA | 583.435342213603 | 0.25868499047628   |
| AATCTACGTCA | 583.592800353032 | 0.140629825951756  |
| CCGCCGAGTCA | 583.604052655764 | 0.300121861417275  |
| ATTTACAGTCA | 583.633324263337 | 0.501377586137001  |
| CCATCGACTCA | 583.706492700106 | 0.228163028170196  |
| GACCCTATGAC | 583.731429538852 | 0.327972394556161  |
| ATGACCCTAA  | 583.75749571788  | 0.239503814340449  |
| AACTGTGACGT | 583.812936672175 | 0.341247457949015  |
| GTCATCAGCAA | 583.856792877315 | 0.141569885639936  |
| ACGTCACATCT | 583.938833240646 | 0.288644729758863  |
| ACAAAGATGAC | 583.950901310687 | 0.376785908436627  |
| GTCATTAATCA | 584.143219202367 | 0.28879326437846   |
| CCTGAGATGAC | 584.172486683332 | 0.249024829123822  |
| ATCAGGATGAC | 584.195391850711 | 0.273163486853818  |
| GTCATAAGTTA | 584.200428729895 | 0.161736379794321  |
| GGTCATCGTCA | 584.219943237413 | 0.307416157961543  |
| CAGCATATGAC | 584.221692722317 | 0.456058651757684  |
| GTCATCAACGA | 584.360109375885 | 0.504484897896659  |
| CACATGATGAC | 584.527681324407 | 0.342913454494948  |
| CCAGGTGTGAC | 584.529141753612 | 0.256705962532466  |
| CACCTGACTGA | 584.559926437666 | 0.323204202564263  |
| ACACTTATGAC | 584.573010828841 | 0.21255813464204   |
| CGTCATCTAAA | 584.576022698631 | 0.169871866276249  |
| AGTGTGACCAC | 584.619939222105 | 0.324812355106742  |
| GTCATCGCTTA | 584.626564487919 | 0.174989399170816  |
| GCTCTGAATCA | 584.66695708843  | 0.318784462584537  |
| ACTCGTAGTCA | 584.706939140133 | 0.574315443739705  |
| AGTCATGAGGC | 584.776654143923 | 0.22118059970145   |
| ATTGCTATGAC | 584.872615120509 | 0.234771611842008  |
| CAGTAATGACA | 584.88996608201  | 0.299104788320403  |
| ATGCTTATGAC | 584.931989854968 | 0.0632748317115897 |
| CAGAAATGACG | 584.932222342828 | 0.370709761526866  |
| GCTCGGAGTCA | 585.132014728633 | 0.336351953947336  |
| CACGTTACTCA | 585.156792030232 | 0.452639558223237  |
| CTTTACAGTCA | 585.20829811147  | 0.46337661021221   |
| GTCATTTATCA | 585.211762679441 | 0.280425225191894  |
| AACTGAATGAC | 585.26818097383  | 0.264164174192562  |
| ATATATGACCA | 585.301867970251 | 0.459030735345837  |
| GTCATCTTCGA | 585.433146162167 | 0.264707878903084  |
| CAGCGGATGAC | 585.475579652412 | 0.35181211150112   |
| GTGACTCGGGA | 585.48602288909  | 0.218699481248155  |
| TGACTGGATAA | 585.555871402727 | 0.349295802960348  |
| CCTATGATGAC | 585.571785822444 | 0.436759775804919  |
| GGTCACGTCAC | 585.611740530607 | 0.225226308662006  |
| ACCATACGTCA | 585.616522669326 | 0.307221471158939  |
| CCGCTGCGTCA | 585.719762738559 | 0.304335868252906  |

|             |                  |                    |
|-------------|------------------|--------------------|
| CATTTGCTCAC | 585.793657773853 | 0.251007664257419  |
| CTACGTAGTCA | 585.867457672332 | 0.343913938967601  |
| TGACGAAATAA | 585.891113329306 | 0.301187440264804  |
| GTCATTGTCAC | 585.959602753893 | 0.326901786352632  |
| ACGTCACATTA | 585.966965257354 | 0.145592122671875  |
| ACGGTGAATCA | 586.049837728091 | 0.375922295622832  |
| CCGAAAATGAC | 586.050386923018 | 0.340711889322849  |
| ATACACAGTCA | 586.065287464505 | 0.279762858478884  |
| ACGGATATGAC | 586.114357245968 | 0.203308596185621  |
| GTCATACGTGA | 586.12228663334  | 0.242347068989909  |
| GTCATCGTCGA | 586.137676556295 | 0.318968078405775  |
| AATCCTATGAC | 586.189700902978 | 0.139730009955882  |
| ACCTGTAGTCA | 586.240076593985 | 0.346735023265404  |
| GGCACTATGAC | 586.248409255689 | 0.202824315842077  |
| ATTAGATGACG | 586.274624206637 | 0.440361102747541  |
| ATGTGGATGAC | 586.290144503321 | 0.310047896729624  |
| AGTCACCTCCC | 586.401802468597 | 0.25531346709499   |
| ATGACACGCA  | 586.464987415831 | 0.35764209473279   |
| GTCATCGCGTA | 586.527442603587 | 0.17994478131581   |
| GATGACTTGAC | 586.538132533161 | 0.307021424282281  |
| ACCCGTATGAC | 586.613461219148 | 0.346527316979338  |
| AGCCGTATGAC | 586.669818380093 | 0.0843312118657767 |
| TGACTCGCACA | 586.684723863124 | 0.185160132817159  |
| GAGTCAATTGA | 586.690488898127 | 0.271955361732766  |
| AGTCACGCGTA | 586.889976195233 | 0.252933618742397  |
| CCTCGTATGAC | 586.891753341169 | 0.23341095058108   |
| ATGACAGAGCA | 586.903173303847 | 0.202190322637522  |
| GAACCGAGTCA | 587.07338389633  | 0.346888041857697  |
| AATTTGACTCT | 587.100075917086 | 0.254008761939174  |
| CACCTTAGTCA | 587.143001460706 | 0.378929637954749  |
| CCGAATATGAC | 587.144827462265 | 0.333916742972019  |
| ATGACAGCTCA | 587.203677743851 | 0.236008796766662  |
| GTCACGTGTCA | 587.306344740315 | 0.125919320694074  |
| GTCATTCATCA | 587.344403367475 | 0.311180761613624  |
| GTCATACGTA  | 587.457828083224 | 0.161990576930964  |
| CGTCATTCGTA | 587.467828388818 | 0.120962782181219  |
| GTCCTGTCATA | 587.510551796545 | 0.349394442178708  |
| GACTCACTCAC | 587.537627169686 | 0.208717919133254  |
| TCAGTCAAAGA | 587.55640311957  | 0.0667726015764631 |
| TGACTCGCTAA | 587.571865431215 | 0.272234936481955  |
| GTGACTTACAC | 587.596322196559 | 0.320953015071364  |
| GTCATAGTGGA | 587.610601377028 | 0.195540462953892  |
| AAACTGTGTCA | 587.63938488631  | 0.380048230128569  |
| AACGCGATGAC | 587.652182698957 | 0.361220005758412  |
| ACGTCACCATG | 587.78731936051  | 0.304036415774659  |
| CGTCATCAGAA | 587.868378484199 | 0.385179975389225  |
| GTCATCATCGA | 587.88734599647  | 0.330110299268     |
| GTCATCATGTA | 587.935496247225 | 0.181717957766143  |
| GTCATAAGCCA | 587.968297826274 | 0.417538714031318  |
| GTCAGATGACA | 587.977350673023 | 0.295229487402168  |
| TGAGTAAGCAA | 588.201137437707 | 0.351626670591952  |
| CCTGCTATGAC | 588.23777511395  | 0.253658213165207  |
| ACCATTGACTC | 588.254206125283 | 0.183861169575897  |
| CTGCGGATGAC | 588.312747076691 | 0.368725604140474  |

|               |                  |                   |
|---------------|------------------|-------------------|
| AATACCGTCAT   | 588.395809883961 | 0.261446952349823 |
| GGAAATATGAC   | 588.422955189941 | 0.190729913223783 |
| GTCATAGTGAA   | 588.480729444462 | 0.285869977001403 |
| GGATTTATGAC   | 588.545635148243 | 0.433600763049299 |
| GCTGTGATGAC   | 588.567316696379 | 0.332630577159217 |
| AGGTGGAGTCA   | 588.571629820431 | 0.174987617825886 |
| ATGCTGCGTCA   | 588.595502606265 | 0.473170032992301 |
| CATCATAGTCA   | 588.791462054193 | 0.373168276103845 |
| ACATCTAGTCA   | 588.841014530174 | 0.224109761530818 |
| CAAGAGATGAC   | 588.906290820367 | 0.312842455701699 |
| AGCTCCGTCAT   | 588.996318207238 | 0.324383119275999 |
| ACCTTGACTAA   | 588.996911734992 | 0.270192555490853 |
| GAGTCAATGGA   | 589.037767113802 | 0.264379464657213 |
| GTAGCGATGAC   | 589.0513471194   | 0.262134573300724 |
| CGTCATCTGTA   | 589.092930066704 | 0.35458316753437  |
| GCCATGTCACA   | 589.10284510465  | 0.152201175729794 |
| AGACTTATGAC   | 589.176225512526 | 0.350628110282588 |
| AACCTTGTGTCAT | 589.189754038604 | 0.252946159461139 |
| GTTTAGACTCA   | 589.191696350933 | 0.283414250692389 |
| AAGCATGACAC   | 589.24662398501  | 0.292760022497874 |
| GTCATATTACA   | 589.248551854179 | 0.497941289069244 |
| AGTCCGATGAC   | 589.278288022201 | 0.481006067743224 |
| ACGTCACCGAG   | 589.321664410117 | 0.444211570148269 |
| GACCTGATGAC   | 589.362892520276 | 0.325340530278627 |
| AATTTACGTCA   | 589.37980572606  | 0.564672488196105 |
| AGACTAATACT   | 589.506650393208 | 0.25814011228903  |
| CGCCCGATGAC   | 589.608327910273 | 0.394169474301252 |
| AAACATGACAC   | 589.636622993651 | 0.188571447547871 |
| CAACAATGACG   | 589.7229975667   | 0.128622057060575 |
| GGACGTATGAC   | 589.7255780511   | 0.335107333754826 |
| ATGACAATACG   | 589.769531070525 | 0.354914332172512 |
| GTCATCCCTGA   | 589.829546624577 | 0.600855370957698 |
| AGTCACTAGTC   | 589.875697321225 | 0.33774262735318  |
| TCATGCAGTCA   | 589.88819852285  | 0.335126976419554 |
| GTCATCAGAAA   | 589.911011554175 | 0.2328838557542   |
| CTAGCGAGTCA   | 589.95463323348  | 0.287513885457931 |
| ATTTCGTAGTCA  | 590.056695382621 | 0.275098708252373 |
| GACCATATGAC   | 590.135467282093 | 0.381666159923162 |
| ACGTCACCTAT   | 590.137308138387 | 0.221462669180561 |
| GTCATCGGATA   | 590.176729876075 | 0.253262115107175 |
| TCCTGACGTCA   | 590.202492952937 | 0.40438966157443  |
| CGTCATTAGTC   | 590.209314360828 | 0.223432482568182 |
| CTAATGGGTCA   | 590.228358038502 | 0.250653450111206 |
| CTGTCCAGTCA   | 590.255772093322 | 0.192748212292878 |
| AACGTACTION   | 590.298580861935 | 0.327164976665454 |
| AGTCATGGTTC   | 590.36245118843  | 0.219178218760449 |
| TCGTCCAGTCA   | 590.374394445003 | 0.36027684260158  |
| ATATTTTCGTCA  | 590.60119374344  | 0.37919831608378  |
| AACTTTATGAC   | 590.643303967166 | 0.371799229974146 |
| GCGAATATGAC   | 590.66130239399  | 0.428995828768192 |
| CTTAGGATGAC   | 590.691995054608 | 0.382972057376935 |
| GTCATCTATTA   | 590.726459405135 | 0.258412713904401 |
| AGTCAAGTCAT   | 590.741096280464 | 0.115808763729455 |
| TGACTGAGGCA   | 590.775487181825 | 0.176127823887731 |

|             |                  |                    |
|-------------|------------------|--------------------|
| AAGAGTGAGTC | 590.788164535911 | 0.235679557110405  |
| GGTGGGAGTCA | 590.844045546854 | 0.176428519126525  |
| ATTAGTGACAC | 590.930535451885 | 0.266662165488674  |
| ATCCTGACGCA | 590.978694817263 | 0.239472247696624  |
| AGTATCCGTC  | 591.077301066836 | 0.239273596944371  |
| GGAGGTATGAC | 591.119891825845 | 0.275010532160931  |
| GACACGATGAC | 591.213844673055 | 0.316090697377098  |
| AACTTGTCACA | 591.235832055638 | 0.292189230278977  |
| GTCATAGGACA | 591.261200477121 | 0.371212159511985  |
| TCTCTACGTC  | 591.330492480836 | 0.345173620221823  |
| ATTATTGACTC | 591.331994339704 | 0.340311675540994  |
| TAGGTGACCCA | 591.378393652147 | 0.217201501339165  |
| CTACCTAGTCA | 591.398463605188 | 0.233091912761666  |
| TCCTTGACTAA | 591.424791379902 | 0.323228678714099  |
| GCAATCTGTCA | 591.515314246025 | 0.459002900827918  |
| CAAAAGTGTC  | 591.597191583546 | 0.423074855889582  |
| CAGGTTATGAC | 591.637284829395 | 0.345147183826236  |
| ATGACCACTAC | 591.713512819573 | 0.201752694038212  |
| ATACTGATGAC | 591.735970122166 | 0.226021523498968  |
| ATGGCGAGTCA | 591.792145439291 | 0.323941931056121  |
| ACGCGCGTCAT | 591.797296715593 | 0.141826967915334  |
| ATCTCGATGAC | 591.828991940793 | 0.0671858494434185 |
| CGGATGATGAC | 591.831345694279 | 0.332957833736284  |
| CATTGATGACG | 591.855470214125 | 0.398688051694524  |
| GGCCATGTCAC | 591.871188328407 | 0.238861040296866  |
| ACCGCGAGTCA | 591.975203188585 | 0.460115258378518  |
| AGTCACGCTAA | 592.016706154908 | 0.396528299301138  |
| AACAGTGTCAC | 592.027084142995 | 0.337512250600017  |
| GTCATCATCCA | 592.162755682223 | 0.280565316599596  |
| AGGTCGATGAC | 592.188068531996 | 0.159605860772638  |
| GTCATTTTGA  | 592.201030515326 | 0.37742235576929   |
| CTTGCGATGAC | 592.249233085694 | 0.282363189305803  |
| ACGATTGCTCA | 592.336818688861 | 0.366614018296795  |
| TCATAGCGTCA | 592.372115761466 | 0.141001504061741  |
| GTCATAGAAAC | 592.421156311151 | 0.421352715060745  |
| GTCATCCATCA | 592.502631452159 | 0.24530117042156   |
| AAGATGATGAC | 592.534589603392 | 0.373355324678102  |
| GTCATCGGGCA | 592.563502778074 | 0.347059088988535  |
| CCATTCGTCA  | 592.567594706503 | 0.370079114346557  |
| GACCTGACACA | 592.602024402922 | 0.15971007667503   |
| ATCCTTACTCA | 592.608472481807 | 0.269868687464841  |
| ACCTTCAGTCA | 592.683014352421 | 0.233829459443445  |
| TCGGTGAATCA | 592.702878474291 | 0.321030743841768  |
| GTCATATTCGA | 592.747192674093 | 0.274947038579403  |
| CAGTCACGAGA | 592.788761651622 | 0.370782385064758  |
| GTCATTCTGTA | 592.845586972291 | 0.289639009725829  |
| TGACGTAGAAA | 592.916223318334 | 0.285483399823206  |
| CCGAAATGAC  | 592.929717101625 | 0.310723351961786  |
| AAGTTTATGAC | 592.933799332037 | 0.395415243468195  |
| CCTGGTATGAC | 592.954320621428 | 0.421551303029395  |
| GTCATAATGTA | 592.955795643534 | 0.0841295974845168 |
| ACAACAATGAC | 593.027774877337 | 0.345340842076142  |
| CGGTCGATGAC | 593.062319177513 | 0.469266335115631  |
| ATTGGGAGTCA | 593.065722818678 | 0.209441362460346  |

|             |                  |                   |
|-------------|------------------|-------------------|
| TGACTCTGCAA | 593.089259914161 | 0.218541477484789 |
| ACACAATGACG | 593.093951521485 | 0.297915285473116 |
| AGTCATGGGTC | 593.094442523203 | 0.263243585144398 |
| CTGTAGATGAC | 593.127283606002 | 0.27000642407225  |
| GATAGAATGAC | 593.144695033624 | 0.308313007980682 |
| AGTCAGCGTCA | 593.232116111351 | 0.216399247456233 |
| GGGCTTAGTCA | 593.273696648053 | 0.163686433510777 |
| GTCATTACATA | 593.315678190134 | 0.498766156209011 |
| CCTAGATGACG | 593.330582543    | 0.274930239119567 |
| CGGTAGACTCA | 593.364336745602 | 0.42384228446963  |
| ATTCGGATGAC | 593.490216883403 | 0.315791263980707 |
| ACCGTGTGTC  | 593.555423806363 | 0.170250803124717 |
| CGTTGACACAC | 593.582095916325 | 0.420510807864    |
| AGAGGGAGTCA | 593.625746994846 | 0.221196514223001 |
| TGACTAGGAAA | 593.664728617058 | 0.17839015413988  |
| TATGTGAATCA | 593.698153686092 | 0.217377075462157 |
| ACGTAATGACA | 593.752773274571 | 0.153576323846832 |
| ACGAGGATGAC | 593.761917061611 | 0.141388596658436 |
| GTCATCTAAAC | 593.814939864673 | 0.317697592243527 |
| AGTACGATGAC | 593.845983358622 | 0.176245946226397 |
| GTCATCTAGAC | 593.850521672679 | 0.359676102967746 |
| GACTCACTCGA | 593.885876075145 | 0.211825384483473 |
| GTCATAGCTTA | 593.89273723444  | 0.31561681307494  |
| AACGTCGTCAT | 593.990017374336 | 0.177173686667638 |
| ATGACAATGCA | 594.025275774156 | 0.322529178409704 |
| ACGTCACCACG | 594.047205292371 | 0.264825842178827 |
| GTCATCATCAA | 594.093926544518 | 0.145376317332261 |
| AGAGTCAATGC | 594.121169944366 | 0.291705205919334 |
| AGATTTCTGTC | 594.23251254658  | 0.317528130179253 |
| CGGATAAGTCA | 594.240652709857 | 0.153071673923559 |
| GACGGAATGAC | 594.249509071917 | 0.294769333180522 |
| CGGACGATGAC | 594.251003570215 | 0.422588509551085 |
| ACCGTGATGAC | 594.262931301935 | 0.331191361430487 |
| GTCACTGACTA | 594.286136440457 | 0.21635220945809  |
| ATCAGTGAGTC | 594.288500099496 | 0.288352145125457 |
| CTGATTACTAA | 594.364825136328 | 0.109249124032043 |
| AGTCTGATTCA | 594.395083176773 | 0.356547977053431 |
| GTCATAGCCGA | 594.400323406279 | 0.287992455120303 |
| AACTTGTCAC  | 594.414599082138 | 0.329049203037896 |
| CTTCGTATGAC | 594.467679689514 | 0.256440603631022 |
| ATGACAGTAAC | 594.560180002391 | 0.189825273272961 |
| ATGTGTAGTCA | 594.603837575618 | 0.508772266832768 |
| ATGACGCCTTA | 594.642054729637 | 0.271763532367348 |
| AATCATGACAC | 594.672112339288 | 0.362648627219381 |
| ATGACGAGATG | 594.678322715163 | 0.259073369327742 |
| ATGACGAGACA | 594.7269785496   | 0.338550816274885 |
| CTGCTACGTCA | 594.803158087752 | 0.215089755946461 |
| ATCCATGACAC | 594.835969658035 | 0.274100913661521 |
| AGAGCGATGAC | 594.858857173566 | 0.176292919094796 |
| AGTTCTATGAC | 594.874349044707 | 0.189953606285317 |
| AGTAGTAGTCA | 594.87464837196  | 0.188975438664125 |
| CCTTGATGACG | 595.003086582513 | 0.377358769911736 |
| ACGTCACTAAT | 595.006001220903 | 0.175966351006555 |
| GTCATTTATGA | 595.011725972023 | 0.308475958113938 |

|             |                  |                    |
|-------------|------------------|--------------------|
| AGCTACAGTCA | 595.037967342163 | 0.38165678568347   |
| GTCATAGGCCA | 595.222812897796 | 0.184885487355813  |
| ACGTCACCGAC | 595.336376668145 | 0.288106575279946  |
| TAGTCACGGAA | 595.35119497849  | 0.308494592210382  |
| ACGTGGAGTCA | 595.574714760074 | 0.272519769731581  |
| CTGATAAGTCA | 595.639654367933 | 0.332695505783687  |
| TAGCTTAGTCA | 595.729387926052 | 0.32906204960567   |
| AACGAATGACG | 595.787260738904 | 0.288310458707668  |
| GTCATATCCGA | 595.922845816386 | 0.233271916801632  |
| CGTCATTGTGA | 595.926243031437 | 0.383956455876723  |
| CATTAGACTCA | 596.084884158093 | 0.369466911460168  |
| TGACGTAGTAA | 596.100477916674 | 0.308455390907044  |
| ATGACGGAGTG | 596.201269863854 | 0.252129061332619  |
| AGACTCACTCG | 596.220564505087 | 0.313164833323629  |
| TAGCTTACTCA | 596.231833002    | 0.258590626507838  |
| GTCACCGTCAC | 596.31200738715  | 0.257732055047417  |
| CGTCATCAGGA | 596.31810667661  | 0.462905005879202  |
| TGACTGTAGAA | 596.403350418365 | 0.366440505404909  |
| CAGCGTGACTA | 596.41506074342  | 0.148178890945062  |
| ACTTGATGACG | 596.419931327703 | 0.365371181764247  |
| AATTGCATCAT | 596.429655699953 | 0.373973037348276  |
| GCAATTGCTCA | 596.472064702305 | 0.391826100633733  |
| ATGACGCCGAC | 596.504128305906 | 0.284758859619644  |
| GTCATTCCTTA | 596.512362530675 | 0.251186135336354  |
| ATGACACGGAA | 596.569140692885 | 0.25500440745473   |
| GTCATACAGGA | 596.615603478023 | 0.327846168320456  |
| AAGTCGTGACT | 596.618070834511 | 0.310653551234606  |
| CTATTGACTGA | 596.629964598763 | 0.179664269937307  |
| GATACAGTCA  | 596.644160256687 | 0.343878771577777  |
| CGTCATTTAAG | 596.647757801435 | 0.418137783683842  |
| ACGCGTGACAC | 596.654538458971 | 0.369751858596241  |
| CTATCCAGTCA | 596.722230440214 | 0.241141324777398  |
| CCAACGATGAC | 596.748146123063 | 0.351464406941005  |
| GTCATAATAGA | 596.812892761082 | 0.202702373272983  |
| AGTCACTCCAT | 596.856853415616 | 0.23009138557957   |
| ATAATTGACTC | 596.914590705983 | 0.434661790220924  |
| CTCACTATGAC | 596.934061867832 | 0.192269664357281  |
| ATGGAATGAC  | 596.939687259129 | 0.322413209494502  |
| TAGATTTGTCA | 596.998226543211 | 0.245777973367118  |
| ACGGTAGTCAC | 597.001950099063 | 0.318182427512397  |
| AGTTATATGAC | 597.015057066761 | 0.330466285580618  |
| ATGACAGACAA | 597.031147873552 | 0.207966550710476  |
| CGTATCCGTCA | 597.065018384294 | 0.0901254356802623 |
| GTGTCACTAAA | 597.083433489769 | 0.386151785072389  |
| GGTTGACACAC | 597.127114742739 | 0.276182522905685  |
| CAACTTATGAC | 597.130564914103 | 0.341322926640961  |
| AACGACGTCAT | 597.176595921905 | 0.239469947985179  |
| CGTCATGATGA | 597.217192497283 | 0.574267995038511  |
| ATCTGGGTCAT | 597.221013762633 | 0.0833354678781028 |
| TCATCGCGTCA | 597.235194237714 | 0.256639159122019  |
| GTCATTCTGAA | 597.241552149229 | 0.406693751767764  |
| GATTGTAGTCA | 597.255576722883 | 0.393241859413543  |
| GTTACTAGTCA | 597.315786874772 | 0.156190803481055  |
| TCAGTCAATGA | 597.317668812863 | 0.406698559983145  |

|             |                  |                   |
|-------------|------------------|-------------------|
| CATAGTAGTCA | 597.317955979402 | 0.381721933691136 |
| GTCATAGCAGA | 597.335316493859 | 0.311689575597582 |
| GTCATGTCACA | 597.416192296453 | 0.341108912767081 |
| CTTACGCGTCA | 597.477463336297 | 0.323512672722825 |
| CGTCACCGTCA | 597.50005377027  | 0.357300781803855 |
| ACGGAATGACG | 597.51925342858  | 0.254270224510527 |
| AGAGTCAAATC | 597.527053848265 | 0.179422136372168 |
| CCAGTGATGAC | 597.576340530675 | 0.402466269930478 |
| AGCTTCAGTCA | 597.694082988204 | 0.460285232325575 |
| TGATTCACGAA | 597.708273739061 | 0.187275058558711 |
| ATCCTTAGTCA | 597.747913408692 | 0.141750259402405 |
| ATCATTGACTC | 597.80363754134  | 0.198590425395703 |
| CTCAGGATGAC | 597.827296783093 | 0.252700507892327 |
| CTGATCCGTC  | 597.837797252343 | 0.348609377816865 |
| CACTGATGACG | 597.846962501783 | 0.46266713343249  |
| CGAGATATGAC | 597.939864097316 | 0.260301826522642 |
| GTCATCAAAC  | 597.980087011012 | 0.264909658812716 |
| ATTCATGACAC | 598.007787632824 | 0.399251877039226 |
| CTCTTGACTAA | 598.017692817562 | 0.289387144843632 |
| GAATACAGTCA | 598.02186653549  | 0.377007823215181 |
| CGTTTGTGTC  | 598.052133666676 | 0.190692912302405 |
| CAGTCACGACA | 598.078104342266 | 0.461344247657701 |
| GTCATTCGATA | 598.082223145345 | 0.343473216708574 |
| AATCTGATTCA | 598.131551495218 | 0.385058591273253 |
| ACCCGGATGAC | 598.134950501954 | 0.430624141931977 |
| CGTATATGTCA | 598.156439831465 | 0.205613155407365 |
| ACTCATACTAG | 598.172429191978 | 0.269886766698368 |
| CTAGTCACGAC | 598.363110431679 | 0.212159214497174 |
| TCCTATAGTCA | 598.418508269345 | 0.298540178761137 |
| GGTACGATGAC | 598.450127266084 | 0.200404268485056 |
| GTCATCGGCCA | 598.454145864997 | 0.246789783493346 |
| CGTGCGAGTCA | 598.459604691377 | 0.467384195599735 |
| ATAGTGACGTG | 598.522360254918 | 0.307267033673866 |
| CACTCGATGAC | 598.527644509523 | 0.421477279477334 |
| AATAGTGTGAC | 598.555852976942 | 0.257543445624051 |
| GTCATATGCAA | 598.588643321462 | 0.312529473393176 |
| GACTCAGTCAA | 598.651011752964 | 0.339793005108021 |
| ATGACAAAGGC | 598.673841613954 | 0.36724778086554  |
| ATGACGAGGCA | 598.681705377617 | 0.391898171541653 |
| ACTCACAGTCA | 598.683212059369 | 0.2806370531169   |
| ACAGTAATGAC | 598.697112489213 | 0.403232616431764 |
| GCAGATATGAC | 598.698118130825 | 0.322211965596935 |
| CGTCACATGAC | 598.821745333391 | 0.301049240447524 |
| TATATATGTCA | 598.87613531143  | 0.476028799207113 |
| TGACTTAGAAA | 598.881592665924 | 0.282095916150375 |
| ATGACAGACCA | 599.022241932155 | 0.16939493594728  |
| ACCGAATGAC  | 599.032240698396 | 0.359133140971314 |
| GATGACAGTGC | 599.034249467845 | 0.249421047090116 |
| CAGATTGTGAC | 599.078245177055 | 0.38079293202133  |
| ATGACACTCGA | 599.095334232238 | 0.224943681476188 |
| AGCGTTGTCAT | 599.145387587963 | 0.287486825766279 |
| CGATTAAGTCA | 599.239886990755 | 0.319692653756714 |
| ATGACGTCGTC | 599.332059215387 | 0.24171404882322  |
| GCTATACGTCA | 599.428944529011 | 0.416147484459614 |

|             |                  |                   |
|-------------|------------------|-------------------|
| AATGCGATGAC | 599.453155847291 | 0.469979839902638 |
| GCCTTGACTAA | 599.467942256788 | 0.33144103493781  |
| GTCATCGGCGA | 599.480189456664 | 0.335036094181803 |
| CACAATAGTCA | 599.484120714934 | 0.552326670564244 |
| AAGTTGTGTCA | 599.500728066255 | 0.247298543547119 |
| GTCACACATTA | 599.533357017369 | 0.438835470561446 |
| GAACGAATGAC | 599.534446029286 | 0.332945230301121 |
| ATGCAGTCAGA | 599.552372155362 | 0.311025507123756 |
| CTGACTGTATC | 599.736887535301 | 0.211311276984863 |
| GTGACGTGCAC | 599.746245844571 | 0.204997640493866 |
| GTAACGACTCA | 599.757718604418 | 0.222195398219827 |
| AATTTGTGTCA | 599.83463205169  | 0.43785733361271  |
| CTTGTTATGAC | 599.866971894007 | 0.281157587624833 |
| ATGCCGAGTCA | 599.890710384772 | 0.273247498062777 |
| ATCGCTGTCAT | 599.97067841306  | 0.206524292050214 |
| CTATCTAGTCA | 600.058757937949 | 0.330882918693099 |
| ATATTGTCACA | 600.112910270948 | 0.313346290030267 |
| TGAACTCGTCA | 600.135070488206 | 0.432718486251592 |
| AAGTATATGAC | 600.139594812925 | 0.188914526404716 |
| GGGCTCAGTCA | 600.196248605279 | 0.36472108314348  |
| CAAACGTGTCA | 600.221531496604 | 0.3681533610622   |
| GACTAGATGAC | 600.249769696639 | 0.291343400969618 |
| ATGAGTACGTA | 600.31883225267  | 0.252279145958786 |
| ACTTGCAGTCA | 600.320254510838 | 0.184260854125786 |
| GTCATCTGTGA | 600.323445517119 | 0.438971691495886 |
| CTAGTTATGAC | 600.412667036322 | 0.337513457347314 |
| CCACACAGTCA | 600.44814332797  | 0.215160310152876 |
| ATGAGTACGAG | 600.45916939629  | 0.259109188748417 |
| AGACTAATTTG | 600.463055933601 | 0.303947494092641 |
| CTCTACAGTCA | 600.479693721511 | 0.23557476690778  |
| CAGTCAATGAC | 600.579504549342 | 0.505492622829919 |
| ATGGGAATGAC | 600.602489543783 | 0.20911730153346  |
| ATGACGATGTA | 600.673253491118 | 0.227351234218772 |
| ACGAAATGACA | 600.727954498805 | 0.242392002214741 |
| AAACCTAGTCA | 600.731082909557 | 0.38534045275328  |
| CTGAGAATGAC | 600.753444862797 | 0.485878752288389 |
| AACTTGATGAC | 600.819560653101 | 0.313988928509327 |
| GTAATCGTGAC | 600.930040671838 | 0.344255747910872 |
| ACTAAATGACG | 600.950570644232 | 0.380097067632168 |
| ATAATATGTCA | 601.048338901035 | 0.2880018252726   |
| GAGTCAATTTA | 601.077898100509 | 0.305276765513438 |
| TGACTGCATAA | 601.111968819599 | 0.394881793670214 |
| GTCATCGCGAC | 601.146833266535 | 0.437948832149393 |
| CAAATTGACTC | 601.158028197195 | 0.2429123159425   |
| CGGCATATGAC | 601.235641778758 | 0.397851347257853 |
| CAGTTGTGTCA | 601.265035552506 | 0.147698401909569 |
| AACGCTGTCAT | 601.276404918455 | 0.134053498296952 |
| CCGATCCGTCA | 601.289930042255 | 0.285957009546683 |
| GAGTCAATGCA | 601.366078599115 | 0.193214861168126 |
| GACTAATAGTC | 601.389379869928 | 0.499474811392934 |
| CAAGGTGTGAC | 601.397113969729 | 0.324362960834588 |
| AGTAAGATGAC | 601.398082572357 | 0.250207365888342 |
| CAGTCACGCGA | 601.42938071367  | 0.301711716768765 |
| AGTATTGACTC | 601.479794945163 | 0.353447678479901 |



|             |                  |                    |
|-------------|------------------|--------------------|
| TAGCAGTCAGA | 601.504797923153 | 0.381819379633507  |
| GCCAGGATGAC | 601.613299727561 | 0.188793657033031  |
| AGCACACGTCA | 601.640325567493 | 0.318878403818882  |
| ATGGCGATGAC | 601.706854779756 | 0.387727171961074  |
| ACGTCACCCAT | 601.750777510667 | 0.131376968464598  |
| CGACATGACAC | 601.813987468802 | 0.2366816302331    |
| ACTCATGACAC | 601.860464094888 | 0.198304424719371  |
| GACTCACGTCA | 601.871501562521 | 0.300992999674235  |
| AAGGCTATGAC | 601.895232229089 | 0.253377196719568  |
| GTCCTCAGTCA | 601.945366137544 | 0.293665792302552  |
| AACTGGATGAC | 601.963257285897 | 0.13036326696572   |
| GTCATGGTCAC | 602.038983761033 | 0.355101855649432  |
| GCATAGATGAC | 602.118779208609 | 0.19138043282263   |
| GCTCGGATGAC | 602.161773429945 | 0.500438369630609  |
| ATGACCCGTCA | 602.172499423094 | 0.11183230585581   |
| TATATCTGTCA | 602.199496906189 | 0.294277126841398  |
| GCATGCAGTCA | 602.27898940979  | 0.476813213237248  |
| GTCATGAGCAA | 602.35472807528  | 0.256452566994728  |
| AGTGCTATGAC | 602.388395479161 | 0.308192803426931  |
| TGACAGATACA | 602.463239301625 | 0.383644360093769  |
| CGTGTGATGAC | 602.463512423872 | 0.162515570670799  |
| GTGAGTAGTCA | 602.473279232046 | 0.205242798659906  |
| CGTTTGTGTCA | 602.517727208043 | 0.436343157244607  |
| AGATTTATGAC | 602.553354249347 | 0.289026723361973  |
| GTCATCTTACA | 602.590522458573 | 0.237186684491484  |
| AGTCGCGTCAC | 602.601777362838 | 0.0902251391568235 |
| AGTGTCATGTC | 602.606535788501 | 0.165193491745469  |
| ATTGGGTCACC | 602.688505357868 | 0.171435787666327  |
| CCGTTGACACA | 602.730110523253 | 0.284083745301033  |
| GTATACAGTCA | 602.753392730657 | 0.414093049286422  |
| GTCATCCGAAC | 602.782829079964 | 0.170287304182829  |
| ATTTTGTGTCA | 602.887621946023 | 0.329727105779175  |
| ATATCTAGTCA | 602.951549134551 | 0.470120334559491  |
| ATCATCCGTCA | 602.964341211471 | 0.299570251822464  |
| GCGATCTGTCA | 603.0172500182   | 0.513379181426507  |
| AGTAATGTCAT | 603.140286667285 | 0.212800671386739  |
| ATGACGAACCC | 603.167542697796 | 0.290712874916403  |
| ATATCGTCACC | 603.205228662399 | 0.237853223824317  |
| AATCATATGAC | 603.217091435663 | 0.287498038137759  |
| GTCATATATAA | 603.264247618641 | 0.410052904851257  |
| CCTAGTGTGAC | 603.28663610851  | 0.440543035107509  |
| ATTTGTGTGAC | 603.490495419045 | 0.244430484303614  |
| TGACGTACTCA | 603.500990893236 | 0.377332222490103  |
| GTCATCCACTA | 603.515820849691 | 0.318408765145218  |
| ATCGTGACGAA | 603.590757933227 | 0.443948704828479  |
| CTTGCGACTCA | 603.593895986662 | 0.343319117953031  |
| GGTACTATGAC | 603.735766069172 | 0.298404807453423  |
| AATCTGTGAGA | 603.748664971885 | 0.193720155570253  |
| GTCATCATTTA | 603.946384752708 | 0.249379567772487  |
| ATGACATTACA | 604.179638916365 | 0.229482442585631  |
| AGAGTCAAAGA | 604.185616738052 | 0.273210530433628  |
| CTGCAGATGAC | 604.278845387399 | 0.296062394178365  |
| GCGATACGTCA | 604.351013306612 | 0.329864035304363  |
| AGCATGATGAC | 604.365312556874 | 0.265560606485376  |

|             |                  |                   |
|-------------|------------------|-------------------|
| GACCTTATGAC | 604.390879457078 | 0.442673343563307 |
| TATGACTTGCA | 604.425783225434 | 0.262394633121038 |
| AAATGTGACGT | 604.44519191423  | 0.232328243318139 |
| TGACGGAGTCA | 604.483977583811 | 0.292378479606827 |
| AACTTGCCTCA | 604.493887954023 | 0.555001779006465 |
| GTGTCATGCGA | 604.502263267837 | 0.31020186757347  |
| GTCATTCGCAC | 604.587837616344 | 0.364585449375853 |
| GACCGGATGAC | 604.599366181673 | 0.266774364219967 |
| GTCATCCTTCA | 604.630349320449 | 0.287432911026858 |
| GACATTGACTC | 604.638256445956 | 0.431035573871742 |
| ATTGCGAGTCA | 604.648409475848 | 0.345987174653463 |
| GTCATATTCAC | 604.653205561632 | 0.263936411163239 |
| GTCATAATCAA | 604.691245938817 | 0.319116942136817 |
| ACGTCACCTTA | 604.720752980371 | 0.273462604588594 |
| AGTCACTCTGG | 604.729121291101 | 0.304908732836258 |
| AATGATTAGTC | 604.805290829195 | 0.41915223384459  |
| GTCATCTCGAA | 604.835552414192 | 0.12568926062899  |
| GTCATACGAAA | 605.017043688173 | 0.181087948536152 |
| TGACTCCCACA | 605.024008846367 | 0.219756170983086 |
| CGGTGGAGTCA | 605.047860713357 | 0.326855257474565 |
| CCAATTGTGAC | 605.122912374552 | 0.184944594375403 |
| GATATGATGAC | 605.157346350241 | 0.133257023057918 |
| GACAAGAGTCA | 605.225014287343 | 0.362852007837178 |
| ACCCGACTCAT | 605.255796791897 | 0.210798066364812 |
| ACGTCACCTTA | 605.270034619394 | 0.363602211813551 |
| ATCATACTCAT | 605.270484915466 | 0.211804372044096 |
| CACGCTATGAC | 605.281847623185 | 0.247603899990669 |
| AGCACGAGTCA | 605.339896007642 | 0.414596632134384 |
| CATCTGTGACA | 605.340497194573 | 0.460091008047974 |
| CAGATCCGTC  | 605.374456717926 | 0.311221420111507 |
| ACGTCACCTTC | 605.447305704837 | 0.255046072181745 |
| GTCATAATAAA | 605.478054629676 | 0.404906681802298 |
| GTCATTCACGA | 605.495223993831 | 0.261902124239907 |
| ATGACGCCGAA | 605.535971471413 | 0.282818595469103 |
| GCGCTGTGTCA | 605.562913787311 | 0.489488042147221 |
| AAAATGAGCCA | 605.679167659105 | 0.274770527785683 |
| ATGACGAACGA | 605.712853472153 | 0.342432110121458 |
| ATGCATAGTCA | 605.716725354085 | 0.247447579273938 |
| AAGGTAGTCAC | 605.718947696167 | 0.24866412676888  |
| TCTTGGAGTCA | 605.73539543617  | 0.406418353417445 |
| ATGACGCCGTA | 605.795438614377 | 0.337689171604959 |
| AGTACTGTCAT | 605.816778700069 | 0.283944223135476 |
| GCCACGATGAC | 605.890882410608 | 0.418902366061223 |
| TGACGTAAGCA | 605.95636214802  | 0.17445728918329  |
| GTCATATACCA | 606.054737064665 | 0.28709915850604  |
| GTCATCTGCAA | 606.073100536492 | 0.571017781507797 |
| ATAGCGAGTCA | 606.089100980215 | 0.476673557966686 |
| ATGACGTGAGC | 606.112283360065 | 0.326265973846038 |
| GGTCCTATGAC | 606.137430315363 | 0.253244064750524 |
| AGACCATGACT | 606.175253540223 | 0.285679554485728 |
| TGACGTATCCA | 606.194325100156 | 0.19080470655882  |
| GTCATCTTCAC | 606.227414570688 | 0.195705543365387 |
| AGTCATGGTTG | 606.356792982512 | 0.145909700321436 |
| CATCTACGTC  | 606.444633840121 | 0.27064973514748  |

|              |                  |                    |
|--------------|------------------|--------------------|
| GACTATATGAC  | 606.555590837781 | 0.325147360257559  |
| GAACACAGTCA  | 606.562068700749 | 0.444915860871132  |
| GGAACGATGAC  | 606.613379950476 | 0.383980167307717  |
| GTCATATTATA  | 606.635785122951 | 0.414213315533831  |
| GTCATCGCCAA  | 606.661908845499 | 0.250600193027268  |
| GACCTGACTGA  | 606.676803395983 | 0.290504324468347  |
| ATGAGTCCCG   | 606.717213857823 | 0.300587613636258  |
| CGCAAGATGAC  | 606.764291427764 | 0.246105279075743  |
| GTCATAACCGA  | 606.768287448854 | 0.331123573152818  |
| GAGTGGATGAC  | 606.905321203387 | 0.176079633199     |
| GTATTGATGAC  | 606.981673190372 | 0.335395247873308  |
| TCCGCGAGTCA  | 607.006014256677 | 0.306818830037851  |
| TATATAAGTCA  | 607.064085574397 | 0.249086826698049  |
| TGACTGAAGCA  | 607.093646216525 | 0.596826800309607  |
| GTCATTCGACA  | 607.120055657445 | 0.417197246515004  |
| GACTTGATGAC  | 607.144273541181 | 0.37994050224168   |
| AATCGGATGAC  | 607.18169381706  | 0.205631286114303  |
| GACTACAGTCA  | 607.206383883326 | 0.33608112818956   |
| GAGGTTATGAC  | 607.261868690091 | 0.232892528714316  |
| GTCATCGGGAA  | 607.320484745507 | 0.235661730678206  |
| ACGCTGAATCA  | 607.534556722135 | 0.357084265308944  |
| CGATTGACACA  | 607.544407224574 | 0.344351812193214  |
| TGACACAACAA  | 607.640838791897 | 0.318168347329501  |
| AATTGTAGTCA  | 607.641532748973 | 0.345242188047221  |
| ACTGGTGTGAC  | 607.667955766323 | 0.2796117594357    |
| ATAGGAATGAC  | 607.681937159151 | 0.227799013652336  |
| AACATTGACTC  | 607.722375405211 | 0.358110783756964  |
| CATCGTATGAC  | 607.73068847721  | 0.371225236962714  |
| ATTAGTCTGAC  | 607.781613260397 | 0.306043837585668  |
| CAGGATATGAC  | 607.79330841651  | 0.254202924803921  |
| TCTTTGTGTC   | 607.807101408703 | 0.459743999749185  |
| GCAGAGATGAC  | 607.994241918873 | 0.189432414967339  |
| GTCATCACTTA  | 607.997540060059 | 0.0824644450399481 |
| ATGACGGAGCG  | 608.020717526229 | 0.287280651032129  |
| AGTGTGATGAG  | 608.02331609535  | 0.28126198894688   |
| AATAGTCAATA  | 608.041497873155 | 0.189145935558278  |
| TACTTACGTCA  | 608.058481844433 | 0.287399311606708  |
| CACGAAATGAC  | 608.240183958001 | 0.316415425098418  |
| ACAATTGTGAC  | 608.261715703816 | 0.300562484410031  |
| ATGAGTAGTTC  | 608.278105144876 | 0.300609265812351  |
| CAGTCATGGGA  | 608.321034338372 | 0.289165496719721  |
| CGGGCTATGAC  | 608.360248020366 | 0.364671735068188  |
| CACGGAATGAC  | 608.46431435975  | 0.268797018888866  |
| CTCAGATGACA  | 608.504753487129 | 0.195077947888418  |
| GTCATTTCTAA  | 608.544904002083 | 0.330926823944006  |
| CGATCCAGTCA  | 608.568440241792 | 0.322637224135807  |
| GTCATAACGTA  | 608.627540863687 | 0.361553115217316  |
| CCAGAGATGAC  | 608.723562613489 | 0.234001061283531  |
| ACGGGGTGACT  | 608.777400403785 | 0.253973565051744  |
| GTCATCCGACA  | 608.795013841402 | 0.234378819625128  |
| ACCCTGACGCA  | 608.849610669095 | 0.184814559234577  |
| AAAATTAGTCT  | 608.906288304634 | 0.372293581053037  |
| GTCATATTTCCA | 609.031368214107 | 0.255219927824058  |
| AAGAAGTGACT  | 609.185678961633 | 0.318637741084034  |

|              |                  |                    |
|--------------|------------------|--------------------|
| ATTGTGATGAC  | 609.194603238031 | 0.275051573486734  |
| ATGACGTTGCA  | 609.298541096855 | 0.204759079659345  |
| CCTGCGATGAC  | 609.311090774239 | 0.442638245366199  |
| CCTGGTGTGAC  | 609.37862181857  | 0.240132558702351  |
| ATGACGCCGTC  | 609.389148759075 | 0.341455867681227  |
| CAAAGGGTGAC  | 609.403854700448 | 0.239402821293351  |
| TAAAAGTCATA  | 609.412162042061 | 0.258432801238669  |
| TCATTGAATCA  | 609.419824836843 | 0.293233433946349  |
| TCTGACTGCAA  | 609.605129474615 | 0.23288019279722   |
| ATTATCTGTCA  | 609.617372963272 | 0.420231335726605  |
| GTGTCACGTAA  | 609.624025224289 | 0.313104939510851  |
| CGGAGGATGAC  | 609.715803066474 | 0.0456318313028942 |
| AGAAAAGTGCA  | 609.741681345922 | 0.192917472135138  |
| TGAGTCGCAAA  | 609.854311919442 | 0.119790487261483  |
| AATTGATTCAT  | 609.886721021801 | 0.235226109860597  |
| CAGTTTATGAC  | 609.957699460042 | 0.340624057070626  |
| AGCTCGATGAC  | 609.988398673912 | 0.313062195251207  |
| ATGTTTCGTCA  | 610.029931764634 | 0.190279183996634  |
| GTC AAGAGTCA | 610.087811607063 | 0.320113914346127  |
| GTCATCCATAA  | 610.116123756348 | 0.173086850929283  |
| CCATGGATGAC  | 610.237091282309 | 0.316210471736454  |
| AACCGTGACTA  | 610.261352503232 | 0.29398461575232   |
| GTCATAACCAA  | 610.27129407574  | 0.296673786218348  |
| CAACCTATGAC  | 610.325152106814 | 0.349321155365738  |
| GGTGTTATGAC  | 610.341897598066 | 0.269780028486578  |
| ATCGCGATGAC  | 610.35729703516  | 0.223010463733488  |
| CTAAAGATGAC  | 610.379383935597 | 0.305796256875836  |
| CACACCAGTCA  | 610.398423329457 | 0.237256708671548  |
| GGTCGTGACTA  | 610.421804240742 | 0.143116390505002  |
| TGTCATTGGAA  | 610.507450599668 | 0.25428565303035   |
| GATTCTATGAC  | 610.518886609379 | 0.200624968004933  |
| GTCATCTAGGA  | 610.583768204167 | 0.429059241353301  |
| TCCCTCAGTCA  | 610.652138980071 | 0.406340867362208  |
| GCGTTTACTCA  | 610.666649255297 | 0.267317433808946  |
| AACGATATGAC  | 610.733878791147 | 0.132406771932296  |
| GTCATCGACTA  | 610.769334096579 | 0.313352885575299  |
| GAAATTGACTC  | 610.829900522485 | 0.327249415014542  |
| TATGACGGTAA  | 610.835445836596 | 0.212961422558178  |
| ACGGATGACCA  | 610.870137066946 | 0.387567489674153  |
| CGATTTCTGCA  | 611.004267345986 | 0.376352399881691  |
| GTCATTCAGTA  | 611.092364002057 | 0.322873103862353  |
| ACGTGTAGTCA  | 611.210405246269 | 0.210915447918786  |
| AAAGGTGACGC  | 611.225308180157 | 0.236929805004214  |
| GTA CTGATGAC | 611.298883140343 | 0.452805008185716  |
| ACGTCACCCGA  | 611.466866091339 | 0.255742371098517  |
| AATAGTCAACC  | 611.628801007956 | 0.227588552657541  |
| AGTTAGACTCA  | 611.630018218404 | 0.210255171233529  |
| CCATTGACTGA  | 611.632249411043 | 0.461215434595783  |
| TGACTGGAACA  | 611.69997487721  | 0.390278606986013  |
| CACGAGATGAC  | 611.700620199739 | 0.342179131542997  |
| TCCGTGTGTC   | 611.793495185304 | 0.419967045614419  |
| AAATTGATGAC  | 611.79778260494  | 0.323551035203969  |
| CTAAGCAGTCA  | 611.842992557995 | 0.425110231777327  |
| CTATTTATGAC  | 611.915080041506 | 0.26297205198385   |

|              |                  |                   |
|--------------|------------------|-------------------|
| GAAGCGATGAC  | 611.940363291521 | 0.376913181261071 |
| GGAACCAGTCA  | 611.965420254596 | 0.334024195634933 |
| ATTTGCAGTCA  | 612.001308000221 | 0.356106252617353 |
| ACTGATATGAC  | 612.031425104482 | 0.226819680580255 |
| ATGACGTTGTG  | 612.083924867928 | 0.22676035051496  |
| GTACACGTCAA  | 612.120911155992 | 0.348015925473145 |
| TGAGTCGGACA  | 612.122254090741 | 0.359199550812369 |
| TAGCCTAGTCA  | 612.297320447204 | 0.365526376863519 |
| TGACTGAGGAA  | 612.304769610058 | 0.260631299355954 |
| GAGTAAATGAC  | 612.380916416507 | 0.312280971102923 |
| AATCTGATGAC  | 612.471746729719 | 0.273768361758602 |
| GTCATTATTTA  | 612.483773387964 | 0.294151110513886 |
| GAGTCGATGAC  | 612.524051982452 | 0.332856017471524 |
| CAGGCGTCATA  | 612.600870420845 | 0.203285081771093 |
| GTCATAACATA  | 612.605810386614 | 0.334806513060111 |
| GTGATTCAACA  | 612.61682986294  | 0.176990379591643 |
| CAGATTGCTCA  | 612.679934498229 | 0.378485932786333 |
| ATGAATCAACC  | 612.711628200317 | 0.404460202273296 |
| AGCAGGATGAC  | 612.833736546306 | 0.283630301147969 |
| AGTCACTTCTC  | 612.84213426723  | 0.233816070341937 |
| ACGTCATGTCA  | 612.844948650983 | 0.259785048243663 |
| GGTCCGATGAC  | 612.879469574963 | 0.454154518052725 |
| GTCATCGCTCA  | 613.091801714391 | 0.339129746387277 |
| CGACTGATGAC  | 613.133739717581 | 0.235856135657269 |
| ACGTCACACT   | 613.201863054558 | 0.193940865493108 |
| ATGACGACTAC  | 613.274229185608 | 0.257150115433801 |
| AAGCGGATGAC  | 613.325243048878 | 0.280090443419404 |
| AGACTCACTCT  | 613.362736595179 | 0.23434546516793  |
| AGACTAATACG  | 613.3779278843   | 0.21094011671383  |
| GATTAGACTCA  | 613.392558892987 | 0.270984242858866 |
| GTCTTGCCTCA  | 613.398639197731 | 0.369588619608966 |
| CACCTCAGTCA  | 613.489653808719 | 0.188163996419924 |
| CTTCTAGTCA   | 613.51055462687  | 0.282949287109188 |
| GTCATACAGAA  | 613.539271169363 | 0.510649199770753 |
| AGTCACTTCAA  | 613.562163402444 | 0.373490229386904 |
| GAGTCAATGAA  | 613.597837356709 | 0.294055068493352 |
| GACATGACCCA  | 613.609901595    | 0.352490228952358 |
| ACGTCACCAAAA | 613.61838752854  | 0.214154378290153 |
| ATGATTACTAA  | 613.742809126075 | 0.388189219955528 |
| AAAGCTATGAC  | 613.745101818009 | 0.303413852229246 |
| CTGCATGACAC  | 613.78605009501  | 0.142825068765048 |
| ACGTCACCCGA  | 613.826240285017 | 0.35938490096931  |
| AATTGACACAC  | 613.846288678105 | 0.219507119430635 |
| AGCTCTGTCAT  | 613.849728714994 | 0.185673057339239 |
| GATGACGTCGA  | 613.884530174854 | 0.156114944943143 |
| ATGACACTCAA  | 613.912632097825 | 0.193453031074467 |
| ATGGCAGTCAC  | 613.972379414521 | 0.21429408737823  |
| GACTTGTGACA  | 614.041197589978 | 0.248290451717095 |
| AGTCAATGACG  | 614.108720578668 | 0.2309807996048   |
| AAACCTATGAC  | 614.1634596458   | 0.370162706378485 |
| TCATAATGACA  | 614.293704285883 | 0.339540140004652 |
| GTCATAACACA  | 614.301153215313 | 0.311310122779507 |
| ACCCTGTGATA  | 614.322103012841 | 0.259016678262199 |
| AGCTTACGTCA  | 614.335577866394 | 0.39725007209328  |

|             |                  |                   |
|-------------|------------------|-------------------|
| ACTCGTGACTG | 614.350691589857 | 0.360810912186915 |
| CATATCCGTCA | 614.597599186154 | 0.261662093173681 |
| CTCTGAATGAC | 614.656239440267 | 0.182917971622126 |
| AGTCAAATGAC | 614.68465375282  | 0.24496051781087  |
| CGTGTGAATCA | 614.692411026416 | 0.450641614638012 |
| ACATTGACTGA | 614.697833702876 | 0.223274509831471 |
| CCGAGTGAGTC | 614.724620601868 | 0.34777604478453  |
| AATGATGACCA | 614.770535926357 | 0.273931704787911 |
| AGACTGACACA | 614.821060612865 | 0.304073454510785 |
| ATGACGGAGTA | 614.82297956792  | 0.250523086722169 |
| ATGCTAGTCAC | 614.842158862605 | 0.345133598245682 |
| ATAGGTGACAC | 614.87130748093  | 0.256791455749884 |
| CGTCATTA    | 614.888574306281 | 0.322524867010334 |
| ATACGTGTGAC | 614.970996156648 | 0.393014451107968 |
| ACCCTTAGTCA | 615.004878421062 | 0.382768458404946 |
| AATAAAATGAC | 615.024037978086 | 0.376551176696217 |
| AGGAATATGAC | 615.040363535617 | 0.242543821618108 |
| AAAGACGTCAT | 615.079055375238 | 0.389812428132618 |
| GATGACGCCGC | 615.09919213652  | 0.471508019374322 |
| GGTCTGATTCA | 615.11528908279  | 0.138830365658082 |
| ATAGGCGTCAT | 615.178768783855 | 0.365562091715609 |
| CCCGTGCGTCA | 615.319066184509 | 0.325949752458864 |
| CAATCGGTGAC | 615.476801224388 | 0.15675459531837  |
| CGCATGACCCA | 615.504684700004 | 0.318920548550228 |
| GTCTCGAGTCA | 615.589864811573 | 0.64397973771095  |
| TCACCCAGTCA | 615.601453999678 | 0.215796572039247 |
| GGTTGGATGAC | 615.620777772153 | 0.197812090198165 |
| CTCGTTAGTCA | 615.7566210873   | 0.304673468577547 |
| CTATTCGTCA  | 615.772655710812 | 0.237828952205601 |
| CCGCTGATTCA | 615.787618400355 | 0.319871744837651 |
| CGTGATATGAC | 615.808597505743 | 0.361312254328198 |
| ACGTCATGCAT | 615.829063267301 | 0.319709688508613 |
| ACTTTACGTCA | 615.837705859443 | 0.332319532549201 |
| TGACGAATGCA | 615.888419483638 | 0.207049415553299 |
| ATGAGCAAGAA | 615.89177822091  | 0.199341629429885 |
| CGCGTGACTAG | 615.989268228016 | 0.185708918504093 |
| TGATTCATGCA | 616.020825800071 | 0.312312307116915 |
| GTACCGAGTCA | 616.089584443156 | 0.201372835259172 |
| ATCATACGTCA | 616.110122597541 | 0.152979498833396 |
| AGTGAGAGTCA | 616.117863440892 | 0.261676157430143 |
| TATCTGAATCA | 616.129105058414 | 0.212880437889594 |
| GTCATCGCCAC | 616.149847569582 | 0.271638843325912 |
| ATGTGGAGTCA | 616.206045997313 | 0.117865754893839 |
| GATTTTATGAC | 616.228932618323 | 0.372200363511597 |
| CATGGTGTGAC | 616.234011169358 | 0.322237478535885 |
| ATTACTCGTCA | 616.263439071433 | 0.148812724281066 |
| TGAGTAAGGCA | 616.332632579456 | 0.224588072606871 |
| CCATCTATGAC | 616.370414405656 | 0.272308715524111 |
| CATGTAATGAC | 616.433594779786 | 0.174464507275205 |
| GCTATTATGAC | 616.503439616477 | 0.306509861377964 |
| CCTATAAGTCA | 616.512902300399 | 0.360564602191542 |
| GTCATCGCAAA | 616.544653090133 | 0.275205080952728 |
| ATGCTGTCA   | 616.588129542041 | 0.162564784044858 |
| AATTGTGTGAC | 616.595935103306 | 0.240547517949667 |

|             |                  |                    |
|-------------|------------------|--------------------|
| CGTCGTGACTA | 616.60063163091  | 0.30622865951817   |
| CCCTGTGCAC  | 616.707796030125 | 0.182129646032902  |
| AACTACTCATC | 616.719015868539 | 0.270034815051228  |
| AGTTGGAGTCA | 616.721073254424 | 0.266951762694459  |
| GTCACACGTAA | 616.75359007113  | 0.356122122142101  |
| ACTCCGATGAC | 616.782740123917 | 0.181604585259306  |
| AATCATGACGT | 616.790330851892 | 0.20660226998455   |
| GTCATATTCTA | 616.792518201144 | 0.197457150180285  |
| ATCCTGCGTCA | 616.892588153656 | 0.378157576756352  |
| CGTCATCAACA | 617.015805002539 | 0.306713646179345  |
| ATGACGCCTTC | 617.047059065114 | 0.360806884200306  |
| ACCTAATGACA | 617.066002769216 | 0.0778386070173624 |
| AATATTGCTCA | 617.261644805669 | 0.301489814972918  |
| GATAATATGAC | 617.278523680696 | 0.325657874047113  |
| GACGTGTGTC  | 617.381573192504 | 0.356324841499988  |
| AGTCACTCCTC | 617.382809790177 | 0.236475939734145  |
| TGACGTCAAAA | 617.397696213324 | 0.463365602484833  |
| GATTAGATGAC | 617.444673950598 | 0.193469729190212  |
| ATGATGTGTAA | 617.477819043973 | 0.180266585267325  |
| ATACAGTCAGC | 617.54681856844  | 0.245754727676292  |
| CAGGGAATGAC | 617.588873703628 | 0.40822209968112   |
| CGCACTATGAC | 617.600314998056 | 0.323999284127899  |
| TGACTCTTGAA | 617.63457167775  | 0.518144427049245  |
| GGTAAGATGAC | 617.640405102388 | 0.312757025752324  |
| ATCCGTGACTA | 617.777130286566 | 0.206619137623815  |
| AATTATTAGTC | 617.814547204606 | 0.40084939563942   |
| ATGAAGATGAC | 617.995201847326 | 0.173315168167774  |
| GTCATTTGACA | 618.008421351539 | 0.277918116841481  |
| GTATTTGCTCA | 618.03893820076  | 0.168885596000207  |
| CTACTGCGTCA | 618.04062674338  | 0.227425394910203  |
| CCCCGATGACG | 618.050085103287 | 0.218549649736861  |
| CTAGGGATGAC | 618.050156094207 | 0.323622357060983  |
| GTCATCAATAA | 618.063232209172 | 0.436337120737496  |
| CTGGCGAGTCA | 618.18449817784  | 0.284934394195176  |
| AATAATGTCAT | 618.291420794726 | 0.371324573004781  |
| GTCATCGTGTA | 618.296348688711 | 0.360853238722348  |
| GTCATTCGGAA | 618.300418100341 | 0.135259863004902  |
| ACGTCACCACA | 618.388701954773 | 0.228916440046917  |
| TACTAAGTCA  | 618.482539582815 | 0.383829252787525  |
| ATGAGTCCGTG | 618.532788460785 | 0.338386967223792  |
| ATAGTCGTCAT | 618.628988641466 | 0.307951976904014  |
| AGATAGATGAC | 618.764238852334 | 0.211581476737926  |
| ACGATATGTCA | 618.848766057644 | 0.60224486677561   |
| AGGCTTACTCA | 618.998800214781 | 0.329176521686186  |
| CTGCTTACTCA | 619.002930425346 | 0.192016582087388  |
| AACCTGCGTCA | 619.012119722684 | 0.26079916278278   |
| ACGTCACCATC | 619.054783757242 | 0.278766828205518  |
| TATGACAGGGA | 619.131634456844 | 0.284579090476247  |
| GTCACCGGTGA | 619.278378151736 | 0.442643357604733  |
| CTGACTCCGAA | 619.281715302756 | 0.219621991631145  |
| CGAAGGATGAC | 619.377725805135 | 0.329455110169127  |
| GTGTCACCTTA | 619.444962324534 | 0.385937896772909  |
| TGACGCAGGAA | 619.461549133567 | 0.341739396134392  |
| GTCATTTGTGA | 619.571318286935 | 0.355695809303933  |

|             |                  |                   |
|-------------|------------------|-------------------|
| TCAGTCAACAA | 619.576139351827 | 0.212912131910081 |
| AGCCTTACTCA | 619.736014438423 | 0.339853775531557 |
| CACGGGATGAC | 619.742977277284 | 0.368320823537984 |
| AACCGGATGAC | 619.75853988048  | 0.305720096299726 |
| AAAACGGTAC  | 619.815060589727 | 0.218385894821335 |
| CACAGATGACA | 619.819156612349 | 0.313539428577905 |
| ACAATGTCATA | 619.917911891744 | 0.258310636966619 |
| CGACAGATGAC | 619.957788957384 | 0.537072079977835 |
| ATGAGCAAGAG | 619.960308629742 | 0.276785773652127 |
| GTCATGTATGA | 620.014809314952 | 0.383707761114242 |
| TCACGTAGTCA | 620.069811726085 | 0.331948503245551 |
| GTCACAGTCAA | 620.091729499199 | 0.330693894640941 |
| CCGTGCAGTCA | 620.132608060367 | 0.257315218709767 |
| AGTCACTAGTA | 620.147133411336 | 0.245172443243212 |
| CTCATTGGTCA | 620.17880333426  | 0.26394069222832  |
| GTCATTCGTTA | 620.204617437994 | 0.162543524228191 |
| ATGACGACGCA | 620.236565926785 | 0.133959246025649 |
| AATTGTGACGC | 620.24297779432  | 0.225808632452412 |
| GCCATGATGAC | 620.266872314821 | 0.103113388399908 |
| GAGCATATGAC | 620.325511222019 | 0.284035094798789 |
| CGCTACAGTCA | 620.345514947623 | 0.261835271635592 |
| TGACGCAAGCA | 620.362352836777 | 0.275304755047798 |
| GACCGTGACTA | 620.417636566967 | 0.316024660361731 |
| ACAGAAATGAC | 620.590089822286 | 0.381384445407741 |
| GCGTTGTGTCA | 620.6000134276   | 0.391506197455745 |
| GACGTAATGAC | 620.61681270415  | 0.426737879618473 |
| ATAAGTGAGTC | 620.630381702096 | 0.222373324244705 |
| GTCATCTTAAA | 620.637566989816 | 0.192816471120038 |
| AATTTCCGTC  | 620.664081613276 | 0.393702901265765 |
| TGACGTGACAA | 620.673227264913 | 0.25801246239392  |
| ATGACACCCAC | 620.681932039012 | 0.226449475036764 |
| GTCATAGCCCA | 620.715436200389 | 0.259561204899277 |
| ACGTCACATTG | 620.769127980583 | 0.241203224328092 |
| ACTCATACCTG | 620.842467676191 | 0.199906677141766 |
| ACTAATCGTCA | 620.848105444794 | 0.316634900577894 |
| CATGGGATGAC | 620.890873446676 | 0.383093921668079 |
| GTCATCTTCAA | 620.911665354729 | 0.154551983827775 |
| CGTCATTGTAG | 620.984419192969 | 0.33363264344991  |
| AGAGAGTCAGA | 621.001175500945 | 0.225365686798765 |
| CATCATGACAC | 621.012759484575 | 0.208919577472167 |
| AGTCACTACGG | 621.113820214117 | 0.31118029011086  |
| AAAGTGATGAC | 621.122535760756 | 0.437872074351001 |
| AGCCGTGACTA | 621.230716965317 | 0.401089763246297 |
| CCATGCAGTCA | 621.262542612785 | 0.589615177100313 |
| ATGACGCCTCG | 621.297361216556 | 0.330113908192017 |
| AAAATGTATC  | 621.329199414636 | 0.262270468910866 |
| GTCATTGTCAA | 621.353942459146 | 0.107336631656448 |
| GTCATTACTTA | 621.369919437245 | 0.117747793704956 |
| ATGACGAGATA | 621.424531493326 | 0.267084407137868 |
| ATGTCTAGTCA | 621.46458632924  | 0.213435218134969 |
| CGTTCTATGAC | 621.470492158976 | 0.377368595379188 |
| ATCTGTAGTCA | 621.524341182547 | 0.332892225917497 |
| AGACTACTGA  | 621.555321956152 | 0.273288899521564 |
| GCATACAGTCA | 621.569646950513 | 0.477777820758773 |



|             |                  |                    |
|-------------|------------------|--------------------|
| GACTAATGACA | 621.572443575024 | 0.176312881149659  |
| CCGCTGAGTAA | 621.586974362584 | 0.309198807693992  |
| GCCGTTATGAC | 621.594592814516 | 0.580470034374196  |
| ACTAAAATGAC | 621.641265438205 | 0.324005455470008  |
| ATGACGCGCTA | 621.672554586471 | 0.416673925756507  |
| TCGAGTCAAAA | 621.700462525008 | 0.186250860614492  |
| CGGTCTATGAC | 621.740875803906 | 0.304814514313495  |
| CAACATATGAC | 621.828663029111 | 0.282002682268767  |
| GGGACTATGAC | 621.857178739729 | 0.321355830624817  |
| CAATAGACTCA | 621.907236106674 | 0.226811575568725  |
| ATCATTGTCAT | 621.923161308815 | 0.192290405905062  |
| ATATTATGTCA | 621.932688025968 | 0.409325224284728  |
| GGACGGATGAC | 621.94658313681  | 0.316936589796188  |
| CATTGCAGTCA | 621.962397325534 | 0.242375010351864  |
| CCGGCGAGTCA | 621.971299082802 | 0.349928450898719  |
| CACCAATGACA | 621.984099285268 | 0.284788547128111  |
| GTCATCTCGTA | 622.080201345725 | 0.361838084539054  |
| ACATTGACTCT | 622.094291435356 | 0.2807924123309    |
| GTCATATACTA | 622.114894060216 | 0.2470514480989    |
| TAGATAAGTCA | 622.127154206763 | 0.151140965078094  |
| ATGAGTACGTG | 622.241398264915 | 0.155700842787175  |
| ACCTAGTGACT | 622.304499828672 | 0.239679660168605  |
| TCTTTAAGTCA | 622.317036538891 | 0.325138003560013  |
| ATGAATCAACG | 622.426651870121 | 0.181212597470326  |
| ATCCCGTCATA | 622.446863511471 | 0.254137522332201  |
| GACATAATGAC | 622.541420693428 | 0.171806819941339  |
| AGTCACTTGTA | 622.554902896186 | 0.167031496249635  |
| GAAACAATGAC | 622.654068105016 | 0.412852993254598  |
| AAGCCTGACTC | 622.659920868432 | 0.33736701682805   |
| TAGATCTGTCA | 622.745123713179 | 0.271824215939444  |
| ATGACAACGTG | 622.803119683662 | 0.0793532145034019 |
| AATTAATGAC  | 622.841701846086 | 0.37390884864276   |
| ACAGAGATGAC | 622.981454901142 | 0.446571279729275  |
| GTCATACCCCA | 623.002924419979 | 0.288138520483196  |
| CCTCACAGTCA | 623.044509720387 | 0.322733292667137  |
| GAGTTTACTCA | 623.094181189481 | 0.550782694880045  |
| ACGGGGAGTCA | 623.103627234983 | 0.193524188373205  |
| TGAGTCGGAAA | 623.112558664989 | 0.166834264504037  |
| GTCATTTTACA | 623.161549896521 | 0.276066060578343  |
| AGGTTGTGTCA | 623.192766619332 | 0.18570390553488   |
| CCGTTAAGTCA | 623.19978966172  | 0.406484634750483  |
| ATGCATATGAC | 623.260869458118 | 0.36914648262268   |
| CGCATTGACTC | 623.269590478933 | 0.287418203888028  |
| GTCATCGACAC | 623.354017892591 | 0.299705912689486  |
| CTAAGTAGTCA | 623.376741917408 | 0.280713659820941  |
| CATGACTTGTC | 623.384622737959 | 0.220489134759319  |
| CAGCTTACTCA | 623.469109368569 | 0.186304207171367  |
| GAACATATGAC | 623.502972140828 | 0.403715120774327  |
| GTATGAATGAC | 623.519006000916 | 0.268257598385002  |
| GTCATCCTTAA | 623.526854249986 | 0.298566613443405  |
| CGTATCTGTCA | 623.55814564646  | 0.307981621214297  |
| GTCATATCATA | 623.655986638228 | 0.281258506508237  |
| TGACGCGTACA | 623.699387688449 | 0.36502194319598   |
| ACGCTGTATC  | 623.764440372671 | 0.191461640640975  |

|             |                  |                   |
|-------------|------------------|-------------------|
| AATAGTGACGT | 623.821851656033 | 0.249034539002535 |
| GCCACTATGAC | 623.832264216595 | 0.44045411743053  |
| AGCAAGTCATA | 623.850351961353 | 0.209508208879255 |
| GTCATCCTGAA | 623.855387493625 | 0.380948417432087 |
| AGCATGACACT | 623.894194384274 | 0.239486011398802 |
| ATGACAACGTA | 623.904769576841 | 0.234232193483658 |
| ATCATGACCCA | 623.93151075497  | 0.224714709970387 |
| CGTCATCTGAG | 624.013836891014 | 0.281616997759559 |
| ACAGTGAGTCT | 624.093686200465 | 0.299484198825911 |
| TGACGTAGACA | 624.104852074319 | 0.239801940304733 |
| AATAGAATGAC | 624.144444589236 | 0.443862495259337 |
| AGGCTCTGACT | 624.150363418965 | 0.395963747003767 |
| AGAGTCAAATG | 624.19542570302  | 0.228341301895827 |
| GGCATGATGAC | 624.209328915948 | 0.296118172464535 |
| ATGACGCCGCG | 624.237917728974 | 0.248605414432506 |
| ATGAGCAAAAC | 624.256889315618 | 0.248239246400682 |
| CACTGGATGAC | 624.268332885368 | 0.56545237664053  |
| GACTATGACCC | 624.320062847191 | 0.302274941916559 |
| CCGACGATGAC | 624.377855228416 | 0.468598929605384 |
| ATTCTACGTCA | 624.41409214042  | 0.137265376986655 |
| ATGGTCATGAC | 624.461395649495 | 0.089514456495086 |
| CTATGACTTGC | 624.506637643941 | 0.196551308265463 |
| CGACTACGTCA | 624.514132815693 | 0.300217175435658 |
| ACATCTATGAC | 624.541386907283 | 0.423291481942558 |
| ATGACAAGATC | 624.605150420493 | 0.344091032186462 |
| ACACTTCGTCA | 624.609054334913 | 0.413699966752216 |
| CGTCATTCCTA | 624.639000707419 | 0.301994370467685 |
| GCATGCGTCAA | 624.656822478315 | 0.335538518491002 |
| CACTTGTGTCA | 624.66027062479  | 0.293833019208067 |
| CGTTGAATCAC | 624.697557846914 | 0.323472371770796 |
| ACGTCACAGTC | 624.708999454038 | 0.17616753366457  |
| ATCCGACTCAC | 624.726715626285 | 0.25718438813911  |
| CCGACTATGAC | 624.805314332131 | 0.332555342101359 |
| GATTGAATCAC | 624.853750342917 | 0.150885528595764 |
| GTCATCAATCA | 624.993942235674 | 0.154862050446067 |
| ATCTTGTATC  | 625.028059906654 | 0.249461756536189 |
| GGTAGGATGAC | 625.042710307846 | 0.254581840059585 |
| ATGACAACGTC | 625.31781099604  | 0.142758474939232 |
| ACTGGGATGAC | 625.329937546669 | 0.307684655936268 |
| GTCATAACGAA | 625.347529754733 | 0.330727790681127 |
| GAGAATATGAC | 625.376171511785 | 0.224689342976011 |
| AAAGTGAGTCT | 625.390035870005 | 0.227574420027573 |
| ACATTGATGAC | 625.415240050597 | 0.396566844725237 |
| AGGGAGTGACT | 625.422196242866 | 0.165877761661117 |
| AACTATATGAC | 625.429254562177 | 0.178078708320342 |
| CTATCGATGAC | 625.439656906917 | 0.207245755522692 |
| AGCTCATGACT | 625.454669921128 | 0.394505730318809 |
| CCGCCGATGAC | 625.481248430474 | 0.12288818639247  |
| GTCATCACAAA | 625.521999419047 | 0.296535817427501 |
| TACTTCAGTCA | 625.532884985543 | 0.376165215922465 |
| ATGACGAGCCA | 625.623677917412 | 0.241442223143995 |
| ATGACACTCAG | 625.649969771239 | 0.327698170078603 |
| ATGCGTATGAC | 625.651671795132 | 0.322932421586555 |
| AGTCACTACCG | 625.705467826135 | 0.40537843503297  |

|              |                  |                   |
|--------------|------------------|-------------------|
| ATGACAGCTTA  | 625.745012327013 | 0.203466654662371 |
| TCAGTGACGAA  | 625.7831723004   | 0.251945995371734 |
| AGGTAGATGAC  | 625.812928423012 | 0.187888036453493 |
| ATGAATAATAC  | 625.885534946686 | 0.433917714355384 |
| AAGACGTGTCA  | 625.897383470893 | 0.275073292136905 |
| TGATTGACACA  | 625.953547057071 | 0.384556988678169 |
| ACGTCACATAT  | 625.95971364179  | 0.307667892502589 |
| CTTCGAATGAC  | 626.008729165548 | 0.202304339007519 |
| AGTCACTTCGG  | 626.031818665838 | 0.304396758035317 |
| AATCTTCGTC   | 626.058918314584 | 0.424169783006185 |
| CATAAAATGAC  | 626.098410408716 | 0.464116062945805 |
| GGCCTTACTCA  | 626.108230967506 | 0.319566186652642 |
| AACGTGAATCA  | 626.125319800813 | 0.348992781731769 |
| ACGTCACCTG   | 626.133750540971 | 0.274030509261975 |
| ATAGCTGTCAT  | 626.203985760587 | 0.329664742507613 |
| CCCTGATGACG  | 626.212745404595 | 0.322788362709998 |
| CGTAGATGACG  | 626.257908026406 | 0.165760827824355 |
| TATACCAGTCA  | 626.401553298774 | 0.199232987369416 |
| GTCATACGCTA  | 626.403279031891 | 0.315221523181398 |
| CATATGGTGAC  | 626.468724927815 | 0.328176330629186 |
| GTCATCGAGAA  | 626.526517485095 | 0.272121129207057 |
| ACTCATACTGA  | 626.539479075436 | 0.265254983902682 |
| GCCCCGTACATA | 626.579370440622 | 0.335568991242378 |
| GTCATTCGGAC  | 626.591140367593 | 0.562061120439752 |
| ATGTTGACTGA  | 626.595660557139 | 0.282662897024608 |
| CTGACGTGAGA  | 626.677157683067 | 0.287548620514946 |
| GTCACCGTTAA  | 626.685399186177 | 0.385145639053811 |
| AAACTGACACA  | 626.746789168162 | 0.190864273409006 |
| AATAGATGACG  | 626.749945415675 | 0.201659417822817 |
| AAAGAAATGAC  | 626.752795733369 | 0.328097454970604 |
| ATGACGATGCG  | 626.782093994934 | 0.318025187550693 |
| ATGACGTGCTA  | 626.824572982259 | 0.268739995775049 |
| GAGTCAGTAAC  | 626.860336733847 | 0.372957463430063 |
| ATGACGACGAA  | 626.884377881276 | 0.257456116486865 |
| AAGACGTGATT  | 626.916467180606 | 0.244721848126495 |
| GTGAGTCGGCA  | 627.029013383011 | 0.298625027266369 |
| ATAGGGATGAC  | 627.070201856718 | 0.256163298377658 |
| AACGTTACTCA  | 627.114786770028 | 0.28734733468291  |
| CCTCGGATGAC  | 627.120992233167 | 0.300284480238752 |
| CACGTCACTGC  | 627.123714690406 | 0.163512391899863 |
| GTCACCTGTGA  | 627.139490229956 | 0.535691071430529 |
| AGTCACGCTGA  | 627.187624032788 | 0.193365022066194 |
| TAGATTGCTCA  | 627.232376106724 | 0.43360769858662  |
| AACCTTAGTCA  | 627.322918202647 | 0.346096556652563 |
| AAAACGTGTCA  | 627.329727438386 | 0.279924464551322 |
| AGTCACTCCAC  | 627.393895216458 | 0.274813284967843 |
| TGATATGACCA  | 627.408872777226 | 0.115651759588668 |
| AAACCATGACT  | 627.428298774691 | 0.426704662811313 |
| AGAGTCAATTA  | 627.442868226649 | 0.202807026829322 |
| AGTTGGATGAC  | 627.444041883359 | 0.19043707564943  |
| AATAGTGAGTC  | 627.491896181013 | 0.341467618171094 |
| GCCTACAGTCA  | 627.519529908659 | 0.420774225985317 |
| GTCATTCAAAA  | 627.584720434344 | 0.283286502442887 |
| AGGCGCGTCAT  | 627.585368642635 | 0.183241383971777 |

|             |                  |                   |
|-------------|------------------|-------------------|
| CCTTAATGACA | 627.594478846112 | 0.471589409999768 |
| GTTCTGATTCA | 627.666443606836 | 0.194250865742379 |
| AGTCACGCGAA | 627.666946446289 | 0.266483556050379 |
| CGTCATTATTA | 627.685218176128 | 0.303910378112735 |
| ATTCATATGAC | 627.692296957276 | 0.337931307051763 |
| GTCATTCCGTA | 627.772595066518 | 0.264467075633509 |
| GTCATCCGAC  | 627.888267907115 | 0.265182491206127 |
| CGTTGGATGAC | 627.927345986351 | 0.399876632665626 |
| CCGGTGACCA  | 628.112180855893 | 0.291175503218033 |
| GAATATGACCA | 628.198036050874 | 0.227568996990399 |
| GTCATCCCTAA | 628.233233754636 | 0.264612204549346 |
| CAGATTTGTCA | 628.692899562641 | 0.185649815907411 |
| ATGAGCAAACA | 628.707435740024 | 0.282879163179232 |
| GGCCTCAGTCA | 628.850177609236 | 0.227654951071864 |
| ACGAAAATGAC | 628.93183734302  | 0.297601452523105 |
| ACATTAAGTCA | 628.998031534926 | 0.384860935171239 |
| TGACTGCGACA | 629.09549085441  | 0.481826521473232 |
| AGTTGACACAC | 629.121586105611 | 0.287798357960005 |
| GACGAAATGAC | 629.190136611541 | 0.305958527981905 |
| ATCTATAGTCA | 629.215781308165 | 0.215728049156748 |
| GTCATCGTCCA | 629.216503113316 | 0.261485380013714 |
| ACAGTGACGTG | 629.243843535747 | 0.276668504309728 |
| AGACTGATTCA | 629.403286169948 | 0.285303689837713 |
| ACAACCAGTCA | 629.41285621111  | 0.284407850307569 |
| GAGCTGTATC  | 629.466273569511 | 0.105709623572639 |
| AGTCACTACAC | 629.472347160257 | 0.184854582021043 |
| ACTCAATGACG | 629.493944568755 | 0.123887683738917 |
| CTCGTGAATCA | 629.523050616347 | 0.384747091828997 |
| CCCTGACGTCA | 629.523129410211 | 0.43095186197915  |
| CGTAGCAGTCA | 629.589430951643 | 0.365013282200338 |
| CTGACAATGAC | 629.599894764422 | 0.23994706494923  |
| TCGAGATGACA | 629.66852353257  | 0.165477414970385 |
| GAGTCAGTACA | 629.68593038128  | 0.373212221347531 |
| AGTCACCCAG  | 629.720013884304 | 0.347058838895069 |
| TGACCAATCAA | 629.836081776046 | 0.328640871663242 |
| ACTGCGATGAC | 630.033007180648 | 0.376321740153467 |
| CTGCCTATGAC | 630.082737769042 | 0.189872065531834 |
| ATGACAACGCA | 630.097656604201 | 0.255835815686524 |
| ATTAGTGAGTC | 630.13080965797  | 0.322811013896535 |
| ACGTCACCAAT | 630.244059872952 | 0.298403409248227 |
| GTGCCGAGTCA | 630.25276973411  | 0.172767100507733 |
| TGACGATTACA | 630.304411178483 | 0.270675886112212 |
| CCGATGAGCCA | 630.334244156671 | 0.30619672924318  |
| AACCTGTGTCA | 630.343558512216 | 0.149783530918349 |
| GACGCGATGAC | 630.443656460774 | 0.324380263596161 |
| TAGCCGAGTCA | 630.503646005802 | 0.217075402127518 |
| GTCATCGAGGA | 630.574111800141 | 0.243822259922526 |
| AGACTAATCTG | 630.574456126001 | 0.350119608288986 |
| TGACTATTGCA | 630.591780853978 | 0.684262444340646 |
| TGACTTAGTAA | 630.634843922741 | 0.342289448299719 |
| GGTAGAATGAC | 630.658515551641 | 0.321871472807656 |
| GAACCTATGAC | 630.726521025864 | 0.484902304134241 |
| ATGAGCAAACC | 630.835479811896 | 0.372681597566404 |
| GTCATCAATTA | 630.934136833048 | 0.326262936935537 |

|              |                  |                    |
|--------------|------------------|--------------------|
| AACTGACGTCA  | 630.993426941875 | 0.367913620859909  |
| GGTGACACGAC  | 631.050676867001 | 0.261674291641337  |
| GTCATCAGAGA  | 631.089304833071 | 0.395242804696913  |
| GTCATCCTAAA  | 631.277625427687 | 0.207744456970946  |
| GCCATCAGTCA  | 631.313248693978 | 0.19888948510864   |
| GTCATAAACAA  | 631.318124966333 | 0.402585931406397  |
| TGACTGGGTAA  | 631.353250822278 | 0.352526151003276  |
| ACCTTTGTCAT  | 631.391639359583 | 0.183518450134253  |
| GTCATAGGATA  | 631.415411700192 | 0.259808232267387  |
| ATGACGTGAAT  | 631.469783142836 | 0.180158343871886  |
| CGCTGAGTAAC  | 631.488401633488 | 0.263575705948964  |
| AACAGGATGAC  | 631.664999723944 | 0.272498194227873  |
| ACGAGAATGAC  | 631.71968508501  | 0.371908580995531  |
| GGTTCTATGAC  | 631.731870964936 | 0.236731992008406  |
| AGAGTCAAAC   | 631.738983141529 | 0.147845569506653  |
| CTGTGAATGAC  | 631.756054438237 | 0.378764213472431  |
| GTCATCACGCA  | 631.756093146982 | 0.344560402002839  |
| ACACCATGACT  | 631.819511668073 | 0.218533871773423  |
| ATGACGCCGAG  | 631.955226855476 | 0.373945183478832  |
| ATGTATTAGTC  | 631.959783667418 | 0.265534497781507  |
| ATCGAATGACG  | 631.981289283139 | 0.261045254577523  |
| CATGCGTCAAA  | 631.992278349236 | 0.250681483660579  |
| GTCATACAGTA  | 632.038691826672 | 0.402370891028878  |
| CAAACGGTGAC  | 632.051971165009 | 0.188824588539402  |
| GTCATAGCCAC  | 632.059858509274 | 0.326199254125955  |
| GTCATCTTTGA  | 632.105967312889 | 0.293597514963492  |
| CACCCTATGAC  | 632.122116712808 | 0.258747269552313  |
| ATCCTCGTCAT  | 632.13341677132  | 0.263852609759453  |
| CCTAGGGTGAC  | 632.144772432344 | 0.401494325513382  |
| CGTAATCGTCA  | 632.249174280171 | 0.32359490195383   |
| GGTCATGTGAC  | 632.33456501796  | 0.375570723186796  |
| GGGTGTATGAC  | 632.335364913465 | 0.285452374780851  |
| AAGAGTCTTAC  | 632.337009210722 | 0.216496285690866  |
| ACTGCTATGAC  | 632.340183108754 | 0.375622096660449  |
| CATTTTATGAC  | 632.34820526303  | 0.366945721436507  |
| GTCATCTGTAA  | 632.354823909517 | 0.165068693274466  |
| ATGACGGTATC  | 632.37327818478  | 0.245095920441845  |
| ATGACCACGAC  | 632.41342973897  | 0.145287686015886  |
| CACACACGTCA  | 632.461075877359 | 0.320076167905461  |
| ACGTCACATAC  | 632.473602306086 | 0.217963200313079  |
| GGTAATATGAC  | 632.632259162084 | 0.178277283285492  |
| GTCATCCTCAC  | 632.634548151223 | 0.205578852799123  |
| ATGACTTGATG  | 632.67129944575  | 0.337125800666234  |
| ACTATATGTCA  | 632.70537854434  | 0.405737831429115  |
| GTCATAACGCA  | 632.730052781421 | 0.335968982518291  |
| CATGTACGTCA  | 632.742206808942 | 0.296593139875655  |
| CGATTTTGTCA  | 632.77544390904  | 0.286950542336026  |
| AGTGTACATGGC | 632.837610332284 | 0.263294838243436  |
| CACGTCACGTG  | 632.853397272135 | 0.0905589019049016 |
| TGACATATAAAA | 632.906034785379 | 0.323214494031584  |
| AGTCACTTCCG  | 632.916127209976 | 0.272927481965918  |
| ATGACCACTCA  | 632.970200465323 | 0.267950555084896  |
| ACAAATATGAC  | 632.999272379487 | 0.157336491182927  |
| GAAGGTGACGC  | 633.084701890883 | 0.125328115398151  |

|              |                  |                    |
|--------------|------------------|--------------------|
| CGTCATATGCA  | 633.135458246182 | 0.379777295867498  |
| TAATTTGCTCA  | 633.171783384727 | 0.359219259577297  |
| AAGAAATGACG  | 633.245951757572 | 0.242829400051718  |
| AGAATTGACTC  | 633.247901442252 | 0.192895801996153  |
| CGTCATCTAAG  | 633.283101948916 | 0.269547198642091  |
| AAGTGGATGAC  | 633.300625634385 | 0.242754675129385  |
| GTCATGTTTCA  | 633.350983220757 | 0.420529788087018  |
| GGCAAGTCATA  | 633.422532344239 | 0.24297229998065   |
| AACTGTAGTCA  | 633.440443048987 | 0.378667312810012  |
| ACAGGGATGAC  | 633.474559584755 | 0.21490302737344   |
| GAGAAGATGAC  | 633.549919693925 | 0.194642638015     |
| ATGACGGTACA  | 633.640516208973 | 0.247277486758563  |
| CTGAGTGAGTC  | 633.697303321779 | 0.285114512191325  |
| GCGTATATGAC  | 633.781504899434 | 0.361158577556738  |
| AGTCAGAGCCA  | 633.842531880068 | 0.190995321648627  |
| ATCAGTGACAC  | 633.89010540629  | 0.34759548351349   |
| GGTTAGACTCA  | 633.901616328294 | 0.290625370767545  |
| TCACTACGTCA  | 633.953540480915 | 0.345287329082871  |
| GTCATTGATAA  | 634.037669454754 | 0.271661902372438  |
| CTGTCCACGTCA | 634.068521855557 | 0.2408362722191    |
| GTATTGACACA  | 634.0699967566   | 0.216899564540245  |
| GATCATGACAC  | 634.078912046284 | 0.243822837843443  |
| AGTCACCTCGC  | 634.082626843295 | 0.186654588346194  |
| AAGCCTATGAC  | 634.100689531536 | 0.191035057026871  |
| TGACACTGTCA  | 634.110458125423 | 0.290665987429087  |
| GTCATCGGCAC  | 634.124851688122 | 0.263726659969822  |
| CGTTCGATGAC  | 634.186700589286 | 0.370948611600266  |
| CTTATATGTCA  | 634.194275357644 | 0.392399332639478  |
| AACCTGACACA  | 634.275399100561 | 0.214217068390939  |
| GACATAAGTCA  | 634.337618946134 | 0.50015437204009   |
| AGTCAGAAGAA  | 634.431664399899 | 0.248016837341061  |
| GTCACACTCAC  | 634.521957761859 | 0.349075644441502  |
| ACTATTGACTC  | 634.580853834782 | 0.23520845872905   |
| CTATAGATGAC  | 634.692392303782 | 0.0657193647785891 |
| AGGGGACTCAT  | 634.774817785815 | 0.233475367426616  |
| ACTAGCAGTCA  | 634.792369955401 | 0.301486161918701  |
| GTCATCCTCGA  | 634.833620742743 | 0.285256237180343  |
| GTCATAAGCTA  | 634.883531461109 | 0.238122023842699  |
| GTCATCACCGA  | 634.887460908885 | 0.096769781582417  |
| ATGAGTATGTC  | 634.928899755834 | 0.336413147047881  |
| GTCTTACGTCA  | 634.992802979421 | 0.3468222669962    |
| CTAACGACTCA  | 635.038477882325 | 0.211746502696006  |
| TAGTCACGAGA  | 635.04047131447  | 0.0886984642669363 |
| GTCATCACGAA  | 635.085290200863 | 0.408813624504931  |
| CAGAGATGACA  | 635.101792532355 | 0.150241754945301  |
| ACGGAGATGAC  | 635.170691834874 | 0.295212683354157  |
| GATGACAGCGA  | 635.292541737889 | 0.297669304103504  |
| TATACGTGTCA  | 635.320296525507 | 0.278848049045777  |
| AGGCTGCGTCA  | 635.332750068    | 0.198802970911605  |
| CCGTGTAGTCA  | 635.383287817016 | 0.581691927750448  |
| AAGGGTGACGC  | 635.405123493138 | 0.210758038194997  |
| ATGACGTTGCG  | 635.439891339205 | 0.225316640128768  |
| AAATGAATGAC  | 635.521195220904 | 0.289592904760305  |
| CAGAGAATGAC  | 635.542967943909 | 0.0735800568701789 |

|                |                  |                   |
|----------------|------------------|-------------------|
| CTCACACGTCA    | 635.551760489381 | 0.292714490814898 |
| GAGTCAGTAAA    | 635.725168121465 | 0.243375874671863 |
| ATCGTGATGAC    | 635.752581928295 | 0.273163165965689 |
| AAGTCACCTTG    | 635.770756201473 | 0.274520257840077 |
| CCTTTACGTCA    | 635.820763083183 | 0.124802286535379 |
| GGTTGTATGAC    | 635.84698246258  | 0.18988228384494  |
| CATGCGATGAC    | 635.921232520095 | 0.449672798587725 |
| ATGAATCAACA    | 635.963431562325 | 0.27444988274919  |
| ACTATCCGTCA    | 635.967364613622 | 0.250344921351971 |
| GGGCCTATGAC    | 635.997555344563 | 0.109337352568427 |
| GCCCTTAGTCA    | 636.042884266782 | 0.45301093077021  |
| GATATCGTCAC    | 636.047993547661 | 0.251624989282636 |
| AGAGTGACGAA    | 636.052169871503 | 0.258671166887472 |
| GAAGAAATGAC    | 636.07345563612  | 0.315441363843076 |
| ACATCCAGTCA    | 636.099958897542 | 0.367386886390695 |
| ATGACACTCTC    | 636.168494463982 | 0.329552459002681 |
| GGAGATATGAC    | 636.219291494946 | 0.150518938909294 |
| GTCATCCGCTA    | 636.220283904756 | 0.157043789688803 |
| CTTTGCAGTCA    | 636.269870560823 | 0.178664392157629 |
| GGTCACATGAC    | 636.333232856591 | 0.424752248411479 |
| GTCAGCGTCAC    | 636.335981860337 | 0.334024720499609 |
| GCTAGGATGAC    | 636.424470021927 | 0.230363725701136 |
| ACGCATGACGT    | 636.455720408359 | 0.382207648408468 |
| AACATTGTCAT    | 636.499896017645 | 0.248894146856564 |
| GTCACAGATGA    | 636.505359873983 | 0.280516363863524 |
| GCGCTGTGATA    | 636.534241509016 | 0.308188872651065 |
| GATTTGCGTCA    | 636.541491989014 | 0.363650316282927 |
| AGTCACGCTCG    | 636.552229637256 | 0.357112395545796 |
| GTCATATAGGA    | 636.572479573769 | 0.257755977848676 |
| GTCATCTCAGA    | 636.591198312646 | 0.342111337103309 |
| TGACGTATGCA    | 636.649231377925 | 0.433060052136589 |
| AGGAAAATGAC    | 636.711361132139 | 0.312502575343835 |
| ATGACAATGCC    | 636.729332124697 | 0.210059157373069 |
| AATTTTGACTC    | 636.739491042605 | 0.360594052320246 |
| ATGACATGACC    | 636.793517048961 | 0.302441616212774 |
| CTGATATGTCA    | 636.812026999038 | 0.307887557540264 |
| ATCCGGATGAC    | 636.889686774923 | 0.26518615746098  |
| CCCTTGCGTCA    | 636.937989112987 | 0.157309761855809 |
| TAAGACTCTTA    | 637.064813650554 | 0.195098088362351 |
| AAAGGGATGAC    | 637.120457045059 | 0.249556968992925 |
| CTTATCCGTCA    | 637.134444959076 | 0.238146356481276 |
| CTCCGACTCAC    | 637.152531385591 | 0.200080655583142 |
| ATGGTGAATCA    | 637.158981243914 | 0.195661383676788 |
| AAAATGGTGAATCA | 637.175510117291 | 0.237322309875587 |
| AGTCACTCCAA    | 637.189695252744 | 0.366267587502322 |
| CGTCATTTGCA    | 637.212338451965 | 0.293671179497706 |
| GTCATCGAATA    | 637.276481600174 | 0.335869602918061 |
| AACAAATGACG    | 637.293618338647 | 0.27461689611127  |
| GTCATAGTAAC    | 637.340710459981 | 0.386197369189331 |
| ATGACAATAAC    | 637.357038035592 | 0.271798453505268 |
| CTCAAGAGTCA    | 637.362240993709 | 0.243097710109621 |
| AAGCTGATGAC    | 637.407374049952 | 0.206192484605696 |
| AATATTTGTCA    | 637.45320379834  | 0.294759115471043 |
| TCGCCGAGTCA    | 637.531961838637 | 0.236968539911449 |

|              |                  |                   |
|--------------|------------------|-------------------|
| CTGCATAGTCA  | 637.547104641396 | 0.342012728571331 |
| GTCATCAACTA  | 637.588831376376 | 0.326104215277416 |
| TGACACTATAA  | 637.6205023048   | 0.255996099954402 |
| GAGTCAGTTTA  | 637.65172795437  | 0.278147055173082 |
| ATGACCCAGAA  | 637.674258657757 | 0.154948745868704 |
| GACCCACGTCA  | 637.873297596357 | 0.329285182916309 |
| ATAATGTCATC  | 637.892307045535 | 0.284330079155925 |
| AGACTGCGTCA  | 637.923847344768 | 0.293954838203811 |
| TGACGTACACA  | 637.929335107392 | 0.483197473150678 |
| ATGACTTGTGC  | 637.931666187059 | 0.467508768308939 |
| CCGGAGATGAC  | 637.974261335904 | 0.443868415190137 |
| GTCATCCAGTA  | 638.088401291083 | 0.208946793383721 |
| ATGACTTGTGA  | 638.148831871263 | 0.384818804922172 |
| AGAATATGTCA  | 638.168389798408 | 0.165628340293855 |
| ACGTAGATGAC  | 638.435231090575 | 0.262584220759936 |
| TAAGGGAGTCA  | 638.447684756233 | 0.281399376320524 |
| AGTCACTTCAG  | 638.462460669008 | 0.328242470160927 |
| AACCCGATGAC  | 638.512590585623 | 0.479304507151594 |
| TACCTTAGTCA  | 638.658507124202 | 0.267295693350487 |
| GTCACCAATGA  | 638.755890017116 | 0.356950183147439 |
| GTCACCGTTGA  | 638.779216899596 | 0.427515734814412 |
| CGTCATCTCTA  | 638.921279124141 | 0.281066103741134 |
| ACCATCAGTCA  | 638.92274950725  | 0.232010472471901 |
| CGGCAGATGAC  | 638.925906047773 | 0.368863337177043 |
| CTGCAGAGTCA  | 638.939306484519 | 0.334018790249711 |
| GCGGCTATGAC  | 638.944383153337 | 0.263722723606254 |
| CCCAAGAGTCA  | 638.951485417982 | 0.39900293474454  |
| CCTACTATGAC  | 638.968887581072 | 0.128144118491831 |
| GACATTCGTCA  | 639.141170883197 | 0.272041046524057 |
| CCATGGAGTCA  | 639.213486628948 | 0.467386084355324 |
| CGTCATTTGGA  | 639.333074830453 | 0.26347262843486  |
| CATTGACACAC  | 639.381551915553 | 0.234145439001619 |
| TCGCTGTGTCA  | 639.401224409096 | 0.289593640177927 |
| TCTTTACGTCA  | 639.421217781838 | 0.321461453788574 |
| CTATATATGAC  | 639.452804225359 | 0.277756016080531 |
| TGACTGTAACA  | 639.47724152703  | 0.161177561909606 |
| ATGACGGTATG  | 639.507029372175 | 0.269759217424367 |
| GCTTGCAGTCA  | 639.509663748892 | 0.345929964769206 |
| ACGGAAATGAC  | 639.534377440613 | 0.300532323364849 |
| CGATGAATGAC  | 639.536989403136 | 0.345016607186862 |
| CATGCGAGTCA  | 639.53957749327  | 0.208189044569435 |
| ATGACCCAGAC  | 639.58062294341  | 0.223995169594891 |
| GGAAATCCGTCA | 639.594411523702 | 0.453357462105366 |
| TCATTAAGTCA  | 639.685280649197 | 0.502134211267063 |
| GACAAAATGAC  | 639.692391590793 | 0.207556014612177 |
| ATGACGCGCCG  | 639.704402559476 | 0.331391114890469 |
| TGACTTATAAAA | 639.715585747582 | 0.379232090779047 |
| ATACTACTCAT  | 639.736795770374 | 0.196703076341371 |
| GTCATCTTGCA  | 639.757084781904 | 0.38308176849797  |
| CCGCGTGACTA  | 639.769366203036 | 0.109731570717604 |
| GCCCTGTGATA  | 639.786220679901 | 0.147368957081584 |
| TGACGAAATCA  | 639.787601593068 | 0.448059720374107 |
| AAATAAATGAC  | 639.791929572094 | 0.340547686687666 |
| TGAATCAGACA  | 639.824480060848 | 0.384994410499852 |



|             |                  |                   |
|-------------|------------------|-------------------|
| CATCTGATGAC | 639.860871209401 | 0.238853765865797 |
| ATGCGAATGAC | 639.905809284921 | 0.433705864026335 |
| GTCATATGTGA | 639.925444614524 | 0.31060923377482  |
| ATGACATCGTA | 639.93307894885  | 0.303008172783202 |
| AGGCGTGACTG | 640.050011432175 | 0.183917302620477 |
| ATGACAATAAT | 640.06206368398  | 0.165883272627581 |
| AATTAGACTCA | 640.101807993972 | 0.361928528293644 |
| ACCCGTGACTA | 640.122811217655 | 0.285309475623008 |
| CCGTGGATGAC | 640.123646847351 | 0.292156143783432 |
| CGTCAGATGAC | 640.133195049347 | 0.259146694843925 |
| TGACTGTTACA | 640.14591923058  | 0.29998052707375  |
| TAATAATGACA | 640.15274362395  | 0.12265611175572  |
| CACCATGACTG | 640.167145616168 | 0.213096960344584 |
| AGTCGGATGAC | 640.197802260785 | 0.247756985775696 |
| AAGGGACTCAT | 640.197939280402 | 0.167629029387506 |
| GTCATTCTATA | 640.233139400871 | 0.270198011180324 |
| CGAGACTCATA | 640.243278303338 | 0.299307223253664 |
| GTCACCCTGAC | 640.289398714741 | 0.259893382306704 |
| GTTTGACTCGA | 640.379191158512 | 0.351481030861084 |
| GTCATCACACA | 640.424471512912 | 0.360148458321569 |
| GTCATTTCTTA | 640.592439636274 | 0.247160579482241 |
| GTCACCCATGA | 640.625593262767 | 0.391900227717751 |
| GTCATCTACTA | 640.636601237261 | 0.273687747559159 |
| GTCATACAGAC | 640.651529868043 | 0.48382323315158  |
| GTTTGTAGTCA | 640.666676064895 | 0.320943528328244 |
| ACACTGATGAC | 640.667210568728 | 0.274353216424125 |
| GTCATCTCTAA | 640.737092861154 | 0.233798449804668 |
| CATACGTGTCA | 640.857277913602 | 0.290928916596157 |
| ACGTCATGCCG | 640.892043365613 | 0.340910373056747 |
| GTATATGACCA | 640.92345582956  | 0.37416385533437  |
| TAATAGTGTCA | 640.942817313859 | 0.201174523790877 |
| GGGGTAGTCAC | 640.994775179964 | 0.261536635190006 |
| GTGTCATGCTA | 641.065168491322 | 0.326100729549759 |
| CGACTGATTCA | 641.199479694172 | 0.329374572911512 |
| ATGACTTGACA | 641.205688230563 | 0.304917934222961 |
| GAAAAGTGTCA | 641.300067517667 | 0.194890205203202 |
| GTGAGTCGGAA | 641.489225962083 | 0.259995207730563 |
| TGACTACAGCA | 641.606203043786 | 0.270885295624141 |
| CTGGCGATGAC | 641.61571197333  | 0.33961472580942  |
| ATGACCACGAA | 641.626258620352 | 0.332589325454328 |
| GATGATGTGGC | 641.67423048032  | 0.224972629526171 |
| AACAAGTGACT | 641.712142842956 | 0.180411065528849 |
| ACCGTGAGTCT | 641.739923191356 | 0.29592165200386  |
| ATAGTAATGAC | 641.773932218956 | 0.330628246394941 |
| CTGCTGTGTCA | 641.796507480276 | 0.33242576907466  |
| CAGTCTAGTCA | 641.826692511347 | 0.26588166240311  |
| CCGTTTATGAC | 641.934482275894 | 0.298422792856796 |
| GTCATCCACCA | 642.025557337007 | 0.229442777444494 |
| ATGACATTTTC | 642.037829092475 | 0.258715364321654 |
| GGATATATGAC | 642.145481821412 | 0.158121192460169 |
| CATCCTAGTCA | 642.196327587551 | 0.158067410173957 |
| GTCATCATTAA | 642.199396664612 | 0.286151929087483 |
| GCGATTTGTCA | 642.204954238248 | 0.35944254721513  |
| TATGATGACCA | 642.215080097147 | 0.188271827183735 |

|              |                  |                    |
|--------------|------------------|--------------------|
| GGCTCGATGAC  | 642.238026558674 | 0.430212252048571  |
| GCGCTCAGTCA  | 642.252112993113 | 0.506535907403546  |
| GTCATTGTAA   | 642.296727184747 | 0.28757669040938   |
| CGTCATCTGTC  | 642.32577592836  | 0.210380248368394  |
| TGACAAATACA  | 642.339647631301 | 0.231687460669158  |
| CGGTAGATGAC  | 642.353995241947 | 0.255770752083457  |
| CAGTTTCGTC   | 642.399617533686 | 0.386357695899597  |
| GCAACGGTGAC  | 642.460558599006 | 0.349674832509029  |
| CCTTGCAGTCA  | 642.510465814753 | 0.314919701172161  |
| TCTCGTAGTCA  | 642.599086058864 | 0.322106750799608  |
| AGTCACTACCA  | 642.617280198189 | 0.204960779382758  |
| GTTTTGCGTCA  | 642.621125751173 | 0.418481019953073  |
| CTTAGTGTGAC  | 642.690262894205 | 0.146027909579923  |
| ACAGCGTGACT  | 642.707475807799 | 0.198701964840263  |
| ATTCTGATGAC  | 642.792638714418 | 0.285939183973018  |
| ATCAGATGACG  | 642.799352723139 | 0.17842356125739   |
| ATGGAATGACG  | 642.805979584431 | 0.20075682407915   |
| CAGCCTAGTCA  | 642.809541172667 | 0.310326077790608  |
| CTCTGGATGAC  | 642.869262851734 | 0.438844702672193  |
| GTCACATATGA  | 642.874126882407 | 0.233814071872114  |
| ACGAGTGTGAT  | 642.925263924885 | 0.330142866953134  |
| AATTGGAGTCA  | 642.93954447403  | 0.273822513480276  |
| ATGTAAATGAC  | 642.94734737796  | 0.297575566365282  |
| ATGAGTATGAG  | 643.017469667239 | 0.201392831692462  |
| GTCATGACCAC  | 643.125624676733 | 0.319075224685082  |
| ATCGTCGTCAT  | 643.173009932008 | 0.309642650609339  |
| ATGACATGCAT  | 643.190096129918 | 0.338630359547662  |
| GTCATAAATCA  | 643.202834446197 | 0.0948763727781061 |
| CTATTATGTCA  | 643.245684575436 | 0.22925259172837   |
| ACGTCACCGAA  | 643.279367034531 | 0.366513647871299  |
| CGGCTTACTCA  | 643.294162161065 | 0.214625020281841  |
| CGTATTATGAC  | 643.464424438861 | 0.443111552859402  |
| GTCATATCCTA  | 643.467840210129 | 0.278210337215531  |
| TGACTACGTAA  | 643.491361759323 | 0.253892928746552  |
| ACGGCGTCAATC | 643.569095586985 | 0.198130378667415  |
| AGTCACTCCCG  | 643.581437689284 | 0.298232620847222  |
| TAAATTAATAA  | 643.655896922845 | 0.35669678209249   |
| TGGGTCATGAA  | 643.667257505731 | 0.218027682652409  |
| AGTAAAATGAC  | 643.743041273734 | 0.26291628558865   |
| GTCATCGCGGA  | 643.871795437285 | 0.253325093789322  |
| ATTAATATGAC  | 643.910866473961 | 0.326148745464649  |
| GATGACGTCGC  | 643.928916267113 | 0.150562356434485  |
| GTAATCATGAC  | 643.932680410547 | 0.260756133491048  |
| GTGTCATGATA  | 643.9339082552   | 0.302349044444239  |
| AATAAGATGAC  | 643.942002831538 | 0.246015858874998  |
| CACGTCACGTA  | 643.954158025641 | 0.292498427788972  |
| AGTCACGCCAT  | 643.998032764189 | 0.332641213544852  |
| AGTCACTCCGG  | 644.131248007289 | 0.339855435321505  |
| CAGAATTAGTC  | 644.133511782584 | 0.420746539620236  |
| GTCATTTAGAC  | 644.163214019919 | 0.258547540992866  |
| GTCACACATAA  | 644.326151841179 | 0.307291153751796  |
| CTACGGATGAC  | 644.397287123846 | 0.28774282604582   |
| AATATGGTCAT  | 644.433794725023 | 0.299041559084777  |
| ATCAAGTCATC  | 644.509170338855 | 0.23886851268684   |

|              |                  |                    |
|--------------|------------------|--------------------|
| GGCCAAGTCAC  | 644.509265441301 | 0.270263060524221  |
| AGTCATGGTGA  | 644.542226809486 | 0.147655793154851  |
| TAGTCACGACA  | 644.54612775089  | 0.237144375687426  |
| TCTAGCAGTCA  | 644.560906643166 | 0.200274564039061  |
| AACCATGACTG  | 644.578214137078 | 0.0793141150147252 |
| AATTGATGACG  | 644.581490058417 | 0.315264031750314  |
| AGTCACGACTG  | 644.632751309946 | 0.249591963007657  |
| CCTAGGATGAC  | 644.646474087782 | 0.285814704756436  |
| GCGATGATGAC  | 644.652082372334 | 0.303219434068328  |
| AATAACAGTCA  | 644.66901768853  | 0.107171955949351  |
| CTTCCTATGAC  | 644.678759816403 | 0.223662387937982  |
| ATGACGCCTAA  | 644.719645738236 | 0.313050836359528  |
| GGCTGACGTC   | 644.841276245243 | 0.366153311500698  |
| GGCGGTATGAC  | 644.857988787547 | 0.136520196275399  |
| GAATGGAGTCA  | 644.862764551699 | 0.189169853134785  |
| TCCTTCAGTCA  | 645.056619868077 | 0.3967307763592    |
| CAAATAATGAC  | 645.079064663282 | 0.228093096120079  |
| GCTTGGATGAC  | 645.116611830966 | 0.311496856489066  |
| GTCATGGGTCA  | 645.169767237554 | 0.424199116688309  |
| ACTTGTACTCA  | 645.171668902088 | 0.251224548585004  |
| CAGTCACGAGG  | 645.176024745667 | 0.280615256527193  |
| GCCACATCATA  | 645.184607947361 | 0.305899313399532  |
| GGTGAATCAAC  | 645.396939082576 | 0.278281771432375  |
| GATTATTACATA | 645.406111321665 | 0.252760244093347  |
| GAAGGGAGTCA  | 645.414166151303 | 0.248666176090533  |
| TGAAAGTGTCA  | 645.432484947926 | 0.177213102598589  |
| AGTCACTAGGC  | 645.43595553048  | 0.148979947477473  |
| ACAATATGTCA  | 645.459735289021 | 0.402177601868517  |
| ATGAGGTCATA  | 645.470748096127 | 0.245378760630131  |
| CGTCATTTAG   | 645.471334676626 | 0.268810503162097  |
| CCACGGATGAC  | 645.543484003128 | 0.347766563812326  |
| AATACTGACTC  | 645.580489691157 | 0.121447798500042  |
| AACGCTATGAC  | 645.594152631646 | 0.289214210410164  |
| CTGTTGACACA  | 645.61353706788  | 0.237520418810513  |
| GTCATCCACAA  | 645.619091223286 | 0.178172074262459  |
| CTATTGACACA  | 645.625669667112 | 0.175727819911123  |
| TACACACGTCA  | 645.635406902362 | 0.35618425125831   |
| GTCATTACACA  | 645.639905782635 | 0.41851992713557   |
| ATGACACGGAG  | 645.651443465798 | 0.226157150894787  |
| CACTTTAGTCA  | 645.731780371346 | 0.443120272417452  |
| CGAACAAATGAC | 645.803367786554 | 0.200317339515891  |
| TATCATAGTCA  | 645.815870458729 | 0.25332917448377   |
| AGATGGAGTCA  | 645.837607064075 | 0.229198426765578  |
| GCCAGAATGAC  | 645.946464676451 | 0.372625852644862  |
| GGATGGATGAC  | 645.956194944476 | 0.229646728575296  |
| GGAGCTATGAC  | 645.972271576186 | 0.386959424034708  |
| CTAGGTGACGC  | 645.989949900551 | 0.129829487880815  |
| TAGACGCGTCA  | 646.055243814351 | 0.369614832067786  |
| ACGTCACCTAG  | 646.109077594731 | 0.345745758611312  |
| CAGCAAATGAC  | 646.120254789129 | 0.385597307276701  |
| GTCATCTAATA  | 646.129296548508 | 0.304200286764473  |
| CGACTAAGTCA  | 646.144951427251 | 0.418958145938892  |
| AACATGACCCA  | 646.255928414749 | 0.322835422730074  |
| CCAGCTATGAC  | 646.41194768023  | 0.368564820250789  |

|              |                  |                    |
|--------------|------------------|--------------------|
| GGTGACATGAC  | 646.417997063864 | 0.293244961664414  |
| ATGACACCCAT  | 646.418901437635 | 0.322049547757387  |
| CTAGGGAGTCA  | 646.478938527599 | 0.360626071691647  |
| TACATGAATCA  | 646.536765896581 | 0.438987204380041  |
| AGAACGACTCA  | 646.564963994221 | 0.317831979396269  |
| CAGCTTATGAC  | 646.592092854412 | 0.152230689953409  |
| GATATACGTC   | 646.616915264458 | 0.599917830322724  |
| ATCTGTCAGAG  | 646.637250651115 | 0.241966032713566  |
| CATAGTGTGAC  | 646.651794770053 | 0.341244131263667  |
| TGAGTCGCACA  | 646.698058145942 | 0.289320150835989  |
| GTAGGAATGAC  | 646.707383276441 | 0.19546215100484   |
| CGTTAAATGAC  | 646.708333606486 | 0.317234029722294  |
| GTCACACGAAA  | 646.766613459131 | 0.335137266835041  |
| ATGAGCAAAAT  | 646.767256499653 | 0.266612092529418  |
| GTTGTGAATCA  | 646.797965966448 | 0.197031694682089  |
| GTC AAGATGAC | 646.839340073172 | 0.353662080974456  |
| AAAACAATGAC  | 646.930800126346 | 0.322049745120473  |
| ACGTCACGTGAC | 646.935951634394 | 0.274990379627266  |
| CTGTGGATGAC  | 646.944932112332 | 0.222672349267354  |
| CGCTTCAGTCA  | 646.949270413611 | 0.398521536102727  |
| AGTGTCATGGA  | 646.953255341692 | 0.245508552758109  |
| GTCATTCGCTA  | 647.014716871999 | 0.262527159320324  |
| TAAACTTGTCA  | 647.017883259032 | 0.270340126117642  |
| ATATGTCAGAG  | 647.118766222021 | 0.200205002632147  |
| GTCATCAAGGA  | 647.155819627318 | 0.331950633531712  |
| CGTCATTTATA  | 647.193277381444 | 0.180206399829229  |
| CAGGTGACCCA  | 647.252703688973 | 0.177458369283769  |
| AGGTGGATGAC  | 647.271211126211 | 0.231797452758059  |
| AAAATTGCTCA  | 647.278402799659 | 0.295165457239858  |
| ATGTGTGTGAC  | 647.36122038257  | 0.262404826873978  |
| ACTTACAGTCA  | 647.371250461495 | 0.270306007562898  |
| GAACACGTCAA  | 647.377959502717 | 0.250722675250909  |
| ATGACGCGCGA  | 647.400538779065 | 0.124301893609629  |
| GTCATCTTAGA  | 647.41747923415  | 0.316779525862042  |
| CCGTCGATGAC  | 647.441634457667 | 0.312980242277861  |
| CGTCATCAAAA  | 647.445998149498 | 0.229466119394643  |
| GCACATATGAC  | 647.502931088647 | 0.234064535094874  |
| AATTGCAGTCA  | 647.524875823337 | 0.279956461471499  |
| CACCCGATGAC  | 647.550849880387 | 0.309049692425035  |
| TGACTCCCTCA  | 647.600005608591 | 0.213217973461556  |
| TGAGCAAATCA  | 647.722247640373 | 0.282662984407063  |
| ACACGAATGAC  | 647.745686638687 | 0.311301692656539  |
| CCGAGTGTGAC  | 647.752913239986 | 0.423122494302419  |
| ACTTGTCACAC  | 647.847855716843 | 0.135269065321899  |
| GGCTGTATGAC  | 647.886093311068 | 0.298003734725437  |
| TCACATAGTCA  | 647.903375556494 | 0.320883658955432  |
| ATGACAGTACA  | 647.920184442301 | 0.365989553558569  |
| GCAGTCACGAC  | 647.924484243679 | 0.350891886681505  |
| AGTCACTACAA  | 647.976958268887 | 0.202737027588565  |
| ATGAGCAAACG  | 648.002443759784 | 0.175920198418424  |
| ATTACGCAACC  | 648.024534242415 | 0.288773504710059  |
| GTAGAGATGAC  | 648.166567190332 | 0.292936494770545  |
| CAACAGAGTCA  | 648.185924304439 | 0.490978192203888  |
| GTCATCCACA   | 648.205106657581 | 0.0954888104625358 |

|              |                  |                    |
|--------------|------------------|--------------------|
| CTGACTCTCAC  | 648.205719640951 | 0.196700780489434  |
| CAACTGACACA  | 648.244873969292 | 0.275355721752093  |
| GATGGGAGTCA  | 648.251170099788 | 0.317845926305802  |
| ATTATATGTCA  | 648.320039376724 | 0.285245622997807  |
| ACTTGACTAAA  | 648.327945097822 | 0.261557155478287  |
| CGATTTGCTCA  | 648.426505337528 | 0.20922940493509   |
| TCATAGTGTCA  | 648.434952597224 | 0.0878015393105979 |
| GTGTGTCAATA  | 648.621998394579 | 0.234121037105487  |
| CAATTATGTCA  | 648.622806768696 | 0.429278581484126  |
| CACTGAATGAC  | 648.623837470517 | 0.315627189356712  |
| ATCTTGTGTCA  | 648.630275528103 | 0.529360779289647  |
| ATGTCACGTCA  | 648.637634842306 | 0.238109567550732  |
| ACGCTGATGAC  | 648.679491918447 | 0.262489318606024  |
| GTCATCTCTCA  | 648.704037145024 | 0.261559085184723  |
| TGACTCGTGCA  | 648.776999900396 | 0.24771818513636   |
| GTATGTGTGAC  | 648.799093901248 | 0.226003591268986  |
| AATAGTGACAC  | 648.833965838632 | 0.222394471196141  |
| GTGCTGACACA  | 648.872540440906 | 0.233826366136871  |
| ATGACGTTAAA  | 648.944813477072 | 0.252076751882639  |
| GTGCACAGTCA  | 649.027883768905 | 0.207865635186962  |
| CTAGTCACGCC  | 649.081771276116 | 0.255914427590533  |
| CGGCCTAGTCA  | 649.129621452912 | 0.206743101249767  |
| CGACTGTGTCA  | 649.143814543164 | 0.279625785652223  |
| ATCACTGTCAT  | 649.155075535856 | 0.322729693596232  |
| GTACCGATGAC  | 649.161040518214 | 0.27113885587662   |
| ATATAGATGAC  | 649.163173841701 | 0.265862422305536  |
| CTGAGATGACA  | 649.189446282036 | 0.274649383534541  |
| ACTACTGACTC  | 649.214496363694 | 0.27792054034334   |
| CATTCGGTGAC  | 649.284281326889 | 0.505962625822575  |
| AAAGGAATGAC  | 649.309186784616 | 0.255313735580734  |
| CGACTAATGAC  | 649.320018278608 | 0.303227935203843  |
| GTTTTGTGTCA  | 649.398079840549 | 0.276526430060393  |
| ACATCGGTGAC  | 649.487671088421 | 0.319445625789903  |
| CAAACCTGGTCA | 649.500015893741 | 0.382757207852623  |
| GTCATTGTACA  | 649.579510615745 | 0.478058537737018  |
| CAATTAAGTCA  | 649.591617620787 | 0.292656277374448  |
| CAGCATGACAC  | 649.606971708263 | 0.264973351938095  |
| GTCATAAATTA  | 649.735516044075 | 0.511206978560541  |
| AGTCAGAGCAT  | 649.873590581463 | 0.28343347689868   |
| CGTCACAGTAA  | 649.875859344904 | 0.307371622165492  |
| ACCTTGCGTCA  | 649.9245157351   | 0.36625054229504   |
| ACGTCACTATA  | 649.950424132776 | 0.321810121514857  |
| TGACGTAACA   | 649.970435831247 | 0.485729926806973  |
| ACGTCACCCAA  | 649.983254096031 | 0.269032898439981  |
| CCCACGATGAC  | 649.985874564231 | 0.241978151066036  |
| AACATGACACT  | 649.990101543044 | 0.236909949944155  |
| ATTGAATGAC   | 650.02184234303  | 0.133994214006099  |
| CTCGCTATGAC  | 650.028347726622 | 0.239195441666448  |
| AAGTCGATGAC  | 650.107433048904 | 0.259493133831137  |
| AGCCGCGTCAC  | 650.236977090501 | 0.270376709291701  |
| ACTTGTGTGAC  | 650.268203666252 | 0.25893515731871   |
| GTCATAATGGA  | 650.274558657281 | 0.131809176352234  |
| CGCTGAATGAC  | 650.398163178757 | 0.397981282210933  |
| TCACTTCGTCA  | 650.437898063275 | 0.185105677502196  |

|              |                  |                    |
|--------------|------------------|--------------------|
| TGACTGCAACA  | 650.448826497062 | 0.189310277953496  |
| ACGTCACCTCT  | 650.449981427181 | 0.213460051682568  |
| CGTCAATGACG  | 650.527351101238 | 0.425416451976767  |
| GGTGACGCCAC  | 650.623909011499 | 0.223078383341524  |
| GATGACATTAC  | 650.704511593189 | 0.278179127022447  |
| CCTAACAGTCA  | 650.750874221535 | 0.462246077804824  |
| GTCATTTTCCA  | 650.90558034871  | 0.33352926637246   |
| AGTTGAATCAC  | 650.912491848232 | 0.29463569796995   |
| AGTCACTCTCC  | 650.945126099282 | 0.285692286524652  |
| CTTAGAATGAC  | 651.005948276131 | 0.365508439555634  |
| AGTCAGTAATC  | 651.04051495131  | 0.252233428133188  |
| GTCATTTCTTA  | 651.045155396135 | 0.236880968309212  |
| TAGTGGAGTCA  | 651.046903016575 | 0.171622065124496  |
| AATGGAATGAC  | 651.106488697806 | 0.223615353350244  |
| ATGCCGTATC   | 651.122758357027 | 0.268457089843414  |
| AGTTTTCGTCA  | 651.148584067286 | 0.391200099790939  |
| AGACTAATTAC  | 651.198478583567 | 0.362457029125735  |
| GGTTCGATGAC  | 651.230047486404 | 0.188968956350297  |
| ACGTCACCGTC  | 651.286326974859 | 0.33684606465544   |
| AACAGAATGAC  | 651.309886835959 | 0.370517711649346  |
| CTGTGTAGTCA  | 651.31814742225  | 0.371621449411503  |
| ACGTCACGTGC  | 651.341736747756 | 0.394950837407646  |
| CGTCATTGTTA  | 651.342801438078 | 0.424564987488384  |
| TGACTGGAAAA  | 651.411755137759 | 0.26891253337512   |
| ACGTCACCCCTG | 651.434607958872 | 0.156533297426731  |
| CATCATATGAC  | 651.442085873784 | 0.163957758026359  |
| GTCATGCATCA  | 651.479065913168 | 0.388859093606409  |
| GTCATTTGTTA  | 651.557832275423 | 0.317786605062841  |
| ATTGCATATC   | 651.584071833166 | 0.293451422671404  |
| AATTGAATGAC  | 651.627526556911 | 0.395609590539378  |
| ATATGAATGAC  | 651.662583450842 | 0.31100807749784   |
| AACGCTGACTG  | 651.790894435046 | 0.0969099339110937 |
| GCGTCGATGAC  | 651.866773772104 | 0.492053100830622  |
| AGATAGACTCA  | 651.919858154556 | 0.490274724242929  |
| ATCTGGATGAC  | 651.939614833    | 0.210629713297655  |
| CACCAATGACG  | 652.142343387272 | 0.208233103193918  |
| CACTTTATGAC  | 652.15642338137  | 0.253293807070684  |
| ATGTTTATGAC  | 652.165571136119 | 0.355896440310429  |
| ATTCCGACTCA  | 652.203990543986 | 0.241417672974485  |
| AGACTAATTCA  | 652.282624310846 | 0.269820883661417  |
| CTGAGGATGAC  | 652.292631181342 | 0.156648460122391  |
| AATAAGTGTCA  | 652.332698520738 | 0.445751461426278  |
| CTGGGTGTGAC  | 652.379730531568 | 0.35808289545721   |
| CCGTGAATGAC  | 652.408467667372 | 0.356238170703189  |
| ATGACAGCTTC  | 652.447739198804 | 0.0984147522268018 |
| CCTAGTGACAC  | 652.454870881544 | 0.338431282755347  |
| CGATGTGTGAC  | 652.485263352558 | 0.242801391556423  |
| ATGAGTACCTA  | 652.491582991123 | 0.218454881955972  |
| GTCATCATGGA  | 652.499016866359 | 0.252952819306597  |
| GTCATAGCATA  | 652.591512087513 | 0.353436554209945  |
| ATGACTCTCCA  | 652.628298363225 | 0.244123548616985  |
| ACGTGTGTGAC  | 652.661456043651 | 0.108949829446364  |
| GTCATTCAGAA  | 652.745200320148 | 0.304668202648307  |
| ATAGGTGACGC  | 652.759570985677 | 0.180090581481525  |

|             |                  |                   |
|-------------|------------------|-------------------|
| CAGATGGGTCA | 652.767014710937 | 0.233791775900604 |
| GACGTGGTGAC | 652.770187773921 | 0.292821811622219 |
| CGTCCTAGTCA | 652.9090508757   | 0.293622432759063 |
| GTCATCATATA | 652.940153204072 | 0.37474975385377  |
| ATGACAGTGTG | 652.940266393789 | 0.230856956364852 |
| CCATAGATGAC | 653.041684791566 | 0.536648163085568 |
| GTCGTGATTCA | 653.043044237716 | 0.411872832131174 |
| AGTACCGTCAT | 653.075545638258 | 0.303578963058163 |
| TAGGATGACCA | 653.141448506808 | 0.259489009567738 |
| ACTGAAATGAC | 653.182009287626 | 0.238057382403627 |
| AGTCACCCAC  | 653.187337434724 | 0.287656709328499 |
| AACAAGTCATG | 653.19673168668  | 0.148877300299124 |
| AAAGGGAGTCA | 653.199137235875 | 0.179653582343069 |
| AATGAGATGAC | 653.256183401829 | 0.325446153388962 |
| GCAATAATGAC | 653.323718835398 | 0.266074805889877 |
| GTCATTTCCGA | 653.351616748257 | 0.235356585440302 |
| TATAAGTGTC  | 653.434534222164 | 0.408234542981032 |
| ACACCCAGTCA | 653.485155002913 | 0.378358800537835 |
| ACATTTTGTCA | 653.506609714756 | 0.391092753726188 |
| AGAGATATGAC | 653.613386298189 | 0.231243448913108 |
| AGTATTAGTAC | 653.616537774365 | 0.28749123338577  |
| ATCGTGAATCA | 653.62752700177  | 0.256386245140339 |
| CTCCTTAGTCA | 653.652088692613 | 0.317956168298556 |
| GTCATCTAAGA | 653.660791168772 | 0.380562523231123 |
| GGAAGGATGAC | 653.699702455819 | 0.245009203540931 |
| GTCATAGTTA  | 653.757652950728 | 0.308287277305796 |
| AAAGGTGTGAC | 653.764847741157 | 0.261397857601062 |
| GTCATTCACAA | 653.894738325264 | 0.264336716397088 |
| GCACTGATGAC | 653.930228343782 | 0.401842822054602 |
| ATGACAACGAC | 653.970004127962 | 0.227162363275707 |
| AGTGTGAGCAA | 653.973779232223 | 0.184438629841922 |
| ATGACAAGGTC | 654.005958606536 | 0.26407993407295  |
| AGACTAATTGG | 654.044945745978 | 0.199887477834443 |
| GTCATCGGGGA | 654.169951948532 | 0.224279392596522 |
| TGACTGCGCAA | 654.203552400847 | 0.476505244511076 |
| TGAGTTCGCAA | 654.254454545124 | 0.195541578268195 |
| GTGTTGACTGA | 654.288084374875 | 0.31006771727649  |
| GGGAGAATGAC | 654.29242166768  | 0.198543362982899 |
| CATTTGACTGA | 654.294148009189 | 0.260640762823065 |
| ATAGAGATGAC | 654.411616917029 | 0.192731151188944 |
| ATTAGGTCATC | 654.436124920779 | 0.303242408964348 |
| CGTTTGATGAC | 654.44184056218  | 0.334056137713396 |
| AGTCACGAGTC | 654.464391717007 | 0.221504687511386 |
| GTCATAAGTAA | 654.475317479162 | 0.294366669631982 |
| GAGTGAATGAC | 654.487505762102 | 0.26412171398209  |
| GGTCATACCTA | 654.564943651981 | 0.188536528394089 |
| ACGCATGACAC | 654.581425508545 | 0.114455599414649 |
| CAGACTAGTCA | 654.62841836369  | 0.364541321996761 |
| AGTCATGAGGA | 654.629742071451 | 0.268526527848883 |
| AGTCACGGTCA | 654.711637682495 | 0.297763210169382 |
| CGACATATGAC | 654.77385337372  | 0.325844573587905 |
| GATGGCGTCAC | 654.833671501799 | 0.3097421024726   |
| GAGCATGACAC | 654.881266067761 | 0.191641399902492 |
| AATGAGTATGA | 654.902889868505 | 0.256421241669863 |

|             |                  |                    |
|-------------|------------------|--------------------|
| ATGACGCCTAC | 654.935252614185 | 0.356323984479814  |
| GTCATCACGAC | 654.990605464352 | 0.208691032563843  |
| CTGGCGACTCA | 654.994940681906 | 0.301781869418791  |
| TGACTATGGCA | 655.017009683944 | 0.242901498516619  |
| ATGATATGTCA | 655.029525138278 | 0.301505439952673  |
| CACATTGACTC | 655.036905983721 | 0.223013500922183  |
| GATGATATGAC | 655.044616224719 | 0.246161354263084  |
| ATTGGAATGAC | 655.060179343891 | 0.16694114847986   |
| CTAGATATGAC | 655.088704121366 | 0.23424104425434   |
| CAATTTGACTC | 655.098796149852 | 0.206935722515945  |
| AGTGAGCAAAT | 655.204660637785 | 0.22989731330255   |
| GTCATCTACGA | 655.255910443834 | 0.311708832003543  |
| ATACAGATGAC | 655.316441271367 | 0.189012668505875  |
| ACGTCACAAC  | 655.318352760215 | 0.303710781056201  |
| CAAGGAATGAC | 655.360959860348 | 0.296989930009412  |
| AACGGGATGAC | 655.469439556707 | 0.277622230582487  |
| ATAACGTGTCA | 655.489776620698 | 0.281640584949815  |
| TATTGCTCAGA | 655.492146432399 | 0.345145923002492  |
| GACTGTGACGC | 655.498821491093 | 0.232314473453942  |
| AGCGGACTCAT | 655.545823487549 | 0.0958363538603142 |
| ATGAGTCGGGA | 655.548797812169 | 0.20670459779738   |
| AGACTCACTAT | 655.576425658761 | 0.225460380827346  |
| ATTACGGTGAC | 655.602176279926 | 0.340917699355851  |
| TCGTGGAGTCA | 655.665834683088 | 0.250810328090479  |
| GCTCAGATGAC | 655.66888651815  | 0.200351262676763  |
| ATGAGTCCCTA | 655.67162906817  | 0.280145374450154  |
| CCTATATGTCA | 655.689525988055 | 0.0578705402866506 |
| ACTCATCGATG | 655.701140220032 | 0.317102919117969  |
| ACTCATACATG | 655.706408752698 | 0.349313465024552  |
| AGCCTCGTCAT | 655.766585545773 | 0.252524148278212  |
| GCCTGACGTCA | 655.776090181468 | 0.420156670123976  |
| CGTGAGAGTCA | 655.777881361879 | 0.104594672144329  |
| TGACACTTTAA | 655.913855252237 | 0.44408036571677   |
| TCGATTGGTCA | 655.95652286814  | 0.303187012099434  |
| AACTTTAGTCA | 655.986003438644 | 0.453302641944243  |
| GATCATGACGC | 656.003599756346 | 0.359640818406774  |
| AAGTGTCAGAG | 656.028376032739 | 0.238281615038386  |
| CTCGCGAGTCA | 656.149926997188 | 0.214761566411969  |
| ACGTCACAATC | 656.174582476722 | 0.235085097343014  |
| GTACACGTAAC | 656.186074730664 | 0.354222556768011  |
| ATGACAACGAG | 656.203062678943 | 0.223864981853616  |
| TACTTGTGTCA | 656.279326484976 | 0.219606436958295  |
| CGAACTGGTCA | 656.281133904364 | 0.323832297197877  |
| CAATTGTGACA | 656.359425176961 | 0.400033096176895  |
| CAGCTGTCATA | 656.359469507426 | 0.132325142238243  |
| TGACTGGTGAA | 656.384799823127 | 0.356394772904939  |
| CTACCGATGAC | 656.434358292247 | 0.22216386129644   |
| AGAGTCAAAGG | 656.440553319756 | 0.213384557902806  |
| CATTAATGACA | 656.471118963964 | 0.230917949447042  |
| GATGACAAGAC | 656.489663383115 | 0.177204270212811  |
| ATCATGAATCA | 656.567596380104 | 0.400499539612759  |
| GTCACTCGTCA | 656.625013329387 | 0.257366897302898  |
| ATCCTGACACA | 656.663747733907 | 0.232632262810076  |
| GAGCTTATGAC | 656.667342124864 | 0.413750706362646  |



|               |                  |                   |
|---------------|------------------|-------------------|
| GTCATCATAAC   | 656.678654863221 | 0.274491803604144 |
| GCCCTTACTCA   | 656.703280470706 | 0.304430196129952 |
| AGTACTGACTC   | 656.757085081408 | 0.334775655324997 |
| AGGGTGATGAC   | 656.802977076868 | 0.293407715889078 |
| GACGTGATTCA   | 656.812294795565 | 0.281235466246487 |
| AATACGTGTCA   | 656.846659257993 | 0.14725135955843  |
| ACGTAATGACG   | 656.866276218069 | 0.397476250702849 |
| ATCGTGTGTCA   | 656.879029390152 | 0.402900764623174 |
| ATCAGACTCAC   | 656.897164814716 | 0.220797537418883 |
| AGGAAGTGACT   | 656.904153090496 | 0.208611478354099 |
| GGCTTGACTAA   | 656.905857983402 | 0.209742645343868 |
| GTGATTTGTCA   | 656.983174504415 | 0.242171302733751 |
| CTTGAGATGAC   | 657.013436219174 | 0.445338291351822 |
| AGGCGTATGAC   | 657.032165521091 | 0.204223222310165 |
| CCACGTGTGAC   | 657.059362575776 | 0.39484695724224  |
| AGAATGGGTCA   | 657.115978736784 | 0.282552680925868 |
| ATTACTCAAGG   | 657.139622638312 | 0.384410780789096 |
| AATGACGGTAT   | 657.145115861985 | 0.298044032351323 |
| GTCATATAAAC   | 657.182201012982 | 0.235260563982986 |
| ATTTCTATGAC   | 657.199120020239 | 0.268259035200528 |
| ACGTCACCCCTC  | 657.201511438535 | 0.192285231764234 |
| ACCCGTGTCAT   | 657.205374858513 | 0.357118426847824 |
| AAGCTTATGAC   | 657.218874611995 | 0.307797944101436 |
| AATGAGTAGTC   | 657.243922601093 | 0.278195173753547 |
| AAGACCAGTCA   | 657.307040563778 | 0.220901313180761 |
| AAGAGAATGAC   | 657.326902167433 | 0.29450809784233  |
| AAAACCTTGTCA  | 657.372781220549 | 0.298885727532396 |
| AGTCACTCCCA   | 657.378143824198 | 0.196152935069989 |
| GATGAGATGAC   | 657.391036147744 | 0.236859203399552 |
| CAGGTGGTGTGAC | 657.416096052948 | 0.217340380839652 |
| GAGATGATGAC   | 657.491503070736 | 0.204876527302614 |
| ATGACGGACAA   | 657.552095096823 | 0.228954001602112 |
| TAATTGACACA   | 657.573280814468 | 0.361771954121118 |
| GCGGTTATGAC   | 657.583766839731 | 0.406881108061376 |
| TGGTCATCACA   | 657.602396273118 | 0.331376219977206 |
| AACTCTATGAC   | 657.623568583434 | 0.33955854448169  |
| ACACTACGTCA   | 657.659050441745 | 0.248858049546709 |
| ACTAACGTCAT   | 657.705225605851 | 0.393538295835064 |
| AGAGTCAAAGC   | 657.764269546294 | 0.212035964858405 |
| CCCATGAATCA   | 657.773006067464 | 0.319292554479317 |
| GTCATCTTCCA   | 657.831650735504 | 0.208673978602201 |
| AGGCCTATGAC   | 657.843364290763 | 0.297288494552973 |
| CCATTTATGAC   | 657.884030919204 | 0.188846596596229 |
| ATGGCTATGAC   | 657.92472179516  | 0.265431384830795 |
| ATACTACGTCA   | 657.957158945495 | 0.306372197896059 |
| CGAACTCGTCA   | 657.997775599443 | 0.331707890288193 |
| ATGACTAGCGG   | 658.011830641387 | 0.256626420392585 |
| ACTCATACTTC   | 658.040754939913 | 0.238473474351151 |
| GTCATATGCCA   | 658.078603117871 | 0.329775925121009 |
| GAATGTGACGC   | 658.087612810612 | 0.287018662370785 |
| ATGACCAGGTC   | 658.108842662621 | 0.297747067506788 |
| AACGCGTGACT   | 658.127917386033 | 0.264821772386774 |
| GTCATATACAC   | 658.146074384124 | 0.301589898595544 |
| ATGACGACGTC   | 658.275603862245 | 0.354979290858553 |

|             |                  |                   |
|-------------|------------------|-------------------|
| TCAGTCAATAA | 658.282506477518 | 0.411009708005316 |
| CGATGGAGTCA | 658.289013974776 | 0.231278053023001 |
| TAGCTGCGTCA | 658.357550046013 | 0.294312723024884 |
| TGACTGTAGCA | 658.41008306845  | 0.3510067488454   |
| GGTGACGTTAC | 658.415956386413 | 0.233347866033654 |
| ACGGAGTGACT | 658.490181919685 | 0.224290497432391 |
| ATGAAAATGAC | 658.498960123696 | 0.295792197447198 |
| TAGTCACGGCA | 658.567862250538 | 0.146080294009399 |
| TGACATAATAA | 658.578592311852 | 0.395936487266507 |
| TGAGTAACGAA | 658.596558504134 | 0.177618175262705 |
| AGCCATGTCAC | 658.60053459062  | 0.258993836406043 |
| GATTGGATGAC | 658.674798938267 | 0.299617678035165 |
| TAACTACGTC  | 658.679998800278 | 0.217966682465983 |
| GAAACTCGTCA | 658.750486559247 | 0.444730794917566 |
| GGCTTTATGAC | 658.768001002152 | 0.376230245597822 |
| ACAGTGAATCA | 658.7765624171   | 0.218109142152959 |
| CTCTAGACTCA | 658.797099753135 | 0.281500485891699 |
| CGTTATATGAC | 658.902543201698 | 0.328140692683285 |
| GTCATCGTGGA | 658.942818462448 | 0.41484350003918  |
| GTACACAGTCA | 659.017924137473 | 0.29335030758615  |
| AGTCACTTGTC | 659.048909689138 | 0.188156495070032 |
| GGCTACAGTCA | 659.081412462379 | 0.40216730163684  |
| GTCATATGATA | 659.085267950414 | 0.348963489455237 |
| AGTCATGGTAG | 659.104275998159 | 0.232813729866593 |
| GTGTCACGCAA | 659.114362537014 | 0.184864811947655 |
| ATGACAGGGTC | 659.133200015733 | 0.25308486212982  |
| GACCTGTCA   | 659.21043858406  | 0.357386390116908 |
| GTGACTGCCAC | 659.216428484221 | 0.195455432449225 |
| GTCATTGTC   | 659.267344400743 | 0.35196831724792  |
| GCAAATATGAC | 659.281941970817 | 0.102328616491752 |
| GTGAGCAAATA | 659.355444333794 | 0.232400505521513 |
| GCGTAAATGAC | 659.386302643665 | 0.270104339238913 |
| GGTCAGATGAC | 659.435903084549 | 0.265664989443535 |
| AATGCGAGTCA | 659.511019220192 | 0.325517484434203 |
| ATGACGACGTA | 659.606207122068 | 0.237135790183692 |
| ACGTCACATTC | 659.637946825647 | 0.189716983773728 |
| GACTAATACTA | 659.68061012859  | 0.113907757763957 |
| ATGACAGACCG | 659.717461044855 | 0.339990916320451 |
| CGACTTATGAC | 659.728479217793 | 0.292014077491816 |
| CGTGGGAGTCA | 659.795922149024 | 0.299864151099786 |
| AAGTCAATGAC | 659.803847641202 | 0.157886835721286 |
| GATGACAGTAA | 659.811312976104 | 0.273864545991845 |
| ATACGGAGTCA | 659.821821382177 | 0.259697824929304 |
| ATCGTTATGAC | 659.951864692357 | 0.332335422662954 |
| GTCCCGTCATA | 659.954548784375 | 0.212805518306112 |
| GTCATCCAGCA | 660.023101781732 | 0.248237809729457 |
| TAAATGGGTCA | 660.059702158619 | 0.222408195031101 |
| ACCGCTATGAC | 660.079148529483 | 0.312412947244221 |
| ATGATTGGTCA | 660.089390285991 | 0.376651433790293 |
| TATGACTTGAA | 660.097744085271 | 0.314173140014572 |
| GTCATCCTCAA | 660.232350689344 | 0.284483924964862 |
| GACGTGATGAC | 660.238825287954 | 0.321616324669154 |
| AAGCATGACGT | 660.243030418969 | 0.251302617260215 |
| ACTCTGATGAC | 660.316692243649 | 0.398710396101156 |

|              |                  |                   |
|--------------|------------------|-------------------|
| CGTCATATGGC  | 660.338980301634 | 0.222994115184054 |
| AGGACGATGAC  | 660.35549655316  | 0.183894347058866 |
| ATGACGGACAT  | 660.380288694612 | 0.346081848311046 |
| GATGACAGTGA  | 660.45128237727  | 0.202430118769025 |
| TGTCATTTCAA  | 660.468785176549 | 0.306805169351182 |
| GTCATCATAACA | 660.479773750562 | 0.424377640317919 |
| ATACAATGACG  | 660.506081494103 | 0.257853188607754 |
| GTCATAACCAC  | 660.520361938898 | 0.261111587970341 |
| CTGAATTAGTC  | 660.535474163358 | 0.336180345163332 |
| GAGGCTATGAC  | 660.538228073683 | 0.321162274815767 |
| TAGCTGACACA  | 660.587234644641 | 0.30922456484389  |
| ATGACGCCTCA  | 660.602121097075 | 0.28036174025541  |
| CATAAGTGTC   | 660.665408284011 | 0.381704698646831 |
| GTCATTTGTAA  | 660.707473905494 | 0.324372713688173 |
| GTCATATTGTA  | 660.721844848385 | 0.274277899088386 |
| CTGACTTGTC   | 660.726209909698 | 0.237877756852712 |
| CGTCCTATGAC  | 660.749502715804 | 0.2988418988774   |
| GTTTTCCGTCA  | 660.782734374844 | 0.271778208827352 |
| AGAGTCAAACG  | 660.797196571343 | 0.316128568758336 |
| ATGACATGATC  | 660.834417901432 | 0.223887567244315 |
| TCTGAGTCGAA  | 660.857010512827 | 0.270627633812764 |
| AAGTGTGTGAC  | 660.898049258781 | 0.178751749611378 |
| TGCGTCAGGAA  | 660.906443591341 | 0.113134550816722 |
| ACAGCTATGAC  | 660.929187543138 | 0.163588000566229 |
| CCCTCGAGTCA  | 661.011230411549 | 0.243838722043703 |
| TGAATCTGTCA  | 661.022974988766 | 0.442732156823398 |
| TATGGGAGTCA  | 661.047923001031 | 0.341345908162269 |
| CAGTAATGACG  | 661.069687740729 | 0.455489651309005 |
| AGTCACGACTC  | 661.084910623543 | 0.229643507529866 |
| ATATCAATGAC  | 661.150680227428 | 0.175202527442049 |
| GTCATCACAGA  | 661.248611160875 | 0.399168607626669 |
| TAAACTCGTCA  | 661.342483838777 | 0.39348421733607  |
| TGAGTACAACA  | 661.38615504821  | 0.383407118535841 |
| AGTGTACAGCA  | 661.395378191366 | 0.284023555627584 |
| ACGTCACCGCT  | 661.396442583795 | 0.249027903502094 |
| AATGGTGACGC  | 661.400962592504 | 0.298957899381993 |
| GTCATAGCGGA  | 661.410055226428 | 0.239463461503375 |
| CTAAAGTGTC   | 661.43669537403  | 0.199734312945208 |
| AAAAGTCATAG  | 661.465208674636 | 0.220640759503381 |
| GTTCTGAATCA  | 661.482581753323 | 0.345638645573883 |
| AGTCACTACCC  | 661.486221052776 | 0.179777162373228 |
| GAGTTGTGTCA  | 661.510320822465 | 0.339216777857097 |
| AATCCTGACTC  | 661.51602414298  | 0.302109241899784 |
| TCCTTGCGTCA  | 661.571912260542 | 0.277337431624158 |
| ACACTAATGAC  | 661.594538184598 | 0.345734940097261 |
| AGTCACTAGAA  | 661.642438183084 | 0.386991474540296 |
| AGAATGACCAC  | 661.685826853376 | 0.25321454204017  |
| GTCATATACGA  | 661.714803303827 | 0.222485561959613 |
| ACTCATACTAA  | 661.727995700962 | 0.223291107546844 |
| ACCTCTGTCAT  | 661.818711127978 | 0.272762809893274 |
| AGTCACGGAAA  | 661.932944378715 | 0.329118015885637 |
| CGTGCGATGAC  | 661.943128073544 | 0.30841028043441  |
| ATGCCGACTCA  | 662.01108381939  | 0.248020389567673 |
| AGTCATGGTAA  | 662.034501075335 | 0.245014715469431 |

|              |                  |                    |
|--------------|------------------|--------------------|
| CACACGAGTCA  | 662.166625053771 | 0.290854023723579  |
| CACGTCACTCC  | 662.338568587539 | 0.227896038580711  |
| AGTCACGCCTG  | 662.345863244321 | 0.290360433025194  |
| ATGACATTTAC  | 662.441440237689 | 0.247870129786921  |
| ACCACTATGAC  | 662.533688728511 | 0.225488560163037  |
| GAGTCAATTCA  | 662.557732268809 | 0.334819483588806  |
| ATGACGACGTG  | 662.565485500408 | 0.200696386855326  |
| TCAACGACTCA  | 662.604953749429 | 0.253339218718385  |
| GCGCCTAGTCA  | 662.685555657978 | 0.389069547795486  |
| ATGACGTTAAG  | 662.713457263714 | 0.122427697787087  |
| GAAGTGATGAC  | 662.752779003494 | 0.186031192358184  |
| ACCAGGATGAC  | 662.860575612404 | 0.328846926521063  |
| GTGATCCGTC   | 662.867938735422 | 0.379775064942413  |
| CATTGTGTGAC  | 662.897216273262 | 0.178311920236257  |
| GTCATTTAACA  | 662.923533206525 | 0.394783664532397  |
| GTCCGTGACTA  | 663.008449939824 | 0.250596945266767  |
| ATGACACCCCTC | 663.028373571292 | 0.235045046435011  |
| AGACTACTGG   | 663.058917844689 | 0.27013005262446   |
| GTCACACCGAA  | 663.067939663413 | 0.245420137904964  |
| AGTCACCCCGG  | 663.109439483448 | 0.192611362646679  |
| GCACTTATGAC  | 663.17082091738  | 0.0930451006868004 |
| GGACTTGTGAC  | 663.229535605775 | 0.231170080524046  |
| GTCATAGAAAA  | 663.235190286612 | 0.290136148342375  |
| ACCATGATGAC  | 663.25267248489  | 0.19233452029325   |
| AATTAGATGAC  | 663.333444300778 | 0.328692198731372  |
| CACACTAGTCA  | 663.345574382294 | 0.332521135463155  |
| CAGTCAGAATG  | 663.452059441198 | 0.170179263344106  |
| ATCGATATGAC  | 663.457097465272 | 0.419781363391375  |
| GGTAACAGTCA  | 663.513614777912 | 0.287684718595996  |
| ATCAGATGACA  | 663.554573477946 | 0.331786833948669  |
| ATCCGTCAGAG  | 663.585368295683 | 0.278007722518879  |
| GGCCGACTCAC  | 663.678377542413 | 0.215815986786456  |
| AAGATCCGTCA  | 663.699133216821 | 0.295628714183998  |
| CCAACACGTCA  | 663.706071057298 | 0.520818692890834  |
| ATTAGTAAGAG  | 663.776043260323 | 0.270650744642715  |
| TCTATCCGTCA  | 663.803266711488 | 0.184048154867789  |
| ATGACGAGGAA  | 663.80655028804  | 0.200596018467252  |
| ATTGTTATGAC  | 663.864742322381 | 0.3945101191051    |
| AGTCACTAGAC  | 663.925744586251 | 0.258517403951737  |
| TGGCGTCACCA  | 663.932536243296 | 0.376601167212934  |
| GCTGCGATGAC  | 663.963521332298 | 0.0836915845082883 |
| CCAATTGACTC  | 663.985522819671 | 0.247395268412577  |
| ACGCCGAGTCA  | 664.064666163662 | 0.297801674629191  |
| ACTCATCGTGA  | 664.071441530905 | 0.238761739493001  |
| CGATTGATGAC  | 664.089046831992 | 0.230700411704991  |
| AGTGTCATGTG  | 664.139991836957 | 0.249969487113694  |
| ATCAAGACTCA  | 664.170804602648 | 0.338088887419041  |
| CAGTCACGCTC  | 664.189667557334 | 0.286464468184631  |
| GGCATTATGAC  | 664.196432799884 | 0.175877584909283  |
| CGGCTGACACA  | 664.218469429876 | 0.482773951176787  |
| ACCGGGATGAC  | 664.252228406301 | 0.212547315401969  |
| AGCCAAGTCAC  | 664.423395892346 | 0.300109596242974  |
| TATGACATTGA  | 664.442179242516 | 0.158321931481448  |
| GTTATCCGTCA  | 664.452901605866 | 0.323598284021268  |

|             |                  |                    |
|-------------|------------------|--------------------|
| CGAGTGACGAA | 664.463735496015 | 0.296849377295426  |
| GAGTCAATAAA | 664.467818893591 | 0.391277920529047  |
| AGTCACGCCAC | 664.547560836855 | 0.243555276798152  |
| CGTCATCTGAA | 664.603455582929 | 0.3015017034307    |
| ATGACAGACAG | 664.720005933474 | 0.17251008139181   |
| TAGGGGAGTCA | 664.772898897166 | 0.210328501485523  |
| GTGACACTGCA | 664.817191402387 | 0.345702078328444  |
| GTCAGTGACAC | 664.845761945658 | 0.315637035382416  |
| TACGTTACTCA | 664.849811273533 | 0.402986288649106  |
| TCACGGTGACA | 664.865895634308 | 0.346056928680669  |
| AACCTTATGAC | 664.871440635108 | 0.355381796159435  |
| GAAACGACTCA | 664.914487155521 | 0.215309514371479  |
| CAGAGTGAGTC | 664.92195300215  | 0.16301335392545   |
| GTCATCCACAC | 664.948412802803 | 0.255976222809346  |
| GTCATCGCCTA | 665.075050672551 | 0.18783675244644   |
| CCGAAATGACA | 665.124596619451 | 0.229564861742442  |
| TCGACTAGTCA | 665.184972241543 | 0.444412637130648  |
| GTCATCTTGAA | 665.196637402261 | 0.249490105362752  |
| CAGCGTGTGAC | 665.197271090556 | 0.235354506366637  |
| AAGCCTAGTCA | 665.214916169649 | 0.311046244246139  |
| TCACGGAGTCA | 665.246066029115 | 0.261704206569591  |
| GCCATAATGAC | 665.249271767895 | 0.303556940681634  |
| GTCATCTAACA | 665.25826146077  | 0.379971181708588  |
| CTTTTACGTC  | 665.290504704491 | 0.0733263938803766 |
| CTTAACAGTCA | 665.348700592901 | 0.42083333839146   |
| ACATGGAGTCA | 665.40225068906  | 0.24393544739765   |
| AATCGTGACGT | 665.402312317871 | 0.201539511890517  |
| GAGTCAGTATA | 665.408363710854 | 0.118835113400657  |
| ATGACAGACCC | 665.428603616036 | 0.238930873064698  |
| ATAATTGCTCA | 665.441925736094 | 0.346160193930692  |
| AGCCTCAGTCA | 665.489798459823 | 0.305048846017904  |
| CGTCATTGCTA | 665.531835990251 | 0.268025330415443  |
| GTCATCATGCA | 665.538773953226 | 0.332579305380445  |
| GTCATAAGAAC | 665.608169575766 | 0.127875067322933  |
| CGCTATAGTCA | 665.695911458599 | 0.319569130793777  |
| GCACGAATGAC | 665.751422061951 | 0.204813207744348  |
| GTAGGTGACAC | 665.778993914905 | 0.43321875071057   |
| ACCTAATGACG | 665.793218617288 | 0.33749516047956   |
| GTCATAGGCAC | 665.892687818398 | 0.347332080366116  |
| AGTGACGCGAT | 665.927997320707 | 0.157970244810228  |
| ATGACAGCTTG | 665.966833409957 | 0.304844334193124  |
| ACGAAGTGACT | 665.975961082617 | 0.258060831546191  |
| AAACCAGTCAG | 665.996968383839 | 0.370467056835046  |
| TCATTATGTCA | 666.004973126228 | 0.162162576019468  |
| CAACTACGTCA | 666.023835257564 | 0.273571215161914  |
| ACGTCACAAAT | 666.037502789515 | 0.144839674191421  |
| ATCATATGACG | 666.056936919871 | 0.160010376774647  |
| CCGGAATGACG | 666.066160904219 | 0.281097832096357  |
| AGTCACTCCAG | 666.076485298443 | 0.240701341780537  |
| ACGTCATGAGT | 666.090086740614 | 0.263410197276774  |
| GTCATAGGAAA | 666.172501827969 | 0.166545279244077  |
| GTCATAGGAAC | 666.196973164599 | 0.286438127645303  |
| GACGTTACTCA | 666.205365832309 | 0.275240570982013  |
| TATGCGAGTCA | 666.216803521186 | 0.327717130838958  |

|             |                  |                   |
|-------------|------------------|-------------------|
| ATGACAGTAAT | 666.228595100409 | 0.173573866158099 |
| CAATTGACACA | 666.24816610264  | 0.391436747335785 |
| TGACGTGTGAA | 666.254602670585 | 0.350253437551421 |
| CTATTGATGAC | 666.287607053558 | 0.230830059255342 |
| ACGAATTAGTC | 666.290780694985 | 0.277548309258989 |
| AGACTCACGAA | 666.493515452633 | 0.285374892122349 |
| GTCATAGACAA | 666.557222237836 | 0.26946147802635  |
| AGAGGTGACGC | 666.573030849131 | 0.147993141615716 |
| CGTACGTGTCA | 666.578121470195 | 0.439853318859767 |
| TGCGTGACCCA | 666.587694864946 | 0.207497562927196 |
| ACGAGTCAAAG | 666.594302432928 | 0.175588618097768 |
| AAGCTAGTCAC | 666.597912061654 | 0.303217351771296 |
| TGACTATGAAA | 666.60020698401  | 0.459493039626784 |
| CTTCTACGTCA | 666.644541630663 | 0.246687140661774 |
| GGACCGAGTCA | 666.677939291957 | 0.413465776148354 |
| AACTTCTGACT | 666.723446343638 | 0.251342224178782 |
| ATACAGAGTCA | 666.737688842314 | 0.261295210501453 |
| ATGACGACTAA | 666.74486004177  | 0.317830518877201 |
| GATAAGATGAC | 666.997134873766 | 0.201820441718007 |
| GTGTGGAGTCA | 667.004229601456 | 0.222717959811845 |
| TGACGAATGAA | 667.028100607969 | 0.300659423039744 |
| ACAGGTGTGAC | 667.055432262298 | 0.307527928429465 |
| ATGACACTCTA | 667.091088580331 | 0.306373871572929 |
| ACGTCACCTAA | 667.143609678925 | 0.2176088294094   |
| TCAGTGAATCA | 667.190482843794 | 0.493222061939563 |
| GTGATCTGTCA | 667.224059105125 | 0.168935746676184 |
| GCTACGATGAC | 667.24058142956  | 0.464408703980673 |
| TCGTAGACTCA | 667.24718742806  | 0.315826537129208 |
| GTCATACGAAC | 667.323314103288 | 0.127625033776363 |
| CCTATCCGTCA | 667.340362720086 | 0.253975675041713 |
| ACCAAGTGACT | 667.369698608524 | 0.253026925960992 |
| AGTCAGAGTAT | 667.405762818335 | 0.257341503843913 |
| ACATAGTGTCA | 667.407626854995 | 0.43276366398514  |
| ACGTCACAGAT | 667.447483386331 | 0.200337661585743 |
| CACAGTGTGAC | 667.449103053691 | 0.168467442374111 |
| AGAGCGTGACT | 667.453640657577 | 0.217454037976193 |
| GATTGACGTCA | 667.460751638512 | 0.444764349934434 |
| ATGACTTTTAG | 667.479537700887 | 0.439084548999581 |
| CGGAAGATGAC | 667.555562756272 | 0.219090593714361 |
| CCCAAGTCATA | 667.598667383809 | 0.189635702047717 |
| AGACACAGTCA | 667.648105922768 | 0.297903071487811 |
| GAATTCGTCA  | 667.730514527976 | 0.33489520893458  |
| AAGAGTGTGAT | 667.875456192544 | 0.174458754658543 |
| CAGTCATGGTC | 667.948979933169 | 0.315224086570127 |
| GATGACAGCTA | 667.952512640639 | 0.253431596479735 |
| CAGACAATGAC | 667.961862969527 | 0.236143989682971 |
| GACCTCAGTCA | 667.966180814604 | 0.321373059461861 |
| AGTCAGACCTA | 667.975316300176 | 0.349749023942782 |
| ATGACGCTCAT | 667.983676294581 | 0.268342544207165 |
| ACACTGTGACA | 667.986011064815 | 0.143517082028647 |
| CGAGTGAATCA | 668.010354010636 | 0.136294788399555 |
| GTCATCTACCA | 668.078202516865 | 0.291283586358577 |
| GCTTCCAGTCA | 668.092541137078 | 0.48178212958906  |
| AGTCTTGTGAT | 668.185921195657 | 0.247638088575101 |

|             |                  |                    |
|-------------|------------------|--------------------|
| ATCGGGATGAC | 668.210611128461 | 0.241595842838616  |
| AACGTGACGTG | 668.218548221487 | 0.1356578239532    |
| ATGACTGGGGA | 668.228871209761 | 0.279884601880019  |
| GGAGACTCATA | 668.250375502219 | 0.10106062890657   |
| CTACTTATGAC | 668.278501291221 | 0.203341303140153  |
| GCGTCACATAC | 668.318179498029 | 0.24857527562681   |
| ACATTTGCTCA | 668.328645127229 | 0.317533783819056  |
| CGTCATTATAG | 668.360699292548 | 0.312594643291632  |
| ATGATTGCTCA | 668.394354076722 | 0.304858606216391  |
| AGTCACTTCGA | 668.457585575968 | 0.33273940050894   |
| ACGTCACCAAC | 668.519172926949 | 0.304208274471658  |
| GAGGTGATGAC | 668.547951526388 | 0.147013386866798  |
| GACCATGAGTC | 668.567395724985 | 0.356849766879986  |
| CCTATTGACTC | 668.584741183314 | 0.257210048169873  |
| AATCGTGAGTC | 668.626334113599 | 0.418251250878321  |
| TAATATGCCA  | 668.681742450104 | 0.378159610683659  |
| ATCACTAGTCA | 668.731267693664 | 0.251348236330385  |
| GACTCTGACAC | 668.771687080948 | 0.139813305727527  |
| AGGCTCAGTCA | 668.795724175456 | 0.183987814029619  |
| GCGCTGCGTCA | 668.798683924972 | 0.0785472135627132 |
| TATGAATAATA | 668.821066979263 | 0.20774747473815   |
| CATTGGGTGAC | 668.837536680528 | 0.415484255288929  |
| CCAGGGATGAC | 668.862429410443 | 0.386787511125804  |
| ACGTCACAGCT | 668.864076946195 | 0.280510340520236  |
| AACCTGACGCA | 668.879449126646 | 0.203192086483927  |
| AGTAAGTGTC  | 668.888930264182 | 0.333715987541507  |
| AGTCACTAGGA | 668.930931818446 | 0.258986971282469  |
| AAGCATGACGC | 668.932797319219 | 0.281313080320254  |
| GCATTTATGAC | 668.976735229415 | 0.0553747739944318 |
| ATGAGCAACAG | 669.027902857676 | 0.329551704923005  |
| GTATCTAGTCA | 669.053435623935 | 0.500224169923685  |
| ATTAAGTGTC  | 669.067721635201 | 0.177567240927463  |
| GTCACCTATGA | 669.073679611305 | 0.623125068268218  |
| ATCTCTATGAC | 669.117510137862 | 0.36030728995342   |
| TATTTTACTCA | 669.17353717885  | 0.142356815049838  |
| ACCTATAGTCA | 669.186755378499 | 0.343716651510192  |
| ACTAATGTGAC | 669.216631110124 | 0.334570540003806  |
| CTCAAGATGAC | 669.223692367003 | 0.275838312930893  |
| AGTCCGACTCA | 669.28980870623  | 0.21544701325289   |
| AGTCATGGTCC | 669.298669543002 | 0.299272729138971  |
| GTCACCATTTA | 669.341617379012 | 0.234173424742303  |
| GTCATTCATGA | 669.358467262763 | 0.258940031600757  |
| GCGACGATGAC | 669.431677554717 | 0.145568606530541  |
| ATGATGCAATA | 669.503100154306 | 0.218788396543629  |
| AGATGAATGAC | 669.559478954644 | 0.300441062417291  |
| GACTGAGTAAC | 669.609557919384 | 0.130565351961409  |
| AACGGAATGAC | 669.642014010224 | 0.232212752632828  |
| GTCATAAGACA | 669.650272424386 | 0.328571280108741  |
| ATTTGCTCATG | 669.772384464569 | 0.307351716565306  |
| GCCATGACCCA | 669.774819958931 | 0.352335597161421  |
| TGTTGACTGAA | 669.79664043623  | 0.258061774578982  |
| CGACCGCTCA  | 669.805744940136 | 0.360867260013188  |
| TATTGACGTCA | 669.833721346727 | 0.235133285837698  |
| TAGTGATGTC  | 669.943307654855 | 0.351142598463225  |

|             |                  |                   |
|-------------|------------------|-------------------|
| AAATTAAGTCA | 669.945699412952 | 0.463784160730884 |
| ATGCCTAGTCA | 669.962207451347 | 0.323653155628676 |
| AGTCACGACTA | 670.020450435523 | 0.230835606369325 |
| GTCATCTGAAC | 670.046274688064 | 0.311443847008235 |
| GATCTTATGAC | 670.071017692846 | 0.199764235177114 |
| GTCATATCAAC | 670.151259853844 | 0.20892989181804  |
| CGTCATTCCGA | 670.166882388365 | 0.311899452028973 |
| CGTCATCAACG | 670.220082296621 | 0.207792490498204 |
| CAATATGACCA | 670.232657294378 | 0.256538080556822 |
| AAAGTGGTCAT | 670.253796973077 | 0.30653002416298  |
| TCACGCAGTCA | 670.270582519352 | 0.317765692597445 |
| GTCATGATTAA | 670.29075556365  | 0.305656840567761 |
| AGTCTTCGTC  | 670.352470789051 | 0.311529303355156 |
| GGCACACGTC  | 670.378594761678 | 0.416296171648716 |
| GTCATCCCCTA | 670.45282086548  | 0.23621311911892  |
| ATTTAGTAATC | 670.481651545733 | 0.185824187511649 |
| GAGTAATGACA | 670.493196076757 | 0.204525473694977 |
| TGACTTATCAA | 670.495029129635 | 0.306970311206957 |
| GATCGCGTCAC | 670.49993526533  | 0.203861652305387 |
| GGGATTATGAC | 670.516301301375 | 0.147666719003897 |
| AAGATCTGTCA | 670.593085150049 | 0.262117230716732 |
| GGCATGACCCA | 670.688347174024 | 0.116528582226571 |
| GTCACCACTGA | 670.753669892826 | 0.409710778826919 |
| TCCGTTACTCA | 670.816608250405 | 0.244843413695216 |
| TAGAGATGACA | 670.825491874731 | 0.16045943019597  |
| CGCAATATGAC | 670.83432140411  | 0.237007242112932 |
| ATAGACTCAGA | 670.84033579203  | 0.32064067851171  |
| CACGCGAGTCA | 670.853127778349 | 0.292216540467096 |
| ACGTCACCTCA | 670.962183633882 | 0.263355094896276 |
| TCGATATGTCA | 671.003981284771 | 0.321243576771592 |
| AATTACGCAAT | 671.039865975613 | 0.275022713771118 |
| GTCATTCTCCA | 671.045488781138 | 0.191601512941857 |
| ACGCATATGAC | 671.057845110393 | 0.42561898070807  |
| CGGGCGATGAC | 671.11704606635  | 0.379216531686266 |
| AATTTTACTCA | 671.122254692913 | 0.350085085068807 |
| GTCATAGCCGA | 671.156135843745 | 0.17793299011485  |
| ACTGACTATGA | 671.16386810987  | 0.291170925613628 |
| GCGTCATGTCA | 671.170174302431 | 0.352486447451434 |
| AGTCAGAGCAC | 671.17969771328  | 0.277060608469298 |
| AGCCGAATGAC | 671.242788576522 | 0.318573061634848 |
| ACGTAAGTCAC | 671.267407275776 | 0.151345120482639 |
| CTACATAGTCA | 671.325424810317 | 0.187942207902718 |
| GTCATAAAATA | 671.326188101154 | 0.350846479744776 |
| AATTCTGACTG | 671.338574326329 | 0.43440191957344  |
| GTGCCGTCATA | 671.348448538311 | 0.198859016452125 |
| GCTCTGATGAC | 671.446499637775 | 0.309517977329258 |
| GTCATTACCCA | 671.448129003444 | 0.263149375504592 |
| TGACGTGGGCA | 671.557186537491 | 0.452931039397144 |
| GTCATTTTCAC | 671.66564487149  | 0.134893229681489 |
| ATTAGCAGTCA | 671.695882079568 | 0.436633646748726 |
| GTCATTACGTA | 671.705462325831 | 0.124796438505766 |
| GCACACAGTCA | 671.784173194854 | 0.284812203076825 |
| GTCATCCTGGA | 671.806869397795 | 0.349910248400838 |
| AGGATCCGTC  | 671.831652590938 | 0.282930563215544 |



|             |                  |                    |
|-------------|------------------|--------------------|
| ACGTCTAGTCA | 671.899556138435 | 0.423758585738481  |
| CGTTGACTGAA | 671.981303496169 | 0.163023675603557  |
| GTGGTGACCCA | 671.985988780985 | 0.271285622009707  |
| TGACACTTAAA | 671.987119517704 | 0.318456885735733  |
| GAGCCTATGAC | 672.052193135328 | 0.18810671559745   |
| ATGACAGTGCA | 672.143504997022 | 0.310155553306614  |
| GGCCTGACTGA | 672.164842591563 | 0.25986544753392   |
| TGACACGTACA | 672.241692933388 | 0.387268969246069  |
| ATGACAGTGTA | 672.272286710593 | 0.222107095816887  |
| AAGTGGAGTCA | 672.307276455296 | 0.230003306781588  |
| CGTCATCTATC | 672.355453426756 | 0.259880260101457  |
| TGGGTCACCAA | 672.40666577145  | 0.284758386494219  |
| CTTGGGATGAC | 672.418129590916 | 0.42171757210292   |
| ACATTTGGTCA | 672.437719327463 | 0.444936895734333  |
| AATCAAGTCAT | 672.484999470028 | 0.36532745929113   |
| ATGACAAGACA | 672.578853861667 | 0.222700929166897  |
| AGGAGGATGAC | 672.602534696573 | 0.194241390990282  |
| CTCTAATGACA | 672.627367112643 | 0.315617630595816  |
| ATGACATTATC | 672.69397493841  | 0.253005298297482  |
| CTAATAATGAC | 672.783774953167 | 0.149309160237683  |
| GAGCGTATGAC | 672.86568788886  | 0.276900182299681  |
| AATTATGACCC | 672.929910425432 | 0.1491586047055    |
| TCAACGCGTCA | 673.081598278072 | 0.448207355143955  |
| TAAACGCGTCA | 673.258656217293 | 0.329947854528392  |
| CCGTTGATGAC | 673.302477454326 | 0.277811940132496  |
| AGTCACTAGAT | 673.377584708211 | 0.252347191048772  |
| ATGACAGCGCA | 673.403726298822 | 0.254419398906229  |
| AAGCGTATGAC | 673.527597846495 | 0.189746750081045  |
| ATGATGAGCCA | 673.532821869983 | 0.317058442661948  |
| AATAGTCAAAG | 673.550999361658 | 0.342522826505373  |
| TGACTCGCAAA | 673.613070508615 | 0.380891329461145  |
| CGGATAATGAC | 673.632380782344 | 0.314290921499577  |
| CTGTCTATGAC | 673.68807351685  | 0.243767746434151  |
| AGTGGTGACGC | 673.692070039128 | 0.337672881749703  |
| GTAGAAATGAC | 673.717946534679 | 0.204899751734506  |
| GCGTCATGCAA | 673.780859963429 | 0.408436044350724  |
| AGTGAGTCTGA | 673.818911314878 | 0.166018028656033  |
| TATCGTAGTCA | 673.854095495451 | 0.217334014572108  |
| AGGGTGAATCA | 673.859651041646 | 0.219332803573415  |
| GGCCAAATGAC | 673.897273859832 | 0.306733798131057  |
| CACCGTATGAC | 673.911878551464 | 0.328942794925367  |
| AGTCCTATGAC | 673.934200019818 | 0.293008160108621  |
| CCTCAATGACG | 674.000168242687 | 0.343168404616328  |
| CGTGACAGTCA | 674.002876087279 | 0.38083104424521   |
| GAGATTGGTCA | 674.063968109128 | 0.288127794653322  |
| GAGATACGTCA | 674.073674026061 | 0.119218232261379  |
| ATCGGAATGAC | 674.097046350625 | 0.362544620329373  |
| CGAATTAGTCG | 674.143503825683 | 0.260010115026678  |
| GTGTCATGAAA | 674.215051254955 | 0.0832151722765562 |
| GTTAACAGTCA | 674.233988813407 | 0.338352429564699  |
| CGTCATATGTC | 674.253779282071 | 0.268333467101565  |
| CACCGTGACTA | 674.263721098421 | 0.187081852921375  |
| ATAGTGGTCAT | 674.35153373873  | 0.219549919540727  |
| ATATAATGACA | 674.358625711985 | 0.246068550865702  |

|             |                  |                   |
|-------------|------------------|-------------------|
| GATAAAATGAC | 674.368137120711 | 0.244311428354298 |
| GGAATGATGAC | 674.410081828986 | 0.241436787201756 |
| TGAATTGCTCA | 674.429320068205 | 0.20268770888061  |
| AAGAGTGACGT | 674.437566918663 | 0.162374936052253 |
| GTCATTTTCTA | 674.489861596827 | 0.166116650809093 |
| CGTCATTTCTC | 674.525722697593 | 0.291573118884181 |
| GTCACGTGACA | 674.548279485467 | 0.218136804086903 |
| AAACCGGTGAC | 674.598134570642 | 0.271475936022843 |
| GTCACAATTTA | 674.603543596607 | 0.373706236084425 |
| TCCCTTAGTCA | 674.664922846608 | 0.346516342761932 |
| GTCATTCTCAC | 674.683037260985 | 0.327811491441978 |
| AGAAGTGAGTC | 674.687845175294 | 0.152164876507866 |
| CGTCATTGCA  | 674.688471350657 | 0.363256488279308 |
| GTCATTAGCAA | 674.70791873392  | 0.330635361869427 |
| GTCATAATGA  | 674.709441381171 | 0.436614832831707 |
| ACCTTGTCATC | 674.752344653255 | 0.262592388233138 |
| CAGCGTGACTG | 674.791789588044 | 0.275865506796251 |
| GTCACATATTA | 674.8123766362   | 0.277267538130576 |
| GATACAATGAC | 674.812805868842 | 0.403414222322313 |
| GCCTGGATGAC | 674.830958184008 | 0.26886170456815  |
| CATCAGATGAC | 674.855170639431 | 0.318558288042823 |
| ACGTCACATCA | 674.865065074468 | 0.175591815930238 |
| CTCGTTATGAC | 674.904198337366 | 0.199982577635483 |
| AGTCACTAGCA | 674.920081225499 | 0.352371994664168 |
| AACGTGTGTC  | 674.921352034978 | 0.323321687837621 |
| CATATTGACTC | 674.950488992426 | 0.174034046027113 |
| CTTAGCAGTCA | 674.991302585651 | 0.297117350779577 |
| CGTCATTGTTC | 674.998049405613 | 0.257577451245978 |
| GAGTCAATGTA | 675.032789803513 | 0.190918854073704 |
| CATTGAGTAAC | 675.038140755967 | 0.272034929798553 |
| GGCGTGCCTCA | 675.067675491255 | 0.239366294554051 |
| GATTATATGAC | 675.08142229299  | 0.305146992962999 |
| TCCAAGTCACA | 675.107948361392 | 0.262889376700398 |
| AGATGTGTGAC | 675.111444430486 | 0.225713135321835 |
| ATGCTGATGAC | 675.111874936833 | 0.344724025429399 |
| GGTGCTATGAC | 675.168473954603 | 0.220604116289236 |
| AATTACAGTCA | 675.176635559002 | 0.332578879812271 |
| AAACGTGTGAC | 675.213945183706 | 0.183821817463688 |
| AGACTAATAGC | 675.236531533465 | 0.261777445683153 |
| TGAATGGGTCA | 675.302684883348 | 0.221878732566692 |
| ACGTCATGCGA | 675.314112660291 | 0.209580762384894 |
| ATGCCTATGAC | 675.356398766221 | 0.213168606460401 |
| CGTCATTGCGA | 675.370483234463 | 0.242394950505411 |
| CTCTTGATGAC | 675.381515508207 | 0.218426236830274 |
| AACCCATGACT | 675.385280086962 | 0.255265092569425 |
| CGGAAAATGAC | 675.442890800725 | 0.34161752497857  |
| TCAACGTGTCA | 675.457159579834 | 0.416537763954854 |
| GTCATTACAAA | 675.47825206427  | 0.257555666699139 |
| AATCACGTGAC | 675.485450979216 | 0.259215798736302 |
| CAGGAATGACG | 675.509242622909 | 0.138277682427526 |
| CCACATATGAC | 675.513751115482 | 0.341630802994015 |
| GAACATGACGC | 675.591811417317 | 0.257564387207334 |
| CTCTCGATGAC | 675.62299371082  | 0.322921054917464 |
| GTCACTGTCAC | 675.664701653486 | 0.245969973373393 |

|              |                  |                    |
|--------------|------------------|--------------------|
| GATTGGAGTCA  | 675.687723317597 | 0.280738830403765  |
| ATTACTGACAC  | 675.744329582264 | 0.261198197267434  |
| CAGGCGATGAC  | 675.830478324358 | 0.247588518054717  |
| CTGCGTATGAC  | 675.877789024824 | 0.0480746351114545 |
| GTCACTACTCA  | 675.887930151291 | 0.288887400958136  |
| GTCATCCTCCA  | 675.892956884662 | 0.273264749458041  |
| GAGTGGAGTCA  | 675.902390928026 | 0.198618169750852  |
| ATCGTGGTCAT  | 675.904055407885 | 0.230894903231963  |
| GCGTCACCCAA  | 676.015841620984 | 0.18493041889925   |
| GCCATGTCACC  | 676.03836635904  | 0.225264497654505  |
| ACGTTAATGAC  | 676.043385800061 | 0.369589459603563  |
| CATTATGAGTA  | 676.046593006491 | 0.306549358740316  |
| CGAGGAATGAC  | 676.11535462345  | 0.187664102506296  |
| GTCACGTATGA  | 676.138592400563 | 0.257854250170368  |
| AGTCACTACAG  | 676.14111684941  | 0.318373158369037  |
| AGCATTGACTC  | 676.165489678463 | 0.331666406378519  |
| AATGGGATGAC  | 676.167691579299 | 0.342427929485058  |
| ATCCTGTGTCA  | 676.214535436681 | 0.208603360389566  |
| AAACTTCGTC   | 676.241942469529 | 0.366837597154821  |
| GCTTGATAGTCA | 676.263156847785 | 0.158245201507552  |
| GACCAAGTCAC  | 676.275163477992 | 0.431755847655958  |
| GCATGGATGAC  | 676.327890180962 | 0.279600239912372  |
| TCGTGTAGTCA  | 676.363027862369 | 0.371161150559012  |
| GTCATCTCCGA  | 676.370078166902 | 0.22090601933899   |
| GTGTCATGTTA  | 676.395465074068 | 0.261273869225258  |
| CGCATTTGTCA  | 676.415466000444 | 0.270094989483327  |
| ATTGGGATGAC  | 676.447777505171 | 0.167418929273014  |
| ATGACATGCCA  | 676.497181539407 | 0.315514093376652  |
| GGATTTCTGTC  | 676.654818393995 | 0.35670899884526   |
| GAGTCAATACA  | 676.686915697659 | 0.285839600666935  |
| GTCACCCGTGA  | 676.70789293733  | 0.398343989592319  |
| ACGCGGATGAC  | 676.73976423702  | 0.282695535812752  |
| TGGGTCACGAA  | 676.751063406601 | 0.178418013328222  |
| TAATAGTAATA  | 676.79401289712  | 0.145170903184944  |
| TAGCAATGACA  | 676.801370505715 | 0.242830476902979  |
| TATGAGAGTCA  | 676.846626289747 | 0.201584993826228  |
| GCAGACTCACA  | 676.847810070738 | 0.28066074131258   |
| CAGGGATGACG  | 676.877998898913 | 0.324348732654663  |
| AGTCAGAGCCG  | 676.881084763871 | 0.294969470033672  |
| CTCATGACCCA  | 676.901532047487 | 0.241761850874472  |
| ATGAATCAATC  | 676.911001130124 | 0.369362096612301  |
| CAAGGGATGAC  | 677.04236635783  | 0.285824691187076  |
| CCGATATGTCA  | 677.078528604456 | 0.24046578490458   |
| GACATGAATCA  | 677.121061292888 | 0.418004493381611  |
| GTCATCCGCAC  | 677.125216376443 | 0.313881304547422  |
| TAGTTGACTGA  | 677.143736306841 | 0.246380643190119  |
| GACTCACTTTA  | 677.146894339078 | 0.197270742455569  |
| GACATGATGAC  | 677.151704649449 | 0.420188056970997  |
| ACGCTTATGAC  | 677.254315784984 | 0.279337556745278  |
| AGTCAGACTAT  | 677.327725535029 | 0.196852533554808  |
| AACGTGTGACA  | 677.355395760993 | 0.112727293903094  |
| ATGAGTACGAA  | 677.412393489939 | 0.265761105737349  |
| CAGTGCAGTCA  | 677.437282945626 | 0.555151111105543  |
| GACACTGTGAC  | 677.438483858265 | 0.242924876661429  |

|             |                  |                   |
|-------------|------------------|-------------------|
| AGACTAATTGC | 677.451261464842 | 0.243791923115745 |
| AGTCACGCGAT | 677.566405967001 | 0.204475003100177 |
| TACCTGTGTCA | 677.574755054024 | 0.189307629386157 |
| ACTGAGATGAC | 677.585301075382 | 0.184176706201155 |
| GATGACTTGCC | 677.718711020636 | 0.285731671094466 |
| CATCGGGTGAC | 677.720875284794 | 0.201023304368115 |
| ATGACGGACCA | 677.75153227793  | 0.241707868633077 |
| ATGACGTTGCC | 677.769542087192 | 0.131815294387481 |
| ACGTCACCATA | 677.799631003397 | 0.368691290173875 |
| TGACTCGCCAA | 677.875779444873 | 0.343010433200422 |
| GCCAAGTACC  | 677.885111413905 | 0.260059044918158 |
| GTCATCCACGA | 677.896232236596 | 0.260444741119167 |
| ACCTCATGACT | 677.897666338662 | 0.148701784055368 |
| GTCACACGGAA | 677.899298551552 | 0.281196265855815 |
| ACGTCACCACC | 677.988486164433 | 0.221916192197642 |
| CTTTGGATGAC | 678.049840490997 | 0.231598926317617 |
| AGTCACTTAC  | 678.058022747418 | 0.190589359147118 |
| AAAAGCAGTCA | 678.072111418071 | 0.349753325003054 |
| GTCACAAATTA | 678.102495174501 | 0.282423551640512 |
| GCCGTGTGTCA | 678.190500856659 | 0.293982352892065 |
| AGCTTGATGAC | 678.284385592333 | 0.208706789812921 |
| CGTCATCTCGA | 678.2861997817   | 0.209915507660007 |
| AGTTTGTGTCA | 678.318532653405 | 0.274940627251891 |
| CATATAATGAC | 678.353023523251 | 0.347413174647923 |
| CATGACAGTCA | 678.384458015037 | 0.24103330257336  |
| GACTAAATGAC | 678.409540883753 | 0.163261127522558 |
| GTCATCGGCTA | 678.432206647637 | 0.348690892883534 |
| ATGACATTATA | 678.437883092224 | 0.243657925347797 |
| ACACTGGTGAC | 678.5060481316   | 0.321170953831721 |
| AATATCGTCAC | 678.506622998666 | 0.209596464358383 |
| CACGATTAGTC | 678.563558363335 | 0.270483886725547 |
| TGACTATGTAA | 678.586119947362 | 0.358969512882913 |
| GCGCATGACAC | 678.590085241546 | 0.334080477620253 |
| TAGATTGGTCA | 678.616840657596 | 0.218039063849872 |
| ATGAGCAAGCG | 678.635681924552 | 0.238395683454129 |
| CATCGGTGACG | 678.6427912626   | 0.129150156115583 |
| GGATAAATGAC | 678.668541728449 | 0.212242801318049 |
| AAGTGTCAGAC | 678.678020641004 | 0.205051646997742 |
| ATGACAGCGTA | 678.699844367052 | 0.198789989520038 |
| GACTACTCATC | 678.72917571891  | 0.086940363131016 |
| CGATTGACTGA | 678.773791095598 | 0.273211620846883 |
| CTCGTGTGACA | 678.786788024329 | 0.322902919762372 |
| CGCCGTATGAC | 678.795324439089 | 0.411067971827689 |
| AGTCACGGCTG | 678.816036610652 | 0.140117282562008 |
| GTCACACTGAA | 678.826912283753 | 0.16600339005064  |
| CATCGGTCAC  | 678.856962682891 | 0.292467237738476 |
| ATGACAGACTA | 678.952692070048 | 0.286628790853652 |
| CACGTCACTGG | 678.996782835373 | 0.306799044661928 |
| ACGATGAGCCA | 678.999372775287 | 0.08493807942982  |
| CAGGTAGTCAC | 679.074963887945 | 0.191311908974685 |
| ATACCCAGTCA | 679.107642069183 | 0.396806850833268 |
| ATATCGGTGAC | 679.113974042799 | 0.292834434784062 |
| AGGAAGATGAC | 679.123260310804 | 0.243993912764904 |
| TGACACAAACA | 679.134736009313 | 0.208802658325725 |

|             |                  |                   |
|-------------|------------------|-------------------|
| AGGGGTATGAC | 679.165361932047 | 0.222374565188096 |
| TACACCAGTCA | 679.231302468871 | 0.221762438293338 |
| CCTTGTGTGAC | 679.255150566367 | 0.441863200042885 |
| CCGCATGACAC | 679.269833207225 | 0.157985406046767 |
| CATCGAATGAC | 679.277647972178 | 0.274959566213756 |
| CCGGGAATGAC | 679.303551107254 | 0.411676818354787 |
| CCAGGTGACAC | 679.310527538314 | 0.265513390709569 |
| ATGACGCCTAG | 679.375861327764 | 0.193469544243969 |
| AAGCCGATGAC | 679.476369370158 | 0.302095127376975 |
| CACGTCCTAG  | 679.488254007735 | 0.272314664294724 |
| GATGATTGAC  | 679.500456861496 | 0.314983498974273 |
| ATGACGAGACG | 679.608022674599 | 0.222120108636116 |
| AGTCAGATCTG | 679.725667376498 | 0.248108260516276 |
| CGTCACTGTCA | 679.750129056115 | 0.3223848708677   |
| TGACTCTCACA | 679.800414606372 | 0.279040256413533 |
| GTCACCTATTA | 679.814721182317 | 0.210812506235268 |
| TTAGTGACCAA | 679.831786532787 | 0.264095822399111 |
| ACGTCACAGTA | 679.849716628152 | 0.203457430823194 |
| GTCATCTAGAA | 679.945806952408 | 0.434679869332681 |
| CGTCATCAGTC | 680.000057505308 | 0.375721590419104 |
| TCATTTGCTCA | 680.013657659441 | 0.256149133482126 |
| CGGAGAATGAC | 680.110441438567 | 0.259642687327365 |
| CGTTGACTCA  | 680.127782442212 | 0.279613826723072 |
| GTCATCTGTTA | 680.138810107243 | 0.272078112431393 |
| GGTGTGAATCA | 680.160159995832 | 0.107594012995376 |
| TACATTGGTCA | 680.164400285479 | 0.436642161004938 |
| ATTAGTAGTCA | 680.190535105648 | 0.174013136162473 |
| AAGGGAATGAC | 680.194012413335 | 0.25785675031027  |
| CGGATTTGTCA | 680.26051895707  | 0.404130309269382 |
| AACCTACTCAT | 680.301389069986 | 0.154582057363646 |
| GTCACCTTTTA | 680.32336864659  | 0.192287367349524 |
| GTCATAGACCA | 680.337160836018 | 0.383412485155461 |
| ATGAGCAGTCA | 680.351824743647 | 0.194984113722637 |
| AACCTGATGAC | 680.434441750727 | 0.135955690251707 |
| CTTCAGACTCA | 680.473015922586 | 0.263266126555377 |
| AGTCACGCTAG | 680.488949902566 | 0.211655342001342 |
| AATTACGCAAC | 680.492731908014 | 0.254464923670204 |
| CCCTGTATGAC | 680.502257530433 | 0.219327139971186 |
| ACCAGATGACA | 680.519142306621 | 0.219969230013798 |
| CGTCATCAAGA | 680.54943181079  | 0.314618068316277 |
| GATCCTATGAC | 680.560591729768 | 0.351391028161363 |
| ACGAGTCAAAC | 680.591081416146 | 0.353405989101324 |
| CAGTCAGAATA | 680.62447937463  | 0.205286941384617 |
| ATCTGAGCAAT | 680.632518612881 | 0.266522292411695 |
| ACGTCTATGAC | 680.689756858691 | 0.320714320021876 |
| CAGTGGAGTCA | 680.730102302114 | 0.257488662237979 |
| TCGCTACGTCA | 680.746761745201 | 0.317720127302868 |
| GGTCGGATGAC | 680.762401390336 | 0.215133797060773 |
| ACGTTTATGAC | 680.764030706733 | 0.303382192321196 |
| GAATAGACTCA | 680.800808423171 | 0.18275724265981  |
| GATGGGATGAC | 680.801683292045 | 0.23622387958714  |
| ATGAGTCCCAG | 680.826783971819 | 0.269908266505947 |
| TACCGTGACTA | 680.847337544755 | 0.169698672684016 |
| TCGTTAAGTCA | 680.865328870737 | 0.283124570721021 |

|             |                  |                    |
|-------------|------------------|--------------------|
| ATGACAGCGAA | 680.89689330806  | 0.279814674383716  |
| CCAAAGGTGAC | 680.914138451979 | 0.203547203052635  |
| GGCCGTATGAC | 680.919387398728 | 0.279108127688622  |
| TGAGTGACCCA | 680.974354058449 | 0.167306006421155  |
| GACAAGATGAC | 681.02136584404  | 0.329161560519092  |
| GTCATTCTACA | 681.142870871719 | 0.362876440366668  |
| TCCTAATGACA | 681.214262274229 | 0.225339908950823  |
| ACGTCACAGGC | 681.239542887463 | 0.214580913576006  |
| AAAAGTCATCG | 681.248813945506 | 0.26343340213921   |
| CGTCGGAGTCA | 681.250310563851 | 0.389291323182536  |
| CTGCAAATGAC | 681.346045469313 | 0.376776688607811  |
| CGTCAGCGTCA | 681.353816837976 | 0.314699795981235  |
| ATGACGGTATA | 681.357178019795 | 0.284038629367763  |
| CATGACTTGGC | 681.400673086705 | 0.0562182946446985 |
| CAATGCATGAC | 681.406755591709 | 0.334204247661898  |
| GCGCAGAGTCA | 681.464678579526 | 0.166105163889034  |
| ACTCTGACGTG | 681.480351651336 | 0.241417798240131  |
| CGATGACTTGC | 681.492977119494 | 0.301057469702749  |
| TAGATGGTCA  | 681.524064161223 | 0.184017443337913  |
| CCATAATGACA | 681.525793303121 | 0.374476411626879  |
| GGTTACATCAC | 681.533050613562 | 0.260035457999409  |
| CGTCATATGAA | 681.551732766333 | 0.290087102402145  |
| GTCACAGTTAA | 681.59045246645  | 0.370511867525727  |
| AACCGCGTCAC | 681.617571422118 | 0.201756932208757  |
| AACAAAATGAC | 681.65115922006  | 0.356104294635631  |
| CTATGTGTGAC | 681.69629004835  | 0.25020432103378   |
| ACGGTGACCCA | 681.752426901591 | 0.248522329725092  |
| TGACTGCAGAA | 681.789447395399 | 0.24789306181584   |
| AATGCCGTCAT | 681.827178204748 | 0.288680033889076  |
| AACCGGTGACG | 681.844094715854 | 0.321422245630225  |
| TACTACAGTCA | 681.852124961573 | 0.138838550930346  |
| CACTAATGACA | 681.858245953799 | 0.238758835554845  |
| ATGACAGCTAC | 681.924139457751 | 0.268983690494801  |
| CCACAGAGTCA | 681.933886142074 | 0.172896517500008  |
| TAGTCCAGTCA | 681.945256965159 | 0.335990618978727  |
| ATGCTGTACC  | 681.976438035429 | 0.289093234381162  |
| ACTAATTGTCA | 681.9869986152   | 0.281989274131025  |
| GTCATCCCGGA | 681.992791524533 | 0.196135743733582  |
| CCTTGTACTCA | 682.099699745554 | 0.171469649777064  |
| CGGTCAATGAC | 682.101347616564 | 0.240060106617812  |
| AGTCAGAAGAT | 682.146373422025 | 0.240353818277177  |
| CAAATTGTGAC | 682.166283554943 | 0.404038893621638  |
| GTCATCCAAC  | 682.183038738957 | 0.380256203340558  |
| GTCATCCAACA | 682.190414740432 | 0.344972185642902  |
| GGATGAATGAC | 682.293492675618 | 0.315849948328307  |
| GCGTCACCCGA | 682.311580667904 | 0.303894971230791  |
| AGACTAATAAC | 682.332151233426 | 0.327089821547376  |
| CGTCATCGGAC | 682.347566273249 | 0.327980133922953  |
| GATCGGATGAC | 682.424536323129 | 0.22091830527925   |
| CCAAGCAGTCA | 682.429614619304 | 0.418213327522558  |
| ACTGGAATGAC | 682.444446792505 | 0.365999937587704  |
| CAGATTGGTCA | 682.505590608907 | 0.238026675491275  |
| TACAAGACTCA | 682.537304724257 | 0.215123994966852  |
| TATCTGATTCA | 682.541059868902 | 0.297643254670075  |

|             |                  |                    |
|-------------|------------------|--------------------|
| ATGTTGATGAC | 682.595465222184 | 0.276722645373408  |
| AAACGTGAGTC | 682.614099991677 | 0.444082147302349  |
| AAACAGAGTCA | 682.616529218217 | 0.270647559587307  |
| CAATTTGTGAC | 682.659721176642 | 0.34200285500186   |
| GGTTGGAGTCA | 682.665797933698 | 0.249538283482802  |
| AAGTCTAGTCA | 682.688791834397 | 0.108605435506583  |
| ATGACTTGGTG | 682.805019684612 | 0.394321062295054  |
| AACTATAGTCA | 682.809525523786 | 0.301226507150666  |
| CGGCCGAGTCA | 682.810846344239 | 0.45493343960641   |
| GAGAGGATGAC | 682.848393438867 | 0.272241182418364  |
| AAGGGGAGTCA | 682.85876804417  | 0.234811110160584  |
| ATGATGACCGA | 682.940010662435 | 0.362342760562766  |
| AGACTCACTTA | 682.97735750584  | 0.232100391939649  |
| TCATTTTGTCA | 683.005158224865 | 0.222755194978205  |
| TGACTCCGCAA | 683.045720116284 | 0.436120483871658  |
| CAATTGACTGA | 683.126466064177 | 0.284067199360588  |
| GAAAGTGAGTC | 683.128670821673 | 0.257073109605909  |
| GCGTCTATGAC | 683.129176623962 | 0.269267107141289  |
| CCCATTGGTCA | 683.175595768391 | 0.298947951942876  |
| ACATAGATGAC | 683.177552319798 | 0.0684439487289394 |
| ACGTCACCGTA | 683.197970962141 | 0.224325939294823  |
| GACTAATTTTA | 683.277054175924 | 0.286186655779416  |
| GTCATTTTCAA | 683.363624125081 | 0.401494598556846  |
| CGAATAATGAC | 683.371463616849 | 0.392833132953422  |
| ATGACCATATC | 683.399409080621 | 0.240515753723698  |
| CATACTGTGAC | 683.407110633466 | 0.140560172253508  |
| CAATAGATGAC | 683.461584173953 | 0.185398793240542  |
| AGCTGATGACG | 683.518698859538 | 0.123522530097303  |
| GACTGTGTGAC | 683.519239021395 | 0.274866972502758  |
| TCGCCTAGTCA | 683.530253862322 | 0.293420030860488  |
| AACTGGGTCAT | 683.57260692459  | 0.242426547066329  |
| AGTCACGAGAT | 683.574894092125 | 0.137157909749295  |
| AACTCGTGACT | 683.593761736515 | 0.292933091042186  |
| TAATTTTGTCA | 683.611481135026 | 0.269864371350778  |
| GACATATGTCA | 683.668600556601 | 0.530350761105164  |
| GATCCGAGTCA | 683.70673298003  | 0.364221145070355  |
| AAGAGACTCAT | 683.721483521424 | 0.223886851413604  |
| GTCAAAATGAC | 683.77855580697  | 0.2447667713404    |
| TGACTTGCTCA | 683.797801181198 | 0.209366583053844  |
| CAACGGAGTCA | 683.876722932461 | 0.253505531122655  |
| CCTAGAATGAC | 683.921760167201 | 0.329250746380599  |
| ATTGTACGTCA | 683.960322497058 | 0.269006952836528  |
| ACGTAATGAC  | 684.022280213661 | 0.25899241907464   |
| ATGACGAGGCG | 684.027054666496 | 0.286133320013944  |
| ATGACCGAATG | 684.041455473069 | 0.244029422700592  |
| GTCATGCGTAA | 684.203875583562 | 0.341317690621457  |
| TGACTTAATCA | 684.246211712493 | 0.222969153269108  |
| ACCCCGTCATA | 684.358406236005 | 0.222985814588808  |
| CACAAAATGAC | 684.420917128905 | 0.373073577849826  |
| TCTATCTGTCA | 684.437456183155 | 0.229858158952539  |
| TCATTGTGACA | 684.444565560241 | 0.223204660021038  |
| ATGGGATGACG | 684.613740961731 | 0.235187035688935  |
| GTCAGCATGAC | 684.670459191655 | 0.257816941466078  |
| TATCTACGTCA | 684.75233330721  | 0.193329959768407  |

|             |                  |                   |
|-------------|------------------|-------------------|
| TGACTCCGTAA | 684.807249179564 | 0.167060814232667 |
| ATGCAATGACA | 684.955310594879 | 0.195124250181845 |
| ATTGATGACCA | 685.058766774822 | 0.391217457259586 |
| AATTTTATGAC | 685.076808642903 | 0.309978765233884 |
| TGACTGCTAAA | 685.085600314041 | 0.326475406926061 |
| GCACTGACACA | 685.100197225965 | 0.248896744808443 |
| ACTCATCGTCA | 685.124872554602 | 0.266363965271911 |
| CACATTTGTCA | 685.147546443038 | 0.302719998921463 |
| AAGTCCGTCAT | 685.14987275406  | 0.139869338360789 |
| CATGCATGACA | 685.16098415515  | 0.235843505997571 |
| CCCGAATGACG | 685.165024157445 | 0.346529208453298 |
| ACGTCTGTCAT | 685.19367696761  | 0.154532448157751 |
| CTAGTCACGGA | 685.265945433588 | 0.249754336165367 |
| CGTGGAATGAC | 685.271597239633 | 0.288164416566238 |
| GAAATGATGAC | 685.289497873503 | 0.306656111222281 |
| AGAGAGATGAC | 685.311057050319 | 0.221796559380538 |
| ATCGTGACAAA | 685.314894343471 | 0.28334529970128  |
| GCGGTGACCCA | 685.362444396844 | 0.226546561028804 |
| TCGATGACCGA | 685.366995811999 | 0.400865993235961 |
| AATGATGTGAC | 685.369715928332 | 0.387559044678892 |
| CTCCGAATGAC | 685.498047014183 | 0.356590101306646 |
| ATCCTGATGAC | 685.562824465513 | 0.360647648610625 |
| ACGTCATGTAA | 685.633035709839 | 0.530015718123846 |
| ACGTCACCCAC | 685.637027087431 | 0.23614081806356  |
| CTTCATGACAC | 685.696270003775 | 0.150024058477424 |
| CAAGCAATGAC | 685.698709743912 | 0.232718473803106 |
| ATCACACGTCA | 685.762200623367 | 0.384342387894466 |
| GTCATAAAGTA | 685.816962197655 | 0.242870733865327 |
| CTACTGTGATA | 685.909637316947 | 0.179144890446133 |
| CACATAAGTCA | 685.92401266598  | 0.286596582828744 |
| ACAGTCAGCGT | 685.924338948411 | 0.257661444688719 |
| GTACCCAGTCA | 685.926070349311 | 0.239081883073553 |
| ACTCAGATGAC | 685.92881572524  | 0.290676174204676 |
| GTCATAGCGAA | 685.990704551795 | 0.226108764725245 |
| CACGTGGTAC  | 686.015038706585 | 0.290249919895844 |
| CATAGTGAGTC | 686.067310099822 | 0.347496190662374 |
| CAATTAGTGAC | 686.067498584236 | 0.434390832372051 |
| GTGTCATGCCA | 686.11391641449  | 0.236575819990012 |
| CGCGCTATGAC | 686.22397405451  | 0.320093539572474 |
| GTCACACACGA | 686.23198098044  | 0.473359168217229 |
| GACTATGTCAC | 686.238820036726 | 0.178120701767007 |
| GGAAAGATGAC | 686.255010606624 | 0.29589979465149  |
| CCGAGAATGAC | 686.302152979382 | 0.355038791684093 |
| AGTTCGATGAC | 686.320702311571 | 0.314589671586026 |
| CGTTAGATGAC | 686.321624645203 | 0.324627271107616 |
| AACATGGTAC  | 686.354726019729 | 0.43637286653039  |
| GTCACACTATA | 686.358490772088 | 0.301309745291984 |
| AATTAGTTCAT | 686.372123425885 | 0.243269336764581 |
| GCAATGTGATA | 686.393460718417 | 0.271717924340755 |
| AGTCACGGCTC | 686.39651783281  | 0.360322891225765 |
| GTCATATCGTA | 686.406877478117 | 0.323642242026537 |
| TCTGCGAGTCA | 686.411265792463 | 0.304352391511159 |
| TATGTACGTCA | 686.445551926964 | 0.141783875282568 |
| CATAATGTGAC | 686.505198698649 | 0.416771458569169 |



|             |                  |                   |
|-------------|------------------|-------------------|
| GTCACATTTGA | 686.541233309474 | 0.286958650009283 |
| AGTCAGAAGCC | 686.634415079695 | 0.343911663869088 |
| AAGATTTGTCA | 686.635955529026 | 0.346302278235906 |
| TATGACAGGAA | 686.648057413208 | 0.212165377712585 |
| TGCCTGACGCA | 686.692696514491 | 0.305385632450636 |
| CCACCTATGAC | 686.705370658965 | 0.322482901748493 |
| ACTCATAGTTA | 686.73359743517  | 0.260796887968782 |
| TGACTCGGGCA | 686.734192006342 | 0.314756792235476 |
| GTCACTGATGA | 686.774088647986 | 0.309188192656204 |
| GGTTGAATCAC | 686.784143366609 | 0.197817682468246 |
| AAGCCGTGACT | 686.844697065029 | 0.324828157545227 |
| GTCATGCGTGA | 686.943831555917 | 0.377227542243972 |
| ACGTCACCCGG | 686.946015327786 | 0.316937656055477 |
| CCTCGTGACTA | 687.041244056167 | 0.274963981603627 |
| AATGACGTGCA | 687.069449968355 | 0.272613855655287 |
| CCGGCTATGAC | 687.12336666194  | 0.26658124037365  |
| CGGAAATGACG | 687.125387239915 | 0.245651106023514 |
| TCTCGCAGTCA | 687.129955467498 | 0.326872769729034 |
| AGCCCGATGAC | 687.155627798515 | 0.254215804103353 |
| GACTCTGTGAC | 687.168689542862 | 0.191397811686448 |
| CCACTGATGAC | 687.194361089101 | 0.306985848799333 |
| GAGCCTAGTCA | 687.198513846833 | 0.29187094656161  |
| GTAATATGTCA | 687.205472846605 | 0.254253687447377 |
| CAGAGTGTGAC | 687.20739156069  | 0.227873415877579 |
| TACACTAGTCA | 687.258889341534 | 0.37741180641595  |
| AACATTCGTCA | 687.319248922375 | 0.465925041118658 |
| AAATTTGCTCA | 687.361143446084 | 0.463809108358125 |
| GTCATTCGGGA | 687.377961264842 | 0.31153783961527  |
| GGGTCTATGAC | 687.470602172623 | 0.387081615115143 |
| GGCCACGTCA  | 687.560874078304 | 0.215767466631283 |
| CATACGCGTCA | 687.61760360833  | 0.134599875102672 |
| ACGGCGTGACT | 687.632213764782 | 0.295513814965507 |
| GTCATTTGCAC | 687.633256921379 | 0.260076645245526 |
| GCTTAAATGAC | 687.661080023444 | 0.304296568617833 |
| ACACAAATGAC | 687.694849493806 | 0.132091732454426 |
| CGGCTACGTCA | 687.717633304858 | 0.279338877045545 |
| GCTCGTGACTA | 687.756360592588 | 0.27443352936902  |
| CCGTCACGTCA | 687.769033239527 | 0.27197343053572  |
| AAGAGATGACG | 687.782846920616 | 0.231484461969619 |
| GATCAGATGAC | 687.811714805259 | 0.29307473024572  |
| AATGACCGAAT | 687.835345337724 | 0.174635915388289 |
| CTATAATGACA | 687.888918315174 | 0.30332430569575  |
| CATGGAATGAC | 687.912781571939 | 0.133930353906053 |
| CATACTGACTC | 687.960768309462 | 0.269601876395094 |
| CTGTATATGAC | 687.983391735729 | 0.428089350584522 |
| GTCACATATAA | 687.9882278795   | 0.206739060240377 |
| AGGTATATGAC | 687.996695611762 | 0.243405493836351 |
| GTCATCTAGTA | 688.014023151945 | 0.263844595107834 |
| GTACAGATGAC | 688.022024226869 | 0.305602111308537 |
| CCCATATGACG | 688.023344484166 | 0.180782134858042 |
| CGTCATTAACA | 688.05812440281  | 0.363656549811433 |
| ACGTCACCAAG | 688.144196268583 | 0.144917454872269 |
| GTCACCACGAA | 688.167184582975 | 0.493112817619802 |
| ATAGGTGTGAC | 688.273173408527 | 0.232388955074517 |

|             |                  |                   |
|-------------|------------------|-------------------|
| GAATTGATGAC | 688.276981568403 | 0.338088154237808 |
| ACTTATATGAC | 688.299393213984 | 0.313867715711413 |
| AGTAGAATGAC | 688.36467922062  | 0.173115713430133 |
| CACGTCACGCA | 688.402152217203 | 0.370707662472448 |
| CTCAGACTCAC | 688.448577218831 | 0.189119662887527 |
| AGCCGGATGAC | 688.52254805477  | 0.286327906238984 |
| CGGGGTATGAC | 688.574967974922 | 0.316185078659251 |
| CCATCCAGTCA | 688.598100370203 | 0.299737301849967 |
| GCATCCAGTCA | 688.607356207449 | 0.395113329479888 |
| AGTGTCATGCC | 688.631750696743 | 0.215062522193223 |
| GTCATATCGCA | 688.640222273514 | 0.253443326057041 |
| ACAATAATGAC | 688.643630218174 | 0.209227524877737 |
| CGTCATTTAGA | 688.649360302069 | 0.250097377481301 |
| GTCATCATGAA | 688.786691603448 | 0.3186087884175   |
| AATCTTATGAC | 688.927752475955 | 0.247754334462345 |
| CGCCGATGACG | 688.948152113641 | 0.275527315112368 |
| ACAACGTGTC  | 688.975704549449 | 0.333764394985003 |
| AGTATCTGTCA | 689.008542900872 | 0.358185759936587 |
| GAGTATATGAC | 689.009597834552 | 0.297582507099545 |
| GTCATCCCGA  | 689.026622171851 | 0.290539723215977 |
| AGTCAGAAGTC | 689.058738355779 | 0.33474000680301  |
| CACATGAATCA | 689.085078278826 | 0.361905098046849 |
| AGAGTCAAAC  | 689.100315603682 | 0.317564546788745 |
| TCGGGGAGTCA | 689.129527871015 | 0.256202024838419 |
| TACGACAGTCA | 689.129822379503 | 0.414203935306756 |
| TCCATGACCCA | 689.138782595183 | 0.179708280339568 |
| ATGACGTTAGC | 689.14626784659  | 0.188177284181048 |
| AACTGGTCAGA | 689.164993669041 | 0.282659762078714 |
| GGTTTGCCTCA | 689.179048785956 | 0.465394263969549 |
| TGACACAACCA | 689.225720351962 | 0.267165072209422 |
| GATGGAATGAC | 689.242172503299 | 0.233734852860362 |
| CGATCTATGAC | 689.324158678682 | 0.205426433701281 |
| AATTGCTCAGA | 689.354174395036 | 0.284463775524456 |
| ATGAATCAATA | 689.394283032093 | 0.159900007929531 |
| ATCGGAGTCAG | 689.410296523384 | 0.314811830051554 |
| CACTGGGTGAC | 689.432883001877 | 0.292691983298779 |
| TCTACTAGTCA | 689.461057651291 | 0.207242981724401 |
| CACCATATGAC | 689.558813945335 | 0.265324970696973 |
| CGCGAAATGAC | 689.654499695021 | 0.356913772581233 |
| AAAGCGAGTCA | 689.665447440535 | 0.176447885193356 |
| CACTCTATGAC | 689.668021947436 | 0.246868960235957 |
| AGTCACTCCGC | 689.688492771877 | 0.261254340513196 |
| TAACGGAGTCA | 689.723562267351 | 0.221510418832667 |
| GTCATTGACGA | 689.730099297121 | 0.198020431875613 |
| TGACATAATCA | 689.733438235819 | 0.293947949587007 |
| CATTAATGAC  | 689.73623726812  | 0.255230727549712 |
| CTCGAAATGAC | 689.779586499773 | 0.343792455524937 |
| CCGGACAGTCA | 689.781747541358 | 0.252123470839974 |
| GTGGCGAGTCA | 689.790579694953 | 0.167158711069233 |
| AATGGCGTCAC | 689.805485203375 | 0.195867921318316 |
| GTCACACTGGA | 689.818355397525 | 0.251681410469216 |
| TACATTCGTCA | 689.863598446317 | 0.232041164438833 |
| TCCAGATGACA | 689.87583086207  | 0.312460432462823 |
| ATGAGTCCCTG | 689.895795374357 | 0.189464917387188 |

|              |                  |                   |
|--------------|------------------|-------------------|
| GTCATATCCCA  | 689.954692316586 | 0.365230735252043 |
| AGTCACTTGAC  | 689.983694965747 | 0.242996033830796 |
| CGCTGGATGAC  | 689.984524447855 | 0.208069619454332 |
| GACACGGTGAC  | 689.98783974299  | 0.375119092635647 |
| CGTCATTAACG  | 690.009183485237 | 0.373991168929052 |
| TGACTGTCAAA  | 690.038902790864 | 0.444960792192362 |
| GCGGATATGAC  | 690.04508128462  | 0.212095149564738 |
| AGAGTGAATCA  | 690.080205331022 | 0.211279226666204 |
| TCATCACGTCA  | 690.082228566436 | 0.264504037875008 |
| GTCAGTGTAC   | 690.120366195924 | 0.425627045508295 |
| TAACTTCGTCA  | 690.137935132062 | 0.22657574302211  |
| ACCCTTACTCA  | 690.144781715342 | 0.226130702941493 |
| ATGAGTTGTAC  | 690.148273560206 | 0.292413017560328 |
| GTCACCGACAA  | 690.166537587087 | 0.20840670258056  |
| CAATAATGACG  | 690.190900625066 | 0.362884316000152 |
| ATTTATATGAC  | 690.232166804016 | 0.34641466859659  |
| ATGAGGTCATC  | 690.2488108193   | 0.318851744803014 |
| CCTCTACGTCA  | 690.254432884167 | 0.156455719247526 |
| ATGACCCTAG   | 690.255790311593 | 0.272635085719765 |
| ATTAAATGACG  | 690.351089844932 | 0.222882234245427 |
| CGAATTGCTCA  | 690.362719218332 | 0.291905318131441 |
| GATAGTGTGAC  | 690.378910075157 | 0.302835113894533 |
| ATGACAGTCAA  | 690.397864381976 | 0.126322684449171 |
| AGATTGACTGA  | 690.436917380705 | 0.278230315906799 |
| AGGTTTATGAC  | 690.513185242285 | 0.255856785339774 |
| CCCACGAGTCA  | 690.528868115715 | 0.200999562767181 |
| CAGCTGATGAC  | 690.590602764232 | 0.316079462956904 |
| GTGACTACCGA  | 690.659341503403 | 0.249865062022373 |
| ACTCTACGTCA  | 690.672534363403 | 0.204872377459037 |
| AGCCATGACAC  | 690.702205296255 | 0.195952184152076 |
| CGGCAGAGTCA  | 690.73799247812  | 0.202759470488197 |
| GAACTACGTCA  | 690.761474352184 | 0.3725780803307   |
| AGCATACGTCA  | 690.790950152968 | 0.23253354426784  |
| GTGATTGGTCA  | 690.802971797365 | 0.232755966262104 |
| GATGACATTTA  | 690.838056636948 | 0.135816070971409 |
| TGTGAGTCCAA  | 690.857747609841 | 0.329471911002415 |
| ACTCATACCTA  | 690.858916323708 | 0.283956234760937 |
| TGAATATGTCA  | 690.898123212617 | 0.237968472287838 |
| CGTTCCAGTCA  | 690.911752075426 | 0.224240347593679 |
| CGAGAGATGAC  | 691.059880831279 | 0.214564562508346 |
| GCCTATAGTCA  | 691.09840665203  | 0.250418470157415 |
| ACGCCGATGAC  | 691.160843837106 | 0.188170256073732 |
| GACTTACGTCA  | 691.162173106054 | 0.250352000626102 |
| CGTGTAAATGAC | 691.182086014462 | 0.270597463396938 |
| AGCGTGATTCA  | 691.192405669888 | 0.241898482333005 |
| CTGTAATGAC   | 691.386381271592 | 0.297636292405609 |
| AAGGAGTGACT  | 691.404065506473 | 0.248436613664027 |
| CTCATTCGTCA  | 691.416397463485 | 0.235012407960844 |
| GAGTAGATGAC  | 691.427041956458 | 0.225979359735412 |
| ATCAATATGAC  | 691.488931649529 | 0.363717747354338 |
| TCGTGCAGTCA  | 691.568079387684 | 0.246750930711335 |
| GTTCTACGTCA  | 691.570812025166 | 0.314469465944546 |
| CGTCAAATGAC  | 691.701502468414 | 0.264973002369297 |
| CGTCATTTATC  | 691.726961036009 | 0.179394841146375 |

|             |                  |                    |
|-------------|------------------|--------------------|
| AAGTTGTCACC | 691.734056051742 | 0.159256748433835  |
| ATTAGTAAGAC | 691.740876204527 | 0.213096117959204  |
| ACCGAGATGAC | 691.752042660158 | 0.377650701883654  |
| ATACGGTGACA | 691.811112714045 | 0.341324671274813  |
| ACTCATAGGTG | 691.827352249192 | 0.39049271577774   |
| AATCCCAGTCA | 691.868783722679 | 0.403287305403729  |
| AGTGGTCACAC | 692.012838192819 | 0.307960005924469  |
| AGTCAGTAATA | 692.026612369537 | 0.25112586591284   |
| CCAAGTAGTCA | 692.027947875405 | 0.247333879175701  |
| TGACTCCACCA | 692.02951761583  | 0.213776799561989  |
| CTCTGAGTCTA | 692.043766820716 | 0.280655263322566  |
| CGGTCTAGTCA | 692.075072924751 | 0.242745219413515  |
| CAACATAGTCA | 692.088688191546 | 0.264536070286032  |
| AGGAGAATGAC | 692.135332180164 | 0.321467952674394  |
| ACCTAGATGAC | 692.192177675886 | 0.237837595683755  |
| GCGTCATGCTA | 692.25092318107  | 0.241369437799679  |
| GGCGTTATGAC | 692.264102472304 | 0.409709010274038  |
| ATGTTAAGTCA | 692.312233061221 | 0.281108656241204  |
| AAGATAAGTCA | 692.340049390761 | 0.172220554753863  |
| CCTGCGACTCA | 692.367316745367 | 0.135270530742167  |
| ATGACAGGATC | 692.372407069857 | 0.263999057717685  |
| TACTTGCCTCA | 692.399548051341 | 0.162856477921475  |
| CGTGACATGAC | 692.419829342663 | 0.287291515880971  |
| ATGGGGAGTCA | 692.424789072062 | 0.272758467695368  |
| GTCATAGAGGA | 692.452513134573 | 0.323538228676654  |
| AAATATGACCA | 692.457668183769 | 0.245017272908101  |
| ATGACGTCTAC | 692.504926715643 | 0.223608484232144  |
| TGAGCAATCCA | 692.50959737347  | 0.275875547517972  |
| AGAACTCGTCA | 692.538873379277 | 0.256633698449525  |
| GTCATTCGGGA | 692.546074952727 | 0.300613817858631  |
| AACTCGATGAC | 692.557611874054 | 0.28507221310786   |
| CAGGCGAGTCA | 692.592244551274 | 0.0914339723547127 |
| GTGATGTAACA | 692.606553568259 | 0.232898291110386  |
| AAATTGACTGA | 692.650960892887 | 0.339429166069711  |
| AATCAGATGAC | 692.71227906143  | 0.321500806231164  |
| ACTCATAATGG | 692.789812451758 | 0.335474691909471  |
| TGTGTCAAACA | 692.839949862104 | 0.431109986628986  |
| CCGAGGATGAC | 692.84216086914  | 0.309760029494627  |
| GTCACATCATA | 692.870976585545 | 0.277303426796295  |
| CGCGTTATGAC | 692.900797750892 | 0.317454061469658  |
| GGTAACGTAC  | 692.913640932345 | 0.218556005337235  |
| AGGTATTAGTC | 692.942670064127 | 0.20885568063199   |
| GAAGAGATGAC | 693.127575971212 | 0.2123431935956    |
| AGATAAATGAC | 693.244812196083 | 0.190545320193212  |
| GTCATATTAGA | 693.269316725764 | 0.150004465767355  |
| CGGCCGATGAC | 693.307185847702 | 0.278308104416581  |
| ATCATGACATA | 693.342179836008 | 0.296907699912151  |
| ACCATGACCCA | 693.378130213705 | 0.181168455443013  |
| GAAATTGCTCA | 693.386549373238 | 0.398193971373001  |
| TGACGGATGAA | 693.410011110074 | 0.326454183768167  |
| AGCCATATGAC | 693.418581312544 | 0.282706028132485  |
| GTCATTAACA  | 693.450021617622 | 0.320929270221345  |
| CAGTCACGAGC | 693.456590064267 | 0.261998587017825  |
| GTCATCTCGAC | 693.464709213691 | 0.078347261636834  |

|              |                  |                   |
|--------------|------------------|-------------------|
| GCCTCGATGAC  | 693.499569632671 | 0.348416786609702 |
| GACAACTCATA  | 693.5065133879   | 0.189727737912083 |
| CTAGTCACGAG  | 693.526070601857 | 0.226364091434568 |
| TCTCTTCGTC   | 693.566697407141 | 0.216635684590321 |
| GGACCCAGTCA  | 693.570644416802 | 0.459130452652618 |
| CGAGAAATGAC  | 693.581300860839 | 0.435031666710091 |
| CCTAAATGACG  | 693.624357161814 | 0.167054005693852 |
| AGCATGACACC  | 693.712822826991 | 0.286123204867826 |
| GTCATTCATAA  | 693.782949643502 | 0.117970211897282 |
| CGTCATCAGCA  | 693.792285836421 | 0.299631119589724 |
| GCTAGCAGTCA  | 693.876834876054 | 0.400863811459831 |
| AAATAATGACG  | 693.966741721384 | 0.263051709925302 |
| AATATGTGACA  | 693.968063761167 | 0.307258776492227 |
| CATTATTAGTC  | 693.989000694959 | 0.304061901315928 |
| TAATTATGTCA  | 693.993247666659 | 0.419505957231612 |
| CTCCCGAGTCA  | 693.99707865334  | 0.258313586475967 |
| AGGCTGACACA  | 694.000906570543 | 0.226878820773955 |
| ATGACACCCAA  | 694.005620265125 | 0.20606210762951  |
| TAACTGTGACA  | 694.095166095221 | 0.101808962194492 |
| GTCATCCAAAA  | 694.143542049555 | 0.396854920509991 |
| CGGATTGGTCA  | 694.151982253308 | 0.225474167009955 |
| CACCGGATGAC  | 694.197715654534 | 0.296524670161499 |
| ACTCAGACTCA  | 694.200063525041 | 0.345843413932448 |
| CATTGTACTCA  | 694.221134987082 | 0.316029041556634 |
| ATCATGACACC  | 694.273844050472 | 0.157135767246536 |
| TGATTACAGACA | 694.280527304574 | 0.196557732868392 |
| AGTCACGCCAG  | 694.30264715916  | 0.212465398056691 |
| TATATGTGAGA  | 694.312939631703 | 0.185893397239844 |
| GATGCGAGTCA  | 694.320079598449 | 0.212445030158057 |
| ACCGATATGAC  | 694.360864495131 | 0.308001667102664 |
| GCCTGGTCATA  | 694.385482371374 | 0.372886456388426 |
| ATTCAGATGAC  | 694.446574342323 | 0.367739853693618 |
| TGAGTCTACCA  | 694.563016171709 | 0.280670919573479 |
| AGAGTCAAAT   | 694.564934793634 | 0.232549472236117 |
| CAGTCCAGTCA  | 694.567740170945 | 0.216750673821716 |
| GCACTGTGTCA  | 694.573347325342 | 0.204490042912897 |
| GTCATATAGAA  | 694.592372678844 | 0.314686875019256 |
| AACTTGACTCT  | 694.595319170369 | 0.312608808311133 |
| TGACTAGTGCA  | 694.595799854606 | 0.276089512497271 |
| ATGGGTGACGC  | 694.600268999239 | 0.315684203327401 |
| GAAATATGTCA  | 694.636451554301 | 0.359258725733288 |
| AGTCACTTGAT  | 694.700391768838 | 0.269686220052872 |
| TATGTCATGCA  | 694.703779736121 | 0.221174854748338 |
| ATGACTTCGTG  | 694.705489418035 | 0.258335589431701 |
| GCTAAGATGAC  | 694.717342843354 | 0.294021161621072 |
| CGCAGATGACA  | 694.720186010309 | 0.223958545915374 |
| CACGTGTGTCA  | 694.742951388611 | 0.25599736854188  |
| CACGTGAATCA  | 694.746417967406 | 0.377074488551773 |
| AGCGGCGTCAT  | 694.789546344159 | 0.352943071763148 |
| CTTCATAGTCA  | 694.830485258455 | 0.286686074772948 |
| AGCCACATCAT  | 694.89928674499  | 0.19115807688481  |
| CTGTGTGTGAC  | 694.985586576963 | 0.359214067876243 |
| CGAACTGTGAC  | 694.995444974893 | 0.275431941066931 |
| GAATGTGTGAC  | 695.01337368151  | 0.108905378946418 |

|             |                  |                   |
|-------------|------------------|-------------------|
| CTTGATATGAC | 695.140528126396 | 0.311261958230271 |
| GCTTGACTAAA | 695.179322615589 | 0.283312670444744 |
| CTGTAAAGTCA | 695.181922453499 | 0.626216462966135 |
| CGTACTCGTCA | 695.184169833492 | 0.309306599743879 |
| CGTCATTTGGC | 695.197022537508 | 0.182499214184493 |
| GTCACACAAAA | 695.279294744302 | 0.298423260622992 |
| TGACTGGTCA  | 695.297234070914 | 0.258740427780042 |
| CCCCGAGTCAC | 695.298958296119 | 0.217177163615357 |
| CGCCTCAGTCA | 695.345021210613 | 0.35360151981965  |
| AGTCACGGTTA | 695.36295711653  | 0.122510909930888 |
| ATGAGTTGTTC | 695.477454042239 | 0.259147973121001 |
| CAGCCTATGAC | 695.478907731521 | 0.280527173969152 |
| GACTCACTCTC | 695.549970013356 | 0.322060950937815 |
| ACATAATGACG | 695.566097913158 | 0.151745703282616 |
| ACGCCTATGAC | 695.597018546552 | 0.366588768258043 |
| ACCATGACACT | 695.628427236519 | 0.255261009890851 |
| CTCATAGTGAC | 695.639123102505 | 0.280786596849622 |
| GCGTGGAGTCA | 695.655663324697 | 0.156313188869454 |
| GTCACAACHTA | 695.773949687648 | 0.209818929486314 |
| GTCATGCAGAA | 695.898915493003 | 0.334434245980166 |
| CACTGTAGTCA | 696.007094785096 | 0.266702017529331 |
| TGACATGTCAA | 696.084955779918 | 0.317109035815289 |
| ACATGCGTCAA | 696.128965749758 | 0.350644401075256 |
| TCTGACAGTCA | 696.15768419096  | 0.224736838941303 |
| ATCCTGACTCG | 696.173585042014 | 0.142438075140084 |
| CGCATTCGTCA | 696.175022694323 | 0.239076136289826 |
| GAACATGACAC | 696.226129709005 | 0.311324112248123 |
| CATGAGATGAC | 696.25185552327  | 0.24302804455385  |
| GTGACGCGATA | 696.258057946026 | 0.206202784345613 |
| CTGAAATGACA | 696.286876040035 | 0.281360653190397 |
| AAGGATGACCA | 696.292271923133 | 0.246759200977064 |
| GAGTCAATATA | 696.296265690188 | 0.151461104638218 |
| AGACTAATCAG | 696.309292039222 | 0.346399615067651 |
| AGAGTCAAACA | 696.372278313525 | 0.124743726458538 |
| TGACTCCAAAA | 696.396079289765 | 0.159539652788991 |
| TATGACATTAA | 696.403362155679 | 0.293966833001523 |
| GTACTAATGAC | 696.4143158538   | 0.266141624776577 |
| CAGCTGTGTCA | 696.421566208138 | 0.325211998977649 |
| TAGTCACGGGA | 696.504217652953 | 0.269377203163691 |
| ACTAATGACAA | 696.545473364493 | 0.219449104336885 |
| GGAATTGCTCA | 696.557093822917 | 0.407991988617077 |
| TACCTGACACA | 696.624964124574 | 0.289565277555932 |
| CCATTGACACA | 696.655198175068 | 0.219830159995907 |
| CGAGTAATGAC | 696.687574069051 | 0.281973902317951 |
| TCAGTGACCAA | 696.691175867763 | 0.406054206923952 |
| CCCCTTAGTCA | 696.70983002053  | 0.344652398516949 |
| ATGACTTCGAG | 696.716610953101 | 0.309569381991621 |
| AGTTATGAGTA | 696.720975997838 | 0.19909772865873  |
| GTCATTGTTC  | 696.736914176766 | 0.214375060134824 |
| GTCGTGTGTCA | 696.755109735418 | 0.386050942915224 |
| AAACCGACTCA | 696.756861458881 | 0.332884474760204 |
| ACATATGACCA | 696.835237733501 | 0.279817452106558 |
| GTCACCTCTGA | 696.882934754907 | 0.216469602944077 |
| CTCCGGATGAC | 696.947306413244 | 0.243237427988691 |

|              |                  |                    |
|--------------|------------------|--------------------|
| CACATTCGTC   | 696.97265938674  | 0.214103386823283  |
| CGGCTAGTCA   | 696.981602478737 | 0.259201285872678  |
| GTCATCCAGAC  | 697.003674221027 | 0.257114572421269  |
| GTCATTTATAA  | 697.109667468783 | 0.494688854436167  |
| GTCATACGGGA  | 697.112381290358 | 0.346871906816915  |
| GTCATCAACAC  | 697.156778956503 | 0.227995835424327  |
| CTTAGTGACAC  | 697.186402171396 | 0.270872332081522  |
| AGTTACAGTCA  | 697.2334338771   | 0.333381083098388  |
| GATATGTCAGA  | 697.258222501805 | 0.237966245348863  |
| GTCATATACAA  | 697.28145119916  | 0.291277560121119  |
| GGAGTTATGAC  | 697.360821317427 | 0.260889811086834  |
| ATATTGACTGA  | 697.429544112707 | 0.163039311298821  |
| AAGTCACCTTA  | 697.431442928269 | 0.240349977293932  |
| GCCGATATGAC  | 697.441214769734 | 0.345205712838255  |
| GCTCATATGAC  | 697.448766069068 | 0.283376199545951  |
| AATAAATGACG  | 697.464110608216 | 0.193575173481292  |
| CCGATTAGTCG  | 697.553296750538 | 0.289454598857474  |
| CCGTATATGAC  | 697.58095381884  | 0.43128019890589   |
| ACTCATACTAT  | 697.616726046522 | 0.226265649129052  |
| CTTAAGGTGAC  | 697.691435250473 | 0.486363398910179  |
| GACTTGTACC   | 697.694068722801 | 0.259860460661527  |
| TATATCCGTC   | 697.710137461434 | 0.24925408191908   |
| CGTAAGTGTC   | 697.719030244069 | 0.275109346226504  |
| CACACTGTGAC  | 697.734414299938 | 0.224109814668358  |
| CGCTGTAGTCA  | 697.752759186883 | 0.570233743192993  |
| CACCCGAGTCA  | 697.769308998845 | 0.232641335828491  |
| ATTAATCGTCA  | 697.798038324777 | 0.440603594386666  |
| AGAGAAATGAC  | 697.802768243242 | 0.27151107864443   |
| AACTAATGACG  | 697.805731921399 | 0.360447168930018  |
| GATCACAGTCA  | 697.875233712429 | 0.310248173032073  |
| CCAATGGGTCA  | 697.880506720957 | 0.25422403227899   |
| ATGACATTTTA  | 697.884083819272 | 0.271695384251283  |
| AACCCTATGAC  | 697.88661080653  | 0.191828238800242  |
| GTAACAATGAC  | 698.029602738493 | 0.219484667540813  |
| GCATCTATGAC  | 698.030439200331 | 0.397511426001671  |
| ATAGCAATGAC  | 698.045507672877 | 0.120715148979816  |
| AATGACCACGA  | 698.078438464768 | 0.243985152395892  |
| CAGTGAATGAC  | 698.149012780297 | 0.170519110419085  |
| AGGCAGATGAC  | 698.149018569487 | 0.299415821369663  |
| CAGTAGACTCA  | 698.192088231805 | 0.196511034008225  |
| AGGCTTATGAC  | 698.263292610851 | 0.0533467989940687 |
| ATGTTTTGTCA  | 698.365215545773 | 0.249565860296365  |
| AACCTGTGACA  | 698.400349901847 | 0.449712737034029  |
| CGATTACGCAA  | 698.437399173155 | 0.388645174899397  |
| TACCTGACGCA  | 698.466543135666 | 0.200390063963547  |
| GTCATTTTCGAA | 698.471362675169 | 0.30130529831376   |
| GGCAGACTCAC  | 698.49613404159  | 0.224589648220669  |
| CTTACTGACTC  | 698.534000713468 | 0.213572906238242  |
| GTGACTAGCCA  | 698.564087277304 | 0.285575037156387  |
| AGGGTTATGAC  | 698.568993485342 | 0.302680827260401  |
| CTGGAATGAC   | 698.576159653321 | 0.268187486449954  |
| GCGTCACCTTA  | 698.58579968971  | 0.213425085585214  |
| CTGGATATGAC  | 698.621645036413 | 0.247473796050235  |
| ACGTCACCTC   | 698.633028745435 | 0.227603731989987  |

|              |                  |                   |
|--------------|------------------|-------------------|
| GGTATGATGAC  | 698.635806110863 | 0.268184162179004 |
| CGGAGATGACG  | 698.648513648649 | 0.217282559476617 |
| GCTACTAGTCA  | 698.652598508099 | 0.407194191705003 |
| CCAATATGTCA  | 698.663402013544 | 0.317518229984875 |
| ATGACGCGCGC  | 698.713578170485 | 0.341099880200975 |
| GGCCTGATGAC  | 698.735808675957 | 0.352912703405116 |
| ACGTCATGCAC  | 698.745828832221 | 0.355819400506905 |
| ACGTCACCTAC  | 698.756923113379 | 0.178462358542217 |
| ATTAATAATGAC | 698.795048712474 | 0.295019144091263 |
| ACGATTGGTCA  | 698.844680833971 | 0.363378510112928 |
| AAGGGTGTTCAT | 698.852695158387 | 0.226549178515581 |
| GACTCACTCTA  | 698.852747911216 | 0.208349340297998 |
| ATGAGTTAGTC  | 698.862904156526 | 0.174686681037759 |
| TCGCGGAGTCA  | 698.874463685845 | 0.399022110954487 |
| GTCATTTCTCA  | 698.927552234636 | 0.206111660136788 |
| TGACAAATCCA  | 698.958212274325 | 0.341925179555043 |
| GCGATCCGTC   | 698.992864067512 | 0.381339287996829 |
| GTCATTCTAAA  | 699.019973879597 | 0.361538219131949 |
| AACTATTAGTC  | 699.023784114276 | 0.236233034564547 |
| CAGTTGACTGA  | 699.029256589311 | 0.301498243271441 |
| ATGACCACGTG  | 699.058993420838 | 0.264266180353051 |
| GAACTGATGAC  | 699.092854389105 | 0.177035738812751 |
| ATGACGACTTC  | 699.104663728359 | 0.116302971786956 |
| CCCGAAATGAC  | 699.128483588154 | 0.302546930708362 |
| GCTATCTGTCA  | 699.137570098946 | 0.225788755849638 |
| GGGTCGATGAC  | 699.15325911402  | 0.174259145920092 |
| GTTCTTCGTC   | 699.155520668178 | 0.452804752788124 |
| GTTCCACAGTCA | 699.1713855668   | 0.182257586504963 |
| ATGACCACTTA  | 699.202058905972 | 0.277051101071292 |
| GGCTTGATGAC  | 699.242437918717 | 0.246166616086971 |
| CTACTGACACA  | 699.249193784755 | 0.234694147129853 |
| TAAGTGAATCA  | 699.252916216614 | 0.33466262503687  |
| AATTGGGTCAC  | 699.280926752974 | 0.242651550976925 |
| AAATCAATGAC  | 699.291501958373 | 0.235590255606087 |
| AGGTCTGTTCAT | 699.317822693895 | 0.210659761275148 |
| GGGAAGATGAC  | 699.3431345042   | 0.209487181039732 |
| GACACCAGTCA  | 699.349997257977 | 0.247364082005653 |
| GCCAATATGAC  | 699.350682301329 | 0.439532095212456 |
| CACATAATGAC  | 699.351683852772 | 0.373963605763415 |
| TGACTACTACA  | 699.414114337369 | 0.309108118589829 |
| CGTAAAATGAC  | 699.447144422073 | 0.249623216889702 |
| TAGTAGACTCA  | 699.490474157517 | 0.329164708510102 |
| GTGTGTAGTCA  | 699.526160713164 | 0.258133697900345 |
| AGCAAGTGACT  | 699.52885181959  | 0.221221999068449 |
| ATGAGTGTTCAC | 699.533186981822 | 0.291139681995885 |
| GGCTTACGTC   | 699.551053553301 | 0.412144215168387 |
| TGACGTACTAA  | 699.5592648428   | 0.249030471380652 |
| GACCCTGACTC  | 699.610705404411 | 0.203378162407002 |
| GTCATCAAATA  | 699.610780073462 | 0.255142195665452 |
| AGCGCTGACTG  | 699.623044737457 | 0.391407005421029 |
| GAGTCAGTTAA  | 699.644987351497 | 0.215170543892007 |
| AGTCACGGATA  | 699.731693231264 | 0.168056416938504 |
| GTCAGATCTGA  | 699.840941823099 | 0.31348928518861  |
| CATAATGACAA  | 699.84186561797  | 0.229342838889422 |



|             |                  |                   |
|-------------|------------------|-------------------|
| ACACTATGAGT | 699.868589725276 | 0.279607512118839 |
| GGTGAGAGTCA | 699.872526176131 | 0.226781150199976 |
| AGACTAATTAT | 699.89381369373  | 0.348180513851294 |
| GTGTCACCTGA | 699.908955960819 | 0.256001303621263 |
| CTCCGAGTCAG | 699.910833318806 | 0.162900450959717 |
| AGTCACGGATG | 699.938838785988 | 0.293689388275773 |
| ACCTGGTCATA | 699.9443350825   | 0.325930579628861 |
| TCCACGAGTCA | 699.95254580048  | 0.457018734096131 |
| TGACGTGATCA | 700.025498258316 | 0.317826704766214 |
| GTGAGTCCAAC | 700.091146978968 | 0.212176633833461 |
| TGAATCAGCCA | 700.138641419327 | 0.137110339498908 |
| GTCATCCCTTA | 700.15951398718  | 0.283961495039644 |
| GTGTCACCTAA | 700.160761271838 | 0.216967019159421 |
| TACCTTACTCA | 700.174868558356 | 0.210016886995812 |
| AACCCTGACTC | 700.175043764506 | 0.310075337549703 |
| GATATTGCTCA | 700.204801127211 | 0.251674558861977 |
| ATTTCGTACAC | 700.277285750473 | 0.354823572392202 |
| ACTTTGACTCT | 700.279697809499 | 0.298254014685467 |
| GAGTCAGGCAA | 700.323652807809 | 0.210518678668737 |
| TGACTACGCAA | 700.323934243203 | 0.304715745724774 |
| AAGAGTCTTAT | 700.342892076903 | 0.238477171445132 |
| CTATTTGGTCA | 700.473203848834 | 0.233298704289086 |
| GTCATCTCCTA | 700.475251471108 | 0.267647734746982 |
| CGAGTGACCAA | 700.525242755345 | 0.174383853445214 |
| ACGACTCAGAA | 700.57026651454  | 0.357253562502814 |
| GATCCCAGTCA | 700.581040301613 | 0.305407811549566 |
| GTCATAAACCA | 700.58556662511  | 0.296073237172664 |
| GGACCTAGTCA | 700.631505955746 | 0.287908435973907 |
| AGTAGATGACG | 700.737614138126 | 0.140332996902311 |
| AGTCACGCTTA | 700.739076460547 | 0.319079310730233 |
| AGGGCTATGAC | 700.803670625996 | 0.127982051155962 |
| AAACTTTGTCA | 700.841751280361 | 0.343848167873049 |
| GTCACACCTAA | 700.854259188322 | 0.384429060157248 |
| CTTAATGTGAC | 700.870425783615 | 0.362525406667334 |
| TGACTGGACCA | 700.911798058825 | 0.199089828890828 |
| GTCATTTGAC  | 700.916743292951 | 0.270120334154    |
| CGGCCTATGAC | 700.993822560822 | 0.222257915624569 |
| ACGAGATGACG | 701.031066630843 | 0.276842413296351 |
| TACTGCAGTCA | 701.031613210131 | 0.200065350884492 |
| ATTATTCATAC | 701.049633246244 | 0.178954121696226 |
| TCCTTTAGTCA | 701.05894555328  | 0.493094235258442 |
| GACAGATGACA | 701.084628019292 | 0.271275873724798 |
| GTACATGACAC | 701.121397096589 | 0.328137798098221 |
| GATCTGTCAGA | 701.141952062968 | 0.262651615462922 |
| GTCATATGCTA | 701.183516147776 | 0.360337639067937 |
| GAGCTAGTCAC | 701.335888252158 | 0.153729030337402 |
| GTCATAGGGCA | 701.35900926242  | 0.240769045286747 |
| CTCGTGATGAC | 701.388623706195 | 0.290518061922029 |
| ATGAGATGACG | 701.464800010961 | 0.24100526231409  |
| AGTTGAGTAAC | 701.491039840965 | 0.262311873030354 |
| ATGAGCAAGCC | 701.511736456677 | 0.407088989114904 |
| ATACCGACTCA | 701.516489801725 | 0.129959697589818 |
| ATGATGGGTCA | 701.568757468017 | 0.155167396867817 |
| CCGTTGAATCA | 701.597649562789 | 0.321952807196616 |

|             |                  |                   |
|-------------|------------------|-------------------|
| ATACGTAATAC | 701.697228252071 | 0.153285579432643 |
| CATAAGGTGAC | 701.705713930842 | 0.265053442459608 |
| CAACATGACAC | 701.711631710616 | 0.325774842187868 |
| AGTCAGTGACG | 701.73177525169  | 0.240011156515565 |
| ATCAGTGTGAC | 701.749921974647 | 0.136473216080628 |
| TCATATCGTCA | 701.775456900536 | 0.231597392962009 |
| CGTTGGAGTCA | 701.833131498765 | 0.243330864939634 |
| AACAGATGACG | 701.872411504622 | 0.265962246691632 |
| ACAGGAATGAC | 702.008836791059 | 0.126025100985492 |
| AATATGTCAGA | 702.010138498281 | 0.227478217030358 |
| AGATCTAGTCA | 702.023586000008 | 0.301505665808355 |
| ATGACGTCGAA | 702.03287956304  | 0.233215387776553 |
| ACGACTCAGAC | 702.033515045291 | 0.228448310155501 |
| CAGGGTGTGAC | 702.196943680842 | 0.419324454521584 |
| GACCAAATGAC | 702.235627825727 | 0.311139912075121 |
| AAAGTGGTAC  | 702.296658250747 | 0.276052103801292 |
| CGTCATTCCAC | 702.350171802879 | 0.251826272529196 |
| ACTAGGGTAC  | 702.352630119784 | 0.287006828362206 |
| GTGCAGAGTCA | 702.39295004016  | 0.18210617151029  |
| CTCATCCGTCA | 702.43288094079  | 0.301925109564514 |
| GAACCGGTGAC | 702.454311164368 | 0.280345310108221 |
| GAAGTGCATCA | 702.456906605206 | 0.244736780722912 |
| TGACACACGAA | 702.493533611654 | 0.223650425505014 |
| CTACCTATGAC | 702.508211055604 | 0.157227265854174 |
| CGGGAGATGAC | 702.52917355542  | 0.258677524962634 |
| CACGTGTGACG | 702.568764931    | 0.340460824411818 |
| GTCATTCCTCA | 702.583809451583 | 0.26085987757164  |
| CAGGTAATGAC | 702.685911944729 | 0.303073419099591 |
| CCCATGATGAC | 702.701327032438 | 0.358101651460767 |
| CAGCATGTGAC | 702.733631204871 | 0.232629851265591 |
| ATGACAAAGGA | 702.737908035019 | 0.238671946772605 |
| ATCTGTCAGAA | 702.790126386489 | 0.289504127191046 |
| CACGTCACGTC | 702.888409540255 | 0.231279949140366 |
| ACGTCATGCTC | 702.943907293257 | 0.16438675881533  |
| TACCTGTACAA | 702.94909252621  | 0.163431474412205 |
| ACGTCACCTTA | 702.960355562066 | 0.1774804093042   |
| ATCATTGTGAC | 702.97212996663  | 0.186807620054717 |
| GACCTATGAC  | 702.978069708771 | 0.305991482432081 |
| CGCATATGACG | 702.993506460179 | 0.219110864524294 |
| CGTACAAGTCA | 703.109340173561 | 0.383359469023801 |
| ATGACAACGAA | 703.146292973321 | 0.211539196106249 |
| GAGGGGAGTCA | 703.149775895252 | 0.230625165073506 |
| AGGCTAGTCAC | 703.199090403724 | 0.167597555862675 |
| GTCATTAATAA | 703.202283429468 | 0.226701293028861 |
| ACGTCACATAA | 703.229937393851 | 0.228740855973187 |
| AGGCAGAGTCA | 703.249718532596 | 0.181210021210921 |
| ATTACTGACTG | 703.251071065977 | 0.204558455421565 |
| ACCAGAATGAC | 703.264686795998 | 0.305532110183661 |
| GTGCTCAGTCA | 703.357598898629 | 0.271585827391952 |
| ACCCGGTGACA | 703.362436700293 | 0.536960694203691 |
| GTGTTGTGTC  | 703.36609617377  | 0.301365627806402 |
| CATGAGAGTCA | 703.395380228624 | 0.329439755004362 |
| GATCCGACTCA | 703.453523319653 | 0.331193641818541 |
| GTCACAAATGA | 703.460562439762 | 0.335759567147702 |

|             |                  |                   |
|-------------|------------------|-------------------|
| GTCATCGCACA | 703.49366590296  | 0.218978394487003 |
| AGTCACGCGTG | 703.748652564223 | 0.326769968263841 |
| GCTTTGTGTC  | 703.789586233571 | 0.243244888759176 |
| CTTAAGTGTC  | 703.791180363685 | 0.346904690274893 |
| ATGACTTCGTC | 703.826454399558 | 0.219027177033325 |
| GATTGGGTCAC | 703.854457350272 | 0.275859485724912 |
| GTCCTGCGTCA | 703.863167953352 | 0.28289489170035  |
| ACTGATGTGAC | 703.88074987707  | 0.30606453134018  |
| CCTTGACTAAA | 703.882260080816 | 0.231666775905817 |
| GTCATTATCTA | 703.917481391572 | 0.238045760262917 |
| AGGGCGATGAC | 703.98301053253  | 0.231293137359074 |
| ATGTGAATGAC | 704.00877565064  | 0.246177314256282 |
| CTGCCTAGTCA | 704.018312105079 | 0.332480224902623 |
| CCCAAGATGAC | 704.034321788442 | 0.199255159509336 |
| ATGTCATCTGA | 704.050293392596 | 0.252075790728523 |
| TCTCCGACTCA | 704.071505376287 | 0.153384446556035 |
| GATTGCTCAGA | 704.08925339478  | 0.336957716847187 |
| GACTTGGTCAC | 704.124660245597 | 0.240856722019975 |
| CAGTCAGAACG | 704.188427951638 | 0.321241242761856 |
| AGCGATATGAC | 704.208262496497 | 0.263361294102141 |
| CTGAGTGTGAC | 704.238819789897 | 0.320588367657591 |
| AGTGACATGAC | 704.2675030005   | 0.239971863644611 |
| TACACGACTCA | 704.275925645808 | 0.24708377600164  |
| CTAGGTGTGAC | 704.304263022668 | 0.269843592423525 |
| GAATCGGTGAC | 704.401070315672 | 0.353171154737544 |
| GACCTGACGCA | 704.411863437014 | 0.234364341031446 |
| ATGACAATGTG | 704.419442132051 | 0.242634435839855 |
| AGACTTTGTCA | 704.420404409222 | 0.344277246864438 |
| AAACCTGACTC | 704.452318333538 | 0.267175206692206 |
| AGTCATGAGAC | 704.464687619458 | 0.32065642381948  |
| CGTTGCAGTCA | 704.505002159664 | 0.237078672924027 |
| AAGGAATGACG | 704.5566489739   | 0.239919217144627 |
| GTCATTCTCAA | 704.568195756342 | 0.232252490000642 |
| AGCAGTGACAC | 704.602924502495 | 0.397639737158859 |
| CGATATGACCA | 704.626486240268 | 0.261591228427691 |
| GGGCGTGACTA | 704.635073017736 | 0.242559901233444 |
| AAGGGATGACG | 704.675834280201 | 0.191311574951813 |
| CACCTAAGTCA | 704.75300625933  | 0.402944862291769 |
| CAAAGTGAGTC | 704.836628132827 | 0.313183723586498 |
| ATAAATGTCAT | 704.858571901362 | 0.339428179318919 |
| AATTATGAGTA | 704.895802594675 | 0.220751020732505 |
| ATGAGTCTCCG | 704.911311730256 | 0.285568887789119 |
| GATCACGTCAC | 704.920891256293 | 0.158215682805738 |
| AAAGATGACCA | 704.928301960108 | 0.247658234458597 |
| GTCATCTAAAA | 704.945447792455 | 0.254220882138408 |
| CTAATTACTAA | 704.95830862097  | 0.23031476205284  |
| CGTCACGTGAC | 705.034684059533 | 0.413068814118813 |
| CACCTGACACA | 705.051524879607 | 0.245262389462812 |
| GTCACAGCTGA | 705.06343122548  | 0.242276505816984 |
| TGACTAAAGCA | 705.159005992896 | 0.293300461103527 |
| GTTGCATCATA | 705.202461717659 | 0.190361270308899 |
| GCACAGATGAC | 705.265581296563 | 0.29931912338698  |
| AGACATATGAC | 705.342334121726 | 0.317997508836197 |
| GGACTTATGAC | 705.430395130751 | 0.279887208026456 |

|             |                  |                   |
|-------------|------------------|-------------------|
| CAGATAAGTCA | 705.440039996952 | 0.329631725359628 |
| GAAGGGATGAC | 705.448614444392 | 0.175636716746491 |
| ATGGATATGAC | 705.460722238529 | 0.266307240882721 |
| GACTAATCATA | 705.467576703397 | 0.192788759279132 |
| TGACTCTGTAA | 705.487740208568 | 0.32328994901345  |
| CCTGTTATGAC | 705.591757985658 | 0.345056043050857 |
| AGTCACTTCGC | 705.643877763198 | 0.187076388913012 |
| TGACAGATGCA | 705.7132938957   | 0.169894865655889 |
| ACGTCACCCGA | 705.714177882352 | 0.314794605606276 |
| ATGACAGCGTG | 705.822607976242 | 0.228926340096163 |
| GTCACACACAA | 705.898853454455 | 0.230355881926832 |
| GCGTCACCACA | 705.90915911538  | 0.233000559576048 |
| TCGAAATGACA | 705.971759386338 | 0.226724283908909 |
| GCTTATATGAC | 705.979992533563 | 0.319777687990037 |
| CACCGAGTCAG | 706.011949386567 | 0.440024459535335 |
| CTGGAGATGAC | 706.055801553536 | 0.12152318134338  |
| GAGACGTCATC | 706.228677951286 | 0.214423017214977 |
| CAACATGTGAC | 706.252157432239 | 0.300926402733011 |
| GAAAAGTCATA | 706.297597776451 | 0.23674570539605  |
| TAATTTGGTCA | 706.314906404315 | 0.289806537531409 |
| AATCATGACGC | 706.390031919531 | 0.210781448511229 |
| ATCCGCGTCAC | 706.423322591745 | 0.197313164641205 |
| ACGTCACCTAA | 706.444021581094 | 0.240031982989515 |
| ATCTGTGTGAC | 706.507657389491 | 0.284463293939745 |
| CTAGGAATGAC | 706.527503159784 | 0.277659159900486 |
| AATTCAGTCA  | 706.535522178056 | 0.202942139092833 |
| AGAACAATGAC | 706.548432383667 | 0.296287808579854 |
| ACACTGAATCA | 706.565435281807 | 0.225403616172288 |
| GATCGAATGAC | 706.567311847676 | 0.297306379863418 |
| AGCTTGCTCAT | 706.589414375565 | 0.248971460299479 |
| AAAAGTGTGAC | 706.605036214738 | 0.22416821542386  |
| CCAAGTCATCC | 706.652970986966 | 0.237421948344357 |
| GTCATAGACGA | 706.717690070071 | 0.397570647601539 |
| GTCATCATAAA | 706.725882529747 | 0.212978860654844 |
| GTCGTGCGTCA | 706.760533304899 | 0.165100386744385 |
| GAGTTTATGAC | 706.777031364245 | 0.130568316812319 |
| CGTCATTCGTC | 706.818527598848 | 0.203387350560526 |
| AGTCAGAGCTG | 706.854895346164 | 0.253056808887529 |
| ATGAATCAATG | 706.86030845383  | 0.269871608996827 |
| ATCGTGACCCA | 706.884873961806 | 0.203275126189777 |
| AGTATAAGTCA | 706.934545829925 | 0.238818491868845 |
| AGTTCTGACTG | 706.988278720697 | 0.294210164166576 |
| GTGGGGAGTCA | 707.145191846466 | 0.157521923495237 |
| GCAGTGATGAC | 707.197882425661 | 0.249719961780376 |
| ATGACTTCGAC | 707.208855325322 | 0.319601202073567 |
| CGGATTGCTCA | 707.211012767391 | 0.37120759347345  |
| CTTACGGTAC  | 707.222836052632 | 0.359215291133915 |
| GTCATCAGGGA | 707.286089331847 | 0.227334751176441 |
| TCGTCATGTCA | 707.300393732238 | 0.159344616383173 |
| ATGACCGAATA | 707.374717639648 | 0.303437847756867 |
| ATGACTTCGAA | 707.421758329189 | 0.362463438221079 |
| GTCATACGCCA | 707.428257134561 | 0.236429110305176 |
| AGTCACGGCAC | 707.436884810802 | 0.272867694596489 |
| ATGACGCCTTG | 707.455939812333 | 0.227732858705842 |

|              |                  |                   |
|--------------|------------------|-------------------|
| ACATGTGACGT  | 707.467812526581 | 0.268221286932417 |
| GGACATATGAC  | 707.476058803918 | 0.224144308996206 |
| GTCATTCAACA  | 707.548149067919 | 0.309276917330027 |
| CTCGATATGAC  | 707.592952504148 | 0.106705345198777 |
| TAAAGTAGTCA  | 707.624325635574 | 0.332091655899993 |
| ATTGCTCAGAG  | 707.67772785433  | 0.343706259957556 |
| GCGCGTGACTA  | 707.679722883463 | 0.216084203812314 |
| AGAGTGACCAA  | 707.694774826648 | 0.255281340367475 |
| GATCGGAGTCA  | 707.724116077729 | 0.28864961863859  |
| AAGGTGATGAC  | 707.727026320572 | 0.179691344176408 |
| ATGATGCAATC  | 707.740997476656 | 0.329971094925967 |
| GTGTCACGAAA  | 707.746956192869 | 0.355738670263892 |
| CGTCATTACTC  | 707.750116509274 | 0.226090609873739 |
| AACGTTATGAC  | 707.839273139298 | 0.282872350116978 |
| CTGACTCGCAC  | 707.869010133491 | 0.154309885914823 |
| TAGGTGAATCA  | 707.874648361242 | 0.134728134879839 |
| ACCATGACTGC  | 707.893826875025 | 0.197793659453103 |
| GAGAGAATGAC  | 707.894275703635 | 0.181960815414102 |
| ACGGGTGTCAT  | 707.932382036504 | 0.212138829302412 |
| CGTCATCAATC  | 707.957238752307 | 0.281054268655754 |
| AGGGGTGTCAT  | 708.034343419835 | 0.224426415352338 |
| ATGACGGCATC  | 708.043349621561 | 0.258589103023715 |
| ACGACGGTGAC  | 708.044020899068 | 0.24886799843968  |
| CGAGTCAGGCA  | 708.097353860235 | 0.342449516751002 |
| ATGACCATATA  | 708.129547766308 | 0.214734661018838 |
| ATGACAACGCG  | 708.143918892031 | 0.194068455260932 |
| GATGAATAATC  | 708.159682540213 | 0.138392023417583 |
| TAGTGTGACCA  | 708.175156278209 | 0.248451137363445 |
| ATGAGATGACA  | 708.233292520379 | 0.260399411466216 |
| ATGACGTGCTG  | 708.254883112128 | 0.230089986986864 |
| CGTCATCCCGA  | 708.287672047028 | 0.248605906113747 |
| CACAAGGTGAC  | 708.291751149383 | 0.442568290529456 |
| TATTGACTGAA  | 708.295200695459 | 0.161840391214003 |
| ACCTAGAGTCA  | 708.33398686392  | 0.530151692036571 |
| AGGGTGACCCA  | 708.394685479326 | 0.231577245231455 |
| GTCATAAGCGA  | 708.438454290451 | 0.276818140127639 |
| TACTATAGTCA  | 708.492312077909 | 0.206869810447574 |
| CAATGGAGTCA  | 708.531503908136 | 0.307689900770907 |
| CTCGAGATGAC  | 708.595888169545 | 0.297159765098464 |
| ATGACAGCGAC  | 708.604233532217 | 0.203501507196252 |
| ATGATAAGTCA  | 708.673852358198 | 0.230075006214245 |
| GTCATATAGCA  | 708.687317474227 | 0.278203566901965 |
| AGACTAATAAAA | 708.691399931968 | 0.276347715920016 |
| AGTATCGTCAC  | 708.72183611012  | 0.195380600801491 |
| AGGCATGACAC  | 708.763625035838 | 0.228163261619436 |
| ACAACGACTCA  | 708.763976930878 | 0.241944794961876 |
| TCCTAGACTCA  | 708.804698004963 | 0.293316558150814 |
| GTCACAATCTA  | 708.842195047639 | 0.36531060111491  |
| GTCATTCCATA  | 708.842679276551 | 0.393079601253164 |
| AGCAAAATGAC  | 708.85387882935  | 0.124930801125876 |
| ATGACAGTGCC  | 708.874132414317 | 0.269565924337721 |
| ATGACACCTTA  | 708.883727742673 | 0.199683087062413 |
| GTCATTCAATA  | 708.89020439009  | 0.219490275905706 |
| ATCCAATGACA  | 708.906971753893 | 0.134230421358184 |

|             |                  |                   |
|-------------|------------------|-------------------|
| ACGCAATGACA | 708.963857828722 | 0.236488431948954 |
| ACCAATATGAC | 709.086112039496 | 0.266626569594943 |
| GCAGACTCACC | 709.126407964519 | 0.24218365255547  |
| CCACTTATGAC | 709.126797460582 | 0.32145431313108  |
| CGTCATTGGTC | 709.160314717506 | 0.17070368566148  |
| CTCGTTACTCA | 709.183413221761 | 0.196194326195183 |
| GTTACTCAATA | 709.293651002356 | 0.271763240774279 |
| GTCATCTCGGA | 709.302269517175 | 0.377574713546234 |
| TGTCATTAGAA | 709.310714971347 | 0.272187820010541 |
| TCTTGTACTCA | 709.371752924123 | 0.246303760547205 |
| TGTCATCTGAA | 709.446812268901 | 0.277845365854057 |
| GGTTGTAGTCA | 709.56171492418  | 0.244823413473821 |
| ATGACAGTAGC | 709.582725790803 | 0.190966147653957 |
| GTCATATGCAC | 709.654089182676 | 0.227173472675435 |
| ACGTCACTGCT | 709.664991722712 | 0.207503873069713 |
| GTCATAGAGAC | 709.682829699484 | 0.300913675645793 |
| ATGACCCTGA  | 709.689385471554 | 0.237304792502477 |
| AGTCACGACAC | 709.695997397442 | 0.30889617978801  |
| TGACGGTGACA | 709.755574500139 | 0.26695843358499  |
| AACACCAGTCA | 709.760837387277 | 0.364583186906273 |
| CAATAATGACA | 709.80067197467  | 0.232875248346969 |
| ACCTAAGTGAC | 709.931980951275 | 0.426471877178931 |
| CGTATTGACTC | 709.933638676308 | 0.28770395684301  |
| TCGACATGTCA | 710.029279524702 | 0.259781725754055 |
| AGACTCACTTC | 710.04638653306  | 0.210768923853594 |
| GACCATGTGAC | 710.067098981515 | 0.322688781593089 |
| AAGTAGATGAC | 710.069243742962 | 0.172149416105079 |
| CCAACGACTCA | 710.082143518159 | 0.221337497511118 |
| CGTCATTAGCA | 710.094891655159 | 0.131619917088947 |
| ATCGAGATGAC | 710.133665236537 | 0.149354686629786 |
| AGTACAATGAC | 710.195221228677 | 0.297360475377853 |
| GTCATATTGAA | 710.196364670423 | 0.345236757529437 |
| TGATTCAACCA | 710.234976520375 | 0.256326910748378 |
| AGTCAGAGCCC | 710.273500995867 | 0.196459836881934 |
| CAATTTTGTCA | 710.292165025655 | 0.169536532330058 |
| AGTCAGACCTG | 710.316560516551 | 0.310296743640765 |
| TACCTGCGTCA | 710.320034244923 | 0.256331192550029 |
| AGATCCAGTCA | 710.409416826722 | 0.235159586421923 |
| GTTCCGAGTCA | 710.447174118952 | 0.220206206679289 |
| AAACATGACGT | 710.467899656538 | 0.261250876739049 |
| GTGTCCAGTCA | 710.48430116559  | 0.443027951852785 |
| CGGCGGATGAC | 710.559071585659 | 0.25929520500772  |
| ATCTTGATGAC | 710.617583116717 | 0.281651502813739 |
| GTCATCAAGAC | 710.628769256675 | 0.28372199088866  |
| CCTAAGCGTCA | 710.639578520879 | 0.46258137870242  |
| ATCCTTGTGAT | 710.717573143323 | 0.211428342348371 |
| AGCGTGACGTG | 710.785577968866 | 0.20128804352482  |
| ATTACGCAACA | 710.817867372396 | 0.336742071931649 |
| ATGACATCTTC | 710.825481391532 | 0.272899865420903 |
| CGTTCGGTGAC | 710.829957155314 | 0.358185984280578 |
| GGTGATATGAC | 710.870807777203 | 0.123305009250259 |
| ATACGTGACAC | 710.905634175331 | 0.33947007816023  |
| GTGATTCAATA | 710.934778509752 | 0.1962057342037   |
| AAAAGTGACGT | 710.961350800791 | 0.164486991602951 |

|              |                  |                   |
|--------------|------------------|-------------------|
| GACAGTGAGTC  | 710.972435296392 | 0.225568464565348 |
| GATCCTAGTCA  | 710.989609806067 | 0.188019758025809 |
| AAACGTGACGC  | 710.999438262769 | 0.205697499010182 |
| ACCGTGAATCA  | 711.016198520152 | 0.10563173563806  |
| ATGACTTTTAC  | 711.025768956922 | 0.246508356381677 |
| GATGACAGCGC  | 711.097668593683 | 0.226122545503652 |
| GACTTTGACTC  | 711.103270269865 | 0.300530023235292 |
| GGTTACAGTCA  | 711.118392884618 | 0.298252386854477 |
| GTCATTATTGA  | 711.129559790156 | 0.312493676386801 |
| ACGAAATGACG  | 711.131476663077 | 0.266626325519845 |
| TGACCAATCCA  | 711.136191388109 | 0.291819891970721 |
| GGATCGACTCA  | 711.150898624884 | 0.476728854920549 |
| ACCATATGACG  | 711.228706267116 | 0.210877915341852 |
| CCCATGACTGC  | 711.251417233693 | 0.227289728801587 |
| ATAACGGTGAC  | 711.273860987937 | 0.396750158668366 |
| GACAGTGTGAC  | 711.3085171591   | 0.225169457747114 |
| GTCATTAACAC  | 711.334856171959 | 0.367934895483837 |
| GTCACACTAGA  | 711.358570809805 | 0.22483997882704  |
| AGTGACGCCAT  | 711.384803544246 | 0.130129498165868 |
| CGGCTGATGAC  | 711.386382892612 | 0.349139909522049 |
| CGTTGTGTCA   | 711.423916456854 | 0.320076393478679 |
| CATGACTTGTA  | 711.451785094405 | 0.31951325520758  |
| GGTCTGATGAC  | 711.562995980391 | 0.346291821648938 |
| AGACTAATTAA  | 711.578637601138 | 0.20648949571129  |
| ATGAGAATGAC  | 711.629703308355 | 0.321116311117505 |
| AAGGATATGAC  | 711.640624114505 | 0.210024437657951 |
| AACCATGACAC  | 711.660215518633 | 0.205989901522103 |
| ACGGTCATGAC  | 711.721334023432 | 0.195683872179659 |
| TGGGTCACTAA  | 711.761055667349 | 0.305400979217832 |
| AGTCACGGAAT  | 711.774934966407 | 0.176788064123777 |
| CGAAGTGAGTC  | 711.798688109619 | 0.280396817028442 |
| AGTTAGATGAC  | 711.809880416775 | 0.271804529476863 |
| ATGACATTGAC  | 711.843418048286 | 0.192629640377146 |
| GTCCAAGTCAC  | 711.891719584201 | 0.292633006388766 |
| AACTAATGACA  | 711.936006546455 | 0.28986926115668  |
| TACAGATGACA  | 711.941934014218 | 0.250284481991857 |
| ATGAGCAACTC  | 711.991485712645 | 0.130321642858667 |
| CCCAGGATGAC  | 711.999710814767 | 0.250774076255051 |
| AGACAGATGAC  | 712.005814604257 | 0.229306724972849 |
| AGTCTTATGAC  | 712.021584956235 | 0.458149262983716 |
| GGATCCAGTCA  | 712.048529764716 | 0.416742898702895 |
| CGCACGACTCA  | 712.128493276201 | 0.287855339046083 |
| GACTATTAATC  | 712.168234364659 | 0.159322645427809 |
| CATGACATGAC  | 712.169474939817 | 0.151904835986    |
| AGTCACGCGCA  | 712.170483392552 | 0.260984874019908 |
| GTCATAAACAC  | 712.176957262269 | 0.455309565452339 |
| AACGAGATGAC  | 712.177477071011 | 0.309805629544723 |
| CTGACTCGGAA  | 712.227096117307 | 0.213380418032407 |
| GTCATCCCAGAA | 712.309607720756 | 0.189126994016788 |
| CGTCATTACGA  | 712.424291453179 | 0.274563141723407 |
| GATATTGTCAC  | 712.463782710991 | 0.251672983325815 |
| ACGTCACCCCT  | 712.47186151685  | 0.187422910215436 |
| GATGCAATGAC  | 712.476152494727 | 0.418241482660541 |
| AAGTTGATGAC  | 712.495806721009 | 0.156924347268342 |

|              |                  |                    |
|--------------|------------------|--------------------|
| CGGCACGTCAC  | 712.502955575289 | 0.288346087418816  |
| GTCATAGAATA  | 712.551278415762 | 0.26047117100224   |
| GTCATTGTCGA  | 712.575152984744 | 0.257868161267774  |
| GCTTTGCGTCA  | 712.599911246157 | 0.271645620457301  |
| GAGTCAGGTC   | 712.609169372008 | 0.302646147082923  |
| AGTCAACGTC   | 712.672367860964 | 0.307130475778883  |
| TCATATGACCA  | 712.793173432064 | 0.249987334060943  |
| GCGCACAGTCA  | 712.834967309892 | 0.343984940335477  |
| CGTCATTACAG  | 712.859585221493 | 0.207248267499593  |
| CGCTCGATGAC  | 712.936506870718 | 0.226388486268009  |
| CCGCGGATGAC  | 712.948448840866 | 0.456966703038728  |
| ACATAAATGAC  | 712.952901630938 | 0.29296256362185   |
| AACGATTAGTC  | 713.010793398711 | 0.250767846735807  |
| ACGTCACCTCGA | 713.032445115824 | 0.146301086198007  |
| CAAATCGTGAC  | 713.065502085504 | 0.433779848842724  |
| TCGACGTGTCA  | 713.118036543941 | 0.229682985911259  |
| GCGCCTATGAC  | 713.130425213173 | 0.276896813293903  |
| CGTCATCTCAG  | 713.140249166844 | 0.286452206035667  |
| AGTCACTACGC  | 713.155136757556 | 0.213078438407394  |
| ATTGCGTGTCA  | 713.215374390862 | 0.305124891826346  |
| TGGTCATCCAA  | 713.261363558935 | 0.223354906234193  |
| ATCTGCAGTCA  | 713.264548965592 | 0.252222176611726  |
| TGACATGACAA  | 713.331098835699 | 0.251707667520382  |
| ACAGGTGACGT  | 713.335465776517 | 0.292599919315171  |
| AAATCGGTGAC  | 713.373513563666 | 0.261164367138305  |
| CATGTGTGACG  | 713.394205060748 | 0.221990616361916  |
| GTTCCGACTCA  | 713.395943624967 | 0.302887148867405  |
| CCTCTTCGTCA  | 713.399859759698 | 0.248592185412128  |
| GTCATCGGGTA  | 713.423441711253 | 0.16840388382625   |
| GTCATCACCCA  | 713.426628150283 | 0.287490745720987  |
| GTCATTGATGA  | 713.444339645175 | 0.269216100329419  |
| AGGACGACTCA  | 713.448180530145 | 0.291526104514367  |
| CTCCCTATGAC  | 713.45726017227  | 0.284573377539541  |
| GTGACGAACAC  | 713.463324485583 | 0.33293038803644   |
| ATGAGTAGGTC  | 713.517068453322 | 0.256567281447075  |
| CGTCATTGGTA  | 713.534446973486 | 0.253133222250193  |
| CGTCATTGGAG  | 713.540095755009 | 0.248045404944946  |
| TGAACTTGTCA  | 713.550227403524 | 0.220495375423545  |
| TCTGAGAGTCA  | 713.577138205281 | 0.0829183343703675 |
| TGAGTCGAGCA  | 713.601479813173 | 0.229747003978576  |
| GTGTAGACTCA  | 713.611185351678 | 0.28547719311466   |
| AGTCCTGACTC  | 713.633572057436 | 0.242169904491889  |
| ATGACAAGACC  | 713.661591044207 | 0.226711294361835  |
| CAAAGTACTC   | 713.682161867184 | 0.144577690642292  |
| CCCCTATGAC   | 713.717349630674 | 0.242077182537109  |
| CTGACTCGGTC  | 713.720061632824 | 0.255441141418106  |
| ACCATAAGTCA  | 713.779067918748 | 0.307122072409119  |
| GTATGACCTCA  | 713.797952878951 | 0.177888706470127  |
| TCGCATAGTCA  | 713.807640535039 | 0.321145399230763  |
| TCACTGAGTAA  | 713.825457261446 | 0.291019520074951  |
| ATTTTCGTCAGA | 713.966567155002 | 0.158518416150215  |
| TCGATGAGCCA  | 714.041030284049 | 0.238572393525016  |
| CGACTCACGTA  | 714.082495173006 | 0.26586376006943   |
| GTGTCATGTAA  | 714.096441800594 | 0.397282205437789  |



|             |                  |                   |
|-------------|------------------|-------------------|
| ATGACGTGAGA | 714.105391020317 | 0.20939218373489  |
| ATTTGATGACG | 714.120914710214 | 0.360879462387521 |
| GTCATTGCGCA | 714.136764947308 | 0.298812134142282 |
| TGAATGAGCCA | 714.157671182613 | 0.240762052454947 |
| CCCTTCAGTCA | 714.159864942952 | 0.174255230168793 |
| CCGGTAATGAC | 714.176754787416 | 0.397122002884647 |
| GTAAGTGTGAC | 714.252052902889 | 0.267458802749173 |
| GTCCAATGACA | 714.337928478086 | 0.276715393703297 |
| AATCGTGTGAC | 714.340609906299 | 0.18269037360802  |
| CACGGTGTGAC | 714.363619594777 | 0.347397526682152 |
| GCGAGGATGAC | 714.370482537903 | 0.218128605556132 |
| ACCAGATGACG | 714.401993674819 | 0.163438594274138 |
| GTCATTCTAAC | 714.416079566941 | 0.280135759524755 |
| GTCATAAGCAA | 714.486130528785 | 0.405952675829333 |
| AACTAGAGTCA | 714.525836348182 | 0.208161532410247 |
| ACCACGAGTCA | 714.567081472448 | 0.262639147993897 |
| ACGTCACCGGG | 714.576025801449 | 0.211386129887165 |
| ATATGTGTGAC | 714.586221278345 | 0.28246480997103  |
| GCGACAATGAC | 714.605089274128 | 0.334437881925917 |
| ACTAATGTGAT | 714.755291014671 | 0.318979593590964 |
| CAGTCATGGGG | 714.766222866991 | 0.178837506925877 |
| TGAGCAAATAA | 714.768716437002 | 0.208235403119879 |
| CACTACAGTCA | 714.772087795853 | 0.436574369628304 |
| ACTCATACGTG | 714.796601992285 | 0.258937600496221 |
| CTCACAGTCA  | 714.832024847305 | 0.23927188301643  |
| TAATGGAGTCA | 714.872618107776 | 0.230084120889627 |
| ATGACCACGAG | 714.935849266328 | 0.140422642741887 |
| AAATTCGTCAA | 714.936989618996 | 0.219514491271093 |
| TGAGTAAGGAA | 714.946496242719 | 0.233312905639135 |
| AGGGAATGACG | 714.986047064949 | 0.211078917697008 |
| TGACGGATCCA | 714.993949038437 | 0.284856030067824 |
| GAGTCAATGGC | 715.015850612265 | 0.154107087626141 |
| CTTTGACTGAA | 715.04098841724  | 0.289311564472628 |
| ATTAAGATGAC | 715.100845311931 | 0.181082168702963 |
| GACGTTATGAC | 715.10834217894  | 0.13913924484381  |
| GAGTCAATATC | 715.119731448414 | 0.189828378568114 |
| GGACTGATGAC | 715.125593014197 | 0.297513479540006 |
| ATACGCATGAC | 715.147775358483 | 0.336634031069207 |
| CAAAATGTGAC | 715.177078363977 | 0.261379903651741 |
| TAGTCTAGTCA | 715.245988343449 | 0.15007639117553  |
| GTCATTCGAAA | 715.247271302983 | 0.232034963373911 |
| CATCTGAATCA | 715.294668197573 | 0.224369589917362 |
| ATGACGCCTGA | 715.303661400439 | 0.194158649216031 |
| GAATAGATGAC | 715.316529410568 | 0.201600631990673 |
| ATACATGACAC | 715.346006889116 | 0.27344988695181  |
| GACGCAATGAC | 715.351482006381 | 0.1979014069027   |
| AATGACGGCAT | 715.459347195767 | 0.364811995072198 |
| GGTCGTATGAC | 715.473585432661 | 0.341657896679794 |
| ATCCAGATGAC | 715.477986094986 | 0.426836810344426 |
| AAACATAGTCA | 715.496983702097 | 0.446436818915674 |
| AAGTCACCTG  | 715.620478167615 | 0.231119166038508 |
| ACGACTCAGAG | 715.624008607312 | 0.234343607065936 |
| GCGTCCAGTCA | 715.697808432352 | 0.247528984742019 |
| GTCACACCATA | 715.765558876531 | 0.3023530294273   |

|             |                  |                    |
|-------------|------------------|--------------------|
| AGACCGACTCA | 715.76713163015  | 0.137259595140884  |
| ATGAGTAGTAA | 715.805973418499 | 0.242320091265052  |
| CGCGATATGAC | 715.807026572778 | 0.345241155868957  |
| TACGTGAATCA | 715.854800986771 | 0.201374173912396  |
| GTCATAGAGAA | 715.974347912967 | 0.122746763316277  |
| ACATAATGACA | 716.031533559575 | 0.240946731620315  |
| GTGACGCGACA | 716.064802011989 | 0.236128601492866  |
| TGACGAGTAAA | 716.110591052483 | 0.315518956268238  |
| AACAATTAGTC | 716.125427866975 | 0.0766943437467412 |
| GTATAAATGAC | 716.146006596291 | 0.253634866963521  |
| CGAGGTGTGAC | 716.153176347772 | 0.235890684641652  |
| ATTATAATGAC | 716.168914915954 | 0.0861085916012172 |
| AATGACGTCGT | 716.207470721034 | 0.2193880477951    |
| GTCATCCCAC  | 716.273263213859 | 0.241872097744296  |
| GTCACCGAATA | 716.295784725775 | 0.283548148386274  |
| ACTACGTGTCA | 716.353394081314 | 0.295411817551955  |
| AATGACTGATG | 716.356742038851 | 0.51502997463142   |
| CCAGTGACGAA | 716.402379785485 | 0.256094824306716  |
| CGTCAGTGACA | 716.420652865355 | 0.446068731371754  |
| GAAATGTCATC | 716.552464961647 | 0.1879563538992    |
| ATGACTTGACG | 716.562635989148 | 0.239739490628082  |
| GCTATCCGTCA | 716.598898553219 | 0.325137767598464  |
| CTTTGTGTGAC | 716.646379651691 | 0.385466722066291  |
| TGAGTCTGAAA | 716.711541733783 | 0.208237451161059  |
| AAAGATTAGTC | 716.736305377602 | 0.321374676247753  |
| CGTTATGTGAC | 716.739378729494 | 0.364721989357942  |
| TACGTGTGACA | 716.770050018207 | 0.129763465578213  |
| GTCACAGTCGA | 716.775042874357 | 0.287253712625879  |
| CAGCCGAGTCA | 716.786184519451 | 0.323311707346838  |
| AAGAGATGACA | 716.889356050103 | 0.183101824655203  |
| GTGACGCCATA | 716.893667244623 | 0.218544425892381  |
| GAGGATATGAC | 716.914933541411 | 0.206473691219006  |
| ACCGTTATGAC | 716.921693786689 | 0.243936483175874  |
| GAGAAAATGAC | 716.931628124452 | 0.302267996755571  |
| GAGTCAATACC | 716.944491414704 | 0.271130425667192  |
| AGTGACGTGCC | 716.98858475303  | 0.13727647054199   |
| AGTGTCATGGG | 717.068000047906 | 0.243155476306276  |
| AGACTCACTAG | 717.108304976161 | 0.24071042074508   |
| ATGTATGTGAC | 717.113754349125 | 0.271514983523087  |
| CACCTGATGAC | 717.274811875787 | 0.255453946122933  |
| CCCTAGATGAC | 717.298850380595 | 0.277522661869852  |
| ATTTTGTGAC  | 717.325307040937 | 0.279568172368419  |
| AGACGTGTGAC | 717.440834440961 | 0.397659466949673  |
| GCATAGTCAGA | 717.479657370649 | 0.307796491530039  |
| ACAAATGACAT | 717.487959768336 | 0.360160706245695  |
| CGTGATCATTC | 717.549171438823 | 0.21230303712638   |
| AATGTGTGACG | 717.554835947556 | 0.189993500396018  |
| AACTTGACTGA | 717.557437674482 | 0.431118156584863  |
| AGTCATGAGAG | 717.581688046864 | 0.158882877235011  |
| CTTAAGCGTCA | 717.687898039528 | 0.438117725608449  |
| GACAGTGTGAC | 717.699184946494 | 0.303346285274298  |
| GCACTGCGTCA | 717.708959791475 | 0.426425282447362  |
| CGATGCAGTCA | 717.826778999859 | 0.339175250251128  |
| AGGTGTGTGAC | 717.829819108734 | 0.208508634534734  |

|              |                  |                   |
|--------------|------------------|-------------------|
| GTCACATTACA  | 717.890786338344 | 0.237387956048672 |
| ATTCAGACTCA  | 717.891888467423 | 0.330489980469141 |
| GCGTCACTGAC  | 717.893301125069 | 0.198177641148025 |
| GTGGCGTCACA  | 717.933312017011 | 0.214692573760167 |
| CCAACGGTGAC  | 717.956331978298 | 0.113733196909721 |
| CGCTAAATGAC  | 718.006333221066 | 0.346405817004187 |
| CGTCATCAAGC  | 718.044394173865 | 0.119930490352166 |
| ACTAGAATGAC  | 718.087718800205 | 0.21825919923527  |
| TGACTACGAAA  | 718.098041367345 | 0.395545481492832 |
| GTCATCGTAGA  | 718.115805883782 | 0.199907903461765 |
| CATTATGACCC  | 718.195152611095 | 0.228212910443642 |
| ACACATGACAC  | 718.212857955464 | 0.210430008040122 |
| ACGAGTCAAAA  | 718.242543923133 | 0.241804832815206 |
| ACGTGTGACAA  | 718.243575852389 | 0.105807841923745 |
| AGTCAGAGTAA  | 718.333784549978 | 0.173406657550298 |
| CATTGACTGAA  | 718.346730093425 | 0.195898688162697 |
| ACGCAATGACG  | 718.36539504507  | 0.229831840393551 |
| ACGATTACGCA  | 718.395561231819 | 0.196707515520287 |
| AGCGCTATGAC  | 718.400539413019 | 0.30495803893082  |
| AGAGATGACAT  | 718.441190843866 | 0.178660650157643 |
| AGTGAAATGAC  | 718.465695785135 | 0.245144093477287 |
| ACCCTGACTCG  | 718.474377918291 | 0.199034534584731 |
| ACCTTTAGTCA  | 718.487985594861 | 0.32374845455318  |
| ACTCATTGACT  | 718.503125490165 | 0.281878816935848 |
| GTGTCATGGAA  | 718.566950131783 | 0.213559024898432 |
| GATGACTTTTA  | 718.576860163503 | 0.406204830573215 |
| CTGACATGACA  | 718.666758708492 | 0.43676472302273  |
| AGCCTGTGATA  | 718.673153055948 | 0.259013257130533 |
| GTCATTCGCAA  | 718.722760533735 | 0.267549974610243 |
| AGGCTGTGTCA  | 718.846048327161 | 0.281330202449624 |
| CCGATGGCTCA  | 718.915787971274 | 0.359922445769168 |
| CTCTTTAGTCA  | 719.005242345108 | 0.285551518804481 |
| GGTGGCTCACA  | 719.041702450315 | 0.277117779955031 |
| AGGCACAGTCA  | 719.052236951539 | 0.296543849564571 |
| GTCATCTTGGA  | 719.114155457595 | 0.265192757274692 |
| ACTCATTCTGA  | 719.136620282505 | 0.18303126259232  |
| ATCATTTGTCA  | 719.160249820451 | 0.28129537282114  |
| ATGACCCTTC   | 719.163221775442 | 0.141379006697627 |
| GTGACACGACA  | 719.168116821088 | 0.222480686162935 |
| GTCATCACAAAC | 719.208463344573 | 0.263852791934081 |
| AGACCTGTGAC  | 719.246029005395 | 0.334710383013394 |
| AATATTGTAC   | 719.314368896835 | 0.341688155600042 |
| AGTCAGACTGA  | 719.317073672221 | 0.211187906591792 |
| ACTCTTCGTC   | 719.326015094598 | 0.160939775309741 |
| AAACCCAGTCA  | 719.41677784159  | 0.267712881857622 |
| ATATCGCGTCA  | 719.426420524059 | 0.213756921374251 |
| ACGGGATGACG  | 719.481543375175 | 0.20484087370222  |
| AATACGTAATC  | 719.502626974035 | 0.269890695139658 |
| GTCATCCAGAA  | 719.503188305797 | 0.140227451499088 |
| ATTTGACTCGA  | 719.543577696114 | 0.248804143319599 |
| ATGAGTGAGCC  | 719.556424549184 | 0.188258591933232 |
| AAAGTGTGACG  | 719.619768074405 | 0.196630733246239 |
| GTCACAATTGA  | 719.626047411575 | 0.259099333805967 |
| ATTCTAATGAC  | 719.687532436297 | 0.180768495404981 |

|              |                  |                    |
|--------------|------------------|--------------------|
| CTATAGTGCA   | 719.73700891924  | 0.215382918894618  |
| AGAGTCAAGTC  | 719.76559539705  | 0.133808753037052  |
| TCTGATGACCA  | 719.88375768727  | 0.313477232534429  |
| TCACTGTGACA  | 719.884886062311 | 0.348870789169855  |
| AATACGGTGAC  | 719.893231090735 | 0.303850234826027  |
| ATCGTGAGTCG  | 719.956751803681 | 0.246188414053375  |
| ATGACTTGATC  | 720.003475369024 | 0.30709960974781   |
| AATCGGGTGAC  | 720.004434241177 | 0.240035598195873  |
| GACTCACTATA  | 720.012634048835 | 0.0902810479810538 |
| TATGACAGCCA  | 720.055950630325 | 0.260225729014786  |
| GTGACCCAATA  | 720.06776109915  | 0.149935154145785  |
| CGCTTGATGAC  | 720.087778786599 | 0.137961624091728  |
| GTCACACTAAA  | 720.119451076518 | 0.184301682899283  |
| CAACCGGTGAC  | 720.140258422564 | 0.330058325940037  |
| AGGTCAATGAC  | 720.208853919285 | 0.238055758014081  |
| AGACACGTGTC  | 720.264007333444 | 0.351432645135866  |
| GTGTCACATTGA | 720.287147610559 | 0.300866408974063  |
| ATGAGCAAGTG  | 720.293860927414 | 0.255366060787261  |
| GCCTAATGACA  | 720.345961503699 | 0.313207455095517  |
| AAGTGAATGAC  | 720.468182679307 | 0.212514303276677  |
| CAACGGTGACG  | 720.495210720531 | 0.298091452765761  |
| ATGTCATCTCA  | 720.545649323503 | 0.220457249582447  |
| CGACAATGACG  | 720.595262930809 | 0.300991901692259  |
| GATGACCGAAC  | 720.637542397179 | 0.218690313103712  |
| AGTCATGAGAA  | 720.764627721554 | 0.196018522906586  |
| CGTAGTAGTCA  | 720.793623361982 | 0.367374950825362  |
| CCTCGTAGTCA  | 720.807442162929 | 0.40653616273322   |
| TAACAGAGTCA  | 720.816393666772 | 0.29784811432422   |
| CCTAGCAGTCA  | 720.820197258218 | 0.264073447974275  |
| GGAACGACTCA  | 720.848104998445 | 0.34632132650041   |
| GTGACAAGTTA  | 720.875017722175 | 0.192641613737134  |
| TGGTCATCTAA  | 720.900810152092 | 0.231625546686155  |
| GTCATAAAACA  | 720.919825217354 | 0.355863739078258  |
| GAAC TAATGAC | 720.929253717118 | 0.210884741445784  |
| ACAAC TGACTC | 720.945709309528 | 0.239486540831241  |
| ATAACGTACC   | 721.000898596436 | 0.274791174761583  |
| AATCCTAGTCA  | 721.005847540813 | 0.315933725460516  |
| ACCGTGTGACA  | 721.019938829745 | 0.292624914193025  |
| AAACATGACGC  | 721.039416590266 | 0.28059289807615   |
| ACCATCGTCAT  | 721.122014709324 | 0.155700924794042  |
| AACCCTGTCAT  | 721.123701951592 | 0.191533036335429  |
| GCCAAGAGTCA  | 721.14139065824  | 0.358774021815815  |
| CGATAAATGAC  | 721.227741233994 | 0.268643516857954  |
| GCGTCAGTGAC  | 721.233791108934 | 0.380835545952461  |
| AATACGCGTCA  | 721.237181116752 | 0.316811598822327  |
| AACCTGTCACA  | 721.296234354704 | 0.202797054749102  |
| CGACATAGTCA  | 721.303630046102 | 0.179601667595559  |
| TAAACTGGTCA  | 721.328424385915 | 0.181094188363518  |
| ATGACAGTGAA  | 721.346428038284 | 0.288931230750455  |
| AATTATATGAC  | 721.351071897413 | 0.284157142066804  |
| ATGAGCATGAC  | 721.402784832375 | 0.20227017662696   |
| TCTTTTCGTC   | 721.423602102478 | 0.31196497981689   |
| AGTCACGACAT  | 721.460423606489 | 0.292006941471352  |
| CGACTGAGTAA  | 721.488031556012 | 0.354278582553676  |

|             |                  |                   |
|-------------|------------------|-------------------|
| ATCACGGTGAC | 721.510023171451 | 0.30447170001348  |
| GCGCTGATGAC | 721.524549903315 | 0.255225605733429 |
| GTCATAGGGTA | 721.555421646736 | 0.206364396584412 |
| CTATGGTGTC  | 721.577861091643 | 0.347759118995627 |
| AATAGTCAAAA | 721.627944911158 | 0.227377760495949 |
| CAGTCAGAATC | 721.652594206929 | 0.303988990644855 |
| CATGTTGTGAC | 721.656075616198 | 0.429072090812169 |
| CTATGATGTAA | 721.699007172978 | 0.27149725591849  |
| AGAGGGATGAC | 721.699864197071 | 0.231933571400122 |
| AAGTTTGTGAC | 721.728874546893 | 0.274482969639784 |
| GATATCCGTC  | 721.732224918562 | 0.235180781586282 |
| TGAGCAATGCA | 721.765466000191 | 0.446937359320401 |
| AGAATTGCTCA | 721.876878203133 | 0.270358434554762 |
| TGACTACGACA | 721.877091736891 | 0.378696638278662 |
| CCGATTACGCA | 721.93495571051  | 0.164270123215013 |
| AACGTGGTCAT | 721.966135747074 | 0.295240610082188 |
| ACGTCACCGCG | 722.021605581639 | 0.350106769853072 |
| CACCTGACGCA | 722.0481052924   | 0.220021642344789 |
| GAGACCAGTCA | 722.113712721237 | 0.315496576815179 |
| TGTGTCAGGAA | 722.144603513711 | 0.215360243525023 |
| GGTGGAATGAC | 722.251064411352 | 0.32831963114155  |
| CCTTGGGTGAC | 722.25272928561  | 0.149973289168201 |
| AACCGACTCAC | 722.269402491343 | 0.228902030806287 |
| ACCTCGATGAC | 722.320838485564 | 0.333310468284531 |
| AATATAAGTCA | 722.347303091498 | 0.356249931715424 |
| GGTGACGATAC | 722.371697386244 | 0.27876556667087  |
| CAACTGTGACA | 722.386634791453 | 0.19674590602928  |
| ATCCCTATGAC | 722.403228365405 | 0.170669399943146 |
| GATGAATAATA | 722.408866386493 | 0.207084404880449 |
| CAGTCTATGAC | 722.412067415531 | 0.201198686631918 |
| CTAACGTGTCA | 722.428892333238 | 0.243973356776971 |
| AGACTGTGTCA | 722.441783719522 | 0.231585789883427 |
| ATACCTGACTC | 722.497148199865 | 0.191992126295149 |
| ATCGATGTCAT | 722.505798623211 | 0.193539525089919 |
| AGACTCACTCC | 722.531082626394 | 0.28753473104882  |
| AATATGTGACG | 722.532740846424 | 0.239705752592157 |
| AGCAAATGACG | 722.536976799841 | 0.202416870668712 |
| AGGGTCATGAC | 722.548945548281 | 0.25402560488256  |
| AGCACCAGTCA | 722.560609362237 | 0.410764626882805 |
| AGTACGTGTCA | 722.575807517347 | 0.295134503840769 |
| ATAAAGTGTCA | 722.615982920324 | 0.334249018126737 |
| ACGTCACCTCG | 722.643101951259 | 0.305597279653795 |
| AATAATGACAT | 722.659322235588 | 0.193791648688895 |
| GCTCAGACTCA | 722.745994676237 | 0.184732830591921 |
| CGTCATTCCAG | 722.798526237914 | 0.321823221630757 |
| CTTCGTAGTCA | 722.805423380569 | 0.198336350886323 |
| CAAAAGGTGAC | 722.854109591921 | 0.3176760137787   |
| CCGCACAGTCA | 722.882468924966 | 0.310551592737992 |
| GTCATCAGACA | 722.89260388813  | 0.330678209628345 |
| CGTGAATGAC  | 722.893491643382 | 0.355922106012115 |
| AACTATGACCC | 722.928564450521 | 0.246195162379365 |
| GCTCTAAGTCA | 722.994418571298 | 0.282627790659963 |
| GACTCACTGAA | 723.015315040216 | 0.192325612167932 |
| CTTTGAATGAC | 723.020021038055 | 0.292014419945922 |

|             |                  |                    |
|-------------|------------------|--------------------|
| GACTAATAATA | 723.060373973545 | 0.269159927918051  |
| TGCAGATGACA | 723.099443684559 | 0.285164144574633  |
| GCCCCTATGAC | 723.179036186189 | 0.311980166909004  |
| GCTTCTATGAC | 723.196671977422 | 0.129169031228836  |
| CTGATGGGTCA | 723.197390003706 | 0.248406566859696  |
| CTCAGGGTGAC | 723.20981366121  | 0.410744300770133  |
| CGTCATCTGCC | 723.210585068446 | 0.23634304417184   |
| ATGACAGTGCG | 723.218679364403 | 0.172397847505715  |
| CATAAATGACG | 723.221345453213 | 0.186228856582855  |
| CGTTGAATGAC | 723.252206450105 | 0.352279345132769  |
| CGTCATGGTCA | 723.275956353672 | 0.230997470140851  |
| AAGGCGATGAC | 723.284687004612 | 0.248984944437994  |
| ACAATGGGTCA | 723.288029040765 | 0.295133011697363  |
| CATCCGGTGAC | 723.295154266174 | 0.349989654816977  |
| AACTTGTCACG | 723.30150099758  | 0.225840337650176  |
| GAGTCAAAATC | 723.338024521355 | 0.318410200028795  |
| CGGCTGCGTCA | 723.346111322034 | 0.226644669738411  |
| ATTAATGACAA | 723.347502573072 | 0.306609015672681  |
| TATCCTAGTCA | 723.366500031276 | 0.310915115666741  |
| ACGGCTATGAC | 723.380929327845 | 0.33804071372102   |
| ACCCAATGACG | 723.385016466423 | 0.198554850982105  |
| GCTGAGATGAC | 723.434385323009 | 0.281875652651985  |
| ATAAGTAGTCA | 723.437222768665 | 0.309028057374008  |
| ATGCATGACGC | 723.456123336692 | 0.330087979677609  |
| ATGACCCAGCA | 723.53789548419  | 0.295169097305466  |
| AGTCACTAGCG | 723.607127137483 | 0.375218730752902  |
| CGAAAGTGTC  | 723.645533666707 | 0.296012417266489  |
| CACGTCACGCG | 723.662652021147 | 0.131512454414958  |
| GAGTCAATGCC | 723.668804760453 | 0.342283218010094  |
| TGAACGCGTCA | 723.691996987928 | 0.202646107042413  |
| ATGACACTCTG | 723.71420103864  | 0.283944421437846  |
| ATCGTGTACC  | 723.720750533811 | 0.271969014067162  |
| GCGTCACATCA | 723.786570105722 | 0.265402812187833  |
| GTCATCGAGAC | 723.804633646308 | 0.298323721415362  |
| GTCATAAATA  | 723.836970049902 | 0.188449373723204  |
| CTAGGTGACAC | 723.841598764508 | 0.216705823076251  |
| AGTCACTTGAG | 723.852375986732 | 0.245367775669861  |
| GAGTCAGGATC | 723.943564267686 | 0.2342227416323    |
| GATTCAATGAC | 723.966295122749 | 0.152191290289477  |
| GTCATATCCAC | 723.966542242302 | 0.201966726352488  |
| ATGACGGCATG | 723.98123331817  | 0.238550503091219  |
| ATGACCACGTC | 724.024224977221 | 0.0661329643318595 |
| AGAGTCAAAAG | 724.027016578673 | 0.180612259746868  |
| TCTGCGACTCA | 724.029696057639 | 0.232526636514392  |
| ATGAGTCTCGA | 724.034407244799 | 0.233222406830457  |
| GTCATCGCGCA | 724.045649775576 | 0.331589230224549  |
| AGTTGCGTAAT | 724.091333403824 | 0.245098787009282  |
| CTAATTGACTC | 724.097463703495 | 0.174918839885246  |
| ATGAATCTTAC | 724.108483577865 | 0.157433037937839  |
| AACTCGACTCA | 724.150768251555 | 0.138153434819607  |
| CTACTGATGAC | 724.220641292187 | 0.193489954131816  |
| CGATGATGCAA | 724.225806218896 | 0.295700145745397  |
| ACTTCCAGTCA | 724.253271175603 | 0.235305184065342  |
| AGTGTCATGTA | 724.261128335647 | 0.166303677569018  |

|             |                  |                    |
|-------------|------------------|--------------------|
| TGACGCAGGCA | 724.301715904586 | 0.273100062836869  |
| TCAGGGAGTCA | 724.323798284321 | 0.192845604439158  |
| CATGCATGACG | 724.336132547398 | 0.420331993453352  |
| CTAGTCACGGC | 724.368864397767 | 0.231501909006155  |
| CCACCGATGAC | 724.369511751446 | 0.220887540533677  |
| ACATGAATGAC | 724.399312708347 | 0.249388012504646  |
| CAGGGGATGAC | 724.40624549525  | 0.259906476077495  |
| GCTTTGATGAC | 724.599277075561 | 0.22435205072074   |
| ACGAGTGACGT | 724.652708953292 | 0.290134880415109  |
| AGTCACGCCCG | 724.661175669736 | 0.33343321534821   |
| GTCATTTGAC  | 724.663708548243 | 0.248576362951251  |
| TCCATACGTC  | 724.738105555615 | 0.163864757999178  |
| GCGATTGGTCA | 724.752658999045 | 0.33457310967241   |
| GTCATTCGCGA | 724.771694306922 | 0.34808012151604   |
| GTGACTAGCAC | 724.810304462779 | 0.364478902239591  |
| CGTCATCAAAG | 724.902264324969 | 0.244176825628556  |
| CAGTTGACACA | 724.903208961581 | 0.294921942136745  |
| GTCATAGAAGA | 724.931646733354 | 0.224067786513119  |
| ATATGGAGTCA | 724.954878296618 | 0.314244995097136  |
| CAACTTCGTCA | 724.958353507925 | 0.382966402823866  |
| AATGCAATGAC | 725.065240090211 | 0.257848787966646  |
| CCACGAATGAC | 725.111289372248 | 0.241367523739293  |
| GTCCTGACGCA | 725.171136071231 | 0.223623081886514  |
| GTGACATACAC | 725.213392005427 | 0.296549121856718  |
| CCAGCGAGTCA | 725.214394447407 | 0.300278063152117  |
| TGACTGGGACA | 725.266357926532 | 0.335139257826877  |
| CAGTCATGGGC | 725.280272997622 | 0.347254321185276  |
| CTCCGTGACTA | 725.34308625197  | 0.192107414182471  |
| CATCCTATGAC | 725.357504169439 | 0.207693533885875  |
| AATGAGAGTCA | 725.37487861879  | 0.239017561964966  |
| GGTGTCATGCA | 725.394837577249 | 0.19031868439076   |
| ACTTTTATGAC | 725.401328085675 | 0.189964681070786  |
| ATTGCGTAATG | 725.50787791275  | 0.210712935364444  |
| CGTCATATGGA | 725.5469257147   | 0.336655179591888  |
| GGTGACCCAAC | 725.641701734658 | 0.232018816108491  |
| ACGTCGTGACT | 725.675958137366 | 0.229007753736669  |
| AATCTAATGAC | 725.707174183509 | 0.280456106168885  |
| CAGCTGACACA | 725.729196304151 | 0.218151107055994  |
| CGTCATTGTAA | 725.734823522007 | 0.258995523822481  |
| GTCCGCGTCAC | 725.746991743841 | 0.250284341344578  |
| AACCTGGTAC  | 725.84480386046  | 0.224580671634059  |
| AAGCCGCGTCA | 725.888368909872 | 0.275527934713237  |
| ACAGTGACGAA | 725.890931164527 | 0.185839816311548  |
| ACTCATTATGA | 725.898750636567 | 0.329366304699693  |
| GATATAAGTCA | 725.936056528026 | 0.0669868025219695 |
| AGCTCTATGAC | 725.95403059863  | 0.227866156536681  |
| GCATCAATGAC | 725.975589402267 | 0.31539483092224   |
| ACTACAATGAC | 726.025161005479 | 0.230640930834098  |
| ATGACACCCCA | 726.043212941065 | 0.21602007677167   |
| AGAGTCGTCAT | 726.141344039406 | 0.315737748476624  |
| ACTGACATGAC | 726.145326682755 | 0.172024163986635  |
| GTCATCCCCGA | 726.155027935435 | 0.28149528123013   |
| GTATGACCTAA | 726.168959207838 | 0.328572819552245  |
| GTCATTTAAGA | 726.222587387616 | 0.304200707024944  |

|             |                  |                    |
|-------------|------------------|--------------------|
| ATACTAATGAC | 726.2241722336   | 0.454354027604759  |
| ACGTCACCTTG | 726.257282580823 | 0.229924723029534  |
| TATGACGGCAA | 726.276191848648 | 0.0975207613411465 |
| AACTTTGACTC | 726.278236487752 | 0.19591207753871   |
| ATGACGCTCAC | 726.318382386992 | 0.250343228486593  |
| GTGACCCGTC  | 726.336499975655 | 0.286966028837571  |
| AGTAAATGACG | 726.421054007389 | 0.311688659964834  |
| CAATCTGTGAC | 726.435388405842 | 0.43333194516163   |
| AATCGCGTCAC | 726.453461069129 | 0.220156059553396  |
| TACATGACCCA | 726.459779251405 | 0.225526599733387  |
| GTCATTGAGCA | 726.484304036827 | 0.253500768028695  |
| GGGTGGAGTCA | 726.536362138741 | 0.177901461515443  |
| GTCATTTACTA | 726.540625601195 | 0.296627606503427  |
| AGACTAATCAC | 726.555954227454 | 0.274356056729194  |
| ATCATAATGAC | 726.562976050187 | 0.139823234021434  |
| ACAGTGGTGAC | 726.591862750816 | 0.106886382601526  |
| TACTAATGACA | 726.647285788992 | 0.365155346406074  |
| ACTTGACGTCA | 726.74753593871  | 0.360436334274678  |
| ACATGTGTGAC | 726.797598818925 | 0.285808093209229  |
| CTAACGGTGAC | 726.806490105075 | 0.208247018824488  |
| CAGTCACGCCA | 726.912928560781 | 0.247956308418869  |
| GTTCCGCGTCA | 726.925297460435 | 0.221837098626085  |
| CGCATGACAGA | 726.941680978587 | 0.328965207950573  |
| ATAACGTATG  | 726.943401004554 | 0.159321569345791  |
| CGATAATGACA | 726.985836578043 | 0.36369838259056   |
| GACTAATACTC | 726.996762752046 | 0.255133154902214  |
| GGAGTGATGAC | 727.002780797311 | 0.199861890042666  |
| GAAGGAATGAC | 727.06423353329  | 0.2349778675796    |
| ACGATGACCGA | 727.137255690129 | 0.294849449033475  |
| GATTTGATGAC | 727.146170367524 | 0.116798681539369  |
| TGACGTGGGAA | 727.150248758788 | 0.235856875737456  |
| GTCACACAATA | 727.163142608622 | 0.30806620147925   |
| ACATTAATGAC | 727.21887192792  | 0.185879416025137  |
| AGTCAGTGTC  | 727.236169800116 | 0.298343780055535  |
| AATAACGTCAC | 727.32150510278  | 0.245364819826187  |
| AGTCACTTCCC | 727.365502072393 | 0.246021289455623  |
| GAGTCAATAGC | 727.374484569616 | 0.234135663616316  |
| AGCACGACTCA | 727.456813815895 | 0.290562146786174  |
| CGTCATTGATA | 727.474252506387 | 0.102612596032067  |
| GCTGACTATGA | 727.505148362154 | 0.213745816131048  |
| GTAAGGCTCAC | 727.519900188747 | 0.27620635156218   |
| TGACATATTAA | 727.560763536802 | 0.350271718339343  |
| TCCTGCAGTCA | 727.576762862238 | 0.245748689255223  |
| GTCATCCGGGA | 727.582575490567 | 0.269666634291994  |
| GTCACCGCAGA | 727.595107718956 | 0.282855725855883  |
| GAGTAAGTCAC | 727.684022187651 | 0.191019119345503  |
| ATGACCACTTG | 727.757260458063 | 0.257184243914499  |
| CTACGTGTGAC | 727.779868916298 | 0.275859500128442  |
| TGACCAAATAA | 727.798664050364 | 0.422376821746785  |
| CACCTTATGAC | 727.861498469235 | 0.310159881628954  |
| TAATCGTGTC  | 727.876365425493 | 0.213643074986127  |
| ATTATGACGC  | 727.905966469713 | 0.349415710243193  |
| GCAACGACTCA | 727.93186994907  | 0.355085270250344  |
| CTTTTGATGAC | 727.961794609503 | 0.244640114557844  |



|             |                  |                   |
|-------------|------------------|-------------------|
| ATGACGGCATA | 728.026956980341 | 0.319831831263384 |
| ATGACAGTAAA | 728.10571269352  | 0.292380220817892 |
| AGCTTGGTCAC | 728.113687498628 | 0.205037115604311 |
| CCGTAATGAC  | 728.175327912713 | 0.265397328008843 |
| ATCAAAATGAC | 728.262289877214 | 0.319952038648874 |
| TGACACAAGAA | 728.277133220671 | 0.380171756029429 |
| AGTATAATGAC | 728.285104644702 | 0.148199120037092 |
| CATCGTGACAC | 728.349890231596 | 0.326584799728654 |
| GGACCGACTCA | 728.387260869216 | 0.203537107138384 |
| CCGCTGTCATA | 728.403015629654 | 0.271020727843649 |
| CTAAGTGAGTC | 728.41015472832  | 0.241435305475945 |
| TGACGAGTTAA | 728.413735458263 | 0.300329693758555 |
| ACACGGTGACA | 728.428944917586 | 0.349712749662568 |
| CACCTGTGTC  | 728.431814117325 | 0.247083772455594 |
| GTTCTAGTCA  | 728.432712201422 | 0.333068338397683 |
| GTCTTGTGTC  | 728.452132122327 | 0.26584918801018  |
| TGACCAATGAA | 728.556844848246 | 0.320788047114468 |
| ACTCATACTCG | 728.610588425832 | 0.196170075515762 |
| GTCATTCCGCA | 728.669539639777 | 0.331106914378164 |
| ACCTGCAGTCA | 728.689219600385 | 0.270188124523641 |
| AATGACATTAT | 728.706785323808 | 0.291034547238015 |
| GATGATGACCA | 728.715572558336 | 0.327167416794116 |
| TGACTTAGCAA | 728.731380625135 | 0.168976304993904 |
| CCGCCTAGTCA | 728.741459847005 | 0.165452661054507 |
| ATGACAAGATG | 728.777540888209 | 0.264848015969434 |
| GGTAAAATGAC | 728.795330881144 | 0.16146896459954  |
| GGTTATATGAC | 728.819299145908 | 0.185049780512203 |
| GTCAACATGAC | 728.820648930239 | 0.32108824576524  |
| GTCATAGGCAA | 728.886932898248 | 0.257780176004623 |
| ATGAGTCTCTA | 728.89087618806  | 0.222515664143611 |
| AGCCTGACGCA | 728.901199895412 | 0.241109642048959 |
| GACTTAATGAC | 728.9117967448   | 0.270153906184701 |
| AGTCACGCGAC | 728.921014557977 | 0.183856256567141 |
| GATACGTCAAC | 729.00276781778  | 0.294211681802785 |
| GTCACACACAC | 729.003874770058 | 0.192889506590447 |
| GATGAGTAGTA | 729.032490195322 | 0.24643386160335  |
| AACGACTCAGA | 729.061487144837 | 0.274701812633282 |
| GGTCCTAGTCA | 729.100818470587 | 0.276565846040635 |
| GTCACCGCGAA | 729.166177884901 | 0.234890641912888 |
| GGTGAGCCACA | 729.207881814797 | 0.27266364378947  |
| ACTCATTGTGA | 729.209776046954 | 0.285864547287917 |
| TCTTTGACACA | 729.226630085551 | 0.195663151769978 |
| ACGTCATAAAA | 729.252698716717 | 0.206470198346719 |
| GTCATTGCTTA | 729.261752181368 | 0.251082862749844 |
| GTGCTGTGTC  | 729.3238260385   | 0.325894176932675 |
| AATTATTCATA | 729.330007567872 | 0.208679486074057 |
| ATAAATGTGAC | 729.387784602363 | 0.250154000065421 |
| ATCGAATCATA | 729.500606958597 | 0.337281333502988 |
| GCATATGACCA | 729.510065328032 | 0.293424803448824 |
| CCGTTCTGTCA | 729.524888537257 | 0.212493723672464 |
| GTGACGCGGTA | 729.540273355622 | 0.178771203311063 |
| CCATGCGTCAA | 729.551478152205 | 0.310918899253872 |
| AAGGTATGAGT | 729.555072211775 | 0.212202065718584 |
| ATTAGTACTCA | 729.620177240464 | 0.231614903887857 |

|              |                  |                   |
|--------------|------------------|-------------------|
| ACTCATAGTTG  | 729.631504010418 | 0.228628027877409 |
| CTCAGTGACAC  | 729.646231893849 | 0.462368141841211 |
| GAGCAAATGAC  | 729.692775690091 | 0.225801039312608 |
| GAGTCAGTATC  | 729.72689681773  | 0.242537772370835 |
| CGTACTGACTC  | 729.744218538541 | 0.200771876467425 |
| ACCATGGTGAC  | 729.770085819537 | 0.256474234301458 |
| ACACATGACGC  | 729.770247419554 | 0.299098360191517 |
| TGACTCCCCAA  | 729.790657057968 | 0.235414069081528 |
| ATGACCCAGTG  | 729.802091431105 | 0.225747143832344 |
| ATTATTCATCG  | 729.859411241324 | 0.238279583539766 |
| GTCATCAGGTA  | 729.865755193406 | 0.212347690662717 |
| AATAATGACAA  | 729.878345422966 | 0.27111257767606  |
| ACCGAAATGAC  | 729.964466664757 | 0.233514901671095 |
| GTCATGTCTCA  | 729.966639295646 | 0.290080021741797 |
| ACTTGAATGAC  | 729.977049613487 | 0.320388634434177 |
| TCCAAATGACA  | 729.986000476992 | 0.254234196224575 |
| AATCAGTCTTA  | 729.988230778796 | 0.128733925607769 |
| ATAACAATGAC  | 729.99896758208  | 0.341668186361462 |
| ACATTATGAGT  | 730.008930348826 | 0.298591831943045 |
| AGTCTGACGTG  | 730.054308262489 | 0.111907422872261 |
| AGCTATAGTCA  | 730.122973624331 | 0.282881302468186 |
| AACTACTCATT  | 730.191549288365 | 0.194324643646254 |
| GACGTGACCCA  | 730.21985074762  | 0.302027035742842 |
| CGTCATCTCTC  | 730.222452137003 | 0.21550738188155  |
| AGTCATGAGCG  | 730.264358630339 | 0.228218254837676 |
| AAAATTGTGAC  | 730.264419088037 | 0.330472861048386 |
| CAGCGTAGTCA  | 730.267271189912 | 0.261923246183036 |
| GTCATCTGCGA  | 730.270940750396 | 0.315777823007883 |
| CATGGTGACGC  | 730.285054251556 | 0.268353418856879 |
| ACGGGAATGAC  | 730.307110271324 | 0.240323964940456 |
| ATGTCATTTTCG | 730.334618830286 | 0.317352222073322 |
| GAGGGTGACGC  | 730.359087461014 | 0.156735070732771 |
| CGAATTAATAA  | 730.366295236994 | 0.321709508297684 |
| ATGACCACGCA  | 730.427524578434 | 0.223660285128854 |
| AGCTGGATGAC  | 730.446583290963 | 0.259900857914394 |
| CATGGCGTCAC  | 730.46071144651  | 0.19672379279286  |
| TCGCCAGTCA   | 730.478952442674 | 0.189102164470214 |
| GAGCCAATGAC  | 730.501730374825 | 0.295838271743324 |
| GCCACGTAACA  | 730.516624371681 | 0.192076016830224 |
| AACACGTGTCA  | 730.558918230306 | 0.324857398263185 |
| GCGATAATGAC  | 730.569438717052 | 0.316859723650281 |
| CATCTTATGAC  | 730.731197357598 | 0.216053879658835 |
| ATACATAGTCA  | 730.761930871163 | 0.297747229975643 |
| ATGTAGACTCA  | 730.783294758099 | 0.415053524575246 |
| AAGGTGAATCA  | 730.788707313633 | 0.217469490897791 |
| GACTAATATGA  | 730.800762251816 | 0.293160377822696 |
| CGTGAGTCTGA  | 730.804710966196 | 0.290255151837188 |
| AGTTATTAGTC  | 730.811754498928 | 0.318895891952837 |
| GTCATAAACGA  | 730.836615788616 | 0.37760044971066  |
| ATGAGTCGGGG  | 730.849047564126 | 0.196361491448751 |
| TAAGATGACCA  | 730.865977049047 | 0.385663762205279 |
| ATGAGTCTCCA  | 730.902125121758 | 0.293707022202734 |
| CGAAATGTGAC  | 730.956004429315 | 0.335127424197302 |
| CTTTCTATGAC  | 730.984839021356 | 0.317872183025033 |

|              |                  |                   |
|--------------|------------------|-------------------|
| ATGACGAACGG  | 731.005540509447 | 0.256827045721093 |
| TGAGTCGGTAA  | 731.031914349912 | 0.223930616664567 |
| AGAATTGTGAC  | 731.034483747914 | 0.307520907756628 |
| AGTAATGACAT  | 731.110816907085 | 0.234217002191626 |
| GATGATGCAAC  | 731.149998157051 | 0.26236268524122  |
| AGTCATGGTAT  | 731.161279691461 | 0.183698373539627 |
| ATGAGTCCCTC  | 731.170925068206 | 0.212731133764581 |
| CGAGGTGACAC  | 731.189489638818 | 0.378456007698669 |
| GGAGGGAGTCA  | 731.192143082495 | 0.213576851757463 |
| ACTGCGACTCA  | 731.219046645653 | 0.212281969674033 |
| CTCCTGACGCA  | 731.263469191258 | 0.18580327869859  |
| GACGGTGTGAC  | 731.268045242605 | 0.264264641999858 |
| GGCGGTATGAC  | 731.293138285584 | 0.226096498975706 |
| ATGAGTCCCCA  | 731.340213602811 | 0.242459218713378 |
| CTGACGGTGAC  | 731.34635003581  | 0.298104276495821 |
| CGGTCCAGTCA  | 731.377220789083 | 0.231912586705805 |
| TCAGTGACCCA  | 731.430894466729 | 0.230942388295698 |
| GTCACGCATGA  | 731.485244409485 | 0.295710201226012 |
| ACATAGGTGAC  | 731.582886009257 | 0.243724030651352 |
| CTATTAAGTCA  | 731.608815949872 | 0.143398575307602 |
| CTGACGTACAGC | 731.644323119086 | 0.60978990277195  |
| GTCACATATCA  | 731.644623677807 | 0.187165419959787 |
| CACGTAAGTCA  | 731.674263462545 | 0.314133498611321 |
| ATATGTCAGAC  | 731.74610044014  | 0.219113906798591 |
| GTCACTGACAC  | 731.825056101359 | 0.18076489252275  |
| ATGACGCCGCA  | 731.860916170118 | 0.228518988055774 |
| GCACAGTACAGC | 731.878452551847 | 0.285381902266502 |
| AGCATTGCTCA  | 731.906743992174 | 0.283621325710654 |
| GAATAAATGAC  | 731.924523048509 | 0.222175239828732 |
| AGAACTTGTC   | 731.939706226726 | 0.32246169835685  |
| TGACTACACAA  | 731.954318560103 | 0.243852103948136 |
| GCTAGTGTGAC  | 731.966733223989 | 0.216271323838574 |
| GGTCGAATGAC  | 731.984366713536 | 0.277502803521618 |
| AGTCACTTGGA  | 731.986868444484 | 0.211559393134295 |
| AGCTTTACTCA  | 732.011873867924 | 0.246802821928983 |
| AGTCAGAGCAA  | 732.027052703657 | 0.19192843685138  |
| GAGTCAGTTAC  | 732.150869836153 | 0.213945235675304 |
| GGCAATATGAC  | 732.206096179582 | 0.287939641897344 |
| ATGTTTGTGAC  | 732.212289568076 | 0.227040314657463 |
| GTCATATAATA  | 732.234359963701 | 0.286275219706535 |
| AGAGGTGACAC  | 732.253188669158 | 0.202581604224669 |
| CGTCATCTGCA  | 732.264782849253 | 0.238610053245372 |
| GACATCCGTCA  | 732.282714728278 | 0.293447905076581 |
| GTCATCAAGTA  | 732.327938992335 | 0.357009515877966 |
| CCGACGTGTCA  | 732.383150366767 | 0.192503143996487 |
| GGCACGACTCA  | 732.42440258603  | 0.290388978889897 |
| ATGACAAGATA  | 732.453436571537 | 0.182335566643911 |
| TGACGCGGACA  | 732.480297530578 | 0.268875116136296 |
| ATTGGTCAACA  | 732.48264134295  | 0.316464367524855 |
| ATCACAATGAC  | 732.49467538784  | 0.304379851789651 |
| GGTGAGCAAAA  | 732.505625471442 | 0.187150464926894 |
| GGTACCAGTCA  | 732.533441341049 | 0.316085824479001 |
| ACGTCACCTCGG | 732.556349561676 | 0.26455153317168  |
| CTTTGACGCAC  | 732.567509657245 | 0.212234114958168 |

|              |                  |                    |
|--------------|------------------|--------------------|
| CTTGAATGAC   | 732.593336587202 | 0.280235193132281  |
| TCCTGTAGTCA  | 732.629459663408 | 0.284950509488045  |
| CGTTCAATGAC  | 732.706746527034 | 0.238310074653527  |
| GTCATATAAGA  | 732.782007550205 | 0.314951731096969  |
| CAGTGGGTGAC  | 732.811141348322 | 0.313986408230358  |
| AGCTGTGACGC  | 732.81777623221  | 0.190250583615587  |
| GGATTGATGAC  | 732.897785365208 | 0.282023768708941  |
| ATGTAATGACG  | 732.931767707097 | 0.279622044796912  |
| CAGTCAGATGA  | 732.965913717034 | 0.304097262302597  |
| GCTCCGACTCA  | 732.984263221141 | 0.228476528542321  |
| GTGTCATGTGA  | 733.007188821427 | 0.266339346607843  |
| GTCACAACCTGA | 733.027155373436 | 0.290170287101757  |
| ATGTCCAGTCA  | 733.126067372017 | 0.185193837365592  |
| GGAGCGATGAC  | 733.132577507785 | 0.213732937975564  |
| GCCCTGATGAC  | 733.140384446101 | 0.382163366195584  |
| ATCTGCATGAC  | 733.162887789455 | 0.300572006132843  |
| CAGACTGTGAC  | 733.182120012492 | 0.253510586643359  |
| TAGAAATGACA  | 733.192052161285 | 0.0478700880919686 |
| AGTCAGACTTC  | 733.22400555048  | 0.313962764139394  |
| AATAGTCAAAC  | 733.227284933946 | 0.234454421606991  |
| GAAATAATGAC  | 733.251835468837 | 0.229920246449434  |
| TCCATTGGTCA  | 733.302375342973 | 0.359652193146467  |
| CACCACAGTCA  | 733.313758302317 | 0.282191262257079  |
| ACGTCACCCAG  | 733.313838317123 | 0.252914757988129  |
| CTGGGAATGAC  | 733.316766228146 | 0.334958028307818  |
| TGTCATTATAA  | 733.329626161558 | 0.227288156567587  |
| CTCGTAATGAC  | 733.331140246574 | 0.242858613573311  |
| GTCATTACCTA  | 733.345696639986 | 0.267577260297731  |
| ACGATGGGTCA  | 733.400213161874 | 0.100444347801991  |
| ATATGTCAGAA  | 733.417663215526 | 0.281748444721733  |
| CTCTGAGTCGA  | 733.446273735643 | 0.293036633941166  |
| AATTAATGACA  | 733.455442257142 | 0.217957699411681  |
| AGTCCTAGTCA  | 733.457374406798 | 0.341865501667204  |
| TCGTTTCGTCA  | 733.499252972481 | 0.274377264946349  |
| AGCACGATGAC  | 733.603116115435 | 0.262561296079858  |
| CGCACTAGTCA  | 733.658829486552 | 0.326596246011262  |
| GTCATCTGGCA  | 733.68171041199  | 0.230219390734949  |
| TGACGTACAAA  | 733.790120878623 | 0.422978284431028  |
| ACCAGTCAGAA  | 733.795340422869 | 0.266879770536271  |
| CTAGAGATGAC  | 733.879397417728 | 0.332160741571514  |
| ACACGGGTGAC  | 733.936890069208 | 0.269215412281852  |
| ATCTTTAGTCA  | 733.939992145929 | 0.396487549083654  |
| ATTACGCAACG  | 733.941693274234 | 0.229610871126224  |
| ACGTCACAACA  | 733.98329694774  | 0.202838448492584  |
| CTGACTGTATA  | 734.021342257184 | 0.192825456714015  |
| GACAAATGACA  | 734.143527415073 | 0.165329322879177  |
| TCTACCAGTCA  | 734.172314171248 | 0.237964196540652  |
| GTCACATTTCA  | 734.237636559899 | 0.390025231019564  |
| CGAGTCAGGTC  | 734.324786525308 | 0.215317764449748  |
| GACAACCTCATC | 734.355472169469 | 0.226239348519458  |
| CAACGTAGTCA  | 734.356261779979 | 0.256040707192857  |
| ATATTTGCTCA  | 734.357093690683 | 0.265090796147355  |
| ACGTTTGACTC  | 734.429973320394 | 0.227528055437498  |
| CAATTAATGAC  | 734.444646577025 | 0.398242323618994  |

|              |                  |                   |
|--------------|------------------|-------------------|
| ACATTTGACTC  | 734.48431138146  | 0.25891341873431  |
| CGTCACATTGA  | 734.496046222807 | 0.207797647600415 |
| CGTCATTCCCA  | 734.554588423392 | 0.231682787431892 |
| ACAAGCAGTCA  | 734.593079835126 | 0.306514678014832 |
| GCGCCGATGAC  | 734.599148394174 | 0.209821275824038 |
| CGCTGATGACG  | 734.610991581776 | 0.298539197891266 |
| CTGCTGATTCA  | 734.665552685669 | 0.276305853053207 |
| TGACTCCACAA  | 734.669232370554 | 0.226134799593406 |
| ACTGGGAGTCA  | 734.6780971473   | 0.275950209118304 |
| CACCGCGTCAC  | 734.689300956809 | 0.265242841289745 |
| TACCGGTGACA  | 734.696734900062 | 0.278850649733042 |
| CGACCGGTGAC  | 734.712800632146 | 0.100230885370944 |
| GTCACACTCGA  | 734.789212725267 | 0.26499744386248  |
| GTCATAAGATA  | 734.797230483072 | 0.291897485052383 |
| TGACCCATCAA  | 734.818758737057 | 0.234915255462495 |
| CAGGGTGACGC  | 734.820847861269 | 0.179670608311041 |
| CGTATAAGTCA  | 734.821352150621 | 0.302126565233409 |
| CGTCGTGTGAC  | 734.826647325279 | 0.324039169930557 |
| CAACCCAGTCA  | 734.840877106866 | 0.265713310811163 |
| CTCTAGATGAC  | 734.849407349926 | 0.241389332027707 |
| ACGAGATGACA  | 734.87121499102  | 0.232490163533813 |
| ACACTAAGTCA  | 734.888976089025 | 0.15357603672686  |
| GTCACCATTGGA | 734.925037698374 | 0.307189092283762 |
| GTCATAACAAC  | 734.927396318091 | 0.295859188742776 |
| CCTGAAATGAC  | 734.930055903696 | 0.291537794685706 |
| CGTCATTGCAA  | 734.937794443295 | 0.289329839303786 |
| AAATGGTGACA  | 734.998311269782 | 0.231121082165784 |
| ATGACGGTACG  | 734.999966373034 | 0.292760949475666 |
| ACGTCACAAGT  | 735.006676420038 | 0.295991443933303 |
| ACCAAGTCACA  | 735.0518724657   | 0.258533553705999 |
| AATAGTGACGC  | 735.068414288082 | 0.276416255762197 |
| ATGACCGTGAC  | 735.16484768424  | 0.137758802344318 |
| TAAACGTGTCA  | 735.219882739126 | 0.23902099730065  |
| CTCAATATGAC  | 735.225772185532 | 0.223367606486871 |
| GATGACCGAAA  | 735.330558911727 | 0.326490534184929 |
| CCATGAATGAC  | 735.443855531474 | 0.244345318240438 |
| ATGACAAAGGG  | 735.458886963568 | 0.242506093433191 |
| ATATTATTCAT  | 735.469453937891 | 0.328431327570713 |
| AAGACTAGTCA  | 735.482944321741 | 0.152223545533075 |
| CAGCAGATGAC  | 735.483096404219 | 0.297812439028857 |
| TATCCGACTCA  | 735.506149519485 | 0.246220686383948 |
| ATACGGGTGAC  | 735.612147549239 | 0.352242724603453 |
| AACCCACGTCA  | 735.729364404258 | 0.286554006860188 |
| AGTCAGAGATC  | 735.734095029529 | 0.299391084206375 |
| TGACTAGTGAA  | 735.840456437502 | 0.347158509239815 |
| TCCGTGAATCA  | 735.866342969176 | 0.253220968233587 |
| GCCATGAATCA  | 735.870643412001 | 0.244722964678934 |
| CACAAGTCATC  | 735.879078482968 | 0.182442041244605 |
| ACAATTAGTCG  | 735.882323151714 | 0.323267820187472 |
| CAGTTAATGAC  | 735.89544750143  | 0.280994520146932 |
| AGCGTCATGAT  | 735.945165967936 | 0.34340635348573  |
| GTCACCAATCA  | 735.957159538686 | 0.238802244734607 |
| ACTTTGACACA  | 736.049811360443 | 0.245721751787337 |
| CGCAGAATGAC  | 736.057221243081 | 0.311210195613589 |

|             |                  |                   |
|-------------|------------------|-------------------|
| AGCCAATGACG | 736.062768993471 | 0.302266271985888 |
| CAGTCAGAAGA | 736.0753456148   | 0.192477596966252 |
| GGTCTTATGAC | 736.080596442766 | 0.140088821811639 |
| AGACTAATTGA | 736.15004674127  | 0.358868300621972 |
| AAATCCGTCAG | 736.238266560664 | 0.312924845054663 |
| CGTCATTCCAA | 736.294911207077 | 0.111133571231328 |
| AACAATGTCAT | 736.306079100961 | 0.292623804196158 |
| CGTCCCAGTCA | 736.307342997418 | 0.291622619623296 |
| TAAGGGTCAGA | 736.312816476814 | 0.21099755051654  |
| ATATATGTGAC | 736.438469649527 | 0.184139336967967 |
| GTCATTTAGTA | 736.442466294087 | 0.220800677181849 |
| CGGGTGAATCA | 736.448584104094 | 0.206710581507219 |
| AAAGAATGAGT | 736.462380429674 | 0.214567911616134 |
| GATGAAATGAC | 736.486555996473 | 0.298834022480501 |
| CCGCTGAATCA | 736.508680857321 | 0.25351028009613  |
| AGTCAGACTTA | 736.520643443616 | 0.280989750723762 |
| AGACTACTAA  | 736.586119544513 | 0.273026051899012 |
| AAACGGAGTCA | 736.589117114822 | 0.16781216952524  |
| GTCATTTAAGA | 736.589947951658 | 0.197427063188788 |
| TGACTCCAAA  | 736.597507372758 | 0.186341890110001 |
| GACTCACTGAC | 736.649553678496 | 0.303832020026194 |
| GTCATATCAAA | 736.650598547989 | 0.332427825000271 |
| CACTTTACTCA | 736.675477943936 | 0.19667557648484  |
| CGTCATTAGAG | 736.699373299272 | 0.154486457693434 |
| TAGCATAGTCA | 736.732755841487 | 0.282422611841283 |
| ATGACAGAGGA | 736.734536344291 | 0.225360591017735 |
| CACATCTGTCA | 736.781965056277 | 0.328444989462084 |
| ACGTCATGCCA | 736.815850651119 | 0.222138203318081 |
| AAAGATGAGTA | 736.824588874536 | 0.186931468328357 |
| AGTAGTGTGAC | 736.824893898767 | 0.212993546850086 |
| GTACCAATGAC | 736.843413038273 | 0.209777021640949 |
| ACTTCTGACTG | 736.905919346115 | 0.253192538017805 |
| GTCACAGCTAA | 736.920941733655 | 0.381225473153949 |
| AAGACTCTTAC | 737.042424148031 | 0.257461505137632 |
| CACCTGTGACA | 737.048203220669 | 0.285365815141663 |
| CTGACTGGTTC | 737.050195377741 | 0.272193761528613 |
| AGTCAGACTAG | 737.061095333015 | 0.216906182434277 |
| GTAATCATGAC | 737.063915088774 | 0.224419709379167 |
| GTCATCGCAAC | 737.10525254838  | 0.281132883785387 |
| ATGACAATAAA | 737.109068084932 | 0.192498369734505 |
| AGTGGTCATTC | 737.140276360704 | 0.238617567702368 |
| GTCATATCGAC | 737.181288464331 | 0.241756046111127 |
| AGAATAATGAC | 737.188264067727 | 0.219904831935745 |
| ACACAAGTCAT | 737.191744135307 | 0.346387599507934 |
| GTCATTGCATA | 737.241663490805 | 0.335140579342485 |
| ACGGCGATGAC | 737.275284841961 | 0.263476014855534 |
| AACCTGACTCG | 737.286185673899 | 0.282844141943539 |
| ACGTCACCTCC | 737.309569556098 | 0.221487951045186 |
| AATCGTGTGAC | 737.31204378661  | 0.279532950119442 |
| ATTGTATCATA | 737.350381629831 | 0.296496003281554 |
| AGGCATGACGC | 737.352551106802 | 0.26313705261864  |
| ACTCAGGTGAC | 737.382881540893 | 0.301182281720572 |
| AGTCACGGCTA | 737.426241912995 | 0.276103528249942 |
| GTAATTGTGAC | 737.440004341994 | 0.194674245272689 |

|             |                  |                    |
|-------------|------------------|--------------------|
| ATGACAGCGTC | 737.470595281938 | 0.272340038970674  |
| ACGAGTGTGAC | 737.559478566151 | 0.0834066817465838 |
| CCTGGGTGACA | 737.563643684298 | 0.298158814480951  |
| GCACCCAGTCA | 737.584630790013 | 0.214569639859379  |
| AATCGGTGACG | 737.589271798049 | 0.2890231648916    |
| CTGACGCAGCA | 737.644586283752 | 0.386602737004317  |
| ATGACGTCGCA | 737.679258356512 | 0.212308224929296  |
| ATGACGAGGCC | 737.710280360623 | 0.318544439564185  |
| GATCCGTCAGA | 737.740906628144 | 0.291041347928086  |
| CGCCATATGAC | 737.744980655836 | 0.238532886449127  |
| CGCACCAGTCA | 737.758512926744 | 0.265274624002207  |
| GTCATCAGCCA | 737.788800442437 | 0.205868362817666  |
| CCAGGGAGTCA | 737.7964976052   | 0.21217460943956   |
| ACGTCACATGA | 737.809940500705 | 0.366401821874165  |
| GTCCCGAGTCA | 737.840375822725 | 0.279254334472494  |
| AGGCCTGACTC | 737.843765178914 | 0.166994875031696  |
| AAAGTCTGACT | 737.905926448826 | 0.157244620662854  |
| GCGTAGATGAC | 737.943834600621 | 0.213787041226419  |
| CCAAATGTGAC | 737.9602571092   | 0.29990943212653   |
| TCACCGACTCA | 737.960981606764 | 0.15393172497763   |
| GTCATCAGCGA | 738.08328689269  | 0.3809704484471    |
| AACCCTAGTCA | 738.171362228261 | 0.284545443987489  |
| ATCTTGCTCAT | 738.186353342423 | 0.266554390324436  |
| ATGACATTACC | 738.19765550285  | 0.212759534582618  |
| GCCAGGTGATA | 738.199247454256 | 0.21001357158157   |
| TATTTGACACA | 738.223944420371 | 0.241067303932073  |
| CCGGCGACTCA | 738.230025960305 | 0.231646203551185  |
| GAGGCGATGAC | 738.23043168533  | 0.286982921827304  |
| GTCATGTCGAC | 738.266549316511 | 0.2006864434166    |
| AGCCTGACTCG | 738.290381554173 | 0.111877754676051  |
| AATGACGGTAC | 738.296638637742 | 0.300256500011962  |
| AAGTAAATGAC | 738.314614676403 | 0.248735795725174  |
| TACCTCAGTCA | 738.322771923525 | 0.0561352950190221 |
| CGTCATTATTC | 738.394272587033 | 0.240918689641914  |
| TGACGGACTCA | 738.410497264083 | 0.236773603538109  |
| GTCATTGCCTA | 738.428288835667 | 0.178924121521294  |
| CGGCGTGACTA | 738.436759712702 | 0.281679577476502  |
| GACTCACTAAC | 738.445514595044 | 0.296574755901868  |
| AGTCACGACCC | 738.481706265411 | 0.238876997264459  |
| AAATAATGACA | 738.52206120988  | 0.207902184413964  |
| GCTTTGACTGA | 738.557055792781 | 0.182821047247987  |
| GTGACTACCCA | 738.588570537639 | 0.131773335127303  |
| TATTGTACTCA | 738.649738388534 | 0.176438926512167  |
| AGATATGACCA | 738.685991555234 | 0.316638336977829  |
| TCAATATGTCA | 738.739019787537 | 0.32924846873656   |
| ATACTGTGACA | 738.762355002924 | 0.215527558645721  |
| GTCATTGTAAC | 738.775880709531 | 0.321716867157058  |
| ACGTCATGCTG | 738.804911985013 | 0.183528516118643  |
| GCATAAATGAC | 738.81067703623  | 0.301089979320695  |
| TATTTACGTCA | 738.883500682591 | 0.289388599864143  |
| CTTAAAATGAC | 738.88540203056  | 0.155044856605528  |
| AAAGAGATGAC | 738.90112454783  | 0.228487855291028  |
| ATTCTTCGTCA | 738.93583181104  | 0.380306970803343  |
| ATGACCATATG | 739.033516052813 | 0.274861150498342  |

|             |                  |                   |
|-------------|------------------|-------------------|
| ATGAATGTGAC | 739.04866584452  | 0.20359381079862  |
| GTGCGTCAAAC | 739.054530379234 | 0.159170691093742 |
| ACAGGGAGTCA | 739.074640601132 | 0.135605905132643 |
| GGTGCGATGAC | 739.07538320021  | 0.251320270483195 |
| CACCGAATGAC | 739.103215498357 | 0.26542627646034  |
| ATTGAAATGAC | 739.15510745391  | 0.321195364618344 |
| TGACTCGGCCA | 739.19209215988  | 0.203883062975709 |
| AAGTCAGAGCC | 739.210728974867 | 0.244349225838515 |
| AGCGTGAATCA | 739.234395075147 | 0.211782375324007 |
| CGAGCCAGTCA | 739.331827022543 | 0.282944019239597 |
| AGTCATGGGTG | 739.358905006322 | 0.15310037890151  |
| AAGATATGTCA | 739.38364417982  | 0.205768681886484 |
| GATGACCTGGC | 739.38411430154  | 0.241544072950272 |
| ACTCCTATGAC | 739.395209070893 | 0.218639909664197 |
| ACAAACATGAC | 739.426721040367 | 0.528783252787981 |
| AAGAGCGTCAT | 739.442239400602 | 0.22631201334862  |
| GATTAGTCGCA | 739.493833485018 | 0.235766045006574 |
| ATCTGTGAGAC | 739.499846233488 | 0.162962754628232 |
| GTCATTCAGAC | 739.544306931921 | 0.390194869089392 |
| GTCATCTGCCA | 739.610065027864 | 0.277864179872557 |
| ATTGTGGTGAC | 739.616759239024 | 0.199972244000233 |
| CTTCGCAGTCA | 739.630735174826 | 0.277271036892781 |
| GATTTCCGTC  | 739.645137148936 | 0.269633962487584 |
| CGTCATTCGGC | 739.649997659174 | 0.24340380390741  |
| ACCCATGACAC | 739.675394777548 | 0.193307670850005 |
| CATCGTAGTCA | 739.675681093068 | 0.264657143518186 |
| GCCAGTGTGAC | 739.675782649137 | 0.203235986579776 |
| GTCATTCGAC  | 739.685527482922 | 0.218331146602764 |
| CGGGCAATGAC | 739.756490041665 | 0.207297924327593 |
| GCAATTGTGAC | 739.806835030926 | 0.354309543295043 |
| TTACTCAGTAA | 739.81965893566  | 0.344256692529441 |
| AACAAGATGAC | 739.823173806136 | 0.350208920174688 |
| GGCGATATGAC | 739.85094658061  | 0.195255170761082 |
| ACTCATATGAG | 739.85744211204  | 0.290184457018677 |
| AGTCACTACGA | 739.87759071204  | 0.310348573600491 |
| ACGGTACTCAT | 739.883559849704 | 0.20681113418516  |
| ATTGCTAATAC | 739.974550400664 | 0.243137815260273 |
| CATGCAATGAC | 739.990130411117 | 0.347357481557953 |
| AGGATTGGTCA | 740.011174162301 | 0.175130280133539 |
| CGACTAATCGA | 740.017291367711 | 0.339390463255633 |
| TCCGTCACTCA | 740.031829450563 | 0.261319331263134 |
| CGTCATTCCGA | 740.035264336951 | 0.233565195164742 |
| ACGGGTGACGC | 740.07995766775  | 0.138475002743645 |
| CTGAGTAGTCA | 740.11684718942  | 0.408600442810344 |
| CACTTTGACTC | 740.13949668648  | 0.234518776611238 |
| CTGACTGTGTC | 740.154693014367 | 0.237929470062293 |
| GTCACCATGTA | 740.166457734298 | 0.260306540299085 |
| GATGTGATGAC | 740.23170404979  | 0.239024300581646 |
| ATTGGTGACGC | 740.272858059477 | 0.297127149574094 |
| GTCATGCAACA | 740.362782693247 | 0.046887990405296 |
| GTCATCCGGCA | 740.365679141157 | 0.215299310142337 |
| CGGGTGACCCA | 740.383700327139 | 0.229955629040216 |
| GATTGAATGAC | 740.38540310805  | 0.252264937160847 |
| AGTTGCAGTCA | 740.389966051043 | 0.163840819428124 |



|               |                  |                   |
|---------------|------------------|-------------------|
| CATATGTGACA   | 740.389978230876 | 0.206235663546309 |
| CACAATGTGAC   | 740.396140626834 | 0.467363113931658 |
| AAAAGTGGTCA   | 740.442628880436 | 0.339365407610282 |
| TCCCTGACACA   | 740.51146243153  | 0.198780286568749 |
| ATCCCGAGTCA   | 740.524809241    | 0.267773457738685 |
| GTTCTAAGTCA   | 740.599794712912 | 0.289864107352028 |
| GTCATTCAGCA   | 740.639271955496 | 0.187520620236123 |
| ATAATAATGAC   | 740.673844379437 | 0.22721949839452  |
| AAAATAATGAC   | 740.704879288951 | 0.278732349734823 |
| CTCATCTGTCA   | 740.73706607951  | 0.275667383350391 |
| ACCGTGACTAG   | 740.746070971906 | 0.183834722204911 |
| CCGTAGATGAC   | 740.766628786541 | 0.473018835314969 |
| ACATAGTCAGA   | 740.767972021972 | 0.153100309508074 |
| AGATTGACACA   | 740.804140076854 | 0.277791841030708 |
| CGACTTCGTCA   | 740.832491613638 | 0.247206674332061 |
| CATTATATGAC   | 740.861357080372 | 0.306807092445098 |
| GTCATTTACACA  | 740.870324446263 | 0.139644125683181 |
| GACCAATGACA   | 740.889913711427 | 0.291687115808794 |
| ATGCGTAGTCA   | 740.981171028452 | 0.406163896825819 |
| AATACAGTCAG   | 740.99122859006  | 0.221944433145047 |
| ACTCCGACTCA   | 741.001624061527 | 0.128013056943717 |
| CTCCGTATGAC   | 741.010151625509 | 0.256941371825313 |
| CCTACTGACTC   | 741.045621578816 | 0.194552019237697 |
| CCAGTTGTGAC   | 741.062758790921 | 0.212692203006374 |
| TACGCGAGTCA   | 741.092029623313 | 0.36297316911358  |
| GGTAAGTGTCA   | 741.101823405343 | 0.185855622454719 |
| ACTGAGAGTCA   | 741.183475706474 | 0.255808072427951 |
| AGCATATGACG   | 741.183651532646 | 0.2440167153479   |
| GCTAATATGAC   | 741.24134483954  | 0.191769430143368 |
| CCGCGGAGTCA   | 741.24382000811  | 0.193690132242873 |
| ACAAATGTGAC   | 741.270300135404 | 0.240783828302671 |
| AGTAGTGAGTC   | 741.300412669498 | 0.130917073292471 |
| GTCATGACAC    | 741.395451458384 | 0.327379415411981 |
| CAAGATTAGTC   | 741.43063696554  | 0.265526256335116 |
| CAATATTAGTC   | 741.456149813692 | 0.334138444817711 |
| GGGTATATGAC   | 741.493386621347 | 0.278740093934619 |
| ACTGACGTCAG   | 741.530261719864 | 0.445226301446402 |
| CATTTGGTGTGAC | 741.540807423723 | 0.410559995908102 |
| GTCACCCCTGA   | 741.585680195202 | 0.307407296895871 |
| CGTCATGTCAC   | 741.647403769397 | 0.251726131853157 |
| AGAGGCGTCAT   | 741.740538218257 | 0.230660929712601 |
| CTTCCGGTGTGAC | 741.7547396143   | 0.295671499981589 |
| CGCAAAATGAC   | 741.777945866954 | 0.257845087719553 |
| GTGTCACCTCA   | 741.780722041813 | 0.265227362885887 |
| CTTTTACTGA    | 741.81577751327  | 0.155159165377221 |
| CTGCTGAGTAA   | 741.852935182574 | 0.225517219381072 |
| AAGTGTGACGC   | 741.867732856871 | 0.214836858713947 |
| AAGTAATGACG   | 741.894566349215 | 0.244123778660842 |
| GTTGCGAGTCA   | 741.897676988371 | 0.295018130355641 |
| ATGAGTAGTCC   | 741.922659179495 | 0.169970446018827 |
| ATGACGGACTC   | 741.939746074507 | 0.144430368915069 |
| TCATCGTGACA   | 741.945111295282 | 0.28981777457875  |
| AATCGGTGACA   | 741.985365277386 | 0.217715768222674 |
| GAGTCAAACA    | 741.990999120191 | 0.244827943702144 |

|             |                  |                   |
|-------------|------------------|-------------------|
| GCCGGAATGAC | 742.067276220136 | 0.187569242088242 |
| ACCTTAATGAC | 742.088694989508 | 0.374025408414527 |
| ATGACGAGGAG | 742.097175807632 | 0.221120916894464 |
| AATGACATTAC | 742.102179690741 | 0.230043668744026 |
| ATGACCTAATA | 742.109809740945 | 0.274486142009175 |
| ATACTGAATCA | 742.158528891874 | 0.246048488995516 |
| AAAAGGGTGAC | 742.184540152684 | 0.138317664115267 |
| GTCATTGTAAA | 742.237450649622 | 0.327114730596037 |
| AACAGATGACA | 742.238172620767 | 0.300286449080332 |
| CGTCACTGTGA | 742.280407996198 | 0.296849230898878 |
| ACTTAATGACA | 742.289782694859 | 0.230490707461858 |
| GTCATTAGGAC | 742.312752405995 | 0.441850528257902 |
| TAACGTAGTCA | 742.320082385072 | 0.28957495748783  |
| CCAGAAATGAC | 742.322692775821 | 0.326202656330129 |
| ACTTAGATGAC | 742.330767554306 | 0.253002743530975 |
| TGACTCGCGAA | 742.38253827518  | 0.235231960965945 |
| ATTAGTGTGAC | 742.392586694071 | 0.212546821255173 |
| GTCATCCCCTA | 742.439329284245 | 0.187754217049752 |
| TGAGTCGAGAA | 742.496876673333 | 0.184607448407101 |
| CAGAAGGTGAC | 742.519565912172 | 0.270526957531337 |
| GTGACGTGATA | 742.618021967217 | 0.205618198216552 |
| AAATGCAGTCA | 742.63237422562  | 0.293539285601393 |
| AAGAAAATGAC | 742.737151948817 | 0.24107082229843  |
| CGTCATTGTAC | 742.76849264588  | 0.381396447491491 |
| AGGAGTGTGAC | 742.781960307182 | 0.187840566284492 |
| GTGACGCGGCA | 742.825236093325 | 0.244483217284739 |
| AAGCAGTCAGA | 742.861478923209 | 0.212098349802387 |
| AGCTATATGAC | 742.904626626634 | 0.163676024299481 |
| AACATTGTGAC | 742.908785447397 | 0.348716871109442 |
| AGTATTACGTA | 742.987592116516 | 0.275753250640734 |
| GTCATTCGAAC | 743.012039160364 | 0.22105864969655  |
| CCGAATTAGTC | 743.046568346386 | 0.372148327089752 |
| CGTCATGAGTA | 743.115226699532 | 0.220002793762457 |
| TAACGGTGACA | 743.120828142276 | 0.199677039219595 |
| ATTGGTGTGAC | 743.16023444632  | 0.274212805949657 |
| ATAATGGGTCA | 743.233403810619 | 0.312177143382119 |
| CCCGCAGTCA  | 743.249969819106 | 0.296546137297507 |
| AGAGCTGTGAC | 743.257526368034 | 0.202931658950952 |
| CGACTGAATCA | 743.263628978454 | 0.14523002581757  |
| GTCACACCAGA | 743.268122081019 | 0.175780251591234 |
| GTCACCATTAA | 743.301806319451 | 0.301829823329288 |
| CTGCGCAGTCA | 743.344769117802 | 0.297629063546802 |
| TCTATATGTCA | 743.344862428972 | 0.204151427233245 |
| ATGAGTAGTTG | 743.369488391401 | 0.307119764186639 |
| GCCCATGACAC | 743.415161732911 | 0.190910522121614 |
| ATACGTAGTCA | 743.430912144036 | 0.320454253491451 |
| GTCATATCCAA | 743.492793705885 | 0.226154869031577 |
| CTGTTTGACTC | 743.494726683573 | 0.296938476302227 |
| CCAGTGAATCA | 743.505952431395 | 0.271245573927589 |
| ACTGTAATGAC | 743.514086609763 | 0.434469117129906 |
| AGTCACGCCGA | 743.518475089497 | 0.26649330795262  |
| CGATTTGACTC | 743.537809465271 | 0.196881869374835 |
| GATACTAGTCA | 743.617543970955 | 0.238470610193968 |
| ATACGTAATCG | 743.648387447963 | 0.366519337584036 |

|             |                  |                   |
|-------------|------------------|-------------------|
| ATGACCGAACC | 743.672330063939 | 0.111233379467657 |
| CGACTTGTGAC | 743.675166305428 | 0.281634907161011 |
| ACAGCGGTGAC | 743.690842235971 | 0.295019333444744 |
| CGTATAATGAC | 743.707610047252 | 0.313046943127855 |
| CAGTTTGACTC | 743.722161823112 | 0.110845358096455 |
| CAGGTATGACC | 743.775268467853 | 0.193999448925526 |
| AAGCACAGTCA | 743.810380748668 | 0.159509765573031 |
| GTCATGTCTTA | 743.815460403513 | 0.330989429084418 |
| AGGCCGAGTCA | 743.84633820392  | 0.329172488374759 |
| AGTCACGCCAA | 743.854813064231 | 0.122605303088027 |
| CAAGTGGTGAC | 743.909905645632 | 0.147605692334659 |
| GTCATTTTAAA | 743.952514778982 | 0.326549579229876 |
| AACTGCGTCAG | 743.968993004876 | 0.283184318266114 |
| CTCCTGACACA | 743.99935251953  | 0.248972064828605 |
| ATGATAATGAC | 744.002939797193 | 0.252741691141835 |
| GACACGAGTCA | 744.024182129647 | 0.374118251732847 |
| CGCTATATGAC | 744.026177088566 | 0.297080077879822 |
| CATAGTGACGC | 744.091143504018 | 0.317458192836751 |
| GCTGTGAATCA | 744.146554078979 | 0.375756616100965 |
| AGATTTGTGAC | 744.164063766756 | 0.180171732656955 |
| CTATGGTGACA | 744.174074050456 | 0.282988111106874 |
| GCCAAGATGAC | 744.178738016132 | 0.32339975049168  |
| GTCAGTAGTCA | 744.211139373213 | 0.267108050326627 |
| GCTGACATGAC | 744.225964273188 | 0.404150458669552 |
| AGTTGCATCAT | 744.249864711826 | 0.273448621036294 |
| AGCGCGTACT  | 744.266857258634 | 0.233760168316473 |
| ACCAAAATGAC | 744.267171725224 | 0.220970886887274 |
| GAAAAGTGTCA | 744.292652682766 | 0.349111399580674 |
| GTCATCCCGCA | 744.312387624275 | 0.112911281757424 |
| CTCTTGTGTCA | 744.343636664828 | 0.310134030126123 |
| GAGGCGAGTCA | 744.375862328089 | 0.187685752446065 |
| GTCCAGTCAGA | 744.431741042519 | 0.334625265560625 |
| TAGTAATGACA | 744.442704265147 | 0.172320390811085 |
| GTCATAGAGTA | 744.44877411875  | 0.179622717202767 |
| CGTCATTCCTC | 744.49964612767  | 0.212013635821602 |
| TGACATGTACA | 744.500053798369 | 0.229164863138076 |
| GTCACACAGGA | 744.54034198199  | 0.298604122610828 |
| GCTTAATGACA | 744.5471721275   | 0.232989302123418 |
| CATAGCAGTCA | 744.582548891705 | 0.395851294346928 |
| AACAGTCAACG | 744.582899202282 | 0.157645635179943 |
| GATCTGATTCA | 744.606080902454 | 0.214334220734968 |
| GCGCCGAGTCA | 744.622707759567 | 0.268728263074721 |
| ATAGTGACCAA | 744.671406552769 | 0.234947289248149 |
| CCACAGATGAC | 744.713617747238 | 0.269000192817203 |
| GTGGTGAATCA | 744.716877654301 | 0.212944637235089 |
| AAATGTCATCA | 744.719994057459 | 0.138264818215775 |
| CGTGAATGAC  | 744.72055536746  | 0.196417020895133 |
| GTGTGTCAAAC | 744.744362672413 | 0.210558402206948 |
| TGACCAATGCA | 744.764443282149 | 0.335931085274457 |
| ATTAGTGACGC | 744.779983413947 | 0.307019066984036 |
| GATTACAGTCA | 744.781355640329 | 0.177262988766403 |
| TGACTCTGCCA | 744.803412521611 | 0.277169388224812 |
| CCTTAATGACG | 744.809371905965 | 0.170260652340264 |
| GACTTTACTCA | 744.834143697898 | 0.279663089232017 |

|              |                  |                    |
|--------------|------------------|--------------------|
| CTGTGGAGTCA  | 744.907779668353 | 0.203172119516616  |
| AACGATGTCAT  | 745.031231697444 | 0.103320097697875  |
| TGAGTGATACA  | 745.052191841122 | 0.271373876135301  |
| GACGACTCAGA  | 745.10054315007  | 0.193356837148496  |
| GTCACACTCAA  | 745.142979094004 | 0.201246234035073  |
| AAGTGTGAGTC  | 745.160354006123 | 0.237200815387274  |
| GTACATAGTCA  | 745.167662596856 | 0.353133703498938  |
| ACATTATGTCA  | 745.25085183276  | 0.277914906661529  |
| CGGTTGATGAC  | 745.258317357135 | 0.235580796069194  |
| ATGACAGACTG  | 745.373781109154 | 0.295746933871209  |
| GTATCTGTGAC  | 745.409213641891 | 0.367364964084737  |
| TCAAGTAGTCA  | 745.409886655665 | 0.0989883277275415 |
| ATGAAGTCAACC | 745.42045247516  | 0.335577583468268  |
| GATGTGAATCA  | 745.431289928685 | 0.248653010013826  |
| CCCATACGTCA  | 745.453002652074 | 0.254949542127985  |
| ATAGTCAGTAC  | 745.482390991256 | 0.326558358604985  |
| TGGTGACCCAA  | 745.487644739481 | 0.21032255960513   |
| ACTACGCGTCA  | 745.515474433641 | 0.203676652774217  |
| GCGCCTATGAC  | 745.528319943254 | 0.381551022583563  |
| GACGAGATGAC  | 745.54574682746  | 0.318313901927223  |
| GTATCACGTCA  | 745.570632788004 | 0.291874072217955  |
| ATGATGTGACA  | 745.574995016219 | 0.220184607273071  |
| ATGTATGTAC   | 745.58527317007  | 0.297309205211199  |
| GACTAATTCGA  | 745.604930963478 | 0.183581046565749  |
| GGTGACAGTCA  | 745.640153061282 | 0.24302285078562   |
| CAAGATGACCA  | 745.64934281428  | 0.430906061240011  |
| ATGACCCAGCG  | 745.657392647397 | 0.292840014544654  |
| GGGCATAATA   | 745.687629433298 | 0.254703556873695  |
| GATGACAAGGC  | 745.72674353213  | 0.22209690071149   |
| GTCACCTAAGA  | 745.745448501339 | 0.306152952433863  |
| GCTTAGATGAC  | 745.758027205749 | 0.288337453890067  |
| AGAACTGACTC  | 745.782985080159 | 0.244518872345191  |
| TCCATGTCA    | 745.852826833123 | 0.190800163482302  |
| CGGATATGTCA  | 745.893320723152 | 0.280573366230609  |
| AAATTGGTAC   | 745.896978419907 | 0.239040372420057  |
| ACTTAATGACG  | 745.92893784121  | 0.196536221080195  |
| AGTCATGGGTA  | 746.026064435451 | 0.221737634129027  |
| CATGGGAGTCA  | 746.08614751277  | 0.255316820127269  |
| CGTCATTGAC   | 746.111363660893 | 0.281694750575626  |
| GACATTTGTCA  | 746.186486931396 | 0.299492416944405  |
| GGGAGGATGAC  | 746.194351489995 | 0.199484207245933  |
| ATTCTATGAC   | 746.202152193916 | 0.24915875126402   |
| TAGCTGTGTCA  | 746.273550501995 | 0.17432689579771   |
| ATTTTCCGTCA  | 746.284173439241 | 0.244905863901935  |
| ATGCCTGACTC  | 746.2930556182   | 0.189776653294455  |
| TGCAGTCAGAA  | 746.299689054021 | 0.260857564652366  |
| GTCATTCACAC  | 746.341663750022 | 0.214140859859734  |
| CAGCCAATGAC  | 746.428288755949 | 0.261830471281748  |
| GTGCATGACAC  | 746.438498529277 | 0.132202160144778  |
| AGCTAGTGACT  | 746.460931164612 | 0.178722615250613  |
| TGATTCACTAA  | 746.474565340383 | 0.268453039054138  |
| CCAATAATGAC  | 746.496131097831 | 0.322916323331586  |
| AGTCACGCGAG  | 746.498623136255 | 0.170694239760258  |
| ACTCGAGTCAA  | 746.527406935615 | 0.358331486748465  |

|              |                  |                    |
|--------------|------------------|--------------------|
| AAGCATATGAC  | 746.56299267975  | 0.285892862008516  |
| GTCATCACCAC  | 746.611880162158 | 0.175842374139427  |
| ACACGCAGTCA  | 746.628176585572 | 0.21307782645705   |
| TGTGAGCCACA  | 746.720075067165 | 0.278547798666561  |
| ACTTTGATGAC  | 746.740182759899 | 0.29807101700391   |
| TGACTGTGGCA  | 746.777771069397 | 0.219892030764487  |
| AGTGACCCAAT  | 746.799988859564 | 0.150044538064774  |
| TACCAATGACA  | 746.817665498865 | 0.212663513616992  |
| AAACGAATGAC  | 746.915283027593 | 0.156112589779038  |
| CCCATTGACTC  | 747.033147255878 | 0.206062119085135  |
| TAGGCGAGTCA  | 747.042862753073 | 0.198590245312429  |
| ATGACGTCTTG  | 747.089732559201 | 0.234487250382845  |
| AGACCCAGTCA  | 747.106773675505 | 0.219671516907238  |
| AGCCACGTC    | 747.107532258594 | 0.185030734024811  |
| CTAAATGTGAC  | 747.180194239842 | 0.0960726663698938 |
| ACGTCACTTAC  | 747.195512402172 | 0.204745092096947  |
| AGTCACTAGTG  | 747.28303425625  | 0.205471355780984  |
| GTCATTTACAGA | 747.289902165558 | 0.338545673869903  |
| AGTGGAATGAC  | 747.308408559695 | 0.176414619816525  |
| AATATAATGAC  | 747.312852726981 | 0.215142089875801  |
| ACCTGTGACGT  | 747.334521006968 | 0.184941604211987  |
| ATGACGGGATC  | 747.407620918317 | 0.228022428122681  |
| CTTCGGTGACA  | 747.439724451426 | 0.232318553003962  |
| CGTCATCTAAC  | 747.463176701112 | 0.247980907083924  |
| TGTCACAGTAA  | 747.494485082426 | 0.259680435840382  |
| CCTTAGGTGAC  | 747.557479083634 | 0.235606465838937  |
| CCGCTTATGAC  | 747.564091344506 | 0.269595045216247  |
| ATAGGGAGTCA  | 747.568443132591 | 0.225939994367533  |
| CACGTCACGAG  | 747.579023946917 | 0.325216393329312  |
| ATGAGTAGGCC  | 747.603385077825 | 0.180784972362617  |
| CGAGCGATGAC  | 747.60794536008  | 0.252959854352012  |
| AAAGGTGACTT  | 747.669580263518 | 0.170318141469453  |
| TAACTTTGTCA  | 747.672411010816 | 0.229119649097195  |
| TCGTCTAGTCA  | 747.721068319964 | 0.396119262789458  |
| ATCTTTACTCA  | 747.743580945792 | 0.203367837180012  |
| GTCACCGTCGA  | 747.80531367564  | 0.300072005322602  |
| AGGTCGGTCAT  | 747.813486080417 | 0.112240220068567  |
| CATATCGTCAC  | 747.849918895999 | 0.30421240065186   |
| AGGATTTGTCA  | 747.862745497136 | 0.19287672751103   |
| TCATGGTGTCA  | 747.888165388278 | 0.471072645843922  |
| ATGACAGCTCG  | 747.926280643837 | 0.221891580710263  |
| CGACTAATTTA  | 747.959767099502 | 0.222861379271585  |
| CTTTAGATGAC  | 747.969704394519 | 0.223060211245072  |
| AAGAGTGTGAC  | 748.027044814206 | 0.217592630886277  |
| ACTTTAAGTCA  | 748.041978420989 | 0.314502983202422  |
| CGTGATGTGAC  | 748.067994936884 | 0.351589494119277  |
| ATCACCAGTCA  | 748.081122593305 | 0.225306887616743  |
| GCGGTGAATCA  | 748.185817170838 | 0.245655159474269  |
| CGTGCACGTC   | 748.230560626946 | 0.309391164499096  |
| TCCTGGTGACA  | 748.254254835166 | 0.302547495870243  |
| CGTCATTTCTA  | 748.356382116101 | 0.182052410684942  |
| TAACGAATCA   | 748.643726835273 | 0.274250178301126  |
| TATCGCAGTCA  | 748.653219074741 | 0.2339629099872    |
| AACATTGCTCA  | 748.653598087416 | 0.33122452681991   |

|             |                  |                   |
|-------------|------------------|-------------------|
| AATCGTGACAC | 748.659346212686 | 0.21567831865834  |
| CTGACTACTCA | 748.668609472677 | 0.242970996382143 |
| ACGTCATGCAG | 748.681981633936 | 0.227114058230683 |
| AGTCACGGCAG | 748.797305292543 | 0.189845878773052 |
| GAGGATGACCA | 748.80253565641  | 0.269985556419915 |
| CCATAGTGTC  | 748.813641013766 | 0.310844468582933 |
| ATGAGTGAATG | 748.8156905989   | 0.266755715361258 |
| ATCGTACTCA  | 748.820642667037 | 0.270226045970631 |
| AGTCTACTCAT | 748.86094484848  | 0.16913299913379  |
| AAACGGTGACA | 748.868620329882 | 0.181718319687601 |
| GCCTAGAGTCA | 748.936264960227 | 0.181866440292068 |
| CGAATTACGCA | 749.004173251649 | 0.213538434291542 |
| ATCTTTGACTC | 749.0644384561   | 0.271412356118124 |
| CACATGACCCA | 749.07397286872  | 0.246590832522779 |
| GACTACATGAC | 749.127612253606 | 0.296383861897655 |
| AGGCGGATGAC | 749.131046917013 | 0.276715073562229 |
| ACCTTTGACTC | 749.151515187945 | 0.201039881156864 |
| ATGACATCGAC | 749.167278387202 | 0.283262511757318 |
| ATGACATGATG | 749.189364254309 | 0.276113103030955 |
| CGAGTGACCCA | 749.203359197081 | 0.240742904936148 |
| CCCATGACCCA | 749.211944342873 | 0.210925575887174 |
| GTCATTGTATA | 749.217139070795 | 0.163825574613564 |
| AGTCAGAAGCA | 749.270176614513 | 0.246728056803017 |
| ATGAGTCCGGC | 749.282806801256 | 0.239041541880785 |
| ATGAGCAACCA | 749.311541107454 | 0.180163952423731 |
| GTCATCACCAA | 749.369197290792 | 0.315720643477414 |
| GAGATTTGTCA | 749.372442111547 | 0.316601311511145 |
| CCGCAGAGTCA | 749.38563468802  | 0.276311015746297 |
| GAACGTGTGAC | 749.391960403048 | 0.227534438463217 |
| ATTAACAGTCA | 749.398558131992 | 0.210720944190969 |
| GAGCTTACTCA | 749.400767515703 | 0.21263468050271  |
| AGAGGTGTGAC | 749.400960079882 | 0.236119268069001 |
| CGTCATTGACA | 749.430635325541 | 0.263341350414148 |
| CGTGATTAGTC | 749.431632034149 | 0.310991680161236 |
| AAGAATTAGTC | 749.438054882214 | 0.279958458990816 |
| ACTCGAATGAC | 749.446828888839 | 0.287679728032194 |
| CCTTATATGAC | 749.450967674263 | 0.220022702359116 |
| GCCCCGATGAC | 749.505647956664 | 0.317307080691224 |
| AGCAAGATGAC | 749.513733824347 | 0.295027666184874 |
| CATCCTGACTC | 749.519825058693 | 0.188613337550006 |
| GCGATGACCGA | 749.530870994389 | 0.210330331655463 |
| CAAACCTGTC  | 749.540237168134 | 0.284569332809485 |
| AAGTTATGACC | 749.562998897045 | 0.320327643524049 |
| GTCTAGAGTCA | 749.567130839146 | 0.24446873773342  |
| ATGAGTACCCC | 749.631171242496 | 0.302292419386609 |
| CAGCATGACGC | 749.659945652594 | 0.226385128425491 |
| ACAACCTGTCA | 749.684586149328 | 0.219928710881368 |
| GGCTGAGTAAC | 749.735114349947 | 0.166829542237527 |
| GTTACGCGTCA | 749.757090145104 | 0.207809811554493 |
| GTCACCACGTA | 749.772715789456 | 0.170942828878838 |
| AAGTGTCAGAA | 749.774114958279 | 0.216272928360021 |
| CCTATGTGACA | 749.856646465712 | 0.230691198634754 |
| ATGAGTCTCTC | 749.932047638574 | 0.219766653048103 |
| TAGCCCAGTCA | 749.939309285572 | 0.160552407524122 |

|             |                  |                   |
|-------------|------------------|-------------------|
| AGCCTTGCAT  | 749.948415672797 | 0.26910688317871  |
| ACGACGTGCA  | 749.952609486688 | 0.307520453064698 |
| ACGTCACAATG | 749.994567620236 | 0.190743291975389 |
| TAGCTGATTCA | 750.019904573416 | 0.272244024712887 |
| GACTAATACCA | 750.030953801021 | 0.21935176879766  |
| GCCTCGGTGAC | 750.102634521405 | 0.236381879028431 |
| TAAGCGAGTCA | 750.121151906938 | 0.176211446137278 |
| ATGATGTGGCA | 750.142740259708 | 0.2133498377298   |
| CGTCATGAATC | 750.224089925412 | 0.289654712181345 |
| GATTGAGTAAC | 750.227002995123 | 0.210134881594993 |
| ATAGGATGACC | 750.253768758184 | 0.250303868165206 |
| GCTTTTATGAC | 750.277171199079 | 0.318786985870395 |
| AGTCACTTGCA | 750.316049114352 | 0.284689686658483 |
| CCACTGTCATA | 750.349143174078 | 0.295621717695085 |
| GTATGTATCAC | 750.384581886982 | 0.19220397959495  |
| GAAGTGTCAGA | 750.390419138712 | 0.231353643314585 |
| ACGAGTGAGTC | 750.46126561927  | 0.26359376872286  |
| AATTACTGACT | 750.492768508629 | 0.172225658419874 |
| GCGTCACAGTA | 750.505554885074 | 0.258313415563533 |
| ATGACGATCAC | 750.508620025808 | 0.162649259183043 |
| CGTCATCCCTA | 750.51894433638  | 0.252249104378832 |
| CCTCTAAGTCA | 750.52053156661  | 0.23819461937011  |
| GACGGGATGAC | 750.633936437395 | 0.251393084983405 |
| TAGCTACGCA  | 750.710285749558 | 0.257883295295916 |
| CGTAGTACTCA | 750.847164644188 | 0.316987371128511 |
| GACCCAATGAC | 750.85094407482  | 0.317398321195397 |
| AAACTAATGAC | 750.867561426785 | 0.239009355113802 |
| CTCTGTGTGAG | 750.965783388485 | 0.229732522310157 |
| GCTATAATGAC | 750.979519072546 | 0.389693120296058 |
| CCAGTGGTAC  | 751.01209251637  | 0.322242208980938 |
| GTGACGTCTTA | 751.039496516687 | 0.338699199501112 |
| CTGACTCGGTA | 751.090624410481 | 0.259632607074345 |
| ATTTAGATGAC | 751.132219203761 | 0.283625528888806 |
| AACCGGTGACA | 751.133734875937 | 0.110766773465353 |
| CCCATTATGAC | 751.286569503224 | 0.198719535227383 |
| CGATATGTGAC | 751.347051863864 | 0.181388509639723 |
| CAGGGGAGTCA | 751.368604173238 | 0.225981341499161 |
| ACACGTGAGTC | 751.39086001352  | 0.38617158945514  |
| TAGCAGAGTCA | 751.429715466805 | 0.204895141803033 |
| GTCTATAGTCA | 751.453630709398 | 0.295991537525125 |
| GTCACCACTCA | 751.488497670815 | 0.232072114076998 |
| GGCCTTATGAC | 751.491953155997 | 0.178798854851668 |
| CGACTAATTCA | 751.505135853181 | 0.36285685424402  |
| AACTGAGTAAC | 751.51027455716  | 0.312836673165216 |
| CACATTGGTCA | 751.519665825118 | 0.203561074566845 |
| CTGACTCGCCA | 751.525239064804 | 0.270617812468537 |
| TACTCATGACA | 751.534406355953 | 0.207582989400172 |
| AACACATCATA | 751.590422244472 | 0.200193895598455 |
| ACAGATTAGTC | 751.597945104563 | 0.373013328405873 |
| CGTCACAATTA | 751.604260614702 | 0.217435073568707 |
| GTGCTACTACA | 751.686560304038 | 0.202635871708023 |
| CGTGAGATGAC | 751.695480449654 | 0.18408719601472  |
| CAGTCAGCGTC | 751.696793993709 | 0.263813004456226 |
| GGTCAAATGAC | 751.708752339697 | 0.210888366262747 |

|             |                  |                   |
|-------------|------------------|-------------------|
| AGCGGAATGAC | 751.723343593995 | 0.17689719517727  |
| ACCCTCGTCAT | 751.726532245899 | 0.182917882215253 |
| CCCGAGATGAC | 751.750595815615 | 0.330113266046038 |
| GACCGAATGAC | 751.762477684499 | 0.177373915558818 |
| TCGGACTCACA | 751.821678374948 | 0.258008031531816 |
| ATGGTGATGAC | 751.852103166364 | 0.139864340105674 |
| GCCTTGATGAC | 751.876522390776 | 0.3069838577945   |
| GTCATAGCGCA | 751.893518649846 | 0.363340023765332 |
| GTCACCACATA | 751.912516321172 | 0.319331822256691 |
| ATTGACGTGAC | 751.928929946148 | 0.345766519825239 |
| ATGACATGATA | 751.959008576359 | 0.274933075077136 |
| TGTCATGCTAA | 751.993300102534 | 0.266865003227875 |
| CATTAGGTGAC | 752.049609550788 | 0.354772537252656 |
| GCTGGAATGAC | 752.062313872843 | 0.229092337244615 |
| GTTACTCAGCA | 752.095873831377 | 0.280154622914646 |
| AGCGCGATGAC | 752.102100655586 | 0.296972295575834 |
| GTCACCATCGA | 752.112674577015 | 0.283396468930463 |
| CGTCACTATGA | 752.140726314177 | 0.257424773536837 |
| AGTCACGGTAT | 752.146887655987 | 0.189705659369269 |
| CCATTGGTGAC | 752.15684872851  | 0.332011918068331 |
| ATGACGTCTAA | 752.171492594682 | 0.206306997270607 |
| GATACGCGTCA | 752.17844937385  | 0.40062601365333  |
| TCCCTTACTCA | 752.210271251286 | 0.226927616101332 |
| AGGACCAGTCA | 752.235620403544 | 0.314668660881599 |
| CATACAGTCAG | 752.280136147251 | 0.40051390912995  |
| AACGCGACTCA | 752.284494330354 | 0.379605019661824 |
| CGGCGTATGAC | 752.286470905866 | 0.308996841983776 |
| ATCGGACTCAC | 752.308935298438 | 0.244414115035493 |
| ATTTTACGTCA | 752.324821346782 | 0.262031317742175 |
| CATCGTGAGTC | 752.359426962876 | 0.277945867567501 |
| TCATTGAGTAA | 752.360189239634 | 0.293239466767504 |
| CGGTTTCGTCA | 752.39607162415  | 0.307529721278063 |
| AACCTACGTCA | 752.498876702027 | 0.246493274666341 |
| GGGTCATAGTA | 752.499606041222 | 0.167794720582499 |
| ATGACGACTGA | 752.564023418069 | 0.117622864004352 |
| ATCGTGGTGAC | 752.573775964682 | 0.210270612915881 |
| GTCGACTCAC  | 752.577351285467 | 0.241985542003794 |
| AGACTGTCATA | 752.579362329511 | 0.181940008632678 |
| GTGACATGACA | 752.58030219118  | 0.167737153448852 |
| ATTGAGAGTCA | 752.606552238373 | 0.214256961247119 |
| GTCATTGTGTA | 752.639185473592 | 0.292557735682041 |
| ATTACACACAC | 752.656809420614 | 0.22424898435584  |
| CTGACTAGTAC | 752.667021946081 | 0.211905680385471 |
| GTCACACAGAA | 752.674410617482 | 0.108826877690881 |
| AGCATGACATA | 752.791459007945 | 0.19914530058449  |
| CGCCTGTGTCA | 752.818118871786 | 0.271240939539659 |
| GTTAGTAGTCA | 752.827727216032 | 0.276386507471564 |
| GAGTCAGGATA | 752.879902202374 | 0.203278400618664 |
| GCGTCACCATA | 752.887281087908 | 0.262770292941682 |
| GTGACGATATA | 752.90988615322  | 0.20279734893406  |
| CTGACTGTGCA | 752.932518634034 | 0.22132256507596  |
| CGATATCGTCA | 752.972965975633 | 0.247235814881269 |
| GTCACAGTTCA | 752.979731155906 | 0.346545907772573 |
| GTCATTTAAAA | 753.031427230779 | 0.400321610255193 |



|             |                  |                    |
|-------------|------------------|--------------------|
| GACTAATCAA  | 753.090784344121 | 0.326936820352586  |
| CTTGGTGTGAC | 753.094275745241 | 0.173335731333624  |
| TACTCATAATA | 753.124664497991 | 0.227534300874367  |
| AGTGATGACCA | 753.16565973608  | 0.217370397790785  |
| AATGTATGAGT | 753.227413461818 | 0.165169524035737  |
| CACAATTAGTC | 753.242141302513 | 0.175209099260509  |
| CTGCCGACTCA | 753.24871303205  | 0.261763335816417  |
| CCTGAGAGTCA | 753.252998271275 | 0.31833276315624   |
| ATCTTTATGAC | 753.265291749657 | 0.122278691791756  |
| TATAGTAGTCA | 753.28221342443  | 0.386114762341358  |
| AGCCCTAGTCA | 753.292618522959 | 0.208497870179445  |
| GATGACGTCTA | 753.318180351834 | 0.199310331697218  |
| GTGTCACGTGA | 753.330588261152 | 0.13888136489344   |
| CACTCGACTCA | 753.355181570698 | 0.23290601482339   |
| CGTCATTTAAA | 753.390124651062 | 0.24580652249156   |
| AGACATGACAC | 753.41987046554  | 0.224327012986594  |
| ATGACCGAAAG | 753.42460376904  | 0.278648700968808  |
| CTCCAATGACA | 753.431980646122 | 0.269465619864042  |
| CGGTGAATGAC | 753.456502603464 | 0.173596392638017  |
| AGCCGACTCAC | 753.506086414897 | 0.187319855393841  |
| GTCAGACTGAC | 753.523150112215 | 0.324566268274856  |
| GTCACCGCTTA | 753.545471623381 | 0.304547973343953  |
| AGTGTCACGAA | 753.573362758091 | 0.254039142860598  |
| TCGCTGATTCA | 753.577727600384 | 0.347556663990568  |
| ACTCATACTAC | 753.654559964085 | 0.231009203696165  |
| GCATTAAGTCA | 753.671582685673 | 0.330237075575149  |
| GTCATCTGGTA | 753.686821536461 | 0.182236433277955  |
| CGTCATCTACC | 753.70645897659  | 0.234312410261909  |
| GACTATAGTCA | 753.729003837841 | 0.429204346887722  |
| AGAACGGTGAC | 753.779925740276 | 0.104879881491322  |
| TGACTTAACAA | 753.842015489638 | 0.236032739046603  |
| GTCATTGGTGA | 753.861162753078 | 0.269553774323103  |
| ACTCATAATTA | 753.862276268682 | 0.203358065389063  |
| CGGCAATGACG | 753.88023250147  | 0.28137928194832   |
| TACATTGCTCA | 753.985540282712 | 0.260476439945694  |
| TGACTCTAGAA | 754.025222044311 | 0.434760145864429  |
| AAAAGTGACGC | 754.091684391238 | 0.171864145973986  |
| CGGCCAGTCA  | 754.141735981074 | 0.122132241611435  |
| GAGTCAGGGCC | 754.143474699478 | 0.266492629565583  |
| GTCACACTGTA | 754.160767519488 | 0.23001650079181   |
| GTCATTGCGTA | 754.203766524326 | 0.416283609178112  |
| ACTTAGGTGAC | 754.234518280464 | 0.143999355687972  |
| GTCTTGACTAA | 754.253646850655 | 0.231269834500069  |
| GCAGGAATGAC | 754.281038728154 | 0.161305909935652  |
| CTCCTCAGTCA | 754.357175754097 | 0.200769453969102  |
| ACCAGTCAGCG | 754.453604561301 | 0.201381849720615  |
| CAGTCACGACC | 754.460604319532 | 0.259639396618338  |
| CCCTAGACTCA | 754.462778025747 | 0.262540222864351  |
| ATGACAGTAAG | 754.469024735303 | 0.21187656028026   |
| GTTTGGAGTCA | 754.499476593109 | 0.270945065585608  |
| CGTACGGTGAC | 754.527147479013 | 0.291366588996462  |
| AGCGAATGACG | 754.550793620141 | 0.0514878783895216 |
| GATGACTTGCA | 754.589594251338 | 0.265609358161562  |
| TGACACACGCA | 754.59020026858  | 0.361830899598096  |

|             |                  |                   |
|-------------|------------------|-------------------|
| AGAAATGTCAT | 754.600804982857 | 0.227321373303229 |
| GTGTGTCAAAA | 754.60516060558  | 0.221718850393409 |
| AACAAGACTCA | 754.612077562846 | 0.26085384006637  |
| CGGGAATGACG | 754.653172910003 | 0.226935954641786 |
| ACCATTCGTC  | 754.666698755314 | 0.269700452635041 |
| TGACTGGTCCA | 754.689693438965 | 0.192959984873223 |
| CGACGGAGTCA | 754.741745107217 | 0.191480241158708 |
| CACATTGTGAC | 754.827629314124 | 0.271078083671961 |
| AGTCACGAGCC | 754.829444605829 | 0.323551708710554 |
| TGACTCCTGCA | 754.832239699044 | 0.154123751612747 |
| CCCGTGATGAC | 754.850997965306 | 0.32516906350503  |
| ACGTGATGTCA | 754.946525811901 | 0.214537869263561 |
| CTGGCGGTGAC | 754.958576395794 | 0.366151680744477 |
| GTCGAATCATA | 754.972667009733 | 0.20501766341169  |
| ACCAGTGAGTC | 755.020854670006 | 0.336032692915772 |
| ATGCGTGTGAC | 755.054755903101 | 0.197119481634481 |
| ATCATAAGTCA | 755.10703031395  | 0.412441190566912 |
| GATTATGACCC | 755.135822845066 | 0.310842222361742 |
| GATTGTGACGC | 755.162631358139 | 0.295005828008351 |
| ATGCAATGACG | 755.207952388911 | 0.28941073945894  |
| GCATCGGTGAC | 755.212650591509 | 0.171968113593513 |
| CCCGGGATGAC | 755.249208276844 | 0.184461537624881 |
| TGACGAAACCA | 755.250294816171 | 0.332186288630574 |
| GTAATAGTGAC | 755.271284075245 | 0.148393464630566 |
| AATCCCCTCAT | 755.276406575806 | 0.196672165636246 |
| GTTACACATCA | 755.28116640151  | 0.265574388122816 |
| GACACGACTCA | 755.356600371214 | 0.204688887924987 |
| GAGATCTGTCA | 755.368180271013 | 0.344355305777867 |
| ATGACCACTCG | 755.396265530032 | 0.273863153371023 |
| CAGGAAATGAC | 755.404083126094 | 0.247858219729079 |
| TACACGTGTCA | 755.441057299147 | 0.247107429136629 |
| ACGTCATGCCT | 755.450728182362 | 0.266415557107026 |
| CAATCCAGTCA | 755.464493846088 | 0.247609263455172 |
| GTCATCGAACA | 755.482972121335 | 0.124623310884391 |
| CGACAGAGTCA | 755.529403902299 | 0.227369478664992 |
| AGACTAATCAA | 755.573821121802 | 0.271463916410058 |
| AACGTGTGAGA | 755.628460080649 | 0.250715882666428 |
| AAGACTGATTC | 755.753598648831 | 0.148868379777757 |
| GCAATATGTCA | 755.77338130322  | 0.271770645575158 |
| CATCGGTGACA | 755.790444142216 | 0.136121996364546 |
| ATGAGCCAGAC | 755.797063312013 | 0.204978735292623 |
| GGTACTAGTCA | 755.816332438099 | 0.242739579151211 |
| TCCTACAGTCA | 755.858260840334 | 0.201797628389752 |
| CTTTAGCGTCA | 755.919978423695 | 0.360504587495264 |
| ATGACATTGTC | 755.937592349656 | 0.301041398608486 |
| CGAGGGAGTCA | 756.051710424276 | 0.19036496542732  |
| CGTCATTGGGC | 756.076606540461 | 0.233028350286159 |
| CGTCATTAAG  | 756.269905291446 | 0.2415251895196   |
| ACCATTGGTCA | 756.286904372494 | 0.226810813759328 |
| AATCCGTGACT | 756.289812384915 | 0.258714893158082 |
| AGTCACTAGAG | 756.309292387403 | 0.289968128033832 |
| GTCATCAGGAA | 756.406143096578 | 0.280258622083092 |
| GAGAGATGACA | 756.416752173798 | 0.218266606160539 |
| AGCCTGACACA | 756.419760092587 | 0.190266874462774 |

|              |                  |                   |
|--------------|------------------|-------------------|
| GTGACAAACAC  | 756.440892909173 | 0.249057277746324 |
| CGATCATGACA  | 756.452289597766 | 0.175777841417525 |
| GTCACCTAGTA  | 756.478597220534 | 0.193463205188842 |
| ATATCCAGTCA  | 756.540794506346 | 0.19078656201796  |
| CCATGGTGACG  | 756.552649504859 | 0.25642298618206  |
| GAGCTGATGAC  | 756.563491762157 | 0.359031686132118 |
| AGGCTGATGAC  | 756.631551835554 | 0.247845959748168 |
| GTCACACCTTA  | 756.637800653176 | 0.175473369298625 |
| TGACGCTGACA  | 756.663532461899 | 0.357571847379629 |
| GTCATCCCTAA  | 756.688971437066 | 0.166885637974555 |
| GTA CTGCGTCA | 756.701910406991 | 0.340616800660123 |
| ACTCGCAGTCA  | 756.723230953269 | 0.265454323570267 |
| ACGTCACCTGC  | 756.734562551956 | 0.23571532668843  |
| GTGATAAGTCA  | 756.75359057135  | 0.100584653541316 |
| AGGCATATGAC  | 756.790483372672 | 0.232636736873942 |
| GACTCAC TTAC | 756.802377107045 | 0.284032970545653 |
| AGTCACGACCG  | 756.890488218228 | 0.15566604570807  |
| GTCATCTGATA  | 756.894978549687 | 0.190015893519165 |
| CAACTAATGAC  | 756.908892634718 | 0.286467624838235 |
| AGATTAATGAC  | 756.914231770565 | 0.209582171037762 |
| TAAGTGACCAA  | 756.933572778755 | 0.264141984964685 |
| GTCACGGATGA  | 756.945365329675 | 0.274378726949994 |
| AGCTCGAGTCA  | 756.953724787015 | 0.315082336453387 |
| AATGATGACCC  | 756.962949673306 | 0.383195069771887 |
| CAA ACTGTGAC | 757.057495102493 | 0.238221927200271 |
| ACGTGTCAGAA  | 757.091259218177 | 0.28786793812905  |
| GCCCTGACACA  | 757.136988824188 | 0.241017679439693 |
| GATGTAATGAC  | 757.148858048689 | 0.169260859643975 |
| CATACAGTGAC  | 757.168009921946 | 0.363355446330796 |
| TGGGTCACCCA  | 757.276515785318 | 0.307182644925076 |
| AGATCTGACTG  | 757.372219082245 | 0.234104811659016 |
| GTCATATTGGA  | 757.376127455217 | 0.262266712657525 |
| AGTCACGAGTA  | 757.396383143042 | 0.225306405155613 |
| ATTTGAATGAC  | 757.396945945308 | 0.344185105687634 |
| AGACATGACGC  | 757.417217667523 | 0.190516481295754 |
| AGTCAGAAGTG  | 757.422793386201 | 0.278163124659262 |
| GTCACACCGAC  | 757.440386837657 | 0.254730924208428 |
| AACATCCGTCA  | 757.470027227491 | 0.261024548050719 |
| GAGTCAGGCCA  | 757.483437939942 | 0.279718088879562 |
| TGAGTCTTGAA  | 757.485599951345 | 0.176144283857505 |
| CAGATATGTCA  | 757.520268485044 | 0.367245525908571 |
| GGCCGCGTCAC  | 757.521377514446 | 0.167604240574636 |
| AGAGCAATGAC  | 757.561850493352 | 0.260835655588105 |
| GTCACGTAATA  | 757.604014214452 | 0.239298713321704 |
| ATGATGTGACG  | 757.637020754394 | 0.275364954155945 |
| GTG TCACTGTA | 757.651302083585 | 0.256122679378012 |
| AGATAATGACG  | 757.664002274303 | 0.213151195845008 |
| GTGACATGGCA  | 757.667618426813 | 0.183369853644155 |
| AAAATGT CATT | 757.687781122928 | 0.17422405503222  |
| GGCCACGTAAC  | 757.694573932299 | 0.200272839572786 |
| CGATTAATGAC  | 757.699840656494 | 0.297400983315903 |
| GTCATTGCAAAA | 757.701562311419 | 0.255513638268444 |
| GTCATTAAGCA  | 757.714375576998 | 0.397554155920615 |
| CGTGACATGGC  | 757.72590256503  | 0.185651044354896 |

|              |                  |                   |
|--------------|------------------|-------------------|
| GTCTAGACTCA  | 757.725943586005 | 0.222179770109409 |
| AGGACTAGTCA  | 757.726671855821 | 0.286537628661162 |
| GTCATTTCAAA  | 757.810107993547 | 0.301816933354341 |
| CCGGGGAGTCA  | 757.82381491574  | 0.246299057452904 |
| ACGCTGACGTG  | 757.829989680925 | 0.377804926269261 |
| GTCATTCTCGA  | 757.844995639938 | 0.246561147454621 |
| TCAATGGGTCA  | 757.883098318724 | 0.296280634153589 |
| CGTCTGAATCA  | 757.887676388188 | 0.161780554694938 |
| ATGACAAGGTG  | 757.889709175662 | 0.226886179941462 |
| GTCAGCAGTCA  | 757.931150132478 | 0.207849368243484 |
| GTCATTGATTA  | 757.931308800988 | 0.220191206527231 |
| ATGACGTGAAG  | 757.957677410142 | 0.198534212676962 |
| ATGACATTATG  | 757.963421099274 | 0.207156960081312 |
| ACGTCACGTAA  | 757.979140559423 | 0.228626969862277 |
| AGACTCACTGC  | 758.062760993686 | 0.212485354169497 |
| CGCCTGACACA  | 758.063720776473 | 0.22823092526198  |
| GTATGATTCGA  | 758.189987359446 | 0.208051180747189 |
| AAAACGACTCA  | 758.23369221371  | 0.323412337667031 |
| GAGTCAAACGA  | 758.235733299034 | 0.256590034921806 |
| CGTCATTACGC  | 758.242409059082 | 0.353680154520123 |
| ATTGTGTGACG  | 758.253386242528 | 0.235513040096779 |
| CCTTGACGTCA  | 758.29336606803  | 0.350838212238463 |
| GTCATCTTGTA  | 758.320118571897 | 0.431154950620022 |
| TACCAGTCAAGA | 758.323617328838 | 0.103691473875665 |
| ATGACGCGCCC  | 758.338285093476 | 0.232195627548021 |
| GTCATTATACA  | 758.379552234707 | 0.250072539192522 |
| ATTCTGACTC   | 758.394160316455 | 0.193236878348508 |
| CATGCGACTCA  | 758.401772888598 | 0.317898133487573 |
| GGTATTTGTCA  | 758.457363671619 | 0.262664394255864 |
| AATGAGTAGGT  | 758.45752991143  | 0.198016570103173 |
| ATTCTTTGTCA  | 758.471881036963 | 0.169892950001381 |
| GTGACAAACAA  | 758.497722204308 | 0.236591420677687 |
| GTTGACTCGCA  | 758.49832879623  | 0.297974598759572 |
| CGGTGCATGAC  | 758.500795121406 | 0.285319541666798 |
| GTCACAGTAAA  | 758.538365698459 | 0.196803166258992 |
| GATGATGTGAC  | 758.543757005303 | 0.265737746120223 |
| ATGACAATAGC  | 758.555233267178 | 0.164922467323217 |
| AGGTGAATGAC  | 758.581744216025 | 0.15749632221266  |
| GGATGGAGTCA  | 758.608053892198 | 0.200148048416304 |
| GTA CTGATTCA | 758.619468736616 | 0.284512596084018 |
| GTA CTACGTCA | 758.625377700709 | 0.262842638098766 |
| ATGACGGACAG  | 758.634106461557 | 0.176414229633861 |
| GGCACCAGTCA  | 758.6348550422   | 0.373443020357304 |
| GACGTGCGTCA  | 758.642285014798 | 0.216507506053114 |
| ATGACGTTGAG  | 758.653016373471 | 0.252649196616599 |
| CATATTGTGAC  | 758.678038333537 | 0.359103166437616 |
| ACCGCGTCACT  | 758.69483177114  | 0.187896419974243 |
| ATGAATCGTCA  | 758.711329223054 | 0.294055348071375 |
| GCGTCACATTA  | 758.760433258503 | 0.366185135969702 |
| ACGCATGACGC  | 758.76628273484  | 0.229270340748834 |
| CAACTTGTGAC  | 758.766430749729 | 0.252359469487373 |
| GA ACTGACACA | 758.774716690159 | 0.242259220324761 |
| ATGACGCCTCC  | 758.785307807517 | 0.179712732201227 |
| GTCACCTTTGA  | 758.809609785392 | 0.359673189210106 |

|             |                  |                   |
|-------------|------------------|-------------------|
| ACCAAATGACA | 758.928036454158 | 0.232230100195802 |
| TGACGAAGAAA | 758.949853542574 | 0.146708568088854 |
| TCCCGGTGACA | 759.010799890974 | 0.208272050453317 |
| ATGACATTTTG | 759.061245882935 | 0.23574897267714  |
| AGTGTACAGTG | 759.064525302029 | 0.139197270776141 |
| GATAACAGTCA | 759.092624914214 | 0.215414260452082 |
| CCGTGTGACAA | 759.12570278298  | 0.22303417467856  |
| TGACTCCATAA | 759.136020117851 | 0.349067890297301 |
| AAATTTGACTC | 759.186471946671 | 0.281353722683649 |
| TGTCACACGAA | 759.213358598923 | 0.22633670356393  |
| ACGCTACGTC  | 759.232226049914 | 0.351592439751929 |
| GACTTGGTGAC | 759.265274453552 | 0.326806876962179 |
| ATTACTAAGTC | 759.26841265763  | 0.298509629383583 |
| CGTCATTTGTC | 759.344815472391 | 0.27396739931953  |
| ACAACGGTGAC | 759.362903001273 | 0.227811650774792 |
| CTAGTGACCAA | 759.396209489286 | 0.222193042863259 |
| ATGACAACCAT | 759.397464144644 | 0.257147342905898 |
| AGTCAGGTGAC | 759.423064671722 | 0.2654162003197   |
| ATGACGGACCC | 759.427744393517 | 0.241707785647087 |
| ACGACTGTGAC | 759.576462904323 | 0.352187205793131 |
| AAACCTGTCAC | 759.591906850799 | 0.224002613811096 |
| AAGAGTCTTAA | 759.592199626976 | 0.198600822035432 |
| ATGACGGTACC | 759.606039838396 | 0.330993795959997 |
| AAGTAATGACA | 759.626457152709 | 0.233460096902206 |
| AATGCTGTCAC | 759.677384066508 | 0.281297422030401 |
| TGACTACACCA | 759.704742914154 | 0.20279452951563  |
| CTTTAATGACA | 759.765664994183 | 0.275907128765343 |
| AAGAAATGACA | 759.863168080218 | 0.1964768611324   |
| AGTAATTAGTC | 759.896153739365 | 0.236263163683596 |
| CGTCACTCGAG | 759.942412710416 | 0.237358043712387 |
| AATATTGACTC | 760.03641020874  | 0.231261620717251 |
| GGCTTGGTCAC | 760.061104348889 | 0.248674035191143 |
| GTCTTGGTCAC | 760.062527738846 | 0.258955092865109 |
| GAGCGGATGAC | 760.067547659293 | 0.194033998050677 |
| GTCACCTGTCA | 760.067558824812 | 0.112101946028813 |
| TACTCGACTCA | 760.073807352202 | 0.2038425404509   |
| GTCATAGCAAC | 760.093526857845 | 0.162909993252557 |
| ATAAGTGACAC | 760.122915285157 | 0.445051662774285 |
| GAGTCAGGGCA | 760.136320715704 | 0.183897663381442 |
| ATATTGTGATG | 760.151234955804 | 0.277381360519871 |
| CACGTCAGACA | 760.161904616751 | 0.310890003926705 |
| AGAACTGTGAC | 760.165173978673 | 0.224940890899517 |
| CTGTAAGTCAC | 760.171260372896 | 0.268432641513    |
| GTCACCCATTA | 760.191121094354 | 0.175013787859131 |
| CCTTGAATGAC | 760.206408679999 | 0.226822948108691 |
| GTGACGCGGAA | 760.20667074763  | 0.161055533794675 |
| ATAACTCGTCA | 760.264170890477 | 0.355437812599891 |
| AGCCCTGACTC | 760.275210664077 | 0.206833529139892 |
| GTACAGAGTCA | 760.301886519724 | 0.130832490821462 |
| ACGCTAGTCAC | 760.331020170148 | 0.254904569967082 |
| GTCCTTACTCA | 760.345747805968 | 0.326805026747211 |
| CGGTAATGACA | 760.354238089935 | 0.209954503517689 |
| GTCATAGCGTA | 760.399057831665 | 0.216082648493614 |
| ACTCTTATGAC | 760.415722964947 | 0.241740344127976 |

|              |                  |                   |
|--------------|------------------|-------------------|
| CCGGCGTCATA  | 760.499373717695 | 0.210941541308119 |
| CGTCATTTGAC  | 760.505637131643 | 0.171949599061417 |
| ATCTTGACTGA  | 760.515172866861 | 0.155912691486817 |
| CCATAATGACG  | 760.550113454599 | 0.192891360789886 |
| CGAGGGATGAC  | 760.624350347075 | 0.179476667631957 |
| CCGATGACCGA  | 760.651968393161 | 0.291158935008011 |
| ACGTCATGTAC  | 760.686626678013 | 0.142859493437212 |
| GGCCGGATGAC  | 760.718830764942 | 0.25446551997851  |
| AACACAGTCAG  | 760.757428177614 | 0.175958546215984 |
| ACACTGTGACG  | 760.775679635518 | 0.254418124960385 |
| AGGCACGTCAC  | 760.78142563056  | 0.250091564800477 |
| CCTGGAATGAC  | 760.810128739488 | 0.343951626563627 |
| GCGTCATGCCA  | 760.843060585938 | 0.212503549371358 |
| TATGACGGGGA  | 760.84448476455  | 0.2534079974016   |
| GGCCTAATGAC  | 760.870743567814 | 0.122206945423394 |
| AGTTTTATGAC  | 760.877108217882 | 0.559024362140491 |
| AATAGCAGTCA  | 760.88174930027  | 0.347892493856479 |
| GACTAATCACA  | 760.980548863261 | 0.350203112156335 |
| AGCGTCATGCG  | 761.056892818525 | 0.161250404714728 |
| CGTCACAATGA  | 761.070980869821 | 0.167543477154752 |
| ACGTCATGAAT  | 761.079056011868 | 0.26212119455352  |
| GAGTCAAGTCA  | 761.127267676193 | 0.12019891542715  |
| GCGTCACAATA  | 761.154409125127 | 0.214409551204305 |
| GTGACAGCATA  | 761.157531540261 | 0.18152698303105  |
| CCAGAGAGTCA  | 761.199354279398 | 0.358577876873155 |
| AGCCCGAGTCA  | 761.212558857845 | 0.305220816879853 |
| GCATAGACTCA  | 761.220251790501 | 0.43554707912174  |
| TCGTAGTGTCA  | 761.221395418412 | 0.293421353471978 |
| CGTCATTGAGA  | 761.241125732857 | 0.24410705061094  |
| AAATATGTGAC  | 761.297121260518 | 0.360848619442074 |
| TCAGTACGTCA  | 761.317533090422 | 0.256904572543315 |
| CCCTTACGTCA  | 761.376192751174 | 0.272051764994114 |
| CTGTCAATTGGA | 761.387081981587 | 0.265526581213642 |
| AACGTGAGTCG  | 761.392144695871 | 0.326022211600356 |
| GTCACCGTCAA  | 761.407691586925 | 0.173995053455896 |
| AGAGGAATGAC  | 761.424217461187 | 0.214031111679404 |
| AATCAATGACG  | 761.426323580601 | 0.246857118853614 |
| GCACGCAGTCA  | 761.488948629268 | 0.380963447145904 |
| CCCGTGAATCA  | 761.499975229114 | 0.159784588415689 |
| ATTACAATGAC  | 761.503267803913 | 0.205086504878251 |
| CATGATTAGTC  | 761.511057522785 | 0.38699099834817  |
| ATTTAAATGAC  | 761.531216032585 | 0.287952387715239 |
| TCTTCCAGTCA  | 761.532304924297 | 0.265190580681043 |
| GCCAAATGACA  | 761.545447156903 | 0.317515653883304 |
| ATGAGCAACCG  | 761.567995829687 | 0.176998763277503 |
| ACTTTGACTCG  | 761.57596468703  | 0.208930118927685 |
| CTACGGAGTCA  | 761.59402996145  | 0.209802601980293 |
| GAGTCAGTAGC  | 761.595046043642 | 0.250026197704106 |
| GCGTTGACTGA  | 761.619443265368 | 0.281496059635472 |
| ATGTCATCTCG  | 761.635788152061 | 0.241539803902306 |
| GGAGAAATGAC  | 761.661074212641 | 0.172602729753352 |
| AGTCACGCCCTC | 761.670736629059 | 0.222466103434543 |
| GTCTTTACTCA  | 761.707896985279 | 0.18506412401416  |
| AAACAAATGAC  | 761.708108374427 | 0.23055608557589  |

|              |                  |                   |
|--------------|------------------|-------------------|
| GAGTCTAGTCA  | 761.727027769926 | 0.298235306525338 |
| CGCCTTACTCA  | 761.730980439369 | 0.257180899630342 |
| AGTCAGAGCAG  | 761.73984912116  | 0.229479555803963 |
| ATTTTGACTGA  | 761.749935226044 | 0.244625581107548 |
| ACGCAGATGAC  | 761.756846512073 | 0.207181969004438 |
| CTGACTCGCAA  | 761.771539457406 | 0.225693175218018 |
| GTC AACGTGAC | 761.780384568359 | 0.276526275966847 |
| CAATTGTGACG  | 761.788952567401 | 0.219953385231701 |
| GGTATCCGTCA  | 761.848546075554 | 0.203114985406181 |
| GTTGATT CACA | 761.855453124216 | 0.236036070600544 |
| AGACTAATCGC  | 761.885435481109 | 0.290366833686224 |
| AGGGCGTGACT  | 761.888777892283 | 0.260105019104957 |
| GGATAGATGAC  | 761.90016857757  | 0.256309243952209 |
| ATGACGTCTCA  | 761.91623159393  | 0.263577455852515 |
| AGTCATGGGAT  | 761.949115728558 | 0.187717279166493 |
| CGTCACCGTGA  | 762.016831960525 | 0.272872221917297 |
| CTTGGAATGAC  | 762.04978621504  | 0.193051718752081 |
| GCTGATATGAC  | 762.121464459038 | 0.266640712656422 |
| GATTACGCACA  | 762.127925589118 | 0.325425548412253 |
| CGGAGATGACA  | 762.143677156572 | 0.256770278734871 |
| GCCAACTCATA  | 762.17065857732  | 0.187294125746639 |
| GTGACTTACTA  | 762.203219411046 | 0.200208237972455 |
| ACTCATATTTG  | 762.226396867288 | 0.21636368941864  |
| GTCATAACCCA  | 762.309213546687 | 0.124294673932081 |
| GCGCTGATTCA  | 762.323974783307 | 0.246999702009218 |
| ATCAGTGT CAC | 762.374146215443 | 0.184543196434571 |
| GTCATCTGAGA  | 762.41217981896  | 0.251936783608858 |
| CGAGATGTGAC  | 762.450469581023 | 0.274733042856418 |
| AGAGTCAATAG  | 762.451389183948 | 0.186508162296099 |
| ACTCATACTCT  | 762.47153511593  | 0.156012915017264 |
| AGGCTCGTCAT  | 762.473981866014 | 0.234375563498949 |
| CCGTCCAGTCA  | 762.474081337626 | 0.193975951454091 |
| ATCATTGGTCA  | 762.487171306661 | 0.249907528119413 |
| GGTCTGTG TCA | 762.516557410853 | 0.13066788916536  |
| GA ACTTCGTCA | 762.521639576968 | 0.24753799786831  |
| GTGTCATGGCA  | 762.547903176902 | 0.174122242671488 |
| GGGCATGACAC  | 762.549326828875 | 0.185415190726081 |
| CTTTTGACACA  | 762.554181789188 | 0.216538668317848 |
| TGGTCACCGAA  | 762.570406463534 | 0.274310978292778 |
| CACTAAATGAC  | 762.593904158774 | 0.276645214114856 |
| CATGTATGACC  | 762.60958757065  | 0.248602067046054 |
| GCGTCAATGAC  | 762.611365049688 | 0.271950528058016 |
| GTCATCTCAAC  | 762.631890756493 | 0.203104468298621 |
| AATAAGGTGAC  | 762.633660048165 | 0.241656581005046 |
| AGCCCTATGAC  | 762.662218422844 | 0.279109150368076 |
| ACGTCACCTAG  | 762.66347822784  | 0.22363276667843  |
| ATGAATAATTC  | 762.701472756775 | 0.262066931737061 |
| AAGGTCTGACT  | 762.718257337684 | 0.226974701391042 |
| CGATGACCGAA  | 762.783727497223 | 0.273894451057163 |
| ACTTTTGGTCA  | 762.784501753426 | 0.22173100389072  |
| TCAGCATGACA  | 762.81516577072  | 0.250232437842357 |
| CGGCCTGTGAC  | 762.866951906462 | 0.183848880476039 |
| GAAAAGGTGAC  | 762.951097407542 | 0.251014241040227 |
| GTCACCCTTGA  | 762.959272301383 | 0.193336871880503 |

|              |                  |                    |
|--------------|------------------|--------------------|
| GTGACGTGCCA  | 762.999805612477 | 0.174443442266498  |
| AAATGTATCAC  | 763.103502228758 | 0.171762685322431  |
| CGTAGTGTGAC  | 763.117740923493 | 0.188123288355813  |
| AACTATTACTC  | 763.130268165592 | 0.214517373081535  |
| CGAATTGACTC  | 763.135031609136 | 0.309130955812204  |
| ATGTCATTACG  | 763.170103145509 | 0.0683517839043882 |
| ACTATTACTCT  | 763.209677302541 | 0.234290083482897  |
| AGCGTGACTGC  | 763.29961620361  | 0.290519269771177  |
| TGACTGCGGAA  | 763.322854327787 | 0.319139001096368  |
| GCCTTGTGTC   | 763.33533470277  | 0.239301492581153  |
| GTATTAAGTCA  | 763.346421098066 | 0.22007585908728   |
| GTCATATCAGA  | 763.353382730699 | 0.189686727623446  |
| ATGATATCATC  | 763.417340391894 | 0.23650600711966   |
| ACGTCACGTAT  | 763.433088936626 | 0.136110917442736  |
| GAGTCAGTACC  | 763.447885581418 | 0.303515620269511  |
| ATGTTGACACA  | 763.459386963401 | 0.0961649971390907 |
| CTAGTAATGAC  | 763.464361629392 | 0.185507133258416  |
| CGCCTGATGAC  | 763.494558967599 | 0.257086798596939  |
| ACTGACTGTAT  | 763.50066475276  | 0.157239673051302  |
| ACGTCACATGC  | 763.541241784455 | 0.261399679772633  |
| CTACGCAGTCA  | 763.54844995987  | 0.104133170150779  |
| GCGTTGATTGAC | 763.646303971204 | 0.256810569083332  |
| CAAATAGTGAC  | 763.668422626412 | 0.275547675965503  |
| GAAAAGTCAATC | 763.712161391631 | 0.255962509390908  |
| CGTACACGTAA  | 763.773678704429 | 0.265559883055196  |
| AGGTTGCTCAT  | 763.786307614035 | 0.340292148499311  |
| ATGACAAGGTA  | 763.835695735485 | 0.219226831686569  |
| AAGACTCGTCA  | 763.950100037176 | 0.281993405628136  |
| AGAGTCAAGAT  | 763.973386028492 | 0.230601981453627  |
| GATGAATCTTA  | 764.0384995436   | 0.243612509700624  |
| ATGACAAGGCC  | 764.045325292725 | 0.161725687429682  |
| TCACCGCTGCA  | 764.07090615169  | 0.19755900438556   |
| GCATGAATGAC  | 764.076225506545 | 0.257878477845455  |
| TGACTTATGAA  | 764.133024225679 | 0.267924975751986  |
| TAGACTCAGAA  | 764.139295835173 | 0.239624603149356  |
| CGATAATGACG  | 764.1543696391   | 0.237507782288523  |
| ATGATGTAACG  | 764.168987276122 | 0.206665713720696  |
| GTCACGCTGAC  | 764.191473147335 | 0.278767846435851  |
| GACTCACTGCA  | 764.215116530003 | 0.328567299047279  |
| CAACGGTGACA  | 764.274646148558 | 0.166548877928658  |
| CAACGAGTGAC  | 764.314610721936 | 0.382126113689328  |
| CAACAGATGAC  | 764.323253322094 | 0.203878320508499  |
| GAGTCAGGCGA  | 764.357656888312 | 0.255873069970295  |
| ACTTTGACTGA  | 764.363086638223 | 0.165370177011189  |
| GTGACACGATA  | 764.364319606319 | 0.248188612761552  |
| GGCCGAATGAC  | 764.379025929438 | 0.293263284953103  |
| CGTCATCGGCC  | 764.384046200847 | 0.312575076800317  |
| AGAATTAGTCG  | 764.391282926464 | 0.217091517642536  |
| AGACTAATACC  | 764.394273565865 | 0.247924746697404  |
| CACAGTAGTCA  | 764.4055370709   | 0.322256316864135  |
| TCACTGATTCA  | 764.468983205127 | 0.21621710408731   |
| AATTCGCGTCA  | 764.497745833939 | 0.31543056369663   |
| AAATTCTGACT  | 764.511206106913 | 0.254494581703414  |
| CTGAGCAGTCA  | 764.514341891767 | 0.210861510900851  |



|             |                  |                    |
|-------------|------------------|--------------------|
| TCGCAATGACA | 764.578096733763 | 0.227777114101434  |
| GAATCAATGAC | 764.604046695727 | 0.141217496310953  |
| CATGTAAGTCA | 764.627911089755 | 0.381539161412533  |
| GTGTCACTGCA | 764.652389594758 | 0.266133460317679  |
| TATAATGACAA | 764.697768180117 | 0.306263272379462  |
| TGACAAACAAA | 764.818466933638 | 0.28386466014687   |
| GTAACGGTGAC | 764.834400952312 | 0.16500464202819   |
| GTCATTGCAAC | 764.885195517207 | 0.250567083352031  |
| CGCTCGACTCA | 764.896877674214 | 0.250015318094221  |
| ATGACAATGAG | 764.901483983189 | 0.171228773515289  |
| CCGCAATGACA | 764.922798354551 | 0.242835120623133  |
| GTCATCAGGCA | 764.948511653168 | 0.284073994358369  |
| GACTCAATGAC | 764.985778729438 | 0.293455070785894  |
| ATCGCGAGTCA | 764.988885278695 | 0.197030186375444  |
| GTCATTCTAGA | 765.033596459756 | 0.127412992230812  |
| CGCGTAATGAC | 765.045208475131 | 0.31510954471311   |
| GTCATCTACAA | 765.052333116213 | 0.283385097869073  |
| CACTGCGTCAG | 765.060098283121 | 0.297612363848509  |
| TGACACAGGAA | 765.066468827446 | 0.242365556567469  |
| AGCATTCTGTC | 765.122548733193 | 0.259426674922694  |
| CGCTTTACTCA | 765.15202359008  | 0.196086201438585  |
| CAGAAATGACA | 765.165359794129 | 0.12870465388111   |
| GTCACAGACAA | 765.16734476061  | 0.297583886066269  |
| CAATTTGCTCA | 765.217564084057 | 0.263066878686063  |
| AAAAGTAGTCA | 765.258467786075 | 0.176257492589347  |
| TCTCAGACTCA | 765.269028916115 | 0.247723021927742  |
| CGTACAATGAC | 765.273672012033 | 0.222936868107591  |
| CAATATGTGAC | 765.291309106446 | 0.344950609351097  |
| AGTCACGGTGA | 765.300289656878 | 0.22255723891428   |
| TATGATTGCAA | 765.338622561441 | 0.304748775239774  |
| TGACACTTACA | 765.369395635577 | 0.258985882488529  |
| GCGTCACCTAC | 765.375719449745 | 0.286618846090634  |
| TGACTGGCTCA | 765.40188876583  | 0.155382605712697  |
| CAGCGTGACAC | 765.415306673799 | 0.192113453511881  |
| GGACTGTGATA | 765.433100636297 | 0.167727038820293  |
| ACGTCACATCC | 765.465183767011 | 0.206410214940292  |
| GTGACGTGCAA | 765.514338291467 | 0.297332051170019  |
| ATGACATTTCA | 765.52046771272  | 0.202275437123243  |
| CTATGACCTAA | 765.547516622152 | 0.166487273923438  |
| TGTCACCGGAA | 765.63540457617  | 0.278222532244384  |
| CCGGATGACCA | 765.687480108232 | 0.273574088093964  |
| GGCTCGACTCA | 765.717054338553 | 0.245811621790536  |
| CTTATTGACTC | 765.758565990871 | 0.195674419588116  |
| AAGACTCTTAA | 765.764538043401 | 0.165429014502673  |
| GATCCGGTGAC | 765.800131552681 | 0.222323724068215  |
| GTCATCTCCCA | 765.823869520015 | 0.24838636018797   |
| TTAGTAATCAA | 765.892085517393 | 0.312212961405072  |
| ACAGTGACCAA | 765.897596388492 | 0.233103948428972  |
| CGTCATTTGTA | 765.927491640433 | 0.212325641813247  |
| ACCATTTGTCA | 765.954006962557 | 0.226631138042104  |
| GCACTTCGTC  | 765.956439243187 | 0.237454081652802  |
| CACTTGGTGAC | 766.001047762255 | 0.305600110868278  |
| ACCTATGTGAC | 766.011845686321 | 0.326422654987802  |
| AACAGTGAGTC | 766.040445907402 | 0.0895826533722312 |

|             |                  |                   |
|-------------|------------------|-------------------|
| ATGACGGACCG | 766.104658048743 | 0.251275395173083 |
| TATGACAGGCA | 766.160602448658 | 0.116364509548226 |
| AATGAGTAGTA | 766.191737289459 | 0.212512335307971 |
| ACCGAATGACG | 766.197398760481 | 0.257188921068397 |
| AATGATGCAAT | 766.20509383582  | 0.136674242174131 |
| CGTCACCGGTC | 766.26015976566  | 0.313988603117581 |
| CCTGGTAGTCA | 766.266704276099 | 0.225288254590247 |
| CGTCACGATGA | 766.272758497902 | 0.348964419510308 |
| CGCATCCGTC  | 766.274698591113 | 0.279112688718003 |
| TAATTGAATCA | 766.358384283004 | 0.385776643487807 |
| CCACGGAGTCA | 766.374531724302 | 0.255477590707513 |
| ATGACAGTCAG | 766.379743217552 | 0.247204100905655 |
| ACCCTGACACA | 766.415526414171 | 0.221296119299698 |
| AAGCTGCGTCA | 766.421205836529 | 0.377962263915374 |
| AAACACATCAT | 766.423854177477 | 0.244274177787119 |
| AGACTCACGAT | 766.448715441905 | 0.306493920272348 |
| CGGAAATGACA | 766.475525210893 | 0.252647116407258 |
| TGACGATTA   | 766.489103077819 | 0.343819518091827 |
| CAGTCAGCGTA | 766.50399228053  | 0.201452106188093 |
| GTCACATCTGA | 766.512632124908 | 0.225610210400924 |
| GATGACGGCAC | 766.514046108488 | 0.262473114752473 |
| AAAGTAATGAC | 766.593436687776 | 0.233604108839796 |
| AATGTATGACC | 766.602380747697 | 0.33547122249858  |
| ACTCATAATGA | 766.6182555647   | 0.244732365225927 |
| AATGCGGTGAC | 766.644060833572 | 0.352304569428288 |
| ACGAGACTCAT | 766.662633730694 | 0.21555867636465  |
| ATCGCGACTCA | 766.679512525882 | 0.285755169011273 |
| TCCCTGTGTCA | 766.779677298518 | 0.26330579674262  |
| CGTCATTAAGA | 766.783875074436 | 0.259658361093908 |
| AAGGTATGACC | 766.794080338221 | 0.130594234626305 |
| AATGTCTGACT | 766.797265001539 | 0.297197485633013 |
| ACAAAGTGTCA | 766.80653366756  | 0.198239383383137 |
| ATGGATGACCA | 766.823044953098 | 0.289943484326298 |
| CGAACGCGTCA | 766.844691881343 | 0.31279982097474  |
| GCGATTACTAA | 766.933533322492 | 0.292779014373423 |
| TGACATGTCCA | 766.938110933069 | 0.358694861316287 |
| CCGGGATGACG | 766.94693636585  | 0.200732684151467 |
| AAATTAATGAC | 766.947485658622 | 0.266010076404233 |
| ATGAGTTGTCC | 766.959692822584 | 0.219208821900667 |
| ATGACCTCATC | 766.968780745671 | 0.194958007596443 |
| ACAGTCGTCAT | 766.979407699674 | 0.201559593940315 |
| ATGACATCGAA | 766.990457468312 | 0.2260506187418   |
| CGAGCGAGTCA | 767.052160969018 | 0.176379189120536 |
| ATGACTTCGCG | 767.086642551046 | 0.275165018861246 |
| CTATGATGCAA | 767.107817213922 | 0.150148027931147 |
| ACTCATATTTA | 767.12575199752  | 0.189789140528919 |
| GGTCAGACTCA | 767.126224051689 | 0.286346879709737 |
| ACGTCACATCG | 767.127059086153 | 0.130539830418169 |
| GCCCTGTGTCA | 767.148017666086 | 0.245840983129794 |
| AACCATAGTCA | 767.186024903166 | 0.351929624384743 |
| GAGTCTGTAC  | 767.195939001696 | 0.298895031632243 |
| TGCAAATGACA | 767.19941377665  | 0.286747391735656 |
| CGTCCGACTCA | 767.219468570584 | 0.173838938791914 |
| CGTCACGATTA | 767.265920290816 | 0.344929628799453 |

|             |                  |                   |
|-------------|------------------|-------------------|
| GGGAATATGAC | 767.278600390886 | 0.162251009196029 |
| ACTTAAATGAC | 767.285207410716 | 0.266121288572082 |
| GACGTGTGACA | 767.303163771139 | 0.231590348433234 |
| CACTAGACTCA | 767.36833510498  | 0.289848091334372 |
| CAGTCAGAAAA | 767.386313742461 | 0.208962600286978 |
| GTTAGGTCATA | 767.398454440306 | 0.192856650025147 |
| ACCTTGGTGAC | 767.408816759683 | 0.326421585724981 |
| GCCATGACAGA | 767.499156670783 | 0.305646139777364 |
| GGGCCGATGAC | 767.511855378478 | 0.281985186379764 |
| CGTCACAGTTA | 767.514777199265 | 0.270658953147966 |
| ACCAAGTACC  | 767.519975000641 | 0.24301174476989  |
| AGTCATGGTGC | 767.625329673691 | 0.221839438815789 |
| ATGACGGACGA | 767.633943705855 | 0.27579082559607  |
| GTCACACGCAA | 767.663663919467 | 0.277874840625674 |
| CACAGTGACAC | 767.685108133511 | 0.404957666488205 |
| AGACTTCGTC  | 767.696269340268 | 0.187989988155497 |
| GCGTCACATGA | 767.699094481682 | 0.265921148869123 |
| GACCTGTGACA | 767.754409586738 | 0.374655779516178 |
| ACCGTACTCA  | 767.761709992787 | 0.250597688651536 |
| ACAGGCGTCAT | 767.81546839071  | 0.153005729133162 |
| GTCACACTCTA | 767.836994932608 | 0.131219014365989 |
| AGTGAGATGAC | 767.842209019843 | 0.201946220098919 |
| CCAGCGATGAC | 767.876359246451 | 0.235894790125607 |
| GTGCTGCGTCA | 767.902336656921 | 0.24310466816686  |
| AACCCCGTCAT | 767.966756298803 | 0.20568744550971  |
| ACGCGGAGTCA | 768.008248350681 | 0.218735535197568 |
| CGCAAGTCATA | 768.081040699731 | 0.341915842767049 |
| AGGGAGATGAC | 768.112929391439 | 0.207717882702905 |
| GTCACCAGTGA | 768.226891873242 | 0.246040007515931 |
| TGACTGCTACA | 768.274738714275 | 0.316363512981812 |
| GTGAGTCGGTA | 768.278039957103 | 0.145897572074905 |
| AGTCATGGGAC | 768.278779904128 | 0.241627571830307 |
| CTCATGACATA | 768.296028872011 | 0.190479662568512 |
| GAGTCGGTGAC | 768.313159504628 | 0.161896511955678 |
| CTGTCAATGAC | 768.321161308446 | 0.249127909262883 |
| GCGTGAATGAC | 768.328256411736 | 0.130018511981937 |
| AGCTCGACTCA | 768.341566790737 | 0.184916082239964 |
| GTGACTGAA   | 768.344881994458 | 0.196324201050946 |
| CGTTTACTGA  | 768.405318987512 | 0.261280237153467 |
| CTCAGTGAGTC | 768.414521481153 | 0.45731189140742  |
| CCCTAATGACA | 768.41963805361  | 0.252471814703704 |
| GCATTGATGAC | 768.420400369833 | 0.21602670262669  |
| GTCACCACTAA | 768.420486055667 | 0.169919021070931 |
| CATGCGGTGAC | 768.426288750783 | 0.358570543349837 |
| AGGCCTAGTCA | 768.433669305405 | 0.253379705149826 |
| GCGACTAGTCA | 768.445251052395 | 0.162884732145786 |
| GTCATTACAAC | 768.459233303118 | 0.289644635099888 |
| ATGACAATAAG | 768.485313960892 | 0.287714107110638 |
| ACTGGTGACGC | 768.526317778483 | 0.291400943873609 |
| ATAACTGTGAC | 768.53292504905  | 0.23353397512605  |
| CGACCGACTCA | 768.539726334936 | 0.177918316373625 |
| CGCCCTATGAC | 768.559457137523 | 0.235237086292243 |
| CCATCTGTGAC | 768.587379946536 | 0.199470832338573 |
| ACGTCACTGTG | 768.588961600944 | 0.334257529923178 |

|             |                  |                   |
|-------------|------------------|-------------------|
| TGAATCAGCAA | 768.608868760905 | 0.278282243125181 |
| AAATCAGTCTT | 768.630719760606 | 0.14971008463058  |
| GACTAATCGAC | 768.65999508392  | 0.269780868472465 |
| ATGACGAGCAT | 768.717065984234 | 0.166855267915251 |
| TGACACAGCCA | 768.721450135033 | 0.304318403178792 |
| GTCAGGAGTCA | 768.798431520722 | 0.163163652977964 |
| GTCATTGAACA | 768.805656882656 | 0.200114408195927 |
| AGTTTACGTCA | 768.818875512239 | 0.250611592314938 |
| TCATCATGACA | 768.829279201671 | 0.292480301823293 |
| CAGACGACTCA | 768.884578878728 | 0.191715581351918 |
| CGTTGATTCAC | 768.897731561004 | 0.197845439902074 |
| GGACTGTGTCA | 768.929833795848 | 0.248124609816703 |
| AGACTCACGGA | 768.937704219575 | 0.344726135138674 |
| ATGACGGACTG | 768.952257525219 | 0.189762464950844 |
| CACGTCACGGA | 768.998468228868 | 0.318995463271454 |
| CAGGATGACCA | 769.003048624598 | 0.344309232209277 |
| ACGTCACTTTG | 769.043572262657 | 0.263780102004402 |
| CTGCCAGTCA  | 769.066134243792 | 0.159782076722413 |
| AATCCGGTGAC | 769.10555844321  | 0.341427061549555 |
| GTCATAAAAGA | 769.129079029949 | 0.217636762921483 |
| GCTCCTATGAC | 769.213460052236 | 0.220558696079135 |
| CTGGGGATGAC | 769.250490381626 | 0.244103491698958 |
| GACTGCAGTCA | 769.273233678173 | 0.332326169932976 |
| TCGACTCAGAA | 769.29480042705  | 0.174187458767518 |
| ACTCATTATG  | 769.379258431914 | 0.24077438533772  |
| CCATTTGGTCA | 769.403722699099 | 0.216587569458461 |
| TATTAATGACA | 769.432128580114 | 0.251902427769567 |
| ACGTGTGTCAA | 769.448226489131 | 0.241267498127786 |
| CGGTTTGACTC | 769.497858316854 | 0.430180834289597 |
| TGACTGCACAA | 769.553400655999 | 0.382704644839785 |
| GTCATCCGCCA | 769.630517562927 | 0.104659126116363 |
| ACCTACTCATC | 769.80511185623  | 0.186956266559269 |
| ATTACTATTAC | 769.854155821545 | 0.244554748726327 |
| AGTGTCACGCG | 769.860878968461 | 0.184466577581872 |
| CAACTTGTAC  | 769.885984735772 | 0.256099634978551 |
| AGTCACTTGAA | 769.924821486528 | 0.228564156552242 |
| ATGACATTTAA | 769.97293911554  | 0.148289288086059 |
| ATGATGGTGAC | 769.973682617425 | 0.189677636373712 |
| CAGTCAGATTA | 769.992058524119 | 0.194716660783163 |
| CGTAAATGACG | 769.996617881279 | 0.291708746869825 |
| GAAATGACCAC | 770.009780859018 | 0.279518589969302 |
| TGACAGTGACA | 770.077775129203 | 0.195145037543233 |
| ACGTCACCTGA | 770.088898631451 | 0.276340443590064 |
| GAACAAATGAC | 770.096324891443 | 0.164608180512651 |
| CGTCATTAGGC | 770.125566077341 | 0.20434177385376  |
| GGCTTCAGTCA | 770.173715412689 | 0.297451149377036 |
| ATGACTTGATA | 770.205874443052 | 0.211571090802549 |
| CGGTCATAGTC | 770.213114882496 | 0.351556485967307 |
| GTGAGTCTGCA | 770.228736723113 | 0.241527928007107 |
| AAATTGTGACG | 770.238718370455 | 0.104922857021518 |
| ATGACGGAGGA | 770.240178339342 | 0.202147545699368 |
| AAGGAAATGAC | 770.254823129717 | 0.229250260527775 |
| CTGTCAAGTCA | 770.270033850419 | 0.261866861733225 |
| CGTCTAAGTCA | 770.301855634668 | 0.322623062394534 |

|              |                  |                   |
|--------------|------------------|-------------------|
| ATGGCTAATAC  | 770.331397031941 | 0.317592377759717 |
| CACAGGGTGAC  | 770.346392066132 | 0.360799061938073 |
| AATAGTCAAAT  | 770.373072546097 | 0.13069104333256  |
| AGTGACTGCCA  | 770.388460126815 | 0.163911125034262 |
| CACTATGACCC  | 770.49719170783  | 0.202814633005781 |
| GTCACACCTCA  | 770.541210126732 | 0.188615076940848 |
| ACTATTGTCAT  | 770.541329463384 | 0.198006481965847 |
| ATTGCATGACG  | 770.602670463526 | 0.250216658250488 |
| ACTAATGCCA   | 770.611166945969 | 0.240460791725463 |
| ATACTTTGTCA  | 770.659999329895 | 0.274585810597772 |
| AATTCTATGAC  | 770.700275375665 | 0.249167196501409 |
| CCACTAAGTCA  | 770.714602934206 | 0.29791535312896  |
| ACCAGTGACAC  | 770.749098343148 | 0.293123402409007 |
| CTCATTTGTCA  | 770.764997811194 | 0.202746505519022 |
| CTGGTAATGAC  | 770.774936716772 | 0.285751080539903 |
| TATACGCGTCA  | 770.779461540318 | 0.352733317524199 |
| GGATGTGTGAC  | 770.794530106982 | 0.226859225141712 |
| GAGTCAGGCTA  | 770.804644751813 | 0.163388245995663 |
| CGGCTGATTCA  | 770.818641238573 | 0.315906615452842 |
| AGTCATGGTAC  | 770.846548716116 | 0.195955097279212 |
| CAAAGTAGTCA  | 770.859662508298 | 0.261244729080256 |
| TCAGTCAACCA  | 770.90539352519  | 0.206845950943348 |
| GTCATTCTGGA  | 770.910938863965 | 0.319475715226996 |
| GACTCACTAAA  | 770.916962601658 | 0.211976425163267 |
| ACTCATCGGAG  | 770.918344844144 | 0.24857847043878  |
| ACCGAATGAGT  | 770.922460150158 | 0.199653093811755 |
| TGACTGCTTAA  | 770.959972763135 | 0.283356441930939 |
| ACCTGTGACGC  | 771.081010628412 | 0.117861871283006 |
| AGCTTGTGTC   | 771.091568924228 | 0.261188462075297 |
| ATTCTGTGAGTC | 771.125365651244 | 0.24946362124535  |
| AGCGTCGTCAT  | 771.179009639122 | 0.29418294332057  |
| ACCCCTATGAC  | 771.197497671458 | 0.247362208400892 |
| GTATGATGCAA  | 771.215008440989 | 0.180106962691416 |
| ATAACTTGTCA  | 771.267318470159 | 0.292102023919175 |
| CGCTCTATGAC  | 771.270730113094 | 0.210095774049662 |
| GACTCACTATC  | 771.285971268515 | 0.198637574831957 |
| GCGACTCGTCA  | 771.3096668412   | 0.261087978944325 |
| ATACCAGTCAG  | 771.386006147649 | 0.212388031058731 |
| CAGCTGTGACA  | 771.393922466429 | 0.307941808921684 |
| CGGACAATGAC  | 771.398064074917 | 0.168915206241363 |
| ATGACCACGCG  | 771.408343926301 | 0.23214005928668  |
| GTGACGCGCCA  | 771.415350745513 | 0.292788571845956 |
| GCCGTTACTCA  | 771.434762366689 | 0.241460365544851 |
| ATTCTGTGACA  | 771.449346144423 | 0.238335691654739 |
| AGCTGGGTCAT  | 771.507112680843 | 0.28953988052788  |
| AGGTGTAGTCA  | 771.515313957628 | 0.20448633910048  |
| GCGTTTATGAC  | 771.581767267983 | 0.199077451156934 |
| GGCCGTGTCAC  | 771.609402999502 | 0.206517385204537 |
| GTCATTGTTTA  | 771.627260749477 | 0.325383495298108 |
| TATTAGTCTGA  | 771.630382600736 | 0.172915432504506 |
| GTCATTATGAA  | 771.65759458255  | 0.228582238592379 |
| CGAAATGACAA  | 771.67656576646  | 0.210582054066953 |
| GTCACACGCGA  | 771.695906966237 | 0.226125019918966 |
| GTCACCCAAAA  | 771.697997941199 | 0.182821969862455 |

|              |                  |                   |
|--------------|------------------|-------------------|
| GGACCAATGAC  | 771.728560760953 | 0.266215228871787 |
| AGACTCACGTG  | 771.743263154718 | 0.215011315830731 |
| ACCAGTCAGAT  | 771.758527619898 | 0.129783237446767 |
| AGTTGTGACGC  | 771.778820286109 | 0.178788904830355 |
| ATTGATTACACA | 771.779972614164 | 0.248277523881415 |
| CGAATATGTCA  | 771.793027205209 | 0.167197148356573 |
| TGCCGTCATAA  | 771.801601114143 | 0.167042351528377 |
| GTGACTTACAA  | 771.805387743988 | 0.263994326426133 |
| AGTCACGACAA  | 771.865130728033 | 0.270808075476434 |
| TCATACGATGA  | 771.919190423041 | 0.315290343649609 |
| AACGTGATGAC  | 771.941649057144 | 0.25114077635154  |
| CGGCGTGACAC  | 771.961536172832 | 0.274729232128372 |
| GAATGCAGTCA  | 772.047553775578 | 0.140216879804529 |
| TGACGCGGCAA  | 772.069318511869 | 0.275826462555335 |
| AAGGGGATGAC  | 772.080099820803 | 0.187917380048743 |
| CACCTTACTCA  | 772.082232648701 | 0.200472272844216 |
| AGCGTTATGAC  | 772.097689827186 | 0.262667456572732 |
| AGACTAATATC  | 772.104695274956 | 0.188518260667456 |
| TGAGTCTATCA  | 772.10842754932  | 0.336913121559283 |
| ATCCGTCAGAA  | 772.138885552277 | 0.418360318432081 |
| TGAAATACTCA  | 772.139599191843 | 0.238426269370699 |
| ATATCGTCACG  | 772.148866726673 | 0.222584061537237 |
| TAGACTCGTCA  | 772.173406489148 | 0.254449129252681 |
| GCGGTAGTCAC  | 772.207425081717 | 0.251741336405832 |
| CTCAGTGTAC   | 772.222595530596 | 0.273519998997777 |
| CGTGGGATGAC  | 772.264966763224 | 0.251872758632458 |
| ATCCGAATGAC  | 772.320828465319 | 0.318093963470792 |
| CTGACACAGTC  | 772.350501983006 | 0.144836561301633 |
| AACCAGATGAC  | 772.354332915821 | 0.314245794313143 |
| GACAGTGACAC  | 772.364297279313 | 0.271754754156394 |
| AGTAATGACAG  | 772.379154144842 | 0.200858217285936 |
| AAATCTGACTG  | 772.383204544097 | 0.220276344271932 |
| TCGAGCAGTCA  | 772.387250458563 | 0.208043470304177 |
| GTCACCCGGAA  | 772.402142502174 | 0.252968084955567 |
| ACGTCATGTCT  | 772.417364173298 | 0.194398681119626 |
| CATTGTGACGC  | 772.429159837154 | 0.186699582748439 |
| GAAATTGTGAC  | 772.487791585706 | 0.234016889566605 |
| AGTCACGGACT  | 772.496919060212 | 0.157219485016066 |
| GCCCTCAGTCA  | 772.507788400227 | 0.257611815056022 |
| TCTAGGACTCA  | 772.558178058077 | 0.243689856643738 |
| ATATTGTCACC  | 772.559102807411 | 0.29488751343848  |
| CTGTTGAATCA  | 772.593553376035 | 0.346721139561169 |
| AGTGTCACGAT  | 772.606411051445 | 0.255639356754351 |
| ACGTAAGTGAC  | 772.669258788112 | 0.384393610454716 |
| ATGACCGAAAC  | 772.693022620977 | 0.164881234807542 |
| AGTGTAATGAC  | 772.702024102631 | 0.274074484554022 |
| TCCCAATGACA  | 772.716581328762 | 0.127679700841894 |
| AGACCTGACTC  | 772.720739316046 | 0.257567322231804 |
| AGGTTTGTAC   | 772.738114049394 | 0.211894472639515 |
| GCCTCGACTCA  | 772.747345845396 | 0.270229630211595 |
| CGAAGTAGTCA  | 772.800720817588 | 0.269016618488674 |
| CAATGGGTGAC  | 772.807804551768 | 0.171142121646004 |
| GTCATCCATA   | 772.81631551251  | 0.162872305381553 |
| ACCCAATGACA  | 772.854462063327 | 0.110239829568662 |

|              |                  |                   |
|--------------|------------------|-------------------|
| GCGTGATTCA   | 772.85616470159  | 0.168902835309802 |
| CCGACGGTGAC  | 772.860747931608 | 0.264015962038709 |
| GGTCATACATA  | 772.873833892772 | 0.262153191970019 |
| GCCCGAATGAC  | 772.885266093928 | 0.264510577025408 |
| CGTCGTAGTCA  | 772.88924053107  | 0.245359030269757 |
| TGACCCATTAA  | 772.944311193332 | 0.151507320624822 |
| GGTACAATGAC  | 772.956847838669 | 0.245080822779711 |
| GAAATCATGAC  | 772.957454356623 | 0.310036513007896 |
| AGAGTGGTCAT  | 772.971350420465 | 0.159494227059452 |
| CGCATGACATA  | 772.997363050337 | 0.194642030278483 |
| GTCATTTACAC  | 773.007080638344 | 0.105903602777131 |
| ATGACGAACGC  | 773.012294162253 | 0.217460869685338 |
| ATCCTGTCATC  | 773.082875501153 | 0.204668142752988 |
| TCCCTGACGCA  | 773.111621170729 | 0.167635840732178 |
| CACTATGTGAC  | 773.115562959572 | 0.184222469702744 |
| CTTCTAAGTCA  | 773.117115448942 | 0.188191150375224 |
| CAAATTACGCA  | 773.16891458024  | 0.235244815864744 |
| CTACAGATGAC  | 773.171878288335 | 0.276508539519312 |
| CAGGAGATGAC  | 773.189870531857 | 0.169107115116422 |
| AACTATGTCAC  | 773.210171844319 | 0.175762323205508 |
| GTCAAATGACA  | 773.250026224215 | 0.191988897952022 |
| GTCATTTCCAA  | 773.263433169088 | 0.307621892462164 |
| ATGTCATCTGG  | 773.288594979307 | 0.28235441957653  |
| AATTCACAT    | 773.296089455594 | 0.153093843273948 |
| TGATGACCGAA  | 773.324822011917 | 0.208205230256523 |
| ATACATGACGC  | 773.330971341093 | 0.238378007746375 |
| CGCGTCACTGA  | 773.348781779059 | 0.150231784957372 |
| GTAGGTGTGAC  | 773.359083649035 | 0.161613285820354 |
| CTATTGAGTAA  | 773.373359732062 | 0.286850373715389 |
| GAACTGTGTCA  | 773.402580706716 | 0.175563006580245 |
| GTCCATGTCAC  | 773.431029870768 | 0.139090481534286 |
| GACCGTGACAC  | 773.458985212838 | 0.125989325438396 |
| GCAGGGATGAC  | 773.469806625176 | 0.213656866072541 |
| GAGTCAATTCC  | 773.51358074119  | 0.367644421274789 |
| AGGGCGAGTCA  | 773.52829145154  | 0.210339600431432 |
| GACTTGTGTCA  | 773.53504720432  | 0.218528206711861 |
| TCAGACAGTCA  | 773.53987083933  | 0.17739727915636  |
| ACCATGTCAACA | 773.561742824835 | 0.12828441392536  |
| CGATGACGGCA  | 773.565742363108 | 0.231517472188483 |
| ATGACAATCAC  | 773.580514464695 | 0.210970512183179 |
| GACAAGACTCA  | 773.594223970912 | 0.164421039757274 |
| GTGACAGACAC  | 773.726396958123 | 0.240883304741545 |
| CAAGGGAGTCA  | 773.727421021046 | 0.183571461128069 |
| TGACGCGATAA  | 773.751938905868 | 0.272817009628992 |
| AGACTACTCAT  | 773.759495729454 | 0.197018350454283 |
| GTACCGGTGAC  | 773.780423046255 | 0.235653863940753 |
| CGTCATCCCTC  | 773.890183505152 | 0.175672139490288 |
| GATGTATGACC  | 773.954170665269 | 0.175436217940635 |
| AACAGTCAACA  | 773.956911938913 | 0.115965472187528 |
| TGACTCTCAAA  | 773.969680456422 | 0.197617791490232 |
| GTCCATGACAC  | 774.002816078777 | 0.188964784621378 |
| CGTAACATGAC  | 774.011054731118 | 0.352282934900344 |
| AGGAGTGAGTC  | 774.020663399082 | 0.219565157850693 |
| ATGAGTAGTTA  | 774.077552978389 | 0.200941853509325 |

|             |                  |                    |
|-------------|------------------|--------------------|
| ACAATGGTGAC | 774.135982603809 | 0.340109199843956  |
| CGCGCGAGTCA | 774.13753088636  | 0.166104142173873  |
| TGTGTCAATAA | 774.150748902703 | 0.210073124620955  |
| GCTTGTACTCA | 774.188204820776 | 0.178588469499782  |
| ACGCGTGAGTC | 774.208885748798 | 0.300005782665826  |
| TATGCCAGTCA | 774.237185467803 | 0.237498037032859  |
| ATTGCTCAGAA | 774.249791199182 | 0.256237775170343  |
| AACCTGTCACC | 774.288655066273 | 0.203457045247765  |
| GTCATTGTGAA | 774.325328922258 | 0.298609896940889  |
| ATAGCGGTGAC | 774.327674998755 | 0.338968486956762  |
| ATAAGTGACGC | 774.338569802846 | 0.24087808046843   |
| CTGTCATGTCA | 774.345311938106 | 0.244857279291604  |
| GTCATCAACCA | 774.353316210097 | 0.246852917105037  |
| AGTGTCACGAC | 774.486002967457 | 0.322816196214667  |
| TACGCATGACA | 774.596749146199 | 0.157265857186205  |
| GTCATTGATCA | 774.607232271427 | 0.123715129650814  |
| TACTTTAGTCA | 774.617901538348 | 0.272955030526599  |
| GATAACGTCAC | 774.652451075977 | 0.0897463878961589 |
| ATGACACCCAG | 774.666097234874 | 0.223797516350829  |
| TCCGTGTGACA | 774.669717018038 | 0.243707137450455  |
| CCGACAATGAC | 774.675907237708 | 0.298428994715757  |
| ATGACGTGAG  | 774.677062364291 | 0.242518376151587  |
| GAGTCAGGAAC | 774.678303983167 | 0.242766426235971  |
| ATGACAATGCG | 774.690588344805 | 0.258302387179786  |
| AACATCTGTCA | 774.717876513017 | 0.396984185070139  |
| AATAATGTGAC | 774.726444720884 | 0.299893871155126  |
| TGACTGTGGAA | 774.795184018741 | 0.265735011271739  |
| ATGAGCTGTCA | 774.795697890668 | 0.130672135499797  |
| ACTCTGTGATG | 774.820307180359 | 0.250880109103497  |
| GACCCGGTGAC | 774.847379781739 | 0.262450209030464  |
| GAATAATGACA | 774.867398941686 | 0.245990364965792  |
| CGGCATGACAC | 774.911988990681 | 0.32114395558996   |
| CTGATGGTGAC | 774.931270129875 | 0.272210102358598  |
| TGACATATCAA | 774.935260387148 | 0.260938126697637  |
| ATAGACGTCAT | 774.949666809366 | 0.32405650437834   |
| ACTTGTCACCG | 774.972516634654 | 0.0935001477536205 |
| AGCGACGTCAT | 774.989653874804 | 0.244213492020454  |
| CCTGTGATGAC | 775.054989027833 | 0.203719307934716  |
| GCGTCACAAAA | 775.126884502678 | 0.244041875963769  |
| CTGATTGTGAC | 775.137306830192 | 0.201494075297591  |
| ATGACACCCCG | 775.194819283361 | 0.182783359137391  |
| ACAGACGTCAT | 775.196818784069 | 0.184778685431143  |
| GTCACATTGTA | 775.198516262679 | 0.237267755179252  |
| GGTTGAATGAC | 775.223679035349 | 0.183121221203687  |
| ATGCGAGTCAG | 775.228938446233 | 0.187957034950347  |
| GTCCTGACACA | 775.366655786445 | 0.14505380978864   |
| CACTTGACTGA | 775.379292329297 | 0.288102687976017  |
| GAGCTCAGTCA | 775.412249772222 | 0.181793842017928  |
| ACACGTGACAC | 775.414785124635 | 0.142766663087322  |
| AGCGTGATGAC | 775.426258706711 | 0.137145751871711  |
| AGATGTGACGC | 775.42720086884  | 0.197460538342387  |
| GATCAGTCTTA | 775.457155546403 | 0.190888754341318  |
| GTCATTTAAC  | 775.505413860625 | 0.165495897841292  |
| CGTCATCCAG  | 775.536192123448 | 0.152668899917666  |



|             |                  |                   |
|-------------|------------------|-------------------|
| GCGTCACTACA | 775.607943371074 | 0.141720079012354 |
| CTGTTTGGTCA | 775.610064594377 | 0.340583286283933 |
| ATGACTTTTCA | 775.612380243831 | 0.243857904730944 |
| GTTACGTGGCA | 775.617253121898 | 0.175225692784278 |
| ACTTGGTGACA | 775.642236638538 | 0.252939143850215 |
| AATCCGACTCA | 775.646211143431 | 0.153175776573148 |
| CGATACATGAC | 775.692442528792 | 0.284535968321049 |
| ATGACTTGCAT | 775.706588232102 | 0.205512837856341 |
| CGGCGGAGTCA | 775.717743458239 | 0.164719573194545 |
| GTATTACTGAC | 775.729483529999 | 0.249315985846445 |
| AAGCTGACACA | 775.758172256125 | 0.293358750986552 |
| CTTTCGGTGAC | 775.833812247631 | 0.235337983332768 |
| GTCACCGAACA | 775.837872144343 | 0.267713759248963 |
| AAGATTGTGAC | 775.892330716288 | 0.234974761312097 |
| GGCAGAATGAC | 775.904583269406 | 0.232464533724835 |
| AAATTTGTGAC | 775.906536628418 | 0.153757357182056 |
| ATAGCTGTGAC | 775.94321110277  | 0.198362794220486 |
| GCATTGACACA | 775.979877750393 | 0.227612206915489 |
| CCTAGTGAGTC | 776.04754000108  | 0.372264054546772 |
| AAAATTAGTCG | 776.052755502893 | 0.197334261692746 |
| ACCCTCAGTCA | 776.103684220889 | 0.234150518465477 |
| ACACTTTGTCA | 776.1043258564   | 0.297999850176054 |
| AACTGCAGTCA | 776.110201445801 | 0.23315024153984  |
| GTCACATCTAA | 776.13329493645  | 0.223337601520135 |
| TGACTTATCCA | 776.17394618835  | 0.244931480662251 |
| ACCTGAATGAC | 776.214758947465 | 0.139111306581327 |
| ATCCAATGACG | 776.233783664568 | 0.158854552049208 |
| GTGTCACTTAA | 776.253731855529 | 0.21161525318683  |
| GATGCGACTCA | 776.259101811837 | 0.32819650496801  |
| ATGACTTCGGA | 776.378402915849 | 0.251100970104562 |
| AACAACGTAC  | 776.387618810692 | 0.23951574192207  |
| GTCACAGTTA  | 776.414743924639 | 0.184218853779725 |
| AAAGTTGTAC  | 776.422042162237 | 0.255028828602027 |
| ATCCCACGTCA | 776.498430303902 | 0.33160300840866  |
| ACGCTCACTCA | 776.52874430968  | 0.22189381128831  |
| CCCAAATGACG | 776.534469298561 | 0.237061830648562 |
| GTAATTGCTCA | 776.553632039548 | 0.237222789608439 |
| TCGAAGTCACA | 776.592300678485 | 0.252894702706085 |
| ACCCTGCGTCA | 776.613200135964 | 0.209994006909444 |
| GAGCCCAGTCA | 776.621297000152 | 0.3466194727015   |
| CATGACGTTAC | 776.642395017972 | 0.208003168111047 |
| CCGGGTGACGC | 776.723784992318 | 0.144384052421866 |
| GAGCCGACTCA | 776.725400553244 | 0.189005262695331 |
| CTTGTAATGAC | 776.732161368079 | 0.352735321200254 |
| TGACTACTAAA | 776.743224534679 | 0.120461536608052 |
| ACTCATACATA | 776.746226718921 | 0.212449733955858 |
| AGAACGTGTCA | 776.755860696239 | 0.14372888723709  |
| AGTCAGAGCTA | 776.760850473098 | 0.151820066100209 |
| AATCATGTGAC | 776.786198666393 | 0.259374337365392 |
| GGTGACCCAAA | 776.809313052929 | 0.17668717708607  |
| AGGCGAGTCAG | 776.81670934678  | 0.22457531175055  |
| ATGACGACTTG | 776.879821424486 | 0.180215607461909 |
| AATTAATGACG | 776.897596567781 | 0.153381004972221 |
| ATGACGAGAAT | 776.915450861713 | 0.1897787848596   |

|              |                  |                    |
|--------------|------------------|--------------------|
| GTCAATAGTCA  | 776.917272056798 | 0.288425419645702  |
| ATGTCATTTC   | 776.928909821376 | 0.232218951835132  |
| CGTCATTGCTC  | 776.936011940976 | 0.31458222554862   |
| GGCATACTGCA  | 776.942942590602 | 0.276591828264032  |
| AGTCACGGTTG  | 776.948967124854 | 0.193956314556626  |
| ATTTTGACACA  | 776.987635589827 | 0.190986378676366  |
| ACGATAAGTCA  | 777.042023803674 | 0.242548709828489  |
| CCGGGTGTGAC  | 777.058718104525 | 0.260137848900671  |
| GTCACATCTTA  | 777.088821178503 | 0.317184785135826  |
| CTTATGTGACA  | 777.096563914401 | 0.220640721321309  |
| GATCTGTGTC   | 777.103608745328 | 0.314791469906542  |
| ATCATCGTGAC  | 777.10832671219  | 0.183049511244821  |
| CGCAAATGACG  | 777.126366280338 | 0.336312976377804  |
| GCGGACTCACA  | 777.148312208728 | 0.271889138416046  |
| TAATCGCGTCA  | 777.153345272828 | 0.14548863267059   |
| TCCTTACGTC   | 777.239328827861 | 0.203999087495053  |
| GCCTTTATGAC  | 777.301530588494 | 0.178686053449618  |
| GTAGTAATGAC  | 777.345901896735 | 0.227004718181738  |
| ATGACACTCCC  | 777.374546553948 | 0.224727609105516  |
| CGGTGTAGTCA  | 777.399639689639 | 0.0952881962251069 |
| ATGTAGATGAC  | 777.479273098203 | 0.195486372148571  |
| AATAGGTCACA  | 777.483524577107 | 0.250009857557288  |
| CCACCCAGTCA  | 777.488836854152 | 0.245722029852861  |
| AATCCTGTGAT  | 777.616601906355 | 0.143694612866037  |
| ACCGGTGTGAC  | 777.622543479765 | 0.279954151063848  |
| GTCACACTGCA  | 777.653168926393 | 0.255371528005456  |
| CACGTAGTGAC  | 777.654977125147 | 0.1984136175067    |
| ACAGTATGAGT  | 777.657025374635 | 0.151463683999092  |
| CACTTAAGTCA  | 777.662416104832 | 0.23739965106724   |
| CCACAAATGAC  | 777.66461630533  | 0.202131547238255  |
| CAAGTTGTGAC  | 777.783715434085 | 0.348650345217952  |
| GTCACCGGTAA  | 777.804005562003 | 0.237415639642571  |
| GTAGTGACGAA  | 777.857010832483 | 0.244476601734847  |
| CTCATGATGAC  | 777.91229414236  | 0.267446861571081  |
| GTCATAGGCTA  | 777.947176112233 | 0.273316041032416  |
| GTCATTTGCGA  | 777.964208863622 | 0.233422656032528  |
| AGTCAGACATG  | 778.00753583595  | 0.225729513962239  |
| ACTCATAAGTG  | 778.016500245868 | 0.295905743753144  |
| ATGAGCAAGCA  | 778.030052976841 | 0.160392726064673  |
| ATGACACCTG   | 778.059514143025 | 0.192258526587022  |
| AACGAAGTCAT  | 778.104546402201 | 0.334537871998233  |
| CAATTGGTGAC  | 778.154548079059 | 0.266485318707395  |
| AGTCACGGTAG  | 778.162755903455 | 0.244877916772615  |
| TACCCACGTC   | 778.270317568267 | 0.210300141216879  |
| AGAGTCAAGTG  | 778.279023815229 | 0.177747435485895  |
| TGAGACTCACA  | 778.281972812964 | 0.249958121875819  |
| GTTGACACAAC  | 778.305249824179 | 0.147046072334542  |
| ATGACCGTCAT  | 778.375322885715 | 0.172226805987525  |
| GTTTGACAGTCA | 778.385417765124 | 0.298513680270098  |
| CCGCGTAGTCA  | 778.388007840397 | 0.290173553603032  |
| GTCACAGTAAC  | 778.412310272879 | 0.267318677433358  |
| ATTGACACACG  | 778.440892585364 | 0.225930890467498  |
| GTCATTATGCA  | 778.443839013911 | 0.226283215246191  |
| TGACTCTGGCA  | 778.478671914463 | 0.300126598853514  |

|             |                  |                    |
|-------------|------------------|--------------------|
| AGCCTGTGACA | 778.496589049302 | 0.179058154187793  |
| ATTGAGATGAC | 778.519440199315 | 0.232166549110484  |
| AGTCGTAGTCA | 778.621253183626 | 0.261738931754744  |
| AGTCAGACATC | 778.65236742537  | 0.159450387363833  |
| CTGAATCGTCA | 778.662357163754 | 0.212909373840781  |
| AGAGTAATAGC | 778.690796486834 | 0.220778577511086  |
| GGGTGTAGTCA | 778.702422755877 | 0.178916719866966  |
| ATGAACGTCAT | 778.723266764252 | 0.257422069809911  |
| ACCCTGATGAC | 778.899569414165 | 0.234382517371322  |
| AGAGTCAATTC | 778.912103419538 | 0.34763662517299   |
| AAGTTTGACTC | 778.934686904659 | 0.142777455235053  |
| ATGAATGACCA | 779.005183439685 | 0.141236593784168  |
| ATGTATCGTCA | 779.041258084807 | 0.257824367083153  |
| AGTCAGACCCA | 779.043303897421 | 0.257842473637289  |
| TAAGACTAACA | 779.112718468706 | 0.184087222103278  |
| AACCGTGTAC  | 779.124144043189 | 0.194144523351052  |
| GACTTTCGTC  | 779.131209959538 | 0.390099309680439  |
| AACGTCACTCA | 779.151667263062 | 0.174540731077919  |
| CAGGTGAATCA | 779.151873699942 | 0.231628768376433  |
| CACGCTGACTG | 779.153870092175 | 0.340038164116552  |
| CCTTTGAGTAA | 779.164902111477 | 0.185143020313449  |
| ATGACGAGCCG | 779.175538074567 | 0.189733536387897  |
| ATCTGTGACGC | 779.242908721009 | 0.278968322379136  |
| AAGCGAATGAC | 779.245389559354 | 0.245040177350657  |
| AGAATGGTGAC | 779.271956074    | 0.253753472293715  |
| CGTTGTGTGAC | 779.272801754053 | 0.35355554060768   |
| AGTCACTCCCC | 779.277244061883 | 0.186055592744702  |
| CACTGGAGTCA | 779.298001940576 | 0.284333603213249  |
| ACATGTGACGC | 779.319569144695 | 0.238426132529073  |
| CTATAGGTGAC | 779.33268640871  | 0.418648368223713  |
| CAACTGGTGAC | 779.333371027328 | 0.330695526206617  |
| CATCCGACTCA | 779.338062210887 | 0.250949223317612  |
| GATATATGTCA | 779.385774295055 | 0.164622023886367  |
| GCTGCGAGTCA | 779.40818668446  | 0.2272339500656    |
| GACCGGTGACA | 779.423746006986 | 0.224875374474246  |
| ATTTACATGAC | 779.45556005089  | 0.20489523112724   |
| GTCACAATAAA | 779.455789972034 | 0.260646433324112  |
| AGCCAATCAT  | 779.488920664218 | 0.198114488708742  |
| ATTGACGTATC | 779.50039137976  | 0.235312158987195  |
| AAAACGCGTCA | 779.521302193492 | 0.231693007188064  |
| GAGTCAAATGA | 779.529023477469 | 0.157560775914567  |
| ATGTGTGACCA | 779.570976333653 | 0.298282431860269  |
| CCCTTGACTGA | 779.575046698845 | 0.249084493904759  |
| GTGACGGGTCA | 779.611306752333 | 0.107495953158093  |
| AACTCAATGAC | 779.630464184146 | 0.236177522159459  |
| CCGTAATGACG | 779.632108353505 | 0.286950038548037  |
| ACAGGTGACAC | 779.659040925356 | 0.238739444126415  |
| AGACGAATGAC | 779.685050688692 | 0.171961406727962  |
| GATATTTGTCA | 779.771346920861 | 0.126208500709769  |
| CGAGTCAGGGC | 779.784825117537 | 0.194308475649924  |
| CGAGTCAGGAA | 779.835465587445 | 0.231897735735322  |
| GTCACCGATAA | 779.890954952884 | 0.0581407688417193 |
| AGTCAGACCCG | 779.913872189491 | 0.268240795856176  |
| TGAGTCGGCCA | 779.963591192003 | 0.182545438064697  |

|             |                  |                   |
|-------------|------------------|-------------------|
| TCTGGTAGTCA | 780.024612698698 | 0.341476970239343 |
| AACGGTGACAA | 780.047079629092 | 0.240079565629205 |
| CAAATGGGTCA | 780.069498001941 | 0.12197994268023  |
| ATGACCGAACG | 780.084919861347 | 0.391590200549875 |
| AAGACGACTCA | 780.117698748501 | 0.108173178532591 |
| CCTAATGACAA | 780.152968393074 | 0.259667242184749 |
| CAATCACGTCA | 780.161964853092 | 0.329291424660759 |
| ATTACTGACTA | 780.166258501088 | 0.258061709376147 |
| ATACGTGAGTC | 780.21310380515  | 0.295345851480692 |
| CCTCGGTGACG | 780.234924060404 | 0.310221747804649 |
| AGAGTCTGACT | 780.28905536979  | 0.248771017364641 |
| AAATGGGTGAC | 780.289691187939 | 0.315599481689668 |
| GTCATCTCCAA | 780.299630994194 | 0.207901605052818 |
| GACATTGCTCA | 780.36023103243  | 0.248768544405577 |
| AGATCAATGAC | 780.402524325019 | 0.179607568326756 |
| AAACTATGACC | 780.408850018492 | 0.306580275585826 |
| AGCAAGTCATC | 780.428393536825 | 0.188390647319892 |
| GTCATATGTAA | 780.464007755619 | 0.256179397575985 |
| ATGACCCAGTA | 780.467407656651 | 0.262358514134562 |
| ATTGCGACTCA | 780.490239306238 | 0.335884266468723 |
| AGTCAGAAGAC | 780.529382372288 | 0.225023772940463 |
| GCCGCGAGTCA | 780.534928073139 | 0.257681154683272 |
| GTCACACCCGA | 780.537412799963 | 0.270377689488271 |
| GGCATGAATCA | 780.563771512143 | 0.293237924487052 |
| GTCATATGAAC | 780.589283879838 | 0.239527637217407 |
| GTGGCTCACAC | 780.62498849326  | 0.175336746956002 |
| GGTGAGATGAC | 780.672102074732 | 0.214545905899888 |
| AGAAATGACAT | 780.682412380334 | 0.14891063728723  |
| TAGGGGTGATA | 780.692647448659 | 0.194223662361366 |
| GACTAATACAC | 780.7267496619   | 0.131996701128034 |
| GTCATTAACGA | 780.755338330591 | 0.217248971520737 |
| AATGACCATAT | 780.804473509884 | 0.207600856414298 |
| AGTCGCAGTCA | 780.909895119129 | 0.16186396646012  |
| GTCTGAGTCGA | 780.928729360365 | 0.306765835636359 |
| CGTCACACACA | 780.947912179595 | 0.174609178841045 |
| GTGAGATGACA | 780.9799235975   | 0.167525854214027 |
| CGGTTAAGTCA | 781.010307515203 | 0.318074875139113 |
| GTCATTCCAAC | 781.015739881795 | 0.15105787126306  |
| GTCATCTGGAA | 781.028336127705 | 0.363220021801391 |
| CAGCGGAGTCA | 781.042436064344 | 0.271157989392732 |
| GTCGACTCTTA | 781.050696383628 | 0.203176931183504 |
| TCGATGGGTCA | 781.109093295993 | 0.192295742594093 |
| AAGATAATGAC | 781.11885268635  | 0.205482338879124 |
| GATTTACGTCA | 781.141330280986 | 0.244331442104779 |
| AGTCACGCTCC | 781.160668895647 | 0.173487838805882 |
| ACCGGTGACAA | 781.202130134052 | 0.260134299198696 |
| GTCACTCGGAA | 781.227531722821 | 0.28831794699976  |
| GCCCTGACGCA | 781.287807707722 | 0.200579523492527 |
| AGTTATGACCC | 781.324292541272 | 0.145554486637668 |
| TGACGTAGCCA | 781.382276790787 | 0.313621757744906 |
| ATGACTTGAC  | 781.390496318484 | 0.237251709948726 |
| CGTCATCAGAC | 781.393032905165 | 0.287212167887113 |
| GATCATAGTCA | 781.396454299685 | 0.205124603583329 |
| AATGTGGTAC  | 781.413798956196 | 0.148726935952391 |

|              |                  |                   |
|--------------|------------------|-------------------|
| ACAGCTGTGAC  | 781.417068965653 | 0.267962038721422 |
| AGTCGTGCAC   | 781.491012924565 | 0.184672052131581 |
| TGATTCACGCA  | 781.575618891553 | 0.151309489627068 |
| GTCATAGGAGA  | 781.576217296478 | 0.233687411652943 |
| CCAACAATGAC  | 781.584081421506 | 0.238127790794664 |
| CACACAATGAC  | 781.669398684104 | 0.248444729596643 |
| CCACTGAGTAA  | 781.722143203139 | 0.188260671476585 |
| CGTACAGTGAC  | 781.728005942569 | 0.304235035009343 |
| CATTTAAGTCA  | 781.814205621321 | 0.323485179268364 |
| AGTTGATTCAC  | 781.821554916366 | 0.182180949308367 |
| GTGACGCCACA  | 781.835820045719 | 0.181501301170826 |
| CTTACAATGAC  | 781.841912311852 | 0.252691104546127 |
| AGCGAAATGAC  | 781.856991007431 | 0.131481428033162 |
| ATGACAGACGC  | 781.872720593893 | 0.26345069857558  |
| AGTAATTAATC  | 781.894024288146 | 0.262305261523729 |
| CTTTGACGTCA  | 781.922101527815 | 0.293236814442154 |
| AGTTGTCACCA  | 781.927260172293 | 0.226931188642196 |
| AACGTGACCCA  | 782.046738309351 | 0.234109583135442 |
| GGCTATGACCC  | 782.10404119186  | 0.345896716708342 |
| AGTCACTTGTG  | 782.148414753952 | 0.322221210873725 |
| ATCCGTGTGAC  | 782.160862873094 | 0.224861866802924 |
| CGGTTGACTGA  | 782.213731321395 | 0.223235907277148 |
| TGTCATCTCAA  | 782.219875873499 | 0.162931586063042 |
| GCCCTGCGTCA  | 782.23383972975  | 0.280777112695872 |
| ATGCAGAGTCA  | 782.266511072192 | 0.293751918619026 |
| AATGACAAGAT  | 782.269580847755 | 0.164401656511107 |
| TGACGGAACA   | 782.335809844376 | 0.188015079172613 |
| AGGCCAGTCA   | 782.348104023192 | 0.182380159815974 |
| GCGAAGATGAC  | 782.372273297551 | 0.214128914375803 |
| GGAATAATGAC  | 782.387888532858 | 0.189894487407304 |
| CGGCATAGTCA  | 782.440220252485 | 0.328337795282832 |
| TACATGACAGA  | 782.450424873741 | 0.211701007209949 |
| AACACAATGAC  | 782.465424946145 | 0.26722350750271  |
| CGCGTCACGAA  | 782.505047851088 | 0.266446301984712 |
| GTCATCTCGCA  | 782.558783367643 | 0.188833104811695 |
| TATTACTGACA  | 782.65965935168  | 0.225219861081686 |
| ACTACTGTGAC  | 782.664913080453 | 0.227314454017523 |
| CCATTTGCTCA  | 782.665836279775 | 0.230155330866473 |
| ATGGGGATGAC  | 782.720280813968 | 0.186658506655478 |
| ACGAGTCAAAT  | 782.721920292246 | 0.162834696867396 |
| ACGTCACCTCA  | 782.726483417316 | 0.283028781337438 |
| GCGTCACCCCTA | 782.741031308632 | 0.134968568961222 |
| AGAGCGAGTCA  | 782.755986562458 | 0.161726042046287 |
| GAACCCAGTCA  | 782.784550668707 | 0.160604828771459 |
| AAATTATGACC  | 782.850802845371 | 0.177695563165997 |
| CCACATGTGAC  | 782.858840180824 | 0.250663351560231 |
| AGTCACGACCA  | 782.867922295643 | 0.308533853080031 |
| AGGTTGACTGA  | 782.956322149029 | 0.27019796078966  |
| CTGCCTGACTC  | 782.992476075781 | 0.160050100038167 |
| CGTCATTTGCA  | 783.013161111938 | 0.235703018544867 |
| TAATCATGACA  | 783.080522058376 | 0.281895172579592 |
| CGACAAATGAC  | 783.088997132234 | 0.268239582620756 |
| TGACATGGTCA  | 783.186121982557 | 0.20173809539558  |
| GCCTTTAGTCA  | 783.21474892459  | 0.305288421915873 |

|             |                  |                    |
|-------------|------------------|--------------------|
| ACTATTACGTA | 783.221680416119 | 0.187108670114557  |
| TGGCTCATCAA | 783.236686680464 | 0.249616523603759  |
| ACCGCTGACTG | 783.315741182251 | 0.183343084748084  |
| CCTTAGATGAC | 783.32662581472  | 0.323687514542128  |
| AGTTGATGACG | 783.379941738277 | 0.213744569685462  |
| AGTCACGCGGA | 783.438345321946 | 0.0974713217373798 |
| AACTGTGACGA | 783.454938694895 | 0.250355750571675  |
| CTGAGTCTGAC | 783.463324125478 | 0.227423718113742  |
| TGGTCATCAAA | 783.480282747532 | 0.183755366992186  |
| GATTACGTGAC | 783.508514512407 | 0.247647869844652  |
| AACGGGTCATC | 783.537470442546 | 0.258540024859856  |
| ATGCACGTGAC | 783.591995975845 | 0.223858877364245  |
| CAGTCAGATCA | 783.623148317451 | 0.253170055493308  |
| AGCCACAGTCA | 783.624534000059 | 0.267217218469033  |
| GGTGTGACCAC | 783.632050711634 | 0.259607895907746  |
| ATGAGTTGCC  | 783.639350235837 | 0.18420304997076   |
| AGCAGATGACG | 783.641981650816 | 0.137290969427544  |
| AAATTATGAGT | 783.694753297619 | 0.172026632541886  |
| GAGCCGATGAC | 783.705848187734 | 0.304749490250978  |
| CAAGAAATGAC | 783.721434678576 | 0.331832269586212  |
| TGAAGTAGTCA | 783.723464070879 | 0.253731040727189  |
| GACTCACTTCA | 783.72648904414  | 0.274984772497195  |
| CGAACTTGTC  | 783.769161630957 | 0.232857375561757  |
| ATTTGGAGTCA | 783.788339414994 | 0.254133207940524  |
| ATGAATAATCC | 783.822856869735 | 0.1641531408432    |
| AGGAAATGACG | 783.828547051116 | 0.232122290018898  |
| TAGATGAGCCA | 783.838819126404 | 0.219381429192974  |
| ATGACAGAGGC | 783.853971071931 | 0.192193986150262  |
| CCGTCTATGAC | 783.866338508759 | 0.27835654567819   |
| CAATCAGTGAC | 783.904963033083 | 0.336420473799715  |
| CCTCCGACTCA | 783.91850516307  | 0.223391344083669  |
| GATTGACTGAA | 783.920996246262 | 0.178911885300743  |
| CATTTGTGACA | 783.934889010322 | 0.232231505319709  |
| TGACACAGGCA | 783.951237493501 | 0.217467163340898  |
| ATCACTGTGAC | 783.973483858838 | 0.181594367634582  |
| TGACTCGTCA  | 783.984518924806 | 0.266711696779588  |
| ACTCATCGGTG | 784.057317134338 | 0.244506121712184  |
| TAGCGGAGTCA | 784.100503714271 | 0.271086412785637  |
| CACCCTAGTCA | 784.112279828058 | 0.17969637088427   |
| AGTCACTAGCC | 784.112529975244 | 0.168739260446702  |
| TGACACGGTCA | 784.12531496489  | 0.227092965218311  |
| TATGCGACTCA | 784.145184806111 | 0.16252080799409   |
| ATCCGGTGACA | 784.146834434183 | 0.228186976046129  |
| CGGTGACCCAA | 784.164819807245 | 0.199829527410052  |
| AAGCCTGTGAC | 784.193702357492 | 0.23325315809127   |
| ATCTTGGTCAC | 784.224266387934 | 0.154478016529064  |
| ATATTTGGTCA | 784.234803080261 | 0.311758586386669  |
| ATCGGTGTCAC | 784.259229184195 | 0.230659722590025  |
| CCGTTTCGTCA | 784.268586503809 | 0.260007913946024  |
| GACTAATTTAC | 784.278116218073 | 0.202278849240009  |
| ATGACTTGACC | 784.29245723239  | 0.246436707904147  |
| CTGACGCAGCC | 784.304056027473 | 0.237251499137072  |
| GGACTTCGTCA | 784.315091856307 | 0.432022022281158  |
| GTATTGTACA  | 784.347205805855 | 0.233952883017763  |

|             |                  |                   |
|-------------|------------------|-------------------|
| GTCATGATGCA | 784.355271166502 | 0.252010493739393 |
| GTCACCCTTTA | 784.366593180895 | 0.217807868156983 |
| CTTCTTATGAC | 784.371471335622 | 0.207123001346192 |
| AGTGTCACGTA | 784.479060270668 | 0.289421494511107 |
| GTGACAACTCA | 784.494286042301 | 0.141892761869205 |
| TCGTGGTCACA | 784.502726614769 | 0.232030945697063 |
| ATACCGCGTCA | 784.509814627815 | 0.2251731566722   |
| ACTCATACAAT | 784.512089888258 | 0.224059773518182 |
| TGACGTAGGCA | 784.600816051074 | 0.144051571182139 |
| AGACTCACGAG | 784.601162848616 | 0.127735738172025 |
| GGACTCACTCA | 784.646950903984 | 0.160394340771978 |
| ATCTGGTCATA | 784.679839903295 | 0.236656841027271 |
| AACTAGATGAC | 784.733324218693 | 0.146725114004399 |
| AGTCACTAGGG | 784.787097025932 | 0.161751179568864 |
| ATATGGTACC  | 784.792877923725 | 0.242852994169108 |
| ACCTAAATGAC | 784.797289205731 | 0.192310756572958 |
| AGTGCGGTGAC | 784.826852653212 | 0.225348256787128 |
| AAATGGTGACG | 784.833910934603 | 0.205279086121822 |
| ATGACGTTGGC | 784.855135254541 | 0.142101040059186 |
| TAATATCGTCA | 784.877794941568 | 0.255827768181914 |
| AACGGTGTAC  | 784.887565636619 | 0.271142180715395 |
| GTCACACTACA | 784.958544253848 | 0.230911707155309 |
| CGTCATCAGGC | 784.965979576043 | 0.206375228248237 |
| AAATTACGCAA | 785.037475447623 | 0.25332013991493  |
| AGTCAGACATA | 785.039582997744 | 0.2004840385771   |
| CACTTGGTCAC | 785.041692385061 | 0.186716743264638 |
| ATTCTTATGAC | 785.042176817279 | 0.245674261027251 |
| CCTAAGTGTC  | 785.042442191713 | 0.283083204514215 |
| TACATTTGTCA | 785.087555064811 | 0.242145417975941 |
| AGTTGAATGAC | 785.097058834683 | 0.280072954372728 |
| AAGCAATGACG | 785.099687633665 | 0.190437962698547 |
| GTCATATAGAC | 785.11434404917  | 0.194745381071646 |
| GTCATGTATTA | 785.130734608695 | 0.321808259611122 |
| AGCTTCTGACT | 785.149522124149 | 0.313005736775238 |
| GAAACTGACTC | 785.176300988404 | 0.199719792983888 |
| GTGACACGCCA | 785.176439151585 | 0.210138648409718 |
| CAGAAGTGTC  | 785.195356742161 | 0.170391124717978 |
| AACCTAAGTCA | 785.204111637046 | 0.14188066911636  |
| GAACAGATGAC | 785.204645157399 | 0.22551323356005  |
| CAGTACATGAC | 785.211971165064 | 0.302445105274012 |
| AGGATAAGTCA | 785.253629416772 | 0.205321994536963 |
| GGCCTTAGTCA | 785.359400364208 | 0.283384848812908 |
| GTCACCGAAGA | 785.360820196417 | 0.152769193482351 |
| ATTATTCATAG | 785.374959122505 | 0.256085805248507 |
| GTCACCGACTA | 785.399693451847 | 0.244304007555026 |
| TGACGCGTTAA | 785.442896367411 | 0.253877749641713 |
| GTCATTTTAGA | 785.480955755828 | 0.188602400985569 |
| GCGGGGAGTCA | 785.532064564903 | 0.200978653657025 |
| ATGACGATCAT | 785.566031314219 | 0.227569961591353 |
| AGTAGCAGTCA | 785.574960983301 | 0.165361599089655 |
| ACTCTGACGAA | 785.600487377248 | 0.236547892103594 |
| CCTTTGATGAC | 785.636416611202 | 0.249847512481979 |
| CCATGGGTGAC | 785.745842340756 | 0.206614186466142 |
| AGTAATCGTCA | 785.782858072926 | 0.190503902123244 |

|             |                  |                   |
|-------------|------------------|-------------------|
| GTCACGGTCAC | 785.78773349916  | 0.271196038126268 |
| ACTCATACAGT | 785.804860839252 | 0.231138306255367 |
| ATCGTAATGAC | 785.847964542294 | 0.290888225862167 |
| CGAGTCAGGGA | 785.928047917603 | 0.179856941563228 |
| CTCTTGACTGA | 785.961566441444 | 0.181957701639469 |
| GGCAAGATGAC | 785.965290120817 | 0.189638477721572 |
| ATGACTTGCCA | 786.035833028324 | 0.237833677835835 |
| GTCATCTCATA | 786.050068716027 | 0.289264169233412 |
| GACTCACTCGC | 786.057862451433 | 0.290530824733556 |
| AAGTTCTGACT | 786.059040535422 | 0.15269267399949  |
| GCGCGTATGAC | 786.06936171662  | 0.257701772101904 |
| AACATAATGAC | 786.071032787269 | 0.171250001514284 |
| CGGATCACTCA | 786.137431723544 | 0.253683519604749 |
| CTAGTGACCCA | 786.261051760693 | 0.161629418731275 |
| ATGACAGGACC | 786.263609737544 | 0.217148540296285 |
| AAAGTGAATCA | 786.27813528171  | 0.284353646635542 |
| TCGGCGAGTCA | 786.296191711985 | 0.264889189180146 |
| GTCACCCTATA | 786.341774974582 | 0.200160429602152 |
| AGAATGAGCCA | 786.37862469097  | 0.249564135254196 |
| GGCCCGAGTCA | 786.393723510365 | 0.296939956381341 |
| AATCTTTGTCA | 786.497247738617 | 0.42294672315664  |
| ATGACATCGCA | 786.50369160746  | 0.186620005714127 |
| AAATCTGTGAG | 786.577539407353 | 0.138179532048607 |
| CTCCTGTGTCA | 786.594978819758 | 0.305042754323226 |
| AGCTATGACCC | 786.641257278341 | 0.200580654952308 |
| CATTGGGTGAC | 786.652431507173 | 0.290562199893843 |
| TCTGCATGACA | 786.658711906896 | 0.255717575222325 |
| GCCTCTATGAC | 786.679683030889 | 0.159548859323575 |
| CCGCATATGAC | 786.682212636097 | 0.241334182613018 |
| CGCATTGGTCA | 786.720295958261 | 0.249965837816252 |
| CCATGGTGTCA | 786.797360415075 | 0.230543691714557 |
| AATAGTAGTCA | 786.941478040383 | 0.215132665422655 |
| ATCGGTGTGAC | 786.992800986939 | 0.204215478335367 |
| GTCACCGTATA | 787.00121966797  | 0.255718340406579 |
| GGAATCTGTCA | 787.030267292299 | 0.31074861023238  |
| TAGCCGACTCA | 787.056743076829 | 0.149572437231648 |
| ATATTTTGTCA | 787.057322361958 | 0.313736467206808 |
| ACGTCACTTTC | 787.105296205851 | 0.211938951097474 |
| ACTCATAGTAA | 787.141921433558 | 0.24466856837366  |
| CTTTCTAGTCA | 787.153315713887 | 0.209055797415197 |
| ACTCATACCTC | 787.154658314063 | 0.207459983092996 |
| TGACACTGACA | 787.26177794575  | 0.243840624070777 |
| GTCATTAGTTA | 787.264574995737 | 0.264028519045651 |
| GATTGCATGAC | 787.322412088146 | 0.259151124903551 |
| CTGACTCGGAC | 787.331894821572 | 0.125259344712861 |
| GAGGTGACCCA | 787.335940284428 | 0.142667484166554 |
| ATGACATTAAC | 787.366773291343 | 0.1697555957162   |
| ATGACAAGGAC | 787.38621895668  | 0.233596178279146 |
| ACGTCACGCGA | 787.389483023325 | 0.302167394056839 |
| GCGTTAATGAC | 787.407989914713 | 0.234700404902501 |
| GCACAGAGTCA | 787.413280263571 | 0.159333587592054 |
| CTAACTGACTC | 787.431570101936 | 0.19948438339383  |
| GTGACCTGTCA | 787.445896329209 | 0.314749153492397 |
| TGAGTGAGCAA | 787.449525773759 | 0.206228563011835 |



|             |                  |                   |
|-------------|------------------|-------------------|
| GAGTCAAACGC | 787.511105259453 | 0.283168655782963 |
| AAGCGTGACAC | 787.532406052467 | 0.218146139584757 |
| GAGTCAAAGGA | 787.54394897336  | 0.161882352899863 |
| ACGATGGCTCA | 787.549961700838 | 0.287247941651841 |
| GACATCTGTCA | 787.58839349689  | 0.235463500492872 |
| ATGACCTAATC | 787.620851175206 | 0.162053458153425 |
| ACCGATTAGTC | 787.621782409103 | 0.280165737476705 |
| AATTCTGTGAC | 787.637415506354 | 0.245952621514575 |
| GCAACAATGAC | 787.639525346567 | 0.263643118577161 |
| CACCCACGTCA | 787.642227277394 | 0.18177389508117  |
| CAGCTGTGACG | 787.672317545941 | 0.314968397852076 |
| AAGATTGCTCA | 787.713082314298 | 0.239124031247646 |
| CGTCATTTCCA | 787.733309498564 | 0.210134936864313 |
| GAGTCAAACAA | 787.775592597375 | 0.137129587231353 |
| CTAGACAGTCA | 787.802796378767 | 0.21454597565129  |
| GGGCCACGTCA | 787.813446213278 | 0.196158270082882 |
| ACGTGTACTCA | 787.847458102976 | 0.240538140580012 |
| GGCACGAGTCA | 787.852180708681 | 0.236048369455666 |
| ATGAGCAACCC | 787.868924995542 | 0.160692633635896 |
| CCACAATGACG | 787.893525039116 | 0.113706588940116 |
| GTCATTTGCA  | 787.947206850785 | 0.227326785429731 |
| GACTCGTCAGA | 788.003755477666 | 0.271686329935366 |
| GATGACAAGGA | 788.006124735644 | 0.218077686677477 |
| ATTACTAAGAC | 788.013915681559 | 0.309619558549419 |
| GAGATAATGAC | 788.027782246339 | 0.23117868864149  |
| CTTGCTAGTCA | 788.066402503368 | 0.275701788977804 |
| CCCGTTATGAC | 788.121534192302 | 0.311781098882815 |
| CGACGAATGAC | 788.133014357245 | 0.208917972600316 |
| CAGTATGTGAC | 788.139585765584 | 0.283890452286872 |
| CTATATGACCA | 788.151294224622 | 0.130976915149561 |
| GTCATTGCCAC | 788.162814985892 | 0.262391794331221 |
| GAATGAATGAC | 788.192806394414 | 0.14102479658814  |
| GCGGAGATGAC | 788.209055073158 | 0.266513037971067 |
| GTCACAGATAA | 788.211975971462 | 0.13408995552679  |
| CGTCTTCGTCA | 788.232796940847 | 0.196700066000518 |
| CGTCATTACAC | 788.311184219243 | 0.223442824971334 |
| GTCATCCCAGA | 788.356093108333 | 0.223124093521818 |
| AGTCATGGTCG | 788.371155784675 | 0.135138490360478 |
| TCTCCTAGTCA | 788.411074701842 | 0.201401405987567 |
| CATGTGGTGAC | 788.428985417257 | 0.108989652737427 |
| AGTTAAATGAC | 788.497267679979 | 0.337092250361109 |
| TGACTTGGACA | 788.499418041231 | 0.25380892586092  |
| GAATTAGTCGC | 788.505817582921 | 0.2416709754437   |
| ACCCTGTCATC | 788.547632787261 | 0.101017261760317 |
| ATTAGTAAGTC | 788.558384913469 | 0.219251126912085 |
| GCGCGCAGTCA | 788.601829751777 | 0.283292742200078 |
| GTCACACACTA | 788.651229130636 | 0.255907450856397 |
| TGACTCGGGAA | 788.670668409918 | 0.177730692728678 |
| ACTTTTGACTC | 788.720895832515 | 0.134886883299792 |
| AAATATTAGTC | 788.822171098574 | 0.338427029482549 |
| ACGTCACCTCT | 788.837469650348 | 0.178282759464495 |
| GCCATATGTCA | 788.853953043495 | 0.336627054829959 |
| CCCCGTGACTA | 788.868045706152 | 0.261109117889866 |
| TAATGTTGTCA | 788.879897099829 | 0.280757247415122 |

|             |                  |                   |
|-------------|------------------|-------------------|
| ACCGAGAGTCA | 788.885635225401 | 0.250152832220967 |
| CATACATGTCA | 788.919125346192 | 0.288696854620787 |
| AATGACAAGAC | 788.921778136763 | 0.226402632106142 |
| CGCTTTAGTCA | 788.926271798591 | 0.157596381739911 |
| GTCATATAAAA | 789.008969631827 | 0.153299869863078 |
| CGTCATTGAG  | 789.026951433171 | 0.141482185923087 |
| TGACGACTCAA | 789.052901225117 | 0.164330261239753 |
| ATGATGCAATG | 789.083905847805 | 0.215192046515525 |
| AGTCGAATGAC | 789.12075734703  | 0.222427291846542 |
| ATTAGCATGAC | 789.126327641151 | 0.276070525269907 |
| ATGTCATGTCA | 789.161309492911 | 0.185175203989265 |
| ATGACAAGCAT | 789.162989776275 | 0.23711029901521  |
| AGGATGGGTCA | 789.205876478712 | 0.225014623234947 |
| GACACGTGTCC | 789.214485245148 | 0.238009156373536 |
| CCGAGATGACG | 789.242392813307 | 0.154763685714853 |
| CAGATCATGAC | 789.296062253658 | 0.341997078891884 |
| GCTACGGTGAC | 789.323820871637 | 0.186414721231807 |
| ACTCTAAGTCA | 789.341842317188 | 0.284331639011013 |
| GGTGAGCAAAC | 789.354028646699 | 0.206115694805571 |
| AGTCAATGACC | 789.362907570436 | 0.216521627557003 |
| GAGTCAGGTAC | 789.375838440152 | 0.178443283410711 |
| GGTTGACTGAA | 789.444860139716 | 0.216862147815132 |
| AATCTCTGTCA | 789.450342974004 | 0.238626003061236 |
| CTGAGTCGAAA | 789.476682400352 | 0.195744364801209 |
| GCCCGTATGAC | 789.479253715479 | 0.22138775317345  |
| CCCGTGTGTCA | 789.482821017118 | 0.178366998695518 |
| TATCTAAGTCA | 789.488572390493 | 0.306779802355623 |
| ACGTCACTACG | 789.517973497542 | 0.245875168379994 |
| AACCATGACTT | 789.524431477375 | 0.147108144921163 |
| GGGCATCCAA  | 789.542753711176 | 0.20201000541759  |
| ACATATCGTCA | 789.636822356531 | 0.315067791159112 |
| AGCCTAATGAC | 789.674254975051 | 0.223852040252189 |
| GTTACTCAACA | 789.721490042688 | 0.252018458239718 |
| CTCGGGATGAC | 789.731846485541 | 0.195384372302469 |
| GTGACTTACCA | 789.782561487107 | 0.211311956727592 |
| GAACCTGTAC  | 789.790358808766 | 0.230445836336702 |
| GAGTCAATAGA | 789.817606190831 | 0.186042851056405 |
| CGATCAGTGAC | 789.828363028913 | 0.304358079940643 |
| ACGGCAATGAC | 789.920060368578 | 0.14901163402564  |
| GATCATATGAC | 789.950103758508 | 0.274130885543992 |
| CATACATGACA | 789.975966396271 | 0.306007278027839 |
| CTCTCTATGAC | 789.995695655457 | 0.240220066532485 |
| GAAGGTGACAC | 790.055715039035 | 0.11940098501141  |
| GCATGCATGAC | 790.064247369067 | 0.148826128786936 |
| GACTCACTCCC | 790.086115595582 | 0.212244727931458 |
| CGATTAGTGAC | 790.114949678733 | 0.181201026731969 |
| CGAAAGGTGAC | 790.117081420106 | 0.187578342272461 |
| GCTGTTATGAC | 790.131166856648 | 0.248920156412291 |
| GAGTCAGTTTA | 790.158770938519 | 0.221360632517767 |
| AACGGTGACAT | 790.168610896958 | 0.134606902260576 |
| GTTACTCAGTA | 790.199452588378 | 0.252666772154052 |
| AACCGTGTGAC | 790.244087384985 | 0.255858654624791 |
| GACAACGTCAC | 790.2597179689   | 0.249713200894175 |
| CGCCTGACGCA | 790.267350377285 | 0.286749854417    |

|             |                  |                   |
|-------------|------------------|-------------------|
| CCTAAAATGAC | 790.300998849691 | 0.237747288736757 |
| TCATCGTGCA  | 790.332266942209 | 0.146048247125894 |
| AGTCATGGGCA | 790.346371576618 | 0.189233996722804 |
| GCACTAATGAC | 790.364931572739 | 0.187495541290626 |
| GAGCAATGACA | 790.399896743891 | 0.225579524914948 |
| ACGTCACCGGC | 790.493656642825 | 0.265592205517286 |
| CCTTCCAGTCA | 790.496169996919 | 0.220063282332482 |
| AGTAATGTGAC | 790.508899828412 | 0.146844062494226 |
| CGAATTGTGAC | 790.521309600753 | 0.191149135923675 |
| AAATTGACACA | 790.524525928957 | 0.171347847154241 |
| CGTGTTTGTCA | 790.538362821988 | 0.216673023393105 |
| GTCATGACCTA | 790.541021438249 | 0.134151453295607 |
| ACCTCCGTCAT | 790.549001151235 | 0.166618816124611 |
| GTCATTAGGCA | 790.572106677073 | 0.187120668574005 |
| TGAGTCGGC   | 790.623019006464 | 0.278141854541016 |
| GAGTCAGGTAA | 790.629317499087 | 0.229007133711026 |
| AATGATGTGGC | 790.640230705569 | 0.146539066758762 |
| GTCATGTTCGA | 790.688468126148 | 0.270043483808709 |
| GAGTCAAAGGC | 790.737197621411 | 0.152060212178983 |
| GTGATGGGTCA | 790.79064507243  | 0.182097462724972 |
| GTCATTAACTA | 790.830435756209 | 0.265807805946263 |
| CGTTTTATGAC | 790.848011194937 | 0.210669154423022 |
| ATGACCATACA | 790.923601506287 | 0.287276441147102 |
| AGTCAGAGATA | 790.972597003097 | 0.228109543289843 |
| AAGCTAATGAC | 790.992215626152 | 0.291715973139175 |
| AGAGTAATAAT | 791.00547186999  | 0.238742854396274 |
| CGTCATTTAGC | 791.03981519576  | 0.17212532632123  |
| GATTACGCACC | 791.044240589974 | 0.222934830544064 |
| AGAAATGACAA | 791.050636860363 | 0.183538868593568 |
| ATATAATGACG | 791.05231034435  | 0.279912453302626 |
| TAGCTGTGACA | 791.075206482574 | 0.260939116250637 |
| ATGAGTTGGTC | 791.077669862519 | 0.148267022598538 |
| ACGCGTGTGAC | 791.137040691345 | 0.235509337228282 |
| CCTTGGTGACA | 791.175882726007 | 0.285957635231982 |
| CGTTAATGACA | 791.270825956427 | 0.216395106167156 |
| AGTGACGCGGC | 791.281204788139 | 0.270571482590564 |
| GAACATGTGAC | 791.308614116164 | 0.229413606949325 |
| AGACTAATAAG | 791.331397306274 | 0.239332778135422 |
| TGACAAAATAA | 791.365429943479 | 0.213181773565488 |
| ATGACCGAACA | 791.372124013995 | 0.217985891261767 |
| ATACTTGTGAC | 791.372376883947 | 0.144360586232496 |
| ACTGTGGTGAC | 791.399010321623 | 0.274191667848079 |
| ACTAGTGAGTC | 791.455444352221 | 0.248276208493942 |
| GTGACAAACTA | 791.507657618161 | 0.176182728521801 |
| GTCATCAGCAC | 791.528871882747 | 0.266096481636238 |
| TACCACAGTCA | 791.544732314293 | 0.343104523005739 |
| CGGGGAATGAC | 791.73650362136  | 0.276512935566748 |
| CAGAGTCAATG | 791.829120140643 | 0.2324929075045   |
| GGAATGACCAC | 791.836362301045 | 0.216151384746797 |
| CGGTAATGAC  | 791.889744477601 | 0.180843531327713 |
| AACCAGTCAGC | 791.892738219936 | 0.276378453647885 |
| GACTTTAGTCA | 791.998034113548 | 0.220222587252297 |
| CCGATTACTGA | 791.998903495502 | 0.138772292696613 |
| ATAATTAGTCG | 792.013403080792 | 0.180788060504772 |

|             |                  |                    |
|-------------|------------------|--------------------|
| GTGACTAGCTA | 792.037088202326 | 0.239127779940231  |
| ACGTCATGGTC | 792.037428321003 | 0.110591723528483  |
| CGGGTGATGAC | 792.062152658112 | 0.194646308749095  |
| GTCACCCAGGA | 792.07598864699  | 0.274195956583994  |
| AAGACTGTCAT | 792.107004796899 | 0.28257191520392   |
| ACTGCGAGTCA | 792.112119113669 | 0.165422847849913  |
| AAATAGACTCA | 792.154191151055 | 0.138628307615889  |
| ATGACCTGGCC | 792.168871423784 | 0.126255239730253  |
| GGCGTGTCACC | 792.204765179054 | 0.159816356276241  |
| GCGGTGATGAC | 792.237399118665 | 0.243437591321404  |
| CATTTAATGAC | 792.375113548924 | 0.131517971618051  |
| CGTCATCTCAA | 792.377864042937 | 0.195565600839231  |
| GTCATCCCAC  | 792.380421684498 | 0.226139117115047  |
| ACTCATCCGTG | 792.403201857227 | 0.1959689078077    |
| CGTCATATGCC | 792.433145574789 | 0.187745915410274  |
| CACTTGATGAC | 792.485069620439 | 0.311415459453627  |
| ATTCAAATGAC | 792.53590451615  | 0.199685212454416  |
| CTGTCGGTGAC | 792.554723796172 | 0.326163025384586  |
| AGGTTTGACTC | 792.558796983421 | 0.249238385583273  |
| AGTCAGAGTTA | 792.592970459946 | 0.219337369512987  |
| ACTCTGAGTCG | 792.596929947271 | 0.0629685007072147 |
| ACGGTGTGACG | 792.66275891158  | 0.215934909012837  |
| ATTGCGTAACC | 792.682482845142 | 0.202143607500712  |
| CTGTCGCGTCA | 792.688579617334 | 0.296566887492909  |
| CGTCATTCCGC | 792.699461957467 | 0.191241416350133  |
| CGTCATTGATC | 792.752430796734 | 0.230094397728321  |
| CTTGGTGACGC | 792.779531215479 | 0.190786521991629  |
| AGGTAAGTCAC | 792.791676782362 | 0.251934523852029  |
| GGTGACGATAA | 792.799203172973 | 0.215138417505696  |
| TCATACTATGA | 792.816536743686 | 0.178840659637372  |
| GGCAAAATGAC | 792.823699160277 | 0.151724678418224  |
| AAAAGTGTGAC | 792.857905136445 | 0.22482596701954   |
| AATGAGTGAAT | 792.910276633641 | 0.211872527426588  |
| GGTGACACGCA | 792.930640922333 | 0.165009197311218  |
| ACGTCACAACG | 792.947363994921 | 0.214359079773501  |
| ACTCATACATC | 792.992675439347 | 0.215932641601345  |
| ATGAATAATCG | 793.014791862497 | 0.175834819517284  |
| GTCATGCTTCA | 793.017355678305 | 0.232212960339063  |
| AGCTTGACTAA | 793.023681239117 | 0.338392215373472  |
| GAGATGGGTCA | 793.069297458211 | 0.219796014046844  |
| ATGACCCAGCC | 793.081077774873 | 0.124608638076075  |
| ACCCAGTCAGA | 793.133325025038 | 0.292126461062394  |
| GCCATGACATA | 793.150176379438 | 0.244335802936871  |
| CAAGGTGACAC | 793.167118282757 | 0.225758684734765  |
| CGTCATTGGGA | 793.204889141689 | 0.221261002310896  |
| AGGTAATGAC  | 793.208721602324 | 0.222386104063428  |
| GACTCACTTCC | 793.219344637021 | 0.166825644064586  |
| GGGTGGATGAC | 793.225850584178 | 0.108515711107756  |
| GTCACATTTTA | 793.274441238545 | 0.236064299071999  |
| ACGTCACCTCT | 793.314054431107 | 0.195633382965425  |
| GATGACAGGGC | 793.316221698737 | 0.165749270565564  |
| GTCACACAAA  | 793.34788247068  | 0.216957595664754  |
| GACCATGTGAC | 793.411040335891 | 0.319042890905161  |
| CGGTATTAGTC | 793.485020057677 | 0.212212649562888  |

|             |                  |                    |
|-------------|------------------|--------------------|
| GTCACCGATCA | 793.505179991835 | 0.228493617311043  |
| GTCACAGGTGA | 793.516867734681 | 0.224704053728698  |
| GTACAAATGAC | 793.575924155165 | 0.258275777080395  |
| ATGACGCCGCC | 793.639461362834 | 0.215563724615741  |
| GTCATAAAGCA | 793.652279550073 | 0.212918298531543  |
| CGATGTGACGC | 793.656802900876 | 0.190728816700206  |
| CTGACTAGGTC | 793.696608987983 | 0.260204337781425  |
| CGTCATTAGAA | 793.710834809838 | 0.163953832693334  |
| ACCGCGATGAC | 793.713033787365 | 0.14087012563317   |
| ATGACTTGAAT | 793.727434347238 | 0.212789957949852  |
| AATATTGTGAC | 793.735976630722 | 0.173709179254235  |
| CAACGCAGTCA | 793.739957179035 | 0.321962765176063  |
| AACAGTGACGT | 793.776509095758 | 0.278644115368162  |
| ATGACGAGCAC | 793.816271072027 | 0.137569778387525  |
| AATCATCGTCA | 793.818096754378 | 0.177628527585457  |
| GCGATGGGTCA | 793.819192210353 | 0.178147941984585  |
| CACTGTGACAA | 793.839548608508 | 0.237730400616719  |
| ACGTCACAATA | 793.854296160518 | 0.166063410265816  |
| CTCACTAGTCA | 793.927828446819 | 0.188977243072267  |
| AGTCAGACTTG | 793.936820478906 | 0.18170178530111   |
| ACGTCACATAG | 794.000080853753 | 0.192441534884659  |
| GAGTCCAGTCA | 794.026552082059 | 0.133423488189834  |
| ATGCAAATGAC | 794.080649880929 | 0.163302483958916  |
| CGTCATGATTC | 794.087908155937 | 0.0731250214005748 |
| CACTCTAGTCA | 794.094584662089 | 0.16348619763741   |
| ACCTGTGTGAC | 794.162657084687 | 0.256060734975699  |
| GCTTTTCGTC  | 794.171514947991 | 0.184702482115275  |
| ACGCCCAGTCA | 794.173749098093 | 0.201341711257665  |
| CGTCATGTGTC | 794.174380842616 | 0.178110988870906  |
| GTGACGATACA | 794.184646278399 | 0.241272795974128  |
| ATAAGATTCAT | 794.202869875676 | 0.219457530943626  |
| CAGTCAGCAGA | 794.213555905043 | 0.266954706318544  |
| ATACCGGTGAC | 794.223042134419 | 0.200193693937996  |
| AAGATGGTGA  | 794.275665587389 | 0.139411521781103  |
| CTAATGTCATA | 794.278473785901 | 0.247505923443312  |
| TCAAGCAGTCA | 794.280475273309 | 0.204267033850505  |
| GTCATGCAAAA | 794.281995107762 | 0.316862253048412  |
| GACGATTAGTC | 794.300308387177 | 0.371141690082512  |
| GACTCACTCCA | 794.33727223912  | 0.16515596965182   |
| AACTTTACTCA | 794.34188135028  | 0.274545954671065  |
| CGTCACACATA | 794.352858891457 | 0.237193313020872  |
| CGCAGTGACAC | 794.374295328915 | 0.233711128896145  |
| GGGCACGTGAC | 794.407245578547 | 0.159790701236038  |
| ATGTCAGTGAC | 794.426987524173 | 0.283582850865008  |
| CAGTTGATGAC | 794.469328447546 | 0.152953494086964  |
| TGAGTCTTGCA | 794.470009805249 | 0.180548771093297  |
| ACACCGTGACT | 794.487371346254 | 0.168756303549787  |
| GTCATGTCTGA | 794.492158677523 | 0.167519529860211  |
| AACCTGGTCAT | 794.513268637716 | 0.244832248231214  |
| CAAATGGTGA  | 794.523909002036 | 0.166294811247551  |
| ATATGTCAGCG | 794.578917543301 | 0.158264826900647  |
| CGCATGACACC | 794.615178700996 | 0.142103814815863  |
| GAAACGTGTCA | 794.635987122521 | 0.16806309529168   |
| ACGTATGTGAC | 794.638721701626 | 0.112320587378104  |

|             |                  |                    |
|-------------|------------------|--------------------|
| AGTTAATGACG | 794.711366869884 | 0.25105209531226   |
| GCCTTACGTCA | 794.717186235805 | 0.161649918268439  |
| TCGTAATGACA | 794.721338872036 | 0.313103127796543  |
| ACGTTTGTGAC | 794.72307623791  | 0.281826422628395  |
| ATGTTTGAICT | 794.727054974752 | 0.276722473511802  |
| GTCACAACGAA | 794.731777733071 | 0.190220090751941  |
| GGGATACGTCA | 794.733106478263 | 0.248994002811865  |
| ACTCATCATGA | 794.757103779287 | 0.143601165750297  |
| AGATAGGTGAC | 794.76259045227  | 0.226881677830308  |
| CTGCTTATGAC | 794.781895781391 | 0.159714670974071  |
| GTC AACGTCA | 794.798330293544 | 0.186639962447283  |
| AATTGGTGACA | 794.829427351676 | 0.127241150916011  |
| CGTATTGTGAC | 794.871242742718 | 0.0866471706982476 |
| AGTGAGTCTGC | 794.881336723689 | 0.196307850509351  |
| CACGTCAGAAC | 794.902439797475 | 0.331952485309062  |
| ATATTAAGTCA | 794.907649913783 | 0.284179697658611  |
| AACCAATGACG | 794.927654165544 | 0.186402826485837  |
| TCTCCCAGTCA | 794.960336509165 | 0.216756094188145  |
| GCACATAGTCA | 794.967366150269 | 0.368758707405222  |
| AGTCACGGTCC | 795.032940183008 | 0.177123743811039  |
| GTCATTGCCGA | 795.069412514274 | 0.352588062340018  |
| GTCATTGTCCA | 795.113180200389 | 0.237478587705336  |
| GTTTACAGTCA | 795.139231302075 | 0.191481904002902  |
| TGACTCTAGCA | 795.150915207303 | 0.354200397223105  |
| GTCATAGGGGA | 795.181046157895 | 0.234902989688776  |
| CACGTGTGACA | 795.197196096713 | 0.0855490013920948 |
| GTCATCTTAAC | 795.228478870847 | 0.332286331554088  |
| ATAATGGCTCA | 795.2532142271   | 0.23932773699689   |
| CTCAAATGACA | 795.281005174999 | 0.37138918319701   |
| AACTTATGAGT | 795.30376235646  | 0.215340062458741  |
| ACTGACTGTGA | 795.328265208849 | 0.212466641872281  |
| ATGAGTAGGCA | 795.331031481799 | 0.179766758866491  |
| GAGTCAAAGCC | 795.331259941151 | 0.254388137997757  |
| CTCTTGGTCAC | 795.33468503693  | 0.193826830376939  |
| GTCATAAGGAA | 795.336740760015 | 0.287667281709083  |
| AAGCTCGTCAT | 795.340051225009 | 0.325186927342902  |
| GGCCCGATGAC | 795.378489134203 | 0.238738794626498  |
| ACACATAGTCA | 795.389632679096 | 0.289628353339794  |
| GTCATACGGCA | 795.397059314022 | 0.191725985569146  |
| ATGACGGGGCC | 795.411557328036 | 0.263826055013354  |
| GAGTTGATGAC | 795.44426323339  | 0.236802406386676  |
| GTCACATCAGA | 795.455656974983 | 0.322256713274478  |
| CCCTTGATGAC | 795.504140355962 | 0.222989265749372  |
| GGTTTGTGTCA | 795.540479307907 | 0.271586777064502  |
| GTCATCTGAAA | 795.559340677631 | 0.157468251720467  |
| TGAGTAAAGCA | 795.669831206465 | 0.196302207520869  |
| ATGTCATTACA | 795.672038721511 | 0.243785097496025  |
| ACAACGCGTCA | 795.726187836467 | 0.271344381153243  |
| GTCATTTACGA | 795.728501481391 | 0.0543424129110842 |
| AGCCTTAGTCA | 795.747214290253 | 0.171006854491952  |
| CACTGCAGTCA | 795.765241380947 | 0.183486507805259  |
| ATCAAATGACG | 795.773533045742 | 0.162208484489245  |
| GAGCACGTCA  | 795.780885482918 | 0.130940643306677  |
| AATCGTGACGC | 795.870250147866 | 0.296629757140664  |

|              |                  |                    |
|--------------|------------------|--------------------|
| AACAAATGACA  | 795.915729576211 | 0.181191301248856  |
| GATTAATGAC   | 795.952012649091 | 0.181112834047507  |
| GGCTAGAGTCA  | 795.983589452762 | 0.1633939941388    |
| AGCAGTCAGAA  | 796.017165437987 | 0.227899215694277  |
| GTCATTCCGAA  | 796.08588815997  | 0.218959298272548  |
| ATAAGGGTGAC  | 796.137227568954 | 0.179810469249937  |
| GGAGAGATGAC  | 796.178326549982 | 0.190729685724181  |
| CGATGGGTGAC  | 796.183883603146 | 0.160787509853085  |
| AGACTAATTAG  | 796.20507291109  | 0.237584372130423  |
| CGCCGACTCAC  | 796.268219007043 | 0.154541081717177  |
| CGCAAGACTCA  | 796.271205443494 | 0.240313322949164  |
| ACAAATCGTCA  | 796.286497877635 | 0.244251293499514  |
| GTAGGGATGAC  | 796.28703784268  | 0.215936104407054  |
| CCCATTCGTCA  | 796.328408004218 | 0.124759005778034  |
| ACGTCACCTCGC | 796.435874177942 | 0.199374485123277  |
| ACTATTACTGA  | 796.444470263879 | 0.231898215340415  |
| ATCCATGAGTC  | 796.453087681839 | 0.212684481843228  |
| ATTTCCGGTAC  | 796.473166863881 | 0.29672439573466   |
| CTCTGTCATGA  | 796.47362239656  | 0.143767281588491  |
| GGTCATGTCAC  | 796.483367053008 | 0.269881313383783  |
| GCATCATGACA  | 796.524744344904 | 0.187126795636641  |
| GGAGGGATGAC  | 796.5300325891   | 0.164610333252444  |
| AAAGCGGTGAC  | 796.565950366945 | 0.213242655438573  |
| ACGATTAGTCG  | 796.588919508723 | 0.248985764979188  |
| ACTCTTTGTCA  | 796.603612400969 | 0.155319602891591  |
| GGTAGTAGTCA  | 796.632263724358 | 0.18186620642817   |
| AAAACATGTCA  | 796.634421360865 | 0.317102187372693  |
| ATGACGAGGGC  | 796.668702695902 | 0.214189645896787  |
| AGACTTGTAC   | 796.674195685412 | 0.241547703720748  |
| ATTACGTATAC  | 796.681249859771 | 0.149881175361956  |
| AGGGTATGACC  | 796.686146752292 | 0.236209914212982  |
| AATACTGTCAC  | 796.72391585512  | 0.188155399473341  |
| CCAAGGGTGAC  | 796.730612939997 | 0.208736040491457  |
| AACGAAATGAC  | 796.730678879807 | 0.232237478132429  |
| CACGTCACGGG  | 796.758866208777 | 0.17312486007645   |
| GGGAAAATGAC  | 796.759962837017 | 0.192817553698579  |
| GTCACGCATAA  | 796.794262715241 | 0.295911715945225  |
| GAAACGGTGAC  | 796.797132271731 | 0.224892420160979  |
| GCACATGACAC  | 796.805311095894 | 0.129198645143773  |
| CAAGCGGTGAC  | 796.853824422796 | 0.261601779078144  |
| TGACACAAGCA  | 796.875575190189 | 0.143892167452623  |
| GACTAATCGCA  | 796.887765180208 | 0.220213717080427  |
| GTGGCTACCA   | 796.900384199731 | 0.205709326025262  |
| CCGCGAATGAC  | 796.906522975339 | 0.135201567428233  |
| AGTTGTCACCG  | 796.952176094096 | 0.0999928149533737 |
| GCAAGTAATGAC | 796.980640023637 | 0.183402865860327  |
| AGTCATGAGGG  | 797.011976046001 | 0.215342007350613  |
| AGTCACGGGTC  | 797.042884377692 | 0.156627376464295  |
| AATGACCACTA  | 797.065123399936 | 0.266666484964161  |
| AGTCTGATGAC  | 797.078446261737 | 0.304194401184535  |
| AGGGATATGAC  | 797.084364717728 | 0.0948063069276509 |
| ATGACTTCGTA  | 797.111922306428 | 0.220135776858734  |
| GCGTCACAGCC  | 797.17490795764  | 0.254195104375439  |
| ACCTTTACTCA  | 797.206730021808 | 0.212380843850734  |

|              |                  |                    |
|--------------|------------------|--------------------|
| ATCATATGTCA  | 797.217984349381 | 0.224998566866248  |
| CGTCATTTAC   | 797.245380528339 | 0.239330899378093  |
| TGACGCGGTAA  | 797.266095630252 | 0.202595856919184  |
| AATGACATTTA  | 797.288540813975 | 0.212056679252018  |
| ACCGCGTGACT  | 797.301507165095 | 0.215611242911085  |
| ATGTTACATCA  | 797.334582784071 | 0.285022017491     |
| CTTTTCCGTC   | 797.375629247638 | 0.24402851800819   |
| GGGTCATCATA  | 797.421685148207 | 0.23130503944005   |
| GGTTTGCTCAC  | 797.448033888332 | 0.226291004873318  |
| CATTTTGACTC  | 797.450681402478 | 0.189326997101303  |
| CGTGACAAGTC  | 797.461209026708 | 0.308251689603722  |
| CGCTGACACAG  | 797.468130249634 | 0.2928764444630796 |
| ACTTATGACCC  | 797.474110637328 | 0.18691248031457   |
| TCCCTGCGTCA  | 797.494830150903 | 0.22238126122808   |
| GAAGGTGTGAC  | 797.56845399016  | 0.16523548483229   |
| AGGATGACCGA  | 797.573302578048 | 0.24033980263994   |
| TGACTGTCTCA  | 797.586887084814 | 0.246008117238978  |
| CCCAGATGACA  | 797.636364121698 | 0.209011319662247  |
| GAATCACGTCA  | 797.667895295467 | 0.226364795053192  |
| CACGCAATGAC  | 797.690474155075 | 0.237809078937371  |
| AAGAGGGTGAC  | 797.690715234093 | 0.192092661444014  |
| CAGTTTGTGAC  | 797.692095107728 | 0.216128948258744  |
| ATGACAATGTA  | 797.735864203879 | 0.210654164506026  |
| ATTTCGATGAC  | 797.783428417192 | 0.207519583977204  |
| ATCATCTATGA  | 797.798530048561 | 0.220868986130458  |
| ATGCGTGTGAC  | 797.805411437671 | 0.203470555213927  |
| ATACGCAGTCA  | 797.807761008517 | 0.212144778896524  |
| CCTGCATGACA  | 797.832265808415 | 0.210178575762967  |
| GACGGGTACATA | 797.840041728464 | 0.148359046217839  |
| ACAACGTACCC  | 797.850867508611 | 0.177582171693535  |
| TGTCATTGCAA  | 797.878125378301 | 0.17251113613464   |
| GCTGAAATGAC  | 797.902176172596 | 0.312822227181039  |
| TATCTGTGAGA  | 797.904760328898 | 0.160667344227745  |
| ATTATGTGAGA  | 797.91721427873  | 0.163012886915236  |
| CTCAGTGTGAC  | 797.919183926817 | 0.3364365365524    |
| AGTCACGCCGG  | 798.070388952181 | 0.232112266192175  |
| GTCACATTGGA  | 798.08128213306  | 0.336568913766462  |
| ATACTGTGATG  | 798.126564187512 | 0.303403724268756  |
| AGTCACGCTGC  | 798.141312387648 | 0.190635730025039  |
| GACCGATGACC  | 798.142994318146 | 0.26415311727767   |
| GACTAATCATC  | 798.149429774175 | 0.214109517231979  |
| AGTGGTGTGAC  | 798.194317053541 | 0.176581161162498  |
| AGGTTGATGAC  | 798.196040493076 | 0.26685098515388   |
| TCGAGTCAAGA  | 798.199399076896 | 0.145663326519829  |
| ACGTGGGTGAC  | 798.200665905202 | 0.265544278271538  |
| CAAGCTAGTCA  | 798.210899616514 | 0.288947256624537  |
| AGTAACGTCAC  | 798.27741374     | 0.161767450407235  |
| CAATTTGGTCA  | 798.280516543747 | 0.273168861379326  |
| AGCGTACTCA   | 798.367551171016 | 0.21574929774636   |
| GTCACATTTAA  | 798.387160139275 | 0.210209981495232  |
| TGACGCTAAAA  | 798.446262156507 | 0.226573181685491  |
| ACTACTCATCT  | 798.449005055698 | 0.181795378548821  |
| ATGAGTCCGCC  | 798.484534644531 | 0.227443643893148  |
| ACGGTCTGACT  | 798.486654028342 | 0.228151794961929  |



|              |                  |                   |
|--------------|------------------|-------------------|
| CCTTGACTCGA  | 798.487302970488 | 0.206406988439183 |
| TACAGCAGTCA  | 798.501511380957 | 0.252163977338589 |
| CAGTCAGATGC  | 798.52068169467  | 0.254270533333841 |
| GGGCTAGTCAC  | 798.524654771779 | 0.236051780435105 |
| CATACTCGTCA  | 798.538497671617 | 0.246955440422383 |
| AACCGTAGTCA  | 798.593995026481 | 0.294726768803328 |
| GTCATAGAGCA  | 798.621763210077 | 0.244516222964419 |
| CTACTACGTCA  | 798.65020570389  | 0.214110482040637 |
| CCATAGGTGAC  | 798.66054908665  | 0.242931291187926 |
| ATGACAAGGCA  | 798.672595568091 | 0.247447611326143 |
| GCGTCATGGCA  | 798.681579300432 | 0.198545640883022 |
| CGCGGAATGAC  | 798.730501446113 | 0.195631445712196 |
| GTCATTTAGGA  | 798.743863792678 | 0.236285341001971 |
| GCATAGGTGAC  | 798.78851524864  | 0.314970717617877 |
| ATGAGTACCTC  | 798.796511431061 | 0.13567310731444  |
| GTCACCGACCA  | 798.860721544092 | 0.241948798629641 |
| GAGAGTGTGAC  | 798.862521215466 | 0.16875218940836  |
| CGTCACACGTC  | 798.868616270935 | 0.182356077979298 |
| TGACGAACACA  | 798.874656900193 | 0.31777978602385  |
| TGACGTACGAA  | 798.886166064345 | 0.219496021930467 |
| TGACGTACGCA  | 798.906779835323 | 0.256942647279265 |
| AGAGTGACAAA  | 798.914446224023 | 0.203291776591253 |
| GCTAGTAGTCA  | 798.921610782848 | 0.223768760054455 |
| ACGTTCTGTCA  | 798.929223806976 | 0.217735970249791 |
| TGTCATTACAA  | 798.957425606222 | 0.218996442124184 |
| CGAGAGTCAGA  | 798.961684321603 | 0.206943881513157 |
| TGACACCGTCA  | 798.989076554274 | 0.127189011832066 |
| GTTGGGAGTCA  | 799.018033841108 | 0.111703157974991 |
| ACGCCTGACTC  | 799.047147397651 | 0.207995437046988 |
| CGCCACGTCA   | 799.05317732171  | 0.223676382806937 |
| GTCACCGGGAC  | 799.061038656937 | 0.156080214825576 |
| CGGGCGAGTCA  | 799.117408201205 | 0.242211638534195 |
| AACGTGGTAC   | 799.159470792912 | 0.156712215863504 |
| ATGTCATTGCG  | 799.176448280882 | 0.207101533142553 |
| ACGTAATGAGT  | 799.179953636187 | 0.197629747451609 |
| AGGCTGTACATA | 799.180164118475 | 0.197389541089024 |
| TGACTGCTCAA  | 799.245624457551 | 0.220286950470912 |
| AGCCCATGACT  | 799.278664087682 | 0.247366431877172 |
| CTCAGCAGTCA  | 799.288223706535 | 0.208000678613953 |
| CAGGTCATGAC  | 799.331681898541 | 0.250224818948215 |
| TGCGTGACAAA  | 799.44398567435  | 0.247699336022383 |
| CACCGACTCAC  | 799.469390003616 | 0.199165913377604 |
| ATGACGAGCAA  | 799.477874584118 | 0.237820848144637 |
| TCTGAATCAGA  | 799.479656512677 | 0.150363912467386 |
| GACATGACACC  | 799.485612512423 | 0.225105171441303 |
| CTCATAAGTCA  | 799.497402962802 | 0.213701644573717 |
| ACACGTCAACG  | 799.498832944494 | 0.151967998587555 |
| TAACGTCATGA  | 799.555025869894 | 0.259269811137257 |
| GTCATTATATA  | 799.557312757388 | 0.261620543871611 |
| CGTCATTTACA  | 799.583144757704 | 0.222408763354878 |
| ACACATCATAG  | 799.648751964089 | 0.17380926399439  |
| GTGTCATGAGA  | 799.671019741035 | 0.158568581650377 |
| CTATAAGTGAC  | 799.721024840233 | 0.208998638939884 |
| GTGCAGTCAGA  | 799.727640336499 | 0.281791161182862 |

|              |                  |                   |
|--------------|------------------|-------------------|
| ACTCATTCTTG  | 799.758013473049 | 0.216405129952545 |
| ATGCGTGAGTC  | 799.777678798171 | 0.251026321284061 |
| ACAGACTCACA  | 799.80586022281  | 0.21001634381771  |
| GCAAACATGAC  | 799.840985141442 | 0.375684504472783 |
| AGGCCGATGAC  | 799.883508264512 | 0.341532474506933 |
| CAGTAGGTGAC  | 799.887425384519 | 0.224615699930573 |
| ATAGTGACCCA  | 799.91438942886  | 0.320453547980144 |
| GTGTCACTAGA  | 800.021408012002 | 0.181324036630335 |
| TGACTACTCAA  | 800.055730778045 | 0.146664018816019 |
| GCGGTGATGAC  | 800.090889809014 | 0.169519718770567 |
| GTGTAATGACA  | 800.1555917562   | 0.179251108844042 |
| TCGGCGACTCA  | 800.172956273778 | 0.22913486620412  |
| GTCATTGAGTA  | 800.204958367548 | 0.188490306806796 |
| GGGTCATAGAC  | 800.206796941913 | 0.204050574841996 |
| GTCATCCAAA   | 800.269630537737 | 0.218659390092142 |
| AACCATGAGTC  | 800.298494901239 | 0.278362770533887 |
| AATCGCAGTCA  | 800.320929482396 | 0.22834446218607  |
| AAAATTACTCT  | 800.324648193673 | 0.278160532930701 |
| AGATTTGACTC  | 800.329961243395 | 0.192398999520051 |
| ACGTCACCTGCG | 800.34671673415  | 0.208307444897503 |
| CATCGAGTGAC  | 800.377766280076 | 0.152260568323024 |
| AACATGACACC  | 800.386719206354 | 0.246708154133468 |
| CCATTAAGTCA  | 800.437056372108 | 0.263147017641745 |
| GGACTAATGAC  | 800.450019755789 | 0.147232821026584 |
| AGCGTCACTAT  | 800.450039543137 | 0.204180274283059 |
| ACTGTACGTCA  | 800.479079864936 | 0.280804911697421 |
| ATAGTGTGAGA  | 800.481508067152 | 0.215519524353633 |
| CGAACTGACTC  | 800.484280152649 | 0.280768127661009 |
| GCGTGGATGAC  | 800.573705110339 | 0.300844776657301 |
| GCGAGTGTGAC  | 800.588276914304 | 0.235058397009518 |
| GTCACAATACA  | 800.63845794727  | 0.232483067784946 |
| ATGACAGGATG  | 800.66680421233  | 0.208723943759117 |
| GACGTGTGAGA  | 800.690527670604 | 0.254536752072758 |
| GATTCCAGTCA  | 800.692133251755 | 0.183002955055365 |
| CTGACGGATTC  | 800.693045856594 | 0.239809546602384 |
| AGGGGATGACG  | 800.74234628923  | 0.192696074765033 |
| GAGAAATGACA  | 800.755934556941 | 0.159668337664025 |
| CGACTCACGAG  | 800.762998656717 | 0.224580084791898 |
| GTCACCTCTTA  | 800.774166184963 | 0.270486365978591 |
| GCTCTACGTCA  | 800.785580243888 | 0.240736339903664 |
| AAGGCGAGTCA  | 800.788248721011 | 0.272504265695983 |
| GGGCTGACACA  | 800.791693932013 | 0.229390169878599 |
| CTATTGGTGAC  | 800.85752276229  | 0.221651614120892 |
| ATCCCTGTCAT  | 800.907758620538 | 0.203060970699773 |
| CTGTTTATGAC  | 800.913871881552 | 0.267140023288779 |
| CCTGATGACCA  | 800.921184655787 | 0.202534770759816 |
| CGATGACCGAG  | 801.00427171667  | 0.264298633246568 |
| ATGATTACGCA  | 801.004778792567 | 0.171382613378158 |
| GAGTCAATTGC  | 801.036132936204 | 0.121706347948913 |
| CTGTAATGACA  | 801.065273750644 | 0.309700709543905 |
| AATGGTGTGAC  | 801.076098181405 | 0.13368050424902  |
| ATCACGTGTCA  | 801.096731207306 | 0.213577097985559 |
| GACTGGTGACA  | 801.101012997929 | 0.117517201611707 |
| TATACGTAATA  | 801.104061723662 | 0.152300847024814 |

|              |                  |                   |
|--------------|------------------|-------------------|
| CCCTGCAGTCA  | 801.119099199135 | 0.208889565098688 |
| ATGTGTACTCA  | 801.122210249979 | 0.231017176607144 |
| CCTGACTATGA  | 801.144888313319 | 0.231172185136095 |
| CGTCATTTTCGC | 801.16066619418  | 0.27906742941505  |
| GCGTCATGCGA  | 801.181474726999 | 0.277572304852252 |
| ACGGTATGAGT  | 801.214168098267 | 0.192753888018884 |
| GGATCTAGTCA  | 801.241975675769 | 0.155454084067255 |
| AGCATGACAGA  | 801.373705671129 | 0.17116852794221  |
| GTCATTTAGCA  | 801.396108251932 | 0.29513831237355  |
| CCATTGAGTAA  | 801.412401197979 | 0.295642322705071 |
| GTCACCTTGCA  | 801.43203281047  | 0.191723709182416 |
| ATGTTTCGCAC  | 801.443867311947 | 0.101664906167671 |
| ATAAATTAGTC  | 801.480685592762 | 0.217483373534153 |
| GTGCGTGACAC  | 801.590444028943 | 0.158607622656458 |
| ACTAGTAGTCA  | 801.614713800675 | 0.191053432119661 |
| AAAATTAATAA  | 801.624120422768 | 0.231752956773068 |
| CGTGATGACCA  | 801.640913927214 | 0.198423618401912 |
| GGTTGAGTAAC  | 801.695603674776 | 0.199348940609287 |
| CCTTTTATGAC  | 801.716106375983 | 0.245466287247197 |
| GCGGCAATGAC  | 801.72873891639  | 0.222510680689538 |
| CATAATTAGTC  | 801.729234554783 | 0.300715179071697 |
| CAGTAGATGAC  | 801.736822925385 | 0.392627205542084 |
| CGTCATTATAA  | 801.751994652261 | 0.312031808419228 |
| CTCCTTACTCA  | 801.803045248351 | 0.158950724955096 |
| GCGTCACCTGA  | 801.839998229578 | 0.257196585962571 |
| GAACCAATGAC  | 801.843208005181 | 0.252815192453216 |
| GTCATAAAGGA  | 801.853993959876 | 0.177231115097428 |
| CCATATATGAC  | 801.898681783734 | 0.214954478585331 |
| GTGACTAGCAA  | 801.931403052558 | 0.222842539343038 |
| GCCACACGTCA  | 801.961370832994 | 0.236022823008052 |
| AGAATTAATAA  | 801.969374727038 | 0.228185676806453 |
| GAAATGGGTCA  | 801.998446402397 | 0.168025077432527 |
| GTCATCCCAA   | 801.999641003073 | 0.200433269665987 |
| AAAATGTGACG  | 802.027035967378 | 0.196900937738241 |
| ACTCATGACGC  | 802.074982909773 | 0.139499351249121 |
| TGAGTCGTGCA  | 802.083487100116 | 0.217792973004602 |
| CGTCATCTCCA  | 802.084918621474 | 0.190207508222778 |
| TGACACTAACA  | 802.093099549568 | 0.24147494789346  |
| ATGTCAATGAC  | 802.13240170891  | 0.224420970503319 |
| ATGACAGGGCC  | 802.132445818516 | 0.204389165644494 |
| CGTCATCTACA  | 802.142689689307 | 0.210995607876219 |
| GGTTAGATGAC  | 802.155960479193 | 0.215013093903627 |
| AAGCGCGTCAC  | 802.163227569644 | 0.104100129202445 |
| AAGCATGTCAT  | 802.18817908887  | 0.1603186584083   |
| ACTCATAATAG  | 802.194246944302 | 0.208319817171202 |
| GTCACCGCACA  | 802.243248213904 | 0.20387873766595  |
| AATATATGTCA  | 802.268935935969 | 0.232798311716389 |
| GCTTAGACTCA  | 802.290548217789 | 0.406216417054392 |
| ACGGTGACGAT  | 802.320560529874 | 0.205314175020431 |
| CTCGAGTCAAC  | 802.391044711553 | 0.219666631665216 |
| TAAGTGACCCA  | 802.391548533677 | 0.212649303649449 |
| GGGTCATAGCA  | 802.415017390431 | 0.19790242304453  |
| GATTGCGTAAC  | 802.423628679035 | 0.23051274599402  |
| CGCTGTATGAC  | 802.429884813926 | 0.183700829712994 |

|             |                  |                   |
|-------------|------------------|-------------------|
| CCTTTTCGTC  | 802.450350366796 | 0.184257689039159 |
| GTACCTGTCAC | 802.46311152529  | 0.22041509279796  |
| ACGCGTCAGAC | 802.488784736231 | 0.228165032453319 |
| ATGACGTCTCG | 802.540491566837 | 0.166126265088549 |
| AACCTCTGACT | 802.542338422314 | 0.185163678793209 |
| GTCACATCGGA | 802.561962598032 | 0.186037128425705 |
| GAGCTGACACA | 802.576273614089 | 0.299623922092487 |
| AGTCATGGGAA | 802.582360107269 | 0.187829317530488 |
| AATTGGGTGAC | 802.61738722889  | 0.176802208174725 |
| GTCACCTTACA | 802.637777462288 | 0.275336318100881 |
| ATGTTTGGTCA | 802.677510388132 | 0.219398301452345 |
| ATTAGGGTGAC | 802.705454504519 | 0.165857238354021 |
| CGAGCTGTGAC | 802.714725114264 | 0.197159517166663 |
| AGTCAGTCTTA | 802.784056717248 | 0.232201723623995 |
| GATAGCAGTCA | 802.790959670192 | 0.201037496794921 |
| CTCACTGTGAC | 802.825685018586 | 0.135379205035588 |
| CAGATTACGCA | 802.827471457309 | 0.197824516412933 |
| GAACGGAGTCA | 802.912093556544 | 0.141998617356719 |
| AACATTTGTCA | 802.924110406002 | 0.205835755544261 |
| AGTATTACGTG | 802.934896185066 | 0.216488398784014 |
| AGACTAATTCC | 802.939284088778 | 0.25140467142098  |
| CTATCGGTGAC | 802.941657061837 | 0.201292487852592 |
| CACTAGAGTCA | 802.953030457353 | 0.259278571674677 |
| GGCTATATGAC | 802.992547078638 | 0.266867174977063 |
| CTCACATGACA | 803.087593740203 | 0.243057064574459 |
| CTGACAGATCA | 803.126004294076 | 0.233302066534105 |
| AACGGAGTCAG | 803.132727901419 | 0.198674887025207 |
| GACTTAGTGAC | 803.142469717683 | 0.200943221175023 |
| ATGACGCTCTA | 803.14618694421  | 0.21711738547133  |
| CTTACATGTCA | 803.178147622227 | 0.231858451290558 |
| ATACGGTCATA | 803.213643096398 | 0.115411813075114 |
| CAAACCTGTCA | 803.231253523614 | 0.237528465537381 |
| AGTCACGACAG | 803.271703510491 | 0.190337926700472 |
| GTCACACAGCA | 803.275284007134 | 0.198249775728527 |
| GGACCTGTGAC | 803.295862219259 | 0.245058617130078 |
| AAATCTGTGAC | 803.301293003888 | 0.14965923692691  |
| AGTCACTTGGC | 803.305134836163 | 0.252466184857982 |
| GGTTTGATGAC | 803.308666438121 | 0.156468121461959 |
| GTCATTGACCA | 803.344870696599 | 0.229568551470525 |
| AACTCGGTGAC | 803.34587411181  | 0.190083627727039 |
| AAAATCGGTCA | 803.383685500552 | 0.205943442525426 |
| GACCGTGTGAC | 803.394768215385 | 0.214059461266852 |
| TCAGTGACAAA | 803.404688191201 | 0.188116259152117 |
| GTCACACGAAC | 803.412924908485 | 0.222741855423886 |
| CATCATGACGC | 803.417783034448 | 0.161074141646776 |
| ATTCCGGTGAC | 803.424887730984 | 0.20347290724112  |
| ACGGGGATGAC | 803.432926285158 | 0.178687351896604 |
| TCCATGACAGA | 803.444595359313 | 0.266100085224091 |
| CCCCTGTGTCA | 803.45341214005  | 0.194713312497833 |
| GACTCACTTGA | 803.483382434384 | 0.230178181044057 |
| CGTCATTTGAA | 803.485195307813 | 0.200503201698429 |
| GTATTGACTGA | 803.489611002522 | 0.224923667293168 |
| TGAGTCCTAAA | 803.502849098016 | 0.276643888250372 |
| CCATTATGTCA | 803.544174295054 | 0.220704035486271 |

|             |                  |                   |
|-------------|------------------|-------------------|
| CTAACTCGTCA | 803.553110961806 | 0.179881179358751 |
| GACCCTAGTCA | 803.569674287174 | 0.13427057192739  |
| TACTGGTGACA | 803.574791359883 | 0.215938174577465 |
| CCAATTAGTCG | 803.623452778777 | 0.154227069239423 |
| TCCTGGAGTCA | 803.635243637857 | 0.232741011602187 |
| ATACTGTCACC | 803.645852623087 | 0.173301316097955 |
| ACGTCACCTGG | 803.660882348672 | 0.270534895364864 |
| GAGTAATCATC | 803.686809882692 | 0.380898654013278 |
| CTGACTACTAC | 803.725692232679 | 0.155068568983158 |
| GCGTCATGTTA | 803.741765865379 | 0.213643674298998 |
| AGTCACGGAAG | 803.780467559799 | 0.221051467719161 |
| AGTCTTGTGAC | 803.846710866321 | 0.148236886923606 |
| GACGTGTCAGC | 803.856030390477 | 0.228537519466646 |
| GATTCTAGTCA | 803.859441016307 | 0.224885399957855 |
| TCTTAATGACA | 803.879735173464 | 0.216764074358439 |
| CCGCGTATGAC | 803.916716267273 | 0.23537469530217  |
| ACCCTTATGAC | 803.921962145009 | 0.136383916460549 |
| ACGTCACCCGC | 803.971744458239 | 0.234230365762361 |
| GACACAGTGAC | 804.015221526221 | 0.23615351020688  |
| CATGTAGTGAC | 804.071388391841 | 0.171785521689244 |
| GACTAATATTA | 804.122300708311 | 0.254828450699531 |
| AAGATGGGTCA | 804.130076301091 | 0.196176741067177 |
| CGTCATCCCAA | 804.154250102763 | 0.162198139917266 |
| AGTCACGGTAA | 804.155919217189 | 0.070270202083435 |
| ACAACTCGTCA | 804.156248121909 | 0.213148685694556 |
| GCAAATGACAA | 804.173536000899 | 0.265561429797059 |
| CACGTCAGACC | 804.178891080816 | 0.214249171590909 |
| CATAGCATGAC | 804.187754793452 | 0.198641371016784 |
| CCTTTGACACA | 804.234610433452 | 0.215149453283874 |
| ACCCTGTGTCA | 804.248236751441 | 0.271993606086862 |
| ATACTGATTCA | 804.276843918707 | 0.236439370147041 |
| ATGTAATGACA | 804.279256167883 | 0.1674853129801   |
| CTGACGTGACA | 804.287927960745 | 0.218865116960034 |
| AGTCACCCCGC | 804.295034502388 | 0.144326365404716 |
| GTGACACCGAA | 804.316116540086 | 0.30238514041054  |
| ACGCGAATGAC | 804.329180631133 | 0.239207327149755 |
| TACTTGTGACA | 804.360395768675 | 0.170478666377057 |
| GCTTTGACACA | 804.369023320894 | 0.202039654800293 |
| GCGAGAATGAC | 804.400947802372 | 0.226459574394665 |
| CCAATTAATAA | 804.401228165709 | 0.169461556358669 |
| AGTGACTAGCC | 804.428416895523 | 0.221826342914648 |
| GTATGGAGTCA | 804.45430089148  | 0.193454794282185 |
| AGTAGTGACGC | 804.489640248539 | 0.138070175022316 |
| AAAAGTCATCC | 804.497100846077 | 0.190769777177016 |
| AACGGGTCATA | 804.503435950512 | 0.180100365765789 |
| AGTTCGGTCAT | 804.521144769874 | 0.176185796069124 |
| ATGACCGAGAC | 804.531829290778 | 0.195191305652552 |
| GTCATATGGAC | 804.534830221019 | 0.239661395769066 |
| AAGATTACTAA | 804.538512362192 | 0.223693869334057 |
| AGTCACGCCCA | 804.594397770428 | 0.177294758039437 |
| AGAATTAGTCT | 804.627937361951 | 0.232349325874577 |
| GTCACATTGAA | 804.638157232855 | 0.225294845116377 |
| CGAAGCATGAC | 804.673541828731 | 0.198940485527357 |
| ATGAGCAAGTA | 804.731695319347 | 0.167132308512985 |

|              |                  |                    |
|--------------|------------------|--------------------|
| GATTCATGACA  | 804.754898847231 | 0.247836140847149  |
| ATCGTCACCGG  | 804.760218724777 | 0.254451970819459  |
| ACGTCACCTCTA | 804.771923706843 | 0.181829254172343  |
| GAGCACAGTCA  | 804.833728237562 | 0.186125096650859  |
| AACTCTGTCAC  | 804.847317809172 | 0.212236078533337  |
| GTCATTATAAA  | 804.852664825661 | 0.149485223298767  |
| GACAGACTCAC  | 804.857121633613 | 0.174181043368921  |
| GTCACATAATA  | 804.869904489698 | 0.272612189681965  |
| TCTTAGTGACA  | 804.878556205934 | 0.209129211638633  |
| CGAAATGACAG  | 804.883967723432 | 0.173284657471162  |
| TAATAGCGTCA  | 804.887696544237 | 0.201414797696984  |
| AATGCTGACTG  | 804.890537562654 | 0.352053897068159  |
| GTCATGAGTGA  | 804.962749288454 | 0.170690142997923  |
| AGGAAATGACA  | 805.019675643286 | 0.205010610763988  |
| GTCATGCTGAA  | 805.033704314    | 0.165389738289826  |
| TCTTTGACGCA  | 805.089337375692 | 0.220683593296152  |
| GGCCATATGAC  | 805.146564067899 | 0.285032755539926  |
| AGGTCGTGACT  | 805.160956802179 | 0.144947436194633  |
| ACAGTCAGCGA  | 805.164172514532 | 0.297470341721685  |
| GGCACAATGAC  | 805.194235706526 | 0.218966772122973  |
| CCGGTAGTCAC  | 805.254010496817 | 0.170547971067048  |
| ATTCTAGTCA   | 805.266631588111 | 0.183750388789636  |
| ATAATGGTGAC  | 805.303640411156 | 0.219714819031523  |
| AACATACTCAT  | 805.338537001795 | 0.276338599058538  |
| ACGTCACCTCCG | 805.342932932288 | 0.137315620757776  |
| GATGGTGACGC  | 805.38664304852  | 0.0876802409083077 |
| GTCACCGAGGA  | 805.390588271068 | 0.25539612705899   |
| GCGAAAATGAC  | 805.418094716357 | 0.162780083935093  |
| GTGACTGCCAA  | 805.421968021486 | 0.207137758938769  |
| CGGTGATGTCA  | 805.425011355849 | 0.22095619965105   |
| GATGAGCCAGA  | 805.434275287259 | 0.148766139910393  |
| ACGTCATGTGA  | 805.498589134952 | 0.213762746354023  |
| GACCATGACGC  | 805.514181432458 | 0.207988590206447  |
| GAGTCAGGCAC  | 805.517893418537 | 0.168819943381565  |
| CATCGCAGTCA  | 805.522944624747 | 0.218763922707952  |
| CTGAGTCGTCA  | 805.539452923925 | 0.197193164250193  |
| GTCACACAACA  | 805.641898026041 | 0.222320128540118  |
| CGACTCACGCA  | 805.650830599265 | 0.219370761559389  |
| GCAACTCGTCA  | 805.683085685684 | 0.174845927648998  |
| ATCAATGTGAC  | 805.726343312032 | 0.219761924770945  |
| TGACTCCCTAA  | 805.731190872506 | 0.0829065555311033 |
| CGGAATTAGTC  | 805.798914532033 | 0.222422608156356  |
| ATCTAATGACG  | 805.802521302389 | 0.173264905595474  |
| GACCGTGTGAC  | 805.840531484938 | 0.253653034879512  |
| CGCCGGATGAC  | 805.864843860937 | 0.315874049646393  |
| GTCATTACCCA  | 805.924622194555 | 0.215942991867505  |
| GTCTCTGTCAC  | 805.969658137758 | 0.219247026233175  |
| GTCATAAGAGA  | 805.972436294337 | 0.197721708794724  |
| AATTATGTGAC  | 806.003444465026 | 0.30976384073821   |
| TTAGTGACAAA  | 806.005129668159 | 0.287609579545624  |
| TGAGTCTAGCA  | 806.008538817202 | 0.243895417525749  |
| ATGGTGACAAC  | 806.024437624387 | 0.206996006824307  |
| CAAATGTGACA  | 806.049846658424 | 0.194753363123802  |
| CGTCTGACGAA  | 806.08746771347  | 0.273544535473428  |

|              |                  |                   |
|--------------|------------------|-------------------|
| GCCTTTACTCA  | 806.116055891311 | 0.202933764307671 |
| TAGTGGTCACA  | 806.120328734512 | 0.191250430331105 |
| ACCTACAGTCA  | 806.132201882275 | 0.208961434245881 |
| AAATATGACCC  | 806.134074812933 | 0.163111561816782 |
| GTCATAGAACA  | 806.16346281519  | 0.266964931360756 |
| GGTGCGAGTCA  | 806.190094466341 | 0.206377935270959 |
| GTCACGAATCA  | 806.203995571297 | 0.238583677962431 |
| AGCTAATGACG  | 806.224895001213 | 0.305941367870897 |
| CTGTGCAGTCA  | 806.275644546571 | 0.163091991274943 |
| ATGACAATGAA  | 806.285464560239 | 0.315266203694943 |
| GTGTTGACACA  | 806.330370909763 | 0.202134483936646 |
| AATTGAGTAAC  | 806.371440414185 | 0.201543823726433 |
| GAGTCAATAAC  | 806.382901813615 | 0.28133022926043  |
| AATACATGTCA  | 806.496456744091 | 0.344656028169004 |
| CGAACGGTGAC  | 806.567546668722 | 0.274149946366489 |
| TGACAATGTCA  | 806.570524433806 | 0.221816246526478 |
| ACGGTGAGCAA  | 806.646629169137 | 0.204502378154652 |
| CGCCAATGACG  | 806.654355056988 | 0.261383074006793 |
| CTACATATGAC  | 806.685663819826 | 0.161011611326496 |
| AGGATCTGTCA  | 806.71716375822  | 0.210430637300816 |
| CGTTGACGTCA  | 806.726756353003 | 0.35199638259907  |
| TCATAGTGACA  | 806.753099513533 | 0.136667606095065 |
| GTCATTGCACA  | 806.772448869292 | 0.319060276569993 |
| GACTCTAGTCA  | 806.811099334194 | 0.182910902785192 |
| ATGCTGATTCA  | 806.811907173961 | 0.272558581047325 |
| GTCATTATCGA  | 806.814883359764 | 0.224372376245751 |
| ACATCACGTCA  | 806.82561014785  | 0.242305756348767 |
| GTCACCGTCTA  | 806.862604602299 | 0.20560246649424  |
| GTCACAATTCA  | 806.873041690519 | 0.126780257277992 |
| AATGTATCACC  | 806.883441268938 | 0.198081478863673 |
| TACCCTAGTCA  | 806.93716301756  | 0.213758112987955 |
| ACTCATTCTTA  | 806.952208402481 | 0.204686287295756 |
| ATGAATTAGTC  | 806.986058711037 | 0.232713463974752 |
| GTGTCACGCGA  | 807.01203088973  | 0.23735719057267  |
| GACCCGTCAACA | 807.047682142265 | 0.203552266207399 |
| CCGTCATATGA  | 807.073476600906 | 0.185377267003615 |
| GTCACACCGGA  | 807.100643355576 | 0.172897475657384 |
| CAGTCAGCGAA  | 807.122416718492 | 0.275930827031974 |
| AAGACGTCAACC | 807.145245073581 | 0.225362147877506 |
| GTCACCATTCA  | 807.170698563103 | 0.252542097803619 |
| GTCATTACCAA  | 807.194799398992 | 0.268106203564061 |
| GTTCTTTGTCA  | 807.226149944974 | 0.164088436119109 |
| ATCGCTGACTG  | 807.229102665946 | 0.218085281726831 |
| ATGACGGGACC  | 807.243783075031 | 0.190813910354798 |
| ATGACATTTCC  | 807.313603863875 | 0.221984891920524 |
| AAAGATGTCAT  | 807.345056483696 | 0.139799381481242 |
| AAACAGATGAC  | 807.34689609721  | 0.305275459860488 |
| AGCATTGTCAT  | 807.397329307293 | 0.204243885068747 |
| ATGACGCGCTG  | 807.464473530877 | 0.212577654050877 |
| ATGAGTAGGAC  | 807.468854572121 | 0.210524262149659 |
| CTCTCGACTCA  | 807.489124546501 | 0.153353445901167 |
| CGTCATCCCAC  | 807.546908321881 | 0.183195042749654 |
| TATGATAGTCA  | 807.571238264564 | 0.229044271836257 |
| GATGACAAGCA  | 807.578547979668 | 0.199333165157573 |

|             |                  |                    |
|-------------|------------------|--------------------|
| GTCGACGTCAC | 807.641177901959 | 0.196810156453264  |
| AAGCGTGACGT | 807.653406385813 | 0.239587877167233  |
| AATCATGACAA | 807.666024604092 | 0.201177928533113  |
| AGACCAGTCAG | 807.669867875003 | 0.137085252025865  |
| GGACAGATGAC | 807.671927767592 | 0.169018748663653  |
| GTCACATTATA | 807.674941984206 | 0.185266274601982  |
| GTGTCACGATA | 807.67863192739  | 0.223035498733691  |
| GAGGAGATGAC | 807.700422596407 | 0.210985632182738  |
| ACGTCACTATC | 807.701148243069 | 0.165139756552449  |
| GTCACGAATGA | 807.711345019769 | 0.143345329427836  |
| GTCACAGTCTA | 807.720295858642 | 0.153852803113307  |
| GGACAAATGAC | 807.736380128532 | 0.196496928133827  |
| GGGTTTATGAC | 807.781527373278 | 0.167436863942389  |
| GGTGTGATGAC | 807.806772239694 | 0.211990660380188  |
| ACGACTCGTCA | 807.832665194984 | 0.279146016662348  |
| GGGCTTATGAC | 807.844947765404 | 0.254917177875571  |
| GACTCATGGAC | 807.854707286107 | 0.214001954125423  |
| ACAAATGACAA | 807.865785121898 | 0.206355587570232  |
| ATGATACAATC | 807.866365219681 | 0.20180723751998   |
| TGACTCTGGAA | 807.954367802732 | 0.237356916728916  |
| ACGTCACCCCA | 807.975882664258 | 0.121167792082446  |
| ATTTAATGACG | 807.998719008563 | 0.146777153566747  |
| GTGGATGCCA  | 808.027814543333 | 0.183382039962181  |
| CTGGCTAGTCA | 808.042173312252 | 0.251541467162438  |
| ACGTGTCAGAG | 808.091042042702 | 0.198236096496694  |
| ATTATTCATAA | 808.105355089364 | 0.130649596639565  |
| TGACATATACA | 808.116723777079 | 0.136683294235372  |
| GTAATTAATAA | 808.119805177053 | 0.128448380813449  |
| GCCTGTAGTCA | 808.130554186188 | 0.237525650955731  |
| GTGGTCATTCA | 808.131618011426 | 0.0746569874839237 |
| GTAATGGTGAC | 808.141253481145 | 0.211101366365735  |
| ACAATGAGTAT | 808.142783294489 | 0.272192194429433  |
| CAAAATTAGTC | 808.173332377513 | 0.22627303234055   |
| GCCAAGACTCA | 808.214486260393 | 0.246438806033605  |
| ACGTCATGCAA | 808.219686738312 | 0.27550032177033   |
| CCAGCGACTCA | 808.221454691897 | 0.258416229266547  |
| GGGTAAGTCAC | 808.297886549834 | 0.20535247022922   |
| ATGACTTGCCG | 808.307840333996 | 0.311273970974197  |
| AGTCAGAGCTC | 808.331467334294 | 0.135748517285348  |
| CGTGGTGTGAC | 808.372056533266 | 0.290565574611054  |
| ATATTGACACA | 808.374340433228 | 0.136741942487041  |
| CAGTCACGACG | 808.383383425382 | 0.293478630955322  |
| ACTCACATGAC | 808.391969933133 | 0.214551477424802  |
| GTGACACTCAC | 808.429717305034 | 0.231236859365331  |
| CCGCCTATGAC | 808.455029833183 | 0.17904943079837   |
| CCTGTGGTGAC | 808.458543053462 | 0.195881762997494  |
| CACTGAGTAAC | 808.45916040992  | 0.120363066368472  |
| ATCAAATGACA | 808.510847731846 | 0.239148432165334  |
| AGAGTAATATC | 808.524240151011 | 0.13888683866522   |
| ACTCTTGGTCA | 808.638719595937 | 0.118990133977057  |
| AGCATTTGTCA | 808.690697941232 | 0.231161795942365  |
| CGCTAGATGAC | 808.73481610882  | 0.375655998477916  |
| GTCATTGGAAA | 808.740031105962 | 0.204083340489901  |
| CAAGCTGTGAC | 808.753608306878 | 0.178772800057482  |



|             |                  |                    |
|-------------|------------------|--------------------|
| CGATCAATGAC | 808.809457768343 | 0.246638111047826  |
| ATGATGCAACA | 808.831410346211 | 0.166989794679067  |
| CGTCATTATAC | 808.834001234571 | 0.284060015727246  |
| ATGACTTGAAC | 808.860925374359 | 0.197655900107752  |
| AAAAGATGAGT | 808.865782159937 | 0.176444949458237  |
| ACATCGTCATG | 808.867602152616 | 0.188650438609507  |
| AGATTAAGTCA | 808.869517038162 | 0.192321303710267  |
| GAGTCAAAAGC | 808.944312338351 | 0.194743109403345  |
| GTCATCCAGGA | 808.954907494391 | 0.27953181729828   |
| GTCACCATACA | 808.975443160235 | 0.204132728674486  |
| GGCATCATGAC | 808.979431559635 | 0.246817523526587  |
| GTCACCCGACA | 809.041332054107 | 0.269995238167136  |
| GGTTGACGTCA | 809.074105192082 | 0.20996547977696   |
| CGACCTGTGAC | 809.085559162745 | 0.319801192751175  |
| AATTAGGTGAC | 809.090968573026 | 0.225625111085751  |
| CGTGACAAACA | 809.162614314935 | 0.240498891609167  |
| GTCATTCGCCA | 809.164794143794 | 0.205358975920666  |
| ACTCATACTGG | 809.169778496806 | 0.194186530947837  |
| GATGCTGTGAC | 809.170599733714 | 0.155343837361431  |
| TACTAGAGTCA | 809.217525083752 | 0.172905650694892  |
| AACGTATGAGT | 809.22357934907  | 0.156670446244222  |
| TATGTCATGGA | 809.225458381198 | 0.245366664307396  |
| AATTATTACTC | 809.245769607539 | 0.21236615643576   |
| CTTGCGGTGAC | 809.286249621863 | 0.0859237292035742 |
| CTCTTTGACTC | 809.298620083365 | 0.170641486839261  |
| CTCGGTGTGAC | 809.305243486354 | 0.125039348353114  |
| GCGCTTCGTCA | 809.307598681597 | 0.222539377258268  |
| TGGTCATATAA | 809.317389790494 | 0.269206084793493  |
| GGTCACCGTCA | 809.334142283323 | 0.319099320686967  |
| ACTACTGTCAT | 809.33529375962  | 0.113253678940518  |
| GTAACTCGTCA | 809.344804835295 | 0.353036359611636  |
| GTCACCACAAA | 809.346784762945 | 0.170212955473986  |
| GACCAGATGAC | 809.384084235671 | 0.216975269045006  |
| CTGGTACGTCA | 809.388555802565 | 0.236251446359223  |
| CCAGGCATGAC | 809.392553028227 | 0.270156714969985  |
| GGTCCGACTCA | 809.418321915036 | 0.200183014799304  |
| ATCATTGCTCA | 809.43130965981  | 0.166606639454656  |
| CACAAATGACG | 809.431628735202 | 0.195936252024144  |
| CACCATGAGTC | 809.434486097496 | 0.129058404127587  |
| CCCAGAATGAC | 809.455957567376 | 0.151705121345307  |
| ATGACGCGCGG | 809.470197570632 | 0.304760752415598  |
| AATCGTAGTCA | 809.489489055717 | 0.193017028987349  |
| CGAAACATGAC | 809.508180339067 | 0.26718504158842   |
| CTGCTGATGAC | 809.523693024693 | 0.236019079336504  |
| AACCAATGACA | 809.540333341987 | 0.236353228087499  |
| TATCTTCGTCA | 809.549623835025 | 0.153189602206033  |
| GTCACACTAAC | 809.628490466434 | 0.139076346666506  |
| AGTATGACCTA | 809.630746236146 | 0.189088701471262  |
| AACCACAGTCA | 809.656669705882 | 0.312651520874797  |
| GTTTTACGTCA | 809.681461999727 | 0.230711073546371  |
| GTCATCTCACA | 809.693000384214 | 0.19153226256287   |
| CGCATCTGTCA | 809.694389007679 | 0.286038215816264  |
| ATTAATGTGAC | 809.715617699171 | 0.264156183831489  |
| GAGTTTGTGAC | 809.723745545958 | 0.18542537042648   |

|               |                  |                   |
|---------------|------------------|-------------------|
| TAACCGCGTCA   | 809.736248378968 | 0.177384873583995 |
| GGCCTGTCATA   | 809.761945684268 | 0.175010892195472 |
| ATCGACTCAAT   | 809.772176665427 | 0.145803703516389 |
| ACAATGTCATC   | 809.777211984735 | 0.202830562761308 |
| TGACTAGAGCA   | 809.795066339687 | 0.323732126386924 |
| GATATAATGAC   | 809.816105429935 | 0.26918974300513  |
| AGAGTCAGGAT   | 809.854888892169 | 0.194435766593921 |
| ACGTGCTGACT   | 809.900983494284 | 0.197909501658073 |
| ACAATTACTAA   | 809.968644698095 | 0.315835128080225 |
| GGCTCTGTCAC   | 809.969900124596 | 0.197165151322709 |
| ACTTCTATGAC   | 809.979302133861 | 0.209812089658876 |
| CGGCCATGTCA   | 810.010433042253 | 0.201145436181364 |
| GTGACAGGTCA   | 810.019292011905 | 0.192831553582444 |
| ACGTCATGTTC   | 810.025922845514 | 0.142404501524867 |
| CGTCATTGACC   | 810.026497694688 | 0.1940711064719   |
| AAAGATTACTC   | 810.105490830398 | 0.138367832548029 |
| CTGATTACGCA   | 810.127169591605 | 0.231233741875881 |
| CAGTCAGAAAG   | 810.133524181288 | 0.196331901330068 |
| ACGACTGACTA   | 810.157073175233 | 0.221146684043423 |
| TGACGATACAA   | 810.200890068076 | 0.205769396759284 |
| AAGTCACTACA   | 810.213903135181 | 0.119247414224083 |
| GACTAGAGTCA   | 810.222242433134 | 0.240065635307768 |
| ACGTTTTGTCA   | 810.259213948008 | 0.267983231226555 |
| ATCTAGACTCA   | 810.284454897658 | 0.162894018212556 |
| GTCACTGATAA   | 810.325113406923 | 0.15686854834962  |
| ATGACAAGACG   | 810.417194574989 | 0.157782866884515 |
| ATGAGTTGGA    | 810.464720244585 | 0.241590821065443 |
| GAGTCAAATCA   | 810.46653462507  | 0.206575556964016 |
| ATCAGTGACGC   | 810.478398790117 | 0.175222813428081 |
| CATTTTGTGAC   | 810.481454320782 | 0.246976948441375 |
| TCAGTCAAGCA   | 810.482872020094 | 0.335632697162776 |
| GTCATATAGTA   | 810.531050386777 | 0.140280683777772 |
| GTA CTGT CACA | 810.543396231151 | 0.205185629536625 |
| ACCCTCTGACT   | 810.555056670146 | 0.205168526082508 |
| GTCACCGCGAC   | 810.586000369885 | 0.187809921190973 |
| CAACCTGTGAC   | 810.612789028782 | 0.237849899551351 |
| CAATAGTGTCA   | 810.633703007783 | 0.295956452122012 |
| CGAACGTGTCA   | 810.655506374221 | 0.215375523290029 |
| TCATGTTGTCA   | 810.668195707087 | 0.21841206725651  |
| GCAGCCATGAC   | 810.688387321797 | 0.298365991420518 |
| AGAGTCAAACC   | 810.739512125977 | 0.212936057342922 |
| AACTCATGACA   | 810.753705397569 | 0.230174674132929 |
| CTCCCACGTCA   | 810.793303889012 | 0.209905335771382 |
| ACGACATGTCA   | 810.808092682949 | 0.388758661068684 |
| ATTTGAATCAC   | 810.812603303126 | 0.227744127605003 |
| GTAGCAATGAC   | 810.852240336405 | 0.194288328596785 |
| GCTGCCAGTCA   | 810.859543121992 | 0.307466112646905 |
| CCC ACTAGTCA  | 810.879974699318 | 0.251451275033311 |
| ACTCATCGGAT   | 810.903798551182 | 0.191370356707452 |
| GGTCCAATGAC   | 810.903977889387 | 0.161140226922215 |
| ATGACAGAGGG   | 810.99162079721  | 0.169489359683416 |
| CGACTAATTAC   | 811.020758655108 | 0.194672707583412 |
| AGTAATGAGTA   | 811.038755391302 | 0.177946009236234 |
| ATGTGTAACAC   | 811.06319063391  | 0.266909732169201 |

|              |                  |                   |
|--------------|------------------|-------------------|
| ATTTATTAGTC  | 811.077047222082 | 0.24904976219012  |
| GAGTCAGGAAA  | 811.079222027222 | 0.193331235890611 |
| CGATCGGTGAC  | 811.088450374721 | 0.162139669604436 |
| AGGCATGTCAT  | 811.127593740126 | 0.171655083233525 |
| ATAGGTCACAC  | 811.170943303694 | 0.228834343797515 |
| CGATGCATGAC  | 811.178013140317 | 0.228967224214864 |
| TTAGTGACGAA  | 811.211795511794 | 0.251228899739392 |
| CGCGTGTGACA  | 811.228971792957 | 0.247582994936562 |
| AGACGTAGTCA  | 811.243139705199 | 0.23725534872116  |
| CCTCCTAGTCA  | 811.250109424116 | 0.24599191598316  |
| AAAGTGACCAA  | 811.265324623535 | 0.194983677754229 |
| TGAGTCGCCAA  | 811.286309363965 | 0.199282330332098 |
| CTCATAGTCAG  | 811.337404738843 | 0.308600781639443 |
| TATAAGCGTCA  | 811.337938756495 | 0.234716530654232 |
| GAGCGAATGAC  | 811.418924701987 | 0.059149196269645 |
| GGACATGACAC  | 811.423248369268 | 0.275413903474733 |
| TCAGTCAAGGA  | 811.451397288477 | 0.182350997084476 |
| GATTGTGTGAC  | 811.457849973059 | 0.220415681323374 |
| TCAATGTGACA  | 811.459886103359 | 0.200568055164635 |
| ACGTCATGATA  | 811.464437083043 | 0.168511827547823 |
| GCGTCATGTGA  | 811.473065072537 | 0.211332529146786 |
| ATCTGTCAGCG  | 811.483250494988 | 0.247941419736741 |
| AGTCAGAGTTC  | 811.483835484115 | 0.231593699806774 |
| AAATGACATTT  | 811.491477628583 | 0.191727101575209 |
| ACCCCGATGAC  | 811.532793583612 | 0.222702796651399 |
| GTATTAGTGAC  | 811.533085494783 | 0.194455132869947 |
| ACGTCACAGTG  | 811.536705197118 | 0.212393539363792 |
| ATGACAGACGA  | 811.560551688998 | 0.200853895345492 |
| CGTCATCTGGA  | 811.564669701999 | 0.157027030806186 |
| GCAAAGTGTCA  | 811.602112461155 | 0.192045541911012 |
| AATTTGATGAC  | 811.628954483919 | 0.212794803767978 |
| CTACCCAGTCA  | 811.68665427375  | 0.110803579557717 |
| CGTCATTGCAA  | 811.702348126492 | 0.210360643702829 |
| ACCTCGTGACT  | 811.731193095356 | 0.197553083767912 |
| GGCGTGTGTCA  | 811.744590334126 | 0.232069974955434 |
| ATAGTCAGCAA  | 811.766023360533 | 0.21140703476916  |
| ATATTGAATCA  | 811.774969851153 | 0.171215931387112 |
| ACCCCTGACTC  | 811.777564199969 | 0.191261575001888 |
| CTGAGCAATAC  | 811.777986484971 | 0.211602310460739 |
| AATTCGGTGAC  | 811.780924132813 | 0.218356560144193 |
| AAAAGCATGAC  | 811.786097594057 | 0.288302672136242 |
| GGTAGTGTGAC  | 811.786175061971 | 0.177244437345679 |
| AATTTAATGAC  | 811.842508822987 | 0.20953925702286  |
| TTAGGTCATAA  | 811.869831808862 | 0.177550010425781 |
| CCTATGGTGAC  | 811.885806718733 | 0.201687265380285 |
| CAGTAAGTCAC  | 811.907555758366 | 0.223824953819257 |
| TGACGAGTCCA  | 811.917713510021 | 0.259251007346464 |
| AAGATTAGTCG  | 811.921410003664 | 0.193386808021316 |
| ATGATTCGACA  | 811.936001943005 | 0.155811075560675 |
| GGTGACTTGGGA | 811.94551332306  | 0.191166644574639 |
| CCATATGACGG  | 811.95212460115  | 0.190640421205772 |
| AGTTGACTGAA  | 811.956982465636 | 0.193062966127451 |
| ATGACATGCTC  | 811.975856684617 | 0.197260701620864 |
| AGTCAGTGACA  | 812.000224115907 | 0.168717752950105 |

|              |                  |                   |
|--------------|------------------|-------------------|
| GATGACCTAAC  | 812.016247678676 | 0.143811682212264 |
| ATGAGAGTCAG  | 812.036518389712 | 0.139532685629818 |
| GTCATTGTTGA  | 812.042840886209 | 0.259071264118167 |
| ATGACGCTCTC  | 812.050571415179 | 0.130808406051934 |
| GCGTCATGCAC  | 812.074125661998 | 0.297499739419512 |
| CGCGTGATGAC  | 812.081850370798 | 0.243734323985545 |
| CGGTTGACACA  | 812.088489671832 | 0.124954472654693 |
| GGGTGAATGAC  | 812.094559656318 | 0.172990876333607 |
| ACTAATGACAG  | 812.096358731792 | 0.145103329673086 |
| GTCATTTGATA  | 812.123109874032 | 0.145617631998981 |
| ACGGGTCATAA  | 812.160460333897 | 0.217820019634442 |
| AGTCACGGCAT  | 812.174884912605 | 0.30698991223256  |
| GGGTTGTGTC   | 812.189900772205 | 0.161039891974016 |
| GTCACCACCTA  | 812.225479108938 | 0.197525677042859 |
| GTGAGCCACAC  | 812.250772033908 | 0.215740479657046 |
| ATGACTTCGCA  | 812.256608491064 | 0.226984723253375 |
| ACATGGTGACA  | 812.278714611976 | 0.221168359498973 |
| GTCACCCTTAA  | 812.322247202869 | 0.199711936391847 |
| ATGACGCTCTG  | 812.349380041597 | 0.159749904571945 |
| GTCATCAAACA  | 812.356153128214 | 0.156996835923882 |
| GTCACACAAAC  | 812.376213070381 | 0.187883712509174 |
| CACGCTGTGAC  | 812.380133104165 | 0.253352428902954 |
| ATGAGTAGGTG  | 812.45695122354  | 0.152961773904049 |
| ACTCATAGTGG  | 812.472893737999 | 0.19427388488057  |
| AGCATAATGAC  | 812.481449145576 | 0.172257861704563 |
| GTCATTGGAAC  | 812.496394758439 | 0.257603244361248 |
| ATGGAGATGAC  | 812.539455322435 | 0.18710836082723  |
| AATCAAATGAC  | 812.548632086574 | 0.181309288998853 |
| CTAGCATGACA  | 812.553698097609 | 0.193589884863553 |
| GCTACAATGAC  | 812.558370717911 | 0.160923384588629 |
| GATGAGCCAAC  | 812.561033934631 | 0.204293464612905 |
| GTCATTTTGAA  | 812.568465864544 | 0.210926145264868 |
| ATGACAGCTAG  | 812.578980353489 | 0.141883645887107 |
| ATGAGGTGTCA  | 812.583096324443 | 0.257938999293425 |
| ACGTCATGATC  | 812.588711380722 | 0.245554961178966 |
| AAACCGTGACT  | 812.613458762569 | 0.182233601280776 |
| ACTCATAAATG  | 812.641449067137 | 0.22595428639897  |
| ATGACGAGAAA  | 812.67214379969  | 0.202690625965755 |
| TCATGTGACGA  | 812.747845713345 | 0.227978093953507 |
| TACGTGACAAA  | 812.770565847996 | 0.310880225211959 |
| CGTCATCTCCC  | 812.774102828362 | 0.170498252920363 |
| CAGTCACGCCC  | 812.842586410907 | 0.268316579212791 |
| AGAGTCAAATA  | 812.859852037094 | 0.171412484311219 |
| ATGACAGTAGG  | 812.871956793547 | 0.148647595414867 |
| AATTTAGTAAT  | 812.882024586556 | 0.181136726984981 |
| ACCGTCGTCAT  | 812.892610299333 | 0.192338904311676 |
| ACGTCATGGAT  | 812.905301684159 | 0.277834808151506 |
| CCTTTGACGCA  | 812.948567400349 | 0.143972894462527 |
| GAGTCTGACGC  | 812.960207800802 | 0.157786686189107 |
| CCTTAAATGAC  | 812.989899281117 | 0.239269152864977 |
| ATGACCATAAG  | 813.002398694853 | 0.262602603168913 |
| AGTGACTAGCA  | 813.0052050418   | 0.250899519393845 |
| TGATTACAGCAA | 813.014180719534 | 0.293729610371623 |
| GTCATTGGCAC  | 813.041748532031 | 0.345177461044069 |

|              |                  |                   |
|--------------|------------------|-------------------|
| GGACAGAGTCA  | 813.07106211873  | 0.19292525083948  |
| AACTCGGTCAT  | 813.093578404694 | 0.193987902380768 |
| GGCACGATGAC  | 813.118172732653 | 0.217884146611866 |
| ATGCGACTAAT  | 813.159108671781 | 0.135726520776369 |
| ACTTGGTGACG  | 813.23270716824  | 0.217684184857036 |
| AAGCAGATGAC  | 813.233207891201 | 0.166201629787094 |
| GAAC TTGTGAC | 813.238447624918 | 0.255336662451178 |
| CGTCATCCCCA  | 813.311706379268 | 0.191083595101314 |
| GTCACCAGTAA  | 813.334013697678 | 0.237550364714638 |
| AGTCAGACTAA  | 813.368094670258 | 0.15949339104489  |
| CGGATGGGTCA  | 813.384847431721 | 0.150890863988842 |
| ATCCATATGAC  | 813.445970419111 | 0.259235322541655 |
| GACTAGACTCA  | 813.457901367184 | 0.298899533563971 |
| GTCATTGTCTA  | 813.461439787716 | 0.212414583590559 |
| GGCAGATGACA  | 813.463418862681 | 0.165080071879238 |
| CCGGTGAGCAA  | 813.519678702448 | 0.155418491628739 |
| GTCACACGTTA  | 813.545037426547 | 0.199373062263275 |
| AGTCAGAGTTG  | 813.545388887363 | 0.182832590592403 |
| CGCCATGACAC  | 813.576904840475 | 0.189602974786245 |
| AGCGCGACTCA  | 813.596934684139 | 0.398204763270967 |
| CGACGGTGACA  | 813.620693026678 | 0.200859851720552 |
| GGCAGGAGTCA  | 813.696330246007 | 0.202919327324404 |
| GACGTGACGAA  | 813.706395488108 | 0.173972917129492 |
| GCGTCACATAA  | 813.724932564279 | 0.155052836694729 |
| ACGATAATGAC  | 813.734707604472 | 0.253230824114032 |
| GTCACACCCTA  | 813.767896017984 | 0.156312511817244 |
| GAGGGGATGAC  | 813.813654681431 | 0.191919438883371 |
| ATCATCTGTCA  | 813.82738857202  | 0.128333778272332 |
| TCGATTACGCA  | 813.864213215655 | 0.235721817021331 |
| AGATAATGACA  | 813.868839462689 | 0.192240249745719 |
| GACCACAGTCA  | 813.884615222726 | 0.3663638613362   |
| TAAGAGTAACA  | 813.950731728141 | 0.158149378948575 |
| CACCGTGAGTC  | 814.021954149068 | 0.203985070392945 |
| CTTTGACACAC  | 814.073475937559 | 0.198118113910759 |
| ATGAGTACGCA  | 814.117949630078 | 0.276373739275547 |
| GTAGAGTAATA  | 814.177041615686 | 0.168629397916503 |
| GAACCTGACTC  | 814.182726640516 | 0.20607816945616  |
| AACAGACTCAC  | 814.198495759875 | 0.18910894923462  |
| GAAATGGTGAC  | 814.20312668716  | 0.192098749184034 |
| ATGACAGTGAG  | 814.214778341714 | 0.171820468923151 |
| AGCGTGAGTCG  | 814.215063207383 | 0.192480318370737 |
| AATGCATGACG  | 814.243149793371 | 0.214925299774266 |
| CGATAGTGTCA  | 814.305098368565 | 0.247863945113854 |
| TGTCACAGCAA  | 814.348739670436 | 0.202438229985623 |
| GACACTGTCAC  | 814.39144782689  | 0.188858275221625 |
| TCGACATGACA  | 814.41205877358  | 0.164777655810804 |
| CGTAATTGTCA  | 814.447934494472 | 0.206063990259339 |
| GAGTAATCATA  | 814.454180780585 | 0.178236955071975 |
| GACAATTAGTC  | 814.500965436548 | 0.167825326262478 |
| ATGCGTGACGC  | 814.502298523763 | 0.198549163401922 |
| ATTTGACGTCA  | 814.502878160381 | 0.208769529446508 |
| GGTGACTTCAC  | 814.536863246157 | 0.277115218981921 |
| AGTCTTTGTCA  | 814.562217632849 | 0.175644607911167 |
| AGTCACGGATC  | 814.565338817097 | 0.15254937743619  |

|             |                  |                   |
|-------------|------------------|-------------------|
| GACTAATTCTA | 814.572425470863 | 0.218785881071637 |
| CTGCGTGACAC | 814.582017133508 | 0.216947763058529 |
| AACCATGTCAC | 814.58837523175  | 0.161509933496646 |
| ATCCTAATGAC | 814.603466169615 | 0.193873477203676 |
| AGGAGACTCAT | 814.605628628879 | 0.173494504581409 |
| TGACATCGTCA | 814.614571151129 | 0.211310773827339 |
| CCTTCTATGAC | 814.631285908056 | 0.145742003942297 |
| AGAAGGGTGAC | 814.660071510824 | 0.205031060818941 |
| GTGAGCCACAA | 814.665015574701 | 0.269900099549357 |
| GTCACGATTTA | 814.682125455054 | 0.198250156410638 |
| ATGACATTTAG | 814.689263453666 | 0.191536619750183 |
| CTCTTTACTCA | 814.691137618791 | 0.168727398560928 |
| GTCATCCCTCA | 814.720418133296 | 0.166089245030618 |
| CCCAGTGACAC | 814.725241067383 | 0.201364139539173 |
| TAATGTCATCA | 814.733985405917 | 0.233150237029597 |
| CTTCTTCGTC  | 814.74376312808  | 0.18173864279947  |
| TGACCAACTCA | 814.753512638144 | 0.153391224015674 |
| GCTGGTGTGAC | 814.785379695267 | 0.179236145664499 |
| TAACTAAGTCA | 814.810801424477 | 0.227256776688156 |
| TGACTGCTGAA | 814.855479431826 | 0.359016400639406 |
| ACAATTACGCA | 814.867802286439 | 0.161510120703287 |
| ACGTCACGTGA | 814.880034719793 | 0.192996828363186 |
| GTCATTATCAC | 814.895178225448 | 0.142406230492849 |
| AGAGTCAAGCG | 814.908522192043 | 0.277757555681509 |
| GTCATGCATAA | 814.929971178476 | 0.116179414343621 |
| CACAGGAGTCA | 814.934426562874 | 0.273841838395382 |
| ATCGGGAGTCA | 814.963397478527 | 0.259891724799407 |
| TAAATCGGTCA | 814.977393155896 | 0.253165784892557 |
| GCGATTACGCA | 814.986854480677 | 0.29448306263143  |
| TGACATGTAAA | 815.052377680259 | 0.196851565589709 |
| ACGTGGTGACA | 815.076740670356 | 0.164572674734793 |
| GCTAAAATGAC | 815.078870456893 | 0.147789320583673 |
| AGATTGGTGAC | 815.106440896235 | 0.198643588639112 |
| GGTGATGTGAC | 815.114842948504 | 0.188214047110618 |
| GACTCACGATA | 815.118973702971 | 0.185872225046131 |
| ATCGGTGACGA | 815.121228133117 | 0.204588089373147 |
| AGTCAGAGTAG | 815.154297330938 | 0.143746679354707 |
| GCGCATATGAC | 815.210475507388 | 0.104695726051418 |
| ATAGTGGTGAC | 815.21320168497  | 0.253350593909102 |
| ATGACCACGTA | 815.268705120811 | 0.215905583038454 |
| AACTTGTCACT | 815.315602593138 | 0.15075825618393  |
| TGATCATGACA | 815.325740098487 | 0.197003056819187 |
| GACTTGACTGA | 815.379259104453 | 0.17442384717995  |
| GTGGACTCACA | 815.436330824399 | 0.122325222471331 |
| CAGGTGTGACG | 815.476332196798 | 0.202603172720427 |
| ACAAGTAGTCA | 815.509635398103 | 0.161845245117145 |
| AGAGTCAGGCC | 815.520584976079 | 0.191592144178371 |
| GACTCAGTGAC | 815.557719596275 | 0.26697492351674  |
| CGCCATAGTCA | 815.560158318405 | 0.193874907840006 |
| GTCACCGTAAA | 815.587121846041 | 0.234717991938804 |
| GACCTGTCAAC | 815.594334760483 | 0.205902067058817 |
| GTCACCCATCA | 815.600650391966 | 0.222414193905385 |
| GGATTATGAC  | 815.605921657821 | 0.26993586015659  |
| CCCTCGATGAC | 815.625323339322 | 0.257650149295039 |

|             |                  |                   |
|-------------|------------------|-------------------|
| GCTATATGTCA | 815.722734042189 | 0.292462336513103 |
| ATTAGTCGCAA | 815.727905806764 | 0.23816816416166  |
| AAAGTGACGAA | 815.731406026533 | 0.195382555433706 |
| AGTCACTGGG  | 815.73270401962  | 0.188129271746629 |
| ATAGAAATGAC | 815.737346140159 | 0.143639291092143 |
| GTACGTGTGAC | 815.757396753621 | 0.134305864672744 |
| GTCATTGACAA | 815.768171989144 | 0.334648320731533 |
| GATCGTGTAC  | 815.779173642253 | 0.216272931623871 |
| GTCATTGCGAA | 815.792978802962 | 0.271184355859264 |
| GACCGAGTCAA | 815.812012706143 | 0.194095933551753 |
| ATCGGTGACAA | 815.827098548843 | 0.197719124420916 |
| AACCGAGTCAG | 815.829899971066 | 0.155948943228842 |
| GCAACTGTGAC | 815.879276021433 | 0.222783072287802 |
| ACAGTGACCA  | 815.88918737137  | 0.162172479653335 |
| GTGTCACGCTA | 815.905936186449 | 0.187454329090298 |
| ACGAATCGTCA | 815.910438804491 | 0.223519079346516 |
| GGTCATAGTAC | 816.002050214931 | 0.169376388261082 |
| GCATGACACCC | 816.03221764843  | 0.130153146797898 |
| AATTCTAGTCA | 816.054565975783 | 0.198322279334878 |
| ATGACAGCGAG | 816.073056547653 | 0.187043554243558 |
| CTGGTCATGAC | 816.107121414382 | 0.224770056983017 |
| GTCACATCAAA | 816.110460105298 | 0.195493663773227 |
| ATGACACTCCG | 816.148717244959 | 0.189308151026358 |
| GGTCATAATAA | 816.173254354658 | 0.210371091930938 |
| AAACGTAGTCA | 816.207787490833 | 0.208762271190058 |
| ATCGCGTACG  | 816.218132739972 | 0.237480012265662 |
| AATACAATGAC | 816.233176530286 | 0.129877580650212 |
| TATCCGCGTCA | 816.235267697844 | 0.155903782628293 |
| GTCACATTCTA | 816.235752485462 | 0.133778951488261 |
| CGTCACCGATA | 816.245245909782 | 0.160274061228432 |
| AATAGTAATAC | 816.25451318033  | 0.230473749712506 |
| ACTCATCAGTG | 816.255899469131 | 0.169040547828491 |
| CGATGACTTGA | 816.266569393108 | 0.139586053041381 |
| AAATGCATGAC | 816.277400324412 | 0.242814751748801 |
| CGAAGCAGTCA | 816.326044071036 | 0.238313658718508 |
| ATGACAGGCTC | 816.38181702291  | 0.243508914807801 |
| CAGTCAGAAGC | 816.403875232229 | 0.19165622560289  |
| ACTATAATGAC | 816.40491882085  | 0.276506340124376 |
| CTCTATATGAC | 816.422408636628 | 0.251712160180416 |
| AATCTATGTCA | 816.434400981357 | 0.241686238105305 |
| ACAAGTCATGG | 816.472860392797 | 0.137036234642284 |
| ATGACATCGTC | 816.49240039349  | 0.264666991770806 |
| ACAGGTGACGC | 816.498643622668 | 0.276256475804313 |
| CAGACGTGTCA | 816.502455523221 | 0.293983924970253 |
| GACCTGTGTCA | 816.503328760748 | 0.172544887268082 |
| AGAGTGGTGAC | 816.521115603424 | 0.21923569080326  |
| AGACTGGTGAC | 816.540957914284 | 0.155803351623623 |
| GACTCGGTGAC | 816.54607613387  | 0.232521014646483 |
| CGCTAATGACA | 816.568002809046 | 0.196897305297139 |
| CCCGTGACTAG | 816.594585743588 | 0.283146483511804 |
| ATGAATAATAA | 816.596900739221 | 0.233472131592098 |
| CCGTTTGACTC | 816.659071058692 | 0.2150331558002   |
| CGGAGTGTGAC | 816.673561259697 | 0.238388380484053 |
| CGACTATGTCA | 816.711868319285 | 0.174033596218533 |

|              |                  |                   |
|--------------|------------------|-------------------|
| AACGGTGACGA  | 816.750099086399 | 0.184031266148198 |
| CAAGCCAGTCA  | 816.760873912198 | 0.119876128169063 |
| GAATCATGACA  | 816.762885437759 | 0.215167586819344 |
| ATCCGAGTCAG  | 816.799546539237 | 0.24960476674326  |
| GGGCTTACTCA  | 816.823780042658 | 0.191164661287753 |
| GCCGCTATGAC  | 816.842839998072 | 0.281598590297549 |
| TCAGAGAGTCA  | 816.843783278893 | 0.226891116566652 |
| AAGCGGAGTCA  | 816.881821108377 | 0.171071189642344 |
| ACGATGGTGAC  | 816.949966380833 | 0.182575577251853 |
| ACACCTGACTC  | 816.964846321683 | 0.177472358078252 |
| CCAGTACGTC   | 816.976646299665 | 0.262696092069685 |
| TATGGCTAATA  | 816.97703745911  | 0.231200362775968 |
| ATGACGGGGAC  | 816.979029389528 | 0.180390802105535 |
| ACTGGCATGAC  | 817.007193663518 | 0.143574311651008 |
| CATCCGCGTCA  | 817.036903329098 | 0.141353981957111 |
| ATTGTAATGAC  | 817.047066004554 | 0.211911908163284 |
| ACTCATAGGAT  | 817.106220463102 | 0.111216271662726 |
| GCTTCTAGTCA  | 817.126945832083 | 0.19468632466059  |
| GACTCACTTAA  | 817.137400147073 | 0.215593414954123 |
| GGGTTTACTCA  | 817.141157865037 | 0.196642346754237 |
| CTAATGGTGAC  | 817.189877751649 | 0.124060669216724 |
| AGTGCGACTCA  | 817.240695919402 | 0.368221490850922 |
| GTCACCGCTAA  | 817.250292562729 | 0.264806877850375 |
| GCAGCTGTGAC  | 817.276974024619 | 0.221801304889386 |
| CCACGTAGTCA  | 817.300452285692 | 0.134922115616291 |
| AGCGTGTGTC   | 817.301240501239 | 0.300941625956956 |
| ATGACATTTTCG | 817.309370118521 | 0.190043340585924 |
| CGAGTCAGGAG  | 817.327854468874 | 0.1902320741894   |
| CACGGGTGACA  | 817.341309604198 | 0.140137063667807 |
| AGGAATTAGTC  | 817.346660513732 | 0.15390507187268  |
| CCCGCGATGAC  | 817.360303607025 | 0.224857349147619 |
| ACACAGTGACG  | 817.388197605213 | 0.22225245983146  |
| GTGCGTAATCA  | 817.415753380112 | 0.144259789855022 |
| GTCATCTGCAC  | 817.451192278374 | 0.188520831814175 |
| CGTCACACATC  | 817.460769351807 | 0.150353446004696 |
| AAACTCTGACT  | 817.471020777081 | 0.23054023140318  |
| CATCTTCGTCA  | 817.535915489982 | 0.208909288553077 |
| ATGACAGGACG  | 817.564530228443 | 0.197406408688053 |
| ATCACGACTCA  | 817.593524303462 | 0.284129710293937 |
| GCAGTCACGCC  | 817.623150536204 | 0.237596998977539 |
| GTTTCGTGAGA  | 817.660832734669 | 0.251594382135055 |
| GAGTCAGTTCC  | 817.662698435342 | 0.261036501834947 |
| GTCACACCGTA  | 817.682071922762 | 0.271195967383469 |
| CGTCATTCGCC  | 817.707493052972 | 0.197290229099143 |
| CTGAGCATGAC  | 817.746693956443 | 0.207728566660225 |
| AGACATAGTCA  | 817.750192914279 | 0.183998553299384 |
| TGTGAGCAACA  | 817.751415407021 | 0.140184994595791 |
| AGAATCATGAC  | 817.821318034514 | 0.209528267312804 |
| GTCATTAGCCA  | 817.82434261974  | 0.193981477847978 |
| GTCACCAGCTA  | 817.840793593584 | 0.182092281583433 |
| AAGTATGTCAC  | 817.857685698426 | 0.140842885775161 |
| ACGGGACTCAT  | 817.906615574654 | 0.225412749735657 |
| CTTTGAATCAC  | 817.975263726342 | 0.135048166071641 |
| GGTGAGTACTA  | 818.007794206936 | 0.155149568619337 |



|              |                  |                   |
|--------------|------------------|-------------------|
| ACGTCATGCGG  | 818.011700750959 | 0.125114312588566 |
| CGTCATTTAAC  | 818.015487774163 | 0.177225383138822 |
| ATGACAAGGCG  | 818.019850911074 | 0.142477787678978 |
| AGCAATGTCAT  | 818.044446409792 | 0.237839411812282 |
| GTCATTTAATA  | 818.052960696531 | 0.187635457140932 |
| AAAGTTGTGAC  | 818.063524033278 | 0.179396727986791 |
| ACCACGACTCA  | 818.081021051647 | 0.188665928202986 |
| CGATTACGCAC  | 818.083366619089 | 0.134882679664254 |
| GTCACCGTGAA  | 818.083544190325 | 0.208623962791825 |
| GTAGTGAATCA  | 818.096855005276 | 0.140902062477    |
| CACTGACTGTA  | 818.098505412408 | 0.218720394035487 |
| ATGTCACCCGG  | 818.124515179989 | 0.250963266468985 |
| AGTTGTACTCA  | 818.146448045083 | 0.192142974155261 |
| ATGACAACGCC  | 818.18769247751  | 0.18090230318649  |
| GTGATTCAAAC  | 818.19949790011  | 0.231509094099456 |
| TACATATGTCA  | 818.210736301328 | 0.235282031135133 |
| ATGTTAATGAC  | 818.210801397604 | 0.234133782796031 |
| GATTAGTCTGA  | 818.231901229087 | 0.185520044193642 |
| CGTCATCTAGC  | 818.249591961149 | 0.178408339469335 |
| ATGACGTCGCG  | 818.27438864499  | 0.201176480956844 |
| GTCATTTGCA   | 818.28576905336  | 0.192020908564725 |
| GCCGCGATGAC  | 818.298976731482 | 0.268987783798863 |
| ACCGTGTACC   | 818.334406196995 | 0.119949762284668 |
| GATGAGAGTCA  | 818.383043913476 | 0.149275241176915 |
| CATTTGACACA  | 818.385527329695 | 0.210140302884012 |
| GAGTCAGTCC   | 818.390981973491 | 0.219140532935595 |
| GTCATCTAAA   | 818.407815712152 | 0.234425317328585 |
| CGCGCATGACA  | 818.42389345417  | 0.234071491114431 |
| AACGTGAGTCT  | 818.429229750419 | 0.204763357531394 |
| AATACTCGTCA  | 818.465722969229 | 0.191156587623093 |
| GTCACCTTAGA  | 818.478751795978 | 0.243586341597348 |
| GTCACAACCTCA | 818.500964083246 | 0.205971293091503 |
| GGGTCACGTCA  | 818.528625070669 | 0.232868570733172 |
| GATTAATGACA  | 818.621395989933 | 0.133566971237202 |
| CCAAATGACAA  | 818.627097370101 | 0.217280489372537 |
| GCGTCACCCAC  | 818.661835830683 | 0.165195229050946 |
| GCATTGACTGA  | 818.683789887647 | 0.124128276335676 |
| AGTCAGAGGTC  | 818.772969019395 | 0.232663301945243 |
| ACACTGATTCA  | 818.787542017075 | 0.173793134090052 |
| CATTAATGACG  | 818.795861634599 | 0.261829050843944 |
| ACCAAATGACG  | 818.820962430512 | 0.121660876279239 |
| AGTATATGTCA  | 818.834372272031 | 0.182822998554337 |
| GGAGGAATGAC  | 818.875019044579 | 0.183213745004345 |
| TCGGTCATCAA  | 818.900576905097 | 0.167866429053664 |
| GGCAGGATGAC  | 818.907221599082 | 0.222633639997839 |
| AATTAGTCGCA  | 818.921254515401 | 0.164951308787503 |
| CGGTGTGTGAC  | 818.955424228148 | 0.189609358213783 |
| GCGGAAATGAC  | 819.030678948225 | 0.208068171181549 |
| ATTACTATTAA  | 819.090523683612 | 0.223992444632057 |
| ACAGCAATGAC  | 819.123004128162 | 0.279011062196181 |
| GGGTCATCAAC  | 819.136281911403 | 0.232252400446377 |
| GTCGTGACCCA  | 819.138412665559 | 0.273949502423916 |
| CCCTTTACTCA  | 819.140678202596 | 0.189016540788109 |
| AGTCAGACCTC  | 819.156875983596 | 0.281425876856116 |

|              |                  |                   |
|--------------|------------------|-------------------|
| ATGATATCATA  | 819.160102265584 | 0.173941591363477 |
| AATCGATGAGT  | 819.193185871678 | 0.170536186395361 |
| CGTCATTGCAG  | 819.204339247101 | 0.175267798625653 |
| GATGACATTGC  | 819.251353556545 | 0.214397152187982 |
| ACGTCACCAGA  | 819.256902420164 | 0.192571383269798 |
| TGACGACGTAA  | 819.267380334943 | 0.157307929496071 |
| ATGTGGCTCAC  | 819.267488987219 | 0.192762710426772 |
| CAGTCACGCCG  | 819.305284717217 | 0.162946574011154 |
| TCGAAGTGTCA  | 819.313146327724 | 0.186021923718546 |
| TGTCACCGTAA  | 819.337217602116 | 0.118280932730164 |
| CACCATGACAC  | 819.34704701584  | 0.193833889862247 |
| GTATTAATGAC  | 819.377297102639 | 0.209626891828737 |
| CGTCACAGCTA  | 819.408267739488 | 0.197373280435197 |
| CGAATGAGCCA  | 819.434244287888 | 0.247956261377514 |
| ATCGGCATGAC  | 819.434527315908 | 0.218254092718545 |
| CCCCTTACTCA  | 819.438683592592 | 0.194606014859065 |
| GTCACCCGAGA  | 819.455567442419 | 0.255401056618179 |
| CACATCATGAC  | 819.472389212112 | 0.256353772610658 |
| GGTCCCAGTCA  | 819.510042064866 | 0.206317248973072 |
| AGTGACGTGAT  | 819.517744452458 | 0.169334442247553 |
| CGGTCGGTGAC  | 819.5341678991   | 0.229651402084801 |
| AGCGATGTCAT  | 819.547919108461 | 0.153585197097738 |
| AGTCATGGTGG  | 819.558559639767 | 0.198469958944105 |
| AGTCACGGTAC  | 819.558745099062 | 0.137187231414484 |
| GACTCACGTAC  | 819.565825489967 | 0.251922660730404 |
| CTTTATATGAC  | 819.569555861423 | 0.189636215387094 |
| ATAGTCAGCAT  | 819.571192438664 | 0.328999139328048 |
| GTCATCTGGAC  | 819.594000433303 | 0.23789805938721  |
| AGAAGTGACGC  | 819.646707854781 | 0.139357742799381 |
| ATCTGTGACGA  | 819.649457815745 | 0.277853007030993 |
| GACTGGAGTCA  | 819.706091232774 | 0.205878829772327 |
| GCCACGAGTCA  | 819.713992168924 | 0.198007341627814 |
| CTCATAATGAC  | 819.725352403463 | 0.222670642453307 |
| ATTTCTAGTCA  | 819.734927062517 | 0.211393903604995 |
| ACCACTAGTCA  | 819.761925282285 | 0.256473140389274 |
| GCGCTGAATCA  | 819.762856134368 | 0.134401582663556 |
| ATGAGTATGCA  | 819.784110187547 | 0.205055914904742 |
| ACGTTACTCAG  | 819.879713237053 | 0.254140333042031 |
| AATTCGTCAAC  | 819.906848723718 | 0.169049471888605 |
| CGGAACATGAC  | 820.027945701665 | 0.2998213506592   |
| AGATTGTGACG  | 820.033533587658 | 0.220285438291336 |
| CCGCTACGTCA  | 820.03428994776  | 0.152237453154867 |
| CTAAGAGTGAC  | 820.063359364708 | 0.181630588196067 |
| ACCTTGATGAC  | 820.06944424406  | 0.180730651534179 |
| GACTAATTAGC  | 820.075386941034 | 0.185767487082476 |
| GGTTTTATGAC  | 820.097578993265 | 0.117339377340493 |
| TATTAGCAATA  | 820.113310772395 | 0.200328412526601 |
| ACCAAGAGTCA  | 820.149362029622 | 0.223242710457991 |
| CTCGTGACTION | 820.151851385918 | 0.182627276964503 |
| CCGTGGGTGAC  | 820.193375625685 | 0.257417677585229 |
| GAGTCTGACAC  | 820.224559142912 | 0.236416855382112 |
| GAAGTGGTAC   | 820.240406687275 | 0.359300393978254 |
| AGAGTGACGGA  | 820.320904311394 | 0.181320584612419 |
| ATTGGGTACG   | 820.327385537473 | 0.192758121303648 |

|             |                  |                   |
|-------------|------------------|-------------------|
| CGATGATGTAA | 820.329957794934 | 0.131551190825329 |
| CGATTCATGAC | 820.338709743257 | 0.135509288259579 |
| GTCATTTACCA | 820.344437928674 | 0.235942886014246 |
| GTCACACACCA | 820.372344856443 | 0.237986064672032 |
| AATGACAAGGT | 820.417829970687 | 0.210471024675937 |
| ATGATATGACC | 820.431199558163 | 0.181497209962499 |
| GACTCACGCGA | 820.4858878682   | 0.135817392939933 |
| CCAACATGACA | 820.486185889932 | 0.210285190071204 |
| ACAGCGAGTCA | 820.552095844042 | 0.1991841750004   |
| AGCTTGTCATC | 820.564764129603 | 0.173252429236406 |
| AGGCGAATGAC | 820.574483150502 | 0.184952598493859 |
| GGTATCGTCAC | 820.59260635139  | 0.249105616514829 |
| ATGACGACGCG | 820.624846762599 | 0.164686609680095 |
| AGCGTAATGAC | 820.637288482636 | 0.236789305638491 |
| ATTCAGTAATA | 820.64890244319  | 0.160060364628443 |
| CGGGATATGAC | 820.653700057156 | 0.164493946092484 |
| GTCATGTCAGA | 820.675247298838 | 0.211797462041047 |
| GATGTGTCTTA | 820.729831718576 | 0.164712638575034 |
| CGTCACACCGA | 820.742047724947 | 0.203544901344873 |
| ACCGGTGACGA | 820.775299882437 | 0.182724651067914 |
| GTCACCGAGAC | 820.779749295337 | 0.216274784789851 |
| CTGCAATGACA | 820.802565878345 | 0.311091163017096 |
| ATGACGTTAGG | 820.820296185867 | 0.191674754624858 |
| GGTGAGCAACC | 820.826940826497 | 0.245391832276508 |
| GTCATGTCTAA | 820.834215464325 | 0.196897159845234 |
| AAAGGGTGACG | 820.902601981709 | 0.181285155968914 |
| AGGTCTGACAC | 820.905270521103 | 0.243001627438664 |
| GTAGCGAGTCA | 820.931278276645 | 0.154086564173644 |
| CGTCATTACAA | 820.937727201929 | 0.215747586427654 |
| ACTCATTTTAG | 820.95035907625  | 0.157932645020375 |
| ATGCATGACGA | 821.029168204782 | 0.222783666762841 |
| GTCACGCATCA | 821.054357374721 | 0.264813222612417 |
| ATCATGACAGA | 821.065448255439 | 0.244650727214181 |
| CTAGAGAGTCA | 821.072945438994 | 0.178572965908663 |
| GTCATAAGAAA | 821.079077428368 | 0.186965855304343 |
| ACTCATAGTTC | 821.129384554276 | 0.190782624272394 |
| ATGAGTCTCCC | 821.132697473318 | 0.167968138562522 |
| AACATGACGCT | 821.155007084726 | 0.137871517549711 |
| ATAGTGACGAA | 821.177199701464 | 0.164336785425336 |
| GGTCATCATT  | 821.192224494498 | 0.253097007576131 |
| CACGTCAGATC | 821.212036735609 | 0.211441213514959 |
| ATGACACTCGC | 821.217762035648 | 0.228333444688135 |
| GATACTGTCAC | 821.223538471884 | 0.21655188455047  |
| ACGTCACAAAA | 821.251955478197 | 0.240736301368748 |
| GACTCACTGGA | 821.264206039313 | 0.192240913453017 |
| GTCACCATTGA | 821.295535733306 | 0.152993438093862 |
| CTATTTTGTCA | 821.309259846011 | 0.151223029303206 |
| CTTAGGGTGAC | 821.365047082383 | 0.164424587966946 |
| ATGACAGGGCA | 821.368819229653 | 0.173086040411611 |
| GGCCGTGACTA | 821.39260468834  | 0.234712035091774 |
| GCAGGGAGTCA | 821.410778157494 | 0.179292269536377 |
| CGTCATCTGGC | 821.4475773088   | 0.14884223636248  |
| CATACTTGTC  | 821.455378801085 | 0.199221759558342 |
| GTTACGCAATA | 821.48664695593  | 0.15587938359487  |

|             |                  |                   |
|-------------|------------------|-------------------|
| ACAGATGACAT | 821.517639608817 | 0.296411150010125 |
| ATGAGTAGTAG | 821.533171778372 | 0.183762870076264 |
| AATACTGTGAC | 821.537797727809 | 0.257066865549931 |
| TGTCATGCGAA | 821.550287820303 | 0.214801014630286 |
| ACTTGACTCGA | 821.560997116653 | 0.207409388766069 |
| AAGATTCATAA | 821.607767526499 | 0.136952934383353 |
| CGGACTGTGAC | 821.63925536694  | 0.215779298234453 |
| ACGAATACTCA | 821.647393524616 | 0.194603361723014 |
| GGCGGATGAC  | 821.655418272719 | 0.181356167104561 |
| AACTAGACTCA | 821.658028412721 | 0.233800723932779 |
| TCACAGTGACA | 821.676261735232 | 0.190796772104205 |
| CCACATAGTCA | 821.6847631849   | 0.309681396495812 |
| GGGATCTGTCA | 821.701228635693 | 0.232519013662633 |
| TAGTTTCGTCA | 821.711200617954 | 0.176674562844139 |
| ATTGACACAAC | 821.719836765482 | 0.136196808877984 |
| ACGTGCAGTCA | 821.742135585265 | 0.264207680438454 |
| ACGACAATGAC | 821.760087465028 | 0.319366029492488 |
| AGACTCACGCA | 821.769486126006 | 0.119988842382189 |
| CGGCGAATGAC | 821.775533834899 | 0.183558320370969 |
| GTCATGGCTAA | 821.781853283078 | 0.199464042362493 |
| ATATGACGCA  | 821.786667634348 | 0.233299800388688 |
| CGCCTGCGTCA | 821.85317169206  | 0.15094460514238  |
| GATAGTGACGC | 821.857101555087 | 0.110175320534501 |
| TCCGACAGTCA | 821.864456429739 | 0.174052241278305 |
| CACAGTGTAC  | 821.865514989045 | 0.175154061472377 |
| AATACGTCAAC | 821.907598394431 | 0.210173887962107 |
| AGTTTGATGAC | 821.924784816714 | 0.179256067027634 |
| TGACGAAACAA | 821.952736717462 | 0.179808488247216 |
| CTATTGTGACA | 821.965895093888 | 0.192859868334491 |
| AGCATCCGTCA | 821.9675104795   | 0.188276370039453 |
| TATGTATCACA | 821.975760452341 | 0.124068483259061 |
| CACTATATGAC | 821.981164648733 | 0.182932173635164 |
| CACCATAGTCA | 822.008273229587 | 0.270973230383009 |
| CGCGGAGTCAG | 822.057717009642 | 0.162305305318736 |
| GGACGAATGAC | 822.063102109146 | 0.159627127598313 |
| CCCACGGTGAC | 822.067939083358 | 0.137258470888593 |
| AATGAGTATGT | 822.068873199102 | 0.149363218727755 |
| GACTAATAGAC | 822.077976555581 | 0.26031002142896  |
| GCGTCACCCCA | 822.086620734629 | 0.1885763382657   |
| GGAAATGACAA | 822.098830646599 | 0.18446828341982  |
| GGCAACGTAC  | 822.104902889487 | 0.227314307447564 |
| TAGCCATGTCA | 822.118356965221 | 0.192970592560746 |
| TGACACTTCCA | 822.143060817308 | 0.18157970791957  |
| CGTAGACTCAG | 822.148328116101 | 0.241901889572159 |
| TGAGTCGCTAA | 822.157388016282 | 0.242812838898528 |
| ACTCATCTAT  | 822.187961471643 | 0.154470835263276 |
| CATTTCCGTCA | 822.241146179572 | 0.187649453838208 |
| AAACGTGACGT | 822.267934087206 | 0.223915763576415 |
| AAATAGGTGAC | 822.28791767124  | 0.222796930176861 |
| CTAACAATGAC | 822.29470849865  | 0.118053796785578 |
| AGTATTGTGAC | 822.308057457323 | 0.201148133464017 |
| GACGATTACTC | 822.308101134111 | 0.207737822649318 |
| GTCATGCCTGA | 822.318545089776 | 0.190945695566396 |
| GGGGTGACCCA | 822.339194746126 | 0.219409625648268 |

|             |                  |                   |
|-------------|------------------|-------------------|
| ACGTCATGCTA | 822.367701471948 | 0.20208838381945  |
| CAAGAGGTGAC | 822.370616741306 | 0.212850794330244 |
| GGTGACGCCAA | 822.395741001644 | 0.206021083374674 |
| GGCTAGATGAC | 822.419773732649 | 0.146939207783158 |
| GGTTAGTCTTA | 822.441009632449 | 0.165583540775045 |
| GACCTGCGTCA | 822.445753691718 | 0.193108860791611 |
| CCGATGTGACA | 822.45237875129  | 0.224316184146919 |
| ACCTGTCACAG | 822.479993622648 | 0.259033192805835 |
| TGACCAGTCAA | 822.496616287197 | 0.176490125547732 |
| GCGTCACAACA | 822.536516794847 | 0.124172801203027 |
| CTACTGGTGAC | 822.566296396476 | 0.203016319627401 |
| TGTATGTGACA | 822.590245074423 | 0.21859637437747  |
| AGCAAATGACA | 822.603639322759 | 0.158865136028808 |
| GCCGGGATGAC | 822.622637582746 | 0.226008367139274 |
| AGTGTGAGTAC | 822.651217784671 | 0.178997539511477 |
| TGTGACAGCAA | 822.662203361365 | 0.193105256832417 |
| AGAGTGACCCA | 822.662469460958 | 0.164356876557319 |
| GGGTCATAACA | 822.705984672341 | 0.125955608750375 |
| CACGGAGTGAC | 822.708465785987 | 0.194631798390133 |
| TGTCATTAATA | 822.801006899749 | 0.15852249452496  |
| GCGAAATGACA | 822.854496114821 | 0.166846505408662 |
| CTCTCGGTGAC | 822.884000467955 | 0.227050656908294 |
| CGGATTACGCA | 822.907801310616 | 0.204058805028794 |
| ATACACATCAT | 822.910288120408 | 0.163884900330116 |
| CTCCTGCGTCA | 822.932279311877 | 0.143470160376815 |
| AGATGGGTGAC | 822.934591822353 | 0.180827676363632 |
| GAGCAGATGAC | 822.958140321379 | 0.124792262641968 |
| ATGACAACGGC | 822.987671020697 | 0.182614448425939 |
| CGAGTGACAAA | 822.997194722707 | 0.032579693905754 |
| AAGGGTGTGAC | 823.042006615928 | 0.178066768393927 |
| ACTCATCATAG | 823.07628092099  | 0.222145809557339 |
| CATGGTAGTCA | 823.086994333298 | 0.185870975058812 |
| CCACGGTGACA | 823.102954787215 | 0.168951635298603 |
| GATTACTAAGA | 823.104268067032 | 0.159407500386201 |
| CATGACACTCA | 823.113873402209 | 0.200135964521484 |
| ATTGCGGTGAC | 823.12213689477  | 0.182686396854129 |
| GTCATGCTTGA | 823.124934048129 | 0.203328983008505 |
| GTATTATGTCA | 823.140981019143 | 0.143949156916014 |
| ATACAAATGAC | 823.152615087673 | 0.198587078795326 |
| CGTCATGCATA | 823.153229056085 | 0.183853986791094 |
| AGGGGAATGAC | 823.195660716014 | 0.177000249620503 |
| GTCATGATACA | 823.237543418907 | 0.182891349924883 |
| GAGTCAAAGTA | 823.245415513764 | 0.18020434838971  |
| AACACGACTCA | 823.27947112325  | 0.185631207034512 |
| CAGCTAGTCAC | 823.292792396403 | 0.140047963445075 |
| GGCCATGACAC | 823.344615445526 | 0.12953697718302  |
| CTCCCTGACTC | 823.369316715753 | 0.198112898352699 |
| AAGGAGATGAC | 823.380614611108 | 0.153493117433702 |
| ACGTTGAATCA | 823.387901835665 | 0.241535458205268 |
| GTCACCCCTTA | 823.396742401738 | 0.22115203549839  |
| AGGAGATGACA | 823.40645943672  | 0.157748387825068 |
| CGCTATGACCC | 823.432407765191 | 0.213986377305526 |
| ATGATTAGTCG | 823.434292720407 | 0.212187747608915 |
| GTCACCTTGAA | 823.446420536418 | 0.227586863309032 |

|             |                  |                   |
|-------------|------------------|-------------------|
| CGACTAATCCG | 823.446464406049 | 0.179273267883798 |
| TCTTGACTAAA | 823.453767455798 | 0.131257327798141 |
| CACATGTGACG | 823.473326124731 | 0.170545519912508 |
| GCTGGGAGTCA | 823.484966355012 | 0.197521032798916 |
| GCGTCACCAAC | 823.512690430247 | 0.230837964375867 |
| CTCGATGTGAC | 823.522573388814 | 0.239500447694812 |
| ATGCGTGACAC | 823.532760158922 | 0.251791593278415 |
| GACTCACTACC | 823.53688613361  | 0.184155177090943 |
| ACCGGTGACAT | 823.542172372365 | 0.127919070028378 |
| GTCACCTTCGA | 823.573813293515 | 0.242788857229881 |
| GGTGAGCAAGA | 823.670017427494 | 0.157013446385323 |
| CGTCATTAAC  | 823.708983653864 | 0.173468280581915 |
| ATGACCACGGA | 823.716580289259 | 0.192214523981048 |
| ACGTCACCGTG | 823.729429454964 | 0.21544487418809  |
| AATTGCATGAC | 823.737141952221 | 0.223231645921611 |
| GTCATTACAGA | 823.810901258286 | 0.17097665354412  |
| ATTTATGTGAC | 823.81502215843  | 0.146298944478733 |
| CGTGGTCACAC | 823.857902058853 | 0.17352987182308  |
| CGATCGACTCA | 823.860874765921 | 0.301314366869813 |
| CGGCAATGACA | 823.872075672614 | 0.182743893502449 |
| TGACAAATGAA | 823.873303162071 | 0.278557739934995 |
| GTCACATACGA | 823.889743346899 | 0.207863838452657 |
| ATACTGGTGAC | 823.92041491159  | 0.240723142386987 |
| AATAGGGTGAC | 823.928051536247 | 0.20416644041822  |
| GTCACATCGAA | 823.994907851882 | 0.166970729054016 |
| TCATGTCGTC  | 824.001856582223 | 0.237689133331333 |
| CGGAGTGAGTC | 824.003264558342 | 0.18524914921106  |
| GTCACACGGCA | 824.004179272293 | 0.268478098056749 |
| ATGGACTCACA | 824.01649796706  | 0.174963347741172 |
| CACATTGCTCA | 824.02409506973  | 0.256191390192813 |
| TGTCACCGACA | 824.047637147043 | 0.203071976811534 |
| CTCGTGACATA | 824.076209402723 | 0.218809846934152 |
| CTTAATCGTCA | 824.097642326352 | 0.209989728810591 |
| AAGATTAGTCT | 824.131754473575 | 0.134707689895507 |
| CGTCACCCTGA | 824.151837173037 | 0.195491887479256 |
| ACAGACTCACC | 824.22197004253  | 0.19436222237272  |
| ATTCCGCGTCA | 824.265408906444 | 0.293374514104795 |
| GTCACCCTCTA | 824.267082325285 | 0.156477100355169 |
| TAAATGGCTCA | 824.323529301219 | 0.228256228788412 |
| GATGACAGGAC | 824.362864880065 | 0.19579177012157  |
| CCCGAATGAC  | 824.370957573726 | 0.186393838481646 |
| CTACGAATGAC | 824.417081007696 | 0.111570276405298 |
| CCAGTGACCAA | 824.419269830903 | 0.225334586261388 |
| AGCTGAATGAC | 824.491596410182 | 0.122470614762324 |
| GTCACCTTATA | 824.498461750918 | 0.149857437157037 |
| ATTAGCAATAC | 824.502353552304 | 0.183465762322636 |
| CGCTCTAGTCA | 824.503211038501 | 0.255927382788796 |
| CCGCTGATGAC | 824.566309426972 | 0.192761845836678 |
| GCAGGTGTGAC | 824.58617858265  | 0.145235602513456 |
| GCACCGACTCA | 824.614570265411 | 0.240514825504578 |
| AACCATATGAC | 824.626433540362 | 0.200346225661654 |
| AGTCAGACCAC | 824.644594594955 | 0.219512558966448 |
| TGCGTGTGACA | 824.658149626217 | 0.17851747339373  |
| GTCATTTAGAA | 824.67240839118  | 0.188279614268581 |

|             |                  |                   |
|-------------|------------------|-------------------|
| ACTCATTGTCA | 824.688029186489 | 0.173239742377024 |
| AGAAATGTGAC | 824.691578102582 | 0.187617332209009 |
| ATTGGTCAACG | 824.694939769437 | 0.195550985099117 |
| AACTCCAGTCA | 824.695804489989 | 0.220555369477545 |
| CGTCATGTTTA | 824.69803155495  | 0.198338528188126 |
| GCAAGTCATCC | 824.743394648278 | 0.192192992291474 |
| GTAGCTGTGAC | 824.760944373735 | 0.117899724208931 |
| CGCGAGATGAC | 824.785600383245 | 0.212089322978519 |
| ACGTCACCCCG | 824.806192945899 | 0.175626788260839 |
| CGCGGTGTGAC | 824.808315048867 | 0.383576251134396 |
| GGTGGGATGAC | 824.812868525646 | 0.185950762684585 |
| AAAAGGTGACG | 824.839183386272 | 0.163286404366701 |
| AGCAGTGACGC | 824.886735224518 | 0.230667021043419 |
| CGGAAAATGAC | 824.947587224175 | 0.124459430303465 |
| GTCACGTTCTA | 824.977189055792 | 0.195006312749282 |
| GGGTCATCCTA | 825.019030094117 | 0.206000840805169 |
| ACCTAGACTCA | 825.03228134428  | 0.180920582425742 |
| CGCGTGACAAA | 825.034069694841 | 0.156375840788654 |
| GAATGCATGAC | 825.054959071441 | 0.187228796281722 |
| GTCATCAGCTA | 825.055237465919 | 0.17865338627345  |
| CTAAATCGTCA | 825.06240356565  | 0.233852988797631 |
| ACGGTCATACT | 825.075139162629 | 0.205998016146266 |
| GCTCTTCGTC  | 825.098844191024 | 0.20833389561757  |
| AGAACGCGTCA | 825.13581349617  | 0.169222346914971 |
| GTAGGGAGTCA | 825.142762131302 | 0.16852100873625  |
| TCAACTCGTCA | 825.165463579179 | 0.15550832510155  |
| GTCACCATGCA | 825.16955332766  | 0.195147882431825 |
| AAAATCGTGAC | 825.170898110003 | 0.249911646897165 |
| ACTGTGTGACG | 825.230142666124 | 0.198052257501952 |
| CATGAGTCCGA | 825.231403554656 | 0.172225869682176 |
| CATTGGTGACA | 825.25666658468  | 0.237450954327948 |
| AAGTATGATTC | 825.261967895035 | 0.120067938188816 |
| AAACGATGACC | 825.269755935295 | 0.198386925699767 |
| TGAGTGAGCCA | 825.27880325022  | 0.193373000642829 |
| GTGACGCTGAA | 825.278930769476 | 0.204336543257339 |
| AAGATTCATCG | 825.323864187957 | 0.193480343417565 |
| ATTTAGGTGAC | 825.32433717773  | 0.168876459510391 |
| TAGAATGACCA | 825.327624071724 | 0.228952629570368 |
| AAAGAAGTCAT | 825.337340072356 | 0.187631874977061 |
| ATGACTTGTGG | 825.358732945571 | 0.192407165733704 |
| ATATATCGTCA | 825.359997034623 | 0.160976922870798 |
| ATGACAACGGA | 825.408859135551 | 0.177872622889624 |
| TCTTCTAGTCA | 825.419064937856 | 0.184768949976965 |
| TGATTCAGTAA | 825.488369754225 | 0.300617821262112 |
| CAACGAATGAC | 825.495704301567 | 0.269838898341996 |
| CTGATGACCGA | 825.507918195348 | 0.207659495541643 |
| CGTTTCCGTC  | 825.546793681447 | 0.172025435839788 |
| TGATTGTGACA | 825.566993490753 | 0.171271814347103 |
| TAATGGTGACA | 825.631522292499 | 0.18961702879243  |
| GAGTCAGTTGA | 825.647143452581 | 0.125958590745906 |
| AAGTTCGTCAC | 825.682044526469 | 0.262404591523081 |
| CCCGATGACGG | 825.682497215057 | 0.218091159657811 |
| ACTTATGAGTA | 825.695300359861 | 0.187697761663618 |
| AGCACTAGTCA | 825.744556988832 | 0.234386339960066 |

|              |                  |                    |
|--------------|------------------|--------------------|
| GTCACCTAGAA  | 825.795147892171 | 0.241273352614076  |
| TGAGTATTCAA  | 825.809099731999 | 0.258496040390696  |
| GGGATGATGAC  | 825.823200695995 | 0.194754918749939  |
| TCGCCACTCA   | 825.823869824234 | 0.0860258758451599 |
| CTAGAAATGAC  | 825.85172026132  | 0.259325932980991  |
| ACTTGGGTGAC  | 825.89337237548  | 0.245893417288625  |
| TCTTCATGACA  | 825.919013061567 | 0.215498455835803  |
| ATAGAGTAATA  | 825.93623372844  | 0.18621539886567   |
| CAGTTGGTGAC  | 825.98748596664  | 0.257170959683044  |
| AGATTCATGAC  | 826.005783338203 | 0.196449633817075  |
| GGTCATCGTTA  | 826.009619681399 | 0.185377129657102  |
| GCGTCACAACC  | 826.019652753189 | 0.232906210018421  |
| CAATCAATGAC  | 826.024374731053 | 0.185617998168056  |
| CTTAGTGAGTC  | 826.033679315976 | 0.252738689116621  |
| ATTTGACACAC  | 826.049721898108 | 0.179450654899482  |
| AGCCTGCGTCA  | 826.066327601835 | 0.199934958415419  |
| CGATGACCTAA  | 826.088281022736 | 0.191565344091035  |
| TGACTAGTCCA  | 826.088493799929 | 0.235180036739691  |
| ACCTGTACCG   | 826.154706423084 | 0.186562833451042  |
| GTCGTCACTCA  | 826.156234440576 | 0.188629515413325  |
| ATACCTGTCAC  | 826.180347960388 | 0.162780137048051  |
| CATTATGTGAC  | 826.193094557708 | 0.246007253363397  |
| CATACATGACG  | 826.227440393811 | 0.194816457189275  |
| TCAAAGTGTCA  | 826.29400323466  | 0.223111296845258  |
| GGTGAATGAC   | 826.304257588637 | 0.178479658937086  |
| GTCACCGTTA   | 826.326475620629 | 0.201158628393259  |
| ACCAAGTACGA  | 826.339375670916 | 0.178393437886852  |
| CACGTCAGAGC  | 826.37312161606  | 0.235752861041896  |
| ACGCTGTACA   | 826.381309340584 | 0.224415447221935  |
| AGGCTTGTGAT  | 826.428352001852 | 0.176307159670471  |
| AGAAGCATGAC  | 826.434405118428 | 0.23289610708752   |
| CGAAGGGTGAC  | 826.434699815435 | 0.126632404019947  |
| TGACCACGTAA  | 826.475504935261 | 0.25325134123897   |
| ATGTCATCTGC  | 826.510508584873 | 0.138822026673606  |
| ACTCATACCGA  | 826.529915586718 | 0.156988419456107  |
| TGACGCGGAAA  | 826.574769366205 | 0.215726085003128  |
| GGTCATACCAA  | 826.574909421896 | 0.175988902677639  |
| GTGTCACCTGGA | 826.610082074574 | 0.185858790379467  |
| GACTTGTGACA  | 826.687873412843 | 0.271550889472956  |
| AGTCAGAGTCG  | 826.693602038497 | 0.236953357509996  |
| ATGACTTGCTC  | 826.696030563647 | 0.14030266991374   |
| GTCACACCCAA  | 826.715797993009 | 0.145323818436971  |
| ACGAATGACCA  | 826.727937606625 | 0.22914192928692   |
| AGTGTATGACC  | 826.733812551744 | 0.197082695675526  |
| GCCAAGGTGAC  | 826.751223084869 | 0.274604844491642  |
| ATGACGTGAGG  | 826.764077210809 | 0.175564802669244  |
| AATTCGGTCAC  | 826.779355373341 | 0.241777546394379  |
| ATGTCGGTGAC  | 826.780515781857 | 0.161667771275959  |
| ACGGTATGACC  | 826.786066469155 | 0.261910216845805  |
| TAATCACGTCA  | 826.790541839591 | 0.178415274952822  |
| AGGAGATGACG  | 826.791954692999 | 0.167334076743312  |
| TGAAATGACAA  | 826.816401641698 | 0.233999036797703  |
| GTCACCTCGAAA | 826.821497649574 | 0.177490875469762  |
| AACCAAGTCAC  | 826.841000735121 | 0.21687935003451   |



|              |                  |                   |
|--------------|------------------|-------------------|
| ACTCGGTGACG  | 826.857209855933 | 0.209075075827502 |
| ACAAGGGTGAC  | 826.861862318528 | 0.146971740600415 |
| GATACGTAATC  | 826.881730575242 | 0.185795889394612 |
| CATTTAGTGAC  | 826.906943652597 | 0.222849632302744 |
| CGGTCTGACAC  | 826.90780214687  | 0.209398684610314 |
| GTCAAGGTGAC  | 826.974260330211 | 0.141787392927415 |
| ATCGAGGTGAC  | 826.988739723471 | 0.170086768716409 |
| GACTCACGTTA  | 827.036717956709 | 0.19663146887122  |
| CTATGGCGTCA  | 827.044174549958 | 0.17605583932235  |
| ATGACCCGGTCA | 827.102847848907 | 0.177574670135084 |
| CCAGTAATGAC  | 827.112119017535 | 0.247074543155253 |
| ACGTTGGTGAC  | 827.114474616353 | 0.24193115110871  |
| AGAGTCAAGCA  | 827.137452829263 | 0.210623402410152 |
| CGTCACATTAG  | 827.191127845284 | 0.242432035509233 |
| TACTTGACTGA  | 827.2348129583   | 0.14567472735971  |
| CACATCCGTC   | 827.248938590408 | 0.205831825248517 |
| ACCATAATGAC  | 827.2738465922   | 0.188082415020995 |
| CCGGAGAGTCA  | 827.280274557117 | 0.158687139578239 |
| CGCAGTGAGTC  | 827.292740203289 | 0.135270558174865 |
| ACCTCTATGAC  | 827.342639531156 | 0.127062230612839 |
| CCCAAATGACA  | 827.344107694497 | 0.171925132376881 |
| ATATGGTCACA  | 827.360440138669 | 0.182836745386436 |
| CCAAGTCAATC  | 827.370795508705 | 0.186298219301861 |
| ACGTCATGCCC  | 827.389907296745 | 0.187016017232619 |
| GTCATGTATCA  | 827.427815455638 | 0.185558615104149 |
| AATTTTCGTGAC | 827.431562775193 | 0.337958722525939 |
| AGGTTGACACA  | 827.435846614273 | 0.199514470749901 |
| TAGTACTCACA  | 827.489896018595 | 0.185191669185927 |
| CAATTGAATCA  | 827.495500334689 | 0.152919666975288 |
| CACGCGTGACA  | 827.496128813843 | 0.317923370253145 |
| CTCATGACAGA  | 827.511350933594 | 0.115047500891742 |
| GACAGCTCATC  | 827.523427240276 | 0.201323850182082 |
| GATGACAGCCA  | 827.525179269857 | 0.189742908508051 |
| TAAACCTGTCA  | 827.532676160582 | 0.202433081409062 |
| CGTCATGCGTA  | 827.538366470872 | 0.291363645799207 |
| AGAGTCAAGGC  | 827.599211033964 | 0.187663036126714 |
| CTGGCTGTGAC  | 827.613103244223 | 0.240403201856687 |
| CTTCAGATGAC  | 827.620216574019 | 0.146665326408236 |
| GAGTGACAAAC  | 827.635840166334 | 0.194028584764796 |
| AACACATCATC  | 827.674118734205 | 0.188966819573096 |
| CACATGACATA  | 827.693656229723 | 0.236582628290255 |
| AAGATTGTCAT  | 827.732098349511 | 0.197931216637818 |
| AGAATGAGTGA  | 827.735047690844 | 0.184810536449815 |
| ACAGTCAGCGG  | 827.753515385163 | 0.178940577425525 |
| GTCACCCCGGA  | 827.769745463837 | 0.259025446789238 |
| AGTCACGGACC  | 827.798688026106 | 0.163915507413596 |
| GTGACAGAGAA  | 827.811572234052 | 0.180464249527158 |
| ACGCTTTGTCA  | 827.852477059402 | 0.224495388593205 |
| ATGACATGCTA  | 827.8573130315   | 0.191084073449528 |
| ATACGTAATCA  | 827.878277150918 | 0.115569121130337 |
| AGCGAAGTCAT  | 827.894983222185 | 0.201342200381637 |
| GATCATGACGA  | 827.92826421891  | 0.201417786858107 |
| CTGCGTGTGAC  | 828.025295108396 | 0.181785864905871 |
| ATTTGAGTGAC  | 828.038822090357 | 0.259351751662589 |

|             |                  |                   |
|-------------|------------------|-------------------|
| AAGCTGTCACC | 828.077597383575 | 0.186099337592612 |
| CCCGGTGTGAC | 828.115802083551 | 0.264312517632364 |
| ATCCAAGTCAC | 828.153647428068 | 0.175651198958582 |
| CGTCACAGTTC | 828.160159456757 | 0.275679410755253 |
| ATTACTCTGAC | 828.189422607846 | 0.177748201072708 |
| ACTCATTCTGG | 828.218084541813 | 0.199784669521456 |
| ACTCATTCACT | 828.243164841708 | 0.179073572576756 |
| GTGTCAGACCA | 828.24846975022  | 0.229461449764512 |
| GCTGCAATGAC | 828.265677910045 | 0.180104351443171 |
| GAGTCAAAGCA | 828.284984042328 | 0.175631326516993 |
| GCTAACAGTCA | 828.318750124404 | 0.125169729478378 |
| GTGATTACGCA | 828.321944970519 | 0.259805296473088 |
| GGGATAAGTCA | 828.322631503336 | 0.176956753929731 |
| GTAATGTGAC  | 828.369223863382 | 0.222514546405937 |
| GTGTCACGTTA | 828.371840323354 | 0.116254603645474 |
| ATGAGTGCATC | 828.395428023021 | 0.223654624618442 |
| CCAAAGTGTC  | 828.399636595425 | 0.318243209872249 |
| GAGTCAAAGAA | 828.411636725541 | 0.186147593422073 |
| GGGTTTGTGAC | 828.423635332079 | 0.254174900753706 |
| GATACGGTGAC | 828.449679751936 | 0.193300814347996 |
| ACTCATAATTG | 828.451941156085 | 0.19603936630451  |
| CGACGTGACAC | 828.483138608499 | 0.230311578679238 |
| CTGCCGTGATA | 828.494106083491 | 0.17804518182734  |
| ATGACGACGAG | 828.502460420921 | 0.148017600810213 |
| ATCCAGTCAGA | 828.532810878359 | 0.155517376425713 |
| CTGCGGAGTCA | 828.546677837342 | 0.212326451107668 |
| TACGTACGTCA | 828.551288963483 | 0.231364408852394 |
| GCCAGTGACAC | 828.551413729514 | 0.249875651755848 |
| TATGAGGCATA | 828.560263382241 | 0.172656739216477 |
| ATAGTGACAAA | 828.573411220286 | 0.148220541914504 |
| ACATCTGACTG | 828.630530584168 | 0.174863391195237 |
| CGTCATTTCAA | 828.681679536698 | 0.17331213450081  |
| GGATGACCGAA | 828.690835380223 | 0.19994794098502  |
| GATGAGTAGGC | 828.704559823982 | 0.172558087835132 |
| GTCACTCAGAC | 828.776175227019 | 0.191342208019495 |
| CCCTTTGACTC | 828.788236732502 | 0.188378141625641 |
| GACTAATCTTA | 828.827536064218 | 0.235782345025602 |
| GCGTTGACACA | 828.845133085038 | 0.219549480266717 |
| ACTCATCAATG | 828.861685131221 | 0.176221554006785 |
| CATTTTCGTCA | 828.863777799259 | 0.17261725839464  |
| ATGAGTGAATA | 828.869501281448 | 0.181813943368275 |
| CCCATTTGTCA | 828.869858555347 | 0.179065219669597 |
| CGAACATGTCA | 828.902828201284 | 0.18322243011842  |
| CCCTTGTGTCA | 828.929242171267 | 0.25844882096376  |
| GATTACTCCTA | 828.932742149624 | 0.134808432931664 |
| ACGTCACTGCA | 828.936805243088 | 0.218711753241415 |
| CCCTAATGACG | 828.973125753791 | 0.12176443705374  |
| ATCTTAATGAC | 828.975521016663 | 0.260662954336099 |
| GCATGGAGTCA | 828.979494494991 | 0.177439953289573 |
| GAGCTGTGTCA | 828.988838140742 | 0.199116801395274 |
| ACACATGACGT | 829.011765072636 | 0.187441794322344 |
| CTGTGCGTGAC | 829.040537784762 | 0.218359825063171 |
| AGCGTGACACT | 829.076407854076 | 0.147329445764101 |
| CTGTTCTGTCA | 829.082330609843 | 0.259334023551503 |

|             |                  |                    |
|-------------|------------------|--------------------|
| GCGATAAGTCA | 829.085020765515 | 0.200260630635552  |
| AATGCGACTCA | 829.085953821603 | 0.156700438038358  |
| TCCTCGACTCA | 829.113411021678 | 0.194732872881001  |
| CTTGCATGACA | 829.170959585966 | 0.218700486198329  |
| GTGACGTTAAC | 829.207930060202 | 0.178690416055995  |
| AGTCACGGAAC | 829.248077269605 | 0.190549841342875  |
| TGAGATGACCA | 829.258123421496 | 0.171176697184879  |
| GCAGTGACAAA | 829.365210041816 | 0.186203298563761  |
| AGGCGGAGTCA | 829.369776644506 | 0.170918463053503  |
| ACCGACGTCAT | 829.384501829038 | 0.21187989725088   |
| TCGACGCGTCA | 829.385655212739 | 0.0807863014333902 |
| ATCCATGACGC | 829.391156661546 | 0.113544537481235  |
| GGTATAATGAC | 829.391445577316 | 0.249982707214312  |
| CAGCGAATGAC | 829.392260901672 | 0.11408981624987   |
| ATGACGGACTA | 829.430499150109 | 0.176234865060691  |
| GTCAAACGTCA | 829.431879025251 | 0.245575456847648  |
| GTAACCATGAC | 829.453073254871 | 0.225224647497089  |
| AACGTGACGCG | 829.455172641946 | 0.235366315645355  |
| ATTGGCTCATC | 829.474051235592 | 0.145166796801023  |
| ATGACAGTGGC | 829.484545158804 | 0.172468388206197  |
| ATGAGTATGCC | 829.551129957649 | 0.179156853611545  |
| AGAGAGAGTCA | 829.58281004697  | 0.169380674511343  |
| ATATAGACTCA | 829.583702951535 | 0.233790988878205  |
| CTGCTAATGAC | 829.590112058354 | 0.254087455595797  |
| ACAACGTATG  | 829.629852648663 | 0.101216043304452  |
| GCTCTTTGTCA | 829.63022049734  | 0.171972840671244  |
| GAGATAAGTCA | 829.646913555223 | 0.210311647357527  |
| TATCCCAGTCA | 829.663635934461 | 0.21959540371552   |
| AAAGTGTGAGT | 829.668472251771 | 0.177238788960023  |
| GTCACATTCGA | 829.695123323769 | 0.106862363896338  |
| CGGGGATGACG | 829.747730277721 | 0.167792642335517  |
| ACTCATACGAT | 829.780661586729 | 0.24017522787147   |
| CAAATGAGCCA | 829.799001156343 | 0.181432479705414  |
| GTGCTGTCA   | 829.799634462333 | 0.247727289089597  |
| CACCTGACTCG | 829.802675421548 | 0.160371041199112  |
| ATTGAGTGTCA | 829.83077875712  | 0.196490137448052  |
| TGGCGTCACAA | 829.857067150277 | 0.287625742690194  |
| GAGTTGTGACC | 829.87916240825  | 0.0896909179681479 |
| TGAGTAAAGAA | 829.928363271849 | 0.171017362771996  |
| CGACTAATTCC | 829.947794794161 | 0.172247828766659  |
| GATGAGTTGGC | 830.017558294471 | 0.181717919339406  |
| AGTCAGAGGTA | 830.024004397857 | 0.177639463224511  |
| ATCCCTGACTC | 830.045672030582 | 0.189900166249838  |
| TACACGCGTCA | 830.053378803036 | 0.171491035494139  |
| GCGCACGTCAC | 830.078654869751 | 0.184933714553177  |
| GTAGTACTCAC | 830.085318235932 | 0.155710125656822  |
| ACTTCGGTGAC | 830.119051008189 | 0.251129043346583  |
| CAATTACGCAA | 830.146676322157 | 0.178400597770293  |
| GGTGACAATAC | 830.178438911456 | 0.0803535582891531 |
| GTATGCGTGAC | 830.202781860486 | 0.163624859731149  |
| GTCATTCGGTA | 830.20793820249  | 0.193038827165758  |
| AATGAGTTGGC | 830.236533320492 | 0.179977034405848  |
| CGTCATGTGAG | 830.255568655339 | 0.18580435823552   |
| ATATTGGTGAC | 830.257875536814 | 0.198661200070024  |

|              |                  |                   |
|--------------|------------------|-------------------|
| AACAGTGACGC  | 830.258647434769 | 0.180076254802432 |
| AGTATGAGTTA  | 830.269233048181 | 0.171990759760906 |
| CGTCACACCTA  | 830.289082361534 | 0.14385175941118  |
| CTGACTCCGTC  | 830.300392624921 | 0.178346523691634 |
| GCCCGGATGAC  | 830.318678760328 | 0.185399372889493 |
| AACATCATGAC  | 830.327720706878 | 0.297894942015083 |
| AGGATGAGCCA  | 830.345788658829 | 0.253857692916591 |
| CTGTTTGTAC   | 830.357646039546 | 0.156013319421852 |
| CTGACTGGTAC  | 830.430264395539 | 0.312702306462788 |
| GGGTGACCCAA  | 830.434631556719 | 0.234193805103712 |
| GTCATATGCGA  | 830.457711729114 | 0.270063568429958 |
| AGTCACGACGC  | 830.474340682181 | 0.233646729481942 |
| GAACATAGTCA  | 830.476949337669 | 0.208909073202897 |
| GCGCTAGTCAC  | 830.527507052876 | 0.163980207734515 |
| AGACGGAGTCA  | 830.528531173915 | 0.15351299512975  |
| AAATTAGTCGC  | 830.564961017035 | 0.243219571322718 |
| GGGCACAGTCA  | 830.595315343405 | 0.232262948434665 |
| CAATATCGTCA  | 830.607128436242 | 0.229351527396158 |
| GTCACAATGCA  | 830.623429985128 | 0.217278613970325 |
| GTCACAATATA  | 830.627848807057 | 0.183794420078715 |
| AAAATGTACACA | 830.645006372167 | 0.197681787517077 |
| AGACTTGTGAC  | 830.666789348066 | 0.226209616671893 |
| AACGTCACCGG  | 830.69985669157  | 0.236649975229431 |
| TCTACGTGTCA  | 830.791010116851 | 0.160798206771857 |
| GTCACAGCAAA  | 830.796715406606 | 0.269863135571334 |
| GTAGTGACAAA  | 830.803508080344 | 0.184656927601541 |
| TCACTTGGTCA  | 830.816230642266 | 0.159392897398804 |
| AAGATGAGCCA  | 830.824619609323 | 0.173655741148322 |
| ACTCATCCTTA  | 830.837557703637 | 0.152374045843889 |
| CATTCTAGTCA  | 830.839118228803 | 0.244421984870114 |
| AGTCAGACACA  | 830.856271714055 | 0.227150128627679 |
| CGTCACACAAA  | 830.863305068437 | 0.21739404534283  |
| AAAAGGTGACA  | 830.876907524555 | 0.195121578274223 |
| ATGAAATGACA  | 830.882118791087 | 0.216445782410176 |
| ATGATTAGTAC  | 830.933930589712 | 0.124430083839883 |
| GTCATGATCCA  | 830.952531443986 | 0.234603225070711 |
| AATTGAGTGAC  | 830.986294587723 | 0.219741562617216 |
| GTCATAAGGTA  | 831.01627129176  | 0.23273357116591  |
| ACGTGCATGAC  | 831.078277332105 | 0.119079601092894 |
| CGACTTGTAC   | 831.083321855146 | 0.201669860179477 |
| ATACGTAATAT  | 831.125310279615 | 0.109155673139371 |
| CTTCGTGACAC  | 831.206371812492 | 0.176705841149201 |
| AGTGACGATAT  | 831.210887136773 | 0.169735219329592 |
| CCGACTGTGAC  | 831.239303825157 | 0.187005384809756 |
| GACTAATCGAA  | 831.274088869581 | 0.218407269169804 |
| GACCAGTCAGC  | 831.293997942388 | 0.149052978972764 |
| GTATTAATCAC  | 831.369249038666 | 0.240599223811796 |
| ATGACATTGCG  | 831.386063155613 | 0.173034940400282 |
| CTGGTGAATCA  | 831.417945249093 | 0.181711160612993 |
| AGTGACTTGGC  | 831.470115261444 | 0.18650870125731  |
| ACATAGCGTCA  | 831.478708496356 | 0.187391233041154 |
| AACCGGTCATA  | 831.49600226013  | 0.147961678884982 |
| TCACAATATGA  | 831.500582935693 | 0.182787851669907 |
| CTGTCACATGA  | 831.504821050097 | 0.249528699792443 |

|              |                  |                   |
|--------------|------------------|-------------------|
| ATGTGTGAAT   | 831.520980296228 | 0.170665093980844 |
| GCAGTGACCAA  | 831.533856981847 | 0.205011728829192 |
| CCTCAGACTCA  | 831.536075161122 | 0.214642741741209 |
| CTTAAACGTC   | 831.573287977776 | 0.309241543664448 |
| AACACGTC AAC | 831.581767676398 | 0.140505348624095 |
| AACTAAATGAC  | 831.610453764968 | 0.270555698917458 |
| TGACACTATCA  | 831.632456218227 | 0.217615217865296 |
| TGACGTGCAAA  | 831.640705900489 | 0.270527457189423 |
| ATGACGGTAAT  | 831.665404291254 | 0.203815836896041 |
| GTCATCAGATA  | 831.704845039593 | 0.176375443238343 |
| AGGTAATGACA  | 831.709695063795 | 0.194298756061357 |
| CATCAGTGTC   | 831.725371397839 | 0.211607543073862 |
| ATGAGTCCCGA  | 831.785324698772 | 0.222325929172228 |
| GTCATTAACCA  | 831.891250412902 | 0.105169894076642 |
| TGACGAGTACA  | 831.898448152838 | 0.23237462025064  |
| TCTTGCTCACA  | 831.975048815893 | 0.117711041965353 |
| AGTATTACTGA  | 831.977034469426 | 0.206611463738714 |
| GGTGATGTAAC  | 831.994530858195 | 0.149028175192037 |
| ACGTCACGCAT  | 832.030830057575 | 0.173575085135524 |
| CAGTCAGATGG  | 832.039977764028 | 0.182196962086145 |
| GTCTCCGTCAC  | 832.05204857411  | 0.181567275521768 |
| ACCTTGACTGA  | 832.055156432272 | 0.158087995675128 |
| CTGCGAATGAC  | 832.065697804777 | 0.1351770158596   |
| GAATTTGACTC  | 832.10511564048  | 0.178160585764292 |
| AAGTGTCAGCG  | 832.130130584546 | 0.172940206008897 |
| ACAGTGGTCAT  | 832.207798993496 | 0.203699463287401 |
| AGCTTTATGAC  | 832.228561448621 | 0.170871341231188 |
| ATACACGTC AA | 832.231372562761 | 0.21504480847301  |
| CCCCTCAGTCA  | 832.236637754315 | 0.147059227637091 |
| GAGCCTGACTC  | 832.274801361274 | 0.152182717026383 |
| CGTCTGTGACA  | 832.276727350848 | 0.280341009797996 |
| GTCACCTATCA  | 832.321022365296 | 0.176787398223142 |
| GATGCATGACA  | 832.327958221288 | 0.167659905636231 |
| ACGTCATGTGCG | 832.336411617084 | 0.114522887371862 |
| CGTCATTAGAC  | 832.346197479895 | 0.284463173434265 |
| ACGTCAGTGAC  | 832.363936579068 | 0.199025937599436 |
| ATGACGACTCG  | 832.36854428984  | 0.164337848917934 |
| ACCGTAATGAC  | 832.369964439673 | 0.210332454562778 |
| GAGGGAATGAC  | 832.377352913794 | 0.177578049290706 |
| ATACACGTGAC  | 832.384503468293 | 0.207113638337799 |
| AAGTCATGGTC  | 832.419437145094 | 0.183376518832906 |
| ACCAGTGACGT  | 832.44549658195  | 0.197586426184032 |
| ATTACCTGTCA  | 832.499400023244 | 0.171179651162195 |
| CGTCATTGCAC  | 832.609896462307 | 0.179499614301099 |
| AGTCAGAAGCG  | 832.646476859852 | 0.120562657886336 |
| ACAAGTGACGT  | 832.653097905831 | 0.231843967233664 |
| AAGCGTGCAC   | 832.677735577112 | 0.208650603883438 |
| GAATTACGCAC  | 832.694864787581 | 0.218116769109892 |
| ATGACGCCGTG  | 832.711915149512 | 0.20870897839818  |
| AGTACTCACAC  | 832.738130954391 | 0.170168269408115 |
| CCCAGATGACG  | 832.819786370825 | 0.266795360512782 |
| ACTAATTAGTC  | 832.827583438465 | 0.186032732418009 |
| ACGTCACGCAC  | 832.831242203993 | 0.282907234570943 |
| GCTAATGACAA  | 832.842872522728 | 0.170630836123769 |

|              |                  |                   |
|--------------|------------------|-------------------|
| ATGAGTAGTGA  | 832.873177165133 | 0.179641899814574 |
| CGACACATGAC  | 832.884395490767 | 0.234591765067881 |
| GTTTAATGACA  | 833.062167312037 | 0.124632247147433 |
| AGTGGGATGAC  | 833.065233620883 | 0.170179731185181 |
| AAATTGTGACA  | 833.074187646942 | 0.222712782815968 |
| GGTGAGTCTCA  | 833.092016683581 | 0.169545107917513 |
| AAATATGTCAG  | 833.096907932613 | 0.192559364996702 |
| ATGCATGACAT  | 833.101573876312 | 0.220006529643077 |
| ACTCATTGATA  | 833.111545048749 | 0.192862648205956 |
| GTGTCATGGGA  | 833.114819670807 | 0.199484449986693 |
| TAGGCGACTCA  | 833.118026497973 | 0.301586045651509 |
| ATGATGTGGCG  | 833.138475769424 | 0.12600182744868  |
| CTGGTATGACC  | 833.139406529829 | 0.245890255011831 |
| AATTTTCGTCAG | 833.183124032566 | 0.195834336727397 |
| CATAAACGTC   | 833.209219630714 | 0.257929353363241 |
| GTCACCCTTCA  | 833.211683512615 | 0.175792929175851 |
| ATGTGACGCCA  | 833.238364174847 | 0.206390368463016 |
| GCTATGACCTA  | 833.263709584168 | 0.167984683911282 |
| ACTCATTCTTC  | 833.267692619118 | 0.174917832725612 |
| CGTGTCACCTA  | 833.277691773841 | 0.179867849158139 |
| AAGATTCATAC  | 833.288486106485 | 0.207263616593937 |
| GATTGCAGTCA  | 833.304214603062 | 0.301956602960058 |
| ACCGGGTGACA  | 833.304284548937 | 0.18866419514875  |
| CCTCGTGTGAC  | 833.306235167302 | 0.219893855957505 |
| GTCACGTCTGA  | 833.318091663348 | 0.238960197986084 |
| GGTCATAATGA  | 833.33389133122  | 0.192526068112792 |
| ACTCATTATG   | 833.343005236624 | 0.213738083333254 |
| AGATTATTCAT  | 833.345015487621 | 0.22934645298325  |
| ACCAGTGTGAC  | 833.348981392328 | 0.162525305671606 |
| CAGCTGATTCA  | 833.36270477413  | 0.177566104268786 |
| AGTCAGAATTG  | 833.408425852511 | 0.172787469830014 |
| GTACGGAGTCA  | 833.428345027564 | 0.213015039483117 |
| CGAATCATGAC  | 833.443108159618 | 0.219217857677399 |
| GAGGAGTAATA  | 833.478779572884 | 0.166096753955919 |
| AGCTAATGACA  | 833.482231421013 | 0.228480165643401 |
| ACAGCTGTCAT  | 833.529154054522 | 0.252579698126511 |
| CAAGAGAGTCA  | 833.534898003945 | 0.219840226994569 |
| ATCCACAGTCA  | 833.547780784679 | 0.213112102031977 |
| CAGTGGTGACA  | 833.554253535733 | 0.129665572072924 |
| AGGATTGCTCA  | 833.572225172447 | 0.171415120922241 |
| ACATTTGTGAC  | 833.582445408743 | 0.18296146593766  |
| TGAGTCTAGAA  | 833.596451436948 | 0.253969061516362 |
| CTCTTTATGAC  | 833.599169511099 | 0.181631657491554 |
| AAGCAATGACA  | 833.622453342854 | 0.167490623646315 |
| GGACGTGTGAC  | 833.623243748882 | 0.171702726646064 |
| AGTCCCAGTCA  | 833.664056735862 | 0.22939123697514  |
| GCGATGAGCCA  | 833.675267273228 | 0.160850681451654 |
| CGACTCACGCG  | 833.677625903085 | 0.234158249519322 |
| CCGATGGTGA   | 833.701830462174 | 0.230806190096426 |
| TCTGTGATGCA  | 833.712294311671 | 0.130151637784372 |
| GTCACCGGAAA  | 833.721526369413 | 0.27777778150092  |
| ATAAAAGTCAT  | 833.73377651673  | 0.178420239197577 |
| CCATTTTGTCA  | 833.740663145128 | 0.205043986319715 |
| ATTAGTCGCAC  | 833.765269387859 | 0.115913303202144 |

|             |                  |                    |
|-------------|------------------|--------------------|
| ATCGCATGACG | 833.816263442923 | 0.0968302430566723 |
| GGTGACAAGTA | 833.817156358513 | 0.166518759123676  |
| AGTCACGGTTC | 833.820103122791 | 0.127717624064188  |
| GCCACAATGAC | 833.823845538332 | 0.221953654254637  |
| ACGTCACTACA | 833.831696147668 | 0.203872715271961  |
| CAGATCACTCA | 833.837911132725 | 0.300296707814501  |
| ATGTCATTACC | 833.86776609132  | 0.222772274132086  |
| ATCTAGAGTCA | 833.89220817501  | 0.137014388074103  |
| GAAAGGGTGAC | 833.940310891705 | 0.192591437796893  |
| AAACCGCGTCA | 833.99733869283  | 0.230542366996464  |
| GGTGAGCCACC | 834.000875818815 | 0.222723579515301  |
| CTCACGCGTCA | 834.000949220117 | 0.176135350317553  |
| ATGCACTCATA | 834.033723158943 | 0.177575448477512  |
| GCTCGTGACAC | 834.061157805998 | 0.245206159184912  |
| ATGACAGGGTG | 834.079889521345 | 0.167280562727887  |
| CAACTTGACTC | 834.143128941494 | 0.195477527399423  |
| CTCCTGATGAC | 834.153503286705 | 0.223821683275393  |
| ATAAGCAGTCA | 834.15432007636  | 0.209414922720799  |
| GTCACAAATCA | 834.176375333568 | 0.150665914725254  |
| GTCACCGTCCA | 834.183015025521 | 0.166078269777006  |
| CGTCACACAAG | 834.220229203883 | 0.174029697919147  |
| AACTTTGTGAC | 834.223280294679 | 0.177632763000984  |
| CTCTAGAGTCA | 834.263949570404 | 0.189351477177541  |
| TATGTCATGAA | 834.282825219179 | 0.136585712117147  |
| GCACTACGTCA | 834.326021775737 | 0.194936074007218  |
| ACTGTGACATG | 834.331699528832 | 0.0844582825872722 |
| AGACTGTGACG | 834.38435840353  | 0.132719546592456  |
| GATTCACTCAC | 834.398588431539 | 0.122701132602276  |
| GTGAGACTCAC | 834.411746238781 | 0.23862982471628   |
| CCCCTGACGCA | 834.437197432825 | 0.16718787925882   |
| TGCGTGACGAA | 834.45723790359  | 0.324179341232322  |
| CCTCGGTGACA | 834.487469257709 | 0.1386658387525    |
| CTTTGAGTGAC | 834.526336371183 | 0.21785431236686   |
| ACTGCATGACA | 834.56102218359  | 0.237838838152647  |
| CGTCACAATAA | 834.566000930983 | 0.29594660742171   |
| GTCATTTCCAC | 834.572669437988 | 0.13304289932139   |
| GACGCGTCAGA | 834.595912325911 | 0.153305149718502  |
| TCACTCTGTCA | 834.60253298542  | 0.205119742554435  |
| CTCGGAGTCAA | 834.615749000651 | 0.168861635523299  |
| GGTTACTCTTA | 834.633367702    | 0.169655440413315  |
| GCGGTAATGAC | 834.639896554006 | 0.16620084801093   |
| ATAGTTGTGAC | 834.647302897991 | 0.216702598900211  |
| CAAAAGCGTCA | 834.648611995386 | 0.18814051604273   |
| GGGTCATCCGA | 834.676766223183 | 0.202975581191626  |
| AAGTCTGACAC | 834.685913523501 | 0.180610493940214  |
| AAAATAGTGAC | 834.697033833037 | 0.198291653504541  |
| ATGTCACCGAC | 834.749652193288 | 0.184942062075445  |
| AAGCGTGACGC | 834.761455947907 | 0.226811840803047  |
| ACGACGCGTCA | 834.799241758011 | 0.226271292655335  |
| GTGTGAGCAAA | 834.802341761601 | 0.186110939118484  |
| ATGACGGAGGC | 834.803722692106 | 0.245605409040691  |
| CGTCACTCTGA | 834.817481402855 | 0.226889621704616  |
| AACAGTCAATG | 834.825702983856 | 0.197756449831921  |
| TACACATCATA | 834.837497430013 | 0.166317159258027  |

|              |                  |                   |
|--------------|------------------|-------------------|
| AACATGAATCA  | 834.865959096103 | 0.147912262087582 |
| GATTACTATTA  | 834.885437900008 | 0.182136632757297 |
| AAATTAGTGAC  | 834.892690157882 | 0.275627442423365 |
| ACCTCGACTCA  | 834.893464493675 | 0.175426595587401 |
| GCGTCACTATA  | 834.904313801638 | 0.190594744437779 |
| ATGAGTCTCGC  | 834.91067224151  | 0.151324681368555 |
| ATGACGGCACA  | 834.912607826626 | 0.189462512842008 |
| ACTCATAGTCT  | 834.915493100335 | 0.191129860012876 |
| ATGCCAATGAC  | 834.968750271022 | 0.260612944640738 |
| AGGCTACGTC   | 834.987139780073 | 0.191219013684121 |
| CTGACTCGCCC  | 835.000543974985 | 0.180595212250261 |
| GATCGTAGTCA  | 835.008258688882 | 0.261014515322897 |
| CCGGATTAGTC  | 835.024819796128 | 0.201320297202075 |
| AACCAGTCAGT  | 835.076548098019 | 0.168179266227685 |
| GACAGTGACGC  | 835.10193533445  | 0.13771383683175  |
| GCGTCACCAGA  | 835.122084546007 | 0.151899773283234 |
| CAGCCAAGTCA  | 835.126468707624 | 0.165118390402597 |
| CTCATATGTCA  | 835.22456865675  | 0.216887562979344 |
| GACGGCATGAC  | 835.239319924429 | 0.249122587882443 |
| ACGTCACGTAT  | 835.241224643298 | 0.190415781022228 |
| GTTTCCAGTCA  | 835.258239542255 | 0.20530384814544  |
| ACTCATAGTCG  | 835.260923025311 | 0.135943291451692 |
| GATCTACGTC   | 835.273993100075 | 0.103408207196462 |
| TATCGGTGACA  | 835.325089178786 | 0.22372836916768  |
| TGACTAGCAAA  | 835.356770048679 | 0.192996827245686 |
| ATTCCGTCACC  | 835.366762418274 | 0.161618576200145 |
| CTGAGTCGAAC  | 835.36694831051  | 0.252136522341647 |
| AAGTTAATGAC  | 835.373017185576 | 0.196168509257009 |
| ATTAATTGTCA  | 835.404471045435 | 0.16494337934166  |
| CACCTACGTCA  | 835.42840923113  | 0.171214115066925 |
| TGTGTGAGCAA  | 835.459028495134 | 0.166540036992396 |
| GACTCATGGCC  | 835.461980549116 | 0.24765876540735  |
| GCAATTACGCA  | 835.470466894462 | 0.209210257887336 |
| GGAGGTGACAC  | 835.473091852473 | 0.161457917178821 |
| TGACCAAGACA  | 835.484029799916 | 0.306485960333084 |
| TCAGAGTGACA  | 835.500294313574 | 0.184047753277666 |
| ACGTTAAGTCA  | 835.514876114635 | 0.204479204966392 |
| TACATCTGTCA  | 835.522321869436 | 0.168998196507281 |
| ACGTCACCTAG  | 835.526590197695 | 0.217908810215778 |
| GTCACTGACCA  | 835.537813352681 | 0.146685500525724 |
| ACTAAGTGTCA  | 835.54019496986  | 0.217387903165504 |
| CATGCCAGTCA  | 835.564984867395 | 0.173313578595653 |
| CACCCTGACTC  | 835.571358066843 | 0.192149424052832 |
| ATGAGTGAGTA  | 835.571381571301 | 0.17082212540856  |
| ACTCTGGTGAC  | 835.579485636824 | 0.25091699079846  |
| ATAGATGTGAC  | 835.5848429114   | 0.201345375571268 |
| AAGATTCATAT  | 835.597945165425 | 0.149649691355769 |
| AGGTCCAGTCA  | 835.599895201683 | 0.184809106188574 |
| ATGGTATGACC  | 835.611205184326 | 0.234077631154853 |
| CATCCAAGTCA  | 835.643538429046 | 0.159744130050475 |
| GAGTCAAACAC  | 835.651685924032 | 0.164495513521113 |
| CGATTCTGTGAC | 835.654574269493 | 0.192740424195921 |
| CGCACGTGTCA  | 835.758660341991 | 0.178107826886774 |
| CCCTGGAGTCA  | 835.785543024542 | 0.171225002932926 |



|             |                  |                   |
|-------------|------------------|-------------------|
| GCAGCGATGAC | 835.787863281758 | 0.226373167481678 |
| AACTCTAGTCA | 835.80543447802  | 0.226208666019419 |
| CTCCAGAGTCA | 835.833532911751 | 0.264496260755743 |
| ACGGGTCATAG | 835.8820086711   | 0.144316642744774 |
| AGTCAGACCAG | 835.91449689082  | 0.26004076498197  |
| TCATCAGATGA | 835.940530011062 | 0.195062978753725 |
| AGTACACGTAA | 835.948522727423 | 0.201783149521893 |
| AGTAATGACAA | 835.95016028207  | 0.136710248961211 |
| TGACACTACAA | 835.988868478123 | 0.3522421967471   |
| ATATACTACC  | 836.009031351341 | 0.187739638799198 |
| TCACTTTGTCA | 836.044607166928 | 0.116295067858569 |
| ACTGTGTCAGC | 836.047686436214 | 0.214676579966841 |
| TGACAAGTCAA | 836.085538714753 | 0.193995480725705 |
| GCTTGTGTGAC | 836.094735891165 | 0.194575525066451 |
| GGCTTTACTCA | 836.134436781766 | 0.128275014336396 |
| GTCATTTCCGA | 836.146699096101 | 0.162151988402769 |
| GCCGAAATGAC | 836.179063907338 | 0.197375858334164 |
| CTTGACAGTCA | 836.183946322914 | 0.24939365338359  |
| CAATTCGTGAC | 836.225465579908 | 0.237594971957701 |
| AGTTCCAGTCA | 836.268620429346 | 0.144805615993918 |
| TCACAGTATGA | 836.295640821627 | 0.195751086016581 |
| GGAACAATGAC | 836.314117917333 | 0.110645895473127 |
| AGGATTAGTCG | 836.31561865751  | 0.141372962105251 |
| TGACACTGAAA | 836.325871231961 | 0.278053785071574 |
| ATCGATTAGTC | 836.328651390273 | 0.248217163598589 |
| CTTTGAGTAAC | 836.349926571623 | 0.193875667047129 |
| AGGGAGAGTCA | 836.360844464327 | 0.203249753510013 |
| AGTCACGGCAA | 836.397908791234 | 0.132688037163654 |
| AAGACAATGAC | 836.407441777527 | 0.171888855929121 |
| GTCATTTGCTA | 836.409119661727 | 0.124724114890146 |
| AGCGGAGTCAG | 836.416179480706 | 0.173097190222382 |
| AAGACTAACAC | 836.436234434039 | 0.17985139593374  |
| AATGATTAATC | 836.446591956792 | 0.230207601802434 |
| TAAATGTGACA | 836.451767311239 | 0.20508514516408  |
| AAAACCCGTCA | 836.471604395765 | 0.313788414648495 |
| GTCCACAGTCA | 836.481028884498 | 0.177817828454458 |
| GCGATTGCTCA | 836.491973579403 | 0.176369102362802 |
| GGATTGACACA | 836.501208834776 | 0.212760160276947 |
| AACACGTAACA | 836.512412376389 | 0.264736796557724 |
| ATGACGTCGGC | 836.520656200028 | 0.194349310550344 |
| AGTCACGCTGG | 836.540611020763 | 0.188511773593746 |
| ATCCCCGTCAT | 836.547353143665 | 0.164476343983657 |
| CGACTCACGAA | 836.625702824497 | 0.170093835894112 |
| CTGACTATGAA | 836.706842843474 | 0.167393737786342 |
| CCCCTGTCATA | 836.708813101816 | 0.173111379771085 |
| AGCTAGTCACT | 836.709169498191 | 0.236609016889591 |
| GAAGACTCTTA | 836.710381933205 | 0.172270711853707 |
| CTAGATGACCA | 836.738142599635 | 0.192053383337353 |
| AATATGACCAG | 836.762875034142 | 0.184200880166311 |
| AAAATATGAGT | 836.778501096534 | 0.173106502963257 |
| CCGTCATCGGC | 836.792978330988 | 0.214224948007471 |
| ACGTTGCTCAT | 836.797510088502 | 0.1508381958207   |
| AATGAGTTGTC | 836.802532956939 | 0.128600811427864 |
| GTAAGAGTAAC | 836.817292476455 | 0.160381816995883 |

|             |                  |                   |
|-------------|------------------|-------------------|
| CAGTCAGATAC | 836.834759562858 | 0.329053673021194 |
| GTGTGCAGTCA | 836.834822840353 | 0.165169830168311 |
| TATTCCAGTCA | 836.857938507139 | 0.144506299677367 |
| CGTCGCGTCAC | 836.860913289696 | 0.15772690204105  |
| AGTTTTGACTC | 836.86229081488  | 0.122421594873186 |
| GCAATTAATA  | 836.869890546803 | 0.141994921902814 |
| TAAGTATTCA  | 836.896422611187 | 0.1205934689068   |
| GTCATAGGGAA | 836.901925864081 | 0.25788815176815  |
| CTCAAGTCATA | 836.910333330278 | 0.1568317305258   |
| CCCCTGCGTCA | 836.950354810587 | 0.196615317697543 |
| ACGTGTCGTC  | 836.96868859105  | 0.270613474096501 |
| TGACAATTACA | 836.989275210875 | 0.165379943088783 |
| CTGAATACTCA | 836.99039531264  | 0.239515800208634 |
| AATGCATGACA | 837.005073626416 | 0.195305474494613 |
| GGGGCGAGTCA | 837.008650784169 | 0.184382209445726 |
| CTGATGGCTCA | 837.012714076435 | 0.236038863665299 |
| CAGTGTGACCA | 837.020157037045 | 0.25384007937664  |
| TGAATTACACA | 837.033705580429 | 0.218280902345357 |
| CACGTGAGTCG | 837.05079954734  | 0.211506751122217 |
| GTATGACCGCA | 837.069538060891 | 0.155712874509568 |
| ATGACGAGCAG | 837.094391887453 | 0.20519083521563  |
| TGACTAGAAAA | 837.15127594278  | 0.266105442531373 |
| ATGAGGGTGAC | 837.190173718652 | 0.110613549405565 |
| TCATAGGATGA | 837.2434031288   | 0.247086926998613 |
| TATGACGGTCA | 837.257102258089 | 0.128186738240548 |
| ATTTCTGACTG | 837.271925049054 | 0.180961340074973 |
| GGTCATCGTGA | 837.276194464536 | 0.164820466114126 |
| TGACCAGTACA | 837.296905649691 | 0.204655682670634 |
| AACATGACATA | 837.298008712321 | 0.169484038733216 |
| ATCTCGTCACA | 837.318797797623 | 0.155455539849363 |
| ACGGACAGTCA | 837.38661739296  | 0.252778903077589 |
| CGAAAACGTCA | 837.410158272604 | 0.206272026298911 |
| ATTCAATGACG | 837.41452796642  | 0.167231842681059 |
| GGGGACTCACA | 837.470960870317 | 0.169890784457287 |
| CTCCGGAGTCA | 837.475788893517 | 0.318552023394355 |
| ACGCCGACTCA | 837.496160767237 | 0.193460436048261 |
| CGTCATTGCGA | 837.504498403358 | 0.165532560051468 |
| TAGTACTAATA | 837.551868125042 | 0.18221979489726  |
| GACTAATCGGC | 837.579215473613 | 0.192655972941377 |
| GTCGAGTAATA | 837.629641311095 | 0.183478459477498 |
| ACCCCATGACT | 837.688690771412 | 0.162903997767087 |
| GTCATTTCAAC | 837.717490418102 | 0.172274057761299 |
| ACGAACGTCAT | 837.739848524619 | 0.238621190852072 |
| GGGGCGATGAC | 837.762333873399 | 0.155327506335705 |
| CCCTCTATGAC | 837.814705673825 | 0.170161859939388 |
| ACTCCTAGTCA | 837.841575272281 | 0.137285940199769 |
| GTCACAATAA  | 837.880488597677 | 0.149989600992606 |
| AAGTCACTCCG | 837.894807729798 | 0.192848026590379 |
| TAAGATGAGTA | 837.899943362121 | 0.157814041729001 |
| AGTCTGAATCA | 837.903125965013 | 0.183760927091834 |
| CACCTGGTGAC | 837.92337759688  | 0.152161576071241 |
| AGTGTACAGAG | 837.942028113693 | 0.133554861545777 |
| TGACATACTCA | 837.943517199421 | 0.167267499889545 |
| ACTAACGTGAC | 837.957030614688 | 0.152752235542315 |

|              |                  |                    |
|--------------|------------------|--------------------|
| CGACTGTCATA  | 837.961013057789 | 0.182195733899297  |
| TCGCGCAGTCA  | 837.964842454851 | 0.129672356029019  |
| AGTCAGCGCTA  | 837.984777014063 | 0.240164362119261  |
| AATCCATGTCA  | 837.99634812382  | 0.183652415787303  |
| TGTCACCGAAA  | 838.028864406338 | 0.169590687174664  |
| CACAGGTGACA  | 838.053718310564 | 0.125621798481433  |
| ACTCATACCAT  | 838.075329426695 | 0.154572856531202  |
| CCATATGTGAC  | 838.10540090094  | 0.188450198602608  |
| CCGCTGACGTA  | 838.10578667453  | 0.242699846074331  |
| GGTCGCGTCAC  | 838.14284362101  | 0.153908052800995  |
| TACATCCGTC   | 838.144596094342 | 0.202436043126999  |
| GGTCATATAA   | 838.150268018848 | 0.278019401568914  |
| GACTATGTGAC  | 838.165663887234 | 0.179267408455977  |
| TACCCGAGTCA  | 838.243535881406 | 0.154957198444981  |
| CGTCATGCAGA  | 838.256837947191 | 0.254292435241333  |
| ACCACGGTGAC  | 838.272551144518 | 0.113473303982582  |
| CGTCATGCTCA  | 838.313957827619 | 0.173251898300473  |
| GTCACAGTACA  | 838.343096960316 | 0.234952878609188  |
| CCAGAGGTGAC  | 838.345856285157 | 0.218420291190363  |
| GTACTIONGTCA | 838.399002985235 | 0.163722235004051  |
| CGGCCTGACTC  | 838.400777223132 | 0.179440700247628  |
| GATCAAATGAC  | 838.409929115135 | 0.0996196602918215 |
| CAGAATGACCA  | 838.425052563097 | 0.179362959430631  |
| ACTATGGTCAT  | 838.4769443252   | 0.21815081011952   |
| GCTTATGTGAC  | 838.492561628184 | 0.196857628888261  |
| GTCACCCGTAA  | 838.500546986099 | 0.274952877697654  |
| AGACAATGACG  | 838.544739747038 | 0.125699362074579  |
| GTCACAAATAA  | 838.54841328498  | 0.174889236066964  |
| ATACTTCGTC   | 838.56437665545  | 0.173571247697327  |
| CCACTTCGTC   | 838.57620819328  | 0.213150772423037  |
| TGACACGTTAA  | 838.60605388572  | 0.179250866979887  |
| GTATCAATGAC  | 838.608164949495 | 0.0472955925909209 |
| AACATGACAGA  | 838.64821184751  | 0.162735491187876  |
| AACGGTGACCA  | 838.650292248534 | 0.176422672920907  |
| ACATAAGTGAC  | 838.671200192629 | 0.177014621122654  |
| ACGGTGACGTC  | 838.677129104799 | 0.18541213371398   |
| AGATTGTGACA  | 838.680951512361 | 0.164033628834181  |
| AAACTCCGTC   | 838.696857715163 | 0.264559602960386  |
| TCGCTTTGTCA  | 838.699345695366 | 0.244535639239883  |
| GTTACAGACTCA | 838.70003129556  | 0.218376266384366  |
| CAGAGTAGTCA  | 838.724251457762 | 0.155954664373401  |
| GTCACCTGACA  | 838.748582460135 | 0.228060401532707  |
| CCAAGTGACAC  | 838.757232055258 | 0.231041550524357  |
| AACAATAGTCA  | 838.757991937763 | 0.23344323782709   |
| GATATTGTGAC  | 838.764237719743 | 0.227080841681402  |
| ACTCATACACA  | 838.769810612752 | 0.124317026001617  |
| ATACATGACAA  | 838.771951294099 | 0.187481910120811  |
| CCCGTTACTCA  | 838.783786113062 | 0.21487751640221   |
| GAAACTTGTC   | 838.807513868666 | 0.151877882656865  |
| ACTAATGACAT  | 838.864815993483 | 0.118130506426677  |
| CTACGGGTGAC  | 838.890912688619 | 0.197017197734715  |
| ATTCCGTGACA  | 838.891730867262 | 0.117199679378989  |
| CAAAGCATGAC  | 838.928519786182 | 0.304467960301686  |
| GTCACCATAGA  | 838.962316506135 | 0.179111097521691  |

|              |                  |                   |
|--------------|------------------|-------------------|
| TGACAGTTACA  | 838.977475004225 | 0.208502890303915 |
| CCCGCTATGAC  | 838.991402761214 | 0.188920981901261 |
| CTAAGTGACAC  | 839.009041034824 | 0.275037693827356 |
| GTGATGTGTAA  | 839.024219426639 | 0.224671364167769 |
| ATGACTTCTTC  | 839.033581903418 | 0.168984675692319 |
| AACAGCGTCAC  | 839.040149867683 | 0.168835697406468 |
| TGACTCCTGAA  | 839.044891407466 | 0.200450370112718 |
| CGTTTGACACA  | 839.090772554419 | 0.176353140068589 |
| CCCTGGTGACA  | 839.113764688259 | 0.173882353340145 |
| CTAGTACGTC   | 839.139611424914 | 0.216592532052069 |
| AGTCAGAGATG  | 839.178239237023 | 0.164804452956593 |
| CTTCCTGACTC  | 839.186502099708 | 0.162475409353881 |
| AGTGACGTTAT  | 839.199288802921 | 0.162157725091183 |
| CTGACTCGGCA  | 839.201333650953 | 0.190085945608354 |
| GTCACCCGACA  | 839.205399823682 | 0.211866452075148 |
| GTCATGCTTAA  | 839.229907914165 | 0.185492785359999 |
| AGTCAGAATCG  | 839.242553230739 | 0.204392913255611 |
| GTCATGCTCAC  | 839.309324161895 | 0.173801582564435 |
| ATGACAACCAA  | 839.316574243285 | 0.154181438013834 |
| ACGAAGTGTC   | 839.332407607729 | 0.212973151478054 |
| GACTCACTGTA  | 839.334223680323 | 0.169236225556933 |
| CTAGGGTGACA  | 839.339718310238 | 0.237108994481356 |
| GCCATATGTGAC | 839.344973276155 | 0.26730647181126  |
| GTCATTCCAGA  | 839.360118835792 | 0.103674629048456 |
| ACTCCTGACTC  | 839.43083422856  | 0.168330515427308 |
| TACTTTACTCA  | 839.443661665615 | 0.162802888494438 |
| CGTCATTTGAG  | 839.496278427427 | 0.184825144260107 |
| GTGACGAACTA  | 839.506707461477 | 0.138739786972921 |
| GCGTCTAGTCA  | 839.53481924079  | 0.321013897504484 |
| AAAGGTGACGA  | 839.551996528956 | 0.172930696540359 |
| TGACTCGCCCA  | 839.556249200891 | 0.204043891491049 |
| GTCACAATCAA  | 839.559179026488 | 0.193401017391057 |
| ATCGATGTGAC  | 839.566924308436 | 0.158065620294258 |
| TAGGAGAGTCA  | 839.579201126776 | 0.16105722683253  |
| CACGTCAGTAA  | 839.590493831891 | 0.319514132300306 |
| CGTGCGACTCA  | 839.591468091242 | 0.243613233030661 |
| CACCGGTGACA  | 839.592738792711 | 0.164950624885144 |
| TACTGGAGTCA  | 839.599469634894 | 0.195585153761092 |
| CTACTAAGTCA  | 839.601376927871 | 0.105892909057042 |
| GTCATTTGAAA  | 839.616229115568 | 0.218165279940022 |
| TCAGCGACTCA  | 839.635614083934 | 0.131818379966871 |
| CCTTGTCATCC  | 839.685874998903 | 0.164621936105202 |
| AATATGGTGAC  | 839.688045433862 | 0.11066584809837  |
| ATCTCGGTCAT  | 839.695754072245 | 0.192493150782048 |
| GGCTAAATGAC  | 839.71513433977  | 0.161413611654874 |
| AGAGTCAAGCC  | 839.751767702219 | 0.228474396258875 |
| CACGTAATATA  | 839.753696682995 | 0.226421766408497 |
| GAATTGGTGAC  | 839.794553141923 | 0.159018467274767 |
| ATAATTACACA  | 839.812689351163 | 0.208053990470012 |
| CGGTGACAGCA  | 839.81309625009  | 0.133352994053833 |
| ACATGCAGTCA  | 839.844156208565 | 0.198021776422284 |
| ATGACAGGATA  | 839.858049674918 | 0.160517572775038 |
| GCCGTGATGAC  | 839.988929271016 | 0.235905772317251 |
| GTCACACCACA  | 839.990930732316 | 0.201828340932939 |

|             |                  |                   |
|-------------|------------------|-------------------|
| AATGGACTCAC | 839.994976336212 | 0.164142904677829 |
| TAAAATGACCA | 839.998641926538 | 0.253046868868817 |
| AATTGTGACCA | 840.003095727425 | 0.178165001928215 |
| CAGTCAGAACC | 840.025069830935 | 0.194840173875413 |
| ACGTCACCAGG | 840.042945663119 | 0.110966894440909 |
| GACGTCACTCA | 840.046752057731 | 0.141842278662949 |
| AATCTTGACTC | 840.09113551881  | 0.171272204103016 |
| GTCATGCCGAA | 840.132146842361 | 0.234279552546202 |
| ATGACAGCGCG | 840.152471527556 | 0.182619489065782 |
| CTAATTGTGAC | 840.153439753827 | 0.134188106334439 |
| TCATGCTGTCA | 840.155427036718 | 0.171004660049079 |
| ACTAATAATGA | 840.180314994793 | 0.195089819227807 |
| ATTTTGACTCG | 840.196068862304 | 0.162378768118728 |
| CTGTCATTTGA | 840.214331603065 | 0.148148713782838 |
| CTTAGGTGACA | 840.214744743721 | 0.134189935186369 |
| ACCTATATGAC | 840.232345956083 | 0.168156849865302 |
| AAGCGAGTCAG | 840.253276294899 | 0.159264552314411 |
| GTCTCTAGTCA | 840.25370317484  | 0.189081560155756 |
| ATGTCATTTCC | 840.256111989466 | 0.15908769202968  |
| ACTCATCCTTG | 840.281778969106 | 0.175452461890099 |
| CTCGTGACAAA | 840.330911344148 | 0.251772382360552 |
| CTTCTGTGACA | 840.334431101518 | 0.198203210580068 |
| GACTAATACGA | 840.347368565814 | 0.208496865713358 |
| GTGCGTCAAAA | 840.372261582987 | 0.190625707173485 |
| GTCACCCTAGA | 840.399717606734 | 0.206096070446592 |
| ATTGGTGACGA | 840.401591611357 | 0.195552093210217 |
| CGATTTGTGAC | 840.409484213341 | 0.176666083130266 |
| AAACGTGACAC | 840.443503715085 | 0.229872814762532 |
| ACCATTGTCAT | 840.470418471851 | 0.151050499863953 |
| GGGTCAATGAC | 840.478992744251 | 0.170114746183738 |
| GAGGAAATGAC | 840.485756208561 | 0.161070193181273 |
| CAGCTAATGAC | 840.62904930438  | 0.173674228464937 |
| TCCACACGTCA | 840.645864015739 | 0.191259077540498 |
| CGTCAGGTGAC | 840.647388901451 | 0.133058774930272 |
| ACGTAGGTGAC | 840.651196693914 | 0.181115920979008 |
| AGTCTATGACC | 840.661041210546 | 0.161522045853444 |
| ATACGGTCATC | 840.675646231279 | 0.166011940867029 |
| ATATATTAGTC | 840.682441890411 | 0.241857047471213 |
| AAACCTCGTCA | 840.689944827469 | 0.239632274232084 |
| TCAAATCGTCA | 840.692587088884 | 0.270465555759707 |
| CAAACAATGAC | 840.730600362234 | 0.175191032734357 |
| GTCACACGACA | 840.730827375841 | 0.230857083609136 |
| CTCAAATGAC  | 840.760322055809 | 0.110715184521179 |
| GCCACCAGTCA | 840.781024340636 | 0.239858905261126 |
| ATGTCATTAAT | 840.790493225564 | 0.173409216936771 |
| ACGTCACCAGC | 840.825944762766 | 0.114436209838264 |
| CGAATAGTGAC | 840.826430589092 | 0.265170509325627 |
| ACTGCTGACTA | 840.83535295476  | 0.159757672567283 |
| CAAACGCGTCA | 840.847271859296 | 0.191347919130502 |
| ATCGGGTCATA | 840.847635092408 | 0.158483572401835 |
| GAACAGAGTCA | 840.866915123397 | 0.193623200076707 |
| GCGTCACCTCA | 840.898732890057 | 0.242013295629874 |
| ACCCTACGTCA | 840.911830333795 | 0.181598127213329 |
| CATCTTTGTCA | 840.915591375952 | 0.123386115764203 |

|             |                  |                   |
|-------------|------------------|-------------------|
| AGTATGGTCAT | 840.928047089019 | 0.133907230369428 |
| GTGTCATGGTA | 840.943090876356 | 0.156286454162113 |
| GCTCGAATGAC | 840.948735816082 | 0.186876307465999 |
| AGTATGACCGG | 840.970893739141 | 0.157045130497888 |
| AATCTATGAGT | 840.974708894586 | 0.211588587576559 |
| CAACGTGTGAC | 840.982949155399 | 0.206334372548003 |
| CACATAGTGAC | 841.005194832654 | 0.198005541263118 |
| GGTGACCCAGA | 841.011924471573 | 0.153450099548695 |
| TCGGTCATCCA | 841.059346290598 | 0.109631444143289 |
| CGTCATGCTTA | 841.085917555704 | 0.165936986001409 |
| GCATTTGTGAC | 841.102499815313 | 0.19551420929148  |
| GTCATTAGAAC | 841.144091546046 | 0.212519078655202 |
| ATGACCTAATG | 841.148904139846 | 0.169487058956909 |
| ACTCAAATGAC | 841.173089360386 | 0.23412923870193  |
| TGACGGAGAAA | 841.186642693003 | 0.186485321097099 |
| GAGTCAGTAGA | 841.19413168758  | 0.163786574910344 |
| ATGACCTGGCA | 841.194921293766 | 0.171160377614972 |
| CATAATCGTCA | 841.214702188602 | 0.192717763461101 |
| CAGTGTAGTCA | 841.220324506754 | 0.243870367257766 |
| ACGACGTCACA | 841.257613237213 | 0.161393393296784 |
| CATGACGTTGC | 841.264176634915 | 0.186638233879672 |
| AAATCATGACG | 841.264447574714 | 0.151527800594992 |
| GTGACAGGTAA | 841.273059482165 | 0.158864568075311 |
| AGTCAGACGTA | 841.277122629149 | 0.161450668652387 |
| CATGGGTGACA | 841.298937175028 | 0.174671748690572 |
| ATGACCATAAT | 841.316042146256 | 0.148311558884837 |
| ATGACAATCAT | 841.321343992826 | 0.205347476061598 |
| AATCCAATGAC | 841.371091863281 | 0.132007290715696 |
| CGTCACCGGGA | 841.392367731898 | 0.184722044184087 |
| CGTCATTGAAG | 841.394167474441 | 0.113512479664273 |
| AATGTACGTCA | 841.437356794439 | 0.178552811814754 |
| AGTCACGAGAC | 841.460607621442 | 0.298967043163143 |
| AAAGGATGAGT | 841.469038509041 | 0.161664908877164 |
| GTCAGTACTCA | 841.498175855644 | 0.165008656813879 |
| ATGAGTGAGCA | 841.503581206004 | 0.159632848339268 |
| AGCAGGAGTCA | 841.516267991503 | 0.173944499269201 |
| GTATTTGCTCA | 841.521228897442 | 0.297935888932983 |
| GTGCGGTGACA | 841.530018143494 | 0.164125124440246 |
| GCGCTTATGAC | 841.545566861681 | 0.273960429734567 |
| TCCTTGTGTCA | 841.549757538321 | 0.135978542969478 |
| AATTTGACTGA | 841.56216958662  | 0.23570366305254  |
| AAGTCTGACGT | 841.569626112143 | 0.173600714566531 |
| CTTATGGTGAC | 841.635322084912 | 0.218830730900205 |
| ACCTTGTGTCA | 841.666652418582 | 0.224238863063576 |
| AAGTTGCTCAT | 841.673392538197 | 0.176241488641797 |
| TACGTGACCCA | 841.674187729009 | 0.165386462672857 |
| CTCAAATATGA | 841.678117126772 | 0.321727255368827 |
| AACGTACGTCA | 841.709951523665 | 0.247715321011579 |
| CAATCTGACTG | 841.850751353289 | 0.200295063850655 |
| ATCTACAGTCA | 841.86696278697  | 0.141370002018671 |
| AGTAGTCAGTC | 841.872688274072 | 0.159734257392154 |
| AATTCATGACA | 841.932707361406 | 0.213895294110718 |
| ACTGTGAGCCA | 841.968405039573 | 0.201394269453528 |
| GGAGTGACGAA | 841.975211667569 | 0.153232968833784 |

|             |                  |                    |
|-------------|------------------|--------------------|
| GCCGCGACTCA | 842.018284831741 | 0.198712296889608  |
| TCGGTCACACA | 842.025757434628 | 0.188519070271322  |
| CCGATCTGTCA | 842.033437870484 | 0.214720035402497  |
| ATGGTGTGACG | 842.062280658662 | 0.201437093473372  |
| GTGAAATGACA | 842.075017710519 | 0.161992840809458  |
| AGCCAATGACA | 842.078894578638 | 0.156694849102825  |
| ATTAGTCGGAC | 842.093243729653 | 0.167645689023111  |
| AGTGACATGGC | 842.1156612808   | 0.174153501560991  |
| AGGGTAATGAC | 842.116384028851 | 0.155040903013458  |
| CGGGTAATGAC | 842.147985548438 | 0.198180649593067  |
| ACGTCACCTCC | 842.155854695625 | 0.188944060287004  |
| CGTCATCTCAC | 842.156105408376 | 0.141786741650702  |
| GGTCGTGACAC | 842.178600995381 | 0.15546399594019   |
| CGGTATGTGAC | 842.201873279251 | 0.176380879714965  |
| TAGACGTGTCA | 842.210283137052 | 0.240658257304049  |
| TCGACAAGTCA | 842.229556142544 | 0.209163351489067  |
| ACGTCACCTCC | 842.236503880466 | 0.189128334985143  |
| AAATGATGAGT | 842.241779993018 | 0.184697221845397  |
| ACAACGTGAC  | 842.249182803465 | 0.178256689206121  |
| CGGCTAATGAC | 842.272960883968 | 0.166722393761724  |
| ACACTTGTGAC | 842.298721915735 | 0.0704656920859053 |
| CAGAGAGTGAC | 842.316175986361 | 0.112707604339828  |
| ATGACTTGCCC | 842.317880941056 | 0.193277331385365  |
| AGTCAGAAGTA | 842.371820284201 | 0.16584086519389   |
| ACTATTACGTG | 842.384847729406 | 0.183612548788928  |
| GTCATCTAGCA | 842.387038313227 | 0.201114101751927  |
| ATGAGTGAACC | 842.3961813991   | 0.15967736447628   |
| GGTCATAATCA | 842.441723810708 | 0.218392095751454  |
| GTCATCTGGGA | 842.460092602116 | 0.182889069073937  |
| AGACCGTGACT | 842.550248802168 | 0.130250723368462  |
| CCCAATATGAC | 842.576435938289 | 0.222166207075742  |
| TCTCTGACGAA | 842.604993195866 | 0.163256506941509  |
| ACTCATCACTG | 842.654412645792 | 0.148125057890567  |
| AAGGGTCAGAA | 842.672036111126 | 0.165910298084273  |
| AATTTGACACA | 842.712252869029 | 0.157609873515251  |
| AGTCACGCGCC | 842.72603930584  | 0.197892504913053  |
| ATTCCGGTGAC | 842.768345071398 | 0.154057469773241  |
| AGTTATTACTC | 842.78340163661  | 0.222849274924897  |
| ATGACAGGACA | 842.801330473812 | 0.161635131775695  |
| TGTCATGCCAA | 842.823236761494 | 0.151454665368176  |
| GTGACCAAGAA | 842.868938835092 | 0.168979758923996  |
| GTGGCCAGTCA | 842.892966180395 | 0.131471741112757  |
| ACCGTACTCAT | 842.943637171546 | 0.174486911887466  |
| GATCCAATGAC | 842.957127337201 | 0.221941901848729  |
| GAAAATGTGAC | 842.961844380024 | 0.172722088402162  |
| AGTCACTTGCC | 842.963185390465 | 0.23110741466286   |
| AATACGTAATA | 842.963643594916 | 0.156357045961659  |
| CGACTAATCGC | 842.985265423929 | 0.206398566023546  |
| ATGATGTGGTC | 843.032275867754 | 0.217691114561386  |
| CAACTCATGAC | 843.036068664607 | 0.220466200720333  |
| GACTAGTCAGC | 843.069333133348 | 0.134231386672634  |
| GCAAGTAGTCA | 843.086386858112 | 0.189725014566301  |
| GCTTACGTGAC | 843.105508370696 | 0.224701932570904  |
| GGTCATAGTTA | 843.141045162063 | 0.17750550257734   |

|             |                  |                    |
|-------------|------------------|--------------------|
| CCTCATGACAC | 843.164183776601 | 0.22679204160685   |
| TGACAGTTTAA | 843.167170853422 | 0.230828745692663  |
| AATTAGTACGA | 843.192647608031 | 0.208059418310937  |
| TACCGTAGTCA | 843.23575297511  | 0.207010287575546  |
| CGACTAATTC  | 843.261506988754 | 0.16112231211123   |
| ATGAGTGTATC | 843.281153336333 | 0.156083192322524  |
| TGACCCATGCA | 843.312766993616 | 0.151185917286508  |
| ATTAGTAAGAA | 843.324414827506 | 0.140214753512239  |
| CGTCACCAGTC | 843.33426660442  | 0.143445444269264  |
| CGGTGACGATA | 843.33913572263  | 0.15658161022429   |
| TGACGTGACCA | 843.353395662825 | 0.123768130488885  |
| GTCATTGCGAC | 843.384692031143 | 0.147381958939704  |
| ACGGCATGACA | 843.428443228084 | 0.160137842671354  |
| GGTGACGTTAA | 843.438805936638 | 0.147380337485887  |
| CGTCATGCTAA | 843.460835319803 | 0.198733759325347  |
| TAGGCCAGTCA | 843.48082970171  | 0.227747652331709  |
| GTCATTATCAA | 843.492022110085 | 0.158605665327102  |
| TGACAGAGAAA | 843.504752580991 | 0.13794379289506   |
| CTTTGCATGAC | 843.561015909389 | 0.209735854349073  |
| TAAGTACGTC  | 843.604007787632 | 0.10538990180125   |
| CGCATAAGTCA | 843.613224573667 | 0.25756896487358   |
| AAGCTTGTGAT | 843.641939803959 | 0.222008030367039  |
| AGGGTACTCAT | 843.648987794544 | 0.134872113804528  |
| ATATCTGACTG | 843.671972974212 | 0.166929481878022  |
| GTCATGCTCGA | 843.676071480187 | 0.218671701866114  |
| AGTTACTCTTA | 843.683112489662 | 0.161326955385101  |
| ATTAACTCATA | 843.692535027584 | 0.117346477831467  |
| ATGAGTTACAC | 843.70182520517  | 0.162125412961427  |
| AAATTTTGTCA | 843.708428465774 | 0.194920944254133  |
| AAGCCGAGTCA | 843.712710770625 | 0.13592631427362   |
| ACCATGACATA | 843.77721760297  | 0.140326178600671  |
| CAACGTGACAC | 843.784710644263 | 0.183396979851101  |
| ACAAATTAGTC | 843.850742538998 | 0.171921609503794  |
| ACGTGGTGACG | 843.854624549016 | 0.227676737678662  |
| CGACTGTGACG | 843.870474663269 | 0.239169336201341  |
| AAGATCTGACT | 843.878338874998 | 0.174985935042554  |
| TCATATTGTCA | 843.881859377093 | 0.267526589328376  |
| ACGTCACAGGA | 843.902135369986 | 0.140475867647858  |
| CCTTTGACTCG | 843.916043307516 | 0.149024902563698  |
| GCACCTGTGAC | 843.950605930492 | 0.215314693743278  |
| AGACTCACGCG | 843.970062991629 | 0.178146289583489  |
| CATTCCAGTCA | 843.993941698311 | 0.110307384752447  |
| GTCACAGGTCA | 844.006343281865 | 0.19034790072795   |
| GTAAGTGTCA  | 844.036260367201 | 0.14236461756643   |
| ATTCATGACGA | 844.087743925792 | 0.192242470534627  |
| ACGTCACAAAC | 844.093853618939 | 0.196984436583004  |
| ACTATGGTGAC | 844.200987222583 | 0.186770310972325  |
| TGACTGGCAAA | 844.200998386637 | 0.232698316512473  |
| CGGGTGAGCAA | 844.225105236416 | 0.155682728744609  |
| CTCCGTAGTCA | 844.24750406383  | 0.224811656453218  |
| GACTAATCCTA | 844.266626918107 | 0.114232250555548  |
| ATGACGAGAAC | 844.275522295754 | 0.198083882021966  |
| CTCATTGCTCA | 844.291400617618 | 0.0841903289948262 |
| CGTCACACGTA | 844.312122713903 | 0.125922955140731  |



|             |                  |                    |
|-------------|------------------|--------------------|
| TTACGTGGCAA | 844.313252285249 | 0.253293267204068  |
| GTCACGTAACA | 844.375089631821 | 0.127986480916392  |
| AAATAGTGTCA | 844.417194373736 | 0.208664667478472  |
| ACGGCGAGTCA | 844.433660088397 | 0.182690895812119  |
| AGATTTGCTCA | 844.471591248896 | 0.180559580298257  |
| GTGACAGTATA | 844.473357903472 | 0.152999948309292  |
| AATGACGTCTC | 844.480458131278 | 0.172881145051304  |
| GATTGCATCAC | 844.493704974245 | 0.167723114186016  |
| AAGATGTCATT | 844.51129443859  | 0.088580946650506  |
| ATTGAGTCGTC | 844.519594739007 | 0.183165922849232  |
| ACCGCGGTGAC | 844.522592946994 | 0.227716108668383  |
| CATAACGTCAC | 844.530176686707 | 0.18604720584257   |
| ATGTGTCGTC  | 844.5448944027   | 0.183500270119202  |
| GCCGAGATGAC | 844.548875466445 | 0.148618695333958  |
| CGGCGAGTCAG | 844.558053377325 | 0.162258788764375  |
| GATGACCGAGA | 844.580470629012 | 0.177645796421015  |
| GTCATGGCTCA | 844.583594370666 | 0.0736584913011513 |
| CGTCATTAATA | 844.607951161546 | 0.179554060305506  |
| AACCGATGAGT | 844.620795489106 | 0.279773968524482  |
| GTCATGTTTAA | 844.635759649734 | 0.15137276465567   |
| GTCATTA AAC | 844.65840227728  | 0.176681285932782  |
| CATTAGTGACA | 844.667783041521 | 0.312731566438728  |
| ATATGTCAGAT | 844.672497407141 | 0.190234130524199  |
| TCGGATGACCA | 844.683900240173 | 0.124854060825267  |
| ACGTGTGACCA | 844.688291895302 | 0.210937936433423  |
| ACTCATAACTA | 844.693452681076 | 0.149043235577443  |
| ATGACGCTCAA | 844.742059819113 | 0.19461305904141   |
| AGGTGAGCCAC | 844.752516905748 | 0.18045711987108   |
| CCTTTAAGTCA | 844.768347881891 | 0.181148027854129  |
| ATGTTGGTGAC | 844.768904617153 | 0.242331544904243  |
| AGTCACTTGCG | 844.783125818914 | 0.134239539318734  |
| ATGACGACTTA | 844.798846995532 | 0.0606618994157353 |
| ATGAGCCAACG | 844.831579682851 | 0.168560608335226  |
| AGCGGTGACAA | 844.839915584441 | 0.174312281323841  |
| CCACTACGTCA | 844.923869037682 | 0.164299291253342  |
| AAGCACGTCAC | 844.933779086446 | 0.12538054171493   |
| GTCACCTTTAA | 844.936219785828 | 0.213570576471307  |
| GACTCACTACA | 844.958755476587 | 0.103836902136825  |
| CTAGCAATGAC | 844.966761086873 | 0.22913474037506   |
| CGCAGGAGTCA | 844.984531174298 | 0.166814377243978  |
| CGTCTTTGTCA | 845.002399243135 | 0.158798106086457  |
| AATAATGACAG | 845.010646460215 | 0.174831231665457  |
| AATTAGTACTA | 845.075625884689 | 0.210907935868896  |
| CACGTGACGAA | 845.127043179182 | 0.161362012932617  |
| CGAGTCAGGTA | 845.236020318558 | 0.0961341562386025 |
| GTACACATCAC | 845.252299707118 | 0.178418883492119  |
| ACGTCACAAAG | 845.252854667319 | 0.278000605381927  |
| ATGACACTCGG | 845.274404724825 | 0.159447867645916  |
| AAGTCACCTCG | 845.292687675219 | 0.196970723455677  |
| AACGCAATGAC | 845.303368168188 | 0.202142579029637  |
| CTCGCATGACA | 845.315719652199 | 0.102427317055714  |
| CGTCACACCAG | 845.318540919791 | 0.142750918956857  |
| AGTCTGACGAA | 845.338460117145 | 0.223932827856139  |
| CGCACAATGAC | 845.348275654249 | 0.226315450776653  |

|              |                  |                    |
|--------------|------------------|--------------------|
| ATGTCATGCAG  | 845.349920643372 | 0.272671198388266  |
| CATGAAATGAC  | 845.40621123538  | 0.224966676916535  |
| ATGAGTAGGTA  | 845.432674831764 | 0.160353403405381  |
| ACGTCACCTGC  | 845.433318170682 | 0.124541215047577  |
| CGTTGAGTAAC  | 845.442688835802 | 0.105004829390898  |
| CATGATGTAAC  | 845.446623471384 | 0.190744032445502  |
| AGTCAGACTAC  | 845.455422145623 | 0.179647895355764  |
| GACTCCGTCAC  | 845.478195030368 | 0.112004738914158  |
| AATGACCACGT  | 845.482465475179 | 0.164126712170865  |
| AGTCAGACCAT  | 845.507461568534 | 0.166673725922803  |
| ACTCATACCGG  | 845.537574922819 | 0.152808540370254  |
| GTCACAGTATA  | 845.553848430995 | 0.246869686236885  |
| GAAGATGACCC  | 845.562176633706 | 0.178919888061595  |
| CTCTGGGTGAC  | 845.564995128962 | 0.291776388428409  |
| ACTCATCGGGA  | 845.592130081836 | 0.185521752539905  |
| CACGCATGACG  | 845.602985220039 | 0.250926332467191  |
| CGGCTCTGTCA  | 845.611132976474 | 0.196334063795959  |
| AAATGTGACAA  | 845.622555810955 | 0.179351670063117  |
| GACTCATGGAA  | 845.630364606307 | 0.117480459738887  |
| GCTACGCGTCA  | 845.658995117597 | 0.17584603449745   |
| GTCACCAACAA  | 845.671861102735 | 0.25805196380822   |
| AACAGTCAACT  | 845.709975646959 | 0.179677208202251  |
| AAGACGTACACA | 845.722172397571 | 0.1470976798245    |
| AGTCACGGCCG  | 845.729256068989 | 0.151882562289084  |
| CCATTGTGACA  | 845.74004649481  | 0.231608001577161  |
| TGACCCATCCA  | 845.754650005724 | 0.182377729927267  |
| CCCATCTGTCA  | 845.779893749957 | 0.162104522148013  |
| GCCACGTAACC  | 845.844996934242 | 0.0973403699486908 |
| GCTAGAATGAC  | 845.891990764531 | 0.154043441130814  |
| AAACATGTGAC  | 845.976342950727 | 0.217068768696479  |
| CTTGACGTCA   | 845.977003469336 | 0.131995733416341  |
| GGCCACATCAC  | 845.999774681018 | 0.193173060212795  |
| AAGATTCATCA  | 846.02476726282  | 0.151513989904685  |
| AAGATTCATAG  | 846.035375793114 | 0.170834463798653  |
| ACGTCACAGCA  | 846.045734668013 | 0.165316059987449  |
| ACTCTCGTCAT  | 846.08832739937  | 0.18444853013346   |
| CAGCAATGACG  | 846.103959297342 | 0.226646098151047  |
| ATCTCGACTCA  | 846.123011522398 | 0.148276661637238  |
| ACGGATGACCC  | 846.136308425418 | 0.2344859424226    |
| CCTCGAATGAC  | 846.174180969592 | 0.206174517538075  |
| GGCCTGCGTCA  | 846.200191040053 | 0.207327068103208  |
| CCCGTGTGACA  | 846.203365180765 | 0.13865676237242   |
| GTCACATACAC  | 846.211147918613 | 0.181898769415963  |
| CTAGTGACGAA  | 846.214726409804 | 0.183995694403306  |
| ACTCGGGTAC   | 846.232505909217 | 0.212718772299619  |
| GCCAGATGACA  | 846.236550432605 | 0.209436223683803  |
| GTGAGTCCACA  | 846.262336793012 | 0.128961826052514  |
| GGACCGGTGAC  | 846.290001779426 | 0.136286316188246  |
| CTGTGACGCCA  | 846.296659718712 | 0.146828375998449  |
| CTAACATGACA  | 846.389937465085 | 0.181468887466715  |
| AGAACCTGTCA  | 846.395275499211 | 0.156588116140147  |
| CTGCTAAGTCA  | 846.409831967752 | 0.199537720855139  |
| ATGACATCTTA  | 846.411255945646 | 0.160484048593237  |
| CGAGTGGTGAC  | 846.413548645106 | 0.17037713694163   |

|              |                  |                    |
|--------------|------------------|--------------------|
| GTCATATGAGA  | 846.430824168468 | 0.200803927701704  |
| ACAGACATGAC  | 846.461082399792 | 0.102554905690269  |
| GTGACGTTATA  | 846.47431789402  | 0.225529781331305  |
| CTTAGCATGAC  | 846.47669525533  | 0.183934994528312  |
| TGATGACGGCA  | 846.507331932861 | 0.179807252092002  |
| TAAC TGAGTAA | 846.53688467525  | 0.216384325121424  |
| TTCGTGACAAA  | 846.540610226414 | 0.178659419891767  |
| GTCATTCCCAA  | 846.613662016066 | 0.2170785956893    |
| AAACGGGTGAC  | 846.613724205039 | 0.206305497144207  |
| ATTTGCTCACG  | 846.618393372956 | 0.159635464023983  |
| CGTCACGTCAG  | 846.675177730326 | 0.1831416032302    |
| AATGACATCGT  | 846.703910046777 | 0.196384583174751  |
| GGTCATCTTA   | 846.756188842565 | 0.1427910661935    |
| CTGAAGGTGAC  | 846.80810573448  | 0.139413234035803  |
| GTACCTGTGAC  | 846.82375118653  | 0.178771574217529  |
| GCCGTGTACCC  | 846.908842300968 | 0.188129468089619  |
| GCAGAAATGAC  | 846.912424987298 | 0.180654500312712  |
| ACTCTGAGTCT  | 846.91981084596  | 0.220112022868468  |
| CTAAAGGTGAC  | 846.933191853072 | 0.0986297925391238 |
| CTCGTGACCCA  | 846.946149693984 | 0.11916381632479   |
| AGTCAGAATAG  | 846.99307258347  | 0.15008080985243   |
| AGTCACGGTTCG | 847.010403263287 | 0.181421323487576  |
| AAGTTGAGTAA  | 847.024218999408 | 0.171907222151503  |
| GTATCGGTGAC  | 847.032721246464 | 0.164024424897714  |
| GGTAGTGACAC  | 847.055148599062 | 0.206420398298876  |
| TAGCGGTGACA  | 847.080689659028 | 0.203119720128243  |
| ACACCGCGTCA  | 847.0931981094   | 0.165637650276131  |
| CTCATCGGTGA  | 847.094318333127 | 0.166009383722238  |
| CTGACGCAGTA  | 847.096036118488 | 0.108214119224462  |
| ATGACGGCAAC  | 847.131263635562 | 0.18786665127694   |
| AGAGTCAGGCT  | 847.142282569548 | 0.156412174159618  |
| GTCATTCCAAA  | 847.164456479276 | 0.168730900047461  |
| CGCAGCAGTCA  | 847.218544405739 | 0.106468062463061  |
| AGTTGACGTCA  | 847.220481966872 | 0.225632241423513  |
| GTCGTCACCGA  | 847.22979957225  | 0.110402071546344  |
| GGTCATCGCAA  | 847.264255073647 | 0.242368161701879  |
| CTATGGGTGAC  | 847.336717302896 | 0.199493907931477  |
| AGACTCAGAAT  | 847.367485799311 | 0.146217046570322  |
| ATGTCTGTGAC  | 847.386470354074 | 0.172264474504342  |
| AGACTCTGACT  | 847.43933105822  | 0.102822250344748  |
| CACGGTGACAA  | 847.455329877464 | 0.193276192852031  |
| AGCCTTATGAC  | 847.464600357092 | 0.169077512446379  |
| CCAGCAATGAC  | 847.474547847918 | 0.223528665170999  |
| CTATAAATGAC  | 847.519081019165 | 0.143433839943929  |
| TCTTAGTGTCA  | 847.526717274994 | 0.181585851496211  |
| ATATTTGTGAC  | 847.529212529115 | 0.203426895230772  |
| AACGGTGTGAC  | 847.558419753428 | 0.215722668913259  |
| TCCTTTACTCA  | 847.568162422997 | 0.166310975129305  |
| CAGCTACGTCA  | 847.585109147506 | 0.210903013184295  |
| TGACTCCGCCA  | 847.658533173685 | 0.143043462157002  |
| GACTAATTGAC  | 847.685271060793 | 0.165848266354098  |
| GTCACCATCTA  | 847.708023406426 | 0.14710606519749   |
| ATTTAATGACA  | 847.741643973889 | 0.168799779821252  |
| ATGACATTTAAA | 847.75079069236  | 0.180197913632532  |

|               |                  |                   |
|---------------|------------------|-------------------|
| GCGCGGAGTCA   | 847.758034710718 | 0.149296062040868 |
| CCTGGTGACGC   | 847.771747033697 | 0.15489011819099  |
| CCGCAGACTCA   | 847.7849140453   | 0.132324598850281 |
| GGTCTGAATCA   | 847.81553151377  | 0.218542843915964 |
| CAAACATGACA   | 847.840466453516 | 0.155524323794453 |
| GTCACCGCGTA   | 847.85963890217  | 0.189376035766049 |
| CATGACGATGA   | 847.878646108038 | 0.211784123681129 |
| ACTAATGAGTA   | 847.896050400839 | 0.13548301957493  |
| CCAACGTGTCA   | 847.926879733039 | 0.189647168803765 |
| GAGAATGACCA   | 847.928229222453 | 0.15854563846524  |
| ATGACGGTAAC   | 847.973245888041 | 0.180867300405526 |
| CGTGACACTGA   | 848.010111150524 | 0.16046159045506  |
| ATGACATTGCA   | 848.010827698551 | 0.152976825994893 |
| AGTCAGCTGAC   | 848.019977523995 | 0.227347075828514 |
| ATGAGTATGAA   | 848.035289896518 | 0.157704248414642 |
| ATGACGAGCTC   | 848.072724275415 | 0.112005222710722 |
| AGATATGTGAC   | 848.078420091568 | 0.223241095452398 |
| AGCGTCATGCC   | 848.180175734523 | 0.199273164638739 |
| GTGACACTGTA   | 848.228718642109 | 0.169739525750851 |
| CACTGGTGACA   | 848.243099305148 | 0.190746401218547 |
| ATGCGGTGACG   | 848.276247521689 | 0.193872592196502 |
| ACATTGACACA   | 848.283660363422 | 0.168563884637184 |
| GACCACGTAAAC  | 848.323743299989 | 0.160366524249451 |
| GCGTCACCAACC  | 848.359498937272 | 0.126117007587792 |
| AATAATGACCA   | 848.360006878757 | 0.200169951775899 |
| CGGCTGTGATA   | 848.365485146603 | 0.165997380223448 |
| ATGCATGACCA   | 848.371201237894 | 0.150163278890785 |
| TCATGAGCAAAA  | 848.377178230923 | 0.258830086490766 |
| GTGCGGAGTCA   | 848.401075084714 | 0.140491224446287 |
| ATCAAGTGACA   | 848.401900185012 | 0.107447725527287 |
| AGTCACGACGA   | 848.403239152227 | 0.233040160423617 |
| TAACCGTGTCA   | 848.406265751569 | 0.12736746585363  |
| ACCTGGGTGAC   | 848.467156554739 | 0.277839674053817 |
| CATCTTGGTCA   | 848.489209733851 | 0.154417662829129 |
| TCCATTTGTCA   | 848.544879436405 | 0.166791281008108 |
| TGTCACTGACA   | 848.554597891876 | 0.307303897003563 |
| GTCATCTCCAC   | 848.596452319337 | 0.108111118324342 |
| ATCCCGTCAATC  | 848.598294792185 | 0.150096465629542 |
| TACGTGTGAGA   | 848.6081803343   | 0.128507210647926 |
| AATGAGTGAGT   | 848.622807124681 | 0.15655314734317  |
| GTCATTCAGGA   | 848.629841472316 | 0.16010948491727  |
| AGTGATGTGAC   | 848.634278124056 | 0.157996980180233 |
| TGCTAATGACA   | 848.636015129859 | 0.214823863939997 |
| CTAGTGACAAA   | 848.638200926165 | 0.106661216979506 |
| AACCTGTGACG   | 848.641779280738 | 0.142822240513373 |
| AAACTGGTGTGAC | 848.648991877602 | 0.17218988689737  |
| GATATACTCAC   | 848.664823640568 | 0.17202927659071  |
| AGAGTAATTCG   | 848.665302156943 | 0.191108965549609 |
| CGTGGTAGTCA   | 848.684663446707 | 0.204718380383965 |
| AACCGAATGAC   | 848.697666813757 | 0.291073879245834 |
| CGCCATGTCAC   | 848.722775020554 | 0.131295904541879 |
| GATTATGAGTA   | 848.725368768139 | 0.156658871531866 |
| GGCATTGTCAC   | 848.745789108382 | 0.140947528606372 |
| GTCATTCAAAC   | 848.795919348526 | 0.223168122832072 |

|             |                  |                   |
|-------------|------------------|-------------------|
| TGACTCCCGAA | 848.820153455053 | 0.18993309602993  |
| AGTACTAATAC | 848.846743926537 | 0.170726229552534 |
| GAAGCAATGAC | 848.883029276972 | 0.249541228812399 |
| AGTGACGTTAC | 848.888245849596 | 0.197188557000918 |
| CGTGGCGTCAC | 848.893503012483 | 0.109457365379101 |
| TACATGTGACA | 848.894632534338 | 0.251507320216266 |
| AGCGCTGTCAT | 848.910859024362 | 0.226029656165849 |
| CGATTGGTGAC | 848.94489675671  | 0.1994761465464   |
| CGTCACCATGA | 848.947525407112 | 0.159049824821069 |
| CATCTAATGAC | 848.958551245576 | 0.194927417062131 |
| AATGAGTAGGC | 848.962303234682 | 0.153160612648854 |
| CATTCATGACA | 848.980862410997 | 0.177828137869829 |
| TATTGTGACGA | 849.04096920855  | 0.209467984166821 |
| AAATGACCACT | 849.045287989032 | 0.184498020723247 |
| ACTCATCGCGA | 849.051725911779 | 0.207568383961239 |
| GAGGTGAATCA | 849.059052017835 | 0.172557384421045 |
| GATGTGGTGAC | 849.082364458823 | 0.145960294096205 |
| ATGACATGCGC | 849.124859802205 | 0.153684783230648 |
| AAGCAGAGTCA | 849.135417158412 | 0.160243643857122 |
| TAATCGTGACA | 849.147954581295 | 0.166354767939017 |
| GTGACCCAACA | 849.201163855886 | 0.179838227142508 |
| CGTCACCGGAA | 849.207989596686 | 0.223091926018524 |
| CTGCATGACGC | 849.213645434    | 0.150465968662489 |
| ATGTATGACCG | 849.214099325965 | 0.164066803748391 |
| CTGTATTAGTC | 849.231654488706 | 0.189901960760715 |
| TCACAGACTCA | 849.26302573181  | 0.152936801885971 |
| GCGTCAGACAC | 849.285219091669 | 0.236680702522758 |
| GTCATGATCAC | 849.305114794925 | 0.23903931522798  |
| CGTGCCAGTCA | 849.32388193758  | 0.103819127943437 |
| TCCACGACTCA | 849.327693351656 | 0.151517403642511 |
| ACAGTCTGACT | 849.347765201783 | 0.157481384817357 |
| AACCGTGACAC | 849.379081102752 | 0.15759910342476  |
| CACCGGTGACG | 849.391229071217 | 0.198017613241532 |
| CCGCGTCACTA | 849.392398299882 | 0.165035225499183 |
| AGTGACGCGAC | 849.409977512522 | 0.16439902999269  |
| AACTTGGTGAC | 849.425395614281 | 0.149517781077803 |
| GTCATTCCCA  | 849.486101151802 | 0.174666508166386 |
| CCGCGTGACAC | 849.494596126658 | 0.240470298766505 |
| ACAGTTGTGAC | 849.50633461912  | 0.224230311670518 |
| GTCACACAAGA | 849.517191180586 | 0.171356147339068 |
| CTGACTCGCTC | 849.523610342211 | 0.18548244760321  |
| AAGGTGACCCA | 849.52371321642  | 0.122806993894996 |
| CGTAGGGTGAC | 849.533992099424 | 0.230216243140525 |
| ATGTCATTTGG | 849.554424106112 | 0.163690667681175 |
| GATGTGTAACC | 849.562331495024 | 0.121679433172518 |
| GTCACGGCTGA | 849.566662362196 | 0.308215699789013 |
| GCGTCACCTAA | 849.594180014681 | 0.237920114278684 |
| GGTGATGACCA | 849.596916034945 | 0.199470769442185 |
| AAGTCCAGTCA | 849.615301233238 | 0.133336218228876 |
| AATTAGTGACA | 849.659332031071 | 0.185697622568953 |
| CTACATGACAC | 849.66620369024  | 0.100392494374192 |
| AAGCTGTGTCA | 849.687381664923 | 0.115427409797411 |
| ATCGTATGACC | 849.717209027896 | 0.142592845702516 |
| AGAGTAATAAC | 849.743992606842 | 0.152305152373863 |

|              |                  |                    |
|--------------|------------------|--------------------|
| ACTCATCTGAC  | 849.744414325875 | 0.122484348066133  |
| ATTGCGCTCAC  | 849.747749411638 | 0.23908638922092   |
| GGACTGACACA  | 849.7871579812   | 0.205579594686704  |
| AATCTACTCAT  | 849.80226650235  | 0.163233810631026  |
| ATGACACCCGA  | 849.808754174516 | 0.12804429401794   |
| ATGACATCGGC  | 849.887194281316 | 0.201197486682042  |
| GTCACCCTCGA  | 849.909778943035 | 0.188163214215058  |
| TAATAACGTCA  | 849.910391593666 | 0.210418274076463  |
| CGTCATGGTGA  | 849.914302828406 | 0.178779230092292  |
| ATACGTGTCAG  | 849.925459774233 | 0.184608689154886  |
| AAGTGTCAGAT  | 849.947030668398 | 0.148951188152801  |
| CCGTATGTGAC  | 849.950757794325 | 0.325751136353064  |
| CGTCATTAAGC  | 849.961029278187 | 0.283228200329167  |
| AGACTAATATA  | 849.961414305554 | 0.0719340163822146 |
| AAGTGTAGTCA  | 849.981368627609 | 0.0595879509471341 |
| CTGACAGTGAC  | 849.999357752385 | 0.115477135996978  |
| GAGATCCGTC   | 850.014030726525 | 0.157662825319553  |
| GGTCATCTGAC  | 850.016557993806 | 0.187620103120403  |
| CTCTGACGAAA  | 850.021858114636 | 0.175029017831446  |
| AACCATGACGC  | 850.029995072441 | 0.149509155304029  |
| TCCCCGAGTCA  | 850.053982850749 | 0.18705412173972   |
| AACGTGTGACG  | 850.072998277286 | 0.115769073972206  |
| CGCGTCACTAA  | 850.073728571666 | 0.108961538551928  |
| ATACCTGTGAC  | 850.074566193834 | 0.267651806259232  |
| ATTGAGGTGAC  | 850.108012996016 | 0.158771452293581  |
| GGATATGACCA  | 850.15504265849  | 0.154882930471922  |
| ACTCATACTCC  | 850.157590617954 | 0.15315731971526   |
| GATCTCGTCAC  | 850.159174442802 | 0.175448789331906  |
| GTATGATGTAA  | 850.164726430866 | 0.16126765309639   |
| GGAATCATGAC  | 850.166340043065 | 0.135234603634487  |
| ACATGTGACAT  | 850.175265013341 | 0.187024491463233  |
| TATTCATGACA  | 850.243414278531 | 0.194667206854523  |
| ATGACAGCTCC  | 850.262490884326 | 0.109780192935923  |
| AGACAAATGAC  | 850.263429159689 | 0.154661511048263  |
| ATATTGTGACA  | 850.265860040518 | 0.191733631314788  |
| GTCACCACTTA  | 850.279035748403 | 0.159342926516272  |
| CGGCTGAGTAA  | 850.305062423964 | 0.218752817356259  |
| GTCACGTGTGA  | 850.312071462005 | 0.18482886336543   |
| CCTCCTATGAC  | 850.315009484049 | 0.151039591504982  |
| ATTGCGTAACA  | 850.357393388451 | 0.148259817833834  |
| ACGTCACCTAAG | 850.405109086775 | 0.178242887757543  |
| CAACCGCTCA   | 850.410663843893 | 0.168578734708327  |
| GTCACTATTTA  | 850.425353959811 | 0.132904024496877  |
| AGATTACGTAT  | 850.449912889828 | 0.174520706733389  |
| GATGTACGTCA  | 850.480765749    | 0.224228109502212  |
| ATTGCGCTGCA  | 850.515668308522 | 0.198832948832583  |
| CGAGTCAGGCG  | 850.517180100044 | 0.215287250642438  |
| ATTTTAAATGAC | 850.520739212939 | 0.194883929483923  |
| TAAAAGTCATT  | 850.545797308364 | 0.16067243831565   |
| ATTACAAGTCA  | 850.561633069111 | 0.186387177102547  |
| ACCTTTATGAC  | 850.566790819692 | 0.100677430561339  |
| CGCGGGATGAC  | 850.603077562177 | 0.163047302125935  |
| ATGACGACTAG  | 850.608680775357 | 0.117866078491236  |
| TGATGTGGCCA  | 850.613082514704 | 0.184164619357151  |

|              |                  |                    |
|--------------|------------------|--------------------|
| CAGGCGTCATC  | 850.636587238054 | 0.172282419037159  |
| ATGATCATGAC  | 850.671304781063 | 0.193580689097433  |
| GAAACTGGTCA  | 850.696806022007 | 0.148018510264982  |
| GGAATATGTCA  | 850.707882643666 | 0.0949087011472433 |
| ATGTCTGTAC   | 850.714633565766 | 0.082043877451044  |
| ATGCTAATGAC  | 850.715541149721 | 0.214774432602371  |
| AATGAATAATA  | 850.717688734107 | 0.167247769164066  |
| TCGCGTAGTCA  | 850.735149937977 | 0.25121959638848   |
| CCAGTGACGCG  | 850.7742479326   | 0.139429599456085  |
| GCACTGTGACA  | 850.828842257115 | 0.280402053363822  |
| ACGCAAGTCAT  | 850.83515644105  | 0.217260563284004  |
| GACAATGTGAC  | 850.921902531081 | 0.192611893215315  |
| GATTGGGTGAC  | 850.970797450622 | 0.187469953450187  |
| ACGTGGCTCAC  | 850.999411177387 | 0.228340806499829  |
| GTCACACGTGA  | 851.031764792681 | 0.115761195423068  |
| ATGACAATAGG  | 851.032249493    | 0.179938279335547  |
| GAGCAGAGTCA  | 851.046069075295 | 0.179797545272488  |
| GTCACATAGCA  | 851.055402874386 | 0.176342590401243  |
| AGTCAGAGTGA  | 851.079220792844 | 0.138994293140274  |
| ACATCATGACA  | 851.144382832362 | 0.154305192107286  |
| ATCATAGTCAG  | 851.199196748646 | 0.151381551856997  |
| TGACACGGTAA  | 851.2120801102   | 0.184583908030613  |
| ACGCCGTGACT  | 851.24260341387  | 0.216907317778216  |
| TGACGGATGCA  | 851.263818212076 | 0.171065053536199  |
| AATTGGTGACG  | 851.284883892672 | 0.175932504262925  |
| CTACTGAGTAA  | 851.285174540169 | 0.120393214691037  |
| GGGCAGAGTCA  | 851.301916869797 | 0.146894614648883  |
| TGACATATCCA  | 851.312065301726 | 0.208604116941554  |
| GTCACCGACGA  | 851.318753739265 | 0.196750425956456  |
| ATGACATGCCC  | 851.338259038552 | 0.169054042084467  |
| AATTGTGACAG  | 851.340869684279 | 0.196911531518096  |
| GAATTATGTCA  | 851.346870394395 | 0.189561901429862  |
| ATAAACTGTCA  | 851.356994979233 | 0.243880617634996  |
| ATAGTACTCAC  | 851.375089922239 | 0.125050986756907  |
| TGGATGAGCCA  | 851.398942369798 | 0.157566323340327  |
| CCAAGTCACCA  | 851.416552633809 | 0.150133840760348  |
| CAGTCAGAAAC  | 851.430725348691 | 0.19178742068237   |
| ATTTCCAGTCA  | 851.431393653403 | 0.15339667052271   |
| GTCTGCAGTCA  | 851.450849706522 | 0.181984366558329  |
| TCACATGACGA  | 851.473518511132 | 0.224263043830949  |
| ACAACATGTCA  | 851.493784077269 | 0.219945138937286  |
| CTACTGTGACA  | 851.522934612667 | 0.0919362398752173 |
| TATTGTCATGA  | 851.536569622809 | 0.204862497887416  |
| GGTGACAACCTA | 851.542837156384 | 0.155339781064392  |
| GGAACGGTGAC  | 851.580629985158 | 0.149619908026969  |
| AGTCACGAGTG  | 851.585652679705 | 0.134054123051832  |
| GGGTAGATGAC  | 851.602056055593 | 0.141801304988676  |
| TGACTCTCTCA  | 851.613155709323 | 0.224339944070181  |
| AGAGTCAAGAG  | 851.619487042841 | 0.166451749323183  |
| ACAGTGACAAA  | 851.637655569812 | 0.149973566716299  |
| ATGATTCGAAA  | 851.644919616398 | 0.192338214087897  |
| GTCATTACCGA  | 851.657628757996 | 0.245296189194884  |
| ACTCATGAGTA  | 851.696123972551 | 0.143723933891021  |
| CGTAGTGACAC  | 851.780324704518 | 0.142571650130665  |

|             |                  |                    |
|-------------|------------------|--------------------|
| AAGTGTCAGCA | 851.801308161126 | 0.147030007089629  |
| AGCTAGAGTCA | 851.808493691731 | 0.150614011320314  |
| CAGATAATGAC | 851.850656535445 | 0.198651855252804  |
| CGTCATTATCA | 851.888381513356 | 0.222674886668266  |
| TGAGTCGTGAA | 851.932264959584 | 0.184726200826844  |
| GAAACTGTGAC | 851.965750063594 | 0.132644365902051  |
| ACACCGGTGAC | 851.969593416384 | 0.156616200939223  |
| GTCACTCAAAA | 852.00419891095  | 0.194855611849668  |
| AACTTGTCAGA | 852.018311730988 | 0.21951926424114   |
| ACTCATACAGG | 852.02691336145  | 0.164818282106224  |
| GTCACCAATAA | 852.032099747646 | 0.165188830323317  |
| CGGATTACTAA | 852.043239449663 | 0.251109991958179  |
| AGTCAGCGTTA | 852.082404749599 | 0.184757536479895  |
| GCGTGCAGTCA | 852.095106297147 | 0.217953960158828  |
| TCACCAAGTCA | 852.124076229427 | 0.158918473230736  |
| GATGACTTGAA | 852.188498903059 | 0.17761874961725   |
| TGCAGTCAGCA | 852.230014983899 | 0.196883122458134  |
| AGGATTACTAA | 852.279476511962 | 0.20619148140594   |
| CGTCTTATGAC | 852.305808151383 | 0.187436099603432  |
| ACTCATACACG | 852.310519631699 | 0.152382420311498  |
| TAATCGTCAGA | 852.319957952926 | 0.205126690278401  |
| TGAACGTGTCA | 852.326590342598 | 0.177812177263687  |
| TACCGTCATAA | 852.350756156751 | 0.180305858257787  |
| CGGAATGACCA | 852.38985559919  | 0.208117065124121  |
| AGATTACGCAC | 852.41356728779  | 0.196161007314663  |
| GAGGGTGTGAC | 852.434394067906 | 0.120199356198524  |
| TACGGGTGATA | 852.447996483823 | 0.156010979786823  |
| GTCACACGCAC | 852.460158823158 | 0.0916771956433551 |
| ACTCATGACAG | 852.472150885732 | 0.160307968740542  |
| TCGCTGAGTAA | 852.490927798178 | 0.0996110011652033 |
| AATGACATCGA | 852.4982174866   | 0.121785980397401  |
| AATAATGAGTA | 852.500984994137 | 0.166947234314488  |
| ACTAATGGTCA | 852.511964512326 | 0.19144977378366   |
| CGCAGACTCAC | 852.529281142478 | 0.152900391208753  |
| AATTCGTGACA | 852.56510472253  | 0.21253071599065   |
| AGCTTGCGTCA | 852.594475368441 | 0.168640181547815  |
| CGTCATGTGTA | 852.598571489174 | 0.159005448176027  |
| GTCATGTTTGA | 852.627574681808 | 0.269169173092054  |
| CGCTAGACTCA | 852.639267434379 | 0.197272839902088  |
| AGCCTGTGACG | 852.665841157504 | 0.141232396640651  |
| GCGCCAGTCA  | 852.680574250341 | 0.167363094951472  |
| AGAGATGTGAC | 852.684723002796 | 0.18198576132405   |
| ACCATGTGACA | 852.68666645541  | 0.162857275688242  |
| AATTAGTCGCC | 852.715047645671 | 0.155662479889797  |
| GACTAATACAA | 852.735497349485 | 0.182426120215338  |
| CATTGGTGTCA | 852.745478412273 | 0.151642448452315  |
| GGGGTGAATCA | 852.77690950855  | 0.109046520999337  |
| GATCTGAATCA | 852.796721572779 | 0.249187971072478  |
| ATGAGCCAGAG | 852.81613843917  | 0.120352310383033  |
| ATAGTGACGCG | 852.820298935266 | 0.152769547000257  |
| ACTTGTCACCA | 852.830917809351 | 0.113632862924255  |
| CATTATGACCG | 852.84117993783  | 0.179836529522242  |
| TCAAATGACAA | 852.920048200058 | 0.276570049824186  |
| AATCTGTGACA | 852.979129549163 | 0.12425089560861   |



|             |                  |                    |
|-------------|------------------|--------------------|
| AGATTTTGTCA | 852.992421948529 | 0.149319562757926  |
| ACTCATATATG | 852.999749951682 | 0.182692486016723  |
| GTCATGGCCAA | 853.018125628069 | 0.22748637544523   |
| GGGTCATAACC | 853.040844010523 | 0.194413937954803  |
| GTGACGTGCTA | 853.073321988675 | 0.168804620550699  |
| ACCGGTCATAC | 853.086700800857 | 0.196484188415906  |
| ACCAAGGTGAC | 853.127989899182 | 0.231345031797169  |
| GAGTCAGGTGC | 853.201527135198 | 0.212256279462265  |
| AATTGTACTCA | 853.20538972677  | 0.172357626029692  |
| GAGTCAAAACA | 853.216885218398 | 0.189578144659861  |
| AGCCGGTGACG | 853.220101373696 | 0.150858927946896  |
| ATCTAATGACA | 853.259157253943 | 0.155753622270027  |
| CAAGTGAATCA | 853.261030893228 | 0.194691210997472  |
| ACATGACGATG | 853.284689588529 | 0.164496353300943  |
| ACCGGTGACCA | 853.304683257346 | 0.181950201526417  |
| AAGTAAGTCAC | 853.358850147347 | 0.131330818811914  |
| CCCCTGACACA | 853.37739272586  | 0.160167290541731  |
| GTTTGACGTCA | 853.392738752117 | 0.131972331607173  |
| ACGTCATGATG | 853.396615777482 | 0.136426123491474  |
| CCAACAGTGAC | 853.438427782677 | 0.19863241415058   |
| AATAACATGAC | 853.482902306623 | 0.178605162726782  |
| TCTCTGTGACA | 853.483508922534 | 0.199121699666609  |
| GAGAATGTGAC | 853.489144082737 | 0.184704375504832  |
| ACGTCACGATC | 853.499868517265 | 0.167065929118853  |
| AGTCACGAGCA | 853.522480127565 | 0.210870393382392  |
| CGACCAATGAC | 853.524297067275 | 0.158468903790552  |
| TCTACGCGTCA | 853.566319263469 | 0.15931884201331   |
| TACAATGACCA | 853.607746689088 | 0.158684491526386  |
| ACGCTGAGTAA | 853.652438297876 | 0.171358975037259  |
| AATTTGTGACG | 853.730773726327 | 0.136064038508583  |
| ACCGTATGAGT | 853.733402342956 | 0.141270509427336  |
| CACCCGGTGAC | 853.760784939222 | 0.174087705355292  |
| CAGACATGTCA | 853.777308195631 | 0.259221838307103  |
| GGTATCTGTCA | 853.809992713631 | 0.145938800789953  |
| TCGGAGAGTCA | 853.815468848529 | 0.134725039132862  |
| ATGACGCTCCA | 853.849462983517 | 0.100889972357611  |
| ATGACCCTGAC | 853.851638326871 | 0.174650870781535  |
| ACCGTGAGTCG | 853.875705133354 | 0.165066481235481  |
| GGTCATATTTA | 853.902034809526 | 0.162017745334986  |
| CGAGGTGACGC | 853.902463666639 | 0.172189687499327  |
| ACGCGTCAGAG | 853.902908903932 | 0.210665094677064  |
| ATACTCATTAC | 853.910163752638 | 0.198925436006558  |
| CGTCACCTAAG | 853.946453179748 | 0.311154040082972  |
| GTCATTAAGA  | 853.963491744275 | 0.199630068382954  |
| CTTTTGCTCAC | 853.963995360436 | 0.157575867460947  |
| GTGACACGCAC | 854.004501296517 | 0.289805851736934  |
| GGGACGATGAC | 854.006400492998 | 0.16189535203958   |
| GACGGTGTGAC | 854.040101129746 | 0.148053343215647  |
| ATGAATCAAAG | 854.042584278467 | 0.166316338425551  |
| TCCATTCGTCA | 854.063628664808 | 0.182733466757787  |
| CTCTGGTGACA | 854.088718431141 | 0.245305926224332  |
| CGTCATGTTGC | 854.094426383155 | 0.224760796015843  |
| GACGTCACCAC | 854.105501185899 | 0.163518627286421  |
| AGTGACAGTCA | 854.109090453458 | 0.0956195901038225 |

|             |                  |                    |
|-------------|------------------|--------------------|
| ACTCATACAAA | 854.118382353904 | 0.107826967672943  |
| AATCTGGTCAT | 854.143425392257 | 0.125447715231142  |
| CCTGATATGAC | 854.159043234165 | 0.115589396752792  |
| AGACTACGTCA | 854.196788668795 | 0.156788319070577  |
| TGACGAAAACA | 854.206393354029 | 0.126762175814443  |
| AGTCACGGAGA | 854.242492140154 | 0.157285264555233  |
| ACTGCATGACG | 854.278975493393 | 0.151531831559412  |
| ATAAAGGTGAC | 854.336644320932 | 0.143788204346215  |
| AATTCGTGTCA | 854.338840159018 | 0.225040683918649  |
| CAGCTGCGTCA | 854.34973039539  | 0.129263631940507  |
| GTCACAGGCCA | 854.37372089491  | 0.261274063422114  |
| AGAAATGACAG | 854.385994666339 | 0.133538913961834  |
| GTCATGTTGAA | 854.418246173716 | 0.179879922480186  |
| CTGGCAATGAC | 854.443272294887 | 0.121945873702973  |
| ATGACATTACG | 854.473645178638 | 0.149843436332489  |
| GAAGATTCATA | 854.491369540004 | 0.163115498563437  |
| CTGACACAGAA | 854.498141010344 | 0.167041544927788  |
| AAGAATGTGAC | 854.513161047141 | 0.15980878971857   |
| GTGTCACGTAA | 854.516360610338 | 0.0970459025487758 |
| CTAGTGGTGAC | 854.533751940669 | 0.18836742973378   |
| ACTTTAGTGAC | 854.544766415455 | 0.165874660468394  |
| GTCATTCCCTA | 854.614446730846 | 0.159407886034141  |
| TGGCTGAGTAA | 854.617961643339 | 0.100071733922346  |
| AAATCGTGACG | 854.625960414424 | 0.151387941016824  |
| AGCCGTGTGAC | 854.640421750104 | 0.173427326677304  |
| GCGGATGCCA  | 854.645076671091 | 0.174182726266093  |
| GATACTCGTCA | 854.741906143197 | 0.171062818446933  |
| AATCTCTGACT | 854.767400610204 | 0.183949314411555  |
| ACTCATAGCTG | 854.776845658093 | 0.130476762738387  |
| ACCAAGTCATG | 854.782880090645 | 0.215408159742023  |
| GACTCTGTGAC | 854.81931269834  | 0.18052312591876   |
| CGTCATTCCCC | 854.819680670564 | 0.146935079562053  |
| AATCTGTCAGC | 854.822810454203 | 0.249340656538418  |
| CCCAGTGAGTC | 854.834220289203 | 0.164076846485226  |
| ATGACATGAAT | 854.871533947592 | 0.188318167330881  |
| CAGCATAGTCA | 854.943446216298 | 0.183017600035516  |
| CATTGCGTGAC | 854.943934205937 | 0.236912175886917  |
| TAAGGCTCACA | 854.95501677326  | 0.175295745704523  |
| AATAGTCAAGT | 854.997116975611 | 0.131148230276291  |
| ATGCTACGTCA | 855.00712288653  | 0.172339231625575  |
| GAACGGTGACA | 855.008031617985 | 0.14156139733696   |
| GTAAGAGTGAC | 855.061989009426 | 0.157425035369117  |
| ATGACGAGAGA | 855.062644149963 | 0.156692539279369  |
| ACGTCATGGGC | 855.070540064185 | 0.159295105067465  |
| GACTGGGTGAC | 855.077316554701 | 0.147727331848145  |
| ATGAGTCCCGG | 855.083334311756 | 0.179570675078988  |
| TACAAATGACA | 855.104883474567 | 0.165319828514393  |
| CGCCAAGTCAC | 855.150090239626 | 0.149198533183431  |
| GTCACTGTGCA | 855.206837379261 | 0.233829410326972  |
| ACTAGGACTCA | 855.241664649875 | 0.220722008966636  |
| GGTTCAGTCA  | 855.276715872159 | 0.172229411961852  |
| GAACGTGACAC | 855.296567112575 | 0.200000868870768  |
| AGCTGTGACGA | 855.300683381959 | 0.21852883730758   |
| AGAATTACGCA | 855.320220145248 | 0.166620316099156  |

|              |                  |                    |
|--------------|------------------|--------------------|
| TGACGTTTACA  | 855.352475733987 | 0.232038539852617  |
| ACTCATCGTAA  | 855.40694186918  | 0.17274073536556   |
| ACGTCACGCTA  | 855.410270697702 | 0.151866521385999  |
| ACGAATGTGAC  | 855.412010361657 | 0.202234977017106  |
| ACTGATGACCA  | 855.413919780508 | 0.196246329839765  |
| CTAGCGGTGAC  | 855.436120096022 | 0.193230919893105  |
| CCTAATGTGAC  | 855.491653827322 | 0.228192057299264  |
| ATCCTTATGAC  | 855.497392546449 | 0.15394901866848   |
| TCATCGTCAGA  | 855.517262118217 | 0.248333017783723  |
| CCTGGGAGTCA  | 855.522099296546 | 0.116203478593975  |
| GTCATGCACCA  | 855.52643915399  | 0.155730925512595  |
| AATGACAAGGC  | 855.539955119259 | 0.098331995662356  |
| ACGTCACAGAC  | 855.540888268385 | 0.153428092402978  |
| TATCTGTGACA  | 855.546473394175 | 0.187107482417592  |
| CCGTATTAGTC  | 855.549235286939 | 0.232647317224546  |
| CTGTATGTGAC  | 855.575195237392 | 0.0996374818762655 |
| AGTCAGACTCG  | 855.592706344184 | 0.188824791650051  |
| AAGTCACTCTG  | 855.594332389626 | 0.193436568702832  |
| ATTACACACCG  | 855.632666795242 | 0.205495115138749  |
| AGTCAGAGAAT  | 855.707791218237 | 0.161224826266356  |
| AACGTGACGAA  | 855.725847922831 | 0.189232886581917  |
| ACTCATACCG   | 855.749968620451 | 0.178012634800435  |
| ACTCATGTGAC  | 855.805624704716 | 0.183418770399869  |
| ACTCATACGTA  | 855.819540673266 | 0.252969162798137  |
| GACTGAGTGAC  | 855.833294893206 | 0.150986071784565  |
| GAACACATCAC  | 855.852173763064 | 0.174908599513312  |
| GTCACTATCGA  | 855.86534575362  | 0.225429062183913  |
| GTCATCGCCCA  | 855.885640399485 | 0.150464234464644  |
| GTCATGTGTAA  | 855.889338543709 | 0.118547825086769  |
| GTATAGGTGAC  | 856.012545379067 | 0.180131614502128  |
| ATCGTCATGCA  | 856.041268287709 | 0.176070982631766  |
| GATCGTGACAC  | 856.116866595896 | 0.103095401626173  |
| GGACTACGTCA  | 856.119896159703 | 0.199315230415929  |
| GCTTGAATGAC  | 856.121283040995 | 0.192330866017367  |
| GTAAGCATGAC  | 856.161013914066 | 0.196786502872223  |
| CCAATTACGCA  | 856.192823679277 | 0.201962892047887  |
| AACGTATGCG   | 856.214846350196 | 0.169438180554968  |
| GCCTAAATGAC  | 856.305247048814 | 0.159424903631328  |
| ATGTCACATCA  | 856.310464285164 | 0.198832412328657  |
| TCCACTAGTCA  | 856.313035926753 | 0.202388219515191  |
| ATGACCTCATA  | 856.393463473885 | 0.177913846586282  |
| CGCAAATGACA  | 856.425640939954 | 0.182685485818676  |
| GAGCAGTCAGA  | 856.449246524396 | 0.164459186591356  |
| GATTAGTCCCTA | 856.450684177401 | 0.142299384862065  |
| CGCATTGCTCA  | 856.511422668607 | 0.114042282023084  |
| GTGGTCACACA  | 856.511911785462 | 0.198402055807626  |
| GAAGTGAATCA  | 856.531708755245 | 0.20239575745961   |
| CATCATGTGAC  | 856.568907241827 | 0.179350800253294  |
| ATGACAGCTGC  | 856.590090434329 | 0.249986004822254  |
| AAGAATCATCG  | 856.667191460226 | 0.167193776172024  |
| AGACTGACGTG  | 856.691792287803 | 0.154885679269422  |
| CGAGAGAGTCA  | 856.717502125378 | 0.192420461843256  |
| ATGACGTCGCC  | 856.744199334672 | 0.151241162034688  |
| GATGACGTCCC  | 856.754340275904 | 0.169184540543779  |

|             |                  |                    |
|-------------|------------------|--------------------|
| TAACTCTGTCA | 856.757926146667 | 0.142245163548621  |
| ATACTTGTGAC | 856.774364018475 | 0.255594086944433  |
| GCGTCACCTAC | 856.777994785803 | 0.163447721813632  |
| GTAGATGTGAC | 856.797198810387 | 0.147247586933378  |
| ATCCGTCAGAC | 856.814452746642 | 0.171120824229515  |
| ACAAAGGTGAC | 856.834827649384 | 0.128640925777961  |
| TGGGTGAGCAA | 856.855472686092 | 0.150094092089521  |
| AAACTTGTGAC | 856.913376732079 | 0.184007939021641  |
| CATATGTGACG | 856.968759255219 | 0.112558686777378  |
| CAGCTTCGTC  | 856.98004544138  | 0.184949846006601  |
| AACGCTGTGAC | 856.991371926041 | 0.177599654289174  |
| AATAGTCAAGC | 857.003248809677 | 0.129617619102677  |
| CCTAGGACTCA | 857.01252131827  | 0.144952813612216  |
| AAGAGTCTTAG | 857.031902064067 | 0.158270132736021  |
| GGAGCGAGTCA | 857.078315896249 | 0.159056332776957  |
| ATGACGTTAGA | 857.090413230515 | 0.151713839114084  |
| GTCACCGAAAA | 857.097075341273 | 0.149825371626989  |
| ATTACATGACA | 857.118870348339 | 0.233022299440371  |
| CGCTGACTGTA | 857.127681693546 | 0.180897350485279  |
| GACTCACTGCC | 857.134742778105 | 0.123818082799216  |
| CACGTCACGAC | 857.135246445756 | 0.13506880253979   |
| AATCAACGTCA | 857.197585267033 | 0.141749825835242  |
| CCACGGTGACG | 857.224343267116 | 0.172612995441322  |
| GTGACAAGTAA | 857.233951442419 | 0.140819012327744  |
| GTCATTTGGAA | 857.262838758353 | 0.194340811394122  |
| GCCTGGGTGAC | 857.284306623677 | 0.174099048772466  |
| CAGAGGGTGAC | 857.315900309663 | 0.178685618994456  |
| ATTCTGTGAC  | 857.338842696098 | 0.242870206608125  |
| CGTCACATTTA | 857.351421068781 | 0.132378913689706  |
| ACAGTGACGCG | 857.355967496731 | 0.224625680904481  |
| CTTCATATGAC | 857.36690264143  | 0.187713738758847  |
| AATGCTGACTA | 857.371720170948 | 0.207860695192489  |
| ACCCTATGAGT | 857.372634465544 | 0.16973179707987   |
| GTCATTAACAA | 857.420457966481 | 0.197617638315251  |
| AAGGTAATGAC | 857.440393057168 | 0.13300875437786   |
| GACATGACATA | 857.455945511046 | 0.145624123900212  |
| GGGGCTATGAC | 857.458758417502 | 0.127942936580322  |
| CCGGTCATGAC | 857.459589349887 | 0.15879724081795   |
| GTGACAGCTTA | 857.492307820829 | 0.142818400299425  |
| GAGTGATGTCA | 857.503609046324 | 0.238990980699477  |
| TGACTACTGAA | 857.504247260615 | 0.0998750831192974 |
| AGACTCACGCT | 857.534198578423 | 0.0950485344243386 |
| GCGTCACCAAA | 857.563435305306 | 0.154439408927468  |
| TGTCATTTGAA | 857.565448996841 | 0.206729146876986  |
| CAATGTGACGC | 857.569191270072 | 0.110253698204753  |
| ATGCGGTCATA | 857.588643434445 | 0.207788618801309  |
| GGTTACGTGAC | 857.60092091524  | 0.157220116828102  |
| ATCATGTGACA | 857.640440426465 | 0.158518543324134  |
| TATTGGTGACA | 857.697070000325 | 0.170529603259225  |
| AGGACAATGAC | 857.753780838624 | 0.189378356549708  |
| ATGATTAGTCC | 857.758921999802 | 0.215045315996572  |
| GTTGACTCGGA | 857.780769940442 | 0.123166309287288  |
| GTCACAGTTTA | 857.801370836735 | 0.162917775113964  |
| AGTTTGACACA | 857.805138971882 | 0.169438560142557  |

|             |                  |                    |
|-------------|------------------|--------------------|
| GGAAAGTGCA  | 857.82192769217  | 0.142971262593256  |
| TCTAATTGTCA | 857.834260164005 | 0.173684677375538  |
| CGGGAGAGTCA | 857.836063266545 | 0.123767472964068  |
| TGTCATGTAAA | 857.895872250019 | 0.195468755169848  |
| CTTTAATGAC  | 857.902853877314 | 0.160515932976309  |
| GTCATTACGAC | 857.913119075323 | 0.125010684861019  |
| ATGCCCAGTCA | 857.925461449165 | 0.142552781817452  |
| CTATAGCGTCA | 857.945263734614 | 0.170653087365717  |
| GTCATAAAGAC | 857.95811783505  | 0.157795638671572  |
| ATTGATGACCC | 858.015426964783 | 0.0900734395305619 |
| GAGTTGACACA | 858.015546863629 | 0.186468020743401  |
| AGTCATGGGAG | 858.028123970147 | 0.201535387507603  |
| CTCCTTATGAC | 858.038734077971 | 0.149630460838888  |
| AATGACGTGCG | 858.110105082655 | 0.19969203749843   |
| GTACCGCGTCA | 858.110343939645 | 0.187971095084907  |
| ACTCATCCTGA | 858.164979226694 | 0.140695716444311  |
| ACAAGAGTGAC | 858.168751694093 | 0.153771301928301  |
| CCCGTGACGAA | 858.197930493725 | 0.246763794764823  |
| AAATTATGTCA | 858.226427238703 | 0.297048164095278  |
| AGGAAGTGTC  | 858.250932521535 | 0.125419041389176  |
| CATGATGTGAC | 858.25877969548  | 0.120071335699983  |
| AATTGTGTAAT | 858.276340728302 | 0.151148042301315  |
| AATTATGACCG | 858.280385355091 | 0.166806023266263  |
| AAGTCACCCTA | 858.280406801058 | 0.0702127523504467 |
| AGCGTGACCCA | 858.288733896834 | 0.19959966030138   |
| GTAAGGGTGAC | 858.2962369073   | 0.155107056777875  |
| GTCATCAAGCA | 858.296861649224 | 0.137903250424485  |
| ACTTATGTGAC | 858.320834372774 | 0.147877056310136  |
| GAAGATGAGTA | 858.34163351556  | 0.147944467628164  |
| GTCATGCGCAC | 858.362982630378 | 0.168298600175412  |
| GACCCATGACA | 858.381251051167 | 0.270223865698924  |
| CGTAGGTGACA | 858.387197072253 | 0.155671467401964  |
| AAAGGGTGACA | 858.409878853653 | 0.154765685669786  |
| AGTCATGGGCC | 858.413726483735 | 0.157654171456701  |
| ATGACGATGGC | 858.427028540387 | 0.159414373245506  |
| ACTCATATGTG | 858.441044195482 | 0.148561758628386  |
| CTCATGGTGAC | 858.459284862878 | 0.23234381671839   |
| GACGTATGACC | 858.503728341519 | 0.183546020372677  |
| ATCTTAGTGAC | 858.528136879388 | 0.164321408856204  |
| CGTCATTTACC | 858.52955509191  | 0.170830133530582  |
| GATTCGGTGAC | 858.539075016208 | 0.139058845229997  |
| TTACACGTCAA | 858.540593984176 | 0.191749958362904  |
| CACGCATGACA | 858.563795944961 | 0.13984676876789   |
| AGGTTGTCAC  | 858.567992837292 | 0.15415382400216   |
| GTCACTGAAGA | 858.602678973419 | 0.182640436928188  |
| TAAAGCAGTCA | 858.621186478568 | 0.150726598330351  |
| ACAATTACACA | 858.640694236781 | 0.204841046145845  |
| CTGACTCTCAA | 858.644048894521 | 0.183638927443857  |
| TATCCATGACA | 858.646425427536 | 0.142323639785936  |
| ATCAGGGTGAC | 858.649805567478 | 0.170117943052043  |
| ACTCATCTTTG | 858.652557992043 | 0.139394525578018  |
| TCCCGTCATAA | 858.654425420406 | 0.170688521633313  |
| ATTGTCACACG | 858.687906751467 | 0.19728414207682   |
| TCCACCAGTCA | 858.735301929014 | 0.161469416917094  |

|             |                  |                    |
|-------------|------------------|--------------------|
| GGCGGTGCAC  | 858.753023143071 | 0.150466646031284  |
| GTCATTGTAGA | 858.77164997054  | 0.129878054030056  |
| GGGTGACGCCA | 858.791984728176 | 0.113297700218664  |
| GAAGTTGCAC  | 858.796222775232 | 0.198030826747286  |
| CAGCAATGACA | 858.7999138701   | 0.167548185805686  |
| ATGACATGCAC | 858.800885501989 | 0.135727405902993  |
| GATTTGACTGA | 858.806044836158 | 0.165228064878556  |
| AATGACAGGGT | 858.816950420465 | 0.140695377421267  |
| TGACTAGACCA | 858.826530157152 | 0.164556193158822  |
| ATGTGCATGAC | 858.834727034201 | 0.25849181918572   |
| GCGTCACCAGC | 858.839558455548 | 0.136245754080915  |
| CAGCTGAATCA | 858.854432393971 | 0.217588033413989  |
| GATCTGGTGAC | 858.858425791373 | 0.163755478986799  |
| AGCATGACGCT | 858.878721221635 | 0.0911981551631246 |
| CTGCCAAGTCA | 858.931724597242 | 0.174709026400968  |
| CATCCTGTGAC | 858.936540433053 | 0.222859956269105  |
| GAAGTAATGAC | 858.983996290507 | 0.170002179125175  |
| AGACATGTGAC | 859.010820967796 | 0.145313527354615  |
| GGTCATACACA | 859.012111322573 | 0.186468642838467  |
| CGTCACCCTAA | 859.034595798541 | 0.139151638366268  |
| CGCCGTGACTA | 859.037801205345 | 0.139550322354798  |
| CGGGTAGTCAC | 859.038352751658 | 0.183820790406502  |
| CATCAGGTGAC | 859.041336513658 | 0.178754217404899  |
| GTCACCACGCA | 859.054316180458 | 0.15343348954027   |
| TACAATAGTCA | 859.065874267786 | 0.178130789463954  |
| ATGACCATAAC | 859.106726799826 | 0.145778841062125  |
| AACTCTGACAC | 859.138938667837 | 0.159201653284822  |
| GTCACTCGATA | 859.145529912033 | 0.158692554356478  |
| TCTGACGTCAA | 859.174578683444 | 0.283005791726393  |
| CATCAGTGACA | 859.175374106704 | 0.186643707554176  |
| GTAGAGGTGAC | 859.186387210123 | 0.14093751801934   |
| GACTCAGAGTC | 859.204761930334 | 0.212995900516032  |
| CTGGTGACAAC | 859.208218191959 | 0.161672261224511  |
| ATTATGACCTA | 859.245381406213 | 0.1928817442069    |
| GTCATTATCCA | 859.284347887918 | 0.164650819968224  |
| TACCTGTGACA | 859.296976832579 | 0.135947009505814  |
| CGTCACCAGGA | 859.314511065436 | 0.143531592552571  |
| CATGGCATGAC | 859.336672874967 | 0.132537275205069  |
| ACATGTCGTCA | 859.368621197113 | 0.18121687440327   |
| ACGTCACAACC | 859.392717326527 | 0.178223237787549  |
| ATAGGTGACGA | 859.418589781264 | 0.145900826599043  |
| TGACGCGTGCA | 859.422622422009 | 0.136974046614148  |
| GCATGTGACGC | 859.424692613858 | 0.144906726618565  |
| AGTCAGAGGCC | 859.46568862568  | 0.154403974064096  |
| GTAAAGGTGAC | 859.477709690943 | 0.144491325621378  |
| ATGAGCTGTCC | 859.484120585898 | 0.284076031469291  |
| CAGACATGACA | 859.553122096143 | 0.195674367984     |
| GTGAGGTGATA | 859.553145159043 | 0.156396747872917  |
| ATGACGAGAAG | 859.584963051887 | 0.148498806285197  |
| AAGTCTGCAC  | 859.623058617723 | 0.151509416588167  |
| TGACTTGTCAA | 859.701965955164 | 0.206475176093541  |
| ATCTATGACCC | 859.705889767994 | 0.147018565607345  |
| CGATGTTGTCA | 859.715150751639 | 0.141078978585862  |
| GTCTATGTAC  | 859.716013266637 | 0.19562104323181   |

|             |                  |                    |
|-------------|------------------|--------------------|
| GGCATGACAGA | 859.719205678299 | 0.18789701640777   |
| ACGACTGACTG | 859.728657951388 | 0.156596514282091  |
| ATGACCACTCC | 859.780636886188 | 0.148063134567034  |
| ACAGACAGTCA | 859.781543611534 | 0.187083663196119  |
| GAGACGACTCA | 859.888862420835 | 0.156756012537344  |
| CTGAATGACCA | 859.901486155942 | 0.161933439545927  |
| AAACTGTGACA | 859.910762193714 | 0.14178888040482   |
| TCATAGTCAAA | 859.948230654697 | 0.151462081777574  |
| AGTGACAAACA | 859.951694870224 | 0.16562364446014   |
| AGACTCACTAC | 859.967225822437 | 0.170190334127376  |
| TCCGTGACCCA | 859.967249593716 | 0.177368245191935  |
| GTGACCACTAA | 859.968079096866 | 0.148072280503201  |
| CGTCACTGACG | 859.97952362843  | 0.222470820329025  |
| AGTCACGAGAA | 860.020146007026 | 0.171149690826748  |
| AAATGTGACGA | 860.020589277746 | 0.174273522245133  |
| CTGTGTCGTC  | 860.040654250585 | 0.170301874384787  |
| AATTGTATCAT | 860.064469383006 | 0.136823710357361  |
| CGCTGAGTAAA | 860.077749988814 | 0.105971960291163  |
| GTGAGTACCAC | 860.089657118459 | 0.166369098616676  |
| AGCTAAATGAC | 860.133001713757 | 0.220750542109271  |
| CGTGTCACTAG | 860.142843541065 | 0.196149968671272  |
| GAGTCAGGGTA | 860.170055807331 | 0.143687343459104  |
| AAGCTGTGACG | 860.171238340704 | 0.139771971475829  |
| ATGACGCTCAG | 860.223103131969 | 0.155838434472005  |
| TGACGCGTGAA | 860.224922168544 | 0.14534362708168   |
| GTCACCAGCGA | 860.226343116113 | 0.243613280786008  |
| CAGTCAGATCC | 860.289343111107 | 0.151785563008197  |
| GTCACCCAGTA | 860.294427041842 | 0.180019595602133  |
| GAATTCGTGAC | 860.29809685182  | 0.199391924958589  |
| ATAGCCAGTCA | 860.327295958368 | 0.198605550788223  |
| GACCTCGTCAC | 860.329507646298 | 0.150457424312527  |
| AGCATACTCAT | 860.353821917991 | 0.136033850190831  |
| CTTATTACTGA | 860.384050779043 | 0.138798318692954  |
| CGAGTCAAAGA | 860.391621036121 | 0.176048383991365  |
| CGATCGCGTCA | 860.39936923621  | 0.19015174225962   |
| GAGTTAATGAC | 860.431961825722 | 0.173954084942194  |
| TGACTCTCCCA | 860.437571481526 | 0.130588648058952  |
| CGTCACTGACA | 860.445894196218 | 0.146260072139947  |
| CACAGTCAGCG | 860.460400687556 | 0.251935282803545  |
| TCTGCCAGTCA | 860.49806708365  | 0.191569277450577  |
| ATGTGCAGTCA | 860.514291874399 | 0.0732310921475036 |
| GTCGGGAGTCA | 860.539587657694 | 0.134966444396729  |
| ACTCATAGCAG | 860.554110782862 | 0.0926145805169762 |
| CTCTGATTGAG | 860.565829865246 | 0.13445193694225   |
| CAAGTAATGAC | 860.576317800377 | 0.174694385469791  |
| GCTCGAGTGAC | 860.594571399247 | 0.239479966820825  |
| ACTCATGTCAT | 860.597118504528 | 0.157726357802343  |
| CTCTGCAGTCA | 860.606418899209 | 0.192374117359942  |
| CTTCCGACTCA | 860.617759625949 | 0.185607404148641  |
| ATAGTTGTGAC | 860.677771322912 | 0.161775260971433  |
| GCGAATGACCA | 860.684645156211 | 0.194882525158999  |
| GCATGTGTGAC | 860.687487834065 | 0.177595083314446  |
| GTCATGCACGA | 860.725783514827 | 0.121963915908282  |
| CGATTTGGTCA | 860.750587920315 | 0.213292457939575  |

|             |                  |                    |
|-------------|------------------|--------------------|
| ATGAGTACCGG | 860.769977519329 | 0.133635403610679  |
| GCAGTGACGAA | 860.837092099175 | 0.154248900365204  |
| GTGACGCTGTA | 860.838466836856 | 0.175968272153025  |
| GAAGATTACTC | 860.855646787397 | 0.261787966548784  |
| GGCAAGACTCA | 860.866269932364 | 0.175170470125466  |
| CAGTCAGTGTC | 860.896823567093 | 0.152236842312521  |
| AGTATGATGCA | 860.916184378563 | 0.141455872105987  |
| AGCTTTGACTC | 860.9479159142   | 0.137300839161884  |
| ACATATGTGAC | 860.953324644577 | 0.144523984040637  |
| GTCACCGTTTA | 860.978575901211 | 0.213926921202849  |
| TCAGCGTGACA | 860.989870107822 | 0.15502433928167   |
| ACACTGTCACA | 860.999391895945 | 0.116233259888114  |
| TATGCATGACA | 861.013092760361 | 0.0879475415687405 |
| AGAGACGTCAT | 861.037646437827 | 0.104003359087347  |
| GATATCATGAC | 861.072437848605 | 0.167321156982723  |
| GTTGAGAGTCA | 861.126446345329 | 0.149023236524179  |
| TGACGAAGGCA | 861.126883329161 | 0.182601707666916  |
| CAATCTGTCAG | 861.146831326697 | 0.108432836650653  |
| GGCTGCATGAC | 861.151955037932 | 0.164506866843337  |
| GAATGGTGACA | 861.181328488378 | 0.237216407516196  |
| AGAGTCAAGAC | 861.200457231479 | 0.123880942264267  |
| ACTGCTGACTG | 861.240687966959 | 0.140725550173702  |
| ATTGGCGTCAC | 861.248568667051 | 0.172614735261107  |
| GTGACACGCA  | 861.254003616656 | 0.150061732389083  |
| CGTCACCATTA | 861.259296324504 | 0.149861662113209  |
| GCATAGTGTC  | 861.26285357572  | 0.170017930481271  |
| CGTCACCGTTA | 861.297366519966 | 0.120932742245596  |
| ACCGGCGTCAT | 861.308391625513 | 0.112127145840485  |
| CGATGTCGTC  | 861.332437147251 | 0.218807246880974  |
| AGACTCAGACA | 861.334322608335 | 0.168687232074228  |
| AATTTGGTGAC | 861.356333079389 | 0.187962829363878  |
| ACGATGACCTA | 861.360298194264 | 0.137653214746398  |
| ACTAGTCAGTC | 861.36839251262  | 0.208104221208934  |
| ACATGTGACGA | 861.401902031636 | 0.250836632313884  |
| GTCACAGATCA | 861.409936391507 | 0.196201795614034  |
| ACAGTCAGTAA | 861.454443815635 | 0.157286712417913  |
| GTGACAAACCA | 861.462593865044 | 0.146685524216393  |
| CAACCTGACTC | 861.467245743477 | 0.161781042199672  |
| GTCACCAGGGA | 861.474996965622 | 0.161797802888304  |
| GTGACGGAGAA | 861.478965994746 | 0.136687774111526  |
| ATCCATGTCAC | 861.502134580521 | 0.154369251620832  |
| ACTCATTCGAT | 861.507663153251 | 0.155021470641259  |
| GTAAGCAGTCA | 861.535510640081 | 0.142977590840463  |
| ACCTGTCACCA | 861.541806605021 | 0.109767712442463  |
| AAATGCGTGAC | 861.623281406275 | 0.160626431290321  |
| GCGCTGAGTAA | 861.65421804278  | 0.151188010059605  |
| GAGCCGGTGAC | 861.666773985482 | 0.18370055152397   |
| GTCATGTCAAA | 861.669265943896 | 0.189458367094642  |
| AGAACTGGTCA | 861.690217392518 | 0.186233300701604  |
| GTCACATAGGA | 861.696063436546 | 0.151581646408339  |
| CGCATAATGAC | 861.722104583013 | 0.133395851276664  |
| ATTACGTATTA | 861.729122105375 | 0.189123700976238  |
| CAGTGACAAAC | 861.732076303806 | 0.180749930029222  |
| CATTGAGTGAC | 861.74749695346  | 0.127285023290433  |



|             |                  |                   |
|-------------|------------------|-------------------|
| GCGGCGAGTCA | 861.777917767763 | 0.118801309580408 |
| ACCGTGACT   | 861.778782012956 | 0.145900876040516 |
| AGTGATTAGTC | 861.801570916311 | 0.22698853972397  |
| ATATGGGTGAC | 861.862228969728 | 0.181850645117607 |
| CGTCATCAAAC | 861.870170828688 | 0.135693337728786 |
| ATACTGTGACA | 861.891666997069 | 0.19071397780988  |
| CACGGTGACGA | 861.922742160784 | 0.118144067179992 |
| CATCATGACGA | 861.974882157728 | 0.127981613698999 |
| CGTCATTATCC | 861.977640819806 | 0.142332647640347 |
| CATTGTGACAA | 861.989654565069 | 0.128811270628023 |
| CGTCACCGAGA | 862.015053750626 | 0.177325408517997 |
| GACTGACGTAC | 862.019164016232 | 0.198000706381689 |
| GGTCTAATGAC | 862.032919725607 | 0.183140294423536 |
| GCTGAGAGTCA | 862.035186300198 | 0.174735362676001 |
| ACGGTAATGAC | 862.040035309159 | 0.101846879710767 |
| GTGACGTTACA | 862.04335547304  | 0.138738030748878 |
| AGTCATGGGCG | 862.060020590596 | 0.178664163681667 |
| ATGACGGAGGG | 862.064607755745 | 0.141982768721421 |
| GCACTGATTCA | 862.066656524734 | 0.217682940065159 |
| ATCGACTCAGA | 862.115665042246 | 0.127411336337903 |
| ATGACATTGTA | 862.166520738335 | 0.148619879132764 |
| CGCGTGACCCA | 862.172224998579 | 0.145636791672491 |
| TAGTTATGTCA | 862.184456185375 | 0.23572978320635  |
| TGACGTTATAA | 862.193851914396 | 0.192560841042886 |
| CCAGAGTGACG | 862.203687168368 | 0.199182312656413 |
| CCCCTGACTCG | 862.207840964604 | 0.146152068953177 |
| CAGTCGCGTCA | 862.229631688594 | 0.109116190117186 |
| ACGCGTAGTCA | 862.230572419211 | 0.167419964387875 |
| AACAGTCAATA | 862.233002168636 | 0.123782817156098 |
| ATATTTGACTC | 862.241446176943 | 0.145946701927529 |
| ACTCTTGCTCA | 862.257693432205 | 0.184093750372919 |
| AATGTAATGAC | 862.268770353525 | 0.142927857562834 |
| GCCCATATGAC | 862.272049479101 | 0.21417186261796  |
| CTGACGCAGTC | 862.298853550475 | 0.167642791040067 |
| CCGTAATGACA | 862.301278029449 | 0.209806994768695 |
| AGTTATGTGAC | 862.303990817109 | 0.150520788746617 |
| GTCATTTGAAC | 862.30504328851  | 0.163552444899499 |
| AGCCTACGTCA | 862.311305337905 | 0.128204347405054 |
| GGTTGGGTAC  | 862.337792155856 | 0.115126559524669 |
| TCCATAAGTCA | 862.342872760696 | 0.167252258720617 |
| ACGTCACTACC | 862.346282022159 | 0.146989411303332 |
| CCCTGTGTGAC | 862.348765832321 | 0.112152631509262 |
| GTGACTTGGA  | 862.376608165359 | 0.153097464393743 |
| AATTAGTCTGA | 862.41411301054  | 0.204569219749768 |
| TGTCATGCAAA | 862.462733610554 | 0.15120260556792  |
| AAACGGGTCAT | 862.463825500545 | 0.137076961104085 |
| GACTAATTCAC | 862.562964931394 | 0.104551499007565 |
| ACGTCGGTGAC | 862.580257133326 | 0.139858433364445 |
| CAAGATGAGTA | 862.617203383165 | 0.151175568590891 |
| GTCACACGATA | 862.62005201613  | 0.166663625469469 |
| GCGTCACCTCC | 862.678231225413 | 0.109434189173452 |
| AGTCAGAGGAT | 862.681873428091 | 0.158130950731088 |
| ACTCAGTCAAC | 862.696310389133 | 0.173482126503757 |
| ACCGTTGTCAT | 862.70475626187  | 0.19072578981844  |

|               |                  |                    |
|---------------|------------------|--------------------|
| ATGACATCTTG   | 862.710144497829 | 0.283889376574496  |
| AAGCGTGAGTC   | 862.72178067837  | 0.161721449355791  |
| AGTGACGCGGA   | 862.761011972506 | 0.132773827149283  |
| CTGCCAATGAC   | 862.765836534615 | 0.118381471239013  |
| ATGACCACGCC   | 862.794066849486 | 0.165370932521794  |
| CCTTCGGTGAC   | 862.79575931925  | 0.15584460247352   |
| AAGATGACCGA   | 862.79939097997  | 0.174807442086586  |
| CTGACTACTAA   | 862.816090051835 | 0.151753764347213  |
| AGCCATGACGC   | 862.825991466486 | 0.170442299655862  |
| CACGAGAGTCA   | 862.829908690371 | 0.191232366108926  |
| GCCATTGTGAC   | 862.859486608748 | 0.124804671102387  |
| CGTTATGACCC   | 862.874268763882 | 0.125812926987954  |
| ACGTCAGTAAT   | 862.913892335055 | 0.118106340454068  |
| CGCTGACTGCA   | 862.916993253267 | 0.175140559248406  |
| TAGGTCATCGA   | 862.933242276941 | 0.136849525786908  |
| GTGGGAGTCAA   | 862.939002418651 | 0.134965512744587  |
| CACTGCATGAC   | 862.953738594694 | 0.209994465955158  |
| GTAACAGTGAC   | 862.957264694998 | 0.197898365185919  |
| ATGACATCGTG   | 862.984371233591 | 0.137239961633429  |
| TCACAGCGTCA   | 863.002838883389 | 0.153760944976756  |
| ACCAACGTCAT   | 863.025427721546 | 0.121899116956426  |
| AGTGCAATGAC   | 863.049497740929 | 0.106757482073538  |
| GCGTCACAGCA   | 863.074521242019 | 0.229890884700585  |
| ATGTCATTATA   | 863.077184891036 | 0.0584676261485942 |
| CACGTATGACC   | 863.096536048033 | 0.0957166603524617 |
| AACCCGTGACT   | 863.110755082089 | 0.17711117363972   |
| GTCACCTTAAC   | 863.126575943181 | 0.183615282836887  |
| CAGAACGTGAC   | 863.159217412233 | 0.112159016780765  |
| CCGTGGTGACA   | 863.1658154815   | 0.145095165331484  |
| GTGACTTGTA    | 863.221522133318 | 0.13753449733631   |
| CTAACGCGTCA   | 863.230271316001 | 0.134926513505859  |
| GTCATTGGCAA   | 863.237984032034 | 0.121152746460222  |
| ACTCGTGTGAC   | 863.26164835648  | 0.194275853538479  |
| GTCACAGCTTA   | 863.282708807264 | 0.210808989859794  |
| ATTATTCATCA   | 863.295625592221 | 0.147211583889847  |
| GATTGATTCAC   | 863.33318817773  | 0.159126746285493  |
| GTGACACCGTA   | 863.35379637775  | 0.146436482824377  |
| ATGGATTAGTC   | 863.358438670157 | 0.133032615991473  |
| CAAGCGAGTCA   | 863.376631743577 | 0.232725524210341  |
| CCGTCATCAGA   | 863.397873399617 | 0.164759006116094  |
| CACGTTGTGAC   | 863.411391956577 | 0.154361715447446  |
| ATGACAGGGCG   | 863.47209945584  | 0.173146677205742  |
| TGACGTTATCA   | 863.488379393389 | 0.203366993703437  |
| AACTAGGTGAC   | 863.488532853374 | 0.130223851049513  |
| GAATGTATCAC   | 863.530811740732 | 0.148368168064863  |
| ACGTCACACTAGT | 863.539711131976 | 0.103989959304171  |
| AGATTATGACC   | 863.576326133567 | 0.135045349855033  |
| AGTTACATCAC   | 863.590077140252 | 0.0957990131415715 |
| ACGTCATGCGC   | 863.590973965956 | 0.086154225908416  |
| GCTAACATGAC   | 863.596731744163 | 0.197014192118369  |
| AGGGTCTGACT   | 863.604790715269 | 0.0893183366473953 |
| ATAGTGAATCA   | 863.616630853576 | 0.174285931072508  |
| CCAGTGACAAA   | 863.624414753682 | 0.199985808226513  |
| AATGAGTAGAC   | 863.626372151262 | 0.146555503400338  |

|              |                  |                    |
|--------------|------------------|--------------------|
| ATCGGGTGACA  | 863.654902946039 | 0.15039419950479   |
| GTCACCAGCAA  | 863.720662774148 | 0.181557072734226  |
| CGTCATCAGCC  | 863.735699246133 | 0.0896531882388976 |
| TCGTCATGCAA  | 863.741323615122 | 0.174671254201354  |
| TATCTATGTCA  | 863.770643156619 | 0.163579477914872  |
| AGTGACAGTAT  | 863.837043644678 | 0.134956529762472  |
| CGACTCACGGA  | 863.84304143293  | 0.189903345138504  |
| TCCGCATGACA  | 863.855706458517 | 0.182622051327565  |
| ACTACTCATTG  | 863.868308778564 | 0.171822082147931  |
| GTCATGAATGA  | 863.882277884092 | 0.140262185741503  |
| GTCACCCATAA  | 863.907502379    | 0.172538115309344  |
| GATTACTCGTA  | 863.919380348926 | 0.115178598801751  |
| GTCGTTACTCA  | 863.920367237352 | 0.102894617998163  |
| AGTTACGCAAT  | 863.942764361599 | 0.164222319568229  |
| CCCGAGGTGAC  | 863.947717722624 | 0.161823913853166  |
| GTCACGATTCA  | 863.990707082169 | 0.168808139377143  |
| CGACACTGTCA  | 864.022063107338 | 0.138416654493239  |
| CACAGCAGTCA  | 864.045121038745 | 0.207757173035587  |
| GAGACAATGAC  | 864.051325666775 | 0.152335319722814  |
| TACTTGTGACA  | 864.07182260799  | 0.193991697044727  |
| ACGCATGTCAT  | 864.07727067988  | 0.260153921521853  |
| CTGCAGACTCA  | 864.116791417152 | 0.140479135110042  |
| GTCACCATATA  | 864.133736551102 | 0.145260624058486  |
| ATGACGTTCCGC | 864.199811254261 | 0.165670561339375  |
| GTCACCAATTA  | 864.219397568175 | 0.0897479455850022 |
| ACGAGGGTAC   | 864.235536596309 | 0.143157289161712  |
| GTCAGTAATCA  | 864.243018561973 | 0.223114131080317  |
| GGATGACTTGA  | 864.25165485629  | 0.135932781710212  |
| AATAGGTGACA  | 864.287374164048 | 0.160447560621688  |
| ACATGGTGACG  | 864.287653832678 | 0.158498439813997  |
| AAGTCACGCGT  | 864.293711910046 | 0.142693368206184  |
| CTCGGGAGTCA  | 864.293845589993 | 0.15653217504047   |
| AATAATGACGG  | 864.317224557803 | 0.186457816853287  |
| ACGTAGTGTCA  | 864.327053253565 | 0.150621434475882  |
| GTCACCCACAA  | 864.335086920203 | 0.17916634864631   |
| TCAGTCAAACA  | 864.341704602145 | 0.19988602556072   |
| AGCATGAATCA  | 864.344738395538 | 0.158240567520388  |
| ACTGACGTGAC  | 864.377447187766 | 0.109729176450974  |
| ATTACGTGACA  | 864.377726312885 | 0.224816499160367  |
| CGCTTGCGTCA  | 864.398066482959 | 0.134899761121523  |
| ATGACGAGCGA  | 864.461410714685 | 0.201158766122105  |
| TCATGGTGACA  | 864.482686524043 | 0.173254941544993  |
| CGACATGTGAC  | 864.504579841691 | 0.100169766385199  |
| CTATCACGTCA  | 864.569865755343 | 0.193536797271851  |
| CGAAATCGTCA  | 864.585083409704 | 0.133099349015806  |
| ATTGATTATG   | 864.620207013609 | 0.146965511613061  |
| AGTTAATGACA  | 864.673430504556 | 0.140539007532082  |
| CGTTGACACAA  | 864.676035380034 | 0.170695819202401  |
| GATTGTACTCA  | 864.680480709869 | 0.226592722973935  |
| GTCACCTAAC   | 864.713722314891 | 0.205625311133057  |
| GGAGTGAATCA  | 864.738853354601 | 0.175328768005781  |
| ATGACACGGGC  | 864.7693310517   | 0.173539260084348  |
| ATCTGAGTGAC  | 864.802705806139 | 0.128589715556376  |
| AGTCAGACCGA  | 864.815719687625 | 0.16744972275913   |

|               |                  |                    |
|---------------|------------------|--------------------|
| AGAGTCAAGGG   | 864.82634463962  | 0.140813772406317  |
| CATTACGTGAC   | 864.882909286572 | 0.222034614604955  |
| ACGTGTCAGAC   | 864.886367121899 | 0.146442611657009  |
| ATTACTAAATC   | 864.900938342736 | 0.158162126181395  |
| AAACGACTCAG   | 864.907524058935 | 0.138130774038402  |
| ATCTATATGAC   | 864.911826270256 | 0.145252247802874  |
| GATATCTGTCA   | 864.928984420775 | 0.188640991481175  |
| GGCAGATGAC    | 864.934538141953 | 0.146307249645697  |
| CGCTTGGTCAC   | 864.935963901633 | 0.105267875323192  |
| CTGACAGATTA   | 865.020963938241 | 0.144448401806687  |
| GGTCATATTCA   | 865.062017305174 | 0.145050968522753  |
| CGTCACCACGA   | 865.11731638236  | 0.181465794379319  |
| GCTAGTCACGA   | 865.13588483617  | 0.188366094662946  |
| CGAATGACCAC   | 865.139210689704 | 0.121517941855237  |
| AGCAGAATGAC   | 865.140666121158 | 0.109215320689399  |
| ATGAAATGACG   | 865.14683275668  | 0.179529160045461  |
| ACATTGAGTAA   | 865.159166643568 | 0.14934878107362   |
| GTCGGTGTGAC   | 865.17853228499  | 0.228828244290022  |
| CGTCAAGTGAC   | 865.18324566629  | 0.145055235947859  |
| GCAAGTGGTAC   | 865.190124007696 | 0.140941968814482  |
| AGGTCGGTGTGAC | 865.200189361875 | 0.180443674679593  |
| ATGAGTATGTG   | 865.201155878336 | 0.186446121852155  |
| AATGACGGGAT   | 865.215750123039 | 0.140611482198217  |
| GTGTCTAGTCA   | 865.21679892735  | 0.167541780721103  |
| GATTTTCATGAC  | 865.230641783897 | 0.191827131720383  |
| CGAATGGGTCA   | 865.250126897716 | 0.186055694729584  |
| GTCACCGGCCA   | 865.272027739552 | 0.209199760481945  |
| CACAGTGACGC   | 865.288449026049 | 0.219619795825237  |
| ATGACGCTCCC   | 865.33061907886  | 0.1929319367646    |
| ATGACGAGGGA   | 865.357008339271 | 0.134503715649859  |
| CTATCATGACA   | 865.362871583155 | 0.163278681601222  |
| ATTTCGTAATG   | 865.365662162406 | 0.147340168030304  |
| AATCGAGTGAC   | 865.375225468213 | 0.0908718419288607 |
| TGAGCAATGAA   | 865.398957961839 | 0.130875472845415  |
| AGTGTGTGACG   | 865.411703362786 | 0.146742184437736  |
| CATTTGACGCA   | 865.413885376978 | 0.0927553426601452 |
| CGATTACTCGA   | 865.468944235747 | 0.198657855560733  |
| AGTGATGTAAC   | 865.479237734788 | 0.115842675585705  |
| ACTCATACGAG   | 865.492756353977 | 0.154599018365624  |
| GATGGTGTGAC   | 865.495143055756 | 0.144481364225011  |
| GATGCGTCTTA   | 865.546637209871 | 0.150908815817824  |
| AAGACTCTTAT   | 865.550266393655 | 0.10269039600754   |
| TAAGAATCATA   | 865.560714137558 | 0.145221239447757  |
| AGTCAGACACC   | 865.673930726494 | 0.173140235590144  |
| GGTACGGTGTGAC | 865.681462125209 | 0.155428595359026  |
| TCGTCACCCGAA  | 865.683070320773 | 0.140922420939716  |
| CGTCACACGAA   | 865.690864534846 | 0.22042657014122   |
| CGCCAAATGAC   | 865.721354588679 | 0.186740678048314  |
| GAGTCAGGACA   | 865.723858865629 | 0.14681599544025   |
| GAGGTAATGAC   | 865.736659067974 | 0.160659763287043  |
| GTCATAAGCAC   | 865.759398083592 | 0.122748430633179  |
| AGATGCAGTCA   | 865.812372188808 | 0.157852097034634  |
| GGGTCATAGGA   | 865.856513952882 | 0.194947146045831  |
| TTACTCAACAA   | 865.889972874642 | 0.107624682334279  |

|               |                  |                    |
|---------------|------------------|--------------------|
| CTGCTGTGACA   | 865.905417961319 | 0.176000150866595  |
| TGACCATTA AAA | 865.907062569804 | 0.186123999708083  |
| TATTTCCGTC A  | 865.915955546181 | 0.151825449412463  |
| CATGACTTGGA   | 865.923651259261 | 0.167985277377603  |
| AGTCAGAGGTG   | 865.939307021763 | 0.15410293826157   |
| GTGTTTCGTC A  | 866.022650555632 | 0.155345489299972  |
| TGACAAAGACA   | 866.042385931228 | 0.21265759741172   |
| CGTCACACCAC   | 866.042553508531 | 0.144193830878575  |
| ATGAATCAAAC   | 866.060765995375 | 0.150447340880198  |
| ATAATTGTGAC   | 866.061447016778 | 0.144840018976982  |
| AGTGACAAGTC   | 866.063618872022 | 0.205991574271973  |
| GTCATCCCCAC   | 866.092602691029 | 0.0952713195023214 |
| TCAGTGACAGA   | 866.099465186666 | 0.174508945210744  |
| GCTGACACTTA   | 866.109201612389 | 0.0863860827838136 |
| TACGGGAGTCA   | 866.124090571939 | 0.166420727921634  |
| ATACA ACTCAT  | 866.134482522501 | 0.145877622849357  |
| ATTTGTGACGC   | 866.172650596187 | 0.14745342484146   |
| CATCGTGTCA C  | 866.190135045311 | 0.145197176554084  |
| AGTCACGCCGC   | 866.226058480204 | 0.134492633360023  |
| GTGTCAGATCA   | 866.230807118622 | 0.207038905862769  |
| CCATAGCGTCA   | 866.236415463484 | 0.228976212455383  |
| GTGATATGTCA   | 866.263245734557 | 0.144963752976357  |
| CTTCCAATGAC   | 866.284123110296 | 0.136750644976296  |
| AAAGAGTCTTA   | 866.321620600804 | 0.193175940619318  |
| AGGACTAATCG   | 866.382028839501 | 0.143198958554377  |
| ACTCTGACAAA   | 866.393057921656 | 0.154329886069696  |
| AGAGTCAGGCA   | 866.435520656005 | 0.143694869081231  |
| CAATGTTGTCA   | 866.466367020047 | 0.18981655658868   |
| AATCGTGACGA   | 866.488889461509 | 0.133388420290912  |
| CCGAACATGAC   | 866.49325336251  | 0.136024268198345  |
| ATCAGGAGTCA   | 866.515276296022 | 0.149470491850916  |
| ACGTCATGGCA   | 866.548770975482 | 0.147352504135501  |
| ACTCGTGACAC   | 866.553690223695 | 0.134335611832825  |
| TGAGTGATGCA   | 866.622537531094 | 0.0951887395317649 |
| TCTATGTGACA   | 866.639388027503 | 0.163109069808462  |
| AGTATGGTGAC   | 866.669787718415 | 0.142544516648756  |
| AGAGTGACAGA   | 866.688976664236 | 0.134240733008681  |
| GAGTCAGGGAC   | 866.698796388168 | 0.095719045689792  |
| GTAATGGGTCA   | 866.709329318751 | 0.170114423305593  |
| ACGTTCTGACT   | 866.735389067113 | 0.160774037473067  |
| AATTACACACA   | 866.738218692301 | 0.13930022329943   |
| TACATGACATA   | 866.742765903253 | 0.16322009638501   |
| AACTCACTCAT   | 866.743349059666 | 0.122724135360588  |
| ATGACAAGGAA   | 866.745925672574 | 0.143915408998989  |
| ATACCAATGAC   | 866.757869952916 | 0.235288598100052  |
| GCCCAGATGAC   | 866.771383825597 | 0.132786403817633  |
| CATAGAGTGAC   | 866.841782778598 | 0.145769344828595  |
| AAGACTGTGAC   | 866.869073410492 | 0.106700636011988  |
| ACCAATGAGTA   | 866.870675292848 | 0.157031071841868  |
| AGACTCAGAAG   | 866.87268844216  | 0.311829687092442  |
| CTGATAGTGAC   | 866.891468185738 | 0.119313495225437  |
| TAGTCGCGTCA   | 867.027663305347 | 0.132427363972569  |
| GTCACAATAAC   | 867.0856669908   | 0.154615212581583  |
| GTGACGATAAC   | 867.085877607946 | 0.116408418306556  |

|             |                  |                    |
|-------------|------------------|--------------------|
| GACTAATTA   | 867.088985213861 | 0.15729131510533   |
| AGTGGCTCAC  | 867.109298757942 | 0.186053823311377  |
| CACATCACTCA | 867.122992734834 | 0.137934532104264  |
| GATGTCTCAC  | 867.12491414737  | 0.0969151145438075 |
| ACTCATACCGC | 867.177147164065 | 0.141030857197692  |
| AAGCAAATGAC | 867.19244273376  | 0.183550083204451  |
| GTCATATGAAA | 867.201529163558 | 0.19904747836415   |
| CAGTTATGTCA | 867.205949275526 | 0.178739235047798  |
| ATGAGTGGTCA | 867.20632336937  | 0.173914844340477  |
| GCGCCAATGAC | 867.274695582894 | 0.306398122310617  |
| TGTGACGCCAA | 867.286175498756 | 0.206334061859184  |
| TGACTACGGAA | 867.30440563346  | 0.0865122855979479 |
| AAATGTGACAT | 867.318186151025 | 0.16468345079386   |
| ACTCGAGTGAC | 867.35223395709  | 0.205968607254594  |
| AGCACAATGAC | 867.355800293633 | 0.26347460853496   |
| GTCATTGGCTA | 867.387120653507 | 0.181295901355656  |
| ATGTTGAGTAA | 867.398647369225 | 0.193654554155635  |
| CCGATTGTGAC | 867.41088183338  | 0.12160765175257   |
| GTCATGCCTCA | 867.449080539434 | 0.167107428363379  |
| GCGTCACATCC | 867.47385873143  | 0.19981462254291   |
| CCGCTTCGTCA | 867.476297691928 | 0.121107425389068  |
| TATAATGACCA | 867.532978757    | 0.16930321648317   |
| ACGTACATGAC | 867.533601594246 | 0.193498631186787  |
| ATGAATCAAAA | 867.53877480631  | 0.162229214827405  |
| ATGACGAGCTA | 867.54465650217  | 0.129735093643698  |
| ATGTCACCAAT | 867.575836316274 | 0.194914493049285  |
| CGGTGACGTTA | 867.627260474737 | 0.14937639230339   |
| CTTGGGAGTCA | 867.633952433432 | 0.167650712387524  |
| ATGACAGGCAC | 867.677130843037 | 0.155833507976804  |
| GGTGACATGGA | 867.712337766277 | 0.133867608390428  |
| ACTCATCTAGG | 867.773477173162 | 0.124696129473291  |
| ACTCATACTGC | 867.781796065844 | 0.138609444096814  |
| GTGAGCAGTCA | 867.823289908358 | 0.135919111640788  |
| ACTCATACCAA | 867.83574684606  | 0.134454785845226  |
| GTCCTACGTCA | 867.836744257235 | 0.146496863951777  |
| CTGACTCGGCC | 867.853492282774 | 0.183660080635837  |
| CGTAGCATGAC | 867.873020250294 | 0.129960821873518  |
| CACGAAGTGAC | 867.897100287922 | 0.153523420531243  |
| CGTCACAAGTA | 867.903550139626 | 0.198250176468156  |
| CGCGTGAATCA | 867.961354812816 | 0.248310335840735  |
| TCTCTAAGTCA | 867.966025327199 | 0.166101656585156  |
| CGCTTTGACTC | 867.99148109263  | 0.139634222844832  |
| ATTAGTAATC  | 868.005438472555 | 0.163697570068594  |
| GTGACTGCCTA | 868.041748525974 | 0.203020603578314  |
| TGGGACTCACA | 868.052718620022 | 0.176156914144391  |
| TGATTCAACAA | 868.08545571248  | 0.163039327545338  |
| ACCAAGTCACT | 868.164281706658 | 0.163798007441871  |
| CGCGAATGACG | 868.174724942055 | 0.169184959033653  |
| GTGACGGAGCA | 868.206942212263 | 0.185103506213705  |
| TATAATCGTCA | 868.22410082453  | 0.200142090754478  |
| ACTTTTGTGAC | 868.236789764536 | 0.185185030756064  |
| CGTCATGGTTC | 868.245459305371 | 0.209812742038487  |
| TGGAAATGACA | 868.265198308387 | 0.112511096226121  |
| ATGGTAATGAC | 868.278097137986 | 0.188354389722872  |

|              |                  |                    |
|--------------|------------------|--------------------|
| CTGACTGGTAA  | 868.279595875814 | 0.199849459861538  |
| AATACTGGTCA  | 868.329187494439 | 0.231781052073721  |
| TCCTAGAGTCA  | 868.334800580941 | 0.170911055561743  |
| ACGTTTGGTCA  | 868.3492477921   | 0.209076138998591  |
| TGGAGATGACA  | 868.358510318447 | 0.101564651449125  |
| CGTCACATCTA  | 868.360803829861 | 0.165094887430029  |
| CTTGATGACCA  | 868.370839132859 | 0.153910912576041  |
| ATAATTACTAA  | 868.388118408094 | 0.15237009470121   |
| ATTATGACCTG  | 868.423174565895 | 0.140127629138794  |
| GATTAGCCATA  | 868.429811657747 | 0.144289946206651  |
| ACATATGACGG  | 868.43039159296  | 0.230062163173279  |
| ACGTCACCTGAG | 868.437030823576 | 0.183637343200867  |
| ATGGCATGACA  | 868.466158613012 | 0.201031500313053  |
| CATAATGACAG  | 868.47190052499  | 0.135673190305382  |
| AGTGTCAGACC  | 868.48941710521  | 0.151730457531932  |
| TGACCAGGTCA  | 868.494121830027 | 0.206689263793938  |
| ACGCTAATGAC  | 868.507306390568 | 0.1366951604361    |
| CCTCTGATGAC  | 868.515560785118 | 0.138374339557763  |
| GTCATGCATTA  | 868.544724360455 | 0.178798756798652  |
| TATAGGTCACA  | 868.562502619081 | 0.133858272971209  |
| GGGTCATAAGA  | 868.578691568339 | 0.129169419263812  |
| GTGACCAAGTA  | 868.59021912121  | 0.150707642953301  |
| CTGTGTGACCA  | 868.62906357803  | 0.194766789490131  |
| ATTTATGACCC  | 868.661619084811 | 0.164718290374823  |
| GGGTCATAGAA  | 868.692944725437 | 0.152731770116371  |
| CACAATGACCA  | 868.69866042038  | 0.133584504167699  |
| AACTTTGGTCA  | 868.710803024143 | 0.204782556374435  |
| GGTCAAATGAC  | 868.712800187739 | 0.157297723360553  |
| AACCCGAGTCA  | 868.733879215383 | 0.150290041811792  |
| GGCTCTATGAC  | 868.750045357849 | 0.222414807409751  |
| ACTCATAGAGT  | 868.76172257375  | 0.188436829503366  |
| TCTAATGACAA  | 868.78453364787  | 0.144185166006996  |
| CACGTCAGAAA  | 868.82692454597  | 0.0971336456961899 |
| ATGACGGTAAA  | 868.848189454464 | 0.14600038945425   |
| AGCTCATGACA  | 868.880632931304 | 0.197555779941925  |
| TATTTTGGTCA  | 868.881518590214 | 0.193041576301714  |
| AACCTCGTCAC  | 868.920961530178 | 0.160423399562585  |
| GTCACTATTGA  | 868.921684750033 | 0.207112535377895  |
| AGGCTGACTAT  | 869.007805839446 | 0.14652537812887   |
| CACTTGTGACA  | 869.024909395099 | 0.140223601301968  |
| GTACGCATGAC  | 869.045771703291 | 0.184405975711493  |
| TCTGGGAGTCA  | 869.060405027466 | 0.152627726739476  |
| AATGGGGTGAC  | 869.08522545249  | 0.122941509653787  |
| CGAGATGACCA  | 869.093034117293 | 0.193137734160399  |
| ATGACGACGCC  | 869.102517420279 | 0.144495569976345  |
| GTCATGCGGAC  | 869.106322191778 | 0.184621307554379  |
| AGTAGTGACAC  | 869.171815113242 | 0.174478553991276  |
| AGCAGACTCAC  | 869.186629018314 | 0.103261302397951  |
| GAAGTGTGACA  | 869.218328081993 | 0.139641723125732  |
| CATATTACTGA  | 869.249235291549 | 0.157353649751006  |
| AGTACTCACAT  | 869.306335920683 | 0.130697552338931  |
| CTCTGACACTA  | 869.306890661565 | 0.131233159446195  |
| AACAGTCAATC  | 869.327328600722 | 0.170841541134943  |
| ATGACGATGGA  | 869.33376412778  | 0.116041067338749  |

|               |                  |                    |
|---------------|------------------|--------------------|
| CACCAGTCAGA   | 869.338013802018 | 0.130571510034481  |
| ACCATGTCACC   | 869.342912686291 | 0.151925615476108  |
| CTAAGGACTCA   | 869.351168712993 | 0.137143327732426  |
| AGTGC GTAATC  | 869.354126913851 | 0.210118980925408  |
| ATGTGCGTAAT   | 869.365171167256 | 0.111878427459184  |
| ATGACGAGAGC   | 869.372502498236 | 0.158213216774024  |
| CTGACTCGCTA   | 869.402179512775 | 0.137449329663295  |
| ACGTCACAGCC   | 869.402784516708 | 0.186638189718792  |
| ACTTTGACGCA   | 869.418926384143 | 0.149287453343684  |
| ACGTTGTGACA   | 869.437580799332 | 0.166996971834089  |
| TCGTTCTGTCA   | 869.462350929467 | 0.222806026286219  |
| CACGTGACAAA   | 869.472146105489 | 0.178657470327629  |
| GAAATGTGACA   | 869.478830855285 | 0.181738081339379  |
| GCCTGGAGTCA   | 869.495334946262 | 0.107204059710881  |
| ATTGAGTCTAA   | 869.503607171597 | 0.138540410194333  |
| GTA CTTGTCAC  | 869.508763596576 | 0.177240618345674  |
| TAGATTACTAA   | 869.516353771679 | 0.136948193251749  |
| ACATCAATGAC   | 869.520898689859 | 0.131401399946196  |
| GCTGAGTCTAC   | 869.562577353257 | 0.191597017742771  |
| GACTCATGGGA   | 869.588420343188 | 0.18460153323614   |
| AACTATGACCG   | 869.596006076694 | 0.150516899720492  |
| GGGCGAATGAC   | 869.613273821082 | 0.128680527187184  |
| ACAGCATGACG   | 869.631278058153 | 0.160057993452961  |
| CCAGTGACCCA   | 869.689628247481 | 0.137365647609959  |
| GTCACATTAAC   | 869.705626513668 | 0.140540224327169  |
| CGCTGTGTCAG   | 869.730297342095 | 0.138313625165113  |
| TACATGGGTCA   | 869.731977892238 | 0.149636036072276  |
| GTCACCACGAC   | 869.749867203509 | 0.170893632852735  |
| GAATATGACCC   | 869.749921368878 | 0.178278443123232  |
| AGAAAGGTGAC   | 869.766555176174 | 0.138349834341488  |
| GTCACTGGTCA   | 869.807804003744 | 0.220921499508948  |
| CGCCCGAGTCA   | 869.827762351143 | 0.0839317946023952 |
| GTTACTCAAAC   | 869.8469770357   | 0.150006883493131  |
| TGACAGGTA AAA | 869.860675443525 | 0.138469039096008  |
| CCGGTGACAAC   | 869.889244558296 | 0.172253619797754  |
| GAAGATGACCA   | 869.908761988996 | 0.18856087094873   |
| CGAAATTGTCA   | 869.91545500725  | 0.229330497992066  |
| ACCGGACTCAT   | 869.926482222777 | 0.0997425638530974 |
| ATAGTAGTCAG   | 869.973895877094 | 0.19485895506687   |
| GTCACAACATA   | 869.977451608404 | 0.162850837899149  |
| ACTCATCGAGT   | 870.009647268222 | 0.153358771850301  |
| GTACGGTCATA   | 870.010679657444 | 0.132538354524825  |
| CGGACTCGTCA   | 870.028622915963 | 0.216945418346634  |
| GAGTCAAAATA   | 870.031563866664 | 0.145228370889709  |
| GGGTCATAAAC   | 870.057761858405 | 0.249954437173399  |
| GTCACCCTGTA   | 870.068281477275 | 0.144525793210418  |
| AAACTATGAGT   | 870.072668087999 | 0.147776405223877  |
| CGTTGCATGAC   | 870.108097638352 | 0.144926148474483  |
| ACGTTATGTCA   | 870.122595300556 | 0.168946007494606  |
| TCGGTACGTCA   | 870.130804283915 | 0.245769492128695  |
| GTATACTCACA   | 870.154376428815 | 0.151807714863424  |
| ACACCAATGAC   | 870.162725795992 | 0.137601177171238  |
| GTGATGTGACA   | 870.163253802102 | 0.136932661942081  |
| CCGAATGTGAC   | 870.170580552319 | 0.235861058129111  |



|               |                  |                    |
|---------------|------------------|--------------------|
| CTCCGCGTCA    | 870.189634672846 | 0.192232345589784  |
| ACTAAATGAGT   | 870.195726016996 | 0.138494926671919  |
| ATGCAGATGAC   | 870.22875969381  | 0.148751046040199  |
| ATGACGGTAAG   | 870.239307114501 | 0.142958853125266  |
| GAAGTGGTGAC   | 870.247480913087 | 0.153951479446687  |
| ATGACGGGATG   | 870.26966706271  | 0.127721576871182  |
| GTCACTTTTGA   | 870.364879469517 | 0.123582067057907  |
| CGACTAGTCAG   | 870.383339944041 | 0.135230600233716  |
| ATAGATGACGG   | 870.401222140365 | 0.12697896076864   |
| CATCTATGTCA   | 870.415567417112 | 0.166103022806955  |
| AATTCTGAGTC   | 870.448213862268 | 0.152039634622124  |
| AGTCGAATCAT   | 870.452337580333 | 0.13051747751306   |
| ACTCATACGTC   | 870.486698920196 | 0.0690391836612853 |
| GGATTGACTGA   | 870.50031912773  | 0.17128339523675   |
| CGACCAGTCAG   | 870.5225957898   | 0.135467192884249  |
| ACACTGACTAT   | 870.540342624514 | 0.15066569032349   |
| CAGTGGTGTCA   | 870.559979911885 | 0.182260945756477  |
| GTCGGAGTCAA   | 870.566242878288 | 0.157710615896748  |
| GATACGTGTCA   | 870.570043515744 | 0.131259281788915  |
| GTCACCAACGA   | 870.570566205322 | 0.160505686765985  |
| GATAAGTGTCA   | 870.576862851356 | 0.129224334655672  |
| GAGTCAGGGAA   | 870.577801580873 | 0.13204281363152   |
| AGTCAGAAAAT   | 870.631929867779 | 0.202590141021257  |
| CACCTAATGAC   | 870.641650616646 | 0.130571989637878  |
| ACTTGTCACAA   | 870.652325157788 | 0.128617918907491  |
| AACGGATGAGT   | 870.656728342128 | 0.136567625649512  |
| ATGGGTGTGAC   | 870.684411027942 | 0.141857554778928  |
| AGCATGGTGTGAC | 870.696834738341 | 0.146016840594668  |
| GAGTCAAACCC   | 870.740996039525 | 0.181718304191115  |
| AATGATGCAAC   | 870.757771661501 | 0.140882261980954  |
| ACTCATACCCT   | 870.76263481108  | 0.137706781707687  |
| AGGTTAATGAC   | 870.771418279625 | 0.112198381743779  |
| CGACTCTGTCA   | 870.77739212095  | 0.193630329212179  |
| GTCATTATAGA   | 870.861286662545 | 0.143871560574929  |
| ACGTCATGTAT   | 870.885381695886 | 0.140550366470129  |
| GCTCCTAGTCA   | 870.975385877781 | 0.144812363665822  |
| CCGTGGTGTCA   | 870.985675218749 | 0.135507182833075  |
| AATGACCGAAC   | 871.022867504729 | 0.174944444939978  |
| GGTGACAGGTA   | 871.045757649806 | 0.115440691140991  |
| GTCACCTTTCA   | 871.072262811676 | 0.146989332277973  |
| GCTATTACTGA   | 871.081470857426 | 0.187999210846238  |
| ATCATAGTGAC   | 871.145587699458 | 0.152168709032164  |
| GTCACAACCAA   | 871.205269210884 | 0.185471304880619  |
| CGCGGGAGTCA   | 871.224576197187 | 0.183448853087981  |
| GTCACCATAAC   | 871.262074357355 | 0.126924908540395  |
| CCCATGGGTCA   | 871.275360385561 | 0.166675180170085  |
| AAAGAGAGTCA   | 871.276508421216 | 0.126409598274183  |
| CTGATCATGAC   | 871.352637820285 | 0.226480473602077  |
| TAGTGATGTCA   | 871.352729013245 | 0.1189603458762    |
| ATGACCGAGAA   | 871.367129345361 | 0.159147779805581  |
| GACCCGTCACC   | 871.386145428593 | 0.136288208905665  |
| AACGTGACGCT   | 871.404675866102 | 0.169601197668077  |
| ATGAATCAAAT   | 871.416491367889 | 0.159977064770112  |
| AAAGCTGACTG   | 871.434557357759 | 0.136749382554582  |

|             |                  |                   |
|-------------|------------------|-------------------|
| AGAAATGACGG | 871.465571659341 | 0.134661593418139 |
| AAAGACTCTTA | 871.488153436678 | 0.139419082928723 |
| TGACTTGTACA | 871.513157584828 | 0.14191415938151  |
| CTGACACTTAC | 871.519222741125 | 0.140241285566993 |
| GTGATGACCGA | 871.571707292829 | 0.13454789099431  |
| ACTCATCCAAT | 871.574251803766 | 0.147470382259635 |
| ATGACGATGGG | 871.618678852813 | 0.133711476852602 |
| CGAAATGACCA | 871.627911690033 | 0.168765317601157 |
| GAATTACACAC | 871.634972081866 | 0.171981919228257 |
| GTCACCTCATA | 871.651604045436 | 0.163457109648279 |
| GCTGACTGCAA | 871.667835693539 | 0.156978210085358 |
| AGATCGGTGAC | 871.68327793287  | 0.177328912579507 |
| TGTCACCACAA | 871.702274446364 | 0.178457698783199 |
| AACGCATGACA | 871.707253382319 | 0.162418456619376 |
| AGTATGACCGC | 871.720822258016 | 0.129367056367583 |
| ACACCTGTGAC | 871.723882549092 | 0.203181935975249 |
| GACGTCACCGA | 871.801496357268 | 0.172718333844981 |
| GATAGTAGTCA | 871.874088968748 | 0.177514456048032 |
| ACTAGGTGACG | 871.874792812797 | 0.171641330249602 |
| TCGTCGTGTCA | 871.880295620988 | 0.171991019005073 |
| GTATCGTCAGA | 871.916093136995 | 0.128897760012825 |
| GTCACCCGAAC | 871.980336050705 | 0.216894155859686 |
| CAGTCGGTGAC | 871.98329334345  | 0.127324340014906 |
| ATTACTAAATG | 872.017437294123 | 0.153192029816965 |
| CGCCCTAGTCA | 872.048625618047 | 0.147218756616829 |
| ACTTGTCACCC | 872.064968901435 | 0.130041154232971 |
| ACCGATGACGG | 872.086678411433 | 0.135636107777518 |
| ATAGACTCAGC | 872.097328773989 | 0.149124493972099 |
| ACGTAAGAGTC | 872.102844288806 | 0.165155214443226 |
| AGTTTGGTGAC | 872.112292424121 | 0.177197869186201 |
| CAGCGGTGACA | 872.113994369528 | 0.179505391348191 |
| CTAAAACGTCA | 872.126172274533 | 0.181730571877616 |
| GTGGTGAGCAA | 872.166412687619 | 0.133655273569617 |
| GCAAATGTGAC | 872.210552560307 | 0.139073048707979 |
| GCGTCACTTCA | 872.239195645042 | 0.162243920694788 |
| AGTCACGCGGC | 872.251763654213 | 0.135811389844628 |
| AGGTGTGACCA | 872.265516052543 | 0.105194797825246 |
| AAGTCACCTCA | 872.269476769064 | 0.096869831970742 |
| GTCACCGGGAA | 872.324492815993 | 0.131848264998464 |
| ATTACACGTAA | 872.329884394462 | 0.283862388926205 |
| CTCAATGTGAC | 872.332872782723 | 0.199189200334049 |
| TATGACCGCAA | 872.335378040951 | 0.153867040786883 |
| CGCGTCACTTA | 872.392819303918 | 0.133886140698742 |
| AGATTCTGACT | 872.478395399087 | 0.135193339960946 |
| ATGTATCACAC | 872.497941500049 | 0.133161308354832 |
| TCAGTCAATCA | 872.50460146238  | 0.141965449369798 |
| ATGTACATGAC | 872.558426590056 | 0.138183873301704 |
| AAGGTGTGACG | 872.569091968454 | 0.1045409892021   |
| GTCATGGCCGA | 872.593460923376 | 0.182347900438839 |
| CTCCGCGTCAC | 872.603347422835 | 0.127968602149983 |
| AGGCTAATGAC | 872.62664081917  | 0.15986655288894  |
| TATGTCACTGA | 872.640938917282 | 0.166580014300819 |
| GCAAGGGTGAC | 872.64467936371  | 0.098472788677533 |
| GAAGCGGTGAC | 872.653278430283 | 0.148031816193255 |

|              |                  |                    |
|--------------|------------------|--------------------|
| TTGTCATTA    | 872.680414450396 | 0.0801377131763047 |
| AACGCGTCAGA  | 872.690541580468 | 0.172593686004366  |
| GGCGGAATGAC  | 872.711832797589 | 0.119470745866146  |
| GATGACATTA   | 872.72159607627  | 0.0984814077473681 |
| GTCACACCAAC  | 872.722222898597 | 0.145219574923421  |
| ACGTCACCGCC  | 872.732147243007 | 0.152929540651284  |
| CGCACTGTGAC  | 872.734543592173 | 0.139387529179382  |
| CCTATTGTGAC  | 872.760670729804 | 0.23555959774024   |
| ATTAGTAAATG  | 872.82725136209  | 0.113518885757325  |
| CACGACAGTCA  | 872.842948722508 | 0.149389651700877  |
| ATTAGTCGACG  | 872.849947044156 | 0.138828967382507  |
| AGTGTCACGGA  | 872.87261913306  | 0.103279676126889  |
| CGTCACAGGTA  | 872.881188984776 | 0.102872755156914  |
| CATCTGTCAGA  | 872.882333963501 | 0.209331528800935  |
| AGACATCGTCA  | 872.898933911812 | 0.164594688701617  |
| AGGGTGACGTC  | 872.902500112369 | 0.156926234842477  |
| ACACATCATCG  | 872.915396149147 | 0.140433105068443  |
| AGTCATGGGGA  | 872.982305298299 | 0.118680386274512  |
| AGAATGACCTT  | 872.98470338919  | 0.120190663634759  |
| CAGTTGAATCA  | 872.990351700442 | 0.165388287744325  |
| GGCCGAGTCA   | 873.005810937463 | 0.172648690098587  |
| TGACCAAATCA  | 873.008768564234 | 0.134925574512295  |
| AAGTCACTAGT  | 873.039403540503 | 0.146836330442058  |
| GTCATGCAGAC  | 873.074968583221 | 0.12414415186824   |
| TATAGCAGTCA  | 873.084485290521 | 0.124446777891379  |
| ATGAGTGAGAC  | 873.088592942721 | 0.167121557368277  |
| TCTTGACGTCA  | 873.102827461708 | 0.122710668660534  |
| CGTCATTATGC  | 873.124461506565 | 0.128529160899492  |
| GAACATGACC   | 873.13298589516  | 0.168317271185434  |
| GCGAATGTGAC  | 873.197690124408 | 0.129213752650136  |
| CGACCATGACG  | 873.215343146713 | 0.146056894644526  |
| ATCTGACAGAT  | 873.231030548454 | 0.147032610417396  |
| CGTGTACGTCA  | 873.236110259525 | 0.154246486415271  |
| GGATGCAGTCA  | 873.245315433703 | 0.124422563758572  |
| GATTACTAAAC  | 873.246296841299 | 0.133085180162034  |
| CGATAGCGTCA  | 873.264354070034 | 0.170839599901276  |
| ATGACGGACGC  | 873.280349020505 | 0.149987713374658  |
| GTCATTTTCGTA | 873.291359547686 | 0.166642547282937  |
| AAACTGATTCA  | 873.307796648637 | 0.187085371278909  |
| GTACTTCGTCA  | 873.360539283742 | 0.18254829530126   |
| CTGGGTGACGC  | 873.392000553347 | 0.132137965899269  |
| AATCGTGACAA  | 873.393228541243 | 0.143652912567364  |
| AACGCGAGTCA  | 873.410096928927 | 0.132458815920693  |
| GTCACAGTGTA  | 873.465517769987 | 0.131375464970049  |
| GAAAGTGACGC  | 873.476211339612 | 0.155949326365589  |
| ACCGGTGACAG  | 873.479484015913 | 0.134932626859761  |
| GGTTAAATGAC  | 873.487941734079 | 0.140662062968232  |
| CTCCTGTGATA  | 873.512721770784 | 0.141319864118405  |
| CGTGTGAGCAA  | 873.532279603187 | 0.121678899351195  |
| GAGTAATCTTA  | 873.560883411343 | 0.270628850774009  |
| ACTCATACGGA  | 873.566478332088 | 0.149744684995187  |
| CTGACTCTCAG  | 873.585951065283 | 0.153405561418845  |
| CCTGACTGTGA  | 873.587395111771 | 0.147204580053283  |
| AACGTCACCGT  | 873.628044492611 | 0.135837064770502  |

|             |                  |                    |
|-------------|------------------|--------------------|
| ACGTCACGTTA | 873.639604234848 | 0.148188006876047  |
| CGATAGGTGAC | 873.655149088715 | 0.150507011205072  |
| CTATGTGACGC | 873.661861015154 | 0.167347404546717  |
| TCATAGCATGA | 873.676497791222 | 0.207002402012815  |
| AAGTCACTTGT | 873.705273808206 | 0.106088584292855  |
| AGCCAGATGAC | 873.76596335545  | 0.215040058692615  |
| TAATGCTGTCA | 873.770537665783 | 0.16339886073747   |
| AGTGACAAACC | 873.794394106566 | 0.144737585997229  |
| GTCACAGCCAA | 873.795968277753 | 0.164790454722282  |
| CATGCTGTAC  | 873.800477948338 | 0.165389442190102  |
| GTGGTCACTCA | 873.816855752432 | 0.166640177078     |
| AGACTAATTC  | 873.817062482286 | 0.152329190065589  |
| AACGTATGACC | 873.846023364423 | 0.158996022442797  |
| AGAGATGACGG | 873.848426962066 | 0.135999735599774  |
| CCTTTTGACTC | 873.871136615717 | 0.119533141169066  |
| AGTCACGAGGG | 873.925267698586 | 0.152501146116434  |
| GACTCACGATC | 873.937562101447 | 0.158450039323009  |
| AGAGTCAAGAA | 873.948893295289 | 0.12910266747045   |
| ATGACAATCAA | 873.961902429654 | 0.163582199086728  |
| CTACCGTCATA | 874.045257649975 | 0.132258308488782  |
| CGTGACCGGA  | 874.065164476704 | 0.152915058720303  |
| ACTCATATTAT | 874.07846177761  | 0.142097632670372  |
| GACTAATTCGC | 874.108684374959 | 0.149612076912251  |
| GTCATTGGTAA | 874.132441983832 | 0.123505829126555  |
| AAGTCAGTAAT | 874.134909359605 | 0.130351486682427  |
| AAATCACGTCA | 874.136883914548 | 0.158262259898017  |
| AATTGCGTGAC | 874.14974001195  | 0.158707153676696  |
| GCGCAATGACA | 874.150883476184 | 0.14725653590757   |
| CTGGATGACCA | 874.175733048051 | 0.139092638362533  |
| CGCTTGGTGAC | 874.193117461188 | 0.150761786861103  |
| AGATCTGTGAC | 874.205408186725 | 0.0874393429026587 |
| GATAACATGAC | 874.208519050746 | 0.147438411474975  |
| ATGACTTGCTA | 874.213105723329 | 0.167300068543626  |
| GTTTGTCACTA | 874.249365441143 | 0.127578295094888  |
| CTAGCCAGTCA | 874.288256538254 | 0.163464888170646  |
| ATTAGTCTGAG | 874.313593945959 | 0.126699667359717  |
| GTCATCTACAC | 874.322367962122 | 0.11047785734936   |
| GTTAAGTGTCA | 874.352162879233 | 0.163699387053477  |
| GTGTCACTAAC | 874.360357052249 | 0.240119075748021  |
| CGTTTAAGTCA | 874.365079457995 | 0.122147857512316  |
| TACTGTGACAA | 874.408953068746 | 0.0965023198493201 |
| CGTACATGTCA | 874.434446288993 | 0.200334534448647  |
| AGTGACGCCAC | 874.445412394762 | 0.182386381636083  |
| ATTATTACGTA | 874.484564937563 | 0.158112891379728  |
| CTGCCATGTCA | 874.505600204808 | 0.0825885634387152 |
| CATTGACTACA | 874.509147814192 | 0.126473833803256  |
| CTCCAGATGAC | 874.535349380675 | 0.157829582595128  |
| TACGTCAGCGA | 874.538702228859 | 0.142998617136872  |
| TGTAATGACAA | 874.585197339736 | 0.242042705365933  |
| ACTAATGACGG | 874.596882764996 | 0.136509797407865  |
| ACGAACATGAC | 874.600269182452 | 0.164891604378768  |
| CCCTTTATGAC | 874.603880975219 | 0.2095606726541    |
| AGAATGTGATA | 874.652506608605 | 0.1351502831887    |
| CCCCGTATGAC | 874.721242338122 | 0.0963430374115284 |

|             |                  |                    |
|-------------|------------------|--------------------|
| AGGGTGAGCAA | 874.732002633083 | 0.132303054850556  |
| ATGACGCCTGC | 874.796127983488 | 0.124462385996102  |
| TGGTCATTACA | 874.799625548608 | 0.137922501679174  |
| ATGAGACTCAC | 874.816636801607 | 0.241029947699707  |
| GTGAAGTGCA  | 874.828382837374 | 0.16851690200245   |
| ATGACGTCTGA | 874.845669390476 | 0.221663465109034  |
| AGCGTGTACC  | 874.851150237089 | 0.171774128109088  |
| CGTTGACTACA | 874.877441233397 | 0.140849489856232  |
| ATGTTCTGTCA | 874.900894921822 | 0.129182407263603  |
| ATGACCACTGC | 874.909539358042 | 0.0753374836312554 |
| AGTTGGCTCAT | 874.913459027253 | 0.142051727110902  |
| AAGCTGTCACA | 874.92314712804  | 0.172775089899047  |
| GTCACCTGTTA | 874.931336984735 | 0.13217940551139   |
| GTGATGTCAGA | 874.937374074369 | 0.0923529441367678 |
| AGCGATTAGTC | 874.942492654899 | 0.131300106143812  |
| CATCGTCACCG | 874.962124333806 | 0.153694393701105  |
| AACAATGAGTA | 874.977113529576 | 0.126154093395249  |
| CTACTAATGAC | 874.985267309802 | 0.145773891687647  |
| GCATCGTACC  | 875.011359945935 | 0.154290694924332  |
| AAGGGTGACGA | 875.011435539067 | 0.131300856351935  |
| ATGACGTTCAC | 875.014549313824 | 0.124818289355009  |
| AGATTTGGTCA | 875.017448886653 | 0.156985306991985  |
| CGTAATGTGAC | 875.055122936953 | 0.125037308833079  |
| GAATTGACTGA | 875.066645944716 | 0.176516500744407  |
| CCGATGATACA | 875.075609531614 | 0.166036281733771  |
| CGATTACTGAC | 875.084102354197 | 0.133729874907771  |
| ACTCATCGTTA | 875.086990100974 | 0.158243452636021  |
| AAGGATGACCC | 875.090157884088 | 0.16892427803      |
| CTCTGTGTGAC | 875.092065731961 | 0.199019842902183  |
| GATGGCTAATC | 875.097873517932 | 0.0954037048580509 |
| ACAAAACGTCA | 875.112108877307 | 0.174375638617193  |
| ATGGTGACGTC | 875.122321709538 | 0.1737235351815    |
| ACAGTGTACG  | 875.132155988838 | 0.131801720325576  |
| ATGACGGGGCA | 875.1561497941   | 0.129771982309444  |
| GTCATTCGAGA | 875.175607142461 | 0.169380378071507  |
| AATTGTGACGA | 875.205030480105 | 0.130003273095313  |
| ATATCGTGACG | 875.259016438484 | 0.159945138892935  |
| GGAGTGACCAA | 875.260388105084 | 0.163321418543125  |
| CGCTATTAGTC | 875.27709568892  | 0.196772042028376  |
| GTCATTGAATA | 875.299179047446 | 0.169199986506575  |
| GCGTCACCTGA | 875.348215841916 | 0.126253955117638  |
| GCCCGTGACTA | 875.357130227664 | 0.17407936492482   |
| ACACGTGACGT | 875.359782017745 | 0.17824034545606   |
| CCCTCGACTCA | 875.367647880033 | 0.134559860979847  |
| AGCCTACTCAT | 875.371750707203 | 0.134810869065191  |
| CACTATTACTC | 875.417085286258 | 0.146572398162774  |
| GTCACTGATTA | 875.418083244599 | 0.221767113511009  |
| ATGAGTATGCG | 875.426507360343 | 0.1034014923733    |
| GTTTTGACTGA | 875.439020636465 | 0.138622116904011  |
| ACCTGTCACAA | 875.452655167181 | 0.1270876700084    |
| CACAGTCAGTG | 875.472081962746 | 0.156559253578561  |
| ACTCATCGATA | 875.480387194952 | 0.146304950965853  |
| ACCGTGACGTG | 875.527834236657 | 0.223877235389752  |
| ATGGCGGTGAC | 875.553921743561 | 0.170742222835724  |

|             |                  |                    |
|-------------|------------------|--------------------|
| AAGCCTGTCAT | 875.560012698677 | 0.171641586882233  |
| CAGCACGTCAC | 875.563553502994 | 0.126993506646843  |
| ATGAGTACGCC | 875.569821989278 | 0.200481698344373  |
| ACTCATACGAC | 875.591718412822 | 0.126018741657243  |
| CCCTACAGTCA | 875.595013904998 | 0.114228047467796  |
| AGCAGTGTGAC | 875.601545585056 | 0.237844695594303  |
| CTTTAGTGTCA | 875.62239081352  | 0.13614726721893   |
| CAGCGGTGACG | 875.639445492133 | 0.17411097321157   |
| AGCGTGGTCAT | 875.649765936545 | 0.078181700418137  |
| AAGATTACGCA | 875.689707333967 | 0.0916459452713301 |
| CTGACTCCGCC | 875.72479248589  | 0.129312739347203  |
| AATTGTGACAT | 875.737799312863 | 0.13227014515499   |
| TGACACGTGCA | 875.740252289723 | 0.197662378239507  |
| CTTCGTGTGAC | 875.741364397316 | 0.146569312741359  |
| ATGAGCAACTG | 875.761065444617 | 0.125022156859435  |
| ATCCCTAGTCA | 875.780090559337 | 0.118602275877348  |
| TGACCCACTCA | 875.853579805102 | 0.136014008669283  |
| CCACGTGACAC | 875.915111951134 | 0.139430788363719  |
| GTCACTCTGGA | 875.952364641618 | 0.152264433987518  |
| CCAAATTAGTC | 875.970153948441 | 0.161909965068538  |
| ACAAAGCGTCA | 875.990131837233 | 0.113351024478395  |
| TACCATAGTCA | 875.992791782028 | 0.139501234313764  |
| GCTCTGACGAA | 876.009198242903 | 0.178603528696145  |
| CCCCGAATGAC | 876.021531879067 | 0.180305671372485  |
| ACTCATTTTAA | 876.021870746237 | 0.128336743542205  |
| GTCACACCGCA | 876.078973974731 | 0.163899166452504  |
| AAAACACGTAA | 876.114735754749 | 0.151065205893776  |
| CAAGTACGTCA | 876.15140720198  | 0.120928147975478  |
| ACGTCACGTCT | 876.179977392759 | 0.17096660109623   |
| CGTGTTGGTCA | 876.18015483561  | 0.137625271286763  |
| CAGAACTGTCA | 876.195820120345 | 0.245145349512684  |
| AGGTATGTCAC | 876.197879954006 | 0.147142311309572  |
| ACGCATAGTCA | 876.226960331009 | 0.113560788492958  |
| CACGCGGTGAC | 876.262972738309 | 0.154373550977724  |
| ATGAGTAGTCG | 876.266074006547 | 0.116164641253356  |
| ATGACGTCTCC | 876.371600394559 | 0.136632027884341  |
| ACCCTGTGACA | 876.391785929557 | 0.160094701531894  |
| GGTGGCGTCAC | 876.422223010481 | 0.146040987926527  |
| TAATATACTCA | 876.42750271234  | 0.197421771260453  |
| CGTGACTCAC  | 876.450948813526 | 0.142829009156824  |
| CCATGGTGACA | 876.48664273973  | 0.125924803697985  |
| ATTGCATCACC | 876.492820449607 | 0.0942183487967389 |
| GGGACTAGTCA | 876.496377088702 | 0.126185126661919  |
| TGCATCATACA | 876.547396950367 | 0.155298369415557  |
| CAAATGTGACG | 876.564187454989 | 0.0796604430431612 |
| CATGTATGTCA | 876.585376688774 | 0.180348077100556  |
| GTTACATCACA | 876.622794861726 | 0.083587630888801  |
| GACTGTGACGA | 876.637896974935 | 0.208613725385298  |
| AGACTCACGGC | 876.699501067194 | 0.105149455806908  |
| GGCTGGATGAC | 876.728461723544 | 0.0952375206808701 |
| CAGTCAGCCGA | 876.78111233093  | 0.196255273827803  |
| CGGAAGTGTCA | 876.783090500812 | 0.122443075852681  |
| AAGAGAGTGAC | 876.798610635216 | 0.129836249463694  |
| AGTTTGACTCG | 876.800096008251 | 0.138130016456743  |

|              |                  |                    |
|--------------|------------------|--------------------|
| GTATAGGTCAC  | 876.876000129602 | 0.151481126086647  |
| AACTCGTGACA  | 876.88553500723  | 0.20417719238019   |
| CGTCATTA AAA | 876.896072987544 | 0.176914565067821  |
| CGTCACATTTTC | 876.923665291677 | 0.124118917971074  |
| AATGTTGTGAC  | 876.92726996056  | 0.151962161838568  |
| CGCACAGTCAG  | 876.979596328186 | 0.162160888694539  |
| AATGAATGAGT  | 876.998397414864 | 0.118767903838382  |
| CACCTGTGACG  | 877.009890868395 | 0.191689741648572  |
| AGGCAAGTCAT  | 877.036920812125 | 0.188537191517266  |
| AAAATGTGACA  | 877.038287722996 | 0.145303577372301  |
| AGACTCACTTG  | 877.047681034274 | 0.154513234529325  |
| ATGACAATCTA  | 877.07161480519  | 0.164610890387589  |
| ACGGAATGAGT  | 877.071825360993 | 0.121531620558098  |
| ACCCCGTCATC  | 877.075065923035 | 0.125657466879458  |
| CCCGGTGACAA  | 877.076643820862 | 0.170905368821115  |
| GGTGACGATGA  | 877.08036226613  | 0.126905682420354  |
| ATAATATGACC  | 877.100968542296 | 0.129582870151361  |
| GCCGTGCGTCA  | 877.102345431653 | 0.202902783184076  |
| GTCACAGGTAA  | 877.102759826141 | 0.137493646235216  |
| AGTCACGACGG  | 877.103012012309 | 0.132545356172158  |
| ATGTCATGAAT  | 877.129290093069 | 0.121223439672198  |
| ATGAGTGTGTC  | 877.136292170578 | 0.121637583487111  |
| GATTCGGTCAC  | 877.142018344344 | 0.164965005995182  |
| GATTGGTGACA  | 877.167993119195 | 0.136943987267107  |
| GGTCATAATTA  | 877.214299581517 | 0.111103519585822  |
| TGAACTGGTCA  | 877.230052050362 | 0.107426074433016  |
| CGTCGAGTGAC  | 877.235797636914 | 0.142712205003457  |
| ATGACAAGGAG  | 877.279498442389 | 0.14831306620636   |
| AAGTCTGACGC  | 877.331486488589 | 0.128127128890418  |
| GTCACTAATTA  | 877.347900223471 | 0.12985907580783   |
| GAGTGTGTGAC  | 877.363257755872 | 0.12843876499722   |
| GTCACCGTTCA  | 877.377522260192 | 0.134339098910972  |
| TACCAGAGTCA  | 877.379038436924 | 0.168879747923028  |
| GGTGACAGTAC  | 877.38697473336  | 0.123570424093616  |
| GTCATTGCTGA  | 877.414672206144 | 0.154920868580684  |
| AGGTAATGACG  | 877.426805469222 | 0.112923422116771  |
| ATGACTTCTGA  | 877.432217892004 | 0.138198863310879  |
| GTCACCGCCTA  | 877.436821446696 | 0.189996005986245  |
| TGATGTGACAA  | 877.437158307925 | 0.159227156673626  |
| CTGCTGAATCA  | 877.457880509845 | 0.115603295343633  |
| ATGACGACTCC  | 877.459190934981 | 0.113572858998022  |
| GTCATGATTGA  | 877.461447684364 | 0.141471314413787  |
| CCGACATGTCA  | 877.463127053912 | 0.190789057428027  |
| AACGTCACCGA  | 877.507222407109 | 0.185451971875386  |
| AGACGTCACCG  | 877.541125198289 | 0.158527974992329  |
| AACA ACTCATA | 877.552630514436 | 0.154651561295452  |
| GAAGATTATC   | 877.555513355593 | 0.160801296485905  |
| GATAGGGTGAC  | 877.558564855504 | 0.12662591483624   |
| CTATTACTCTA  | 877.588515278181 | 0.124209684747826  |
| GATTACGTATA  | 877.6132362443   | 0.132805270357093  |
| AGCTAGATGAC  | 877.634579079882 | 0.0986158341317738 |
| TTACGTAAGAA  | 877.655754343987 | 0.12874781852983   |
| CCTTTTGGTCA  | 877.663101556068 | 0.132310709900462  |
| CTCGTGACGAA  | 877.680747578948 | 0.0528038611602895 |

|              |                  |                    |
|--------------|------------------|--------------------|
| ATACCAAGTCA  | 877.680882212985 | 0.161640181966196  |
| AACATGGTCAT  | 877.702491400867 | 0.128278732870496  |
| AGGGGTGACGC  | 877.793277526244 | 0.154208323287682  |
| TGACTGCACCA  | 877.810914965296 | 0.139925814814939  |
| ACTCATCTAA   | 877.826013415477 | 0.13731900820466   |
| AGCTCGTGACT  | 877.840820451945 | 0.0897230233270046 |
| CCTCGGGTGAC  | 877.853866098126 | 0.158681840296244  |
| TCGTAGCGTCA  | 877.884722905007 | 0.146258104725591  |
| TAACGCAGTCA  | 877.921097807812 | 0.185723440764233  |
| CAATCATGACG  | 877.923166276696 | 0.138757793665094  |
| CCACGCAGTCA  | 877.927048870376 | 0.174294362355647  |
| ACACTCTGACT  | 877.931418403668 | 0.127410655845865  |
| GATGAGTAGAC  | 877.985228858925 | 0.145558242536922  |
| CCCAAAATGAC  | 877.991845501847 | 0.168945883121611  |
| GGTTGCAGTCA  | 878.00029954717  | 0.158615952546993  |
| GAACACGTGTC  | 878.004217379508 | 0.162135018617926  |
| AAATACGTAAT  | 878.024437490086 | 0.182990522818518  |
| ATGACAGGGAC  | 878.03433426348  | 0.144219829129071  |
| GATACTGTGAC  | 878.069220112255 | 0.190415651966055  |
| GTATCAGTGAC  | 878.084932797528 | 0.125089029919116  |
| AGTAAGGTGAC  | 878.119174577116 | 0.127569674755386  |
| CGACCTGACTC  | 878.124795708523 | 0.119693091111176  |
| TATGACGGGCA  | 878.126071281893 | 0.150181622658713  |
| ACCCGTGTGAC  | 878.132943895067 | 0.154593880156124  |
| AACTGTACTCA  | 878.16068662046  | 0.163470892507644  |
| CCGCTGGTGAC  | 878.162786478041 | 0.1188297354471    |
| GATTTGTGTCA  | 878.163602707267 | 0.0795685148372708 |
| GTCACCCACTA  | 878.18362538992  | 0.108499859879712  |
| AAGACGGTGAC  | 878.25700685246  | 0.153526970752151  |
| ATCTCAATGAC  | 878.270958196114 | 0.115411051759709  |
| ACTCATTTCCGG | 878.276682606417 | 0.120956168421762  |
| GATTAATCACA  | 878.299591127963 | 0.166041574661541  |
| GGGTAATGAC   | 878.310260337388 | 0.121064833142948  |
| AGTGGTGACAT  | 878.316649590622 | 0.140875385020022  |
| GAATACATGAC  | 878.329716682986 | 0.159109244733907  |
| GTCAGTAATAA  | 878.381151030938 | 0.0960726985275785 |
| AGAGTAATTTG  | 878.410150149777 | 0.13932234187354   |
| CGACTAATCAC  | 878.415065506351 | 0.166496274663714  |
| ATAAGAGTGAC  | 878.46704018163  | 0.151623822444097  |
| GCTGAGTAAAC  | 878.491532690726 | 0.155591411052341  |
| GTCATGTACAA  | 878.496778017915 | 0.222650244548897  |
| AGTCTGACCCA  | 878.497503570042 | 0.138077933349987  |
| ACAGCATGACA  | 878.505702049973 | 0.0913995973607463 |
| GTCATTGAAAA  | 878.550450637558 | 0.21492923300546   |
| GGCGTACACAA  | 878.595777649309 | 0.128248271016774  |
| GACAGCGTCAC  | 878.604205127615 | 0.185914252235597  |
| ATGTCATTATG  | 878.605072328976 | 0.166591579920025  |
| ACTGATGACGG  | 878.618406131113 | 0.134834542756666  |
| GTCATGCTAAA  | 878.648053114005 | 0.151866553887052  |
| ATGGGTCAACG  | 878.670230697724 | 0.140905275932674  |
| GTCACCAAAGA  | 878.683224600609 | 0.161974964880123  |
| ATCGTCACTCA  | 878.714080490798 | 0.133965606707741  |
| AAATGTCATCT  | 878.722749877831 | 0.168766039449008  |
| ATTGGGTGACA  | 878.737011362765 | 0.128293777893537  |



|              |                  |                    |
|--------------|------------------|--------------------|
| TCGTTTTGTCA  | 878.750708865317 | 0.0861823309098903 |
| GTCACCGGCTA  | 878.753881801922 | 0.135182955103086  |
| CGAATGGTGAC  | 878.795965750213 | 0.155099699279732  |
| TCCGTCACTAA  | 878.84301541358  | 0.127272944630522  |
| CAGCCTGACTC  | 878.876710813823 | 0.123526755155441  |
| AATATGTGACG  | 878.877965785239 | 0.150023474328551  |
| AGTCACGAGGA  | 878.963566541684 | 0.128765550440255  |
| GCGGTGACAAC  | 878.988042961716 | 0.190853803214856  |
| AGTCACGGACA  | 878.988275143191 | 0.126704626359832  |
| ACTCATCTTTA  | 878.995143126957 | 0.125283979607413  |
| GTGACGCGCGA  | 879.021533087231 | 0.181286956017358  |
| GGAAGTAGTCA  | 879.029210439602 | 0.187308228795452  |
| AAAGCAATGAC  | 879.037527789022 | 0.179057523106628  |
| GAAAATTAICTC | 879.058282639872 | 0.148707630338369  |
| ACAGTAGTGAC  | 879.096382755441 | 0.225458029093117  |
| ACAGGATGAGT  | 879.122199646663 | 0.17306523608109   |
| CACGTGACCCA  | 879.123967300969 | 0.143734372910275  |
| ATAGACTCAAT  | 879.135941514916 | 0.1665845048593    |
| GCCTTGTACACA | 879.15369632757  | 0.136817510416174  |
| TGACAAAACAA  | 879.160928856147 | 0.155879696854954  |
| CGTCATTACCA  | 879.179993423318 | 0.109669299928782  |
| CAGGCGGTGAC  | 879.180662843346 | 0.161699726708283  |
| AACGGGAGTCA  | 879.255079176204 | 0.129547591612944  |
| GACTCACGCAC  | 879.267920347058 | 0.182752911292838  |
| ATACGTCAATG  | 879.340471477845 | 0.145129905166277  |
| ACGGGTGTGAC  | 879.354931946882 | 0.1619207403447    |
| CATCCATGACA  | 879.414887964025 | 0.209788057141109  |
| GAGGAGTAATC  | 879.415397995384 | 0.133224959264015  |
| ATATTGTGACG  | 879.467867541218 | 0.130365963313437  |
| GCGTCACCTTTA | 879.479645293355 | 0.164713139401671  |
| CCTGTAATGAC  | 879.487304674429 | 0.168430957530021  |
| AGTGTGACCGA  | 879.497987484631 | 0.132336083282765  |
| CGTCATTTCCC  | 879.501754360013 | 0.125370351382167  |
| CGATCATGACG  | 879.516891705931 | 0.153336572795919  |
| ACTCATCGGAA  | 879.54911141765  | 0.229645916762194  |
| ACCGTGACCCA  | 879.552883972875 | 0.12166345002244   |
| TCGGCGTCACA  | 879.575718957336 | 0.115536058887812  |
| GCGACTAATCC  | 879.607270515692 | 0.14061295271255   |
| CATGACGCGGA  | 879.653882730079 | 0.246255560256611  |
| GCGTCATGAGC  | 879.655248710198 | 0.151058064681909  |
| CATCAGACTCA  | 879.678436888612 | 0.0602862877394207 |
| ACTCATACGCA  | 879.693397155211 | 0.140806754307563  |
| CCGCGTGTGAC  | 879.711845347108 | 0.11816908566214   |
| ATAACAGTGAC  | 879.731301098004 | 0.13541730076884   |
| ATGACAGGGTA  | 879.746197455342 | 0.120454113005452  |
| CTTATTGTGAC  | 879.7494061581   | 0.135530431101466  |
| GCGTAATGACA  | 879.749886053237 | 0.113037507487729  |
| ATGCGGAGTCA  | 879.777951424281 | 0.147901817240957  |
| ATTTGACGCAC  | 879.793571078394 | 0.117745154693606  |
| ACAGTCAGCTA  | 879.802442953376 | 0.124463320531144  |
| ACGTCACAGAA  | 879.825607322531 | 0.0839270352539733 |
| CGATTATGACC  | 879.840475364971 | 0.18609496828585   |
| GCCGTGTGACA  | 879.852515059829 | 0.168510904320703  |
| TGTCACATTAA  | 879.895970151648 | 0.137511723706237  |

|             |                  |                    |
|-------------|------------------|--------------------|
| TGATAATGACA | 879.89994591206  | 0.13977272174507   |
| GTCATTACGGA | 879.924147143811 | 0.154573812165065  |
| AGTCACGGGTG | 879.9374682679   | 0.147190021960091  |
| ACTGACAGTCA | 879.966226394854 | 0.224920216791869  |
| TAGATTACGCA | 879.994944784528 | 0.190176894370001  |
| AGCAACGTAC  | 880.106945380408 | 0.190843084081004  |
| ACGACTTGTC  | 880.114952891976 | 0.16272960789863   |
| AAGATCATGAC | 880.136572926465 | 0.143542115543977  |
| CAGTCAGCGAG | 880.141497569238 | 0.126639828505607  |
| GTCACCCGCA  | 880.147965461893 | 0.14215354240995   |
| AGGGAAATGAC | 880.153620265624 | 0.121146741725912  |
| GGACCCGTAC  | 880.186038689508 | 0.177918856327923  |
| CATTAGTGTC  | 880.18681747803  | 0.15489708253564   |
| CCACATGACAC | 880.192786737218 | 0.162696661333157  |
| ATTGGGTGACG | 880.208632004002 | 0.132386120124459  |
| CTATGATGACC | 880.209925929769 | 0.118499914320525  |
| CATGATGCCA  | 880.21163817888  | 0.14447250660465   |
| GTAGTGACGGA | 880.225807112284 | 0.118938032788282  |
| AACGTAATGAC | 880.233826987954 | 0.114777609178788  |
| CAGCCGACTCA | 880.26216763701  | 0.0831520722918235 |
| ACGTCACGATA | 880.274446476614 | 0.0730728049726481 |
| ACCGCTGTCAT | 880.289624165452 | 0.154576903073111  |
| CATCACGTAC  | 880.290699841204 | 0.150845796422128  |
| AAGATGAGTAG | 880.3466773797   | 0.119851288405887  |
| GACTAATCGGA | 880.370877699473 | 0.161460384763082  |
| ATGACGGGACA | 880.41090170632  | 0.118103386744585  |
| CTGACACTTTC | 880.44881319125  | 0.136059392064063  |
| CCAAGTGTGAC | 880.457699096334 | 0.118466129820399  |
| CCACCTGACTC | 880.466448891992 | 0.12065848030355   |
| ATGATGCGTAA | 880.474775693823 | 0.142905080923415  |
| CGCTTGACTGA | 880.492033536206 | 0.113402726061034  |
| GCAACGTGTCA | 880.493574485222 | 0.184552071069022  |
| CCGATAATGAC | 880.50542044716  | 0.160265642137132  |
| ACTGGTGACAT | 880.542977027497 | 0.102146278691624  |
| CTTACTGTGAC | 880.584156431533 | 0.159126473542612  |
| GTCACACAGTA | 880.59457443599  | 0.10336854841154   |
| ACGGACTCACA | 880.603345923661 | 0.139117521161021  |
| GATTAGCAATC | 880.644176885402 | 0.145414345950598  |
| GTGTCATGAAC | 880.646756257739 | 0.158738247924195  |
| GTACCGACTCA | 880.652124102397 | 0.102963620556818  |
| ACTCATAGGGA | 880.653585642656 | 0.145242006485295  |
| GTCACACTCCA | 880.698870335915 | 0.0939387125530348 |
| CCATTTGACTC | 880.706751716605 | 0.116987161380363  |
| GTGAGCAACAC | 880.714605361021 | 0.123097322039716  |
| AATAGCATGAC | 880.741532167034 | 0.186956430856795  |
| ACCACACGTCA | 880.75119930636  | 0.114721257798311  |
| GACTAATAATC | 880.768849659324 | 0.237505101422909  |
| AGTTTAGTGAC | 880.784087280343 | 0.161493207528142  |
| ATACGATGACC | 880.811202070767 | 0.108956483823571  |
| ACCGATGTGAC | 880.818020686553 | 0.177751745218746  |
| AGTAAGAGTAA | 880.826512304024 | 0.121425568644153  |
| ACCCAAGTCAT | 880.828515338169 | 0.0972014341899183 |
| CGTCACCGACC | 880.887337543145 | 0.122474247297436  |
| ACAAGTGAGTC | 880.906798815978 | 0.0990165754378108 |

|             |                  |                    |
|-------------|------------------|--------------------|
| GATGGCATGAC | 880.920110674827 | 0.178348137210453  |
| ATCCTACTCAT | 880.944056095884 | 0.117141313521206  |
| CTACTGTCATC | 880.947791829    | 0.124135044623916  |
| CCTTTGAATCA | 880.978023205738 | 0.157546505487906  |
| CTTCCCAGTCA | 881.012061699151 | 0.178273791740875  |
| ATTACGCACAC | 881.023950544487 | 0.168338746918589  |
| AGTCAGAACT  | 881.031236094605 | 0.169233509496385  |
| ATCGTGACAGA | 881.055666789215 | 0.144017534368094  |
| GAGTCAAATAA | 881.060463089438 | 0.12694449023209   |
| ACGGTTGTGAC | 881.066656518965 | 0.207065600396606  |
| ATAGGGTGACG | 881.092363726174 | 0.133922811618772  |
| GAGTTCGTCAC | 881.103810833418 | 0.171997988268773  |
| GAGTCAGGTGA | 881.121692841981 | 0.12460785620343   |
| CGAGGGGTGAC | 881.126854376855 | 0.134256585553774  |
| CTAATGAGCCA | 881.134506812902 | 0.150123867001027  |
| AGAGTTGTGAC | 881.156585659622 | 0.133172906906941  |
| CGTCATTACCC | 881.161490255361 | 0.125730730699138  |
| GCGTTCGTCAC | 881.17318826463  | 0.196350350807004  |
| ACTTTAATGAC | 881.197128636023 | 0.185062225633213  |
| GAGACTAGTCA | 881.20423099097  | 0.115573642679657  |
| CGTCACAATAG | 881.214247996627 | 0.177403995791026  |
| GCCAGCATGAC | 881.22961038005  | 0.162044237477951  |
| CTCGACAGTCA | 881.25237889251  | 0.14176188964226   |
| ATATGTCGTC  | 881.293631470382 | 0.163305269637531  |
| CAGATTACTAA | 881.30989284361  | 0.1487857827021    |
| CTGTGGTGACA | 881.310377691055 | 0.133654328813937  |
| CTACATGTGAC | 881.311354803514 | 0.170895395524727  |
| CGTCACAGTGA | 881.332456712237 | 0.138877175805087  |
| AACTCAGTCAA | 881.340060816991 | 0.175757875678568  |
| AACATGTGACG | 881.357902414523 | 0.132700348934156  |
| CTGACGGATCA | 881.360562750871 | 0.199517008564516  |
| AGCTGTAGTCA | 881.382542053381 | 0.213725466855177  |
| GTCACCTGTAA | 881.384023740536 | 0.17549766102499   |
| GGCTCGAGTCA | 881.394454264242 | 0.148916306313341  |
| ATTGATGACGG | 881.399367518234 | 0.139521903985126  |
| TCTAGGTGTCA | 881.418633202632 | 0.187897813385214  |
| GATCTGTGACA | 881.438482847127 | 0.1342947663674    |
| CGAGTCAAAGC | 881.441763187323 | 0.122108512549378  |
| TAACTTGGTCA | 881.46332643215  | 0.153251895733708  |
| GTTTGTACCGA | 881.483540480565 | 0.143110679244472  |
| GATGACAGGGA | 881.499041839761 | 0.11986522336709   |
| GACGGTGACGA | 881.501277299126 | 0.127397777453795  |
| GTCACAATCCA | 881.506458898926 | 0.130857151959971  |
| CAAAACATGAC | 881.511002116223 | 0.157272387963191  |
| ATTACACACAA | 881.569199613344 | 0.137098911140478  |
| CATAGTGACAC | 881.578555873369 | 0.142676678862272  |
| CAATCGTGTCA | 881.58619691434  | 0.160909510111274  |
| TCGACTCGTCA | 881.6689101283   | 0.222603049930679  |
| GTGACGAACCA | 881.686210277081 | 0.143794476597589  |
| AAGACTGATTA | 881.698307770687 | 0.119156582406127  |
| AATCAGACTCA | 881.722616391257 | 0.211148662996227  |
| CATCCGTGTCA | 881.741513925154 | 0.121062137509828  |
| CAAGGGTGACA | 881.843733296491 | 0.162855801108647  |
| ATGACAACCAC | 881.846704479482 | 0.0929110728825437 |

|             |                  |                    |
|-------------|------------------|--------------------|
| ACCTGGTGACA | 881.863798724274 | 0.163248529624081  |
| ACTCATAGATG | 881.899064819327 | 0.152891787772697  |
| ACTCTCTGACT | 881.917680729849 | 0.12245106241437   |
| GTGAGTTGTCA | 881.92648723111  | 0.14839523086311   |
| CGGGTCATGAC | 881.927950394496 | 0.15628766733091   |
| CGTCATGGTAA | 881.931378147258 | 0.152016317088209  |
| ATGGTACTCAC | 881.955995280002 | 0.115942703687981  |
| ACAGTCAGTCG | 881.963281588878 | 0.140588115117145  |
| CTTACAAGTCA | 881.997717962895 | 0.144016688585934  |
| ATGTTGCTCAC | 882.020667277303 | 0.127544958464881  |
| CGGACATGTCA | 882.029930151217 | 0.136326680847045  |
| ACTCATTCTG  | 882.088931201002 | 0.154609234975644  |
| AAGTGGTCATT | 882.095893535452 | 0.118442904303321  |
| AGATGTATCAC | 882.114022505738 | 0.117040771759754  |
| CACGAGTCAAC | 882.147787247887 | 0.124544384169299  |
| AATGACCACTC | 882.163037418749 | 0.138559122942804  |
| AGTCGTGACAC | 882.180718153546 | 0.139043308742656  |
| AGTGACGTGCA | 882.183292310656 | 0.126680168495427  |
| AATTGTGACAA | 882.213109795336 | 0.119348442817303  |
| ACCGTGTGACG | 882.250170314573 | 0.171523261542065  |
| AATGGTAGTCA | 882.265908211786 | 0.100179045842803  |
| AACACGTAACC | 882.267233627964 | 0.102271286141491  |
| GTGCCCGCTCA | 882.292855460255 | 0.138249104070879  |
| CTGACTAGTCC | 882.352257394828 | 0.139427008532575  |
| GCCATGACACC | 882.432828920493 | 0.135350219071583  |
| AGTTTGACTGA | 882.460114168154 | 0.10500202403153   |
| ACTCATGACAA | 882.495582588915 | 0.163992691640359  |
| CTCATCGATGA | 882.499636067487 | 0.140324435156013  |
| CAGCGCGTCAC | 882.527965663787 | 0.155816747667919  |
| GACGAGGTGAC | 882.534244143579 | 0.144205302635314  |
| CCGACGTATC  | 882.544806567581 | 0.146494614127829  |
| AAGTGCATGAC | 882.553038673168 | 0.126541760686104  |
| CGACTAATTAA | 882.623058211938 | 0.174080645715556  |
| AACGTGACACT | 882.640370045024 | 0.129560389674709  |
| GTCACCACAGA | 882.656795494018 | 0.146082834796815  |
| GGGCATATGAC | 882.672931037523 | 0.204337482385777  |
| ATCTCGGTGAC | 882.673315032535 | 0.101837783085849  |
| ACCTCGTCACA | 882.695734089413 | 0.135396150619192  |
| AGACTCTGTCA | 882.732764874801 | 0.137577280643008  |
| CCACTTTGTCA | 882.755466660191 | 0.124894760822911  |
| GAGATGGTAC  | 882.763374698837 | 0.114673269404891  |
| AATGGTGACAT | 882.784275443724 | 0.159708290656367  |
| ACTGGGTGACG | 882.786925710703 | 0.10876309724593   |
| AAGTTAAGTCA | 882.81990279902  | 0.150034897242945  |
| AAGTCACTTCG | 882.820150153315 | 0.154797191957154  |
| GAAGCGAGTCA | 882.856624550721 | 0.161053006944378  |
| CACTAGGTGAC | 882.870173337373 | 0.198255845252006  |
| GATAGGTACCC | 882.87221530255  | 0.132702394174531  |
| GTCACCCAAGA | 882.876952096273 | 0.136815765142848  |
| TGGGATGACCA | 882.885686696289 | 0.127400664915607  |
| GAGTCAAACCA | 882.894883898937 | 0.244436806422185  |
| AGCAGTGTAC  | 882.924580286077 | 0.122167495259156  |
| AATGGTGACAA | 882.927094820029 | 0.190303346879937  |
| CCCTAGGTGAC | 882.973461788643 | 0.0810915856900946 |

|              |                  |                    |
|--------------|------------------|--------------------|
| ATACAGTCAGG  | 882.975581333663 | 0.135752871599588  |
| GGAGTAATGAC  | 883.031372908727 | 0.116725384069101  |
| ATCCGTGTCAC  | 883.033262918922 | 0.125518074162534  |
| TAACCATGACA  | 883.034224342274 | 0.113349530344056  |
| ACTCATTATTA  | 883.034618305381 | 0.145627288668789  |
| GTGACAATATA  | 883.075731848306 | 0.132617988020548  |
| ACTCGGTATC   | 883.083152223554 | 0.152394294798971  |
| AGTCAGCGTTC  | 883.12376899406  | 0.10178292161019   |
| CTGCCTGTGAC  | 883.155448055726 | 0.107626029153476  |
| CTTCGGGTGAC  | 883.184989115642 | 0.126474278596243  |
| CGTCACGTCAA  | 883.193051811152 | 0.178055078431646  |
| AAGACTGACAC  | 883.194140251521 | 0.182390341766614  |
| ATTGTTGTGAC  | 883.205235817275 | 0.124674325217889  |
| GATTAGCAATA  | 883.211454932938 | 0.115721566138831  |
| GGTACTCGTCA  | 883.214286401413 | 0.118905510695109  |
| GTCGGTGACGA  | 883.260494875944 | 0.133745040731342  |
| GTCACCGTAAC  | 883.303579726611 | 0.115516209422623  |
| ACGTCACTAAC  | 883.314169776989 | 0.114138241612348  |
| ATGTGGGTGAC  | 883.32223912935  | 0.151888520409616  |
| GGTGCAATGAC  | 883.332723268519 | 0.178283267408321  |
| CTGTGGTGTCA  | 883.334414314565 | 0.151669410270007  |
| CGTCATGCTTC  | 883.356874461412 | 0.113285895707435  |
| ACCCCGAGTCA  | 883.362676985305 | 0.12563746933309   |
| ACCCTGACTCT  | 883.37556601506  | 0.118703450625279  |
| GAGATTGTGAC  | 883.377578977268 | 0.140767941657214  |
| ATAGGTCACAG  | 883.40613547696  | 0.199134951806086  |
| GCGCATGACAA  | 883.449392468956 | 0.171415709949046  |
| CGGCTTCGTCA  | 883.451834030253 | 0.131672350863555  |
| AGTTTAATGAC  | 883.461857107599 | 0.129122793885065  |
| ACGTCATGTCC  | 883.524586240956 | 0.138721237163239  |
| CGACTCGTGAC  | 883.539586409799 | 0.124966444031359  |
| GGGTCATATAC  | 883.62238502816  | 0.12924445428797   |
| CCTACGTGTCA  | 883.624914899312 | 0.151016395357347  |
| GGAGGTGTGAC  | 883.736673782981 | 0.132665994802557  |
| GGATCTGTGAC  | 883.74612407168  | 0.191231326185913  |
| TCCGTGACGAA  | 883.761384457422 | 0.173671290187998  |
| ACTGGTGACAA  | 883.803186380743 | 0.139938048966823  |
| ACCGGTCATAA  | 883.81363578312  | 0.127652101006336  |
| ACCATGACGCT  | 883.818254072181 | 0.165647529788316  |
| CACTATTAGTC  | 883.830137616965 | 0.13641638277817   |
| GTCTTTAGTCA  | 883.835699883081 | 0.204227370172521  |
| GTGATTCAAAA  | 883.84772801666  | 0.157881078953329  |
| CGTGTGTCAAC  | 883.870316330318 | 0.149604158008418  |
| ATTAACATCATC | 883.87813962988  | 0.113113805672596  |
| AGGTAGACTCA  | 883.884920904804 | 0.146425920954649  |
| GCGTCACAAAC  | 883.893620873987 | 0.0779035527675286 |
| CTGACTCCGTA  | 883.909680639777 | 0.144141220923513  |
| TAGACTTGTCA  | 883.913342844566 | 0.161075835413032  |
| AGGATAATGAC  | 883.945693333464 | 0.139659385711062  |
| GGGATGGGTCA  | 883.954764780389 | 0.129767123579585  |
| CGCTTTATGAC  | 883.979815797399 | 0.118107568913873  |
| CCCGGGTGACA  | 883.98577303378  | 0.116357785655833  |
| ATCGGTGACCA  | 884.01086223727  | 0.121506628842118  |
| ATGAGGCATAC  | 884.053385826697 | 0.10710671795067   |

|             |                  |                    |
|-------------|------------------|--------------------|
| GACTTATGACC | 884.058201498164 | 0.143717582022081  |
| TGACTGGCCAA | 884.112363585569 | 0.127778383100738  |
| AATGAGCCAAC | 884.13961741199  | 0.146560643795332  |
| GTGAATCAATA | 884.141385992493 | 0.156632328413639  |
| TCTGTAAGTCA | 884.160534434323 | 0.143291546292567  |
| TGCGTCAAACA | 884.187218600564 | 0.12238043381686   |
| AACTGTGACAT | 884.205798480896 | 0.156941673102     |
| AGTCCTGTCAT | 884.216753445977 | 0.137934864908938  |
| GAGGGGTCATA | 884.221075349871 | 0.114783348850027  |
| CAAACATGACG | 884.22645364189  | 0.116616450986595  |
| GTCACCAAGAC | 884.254716298011 | 0.18488388367369   |
| GGCCCGTCATA | 884.278956884803 | 0.12393549978334   |
| TGACGGAGTAA | 884.305938500015 | 0.159795148846402  |
| AGCCCCGTCAT | 884.342711168115 | 0.110025753441522  |
| ATGTGTAACCG | 884.344413771503 | 0.147925649972163  |
| TGACGCGATCA | 884.363037659414 | 0.143562151375925  |
| GCTAGTGACAC | 884.366291064019 | 0.117019331505006  |
| ATGAGCAACTA | 884.377663514222 | 0.127577741904692  |
| ATGACGTCGGA | 884.390447181358 | 0.118994312851181  |
| CTATCGTGTC  | 884.402605575339 | 0.153488875795154  |
| ATAACTGGTCA | 884.40485671509  | 0.16296940846554   |
| ATTGATTACC  | 884.406680872764 | 0.142469604011612  |
| CGGTCACGTC  | 884.457052769367 | 0.107882937338399  |
| GTCATTAGAAA | 884.473490940751 | 0.132077356827936  |
| CAGTGCATGAC | 884.477122428809 | 0.208296440127792  |
| CAGGTGTGACC | 884.529359847804 | 0.161822479416163  |
| AGTGACGCTGA | 884.544328025423 | 0.122412702711945  |
| AATTACTATTA | 884.56641208201  | 0.184996765555868  |
| GCGTCATGCCC | 884.570579731257 | 0.10590286269009   |
| AGAAACATGAC | 884.606140844272 | 0.166758162347015  |
| AGGTTCTGACT | 884.62079077959  | 0.122970003995315  |
| TCAACATGACA | 884.645620963515 | 0.0857953698257115 |
| ACCATGGGTCA | 884.652127279405 | 0.11985045017009   |
| AGAGTCAGGGC | 884.666484568859 | 0.116934899717819  |
| GGCCTGGTGAC | 884.685556275396 | 0.169364112896861  |
| CGTAATGACAA | 884.702055173695 | 0.121367705837248  |
| AAGACTGACTG | 884.725873685104 | 0.12776695044926   |
| ATGACGACTGG | 884.72702702991  | 0.125316846863743  |
| AGCAGTCAGAT | 884.750774465879 | 0.154468006719374  |
| GGTATAAGTCA | 884.754489528711 | 0.105609985071994  |
| AGCTGCGTCAG | 884.764460979322 | 0.179348662901822  |
| CGTCATGCGTC | 884.768389657507 | 0.158816319621252  |
| ACACGTTGTCA | 884.772724503092 | 0.0953694202884613 |
| TGACGTAGGAA | 884.794389522128 | 0.172861931222058  |
| ACACAGGTGAC | 884.810640465791 | 0.200369647868141  |
| CAGGATTAGTC | 884.812080419371 | 0.220381160946477  |
| TGAGTATTTAA | 884.820662924516 | 0.116681408626208  |
| GTCACCTTCTA | 884.826233013864 | 0.144634779511182  |
| TAAGTGACGAA | 884.84653223843  | 0.140681793227056  |
| ATAGTCAGCAG | 884.870770117624 | 0.121269182543423  |
| ACATACGTAAT | 884.876708167158 | 0.129757474946934  |
| AACCTGACTCT | 884.882917372099 | 0.122074634556288  |
| ATTGGTGACAA | 884.910563353385 | 0.132113058903317  |
| GTCACCTTGTG | 884.923138136273 | 0.12246579213341   |

|               |                  |                   |
|---------------|------------------|-------------------|
| ACTCATCTGG    | 884.955232415776 | 0.142778219566777 |
| CAACCAGTCAG   | 884.966580415594 | 0.144348190813643 |
| GTCACCATCAC   | 884.990154425001 | 0.153944351863301 |
| GAGCCGTCATA   | 884.994846758008 | 0.152819973807209 |
| GGCGAGTCAAC   | 884.995304573685 | 0.117702772992835 |
| GCCCTACGTCA   | 885.004512513345 | 0.173832475697877 |
| TCGAGTAATAA   | 885.021292626981 | 0.143652334191731 |
| GTCATTATTAA   | 885.060251031893 | 0.16785829808449  |
| ATCAGAGTGAC   | 885.060713577357 | 0.117195729787608 |
| CGTCACCCTTC   | 885.068839402974 | 0.117990796495739 |
| AGAAGTAGTCA   | 885.078764870986 | 0.144153476967103 |
| GGCATGACACC   | 885.081227191507 | 0.133897291413999 |
| GGCTCCGTAC    | 885.089728398247 | 0.123066537007653 |
| CGTCGGTGACA   | 885.1086628318   | 0.15717584444462  |
| ACGTCACTGCC   | 885.126370555964 | 0.136644388291333 |
| ACACTATGTCA   | 885.155114526131 | 0.136543156539104 |
| ATTGTATCATC   | 885.155343117222 | 0.136591903163484 |
| GGACATAGTCA   | 885.157088379082 | 0.114447270619368 |
| ACTAACATGAC   | 885.199963041722 | 0.151802510442849 |
| GAACACTCATA   | 885.21540698607  | 0.142757276106053 |
| AGATAGTGTCA   | 885.221228425142 | 0.199182519850421 |
| CATGGTGACCA   | 885.260863338278 | 0.122139170703251 |
| GCGGGGATGAC   | 885.278892555404 | 0.139436131476209 |
| GACTCACGAAC   | 885.30234167294  | 0.127882700739687 |
| AGTCAGAATTC   | 885.307200652188 | 0.141298908060137 |
| GACCGGTCATA   | 885.308820219162 | 0.127256813732073 |
| ATATGACGGTA   | 885.329195265881 | 0.116138540923616 |
| AATCATGACGA   | 885.330852455476 | 0.105160135114466 |
| ACTCATTATTG   | 885.337068742428 | 0.163627313561305 |
| ACTTGACTGAA   | 885.349566272558 | 0.131210007582368 |
| CAGTCAGCACG   | 885.356202548689 | 0.152891138869568 |
| AGACGGGTGAC   | 885.364695306464 | 0.115472209338871 |
| CTACGGTGACA   | 885.371344746871 | 0.127578243329123 |
| CATCTGGTGAC   | 885.372819299964 | 0.135903409015648 |
| AGACAACACTCAT | 885.374409215028 | 0.171718597348509 |
| CTGAATGTGAC   | 885.374541908651 | 0.14508308296235  |
| GTAATGATCA    | 885.394484145575 | 0.197205114345814 |
| CTAGCGACTCA   | 885.405016774509 | 0.192514797847531 |
| ATTGCATGACA   | 885.46168459438  | 0.134293553225656 |
| ATGAATAATAG   | 885.466916924027 | 0.142889983907356 |
| ATTGACACAGA   | 885.54942230061  | 0.138515888293033 |
| CGTATGACCTA   | 885.589426533035 | 0.152553852555976 |
| GTCATGCGAAC   | 885.596571081622 | 0.149307727140674 |
| ACGTCATGGCC   | 885.598686018471 | 0.128214187448948 |
| ACTCATATAAG   | 885.622817934154 | 0.126844232081547 |
| TGTGACCCTAA   | 885.636003497933 | 0.138655698656616 |
| GAGCTGCGTCA   | 885.638343349319 | 0.112409611819354 |
| GAGAAGTGTCA   | 885.642628038203 | 0.151115814850142 |
| ATGAATCTTAA   | 885.67250939863  | 0.180440149824636 |
| GTCACCGAAC    | 885.676305458959 | 0.121713633444724 |
| AAAATGAGTGA   | 885.677993731628 | 0.117356366226472 |
| ACACGTCAACA   | 885.705807218467 | 0.186046809491217 |
| GAAGTTGTGAC   | 885.720477455049 | 0.179539669214847 |
| CGACTGACGTA   | 885.736001092985 | 0.251206103913338 |

|             |                  |                    |
|-------------|------------------|--------------------|
| CGATTGAGTAA | 885.790024690958 | 0.0843322443882362 |
| ACTCATTTGTG | 885.790657522416 | 0.213103407225202  |
| ACGTCACGAAC | 885.812236932391 | 0.128674443143392  |
| CTAGTAGTCAG | 885.813441359794 | 0.168407784089916  |
| AGGAGCGTCAT | 885.848926753454 | 0.153444470469382  |
| AGAAATTAGTC | 885.862430861116 | 0.166760418225605  |
| CGTGGAGTCAA | 885.883965511177 | 0.141190539750395  |
| ACTACATGACG | 885.893796928744 | 0.167041353007052  |
| GCCTTAATGAC | 885.95322426153  | 0.12011901184153   |
| CGCATGATGAC | 885.95921880438  | 0.152761048085008  |
| GTCACTGACAA | 885.993326949801 | 0.0784457709368245 |
| TAACCGACTCA | 886.07213490345  | 0.147592079871629  |
| GGTCATACGAC | 886.077581046471 | 0.118678771751748  |
| ATGTCACCACA | 886.096045704121 | 0.126071201459763  |
| ACTGCGGTGAC | 886.150913740491 | 0.136054780149202  |
| ATTACGCACCG | 886.178540132506 | 0.115884623621835  |
| TGACTATGGAA | 886.207264981919 | 0.132543543753952  |
| GAGTTATGACC | 886.207806078781 | 0.131116500518108  |
| AGTCAGAACTA | 886.238427064707 | 0.127758561886112  |
| ATGCAGTCAGC | 886.240952128216 | 0.138068065614571  |
| CCATGACGTTA | 886.345995633502 | 0.222644572673351  |
| GCATTTGCTCA | 886.352134209384 | 0.125061947090193  |
| ATATATGACCC | 886.356743051155 | 0.152447327051969  |
| CCTTAGTGTCA | 886.36503700524  | 0.195353262848661  |
| AAGGGTGACAT | 886.375649873428 | 0.130691971332039  |
| CACCGTAGTCA | 886.378456527945 | 0.173097218734622  |
| GGTTTAATGAC | 886.379235827883 | 0.0993418309279506 |
| CTGAGGGTGAC | 886.38856892878  | 0.156922514766908  |
| ATGCCGGTGAC | 886.41691986152  | 0.197800518625704  |
| TCATTGTCACA | 886.424956145436 | 0.131562305264201  |
| AAGTCACGCTG | 886.429520459263 | 0.134204722362797  |
| GTGAGTCCGAA | 886.481216557579 | 0.11602082126207   |
| CGCAGAGTGAC | 886.4984951596   | 0.167643139857946  |
| AGATTATGTCA | 886.513169471933 | 0.169378875937792  |
| ACTCATTCTAT | 886.517144736311 | 0.126491063561546  |
| GTAATGTGACA | 886.570038544851 | 0.151313782270799  |
| ATATGCAGTCA | 886.577678049134 | 0.122002948154452  |
| GGTGGTGTGAC | 886.583308546923 | 0.111608692065083  |
| TCGACGTCACA | 886.583361055484 | 0.139929341640731  |
| AAGACTGACTA | 886.609369339749 | 0.166547608139723  |
| ACTCATACACT | 886.625181511284 | 0.12531857114002   |
| CATTGGTGACG | 886.625196212532 | 0.114831863849379  |
| GACTCATGGCA | 886.667629379394 | 0.13633279172125   |
| ACTAGTCAACG | 886.72833421295  | 0.114165951844544  |
| CATGTTTGTCA | 886.761779665511 | 0.178685780984748  |
| ACTCATTCTAA | 886.762710036646 | 0.15196358471894   |
| TGACACTGCAA | 886.773084617177 | 0.111810540292801  |
| ATGTCACCATG | 886.775280316168 | 0.172126381423856  |
| GCTGACTGCTA | 886.777364994836 | 0.175617037858676  |
| CAAGTGACCCA | 886.789864521922 | 0.122502141242091  |
| AAGTCAGTGAC | 886.832914782107 | 0.14731681702178   |
| CTGTGAGCCAC | 886.854428345258 | 0.134552765879875  |
| ACTAATTGACT | 886.874158515495 | 0.17013241662462   |
| GTTGCATGACA | 886.889848839884 | 0.120386524138345  |



|             |                  |                    |
|-------------|------------------|--------------------|
| AATGGATGAGT | 886.91674659588  | 0.110406406413024  |
| ATGACCGAGTC | 886.928795318861 | 0.158936422126678  |
| GTCACAACCGA | 886.935331703385 | 0.118106210478562  |
| GAAGTGACGAA | 886.943718847249 | 0.128549101967103  |
| ACCTCGTACC  | 886.970812568114 | 0.118684323459594  |
| GTCACCTAGAA | 887.016938195214 | 0.0796500459734097 |
| GCATTGTCACA | 887.021277573696 | 0.219984366979793  |
| GCGAGATGACA | 887.026380222209 | 0.109708523526002  |
| ATTACAGTCAG | 887.033063975081 | 0.110979129757565  |
| CAAAACGTGAC | 887.046083895341 | 0.155113517448679  |
| TGTCACATAAA | 887.095058558855 | 0.148599915866908  |
| GTCACCTAGCA | 887.097686378321 | 0.190368063131101  |
| TCTGTACGCA  | 887.103447100953 | 0.132526485911806  |
| CGAGTGAGTCC | 887.111247725452 | 0.180436379051207  |
| CTGACTCCGCA | 887.115159808194 | 0.148883620258024  |
| AGATTACGCAA | 887.115598479961 | 0.154759374620445  |
| ATTAGCAATAA | 887.122034400686 | 0.141959352562853  |
| CGTTTGACGCA | 887.199791317302 | 0.113974601221716  |
| ATGCTGAGTAA | 887.221767827741 | 0.0745939906438575 |
| CGTCCGGTGAC | 887.238434994508 | 0.23187426181606   |
| GTCATGGACCA | 887.270166590054 | 0.139116874446119  |
| ACTTAAGTGAC | 887.27538020103  | 0.216085870577554  |
| GAGTCAGTTCA | 887.293448807315 | 0.125050166860623  |
| GGATGCATGAC | 887.309632439806 | 0.133196041999168  |
| ATCCTGAGTAA | 887.313940268131 | 0.151646895121457  |
| AGTAAGGTGCA | 887.314960156272 | 0.124826580564065  |
| CCGGTGACGTC | 887.387450971508 | 0.111780582053323  |
| CCAACCTGTCA | 887.403558967577 | 0.0818029312088992 |
| AGAATATGACC | 887.460274417855 | 0.120734881685001  |
| CGAATGAGTGA | 887.49492761732  | 0.157593613637737  |
| ATGACGATCTC | 887.497524405367 | 0.112530814141627  |
| ATCTGTGACAA | 887.499735907831 | 0.139851008879966  |
| AGCCCTGTCAT | 887.502654591982 | 0.110204556645727  |
| ATCTGGTGACA | 887.53061619511  | 0.175016729336534  |
| GTCATCTGCTA | 887.538083307609 | 0.0592627981122244 |
| TATTAGCGTCA | 887.562335962934 | 0.171081074789985  |
| ATAACGCGTCA | 887.58272907699  | 0.0862030083352236 |
| GAAAATGACCA | 887.610520708841 | 0.114560215991454  |
| ATGACCATACG | 887.621410217069 | 0.1135731922548    |
| ATTACTTGTC  | 887.639554034723 | 0.129350882858276  |
| ACTCATAGATC | 887.640132593959 | 0.110877800020553  |
| CGCAGTGTCAC | 887.654954259787 | 0.128710311643266  |
| ATACTGTGACG | 887.663287495286 | 0.149403730061072  |
| ATGAGTATGTA | 887.673393936641 | 0.130626714768356  |
| GTCACCTCGTA | 887.678930332075 | 0.113862486852538  |
| GCTGGCATGAC | 887.721940801113 | 0.20061014916407   |
| ACGTAATACTC | 887.747558948684 | 0.136872789783319  |
| ACTGGTCAGAG | 887.792123273602 | 0.117614046257846  |
| GATCCGCGTCA | 887.81614998695  | 0.205818665537571  |
| GGGAGATGACA | 887.857387373484 | 0.124061504665772  |
| GGTATTAGTAC | 887.860987157032 | 0.131298989458576  |
| GGCTAATGACA | 887.872286324498 | 0.134835903848662  |
| GACGAATCATC | 887.892678215675 | 0.116242393620975  |
| GTGACAGGTTA | 887.904320261993 | 0.115693702271942  |

|              |                  |                    |
|--------------|------------------|--------------------|
| CATCTAGTCAG  | 887.917672835301 | 0.128926683677443  |
| ACGCTAAGTCA  | 887.9633882535   | 0.172019713150222  |
| ACTCATACCCA  | 887.970364113926 | 0.155933517126681  |
| CGCGACATGAC  | 887.975075438847 | 0.118522475270064  |
| ACACGTGGTCA  | 888.006628402679 | 0.176029257218714  |
| GCTGGGATGAC  | 888.031618359269 | 0.125972670419608  |
| TAAATGAGCCA  | 888.050423992162 | 0.13684067453676   |
| AAACACGTCAA  | 888.053038558749 | 0.163076994775144  |
| AATCATGACAT  | 888.065516670693 | 0.164373085335715  |
| TCGGGTGACAA  | 888.077781832184 | 0.133762446347715  |
| GTCATTTCCCA  | 888.086043686351 | 0.147477648855555  |
| TGGCATGACAA  | 888.095629988839 | 0.153372675429714  |
| CGTCACCCGTA  | 888.134253718801 | 0.109526357995953  |
| ATTACTCTACG  | 888.213021968143 | 0.161175430066524  |
| CTTACTCGTCA  | 888.215402524298 | 0.121189994166919  |
| GTCACCGCTCA  | 888.216960440832 | 0.16279461936688   |
| GTCATATGGTA  | 888.260485955413 | 0.142450704288103  |
| ATCCGTGACGG  | 888.265299012662 | 0.125926910884597  |
| ATGACAAGCAC  | 888.269726425326 | 0.118015626073915  |
| GCACATGTGAC  | 888.296971072442 | 0.176546420672963  |
| ATGACAAGCTC  | 888.325796246438 | 0.142163372611312  |
| TGCTGTACCA   | 888.328326305804 | 0.0866154998467105 |
| TATTGACACAA  | 888.33840751787  | 0.130261611105941  |
| AACAGGAGTCA  | 888.355849740976 | 0.174641524420765  |
| ATCCGTGACAC  | 888.364272208129 | 0.118141184726249  |
| ACAGAATGAGT  | 888.372195684727 | 0.130697995618658  |
| GAGCTGTCA    | 888.416839308547 | 0.129851672812552  |
| GATTGCTAATA  | 888.417523155826 | 0.0803884950933172 |
| GGGGTTATGAC  | 888.422022165884 | 0.1560282661973    |
| ACCTGGTCA    | 888.452863988083 | 0.11934242721076   |
| CGTGTGACGCA  | 888.462252026224 | 0.168609853518168  |
| ATGACGGCAAAA | 888.484093064711 | 0.12147690045083   |
| GTGAAGTCACA  | 888.512081978127 | 0.109241227653795  |
| CGATGCTGTCA  | 888.542451927317 | 0.138366409720413  |
| ATCCATGTGAC  | 888.570359334459 | 0.118313732899932  |
| GTGTCACTTCA  | 888.5797846913   | 0.142923602268538  |
| GAGTCAAAAAGA | 888.590635601034 | 0.135949265333473  |
| ATGAGCCAATG  | 888.595964236156 | 0.107566923920473  |
| CAGAATGTGAC  | 888.603216103288 | 0.13790300161924   |
| ACAATGAGCCA  | 888.60417844795  | 0.118608331355051  |
| ACCAATGACAT  | 888.608784253602 | 0.145405268929999  |
| ACAGTCAGCAG  | 888.63071357551  | 0.217630861413033  |
| GATTGGTCAAC  | 888.640526366532 | 0.145824401670577  |
| ACTCATCATCG  | 888.651174053005 | 0.126510776564148  |
| TCACAGTGTCA  | 888.678916538763 | 0.194089282710634  |
| ACATATGACCC  | 888.692544384103 | 0.123245420818688  |
| CGGTGCAGTCA  | 888.692589976392 | 0.132544910312638  |
| AATTTTGTGAC  | 888.705779372043 | 0.148307020010618  |
| AGCATAAGTCA  | 888.710040317571 | 0.174401053242472  |
| CTTAGGACTCA  | 888.725376543641 | 0.0988182686942742 |
| TGACGCGCAAAA | 888.727976707603 | 0.179391798809475  |
| CTGATTCAGAA  | 888.732971575349 | 0.128354308714092  |
| AGGTGACAAC   | 888.761005926372 | 0.104891326219898  |
| ACCTGTGACAA  | 888.798317399488 | 0.127924210571624  |

|              |                  |                   |
|--------------|------------------|-------------------|
| AGTTGGGTGAC  | 888.807376858044 | 0.138023064125424 |
| AGAAGCAGTCA  | 888.838348365404 | 0.191542038637463 |
| AAGCGCTGACT  | 888.87269162397  | 0.127876273898802 |
| AATTAGCCATA  | 888.918262238922 | 0.144362596305334 |
| CCTAATGACCA  | 888.968669691767 | 0.11703203972549  |
| AATTAGTCGGC  | 888.981349564116 | 0.125934754217089 |
| CTTTAAATGAC  | 888.985934276208 | 0.129049725669475 |
| CTGACTGCTAC  | 888.990420758382 | 0.129063058770098 |
| GTTCCGTGACA  | 888.993688453459 | 0.113102991878879 |
| TAGTCAGCCGA  | 889.001112137868 | 0.110217195677952 |
| ACTCATCATT   | 889.018534538521 | 0.133023863293872 |
| ACAATATGAGT  | 889.022546148367 | 0.150461712203695 |
| TGACTACTGCA  | 889.03648323156  | 0.173760219134957 |
| TACTAGTGTC   | 889.043579737422 | 0.123793270764167 |
| AATGACCTAAT  | 889.092214734473 | 0.121047884953644 |
| GTCATGATCGA  | 889.124819622156 | 0.141293290601887 |
| ACTCATAACAAC | 889.136600922266 | 0.114323088463126 |
| AATGAGTATGC  | 889.137761441147 | 0.150364298768552 |
| AACTTGACACA  | 889.152315988028 | 0.122215080894531 |
| ACCCATATGAC  | 889.180156598266 | 0.150494475124644 |
| GAGTGACGAAC  | 889.184218195669 | 0.111904399230606 |
| GTGGAGAGTCA  | 889.186734851444 | 0.114382499915308 |
| CCAAGAGTGAC  | 889.226826635783 | 0.08276709172628  |
| CATGCAGTCAG  | 889.228644327095 | 0.139997562293631 |
| CATCTGTGACG  | 889.237749727341 | 0.152135567767189 |
| CACTGTGACAG  | 889.25053954088  | 0.11872297737904  |
| GTTGCGACTCA  | 889.301323571253 | 0.167030970376908 |
| ACGTCATGTGC  | 889.303015469971 | 0.157133411210912 |
| CAAAGGTGACG  | 889.348756843371 | 0.130743804753545 |
| CTGACCCGTCA  | 889.368615256217 | 0.148132831457789 |
| ACTACCGTCAT  | 889.389691584919 | 0.143541152844321 |
| CACATGGGTCA  | 889.397061764632 | 0.145366411011848 |
| GAGGCAGTCAC  | 889.402343680662 | 0.116509643298499 |
| AAGACGCGTCA  | 889.436254999341 | 0.157667284781893 |
| GATCGCATGAC  | 889.454328184154 | 0.247395452347262 |
| CAAGTGACCAA  | 889.476196724029 | 0.163612599946899 |
| GTTAACTCATA  | 889.51370140199  | 0.151931849981824 |
| AAGTATGAGTG  | 889.521657981954 | 0.121523033704837 |
| GTCACCACAAC  | 889.565684719481 | 0.130625243215223 |
| CGCGGATGACC  | 889.628856422852 | 0.213180094210224 |
| TCCATTGCTCA  | 889.636193324098 | 0.123784285860288 |
| CGTCAACGTCA  | 889.646544284721 | 0.133757974497188 |
| CGTTGGGTGAC  | 889.650948352368 | 0.157185938201258 |
| GTCACGATATA  | 889.724928328818 | 0.174653353227115 |
| AAGGTTGTGAC  | 889.775837293708 | 0.128256385381899 |
| CTACCGGTGAC  | 889.784081762869 | 0.158045414204132 |
| ATGACAAGCAA  | 889.793382665815 | 0.154401362357084 |
| GCTTGGAGTCA  | 889.809689921099 | 0.139312228411847 |
| GAGATTGCTCA  | 889.829562587961 | 0.102697724767879 |
| AGCGGGATGAC  | 889.844171704879 | 0.147318254253487 |
| TCGCTGAATCA  | 889.85589182888  | 0.109715799136341 |
| TAAGGGTGACA  | 889.862238464393 | 0.118717827026636 |
| ATAGGGTGACA  | 889.880162391801 | 0.137105647720625 |
| ATCACTGACTA  | 889.883316852765 | 0.167289778442007 |

|              |                  |                    |
|--------------|------------------|--------------------|
| ATCAACGTCAC  | 889.883852454557 | 0.11080496785421   |
| GGTCACACTCA  | 889.89643888491  | 0.155734381054297  |
| CGCGTGACTGC  | 889.904344702165 | 0.138485613404777  |
| ACTCATCGCTA  | 889.928137008118 | 0.110472310017834  |
| AAGTCACGGCT  | 889.935984357196 | 0.148998116576418  |
| ATAAGACTAAC  | 889.97937615857  | 0.153697333374002  |
| AACCCGTCACA  | 889.990537240354 | 0.148202455479207  |
| ACCGTGGTCAT  | 890.050695892737 | 0.119338948775748  |
| AAGTCATGGGT  | 890.054046171857 | 0.139135227109494  |
| CTTTTGTGACA  | 890.059787799044 | 0.159906049734584  |
| GTGTCAGACAA  | 890.067366467272 | 0.104628271366955  |
| AAAGATTGATA  | 890.141735102301 | 0.161667352625102  |
| GCAATGGGTCA  | 890.210988791453 | 0.0864245672086003 |
| CGTCACTATTA  | 890.22270983456  | 0.135505066749404  |
| TGAATGTGACA  | 890.239289938832 | 0.151291750760058  |
| CCGATGACCTA  | 890.27774292728  | 0.175923478964378  |
| AACATTACTAA  | 890.292636462569 | 0.13016465004506   |
| AGGAGTGTGAC  | 890.343587774234 | 0.119878112798291  |
| AAAGTGAGTCC  | 890.364132845586 | 0.0845876331756104 |
| GTCCACGTCA   | 890.385845381612 | 0.195843655760299  |
| GGGGCGATGAC  | 890.391137820222 | 0.135660187915183  |
| ATGAGTACCCG  | 890.401380152831 | 0.154899045756838  |
| AGTAATGACGG  | 890.401946742798 | 0.135157560658003  |
| GTCACAATGAA  | 890.415348795918 | 0.139010245622337  |
| ACCGTGACAAA  | 890.433766641131 | 0.150526973207756  |
| ATGCCTCATAC  | 890.456797859634 | 0.165374978031853  |
| ACTCATCTAG   | 890.485615085251 | 0.120713991561072  |
| AGCAGATGACA  | 890.491655710187 | 0.126469248238191  |
| AGGGTGTGACG  | 890.495889669291 | 0.108144381538903  |
| GTCCTTGCTCAC | 890.518843789273 | 0.174651677051677  |
| GTCATTAGCAC  | 890.525263970549 | 0.152917870458179  |
| GTAAGTAGTCA  | 890.586713301403 | 0.129890524921238  |
| GATCGGTGACA  | 890.600053279297 | 0.105884569793739  |
| CCGACTGGTCA  | 890.612911821397 | 0.106177520788176  |
| TCGGTCACAAA  | 890.619015621192 | 0.146510977487837  |
| GAATTCATGAC  | 890.632346081277 | 0.166939104936946  |
| GCACTGTGACA  | 890.68665992036  | 0.111427321137149  |
| AGCTATTAGTC  | 890.695546772253 | 0.123443427620168  |
| GGATCGGTGAC  | 890.697764840017 | 0.108264881068101  |
| GAGTGTGACCA  | 890.702582654186 | 0.136009939599462  |
| GAGTAATAGCC  | 890.725786634802 | 0.184254187338926  |
| ATTGCAATGAC  | 890.751328345048 | 0.143335735803911  |
| ACTCATCGTTC  | 890.755212229774 | 0.110093562999856  |
| GGAGCAATGAC  | 890.773568580167 | 0.157772429276752  |
| AGTCATGGGGC  | 890.845344531135 | 0.137321593986871  |
| GTCACACCCCA  | 890.861009116716 | 0.105780501252597  |
| CGTCACACCTC  | 890.865600775947 | 0.106693669159391  |
| GATGTCATTAC  | 890.875894293214 | 0.11883529691884   |
| ACTCATTTTAT  | 890.926645021719 | 0.137395122611369  |
| ATGAAGGTGAC  | 890.939577495203 | 0.11215727934193   |
| GTCACATTCAA  | 890.995089708232 | 0.159320216017617  |
| GTGACAGAGTA  | 891.075021256291 | 0.110370744367401  |
| ATGACATTGTG  | 891.079450320821 | 0.1106237971906    |
| CGATCTGTGAC  | 891.086983801207 | 0.105947882177201  |

|             |                  |                    |
|-------------|------------------|--------------------|
| GGCATCGTCAC | 891.087289955051 | 0.0960401514118534 |
| CTGTTATGTCA | 891.115400995911 | 0.132008175720854  |
| ATGTATTCATA | 891.134369735951 | 0.125682967450402  |
| GTAGTGGTCAC | 891.138988858077 | 0.110955893988043  |
| GAGCGCGTCAC | 891.176571279625 | 0.194514821416986  |
| ATTGTGAGCAA | 891.188063031497 | 0.251988719899665  |
| ATTGACTACAA | 891.224046379412 | 0.166702067763107  |
| CAGCAGACTCA | 891.236866292677 | 0.106056405490702  |
| AATTTACTAAT | 891.246039627041 | 0.127220579552196  |
| ATGAGTTGGAC | 891.247356049649 | 0.143828015229834  |
| GTCATTTGCAA | 891.249930397657 | 0.108351961137864  |
| AGGGTCATTCC | 891.250139432444 | 0.113058045875018  |
| CTGTCACATTA | 891.312156136692 | 0.11222988484033   |
| AATTACGCACC | 891.319924221657 | 0.135644789191737  |
| TATGACGGCGA | 891.373897817756 | 0.0673720631035447 |
| ATATCGTGACA | 891.414463408035 | 0.156765040061823  |
| ACTAGCATGAC | 891.452937538496 | 0.128748471634635  |
| ATGTTATGTCA | 891.529651421356 | 0.0962873072429724 |
| ATTAGTCGGCG | 891.556891155098 | 0.190982597124421  |
| CAGTGACGCCA | 891.56661751189  | 0.154826003173117  |
| GAATTAATGAC | 891.628683710543 | 0.160255190067319  |
| AGACTAATCCA | 891.631597138194 | 0.133279474986141  |
| GTCACCTGGGA | 891.666526055719 | 0.117237678131102  |
| CATCGGTGTCA | 891.691255052572 | 0.131718690541246  |
| ACGAGCGTCAT | 891.694148573748 | 0.0670895596246282 |
| GTCACCTGAAA | 891.698438206467 | 0.109318342666619  |
| GGATGACGGCA | 891.716404936665 | 0.104897581805323  |
| CGTCACCGATC | 891.726625585721 | 0.125108955878729  |
| GACATCGTCAC | 891.734729672509 | 0.111514788477666  |
| CTGTTTTGTCA | 891.739940744387 | 0.234686159842194  |
| TCAGGGTGACA | 891.757459192695 | 0.0886654422579123 |
| ACATCGCGTCA | 891.799907779795 | 0.143046189714354  |
| GAAGCTGTGAC | 891.805841620074 | 0.111558969166564  |
| ATGCGGGTGAC | 891.8242509369   | 0.144805889307151  |
| CTTGGGTGACA | 891.838072879754 | 0.129155071003139  |
| AGAGTAATATG | 891.862001649804 | 0.126438433084812  |
| GAATAGGTGAC | 891.883939394577 | 0.114616737112378  |
| TAGATGTGACA | 891.979637705156 | 0.112951777657576  |
| GGGCTGTCATA | 892.073229891651 | 0.0757816805221709 |
| GACACGTGTAC | 892.083080858792 | 0.150536234631328  |
| TGTGAGCAAAA | 892.103881476432 | 0.15245076689966   |
| CTGCATATGAC | 892.107350560007 | 0.110134779598877  |
| CAGCTTGTGAC | 892.116301135393 | 0.139794593585325  |
| CTACTTCGTCA | 892.135567856285 | 0.14501405613548   |
| GAATTAAGTCA | 892.148649387334 | 0.11176682286157   |
| GCCGCATGACA | 892.160506853907 | 0.0789670003935592 |
| CGTCACCAATA | 892.160559645223 | 0.143139337418356  |
| ACTCATCTTAT | 892.164687161078 | 0.1415682776072    |
| ACGTCACAAGG | 892.172877469411 | 0.114147287879248  |
| CGTCACAATAC | 892.204407420084 | 0.142876562475862  |
| AGAATTACTCT | 892.21045385112  | 0.111058923605293  |
| CATGACAATAC | 892.213494399225 | 0.143352104803219  |
| ATTAGTGACGA | 892.233262690323 | 0.189864987378103  |
| CTAAATGACCA | 892.239603886613 | 0.12667293972984   |

|              |                  |                    |
|--------------|------------------|--------------------|
| GGACGGAGTCA  | 892.245813383783 | 0.135191896223817  |
| ACTCTGACCCA  | 892.281277556416 | 0.10724739325178   |
| GTAGGCATGAC  | 892.283632834702 | 0.166214364286986  |
| ATGAGTTAATC  | 892.305881545915 | 0.114632913955537  |
| AAGTTATGAGT  | 892.341175665004 | 0.122428657449611  |
| ATGTCATCTCC  | 892.406467360605 | 0.128679705317149  |
| ATCACAGTCAG  | 892.406795036166 | 0.107264361267303  |
| ACGTCACGTTG  | 892.489872232548 | 0.13883973861073   |
| GTGACCACGAA  | 892.495763080302 | 0.120642951473537  |
| CAGTCAGAAAG  | 892.506523560656 | 0.10948525834674   |
| GTCACCCGATA  | 892.549211806177 | 0.121121769692146  |
| GCTGCGACTCA  | 892.554577382239 | 0.12960415552558   |
| ATTTCGTAACA  | 892.569945426661 | 0.13166884882414   |
| CCACTGATTCA  | 892.591735600588 | 0.126240697345477  |
| GATGATATCAC  | 892.592415712692 | 0.1464591594623    |
| CGTCACATCAG  | 892.789260504819 | 0.196298453829568  |
| ATGACGGCAAT  | 892.795691760419 | 0.127889610122696  |
| TATGACCGTGA  | 892.800621705203 | 0.167807729209658  |
| ATTGAGTGACG  | 892.827866315692 | 0.152977978607985  |
| ATGAGTTGTTCG | 892.839417871918 | 0.14479124224656   |
| ATGTGATGTCA  | 892.855478809501 | 0.219270329554207  |
| GCGATATGTCA  | 892.860763610445 | 0.115252093226633  |
| ACTTAGTGACA  | 892.863888687288 | 0.114538526996507  |
| GGAGATGACCA  | 892.864223190918 | 0.137173303032625  |
| AATGATTCTTA  | 892.884048731487 | 0.134184437458641  |
| ACCCGAGTGAC  | 892.885061987231 | 0.163071923527975  |
| TCGTCACCCAA  | 892.890035577199 | 0.138435799980493  |
| CAACATGACAA  | 892.898535408766 | 0.107994430036475  |
| ACTCATTACA   | 892.904526821458 | 0.128902055124794  |
| GTCACAAGTAA  | 892.938042933396 | 0.191500872768462  |
| GGGTGAGCCAC  | 892.938333182947 | 0.114222792030237  |
| ACACTATGACC  | 892.938395375883 | 0.0788314274310028 |
| GTCACATAAAC  | 892.943366387405 | 0.150266889335903  |
| ACTTGTGACAG  | 892.96131512519  | 0.114336372956001  |
| AGTCTGACACT  | 893.039063605806 | 0.157371925761016  |
| GTCGTGACGAA  | 893.074806407828 | 0.127753597732301  |
| ATAGGGGTGAC  | 893.128275087694 | 0.138550821316767  |
| GATTTCGTGACA | 893.167683857833 | 0.104158344575717  |
| CAACTTTGTCA  | 893.170525270118 | 0.152509313850995  |
| GACCTATGACC  | 893.192719761322 | 0.121266153522468  |
| AAACTTCATA   | 893.210682634451 | 0.10505850682272   |
| CGGTTTGTAC   | 893.296031209636 | 0.169725564842752  |
| ACTCATGACAT  | 893.333788467943 | 0.18114176488737   |
| ATGATTCTTAC  | 893.352915151112 | 0.12555011800824   |
| ACAGTCAGTAT  | 893.359678932549 | 0.106605106305738  |
| AAGTTTCGTCA  | 893.36471664358  | 0.168460009213205  |
| AACTTTCGTCA  | 893.375205395597 | 0.125069883970781  |
| CGATGAGCCAA  | 893.391615107329 | 0.157080411298127  |
| GACTAATAGTA  | 893.406952175565 | 0.120333667444549  |
| AAGTCACTAGG  | 893.463007124086 | 0.134947238274064  |
| ACATCGTGACA  | 893.469215197651 | 0.159745384714458  |
| ATACGTGACGC  | 893.482634106149 | 0.128713879726789  |
| GACATCATGAC  | 893.491347730095 | 0.0596851238239925 |
| GTCACAACACA  | 893.536024944492 | 0.109930647873349  |

|              |                  |                    |
|--------------|------------------|--------------------|
| GTCACCTTGGGA | 893.564466614349 | 0.0954899655258385 |
| CATGACAGTAA  | 893.566209959824 | 0.14335134345645   |
| CTGGACATGAC  | 893.570640209691 | 0.0675245587763448 |
| GACATCACTCA  | 893.60326864369  | 0.111882394878957  |
| CGTAATGAGTA  | 893.615763901611 | 0.114607772453475  |
| CGTCATTAGGA  | 893.640509692976 | 0.150272124496729  |
| ACCTTCTGACT  | 893.664648615172 | 0.14853189009022   |
| CATATCACTCA  | 893.678044043526 | 0.14082295015601   |
| GTCATGGCATA  | 893.680027230797 | 0.111093296751455  |
| GGCAGCGTCAC  | 893.700373702822 | 0.178188634819768  |
| GAGTAATGTCA  | 893.70098797695  | 0.230963130436633  |
| ACTGATGACCC  | 893.775127290232 | 0.128253514095417  |
| GACGTCACCGC  | 893.78891273089  | 0.14314740651558   |
| GACTCACGCTC  | 893.794576953003 | 0.128330547684665  |
| GAACCCGTCAC  | 893.803466553445 | 0.0991829491338987 |
| ACCTGGAGTCA  | 893.807205412284 | 0.15570906615712   |
| CTCCGTGTGAC  | 893.807591221344 | 0.176969850714649  |
| ACGTCACGAAT  | 893.846746628533 | 0.0736854249153956 |
| TCGAATGACCA  | 893.870909592639 | 0.103177419904323  |
| GTCACCTTCTGA | 893.875182955185 | 0.169099751395185  |
| ACTCATTGCAA  | 893.913411367718 | 0.1308007851724    |
| CTATGATACAA  | 893.920478588333 | 0.105401152145222  |
| GTCACCCGTTA  | 893.939984861242 | 0.167992694176079  |
| TAGCCGTGATA  | 893.942927843525 | 0.133511640163422  |
| CGCCGAATGAC  | 893.949326015332 | 0.146260539596086  |
| CCCATGACATA  | 893.989609007911 | 0.105650732716521  |
| GCGGTATGACC  | 894.007416742151 | 0.127984847589446  |
| CTGACTGCAAAA | 894.02973716883  | 0.106882544067248  |
| GGTTCGGTGAC  | 894.06081992363  | 0.128890107688455  |
| CTATTTGACTC  | 894.098219096144 | 0.103724924066523  |
| CTGACTCTCCC  | 894.105630517756 | 0.107156760073269  |
| GTCACAACAGA  | 894.122761360485 | 0.0903217224387314 |
| ATGACGGGATA  | 894.142497415541 | 0.118327956470831  |
| TAGTCAGTCGA  | 894.152859284418 | 0.117537907666492  |
| TTCGTCACGAA  | 894.173928254463 | 0.163031348914031  |
| CGATGACCTCA  | 894.182281906362 | 0.105770353365116  |
| CGTCATCCCGC  | 894.193190289307 | 0.10213431581433   |
| CCATTAGTGAC  | 894.2242820958   | 0.104358822675195  |
| AGGCGTCATGC  | 894.235006932216 | 0.121124366201885  |
| ATGAGCATTAC  | 894.238360313921 | 0.124776986513158  |
| AATCTGAGTCT  | 894.267317521132 | 0.162691214540266  |
| GGCTTAATGAC  | 894.288501727199 | 0.133952001000994  |
| TACCTACGTCA  | 894.322679013076 | 0.138092108528558  |
| CAACTATGTCA  | 894.353122341453 | 0.225518700611838  |
| AATGACAGGGC  | 894.394197741959 | 0.109307252336534  |
| CTCCATGACAC  | 894.404304049373 | 0.106430170264527  |
| CACATATGTCA  | 894.426124018154 | 0.115375094336534  |
| AAGGGTCAGAG  | 894.435240945195 | 0.111031965915848  |
| CACAGACTCAC  | 894.44995234525  | 0.102839908320837  |
| ACTCATAGACT  | 894.478523937185 | 0.128139503882949  |
| ATGACAGGGAA  | 894.488565246121 | 0.123222623626258  |
| CGTAAGGTGAC  | 894.496077783752 | 0.14009914180856   |
| CACGGGAGTCA  | 894.515776960456 | 0.154121243971547  |
| AGTCAGAGGCA  | 894.520141398264 | 0.107693058739872  |

|             |                  |                    |
|-------------|------------------|--------------------|
| GGCATGACATA | 894.520993395728 | 0.1380256216389    |
| ACACATCATAC | 894.523084644505 | 0.111713125324296  |
| TGAAGTCACCA | 894.523925921271 | 0.104151291050194  |
| CTTAATGACAA | 894.54005881535  | 0.142545588876048  |
| TGACAGGTCA  | 894.555001932959 | 0.103701918964193  |
| GTGACATAGCA | 894.559282451514 | 0.144920766802922  |
| CAGTGTGTGAC | 894.574574836444 | 0.109383634614244  |
| GATCATCGTCA | 894.576984743975 | 0.136474002827397  |
| ATATGCGTGAC | 894.590848976316 | 0.115029282725634  |
| AGAGGGTGACG | 894.608929709093 | 0.116857126546801  |
| CCGCAGGTGAC | 894.629599684527 | 0.125008852519404  |
| GTGCGAGTCAA | 894.643854498047 | 0.110246727772868  |
| AGTCTAATGAC | 894.655640175691 | 0.121692855353226  |
| GTGACGACTAA | 894.750763599971 | 0.154831299111211  |
| GAAACCCGTC  | 894.790761968063 | 0.103267470299606  |
| ATTGAGTCGAA | 894.799135587421 | 0.128443601609766  |
| AACATGTGACA | 894.801420307735 | 0.173708605062103  |
| ATTTAGTGTC  | 894.830908833221 | 0.141448945607767  |
| CCATCGCGTCA | 894.843271866485 | 0.106345460403666  |
| ACTCATCCGGG | 894.847854365601 | 0.186750098012397  |
| CAAGGTGACGC | 894.887377696167 | 0.0880586177846986 |
| TACTCATCTGA | 894.907358380589 | 0.158366483900601  |
| GAGCGTGACAC | 894.969715913187 | 0.138138360082886  |
| CTTGTTGTGAC | 895.034920084122 | 0.201025754300626  |
| ATTGGTAGTCA | 895.112391416196 | 0.113091667767371  |
| GTTACTCGTCA | 895.125327781211 | 0.10727799052039   |
| ATGTCACAAAA | 895.13581979941  | 0.118182149182332  |
| CCTTGACTGAA | 895.207214943662 | 0.168019240139765  |
| CGTCATTGGAC | 895.257535890193 | 0.154090661622422  |
| GGTCTTCGTC  | 895.27415792082  | 0.228498990420908  |
| CATGAGCAACA | 895.275580193902 | 0.139790459749793  |
| ATGACATTGCC | 895.292351225566 | 0.128940901843315  |
| AGTGACACGAC | 895.319939415207 | 0.0936424339217908 |
| AGTAACATGAC | 895.330416456914 | 0.234375514732293  |
| GAGTGACATAC | 895.344078119836 | 0.163752332636969  |
| GATCCGTCAGC | 895.369933898068 | 0.112100876859116  |
| AGGTGACCCAA | 895.372571442922 | 0.112428894050767  |
| CGCAATGACAG | 895.379674912286 | 0.138952615531752  |
| GTAGTGGTGAC | 895.381855421228 | 0.128213609945006  |
| CTATTAATGAC | 895.431875682477 | 0.101995817639175  |
| ATGAGTAGATG | 895.441297594192 | 0.101440612207212  |
| ATGAGTACCGC | 895.458987809704 | 0.178425271256997  |
| GCCTGTGACGC | 895.462383699625 | 0.138720041748117  |
| CGTCATTAATC | 895.509340071397 | 0.0556870513049495 |
| GATTTAATGAC | 895.509424569096 | 0.112781814548097  |
| GAATCAGTGAC | 895.545686286219 | 0.167973610005913  |
| GGTGACACGGA | 895.560206708643 | 0.101535913568923  |
| GTCTGGTCATA | 895.56544636176  | 0.128231690146088  |
| TCTGTTCTGTC | 895.594716499415 | 0.114368028313527  |
| ATTACGTATTC | 895.602122100706 | 0.104928870146261  |
| GTTAGTCTTAA | 895.621979499095 | 0.110388296190705  |
| CTCTTGCTCAC | 895.637743711123 | 0.104585604403822  |
| AGTCAGAACTG | 895.651715089778 | 0.128836667971692  |
| ATATGATGCAA | 895.73270526067  | 0.126917451171068  |



|              |                  |                    |
|--------------|------------------|--------------------|
| GAGTCAAATGC  | 895.742029124291 | 0.109423776647294  |
| TACCGCAGTCA  | 895.748408033232 | 0.129148162758912  |
| AGTCGAGTGAC  | 895.756420696432 | 0.113472813488569  |
| ACCGAGTCAAC  | 895.783893113326 | 0.13774246687162   |
| CTATTATGACC  | 895.78901388383  | 0.136967193103714  |
| GTGACGCGAAC  | 895.814789566297 | 0.120211635950057  |
| ATATGCATGAC  | 895.884813751353 | 0.176072640973028  |
| ATGACGTTCTA  | 895.887030315474 | 0.115817438445469  |
| AAAACAAGTCA  | 895.895398086745 | 0.154457734031399  |
| ACATATTAGTC  | 895.931138460845 | 0.143009830293589  |
| ATGACAGCGGA  | 895.940355236225 | 0.104667768796074  |
| GTCATGAATAA  | 895.952819676611 | 0.140049138715919  |
| AAATTTGGTCA  | 895.974833450596 | 0.138873400620945  |
| AAACCATGACG  | 895.990669987025 | 0.115102205303975  |
| ACTCATATCTA  | 896.03804885324  | 0.110183830785561  |
| GTAAGATTCAC  | 896.053016713187 | 0.102677688739323  |
| GTGGTGACAAC  | 896.075602770046 | 0.108656486094419  |
| GTCATAAGGGA  | 896.083636709735 | 0.163342868628561  |
| GATGACGCGAA  | 896.094038132659 | 0.102475191339284  |
| CTTGGTGACAA  | 896.10309495655  | 0.106043612315548  |
| CCGCCGACTCA  | 896.115514518824 | 0.102760249271001  |
| GTCACGTCTCA  | 896.133565873508 | 0.132830548342899  |
| ACCTTGTGACA  | 896.156407014772 | 0.143767603665928  |
| ATGACCATACC  | 896.192278469126 | 0.133267298893681  |
| ATGACGCTCCG  | 896.24754260109  | 0.138822598565022  |
| ACGTCACGCAA  | 896.259415868638 | 0.1183530525131    |
| ATGACTTTTAA  | 896.271260060134 | 0.112503725989097  |
| GAAGATTAGTC  | 896.280672061064 | 0.128983222085055  |
| GCACGGAGTCA  | 896.290351658596 | 0.140856753279938  |
| GTTGATGACCA  | 896.321410707708 | 0.164761194292711  |
| CGAGATTAGTC  | 896.333547769824 | 0.117463430280279  |
| ACTCATCCGTA  | 896.351106344025 | 0.106601596052892  |
| ATGACGTCCAT  | 896.393272387584 | 0.0767254961003752 |
| CGAAACTGTCA  | 896.408253585303 | 0.188922325910128  |
| TATGACATTCA  | 896.444907510773 | 0.100458492758594  |
| AAGACTAACAT  | 896.473644423377 | 0.120469541253823  |
| GTATGAGTGCA  | 896.475212983644 | 0.14705936721436   |
| ATGACCCGTTC  | 896.47635934254  | 0.113041993213478  |
| GATGACAAGCC  | 896.482032735679 | 0.159889032768967  |
| CGTGTCACGAA  | 896.51816313895  | 0.162082993284198  |
| CCGACATGACA  | 896.530067626132 | 0.165556394333461  |
| CTGTCAATTATA | 896.609268003625 | 0.155183827579896  |
| GTCACGGAAAA  | 896.655597009972 | 0.136167795638356  |
| AGCCAGAGTCA  | 896.665443753313 | 0.1859578022841    |
| ACCGCGACTCA  | 896.696658648341 | 0.152945385344272  |
| CGTCATCAACC  | 896.697265031739 | 0.128002149042092  |
| AAGTATGTGAC  | 896.722432990848 | 0.107967918088168  |
| ACTCATCCAGT  | 896.727770498797 | 0.113588975224774  |
| GTATGGGTGAC  | 896.731525225214 | 0.170143082823966  |
| GCGCTACGTCA  | 896.777929603705 | 0.12476859192332   |
| TGACAGAGCCA  | 896.794830652485 | 0.104540447357506  |
| CTACCGACTCA  | 896.851967433024 | 0.123975751789421  |
| GGTAACATGAC  | 896.912869379643 | 0.181599881904877  |
| ACTCATATTGA  | 896.962936383703 | 0.138129181827394  |

|              |                  |                    |
|--------------|------------------|--------------------|
| ATGAGTACGGA  | 896.972936202585 | 0.127059835837887  |
| GTCACCGGCGA  | 897.044946209853 | 0.15831397900519   |
| GGTCATACCGA  | 897.070550646548 | 0.102175190841026  |
| ACGGATGTGAC  | 897.113912260593 | 0.113249976615397  |
| ACCTTGACTCT  | 897.148511259714 | 0.108917230164587  |
| CGTCACAGGCA  | 897.168013488043 | 0.124766073709204  |
| CTATCAATGAC  | 897.168059421299 | 0.110072914327879  |
| GTATGACCGGA  | 897.235480259848 | 0.120940282388697  |
| ACATTGGTGAC  | 897.254370224796 | 0.14472545330778   |
| AAATGACATCG  | 897.281727996897 | 0.126759326064276  |
| ATTGCATCACA  | 897.315109111888 | 0.113915390813527  |
| ACTATGACCTA  | 897.331818136197 | 0.127119764386702  |
| GAGTAATAGTA  | 897.3432012134   | 0.117330661618607  |
| CAGTCAGTATG  | 897.376416284389 | 0.112547144574591  |
| CACCGTGTGAC  | 897.449979601948 | 0.112010639869029  |
| ATGAGTACCGA  | 897.475866088467 | 0.0730428363758329 |
| ATACTAGTGAC  | 897.488254892028 | 0.148651427028334  |
| TATCTTGGTCA  | 897.53368825555  | 0.150974613254267  |
| CTCCATAGTCA  | 897.565503068185 | 0.103122613377799  |
| AGAGATGAGTA  | 897.632723392012 | 0.112986085734953  |
| AATGTATCACA  | 897.645282974636 | 0.114567294120951  |
| AGTTGGGTGAC  | 897.650394808995 | 0.0855548990691781 |
| TCTTAGCGTCA  | 897.658736981556 | 0.129679615403682  |
| CGCCAATGACA  | 897.696509427383 | 0.146620918211761  |
| AATCAGGTGAC  | 897.697808913806 | 0.145842137454096  |
| TAGTTAAGTCA  | 897.701058550137 | 0.187941526166075  |
| GTGAATCGTCA  | 897.766495340998 | 0.206704871912769  |
| GACTTTGTGAC  | 897.777995272953 | 0.1286033217269    |
| GGGCGGAGTCA  | 897.791738839948 | 0.102069450278545  |
| GCAGTGACCCA  | 897.804927563738 | 0.115727603068325  |
| ATAATGTACACA | 897.84941959189  | 0.14251898003748   |
| AGCGTCATGTA  | 897.974896607315 | 0.0987537446875106 |
| CTAGTGACATA  | 897.979176704363 | 0.10165419198956   |
| GACTAATATCA  | 898.039917636843 | 0.10401222920194   |
| GGTATTGTGAC  | 898.053750079578 | 0.0996875020663838 |
| TCAATGAGCCA  | 898.087189677496 | 0.170577619904741  |
| AGCGTCATGTG  | 898.088178926563 | 0.105534618250464  |
| GAATGGGTGAC  | 898.126157555533 | 0.104276215067628  |
| AGTATCACTCA  | 898.135490123217 | 0.108360723482482  |
| ATAGTACGTCA  | 898.157787532245 | 0.137567901808456  |
| ACGTCACAGCG  | 898.162833285765 | 0.135936595566008  |
| ATTATTACTGA  | 898.210055991183 | 0.128443682451736  |
| AGACTGTGACA  | 898.213146304295 | 0.0869030169485693 |
| AAGCAAGTCAT  | 898.224132585738 | 0.124215607983956  |
| GGCGTCATGCA  | 898.228277662528 | 0.113972553389261  |
| GATTCATCATA  | 898.274846014951 | 0.132286193049661  |
| ACTCATAATTC  | 898.285052374171 | 0.145118895877381  |
| GTATAATGACA  | 898.332544748759 | 0.0911259415883183 |
| ACGCTGACGTA  | 898.343179735235 | 0.121740723337173  |
| ACAATGTGACA  | 898.368129457203 | 0.0826745976349922 |
| AACCATGACGT  | 898.372270331362 | 0.109291420235652  |
| TATGACCAGGA  | 898.407242740872 | 0.103421848483834  |
| AGATTACTGAC  | 898.427345104213 | 0.115994847135595  |
| TATTTGACTGA  | 898.437846157625 | 0.127275588392879  |

|             |                  |                    |
|-------------|------------------|--------------------|
| CCGTCATCTAA | 898.473172982091 | 0.118278286431199  |
| CGTCCAATGAC | 898.515969244516 | 0.199821535983827  |
| TCGATGTGACA | 898.535917974735 | 0.0922724465545397 |
| CCGGCTGACTA | 898.608080702781 | 0.146432358280551  |
| TATTTGACGCA | 898.652484276437 | 0.10152704918095   |
| GACGTCACCAA | 898.729898506053 | 0.121758274761853  |
| TGACTTACTAA | 898.780904257189 | 0.115961687043324  |
| GGGGATATGAC | 898.800636574412 | 0.103520050693925  |
| TGACGCTACAA | 898.823457240103 | 0.115092632206236  |
| GACGGTGACCA | 898.835640495546 | 0.13312835647634   |
| CGTCTCTGTCA | 898.841934914105 | 0.141831274105873  |
| CGGTGAGCAAA | 898.886791049428 | 0.100261306826719  |
| CCAATGTGACG | 898.888432394038 | 0.11521616004735   |
| AAATAAGTGAC | 898.953234238043 | 0.169626259721588  |
| AAAGTGACGCT | 898.958361594924 | 0.161856376136534  |
| ACGTCATGTTG | 898.958546247709 | 0.114499443671349  |
| ACTCATCCGTC | 899.006931926814 | 0.100436629710319  |
| GCGTGTGACAA | 899.008178560243 | 0.111312922966163  |
| ATGACACGGGA | 899.012524203424 | 0.107385202403143  |
| AGTACGGTGAC | 899.056850355967 | 0.103373950985629  |
| CTTTGTGACAA | 899.058165993638 | 0.0996114702409856 |
| GACAGGAGTCA | 899.062225451284 | 0.128656675068726  |
| ACCCGGGTGAC | 899.069849307142 | 0.102982557108431  |
| ATGCCGCGTCA | 899.091875978942 | 0.158771818050469  |
| ATCTAGATGAC | 899.099804920765 | 0.112040219064785  |
| GTTGACTACAA | 899.133219422967 | 0.0979077674629806 |
| CATACTGTAC  | 899.151672752467 | 0.0857001250895656 |
| TAGGTCATAGA | 899.174309424016 | 0.112217619439888  |
| CTATGTGACAA | 899.189439841754 | 0.133967923417763  |
| ATATTACTCTA | 899.213128126232 | 0.11804873777025   |
| TAGTGCAGTCA | 899.224490587749 | 0.0804529692727219 |
| ATGAGCCAGTC | 899.225967824891 | 0.0983798963697438 |
| GCTGACGTGAC | 899.234736069493 | 0.098521932821707  |
| GATGGGTCAAC | 899.236979559503 | 0.0998656201874164 |
| GATGAGTGTAC | 899.237672544466 | 0.123913261191063  |
| AAGAATTAATC | 899.290110108889 | 0.0983388120305965 |
| ATAGTCAGCTG | 899.345964710207 | 0.115866789508539  |
| GTCGCGAGTCA | 899.363116271594 | 0.149757205014048  |
| GAGTCAGGAGA | 899.373336784086 | 0.126404782870315  |
| AAGTCGGTGAC | 899.413255804608 | 0.081736219701358  |
| CTTACATGACA | 899.426879942026 | 0.14664382045245   |
| CAGATCGTGAC | 899.436193766744 | 0.145996544485666  |
| ACTAATCATGA | 899.46518590395  | 0.144510409422841  |
| ATCAGCATGAC | 899.474007711635 | 0.103540310644312  |
| CGCGGTGTAC  | 899.477410793104 | 0.0762492688127351 |
| ACTTGTCACCT | 899.48450861505  | 0.102477141054239  |
| GTCATTACCAC | 899.488568740079 | 0.144009383739397  |
| AACTGGGTGAC | 899.518596530889 | 0.156321484296382  |
| GTCATATGGAA | 899.549848482812 | 0.127174068524351  |
| ATGACAACCTA | 899.566833502069 | 0.151655685697297  |
| AATGAATAATC | 899.630807375684 | 0.167243739391997  |
| CAAGCACGTCA | 899.709810034792 | 0.111927747588488  |
| CCGTCATCGGA | 899.748598474236 | 0.118108515664002  |
| AGGGGTCATAG | 899.785961011961 | 0.0972491595949932 |

|             |                  |                    |
|-------------|------------------|--------------------|
| ATGACGGGCAC | 899.788077194719 | 0.111385734113531  |
| TACGGTGACAA | 899.800571586191 | 0.0986992699649406 |
| ACTCATCATCT | 899.81541302974  | 0.103417273006205  |
| AATGTGTAACA | 899.821132413273 | 0.1065348707674    |
| CCGAGGTGACA | 899.82923695007  | 0.0800163114332005 |
| CAAAGCAGTCA | 899.843857028826 | 0.128221807220601  |
| TGAACATGTCA | 899.85310010238  | 0.146674028784621  |
| GACAGCTCATA | 899.859788404102 | 0.123835096767607  |
| AGAGGGTGACA | 899.860124538681 | 0.104668513300055  |
| GAGTCAGGAGC | 899.867323379238 | 0.140482655576696  |
| AAGAATCATAC | 899.872142524457 | 0.103535356654747  |
| ACGCTCTGACT | 899.889066131766 | 0.146825988267748  |
| ACTCATGACCA | 899.891569319274 | 0.136261324362409  |
| ATGAGTATGGC | 899.917437767686 | 0.100774336323074  |
| CGTCACCGGTA | 899.941890962529 | 0.161300572492489  |
| CAACGTCATGA | 899.959971380648 | 0.172539351239341  |
| GCATTATGACC | 899.978524970137 | 0.146095606343708  |
| ACTATGAGTTA | 899.998793958807 | 0.0992784667517556 |
| TGTGACAATAA | 900.066823674028 | 0.0964865067846269 |
| AGACTGAATCA | 900.080955119083 | 0.107773489245311  |
| AGGCGTGTGAC | 900.08109990775  | 0.125532321274661  |
| GTCACGCGTGA | 900.095235218713 | 0.160370219942067  |
| ACTCACGTGAC | 900.1183221244   | 0.111334082987727  |
| CGGCGGTGACA | 900.125729698215 | 0.0667772988379585 |
| GGGCTAATGAC | 900.143638403966 | 0.114570673989955  |
| TCAACCTGTCA | 900.149020486701 | 0.142907663768705  |
| CGTCACCTATC | 900.149061499411 | 0.110149871679615  |
| AATCTGTGACG | 900.193260165254 | 0.161030223487044  |
| ATTACATGAC  | 900.195712123379 | 0.113668258049511  |
| GGGGTGATGAC | 900.197732908577 | 0.134567607453876  |
| AGCATCTGTCA | 900.21984258317  | 0.11242625037262   |
| CTGCCGCGTCA | 900.266014153169 | 0.135597036001991  |
| ACCTATGACCC | 900.299935615756 | 0.106231285717528  |
| TCATGGCGTCA | 900.359947680667 | 0.126976891117153  |
| CTTCTGACAAA | 900.362900302748 | 0.156100467514576  |
| ACCGTGACGAA | 900.367026796941 | 0.129561248187862  |
| ACTCTGACACT | 900.375380925063 | 0.151136575234881  |
| TGACTCTCCAA | 900.435737177117 | 0.149933831527369  |
| CGTCATCTCGC | 900.468791543168 | 0.109762052191271  |
| AGTCAGAAATC | 900.518790851193 | 0.117493851629528  |
| AGCAATAGTCA | 900.525161694608 | 0.138528165482534  |
| ATTACACACCA | 900.601131954047 | 0.108026382216302  |
| TGACTCTCTAA | 900.641327320023 | 0.103150408655762  |
| AGGGTGACGAT | 900.643683762904 | 0.111769546443654  |
| ACTTGAGTGAC | 900.754948539509 | 0.124870901028476  |
| ACCCATGACGT | 900.820480272749 | 0.120729515479633  |
| CAATGTGACGA | 900.887867194424 | 0.110519345233753  |
| AAAAGAGTCTT | 900.907804424304 | 0.120226531588502  |
| CATAGGTGACG | 900.910764082264 | 0.204638797733702  |
| ACCGATTACTC | 900.920804208279 | 0.126401528458842  |
| CGTGAGTCCGA | 900.924286170283 | 0.129834911809191  |
| CCGCTGTATC  | 900.93616141034  | 0.101469355267437  |
| GAGTGAGCCAC | 900.940002585003 | 0.102069426387182  |
| TACAGTAGTCA | 900.940430796122 | 0.135176595143246  |

|              |                  |                    |
|--------------|------------------|--------------------|
| GACCGGGTGAC  | 900.991998294321 | 0.12816010038278   |
| GTA CTCACCGA | 901.008970311433 | 0.132479598341591  |
| CAGATGTGACG  | 901.064073097706 | 0.121337518417389  |
| AAGCTGTGACA  | 901.084156577949 | 0.120859628104562  |
| TGGATTACTAA  | 901.092053773848 | 0.075215985899864  |
| CTGACCATGAC  | 901.109844836792 | 0.175330824402827  |
| CTGTCATTAGA  | 901.112679769832 | 0.155328207739181  |
| CTGTCATTACA  | 901.161779109544 | 0.130399812403992  |
| CGTCAGAGTAA  | 901.165904132507 | 0.131808961139448  |
| GATATGTCAGC  | 901.170034869994 | 0.0700796749047776 |
| AACTGCATGAC  | 901.171947661579 | 0.136072197443121  |
| ATACGGTGACG  | 901.233380546339 | 0.110263174695038  |
| CACCGAGTCAA  | 901.240005396649 | 0.103711816817675  |
| CTGACTCTCCA  | 901.240948396459 | 0.108153167554882  |
| CGCAGATGACG  | 901.285501632436 | 0.0838519295392617 |
| GTGACGCCAAA  | 901.299430993558 | 0.124308884426687  |
| ATGGCGACTCA  | 901.307263339721 | 0.146313540206591  |
| GAGACGTCACC  | 901.314459046205 | 0.124801398976829  |
| GACTGGTCAGA  | 901.32922669436  | 0.12392494661506   |
| AGTGAATCAAC  | 901.337649426168 | 0.0936748731998005 |
| ATTTCTGTGAC  | 901.361637935692 | 0.204574908521947  |
| GTCATTGCCCA  | 901.363930291197 | 0.118795206187318  |
| GTTGACTGTTA  | 901.403761744117 | 0.105874637476665  |
| ATCGTCACCGA  | 901.406201235263 | 0.189936175215055  |
| GTCACGCCAAA  | 901.411816403021 | 0.142840462375722  |
| AATAGGTCACC  | 901.460476339924 | 0.0906548691593664 |
| GTGAGTCCATA  | 901.462966568025 | 0.0897781447336753 |
| GGTCATAGCCA  | 901.463623546085 | 0.202333798039635  |
| ATGCTGTGTCA  | 901.465024695685 | 0.103140504374387  |
| AGTCACGGTGC  | 901.497502190649 | 0.153536277868308  |
| AGAGAGGTGAC  | 901.522115036239 | 0.107577585135549  |
| CAGTCAGCGCG  | 901.547763774425 | 0.122529488190753  |
| GGGTCACACTA  | 901.551714689825 | 0.12415024995495   |
| CACTCTGTGAC  | 901.566209130718 | 0.103334801153464  |
| ACCTGTACCT   | 901.597717906082 | 0.113609536230908  |
| GCGTCACGCTA  | 901.598143512418 | 0.176095742430478  |
| AAGTCAGACTC  | 901.603438893207 | 0.129105028803649  |
| AGGCCAATGAC  | 901.603487624232 | 0.162028750470816  |
| CCTGCAGTGAC  | 901.617372345664 | 0.141758525889367  |
| ATGACGTTCTG  | 901.68328414199  | 0.10386693395049   |
| GATTAGTACTA  | 901.692780691465 | 0.112422391936711  |
| CATTGTCACAC  | 901.731514930062 | 0.142681647636827  |
| ATGACAAGCTA  | 901.735638487521 | 0.106228601626874  |
| ACTTGGTCACT  | 901.737920248825 | 0.0980574203059799 |
| CGTTGACGTAA  | 901.746033476452 | 0.111523073003564  |
| CTGCTAGTCAC  | 901.748551885311 | 0.0961884587052156 |
| CGATCCATGAC  | 901.759750058049 | 0.119940047568077  |
| ATGACGATCCA  | 901.76385186568  | 0.140378708705832  |
| CTCATGTGACA  | 901.802126687244 | 0.0871127849072711 |
| AAACTGGTCAG  | 901.82396362979  | 0.137017058571803  |
| ATGACGACGGA  | 901.874343964738 | 0.137157253639266  |
| AGTGCCAGTCA  | 901.897922041954 | 0.0972641996163144 |
| AAGCCGGTGAC  | 901.924299381319 | 0.0861921887182697 |
| GGTCGTGTCAC  | 901.933611960464 | 0.138409651378167  |

|             |                  |                    |
|-------------|------------------|--------------------|
| AATACTGACTA | 901.955322533834 | 0.105306429379973  |
| GTCAGTCGTCA | 901.961421936374 | 0.118734454002863  |
| GAGCCGAGTCA | 901.964998623743 | 0.100414864163717  |
| GATTTGTCAAC | 901.972806113838 | 0.132800737723493  |
| AGTCAGCGTAT | 901.974984970189 | 0.122763092457778  |
| CACCAAGTCAC | 901.978750021628 | 0.0962021453808993 |
| ACAGATGTGAC | 902.032650353017 | 0.137277456667569  |
| AGACCGTCATA | 902.036469536808 | 0.139608825009799  |
| GAGCGGAGTCA | 902.086082035605 | 0.113291656095694  |
| TATGACCTAAA | 902.134128384008 | 0.0853872863094839 |
| GTCACCAGGTA | 902.134605504914 | 0.138291333436421  |
| AGTCACGGGAT | 902.162324118021 | 0.0901647070804291 |
| CGGTTTCGTAC | 902.164121438621 | 0.104742154253381  |
| GACCGAGTGAC | 902.194549925536 | 0.156898240013325  |
| ACGACTCAGAT | 902.216260529967 | 0.101570558211236  |
| CCGAGTAGTCA | 902.221066136553 | 0.127141484565863  |
| AAAAGAGTGAC | 902.228486951994 | 0.100198856875402  |
| AACTCCGTAC  | 902.238404335339 | 0.124498610311993  |
| AAGTCACGGAA | 902.242110541944 | 0.110857289960897  |
| CGACTAATCCA | 902.257254066139 | 0.108532091578432  |
| GGATTTGCTCA | 902.274679304174 | 0.114227771354564  |
| AGTCCAATGAC | 902.282828730096 | 0.127532959050769  |
| AGCAATGAGTA | 902.321461330158 | 0.108161782566552  |
| CATACAAGTCA | 902.321922953234 | 0.121469505582297  |
| GATGATGTGTA | 902.329027391381 | 0.100226723398472  |
| CGTCACACCCA | 902.360481155074 | 0.113368327649138  |
| ACCACCAGTCA | 902.369576818605 | 0.126760047109438  |
| AGTCGGTGACA | 902.377372432709 | 0.0822264534712602 |
| GTCACTACTTA | 902.385598180414 | 0.209697213012366  |
| TGCGTAATCAA | 902.393163880489 | 0.106645900952653  |
| CTTGTCATTTT | 902.41155740169  | 0.105945737164718  |
| TGACGACATAA | 902.416906492577 | 0.122102414237676  |
| CTGGCAGTCAC | 902.448374398539 | 0.120943392789408  |
| AGAGTAATTAT | 902.457234166338 | 0.168165778413356  |
| GAAACGCGTCA | 902.465951259011 | 0.138072434159771  |
| GACTAATGACC | 902.477070803973 | 0.0958438238413786 |
| AAGTCGTACC  | 902.507044976139 | 0.107901775448413  |
| AGAATGTGACG | 902.546177214574 | 0.103494542554773  |
| CAAGGGTGACG | 902.560472681092 | 0.110638337429176  |
| GTGAGTATATA | 902.589551258088 | 0.0942185613414992 |
| GAAGAGTCTTA | 902.606429922631 | 0.132101769955048  |
| GCGTCACTAAC | 902.624579961432 | 0.0842185093992299 |
| CGCGTACGTCA | 902.677408778256 | 0.118552053027792  |
| GTCACAGACAC | 902.684365541758 | 0.120029579328053  |
| TGTCATGTTAA | 902.722237317748 | 0.0990641216261964 |
| AAGTCACGGAT | 902.73371328923  | 0.119312015477489  |
| CAGACTCACTC | 902.763207763816 | 0.12763547500404   |
| TCTGTACGTCA | 902.777193671217 | 0.114065019229337  |
| GAGGATTACTC | 902.790019781421 | 0.103727968463513  |
| ATGACAGCTGA | 902.794965905593 | 0.0712361529514939 |
| AGATGGTGACG | 902.797426217354 | 0.119331521228528  |
| CCCCTGATGAC | 902.805820016831 | 0.0943290581594121 |
| ATGACAATAGA | 902.819253822438 | 0.107037438656952  |
| CATAGCGTGAC | 902.834955600039 | 0.0948137295954467 |

|              |                  |                    |
|--------------|------------------|--------------------|
| CGACCATGACA  | 902.855271086283 | 0.0933359678814365 |
| ATGTCTGAGTC  | 902.856419868185 | 0.107912494078593  |
| CGGTCATACGA  | 902.882668434971 | 0.0980630664024292 |
| GTCCTGTGTCA  | 902.892578463035 | 0.109391732452995  |
| AGTAGGGTGAC  | 902.940344816815 | 0.103600398163922  |
| CGCGAGTCAAC  | 902.992919806478 | 0.189894569307391  |
| GACTGTGACAA  | 903.009285483635 | 0.0864540792439608 |
| GGCTTGTGTCA  | 903.025005856819 | 0.130000685807734  |
| AGACTGTCATC  | 903.027477179257 | 0.0724507194825221 |
| CTAATGTGACA  | 903.028390653408 | 0.125980921409463  |
| AGTCAGAGTAC  | 903.061640902429 | 0.122935005259285  |
| GTCACATTCAC  | 903.078513765259 | 0.128788032649904  |
| GTGACGTTGTA  | 903.109170531214 | 0.102361869955342  |
| ACTCATAATAC  | 903.130543784982 | 0.120800181577505  |
| CGTCACCCGAA  | 903.170567309883 | 0.0930953616453236 |
| CTACCTGACTC  | 903.172966673102 | 0.10898055332951   |
| ATCTCCGTCAC  | 903.201162336518 | 0.103906435395774  |
| AAATGTGACCA  | 903.234139087128 | 0.131940435781881  |
| CAACCATGTCA  | 903.240712727845 | 0.136143345080084  |
| CTATCTGTGAC  | 903.252992880184 | 0.111369950805315  |
| AGTATTAGTCC  | 903.26603288217  | 0.169571612752584  |
| ATAGATGAGTA  | 903.302775650813 | 0.107450605584423  |
| ATGGTGAGCAA  | 903.306524744994 | 0.149214470833839  |
| ACTCATAGTTC  | 903.387525419777 | 0.100548278536185  |
| GACAATAGTCA  | 903.39489303867  | 0.148708696207051  |
| AAGGGTCAGAC  | 903.434707856909 | 0.114239337473652  |
| ACTCATACAAG  | 903.460228691824 | 0.137519902395536  |
| ATCTGACTGCA  | 903.461816990794 | 0.132871620858572  |
| AAGCTATGACC  | 903.479880259451 | 0.176286353681729  |
| ATGTCATGATC  | 903.50715432521  | 0.106865236348644  |
| AACTGGAGTCA  | 903.516247429706 | 0.103278128629535  |
| GCACGTCACCTA | 903.549364587266 | 0.113761521997111  |
| TGAAGCAGTCA  | 903.558137081085 | 0.149010505347468  |
| TATGGTAGTCA  | 903.560019482236 | 0.126070831161746  |
| ACTCTGTGACA  | 903.578755238746 | 0.187533417973392  |
| GTCACCTCAGA  | 903.615238585639 | 0.103837347357051  |
| TATACTTGTC   | 903.619040378486 | 0.13882647825144   |
| ATCCTGAATCA  | 903.619920389758 | 0.117842436764195  |
| TAGTGACCGCA  | 903.640139587759 | 0.0593699043990486 |
| GCTCGAGTCAA  | 903.644589604313 | 0.134068661619907  |
| GGTGTCATGGA  | 903.660072028202 | 0.0984530504411604 |
| TCTTGACTGAA  | 903.660814271962 | 0.160819242181736  |
| GGTGATACATA  | 903.683264996775 | 0.117751765317129  |
| ACTCATTGTTA  | 903.683806981205 | 0.11435553650873   |
| CGAGTGACAGA  | 903.694487837781 | 0.0938800356866551 |
| AGTCAGAATCA  | 903.701741019262 | 0.11533479039731   |
| ATTTGGTGACG  | 903.705812295203 | 0.09669794100985   |
| TGGTGAGCAAA  | 903.712588965872 | 0.132715762986726  |
| CTAATAGTGAC  | 903.71774996002  | 0.149105486011019  |
| ACTAGTCAGCA  | 903.727502643522 | 0.140198300614902  |
| GCCCACAGTCA  | 903.728213063384 | 0.123767552488469  |
| AGACTAAGTCA  | 903.72881417167  | 0.068360713617448  |
| AGTCAGTAAACG | 903.774245373653 | 0.1410760776289    |
| CCCAGTGTGAC  | 903.777553136228 | 0.10778497957761   |

|             |                  |                    |
|-------------|------------------|--------------------|
| GGAATGGGTCA | 903.798680623406 | 0.126771406741446  |
| ATATCATGACA | 903.814718094347 | 0.120060079023252  |
| AATGCCAGTCA | 903.833248632565 | 0.0766652208863692 |
| TAATTGACTGA | 903.853833662001 | 0.154241045204746  |
| ATCCATGACAA | 903.85575421652  | 0.100763007485548  |
| CGTCATGCTGA | 903.882148841307 | 0.104819514713599  |
| TATATCGGTCA | 903.942465287834 | 0.120556703726143  |
| TGTGACTTCAA | 903.980120157769 | 0.0957373059097243 |
| AAAATGTCACC | 904.066087921923 | 0.0935521516161243 |
| ACAGTCAGCAT | 904.096847127582 | 0.14068834132572   |
| ATACATGTGAC | 904.115760104966 | 0.0931499130526571 |
| ATTCATGTGAC | 904.158441244647 | 0.0980011450312449 |
| ACTCATCTATG | 904.175148637387 | 0.0947110660977712 |
| ACTAGTGACAC | 904.184012528277 | 0.123754227055545  |
| ATATAGGTGAC | 904.214068132747 | 0.113560608230149  |
| CCAGCAGTGAC | 904.214336573167 | 0.0621582137654056 |
| CGTGACAGGTC | 904.216935081645 | 0.124501736511506  |
| GGCGAGATGAC | 904.24584936613  | 0.128220717084326  |
| AGTGACACGAT | 904.253040566807 | 0.102278342598238  |
| CACTTGACACA | 904.257034902508 | 0.092785983743401  |
| GTGTGACAATA | 904.267555737052 | 0.0990486610970858 |
| CGTCACCGCTA | 904.300583595962 | 0.170221854703966  |
| GTATTTTGTCA | 904.314904385517 | 0.0825766207142799 |
| CCTCAGATGAC | 904.342950855129 | 0.125045698472796  |
| ACTCATGACGA | 904.373739076514 | 0.111608664608834  |
| CGGTCATACAC | 904.373906524797 | 0.0955384637844999 |
| AGTCACGGGTA | 904.394424144982 | 0.158358559732735  |
| AGTGTCAGAGA | 904.39936301648  | 0.123716508119242  |
| GTGACGCGCAA | 904.405245871123 | 0.103048369697891  |
| ATGTAGCGTCA | 904.410977960406 | 0.155654133398545  |
| ACTCATTCTAC | 904.434055878045 | 0.103577993823691  |
| CTATGCATGAC | 904.437206955245 | 0.123212531132332  |
| CAAGATGACCC | 904.45574563375  | 0.115732790244493  |
| AGTCACGAGCG | 904.470287335478 | 0.084578861551922  |
| CTCAAGCGTCA | 904.498562737178 | 0.093296060458598  |
| ACCGATGTCAT | 904.521022787583 | 0.0996785548520815 |
| GTGACATACTA | 904.525605578484 | 0.110990720114685  |
| CTTCGGTGTCA | 904.532015983472 | 0.111302255238901  |
| ACCCGTCACAC | 904.546177833941 | 0.107597933080287  |
| TAGGCATGACA | 904.55014549733  | 0.105403190965326  |
| CTAATGGCTCA | 904.563342821953 | 0.102283334238829  |
| GGTCATACGCA | 904.596971674124 | 0.123828411559375  |
| GGGATTTGTCA | 904.597017445178 | 0.124602355020823  |
| GTCACCTCTAA | 904.616895188012 | 0.0835879315971787 |
| AAGTCTGAGTC | 904.636564142972 | 0.170132293307476  |
| GCGTGATTCAA | 904.671796893665 | 0.151284069170116  |
| CCGTCATCTGA | 904.671804883857 | 0.107014876349037  |
| CGTCACATCAC | 904.688404032392 | 0.098570941901071  |
| ACGACATGACA | 904.691838498014 | 0.142241790007914  |
| GTCACTACAGA | 904.705085061447 | 0.10844758124479   |
| TATCGGACTCA | 904.713427127375 | 0.13036919639403   |
| GACTAATATAC | 904.73623923544  | 0.139091516398485  |
| AGAGTCAGGCG | 904.749064332875 | 0.11270703936644   |
| CGGGATGACCA | 904.755240855072 | 0.097969394822548  |



|              |                  |                    |
|--------------|------------------|--------------------|
| GCGTCACAGAA  | 904.764903871613 | 0.103550983966174  |
| AGTATGATTCCG | 904.769375645107 | 0.111702101205397  |
| GTGACCACTCA  | 904.798612414983 | 0.112625389004261  |
| GCAACGTCACC  | 904.80195552666  | 0.140366877469214  |
| GTCACAGTCCA  | 904.804847307622 | 0.126732208885485  |
| TATGCTAGTCA  | 904.847589665571 | 0.0880507676380324 |
| GTCACCAAAC   | 904.89295089634  | 0.11335171764874   |
| ACTCATTATA   | 904.907390368018 | 0.0971791224333238 |
| GTGTCAGAAGA  | 904.915742728185 | 0.0977362737171767 |
| GGTGTGATGAA  | 904.926234471524 | 0.116778199649585  |
| AGTGGTAGTCA  | 904.928674868484 | 0.104704039895832  |
| CGTCACCCGAG  | 904.956272056402 | 0.0996777529004708 |
| GGGTCATCTGA  | 904.974452637982 | 0.140526288189666  |
| CTTAGAGTGAC  | 905.025968790485 | 0.157068818954298  |
| TGTCACGCGAA  | 905.046794868824 | 0.098124705916597  |
| CCGCGGGTGAC  | 905.053008289769 | 0.155507019618413  |
| GTCATTATAAC  | 905.121758730608 | 0.152270532512659  |
| GTACACGTGAC  | 905.137016944739 | 0.0983207796332282 |
| TCTTGGTGACA  | 905.140100369344 | 0.124131374287742  |
| CGCTGGTGACA  | 905.15025335427  | 0.0904600011658835 |
| CTCTGAGTGAC  | 905.169899096142 | 0.0967934201290582 |
| TAATGTGACCA  | 905.176846489813 | 0.111445532226065  |
| CGCTCCAGTCA  | 905.185326458054 | 0.110132769285024  |
| ACGTCATGAAC  | 905.208737134606 | 0.190208283514668  |
| GTCACCACCAA  | 905.268766222592 | 0.152485679528237  |
| GCAACATGAC   | 905.294805294205 | 0.175873214971979  |
| ACTCAGCGTCA  | 905.306446392528 | 0.0990042207620495 |
| ATCGCCGTCAT  | 905.346780387974 | 0.128465348724292  |
| ATGACAAGAAC  | 905.353085169408 | 0.103052964175216  |
| ACACTACTCAT  | 905.381825162426 | 0.0978105777938249 |
| GTCACGAATTA  | 905.40817454418  | 0.118282404815395  |
| ACGTCACGTTC  | 905.434648495769 | 0.166521059672571  |
| CTTCGAGTGAC  | 905.450308952741 | 0.10730634645522   |
| TGGTCATTCAA  | 905.468911951792 | 0.138990145307978  |
| ACGATCGTCAT  | 905.554669273851 | 0.144311171011651  |
| ACTCATCGACT  | 905.555212609872 | 0.0906885576288996 |
| AGTGGTCACAT  | 905.565659705927 | 0.0941418815440251 |
| GAATGCGTGAC  | 905.570835750889 | 0.112283693063103  |
| GAAGCATGACA  | 905.602182525656 | 0.124264153780905  |
| ATGACATCTCA  | 905.625628291306 | 0.105423259942919  |
| ACTTTTCGTC   | 905.648212542978 | 0.130117015611351  |
| TGAATTACGCA  | 905.655796794999 | 0.188493236327234  |
| AGAGTAATAGG  | 905.658089847569 | 0.095773601127296  |
| ATGACGGGGTG  | 905.658583599408 | 0.104556336323121  |
| ATTAGTCGGTG  | 905.669893214201 | 0.118571866211549  |
| TATGCGTGACA  | 905.717009773245 | 0.107517369704737  |
| CTCTGTGACGC  | 905.722649325484 | 0.0916649804856574 |
| ATCTAAATGAC  | 905.728920609548 | 0.105523548326368  |
| AGTCAGAAAAC  | 905.741219453159 | 0.138379757117954  |
| GTAGAGAGTCA  | 905.745279468408 | 0.121348524795765  |
| GTGACAGACAA  | 905.754772101285 | 0.119223677712904  |
| GACCAGGTGAC  | 905.766941356088 | 0.0916755336489166 |
| CTGACTGTCAC  | 905.773991776293 | 0.0908046123373229 |
| AACTCTGAGTC  | 905.781441311944 | 0.119074008960735  |

|              |                  |                    |
|--------------|------------------|--------------------|
| ACAGTGACACG  | 905.829800728205 | 0.178042947337881  |
| GCGCTGGTGAC  | 905.852018159876 | 0.100084345732557  |
| AGGCAATGACG  | 905.852129747637 | 0.125966388122754  |
| AAATGACAAGG  | 905.872090323619 | 0.102090606593453  |
| AGAATCGTGAC  | 905.905821332134 | 0.0963510069449437 |
| AGGGTTGTCAT  | 905.927962364202 | 0.0928240442566237 |
| GTCACGTTTCA  | 905.92796445759  | 0.16767059030541   |
| CTCGTCACTCA  | 905.959582435505 | 0.0911000627211752 |
| GCGTAATGAC   | 906.006303865297 | 0.150059161827015  |
| AAGTATTACGC  | 906.006673113013 | 0.0940333697301265 |
| ATGATTCGACG  | 906.006863031315 | 0.11627893334597   |
| CGTCATGCCAG  | 906.008534715707 | 0.161896431004537  |
| GTCTGACGAAA  | 906.07906370778  | 0.13759784287293   |
| GCGTCACGCAC  | 906.085068017386 | 0.0982750518873046 |
| GCCTGGTGACA  | 906.164109035169 | 0.141171646920348  |
| ATGACTTGACG  | 906.226130814005 | 0.115562389009093  |
| CTATTGCGTAA  | 906.233392058435 | 0.108694752328478  |
| CTCTGACGAAG  | 906.252706520645 | 0.163817285977016  |
| GTAGTGACAGA  | 906.253196074889 | 0.0963766333125154 |
| GAGTATGTCAC  | 906.273669274606 | 0.126843724600245  |
| GGTGATTAATA  | 906.283612914013 | 0.0914196929577764 |
| CTGTCATTAATA | 906.337837075721 | 0.11535427628442   |
| ACTCATCGAGA  | 906.354602876284 | 0.132825067433825  |
| CAGTGACGTGC  | 906.405362209709 | 0.0985554782033469 |
| AGTCAGATCAG  | 906.444612838114 | 0.126550114098826  |
| ACGTCACCTGA  | 906.456588245081 | 0.0738402520580405 |
| GGAAATTGTGAC | 906.462379500365 | 0.10226556891415   |
| GGTCGGTGACA  | 906.47427490693  | 0.156323078257111  |
| CTGAGAGTGAC  | 906.509745894113 | 0.130766876666948  |
| CCTGTGTGACG  | 906.512951074878 | 0.148803361423484  |
| CGTCATGATAC  | 906.572417641954 | 0.124107586646867  |
| GTCACCGGAGA  | 906.594633290727 | 0.137458513367315  |
| CAGTCAGCCTA  | 906.616474785461 | 0.138353055289257  |
| TCGTTGAGTAA  | 906.644675800042 | 0.0944199236057268 |
| ATACTCACTCA  | 906.684782580645 | 0.110344853032705  |
| GTCACGTTTAA  | 906.696943182177 | 0.0897370341833559 |
| GATGAGTAGGA  | 906.704122547517 | 0.0990514599650706 |
| TATGTGTAACA  | 906.780297474275 | 0.119036641744954  |
| ACACCGACTCA  | 906.785290674207 | 0.126651073561498  |
| TACGGTGACGA  | 906.853590064038 | 0.088830006766679  |
| CATGACGTTGA  | 906.868575743336 | 0.163598083130844  |
| CGGTGGCTCAC  | 906.89836612225  | 0.119997906943475  |
| GATTACATGAC  | 906.952809765129 | 0.0981511797170698 |
| GTTCCGGTCACA | 906.969134188193 | 0.0874311579275427 |
| ATCTTGACACA  | 906.972796565018 | 0.113236142546555  |
| ACGACTCAGTC  | 906.9733750673   | 0.13890762919192   |
| GCATAATGACA  | 906.975959392064 | 0.131577849702075  |
| ATATACGTAAT  | 906.977969833742 | 0.133866389706036  |
| AGTGACAATAT  | 906.986308264691 | 0.13730287713194   |
| ATAGTCAGTCG  | 907.0284921612   | 0.137099979225722  |
| GGAAATGTGAC  | 907.066954925032 | 0.110395873605098  |
| GTCATTAGGTA  | 907.08849389221  | 0.170155715450741  |
| AGAGTCAGGTC  | 907.090378220116 | 0.113898581547431  |
| TAAATTACGCA  | 907.099527063577 | 0.114411471340737  |

|             |                  |                    |
|-------------|------------------|--------------------|
| TTGCTCACCAA | 907.128775405754 | 0.0890285379463322 |
| CGTCATGATCA | 907.136345571408 | 0.14593808668955   |
| AAAGCTGTGAC | 907.235350173837 | 0.14015978164412   |
| ATGACCACGGC | 907.266445012397 | 0.10067600124818   |
| ATGACGGGGTC | 907.277344467359 | 0.1246456356268    |
| GATCATGACAA | 907.29166623361  | 0.0993970473058267 |
| TGACGCTGAAA | 907.294739500089 | 0.178289262428887  |
| GGCAGTGTGAC | 907.315503383635 | 0.100276252321998  |
| TGTGAGTATAA | 907.318560424961 | 0.102829337001019  |
| AAGAAGGTGAC | 907.364701453155 | 0.099741828229786  |
| ATAGTCAGCCG | 907.368357862709 | 0.155816651023499  |
| GTCACATGGAC | 907.380345382605 | 0.131458931120707  |
| CAGTTGAGTAA | 907.388378456465 | 0.142147280758683  |
| GTGTCACGGAA | 907.396661476148 | 0.091866276521128  |
| AATGTTCTGCA | 907.422215729753 | 0.160351305237468  |
| ACTCATTTTGC | 907.457944006138 | 0.100358913564456  |
| GATGTATCACA | 907.472644174099 | 0.0832234756796327 |
| GACCTTGTGAC | 907.499530929187 | 0.108011096707667  |
| AAGTTTGTGAC | 907.518955159443 | 0.106676739167674  |
| AGAACACGTAA | 907.529467351449 | 0.11518468775329   |
| GACGTTGTGAC | 907.531980748131 | 0.0895390041669136 |
| ACTTTAGTCAA | 907.535212899539 | 0.113976086419073  |
| CCAATGTGACA | 907.562793554158 | 0.113435217755697  |
| AAGAGTAACAT | 907.565626476869 | 0.0938407083594207 |
| AAGTCACCTCT | 907.627791041016 | 0.11061395640456   |
| GTGACATAGTA | 907.639161691582 | 0.112842514789347  |
| ACTCATACCAC | 907.655916922089 | 0.108344919493601  |
| CACAGTCAGCA | 907.665875646035 | 0.157928396143849  |
| AATGGGTGACG | 907.702853610555 | 0.0965740042233037 |
| ACTCATAGGCG | 907.742342209558 | 0.177848904865242  |
| CTGACTGGTTA | 907.758676487171 | 0.134443608835145  |
| CTAGATAGTCA | 907.837393043692 | 0.135840660078979  |
| CGTCATGCACG | 907.871396616457 | 0.108884436751544  |
| AATGAGGTCAT | 907.89810825948  | 0.0938102596823266 |
| AAGTCAGAGTC | 907.904391296735 | 0.0992822365334367 |
| CGACTTTGTCA | 907.910340024101 | 0.112870525363385  |
| GTCACTCTATA | 907.911572509981 | 0.151334361564186  |
| AGTCAGACCCG | 907.922194799925 | 0.129057898389782  |
| CAATAGCGTCA | 907.923474894977 | 0.129222904948104  |
| AAGGATTAGTC | 908.005580739768 | 0.106279935187386  |
| ATGAGCCAGAA | 908.044208733657 | 0.104786786080299  |
| GGTGTGAGCAA | 908.068037244032 | 0.0883690924143766 |
| ATAATGAGTAT | 908.071374143172 | 0.140165370647918  |
| AAAAGTGACAC | 908.071899747538 | 0.103417486402104  |
| CGGTGACCGAA | 908.086460645102 | 0.130956651385041  |
| TCAATGGCTCA | 908.094417117955 | 0.134581713831179  |
| ACTCATAACAG | 908.136597727413 | 0.0936503607111987 |
| ATTGTATACAA | 908.140783882758 | 0.155295141799377  |
| TGACATGGCAA | 908.18752065452  | 0.137708171961099  |
| AGTGAGGTGAC | 908.199160866889 | 0.144600232997745  |
| CGGCGTGTGAC | 908.226066594099 | 0.115229799241531  |
| GATTGCGTGAC | 908.310916522416 | 0.134175960555038  |
| CTTGATAGTCA | 908.326814691332 | 0.108791845070804  |
| GAGTCAAGTAC | 908.361919810951 | 0.148123857394095  |

|             |                  |                    |
|-------------|------------------|--------------------|
| GTGTGAGCAAC | 908.365408563937 | 0.0975872790988886 |
| GCGTCACGAAC | 908.367219158557 | 0.125417656669881  |
| AATGACCACGC | 908.371455107633 | 0.104283305633092  |
| AATCGAATCAT | 908.375953829528 | 0.119643519391889  |
| AAGTTGTGACA | 908.408328927789 | 0.157351980320518  |
| ACGCGCATGAC | 908.410108731973 | 0.146176734866652  |
| GCTTAGGTGAC | 908.428435769809 | 0.162673981135516  |
| ACTCGGTGACA | 908.44865134316  | 0.0811978141449542 |
| GAGTAATAATC | 908.454729951997 | 0.114635299622938  |
| CGGTCATAATA | 908.471044365827 | 0.133952875791298  |
| AGACTCCGTC  | 908.480324755364 | 0.182168331781694  |
| CTATTTGCTCA | 908.508057832376 | 0.0917855190639531 |
| GAATTGTGACA | 908.51757132031  | 0.141655545647169  |
| AGTATGTCACT | 908.540382102004 | 0.0959494128839728 |
| CCTTCATGACA | 908.55046147388  | 0.120620544727803  |
| GTCACCTTAA  | 908.560283817892 | 0.133963298113175  |
| TATTGTGACCA | 908.578423164637 | 0.113339136437749  |
| ATTGAGTCTAC | 908.639501653263 | 0.143292430022222  |
| ATTTACGTC   | 908.655134277823 | 0.102515691389558  |
| ATACTGTACG  | 908.664515826493 | 0.15366558537081   |
| AAGATTACGTG | 908.67099719374  | 0.142420198281346  |
| GGATGACAAGA | 908.672253090622 | 0.101721841273325  |
| CGTCACCTGAG | 908.704327951197 | 0.132058148692528  |
| AAGGTGGTAC  | 908.716402282151 | 0.0927152394840121 |
| ACGCGGTGACA | 908.739910718141 | 0.178210927148652  |
| CCCCGGAGTCA | 908.74105314251  | 0.129269250905729  |
| GCTTGTCATCC | 908.74144603494  | 0.0631621596822634 |
| CCCAGGGTAC  | 908.74169019068  | 0.102659799002893  |
| CTGACATATTC | 908.767006794698 | 0.115041643321876  |
| GATATGTGACA | 908.803544989976 | 0.141799201255375  |
| CACAGAGTAC  | 908.807181795629 | 0.186162744399777  |
| GTCACGATACA | 908.827430063015 | 0.133940186066825  |
| ACAGATGAGTA | 908.834669484009 | 0.120082631926209  |
| CGTGCTGTAC  | 908.83571582673  | 0.0828781836601574 |
| GTGACCAAGCA | 908.874018163613 | 0.0948744994608637 |
| CACCCATGACA | 908.888561896385 | 0.105854988037173  |
| GTGACGTGAAC | 908.909768366324 | 0.0968831891569658 |
| TGCGGTCATAA | 908.936301063882 | 0.12189445379735   |
| CGGCCGACTCA | 908.959035684083 | 0.126182957144279  |
| CGGCTAGTAC  | 908.983238414402 | 0.135847120385288  |
| AATGACCTCAT | 909.014821139241 | 0.0894808579830479 |
| CCCCTGTGACA | 909.020977164387 | 0.113371909599548  |
| ATGAGTGTACC | 909.035702776094 | 0.101877872749062  |
| GAGTAGACTCA | 909.04445098561  | 0.10196793379731   |
| GAAGAGGTGAC | 909.056711146911 | 0.112048564486269  |
| CGTCATTGCCC | 909.069760849143 | 0.140558095514478  |
| TCACGGTGTCA | 909.071550175179 | 0.0946434147283131 |
| CACGTCACGGC | 909.130246522251 | 0.137071976718001  |
| ACTACATGACA | 909.14569968331  | 0.110245342737192  |
| CGTGTGGTAC  | 909.154940325378 | 0.145824357170517  |
| GTCACCAGTTA | 909.17489778052  | 0.106203881744876  |
| ACGCATGACAA | 909.179073125765 | 0.14672012830337   |
| TGACACTAAAA | 909.19033635581  | 0.0791420840708079 |
| AGGGATGACGG | 909.191166254063 | 0.089721190379712  |

|             |                  |                    |
|-------------|------------------|--------------------|
| AGTCAGAACGG | 909.200063288883 | 0.125356937117281  |
| ACACGCATGAC | 909.238914026591 | 0.0975635911108695 |
| ATGACGACCAC | 909.269058296301 | 0.13277576440988   |
| CAACGGGTGAC | 909.278735431897 | 0.0667209626943439 |
| GTCACAGCTCA | 909.289591645451 | 0.113852895118822  |
| CATTCAATGAC | 909.301017509501 | 0.117248561333851  |
| ACTAGGTGACA | 909.303754220793 | 0.097906916046109  |
| TGACAACATAA | 909.31175683457  | 0.0776526870134973 |
| GTCACCGTGGA | 909.381757597272 | 0.0978484147066682 |
| CCATTTGTGAC | 909.406087809196 | 0.123471757078119  |
| CTGACATATTA | 909.520134608207 | 0.0881900485068936 |
| AGTCAGAGGAG | 909.525690651686 | 0.107603791081013  |
| AACTCGTCAGA | 909.52892026343  | 0.121872119949966  |
| CCTCTTTGTCA | 909.55429668198  | 0.0903865007506761 |
| GCAAATGACCA | 909.573329455975 | 0.12205004094017   |
| CACGGTGACCA | 909.590003403942 | 0.138933101657628  |
| ACCTGAGTGAC | 909.60135126907  | 0.104233277488038  |
| TACGTGACGAA | 909.613603534799 | 0.0889889975737805 |
| TAGGAGTAATA | 909.635916191781 | 0.0877847939556389 |
| GCCCAATGACA | 909.639912917367 | 0.103959933638227  |
| CCGTTGAGTAA | 909.664961332711 | 0.0972905119639683 |
| ACTCATCGATC | 909.67592979921  | 0.128817255984433  |
| ATGACGGCGCA | 909.70807890019  | 0.102797052350837  |
| AAAGTGACGCG | 909.764014468053 | 0.0982987007125135 |
| ATGACTTTTCC | 909.800173357025 | 0.0875442541450214 |
| ATGACGGCAGA | 909.85744414242  | 0.0978039946481759 |
| AGAATGTGACA | 909.908704705465 | 0.12970143652518   |
| GCACCAATGAC | 909.913272605766 | 0.131658848280895  |
| GCGTCATGATA | 909.926236669861 | 0.165361690994634  |
| AGTGATACATC | 909.93867385752  | 0.143239888051546  |
| ACTCATTCAAG | 909.989270450928 | 0.103081317896568  |
| TCTAGGTGACA | 909.994621430421 | 0.116641165249007  |
| GTGATTAATCA | 910.016937731235 | 0.0675162627959717 |
| AGGGATTAGTC | 910.057335255824 | 0.117151421667366  |
| GTCATTGAGAC | 910.073935383277 | 0.125779697860516  |
| GGGTGTGTGAC | 910.074642484752 | 0.128554281187984  |
| GAGTACATGAC | 910.078167255098 | 0.129514883225997  |
| GTCACCACACA | 910.09729567208  | 0.092916845507691  |
| AACGTCATGCA | 910.109552766259 | 0.114819342999142  |
| ACGCCGTGATA | 910.119675497499 | 0.113498860598982  |
| AAGTTGTCACT | 910.136390927297 | 0.108182764889745  |
| CTGTTGGTGAC | 910.175828191084 | 0.064443815417744  |
| ATGATGTGGAC | 910.183147796825 | 0.109320563316953  |
| ACATCATGACG | 910.189987378808 | 0.0743679672861984 |
| GCCAGCTGATA | 910.245739225594 | 0.140024330354054  |
| TATACATGTCA | 910.250466330645 | 0.130264808252683  |
| GGAACGTCAAC | 910.271235692947 | 0.108561436823137  |
| ACCGTGTCACT | 910.272004649229 | 0.095326674904369  |
| CCTTCTAGTCA | 910.282791286337 | 0.106047090701951  |
| AGTTGTCACCC | 910.30246745493  | 0.0775639457769655 |
| CTGAGTCTAAC | 910.309445577432 | 0.0886714239794114 |
| TTCGGTGACAA | 910.329598075065 | 0.103395065121164  |
| GTCACCAGAGA | 910.349690338489 | 0.126699272573299  |
| AGCAATGACAG | 910.361128651428 | 0.117456287088152  |

|               |                  |                    |
|---------------|------------------|--------------------|
| ACATTGTGACG   | 910.376435746749 | 0.0914528745234822 |
| CTAGTGGTCAC   | 910.404787910731 | 0.11809883989273   |
| AACAGTGACAC   | 910.40793979699  | 0.0997640522434808 |
| ATAAGTGTGACG  | 910.427242026917 | 0.157523931460898  |
| AGTGTGACAGACA | 910.430580878009 | 0.14172733310204   |
| AACTGAGTGAC   | 910.435032069554 | 0.0937735847687506 |
| ATGGCCAGTCA   | 910.448672876592 | 0.130597941588172  |
| AAACGAGTGAC   | 910.510814000361 | 0.109735273356007  |
| GTCACTATATA   | 910.572474813422 | 0.172348433482928  |
| TACAGTCAGGA   | 910.598120534697 | 0.0950747091531782 |
| ACGCTTGGTCA   | 910.616018493192 | 0.101627648724698  |
| AGCAGTCAGTC   | 910.654001494256 | 0.133235958623409  |
| GTATTCATGAC   | 910.674230751701 | 0.114146996769953  |
| CCAGTGACAGA   | 910.711739206226 | 0.108047960278861  |
| AGTTACGTGAC   | 910.744280496132 | 0.0923168744364533 |
| TCGGGTGACGA   | 910.778394537394 | 0.124656215976764  |
| ACTGACACGTC   | 910.796296978563 | 0.15452192181242   |
| CTTACAGTGAC   | 910.818107237312 | 0.110355639766055  |
| CGCGTCACTGC   | 910.82111805102  | 0.118082574809137  |
| ACTTGACACAC   | 910.828274448919 | 0.0938615861406951 |
| AGTCACGCCCC   | 910.855150816903 | 0.0998222792810366 |
| TGTGTCAAGAA   | 910.860499076399 | 0.0927965800170831 |
| GTCAGTGTATA   | 910.914749332321 | 0.101026503888115  |
| AACAGTCAAAG   | 910.915702781089 | 0.154952628286698  |
| CGGTCATCGCA   | 910.918834879065 | 0.0946094555946284 |
| AATGAGTTAAT   | 910.921160224883 | 0.155790760217493  |
| TAAGGTGACGA   | 910.943059685434 | 0.159484589666086  |
| TAGAGTAGTCA   | 910.963717119647 | 0.148616335735721  |
| ACGGTGACAAT   | 910.967049446546 | 0.132025082211454  |
| GGTAGCAGTCA   | 911.001123114784 | 0.121510077663366  |
| AGATATGACCC   | 911.03273778625  | 0.133579573919248  |
| ACTCATAAGCG   | 911.046027582527 | 0.127385820787126  |
| CGACAGGTGAC   | 911.065286222918 | 0.127002316108926  |
| ATAATGTGACA   | 911.087515872237 | 0.129159821614097  |
| CACATGACAGA   | 911.150667218089 | 0.0859403300588461 |
| CCAATGTCATA   | 911.170909450237 | 0.108054613869264  |
| ACCCTGAGTAA   | 911.18057462545  | 0.176482844419487  |
| AGCGTGTGACA   | 911.192919401182 | 0.0738560267160454 |
| AGCTTTGTGAC   | 911.194762149381 | 0.12706677664275   |
| AACATGACGAT   | 911.201967567935 | 0.137193613480954  |
| AATTCATGAC    | 911.217955189791 | 0.10282670414947   |
| ATCGGTGACAT   | 911.223326228805 | 0.0883687730986304 |
| CGAATGTGACA   | 911.258742489286 | 0.0600031701770568 |
| CTAGATGTGAC   | 911.294607332362 | 0.153753535326888  |
| GCTGACTGCAC   | 911.318734945857 | 0.125642550658476  |
| GAGCATGACGC   | 911.342499951774 | 0.0999325475470408 |
| AACGGGTGACA   | 911.423061310199 | 0.131800852021365  |
| GCTGCATGACA   | 911.431747168946 | 0.0915049680642573 |
| AACCGTCACAC   | 911.503199359353 | 0.088310499819356  |
| ATCATGACGAT   | 911.508064584764 | 0.123827754459497  |
| AGTCTCCGTC    | 911.509014713463 | 0.101887507446223  |
| CAGTCACGCGC   | 911.545215453938 | 0.0848481659148101 |
| TGTCACCCAAA   | 911.585249356532 | 0.145353273666722  |
| AGGTGGTGACA   | 911.622432948382 | 0.111954098473835  |

|             |                  |                    |
|-------------|------------------|--------------------|
| AAACACGTAAC | 911.661797529785 | 0.0935205904711367 |
| ACACAGTCAGT | 911.682516200914 | 0.0765907292986859 |
| GTCATCAAGAA | 911.712954362964 | 0.124172134642878  |
| CGAGTCAAAAG | 911.751420716988 | 0.13445305642317   |
| ATGAATTACTC | 911.758602240599 | 0.137891330912884  |
| AACGATTACTC | 911.788271163963 | 0.10603476481566   |
| ATGGGTGACGA | 911.820152069854 | 0.0853576387945076 |
| AATTAGCAATC | 911.838286016542 | 0.145623007060842  |
| GCGGGAATGAC | 911.876840063318 | 0.093540210454969  |
| ATACGTAATAG | 911.916355996029 | 0.12814009814212   |
| ACATTCTGACT | 911.91903314616  | 0.133038951095458  |
| CAAATGGCTCA | 911.921310264783 | 0.150887247951066  |
| CGTGACTAGCC | 911.947322649597 | 0.131088508754573  |
| GACTTGCTCAC | 911.985184751745 | 0.0889976046054131 |
| GACTCACTGGC | 912.008736803976 | 0.0638141223228667 |
| ACCGTGGTAC  | 912.018631767162 | 0.104511823438673  |
| AGGGGTGTGAC | 912.036667259958 | 0.0864937785012957 |
| CCGTTAATGAC | 912.038440711021 | 0.126114879737909  |
| GGACCTGTGAC | 912.041583899359 | 0.160715888090999  |
| TTCAGTCAAAA | 912.042043563982 | 0.0675780736508626 |
| TGACATATGCA | 912.049528979416 | 0.139337653225137  |
| GTCATGTGCCA | 912.058148525892 | 0.146658039107956  |
| ATTATGTGACA | 912.089586342374 | 0.102710955268688  |
| ACTGTCTGACT | 912.117914899979 | 0.125563506791692  |
| ATTAGTACTAG | 912.119918617338 | 0.107317195553828  |
| ATTCATCGTCA | 912.122976417255 | 0.121322306845685  |
| GCAAGTGACAC | 912.139180097542 | 0.119035801427107  |
| TCAATTACGCA | 912.176615146407 | 0.110238793856728  |
| GGCGAAATGAC | 912.178732407961 | 0.0903461521831494 |
| GTTACTCAGGA | 912.239082207474 | 0.0892282589366325 |
| AGGTTATGACC | 912.241758418896 | 0.101502803330324  |
| AGCGGACTCAC | 912.251772293666 | 0.100747890807383  |
| ACGTCACGAGT | 912.279233336475 | 0.117667075162315  |
| GTCAAGTCACA | 912.301279599806 | 0.09815417429335   |
| GTCACCTGCGA | 912.307949136912 | 0.110441806443261  |
| GCATTAATGAC | 912.314116887958 | 0.0843515054564211 |
| ACTGGGGTAC  | 912.344309952237 | 0.117949628538812  |
| CGTACCATGAC | 912.37901193709  | 0.0992168038056459 |
| CCCTATGACCC | 912.398719815861 | 0.0916428530412545 |
| AATTTCTGACT | 912.411376257623 | 0.0983757656718146 |
| CCTTGGTGTCA | 912.422276654479 | 0.113301648090862  |
| CGTCACCGTTC | 912.445376948492 | 0.0937235773827028 |
| ACTGGTAGTCA | 912.456638962079 | 0.15551071746046   |
| CCGGGTGACAA | 912.483757546995 | 0.10003343892534   |
| ACTCATCTTGA | 912.520479196893 | 0.112637326206629  |
| GACGTGAATCA | 912.541929276011 | 0.0884164057369048 |
| AGCTCTAGTCA | 912.543220093983 | 0.109739427348241  |
| ATGTCACCACG | 912.553481835778 | 0.117256705480403  |
| ATGAAGTCACA | 912.596057429952 | 0.093533817760702  |
| AGTTAGGTGAC | 912.603203021576 | 0.100390521044835  |
| GAGTCAAATC  | 912.640311712462 | 0.173328358227568  |
| ATGACGTTCCA | 912.675876694708 | 0.085902798363686  |
| GCTTTGGTAC  | 912.694260095801 | 0.104810839616829  |
| ACTCATAGAAT | 912.714387973394 | 0.081896529658966  |

|             |                  |                    |
|-------------|------------------|--------------------|
| CCCCTTATGAC | 912.725690328308 | 0.133196377631012  |
| ACTCATAAGTA | 912.734905785991 | 0.124506944299025  |
| ACTCATTCTCT | 912.784290084579 | 0.0929817405914935 |
| CGCATGGTGAC | 912.817334422713 | 0.0919974722263374 |
| GGCGTCACCCA | 912.859233524249 | 0.118366268101628  |
| AATGACAGGAC | 912.862732023546 | 0.109292706321422  |
| ACGCGATGAGT | 912.871317522002 | 0.137834874696056  |
| ACTCATTCCGG | 912.932924799951 | 0.0957633610479475 |
| TGAGTGATCCA | 912.933542530295 | 0.0848332314007157 |
| AGTGAATCAAT | 912.967990412875 | 0.110922292846382  |
| CATAAAGTGAC | 913.000404266922 | 0.115255499207003  |
| GTGACAGAGCA | 913.021392859133 | 0.11126672714011   |
| GTCATTGGCGA | 913.154586737187 | 0.0858557198768431 |
| ACGGGTGACAA | 913.15879368825  | 0.0765871139750593 |
| CGTGCAGTCAG | 913.182778380783 | 0.116779842458371  |
| ACTCATTACTC | 913.253952295856 | 0.102592773011023  |
| ATGAGCCAATA | 913.276201380112 | 0.106973602803258  |
| GTGACACGGTA | 913.361873249384 | 0.108810531564002  |
| AACGATGACCG | 913.368396130757 | 0.0964340159994848 |
| ATGACATCTAA | 913.376355344314 | 0.115494891053441  |
| TAGAGTAATAA | 913.392331568162 | 0.0870293618754882 |
| ACCTGTGACGA | 913.447438869891 | 0.0869562253961262 |
| ATTACGCAAGA | 913.533885714881 | 0.105486911339699  |
| AGTGCCGTCAT | 913.549494827746 | 0.114372800430255  |
| CAACCAATGAC | 913.580248988338 | 0.0919144019328447 |
| GAGTGACGTGC | 913.590414630752 | 0.110000133169184  |
| CAGATTAGTCG | 913.598889717784 | 0.126708993876727  |
| GTCACTACGTA | 913.602780811728 | 0.118677900011782  |
| CGACATGACAA | 913.608806336499 | 0.114974231526386  |
| GAGTAATCGGA | 913.620359736728 | 0.0921910882994569 |
| CGTCACCGAAA | 913.624433961226 | 0.0825803486168244 |
| TGACGTACCCA | 913.658044785055 | 0.142128807781136  |
| ATGTGTCTTAC | 913.669777674093 | 0.134914143955407  |
| CGTCGTGTAC  | 913.683631280904 | 0.107872363237     |
| GTCACATAGAC | 913.691119776486 | 0.103039730933514  |
| GGTCATCGCAC | 913.735560740576 | 0.166563613989434  |
| ACTCATTACAG | 913.74629281757  | 0.0912805502619078 |
| ATGTCATTAGG | 913.786501105323 | 0.095352479651131  |
| ATGACTTGAGC | 913.815182886214 | 0.115668483552632  |
| CACGATTACTC | 913.817935442554 | 0.085601504676375  |
| ATGTCGCGTCA | 913.820207208596 | 0.149116022509213  |
| TGACGCTATCA | 913.886202648999 | 0.124205831177623  |
| AAACCCGTCAC | 913.894407328809 | 0.116741788254164  |
| CGTCATTGAAA | 913.98887410134  | 0.0867903703032841 |
| CATCGATGACC | 913.997175311614 | 0.0972961926528317 |
| CCAGTCAGAAG | 913.99864371601  | 0.120530287649442  |
| CGATTACTAAA | 914.02291738213  | 0.121848265392706  |
| ATTACGTATCA | 914.038168082235 | 0.113508579091915  |
| CTCATTGTGAC | 914.044682370725 | 0.0833695926319815 |
| CTTGACTCAC  | 914.079717284653 | 0.0948165261611541 |
| CATGCTAGTCA | 914.097434031174 | 0.108448950804308  |
| AAGAGTAACAC | 914.117282338613 | 0.117480482421695  |
| GTTATATGTCA | 914.165754153608 | 0.155550664011624  |
| ATGACCAGGCC | 914.166388024205 | 0.0849283874418891 |



|              |                  |                    |
|--------------|------------------|--------------------|
| GTCAATGAGTA  | 914.17117381191  | 0.0887192777401207 |
| ATGACGATCAG  | 914.178551634835 | 0.100184577466657  |
| CAGCGAGTCAG  | 914.223971758497 | 0.110071686473193  |
| AGCAATGACAT  | 914.226074205551 | 0.124143531255315  |
| ACTCATCAGAT  | 914.250903641662 | 0.112101291331237  |
| CTCCGGGTGAC  | 914.268358180571 | 0.12328513652472   |
| AGTCACGGGCA  | 914.280102470474 | 0.105091214605076  |
| AACGTGACAAA  | 914.31067700262  | 0.13214018918929   |
| GTCCTAGTCA   | 914.343990113364 | 0.102282421970637  |
| CACTATGTCAC  | 914.344872157126 | 0.110985674996611  |
| CAACCTGTCAC  | 914.386125097892 | 0.0859027219983157 |
| ACGGTCATAGT  | 914.408184113984 | 0.113317341908942  |
| TCACTGTCACA  | 914.430528770483 | 0.09227744903657   |
| CAAATGTCATC  | 914.441789776096 | 0.0916379626842618 |
| ATTAACGTCAC  | 914.453551608817 | 0.114005831633381  |
| GGTGACGTTGA  | 914.463433259968 | 0.0835343649049274 |
| ATTTTGACGCA  | 914.466786713172 | 0.0818287008611028 |
| AGTCAAGTCAC  | 914.485023170145 | 0.112157608671947  |
| ATCGAGTGACG  | 914.498353939105 | 0.111086123192021  |
| AGTAGGTGACG  | 914.538723627056 | 0.0845336877849214 |
| ATGAGGTACC   | 914.540437864533 | 0.137179713249746  |
| AGTGGTCATTA  | 914.557196987905 | 0.0862279537197232 |
| GTGAGTCCAAA  | 914.559097857381 | 0.159753318794399  |
| CAAACCTGTCA  | 914.599967729494 | 0.157858515466577  |
| TTGAGTCGAAA  | 914.611517101616 | 0.0876935708612686 |
| CTGTCAATTTCA | 914.616235867997 | 0.102388480154404  |
| CGTTTTGACTC  | 914.616781876326 | 0.156361046969835  |
| CAATGGTGACG  | 914.640782892195 | 0.168250923458331  |
| ATGAGTAGTGC  | 914.757213949071 | 0.122970577399063  |
| CCGTTGTGACA  | 914.814442671879 | 0.0897625265574097 |
| AGACGGTGACA  | 914.841225977884 | 0.104221792805111  |
| AAGTGGTGACA  | 914.871899673448 | 0.0978092345798102 |
| CTCACGACTCA  | 914.878554302129 | 0.115223769259841  |
| CGCTCAATGAC  | 914.90301659256  | 0.152462712361811  |
| GTCACGTCTTA  | 914.905692607592 | 0.102131754567502  |
| ACTCATTATC   | 914.918923409122 | 0.104861741296721  |
| CGTGCTAGTCA  | 914.928047040786 | 0.10015265024574   |
| CGTGCTGACTA  | 914.928050007981 | 0.141536617957706  |
| AATAAATGAGT  | 914.935549509027 | 0.122165966124596  |
| ACGCTATGACC  | 914.949976265467 | 0.11251283128931   |
| AGCTGTGACAA  | 915.049947445057 | 0.0707180988204269 |
| AGCTCAATGAC  | 915.0583355173   | 0.109103629808648  |
| AGCTCCGTCAC  | 915.063694978726 | 0.117458157868367  |
| CAGTCAGGTCA  | 915.066073378807 | 0.0933566911716555 |
| ACGTCACGGCA  | 915.076903683256 | 0.114654244172625  |
| AAACCGTCACA  | 915.084654298217 | 0.0865653536539087 |
| ATATGTGACAA  | 915.126661051304 | 0.127971988295038  |
| GGATTAATGAC  | 915.154942789891 | 0.0980977255393777 |
| CGTCACACACC  | 915.177171880443 | 0.0928936999583099 |
| AATTCATGACG  | 915.18299062507  | 0.121175575081003  |
| AAGTTGACACA  | 915.189399300431 | 0.094929524803151  |
| ATGAGTCCGGA  | 915.191977497455 | 0.0904565174851318 |
| CGTCATTGTGC  | 915.200502590824 | 0.0753538699791968 |
| GTCACCCACGA  | 915.214840954681 | 0.110599985716369  |

|             |                  |                    |
|-------------|------------------|--------------------|
| AGTGTGACCAT | 915.243038830912 | 0.0849348897003879 |
| AGTTTCCGTCA | 915.243943513169 | 0.137558621919356  |
| CGGGGTGACGC | 915.289228945469 | 0.106125315576795  |
| GTCACCTCCTA | 915.295564157491 | 0.0773366713018793 |
| GAAATCGTGAC | 915.298791779706 | 0.0801059523932542 |
| GTAGTGACATA | 915.305961891032 | 0.0973575689158708 |
| AAGTGCCTAAT | 915.318505552308 | 0.0971761812883468 |
| TGACGCGTCCA | 915.363599643307 | 0.0986225435207056 |
| CTGGCCAGTCA | 915.414256605451 | 0.140088384288831  |
| ATTACTAAGAA | 915.492275644893 | 0.0932970010235757 |
| GAATTACTGAC | 915.527938638961 | 0.12413757349985   |
| CATGGGGTGAC | 915.529998108995 | 0.0808844303209735 |
| AAGTTAGTGAC | 915.563717410972 | 0.120807939697361  |
| GACAAGGTGAC | 915.593775888974 | 0.101123834103815  |
| CGAGTCAGGAC | 915.702678444285 | 0.142110694848269  |
| ACGAAGTACCC | 915.703178718661 | 0.137955660930116  |
| CTGGGTCATGC | 915.709227394486 | 0.10074070564994   |
| ATGAAGTGTC  | 915.710456169412 | 0.108228747196521  |
| CGTGATTACTC | 915.712324066008 | 0.120462196661769  |
| AATCCGTACGT | 915.727663517198 | 0.0916514542112402 |
| ATCTTGTACCA | 915.736894717438 | 0.137985175608324  |
| CAGGTACGTCA | 915.794023078235 | 0.147636677466388  |
| ATGACGATCAA | 915.814432925007 | 0.0730652257990983 |
| ACCATTGCTCA | 915.831284537136 | 0.123542093543012  |
| AGTCAGAGAAG | 915.833697556191 | 0.0941253220037522 |
| ATTGTCACCGA | 915.835560943394 | 0.0838270487264823 |
| CTATTACTGAC | 915.858649170235 | 0.125149163076659  |
| AGTGTCAGAAG | 915.876536201566 | 0.103333350988779  |
| GTCATTATGTA | 915.889415261184 | 0.0802133980473371 |
| AGGGTCACACT | 915.93053598235  | 0.0585115710277959 |
| CCTTATGACCC | 915.947038652271 | 0.0963200158600805 |
| ACCACATCATA | 915.950292573728 | 0.0820965963457705 |
| CAGCGTGAGTC | 915.950872896926 | 0.113446811783854  |
| ACTCATCTTCT | 915.951364414295 | 0.117467395821859  |
| TAGCATGACAA | 915.989794962914 | 0.0819852698314998 |
| GAATATGTGAC | 916.02637608699  | 0.165349352594543  |
| ATGACGGGCCC | 916.034081810974 | 0.0933354510708009 |
| AATATCACTCA | 916.11751159563  | 0.130119938674753  |
| CTGTCATTATC | 916.137338349453 | 0.108328249274587  |
| CTAATTGTGTC | 916.169025277673 | 0.142023274553543  |
| CTACGTGACAC | 916.170162242688 | 0.102176604217577  |
| GGTGAGTACCA | 916.178287311024 | 0.116602245531073  |
| GTCACCGACAC | 916.236451157103 | 0.104672384961537  |
| AGTCACGGGAG | 916.2374670703   | 0.106017868921451  |
| ATATTAGTGAC | 916.240380629909 | 0.077006818814899  |
| CGTAGGACTCA | 916.244328356685 | 0.133888329684004  |
| ACTGCGTCAGG | 916.351895267589 | 0.0921847996614585 |
| AAGAGTCTTCA | 916.378354245206 | 0.0978484502641101 |
| CGTCACCGACA | 916.396674525829 | 0.0920890303368625 |
| GTGACAGCTCA | 916.408653873345 | 0.101690212651286  |
| ACTCATACAGC | 916.416504783137 | 0.0889142772504198 |
| ATGTCACATAC | 916.425135756974 | 0.102331142545081  |
| GAAGACGTCAC | 916.432447656212 | 0.160127701156457  |
| AAATAGTGACG | 916.435721359991 | 0.0857051970667181 |

|              |                  |                    |
|--------------|------------------|--------------------|
| CCTGCATGACG  | 916.462324728514 | 0.1176113583545    |
| GGGCAAATGAC  | 916.462857387687 | 0.113743825118029  |
| GCTACAGTGAC  | 916.476536064674 | 0.12348759227953   |
| GTCACAATCAC  | 916.551773433375 | 0.10932648567562   |
| GACTAATTGCA  | 916.607531061424 | 0.129658929718157  |
| ATGTATCACAT  | 916.611903116782 | 0.0900485704935179 |
| GTCTTTCGTCA  | 916.625671239334 | 0.106147287448505  |
| CACTGACACAG  | 916.628534905038 | 0.0878703068496916 |
| GTGACGACGCA  | 916.635904464913 | 0.133939331883641  |
| GAATTGACACA  | 916.639819976642 | 0.108925155743689  |
| ACGAGTCAAGG  | 916.678292384223 | 0.116851817590373  |
| ACCCGTGACAC  | 916.691036826167 | 0.105654332853352  |
| GAGACTGTGAC  | 916.701524569807 | 0.0982408386077189 |
| GCGTCATGTCC  | 916.711661150818 | 0.107857507239906  |
| AGATTGAGTAA  | 916.715278257917 | 0.0796662034322696 |
| CGAATTAGTAC  | 916.741149410722 | 0.128575744583997  |
| ACGATGATGCA  | 916.752172353468 | 0.0901641255382892 |
| CGTAGTGAGTC  | 916.80448334259  | 0.100930695740706  |
| CTCAGCGTCAC  | 916.829789927382 | 0.0971212400670083 |
| ATTCAGGTGAC  | 916.830626013585 | 0.0940149641881194 |
| AATGCACTCAT  | 916.88594207148  | 0.0925385240518797 |
| ACCTAGTCAGT  | 916.903965936222 | 0.1532716294811    |
| CGTGACGATAC  | 916.953482459663 | 0.0978203489330044 |
| GTTGTCACCTA  | 916.957886687038 | 0.142089352315902  |
| TCCCCTAGTCA  | 916.969427684193 | 0.125340053369655  |
| TGCTGGTGACA  | 916.997270478357 | 0.123400353333317  |
| ATGGTGGTGAC  | 917.032008788044 | 0.153736764040323  |
| GTGATGCAATA  | 917.039602247568 | 0.108971005810055  |
| AATGAGCCAGA  | 917.057687479397 | 0.139267653963965  |
| TGACAACGTAA  | 917.061191543562 | 0.0793715646254484 |
| CGTCACTCTTA  | 917.061559890014 | 0.0828991975060916 |
| CGTCATGCAAG  | 917.061780831222 | 0.0881834125752804 |
| ATGACGACTGC  | 917.073464815728 | 0.080829090509546  |
| CGAGCCATGAC  | 917.100533936757 | 0.0706990474218978 |
| ACTCATCAAAG  | 917.107087014976 | 0.0683260591178168 |
| TAATTACGCAA  | 917.112900902863 | 0.101587303163649  |
| TGACCTACTCA  | 917.154524879098 | 0.123960958667669  |
| GACTAATCTGA  | 917.17641493693  | 0.127261500617041  |
| TCGTCACATCA  | 917.192656633907 | 0.0911052310059432 |
| CAATACATGAC  | 917.218273958326 | 0.0915223555433939 |
| AGGATCGTCAT  | 917.233140723856 | 0.118261229389056  |
| CAATAGTCAAC  | 917.269513581018 | 0.0963251918472879 |
| ACACATCATAA  | 917.27162672338  | 0.0868165518058333 |
| AGTTTTCGTCA  | 917.312041748875 | 0.0901432753348582 |
| GTCACGACTAA  | 917.36414463153  | 0.14821376757669   |
| AAATCTTGTCA  | 917.386139524617 | 0.107187091598838  |
| CGTCACCTATA  | 917.447757497395 | 0.0972361768302606 |
| ACGTCACCTAGA | 917.456248911479 | 0.0806230148827319 |
| CGCGCTGTGAC  | 917.505321065064 | 0.1327873642182    |
| GACGTCACATC  | 917.524540576695 | 0.0936309712830049 |
| GTGTAGCGTCA  | 917.527346179326 | 0.144316480572313  |
| TCATATCATGA  | 917.551771752835 | 0.095983898706874  |
| ACTCATTAGTC  | 917.604552086192 | 0.114227661876218  |
| AAACCGTTCAT  | 917.739986308163 | 0.177945537906925  |

|             |                  |                    |
|-------------|------------------|--------------------|
| ATTTATGAGTA | 917.787411916101 | 0.103355572005885  |
| TGTCATGGACA | 917.791205050272 | 0.112348683158423  |
| ATGACGACCTA | 917.805516431361 | 0.133789628658703  |
| GTGACACGGAA | 917.849392048667 | 0.0882026683390317 |
| AATACATGACA | 917.920837037884 | 0.0678596248844178 |
| CATCATCGTCA | 917.930542864896 | 0.0841260550743044 |
| AATATATGAGT | 917.953737775995 | 0.0883504286059685 |
| ATGAGTCTCTG | 917.994533902775 | 0.0983987753296047 |
| CTACTGATTCA | 918.035829960065 | 0.097328631909358  |
| GCCATCTGTCA | 918.062746010119 | 0.139226503161992  |
| CTGTCACAGTC | 918.091847887095 | 0.0961097825684846 |
| ACCAGTCAGTG | 918.09540646135  | 0.165639654618515  |
| CTCGGGGTGAC | 918.100112748193 | 0.103173292494363  |
| TGTCATGGTAA | 918.110237588537 | 0.107074319696225  |
| ACTGCTGTGAC | 918.11554491945  | 0.0940668055611977 |
| GATGACGGGGC | 918.118617577296 | 0.0786471888012484 |
| ACAGCGACTCA | 918.154957134683 | 0.168924534363919  |
| ACGTCACGGCT | 918.159831325312 | 0.126618389863673  |
| CCGTCACATGA | 918.168173401396 | 0.168044773806834  |
| AGTGACCAAGA | 918.172505441791 | 0.0911670282487624 |
| ACACATCATCT | 918.188431411111 | 0.100306210956575  |
| CGTCACATTAA | 918.202266906547 | 0.142442481530186  |
| CCGACTGACTA | 918.221778333241 | 0.0879793815802278 |
| CTATGACCGCA | 918.231492672293 | 0.105320702845808  |
| ACTATGTCACT | 918.234095676256 | 0.127028654715841  |
| TCAGATGACCA | 918.243674919723 | 0.109881059070602  |
| ATACCGTACA  | 918.332857988685 | 0.154293529771989  |
| TGATGTGACCA | 918.359735202754 | 0.112185847426405  |
| CAAGGCATGAC | 918.381375589243 | 0.087327986683825  |
| AGTCAGATTTA | 918.386339009548 | 0.141839248058362  |
| TGAGTACTACA | 918.417084233368 | 0.12698322381367   |
| ATGACTTGGGC | 918.42740896481  | 0.113586065086974  |
| TATGTCACGCA | 918.436420429987 | 0.104897159941591  |
| ATGACGATCGC | 918.440762862353 | 0.0798740603542234 |
| ATGCATGACAA | 918.479302902917 | 0.110611971707526  |
| GTGACATACCA | 918.493132384093 | 0.0818725915946773 |
| TAAAGGTGACA | 918.498106074985 | 0.0940106976435329 |
| GTCTTACGTAA | 918.514208883713 | 0.103537960997084  |
| GGTCATCGTAA | 918.520710324803 | 0.0809671752089674 |
| ATGAGTGAGTG | 918.564748348817 | 0.0815622119702871 |
| CCCTGGGTGAC | 918.573215862237 | 0.144885328128664  |
| ACGTGCGTCAA | 918.597359134208 | 0.0927415045408733 |
| ATGACCGAGCA | 918.622323384845 | 0.10505683100394   |
| CAACTCTGTCA | 918.633611507718 | 0.108728589747195  |
| AGAGTGACATA | 918.695495832774 | 0.0948905790123741 |
| AATTAGTCGGA | 918.707415899779 | 0.123906292660242  |
| GTCACCTCGAA | 918.755179065459 | 0.116041349466955  |
| AGTCACGGGAA | 918.755775127579 | 0.0833917337162354 |
| ATGTCATTAAG | 918.759463980016 | 0.0722895798078902 |
| TGACACTTGAA | 918.779644220149 | 0.0781014834560485 |
| GTCACTCGAGA | 918.78324513259  | 0.112201733347756  |
| AAGGTACTCAT | 918.836820840576 | 0.158259342659747  |
| ATGACGACGGC | 918.841493406041 | 0.127555745642784  |
| AGAGTCAGGAC | 918.858314201984 | 0.0869126751756527 |

|             |                  |                    |
|-------------|------------------|--------------------|
| GTCATCCCAAC | 918.92613622549  | 0.107722862031284  |
| ATCTTAAGTCA | 918.961024124734 | 0.127231270455772  |
| TAGAAGTGTC  | 918.961911099151 | 0.111409261449001  |
| GCCATCCGTCA | 919.08870463391  | 0.0798143801589806 |
| GATTGAGTGAC | 919.109074253382 | 0.0822395199596087 |
| CCCAATGACAG | 919.113376240508 | 0.114830681292958  |
| CCGTCGCGTCA | 919.159108069628 | 0.11721479501357   |
| AGCGTGACGCG | 919.168281009221 | 0.0924359403115784 |
| GTGACACGCAA | 919.199417706829 | 0.101050200431575  |
| GATAATGACAA | 919.199745454517 | 0.118892179693393  |
| CCTGACTCTCA | 919.23815706067  | 0.0961291375127501 |
| GCGTACATGAC | 919.241689234645 | 0.145462107467594  |
| TATGTCTCACA | 919.255017165521 | 0.100892373181462  |
| AGGACGTGTCA | 919.256507969995 | 0.0966093462403258 |
| GGTGTCTCATA | 919.289541282735 | 0.0978451714820578 |
| ACTCATTTTGA | 919.306054377956 | 0.102563963726489  |
| TATACTCGTCA | 919.317539019789 | 0.141856562818302  |
| TGTGACAGTAA | 919.336137727066 | 0.0770410591384389 |
| CGACATGACGC | 919.351493227411 | 0.0688888156182046 |
| CGGATGGTGAC | 919.364365096933 | 0.10511350883047   |
| CTGTTCTGTAC | 919.37171329391  | 0.0926022411985099 |
| GTCACCTCTCA | 919.396957566677 | 0.0918334754838751 |
| GCTATTGTGAC | 919.397182632549 | 0.110234010568901  |
| AAGTCAGAGCA | 919.403958491488 | 0.117338761021801  |
| AAGACTGATTG | 919.405899071957 | 0.100510826053036  |
| AGTCAGAAATA | 919.427251039501 | 0.0811304002520069 |
| CGGAGGGTGAC | 919.435616308777 | 0.118178554884171  |
| CGTCACCAACA | 919.449674412695 | 0.10789783897588   |
| AATGAGTGAGC | 919.457633963402 | 0.0950907397989407 |
| ATCAGTCTTAC | 919.498030336282 | 0.0829020841051409 |
| GCTCGGGTGAC | 919.515452615789 | 0.145358794198078  |
| AGTTGTGTGAC | 919.516048923004 | 0.13869762457462   |
| AATTGAGTCGA | 919.51689613769  | 0.131403614435968  |
| CCCAAGACTCA | 919.567262634168 | 0.0701433279571029 |
| GTCACAATCGA | 919.587531150494 | 0.0725469735111162 |
| AGCAGTCAGCC | 919.62545070157  | 0.111387219197828  |
| AAGTCACGCTA | 919.684190760924 | 0.0887335993548354 |
| ATTGCTAATCC | 919.71126078004  | 0.126792344552471  |
| ACGGAGAGTCA | 919.759916188687 | 0.0657571084825116 |
| TGACGATTCAA | 919.776403138326 | 0.109806786062492  |
| ACGCCTGTGAC | 919.795042543051 | 0.134459107088075  |
| GTACGGTGACA | 919.803777548251 | 0.123873481784617  |
| GACGGTGACAA | 919.803874902418 | 0.10250430038532   |
| TGGTCACCACA | 919.85759333277  | 0.105841437581015  |
| AAGCATGACAT | 919.883903799163 | 0.121916184335895  |
| ATGACATGAAC | 919.920440691053 | 0.0681960656841237 |
| AAAGCTGTCAC | 919.969458145807 | 0.126389450016264  |
| ACTAAGGTGAC | 920.009545822514 | 0.0922121652925031 |
| CGGACGGTGAC | 920.03042375024  | 0.0809614038690695 |
| AGGTGGCTCAC | 920.111327793424 | 0.14303528575404   |
| CATGACAGACA | 920.140494131047 | 0.08986733180884   |
| CACAATGACGG | 920.161426699882 | 0.135163885144746  |
| TAATGTGACGA | 920.207015532653 | 0.0907554304798443 |
| AGAGTAATTC  | 920.211476968992 | 0.130755938451508  |

|             |                  |                    |
|-------------|------------------|--------------------|
| CACGGTGTAC  | 920.270750209963 | 0.149885294116029  |
| CAGCCTGTGAC | 920.292503016867 | 0.0763453257643148 |
| AAGATTAGTAC | 920.293500260049 | 0.0793891636692063 |
| ATCTGATGTCA | 920.336856336484 | 0.103292369386372  |
| TATTACTCTAA | 920.369293157089 | 0.0817739826819862 |
| ATGACCATGTA | 920.379358987691 | 0.109336331538063  |
| GATGACGGGAC | 920.404141933774 | 0.0767132883597673 |
| GTGTGACCCTA | 920.423604666505 | 0.0892320960527997 |
| ATTGTAGTGAC | 920.447994616934 | 0.105969943149835  |
| GGTCGTGTGAC | 920.449970166089 | 0.0879892571183746 |
| AGTGAGTCCGA | 920.521107021272 | 0.0930279310751602 |
| AATCGATGACC | 920.539487422772 | 0.126256286918389  |
| CGTAAGCGTCA | 920.539662945703 | 0.0988777198293738 |
| ATCGAATCATC | 920.546863936739 | 0.0854653785193248 |
| GTCCTGTGACA | 920.549182656719 | 0.100890183534263  |
| CGTCACAGGTC | 920.602382755075 | 0.0926401256392776 |
| AAGTGTGTAAT | 920.609983394656 | 0.0862691687293476 |
| CCTCTTATGAC | 920.667169533295 | 0.110433055907151  |
| GTCACCAGACA | 920.667391161685 | 0.111902364847996  |
| TGACAGGTCAA | 920.69622629797  | 0.113703791630885  |
| GATGAGGCATA | 920.699750275552 | 0.0888610165013198 |
| GTGACGTTAAA | 920.73228055276  | 0.0889143026285855 |
| AGTCAGAGAAC | 920.778483227583 | 0.147662480850027  |
| ATGGCTAATCC | 920.788374325899 | 0.094639844147196  |
| AGGTGTGTAAT | 920.792344496264 | 0.0928059507489333 |
| AGTGAGCCACA | 920.798794133151 | 0.0543163613169454 |
| GGTGGAGTCAA | 920.8218847065   | 0.0968764275013745 |
| GCCACTAGTCA | 920.831000173173 | 0.100102288160333  |
| AGTCACGGCGA | 920.86565527445  | 0.112067482297416  |
| AGTTGTGACCA | 920.878671832952 | 0.110696366255226  |
| CTAGTACTCAC | 920.890847578841 | 0.0797695932962819 |
| ATTCTGAATAC | 920.893301846195 | 0.0934343028622413 |
| AGACTAATCCT | 920.907641743851 | 0.0822409972976505 |
| CGCTCCGTAC  | 920.924186846733 | 0.085216600171062  |
| GTTGGAGTCAA | 920.966027123417 | 0.0896839364057088 |
| AACCATGACAT | 920.99530243637  | 0.0929118846300303 |
| ATCATTACTAA | 920.996848523337 | 0.0768240454117116 |
| AGACGGTGACG | 921.009462230261 | 0.128663155166765  |
| AACCCTGTGAC | 921.025226212329 | 0.102325335638147  |
| ACCAGTAGTCA | 921.035653224412 | 0.0871037311210466 |
| CGCAACATGAC | 921.03719874456  | 0.117689820974272  |
| ATATGAATAAT | 921.046236774722 | 0.12844853318108   |
| CGCGTCACTAC | 921.115111142518 | 0.0915463568041967 |
| GCAACAGTGAC | 921.138280206451 | 0.173283755954588  |
| AATATGTCAGT | 921.157072977039 | 0.100454154065924  |
| CTATGTCGTCA | 921.181597717177 | 0.129911309129434  |
| GTTTGCTCACA | 921.183083474111 | 0.15295158453002   |
| ATGACATCGGA | 921.196688081951 | 0.0600828874976127 |
| TATGCACGTCA | 921.226139678905 | 0.0757368949689281 |
| GATCTAAGTCA | 921.297412727083 | 0.0911227235062028 |
| CGTAGTGACGC | 921.3044671029   | 0.13618510954163   |
| AGAGCTGTGAC | 921.371637727157 | 0.0958307552139162 |
| ATGACGTCTAG | 921.372747517696 | 0.139724143689091  |
| AGCATCGTCAC | 921.379628551798 | 0.106321568578605  |

|              |                  |                    |
|--------------|------------------|--------------------|
| GAACGCGTGAC  | 921.397404712341 | 0.102896328849322  |
| CTGACTCTCTC  | 921.406216093579 | 0.0928078887754941 |
| AACGTCACCCT  | 921.45453508371  | 0.0813090444575087 |
| CCTAGAGTGAC  | 921.460400330279 | 0.0975599293739836 |
| CCGATGAGTTA  | 921.483985452647 | 0.0775584856139057 |
| AATGAGTGCAT  | 921.485910513522 | 0.0847739105587327 |
| ATAGTCAGTCC  | 921.497582611352 | 0.0898410182861127 |
| GTCACGTATCA  | 921.512000619256 | 0.133925918822839  |
| AAGATGTCACC  | 921.531790528693 | 0.0778581350287537 |
| GTGTCAGAGCA  | 921.537630541514 | 0.105824125915092  |
| CACTCATGACG  | 921.569123496562 | 0.0835951874706081 |
| GCATGCGTGAC  | 921.583318505418 | 0.0895896047133963 |
| GTATGATACAA  | 921.608546353176 | 0.0899335546557076 |
| ACTCATCTTTC  | 921.617638095044 | 0.0827844292547284 |
| ACTCATATCAT  | 921.623071780751 | 0.129971357130332  |
| ATGTCACCACC  | 921.637080712199 | 0.0982792237725309 |
| ATGAGTATCAT  | 921.666639297861 | 0.0510928797388704 |
| GGGTCACACCA  | 921.675572615521 | 0.0836021254658811 |
| CCAGACAGTCA  | 921.68934139369  | 0.0960309614530792 |
| CATATCATTGAC | 921.703799279907 | 0.086759883033047  |
| GCTACGTGTCA  | 921.70709202346  | 0.102376489897356  |
| TATGTCACGAA  | 921.748011663345 | 0.0927203921448794 |
| TGCCTGTGACA  | 921.758659590387 | 0.109440839661466  |
| ACTCATATTTTC | 921.7809065449   | 0.0763432555769495 |
| AATGACATTTTC | 921.80974500196  | 0.0904662131896405 |
| GTCACATTTAAA | 921.843127601469 | 0.105665079605087  |
| AATGGGTGACA  | 921.855648171015 | 0.09833555611765   |
| CTTCTTGGTCA  | 921.883924788668 | 0.0770791750824055 |
| GACTAATTTCC  | 921.926969831146 | 0.0757531068977173 |
| CGTCACCATCA  | 921.946063081387 | 0.134793673684939  |
| ATTAATCACCG  | 921.966530943103 | 0.0944349252592624 |
| ATAATGACCAT  | 922.078404691688 | 0.121806148337307  |
| ACTCATATTAC  | 922.154684631314 | 0.100030294206241  |
| TATGTCACTAA  | 922.183424000474 | 0.1037042538231    |
| CAGTCAGATAG  | 922.196594893044 | 0.11229310655474   |
| GTGAGCAACCA  | 922.201782785572 | 0.115941474550376  |
| GGTCATCGAAA  | 922.214061493683 | 0.0923732058832785 |
| CGCCTGTGATA  | 922.242689432839 | 0.115500621554583  |
| ATTGGAGTCAA  | 922.254178932116 | 0.106794710341499  |
| GGTTGATTAC   | 922.262317385828 | 0.151462191812014  |
| GTCATTGAAGA  | 922.332965802517 | 0.0847368742253007 |
| AACCGGGTGAC  | 922.407784180696 | 0.117783619763343  |
| AGTCAGAATGA  | 922.415988015226 | 0.0770019860004072 |
| AAGTCACGCGA  | 922.446818484981 | 0.101967321859757  |
| ATGACGGTCAC  | 922.448522850375 | 0.102111420378651  |
| CAAAGAGTGAC  | 922.452083738223 | 0.0904982420985326 |
| AGTCACGAGAG  | 922.492492743136 | 0.0986656595774681 |
| CGTATCACTCA  | 922.517064228633 | 0.0568306185122269 |
| ATTTGGGTGAC  | 922.532591922241 | 0.079506466642137  |
| GGAAGGGTGAC  | 922.552936171959 | 0.0785919212057727 |
| ATGACAACGGG  | 922.556285847363 | 0.12288163770837   |
| ATGCATGACAG  | 922.575277542271 | 0.114925145265693  |
| AAGAGCATGAC  | 922.591233105622 | 0.0763184560831556 |
| GATGGGTGACA  | 922.635752954594 | 0.0804497497714334 |

|             |                  |                    |
|-------------|------------------|--------------------|
| AATCTTGTCAC | 922.669431596117 | 0.080291316827947  |
| AACTCATGACG | 922.681363575282 | 0.131541698402853  |
| AGTCAGTAGAC | 922.68248163016  | 0.0879018696708357 |
| ATGGGTGTCAC | 922.683710470637 | 0.110582963377345  |
| TGGAATGACCA | 922.823217115085 | 0.0837678507352584 |
| GAAATAGTGAC | 922.839101546005 | 0.116127937239543  |
| CCCTATATGAC | 922.847265451229 | 0.109343288089891  |
| ATGACTTCTAC | 922.868248852465 | 0.114695442308221  |
| ATGACTTGCGC | 922.880805273099 | 0.146193169628241  |
| GATCGCGTGAC | 922.886623859844 | 0.0815464406283706 |
| CCTTTGTGACA | 922.888810877337 | 0.0851526417237396 |
| TAGTGGTGACA | 922.900330769097 | 0.0863923451333445 |
| AGACTAATAGA | 922.933069380453 | 0.0933755095620528 |
| TCGTGGTGACA | 922.978445744088 | 0.100561475811661  |
| ATGACATGCTG | 923.072916964551 | 0.109711665944589  |
| TCGTGACGCCA | 923.100128616438 | 0.0874386526033427 |
| ATTGACTCTCA | 923.105563819414 | 0.0850538752732323 |
| GTATGCAGTCA | 923.130669586064 | 0.0828955021675952 |
| CCTGACTCGCA | 923.177555680449 | 0.0810443479284957 |
| GAGTAATCGGC | 923.197332134179 | 0.13392064203338   |
| AAGTATTACGT | 923.205260923262 | 0.104941975762794  |
| TGATTCAATCA | 923.222114822615 | 0.122706692190575  |
| GATTGTGACGA | 923.231710519513 | 0.0749954389611851 |
| AAATGTCATTG | 923.235401489452 | 0.0770584979875083 |
| AGTCGGGTGAC | 923.240136591733 | 0.0731306564539253 |
| AGTCCGGTGAC | 923.302250709618 | 0.12414909434617   |
| ACTAGGTGATA | 923.303818361748 | 0.0952452624953962 |
| CACGAGGTGAC | 923.30740875716  | 0.115956895059881  |
| ACTCATAATCG | 923.327063491296 | 0.0712765056829149 |
| GCATATGTGAC | 923.398018598202 | 0.102092321624837  |
| ATTCTAGTGAC | 923.41874124289  | 0.113368578178677  |
| CGCCCGGTGAC | 923.428580812753 | 0.082078932999528  |
| AAACCATGTCA | 923.436387916901 | 0.140728166844428  |
| AGGGTCACCGA | 923.466303171026 | 0.102880079310108  |
| ACGTCACATG  | 923.502308476493 | 0.101494481381418  |
| CATCATTATGA | 923.520066152099 | 0.0728120807958688 |
| AATTGCTAATC | 923.620728197992 | 0.0793995999178179 |
| CCGTCATCTAG | 923.648043427904 | 0.0726156265449657 |
| AGATGAGTAGG | 923.654137652765 | 0.0846958131936534 |
| TGAGCATGACA | 923.681491448282 | 0.116169425921358  |
| CCTCTTGGTCA | 923.698397402758 | 0.0732907642273765 |
| GCTTGACTCGA | 923.70989993871  | 0.0970337319532769 |
| GTGATACATCA | 923.798631622278 | 0.1184938191057    |
| GAGTTTCGTCA | 923.814096774464 | 0.111368854969812  |
| ATGATTCGATA | 923.845313179344 | 0.0932700155208215 |
| TCGAATCATAA | 923.86019558489  | 0.0995193415685669 |
| GTCACCTACTA | 923.901921421212 | 0.100176732592502  |
| ATGTTATGACC | 923.95710146064  | 0.152863583218715  |
| TCTTTAGTCAA | 923.960177519001 | 0.0957492948078473 |
| TATCGTCACCA | 923.969562678117 | 0.086259314093157  |
| GCGCGGGTGAC | 923.972500307999 | 0.0974071948323577 |
| GAGTAATTGAC | 923.976442844974 | 0.106021575251437  |
| ACGGTCATACA | 924.011326908124 | 0.0792179893755796 |
| AGTCAGAACCA | 924.034879845811 | 0.0992810185824021 |



|             |                  |                    |
|-------------|------------------|--------------------|
| CGTCATGTAAG | 924.090807569045 | 0.113147048122044  |
| ATAGTGACAGA | 924.136581370519 | 0.110344161395534  |
| GTCAGGTGACA | 924.140082364857 | 0.073551176537715  |
| TTCGTCAGAAA | 924.161098372135 | 0.155994295027641  |
| GGTAGGGTGAC | 924.232936111179 | 0.102319838071906  |
| ACGGCGTCACA | 924.234446598339 | 0.0941823549442691 |
| GACCGGTGATC | 924.294348124072 | 0.108854839078319  |
| GTCTAATGACA | 924.333577455092 | 0.13531087411857   |
| GATCTTGTCAC | 924.34009437527  | 0.0509547260254811 |
| TGATTGAGGAA | 924.379277353842 | 0.090188089629393  |
| ATTCTAAGTCA | 924.449569329548 | 0.107318234609717  |
| CAGTCAGTAAG | 924.553483567107 | 0.0810322333630771 |
| CGTTGCGTGAC | 924.564066041772 | 0.115073440105433  |
| CTATGATTCGA | 924.591073592283 | 0.0714831167036935 |
| GTCACTCGTAA | 924.600094472154 | 0.102875805598734  |
| AATTTGTGACA | 924.625212470847 | 0.0786452474642483 |
| AGTGGTGACCA | 924.646701900389 | 0.0783042202680442 |
| GGCTAGACTCA | 924.67811648531  | 0.07526488891152   |
| ACACTGTGATG | 924.686726675529 | 0.0975026137792775 |
| ATCCTGGTCAT | 924.742857928015 | 0.0841229782323405 |
| CGCCTGAGTAA | 924.744502018978 | 0.126148762657419  |
| ATGAGTAGATA | 924.75906822748  | 0.110374848284029  |
| GACATGACAGA | 924.815920541827 | 0.107234562441432  |
| TAAGACGCATA | 924.838489011937 | 0.109578550612727  |
| ATACTCATTGC | 924.850557402924 | 0.066122334175405  |
| ACGTCGTCACA | 924.853945677347 | 0.0914972277112851 |
| TGAGTCGCGAA | 924.880009409796 | 0.0885771799120591 |
| ATTACAGTGAC | 924.931804874562 | 0.139585479154055  |
| CAATTACGCAC | 925.001153991194 | 0.101252348567241  |
| CACATTACTAA | 925.007292599402 | 0.0862808833638876 |
| CGTCATGCATC | 925.020272796487 | 0.133679019185935  |
| AGATATTAGTC | 925.076949323076 | 0.0839811158665994 |
| ACGGCGACTCA | 925.09394306124  | 0.108222690355765  |
| CGTCATGATAG | 925.106135522754 | 0.123092907660944  |
| ATGACGGGGCG | 925.110417545469 | 0.0991684739525049 |
| CGTGAGGTGAC | 925.112624342315 | 0.0769904429071602 |
| ATGGGAGTCAA | 925.185186857904 | 0.0735071673430674 |
| CGTCACCGCAG | 925.228871296098 | 0.0974045784638953 |
| ACTCATAGACA | 925.23179373186  | 0.0876727392150832 |
| AAAGGGGTGAC | 925.236676414066 | 0.0501308693920059 |
| ATCTATGTCAC | 925.256257523569 | 0.0720009951867682 |
| ATGACATGCAA | 925.286244916169 | 0.0603548845814737 |
| AGCTGTCATGA | 925.310248001821 | 0.110538118591359  |
| ACTGAGTCTAA | 925.325614952276 | 0.0836052299187484 |
| GTGACAGACCA | 925.364948643404 | 0.115687137845935  |
| GTGAGTCCCAC | 925.395537015738 | 0.112991248309102  |
| CAGTCAGTAAA | 925.454095326725 | 0.0959231650896194 |
| ATGCGTCTTAC | 925.513828040638 | 0.0918682108710729 |
| ACTCATTGTA  | 925.570093833016 | 0.0860131129608473 |
| AGCTGTGACAG | 925.570724846189 | 0.106688956068006  |
| CACTACTCATC | 925.593080573052 | 0.0755542536154373 |
| TGGCCACGTAA | 925.629858335683 | 0.109042637312612  |
| GAAAATGTCAC | 925.656380697891 | 0.10565020887592   |
| ATGACATCTAC | 925.688004267396 | 0.139362915798565  |

|              |                  |                    |
|--------------|------------------|--------------------|
| TGACGTGAGCA  | 925.773411388735 | 0.111871686773695  |
| TCATACAATGA  | 925.784719283842 | 0.132667618089998  |
| CCGACATGACG  | 925.790309114459 | 0.112850398601304  |
| TAAAATCGTCA  | 925.824373473985 | 0.0749780018497223 |
| AGTTGTATCAT  | 925.888608726054 | 0.0837976916802282 |
| TAGGGTGACAA  | 925.90146406928  | 0.0857513033471817 |
| AGTCAGCGTAA  | 925.94977136171  | 0.0718876833442375 |
| ACACTGTCACC  | 925.994254858956 | 0.131942013591899  |
| ATCTTAGTAAT  | 926.002225095268 | 0.0463960044225808 |
| AACTGTGTCAG  | 926.071155019302 | 0.101231786179886  |
| GCGTCACTGTA  | 926.095315163978 | 0.0809303503856366 |
| ACGACCTGTCA  | 926.124544511937 | 0.14283086793616   |
| ACTCATTATAG  | 926.132675203369 | 0.11023514472094   |
| TCTAATCGTCA  | 926.166633046318 | 0.0821959220240757 |
| ACTCATTCTGTG | 926.16801577997  | 0.0898207461672589 |
| AAGTCACCCCTC | 926.173594129914 | 0.10816641422356   |
| CAACTATGACC  | 926.224567602827 | 0.11205233199243   |
| CTAATCATGAC  | 926.228094740367 | 0.108448630362241  |
| AGTACTGTCAC  | 926.318002897263 | 0.0868970515943839 |
| AGAGTGAGTCC  | 926.319172472171 | 0.105553048755952  |
| AGACGTGTCAG  | 926.375712581312 | 0.0940074583162901 |
| CTTAAGACTAA  | 926.376939616449 | 0.140104351957739  |
| CCTGCAATGAC  | 926.393650674019 | 0.149721438224153  |
| ATTCCGGTCACG | 926.434480985881 | 0.114970024823531  |
| CGATACTGTCA  | 926.435979955825 | 0.145909721777819  |
| ACTCCTGTGAC  | 926.473081148949 | 0.0805767255905833 |
| GTCACGTCAAAA | 926.478480730935 | 0.0743609873800992 |
| CCTGTACGTCA  | 926.480580013787 | 0.0712694145927775 |
| ACTCATACGAA  | 926.507175089762 | 0.0784696664137777 |
| CTCTATGACCC  | 926.532580385084 | 0.105497051509387  |
| GTCACGTAAGA  | 926.547325545718 | 0.0906062489887986 |
| CCACCGACTCA  | 926.570404374672 | 0.0873084464043403 |
| ATCCGACTAAT  | 926.577660769913 | 0.0747912986728379 |
| GTCTGACATCA  | 926.583822148707 | 0.112306269592574  |
| CTCTGACATCA  | 926.603940601776 | 0.136649792296522  |
| TCATCTCGTCA  | 926.658169381876 | 0.0866571126608999 |
| GTTGTACGTCA  | 926.728231109051 | 0.0711980557372654 |
| ATCTCTGTGAC  | 926.794931480782 | 0.0726026011597078 |
| AGTGGTGACAA  | 926.799569483874 | 0.0752601401171158 |
| AGTGACGATAC  | 926.799814743003 | 0.0861239144704019 |
| GACTAATTGGC  | 926.822029840356 | 0.0701904998246795 |
| AGTTCGTACAG  | 926.884905579015 | 0.125569637109793  |
| CCGATGATGCA  | 926.891917002314 | 0.076997297114617  |
| CATCATGACAA  | 926.916946170123 | 0.0507884421570324 |
| AATCTAAGTCA  | 926.927160516075 | 0.119088975197232  |
| AGGTGACACGC  | 926.947756169047 | 0.105457430236992  |
| ATATACTCACA  | 926.985109070604 | 0.0753604382482194 |
| ATGACAAGCCC  | 926.988109262344 | 0.0913177257222162 |
| ATAGTGGTCAC  | 927.00389575053  | 0.106828183170197  |
| CACACGACTCA  | 927.005857019808 | 0.108724891334353  |
| CAGTCAAGTCA  | 927.038758522199 | 0.0548289269610755 |
| GAGTGTAGTCA  | 927.046001296969 | 0.0971146218109661 |
| ATATGTGACCA  | 927.110816472165 | 0.104820611758197  |
| TACTCATAAAA  | 927.214988731192 | 0.06946785665918   |

|             |                  |                    |
|-------------|------------------|--------------------|
| GACTAATAACA | 927.221785981593 | 0.0957611380201189 |
| TGAGGGTGACA | 927.261275030369 | 0.0757725169254634 |
| CTGGCAGTGAC | 927.276045011074 | 0.0998428324324953 |
| GGGTCATCACA | 927.293297381659 | 0.088329377241055  |
| GGTTGACACAA | 927.324829761194 | 0.148850372500017  |
| ACTCATAGCAT | 927.35120119777  | 0.104495142063075  |
| CGAGACAGTCA | 927.417360376268 | 0.13915850736687   |
| GTCACTGTAAA | 927.438360687848 | 0.0883016200587268 |
| GTCACTCTACA | 927.485207589186 | 0.0721153392951058 |
| CGACTATGACC | 927.491795020395 | 0.0837930706058386 |
| ACGTCACCTGG | 927.52154797279  | 0.0931476012718045 |
| AGTCTGTGACA | 927.524602394834 | 0.0789005075385506 |
| ATAGCGTCAGA | 927.552924718345 | 0.0791415883620972 |
| AGATGACGCA  | 927.565086591287 | 0.0739053444102511 |
| GAAGTGTCAGC | 927.618074448388 | 0.0886568788610986 |
| ACTCATTGACG | 927.721550920722 | 0.0786768586717517 |
| ATTTCGCAACC | 927.733604091647 | 0.0816077136250234 |
| ACGAGTCAAGT | 927.735935608676 | 0.13060435599439   |
| ACAGCCAGTCA | 927.804043693226 | 0.11013231838742   |
| TGACTGGGCA  | 927.810311852948 | 0.084071686797328  |
| TGAGTAGTCAA | 927.816765616123 | 0.0721279582537501 |
| AGTCAGACGGA | 927.840127932933 | 0.0826924295553933 |
| AAGCTTCGTCA | 927.847484922741 | 0.0873784884180713 |
| AATCTCCGTCA | 927.858179826676 | 0.0692594910878477 |
| AACGGTGACAG | 927.858283685565 | 0.0955269346559515 |
| GGGTCATAAAA | 927.883652167425 | 0.0922559347541737 |
| GATTCTGTGAC | 927.892170180778 | 0.0835630801028597 |
| CGGTGAATCAA | 927.894689934286 | 0.0934583403007799 |
| ACTTCATGACA | 927.918867253613 | 0.0858890756823639 |
| AGTGAGCAAAA | 927.93647571297  | 0.109466848565646  |
| TACGAGTAATA | 927.967570133654 | 0.0862456845541402 |
| CGTCACCCGTC | 927.967676542113 | 0.0818747819978136 |
| ACTCATTGTTG | 927.968519000902 | 0.0893570295478202 |
| GGTACTGTCAC | 927.968843746814 | 0.0747881587161828 |
| ACTTGTGACGC | 927.972647330315 | 0.0988124991371426 |
| ACTGGGTGATG | 927.98449975122  | 0.0851302507985102 |
| GTCATGTCCGA | 927.993752994683 | 0.100430630531803  |
| ACAGGGTGACA | 928.009078519916 | 0.104219869974091  |
| AAGGCAGTCAC | 928.022071776673 | 0.0970667482956695 |
| GTGACTTACGA | 928.032498272731 | 0.097932839407569  |
| GATTAGGTGAC | 928.048332844692 | 0.0914387736914797 |
| CAGGTGAGCAA | 928.055392198431 | 0.0822594770530531 |
| CGACTAATCCC | 928.089380119367 | 0.0952667438288711 |
| ATACCATGACA | 928.143164010433 | 0.0895559894280819 |
| GCAATGGTGAC | 928.152400678375 | 0.0799805297688033 |
| ACTCATAATGC | 928.168062388792 | 0.113443220650443  |
| CATTGATTCAC | 928.173711750804 | 0.076209849444399  |
| ACAGATGACCA | 928.182730673597 | 0.0939535599625194 |
| GTCACCTACAA | 928.186018642449 | 0.0532088556144947 |
| GTTGTATCATA | 928.214019879994 | 0.0864621235802819 |
| TAGTTTTGTCA | 928.246852526958 | 0.158408670686793  |
| AATGACATCGG | 928.255338755451 | 0.0820970819386516 |
| CCTCGTCATGA | 928.259895363777 | 0.0847356388912373 |
| CGTCACAATGC | 928.262498554679 | 0.103280132764467  |

|             |                  |                    |
|-------------|------------------|--------------------|
| ATGACAGGCCA | 928.271705307605 | 0.0700097581544931 |
| TCGACCTGTCA | 928.273025487936 | 0.114469705468505  |
| CCTGCTGACTA | 928.331115098765 | 0.0842368097979505 |
| GGCGGGATGAC | 928.343591689788 | 0.079040635681535  |
| GTCACCGGCAA | 928.363192324531 | 0.0766335366497856 |
| GATGACAGGCA | 928.367378214568 | 0.0774371038091192 |
| ATAAGGTGACA | 928.381720761531 | 0.0783631399747564 |
| GCCTGTGACAA | 928.406451468324 | 0.068456774881124  |
| AGAGCATGACA | 928.411229006646 | 0.102925116905683  |
| ACTCATAATCT | 928.469711974257 | 0.0868388896479069 |
| CGCCAGATGAC | 928.501032510986 | 0.0717008265195733 |
| ACCCCGTGACT | 928.534696615161 | 0.0841606689767771 |
| GAACGGGTGAC | 928.548388993296 | 0.0563237392530707 |
| GTCACTCAGTA | 928.652079948381 | 0.114212498919656  |
| AGTGGCGTCAC | 928.654442439665 | 0.0849028373486099 |
| TCCATGTGACA | 928.655698033385 | 0.0855218261776396 |
| GTCACATACCA | 928.665944031934 | 0.114717032946218  |
| GAGAAGGTGAC | 928.687103697309 | 0.0680340846142245 |
| TAGTTTGGTCA | 928.70436099823  | 0.0847664993132808 |
| TGTCACCCTAA | 928.764729710667 | 0.0854441894764296 |
| GTAGCGGTGAC | 928.884247847306 | 0.0714654665912374 |
| ACTCACTATGA | 928.885924921224 | 0.0977239600936523 |
| CGTCACCTTTC | 928.89169905298  | 0.0864070891564495 |
| AAGTGGTGACG | 928.897392392974 | 0.103356894346568  |
| ACTCATCGGTA | 928.902290092011 | 0.122046700964434  |
| ATTATTACGTG | 928.913294111577 | 0.102495509038519  |
| AACCTGTACAG | 928.959992148377 | 0.117291475324277  |
| CGTCACCTGAC | 928.960180711025 | 0.112582137678096  |
| ATCTTGTGACA | 928.984600008265 | 0.0983236585617001 |
| ATCCCGGTGAC | 929.038684520509 | 0.0671958956562065 |
| GATGACAGGAA | 929.047754053104 | 0.0956639530681373 |
| CGCGGTGACAG | 929.062282842263 | 0.134729722440785  |
| AGTCACGCGCG | 929.073912830728 | 0.137204575610334  |
| ACTTACTTCC  | 929.103284789886 | 0.0702895725040699 |
| AGTGAGCCACC | 929.135755313149 | 0.0601836822013823 |
| TGTGACCGAAA | 929.155460420315 | 0.0944546580678843 |
| GAATAGTGTCA | 929.22419483823  | 0.0785104703432574 |
| GTCACCCATA  | 929.273138181096 | 0.120050496565874  |
| ATCCGAGTGAC | 929.293102721722 | 0.0673094398705079 |
| ACTGAGTGACG | 929.318595279779 | 0.0932835661865412 |
| AAATTCGTGAC | 929.379789240344 | 0.0916051863379514 |
| AATAGGTGACG | 929.405131915604 | 0.0690150056709775 |
| AATGTGTCTTA | 929.426814630157 | 0.0798121972082209 |
| ACCCATGAGTC | 929.433132500621 | 0.103486251649522  |
| ATGACCTAACA | 929.447193226709 | 0.102070945079778  |
| ATTTGTGACCA | 929.467448174256 | 0.0862842656605323 |
| AATTGCTAATA | 929.511594977944 | 0.0839624549376986 |
| GTCACCCCTCA | 929.521884355584 | 0.0755903794350052 |
| ATGGCTAATTC | 929.556859418243 | 0.10798885638195   |
| ATCTGTGACAG | 929.571858199976 | 0.100689474111629  |
| ATTGTGACCGA | 929.596105414406 | 0.0686156948813627 |
| AAGTCACTTGA | 929.645967374019 | 0.0709181925924319 |
| ACAGATGACGG | 929.659465413268 | 0.083631599952975  |
| ATGACATCGAG | 929.680187175586 | 0.100732322573728  |

|              |                  |                    |
|--------------|------------------|--------------------|
| CGTGCGTAATC  | 929.725140249774 | 0.0928214549478203 |
| GAGTAGGTGAC  | 929.798793123432 | 0.107479004675186  |
| GACATGTGACA  | 929.799686239812 | 0.121785716898105  |
| AATTTATGAGT  | 929.800032869963 | 0.104704240824334  |
| ATTAGTCTGAA  | 929.817683992126 | 0.0829371116239147 |
| TAGTTGTGACA  | 929.856691504024 | 0.0756528994019488 |
| CTGTGACAGCA  | 929.904415551701 | 0.102004285760601  |
| GCCCAGTCAGA  | 929.972185859646 | 0.0734781645098366 |
| ATCCTGTGACA  | 929.991271080486 | 0.0862522355457613 |
| GCAATGAGTGA  | 930.011059407639 | 0.0844421943096311 |
| GACGTGTCAAC  | 930.04760170239  | 0.0943595705670075 |
| AGACTCAGACT  | 930.053128168738 | 0.09758354280889   |
| GTCACAACGGA  | 930.089604669518 | 0.078827754566498  |
| CTGCACGTGAC  | 930.157931952104 | 0.0827251249070295 |
| AGATATGTCAG  | 930.183785378875 | 0.105124000949649  |
| CGATTACTAAG  | 930.208388770257 | 0.100746391643519  |
| TAAGATTCACA  | 930.247111256173 | 0.0960825145398198 |
| AGCCTATGTCA  | 930.249887429555 | 0.0991884388277575 |
| CAATGACATTA  | 930.284042064654 | 0.0838540573306094 |
| AGGCCACGTAA  | 930.287850612573 | 0.103027696458478  |
| CTTCCAAGTCA  | 930.293185437654 | 0.0820756061392779 |
| TGTCACCGCAA  | 930.303384799518 | 0.106648487183723  |
| AGTCAGCGATA  | 930.467839942599 | 0.0733479336217543 |
| ATTCACGTGAC  | 930.501942294613 | 0.08233198695982   |
| ACGGTGACATG  | 930.58306011442  | 0.104255620679491  |
| ATCGGTGACAG  | 930.653860364921 | 0.0939558838762365 |
| AACTTACTCAG  | 930.676599527721 | 0.0936081246043652 |
| AAGTCACGCCA  | 930.750954606354 | 0.116188257927512  |
| ATTGTCACCGG  | 930.877993848939 | 0.0809581238480994 |
| AATTGACGTCA  | 930.919376926249 | 0.108788885132167  |
| CACACGCGTCA  | 930.931614095141 | 0.0738059264631938 |
| ATGATGTAAGA  | 930.933614480785 | 0.108546797376289  |
| TCATACTGTCA  | 930.961680903899 | 0.0903186816683357 |
| ATTACTAAATA  | 931.020869099824 | 0.0972341648131433 |
| CCGAATGACCA  | 931.033293640007 | 0.0483272821437227 |
| GTCACAAAGCA  | 931.070940919009 | 0.0869786413243894 |
| CCGTCAATTACA | 931.078465994924 | 0.0675999248836758 |
| ATCGACGTGAC  | 931.135677089374 | 0.0862310461377571 |
| AAAGGTGACAA  | 931.151875368797 | 0.0819707696131648 |
| ATTAGTCGCTG  | 931.248593926779 | 0.111603435859708  |
| GTAGACTCAAC  | 931.364723558496 | 0.0987709551966174 |
| ACTCATAAAAT  | 931.366607987496 | 0.140881403972479  |
| CGGACTTGTCA  | 931.425818918905 | 0.0745562538895898 |
| GATACATGTCA  | 931.431173816532 | 0.108474844814286  |
| TGACAAAGAAA  | 931.459968577681 | 0.108240162124344  |
| CCATATGACCA  | 931.550419844516 | 0.0750843666817369 |
| CTGACTCGCAG  | 931.559884391885 | 0.0952385874484124 |
| ACTCATCGGAC  | 931.57189255624  | 0.0870741420481168 |
| AGAGTCAAGTA  | 931.57615591616  | 0.0985822754282251 |
| ATATGTGACAG  | 931.581244638144 | 0.133732971073999  |
| ATAGCAGTCAG  | 931.587622045037 | 0.0723736193016538 |
| GACTCACGAGA  | 931.626468433447 | 0.0963757733750073 |
| CCTCTGACAAA  | 931.664632949441 | 0.088385170273816  |
| AGTATGTGACA  | 931.665986029582 | 0.0819203045222747 |

|             |                  |                    |
|-------------|------------------|--------------------|
| AATTGACTCTG | 931.810726719315 | 0.0689255476063076 |
| ATGCTCATGAC | 931.870222202307 | 0.0960070398179469 |
| CAGTCAGTGGC | 931.934429653221 | 0.078223802798606  |
| GAACGATGACC | 931.936962881646 | 0.0759139093700374 |
| GATGACGGGGA | 931.97864615845  | 0.0938842643852767 |
| GAGCATAGTCA | 931.993831455049 | 0.0709105939991289 |
| ATGAGCTGGCC | 932.038556536086 | 0.0903140166808352 |
| GAAGGGTGACA | 932.054512641691 | 0.0668472259007236 |
| TACTCATTATA | 932.054949590448 | 0.068169556658047  |
| CTTAACATGAC | 932.163640965392 | 0.0670775309440024 |
| CGGATGACCGA | 932.17189701543  | 0.100151872587292  |
| GTGAGGTGTCA | 932.172434084536 | 0.0942143435250831 |
| CATATGGTCAC | 932.19103195137  | 0.129625556139845  |
| AATCTTGTGAC | 932.199784458729 | 0.0583495361474374 |
| CTCGGACTCAC | 932.218948360721 | 0.0886913705615928 |
| AATTAGTACCA | 932.235247847527 | 0.0715214094788863 |
| ATGACATCGCC | 932.239841446349 | 0.0758961106088696 |
| GCTATCGTCAC | 932.272337161889 | 0.0844022523725158 |
| ATAGGGTCACA | 932.282427870766 | 0.0679339370495935 |
| AAGAGTGACGA | 932.302033831892 | 0.0764628199846011 |
| ATGACATGCAG | 932.305882637685 | 0.0882824878372323 |
| GAAGATGTGAC | 932.340750890976 | 0.064413246169271  |
| AAGTATGAATC | 932.341816135317 | 0.116916278591579  |
| TGATTGAGTAA | 932.350780301076 | 0.0900575290880211 |
| ATGACGTCCAC | 932.353567327832 | 0.0716619859934982 |
| ATACTATGACC | 932.368757801284 | 0.0815434948729727 |
| CGTCATTGTCC | 932.375105125838 | 0.069127593386721  |
| GAGTCAAATTA | 932.388620445035 | 0.112286090493755  |
| CGTCACTCGTA | 932.395517655467 | 0.0886587341381193 |
| CTCGACATGAC | 932.401075271078 | 0.0948771288391842 |
| TCATATGGTCA | 932.432239103713 | 0.0884952045000054 |
| AATGACCATAC | 932.472815414139 | 0.128090544071141  |
| TCATGGTCACA | 932.480009194524 | 0.0922075903788851 |
| ATGCCATGTCA | 932.524273396584 | 0.074699114928477  |
| AGTCAGATTAG | 932.589332739364 | 0.0755333911698284 |
| GTCATGTCGAA | 932.604206660085 | 0.128102570488223  |
| GATGACAAGAA | 932.637089197254 | 0.0870118864710725 |
| ACTAGTGTGAC | 932.654022473541 | 0.0733484093523708 |
| GAAGGTGACGA | 932.659631371979 | 0.0850539174413613 |
| GCTACTTGTCA | 932.664285458181 | 0.0681942927211153 |
| AGTGTGAGAGG | 932.68263597557  | 0.0819992885896725 |
| GATCGTGTGAC | 932.693570634311 | 0.097259227211077  |
| ATACACGTAAC | 932.694485596214 | 0.0902418584283158 |
| GTCACCAATA  | 932.703283426021 | 0.0736640159008542 |
| AGAGTCAGGGA | 932.729731861326 | 0.0693795130130694 |
| AAGCCGTCATA | 932.762937522269 | 0.0754084469106807 |
| ACTCATCTTAG | 932.785052885851 | 0.0744695775114195 |
| CACTGAGTGAC | 932.793256688554 | 0.0732460172106849 |
| AAAGCGTCAGA | 932.835809964245 | 0.0780584291095866 |
| CGATCTCGTCA | 932.862369717526 | 0.0764993625432311 |
| GTGAATGACCA | 932.872684094071 | 0.132809228482829  |
| AGTGTACCGGC | 932.944422278094 | 0.079054062901493  |
| AGGCATGACGA | 932.967202652482 | 0.10437269316422   |
| GTAGCCATGAC | 932.968536005207 | 0.0815685246656151 |

|              |                  |                    |
|--------------|------------------|--------------------|
| ACACGTCAATA  | 932.973402419759 | 0.0717459739958154 |
| ACTGACTAGTC  | 933.034404737872 | 0.0834742902534821 |
| AGTCAGAATCC  | 933.060106242256 | 0.0858858795457252 |
| GAGTCGTGTCA  | 933.146990621897 | 0.0964782993377852 |
| GGCCGTGACAC  | 933.174658697159 | 0.0877122629199064 |
| ACTTCTAGTCA  | 933.201470787739 | 0.070682709061916  |
| AGAAGAGTGAC  | 933.204732535888 | 0.0737559045621038 |
| GTCGGGTCATA  | 933.224911735892 | 0.0728707587114965 |
| ACGATTACGTG  | 933.250901039009 | 0.111395598282597  |
| GTAGTGTCAGA  | 933.268200384062 | 0.0943500348180262 |
| GTCATGCCACA  | 933.291855738634 | 0.0637252399575613 |
| CACGCCAGTCA  | 933.323868209494 | 0.0799278845241625 |
| GGTACCCTCAC  | 933.329269169199 | 0.0741758606646785 |
| CAGTTCTGTCA  | 933.362762089007 | 0.103919928432944  |
| TGGCTCATTAA  | 933.38714260002  | 0.0841213751245586 |
| AGAGATTAGTC  | 933.395229166072 | 0.0821602147519231 |
| CTGGTTCGTCA  | 933.399270466808 | 0.0849113736017412 |
| AAGAGTAAACC  | 933.45997834715  | 0.0694876299417246 |
| GGCCTGACGCA  | 933.471641523752 | 0.0757129943235926 |
| CATAAGGGTCA  | 933.490765041044 | 0.0795723496003679 |
| AGCACAGTCAG  | 933.502309497225 | 0.0689802159758105 |
| AGGAGTAATAG  | 933.517754157848 | 0.0694785401255936 |
| AGCAGCGTCAC  | 933.534638961796 | 0.0793074793144262 |
| ATGACGTTGGA  | 933.536575391392 | 0.0712364472485112 |
| TCCGTTGGTCA  | 933.537319893218 | 0.0958637275225517 |
| AATTTTCATGAC | 933.611324024585 | 0.0942188453373795 |
| TCCGGGTGACA  | 933.617365710106 | 0.110405163477762  |
| CATAGTTGTCA  | 933.623816879535 | 0.0909629580250209 |
| AAAATGTGATG  | 933.631554411068 | 0.0990507799606309 |
| GGATGTCTCAC  | 933.636503398115 | 0.0868781794695327 |
| CGATGGTGACA  | 933.636560955608 | 0.0647806402174842 |
| GTCACAATAGA  | 933.668924117638 | 0.0649324432141208 |
| ACTCATCACTA  | 933.675309273623 | 0.0876148500387249 |
| CAAGGGGTGAC  | 933.696154225672 | 0.105011102318381  |
| AAACAACCTCAT | 933.697363975632 | 0.0702720328937435 |
| GTCACCTGGTA  | 933.724173671654 | 0.0780969572471277 |
| GAGTAATATCC  | 933.732792242925 | 0.0963966471454511 |
| GAAAGTCATAC  | 933.800795472094 | 0.106680502352246  |
| AATGCTCATAC  | 933.819745606413 | 0.083381828924917  |
| ATTAGTCGGAG  | 933.858979350953 | 0.0749418339688634 |
| GATACGTAATA  | 933.97215751627  | 0.0797525629445558 |
| GCCCAGAGTCA  | 933.993318844582 | 0.0774352398718648 |
| CATGGGTGACG  | 934.001262320171 | 0.0843503752549449 |
| GGAACTGGTCA  | 934.046071929803 | 0.131925027270861  |
| TCGAGTGACGA  | 934.090429917133 | 0.0822488933639489 |
| CGTGACTTGGC  | 934.124354972595 | 0.0716562859757336 |
| ACCTCTAGTCA  | 934.129083608499 | 0.0673341953477934 |
| ACACAGTGTCA  | 934.137769797825 | 0.0863095104131082 |
| CTAGTCAGTGA  | 934.151250052645 | 0.117353132068927  |
| ATGAGCAACGG  | 934.205094571919 | 0.0934203887887991 |
| GTCATTAAGAA  | 934.215646928783 | 0.117509304400836  |
| TAAGTCAGCCA  | 934.215702492588 | 0.0854944314698628 |
| ACTGACTGGAT  | 934.231706862649 | 0.0872274976618985 |
| CTCGAGTGACA  | 934.268057094431 | 0.0870657882129129 |

|              |                  |                    |
|--------------|------------------|--------------------|
| GTCACGCAATA  | 934.274304586978 | 0.0903938307785381 |
| AGTCAGACTGC  | 934.334014441502 | 0.0739449177148486 |
| AGGCAATGACA  | 934.396175546601 | 0.0838806154891471 |
| TATCAGACTCA  | 934.414978277659 | 0.0698627087394336 |
| ATCGTTGCAC   | 934.442650580568 | 0.0620367012360506 |
| AGACTCAACTG  | 934.499259952169 | 0.11480877269113   |
| CCATGTCACCC  | 934.538125544069 | 0.120950713085918  |
| ATGACGGTAGC  | 934.542458522389 | 0.0909672835977483 |
| CTCGCAATGAC  | 934.564715250684 | 0.117036610437716  |
| AATATTACTCT  | 934.571599070308 | 0.0900923486902453 |
| ATGACGATCCC  | 934.59893472126  | 0.078206960291328  |
| CACAGTCAGTC  | 934.618313421879 | 0.139538417839583  |
| ACAGGGGTGAC  | 934.632405345947 | 0.107459361538802  |
| ATTGACGTCAG  | 934.639851322127 | 0.0765839127309435 |
| AATAGTCAAGA  | 934.683949745875 | 0.0886530971185254 |
| CTTTGGGTGAC  | 934.690655381139 | 0.0640009887669044 |
| ATGGGGTCAATC | 934.708922588387 | 0.0775520465568727 |
| TCTCGGTGACA  | 934.738935095648 | 0.0897553790604883 |
| GGTCATTGTCA  | 934.748048566152 | 0.113513457413991  |
| ATAATGACCGA  | 934.819586363522 | 0.0809170981898828 |
| AGGAGTAATCG  | 934.826340827951 | 0.0826361374321427 |
| ACGGTCATAAC  | 934.826445268782 | 0.0972350940846755 |
| AATGAGTAGGA  | 934.828984101239 | 0.0719606267096993 |
| ACCCCTGTCAT  | 934.852988989115 | 0.0742685429077998 |
| CAGACTAATAC  | 934.864217192837 | 0.102193250696198  |
| GTGATACATAA  | 934.902412036593 | 0.100316581520311  |
| CGAGATGACCC  | 934.931742911589 | 0.0946941875281875 |
| AGTCAGAGGAA  | 934.997443078602 | 0.0792199166375873 |
| ACAACATGACG  | 935.000305811315 | 0.0975164037458533 |
| TGGTCACTCAA  | 935.029604763354 | 0.0763872663132207 |
| ACTCATTTGCA  | 935.057426787478 | 0.0766593101704345 |
| TAAGAGTCGTA  | 935.06386965625  | 0.0862738592456941 |
| GACAACATGAC  | 935.075515926475 | 0.119636060870815  |
| ACTGTTTGTCA  | 935.075647724627 | 0.0748379226488696 |
| CAATAACGTCA  | 935.094968736882 | 0.0829733559427233 |
| GGTATTGCAC   | 935.098276178162 | 0.0761945154990969 |
| TCTGACCCACA  | 935.118420644167 | 0.0696885109582994 |
| CATCTTGACTC  | 935.118541158542 | 0.119513841008237  |
| ACCTATTACTC  | 935.119246055662 | 0.0695243309131813 |
| GGCATAAGTCA  | 935.191758355602 | 0.123157568773675  |
| AGGAGAGTCAG  | 935.214382838885 | 0.0701221303591469 |
| TGTGACCATAA  | 935.220882352414 | 0.119612536940774  |
| CGATACGTCAA  | 935.229080024237 | 0.0999090167869836 |
| AGACTGAGTAA  | 935.263211262276 | 0.0676227375244514 |
| GCCGTGGTGAC  | 935.276255243037 | 0.0776552414424372 |
| ATAGGTCACAA  | 935.294107601464 | 0.0931348415475891 |
| ATCTGGCTCAT  | 935.29576425659  | 0.110847871460722  |
| CGTCACCACAG  | 935.301330275186 | 0.118775212890954  |
| ACAGAAGTGAC  | 935.348844589213 | 0.0700118759280092 |
| CGAGGGTGACA  | 935.360933162594 | 0.108219531072451  |
| ATGTGACAGCA  | 935.372230115572 | 0.0840783027608083 |
| GTCACTCTTCA  | 935.388833864385 | 0.110019738982929  |
| GTGACGCGAAA  | 935.398145292993 | 0.096422606426785  |
| GGTCATAAATA  | 935.407091310629 | 0.0704425537768201 |



|              |                  |                    |
|--------------|------------------|--------------------|
| GATGAGTTAAC  | 935.416614979352 | 0.0812206858100538 |
| AGGCTGAGTAA  | 935.468327736239 | 0.084373672846824  |
| ACCTTGACACA  | 935.527107023403 | 0.0636763900950507 |
| GCCCGTGTGAC  | 935.557517964687 | 0.103913831808123  |
| TAGGGTGACGA  | 935.570090368624 | 0.0848334831639201 |
| TATAGGTGACA  | 935.599910808663 | 0.0673271383752699 |
| ATAGTGACACG  | 935.601540940016 | 0.0703770302684578 |
| CCCTATGTGAC  | 935.630237269834 | 0.0695389594711103 |
| GGTGACTCAC   | 935.653968324387 | 0.0627482185232465 |
| ATGTCACCCCTG | 935.668138027161 | 0.0885388269068701 |
| ATAATGTCACC  | 935.683690251159 | 0.0585571890045536 |
| CACGTCAGAGG  | 935.709861141271 | 0.0912558521771363 |
| ATGATTCGATG  | 935.719682843538 | 0.0639107340811446 |
| AAGCTGTGATG  | 935.728054422333 | 0.0976032616574486 |
| GGAGTGACAAA  | 935.736642236089 | 0.0644784083831854 |
| CGCCCTGACTC  | 935.754466735852 | 0.0635236480992251 |
| CTATGACCCTA  | 935.760571929935 | 0.0707387193680763 |
| ACTGACACAGA  | 935.767171041887 | 0.0705744787038128 |
| ATTATGACCCG  | 935.772230067854 | 0.0850619348249349 |
| CGGTCATCGTA  | 935.787497539199 | 0.0627928463444174 |
| AGTGATACATA  | 935.841035309291 | 0.0697899466535112 |
| AGGGTGACATG  | 935.893572534094 | 0.0763122859909888 |
| ATACCGTCACC  | 935.900246864557 | 0.0644797117417503 |
| CTGGGTGACGA  | 935.915570689252 | 0.103831714145023  |
| ATTGACTGTTA  | 935.940608401364 | 0.106260576310018  |
| GTCACCAGGAC  | 935.948719516544 | 0.0820123217771966 |
| CCGTCATCTAC  | 935.951267374502 | 0.0743856771292377 |
| AAGTAGGTGAC  | 935.960470543878 | 0.0653308034186866 |
| ATCAATGAGTA  | 935.984965226974 | 0.10385914028543   |
| CGCTTTGGTCA  | 936.002905936224 | 0.0873621091470066 |
| CACGGGGTGAC  | 936.062333470432 | 0.0822813939088641 |
| CCATCGTGTCA  | 936.24050244344  | 0.0844005803006457 |
| TGACGGAGCCA  | 936.297626690547 | 0.109389679311097  |
| CTGACACTTTA  | 936.336178219134 | 0.0826392198866034 |
| ACAGTCAGCCG  | 936.377984225347 | 0.0796794256233131 |
| GAAAGCAGTCA  | 936.423345993813 | 0.0484160523413036 |
| GTCATTAATTA  | 936.455307318035 | 0.0890509983737927 |
| ATAATGACCAC  | 936.516425311486 | 0.0907817132372718 |
| AAAATCATGAC  | 936.517957124408 | 0.12090530253959   |
| GTCACCGCCAC  | 936.536514402915 | 0.0975587650313409 |
| GACAGGGTGAC  | 936.536619613573 | 0.0936448819644863 |
| GACTCACGAAA  | 936.662967051279 | 0.0943247745759489 |
| TCCTCTAGTCA  | 936.715324522831 | 0.079182960748458  |
| TCCCGTAGTCA  | 936.717824346039 | 0.0763073903331669 |
| AATATACTCAC  | 936.732029963087 | 0.0803299693296941 |
| AATGTCTCACC  | 936.813051990761 | 0.0778248716374118 |
| ATAATGAGCCA  | 936.813622245822 | 0.100694187395215  |
| GAGTGATGACC  | 936.862558444707 | 0.0849847780565534 |
| GTGACGTTGAA  | 936.867197939803 | 0.0847451473369819 |
| AACAGCAGTCA  | 936.897158693576 | 0.0972341668241536 |
| TGCGCATGACA  | 936.932984095693 | 0.0630376804210362 |
| ATGACCCCTGAA | 936.946033254399 | 0.093936728430645  |
| CAACTAAGTCA  | 936.962236513146 | 0.0872083761502146 |
| TCATGTGGTCA  | 937.029198070438 | 0.080367376944976  |

|             |                  |                    |
|-------------|------------------|--------------------|
| AAGTTGTCAT  | 937.060193944632 | 0.112449556805424  |
| GTCATTGGACA | 937.127250089721 | 0.0622923664657716 |
| ACGGCAGTCAC | 937.130132716146 | 0.110136775396598  |
| CTCAGTCAACA | 937.147510732214 | 0.123714383995295  |
| ACGGGTGACGA | 937.149815004714 | 0.0829820516236337 |
| GTCACCTTCAA | 937.16427650681  | 0.0820995041879122 |
| CGTAACGTCAC | 937.201221793154 | 0.0599766987596315 |
| AACTTGCTCAC | 937.233628061162 | 0.062211787627976  |
| CGTAGCGTGAC | 937.234492683205 | 0.0952865381998646 |
| GACAAATCATC | 937.302231040998 | 0.0957956228055065 |
| GTCACCGAGAA | 937.304600492844 | 0.0873761655992736 |
| CTACAGCGTCA | 937.337016774646 | 0.0617153209519493 |
| ACTTGTCACAT | 937.344652124901 | 0.0707935985004759 |
| CGTCAGTAATA | 937.361036702785 | 0.107408577317952  |
| CTCGGTGTGAC | 937.378881659533 | 0.061026472852542  |
| GTAAGACTGAC | 937.389900684907 | 0.0639117110104836 |
| AGTCAGCGCTG | 937.472436033064 | 0.108664516631202  |
| CGTCATGTCGA | 937.545169672026 | 0.106476860369524  |
| CTACTTGTGAC | 937.594038913236 | 0.0623950842071611 |
| AGGATATGTCA | 937.602546619767 | 0.0839248013504858 |
| GTGAGCCACCA | 937.669426816903 | 0.111119878321917  |
| AGGGTGACAAC | 937.699719296506 | 0.116978023711528  |
| CTGCATGTGAC | 937.776550051532 | 0.0939016505676567 |
| CGTGCGCGTCA | 937.792092760898 | 0.0710364105508949 |
| CTGACATATAC | 937.856367112061 | 0.101730193970679  |
| TCACCGTCACA | 937.880039293377 | 0.0613717729822291 |
| GACACTAGTCA | 937.891175162812 | 0.0883631499519975 |
| GTGCGGTGATA | 937.960931228687 | 0.0632791743734702 |
| CGAAGACGTCA | 937.966371167474 | 0.0686827580933241 |
| ATTAATCACAC | 938.004942158167 | 0.0798770803395993 |
| ACGAAGTCACA | 938.038544981891 | 0.0883750072551859 |
| CTGACTAGTAA | 938.056388381463 | 0.0906748651366631 |
| CCGTCATCAGG | 938.057298442745 | 0.0776792777709758 |
| GACGTCACCTA | 938.092663740852 | 0.0661105750825245 |
| CTCTGTGTCAA | 938.114453668918 | 0.103814279138913  |
| AGTCGGTGACG | 938.13246448332  | 0.0899873850215945 |
| AGTGACGTCA  | 938.137529448352 | 0.0640762988026729 |
| ATCGTGTGACA | 938.141739698812 | 0.0528649731745598 |
| AAGTGACGTGC | 938.15183380386  | 0.0793019547304921 |
| ATGCACTCATC | 938.249196759537 | 0.0605707432303656 |
| TGACAAGTAAA | 938.320472525402 | 0.0824547719903276 |
| CCGTCATGTCA | 938.337245223608 | 0.0791763098478201 |
| ACTCATAAGAA | 938.339352461036 | 0.0673059191746979 |
| GTCACCCTAAC | 938.400643533537 | 0.0816904462520917 |
| ACTCATTCTCA | 938.44568586216  | 0.0621855319282824 |
| CAATACGTGAC | 938.452847150768 | 0.118661136330849  |
| ACTCATCATAC | 938.484319799174 | 0.0646377874188445 |
| AATGTGTAACC | 938.574672589795 | 0.0786604732271016 |
| AGTCAGATCCG | 938.598967348929 | 0.103832132653244  |
| GTCACACCAC  | 938.604050056287 | 0.0769963001334545 |
| GTCACATGCAA | 938.620302772381 | 0.108185058154119  |
| CCTTATGAGTA | 938.623928477389 | 0.0829919871063195 |
| GAGAGGGTGAC | 938.630162777903 | 0.065898436827635  |
| CACTGTGACGC | 938.636395453411 | 0.0579012220311284 |

|              |                  |                    |
|--------------|------------------|--------------------|
| GTACGGGTGAC  | 938.650077209879 | 0.113024222478526  |
| ATGGCGTCACG  | 938.678349739167 | 0.0619385991760077 |
| CACGTTTGTCA  | 938.700259111667 | 0.0786907744439882 |
| GTCACCTCCGAC | 938.748065122723 | 0.0582214745743766 |
| AATGAGTAGAT  | 938.751066830566 | 0.0632292928042456 |
| AGCGTGGTAC   | 938.768520868335 | 0.0718522240362148 |
| ACCACAATGAC  | 938.789278669897 | 0.0656229007850003 |
| GAGTTGGTAC   | 938.800063225561 | 0.0934566989044173 |
| CCAATGGTAC   | 938.848480237088 | 0.089514720257417  |
| GAGGCGTACC   | 938.870591550977 | 0.0653675220934273 |
| CGTCACATGCA  | 938.961317986523 | 0.0652249403291736 |
| GTCACCTGTAA  | 938.969823470899 | 0.109908192037642  |
| AATTACGCACT  | 939.008325529115 | 0.0643774156108201 |
| ATGTCACATCG  | 939.009718799114 | 0.079225371200292  |
| CTTTATGACCC  | 939.046209320734 | 0.0719750957393689 |
| CTATATCGTCA  | 939.072680774797 | 0.0820127482674347 |
| AAGTTGTGACG  | 939.083558247348 | 0.102716609178336  |
| GCGGAGAGTCA  | 939.09592916045  | 0.065179342125642  |
| AATGACATTGC  | 939.148965772313 | 0.089018855479221  |
| AGCGCGAGTCA  | 939.161828564605 | 0.0778759968668211 |
| GTTTGACTGAA  | 939.175799211729 | 0.0591516254528133 |
| ACGTGATTCAA  | 939.206929662306 | 0.0687455108218701 |
| CAAAAGTCATA  | 939.279509200095 | 0.0756360916619959 |
| ACTTGCTACC   | 939.33207246908  | 0.0665873688309653 |
| GTCACATAGTA  | 939.35562585869  | 0.0817856644466771 |
| ATTACACACTA  | 939.355927383486 | 0.063172519992355  |
| CTATCGCGTCA  | 939.3603062135   | 0.0839427745036671 |
| AGTCAGACTGG  | 939.388999780639 | 0.120023576267854  |
| CAGTCAGCTGG  | 939.419692287187 | 0.113752302398751  |
| ACCATACTCAT  | 939.491178246229 | 0.0841226043485751 |
| ACGTCTGACAC  | 939.496126637092 | 0.0674262400679553 |
| CCGCGCAGTCA  | 939.527268723521 | 0.0740046010683376 |
| AGGTATGACCG  | 939.533872326831 | 0.0690882781349143 |
| AGCGTCACGCA  | 939.53731169354  | 0.0578722885272542 |
| AAGTCAGAAGC  | 939.569433715736 | 0.0627434231744733 |
| GGTCATCGGTA  | 939.596046676778 | 0.0946900375244986 |
| CGCCGTGTAC   | 939.665042775069 | 0.118004585440598  |
| GAAGAGAGTCA  | 939.666119739176 | 0.0569150177392078 |
| AGTTAGTTCAT  | 939.692640150662 | 0.0822921862214761 |
| AGCGTCATGGC  | 939.710319388086 | 0.0670752870546646 |
| ATTTGACGCAA  | 939.712897934599 | 0.106827302616408  |
| ACGTGATGGTG  | 939.730240747217 | 0.0728764504495752 |
| ATAAATGACCA  | 939.737457981168 | 0.0716729967165866 |
| TGGTTGAGTAA  | 939.73834520742  | 0.0650411156124629 |
| CAGTGTCAGAC  | 939.805316800777 | 0.0594702948827614 |
| CGAGTCAAACA  | 939.899336435878 | 0.0846265431855494 |
| GTCACGCGGAA  | 939.943286074043 | 0.138491070321482  |
| GTCACAAACAC  | 939.973655082997 | 0.0847664826001385 |
| TCATCTTGTCA  | 940.047996442389 | 0.0795666918003825 |
| GTCACCTATAA  | 940.059132661609 | 0.103088889905633  |
| GTCACGCAACA  | 940.07542816101  | 0.0953087616431692 |
| GATCTATGACC  | 940.125280727763 | 0.0741120644507829 |
| AAGTCAGAGCT  | 940.136087134826 | 0.0701455422000601 |
| CCAATGAGCCA  | 940.1390766953   | 0.0980734480468412 |

|              |                  |                    |
|--------------|------------------|--------------------|
| AAAGACAGTCA  | 940.155826940061 | 0.0820409740111861 |
| ACTCATCTGTG  | 940.156549218033 | 0.0688436989996588 |
| GTGAGTCTCAA  | 940.164736887976 | 0.0944324893695329 |
| ACAGTCAGTGA  | 940.227628231471 | 0.0813234342335176 |
| AGTCAGAGCGA  | 940.230797224104 | 0.0738374050512466 |
| GTTCTCCGTCA  | 940.236329756168 | 0.0981588361126167 |
| ACCATGACACC  | 940.259914319702 | 0.0831172401137557 |
| CGTCACATACA  | 940.268521272083 | 0.0743262776766607 |
| AATCAGTGACA  | 940.283355265356 | 0.0399072982522197 |
| GGTGCGACTCA  | 940.436452891472 | 0.102188144655276  |
| GAAGGGGTGAC  | 940.455843528009 | 0.0933926911837655 |
| ATATGACGGGG  | 940.484139949349 | 0.0589296564849675 |
| GACAATGAGTA  | 940.488385230701 | 0.0678519821072544 |
| GTAATAATACA  | 940.488893069718 | 0.129195731394877  |
| CAAAGCGTGAC  | 940.496940620445 | 0.0689341787057695 |
| ATTACGCACCA  | 940.526837376655 | 0.0850430355780146 |
| ACTTGACTCCT  | 940.542680988784 | 0.0729878994000471 |
| ACTGTGAGTAC  | 940.58321052949  | 0.06999780258799   |
| ACGTACTGTCA  | 940.584069639771 | 0.0722714419777497 |
| AGGCGTGTGAC  | 940.594890308336 | 0.0689908972107979 |
| CTGACTGCATC  | 940.624996580886 | 0.0765079867654731 |
| CACTGTCATGA  | 940.651141746924 | 0.063812485490256  |
| CTCATGGCTCA  | 940.677234160776 | 0.0645924002278769 |
| GACTAATCCAC  | 940.798448642145 | 0.0871774981860878 |
| GTAACGCGTCA  | 940.840840676122 | 0.0777560459374121 |
| GCCAATGTGAC  | 940.84224214357  | 0.0633580143726503 |
| CCTGAGTGACG  | 940.87017896461  | 0.0938556001220931 |
| ACGTGACATAC  | 940.875297462643 | 0.0927050172330383 |
| TGACACGTGAA  | 940.875826736867 | 0.0965114288712317 |
| CGCGTCACTAG  | 940.880265362641 | 0.0592484361476382 |
| AGCGGTCATAC  | 940.882469265646 | 0.0612703729811189 |
| CGAATGACCGA  | 941.001055122725 | 0.101680471129818  |
| CTTGGTGACCA  | 941.00415320977  | 0.0567011300399743 |
| CTATGTATCAC  | 941.030085214432 | 0.0568603431459147 |
| CCCTGACTGTA  | 941.035008003797 | 0.0590747061869884 |
| GACGGGTGACA  | 941.038519961516 | 0.0574875798702025 |
| TACGGGTGACA  | 941.063754690509 | 0.118044804017544  |
| ATTAATGACAG  | 941.069422639316 | 0.0908859657140721 |
| TGCAATGACCA  | 941.069996602908 | 0.0815200539116472 |
| GGTCATCAATA  | 941.08777428993  | 0.0804873936479624 |
| AGCCCGTGACT  | 941.230764380783 | 0.0713329766727003 |
| GGTGTCATGTA  | 941.254893127847 | 0.0860062874584273 |
| ACGTACACGACA | 941.255522400109 | 0.0794399629955189 |
| CGACCATGTCA  | 941.265733170585 | 0.122759846008446  |
| GTCTCGACTCA  | 941.317941006151 | 0.0746671391816374 |
| ATGGGTGACAA  | 941.322865622113 | 0.0588162513527682 |
| ATATGACCTAA  | 941.334420213212 | 0.0941695588832179 |
| AAACGATGAGT  | 941.33873523048  | 0.0699403296988028 |
| CGTCATGGAAA  | 941.359577208464 | 0.0832114684752957 |
| GCACGTGACAC  | 941.379268570728 | 0.113692508521039  |
| CCCGCAATGAC  | 941.393919224231 | 0.0733548225797428 |
| AGATGTGACAA  | 941.518357050788 | 0.0601336378851968 |
| ATGACAGCCTA  | 941.522988720266 | 0.0835089249089586 |
| CGACACGTGAC  | 941.536338798657 | 0.0861614310518433 |

|              |                  |                    |
|--------------|------------------|--------------------|
| CACTTTGTGAC  | 941.540285192753 | 0.0825347075914516 |
| AGGCAGTCACT  | 941.569249998757 | 0.09758726839061   |
| AATTACTCCTC  | 941.587062863255 | 0.0615637511445637 |
| GGTGAGACATA  | 941.670102019163 | 0.0552605088618673 |
| GACGACTCAAC  | 941.683380261728 | 0.0641810346237162 |
| TAGGTCATACA  | 941.692525728548 | 0.0578712831928248 |
| GTGATTAATAA  | 941.697456115241 | 0.118296400511649  |
| CAATCCGTCAG  | 941.706183358053 | 0.109493902845418  |
| CGCTATGTCAC  | 941.706934859547 | 0.0846172730903691 |
| GTCACTCAGCA  | 941.708409693045 | 0.0767486606369287 |
| ACTATCACTCA  | 941.786951828418 | 0.0710589804910151 |
| AGAAAAGTCAT  | 941.788038204206 | 0.0984742339218968 |
| ACACATCATCA  | 941.79428294197  | 0.0576385212145405 |
| CGGAAGGTGAC  | 941.798656425247 | 0.127615594321336  |
| AACACAGTGAC  | 941.815493434644 | 0.0793523626287088 |
| AGGGTGGTGAC  | 941.841046554617 | 0.0896502837281978 |
| ATCTCTAGTCA  | 941.879188236606 | 0.0869133762274615 |
| ACTCATATTAG  | 941.891365001179 | 0.111481751882005  |
| ATGACAACCTC  | 941.908049208194 | 0.084573050743147  |
| GGACTGGTGAC  | 941.91966120275  | 0.083079450993179  |
| CGCAATGAGTA  | 941.935470739363 | 0.0961323996643078 |
| CGACTCAATGA  | 941.944597780948 | 0.0464172710022322 |
| CGTCACCTTGA  | 941.984867070739 | 0.0813413499964332 |
| TGTCACATGAA  | 942.067702320641 | 0.101048250338468  |
| TGACAGAGACA  | 942.122508528917 | 0.0857997548079907 |
| CTGCAGTGACA  | 942.149163821174 | 0.0767717708528603 |
| CGTACTTGTCA  | 942.173769761972 | 0.0912324472851293 |
| CGTCACCGTAC  | 942.175653656225 | 0.0698865705312465 |
| CATAAGTGACG  | 942.231589280908 | 0.0713928692508367 |
| ATGATTACGTG  | 942.288371833309 | 0.0742814070273111 |
| GGACGGGTGAC  | 942.333121191623 | 0.0800700086180325 |
| ACTCTGTCACT  | 942.339551979821 | 0.0765825148565631 |
| TAAGCGTGACA  | 942.355433823427 | 0.118535868706002  |
| ATTCTCTGTCA  | 942.383027871217 | 0.0603787745564171 |
| TACACATGACA  | 942.398175574257 | 0.0550216745949487 |
| CTAGATGAGTA  | 942.449774520138 | 0.100864536670064  |
| TCTCCGCGTCA  | 942.455982540791 | 0.0612926056970615 |
| GGTTATGTGAC  | 942.47558561113  | 0.0694231891284496 |
| GTCACGTCAAC  | 942.49083666346  | 0.0687541303652639 |
| TCGTCACCTCAA | 942.50040774108  | 0.0579970982864133 |
| GGTCATAGCTA  | 942.512275630848 | 0.09694855597188   |
| AGTCAGCTCAT  | 942.544648296372 | 0.107744585658535  |
| AGGCGTGACAC  | 942.592479332743 | 0.0548042335484891 |
| CTCTGGGTCAC  | 942.617489634981 | 0.0549504674981619 |
| AGAGTCAAGGA  | 942.625456509614 | 0.0957035943162452 |
| CGTCATGTTAG  | 942.627144417747 | 0.0623978233344006 |
| GGTAATGACAA  | 942.654753132199 | 0.0839103216513604 |
| GACTGTGACCC  | 942.711520476437 | 0.091136400433057  |
| ACTCATCTTAA  | 942.748213874297 | 0.0560444323793799 |
| TATTATTCACA  | 942.764958186208 | 0.067586817183044  |
| AGTGTACGTCA  | 942.804638736629 | 0.0688760923974851 |
| GGGTCGGTGAC  | 942.838435558598 | 0.0545882185100977 |
| AAGATATGAGT  | 942.851453150465 | 0.0655642519366212 |
| ATCTCGTCATG  | 942.886558366603 | 0.0987659063628603 |

|             |                  |                    |
|-------------|------------------|--------------------|
| ACGAATCATAC | 942.92547955524  | 0.0629061249063925 |
| GTCATGTCAAC | 942.933734843142 | 0.0901254155868924 |
| GACATGGTGAC | 942.94054320413  | 0.0415367126809655 |
| CCTGACTCGCC | 943.004087978794 | 0.076481295107795  |
| GAGCCGCGTCA | 943.005172518676 | 0.0991989936474759 |
| TGACATCACAA | 943.081997491766 | 0.0834594784376862 |
| GGCCTTGTGAC | 943.106937475211 | 0.109275759079572  |
| ACATTATGACC | 943.150916502734 | 0.0993645553050844 |
| CCCGGGTGACG | 943.162537156586 | 0.0810625476319849 |
| AGGGTCATTCA | 943.204211337952 | 0.0909886917621295 |
| CGCGCATGACG | 943.230229503014 | 0.0615945971180816 |
| ATACGTCAATC | 943.251641661682 | 0.0801075219829629 |
| AACACTGACTG | 943.252379751961 | 0.0736758314174988 |
| CATCGTCATGC | 943.384481119754 | 0.0547944403531414 |
| AGTTGTGACAA | 943.450078641702 | 0.0993302461057636 |
| TTAGGTGACAA | 943.48304420862  | 0.0615776097131727 |
| TCATATGATGA | 943.513012106414 | 0.0764696056349745 |
| CGTCACAACCA | 943.525193382212 | 0.0854994924655724 |
| GTTGACGTGTA | 943.576716549616 | 0.0570025599570078 |
| CTATGTTGTCA | 943.596086539993 | 0.0704201129131775 |
| AAATGATGTAA | 943.635314077428 | 0.0922781332383112 |
| TGACAGCGTCA | 943.723295345349 | 0.040447302416717  |
| AGTGGTCATTG | 943.7289820606   | 0.0684713987217734 |
| GTTGTGTCAAA | 943.735958026881 | 0.0805164952597521 |
| AGGAATGACCA | 943.7364284659   | 0.121037854503058  |
| GCTGCTGTGAC | 943.754892985737 | 0.058257278579855  |
| ACGACGTCAAC | 943.812389581635 | 0.0748760090813961 |
| AAGTCACCCCT | 943.855761999565 | 0.0799473575391191 |
| ATGACAGGGAG | 943.89373396525  | 0.0543595348954454 |
| AGTGACGAACC | 943.911415436941 | 0.067677194478038  |
| GGTGGTGACGA | 943.920410652045 | 0.0527262443904618 |
| GATTTGTGACA | 943.946817440432 | 0.080073335764035  |
| ACTCGATGACC | 943.972698832917 | 0.0660686643362945 |
| GATTAATCAAC | 943.981848167517 | 0.0696817580989692 |
| TGACATCAGAA | 944.015949893636 | 0.0703417080173113 |
| GTATTATTCAC | 944.019845180084 | 0.070826019991374  |
| GAGTGGTGACA | 944.023971660904 | 0.0519138791218372 |
| GCCTTGACTGA | 944.089274834019 | 0.0603109248907325 |
| ATCGTGACACC | 944.11709933195  | 0.0634737562237086 |
| ACACAATGAGT | 944.120035624582 | 0.0630788640906858 |
| ATGCTGACGTG | 944.186812059501 | 0.0931598753651432 |
| AACTCATATGA | 944.220459091179 | 0.0616958424158245 |
| CAGTCAGCATC | 944.311697931051 | 0.0760625951987318 |
| AATGCGGTCAT | 944.325500173433 | 0.0766892461735162 |
| ACGACTCAATG | 944.336989896927 | 0.0647199542661725 |
| GTCATTGTGCA | 944.357060017407 | 0.0785871230720539 |
| CACCTGAATCA | 944.357417402972 | 0.0806432439683926 |
| GAGTAATAATA | 944.392235316696 | 0.0764751377851519 |
| CAGGATGTGAC | 944.436766584549 | 0.0647739422358725 |
| GTATGTGACCA | 944.443089357983 | 0.0984409419094639 |
| ATGAGTAGACG | 944.487630467155 | 0.0651499097025288 |
| CATTTTGCTCA | 944.492431243086 | 0.0650144043760331 |
| AAGGGGTGATA | 944.499076680122 | 0.0547791807435197 |
| ATGACTTCGCC | 944.556488641847 | 0.0545989190568433 |

|             |                  |                    |
|-------------|------------------|--------------------|
| GTCTGAGTCTA | 944.557343639368 | 0.0787892711582611 |
| ATGACGGCTAC | 944.561580761483 | 0.0582617333535509 |
| AGTGTGAGTAT | 944.581437367961 | 0.0722080154120578 |
| CAAGTAGTCAG | 944.612399087804 | 0.0556677587783511 |
| GACTGTGACCA | 944.668912016102 | 0.0761327291209352 |
| CGTCATGGATA | 944.682073617495 | 0.0759558715055693 |
| GGGTAATGACA | 944.753645439949 | 0.0923353309853008 |
| CTCGCACGTCA | 944.758861346428 | 0.0778351676196289 |
| TAGTGACGCCA | 944.769659084584 | 0.0899697916254067 |
| CCCCATGACAC | 944.785171899864 | 0.0647350766024637 |
| GGACTTGTGAC | 944.789148442129 | 0.0602143586769495 |
| AATTAGTGTCA | 944.797734282753 | 0.0636192271876799 |
| AAACAACGTCA | 944.882495918166 | 0.0593786172152694 |
| ACTCATTGGA  | 944.894177871424 | 0.0666481216394678 |
| CGTCATGGTTA | 944.894185453112 | 0.0845501833552595 |
| ACCATGACAGA | 944.926643615175 | 0.0608132282018393 |
| AACATCGTCAC | 944.953894576935 | 0.0551971911646851 |
| GGCTATAGTCA | 944.977284398319 | 0.0777874635159153 |
| CGTACTGTGAC | 945.004406976296 | 0.0738197051918692 |
| AAGAGAGTCAG | 945.03002117781  | 0.0585296278500682 |
| CTAACATGTCA | 945.032069936731 | 0.0580189883802673 |
| GTGACAATACA | 945.045441759751 | 0.0626637978930337 |
| ACAGAGGTGAC | 945.103290431143 | 0.0553515667134034 |
| TGAGTCTGTAA | 945.146449704979 | 0.0671822733623601 |
| AGCCTGATGAC | 945.154997881133 | 0.0696730130077717 |
| GTATTGTGACA | 945.15591216295  | 0.0791732568573921 |
| ATCTACTCATC | 945.218484239888 | 0.0616470902842783 |
| CTGTGGGTGAC | 945.222994289214 | 0.0492799192811101 |
| AACTGTGTCAA | 945.231289158863 | 0.0716988743333376 |
| ACTCACTGACT | 945.268830560933 | 0.0681572752594929 |
| AATATTACGTG | 945.270728129686 | 0.0809021259400521 |
| GGGATTGTGCA | 945.30846428454  | 0.0557593969336575 |
| GCTGACTAGTA | 945.395142314509 | 0.0658075104245676 |
| CTGTGACAATA | 945.429690363635 | 0.0639906006790907 |
| TATATGTGACA | 945.464592291882 | 0.0853009163474073 |
| ACTCATTGAC  | 945.53829660599  | 0.053853221148952  |
| ACTCCGGTAC  | 945.539906495056 | 0.0780342127349252 |
| AAGTGTGAGTA | 945.613083551152 | 0.0562817353477456 |
| GTCACCACCA  | 945.622762583652 | 0.0973335783579806 |
| TGGTCACAGAA | 945.639192001516 | 0.0966571538885    |
| ACCCTTGTGAT | 945.67985685562  | 0.0614257055118725 |
| AGTCAGATATC | 945.780274568864 | 0.0762192922785473 |
| CATGGTGACAA | 945.79299859268  | 0.103945336336633  |
| CGTACTAATA  | 945.809022158835 | 0.0545018609390899 |
| TCATTACGCAA | 945.830512427071 | 0.0664858329559349 |
| TCGATGTATCA | 945.900733119277 | 0.0752811920492731 |
| CACAATGAGTA | 945.910822538143 | 0.112159605067128  |
| AAGGTAGTGAC | 945.945995198344 | 0.0565775288324783 |
| ACTGTGACAAT | 945.978571520399 | 0.063469440893221  |
| AACTGTGACCA | 946.017113297546 | 0.0841395568387903 |
| GGAAGCATGAC | 946.041082660545 | 0.0694276163482733 |
| CTGAGCAATAA | 946.056180578757 | 0.0561050361593164 |
| AATGACGGGGT | 946.157893839543 | 0.0676713081718766 |
| ATTACGCACAA | 946.200571701545 | 0.0410406858183015 |

|             |                  |                    |
|-------------|------------------|--------------------|
| ACAGCTAGTCA | 946.345550041139 | 0.0598325461088575 |
| TGATGCAATAA | 946.348535286938 | 0.117319534597234  |
| AGTGACGTTGC | 946.378810531485 | 0.0791639346314719 |
| GAGTATTACAC | 946.431346610993 | 0.105632705634648  |
| AGAGTCAGGAA | 946.4324765359   | 0.0631499409679629 |
| ATTGTGACATG | 946.47922328013  | 0.0991018575281402 |
| AGATTCGTGAC | 946.483583525086 | 0.0617310197608562 |
| AGTCAACTCAT | 946.559889225006 | 0.0704692785261297 |
| GGTTGCATGAC | 946.583589256512 | 0.0785961773289401 |
| AAGATCGTCAT | 946.600250402874 | 0.0596809026712488 |
| AGGTGACACGA | 946.608994841822 | 0.0888667281718562 |
| CTCTCAATGAC | 946.611209698716 | 0.0582704033799074 |
| ATCGCGCGTCA | 946.642302919406 | 0.0682699915279462 |
| GATGAGACACC | 946.733137201061 | 0.0743063225341656 |
| ACTCATTACTA | 946.779770029093 | 0.0695425047249996 |
| GCGAGTCAGGA | 946.807618431399 | 0.0546288755231609 |
| CTTTCCAGTCA | 946.809890236774 | 0.0710973776017143 |
| ACTCATAGTAG | 946.875476548526 | 0.0696340379282076 |
| AAGGTGACACG | 946.882848126839 | 0.061268970147372  |
| GACTACTCACA | 946.920757225872 | 0.0702927155610838 |
| GTCACTGTGAA | 947.002040062236 | 0.0581955073373169 |
| CAAGTTGTAC  | 947.007127981575 | 0.0744842621840288 |
| AGACTCAGAGA | 947.012238498999 | 0.0832320584638447 |
| CACGGAGTCAG | 947.018082281394 | 0.0934430103417662 |
| ACTCATCACAA | 947.040359734689 | 0.0730966949955162 |
| GTCATGCCATA | 947.062954600953 | 0.0802835015107117 |
| GGTGTGAGTAC | 947.073145010902 | 0.059358683615779  |
| ACTTATGACCG | 947.114327251569 | 0.0744365571165648 |
| TCTTTCCGTCA | 947.129058715605 | 0.0641169889370516 |
| ATGAGCAACGC | 947.143858488889 | 0.0709246126539149 |
| GAGTCAGGGGC | 947.153443551284 | 0.0601044311706042 |
| ATGAGTGAACG | 947.164027290774 | 0.0537179869588915 |
| GTCACCTCAAC | 947.211972009718 | 0.0555705219637709 |
| ACGTCATGAAG | 947.249952572201 | 0.0901800612891115 |
| ACTCATCATTC | 947.255587740481 | 0.0679232428311216 |
| TTCGGTCACAA | 947.287832165033 | 0.0649584516123322 |
| AACCAAATGAC | 947.30574671257  | 0.0545486187468388 |
| GTCATGCCGAA | 947.339108581365 | 0.0650890020003854 |
| ATTGCTCAGTG | 947.367384673827 | 0.0538627280676822 |
| ACTCATTCGAG | 947.485006091396 | 0.0546857711338261 |
| CACGTTGTAC  | 947.486096413744 | 0.0798333787931033 |
| GACGTCACTAA | 947.541756116006 | 0.0692186142500362 |
| AGAGTGAGCAA | 947.558588030573 | 0.0603125369760956 |
| CTCTAGGTGAC | 947.577699213375 | 0.0940568660872727 |
| ACACCATGACA | 947.579868879008 | 0.0771870556731581 |
| AGACCGTGTC  | 947.62707390457  | 0.0961325210603127 |
| ATTTGCGGTCA | 947.666701870863 | 0.0947427705182728 |
| AAACTACTCAC | 947.681512163533 | 0.0667216857028791 |
| GTCACCCTCCA | 947.734602241239 | 0.0829123718803028 |
| TCGGCATGACA | 947.74111576117  | 0.056822288262081  |
| ACCGTTGACTA | 947.756149377785 | 0.0529384962267216 |
| CGTTAGCGTCA | 947.836736429743 | 0.0760819002131479 |
| GAAATGACATC | 947.919878332051 | 0.0809062674863141 |
| CACTGTGACGA | 947.94887557439  | 0.0660276722325433 |



|             |                  |                    |
|-------------|------------------|--------------------|
| CACCTGTCACA | 947.960420168714 | 0.0836284690231546 |
| AGGTTGTGACA | 948.056160279496 | 0.0768583641562642 |
| TCAGTGGGTCA | 948.096686791888 | 0.0868521065021279 |
| CCAGGAGTGAC | 948.127562965813 | 0.0843370613314638 |
| ATGAGGTGACA | 948.146953913998 | 0.0761102808279553 |
| TCACTCATTCA | 948.153241737916 | 0.0515408182929276 |
| GTCATTTGGGA | 948.166308405473 | 0.0713606843126682 |
| ATGTCATTTGA | 948.227877266267 | 0.0729868511674405 |
| ACGTAACGTCA | 948.244300776365 | 0.0716175868099878 |
| AGCCACGTAAC | 948.334835759708 | 0.0598777951034608 |
| CACGTGGCTCA | 948.341986859163 | 0.0661477829130341 |
| GACACGTGGCC | 948.352384937942 | 0.0877021105314722 |
| ACTCATCCGAT | 948.360354975282 | 0.0554496628795878 |
| GTGACACTCCA | 948.362488062427 | 0.09606040229133   |
| ACGTCACAGAG | 948.398122561778 | 0.0644538788084132 |
| AAGGCGTCACA | 948.554914122287 | 0.0531386674735062 |
| AAACTGTGACG | 948.574891029922 | 0.0681687915733563 |
| AGATGGTGACA | 948.609520340251 | 0.0658026102631831 |
| TACTTGACACA | 948.665304466009 | 0.0654039482675669 |
| GATGGTGACGA | 948.734825045753 | 0.0500714198663042 |
| GGAAAGGTGAC | 948.76104073609  | 0.0492334238551921 |
| ATTCATGACAA | 948.763002465828 | 0.0657800299741296 |
| AAGCGATGAGT | 948.780139800503 | 0.0712898131401927 |
| ACTCATATTAA | 948.813231028098 | 0.0625617348486234 |
| CCGTCATCTGC | 948.817297682367 | 0.0692124879611202 |
| CATGACAGTGA | 948.837260335937 | 0.0865751566073504 |
| GACTAATCAAC | 948.848926648899 | 0.0747333338452152 |
| GTAGTTGTGAC | 948.885758867264 | 0.0558173881659794 |
| ACTCATTTGAG | 948.902153912464 | 0.0592776839777556 |
| ACCGCGTCAGA | 949.013030787176 | 0.0669566098366168 |
| GTTATCACTCA | 949.020144770147 | 0.0659031588885194 |
| AACGTCACCAA | 949.047855922777 | 0.043247655533326  |
| GCTTGACGCAC | 949.199308104188 | 0.0580266963464057 |
| AGTACTCACCG | 949.209511781603 | 0.0661766528465964 |
| CGACTCACGTC | 949.23158473019  | 0.0477378249853604 |
| ACGATTACTGA | 949.279682718938 | 0.0764967538431383 |
| AGTAATTGTCA | 949.286131630595 | 0.0597498520555781 |
| GATCTTTGTCA | 949.340450338188 | 0.0640742743659228 |
| ACGACTCAATC | 949.364686550294 | 0.0679953438273005 |
| CGGTCATATTA | 949.40162438239  | 0.109541360117805  |
| ACTCATATGTC | 949.419621598867 | 0.0862974056982335 |
| CGTGAGCAACA | 949.431959742063 | 0.0987175954721889 |
| CTAGTGAGCAA | 949.466286600922 | 0.0714672481371238 |
| CGTCACCCATC | 949.473221440875 | 0.072640114884017  |
| AGTTCTGACAC | 949.475176428891 | 0.0485102925184226 |
| GACTCACTTGC | 949.612320339454 | 0.0520203294077313 |
| AGATGTGACCA | 949.624564129174 | 0.0742523267366128 |
| GTCACCTGCTA | 949.79975724695  | 0.0617693673648241 |
| CGAAGAGTGAC | 949.853189934763 | 0.0494178960385171 |
| AATTGTATACA | 949.86786909641  | 0.103419063648579  |
| GAAGTGAGTAC | 949.910515483086 | 0.0902723173678098 |
| ATGACAATCTC | 949.965790308554 | 0.0680713738144085 |
| CGTCACCACAA | 949.970214517105 | 0.0533021077546797 |
| GACCTTCGTC  | 950.018452684993 | 0.0880749083002898 |

|             |                  |                    |
|-------------|------------------|--------------------|
| TTACGTGTA   | 950.065584764436 | 0.0563934398320424 |
| ACGTTGTCACC | 950.088978851582 | 0.0388327227870506 |
| GCTTGGTGACA | 950.190388484628 | 0.0683964221386846 |
| CGCCATGACGA | 950.207212056688 | 0.094732565018402  |
| AGCGAGTCAAC | 950.240514888574 | 0.0636179640706664 |
| ATGACCGTATC | 950.260307402633 | 0.0506816088305552 |
| AGGTAGGTGAC | 950.298721533734 | 0.0695848723577603 |
| AGATGACATTA | 950.32295962511  | 0.0983181271550014 |
| AGTTTATGACC | 950.345434538975 | 0.102780882872498  |
| GTGGCTCACAA | 950.357605146865 | 0.0469620487274835 |
| GGGTGAGCAAA | 950.468265513002 | 0.060340934727546  |
| GTGGGGTCATA | 950.514566909471 | 0.0767666605433464 |
| CCATCATGACA | 950.52436872635  | 0.0454442045029616 |
| CGTGACATACA | 950.544227760631 | 0.0515689711085319 |
| GTGTCAGAGTA | 950.61251086777  | 0.052347236574621  |
| CTGTCATTAAG | 950.621411167801 | 0.0537443484856517 |
| CTCCAAATGAC | 950.631921169426 | 0.082094639675572  |
| GACTTGACACA | 950.645606402821 | 0.0715823797785434 |
| ACACGTCAACT | 950.813813162628 | 0.0839798735914296 |
| CCGTGCGTGAC | 950.841610361412 | 0.050052983033745  |
| ATACTTGACTC | 950.854087459127 | 0.0585545528720206 |
| ATGACGAGCTG | 950.864621605593 | 0.0728471135149761 |
| GGGCTGCGTCA | 950.88169141043  | 0.0477219068088292 |
| ATGGTTGTGAC | 950.884268238754 | 0.072170292414529  |
| ACCGAGTGACG | 950.898278113859 | 0.0793163715967502 |
| CCGTCAGTGAC | 950.906203483087 | 0.0549664866572945 |
| AGTCAGACCCC | 950.945280519766 | 0.0668030135997997 |
| ATTCTGTGACG | 950.958209293724 | 0.0524765322784229 |
| AACCGTGACTT | 950.977185297039 | 0.0677946368925074 |
| ACTTCATGACG | 950.987692875721 | 0.0698286084984512 |
| CTGTCACATCA | 951.119085170919 | 0.0688149757222192 |
| AGTCAGCTTCA | 951.274624423682 | 0.0484295303424244 |
| GAACTCTGTCA | 951.393386977523 | 0.0624903222523994 |
| AATGACGGTAA | 951.440391778058 | 0.08490214029177   |
| CTAGTTGTCAC | 951.4772085457   | 0.0770135239044279 |
| GTGTGAATCAA | 951.482370460387 | 0.0824555005592173 |
| TCCCACAGTCA | 951.499641959424 | 0.0715930725095832 |
| AATTACTCTAA | 951.557383066389 | 0.0958519683442579 |
| TCGGGTCATAA | 951.57833905508  | 0.0757486370851113 |
| GGCCGCATGAC | 951.6512665055   | 0.0594134417448621 |
| GATGCTGTGAC | 951.660821544814 | 0.0633692444973209 |
| ATGACGAGGGG | 951.673970761862 | 0.0792986762984799 |
| ATGAGTAGATC | 951.693355525043 | 0.0542692366923704 |
| AGTCTATGTCA | 951.70820107945  | 0.0475947159314764 |
| GTCACTCGTTA | 951.722316381093 | 0.0806528019323912 |
| CAGTGACGTGA | 951.731943763818 | 0.0621727623606422 |
| AGTAATCAGTC | 951.756606413901 | 0.0510266680452664 |
| CTGGTTGTGAC | 951.872702142052 | 0.0514444205179429 |
| CAGTGACGCGG | 951.905235116775 | 0.0775371709996695 |
| CATGAAGTCAC | 951.918799187152 | 0.10079363228445   |
| CCGACTCGTCA | 951.968721576042 | 0.0687662180049856 |
| TCGGTGAGCAA | 952.038276813584 | 0.0952603337860333 |
| TGTCATGCACA | 952.069907718598 | 0.0606632124721443 |
| GAGTCAGGGGA | 952.113821193038 | 0.0519767515121868 |

|              |                  |                    |
|--------------|------------------|--------------------|
| TGACAGATGAA  | 952.333646375598 | 0.0339785611533864 |
| ATTTTGTGAGA  | 952.354061240784 | 0.0801962733215657 |
| CGCGGGTGACA  | 952.361189480129 | 0.0598165067761704 |
| CGCGTGGTCAC  | 952.38864625542  | 0.0838479966553718 |
| ACCGGTCATAG  | 952.443769040136 | 0.0660049874372408 |
| TCTGTCATGAA  | 952.450047386793 | 0.0703072206491455 |
| GTGAGCAAGAA  | 952.458724264587 | 0.0483955157426946 |
| ATAAATGACGG  | 952.480032308702 | 0.0468141040503563 |
| ATCGTGACACG  | 952.539543997353 | 0.0538818313037646 |
| AGGGGAGTCAA  | 952.54342060889  | 0.0660244181665151 |
| GGTCATCCGCA  | 952.543610129262 | 0.0539646550125285 |
| CAACGTCATGG  | 952.603524942758 | 0.0673975700332697 |
| CATTCGTGACG  | 952.640912461878 | 0.0710984996863778 |
| CTTGCTCACAC  | 952.667363287099 | 0.0646671306447661 |
| ACACCGTGTC   | 952.696991610556 | 0.0574479577459648 |
| CATCCGTGACA  | 952.727056264885 | 0.0636862454833062 |
| CTCTCCGTGAC  | 952.729530792396 | 0.0470296283684361 |
| CGTGACACTGC  | 952.731341834436 | 0.0478933934445135 |
| AGCCGAGTGAC  | 952.778837683349 | 0.0833093025694353 |
| CAGACGTCATC  | 952.838178189481 | 0.0848622766568368 |
| GTAATAACTCA  | 952.845472160294 | 0.0690395774736181 |
| GATGATTCTTA  | 952.852148536423 | 0.0581126651920178 |
| GATTGACTACA  | 952.882982627886 | 0.0441453953205171 |
| ACTCCCAGTCA  | 952.885777632484 | 0.0524862386700139 |
| GGTCATAGTAA  | 952.921343685928 | 0.054508208223921  |
| AAGCCCAGTCA  | 952.97629873992  | 0.0601265567567718 |
| ATATGGTGACA  | 952.989434158723 | 0.0622119450741936 |
| GTCCTCGTCAC  | 953.020209010126 | 0.0554856711360244 |
| ATGACAACCGA  | 953.028564985972 | 0.0460958941182385 |
| ACGGCGTCA TG | 953.039833246717 | 0.0662700870651525 |
| GGGTCAGTGAC  | 953.042138159492 | 0.0524452184497234 |
| GTCACCTCGCA  | 953.088648314867 | 0.0533179041468889 |
| ACATGTGACAA  | 953.200730412659 | 0.0469177510105297 |
| ACCATGACATG  | 953.280171497276 | 0.0616906169462956 |
| AATGTGAGCAA  | 953.285479225146 | 0.0758298979893912 |
| CACTTACTCAG  | 953.311869737873 | 0.0656021413923191 |
| GCCAGTAGTCA  | 953.336411312179 | 0.0584049821044801 |
| GTCACCTCCAA  | 953.458224771175 | 0.0671293731199263 |
| GGGTCATTGAC  | 953.526380605705 | 0.062524824080177  |
| GGGACAATGAC  | 953.53350886939  | 0.0714425804700076 |
| GCGGCGACTCA  | 953.561537437785 | 0.0704953272831789 |
| GTGACACCGCA  | 953.564636761438 | 0.0427532725818103 |
| GAGATTACTAA  | 953.566543692405 | 0.0647481993698097 |
| TACTCATAACA  | 953.633407892746 | 0.07976755404148   |
| ATTGACACAGC  | 953.65379082187  | 0.0584385895257294 |
| AACCCGTCACC  | 953.681623181609 | 0.0471649998565547 |
| ATGAGGTGTTC  | 953.692068012532 | 0.0675954927853007 |
| ACTCATCTTAC  | 953.715379728829 | 0.0657180541233068 |
| CCGTCATTGTA  | 953.71745061337  | 0.0435789776610497 |
| CAGAGTGACGA  | 953.778896322746 | 0.0764699037509939 |
| CTCGCGACTCA  | 953.792314528655 | 0.0611124762647379 |
| AATAGACTCAG  | 953.811063632036 | 0.0586703321977691 |
| CTGCTCCGTCA  | 953.842425093556 | 0.0681467292330034 |
| ATTACTCGTAC  | 953.969285814568 | 0.0523674514235241 |

|             |                  |                    |
|-------------|------------------|--------------------|
| CTCAAGGTGAC | 954.093442654278 | 0.061158618880823  |
| CTTCTCCGTCA | 954.181209636486 | 0.0432302222668552 |
| AGAACAGTGAC | 954.229531039011 | 0.0771306563665184 |
| AGCTCACTCAT | 954.239190793477 | 0.0734565238741025 |
| CTGTGTCAGCC | 954.24718435581  | 0.0521704643368518 |
| TTCCGAGTCAA | 954.304107041553 | 0.0539860164947035 |
| AAGACTAACCG | 954.313555452145 | 0.0841848886264177 |
| ATGATGTATCA | 954.378022544872 | 0.0492970508904103 |
| ATTGGACTCAC | 954.403559819501 | 0.0621055151800032 |
| TGATGACCACA | 954.431249578636 | 0.0478602754755512 |
| AAGAGTCTGAC | 954.487796011171 | 0.0544080643705998 |
| ACTAACTGTCA | 954.575576387007 | 0.0550715357501271 |
| GTGACGTGAAA | 954.645716584182 | 0.0516407588288568 |
| CTTTTCTGTCA | 954.682877212743 | 0.0501719110380977 |
| GAGTGGTCACA | 954.72257465208  | 0.0565817243381656 |
| AATCATGACGG | 954.739321828621 | 0.0650969740091465 |
| CTGTGATGTCA | 954.79906850423  | 0.0624883848488992 |
| GAGTTGACTGA | 954.824189391912 | 0.0638661988850724 |
| AACACTCATCG | 954.826242267319 | 0.0853472453951016 |
| ATCAGTCTTAG | 954.837444919127 | 0.0519055408227742 |
| AGACTGACTAT | 954.8903680212   | 0.0640152910984824 |
| CGTACTAATCA | 954.902595782831 | 0.0968387425536045 |
| CCTCGCAGTCA | 954.929605973492 | 0.0515117913471774 |
| AACGGGGTGAC | 955.017805821694 | 0.0430843390247412 |
| TGTCAGACTAA | 955.039726031492 | 0.0477636296295872 |
| AAGGAGAGTCA | 955.162237474818 | 0.0543821556918236 |
| ATACGTCAACG | 955.16458072695  | 0.0500574283458356 |
| TGACGTGCTAA | 955.215374943762 | 0.0553091929874098 |
| GTCTCGTCACA | 955.268381320747 | 0.0511800715502891 |
| ATGACTTGCTG | 955.328112039472 | 0.0370404054280738 |
| GAATCTGTGAC | 955.372636583364 | 0.0765918806931361 |
| ACGTACTAATA | 955.377515159106 | 0.0885009865572531 |
| CACGTAATACA | 955.440636833088 | 0.0501435535993422 |
| GCAGGTGACGC | 955.47639236601  | 0.0500061538680192 |
| CCCTCTAGTCA | 955.484243313622 | 0.0418081142839604 |
| CAGTCAGGGCA | 955.495683463424 | 0.0553357600463156 |
| CGACTGACTAC | 955.567322513341 | 0.0462318298626435 |
| AACATGAGTAC | 955.586292866676 | 0.0450984921639705 |
| AAGGGTGACAA | 955.596430158469 | 0.0472498379107418 |
| ACGAAATGAGT | 955.756219838972 | 0.0620241705181363 |
| AACCGCATGAC | 955.786373166948 | 0.0855417490188201 |
| ATGACCCGTAA | 955.914721502201 | 0.0816606009488565 |
| ACCAACTCATA | 955.950760916696 | 0.0836643453820092 |
| ATGAATACATG | 956.050488426756 | 0.0570747735992837 |
| ATGAGTGGGTC | 956.087746241163 | 0.0464439126023056 |
| CATAAGACTAA | 956.097370152624 | 0.0427090791507408 |
| ATGACGGCGTA | 956.125168630336 | 0.0442782582132596 |
| ACAATTACTGA | 956.149309007059 | 0.0565464483632672 |
| AGTCAGAATAC | 956.183632659542 | 0.0607761983553968 |
| GCGTGTCACTA | 956.216174885736 | 0.0724929351411649 |
| CCAAGTCACTC | 956.238964615168 | 0.0507362204668998 |
| CGAGAGGTGAC | 956.276569930458 | 0.0661878621888559 |
| ACAATCATGAC | 956.279511093885 | 0.0790436128420238 |
| ATCGTCACCAT | 956.35662040368  | 0.0427101191440928 |

|             |                  |                    |
|-------------|------------------|--------------------|
| CTCTCTGTCAC | 956.369534209294 | 0.0613167183583536 |
| TGTCACAACAA | 956.370875083245 | 0.0318948175582233 |
| GTCACCTCGCA | 956.416187103508 | 0.0617920848607541 |
| ATTGAGTAACG | 956.432270157468 | 0.0611169820178215 |
| AGCTCTGTCAC | 956.479669508401 | 0.0488085412583134 |
| GTCTTGTGACA | 956.508873111767 | 0.0460774419064973 |
| ACTCATCTCA  | 956.580828043119 | 0.065387936086272  |
| ATTATGTAATA | 956.721940602171 | 0.0770366076476515 |
| GACCTAATGAC | 956.803621599772 | 0.0403251953509605 |
| AATGTGACAGT | 956.849223257898 | 0.0444627122599798 |
| AAATGTGACAG | 956.898544169504 | 0.0593707623592562 |
| GTCACAGTAGA | 956.910012691217 | 0.0475285581802968 |
| ACTCATCATAA | 956.952578609887 | 0.0415459578843953 |
| GTCAAAGTGAC | 956.952888224419 | 0.07495051725938   |
| AAGGAATGAGT | 956.976643712059 | 0.054039326115886  |
| AAGCGTCAGAG | 956.999569601519 | 0.0507644955110977 |
| AAGACTCTTAG | 957.007485007242 | 0.0600735461505832 |
| GCCAATGCCA  | 957.092853255546 | 0.0508463765149604 |
| ACGTCACAGGG | 957.130888165415 | 0.047270997142422  |
| ACGCTATGAGT | 957.13178279278  | 0.09103741166714   |
| AAGCCAAGTCA | 957.208052963468 | 0.0578789151721645 |
| ATGTGTGACGG | 957.253883986653 | 0.0528738823106964 |
| TCTATGATACA | 957.305891117713 | 0.0587682244652093 |
| ATTAGTACGTC | 957.312037355656 | 0.0512164660770035 |
| AGTCACGGGGC | 957.342910363815 | 0.0512902463730763 |
| CAGTAATAGTC | 957.384844944034 | 0.0478128274669942 |
| GAGTGTGATGA | 957.444831592846 | 0.0555832915656885 |
| AGCAGTCAGCT | 957.449967721975 | 0.0671489040715918 |
| AAGTGATGAGT | 957.465898974876 | 0.040894028582776  |
| TCGCCGTGTCA | 957.652237040348 | 0.0652007777935316 |
| TCAAGGTGACA | 957.720258323916 | 0.0547083902947783 |
| TGACGTGCACA | 957.739168522339 | 0.0440522329763279 |
| GAGTCAAGCAC | 957.780289890903 | 0.0591663014072794 |
| ACTGTGTCAAT | 957.797434360981 | 0.0490932776576683 |
| ACAGTCAACGT | 957.873951664473 | 0.0493396574882678 |
| CGTCATTGAGC | 957.935160232268 | 0.0542760969623228 |
| AGCAGGGTGAC | 957.963415954439 | 0.0534753306080353 |
| GTGACAGTACA | 958.039053902381 | 0.0576890078453181 |
| GATGAGGTGAC | 958.143976678687 | 0.0506640975386382 |
| CAACCTGACTG | 958.213797392831 | 0.0588931460402678 |
| CTACCTGTGAC | 958.232353154262 | 0.081902163122442  |
| GAGTGTGACCC | 958.251809700198 | 0.0518430205612325 |
| AACCTGATTCA | 958.258407783519 | 0.058860319330427  |
| ACTCATTTGAG | 958.316273322783 | 0.0524054758024265 |
| TATATCACTCA | 958.39664565101  | 0.0544483966223754 |
| GCTGACTTAAC | 958.456743224755 | 0.0681006191783144 |
| AAAGTGTCAC  | 958.509340976013 | 0.0580943305467131 |
| TAGCCATGACA | 958.520915685145 | 0.0451343197535066 |
| ACTCATCCACT | 958.61352454423  | 0.0459449918760454 |
| CAGTCAGTATA | 958.658187631532 | 0.0704766049628323 |
| CTTGACAGTCA | 958.762860576624 | 0.0502731123291349 |
| AATCAGTACAT | 958.789794273333 | 0.0624190645092847 |
| AGGGTCACATC | 958.816612533667 | 0.0446273505382893 |
| ACATGGCGTCA | 958.822104687833 | 0.0534737720913375 |

|              |                  |                    |
|--------------|------------------|--------------------|
| GTCACCGCATA  | 958.877996474041 | 0.07576540127901   |
| AGTGAGTCCAT  | 958.98678478863  | 0.0562189067875649 |
| AGTGACACGCA  | 959.027707878084 | 0.0524276393807899 |
| CTTTCAGTGAC  | 959.07028935317  | 0.0576930653385192 |
| GAGGGAGTCAA  | 959.083860634664 | 0.0869259186826063 |
| CGTCATTGAAC  | 959.094300317897 | 0.0425184165728036 |
| ACCGAGTCAAA  | 959.120067152822 | 0.0470085782639647 |
| AGAGGGGTGAC  | 959.200072589456 | 0.0763289863305184 |
| TAGACATGACA  | 959.24858306431  | 0.057605559585579  |
| CCGTCATCTCA  | 959.262157972804 | 0.0398165350051542 |
| ACGGTCATAGA  | 959.27367500114  | 0.0458039164782198 |
| CGTCACCACTC  | 959.287439732792 | 0.0430916717114423 |
| TATGTCACGGA  | 959.295760569613 | 0.0558395311221033 |
| AAGACGTGCC   | 959.317395007684 | 0.0602566052852337 |
| CGACTCACGCC  | 959.336677104073 | 0.0555436661438874 |
| ACGAGTAATCG  | 959.424044536069 | 0.040390976520348  |
| GTTAGCAGTCA  | 959.429571037449 | 0.0520884471115068 |
| ATCACGTACCG  | 959.504687325793 | 0.0531874790190891 |
| CGGTGTCACGC  | 959.514493339248 | 0.0860873738003138 |
| AATTACTCTAC  | 959.597042329932 | 0.0453025996699544 |
| AGAGGTGACGA  | 959.617598987877 | 0.0875174379693323 |
| GTA ACTCTGAC | 959.642423542068 | 0.0554344445674544 |
| ACTCATCCACA  | 959.711655186876 | 0.0508143729721896 |
| GGTCATACAAC  | 959.773926259114 | 0.0485055453950504 |
| ACTGCCGTCAT  | 959.826746467271 | 0.0663805731113087 |
| ACTCATTCTGC  | 959.842182715956 | 0.0601954139142713 |
| CTCTGTCATGC  | 959.860963967869 | 0.0398527652755971 |
| AGTCAGCGGTA  | 959.885168038071 | 0.0754828453272888 |
| AAGAATCATAA  | 959.888727781782 | 0.0780062520068495 |
| AGGTGCGTAAT  | 959.997537430122 | 0.0563262285360735 |
| ATGTCACCCGA  | 959.999753474503 | 0.0733284269661121 |
| CCGCGGTGACG  | 960.01079082372  | 0.0713037125651115 |
| AACACTGTCAC  | 960.018506982378 | 0.0600678508553694 |
| CTCCGTGACAC  | 960.018630018767 | 0.0408809138225273 |
| CGTCACAGTAG  | 960.08956190929  | 0.0561126935642366 |
| TACTCACGTCA  | 960.105267670989 | 0.0496623588153774 |
| AGGGTCATTTA  | 960.115384793294 | 0.0520774066996716 |
| ATTACTCCTCG  | 960.129008331167 | 0.0419446966011603 |
| GGGTAGACTCA  | 960.138419485352 | 0.0444388161976176 |
| TCGTAGTGACA  | 960.241576046836 | 0.0519119568649008 |
| GGTGACGTCA   | 960.277918873741 | 0.0514168514577718 |
| CTCCAAGTCAC  | 960.286567887379 | 0.0422146666261359 |
| AGCATCATGAC  | 960.3049088215   | 0.0845680116379538 |
| TGTGGTGACAA  | 960.383804368895 | 0.0383768321962222 |
| GTCACCCGCTA  | 960.389201510445 | 0.0401550322106936 |
| TCGATGTCACA  | 960.4339849775   | 0.0870907843218141 |
| AAAGAGTGACG  | 960.449761339379 | 0.0576889356375402 |
| GCGCCATGACA  | 960.550989517648 | 0.0470557383439597 |
| ATTGTGACGTC  | 960.557689279753 | 0.0511607919023844 |
| CTAACTCATAC  | 960.577162531595 | 0.0565620951146815 |
| GTCACAGACCA  | 960.587080743156 | 0.0842012866941269 |
| CACGTAATCAG  | 960.599049654739 | 0.0679509780744599 |
| AGAAGATGACC  | 960.621360110188 | 0.0371471919088182 |
| ACACAACGTCA  | 960.68325942979  | 0.0549268094323221 |

|             |                  |                    |
|-------------|------------------|--------------------|
| CGTGCCATGAC | 960.757578520046 | 0.0412370852314798 |
| TCACGTTGTC  | 961.020700280477 | 0.0567667614754012 |
| AAAGTTCGTC  | 961.049410030744 | 0.0547551494235618 |
| CGGGTGTGACG | 961.131785081518 | 0.0509919076653494 |
| GTCATTAGATA | 961.140897082653 | 0.0422006876594399 |
| TACTCTAGTCA | 961.21270884367  | 0.0503194331678443 |
| AGTACCATGAC | 961.226827508003 | 0.0490929570874655 |
| CCCGGTGACAG | 961.273351849249 | 0.0655323446720977 |
| CGGTCATAGTA | 961.323281426952 | 0.0607290927059316 |
| ATGACAGACGG | 961.364034139638 | 0.0591072772083421 |
| CACATGACACC | 961.447482707196 | 0.0527182344280577 |
| AAGATGTGACA | 961.464956209408 | 0.0562733635865895 |
| TCTAACTGTCA | 961.519081455598 | 0.0379724091948304 |
| GAAAGAGTGAC | 961.633430805833 | 0.0536943115735088 |
| CGTTTCGTGAC | 961.669559869722 | 0.0375576320467067 |
| ACAGTGACAGA | 961.681077995168 | 0.0480906441368613 |
| CCGAACGTGAC | 961.687590779643 | 0.0685514847357782 |
| GGTGAGTATAA | 961.699365695727 | 0.0443337498512365 |
| AGGGCAATGAC | 961.718993047007 | 0.0801647436409746 |
| CATGTCATGAG | 961.744900358415 | 0.0758482793104696 |
| CGACGGACTCA | 961.773370523321 | 0.074618057318028  |
| GAACGTGAGTC | 961.845914515209 | 0.0508578994217451 |
| ATCTAGGTGAC | 961.920003684852 | 0.045428629895308  |
| ATGACAATGGA | 961.965717820917 | 0.0853235381477938 |
| TGTCACCTCAA | 961.982635195527 | 0.0466063575010402 |
| GGTGACCCTAA | 962.024278090218 | 0.0609312781575425 |
| CGATGACCTAC | 962.058863233369 | 0.0436873205310236 |
| AATTCTGACAC | 962.06130589213  | 0.0417327386086635 |
| GTCCGAGTCAA | 962.263542713418 | 0.0710790489553322 |
| GTTCTGACAAA | 962.296292902039 | 0.0426167892373768 |
| CAATACGTC   | 962.307314428486 | 0.0716424170613706 |
| GAACCGACTCA | 962.334691094602 | 0.0768775639106634 |
| CGGTATGTCAC | 962.350234900315 | 0.0280944149997998 |
| GAAAACATGAC | 962.410598266181 | 0.0643387491873061 |
| CATCACATGAC | 962.420429147744 | 0.0652994458450164 |
| ACTCATACGCG | 962.570200233313 | 0.0536120155975394 |
| CAGCAGTCAGA | 962.681225136729 | 0.0488810165030283 |
| GGATACGTGAC | 962.693414616434 | 0.0366757779437403 |
| AAGTCACTACC | 962.714736418056 | 0.0403318614332786 |
| AACCACTCATA | 962.79110342325  | 0.0407030634401304 |
| GGTTATGAGTA | 962.819954190064 | 0.0354108853219631 |
| TAACATGACGA | 962.837254424962 | 0.0381566307541529 |
| TTGACGCAAAA | 962.8649149995   | 0.0467499224351265 |
| ACGGTGACGAG | 962.973003919784 | 0.0583634580734159 |
| AGGAGGGTGAC | 963.009994529811 | 0.037839696053836  |
| TAGTCGTCA   | 963.185126473785 | 0.0551326207201317 |
| ACTTTGAGTAA | 963.258571810403 | 0.0618658847061019 |
| AAGACTAACCA | 963.343445971234 | 0.053548524085712  |
| ATGACGGGGTA | 963.612886303891 | 0.0383760419410312 |
| ATCGATAGTCA | 963.847798627086 | 0.055865945673274  |
| ATGAGTAGGAA | 963.900132396639 | 0.0449087319427776 |
| ATACGTAATCC | 963.916988677901 | 0.0505368174698732 |
| GAATTAGTCCA | 964.13932521512  | 0.0669167401304324 |
| TGACTTGGCCA | 964.175703428639 | 0.0469894227940172 |

|              |                  |                    |
|--------------|------------------|--------------------|
| CGTCACCCACA  | 964.182511738328 | 0.0616875271948211 |
| CGTCATGGTGC  | 964.235183582858 | 0.0758251334209423 |
| ACTCATATATC  | 964.285307580597 | 0.0343010362687828 |
| AGAGTAATTTA  | 964.293614758992 | 0.0577958011249804 |
| TCTGACGAAGA  | 964.361046056658 | 0.0433996653419007 |
| CTACTATGACC  | 964.400334630976 | 0.0359195016804049 |
| AGTGCTGACTG  | 964.413206426773 | 0.0542093517400107 |
| CGTCACATTAC  | 964.483393411659 | 0.0545234545397638 |
| ATGTCACCTAG  | 964.627696967304 | 0.050182010346947  |
| ATATGTCAGTC  | 964.800125481605 | 0.045554748760261  |
| AGTGAGCAAGA  | 964.806691241012 | 0.0550789875628297 |
| ACGTGATGAGT  | 964.815159628711 | 0.0628041251921089 |
| ATCATGACATG  | 964.964320985108 | 0.0733764562879926 |
| GTGACTGCCCA  | 965.025550383993 | 0.0387630418386296 |
| GTCTTGTACACA | 965.07958447338  | 0.0555755285455047 |
| ATGATGACCCC  | 965.105159345862 | 0.0430421459301765 |
| ATGGGGTCATA  | 965.131281894138 | 0.0429927377800747 |
| GAGTCGCGTCA  | 965.135429588004 | 0.0647363891375862 |
| ACTCATTCCAA  | 965.194155797715 | 0.0494026848505179 |
| AAGAGTGTAC   | 965.216918257742 | 0.0506800951297529 |
| ATTATATCATA  | 965.317062065506 | 0.0368276024714319 |
| GGTGACGGTAC  | 965.343272096788 | 0.0376449324995372 |
| GGATGACCGCA  | 965.434693424818 | 0.0429148373609783 |
| GTGTATCATCA  | 965.541905479623 | 0.036706183908379  |
| AGTGACGGAGA  | 965.600568238952 | 0.0327940379533311 |
| AGCTGTGACCA  | 965.607560924362 | 0.0479832329402929 |
| ACTCATCTCTG  | 965.617358935333 | 0.0343026441045043 |
| AAGAGTCGACA  | 965.741982710821 | 0.0502204223716203 |
| AAGTGTCAGTA  | 965.851719113014 | 0.0529064076401354 |
| GGTGACTTCGA  | 965.870045474166 | 0.0267059724565441 |
| GTGACAAACGA  | 965.91615103985  | 0.0602706948439678 |
| CAGCTGTATC   | 965.920734721216 | 0.0383588411373608 |
| CGTGCGGTGAC  | 966.065441757352 | 0.0504879894045592 |
| GCCCCAGTGAC  | 966.430962435314 | 0.0516482948253052 |
| AGCGGTGACGA  | 966.451843778712 | 0.0450578352417218 |
| ATGTCATTAGA  | 966.64992184565  | 0.0449786031138497 |
| ACACTTGCTCA  | 966.718743661504 | 0.0482600655813086 |
| ATGACCACGGG  | 966.75134361093  | 0.0554631820819531 |
| GTCACAGGGCA  | 966.779679855846 | 0.069498270710809  |
| CTTGTATGACC  | 966.814513029082 | 0.0343072453122012 |
| ATACTAGTCAG  | 967.229567636444 | 0.034438290708993  |
| GTCACAAAATA  | 967.391315798414 | 0.03312152729188   |
| ACTGATTAATC  | 967.61591268858  | 0.0391714287719483 |
| ACCTGAGTAAC  | 967.623290568291 | 0.033985144578172  |
| GAGAGTGTAC   | 967.693766453501 | 0.0427759216821516 |
| CTCTGACAGAA  | 967.696766208796 | 0.0513353567993249 |
| ACGGATTAGTC  | 967.734433852217 | 0.0403710035896176 |
| AAGCGTCAGAC  | 967.741656462053 | 0.0342082959129432 |
| ACAGTAATACT  | 967.815531300175 | 0.0389245293962099 |
| GGTCATCCGTA  | 967.868653708379 | 0.0471819724095417 |
| TAACGTCACCA  | 967.896195360953 | 0.0541065053639234 |
| TGACTCCCSCA  | 967.932293037084 | 0.0320242666796734 |
| ATGTCACCTAC  | 967.994511320709 | 0.0477302783958743 |
| TACTACTACTA  | 968.115471141001 | 0.0481144569452654 |



|             |                  |                    |
|-------------|------------------|--------------------|
| AGCTTGTGACA | 968.148727804418 | 0.0466580547152986 |
| GCTCAGTCAAC | 968.16483566373  | 0.0332454006974654 |
| GTATATGTGAC | 968.23660779202  | 0.0445134099165762 |
| ACTCATAACC  | 968.255330426249 | 0.0441134927937812 |
| GTCACCTGACA | 968.279153525929 | 0.0671290344414423 |
| ACCCACAGTCA | 968.310051866532 | 0.031206352358645  |
| ACTCTTGCAT  | 968.401477066065 | 0.0380915886860043 |
| GGCTTGGTGAC | 968.560134670654 | 0.0319441333902968 |
| ACTCAGTGACA | 968.566951986175 | 0.0333745479964676 |
| GAGGAGAGTCA | 968.703758394474 | 0.0436619756491992 |
| AGCGGTGACCA | 968.82773650897  | 0.0708114365604406 |
| TAGACTGACTA | 968.920453898941 | 0.0548769526803069 |
| CATCTGACTGG | 969.042792771256 | 0.0585867923453285 |
| GCGCGGTGACA | 969.217557208967 | 0.0268902211939528 |
| CCGGCGGTGAC | 969.229475055548 | 0.0303989016060293 |
| CGCGGACTCAC | 969.265262843542 | 0.0322051015745509 |
| CATGTCACCTA | 969.319883891378 | 0.0505110096841679 |
| ATGACTTGAAG | 969.672995226832 | 0.0456143295041479 |
| GAGGCATGACA | 969.841688235585 | 0.0387196937296632 |
| AGCATGACAAC | 969.842709659574 | 0.0411657920893602 |
| TCGTCACATAA | 969.997852540448 | 0.0353594653205325 |
| ACTCATTTTAC | 970.03844726     | 0.0299886670143807 |
| CCTTGTGACGA | 970.08123510889  | 0.0434852420924598 |
| ATTACTCTATC | 970.111325887722 | 0.032705159249231  |
| ACTGGCTCATC | 970.16951893395  | 0.0374946409501744 |
| GCCTATGACCC | 970.235236031529 | 0.0495152684494574 |
| GGGAGTGTGAC | 970.247329571886 | 0.0540941249897449 |
| ATCCACGATGA | 970.320145902523 | 0.067370265393848  |
| GGGTGACGATA | 970.327869079914 | 0.0324613407745156 |
| ACTAATTAATC | 970.329989403747 | 0.0433958452796894 |
| CGTCACGCAAC | 970.38123011456  | 0.0560331328885546 |
| AAGACTGATCT | 970.387879507467 | 0.0425349024450089 |
| ACTAGTCAGCT | 970.72034854313  | 0.0626788392041742 |
| ATGACGGCTCA | 970.771518498728 | 0.0390728512179412 |
| GTAGGGTGACA | 970.800799769726 | 0.0296089326192707 |
| ACTCATCCGGC | 970.837944767441 | 0.046405632459191  |
| CGTATTGTCAC | 970.949286587326 | 0.0320042925756714 |
| TGGCAATGACA | 970.962093332207 | 0.0538217906063001 |
| ATGTCATGATA | 970.976302500809 | 0.041538652939161  |
| AGTCAGATCAT | 971.06427157539  | 0.0356571003047017 |
| CAGACTGACTG | 971.068790189833 | 0.054353004712468  |
| GACGGTCATAC | 971.283577278797 | 0.0269771193077844 |
| AGATCTGTCAG | 971.378988302095 | 0.0292543291094313 |
| GACGAGTAATA | 971.387596762709 | 0.0347101004587553 |
| CGGTCTGTCAC | 971.513660531682 | 0.0427471854619827 |
| AAGACTGGTCA | 971.571587111527 | 0.0496664120716805 |
| GAAATGTCACA | 971.606128274684 | 0.058855705654567  |
| CATTTGACTCG | 971.645165119539 | 0.0378957258578941 |
| AGACGGTCAT  | 971.835543699489 | 0.032399246352296  |
| ATGACCTCACA | 971.935259295857 | 0.027135976351124  |
| CTCCGGTGACA | 972.175881082067 | 0.0408013988665648 |
| AGGTGAGCAAC | 972.218044134371 | 0.0608374393952329 |
| CCATAAGTGAC | 972.259793460441 | 0.0312351930670801 |
| CACGTAATCCG | 972.319098568486 | 0.0384402992211239 |

|              |                  |                    |
|--------------|------------------|--------------------|
| ACAGAGTCAAT  | 972.502928025574 | 0.032970669602396  |
| CGCCGTGACAC  | 972.629486898584 | 0.0518722779543586 |
| ATTACTCTACC  | 972.77756446928  | 0.0517569951532411 |
| GATGGTGACAA  | 972.919105532309 | 0.0359171295983057 |
| CACGTACGTCA  | 972.964323828179 | 0.0534772131645197 |
| AGACTCAGCGA  | 972.983472601114 | 0.0311189654728108 |
| CAACACGTGAC  | 973.002518606655 | 0.0327029699919563 |
| ATTACTCTTAC  | 973.009857965855 | 0.0386527748264371 |
| AGTTGTGTCAA  | 973.035243936102 | 0.0439479600618727 |
| TCTCCATGACA  | 973.061525712615 | 0.0284089966817563 |
| ATCATGACAAT  | 973.088394376927 | 0.0280926670969963 |
| ATAATGACAAG  | 973.237123009039 | 0.0371584992152349 |
| AAACCGTACC   | 973.243507572337 | 0.0384704404959847 |
| ACTGGTGACGA  | 973.32848955219  | 0.0259143313048209 |
| ACCAGTCAGGG  | 973.553714952013 | 0.0599314596324843 |
| CGTGTCAGACA  | 973.562476814833 | 0.0301265062396741 |
| AAACTATGTCA  | 973.616002266535 | 0.0326556372087041 |
| TAAACATGACA  | 973.61991886533  | 0.0296358243936679 |
| ACACTCATACT  | 974.138703884902 | 0.0376196134160096 |
| ACCCGCGTCAC  | 974.213727952506 | 0.056088792058696  |
| AAGGGTGACAG  | 974.265718861988 | 0.041321438825433  |
| AAGTCGCGTCA  | 974.321806625556 | 0.0545915190800936 |
| ATAAGTCAACG  | 974.42061620669  | 0.0495861313522848 |
| AACTGAGTCGT  | 974.544848810295 | 0.0533449926466579 |
| AACGACATGAC  | 974.589853622381 | 0.0288698033170507 |
| TCCTCCAGTCA  | 974.604355760857 | 0.0517817763116738 |
| TGACTTAGGCA  | 974.947312649151 | 0.0305842316587035 |
| AGGGGTCATAA  | 974.958448803777 | 0.0361569116204666 |
| CTGTCCACAGTA | 974.959347372338 | 0.0295347726095093 |
| TCACGTGACGA  | 975.131029660567 | 0.0232187741421905 |
| CACAGCGTCAC  | 975.148065927863 | 0.0312646941377231 |
| AGGCGGTGACA  | 975.227722533597 | 0.0311709060213167 |
| AATGAAGTCAC  | 975.282477964701 | 0.0293971735070887 |
| CTGACCTGTCA  | 975.350013605515 | 0.0356133936441727 |
| ATCCTAAGTCA  | 975.475209139814 | 0.0259510768272456 |
| ACCTGTCACTC  | 975.714273903617 | 0.0372379959062504 |
| AGTACTTGTCA  | 975.824310265541 | 0.0230824078966425 |
| ATGAGTGGTTC  | 975.843291677014 | 0.0347608077589877 |
| AGCGTGACAGA  | 976.038138016214 | 0.0263597854725168 |
| GACACCGTCAC  | 976.236835096662 | 0.0345338812767753 |
| AGAGTGACCAC  | 976.272622451062 | 0.0428036010088219 |
| AATTCACGTCA  | 976.298321826835 | 0.0413103052155963 |
| AAGGGAGTCAA  | 976.375570899823 | 0.0265094555239249 |
| CGTCACCTTAC  | 976.582408122056 | 0.0325192601449247 |
| GAAACCATGAC  | 976.814762564771 | 0.0524526157087746 |
| CCACCGGTGAC  | 976.858105152122 | 0.0277960921725653 |
| TGCTTGTGACA  | 976.879501561326 | 0.032650418773989  |
| TGACGTGTCTA  | 976.909037822499 | 0.0325825253850262 |
| GGAACTGTGAC  | 976.925656759359 | 0.023573856878768  |
| AAAGATGTAC   | 977.081599694731 | 0.0317534722718633 |
| ATTACTCTATA  | 977.096379852685 | 0.0311924329648472 |
| ACTCATCCCGG  | 977.22246467698  | 0.0467810763182826 |
| CGTGAATCAAC  | 977.305535335538 | 0.0232633935204202 |
| ACGTCACGCCA  | 977.373984967219 | 0.0319197197726914 |

|             |                  |                    |
|-------------|------------------|--------------------|
| CAAATTAGTCG | 977.383115965077 | 0.0408559517670586 |
| CATCGTCACCA | 977.4938352577   | 0.0219899781106648 |
| CGTCACACCAA | 977.515210409824 | 0.0236152947734693 |
| TGACGGGTA   | 977.517386410186 | 0.0308383234372053 |
| GCTTCATGACA | 977.556662772315 | 0.024282935137929  |
| ACATGACAGCT | 977.638265260797 | 0.0302105495999367 |
| GTCACAGCATA | 977.872944245679 | 0.021151464967584  |
| ACATGACGCCG | 977.918570012577 | 0.0207535016321816 |
| AGTGACAGTAC | 977.999486776489 | 0.0320606878984376 |
| CGGTGGTGACG | 978.053290571014 | 0.0304550106413852 |
| AGGATGACCAG | 978.173447773411 | 0.0371564729229452 |
| AAGATAGTGAC | 978.304318098177 | 0.0299106615702231 |
| ACTCATCACGA | 978.527288727186 | 0.0378821370806488 |
| CATTTTGGTCA | 978.700946747864 | 0.0346724686791934 |
| GAGTTGTGACA | 978.985570064796 | 0.0227888328509518 |
| AGTCAGAAACG | 979.018548343721 | 0.0291130401861865 |
| ACTAATCAGTC | 979.05451538484  | 0.0320259063440805 |
| CCGGTTTGTCA | 979.128051615115 | 0.0202399821861795 |
| CCCGTCATCTA | 979.241460888675 | 0.0210158741219281 |
| GCACCGCGTCA | 979.243364996668 | 0.024026803333839  |
| CTTAAGTGTCA | 979.50894918191  | 0.0345563895786604 |
| CATGACCGAGA | 979.605431156568 | 0.0460721797680898 |
| CCGGACATGAC | 979.753509061428 | 0.02807858730603   |
| GTCGTGTGACA | 979.859732054464 | 0.0360622394208869 |
| GTCACAGGAAA | 979.893300311863 | 0.032352690935102  |
| GGTCATAACTA | 980.127244367223 | 0.028034001266941  |
| ATTCGTGACAA | 980.134188107087 | 0.0378096742751146 |
| CCCCGTCATAA | 980.17329348914  | 0.0186865538943005 |
| GTCACCAGGCA | 980.248426886033 | 0.0263271412806306 |
| AACTCGCGTCA | 980.255207204997 | 0.0306054305275831 |
| ACTCTGTACG  | 980.289626460755 | 0.0295216646099091 |
| ACTCATCCATA | 980.294035987733 | 0.0209774661608163 |
| CCACAGCGTCA | 980.413539134867 | 0.0271793934775446 |
| GACTAATACCC | 980.420411979608 | 0.0224568549259965 |
| ACCTGACTCGC | 980.663215437283 | 0.0237025387731602 |
| AGATGATGTAA | 980.904217313151 | 0.0394609595455853 |
| GTCAGATCAGA | 980.985735560621 | 0.0345727451172968 |
| GTCACCCTCAC | 981.166645097999 | 0.0201931680740342 |
| AATTGATTCAC | 981.225715700739 | 0.0179774050830212 |
| ACTGCGTAATC | 981.365750218751 | 0.030681744350771  |
| CTGCCATGACA | 981.533883279953 | 0.0238450860145114 |
| GCTGATGTGAC | 981.888522697068 | 0.0168041774867517 |
| CCTTTGGTGAC | 982.141004437935 | 0.0272929940001984 |
| GTCACTACACA | 982.144871417389 | 0.0167995799796967 |
| ACCAGGTGACA | 982.411597089257 | 0.0179425731606526 |
| CTTGATGACC  | 982.498083318636 | 0.0223558084652049 |
| TCTAGTACTCA | 982.56139622306  | 0.0325902992014115 |
| GACCATGACAA | 982.812255948303 | 0.0246663061021114 |
| GACTAATCACC | 982.988099970611 | 0.0343516082138982 |
| AAGTCACGACG | 983.113583029416 | 0.019953665762156  |
| CATCGTCACCC | 983.12945972491  | 0.0240335994714761 |
| CTCTGACCCAC | 983.136279873588 | 0.0258773483044245 |
| CTCGATTAGTC | 983.146832495812 | 0.0286710396767416 |
| GGTTGTGACGA | 983.15563162721  | 0.0355808811194513 |

|             |                  |                      |
|-------------|------------------|----------------------|
| ATGACGTCTGC | 983.2374482581   | 0.0218321909993435   |
| ATGACGATCTA | 983.58847204687  | 0.0219854797004943   |
| GACTGAGTCGA | 983.832937116572 | 0.0155705406929326   |
| ACTGTCACCGA | 983.889775335191 | 0.0171611483813883   |
| ACATGACGTTA | 984.70349562092  | 0.0206037628309634   |
| ACGCAGTCAGA | 984.844268186468 | 0.0199129556457614   |
| GTCATGTACGA | 985.037544143191 | 0.0253905068827352   |
| GAAGCTGACTA | 985.216375647813 | 0.0169594747928409   |
| CGTCACCTTCC | 985.359903276165 | 0.0248490005870954   |
| CTGCATGACCA | 985.364430446725 | 0.0222902010555629   |
| ACTCATTTCTC | 985.57974420444  | 0.019082375559168    |
| AAATTAATCAC | 985.651953622439 | 0.0274583164806212   |
| TCGGCCAGTCA | 985.705522422623 | 0.018057285265489    |
| GAGGATGACCC | 985.727757665926 | 0.0214845588219067   |
| GTGAGTCCCAA | 985.912869738994 | 0.0201899676161987   |
| CAACTGTGACG | 985.949917516705 | 0.0272719796156574   |
| AGGGTGACTTG | 985.988483409895 | 0.0229066035960203   |
| AGTACTCACAG | 986.138827618834 | 0.0240490348306137   |
| ATGACGTCCCA | 986.148203516991 | 0.01910255832522     |
| CTATGACCCCA | 986.708254191564 | 0.0188413850235732   |
| AGTATGTACAG | 986.857921766378 | 0.0209737937821592   |
| AAGTGTCACG  | 986.872044858784 | 0.0292754742313886   |
| CGGTGACAATA | 987.419232929081 | 0.023785520318806    |
| ACGAATGACCC | 987.968136003554 | 0.012207252907467    |
| AGACGTCATGC | 988.197413164501 | 0.0188145327136025   |
| ACGTCACGACT | 988.447137723198 | 0.0202176868962295   |
| TCCTGTGACAA | 988.598226026315 | 0.0166808392483019   |
| CTGACTAGTGA | 990.722460159993 | 0.0127457202412539   |
| AGGGCAGTCAC | 990.732762293349 | 0.0166574053892587   |
| CACGTCAGCAG | 990.741631366635 | 0.0125183778000351   |
| GTAGACGTCAC | 991.107725100195 | 0.0120959321174801   |
| AAGGCTGTCAT | 991.464671587351 | 0.0144605813305919   |
| ACGTCAGATCC | 992.061620886078 | 0.0109178808781081   |
| AGAGTCAAGCT | 993.084061485806 | 0.0118544309941326   |
| AGTGACTGCCC | 994.161475156473 | 0.00801972032790026  |
| GTTAATCGTCA | 994.385146233263 | 0.00593635434999594  |
| CGCACATGACG | 994.988731000069 | 0.0112334197055804   |
| ATGTCTCACCC | 995.135231216826 | 0.00816441147347639  |
| AAGACTAACAG | 995.637005186534 | 0.0097760192485468   |
| TATGACCCCGA | 995.713750559985 | 0.00960267210624075  |
| TCGTCACGTAA | 995.94996192385  | 0.00907277529891797  |
| GAACGCATGAC | 996.425619906487 | 0.00643185770148228  |
| GTCATTGCAGA | 996.639367622535 | 0.00340104656116379  |
| CAAATTAGTAC | 999.948557313809 | 9.33609921743679e-05 |

|              |                  |                    |
|--------------|------------------|--------------------|
| ATGACTCATAGT | 8.49307895834707 | 0.157221413959732  |
| TTATGACTCATA | 8.73783452804177 | 0.128498609844002  |
| CAATGACTCATA | 9.24754289708912 | 0.129678668365818  |
| GATGACTCATCT | 9.33527059020161 | 0.080983032344416  |
| GATGACTCATTG | 9.38609724964584 | 0.165320262190143  |
| GCGATGACTCAC | 9.64906063684776 | 0.0256111881692365 |
| GATGACTCATA  | 9.6853570387977  | 0.222991456003957  |
| AGTGTGACTCAT | 9.83280766485647 | 0.142020131451215  |
| GATGACTCATTC | 10.2474037628112 | 0.20696790415465   |
| AGTATGACTCAT | 10.397761713445  | 0.0541109826225076 |
| ATGACTCATCGG | 10.497948613403  | 0.119268924606958  |
| TGATGACTCACC | 10.6397870545755 | 0.0769244660625327 |
| AATGACTCATTT | 10.7384351385721 | 0.107768623029179  |
| CGGATGACTCAT | 10.8198309314954 | 0.110221153917092  |
| ATGACTCATCAT | 10.8538789738981 | 0.17509154772439   |
| AATGACTCATT  | 10.8714597170191 | 0.26518336757247   |
| ATGACTCATAAT | 10.9229484393296 | 0.395708827678148  |
| ATGTGACTCATT | 10.9365611232273 | 0.179451057608884  |
| CGATGACTCACC | 11.0188668968666 | 0.16995800419287   |
| AGTGACTCATA  | 11.0451023977526 | 0.0461427726499892 |
| AATGACTCATAA | 11.1729065603442 | 0.230720296340799  |
| AATGACTCATCG | 11.1972829474896 | 0.0344488317795791 |
| AAATGACTCATG | 11.2280434012176 | 0.105501355733947  |
| TATGACTCATTC | 11.2638762288359 | 0.158637740320621  |
| TTTATGACTCAT | 11.3259903440551 | 0.164331211700882  |
| TTGTGACTCATT | 11.4055969302114 | 0.241660174674434  |
| GTGACTCATATT | 11.4682252937858 | 0.169227266662836  |
| ATGACTCATACT | 11.5398840901242 | 0.314097409240464  |
| ATGACTCATAAA | 11.5553897567004 | 0.1691472705256    |
| GATGACTCATGC | 11.59350150228   | 0.137913710188505  |
| GTATGACTCACA | 11.8465327713185 | 0.197761462910399  |
| AGGATGACTCAT | 11.9466378906036 | 0.0996943291294642 |
| ATGACTCATCTA | 11.9500245136235 | 0.0878370503701491 |
| ATATGACTCATA | 11.9915595763786 | 0.292431247539512  |
| CGAGTGACTCAT | 12.0001097731195 | 0.307836221376686  |
| ATGACTCATCTT | 12.0051738541951 | 0.164374323611394  |
| GCTATGACTCAC | 12.0971958549146 | 0.352561020250488  |
| ATGTGACTCATC | 12.2435672889651 | 0.138381239812754  |
| TCATGACTCATA | 12.2986413598393 | 0.084510847778221  |
| ACATGACTCATT | 12.3696300440366 | 0.219603002115613  |
| GTGTGACTCATC | 12.3878517421763 | 0.178734285802214  |
| ATGACTCATCGT | 12.4631743535494 | 0.389912474824356  |
| ATGACTCATTAC | 12.5238356907772 | 0.325254831281271  |
| GTATGACTCATT | 12.5599773471483 | 0.262049120659696  |
| CTTATGACTCAT | 12.5925197938473 | 0.355153826304715  |
| CAATGACTCATC | 12.6320231834982 | 0.255936206536768  |
| ATGACTCATTTT | 12.6742063580186 | 0.100633704817684  |
| GAGTGACTCATT | 12.6744493581326 | 0.100112795914332  |
| CGGTGACTCATA | 12.74107136068   | 0.092770281846233  |
| CCTATGACTCAT | 12.7660705757581 | 0.360281659291039  |
| GTGACTCATTTA | 12.8404628069309 | 0.260752118150164  |
| GGTGACTCACAA | 12.880395916381  | 0.10808918674926   |
| TGTGTGACTCAC | 12.9268626596421 | 0.10890056285568   |
| AGATGACTCATC | 12.9402837598319 | 0.3771013299096    |

|               |                  |                    |
|---------------|------------------|--------------------|
| GATGACTCACTG  | 12.9558538930458 | 0.147772234673847  |
| TATGACTCATAT  | 12.9570758303824 | 0.459193535539576  |
| GTGTGACTCATA  | 12.9702698603859 | 0.313619346748334  |
| TATTATGACTCA  | 13.0296611800037 | 0.356196876341094  |
| ACTATGACTCAT  | 13.0691429122778 | 0.238735671675016  |
| GGTGACTCATAT  | 13.0693151712696 | 0.155756349277301  |
| CAAATGACTCAC  | 13.2086063973434 | 0.0341226429140976 |
| ATGACTCATGAA  | 13.2392866965277 | 0.287079661180063  |
| AATGACTCACAG  | 13.3194655663251 | 0.196470377256052  |
| CGATGACTCATG  | 13.3977651107845 | 0.126705781278677  |
| TGATGACTCACT  | 13.400282436709  | 0.166958477339034  |
| CATGACTCATAT  | 13.4148980076396 | 0.21798173630567   |
| ATGACTCATCCG  | 13.447810667791  | 0.267828407159142  |
| ACGTGACTCATA  | 13.5057178550464 | 0.265752362412907  |
| TATGACTCATAAC | 13.5198712469185 | 0.503749638047698  |
| ATGACTCATTTA  | 13.6027487881037 | 0.290436067024107  |
| GATGACTCACAG  | 13.6434848485522 | 0.220516696418246  |
| GGTGACTCACTG  | 13.6700319210134 | 0.330980962896917  |
| GTGACTCATCAA  | 13.7538647032603 | 0.23327241566607   |
| CGTGACTCATTG  | 13.759263815803  | 0.221653941987266  |
| GGATGACTCACC  | 13.7941658918311 | 0.168741489897423  |
| TGTGACTCATAT  | 13.8703658581365 | 0.2290563817847    |
| GGATGACTCACA  | 13.9007059074399 | 0.303753285089448  |
| TGTGACTCATCG  | 14.0749695123157 | 0.0949372585309373 |
| TGGGTGACTCAT  | 14.0875549026154 | 0.385501286566388  |
| AAATGACTCATC  | 14.1826858336693 | 0.331281001219904  |
| TAGTGACTCATA  | 14.1903751645431 | 0.231392161429045  |
| GTTTATGACTCA  | 14.3065338074592 | 0.417790795527204  |
| GAATGACTCACC  | 14.4137569247866 | 0.401358610175678  |
| GATATGACTCAT  | 14.4845620807872 | 0.395225116939234  |
| AGGTGACTCATC  | 14.515888561689  | 0.346524757671253  |
| CTGAGTCATCGG  | 14.5186943691672 | 0.463646474522666  |
| CAATGACTCATG  | 14.5587040043129 | 0.376690406431769  |
| AGTGACTCATCC  | 14.5716965555043 | 0.230733537465042  |
| AATGACTCATAAC | 14.6380094238103 | 0.401107985569274  |
| GTATGACTAATA  | 14.674845277075  | 0.0721971486332761 |
| ATGACTCATCAG  | 14.7008770752446 | 0.389480235184098  |
| TTCTATGACTCA  | 14.7084208912544 | 0.150908467309521  |
| CAAGTGACTCAT  | 14.7229998472378 | 0.202449773882772  |
| ACCTATGACTCA  | 14.7340964233529 | 0.373570802669594  |
| GATGACTCACTT  | 14.75507938311   | 0.307282551881751  |
| ATGACTCATGTG  | 14.7861559625555 | 0.305650180531527  |
| AGAGTGACTCAT  | 14.9155362997948 | 0.288554147124225  |
| GCGTGACTCACT  | 14.9605245223524 | 0.249014614606007  |
| AATGACTCACTC  | 14.9634644778302 | 0.287052911336093  |
| GTGACTCACAGC  | 15.0533824239576 | 0.132765273520625  |
| ATGACTCACTCA  | 15.0538885055968 | 0.214067508651771  |
| GATGACTCATCG  | 15.0914306633778 | 0.355784678973346  |
| ATATATGACTCA  | 15.1325301671145 | 0.448349679345471  |
| TTAGTGACTCAT  | 15.1348912518138 | 0.248282803903134  |
| CTATGACTCACA  | 15.1671987978513 | 0.21229343130388   |
| AGAGTGACTCAC  | 15.1906862345267 | 0.130376499450616  |
| TAATGACTCATA  | 15.2461382229189 | 0.161990293680459  |
| AGCATGACTCAC  | 15.256470796195  | 0.150797137195773  |

|              |                  |                    |
|--------------|------------------|--------------------|
| ATTTATGACTCA | 15.2784043547953 | 0.380209259126942  |
| TAGATGACTCAT | 15.2844071689508 | 0.497090635496613  |
| CCGATGACTCAT | 15.3186871944745 | 0.474191455323924  |
| TGATGACTAATC | 15.3327947676957 | 0.18351798768958   |
| ATGACTCACCGA | 15.3513344741978 | 0.264611228871953  |
| TATGACTAATAC | 15.3519585464071 | 0.233492971001578  |
| GTGACTCATAGT | 15.3634826946029 | 0.329814603809708  |
| GAGGTGACTCAT | 15.420298331853  | 0.477021359545572  |
| GTATGACTCACG | 15.4800194101033 | 0.595372661484144  |
| TCCTATGACTCA | 15.5181397222023 | 0.125718038922589  |
| GCCTATGACTCA | 15.5722877572306 | 0.513826537897872  |
| AACTATGAGTCA | 15.600676598826  | 0.103080211082366  |
| CAGTATGACTCA | 15.6743128650461 | 0.401644044752158  |
| AGCATGACTCAT | 15.7595993225646 | 0.0605079790389709 |
| ATGACTCACGGT | 15.8602190267974 | 0.0758973362196741 |
| ATGACTCACCTG | 15.8652550451988 | 0.199289912513055  |
| AAGATGACTCAC | 15.8887271902907 | 0.179650242402852  |
| GTATGACTCAGA | 16.0193334504941 | 0.300135616986149  |
| ATGACTCACTTG | 16.0689013820047 | 0.406717726296941  |
| AATGTGACTCAT | 16.0795516607352 | 0.691603232223687  |
| TTGATGACTCAC | 16.100406571966  | 0.355569116249659  |
| TATGACTCACTT | 16.1570956257038 | 0.22069999346327   |
| CGGTGACTCATC | 16.1598459520017 | 0.574969949681122  |
| GGTATGACTCAG | 16.2128476704618 | 0.206399618448324  |
| ATGACTCACATG | 16.2200575681753 | 0.395600487869399  |
| AAGATGACTCAT | 16.2316787751171 | 0.546628251613827  |
| ATGACTCATTCT | 16.3093509973998 | 0.534476956405752  |
| GTGATGACTCAT | 16.3200285523957 | 0.267105624462512  |
| GTGACTCATTCT | 16.332291314978  | 0.341818678047085  |
| AATGACTCATAG | 16.3395283092813 | 0.0385843418964956 |
| AAATATGACTCA | 16.3504827471204 | 0.645434762735854  |
| ATGACTCACTTC | 16.3604476212856 | 0.356976457056998  |
| CCATGACTCATT | 16.3683176875466 | 0.451285839604071  |
| ATGACTCATCGA | 16.3741976547898 | 0.708238139093599  |
| TATGACTCACGG | 16.4151139709743 | 0.1561098613203    |
| CTGTGACTCACA | 16.4302792639163 | 0.0540364735917263 |
| AAGTGACTCATC | 16.4506357446401 | 0.565295804482296  |
| GAAGTGACTCAT | 16.516202044979  | 0.239408774934907  |
| GATGACTCACCT | 16.5696677289299 | 0.432465065502905  |
| GATGACTAATCC | 16.5769102592268 | 0.431131037617266  |
| GTGACTCATTGA | 16.648658613555  | 0.406087112094889  |
| TATGACTCATTT | 16.656669679906  | 0.603909479811966  |
| ATGACTCATTCA | 16.6823048933753 | 0.429818173419446  |
| TATGACTAATCG | 16.7389958448145 | 0.48252575603523   |
| GAATGACTCACT | 16.7571691870976 | 0.249271792943643  |
| AGTGACTCATTT | 16.7572610945454 | 0.161082422202425  |
| TATATGACTCAT | 16.7806381062639 | 0.54705610147228   |
| ATGACTCACTTT | 16.7821871431447 | 0.257220574458529  |
| ATGACTCATATG | 16.8089336380928 | 0.616070880924896  |
| GCATGACTCACA | 16.8733232341248 | 0.234332370148499  |
| ATGTGACTCACC | 16.898229365658  | 0.296824293289604  |
| AACGATGAGTCA | 16.9909078832801 | 0.43519066839923   |
| TGATATGACTCA | 17.0653954048667 | 0.308823704548608  |
| AGGTGACTCACT | 17.085588931162  | 0.321291655374426  |

|               |                  |                    |
|---------------|------------------|--------------------|
| ATGACTAATCGA  | 17.0921150599795 | 0.326711286301205  |
| ACCGTGACTCAT  | 17.1006891982623 | 0.21985183332283   |
| GTGACTCATAACG | 17.1438298238947 | 0.565618401220353  |
| TAGATGACTCAC  | 17.1998020293204 | 0.352794060407532  |
| GTGACTCATCAG  | 17.2163657405548 | 0.384361997236344  |
| GCGTGACTCATC  | 17.2617804619961 | 0.115030510651186  |
| TATATGACTCAC  | 17.2724135217472 | 0.0737520409547269 |
| AGATGACTCACA  | 17.360749392668  | 0.543332962199556  |
| TATGACTCACCG  | 17.4366942144277 | 0.207948418276069  |
| TGATGACTAATA  | 17.503383194058  | 0.174643856120873  |
| ACATGACTCATC  | 17.5307952379743 | 0.564324436794729  |
| GATATGACTCAC  | 17.5322512373637 | 0.313909623413732  |
| GTGACTCATGTT  | 17.546575905201  | 0.302136208916628  |
| GAATGAGTCAGC  | 17.5499967517823 | 0.120466566447121  |
| TCTGAGTCATCG  | 17.5671730927058 | 0.0536824833071718 |
| TATGACTCACTG  | 17.6376851109231 | 0.403431131245285  |
| TGTGACTCACAT  | 17.6470616656233 | 0.207762851973968  |
| GATGACTAATAC  | 17.6651554371093 | 0.125145678309844  |
| ATGACTCACTGG  | 17.6703726704588 | 0.728642118712316  |
| TCGATGACTCAC  | 17.672830036086  | 0.222789450566624  |
| ATTGTGACTCAT  | 17.7112318652707 | 0.484348210082194  |
| GTGACTCATTGG  | 17.7185485112871 | 0.378992418442464  |
| TATGACTCACCT  | 17.8117262249397 | 0.15318760809353   |
| GTAGTGACTCAC  | 17.8188456451016 | 0.367784603614539  |
| GATGACTACCA   | 17.8852514829791 | 0.350596245998791  |
| TTTTATGACTCA  | 17.9695316998928 | 0.338214929378519  |
| ATGACTCACAAT  | 18.0628956148792 | 0.595776004642053  |
| GTCTATGACTCA  | 18.078893209759  | 0.526348717717588  |
| TATGACTCATCG  | 18.100411913554  | 0.694016895036816  |
| GAGTATGAGTCA  | 18.1302226264238 | 0.249395263838489  |
| GTATGACTAATC  | 18.1622342628973 | 0.304683298877867  |
| GTGTGACTCACC  | 18.2229214471286 | 0.469685953540232  |
| GTAATGACTCAT  | 18.2275633175887 | 0.672087124101429  |
| ACAATGACTCAC  | 18.2432342663842 | 0.521635884111923  |
| CAGTATGAGTCA  | 18.2463265716152 | 0.0897993375913224 |
| TGAGTGACTCAC  | 18.247768616112  | 0.429526935280713  |
| ATGACTCATGGA  | 18.250852904838  | 0.364667371103762  |
| CGATGACTAATC  | 18.2913912294391 | 0.369532964482856  |
| TTAGTGACTCAC  | 18.3750180729569 | 0.216934307374596  |
| TTCGTGACTCAT  | 18.4130768857304 | 0.282134407977718  |
| TTATGACTCACC  | 18.4890559102636 | 0.503042516379907  |
| CGATGACTCACT  | 18.5351955991508 | 0.229486714632841  |
| TATGACTCACAG  | 18.5609739570913 | 0.637148060025573  |
| GTGACTCATTAC  | 18.5890224592296 | 0.1504909425764    |
| CCGTATGACTCA  | 18.6122747105983 | 0.261790458133444  |
| TAAGTGACTCAT  | 18.6271301028757 | 0.404466966075685  |
| ATAATGACTCAT  | 18.6290776252729 | 0.35957160219352   |
| TGTGACTCATGC  | 18.7626764515656 | 0.358525922640735  |
| CGTGACTCATTC  | 18.7822581241571 | 0.0908310796874286 |
| GATGACTAATCG  | 18.8374102252043 | 0.333293521098146  |
| TAGGTGACTCAT  | 18.9004389546305 | 0.163512280940462  |
| TGAGTCATCACG  | 18.9146798754988 | 0.509204257447482  |
| CGCTATGAGTCA  | 18.9578324700453 | 0.298652672928917  |
| GTGACTCATCGG  | 18.9666456973812 | 0.453648851628619  |



|              |                  |                    |
|--------------|------------------|--------------------|
| GTGTATGACTCA | 19.0382254428771 | 0.351487082987402  |
| GCGTGACTCACC | 19.084450178392  | 0.429605498048975  |
| AGGTGACTCACA | 19.1010568635589 | 0.477152411228466  |
| ATGACTCACCGG | 19.1034351732234 | 0.525451593456668  |
| ATGACTCATCCT | 19.1110508732139 | 0.622473794136     |
| GCAATGACTCAC | 19.1186728793382 | 0.453752759807434  |
| CATGACTCACAA | 19.1909622154667 | 0.307879195670051  |
| GATGAGTCAGAC | 19.2196006751907 | 0.346578960394552  |
| AGATGAGTCAGA | 19.3022332205956 | 0.463901963862469  |
| ATGACTCATCTG | 19.3453744373336 | 1.2017382564618    |
| CGGATGACTAAT | 19.3580575355643 | 0.234746230591188  |
| TCATATGACTCA | 19.3721445634715 | 0.236650757464717  |
| CGATGAGTCAGA | 19.3784054808078 | 0.824858588354223  |
| TACATGACTCAT | 19.4142776748439 | 0.132953481987376  |
| GATGACTCACGC | 19.4201569999515 | 0.460602604178439  |
| GTGACTCATTCG | 19.4327582490705 | 0.708002538492288  |
| ATGACTCACACC | 19.4424886937713 | 0.14774664688752   |
| GGTGACTCACAC | 19.4596349404164 | 0.208777994140575  |
| GTGACTCATCGA | 19.469268807519  | 0.2272517537096    |
| TATGACTCAGAT | 19.5172017979997 | 0.232566596431624  |
| GTGACTCACACG | 19.5407915049372 | 0.290888773998947  |
| AATTATGACTCA | 19.5438261629983 | 0.296368727226317  |
| ATGACTCACGTC | 19.5667436915926 | 0.421552797724736  |
| CCGAATGAGTCA | 19.6147046272078 | 0.406562327579607  |
| GTGACTCACATT | 19.6649975054193 | 0.212767062779324  |
| AGTGACTCACCA | 19.7074601176328 | 0.234637471820908  |
| ATGACTCACCTT | 19.7090537697218 | 0.275276806595771  |
| CACGATGAGTCA | 19.7169874371145 | 0.582901246284214  |
| CCAGTGACTCAC | 19.7241703185895 | 0.242758891610293  |
| GTGACTCACGAA | 19.7426007462382 | 0.136048532190863  |
| ATGACTCACGCT | 19.7638546599342 | 0.465714086567349  |
| GTATGACTCAAC | 19.8225024199488 | 0.504552141451921  |
| ATGACTCATGAC | 19.8778546470754 | 0.237225661746227  |
| TTATGACTCATT | 19.8890758895308 | 0.491666223971952  |
| CGGATGACTCAC | 19.8891970313852 | 0.216750841062227  |
| ATGACTCACACT | 19.9396549219808 | 0.312201916285788  |
| GGATATGACTCA | 19.976767757091  | 0.431165306614752  |
| ATGACTCACTGC | 20.1088056593795 | 0.254072567725619  |
| CTTGTGACTCAC | 20.1315845212913 | 0.310535990125957  |
| AATGACTCACTT | 20.1377753206264 | 0.407452197925649  |
| AATGACTAATCA | 20.1457969079518 | 0.208256170515378  |
| TAAGTGACTCAC | 20.1600398382578 | 0.0730044336687818 |
| GGTGACTCATT  | 20.1666050879247 | 0.373021366027746  |
| ATGACTAATTAC | 20.1709617488317 | 0.19229617173977   |
| TTGTATGACTCA | 20.228342409037  | 0.434689074983006  |
| AATGACTCATTC | 20.2626345481309 | 0.424491626154727  |
| AACTATGACTCA | 20.3243109529588 | 0.612995884076083  |
| TATGAGTCAACA | 20.3369575788211 | 0.233912897428688  |
| GCCATGACTCAC | 20.3924157470941 | 0.39232174268413   |
| ATGACTCACCTA | 20.3957298594206 | 0.350328852080056  |
| GGATGAGTCAGA | 20.4082515260637 | 0.385706245750778  |
| TTAATGACTCAT | 20.4238493688792 | 0.287824961787916  |
| CCAGTGACTCAT | 20.4282928275474 | 0.255326919608103  |
| TACGTGACTCAT | 20.4472403497831 | 0.624783449283561  |

|              |                  |                    |
|--------------|------------------|--------------------|
| TGGTGACTCACA | 20.4656928972428 | 0.539915857769464  |
| ACTGTGACTCAC | 20.5052446357719 | 0.403840620705563  |
| TGTGACTCATCT | 20.5228315018612 | 0.83332124616368   |
| GTGACTCATGGA | 20.528738102536  | 0.231453547551086  |
| GATGACTCATCC | 20.5332796199537 | 0.512740006059409  |
| GTAGTGACTCAT | 20.5341809096239 | 0.746996362265444  |
| TATGACTCAACT | 20.5692299720936 | 0.211017817246077  |
| CGCAATGAGTCA | 20.5775646902366 | 0.31936420544696   |
| CATGACTAATAC | 20.6114707088377 | 0.156418544339722  |
| CATGACTCACCT | 20.6339889805154 | 0.241132853598398  |
| TGTGACTCATTC | 20.6478310657886 | 0.999191518298144  |
| TGAGTCATCGGA | 20.6646397186112 | 0.475878676535031  |
| CACGTGACTCAT | 20.7124021434563 | 0.35397340819975   |
| TTATGAGTCAGC | 20.7213990196711 | 0.0668182025442248 |
| GGGTGACTCATC | 20.7360722627971 | 1.15454721840736   |
| TTCTGAGTCATC | 20.9180547548455 | 0.478649791169997  |
| AATGTGACTCAC | 20.9343483689469 | 0.498845658822793  |
| ATGACTCATTA  | 20.9668422960007 | 0.701507414333487  |
| GACGTGACTCAC | 21.0029635703472 | 0.410080707140088  |
| TATGACTCAGTT | 21.0068667423695 | 0.146267474394175  |
| ACGTATGACTCA | 21.0771249108214 | 0.57417283602128   |
| ATGACTAATCAT | 21.0875810778124 | 0.126823871207336  |
| GCGTATGAGTCA | 21.0971845111357 | 0.268128961220398  |
| GTTATGACTCAC | 21.1014988199779 | 0.490947101071845  |
| AAGTGACTCATT | 21.1081170793572 | 0.865134072948973  |
| AAATGACTAATC | 21.2713173950452 | 0.261100404991585  |
| AAAATTAATTTT | 21.2822246526644 | 2.90706157352734   |
| GACTGTGACTCA | 21.3459288010103 | 0.345969337821205  |
| AAGGATGAGTCA | 21.4152745748591 | 0.266046693749878  |
| CACTATGAGTCA | 21.4329195077658 | 0.521497089990248  |
| AAGTGACTCACG | 21.4468724009213 | 0.499346698418854  |
| ATGACTCATTTT | 21.4632571245561 | 0.434835213154578  |
| GTGACTCACTTA | 21.6100442213579 | 0.161882389887346  |
| GTATGACTCAGC | 21.6438128740777 | 0.729619616914924  |
| CGATGACTAATA | 21.681819920902  | 0.290417195616074  |
| GAATGACTCACA | 21.6961880179523 | 1.32002906696681   |
| TATGACTCATCT | 21.7388986835187 | 0.401295073423851  |
| CGAATGACTCAT | 21.7437628047993 | 1.10724220928325   |
| ATGACTCACCCG | 21.7781017181893 | 0.445945320040321  |
| ATGACTCACGGA | 21.8067014919588 | 0.409295327784756  |
| GTGACTCATCCA | 21.8472962593334 | 1.29463676681802   |
| AAGGTGACTCAT | 21.8686681009924 | 0.250622964772892  |
| ATCGTGACTCAC | 21.8786806446707 | 0.204398365354445  |
| TCAGTGACTCAT | 21.9046946773982 | 0.253753817945402  |
| TGGATGACTCAT | 21.9074580893782 | 0.853526575813359  |
| TGTGACTCAGAG | 21.9085417548837 | 0.213832811532282  |
| GACATGACTCAC | 21.9198184773384 | 0.21777891840951   |
| AATGACTCACTG | 21.9429115901397 | 0.442244015311116  |
| GGTGACTCATCT | 21.9457831126143 | 0.0665506225591188 |
| ATGACTAATTGC | 21.9563617825633 | 0.316778306990446  |
| CTGAGTCATCAG | 22.0230245791067 | 0.564834336034298  |
| AATGAGTCAACG | 22.0314080392006 | 0.417874453931706  |
| ATGACTCATGCA | 22.0738105115219 | 0.99697285735656   |
| GTGACTCACGAG | 22.1805183227221 | 0.189441871122112  |

|               |                  |                    |
|---------------|------------------|--------------------|
| GTGACTCATCTA  | 22.2141448467659 | 0.888340340856852  |
| CTATGACTCAGA  | 22.2517059779381 | 0.299321906732054  |
| AGTGACTCATCG  | 22.2717894942035 | 0.221813441610891  |
| ATCATGACTCAT  | 22.2742286157071 | 0.57861801673422   |
| GTGACTCATAAG  | 22.2822865831199 | 0.376233311984445  |
| AACATGACTCAC  | 22.3278164718109 | 0.277570405171612  |
| ATATGACTCAGA  | 22.3300096782032 | 0.374616962313945  |
| CCTATGACTCAC  | 22.3315697180116 | 0.368436798956164  |
| GCATGACTCATG  | 22.3728879965556 | 0.453257990101163  |
| AAGAATGAGTCA  | 22.3824727966991 | 0.198595096114004  |
| GATGACTCACTC  | 22.411816255612  | 0.367056830032425  |
| GTTTGAGTCATC  | 22.4961696553462 | 0.25689421139193   |
| ATGACTCACGAA  | 22.5002205477937 | 0.900857202848644  |
| ATGACTCATTAT  | 22.5164207555476 | 0.534289895916323  |
| TATGACTAATCA  | 22.5372807269077 | 0.464253760480624  |
| ATGACTAATATG  | 22.5621344081597 | 0.322974460992573  |
| ATAATGAGTCAA  | 22.5842639066083 | 0.0938434536146841 |
| AAGTATGAGTCA  | 22.5946014765608 | 0.202366320196339  |
| AGTGACTCACTG  | 22.6091398613187 | 0.0304540775315984 |
| TATGACTCAGAC  | 22.7216790219517 | 0.477292937291511  |
| ATGACTCACAAAC | 22.7770986305417 | 0.517728431804947  |
| ACTATGACTCAG  | 22.7836572566441 | 0.250668918688557  |
| GGTGACTCATGA  | 22.8180124905375 | 0.800127506935304  |
| GGTGACTACCA   | 22.8211714832043 | 0.405386442998707  |
| CCTATGACTCAG  | 22.8412179006372 | 0.0904746309816888 |
| CTGAGTCATCAC  | 23.0367554439698 | 0.35458237703866   |
| GATGAGTCAGAA  | 23.0627836592252 | 0.232501032048505  |
| ACCTATGAGTCA  | 23.12344781984   | 0.796951071168388  |
| AATTGAGTCATC  | 23.1610514150191 | 0.0413141607472331 |
| AATGACTCACTA  | 23.1890068015786 | 0.377754597208708  |
| AAGTGACTCACT  | 23.224507400518  | 0.306001383319951  |
| GAAATGAGTCAG  | 23.2797724793584 | 0.335676863642843  |
| GGGTATGACTCA  | 23.325785959787  | 0.742520354674746  |
| GTGACTCATTTC  | 23.349334098492  | 0.740304715847777  |
| GTGACTCACTCA  | 23.3663212353643 | 0.214065615603596  |
| GCCTATGAGTCA  | 23.4180023207228 | 0.335348281289253  |
| GCTATGACTAAT  | 23.4210828207553 | 0.195588413710752  |
| ATATGACTAATC  | 23.4535283719246 | 0.550076885127171  |
| TATGACTCAACG  | 23.4597955399469 | 0.183440740088028  |
| ATGACTAATCCA  | 23.4680690045175 | 0.0856641040109922 |
| ATGACTCACATA  | 23.4903332554254 | 1.45388264769847   |
| CATGACTCACTG  | 23.5016872178386 | 0.3945421249951    |
| CGTGACTCATGA  | 23.5205529375995 | 0.23319952390357   |
| ACAATGACTCAT  | 23.5285936870488 | 0.330218571235102  |
| TATGACTCAGGG  | 23.5323277723321 | 0.217959125391626  |
| ATATGACTCATC  | 23.5614120007219 | 1.53543258591917   |
| ACAATGAGTCAG  | 23.6465255792512 | 0.431335315229255  |
| GCTGAGTCATCC  | 23.8086991586676 | 0.427276354609062  |
| GTGACTCACTCT  | 23.9135932094706 | 0.26227146387535   |
| TATGACTCAGAG  | 23.9177048591449 | 0.500424959963825  |
| TCGGTGACTCAT  | 23.9318103832334 | 0.397087068507218  |
| CATTGAGTCATC  | 23.9392000838447 | 0.320571168795519  |
| ACTGTGACTCAT  | 24.066369350082  | 0.436387081165441  |
| TTTGTGACTCAA  | 24.0733991450034 | 0.323068659880181  |

|              |                  |                    |
|--------------|------------------|--------------------|
| GTGACTCACGTT | 24.1311379581757 | 0.310810951478784  |
| AAATATGAGTCA | 24.1766756958738 | 0.355664043570332  |
| TATGACTCATTG | 24.2222880948194 | 0.898810952780222  |
| TGTGACTCATT  | 24.2742006741035 | 0.37529518547669   |
| CATGACTCACGT | 24.2783406288879 | 0.222835531272374  |
| CGAAATGAGTCA | 24.3174554720468 | 0.201651972875162  |
| ATCGTGACTCAT | 24.3711605912021 | 0.282768601687979  |
| TATGAGTCAGAA | 24.3779588552339 | 0.735818119246926  |
| TGGTGACTCACG | 24.3929964056102 | 0.310779003393347  |
| ATGACTCATTGC | 24.537034244831  | 0.479534219769742  |
| GAATGAGTCAGA | 24.5440755144039 | 0.469406834453717  |
| CTGTGACTCACG | 24.5783480344656 | 0.499976393626862  |
| ATGACTCATGCT | 24.5785892840914 | 0.587910714717625  |
| ACGTGACTCACA | 24.6244521863586 | 0.58045445295119   |
| CATGACTCATCT | 24.6397822187396 | 0.668444839140655  |
| ATGACTCACAGT | 24.6482139553433 | 0.713905369223265  |
| TTGTGACTCATG | 24.650727737604  | 0.806773485891951  |
| GTGACTCACCGA | 24.7319240377425 | 0.186060020753727  |
| GAAGATGAGTCA | 24.7683459637208 | 0.243516594502966  |
| GAATGACTAATC | 24.815659204838  | 0.094107831531736  |
| GTATGAGTCAAC | 24.846382805848  | 0.311221490650856  |
| CATGACTCATT  | 24.8466111435633 | 0.602258068506559  |
| CTCTATGACTCA | 24.8601249291493 | 0.46368654185304   |
| GTGACTCATGCA | 24.899762747061  | 0.757519902018327  |
| ATGACTCATCTC | 24.9310884231124 | 0.916253101329684  |
| GTTGAGTCATCG | 24.9698538102303 | 0.856583888160057  |
| ACTATGACTCAA | 25.0137692686996 | 0.440593014966772  |
| AGATGAGTCAGC | 25.0326725729669 | 0.404020254599944  |
| TGTGACTCACGC | 25.0329649747803 | 0.309071328234672  |
| AGCGATGAGTCA | 25.0395638148692 | 0.246183755693666  |
| TTATGACTCAGT | 25.049621672937  | 0.356833085613561  |
| AGATGACTCATG | 25.0705345032208 | 0.300018191479334  |
| TATGACTCATCA | 25.0980955366316 | 1.39647539972019   |
| CGATGACTCACG | 25.1324484925073 | 0.0505058946584266 |
| GACTATGAGTCA | 25.1550615611197 | 0.44881814621419   |
| TCGATGAGTCAA | 25.2283301910909 | 0.583786144637126  |
| GGTGTGACTCAT | 25.2455269928042 | 0.672284891952984  |
| AGTATGAGTCAG | 25.2459547138169 | 0.27224805921235   |
| CTTGTGACTCAT | 25.2515768720602 | 0.601530158469826  |
| TTATGACTCAGC | 25.2597119324968 | 0.290833080000807  |
| TGAGTCATCAAC | 25.3102617908866 | 0.575382945556705  |
| CTGTGACTCAGA | 25.3445886540372 | 0.0985837195036862 |
| ACTATGAGTCAA | 25.3648571510829 | 0.215274990596837  |
| CTATGACTCATG | 25.382742199355  | 0.426161067330546  |
| ACGGATGAGTCA | 25.408159976831  | 0.335243437372218  |
| GGTGTGACTCAC | 25.4642201500641 | 0.478032848858926  |
| AGTGACTCATGT | 25.495362820903  | 0.104853552274218  |
| AGATGACTAATT | 25.5511385040478 | 0.206280290386226  |
| TATGAGTCAGAG | 25.5647912210745 | 0.730604741219166  |
| TATGACTCACAT | 25.6015495627323 | 0.87867343808534   |
| CAATGAGTCAGA | 25.6055525687058 | 0.453004006997434  |
| TCTGAGTCATCT | 25.695269032706  | 0.57881858948627   |
| AATATGACTCAG | 25.6967588328961 | 0.478617242559862  |
| GCGATGAGTCA  | 25.7386104508623 | 0.267417648074152  |

|              |                  |                    |
|--------------|------------------|--------------------|
| ACCGATGAGTCA | 25.7749258717949 | 0.537217198592339  |
| TATGACTAATGT | 25.7937290280898 | 0.269969250977661  |
| CCATGACTCACA | 25.8030180641735 | 0.543157105536018  |
| ATGACTAATTAT | 25.8049938645759 | 0.550926184252603  |
| TCTGAGTCATCA | 25.8222484718885 | 0.119867823538852  |
| GAGTGACTAATC | 25.8266953744059 | 0.0419762163882314 |
| AGAAATGAGTCA | 25.8723206172528 | 0.354220704829937  |
| TGATGACTAATG | 25.8948412689288 | 0.192710750564974  |
| AATGAGTCAACC | 25.9090663380216 | 0.445639174045638  |
| ATGACTAATCAC | 25.9471711975937 | 0.274418405060136  |
| CTATGACTCAAA | 25.9809282217847 | 0.266820918950517  |
| TTATGACTAATA | 25.9897924286623 | 0.72153218521781   |
| GCCGTGACTCAT | 26.0296971732444 | 0.411944400211152  |
| AATGACTCATCC | 26.0322505486527 | 0.132711457824109  |
| GTGTGACTCAAC | 26.0679324715634 | 0.348952883553836  |
| AACGTGACTCAT | 26.0793651200333 | 0.766132294605419  |
| ATGACTCACTCG | 26.0795524027435 | 0.667087282095036  |
| GGTGACTCACCT | 26.1232780346045 | 0.475237299795397  |
| GGGATGACTCAT | 26.1876958105319 | 0.535420740553925  |
| TCATGACTCACC | 26.2937421218874 | 0.384064835624358  |
| GTCATGACTCAT | 26.3380307453461 | 1.18404008474215   |
| GCATGACTCACT | 26.3437875727568 | 0.500874025375341  |
| TGTTATGACTCA | 26.3721127205308 | 0.858672585131332  |
| ACAAATGAGTCA | 26.3754380029857 | 0.320803766274379  |
| TCATGACTCATG | 26.4286050688269 | 0.437644066956494  |
| ATGACTCATTGT | 26.4798049700043 | 1.07817625559867   |
| AGAATGACTAAT | 26.5113380017779 | 0.263905450196363  |
| TGTGACTCACTC | 26.6023803893769 | 0.648672605537016  |
| CCTGTGACTCAT | 26.6953749646997 | 1.046312559374     |
| TTTGTGACTCAC | 26.7324983363099 | 0.373215224819166  |
| GTGACTCACAGT | 26.7390478638474 | 0.54066332178004   |
| TTAATGAGTCAG | 26.7831386182525 | 0.148132965598543  |
| GTAATGAGTCAG | 26.8038903782304 | 0.324305851602573  |
| TATGACTCAGCT | 26.8112562009193 | 0.408433101546599  |
| TATGACTCACGA | 26.8712771000571 | 0.848099243629544  |
| TGAGTCATCGGG | 26.9120742561365 | 0.483122354330042  |
| GTGACTCATGAC | 26.9136454380134 | 0.346840831451047  |
| AAGATGAGTCAG | 26.9841074856433 | 0.249649198825618  |
| GATGAGTCAAAC | 26.9948811004908 | 0.186874419305545  |
| AACTGAGTCATC | 26.9958735591051 | 0.321765392011149  |
| AGTGACTCACTT | 27.0175610566762 | 0.589106701107407  |
| CTATGACTCAAT | 27.0320177791474 | 0.29194986716056   |
| GAATGACTAATA | 27.0357430655953 | 0.4296187056453    |
| ATGACTCATGCG | 27.0651706875845 | 2.02163634875028   |
| GCGATGAGTCAG | 27.0680944061654 | 0.51264335063379   |
| ATATGACTCAAC | 27.0690861904163 | 0.11265540346032   |
| TATGTGACTCAA | 27.0758241550588 | 0.44418880585036   |
| AGAGATGAGTCA | 27.1470529201517 | 0.380642469415659  |
| TGCGTGACTCAC | 27.176503064047  | 0.484239194033402  |
| ATGACTCACTAT | 27.1848515811631 | 1.06037223562187   |
| TGAGTCATCAGC | 27.2099245070191 | 0.089685160114161  |
| CCCTGTGACTCA | 27.2769295534956 | 0.534129965894028  |
| CAAGATGAGTCA | 27.299626044303  | 0.434666966164546  |
| TATGACTCAGTA | 27.3329134110994 | 0.546052729891704  |

|              |                  |                   |
|--------------|------------------|-------------------|
| AGGTATGACTCA | 27.3511162951287 | 0.869535866656004 |
| TCATGACTCATC | 27.3606286038051 | 1.04929267021642  |
| ACGTGACTCATC | 27.3627175167792 | 0.645055998311151 |
| GTGACTCACCTA | 27.4369163968156 | 0.499433205651919 |
| CTTTGAGTCATC | 27.4373931386486 | 0.354000409176111 |
| GATGACTAATAG | 27.4518683428031 | 0.182498786284013 |
| AGGTGACTCACC | 27.5202612580808 | 0.118066981986606 |
| AATATGACTCAA | 27.5480719835685 | 0.668115576465023 |
| ATAGTGACTCAC | 27.581795159105  | 0.646556190918756 |
| GATGTGACTCAC | 27.6366723595697 | 0.240305582356847 |
| CATGACTCACTC | 27.6635221973557 | 0.238676574011943 |
| CTCTGAGTCATC | 27.6844570303146 | 0.811046567912764 |
| GGATGACTAATA | 27.6875255099674 | 0.241430035671628 |
| GATGACTAATCT | 27.6889453741932 | 0.118669256907653 |
| TGAGTCATCGCG | 27.7040579960213 | 0.491325477464894 |
| ATATGAGTCAGA | 27.7236294172235 | 0.747553182374413 |
| ATATGACTCACA | 27.7660622334248 | 1.07603267071862  |
| ATGACTAATAGT | 27.7859921968778 | 1.09719768096395  |
| ATGACTCACGCA | 27.797798269916  | 0.576275803537598 |
| GAGGATGAGTCA | 27.8658945113519 | 0.222557653086463 |
| GACTATGACTCA | 27.8821379130511 | 0.627052863733681 |
| ATGACTCATACA | 27.8876485483373 | 2.00227175050889  |
| CGGAATGAGTCA | 28.0111373324727 | 0.237716567815389 |
| TGGATGAGTCAG | 28.0534484783763 | 0.213356859388319 |
| CCTGTGACTCAC | 28.1362192929772 | 0.25742492168619  |
| ATATGAGTCAAC | 28.1624279064723 | 0.349749643038497 |
| GGCTGAGTCATC | 28.2155034979331 | 0.544045495080308 |
| ATGACTCACGAC | 28.2205929431506 | 0.647420058598986 |
| TCCTGAGTCATC | 28.2910269829189 | 0.197788548720572 |
| TGGATGAGTCAA | 28.3464243969201 | 0.19382992865656  |
| GGATGACTAATT | 28.3827686742221 | 0.432213848484722 |
| CGTGACTCACTG | 28.4170255161206 | 0.111979548558462 |
| CGCATGACTCAT | 28.4666095740308 | 1.58112581895779  |
| TATGAGTCAGCC | 28.4762278205442 | 0.238676458884687 |
| CACAATGAGTCA | 28.503518558619  | 0.485128335432407 |
| ACGGTGACTCAT | 28.5165608256332 | 0.418983974187276 |
| AGAATGAGTCAG | 28.5296287308007 | 0.21901205513518  |
| ATTATGAGTCAG | 28.5757767867725 | 0.571930799006521 |
| CCTTATGACTCA | 28.5874377998827 | 0.406204904127875 |
| TATGACTCAATG | 28.6565469634712 | 0.727615007079961 |
| GATGACTCACAA | 28.67340706749   | 0.997568029978854 |
| GTGACTCATTAA | 28.704469674159  | 0.82030148781324  |
| CGTGACTCACAC | 28.7478075466109 | 0.207471576472784 |
| ATGACTCACACG | 28.8955712891007 | 0.951791732456819 |
| CTGTGACTCATG | 28.9387077362116 | 0.419241200351315 |
| AGGATGAGTCAG | 29.007038695034  | 0.257882847022863 |
| GGTGACTCACAT | 29.0118541438026 | 1.03042710940352  |
| ATGACTCATTAG | 29.0182593652357 | 0.88810096585244  |
| CAGATGACTAAT | 29.0478443737579 | 0.420271706155307 |
| TGAATGACTCAC | 29.078221337435  | 0.492075780621399 |
| CTTATGACTAAT | 29.0866049068822 | 0.845480788775913 |
| GATGACTAATTA | 29.0963439009267 | 0.212026624887635 |
| GTTGAGTCATCA | 29.1123575416419 | 0.219269771579896 |
| GTGACTCACTGT | 29.1141403402647 | 0.411096585220415 |

|              |                  |                    |
|--------------|------------------|--------------------|
| GTGACTCATTCA | 29.1282006285177 | 1.53443966857062   |
| CTATGACTCATC | 29.1450185240748 | 0.939212761326583  |
| GCATGACTAATC | 29.1750415230976 | 0.484295240029638  |
| ACGAATGAGTCA | 29.1846500530646 | 0.238099201638396  |
| AGTGACTAATCA | 29.1867761920771 | 0.0914865631176684 |
| GTGACTCACCAA | 29.2469617067345 | 0.870070510839678  |
| TCAATGAGTCAG | 29.2788314321903 | 0.316050087672591  |
| GGCTATGAGTCA | 29.3110475815509 | 0.212736164397698  |
| TAGATGAGTCAG | 29.3418792058389 | 0.186802933942441  |
| TTTATGACTAAT | 29.3572397858107 | 0.531018550448523  |
| GAATGAGTCAAC | 29.3594782491769 | 0.562967361226767  |
| ATGACTCACCGT | 29.42629852025   | 1.26035932032008   |
| GTGACTCACCAT | 29.5079108047686 | 0.380579622352798  |
| GATGACTAATGA | 29.6362641406403 | 0.158381343662605  |
| TTTTGAGTCATC | 29.6451464716892 | 0.242579990495014  |
| AAATGAGTCAAC | 29.6528840525403 | 0.424201177450338  |
| ATGACTAATTTA | 29.7426124101502 | 0.640301873051088  |
| TGAGTCATCGGC | 29.7772400887682 | 0.255600444623427  |
| GAGTGTGACTCA | 29.8100027450109 | 0.632536376985878  |
| GTTATGAGTCAG | 29.8207223863258 | 0.40371540669108   |
| AATGAGTCAACA | 29.8215648257597 | 0.821438916093768  |
| CTATGAGTCAAT | 29.8528580781987 | 0.214577184855485  |
| ATATGAGTCAAA | 29.8605839080722 | 0.131055474673491  |
| GAATGTGACTCA | 29.9048277410476 | 0.199188322210254  |
| TATGACTCAAAT | 29.9164716092736 | 0.294030901386796  |
| AATGAGTCAGAC | 30.030541929667  | 0.773589814829865  |
| TGAGTCATCCAA | 30.0437690719864 | 0.359567275126198  |
| CACTGAGTCATC | 30.153814289941  | 0.327039870944968  |
| ACATATGAGTCA | 30.1605274175978 | 0.181608083965651  |
| TGCTGAGTCATC | 30.2159801949437 | 0.17961065670891   |
| TATGAGTCAGGA | 30.2304729855748 | 0.283266357709695  |
| AATGACTAATAA | 30.2440066019807 | 0.272945156059196  |
| ACTGAGTCATCG | 30.2514532737872 | 0.270251361468449  |
| ACGTGACTCACT | 30.2658123871263 | 0.175372588247038  |
| AGCTATGACTCA | 30.2885940655393 | 1.02013218694345   |
| TTCATGACTCAT | 30.3576321894667 | 0.585659340101315  |
| GTGACTCACAC  | 30.4215380316298 | 0.589785889051295  |
| GGAATGAGTCAG | 30.4370215950319 | 0.0431452826388902 |
| GCATGACTAATA | 30.5212396787684 | 0.0664759023426759 |
| ACATGACTAATA | 30.5590673491921 | 0.269414640312586  |
| TCCGTGACTCAC | 30.5645478534119 | 0.342443542626385  |
| TGATGAGTCAAA | 30.5901912777312 | 0.182290399124019  |
| TCAATGACTCAT | 30.6010166557506 | 1.27424234027029   |
| TTCGTGACTCAC | 30.6510504576816 | 0.413886216563462  |
| GTTGAGTCATCC | 30.656515509908  | 0.436257615785101  |
| TGTGACTCAGAC | 30.68160599827   | 0.490673000260424  |
| TTTGAGTCATCC | 30.6982140342488 | 0.276675039556563  |
| AGTGACTCACAC | 30.7043238280347 | 0.423944204155752  |
| AGGAATGAGTCA | 30.7087507413722 | 0.276957907920912  |
| AGGTATGAGTCA | 30.8412278249524 | 0.579779041937318  |
| TAAATGAGTCAG | 30.8431617522562 | 0.465051707717632  |
| CATGACTAATAT | 30.9995753109311 | 0.0985536468691544 |
| TGATGAGTCAAC | 31.0159346854823 | 0.247746734573439  |
| ATGACTAATTA  | 31.0318355146126 | 0.629863797929714  |

|              |                  |                    |
|--------------|------------------|--------------------|
| TATGAGTCAGAC | 31.0559178225909 | 0.392327878561284  |
| GCATGTGACTCA | 31.0959085123884 | 0.22918318297617   |
| GCAGTGACTCAT | 31.1004682567488 | 0.684477578572026  |
| ATGACTCACAGG | 31.11593941341   | 0.530721803835398  |
| CGTGACTCACGA | 31.1195326476458 | 0.483070432381955  |
| TAATGACTAATT | 31.1889323469723 | 0.345535931617048  |
| AGTATGAGTCAA | 31.2124457372551 | 0.411330143869608  |
| AGAATGAGTCAA | 31.3238173452848 | 0.2724984465967    |
| TGTGTGACTCAT | 31.3966244132611 | 1.48188655434108   |
| ACATGACTCACA | 31.4358363094771 | 1.35999266708485   |
| GTGACTCATTTT | 31.5227656629473 | 0.925685087280654  |
| ACCTGAGTCATC | 31.5230472575978 | 0.262920615688498  |
| GCTATGAGTCAG | 31.5426088514907 | 0.338703308418559  |
| TATGAGTCAAAA | 31.6290546856447 | 0.399043794148837  |
| AGGTGACTCATT | 31.752639788275  | 0.759016819949379  |
| GTATGAGTCAAT | 31.7723213756722 | 0.173449651147283  |
| GACGTGACTCAT | 31.7910042240824 | 1.23115648046312   |
| TAAATGAGTCAA | 31.8040090600106 | 0.159748852532797  |
| AAAGATGAGTCA | 31.819961816955  | 0.381464779085223  |
| GAGTGACTAATA | 31.8209955368512 | 0.286460558500633  |
| TATGACTCACAC | 31.8302074918982 | 1.07086617914162   |
| TTGAGTCATCGG | 31.8901453180456 | 0.0413889360171281 |
| GAATGAGTCAAA | 31.9159653186772 | 0.26927760249261   |
| TATATGACTAAT | 31.9499779050038 | 0.42881709039992   |
| CGTATGACTCAT | 32.0508542963656 | 1.14676473406725   |
| TAATGAGTCAGA | 32.0547912234159 | 0.595802079365759  |
| TAGATGAGTCAA | 32.0578126343986 | 0.439047600691668  |
| ACATGACTAATC | 32.0890896732062 | 0.287518243599594  |
| ATATATGAGTCA | 32.1319305068988 | 0.888170620975349  |
| TATGAGTCAGGC | 32.1481408541559 | 0.271935910302218  |
| CGCTGAGTCATC | 32.2580507534692 | 0.605695739924029  |
| GGTGTGACTCAG | 32.2708014096353 | 0.509720244566281  |
| CAAAATGAGTCA | 32.2923040841143 | 0.490389855581196  |
| ATAATGAGTCAG | 32.3070439303372 | 0.702842300458685  |
| GGTTGAGTCATC | 32.3308140451974 | 0.460655895921523  |
| ATGGTGACTCAC | 32.3448643924333 | 0.748898943335385  |
| TAAATGACTCAC | 32.3829653548605 | 1.8924331658849    |
| ACTGAGTCATCA | 32.3847000426088 | 0.318695120036422  |
| TACTGAGTCATC | 32.4097003410653 | 0.141531150451948  |
| TACTATGACTCA | 32.4289812474449 | 1.23454136102306   |
| GAGTGACTCACA | 32.5683965497902 | 0.613304851220057  |
| TGTGACTCATGT | 32.6350933632627 | 1.12868663792486   |
| CATGACTCACAC | 32.6714524731923 | 1.07302043576022   |
| AATGAGTCAGAA | 32.7068687779178 | 1.05148475382949   |
| GAGATGAGTCAG | 32.7172427936733 | 0.30169192157084   |
| CGTATGAGTCAA | 32.731162238675  | 0.37635250546703   |
| GTATGACTCACC | 32.7934880561374 | 0.552620011692828  |
| GCTGAGTCATCA | 32.8117708185534 | 0.397243880789258  |
| CTGAGTCATCCC | 32.8417536303079 | 0.243964290308199  |
| AACAATGAGTCA | 32.9085698095276 | 0.677390625370873  |
| CGCATGACTAAT | 32.9370192844696 | 0.173723156826584  |
| TGAGTCATCCGA | 32.9579225877344 | 0.47825510149909   |
| GCAGTGACTAAT | 32.9605927536158 | 0.137409657166061  |
| TGTGACTCATCC | 32.9670111443734 | 1.27627876664315   |



|              |                  |                    |
|--------------|------------------|--------------------|
| TATTGAGTCATC | 32.9726901730289 | 0.204415465541606  |
| AGCTGAGTCATC | 33.017806443369  | 0.394624795581677  |
| GGGAATGAGTCA | 33.0209847942545 | 0.33636346070263   |
| GTATGACTCATA | 33.1023412637176 | 1.71067427281854   |
| AAATGACTCACT | 33.1097574757576 | 1.91828315911977   |
| CGGTGACTCACC | 33.1117473572152 | 0.988146764727672  |
| ATGATGAGTCAG | 33.128323150712  | 0.691067459455147  |
| CTGTGACTCAAC | 33.1537596192848 | 0.248069175945378  |
| CCTGAGTCATCG | 33.1648477994994 | 0.488210484316895  |
| CGCTATGACTCA | 33.1890611359181 | 1.30742604731178   |
| CAATGAGTCAGG | 33.1894422079989 | 0.19661441843955   |
| AATATGAGTCAG | 33.1997142006726 | 0.305614213110147  |
| CCGATGACTAAT | 33.2172480576293 | 1.17615911513487   |
| CCTGAGTCATCC | 33.2264181425823 | 0.518859819920658  |
| AGGTGTGACTCA | 33.2413970021372 | 0.191073104761624  |
| AAATGAGTCAGG | 33.2622553143234 | 0.46800001697417   |
| CTGATGAGTCAG | 33.2863633786349 | 0.553544569530664  |
| AATGACTCATAT | 33.3493359135797 | 1.38557619050571   |
| ACGATGAGTCAG | 33.3556229479272 | 0.39060543109874   |
| TTGTGACTCAAC | 33.5765523730501 | 0.173446723280884  |
| CATATGACTCAT | 33.5901609016026 | 1.61002732439644   |
| GCCATGACTCAT | 33.5965667123428 | 0.62825625779096   |
| GTGACTCATCCG | 33.6092650384908 | 1.10157006711381   |
| AATGAGTCAGAG | 33.6535592836448 | 0.975872911797271  |
| CGTATGACTCAG | 33.7133770623736 | 0.414583975120893  |
| CCTATGAGTCAA | 33.7716373880445 | 0.173486509720168  |
| CACTATGACTCA | 33.9514356240836 | 1.3415951379233    |
| AGGGATGAGTCA | 33.9589867688734 | 0.568306681532882  |
| TATGACTCAAGT | 33.9904305488604 | 0.110942379113808  |
| GTGATGAGTCAG | 34.0528800400874 | 0.632494230795752  |
| AAGTGTGACTCA | 34.0662399323929 | 0.388399704785177  |
| AGAATGACTCAC | 34.0965508491642 | 1.91573640626807   |
| CGCGATGAGTCA | 34.1276639200635 | 0.530491463772189  |
| AAATGACTAATA | 34.1341204627326 | 0.364305972415032  |
| CTATGAGTCAAA | 34.1370136818882 | 0.251144918618824  |
| GGATGACTCATG | 34.2109970676062 | 0.394727072181592  |
| TAAGTGACTAAT | 34.3335331067448 | 0.198125512067114  |
| AGTGACTCACCG | 34.3817021853773 | 0.63727249812747   |
| CAAATGAGTCAG | 34.4361871115822 | 0.093643981493083  |
| AAGTGACTAATC | 34.4530197211721 | 0.0985236102362874 |
| GATGACTAATTG | 34.4559410804272 | 0.808885808661242  |
| TAATATGACTCA | 34.4664125203042 | 0.745901522945465  |
| TGAGTCATCAGG | 34.5072997401448 | 0.193231284529515  |
| CAAATGAGTCAA | 34.5438679251553 | 0.225557830470865  |
| GTGACTCACAAG | 34.5537960294854 | 0.137597303656739  |
| AAATGAGTCAAA | 34.5792583843108 | 0.262028941735027  |
| GATGAGTCAGCG | 34.5878691954985 | 1.17712463295707   |
| CGTTATGACTCA | 34.5960235079749 | 0.862288928156382  |
| ACTGTGACTCAA | 34.6128059636058 | 0.247957315301435  |
| AAGTGACTAATT | 34.6343730483767 | 0.197617560109321  |
| CGATGTGACTCA | 34.6591864117792 | 0.094776007508174  |
| GTGACTCACTCG | 34.7350176178143 | 0.567257108469279  |
| AAAGTGACTAAT | 34.8172370846663 | 0.183948454607046  |
| GCCAATGAGTCA | 34.8396482895594 | 0.185907503860702  |

|              |                  |                   |
|--------------|------------------|-------------------|
| ACATGTGACTCA | 34.8588841036438 | 0.714503403234744 |
| ATGATGAGTCAA | 34.8636744609555 | 0.463806472680205 |
| GAGTGACTCACC | 34.8946158222311 | 0.481988450115444 |
| AGCGTGACTCAT | 34.9096398020758 | 1.01088172861413  |
| CTGAGTCATCGC | 34.9974990387172 | 1.48866940106584  |
| GCGAATGAGTCA | 35.0112622442504 | 0.386739897200699 |
| GAGAATGAGTCA | 35.0220785646923 | 0.562243182636572 |
| TAATGACTAATG | 35.0470796894725 | 0.108932243091156 |
| TCGATGAGTCAG | 35.0991657407995 | 0.647970979922632 |
| CATGACTCACTT | 35.1298395836734 | 0.911437061049946 |
| CTATGAGTCAGG | 35.1711116788531 | 0.169330749701783 |
| AGAATGACTCAT | 35.1898741260437 | 1.49031676751227  |
| TATGAGTCAACT | 35.2147783077706 | 0.175934420685805 |
| TTGTGACTCATA | 35.2222004997927 | 1.86109399601031  |
| GATGAGTCAACA | 35.2281448079091 | 0.392179959943676 |
| AAATGAGTCAGA | 35.322958389096  | 0.463627320772623 |
| CATGACTAATGC | 35.360192166994  | 0.247129584243496 |
| TAGTGACTAATC | 35.4716463881573 | 0.279385647364119 |
| CAATGAGTCAAC | 35.5770052384528 | 0.545059956603143 |
| GATGAGTCAAAG | 35.5845416205733 | 0.51718831880463  |
| GGAATGACTCAC | 35.6413274759418 | 0.549578735190263 |
| ATGACTCACCAT | 35.7176932496143 | 0.580485911925429 |
| GGTGACTCATCC | 35.7623301426631 | 1.8884271623451   |
| CATATGAGTCAA | 35.7950576215724 | 0.212099210679747 |
| CGATGAGTCAAC | 35.795231274763  | 0.854383811584356 |
| AATGACTCACAA | 35.8693968734081 | 1.87570803935357  |
| GTGACTCATCAT | 35.8906437454617 | 1.54703072828721  |
| ATGACTCACCAA | 35.9093546603207 | 0.684738905261081 |
| ATAATGACTCAC | 35.9687157618109 | 1.33679799509275  |
| GCGTATGACTCA | 36.1710682917868 | 0.924782293808296 |
| GAAAATGAGTCA | 36.1750635533309 | 0.264174284831283 |
| TTATGACTCAAT | 36.2258494156196 | 0.383813643180307 |
| ATGACTAATACG | 36.2363975819767 | 0.971835505133854 |
| ATGTGACTCAGG | 36.2523189795532 | 0.465160985717641 |
| CCGATGAGTCAA | 36.2594882602059 | 0.779245645803288 |
| ACTGAGTCATCC | 36.2898719002965 | 0.295871326505325 |
| GATTGAGTCATC | 36.3121700015404 | 0.461217797913298 |
| TATGACTAATCT | 36.376363463783  | 0.668182044760783 |
| TGAATGAGTCAA | 36.4625131304341 | 0.733601074507411 |
| GTGACTCACGAT | 36.4756271295217 | 0.701560725450826 |
| CCATGACTCACT | 36.5559049217786 | 0.490094980350831 |
| ATGACTCACTAC | 36.5944120890203 | 0.874090990708307 |
| TTGAGTCATCAA | 36.7377905284545 | 0.835692974778128 |
| CTAATGAGTCAG | 36.7479979013862 | 0.519118691309645 |
| CCGATGAGTCA  | 36.7610092468038 | 1.17205968268247  |
| TTGAGTCATCCG | 36.7786992000476 | 0.815573229628415 |
| TGAGTCATCCAG | 36.8149489175002 | 0.346240582002744 |
| GATGAGTCAACC | 36.8856858364226 | 0.366790643961797 |
| TAGGTGACTCAC | 36.9021811181546 | 0.524207804746233 |
| TTGAGTCATCGT | 36.9073589511915 | 0.281941093544763 |
| TCGTGACTCACT | 36.9078286321352 | 0.511133798125833 |
| CGTGACTCATTT | 36.9388982285663 | 1.31789192644575  |
| AGATGAGTCAAA | 36.9682305362277 | 0.485767789733759 |
| GAAATGAGTCAA | 36.9724275711943 | 0.263645362020463 |

|              |                  |                   |
|--------------|------------------|-------------------|
| GGATGAGTCAAA | 37.0499067711753 | 0.603213421552993 |
| CTCATGACTCAT | 37.0737656892174 | 1.45955869195243  |
| GGATGAGTCAGC | 37.113785235896  | 1.25696848159156  |
| TATGACTAATGC | 37.1178929602869 | 0.398185908289841 |
| ATGACTCACCTC | 37.1484246517838 | 1.44453112035228  |
| GTGTGACTCATT | 37.1499850542621 | 1.44800561557735  |
| AAATGTGACTCA | 37.1691867352253 | 0.763775444805996 |
| CAGTGACTCACA | 37.1787044586985 | 0.913890950455191 |
| GATGAGTCAGAG | 37.2237372107318 | 0.91451537718045  |
| CGAATGACTCAC | 37.3724051501753 | 0.70905666637574  |
| AATGAGTCAAAA | 37.3798652325771 | 0.317003466307519 |
| TGGGTGACTCAC | 37.4459725919204 | 0.515377837353727 |
| CCCTGAGTCATC | 37.4989535514301 | 0.173108838050324 |
| GCATGACTCACC | 37.5722644414404 | 1.8450196617057   |
| GGCAATGAGTCA | 37.6214332404919 | 0.590539059463558 |
| AGATGAGTCAGG | 37.6508463322508 | 0.382429802568005 |
| GATGAGTCAAGA | 37.6570625233197 | 0.286882332727921 |
| CCGATGAGTCAG | 37.6827492750916 | 1.07579473642299  |
| TATGACTAATTG | 37.7635619479525 | 1.3872756972736   |
| TATGACTAATTT | 37.7693948276149 | 0.7746849497402   |
| AGTGACTAATAC | 37.7782662756208 | 0.127965184713388 |
| CAATGTGACTCA | 37.863108899577  | 0.822793583015214 |
| AGATGAGTCAAC | 37.9031739628291 | 0.361214516798979 |
| CTATGAGTCAAC | 37.921878790971  | 0.506039908233826 |
| CATGACTAATCA | 38.0070651660337 | 0.276486350178335 |
| GATATGAGTCAG | 38.0172105905252 | 0.450104779575407 |
| TTGAGTCATCCC | 38.0383669493348 | 0.272447010018371 |
| CTGAGTCATCGA | 38.1215344012611 | 1.17898263674568  |
| GGAAATGAGTCA | 38.1693893985665 | 0.404688359835764 |
| CGTGACTCATCT | 38.185207985716  | 1.04102472224294  |
| GATGTGACTCAA | 38.2425518383743 | 0.519016388624227 |
| ATATGAGTCAGC | 38.2640408574325 | 0.786688412777983 |
| CAGGATGAGTCA | 38.3692419288884 | 0.420021297523567 |
| AAGTGACTAATA | 38.4426299431485 | 0.246989430446649 |
| GTGACTCATCAC | 38.4867303087572 | 0.684664287799887 |
| CTTTATGACTCA | 38.4939170459209 | 1.83132896495556  |
| GACATGACTAAT | 38.5271463949671 | 0.220018576372646 |
| TTTATGAGTCAG | 38.6050617122837 | 1.14193557458988  |
| AATGAGTCAAAC | 38.6060218596343 | 0.880611125122754 |
| ACATGACTCACG | 38.7233502252636 | 0.763709748597849 |
| GTCATGACTCAC | 38.7283526854272 | 0.845003985282039 |
| GACGATGAGTCA | 38.79982192193   | 0.357769756120115 |
| GTCGTGACTCAC | 38.8751644451146 | 0.603371229149002 |
| AGTGACTAATAG | 39.0766746434071 | 0.481788031198746 |
| AGTGTGACTCAA | 39.0960470765698 | 0.592662837390702 |
| GTGTGACTCAAA | 39.1265851753021 | 0.503878837874514 |
| GATTATGACTCA | 39.1440853261834 | 1.59423827266979  |
| CGGGATGAGTCA | 39.1670605719453 | 0.247568923002351 |
| CAGTGACTAATA | 39.1837910254377 | 0.4620390689629   |
| CCTGAGTCATCA | 39.2144307772528 | 0.342756723372644 |
| GTGACTCACGTA | 39.2293501699775 | 0.528427376587759 |
| GCTGAGTCATCG | 39.3213355282369 | 0.561064265148344 |
| AGTGACTCACTA | 39.360998662231  | 0.384092993144602 |
| ATTGAGTCATCC | 39.4493153397085 | 0.696830404117418 |

|              |                  |                   |
|--------------|------------------|-------------------|
| AAGATGAGTCAA | 39.4829172259012 | 0.307644174189708 |
| TTATGACTAATG | 39.496206669254  | 0.287980654012423 |
| GGAGATGAGTCA | 39.521111557811  | 0.434004248820491 |
| ACTTGAGTCATC | 39.5439592440575 | 0.279502849332707 |
| AATGAGTCAGGA | 39.5516838910933 | 0.580839033720905 |
| GTGACTCATTGC | 39.5527853534876 | 0.28200326866934  |
| TAATGAGTCAAC | 39.5644236491845 | 0.170003603769604 |
| TGTGACTCACAG | 39.5745137364143 | 1.28082796528031  |
| CAGATGAGTCAA | 39.5772745109997 | 0.279800513889049 |
| TTGTGACTCAAA | 39.5925156392545 | 0.234377273649833 |
| AGATGTGACTCA | 39.6045723843468 | 0.368224563622237 |
| GAGTGACTCATG | 39.608517671351  | 1.08861740004112  |
| GATGAGTCAGGA | 39.62632805853   | 0.427515806299905 |
| AATGAGTCAAAG | 39.670673664105  | 0.520685499036418 |
| GCAAATGAGTCA | 39.7298565694615 | 0.331104394614431 |
| GTATGAGTCAGT | 39.7635387594274 | 0.582981035839751 |
| GATGAGTCAAAA | 39.8919800573572 | 0.345377462140964 |
| TATGACTCAGCC | 39.8983457089496 | 1.21383108815942  |
| AGTGACTCATTC | 39.9145558187622 | 0.859358120642148 |
| TTCATGACTCAC | 39.946893706348  | 0.893578348386212 |
| TCAATGACTCAC | 39.9669045865367 | 1.82163514337764  |
| CTTGAGTCATCC | 39.9929544674527 | 0.390893761486227 |
| ATATGACTCACC | 40.0048769839515 | 1.39598721412139  |
| ATGACTAATGTG | 40.0796330962212 | 0.384827926445845 |
| GGAATGAGTCAA | 40.3896584206818 | 0.318683969932657 |
| GGTGACTCATGC | 40.4371878931189 | 0.991125552946597 |
| GTGACTCACTAC | 40.4391351082485 | 0.643545541210652 |
| GCTGTGACTCAA | 40.450875380938  | 0.559221170333517 |
| CGGATGAGTCAA | 40.4824456864173 | 0.531600057567175 |
| ATTATGACTCAG | 40.5275027217971 | 0.533163638495765 |
| ATTATGACTCAC | 40.5335268504188 | 1.07846630052221  |
| AAATGACTCACG | 40.5664490045981 | 1.39400076397305  |
| AATGACTAATGC | 40.9543658045672 | 0.382144262560285 |
| AATGTGACTCAA | 40.975571956577  | 0.236152951817092 |
| AAAATGAGTCAG | 41.0452617413498 | 0.648906389666603 |
| AATGACTCATGT | 41.132430507411  | 1.17946602500012  |
| GTGACTCACCTC | 41.1644498835149 | 0.994874471909853 |
| GCGTGACTCATT | 41.203452130002  | 1.42898288069641  |
| TATGACTCAAAG | 41.2411585818824 | 0.562192062655466 |
| AGGATGAGTCAA | 41.3058526528605 | 0.263300803521843 |
| CGGATGAGTCAG | 41.3290141501391 | 0.783033385903677 |
| TGTGTGACTCAA | 41.3347286033047 | 0.430266758941191 |
| CGGTGACTCACG | 41.4290281122984 | 1.37936634003628  |
| TTGAGTCATCAG | 41.4656730979298 | 1.08376378678345  |
| GCAATGAGTCAG | 41.5482466090031 | 0.873366987425363 |
| GTGACTCACTTT | 41.5547325779462 | 1.63371047572567  |
| TGAGTCATCACC | 41.5710176571437 | 0.268970179900004 |
| TCTATGACTCAA | 41.7813945587398 | 0.488725038488218 |
| GGATGAGTCAGG | 41.8373131075151 | 0.367335167660127 |
| CGTGACTCACAA | 41.9859760086907 | 0.512765703577787 |
| ATGACTCACTGT | 42.0427332362613 | 1.83659780073784  |
| CACGTGACTCAC | 42.051637238041  | 0.629000347178626 |
| TATGAGTCAACG | 42.0590994792051 | 0.74561530096567  |
| TATGACTCAAGC | 42.1427731808603 | 0.822018822063795 |

|              |                  |                   |
|--------------|------------------|-------------------|
| TTGAGTCATCGA | 42.1657535038088 | 0.172800303986462 |
| ATGACTAATGCT | 42.244045242764  | 0.563384485762022 |
| GTGACTCACAGA | 42.2644636137425 | 1.09400829204101  |
| GAGATGACTAAT | 42.2888155928869 | 0.681371810328866 |
| CGAATGAGTCAG | 42.3194126329809 | 0.890549597438744 |
| AAAATGACTCAT | 42.3910413191473 | 1.85165296933964  |
| ACAATGAGTCAA | 42.4778939275964 | 0.451663410303418 |
| CCTGTGACTCAA | 42.5054042222341 | 0.512608226596388 |
| TGTATGACTAAT | 42.5088432310743 | 0.951557516216784 |
| GAGATGAGTCAA | 42.6129830573536 | 0.201197701401112 |
| ATGACTCACGTA | 42.6647629030146 | 1.26673707928593  |
| AATGAGTCAGCC | 42.6771380561839 | 1.47591417565518  |
| GTATGAGTCAAA | 42.7558475969776 | 1.06663732930338  |
| ATTGAGTCATCG | 43.0551779565174 | 0.232151414237559 |
| ATAGTGACTCAT | 43.1738669731804 | 1.58732766791449  |
| TGATGAGTCAAG | 43.2517427592801 | 0.403393193205316 |
| GTGACTCACAAT | 43.2626847762312 | 1.54600424036212  |
| GTGACTCACTAA | 43.4382079543632 | 1.78804054006489  |
| GATGAGTCAGGG | 43.4733272676687 | 0.518797528475591 |
| CAATGAGTCAAA | 43.4852773091062 | 0.542582524024614 |
| CGGTGTGACTCA | 43.5159948282835 | 0.714760032396175 |
| CTATGACTCAGC | 43.5286773565448 | 0.460634483744507 |
| AGTGACTCATCT | 43.5442833289734 | 1.08042639127684  |
| GATGAGTCAAGC | 43.6426437362492 | 0.706577513188254 |
| TTAATGAGTCAA | 43.7395136953221 | 0.328514848961164 |
| GCTATGAGTCAA | 43.7691226027581 | 0.276493563297184 |
| GCAGATGAGTCA | 43.824899772287  | 0.561315550020926 |
| ATGACTCACTAA | 43.8272931317094 | 1.60612734553204  |
| TATGACTCAACA | 43.8753055749161 | 1.13331851053994  |
| TGTGACTCACCC | 43.8824885468319 | 0.618011507154819 |
| GCAATGAGTCAA | 43.8944512662039 | 0.330300041606662 |
| TGTATGACTCAT | 43.9807606964398 | 2.06343305018489  |
| GCCTGAGTCATC | 44.0791593270073 | 0.222802492399027 |
| GTGACTCACGGT | 44.121437316292  | 0.757001344738181 |
| ACTGTGACTCAG | 44.1288693280638 | 0.532970358238081 |
| AAGTATGACTCA | 44.2051028406038 | 1.34976011093832  |
| GGATGAGTCAAC | 44.2074087343776 | 0.761951439849646 |
| CTATGACTCACT | 44.2138369259037 | 1.80408456483799  |
| AATGAGTCAGCG | 44.2402027093219 | 1.80649726968566  |
| CTGATGAGTCAA | 44.2559202139388 | 0.883745312642213 |
| AAAATGAGTCAA | 44.3367603083585 | 0.514596558357897 |
| GGATGAGTCAAG | 44.3550700848117 | 0.513167008945341 |
| AGCAATGAGTCA | 44.3838673506904 | 0.310262492712802 |
| AATGACTCACGT | 44.4041644740272 | 0.806090803942434 |
| ATATGAGTCAGG | 44.4273670686405 | 0.555476403709767 |
| TTGTGACTCAAG | 44.5098584751916 | 0.24007264030533  |
| GTTATGACTAAT | 44.5198226732231 | 1.8204441170933   |
| CGAATGAGTCAA | 44.5435609175009 | 0.296769805537475 |
| ATGACTAATGGA | 44.729184380717  | 0.11502907701569  |
| ATTGTGACTCAC | 44.7828476547436 | 0.723186521033162 |
| ACAGATGAGTCA | 44.8881236280444 | 0.910036301275365 |
| CAGATGAGTCAG | 44.9073395646374 | 0.838043907691225 |
| CTATGACTCACG | 44.9280474200685 | 0.187542938945056 |
| CTGTGACTCAAA | 44.9655985609278 | 0.656291846960331 |

|              |                  |                   |
|--------------|------------------|-------------------|
| ATGTGACTCAAA | 45.1108694612211 | 0.415240423499557 |
| GCGATGAGTCAA | 45.1709160352895 | 0.320307358648792 |
| TAATGAGTCAGG | 45.1721939948955 | 0.584381255288914 |
| CGAGATGAGTCA | 45.2094669439284 | 1.05180669449161  |
| TGATGAGTCAGG | 45.2970690670732 | 0.27731746851623  |
| CCAGTGACTAAT | 45.3416932769362 | 0.136893609890786 |
| ATGACTCACGTT | 45.4313243651396 | 1.89146313746743  |
| GTGACTCACGCT | 45.4421798718037 | 0.664871152378601 |
| TGAGTCAATGCA | 45.4501347202327 | 0.411748742487083 |
| TGTGACTCAGCC | 45.4807616278121 | 0.494665620232331 |
| AATATGAGTCAA | 45.4986635899041 | 0.573509830901441 |
| GATGAGTCAGCA | 45.5229171059179 | 0.989384018051595 |
| ATGACTAATAAT | 45.5386562636914 | 0.613428745370189 |
| TTGAGTCATCAC | 45.5442933018684 | 0.426813294006621 |
| GTGACTCACCCA | 45.5516433624774 | 1.03752734395485  |
| CGGTGACTCACT | 45.6976300495508 | 0.783816358875465 |
| AGTGACTCATGA | 45.7420651845186 | 0.383283212178771 |
| AGATGACTCACT | 45.8550046920459 | 1.82601839282799  |
| TATGACTCAATA | 45.8569258712522 | 0.776427780634607 |
| TAAATGACTCAT | 46.1063462617279 | 1.7783823141619   |
| CACATGACTCAC | 46.1084095513803 | 0.868494658619815 |
| AGTGACTAATAA | 46.1464275051514 | 0.432130525400944 |
| ACGATGAGTCAA | 46.1607150466005 | 0.703576099037825 |
| ATTGAGTCATCA | 46.1963044925418 | 0.58147800323788  |
| AGAGTGACTAAT | 46.2153234921467 | 0.474288665362126 |
| AACGTGACTCAC | 46.2211561012147 | 1.75096740021865  |
| CAATGACTCACA | 46.2859479907077 | 1.12261404209687  |
| TGTGACTCACGT | 46.4424814548974 | 1.81212997677218  |
| ATGGTGACTCAT | 46.4848985893514 | 1.9043324514121   |
| ATGACTCATGTC | 46.5982435240511 | 1.81045948285657  |
| CATGACTCATGC | 46.6628417217941 | 1.50375434830484  |
| GATGACTAATGT | 46.6754807681922 | 1.01563046293263  |
| CTATGACTAATC | 46.7857686887337 | 0.371339876420335 |
| GTGACTCATCTT | 46.8505767394855 | 1.15013120911145  |
| TGAATGAGTCAG | 46.8532547510643 | 0.726904946649315 |
| GGGATGAGTCAG | 46.8588906364038 | 0.234999170549198 |
| TAGTGACTCATG | 46.9405905556517 | 0.643171957466175 |
| TTATGAGTCAGA | 47.0064491892378 | 1.31202459545649  |
| TAATGACTCACT | 47.0346192292642 | 1.16691881614146  |
| ATGTGACTCAAC | 47.1160422493804 | 0.663072373822688 |
| CATGTGACTCAG | 47.2524135106199 | 0.306518819301052 |
| GTGACTCACATG | 47.2592336882344 | 1.71280970358465  |
| TTGTGACTCAGC | 47.4131725808303 | 0.371358514914133 |
| ATGACTCATTCC | 47.428515061133  | 1.20851147479365  |
| GCCGATGAGTCA | 47.5043863400694 | 1.77257662466353  |
| GGGATGAGTCAA | 47.5067409655975 | 0.444124299042772 |
| TATGACTCACAA | 47.6017786280676 | 1.62925376068442  |
| GGGGATGAGTCA | 47.6633338193553 | 0.22704104278307  |
| GTGTGACTCAGC | 47.8172544464222 | 1.051589809000095 |
| GTATGAGTCAGC | 47.9409110869398 | 1.73229433251054  |
| TAATGAGTCAAA | 47.9468404565704 | 1.32610351164007  |
| AATGACTCACCT | 47.9732118915652 | 1.72219222931198  |
| AAATGAGTCAAG | 48.2335697342911 | 0.197791992025282 |
| ATGACTAATTTT | 48.2461915513325 | 0.109969144155221 |

|              |                  |                    |
|--------------|------------------|--------------------|
| TGTGACTCAACG | 48.272333892053  | 0.701807671369507  |
| AATGACTAATAT | 48.3373327771126 | 1.4054990378303    |
| TATGAGTCAGGT | 48.3608918630265 | 1.01767630281227   |
| CCAATGACTCAT | 48.4174500349486 | 1.79013786541302   |
| TTGATGAGTCAG | 48.4669291536601 | 0.766193408491831  |
| ACTATGACTAAT | 48.543499966766  | 1.52784116105413   |
| AGTGACTCACCC | 48.5539548673267 | 1.47334795447411   |
| AGGTGACTCACG | 48.5784424610165 | 0.819024804376048  |
| CGTGACTCACCT | 48.6954692171294 | 1.10472356526404   |
| AGATGACTAATG | 48.7231335832162 | 0.50156032402488   |
| GAATGACTAATG | 49.1975887714725 | 0.468514252518555  |
| TGTGACTCAACC | 49.2479775590757 | 1.20745086655157   |
| CATGACTAATTA | 49.3376822348668 | 0.688071810430471  |
| TGATGAGTCAGA | 49.3773785914292 | 0.961962255723027  |
| CTATGAGTCAGA | 49.6009637546109 | 1.71105160901682   |
| AGCTGTGACTCA | 49.6672970370282 | 0.391306999963763  |
| AGATATGACTCA | 49.6749725663415 | 1.34834078474248   |
| TGTGACTCAGAA | 49.6826640239699 | 0.625127763378936  |
| TCTGTGACTCAC | 49.7650860339462 | 0.646720905693292  |
| AGATGAGTCAAG | 49.8088382812    | 0.460714410845728  |
| ACCATGACTCAT | 49.9489934755916 | 1.78263638491015   |
| ATATGAGTCAAT | 50.2198977447541 | 0.646970929130823  |
| TTGAGTCATCCA | 50.2610690288456 | 1.48583506343189   |
| GTATATGACTCA | 50.2821769712629 | 1.71228899762759   |
| ATGACTCATGTA | 50.4148864456077 | 1.38914232742667   |
| GCTTATGACTCA | 50.4693356668129 | 1.31916993362246   |
| ACGTGACTCATT | 50.5333472338625 | 1.78904222546068   |
| ATCATGACTCAC | 50.7300686995773 | 1.58502589442528   |
| TAATGACTCACC | 50.7323420642639 | 1.75231477316483   |
| TCGTGACTCACA | 50.8003676131627 | 1.38861608798553   |
| ACCTGTGACTCA | 50.8456654190297 | 1.75969723012774   |
| GATGTGACTCAG | 51.1026597931507 | 0.429013223118976  |
| ACGATGACTAAT | 51.1952307405441 | 1.32226544671485   |
| TATGACTAATAA | 51.2819235358281 | 1.7298086537891    |
| TTATGACTAATT | 51.4344229049671 | 1.72660042017435   |
| GGAATGACTAAT | 51.4581284163052 | 0.672074281449141  |
| GTGACTCACTAT | 51.6208236522815 | 0.655783881130773  |
| GTATATGAGTCA | 51.9531572119992 | 0.700108958848857  |
| CAATGAGTCAAG | 52.0951310029583 | 0.249790810506974  |
| AGTGACTCACGG | 52.1587227569898 | 0.7234474444852998 |
| TGTGACTCAACA | 52.2870556580965 | 0.722491922120959  |
| CGTGACTCACTC | 52.4068679983244 | 0.632673703592664  |
| GTGTGACTCAGG | 52.5286405561764 | 0.257352192471675  |
| GGTGACTCACAG | 52.5783515587373 | 1.75868975107972   |
| GTGACTCACCTT | 52.6884802444548 | 1.6716153723247    |
| CATATGAGTCAG | 52.7432277052208 | 0.942849002611303  |
| GATGAGTCAAGG | 52.7997340334923 | 0.498486963017596  |
| ACCGTGACTCAC | 53.0573889163996 | 0.483063189083402  |
| ACCAATGAGTCA | 53.421363985509  | 1.59775827578709   |
| TTTGTGACTCAT | 53.6291286985011 | 1.55651702280526   |
| GCGGTGACTCAT | 53.6675892588789 | 1.74745833112058   |
| ATGTGACTCAGA | 53.6761938758322 | 1.22551288881924   |
| CTGATGACTAAT | 53.7007717703416 | 1.7732187267242    |
| TGTGACTCAGCA | 53.7149884648213 | 0.453518434899254  |

|              |                  |                   |
|--------------|------------------|-------------------|
| TGAGTCATCCGC | 53.739675573398  | 1.10030468285265  |
| GCAGTGACTCAC | 53.8086619496644 | 1.64473114368374  |
| AGTGACTAATCC | 53.8141701988028 | 0.74378412683963  |
| CTATGACTAATT | 53.9034665320345 | 1.25277471238638  |
| CGCATGACTCAC | 53.9486087801067 | 0.774862208099973 |
| CAAATGACTAAT | 54.1677253096274 | 1.68766760729456  |
| GTGACTCATTCC | 54.2767800117568 | 1.71202874121906  |
| TAGTGACTCATT | 54.2982630107073 | 1.2644869443663   |
| ATGACTCACGGC | 54.3493665904341 | 0.862517743490858 |
| CGTGACTCACAT | 54.3836632870794 | 0.561989435723743 |
| CATTTTGACTCA | 54.3861805812794 | 0.265301301319569 |
| AATGACTCACAT | 54.4104753876329 | 1.38936037123973  |
| TGTGACTCACCT | 54.5011669413828 | 1.74914549007408  |
| TGGTGACTCATA | 54.5236944746704 | 1.72902773461763  |
| CTGAGTCATCCA | 54.6732585758844 | 1.72322006142571  |
| TATGAGTCAAAG | 54.6841107626296 | 0.849680135001622 |
| ATATGACTAATT | 54.694341220874  | 1.66738328864867  |
| CCTGTGACTCAG | 54.7668467083624 | 0.674615096440086 |
| TTCATGACTAAT | 54.8392859567935 | 0.526769483459802 |
| CCGTGTGACTCA | 54.8424089964309 | 1.14356324908884  |
| TATGACTCAGCA | 55.0188354525799 | 1.05517318865662  |
| TTGAGTCATCGC | 55.0592693517684 | 0.23974839724209  |
| ATTTGAGTCATC | 55.1705811276271 | 0.946118032235486 |
| GTGACTACAAC  | 55.204171615925  | 0.979827559393614 |
| GTGACTCATGAA | 55.2106546048169 | 1.70280756566314  |
| GTGACTCACGTC | 55.2630475321019 | 1.58880879846982  |
| CGATGAGTCAAG | 55.287750085914  | 0.739662476953582 |
| GGGGTGACTCAT | 55.2961463753331 | 1.20908024900009  |
| TATGACTCAAGA | 55.3928457831294 | 0.763610264535231 |
| CGTATGACTAAT | 55.4402135710981 | 1.0432573984458   |
| GTGATGACTAAT | 55.4626188301142 | 0.735948773441894 |
| TCTGAGTCATCC | 55.4763402835581 | 1.67336216822492  |
| GTGACTCATAAC | 55.5518670811834 | 1.45924034940149  |
| CCAATGAGTCAG | 55.5629621705944 | 0.673415645396049 |
| CCAATGAGTCAA | 55.6139577181115 | 0.337589912359916 |
| GTGTGACTCAAG | 55.9436167595904 | 0.108392764097281 |
| AGATGACTAATC | 56.1049198677637 | 1.0384768804346   |
| ATGACTCATTTG | 56.1421589384219 | 2.00729052028522  |
| GCATGACTCATC | 56.2985300051264 | 0.546311710217993 |
| ACGGTGACTCAC | 56.3278551916144 | 1.16525191709702  |
| GTGACTCACGGG | 56.464122742382  | 1.2391802251636   |
| TCATGACTAATA | 56.478266838484  | 1.31595582398363  |
| GCTGAGTCATCT | 56.8768184363742 | 0.831278485135982 |
| CGTATTGACTCA | 57.1468732389636 | 0.188646341504701 |
| GCGGTGACTCAC | 57.1754576888499 | 0.945676575791832 |
| ATAATTGACTCA | 57.1961357542372 | 0.533288130733728 |
| TTTGTGACTCAG | 57.2515770894969 | 0.832294056759898 |
| TGTGACTCACGG | 57.4163285332504 | 1.65233431547897  |
| CTGTGACTCAGG | 57.4810724646026 | 0.714701995602032 |
| GAGTGACTCATA | 57.580294970102  | 1.52180000729235  |
| GAATGAGTCAAG | 57.6910992130807 | 0.564790729233054 |
| ATGACTAATCTC | 57.7112941550816 | 1.6365089937471   |
| GGTATGACTCAA | 57.7359316036797 | 1.64755594450018  |
| TCAATGAGTCAA | 58.5515386895385 | 0.454689383391583 |



|               |                  |                   |
|---------------|------------------|-------------------|
| CTTATGAGTCAA  | 58.6716200094395 | 1.61050220935998  |
| TGTGACTCAGGA  | 58.7884193351816 | 0.423937431142218 |
| TCATGACTCACG  | 59.0847728982121 | 1.63614542416291  |
| TATGAGTCAGCG  | 59.1502239777675 | 1.30303569107355  |
| AATGAGTCAGGG  | 59.204910840101  | 1.58280600177024  |
| TAGTTTGACTCA  | 59.2317246457041 | 0.211574662411777 |
| GTGATGAGTCAA  | 59.3724898949172 | 1.60140308294404  |
| ATGTGACTCAGC  | 59.5198050751551 | 1.0615912814619   |
| ATGACTAATACC  | 59.5234910657373 | 1.51095952674268  |
| CTATGACTCACC  | 59.6220843247478 | 1.64087219477696  |
| GGAGTGACTAAT  | 59.9198577364336 | 0.258510779383344 |
| AGTGACTAATGA  | 59.9231249702495 | 0.654933035214471 |
| TATGACTCACCC  | 59.9452828136208 | 1.69465049549522  |
| GTGACTCATATA  | 60.0164569013693 | 1.20153607120744  |
| ACAATGACTAAT  | 60.0204748315714 | 1.31118362058197  |
| CGGTATGAGTCA  | 60.101609299693  | 1.28669071474428  |
| GTAATGAGTCAA  | 60.3788839208523 | 1.43886704612976  |
| ATATGACTAATA  | 60.4406929588222 | 1.43837195533653  |
| TTGTGACTCAGG  | 60.5596344494919 | 0.668156280878847 |
| AGGGTGACTCAC  | 60.681769791498  | 1.63925055638635  |
| GAATGAGTCAGG  | 60.6844559961513 | 1.00058733388059  |
| GATGACTAATAA  | 60.7856907587794 | 1.40897662627806  |
| GCTTATGAGTCA  | 60.7994559631565 | 1.30430127225143  |
| ATGACTCATAGC  | 60.8096759905988 | 0.917963484774368 |
| TGAGTCATCGAG  | 60.8312432120766 | 1.67279596106447  |
| GTCATTGACTCA  | 60.837683504589  | 0.283622453362461 |
| ATGACTAATCTT  | 60.8648343304457 | 1.66014186152177  |
| ATATTTGACTCA  | 60.9324678315977 | 0.753406834203097 |
| AGTGACTCACCT  | 60.9358612983528 | 1.24308020283702  |
| TTATGAGTCAGG  | 60.9569914162704 | 1.24618071740707  |
| TCCATGACTCAT  | 60.9755609024972 | 1.59495671151364  |
| TGGTGACTCACT  | 61.0017632523733 | 1.09000953365025  |
| TATGAGTCAAGT  | 61.0541538407523 | 0.48500430371464  |
| ACATGACTCACT  | 61.0691044884269 | 1.62361781901964  |
| AGTGACTCACGT  | 61.4880337901472 | 0.762891431380944 |
| AACATGACTAAT  | 61.5816644986471 | 1.39364623777833  |
| GTAATGACTAAT  | 61.7489364141358 | 0.99703947520133  |
| GTGTGACTCACT  | 62.1030242210807 | 0.91613541758732  |
| TCTGTGACTCAA  | 62.139719220047  | 0.702844159643189 |
| GCCGTGACTCAC  | 62.1729975648672 | 0.253375706035971 |
| GAAGTGACTAAT  | 62.7271837514236 | 0.332175030558831 |
| ATTATTGACTCA  | 62.9147952498964 | 0.786690339735864 |
| CGATGAGTCAAA  | 62.9322048340819 | 0.819178161767435 |
| AGTATTGACTCA  | 62.9887094133481 | 0.289148172951301 |
| ATCTTTGACTCA  | 63.0291075315619 | 0.417505304187222 |
| TAATGAGTCAAG  | 63.167033104876  | 0.680175001113205 |
| TCTATGAGTCAA  | 63.5490121560014 | 1.59525303271458  |
| GGATGTGACTCA  | 63.6445788242897 | 0.879400545349569 |
| CAGTGACTAATC  | 63.6898189741372 | 1.39543976964066  |
| CAAGTGACTAAT  | 63.7640684636206 | 0.395432435517915 |
| CAATGACTCACC  | 63.7813104411556 | 0.765222372668358 |
| TATATTGACTCA  | 63.8925231105761 | 0.662054480433384 |
| AACCTTTGACTCA | 63.9703124266524 | 0.473814327054757 |
| TGAGTCAATGAA  | 63.9794931574184 | 0.526990451125043 |

|              |                  |                   |
|--------------|------------------|-------------------|
| ACAGTGACTCAT | 64.0037797220504 | 1.96420760469512  |
| GACTTTGACTCA | 64.0256218167798 | 0.422232797177864 |
| ATGACTAATGGC | 64.2378947675912 | 0.284326379893109 |
| GGGTATGAGTCA | 64.3770948265018 | 1.01969710222246  |
| CGTGACTCACTT | 64.6759893448889 | 0.816875921898052 |
| TGTGACTCAAGG | 64.6954781277418 | 0.63613973582421  |
| CTGAGTCATCAA | 64.730541111946  | 1.57596938280407  |
| CATGACTAATGG | 64.749063500291  | 0.424508079363887 |
| CATGACTAATAG | 64.8318924827521 | 0.585433388607423 |
| ATGTGACTCAAG | 64.8458735293082 | 0.442747282492988 |
| GACTGAGTCATC | 64.989539799913  | 1.62773035077982  |
| ATGTTTGACTCA | 65.0093503248911 | 0.410653017395123 |
| GTATGACTCAGG | 65.0289564723691 | 0.811951093505576 |
| TATGAGTCAGCA | 65.2618797669342 | 1.52445482373741  |
| GTGACTCACTTC | 65.4738042819343 | 1.39660167677333  |
| TCGGTGACTCAC | 65.5205011628998 | 1.47196132481299  |
| AGCTATGAGTCA | 65.6494905056329 | 1.81211482184475  |
| GATGACTAATTT | 65.6683959566811 | 1.61833830112137  |
| TCCATTGACTCA | 65.6994900566663 | 0.179748270959726 |
| CCTATTGACTCA | 65.8714203118712 | 0.092882709598941 |
| CGTGTGACTCAT | 66.2052167948457 | 1.44024303343964  |
| ATGACTAATTTT | 66.2125304044226 | 0.405434449984034 |
| ATGTATGACTCA | 66.2201775824785 | 1.08648709785682  |
| AGTTGAGTCATC | 66.2658020499527 | 0.854598280241775 |
| TTGGTGACTCAC | 66.4713068197121 | 1.65066271711979  |
| CATTATGACTCA | 67.0391611790628 | 1.60064123957988  |
| TCCGTGACTCAT | 67.1666191154013 | 1.65272283664628  |
| AATGAGTCAGGC | 67.2378743516131 | 1.62080436872568  |
| CCGTGACTCATC | 67.2644991672058 | 1.5128002613658   |
| AGTGTGACTCAG | 67.4250544055525 | 1.37934132193151  |
| ATGACTAATAGC | 67.4481183527396 | 0.8425031924129   |
| TCTGTGACTCAG | 67.5418943719858 | 1.06513162332283  |
| TTATGACTCACT | 67.5565284985144 | 1.84082824353765  |
| TTTGAGTCATCG | 67.5758747918016 | 1.5566847514065   |
| AATATTGACTCA | 67.745501864988  | 0.683589834729907 |
| TGTGACTCAAAG | 67.8130533949427 | 0.815550875286359 |
| TAGTGACTAATG | 68.103214572115  | 0.543959525070555 |
| CGATATGAGTCA | 68.1073473115127 | 1.56828290758377  |
| GGTGTGACTCAA | 68.1800535001881 | 0.784970961748816 |
| TACATTGACTCA | 68.4668955982146 | 0.635884551362839 |
| ATGACTAATAGA | 68.4812827618779 | 0.82640552973     |
| GGTATGAGTCAG | 68.7158623563188 | 0.975522746840283 |
| TAGTGACTAATA | 68.7510389603342 | 0.525839573416753 |
| ATGACTAATGAC | 68.9152330174403 | 0.333662998565026 |
| AGTGACTCATCA | 69.1940184229777 | 1.38504226471534  |
| CGATTTGACTCA | 69.4855467134074 | 0.361268842251169 |
| TTGTGACTCACT | 69.6158074049143 | 1.49300902813476  |
| TACATGACTAAT | 69.7212489548386 | 0.486759396057561 |
| CCATGACTCATC | 69.7650047485287 | 0.844543471872081 |
| ATGACTAATGTC | 69.8191751463256 | 0.351819250684837 |
| TGGATGACTAAT | 70.0245634327796 | 1.07814464027123  |
| GGTATGACTCAT | 70.0588066377075 | 2.00461874583319  |
| CTCATTGACTCA | 70.0754174049798 | 0.380164641989115 |
| GTTATTGACTCA | 70.1163672371335 | 0.20252317902925  |

|              |                  |                    |
|--------------|------------------|--------------------|
| ACCTTTGACTCA | 70.3231349805762 | 0.27057449839398   |
| CAGAATGAGTCA | 70.5481835910689 | 1.56409834717878   |
| ATCATTGACTCA | 70.6070104998932 | 0.272729195707327  |
| CTAATTGACTCA | 70.6469028049776 | 0.405287108940681  |
| GGTGACTCACTC | 70.7631784431978 | 1.73158223850288   |
| TATGTGACTCAG | 70.776457735367  | 1.59017799406483   |
| TGTATGAGTCAA | 70.8350176044011 | 1.22826441642997   |
| CATGACTCACCC | 70.8546203874661 | 0.45453967692128   |
| TTTATGACTCAC | 70.9037063135802 | 1.90294832888524   |
| AATGACTAATCT | 70.9424689319042 | 1.0496279703386    |
| GCCTGTGACTCA | 71.1728425147764 | 0.343357989894076  |
| GCCGTGACTCAT | 71.207307621183  | 1.31078963635265   |
| TATGACTCAGGT | 71.3492514996199 | 1.52661868916644   |
| CTGAGTCATCCG | 71.5818515000115 | 1.61513587480275   |
| GTATGAGTCAGG | 71.6375244912274 | 1.53921372779669   |
| GTGACTCATAAA | 71.6550260461405 | 2.41099702847649   |
| TAATGACTAATC | 71.8172408738927 | 1.53258679477182   |
| AATGAGTCAGCA | 71.9439306029905 | 1.53169059821244   |
| TGAATTGACTCA | 71.9698848747908 | 0.434619204217859  |
| AATCATTAGTCA | 72.1369027264183 | 0.457299909294524  |
| GTATGACTAATG | 72.2951247874854 | 1.53111498574332   |
| ATGACTAATGCG | 72.3044926546536 | 1.54223203394529   |
| AATGTGACTCAG | 72.3089112899443 | 1.1777933783945    |
| ACTATGAGTCAG | 72.4509545870821 | 1.53184804874308   |
| GCAATTGACTCA | 72.4709660333766 | 0.316204177098209  |
| AATGACTAATGA | 72.5542761901835 | 1.4912160165143    |
| CTGTGACTCAAG | 72.7601772287596 | 0.0812174540738487 |
| AATGACTACCA  | 72.7622502569678 | 1.66081303713773   |
| GTGACTCATCCC | 72.8221482358149 | 0.560614306527444  |
| CTCGTGACTCAT | 72.9950000445486 | 1.2735999950361    |
| ACAGTGACTAAT | 73.1042544610636 | 0.47886666295871   |
| GGTGACTCACTT | 73.2235301740746 | 1.80406968013275   |
| ATGACTAATGGG | 73.5185516776859 | 0.818139878327046  |
| GCGCATTAGTCA | 73.821072951895  | 0.217082102943568  |
| CTGTGACTCACT | 73.8621837880161 | 1.54630894523972   |
| AAGTGACTAATG | 74.0448537000925 | 0.215116136126271  |
| TGAGTCAAATAA | 74.0554686554884 | 0.955154332363225  |
| ACGCATTAGTCA | 74.2530161457507 | 0.405006841305065  |
| TGTGACTCAAAC | 74.3049860516448 | 1.46453122729444   |
| GATGAGTCAGGC | 74.4159647725211 | 1.46641634347124   |
| TCTTTTGACTCA | 74.4360397719164 | 0.252678757579746  |
| ATGACTCACAC  | 74.4647281608014 | 1.1289639142871    |
| ACTTTTGACTCA | 74.5885217968586 | 0.285658842903729  |
| TTGTGACTCACC | 74.6194418393296 | 1.44830597716723   |
| GATGACTCATCA | 74.7408567449073 | 1.58190984352212   |
| ACAATTGACTCA | 74.9714948670382 | 0.168581185313373  |
| GTGACTCATGAG | 74.9814808659477 | 0.71144293389992   |
| AACTCTTAGTCA | 75.1150446064184 | 0.527643075467189  |
| ATGACTAATCCG | 75.2041862252971 | 1.29799368934662   |
| GACATGACTCAT | 75.2305839502718 | 1.31961574474936   |
| AGCGTGACTCAC | 75.2466204347852 | 1.50911025510124   |
| CTGTTTGACTCA | 75.7094515578806 | 0.584676580618536  |
| TTGTGACTCACG | 76.3366845677424 | 1.48414177843337   |
| AATGAGTCAAGA | 76.4107277329565 | 1.45591726941402   |

|              |                  |                   |
|--------------|------------------|-------------------|
| CATGTGACTCAA | 76.4421812220315 | 1.09487072849135  |
| TACCATTAGTCA | 76.4554983241944 | 0.539068549479474 |
| TCACTTGACTCA | 76.5914197916449 | 0.511378487196255 |
| CTATGACTCAAC | 76.7217770291838 | 1.16086242261421  |
| AATGACTCATGA | 77.1078835496927 | 2.34034731438634  |
| ATGACTCATGAG | 77.1561848845497 | 2.15643707593743  |
| TCATGACTAATG | 77.3056222800874 | 1.48970137079363  |
| ACCATTGACTCA | 77.7711146741453 | 0.716203456434151 |
| TTGATGAGTCAA | 77.8430262455909 | 0.859706522631158 |
| ATGACTAATGCC | 77.978497994349  | 1.48351238780682  |
| TATGAGTCAATC | 78.068705809116  | 1.18357451812114  |
| CATGACTCACTA | 78.0785827677412 | 1.70140074748673  |
| ACTCTTGACTCA | 78.142874689726  | 0.2650290481502   |
| ATGACTCACAGA | 78.2054000542976 | 1.43308744904013  |
| ATGACTAATGAT | 78.293245867467  | 0.47012859886364  |
| AATGACTCACGA | 78.8649409379646 | 1.50297085042552  |
| GTGACTCACACT | 78.9282542675186 | 1.71872151990343  |
| TGTGACTCACTA | 79.0121557009231 | 0.813423117436363 |
| CCCATTGACTCA | 79.0970302063509 | 0.184809630424327 |
| TGAGTCAATTAA | 79.5144549179204 | 0.666710627185963 |
| CACTTTGACTCA | 79.5188935056931 | 0.459343538804537 |
| GCATATGACTCA | 79.5586681015315 | 1.64703932493589  |
| TAATGACTCATG | 79.5825936623668 | 1.32011010832227  |
| AACTGTGACTCA | 79.6728819584722 | 1.49888864180666  |
| TAGTGACTCACT | 79.9553154985789 | 1.51901565874889  |
| AATGACTCACGG | 80.1914103471562 | 1.84316605125444  |
| TCTATTGACTCA | 80.2768486070168 | 0.245418156557682 |
| CTATGACTAATA | 80.8409939443094 | 1.7631549074356   |
| GATGACTAATGC | 81.1026171633298 | 1.87883376917243  |
| AGATATGAGTCA | 81.1341628491865 | 1.28743371802829  |
| GTATTTGACTCA | 81.4109638083594 | 0.514963367603187 |
| CACATTGACTCA | 81.6195570433728 | 0.505717990890422 |
| CAACTTGACTCA | 81.6531260401468 | 0.819099440502784 |
| TGTGTGACTCAG | 81.855458129534  | 1.44503722938983  |
| TCATTTGACTCA | 81.9099961205151 | 0.23559481928211  |
| CTCTTTGACTCA | 82.2328539977563 | 0.436180209559602 |
| ATCATGACTAAT | 82.2564815622131 | 1.47310181883008  |
| TATGTGACTCAC | 82.477562435711  | 2.09677479155265  |
| CAAATTGACTCA | 82.6278975593709 | 0.398000171968349 |
| ATATGACTCAAT | 82.7747483787175 | 1.89191221927958  |
| TAAATTGACTCA | 83.1900559405352 | 0.402621229202654 |
| GCGTGTGACTCA | 83.190176618909  | 0.729051983265137 |
| CGATGAGTCAGG | 83.2196898594447 | 1.40423276193753  |
| TCCTTTGACTCA | 83.3995064905336 | 0.408737705464718 |
| CCTATGAGTCAG | 83.4920958214851 | 1.40592867975142  |
| TAGATGACTAAT | 83.6842803752838 | 1.26685105352269  |
| TACTTTGACTCA | 83.764951928236  | 0.285592899404394 |
| CTTGAGTCATCG | 83.8188176411824 | 1.01422913160009  |
| ATTCATTAGTCA | 83.8363329407742 | 0.690880836152915 |
| CGTTGAGTCATC | 84.0036223415781 | 1.97483839672785  |
| TCAATTGACTCA | 84.0532325748267 | 0.44436005184725  |
| ATACTTGACTCA | 84.0581967880027 | 0.211998213108015 |
| CCTTTTGACTCA | 84.1109525633221 | 0.216722722500595 |
| TGTGACTCAAAA | 84.2405936087583 | 0.962528778893093 |

|              |                  |                   |
|--------------|------------------|-------------------|
| GTGACTCACCTG | 84.6571935895242 | 2.26366069975192  |
| CCCTTTGACTCA | 85.3249209338334 | 0.258951802241677 |
| TGACTAATGGAA | 85.4442399998978 | 0.667316046931854 |
| GTGACTCATGTG | 85.6341748654634 | 1.45907463970917  |
| ATGACTCACGAT | 85.904766528583  | 1.66577862988697  |
| CTTATTGACTCA | 85.9372598464265 | 0.562695441398573 |
| TGAGTCAATAAA | 85.9677543215619 | 0.74434738752607  |
| ATGACTAATGTT | 86.2555154517756 | 0.613696170168714 |
| TCCATGACTCAC | 86.3993328019185 | 1.81554236886593  |
| GTGACTCACACA | 86.4813396229932 | 1.46806097765353  |
| ATGACTAATCCT | 86.5605424668092 | 1.6122812185105   |
| CGCTTTGACTCA | 86.7354479768678 | 0.319244803095211 |
| CAGCTTGACTCA | 86.8001105083127 | 0.196997688813228 |
| CCAATTGACTCA | 87.0075060345641 | 0.377061998050331 |
| GGTATGACTAAT | 87.4106737946011 | 1.28895408168229  |
| CCACTTGAGTCA | 87.7153933667772 | 0.31986927571787  |
| AAATGACTAATT | 87.7410607809392 | 0.948753873660417 |
| TAGTGACTCACC | 87.9972301305321 | 1.4564727763222   |
| GCCATGACTAAT | 88.342265368443  | 0.940402750774607 |
| ACAGTGACTCAC | 88.3898263458482 | 1.95203262575231  |
| GTTGTGACTCAG | 88.5305127818983 | 1.32091861954052  |
| AATGAGTCAAGG | 88.6063302874034 | 1.40239530837026  |
| CAATGACTAATT | 88.6858786171068 | 2.05934333641856  |
| TATGAGTCAAAC | 88.7020648679571 | 1.48918775258132  |
| CCATTTGACTCA | 88.7801890462323 | 0.404552346764069 |
| CGACTTGACTCA | 88.8950337195256 | 0.537286019441731 |
| ATGTGACTCACT | 88.9616577433804 | 1.28377547527288  |
| TAGTGACTCACG | 89.0980971420046 | 0.703014693213058 |
| ACTGAAGAGTCA | 89.2388638746401 | 0.743360168159474 |
| GTGACTCACAGG | 89.5857196286646 | 1.90987636038389  |
| GTATGACTCATG | 89.7935663135089 | 2.20252450198876  |
| CAGGTGACTCAC | 89.9922311242037 | 1.5626777206936   |
| TGTGACTCAGGG | 90.2213965499793 | 0.650627756660744 |
| CTTGTGACTCAA | 90.2344146619458 | 0.668931209019839 |
| ATGCTTGACTCA | 90.487017152236  | 0.556861205573997 |
| CGTGACTCACTA | 90.5195769819782 | 1.69951420710873  |
| TATCTTGACTCA | 90.5240033286287 | 0.365117464667685 |
| CTGCTTGACTCA | 90.7656316421688 | 0.28826709742333  |
| GGTATGAGTCAA | 90.9146166661451 | 1.16020022358518  |
| AGTTTTGACTCA | 91.1946843587184 | 0.406086790322499 |
| TGACTAATGAAA | 91.3177985267868 | 0.407880775309871 |
| CCGTTTGACTCA | 91.4140824733059 | 0.341851648096773 |
| GCCTTTGACTCA | 91.4719521398809 | 0.554582725634575 |
| TGAGTCAAGAAA | 91.5159469227304 | 0.56507894324508  |
| TTATGACTAATC | 91.5726811308776 | 1.44940753663072  |
| TGACTTGACTCA | 91.7232820126485 | 0.377735107401642 |
| GACATTGACTCA | 91.7253835699228 | 1.41362712355551  |
| GATTTTGACTCA | 91.8841911932336 | 0.5640443200127   |
| GCTATTGACTCA | 92.024379312701  | 0.807223570250283 |
| TGAGTCAAGCAA | 92.0602917161588 | 0.521624763609784 |
| TGAGTCAAAGAA | 92.1069393003054 | 0.620142288734545 |
| TGAGTCAATACA | 92.4126375666958 | 1.0014460727075   |
| CCATGACTCATA | 92.467972676458  | 1.59876483484131  |
| TATGTGACTCAT | 92.8235599094693 | 1.44935387523434  |

|              |                  |                   |
|--------------|------------------|-------------------|
| GATCTTGACTCA | 92.985423912934  | 0.337406971406715 |
| ATGACTAATGCA | 93.010871587411  | 1.59088250695672  |
| ATGACTCACATC | 93.1706364693541 | 2.21575562147445  |
| CACATGACTAAT | 93.3538976136057 | 1.39741998272786  |
| TATTTTGACTCA | 93.3996558961393 | 0.409101430642019 |
| GCCATTGACTCA | 93.59209577994   | 0.57013385437552  |
| CTATTTGACTCA | 93.6613763711403 | 0.345875879989588 |
| CTATGAGTCAGC | 93.8850058604399 | 1.54096103788648  |
| ATAACTTAGTCA | 93.9570302360392 | 0.628541976175573 |
| ACGTTTGACTCA | 93.9917434814712 | 0.408076760199819 |
| CATGACTAATGA | 94.0049281336385 | 1.3518427242859   |
| ATACATTAGTCA | 94.1055470740411 | 0.62168127609458  |
| CGACATTAGTCA | 94.292866645079  | 0.73236929382033  |
| GGCATTGACTCA | 94.4144306082242 | 1.00858989051234  |
| CGTGTGACTCAA | 94.5919466356935 | 1.4178495627305   |
| TAGCTTGAGTCA | 94.7823880566549 | 0.366456399163253 |
| GTGACTCACGCG | 94.8004066288252 | 1.54911687416141  |
| ACACTTGAGTCA | 95.5770070474514 | 0.550686031907345 |
| AATTTTGACTCA | 95.6625343190689 | 0.53002309633281  |
| TGAGTCAAACA  | 95.9372363252879 | 0.621994141610046 |
| TCACATTAGTCA | 96.0042459544943 | 0.647826608818634 |
| GATATGACTCAG | 96.0632128790884 | 2.08895605615292  |
| CATCTTGACTCA | 96.100191110283  | 0.561980516521891 |
| ACGCTTTAGTCA | 96.2732582436263 | 0.944146425255147 |
| TAACTTGACTCA | 96.5290247649323 | 0.503328786845826 |
| GGTTTTGACTCA | 96.8295389352529 | 0.982066405348966 |
| CGGGTGACTCAT | 96.8813631848747 | 1.5988315484698   |
| TAACTTGAGTCA | 97.270413559261  | 0.633812075798539 |
| TGACTCAAGGAA | 97.482042572476  | 0.509063686849679 |
| CTTCTTGAGTCA | 98.004847468101  | 0.316419511309351 |
| ATTGAAGAGTCA | 98.2428509379222 | 0.334027899382589 |
| ACATCTTAGTCA | 98.5250889307453 | 0.353485668579803 |
| GCTCATTAGTCA | 98.7768324682199 | 0.458964288257694 |
| CGAATTGACTCA | 98.7858003439597 | 0.635040625495764 |
| TGAGTCAAGTAA | 98.8665906151312 | 0.435734344653681 |
| CAATTTGACTCA | 98.9294268232363 | 0.531517914033673 |
| AATGAAGAGTCA | 99.0493825021382 | 0.504128610657834 |
| GTAATTGACTCA | 99.1876205379241 | 0.494536869283676 |
| GATATGACTAAT | 99.388489953615  | 1.35747009582383  |
| CATGACTACCA  | 99.4397824931364 | 1.55569529998459  |
| TGACGTGTTTAA | 99.5478231617895 | 0.488346357717348 |
| CAATGACTAATG | 99.7239207674924 | 1.38888632840419  |
| CTCCTTGAGTCA | 99.9672602497312 | 0.313907727841245 |
| TACTCTTAGTCA | 100.28149352468  | 0.326379820595383 |
| ATGACTCATCCA | 100.302424122305 | 1.43024564244643  |
| CTATGAGTCATA | 100.314707401341 | 1.36117496455948  |
| ATGACTCACAAA | 100.585209323872 | 1.92378124743876  |
| CGTTTTGACTCA | 100.95664838518  | 0.345037090461834 |
| ACTCATTAGTCA | 101.045250701415 | 0.625203120997715 |
| AGTGAAGAGTCA | 101.090836682244 | 0.175665468746765 |
| CTAATGAGTCAA | 101.216966223305 | 1.41240774618354  |
| GATGAGTCAGCC | 101.416618348795 | 1.79372649201084  |
| ACCCTTGACTCA | 101.849351276912 | 0.268228090863978 |
| GTGACTCATCGC | 101.898463342083 | 1.43592031352751  |

|              |                  |                   |
|--------------|------------------|-------------------|
| GTCATCGATGAC | 102.392048056899 | 0.556878679687567 |
| TATGAAGAGTCA | 102.408231735069 | 0.240911653853051 |
| GGTCATTAGTCA | 102.452968282002 | 0.770822818884975 |
| AAAGAAGAGTCA | 102.576647673282 | 0.29096767235982  |
| ATGACTAATGAA | 102.628894528867 | 1.01485401427701  |
| TGTGACTCACTT | 102.655173060662 | 1.47874451514368  |
| CCGCTTGACTCA | 102.880688580661 | 0.480747037934132 |
| TCTCTTGACTCA | 102.894454859032 | 0.332088195835743 |
| TGACTCTTCGCA | 102.917253117511 | 0.195302428088554 |
| CAGTTTGACTCA | 102.963861001554 | 1.28789514854049  |
| TTGATGACTAAT | 103.028016490929 | 2.11320191417668  |
| AAACGTTAGTCA | 103.037598572481 | 0.507355606709585 |
| TGAGTCATCCCG | 103.261360072428 | 1.2009841857278   |
| AGAATTGACTCA | 103.401651159382 | 0.607565828278998 |
| TGACTAAGAGCA | 103.520031983682 | 0.333379860701112 |
| GTACATTAGTCA | 103.598172661428 | 0.370435679813906 |
| TGACTCAAGGCA | 104.064819132253 | 0.771167713273241 |
| TCCGAAGAGTCA | 104.116245212425 | 0.320778055294488 |
| ACCCATTAGTCA | 104.202734894471 | 0.465208500032524 |
| TGACTGATGTAA | 104.693583754961 | 0.946647926844123 |
| TGTGACTCAGGC | 104.865509909125 | 1.30363909385978  |
| TGAGTCAAAGCA | 104.918665193935 | 0.45137741992747  |
| TAAATTAGTCA  | 105.010576927328 | 0.711962631864142 |
| TGATGAGTCAGC | 105.088039667594 | 0.833954134475555 |
| ATCCTTGACTCA | 105.40474843147  | 0.294156413203154 |
| GAACATTAGTCA | 105.535527468747 | 0.405767857448118 |
| GCTTTTGACTCA | 105.600803491511 | 0.390425624930481 |
| TGACTCAAGACA | 105.6730008204   | 0.511531900343549 |
| TGAATGACTAAT | 105.965588341695 | 2.05541466266053  |
| ACTCTTGAGTCA | 105.971280030201 | 0.495517847611769 |
| CAGTCTTAGTCA | 106.11026630851  | 0.704254889757078 |
| TGAGTCAAGGAA | 106.331241159976 | 0.376077999143579 |
| TGAGTCATCCCC | 106.471732634351 | 1.44580724314006  |
| TCCCATTAGTCA | 106.493068976604 | 0.282940131026708 |
| ATAGAAGAGTCA | 106.554271658421 | 0.336211676974527 |
| CACCATTAGTCA | 106.597976854713 | 0.742584739756168 |
| CTCACTTAGTCA | 106.680103429509 | 0.615413558891319 |
| CAGCATTAGTCA | 106.698870724647 | 0.414726143742254 |
| GAATTTGACTCA | 106.711095252031 | 0.44874293269017  |
| ACATGACTCACC | 106.733716312412 | 1.34179529853728  |
| ATCCTTGAGTCA | 106.979509209114 | 0.347209130158169 |
| CGTGTGACTCAG | 107.631817897806 | 1.46383650322816  |
| GGCTTTGACTCA | 107.887026838086 | 0.208349790373492 |
| CTGTGACTCAGC | 107.988325242538 | 0.645774953287698 |
| CTATGAGTCAAG | 108.208729602991 | 1.35801659232283  |
| AATCTTGACTCA | 108.248736345194 | 0.695356543188412 |
| CTGCATTAGTCA | 108.565712410161 | 0.509471053826545 |
| CTTGAAGAGTCA | 109.291787278537 | 0.399880086777173 |
| AAGCTTGAGTCA | 109.503860228962 | 0.170061033200498 |
| ACACGTTAGTCA | 109.528106700592 | 0.851964769696846 |
| TGACATCAGTCA | 109.550459464934 | 0.788452626335164 |
| ACCTCTTAGTCA | 109.644947135877 | 0.45266512577146  |
| TGACTCTTCGAA | 109.823238669383 | 0.480371347370941 |
| AGCATTGACTCA | 109.946816033873 | 0.566604227500656 |

|               |                  |                   |
|---------------|------------------|-------------------|
| AAGCATTAGTCA  | 109.981477834033 | 0.742788648233744 |
| AGCTCTTAGTCA  | 110.057945639973 | 0.509424512722694 |
| GGGCTTGACTCA  | 110.344843007156 | 0.698032132459453 |
| CTACTTGAGTCA  | 110.462836550136 | 0.566517851274886 |
| GATATTGACTCA  | 110.567631208537 | 0.591589361548346 |
| CCTCTTGACTCA  | 110.724898635796 | 0.408622980162808 |
| GTCGAAGAGTCA  | 110.840579077259 | 0.299180414547051 |
| CATATTGACTCA  | 110.847731264039 | 0.395635370147416 |
| GATGAAGAGTCA  | 110.858255317108 | 0.255992588592695 |
| GTGACTCATGGT  | 110.871211688144 | 1.88708808659629  |
| TGAGTCAAACCA  | 111.005460065536 | 0.890859902940594 |
| TATGAGTCAAGA  | 111.080907607556 | 1.62715504319446  |
| TACACTTAGTCA  | 111.123461047206 | 0.558702264922317 |
| GCACATTAGTCA  | 111.259954260719 | 0.783182381527639 |
| TCAGAAGAGTCA  | 111.464670119623 | 0.32343060533141  |
| ACTATTGACTCA  | 111.507291136709 | 0.607804642481524 |
| GACCTTGACTCA  | 112.11217472975  | 0.564159084194938 |
| ATGACTAATAAAA | 112.17038582545  | 1.64034018724275  |
| CATGAAGAGTCA  | 112.262476370601 | 0.438251838319358 |
| ATTTCTTAGTCA  | 112.278764906962 | 0.631043168467312 |
| GTCATAGATGAC  | 112.475471096469 | 0.644895372442737 |
| CCACTTGACTCA  | 112.694162333826 | 0.483405073906669 |
| AGACTTGAGTCA  | 112.780688762561 | 0.577795895093769 |
| GTATCTTAGTCA  | 113.039362476277 | 0.487337350190568 |
| ACATTTGACTCA  | 113.189832195907 | 0.199822924601989 |
| AACCTTGACTCA  | 113.511070396098 | 0.525276112764967 |
| ACACTTGACTCA  | 113.527487644931 | 0.499429869324692 |
| AGTGACTAATGC  | 113.792566099858 | 0.358989229575341 |
| AGCTTTGACTCA  | 113.838307978304 | 0.405624331167626 |
| CATGACTAATTG  | 113.948435160264 | 1.9989301081613   |
| CTTCTTGACTCA  | 113.994289486174 | 0.121444159130187 |
| CTCCTTGACTCA  | 114.014120662532 | 0.41324231681298  |
| GGGCATTAGTCA  | 114.129873028162 | 0.487346854972926 |
| CGCCTTGAGTCA  | 114.369071793831 | 0.426259020099924 |
| CAATCTTAGTCA  | 114.386583964916 | 0.266186177943746 |
| CGATGAGTCAGC  | 114.897161594416 | 0.977411557384136 |
| CCACATTAGTCA  | 115.042423251408 | 0.987404315195888 |
| GTGACACAGTCA  | 115.055463226095 | 0.299232451552576 |
| CTCGTGACTCAC  | 115.098994031043 | 1.33915519697949  |
| TGAGTCAAGACA  | 115.243534322185 | 0.481267638726008 |
| AGCGAAGAGTCA  | 115.278496420792 | 0.473313379729113 |
| ATCCATTAGTCA  | 115.402871686347 | 0.461219884931991 |
| ATTCTTAGTCA   | 115.508748291782 | 0.391616767356865 |
| ATGACTAATAAG  | 115.522659603287 | 1.70951743860406  |
| AGTTATGAGTCA  | 115.874894421094 | 1.47180398213615  |
| TTATATGACTCA  | 115.889528656647 | 2.04536022981245  |
| TACCTTGAGTCA  | 115.916861927198 | 0.454650128647044 |
| GCAACTTAGTCA  | 116.051061245704 | 0.452733139436926 |
| GCGCTTGACTCA  | 116.152767037279 | 0.710879849294956 |
| TGACTCAAGTAA  | 116.224949680646 | 0.181743369042127 |
| CTCATGACTAAT  | 116.338919172181 | 1.5239375618769   |
| ATACTTGAGTCA  | 116.39587406497  | 0.205927622533556 |
| CTGACTTAGTCA  | 116.47883539541  | 0.829991841355187 |
| TCTCATTAGTCA  | 116.52511098666  | 0.624912515117619 |



|                |                  |                   |
|----------------|------------------|-------------------|
| TCCATGACTAAT   | 116.613960935501 | 1.9750701962763   |
| GTACTIONGACTCA | 116.722742995636 | 0.841131871848096 |
| CTCCGTTAGTCA   | 116.853084783004 | 0.491417795017471 |
| GCTGAAGAGTCA   | 116.913169337695 | 0.170090124427057 |
| GGCTATGACTCA   | 117.030277658334 | 1.60910567499098  |
| TGAGTCAAACAA   | 117.099809442616 | 0.646121997562258 |
| TATGACTAATGG   | 117.26665783118  | 1.47418945770481  |
| AGACATTAGTCA   | 117.457463365998 | 0.502778846416902 |
| TATCTTGAGTCA   | 117.757325243879 | 0.398576784875135 |
| AGGTTTGACTCA   | 117.881097846806 | 0.638373934348047 |
| GAAATTGACTCA   | 117.938977842963 | 0.652974872149477 |
| TTATGAGTCAAT   | 118.078500910211 | 1.76393693614261  |
| CTTACTTAGTCA   | 118.341406473998 | 0.265985467423765 |
| AGAGAAGAGTCA   | 118.807178010467 | 0.368660593617064 |
| TAGTCTTAGTCA   | 118.818883318455 | 0.39771186982595  |
| TACGAAGAGTCA   | 118.837903753059 | 0.440997689120356 |
| TGAGTCAAGCCA   | 119.479579237562 | 0.637514706103851 |
| AACATTGACTCA   | 119.49856701957  | 0.291212683989024 |
| CCCCTTGACTCA   | 119.611487239366 | 0.317205311575378 |
| ACAGAAGAGTCA   | 119.685926416137 | 0.467127709623794 |
| TGACTAACGGCA   | 119.71345216878  | 0.61923367155408  |
| TGACTCTTCAAA   | 119.739662831355 | 0.541112355795488 |
| CACTCTTAGTCA   | 119.839403580073 | 0.372195954109495 |
| ATGACTCATGGG   | 119.994118831539 | 1.84861831397934  |
| CGTTCTTAGTCA   | 120.375003359632 | 0.672439225132962 |
| CACCTTGAGTCA   | 120.838312917376 | 0.88843414436172  |
| AGCCTTGACTCA   | 120.839804786659 | 0.53324740175452  |
| TCATCTTAGTCA   | 120.945437817213 | 0.310528518720552 |
| TATGAGTCACAG   | 121.024210419157 | 1.44674530201961  |
| TCCCTTGACTCA   | 121.065005940281 | 0.232787178456957 |
| TAATCTTAGTCA   | 121.101638999495 | 0.608366710359924 |
| TCGCTTGACTCA   | 121.244785644053 | 0.437813009940954 |
| TATGACTCAGTG   | 121.321187561841 | 1.48733898757522  |
| TGTGACTCACAC   | 121.411327831954 | 0.948389639704123 |
| GAGTGACTAATG   | 121.627557348532 | 0.315204763871092 |
| ACGCTTGACTCA   | 121.770219751982 | 0.627740026413967 |
| TACCTTGACTCA   | 122.023089855534 | 0.312017346405593 |
| GTGACTCACATA   | 122.23061047776  | 1.0009921741898   |
| ATGGAAGAGTCA   | 122.254288668402 | 0.305613344841441 |
| CGTGACTCATGG   | 122.546192876673 | 1.90020382872932  |
| TCCCTTGAGTCA   | 122.546588507366 | 0.590007401110223 |
| GGGTGTGACTCA   | 122.552139463652 | 1.255274212288    |
| AAATTTGACTCA   | 122.703243090732 | 0.356955246999057 |
| CCACAAGAGTCA   | 122.733738384365 | 0.727991653540209 |
| GCTCGTTAGTCA   | 122.947172262585 | 0.855488736486894 |
| GCCCTTGAGTCA   | 123.034756526195 | 0.45069090351814  |
| TAATGACTCACA   | 123.099402382924 | 0.782263435875877 |
| AGTTATGACTCA   | 123.127332337623 | 2.06192163955346  |
| TGACTCTTCTAA   | 123.140339349479 | 0.212038300882827 |
| GGATATGAGTCA   | 123.195629571216 | 1.24451962382397  |
| AAACTTGACTCA   | 123.849212085591 | 0.367636915052871 |
| CTACTTGACTCA   | 123.937857580925 | 0.321861192878088 |
| GCAGAAGAGTCA   | 124.106034161296 | 0.388185293873594 |
| AAGTCTTAGTCA   | 124.172908325065 | 0.857944176892568 |

|              |                  |                   |
|--------------|------------------|-------------------|
| CTACAAGAGTCA | 124.217655010692 | 0.443294315599862 |
| AAATCTTAGTCA | 124.285935056363 | 0.523109644166578 |
| GTCACCGATGAC | 124.499342245504 | 0.704120550407456 |
| CCTTGAGTCATC | 124.79845650659  | 1.27643906378663  |
| CAACGTTAGTCA | 124.906911786019 | 0.578296377734642 |
| TCGAACACGTCA | 124.944473614853 | 0.685188604986844 |
| ATGACTAATATC | 124.951767917382 | 1.54706629420894  |
| CAGACTTAGTCA | 125.208900881466 | 0.465878764927979 |
| GCTTGAGTCATC | 125.248487270763 | 1.31225640756675  |
| TGACTGATGAAA | 125.456290353898 | 0.625347232200928 |
| CGCTCTTAGTCA | 125.748000690272 | 0.457299073484991 |
| AGGGAAGAGTCA | 125.756937648292 | 0.336433998999603 |
| CCCTCTTAGTCA | 125.76340576647  | 0.357789099374988 |
| AACACTTAGTCA | 125.934997039299 | 0.270102624383992 |
| CGGTGACTCATG | 126.087920259261 | 1.15220665397961  |
| CGTGACTCATT  | 126.238283710162 | 1.95026565078426  |
| TAGCATTAGTCA | 126.345154703654 | 1.0894778244989   |
| GTAGAAGAGTCA | 126.403264022918 | 0.412224968813035 |
| TGACTCAAGTCA | 126.444457135019 | 0.522306588754869 |
| TCAACTTAGTCA | 126.79418484838  | 0.4040989412646   |
| CGTGAAGAGTCA | 127.368141875029 | 0.430387380089416 |
| GGTATTGACTCA | 127.400634925975 | 0.50304691036886  |
| ATGACTCATAGG | 127.429236044245 | 2.09209067101129  |
| CTCCATTAGTCA | 127.603953985337 | 0.584570159608891 |
| AATCTTGAGTCA | 127.818405083093 | 0.792650605038808 |
| AACCATTAGTCA | 128.035129555751 | 0.818912731302862 |
| TGACTAATGTAA | 128.139420921203 | 0.544633607423187 |
| TAAAACACGTCA | 128.285467600359 | 0.256858888911846 |
| GGAGAAGAGTCA | 128.448735885357 | 0.256241419205986 |
| ATATGACTCAAG | 128.473340950793 | 1.49453374367991  |
| TCTCGTTAGTCA | 128.761453437142 | 0.88052415789802  |
| GGCGATGAGTCA | 128.789254546395 | 1.23827943235806  |
| CTAGAAGAGTCA | 128.972426833943 | 0.482290527824033 |
| CCTCATTAGTCA | 128.998846739976 | 0.361403988297907 |
| TGACTCTTCAA  | 129.191380214704 | 0.269749054257123 |
| CCCAATGAGTCA | 129.20015354139  | 1.36424387588831  |
| ACATATGACTCA | 129.248600015628 | 0.431107252246244 |
| TCACGTTAGTCA | 129.300974175386 | 1.09952543397901  |
| ACCCTTGAGTCA | 129.390507930055 | 0.633140867783259 |
| GTGCATTAGTCA | 129.516515269828 | 0.53537601462462  |
| ATCTCTTAGTCA | 129.589366776999 | 0.476078200834292 |
| TCGGAAGAGTCA | 129.795661227348 | 0.445206727265403 |
| GCACGTTAGTCA | 129.840373913632 | 0.614353617331837 |
| TCGTTTGACTCA | 130.131857859613 | 0.524300975008344 |
| ATCGAAGAGTCA | 130.199215256961 | 0.419465081241762 |
| TAAGAAGAGTCA | 130.222909261687 | 0.423096245278331 |
| GTTGAAGAGTCA | 130.240394522535 | 0.311790844955419 |
| GTACTTGAGTCA | 130.32348436189  | 0.769668552702916 |
| ACACATTAGTCA | 131.012049010942 | 1.017356314444039 |
| TCAATGACTAAT | 131.186083521864 | 1.96455511312695  |
| GCGTTTGACTCA | 131.355882362607 | 0.962557596995713 |
| TGACTAACGTAA | 131.453104764585 | 1.04178684373921  |
| CACCTTGACTCA | 131.74276964165  | 0.428747430486772 |
| TGAGTCAAGGCA | 131.75166837864  | 0.649871533237705 |

|               |                  |                   |
|---------------|------------------|-------------------|
| TGACGTTAGTCA  | 131.794617042326 | 0.442452679612623 |
| TAGGAAGAGTCA  | 131.993451874652 | 0.273924703642814 |
| AATTCTTAGTCA  | 132.104244134448 | 0.831528618489067 |
| GTGAACACGTCA  | 132.182775855153 | 0.580700048021552 |
| AAACATTAGTCA  | 132.525628555001 | 0.870187199465765 |
| TAATTTGACTCA  | 133.179895900105 | 0.627019620297432 |
| GCTGCTTAGTCA  | 133.487263142112 | 0.615144631418853 |
| ATTCTTGACTCA  | 133.541286975205 | 0.569777959257689 |
| TCGTACACGTCA  | 133.818167642387 | 0.548121647226046 |
| GCACTTGACTCA  | 134.164419539832 | 0.392095160430811 |
| TCGTCTTAGTCA  | 134.231262045258 | 0.843254154000368 |
| GCCCTTGACTCA  | 134.237942917735 | 0.484206354851906 |
| TGACTAATGACA  | 134.415177008059 | 0.5606195061179   |
| CCATGACTCATG  | 134.538257400297 | 1.58337140407237  |
| TAGCGTTAGTCA  | 134.552795348614 | 0.830334477514411 |
| TAGCATCAGTCA  | 134.71340404376  | 0.563390682541758 |
| AAGTTTGACTCA  | 134.760290420826 | 0.570132526332676 |
| TCTATGACTCAG  | 134.79926468773  | 1.2905749762579   |
| CTTCATTAGTCA  | 135.047833309895 | 1.02361146243402  |
| GTGGAAGAGTCA  | 135.436131129307 | 0.272529428270924 |
| TCTGAAGAGTCA  | 135.470863993955 | 0.586205907579719 |
| CACACTTAGTCA  | 135.70733711697  | 0.577983854915386 |
| GTCACCTATGAC  | 136.26347954508  | 0.531324003644089 |
| GAGCATTAGTCA  | 136.332381410646 | 0.529509506776801 |
| AATGACTCACCC  | 136.437197142402 | 1.50419519956865  |
| CGTCATTAGTCA  | 136.447546724814 | 0.815310139322159 |
| TGACTCTTCTCA  | 136.55888602499  | 0.34264276831232  |
| CGACATCAGTCA  | 136.81295808393  | 0.567474159271606 |
| CGGCATCAGTCA  | 136.928420528784 | 0.991384170745439 |
| TGACTCAAGAAA  | 137.421062699232 | 0.713860693980269 |
| GGCCTTGAGTCA  | 137.444340716081 | 0.852977077557624 |
| AGGCATTAGTCA  | 137.551461609133 | 0.380867569263979 |
| CGATGACTAATG  | 137.608240873268 | 1.32025311343873  |
| TGACTAAGAAAA  | 137.811772450222 | 0.266211071831438 |
| GCGGAAGAGTCA  | 137.880955567039 | 0.356916296419191 |
| GTGACTCATGCC  | 137.933115466632 | 1.97723770717617  |
| CGCACTTAGTCA  | 137.94361686288  | 0.623538513284932 |
| GATGACTAATCA  | 138.040573714024 | 1.49858422886608  |
| AAGGAAGAGTCA  | 138.061829470374 | 0.288857709717844 |
| ACGTGACTCACC  | 138.303605428075 | 0.864051949063237 |
| AACGAAGAGTCA  | 138.400595654805 | 0.53084956512159  |
| GTCACCTTAGTCA | 138.857748234172 | 0.205634370161588 |
| TGACTAAAGCCA  | 138.887506988476 | 0.286491888697986 |
| CCTTCTTAGTCA  | 138.968171982889 | 0.375674518980759 |
| CTACATTAGTCA  | 139.030303070196 | 0.323536507408911 |
| CCTGAAGAGTCA  | 139.05574669169  | 0.660892844487583 |
| GAACCTTGAGTCA | 139.155705795149 | 0.530335924698901 |
| CCGCGTTAGTCA  | 139.249378677813 | 0.604384631912591 |
| GATGACTCATTA  | 139.507167119022 | 1.55345578822161  |
| GACGAAGAGTCA  | 139.767195060461 | 0.325302630244663 |
| CGTCATGATGAC  | 139.848416176888 | 0.479667259546794 |
| TAGACTTAGTCA  | 140.611689324151 | 0.503847718736674 |
| TGACTAAGTTAA  | 140.800170221147 | 1.03978562935377  |
| AGATCTTAGTCA  | 140.820375886379 | 0.570711489561817 |

|               |                  |                   |
|---------------|------------------|-------------------|
| CCAATGACTAAT  | 140.833045233775 | 1.82158407266933  |
| TAAACTTAGTCA  | 140.981648053335 | 0.736771611320053 |
| GATCATCAGTCA  | 141.127003766392 | 0.484068383235459 |
| GTATGACTCACT  | 141.52526329166  | 1.88631886588004  |
| AAATGACTCACC  | 141.826242002751 | 1.45361276290986  |
| ACGGAAGAGTCA  | 141.96099857864  | 0.227791048062768 |
| AGGCTTGAGTCA  | 142.034292570717 | 0.276143902771207 |
| CTCTCTTAGTCA  | 142.80818136507  | 0.263616167919846 |
| ACTACTTAGTCA  | 142.836195768288 | 0.213015130220688 |
| TGACTCGAGTCA  | 142.930740503605 | 1.22401851964312  |
| GAACTTGACTCA  | 143.094022805625 | 0.91853432468066  |
| AAAACCTTAGTCA | 143.853356525156 | 0.422222018110269 |
| CGGGAAGAGTCA  | 143.890376546644 | 0.345349885548006 |
| CAAGAAGAGTCA  | 143.921951443535 | 0.505641723915656 |
| GTCATACCATGA  | 143.987440754664 | 0.352444271995288 |
| CCCCTTGAGTCA  | 144.082713790146 | 0.404384307850896 |
| GTGCTTGAGTCA  | 144.613069205473 | 0.613912801091572 |
| CCGGAAGAGTCA  | 144.679136228512 | 0.199905569290136 |
| ACTGATACGTCA  | 144.816058278099 | 0.206891559012475 |
| TGACTAAGTAAA  | 144.914078462629 | 0.547931903850902 |
| ATGACTCACTTA  | 144.97237765055  | 1.57095891917884  |
| CGCATTGACTCA  | 145.068868106881 | 0.511795011712807 |
| GTGACTCATGGC  | 145.371058953783 | 1.23170634000025  |
| CGTACTTAGTCA  | 145.39609290115  | 0.51530615282777  |
| CATGACTCACGG  | 145.569812820141 | 1.58910988285977  |
| TATTCTTAGTCA  | 145.59292704023  | 0.190525140646311 |
| AGTTCTTAGTCA  | 145.593598637325 | 0.90991187372369  |
| TTGAGTCATCTC  | 145.833324823199 | 1.13882143434539  |
| AAAATTGACTCA  | 145.88402928142  | 1.12170973848038  |
| CATGCTTAGTCA  | 145.911441870507 | 0.214499030445371 |
| ATATCTTAGTCA  | 146.127250268636 | 0.516858596040617 |
| CGAGAAGAGTCA  | 146.186766774595 | 0.495217239312746 |
| GTCACGGATGAC  | 146.357819479438 | 0.229825086530565 |
| CTTAACACGTCA  | 146.512129735528 | 0.313811431691524 |
| GCTTCTTAGTCA  | 146.970321522717 | 0.574890954794584 |
| TCTCAAGAGTCA  | 147.006133239449 | 0.50735479894396  |
| TCTCTTGAGTCA  | 147.332348954449 | 0.949416766793859 |
| GAAGAAGAGTCA  | 147.93123649336  | 0.312243354288532 |
| TGACTAAGAGAA  | 148.200156725215 | 0.517790251130128 |
| CGTCACGATGAC  | 148.660762256075 | 1.14314610278746  |
| GAATGACTAATT  | 148.74419626425  | 1.41518757029081  |
| CAGCTTGAGTCA  | 148.773084128332 | 0.490368709089264 |
| CGCCTTGACTCA  | 148.82856397944  | 0.933077849225394 |
| GGTGAAGAGTCA  | 148.856954095888 | 0.441856430472632 |
| GACTCTTAGTCA  | 149.003078117746 | 0.613861420827101 |
| CGCGAAGAGTCA  | 149.034871708179 | 0.226132260481219 |
| TCCACTTAGTCA  | 149.096007450487 | 0.740371141469245 |
| AGGTTTACTCAT  | 149.194916440583 | 0.506822915355    |
| GGCGAAGAGTCA  | 149.3547030195   | 0.437881012424245 |
| CAATGACTCACT  | 149.942519308904 | 1.92729729219327  |
| GTCTTTGACTCA  | 149.961642428032 | 0.901365180587596 |
| ACGAACACGTCA  | 150.100697125703 | 0.533540565426312 |
| TGACTAAGAACA  | 150.394016794083 | 0.559527651812063 |
| CGTCATCAGTCA  | 150.406797831652 | 0.737472245918788 |

|               |                  |                    |
|---------------|------------------|--------------------|
| AAACTTGAGTCA  | 151.500903409223 | 0.291941333210639  |
| TAGTACACGTCA  | 151.518886441175 | 0.532844209273133  |
| TCGCATTAGTCA  | 151.740382378939 | 0.560015206808916  |
| CCGTGACTCACT  | 151.999448958101 | 1.28841149701067   |
| CCCACTTAGTCA  | 152.025683540246 | 0.254298655539554  |
| CTTGCTTAGTCA  | 152.150900300586 | 0.486125820412284  |
| TGACTAATGCAA  | 152.235348440708 | 1.27147460621229   |
| GCCACTTAGTCA  | 152.366922229636 | 0.743166802506933  |
| ACAACCTTAGTCA | 152.385004677906 | 0.244962378839164  |
| ATGTCTTAGTCA  | 152.388479188835 | 0.510959274694638  |
| TCACATCAGTCA  | 152.572959199353 | 0.871704081154048  |
| GTTGTGACTCAA  | 152.636513039695 | 1.42992155368893   |
| AGTTTTACTCAT  | 152.828473454856 | 0.42207773161485   |
| CTGCCTTAGTCA  | 152.904174649008 | 0.595299480122837  |
| AGCCGTTAGTCA  | 152.944645192969 | 0.400462347806957  |
| AGATTTGACTCA  | 153.106973165289 | 0.751897849567035  |
| AGAACTTAGTCA  | 153.11987697188  | 0.473761424368212  |
| CTAATGACTAAT  | 153.316386897345 | 1.86160484484668   |
| TGACTCTTCACA  | 153.324851701649 | 0.321361144959872  |
| GAGGAAGAGTCA  | 153.382510764294 | 0.28428465610358   |
| GAGTCTTAGTCA  | 153.458245579986 | 0.444784018967497  |
| GATCATTAGTCA  | 154.12605627852  | 0.598677279201416  |
| CTGTACACGTCA  | 154.750466755723 | 0.0586857042993619 |
| CATACTTAGTCA  | 154.824018806548 | 0.283120216724492  |
| CTGGAAGAGTCA  | 154.830577935857 | 0.518649025818445  |
| GTCATACAGTCA  | 155.063658946491 | 0.70119770237808   |
| CAGGAAGAGTCA  | 155.23956535882  | 0.327912459933378  |
| CGGTTTGACTCA  | 155.631573817898 | 0.421238637783732  |
| TAGCTTGACTCA  | 155.637934925019 | 0.37601070144326   |
| TGACTAAGTACA  | 155.657448283635 | 0.302759738447203  |
| CGAGTGACTAAT  | 155.920805240672 | 0.698845331501526  |
| CGCTGTGACTCA  | 155.925059178628 | 1.09838805058922   |
| TGACGTGTTCAA  | 156.185252693144 | 0.797373563967127  |
| CGTCTTGACTCA  | 156.947510191408 | 0.410966057667056  |
| AAGCAAGAGTCA  | 156.98758973869  | 0.453523765875493  |
| CATCATTAGTCA  | 157.060555796086 | 0.839541375550776  |
| CTATCTTAGTCA  | 157.543108208736 | 0.479093632273507  |
| ACTCATCAGTCA  | 157.842749862318 | 0.519777736459634  |
| ACCGAAGAGTCA  | 158.660697837611 | 0.843285810159374  |
| AGTGACTCATGC  | 158.882029628831 | 1.68855796906      |
| TGACGTGTACCA  | 158.974006249648 | 0.739047446195349  |
| ACATGACTAATG  | 159.178524247621 | 1.09752333644662   |
| ACGCGTTAGTCA  | 159.549723864561 | 0.872678282166124  |
| TGACTCTTCCCA  | 159.819536536949 | 0.374633671592193  |
| CCTCTTGAGTCA  | 159.961194063143 | 0.824725528441913  |
| GGGTTTGACTCA  | 160.203401075913 | 0.939654305186998  |
| CATTCTTAGTCA  | 160.365752474826 | 0.673378389383892  |
| TGACTCTTGCAA  | 160.423481475159 | 0.341733806550236  |
| AAACCTTAGTCA  | 160.483294159423 | 0.441461822795875  |
| CGACTTGAGTCA  | 160.632019357004 | 0.543105115004001  |
| CATCGTTAGTCA  | 160.710967263262 | 0.482883871711211  |
| CGTCATTATGAC  | 160.949465515038 | 0.549369673242603  |
| TCGCAAGAGTCA  | 161.138260533515 | 0.753287946408777  |
| AAGAACACGTCA  | 161.452407150772 | 0.723371306764144  |

|              |                  |                   |
|--------------|------------------|-------------------|
| GCCTCTTAGTCA | 161.590578420066 | 0.574768197579494 |
| ATGAGTAAAAGG | 161.89948212242  | 0.304741093792406 |
| GTCATTAATGAC | 162.565946343708 | 0.34492264762036  |
| ATGACTAATAGG | 162.759017098072 | 1.22736505439352  |
| TCGACTTAGTCA | 162.792568879637 | 0.769570870451185 |
| TGTTGAGTCATC | 162.858421175518 | 1.52000764968654  |
| AGTACTCAGTCA | 163.138939440903 | 0.431415973548316 |
| AACGCTTAGTCA | 163.180030290242 | 0.933963579454205 |
| TCACCTTAGTCA | 163.517768808309 | 0.401938367821503 |
| TGACTAAGTCAA | 163.642976326377 | 1.05138282115179  |
| TGACTCTTGTA  | 163.70157290242  | 0.758383312130797 |
| GCATTTGACTCA | 163.75249018563  | 0.955543304774506 |
| ATGAGTAAAAGA | 163.793487041879 | 0.29964704736274  |
| TAACATCAGTCA | 163.973299076821 | 0.441130865000121 |
| CTCCAAGAGTCA | 164.022034448496 | 0.782332531271497 |
| TGACTCTAGAAA | 164.192939142298 | 1.06237805450421  |
| ATGACTCACCT  | 164.297316471097 | 1.72706411050927  |
| ATGAGTAAACTC | 164.445485425209 | 0.629092115301111 |
| ATGAGTAAAACG | 164.607082129948 | 0.257747422177735 |
| TCTCTGAGTCA  | 164.802185023989 | 0.169939636267462 |
| AGCCATTAGTCA | 164.869858123078 | 0.480760656231486 |
| TCGAATACGTCA | 165.33108782934  | 0.671372270373938 |
| AGGCCTTAGTCA | 165.426487217244 | 0.563816879404187 |
| ACTTTTACTCAT | 165.502003024116 | 0.20711386105682  |
| GCCGAAGAGTCA | 165.534605739353 | 0.306254277071765 |
| TACCGTTAGTCA | 165.796237343797 | 0.826297679259087 |
| GGCCCTTAGTCA | 165.970474826747 | 0.932754427588917 |
| GCTCTTGACTCA | 166.078902952259 | 0.540924205048427 |
| ACACATCAGTCA | 166.364705255302 | 0.703251329559108 |
| CAGATTTATGAC | 166.748858240509 | 0.523234856281642 |
| ATTGTGACTCAG | 167.322195047224 | 0.343712255746185 |
| TCCGCTTAGTCA | 167.766955339258 | 0.820953450738849 |
| CACGAAGAGTCA | 167.963230012456 | 0.472216161701704 |
| GGTCTTGACTCA | 168.83694660265  | 0.594088063302813 |
| ACGTGTGACTCA | 169.186778603577 | 1.07751285049995  |
| CAAGTGACTCAC | 169.307348937141 | 1.45256451267752  |
| ACATTGAGTAAT | 169.461171899224 | 0.385786428509751 |
| AACAAGTCATAC | 169.651035899556 | 0.454424291714353 |
| TGGTGACTCACC | 169.6604631811   | 1.61587940923629  |
| GACGCTTAGTCA | 169.826127406788 | 0.874644354813899 |
| CATGACTAATTT | 169.842639105487 | 1.0448201317632   |
| AGTGACTCATGG | 170.142939298274 | 1.62348481142637  |
| GTCCAAGAGTCA | 170.390375412491 | 0.406994093147783 |
| ATGAGTCGGACA | 170.541986052211 | 0.175746955869007 |
| GGTGACTCATAG | 170.612173957755 | 1.78606135113129  |
| GAGCTTGACTCA | 170.923771976204 | 0.867108207122159 |
| AAGACTTAGTCA | 171.048656262239 | 0.683294958684491 |
| CATCTTGAGTCA | 171.270208925888 | 0.989077329157742 |
| GTCATACATGAC | 171.279745279222 | 0.507288194079781 |
| ATGAGTAAACTG | 171.742867305893 | 0.593885728360181 |
| GGTCTTGAGTCA | 171.76517305406  | 0.746759163749771 |
| TCTCATCAGTCA | 172.079736286686 | 0.393547118061868 |
| CGTAACACGTCA | 172.090740945463 | 0.687920086931508 |
| TGAGTCAAATCA | 172.241977407559 | 0.568935243108599 |

|              |                  |                   |
|--------------|------------------|-------------------|
| ATGAGTAAATC  | 172.372268013813 | 0.391725237420529 |
| CCACGTTAGTCA | 172.396053104046 | 0.383600737356496 |
| CATGTGTATGAC | 172.402070751019 | 0.406020235662868 |
| AGGTCTTAGTCA | 172.441342125396 | 0.648261236262088 |
| TATGACTCAAGG | 172.6460963672   | 0.399705270355989 |
| ATGAGTAAACGG | 172.68016055643  | 0.397482655494151 |
| TGACGTGTACAA | 173.156689558968 | 0.422255740759383 |
| ACGTTTACTCAT | 173.185437733348 | 0.186126096138211 |
| ACCACTTAGTCA | 173.677446136359 | 0.643377956465882 |
| AGGCTTGACTCA | 173.760800944746 | 0.769128271977488 |
| CTTCATCAGTCA | 173.97510477111  | 0.586566359730005 |
| CTTTCTTAGTCA | 174.014283025102 | 0.196151976081293 |
| AAGTTTACTCAT | 174.042341953117 | 0.402552062775956 |
| ACCCGTTAGTCA | 174.427899359864 | 0.709275994406789 |
| TCTACTTAGTCA | 174.580762759502 | 0.236180159703175 |
| ATGAGTCGGCTC | 174.844132621173 | 0.418416407113214 |
| CCGATACAGTCA | 175.019662591894 | 0.963877598650077 |
| TAATGTGAATCA | 175.048278157955 | 0.758095647895563 |
| TCTGATACGTCA | 175.253362529833 | 0.490410448758887 |
| GATCTTGAGTCA | 175.387860081765 | 0.915024214818376 |
| GAAATGACTAAT | 175.513377102191 | 0.886696822012574 |
| TGACTAAGCGCA | 175.569409184319 | 0.837193736828424 |
| GGGTGACTCATG | 175.71840683579  | 1.35382724403185  |
| TCTGCTTAGTCA | 175.721263863218 | 0.434492011335505 |
| TCACTTGAGTCA | 175.789393044397 | 0.468743663173897 |
| GAGTACACGTCA | 175.928668478936 | 0.967191769320521 |
| CACGCTTAGTCA | 175.980646610863 | 0.542611355040776 |
| CGCCATTAGTCA | 176.178041561169 | 1.26611625839308  |
| AGCCATCAGTCA | 176.190200276424 | 0.628694531393137 |
| GTCATCTAGTCA | 176.367330988001 | 0.250688716693264 |
| GTCAACTATGAC | 176.449129094436 | 0.650779808519036 |
| ACGCAAGAGTCA | 176.493327802869 | 0.322719071919455 |
| CTAACTTAGTCA | 176.507970476524 | 0.563702547046816 |
| TCTTATGACTCA | 176.513071109461 | 1.84591201698594  |
| AAACCGAGTCAC | 176.524395109189 | 0.309897114356001 |
| GTCACTGATGAC | 176.545794633753 | 0.619667643367558 |
| ATGAGTAAAGC  | 176.731682731714 | 0.323256313683654 |
| ATCACTTAGTCA | 177.183176719605 | 0.504176040272863 |
| ATGAACACGTCA | 177.477375411589 | 1.17099192979189  |
| TCCTCTTAGTCA | 177.998565132191 | 0.488191296061011 |
| AGACTTGACTCA | 178.042779792673 | 0.650279471507488 |
| ATATGACTAATG | 178.061728775831 | 1.28013335672019  |
| CCAGAAGAGTCA | 178.1360587477   | 0.475370096993013 |
| TGAGTCATCGCC | 178.246410642141 | 1.04571955751389  |
| TAGAACACGTCA | 178.294437634931 | 0.606108267833618 |
| TGACGTATTACA | 178.852763488549 | 0.43487063346742  |
| GCTCTTGAGTCA | 179.128583810344 | 0.588491580269089 |
| CGAACTCAGTCA | 179.324314220445 | 0.728952733702459 |
| TGACTAAGGAAA | 179.327662074746 | 0.321055052465891 |
| CGGAACACGTCA | 179.336493022688 | 0.543957540093533 |
| TGACAAGAGTCA | 179.338530719267 | 0.661777670760421 |
| TGACTCGGAAAA | 179.407849072265 | 0.5963277504548   |
| TGACTAAGACCA | 179.431098297161 | 0.211673645698865 |
| ATGAGTAAACCG | 179.693317932804 | 0.445714658345827 |

|              |                  |                   |
|--------------|------------------|-------------------|
| AGACAAGAGTCA | 179.793937174718 | 0.483900332274583 |
| GCAATCTATGAC | 179.81074892482  | 0.918897325343272 |
| ATGAGTAAACTA | 179.939768351527 | 0.165373648616823 |
| GTCACCGGTGAC | 179.985219820859 | 0.64815304821618  |
| CCTACTTAGTCA | 180.025629933394 | 0.763142126743159 |
| AGTCCGAGTCAC | 180.048482331566 | 0.447946885570888 |
| GTCCTTGACTCA | 180.148785273953 | 0.228355038801366 |
| CTGTCTTAGTCA | 180.586072182847 | 0.594183868800871 |
| CATCATCAGTCA | 180.604379177822 | 0.538081757340743 |
| GGCCTTGACTCA | 180.716493726516 | 0.968443699031291 |
| CCTCAAGAGTCA | 180.840532225051 | 1.08940017569726  |
| GTCATTAGTCA  | 180.983179446642 | 1.22592567256389  |
| CAGAACACGTCA | 180.996616958406 | 1.0172154492857   |
| GTTCTTGACTCA | 181.116130501473 | 0.784465892333773 |
| GAGTTTGACTCA | 181.260444062132 | 0.935364130988473 |
| TTTGAGTCATCA | 181.594677066735 | 1.51579704124203  |
| ACTTCTTAGTCA | 181.653921941407 | 0.316782142913353 |
| CCCGAAGAGTCA | 181.724919629007 | 0.745398568583153 |
| AAACAAGAGTCA | 182.222586319774 | 0.238641695925052 |
| ATTACTCAATGG | 182.302755329747 | 0.34299106874946  |
| GGGGAAGAGTCA | 182.361188493667 | 0.240788554227746 |
| ACTGCTTAGTCA | 182.53373321579  | 0.426982422667471 |
| CCATGTGACTCA | 182.587822112265 | 0.721964502049286 |
| AAGATGACTAAT | 182.909956692001 | 1.26555790430001  |
| TGCATGACTCAT | 183.078404887902 | 1.48706679872952  |
| GTGACTCGGAGA | 183.955500036039 | 0.398105180256402 |
| CGTCCGAGTCAC | 184.428717557719 | 0.658204378593477 |
| TGACTGATGGAA | 184.512081961745 | 0.355889548770468 |
| AATCATCAGTCA | 184.781709487215 | 1.11374750077589  |
| TATGAGTCAACC | 185.088521579315 | 1.70101377493748  |
| TGACTAACGGAA | 185.239234840052 | 0.172486121304556 |
| ATTACTGCGTCA | 185.478475351125 | 0.856528360197433 |
| CACATCGATGAC | 185.604142267124 | 1.12215857251627  |
| ACACAATAGTCA | 185.870970641103 | 0.455106323033148 |
| TGACTAATGGCA | 186.539803964729 | 0.280422753391729 |
| ATTGCTTAGTCA | 187.139914466071 | 0.70028560034014  |
| TGACTAAGCGAA | 187.155682075179 | 0.372490729272696 |
| ACCGCTTAGTCA | 187.210830735638 | 0.437271145318385 |
| GTACGTTAGTCA | 187.623306201735 | 0.546368528481222 |
| TGACGCAGCGAA | 187.797056437724 | 0.559127798886114 |
| CGAACTTAGTCA | 187.882077803716 | 0.801949252004212 |
| ATATGAGTCAGT | 187.919291661608 | 2.03046575987958  |
| GAGTGACTCACG | 188.1895373338   | 2.0110979753687   |
| ATAAACACGTCA | 188.364997619464 | 0.501864073121878 |
| TGATTCATGGCA | 188.390823686471 | 0.855869101688643 |
| GTCATAATGTCA | 188.4267989113   | 0.822536925230361 |
| AGTCCTTAGTCA | 188.499614096305 | 0.669511551156044 |
| TGACTAAGTGAA | 188.631531060386 | 0.658586944689784 |
| ACAACCTAGTCA | 188.742667251039 | 0.690023665102471 |
| TCGCATCAGTCA | 189.206503592749 | 0.826164245455053 |
| CGGCATTAGTCA | 189.224223123824 | 0.789981831057019 |
| CGTAACTATGAC | 189.238216613123 | 0.701692932231487 |
| GATACTTATGAC | 189.267327240191 | 0.599658533789207 |
| ATGAGTAAACGA | 189.688150164259 | 0.334064222345949 |



|               |                  |                   |
|---------------|------------------|-------------------|
| ATGTGTCAACAA  | 189.786270252337 | 0.493500185228625 |
| AGTCTTGACTCA  | 189.925151080627 | 0.643951434860792 |
| ATTACTCAATGA  | 189.987349638737 | 0.585397200778628 |
| CATTACGATGAC  | 190.1119230933   | 0.730512542071565 |
| CTGTGGTATGAC  | 190.238744682692 | 0.307213160840782 |
| AACCGTTAGTCA  | 190.602474994547 | 0.870869044086162 |
| TGACTAAGACAA  | 190.869338134935 | 0.852627377499294 |
| TGACTGATGGCA  | 191.179736738865 | 0.562323689428111 |
| GGACTTGACTCA  | 191.310703352583 | 0.931242629000066 |
| CAGTCCACGTCA  | 191.57525554463  | 0.698218696670911 |
| ATGAGTAAACAA  | 191.905855975177 | 0.583496140820136 |
| AAACATCAGTCA  | 192.216927562418 | 0.622347439753958 |
| AAAGTATTAGTC  | 192.710505997689 | 1.10543387484038  |
| GTCACCAATGAC  | 192.730416905854 | 0.565575758945375 |
| GTGACTCGGAAA  | 192.731711712497 | 0.483914937398855 |
| GATTACACGTCA  | 192.833488469626 | 0.508962583220857 |
| ATACAAGAGTCA  | 192.89630814527  | 0.797069480190532 |
| AACCTTGAGTCA  | 192.905383031699 | 1.05537057320501  |
| CCGACTTAGTCA  | 193.212488681434 | 0.676558060540585 |
| GTCACAGATGAC  | 193.435449760385 | 0.497621050821039 |
| ATGAGTAAACAA  | 193.48892239541  | 0.186598888779009 |
| CAACTTGAGTCA  | 193.56774522898  | 1.04046488805831  |
| CGGCAAGAGTCA  | 193.56826095836  | 0.320449826896829 |
| TGACTAAGGTAA  | 193.658521690417 | 0.572813971301029 |
| ACGAATTCGTCA  | 193.698779670849 | 0.738715782082606 |
| CGTTTATATGAC  | 193.878956078206 | 1.09426103030609  |
| CCGGTTGTGTCA  | 194.054410081045 | 0.62022903447008  |
| CATACGTATGAC  | 194.188456141537 | 0.328999790372329 |
| AGACCGAGTCAC  | 194.327814031706 | 0.277454249639948 |
| ATTAATTATGAC  | 194.398450625648 | 0.887116559333947 |
| GTCATAATTACA  | 194.85027248917  | 0.271091482090862 |
| CAAACCTTAGTCA | 195.179316880484 | 0.831497890067214 |
| ACAAACGATGAC  | 195.222404820402 | 0.458827558372906 |
| GTCATAGTTTAA  | 195.390904900705 | 0.574828123965623 |
| CCTAACGATGAC  | 195.652107622762 | 0.599713395337449 |
| GTCACGTATGAC  | 195.659658466657 | 0.314806466174189 |
| TGACTCTTGAA   | 195.920955776145 | 0.544698805075882 |
| CGTCCTTAGTCA  | 195.945471021206 | 0.57749602304473  |
| TATCAAGAGTCA  | 196.249851323149 | 0.388107689410523 |
| GTCATACAATGA  | 196.290004717354 | 1.06227825844395  |
| CGTCATCTATGA  | 196.328552410807 | 0.496505875396979 |
| CATCATTTATGA  | 196.357143852132 | 2.01163256184383  |
| CCATCTTAGTCA  | 196.528259229107 | 0.695024758305738 |
| GTCATCGTATGA  | 197.013325332495 | 0.862692372409215 |
| ACGTATACGTCA  | 197.125699350423 | 0.305210092894455 |
| GGTTCTTAGTCA  | 197.439229212397 | 0.685438563527494 |
| GCGCATCAGTCA  | 197.536352277878 | 0.307602806900279 |
| AGTCACCTTAGG  | 197.907024842713 | 0.802436006292559 |
| AGACATCAGTCA  | 198.125527791013 | 0.594981866135979 |
| GTACATCAGTCA  | 198.29042057128  | 0.363261923947606 |
| ATGCTTGAGTCA  | 198.369624259189 | 0.443701125918577 |
| GTGACTCGCTAA  | 198.554800072211 | 0.359400633825212 |
| TAAGCTTAGTCA  | 198.628382656026 | 0.936426354093595 |
| GTGACTCGGACA  | 198.974122961795 | 0.553989673351068 |

|               |                  |                   |
|---------------|------------------|-------------------|
| TGACTGAGCAAA  | 199.509770522219 | 0.780185661006026 |
| GGCACTTAGTCA  | 199.985799742604 | 0.70762255904468  |
| AGTCAAGAGTCA  | 200.086781857742 | 0.424569087112533 |
| GCAAACATATGAC | 200.097633569919 | 0.607558980597318 |
| TCGCTTTAGTCA  | 200.305237627208 | 0.316370992033848 |
| GTTCATTAGTCA  | 200.488707439278 | 0.755882709402177 |
| TCGCGTTAGTCA  | 200.502344381861 | 0.430719133497189 |
| CAACATTAGTCA  | 200.523702142808 | 1.15649138388562  |
| CATCTTTAGTCA  | 200.547689986697 | 0.516375278208189 |
| TCACAAGAGTCA  | 200.82835837217  | 0.593233437100197 |
| GTCATCCAGTCA  | 200.83147975746  | 0.409631897621704 |
| GACCTTGAGTCA  | 200.938868098251 | 1.05304597218016  |
| TGACTAAGCTCA  | 201.04373944727  | 0.331257287279588 |
| ATATACACGTCA  | 201.096865582587 | 0.549644182009389 |
| AGCAACGATGAC  | 201.117729090295 | 0.874802341136585 |
| GACTTCGATGAC  | 201.483851324218 | 0.599082284548936 |
| GTTTCTTAGTCA  | 201.501236526805 | 1.03697495858566  |
| AGTGCAGTCCAC  | 201.503794482941 | 0.344239988958091 |
| GCACCTTAGTCA  | 201.733160482211 | 0.443405390868881 |
| GTCATAGTCAGA  | 201.835865817979 | 0.898857868511715 |
| ACAATCTATGAC  | 201.975397000369 | 0.514964910067345 |
| CAGCATCAGTCA  | 202.056324024283 | 0.656946600630462 |
| GTCACTCAGTCA  | 202.156085718529 | 0.734045983121143 |
| AAGCGTTAGTCA  | 202.175055986718 | 0.376744723739608 |
| AGCGCTTAGTCA  | 202.242043786154 | 0.660079844654637 |
| CCGCATCAGTCA  | 202.334040570804 | 0.765648051198966 |
| GAGCTTGAGTCA  | 202.364606170868 | 0.511058059864794 |
| TGACTAACGCCA  | 202.453793427927 | 0.634627362575865 |
| ATGACTAATTCG  | 202.530010992101 | 0.693742456779083 |
| CAAGACTATGAC  | 203.112095317425 | 0.381956643965329 |
| ATCCATCAGTCA  | 203.147832194597 | 0.523697018496644 |
| ACTCGTTAGTCA  | 203.221073398197 | 0.594042714710523 |
| GGGCATCAGTCA  | 203.268682066388 | 0.630590458015626 |
| TATACTTAGTCA  | 203.376107378757 | 0.40114956217702  |
| CCGTGACTCACC  | 203.377392603378 | 0.841088980798913 |
| TATGAGTCAGTT  | 204.054370598461 | 0.401223977658697 |
| GCACTTGAGTCA  | 204.835450389703 | 0.754683435059928 |
| TGACGTGTTCCA  | 204.9002127004   | 0.80789308226346  |
| GTCATAGACTCA  | 205.070216657611 | 0.318350774229012 |
| ATGATACAGTCA  | 205.183885006129 | 0.575980001308491 |
| GTTCTTGAGTCA  | 205.300793401804 | 0.228571136314441 |
| CAAACCTCAGTCA | 205.867167976069 | 0.728948575531838 |
| ATTACTCAAATG  | 206.027203222149 | 0.598731572711195 |
| ATCCAAGAGTCA  | 206.139719044562 | 0.68554381016466  |
| ATGTAATATGAC  | 206.245435891441 | 0.869322417550844 |
| TGACTCAAGCCA  | 206.257590933623 | 0.310991262463083 |
| ATGAGTCGGTCA  | 206.312096169155 | 0.551067775172613 |
| CAACATCAGTCA  | 206.459840754386 | 0.563760462376421 |
| ATTACTCAACGA  | 206.673197723727 | 0.328096597002681 |
| ACGTTGACACAT  | 206.948236750542 | 0.219602989483967 |
| ATGAGTAAACCA  | 206.987684335577 | 0.548768998796174 |
| GCATCCGATGAC  | 206.989769249876 | 0.554024431800901 |
| GATACTTAGTCA  | 207.113643971769 | 0.836326423918857 |
| ATTTACACGTCA  | 207.413561816305 | 0.382062150670858 |

|               |                  |                   |
|---------------|------------------|-------------------|
| TCATAACAGTCA  | 207.451797705929 | 0.887721719270598 |
| TATCATCAGTCA  | 207.528533905303 | 0.487982435775547 |
| AATGACTCACAC  | 207.57069896138  | 1.38582883693865  |
| AAGCTTGACTCA  | 207.707133123755 | 1.48128742804034  |
| ATTCTTGAGTCA  | 208.091407339551 | 0.982978496751682 |
| GTACAAGAGTCA  | 208.366572789945 | 0.33321791036543  |
| CCATGACTCACG  | 208.489116816097 | 1.92804732769378  |
| GAATCCACGTCA  | 208.537777363694 | 0.754772773496898 |
| CGACCGAGTCAC  | 208.997970514863 | 0.746510419810358 |
| GTCACCTATGAC  | 209.040492855472 | 0.7763844221366   |
| AGTGCTTAGTCA  | 209.05704904129  | 0.513425283238978 |
| CCCGCTTAGTCA  | 209.152613195009 | 0.694489451808182 |
| GTGACTCGGCAA  | 209.288272645409 | 0.649932451570411 |
| GTATGACTTGGA  | 209.368955426984 | 0.341282405956255 |
| ATGACTGGGTCG  | 209.626441317856 | 0.645876630046365 |
| ACGTCCGAGTCA  | 210.078237378852 | 0.614291119347841 |
| ATGAGTCCGTCA  | 210.188481478144 | 0.280661162368995 |
| GATCAAGAGTCA  | 210.246720691296 | 0.265373648465765 |
| GACGCATGACAC  | 210.643377467528 | 0.982837059628992 |
| ATGAATTATGAC  | 210.659689204447 | 0.744105292207511 |
| ATCCTAGAGTCA  | 210.684020198674 | 0.437216312596692 |
| CTCCATCAGTCA  | 210.762842371302 | 0.470734203323664 |
| GTCATCGACAGA  | 211.08066521053  | 0.49983884811685  |
| CGGTCTTAGTCA  | 211.096929252491 | 1.12495306258236  |
| GAGACTTAGTCA  | 211.101043118184 | 0.516302226700982 |
| GCACAAGAGTCA  | 211.157094805852 | 0.16176571413529  |
| ATTACTCAATCG  | 211.203970794535 | 0.37796760546821  |
| GACACTTAGTCA  | 211.256649204389 | 0.984346667631491 |
| ATTTCCGAGTCA  | 211.297682589696 | 0.482417394434974 |
| ATTGCGAGTCAC  | 211.330416603674 | 0.658073492541111 |
| GCCCCTTAGTCA  | 211.443183055273 | 0.482296306411147 |
| GTTTCATCAGTCA | 211.523808568798 | 0.534071257567829 |
| GGACTTGAGTCA  | 211.633309313124 | 0.314519191276214 |
| CGGCTTGACTCA  | 211.728594960888 | 0.999958601878433 |
| GTCAAATATGAC  | 211.815616791556 | 0.39410996307117  |
| CGAATGTATGAC  | 211.849135339629 | 0.677093202379223 |
| CATGACGATGAC  | 211.871367095839 | 1.07853409441035  |
| ACGGCTTAGTCA  | 211.917935361409 | 0.71783241345387  |
| GAACGTTAGTCA  | 212.262059699681 | 0.74786300667037  |
| TGACGTGGACCA  | 212.485180049476 | 0.873091593799026 |
| TACGCTTAGTCA  | 212.551326363473 | 0.683591261919438 |
| GTCACAGAGTCA  | 212.692353703065 | 0.625336814282651 |
| ATGAGTAAACAG  | 212.7271148428   | 0.368970702697111 |
| CAGTGTGACTCA  | 212.963956023563 | 0.844639383129817 |
| CTTCGTTAGTCA  | 213.137228047079 | 0.656188258156787 |
| ACACAAGAGTCA  | 213.148636294375 | 0.508038720318525 |
| CAAAATTATGAC  | 213.177716464039 | 0.700912024283893 |
| GACAAGTCATAC  | 213.483515443269 | 0.269294154800764 |
| GTCGCTTAGTCA  | 213.793539683837 | 0.755904157015569 |
| GTCATAATTTGA  | 213.805319554455 | 0.662915392813206 |
| GTCATATCGTGA  | 213.995493537626 | 0.40006247737852  |
| GTCCTTAGTCA   | 214.073597660334 | 0.43777974069909  |
| TCGTCCACGTCA  | 214.095868723114 | 0.462669271987818 |
| ACGAACTATGAC  | 214.3321685267   | 0.883897895776136 |

|               |                  |                   |
|---------------|------------------|-------------------|
| GTCAATTATGAC  | 214.343549807625 | 1.06817431238003  |
| ATCCGTTAGTCA  | 214.518450164786 | 0.413628686280831 |
| TGACTAAGGCAA  | 214.813101192781 | 0.631286281884387 |
| ATGACTAATATT  | 214.969094406602 | 1.98609619950455  |
| GTCCTTGAGTCA  | 215.242230738067 | 0.955355896784733 |
| AGGCCCAGTCAT  | 215.24400686636  | 0.428287088159459 |
| GGGTCTTAGTCA  | 215.301532188895 | 0.641750862754732 |
| GCAGCTTAGTCA  | 215.313704614827 | 1.1799275342149   |
| GAATACACGTCA  | 215.333527109084 | 0.895827182133101 |
| TCATTGTAGTCA  | 215.334371022194 | 0.718340273220984 |
| CGTTTGTATGAC  | 215.680497240388 | 1.01810414572125  |
| GACCATCAGTCA  | 215.732078984059 | 0.615841206460242 |
| GAAGTGTGTAC   | 216.177682922361 | 0.448570513059331 |
| GTCATCGACTCA  | 216.253821168859 | 0.698162964706758 |
| GAAAACACGTCA  | 216.414821163535 | 0.446445237621621 |
| CCTCATCAGTCA  | 216.453933458803 | 0.35915051192297  |
| TGACTCGGAGAA  | 216.776485242081 | 0.368714024276431 |
| CATCTAGAGTCA  | 217.009453675821 | 0.886232323036949 |
| ATGTGTCAACAC  | 217.135289799635 | 0.274294734195835 |
| TATCATTAGTCA  | 217.174874710241 | 1.07041718034699  |
| CGTAGCTATGAC  | 217.254307275871 | 0.949674571104187 |
| AGACCTTAGTCA  | 217.372849157839 | 0.836913345493576 |
| GTCATAGCTCGA  | 218.012037710394 | 0.495064253793991 |
| ACGCATCAGTCA  | 218.104478913787 | 0.349830374808103 |
| AGGCGTTAGTCA  | 218.130325170839 | 0.452827118549404 |
| AATCGTTAGTCA  | 218.148378817346 | 0.917902389971537 |
| ATGACTCACCCC  | 218.203082330376 | 1.41832661684618  |
| ACTGACTATGAC  | 218.218915331459 | 0.239529387433704 |
| TAGTGACTCACA  | 218.362872851441 | 1.87781611958672  |
| AATCAAGAGTCA  | 218.36404705623  | 0.145303705717303 |
| GTCACATGTGAC  | 218.436396704304 | 0.892320962014764 |
| GTCATCGTATAA  | 218.472058119213 | 0.58330463999018  |
| GAGAACACGTCA  | 218.531267983056 | 0.29147392083545  |
| AGTCAGACTCAC  | 218.643858554893 | 0.53734553595117  |
| TGACTAAAGAAA  | 218.704323387384 | 0.328670547195812 |
| AGTCACCCTGAG  | 218.816111712264 | 0.303747167707463 |
| TGACTAAGCACA  | 218.984745230779 | 0.905878944182603 |
| GTCATACATAAA  | 219.40571323616  | 0.70393332521725  |
| CTGACTGCGTCA  | 219.426715742955 | 0.307363299008967 |
| AACTTGTAGTCA  | 219.611536833818 | 0.617611909252939 |
| CCAACCTTAGTCA | 219.859695319781 | 0.503365384944387 |
| ATTACTCAACTA  | 219.89830041383  | 0.193326104270347 |
| GCGCTGTGTGAC  | 219.96141892515  | 2.60882949149833  |
| TGACTAAGGACA  | 220.081975430908 | 0.650760587825675 |
| TCTCTTTAGTCA  | 220.171952980096 | 0.225537690971454 |
| ACGACGTATGAC  | 220.349025549506 | 0.471889414147345 |
| GTCATCGTTTAA  | 220.392019792765 | 0.519658896735192 |
| TGACATTAGTCA  | 220.551826167693 | 0.920363778893492 |
| GTGCAAGAGTCA  | 220.755232018708 | 0.560185576651688 |
| TGACTCCGAAAA  | 220.86633281685  | 0.8777984263184   |
| TGACTCTTGCCA  | 221.682376935569 | 0.396965464470569 |
| CAGACTTATGAC  | 221.765037208192 | 1.2417838118901   |
| GTCATAGTCGAC  | 221.817815396045 | 0.495240571953189 |
| TACCAAGAGTCA  | 222.075532085327 | 0.919424920337639 |

|              |                  |                   |
|--------------|------------------|-------------------|
| CGATACACGTCA | 222.097604997429 | 0.74242940037846  |
| AATCCGAGTCAC | 222.197296622029 | 0.448511411914109 |
| TGACTGAGTACA | 222.245399535203 | 0.61529222256365  |
| CGCTTGAGTCA  | 222.25493479275  | 0.638027504940419 |
| CATCAATATGAC | 222.375211248767 | 1.25114323410497  |
| TCATACGTATGA | 222.489309277526 | 1.80331008449818  |
| ATTACTTAGTCA | 222.648678035885 | 0.572990038871929 |
| CCAATGTATGAC | 222.800190044803 | 0.837149630514544 |
| GTGACACAGAAA | 222.812431948585 | 0.22730497941894  |
| AGTCTTGAGTCA | 222.841913503545 | 0.547752248172991 |
| CTGATAGACTCA | 222.906493504935 | 1.19580081257089  |
| TCACTCGAGTCA | 222.995571186676 | 0.739677095941156 |
| ATTCCGAGTCAC | 223.091475944276 | 0.378397039495845 |
| ATGTGTCAACGC | 223.094950400156 | 0.342370188442278 |
| CAACAAGAGTCA | 223.137051984791 | 0.855349544433937 |
| GGTCCGAGTCAC | 223.18725038792  | 0.471955889621677 |
| CAGCGTGCCTCA | 223.40786834921  | 0.883461532353868 |
| GAAACTTAGTCA | 223.570908860039 | 0.867285125105187 |
| ATCAGTTATGAC | 223.575771596034 | 0.959889049075983 |
| CTCTGTGAATCA | 223.614880796106 | 0.545682307679399 |
| AGGCATCAGTCA | 223.694905959506 | 0.284471582785691 |
| ACTCATAATAAG | 223.813777999532 | 1.09223638420896  |
| TCATATAAGTCA | 223.945682910884 | 0.744849191049899 |
| CTTCCTTAGTCA | 224.156514089793 | 0.4899719817429   |
| TATCGTTAGTCA | 224.18262114277  | 0.390932552553302 |
| TGACTAAGCAAA | 224.210021649236 | 0.296600122403814 |
| GCCGCTTAGTCA | 224.303160887079 | 0.789676417004991 |
| ATACCTTAGTCA | 224.471753995398 | 0.539543115580964 |
| TCGGCTCAGTCA | 224.66845893749  | 0.648899473289158 |
| AAACAAGTCATA | 224.729240526173 | 0.393207513478771 |
| GTCATTCTGTGA | 224.929804637145 | 0.841108049492228 |
| ATACATCAGTCA | 225.020826943562 | 0.947530940636696 |
| CATTGATGAC   | 225.190358567813 | 0.848669234402375 |
| GGTGACTCACGT | 225.442408878803 | 1.59605818172425  |
| ACCGTAGACTCA | 225.4624360119   | 0.740154838187215 |
| CCTAATTATGAC | 225.532485038287 | 0.287060646815763 |
| CCTATGGAGTCA | 225.536956054265 | 1.18039676743011  |
| CGTACCCGGTGA | 225.844913726599 | 1.12377933369856  |
| CTACGTTAGTCA | 226.158136216277 | 0.83633563123846  |
| AAACTAGTGACT | 226.31716484296  | 0.749057086115661 |
| TGACTGATGCCA | 226.379938378444 | 1.02270065262863  |
| CTGGCTTAGTCA | 226.711065312067 | 0.904295297429014 |
| GTCATACATTGA | 226.826259768214 | 0.471565292487265 |
| AATTCGAGTCA  | 226.836379907022 | 0.501309718124349 |
| GTGCATCAGTCA | 226.955905618584 | 0.947648479973744 |
| GAGCATCAGTCA | 226.972675468964 | 0.685464410125774 |
| TGACTAAGTGCA | 226.999671979492 | 0.498481628408616 |
| GTCATAGTGTC  | 227.014189558396 | 0.552857007292928 |
| ATTCCGAGTCA  | 227.181072200395 | 1.57274867847858  |
| CTGGCGAGTCAC | 227.231869727633 | 0.429768307504352 |
| GATGACTTGAC  | 227.387845657737 | 0.345355090081923 |
| CCAGAATATGAC | 227.482256413589 | 0.590470653499019 |
| GTGTCTTAGTCA | 227.485758073954 | 0.444208663591008 |
| CAGAACTATGAC | 227.511925650603 | 0.411328578579668 |

|              |                  |                   |
|--------------|------------------|-------------------|
| CACCTTTAGTCA | 227.795854183226 | 0.605129165475989 |
| CATAATTATGAC | 227.953916803648 | 1.00789115909139  |
| CTAGCTTAGTCA | 228.119493853459 | 0.581576954305596 |
| ATGGCGAGTCAC | 228.12012458138  | 0.338542168761351 |
| ACGATGTATGAC | 228.125731709796 | 0.665361399531131 |
| CGAAACACGTCA | 228.24391724759  | 1.11638187111162  |
| CAGCCTGACTGA | 228.245250667325 | 0.705073048778162 |
| CGATGACTTGTC | 228.303469865742 | 0.338714430503359 |
| ATGTGTCAATTG | 228.392289154923 | 0.77883600312596  |
| TACCATCAGTCA | 228.541675394056 | 0.626738144371036 |
| TATTACACGTCA | 228.615353367331 | 0.305288683015791 |
| GGATTTGACTCA | 228.727443771089 | 0.735976742086138 |
| CGTGCGAGTCAC | 228.782975779723 | 0.563929775498816 |
| GTCATAATACTA | 228.791055519361 | 0.658153372088294 |
| CCCCATTAGTCA | 228.85324685256  | 0.817961933758209 |
| CTGCATCAGTCA | 228.979945220181 | 0.429886558326599 |
| CCGAACACGTCA | 229.082349047406 | 0.558871571768794 |
| ATGTACTGACTC | 229.167388940504 | 0.734457764552012 |
| CTTGCGAGTCAC | 229.247786203438 | 0.464690485693603 |
| CGAAACCAGTCA | 229.284829800361 | 0.559448934214592 |
| ATGAGTCGGAAA | 229.309703134266 | 0.377076783719006 |
| AAGCCTTAGTCA | 229.390317696317 | 0.658071469851256 |
| AATCTATATGAC | 229.468078250949 | 1.15158494464819  |
| ATTCATCAGTCA | 229.564996455458 | 0.984663024946921 |
| ATAGCTCAGTCA | 229.590719429816 | 1.11231167290836  |
| GTCTCTTAGTCA | 229.862304432129 | 1.08264852381435  |
| AGCAATTATGAC | 229.946422467054 | 0.422795447477139 |
| GCTACTTAGTCA | 229.995250504675 | 0.238971171627812 |
| TCACTTTAGTCA | 230.086016085016 | 0.476328718237039 |
| GTCATCGCATGA | 230.122156955172 | 1.0413363799824   |
| ATCTCCGAGTCA | 230.170444328811 | 0.713836232076098 |
| CAAGAATTAGTC | 230.178043703915 | 1.20662452614506  |
| CATAAATATGAC | 230.406527676812 | 0.729710854016772 |
| CCGCAAGAGTCA | 230.444621574462 | 0.7404153446453   |
| CGTGATAATGAC | 230.558090643001 | 1.65792780187294  |
| ACCCAAGAGTCA | 230.595018661914 | 0.443046380469315 |
| CACCGTTAGTCA | 230.627280122038 | 0.768295088378991 |
| ATGTGTCAATGA | 230.772348107168 | 0.622332056138634 |
| GTCATCCATGAC | 230.847172329416 | 0.884172003021778 |
| ATGCAAGAGTCA | 231.141199120042 | 0.522935900469865 |
| GTGTTTGACTCA | 231.157409116141 | 1.18530358699241  |
| ATGTGTCAACAT | 231.433437038562 | 0.327424210143585 |
| CATGACTAATCC | 231.443173000177 | 1.19303274807524  |
| ATCGCTTAGTCA | 231.45882570914  | 0.151984640169749 |
| AAAGTTTACTCA | 231.472998410375 | 0.307011533651084 |
| ATGTGTCAATGC | 231.492489793932 | 0.372135046142208 |
| TCCCATCAGTCA | 231.537571937123 | 0.627925109574967 |
| CGGGCTTAGTCA | 231.602762102321 | 0.89947570599393  |
| GTCATAGTTGCA | 231.790862499083 | 0.935749536516024 |
| GCTCATCAGTCA | 231.905118272175 | 0.687630986293532 |
| TCAGTCAGGTAA | 232.143739733028 | 0.516164829188435 |
| ATTACTCAACGG | 232.17876716909  | 0.798246360495008 |
| ACGCTTTAGTCA | 232.219555192087 | 0.362369469322881 |
| ACCGTGAATCA  | 232.335836623958 | 0.540983907929436 |

|              |                  |                   |
|--------------|------------------|-------------------|
| TGACTCGTGACA | 232.405294574454 | 0.553731357280498 |
| CTGATCCAGTCA | 232.461491904055 | 0.554538741498399 |
| CCTTGTGAATCA | 232.477696039129 | 0.749366805881231 |
| TATGAGTCAAGG | 232.534548946473 | 1.26090597585108  |
| ACGGCTCAGTCA | 232.555999672553 | 0.668981514295422 |
| GTCATAAATGAC | 232.598198015127 | 0.649020313385108 |
| TCAAATTCGTCA | 232.766887077719 | 0.637594789181768 |
| ACTTACACGTCA | 232.960442281859 | 0.546928077458132 |
| GTCATCGCGTCA | 232.968223130177 | 0.310534179306338 |
| TGACTAACGACA | 232.984657630206 | 0.751455069044559 |
| CATCGTGCCTCA | 233.019761308258 | 0.550859713355864 |
| CCTTACACGTCA | 233.183273157823 | 0.53907687799944  |
| ATTCACGAGTCA | 233.198522271118 | 0.372255582321173 |
| AAACCCAGTCAT | 233.529659887995 | 0.121235295471831 |
| GTGACTCGGTCA | 233.725640266609 | 0.985313116976501 |
| ACCGTGGAGTCA | 233.876499937263 | 0.478437397564228 |
| CAATGCTATGAC | 233.892734689086 | 0.332817003974825 |
| TCTTCTTAGTCA | 234.055313629573 | 0.345539803162097 |
| GCGACCGATGAC | 234.296734354195 | 0.416908885554533 |
| GATCCGAGTCAC | 234.423798408035 | 0.589771586413262 |
| CAGCTGTGTAC  | 234.901990385324 | 0.314399960959776 |
| GAAGCTTAGTCA | 234.93464543741  | 0.520513886889034 |
| AATTGTGAATCA | 235.087541069858 | 0.735674687643521 |
| TCATACGTAGAA | 235.149275525633 | 1.34513159463488  |
| TGACGAATTTAA | 235.449730992959 | 0.352420117553423 |
| ATAGCTTAGTCA | 235.497463601977 | 0.721346616827354 |
| ATACTTCAGTCA | 235.534783763026 | 0.682062522938531 |
| CGCCGTTAGTCA | 235.603526405924 | 1.11166126404542  |
| CAGCTTTAGTCA | 235.763250554699 | 0.681657378179616 |
| TGACTGGTTTAA | 235.920914798607 | 0.542489176956251 |
| ACCACGTATGAC | 236.119608149239 | 0.614923416988051 |
| AGTCACCTTTTA | 236.123050889803 | 0.182445430266109 |
| CTGCAAGAGTCA | 236.157320969604 | 0.906640895987427 |
| GTCAGGTATGAC | 236.166240372801 | 0.677610947004133 |
| GTGCTTGACTCA | 236.209150316977 | 1.08531527449301  |
| ACCATGTATGAC | 236.240970921409 | 1.07939040243481  |
| AATTACTAGTCA | 236.268957864146 | 0.658786682549636 |
| GTTTCCACGTCA | 236.289023994748 | 0.565926673167631 |
| TGACTAAGTCCA | 236.476158014948 | 1.06985267674731  |
| TAACAAGAGTCA | 236.587606868934 | 0.335863243570953 |
| GTGTACACGTCA | 236.596096176086 | 0.822250381240296 |
| ATGAGTAAAATA | 236.710689027151 | 0.401818767665268 |
| GTGACACAGAAC | 236.784653027898 | 0.641649822455496 |
| CTGAACACGTCA | 237.144037299825 | 0.464208471685171 |
| GAACATCAGTCA | 237.194994554786 | 0.450852099065618 |
| CTTTGTGAATCA | 237.26481018993  | 0.411450526226558 |
| ATCGCTCAGTCA | 237.423668869519 | 0.5893385807542   |
| TGACTGAGCCAA | 237.426182567441 | 0.861445789669939 |
| TATGACTTGTCA | 237.520213917212 | 0.522647644331439 |
| TGACTAAAGGAA | 237.610081683491 | 0.525251319621442 |
| CAGGATACGTCA | 237.649934745932 | 0.665572114587039 |
| AGTAATTATGAC | 238.017713048973 | 0.861846333777405 |
| ATGTGTCAATGG | 238.111427573356 | 0.2530165882662   |
| TGACGTGTAATA | 238.178758700615 | 0.690142961232554 |

|                |                  |                   |
|----------------|------------------|-------------------|
| ACGAATTATGAC   | 238.258195960521 | 0.54777148962835  |
| GTGACTCGCTTA   | 238.36253181631  | 0.472567434113512 |
| AGTCATGGTCAT   | 238.434699470773 | 0.322471989024065 |
| GGTTATGAGTCA   | 238.670538051959 | 1.30498314508304  |
| ATACCGAGTCAC   | 238.715297895304 | 0.530007141631305 |
| GACTAATATGAC   | 238.844863884418 | 0.840818049088272 |
| TCACTAGAGTCA   | 238.9016348329   | 0.772870400451634 |
| ACGTAACAGTCA   | 238.975105312018 | 0.660545557091784 |
| CAACATTATGAC   | 239.101903595462 | 0.782718097369494 |
| ATGACTGGGTAA   | 239.168734520671 | 0.535500572001225 |
| GTCATAATCGGA   | 239.186484467158 | 0.724557179758661 |
| TAGTCCACGTCA   | 239.205217862279 | 0.552697971730066 |
| AACGTTGTGTCA   | 239.236025567987 | 0.295592579492562 |
| GTCATAGGTCAC   | 239.253837647949 | 0.956531016934364 |
| GTACTIONGAGTCA | 239.279999775651 | 0.375605028619954 |
| CCGGTATATGAC   | 239.44043425433  | 0.646572918355417 |
| GTGACTCGCCCA   | 239.53165285333  | 0.825499500748045 |
| CGGCGTTAGTCA   | 239.634945692469 | 0.75067394258049  |
| TAACCTTAGTCA   | 239.638260776216 | 0.687467147512747 |
| CCCCGTTAGTCA   | 239.738753220687 | 0.300729525373062 |
| CGAACTGTGTCA   | 239.798579259419 | 0.777710005790587 |
| TGACTCTAGGCA   | 239.805680930405 | 0.94936860677887  |
| ATGACTAATGTA   | 239.811695955672 | 0.894716486996749 |
| CAAGCTTAGTCA   | 240.068975601689 | 0.670864071746882 |
| ATGCCTTAGTCA   | 240.293976661903 | 0.875604435860849 |
| AGTCACTAGTCA   | 240.693326462721 | 0.311900583794622 |
| CCTGCTTAGTCA   | 240.797153639392 | 0.642675041629942 |
| GATTCTTAGTCA   | 240.838108266948 | 0.81074782531132  |
| CGTACGGAGTCA   | 240.938307352391 | 0.881958813530055 |
| AGTCACCTTTGG   | 240.970760542867 | 0.67229714314703  |
| AACCCTTAGTCA   | 241.003378069027 | 0.410041867911768 |
| AGGTACACGTCA   | 241.015964719235 | 0.468689702676512 |
| TCTTATAAGTCA   | 241.028336588942 | 0.752087932063114 |
| TACCCTTAGTCA   | 241.100397710817 | 0.558399290253863 |
| ATCCCTTAGTCA   | 241.105110735078 | 0.401695789468299 |
| GTAACCTTAGTCA  | 241.122784752226 | 0.46477864958752  |
| CCTAGGTATGAC   | 241.14173820299  | 0.58266527359259  |
| TACCATGAATCA   | 241.274952090365 | 0.686204716848039 |
| CGCCTTTAGTCA   | 241.354957346981 | 0.593516484103324 |
| ATTCATGAATCA   | 241.369863416796 | 0.880169832736847 |
| GATGATGTAACC   | 241.534876963797 | 0.179567355690362 |
| TATTATGAGTCA   | 241.676824266526 | 1.59459621069408  |
| GGGCTTGAGTCA   | 241.812030107219 | 0.460890998944403 |
| GTCATATCTTGA   | 241.815231038579 | 1.12135180019104  |
| TATAACACGTCA   | 241.864304294402 | 0.573534219742044 |
| GACGTATATGAC   | 241.865097112475 | 0.888442255814824 |
| ATGACTGGGTTC   | 241.8711892881   | 0.375402620226813 |
| AGAGCTTAGTCA   | 241.894658156145 | 0.526332791809997 |
| GACTCATGGTCA   | 241.957846643337 | 0.898594788923361 |
| GTTCTTAGTCA    | 242.007538517138 | 0.63267336913649  |
| ACACTGTATGAC   | 242.2874687647   | 0.610771846563973 |
| GCCCCTTAGTCA   | 242.513319559491 | 0.794295543985778 |
| ACACCTTAGTCA   | 242.598558148839 | 0.572541478778147 |
| CACTATTATGAC   | 242.608327522484 | 0.660685457476078 |



|              |                  |                   |
|--------------|------------------|-------------------|
| CCGACTCAGTCA | 242.704247840916 | 0.22246472986043  |
| ATGAGCAAATCG | 242.782539119543 | 0.549581603050814 |
| ACATACACGTCA | 242.822107602637 | 0.918242053774109 |
| TGACATACGTCA | 242.921163784457 | 0.888880568261963 |
| GTCATACAGTGA | 242.935772009929 | 0.900297356121558 |
| CCTCTGACGTCA | 243.031906717941 | 0.426711523453183 |
| GTCATCGTAATA | 243.097322157127 | 0.665819595557164 |
| ACTGCTCAGTCA | 243.186376923536 | 0.323356059593803 |
| GTGCTTTAGTCA | 243.327122502717 | 0.462851003090335 |
| TCAGCAGAGTCA | 243.426221892465 | 0.93462587245238  |
| TCATCCACGTCA | 243.509895335626 | 0.191667794016727 |
| AGACCGACTCAT | 243.652551091952 | 0.323404904418416 |
| CGTCTGGATGAC | 243.683246098087 | 1.01665558217925  |
| GTCATAACTTGA | 243.721086261327 | 1.02509204539795  |
| ATGAGTAAACAT | 243.73113118593  | 0.374410108191653 |
| AGGCTGTGTAC  | 243.798100969475 | 0.385365876199537 |
| ATGACTGGGTGA | 243.81384349724  | 0.451516856098855 |
| TAACTTTAGTCA | 243.89831421326  | 0.52227593467441  |
| TCGGCTTAGTCA | 243.972542638372 | 0.716248939006194 |
| GGTCATCAGTCA | 244.072285008084 | 0.601451672271775 |
| GTTACTCAGTCA | 244.146955932175 | 0.658385165248525 |
| CGGGCGAGTCAC | 244.271587001798 | 0.385356864383433 |
| TGACTAAGATAA | 244.279662673553 | 0.807208663459355 |
| GTGACTCGGATA | 244.328988505014 | 0.271602370741354 |
| CAGGCTTAGTCA | 244.378088951538 | 0.395277769901553 |
| ATGAGTCGGATC | 244.506748024072 | 0.487081076940031 |
| TGACGCACGTAA | 244.518225640775 | 0.588878684766578 |
| CACAGTGAATCA | 244.658433856507 | 1.08444456310939  |
| AGATTGAGTAAT | 244.669515634656 | 0.306737407633251 |
| ATGTGTCAATCC | 244.673858643382 | 0.421879021776485 |
| CAAATGTATGAC | 244.68479852204  | 0.503113269404523 |
| CTGATTAAGTCA | 244.878058072111 | 1.40308421535598  |
| GTACCGAGTCAC | 244.954153321036 | 0.493508804703981 |
| CTTATCGATGAC | 245.261750946884 | 0.857974860672781 |
| TACGATACGTCA | 245.275797069114 | 0.552633737300991 |
| CTCTTGTAGTCA | 245.279790166991 | 0.767626508734332 |
| CCAGGGTATGAC | 245.281230199206 | 0.820642584276575 |
| CAATTCGATGAC | 245.393892264301 | 0.668124589402214 |
| ATACCCAGTCAT | 245.41841173545  | 0.185360548363229 |
| ATCACTGCGTCA | 245.456326458528 | 0.20519212089995  |
| ATTACTCAACAC | 245.522383518962 | 0.456991474777203 |
| GTGGCTTAGTCA | 245.553568242266 | 0.70496670865903  |
| AAAAGTTATGAC | 245.583221643404 | 0.946826811371491 |
| ACTGATTATGAC | 245.588052945268 | 0.346380686193139 |
| AAAGCGAGTCAC | 245.589126642404 | 0.265602652392486 |
| CTCGCTTAGTCA | 245.6749043068   | 0.851534798200137 |
| GACTATTATGAC | 245.760510477143 | 1.08043077570415  |
| TCCTCGGAGTCA | 245.916385273396 | 0.581241090478324 |
| CTCTCGGAGTCA | 245.938680029575 | 0.846711048943784 |
| CCTCCGAGTCAC | 246.051742570574 | 0.320583359621896 |
| CCTTAGTAGTCA | 246.179241988615 | 0.34120623928979  |
| CATCCGAGTCAC | 246.182487333806 | 0.193195342159622 |
| ACGTCACGTCAT | 246.223299989821 | 0.251180118520556 |
| GTCACCGTATGA | 246.364668610762 | 0.622939273175995 |

|              |                   |                   |
|--------------|-------------------|-------------------|
| TGACTAACGCAA | 246.501322891453  | 0.928082902955746 |
| CGTCAAGAGTCA | 246.730734809548  | 0.559274088030511 |
| GTCACCTAGTCA | 246.767242302688  | 0.466435237311105 |
| TGACGTGGAAAA | 246.809831938773  | 0.580081284492939 |
| TGACTGGTCAAA | 246.889077035215  | 0.575462636922056 |
| CATAATTCGTCA | 247.002317525019  | 0.435176052784794 |
| AATCTGTATGAC | 247.041477774476  | 0.604646149702803 |
| TGACTACGATAA | 247.050863319796  | 0.868192065845775 |
| TGACTACAATCA | 247.112299047139  | 0.824848348240424 |
| GTGACTCGCATA | 247.135678307627  | 0.407074231786183 |
| TCCTGTGAATCA | 247.136522479963  | 0.770399936037631 |
| GGCCATTAGTCA | 247.154037745285  | 0.937066719224061 |
| CCTATGTATGAC | 247.158663678401  | 0.274167876814899 |
| ACGTTGAGTAAT | 247.320856236763  | 0.535451164761777 |
| GTCCATCAGTCA | 247.322487236368  | 1.00264492096301  |
| ATGTGTCAATAC | 247.355300251187  | 0.481974739984559 |
| TCCCCTTAGTCA | 247.41995544524   | 0.748671150495904 |
| ACAAACTATGAC | 247.529017544783  | 0.484689370060116 |
| AACTTGGAGTCA | 247.785364602453  | 0.62863600745035  |
| AAATCTGTGTCA | 247.9511110822661 | 0.306037339093411 |
| TGACTCTGCGAA | 247.984978175426  | 0.951981284190552 |
| ACTAATTATGAC | 248.214804816038  | 0.913287296795936 |
| TCGCTTGAGTCA | 248.244966094074  | 1.17480242280116  |
| CAACGGTATGAC | 248.300392850279  | 0.912547605689945 |
| ATTACTCAATTA | 248.33380544678   | 0.291270072044743 |
| ACCAGGTATGAC | 248.355426346587  | 0.840072204633971 |
| CATACTCAGTCA | 248.38347863129   | 0.468446031122395 |
| CTCGGTGAATCA | 248.408852303902  | 0.656204406538537 |
| TGACTCTTGACA | 248.526580839442  | 0.421207375861601 |
| GTCAATTCGTCA | 248.66281171799   | 0.577640157719527 |
| TCTTACACGTCA | 248.688350353292  | 0.339525565162357 |
| ACACCATGACTG | 248.841203046742  | 0.410198204872527 |
| AGAAACACGTCA | 248.916480569686  | 0.216051135611633 |
| GTCATAAAGTCA | 248.955985304865  | 0.388270563101381 |
| ATACTTGATGAC | 249.123114448788  | 0.866355037678934 |
| ACATTGTATGAC | 249.170995846406  | 1.27702361691135  |
| CATCCTTAGTCA | 249.332343793759  | 0.236489651736377 |
| GATTACGCAATC | 249.375976400877  | 0.510434998986345 |
| CATAAGTGAGTC | 249.409451043081  | 1.35399524742997  |
| GTCATCGGAGAA | 249.439646257049  | 0.325491803603683 |
| GGACAAGTCATA | 249.457023081013  | 0.139668818646009 |
| CACAATTCGTCA | 249.478947646192  | 0.61410231962719  |
| AGCCAAGTCATA | 249.870154381545  | 0.379845216130323 |
| GTCATAATAAGA | 249.952841301853  | 0.826278056359585 |
| GCGCAAGAGTCA | 249.992913505104  | 0.485263587254154 |
| AGGAACACGTCA | 249.997113784524  | 0.323756479917563 |
| GTGACTCGCCAA | 250.00311478716   | 0.654628418742195 |
| AGGCAAGAGTCA | 250.01448249091   | 0.219467975048856 |
| GTCATAGCGTCA | 250.15418686942   | 0.725404256674518 |
| GACACGTGAGTC | 250.179785251215  | 1.12129596169981  |
| ACTAGTGATGAC | 250.235903523037  | 1.44152104432134  |
| CGACGTTAGTCA | 250.26048028573   | 1.32343379918248  |
| CCGGATTATGAC | 250.36502647831   | 0.692317534482743 |
| CCATCGGAGTCA | 250.389663210567  | 0.508544502065054 |

|              |                  |                   |
|--------------|------------------|-------------------|
| ACAACCGAGTCA | 250.463465125025 | 0.497612981684971 |
| ATGTTGAGTAAT | 250.577656184809 | 0.415080208630001 |
| CTGGCTGCGTCA | 250.605231235802 | 0.966671450453407 |
| TGACGTATAAAA | 250.632944330871 | 0.378183390760526 |
| TAAAACCGTCA  | 250.734585680979 | 0.379157097419132 |
| AAATTTGCGTCA | 250.845999975117 | 0.904249207433782 |
| ATTACGTATGAC | 251.01409852534  | 0.517974609307026 |
| CAGACCGATGAC | 251.136034502308 | 0.466302251991889 |
| TGACTAGACTCA | 251.221365260072 | 0.762851418971697 |
| TCTCTAGAGTCA | 251.345925253478 | 0.857341783890869 |
| TGACTGCAAGAA | 251.35141536161  | 0.362501362353905 |
| GTCATAATTTTA | 251.403572657887 | 0.683406296926801 |
| ATCCTTTAGTCA | 251.555897223281 | 0.660063853648638 |
| ATAAATTGCTCA | 251.609739910927 | 0.83840131241293  |
| GACCATTAGTCA | 251.782164709333 | 1.3213919395155   |
| ACAGCTTAGTCA | 251.816398930524 | 0.709060103518796 |
| CAGTACACGTCA | 251.849903625653 | 1.17029984098977  |
| ACTACGTATGAC | 251.866275340926 | 0.888613946136629 |
| GTCATATATGAC | 251.933149365423 | 1.26313438813811  |
| CTTCAAGAGTCA | 252.031945519679 | 1.04343098790221  |
| ATGACATTAGTC | 252.131211099762 | 0.935970241638878 |
| CAAGATTATGAC | 252.284916770157 | 0.882128032272112 |
| ACGCTTGAGTCA | 252.379437942763 | 1.22315274979754  |
| AGTACTTAGTCA | 252.387355781529 | 0.700722571004304 |
| AATGATTATGAC | 252.538797993784 | 0.638666465181603 |
| CTAGTGTATGAC | 252.542105329014 | 0.35171864936766  |
| CTGTCCACGTCA | 252.663684606434 | 0.50331395664423  |
| ACGACTCAGTCA | 252.735909164573 | 0.483435143559184 |
| ATGTGTCAATCG | 252.759669853741 | 0.448663908863933 |
| AAGTGACTCATG | 253.00552890102  | 1.73729661478119  |
| GTCACTGCGTCA | 253.132871464786 | 0.82080416282352  |
| GTCATACCTCAA | 253.191828852051 | 0.543172324734063 |
| CGACCTTAGTCA | 253.22290486248  | 0.6272630587144   |
| ATATCCACGTCA | 253.24888761906  | 0.463778622055026 |
| ATGTGTCAATAG | 253.566749215723 | 0.154562042395673 |
| GACTGTGTCA   | 253.598835049772 | 0.803369110104112 |
| AATTTGACTCA  | 253.646644964795 | 0.460891802791242 |
| TCTGACCAGTCA | 253.731554788535 | 0.363963909631266 |
| GCATCCGAGTCA | 253.812470859729 | 0.39059127789561  |
| CTAAACACGTCA | 253.847620178743 | 0.236849360689387 |
| CTTCTGACGTCA | 253.963343862068 | 0.716243024282219 |
| TGACTCGGACCA | 253.987925618593 | 0.600044872173268 |
| ACTCAATAGTCA | 254.180087172423 | 0.441601721666038 |
| CCAAGGTATGAC | 254.190908405727 | 0.515386579553228 |
| CCGACTATGAC  | 254.295733516706 | 0.345281865721895 |
| GCGACTTAGTCA | 254.358498728448 | 0.549466376272019 |
| TGACGTTACTCA | 254.359646474032 | 0.402468117009533 |
| TACCTTTAGTCA | 254.597346498233 | 0.344144153465798 |
| CGGTGTTATGAC | 254.721653968354 | 0.401336851712701 |
| CGGACTTAGTCA | 254.798913770431 | 0.59519904128059  |
| TAGCTTTAGTCA | 254.812224118393 | 0.627349134155651 |
| TGACGAATTCOA | 254.864554897997 | 0.566290203923946 |
| GACAATCTGTCA | 254.950702739759 | 0.79414263005314  |
| CCTGAATATGAC | 255.107486275663 | 0.489725765063872 |

|              |                  |                   |
|--------------|------------------|-------------------|
| GGAATTGACTCA | 255.114369961696 | 0.791422725910139 |
| GTCACATTGTGA | 255.335702123352 | 0.515940680728091 |
| TAGCAAGAGTCA | 255.336645561313 | 0.487969159809061 |
| GTCATTCTGACA | 255.468505144343 | 0.670197522643052 |
| ATGAGTAAATG  | 255.598155386715 | 0.353082019808055 |
| GTCATCGGCTGA | 255.670052427103 | 0.819903125361189 |
| GTACGCTATGAC | 255.752635595495 | 0.914412428363463 |
| GTCATACCGAGA | 255.796567123552 | 0.679545082848386 |
| GTCATAGTTTGA | 255.855348755057 | 0.404479895047247 |
| ATGAGTCGGCAT | 255.98162347535  | 0.478688117438148 |
| AGTTACACGTCA | 256.11395343281  | 0.486915898891056 |
| TCTCCTTAGTCA | 256.304567916648 | 0.344501986593603 |
| TGCATGACTAAT | 256.308894459045 | 1.5917789114719   |
| GTGACACAGTTA | 256.317159957085 | 0.488102498307106 |
| GAACCTTAGTCA | 256.331040171784 | 0.85079400779415  |
| ATGTCCGAGTCA | 256.343120362073 | 0.586680029019148 |
| ATGACTAGCATG | 256.355165314611 | 0.722731020846511 |
| CCTTTGGAGTCA | 256.445846933904 | 0.579354671371985 |
| GCTCTTTAGTCA | 256.541740400882 | 0.545835626952284 |
| ATAATGTATGAC | 256.844647295168 | 0.562930717825855 |
| GTCATACACGGA | 256.863929206712 | 0.223192483441525 |
| CTGAGTCGAAAC | 256.924462477491 | 2.21817050761732  |
| ATGACTGGGTTA | 257.025336979682 | 0.237984934749228 |
| GTCATATTCGAA | 257.041230766678 | 0.329161565629844 |
| GGTCATCATGAC | 257.052903845446 | 0.411187064091771 |
| AATTTTACTCAT | 257.054175514161 | 0.759871171063164 |
| ATGACGTGACCA | 257.168109086572 | 0.658839871456136 |
| ATCGATACGTCA | 257.189667181935 | 0.754248162082277 |
| TGACTCGGAACA | 257.286311786081 | 0.68230770995924  |
| CAATATGATGAC | 257.363788272866 | 0.573805400154645 |
| GCGTACACGTCA | 257.399946970833 | 0.586239325246262 |
| GTCATCGCATT  | 257.493959551071 | 0.732895425673283 |
| GTGACACAGACA | 257.516307146521 | 0.705145284445816 |
| AGTCATGGTGAC | 257.608933562254 | 0.597492308938817 |
| TGACTCGAGTAA | 257.708103020204 | 0.556884761111128 |
| GTCACCGAGTCA | 257.813053791132 | 0.598263422196315 |
| ATGTGTCAACTA | 257.85772918753  | 0.354316770059919 |
| ATTACTCAAACG | 257.925354571072 | 0.436850759942134 |
| TCCGATTGGTCA | 257.953244844756 | 0.614322106295283 |
| ATGACTTCGTGA | 258.149475707723 | 1.0892716177644   |
| CTAATGCAGTCA | 258.257069470511 | 0.514263974362781 |
| GTGACTCGGTAA | 258.308309562843 | 0.221704829652882 |
| ATGAGTCGGACC | 258.349336198143 | 0.22492403340727  |
| GTGACTCGCCGA | 258.429418505823 | 0.706412225797469 |
| ATGACAGACTCA | 258.593470445654 | 0.606584201604072 |
| CAATACACGTCA | 258.618931046273 | 0.851894781042358 |
| GAGCAAGAGTCA | 258.674294011444 | 0.453958126768788 |
| GTCATCGGTAAA | 258.704898124675 | 0.209248957525619 |
| ATAGTCAATGAC | 258.764901834418 | 0.674733771273161 |
| AAACTAGAGTCA | 258.914018930208 | 1.09196758385886  |
| GGACCGAGTCAC | 259.055445539194 | 0.817303798285132 |
| ATGCATCAGTCA | 259.324936187097 | 0.499203198101098 |
| ATATATACGTCA | 259.433392598952 | 0.510229050918333 |
| CTCAATACGTCA | 259.600639914672 | 0.350479677551069 |

|              |                  |                   |
|--------------|------------------|-------------------|
| AGTCCGACTCAT | 259.677763330531 | 0.600961147351289 |
| GATTCATATGAC | 259.811736698381 | 0.261417097479658 |
| CTAAATACGTCA | 259.823669254921 | 0.60699798243089  |
| GTCATATTACAA | 260.020225684212 | 1.12913469335664  |
| CCACATCAGTCA | 260.186699246647 | 0.462531795022314 |
| CCATTGTAGTCA | 260.291923362842 | 0.638197886850832 |
| CGTCATCAGTAA | 260.320918627155 | 1.14475750153096  |
| ATGCATTAGTCA | 260.384111236178 | 0.718904124819757 |
| TGACTAAAGGCA | 260.38968602018  | 0.744863183151797 |
| ATCCATGAATCA | 260.435589954599 | 0.878485438511945 |
| GTCATCGATACA | 260.444788708189 | 0.836866728046771 |
| ATGAGTAAACAC | 260.48971990355  | 0.54897712526911  |
| CTCGCGAGTCAC | 260.531535189446 | 0.441187537176579 |
| ATGACTAGCTTA | 260.69344178655  | 0.925550293881727 |
| CTCTAACAGTCA | 260.853183813724 | 0.657920491960711 |
| GTCATACCGAAA | 260.855028480522 | 0.498031604567222 |
| ACGACTTAGTCA | 260.989475210277 | 0.714624703785697 |
| ATGAGTCGGTCG | 260.993650219137 | 0.317928786940004 |
| AGTCACCTTTAA | 261.012829869808 | 0.299960894412197 |
| ATGAGTAAACGC | 261.024638366001 | 0.287773087272777 |
| GTCATATATTCA | 261.096722639586 | 0.788761836577641 |
| CAACATACGTCA | 261.220965087703 | 0.455298005342329 |
| TGACTCAAGCAA | 261.336013852949 | 1.10543144284152  |
| GATTACTATGAC | 261.493482768929 | 0.378868583726926 |
| CGTCACATGACG | 261.598030809459 | 1.00632514229197  |
| GTCATCGACTGA | 261.605433065024 | 0.849357652210339 |
| TCACGTGAATCA | 261.636795563639 | 1.26325694777285  |
| GTAATTTATGAC | 261.734412833933 | 1.00619941474378  |
| GTGACTCGGCGA | 261.779419807824 | 0.525858087406009 |
| ATGACTGGGACA | 261.825469564247 | 0.366492457944553 |
| GTCATAGTTTTA | 262.04111557981  | 0.667883938619572 |
| GCTAATTCGTCA | 262.135463295206 | 0.867923913921736 |
| ATGTACACGTCA | 262.145768349023 | 0.815377429871791 |
| TCGCTAGAGTCA | 262.256722053171 | 0.539519986888998 |
| ATGTGTCAAAGA | 262.298041866823 | 0.342884958601884 |
| GTCATAGCTTTA | 262.30383441737  | 0.481524599808896 |
| GGTCCCTATGAC | 262.381652994706 | 0.58472512309744  |
| GCATCTTAGTCA | 262.390292922286 | 0.584086811521161 |
| CCGCTTGAGTCA | 262.4656948938   | 0.856562530870736 |
| TGACGTCAGAAA | 262.534994192663 | 0.403087432272807 |
| ATGACGGCATCG | 262.586719055218 | 1.12072859413797  |
| GAACAAGTCATA | 262.612374942128 | 0.345071264534555 |
| ATGCTATATGAC | 262.628472503982 | 0.839471190163554 |
| ATGAGTAAACCC | 262.701314555477 | 0.254751320317314 |
| ATAACTGTGTCA | 262.908105728958 | 0.770203983889567 |
| CGTCTTGAGTCA | 262.910806277712 | 0.622276278652502 |
| AGTCTGTGTAC  | 262.922270012866 | 0.548474403306463 |
| GTCATAGTTCGA | 262.958674151657 | 1.03390159285547  |
| GTGACTCGCAAC | 263.070170851658 | 0.471427125148993 |
| GGCATGACTAAT | 263.14803805982  | 1.35224123924501  |
| ATTACTCAACTG | 263.231403069715 | 0.302750808073719 |
| CCGAATACGTCA | 263.259921660057 | 0.743648723543851 |
| TCCCAAGAGTCA | 263.301033677984 | 0.631304825531261 |
| TCATACACGTCA | 263.330929528347 | 0.592986981752111 |

|               |                  |                   |
|---------------|------------------|-------------------|
| TGACTAAGATCA  | 263.352208142924 | 1.19033278597433  |
| GTGACTCGCTCA  | 263.444979080629 | 0.630810706042035 |
| ATCTGTGAATCA  | 263.544246395494 | 0.906632156118736 |
| AAGACCGATGAC  | 263.5656535109   | 0.395479235624902 |
| CCTGCCGATGAC  | 263.581175519815 | 0.690903385992642 |
| TCGACTCAGTCA  | 263.582070505781 | 0.470717041105573 |
| ATGAGTCGAGAGA | 263.627817376368 | 0.327466293248119 |
| AAAAGGGTGACT  | 263.629909305229 | 0.245280715885915 |
| GTCATACATGAA  | 263.668111169804 | 0.740695952261844 |
| GATCCTTAGTCA  | 263.816117222292 | 0.556662781477774 |
| CGCGCTTAGTCA  | 263.905217197375 | 1.10030020486373  |
| TGACACACGTAA  | 263.957130781683 | 0.614967619853319 |
| ATGTGTCAATTA  | 264.056458048377 | 0.439852474254305 |
| CACGATACGTCA  | 264.081910722414 | 0.779927686157841 |
| GGCACTCAGTCA  | 264.088094593949 | 1.02746351750719  |
| CTTGGTGAATCA  | 264.093827555113 | 0.697902613818522 |
| CAAGCGTGACTG  | 264.105593267933 | 0.816371960344673 |
| GTCATACGTAAC  | 264.15792753693  | 0.947394292733283 |
| GTCATCATTACA  | 264.21344029744  | 0.521691182584718 |
| GGTCACTATGAC  | 264.257093456016 | 0.921222421318774 |
| AAAGCTGTCATA  | 264.295272227772 | 0.336627944107085 |
| GCGCTGTGTAC   | 264.501030160549 | 0.425286471740639 |
| GTCATACCTAGA  | 264.572676712469 | 0.341222690987058 |
| ACCTTGGAGTCA  | 264.578255263979 | 0.838317311456927 |
| GGAACCTTAGTCA | 264.630003457508 | 0.446362569245987 |
| GTGACTCGCACA  | 264.659939295221 | 0.491496438380128 |
| TGACGAATTAATA | 264.998071099317 | 0.434281913769536 |
| AAAACAAGTCAT  | 265.018240040997 | 0.559856892409467 |
| CTTAGGTATGAC  | 265.041674048875 | 0.852235525701324 |
| ATTACTCAATAG  | 265.078533017445 | 0.276181353945717 |
| TATAATACGTCA  | 265.104059067495 | 0.549000285210717 |
| TAGGCTTAGTCA  | 265.300004474053 | 0.674455189457038 |
| GCCTCCGAGTCA  | 265.355041308105 | 0.269568082702756 |
| TGACACACGGAA  | 265.435155306197 | 0.520704998071968 |
| ATGACTGGGATC  | 265.475545005377 | 0.738837308329965 |
| ACTCAAGAGTCA  | 265.591103231758 | 0.556766152345513 |
| GTCATCAAATGA  | 265.591367027798 | 0.581613129874845 |
| GTGCGTTAGTCA  | 265.725405643462 | 0.46170421314572  |
| ATTACACAGTCA  | 265.727499504864 | 1.12082596419174  |
| GTCACTGACACA  | 265.748064590072 | 0.736788992796055 |
| AGTCATGAGTAC  | 265.781385185947 | 0.736324400595268 |
| CATGACTCATAG  | 265.803681562    | 1.92660247733898  |
| AATCTTACGTCA  | 265.847361744497 | 0.371997576161636 |
| AATCATAGTGAC  | 265.861925493553 | 1.0827699405926   |
| AAATTATTAGTC  | 265.968955748315 | 0.932352417548481 |
| AAGTTGACACAT  | 265.993719060096 | 0.373768795007558 |
| GTCATCCGATGA  | 266.001752789032 | 0.448294702800662 |
| ATTGCATGACAC  | 266.064898055982 | 1.19610295894126  |
| CATAGTGATGAC  | 266.333224370405 | 0.656231601018707 |
| CCAAGCTATGAC  | 266.403249222464 | 0.471292255659573 |
| TCGCCTTAGTCA  | 266.56119165484  | 0.569709124360281 |
| GTCACCATATGA  | 266.776872369768 | 0.63901421017031  |
| ATGCTGTGTAC   | 266.901399859534 | 0.45500358015876  |
| CAAAATGATGAC  | 266.929688213221 | 0.26183838212142  |

|              |                  |                   |
|--------------|------------------|-------------------|
| CGTCTTGCGTCA | 267.088663797993 | 1.12904455042089  |
| AACCTTTAGTCA | 267.17588205064  | 0.682758439950406 |
| ACCCATCAGTCA | 267.209410100905 | 0.596500629110294 |
| GTCATCGGATGA | 267.223389450004 | 0.592983588224882 |
| ATGACTGGGCCG | 267.244966776879 | 0.55438029768652  |
| GTCATACCAGAA | 267.371721595122 | 0.764849066486762 |
| CCGCATTAGTCA | 267.459114857254 | 0.59192882818478  |
| CTATGACTTGTC | 267.543832266693 | 0.330594382990439 |
| AACAAGTCATAG | 267.555859969835 | 0.497892390755614 |
| CCACTTTAGTCA | 267.724191899183 | 0.48341959811673  |
| CAAATACAGTCA | 267.817006228697 | 0.964549287930915 |
| TGAGCAATACAA | 267.871136491669 | 1.00639715648001  |
| ATGAGTCGGTCC | 267.972463231087 | 0.414253880982031 |
| TCATAGTAGTCA | 268.053143717444 | 0.688629921582956 |
| TCTAACACGTCA | 268.089033503587 | 0.181096266614066 |
| AGTCACCTTTTC | 268.1129125263   | 0.569598265282914 |
| ATCATTTATGAC | 268.199360927619 | 0.564908128905185 |
| ATGACGTGACAT | 268.212458284735 | 0.485331449400485 |
| GTCTCCGAGTCA | 268.22677152611  | 0.415123915036204 |
| GTCATACCTATA | 268.23796671542  | 0.656465365157457 |
| ATGACTGGGTTG | 268.334074903089 | 0.390622019373925 |
| GTCATCGCAAGA | 268.516369257464 | 1.1007767247983   |
| AAACTTACGTCA | 268.552506072766 | 1.09512398872127  |
| TGACTCGGATAA | 268.574604711779 | 0.531353952618516 |
| TCGTTGCACTCA | 268.615650925532 | 1.07250030321798  |
| ACATCCACGTCA | 268.631127927977 | 0.490247970644013 |
| GATGACTTGTC  | 268.631458889016 | 0.432899283224685 |
| ACTCCGAGTCAC | 268.933501040412 | 0.2817806581174   |
| TCTAGTGAATCA | 268.935743553382 | 0.40400528307922  |
| GGACATTAGTCA | 268.983805910236 | 0.883245755956296 |
| ACCTCGGAGTCA | 269.316601038904 | 0.544677892107116 |
| ATAATCGACTCA | 269.356698011609 | 0.33056506963741  |
| AATACCGATGAC | 269.455785538336 | 0.665065751610893 |
| GTGACTCGGAAC | 269.4673500453   | 0.579146012715313 |
| AGTCTGACGTCA | 269.639109567305 | 0.278451518881811 |
| GGAAACACGTCA | 269.825089754875 | 0.772995896584948 |
| CTATAAGATGAC | 269.830350315627 | 0.303726255310311 |
| ATGTGTCAACGG | 269.867146774292 | 0.566150421432798 |
| CCAAAAGATGAC | 269.933558555157 | 0.742164711856866 |
| AGTCACCTTTTG | 270.011157709099 | 0.362311866151949 |
| CTTACTCAGTCA | 270.422436748754 | 0.269931935710265 |
| TGACTGTATCAA | 270.473671312187 | 0.825777747997421 |
| GACTTTGTGTCA | 270.634118472916 | 0.325314725500543 |
| GTTCTTGCGTCA | 270.730166219919 | 0.582119468458809 |
| CTACATCAGTCA | 270.7938425664   | 0.48836322889453  |
| ACCCTAGAGTCA | 270.903133051405 | 0.25098208479422  |
| CTTAAATATGAC | 270.915929621399 | 0.911376767982821 |
| TGACTAATGCCA | 271.084762602933 | 0.876870119303362 |
| ACTAATGATGAC | 271.120109752635 | 0.621298607585543 |
| GTTCAAGAGTCA | 271.125757096032 | 0.269877599871882 |
| CTCCAAGTCATA | 271.393938045015 | 0.392296803472347 |
| GATACTGTCATC | 271.474652431726 | 0.229680598863858 |
| CTATGAGAGTCA | 271.478656004826 | 0.664497271651532 |
| AACTCGTGACTG | 271.517515925462 | 0.885965493771245 |

|                |                  |                   |
|----------------|------------------|-------------------|
| CTGCTTGAGTCA   | 271.694836071672 | 1.16799568420127  |
| AAAACACTACGTCA | 271.742656065664 | 0.598488896982331 |
| ATATTGTATGAC   | 271.781734645821 | 0.848451142485522 |
| GAACAAGAGTCA   | 271.804119784439 | 0.540719341718162 |
| AGACAAGTCATA   | 271.916797026499 | 0.376485706226645 |
| ATGAGTCGGCTA   | 271.975464166613 | 0.486413208408141 |
| AGTCTTTGTTCAT  | 272.055857016678 | 0.258756029053467 |
| GCACATCAGTCA   | 272.143677438382 | 0.373896909963676 |
| ACTACTCAGTCA   | 272.331960412882 | 0.451732429681641 |
| GGTAATACGTCA   | 272.363365619679 | 0.783939890901829 |
| AATCACGATGAC   | 272.398251532741 | 0.619607321208249 |
| GTCATCGAATTA   | 272.3986471258   | 0.403281444694765 |
| AAACTTTGTTCAT  | 272.571052391588 | 0.38475640419465  |
| AAGGCTTAGTCA   | 272.594002446175 | 0.188419530849889 |
| GCACTTCAGTCA   | 272.648257353829 | 0.481635688409958 |
| CCGAGGTATGAC   | 272.681371891925 | 0.852981739531829 |
| TGACTGAGTGCA   | 272.728131771085 | 0.744883437664142 |
| AGCCCTTAGTCA   | 272.762183908821 | 0.687843664240237 |
| TGATTCATGTAA   | 272.78105596934  | 1.016846640767    |
| AAAACCTTACTCA  | 272.831421837511 | 0.664034893467411 |
| CCCTGGGAGTCA   | 273.082628171025 | 0.986271088457802 |
| CTTTAACAGTCA   | 273.159428794606 | 0.66455483574939  |
| ATACCATGACTG   | 273.249465695725 | 0.603285564479933 |
| CCGTCTTAGTCA   | 273.412797717713 | 0.623824125098791 |
| GTCATCAATGGA   | 273.437230782005 | 0.678793035651803 |
| GTCATCGTCAAA   | 273.444493008524 | 0.955588479228008 |
| AGGCCGAGTCAC   | 273.486898421863 | 0.520607588281922 |
| ATCCAAGTCATA   | 273.48794732099  | 0.32935381483849  |
| GCCCTAGAGTCA   | 273.655862624446 | 0.47597468800254  |
| CGTATCCAGTCA   | 273.89914996731  | 0.826101846062321 |
| ATATATTTGTCA   | 273.909908995346 | 0.656033076122746 |
| ATGACCCAGTCA   | 273.918329093839 | 0.634848914246954 |
| AGACTAATAGTC   | 273.934324976714 | 0.868775166166563 |
| CACCATCAGTCA   | 274.010163761468 | 0.27819307004349  |
| ACTCACGAGTCA   | 274.3545494045   | 0.537219775626947 |
| AAGTCCACGTCA   | 274.436115437137 | 0.664481853419768 |
| TAATCCACGTCA   | 274.531815555153 | 0.685223389647901 |
| ACTTTGACACAT   | 274.538734450478 | 0.303329207857667 |
| AGACAAGTCATC   | 274.561460834314 | 0.475407757583927 |
| GGTCAAGAGTCA   | 274.663050358817 | 0.337713306806594 |
| GTCATAGATTGA   | 274.67170671543  | 0.654040702614651 |
| GGAGCGAGTCAC   | 274.754741346519 | 0.148412876358535 |
| CCTTGCGAGTCA   | 274.897821637686 | 0.591223161733496 |
| ATAAATTCGTCA   | 274.946382012776 | 0.583555904995035 |
| ATGAGTCGGCAA   | 274.947253968026 | 0.200247077272721 |
| TCTGCAGAGTCA   | 275.004108921879 | 0.903728600205517 |
| CCTCTGGAGTCA   | 275.024219077855 | 0.521286680875495 |
| CGGACTCAGTCA   | 275.028960192267 | 0.697510019925634 |
| TGACGTGGACAA   | 275.03691837524  | 0.217543988838113 |
| ATATCCGAGTCA   | 275.192475292605 | 0.280365304650508 |
| CTCAGAAATGAC   | 275.245057087956 | 0.61275123287227  |
| AATGATACGTCA   | 275.30929296166  | 0.822995992266372 |
| ATGACTGGGCTA   | 275.317766819655 | 0.291523713669889 |
| CAAAATTCGTCA   | 275.405397228727 | 0.483040228355854 |



|              |                  |                    |
|--------------|------------------|--------------------|
| ATTCCTTAGTCA | 275.447680374967 | 0.573689728420204  |
| ATTACTCAAAGG | 275.499117906585 | 0.368405103690331  |
| GTGACTCGCAAA | 275.660819063646 | 0.449028315352895  |
| GTCATAGTTCCA | 275.690585973281 | 0.145069254571683  |
| ATTACTCAACCA | 275.764694421173 | 0.384615311471856  |
| CTGCTCGATGAC | 275.783621766157 | 0.715246875835231  |
| GCAGCGAGTCAC | 275.842568992829 | 0.636994819979051  |
| CATCGGTATGAC | 275.882129923313 | 0.516317184561785  |
| CGACATGAATCA | 275.906716406517 | 0.861462590600458  |
| ACATTTGCTCAT | 275.924148591098 | 0.276871101890368  |
| AATAGGTATGAC | 275.940219977173 | 0.299641712156321  |
| TGACTGTAAACA | 276.034811808616 | 0.73004510029156   |
| CTCATACAGTCA | 276.156305488438 | 0.60285386878035   |
| TGACTGTGACAA | 276.175345394782 | 0.428715985238509  |
| GTCATATCTGCA | 276.323072824868 | 0.670566935274928  |
| ATTACTCAATTG | 276.416089911041 | 0.171259026779096  |
| AAGCTTTATGAC | 276.449930440096 | 0.885656694923508  |
| CACGTAGACTCA | 276.456525128268 | 0.391266005466287  |
| CACGCGAATGAC | 276.605934710664 | 1.17352504202916   |
| GTCACATGACGA | 276.769927643894 | 0.419978915386076  |
| CGAGCGAGTCAC | 276.81963447437  | 0.443819124363585  |
| ACCAAATATGAC | 276.865238515824 | 0.385700017570769  |
| CTACCGAGTCAC | 276.915464139886 | 0.0792982945796646 |
| CATAACTATGAC | 276.970838169966 | 0.729345466834936  |
| ATGAGTCGGTAA | 277.469244590884 | 0.439504484882144  |
| TGACTGAGTAAA | 277.534186143815 | 0.45606615542461   |
| CAAATCCGTCA  | 277.623879552704 | 0.641016572014282  |
| GCGTCTATGAC  | 277.670863383515 | 0.346635113524451  |
| ATCATAGATGAC | 277.691035290657 | 0.79090750751586   |
| GCGGCTCAGTCA | 277.808814496671 | 0.621067062185712  |
| TGAGTCTAACAA | 277.811996063537 | 0.865540782818949  |
| CCGGCTCGGTCA | 277.832083567765 | 0.467809014695098  |
| GTGACTCGGCTA | 277.913892441338 | 0.332282348543352  |
| ACTCTAGAGTCA | 277.957111161632 | 1.12593154292837   |
| GTGACTCGCCAC | 278.021786413939 | 0.280631234256858  |
| ACGCTGTGTAC  | 278.063828565498 | 0.28327635475766   |
| ATCTCTGTGTCA | 278.195390409251 | 0.650129453999775  |
| GAATCTTAGTCA | 278.233897962565 | 0.49079442888509   |
| GAACCGAGTCAC | 278.259839153227 | 0.448263619570355  |
| ATGACTGGGCAT | 278.27803477076  | 0.503656565770594  |
| GGACGTTAGTCA | 278.306986140551 | 1.0989707001528    |
| CTAAATTCGTCA | 278.389011530796 | 0.375041711774835  |
| AATCTTTAGTCA | 278.408053384201 | 0.783865787954289  |
| CCTAACACGTCA | 278.505582365896 | 0.346332740186995  |
| AGCCGGTATGAC | 278.553177787017 | 0.404691349839253  |
| GCTACCGATGAC | 278.597300145766 | 0.638676673674602  |
| ACAAGATATGAC | 278.710450009502 | 0.955221134658848  |
| CCTCGTGTGTCA | 278.905511796786 | 0.60791322051091   |
| GGCTCTTAGTCA | 278.914738381251 | 0.916299121608214  |
| TCAGCTGTGTCA | 278.931287266797 | 0.594853946436888  |
| CAGACTCAGTCA | 278.939081115987 | 0.854854471570827  |
| ATGACTGGGTAC | 278.941195620821 | 0.335990733653844  |
| TCATCCGAGTCA | 278.95575420857  | 0.29589144171129   |
| AAGTTGAGTAAT | 278.997859334528 | 0.311558720890703  |

|               |                  |                   |
|---------------|------------------|-------------------|
| ACACGCTATGAC  | 279.012384018744 | 0.754952965583714 |
| CGCACTCAGTCA  | 279.015562246123 | 0.60563867000551  |
| ACTCATATGAGT  | 279.346110511959 | 0.786530075402621 |
| GCGAACACGTCA  | 279.38510922683  | 0.475738397375262 |
| AACTCATAGTCA  | 279.391101554525 | 1.22662942675385  |
| TGACGAATTACA  | 279.419392676164 | 0.867276600744656 |
| ATGTTTTATGAC  | 279.616792823531 | 0.487187361172929 |
| CCTCCTTAGTCA  | 279.628935676989 | 0.378363232523902 |
| AATGCGAGTCAC  | 279.648599317874 | 0.601289811295508 |
| ACCTGTGAATCA  | 279.840950232152 | 0.826290362488965 |
| CATAACACGTCA  | 279.885712406157 | 0.482936047217703 |
| TCGACCTAGTCA  | 279.886086188055 | 0.780697161947351 |
| GTCATAGTTCAA  | 279.905445860601 | 0.562502879761117 |
| AGTCACCTTAGA  | 280.02672764925  | 0.316727709243179 |
| GACTAATCTTGC  | 280.097533434994 | 1.3242999752206   |
| TCGAATTCGTCA  | 280.151624469107 | 0.804639542617055 |
| GAGTAATTAATC  | 280.417244268896 | 1.15074211633344  |
| CAGTGTGAATCA  | 280.478170067386 | 0.378630373772121 |
| CTTCCGAGTCAC  | 280.525864960198 | 0.313778594793817 |
| TATTATACGTCA  | 280.559642833932 | 0.57134987200085  |
| CCAGATTATGAC  | 280.62350507283  | 0.514639402164576 |
| AACCAAGTCATA  | 280.634447813516 | 0.384881479887538 |
| GTCATAATATCA  | 280.853902482293 | 0.831211874005804 |
| ATGACGTGAGTC  | 280.908052848855 | 0.503900937260922 |
| TGACGCACGAAA  | 280.973387419902 | 0.446141064091081 |
| TGACTCGGTAAA  | 281.208891880961 | 0.276005332463837 |
| GTCATTGTGACA  | 281.250612922069 | 0.478940316684921 |
| CGTCACGAGTCA  | 281.449053168514 | 0.640274202087248 |
| AGATTGACACAT  | 281.471007195344 | 0.506184616855443 |
| CGTATATATGAC  | 281.538582182061 | 0.613040213736624 |
| GTCATCGAATGA  | 281.562661696303 | 0.718699378450014 |
| CCAGCGAGTCAC  | 281.599602172537 | 0.718819996327106 |
| ATTTCTGTGTCA  | 281.618643065214 | 0.35028028981383  |
| CGCAATTCGTCA  | 281.708993719919 | 0.58377035942967  |
| GTCATCTTATGA  | 281.774577797949 | 0.457157295948524 |
| TAGTCTGTGTCA  | 281.791762879976 | 0.386550960880333 |
| TGACTGAAGAAA  | 281.838273833091 | 0.489433838440559 |
| TGACTATAGTCA  | 281.942290810713 | 1.16295591775688  |
| ATGAGTCGGCCG  | 281.951654077839 | 0.478605155558802 |
| GTCATCCGTTGA  | 281.996146189543 | 0.793903241195781 |
| TCACGTGATTCA  | 282.006738238371 | 0.799522623577463 |
| ATTGCATAGTCA  | 282.044840938288 | 0.83432502756106  |
| CTGCGTTAGTCA  | 282.057951893972 | 1.1680109759114   |
| GTCACCTCAATGA | 282.095558718821 | 1.10563102835293  |
| ACACCCAGTCAT  | 282.102623511594 | 0.25373325140685  |
| ATTGCCGAGTCA  | 282.123277250422 | 1.0248370473209   |
| ACTAATATGTCA  | 282.126364105901 | 0.644979875887855 |
| CTGTGATATGAC  | 282.170446048013 | 0.861216835166118 |
| CATTAGAATGAC  | 282.211657059909 | 0.465421635468205 |
| TCGTCTGTGTCA  | 282.253177804828 | 0.697639051045526 |
| GTCACCTACTCA  | 282.28504373647  | 0.224454852645605 |
| CTGGCTCAGTCA  | 282.301133126782 | 1.18938913900598  |
| ACATGTTATGAC  | 282.359773182398 | 0.653895645469747 |
| CGTCAATAGTCA  | 282.419244115359 | 0.743114251630682 |

|               |                  |                   |
|---------------|------------------|-------------------|
| TCCCCTTAGTCA  | 282.462945898277 | 0.44666807944508  |
| CAACTTGACTAA  | 282.546091914586 | 0.988882874051258 |
| GGTTTCTATGAC  | 282.564248034685 | 1.15632236018615  |
| TCATTGACGTCA  | 282.56796266905  | 0.432782552069432 |
| ATGTATACGTCA  | 282.576208671374 | 0.921843272873195 |
| ATCTTGATGAC   | 282.591040403231 | 0.702283097331928 |
| CGCATGTATGAC  | 282.63423531446  | 0.592487960177736 |
| CCGTAACAGTCA  | 282.665029545774 | 0.737678737616014 |
| GTGACACAGATA  | 282.717238471206 | 0.507996554160624 |
| GTAGCTCAGTCA  | 282.74098427931  | 0.77908647986406  |
| CTTCGGTATGAC  | 282.766586386805 | 0.550479792200041 |
| GCACCGAGTCAC  | 282.790310425181 | 0.628897243333323 |
| TGACTGATGCAA  | 282.893807282768 | 0.760788049691204 |
| TGACAAGACTCA  | 282.905485702807 | 0.652289238940245 |
| ATGACTGGCCA   | 282.938190445533 | 0.651994070722364 |
| ATGACGTGACAC  | 283.147561175707 | 0.489661529330769 |
| CGGTATTGCTCA  | 283.245191717566 | 0.689274336324853 |
| TGACTACAGTCA  | 283.342322039989 | 0.483152490289962 |
| CCGTAGTAGTCA  | 283.356720626973 | 0.650316560309262 |
| GATCTAGAGTCA  | 283.388606521949 | 0.268591497971447 |
| AAAGCTTAGTCA  | 283.393610008055 | 0.588753075109362 |
| ATTCTGTGTCAC  | 283.485129007876 | 0.439773139209453 |
| GTCATCGTGACA  | 283.538638891368 | 0.874412461424569 |
| GTCATATATAAC  | 283.570582636808 | 0.515400699645601 |
| AGCCTTGAGTCA  | 283.586248813385 | 1.04446333256055  |
| ATGGCTTAGTCA  | 283.611276751497 | 0.908454950776612 |
| CCTGTGGAGTCA  | 283.612665657579 | 0.688461635231138 |
| GTATACACGTCA  | 283.661094409799 | 0.798025617206725 |
| ACTCCGACTCAT  | 283.675746589338 | 0.192849689683276 |
| CTGCTTTAGTCA  | 283.708349736576 | 0.423746415358273 |
| GTCATTTGGTCA  | 283.751520111158 | 0.555040704503353 |
| GCCGTTTACTCA  | 283.811037843179 | 0.440458913471444 |
| CAACCGAGTCAC  | 283.813804952864 | 0.245357515841739 |
| AAATTTGCTCAT  | 283.870499547729 | 0.703878833612937 |
| TATCTTTAGTCA  | 283.96252005576  | 0.712273056181505 |
| ATGACGTGACGA  | 283.972503038259 | 0.147339353841289 |
| CCCGTTGTGTCA  | 284.023436853156 | 0.751767894341304 |
| GTCATTGACTGA  | 284.061319358359 | 0.711376870899923 |
| TGACTCTGTGAA  | 284.104666130002 | 0.640774639120308 |
| ACAGAGGTGACT  | 284.118776538456 | 0.277798464734784 |
| GGAACCTTATGAC | 284.163079401219 | 0.679603239254055 |
| TATCGTGCGTCA  | 284.279458887181 | 0.422489975080302 |
| TGAGTAAGCGCA  | 284.287585135464 | 0.302681286056725 |
| ACGTACACGTCA  | 284.376509491109 | 0.835534598112197 |
| CGACAAGTCATA  | 284.385610063359 | 0.350438765842909 |
| TCATACTAGTCA  | 284.513482747821 | 0.626245043464967 |
| TCAAATCTGTCA  | 284.548429901225 | 0.628810797575543 |
| ATCAGCGATGAC  | 284.633828444479 | 0.856032795960827 |
| CTGACCTAGTCA  | 284.699567126546 | 0.282166755655041 |
| CCCGATACGTCA  | 284.789974003847 | 0.539547283568805 |
| GTCATAGTCGCA  | 284.835159028645 | 0.602520514261974 |
| GTCAGAGATGAC  | 284.849209133197 | 0.312662336525191 |
| GAAGCGAGTCAC  | 284.849479744531 | 0.459611020102261 |
| CATTATTTGTCA  | 285.096460489986 | 0.457759409855645 |

|              |                  |                    |
|--------------|------------------|--------------------|
| CGCTGGTATGAC | 285.16242614274  | 0.337882510629953  |
| AGTCACCCTGAC | 285.18613495263  | 0.214226415012335  |
| GTCATATTAAC  | 285.267120846718 | 0.721749496056402  |
| GTCATAAGTTTA | 285.331519113501 | 0.526860138945294  |
| TCCGCGGAGTCA | 285.33194397715  | 0.659989033445123  |
| ATATTGAGTAAT | 285.338377903485 | 0.768657696083728  |
| CGAAACTATGAC | 285.377581679364 | 0.51227944717717   |
| CCACCTTAGTCA | 285.497652319106 | 0.590463106751634  |
| ACCTACTATGAC | 285.567510142032 | 0.423354716195623  |
| AAATACACGTCA | 285.579459190991 | 0.26501794245991   |
| ATAACTTACTCA | 285.601097420987 | 0.354757930681218  |
| GACACATATGAC | 285.644152150944 | 0.915782234661291  |
| TGACTAAGCTAA | 285.647537476851 | 0.757292685743803  |
| CGTCATTGACTC | 285.648568167805 | 0.230656998321963  |
| CGTCTGTGTAC  | 285.741342172196 | 0.266500137564032  |
| CCACAAGATGAC | 285.850026752916 | 0.527090873976892  |
| TACAGTGAATCA | 285.864837170693 | 0.844024737594508  |
| AGTCACCCTGGG | 285.891666451526 | 0.514038082015828  |
| AATTATCCGTCA | 285.932244444873 | 0.564269929617928  |
| GTCATAACGAGA | 285.93849591869  | 0.536040294369566  |
| ACCCTTTAGTCA | 285.995769136555 | 0.407096320256239  |
| CGAGCTTATGAC | 286.026946478922 | 0.795284469262819  |
| GCTGACTATGAC | 286.028566796157 | 0.65070104180133   |
| GCTTAATGTGAC | 286.27926322151  | 0.353992145423136  |
| GTCATACCAAGA | 286.335437909324 | 0.66146847080998   |
| CGTCACCGATGA | 286.350229432367 | 1.00169429779412   |
| CATTACACGTCA | 286.384564057367 | 0.371220026068599  |
| GTAACCTAGTCA | 286.490923518741 | 0.447964839760601  |
| CAGTCATGGTAA | 286.571409237003 | 0.515828195363831  |
| CATAATGATGAC | 286.734542609173 | 0.417694126682279  |
| GCGGCTTAGTCA | 286.850310750591 | 0.825678875973247  |
| GTCATAGGTCCA | 286.896727748596 | 0.448194885230716  |
| ATATATCTGTCA | 286.965700259615 | 0.621666826481002  |
| GTGATACAGTCA | 287.074380018271 | 0.44482416711563   |
| AGTCACCCTAAT | 287.294835359137 | 0.0726981234933313 |
| ATCATCTATGAC | 287.366287678668 | 0.547673863687064  |
| AGATTTGCTCAT | 287.388337408306 | 0.375233409487349  |
| CCATGTGATGAC | 287.473283631799 | 0.599584036075218  |
| ACCCCTTAGTCA | 287.609199855994 | 0.353571852771272  |
| CACCTAGAGTCA | 287.644367522132 | 0.754273905798634  |
| GTGACACAGCGA | 287.678303457139 | 0.655658382327079  |
| CCTGATACGTCA | 287.723485784856 | 0.80293212014622   |
| GTCATAATATGA | 287.783562820776 | 0.489017259000426  |
| TGAGTCGTCACA | 287.795680284333 | 0.680229362201432  |
| GACACGTGTGAC | 287.834730101948 | 0.911570566189557  |
| AATCTCGAGTCA | 287.879170418997 | 0.896549543109279  |
| ATGTCGTATGAC | 288.08035695605  | 1.090296633787     |
| GTGACACAGTGA | 288.294943959486 | 0.17058883635276   |
| TGACACGAGTCA | 288.314935150595 | 0.671371640344327  |
| ACAGCGAGTCAC | 288.364767207894 | 0.630394187373068  |
| CAAAGATTAGTC | 288.387072078513 | 1.0334925989284    |
| GTCATATGACCA | 288.422954818964 | 0.546329576338686  |
| CCGGCTTAGTCA | 288.471213691009 | 0.724525985924469  |
| CTCATGGATGAC | 288.53073316047  | 0.685909096733308  |

|              |                  |                   |
|--------------|------------------|-------------------|
| AGTCACTCTGAC | 288.687844491354 | 0.365627725740617 |
| CTGTAACAGTCA | 288.733195216429 | 0.427289001291043 |
| GCAAGTTATGAC | 288.74939613746  | 0.661515121232578 |
| GTGACTCGGTTA | 288.77045011555  | 0.692120388795297 |
| ATGACTGGGCAA | 288.809361922962 | 0.285159976325441 |
| AATGAGTGAGTC | 288.829338771952 | 0.470926531355084 |
| GTCATACAACAA | 288.877433744104 | 0.70222946648512  |
| GCGTCTTAGTCA | 288.903542104192 | 0.484763042307761 |
| AGACCCAGTCAT | 288.978645791033 | 0.553891080563326 |
| ATTATAGACTCA | 289.01519396504  | 0.727289796021116 |
| GTCATAGATGGA | 289.035166217197 | 0.559076274752473 |
| TGACGTGGATAA | 289.076167318325 | 0.306781596349499 |
| TAGCCTTAGTCA | 289.097094240016 | 0.442741685889798 |
| ACCAGTTATGAC | 289.139781763647 | 0.590092190095158 |
| GTCACCTTGTGA | 289.198612510842 | 0.873866389046445 |
| ATCTCGGAGTCA | 289.21198679421  | 0.360464813850923 |
| ATGACTAGCTTC | 289.285156976565 | 0.15490290600418  |
| TCACACGAGTCA | 289.299020083956 | 0.828330010969822 |
| ATGACTGGGTGG | 289.462124553003 | 0.289125488466543 |
| TGACGTGTTGCA | 289.536453231624 | 0.395901092850202 |
| CGTCATTAACAA | 289.572934932548 | 1.35681913462704  |
| ATGTGTCAACCG | 289.603034424134 | 0.525459288758059 |
| CCTAGTGAATCA | 289.611622116398 | 0.414857466188925 |
| CATACCGAGTCA | 289.65748174129  | 0.635392917927207 |
| CTCAAGGATGAC | 289.692800066818 | 1.01307125120191  |
| ATTGGTGAATCA | 289.775483132369 | 0.549032813705857 |
| GTCAGCGATGAC | 289.786738235857 | 0.950441552353158 |
| TCCGATGGGTCA | 289.863855358791 | 1.16699069960809  |
| CAAGCTTGTGAC | 289.962065012702 | 0.963852226383389 |
| TAGCTAGAGTCA | 290.015483589395 | 0.664032839993222 |
| GTTAATCCGTCA | 290.049230830021 | 0.616763827112974 |
| CATGACAATGAC | 290.145686288912 | 0.75939608443598  |
| TGACTCTTGAAA | 290.279487423034 | 1.05067169832794  |
| GACGATTATGAC | 290.433748215297 | 0.815751794022563 |
| CAGTTCTATGAC | 290.444969124865 | 0.524572020620625 |
| TCAATCTAGTCA | 290.491074168296 | 0.774921016445304 |
| ACATTTGCGTCA | 290.521946512227 | 0.557028233308869 |
| GACCGTTAGTCA | 290.589597363828 | 1.06730775669367  |
| ATGACTTGTTC  | 290.677319907568 | 0.968617742680211 |
| GTGATCGACTCA | 290.915570113887 | 0.559588185782441 |
| GAGGCGAGTCAC | 290.955846679315 | 0.442488501046917 |
| CATGATCTGTCA | 291.003800578778 | 0.677962141583685 |
| GTCATCGGTGCA | 291.093195078251 | 0.358877734574664 |
| ACAAGGTATGAC | 291.119385314582 | 0.533996068378948 |
| ATTTTAGACTCA | 291.136234191257 | 0.643957925921546 |
| TAGCTTCAGTCA | 291.148574272786 | 0.268908393878285 |
| GTCACTGTGTCA | 291.331531954728 | 0.473454098594064 |
| ATGACTGGGACC | 291.351088554472 | 0.594165894332846 |
| GTCATATTTCGA | 291.37081134663  | 0.449674934286255 |
| ATTTGTGAATCA | 291.379340472162 | 1.2679897906557   |
| GTCACCCAGTCA | 291.38586609055  | 0.733386465510252 |
| ATGTGTCAATTC | 291.482910351738 | 0.622070609842617 |
| TCAAATACGTCA | 291.576684277449 | 0.709583605212676 |
| ATGACAAAGATC | 291.65068532538  | 0.695453360753774 |

|               |                  |                   |
|---------------|------------------|-------------------|
| CTTCTTCAGTCA  | 291.807315704112 | 0.28547297171762  |
| ACTATTTTCGTCA | 291.815072232118 | 0.670234190619272 |
| TACTGTGAATCA  | 291.832149196875 | 0.611909912015822 |
| GTGACACAGCAA  | 292.015624451646 | 0.468413346311815 |
| GCGACTCAGTCA  | 292.097319812244 | 0.534208857421811 |
| GACTAATACTAA  | 292.117570251908 | 1.22833317774788  |
| ATGAGTCGGAAC  | 292.161179744579 | 0.628361245092707 |
| ACTATTTATGAC  | 292.227444700295 | 0.82379008875287  |
| CGTCATTGATGA  | 292.309080769409 | 0.784828351859314 |
| CGTAGCGAGTCA  | 292.343593062484 | 1.95442090223718  |
| ATGCCGAGTCAC  | 292.357904254466 | 0.3743511614492   |
| ACTTTTGCCTCA  | 292.385504271751 | 0.381926170955833 |
| ACGAGCTATGAC  | 292.443114544643 | 0.676254975235924 |
| ACCGATACGTCA  | 292.458977100818 | 0.361288631857074 |
| TGAAATTCGTCA  | 292.468823632036 | 0.716193390611054 |
| GTCATACATCTA  | 292.520157443419 | 0.539522546482972 |
| ATGAGTCGGATA  | 292.533037490357 | 0.379110968642891 |
| CAATCGGAGTCA  | 292.561080339826 | 0.478555328470464 |
| GTCATCCTCTGA  | 292.673814662182 | 0.558310104407237 |
| ATGACTGGGTCC  | 292.704047801478 | 0.649558488548469 |
| CATGCGAGTCAC  | 292.726611611795 | 0.616351145049628 |
| GTCATAATGACA  | 292.834665501401 | 0.519780157362215 |
| GTTACTTAGTCA  | 292.848864177486 | 0.342999686969615 |
| AAACTATTAGTC  | 293.005625256935 | 0.643379574483522 |
| AGTCACCCTATG  | 293.036119315917 | 0.480425577000179 |
| ACTATAGATGAC  | 293.04751723078  | 0.321164228169361 |
| ACTTATACGTCA  | 293.055919000917 | 0.61371402664834  |
| TCTTCCACGTCA  | 293.0805927218   | 0.373098019458632 |
| GTCATCGCGAAC  | 293.131569389868 | 0.469821072253327 |
| GTCATAATTCOA  | 293.185637761631 | 0.600119439386847 |
| AGGACTTAGTCA  | 293.224872827917 | 0.801157000262322 |
| CATCAGTGAGTC  | 293.234169491352 | 0.889896823605068 |
| AGAGTCAATGAC  | 293.285866955483 | 0.330967084656522 |
| ACCGTGTAGTCA  | 293.286003803413 | 0.861237945222256 |
| CTCAGGTATGAC  | 293.295051744477 | 0.559275467599078 |
| GTCATTGTCTGA  | 293.389739738748 | 1.03321612441808  |
| ACTTCGGAGTCA  | 293.450202900244 | 0.48213550507196  |
| CCCTCGGAGTCA  | 293.464144655065 | 0.923092839100872 |
| GCTGGCGACTCA  | 293.479183043283 | 0.720776727100718 |
| GTGACTCATGGG  | 293.496062839304 | 1.19913932491173  |
| TGACTGAAGTCA  | 293.534241381058 | 0.650708483582515 |
| GTCATACCTGAA  | 293.573828742062 | 0.664385773153789 |
| GTCATAGGCTAA  | 293.592201088464 | 0.375041183141587 |
| AATACTGTGTCA  | 293.608613038087 | 0.619162868848663 |
| TGACGCAAAGCA  | 293.609118091189 | 0.419158705061352 |
| CGTCATCAGTTA  | 293.653313896005 | 0.752665312208773 |
| AAATCCACGTCA  | 293.670915884541 | 0.536552612297735 |
| AGCATGTATGAC  | 293.672087652707 | 0.752740344599665 |
| ACCGATTGCTCA  | 293.681681939354 | 0.283660265861082 |
| AAACCGTATGAC  | 293.782100267793 | 0.374982417852439 |
| AGTCACGAGTCA  | 293.788752856242 | 0.251800790337919 |
| ACACGTTACTCA  | 293.884779926532 | 0.473962560247085 |
| GCTTTGTATGAC  | 293.89939887039  | 0.450769337060024 |
| ACTCATGAATCA  | 293.913836897454 | 0.509172896340527 |

|               |                  |                   |
|---------------|------------------|-------------------|
| AGTCACCTTTAT  | 294.064469225355 | 0.443802351031928 |
| GGTCATTATGAC  | 294.090797248565 | 0.207978805418214 |
| CCCCTTTAGTCA  | 294.161126744045 | 0.436388555707983 |
| AAGGCGAGTCAC  | 294.172366872655 | 0.353243750500253 |
| GTCATCCGAACA  | 294.243683611911 | 0.733801225994493 |
| GTCATCTTAGTA  | 294.295619697748 | 0.460907754740594 |
| CATCTAGATGAC  | 294.397808709711 | 0.707216335742077 |
| GTCATAATAATA  | 294.503316599342 | 0.634623550912431 |
| GTCATCGCCAGA  | 294.542905178181 | 0.466205749327818 |
| TGACTGAGTTAA  | 294.583380331403 | 0.517243691856474 |
| AAACCGACTCAT  | 294.587722350768 | 0.28681742706932  |
| GTCACGAATGAC  | 294.618858687283 | 0.960599962775947 |
| ATGAGTCGGAGG  | 294.707253674648 | 0.267123346197285 |
| TGACGTATCCAA  | 294.708418294189 | 0.557673109022673 |
| GTCATCGAGTGA  | 294.729258462278 | 0.243653775507995 |
| GTCATCATTATA  | 294.895989669304 | 0.244825728369249 |
| AACCAAGAGTCA  | 294.913862564033 | 0.766530590233547 |
| ATAGCGAGTCAC  | 294.957280568486 | 0.40766328765271  |
| AAAACCTAGTCA  | 294.984054112713 | 0.698097614706163 |
| CACGCAGAGTCA  | 295.101590464858 | 0.853358967283212 |
| AAATCGTATGAC  | 295.14731972491  | 0.395566787320437 |
| GTCATACGATTA  | 295.158279749728 | 0.591433740259412 |
| GGTTACAGTCA   | 295.311158031298 | 0.583146823473925 |
| GTCACCTAATGA  | 295.354117620864 | 0.806878111331677 |
| ACAAAATATGAC  | 295.403793499394 | 0.793519895968977 |
| GTCATACATCAC  | 295.4986696012   | 0.697574319740914 |
| GTCATATGCTGA  | 295.51422108433  | 0.552386146288184 |
| ATTACTCAATAA  | 295.5232044182   | 0.236779364083098 |
| GGGCAAGAGTCA  | 295.529065603356 | 0.289512373345127 |
| AGTCACCTTAGC  | 295.546489470341 | 0.519653248180795 |
| CGAATTTATGAC  | 295.716790662222 | 0.806740477053973 |
| GATGCTTAGTCA  | 295.756426953028 | 0.805527555270514 |
| CATAGAATAGTC  | 295.771454836586 | 1.2473764761662   |
| TGACTATTGCAA  | 295.777673497115 | 0.831426532546637 |
| CACACTCAGTCA  | 295.781145711347 | 0.291464669299982 |
| CACGGCTATGAC  | 295.783690715804 | 0.700116708072199 |
| GTCATAACTCGA  | 295.799725753206 | 0.855933254013827 |
| GTGACTCGCGGA  | 295.814131599092 | 0.612522745686138 |
| CAGTCATGGTCA  | 295.852828107002 | 0.353850192507272 |
| GATCATTATGAC  | 295.882964961336 | 0.914848896992367 |
| ACTCACGGTGAC  | 295.916394043966 | 0.641030099876092 |
| CCTGCGAGTCAC  | 295.92202712912  | 0.49205214480569  |
| TCTGCTCAGTCA  | 295.987458293817 | 0.611945237568016 |
| AGTGTCATGCAT  | 296.036628645533 | 0.611099742703777 |
| GCGTCACAGTCA  | 296.072455805873 | 0.634360331140135 |
| GTCATCATCTGA  | 296.126013069116 | 0.459367592569973 |
| GAACCTTTAGTCA | 296.418881739994 | 0.780437875224097 |
| GCTACCGAGTCA  | 296.421411668973 | 0.613241496756222 |
| AAGACCTATGAC  | 296.443543323911 | 0.6426733629059   |
| CTAATACAGTCA  | 296.461641512837 | 0.758888669018008 |
| ATAAATACGTCA  | 296.50410021545  | 0.963524373112224 |
| GTCACAGACTCA  | 296.507695234489 | 0.395435424302044 |
| ACAATCGATGAC  | 296.536930137887 | 1.24239846642239  |
| ATGACCGAGTCA  | 296.554178617644 | 0.956170581528874 |

|               |                  |                   |
|---------------|------------------|-------------------|
| TCCCTAGAGTCA  | 296.761815232926 | 0.717226434696759 |
| AGTCAGAGCATA  | 296.799794899282 | 1.20082674918055  |
| GTCATCAATTGA  | 296.821733987452 | 0.884475750317709 |
| TGACTCGTGGAA  | 296.831806543862 | 0.638290052773807 |
| CGATGATATGAC  | 296.872210381582 | 0.224366729534135 |
| CTTTACCAGTCA  | 296.881187538724 | 0.406437961152842 |
| CCATTGTATGAC  | 296.919256955774 | 0.659695118081694 |
| AAAGATACGTCA  | 297.120780118565 | 0.464697935115381 |
| CCGATGTATGAC  | 297.120891917831 | 0.794131047298523 |
| GTCATCATATGA  | 297.129495151    | 0.462519540529301 |
| ATTACTCAATAC  | 297.247933801145 | 0.684391076196321 |
| GTCACCTTCGTGA | 297.332264590688 | 1.52333049609518  |
| GTACCTTAGTCA  | 297.349637087498 | 0.299919485635156 |
| TAGACCGAGTCA  | 297.359080122976 | 0.295084914090242 |
| ATGACTAGCATA  | 297.376150403524 | 0.301766273756434 |
| GTCATAATATTA  | 297.406747023287 | 1.29094409478896  |
| GATCGTTAGTCA  | 297.506657284584 | 0.272606728713461 |
| CTTAATACGTCA  | 297.525704710387 | 0.466948107072401 |
| ACGTGGTATGAC  | 297.843174396705 | 0.329001714300072 |
| GTAAGTTATGAC  | 297.847668525852 | 0.852690358793634 |
| GTTTGTGAATCA  | 297.883697416715 | 0.940819732333145 |
| GCAAATTATGAC  | 297.897942908126 | 0.318365835690636 |
| AGTACAAGTCAT  | 298.045283431651 | 0.399129169954764 |
| GTCATACGTGTA  | 298.046753163127 | 0.46634463075438  |
| TACACTGCGTCA  | 298.056633270018 | 0.26903563004428  |
| ACGTCACAGTCA  | 298.178583578958 | 0.470210121410746 |
| CCTTGGTATGAC  | 298.238693896193 | 0.768030366880788 |
| CTGCGTGGTCA   | 298.257626531239 | 0.920584541036208 |
| CACAGGTATGAC  | 298.270943552659 | 0.514711772583544 |
| GTCATACCTAAA  | 298.285611600487 | 0.434380194916369 |
| CCATACGGTGAC  | 298.342886770402 | 2.03182691493937  |
| AATCCTTAGTCA  | 298.526729543916 | 0.581742748039565 |
| GAGTACTGACTC  | 298.535141894642 | 0.706220832543336 |
| CTATACACGTCA  | 298.547697966045 | 0.620197883445318 |
| CATCAAGAGTCA  | 298.556513087909 | 1.11306270653687  |
| AGTCACCCTTTG  | 298.65998267349  | 0.480475931777394 |
| CACTCGGAGTCA  | 298.801832296437 | 0.585120646989795 |
| ATGAGCAAATTA  | 298.822946985966 | 0.337623245406609 |
| ACTCTTGACTAA  | 298.83083066989  | 0.308450231962656 |
| CCAAATACGTCA  | 298.92877077112  | 0.846923129817136 |
| ATGACAATGACG  | 298.935590164333 | 0.538179749147486 |
| CCGTATGATGAC  | 298.945768229559 | 0.762106111780798 |
| CTTCTTTAGTCA  | 298.989306249404 | 0.469432597552891 |
| CCGTCCGATGAC  | 299.015469882927 | 0.708705126721425 |
| TGACGTGTATCA  | 299.103578750893 | 0.544867590494561 |
| TCATATACGTCA  | 299.191169869094 | 0.744859403138727 |
| ATGTCACAGTCA  | 299.222777856081 | 0.438320167130061 |
| CATTTGGATGAC  | 299.260588219303 | 0.365894527704585 |
| GTCATAATTTCA  | 299.280100829371 | 0.866972060834897 |
| GACTGTTATGAC  | 299.28611270222  | 0.524768610479462 |
| AGTGTTCATCAT  | 299.287985034394 | 0.273601244689786 |
| ACACATACGTCA  | 299.31486443473  | 0.306437855246206 |
| CGCGCCGAGTCA  | 299.316655143389 | 0.716933052725635 |
| ATGTGTCAATCA  | 299.383177089724 | 0.319866060553541 |



|               |                  |                   |
|---------------|------------------|-------------------|
| CGTGTGATGAC   | 299.415955369592 | 0.699855800021612 |
| GTCATACCTGTA  | 299.45121980994  | 0.729775042184394 |
| ATGACTAGCTAA  | 299.471537977229 | 0.776932665758153 |
| CGAAATCTGTCA  | 299.594905971786 | 0.874806860662858 |
| CGTCATTCGTCA  | 299.603811818561 | 0.639607644647773 |
| ACGTCTGATTCA  | 299.679662937333 | 0.293321144905941 |
| ACTGATGATGAC  | 299.820846719606 | 0.619506067693336 |
| GTCCTTTAGTCA  | 299.853221464865 | 0.613539919229854 |
| GTCATCGAGAAC  | 299.885536110369 | 1.03400411972123  |
| ACACCGACTCAT  | 299.91251907541  | 0.327465793649485 |
| GTCATTGCAGA   | 299.985693841364 | 0.402563632837282 |
| CTGACGCAGCAA  | 300.03249620309  | 1.16325807810053  |
| ATTACTCAATGC  | 300.042027817042 | 0.366157299993311 |
| ACATGGTATGAC  | 300.108597709414 | 0.618561994366783 |
| ACTGTAGACTCA  | 300.115848519493 | 0.837887018950519 |
| GTCATCATGAAC  | 300.309155787774 | 1.44884328071793  |
| GCGCTTGAGTCA  | 300.321169618606 | 0.503124154401797 |
| TGACTAAAGTAA  | 300.356684212646 | 0.711067673094222 |
| TGACGCAGTCAA  | 300.379961946188 | 0.888662480073781 |
| CTGAATACGTCA  | 300.469092378766 | 0.9007366628058   |
| ATAATCGCTGAC  | 300.531810645263 | 1.61661081593774  |
| ATGACGTGATCG  | 300.548347966602 | 0.58186082666384  |
| GCATACGATGAC  | 300.554019119805 | 0.614807927829469 |
| AGGTCACGTCAT  | 300.676643640316 | 0.505387874694979 |
| ACCTTTGTGTCA  | 300.695952736464 | 0.510108484032116 |
| GTACTTCAGTCA  | 300.722980935663 | 0.892893833644497 |
| GTCATAGTTACA  | 300.78865598168  | 0.699203825731192 |
| TCAACATAGTCA  | 300.85427612214  | 1.25561544306404  |
| ATATTGACACAT  | 300.854927042016 | 0.565907989915388 |
| CTTGATACGTCA  | 300.935840142803 | 0.65463593747622  |
| AATGCTGCGTCA  | 300.946656894701 | 0.767355428720466 |
| GACTAATTAGTC  | 301.014497936584 | 1.51631690211571  |
| ATGACTAGCACC  | 301.087351780526 | 0.434466140114666 |
| ATTAACACGTCA  | 301.104819904475 | 0.879629607397666 |
| GTATACGATGAC  | 301.106006856948 | 0.629225224272171 |
| GATTACGCAATA  | 301.107476537184 | 0.466713794543848 |
| GTAATACGTCA   | 301.122897658463 | 1.06007581719544  |
| CACACGGAGTCA  | 301.143571839158 | 0.879432182722236 |
| AGTAACTATGAC  | 301.231218153373 | 0.583901132372061 |
| CTCAGTGAATCA  | 301.297624713509 | 0.801549824384051 |
| GAGCCTTAGTCA  | 301.31734556948  | 0.572239851656625 |
| CCATGCGATGAC  | 301.346743581675 | 0.120791406714958 |
| ATGAGTAAAGCG  | 301.374214530458 | 0.320573452213641 |
| GGTTACATCATA  | 301.465414220702 | 0.403713811981861 |
| CTCATGTATGAC  | 301.57072336765  | 0.263123954893083 |
| AAACGTGTGTCA  | 301.577065646986 | 0.472887671455382 |
| ACTCGTGATTCA  | 301.625032958766 | 0.483568483512473 |
| CTCGAAGAGTCA  | 301.634982100349 | 0.839566779925582 |
| CGCAACACGTCA  | 301.665890289177 | 0.583428648345771 |
| ACGCACGAGTCA  | 301.699619921911 | 0.795499887894735 |
| AGTGTTCTGTCAT | 301.707430668057 | 0.279446270496278 |
| TCGGATACGTCA  | 301.758821551739 | 0.522507213488986 |
| GAGCACGAGTCA  | 301.785666419758 | 0.866815432187334 |
| CACTTGTATGAC  | 301.802765555138 | 0.832826316234505 |

|              |                  |                   |
|--------------|------------------|-------------------|
| AGACTGTGTCAC | 301.812296764318 | 0.334081386111828 |
| TCCGATTTGTCA | 301.835385094745 | 0.194538558831801 |
| ATGTATTATGAC | 301.851717492567 | 0.657704539447124 |
| GTCATAGTGGAC | 301.869595700503 | 0.340064886708384 |
| CTCCCTTAGTCA | 301.910264460097 | 0.361367458510276 |
| TAGACTCAGTCA | 301.971339050256 | 0.532107993870423 |
| ACTGTTGTGTCA | 302.028359938082 | 0.866265677522968 |
| GGGTCATAGTCA | 302.034514823031 | 0.57631315052865  |
| AGGGCGAGTCAC | 302.091699815948 | 0.454920104116109 |
| CCAGCTTAGTCA | 302.096154293374 | 0.487571759938404 |
| ATGACAAAGTTA | 302.100653562466 | 0.314594637825596 |
| GTCATAGTTCTA | 302.116038537025 | 0.755701089687898 |
| TGACTCTGCAAA | 302.277951921815 | 0.321346894687647 |
| CGCACCGAGTCA | 302.375158237551 | 0.56193344259151  |
| AGAACTTACTCA | 302.384939017956 | 0.514088580449008 |
| TGACTCGGTCAA | 302.497042374704 | 0.349182988387825 |
| AAATACTATGAC | 302.556878646431 | 0.439809533744991 |
| ATGCATGAATCA | 302.593277068814 | 1.02585182183369  |
| CAACAAGTCATA | 302.758228155013 | 0.561236007268498 |
| CTTCTGTGTGAC | 302.794371501866 | 0.363649594293338 |
| ACGCACGATGAC | 302.832184053315 | 0.297090932521232 |
| GTCATCAGGTCA | 302.89185203667  | 0.333575432769166 |
| GTCATACATTTA | 302.984281268629 | 0.310844396459053 |
| ATGACGTGACCG | 302.990152093099 | 0.853985753320495 |
| ATGACTGGGCAG | 302.991974950212 | 0.259681684802184 |
| CACTAGATGACG | 303.052909789011 | 0.459700089354635 |
| TGACTGGTAGAA | 303.074648658855 | 0.459156007777875 |
| CCGTGGTATGAC | 303.095304105987 | 0.756606282626173 |
| CGGCCGAATGAC | 303.154065197778 | 1.25043300065406  |
| ATTCTGTAGTCA | 303.174799673945 | 0.471709534539235 |
| CGGCCTTAGTCA | 303.193571277612 | 0.734502226880664 |
| CTCGTTTATGAC | 303.236571867587 | 0.532816188395792 |
| CTCACCGATGAC | 303.246063613262 | 0.136866524187066 |
| CCGACGTATGAC | 303.252524787681 | 0.739319266566547 |
| CCCTTGTAGTCA | 303.291800002035 | 0.331724150897658 |
| GACCCTGACTGA | 303.30137884851  | 0.563267847286654 |
| AATCTAGAGTCA | 303.361721507095 | 0.801241609824612 |
| TGAGTAAACAA  | 303.365289699446 | 0.387792478820147 |
| ATGAGTACGTCA | 303.468399905322 | 0.395537755799364 |
| ATTACTGACACA | 303.517433190451 | 0.747008501284843 |
| TGACACAGAGCA | 303.555626679694 | 0.735590432441869 |
| GTCATCAATTCA | 303.584792643573 | 0.359731912136944 |
| ACGATACAGTCA | 303.628954033767 | 0.783388713865457 |
| TGACTATGAGCA | 303.701531243712 | 0.464300153471965 |
| ATCTTTACTCAT | 303.762276619787 | 0.304016114716123 |
| TCAGTCAGGCAA | 303.777747289343 | 0.502193091545978 |
| CGGCTTGAGTCA | 303.87343712552  | 1.06122980432271  |
| ATACATGAATCA | 303.932816015924 | 0.641582768768413 |
| TGACTAAGCCAA | 304.010790409196 | 0.751550488044174 |
| GTATGACTTGTA | 304.079218511785 | 0.631529903578362 |
| GTCATCGTAAAC | 304.089044107008 | 0.692569909442248 |
| TCACCAAAGTGA | 304.097171848778 | 1.71105991806292  |
| ATGACAGTACTG | 304.119845552695 | 0.74909241722534  |
| AACTATTTGTCA | 304.138253759375 | 0.918014058720245 |

|              |                  |                   |
|--------------|------------------|-------------------|
| ATCGACTATGAC | 304.169513144108 | 0.870029660638048 |
| GTCATCGCGCGA | 304.236042598955 | 0.662110571007784 |
| AGCAACACGTCA | 304.239453712022 | 0.45739282788689  |
| CCGAGTTATGAC | 304.306638623229 | 0.744085929796636 |
| ACAAATTCGTCA | 304.315401229035 | 1.00672456306124  |
| CCCAAGAGTCA  | 304.360172819767 | 0.710178089205337 |
| CAGTCAGAACGA | 304.364995993957 | 0.94576304147     |
| CTCGGAGATGAC | 304.37088603198  | 0.368321697781962 |
| ACATATACGTCA | 304.462285319219 | 0.811565051826045 |
| GTCATAGCTGAA | 304.603488757839 | 0.681867825124485 |
| TGACGCAGCTAA | 304.607502331658 | 1.13092681424056  |
| AACTTTACTCAT | 304.669728696041 | 0.581514815793375 |
| TCAAACACGTCA | 304.679523189465 | 0.683865828583663 |
| CTCTCCGAGTCA | 304.701838110657 | 0.378894753592095 |
| AATTAGTGACAC | 304.722886533085 | 0.63399349053986  |
| CGACAAGAGTCA | 304.724337091929 | 0.501626687780593 |
| CAATCCTATGAC | 304.767849939054 | 0.531156844974667 |
| GGCACTTACTCA | 304.831579227888 | 0.827149461557933 |
| CCTGATTATGAC | 304.843470855674 | 1.15368227653395  |
| CAGCTAGAGTCA | 304.843931474264 | 0.774286714683776 |
| GGCAATTCGTCA | 304.887594591339 | 0.704025483622582 |
| CCGCGTGTGTCA | 305.003907549386 | 0.885915200611033 |
| TGACTAACGAAA | 305.007078697    | 0.586012031342869 |
| ACGATCGACTCA | 305.024741620058 | 0.584207381657467 |
| GACTAATACTGA | 305.033888375273 | 0.685006829051952 |
| ATGCTTGACTAA | 305.051839683927 | 0.629012750282431 |
| AGGTTGAGTAAT | 305.188118732961 | 0.360346094972872 |
| AGCCTCGAGTCA | 305.194719666269 | 0.753390728196946 |
| CAACTAAGTGAC | 305.219849340154 | 1.63459775221827  |
| GAGCGTTAGTCA | 305.272444946797 | 0.422176821499291 |
| GTCATCATTGGA | 305.276540711789 | 0.415045726811033 |
| GTCATCGGTTGA | 305.305882081    | 0.486669228791339 |
| CCGATCGATGAC | 305.316343632859 | 0.452938731307553 |
| TGACGTATTGCA | 305.347565822056 | 0.46399219814485  |
| ATGCTTTAGTCA | 305.350138424093 | 0.46575746833925  |
| GGCCAAGTCATA | 305.525974800476 | 0.380240523635691 |
| GTCACACAGTCA | 305.561532324573 | 0.493495022263997 |
| TATTGTGAATCA | 305.573981851877 | 0.397913335590843 |
| TAACTTCAGTCA | 305.600545839872 | 0.520897190230144 |
| CCGAGTGAATCA | 305.60059918417  | 0.675315486691176 |
| AGCCTTCAGTCA | 305.611526552806 | 0.287413728453337 |
| ATGTGTCAACCA | 305.730138844191 | 1.10069728715617  |
| GATGACTAATGG | 305.800683201438 | 1.21118339004748  |
| AATTACACGTCA | 305.963095344973 | 0.727436284618382 |
| CGCATCGATGAC | 305.972420084699 | 0.772383823639432 |
| GTCATATCGAAA | 305.976388294739 | 0.519714908456793 |
| ATACGTGATTCA | 305.979941622065 | 0.698451178776423 |
| AACCGTGAATCA | 306.034053169703 | 0.487727811883546 |
| GTCATAGATGAA | 306.03809892352  | 0.247556497966823 |
| ATGAGCAAATCA | 306.076516245237 | 0.692071613185364 |
| CTTGAGATGAC  | 306.08840047443  | 0.910454061706954 |
| CAGCCTTAGTCA | 306.198677792138 | 0.475545278899829 |
| CCGAACTATGAC | 306.201665130696 | 0.929990654236972 |
| TCGATTAAGTCA | 306.228910984174 | 0.457750682986448 |

|               |                  |                   |
|---------------|------------------|-------------------|
| ATGAGCAAATTC  | 306.322611910429 | 0.497279453994183 |
| GTCATCATGTGA  | 306.3235648477   | 0.721152824958463 |
| TGACGTATAGCA  | 306.362484538203 | 0.487212707121403 |
| ACGTCCACGTCA  | 306.388730602453 | 0.671979467885512 |
| GTCATCGAGCCA  | 306.413078494521 | 0.760954555189125 |
| ATAATACAGTCA  | 306.529333075001 | 1.06944097556587  |
| ATGTGTCAAGTC  | 306.566568757715 | 0.393086789853921 |
| AGTCACCCCTTA  | 306.575145154204 | 0.256119890003539 |
| CCAATATATGAC  | 306.60248366356  | 0.325812216823056 |
| GTCATACCTTTA  | 306.645679401864 | 0.232945576213593 |
| CATCTGAATGAC  | 306.646851235174 | 0.763099592558477 |
| CTTGCTCAGTCA  | 306.758597502899 | 0.571172366908262 |
| CTACTCGAGTCA  | 306.807517776229 | 0.705924532386495 |
| CCTGACGATGAC  | 306.816895678244 | 0.325476461448153 |
| GCTCTGACGTCA  | 306.897202355682 | 0.473449070932601 |
| AGTAGGTATGAC  | 306.923153023908 | 0.168774094459497 |
| CGAACTTACTCA  | 306.961339891169 | 0.286313118110327 |
| ACATTGACACAT  | 307.080689726321 | 0.681644288210217 |
| ATGACTTGGTTG  | 307.109831866369 | 0.572222428535824 |
| TGACGTGTATAA  | 307.110699196682 | 0.472233609855902 |
| CTGCTAGAGTCA  | 307.116643909735 | 0.801441356001149 |
| GTCATACCGTCA  | 307.117989603906 | 0.526056821817216 |
| CTGACCGAGTCA  | 307.151923740861 | 0.802444096924311 |
| CAACTGTGTAC   | 307.163683845282 | 0.642153202522195 |
| TGACAAATCTAA  | 307.21433175623  | 0.581083087893613 |
| GACATATATGAC  | 307.237587906908 | 0.431279821027152 |
| GGATCTTAGTCA  | 307.402113932153 | 0.690393944465105 |
| CATCTCGAGTCA  | 307.436109014446 | 0.150324086541908 |
| TGAATCCAGTCA  | 307.449126615059 | 0.474028108347957 |
| CTGTTTGGGTCA  | 307.527486779939 | 0.564344236324964 |
| ATGAGTCGGTTC  | 307.567272442641 | 0.327134301947341 |
| ATGACTTGTTC   | 307.618684381828 | 0.383638283656732 |
| GTCATCTAGTGA  | 307.623750301541 | 0.937638872722967 |
| CACGCTGCGTCA  | 307.629741003849 | 0.452258085610455 |
| CTGATCGACTCA  | 307.632401748576 | 0.58903759792452  |
| GTGACTCGCTTA  | 307.648624942691 | 0.652461177852193 |
| GAGTCAATGACC  | 307.713282969503 | 0.93632560379861  |
| GTCATCGATCGA  | 307.715738846078 | 0.701800375979266 |
| GTCATAACCGGA  | 307.721113147127 | 0.625820669078267 |
| CTCATGGAGTCA  | 307.761372502449 | 0.581248050782239 |
| ATGAGTAAAACC  | 307.777389121599 | 0.588723903277872 |
| CGCTTTTACTCA  | 307.780813327382 | 0.334708487535521 |
| CATAAAGATGAC  | 307.814803929721 | 0.658566726710375 |
| GACATCTATGAC  | 307.830520847609 | 0.251452293665479 |
| ATGACTTGTATG  | 307.894398398211 | 0.617274111845084 |
| TAATAACAGTCA  | 307.970249989358 | 0.691242041886414 |
| TAACAAGTCATA  | 307.991878784816 | 0.600824017688359 |
| TGACGTGTTAAA  | 308.043173295035 | 0.637676441381292 |
| GTCATACCGTGA  | 308.047615160257 | 0.813706480243479 |
| CCGGCAGAGTCA  | 308.086451560752 | 0.918592755600462 |
| CGCCAATAGTCA  | 308.134676972891 | 0.532702470680996 |
| ACTATCTAGTCA  | 308.149179545748 | 0.399699230498916 |
| GTC AACGATGAC | 308.198962785378 | 0.466254720783721 |
| AATCCGACTCAT  | 308.208489348629 | 0.470333257432032 |

|              |                  |                   |
|--------------|------------------|-------------------|
| CCGCCGAGTCAC | 308.217387665225 | 0.386453505705475 |
| ACTAGCGATGAC | 308.297171571881 | 0.959767614696434 |
| GCCCATTAGTCA | 308.298068374195 | 1.10334586341226  |
| ATGTGTCAACGA | 308.321677082086 | 0.242770231010153 |
| AACTAACAGTCA | 308.36225542074  | 0.931002898624833 |
| GTCATCGCGGAC | 308.415939978404 | 1.36993187193259  |
| GTACCGGATGAC | 308.416927802509 | 0.805013940017588 |
| AAATTGAGTAAT | 308.45684570251  | 0.323860826511512 |
| CCAGTGGATGAC | 308.574069880373 | 0.605048795616163 |
| CCGCTGTGTAC  | 308.631880699591 | 0.231357179391889 |
| GTGACTCGGCAC | 308.772910321401 | 0.560164396971616 |
| AAGCATTGACTC | 308.841981958984 | 0.973261767923147 |
| GTCATAGTATGA | 308.86738001454  | 0.179935672913267 |
| TGACGTGTTACA | 308.876546775221 | 0.939829387630231 |
| TGACTGGTACAA | 308.921534768606 | 0.678569507425908 |
| ATCCAAGACTCA | 308.939828222817 | 0.505630086032299 |
| TGATTCATGACA | 308.966472847475 | 0.900936777337711 |
| GTCATATACCAA | 308.976728297094 | 0.569174581673331 |
| CTGCAATATGAC | 308.977348480476 | 0.523210193370074 |
| CAGCCGAGTCAC | 308.994657523992 | 0.736162478665267 |
| TGACTAAGGGCA | 309.00041841863  | 0.839548425511903 |
| CGGACCGATGAC | 309.067042073297 | 0.601766497165868 |
| CAGTACTGACTC | 309.073841917542 | 0.895585914388882 |
| CTTTCCGATGAC | 309.095301983179 | 0.331670640911994 |
| GGTGACGATGAC | 309.239123927978 | 0.616943202673148 |
| CATACTGATGAC | 309.27190447363  | 0.494185301385717 |
| ATGACAAAGACC | 309.328872325377 | 0.275758863503148 |
| GCTCTCGAGTCA | 309.33252477997  | 0.599138058288866 |
| AACTGGTGACGC | 309.391597070529 | 0.813138377102162 |
| ATCTTATATGAC | 309.467124129462 | 0.90584651473642  |
| ATGCATTATGAC | 309.48975159818  | 0.801509023020939 |
| CACTTGGAGTCA | 309.534119623547 | 0.702436771493591 |
| ACTACCGAGTCA | 309.564490740932 | 0.483617336337347 |
| ATTTTGTAGTCA | 309.569338870121 | 0.327633980585379 |
| ATTCAAGAGTCA | 309.610269316664 | 0.421076296940313 |
| ATTACTCAATTC | 309.657695602553 | 0.331210198214062 |
| ATGAGTCGGACG | 309.663610192166 | 0.157422311342539 |
| CTCATAGACTCA | 309.694444940432 | 0.73644129882243  |
| GTCATTCTCGGA | 309.712756188945 | 0.94292793060933  |
| TGACTAAAGCAA | 309.824402512814 | 0.46653599347487  |
| TGACTGCTAGAA | 309.848411322394 | 0.548437255835672 |
| AACCTAAGTGAC | 309.862700281318 | 1.28801490574571  |
| CATATGGAGTCA | 309.954273244819 | 0.820805155088212 |
| AACTGCTATGAC | 309.974889747384 | 0.661315804275486 |
| GACTGATATGAC | 309.975848423967 | 0.5824521293066   |
| TCCTCCGAGTCA | 310.050746616788 | 0.314253455031156 |
| CTCCATGAATCA | 310.190548872729 | 0.361963294715429 |
| ACTTTGAGTAAT | 310.205851914006 | 0.224267700476178 |
| CGTTCAGATGAC | 310.209084301853 | 0.614175983447221 |
| GTCATATGCCAA | 310.227341936675 | 0.875146393525855 |
| AGTCACCTCTGA | 310.293107718195 | 0.245656237429858 |
| ACGTTGTATGAC | 310.350819429505 | 0.735685278563233 |
| AACACTGCGTCA | 310.37588544281  | 0.62680018763136  |
| AATCAATAGTCA | 310.399365682858 | 0.411086341723201 |

|               |                  |                    |
|---------------|------------------|--------------------|
| TCACTGACGTCA  | 310.435790253138 | 0.563829704774537  |
| AGAAGCTATGAC  | 310.442290076879 | 0.420009429251088  |
| ACATACGATGAC  | 310.45255276587  | 0.768761077924224  |
| GTGACACAGTAA  | 310.475181698632 | 0.547200559903234  |
| AACTTTGTGTCA  | 310.493202586656 | 0.657578015803934  |
| GTCATACGCTAA  | 310.52165652858  | 0.471340408797712  |
| TCAGCTTAGTCA  | 310.54876883561  | 0.877624685510696  |
| TGACGACAGTCA  | 310.573813965635 | 0.696495997519672  |
| GACTCTTCTGAC  | 310.586813066857 | 1.20429064155055   |
| AGTCGTTAGTCA  | 310.638719774651 | 0.532919419458459  |
| GTTCTTACGTCA  | 310.675555095689 | 0.796311943983702  |
| ACTCTGTGTAC   | 310.809832669751 | 0.377867276373218  |
| ACTTCCACGTCA  | 310.846488822201 | 0.216799208162608  |
| CTGAAATATGAC  | 310.849457921385 | 0.539449108051815  |
| GTCATAGCCTAA  | 310.94940475401  | 0.726296711863806  |
| GTCATAAATAA   | 310.963355219349 | 0.730809155169255  |
| TCGTGCGAGTCA  | 311.050187071729 | 0.709975587007223  |
| ATTACTCAACTC  | 311.103801910115 | 0.218688763319169  |
| CGCGTAGACTCA  | 311.167541062786 | 0.420793870667912  |
| GTCATAAATAAC  | 311.297966416978 | 0.730875922924654  |
| CCCTGCGAGTCA  | 311.316088380122 | 0.424669129099923  |
| GACAATTATGAC  | 311.371006265033 | 0.564841040877311  |
| ATACGTGTGTCA  | 311.522425039722 | 0.737269913750032  |
| ATTGCTGCGTCA  | 311.542460949434 | 0.844427777138361  |
| TGACTCGAGGAA  | 311.606607571467 | 0.446370768187507  |
| TAATATACGTCA  | 311.63001422467  | 0.949749980618032  |
| AACGCTGCATA   | 311.657089072232 | 0.413278271499534  |
| AGTCACCCTTCG  | 311.706246830686 | 0.0932814918138054 |
| TATCCTTAGTCA  | 311.71393875439  | 0.372455849987708  |
| GTTTACACGTCA  | 311.743715790667 | 0.942988024835489  |
| TGATTCACTGAA  | 311.774813039358 | 0.703451260596005  |
| ATGAGTACCATG  | 311.883058844064 | 0.905900543908062  |
| GTCATCGCTAAA  | 311.892912551703 | 0.694693743240586  |
| AGGACAAGTCAT  | 311.89785469318  | 0.229064478093747  |
| AGTCACCCTTGG  | 311.907637471458 | 0.481703673759667  |
| CAAGTGTATGAC  | 311.958516079069 | 0.486325496947583  |
| TGATTCACTGAA  | 311.979287372428 | 0.867263648639825  |
| AGGCCGACTCAT  | 312.037607529713 | 0.447641991557048  |
| GTCATTCTACGA  | 312.049359126191 | 1.13611405042582   |
| ACTCATATGACG  | 312.054394509449 | 0.487786257533126  |
| AATGCTAGTCAT  | 312.125991300564 | 0.584353609232011  |
| AGTCACCCTGAA  | 312.169779103343 | 0.603582603371957  |
| ATGACTGGGCAC  | 312.241572681823 | 0.347899812758875  |
| GCAGACTATGAC  | 312.296177477365 | 0.590618670141116  |
| CTATGACTTGGC  | 312.298287867378 | 0.452977268373351  |
| CGTACTTATGAC  | 312.316683183021 | 0.70183792024343   |
| GCTCCGAGTCAC  | 312.348848237241 | 0.329097564670842  |
| TGAACTCAGTCA  | 312.394632020922 | 0.467184161860846  |
| TATGACTTGGCA  | 312.410450343672 | 0.382900349806922  |
| AACGCTCAGTCA  | 312.412752685153 | 0.400952458063108  |
| ATGTGTCAAACAG | 312.503080297286 | 0.68788266776351   |
| CTTTTGGAGTCA  | 312.542755285337 | 0.786719012497305  |
| ATATGCTATGAC  | 312.578009814967 | 0.964784845611842  |
| GTCATCTAATGA  | 312.589642477395 | 0.739766245120589  |

|              |                  |                   |
|--------------|------------------|-------------------|
| AGGTTGACACAT | 312.650637521662 | 0.286539231005766 |
| AGCCTTTAGTCA | 312.66304619765  | 0.664737801794955 |
| ATTACTCAATCA | 312.710327284475 | 0.239078589172168 |
| TAATACGTGTCA | 312.727314404319 | 0.433287739263561 |
| GCGGATACGTCA | 312.783101003759 | 0.369252916927127 |
| GCGGATTATGAC | 312.787112679594 | 0.481157747100224 |
| CAACTTTAGTCA | 312.788749604774 | 1.0223262417271   |
| AATTATTGCTCA | 312.841042656861 | 0.37081266352996  |
| TGAGTAAGTCAA | 312.877767970245 | 0.566850938534631 |
| CTATGGTATGAC | 312.940518024191 | 0.769155735894079 |
| CTGACTGTGTCA | 312.949995583875 | 0.32535985989884  |
| CAAAACACGTCA | 313.144336419825 | 0.743134755470667 |
| AAAATCGATGAC | 313.189534132549 | 0.185953219456575 |
| ATTACAGATGAC | 313.193412912588 | 0.669366549562673 |
| CATTATGATGAC | 313.220738452233 | 0.72956551078577  |
| GATACCTGTGAC | 313.32324002787  | 0.902892308988593 |
| CAGATCGACTCA | 313.323367214223 | 0.565611320744075 |
| CTATGATATGAC | 313.365577714579 | 0.961678191812155 |
| GTGACTCGGTGA | 313.402651823255 | 0.321955776591989 |
| CATTAGGATGAC | 313.450972823669 | 0.697104838046399 |
| TATCACGAGTCA | 313.461360820039 | 0.685327027018653 |
| CCGCTTTAGTCA | 313.499552292562 | 0.301527188754179 |
| GCTCTGTGTGAC | 313.522382410321 | 0.472935824624293 |
| ACTGTGTATGAC | 313.542459256611 | 0.532333915275298 |
| ACGTGATTAGTC | 313.576229231189 | 0.705187771037321 |
| TCTGATTGCTCA | 313.59505662845  | 0.507912069500321 |
| CCTCTGTGTGAC | 313.605623894677 | 0.202321555152633 |
| CATCTTCAGTCA | 313.644976769341 | 0.181033071078864 |
| CTGCTCGAGTCA | 313.793512334866 | 0.68676954768495  |
| GAGCCGAGTCAC | 313.807011964369 | 0.642566936764328 |
| GTTATCTAGTCA | 313.97168509379  | 0.688856568672332 |
| ATGTGTCAAAGC | 313.979897081739 | 0.408934728961553 |
| GAGTCAAATGAC | 313.983300647675 | 0.340216986236849 |
| ACGCATTATGAC | 314.012643782433 | 0.252761909963539 |
| TGAGCAATAAAA | 314.016423727876 | 0.163796955788836 |
| GTCATCATAGAA | 314.035668082236 | 0.706068123626308 |
| ACATCCGATGAC | 314.035705895021 | 0.351499289398536 |
| CCAATGTGTGAC | 314.146664108041 | 0.526017263681031 |
| ATGACGTGACAG | 314.173093056246 | 0.45933004527496  |
| CCGAATTATGAC | 314.232788332567 | 0.394692849606063 |
| ATCTTTGATGAC | 314.251212402829 | 0.899155873962136 |
| AACACTGTGTCA | 314.347322921736 | 0.884568227607379 |
| AACGCTGACACA | 314.349252498262 | 0.316547012407322 |
| ATGAGTCGGCCA | 314.36882104772  | 0.520644694208057 |
| TGACTACTAGAA | 314.453468713412 | 1.063026400996    |
| GATAACTATGAC | 314.487690949562 | 0.90341878712948  |
| CAAATATATGAC | 314.488814402469 | 0.468504474595886 |
| GTGACTCGCGAA | 314.522902959564 | 0.471863108847058 |
| CAGACGTATGAC | 314.555035511516 | 0.544955117715018 |
| GAGAACTATGAC | 314.555443079019 | 0.303467721511762 |
| TAAACTGCGTCA | 314.567291152121 | 0.683556972719103 |
| ACGCCTTAGTCA | 314.568590256278 | 0.655455156425109 |
| ATTGACGACTCA | 314.569193403199 | 0.420781008513991 |
| GCCAAGTCATAC | 314.633873174784 | 0.559755151653932 |

|               |                  |                   |
|---------------|------------------|-------------------|
| ATGACGTTATCA  | 314.648680946128 | 0.581109427474062 |
| ATGACTTGG AAC | 314.694667591461 | 0.455157431262427 |
| CACGATGATGAC  | 314.925777914445 | 0.315972066329897 |
| AGTTACTGACTC  | 315.107965961967 | 0.599047005370696 |
| CGGATCTATGAC  | 315.117999773625 | 0.741730524990037 |
| GTCATACATATA  | 315.215810355899 | 0.928994439188166 |
| GTACAAGTCATA  | 315.217547231266 | 0.290651872358811 |
| ACGGTATATGAC  | 315.243995490681 | 0.729726513512793 |
| TATGTTGTGTCA  | 315.326120343021 | 0.331273628201981 |
| CCTGTGGATGAC  | 315.532872711164 | 0.929544341052554 |
| CCGTATTGCTCA  | 315.637516695793 | 0.701170700272527 |
| CAAACCGAGTCA  | 315.680004339978 | 0.831165494705948 |
| CATCGTGAATCA  | 315.684342835003 | 0.698948791451021 |
| TCAACCGAGTCA  | 315.711634954483 | 0.497438123679262 |
| ATGACTGGCGCA  | 315.711681840116 | 0.256212215034091 |
| ATGAGTCGGTTA  | 315.725633328992 | 0.357715949965713 |
| GTA AACACGTCA | 315.90196638969  | 1.11010763546699  |
| CACAGTTATGAC  | 315.997729821411 | 0.915234839414163 |
| ATTACTCAACAA  | 316.054436046899 | 0.252057482305696 |
| TAGAATTCGTCA  | 316.089495027194 | 0.367792642495412 |
| CGACAGGATGAC  | 316.110124296658 | 0.251808141903606 |
| TGACTTGACTAA  | 316.116061713412 | 0.660434404772962 |
| ATGACTTGTACA  | 316.149070765309 | 0.510614251031412 |
| CCGCTGACGTCA  | 316.149961654886 | 0.591406732702441 |
| AAGCATCAGTCA  | 316.181846251216 | 0.759778213245833 |
| AATACTCAGTCA  | 316.19271004347  | 0.503991185970358 |
| AATCTTTGT CAT | 316.199633508584 | 0.539816625189762 |
| CCTCGTTAGTCA  | 316.246132632401 | 0.819215674757764 |
| CAGTCATGGTTA  | 316.273965731347 | 0.451153269700258 |
| ATGATAGATGAC  | 316.282180696585 | 0.596646180215883 |
| AAAGATTATGAC  | 316.314533116125 | 0.684994352580508 |
| ATTCTTCAGTCA  | 316.421812588515 | 0.266497162875402 |
| GTCATGCATGAC  | 316.444346626552 | 0.764244067762519 |
| GTCATTATGTCA  | 316.502939267482 | 0.444919202831844 |
| CAGTCAGCGTCA  | 316.509219757099 | 0.552786287936991 |
| ATGTGTCAAACA  | 316.600551686838 | 0.64646726756     |
| ATTACTAAGTCA  | 316.605123065926 | 0.56453007151794  |
| CTCAACACGTCA  | 316.625066745941 | 0.302355759880796 |
| ACTAGTTATGAC  | 316.661629982069 | 0.8196993266038   |
| GTCATACCTCGA  | 316.711272730151 | 0.550037519701513 |
| TACTGGGAGTCA  | 316.750340706709 | 0.716131382473974 |
| CCTCTTTAGTCA  | 316.81618802464  | 0.41326873398052  |
| GTCATACCGTTA  | 316.878805129358 | 0.59913090429065  |
| TCGATAGCGTCA  | 316.916091390612 | 0.690287654291495 |
| CCAAATTCGTCA  | 317.016351519571 | 0.50789035912001  |
| CATTATAAGTCA  | 317.051144401521 | 0.796372160041013 |
| GAGTAATATGAC  | 317.066230692884 | 0.416330693273159 |
| CATAGTTATGAC  | 317.163684505313 | 0.611733677612894 |
| TGACCAATGACA  | 317.188192153    | 0.582184368544085 |
| CTAAACCGTCA   | 317.291140899374 | 0.408537219075622 |
| CCCTAAGATGAC  | 317.313296998884 | 0.550422211938687 |
| CGATCTTAGTCA  | 317.321011603962 | 0.813890143099837 |
| CACTCTGTGTCA  | 317.354099341126 | 0.441184596750507 |
| CCGGATACGTCA  | 317.394847698368 | 0.897881790389514 |



|              |                  |                   |
|--------------|------------------|-------------------|
| TCTTTTGGCTCA | 317.41423455206  | 0.379688452945691 |
| CGGAGCTATGAC | 317.53532499957  | 0.795443620736217 |
| GTCATACCGGTA | 317.602860907322 | 0.482123251876905 |
| ATGAGTCGGCGC | 317.677928870052 | 0.540088956347211 |
| ATGAGTCTCAAT | 317.724054276657 | 0.838817915422945 |
| ATTACTCAACGC | 317.784791031684 | 0.360753525192823 |
| CGTTAACAGTCA | 317.809520727977 | 0.721254431226634 |
| ATTAGTCGCATG | 317.909830785729 | 1.36577321041462  |
| ACTTTTGTGTCA | 317.910533768921 | 0.451043270264042 |
| ATGTGTCAATAA | 318.017295653725 | 0.71617497159263  |
| AGAGTCAATTGA | 318.042387637391 | 0.410160494924435 |
| CCGTTAGACTCA | 318.06531756517  | 0.559354608693753 |
| GTCATCGGAAAC | 318.085093334141 | 0.509272196568747 |
| TGACGTGTAGCA | 318.1199546577   | 0.698982422279588 |
| GATCTTCAGTCA | 318.151759212733 | 0.817345022616343 |
| GTCATAGATAAC | 318.252106764912 | 0.902865608538969 |
| GTCATCAGCAAA | 318.27672894791  | 0.360108296398963 |
| ATATGTTATGAC | 318.304211177437 | 0.784758366045904 |
| AAACCAGTCAGA | 318.394741690206 | 0.391754561457659 |
| CATAATTGAGTC | 318.39560188803  | 0.878256757906263 |
| AGTCATGGTTAC | 318.448152077544 | 0.551704675545747 |
| GAATCATAGTCA | 318.476925806073 | 0.532867688921754 |
| GTCATCGGGTGA | 318.516442870319 | 0.324996406765372 |
| GTCATCCAATGA | 318.576630981751 | 0.706298852132735 |
| GTGACACAGAGA | 318.593470102389 | 0.306287594424202 |
| TCCGTGGAGTCA | 318.597322680603 | 0.829705937056437 |
| GTCATATCGTCA | 318.614142040964 | 0.684620763071133 |
| TAATACACGTCA | 318.621877573283 | 0.21832239068839  |
| TCTTCTGTGTCA | 318.700677103898 | 0.470287626807819 |
| ATCTTTTACTCA | 318.715522034785 | 0.427515027596862 |
| GTCATAGTGACA | 318.744105085815 | 0.625042236804112 |
| CAAGGTTATGAC | 318.750863602543 | 0.372363384311228 |
| GTCATCTTTTGA | 318.755682477551 | 0.265804790490213 |
| TCCGCTCAGTCA | 318.769867674596 | 0.613505850195221 |
| CAACTAAGAGTC | 318.773733638065 | 1.51586535415203  |
| AACTACTATGAC | 318.783311437047 | 0.788446627511234 |
| GTCACTGAATCA | 318.790837229689 | 0.364178581908971 |
| GTCATATCTGAA | 318.811005529512 | 0.837411592115117 |
| ACATATTTGTCA | 318.841354832555 | 0.62383325345272  |
| TGACTAGGTAAA | 318.853940119369 | 0.194566305110171 |
| ACGTACGATGAC | 318.857361355652 | 0.428647482117136 |
| CGTAACCAGTCA | 318.915915563956 | 0.336369826705776 |
| GTTGCTTAGTCA | 318.953869491482 | 0.507270839964042 |
| TCAACTCAGTCA | 318.9743069154   | 0.703353816458281 |
| GCTACCTATGAC | 319.041688638746 | 0.507856313911623 |
| CCCGAGATGACA | 319.129329819008 | 0.591262248508481 |
| GTCATACGTCGA | 319.13972291691  | 0.530775403863031 |
| CATTATTGCTCA | 319.162284222514 | 0.397540566152844 |
| GTCATAGCCTGA | 319.219312947283 | 0.706359487206603 |
| AATATCGATGAC | 319.240518754044 | 0.281213498481992 |
| CCCTTGGAGTCA | 319.247211329913 | 0.627346869085351 |
| ATGACGAACAAT | 319.299123906455 | 0.263116194227019 |
| AGTCACCTCGAT | 319.322284842911 | 0.435705340218075 |
| GGGACTTAGTCA | 319.331785935488 | 0.479425088835625 |

|              |                  |                   |
|--------------|------------------|-------------------|
| CGCAATACGTCA | 319.357755346389 | 0.295759031210941 |
| CGACTGTGTAC  | 319.36146511617  | 0.441081389547483 |
| GTATTCTATGAC | 319.399759983464 | 0.278188995762058 |
| ATGTCCACGTCA | 319.439157712142 | 0.691313026181702 |
| CGTACTGCGTCA | 319.575485556092 | 1.13214401598495  |
| TCCGCTGACACA | 319.581855035333 | 0.389911487432729 |
| CCAGCGGATGAC | 319.596178834571 | 0.744870498384288 |
| AGTCACGGATGA | 319.615479667175 | 0.354198822507584 |
| ATGAGTCGGAAT | 319.640171748317 | 0.384034906802666 |
| CTTACCGAGTCA | 319.721547996538 | 0.689471774024071 |
| ATGAGACTCATA | 319.725749093664 | 0.471713019895012 |
| GCCTCGGAGTCA | 319.732623037977 | 0.894184348796631 |
| GAGTCAGTTATC | 319.735914895144 | 0.529380330403604 |
| TCATGTGAATCA | 319.812223569868 | 0.423932354157714 |
| AGTCACGGAAAA | 319.886571885592 | 0.574210022384123 |
| GAGTCCTATGAC | 319.898388760877 | 0.722213823502736 |
| CAGCGATATGAC | 319.954022715222 | 1.22852247473425  |
| CAATAGTGACAC | 319.957250440039 | 0.446159820805801 |
| AATATTTATGAC | 319.992516432601 | 0.701679977304019 |
| ATGACTTGCCAA | 320.024227100332 | 0.678137255140322 |
| ACAAATACGTCA | 320.035213930518 | 0.946477538593521 |
| CACTATTTGTCA | 320.085057862459 | 0.54681365264619  |
| CTGAACTATGAC | 320.093461269456 | 0.942654655800292 |
| TGACGGATTCAA | 320.102746806178 | 0.531434696191014 |
| GGTCATAATGAC | 320.110250382064 | 0.555658704009409 |
| GTCATAGTTTCA | 320.11165507038  | 0.432871015627984 |
| GTCATACGTTTA | 320.237076467402 | 1.02833029480316  |
| GACTAAGATGAC | 320.321801199407 | 0.775460658964493 |
| TGACTAAAGTCA | 320.42968242815  | 0.876194688675357 |
| GTCATACGACAA | 320.444304896558 | 0.525432917061495 |
| CATCCGATGACG | 320.798371650017 | 0.51949992679315  |
| CTGTAAATGAC  | 320.806063411496 | 0.489047183183779 |
| ATGACACGGTGC | 320.808359603379 | 0.388270632057047 |
| TGAATCAGAACA | 320.80900067332  | 1.26548205006815  |
| CACAATACGTCA | 320.819688778223 | 0.416847831546645 |
| GTCATCGCGTAA | 320.82105953381  | 0.503742305275878 |
| TCTTGCGAGTCA | 320.828132513906 | 0.988487788206851 |
| CCCGGTGATGAC | 320.833147171016 | 0.751345554524207 |
| CAGTCACGCGTA | 320.83734343866  | 0.684712312175468 |
| CTGGGCTATGAC | 320.842670232451 | 0.567766801529006 |
| GTCATCTTCAGA | 320.878485261545 | 0.707201005305273 |
| CAGCGTTAGTCA | 320.955335677058 | 0.418579166642639 |
| CGTATCTATGAC | 320.956368008566 | 0.690722547389512 |
| GGCATAACGTCA | 320.987372790657 | 0.906754396660709 |
| GTCATAATAGGA | 321.014436036922 | 0.39177533850914  |
| TCATTGGAGTCA | 321.083047290151 | 0.676320355542592 |
| AGAAAGGTGACT | 321.083181167086 | 0.18286831355382  |
| GTCATTTTGTCA | 321.142029518615 | 0.497575266011796 |
| ATAGTGTATGAC | 321.148981050196 | 0.528232633062431 |
| TCAGGTGACCCA | 321.200866067459 | 0.857595870845722 |
| ACTTATGATGAC | 321.21223081784  | 0.541945546225178 |
| GTCACACTATTA | 321.241817427376 | 0.430382377462421 |
| TCGACACAGTCA | 321.297242542047 | 0.323994983146087 |
| GACTAATACTAC | 321.333238081152 | 0.655648480763135 |

|               |                  |                   |
|---------------|------------------|-------------------|
| GTCATAGCTGCA  | 321.343569426945 | 0.888139459875715 |
| ACACTTGACTAA  | 321.372903737482 | 0.126677828007906 |
| AACCTGTGTAC   | 321.397662902687 | 0.24552000229082  |
| ATGAGTCGGAAG  | 321.430592319172 | 0.338806340036619 |
| ATCTGTTATGAC  | 321.44603905997  | 0.475604416532067 |
| GGACCTTAGTCA  | 321.506738324441 | 1.15736869543444  |
| CTCAAATATGAC  | 321.609978761872 | 0.403344468225786 |
| GTCACCGCAAGA  | 321.655856690036 | 0.305275316170474 |
| GTCATAATTGCA  | 321.664928596037 | 0.547567363441945 |
| ACCATGTGTGAC  | 321.723560350884 | 0.768765806611896 |
| GTCCAAGTCATA  | 321.738109020158 | 0.320683211951758 |
| CGGCCGAGTCAC  | 321.756991200813 | 1.03580227250117  |
| GTGTATACGTCA  | 321.766284207564 | 0.503197147378756 |
| ACTCACTATGAC  | 321.880058249631 | 0.497324372039422 |
| CTCGACTAGTCA  | 321.940844127516 | 0.819174485675594 |
| GAACCTCAGTCA  | 321.948474044063 | 0.649766478554586 |
| CGCAGCGAGTCA  | 321.976935265699 | 0.996210510361661 |
| TGATTCACAAAA  | 322.020640556849 | 0.681963474658628 |
| CCATGCGAGTCA  | 322.03279154063  | 0.752762258011784 |
| TGACTGTGTCAA  | 322.060300369829 | 0.749685193551862 |
| ATGACAAAGCCG  | 322.130419131608 | 0.398613150967578 |
| ACTAAGGTGACT  | 322.181952053448 | 0.371724709318111 |
| GTACAATATGAC  | 322.264166881801 | 0.493424719436632 |
| GCAAAAGATGAC  | 322.271814010983 | 0.306230208859692 |
| AATATGTATGAC  | 322.297327576575 | 0.8195908163793   |
| TGAGTCGATAAA  | 322.332256035681 | 0.453887099920382 |
| ACTTCGTATGAC  | 322.368657803697 | 0.472435723763078 |
| CGTGTTTATGAC  | 322.394489914748 | 0.822058393793592 |
| ATGACTGGGTCA  | 322.400005667506 | 1.03296487206534  |
| AATAGTCAACTG  | 322.405728263988 | 0.762294387708808 |
| AGTCACTACATG  | 322.449339916095 | 0.408633664791738 |
| GGTCTCTATGAC  | 322.458016902968 | 0.498498667387213 |
| TGACTGTTAAAA  | 322.519254326328 | 0.803050250424915 |
| AATAATTCGTCA  | 322.668428455796 | 0.668346066179714 |
| ACTTGATGATGAC | 322.692177366434 | 0.292699865221161 |
| GACTTTTACTCA  | 322.695483187768 | 0.33707704793874  |
| TCCGGTGAATCA  | 322.722897952213 | 0.573626308415758 |
| AAATTGTGACGC  | 322.839775964882 | 0.544483103362437 |
| GACACCGATGAC  | 322.855628189047 | 0.847490518001616 |
| ACCGAAGATGAC  | 322.881801862797 | 0.571045239292884 |
| CTCAGCTATGAC  | 322.917162968765 | 0.328216013727696 |
| GTCACAGGTGAC  | 322.937458875032 | 0.571588259705854 |
| CGAGCATATGAC  | 322.945115386805 | 0.828745254355453 |
| TAATCACAGTCA  | 322.950343385525 | 0.49046578104813  |
| CTTGAATTAGTC  | 322.986279130194 | 0.292876764885212 |
| TGACTCTGTCAA  | 323.011911746129 | 0.931863634874705 |
| CAGCCGATGACG  | 323.032744279009 | 0.943289900150339 |
| CAATATAATGAC  | 323.077930711364 | 1.13858713584184  |
| CATAGATTAGTC  | 323.112164890449 | 1.36120180912354  |
| ATTACCGATGAC  | 323.129233678551 | 0.767874846725597 |
| ACCGATTTGTCA  | 323.22986893872  | 0.509827214771619 |
| GGGGCGAGTCAC  | 323.230918799776 | 0.411639368149341 |
| GTCATACGGTCA  | 323.292236477554 | 0.754460042997793 |
| GTCATAGGCAAC  | 323.339752040036 | 0.776242605807017 |

|              |                  |                   |
|--------------|------------------|-------------------|
| CGTATAGACTCA | 323.363072475499 | 0.726624622905571 |
| GTGCAATAGTCA | 323.403329740132 | 0.879390827746355 |
| ATGTGTCAAATG | 323.405998061136 | 0.241072899888725 |
| GTCATCGGTCTA | 323.461059662158 | 0.123388367737642 |
| ATGACACTCACA | 323.523167343657 | 0.232015461190143 |
| GTCATCTATGCA | 323.542177400953 | 0.589882724006346 |
| ATGTGTCAAAGG | 323.563877888135 | 0.369079632148687 |
| AGATTGTATGAC | 323.615496695621 | 0.454666531858046 |
| CGTCATCTGTCA | 323.655505507516 | 0.58366596296256  |
| GATTCCACGTCA | 323.664433823636 | 0.879922495971956 |
| ACTGCTGCGTCA | 323.718456281829 | 0.404589290888188 |
| AGTCACCTCAGC | 323.784626090302 | 0.290721911916809 |
| CGATGATGTAAC | 323.827251667919 | 0.378410285443311 |
| GATACCTATGAC | 323.851277983268 | 0.690557256776854 |
| ATGACTAGCCGC | 323.859952001387 | 0.558571146810145 |
| GTCATCCGGA   | 323.864517450885 | 0.78364877783536  |
| GTTCTAGTCA   | 323.895632184873 | 0.871844676932242 |
| CAAATGTGTGAC | 323.904427538456 | 0.779723315484115 |
| TATTACTAGTCA | 323.977300633006 | 1.17633243300014  |
| ATACAAGTCATC | 323.981820590896 | 0.438556718472737 |
| GTGTCCACGTCA | 323.99247332508  | 0.967967080040266 |
| TGATTACACAA  | 323.992530842646 | 0.942947359798878 |
| TATTCTGAATCA | 323.994965587372 | 0.342328643765449 |
| TGAGTAAAAGAA | 324.026325807958 | 0.570988279186784 |
| AGATTACGCAAT | 324.06982558023  | 0.631368970919444 |
| GTCATACCATTA | 324.09989983846  | 0.684044298619274 |
| ATTTATACGTCA | 324.172044111936 | 0.579015295731546 |
| AGTCACCTTGAC | 324.20530979689  | 0.166190032109784 |
| GTCATTATATGA | 324.428789500577 | 0.704612782840168 |
| AGCCTTGACTAA | 324.465188442114 | 0.518992879205941 |
| CATATAGACTCA | 324.499537927218 | 0.768980508369274 |
| ATGAGTCGGCGA | 324.516059238884 | 0.435159715634503 |
| ATGCGTTAGTCA | 324.52162171973  | 0.486646217209617 |
| GTTGCTCAGTCA | 324.533902853953 | 0.752465967436042 |
| CGATGACTTGTA | 324.548324705398 | 0.259673852330845 |
| GTCATACCCGGA | 324.652076825726 | 0.513969134372477 |
| AGTGATTATGAC | 324.675060797168 | 0.601031071564851 |
| CGCGACCAGTCA | 324.714511007873 | 0.989767912090386 |
| ATGTCCGATGAC | 324.7152997335   | 0.752889413078374 |
| TGACATGAATCA | 324.719137386372 | 0.830844198132138 |
| CTGTGTGAATCA | 324.721053501669 | 0.951482192914125 |
| ATGACAGAGTCA | 324.800814822911 | 0.805210003383668 |
| ATGACGTTACTC | 324.833321055674 | 0.196243322794614 |
| ATGACTTGTACG | 324.883539228655 | 0.28496253060613  |
| GTCATAATGCTA | 324.921889849917 | 0.334357813748393 |
| GTCATAGTGTGA | 324.938750920884 | 0.816463814886164 |
| GCCTTGTATGAC | 324.973811805257 | 0.852829537725445 |
| CTGTGAGAGTCA | 325.000699785849 | 0.731066676693899 |
| ATCATGTGTGAC | 325.010612210878 | 0.676557484402691 |
| CGGCTTGACTAA | 325.032586374485 | 0.909361167102887 |
| GTCATAGATTAA | 325.039351268999 | 0.542081707384086 |
| ACACCGAGTCAC | 325.090346210305 | 0.456367221366784 |
| AACTGTGAATCA | 325.13664476566  | 0.638982297530498 |
| ATGACAGTATCA | 325.297310294313 | 0.757346398629116 |

|              |                  |                   |
|--------------|------------------|-------------------|
| ACCGCTCAGTCA | 325.32120060096  | 0.645712321624362 |
| CATCTTGCGTCA | 325.336591652466 | 0.369391420654917 |
| AAAGCTAGTCAT | 325.372691303092 | 0.377364014954934 |
| ATGAGTCGGTGA | 325.391558777887 | 0.428730887765036 |
| TACTTGTAGTCA | 325.39613710388  | 0.552339243217806 |
| CAGTACTATGAC | 325.408199369923 | 0.375434600193507 |
| AATAATCCGTCA | 325.433747699316 | 0.649514509276151 |
| AGTCACTTCAGG | 325.482621789668 | 1.23353750804351  |
| AAATAACAGTCA | 325.523375937611 | 0.520892902041504 |
| ATGACGTTATAC | 325.640992536229 | 0.580676497290721 |
| GACAGATATGAC | 325.68200034135  | 0.568791518137051 |
| GACTCCGGTGAC | 325.731228287681 | 0.856056472195322 |
| GTCATCCCGGGA | 325.738617904872 | 0.820128189823654 |
| GTCATAGCATCA | 325.836417821613 | 0.801201776853508 |
| AAATTGTGACGT | 325.850530623005 | 0.281062534777874 |
| ATGATAAATGAC | 325.863413256781 | 0.311943466195449 |
| CCGGTGGAGTCA | 325.869636200771 | 0.35623580207905  |
| AATTCTGTGTCA | 325.871112220227 | 0.508160798481986 |
| GTCATAATAACA | 326.089685535757 | 0.647875336841714 |
| AATACTGTCATA | 326.093004066154 | 0.487150405559222 |
| ATGAGCAAATAA | 326.102188519723 | 0.352845771442912 |
| GTCATACCCGAA | 326.133321860379 | 0.538609795208611 |
| CAAAACTATGAC | 326.138005766847 | 0.62916842309717  |
| ATGACGTGATGA | 326.160395696579 | 0.241014643833672 |
| CCTCGTGAATCA | 326.170157934751 | 0.117580676654295 |
| GTCATATTATGA | 326.206412128349 | 0.646703540463622 |
| ATGACGTGACCC | 326.218774421224 | 0.711908635661546 |
| AACGTGTATGAC | 326.234042892071 | 0.742601579796607 |
| AGACTAATAATG | 326.349550750093 | 0.3877117652568   |
| CACACGTAGTCA | 326.370041218323 | 0.757632576620159 |
| AATAACACGTCA | 326.408963707887 | 0.625927816094652 |
| ATGAGTCGGAGC | 326.420177635477 | 0.375722211217324 |
| AAGCGCTATGAC | 326.437574926091 | 0.787864857822975 |
| TGACTCCGAGAA | 326.468065170592 | 0.804224625715735 |
| CGTCGTTAGTCA | 326.510165155323 | 0.951664497404628 |
| CCATACTAGTCA | 326.605477824683 | 0.349276368896654 |
| AAACTATATGAC | 326.628882302551 | 0.722929991540711 |
| AGTCACCTCTAA | 326.630108833787 | 0.323987833095777 |
| CATTTGACTCA  | 326.635712103285 | 0.542917198346251 |
| CTCGCGTATGAC | 326.668247432647 | 0.597972221853511 |
| GTATGCGATGAC | 326.705176508422 | 0.519812765456349 |
| GCCCAAGAGTCA | 326.706053344909 | 0.70847406701915  |
| GTCATAACGTGA | 326.721919471335 | 0.63387630833577  |
| CATTTGTATGAC | 326.729681041472 | 0.94066653554657  |
| AGTCACCCTAGG | 326.75045677705  | 0.591896545576173 |
| CCTTCCGAGTCA | 326.75647371344  | 0.390179747397196 |
| CACTACTAGTCA | 326.761569731807 | 0.863041447111345 |
| CATCCGGTGACA | 326.762960777513 | 0.673970361145782 |
| GTCATCCTAGAA | 326.764929305376 | 0.468639040730523 |
| CTTTTGTAGTCA | 326.765130813908 | 0.699263298294164 |
| TACAATACGTCA | 326.789247692907 | 0.29675157237544  |
| ACGTCATGATTG | 326.856482384854 | 0.616637562844541 |
| CTAAGGTATGAC | 326.904462647945 | 0.839981865897784 |
| CACATGTATGAC | 326.914482188873 | 1.02473942769065  |

|              |                  |                   |
|--------------|------------------|-------------------|
| ACCAACTATGAC | 326.925300971724 | 0.414113943823444 |
| TACAACACGTCA | 326.932910326414 | 0.729258464617486 |
| AGTCATGAGCAA | 326.940932523568 | 0.541497621332882 |
| CAGTCATGGTAC | 327.083977244324 | 1.09059428446251  |
| CGAAATTATGAC | 327.119129019821 | 0.344473641969493 |
| CCGCTTGACTAA | 327.219559476573 | 0.363437664187575 |
| ATGACGAGGTCC | 327.327080095835 | 0.356460254207128 |
| AAGACTCTTACT | 327.351135288434 | 1.2136739561324   |
| TATATACAGTCA | 327.367981388081 | 0.527953613959614 |
| GACTCACGTGAC | 327.532437150478 | 0.581345551613837 |
| AACGACTATGAC | 327.662601874374 | 0.630213082741142 |
| AGTCACCCTTGC | 327.667345374662 | 0.430911446738132 |
| TGACTCGCTAAA | 327.667651341588 | 0.779413374883158 |
| GTCATACCCGTA | 327.699879927934 | 0.388049179661888 |
| GGTCCCAGTAC  | 327.835822116336 | 0.363384240643326 |
| CAGTATGATGAC | 327.874866776296 | 0.934728389191852 |
| ACAGATACGTCA | 327.950796245562 | 1.06184153264208  |
| ATCATGTATGAC | 327.95426476856  | 0.706299063133443 |
| CGCGGGCATGAC | 327.963935568264 | 0.844171817620595 |
| GTCATAGGCTGA | 327.96573286987  | 0.65379008107892  |
| CCACAGATGACG | 327.969877994232 | 0.808006427288898 |
| GTCATCGCACGA | 328.111233079926 | 0.767092201107394 |
| CTGACAGATGAC | 328.146371437609 | 0.81698847786908  |
| AACGATTATGAC | 328.236458453458 | 0.570734604912956 |
| ATATATTATGAC | 328.279887352636 | 0.673924329858309 |
| AGCCGTGCGTCA | 328.281056480269 | 0.915862061389673 |
| GTCATAATACAA | 328.289175602645 | 0.884882605364349 |
| GAGTCAATTATC | 328.320641213915 | 0.617999356149981 |
| AGTCACCTCGGA | 328.323543185508 | 0.580512854236639 |
| CGTGTCTATGAC | 328.377792617774 | 1.05735032259925  |
| ATGACATGACGC | 328.378430097632 | 0.593212528148702 |
| ATGATGTAACCC | 328.3844309145   | 0.431091676721766 |
| GTCATGCTAAAC | 328.391182793949 | 0.744489537109409 |
| AACAGGTATGAC | 328.418340945399 | 0.439002230205324 |
| ACACATAAGTCA | 328.429678978528 | 0.806314844191231 |
| ATGACAAAGCAA | 328.446122101634 | 0.637493863574266 |
| ACATAGAATGAC | 328.449951115477 | 0.849695099425395 |
| GCACTGTCATA  | 328.456897506024 | 0.57780084679472  |
| AGACGTTAGTCA | 328.466275901574 | 0.422651801872671 |
| CAGTCATGGGTC | 328.513901587924 | 0.62905698192033  |
| GTCATCTTTGCA | 328.515175232151 | 0.596132730933296 |
| TGACCTTAGTCA | 328.530843441869 | 0.984596158786413 |
| TCATAGATGTCA | 328.545540592891 | 1.33937203264341  |
| CTCATCGATGAC | 328.622976343524 | 0.5049352587478   |
| ATGACTGGGCC  | 328.707271650138 | 0.627899101909062 |
| AACTCCACGTCA | 328.711238031547 | 0.418726768120515 |
| GTCATACCATAA | 328.78490422733  | 0.855493603372811 |
| GACGCTTACTCA | 328.807555982304 | 0.372428450168234 |
| TGACTGTATACA | 328.810847355751 | 0.997898195247478 |
| GTGTCATGCGCA | 328.815441135102 | 0.740817678629289 |
| ATTTATTGCTCA | 328.88779632427  | 0.323917589864198 |
| CTGAAAGCGTCA | 328.93596776946  | 0.691402070041781 |
| GTCATAGTCCTA | 328.937001448819 | 0.180537311116525 |
| TACGCGTACTA  | 328.941857423988 | 0.478381283051816 |

|              |                  |                   |
|--------------|------------------|-------------------|
| ACCCACGATGAC | 328.948235674455 | 0.479071378782075 |
| CGAACCGATGAC | 328.983311891371 | 0.657315583772972 |
| GATATTTATGAC | 329.019591802621 | 1.09739316783492  |
| TGACACACGTCA | 329.033358106595 | 0.338122486559762 |
| CAGCTACAGTCA | 329.034547308242 | 0.712320217751095 |
| GGGAACTATGAC | 329.037815757492 | 0.661045900515924 |
| CGATGAAATGAC | 329.09409227482  | 0.588378133016364 |
| ATCTTTGCGTCA | 329.09891101136  | 0.438756372911769 |
| TCCGGCGAGTCA | 329.14322868866  | 0.776592643337548 |
| AGTCCTGACTGA | 329.168385936384 | 0.550440182097737 |
| TCATTTGTGTCA | 329.184026484986 | 1.02619343379927  |
| GGTCCGTATGAC | 329.215174618891 | 0.333782735590078 |
| ACTTTGGAGTCA | 329.269707102215 | 0.82151254676459  |
| CGGTACACGTCA | 329.315631407419 | 1.15262162024207  |
| TGACACAGAACA | 329.349929672728 | 0.54773785742228  |
| ATCTTGTAGTCA | 329.378660836396 | 0.552167072750333 |
| CCAAGGGATGAC | 329.415307973285 | 0.647067145067879 |
| GATGACTTGTA  | 329.452588352695 | 0.298165218921284 |
| TACTTGGAGTCA | 329.471784737177 | 0.512939449030737 |
| GTCATACGGTGA | 329.565565647403 | 0.5555923691735   |
| TAATCCGAGTCA | 329.590164786318 | 0.717096491520869 |
| CCGTTGACTGAA | 329.6341654955   | 0.644245417957598 |
| CTGCCGAGTCAC | 329.655787082905 | 0.335882054318431 |
| CACGTCACTAAG | 329.7062517809   | 0.442401567687265 |
| ATGAGCAAATAC | 329.707023120274 | 0.114318854228429 |
| TTATGACTCAAG | 329.709144405971 | 1.42155345746389  |
| GTCATACATAGA | 329.717834209699 | 0.446512687692085 |
| ACACTGTGTAC  | 329.745827739599 | 0.365039812803564 |
| CAAATACGTCA  | 329.816101589958 | 0.351561000380567 |
| ACTCTGTATGAC | 329.844574420989 | 0.341964507757212 |
| GTCATTGAATCA | 329.874584487431 | 0.486547887788746 |
| ATCTACACGTCA | 329.879020098942 | 0.264821467461744 |
| CATTCCGAGTCA | 329.897327097574 | 0.447474107527989 |
| TGACTGAGTGAA | 329.952571175794 | 0.558071202581554 |
| TGAAACACGTCA | 329.964228588234 | 1.07788705578887  |
| TGATTCACGGAA | 329.995845302827 | 0.511797721842832 |
| CTGAGTGAATCA | 330.111463796919 | 0.685674653054231 |
| TACCTAGAGTCA | 330.146516217425 | 0.80825121009667  |
| ATGTGTCAAAG  | 330.159375559432 | 0.421024393552955 |
| AATCACTATGAC | 330.164164401427 | 0.691258467550544 |
| ACAAAGGTGACT | 330.28256550342  | 0.384559980816669 |
| ACCGATAAGTCA | 330.320491542041 | 0.839190572259414 |
| ACCTAACAGTCA | 330.344007137953 | 0.656471422301777 |
| GCCTATTATGAC | 330.366801130145 | 0.733654359771856 |
| CTGGACTATGAC | 330.425143723292 | 0.584001959039426 |
| ATTACTCAATCC | 330.46338439379  | 0.315373539753225 |
| TGACACACGAAA | 330.485986854841 | 0.479170039939819 |
| GTCACACAATGA | 330.600931070375 | 0.378828538799042 |
| AATTATACGTCA | 330.609619687141 | 0.779158125032893 |
| AGTGCTAGTCAT | 330.617684912466 | 0.403790984664594 |
| GTCATAGTACAA | 330.627875923421 | 0.656035515599109 |
| GATAATACGTCA | 330.651850364309 | 1.30498113537126  |
| GTCACCCGTCA  | 330.683920725635 | 0.739231304513195 |
| AACACCGAGTCA | 330.741471166357 | 0.633832531238344 |

|               |                  |                   |
|---------------|------------------|-------------------|
| AGTCACCTCTTA  | 330.741795620722 | 0.34357400064183  |
| TAAACCGAGTCA  | 330.758474242434 | 0.576134482445079 |
| ACCAGTGAATCA  | 330.767108342153 | 0.592698741440489 |
| GTCATAACAAAA  | 330.796800908608 | 0.462704328671616 |
| CGGCAGAATGAC  | 330.797550658332 | 0.909878097314067 |
| CGTTAAGATGAC  | 330.87046562765  | 1.13361145398125  |
| GCATACTATGAC  | 330.878031830288 | 0.553020053436181 |
| CACTGTTATGAC  | 330.889074518884 | 0.603291726466343 |
| CGTAGGTATGAC  | 330.918943164337 | 0.789984535703843 |
| ACTACAATGACG  | 330.938965736461 | 0.386286449018195 |
| AATTATTTGTCA  | 330.953608840436 | 0.892000510436494 |
| CCATGCTATGAC  | 331.011059758228 | 0.666559270090409 |
| CGCGTGTATGAC  | 331.199982700797 | 0.39597276270813  |
| ACATATGATGAC  | 331.2747734454   | 0.654078544285337 |
| CACGGTGTATGAC | 331.281394550322 | 0.735074882354399 |
| CTTCTCGAGTCA  | 331.327708006861 | 0.35498336096052  |
| TAGAACCAGTCA  | 331.351223355409 | 0.453984819116003 |
| ATTAATTCGTCA  | 331.35824465344  | 1.02693364843058  |
| ACTAATAATGAC  | 331.423325489043 | 0.730968702461493 |
| CAATTTGCGTCA  | 331.432762742146 | 0.473910226900298 |
| ACTTAGTAGTCA  | 331.461534265668 | 0.707469765668712 |
| AACTGTTATGAC  | 331.467889460559 | 0.719221426001069 |
| AAAAGCTGTCAT  | 331.474322094877 | 0.535554526549991 |
| GTCATCCCGTGA  | 331.475948266997 | 0.521632052398347 |
| CGTTACACGTCA  | 331.504497428878 | 0.842053306386117 |
| ATCGTGTATGAC  | 331.531919701083 | 0.567767208350295 |
| GACCCTGACGCA  | 331.549798280818 | 1.21829899725783  |
| GTCATAGTGTA   | 331.556281360379 | 0.700886478988615 |
| ATTCTTTAGTCA  | 331.557034217976 | 1.08707716709626  |
| AGACTGACGTCA  | 331.576068596485 | 0.518488485033828 |
| AAGCTGTGTAC   | 331.58183704095  | 0.51155677865964  |
| CATGACTTGTC   | 331.604062575674 | 0.622019257087597 |
| CAAAACGATGAC  | 331.658715082592 | 0.566528294993251 |
| GTCATACGCAAA  | 331.694297010739 | 0.184925588203287 |
| GTAACCGATGAC  | 331.727234469225 | 0.587316069315172 |
| ACCGGGTATGAC  | 331.753492036764 | 0.420745091476249 |
| ATGACTTGTTTA  | 331.792123417362 | 0.454031704194137 |
| AGGAATTATGAC  | 331.815662782403 | 0.257553867181192 |
| CTTTCTGTGTCA  | 331.843246805476 | 0.465635674305431 |
| CATGAATATGAC  | 331.877228024434 | 0.674214002980365 |
| TACGCTCAGTCA  | 331.883439171067 | 0.422902518545825 |
| GAACACATCATC  | 331.932962695111 | 0.257365228073996 |
| TCTCACGAGTCA  | 331.943788708176 | 0.596532759999613 |
| AGAAATTATGAC  | 331.971151619284 | 0.532387992083775 |
| GTATGTAATGAC  | 331.990645995123 | 0.355962548798076 |
| TGACACAGAAAA  | 331.992213570816 | 0.89756815111826  |
| GCCTTTTACTCA  | 331.99507668613  | 0.288254431463657 |
| AAGCTGTATGAC  | 332.026778958769 | 0.613841490542572 |
| TCGGACCAGTCA  | 332.105314157663 | 1.1619118502971   |
| AGTCACCTTTCA  | 332.209485709216 | 0.594897377086341 |
| CATATGTATGAC  | 332.25739072924  | 0.776923039092926 |
| ACTTTGTAGTCA  | 332.289780344733 | 0.66479908474462  |
| ACCTTTACTCAT  | 332.347462087123 | 0.242257426020716 |
| ATGTGTCAACTG  | 332.360137658191 | 0.623082533713485 |



|              |                  |                   |
|--------------|------------------|-------------------|
| TGACTATTGGAA | 332.399893608354 | 0.328918056931172 |
| GATCTGTATGAC | 332.46539820008  | 0.528442865915375 |
| ATGATGTGTGAC | 332.470153492567 | 0.451014194429546 |
| CCCGGTGAATCA | 332.507562343311 | 0.949103815582745 |
| GTCATAGTGATA | 332.510861516279 | 0.804419506767133 |
| AGTCACCCTTGG | 332.59244262428  | 0.532819523730018 |
| CGTGCTCAGTCA | 332.713312604634 | 0.429959905031001 |
| AGAGCGAGTCAC | 332.745459405269 | 0.292851960852848 |
| CCAGAGAATGAC | 332.846894320951 | 0.402021778269646 |
| GTCATCGCAAAA | 332.856222122304 | 0.869290863045373 |
| TCACCAAGGTGA | 332.919685769126 | 1.31394542538203  |
| TGTATTGACACA | 332.93737872844  | 0.969045455435341 |
| TATACTCAGTCA | 332.949705890324 | 0.440242654143222 |
| AATACTTAGTCA | 332.998560327442 | 0.818774535852234 |
| TTACTTGACTAA | 333.017589387652 | 0.749617502818845 |
| TCGATCCAGTCA | 333.048173048458 | 0.684303839734731 |
| CTAAACTATGAC | 333.05208255352  | 0.217860012844428 |
| CAGCACGAGTCA | 333.085891554981 | 0.470481225261416 |
| TCCAGTGAATCA | 333.096733622315 | 0.797035186951817 |
| CCTCTCGAGTCA | 333.146073546645 | 0.491544745196639 |
| TCGATAGACTCA | 333.150667147404 | 0.414867001227784 |
| CAAACGGATGAC | 333.269021288394 | 0.716994789584065 |
| GTAGCGAGTCAC | 333.278398610295 | 0.451380957632065 |
| CTGACTGTATCA | 333.308805327825 | 0.460119134203786 |
| ATATACTATGAC | 333.310278747513 | 0.722095093781063 |
| AAGACAAGTCAT | 333.314415999106 | 0.33399682417749  |
| CACTATTGCTCA | 333.328017809252 | 0.463870040985166 |
| ATTGATTGCTCA | 333.380080906122 | 1.00674144023796  |
| AATGTTTGACTC | 333.429463922477 | 1.10190734836299  |
| TCATACCTAGGA | 333.434180298323 | 1.19255545528236  |
| CGCTAAGATGAC | 333.486095224593 | 0.835123192779004 |
| AAAGATTGGTCA | 333.490033985512 | 0.305437435763777 |
| CGTCACCAGTCA | 333.490960239326 | 0.369728693128701 |
| CAGACCTATGAC | 333.497103310666 | 0.372619674144067 |
| AGTCGGACTCAT | 333.563142629733 | 0.268848115505964 |
| GTCATTGACACA | 333.659296067413 | 0.395126962931736 |
| AACATAGACTCA | 333.664152465057 | 0.691926829192479 |
| GACTTAAATGAC | 333.674959501003 | 0.495485666729114 |
| CTGCGGTATGAC | 333.974166107125 | 0.898344813400227 |
| TATCAATAGTCA | 334.007556934779 | 0.608807304926716 |
| GACGACTATGAC | 334.048114270042 | 0.51304009599363  |
| ATGTCTGTGTCA | 334.080627760456 | 0.729544292264276 |
| ATTACTCAAAGA | 334.094595984006 | 0.826163342064231 |
| ATCAGGTATGAC | 334.23369419996  | 0.551878082615891 |
| CATCACGATGAC | 334.288343542623 | 0.824217391255053 |
| GAGTCAGTATGA | 334.296449160505 | 0.319758856771598 |
| ACGGATCCGTCA | 334.313730363725 | 0.8698590851356   |
| CCACTGTGTAC  | 334.335627530413 | 0.287951514128019 |
| ATGCTGTAGTCA | 334.383648383411 | 0.919717536092566 |
| GTCATATTCATA | 334.410860893851 | 0.989005182769757 |
| ATCGCACAGTCA | 334.429298564431 | 0.711801561659146 |
| ACCGCTGACACA | 334.437834822448 | 0.199295221272639 |
| TCACAAGACTCA | 334.489987105036 | 0.359040059960106 |
| ATGACGTTATCG | 334.511376255661 | 0.538526150332314 |

|               |                  |                    |
|---------------|------------------|--------------------|
| GACTCACTCGTA  | 334.539472106324 | 0.555154189348357  |
| GTCATTTAAACA  | 334.541201941962 | 0.447686014375794  |
| GACTCCGAGTCA  | 334.558313184719 | 0.53286846636324   |
| CGTAGCAATGAC  | 334.560628826252 | 0.818626659224743  |
| GTCATACGTTAA  | 334.590825903088 | 0.64953802015935   |
| CTTGACAGTCA   | 334.593790889375 | 1.02523472037357   |
| TGACGTATCGCA  | 334.599317015957 | 0.708290267819437  |
| CTCAGTTATGAC  | 334.641032165339 | 0.389434825116222  |
| ATTGATTATGAC  | 334.654290601103 | 0.484593752795146  |
| TCACTTGCCTCA  | 334.697169103859 | 0.61429555592513   |
| CGTCATTAATAA  | 334.732074811421 | 0.58852654425341   |
| CGACTTGCCTCA  | 334.767408693865 | 0.785778496934149  |
| CATAATCTGTCA  | 334.771255167476 | 1.10864148866372   |
| AATGGGGTGACT  | 334.790123170632 | 0.252844283242193  |
| CTATGTGAATCA  | 334.825447895738 | 0.294085221393842  |
| CCGCACGAGTCA  | 334.837957550298 | 0.717627940785181  |
| GTCATTGGTCAA  | 334.905661050705 | 0.636934345986228  |
| ACGTGGTGACGC  | 334.90848566132  | 0.911671909930834  |
| TCTCTTGCCTCA  | 334.911382017427 | 0.445531111312969  |
| GTCATCGGCGGA  | 334.916535096901 | 0.378658944824398  |
| ACGATCGATGAC  | 334.940494815225 | 0.793345044343169  |
| GTCATCGCCGGA  | 334.972988477225 | 0.362836521988377  |
| GTCACACCGTGA  | 334.979053838356 | 0.592435749561033  |
| AACAGCTATGAC  | 334.981155787924 | 0.786924311829335  |
| ACGGATTGCTCA  | 335.041769564939 | 0.601049003865183  |
| GTCAGTTATGAC  | 335.058281520566 | 0.529363922955068  |
| GTCACACTATGA  | 335.083221874403 | 0.755471819127067  |
| AACCTTCAGTCA  | 335.101708332946 | 0.367062617380244  |
| ATTGATAAGTCA  | 335.102051125209 | 0.456883259989781  |
| GACGGCGTCATA  | 335.128722126368 | 0.371908516121453  |
| ATGACGTTATCC  | 335.162544573921 | 0.358605600708101  |
| ATGGTCGATGAC  | 335.170781337279 | 0.564748039867825  |
| GATATCGATGAC  | 335.243299160207 | 0.481024205607326  |
| TGACTATAGAAA  | 335.259256357856 | 0.671357146054778  |
| GATACTCAGTCA  | 335.341924196907 | 0.519050376401747  |
| ACTCTTTAGTCA  | 335.404207718134 | 0.670936271456618  |
| CGACTTGTGTCA  | 335.436546127113 | 0.434478664284313  |
| AATAAATTAGTC  | 335.44479124561  | 0.655534668339668  |
| CGGTACGATGAC  | 335.451196420366 | 0.8578370211111909 |
| GTCATACATCAA  | 335.452168977963 | 0.35384763255555   |
| GTCATCCGAGTA  | 335.480484636163 | 0.568232335151986  |
| CTGTATACGTCA  | 335.487170470914 | 0.866408073435135  |
| CAATGGAATGAC  | 335.510838074365 | 0.492250938656389  |
| ATGACGTTACTG  | 335.534645339219 | 0.627665092339692  |
| CTCATGCATGAC  | 335.543464579892 | 0.58790339607213   |
| GCAACCGAGTCA  | 335.543586578396 | 0.589790563944186  |
| GTCATAGCACAA  | 335.548647715933 | 0.536981361836879  |
| AGTCACCTTATG  | 335.550357415191 | 0.613823803481956  |
| AAACAAGTCATC  | 335.58357656263  | 0.17211866402671   |
| CCAAGTTATGAC  | 335.618982561922 | 0.843127744042732  |
| AGATGCTATGAC  | 335.695014828419 | 0.295153891634549  |
| TGACGCCAAAACA | 335.729139267573 | 0.730235530600943  |
| AACGCTGTGTCA  | 335.785438936046 | 0.903195528556404  |
| TGACTAGGTCAA  | 335.902602409691 | 0.396266628348091  |

|              |                  |                   |
|--------------|------------------|-------------------|
| CGAGCTTAGTCA | 335.936919554237 | 0.695077779954934 |
| CATTCGGAGTCA | 335.941854865342 | 0.556811014090174 |
| CGACTCGAGTCA | 336.029072122377 | 0.656334479017938 |
| GTCACCCGATGA | 336.065854072105 | 0.685749383970115 |
| AGTACCCTTAC  | 336.083672704308 | 0.324639227636969 |
| GTCATAGTCGTA | 336.087537518645 | 0.922742162815831 |
| GTCATAGTCCGA | 336.321851541835 | 0.584182026366964 |
| CATTAACAGTCA | 336.329986857157 | 1.02186172511587  |
| TAGTTCGACTCA | 336.36193937541  | 0.468246343656119 |
| ATGTAATATGAC | 336.451869552909 | 0.812208722361728 |
| GTCATCATGTCA | 336.47430534988  | 0.295707534644311 |
| TCGAGTGAATCA | 336.479571619773 | 0.465612792105967 |
| GTCACTAGTGAC | 336.50412062645  | 0.871630639249395 |
| CGATCGTAGTCA | 336.50512487242  | 0.481275228803027 |
| ATGACTAGCCCG | 336.511954780819 | 0.675847272473351 |
| CGGGCTACGTCA | 336.522245663449 | 0.849503283208088 |
| AGACTAATCGAA | 336.525509937896 | 0.60739223284112  |
| CCATATACGTCA | 336.580886748788 | 0.607639714564981 |
| CTTTTGCAGTCA | 336.596717409984 | 0.31444138693806  |
| ACTCATCGGTGA | 336.637506946317 | 0.817064697528242 |
| ATTACTTACTCA | 336.655986214404 | 0.545734647550733 |
| CCTGCTCAGTCA | 336.697530691102 | 0.368776554304749 |
| ATGTATCCGTCA | 336.733215670887 | 0.669060549801232 |
| AACATGTATGAC | 336.754786208021 | 0.796233822516055 |
| AACTTCGATGAC | 336.778901741785 | 0.989332688294646 |
| AACAGTGAATCA | 336.798633532559 | 0.14126397644513  |
| AGTCACCTTCAG | 336.827569091174 | 0.297902537160696 |
| ATAAAAGTGTC  | 336.831473391373 | 0.605784475736605 |
| CATTTATATGAC | 336.832225030252 | 0.837150566426573 |
| CATGTTGATGAC | 336.907487236865 | 0.960487737618741 |
| ACATAGGATGAC | 336.917316660242 | 0.6183803133334   |
| GAGTCAGTATAC | 336.970775630664 | 0.259832450284996 |
| ATGACGACGACA | 337.049490116528 | 0.501416820018833 |
| GTGACACAGCTA | 337.069852542238 | 0.12375464895696  |
| ACCGCGAGTCAC | 337.075669566536 | 0.714515795978104 |
| ATGACGCGCAAT | 337.163828446602 | 0.368899062046195 |
| GTCATCCGCGAA | 337.17745765893  | 0.752476961780046 |
| GTCACATATGAC | 337.184717915771 | 0.763160842704112 |
| CGGTGACATGAC | 337.209707067166 | 0.794718207082197 |
| GTCAGGAATGAC | 337.272829727095 | 0.445637422914201 |
| GAAGCTGTCATA | 337.314997153867 | 0.23791694570097  |
| ATTACTCAACAG | 337.447015123849 | 0.613804053839441 |
| GTCATACCTAAC | 337.448937286952 | 0.190772816047458 |
| CATAGCGGTGAC | 337.498076643735 | 0.343116203124484 |
| ACTACCGATGAC | 337.554272587765 | 0.322949366142154 |
| ACAACGTATGAC | 337.595981413222 | 0.462841009266966 |
| ACGCATCGTCAT | 337.599106392077 | 0.557977900155041 |
| CACACGTATGAC | 337.599389036871 | 0.441582537636398 |
| GCCTACTAGTCA | 337.626366667626 | 0.433418160795778 |
| ATGACTGGGATA | 337.62921945954  | 0.320626799999089 |
| AGTCACCCTGAT | 337.632650553443 | 0.471330110191019 |
| GCTCAATATGAC | 337.647535482508 | 0.794937548722487 |
| ATACATACGTCA | 337.691562106665 | 0.768107637192406 |
| TGTCATTAGTAA | 337.779331770278 | 0.33693797477593  |

|               |                  |                   |
|---------------|------------------|-------------------|
| GTCATCGGAGGA  | 337.824108225807 | 0.224101284722195 |
| GGACAAGAGTCA  | 337.98508012145  | 0.536596885592499 |
| TACTACTAGTCA  | 338.003711850587 | 0.148023054960225 |
| GTCATAGCACGA  | 338.005739422503 | 0.410430618140766 |
| GAAACTCAGTCA  | 338.008001639992 | 0.635005835561492 |
| GTCATACCAAAA  | 338.037271294912 | 0.729129060218092 |
| TCGACCGAGTCA  | 338.058016503428 | 0.55083027999512  |
| GGCACCTAGTCA  | 338.069392595359 | 0.59200868362915  |
| ACCAATTCGTCA  | 338.072119539235 | 0.479501236255787 |
| GTCATATTTAAC  | 338.12897525027  | 0.460684605283809 |
| ACTCTTCAGTCA  | 338.138578125422 | 0.452302981917982 |
| AATCAGTGACAC  | 338.148851211322 | 0.64981076396577  |
| CGTCATCTCGAG  | 338.154807423853 | 0.678787954130842 |
| CCGCCTTAGTCA  | 338.200194499569 | 0.68985701210882  |
| GTCATAGGGTCA  | 338.232465275692 | 0.513949943995648 |
| GTCATTTATATA  | 338.246320856499 | 0.752466340658607 |
| CACAAAGATGAC  | 338.254848767785 | 0.859964168554848 |
| GTCATTTTCGTCA | 338.268425379968 | 0.596974912268232 |
| CTACGTGTGTCA  | 338.280442103687 | 0.447181894387642 |
| GTCATTTACGCA  | 338.391572230608 | 0.529240909637502 |
| GCCCATCAGTCA  | 338.42333984834  | 0.495172151334863 |
| ACCCGGTATGAC  | 338.448368254514 | 0.968279448747087 |
| GTCATAGCTCCA  | 338.454051898731 | 0.351096206206455 |
| GATGTCTATGAC  | 338.465259383738 | 0.779018085560246 |
| AAAATGTATGAC  | 338.490821056214 | 0.504839569519879 |
| TGAGTCGTTCAA  | 338.537204341582 | 0.527504521919846 |
| CAGTCAGATGAC  | 338.593229689529 | 0.315660697157163 |
| TGACGCAAACAA  | 338.600635580403 | 0.688964604403085 |
| ATAACCGATGAC  | 338.620811423684 | 0.765840858033501 |
| CTATCGGAGTCA  | 338.621102139855 | 0.618345805636506 |
| ATGCTTCAGTCA  | 338.689298663816 | 0.648030325838294 |
| ACCTAGTAGTCA  | 338.716644820962 | 0.82634948160815  |
| TAACTGTGTCA   | 338.728548342766 | 0.354685221401725 |
| AGAAATACGTCA  | 338.733262603214 | 0.405951900791804 |
| AACGCTTACTCA  | 338.75078085123  | 0.60446424542966  |
| ATGACTGGGCTC  | 338.751988773626 | 0.121651213422643 |
| TGAATCGACTCA  | 338.767909005866 | 0.700075034118253 |
| TATCGTGATTCA  | 338.780299908607 | 0.547536240140439 |
| CACCATGAATCA  | 338.799729968649 | 0.705583472746246 |
| CAAACAGAGTCA  | 338.815116791671 | 0.949953570163584 |
| AGTCACGGTGAC  | 338.912833505069 | 0.656860877111345 |
| CACATAGACTCA  | 338.916439409532 | 0.651111873284857 |
| AGCCAAGAGTCA  | 338.929007524925 | 0.701528116471087 |
| ATGACTTGCTCA  | 338.929675044209 | 0.320394782475043 |
| ACAAATTATGAC  | 338.972150477689 | 0.443030719354498 |
| TATGCTTAGTCA  | 338.976501696588 | 0.769838469929079 |
| GTCATCGTTCAA  | 339.050544775353 | 0.365139143545394 |
| TGACTAGACAAA  | 339.053283460783 | 0.625752152761085 |
| AGTCACCTATA   | 339.054760517474 | 0.256225147165627 |
| GTCACCGCTGAC  | 339.086653583656 | 0.702612276856795 |
| GTCATTCGTAAC  | 339.105566308616 | 0.130045547581801 |
| CGTCTTCAGTCA  | 339.130385565339 | 0.456841758613542 |
| TGACTGTAACCA  | 339.132368334539 | 1.0105601641733   |
| CACGCTCAGTCA  | 339.156759378692 | 0.462777301783973 |

|              |                  |                   |
|--------------|------------------|-------------------|
| TCTATGGAGTCA | 339.218738212566 | 0.468439806174871 |
| CTGGAGAATGAC | 339.243961702745 | 0.443305044157619 |
| GTGACTACCATA | 339.244570411944 | 0.513688930969718 |
| TGACTTATCGAA | 339.246142283719 | 0.815524781042251 |
| ATTACTCAACCG | 339.268449902692 | 0.403494711736775 |
| AAAAGAGTGACT | 339.286654508403 | 0.290623575713566 |
| ACCAAGTCATAG | 339.295697996651 | 0.372848039229557 |
| ATGAGTAAAGTG | 339.310989675689 | 0.313212811030318 |
| GCGTCATGTGAC | 339.329494763749 | 0.957613619104555 |
| AAAATTGACTCT | 339.336531953704 | 0.792937934369665 |
| CTATCCGAGTCA | 339.452061513826 | 0.270059626195372 |
| CTGTCACAGTCA | 339.487019948762 | 0.423669520983132 |
| CAAGATTGCTCA | 339.497311676902 | 0.716326694558186 |
| CGTCACAATGAC | 339.52388874358  | 0.445985720513202 |
| CTGCCTAGGCAG | 339.535910073705 | 1.76283318193214  |
| CTAGATACGTCA | 339.59241181824  | 0.508470550879789 |
| CACAGATATGAC | 339.661003788558 | 0.770989425673792 |
| ACTCATTCTGCA | 339.664156950274 | 0.375357770056248 |
| GCAATTTATGAC | 339.693118192011 | 0.510975791918979 |
| CGTCATCTATAA | 339.706657970921 | 0.534114600755478 |
| ATGACGAACTCA | 339.719513476478 | 0.392214102448212 |
| ATGCGTTACTCA | 339.730590880539 | 0.78562835205859  |
| GTCCTGTAGTCA | 339.731836638295 | 0.829463484198008 |
| AGAAGGGTGACT | 339.798017373828 | 0.375497832711286 |
| CCGTTGTAGTCA | 339.81317014441  | 0.362581322619164 |
| GTCATAATCTCA | 339.831556461725 | 0.670266673352366 |
| ACTAATCTGTCA | 339.836449722315 | 0.520103621518169 |
| TCCACTCAGTCA | 339.838744760845 | 0.48339361283831  |
| CAAGCGAGTCAC | 339.899300769064 | 0.535673447565791 |
| GTCATCGGAAAA | 339.914275250257 | 0.235121209917546 |
| GTCATCGGCAGA | 339.97234787363  | 0.600585902631286 |
| GTCATCCGAGAC | 340.01993895935  | 0.822207986189434 |
| TCGGTAGACTCA | 340.072050199916 | 1.0643147894329   |
| AAATCACGTCAT | 340.077266279649 | 0.545507108428734 |
| CGGTCATAGTCA | 340.114013859177 | 0.390732883021649 |
| GTCATCGTGTA  | 340.156135379297 | 0.272081405321015 |
| ATGCTCGAGTCA | 340.158711883199 | 0.564436180677876 |
| GCACTTACGTCA | 340.182224033086 | 0.65558061457596  |
| CCATACTATGAC | 340.201053087371 | 0.443569630087882 |
| AGTCACCCTTTA | 340.220658390708 | 0.304331842114455 |
| GACTATTGCTCA | 340.242013266351 | 0.646131265869335 |
| CACGGTTATGAC | 340.259262457294 | 0.637520941680143 |
| ATGACGATGACC | 340.31209788903  | 0.324037299143371 |
| CGAAATACGTCA | 340.378310290086 | 0.682432639999927 |
| AGTCACCTTCTA | 340.384079952175 | 0.313579163507954 |
| CCTTACTATGAC | 340.391762658755 | 0.171598048932956 |
| GTCATAACATTA | 340.394561871731 | 0.865832956386921 |
| CCTACCGATGAC | 340.413616037804 | 0.388298927254594 |
| AGTCACCCTTGA | 340.444270633779 | 0.312989525391481 |
| GTGTCACCTGCA | 340.444727469843 | 0.57861641802657  |
| CTGAATCCGTCA | 340.5268487847   | 0.374759376092021 |
| ATTAATTGACTC | 340.528956440496 | 0.948188737845682 |
| ATGACTTGTGCG | 340.62937967756  | 0.452350325983697 |
| GTCATCGGCAAC | 340.689168104843 | 1.03261145270484  |

|                |                  |                   |
|----------------|------------------|-------------------|
| TGACTCCAAGAA   | 340.707134752732 | 0.658631047213183 |
| AAACTTTAGTCA   | 340.749229430728 | 0.305033015391265 |
| TGACGAATTGAA   | 340.750011702893 | 0.690119635176955 |
| CTTTCGGAGTCA   | 340.750448970028 | 1.03619795743084  |
| CTTGCTGACACA   | 340.900796852479 | 0.370885739669679 |
| CCTAATACGTCA   | 340.907411563675 | 0.317854819656169 |
| TGACAAATGACA   | 340.91542420078  | 0.441467378307603 |
| ATGAGTGAATCA   | 341.080679662336 | 0.730984546418287 |
| GTA AAAATATGAC | 341.081598877231 | 0.378598627495348 |
| TCGATTATGTCA   | 341.099617664198 | 0.418594608793494 |
| GTCATCGTAGAA   | 341.108816697825 | 0.365070301698618 |
| TGACTGAGCGAA   | 341.144344794625 | 0.464804906951941 |
| CAAATCTAGTCA   | 341.152065779543 | 0.644740304004915 |
| GTCATATACATA   | 341.17972138035  | 0.658577710709907 |
| ACTGCGGATGAC   | 341.195013886661 | 0.582431155290612 |
| AATAATTGACTC   | 341.224605403537 | 0.599163323823228 |
| AAACTGTGTAC    | 341.253882113231 | 0.423885151546951 |
| CAATGATATGAC   | 341.255604080109 | 0.452239490674425 |
| AGTCAAGTCATA   | 341.270402530276 | 0.228656534175813 |
| CTGTGCGATGAC   | 341.340328923803 | 0.853132810156453 |
| CCCGATAAGTCA   | 341.355359593883 | 1.02163385185473  |
| ACGCCAGTCAT    | 341.407705418411 | 0.383106416493264 |
| GTCATAACATAA   | 341.434233562323 | 0.688622023103255 |
| GGCTACTATGAC   | 341.529648611094 | 0.582999921133312 |
| GTCATATATTTA   | 341.574399140178 | 0.703474265724064 |
| CTTGATCTGTCA   | 341.637996077966 | 0.549297035642631 |
| CAGTATTATGAC   | 341.643489150067 | 0.326236620350477 |
| GCTCTGGATGAC   | 341.759390453831 | 0.749759609065927 |
| ACCTTTGACTGA   | 341.761236799258 | 0.476838542278453 |
| GTCATAATGATA   | 341.795308116948 | 0.276573401289063 |
| AATCTGACGTCA   | 341.801451645484 | 0.852655080876901 |
| TAACGTTAGTCA   | 341.801521288516 | 0.963640900468994 |
| CTCAACGATGAC   | 341.825303406347 | 0.787916486243816 |
| AACTATCTGTCA   | 341.839737307673 | 0.640641042809346 |
| CTAAAGTAGTCA   | 341.856930960639 | 0.752875973059013 |
| ATCTTGATGAC    | 341.898776944522 | 0.836519124920902 |
| AGTCACCTCGGC   | 341.925190771487 | 0.436935734888665 |
| GTACATACGTCA   | 341.940657531951 | 1.02577761236     |
| ACTCATTGGTCA   | 341.9436399026   | 0.494348423735377 |
| GTCATACATGCA   | 341.948364139496 | 0.409555282837651 |
| ACTAACACGTCA   | 341.954408817109 | 0.74886058444416  |
| GTCATACCTTCA   | 342.030659624257 | 0.600747910155468 |
| ACTACTGTGTCA   | 342.061542294499 | 0.591404897273102 |
| GTCATCGGTCGA   | 342.064327429462 | 0.650949478944816 |
| CCGTCATATGAC   | 342.092633262417 | 0.414309727595009 |
| GATCTGTGTAC    | 342.116743681125 | 0.270995606994476 |
| ATGTGTCAAATA   | 342.174128717844 | 0.147649530165686 |
| ATTGCCGATGAC   | 342.241599761312 | 0.375776301120495 |
| CCTATGAATGAC   | 342.251123073289 | 0.528570792650191 |
| AGTTACTATGAC   | 342.259662117725 | 0.416152302629775 |
| AGAGTCAATGGA   | 342.268385774026 | 0.496695733524126 |
| ATACAAGTCATA   | 342.323787022725 | 0.629244777795933 |
| TCCGCATAGTCA   | 342.333745418044 | 0.517009019821161 |
| ATCACCGAGTCA   | 342.406238650945 | 0.411067618711106 |

|               |                  |                   |
|---------------|------------------|-------------------|
| GTCATCGGATCA  | 342.424927714872 | 0.755137841540329 |
| GTCATCTGACAC  | 342.427839319358 | 0.811459722284764 |
| CGTTCTGTGTCA  | 342.432183951739 | 0.793236990788912 |
| ACACTCATGACT  | 342.494638182258 | 0.524559319868139 |
| CTAACTCAGTCA  | 342.516078854144 | 0.416384386643507 |
| CTTCATGAATCA  | 342.519063600562 | 0.626466574573643 |
| AGTCACCTTACA  | 342.531222665441 | 0.447684395494233 |
| CTAGCGAGTCAC  | 342.552802287271 | 0.283232379226213 |
| AGTCATGAGTGA  | 342.561960684052 | 0.322006611903015 |
| CGGTCCACGTCA  | 342.572034517523 | 0.701656951987292 |
| ATAGTATATGAC  | 342.637199772972 | 0.323561057970743 |
| ACATAACAGTCA  | 342.655974750307 | 0.75850983081306  |
| GCGACTTATGAC  | 342.775406060295 | 0.841888715235275 |
| CCCGGTATGAC   | 342.802083336985 | 0.8018474399877   |
| ATGTGTCAACTC  | 342.860738382093 | 0.661689396833479 |
| CCGACCGAGTCA  | 342.871142431511 | 0.708675407301344 |
| CGTCATTCGTGA  | 342.903626062202 | 0.391708811374351 |
| AGTCACGCCTAT  | 342.918829408789 | 0.403289035328188 |
| AGTCATGGTAAG  | 342.942796811251 | 1.24023639007132  |
| GTTACTTACTCA  | 342.958558481579 | 0.281898282203232 |
| TCGAACCAGTCA  | 343.001448248466 | 0.663536155949263 |
| AATGTGTATGAC  | 343.002492420088 | 0.258575106402538 |
| GATAGGTATGAC  | 343.015074147733 | 0.407925636736133 |
| GTCATCCATAAA  | 343.015311764544 | 0.701447375732346 |
| TGAGTAAACCAA  | 343.069725686158 | 0.449863039153425 |
| CCGTCCGAGTCA  | 343.084569446455 | 0.884593324824837 |
| TGACTAGTGACA  | 343.117110695941 | 0.307724023878717 |
| AGTCAGAATGAC  | 343.139326994626 | 0.67421492737978  |
| CACTTGTAGTCA  | 343.20383292219  | 0.783964782697001 |
| TCCAATACGTCA  | 343.230094382291 | 0.886325446040393 |
| AAGGTGTATGAC  | 343.24563698458  | 0.345998602539338 |
| GTCATACGTAAA  | 343.268599541392 | 0.827782400546725 |
| ATGTCCTATGAC  | 343.290507253388 | 0.92360809954203  |
| ATGACTTGTACAC | 343.304402539554 | 0.369141228679869 |
| AGTACCTATGAC  | 343.313162550236 | 0.617179243455036 |
| GGATCCACGTCA  | 343.382044332502 | 0.778277910865586 |
| GATTCTTATGAC  | 343.534926615658 | 0.951893977583076 |
| GTCGATCCGTCA  | 343.535684740215 | 0.680173492270856 |
| CTGTACCAGTCA  | 343.573962780354 | 0.68455008724032  |
| CACTTAGGTGAC  | 343.589453655784 | 0.872009117883801 |
| CAGTCCCGATGA  | 343.602367230492 | 1.24122592606348  |
| ATGACGAGGTTT  | 343.624755153833 | 0.423069983143589 |
| GTCATCGACGAC  | 343.641980899825 | 0.603241065890001 |
| ATGAGTAAAGCA  | 343.658803976658 | 0.281771100414143 |
| ACGGCACAGTCA  | 343.659946468965 | 0.920275704415393 |
| ACGACAAGTCAT  | 343.719603384677 | 0.449337038579243 |
| CTTGCCGAGTCA  | 343.742745326217 | 0.598920462276825 |
| AGTTCTGTGTCA  | 343.753734335547 | 0.80209954699113  |
| CGTTATCTGTCA  | 343.756258483938 | 0.613351301043642 |
| GTCATACATTAA  | 343.811300340681 | 0.361049484607745 |
| GTAACCTTACTCA | 343.896549707326 | 0.60952546941796  |
| CATTATACGTCA  | 343.951987905876 | 0.837874538043024 |
| TGACTGTGAGCA  | 343.977968926656 | 0.979410506214564 |
| TGAACCTTAGTCA | 343.980296381734 | 0.477123220426696 |

|               |                  |                   |
|---------------|------------------|-------------------|
| CACCTCGAGTCA  | 343.982271533349 | 0.646959850603744 |
| GCGAATCCGTCA  | 344.119708380384 | 0.68152088257546  |
| TGACTGGATCAA  | 344.122638155968 | 0.779669665669652 |
| GCTCGGTATGAC  | 344.157617830607 | 0.777906134637492 |
| GTCACAGTATGA  | 344.202753192117 | 0.457186692469237 |
| TCAGTCAGGACA  | 344.224816646388 | 0.274490105690173 |
| GCTGCTCAGTCA  | 344.234459213307 | 0.79194304097164  |
| GACTAATTCTAA  | 344.283571027095 | 0.556899629946303 |
| AATAAGTGAGTC  | 344.286693490208 | 0.903670667567268 |
| ACCTGGGATGAC  | 344.299085104568 | 0.823641983634388 |
| CACTAGGATGAC  | 344.320925063166 | 0.235983592771847 |
| AGTCACCTTGGC  | 344.395758734293 | 0.316531131345466 |
| GTCATTGACGAA  | 344.439781929357 | 0.775279906027563 |
| CCTAAGGATGAC  | 344.442788160002 | 0.697003025682413 |
| GTCATAATTATA  | 344.460704805028 | 0.856608867230188 |
| CACTACACGTCA  | 344.487475617287 | 0.533576283801557 |
| AGACTAATTCGG  | 344.504564581202 | 0.662302887491606 |
| CGGCTCGAGTCA  | 344.536216280833 | 0.872186578132728 |
| AGTCACCTTCGG  | 344.552559477205 | 0.148935681959165 |
| ACGTAAGATGAC  | 344.558163834855 | 0.557454462964219 |
| AGCTTGTAGTCA  | 344.591584551819 | 0.892896762988004 |
| GTCACCGTGTCA  | 344.604097403676 | 0.689903468023308 |
| CGAGCCTATGAC  | 344.61084902172  | 0.804207352604421 |
| TCGCTCGAGTCA  | 344.615386614735 | 0.627027632790216 |
| CAATATACGTCA  | 344.61685199479  | 0.759250096633329 |
| GCGATTTGTC    | 344.640946545385 | 0.717371725442964 |
| GGGTACACGTCA  | 344.670213814704 | 0.561060084050613 |
| GTGACTTGGTCA  | 344.811479459837 | 0.48338281084227  |
| TCGACTCGGTCA  | 344.868569890072 | 0.613595202241047 |
| TGACTGGTTAAA  | 344.883194026039 | 0.384133307545592 |
| CTGCCCGATGAC  | 344.917530700363 | 0.424193842597052 |
| AGTCACCTTGTA  | 344.964149972535 | 0.404614039508452 |
| TAGTAACAGTCA  | 345.04110758807  | 0.581466350454177 |
| AGTCACCTCTAT  | 345.117371640037 | 0.346513274657859 |
| GGTCACACGTCA  | 345.138794917048 | 0.332045973882765 |
| TAGAATCTGTCA  | 345.219205919871 | 0.388782882069719 |
| ATGACGTGACAA  | 345.223644897084 | 0.413643311690154 |
| CTGACTCGCAAG  | 345.228599855999 | 1.97243498342316  |
| AAGTTCGACTCA  | 345.250219083883 | 0.624876602232149 |
| AGAGTCAATTGG  | 345.255286443943 | 0.436692917516778 |
| GCTAACTATGAC  | 345.281799668478 | 0.68439867784738  |
| GTAACCTTATGAC | 345.291326626031 | 0.235221669498857 |
| CGTCACTGTGAC  | 345.332514243302 | 0.730018017743821 |
| CACACATATGAC  | 345.3435455937   | 0.345356543228337 |
| AAGAAGTCACTC  | 345.397528960197 | 0.638325497968611 |
| AAACCTGCGTCA  | 345.444476641543 | 0.380116076662661 |
| AGTCACCTCATA  | 345.471094556848 | 0.462028790636965 |
| CTATAACAGTCA  | 345.474000873797 | 0.245884711197491 |
| ATAACGAATGAC  | 345.522732273792 | 0.936224129813319 |
| CCCCATCAGTCA  | 345.550931309999 | 0.206203648382926 |
| CAACTGGATGAC  | 345.553524458092 | 0.706620401772473 |
| AGTCCTGCGTCA  | 345.570916643566 | 0.571030192801168 |
| CCTGGGGAGTCA  | 345.685780574444 | 0.737494456770567 |
| ATTATGTATGAC  | 345.696682416657 | 0.933266547432243 |



|               |                  |                   |
|---------------|------------------|-------------------|
| GAGTCAATGCCA  | 345.699495382293 | 0.691899039938943 |
| GACGTTGTGTCA  | 345.702901515461 | 0.560081126476266 |
| AGCGCTGACACA  | 345.849469468674 | 0.534228142414799 |
| CATGTGCAGTCA  | 345.863167379158 | 0.712377797360109 |
| GTCATCGTTTTA  | 345.879264214268 | 0.671714144546623 |
| GAGTCAGGTGAC  | 345.902657696216 | 0.269358924614609 |
| CACAGCTGTGAC  | 345.918359941662 | 0.58481871425656  |
| ATTCGTGATTCA  | 345.934769711253 | 0.835644733085061 |
| GTGCTCGAGTCA  | 345.939683252536 | 0.992591322542129 |
| ACCGTGTATGAC  | 345.951755009673 | 0.706646957797353 |
| GTCATAGTATTA  | 345.966044775951 | 0.845849921028427 |
| GTCATATTCTCA  | 346.000572494182 | 0.421654602223154 |
| CCTGAAAATGAC  | 346.006295859168 | 0.758693668631705 |
| CATCGTTACTCA  | 346.050905742043 | 0.463267964285291 |
| ATCGATTATGAC  | 346.05182189775  | 0.347464927307409 |
| GTCACGTGACAC  | 346.054092626753 | 0.663691344646043 |
| ATGACGAACATG  | 346.057156522038 | 0.198760869375546 |
| ATGACGTGATCA  | 346.160008774706 | 0.417725600749055 |
| GTCACATGACCA  | 346.228243645992 | 0.562581496426491 |
| GTCATACGTCTA  | 346.236824932797 | 0.512003972694323 |
| TGACACAGACAA  | 346.245428490521 | 0.453276673141885 |
| GTCATCTTGTCA  | 346.286181942464 | 0.519129959922882 |
| AGAACCGATGAC  | 346.313179773501 | 0.425353135818697 |
| AGTCATGAGATC  | 346.341540969141 | 0.815757510515128 |
| CGACAAGTCATC  | 346.349912719677 | 0.385402025665418 |
| ATTAAAGATGAC  | 346.408533595006 | 0.915942600443109 |
| AAACTTGACTAA  | 346.428606570534 | 0.32501800868535  |
| CTCAACTATGAC  | 346.441603571067 | 0.210560554910407 |
| TGAGTAAAGTGCA | 346.472157788129 | 0.409638967705533 |
| CTCGCTCAGTCA  | 346.473794115999 | 0.475695102113866 |
| ACCATCTATGAC  | 346.53613569609  | 0.378554435804659 |
| AATCCTGACTGA  | 346.574622668763 | 0.717473633985676 |
| ACTAACAATGAC  | 346.683003349214 | 0.24976999524269  |
| TGACTCGCAGAA  | 346.859956431453 | 0.989478605923989 |
| ATTGACTATGAC  | 346.912020948035 | 0.600203356005805 |
| TGAAATACGTCA  | 347.020237442571 | 1.26859846679963  |
| AAGAGGGTGACT  | 347.034974966051 | 0.276672565092673 |
| AATCTGTGTAC   | 347.042382480727 | 0.452462289826676 |
| CATATAAATGAC  | 347.064441758379 | 0.57748763927343  |
| CTCACCGAGTCA  | 347.086204559262 | 0.453302053673943 |
| GCTGACGATGAC  | 347.171056141799 | 0.841399067876617 |
| AATAGGGTGACT  | 347.198671550459 | 0.497975724874207 |
| CAGTCGAATGAC  | 347.222323157458 | 1.26986554383859  |
| CACCCTTAGTCA  | 347.225077643962 | 0.505202421764848 |
| CTTAGCGATGAC  | 347.22559587213  | 0.640025326379435 |
| GTCATACACCAA  | 347.260153119563 | 0.261036656327158 |
| GTCATAATCATA  | 347.305250617771 | 0.444717503991479 |
| CCGAAATATGAC  | 347.341126619147 | 0.269188421977316 |
| GGAGCTTAGTCA  | 347.380040903197 | 0.704890044193367 |
| ATTTAATATGAC  | 347.383767334791 | 0.707782377884932 |
| CGTTATTTGTCA  | 347.445469501316 | 0.404035186367965 |
| TGAGCAATATCA  | 347.453335817805 | 0.711791992369446 |
| TCGTATTTGTCA  | 347.45462914821  | 0.185211192017821 |
| GTCATAGCGCGA  | 347.458920586136 | 0.760712433379836 |

|               |                  |                   |
|---------------|------------------|-------------------|
| AGTCACCTTGTG  | 347.499240796742 | 0.637655012741887 |
| CTGTTGGAGTCA  | 347.514318453928 | 0.612321832627988 |
| AAGTGTGAATCA  | 347.525938740551 | 0.270822555343905 |
| CGGCAATTAGTC  | 347.546160016604 | 0.797447111643871 |
| AATAATTATGAC  | 347.547521203522 | 0.702259527949134 |
| CAAGTTTACTCA  | 347.597080966111 | 0.611687684983574 |
| ACTCCTTAGTCA  | 347.684311867829 | 0.397939438857235 |
| ATGGTGTATGAC  | 347.695401001085 | 0.716975843297935 |
| CACGGTGAATCA  | 347.695457119564 | 0.422207799003848 |
| TCGCTGACGTCA  | 347.846246162628 | 0.937235146203108 |
| AAGCCAAGTCAT  | 347.897353574574 | 0.148537698596096 |
| AGTCATGGTGTA  | 347.922842179974 | 0.170230969449878 |
| AGTCACTAGATA  | 347.989162132773 | 0.681383088756946 |
| ATGTAACAGTCA  | 348.054943816674 | 0.716410330188188 |
| TATCTTGACTAA  | 348.078298276723 | 0.51808941928363  |
| AACGGCGTCATA  | 348.092603770011 | 0.242630516441164 |
| TGAGTAAACTAA  | 348.100151183712 | 0.727251910162347 |
| CAGTATACGTCA  | 348.133609931111 | 0.497590424472007 |
| GCGTCACGTAC   | 348.29872915465  | 0.670936873055351 |
| AGACATTATGAC  | 348.332405488914 | 0.785007042893831 |
| CGAATACAGTCA  | 348.35108033081  | 0.748350853480943 |
| GGACTTTAGTCA  | 348.411564895355 | 0.785778056915807 |
| GTCATTCAGTAA  | 348.446986716415 | 0.744992445581141 |
| ATAGACTATGAC  | 348.458147291344 | 0.639717318306724 |
| TGAACTACGTCA  | 348.462003331828 | 0.946345415461918 |
| ACCGGTTATGAC  | 348.482725578212 | 0.465197236490917 |
| CTTATTAAGTCA  | 348.483593769457 | 0.655472180478848 |
| CGTCATTAAGTGA | 348.555846954679 | 0.647455170558935 |
| CGCATAGACTCA  | 348.580224648729 | 1.05710192851431  |
| GTGACGTGACAC  | 348.602049723596 | 0.70155417593557  |
| GTATCGGAGTCA  | 348.613800524951 | 0.55018400229147  |
| CTACCTTAGTCA  | 348.620824901998 | 0.296284447022587 |
| CGATGGTATGAC  | 348.643342273751 | 0.521115090687434 |
| CCGTCCACGTCA  | 348.728688162481 | 0.442857952361975 |
| GGTATGTATGAC  | 348.741626439366 | 0.67094163020628  |
| AACAATTGTGAC  | 348.755529252051 | 0.916325151684621 |
| GTCATCCGATAA  | 348.775953930217 | 0.338508227293214 |
| CGGAATCCGTCA  | 348.785658533355 | 0.410369084186319 |
| GTCATATGGTCA  | 348.827005956349 | 0.51414747643492  |
| ATACCGACTCAT  | 348.939939470062 | 0.296027813519159 |
| AGTCAGGATGAC  | 348.968847015466 | 0.339180754170286 |
| TACGCACAGTCA  | 348.975394362353 | 0.592770784283937 |
| CCTTACGATGAC  | 348.986832355161 | 0.698083289704782 |
| GACGCCTAGTCA  | 349.005381826387 | 0.815470534296767 |
| GCACTGTGTGAC  | 349.019942273319 | 0.596716114124845 |
| GACTAATCGCAA  | 349.079122897445 | 0.752867263905001 |
| GTCATAATGTGA  | 349.083003437705 | 0.297611702447128 |
| AGTCACGCGTCA  | 349.085027592605 | 0.242405068385835 |
| CAGGCGAGTCAC  | 349.114379297589 | 0.702447904708606 |
| AAGTAACGTCAT  | 349.147222514258 | 0.320773455726971 |
| ATGACAAAGCAT  | 349.163537935837 | 0.411915699250602 |
| GACTCTGAATCA  | 349.164558702766 | 0.733348679098852 |
| TGACTCGGTGCA  | 349.179026255872 | 0.660545265839728 |
| GTCATATGGTAA  | 349.18081883947  | 0.240479812484453 |

|               |                  |                   |
|---------------|------------------|-------------------|
| GGCACTGCGTCA  | 349.222183116047 | 0.815451646942384 |
| CTGCATAAGTCA  | 349.25377205814  | 0.655335132567358 |
| CCGTATTTGTCA  | 349.33364084041  | 0.651209674131992 |
| GTCATCGAAGAA  | 349.3418180504   | 0.801225925081934 |
| TCTGACTGGTCA  | 349.350376638211 | 0.494970646271274 |
| AGTCATGGGTCA  | 349.354724269771 | 0.499313407125124 |
| GACTCACTCACA  | 349.419482795746 | 0.497363545125161 |
| GTCATAGATCCA  | 349.494938122092 | 0.927866667715788 |
| CATCATTATGAC  | 349.547206760279 | 0.432231186250586 |
| AGTCACCCTAGA  | 349.56504053314  | 0.41598244942407  |
| CTATGCGAGTCA  | 349.575125474431 | 0.499777146232779 |
| ATCAAGTCATAC  | 349.576992455524 | 0.668420049041086 |
| CAGATATATGAC  | 349.620487811498 | 0.429196080723999 |
| TGACTAGATCAA  | 349.689970398348 | 0.784018866091542 |
| CACCGTGTGTCA  | 349.718693263714 | 0.413369145636612 |
| CTGATACAGTCA  | 349.758360597783 | 0.538046911206069 |
| CTTACGGAGTCA  | 349.793044685333 | 0.454294224586673 |
| GTCATTTTCAGA  | 349.795337399302 | 0.748000768507303 |
| GTCACCCAGTCA  | 349.812837655111 | 0.249262370829696 |
| CGCATCTAGTCA  | 349.873047610244 | 0.753664607343546 |
| CTGATGTATGAC  | 349.898835506051 | 0.577952163516318 |
| AGTCACTAGTTG  | 349.912789291197 | 0.503751428754375 |
| CTTAGATATGAC  | 349.93661445305  | 0.741457688224931 |
| CAGGACTATGAC  | 349.960262818893 | 0.505555333483948 |
| CTCGATTGCTCA  | 350.029935925377 | 0.464154244006498 |
| ACTGATTAATA   | 350.038372144345 | 0.430856556397733 |
| TGACTACTAACA  | 350.072499069147 | 0.404391017470397 |
| CCCAGGTATGAC  | 350.090182110461 | 0.752030685965542 |
| AATGTTCTGTCAT | 350.091631796497 | 0.422169682141444 |
| ACGTCATGCGTA  | 350.092662383366 | 1.20883552768871  |
| CTTTCCGAGTCA  | 350.094504758154 | 0.424505276774024 |
| GCGAACTATGAC  | 350.105609706926 | 0.864184243306309 |
| ATGACAAAGATG  | 350.110190046926 | 0.171589620161179 |
| ATCACAGAGTCA  | 350.126105822683 | 0.604531727884217 |
| GTCATCATAGCA  | 350.128947973122 | 0.951296016706017 |
| GTCATCATCGTA  | 350.13753031522  | 0.497566585857254 |
| AAATTGGATGAC  | 350.163928069429 | 0.395617934082211 |
| ATGACGTGACGC  | 350.244169426728 | 1.03134396530308  |
| GGTACTTAGTCA  | 350.257533097043 | 0.647130755876084 |
| ATAGACGACTCA  | 350.261791213353 | 0.979246883863809 |
| ACCCAATAGTCA  | 350.282236512432 | 0.57854174650933  |
| GCCGGGTATGAC  | 350.284672954869 | 0.537444396161873 |
| AAATTCGACTCA  | 350.298270572216 | 0.322307692262312 |
| GCGTGTTATGAC  | 350.322345144804 | 0.618673179795392 |
| TCTTATACGTCA  | 350.352025755474 | 0.650285955236894 |
| AATCGAAGTCAT  | 350.399541461334 | 0.10214719934527  |
| GAAATGTATGAC  | 350.39966067718  | 0.438588101718063 |
| CAGAGCTATGAC  | 350.41638108279  | 0.739237245203887 |
| CCGATTGATGAC  | 350.435890008249 | 0.742274445797424 |
| ACCAATTATGAC  | 350.496486156916 | 0.570278063252011 |
| CCAATGCAGTCA  | 350.507254505335 | 0.958313302135903 |
| TCATAATTGTCA  | 350.536907404029 | 0.829624874443138 |
| TCGCACGAGTCA  | 350.559585511723 | 0.830006990633719 |
| TCATTTACGTCA  | 350.621440696632 | 0.374491956301863 |

|               |                  |                   |
|---------------|------------------|-------------------|
| TACTTAGACTCA  | 350.643698864934 | 0.223190473253933 |
| ATGACAAAGAAC  | 350.676977916922 | 0.46500651152696  |
| ATGAGTCGGCTG  | 350.731037888829 | 0.510663098223926 |
| GCTCACTATGAC  | 350.735970594674 | 0.635157959864877 |
| AGTCACGCGTAT  | 350.784843811572 | 0.252580398015896 |
| GAGTCCACGTCA  | 350.793077340464 | 0.501838619727502 |
| AACATCGACTCA  | 350.79659378804  | 0.407014410677039 |
| CTTTGAGAGTCA  | 350.799651864194 | 0.597655759621308 |
| TGACTGTTATCA  | 350.819289915705 | 0.59460274153559  |
| CTCCGGTATGAC  | 350.834938313545 | 0.815329103839156 |
| CTCATCTAGTCA  | 350.850836631641 | 0.44786257923583  |
| CGATACTGTGAC  | 350.858339271368 | 0.695887614524597 |
| GAGCTGTGTAC   | 350.862179303555 | 0.506750595174389 |
| GTCATAGTACAC  | 350.892313606984 | 0.68222271216903  |
| GCTGCGAGTCA   | 350.9399654286   | 0.820908858673753 |
| GTCATAGCAGAA  | 350.956676992493 | 0.523796401459568 |
| CGTATCGACTCA  | 350.983610319656 | 0.644724315372285 |
| ATATTATTAGTC  | 351.051446633491 | 0.98633812022906  |
| GAACTTTATGAC  | 351.096990545984 | 0.461321232844981 |
| AGTCATGGTTCA  | 351.155399106258 | 0.353790548781139 |
| ACGGTTTATGAC  | 351.231629050139 | 0.598640083457128 |
| CTGCAAGATGAC  | 351.237786123985 | 0.208698183711955 |
| AGTCCCAGTCAT  | 351.25300954291  | 0.278512581807776 |
| TGACACGTGTCA  | 351.264964358464 | 0.615817965344674 |
| ATCGCGTATGAC  | 351.273471609751 | 0.48377721572163  |
| CTAAAAGTGTC   | 351.285281342168 | 0.981138123993032 |
| CCACTCGAGTCA  | 351.295852545935 | 0.379444140275412 |
| AGTCACCTGTGC  | 351.308674531254 | 0.385328792568251 |
| TGACGCACGGAA  | 351.435380878513 | 0.566594121258572 |
| GTAICTGATGAC  | 351.435722241377 | 0.246004601249157 |
| TCTCATACGTCA  | 351.457785991349 | 0.47185090794018  |
| CGCCACGAGTCA  | 351.459139054259 | 0.578481281007006 |
| AGTCACCCTAAG  | 351.497024868453 | 0.330557846151428 |
| CTAAAAGTCATA  | 351.504627498032 | 1.45317374811648  |
| GTCACTCTATGA  | 351.531830805153 | 0.711727076183193 |
| TCATCGGAGTCA  | 351.614538939135 | 0.400720336238821 |
| CTTGACAGAGTCA | 351.646314732314 | 0.688705187800538 |
| TATTCGGAGTCA  | 351.652955494318 | 0.503827010041608 |
| AGTCAACGTCAT  | 351.666553144564 | 0.279686832994239 |
| CACTATGATGAC  | 351.718597676814 | 0.411831723086444 |
| TAACGTTACTCA  | 351.750938962488 | 0.336314590628917 |
| ATATAACAGTCA  | 351.786424976156 | 0.888052491831457 |
| GGCTTTTACTCA  | 351.787090545038 | 0.418565433234839 |
| TGACTCGGTCCA  | 351.813400852339 | 0.694653653274897 |
| AATGCTTAGTCA  | 351.839175309182 | 0.774052677422354 |
| TGACTGAAGACA  | 351.858076396231 | 0.329650513740685 |
| ATGATGCAATAC  | 351.913539649985 | 0.686788763699403 |
| AGTAAGGTGACT  | 351.916053073474 | 0.249959766538285 |
| GTCATCATACTA  | 351.971952582011 | 0.829291798294374 |
| TCGTAACAGTCA  | 352.007416742919 | 0.423714729947574 |
| CTGCATGAATCA  | 352.055199624247 | 0.665641678959705 |
| CTCGACCAGTCA  | 352.056637629483 | 0.608572548485057 |
| CCGAGGTGACGC  | 352.076453985725 | 0.770852074499084 |
| TGACTCCAGTAA  | 352.07879237183  | 0.819524525211179 |

|              |                  |                   |
|--------------|------------------|-------------------|
| CAGATCTAGTCA | 352.088430324093 | 0.582640342513605 |
| AGTCACTCTGAG | 352.114404879934 | 0.545195500692049 |
| TCAAACCAGTCA | 352.135371883148 | 0.396446648421181 |
| ATACTTGCCTCA | 352.150968353767 | 1.01318473268098  |
| GACCTCGAGTCA | 352.154867356223 | 0.528055480561108 |
| AATCGTGCCTCA | 352.157051605098 | 0.783793029462022 |
| ATTACTCAAACA | 352.175071213221 | 0.491686105057111 |
| CAGTCCGATGAC | 352.183981144881 | 0.963009634304659 |
| CATTGCGAGTCA | 352.185036103522 | 0.740062770275775 |
| TCACGCGAGTCA | 352.189979445314 | 0.238565727877845 |
| GCGTATACGTCA | 352.197353085431 | 0.530407770605699 |
| GGCTCCATATGA | 352.211840736178 | 0.971135255299695 |
| GTCATCACTATA | 352.233676475622 | 0.359820239075261 |
| ATGACGTGATTG | 352.267770100728 | 0.628499126584182 |
| CTTACGAATGAC | 352.278217627459 | 0.587919807854733 |
| AGTCACCCTTAA | 352.30296523631  | 0.278913146314217 |
| TGACTATTGCCA | 352.348131237567 | 0.364240665631662 |
| AGTCACCCTGTG | 352.349268792738 | 0.204452169392665 |
| ATTGCGTAATCG | 352.353433238907 | 0.357260729222655 |
| CAAATTTATGAC | 352.39294216005  | 0.928232000918572 |
| ACTATGAATGAC | 352.421390486378 | 0.757282510052991 |
| TACGTAGACTCA | 352.460261400287 | 0.307202855859501 |
| AGTCACCCTTCA | 352.467909305676 | 0.303253153196383 |
| ATAGTCGATGAC | 352.483541584195 | 0.263295400191585 |
| GTAGATTATGAC | 352.497808167332 | 0.35127198213726  |
| ATGACAATGTCA | 352.512531397643 | 0.491960798816563 |
| CTTGTGTATGAC | 352.523396216275 | 0.569499111867385 |
| TAGTATTTGTCA | 352.523532906285 | 0.387703567035079 |
| GACTCAGTCAAC | 352.555394361    | 0.414250898634085 |
| CGCCCTTAGTCA | 352.576184765817 | 0.493199826713586 |
| CATGCACAGTCA | 352.605951067298 | 1.07327833013795  |
| GTCACACTCGGA | 352.629282670294 | 0.845982681052294 |
| ACAAGGGTGACT | 352.635530821579 | 0.301404671020416 |
| GAATAACAGTCA | 352.635911283234 | 0.370555495922731 |
| GACGCTGACACA | 352.673694031844 | 0.676082160285758 |
| GGATTGACTCA  | 352.684758234197 | 0.573076434280861 |
| ATACGTGCGTCA | 352.692588532621 | 0.310713642427644 |
| CTTTTACAGTCA | 352.698854198096 | 0.674760916956672 |
| CGAAATATGTCA | 352.701973129955 | 1.06676099375761  |
| AAGGTTCTGCAT | 352.706019353532 | 0.429412027594325 |
| CTTGCCGATGAC | 352.807947081985 | 0.567163094884594 |
| GATCTTGCCTCA | 352.815543543235 | 0.538032814402748 |
| TATCTGTAGTCA | 352.841173718307 | 0.874628415039785 |
| AGACTTTAGTCA | 352.854002623022 | 0.362230296229154 |
| TCAGACGTGTCA | 352.87700751331  | 0.718700966194058 |
| GTCATAGTGTTA | 352.910707641566 | 0.312109687668674 |
| TGACTACAGCAA | 352.939800479299 | 0.798647560346902 |
| ATCACTTATGAC | 353.0314303624   | 0.626383694777964 |
| CATCACGAGTCA | 353.095227026708 | 0.499372736761426 |
| GTCATCACCAGA | 353.113257503218 | 0.324635175562449 |
| TGACGGATTACA | 353.113712909767 | 0.474889772765298 |
| GTCATTTTGACA | 353.190772976832 | 0.729539962980213 |
| AGTCACCTTTG  | 353.194351709054 | 0.348825537670308 |
| GACACTTACTCA | 353.23909885178  | 0.348401450988266 |

|               |                  |                    |
|---------------|------------------|--------------------|
| GGTCCTTATGAC  | 353.260529427821 | 0.726600666524749  |
| CATTTTCGATGAC | 353.299518522338 | 0.388487918471097  |
| TAACTTGACTAA  | 353.323443059625 | 0.241521174305346  |
| GTCATATACTAA  | 353.350480234037 | 0.329753439927775  |
| GTCATCCGAAAC  | 353.397440778582 | 0.31671559860914   |
| CAGAATTCGTCA  | 353.424062554741 | 0.670734574138608  |
| CACGCTGACACA  | 353.424550448825 | 0.246757860671127  |
| CATGATTATGAC  | 353.457142917827 | 0.89711210805132   |
| ATGAGTCGGCAG  | 353.497281188239 | 0.274844065246228  |
| CTAAGTTATGAC  | 353.555087877166 | 0.741966437161451  |
| CATCTTGACTAA  | 353.690855632327 | 0.425988800254583  |
| CCCAATTCGTCA  | 353.720866654581 | 0.400420643209418  |
| GCTTAGTAATCA  | 353.824345267608 | 1.75764112974767   |
| CCACAGGATGAC  | 353.852292840037 | 0.808822185478544  |
| ATGACTTGTTC   | 353.867776400024 | 0.141774342906264  |
| GTCATCCTGCCA  | 353.875986097977 | 0.490959029934783  |
| AGGCTTTGTCAT  | 353.912176829139 | 0.214451242037804  |
| CTATCCACGTCA  | 353.929342004482 | 0.246726563009402  |
| CATGAAGTGTCA  | 353.934853565056 | 0.503013016684811  |
| GGGAACACGTCA  | 353.967404534342 | 0.573616506293727  |
| CGTCATCGGGCA  | 353.979052551656 | 0.696848047110326  |
| CTAGATTATGAC  | 354.007727511069 | 0.325484033551752  |
| CCGTAATAATGAC | 354.066986030069 | 0.350941714925512  |
| ACACATTGACTC  | 354.097959289132 | 0.533045042310134  |
| CTGAACGATGAC  | 354.121273150028 | 0.331223949715789  |
| GTCACCAAGTCA  | 354.156015584902 | 0.682948403349058  |
| CTCATCGACTCA  | 354.232174986253 | 0.224727028185431  |
| TGACTCGGCAAA  | 354.252631825536 | 0.842827888524509  |
| TGACTCGTGTA   | 354.260781687894 | 0.685619716295578  |
| AAGTACACGTCA  | 354.317947212468 | 0.285577582402387  |
| ATGACAGAGTTC  | 354.334616051933 | 0.0787359480747384 |
| CGTCATCAGCGA  | 354.350414952285 | 0.826479333162292  |
| GACTAATAATGC  | 354.36175864522  | 0.968742833593933  |
| CGTTGTGAATCA  | 354.408517593677 | 0.577649974609577  |
| ATAATCTAGTCA  | 354.434107964736 | 0.43244079114544   |
| CTTGACTATGAC  | 354.45255656106  | 0.382523414883408  |
| CTTCCTGACTGA  | 354.491502905867 | 0.3565965004525    |
| GTCATCAGTTAA  | 354.494702717419 | 0.674261994312761  |
| ACCTTTTACTCA  | 354.496022857333 | 0.386975451799379  |
| GCTGGTAGTCAC  | 354.551834009855 | 0.124254321273648  |
| AGCTTTACTCAT  | 354.667647928849 | 0.157407973729498  |
| GTCATCTTAATA  | 354.6954514874   | 0.188033681724951  |
| TACGATTAATA   | 354.710922403179 | 1.00891762401897   |
| GTCATACCTGGA  | 354.719719404045 | 0.578453127780503  |
| ATTGACTAGTCA  | 354.738983421262 | 0.996636739346323  |
| CTGGACGACTCA  | 354.74136296839  | 0.677499307965642  |
| GTCATAAGTATA  | 354.879960995716 | 0.415149667167753  |
| CTGACTGACTC   | 354.943440792084 | 0.727467065262678  |
| CAATCGTATGAC  | 354.948975536418 | 0.432011674433249  |
| CTGGACGCGTCA  | 354.954286223158 | 0.755273134667157  |
| CTGCGTTATGAC  | 354.97591376663  | 0.634253521882538  |
| ATTACCTATGAC  | 355.012883355451 | 0.488858070664315  |
| TGACGCTACGAA  | 355.039243598061 | 0.646414863500346  |
| CAGTACAATGAC  | 355.044596707908 | 0.797577682834983  |

|              |                  |                   |
|--------------|------------------|-------------------|
| CACTATAATGAC | 355.050859669641 | 1.04819370401077  |
| TAATCATAGTCA | 355.061249053764 | 0.463116863436296 |
| AATGAATATGAC | 355.099537262722 | 0.703593081024129 |
| ACAATTGAATCA | 355.116401947185 | 1.21128028951807  |
| CGATATATGTCA | 355.127480442457 | 0.812818942920957 |
| ACGGACGACTCA | 355.138472080806 | 0.490046321230405 |
| GTAAACACGTCA | 355.154715631149 | 1.02795893919539  |
| ATGAGTAAAGTC | 355.161169343747 | 0.3821114411768   |
| CTTACAGAGTCA | 355.186951880985 | 1.08134932277757  |
| CTATTTGTGTCA | 355.30254302833  | 0.405543648511807 |
| TCCTTTGCGTCA | 355.30619741247  | 0.468433511957151 |
| GCTTACACGTCA | 355.314674934157 | 0.611589495890457 |
| ATAAAAGATGAC | 355.367391974608 | 0.479350742169591 |
| TATGCTCAGTCA | 355.37081600578  | 0.541585741080646 |
| ACGTTTTACTCA | 355.386569290271 | 0.317336302554607 |
| GCAGTTTACTCA | 355.428030145611 | 0.787788817093295 |
| AGGACTTACTCA | 355.444141173589 | 0.712313895024086 |
| ATGACGTGATAA | 355.451778962163 | 0.626410474248367 |
| TGACTCGGAGCA | 355.452571164484 | 0.538552602062581 |
| CCGGCTTATGAC | 355.458338874322 | 0.510778603428141 |
| GTCATTGCTAAC | 355.490611104818 | 0.391279043942163 |
| GTCATCGTACTA | 355.522518251279 | 0.717034416194095 |
| TGACTGGTTCAA | 355.550879746955 | 0.720559052259487 |
| CAGCAAGAGTCA | 355.557913246201 | 0.533258951696711 |
| AGCTATTGCTCA | 355.5600693052   | 0.604732278045379 |
| CCAGTTGACTGA | 355.562179397397 | 0.967560939341182 |
| CGTAATTGACTC | 355.569243523271 | 0.511480375860384 |
| CAAGCTGTGTCA | 355.579718552904 | 1.00296265863719  |
| GGCCTTAATGAC | 355.601704697653 | 1.13534382155885  |
| CTTATGTATGAC | 355.609356241765 | 0.601338944389564 |
| GTCATAATTGAA | 355.620659890233 | 0.710347677008579 |
| ATGAGTAAAGAA | 355.774914166462 | 0.319542283051457 |
| TCACAGCAGTCA | 355.801145798104 | 0.579473853252428 |
| ATTACTCAAAGC | 355.869114713104 | 0.30483606966748  |
| ACATCACAGTCA | 355.896285007648 | 0.283192320184721 |
| AGACTAATACTG | 355.901632416695 | 0.612500059625423 |
| GTCATCAGATCA | 355.916278518674 | 0.711139532849458 |
| GTCACATAGTCA | 355.92193382002  | 0.718243338554798 |
| TCCACTGCGTCA | 355.951072612959 | 0.417055448723203 |
| CAGTTGGAGTCA | 355.986209866923 | 0.38142698072884  |
| TGACTGTAATAA | 356.016673211942 | 0.83703381234303  |
| CTTATACAGTCA | 356.027102205328 | 0.242117740118723 |
| AGTCATGAGCCG | 356.110547420685 | 0.759363928657515 |
| CCATAGATGACG | 356.248426386342 | 0.621310563910028 |
| AATAGTCAACGA | 356.264705475972 | 0.376741902986362 |
| GTCATAATTGTA | 356.353098024324 | 0.671078872184183 |
| AAGTATTATGAC | 356.400407726822 | 0.221320358068787 |
| TCAGATTTGTCA | 356.406315006764 | 0.123670041697586 |
| GTCATCATCTAA | 356.519209493525 | 0.47460219219932  |
| GTCATCCTGTGA | 356.562478922627 | 0.364133975320364 |
| TAGACTTACTCA | 356.570722838637 | 0.311962277695934 |
| AGAACCTATGAC | 356.611258130215 | 0.378940502214957 |
| ATTGATACGTCA | 356.621028030883 | 0.676137738691395 |
| GGCAATTATGAC | 356.654783945919 | 0.579771224054246 |

|              |                  |                   |
|--------------|------------------|-------------------|
| ATCCAGTGAGTC | 356.657498801122 | 0.456300843234588 |
| GTCACATTATGA | 356.699143124456 | 0.919951193547912 |
| CGTCATCAGGTC | 356.738578098171 | 0.469771573996455 |
| GGACACACGTCA | 356.746229935767 | 0.605000422718511 |
| CCTGATTGGTCA | 356.768080961075 | 0.292926048398204 |
| CATGTAGCGTCA | 356.784491074937 | 0.896833830496226 |
| GACAACGACTC  | 356.796129894552 | 0.440287183587433 |
| ATGTACGATGAC | 356.856283903481 | 0.570361694857263 |
| GACCTGTGTGAC | 356.885853598966 | 1.20207450875874  |
| ACAAACGGTGAC | 356.900909962626 | 0.176394289191097 |
| GACTAATAGTAA | 356.906507014706 | 0.432324781292757 |
| ATTATCTGAGTC | 356.929858686939 | 1.05625891779337  |
| CATGTATATGAC | 356.999481817353 | 0.720772723960608 |
| AGCTACTATGAC | 357.039228058705 | 0.80991675234388  |
| AGTCACCCCTGA | 357.041036046431 | 0.529526080310764 |
| GACTTGACGTCA | 357.069403584948 | 0.707134712846197 |
| ATAAACTATGAC | 357.076044356112 | 0.7318462461037   |
| CTGAGGTATGAC | 357.12871539897  | 0.425787073242184 |
| CGTATAGTGTCA | 357.166023837448 | 0.826854562452483 |
| AATACGGATGAC | 357.186309614621 | 0.525385963730307 |
| TCACGTGCGTCA | 357.229332766094 | 0.739787050613516 |
| AATAACTATGAC | 357.257928076153 | 0.937326969408569 |
| CTCGGTGATGAC | 357.267218433966 | 1.05721054890111  |
| CGTATGTATGAC | 357.268624616232 | 0.897014550983628 |
| AGACTTTGTCA  | 357.27516584505  | 0.39846239019793  |
| CGTCATCTGAAC | 357.281940537608 | 0.190903001356955 |
| CATGGCTATGAC | 357.288745346318 | 0.640051253384008 |
| CTTGTGGAGTCA | 357.318072203101 | 0.760007008554842 |
| TCACAATAGTCA | 357.380384700837 | 0.48920974617484  |
| GTCATAATCCAA | 357.38607588042  | 0.506318885563388 |
| TCGGCTACGTCA | 357.445406484536 | 0.884213706470718 |
| GTCATAACTTCA | 357.453538815007 | 0.638352019729603 |
| AATATTTGACTC | 357.476637603346 | 1.01895090336761  |
| TGACGTGTTGAA | 357.480271184499 | 0.642126845646759 |
| GAATCTGTGTCA | 357.484160448357 | 0.701560587760387 |
| CCGTCACAGTCA | 357.494447606136 | 0.230480070711419 |
| CAATTGTATGAC | 357.495537820132 | 0.591008386455876 |
| CACTTCGATGAC | 357.548182987715 | 0.564228964850527 |
| CTATACTAGTCA | 357.558823442674 | 0.623029672718298 |
| AAGAACTATGAC | 357.63370501386  | 0.34385688602394  |
| ATGACGGACTCA | 357.634664769617 | 0.502500198862512 |
| AGTCACCTTCTC | 357.654186583343 | 0.19100828100486  |
| GCGCCCGATGAC | 357.679686360665 | 0.833933269334229 |
| ACTCCTGACTGA | 357.731735444926 | 0.384130712698869 |
| CCCTCTGTGTCA | 357.746709488883 | 0.582712143390893 |
| CCAGTGGAGTCA | 357.752660016507 | 0.771557849919589 |
| CGTCATCAACAG | 357.76056001479  | 0.42504564244625  |
| GCAACTCAGTCA | 357.762400084212 | 0.787655555258048 |
| CATGGTGACCCA | 357.763913146882 | 0.398734715972979 |
| GTCATGCAGTCA | 357.769523105025 | 0.753775781658604 |
| TAGTATTGCTCA | 357.783845867228 | 0.645107344880787 |
| ATAACCGAGTCA | 357.792218801206 | 0.99139527855671  |
| AACAGGGTGACT | 357.855750912378 | 0.388499977682249 |
| AAGTACTATGAC | 357.884806941982 | 0.306571084813113 |



|               |                  |                   |
|---------------|------------------|-------------------|
| GTCATCTATATA  | 357.914444918232 | 0.694929326978764 |
| CGTGGGTATGAC  | 357.929188855786 | 0.489406405018291 |
| ACTTATTATGAC  | 357.937685159395 | 0.473474243265982 |
| GTGACCGAGTCA  | 357.978061332632 | 0.790563246391333 |
| AAGACCTAGTCA  | 357.980962181271 | 0.683897563039904 |
| CCTCGGTATGAC  | 357.982350156731 | 0.647514797891531 |
| ACGAATGATGAC  | 358.01028919976  | 0.607076428729849 |
| GTCATCGGATAA  | 358.049601875396 | 0.447469831486746 |
| ACATATAAGTCA  | 358.04972905589  | 0.295788035506054 |
| GATGACAGTGAC  | 358.064659033137 | 0.319870476287954 |
| CCGATTGACTGA  | 358.096172033329 | 0.441906535315793 |
| GTAAGGTATGAC  | 358.172198348763 | 0.203550688995837 |
| CATATCGGTGAC  | 358.198967528935 | 0.918772433751825 |
| CCAGACGATGAC  | 358.259075510819 | 0.407562265439376 |
| TGACGCGAGTCA  | 358.308308681521 | 0.984159835827004 |
| ATACTTGACTAA  | 358.323582775137 | 0.67956429751191  |
| AAAAGCGTGACT  | 358.382437074654 | 0.364542007184781 |
| TGACACAACCTCA | 358.402101102464 | 0.595440801330154 |
| GTCATCCGTATA  | 358.42769876283  | 0.775974979502608 |
| ATGACTAGCATC  | 358.435373852205 | 0.626277229332724 |
| TCAGTTTACTCA  | 358.451316109843 | 0.620195991751379 |
| ATGAGTCGGTGC  | 358.451736284071 | 0.516317128973643 |
| ATTCTCGAGTCA  | 358.472066600419 | 0.530058786383253 |
| ATTGTGCGATGAC | 358.507475729643 | 0.878370248648693 |
| ATGCCAGATGAC  | 358.515207016653 | 0.437043991742401 |
| GATTATTATGAC  | 358.533947969746 | 0.725228367152033 |
| ATTAGTTATGAC  | 358.534217398012 | 0.49125246793535  |
| CAAGGGTATGAC  | 358.553018383179 | 0.345117977734461 |
| GACCATTATGAC  | 358.570473370468 | 0.621062269434105 |
| TAACGTGCGTCA  | 358.586951390332 | 0.523248737720939 |
| CTACTGTGTAC   | 358.604002375769 | 0.301982414702032 |
| GGTACTGTCATA  | 358.632576290266 | 0.247827574963045 |
| AAATAACGTCAT  | 358.669667133749 | 0.477188111477767 |
| CAAATCGATGAC  | 358.685267358655 | 0.815153967076694 |
| TCGTTAGACTCA  | 358.693511575395 | 0.854976834498473 |
| CAACACGAGTCA  | 358.699794184229 | 0.369276558603232 |
| CTACACGAGTCA  | 358.711356993127 | 0.495934778957467 |
| GTCATATCGGAC  | 358.805630814159 | 0.600331428465159 |
| CGACTGTATGAC  | 358.80968855174  | 0.638542351855711 |
| TGACGCAGTACA  | 358.810805695883 | 0.818725504434534 |
| AACTCATATGAC  | 358.813304692818 | 0.335016807488699 |
| AATATCTATGAC  | 358.82769153061  | 0.986562202055199 |
| CGAATGTGTGAC  | 358.834113501785 | 0.737302071281705 |
| CTAACTGTGTCA  | 358.834719274018 | 0.500008093292336 |
| GTCATACAAATTA | 358.859855427383 | 0.629988863341169 |
| AATACTGCGTCA  | 358.879272081858 | 0.61995390216628  |
| TGACTCGCTGAA  | 358.925036877043 | 1.02074368122678  |
| GACTCAGATACC  | 358.943285513404 | 1.19317070189326  |
| CTCGTTGATGAC  | 359.046670401579 | 0.561600682542981 |
| GATGACGCCCTTA | 359.072913915673 | 0.136086266705758 |
| CGACCGATGACG  | 359.12002820944  | 0.486583915948593 |
| ATTTATATGTCA  | 359.142703762552 | 0.706654090321848 |
| ACTCATCGTCAT  | 359.150995128066 | 0.439118340071132 |
| GTGACATAGTCA  | 359.187056599962 | 0.325796356404055 |

|              |                  |                   |
|--------------|------------------|-------------------|
| GATTTCTATGAC | 359.199579098265 | 0.654003265955543 |
| CGTCATTTGTCA | 359.265527241273 | 0.316527188414124 |
| GTCATCCTGTCA | 359.290080206082 | 0.719337847066064 |
| TATTCCACGTCA | 359.322493099858 | 0.478883937034197 |
| ATTCGTGCGTCA | 359.34504226643  | 0.93625091692499  |
| TCCTCTGTGTCA | 359.360319572395 | 0.267920002084026 |
| GTGAGAGTCAGA | 359.372400459987 | 0.315890251053905 |
| CCACTGTAGTCA | 359.410153177057 | 0.415514299831377 |
| TCATAACTATGA | 359.412565011876 | 1.11912885035902  |
| CCTCTTACGTCA | 359.466545469972 | 0.469423679294693 |
| TCATTGACTCA  | 359.511931932956 | 0.331111593294395 |
| CATCTGACGTCA | 359.51255176473  | 0.709187790462964 |
| GTCATATCTATA | 359.512752093302 | 0.906163628363004 |
| CGCGACTATGAC | 359.523092708138 | 0.602524564037312 |
| ATTTACCAGTCA | 359.529213096127 | 0.162902853992396 |
| ATAAGGTATGAC | 359.56853144614  | 0.456116594408953 |
| AGTGTCTATGAC | 359.607171140638 | 0.356531096087505 |
| GTCATCTGTTGA | 359.613976161394 | 0.686273776236687 |
| AACTTAGACTCA | 359.674028457477 | 0.618472149254688 |
| GCTGATTATGAC | 359.68146321674  | 0.219875820069368 |
| GCTGATACGTCA | 359.704753954806 | 0.849176832028403 |
| GTCATAAGCGAA | 359.72935654209  | 0.7392288118818   |
| CTCTATTTGTCA | 359.737379752761 | 0.294695339842541 |
| TATGACTTGGAA | 359.829781445288 | 0.223630875910507 |
| ACTAACTATGAC | 359.836513227886 | 0.535945520318853 |
| CAGTAATATGAC | 359.863818501028 | 0.823920341088808 |
| CGTTACTGTGAC | 359.898517530543 | 0.457294387552437 |
| AGAACAAGTCAT | 359.933444321428 | 0.39182152255937  |
| AACAATTGCTCA | 359.949607794702 | 0.400095456587471 |
| ACTGTAAATGAC | 359.95386481143  | 0.398178544096699 |
| ATGACTTGTCTG | 359.964758160916 | 0.45306330149516  |
| GTATGACTTGAC | 359.967548842255 | 0.584059928841098 |
| CACGCACAGTCA | 359.995950012339 | 0.514560138962638 |
| ACTCATTGACTC | 360.044587947673 | 0.300904123807432 |
| CTAGATGATGAC | 360.056130938379 | 0.317707914514062 |
| AGTCACCTCTG  | 360.069209533844 | 0.535189180570888 |
| CCGTAATTAGTC | 360.075519021353 | 0.500340549579288 |
| CGCTCCGAGTCA | 360.079342943067 | 0.564397597709807 |
| ATGATGTAACCG | 360.146321422715 | 0.332034030105342 |
| GTCATAGTGAAC | 360.216981695958 | 0.720605497343073 |
| GACTTAACGTCA | 360.270085493542 | 0.994924279697375 |
| AACCCGAGTCA  | 360.279918475046 | 0.732903078236313 |
| GACCCGTATGAC | 360.340620525839 | 0.540296165651449 |
| GTCATATTGTGA | 360.341807186453 | 0.619615819495315 |
| GATAATTATGAC | 360.343207911416 | 0.983674218118556 |
| ATAGTTGTGTCA | 360.346969580604 | 0.347938729522885 |
| ACTCATAGTGAC | 360.384152627099 | 0.679046542307241 |
| CGACCCGATGAC | 360.390917632282 | 0.712203417110254 |
| GAGACTCAGTCA | 360.397416680249 | 0.122891948470347 |
| CCGTGTGAATCA | 360.414830943814 | 0.925441632171007 |
| ATCACTGTGTCA | 360.433244468917 | 0.374044028769656 |
| CGCGACGATGAC | 360.447348546876 | 0.3878969000907   |
| ATGACTTGGACA | 360.448905374292 | 0.682712884056175 |
| ATGAGTAAAGGG | 360.459728231397 | 0.296911772656326 |

|               |                  |                   |
|---------------|------------------|-------------------|
| AACTACGATGAC  | 360.488023765013 | 0.650710065992895 |
| CATTCATAGTCA  | 360.618482264359 | 1.0582835253971   |
| ATTCCGGTCATCA | 360.625943303432 | 0.369473459081585 |
| AGTCACCTCGTC  | 360.632191909258 | 0.32240119412057  |
| CCACAATAGTCA  | 360.669411328305 | 0.435324921856159 |
| GTTATACAGTCA  | 360.730726647418 | 0.523703734987848 |
| CTATATAAGTCA  | 360.737533389593 | 0.783987205177662 |
| AGTCACTCTTAG  | 360.781425686344 | 0.36548351837406  |
| TGACTTAGCTAA  | 360.790407898171 | 1.27529085204413  |
| GTCAGACTCACA  | 360.792919156378 | 0.288947649712071 |
| ACGTCATGCGTC  | 360.807102772307 | 0.458130700866974 |
| GAAAAGTGAGTC  | 360.808483396665 | 0.391720432593125 |
| GTCATACAACGA  | 360.822507693466 | 0.395655746393736 |
| AATAGTGATGAC  | 360.873278928072 | 0.483241021633636 |
| GTCATACACGCA  | 360.909321318659 | 0.577385014480178 |
| CGGAATTATGAC  | 360.917315588431 | 0.273301334304869 |
| GCCGATTTGTCA  | 360.92340902296  | 0.632457202569779 |
| AACTATTGCTCA  | 360.937661793727 | 0.6831736492875   |
| ACTATCTATGAC  | 360.970979911116 | 0.62027744668458  |
| AGTCACCTTCTG  | 360.980792122095 | 0.340632723122469 |
| GTCACATGCTGA  | 361.070814247015 | 1.06330125638438  |
| ATTGATCTGTCA  | 361.155884704224 | 0.380748926283716 |
| ATTAGGTCATCG  | 361.156320976943 | 0.59166170984837  |
| ATGACAATATGC  | 361.164693019313 | 0.632007521566783 |
| AATGGATTAGTC  | 361.211622559998 | 1.03115158076324  |
| AGTCACCCTTAT  | 361.233278754213 | 0.323280088035873 |
| GTCATACATACA  | 361.255209135244 | 0.407015720537576 |
| GACCTGTGTAC   | 361.261598175644 | 0.903787560437778 |
| GAGGCTCAGTCA  | 361.268816705695 | 0.396378581566414 |
| GTCATCATAATA  | 361.332410771443 | 0.657985675187924 |
| GCACACGAGTCA  | 361.35093820999  | 0.716465089392227 |
| ATGACTTGCCCG  | 361.359606631711 | 0.663875314719384 |
| TGACTGAGCTAA  | 361.384673765704 | 0.968100161183859 |
| GACACTCAGTCA  | 361.411975053241 | 0.71018630666018  |
| ATGAGTAAAGCC  | 361.42393829027  | 0.348255414906777 |
| ACTGACTAGTCA  | 361.451810191107 | 0.44483877459408  |
| CTGTGACAGTCA  | 361.518298300294 | 0.690406574755764 |
| AAGTATACGTCA  | 361.527862383755 | 0.466555015555845 |
| GTCATCCGTAAA  | 361.575617970837 | 0.38376491640853  |
| ACCAAAGATGAC  | 361.612996144    | 0.485061523767987 |
| TGACTCGTGCAA  | 361.636104994737 | 0.410111289918424 |
| TAACACGAGTCA  | 361.636761996631 | 0.497917525080139 |
| GATTAGTCTGAC  | 361.64795092564  | 0.573733760242362 |
| AACCAAGTCATC  | 361.668392669154 | 0.441020299865073 |
| CCGATAAGTCA   | 361.766835437587 | 0.557602012224461 |
| CTCGGGAATGAC  | 361.769588943366 | 0.443955216739204 |
| AATCCGTGTGAT  | 361.809712338903 | 0.170060603599485 |
| AATTCCACGTCA  | 361.82667636234  | 0.393232786892323 |
| GTCATACACTCA  | 361.834042246272 | 0.535489301274189 |
| GTCTAACAGTCA  | 361.857698540979 | 0.907144044561364 |
| ATAACGGATGAC  | 361.908417294937 | 0.278082131536668 |
| GGTTCCGATGAC  | 362.024107955762 | 0.551393428978047 |
| GAACTTCAGTCA  | 362.104338603428 | 0.799431530524459 |
| GCCAGAAATGAC  | 362.105340218138 | 0.544001617730038 |

|               |                  |                   |
|---------------|------------------|-------------------|
| GCGCTTACGTCA  | 362.135320993859 | 0.616949949619747 |
| GTCGGCGTCATA  | 362.194040634396 | 0.463723819186963 |
| TGAGTCTTGTA   | 362.211737551744 | 0.904034085506846 |
| TCGTATACGTCA  | 362.215599898317 | 1.0270283503909   |
| TGACGTGAATCA  | 362.233365988589 | 0.44916809211695  |
| ATGACTGGGAGA  | 362.263484169124 | 0.284303780282059 |
| TCGTCACAGTCA  | 362.29223366728  | 0.58989363512704  |
| CAAGACGATGAC  | 362.377004897655 | 0.409329609203942 |
| ATGACACGGCCA  | 362.38687925189  | 0.630739928453271 |
| CACATGGGTGAC  | 362.426080878438 | 0.916473419008893 |
| ACGTATTGCTCA  | 362.435830112699 | 0.809654265704629 |
| GTCATCGTAAGA  | 362.454697305596 | 0.764821551199148 |
| CACAATTATGAC  | 362.463481092077 | 0.635646100581299 |
| TGACTAGGCTAA  | 362.469420427959 | 0.946431213554337 |
| GCTTCTGATTCA  | 362.504993963336 | 0.390156309566294 |
| GGGTCCACGTCA  | 362.514976507769 | 0.946178090602488 |
| GTCATACCTCTA  | 362.520565207118 | 0.38992223034732  |
| CGAAGTTATGAC  | 362.550218566773 | 0.708626434131303 |
| CACGTCCTAAA   | 362.571266279059 | 0.921900174052152 |
| AAGCCGAGTCAC  | 362.585597166651 | 0.670491368395753 |
| CATACTGTCATA  | 362.637109371639 | 0.613110782168044 |
| CAGTCACGCTTC  | 362.649414503157 | 0.3884550538425   |
| GTTACGTGTTCA  | 362.666105756452 | 0.722089681130182 |
| CTCACAGAGTCA  | 362.709909888139 | 0.789740784992333 |
| ACCTTGTAGTCA  | 362.741213594405 | 0.713374389270629 |
| AGTCACCTCTCG  | 362.746037013657 | 0.350671449250952 |
| GTCATTTGCTCA  | 362.778020065511 | 0.447391565389111 |
| ATTACCGAGTCA  | 362.784538545889 | 0.737421369205417 |
| CACTATACGTCA  | 362.798877681733 | 0.792980921078639 |
| ACATTGATGAC   | 362.818110204154 | 1.02594361106222  |
| ATTAATACGTCA  | 362.840860116966 | 0.731431450760354 |
| TGAATCACGAAA  | 362.858629642919 | 0.466791553525306 |
| GCACAATATGAC  | 362.900854439654 | 0.953024397453116 |
| TCTTCCGAGTCA  | 362.92340243889  | 0.386623999013303 |
| AATCCTCAGTCA  | 362.966060279569 | 0.372171455150789 |
| ACCGGAGATGAC  | 362.977305530766 | 0.746561179771816 |
| ATGAGCAAATCC  | 362.995890980468 | 0.129870560971836 |
| GTGAGTGAATCA  | 362.998844632831 | 0.325031955628751 |
| TATTTTGC GTCA | 363.0547775775   | 0.466484908699919 |
| CTGACCTATGAC  | 363.078344392622 | 0.565171984100556 |
| GTCATCCTATTA  | 363.108051927652 | 0.662767014673256 |
| GCTTCTGATGAC  | 363.125571430075 | 0.823019938691702 |
| TGACGTGTGACA  | 363.142951414051 | 0.454200322139693 |
| TCGATCGACTCA  | 363.166994377909 | 0.799903802347548 |
| AGGCGGTATGAC  | 363.225604665793 | 1.23905420883364  |
| GGTTCACGTCA   | 363.231491200024 | 0.463615340273098 |
| TGACGGATTA    | 363.263688995349 | 0.684899894832483 |
| GTCATCGGTCAA  | 363.285696102088 | 0.446986485221157 |
| TCCGAAGTGTC   | 363.365323598971 | 0.563910527007756 |
| ATGACGCGCGAA  | 363.368887838785 | 0.292344355595194 |
| TGACACAGCACA  | 363.376068840365 | 0.902755540565818 |
| GCTGTGTATGAC  | 363.440655760529 | 0.633113395981594 |
| CCAAATTATGAC  | 363.469581910946 | 0.844427113493317 |
| CGAATCTATGAC  | 363.544746662336 | 0.631293675188762 |

|               |                  |                   |
|---------------|------------------|-------------------|
| CATTTGTAGTCA  | 363.544902445361 | 0.495077909748992 |
| CTCGGAAATGAC  | 363.556317140613 | 0.505991703444792 |
| GCATAAAATGAC  | 363.587509537621 | 0.67649504704159  |
| GTCATAGTAGAC  | 363.602768652875 | 1.10475193313486  |
| GATAACGATGAC  | 363.608727911792 | 0.342909128135243 |
| AGTCATGGTGTC  | 363.652269075602 | 0.657378382757051 |
| GCTAGGTATGAC  | 363.655191915239 | 0.344533920844885 |
| ACTGACGACTCA  | 363.676149650936 | 0.37218993287077  |
| CCGTTACAGTCA  | 363.700685553094 | 0.489415180959023 |
| GTCATACCCTAA  | 363.709042736231 | 0.367949105258993 |
| GTGACACAGCCA  | 363.818275034038 | 0.627046335094875 |
| CCACGAGTATGA  | 363.834015699489 | 0.963793768945504 |
| TCAGCTCAGTCA  | 363.970506113698 | 0.328208260250797 |
| TCACTTCAGTCA  | 363.980097153455 | 0.38001038574479  |
| GTCATAACTCAC  | 364.0434435252   | 0.459842210038672 |
| ATGACTGGGCTG  | 364.128949912053 | 0.612282176675043 |
| CATTCGTATGAC  | 364.197992499015 | 0.6692727315417   |
| TACTAGCAGTCA  | 364.262924774738 | 0.58794734948001  |
| CACACCGATGAC  | 364.274734885114 | 0.358728758842816 |
| GTATTATTCATA  | 364.275971367696 | 1.02222029890078  |
| TAACTCGAGTCA  | 364.284357309467 | 0.435576535583742 |
| AATGTTGTGTCA  | 364.320405497959 | 0.314554833563428 |
| CTACTTTAGTCA  | 364.4231330177   | 0.19632884379024  |
| AATGAGTAGTCA  | 364.43301225028  | 0.425063833111953 |
| ATGACTGGGAAA  | 364.459753491572 | 0.411880857278636 |
| ATGACGGAGTCA  | 364.503250742927 | 0.577876986730181 |
| ACTTTCGATGAC  | 364.522655434781 | 0.460685120224217 |
| TCAGTCAGGGCA  | 364.556802759188 | 0.347005976970948 |
| AATCTTCGCTCA  | 364.598130463437 | 0.651954389854517 |
| ATGACTGGGTGC  | 364.615453192172 | 0.441084217862763 |
| CATATTGATGAC  | 364.616650746675 | 0.635879368845983 |
| CCCTATGATGAC  | 364.619710737767 | 0.549263363798851 |
| CTTTATACGTCA  | 364.644831330494 | 0.249906619827099 |
| TGACTAGTTAA   | 364.659369981142 | 0.222747057504163 |
| CCCTTGTATGAC  | 364.668581619434 | 0.396788203022526 |
| GTCATATTA AAA | 364.687275912451 | 0.795633813810441 |
| TCCGATACGTCA  | 364.747908598595 | 0.503375666402432 |
| CGTCAGAATGAC  | 364.789766066016 | 1.22283383838147  |
| ATGACAAAGTCG  | 364.80948680885  | 0.414617760092885 |
| AGCTTACAGTCA  | 364.817242676374 | 0.681858251841065 |
| GATTCGTATGAC  | 364.852550655934 | 0.546509997587795 |
| CACACGGATGAC  | 364.909164164825 | 0.785825204512337 |
| AGTCACTTCTTG  | 364.912909496343 | 0.644919755116202 |
| TGACATGTGACA  | 364.913224936719 | 0.855678461736441 |
| TGACGTATTGAA  | 364.914606952572 | 0.424325957070695 |
| TGAAATCCGTCA  | 364.919133890183 | 0.61138491461176  |
| GACTTGGATGAC  | 364.979112504368 | 0.391626526063882 |
| GCAATGTGTGAC  | 364.980252632669 | 0.860411182750126 |
| TATTAGTAGTCA  | 365.02661719555  | 0.893851660917357 |
| TCAGTCTAGTCA  | 365.034488497932 | 0.593622479800473 |
| CCTAACTATGAC  | 365.054937626212 | 0.674963832976241 |
| GATACTGCGTCA  | 365.065740349487 | 1.08860689576246  |
| AGTCAACCCCTAT | 365.218086610388 | 0.412629598357798 |
| AGTCACTACGTA  | 365.241022202252 | 0.317879537176711 |

|                 |                  |                   |
|-----------------|------------------|-------------------|
| GTCATCAGTACA    | 365.248560435014 | 0.951710702226116 |
| GTCACCGTATTA    | 365.256049074015 | 0.628208301567608 |
| GTACTIONGACGTCA | 365.26464241071  | 0.392030127861179 |
| TGACAGAGTCAA    | 365.292398778655 | 0.502303887636543 |
| GTCATACATGTA    | 365.294330081593 | 0.383288215247746 |
| ATTACGCAGTCA    | 365.38903145419  | 0.843992912875689 |
| AAATATCCGTCA    | 365.444927450869 | 0.39965023249964  |
| GTCATCTCTTGA    | 365.450421185762 | 0.470346117299115 |
| ACGGGCTATGAC    | 365.453421209209 | 0.596024342988236 |
| GTCATAGTGCAC    | 365.455210422368 | 0.416240587524262 |
| CAGGTCTATGAC    | 365.499918664625 | 0.602346194892211 |
| TACGCTGTGTCA    | 365.530397873837 | 0.473670386258354 |
| ATGAGTAAAGAG    | 365.565997894948 | 0.321471258424196 |
| CAGCGGTATGAC    | 365.576909008385 | 0.26926907788254  |
| GTCATATTGACA    | 365.581065534631 | 0.496039697637916 |
| ATCCCATGACTG    | 365.586895390146 | 0.315061081617101 |
| CAACCTTAGTCA    | 365.590161582563 | 0.916469138164865 |
| CGTCATTGCGAA    | 365.629318089944 | 0.603234049296356 |
| CTCATCTATGAC    | 365.630522891026 | 0.547223278946104 |
| GTCATCATGATA    | 365.640093388897 | 0.692752102026608 |
| ACGAGTTATGAC    | 365.641363439049 | 0.580327981838072 |
| ACGTAACATGAC    | 365.666675115351 | 0.792922551702947 |
| GTCATATACTGA    | 365.694344777889 | 0.522714216396897 |
| CGCAGAGATGAC    | 365.701450285606 | 0.170486579376705 |
| ATTTGCGAGTCA    | 365.725328125557 | 0.620365360113932 |
| TGACTAAGGCCA    | 365.759497292524 | 0.919753230027257 |
| AGTCACCCTTTC    | 365.809940130595 | 0.354092332346505 |
| CTGCTGTGTAC     | 365.850572800341 | 0.488797542954378 |
| CACGATGGCTCA    | 365.879928444067 | 0.577296357985634 |
| CGGTCATATGAC    | 365.894783067984 | 0.792617346592459 |
| GTCATATCGTAA    | 365.899801903423 | 0.602967503673223 |
| TAATTAGACTCA    | 365.936742066724 | 0.753289900045098 |
| AATTGCGATGAC    | 365.951609738786 | 0.530620934102111 |
| CATGGGTATGAC    | 365.956341358727 | 0.572365766602957 |
| TCTTTAGACTCA    | 366.00723918667  | 0.348474514459268 |
| ATGAGTCTCAAA    | 366.013673538836 | 0.151956080741328 |
| CAATCCGATGAC    | 366.049126169828 | 0.51791415424573  |
| CTTGAATATGAC    | 366.052115160799 | 0.454680107900073 |
| ACGTTAAATGAC    | 366.085566614152 | 0.411820806585555 |
| GCCTACACGTCA    | 366.152118868433 | 0.720005668259942 |
| GTCATAATCCGA    | 366.15382777403  | 0.310205441209006 |
| AGTCACCCTCAG    | 366.226209764649 | 0.439955619096203 |
| AGTGCTTACTCA    | 366.234184218361 | 0.62399888706185  |
| CGTCATTAGTGA    | 366.240521721625 | 0.801504134783163 |
| ATGACGTGATAC    | 366.263447680012 | 0.271637657505648 |
| TGACTGCAGAAA    | 366.295803763881 | 0.575726264733673 |
| CTAAGATATGAC    | 366.374856479048 | 0.618869903773276 |
| ATCATGGATGAC    | 366.375909412079 | 0.580780399356969 |
| GACACGTAGTCA    | 366.379590000409 | 1.20336923487346  |
| GTCATACAAGCA    | 366.386103288122 | 0.47634670220999  |
| CGAAGGTATGAC    | 366.391700132342 | 0.970228948074691 |
| GAACCGTATGAC    | 366.429900067237 | 0.754488354492721 |
| CGACTGGATGAC    | 366.443746677429 | 0.892542784158795 |
| GTTAACGACTCA    | 366.44850706359  | 0.840851662785656 |

|               |                  |                   |
|---------------|------------------|-------------------|
| CCGTGCTATGAC  | 366.471366991286 | 0.662655415570266 |
| GTCATACCGGAC  | 366.529826737179 | 0.578265196125265 |
| CCAGGCTATGAC  | 366.592777496387 | 0.577402198790724 |
| CACCATTATGAC  | 366.609034423504 | 0.321091931805726 |
| GGTCTTTAGTCA  | 366.622266698089 | 0.946769381775332 |
| TACTACTAGTCA  | 366.631643322159 | 0.412292501389488 |
| TACGGTGAATCA  | 366.632759959159 | 0.186450739810907 |
| TGACACAAGTAA  | 366.654207136602 | 0.614271567454844 |
| CATCCCGATGAC  | 366.695473474292 | 0.52885107480674  |
| CTGTGCTATGAC  | 366.712544829464 | 0.515139908158272 |
| GTCATATTGTCA  | 366.719050046335 | 0.767600625039036 |
| AAAGCGCGTCAT  | 366.740271099783 | 0.553233906906749 |
| CTTTATTTGTCA  | 366.775229844235 | 0.456723152796162 |
| GTCATCATCAGA  | 366.824790800105 | 0.369226921758759 |
| GGGTCATATGAC  | 366.852301258995 | 0.50078981387573  |
| CGCTACGATGAC  | 366.869492245013 | 0.723091919405164 |
| GATGACGCCCTAC | 366.871827294333 | 0.36095281381889  |
| ACAAGTTATGAC  | 366.873914615265 | 0.620653828324187 |
| AGTTACATCATC  | 366.882513039386 | 0.241312946881912 |
| GTCATACAGCTA  | 366.888553570373 | 0.76386508766133  |
| ATGACAATATCA  | 366.921631369446 | 0.795469167275451 |
| TAGCATGAATCA  | 366.92614987143  | 0.560661039738569 |
| CAAACATATGAC  | 366.929194271047 | 0.58600611228661  |
| TGACTCGTGAAA  | 366.94359704284  | 0.775936033799606 |
| ATTCTGACTGA   | 366.950746988419 | 0.451939242551982 |
| CTTACCGATGAC  | 366.988041645384 | 0.393263181408573 |
| CGACTGTGTGAC  | 367.047116268305 | 0.836698575198506 |
| CATCGAGATGAC  | 367.055774446982 | 0.5855686892295   |
| CTGAATTCGTCA  | 367.101596364225 | 1.00733803313912  |
| ACCAACGATGAC  | 367.108434382425 | 0.552906084968808 |
| AATATAGACTCA  | 367.168909680707 | 1.1298899737946   |
| ATGTGTCAACCC  | 367.185885166939 | 0.323990610817919 |
| CCTCTAGAGTCA  | 367.207807412316 | 1.02202112345529  |
| CACGATGAGCCA  | 367.224236815874 | 0.445980064342221 |
| CCTACGGATGAC  | 367.232860004813 | 0.657742046454287 |
| ACTTCTGATGAC  | 367.244240448205 | 0.73969051207019  |
| GATTTGCTCACA  | 367.250387601808 | 0.615603477165133 |
| CCTATGTGTGAC  | 367.285874573928 | 0.662008535230334 |
| ACTAGGTATGAC  | 367.28940271834  | 0.535059089776532 |
| CCACGTTACTCA  | 367.336338630189 | 0.440082438497877 |
| CCGATAGTGTCA  | 367.337523202076 | 1.36784118478946  |
| ACCGCCGAGTCA  | 367.341651962705 | 0.603276329960069 |
| CGTGTATTAGTC  | 367.347105862194 | 0.976433014249839 |
| AGTCACTTAGG   | 367.361271641509 | 0.467617942563348 |
| AGTACGTATGAC  | 367.365430526243 | 0.204994217325625 |
| TACGTCCAGTCA  | 367.383310846339 | 0.447332903759966 |
| GTCACTAAGTCA  | 367.389452950606 | 0.811941982632519 |
| CCAGGTTATGAC  | 367.391037571632 | 0.810297364477051 |
| CAACAATATGAC  | 367.409552295637 | 0.551806401892904 |
| CTCAGTAATGAC  | 367.437915284953 | 0.695308912995294 |
| CTTTCCACGTCA  | 367.462400237618 | 0.571981901803539 |
| GTCATCGGGCGA  | 367.469513898495 | 0.55118326820949  |
| ACGCATTGGTCA  | 367.501162491185 | 0.450774053435125 |
| AGAGAGGTGACT  | 367.563122862498 | 0.322945380289419 |

|               |                  |                   |
|---------------|------------------|-------------------|
| GTCATCACGACA  | 367.577541616803 | 0.719511110033928 |
| GTCACCAAGTGAC | 367.595867416059 | 0.972707452040748 |
| AGCACTTACTCA  | 367.605498479866 | 0.575448083681832 |
| GTCACACCATGA  | 367.635806013823 | 0.746544513801963 |
| CAATGCGATGAC  | 367.642141532526 | 0.594119717571764 |
| AACAATTAGTCT  | 367.663669330367 | 0.528604629607795 |
| GCTACGTATGAC  | 367.679130843295 | 0.745285065303439 |
| AGGCTTCAGTCA  | 367.704993240404 | 0.718707000614636 |
| TGACTCTAGTAA  | 367.725477875579 | 0.269099029459193 |
| ACTAGGGTGACT  | 367.803649484505 | 0.559670105824783 |
| ACTGCCGATGAC  | 367.80450988418  | 0.621027013017469 |
| CTTAGTGAATCA  | 367.844657067868 | 0.80709549682604  |
| AACTTTTACTCA  | 367.880643946634 | 0.379528996275617 |
| GTCATCCGTGCA  | 367.89670652469  | 0.833694803862768 |
| ACCGAATATGAC  | 367.901988191289 | 0.460235900971554 |
| ATGACTAGCAGC  | 367.956131092895 | 0.265692981977088 |
| AGGCATGACCCA  | 367.993206599801 | 0.76097008611382  |
| CTTTGGGAGTCA  | 368.064552112776 | 0.662751528000775 |
| ATGACTTGTATC  | 368.06944389829  | 0.404193140891228 |
| CAAGCTTATGAC  | 368.085159047705 | 0.59686205496903  |
| AGTCACCCTGGC  | 368.141179857696 | 0.57641110967615  |
| CTAGGATATGAC  | 368.190415867622 | 0.658661929441543 |
| CTTAATTCGTCA  | 368.199943512701 | 0.655780339170217 |
| ACCTATGATGAC  | 368.202487505011 | 0.419115833730973 |
| AGGCCATGAGTC  | 368.236738682596 | 0.426142693218813 |
| GTCATACCCTTA  | 368.309309989082 | 0.460360050587969 |
| ATCGAGTGAGTC  | 368.350877898157 | 0.264119520106476 |
| GGAAACTATGAC  | 368.370670206688 | 0.563639841869918 |
| GTCATCACAAAGA | 368.407777534409 | 0.668974942132976 |
| CATGTCGGTGAC  | 368.411640912259 | 0.960758883793327 |
| ATGTCTTATGAC  | 368.456725324306 | 0.759185397027261 |
| ACATACGGTGAC  | 368.480039082275 | 0.818030790567035 |
| CATGCGTATGAC  | 368.525913704599 | 0.705013057960612 |
| TCCGATTGCTCA  | 368.556950837343 | 0.123829734501888 |
| GTCATACGTGGA  | 368.625853646789 | 0.372075164242218 |
| TAAACTGTGTCA  | 368.627952795687 | 0.302759539577325 |
| GTCATCGGTTCA  | 368.656683889491 | 0.963089680258853 |
| GACATGCATGAC  | 368.703144944992 | 0.828496745464386 |
| AATTACTGACTC  | 368.709924513483 | 0.34626665134363  |
| CATAGATATGAC  | 368.722619236767 | 0.642951846029604 |
| GTCATATTCGCA  | 368.752693151414 | 0.464565772157877 |
| ATAAATGGGTCA  | 368.76232433665  | 0.288384364155423 |
| GCTTGAAATGAC  | 368.772958408571 | 0.974967001597756 |
| GTCACATTGACA  | 368.834883127151 | 0.581212372621124 |
| GTCATAGATAAA  | 368.83925120014  | 0.801854695077165 |
| GCACATTATGAC  | 368.855412719088 | 0.400749659103849 |
| CGTACTGTCATA  | 368.860909734303 | 0.2437658595508   |
| ATGTTTTACTCA  | 368.865648264071 | 0.586567965376134 |
| ACATTGGATGAC  | 368.86685764581  | 0.394239956222606 |
| CAAGACTAGTCA  | 368.873764413011 | 1.55840592781226  |
| CAGATCTATGAC  | 368.899967696179 | 0.61787595832262  |
| GTCACACATGAC  | 368.915956515891 | 0.609641596320317 |
| ATCCCTGACTGA  | 368.931709342565 | 0.338337721886415 |
| CAGGATTGCTCA  | 368.963856323632 | 0.858900864468312 |



|              |                  |                   |
|--------------|------------------|-------------------|
| GATGCGAGTCAC | 368.975328137395 | 0.521425901996183 |
| CGTACGTATGAC | 369.004003607483 | 0.925424367564271 |
| CCTTAACAGTCA | 369.078546227851 | 0.826423516842356 |
| GTCATCCAATTA | 369.163546593429 | 0.521587374229224 |
| GCGACACAGTCA | 369.196194555878 | 0.808209901206687 |
| AGATCACGTCAT | 369.351297434315 | 0.663520291247714 |
| ACATCGGATGAC | 369.369557573182 | 0.487611999152385 |
| GCTCTATAGTCA | 369.389250274608 | 0.597316424690607 |
| TGACTCCGATAA | 369.395205740724 | 0.730909814782149 |
| ACGTTAGACTCA | 369.396966667595 | 0.847757420021679 |
| AAATCCGATGAC | 369.422776650077 | 0.880792581640254 |
| ATGAGTACGTAA | 369.480483529058 | 0.260830131478686 |
| CCCAGAGATGAC | 369.481866053175 | 0.718269704554072 |
| GCCGATTATGAC | 369.497044743013 | 0.486370327520123 |
| GCCCCATATGAC | 369.504514907412 | 0.705874771382925 |
| GACTCCACGTCA | 369.516482949184 | 0.77317349692595  |
| CTTACTGATGAC | 369.517354027524 | 0.635347126421226 |
| GTACGCGATGAC | 369.522298357772 | 0.62947505253835  |
| GTCATCGATGGA | 369.530996307355 | 0.546294514315617 |
| CTAACCGAGTCA | 369.54586799317  | 0.6219311260037   |
| ACCAAGGTGACT | 369.565632546113 | 0.29348006684418  |
| ATTACGGATGAC | 369.588567331155 | 0.431404916536396 |
| ACGGGTTATGAC | 369.623434937584 | 0.34941228493661  |
| GTCATATCACTA | 369.635434870781 | 0.539683398698816 |
| ACTATGTATGAC | 369.669037423093 | 0.534136171391393 |
| AGTCACCTTGAG | 369.695087119594 | 0.47907619933989  |
| CGCACCGATGAC | 369.757999102138 | 0.832432541349102 |
| ATTTGCTCACAC | 369.766628815575 | 0.429386074044249 |
| GTCATAGTCAAA | 369.802453870822 | 0.606713192657217 |
| ACTCAGTGAGTC | 369.83127944634  | 0.936022246012142 |
| CTGACGCAGTGA | 369.87774732777  | 0.795747051376292 |
| GAGTCAGTAATC | 369.88796937475  | 0.415166688185663 |
| GCATACCAGTCA | 369.928859960725 | 0.853931553411085 |
| GTCATAAGCTGA | 369.941634090318 | 0.654414502451433 |
| ACGCGTTACTCA | 369.973462748632 | 0.840479901599883 |
| CCGGCATATGAC | 370.041507315664 | 0.684614136199018 |
| CAGACGTGAGTC | 370.063845864605 | 1.39068423389272  |
| CTTTACACGTCA | 370.104630985497 | 0.719367913923282 |
| ACTCATCGGGTG | 370.118726526109 | 0.711235590679039 |
| GCCGATAAGTCA | 370.16006257741  | 0.947180708468228 |
| GGCCTGTATGAC | 370.189034051285 | 0.692119030097936 |
| GTCATAACTGTA | 370.196678224368 | 0.560931771591667 |
| GTCATATCAACA | 370.201214250287 | 0.520130326555267 |
| GTGTCATGCTCA | 370.203733396958 | 0.86085178510295  |
| ACTAATTCGTCA | 370.207291609454 | 0.617712799162236 |
| ACTAATACGTCA | 370.254475382332 | 0.549145545524908 |
| GCCACAGATGAC | 370.263742698663 | 0.834473623066914 |
| GCAACGTATGAC | 370.271398199361 | 0.433606307890674 |
| CTTACTTATGAC | 370.332194654103 | 0.412991750967336 |
| ATGAGTACGTCC | 370.358040518073 | 0.377829092783259 |
| CGCGCTGTGTCA | 370.366959998471 | 0.667647074353012 |
| ATGACTTGTTAC | 370.41362883188  | 0.571956803908652 |
| ACACATTATGAC | 370.46105280906  | 0.63041437252527  |
| AGTACCAATGAC | 370.516241617938 | 0.589162482816224 |

|              |                  |                   |
|--------------|------------------|-------------------|
| CCAAAAGTGTC  | 370.562873358843 | 0.567449562177162 |
| CGTCTAGAGTCA | 370.569217674314 | 1.07051873888319  |
| TATGACAGCTAA | 370.608817866286 | 0.477823669573558 |
| AATACGTGACAC | 370.626853369697 | 0.869135029247048 |
| CAACTCTATGAC | 370.638299403895 | 0.558754651929042 |
| ACAGTCGATGAC | 370.679007003729 | 0.67815653784382  |
| AGTCACCTTGAA | 370.683108908293 | 0.46979532655744  |
| ATCACCTATGAC | 370.685012339947 | 0.650333695856054 |
| CACTTTTACTCA | 370.814783846472 | 0.171545859929685 |
| ATTGCGGATGAC | 370.871822986839 | 1.03357709077106  |
| CAACCGTATGAC | 370.896272262978 | 0.520327536411502 |
| CTATTTGCGTCA | 370.902443047542 | 0.409240468749335 |
| CCTTGGGAGTCA | 370.921088779428 | 0.832720475253896 |
| CTGACCGGTGAC | 370.921275568833 | 0.432052975520003 |
| GTCATACAGGAC | 370.931441787653 | 0.563747022562973 |
| AATACCGAGTCA | 370.938038704296 | 0.774584083842784 |
| GGTACTTACTCA | 370.942284979355 | 0.726800961523019 |
| ACCGGCTATGAC | 370.945095413017 | 0.956422990246113 |
| CAACCGTACTA  | 370.997863387416 | 0.563629247340665 |
| AATCTCTGTCAT | 371.088217183894 | 0.35356562853376  |
| CAAATCTATGAC | 371.094197421729 | 0.610939399964055 |
| GTTGCTGACACA | 371.097806258604 | 0.711991460338871 |
| GTCATAACCGTA | 371.12207561333  | 0.589639031319862 |
| GTAATGTATGAC | 371.161447136105 | 0.309269265705247 |
| ATCATCGATGAC | 371.210653658542 | 0.69630905390981  |
| TGACTGTAGCAA | 371.211876253245 | 0.569121338970251 |
| GTCATATTAACA | 371.26971747836  | 0.259023384669634 |
| ACCTCGGATGAC | 371.30691412116  | 0.673991730964845 |
| TGACTGGTGACA | 371.34650409773  | 0.247065328069302 |
| GCACTTGACTAA | 371.414145398992 | 0.636098078229586 |
| ATGACAGACTTA | 371.433382900225 | 0.534797577339594 |
| GTCATAGTAAAA | 371.494135528288 | 0.466199513704107 |
| GTCATCGATTAA | 371.501157732624 | 0.241664693242027 |
| ACAATGAATGAC | 371.529680554489 | 0.682976823643456 |
| CGTCATTATTAG | 371.54531386567  | 0.646987127431796 |
| CTCGTTGACTGA | 371.566200620025 | 0.427447471592632 |
| GTAACTGCGTCA | 371.582931317213 | 0.715910564959902 |
| CGTCATGGATGA | 371.59190264464  | 0.749961750374374 |
| GTCATCATGACA | 371.625393875091 | 0.660987186342529 |
| GACGACTAGTCA | 371.712803460465 | 0.871695876441634 |
| GTCATCACAAAA | 371.725450279223 | 0.63262012284326  |
| TAAAGTGAATCA | 371.761709357905 | 0.839567522777554 |
| CATATCGACTCA | 371.789802936115 | 0.457426595944218 |
| CCTGACTAGTCA | 371.799278131468 | 0.397961592205424 |
| CAACTTCAGTCA | 371.819418723303 | 0.611692117736393 |
| GTCATATCCGTA | 371.83425392527  | 0.679893413617522 |
| ATAAACTGACTC | 371.840738564796 | 0.582784827937764 |
| CCATACGATGAC | 371.913375757046 | 0.509571875179127 |
| CGGCGTTACTCA | 371.916282543751 | 0.22595508257584  |
| GTCATCCCGGAA | 371.960278574019 | 0.828208936604101 |
| CGTCATTTCAAG | 371.991937844336 | 0.827635704227344 |
| ATACAGTCAGTC | 372.01794219417  | 0.544883164771749 |
| TCAGATCTGTCA | 372.050361949677 | 0.872670720709581 |
| TATGATACGTCA | 372.05873798745  | 0.44006520250059  |

|               |                  |                   |
|---------------|------------------|-------------------|
| ACAGTTGTGTCA  | 372.068847007589 | 0.553971337414842 |
| GTCCTGACTGA   | 372.196120435967 | 0.764149508634435 |
| GTCATAGGCAGA  | 372.247910156414 | 0.298215450559344 |
| CAGCATATGACG  | 372.248285931029 | 0.776774962990242 |
| TGACAAATCAAA  | 372.252820474106 | 0.440843436417613 |
| GATGCCTAGTCA  | 372.256044393913 | 1.00250457112989  |
| AACACTTACTCA  | 372.265785786354 | 0.355492776598239 |
| ACAACATGTGAC  | 372.273906686552 | 0.295813552393932 |
| ACCAAGTAGTCA  | 372.30226248589  | 0.365031665570889 |
| CAGTACGATGAC  | 372.333218129962 | 0.990163975134582 |
| GGCAACACGTCA  | 372.351664996177 | 1.05315437172615  |
| CCTAGGGATGAC  | 372.354088780677 | 1.07249215609626  |
| GATTCCGAGTCA  | 372.364135661664 | 0.407721682897741 |
| CGTTGTATGAC   | 372.378433825375 | 0.868370895645471 |
| AGCTGCTATGAC  | 372.390849822484 | 0.642727344287769 |
| CAACGCTATGAC  | 372.504476319557 | 0.704098809959665 |
| CAGCAAATGACG  | 372.506872194086 | 0.779035615959736 |
| CCCAGCTATGAC  | 372.5240699702   | 0.692644248015422 |
| GAGTACTATGAC  | 372.561281758164 | 0.28092979525594  |
| GTCACGTCAGAA  | 372.59781044987  | 1.01496226028212  |
| GTCATTGACGTA  | 372.628549462572 | 0.530927170089657 |
| CGTTGTATGAC   | 372.67108101464  | 0.728791086479152 |
| GTCATAATAAAA  | 372.695376220444 | 0.704835483245207 |
| ATGACTTGTTCG  | 372.697222049044 | 0.869113335251627 |
| ATGACTTGTCTGA | 372.713618870992 | 0.668178018844821 |
| ATCTCGTATGAC  | 372.740361151288 | 0.446072490545161 |
| ACGTACGTTCAA  | 372.75452706932  | 1.94129532755564  |
| TATAATTCGTCA  | 372.762754116886 | 0.800408121569898 |
| ATGAAAGTGTC   | 372.767948216107 | 0.3658506539258   |
| AAAGCCTATGAC  | 372.835263329961 | 0.492971169821039 |
| TGACTCGAGACA  | 372.838543984057 | 0.987310612711795 |
| ATTACTCAAATA  | 372.917521338913 | 0.574307396329224 |
| AGTCACCTTCC   | 372.954184219537 | 0.301887269801884 |
| CCACATGAATCA  | 372.96993866967  | 0.384180664606387 |
| AAACTTGTCA    | 372.990766351299 | 0.411308553967122 |
| GTCATCTATACA  | 372.991852208965 | 0.76285767978513  |
| CACGTCACGTCA  | 373.008388042603 | 0.685544511143259 |
| GTCATATGAGCA  | 373.00905829998  | 0.300621803064229 |
| AGTAACTGACTC  | 373.019748367827 | 0.208760310300784 |
| GTCATCGCATAA  | 373.032120415096 | 0.478376106008277 |
| ACAGATTTGTCA  | 373.044098016286 | 0.485791161701439 |
| GTCATATATTGA  | 373.081401667388 | 0.799360139068171 |
| ACTGCGAGTCAC  | 373.098885570545 | 0.579571874023473 |
| TGACGTCAGCAA  | 373.101961691233 | 0.484853748661797 |
| GTCATATGAGAC  | 373.103007063828 | 0.88180610959046  |
| CGAAATAATGAC  | 373.115399526296 | 0.585852455902312 |
| TGACCCACGTCA  | 373.115539360893 | 0.709773951953607 |
| CATAATATGTCA  | 373.149061234152 | 0.979980032714934 |
| AAATACGATGAC  | 373.16639238552  | 0.285542379821797 |
| AGTGATACGTCA  | 373.203081525778 | 0.384030225294685 |
| TAGTCACGGAAA  | 373.242833942382 | 0.554244425426839 |
| GTCATAAAGGAC  | 373.261135449427 | 0.312989620888422 |
| GTCATCTCGTGA  | 373.291967063967 | 0.418981876019086 |
| CCAGTCGGTGA   | 373.309223627578 | 1.07369892753971  |

|               |                  |                   |
|---------------|------------------|-------------------|
| CTCGTGTATGAC  | 373.31021345433  | 0.53635900592203  |
| CGTATCAATGAC  | 373.378421339634 | 1.01771822691488  |
| AGTCACCCTCGA  | 373.389101699448 | 0.417760353658351 |
| GTCATCCGGTAA  | 373.437387242469 | 0.597611236430916 |
| ATATTTTATGAC  | 373.444557417906 | 0.715234548848706 |
| CTTCACGAGTCA  | 373.55627237495  | 0.646995063428306 |
| CGTACCTAGTCA  | 373.589310953854 | 0.602838271089439 |
| AATCCCAGTAC   | 373.644985776838 | 0.24953726988968  |
| AATTTAGACTCA  | 373.649392785775 | 0.634027436333727 |
| ACCAGATATGAC  | 373.694831596641 | 0.599399858317515 |
| AGTCACCTCGTA  | 373.723335678434 | 0.266838918544021 |
| AGTCACCCTCTA  | 373.741418179557 | 0.237304404455857 |
| GATAACACGTCA  | 373.773665477842 | 1.09546995961055  |
| AAAATTATGAC   | 373.798249617767 | 0.532315698345716 |
| AGCATATATGAC  | 373.802916331553 | 0.398450938233383 |
| GTCATCACGTCA  | 373.830505239745 | 0.464748780598664 |
| ACTAAATATGAC  | 373.850055396466 | 0.58680229895309  |
| GTCATACACGAA  | 373.889500993607 | 0.445135268413187 |
| ACACGTGATGAC  | 373.909997924785 | 0.795714457248174 |
| AGTCATGAGGCA  | 373.935303707275 | 0.521609069793559 |
| CAACGTGTGTCA  | 373.935501273643 | 1.01501329430634  |
| AACAATGATGAC  | 373.949950596608 | 0.669932786311475 |
| GAGTCAGTAACC  | 373.968437440865 | 0.641265173049116 |
| GTCATCATCAAA  | 374.000417191634 | 0.35677770560396  |
| GACACTAATGAC  | 374.012425186687 | 0.70482306783705  |
| CTTATCGACTCA  | 374.027281920109 | 0.400876397823166 |
| GTCATCAATCGA  | 374.080372184796 | 0.509476546146098 |
| CTCACTCGGTCA  | 374.086926303043 | 0.617661400667735 |
| GCATATGATGAC  | 374.115472896033 | 0.999893510777355 |
| ACTGAAGATGAC  | 374.156299161178 | 0.65487813034713  |
| GCCACCTAGTCA  | 374.181073290273 | 0.766432023650102 |
| AGCACTTAGTCA  | 374.182319854631 | 0.692493980070578 |
| ACATTATTAGTC  | 374.190237742913 | 0.372034408367176 |
| ATGAGTCCGGTAC | 374.194439250825 | 0.328044517746446 |
| ATGAGTCCGACA  | 374.206884019479 | 0.308078559417246 |
| AAAATTGTGAC   | 374.263967642797 | 0.36452181146128  |
| AGTCACCTCAGA  | 374.276915450534 | 0.427588625033331 |
| AACTACACGTCA  | 374.289366474553 | 0.842691721121199 |
| GTCATCGGTATA  | 374.304252521555 | 0.473686022554192 |
| TAAATTTGTC    | 374.321343087578 | 0.554580714710856 |
| ATGACTTGTCCA  | 374.324076375727 | 0.225500877615888 |
| CATCCGTGACTA  | 374.343725119321 | 0.632359509433567 |
| TGACGTATTA    | 374.384691076005 | 0.563373414128156 |
| GTCATACCAACA  | 374.408771769874 | 0.480155640447932 |
| CAGTCGCGTGAC  | 374.471836184342 | 0.715998310823165 |
| CTGTTGACTCA   | 374.484855550782 | 0.753979507448784 |
| GTCATTTTATGA  | 374.506461362092 | 0.641066387238509 |
| AGTACTGTCATA  | 374.516284161284 | 0.53451584944567  |
| GCGATTGACACA  | 374.524774539298 | 0.4996850556701   |
| GTAATCCAGTCA  | 374.538922126709 | 0.677251317173823 |
| CACGTGGAGTCA  | 374.553825694318 | 0.6332151512627   |
| GCTCATTATGAC  | 374.578762560836 | 0.233343032474721 |
| AGTCACCCTTTC  | 374.581330666335 | 0.254531850486076 |
| GAACACACGTCA  | 374.601605785681 | 0.529355332482768 |

|               |                  |                   |
|---------------|------------------|-------------------|
| CTCACTCAGTCA  | 374.619390893658 | 0.325292275755025 |
| ACCTTAGACTCA  | 374.634091212435 | 0.632151508945553 |
| ACATCCGAGTCA  | 374.660627984352 | 0.47842098073058  |
| ATGAGTAAAGGC  | 374.701095571253 | 0.275266030156948 |
| AGTCATGAGCCA  | 374.718830916247 | 0.409467138173708 |
| GTGTCCGAGTCA  | 374.724181067416 | 0.414830138716019 |
| GTCATCCTATGA  | 374.77248748852  | 0.320602612405024 |
| ACAATGCAGTCA  | 374.780477517474 | 0.46523510665451  |
| ATGACGAGATTC  | 374.81145713564  | 0.560289920122447 |
| CTTTAATATGAC  | 374.825625173051 | 0.762306536737621 |
| CGTCATCGGTCA  | 374.941192164703 | 0.536568565723856 |
| CGTCACTATGAC  | 374.97812302508  | 0.409081660940638 |
| GTCATCTCAAGA  | 374.992611559822 | 0.903456527659337 |
| GCGCACTATGAC  | 374.998394381435 | 0.867639239498609 |
| ATGACAATACCG  | 375.030638916352 | 0.853231510768817 |
| CCATAATATGAC  | 375.044666348958 | 0.678137861481608 |
| ATCGCTGACACA  | 375.052715786775 | 0.504818293755003 |
| TATTAACAGTCA  | 375.075600696144 | 0.888018859039512 |
| ACGTCACGATGA  | 375.114252300907 | 0.736292660945409 |
| GTCCTCGACTCA  | 375.117683456412 | 0.813009624089942 |
| ATGACTTGGTTC  | 375.134536092798 | 0.378580577608828 |
| ATTATTGACTGA  | 375.161976311476 | 0.960133000357489 |
| GTAATATATGAC  | 375.21770589363  | 0.487073013383678 |
| AATGATTAATAA  | 375.279292755155 | 0.825743070993645 |
| AGGCTGTATGAC  | 375.323580601023 | 0.569087655227304 |
| GTCATCCGTAAC  | 375.341500026803 | 0.443137599146934 |
| ACCGATGATGAC  | 375.474031864616 | 0.533521799141539 |
| AAAATGAATGAC  | 375.492006150385 | 0.512765482040965 |
| ATCAATACGTCA  | 375.575958531966 | 0.423125006851087 |
| GGTAGGTATGAC  | 375.602478699204 | 0.285836619611629 |
| ACGTTGCACTCA  | 375.60364135535  | 0.700402165136772 |
| GGCCTTCAGTCA  | 375.619872831207 | 0.605808202569526 |
| AGTCACTACTCG  | 375.637650038712 | 0.166785980218225 |
| AAATCATGTTCAT | 375.652655966099 | 0.480744841211703 |
| CTAGACTAGTCA  | 375.658595817142 | 0.562433267499072 |
| CTGTCCGATGAC  | 375.680028027798 | 0.589052821343708 |
| GCAAGGTATGAC  | 375.692423570109 | 0.194618810938155 |
| AAGTCTACGTCA  | 375.700665616981 | 0.470995758595812 |
| CCTATAGACTCA  | 375.706450169185 | 0.622342108000623 |
| GTCATCGTTGCA  | 375.731120584508 | 0.767641592435902 |
| ATATTATATGAC  | 375.732060619977 | 0.629040083484269 |
| GTCAGATATGAC  | 375.741024823466 | 0.558597047336285 |
| CATAGGGATGAC  | 375.752342535942 | 0.515927124433151 |
| GTCATTCGTTAA  | 375.763724304611 | 0.767786323391032 |
| CATGTATTAGTC  | 375.781039746828 | 0.640927302244605 |
| CGCGATTATGAC  | 375.81991768339  | 0.594370399536218 |
| TATTTGCACTCA  | 375.837450945925 | 0.530657244309329 |
| GCGTCCACGTCA  | 375.880466786303 | 0.869128140036726 |
| CAGATTATGTCA  | 375.887970030894 | 0.707244897975356 |
| GTCATCCTTTGA  | 375.896142948938 | 0.473714694327369 |
| AGTCACCTTCGA  | 375.950101442439 | 0.191536656281062 |
| ATGAGTCCCAAA  | 375.974775339631 | 0.422636443123623 |
| ATGACAGAGCCA  | 375.99066201542  | 0.49259362824812  |
| ACACGGTATGAC  | 376.032717493313 | 0.76486514923256  |

|              |                  |                   |
|--------------|------------------|-------------------|
| TAATTGGAGTCA | 376.082462130736 | 0.754924090769942 |
| GTCACAATATGA | 376.090000971789 | 0.845559045864548 |
| GCGACCTAGTCA | 376.145758649426 | 0.934160526042878 |
| GTCATAGATCTA | 376.162399387548 | 0.334962215251987 |
| AGTCACTCTGTG | 376.169805124622 | 0.60605683274522  |
| GTACACGAGTCA | 376.215171176117 | 0.756368992509488 |
| GTCATCGACGTA | 376.232016717639 | 0.955493373675736 |
| GTCATTCAATGA | 376.249439393446 | 0.743557885995714 |
| AGTCACGCTTCG | 376.2802350018   | 0.449431086553402 |
| CGACACACGTCA | 376.372126537664 | 0.314173266352686 |
| ACAATTTATGAC | 376.41587186196  | 0.545759253903642 |
| GTCACACGACGA | 376.432455268355 | 0.675850674249994 |
| AGTCACCTCCG  | 376.49648162589  | 0.33822703437152  |
| GTCATATTTCCA | 376.500145957625 | 0.167064836596273 |
| GAACACTAGTCA | 376.511199293741 | 1.32365810490906  |
| GTCATACGTCAA | 376.513658692785 | 0.842528740345805 |
| CTTCTTGCGTCA | 376.515201298452 | 0.513880045516715 |
| ATATTTGCGTCA | 376.537448297679 | 0.824204572780633 |
| AGACACGTGTCA | 376.550233324774 | 0.316591191753587 |
| GTCATAATCTGA | 376.564023351937 | 0.903158148383437 |
| GTCTCATAGTCA | 376.590647690562 | 0.665271604869435 |
| ATGACGTTATTG | 376.602328918952 | 0.62594604709363  |
| AGTCACCCCTAA | 376.61294580478  | 0.537458213311869 |
| ACTCGGTATGAC | 376.642357916861 | 0.318724346291022 |
| ATGACGATGTCG | 376.664651975105 | 0.286734685045814 |
| TGAGTCGAAACA | 376.711209767453 | 0.330812330695044 |
| TGACGTGTAACA | 376.756423427851 | 0.408569583195967 |
| AAAACGCAGTCA | 376.778736764807 | 0.775310499197346 |
| ATCAATGATGAC | 376.796302765862 | 0.507086094140719 |
| CAGATTGATGAC | 376.828289622511 | 0.9347556972442   |
| CATACAGAGTCA | 376.83870047721  | 0.563295064747199 |
| GTCACCCATGAC | 376.881270130938 | 0.601633198092807 |
| CTCGATATGTCA | 376.887841001706 | 0.36556933834915  |
| CTCGACTATGAC | 376.894366023747 | 0.146515365218679 |
| ACTCATTAGTGG | 376.9256479616   | 1.06349642437988  |
| ACTCCGATGACG | 376.928281122236 | 0.51665120803194  |
| GTCATCCGTCGA | 376.942828575805 | 0.340552738531352 |
| TCGACTGTGTCA | 376.989962868105 | 0.961379597593597 |
| ATGACAGTGACA | 376.991170120955 | 0.706666253185985 |
| CTCTCTGTGTCA | 377.003869528095 | 0.407960699715133 |
| ATGACTAGCGCC | 377.008851582749 | 0.729594271197351 |
| CTACTAGAGTCA | 377.080723313078 | 0.756596213537877 |
| GTCACCTTATGA | 377.08990371009  | 0.944669207356454 |
| GCAGATACGTCA | 377.103074592048 | 0.401331476925424 |
| CAAAGTGTGTCA | 377.105097515639 | 1.26004722597287  |
| CGTACGAATGAC | 377.13207214759  | 0.640034631700379 |
| AGTCACCTTATC | 377.16416448577  | 0.310121581140343 |
| ACCGAAAATGAC | 377.208513394584 | 0.488386988170085 |
| TGACTAGGCTCA | 377.235437483554 | 0.558512266264849 |
| ACGGCTAGTCAT | 377.24096228789  | 0.864116665811618 |
| CCGTTTGCGTCA | 377.26849792255  | 1.0466453627331   |
| GTCACAGTGACA | 377.306932657171 | 0.417664658318904 |
| GAAGATTATGAC | 377.383536821092 | 0.265805823753652 |
| GCACTCGATGAC | 377.393066615899 | 0.870578818984852 |

|              |                  |                   |
|--------------|------------------|-------------------|
| ATGACGCGCCAA | 377.423049982942 | 0.564174533388746 |
| ACTCTTACGTCA | 377.426440460399 | 0.343786058585289 |
| CAATATTATGAC | 377.440283317948 | 0.478151383693893 |
| CCTAGGTGTGAC | 377.446015844709 | 0.778733975203635 |
| GTCATAAGGTCA | 377.462077658498 | 0.594158750435164 |
| ATACCGGATGAC | 377.46717906389  | 0.508222349230012 |
| TAATATTGCTCA | 377.472407382663 | 0.632553459675715 |
| AGGACTCAGTCA | 377.479764133694 | 0.581472086654863 |
| GTAGCTTAGTCA | 377.480771040681 | 0.736080478500016 |
| TACGACGACTCA | 377.513938012654 | 0.426120740738953 |
| GTCATATTTCTA | 377.570972013851 | 0.255010735639335 |
| CGAACGAATGAC | 377.578566903356 | 0.485862187385611 |
| GGATCTGATGAC | 377.593794029799 | 0.482868976435665 |
| CTCACGGGTGAC | 377.6168412828   | 0.389562327825807 |
| CTTAACGGTGAC | 377.648972411128 | 0.970177463834423 |
| AACATACAGTCA | 377.659826193039 | 0.58416801276233  |
| CCGTACACGTCA | 377.689166832136 | 0.679861714954144 |
| GGTAGTTATGAC | 377.695167798177 | 0.457280034974688 |
| AACTCCGAGTCA | 377.711163002205 | 0.601382705846751 |
| GAAATCGACTCA | 377.71808181054  | 0.575979872277825 |
| GTCATCGTACAA | 377.731357261786 | 0.584205587174605 |
| AATGTATTAGTC | 377.731547813317 | 0.814841469865977 |
| ACTGTGGATGAC | 377.739635099029 | 0.850499857120526 |
| ATCACATATGAC | 377.752426222137 | 0.411491586954017 |
| GTCATCCTTGCA | 377.787497728487 | 0.674263197327017 |
| CACTTACAGTCA | 377.831405085573 | 0.915687435674624 |
| AGTTACATCATA | 377.83954893206  | 0.184087830914715 |
| CGTGATGATGAC | 377.84248548457  | 0.514013848779106 |
| AGTCACTTCTTA | 377.888300596083 | 0.465690858399383 |
| ATACATGATGAC | 377.954149223992 | 0.87371928795725  |
| ATCGGGTATGAC | 377.981129332602 | 0.574702992764475 |
| GTCATAATGCAC | 377.99137651964  | 0.667905701520753 |
| GTAATACAGTCA | 378.003284995166 | 0.5870950613407   |
| CTAATTAAGTCA | 378.011879117297 | 0.703386474187169 |
| ACGTACTATGAC | 378.012378516605 | 0.422964595047456 |
| GTCATAATAGAC | 378.01314789865  | 0.658372214227039 |
| AATTATGATGAC | 378.025946821617 | 0.741773145181167 |
| TGACGTCAGCCA | 378.057671545479 | 0.705482436985097 |
| AGTTCACGTCAT | 378.075674785493 | 0.767204211195432 |
| ATGATGTATGAC | 378.101934095363 | 0.263324877614731 |
| TCCGTCACGTCA | 378.147466606639 | 0.161430515081125 |
| ATGAGTCCGACG | 378.15440977485  | 0.502594609201939 |
| AGTCAGTGTGAC | 378.164049781999 | 0.34189306491427  |
| AGATAACGTCAT | 378.167054082224 | 0.213541971453667 |
| AACTCTGTGTCA | 378.179070442187 | 0.689998792701803 |
| GTTGACTAGTCA | 378.20774527873  | 0.706244169132858 |
| ATGAGCAAATGG | 378.225652472689 | 0.318316956138819 |
| ATACTATAGTCA | 378.234943468071 | 0.768749173212333 |
| GTCATATCATGA | 378.256443379313 | 0.386786332257417 |
| GCCTGGTGTGAC | 378.259023720747 | 0.585809061545161 |
| AAGCCATATGAC | 378.292545843599 | 0.44901342369101  |
| CGTTTCGATGAC | 378.327905432513 | 0.510711522703305 |
| GTCATCCCTGGA | 378.348744536989 | 0.891546197998955 |
| AATACCTATGAC | 378.434735526301 | 0.480180674649705 |

|              |                  |                    |
|--------------|------------------|--------------------|
| ACACTCGAGTCA | 378.449131247384 | 0.505131265851452  |
| CCATCCGATGAC | 378.460063501539 | 0.450669419472183  |
| TCAGTTGTGTCA | 378.467487555465 | 0.518171586817376  |
| GTCATACCTGCA | 378.473856493846 | 0.246356515704493  |
| GACTCACGTATA | 378.47997998397  | 0.668570513396557  |
| CGTAACGATGAC | 378.502038264863 | 0.848911095243246  |
| AACGATCCGTCA | 378.505783769394 | 0.576245515367628  |
| ATGACGATGTAA | 378.51479605859  | 0.495572878752022  |
| ACTACTGCGTCA | 378.516190423993 | 0.45048584088806   |
| GTTCTGACGTCA | 378.553806069525 | 0.920224760720488  |
| ACGTCACCGATG | 378.560442051494 | 0.597459193420435  |
| AGGGCTTAGTCA | 378.580383914966 | 0.439346844528697  |
| GGTCTGTGTAC  | 378.63596647234  | 0.50183828092648   |
| GAAGCCAATGAC | 378.641099666443 | 1.38189905989209   |
| TATCTAGAGTCA | 378.641918610718 | 0.884414606521713  |
| TAATTCGACTCA | 378.698336575199 | 0.349572409547459  |
| CGATACTGACTC | 378.74281411188  | 0.305747014012776  |
| AATGATGCAATT | 378.777789243203 | 0.616907258106152  |
| CATCAATAGTCA | 378.805177312131 | 0.419277908322083  |
| CTATTGTAGTCA | 378.808934961306 | 0.5141598073665    |
| AACTATACGTCA | 378.847123044922 | 0.857992970264236  |
| ATATTGCGTAAT | 378.920127145764 | 0.228618811636435  |
| GGTCCTGTCATA | 378.921381325409 | 0.406811925293939  |
| CTGCACACGTCA | 378.930909054976 | 0.484924578739466  |
| ACCGATTGGTCA | 378.932198359095 | 0.593790960163386  |
| TCAGCACAGTCA | 378.960586917461 | 0.70446845895866   |
| ATTGAGTGAGTC | 378.962340958893 | 0.72070403008628   |
| AAACTATAGTCA | 378.968150055685 | 0.580061097389344  |
| GTTGTTGACACA | 378.988902814325 | 0.787718815619438  |
| ATCAGCGAGTCA | 378.993159147385 | 0.915466994002564  |
| GTCATAATGGTA | 378.995023536826 | 0.60120620439705   |
| ATACTGTGTAC  | 379.022050036877 | 0.374244940897     |
| CCAGCCGATGAC | 379.025338240577 | 0.852850343858969  |
| GGTAACTATGAC | 379.035575519104 | 0.16442396924075   |
| GTCATCGCGTGA | 379.044536989329 | 0.581549981893408  |
| GACGCGAGTCAC | 379.10532416306  | 0.721244190761437  |
| CACTCATAGTCA | 379.12903386894  | 0.0652901796638108 |
| TGACTACAATAA | 379.134553403281 | 0.690556098853828  |
| GCGGTGTATGAC | 379.168299751521 | 0.658964340232614  |
| CATTATTATGAC | 379.171704429427 | 0.561752772592328  |
| CTGAATAATGAC | 379.185320304942 | 0.698702600955058  |
| ATCGATAAGTCA | 379.243454078715 | 0.532042070677178  |
| GAAGGCGTCATA | 379.277307258654 | 0.366901028340035  |
| ATATCATATGAC | 379.301002467453 | 0.550735902034304  |
| TCATACGCGTCA | 379.308010213607 | 0.248598461440087  |
| GTCATAGCTTAA | 379.314303890596 | 0.632180470714759  |
| CAATAGCAGTCA | 379.324055509971 | 0.879446498311678  |
| CATGTTGTGTCA | 379.352299822169 | 0.535448490923224  |
| CTGTAATGATGA | 379.36584057493  | 1.48487190559865   |
| TGAGTCTAAACA | 379.391541496448 | 0.379839070767636  |
| TAAATCGACTCA | 379.409359048587 | 0.570958873274409  |
| ATTGCATGACGC | 379.41863910884  | 0.80997561767636   |
| GCACTGACGTCA | 379.427244384201 | 0.404295044250666  |
| TGACTGTGTGCA | 379.443028206611 | 1.08971996220709   |



|               |                  |                   |
|---------------|------------------|-------------------|
| TCGTGTGAATCA  | 379.46064186727  | 0.673214000684721 |
| ACTCACGATGAC  | 379.484827940881 | 0.491018634477986 |
| CGAGCCGATGAC  | 379.510855271842 | 0.560433296401277 |
| CCTTATTATGAC  | 379.579902962095 | 0.219427523893196 |
| ATGACTAGCGCG  | 379.589649909214 | 0.718974502762459 |
| TGAGTCGATGAA  | 379.637678792795 | 0.399416697738628 |
| ACAAACTGACTC  | 379.656115169339 | 0.691047774596927 |
| ATAAGTGACGTG  | 379.740885997158 | 0.239256213665857 |
| TGCTCATGAGCA  | 379.77894837263  | 1.0553456197844   |
| GTAGACTATGAC  | 379.779577675886 | 0.69989381991235  |
| ATTCTGTTACTCA | 379.789038334094 | 0.41150346726946  |
| CACCACGATGAC  | 379.801352379892 | 0.61820151077364  |
| GCTTCGAATGAC  | 379.82194074731  | 0.695445041876531 |
| AGTAGGGTGACT  | 379.827513182614 | 0.424666482167799 |
| ACCTATACGTCA  | 379.82824693032  | 0.439748088904339 |
| GGAAGCTATGAC  | 379.830160166854 | 0.596259428556353 |
| ATGACTTGACTG  | 379.911258021251 | 0.567437620358098 |
| CCCAGTTGTGAC  | 379.932309647746 | 0.710649331041481 |
| CCAATGGAGTCA  | 379.952536675971 | 0.866828368408163 |
| ATTTCCGATGAC  | 379.965821317336 | 0.568036596567772 |
| CATCATGATGAC  | 379.977463845202 | 0.45555242421769  |
| GTGCACGAGTCA  | 380.027986791997 | 0.496100205157059 |
| CGTCATATGTAC  | 380.054727187273 | 0.458620307465473 |
| CTTGCGCATGAC  | 380.146502294566 | 0.365963814853394 |
| CAGACTTACTCA  | 380.155129648592 | 0.543983744056837 |
| ATGACTTGGTCA  | 380.158354896776 | 0.297507462603977 |
| AGGTTCCGACTCA | 380.215312033046 | 0.543161687870081 |
| ATGTTTCCGTC   | 380.241048642774 | 0.71149922615672  |
| TGACTAGTACCA  | 380.258340977294 | 0.85612670022545  |
| GTCATCATGTGA  | 380.264211989848 | 0.637754275844864 |
| GTCATATTCTGA  | 380.26890399729  | 0.706493105639127 |
| AAACTCTGTCAT  | 380.285378948276 | 0.729261876700342 |
| ACAAGATTAGTC  | 380.31937351587  | 1.0677542649884   |
| CAGTCATGGTTC  | 380.322673405414 | 0.595705771370675 |
| CAGAACCAGTCA  | 380.328981697198 | 1.01121846172299  |
| TGACACAAACAA  | 380.392256622119 | 0.622800365200157 |
| CCCAAGGATGAC  | 380.413695439098 | 0.744861062397161 |
| GAGTCAGTAATA  | 380.415575810396 | 0.346674949932013 |
| GACCTAGAGTCA  | 380.42008567815  | 0.843146882254471 |
| ACCTCCGAGTCA  | 380.430985514738 | 0.348069755540406 |
| ATTCTGACGTCA  | 380.437889016174 | 0.600884740351952 |
| CTAGACCAGTCA  | 380.487111845951 | 0.178277524281462 |
| AAATTTTGACTC  | 380.513496762538 | 0.535115819781638 |
| GTCATCTTCGGA  | 380.522061974662 | 1.03024453172561  |
| GAGTCAAACCTCA | 380.570627173949 | 0.797267956973672 |
| TCTTGTGAATCA  | 380.584724699275 | 0.215034640162024 |
| TCATCATAGTCA  | 380.616514133069 | 0.54151657803929  |
| GTCATCCTTAGA  | 380.618175798617 | 0.428306064101229 |
| CGTCATATGTCA  | 380.692483337918 | 0.391404335616149 |
| AGTCACTCTCTA  | 380.722835222365 | 0.32134956736707  |
| GTCATCCGAAGA  | 380.734928001373 | 1.07422845906989  |
| CGTGCGAATGAC  | 380.763413045506 | 1.03717525275438  |
| GTCATTGTATGA  | 380.765919249184 | 0.595050688562625 |
| CGGCTTTAGTCA  | 380.770855907529 | 0.531137158625849 |

|               |                  |                   |
|---------------|------------------|-------------------|
| GTCATCTGACAA  | 380.807572864677 | 0.702377702732667 |
| CTCAAAGTGTC   | 380.906159458512 | 0.82891763063818  |
| GTCACGCATGAC  | 380.911236055242 | 0.375992459826318 |
| TGACAGATTA    | 380.961141681589 | 0.733118305185898 |
| AGAATTTATGAC  | 381.000439501559 | 0.521631720366492 |
| TCATGCATGACA  | 381.013896736688 | 0.552142986809488 |
| CTGACACAGTCA  | 381.103201075718 | 0.394659705081415 |
| CCATCCGAGTCA  | 381.117173148057 | 0.784092136911438 |
| GCGGCCTATGAC  | 381.15097820073  | 1.14049308855728  |
| CCTTCGGAGTCA  | 381.189551173507 | 1.04901804915273  |
| AACTCGGATGAC  | 381.195812041371 | 0.908190240075309 |
| GCAGAAGATGAC  | 381.210364052335 | 0.338931946226966 |
| CATAACTGACTC  | 381.211137121374 | 0.324953189139574 |
| AGCTTCGATGAC  | 381.230850873066 | 0.510534239253909 |
| ACAATGTATGAC  | 381.249957176235 | 0.551799717433304 |
| TGATTCACCTCAA | 381.258552476554 | 0.550069249640033 |
| GTCATACGAGCA  | 381.272362040609 | 0.669199096787389 |
| ATTAGCTATGAC  | 381.283459754894 | 0.729336949105544 |
| ATCTAGTAGTCA  | 381.286148917795 | 0.279704054788791 |
| CGATGTAATGAC  | 381.301162982348 | 0.911987637608419 |
| GCCAGGTATGAC  | 381.318160803127 | 0.823648986687025 |
| AGTCATGGTTAG  | 381.318350963644 | 0.329340230769404 |
| AATGCACAGTCA  | 381.323120936552 | 0.945915128641756 |
| ATGACGTTATTC  | 381.328834122273 | 0.703408775847926 |
| AGTCACCCTGGA  | 381.378264344945 | 0.866809249299361 |
| ACGCTTTGTTCAT | 381.384279128828 | 0.401166699524848 |
| AAGAGAGTGACT  | 381.434346001406 | 0.298604202284649 |
| ATGACTGGGAAC  | 381.457710678242 | 0.624547037053079 |
| AGAACTCAGTCA  | 381.563664389195 | 0.53826306172048  |
| ACATACTGACTC  | 381.606041871009 | 0.237036124405282 |
| GATACTGTCATA  | 381.636357443317 | 0.501697295617079 |
| CATATACAGTCA  | 381.663044948018 | 0.470185666783368 |
| ACATTTGATGAC  | 381.697383270088 | 0.374906759639324 |
| CCCGCGGAGTCA  | 381.715356071899 | 0.705511116170235 |
| TCCTTTGTGTCA  | 381.726632314336 | 0.310221962348065 |
| GTCATACACGTA  | 381.743593134098 | 0.27205474403322  |
| CCTCTTCAGTCA  | 381.753944545252 | 0.324608336121994 |
| CATCCTGATGAC  | 381.75690177228  | 0.643137199414847 |
| GTCATCGCTTGA  | 381.763492371163 | 0.752336747569446 |
| ATAATTGACACA  | 381.85346183973  | 0.900093974915843 |
| ATTCATACGTCA  | 381.885836024746 | 0.402059075070294 |
| TCCATACAGTCA  | 381.909867978251 | 0.424801510308059 |
| GTATTTTACTCA  | 381.955199812565 | 0.695518343694345 |
| AAGCTGCTGACT  | 382.03011882089  | 0.935283841898864 |
| AGTCACTAGTCG  | 382.032296733546 | 0.409054150230206 |
| ATGCGTGCCTCA  | 382.055856694693 | 0.367880986023094 |
| CTGTATCTGTCA  | 382.058378664028 | 0.539626350886889 |
| TGAGTCGAACAA  | 382.061273332295 | 0.554578353030636 |
| ACTGTCTATGAC  | 382.148028444421 | 0.721638430516961 |
| GTCATAATGCAA  | 382.148679023658 | 0.81614320611337  |
| GTCATCTCATGA  | 382.180697771587 | 0.574730165311443 |
| CTGTATAAGTCA  | 382.195038567773 | 0.415264086101882 |
| TATATCGACTCA  | 382.213720221506 | 0.510598546829494 |
| GTGTTTTACTCA  | 382.292798259836 | 0.404642617089323 |

|              |                  |                   |
|--------------|------------------|-------------------|
| ATTAACCAGTCA | 382.292927488081 | 0.592810157753307 |
| ATAGATCCGTCA | 382.296938430322 | 0.541108808412691 |
| ACTGATAAGTCA | 382.322333012434 | 0.662037791495771 |
| TAGTATCCGTCA | 382.353443317414 | 0.431577419722261 |
| GGTAAATATGAC | 382.406641267594 | 0.182964549988343 |
| GCACGATATGAC | 382.420655938993 | 0.582404466920961 |
| GTCATTCGGTAA | 382.420696228421 | 0.501534084363089 |
| ATGACGCGCATA | 382.428119479592 | 0.427862056811173 |
| GATAATTCGTCA | 382.476705115774 | 0.735935804801012 |
| ATGACATTACTC | 382.486837710858 | 0.195892276141555 |
| TAGTACTAGTCA | 382.516571416252 | 0.430902514856919 |
| CCTTTTGTGTCA | 382.535789275243 | 0.478852496436811 |
| ATGACTGGGACG | 382.551456056572 | 0.542667397363127 |
| TGAGTCTATGAA | 382.58047251486  | 0.650405671681918 |
| CGTCATTGGTCA | 382.611127196294 | 0.423841180999553 |
| GATATGTATGAC | 382.613253489543 | 0.588809590224585 |
| GTCATAGTTAAA | 382.625468029551 | 0.557762372998042 |
| TGACTCGCGGAA | 382.630157720856 | 0.531773544799556 |
| CTGCATTATGAC | 382.640396382671 | 0.375596928186225 |
| GTCATCGTCGGA | 382.699650738662 | 0.593727372045233 |
| GTCATACACTAA | 382.747769781266 | 0.634156060723921 |
| GTCATCGTGGCA | 382.765111192039 | 0.670887993632259 |
| ATACTTACGTCA | 382.788860938146 | 0.242187346925048 |
| CGCCATTATGAC | 382.813740492871 | 0.333263922515992 |
| GCCACTTACTCA | 382.817432634312 | 0.29487096013907  |
| TCAAATATGTCA | 382.835650771862 | 0.927121552365669 |
| CTTGACGATGAC | 382.864862364215 | 0.815102054812537 |
| GTCATACAAGTA | 382.871048870021 | 0.453082445610208 |
| AGTGCGCGTCAT | 382.871997116177 | 0.360693528556708 |
| TCACGTGTGTCA | 382.918723730065 | 0.276587827817986 |
| CGTGTCATGAC  | 382.93538488364  | 0.716400784801189 |
| GCCGTTTATGAC | 382.955859908341 | 0.772501647087911 |
| TGACTAGGACAA | 382.966253554137 | 0.58133152019611  |
| TGACTGTTAGAA | 382.96680107163  | 0.911235409137034 |
| GTCATCGTGTCA | 382.969218280744 | 0.45640144333341  |
| CTGGAAAATGAC | 383.064274726359 | 0.4439872378702   |
| ACGTGCTATGAC | 383.110227775031 | 1.03411445478723  |
| ACGTCCGATGAC | 383.115464028969 | 0.790947736386822 |
| CGTAGATTAGTC | 383.13650711912  | 1.52611226294527  |
| AGTCACGACTCA | 383.20015400396  | 0.52062495067731  |
| CTAACCTAGTCA | 383.202402217505 | 0.363616107390255 |
| ATGAGTCGGATG | 383.205773619979 | 0.316208922366991 |
| TATACCGAGTCA | 383.216711206454 | 0.781358873578273 |
| GTGTCATGGTCA | 383.239240825799 | 0.639721609635808 |
| ATGCAAGACTCA | 383.251009474056 | 0.448911963967961 |
| GTTTCCGAGTCA | 383.280620712115 | 0.489385000603418 |
| GACTCTGATTCA | 383.297555346605 | 0.591460360611503 |
| GTCATCGGGCAA | 383.323698320376 | 0.654534629683242 |
| CGGCTCGGTGAC | 383.338050709564 | 0.815737048593236 |
| TCCCTTTAGTCA | 383.38481664188  | 0.516093836288369 |
| CTTGTCGATGAC | 383.405322597241 | 0.720916938541598 |
| CATGAGTGAGTC | 383.438481073077 | 0.657704848856592 |
| CGTAAATATGAC | 383.448011092219 | 0.726827843120726 |
| GCGCTCGAGTCA | 383.473740362928 | 0.376790489986381 |

|               |                  |                   |
|---------------|------------------|-------------------|
| ATAATAATGACA  | 383.499383294812 | 0.961026281223638 |
| CTTTACTAGTCA  | 383.519020585311 | 0.732931341564915 |
| ATTGGCTATGAC  | 383.556059997576 | 0.61564246694402  |
| GTCACCGTCACA  | 383.572878659991 | 0.430439364909868 |
| GCAACGGAGTCA  | 383.584221858799 | 0.836034591605575 |
| AGTCACGCTAAA  | 383.615502396783 | 0.409626436950165 |
| TAAATACAGTCA  | 383.660325691804 | 0.704733287472493 |
| CTTTAGTAGTCA  | 383.700779158908 | 0.52939398143258  |
| GTCACAGTGTA   | 383.732650397098 | 0.50771990381403  |
| ACAAAAGTGTCA  | 383.743235797871 | 0.75632224993707  |
| AAAGGTGAATCA  | 383.774080697298 | 0.464693573439548 |
| AATAGTAATACC  | 383.780936118819 | 1.70285937468938  |
| TCACTTGACTAA  | 383.818340607206 | 0.447938596792821 |
| GTCATCTGTGCA  | 383.828730285969 | 0.738163960138657 |
| ATGACAGAGTTG  | 383.856810472872 | 0.407042295100192 |
| TGTGTCAACAAA  | 383.904530244737 | 0.620084949547739 |
| ATGAGCAACACA  | 383.912304946447 | 0.310017911900148 |
| AGAGTCAATGAA  | 383.9250268625   | 0.43386265441951  |
| CGTAACTGACTC  | 383.92853060669  | 0.448631406766184 |
| CCGATTTTGTCA  | 383.949706686703 | 0.50127152589977  |
| GTC AACGGTGAC | 383.963802534713 | 0.852413235381952 |
| CGGTACTATGAC  | 383.984295049711 | 1.31402822205012  |
| ACGTTTGATGAC  | 384.008681449454 | 0.679830664489161 |
| GCTCAATAGTCA  | 384.029207074361 | 0.876157329012725 |
| CGTCATCTGTGA  | 384.052951973634 | 0.578060558171185 |
| ACTAGAAATGAC  | 384.055629465926 | 0.693906347051747 |
| CATCTGTGTGAC  | 384.091154772478 | 0.243526568398389 |
| GTGTTTGC GTCA | 384.106934665202 | 0.321805869669893 |
| GTACCGTATGAC  | 384.112650648376 | 0.746397220528486 |
| GTCATCGGATTA  | 384.19389621423  | 0.289209504890318 |
| CATACGGAGTCA  | 384.210452683363 | 0.66760129441142  |
| ACACACTATGAC  | 384.220147553475 | 0.417033180718269 |
| GAACGATTAGTC  | 384.241586031609 | 0.469867497627702 |
| CAGTTATCGTCA  | 384.242550121077 | 1.80811642363284  |
| ATGACGTGATTA  | 384.30383498162  | 0.419148013172805 |
| GACTCACTCGAC  | 384.316608897662 | 0.50492232277447  |
| CACGCTAGATGA  | 384.33083557396  | 1.3600371976993   |
| GAACGTGATTCA  | 384.345970254844 | 0.716347938965277 |
| GTCATAAAAGAC  | 384.349248718553 | 0.798861599707688 |
| TGACGTTATTAA  | 384.362870179072 | 0.879698819106976 |
| GATCCTGACTGA  | 384.375069245238 | 0.689030460939597 |
| ATGTGTGAATCA  | 384.384378363953 | 0.563006518191611 |
| GTCATAGTTGGA  | 384.418538866751 | 0.284115033870279 |
| AAGATGTATGAC  | 384.42383813146  | 0.313816471733591 |
| ATTTTGCAGTCA  | 384.4326560138   | 0.515905311732817 |
| GTCATTTTACGA  | 384.461532073673 | 0.63013410146363  |
| CACTTCGACTCA  | 384.511395307146 | 0.332563208096116 |
| CATCCTGACTGA  | 384.536943467007 | 0.456757352199045 |
| CACGTGTGTGAC  | 384.555426414106 | 1.20124137249681  |
| TCAACTGCGTCA  | 384.574889356362 | 0.640677842155078 |
| CAAAGTTATGAC  | 384.634119907244 | 0.798571474620069 |
| GATGACGTCTTA  | 384.637807020307 | 0.587051133880557 |
| GTCATAGTCTAA  | 384.640806313099 | 0.701270076239038 |
| AACGAAGATGAC  | 384.680174311588 | 0.263241139275763 |

|               |                  |                   |
|---------------|------------------|-------------------|
| ACTTAACAGTCA  | 384.693426600953 | 0.443054807491275 |
| AAGAAGGTGACT  | 384.713153590919 | 0.405431421474922 |
| CCAGACCAGTCA  | 384.752811725684 | 0.774248714807605 |
| AATCCGATGACG  | 384.80360586653  | 0.766018874129222 |
| ACGCTCATGACT  | 384.804161893815 | 0.604554275762484 |
| TCTGGTGAATCA  | 384.84024192532  | 0.572135599459318 |
| GCGATATATGAC  | 384.891177253455 | 0.383922590249176 |
| TCGCGTGATTCA  | 384.930160145776 | 0.713833790698867 |
| GTCATCCGTTTA  | 384.937095789121 | 0.425894649485566 |
| CAATACTATGAC  | 384.997074383941 | 0.906257259771085 |
| CGTTTTGCGTCA  | 384.999607759066 | 0.638708945519424 |
| ACGGCGAGTCAC  | 385.004319963331 | 1.0166730172291   |
| GTCATTCGAGAGA | 385.006815377086 | 0.367004068697217 |
| GATTTGCAGTCA  | 385.013828421603 | 0.594657555607805 |
| ACCTCTGTGTCA  | 385.015219852408 | 0.242362248192043 |
| ATCTGAGAGTCA  | 385.023908527994 | 0.333444004082208 |
| GATGATACGTCA  | 385.028970436393 | 0.882441090096663 |
| GATTTGCTCACC  | 385.046500077799 | 0.234531043155513 |
| TGACTGAGGACA  | 385.055540440807 | 0.386903726168676 |
| ACGACCGATGAC  | 385.099393495524 | 0.318852163586561 |
| GACCAAGTCATC  | 385.113982616551 | 0.302905124467986 |
| ATGACAGAGACA  | 385.135543025012 | 0.153222534730568 |
| CGTCACGGTGAC  | 385.14852963147  | 0.772085094370094 |
| TGATTCAGAAAA  | 385.187804172158 | 0.250233508130084 |
| AGAAGGTATGAC  | 385.20839877848  | 0.190906712710173 |
| CCTTAAGATGAC  | 385.26125283281  | 0.722922831647903 |
| GTCATTAATAAC  | 385.282394534426 | 0.360591588212589 |
| CCGCTGGGTGAC  | 385.292956157177 | 1.14691338600765  |
| ATGAATGATGAC  | 385.327165044726 | 0.423412965265499 |
| ATGAGTCTCATA  | 385.329993833503 | 0.571111397648497 |
| ACTAGGTGACAC  | 385.334577076931 | 0.665960964966442 |
| TGACATATGTCA  | 385.363716335912 | 0.842649704327473 |
| AGTCACTCCTAA  | 385.40300348618  | 0.303611129017259 |
| AGATACACGTCA  | 385.4044037587   | 0.847092514222379 |
| TCGAATCCGTCA  | 385.462002939394 | 0.451826928633883 |
| GCCTAATATGAC  | 385.476894831128 | 0.723688838185598 |
| CGGTCCGATGAC  | 385.496654251833 | 0.24329739457262  |
| TATGAGTCTCAA  | 385.547876618208 | 0.588299701864132 |
| ATGGTTTACTCA  | 385.562245204703 | 0.658678950204444 |
| AGTAATTGACTC  | 385.590525828267 | 0.384565401447286 |
| CATAAGTGACGC  | 385.601825109505 | 1.49707077513333  |
| GTCATAGACCA   | 385.604937541993 | 0.621484669990038 |
| GTCATCTGTACA  | 385.618399364603 | 0.617617653066394 |
| AGTCACCTTTGA  | 385.63934272732  | 0.732240996455269 |
| ACGCCGACTCAT  | 385.666339702362 | 0.253032468559163 |
| GCATTGTATGAC  | 385.671801351876 | 0.548116626795297 |
| TAAGGCGTCATA  | 385.735702712523 | 0.269769863504458 |
| AGTCACCTCCTA  | 385.830346806678 | 0.35119705771091  |
| GTCATCTATGAA  | 385.844044740465 | 0.674083389852556 |
| TAGTCCGAGTCA  | 385.863767112299 | 0.857249300531265 |
| TGACTGCGAAAA  | 385.86638691358  | 0.51596554631321  |
| GTCTCGGAGTCA  | 385.878450257271 | 0.732328870966998 |
| GTCATCGATGCA  | 385.889827406807 | 0.96051913636268  |
| TGACAAATAAAA  | 385.902282595391 | 0.626063993907147 |

|               |                  |                   |
|---------------|------------------|-------------------|
| GTCAGTGATGAC  | 385.915165989526 | 0.289924968018685 |
| CAAACACTAGTCA | 385.97836181944  | 0.722376138751182 |
| GTGTCACCTTTA  | 385.98539414731  | 0.633701654805505 |
| TAAAATCCGTCA  | 385.993314235797 | 0.444945851984024 |
| GGCCAAGAGTCA  | 386.000549203938 | 0.367222990346286 |
| ATCCTCGAGTCA  | 386.003666405772 | 0.544150472213789 |
| ATGAGGTATGAC  | 386.016287853558 | 0.581370581839667 |
| GTCATCCACTGA  | 386.076115487058 | 0.664197036167506 |
| ACTGATTGGTCA  | 386.086658985908 | 0.811277210001554 |
| CGTCATTGGTAC  | 386.096638770464 | 0.700962667958608 |
| ACCACTCAGTCA  | 386.100808977585 | 0.409675520912486 |
| ATTGCTCAGATG  | 386.105809975472 | 1.06209351044055  |
| ACGTCATGTCAT  | 386.142841793942 | 0.713783320508404 |
| AACCGTGCCTCA  | 386.151037062138 | 0.478366968650599 |
| GTAATGGATGAC  | 386.178642611211 | 0.381241142128431 |
| TGACTCGGACAA  | 386.19388953276  | 0.408139453437828 |
| AACTCGTATGAC  | 386.267114308243 | 0.658752121143455 |
| CATGGTCATGAC  | 386.295564719037 | 0.882266127630907 |
| TCAGACTTATGA  | 386.320874648735 | 0.779575375623868 |
| GTCATACCGGAA  | 386.336555947933 | 0.759189824930967 |
| AGTCATGGTTGA  | 386.339710950837 | 0.525034307670925 |
| AATGCTGACACA  | 386.342194605565 | 0.961064745762656 |
| GAATACTAGTCA  | 386.36804643598  | 0.704420729044222 |
| AGACTCACTCAT  | 386.370609762603 | 0.290621259728809 |
| ACATTTGTGTCA  | 386.39215386441  | 0.864624931234668 |
| GTCATAAGCATA  | 386.395535541853 | 0.381534071974888 |
| GTCATCTTAGGA  | 386.433875253004 | 0.657338494168184 |
| CGCGGCTATGAC  | 386.444471367655 | 1.02683838460506  |
| CACTGTGAATCA  | 386.474594744693 | 0.556364523175505 |
| ATTACTCAAGCG  | 386.481712229841 | 0.376672254970778 |
| GTCATAACGTCA  | 386.487159476385 | 0.793889060283159 |
| CACGCCTAGTCA  | 386.491681541351 | 0.442471193302644 |
| AGTCACTCTCTG  | 386.493556355391 | 0.487720334908736 |
| ACGAGGGTGACT  | 386.523600726471 | 0.354449253173897 |
| CAGTTGTATGAC  | 386.547492531857 | 0.696135251097949 |
| GTCATAATCGAC  | 386.5807679819   | 0.647301077913141 |
| ATAACCTAGTCA  | 386.582919493306 | 0.49189696038216  |
| ATTGCTCAGTCA  | 386.604151618462 | 0.695203634164347 |
| GAACACGTAACC  | 386.607167061252 | 0.441772991091701 |
| ATGACGAACTAC  | 386.614860026383 | 0.511281201107902 |
| CCCTGGTATGAC  | 386.643098814574 | 0.365529577439234 |
| AGAATCTATGAC  | 386.655101817941 | 0.532851581559871 |
| ATGACTTGTAAA  | 386.659020671319 | 0.473850352207016 |
| GTCATAGCAAGA  | 386.700182911711 | 0.576128043122775 |
| CTCGAGTAGTCA  | 386.733738652602 | 0.966934746417886 |
| GTCATAGTTGTA  | 386.734981722652 | 0.500844593906719 |
| ATTTCCGATGAC  | 386.765978077906 | 0.452250382338311 |
| CAACATATGACG  | 386.794436598933 | 0.680272650243684 |
| CAGTATTGAGTC  | 386.794892687212 | 0.610468631323407 |
| TCAGACCAGTCA  | 386.8683919159   | 0.591321750210492 |
| ATGAGTCGGTAG  | 386.876083699083 | 0.314106237866342 |
| GTTATCGACTCA  | 386.876452379098 | 0.461163631742379 |
| GTCATAATCCTA  | 386.940125537601 | 0.407791710901999 |
| GTCATTAGTTAA  | 386.9641829417   | 0.613530252677768 |

|              |                  |                   |
|--------------|------------------|-------------------|
| AGTCACCTTATA | 387.038536337162 | 0.310341454735301 |
| AACCCATGACTG | 387.071837421658 | 0.291479169608631 |
| AATTGGTATGAC | 387.092616035237 | 0.658873202138357 |
| AACGCGAGTCAC | 387.106348505866 | 0.469746358011142 |
| GATTGGGTACCC | 387.107593080457 | 0.698395394440542 |
| CTAAGTAATGAC | 387.154147835531 | 0.471723769266863 |
| AATATGTGACGT | 387.169531821635 | 0.546828038058943 |
| GTTGACGACTCA | 387.169693423114 | 0.568531521250965 |
| TACGCTGACACA | 387.22925421348  | 0.407182593243469 |
| ACATACCAGTCA | 387.250661083504 | 1.07208522178683  |
| GATTACCAGTCA | 387.263760307676 | 0.413195625205612 |
| GCCATACAGTCA | 387.277541904506 | 0.660766238523027 |
| GTCATATTTTGA | 387.299090297443 | 0.822824240907518 |
| GACCCTTAGTCA | 387.324545241598 | 0.507976865443984 |
| AAATGTGAATCA | 387.32531453099  | 0.434915246945897 |
| ACATGGTAGTCA | 387.35827542011  | 0.719289350802034 |
| CGTCGTGTGTC  | 387.376686111158 | 0.589559836962932 |
| ACCGTTGATGAC | 387.399110261804 | 0.591642397632192 |
| ATGCCTGACTGA | 387.40608606239  | 0.677445729022059 |
| GTCGACGACTCA | 387.555712277225 | 0.530110265461205 |
| ATCGCTTATGAC | 387.617817660162 | 0.66041197460641  |
| CCGAAAATGAC  | 387.623010866032 | 0.824283735960477 |
| CCATCTGTGTC  | 387.627023849629 | 0.25723829555117  |
| CATTAGTGTGAC | 387.669487609487 | 0.590262321377797 |
| GTCATCGGGACA | 387.680926857356 | 0.627619137845874 |
| CACCAAGAGTCA | 387.710472892648 | 0.619957103999836 |
| GCACCCGATGAC | 387.718529054724 | 0.759824131254655 |
| TCTGATTGGTCA | 387.738917000861 | 0.613395399417803 |
| CACGTAATGACG | 387.78440238017  | 0.866601930263874 |
| CCCTTTCGCTCA | 387.78842629935  | 0.472499491513831 |
| TGACATATTTAA | 387.79077348036  | 0.87671737647338  |
| CAGGCTCAGTCA | 387.819704934458 | 1.02339988620931  |
| AGAGTCAATGAG | 387.825393103625 | 0.300460841578638 |
| CTTGCTCGCTCA | 387.832429154107 | 0.571549697432158 |
| CTCTGTTATGAC | 387.834552532334 | 0.423187646165179 |
| AGAGTCAAATTG | 387.876702952182 | 0.260665516037948 |
| TCTACCGAGTCA | 387.922161426188 | 0.175353244533378 |
| ACATGTGAATCA | 387.956822440736 | 0.735001039373896 |
| CATTACTGACTC | 387.971659788073 | 0.321665655960338 |
| GATTTGACTCA  | 387.986189539862 | 0.356660452069461 |
| GATGCCGATGAC | 388.05505495307  | 0.290151908871016 |
| CTGAATTATGAC | 388.060894999037 | 0.557713267843972 |
| GAATCATATGAC | 388.067430349983 | 0.907927285787214 |
| GAGTTGTATGAC | 388.072737739468 | 0.5049507365918   |
| GTCACACATTTA | 388.080976449257 | 0.545079860604422 |
| ATGTGGTATGAC | 388.08270055564  | 0.5071822107923   |
| TCATTTTCGGAA | 388.112300863122 | 1.48768185965465  |
| GTCAACACGTCA | 388.142624494718 | 0.806153804238349 |
| CATATTATGTCA | 388.195605968836 | 0.651927443603143 |
| CGTTGTGATGAC | 388.208580011719 | 1.00698791804897  |
| CTCAGGTGACAC | 388.221377824657 | 0.453574497281759 |
| AAGACTCGCTCA | 388.225474598185 | 0.19315485836596  |
| GTCATCTACTCA | 388.23719460756  | 0.507405096028714 |
| ACATATTGCTCA | 388.241873034501 | 0.829992322293634 |

|               |                  |                   |
|---------------|------------------|-------------------|
| CCTAACCAGTCA  | 388.244622109162 | 0.774723793697301 |
| GTGTCATGCTTA  | 388.246922740279 | 0.511413510476929 |
| ATTTCGATATGAC | 388.267322382192 | 0.641811620160103 |
| GAGCTGTATGAC  | 388.2792426776   | 0.181185060227006 |
| CGTCATTTACAGA | 388.286285755777 | 1.17166836451602  |
| AGTCACCTTTAC  | 388.340678621352 | 0.233465462563988 |
| CACGTAGATGAC  | 388.349897004165 | 0.285043000156141 |
| AACAAGTCATCG  | 388.398843550161 | 0.377549021646318 |
| AGGTCGGAGTCA  | 388.449547826715 | 0.214225763297157 |
| CAATTCTGACTG  | 388.465852983312 | 0.833789784563565 |
| TCATAGACATGA  | 388.493061186185 | 1.15050094453099  |
| AGTCACCTTAAC  | 388.544650506752 | 0.341538290005462 |
| GGGCCCTATGAC  | 388.55938645571  | 0.238660336854626 |
| AATAGTCAACGT  | 388.607511471463 | 0.579652333200553 |
| GCTATCTATGAC  | 388.630345830533 | 0.709514636576889 |
| GACTCACTGATA  | 388.655859671499 | 1.04310990194328  |
| AGTCAGTGACAC  | 388.726052804375 | 0.70849605851386  |
| TGACTGTGATCA  | 388.758320817859 | 0.941087085388815 |
| ATGAGTCCGATG  | 388.779214660059 | 0.537707658247903 |
| AGTCACCTTTAG  | 388.833253084848 | 0.396093496376224 |
| GCCAATCCGTCA  | 388.843536824894 | 0.123680325649989 |
| CATCGGGATGAC  | 388.907398797382 | 0.50594193369087  |
| AAATGGTGACGT  | 388.930052727453 | 0.293386656252109 |
| CCTGTTGTGTC   | 388.930446566558 | 0.560783823938033 |
| ACGTCACCGTTA  | 388.935408645963 | 0.684296680256567 |
| ACCTATTATGAC  | 388.97116729785  | 0.514382732406401 |
| CGGGCTCAGTCA  | 388.980704319594 | 0.65675627142956  |
| TGACTAAAGACA  | 388.985077975985 | 0.794354395506457 |
| CGTTATAAGTCA  | 388.990340858844 | 0.712377616435924 |
| GCTTGCGAGTCA  | 388.994771216974 | 1.05908081640037  |
| GACAGCGATGAC  | 389.045376281722 | 0.62345124075814  |
| ATCATACAGTCA  | 389.054677645246 | 0.577788798867006 |
| GAGGCTTAGTCA  | 389.054706276296 | 0.463214482360107 |
| AAATCCTGACTC  | 389.055008132074 | 0.441200377111275 |
| AAGCGTGAATCA  | 389.110719082737 | 0.399828639887079 |
| CTTTCTAAGTCA  | 389.12482210298  | 0.670053009953028 |
| TAAGCTGCATA   | 389.13471853594  | 0.400327802489274 |
| GTCATATCGGGA  | 389.16556355833  | 0.703991657392927 |
| GATCATGATGAC  | 389.182983628978 | 0.490360692702403 |
| CTCATATATGAC  | 389.187688336254 | 0.478756909289382 |
| TAATCGGAGTCA  | 389.19523755159  | 0.54611210399553  |
| GCCCTTTAGTCA  | 389.195852955713 | 0.495495255275571 |
| GTCATACCTTGA  | 389.198095995925 | 0.432234666621435 |
| AGTCACTTCAAG  | 389.213747091938 | 0.718091221300709 |
| CATTCCGATGAC  | 389.214016975673 | 0.454922128139531 |
| CGAAATCCGTCA  | 389.227736204564 | 0.588669864770794 |
| CTTACCTAGTCA  | 389.234760886744 | 0.484350355195857 |
| TCCCGTGATTCA  | 389.305621070565 | 0.35502292007988  |
| AGTCAGAGTGAC  | 389.331241000648 | 0.553593305159224 |
| ACTACTTACTCA  | 389.334903993042 | 0.358099353164116 |
| ATGATGTAACAA  | 389.339064214942 | 0.472409255311346 |
| CACTTAGACTCA  | 389.362724097098 | 0.639509285469304 |
| AGTGTGTATGAC  | 389.382895484565 | 0.127431900901834 |
| GCCAATTCGTCA  | 389.393129980955 | 0.703954574688647 |



|                |                  |                   |
|----------------|------------------|-------------------|
| GCACAAGTCATA   | 389.419404008496 | 0.62537809884018  |
| AACGTTTCGTCA   | 389.438681656149 | 0.698371334119844 |
| GCAAACGATGAC   | 389.443389687389 | 0.987830029643833 |
| CCGGACTAGTCA   | 389.450854583409 | 0.891579145712639 |
| AGTCACCTCGTG   | 389.466009875403 | 0.455643787684282 |
| ATCTTGAGTAAT   | 389.495814499559 | 0.577532469004092 |
| GTGTCACGCAAC   | 389.519225295736 | 1.12062667657037  |
| ATGACGGAGACC   | 389.519712375001 | 0.55324358631956  |
| TGAGCAATAACA   | 389.544143500973 | 0.808350117613391 |
| ACAATCTAGTCA   | 389.561167713302 | 0.981642105101608 |
| CACGTCACGATG   | 389.565115459667 | 0.717102070519852 |
| AATAAGGTGACT   | 389.567015784812 | 0.562606599230123 |
| CCTACCGAGTCA   | 389.572025890968 | 0.271387372220518 |
| GTCATCCACGTA   | 389.572373373626 | 0.520656275179024 |
| CCAATTGATGAC   | 389.595391666379 | 0.498236756562956 |
| GTCATCGGTTTA   | 389.607326617312 | 0.458570914990636 |
| CTGGCACAGTCA   | 389.617146783356 | 0.445749530711799 |
| TGACTGTGTA AAA | 389.686207473426 | 0.229830594841499 |
| GTCATAATTCGA   | 389.689994221113 | 0.734890201327424 |
| CTGCGTTACTCA   | 389.700695711349 | 0.573315688270359 |
| ACA ACTGATGAC  | 389.759253094718 | 0.690279466463203 |
| CCTGATTTGTCA   | 389.777316395163 | 0.553141518105345 |
| GTA AATGATGAC  | 389.793124254963 | 0.687535569189044 |
| ATTTTGTATGAC   | 389.814960118782 | 0.815572376961089 |
| AAGTCCGAGTCA   | 389.82042848739  | 0.430601867647306 |
| CATGTAGACTCA   | 389.854885470101 | 1.32101149020405  |
| GTA AACCAGTCA  | 389.880410939783 | 0.822288668058003 |
| AAGTCTGTGTCA   | 389.93959439252  | 0.712601707692705 |
| CCCTTTTACTCA   | 389.949249935836 | 0.339210771740065 |
| AATTTGAGTAAT   | 389.953321034771 | 0.28663733606535  |
| ATGACTAGCCTC   | 389.959682909523 | 0.375842660049056 |
| CGTGCAGAGTCA   | 389.966152808894 | 0.727743791938022 |
| GTCTTTTACTCA   | 389.984418277238 | 0.620574712321224 |
| GTCATAACCTGA   | 389.991359613571 | 0.985384769839763 |
| ATA AATCTGTCA  | 390.034822240282 | 0.473279152684588 |
| GTCATAGCTATA   | 390.04551669959  | 0.647732304802537 |
| ATTTACTATGAC   | 390.055398967776 | 0.912347401323668 |
| AGTCAGAGCTTA   | 390.088901337232 | 0.42751436027935  |
| AGTCACCCTCAT   | 390.101961872599 | 0.542887962279582 |
| CCTATTGACTGA   | 390.122390565793 | 0.313327041012109 |
| ACAGTCTAGTCA   | 390.128578285464 | 0.567875344413701 |
| TACACGGAGTCA   | 390.178746994935 | 0.647915572273747 |
| CGTCATCGGGAG   | 390.18720311673  | 0.327801348556116 |
| GTCATCTAATTA   | 390.187720378687 | 0.403602103293912 |
| ATGACACGGTTC   | 390.204278634247 | 0.675066083861192 |
| ATTTCTATGAC    | 390.213762519706 | 0.335142652491725 |
| CATATAGCGTCA   | 390.237957695031 | 0.664605975213926 |
| ACACTTGC GTCA  | 390.252256744016 | 0.530702319629256 |
| CTGAGTTATGAC   | 390.288211235228 | 0.687600221750083 |
| CTTATCTATGAC   | 390.335415349019 | 0.390605300244316 |
| ATGCGCTATGAC   | 390.356455842731 | 0.528374669879148 |
| TATAATCTGTCA   | 390.360978900774 | 0.43288991416937  |
| CTGTTCTATGAC   | 390.362222850886 | 0.985560701083979 |
| CGATTAGACTCA   | 390.362550938955 | 0.876771308443383 |

|               |                  |                   |
|---------------|------------------|-------------------|
| CATGCTTACTCA  | 390.364274131938 | 0.491366354940139 |
| CACTGTGATGAC  | 390.3694449801   | 0.447162063053427 |
| ATTGACTGTGAC  | 390.475596754145 | 0.468644519431663 |
| CTTAATATGTCA  | 390.481288416566 | 0.665840509482072 |
| CGTGTGTATGAC  | 390.481949668409 | 0.741213646764197 |
| CATAGTGAATCA  | 390.54705365196  | 0.57937159944149  |
| TCAGTCAACGGA  | 390.61812583511  | 0.709347332430823 |
| CAATAAGATGAC  | 390.641670401928 | 0.446270984256342 |
| TGACGTGTGCAA  | 390.656522134301 | 0.214331339722286 |
| CATACAGATGAC  | 390.663224904847 | 0.379173973253929 |
| ATATTGGAGTCA  | 390.68909981447  | 0.590464886203067 |
| GTCATAGGAAAA  | 390.690422511681 | 0.504552941557196 |
| TACCGTGCCTCA  | 390.70706614334  | 0.395718483732409 |
| GTCATAATTGGA  | 390.713551217716 | 0.598168148866682 |
| AGTCACTACGGC  | 390.737563174577 | 0.284182878604941 |
| GTCATCCAATAA  | 390.739442656887 | 0.649446025505852 |
| ACAGATCTGTCA  | 390.785907735488 | 0.784351787594298 |
| ATACGGTATGAC  | 390.792221074533 | 0.583515737507622 |
| CTGTGCGAGTCA  | 390.855974199204 | 0.330490197677703 |
| AATGTGTAGTCA  | 390.885683965823 | 0.777217790661118 |
| GTCATCGCTTTA  | 390.892768080656 | 0.423278188530107 |
| ACTGGTGACCCA  | 390.943047075219 | 0.339779638139801 |
| TACGTGGAGTCA  | 390.943809450211 | 0.460918711433563 |
| ATTCACGATGAC  | 390.946188079772 | 0.894866364036489 |
| GCCAAATATGAC  | 390.970871724067 | 0.303215545427772 |
| TATACTGTCATA  | 390.980357764566 | 0.362405976358301 |
| CTGACTTACTCA  | 391.069745558099 | 0.254522568927982 |
| AATAATACGTCA  | 391.136032611497 | 1.0314068899222   |
| GACTGATCAGTC  | 391.149316462777 | 0.971908316392114 |
| CACAATGATGAC  | 391.185377522827 | 0.770984843821052 |
| TGAGTCGATGCA  | 391.215220618807 | 0.262073002589924 |
| ATGAGCAAGTCA  | 391.22333188923  | 0.397079514928673 |
| CGTCATTTAGAA  | 391.257598897052 | 0.63288050601416  |
| ATGATGTAACAC  | 391.25765105749  | 0.416923246676938 |
| GTCATGCTGTCA  | 391.297652671946 | 0.91100336798058  |
| TGACTAAGGGAA  | 391.378511197989 | 0.333549571755983 |
| TATGCACAGTCA  | 391.411367440804 | 0.512549032928539 |
| TCCTCATAGTCA  | 391.429977803929 | 0.904467289423877 |
| CCCTTAGACTCA  | 391.459453036277 | 0.338120495657559 |
| GTCACCGGATGA  | 391.510612820012 | 0.445532320006925 |
| AATCCTGACTCT  | 391.520303034768 | 0.337219893393069 |
| AGTCAACCCTCTC | 391.554379941784 | 0.27349325451466  |
| TGATTACACCA   | 391.575262312211 | 0.697703241279976 |
| CTTGATTTGTCA  | 391.609732096393 | 0.755294423284644 |
| CAATCACAGTCA  | 391.634088236341 | 0.620196269347614 |
| CAAACTGACTC   | 391.634343868348 | 0.687830329699459 |
| ACCTGGTATGAC  | 391.675877900777 | 0.429937937867972 |
| ATAGTGGATGAC  | 391.681432385466 | 0.242169547704574 |
| TACCGTGTGTCA  | 391.730904800227 | 0.575595646867947 |
| ACTCATCAGGAT  | 391.83298994078  | 1.33796249218608  |
| CGTAATCCGTCA  | 391.841972823046 | 0.501572310200446 |
| CAACTTGATGAC  | 391.855200866915 | 0.517452250678105 |
| ACTGAGGTGACT  | 391.890505591526 | 0.808627238147332 |
| GTCATAGTTAGA  | 391.891705750619 | 0.335079119199905 |

|               |                  |                   |
|---------------|------------------|-------------------|
| ATCCTAGATGAC  | 391.912049246379 | 0.567920204089054 |
| GTC AAGGATGAC | 391.919150348747 | 0.204058461542908 |
| GACTCTGTGTCA  | 391.985449776453 | 0.920938900145621 |
| CAGACAATGACG  | 391.988040345083 | 1.12921121512227  |
| ACTCTTTGT CAT | 391.989404691797 | 0.305902719081467 |
| ATGAGTCCGCTG  | 391.992698873191 | 0.644306525568798 |
| AACCGGTGACGT  | 392.00050299786  | 0.349265452208821 |
| GACTCACTTGGA  | 392.021272890429 | 0.742027874856329 |
| ACATACTAGTCA  | 392.026956562842 | 0.618316106975189 |
| CTCACTTACTCA  | 392.028667550813 | 0.300289344716699 |
| CGTCATTTGTGA  | 392.03331434622  | 0.635296844587213 |
| CCGTGCGAGTCA  | 392.037635942445 | 0.922483640539588 |
| GTCATCCACCGA  | 392.041133800961 | 0.298715915036169 |
| CTTAACGATGAC  | 392.081044742275 | 0.674822889053275 |
| GTCATCGGGAAC  | 392.084733086427 | 0.81939950358002  |
| CTATGACTTGGA  | 392.086082988553 | 0.256208027540869 |
| TAATTTGTGTCA  | 392.108039763801 | 0.735314403263413 |
| GCGTCACAATGA  | 392.153332989102 | 0.493783466754417 |
| AATACTTACTCA  | 392.155357381578 | 0.534940234784989 |
| TCTCAATAGTCA  | 392.158001051782 | 1.07496703393079  |
| CATTGTACGTCA  | 392.226119251513 | 0.686727692119252 |
| CAGCTTGGTGAC  | 392.230154945923 | 0.965661858763656 |
| CCTAGAGAGTCA  | 392.232452408682 | 0.867047003262321 |
| AATGGTAGTCAC  | 392.243809713393 | 0.557365272221747 |
| CGTCACCTGTGA  | 392.246861414418 | 0.704537683901288 |
| AGGTTACATCAT  | 392.273811451756 | 0.418033406732177 |
| ATCAACACGTCA  | 392.315658386187 | 0.208494655628022 |
| AGCTCTGTGTCA  | 392.3479982766   | 0.79866382779553  |
| GTCATACAGGTA  | 392.355607583885 | 0.242588691357112 |
| GCCATGGAGTCA  | 392.387666685817 | 0.434210684205243 |
| TCACAGTAGTCA  | 392.389781275111 | 0.76196744473348  |
| ATGAGTCCGGTGG | 392.419966225926 | 0.4180295882306   |
| ACGATAGACTCA  | 392.423721530101 | 0.735695904963403 |
| ATATCACGT CAT | 392.474130852391 | 0.396701745933362 |
| CGATACGCGTCA  | 392.47512489831  | 0.77263781610552  |
| CGTCATTTAGTA  | 392.489930509608 | 0.836999129206169 |
| CATTAAGTGTCA  | 392.491311944704 | 0.776645776195935 |
| CAGTAACAGTCA  | 392.504016822198 | 0.904643814495152 |
| GTCATACCATCA  | 392.533585993698 | 0.389328961444382 |
| CAAACCTATGAC  | 392.537037686961 | 0.730939726904146 |
| GGATACACGTCA  | 392.557110047696 | 0.888033335348199 |
| GTCATAGTAGTA  | 392.574072363606 | 0.581260146070593 |
| GTCATAGAGTGA  | 392.592357461214 | 0.68011409382166  |
| ATATGTGATGAC  | 392.602634204534 | 0.503391289431607 |
| CGGTATACGTCA  | 392.611656294224 | 0.670635360683334 |
| ACGCGTGAATCA  | 392.615628592428 | 0.758189952612207 |
| GCACGTGTGTCA  | 392.701710877321 | 0.785012514212493 |
| CCTCATGAATCA  | 392.737345344873 | 0.671384178576616 |
| CACATGGAGTCA  | 392.748462875069 | 1.02727428836277  |
| CACATTTTGTCA  | 392.814065739315 | 0.446273824305603 |
| CCGCGGTATGAC  | 392.822562969182 | 0.55636951632321  |
| AGTCACTCTTAA  | 392.824939729846 | 0.466382109680993 |
| GCCCGTGC GTCA | 392.826511336112 | 0.894752078276892 |
| ATTCTGTATGAC  | 392.861318378856 | 0.791818178528657 |

|              |                  |                   |
|--------------|------------------|-------------------|
| CGTACCGAGTCA | 392.865925336678 | 0.487113910174998 |
| GATGACTTGGAC | 392.890637864887 | 0.393022398193954 |
| GACTCACTTTGA | 392.896200489546 | 0.540111235709045 |
| GCCGCTCAGTCA | 392.910624249134 | 0.316644946292631 |
| AGAGTCAGGATC | 392.912590026239 | 0.613775623521988 |
| AAAATAAATGAC | 392.926152329314 | 0.358794080085472 |
| AATTACCAGTCA | 392.936954473805 | 0.755999868381097 |
| CGAACTAATGAC | 392.959489382883 | 0.553919366924008 |
| CGCCAAGAGTCA | 392.974146444989 | 0.52142993883651  |
| AATCTTCAGTCA | 392.989049971611 | 0.442568100960698 |
| TCATAAGGGTCA | 393.017326237596 | 0.368879589572378 |
| CTGTATTATGAC | 393.025935804745 | 0.607533295184632 |
| CACAACATGAC  | 393.057894293661 | 0.467178276520227 |
| TCACAAATGACA | 393.075376168228 | 0.505318177783837 |
| CATACTGTGTC  | 393.080456291824 | 0.507069929070869 |
| AATTTGTAGTCA | 393.118657885938 | 0.743132913097247 |
| AGGTACTGACTC | 393.146188416619 | 0.751190719976601 |
| ATCACTCAGTCA | 393.178798583417 | 0.367245966455513 |
| ATGACGGAGTTC | 393.184469097005 | 0.411639962343257 |
| AATAGTCAACGG | 393.210157320549 | 0.48731870812209  |
| TGACAGATCACA | 393.213653395157 | 0.876750283342262 |
| CTCTTAGACTCA | 393.238466463977 | 0.506692337720159 |
| GTCATCCAAGGA | 393.26551157622  | 0.805774327946607 |
| TAGACACAGTCA | 393.274316681397 | 0.744755954487284 |
| GTATCTTATGAC | 393.299025784201 | 0.667528372200018 |
| AAAAGATTAGTC | 393.357762491634 | 0.233012196949953 |
| CGTCACATGTGA | 393.389336950517 | 0.941396154725728 |
| GTCATGGAGTCA | 393.413209873712 | 0.540297557017336 |
| CATTTGCAGTCA | 393.427637541944 | 0.788852768918466 |
| CGTCGCGATGAC | 393.436561041675 | 0.803376693210491 |
| CGTCATGTTCGA | 393.469158911691 | 0.857390072503585 |
| ATATCGAATGAC | 393.476247830648 | 0.664595962053362 |
| GCACTTTAGTCA | 393.52007562948  | 0.906159920278636 |
| ACAACATATGAC | 393.541234370129 | 0.348181627480275 |
| AGTCTATATGAC | 393.541526440473 | 0.359579519628289 |
| AAGCCGCGTCAC | 393.5604994231   | 0.308819041868834 |
| GAATCATGACAC | 393.568323651528 | 0.562515006716923 |
| GTCACCCTATGA | 393.589781715294 | 0.5734554821129   |
| CACATTGTGACA | 393.604508810904 | 0.824006992022175 |
| GTCTACACGTCA | 393.614354548022 | 0.51868099665085  |
| ATTATTAAGTCA | 393.617877765444 | 0.728434210679735 |
| GTCATTTGCACA | 393.621354535567 | 0.8211667365785   |
| CTAGGTGATGAC | 393.629887889725 | 0.909783553546267 |
| GCGAAATATGAC | 393.636241659953 | 0.622104886114015 |
| CGTCATCAATAG | 393.642079538006 | 0.468082464966862 |
| CAGGCGTATGAC | 393.660559521393 | 0.414959583511565 |
| AGAGTTCGTCAT | 393.673676937806 | 0.479727462650258 |
| TGAATCACGTAA | 393.679958945763 | 0.438884608251056 |
| GGGATCTATGAC | 393.684452016385 | 0.383360687518655 |
| GAACGTTACTCA | 393.689223592039 | 0.635857794250092 |
| CAGTCACGCGGC | 393.724642054395 | 0.945890303157506 |
| GTACGTTATGAC | 393.741926521835 | 1.0567737022184   |
| CACATTAAGTCA | 393.746135611874 | 0.648228433234539 |
| ACCATGCAGTCA | 393.772824936312 | 0.72335992077097  |

|              |                  |                   |
|--------------|------------------|-------------------|
| AGTCATGGTTTA | 393.781900091755 | 0.465955332188719 |
| ATACGTGACGTG | 393.787238812974 | 0.511446250676628 |
| ACAATAGACTCA | 393.787245553623 | 0.529981739134817 |
| GTCATACGAATA | 393.844381904294 | 0.599167140849422 |
| CACGCGAGTCAC | 393.844847814337 | 0.580190055117697 |
| GTCATACGACGA | 393.846661552535 | 0.647479628233527 |
| ATAGCTGCATA  | 393.897506395617 | 0.554602284276386 |
| GGTCAGAATGAC | 393.900799562042 | 0.645777645164471 |
| GATTGGTATGAC | 393.911355613726 | 0.301218806651207 |
| AGTCATGGTCAG | 393.948778483525 | 0.341595908976535 |
| ATACCCGATGAC | 393.986136719196 | 0.348272021231649 |
| CCAGATACGTCA | 394.009805729489 | 0.854413011009577 |
| CACTTTGCGTCA | 394.021561060398 | 0.532106443466695 |
| GTCATCGTATTA | 394.107777953237 | 0.643299324515096 |
| GTCATCCTTGGA | 394.11437452282  | 0.614665811933124 |
| AGAAATTCGTCA | 394.203108382221 | 0.2911705430605   |
| AGCTTTACGTCA | 394.221763445906 | 0.589681864129161 |
| TCCGACCAGTCA | 394.265822908519 | 0.567393412103736 |
| GTCATAGCCCTA | 394.330683474666 | 0.508960668241189 |
| CTGTTGTATGAC | 394.360855745661 | 0.550360601540414 |
| ACGGACCAGTCA | 394.362495064811 | 0.49867037659787  |
| CCGTACGATGAC | 394.365999038325 | 0.618418456699061 |
| AGTCATGAGTTG | 394.37422638408  | 0.410943602832184 |
| ATCGTTGACTGA | 394.399833404081 | 0.665341980088587 |
| GCTACTTACTCA | 394.418481189271 | 0.240059405553075 |
| GTCATAGGTAAC | 394.423146592528 | 0.368801016161964 |
| AGTCACCTCCGA | 394.439576751437 | 0.437346005982335 |
| CGACCAGAGTCA | 394.442616734479 | 0.853008182465272 |
| TCCAACCAGTCA | 394.465320107673 | 0.614463765627464 |
| TGACGTGGATCA | 394.470616580581 | 0.563318363188062 |
| GACTCATGGCTC | 394.524908927153 | 0.571142848987593 |
| GTTGCCGAGTCA | 394.542663511155 | 0.704753231698251 |
| CATTGTTATGAC | 394.579030492141 | 0.67514956254864  |
| AGTAAATATGAC | 394.588714682546 | 0.624579886483349 |
| ACAGATTAGTCT | 394.606276863241 | 0.398280753505186 |
| GTCATCGAAGAC | 394.637032773635 | 0.921854475885154 |
| CAGATTAAGTCA | 394.673496132463 | 0.665423598562311 |
| CTGACTGGTGAC | 394.677203681081 | 0.278105688557675 |
| AGGCTCATGACT | 394.793249224413 | 0.247522872673733 |
| CAATGGGAGTCA | 394.794151942088 | 0.709564538618112 |
| GTCATATTAAGA | 394.821691653607 | 0.257058027083409 |
| GTATGCTATGAC | 394.839151674367 | 0.589630301711621 |
| ACACAAGACTCA | 394.848721304946 | 0.614148273794173 |
| TGACTGGACTCA | 394.865703452022 | 0.281495706565749 |
| CGCCATCAGTCA | 394.896847508082 | 0.288800976304681 |
| CTATGACTTGTA | 394.921320458799 | 0.392998541896688 |
| CAGGTTTACTCA | 394.949753737791 | 0.675327153912816 |
| ATGAGTAAAGTA | 394.952472903795 | 0.33745750822152  |
| CCTATATATGAC | 395.031512396325 | 0.459864219932552 |
| GACTCAATATGA | 395.051355233053 | 0.413639140179978 |
| AAAATCGACTCA | 395.169545019489 | 0.709001652473611 |
| GTCACACGTGGA | 395.185894873746 | 1.02158187508865  |
| CTTTTAGACTCA | 395.202451820709 | 0.379985467296929 |
| CGAAAAGATGAC | 395.25889522634  | 0.584752001496294 |

|              |                  |                   |
|--------------|------------------|-------------------|
| ATGGCTCAGTCA | 395.302279609884 | 0.59194688590718  |
| CTGGTGGAGTCA | 395.323205449482 | 1.04995899627113  |
| CAAGTCTATGAC | 395.326975714291 | 0.597832341092548 |
| ACCCACGAGTCA | 395.329199449246 | 0.602147131205472 |
| ATCTTGACACAT | 395.346078218196 | 0.489400067799428 |
| AGTAACACGTCA | 395.372515264456 | 0.926502269969567 |
| CAAAGGTGTGAC | 395.373028184267 | 0.624175769904986 |
| GTCATCCCTTGA | 395.373411315903 | 0.301331725911324 |
| TGCCTTGACTAA | 395.407205190041 | 0.48869813055906  |
| GTCATCGGCGAC | 395.417274760194 | 0.790322531231111 |
| CTTGACCAGTCA | 395.456225450834 | 0.538953729065986 |
| ACTAGCGGTGAC | 395.467340847107 | 0.44497706048048  |
| GACAAGTCATCC | 395.487210050764 | 0.449353544350275 |
| AAAGACGTCATC | 395.541086845032 | 0.514613054446806 |
| CATAACGATGAC | 395.547385129135 | 0.660750718248553 |
| AGTCACTTCCGG | 395.556216881759 | 0.547355999865242 |
| TGACTAGTATAA | 395.578938714076 | 0.470290702618842 |
| GTCATAACATGA | 395.587025919581 | 0.812415085463518 |
| GTCATAATCACA | 395.615903246182 | 0.708746946847168 |
| GTCATAGAGAAA | 395.623763672889 | 0.521201262616846 |
| TGACTACTGACA | 395.664215746297 | 0.682188845581566 |
| CCAAAGGGTGAC | 395.691160205938 | 0.674353563299409 |
| AAAGGGTATGAC | 395.724427117276 | 0.519350824046593 |
| CCATATTTGTCA | 395.726161634118 | 0.635688154268354 |
| AAAGGCGTCATA | 395.789633317035 | 0.308489029525617 |
| CGAAATTGACTC | 395.839829694927 | 0.611250616053302 |
| GTAATCTAGTCA | 395.846815947285 | 0.757030553831542 |
| ATAGCTTATGAC | 395.848743206289 | 0.581906080014334 |
| GTATGGTATGAC | 395.850289757113 | 0.274812098289621 |
| CACAAATGTGAC | 395.898029355428 | 0.66545124173864  |
| CAGAGGTATGAC | 395.903594132089 | 0.460595022697244 |
| CGCACTTACTCA | 395.913412125179 | 0.479480314300424 |
| AAAGGCGTGACT | 395.915566600644 | 0.38917764651007  |
| AGTCTCGAGTCA | 395.917578984233 | 0.555957736240149 |
| ACCAATTGCTCA | 395.925834821686 | 0.350332168434149 |
| AGTCACTTCTCG | 395.943631585639 | 0.450957589639382 |
| AGACTTCAGTCA | 395.956947810528 | 0.603506096995208 |
| GTCATAACTGAA | 395.977415117535 | 0.968524933098931 |
| CACAGTAATGAC | 396.024338618249 | 0.506781755603663 |
| GAGTCAGTAGAA | 396.030581038834 | 0.193949871493448 |
| AGCCTATATGAC | 396.038674779222 | 0.544399857374203 |
| CGAACGGATGAC | 396.084237089202 | 0.550755784344655 |
| ACGAATCCGTCA | 396.088147027452 | 0.530317917712085 |
| GAGCACTATGAC | 396.126551340228 | 0.60699878274151  |
| AAATTTTGAGTC | 396.141271891343 | 1.02268257131092  |
| GATATCTATGAC | 396.153400194215 | 0.488196162487323 |
| ATGGTATATGAC | 396.172708250124 | 1.00709711967792  |
| CACGGGTATGAC | 396.18539956461  | 0.333268385120522 |
| TATTATTTGTCA | 396.281354652956 | 0.563263922180084 |
| GATCTTTATGAC | 396.282754577232 | 0.682466043371086 |
| TGACACACGGCA | 396.2879684385   | 0.881805173987699 |
| GGCTCTGATTCA | 396.299363892504 | 0.344187630395206 |
| GTCATCATTGCA | 396.303245111694 | 0.447353633071591 |
| CGCGCTCAGTCA | 396.30477840921  | 0.920776785283645 |

|               |                  |                   |
|---------------|------------------|-------------------|
| TGATTCAGACAA  | 396.334719424735 | 0.362010823662019 |
| GCAACACAGTCA  | 396.350509663275 | 0.626990722287759 |
| CACTCGTATGAC  | 396.354493283761 | 0.533884575318256 |
| CTGCCTGACTGA  | 396.364531850807 | 0.690990777048135 |
| GTCATAATCTTA  | 396.382025136561 | 0.356768915283099 |
| TGACTGTTAGCA  | 396.391811752167 | 0.416252636425362 |
| CTCAATGATGAC  | 396.402402248049 | 0.793034801690914 |
| ACACGTGATTCA  | 396.43690324298  | 0.320041534355849 |
| ATTTTCGACTCA  | 396.456052707056 | 0.654116395200004 |
| CTATAAGTGTCA  | 396.474384068215 | 0.371479518544224 |
| TGACTAGGAAAA  | 396.474517504774 | 0.425140434548969 |
| ATCTACTATGAC  | 396.478491533655 | 0.166244437368131 |
| ACTTGCGAGTCA  | 396.510433539787 | 0.549822544068259 |
| GTCATCTCGACA  | 396.525319793292 | 0.645367297262973 |
| AATCGGACTCAT  | 396.548892875442 | 0.757575061051547 |
| CAGTCACGCGTC  | 396.627311420446 | 0.496595616371439 |
| CCTGACTATGAC  | 396.643556262784 | 0.318404005727068 |
| GTATTGTATGAC  | 396.666532927517 | 0.638994239663508 |
| TCGACTTACTCA  | 396.678761654341 | 0.226294614251688 |
| ATGACTTGACTC  | 396.692596556584 | 0.548043182699212 |
| GAGTCAAAATGA  | 396.718129607458 | 0.598905214126039 |
| ATGCTAGAGTCA  | 396.791771419257 | 0.692518999287534 |
| AGAGGGTATGAC  | 396.795091623519 | 0.117923464148199 |
| AGACTGTATGAC  | 396.797255943147 | 0.581003452300033 |
| ATGACTAGCCAA  | 396.841409837775 | 0.21293876926049  |
| TAGTGTGAATCA  | 396.906753570365 | 0.588883451676312 |
| GTCATACACCCA  | 396.909356618348 | 0.398334297649988 |
| CTTGTTGACTGA  | 396.937890597899 | 0.554439459852037 |
| CGGCACACGTCA  | 396.949498798125 | 0.642254877582015 |
| CCAGGTGTGACG  | 396.950639255216 | 0.493734682546788 |
| ACAAGTGATGAC  | 396.956781498067 | 0.546147253755136 |
| GTCATCCGTACA  | 397.055010746833 | 0.523364876977273 |
| AAAGGGGTGACT  | 397.065516078195 | 0.251391047617455 |
| CTCTAAAATGAC  | 397.071197245517 | 0.382515100366108 |
| CTGCCGATATGA  | 397.072276321213 | 1.33804134886946  |
| ATGTGTCAAGCA  | 397.091781193937 | 0.306660621456622 |
| AGTCACCTCTAG  | 397.092262360396 | 0.47301328399014  |
| GAAC TTGTCACC | 397.113654547951 | 0.498853619440573 |
| ATACAATAGTCA  | 397.118286345599 | 0.543290367095575 |
| AGTCAGACCTTA  | 397.125518060571 | 0.457624562456759 |
| ACCGTTTATGAC  | 397.133661243125 | 0.337106407435468 |
| ATATTGACTCA   | 397.147027153851 | 0.673586024756118 |
| TGACTCCAGTCA  | 397.17039434537  | 0.33887471920664  |
| ATGACACGGTCA  | 397.260721224746 | 0.536054279326766 |
| GTCACATCATGA  | 397.267657995034 | 0.779722048213703 |
| ACTCGTGC GTCA | 397.29884096363  | 1.01015982322154  |
| ATAAGAGATGAC  | 397.307424980749 | 0.459707694121054 |
| ACACGTGAGTCT  | 397.33518827976  | 0.885000043555832 |
| CTATACGATGAC  | 397.344140584122 | 0.232602015514696 |
| GTCATTCTATGA  | 397.346085590191 | 1.31178408015007  |
| CAGGCTGTGTCA  | 397.386312184259 | 0.846219357828247 |
| GTTCTTCAGTCA  | 397.407676461934 | 0.39865495115759  |
| TGACTGTGCTAA  | 397.414980438074 | 1.0267752738872   |
| AACAATTGACTC  | 397.429416167698 | 0.596549844905089 |

|               |                  |                   |
|---------------|------------------|-------------------|
| CCCACTCAGTCA  | 397.434660874132 | 0.476548044774156 |
| TCGCATGACAGA  | 397.532536281664 | 1.04137527335558  |
| ATAGCTAGTCAT  | 397.563409774144 | 0.495360860040957 |
| GTCATAGTCGGA  | 397.565128661235 | 0.659441408356689 |
| ATGACAAAGCAC  | 397.588824338271 | 0.487890775654955 |
| CTTCACGATGAC  | 397.629836484463 | 0.564171026835166 |
| CGTGATAAGTCA  | 397.673780061037 | 0.703891404208852 |
| CACTACGGATGA  | 397.681306887566 | 0.613295786500381 |
| ATGAGTCCGATA  | 397.698757800111 | 0.171699867588734 |
| AAACATTATGAC  | 397.714430893016 | 0.468572512727086 |
| TAGACCCAGTCA  | 397.714526871092 | 0.317206878828435 |
| GTCATCACTCGA  | 397.787142831439 | 0.448457686903438 |
| AGAGTCAGGGCA  | 397.819641569397 | 0.49328348932345  |
| CGTCATCGGTTT  | 397.819773540483 | 0.685981134226735 |
| GAATGTGAATCA  | 397.852490952435 | 0.945336452600139 |
| TATCTTCAGTCA  | 397.864607581283 | 0.178847656785779 |
| TCTCTATAGTCA  | 397.903125753559 | 0.853519843942188 |
| GATTCATGACAC  | 397.909711554204 | 0.490454609720557 |
| GAAACTGCGTCA  | 397.910438927771 | 1.16398644429874  |
| AGAGTCAATTTG  | 397.927915237992 | 0.200314630381706 |
| GTTTTCGACTCA  | 397.929258093371 | 0.871199077909341 |
| TGACTGAAGCAA  | 397.953561176008 | 0.633655133797204 |
| CGCTGACATATA  | 397.965426310474 | 1.31191930904455  |
| ACGAATACGTCA  | 397.965877216763 | 0.574546506013186 |
| AAATATACGTCA  | 398.010099501704 | 1.22871324862879  |
| CCATTTGCGTCA  | 398.033539046495 | 0.485740678381198 |
| ATGAATTGACTC  | 398.101696632064 | 0.604333604385902 |
| CATTGAGAGTCA  | 398.106516169796 | 0.694418773694606 |
| AGACTAATTAGC  | 398.133233348207 | 0.379373569245601 |
| ATGACTAGCAGA  | 398.152675820123 | 0.241977232092593 |
| CACCGATATGAC  | 398.161397293461 | 0.582898391144421 |
| TCGATGCAGTCA  | 398.177329788647 | 1.07214908318359  |
| ATCATTGATGAC  | 398.185914272862 | 0.668535600018147 |
| CCAGTGTAGTCA  | 398.202054552785 | 0.683737213871745 |
| TGACGTAGACAA  | 398.207265427488 | 0.537748536613466 |
| AAGTACTGACTC  | 398.209070035909 | 0.792500113068737 |
| GTCACGTCACGA  | 398.215788151483 | 0.131166014620199 |
| ACATTAGATGAC  | 398.245620406494 | 0.73207713901111  |
| GACCACGATGAC  | 398.270814885373 | 0.554857713569098 |
| GTGACAAGTTCA  | 398.322321294736 | 0.400183951918165 |
| CCGCTCGAGTCA  | 398.350628476201 | 0.689317587271698 |
| ATTTCGGTCATCG | 398.360677689986 | 0.381400506377437 |
| CTTGAAGTGTC   | 398.38877862968  | 0.788197373967609 |
| AAAATGGAGTCA  | 398.401568702312 | 0.310817469979138 |
| CCCGATGATGAC  | 398.416220476445 | 0.356950963745819 |
| TGATTACCCGAA  | 398.449420759253 | 0.662910897626215 |
| CGTCTAGGTGAC  | 398.458184648875 | 1.01737274637372  |
| CTTGACGACTCA  | 398.482633323021 | 0.625526948830874 |
| AGAATCGATGAC  | 398.496297393075 | 0.569810139019277 |
| ACTCATACGTCA  | 398.526378768993 | 0.428419329328217 |
| CAGCTGACGTCA  | 398.558819101383 | 0.709203033265732 |
| CACACACAGTCA  | 398.595648869409 | 0.336946162121368 |
| CAAGTTGTGTCA  | 398.598292266941 | 0.580408703934575 |
| CTCTTTGCGTCA  | 398.599163554444 | 0.246333382534011 |



|               |                  |                   |
|---------------|------------------|-------------------|
| AGCTCACAGTCA  | 398.607687936362 | 0.446000409634699 |
| ATAGCACAGTCA  | 398.618565283652 | 0.743137909466991 |
| ACTATATTATGA  | 398.624677827922 | 0.784834117798566 |
| AATTCATAGTCA  | 398.638304522447 | 0.761519615710035 |
| ATCGTTGTGTCA  | 398.675774830334 | 0.714520434089821 |
| CCTGATGATGAC  | 398.692160390037 | 0.449956132632799 |
| CAAAGCCAGTCA  | 398.716003766305 | 1.09953805535612  |
| AGACTAATTCAG  | 398.72374160456  | 0.785500571905956 |
| CCGTCGGATGAC  | 398.759174504441 | 0.906802205479586 |
| ACAGCACAGTCA  | 398.772751154556 | 0.630764694015566 |
| AGCTTGTATGAC  | 398.792378213636 | 0.541355052197742 |
| GTC AACGACTCA | 398.804027984221 | 0.314146078493412 |
| TCCTTGGAGTCA  | 398.857152407361 | 0.686190686314079 |
| ATATAGGATGAC  | 398.872272376734 | 0.346560256987606 |
| CGAAATTCGTCA  | 398.932937305698 | 0.321648458059052 |
| TCCAATTCGTCA  | 398.940315623493 | 0.50097742139897  |
| TATTCGAGTCA   | 398.946122650362 | 0.5618588007033   |
| CCTATACAGTCA  | 398.96680867578  | 0.204807421374562 |
| GTCATACGCACA  | 399.00316981326  | 0.802637992556942 |
| AACCTCGAGTCA  | 399.011222110662 | 0.613666770001424 |
| AAGTCTCGTCAT  | 399.037498238524 | 0.625021955845312 |
| TCGTCGATGATCA | 399.07367880906  | 0.842275803432715 |
| GTCATAATGAGA  | 399.074574403109 | 0.683588746486784 |
| ATCACGAATGAC  | 399.099698263487 | 0.676493015061133 |
| ACGTCCTATGAC  | 399.124165805651 | 0.629680366004    |
| ATCAGAGATGAC  | 399.172800473745 | 0.297735153208943 |
| CGTATAGATGAC  | 399.215503356977 | 0.671093703795361 |
| AGTCACCTCTTC  | 399.236609482803 | 0.207852886072961 |
| AAA ACTGTGTCA | 399.247681952725 | 0.616650004711102 |
| GACGGGTATGAC  | 399.259285665047 | 0.200408794718291 |
| GTCATCCGATTA  | 399.26467547978  | 0.388420873317712 |
| ACTAAAGTGTCA  | 399.278984751267 | 0.458322424859749 |
| CCGAAGTGAGTC  | 399.309622666527 | 0.922304491608757 |
| TCTCTTCAGTCA  | 399.330057595504 | 0.258367107827753 |
| GTCATAACGCAA  | 399.347276238872 | 0.48533825875119  |
| AGACCGTGTTCAT | 399.398844480673 | 0.411215789855258 |
| AACGACGACTCA  | 399.423964711826 | 0.64538383079696  |
| GGTCGGTATGAC  | 399.43289244466  | 0.405992329983783 |
| TATGACTTGATA  | 399.445343978769 | 0.373059860961505 |
| GTCATAGTAGAA  | 399.44890521843  | 0.443031003966344 |
| ACTATTAAGTCA  | 399.456057412708 | 0.593297818839196 |
| CACCGTGATTCA  | 399.487545777951 | 0.422904045801649 |
| TGACTGTAGACA  | 399.489582631436 | 0.858777530499248 |
| ATAACATATGAC  | 399.498178631761 | 0.629848477112217 |
| GTCATCAACAAA  | 399.526034557643 | 0.544915549655806 |
| GTCATATATAAA  | 399.529008063791 | 0.664723561773339 |
| GACCTTTATGAC  | 399.559307922629 | 0.226472467609329 |
| GTGACTTACTCA  | 399.568064659106 | 0.724076120636842 |
| CAACGATATGAC  | 399.586728815252 | 0.846132583741671 |
| CAGGTCTGAGTC  | 399.588559465506 | 0.556075492764631 |
| ATAAATCCGTCA  | 399.59009534634  | 0.853839952405216 |
| CATTGGTATGAC  | 399.600391440892 | 0.61231679877303  |
| GTCACCGACTCA  | 399.611769313432 | 0.242808384831194 |
| GTA AATTATGAC | 399.618629329804 | 0.221506846504288 |

|              |                  |                   |
|--------------|------------------|-------------------|
| GGTAATTCGTCA | 399.622639789096 | 0.811286250921958 |
| CTATCTGTGTCA | 399.628385679775 | 0.536483860897938 |
| CATAACTCGTCA | 399.689680156077 | 0.403902299790092 |
| GCCGGCTATGAC | 399.710190272278 | 0.796350119914397 |
| AACCGTGATGAC | 399.732003850742 | 0.537766643722064 |
| GAGTCAATGAGA | 399.774686056573 | 0.460526372884177 |
| ATTCCGGATGAC | 399.782854718085 | 0.461496193657212 |
| GTCACGGTGACA | 399.805914296401 | 0.579787857670414 |
| GAGCTTTGACTC | 399.813183299374 | 0.689157357508044 |
| CCGAGCGAGTCA | 399.87876243866  | 0.598816056138489 |
| CGCGTTTATGAC | 399.879671931765 | 1.01587643305466  |
| TGACCATAGTCA | 399.907621903734 | 0.89873157058974  |
| TGACTCGGCCAA | 399.976486011508 | 0.550839141152135 |
| GTCATCACTGTA | 400.022013257043 | 0.866550203256042 |
| ACCATAGACTCA | 400.022627427433 | 0.503322476800396 |
| CCACTAGATGAC | 400.044113192407 | 0.876076007192304 |
| AAAGTCTATGAC | 400.102592623627 | 1.01149759642104  |
| AAGTGACGTGAC | 400.15673067969  | 0.21441150958462  |
| GACTCCTATGAC | 400.171674167256 | 0.683402446668364 |
| GTCATAGTTCAC | 400.188886725502 | 0.553522016533126 |
| CTTAGCTATGAC | 400.196125147486 | 0.402668576367007 |
| GATAGCTATGAC | 400.221035217737 | 0.926999864478605 |
| AGACTGGATGAC | 400.240307492729 | 0.454689803900953 |
| CAGAAGTGAGTC | 400.242646589772 | 0.43746277651288  |
| ATGCAATAGTCA | 400.25749402595  | 0.595999724997319 |
| CACGATCCGTCA | 400.279663936831 | 0.364131454900803 |
| GCAACCTATGAC | 400.305350432075 | 0.457914716038962 |
| CACAGGTGACAC | 400.316635670433 | 0.253153443402414 |
| GAATTTTGACTC | 400.39268568389  | 0.416695333671444 |
| GTCATCGGCTAA | 400.397077088803 | 0.67309770000945  |
| GTCATTGGCTCA | 400.408592230682 | 0.82229823138496  |
| CTCACCTATGAC | 400.415727650181 | 0.481283667860618 |
| CATGATGATGAC | 400.431079889471 | 0.531255670522311 |
| GTCATATTGAAC | 400.437272108006 | 0.356231238163326 |
| GTCATATTTGGA | 400.441141463785 | 0.700072622707679 |
| ATTGGGTATGAC | 400.441773213968 | 0.386336478372948 |
| TCCACTGTGTCA | 400.470611850001 | 0.624809166477504 |
| GTCATCTTTTAA | 400.475236604932 | 0.483113618151256 |
| GTCATATCGATA | 400.525001888962 | 0.704555605143888 |
| AGGAACTATGAC | 400.55632062373  | 0.200012555269691 |
| GTACACTATGAC | 400.620150501226 | 0.839702784069074 |
| AATAGTCAACGC | 400.661793693564 | 0.413949978519552 |
| GACAACACGTCA | 400.670659446548 | 0.341838074802926 |
| AATTTGCTCACC | 400.676170966282 | 0.286458024341182 |
| AGTCATGGGTAA | 400.699368746355 | 0.246941544053561 |
| GATCTCGAGTCA | 400.700059031862 | 1.01506567819002  |
| ACCGGTGATGAC | 400.701550067647 | 0.707050411539549 |
| ATGTGGGAGTCA | 400.706828796882 | 0.243127233270139 |
| TCTACAGAGTCA | 400.707616438933 | 0.439624340107597 |
| GAGTCAGTACGC | 400.708309268896 | 0.584800226886244 |
| CGGACCGAGTCA | 400.730749294363 | 0.559458871861872 |
| AGTCACCTCCTG | 400.75699623146  | 0.200944395229526 |
| TCGGACGACTCA | 400.757655208554 | 0.769570472072825 |
| CGTTTAGATGAC | 400.772809710527 | 0.777702027426608 |

|              |                  |                   |
|--------------|------------------|-------------------|
| ACTCATCGATGG | 400.844826701318 | 0.912811580143825 |
| CTAACTGCGTCA | 400.845758700265 | 0.586318709257672 |
| TCCTACACGTCA | 400.849692839328 | 0.477060001533311 |
| TGACACAGCGAA | 400.874594470831 | 0.553817788232565 |
| CGAATTATGTCA | 400.942775839094 | 0.725610872092736 |
| TGACACAGTGAA | 400.943094723165 | 0.368397177387234 |
| TATTATTGCTCA | 400.966583527341 | 0.480945826304778 |
| CATACATATGAC | 400.97992209421  | 0.449440233008991 |
| ATAGGTTATGAC | 401.011810946287 | 0.285306725186248 |
| AAAATCTAGTCA | 401.01326030772  | 0.598684788006476 |
| AAGAATACGTCA | 401.017822551854 | 0.24839440954472  |
| TCGTTTGTGTCA | 401.033367441883 | 0.766232911165262 |
| GTCATTCGTACA | 401.049513092378 | 0.798929835205865 |
| ATGCATTGACTC | 401.062205350613 | 0.511039136578554 |
| GGCTACACGTCA | 401.127966092328 | 0.701139909588963 |
| CTAGTTGTGTCA | 401.130857340209 | 0.37975569876166  |
| CGATGCTATGAC | 401.150811736945 | 0.342294901483202 |
| AGGGCTAGTCAT | 401.154490708924 | 0.273269931076609 |
| GACTAATTGTTA | 401.171690479617 | 0.552432596814001 |
| CACGGATGACCA | 401.197497169156 | 0.783624128327446 |
| CTAGCACAGTCA | 401.2206008057   | 0.534474192198451 |
| ATGACCCAGAAT | 401.238566557161 | 0.283329113333631 |
| AGACCTGACTCT | 401.27388216881  | 0.590930167217552 |
| AGTGAGTCTGAC | 401.292943298544 | 0.328914247782124 |
| ACTACGTAGTCA | 401.298126008187 | 0.860872460272941 |
| GTCATATGGTGA | 401.310109183072 | 0.690683695778988 |
| GACTCACTCGGC | 401.377230983985 | 0.310670890968834 |
| CCTTATTGCTCA | 401.412058916833 | 0.395811035355215 |
| GATCCCAGTAC  | 401.446980377762 | 0.666565328968331 |
| CACTCCGAGTCA | 401.479530527467 | 0.315120973311616 |
| ATGACTAGCAAG | 401.48639424078  | 0.409039952718125 |
| CATGGATATGAC | 401.49936431104  | 0.857205089984307 |
| AGTATGTATGAC | 401.507649264637 | 0.535957596269822 |
| AGTCACGGTATC | 401.524664732419 | 0.373045162067434 |
| ATTGTTTATGAC | 401.528638590238 | 0.765450669718162 |
| ACGCATATGACG | 401.540833673509 | 0.47836185348962  |
| ATGACACGGTAA | 401.551021256411 | 0.373462701694043 |
| CAAGCTGCATA  | 401.555308922713 | 0.125086514980218 |
| GTCATACAGCAA | 401.56015012852  | 0.30109146783357  |
| CCACGGTATGAC | 401.561816307717 | 0.443429733535439 |
| ATTGCGTGACGC | 401.579992827484 | 1.2732411943866   |
| ACAGTCAGTGAC | 401.605281898724 | 0.676324047087874 |
| GGTTATTATGAC | 401.632798035998 | 0.616376533297603 |
| GCAATATATGAC | 401.634986655162 | 0.443202925641359 |
| ATGACAAAGAAT | 401.652929327526 | 0.339146609854467 |
| CCACAAGACTCA | 401.664636856728 | 0.415120899976101 |
| GTCATTGTGTAA | 401.679281096814 | 0.579428485394014 |
| CTCCTTTAGTCA | 401.692233340531 | 0.484965703861409 |
| AATACGTAGTCA | 401.706434902342 | 0.605650943223568 |
| CAATACGATGAC | 401.711847218239 | 0.799361224037369 |
| TGACGCAAAGAA | 401.740532430269 | 0.208014106543208 |
| ACTACTAGTCAG | 401.741563455129 | 1.0193678014817   |
| ATACGATCAGTC | 401.74287047125  | 0.903083138785588 |
| CTCGTTTACTCA | 401.796510999342 | 0.361368856015647 |

|               |                  |                   |
|---------------|------------------|-------------------|
| GGTCCAGTCAGA  | 401.800434156616 | 1.30382506588322  |
| AATTTGACACAT  | 401.80397908371  | 0.670173712102026 |
| GTCATAGGTCAA  | 401.836286468207 | 0.682194330369481 |
| GCGTCACATGAC  | 401.842577939097 | 0.69167781147388  |
| TACGGCGTCATA  | 401.880639876712 | 0.60303470015436  |
| GTCATACCGATA  | 401.948898673716 | 0.445278113975964 |
| GTAGCTGCATA   | 401.957744284207 | 0.325235215527129 |
| ACATGCTATGAC  | 401.964393754863 | 0.753848930733859 |
| GCTACTCAGTCA  | 401.972785362674 | 0.684431202517123 |
| CTGCTGAATGAC  | 401.984167263343 | 0.750269335188191 |
| CACTCCACGTCA  | 402.022368226417 | 0.289228871402247 |
| AGTCAGACTTTC  | 402.022629535693 | 0.546782288534505 |
| GCTTCCGAGTCA  | 402.03307902423  | 0.61112053581294  |
| AAATAATATGAC  | 402.050418610255 | 0.668268690206379 |
| TATGACAGCTCA  | 402.072578411143 | 0.451054642780015 |
| TGACTAGGCAAA  | 402.076408888577 | 0.510566237500313 |
| ACACAGATGACG  | 402.093966831793 | 0.536118394913012 |
| GAGTCAATAAAC  | 402.098666541194 | 0.772042033181005 |
| ACGTAGTGACGT  | 402.10983982773  | 0.496465526052981 |
| CTTTACGATGAC  | 402.114700441783 | 0.601557145085341 |
| CAAGCCTATGAC  | 402.122640910807 | 0.681857624263902 |
| ACGAAGGTGACT  | 402.150933188458 | 0.442414892034593 |
| ATGACTAGCCAC  | 402.158342691175 | 0.708507061132418 |
| ATGAGTCCGACC  | 402.166194366635 | 0.230148847334131 |
| GACTACTAGTCA  | 402.189916718762 | 0.232407957375521 |
| AATCCGTACAGAG | 402.213067095106 | 0.568523560427985 |
| TGACTGTGACCA  | 402.260860511603 | 0.856096484834274 |
| CGACACGATGAC  | 402.347444747232 | 0.563098063482181 |
| CGTTCACGTCA   | 402.355507916597 | 0.33347895603068  |
| GCTACGTAGTCA  | 402.395229403008 | 0.942798031388625 |
| AGTCACCTCCAT  | 402.40738008624  | 0.332126819318679 |
| CCGTATTATGAC  | 402.414242283323 | 0.633904973027452 |
| TGACTGGATTAA  | 402.479000137458 | 0.50055438198302  |
| CCTATCTAGTCA  | 402.484526846636 | 0.615899794452774 |
| ATGACTTGTAAAT | 402.505768589243 | 0.473408955176046 |
| AATCGTGAATCA  | 402.505828065834 | 0.498122417665919 |
| CTTAAGTAGTCA  | 402.527521875275 | 0.943172129610753 |
| TGACTGTGCAAA  | 402.532672641725 | 0.3372157841256   |
| GAAAATACGTCA  | 402.569753513085 | 0.630305997713856 |
| AAGTCGTGAGTC  | 402.641524246162 | 1.2935106620511   |
| CTGGATCTGTCA  | 402.642880946962 | 0.513665347429961 |
| GCATTGACTCA   | 402.698146821866 | 0.659538754948884 |
| AGTTCTGATGAC  | 402.698664434806 | 0.881754400861183 |
| TGACACAGATCA  | 402.712436771716 | 0.886968813141009 |
| CAATACTAGTCA  | 402.74383567712  | 0.804843888023771 |
| CAGAATTATGAC  | 402.744135247447 | 0.605858892781951 |
| GCCATAGATGAC  | 402.77782985183  | 0.570548133853886 |
| ATTAGTACGTCA  | 402.793992574598 | 0.359425084567964 |
| ACAACCTATGAC  | 402.801596108499 | 0.459126680978082 |
| CACATCGACTCA  | 402.813158524417 | 0.5180417170853   |
| GACACGTATGAC  | 402.84873743829  | 0.444143615853523 |
| ATGACGTGACGG  | 402.855361032071 | 0.530515622669329 |
| CAAACCGATGAC  | 402.857975373852 | 0.683090311368174 |
| ATTGATATGTCA  | 402.863328281283 | 0.563697803823419 |

|               |                  |                   |
|---------------|------------------|-------------------|
| CATCAAGATGAC  | 402.895726560076 | 0.431116223501745 |
| GTACACGTCAAC  | 402.901258848034 | 0.555573784552489 |
| ACGGAATATGAC  | 402.90133778661  | 0.507631283107286 |
| TGACGTGACCCA  | 402.914020936204 | 0.327594461935241 |
| GTCATAAGTCAA  | 402.964183620701 | 0.596390495532687 |
| CTGACTACGTCA  | 403.006360059649 | 0.657052698271573 |
| ATCTTGGAGTCA  | 403.01894684226  | 0.645666939196414 |
| ACTCATACTGGA  | 403.027551498298 | 0.46561959867275  |
| GTCATCTTCTCA  | 403.043824874686 | 1.29303054567092  |
| AATAACGACTCA  | 403.054082287433 | 0.421328845763185 |
| CAACGTGATTCA  | 403.104420662434 | 0.971843838871874 |
| AATCATTCTGTC  | 403.116736654854 | 0.45948097048399  |
| CCAATGGATGAC  | 403.152054689618 | 0.825129593156271 |
| GTAGACCAGTCA  | 403.161083611768 | 0.634674444183608 |
| CCGGCGAGTCAC  | 403.171796010606 | 0.798255163977554 |
| TGACTACGCAAA  | 403.212369202496 | 0.668570521123191 |
| GTCATCGGCAAA  | 403.238916073724 | 0.570060268878392 |
| ATAGTTTACTCA  | 403.24160712126  | 0.687916558382916 |
| TAACTAGAGTCA  | 403.257285193262 | 0.769270678722108 |
| ACGCATGACCCA  | 403.280299518443 | 0.52893245037957  |
| TCACCTGCGTCA  | 403.282118680885 | 0.375437115626783 |
| GTCACCGTTGCA  | 403.301805367949 | 0.619512689256228 |
| ATGAGTCGGCCC  | 403.307846250382 | 0.393929190696865 |
| CACCATGGTGAC  | 403.359165112084 | 0.887681437304271 |
| GATAATGTCATA  | 403.376393724329 | 0.309116578912725 |
| GACCCTGTCATA  | 403.391783286868 | 0.317422783982472 |
| CTGATAGATGAC  | 403.40373957524  | 0.57962281372407  |
| ATGTCGGATGAC  | 403.414944639355 | 0.347079232739029 |
| GACTACACGTCA  | 403.426708800795 | 0.734377327526319 |
| CCTACTCAGTCA  | 403.448269348803 | 0.503516981219347 |
| CTATGTGATGAC  | 403.457165820557 | 0.382186901661136 |
| ATGACTTGGCAC  | 403.46868225518  | 0.647943244764776 |
| CGATATTGACTC  | 403.488420746319 | 0.74663598701221  |
| ACGATATGTGAC  | 403.488477215277 | 0.954832805463639 |
| ACCTATTTGTCA  | 403.498847003922 | 0.533924807456614 |
| CAGTCGGAGTCA  | 403.527165403624 | 0.862114234298944 |
| CTACAAGTCATA  | 403.546548695388 | 0.615754634034503 |
| AGCTATTATGAC  | 403.547787827764 | 0.896463603080159 |
| ACTCATAGTTGA  | 403.563557102529 | 0.755330054095394 |
| AGTCACCCTTAG  | 403.579265609056 | 0.660766740529787 |
| GCTCAAGAGTCA  | 403.60145540203  | 0.581237957368893 |
| CCCTAGATGACG  | 403.620907594499 | 0.385669335956338 |
| AACCCTGACTCT  | 403.626328056945 | 0.373344369530482 |
| TCCTATACGTCA  | 403.635876216813 | 0.206807983771363 |
| GAGTCAATGCAA  | 403.64739707109  | 0.469168826754216 |
| CGTATCGATGAC  | 403.654121009021 | 0.462330871789578 |
| CGATTGGATGAC  | 403.66126319129  | 0.556309079607792 |
| TCCGTGTAGTCA  | 403.668666013026 | 0.798502294525157 |
| AAAGACTATGAC  | 403.673560695011 | 0.672359684623007 |
| ATTTTCGTATGAC | 403.677650528135 | 0.398465845049525 |
| CAATCCACGTCA  | 403.687615327711 | 0.147728759547313 |
| CTTCGTGATTCA  | 403.734807736771 | 0.391634201464266 |
| GTCATAACTGCA  | 403.811911357335 | 0.741659188030666 |
| CTTATAGATGAC  | 403.817122615544 | 0.647301209716039 |

|               |                  |                   |
|---------------|------------------|-------------------|
| TGACTCTTGGA   | 403.833394102137 | 0.645539394995114 |
| TCATGTACGTCA  | 403.835380730641 | 0.54616586246069  |
| GATTATACGTCA  | 403.846113683275 | 0.357466141777779 |
| GCTACATAGTCA  | 403.855010252587 | 0.631857212115473 |
| CACATGGATGAC  | 403.867837703791 | 0.722918310103761 |
| CATGTACTGACG  | 403.894636687029 | 1.83977298617558  |
| GTCATTGTCAAA  | 403.897210027466 | 0.776193879856616 |
| CCTAAAGATGAC  | 403.900296637317 | 0.586175005857026 |
| ACCCGAGATGAC  | 403.917533585001 | 0.426041959875596 |
| TCATATATGTCA  | 403.960196949671 | 0.421205064837762 |
| CGAACCGAGTCA  | 403.977399970022 | 0.683190297047824 |
| CAAATAGATGAC  | 403.997900923029 | 0.57283570975681  |
| TCAGTCAGCGCA  | 404.056983468663 | 0.423472081807438 |
| GGTACCCAGTCA  | 404.087924464281 | 0.508064866566898 |
| GTTCTAGAGTCA  | 404.103899440592 | 0.570946349643861 |
| TAGGCGTACTA   | 404.105847165109 | 0.426652904360332 |
| ATTAGGTATGAC  | 404.113624950397 | 0.262045297385248 |
| CCTCAAGACTCA  | 404.149671915461 | 0.384483139238564 |
| AGTCAGCGTCAC  | 404.1841349551   | 0.57744046398514  |
| CTTGCATATGAC  | 404.194376592105 | 0.710691767160974 |
| CAACCGGTGAC   | 404.197487187112 | 0.793764644756161 |
| TATCATGAATCA  | 404.225803746035 | 0.457802466098703 |
| GTCATATATCAC  | 404.248973478043 | 0.532387041706748 |
| ACGATCTAGTCA  | 404.283514517942 | 0.601336573271488 |
| AAGCCGTATGAC  | 404.301135326608 | 0.467149914946043 |
| CGTACTCAGTCA  | 404.321651483825 | 0.577197342440386 |
| GCTGTTGTGTCA  | 404.324376562068 | 0.620688160055975 |
| ACAGTTGACTGA  | 404.352866740425 | 0.553050460401675 |
| ATGACGTTGTCA  | 404.357899463152 | 0.622462324720933 |
| CGCTAAATGACG  | 404.368488347672 | 0.516622779397259 |
| ATGAGTATGATC  | 404.369260492229 | 0.490766861303405 |
| TGACTGCGTCAA  | 404.381937046827 | 0.507296981299343 |
| GTCACCAGATGA  | 404.432935223135 | 0.884737574040835 |
| AGTCATGGTCAC  | 404.43693033893  | 0.458120938157086 |
| AACGCGTATGAC  | 404.443526073109 | 0.738310865353177 |
| ACCAAGTCATAC  | 404.4503102663   | 0.40418079020485  |
| ATGACTAGCCGA  | 404.450797380422 | 0.322906251787579 |
| GTCATTGATCGA  | 404.473436384463 | 0.358561298672033 |
| GTCATATTTATA  | 404.483466705535 | 0.3877188048778   |
| GTCATCACGTAA  | 404.48867578303  | 0.855770039093328 |
| ATGACTTGGACG  | 404.490146641584 | 0.606025292405267 |
| ATCAATTCGTCA  | 404.551494884541 | 0.499489959002673 |
| AGTCACCCCGTG  | 404.580316615012 | 0.422553315857442 |
| TGACTCGGCTAA  | 404.592619381022 | 1.04624486920983  |
| TCGCATACGTCA  | 404.628103323692 | 0.502364997654945 |
| GAAAACCAAGTCA | 404.633727534909 | 0.393355851830907 |
| CGTCTGACGTCA  | 404.642105778929 | 0.664050573423912 |
| AAAACGTATGAC  | 404.690115009356 | 0.354272924797732 |
| GACAGTTATGAC  | 404.711422207236 | 0.722700155628768 |
| ATGACAAAGTTC  | 404.715442960777 | 0.384399938004861 |
| GTCATCGCCATA  | 404.719254971033 | 0.543221689884094 |
| CACGTTTACTCA  | 404.729359441559 | 0.526931848848713 |
| TACTAACAGTCA  | 404.776442589078 | 0.450769074352222 |
| CAGAGCGATGAC  | 404.791382751349 | 0.671308773804642 |

|               |                  |                   |
|---------------|------------------|-------------------|
| ACTGAGTGCAT   | 404.804582264263 | 0.690300325614592 |
| AGACACTATGAC  | 404.817714053557 | 0.547357774919182 |
| ATGACACGGACA  | 404.838314552567 | 0.249801884326028 |
| AGCTGCGATGAC  | 404.848137955738 | 0.952541492200312 |
| TGACTGAAGGCA  | 404.851002178566 | 0.617686877222533 |
| GACGCTACGTCA  | 404.862484792931 | 0.378930253068967 |
| GTCATAGACGAA  | 404.884213190179 | 0.755531838513414 |
| CAATCAGGTGAC  | 404.893316798405 | 0.724188220796078 |
| GTCATTTGGTGA  | 404.915221321534 | 0.702617318724481 |
| GATGCCTATGAC  | 404.924184605614 | 0.782029016165153 |
| TCATAGCGGTCA  | 404.945826606819 | 1.31263563706331  |
| ACGCCGAGTCAC  | 404.946608137004 | 0.710671608189756 |
| ACTCGAGATGAC  | 405.007440521762 | 0.816340907504341 |
| GTCAGCGAGTCA  | 405.016241194922 | 0.664999099614967 |
| AGCAACCAGTCA  | 405.054557910614 | 0.685107592825279 |
| GTGACTACCACA  | 405.067088378702 | 0.555157730781824 |
| CAACTTTATGAC  | 405.073265209828 | 0.547586022138389 |
| ATGACGCGCACA  | 405.079198177463 | 0.650767166140684 |
| GTCATAGACGCA  | 405.085435802912 | 0.640139696272618 |
| TGACTCGCAGCA  | 405.165303452182 | 0.871929454132255 |
| TGAGTCGCATCA  | 405.17100764377  | 0.562104083485513 |
| AGTCACCTTTGC  | 405.203706004315 | 0.280754717888201 |
| ATGACGTGAACG  | 405.234461008934 | 0.336900223477447 |
| GAAACGTATGAC  | 405.240973297473 | 0.304397454378778 |
| GTCATTAATGAA  | 405.244329105894 | 0.872293935334678 |
| AGAACATGACGC  | 405.248350023923 | 0.591539522016856 |
| CACACTTACTCA  | 405.260013984745 | 0.267703938235452 |
| CATGGTGAATCA  | 405.351128818829 | 0.631977077277309 |
| GCCCCGTGATTCA | 405.38049648392  | 0.694317515018821 |
| GTCATTACTCGA  | 405.38081809004  | 0.401064256991233 |
| TCATACGTGTCA  | 405.38436988481  | 0.550916057329386 |
| TGATTACACAGCA | 405.403007604649 | 0.55162318581294  |
| CCGACCGATGAC  | 405.407363689741 | 0.590972579836212 |
| GACTAATAATAC  | 405.426572102808 | 0.552356690012428 |
| AAATTGACACAT  | 405.437624287412 | 0.434865118155939 |
| CTCTACTATGAC  | 405.464848256056 | 0.248086593920841 |
| GTACTIONATGAC | 405.500916406265 | 0.464259329508406 |
| GATCCCTATGAC  | 405.508632321498 | 0.591738194826252 |
| ATGACTAGCGAA  | 405.511872472202 | 0.444219205407017 |
| GTCATACCGAAC  | 405.549467224069 | 0.503342837223673 |
| AGATATTGCAT   | 405.550128760718 | 0.357982776682438 |
| TAACGTGTGTCA  | 405.591750533603 | 0.722863499014465 |
| AAAATAGACTCA  | 405.593806896722 | 0.382389929581003 |
| CTGAGATATGAC  | 405.599340161598 | 0.567170939113905 |
| ACTTCCGAGTCA  | 405.631017312468 | 0.308553058335982 |
| GTCATATAGTGA  | 405.631091266381 | 0.75983935995386  |
| GGAGTTTACTCA  | 405.644007051733 | 1.08207218943798  |
| CCCAATTATGAC  | 405.653460589999 | 0.214105324911724 |
| TGATTATGCAA   | 405.655799386737 | 0.694157388838043 |
| CTTAGAAATGAC  | 405.657962997316 | 0.566167924948218 |
| CCTCGGAGTCAG  | 405.668437251701 | 0.51753970224546  |
| AAGAATTCGTCA  | 405.676067860905 | 0.505541907567779 |
| CCATATAAGTCA  | 405.714051071727 | 0.770650922921136 |
| GCTTATTATGAC  | 405.731417598215 | 0.544489629787995 |

|               |                  |                   |
|---------------|------------------|-------------------|
| ATTACAAATGAC  | 405.756091748778 | 0.554197142174946 |
| GTCATAGGAAGA  | 405.758381523502 | 0.427946310084674 |
| GCAAAGGATGAC  | 405.761350754935 | 0.334773765317678 |
| GACTCACTTCTA  | 405.803647279134 | 0.292111147878033 |
| GTCATACGATCA  | 405.831987505198 | 0.5391106605962   |
| AACTGGTGACGT  | 405.832188170459 | 0.552976864905745 |
| GATCACTAATAA  | 405.850180996522 | 1.53897315116545  |
| CACTTCGTGATG  | 405.870958365789 | 1.67756408568392  |
| TCACATTAATGA  | 405.922862581241 | 1.02455872930651  |
| ACGGAATTAGTC  | 405.92470522773  | 0.706548538864352 |
| GAGTCAGGCAAA  | 405.928057317765 | 0.408382536152213 |
| GCGTCACCCATA  | 405.933061811499 | 0.979576414960344 |
| ACAAAAGATGAC  | 405.936600900647 | 0.27099284991693  |
| ATGAACTATGAC  | 405.972445025984 | 0.777136617407177 |
| GTCATTCATTGA  | 405.988485883407 | 0.609360274443797 |
| GATCAAGATGAC  | 406.002104371698 | 0.306062634004289 |
| GACTAATAGTCC  | 406.008446573106 | 0.790544767984151 |
| TAACATACGTCA  | 406.011102885135 | 0.650752563294373 |
| ACCGGAAATGAC  | 406.023213755583 | 0.83281482382605  |
| GCTATATATGAC  | 406.082755938307 | 0.690695610365837 |
| CCGCGTTATGAC  | 406.10632707985  | 0.516397754006109 |
| ACAACGTAGTCA  | 406.122400833892 | 0.878425898975217 |
| ATGAGTCTCAGA  | 406.182394698786 | 0.421199539247429 |
| GTCATAGGACCA  | 406.210145368109 | 0.41541027400943  |
| GTCACCCAAATGA | 406.246393440297 | 0.445708512955053 |
| AGTCAGACTAAT  | 406.343579170923 | 0.572079116431342 |
| GTTTCATCTATGA | 406.361907875767 | 1.020206922211606 |
| GGATACTATGAC  | 406.398209682327 | 0.846292256546526 |
| CATACGGGTGAC  | 406.416832357262 | 0.661343506368292 |
| AATCATTGAGTC  | 406.418424750647 | 1.16306031741641  |
| ACGTAATATGAC  | 406.427510682765 | 0.798439713711092 |
| ACGACCCAGTCA  | 406.436530446224 | 0.507729260265027 |
| ATGACACGGTCC  | 406.448474019103 | 0.382872954463535 |
| CCGGCGTAGTCA  | 406.510528719858 | 1.33818876279718  |
| GGTCTGACGTCA  | 406.522834854696 | 0.608126228185789 |
| GTCATACCTCAC  | 406.552944725454 | 0.587225554549042 |
| AGTCACCTCTAC  | 406.555319195801 | 0.253248353745461 |
| GTCATAACAAAC  | 406.57533196784  | 0.323910351179407 |
| ACAAACGACTCA  | 406.590328061334 | 0.491850684734437 |
| AATCCCAGTCAT  | 406.620550077527 | 0.517654224246403 |
| ACTAACGATGAC  | 406.645807211891 | 0.558885687137881 |
| GAGCCTTATGAC  | 406.648985832166 | 0.519181993334768 |
| GAAGACGTCATC  | 406.650742211654 | 0.25154512722209  |
| CTGCGTGTGTCA  | 406.682412376565 | 0.699786232592917 |
| ATAAGTTATGAC  | 406.690754016897 | 0.6549158709168   |
| CCTAGGTGACGC  | 406.73328716138  | 0.353470452372854 |
| AGTAATGATGAC  | 406.796310133652 | 0.405349058743421 |
| CAGGATGATGAC  | 406.859930706324 | 0.784754944884287 |
| CTCTTTGTGTCA  | 406.865625219991 | 0.742748526393374 |
| GTCATAATCCCA  | 406.867414357375 | 0.331016160861755 |
| ATCGCGGATGAC  | 406.89999053828  | 0.433028124742262 |
| GTCATAACAGTA  | 406.964107261233 | 0.426385151667862 |
| AACCTATAGTCA  | 406.967321325402 | 1.31961295161103  |
| GCACTGTGTAC   | 406.999965789482 | 0.544960724426501 |



|              |                  |                   |
|--------------|------------------|-------------------|
| CGTCATATGAGC | 407.01197647204  | 0.346895881534161 |
| ACAAACTGTGAC | 407.033340757493 | 0.273932649953845 |
| GTCATGCACTGA | 407.053487045914 | 0.424037362504244 |
| GTCATATACTCA | 407.073453368877 | 0.576457550876653 |
| GTCACCACAAGA | 407.150310701289 | 0.537567165503644 |
| GGTGCCGATGAC | 407.151761289897 | 0.977056744494996 |
| GAGTCAATGTGA | 407.153272937318 | 0.450701074694628 |
| ACACAGGATGAC | 407.202974001428 | 0.74784924480948  |
| GTCATCCTGGCA | 407.221763135193 | 0.356886755278086 |
| AGCATTTATGAC | 407.224168457983 | 0.762678318721493 |
| ATGACAGCTCAT | 407.224789159822 | 0.198626234531605 |
| ACTCATAATTGA | 407.250557953778 | 0.702499712257992 |
| AGCCGTTACTCA | 407.251508800888 | 0.388081077084717 |
| CTCATCGGTGAC | 407.259625836278 | 0.560280424758292 |
| ACTTAATATGAC | 407.300185439047 | 0.642087631048414 |
| GATAACCAGTCA | 407.304360653837 | 0.577685472281952 |
| GTCATCCACTTA | 407.329753616887 | 0.305838840557907 |
| GTCATAATTAGA | 407.344780498651 | 0.352610872223076 |
| GTAGGCGTCATA | 407.346296622653 | 0.3065241598648   |
| CACGATTATGAC | 407.353943676671 | 0.247703796037242 |
| CCATGTGAATCA | 407.376155921976 | 0.813083160439421 |
| CGAAAGTGACAC | 407.393142618298 | 0.783945402540505 |
| GCAGGGTATGAC | 407.401783331836 | 0.578265059320898 |
| CCACGTGAATCA | 407.405460740393 | 0.412562714483581 |
| CTCTAGTGTGAC | 407.406393487761 | 0.638975299527627 |
| AGTGAGACTCAT | 407.419487008696 | 0.162972952656937 |
| GCGCGTTACTCA | 407.481517657174 | 0.805415945050854 |
| ATACTTTAGTCA | 407.50279456703  | 0.929854824603461 |
| ATGACGAACTTC | 407.504992387545 | 0.443385302053731 |
| TCGCAATAGTCA | 407.542422941024 | 0.574907738862189 |
| GTCATAAATATA | 407.545781226634 | 0.321376233261828 |
| TCACTGGAGTCA | 407.549180513645 | 0.639746744990336 |
| ATATTGTACTCA | 407.553013916369 | 0.227466407482811 |
| TGAGTAAACTCA | 407.565472874168 | 0.586620739827672 |
| ATGACGTTATTA | 407.566508052874 | 0.432132630737639 |
| CACAAGTGAGTC | 407.574489601763 | 0.966754944914511 |
| TGAATCACGACA | 407.575492141601 | 0.831921467495862 |
| GCGTTCTATGAC | 407.57674768088  | 0.166848406174989 |
| TGACAGATGACA | 407.5776617059   | 0.419674036011981 |
| AGCGGCGTCATA | 407.583547786927 | 0.279424655463149 |
| ATAGGCGTCATA | 407.603563481428 | 0.205323924576107 |
| GAAAGGTATGAC | 407.620095068843 | 0.111847397495472 |
| AGAGGGGTGACT | 407.653935597329 | 0.253867088907619 |
| CAGTTTGCCTCA | 407.659293927307 | 0.213050309176804 |
| GTCATCGCGAGA | 407.669936450583 | 0.492495722110405 |
| AGTCGTGACTGC | 407.674413158801 | 0.719935148702103 |
| GGTGAGTCTGAC | 407.692262602273 | 0.355522392353961 |
| ATCGGTGAATCA | 407.694832234169 | 0.491087090022016 |
| ATGAGTCCGAGG | 407.735639398788 | 0.46069769043271  |
| AAGGTATTAGTC | 407.767170793062 | 0.32625964745743  |
| CGTGCTTAGTCA | 407.773270190667 | 1.33968593992692  |
| TATTCTGTGTCA | 407.791289236799 | 0.537873338288832 |
| GCACAAAATGAC | 407.80052112059  | 1.0090184369561   |
| ACTAATGGGTCA | 407.835456217143 | 0.418125361493276 |

|              |                  |                   |
|--------------|------------------|-------------------|
| TGACTGTTATAA | 407.884640654169 | 0.4396812079729   |
| GTCAGTAATGAC | 407.898185616781 | 0.435419393973339 |
| CCAGTAATGACG | 407.932873040801 | 1.28011009193115  |
| GATCGTGCCTCA | 407.945425217747 | 0.924662657861159 |
| CGATATACGTCA | 407.979307283367 | 0.946769501932658 |
| CGATTATTAGTC | 407.99601974972  | 1.06967433907458  |
| ATGAGTCGGCAC | 408.03953251581  | 0.64363328124879  |
| GTCATCAGATGA | 408.076098698517 | 0.375259903423009 |
| GTCATAAGTTGA | 408.080622847188 | 0.772660685717136 |
| TAGGATACGTCA | 408.111926441506 | 0.603670079411394 |
| CAACTACAGTCA | 408.131751018131 | 0.489990025865417 |
| ACGACCTAGTCA | 408.173764510257 | 0.885120822556822 |
| GCGCTTCAGTCA | 408.195075979469 | 1.00176192801112  |
| GGATGACTTGTA | 408.223617919198 | 0.386492553348145 |
| TAAAATTCGTCA | 408.288760965945 | 0.702660002812736 |
| AGTTCCGATGAC | 408.289548329243 | 0.41618282348227  |
| ACACTTCAGTCA | 408.290314381091 | 0.319237550813767 |
| CTTAACATGAC  | 408.290857449412 | 0.423383329378082 |
| CCGTTCCAGTCA | 408.294324688084 | 0.620040135335086 |
| AGCAAAGATGAC | 408.308132170719 | 0.449305766381858 |
| GTATGACTTGCA | 408.322703134123 | 0.241406570156426 |
| CACAGTGACGTG | 408.329130973287 | 0.450766331848856 |
| CGTCATTGACTA | 408.333686773409 | 0.45379480940493  |
| GTGTGTGAATCA | 408.337438179684 | 0.604089618104893 |
| GGCTATTATGAC | 408.338159003829 | 0.542069964946337 |
| TCAACACAGTCA | 408.354932922328 | 0.726956634568982 |
| TATTCATAGTCA | 408.394987849163 | 0.578908439821674 |
| CACTAAATGACG | 408.416648733552 | 0.592504125782751 |
| CGACTTTAGTCA | 408.421286624541 | 0.32486963624091  |
| CCTCGTGCCTCA | 408.431721007311 | 0.493327113897631 |
| CACCCATGACTG | 408.434817374575 | 0.367864057064231 |
| CCTATTTATGAC | 408.452881503683 | 0.29171374783611  |
| ACGATATCGTCA | 408.461225269969 | 0.734621658940386 |
| ACGTCACCACTG | 408.477050521114 | 0.302814587047914 |
| CGTATTGACACA | 408.477864830271 | 0.186119196489781 |
| CAGTCACGCGGA | 408.488038785954 | 0.542781670641718 |
| GTGGCTGCCTCA | 408.507417704635 | 0.831380947897558 |
| ATAATTTATGAC | 408.515801441533 | 0.927549776519509 |
| AAAACCTATGAC | 408.567347828009 | 0.641217122203202 |
| AAACAACGTCAT | 408.633718416511 | 0.625437837055307 |
| ACTAGGCGTCAT | 408.649622575564 | 0.600801246741685 |
| GTCATATGTACA | 408.676880894234 | 0.598983232189953 |
| GTCATTGATAAC | 408.709543825799 | 0.822076963233441 |
| CCTAGACTATGA | 408.71610618181  | 0.32124729183027  |
| ACCGAGGTGACT | 408.759472727201 | 0.477768936166844 |
| TAACACACGTCA | 408.762577424077 | 0.484317320674362 |
| CCCACAGAGTCA | 408.770220101038 | 0.860380829227678 |
| GTCATCGTCCTA | 408.797575166693 | 0.362560662576074 |
| GTCATTCCATGA | 408.809309422019 | 0.582065673044558 |
| ATGAGTCCCACG | 408.810829845739 | 0.388544077714014 |
| ACTGTTGATGAC | 408.812828259469 | 0.850255820121494 |
| CTAGTTTACTCA | 408.826811037547 | 0.304020950365179 |
| ATACAAGACTCA | 408.83534910186  | 0.588289890421129 |
| CCGGTTTACTCA | 408.889980459206 | 0.611396608986163 |

|              |                  |                   |
|--------------|------------------|-------------------|
| CTAGGGTATGAC | 408.911343489802 | 0.537186660688188 |
| ACTTCGTAGTCA | 408.923130903081 | 0.783752322497563 |
| GACAATTGACTC | 408.935856487188 | 0.598464750587927 |
| GGTAATTATGAC | 408.936516183439 | 0.358960646693695 |
| AGTCACCCTATC | 408.958118450717 | 0.29903897170562  |
| AAACCTCAGTCA | 408.960846300443 | 0.430572423367406 |
| GCGAATTCGTCA | 409.01460491144  | 0.442078792224433 |
| AAAAGTCGTCAT | 409.023578029106 | 0.366402400857977 |
| CAGACACAGTCA | 409.028511033437 | 0.747476210984913 |
| GTCTATTTGTCA | 409.037640697565 | 0.627514636833804 |
| CTGCATTCGTCA | 409.040842569708 | 0.267983431962026 |
| GCACCGGATGAC | 409.045418452968 | 0.433695111262924 |
| TCACATATGTGA | 409.047817817993 | 1.14381105728397  |
| TGAGCAATAGAA | 409.064929892598 | 0.536732378765746 |
| CCGCATGAATCA | 409.06655806556  | 0.406846098110831 |
| ATGACAGACACA | 409.075517302418 | 0.763978426100105 |
| GATGACTCACGA | 409.078286278732 | 0.976011051620276 |
| TCCTCTAAGTCA | 409.086849623063 | 0.526096132008463 |
| AATTATAAGTCA | 409.099688058798 | 1.12733043302743  |
| CATTCTAAGTCA | 409.108174026884 | 0.911439367224513 |
| ATGACTGGGGCA | 409.142120785947 | 0.325623119953088 |
| GGTCTACAGTCA | 409.160968751656 | 0.340979110696195 |
| CAGTTCGATGAC | 409.17628578329  | 0.864887320601363 |
| GTCATTTGTAA  | 409.218193054148 | 0.53011081304142  |
| ATGACCGAATCG | 409.246513157635 | 0.464263396546399 |
| CCTTTGTAGTCA | 409.24707118903  | 0.76174639751937  |
| GAATATACGTCA | 409.269394354897 | 0.701717482719234 |
| GTCATCGTCTAA | 409.304254314365 | 0.347158501840903 |
| GTCATTCGACAC | 409.339298251912 | 0.668605760512807 |
| CCTTTTGGGTCA | 409.355187794031 | 0.648096481185692 |
| ACGTATTATGAC | 409.360673411418 | 0.852901346481923 |
| CAGAAATATGAC | 409.379378738645 | 0.809361180348534 |
| CACTTATATGAC | 409.381293539477 | 0.626903359897962 |
| CGCGTTGACTGA | 409.425503198056 | 0.63966528100703  |
| GTCATCGTGGAC | 409.446039901874 | 0.878559917756598 |
| ATGACGTTGTCC | 409.452355882963 | 0.36707589046434  |
| ATACATTATGAC | 409.460404609316 | 0.75607760755474  |
| CCGTCATCAGAG | 409.465483260249 | 0.630918929717415 |
| ATGACAACGTCA | 409.469761020822 | 0.382944812433525 |
| GCGACCTATGAC | 409.533307497493 | 0.864321989794681 |
| GTCAATACGTCA | 409.543221393067 | 0.597738095576529 |
| ATTGATTGGTCA | 409.576777439233 | 0.592950620254802 |
| AGACTAATGACG | 409.593350661079 | 0.364293733569049 |
| CTTCGATATGAC | 409.597541451068 | 0.715531807382272 |
| GTCATTCCTCGA | 409.623881622278 | 0.355521801969354 |
| CGCCAAGTCATC | 409.648604122711 | 0.159463986019241 |
| CCTGCCGAGTCA | 409.655570402272 | 0.366500117904425 |
| CTACACTATGAC | 409.679296777883 | 0.277718082073326 |
| AGTTAACAGTCA | 409.679373797896 | 0.431958244529655 |
| ACTCATACTTTG | 409.697691858258 | 0.32332147474896  |
| CTGTCGGAGTCA | 409.760968950381 | 1.35890624331369  |
| AGTCACTACTCA | 409.765214118809 | 0.349859694373793 |
| CCCGGATATGAC | 409.768039293542 | 0.303889674600788 |
| GTCATCGAGCTA | 409.771510449575 | 0.534306817939575 |

|              |                  |                   |
|--------------|------------------|-------------------|
| ACTCTGACGTCA | 409.780677833483 | 0.526784632018718 |
| CTGGACTCGTCA | 409.781784567492 | 0.565369779546612 |
| CACGTAGTGACG | 409.784959170511 | 1.33602932240477  |
| CTCCGTGATGAC | 409.806916129046 | 0.711197320469391 |
| TATGATTTGTCA | 409.807294392694 | 0.208528415111675 |
| TGACGAATTGCA | 409.822309644198 | 0.800470954120666 |
| AGAGTCAGGCCG | 409.848980954562 | 0.655271715731646 |
| CCGGTTATGAC  | 409.854803403907 | 0.990571343910436 |
| GTCATAACCGAA | 409.858113860617 | 1.01175347846864  |
| CGTACGCGTGAC | 409.862354129722 | 1.16266359364954  |
| AGAATATATGAC | 409.894578249918 | 0.171781700651588 |
| CGTTTTGATGAC | 409.936671174926 | 0.484375077893156 |
| AGTCATGAGATA | 409.938339826474 | 0.449617271450369 |
| GACTAATGACAA | 409.985789419036 | 0.355919865439245 |
| ACTTACTAGTCA | 409.990651774491 | 0.373888971991654 |
| ACTCATTATGAC | 410.001611407644 | 0.261726475816584 |
| CACCTTCAGTCA | 410.002358973777 | 0.388559060211752 |
| AATCCTTATGAC | 410.017213462474 | 0.306365769363325 |
| GACCGCTATGAC | 410.026003780437 | 0.426721466517395 |
| CTCTTCGATGAC | 410.048751611361 | 0.485500091922753 |
| ATTACGCAATAC | 410.103443073925 | 0.511101358796177 |
| ACACATATGACG | 410.125161172643 | 0.862389967555285 |
| TGACAGGAGTCA | 410.127861645869 | 0.512173263838798 |
| GTCATCTTGAGA | 410.15394172789  | 0.929523938348668 |
| GCCGATACGTCA | 410.168243102207 | 1.12811390202197  |
| TGATTCACAGAA | 410.168872894344 | 0.761080408289955 |
| CAAAACCAGTCA | 410.188383876908 | 0.750506436872581 |
| CAGTCACGACTC | 410.225323194982 | 0.603020435450552 |
| CAAGCGTACTA  | 410.230062782121 | 0.452387568612304 |
| CGTCATTGCTCA | 410.231929537591 | 0.496984753315874 |
| TGAGTCGTTACA | 410.249173982111 | 0.688149177289978 |
| AGTCCGGATGAC | 410.259033026144 | 0.410521410401465 |
| ACAACGGATGAC | 410.286802633808 | 0.4658699564163   |
| ACCTGGGAGTCA | 410.309369482854 | 0.667456507533838 |
| CTGTTCAATGAC | 410.322917071422 | 0.347051776482563 |
| CAACTGTATGAC | 410.342520566182 | 0.785827147200501 |
| CTACAGGATGAC | 410.363218141831 | 0.506750735086552 |
| TCTCGCGAGTCA | 410.379128235765 | 0.154975346913992 |
| GTCATACTACA  | 410.391250379144 | 0.16948234309763  |
| ATACCGATGACG | 410.395175188714 | 0.61932456340264  |
| ATGACTGGGCGG | 410.397298409623 | 0.483950750695378 |
| CGTCATCGGAAC | 410.406116314384 | 1.49899312633132  |
| TATGATCTGTCA | 410.439863882007 | 0.555640945459854 |
| GTCACTATGTGA | 410.46385869962  | 0.745090560057821 |
| TACCGCGAGTCA | 410.467224255384 | 0.285791484491512 |
| ATATTTTACTCA | 410.468676193236 | 0.639546653776599 |
| CACAGCGATGAC | 410.48868818521  | 0.649773923606914 |
| ACGATTTATGAC | 410.539880799808 | 0.560919297864609 |
| ACGTCACATGAC | 410.58784752415  | 0.420344300192782 |
| ATGTGCGAGTCA | 410.646839044418 | 0.511387297579744 |
| TCTCTCGAGTCA | 410.662931508788 | 0.476432983217452 |
| AGTCATGGTTGC | 410.679336062685 | 0.217833764895024 |
| GTCATAATGGCA | 410.727861197316 | 0.511519296429457 |
| CAAAAGGATGAC | 410.738618988588 | 0.456848302693061 |

|               |                  |                   |
|---------------|------------------|-------------------|
| CTATATTGCTCA  | 410.761331822999 | 0.271726569879034 |
| CCCTCCGAGTCA  | 410.765901248113 | 0.339763024985003 |
| ATATTGCAGTCA  | 410.823814330324 | 0.822457575016313 |
| AGTCACTTCTGA  | 410.828807539255 | 0.518164662767382 |
| CACGACGGTGAC  | 410.846801995877 | 1.17739235972328  |
| GGCAGGTATGAC  | 410.859092035721 | 0.242455021779899 |
| CATATCCGATGA  | 410.876516490379 | 1.12431601766099  |
| CCATATTGCTCA  | 410.908350662589 | 0.649875178628246 |
| ACTACTGACACA  | 410.914192338967 | 0.272012945536528 |
| GCAGTCGATGAC  | 410.922821990926 | 0.539261248422721 |
| CAATAGAATGAC  | 410.931529488314 | 0.636507651847692 |
| AACTCTGAATCA  | 410.933907981237 | 0.690770420258879 |
| CGTTACGATGAC  | 410.934978773369 | 0.9518304554944   |
| CCTTATTTGTCA  | 410.949484060704 | 0.288805859827262 |
| GTTAATACGTCA  | 410.95549182646  | 0.586950931397836 |
| TACCTTGACTAA  | 410.958862027482 | 0.399178142559142 |
| GACTATACGTCA  | 410.963232673074 | 0.354461952709118 |
| AAACGCTGTCAT  | 410.987332925323 | 0.245999755347271 |
| CGTTCACAGTCA  | 410.988680111423 | 0.351613297172352 |
| GTCACCGAATGA  | 410.99175263525  | 0.759202003514984 |
| GTCATAATGCCGA | 411.004424959181 | 0.500621038047362 |
| ACTATGCAGTCA  | 411.039177779439 | 0.681433112991632 |
| ACGTATATGTCA  | 411.040390694043 | 0.604150570827897 |
| AGTCACCTCTCA  | 411.102433698904 | 0.316689859723576 |
| CAATACCAGTCA  | 411.122977308877 | 0.778157533840141 |
| ACCTTCGACTCA  | 411.187743178103 | 0.310357167483856 |
| CCTGCAGAGTCA  | 411.198275227659 | 0.561010823352003 |
| CCATTTGTGTCA  | 411.206077107793 | 0.647887348483441 |
| GGCTTGTATGAC  | 411.245947833345 | 0.194718448038414 |
| TAGAATCCGTCA  | 411.257647749688 | 0.307688450022409 |
| CCGACACAGTCA  | 411.28836496502  | 0.5987988820258   |
| GTCACCTTCAGA  | 411.314069683513 | 1.15275712184515  |
| TGACGCAGTGAA  | 411.317731071391 | 0.396506094529167 |
| CAGTCATGGGAA  | 411.342763571236 | 0.554967824709893 |
| ATGACGATGATG  | 411.363451294916 | 0.446465712528073 |
| ATGACTAGCGTC  | 411.397034692251 | 0.557027227722204 |
| AAACTCCGTCAT  | 411.456252155534 | 0.534964304579063 |
| ATGAGCAAATGA  | 411.462952940581 | 0.283456865656906 |
| AAATCCGAGTCA  | 411.623543975015 | 0.551807568388475 |
| GTCATAGTCAAC  | 411.650172274785 | 0.526142337646413 |
| GTCATCACTCAA  | 411.65327670981  | 0.345242488677856 |
| CCTAAGTAGTCA  | 411.67085921572  | 0.392164646095655 |
| ATGACACTCATG  | 411.722637464574 | 0.380529580763009 |
| CAACTCGATGAC  | 411.728249296645 | 0.574410231879066 |
| ATGAGTCCCTTG  | 411.742183348441 | 0.315848994395699 |
| GACTATCTGTCA  | 411.757585298246 | 0.683791726210355 |
| AAGCTTTAGTCA  | 411.763806121433 | 0.296057800618915 |
| ATGATGTAACAT  | 411.776504413623 | 0.264233789196763 |
| ATGAGCAAATTG  | 411.787805705261 | 0.491272846861603 |
| ACGTCTGTGTCA  | 411.829077815538 | 0.434862887984115 |
| GTCACCGATTGA  | 411.838080408905 | 0.687142904275974 |
| ACATTGTGTGAC  | 411.838197013311 | 0.782818861184213 |
| TGACGCAAGAAA  | 411.877555975603 | 0.264085085021298 |
| AATTATAATGAC  | 411.910597349696 | 0.819202147616235 |

|               |                  |                   |
|---------------|------------------|-------------------|
| GTGACTCGCGTA  | 411.924454021205 | 0.696993898940374 |
| CCGGTAGACTCA  | 411.930166727587 | 0.944733562400035 |
| CTTCTATAGTCA  | 411.950177184023 | 0.234112936277975 |
| TGACACTTTGAA  | 411.959979580254 | 0.6183149745357   |
| CACAGGTGTGAC  | 411.967298804915 | 0.858989055321026 |
| GTGACCTAGTCA  | 411.975108143461 | 1.03203927160669  |
| GACTTGTAGTCA  | 412.070696508724 | 0.636811943066157 |
| CGAAAATATGAC  | 412.179725014032 | 0.417643057155626 |
| ACTATCCAGTCA  | 412.181022621108 | 0.504250886554501 |
| TGACGCAGCGCA  | 412.187634415947 | 0.575429444776996 |
| ATGAGTAAAGAC  | 412.190773165101 | 0.386933788059406 |
| GTCATCAATGAC  | 412.191360354224 | 0.624131259689326 |
| CCCGGGGAGTCA  | 412.195591391184 | 0.879079226067806 |
| TAATACTAGTCA  | 412.228938276517 | 0.451007592708303 |
| GGACTCTATGAC  | 412.249886547771 | 0.415891710973674 |
| TGACGCAAGCAA  | 412.264792826842 | 0.588108337385555 |
| GTCATCCGTCOA  | 412.266245697044 | 0.567775968206666 |
| ATGACATGACAC  | 412.321002993779 | 0.515325549035788 |
| GATCGCTATGAC  | 412.322458038241 | 0.336986826816775 |
| CTGAGAAGTAC   | 412.325349834847 | 1.16121383205005  |
| GGACACTATGAC  | 412.343475644467 | 0.53940150671524  |
| ACTAATTGCTCA  | 412.354422487797 | 0.251666462331878 |
| GTGACTCGGCCA  | 412.367048558403 | 0.340446852230433 |
| CAAAAATATGTCO | 412.408276423105 | 0.953960925960482 |
| GATGATGTAACA  | 412.413365144976 | 0.413639810700091 |
| ACTATCGATGAC  | 412.414580791548 | 0.463086004240752 |
| GTCACAATTGGA  | 412.442349591966 | 0.396534006589975 |
| AAAGCTCTGACT  | 412.448642793019 | 0.389493230845708 |
| AGACAATAGTCA  | 412.460940530457 | 0.686953715485124 |
| CTGTTACAGTCA  | 412.467384275565 | 0.269628663023455 |
| CGGCTTCAGTCA  | 412.47531971569  | 0.816778133700652 |
| GCGCCGAGTCA   | 412.536826157247 | 0.570067928019402 |
| GTCATCCATTGA  | 412.54524292037  | 0.347460699696656 |
| GTATCGTATGAC  | 412.577254732413 | 0.142264730034235 |
| AACAATTCGTCO  | 412.602294989381 | 0.734535546199751 |
| AGTCACCTCACT  | 412.620875753146 | 0.517937393540949 |
| AAGATTTATGAC  | 412.622135156209 | 0.588113323981104 |
| CGTCATCTAAGA  | 412.630802309883 | 0.873444962348006 |
| ACACGTGCGTCA  | 412.633967730834 | 0.55543608429232  |
| ATGACAAAGAGG  | 412.646816160706 | 0.314669223138684 |
| ATGACTTGTGAC  | 412.662153465465 | 0.384024969928701 |
| CGACTATAGTCA  | 412.672192872138 | 0.514307241501499 |
| GTCATATGATTA  | 412.677414670922 | 0.522585936880684 |
| ACTGAGACTCAT  | 412.710785113697 | 0.457095311914863 |
| AGAGTCAATTAC  | 412.711681485826 | 0.54269567689478  |
| CGAATAAATGAC  | 412.754195630817 | 0.286254656070229 |
| GACTCAGACTCA  | 412.769381029676 | 0.968335178904241 |
| CGTCAGGCTTGA  | 412.780113519207 | 1.21870121548844  |
| AGTGACGATGAC  | 412.786070470979 | 0.249481966595528 |
| TGACGCAGCAAA  | 412.897755019817 | 0.794846156212597 |
| GCGCAATAGTCA  | 412.90832942907  | 0.432051891627081 |
| TACTCGGAGTCA  | 412.951783629314 | 0.640002242398457 |
| GTCATCGGACAA  | 412.954508887954 | 0.814357956940684 |
| ATAATGTATCA   | 413.020200567649 | 0.435587686798906 |

|              |                  |                   |
|--------------|------------------|-------------------|
| TCTAATACGTCA | 413.07114316664  | 0.388485471188644 |
| GACTAATCGTCA | 413.095301880442 | 0.284755339702776 |
| CGCTATTTGTCA | 413.105878938527 | 0.721808541742787 |
| GTCATCTCGTCA | 413.12517841656  | 0.43195217748653  |
| CACACTGCGTCA | 413.130752193399 | 0.51889001455443  |
| CCTGTAGACTCA | 413.139706669319 | 0.848655855058247 |
| CACGTCACTTGG | 413.167664688655 | 0.912881580101564 |
| CACGTCACTGAG | 413.182792065436 | 0.886746690737173 |
| ACTGTAGATGAC | 413.198937187055 | 0.395265256373254 |
| TAGTCGGAGTCA | 413.212963413959 | 0.313511120250481 |
| AGATCCACGTCA | 413.214866078611 | 0.470287241444598 |
| GCAAATACGTCA | 413.258538827704 | 0.623489806263871 |
| AGAGTCAATATA | 413.263552386206 | 0.396618386671057 |
| GTGCCTTAGTCA | 413.263772376609 | 0.605690569314669 |
| AAAGTCGTGACT | 413.27463908272  | 0.488243757151829 |
| ATTTTGCATGAC | 413.284992575369 | 0.970431998574576 |
| CTTCCGTATGAC | 413.319092473748 | 0.315204607371101 |
| GTCATCCAGCTA | 413.332403351403 | 0.624473341591198 |
| GCCACACAGTCA | 413.365942576474 | 0.649811094621502 |
| GACTAATCTTTA | 413.376868655665 | 0.872622089082021 |
| ATGTGCTATGAC | 413.395259207959 | 0.85726628230341  |
| CATGACGACTCA | 413.420513045317 | 0.222693734533776 |
| ATGACTTGGATG | 413.439339428612 | 0.472608626041842 |
| CACGTTGATGAC | 413.465424923646 | 0.826647633339155 |
| GATGCCGTCATA | 413.47773521377  | 0.244668319792332 |
| ACCCTTGACTAA | 413.488741916467 | 0.298631557821689 |
| GTCATCGCCTTA | 413.497454325424 | 0.222832307397721 |
| AGTCACTACTTA | 413.51791089558  | 0.598412813545635 |
| AATAGTCAACAA | 413.544026310937 | 0.543209443810814 |
| CCGACATAGTCA | 413.578394387595 | 0.361360617441336 |
| TCTTAGTAGTCA | 413.582072136021 | 0.667951364835995 |
| GTTACATCATCA | 413.645926040279 | 0.442792535945936 |
| TGACACAAATAA | 413.661147463495 | 1.01922558234946  |
| GTCATCCGCTTA | 413.671004878378 | 0.345575567899143 |
| CGTATAAATGAC | 413.699731088817 | 1.35454421555718  |
| CCGACTGCGTCA | 413.709960494895 | 0.30243428831605  |
| CCTGGTTATGAC | 413.744221976148 | 0.722253246196758 |
| TGACGTATTCAA | 413.765013425727 | 0.464338365317924 |
| TGACATATAAAA | 413.770662932769 | 0.508010551876558 |
| GCTGACGACTCA | 413.788971567849 | 0.563801804959539 |
| ACTGATTTGTCA | 413.835238618747 | 0.951263425190242 |
| CCGCTTACGTCA | 413.836969893297 | 0.463625995558175 |
| GTCATCACTAA  | 413.942899864396 | 0.233611538321547 |
| CGACATAATGAC | 413.968163493274 | 0.700183741257363 |
| GCTACTGCGTCA | 413.994699766797 | 0.601714084452405 |
| CCGGGCTATGAC | 414.014743822693 | 0.628053626775464 |
| GATGACAGTATA | 414.027848968436 | 0.182229302182771 |
| ATCATGAATGAC | 414.048347242747 | 1.18349231860281  |
| ATGACTAGCGAG | 414.075513007323 | 0.229038633091247 |
| TCCCACGAGTCA | 414.099261522425 | 0.39958159744677  |
| TGACACCAGTCA | 414.114705829133 | 0.623408115348956 |
| GTCATCAACAGA | 414.135257340326 | 0.659156853061191 |
| ACTCATTATAGG | 414.183943691824 | 0.924423488690743 |
| ATGACTTGGCCA | 414.20984810382  | 0.379793492274511 |

|               |                  |                   |
|---------------|------------------|-------------------|
| AGCATACAGTCA  | 414.260583299023 | 0.857833549783758 |
| ATGATGTGGCCA  | 414.280928545904 | 0.32237238991829  |
| TGTGTCAGCAAA  | 414.287971341076 | 0.524185318158206 |
| CATATAGATGAC  | 414.298374999854 | 0.706160236748711 |
| AGCACTGTCATA  | 414.327828046133 | 0.496958460418389 |
| ATAATTTCTGTC  | 414.346980211041 | 0.601036012623363 |
| GCACTTGGTGAC  | 414.357062328488 | 1.12151165774043  |
| GTCATCACCGGA  | 414.382363891554 | 0.474236147478694 |
| CCTGGTGATGAC  | 414.427275561235 | 0.537835271955909 |
| ATACTTTGTTCAT | 414.436504366011 | 0.152152212554619 |
| AGTCACTCTGG   | 414.447284297991 | 0.571104142625159 |
| ATGACTTGTCCC  | 414.475587085621 | 0.170540692159768 |
| GTCATACCCACA  | 414.478686040418 | 0.618613814211132 |
| CAAACGTGAGTC  | 414.481829513794 | 0.820094512843088 |
| CGTCACACGTCA  | 414.487442257649 | 0.673595578405487 |
| AGTCACCTCGAC  | 414.554773951625 | 0.467080451257406 |
| ACGATAGATGAC  | 414.569745569659 | 0.567236170873365 |
| GTC AATTGCTCA | 414.576569223077 | 0.676547711067367 |
| ACCAGGGTGACT  | 414.589743761782 | 0.247406817745392 |
| TCTTCTGAATCA  | 414.598720412884 | 0.347733916608523 |
| G TACTGTGTCAC | 414.62967523015  | 0.443368409695922 |
| GACTAATCTGTC  | 414.654038287156 | 0.752823180837427 |
| CATTAAATGACG  | 414.67249230633  | 0.412400832278136 |
| TAAACACAGTCA  | 414.714169324772 | 0.538654644535069 |
| CAAGTATTAGTC  | 414.718557036587 | 0.500179261379899 |
| CTTGCTGTGTC   | 414.816177083768 | 0.438676722284986 |
| AGAGTCAATACA  | 414.826374439376 | 0.557488555312736 |
| GATTCTGTGTC   | 414.833909572312 | 0.46909091941971  |
| CCTCTGATGACG  | 414.869464379312 | 0.624402216650611 |
| ACTTGTTATGAC  | 414.869975459605 | 0.454624839908273 |
| GTCATATTTTCA  | 414.874784651412 | 0.679142344680733 |
| GGCTCTGATGAC  | 414.925409954035 | 0.619210015355285 |
| G TAGGTTATGAC | 414.928226315981 | 0.19176501828921  |
| AGAACACAGTCA  | 414.932469549041 | 0.458418183301939 |
| GTCATAGTCCAA  | 414.933131542611 | 0.625394012967102 |
| TGACTCGAGAAA  | 414.958767900244 | 0.919821356353897 |
| ACTGACGATGAC  | 415.013274625501 | 0.505779348381541 |
| ATAAAGTGAGTC  | 415.031987069339 | 0.306766067909473 |
| AACCAGTGTGAC  | 415.060004704345 | 0.49772352462857  |
| AGCAACTATGAC  | 415.085790961559 | 0.629799879152941 |
| AGGCACTATGAC  | 415.085825244528 | 0.335859719917974 |
| ATTCCGTATGAC  | 415.097289841825 | 0.997525976802989 |
| CACAATGGGTCA  | 415.098891863976 | 0.550445674135047 |
| GTCATCTACTAA  | 415.12836825776  | 0.685260230578972 |
| GTCATTCGCGGA  | 415.13234016499  | 0.45680084102554  |
| CTCTTGAGTCA   | 415.165595323788 | 0.76112256206212  |
| CGTACGGATGAC  | 415.175751408058 | 0.549014199577581 |
| ACTCATACTCAT  | 415.18891538454  | 0.365448220218956 |
| GTTGTCACGTCA  | 415.193850084328 | 0.561199943617121 |
| ACGTCACCTTCG  | 415.205612831847 | 0.38417943158169  |
| GCGTCAGACTCA  | 415.269136116469 | 0.648137237697477 |
| CTTATAGTGTCA  | 415.309294924812 | 0.466599846144607 |
| ACGAGGTATGAC  | 415.366674452929 | 0.262474062444734 |
| GTCATATCTCAA  | 415.382458598286 | 0.311043161098154 |



|               |                  |                    |
|---------------|------------------|--------------------|
| ACGGTTTACTCA  | 415.384112945384 | 0.405852971750053  |
| ATGAACCAGTCA  | 415.41078611535  | 0.634868553336417  |
| ATCGTAGACTCA  | 415.439723767565 | 0.658545845838667  |
| GTCATATGCTCA  | 415.453254452145 | 0.641905040917628  |
| ATTTGCTATGAC  | 415.454111183145 | 0.342287493446079  |
| AATAAATATGAC  | 415.461933438955 | 0.804375108272942  |
| ATGACGTGATCC  | 415.478385472061 | 0.339425813242251  |
| TGACGTGACAAA  | 415.478445759298 | 0.519166516475999  |
| AACAATCTGTCA  | 415.50543616088  | 0.64731916336643   |
| TCGTATATGTCA  | 415.506700698496 | 0.586544745153113  |
| GCTAACCAGTCA  | 415.522422564613 | 0.530052485078292  |
| GATTATTGCTCA  | 415.5242248436   | 0.55645823531195   |
| CCCTAAGGTGAC  | 415.527361405523 | 0.535001338502871  |
| AACCCGATGACG  | 415.554041305417 | 0.826255271714214  |
| CGGCGCTATGAC  | 415.582602433042 | 0.615845451927343  |
| ATGACGGAGCAA  | 415.595800675945 | 0.34710189855244   |
| ATGACGAACACA  | 415.605646270828 | 0.640312847865299  |
| GTCATCTCACTA  | 415.615628687407 | 0.616958421861778  |
| TGACGTAGATAA  | 415.650368111036 | 0.618715526438585  |
| GCTCCTGACTGA  | 415.651016434917 | 0.625931865460021  |
| GCACTTGCGTCA  | 415.655133739687 | 0.51515416554531   |
| TAGTACCAGTCA  | 415.661895741204 | 0.702344663655371  |
| ACACACGATGAC  | 415.685247506152 | 0.392655494783963  |
| GTCATATTGCGA  | 415.688986400978 | 0.3762490520775    |
| TCCTTTTACTCA  | 415.696504984061 | 0.255013621492515  |
| GTGTCATGCAAC  | 415.758762187765 | 0.414270258416838  |
| GTCATCATTGCA  | 415.791684479332 | 0.363041466584024  |
| GAGATCTATGAC  | 415.800106265984 | 0.365333906534357  |
| TATGATTGCTCA  | 415.803480376245 | 0.550110369271957  |
| ATATTCCGATGAC | 415.827291632413 | 0.715088893076863  |
| CACAAGAGTGAC  | 415.862271547096 | 0.596045150767847  |
| ACTTATTGCTCA  | 415.890850086882 | 0.229222470217502  |
| GTCATATGTCAA  | 415.907737861424 | 0.803492398948373  |
| ATGAGTCGGGTC  | 415.960389879809 | 0.292259871656403  |
| CTTCTTGACTAA  | 415.963059610104 | 0.429904260815152  |
| GACTCACTGATC  | 415.963459423343 | 0.390890225211581  |
| GTATGTTATGAC  | 415.968741819806 | 1.06372143319119   |
| CACTACTATGAC  | 415.972957315731 | 0.422750940473208  |
| ACACATTCGTCA  | 415.999242984792 | 0.0997914250436773 |
| AGACTAATCGTG  | 416.008528981493 | 0.882343423875458  |
| ATGACAGTGTC   | 416.012609017457 | 0.615775169197484  |
| GGTCATTCGTCA  | 416.041512715535 | 0.348913323886565  |
| AACAATTATGAC  | 416.075932727784 | 0.627878626970554  |
| AAATTCTGAGTC  | 416.107085440601 | 0.569855002524795  |
| ACAATGGATGAC  | 416.119795589667 | 0.608359901766831  |
| TAAGCAGAGTCA  | 416.170313151331 | 0.178444048636229  |
| ACTTCACAGTCA  | 416.187804104306 | 0.315671314215871  |
| CGGTTACAGTCA  | 416.205314697686 | 0.629780250261134  |
| ACTATACAGTCA  | 416.208908421151 | 0.655464515169137  |
| CATATTTGCTCA  | 416.266304531487 | 0.678150318963338  |
| GTCATCTTATTA  | 416.266415086313 | 0.774188006409573  |
| CAAGATCTGTCA  | 416.267412875503 | 0.998967631535886  |
| GTCATACATGGA  | 416.27473003604  | 0.640982323863665  |
| CCAGAGTGAGTC  | 416.282308742188 | 0.314131357609699  |

|              |                  |                   |
|--------------|------------------|-------------------|
| GTCATACAGTTA | 416.285838253465 | 0.169537980041013 |
| ACGGTCTATGAC | 416.288395626539 | 0.673267441482022 |
| AAAACCTGACTC | 416.289864592913 | 0.37403401907429  |
| CAACACGATGAC | 416.291935848404 | 0.616602674316375 |
| GTCATAGTAACA | 416.29736037996  | 0.637912275723784 |
| TCCGATGAGCCA | 416.297534294012 | 0.634227246068156 |
| AAGGCTAGTCAT | 416.297664785111 | 0.31093189479231  |
| GGTCTTCAGTCA | 416.325407965077 | 0.508806344686359 |
| GTAGTGTATGAC | 416.337797352401 | 0.573983391881855 |
| GTGGTTTACTCA | 416.341948738418 | 0.807320503530163 |
| ACGGACTATGAC | 416.353217395065 | 0.864682609334826 |
| ACTGTAAAGTCA | 416.359859351044 | 0.784797956542123 |
| AGTCACTCTATA | 416.385199263438 | 0.477448271229145 |
| AACAAGGTGACT | 416.415431849465 | 0.426065100861629 |
| CTGCCGGATGAC | 416.418041899408 | 0.865428876469372 |
| ATGACGAACACG | 416.454869044737 | 0.156603192085094 |
| GCTCTTGATGAC | 416.458274550368 | 0.827664255797712 |
| TCAACCTAGTCA | 416.460445573161 | 0.479211186530307 |
| GTCACAAACTTA | 416.486334132406 | 0.760025211008876 |
| ATGTGTCAAACG | 416.503217322577 | 0.169286418298021 |
| AGCCTAGAGTCA | 416.553535059064 | 0.499023688377112 |
| ATGACGTTATAA | 416.590198695191 | 0.215559287630132 |
| ATGACTGGGTAG | 416.604866141758 | 0.203497892159092 |
| TGATTCACGTAA | 416.607593314497 | 0.703697329851252 |
| CGACAATAGTCA | 416.607899217349 | 1.07705291839733  |
| CGTGCGGATGAC | 416.633906853489 | 0.923226791694117 |
| TGGGTCACCGAA | 416.639932832478 | 0.319059866264869 |
| ACACCGTGTGAT | 416.695445649899 | 0.756213987093826 |
| ATCGACGTGTCA | 416.697036579318 | 0.520732435777261 |
| CTCACGGATGAC | 416.727484214181 | 0.659868577650465 |
| ACATTGATGACG | 416.728302004635 | 0.60829882389965  |
| TGACGTCAGGCA | 416.751071488307 | 0.82216332703156  |
| AAAAGCGAGTCA | 416.778766669588 | 0.404018348010884 |
| AGACTAATCATG | 416.784467329222 | 0.625740912827081 |
| AACACGGATGAC | 416.834000850801 | 0.560532904516295 |
| ATGAATAATGAC | 416.858315764191 | 0.430279427863601 |
| CACCAAGTCATA | 416.888090962981 | 0.246164812015021 |
| GAGAGTTATGAC | 416.891923784595 | 0.384299764911485 |
| ATGACGCCTAAG | 416.896127858528 | 0.20132522587509  |
| GGCACCTATGAC | 416.910739392068 | 0.268561708704043 |
| GCTGAATATGAC | 416.937447572338 | 0.33498614489049  |
| GTCATACACAAA | 416.942287014056 | 0.865712190670178 |
| GAGTCAATTTGA | 416.959425903032 | 0.262670610663838 |
| GTCAACAATGAC | 416.97153515645  | 0.534166408570062 |
| TGATTCACTAAA | 416.999477278409 | 0.644536057980875 |
| CAACGTGCGTCA | 417.045029002038 | 0.788403828497407 |
| ATCGACGACTCA | 417.065247020256 | 0.163718204734706 |
| GATCTGTGTGAC | 417.078155972575 | 0.342489988508328 |
| GTCACACATGGA | 417.123559608411 | 0.573106291628554 |
| GCATACACGTCA | 417.127568412505 | 0.379489819736519 |
| GACCCGGATGAC | 417.143650065307 | 0.372855176681228 |
| AGACTACTGGG  | 417.187365676809 | 0.67173741068279  |
| ACTCAAGATGAC | 417.199495947577 | 0.578206188951294 |
| TGACGTATTCCA | 417.207945184822 | 0.442520358210342 |

|              |                  |                    |
|--------------|------------------|--------------------|
| CCTCGTGATTCA | 417.22953786657  | 0.453567871698107  |
| TAGTCACGCGGA | 417.250573250238 | 0.243895305716582  |
| GTCATTTTAACA | 417.259595342382 | 0.827543000721007  |
| CATGGTTATGAC | 417.290587314253 | 0.573273612748719  |
| GAGTCAGTTTCA | 417.324421476852 | 0.68463020334029   |
| GACTAATATTCA | 417.333871311818 | 1.23827514601068   |
| GTCATCAAGTCA | 417.356004688963 | 0.746360339831622  |
| GGTCATACGTCA | 417.375233448765 | 0.382519278852464  |
| ATTACGCAATAG | 417.397520359635 | 0.325860499407163  |
| AGTCACTCTGGA | 417.39884823894  | 0.555343718290864  |
| GGTCATAGTAC  | 417.421110716113 | 0.0845184462386903 |
| ATGACACGGTTA | 417.42430057954  | 0.230339961811612  |
| GTCATGTGACCA | 417.467640569843 | 0.530117558652523  |
| CACAATTGTGAC | 417.468469204522 | 0.472887144242855  |
| CATGATCCGTCA | 417.503580805504 | 0.488292149660366  |
| GTCATTACATGA | 417.50980390291  | 0.819508497673303  |
| ACAAGAGTGACT | 417.51679089999  | 0.374459393564246  |
| GCTAACACGTCA | 417.519412589885 | 0.91340962992116   |
| TCAGATTACTAA | 417.531676853113 | 0.546738037176359  |
| GTCATCTGATCA | 417.540566504707 | 0.729140235170999  |
| CACCTAATGACA | 417.553920951767 | 0.385477534747849  |
| TGACTAGGTACA | 417.558859152591 | 0.728111733348864  |
| ATGATGCAGTCA | 417.573801435621 | 0.514258497957621  |
| GTCACATGACAC | 417.579922410989 | 0.334832969413778  |
| AAAGTTCGTCAT | 417.616856913787 | 0.515740487563278  |
| TGAGTCGATCCA | 417.623430730604 | 0.891637308818576  |
| ACCTATATGTCA | 417.631516206188 | 0.38593766910006   |
| GAGTCGGAGTCA | 417.671225848655 | 0.367032973224445  |
| CGGCTTGATGAC | 417.685073677798 | 0.838789176386151  |
| CTATTAGACTCA | 417.692258688898 | 0.199213057441762  |
| GTCATACGCCCA | 417.789852356934 | 0.542287492182726  |
| ATGACGCGCTAA | 417.803520778488 | 0.358984896801021  |
| CCGTAAGTGTCA | 417.807013105232 | 0.568527008373565  |
| CGTAATTGTGAC | 417.818722071149 | 0.683602898719036  |
| AGTCACTTCGAT | 417.84707474379  | 0.517747953168713  |
| CCAGGCTGAGTC | 417.848083625121 | 0.8580215180709    |
| AGACTAATTTTA | 417.865262410118 | 0.600847352751764  |
| GTCATAGAGTAA | 417.885555488121 | 0.55972376207417   |
| CAAGAGGATGAC | 417.898600402662 | 0.400961714918888  |
| ACCGTTGTGTCA | 417.960103647518 | 0.389784896522777  |
| TGACACAGTGCA | 417.989525647137 | 0.672425417352637  |
| CACCAAGATGAC | 418.012238096409 | 0.457951705265632  |
| ACGTCATGTGTC | 418.021331833678 | 0.260840216090499  |
| GTCATCTATTTA | 418.05223295302  | 0.665220808398616  |
| CCCCAATAGTCA | 418.102214042624 | 0.592751276309155  |
| ACTCGGACTCAT | 418.115236255486 | 0.661154956625212  |
| ATGACGTCGACA | 418.116314343663 | 0.562130679016834  |
| CCTAATGGGTCA | 418.13545608155  | 0.647952856597074  |
| CAAAATCTGTCA | 418.14183726211  | 0.711990666267503  |
| AACTACTGACTC | 418.145908918319 | 0.343130241820528  |
| CACGTGTATGAC | 418.178055378501 | 0.79407889354684   |
| GTCATATTGTAA | 418.201694656785 | 0.624181419586457  |
| AGGATCGATGAC | 418.224434284446 | 0.213861237303558  |
| ATGACGCGCACG | 418.231166545661 | 0.369586582524572  |

|                |                  |                    |
|----------------|------------------|--------------------|
| ATTCAGGATGAC   | 418.246267232498 | 0.336424358329333  |
| AGTACGGATGAC   | 418.28313054393  | 0.540409808457629  |
| TGGGTCATGCAA   | 418.290997428979 | 0.384303609264591  |
| ACACTTTGTCAT   | 418.316986363619 | 0.538750763884988  |
| GTCACAATTTTA   | 418.356979839557 | 0.700386549725319  |
| CCAAACGATGAC   | 418.360834685482 | 0.595644432609055  |
| ACCGTTTACTCA   | 418.366252274378 | 0.486435130605614  |
| AGCCAGAATGAC   | 418.409818055661 | 0.373445504147001  |
| ATCTTCGACTCA   | 418.419654543311 | 0.347670601686972  |
| AGACTAATCTGA   | 418.471198667827 | 0.0989055833672525 |
| ATTGCATATGAC   | 418.491825545207 | 0.555610834270189  |
| TCGTATCTGTCA   | 418.510585344357 | 0.591180531521322  |
| GTCACACCTGAC   | 418.517944936228 | 0.792932728267227  |
| ATGACTAGCTTG   | 418.528986278186 | 0.683556967474339  |
| AACATATTAGTC   | 418.558630947366 | 0.58028322248619   |
| CGTCAGAGTGAC   | 418.568475366446 | 0.738667930317884  |
| AAGTCCTATGAC   | 418.571566115106 | 0.404287303087013  |
| ACGCATACGTCA   | 418.587033457915 | 1.04964628019289   |
| GACTCACTTTTA   | 418.612429447973 | 0.534520390106414  |
| ATGAGTCCGAGA   | 418.629931793521 | 0.289738873440724  |
| GTCATCACGAAA   | 418.643465427861 | 0.371424987854884  |
| AAGAGGTATGAC   | 418.644098903825 | 0.33784039492622   |
| ACCGGGTGACGT   | 418.65338103915  | 0.201612309694086  |
| ACAAATCTGTCA   | 418.675463814254 | 0.80870965220177   |
| AAAGAGGTGACT   | 418.708876337139 | 0.354640539013767  |
| ACAAAGGATGAC   | 418.715177413232 | 0.600087950573247  |
| ATGAGCAAATAG   | 418.742738398778 | 0.255415709968489  |
| GTCATATGAAAC   | 418.74822949697  | 0.90895988802967   |
| GAAAACCTCGTCA  | 418.796504576273 | 0.793505393153474  |
| CTCTACACGTCA   | 418.813799872373 | 0.583230446105685  |
| CAGGTTGTGTCA   | 418.817628301535 | 0.447211140463128  |
| GTCACAATGAAC   | 418.82824558993  | 0.793340160935828  |
| ATCATCGACTCA   | 418.872003777369 | 0.613601554163682  |
| ATGACAAAGTGG   | 418.885986735558 | 0.219626919546269  |
| CCGGAATTAGTC   | 418.905927793678 | 0.78479039881132   |
| CCATACACGTCA   | 418.9091464271   | 0.665414915489138  |
| ATACATATGACG   | 418.920862093881 | 0.919301486736618  |
| GTCATAACGCGA   | 418.981286723288 | 0.762938335690039  |
| GTACTIONGATGAC | 418.984151549372 | 0.388945359121861  |
| ACAAATTGCTCA   | 419.027416469751 | 0.266582934277295  |
| CACTATATGTCA   | 419.046152301849 | 0.363812049372758  |
| GTCATAATTACAC  | 419.054342538071 | 0.638683256117111  |
| AAATCTGATTCA   | 419.063779540738 | 0.325414181999271  |
| CGGCTAGAGTCA   | 419.102520003586 | 0.221965836684132  |
| GAGTCAAAGGCC   | 419.151009616494 | 0.979929628339153  |
| TACTATACGTCA   | 419.171407259685 | 0.367658566578867  |
| TGACACAGAGAA   | 419.19655228264  | 0.601287757435225  |
| TGACTCTAGCAA   | 419.261160244045 | 0.503622893089361  |
| GTCATCCAAGAC   | 419.27034343268  | 0.488173046822734  |
| GTCACTAATGAC   | 419.290048966538 | 0.592459982683736  |
| ATCCTTCAGTCA   | 419.311466463436 | 0.496801833264772  |
| GGATCCTATGAC   | 419.3270109028   | 0.614929183427333  |
| CGAGAGTGAGTC   | 419.359369744574 | 0.366635422187506  |
| CACGGATATGAC   | 419.360185948948 | 0.775773628555893  |

|               |                  |                   |
|---------------|------------------|-------------------|
| GCATGTGATGAC  | 419.377490663753 | 0.598622386956741 |
| AATCGTTATGAC  | 419.388743075489 | 0.923227011920264 |
| GTCATCAGTAAA  | 419.392456257703 | 0.583352754526273 |
| AATGGCGTCACA  | 419.430883468769 | 0.237882779372641 |
| ATGCCGGATGAC  | 419.434334417366 | 0.68996743480971  |
| AGTCACTTTAC   | 419.483701452029 | 0.246932640160925 |
| GACTCACGTTAC  | 419.50297471828  | 0.728355882333317 |
| CACTATAGTGAC  | 419.525413604156 | 0.873927073658253 |
| GCTCTTCAGTCA  | 419.541934219739 | 0.564813256703371 |
| CAAGCCTGACTC  | 419.550132443974 | 0.678852031878696 |
| GCATAACAGTCA  | 419.594612016358 | 0.395459073392873 |
| ATGACTAGCACG  | 419.607500036873 | 0.453933235537117 |
| ATCGATCCGTCA  | 419.628895385125 | 0.615071890108783 |
| CTTCGAGATGAC  | 419.631181682598 | 0.658328957459667 |
| ATGACAAAGACA  | 419.650257511946 | 0.406651075569007 |
| GACACCTATGAC  | 419.659936753515 | 0.396204500826556 |
| CGTAATCTGTCA  | 419.697627137302 | 0.907527278201423 |
| CCAATACAGTCA  | 419.73519266297  | 0.785400755240992 |
| GTCATAGCGTGA  | 419.74456238821  | 0.750436308827309 |
| ACAATACAGTCA  | 419.746172310053 | 0.756103990293976 |
| AAAATGTGACGC  | 419.767085039605 | 0.435109687502235 |
| GGCGGACTCACA  | 419.775562480266 | 0.364502013660723 |
| GTCATCACTTGA  | 419.782441418239 | 0.733782482240503 |
| ACGATATATGAC  | 419.831735934158 | 0.546073479241123 |
| ATGACGAACAGA  | 419.883827864869 | 0.403021403310909 |
| CGGAGCGATGAC  | 419.921532684954 | 0.733243428066579 |
| ATGACCCAGATG  | 419.925790296324 | 0.729933670477765 |
| GTCATTATTTTA  | 419.926027510904 | 0.626114080144973 |
| CAGATGGAGTCA  | 419.937776509508 | 0.769859582443319 |
| ATCGTCGATGAC  | 419.968644024787 | 0.806169996678103 |
| AGTCACTAGTAG  | 419.969433538084 | 0.342020626478204 |
| CGTCATTTCCGGA | 419.973588237741 | 0.471939733891929 |
| CTGCACGATGAC  | 419.980764302119 | 0.622987505911073 |
| CCGGCTCAGTCA  | 419.990788069207 | 0.749528929905575 |
| ACTCCCAGTAC   | 419.998583786135 | 0.431009023826375 |
| CTCAGCGATGAC  | 420.02805372065  | 0.862813822636378 |
| GTCATAAAATGA  | 420.046497103444 | 0.382151209799336 |
| AGTCACCTTCAT  | 420.054192960116 | 0.449992724500658 |
| ATGACAGTACAT  | 420.066626155231 | 0.442241705413032 |
| GTCATAGGTAAA  | 420.086354816902 | 0.405799471885252 |
| GTCATCCATTTA  | 420.089918007581 | 0.535400667589294 |
| GTCATAACATCA  | 420.094115225516 | 0.411318038161939 |
| GACTCACGCAGA  | 420.103803819979 | 1.18815513600976  |
| GTCATACAGAGA  | 420.127037970558 | 0.417281734965704 |
| GTCATAGGATAA  | 420.134095737206 | 0.599942941814435 |
| AAACAAGACTCA  | 420.163286952388 | 0.600640461888933 |
| CTTAGGTGACGC  | 420.166098415616 | 0.494520879144946 |
| ACTGTCTAGTCA  | 420.178095914263 | 0.347336787419631 |
| GGTGACGACTCA  | 420.369336486509 | 0.738781733951577 |
| CACTACGATGAC  | 420.372814210189 | 0.565011010505206 |
| ACTCATACTTGA  | 420.415460253673 | 0.276211730030537 |
| GTCATAATGAC   | 420.434034682138 | 0.803803176986244 |
| CTGTGCAATGAC  | 420.436273119991 | 0.783124703832804 |
| GCTCCTTAGTCA  | 420.447985682644 | 0.640448339338421 |

|              |                  |                    |
|--------------|------------------|--------------------|
| GCTTGTGATGAC | 420.485856217539 | 0.342254674580968  |
| GAACATTGACTC | 420.542218261144 | 0.759672252419063  |
| CTAATATATGAC | 420.551491624347 | 0.300617365690478  |
| AGACCCATGACT | 420.553740898912 | 0.564482379021316  |
| CGCTTGGAGTCA | 420.555695508779 | 1.01182217651768   |
| TGACGTCAGACA | 420.561169010407 | 0.568186472109643  |
| AGCTCCGATGAC | 420.562463449627 | 0.354762970307759  |
| TATGACAGTACA | 420.569737100518 | 0.530802529603458  |
| ACTCAGGATGAC | 420.599558171884 | 0.730151516599292  |
| TCCACGGAGTCA | 420.618390967191 | 0.546457213825129  |
| ACGTTCTATGAC | 420.664301052093 | 0.778299624800471  |
| GTGGCTTACTCA | 420.68608339741  | 0.80567839632331   |
| ATTACTGTGACG | 420.806379978121 | 0.521296777557095  |
| AAACAGTGTAC  | 420.845000370656 | 0.353567207629322  |
| CTCTAGGATGAC | 420.866609360826 | 0.80968034383329   |
| TCAGTCAGGAAA | 420.880856971358 | 0.202302326057003  |
| CCAAATCTGTCA | 420.884480988457 | 0.559892859562997  |
| ATTGTGTATGAC | 420.907341525262 | 0.507699692567399  |
| TACACTTACTCA | 420.950332178958 | 0.214241943136513  |
| CTTGCGAATGAC | 420.963554140593 | 0.881439250445915  |
| GATCTCTATGAC | 421.022815699115 | 0.745180481103804  |
| GACTCACTAATC | 421.026138620233 | 0.636205483313171  |
| ATCAATTATGAC | 421.028144797292 | 0.0685720554464864 |
| AGTCATGAGATG | 421.051478902854 | 0.419780568208747  |
| CGAGGCTATGAC | 421.066208579446 | 0.543105848683994  |
| GTCATAACGTAA | 421.069166567166 | 0.560310650755707  |
| ACCCTTCAGTCA | 421.092161566423 | 0.355502722067861  |
| ATGTCGTGACTG | 421.09814253179  | 0.571400353207843  |
| ATCGTTTACTCA | 421.133836330588 | 0.279197301694397  |
| AAATATTGTCAT | 421.135695686337 | 0.338865507810191  |
| ATGACAGTGCTG | 421.162175914504 | 0.726832108213922  |
| GATAAATATGAC | 421.166822568979 | 0.102209056808069  |
| ACGTTTGTGTCA | 421.174467439615 | 0.802559101186135  |
| AGAACGTATGAC | 421.189891578368 | 0.350007232125627  |
| AACGCTTATGAC | 421.242159484007 | 0.6857225707065    |
| GGATCTCATGAC | 421.267754181874 | 0.750476015451874  |
| CGAATCGATGAC | 421.269197123412 | 0.720088746508524  |
| CTCCAGTAGTCA | 421.305798337463 | 0.57320332305411   |
| CACGTCACGTGA | 421.307204219575 | 0.223583612601303  |
| CATTAGTAGTCA | 421.320893231797 | 0.665418950322132  |
| CTTGACGCGTCA | 421.326353781719 | 0.179461591296127  |
| AATGCGCGTCAT | 421.363475889972 | 0.852419332155358  |
| CTATTAGATGAC | 421.367069714409 | 0.885980188156902  |
| ACACTGCAGTCA | 421.425134361776 | 0.524514380851827  |
| CTTACACAGTCA | 421.490156670142 | 0.715276257246208  |
| AGAGTCAATAAT | 421.49088075516  | 0.541530881874542  |
| AAATTTTATGAC | 421.504003597401 | 0.569038082505626  |
| ACATGGGAGTCA | 421.504458330021 | 0.48123783910544   |
| CACTTCGTATGA | 421.552634370353 | 1.17486519500663   |
| GTCACATCTGAC | 421.575447224098 | 0.53835309644694   |
| CCATCAGATGAC | 421.62897057647  | 0.578372069484226  |
| CGTCGTTATGAC | 421.645733009598 | 0.813100488168134  |
| TCATTAATGACA | 421.647852089853 | 0.931765618306503  |
| GTCATTTGTTCA | 421.668929888005 | 0.599829037662504  |

|              |                  |                   |
|--------------|------------------|-------------------|
| GACTAATTTTAA | 421.67091544271  | 0.609986280021176 |
| CAGTCTACGTCA | 421.679455171462 | 0.662598053776347 |
| CCTCGCGATGAC | 421.686566078467 | 0.626426834240062 |
| CGAAACGATGAC | 421.690407449709 | 0.863479390024653 |
| GTCATAGGTCGA | 421.705745247287 | 0.473562353921845 |
| ATCATCTGTGAC | 421.724495784047 | 0.613827890903899 |
| GTCATAGTTAAC | 421.726341389758 | 0.719732503253731 |
| CATGTTAAGTCA | 421.730233962968 | 0.512772878288378 |
| GACTGGTGACGC | 421.734509403503 | 0.526574381773013 |
| TCTACTCAGTCA | 421.737260255805 | 0.21747445632901  |
| TGATCTGAATCA | 421.758143544394 | 0.769028885210777 |
| CAAGCTGCGTCA | 421.791121479492 | 0.177180660349246 |
| TCGTCCGAGTCA | 421.814081558926 | 0.81372184204766  |
| GTCATCGCAGGA | 421.817637903616 | 0.80530263958714  |
| GTCATCGTCGCA | 421.822469846891 | 0.38355534929171  |
| AAACTTGTACCG | 421.826952380108 | 0.297003685454069 |
| ATGACTAGCCGG | 421.845090905252 | 0.76937797720222  |
| ATGCATGACCCA | 421.866010824224 | 0.440787331137002 |
| GTCATACGTGCA | 421.891758366401 | 0.69388443127014  |
| AACCCGGATGAC | 421.900666766612 | 0.731843211113119 |
| GTAATCGATGAC | 421.912626250253 | 0.556908090082123 |
| ACTATTATGTCA | 421.913809001589 | 0.430957736466694 |
| ATCGCGTAGTGC | 421.946109433444 | 1.20116388503294  |
| GTCATCACTGAA | 421.959877353827 | 0.792528138814819 |
| ACACCGTACTA  | 421.981777052824 | 0.242008704227912 |
| GGCCACATCATA | 422.006976949596 | 0.344428262986076 |
| CGTGATGGCTCA | 422.007100351135 | 0.99181104176897  |
| CAATTTTATGAC | 422.027643619896 | 1.03197515283739  |
| CGAATCTAGTCA | 422.053315904313 | 0.668594088654238 |
| GTCACACGTCGA | 422.083889351444 | 0.683329503097165 |
| CGTTATGATGAC | 422.090507484578 | 0.727177519110167 |
| ACTAATACATGA | 422.107018364203 | 0.892704010086407 |
| ATGACGTGAACA | 422.134244425042 | 0.236337987458392 |
| AGCTATGATGAC | 422.145663436591 | 0.229309768166054 |
| GTCATTATTTAA | 422.180223779151 | 0.426835484741495 |
| TCCTATTTGTCA | 422.183279459517 | 0.438260671587998 |
| TCACATGAATCA | 422.183358716412 | 0.531719488737323 |
| CAGGCCGATGAC | 422.205118533907 | 0.463227631815169 |
| CCATTGGGTGAC | 422.281326999346 | 0.666503028971147 |
| GTGAGTCTGTCA | 422.318175239502 | 0.774065034299842 |
| TCACTTACGTCA | 422.32565456242  | 0.441286719180582 |
| CGTTAGAATGAC | 422.358718497204 | 0.516963448796626 |
| TAATACCAGTCA | 422.39250301593  | 0.608707566571105 |
| CGAGATTATGAC | 422.40471795083  | 0.780970394297435 |
| GTCATATCGGCA | 422.433937722314 | 0.444918829808751 |
| CACAAGCAGTCA | 422.435045370024 | 0.751250019512314 |
| CATAACGACTCA | 422.442720780896 | 0.845046686296629 |
| GGTATTTATGAC | 422.451424159605 | 0.282695695293368 |
| ACTTTGAGTGAC | 422.483704024425 | 0.727806285405414 |
| AACATCGATGAC | 422.504681030431 | 0.364694183368688 |
| GCAAACACGTCA | 422.536447983009 | 0.580984311393166 |
| AATTATTGTCA  | 422.556640998642 | 0.165348537291794 |
| GTCATCGCCACA | 422.61031492194  | 0.394575382547156 |
| GTCATACACAGA | 422.611895266172 | 0.767684829792656 |

|               |                  |                   |
|---------------|------------------|-------------------|
| GCGAGGTATGAC  | 422.643525459537 | 0.467919994099455 |
| AGATTCGATGAC  | 422.653978285472 | 0.74972915300385  |
| ATTCGTGAATCA  | 422.670199515594 | 0.479957647884911 |
| AGTGCATGATGAC | 422.68488061204  | 0.434900646670885 |
| CCTGAGTGAGTC  | 422.694871156345 | 0.784319213046643 |
| ACCTATTGCTCA  | 422.696724476859 | 0.272595503007438 |
| ATAATTAAGTCA  | 422.750682945784 | 0.730535549260214 |
| GTCATCGTAGAC  | 422.758122569857 | 0.372461883722289 |
| GAAAACATGAC   | 422.768122315074 | 0.700056314304277 |
| TGACGCAGGTAA  | 422.788374450657 | 0.597307845602993 |
| CGTCATTGTGAC  | 422.835518604913 | 0.382449634154517 |
| CGCGAATTAGTC  | 422.853263731054 | 0.662385545984507 |
| CTGTACCGTCA   | 422.854343649477 | 0.723674994364907 |
| CAACGTTATGAC  | 422.896810890625 | 1.10241444156423  |
| AGAACACGTAAC  | 422.905940644783 | 0.116199383599006 |
| AGAACCATGACT  | 422.932598654995 | 0.191164019170555 |
| GACGAATTAGTC  | 422.962550591049 | 0.789248414796918 |
| TGACTTATCTAA  | 423.031692464077 | 0.799274219942144 |
| CGATAATATGAC  | 423.041281690123 | 0.516385035957515 |
| ATCGCGAGTCAC  | 423.070608468382 | 0.190967592953744 |
| GTCATCAATCCA  | 423.083687668554 | 0.680318963379558 |
| GTCATAGAATGA  | 423.107607360936 | 0.563473961595595 |
| GCGTCACGTCA   | 423.121961184468 | 0.476963590818132 |
| AACGTCGATGAC  | 423.122277811647 | 0.587211421150476 |
| TCATACCAGTCA  | 423.143666694976 | 0.507662748608809 |
| ATCCGTGTGTC   | 423.149172774865 | 0.468920355105514 |
| GTCATAGTTATA  | 423.167588105863 | 0.705461417381667 |
| GTCATCGTGTGA  | 423.178167525605 | 0.940019728956509 |
| ACATAATATGAC  | 423.186967115383 | 0.564127921600835 |
| GACGCGATGAC   | 423.191127557529 | 0.548106837584905 |
| GCTAATCCGTCA  | 423.200166109924 | 0.676425710722411 |
| TATGACAGTGAA  | 423.20358490759  | 0.392065757139506 |
| CAGTCAAATGAC  | 423.225032285138 | 0.400078059131262 |
| CTGGTTTATGAC  | 423.258295574134 | 0.383078631083111 |
| AGAGTCAGGCAG  | 423.26836448772  | 0.277082050149949 |
| ACGTATTTGTCA  | 423.283323786501 | 0.580806899277621 |
| CGTCATATGTTA  | 423.298086016884 | 0.315187670092826 |
| AGACTGTAGTCA  | 423.348715410335 | 0.467698222196152 |
| ACTACCTATGAC  | 423.363019372616 | 0.446164443557737 |
| CGTCACATGCGA  | 423.373706870803 | 0.745680776126086 |
| AAGTCGGAGTCA  | 423.408119910467 | 0.267004764290437 |
| ACCTTTGCGTCA  | 423.41436313998  | 0.634991969297971 |
| GTCATAGGATGA  | 423.447963267539 | 0.15381633821625  |
| TGACTGGTCGAA  | 423.475015685217 | 0.341375017813993 |
| GTCATACAAAAC  | 423.492269403305 | 0.71706510138253  |
| CGGATCGATGAC  | 423.50394540267  | 0.688311774827476 |
| AATTATTATGAC  | 423.511199856291 | 0.551029727212179 |
| CTCCGTGATTCA  | 423.525060346742 | 0.38689727525734  |
| ATCGCCGAGTCA  | 423.558233339266 | 0.693220257323596 |
| ATAACTCAGTCA  | 423.591752394991 | 0.323362003369068 |
| ATTACTCAAACC  | 423.600878741026 | 0.377978031647326 |
| GATGACGCCTCA  | 423.610540758571 | 0.645683689054587 |
| ACTTAGGATGAC  | 423.617448103054 | 0.894809207818266 |
| GGCTCCACGTCA  | 423.620801848991 | 0.757214361063345 |



|              |                  |                   |
|--------------|------------------|-------------------|
| CCCAGTGATGAC | 423.622701536687 | 0.795836042924852 |
| CATTCTGATGAC | 423.636141506956 | 0.669776493086676 |
| ATCACTAATGAC | 423.6428818186   | 0.346192280348381 |
| TATGACGCCTCA | 423.648908228211 | 0.470176622836972 |
| ATACGTCGTCAT | 423.659197218255 | 0.194069965631229 |
| GACCCATGACAC | 423.726053232481 | 0.35926083570152  |
| AGATTTTACTCA | 423.736626673478 | 0.596704596472589 |
| ATCACTTACTCA | 423.745443400186 | 0.353418959035918 |
| TGACTACTACAA | 423.762559647528 | 0.510463315743771 |
| GTCATATCTCCA | 423.7804823567   | 0.424609218458328 |
| TACATGGAGTCA | 423.781611981283 | 0.669475147785509 |
| ATTACTGTGTCA | 423.789411114059 | 0.540496614194758 |
| GAGTGCTATGAC | 423.795834790252 | 0.655473536946953 |
| GTCACTAATTGA | 423.81802200116  | 1.21063810230392  |
| CGTCATCGGAAA | 423.81945591292  | 0.411069557807468 |
| TGACACGTCGAA | 423.842372935503 | 0.3500653952867   |
| CGAAGCTATGAC | 423.844226391965 | 0.852892605705063 |
| CGGTTTTATGAC | 423.849696077543 | 0.645504456122774 |
| CAAATTAAGTCA | 423.862541435278 | 0.669105127104426 |
| AAACGTGCGTCA | 423.864664492283 | 0.65353099628061  |
| CTGATCTATGAC | 423.880926343826 | 0.516818368184368 |
| CTGGATACGTCA | 423.884804034508 | 0.750281876148212 |
| GACACTGATGAC | 423.895718649965 | 0.653289234666497 |
| AAGACCATGACT | 423.900660845715 | 0.30585440362556  |
| CTGTGGTGACGC | 423.929324183907 | 0.4384394970406   |
| CACATACAGTCA | 423.943083228095 | 0.446434216256634 |
| ATTTACTGACTC | 423.977294239344 | 0.445996356325996 |
| AATAGCGAGTCA | 424.00624547762  | 0.594943655626921 |
| CTGTCAAATGAC | 424.081000210632 | 0.448090058206687 |
| AAATTAATGAC  | 424.107398584435 | 0.386864434041079 |
| AATCATCGTCAT | 424.113134102202 | 0.461435889308828 |
| AGTGTCATGCAA | 424.144722888791 | 0.630271693274208 |
| ACACTAATGACG | 424.164074006225 | 0.586959297645288 |
| AGATACTGTCAT | 424.260146308643 | 0.558110906842387 |
| GTTAATTCGTCA | 424.349616348703 | 0.585652937313235 |
| GCAAATTGCTCA | 424.362031066776 | 0.87330425064928  |
| ATCTCCACGTCA | 424.375308028974 | 0.29028393940565  |
| GAGAATTATGAC | 424.386032050049 | 0.280804928080227 |
| GATTATTCATAC | 424.447568351042 | 0.175834282437075 |
| GATCACTATGAC | 424.468324707021 | 0.303471063939079 |
| AGCGCTAGTCAT | 424.491388607488 | 0.208889992804473 |
| ATGACAGTATTG | 424.519426381968 | 0.578641448801685 |
| TGACTACAAACA | 424.536883267445 | 0.730152933684103 |
| ATAATGTGTGAC | 424.544164700535 | 0.746008240358149 |
| CGGCACTATGAC | 424.545504275077 | 0.457638017501286 |
| AACGGGGAGTCA | 424.553383699789 | 0.410251705257301 |
| AAAAGGTATGAC | 424.557796077189 | 0.467205270678943 |
| TATCGTGTGTCA | 424.602370865945 | 0.630382563261204 |
| CAAGAAGATGAC | 424.607511900002 | 0.492172432187847 |
| AACCTCATGACT | 424.610901702772 | 0.182486391409467 |
| TGACAAATCGAA | 424.613071612528 | 0.675779731236465 |
| ACTACTGTCATA | 424.618907382515 | 0.335203262656338 |
| ACATGGTGACGT | 424.626837088571 | 0.753940650845467 |
| ACGATGTGTGAC | 424.646639193467 | 0.49532178557431  |

|               |                  |                   |
|---------------|------------------|-------------------|
| TCATAGCAGTCA  | 424.665602069131 | 0.867134337618066 |
| CATACAATGACG  | 424.672299489616 | 0.672298019453255 |
| CAAACCTGATGAC | 424.711464371877 | 0.554965214514563 |
| ACGGTGGAGTCA  | 424.727942788316 | 0.139791332111291 |
| AGTAATTCGTCA  | 424.735709328414 | 0.414258899623666 |
| GCGTCAGATGAC  | 424.751993934187 | 0.684561778756887 |
| AATATCCAGTCA  | 424.764299562509 | 0.713933026341216 |
| CGTCGCATGAC   | 424.780443600444 | 0.672589058513933 |
| AACAACTGACTC  | 424.783270360999 | 0.395660095245464 |
| TCTTGGTAGTCA  | 424.786003953531 | 0.746631328697474 |
| CGATAATTAGTC  | 424.809805099884 | 0.513015129010909 |
| CTTACGTATGAC  | 424.812657098496 | 0.304795266575702 |
| AGTCACTCTCGG  | 424.818010410982 | 0.663215365829796 |
| AGTCATGAGTTC  | 424.818027858187 | 0.679733383845841 |
| CACTAACAGTCA  | 424.825671983014 | 0.652240942799465 |
| GTCATAAAGTAA  | 424.834615466353 | 0.321121430057303 |
| GTCTCCACGTCA  | 424.853260675053 | 0.533402928873586 |
| AGTCGTTATGAC  | 424.866087927861 | 0.286706573701085 |
| ATGAATTCGTCA  | 424.874626273177 | 0.550135930406012 |
| ATGAGTACCTCG  | 424.912590118017 | 0.716196468429227 |
| ATATCGGAGTCA  | 424.935816891421 | 0.420822372688796 |
| GTCATAACTACA  | 425.044650222785 | 0.665153123376113 |
| ATTTCCGAGTCA  | 425.049499383811 | 0.495760368719166 |
| AAACCTCGTCAT  | 425.159422226456 | 0.272701719365821 |
| AAAAGCTATGAC  | 425.184951771376 | 0.493498514634871 |
| CACACCTATGAC  | 425.189433601365 | 0.508615758300837 |
| AGAGTCAATTAA  | 425.203498050928 | 0.438245117309981 |
| AAAATTTTCGTCA | 425.211839049621 | 0.425834836075219 |
| ATGACGTTATGG  | 425.214149224198 | 0.565904571271545 |
| AAATGTACGTCA  | 425.217645356079 | 0.820680673398969 |
| CACCGCGGTGAC  | 425.221315739779 | 0.787314548605041 |
| ATGACGAACAAC  | 425.235040526658 | 0.745962739250501 |
| GTCATTGCATGA  | 425.257888490411 | 0.820616377442622 |
| AATTGCCTAATC  | 425.267266195494 | 0.454800182245575 |
| TCACTATAGTCA  | 425.279289985136 | 0.682459495827903 |
| ATTACTCAACCC  | 425.281362776303 | 0.306618113965632 |
| ACCTTGACACAT  | 425.283947947047 | 0.308165455658149 |
| GTCATATTTAGA  | 425.289513178494 | 0.352054622693816 |
| AACTGTACGTCA  | 425.313544436692 | 0.57425344439559  |
| GTATCAGATGAC  | 425.313855598335 | 0.455569145811831 |
| ATATAACGTCAT  | 425.330541260404 | 0.532560491772868 |
| GTCATAACCTA   | 425.330809753366 | 0.215927647755478 |
| ATTATCTATGAC  | 425.380168733552 | 0.444133905214358 |
| AGTCACCTTCAA  | 425.402368922994 | 0.65162233770328  |
| GGTCTGTATGAC  | 425.423695984348 | 0.625702658967113 |
| CTGACATAGTCA  | 425.430384873401 | 0.639217747559522 |
| CGATGTGATGAC  | 425.458537135909 | 0.778391411754023 |
| AAAACCTAGTCA  | 425.465963976485 | 0.481704537698573 |
| TACACAGAGTCA  | 425.466696037712 | 0.55776478637229  |
| AGCATCTATGAC  | 425.493609454496 | 0.837769876446243 |
| CACAAGTCATAG  | 425.520353819078 | 0.448435585847446 |
| ACCGTCTAGTCA  | 425.524008600931 | 0.354913482851091 |
| CCCAATGTATGA  | 425.540080251087 | 0.988172968217332 |
| ACTGATTGCTCA  | 425.553098757323 | 0.669048685896757 |

|               |                  |                   |
|---------------|------------------|-------------------|
| ATGACGCGCCTA  | 425.567861559569 | 0.651189688154559 |
| TACACCGAGTCA  | 425.569344262423 | 0.271877511914665 |
| ATATTTGTGTCA  | 425.571546394557 | 0.929568486392516 |
| GAAATCGATGAC  | 425.59065339352  | 0.555508999820911 |
| CGTAATGATGAC  | 425.590941811651 | 0.520493723673692 |
| AGTTTCGACTCA  | 425.599994175334 | 0.530938060256202 |
| ATTATAATGACA  | 425.600512564714 | 0.428378199244109 |
| CTCAATCTGTCA  | 425.600619859245 | 0.246577404137397 |
| TGACGTATACCA  | 425.618359963158 | 0.603439151453431 |
| AACATTTATGAC  | 425.634816346113 | 0.472378435792508 |
| GATGACCGAATC  | 425.640181565469 | 0.477259564769602 |
| ACGATTTGACTC  | 425.644573525089 | 0.854082885713625 |
| CGTAGTGAATCA  | 425.651415715819 | 0.524841462957473 |
| ATGACATGCCAT  | 425.66301782189  | 0.660122383144878 |
| ATCTCGCAGTCA  | 425.668127440081 | 0.460166533054795 |
| CTTATGGAGTCA  | 425.683731898054 | 1.03762916669908  |
| AACGCAGAGTCA  | 425.688844841885 | 0.679582599056486 |
| CAGAACGACTCA  | 425.690144537791 | 0.833967231473867 |
| GAGTCAGTATTA  | 425.690268339497 | 0.260570360435936 |
| GACTAATAGCGC  | 425.702972473481 | 1.6661446018315   |
| TCCTAGTAGTCA  | 425.728418138013 | 0.693138475312078 |
| GTCATAAGCGAC  | 425.748510999572 | 0.845629761750383 |
| GTCATAGCTAGA  | 425.750389291035 | 0.306607297231385 |
| CTTAATGATGAC  | 425.778148408895 | 0.658625861648993 |
| GCGCGTTAGTCA  | 425.787432186906 | 0.385936964964001 |
| AACCGTGATTCA  | 425.811606564447 | 0.725020857538248 |
| AGTATATATGAC  | 425.81384383501  | 0.677262008142624 |
| ATGACGTGATTC  | 425.822671124249 | 0.361282489080029 |
| GTCATTCCAGGA  | 425.824975773307 | 0.414546912331575 |
| AATAGGTGACGC  | 425.835998722387 | 0.698346904981043 |
| GATCGCGATGAC  | 425.842610179447 | 0.402817217935768 |
| CGCGGTGACCCA  | 425.858633540144 | 0.488801249522666 |
| GGTACGTATGAC  | 425.860702264746 | 0.623947617614445 |
| AATTTATATGAC  | 425.900385885471 | 0.788858546787901 |
| ATTACTCAAATC  | 425.936070674398 | 0.241561708656447 |
| GATGACGTCGAC  | 425.944211215746 | 0.591216456726204 |
| AACTAGGATGAC  | 425.953672192395 | 0.60286034376961  |
| TGACGTGTGTAA  | 425.975538198292 | 0.502968261551163 |
| TCTCATGAATCA  | 425.976192380864 | 0.579392275416048 |
| GACTAATTTCTGA | 425.999169852024 | 0.596332330344145 |
| ATAAGGTGACAC  | 426.028569819451 | 0.508739380942453 |
| TCGCGTGCCTCA  | 426.034778804191 | 0.513740417460175 |
| CTTTGCTATGAC  | 426.066743809515 | 0.620900159697694 |
| TCGTTTTACTCA  | 426.069101281386 | 0.670634150208656 |
| GTCACCGACTGA  | 426.080999609759 | 0.745913202968217 |
| ATACGTGAATCA  | 426.086814391864 | 0.962929894106637 |
| CCGATTATGTCA  | 426.108320456133 | 0.848622105296812 |
| GTCATCTAACAA  | 426.184310305824 | 0.735117242082636 |
| AATTCTGATTCA  | 426.226503746937 | 0.48618649864255  |
| GTATCTACGTCA  | 426.255591172647 | 0.490098899776275 |
| TGAGTCGATCAA  | 426.267092117669 | 0.578461576072962 |
| GACTAACTATGA  | 426.318845108747 | 0.989875946945579 |
| CACGATCTGTCA  | 426.321371023513 | 0.803206740514991 |
| GTCATAACGGGA  | 426.323160341075 | 0.537663159178599 |

|              |                  |                   |
|--------------|------------------|-------------------|
| ATCCAAGTCATC | 426.329256366614 | 0.449460854837093 |
| ATGTGTCAAAT  | 426.346471783782 | 0.320411103398697 |
| CAGAGGTGACGC | 426.346910360973 | 0.349570717488019 |
| AGTGGTAGTCAC | 426.367985482683 | 0.483658449255745 |
| CGTAATTATGAC | 426.38176062671  | 0.449496352879845 |
| TGTCATTACTAA | 426.406753684942 | 0.502850580340687 |
| GTCATACACCAC | 426.407117686679 | 0.248955385464756 |
| GACTAATTCGGA | 426.410548575465 | 1.01518374686565  |
| CGATCGTATGAC | 426.414086481224 | 0.153702311492835 |
| GTACACATCATA | 426.434314479776 | 0.488836339851842 |
| GGCCTCTTATGA | 426.448711631726 | 1.39783513269011  |
| GTCATATAATCA | 426.482823200154 | 0.39991388685318  |
| AACAAAACAACA | 426.502073486167 | 0.81947683895544  |
| GACATAAATGAC | 426.507982698356 | 0.255358561115566 |
| GTCATATAGCCA | 426.510318374529 | 0.914219360524906 |
| TCGGATCTGTCA | 426.518127280374 | 0.364262107604058 |
| CGTCATCAGGGC | 426.538982281512 | 0.670111418812056 |
| GTCATCGCAGAC | 426.548245026386 | 0.406331352731853 |
| GACTAATCATA  | 426.554709535141 | 0.493542392011833 |
| ATGACTTGCTG  | 426.604138623951 | 0.63390449932927  |
| GACTCTTTATGA | 426.630087588706 | 1.13158100607609  |
| GTAATCTATGAC | 426.64317124436  | 0.5820634761315   |
| GCCATAATGACA | 426.643747511052 | 0.735055519706628 |
| GCCTTGTAGTCA | 426.643862067235 | 0.570834205817407 |
| GTCACCTCGTCA | 426.64497899761  | 0.487659530225932 |
| GCACTCGAGTCA | 426.664827978097 | 0.993661102150814 |
| GAACCTACGTCA | 426.667145380492 | 0.806345053019472 |
| TCAATACAGTCA | 426.673059504769 | 0.509441551128576 |
| CTGAGAGATGAC | 426.684297353382 | 0.51221529588984  |
| ACGTCACATTA  | 426.686744268037 | 0.606939055251118 |
| CAGTCTTATGAC | 426.693274558755 | 0.923846862214755 |
| AGGTGGGAGTCA | 426.715608834538 | 0.100456216564589 |
| ATGACTAGCCTG | 426.715803547643 | 0.632211844810698 |
| ACGTCACGTGAC | 426.752763958385 | 0.612377342923585 |
| ACTATTGGTGAC | 426.773239094939 | 1.10962218594307  |
| TGACTAGGTGAA | 426.79407868784  | 0.329893313835376 |
| GTCATAACTTAA | 426.823545528958 | 0.855910983029125 |
| ACCTACTGACTC | 426.845782699797 | 0.33354143293589  |
| ACGGACATGTCA | 426.857149823078 | 0.420433281994148 |
| ACTGTGCATGAC | 426.882247941527 | 0.60717548867404  |
| TAGTCACGCGAA | 426.894460790199 | 0.470729916954436 |
| GTCATAGAGGCA | 426.894833542539 | 0.294915466097222 |
| CCGAAATGACG  | 426.931910659744 | 0.472866389423573 |
| AGTCACCTCGAG | 426.959838512315 | 0.555323694287264 |
| ACACTTACGTCA | 426.961675442232 | 0.24934547665701  |
| GTCATGGTGACA | 426.979740124385 | 0.517848394829338 |
| AAGAAATATGAC | 426.997890240553 | 0.274359148129416 |
| CGGAACTGAGTC | 427.007967062417 | 0.562358694707776 |
| CGCGGAGTCAC  | 427.061022447663 | 0.563871469938297 |
| GTCATCCAAATA | 427.077388162451 | 0.625188915207566 |
| ACTTGTGATGAC | 427.084048061356 | 0.180999563399396 |
| CGTCATATGAGA | 427.108727129424 | 0.454294041550613 |
| GGCACGGATGAC | 427.132729234974 | 0.352115629236784 |
| GAGTCTTCGTCA | 427.149948076861 | 0.750881910838051 |

|               |                  |                   |
|---------------|------------------|-------------------|
| TCCACCGAGTCA  | 427.164643338737 | 0.213394572264407 |
| CTTATCGGTGAC  | 427.178486832794 | 0.595789866585389 |
| GTCATCGTGAGA  | 427.179167431044 | 0.327308083811225 |
| CTGACGGATGAC  | 427.190543087604 | 0.503414721029297 |
| CACAATCTGTCA  | 427.196726430805 | 0.389281710702795 |
| ACGGTGGATGAC  | 427.211776514979 | 0.52994397038159  |
| GTCATAACGGAC  | 427.233468547849 | 0.568362982115866 |
| AGTCGGTATGAC  | 427.238234044871 | 0.476034065241893 |
| ATGACAGTATCG  | 427.245076482457 | 0.256810089551827 |
| CCAACTGTGTCA  | 427.266999178908 | 0.682880945735124 |
| ATCTCTGATTCA  | 427.283798026906 | 0.632085520948503 |
| GTGAGTCTGACA  | 427.290651264675 | 0.433425406145713 |
| AGTCACCCAGG   | 427.297553694212 | 0.42395374888166  |
| CGTAAGCAGTCA  | 427.302289428714 | 0.52514074070495  |
| GTCATCCATCTA  | 427.329944633307 | 0.394836818764805 |
| ATGACCATATTA  | 427.341178414688 | 0.199085355465044 |
| CATATATATGAC  | 427.345482831815 | 0.598703381821282 |
| CGCGTTGTGTCA  | 427.369706551964 | 0.904913776004439 |
| GCGTTAGACTCA  | 427.379212298619 | 0.544027970448948 |
| GCGTACTATGAC  | 427.421260313967 | 0.48891855160038  |
| ATAAATTGACTC  | 427.431825189983 | 0.644379667314977 |
| ATCTGCGGTGAC  | 427.455221043887 | 0.66139243554693  |
| CTGGATTGGTCA  | 427.459691744168 | 0.354969817104202 |
| CCCGATTATGAC  | 427.461758491823 | 0.606922347888096 |
| TCGAACTTGTC   | 427.463971238745 | 0.495701210813933 |
| TCTGTAGACTCA  | 427.466335846283 | 0.682989936265582 |
| TAAATCCAGTCA  | 427.470835628033 | 0.341251685160952 |
| AGCAGGGTGACT  | 427.487653361352 | 0.403668542212334 |
| TCGAGCCAGTCA  | 427.495664531084 | 0.680365202304536 |
| AGTCACCCTCAC  | 427.500810498276 | 0.329316713860369 |
| GATGACGCCCTAA | 427.528608786354 | 0.405325840433764 |
| ATACTAGAGTCA  | 427.545998148655 | 0.862234216806706 |
| GTCATTTTAAAC  | 427.552638030962 | 0.440556066779942 |
| GACCAATATGAC  | 427.57108581459  | 0.641963344093102 |
| GTCATATCACAA  | 427.589881095652 | 0.770836687338503 |
| GTCACCAAATGA  | 427.598059422966 | 0.521880616166074 |
| ATGACTTGTCTA  | 427.603770277942 | 0.353313895484255 |
| GTCATTTGCTGA  | 427.61549859736  | 0.30830102433511  |
| GTCATAAGCTTA  | 427.642958526137 | 0.484933251829406 |
| AGTCACCCTTCC  | 427.653635178556 | 0.286000894816958 |
| GTGCTTGACTAA  | 427.673490676997 | 0.718500719237812 |
| GTTACTGTCATA  | 427.683575188887 | 0.192128116578853 |
| CAGTCACGAGGC  | 427.686245952412 | 0.740789674401741 |
| AGTCTAGAGTCA  | 427.710928419569 | 0.347850822338138 |
| CATTCGAATGAC  | 427.720517393733 | 0.775750658582422 |
| ACGTCGGAGTCA  | 427.730027899763 | 0.525546551895028 |
| CGATGTGAATCA  | 427.731833038803 | 0.594481490984082 |
| CAGAAGGATGAC  | 427.750300665511 | 0.399898514904065 |
| TGACGTATATAA  | 427.755002759553 | 0.83049050690308  |
| CGCTGATATGAC  | 427.775098779499 | 0.703572181215606 |
| GTCACCTAGGAC  | 427.785548463309 | 0.632600909489807 |
| CCACGTGATGAC  | 427.788132254527 | 0.638592565737083 |
| TCGGCCGAGTCA  | 427.805858622094 | 0.695575893685802 |
| CGTTCAAATGAC  | 427.815095202005 | 1.02840294407365  |

|               |                  |                   |
|---------------|------------------|-------------------|
| CCAATCGGTGAC  | 427.821994443707 | 0.358501544029073 |
| CGACTAAGAGTC  | 427.840774135545 | 1.16429410774851  |
| ACATCGGAGTCA  | 427.842435167914 | 0.76948962960072  |
| ACCGTTACTCA   | 427.861869899861 | 0.316551742544105 |
| GTCATCGACAAA  | 427.871205770818 | 0.727921674107232 |
| CTTGCGGAGTCA  | 427.878828076412 | 0.586286622163027 |
| AGCGATTATGAC  | 427.897024561965 | 0.491914564536489 |
| CGTGAGTCTGAC  | 427.911369137972 | 0.522121026432971 |
| TGAGCAATCGAA  | 427.91486982635  | 0.631210686880858 |
| GTCATAGTGCCA  | 427.934241219607 | 0.521251424198081 |
| AATAGTCAATTG  | 427.941499990729 | 0.433168074529314 |
| GTCATCTTTATA  | 427.950238568052 | 0.544542782899955 |
| CGATATTTGTCA  | 427.959212717463 | 0.409952029301646 |
| ATTGCATCATCG  | 427.96865971914  | 0.367662851020971 |
| ATAGTTTGACTC  | 427.97342764754  | 0.71520491972595  |
| GTCACCACTTGA  | 428.01753798492  | 0.563257539373155 |
| AGTCACCCCATG  | 428.03137588864  | 0.46290588421912  |
| CGCAACGATGAC  | 428.055997036428 | 0.806467883695471 |
| TCTGCTGCGTCA  | 428.062600093074 | 0.4574832532005   |
| TGAATACAGTCA  | 428.080331177723 | 0.315760872305851 |
| ATTACTTATGAC  | 428.096065862051 | 0.615734982500434 |
| GTAAACTATGAC  | 428.103050453969 | 0.736034665107362 |
| AGTCACCTTCCA  | 428.108613355555 | 0.203114993411682 |
| ATGACTTGTATGA | 428.1171048311   | 0.441763018226493 |
| CAACTTATATGA  | 428.117400750627 | 1.35967912299374  |
| ATTGTGGATGAC  | 428.133992326293 | 0.284936870023063 |
| GTCATAGTGCAA  | 428.136419152165 | 0.49079543611788  |
| CTAAACTGACTC  | 428.137575943191 | 0.568457787942423 |
| GTCATAGGGACA  | 428.150253506256 | 0.432305570748809 |
| GTCATCGGACGA  | 428.156470618038 | 0.66829393541577  |
| ACTTCGGATGAC  | 428.193801217732 | 0.477565615188315 |
| ATGACTTGTTTG  | 428.195028678645 | 0.427694662268072 |
| GTCACGCAGTCA  | 428.210610161389 | 0.593401686281767 |
| GTCATCTACATA  | 428.234947979218 | 0.880765287192258 |
| CATTGCAGTGAC  | 428.240345122144 | 1.46377924191009  |
| GTCAGGGATGAC  | 428.250650298222 | 0.543830462278165 |
| CTCTGAGTATGA  | 428.323422287323 | 0.685934009829777 |
| ACGTCACGATAT  | 428.329034216194 | 0.374788980750446 |
| AGTCACTACTTG  | 428.367559649034 | 0.627557124070855 |
| ACCTGCGATGAC  | 428.378193765671 | 0.748910696809956 |
| CTATGATGTAAC  | 428.380574665561 | 0.389696468734588 |
| AACCACGAGTCA  | 428.382217311425 | 0.600093375183664 |
| ATGACGAGGTAC  | 428.39219594364  | 0.445003742167116 |
| ACAGGGTATGAC  | 428.399237062207 | 0.544519420100856 |
| AAAGGTTATGAC  | 428.402455490188 | 0.211572304589547 |
| TGACTCTAGGAA  | 428.431420970069 | 0.533257248708377 |
| TATCCTGACTGA  | 428.477128035925 | 0.479147116067624 |
| CGCATAGCGTCA  | 428.526421131937 | 1.36458584961048  |
| ACTGGCTATGAC  | 428.563597367315 | 0.695860770391559 |
| AGAGTCAGGTGC  | 428.579310728856 | 0.406949910066701 |
| AGTCACCTTGGA  | 428.594729632043 | 0.565222170987156 |
| CACGATATGTCA  | 428.595767070668 | 0.569463936156809 |
| AACTTATGTGAC  | 428.598322000006 | 0.883982378460732 |
| GACGCATATGAC  | 428.60308204637  | 0.480065493015308 |

|               |                  |                   |
|---------------|------------------|-------------------|
| GTCAATCATGAC  | 428.62693900453  | 0.65958239134845  |
| CACGTTGACTGA  | 428.658778477057 | 0.634343665482246 |
| GTCATATTCACA  | 428.667598366109 | 0.227089683605426 |
| GAGGCTTGACTC  | 428.692159056397 | 1.36188748022342  |
| ACTAATCCGTCA  | 428.692820405511 | 0.427641344762292 |
| ATGAGTCCGATC  | 428.698088324218 | 0.54061058843598  |
| TCATCAGACTCA  | 428.706434122989 | 0.285637658263651 |
| CACTTGGGTGAC  | 428.73575664865  | 0.904997911803357 |
| TGACGCAAACCA  | 428.767908326781 | 0.504513569263925 |
| AGTACACATCAT  | 428.775274922325 | 0.348013264765338 |
| GTCACGCAATTA  | 428.781740088701 | 0.491318955079247 |
| CTGTATGATGAC  | 428.789760660844 | 0.933001507124015 |
| CTTACTTACTCA  | 428.801159507872 | 0.46749755150594  |
| AACGGTTATGAC  | 428.827447366562 | 0.268224843265536 |
| TGAATCACGTCA  | 428.860517117196 | 0.385641477705206 |
| GTCACATTTTGA  | 428.868232699746 | 0.648276464461468 |
| ACGGTAGATGAC  | 428.92206446587  | 0.625513816046311 |
| CATACTTATGAC  | 428.928418966657 | 0.157151635338992 |
| AAGACGGATGAC  | 428.929692573626 | 0.289528402004894 |
| AGAGACTATGAC  | 428.940735428176 | 0.2144164161193   |
| ATGAGTACCACA  | 428.948394117305 | 0.835031632334218 |
| GTCATCCCAGAGA | 428.951326774404 | 0.602870929594431 |
| ACGGCTTACTCA  | 428.954852725844 | 0.471773603434454 |
| ATGACTTGGACC  | 428.958997327147 | 0.279008046920216 |
| AGATATTATGAC  | 428.970177912949 | 0.680938893558049 |
| ATGTATTGCTCA  | 428.981450650835 | 0.470854219292321 |
| CACAACGATGAC  | 429.020378425412 | 0.514587821644393 |
| GACTGCTATGAC  | 429.024789521745 | 0.75685598518334  |
| TCCTTCGACTCA  | 429.062800249361 | 0.309357448789592 |
| ACAGAAATGACG  | 429.064200441575 | 0.415200540879728 |
| GACTAATCGACA  | 429.075763880407 | 0.434831776486614 |
| ATAAGATATGAC  | 429.079954932484 | 0.620795717373068 |
| CATCACTATGAC  | 429.087133526604 | 0.535735078270508 |
| GCCGACTAGTCA  | 429.09964603422  | 0.526825551260284 |
| CGTGAAGATGAC  | 429.134433564311 | 0.326232518228846 |
| GAATATTATGAC  | 429.148241716979 | 0.679134035335757 |
| AGGTTTTACTCA  | 429.17300785003  | 0.91942222704208  |
| CAGGTGTATGAC  | 429.187682216567 | 0.858378228229853 |
| GGTACTGATGAC  | 429.207415595375 | 0.845535772460071 |
| GAACACGTCAAC  | 429.217940964206 | 0.186448719487619 |
| TAGCGTGTGTCA  | 429.222299591913 | 0.931020405355473 |
| AGAGTCAATTTT  | 429.22628705574  | 0.626049607722706 |
| ATGTGTCAAGTG  | 429.23568659049  | 0.485497178842811 |
| TGACTAGTCAAA  | 429.265237493999 | 0.60600924343423  |
| CACGTTGACACA  | 429.274190912515 | 0.568809062825088 |
| GTCATTCATTTA  | 429.277890709686 | 0.405509477320945 |
| ACGTCACCCAT   | 429.316549607933 | 0.338823997468615 |
| AATGCGGATGAC  | 429.320706233767 | 0.445768729135134 |
| GTCATATATTAA  | 429.325532760164 | 1.25522646635058  |
| AGAAGCGTGACT  | 429.325634049374 | 0.538083900158839 |
| GGAAACCACTCA  | 429.33002957518  | 0.61367518625143  |
| TCATGATAGTCA  | 429.346907563586 | 1.11338363771163  |
| ACTAACCAGTCA  | 429.369577211592 | 0.467784025071009 |
| GTCATCGTCGTA  | 429.393274012159 | 0.501300871806183 |

|              |                  |                   |
|--------------|------------------|-------------------|
| GTCCTAATGACA | 429.453996004335 | 0.700978771638939 |
| GTCATAATGAAA | 429.458625258631 | 0.524770102428065 |
| ACCTCTGATTCA | 429.459746530466 | 0.266247912971677 |
| CTGACTAGATGA | 429.468026434152 | 0.892255030476158 |
| AAGAGTGATGAC | 429.48268580565  | 0.20184612136994  |
| CCTGGAGATGAC | 429.48830455972  | 0.688294848980379 |
| GTCATCTTGGTA | 429.49798848397  | 0.746653858085413 |
| GAGTCAGTTGAC | 429.503450765432 | 0.45087923411416  |
| GTCATTCAGTGA | 429.517631384852 | 0.521236295277716 |
| CAAGGCAATGAC | 429.552915077678 | 1.16566356129563  |
| CATGTGGAGTCA | 429.563274856287 | 0.577254082397781 |
| AGTCACTACTAC | 429.569165707475 | 0.307877722594998 |
| GTCATAAACAAA | 429.630413417854 | 0.599171296907089 |
| AGTCACCTTGCA | 429.631519563626 | 0.530289921329531 |
| GTCATATTCGTA | 429.638922073938 | 0.702678613894953 |
| GTCATCACCTGA | 429.654540582867 | 0.556654482469398 |
| ACCGTGCAGTCA | 429.67011058786  | 0.212639231113528 |
| CATATTGTGACA | 429.67640833852  | 0.670083194258963 |
| ACATACAATGAC | 429.681391971231 | 0.51375735175253  |
| CTAAACGATGAC | 429.684597380556 | 0.543595948249337 |
| TGACACACGACA | 429.708793465187 | 0.84342814487493  |
| ACCAATCTGTCA | 429.718715123821 | 0.617579858001352 |
| CCGGGTAATGAC | 429.724169315498 | 0.861534208402339 |
| CTAACTTACTCA | 429.726447843992 | 0.208815547923033 |
| ATGACGTTGTTC | 429.766455772498 | 0.709554999082289 |
| GTAGCTTACTCA | 429.807300325103 | 0.189011515637338 |
| ACTCTTGGTCA  | 429.848218997387 | 0.678343918355224 |
| AGAGTCAGGCAT | 429.861807833394 | 0.537513210707607 |
| AGAAAGTGAGTC | 429.917097070858 | 0.285482331856934 |
| GTCATATTCAGA | 429.93436255663  | 0.469071852056487 |
| CGTATGGATGAC | 429.937440759494 | 0.772412275371949 |
| AATCATTATGAC | 429.964245656239 | 0.804362215600858 |
| AATATGCAGTCA | 429.975221969988 | 1.05011835841432  |
| GTCATATAACAC | 429.98976044132  | 0.735022694654025 |
| GTCATCATAGTA | 430.005742160727 | 0.460536916146615 |
| ATGATGTGTAAC | 430.024561352726 | 0.389341914026299 |
| ACATCAGATGAC | 430.025467740094 | 0.848941363372084 |
| AGTAATGCATA  | 430.026461447734 | 0.299860537834071 |
| GACTCACTGTCA | 430.042200093875 | 0.524884970292119 |
| CACGTCCTCTG  | 430.060659829252 | 0.254585084056974 |
| GTAACGGATGAC | 430.066453221469 | 0.365545629878274 |
| ACAGAGGATGAC | 430.095000902297 | 0.454917157273715 |
| ATCCGATATGAC | 430.099455742824 | 0.286161462682901 |
| GAATACGATGAC | 430.113561672186 | 0.335813468252816 |
| GAATCTTTGTCA | 430.114931648681 | 0.915652425580486 |
| GTTTATACGTCA | 430.115316130574 | 0.843184516042741 |
| CAATGGTATGAC | 430.140266350749 | 0.581168289419144 |
| CCGACGGATGAC | 430.145116215651 | 0.571469269704036 |
| GCTGCTGCGTCA | 430.172955245439 | 0.935762535406456 |
| GTCATCGAAAGA | 430.182463969898 | 0.425655221865673 |
| GTCATCTACGAA | 430.187364473301 | 0.492667420491243 |
| TCGTCAGACTCA | 430.191102684692 | 0.742533905715372 |
| GCCATTGATGAC | 430.231037060422 | 0.307559852289401 |
| CATGTTGACTGA | 430.252227169209 | 0.353505669069351 |



|               |                  |                    |
|---------------|------------------|--------------------|
| GTCATACACGAC  | 430.257160474502 | 0.655448494352935  |
| ATAGCAGAGTCA  | 430.273954838549 | 0.409912161913752  |
| ATGAGCTATGAC  | 430.279133980997 | 0.777974905698074  |
| TGACGCTTAGAA  | 430.303065885206 | 0.62447666916345   |
| CTTCGAAATGAC  | 430.308242620501 | 0.769932329377761  |
| TACGCTTACTCA  | 430.32139081432  | 0.377650032778937  |
| GTGATTCAATTA  | 430.356721428405 | 0.406525695617199  |
| CTGCAGAATGAC  | 430.376627578061 | 0.672583119763899  |
| CATGGTAGTCAC  | 430.38975284524  | 0.538599499315209  |
| CGGGACTATGAC  | 430.399291880147 | 0.469141889569334  |
| AACACCGATGAC  | 430.406368824545 | 0.666434315516891  |
| ATCGGCGATGAC  | 430.435529166467 | 0.913181908766264  |
| ATCCGTTACTCA  | 430.441732096384 | 0.386262249063218  |
| GTGTATTGCTCA  | 430.449723717696 | 0.907016860744478  |
| GATGATGTGGCC  | 430.461602132189 | 0.527433895999808  |
| GACACTGCGTCA  | 430.469268169625 | 0.606542532515595  |
| ATGAGTAGTTCA  | 430.483037061569 | 0.50529477625988   |
| GTCATATTCCTTA | 430.508956926582 | 0.5914216605103    |
| ATAGCGTACTG   | 430.511368102714 | 0.496827706784984  |
| ACCGATGATACA  | 430.529345713634 | 0.531470837283756  |
| AGGAAGGTGACT  | 430.579404637247 | 0.281945222380706  |
| CGTCATCTCTGA  | 430.584223900735 | 0.430557656509175  |
| ATGAGCAACACC  | 430.590430255515 | 0.554229681997126  |
| CAACGAGATGAC  | 430.603472125326 | 0.299470175432678  |
| ATTGTTGACTGA  | 430.614537210598 | 0.0313421547405599 |
| TCTAATTCGTCA  | 430.61780665455  | 0.421501163069163  |
| CGTACGTGAGTC  | 430.619153041486 | 0.883240664937111  |
| TGACGTATACAA  | 430.621325476083 | 0.931851861995169  |
| CCCTAGTGAGTC  | 430.6220575452   | 1.26881298977573   |
| AAGTGGGAGTCA  | 430.623158202158 | 0.151863871036321  |
| CGGTTCCGATGAC | 430.679183693922 | 0.655378965256697  |
| CCGATGGCGTCA  | 430.687840901975 | 1.06350364125338   |
| GCTAATGATGAC  | 430.690310772912 | 0.296904694608001  |
| AGTCACCCCTCA  | 430.738997093201 | 0.525327978632507  |
| TACTTTGTGTCA  | 430.748961346711 | 0.223586985409948  |
| TGACGCAAGTAA  | 430.782888345082 | 0.530080117103342  |
| CGTCGGTATGAC  | 430.803817944566 | 0.640453174578008  |
| TACAATATGTCA  | 430.81325150762  | 0.604352651656975  |
| TCGTTTACGTCA  | 430.831961900608 | 0.310851546222648  |
| GATTCATGACCC  | 430.835179230431 | 0.874723076286179  |
| TGACTGAGGCCA  | 430.860371319242 | 0.632759542528144  |
| CTTCGCGAGTCA  | 430.874436238556 | 0.637265262168074  |
| CGCGTGTAGTCA  | 430.916849126604 | 1.34152927721242   |
| CGTCATCGGTAA  | 430.918340782185 | 0.451769176199099  |
| CGTCATCAGTGC  | 430.927685852127 | 0.667353760320129  |
| ACCTTACAGTCA  | 430.97981859766  | 0.574893808729291  |
| GTCATCTAAACA  | 431.001112169592 | 0.747411846018126  |
| TGATTACCAAAA  | 431.036504991668 | 0.328335907273494  |
| GTCATATAAACA  | 431.074669843839 | 0.696759706937999  |
| TCCTATTGCTCA  | 431.07854607881  | 0.24775348064384   |
| TATGACTTGACA  | 431.088750853949 | 0.393793458286765  |
| GTCATCGACGCA  | 431.090420364533 | 0.441861877624471  |
| GTCATCCTACGA  | 431.129406555598 | 0.343861768827826  |
| ACTGACTGTGAC  | 431.158050973899 | 0.275255095661619  |

|              |                  |                   |
|--------------|------------------|-------------------|
| ATTTAGTAATCG | 431.170783477572 | 0.828630448126216 |
| GTGACTACCAGA | 431.192448363401 | 0.527997508526706 |
| CTCGATGGTGAC | 431.208214006157 | 0.989106715880607 |
| GCGCTAGAGTCA | 431.221826634602 | 0.669369812595279 |
| TGAGTCTATACA | 431.281420344264 | 0.794346778743666 |
| GGTGCCTATGAC | 431.292406598202 | 0.803135399421662 |
| TGACACAGCCAA | 431.2978877199   | 0.498206908223102 |
| ACAATTGATGAC | 431.29791042875  | 0.38449028758526  |
| CGTTAATATGAC | 431.321004034123 | 0.520945449109805 |
| GGCAATACGTCA | 431.349764189197 | 0.353735011102418 |
| GCCACCGGTGAC | 431.467533793451 | 0.689273733833328 |
| GAGGATACGTCA | 431.49423113864  | 1.32838675199239  |
| AACTAATATGAC | 431.49780734627  | 0.781927266072683 |
| CTAAATTGCTCA | 431.500965025729 | 0.468379866331504 |
| AACTTATATGAC | 431.512347011466 | 0.847877410392698 |
| TGACACAGTCAA | 431.51865213767  | 0.526318665127563 |
| CTGACTGTGACA | 431.532352722609 | 0.622189366227697 |
| ATTACTCAAAT  | 431.536581068744 | 0.431268474539891 |
| GATGACTTGGAA | 431.557726642368 | 0.322619837769046 |
| ACCAACACGTCA | 431.564054322255 | 0.647621493971322 |
| GTAACTGATGAC | 431.609903072266 | 0.311005119562277 |
| GCCTTTGTGTCA | 431.618297205786 | 0.605240537387993 |
| CATGCCTATGAC | 431.62495649644  | 0.642083663547735 |
| ATGACGCCGAGC | 431.643328008369 | 0.66050997123584  |
| ATGACGAACCAG | 431.667996019701 | 0.408510691724564 |
| GTCATCGAGAAA | 431.669082524529 | 0.551948772617731 |
| CCAACCGATGAC | 431.686237531326 | 0.328811608468527 |
| ATTCAGAATGAC | 431.721624044376 | 0.494256090760624 |
| CGTCATCTATCA | 431.724917911325 | 0.552524723678343 |
| CGCGGTGAATCA | 431.740607242477 | 0.922242424062472 |
| ACGTCACAGTAA | 431.776768275113 | 0.518197444376062 |
| GTAGTCAATGAC | 431.791346310848 | 0.400211543210377 |
| ATAGGTCACAAC | 431.854090641598 | 1.37759368276308  |
| GTGACTCGCAGA | 431.858058339698 | 0.528751014239604 |
| AGTCACTTGGAT | 431.861421368309 | 0.547496587183227 |
| GTAATCGGTGAC | 431.862240974198 | 0.640566262000651 |
| CCAAACTATGAC | 431.862917897752 | 0.328959630421481 |
| GTCATTTTCTGA | 431.877014110849 | 0.250198634557847 |
| GTCATATATGGA | 431.907116460271 | 0.234685614610303 |
| AATAGTCAACAT | 431.934930050939 | 0.43365472249185  |
| CAAAGAGATGAC | 431.939625817614 | 0.650866114712025 |
| AGTGGGACTCAT | 431.942244869336 | 0.212988091839537 |
| ATGTGTCAAACC | 431.945676318166 | 0.290793935209969 |
| GTCATCGATCCA | 431.948854101323 | 0.60289162636999  |
| GGACTCGATGAC | 431.965922094681 | 0.608521321061291 |
| TCATGACTAATT | 431.999275570877 | 1.0918974842092   |
| AGTCACGGCTAC | 432.017478492556 | 0.511307884676604 |
| GTTATAGACTCA | 432.020249869224 | 0.672715014332682 |
| CGCGTTTTGTCA | 432.045013916836 | 1.35759664732743  |
| GTCATCGTACGA | 432.045490908787 | 0.480846043787902 |
| TGAGTAAGTTAA | 432.056053466866 | 0.624853361723286 |
| GTGTTGACGTCA | 432.087852571492 | 0.585071394292308 |
| CCGTGATATGAC | 432.171574336381 | 0.411364588972831 |
| AATTCACAGTCA | 432.178091487913 | 0.507253071077911 |

|              |                  |                   |
|--------------|------------------|-------------------|
| TGACGGATTTAA | 432.184053931774 | 0.456963402131771 |
| AGTCGTACTION | 432.199864888217 | 0.787104195781342 |
| TCAACAGAGTCA | 432.201222109423 | 0.515053243800631 |
| CAAGGATGACCC | 432.206626576437 | 0.901240027374757 |
| CCATCTGTGACA | 432.233938973568 | 0.672116200923345 |
| ATAGGCTATGAC | 432.245565723047 | 0.445121585552501 |
| TCCTCACAGTCA | 432.254506473864 | 0.520965653532501 |
| ACCGCTGTGTCA | 432.273590797085 | 0.318510168454504 |
| ATATTTGCTCAT | 432.28056072387  | 0.470408594867033 |
| CTCATAGATGAC | 432.295776600135 | 0.51083584695864  |
| ATACTGGATGAC | 432.309501986898 | 0.43810742752299  |
| ATTTCTGATGAC | 432.321157097305 | 0.569219718347973 |
| CGACTAAATGAC | 432.324303567614 | 0.360559292197124 |
| ACTAAGTGACAC | 432.333946321233 | 0.906153368164795 |
| TCAGTAGACTCA | 432.341344410223 | 0.946846672296375 |
| GTCATCGCAATA | 432.346347517452 | 0.333775019867303 |
| CGTCATCAGATC | 432.352304830592 | 0.488229605441246 |
| CACGTTTCGTCA | 432.352371217415 | 0.668529753146263 |
| ATGACGCCTACG | 432.371776578481 | 0.313188145685858 |
| CCGTACGCGTCA | 432.384988381881 | 0.398129613593746 |
| ATACTCGATGAC | 432.412340213101 | 0.824866280239111 |
| CCGAGAGATGAC | 432.448430089192 | 0.846243514869445 |
| GACTAATCTATA | 432.453123104146 | 0.963198536398548 |
| GCGCTAAATGAC | 432.48201451305  | 0.880322914954044 |
| AGACTACTAGG  | 432.482934856579 | 0.777053099271456 |
| GTCATTAAGTCA | 432.511935690803 | 0.824708547397062 |
| TAATTGTAGTCA | 432.533482438441 | 0.54661482090353  |
| GTCATCGTGCCA | 432.562335355045 | 0.845565375360783 |
| CACGTATGAGCC | 432.566383873938 | 0.773453517732777 |
| CGCTCACAGTCA | 432.569857723987 | 0.337818970432872 |
| ACTCATTATGA  | 432.608003649172 | 0.372395837769275 |
| GTGTCATGCCAA | 432.637654156466 | 0.361047090062244 |
| ATGGTAGATGAC | 432.693321256034 | 0.394452687986412 |
| GTCATAACTGGA | 432.709212663218 | 0.842217474186362 |
| CAGCACGATGAC | 432.723310301404 | 0.796992353536297 |
| GTCATTACCTGA | 432.729219109833 | 0.316622309481227 |
| GAAGGCGTCATC | 432.740971945503 | 0.408014653425501 |
| GTCATAAGGCAC | 432.761493942973 | 0.515074725271682 |
| TCGTATTGCTCA | 432.762462379031 | 0.733007650710455 |
| ACAGCGGATGAC | 432.764005990757 | 0.537855357877206 |
| TGACTACAGTAA | 432.772438706398 | 0.583825603585818 |
| TCATAGTTACGA | 432.800222813389 | 1.02311714824167  |
| CCCAGTGAATCA | 432.819965662333 | 0.645987149869796 |
| CGACATAAGTCA | 432.827384286773 | 0.702848461871239 |
| AATACATATGAC | 432.846180693433 | 0.576380241932344 |
| TGGTCATCCTAA | 432.858679989278 | 0.669598701702892 |
| CATGAGGATGAC | 432.880263218876 | 0.388472977557041 |
| GCATGATATGAC | 432.898407720904 | 0.480252276203775 |
| CGCGCTGAGTAA | 432.935673291829 | 0.592578154800713 |
| CGTCATCAACGA | 432.944567719729 | 0.718814627496858 |
| AGATACTGACTC | 432.965401499524 | 0.568956840969086 |
| ATCTCTGAATCA | 432.990628169035 | 0.225526804010889 |
| GTCATACACCTA | 433.002020747593 | 0.376882059626734 |
| CTCATGAATGAC | 433.020592614159 | 0.243685230755064 |

|               |                  |                   |
|---------------|------------------|-------------------|
| AAATGTTTGTCA  | 433.045625192168 | 0.809350904181361 |
| GTCACGTAAGAC  | 433.047321040828 | 0.465247305747118 |
| TAGCGTTACTCA  | 433.056843054711 | 0.333371015886212 |
| AACAGTTATGAC  | 433.062135197744 | 0.324355026590257 |
| ATTATCCAGTCA  | 433.089553706639 | 0.235947883773947 |
| AGGCTCTGTGAT  | 433.092182354033 | 0.490768601880378 |
| GGTCCTGATGAC  | 433.140619988045 | 0.540417023017075 |
| AATTTTGCCTGCA | 433.151922041429 | 0.931884916986598 |
| AAGTCGTGACTA  | 433.175807198968 | 0.33104806718024  |
| CGCGCTGCGTCA  | 433.212003670226 | 0.763414435841174 |
| TGACGCAGTTAA  | 433.226063204472 | 0.606832890875999 |
| ATTCTTGCCTGCA | 433.232339428812 | 0.499119231983742 |
| GCAGCTGTGCTCA | 433.235644945496 | 0.77481119201743  |
| GTCATTTCCGAA  | 433.26830122797  | 0.434214754045235 |
| AATATGGATGAC  | 433.282692022861 | 0.639959413521488 |
| TCTAGGGAGTCA  | 433.307909867807 | 0.464760851145187 |
| ATCACGGGTGAC  | 433.310513643133 | 0.914647601371285 |
| GGTCCTTAGTCA  | 433.317636613533 | 0.937356209341728 |
| CCGCAAGACTCA  | 433.32309841553  | 0.473073652073453 |
| ATTACGCAATCG  | 433.334404392435 | 0.651946586878246 |
| GCGAACCAGTCA  | 433.335608442544 | 0.840476765067924 |
| CAAATCCAGTCA  | 433.342715641437 | 0.43552907040108  |
| ACACGTGACGTG  | 433.355224417517 | 0.666216347215077 |
| CCTTAAGGTGAC  | 433.405927739201 | 0.701405768066051 |
| ACGCAGGATGAC  | 433.415561471086 | 0.684886490386498 |
| GTCATCGACCAC  | 433.458386005312 | 0.345571119069081 |
| GGCGCCTAGTCA  | 433.479358943649 | 0.499420373336816 |
| AGTCAACGTGAC  | 433.488019109006 | 0.532827288395858 |
| GTCATACCGCAA  | 433.488671085778 | 0.500861508416807 |
| CATACGAATGAC  | 433.513610840395 | 0.321379811572624 |
| ATGACTGGGAAG  | 433.525467322465 | 0.434659748399004 |
| ATGACTTGGTCC  | 433.531060249427 | 0.446211499330492 |
| GCTGGATATGAC  | 433.550298210875 | 0.707841697635425 |
| GTCATCCGAGAA  | 433.555451385315 | 0.212132065208105 |
| CATGATGGTGAC  | 433.595311273701 | 0.797406195242135 |
| ATGACAGAGTTA  | 433.596493521474 | 0.451485283972332 |
| GACTCACGATGA  | 433.622359683526 | 1.07926555728443  |
| GTCATAGCGGAA  | 433.650415894574 | 0.772633377333996 |
| CTATTGGAGTCA  | 433.654481067492 | 0.326742772639771 |
| CCGGTGGATGAC  | 433.70888240357  | 0.497943258354954 |
| GACACGGATGAC  | 433.715335136546 | 0.430697607195011 |
| TGACACACGCAA  | 433.725986651705 | 0.357236674291487 |
| GTCATTCGGTGA  | 433.739128834411 | 0.354125495060133 |
| TCCGCCGAGTCA  | 433.789754183522 | 0.661512113559718 |
| TGACACAGTTAA  | 433.839856018848 | 0.504939927266996 |
| ACAAGTGTGCTCA | 433.841742899992 | 0.449805469376908 |
| TCTGCTACGTCA  | 433.862686568964 | 0.593636916282322 |
| TGAGTCGAAGAA  | 433.869505776178 | 0.288080609013967 |
| GTCACAGTTCGA  | 433.883349090758 | 0.374446152459535 |
| GACTCACTATTA  | 433.896705843546 | 0.359945844054331 |
| CCCTTCGATGAC  | 433.917372660153 | 0.253313791684556 |
| TCATATTGCTCA  | 433.919108198853 | 0.177629725206444 |
| AAACTACTCATC  | 433.929687154337 | 0.306966807392294 |
| ATTGATCTGACA  | 433.938912672457 | 1.49139961676521  |

|               |                  |                   |
|---------------|------------------|-------------------|
| GTCACACTCTGA  | 433.955686528598 | 0.574554515812153 |
| TGACGCGTAAAA  | 433.978208983531 | 0.662459128786636 |
| ATTCAGATGACG  | 433.988321171913 | 0.776734974281643 |
| ACGCAGAATGAC  | 434.010284996699 | 0.651451663351416 |
| CACAGATTAGTC  | 434.057044697379 | 0.426257915880613 |
| TGACTTATAAAA  | 434.073272777101 | 0.501989730019835 |
| GTCATGAATGAC  | 434.090547987135 | 0.771693034791683 |
| ACGTCACCTTAGG | 434.09899457902  | 1.00822963784443  |
| GTCATAGATATA  | 434.101498901985 | 0.504282648808749 |
| ACCACTGTGTCA  | 434.12711212141  | 0.68683686238151  |
| CGATGAGATGAC  | 434.154163966887 | 0.390469323729968 |
| GTCATATATGCA  | 434.162315071216 | 0.8417552177384   |
| GACTATAAGTCA  | 434.172387931865 | 0.179986350861139 |
| TAGTGGGAGTCA  | 434.205622517294 | 0.072038803148467 |
| ACGCTTGACTAA  | 434.208817991535 | 0.502761692140615 |
| TGACAATAGTCA  | 434.210240749112 | 0.529174829595913 |
| GACTGTGAATCA  | 434.211811748276 | 0.766860419464851 |
| ACTCAGAATGAC  | 434.217744128547 | 0.529760241820761 |
| AGCGCCGATGAC  | 434.244448317606 | 0.616624529927916 |
| GGCCATGTCACC  | 434.245263298047 | 0.46075590845328  |
| AAGCTTTGTCAT  | 434.29477446496  | 0.318812507082897 |
| GAATAGTGAGTC  | 434.295155781875 | 0.247118977161274 |
| CATCTATAGTCA  | 434.299006315218 | 0.55941967773565  |
| CGTTACTAGTCA  | 434.349023414686 | 0.658018296332475 |
| GCCATGTATGAC  | 434.35226070095  | 0.373705039546847 |
| AAAGTTGTGTCA  | 434.379701898921 | 0.482705974493189 |
| AATTTTACGTCA  | 434.445484787133 | 0.875133329866165 |
| GGAACTTGTAC   | 434.484674718878 | 0.443007558227958 |
| GCTACCTAGTCA  | 434.486578534158 | 0.325030441346643 |
| GTCATTCGGTGA  | 434.523241438939 | 0.464722791727397 |
| AGTGGCGTCACC  | 434.532923522527 | 0.821796279763418 |
| ATGACGTGATGG  | 434.560185903668 | 0.189401362096336 |
| AGTCACGAGCCG  | 434.566764256722 | 1.3664446770473   |
| CACGTCACCTAA  | 434.615371569012 | 0.4274892511755   |
| CGATTGTAGTCA  | 434.62434760607  | 0.634919462291007 |
| CCTGTTGATGAC  | 434.630320302353 | 0.282824603401448 |
| ATGACTAGCTCA  | 434.675385817978 | 0.788056153916305 |
| ATGACTGGGGCC  | 434.694732688293 | 0.679470226467677 |
| CATGCATGACAC  | 434.696356261461 | 0.196240048105305 |
| AGTCACGGCACG  | 434.700826984636 | 0.598358428941431 |
| GCTCACGATGAC  | 434.702653601465 | 0.61339025497875  |
| ATGACTGGGAGG  | 434.712142794885 | 0.374270740589917 |
| GTCATAAAGCAA  | 434.750692854547 | 0.9858886790607   |
| TGACGTATCTAA  | 434.752004792137 | 0.731796143195292 |
| CGTCACATATTA  | 434.755841231088 | 0.672147386163426 |
| GACTCACTCCAA  | 434.787413642364 | 0.387852193060328 |
| GCTTGATATGAC  | 434.78924326482  | 0.376167310401546 |
| CCTAGGGTGACA  | 434.818163364504 | 0.606487696755711 |
| CACAGAGATGAC  | 434.819898602424 | 0.8151912672741   |
| ATGTACTAGTCA  | 434.844093965564 | 0.786213808757263 |
| GTCATAGCAGCA  | 434.847260341139 | 0.725486899235492 |
| GCCAGTTATGAC  | 434.875649407312 | 0.925570688908326 |
| ATGAATCTGTCA  | 434.880024894241 | 0.353941539235123 |
| CATCGCGATGAC  | 434.910881225389 | 0.582015385359441 |

|               |                  |                   |
|---------------|------------------|-------------------|
| CCCTACTAGTCA  | 434.928631628916 | 0.402645052148763 |
| TGAGTCGCAAAA  | 434.934482883595 | 0.249507455921291 |
| AATGGGTATGAC  | 434.946666832462 | 0.532173996982163 |
| ATTTATAAGTCA  | 434.946834805213 | 0.405827343643126 |
| AGCCACTATGAC  | 434.953493970403 | 0.814590757475575 |
| AATTCTACGTCA  | 434.981233572707 | 0.573310466707587 |
| CCTGTGAATGAC  | 434.985822581996 | 0.479763376689903 |
| GTCATAGTCGAA  | 434.987821551526 | 0.627244536953168 |
| ATCTTTGTGTCA  | 434.996143365057 | 0.169930603465733 |
| CGGTAAGATGAC  | 435.010701742544 | 0.389190741433258 |
| AATGTGGATGAC  | 435.024628167442 | 0.533760238493014 |
| CGAATCGGTGAC  | 435.028490960442 | 0.793313218669552 |
| GGTAACGTCACC  | 435.034149180913 | 0.409913146696484 |
| AGTTTGAGTAAT  | 435.037355667152 | 0.262310391708213 |
| TCCGACTAGTCA  | 435.040206734045 | 0.748692252370928 |
| ATCCTTGATGAC  | 435.047995655392 | 0.174399355029549 |
| GTCACGGAGTCA  | 435.055772360913 | 0.363590133606365 |
| GTCACACACGAC  | 435.068101172223 | 0.209400538582884 |
| GTGACACAGCAC  | 435.099044959006 | 0.560798413894267 |
| ATGACAGTATAC  | 435.104751619255 | 0.316882491387613 |
| GTCACACCTGTA  | 435.143888102179 | 0.720913479884068 |
| AAAACAACAAAA  | 435.151022678173 | 1.36289879225057  |
| CACGACGATGAC  | 435.155123824649 | 0.431961206646782 |
| ATGACGGAGAAA  | 435.174021968022 | 0.278740726845864 |
| AGACCCTATGAC  | 435.192987098232 | 0.559329382336242 |
| AGTCACTTCACG  | 435.245612802232 | 0.511243873806553 |
| CTGAGCGGTCA   | 435.268780139226 | 0.814037870149352 |
| ATAGATTATGAC  | 435.273747658006 | 0.557222566132087 |
| AAGCTCATGACT  | 435.28947434244  | 0.507455313634849 |
| GCCTTGAGTCA   | 435.306940969733 | 0.492928127527719 |
| GTCATTGTCACA  | 435.31607913505  | 0.523587922092077 |
| CGATGACTTGGA  | 435.320099071584 | 0.307349790026567 |
| TGACTACGATCA  | 435.351020991304 | 0.75583175892245  |
| TGACGTGTAGAA  | 435.353512116215 | 0.472894862014391 |
| CGTTACTGACTC  | 435.356807764839 | 0.316324099839517 |
| GTGACTACCCTA  | 435.387718583568 | 0.446982448676067 |
| CTGCGTGATTCA  | 435.391176999692 | 0.546163420143036 |
| TCGCGTGAATCA  | 435.401647355451 | 0.461145383389859 |
| AAACGGACTCAT  | 435.42632116924  | 0.401023399989056 |
| GTCATCACTGGA  | 435.457871264358 | 0.412981925439235 |
| CTATGACTTGAC  | 435.461415476366 | 0.270884556359567 |
| AGTCATGGTTAA  | 435.48752444839  | 0.276188732026912 |
| ATGACCAGGTCA  | 435.492203387354 | 0.3697439190394   |
| AATACTGATGAC  | 435.509990071262 | 0.366815079786625 |
| AATTAGTGAGTC  | 435.522512237903 | 0.587081738635989 |
| GCCACTCAGTCA  | 435.544293441082 | 0.56747012594973  |
| GTAATCCGTCA   | 435.545013952819 | 0.287948031761454 |
| AGCAGGTATGAC  | 435.550395757939 | 0.469946973209588 |
| CTGCGGGATGAC  | 435.557354411979 | 0.458099562246115 |
| CGTCATCAGAAC  | 435.633701299598 | 0.749630288567369 |
| TGACTCTGCGCA  | 435.645620002296 | 0.623926053120172 |
| AACTTTGATGAC  | 435.667336566278 | 0.715699818348942 |
| CCGCAATAGTCA  | 435.66985334972  | 0.75788944272553  |
| GTCACCTTCTGAC | 435.672686811853 | 0.672857463232032 |

|              |                  |                    |
|--------------|------------------|--------------------|
| GTCATAGAACCA | 435.696606728484 | 0.75981735395133   |
| GTCATCCTCCGA | 435.704831517542 | 0.22342351917955   |
| AATGACGTCTTA | 435.720964558363 | 0.439100165365445  |
| CCGCTAGAGTCA | 435.732302047874 | 0.489489187160387  |
| CTCCCTGACTGA | 435.740668300578 | 0.306983299078011  |
| AACCCTGACTGA | 435.748409976752 | 0.509945039269874  |
| CGACCTGACTGA | 435.755553627913 | 0.338996750149991  |
| GAACTCGAGTCA | 435.765258346463 | 0.822623097511497  |
| AATTTGTATGAC | 435.777609268048 | 0.724962669531275  |
| AGAGTCAGGCCA | 435.778642532969 | 0.548401456561338  |
| CATCATGAATCA | 435.792285956324 | 0.481749023508385  |
| GACTAATTACTC | 435.826495320324 | 0.596752765389775  |
| ACTTCTGAATCA | 435.836724405065 | 0.331665995695996  |
| CTCTGAGATGAC | 435.85997429374  | 0.829946297956079  |
| AGGTCCAATGAC | 435.867172625508 | 0.838589413149992  |
| GAGTCAATTACA | 435.895898129472 | 0.712071891131281  |
| GTCATAACCGCA | 435.905187324869 | 0.609795614086952  |
| CCTGCTGCGTCA | 435.912804762172 | 0.0732526013667463 |
| GAACAAGTCATC | 435.948376582895 | 0.789609675448462  |
| AGTCAGAGTATG | 435.978967392498 | 0.48504568911794   |
| ATGAGTAAAGGA | 436.012083576655 | 0.314670707994085  |
| CGTCATGTAGTA | 436.034116287989 | 1.34236157721489   |
| CAAGCTGATGAC | 436.040625814745 | 0.478233283603183  |
| GTCATACGACTA | 436.055932463939 | 0.580055658343756  |
| TGACCTAAGTCA | 436.07928452725  | 0.353521838588732  |
| TCAATTTTGTC  | 436.098211817717 | 0.369013050283932  |
| ATCTGAGCAATC | 436.101559838937 | 0.480206616772103  |
| GTCATCGCGAAA | 436.102820178451 | 0.662982937599816  |
| CCGGGATATGAC | 436.104323276425 | 0.246618662237263  |
| AGTCACTAGGAT | 436.143364357729 | 0.540304328951469  |
| GACCTGTATGAC | 436.171978974831 | 0.229749798087323  |
| GTCATAGAACGA | 436.206121916954 | 0.718691223973199  |
| AGCAAGTCATAC | 436.222338077449 | 0.629125043089898  |
| GACCTGGATGAC | 436.232258124941 | 0.334218853554155  |
| AGTCACCTTCAC | 436.23324410282  | 0.308182466801966  |
| GACAATGATGAC | 436.304737814612 | 0.540876270873674  |
| CGTCATATGCAA | 436.322210231237 | 0.955580922463435  |
| GTCATTGTTTTA | 436.358369202134 | 0.383995376008332  |
| AGAACCAGTCA  | 436.358761657782 | 0.238992819462922  |
| AGACTCACGTCA | 436.365211374095 | 0.213332417634259  |
| CCCTATACGTCA | 436.379559203378 | 0.570856979101706  |
| TCACCGGAGTCA | 436.398863836829 | 0.870508003794609  |
| ATCACGTATGAC | 436.41611358494  | 0.278174129612565  |
| GTCATACCCAGA | 436.424316506457 | 0.929051070510416  |
| AAACTTCAGTCA | 436.43849671633  | 0.314376252366176  |
| CGCCCGATGACG | 436.445609354723 | 0.706092543081964  |
| CATGTCTATGAC | 436.468626599591 | 0.952019030310415  |
| AGAGTCTATGAC | 436.490329613173 | 0.531775091094334  |
| AATAGTCAATGG | 436.49345586462  | 0.431281451759304  |
| GCTTCCGATGAC | 436.528463586215 | 0.445389160355188  |
| GTCATACCACGA | 436.547730362248 | 0.583478667718421  |
| ACGTATCTGTCA | 436.548866925302 | 0.450255769253528  |
| GCCCTTCAGTCA | 436.556355547078 | 0.201237687921261  |
| GTCATAACGGAA | 436.573788683446 | 0.269495115898516  |

|               |                  |                   |
|---------------|------------------|-------------------|
| AAGTGTTATGAC  | 436.57514835341  | 0.423790648017488 |
| ACCTTGATGAC   | 436.583517435137 | 0.476854883802695 |
| TCTGATAAGTCA  | 436.585155730821 | 0.464734909590979 |
| CCGATTTATGAC  | 436.668744991022 | 0.588567090867424 |
| CAGGATCCGTCA  | 436.685617437559 | 0.316369253887929 |
| ATGACGCGCTCA  | 436.70133905125  | 0.435841619565828 |
| ACGTATTGACTC  | 436.732598512881 | 0.791736015795585 |
| CACGTGTAGTCA  | 436.73813912155  | 0.404548326475172 |
| GCGAAAGATGAC  | 436.748200701004 | 0.526926959901931 |
| CTCGTGCACTCA  | 436.768236355899 | 1.04200145611496  |
| ATGACAAAGAGA  | 436.800733036077 | 0.446973890906347 |
| GGTGACACGACA  | 436.807233611046 | 0.236590299857848 |
| ACTACGGATGAC  | 436.817597182874 | 0.49779560897756  |
| ATGTGTCAAGGC  | 436.830453790679 | 0.190861892425946 |
| CAGAATGATGAC  | 436.848920379127 | 0.252282339548664 |
| GACTAAAATGAC  | 436.859580146426 | 0.333043340579302 |
| TGACTGAGCGCA  | 436.872149065129 | 0.780219996562051 |
| ATGACGGACACA  | 436.882780295401 | 0.162805993351182 |
| CACCATACGTCA  | 436.892584591492 | 0.679025300366224 |
| TATTGCGAGTCA  | 436.899132540257 | 0.755486809784798 |
| ATGACTAGCTCG  | 436.934359857212 | 0.669714785592775 |
| TAATCGTCAGAA  | 436.961996120708 | 0.715162584479832 |
| TGACACTTAGCA  | 436.965755879844 | 0.676478734485081 |
| CCAATTTATGAC  | 436.980913924831 | 0.512280658292339 |
| GTCCGTTAGTCA  | 436.98956249829  | 0.794752939705928 |
| CTGATCTAGTCA  | 436.989889331386 | 0.523922938381693 |
| ATGACAACGTGA  | 436.995872809383 | 0.219179907496405 |
| TGACTGTATCCA  | 437.068559313178 | 0.239582443840497 |
| GCCATCTATGAC  | 437.136441472676 | 0.401277311668391 |
| GATTACGCAACC  | 437.144779264052 | 0.628091763605999 |
| ACGGCTAGTCAC  | 437.146917054011 | 0.176111218119291 |
| GACGATACGTCA  | 437.163489338715 | 0.759616828971419 |
| ATCCCGGATGAC  | 437.182904191642 | 0.35220909425872  |
| GACTCAGAAATCA | 437.211360886611 | 0.59724139803804  |
| GTCATAGCATGA  | 437.212393030297 | 0.721923205063209 |
| GTCATCAATATA  | 437.227337741257 | 0.548443481374726 |
| AACCGGTATGAC  | 437.22814691479  | 0.88417642194149  |
| GACACATGACAC  | 437.26642181068  | 0.62289059855603  |
| CTAATCGACTCA  | 437.26914211706  | 0.538894297858525 |
| AATCTTGTGTCA  | 437.271528015886 | 0.883014558345977 |
| GCACTAGAGTCA  | 437.280414059263 | 0.596141118085724 |
| AGTCACTTACA   | 437.322095858452 | 0.306472392396474 |
| GCCTACCAGTCA  | 437.369529694016 | 0.447433787248761 |
| AAAACAACAAA   | 437.377824691011 | 1.33908684086086  |
| TAAACATAGTCA  | 437.380060920551 | 0.748363315675652 |
| CAGTATTTGTCA  | 437.418122722806 | 0.564907503875463 |
| CGACACGAGTCA  | 437.421140984877 | 1.08549501806352  |
| ATACAATATGAC  | 437.442727977804 | 0.374824859316601 |
| ATTGTCTAGTCA  | 437.44273411838  | 0.529698647191224 |
| AGACTCACTGGA  | 437.444429474884 | 1.07383900452454  |
| GTCATAGACCGA  | 437.44941912109  | 0.685125194635562 |
| ATTAGTGAATCA  | 437.487583016453 | 0.551186330069886 |
| ATGACTTGTGG   | 437.498542078305 | 0.664558522392698 |
| GTCACCAGAGCA  | 437.50665551081  | 0.706222788670163 |



|               |                  |                   |
|---------------|------------------|-------------------|
| GTCATACGTAGA  | 437.516608187641 | 0.189942051462986 |
| ATTGGATATGAC  | 437.566823782156 | 0.453274639547852 |
| GCCCAGGATGAC  | 437.572471149666 | 0.495049089231515 |
| ACCGCGGATGAC  | 437.578329374552 | 0.820734181545757 |
| TGACTACAGACA  | 437.588081894547 | 0.902277791125664 |
| GCGATCTAGTCA  | 437.593642785252 | 0.330924337565566 |
| GCTTGCTATGAC  | 437.634394136248 | 0.706305173199441 |
| CCAAATATGTCA  | 437.667085894251 | 0.870680527732702 |
| GTCATCGAACGA  | 437.672250748907 | 0.297062847740054 |
| GTCATGCCGTGA  | 437.67387078759  | 0.522129756408944 |
| GTCATCAACTAA  | 437.674010898676 | 0.633028412650732 |
| AATCTAAATGAC  | 437.7077312742   | 0.568268901783489 |
| ATGACAATACTG  | 437.730922076665 | 0.286500748993271 |
| GTACGTGATTCA  | 437.739584079443 | 0.68961837207916  |
| AGAACCTAGTCA  | 437.756784667563 | 0.489104266243459 |
| CAAATGGAGTCA  | 437.785524635428 | 0.544824597632936 |
| TCCCAATAGTCA  | 437.793545332063 | 0.730690637012811 |
| GTCATAAGTACA  | 437.794721093823 | 0.335017217130396 |
| ACCCCTGACTGA  | 437.806416868045 | 0.373248646855904 |
| ATCTAACAGTCA  | 437.810506334458 | 0.294012406975128 |
| CGTTCTGATGAC  | 437.812262311305 | 0.82356399754193  |
| AGTCACCCTGCA  | 437.813264434852 | 0.288093863242929 |
| AATAGTCAATCA  | 437.831262480114 | 0.450445998710425 |
| ACCAGCTATGAC  | 437.839230884639 | 0.529209670297262 |
| TGACTAGTGTA   | 437.852553662553 | 0.460040025644265 |
| GCCCTGTAGTCA  | 437.875574006575 | 0.575862247034709 |
| AACTCGGAGTCA  | 437.895742944527 | 0.750998974501321 |
| CGGACCTATGAC  | 437.927594034981 | 0.496614398309038 |
| GACACACAGTCA  | 437.93016788509  | 0.383359991021727 |
| CACAGCAATGAC  | 437.939115557973 | 0.896912452323725 |
| GTCATCCATCGA  | 437.961101533813 | 0.587880459912261 |
| AGATTGACTCA   | 437.984078069176 | 0.337168962408876 |
| ATGACAAAGAAA  | 438.018449048957 | 0.316143610991253 |
| ATGTTGTAGTCA  | 438.038248595592 | 0.533338069379776 |
| GGATTTTATGAC  | 438.068933751497 | 0.420048913282983 |
| AAACTGGATGAC  | 438.073290879442 | 0.277113344527391 |
| GTCACACTAAGA  | 438.095185133589 | 0.269542274047068 |
| ATTTTCAGATGAC | 438.103119523263 | 0.688074181497134 |
| GTCATCGAATCA  | 438.116310055127 | 0.514925725066237 |
| AGTCACTCTAGA  | 438.128414366122 | 0.436520620557851 |
| CAAACCTTACTCA | 438.131017648222 | 0.533894380780727 |
| ATGACGGTATGA  | 438.149005322847 | 0.230676198079464 |
| ATGACGTCGATC  | 438.170591252297 | 0.554045981098187 |
| ATGACTAGCACA  | 438.194521378423 | 0.525867333997767 |
| AATTACTGTGAC  | 438.200970824782 | 0.530015384835221 |
| ATGACAAAGCGA  | 438.227026680304 | 0.366066468753547 |
| GATTGTGAATCA  | 438.229924504697 | 0.257852582177391 |
| TCTTTGTAGTCA  | 438.279353121727 | 0.651940049544336 |
| CCTGGCGAGTCA  | 438.283505682907 | 0.617576180345733 |
| TGACTCGCCGAA  | 438.30631225333  | 0.828288871904273 |
| AATCGTGACGTG  | 438.320038452999 | 0.309257340775625 |
| ACACTGGAGTCA  | 438.320812922516 | 0.514952825951506 |
| TGACAGATAAAA  | 438.339985463117 | 0.360880271384021 |
| ACGTCACCGTCA  | 438.359609557598 | 0.486991367727673 |

|               |                  |                   |
|---------------|------------------|-------------------|
| GTCATATTAGAA  | 438.362365790622 | 0.778647045149433 |
| ATTGCCTAGTCA  | 438.368136302055 | 0.375644170431699 |
| ACGTCACCCGTA  | 438.407913744864 | 0.232700986351947 |
| CACCTAGATGAC  | 438.413268855677 | 0.584821437631209 |
| GAGATATATGAC  | 438.444096225807 | 0.706910964884742 |
| AATGTCAATGAC  | 438.47202125226  | 0.811455578714592 |
| GTATATTGCTCA  | 438.48927255667  | 0.662266903620034 |
| ACCTCCGATGAC  | 438.498662664824 | 0.477765694482843 |
| AAATCGTGAGTC  | 438.508467558179 | 0.57824017963744  |
| CATACCGATGAC  | 438.509787335708 | 0.422545943479467 |
| TATGGCGAGTCA  | 438.561879480718 | 0.303703428127014 |
| GCTATCTAGTCA  | 438.576541705056 | 0.463117274218428 |
| CACGCGTACTA   | 438.585496280574 | 0.245074858657984 |
| CGTAAAGATGAC  | 438.597903322399 | 0.630668795459675 |
| CGGTTCTATGAC  | 438.610171424364 | 0.322589017190905 |
| GTTTAAACAGTCA | 438.619327704965 | 0.764815573317433 |
| CCCTGTGAATCA  | 438.641912913682 | 0.45312925934655  |
| ACTGTGAATGAC  | 438.683717158283 | 0.498514547275464 |
| GGACCGTATGAC  | 438.689980012789 | 0.725498880544368 |
| CTTCATTATGAC  | 438.695288508396 | 0.510023425122564 |
| CACTTTGTGTCA  | 438.699169200358 | 0.481981119141416 |
| CTTACTAATGAC  | 438.714425879934 | 0.422165407478979 |
| CTATACTATGAC  | 438.735342682859 | 0.542318390209    |
| ATGATCGACTCA  | 438.744830675649 | 0.299383478754045 |
| GCGTCATGCTAA  | 438.751026143077 | 0.889724848917325 |
| TGACTTATAGAA  | 438.760038006768 | 0.811590819884775 |
| ATGACGATGAAC  | 438.787533614349 | 0.300773966578502 |
| ACGTCACATTAA  | 438.790514186888 | 0.429454376379727 |
| TCCACACAGTCA  | 438.791466830591 | 0.30798050874677  |
| TATCTTGC GTCA | 438.805342377189 | 0.489795424221486 |
| ATTTTAGATGAC  | 438.82320852611  | 0.327049938094253 |
| AGAGTCAACT    | 438.839390039565 | 0.468413309730136 |
| ATGACGTTGTAA  | 438.856572078616 | 0.373185197936113 |
| AAATATAATGAC  | 438.86745119633  | 0.646164164723254 |
| CCATCGTGAGTC  | 438.872940279363 | 0.61629633694865  |
| AGCTACACGTCA  | 438.877578688086 | 0.504163712837674 |
| ACGTTACGTGAC  | 438.879511453849 | 1.16836404993928  |
| ACGTAATGTGTC  | 438.887117741304 | 1.20375516446865  |
| AGTCACGCCCTTA | 438.894720237964 | 0.315647415978297 |
| ACGTGTTTGTCA  | 438.902243108471 | 0.435836438669406 |
| GTCATCCGTTAA  | 438.903622649279 | 0.654044151225777 |
| GACTAATTTCTGA | 438.909480425044 | 0.560573754209447 |
| TCCATCTAGTCA  | 438.922419530505 | 0.46099752769541  |
| ACAGATTATGAC  | 438.934457879905 | 0.625547485032195 |
| CGCATCCGATGA  | 438.94228179204  | 0.932377581890066 |
| GTCATATGAAAA  | 438.959705317707 | 0.567443002702493 |
| GTA CTTGACTAA | 438.998795631709 | 0.673188301234529 |
| GTCATCCAGATA  | 439.000037348879 | 0.6313112989712   |
| CTGCGATAGTCA  | 439.007572499686 | 0.657158416568119 |
| TACGAACTATGA  | 439.022121369681 | 1.01613348771336  |
| GTTCTGACTGA   | 439.027327491913 | 0.531840962987007 |
| GAGTAATCATCA  | 439.046234901893 | 0.528715533265737 |
| GCTGGGTATGAC  | 439.062783553835 | 0.648710158955987 |
| CCTATAGATGAC  | 439.087935958875 | 0.736648415564374 |

|               |                  |                   |
|---------------|------------------|-------------------|
| CGTCCCGATGAC  | 439.110905973702 | 0.668018906895454 |
| CATAGACATGAC  | 439.113659404943 | 1.0889997597722   |
| CGACAGTGACGC  | 439.142913732983 | 0.752337103033094 |
| GGGCGTTAGTCA  | 439.147188225742 | 0.294549145288065 |
| ATTTGCTCACCG  | 439.211063848019 | 0.348423075407944 |
| GACCCTTACTCA  | 439.225030495733 | 0.302985430109139 |
| GTCACCGGTCTGA | 439.244359237757 | 0.518800336774876 |
| AATTGCTATGAC  | 439.248824261769 | 0.367212150257815 |
| CAATTTGTGTCA  | 439.254671078064 | 0.759377173390233 |
| ACGACCTATGAC  | 439.284989299544 | 0.701475020090322 |
| CAGTACCAGTCA  | 439.292394074412 | 0.732144377029404 |
| GAGAGGTATGAC  | 439.31677421812  | 0.412607744655243 |
| AGTCACTTTAT   | 439.335488522193 | 0.502414168118243 |
| GTCATAAATGTA  | 439.357486445184 | 0.429864023425993 |
| GACACATGACGC  | 439.366435883341 | 0.587801954776066 |
| CCAGTAATGACA  | 439.390643588239 | 0.306991584100157 |
| GTCATCAACGTA  | 439.45062751727  | 0.266800346401259 |
| GTCATTAGGACA  | 439.484217947131 | 1.0078465183678   |
| GACTAATTACGC  | 439.489301286649 | 0.691744926951433 |
| GATTCCGATGAC  | 439.557971195814 | 0.382624916094628 |
| ACGGCACGTAC   | 439.563257601405 | 0.643428809720513 |
| ATGACGATGTTG  | 439.564300781441 | 0.281783615137016 |
| GTCATCGGTAA   | 439.567426348344 | 0.471278798744427 |
| AACCTCGATGAC  | 439.585659867762 | 0.70320968388828  |
| GTCATCTATCAC  | 439.596546245994 | 0.785180388634337 |
| CCTGATATGTCA  | 439.611789740253 | 0.784143231937182 |
| CGCCTTGACTAA  | 439.611966177623 | 0.357235263057832 |
| GTCACCTTATTA  | 439.635648165598 | 0.663482819950761 |
| AGTCACTTCTAG  | 439.659245321072 | 0.584312878011945 |
| CCGCAGATGACA  | 439.667728340149 | 0.970187303069411 |
| GTCACCTCGTGA  | 439.671195371311 | 1.00407990058255  |
| ACTCATGATGAC  | 439.678368602322 | 0.703051014130329 |
| CTGAAGGATGAC  | 439.697268377419 | 0.388911643581197 |
| TTAAATTAATAA  | 439.710372656156 | 1.04750945485021  |
| ATATGATATGAC  | 439.74842202928  | 0.649910376639299 |
| TCTTTCGACTCA  | 439.758867127921 | 0.365600854997219 |
| AACGTCAGTGAC  | 439.759431871586 | 0.730184286745172 |
| TCCTATAAGTCA  | 439.7624514179   | 0.561468225348516 |
| CAGTCACGACTG  | 439.799492723758 | 0.492723204096473 |
| AACATGGATGAC  | 439.81664484297  | 0.495103988181536 |
| TGACACGTTTAA  | 439.873767813483 | 0.484437900380452 |
| AAATTATATGAC  | 439.902898823822 | 0.675880104619161 |
| TGACTAGTAGAA  | 439.905502516164 | 0.590119723546907 |
| CAGATCGATGAC  | 439.914115268113 | 0.719256865452166 |
| TCGGCACAGTCA  | 439.928834407893 | 0.604080086188112 |
| TAGTCACGGTGA  | 439.933833428926 | 0.263121392416998 |
| ATCAAATATGAC  | 439.947352913505 | 0.438907639294926 |
| GACCGAGATGAC  | 440.032214298332 | 0.549141294146252 |
| ATACAGTGAGTC  | 440.032907539484 | 0.503373538180034 |
| CATCAAATGAC   | 440.055196710129 | 0.697412753902252 |
| ATGACGTCTTAC  | 440.055203859782 | 0.398132649042176 |
| ATGAGTCCGAAT  | 440.062074996075 | 0.263081230988594 |
| ACCGCGTATGAC  | 440.091329430646 | 0.61936670224335  |
| ATATCACAGTCA  | 440.099143953495 | 0.571988353478676 |

|              |                  |                   |
|--------------|------------------|-------------------|
| ATTAGGTCATAC | 440.099670842859 | 0.599983948556574 |
| TAGACTGCGTCA | 440.100833846574 | 0.475206978579192 |
| GGTATACAGTCA | 440.112014758949 | 1.28167625921053  |
| GCACGTGATTCA | 440.128402010698 | 0.478731054915118 |
| GACCAAGTCACA | 440.136820789993 | 0.332098038969392 |
| ATGTGAGAGTCA | 440.194659834868 | 0.755657177185443 |
| CATGCTCAGTCA | 440.227115555444 | 0.217004542297439 |
| CATTATGGCTAA | 440.360041736517 | 1.36478892069104  |
| TCATCTGTGTCA | 440.371686150785 | 0.245627358145948 |
| ATGACGTGATAG | 440.375035663835 | 0.211472675129863 |
| ACGGATCTGTCA | 440.375215637874 | 0.556804181649668 |
| GACTCACTCACC | 440.396304618848 | 0.130593824164753 |
| ATTCGTGACGTG | 440.400331620035 | 0.589398340753338 |
| TAAGATTACTAA | 440.473478465717 | 0.864211169577398 |
| GATGACTTGGCC | 440.510047196686 | 0.470976822923704 |
| ATCACTGTCATA | 440.51046016764  | 0.692411840774274 |
| ACCTTGGATGAC | 440.531299837517 | 0.393454288951774 |
| ACGTCACTTATG | 440.546984330602 | 0.424234715564508 |
| CTCTTACAGTCA | 440.569721022865 | 0.509820644214151 |
| ACAGACGATGAC | 440.604748181158 | 0.474072269940986 |
| CCACGCGATGAC | 440.60485877396  | 0.818507938709306 |
| CACCCTGACTGA | 440.623182171422 | 0.254023113140633 |
| GTCATCGGGAGA | 440.630438563107 | 0.343717205484756 |
| ATACCTGACGCA | 440.669916494961 | 0.475440372191928 |
| GTCGACCAGTCA | 440.692742172894 | 0.489138431728858 |
| GACTCTTATGAC | 440.708895667355 | 0.362311702711312 |
| GTCACACTCAGA | 440.713054643814 | 0.521314972100182 |
| AATCAACGTCAT | 440.714755907985 | 0.453577240999434 |
| CATCATTGTCAT | 440.715757981379 | 0.637369824389396 |
| ACTCGTGTGTCA | 440.721915237941 | 0.951302162149942 |
| ATGACTGGGATG | 440.725320803235 | 0.470209122802935 |
| GTCATACAGAAC | 440.754082852607 | 0.755645407772    |
| TGACGTAAGAAA | 440.759672471626 | 0.333490587732979 |
| GTCATCGCATCA | 440.769240441984 | 0.513379034800761 |
| ACGTCACCACGG | 440.776637007867 | 0.349490011285937 |
| AATCTTGTGATC | 440.787612599391 | 0.361722726249034 |
| AAATGATATGAC | 440.796801364276 | 0.23676814796064  |
| ATTGTATTAGTC | 440.826124845728 | 0.722128523729465 |
| TCGGCTTTGTCA | 440.830841140421 | 1.05571791604001  |
| GACAGGTATGAC | 440.835465295729 | 0.419670436964586 |
| CGACTTCAGTCA | 440.837848294277 | 0.583319420449203 |
| CTGGAAGATGAC | 440.838404095314 | 0.264043996133071 |
| CACACTTAGTGA | 440.845026800467 | 0.803500297548116 |
| GAGTCAGGCTAC | 440.885880172658 | 0.813136135609596 |
| GTCATCGGAGAC | 440.899419518008 | 0.42672746488384  |
| CTCCGATATGAC | 440.931436856821 | 0.387564979163663 |
| AGCCCATGACTG | 440.936735452993 | 0.403348210593393 |
| GTCACATAGGAC | 440.941713169439 | 0.597908148899566 |
| CCGCGTGAATCA | 440.953977978163 | 0.95436080080142  |
| GCCGCTGTGACA | 440.960272613151 | 0.595498017426425 |
| ATAAAGGATGAC | 440.98866994745  | 0.250081269284931 |
| AGTCACCCTAAA | 441.016715047832 | 0.146841152876466 |
| GATTCATGACGC | 441.019428615422 | 0.58958837743214  |
| CGGCTACATGAC | 441.039044123643 | 1.35541880567138  |

|               |                  |                   |
|---------------|------------------|-------------------|
| AGTCAGTGACGC  | 441.058833237843 | 0.155795639180754 |
| CTGCTATAGTCA  | 441.077894784671 | 0.482995721575416 |
| AATTCTTCGTCA  | 441.082808044079 | 0.551116995285805 |
| CATATATGTGAC  | 441.083012034998 | 0.800859580568942 |
| AGTCACTCTTTG  | 441.101000344732 | 0.488539287661722 |
| TCAGATGACCGA  | 441.130567627908 | 0.778509438116195 |
| CCTTATACGTCA  | 441.139838572868 | 0.31994999084508  |
| ACCGAAATGACG  | 441.14266528025  | 0.439454435891012 |
| TCATCTGTGACA  | 441.17672962996  | 0.434997380247467 |
| CCCCGGTATGAC  | 441.17819300495  | 0.520416783974443 |
| CTGCAAAATGAC  | 441.178434044878 | 0.894926939842327 |
| AGATTGCGTAAT  | 441.196381615353 | 0.268755253982997 |
| GCAACCTAGTCA  | 441.209927970727 | 0.797811485631699 |
| ACAGCATGACAC  | 441.210079488225 | 0.401755343045483 |
| TGAGTCGTCTAA  | 441.225233212307 | 0.695739928336425 |
| CGCCGTGATTCA  | 441.232982166957 | 0.587564072002458 |
| CATACGGATGAC  | 441.268783393481 | 0.484893089033321 |
| ACGTCACCCTTA  | 441.276458103472 | 0.305627675325937 |
| ATGACGGAGCCA  | 441.281806401711 | 0.603997764782167 |
| CATCCGTATGAC  | 441.319287208399 | 0.213675652011113 |
| ATCGTTAATGAC  | 441.338938158419 | 0.778714616173002 |
| GTCATACGAGAC  | 441.366798887329 | 0.483451744240741 |
| ACGTCACCGGAT  | 441.386534011719 | 0.693097893307778 |
| CACATTGATGAC  | 441.387164415712 | 0.483517177362545 |
| GTCATCGGCCAA  | 441.403707828461 | 0.657950437128688 |
| ACACTGACGTCA  | 441.409526348983 | 0.484981540974175 |
| CTGGCAGAGTCA  | 441.41429469926  | 0.383669937225604 |
| CTTGCTAGTCA   | 441.426150562252 | 0.613041522935934 |
| CGTGCCGATGAC  | 441.444165298311 | 0.718211580761024 |
| AATATAAATGAC  | 441.451387054959 | 0.585129194197245 |
| GTCATAACCATA  | 441.454736722001 | 0.489147928310123 |
| TGACTATAGTAA  | 441.480025911423 | 0.978737022412393 |
| TCTAAGCAGTCA  | 441.485854508967 | 0.615433910061412 |
| GTCATTCTGAAA  | 441.491765290372 | 0.942320917462682 |
| AGAGTCAGGACC  | 441.502915101865 | 0.813723537055063 |
| TATATTTTCGTCA | 441.540805755771 | 0.474128939487721 |
| CCCTACGATGAC  | 441.566087941813 | 0.307864394123469 |
| ACCGAGATGACG  | 441.589908179383 | 0.216635465630658 |
| GCTATTTATGAC  | 441.596383173321 | 0.454503683437835 |
| ACTTATCTGTCA  | 441.618274427867 | 0.400716679245864 |
| CTTTCTGAATCA  | 441.620000091337 | 0.302378558029944 |
| CCGAGATGTGAC  | 441.625320978657 | 0.646210118063476 |
| CGTACCGATGAC  | 441.632051203262 | 0.452654091274488 |
| CGCTCGTACTA   | 441.635493967553 | 0.418132965873273 |
| AGTCACTACATA  | 441.649666983028 | 0.388432626015022 |
| ACAGTTCGTCAT  | 441.654802140611 | 0.310203859912451 |
| GAAGCGTACTA   | 441.65542839269  | 0.439603957404042 |
| CGATGCGAGTCA  | 441.708028598452 | 0.499394708296203 |
| ACGTGTGAATCA  | 441.72175466901  | 0.318190633817189 |
| CGTGTGATGAC   | 441.734152031879 | 0.748357801126381 |
| CCATTGACTCA   | 441.795272164289 | 0.415705094420145 |
| GCGGAAATGAC   | 441.800582575307 | 1.35535401094653  |
| ATGACAGAGTGA  | 441.818171137997 | 0.301591124315746 |
| CTTCAGGAGTCA  | 441.830916679921 | 0.722101482216793 |

|               |                  |                   |
|---------------|------------------|-------------------|
| CGGCCTAGTGAC  | 441.88276303574  | 0.940177694080579 |
| CATACTGCGTCA  | 441.884299104571 | 0.732153959665917 |
| CGCGCTGGTGAC  | 441.906703139044 | 0.824449736339673 |
| GCTGTAGACTCA  | 441.941255173384 | 0.753070229957664 |
| AGTCACCTTTCG  | 441.965242622153 | 0.217020863651466 |
| GTCACACTGGAA  | 441.983894941583 | 0.49722328464124  |
| AGTCATGAGGTG  | 441.988910946288 | 0.208224544042281 |
| ACTAGCTATGAC  | 442.006205597602 | 0.88032335015468  |
| GTCATCGTCCGA  | 442.016748003538 | 0.582167845747944 |
| GTCATTCCATAA  | 442.019255483951 | 0.733656944310634 |
| GTCATCTTTAGA  | 442.031484330318 | 0.480729485141783 |
| ATCTCGTCATGA  | 442.0477675485   | 0.923848609521331 |
| TAGTATACGTCA  | 442.052536992864 | 0.364915738851691 |
| CCAATCGATGAC  | 442.085557305954 | 0.424630238377164 |
| GTCATAAGTTAA  | 442.088950684415 | 0.665093583353786 |
| ACATGTAATGAC  | 442.10570956984  | 0.438616192591591 |
| ACACCTGTGTCA  | 442.215471192923 | 0.617325325387415 |
| AGAGATTATGAC  | 442.260833309374 | 0.250733183659088 |
| GTCACAATGTGA  | 442.280915204091 | 0.420997000224768 |
| AACTTCTATGAC  | 442.306973932741 | 0.733531610731201 |
| CGTAGTGATGAC  | 442.338798631815 | 0.830486100264558 |
| AGTCAGATCTGA  | 442.349220302042 | 0.54195997218664  |
| CCACCGAGTCAC  | 442.441280508772 | 0.269329668805524 |
| CATACCTATGAC  | 442.446809746867 | 0.580993641187661 |
| GTCATAGGGCCA  | 442.466128915398 | 0.524103098469801 |
| ATCGACTAGTCA  | 442.507079964906 | 0.851859147532317 |
| AGTCACTCTTGG  | 442.537761386959 | 0.212870145753908 |
| CCTCTTGC GTCA | 442.561781034337 | 0.381079741333245 |
| ATGACAAAGTGA  | 442.582592108419 | 0.308265018271511 |
| ATTTGTTATGAC  | 442.607564475134 | 0.364368647731386 |
| GAACACATCATA  | 442.62862858386  | 0.228504920639693 |
| CATATCTATGAC  | 442.631520262769 | 0.545794479518967 |
| GACGTCAATGAC  | 442.711474477861 | 0.669355515540541 |
| GTCATAACACAA  | 442.72252020326  | 0.629221271037518 |
| AGAGCTGTCATA  | 442.73161522914  | 0.364977423633752 |
| CTAGACGATGAC  | 442.778042885195 | 0.385695346865027 |
| GAAAGTTATGAC  | 442.78519476777  | 0.395967698941638 |
| CGCGGCGTCATA  | 442.815124033572 | 0.20991586960654  |
| GCACGGTATGAC  | 442.819222451148 | 0.560601734685147 |
| GCCTAGCAGTCA  | 442.824398909709 | 0.719318591701059 |
| GTCAATCCGTCA  | 442.825587122981 | 0.459358040822423 |
| GGAAATTCGTCA  | 442.911381534698 | 0.545441377074518 |
| GTCAATGTCATA  | 442.975443569589 | 0.472261513418964 |
| CTTTCATAGTCA  | 443.000592318502 | 0.672367885009938 |
| GTCATTCTCTAA  | 443.045516563088 | 0.57469605790008  |
| GGAAATACGTCA  | 443.048274803963 | 0.492905603469325 |
| AGTCAGCTGACT  | 443.071080428895 | 0.859521350620699 |
| CTTCGTGTGTCA  | 443.095313126936 | 0.613739213270168 |
| AGTAGTTATGAC  | 443.122590091621 | 0.5070295400837   |
| CCAGTATTAGTC  | 443.127154831728 | 0.609603889393622 |
| CGGTTTACGTCA  | 443.142365979648 | 0.74862892699234  |
| CGGCAGTGAGTC  | 443.147846039868 | 0.7690450698331   |
| AGTCAGAAGTGA  | 443.148270261578 | 0.326683397347647 |
| GTCATCGGAGCA  | 443.149461938575 | 0.500268558389337 |

|               |                  |                   |
|---------------|------------------|-------------------|
| CCCATGTATGAC  | 443.158743610232 | 0.597193787286662 |
| GTCATCAATTTA  | 443.20894301545  | 0.418279153649401 |
| GTCATGATTAAC  | 443.209401304966 | 0.566597428586977 |
| CGCTGTGATGAC  | 443.21020082253  | 0.889844724176223 |
| AATTATCTGTCA  | 443.227542409976 | 0.693990684145911 |
| CATGTTTTGTCA  | 443.231446431834 | 0.570476606439716 |
| GGTCATCGTGAC  | 443.254449118185 | 0.537609733047338 |
| TGACTAGATTAA  | 443.313329802724 | 0.770144863923242 |
| GTCACGGTCTGA  | 443.330012551469 | 0.870366997331103 |
| CGACATACGTCA  | 443.348853202388 | 0.585976198283322 |
| GTCATACAAACA  | 443.377032471696 | 0.454214636622739 |
| CAGTGACTCACG  | 443.398694418785 | 1.02543810496724  |
| TGACTCGTTTAA  | 443.409078447521 | 0.610968291281496 |
| ACGTCACGATTG  | 443.423315955284 | 0.574961047561209 |
| CCGTGTGATGAC  | 443.423470237319 | 0.647797232751032 |
| CGAAAGTGAGTC  | 443.432109942654 | 0.277116728328373 |
| CTGATGGAGTCA  | 443.443092639809 | 0.864446524658081 |
| CTTCTTACGTCA  | 443.462568390773 | 0.317289920002285 |
| GATGACTTGTCA  | 443.491097116045 | 0.378651868520176 |
| CAATTAATGACA  | 443.502786442229 | 0.723563402792612 |
| CTTCACTATGAC  | 443.508708027884 | 0.33741882458368  |
| GTCACCACGAAA  | 443.512058845716 | 0.769078023953589 |
| TGAGTAAGCGAA  | 443.514145819926 | 0.416068361321762 |
| CACGTCACTATA  | 443.524310039197 | 0.500032992952785 |
| AAATCTGTGAGA  | 443.531760798497 | 0.554262641655551 |
| CTTTATGATGAC  | 443.551215730764 | 0.52430074103139  |
| AGTCACCTCCGG  | 443.558602044413 | 0.583139409759247 |
| ATTGGTAGTCAC  | 443.584568924326 | 0.554462695296858 |
| GATTACGCAACA  | 443.589081252132 | 0.363615480626561 |
| CGTCACGTATGA  | 443.594840649227 | 0.904015762833721 |
| GGTAAAGATGAC  | 443.634694682211 | 0.422270582673997 |
| GTCATACGGTAA  | 443.637645494559 | 0.148630800537477 |
| GTCATCGTGCGA  | 443.674235422419 | 0.577876850374479 |
| CTCATTGATGAC  | 443.675764987445 | 0.796710669804871 |
| GTCATAGATCAA  | 443.682521267745 | 0.587065666334958 |
| GCTCACGAGTCA  | 443.693269494446 | 0.63737796733139  |
| ACTCATCGAGTC  | 443.725289896525 | 0.869666653065174 |
| GTCATACCTGA   | 443.734560419052 | 0.594555627451964 |
| AGTCACTTGAAG  | 443.759255776735 | 0.508788754747599 |
| ATAAGCGATGAC  | 443.76867232957  | 0.369952481313378 |
| TCTTATTGCTCA  | 443.783571906435 | 0.421898926260014 |
| GTCATTTTCGGAA | 443.803074199692 | 0.412317689365097 |
| AGCAGTAATGAC  | 443.836564880511 | 0.733323269200131 |
| TGATTCACTTAA  | 443.859650914989 | 0.534857306057616 |
| AGTTGGTATGAC  | 443.860700228973 | 0.16101832808094  |
| ACGTCATGTTTCG | 443.870621680064 | 1.07573697151499  |
| AACTTAGATGAC  | 443.878523491896 | 0.833544816098033 |
| TAGGCTTACTCA  | 443.937197603762 | 0.800470953665843 |
| ACGATCAGTGAC  | 443.958421646925 | 0.443564069531803 |
| CTCTGCGAGTCA  | 443.968766548746 | 0.363911812121285 |
| ACTGGGTATGAC  | 444.002479304689 | 0.579238790215783 |
| CACGTCACGTTA  | 444.014137647757 | 0.524146121001398 |
| CATGGCGAGTCA  | 444.048565365687 | 0.532644581413751 |
| CCTAGCGAGTCA  | 444.050686613265 | 0.914615230796858 |

|              |                  |                   |
|--------------|------------------|-------------------|
| AACTCAATGACG | 444.071166831594 | 0.442584712843963 |
| TAGCTACAGTCA | 444.077695785782 | 0.714437121441812 |
| ACTCATAAGTCA | 444.092617690285 | 0.554913211348208 |
| ACTTACTATGAC | 444.096455203552 | 0.480210982642067 |
| TCAAATCCGTCA | 444.098308042911 | 0.481277252096581 |
| CCTGATAAGTCA | 444.10164227345  | 0.457353294148426 |
| AACCGTTACTCA | 444.102896067207 | 0.598295065759626 |
| AAACCTGTGTCA | 444.118724021904 | 0.595526004779455 |
| CATGTTAGTGAC | 444.123560799937 | 0.712259289661207 |
| CGATCCGATGAC | 444.127202431336 | 0.793885796643801 |
| CGGCCTGATGAC | 444.157019741728 | 0.748466638847148 |
| GGCGAATATGAC | 444.163223340212 | 0.599656843866932 |
| CGAGTGTATGAC | 444.169877995482 | 0.623566258681508 |
| ATTGCGTAATCA | 444.179379356064 | 0.323456321577215 |
| GAGATCGATGAC | 444.195525254496 | 0.446231230749661 |
| GCTGTCTAGTCA | 444.244503375606 | 0.875760509397493 |
| TGACTCCAATAA | 444.274549364613 | 0.483274239606224 |
| CCCAACTATGAC | 444.282346242362 | 0.528084315116391 |
| GTCATCTTCTGA | 444.284272402388 | 0.515305062130618 |
| AAATCGGAGTCA | 444.345953796848 | 0.531717462216935 |
| ATGACACTCATA | 444.350906716118 | 0.297759525180514 |
| GGGTACTATGAC | 444.369717714604 | 0.133067142780051 |
| CATAATGTCATA | 444.408558653424 | 0.777330207222119 |
| ACTAGCGAGTCA | 444.415118446803 | 0.456895705143883 |
| GTCATCGTTTGA | 444.415355760683 | 0.486304720052216 |
| TGAGTAAGTCCA | 444.425308956498 | 0.404897227487512 |
| GAGTCGTATGAC | 444.426939134532 | 0.339195477899602 |
| TGCTTGACTAAA | 444.459694160625 | 0.357957018140512 |
| AGACTCTGTGAT | 444.463632790768 | 0.47562994181958  |
| ACGTGGAATGAC | 444.472539139705 | 0.538513727319106 |
| ACCTGAGATGAC | 444.475544262    | 0.562348662002742 |
| TGAGTAAGTAAA | 444.480253781789 | 0.260536079951651 |
| AATATTATGTCA | 444.519445101258 | 1.38190829599293  |
| ATGATTTGCTCA | 444.546111216501 | 0.735422880153092 |
| TGAGTAAAAGCA | 444.561251366833 | 0.267108916710192 |
| ATATTGTAGTCA | 444.561504004074 | 0.710489535586244 |
| TACACTGTGTCA | 444.568799933083 | 0.388412405723563 |
| AGCCCGAGTCAC | 444.576583538275 | 0.619714144070849 |
| ATCATATATGAC | 444.592662056298 | 0.487522806281837 |
| GTCACACTGTCA | 444.610649168968 | 0.489284659693843 |
| CATCATTGACTC | 444.674403058729 | 0.307017896216875 |
| CCGTCTACGTCA | 444.684869195394 | 0.54398805546844  |
| TACGTTTACTCA | 444.70386948046  | 0.737560185500931 |
| GTCATCAAAGCA | 444.710232403954 | 0.668924347802505 |
| CGTAACTGTGAC | 444.710724483039 | 0.641504373218659 |
| GTCATCCCTAGA | 444.71857527974  | 0.322523308904783 |
| AGTCACTCCGAC | 444.792189504195 | 0.300590950582356 |
| ATGAGTCCCTAG | 444.796495275568 | 0.366206522367935 |
| ACAATTGACTCT | 444.800882500169 | 0.429548253965413 |
| AGTCACTTGAT  | 444.816452338653 | 0.253740431058105 |
| CAGCAGATGACA | 444.827274917597 | 0.931996212991501 |
| TGACATCCGTCA | 444.832483973685 | 0.389858629940626 |
| TCTGACGACTCA | 444.836671232521 | 0.487590863798214 |
| TGACAACTGTCA | 444.869081766637 | 1.17778423173154  |



|              |                  |                   |
|--------------|------------------|-------------------|
| CTTGTAGACTCA | 444.884397139827 | 0.65702160912678  |
| AGAGAGTGAGTC | 444.886722809105 | 0.410205314655686 |
| GGCCAAGACTCA | 444.917380074897 | 0.722537466837005 |
| AAACTGTGCAT  | 444.953742550995 | 0.462273127445975 |
| CAGTTCCAGTCA | 444.981531498592 | 0.581192403649818 |
| ACGTAGCAGTCA | 444.985471484275 | 0.538905533399346 |
| AGTCACGGCAGA | 444.989910624772 | 0.207500451876312 |
| GTCATAATTAAC | 445.005770361893 | 0.257886381165488 |
| ACGCATTCGTCA | 445.018733235739 | 0.466555227640449 |
| ACGTCATGCTGA | 445.030724971382 | 0.539460648902522 |
| GGTCCGCATGAC | 445.046699704784 | 0.880110075206443 |
| GTCATAGGGTGA | 445.051055914728 | 0.289017647652269 |
| GTGACGGAGTCA | 445.058251917186 | 0.396615143533288 |
| ATGACAAAGATA | 445.065566896068 | 0.28522276569834  |
| TGACAGATTCAA | 445.068162349512 | 0.922404001025137 |
| AGAAGAGTGACT | 445.075290893617 | 0.246355371137538 |
| ATCAACCAGTCA | 445.104451556612 | 0.623532376582523 |
| CACGCCGATGAC | 445.108921169026 | 0.565524916715788 |
| CACAATTGACTC | 445.169705958175 | 0.433990872805428 |
| CTTTAAGTGTCA | 445.191119273966 | 0.673237495474226 |
| ACGCTCGAGTCA | 445.218134070207 | 0.613086815257003 |
| TGACGTAGTCAA | 445.252970398177 | 0.73274246089407  |
| ACGCTAGAGTCA | 445.281268937251 | 0.96465866383697  |
| CGTAGTTATGAC | 445.317631280498 | 0.396228160729684 |
| TGAGCAATATAA | 445.335595307294 | 0.62765555865397  |
| GTCATTCGTATA | 445.360342545068 | 0.703152216784205 |
| AGTCATGGTTTG | 445.431787293155 | 0.678190565974784 |
| GACAACGATGAC | 445.488471071552 | 0.516439828240178 |
| TCGCCTCGGTCA | 445.495304654834 | 0.509233118001446 |
| ATGACGTTGATG | 445.496904048381 | 0.146286428071915 |
| CGTAAATTAGTC | 445.516037066513 | 0.457748922357619 |
| AATTGATATGAC | 445.524902796608 | 0.532440188568561 |
| TGAGTCCTAGAA | 445.533187475962 | 0.69952564839444  |
| ACCTTATATGAC | 445.537027925965 | 0.690150796088235 |
| GACATGTATGAC | 445.550589106425 | 0.614133257517534 |
| ATGACTAGCTGA | 445.56793343303  | 0.559026550936932 |
| GTCATAGTAAGA | 445.581998729025 | 0.426698447311327 |
| GTCATCGTAACA | 445.601688421541 | 0.350710135339851 |
| GGTACCAGTCA  | 445.638002131401 | 0.616954195599638 |
| AACCTGTAGTCA | 445.660982794073 | 0.604654925189797 |
| CCCTTGATGAC  | 445.690647380689 | 0.576755286106308 |
| GAAAATGTCATC | 445.693100411356 | 0.508695870058294 |
| GTCACACGTATA | 445.707887093395 | 0.534560835723266 |
| CGTAGCGATGAC | 445.726314005546 | 0.6315491544124   |
| CGCAGCGATGAC | 445.730126847222 | 0.8192873604404   |
| GTCATTTCCGGA | 445.745941336316 | 0.598784380727712 |
| ATGACAAAGCAG | 445.747393249086 | 0.294968143990803 |
| ATGACCGGTGAC | 445.76725202489  | 0.504470019492367 |
| AATCTGTAGTCA | 445.771045436638 | 0.857738395758674 |
| GTCATCCTGACA | 445.784435657615 | 0.426352590953178 |
| GATGTGTATGAC | 445.799565463097 | 0.410880281018211 |
| GATGAGTAGTCA | 445.814960418699 | 0.315914042941021 |
| CAGTGGTATGAC | 445.83627393236  | 0.964745263467037 |
| GTCATAAACTTA | 445.858552827291 | 0.5681164692382   |

|               |                  |                   |
|---------------|------------------|-------------------|
| TCAGTCCAGTCA  | 445.860000370567 | 0.414142027558101 |
| CACGTCACTGGG  | 445.862178371702 | 0.492579391510747 |
| ATGAAAGATGAC  | 445.873671714449 | 0.667963156141433 |
| GTCATATATGAA  | 445.909408169756 | 0.873149552214429 |
| GCCTGGAATGAC  | 445.927135740334 | 0.516167811275025 |
| AGAGTCAGCGCA  | 445.951694073133 | 0.483405231132271 |
| CGCACATATGAC  | 445.97515603647  | 0.596782514053521 |
| ATTAGGTCATCC  | 445.987015317331 | 0.593228088417561 |
| ACTTTCGACTCA  | 445.992876882099 | 0.409615113408847 |
| AGAGTTTACTCA  | 446.028464608692 | 0.654218525599207 |
| ATCGCTGCATA   | 446.047571977887 | 0.124611841530243 |
| GTGACTAGCCCA  | 446.054691506484 | 0.290959532098116 |
| GACTCGTATGAC  | 446.066328107155 | 0.511564049404019 |
| TCATATCTAAGA  | 446.067750129622 | 1.03478185592422  |
| CGAGGCGTCATA  | 446.069866374317 | 0.207863931933948 |
| CGGACTTATGAC  | 446.082088385844 | 0.639589617250408 |
| CCTGAAGATGAC  | 446.093735724118 | 0.875997545573976 |
| ATAAATAATGAC  | 446.094569457526 | 0.31899180221354  |
| CGTCATCGGCAC  | 446.156994929554 | 0.542666170054873 |
| AGAGTCAGGAAT  | 446.18691275061  | 0.356500890015479 |
| ATGAGTCCCAGG  | 446.208513354913 | 0.500704919709367 |
| GAATTTGCGTCA  | 446.212123205195 | 0.37953197018889  |
| CACGTGGTGACA  | 446.22062302897  | 0.600453917848372 |
| CGCCTAGATGAC  | 446.243082333294 | 0.231023675931661 |
| CTCGCTACGTCA  | 446.247541241348 | 0.328493630331057 |
| GGAACCTCGTCA  | 446.270232298574 | 0.6770604981855   |
| ATTATCTAGTCA  | 446.286335238368 | 0.579338458490735 |
| CGTCATCGGCAG  | 446.306698596131 | 0.839215952535212 |
| GGCGCTTAGTCA  | 446.34598203471  | 0.671413552124386 |
| ATTCTGTGTGAC  | 446.381085728    | 0.497894286564123 |
| CCTGCACAGTCA  | 446.411045985357 | 0.543063786504209 |
| ATATCCGATGAC  | 446.424958798573 | 0.562322484347592 |
| CGTTTCTATGAC  | 446.425036699483 | 0.555706236955456 |
| GTGATGGAGTCA  | 446.458436840414 | 0.318832734924245 |
| ATCACGGATGAC  | 446.485257003753 | 0.635492429443492 |
| GTCATTGAGTAA  | 446.496891585946 | 0.374463143960559 |
| GTCATCTTAAAA  | 446.513611016542 | 0.561798922841397 |
| ATATCCTATGAC  | 446.518097317314 | 0.623068044855168 |
| AGTCATGAGTGG  | 446.527892175237 | 0.490279053427596 |
| AGGTGAGCAAAT  | 446.568839370139 | 0.29833971040724  |
| ATTGCGTAATCC  | 446.584900523944 | 0.558756946358625 |
| TGACGTATCACA  | 446.584971836476 | 0.533331557757864 |
| GACTAATTATTA  | 446.603647253043 | 0.666501268183641 |
| GCCAGGAATGAC  | 446.614685313454 | 0.527186588507837 |
| ATGTGTCAAAGAA | 446.62376149098  | 0.402091509073156 |
| TCAGATGGGTCA  | 446.623770785766 | 0.115821718838976 |
| GTATTTGTGTCA  | 446.631690990761 | 0.56996766559169  |
| CTTCAGATGACA  | 446.641137475341 | 0.225069117710391 |
| ATGACGCGCACC  | 446.662414442262 | 0.660670715602094 |
| ATGACAGAGACC  | 446.663806454797 | 0.401107733650272 |
| TCTTACGCGTCA  | 446.6866731264   | 0.13643280333887  |
| CCGTGTTATGAC  | 446.697557072754 | 0.708669136969182 |
| CGCGTATATGAC  | 446.71576046078  | 0.761944639592208 |
| GTCATCGGACTA  | 446.725494373236 | 0.454724492478674 |

|               |                  |                   |
|---------------|------------------|-------------------|
| CTGCGTGAATCA  | 446.767111681121 | 0.545979396672862 |
| CTCATTTTCGTCA | 446.76737270199  | 0.291930338657263 |
| GTCATCTTGGGA  | 446.769561338291 | 0.651575477993179 |
| GTGACTCGCTGA  | 446.814897061819 | 0.660332235705993 |
| GTCATATCGTTA  | 446.827826443672 | 0.485822788391616 |
| ATGACTTCGATG  | 446.839351471076 | 0.48013469393866  |
| CCAAGCTGTGAC  | 446.852124046654 | 0.922113820851033 |
| AGAGGCGTCATA  | 446.853219774949 | 0.240237267221888 |
| AGTACCGTCATA  | 446.854724428721 | 0.460536432042391 |
| CTGACGTCAGGA  | 446.867777355732 | 1.25596248579132  |
| ATGAGTCGGTTG  | 446.919157159285 | 0.475171017557266 |
| TGACTTATATAA  | 446.927214885471 | 0.559647168222603 |
| GCTTTTGTGTCA  | 446.958726238527 | 0.559982775864982 |
| AGTCACGCGTAC  | 446.962535040927 | 0.689217162023176 |
| CGTCTGAATGAC  | 446.982914487678 | 0.849724037641899 |
| TGACAGATTGAA  | 446.987938128588 | 0.316318752023389 |
| GACAACATGAC   | 447.00375658734  | 0.9189146988023   |
| TGACGAAATACA  | 447.028519399622 | 0.417074238936177 |
| CCCATGGATGAC  | 447.04093402109  | 0.767348501824771 |
| AGTGTGGAGTCA  | 447.049705486101 | 0.327258109666194 |
| AGCTTGAGTAAT  | 447.055301837466 | 0.421434080580142 |
| GCAAATCTGTCA  | 447.057400838202 | 0.661250910770245 |
| AAAGTTTGACTC  | 447.105945765355 | 0.461352060444264 |
| GTCACCGTTCGA  | 447.106352724353 | 0.711616299805666 |
| CACTACCAGTCA  | 447.113091353717 | 0.498394704403168 |
| TCACTATAGTGA  | 447.151720562825 | 1.44275015028816  |
| CCTAATCTGTCA  | 447.17292805175  | 0.647069591778265 |
| CTAATGGATGAC  | 447.190047328141 | 0.692090161981813 |
| ACAATTATGTCA  | 447.192397151619 | 0.688524869663089 |
| TCGAAAGTGTC   | 447.193210585277 | 0.82574404107793  |
| GAGATGTATGAC  | 447.222292122673 | 0.199479783641707 |
| TGTCACGCGTAA  | 447.23366051379  | 0.773740353985973 |
| CATCTATTAGTC  | 447.279850842519 | 0.845740475195531 |
| CGTCAGGATGAC  | 447.288164843773 | 0.614568731657695 |
| GGGACCTATGAC  | 447.311934532316 | 0.404240475684794 |
| ACTTTACAGTCA  | 447.323693884872 | 0.229470402498634 |
| CCGAATCCGTCA  | 447.328180042938 | 0.316104496496503 |
| CTATATTATGAC  | 447.329106614238 | 0.648958006617556 |
| GTGACGCGGTCA  | 447.336581164342 | 0.270836927689587 |
| ATGAGAGTCAGA  | 447.345728630432 | 0.215621487100169 |
| GTGTCACAAAA   | 447.351438286461 | 0.71041687948772  |
| GTCATCCTCAGA  | 447.353594394662 | 0.516902463422694 |
| CGATCATGACAC  | 447.362935816582 | 0.458457871199528 |
| ATAAACAATGAC  | 447.3652821404   | 0.660431727121222 |
| AGATCCTATGAC  | 447.414070670565 | 0.692223673452713 |
| GTACAAAATGAC  | 447.418363575021 | 0.356748446307496 |
| AGACTCACGAAT  | 447.454840862849 | 0.548493773429856 |
| ACGTTTGTCAT   | 447.472631338245 | 0.174046648253508 |
| AACCTTGACTAA  | 447.489363247018 | 0.25985534553678  |
| ACTCATGGTGAC  | 447.498756449067 | 0.710606615902603 |
| TGACGGATTGCA  | 447.505963543255 | 0.644277307771621 |
| CAACTGAATGAC  | 447.506589542752 | 0.473133390804013 |
| CGATTACGAGTC  | 447.508797587971 | 1.35320772035074  |
| GCTGTCCAGTCA  | 447.52348767002  | 0.52161421842296  |

|               |                  |                   |
|---------------|------------------|-------------------|
| TCGTTACAGTCA  | 447.529838148479 | 0.54023124866911  |
| GAAGAAGATGAC  | 447.546287918851 | 0.220693009744233 |
| CTCAATTGACTC  | 447.57826840757  | 0.450467663355163 |
| CTAATTTTCGTCA | 447.588203717012 | 0.376313371510074 |
| GTCATACGTTGA  | 447.620129051889 | 0.533960090216885 |
| GTCATAGCACTA  | 447.663272299938 | 0.598525287708048 |
| ATGACGCCGCGA  | 447.686144510342 | 0.425169723755854 |
| GTATAGAATGAC  | 447.690566125662 | 0.218201473861698 |
| ATGACGAGCTTA  | 447.711055978953 | 0.407587361173863 |
| GTCATCCTAGGA  | 447.727436704081 | 0.83548846935576  |
| TGACTGGACAAA  | 447.741222144949 | 0.738358261220389 |
| CACGAAATGACA  | 447.757585201937 | 0.454893852985896 |
| ATATATTGTGAC  | 447.761676846782 | 0.695270644252074 |
| TCACAAGTGTGA  | 447.774571427036 | 0.653742425537195 |
| CTTAATGGGTCA  | 447.781143748446 | 0.529931157721706 |
| CAGAACATGTCA  | 447.794676445164 | 0.779735638451289 |
| CCTCGAATGACG  | 447.799142834133 | 0.607972419512935 |
| ATGAGGTCATAC  | 447.816120477463 | 0.277019056753484 |
| CTGTCATGTGAC  | 447.831547236252 | 0.783002683601605 |
| AAGAGTGAATCA  | 447.84536784437  | 0.300466731618469 |
| GTCATCATTCTA  | 447.852541469208 | 0.514003921996433 |
| AAATATTGCTCA  | 447.852591141438 | 0.656677732681854 |
| ATGACAGAGCCG  | 447.858595084974 | 0.34653153739673  |
| CACTGGTATGAC  | 447.864738408626 | 0.598261857154977 |
| AGTACATATGAC  | 447.865854063128 | 0.288950542989748 |
| AAGCCCAGTCA   | 447.867875140772 | 0.471295276280942 |
| ATGACGTTACAG  | 447.891890426624 | 0.462579791602054 |
| AGGTACTGTCAT  | 447.928382320454 | 0.149230068929764 |
| CTCTCCGATGAC  | 447.956596434376 | 0.5666835828275   |
| AGTTTCGATGAC  | 447.96496619552  | 0.638806007905683 |
| CCAGCTCAGTCA  | 447.972007495556 | 0.359011433495169 |
| CATGGCGATGAC  | 447.97930659103  | 0.400348599876293 |
| TGACTGGTAACA  | 447.988475240093 | 0.853592499829096 |
| ATGACCTAATGA  | 447.999590162535 | 0.855116343814536 |
| ATGACGAGGTTG  | 448.02257361603  | 0.415586553807745 |
| CTGGCTTATGAC  | 448.04953578174  | 0.67786999373017  |
| CATTGGTGACGC  | 448.055858051923 | 0.436774188976407 |
| ATGACAGTATAG  | 448.083174552121 | 0.118844731189338 |
| GTCATTTCGAAA  | 448.087769995072 | 0.391368923415556 |
| ATACACTAGTCA  | 448.092900074251 | 0.743321246606742 |
| ACACGTAGTGAC  | 448.126099341358 | 1.23019986890704  |
| GTCACCCGGCTGA | 448.203112703705 | 0.90562872059802  |
| GTTTCGGAGTCA  | 448.216297423709 | 0.663108636148737 |
| GCGGCTGATGAC  | 448.217837611368 | 0.393877560657994 |
| GTCATTTGTTAA  | 448.248622031323 | 0.590062736163904 |
| AGTCACTCTATG  | 448.262783009331 | 0.900323842225143 |
| ATGAGTCCGTGA  | 448.322777184743 | 0.383386480975948 |
| TGCCTAATGACA  | 448.324883960245 | 0.597118875984361 |
| ATGAGTACGACC  | 448.331271161513 | 0.576089059552616 |
| CTGTAGTGTGAC  | 448.331703516687 | 0.385273720805229 |
| TACACTGTCATA  | 448.340342031185 | 0.144683032608081 |
| TCACCTGGATGA  | 448.35056395273  | 1.36482188433246  |
| CTTGTGGATGAC  | 448.352709294323 | 0.548068121800032 |
| CCGAATCTGTCA  | 448.384446567412 | 0.403838938581499 |

|              |                  |                   |
|--------------|------------------|-------------------|
| CAATTAATGAC  | 448.38507475557  | 0.547617710705044 |
| ACCGATCTGTCA | 448.386631750486 | 0.370560203884712 |
| ATGACGTTGTCG | 448.387353484216 | 0.521828536540609 |
| TCATAGTCGTCA | 448.402568134115 | 0.815528227425888 |
| CGTCATTTATGA | 448.403807891738 | 1.02166645302633  |
| TATACTGCGTCA | 448.419384349316 | 0.286209530941104 |
| ATTATGGAGTCA | 448.420678005241 | 0.522641228884702 |
| GAGTCAGTTCTA | 448.435340611946 | 0.276929992846965 |
| CTTATTTATGAC | 448.460080784972 | 0.548806584691181 |
| AGCCACGAGTCA | 448.4715013628   | 0.563502623060481 |
| TAGTCACGCCAA | 448.488707156231 | 0.491188418446533 |
| CGCGTAAATGAC | 448.498266259541 | 0.678983587153542 |
| ACATTCGGTCAT | 448.516916903317 | 0.60900926272504  |
| ACTCATAGGTAC | 448.543776880006 | 0.835771839704006 |
| AAAGAGTGAGTC | 448.554303964481 | 0.339732027988924 |
| GACTCACGATTA | 448.583375963708 | 0.473840810295334 |
| ATGACTGGGAGC | 448.591072321062 | 0.31300761487561  |
| ACTACCATGACT | 448.624239874428 | 0.508661808442798 |
| GTCATAGACCTA | 448.683994673548 | 0.78225189806054  |
| CCGAACTGGTCA | 448.696372655315 | 0.814714334785146 |
| TAAAATATGTCA | 448.728799319919 | 0.512318408900277 |
| ATGACACGGATC | 448.732834478084 | 0.416558372628248 |
| CATACTTACTCA | 448.765396760154 | 0.419084673546416 |
| ATATACTGACTC | 448.783463432693 | 0.521046164251866 |
| GACCGGTATGAC | 448.831970662776 | 0.225583985763041 |
| AGAAACTATGAC | 448.844153373629 | 0.300075373643959 |
| ACATTGGAGTCA | 448.852095982413 | 0.510957008728983 |
| CCTAATTCGTCA | 448.855250510547 | 0.726678164445617 |
| GAGTCAGTTAAC | 448.882325811747 | 0.502128381441098 |
| ATGATATATGAC | 448.892107866443 | 0.49160104851868  |
| AACACAGAGTCA | 448.90093838061  | 0.475629993081311 |
| CCCTATTATGAC | 448.905794506633 | 0.318266794563457 |
| GTATTGCTCAGA | 448.908945168491 | 0.51296886342677  |
| GACCCTGATGAC | 448.913841705709 | 0.37068551293262  |
| CTACGTGCGTCA | 448.943099599553 | 0.570832853073173 |
| ACGTTTTCGTCA | 448.96943941211  | 0.565569461994782 |
| GTCATCAGGACA | 448.970340906787 | 0.59728056280072  |
| AGTTATACGTCA | 448.97839024921  | 0.623318357293978 |
| CGCGGATTA    | 448.987705899004 | 0.714773216945958 |
| AATAGCGTGACT | 448.999216663689 | 0.335468380797266 |
| ATACACGAGTCA | 449.001874936765 | 0.520769185677325 |
| TCCCATGAATCA | 449.03013304111  | 0.429020143625159 |
| TATTTTGTGTCA | 449.033429051111 | 0.33814746583622  |
| CAAATTGACACA | 449.051202028307 | 0.291707995630857 |
| AGCTATTGACTC | 449.058632540689 | 0.573716169245984 |
| ATGACGGAGTTA | 449.063200934267 | 0.16352853098751  |
| AGAGTCAGGATA | 449.071964506968 | 0.286511214123205 |
| GTCATTCTATTA | 449.074864365783 | 0.523652799779256 |
| GCCTCTGTGTCA | 449.07819718034  | 0.293912488535712 |
| TGACTATTGTAA | 449.105512341358 | 0.890277534202166 |
| ACTTAAATGACG | 449.109257534325 | 0.678041969805144 |
| GTGACACAGGTA | 449.110527690879 | 0.198516487380073 |
| AGTCATGAGCAC | 449.129067613694 | 0.624350999860443 |
| TGACACTTAACA | 449.131781331121 | 0.21241015350663  |

|              |                  |                   |
|--------------|------------------|-------------------|
| ACTCATCTGACT | 449.168692675778 | 0.401655213233118 |
| ATGACGTGAAAA | 449.186720214532 | 0.604684665306167 |
| GTCATCGGAAGA | 449.226570110395 | 0.44981293198751  |
| ATGACAGTGACG | 449.24240349146  | 0.447211042150072 |
| GCCACCGAGTCA | 449.260033878194 | 0.426604279524886 |
| AGTGTTTACTCA | 449.261165568872 | 0.697506791680776 |
| TGACGTCAGTAA | 449.273599939676 | 0.846309589891685 |
| CTTAGGTGTGAC | 449.31183857097  | 0.416272643251352 |
| AGTCACTCCCGA | 449.316002978696 | 0.296650608010367 |
| AAATGGTGACGC | 449.319995973216 | 0.400278048506907 |
| CTTATAAATGAC | 449.33636080567  | 0.90138922054998  |
| AGCCCGATGACG | 449.347714466026 | 0.513332827453988 |
| GTCATCTAAATA | 449.360820014783 | 0.665696828164221 |
| CGCATACAGTCA | 449.362034794865 | 0.901151686475309 |
| GTTCAACAGTCA | 449.363365921862 | 0.880951204607418 |
| GACCAAGTCATA | 449.364662695964 | 0.516638970231747 |
| AAATTGCGTAAT | 449.382317937877 | 0.432493586312175 |
| GAGTCAGGCCAC | 449.401673543424 | 0.5252228382504   |
| ATGACACGCCGA | 449.403744965776 | 0.352158704755355 |
| GTAGCTGCGTCA | 449.430518058204 | 0.825374103480836 |
| ATATACGATGAC | 449.440074900971 | 0.379327202438447 |
| ACAGGTCTGACT | 449.460155127168 | 0.426828868174301 |
| CCCGATTTGTCA | 449.469765927035 | 0.508246533125415 |
| CAGATCCAGTCA | 449.47702998513  | 0.363585397069285 |
| GAAGGCTATGAC | 449.49228011763  | 0.312714333115342 |
| GTCATCGAGGAA | 449.514656083935 | 0.689075775899255 |
| GCCCTAGATGAC | 449.516783628298 | 0.887160728927574 |
| AACTCGTACTA  | 449.522509847845 | 0.605325071847219 |
| ATTGATGATGAC | 449.529949961296 | 0.184161185463681 |
| ATCAGCTATGAC | 449.584650877946 | 0.820308308815842 |
| ACAACACAGTCA | 449.599441438094 | 0.658345512881678 |
| AGACTAATAGAC | 449.620219207868 | 0.439759726934651 |
| TCGGCCTAGTCA | 449.622928893937 | 0.697660120512357 |
| CGTGATTATGAC | 449.667589500898 | 0.463461781385877 |
| GCAATTGATGAC | 449.68556768828  | 0.553902411974001 |
| GCCAATCTGTCA | 449.688470426418 | 0.322906701349259 |
| CCGTGGAATGAC | 449.695728493293 | 0.866449176342369 |
| ATTTTCTATGAC | 449.743045291269 | 0.457833992871423 |
| AGACTGACACAG | 449.762710065097 | 1.36136646356232  |
| GACTTGTATGAC | 449.778156122753 | 0.497822402617358 |
| ATGCTGGATGAC | 449.782656921325 | 0.15214482179084  |
| ATCCACTATGAC | 449.819869931446 | 0.291682860905693 |
| GTCATAATAGAA | 449.824098794473 | 0.642034489088228 |
| GTCATATTTTAC | 449.830153766097 | 0.268005608258173 |
| AGCAGCTATGAC | 449.830370948488 | 0.47403169232835  |
| ATGACGAGATCC | 449.84454473717  | 0.184117411471214 |
| GTGAGACTCATA | 449.863245640847 | 0.363383398607287 |
| CTCGATGATGAC | 449.873715643743 | 0.774532899771329 |
| GATATAAATGAC | 449.893476976841 | 0.860706000415743 |
| GACCTTAATGAC | 449.910916271568 | 0.533234108083845 |
| ATGACAAGGCTC | 449.940254861709 | 0.75510858875181  |
| CAGGGTTATGAC | 449.951156636116 | 0.270593510674059 |
| GTCATAGACGAC | 449.952468958349 | 0.903688475389838 |
| CCGGCCTAGTCA | 449.954037537941 | 0.320089602582712 |

|               |                  |                   |
|---------------|------------------|-------------------|
| CATAGAGATGAC  | 449.961549241472 | 0.747658124615679 |
| GTCGGTGAATCA  | 449.966975462017 | 0.134135423555002 |
| GATGAGTAGTAC  | 449.967391802161 | 0.345661396543763 |
| GTCATAGGCATA  | 450.019166906247 | 0.363627629740244 |
| GCCGCTGTGTCA  | 450.019524338036 | 0.356451853235411 |
| ACAGATAAGTCA  | 450.021936249185 | 0.457116538732839 |
| GACCTTGGTCAC  | 450.033791368239 | 1.36940779838598  |
| CGGATATATGAC  | 450.04603355325  | 0.418259153334679 |
| AGTCACCTTGCC  | 450.052929667314 | 0.169339760808211 |
| ACCACGAATGAC  | 450.065221201693 | 0.78009229422246  |
| GCGCTATATGAC  | 450.065735412972 | 0.79795032910014  |
| AGATGCGATGAC  | 450.080317503287 | 0.248404039593166 |
| GTCATCTAGGCA  | 450.084500640408 | 0.55903592886863  |
| GTCATATCTGGA  | 450.112371896741 | 0.484623837076851 |
| ATGAGTCCGAAA  | 450.121171413003 | 0.515900344556995 |
| GCCTGTGAATCA  | 450.146431146668 | 0.773533694280644 |
| CATTACCAGTCA  | 450.154190723966 | 0.438434311918653 |
| CATCATAGTGAC  | 450.156731706955 | 0.827112395220845 |
| AAAACCTGCGTCA | 450.16476736168  | 0.865683504346772 |
| CACATTTGTCAC  | 450.185624428467 | 0.570907432346579 |
| CCACGTGCGTCA  | 450.194677744405 | 0.855316685392877 |
| GATCTTTAGTCA  | 450.227716254544 | 0.773571773724696 |
| GCGGACTAGTCA  | 450.246847475669 | 0.682348292964164 |
| AACGTAGATGAC  | 450.247890592974 | 0.505624880015409 |
| ACTGTTGACTGA  | 450.250630547685 | 0.581377169603263 |
| ATAGGTGACCCA  | 450.288488884671 | 0.90022009101448  |
| GACCGATTAGTC  | 450.293847490489 | 0.766001137329544 |
| CAGAACGATGAC  | 450.296327462785 | 0.592533335038719 |
| GAAAACCTGACTC | 450.296934872346 | 0.954099201019012 |
| CAGGGCGAGTCA  | 450.307679416365 | 0.482304841215285 |
| ATGTGTCAA AAC | 450.309731416684 | 0.545226525670697 |
| TAGTCACGCTAA  | 450.315390971213 | 0.606186489897946 |
| ATTCTGTGTGTC  | 450.322042518319 | 0.464128350119146 |
| GACTCACTTAGC  | 450.327914546685 | 0.436141040125472 |
| GTCACACCCGGA  | 450.331477105603 | 0.67685650485548  |
| AGAGTATTAGTC  | 450.342621715274 | 0.639568455763127 |
| ACTTTAGACTCA  | 450.374448990882 | 0.624783262553127 |
| CCGGATCCGTCA  | 450.377378551056 | 0.265013401962815 |
| CGAGATACGTCA  | 450.386501649414 | 0.402259337441087 |
| CCGCTATAGTCA  | 450.389726260417 | 0.23275061095585  |
| GCGTTTTACTCA  | 450.390910657629 | 0.525824292018541 |
| TCAGTGGAGTCA  | 450.408155277756 | 0.248920195560394 |
| CAAGATACGTCA  | 450.438496955923 | 0.624081063920967 |
| ATGGCTGCGTCA  | 450.447746243668 | 0.622031323364484 |
| TCTTACCAGTCA  | 450.451873707281 | 0.541577112187974 |
| AATAGTACGTCA  | 450.459432722146 | 0.948925110940395 |
| TCACTGTAGTCA  | 450.520797350335 | 0.813039212763097 |
| CTCATTTGGTCA  | 450.531157045922 | 0.5983497145416   |
| ATGACTAGCAGG  | 450.550148731108 | 0.404248972710038 |
| GGCATCTATGAC  | 450.55473570669  | 0.697021766923099 |
| TAGTTGTAGTCA  | 450.559574342052 | 0.568154951657318 |
| AGACTAATCGGA  | 450.575739654982 | 0.219541308524153 |
| ACAAATATGTCA  | 450.580652991848 | 0.589231876160816 |
| GTTAATCTGTCA  | 450.593491421353 | 0.541281967016536 |

|               |                  |                   |
|---------------|------------------|-------------------|
| AGTCAATGTCAT  | 450.593701164081 | 0.388708930016281 |
| ATATTCTGACTG  | 450.605193772381 | 0.611269423708015 |
| AACGGTGAATCA  | 450.608218985683 | 0.281471015841389 |
| GAGTCAGGTCAC  | 450.619366876153 | 0.40375109670119  |
| GTCATGTTGACA  | 450.622267925115 | 0.639207554738642 |
| GTCACCGAATAA  | 450.622904177602 | 0.426523278958018 |
| TGACTCGAGGCA  | 450.638058784843 | 0.781639584294405 |
| ATTACACGTGAC  | 450.649120470784 | 0.853649258673357 |
| CGCGCGAGTGAC  | 450.674587257507 | 0.410291859962861 |
| AGTCACCTCACA  | 450.676112321296 | 0.473037279679869 |
| GATGGCGTCACC  | 450.696010650955 | 0.367584769252794 |
| GTATAGGATGAC  | 450.719494366389 | 0.18809979075374  |
| GACTCACTTTAA  | 450.721585532054 | 0.21985599480125  |
| GTCATAAAGTTA  | 450.725285651488 | 0.52454583244064  |
| CACGAATATGAC  | 450.75160762764  | 0.553222339526811 |
| CGTATGGAGTCA  | 450.752870245957 | 0.406181702935828 |
| ATACGGCGTCAT  | 450.756931484524 | 0.476674692422969 |
| ACCATCGATGAC  | 450.767634229677 | 0.343873151948547 |
| GAGTCAATGTAA  | 450.777528740379 | 0.241326303596787 |
| ATGACGCCGTCA  | 450.778566115979 | 0.58086888389363  |
| ATCGCAGAGTCA  | 450.782916548788 | 1.10001244284689  |
| ATGAGTCTCATG  | 450.790199675556 | 0.791888431419287 |
| AAGTAATATGAC  | 450.792690921568 | 0.290820348825306 |
| CCCACGGATGAC  | 450.834097632081 | 0.60463036924744  |
| ATGACGAACGTA  | 450.845162272835 | 0.443102311706377 |
| AGTCATGAGGAC  | 450.863334784847 | 0.597066970078049 |
| ATTGTATATGAC  | 450.865130346649 | 0.476818132983725 |
| GTCATCATTGAA  | 450.887034942998 | 0.4538785408879   |
| CATAGCGATGAC  | 450.915498146062 | 0.867937197967889 |
| CAAGCTCAGTCA  | 450.923585594692 | 0.680813342967299 |
| ATGACGTTGACA  | 450.93582488682  | 0.616511039983655 |
| TGTGAGTCTGAA  | 450.937925537639 | 0.237001417725858 |
| TCGACTGACACA  | 450.949400349149 | 0.495338082892853 |
| ACGTCAGTGTC   | 450.997850954358 | 1.46019059258826  |
| CCACACGATGAC  | 451.020478218886 | 0.652060296620191 |
| CATGTGAATGAC  | 451.041099314133 | 0.364488365798715 |
| TATCTTACGTCA  | 451.082790664879 | 0.438721721487758 |
| AAATCACAGTCA  | 451.085614223742 | 0.540957239193464 |
| ATTACTCTATGA  | 451.090357736299 | 0.647696995608415 |
| ACGTCATGCGAT  | 451.125368914369 | 0.637714122990297 |
| GTCATAGGCCGA  | 451.134754845393 | 0.602529598531821 |
| GTCATAGCTAAC  | 451.136296488513 | 0.655139711029106 |
| CGAGGGTATGAC  | 451.142125064138 | 0.486596937673459 |
| CGATACTAGTCA  | 451.152967751032 | 0.608619498503295 |
| GTCTTACAGTCA  | 451.173968416254 | 0.550304122092864 |
| AGCGACGACTCA  | 451.174475587374 | 1.01603142234712  |
| ATGACCACTCAT  | 451.175178613186 | 0.370684081403484 |
| GTCATAATACGA  | 451.182824354887 | 0.624251115751953 |
| CAGAAAGATGAC  | 451.241072366392 | 0.572853048276333 |
| AGTCAGAGATCC  | 451.267867888504 | 0.6957650240834   |
| GTCATAAACAAAC | 451.284825488477 | 0.565108356576124 |
| CGATTTGCGTCA  | 451.296085590284 | 0.592225107000168 |
| GTC AAGCAGTCA | 451.321609633298 | 0.76293140967969  |
| GCTTAGAATGAC  | 451.326166526589 | 0.813155010723318 |



|              |                  |                   |
|--------------|------------------|-------------------|
| AGTCAGAGCTTC | 451.341729546927 | 0.566074879157254 |
| GGCAACCAGTCA | 451.344558475999 | 0.720168590809863 |
| AGTCATGGTATC | 451.375472321957 | 0.636767680089578 |
| CCTCAATAGTCA | 451.405583242913 | 0.481984091650487 |
| GTCATCAATGTA | 451.437579816893 | 0.386919518069071 |
| AGATTATTCATC | 451.4745756987   | 0.523697101803012 |
| AGTCATGGTAGA | 451.475679832053 | 0.324768958792961 |
| TAATATTTGTCA | 451.482086914917 | 0.293819951887848 |
| CGTACCTATGAC | 451.499117990256 | 0.273479086869171 |
| ATGACAGCGATC | 451.51228336535  | 0.368829288452868 |
| GGCCCATATGAC | 451.547887929636 | 0.406688535367856 |
| GTCATACACATA | 451.580602722918 | 0.519400726796222 |
| AACACTGTCATA | 451.593219711066 | 0.475676287543289 |
| ATGTGCGATGAC | 451.59327779738  | 0.540181293606337 |
| TCAACTTACTCA | 451.594139464371 | 0.268705433319189 |
| AGGCATGAATCA | 451.598889513616 | 0.707981574019615 |
| GTCATCATCATA | 451.600456810677 | 0.262550647953898 |
| CTCATAGGGGTC | 451.639767889667 | 0.971201194432052 |
| TCTTCTGATTCA | 451.644010745879 | 0.398133827986924 |
| TGAGTCGTCAAA | 451.646524779525 | 0.619277591418065 |
| AGTCACCCAGAG | 451.689374059422 | 0.547346516487537 |
| AGTCACTTGACG | 451.696005825524 | 0.628014929783093 |
| ACGTTGAATCAC | 451.706451676026 | 0.708098167001242 |
| GTCATTCGGAAA | 451.721829607776 | 0.168646388842579 |
| CCACTGTATGAC | 451.732670691139 | 0.312131117903122 |
| CGAAGATATGAC | 451.739325709392 | 0.565222692188848 |
| GTCATACGTATA | 451.742047199926 | 0.633007083052618 |
| TGAGTCTGACAA | 451.749031387734 | 0.592006717918649 |
| TCGGGTGAATCA | 451.755937629117 | 0.455233765006659 |
| GAGTCAGTACCA | 451.760245489001 | 0.557575347662538 |
| ACTCATTTATGG | 451.782189984099 | 0.711424627131361 |
| CGACTGCAGTCA | 451.793867008303 | 0.756562855672676 |
| CATTCTGTGTCA | 451.796102323015 | 0.795863654345863 |
| ATCCGTTATGAC | 451.800726394462 | 0.563978534758011 |
| CAGCTGAATGAC | 451.815381103488 | 0.521020468226086 |
| GAAGAATTAGTC | 451.823493425259 | 0.392622995048989 |
| TGACTGCGCAAA | 451.849557181058 | 0.596013271634182 |
| TGACTTGTCA   | 451.880823538977 | 0.452613736365406 |
| AAGGACTATGAC | 451.881299211028 | 0.564372468285936 |
| GACTAATAATTA | 451.88234485003  | 0.615507582656651 |
| ATTAGCTAGTCA | 451.889280520328 | 0.489422522198583 |
| CGACCATATGAC | 451.893746485731 | 0.424094826108268 |
| CAGGTAAGACTC | 451.898376628675 | 0.768870330110724 |
| ATGACGACGTAA | 451.908672522894 | 0.301896119309373 |
| GTCGCTGCGTCA | 451.922563339706 | 0.853488450784378 |
| CATTGATATGAC | 451.93901647451  | 0.69931308898276  |
| ACTCTGGGTCAT | 451.944070243323 | 0.340021595110158 |
| GCCTATTGCTCA | 451.965154769547 | 0.340799654589052 |
| GTCATTCGATAA | 451.967106336482 | 0.426234167801475 |
| CTGGTATTAGTC | 451.970710130306 | 0.636312409079873 |
| AGTCACGCGCAA | 452.014428389629 | 0.3891212224466   |
| TACTCCGAGTCA | 452.035250084385 | 0.446717963149291 |
| CAAATGAATGAC | 452.106464226931 | 0.947927509016031 |
| TGACTTGGTCAA | 452.112755429155 | 0.688165607384247 |

|               |                  |                    |
|---------------|------------------|--------------------|
| AGTAGATATGAC  | 452.171007671547 | 0.216812016400921  |
| GTCATAGCCGAC  | 452.179100412358 | 0.373390598704978  |
| GTCATATCGAAC  | 452.185790946539 | 0.490631938997056  |
| CTTCCGTGACTA  | 452.189716152244 | 0.150483013949428  |
| GAGTCAGTATAA  | 452.191564961246 | 0.310281855987906  |
| CGGCATTATGAC  | 452.216848692612 | 0.460860891443247  |
| GAGAATTCGTCA  | 452.262871625441 | 0.394328574426504  |
| CGGCTATATGAC  | 452.269411284688 | 0.68985887800675   |
| ACTGTGGAGTCA  | 452.319260553437 | 0.881894610214111  |
| ACGAGGCGTCAT  | 452.363631073952 | 0.54370248577397   |
| CTGATCTTATGA  | 452.368525294669 | 0.791302198160423  |
| TCATAAGTGTCA  | 452.380919412696 | 0.734301428485136  |
| CTGATGCATGAC  | 452.386732287208 | 0.825772446446839  |
| AGCGACTATGAC  | 452.390369369399 | 0.130049485771248  |
| AAAATTGATGAC  | 452.391723867967 | 0.721526212202075  |
| ATGACAAAGTCA  | 452.392556160626 | 0.666836958764855  |
| CCGCATACGTCA  | 452.418352700923 | 0.878465258932907  |
| GCACGTAATGAC  | 452.428763248038 | 0.885258953825817  |
| GATCAGAATGAC  | 452.430552049339 | 0.240479766624763  |
| AGGTGTGAATCA  | 452.435678040474 | 0.324123647944598  |
| CGCGTCGATGAC  | 452.454773244426 | 0.60268242043462   |
| TCTCGTGTGTCA  | 452.46938549912  | 0.627140474374407  |
| GCCCTATAGTCA  | 452.476075302281 | 0.522124241117288  |
| AGTGCCGATGAC  | 452.480184407089 | 0.54195124394652   |
| TACCACGAGTCA  | 452.488732895588 | 0.326960401760179  |
| AATATTTTGTCA  | 452.491868567122 | 0.546213679501177  |
| CGGCGTGGGTCA  | 452.506902207029 | 0.568793077776073  |
| ACGTATAATGAC  | 452.526919281403 | 0.575849300695682  |
| ATGACTAGCCCA  | 452.547543175602 | 0.444635527323265  |
| CGACTCGATGAC  | 452.557844989215 | 0.56880786547931   |
| CATGACTTGGCA  | 452.570863033369 | 0.45241797529056   |
| AAGTTATTAGTC  | 452.662367299421 | 0.411687031395469  |
| GTCATCTTACAA  | 452.665490831594 | 0.0921608017141554 |
| GGTTACTAGTCA  | 452.72130300663  | 0.678423480237254  |
| TACAATTGCTCA  | 452.7265192788   | 0.620298176574884  |
| ATGACGTCTTCG  | 452.756182578592 | 0.271278278467053  |
| GACACGAATGAC  | 452.808711423161 | 0.605703070469473  |
| TGAAACGACTCA  | 452.824365279562 | 0.869263238540093  |
| CAGATTTGCTCA  | 452.857827242378 | 0.445291026139224  |
| GTCACCTTGTGA  | 452.861413493559 | 0.319560921871569  |
| ATGACGAACCTG  | 452.86235050038  | 0.224920120538207  |
| TAACGTGATTCA  | 452.92259208611  | 0.75573345735535   |
| GTCATAGGAACA  | 452.947661795089 | 0.600640867390457  |
| GTCATTTTCGATA | 452.953176064792 | 0.58669153925987   |
| CGTCACTAGTGA  | 452.962736860259 | 0.960149899054538  |
| GCGTCACGTGAC  | 452.978983695808 | 1.04459934828647   |
| CGTCTAGATGAC  | 452.986372984122 | 0.392445249189031  |
| AGACCGTGAGTC  | 453.028827386714 | 1.16188861787299   |
| AGATTCTATGAC  | 453.054780897195 | 0.4323167105493    |
| TGACATAATACA  | 453.060927045109 | 0.473074663229507  |
| CACCGTGGGTCA  | 453.072180543549 | 0.800689767234668  |
| CATGGAAATGAC  | 453.089250321422 | 0.575336133135898  |
| CGAGTATTAGTC  | 453.09583912991  | 0.511970630516135  |
| ACGTTGGAGTCA  | 453.110832759391 | 0.583880771165746  |

|               |                  |                   |
|---------------|------------------|-------------------|
| GCTATCGATGAC  | 453.126345498166 | 1.03508398487192  |
| GTCATTGGTCTGA | 453.142814254334 | 0.419350625492356 |
| GTCATCTTTTCA  | 453.156846528465 | 0.419552772305094 |
| GAGCCTACGTCA  | 453.17493117011  | 0.881942680056807 |
| ACGTCATGATGA  | 453.194195199319 | 0.697981768363494 |
| TAAGATCCGTCA  | 453.206664217591 | 0.403304393892508 |
| CGTGTTGTGTCA  | 453.212387564371 | 0.577731999184318 |
| ACTGAAAATGAC  | 453.225292141446 | 0.531051138526648 |
| CCACGTGATTCA  | 453.2372965766   | 0.480422808745664 |
| GGCTTTACGTCA  | 453.248684897692 | 0.627591223902709 |
| CTAGTATATGAC  | 453.249631184098 | 0.409849538862451 |
| TAAAACCTGTCA  | 453.275307510166 | 0.36407336767286  |
| TGACGTAGTAAA  | 453.336372876581 | 0.510161197184316 |
| CTTACTGACACA  | 453.35038277486  | 0.374656804922052 |
| AGTTACGTGTTT  | 453.362058221795 | 0.487241882079364 |
| AATGGTACTCAT  | 453.365744056175 | 0.535334440327249 |
| GTCACACATTAA  | 453.36671147218  | 0.513896756554517 |
| CCGTAAGATGAC  | 453.370777308584 | 0.800240106232675 |
| CGACTAAGTGAC  | 453.387508371038 | 0.549194984154385 |
| TGTGTCAATGAA  | 453.417304092077 | 0.55587475916004  |
| AAGTAACAGTCA  | 453.428603658797 | 0.234010797906114 |
| ACTCTCGAGTCA  | 453.437162431891 | 0.610675480719169 |
| ACGCAAGACTCA  | 453.450797615523 | 0.805726922094956 |
| AGTTTGTATGAC  | 453.482005153197 | 0.476337448826752 |
| AATGCCGAGTCA  | 453.499318473672 | 0.706367873074014 |
| GACTCGTAGTCA  | 453.502076188897 | 0.75067293771189  |
| TGAGCAATTTAA  | 453.509330935304 | 0.779647323631386 |
| CTGACAGAGTCA  | 453.51257097374  | 0.641564540309644 |
| GTCATCATGGCA  | 453.525761194921 | 0.466789979944252 |
| CATGATACGTCA  | 453.551476059635 | 0.49257801991601  |
| CACAAATTAGTC  | 453.620822653782 | 0.6298283190142   |
| TCCGTTTACTCA  | 453.633391803518 | 0.507882920508504 |
| TGACTGAGCACA  | 453.650540502725 | 0.737904401388398 |
| GGTAGATATGAC  | 453.653215002427 | 0.326697755356563 |
| AACTTGACACAT  | 453.654632936349 | 0.320361877065084 |
| ATGACAATATCG  | 453.683607342085 | 0.439271723605001 |
| CTGGTTTACTCA  | 453.713680454804 | 0.555953178314971 |
| CGTCATTGTGAG  | 453.724242129545 | 0.76392055220914  |
| CACGACTAGTCA  | 453.732903613671 | 0.539825938300241 |
| CGGTACCAGTCA  | 453.747545165633 | 0.532591761533645 |
| CAGCTGTATGAC  | 453.759223543249 | 0.668788386506342 |
| CAAACGTGACGC  | 453.780849123408 | 0.969564029972681 |
| TCTGAGCAATAA  | 453.781082649202 | 0.475606330911594 |
| GTCAACTCGTCA  | 453.85710870065  | 0.577533657195628 |
| TGACAGAGTTAA  | 453.863782513473 | 0.310845941068018 |
| GAAGGTGAATCA  | 453.876826195046 | 0.184575152767901 |
| GCAAAATATGAC  | 453.883596664848 | 0.528292061849568 |
| GATTTAGACTCA  | 453.888259094113 | 0.386631169991311 |
| CGCCTGTATGAC  | 453.890215789668 | 0.482539191788282 |
| TGGGTCACGCAA  | 453.921702001791 | 0.796749396198319 |
| CGTGTCATGAC   | 453.922095502051 | 0.984004264047261 |
| GTCATAGCGCAA  | 453.9735184924   | 0.552721855273568 |
| CGTCAGCAGTCA  | 454.004123480437 | 0.285394391695965 |
| AGTCACTCCGAT  | 454.012528090889 | 0.524225877621118 |

|              |                  |                   |
|--------------|------------------|-------------------|
| CTGTTAATGACA | 454.0276307807   | 0.650931610942088 |
| ATGACACTCATC | 454.03237446392  | 0.288522282206281 |
| GAGTCAATAATA | 454.040588238168 | 0.425825931098619 |
| CGCCTTCAGTCA | 454.04699216434  | 0.419326169011035 |
| ATGACTTCGTCA | 454.059709387557 | 0.665860499410659 |
| GACTCAACGTCA | 454.072019698855 | 0.544025299426403 |
| AAGCCTGACTCT | 454.078011481093 | 0.353822876202524 |
| CCGTGACAGTCA | 454.081724486911 | 0.922252657834284 |
| AGCTTGACGTCA | 454.081866303787 | 0.62011246501556  |
| CTCTTTTACTCA | 454.085667574855 | 0.32342670635174  |
| TGACTCCGACAA | 454.090719531357 | 0.35007643262738  |
| TGACGCGTATAA | 454.098703717936 | 0.600763653819395 |
| GTCATCAGCTGA | 454.129615559625 | 0.574445901849059 |
| AATCATGAATCA | 454.153380161347 | 0.26377403019476  |
| AAAGGGTGACGT | 454.206471753465 | 0.204658812263125 |
| CAATTGGTGACA | 454.225984723289 | 0.411580761121141 |
| CGTCACACATGA | 454.276610291717 | 0.65440363073766  |
| CAGTAGGATGAC | 454.30075227993  | 0.582484432242926 |
| GCTAGCGATGAC | 454.302387599345 | 0.586573230523684 |
| GTCATCCTATCA | 454.340126730276 | 0.515593378195892 |
| GACTAATCACCA | 454.340623993569 | 1.11599976037208  |
| CAAGTCCAGTCA | 454.351232926094 | 0.360171680417174 |
| GCATTGAATGAC | 454.357918388577 | 0.426789479764473 |
| TCTCGTGATTCA | 454.358931369492 | 0.406908604638414 |
| TGACTAAGCCCA | 454.362635357375 | 0.438042341423286 |
| CCCCTAGAGTCA | 454.402946216257 | 0.364728831265073 |
| GACAAGGATGAC | 454.414448032659 | 0.438705111079979 |
| GCGTCACGCTAA | 454.444937948126 | 1.01281441478274  |
| ATAACAGAGTCA | 454.445921514641 | 0.599729832286736 |
| GACTCACTATGA | 454.450395276494 | 0.599162707267365 |
| AGTCATGAGCTA | 454.45764103085  | 0.340572077158525 |
| ATGACGGAGATC | 454.458194909868 | 0.313046483551194 |
| AACCATTATGAC | 454.487728496269 | 0.39140480618977  |
| CGAATCCAGTCA | 454.495686509066 | 0.64358176817458  |
| GTCATTTATACA | 454.54593903122  | 0.445752881765135 |
| ATCCGTGATGAC | 454.55629183861  | 0.696005528566582 |
| TACATCGACTCA | 454.557478602223 | 0.576542401343084 |
| CAGGCTGACACA | 454.582579179333 | 0.427568537484147 |
| GTCATCAGTCGA | 454.593540489319 | 0.378493850014945 |
| GTCATATACCAC | 454.599690075288 | 0.580672757797809 |
| GCTCAGAATGAC | 454.619238145198 | 0.749113024348327 |
| AGCCAATATGAC | 454.621212196246 | 0.56247815250903  |
| GATACTGACACA | 454.652598532326 | 0.754588946710777 |
| AGTGCCGAGTCA | 454.67786696891  | 0.467169798376734 |
| TGACTCCACGCA | 454.681703433799 | 0.239498304293953 |
| ACCACTGCGTCA | 454.683142085619 | 0.527166140017029 |
| GTCATCAAGACA | 454.691096968312 | 0.896628183351555 |
| GGCTTCTATGAC | 454.727246217259 | 0.871549954552851 |
| ATACACGATGAC | 454.732267811681 | 0.527907751775928 |
| CAAAATTGACTC | 454.752630995741 | 0.503227891629815 |
| GTCATAGGTGAA | 454.767424062273 | 0.359063104428355 |
| CAACTGGAGTCA | 454.769060278941 | 0.830420665511122 |
| AGGACGTATGAC | 454.773909396605 | 0.21708927170301  |
| GTCATTGCAAAA | 454.777488712589 | 0.587208481919359 |

|              |                  |                   |
|--------------|------------------|-------------------|
| AATTAGTGACGT | 454.815361960183 | 0.273406340345785 |
| GTCCTTCAGTCA | 454.82729337208  | 0.683635637248288 |
| ATGACTTGTTAG | 454.868118606274 | 0.355290353792508 |
| CCAACCGAGTCA | 454.894803790101 | 0.628886707895807 |
| AGTGACGTGACA | 454.900240222031 | 0.415444274460152 |
| AGTCACTCTTTC | 454.900985088709 | 0.300022715765538 |
| CGTGATCTGTCA | 454.911557713266 | 0.659591977293607 |
| AATTACGATGAC | 454.922062961531 | 0.603454137218804 |
| CCAAGTGATGAC | 454.927432821545 | 0.387800740791127 |
| TAGATAGACTCA | 454.944600671174 | 0.674114932332934 |
| GTCATCTTAAGA | 454.954349342767 | 0.704165349075676 |
| CAAAGATATGAC | 454.95542781415  | 0.472898723048298 |
| TCAACCCAGTCA | 454.964924785263 | 0.313431304178814 |
| CGATGTTATGAC | 454.976545415938 | 0.624103885983962 |
| CGACGCGGTGAC | 454.9904004972   | 0.911566150670136 |
| ATCGTGTAGTCA | 455.012150874453 | 0.825272203586878 |
| AGTCACGCCTAA | 455.037380388738 | 0.646574419511248 |
| GTCACCGATGAA | 455.103823479622 | 0.685368582881681 |
| CTAATGAATGAC | 455.111708129009 | 0.541103465470882 |
| ATGACAGTGTA  | 455.120719987379 | 0.214880464245063 |
| CCGAATGATGAC | 455.151144959431 | 0.273181242391058 |
| CCCGAAATGACA | 455.153287324862 | 0.594509509289115 |
| AAAGCGTGACTG | 455.183348600595 | 0.24601314273187  |
| GCGCTTGACTAA | 455.196194840141 | 0.947537049806651 |
| GACTCATGGAAC | 455.202813334917 | 0.371243985484862 |
| AGACCTGATGAC | 455.230104614732 | 0.814893279130667 |
| CGTCACAGTCAG | 455.23329126725  | 0.427945321535022 |
| AAATACCGTCAT | 455.255775399067 | 0.310834958806643 |
| GGTCTTAATGAC | 455.259724699616 | 0.732010093462233 |
| AGTTTTGCGTCA | 455.269657321448 | 0.851807610942124 |
| ACGACGGATGAC | 455.29113230642  | 0.696398733860253 |
| CTCTATACGTCA | 455.300386506011 | 0.357615056760508 |
| ATGACACGGCCG | 455.301155391194 | 0.40781683737068  |
| ACACGAAATGAC | 455.315241148055 | 0.568611955710627 |
| ACTCATAATAGG | 455.324515280893 | 0.692541446548432 |
| GGGTCATAACCA | 455.361704293608 | 0.542011101378184 |
| AACGATTAATA  | 455.367554072165 | 0.327328331450631 |
| ATATCTACGTCA | 455.39154061172  | 0.571315464886232 |
| CCATGTACGTCA | 455.398815200636 | 0.534193867146184 |
| CACGTAAGAGTC | 455.422315223218 | 0.934201431218348 |
| AGACTAATATGA | 455.440584429841 | 0.501859569351208 |
| CATGAGCATGAC | 455.452069724328 | 0.542053057314119 |
| TGACTCGCCACA | 455.467681762426 | 0.616442568150542 |
| GTCATTGATACA | 455.470556239583 | 0.836170603439256 |
| ACGTTATTAGTC | 455.47287183567  | 1.24738585170071  |
| ACAGGGGTGACT | 455.47512139704  | 0.481569298379835 |
| GAATTCAGTCA  | 455.483375605392 | 0.18104993974084  |
| CGCGCTTACTCA | 455.506936830509 | 0.648773470001439 |
| TGACACAGCAAA | 455.508054119061 | 0.54930355495899  |
| TGACATTGGTCA | 455.510241682957 | 0.689882146612788 |
| GATGACTTGTTA | 455.521466767839 | 0.319949034708072 |
| AAAAGACGTCA  | 455.567200516033 | 0.411611270022791 |
| GTCCAAGACTCA | 455.585832703851 | 0.499171474079894 |
| GTTCTTTAGTCA | 455.606132373838 | 0.453819912931481 |

|              |                  |                   |
|--------------|------------------|-------------------|
| TATGATGTGTAA | 455.607055267397 | 0.143253062528077 |
| TCTGTTGTGTCA | 455.617797528625 | 0.541159404066259 |
| GATTCATCGTCA | 455.6264522213   | 0.435353675238122 |
| GTATTGGATGAC | 455.650469941825 | 0.271255897381954 |
| GACCAAGATGAC | 455.651948373521 | 0.45386262336214  |
| ATGACCCGCTCA | 455.652694819568 | 0.445205512770684 |
| ATGACCCAGTGA | 455.671979708155 | 0.409703354151504 |
| TAAGATCTGTCA | 455.674891982723 | 0.641960666777921 |
| GTCATTATGGAC | 455.679957419247 | 0.95255964707398  |
| CAACAATAGTCA | 455.690389325159 | 0.503147334170176 |
| CGTCATGCATGA | 455.761978792705 | 0.573191378360962 |
| TGACTGGTAGCA | 455.772735969259 | 0.262692655073643 |
| ATACGTTAGTCA | 455.774690538142 | 0.586942596220271 |
| GTCATCCTGCAA | 455.80643210119  | 0.589371452273408 |
| GTCATCAATGAA | 455.808818505656 | 0.469307308924465 |
| TGAGTAACGGAA | 455.820284459925 | 0.240833264365854 |
| ATATAAGATGAC | 455.856767828198 | 0.444932270926998 |
| AGTCAGACTATG | 455.886527799153 | 0.37916154804689  |
| ACTCATACTTTA | 455.930262981161 | 0.310415240065534 |
| GTCGATTACTAA | 455.931623150794 | 0.780307959218443 |
| GACCACTATGAC | 455.939613350774 | 0.545748203115925 |
| AGTCACTACTGG | 455.943059003771 | 0.549494331512935 |
| ACAATTTGGTCA | 455.947586398002 | 0.410643057655811 |
| GCGAACGATGAC | 455.953048374632 | 0.742014836188856 |
| GACTCACTCTGA | 455.99198385788  | 0.214533948322392 |
| CTCGAGGACTCA | 455.999567398248 | 0.987832903486395 |
| ACACGTCGTGAC | 456.006540258778 | 1.14496724000529  |
| GTCATCCTAAGA | 456.018517201917 | 0.83394916703046  |
| CCTCAGGAGTCA | 456.067123456762 | 0.655560769099337 |
| AAAACACTCAT  | 456.072064458568 | 0.189062631294606 |
| ACATCAATGACG | 456.087182110135 | 0.714051391563356 |
| CAATGTGATGAC | 456.092041746371 | 0.558265885705318 |
| GGCTTCGATGAC | 456.099310580392 | 0.147647388911595 |
| GTCATCATAGGA | 456.099410862041 | 0.590619191957912 |
| AATGGTGACCCA | 456.125871059015 | 0.604165128060539 |
| TGAGTCTACAAA | 456.133356760586 | 0.569020901681554 |
| AATTCCTGACTC | 456.134253879656 | 0.251729039109277 |
| AAATTGTAGTCA | 456.154065358367 | 0.484266335169752 |
| GACAACCTACAT | 456.163736773892 | 0.356717054251968 |
| GAAAACGATGAC | 456.181172752211 | 0.356239760796626 |
| CATGATTTGTCA | 456.187214660371 | 0.461073453606794 |
| GGACTAGAGTCA | 456.226699304057 | 0.52078846974107  |
| ACTCATAAGATG | 456.23156055788  | 0.706400932505051 |
| CATGTGATGAC  | 456.253561809674 | 0.773499223633427 |
| ATGTGTTATGAC | 456.292536526617 | 0.687034502051526 |
| CTTGCCAGTCA  | 456.294763629005 | 0.189531708080939 |
| ACGTTACAGTCA | 456.307844840928 | 0.229565849959732 |
| CACTCTGATTCA | 456.310758172197 | 0.308099611974449 |
| TCATCGCGATGA | 456.31911090224  | 0.545387596495763 |
| CACAGACATGAC | 456.333162239495 | 1.19006052660508  |
| CGGACATGACAC | 456.350082742487 | 0.564358232581251 |
| ACATTTTATGAC | 456.356364653259 | 0.51775424089363  |
| ATTGCAGATGAC | 456.367403426251 | 0.907260369834811 |
| ACGTCACCATTG | 456.370414037117 | 0.614698999425549 |

|               |                  |                   |
|---------------|------------------|-------------------|
| GTCATCGAAGTA  | 456.379334049014 | 0.29052479648628  |
| GCGATGGAGTCA  | 456.38102243103  | 0.408565605922919 |
| ATAATAAATGAC  | 456.388513848095 | 0.542179104206973 |
| AATCTTCTGACT  | 456.39563292848  | 0.383123307318375 |
| AGGCTCGATGAC  | 456.412564155989 | 0.374747681278407 |
| GTCATAGTTGAA  | 456.415561440347 | 0.622994161990022 |
| ACCTCGTGACTG  | 456.425456231292 | 0.195266545323131 |
| GTACTTTAGTCA  | 456.425929017019 | 0.474582106864153 |
| ATGTCATGTGAC  | 456.429476934265 | 0.466348823449123 |
| GTCATACGATGA  | 456.451668664145 | 0.467507664495701 |
| GCATCTGATTCA  | 456.454629540626 | 0.516741992261253 |
| AGTGGGTATGAC  | 456.455320289788 | 0.317264136787478 |
| GTCATCGCCGAC  | 456.456389396292 | 0.581432390954099 |
| GAGAACGATGAC  | 456.45666976419  | 0.395776984290001 |
| ATATTGATGACG  | 456.463078343791 | 0.514449141566786 |
| AGTCTTGTGTCA  | 456.463701482316 | 0.639257108418968 |
| AGGTATTGACTC  | 456.473215533123 | 0.48319339919467  |
| CAGTCGTGACTA  | 456.495083305294 | 0.443515253352589 |
| GCCGACGGTGAC  | 456.515710950264 | 1.14860275101157  |
| ATGACACGGTTG  | 456.550185288911 | 0.143609883482531 |
| CGTCATGAGCCA  | 456.584537220688 | 0.385683650147841 |
| CAGTGACGTGAC  | 456.596949387924 | 0.604280839209731 |
| ATGCACAGTCAG  | 456.615860593822 | 0.442807655324734 |
| GATCTTGACTAA  | 456.617254809056 | 0.749904609681003 |
| GAGTCTGTGTCA  | 456.618333319781 | 0.768112946236672 |
| CGATCCACGTCA  | 456.703901776941 | 0.301281619542177 |
| AATAAAGATGAC  | 456.730408874987 | 0.801526187778788 |
| ATGACAGAGTCG  | 456.739054560106 | 0.567409084560917 |
| CTCAACTGACTC  | 456.746700828347 | 0.20445808882412  |
| AAGCATGACCCA  | 456.748458133473 | 0.367167260282647 |
| ATACAGTGTGAC  | 456.777174276081 | 0.763658718339852 |
| CCAATCGTGACG  | 456.781137226428 | 0.74557572630374  |
| GCACTTAGTGAC  | 456.808487050286 | 0.957188862267961 |
| AACACGTGTGAC  | 456.812385142594 | 0.55600960363038  |
| ATAAGACTCTTA  | 456.821737545158 | 0.393110582436197 |
| ATGACACGGTCG  | 456.851512778198 | 0.304409965363121 |
| TCTTAAGTGTC   | 456.901014697945 | 0.60032636429633  |
| CTGGCTGACACA  | 456.910005564175 | 0.424188273044365 |
| CGTCATGCACAG  | 456.919855410576 | 0.711470164045657 |
| GACTAAACAGTC  | 456.942161573009 | 0.981879623204581 |
| CCAGTATATGAC  | 456.943740749744 | 0.937340596265547 |
| AGTCACTACAGA  | 456.964352903468 | 0.437784479257042 |
| CCTGGCTATGAC  | 456.968669049586 | 0.482491530311194 |
| GTAAGATATGAC  | 457.002768716869 | 0.272642850300691 |
| AACAATACGTCA  | 457.004080735006 | 0.470470901135583 |
| GCCACATATGAC  | 457.019037274502 | 0.353029013447994 |
| AAAACATGACAC  | 457.030986884559 | 0.600381339235342 |
| CCCATTATGAC   | 457.032042465977 | 0.50010143606589  |
| ACGTCACAAATTA | 457.056163579183 | 0.468060685889757 |
| TCACATACGTCA  | 457.070913762389 | 0.864111227964507 |
| CTTAAACTATGA  | 457.087661047673 | 0.512374345850112 |
| GCCGATTACGCA  | 457.125304660007 | 0.508846413247608 |
| AGTCATGAGTAG  | 457.135062327665 | 0.275184909903629 |
| ATGACCATATCA  | 457.142597038404 | 0.564238815973681 |

|              |                  |                   |
|--------------|------------------|-------------------|
| AATCGTGTGTC  | 457.1433895596   | 0.525547068972557 |
| GTCATATCTCGA | 457.154544832381 | 0.505872152389318 |
| AAACTGTATGAC | 457.16582867073  | 0.824644089307089 |
| TCAGGGGAGTCA | 457.199122403178 | 0.418831363579071 |
| TCATAGTCAGCA | 457.213140280956 | 0.748801696792396 |
| ATGAGTACCATA | 457.24017047066  | 0.454936225338938 |
| GTCATCGAAACA | 457.243672294509 | 0.184670017126901 |
| GTCATATTGAAA | 457.285813205731 | 0.497685316153896 |
| CTCTTGGGTGAC | 457.290743946163 | 0.998596574599828 |
| ATGTGATGACCA | 457.322575646898 | 0.611339086605489 |
| AGTCACTCTATC | 457.32586718213  | 0.407528378797991 |
| CCATATGGTGAC | 457.337266718911 | 0.737464110046281 |
| ACACAGTAGTCA | 457.342597684675 | 1.01243539410088  |
| AATCAAATGACA | 457.372667419134 | 0.83299766419766  |
| AGTCAGACCTAT | 457.384645953358 | 0.664968445675291 |
| TGACTACAGAAA | 457.385155972816 | 0.769647608744813 |
| CAACATTTGTCA | 457.410849569114 | 0.40946900338122  |
| GTATGATGTAAC | 457.411771817314 | 0.501042312834578 |
| TGAGTAACGTAA | 457.423728135828 | 0.430536568559952 |
| GATGATGTGTAC | 457.441167786869 | 0.272906532962784 |
| GTCATCACTAGA | 457.457588073522 | 0.287902733709724 |
| TCTAAGTAGTCA | 457.486863348613 | 0.623716114902963 |
| GATCATCCGTCA | 457.493254507186 | 0.258605167094855 |
| GACACCGAGTCA | 457.508743143527 | 0.468392400665051 |
| GGATTTGCTCAC | 457.524393090346 | 0.631675335083811 |
| GCCCTTGACTAA | 457.532560634529 | 0.519977951875762 |
| GAGACTTATGAC | 457.538358972484 | 0.504973167076776 |
| TACATAGACTCA | 457.546668921127 | 0.590775470817338 |
| AGTAGTGATGAC | 457.560218366037 | 0.226313544435633 |
| TGAGTCGTTTAA | 457.589351344942 | 0.419433248610827 |
| ACAAAATGTGAC | 457.594342163517 | 0.816104216466704 |
| CGACTCACGTGA | 457.603457888851 | 0.225617351980068 |
| ATGTTGGAGTCA | 457.605038887513 | 0.627022646177385 |
| GCAACTGTGTCA | 457.616035624628 | 0.984515383169606 |
| CGTCTTTAGTCA | 457.616598292886 | 0.675890539075461 |
| ATTCCGTGTGAC | 457.618527301385 | 0.71141833050381  |
| AGTCACGACAGA | 457.619381631809 | 0.763307058826024 |
| AGCGGCGTCATC | 457.625627775465 | 0.609376067402724 |
| CGTTCATAGTCA | 457.630835044722 | 0.587683661158331 |
| AGTCACTCTGTC | 457.642385375262 | 0.28795642091777  |
| TGGTCATATACA | 457.666386098202 | 0.865249122521457 |
| CTCGCACAGTCA | 457.701283491641 | 0.400240868516753 |
| GCCTGAGATGAC | 457.712385791323 | 0.253005668458237 |
| ACAAACCAGTCA | 457.715664583947 | 0.60275742731344  |
| CGGATGTATGAC | 457.735346134175 | 0.241011669042042 |
| GAATCCTGACTC | 457.771780442042 | 0.379875754475695 |
| CGTGTACAGTCA | 457.774467451846 | 0.254559615084663 |
| GTCATATACAAC | 457.778212254839 | 0.664947782306407 |
| GCTTTTGGTGAC | 457.79422131158  | 0.991701321712918 |
| ATCTCGTACTG  | 457.81568678703  | 0.586554116035715 |
| TGAATCACGGAA | 457.820591541999 | 0.29542169139511  |
| CGGCGGTATGAC | 457.823628327018 | 0.367127823454452 |
| GTACATAATGAC | 457.843542338073 | 0.733414683463452 |
| GGCTATTGCTCA | 457.916235010093 | 0.511827251582548 |



|              |                  |                   |
|--------------|------------------|-------------------|
| GACTCACTCTTA | 457.917791276671 | 0.25975424638849  |
| AAGGTCTATGAC | 457.959582560974 | 0.415704275325472 |
| TGACTACAAGAA | 457.966757591831 | 0.129108473945565 |
| GTCACCTGCAGA | 457.974970027633 | 0.769228145656094 |
| AATCTTATATGA | 457.981175969536 | 0.651165164486247 |
| GTCACTACGTAA | 458.007261161255 | 0.363989368237603 |
| TACGATTTGTCA | 458.009268023666 | 0.530526503743273 |
| CTAGTTGACTGA | 458.009687599704 | 0.278956628000381 |
| ACATCATGACGC | 458.010071166002 | 0.308356317723372 |
| ACCCAATATGAC | 458.012161148418 | 0.763845414700435 |
| TGACGTATTTAA | 458.023027507008 | 0.817995794902904 |
| CCGTCATGATGA | 458.036846035014 | 0.597333266957845 |
| CTCACTGTGTCA | 458.106093426045 | 0.445960129604086 |
| TACCTGTAGTCA | 458.133508967939 | 0.540700180519382 |
| ATGATGGAGTCA | 458.134366036051 | 0.56734616954928  |
| ATGACTTGATA  | 458.135035857309 | 0.233998349360631 |
| CAATATCCGTCA | 458.150235906224 | 0.532886782648134 |
| GGTCCTACGTCA | 458.150746531648 | 1.30862260756917  |
| ATATGACGGTAC | 458.17927313682  | 0.593553346755191 |
| ATGACTTGTACC | 458.18047254037  | 0.460454919837031 |
| CGGATCCAGTCA | 458.189625602844 | 0.396788565647872 |
| ATGACGAGGTAA | 458.203370812613 | 0.217559061229907 |
| CACCGTGAATCA | 458.221548770913 | 0.744086558055568 |
| GTCACAAATGAC | 458.229571249398 | 0.60695196649763  |
| CACGTTTATGAC | 458.231141780522 | 0.587473256524052 |
| ATCCTTGACTAA | 458.255413678485 | 0.389024141245868 |
| GTCATCCGAATA | 458.286071911032 | 0.561558653119551 |
| CGTCACCTATGA | 458.28709284336  | 0.904343701347799 |
| ATAGCCTGACTG | 458.32122870559  | 1.37082066064549  |
| AGTTCATAGTCA | 458.332320073498 | 0.565497821834579 |
| ATAATAGACTCA | 458.332730281613 | 0.61830450945637  |
| AAATTTACGTCA | 458.345933058774 | 0.834166472863239 |
| GAGTCAGTAAGA | 458.36337682602  | 0.31563098860936  |
| GAGTAATCTGAC | 458.415287500942 | 0.672351616930208 |
| TGAGTCGATTAA | 458.438232796477 | 0.971747702509511 |
| CCAGATGATGAC | 458.4542508771   | 0.903323822026259 |
| GTCATAACCTTA | 458.458002214957 | 0.583124452462536 |
| CCTGATCTGTCA | 458.501784499764 | 0.486794812568718 |
| CAGCAAATGAC  | 458.517456535354 | 0.642626898652588 |
| GCTGCCTATGAC | 458.520030222231 | 0.976227230399724 |
| GTCACACATACA | 458.530898655915 | 0.456217188938827 |
| TCTCTTGACTAA | 458.551796227308 | 0.429125231502613 |
| TGACATATGGCA | 458.560253788842 | 0.920770523881327 |
| AAAGAAGTGACT | 458.560346241963 | 0.527878383098635 |
| GCCAGATGTGAC | 458.568109117749 | 0.593792598358059 |
| CACGTAATGACA | 458.579804568647 | 1.10685753873762  |
| ATCAACTATGAC | 458.64665044387  | 0.697179342579311 |
| GTCATCGTAGGA | 458.647546450369 | 0.356353512655553 |
| CAATTAGTGACG | 458.651564654004 | 0.428545046639259 |
| ACAGTCGTGACT | 458.655998015786 | 0.460033800783938 |
| CCTTCTGATGAC | 458.671114894421 | 0.480194459427554 |
| TCCTTACAGTCA | 458.683855205077 | 0.540396217175536 |
| CACAGCATGACG | 458.696439669091 | 1.05569548994323  |
| AATCATCCGTCA | 458.709409068209 | 0.639382199148487 |

|              |                  |                   |
|--------------|------------------|-------------------|
| AGAGTCAGGTCC | 458.726848104743 | 0.585479249677214 |
| CTTGCTGATGAC | 458.72787998681  | 0.322936955216028 |
| GTCACCGTAAGA | 458.74051971807  | 0.76452656392439  |
| ATTTAAATGACG | 458.751194399443 | 0.605978366621005 |
| GATGCACAGTCA | 458.756823877173 | 0.679912074491869 |
| GTCATACCCAAA | 458.76359737745  | 0.454933025367443 |
| AGTCAGAAGAAA | 458.778928237464 | 0.363192383898355 |
| TCATATCTGTCA | 458.787357971076 | 0.583771311110702 |
| TGAGTCTACGCA | 458.807935934412 | 0.177153402338725 |
| GAGTCAGGTTAA | 458.814254856717 | 0.378584034355431 |
| TAAGCTCAGTCA | 458.829509079231 | 0.517318404248514 |
| CGTCATCTGCAA | 458.843929985619 | 0.792928985356723 |
| ATGACAGTAATC | 458.844832097869 | 0.241443994187412 |
| CTAGATATGTCA | 458.851273970783 | 0.471205388300194 |
| ACCAAGCAGTCA | 458.862169796088 | 0.990255962173778 |
| ATGAGCAAAATC | 458.876860772596 | 0.428861498900964 |
| AGTCAATTAGTC | 458.877095611959 | 0.23234016995383  |
| GACTACCAGTCA | 458.878014760075 | 0.742323483670752 |
| AGTCACTTCTAT | 458.882970239441 | 0.548675987611677 |
| CTGACAAAGTCA | 458.88408510878  | 0.572862164629636 |
| CTCATCGATGAG | 458.888523790867 | 0.856045849809318 |
| GTCATCATTAAA | 458.900953998269 | 0.846564973260032 |
| ATACCGTGTCA  | 458.913924405326 | 0.680968392505166 |
| TAGAATACGTCA | 458.979866111695 | 0.491033324707026 |
| GCCCTGGATGAC | 459.019845992455 | 0.696913728891548 |
| GTCATAGCCTTA | 459.026081110589 | 0.48252008307219  |
| CGATTATTCATA | 459.030943552735 | 0.334221828157498 |
| ATGAGTCCCAAT | 459.050700586207 | 0.504341760504113 |
| CATGTCCAGTCA | 459.100720185716 | 0.691809590885295 |
| CCAAATAATGAC | 459.113625653995 | 0.829327936304156 |
| TAGTTTGTGTCA | 459.126555403549 | 0.729364665831233 |
| TGACTGTATAAA | 459.1396998475   | 0.679838002392353 |
| AGGCCACATCAT | 459.143034071391 | 0.511203940288299 |
| ATTCAATAGTCA | 459.159199748828 | 0.793510124690925 |
| ACCATTGATGAC | 459.183832185221 | 1.214383480952    |
| CGTCAGACTCAC | 459.209723143676 | 0.421551696127402 |
| CAAGTTTGACTC | 459.246891078127 | 0.976536879454955 |
| ATCTTGACGTCA | 459.256327573905 | 0.5518974772307   |
| CAATATTGTGAC | 459.263641916604 | 0.604705453748304 |
| AATAACGGTGAC | 459.270508827467 | 0.588642292637635 |
| CCGTAGCAGTCA | 459.27380191097  | 0.790095275990406 |
| ACGCATGAATCA | 459.275745647965 | 0.585492341690766 |
| TAGTCACGGACA | 459.285449597693 | 0.232037755525461 |
| ATGACCACTAAG | 459.296785561015 | 0.586959993108686 |
| ATCGTGCATGAC | 459.308318932164 | 0.446626207577919 |
| GTCATCATCACA | 459.317046183331 | 0.78961000356721  |
| CGTCATTGTAAA | 459.33812528193  | 0.73582687878645  |
| ACGTAGAATGAC | 459.372791966915 | 0.47172739485332  |
| ATAGTCTGTCA  | 459.377125496703 | 0.597351594198967 |
| CCGACGATGAC  | 459.38477403966  | 0.50517662284981  |
| GTGTCATGAAAA | 459.404214735153 | 0.33906704241552  |
| AACACTCAGTCA | 459.407780382198 | 0.556398390469417 |
| CGAACAAATGAC | 459.413674954496 | 0.837267454893912 |
| TGACTGAGGCAA | 459.432841757264 | 0.494315796107018 |

|               |                  |                   |
|---------------|------------------|-------------------|
| ATGACGACGTTG  | 459.438491987642 | 0.405942380967825 |
| GTCATCTGCCGA  | 459.533657324956 | 0.793145143720431 |
| TACTTTTACTCA  | 459.538975298232 | 0.496299057531715 |
| AGTCACTCCAT   | 459.559869956313 | 0.625662960316121 |
| ACGCTTCAGTCA  | 459.560627791239 | 0.250770620613615 |
| ATTTGACATGAC  | 459.575333422731 | 0.606540766976521 |
| ATGACGTTGTAC  | 459.57697789384  | 0.473339778435054 |
| ATGAGTCCCTGA  | 459.582727290051 | 0.163432222722045 |
| GCGCGTGCGTCA  | 459.601089775205 | 0.662873924334088 |
| AAAATCTATGAC  | 459.62555518972  | 0.379025238337951 |
| TGACTAGAGTCA  | 459.640526850284 | 0.352053464134282 |
| GGAACCGAGTCA  | 459.643499498109 | 0.54737197690285  |
| GCGGAATATGAC  | 459.722363887565 | 0.363020220814009 |
| CTCGTTGACACA  | 459.734650808433 | 0.419364331806012 |
| ATTGTTGATGAC  | 459.745969630446 | 0.41471147765817  |
| TATGAGTTGTCA  | 459.776136184602 | 0.417076729075322 |
| GTCATATTCTAA  | 459.787693004912 | 1.09070794781278  |
| AACGCTAGTCAT  | 459.793792486856 | 0.473479035868379 |
| GTCATAAGATGA  | 459.809396038701 | 0.318997154957102 |
| CTGGATTGCTCA  | 459.810310734847 | 0.607766318186213 |
| GTCATAGTGCTA  | 459.81708945743  | 0.301365913680702 |
| AGTCAATATGAC  | 459.836857242521 | 0.5453823822669   |
| ATAGTTCGTCAT  | 459.849669093734 | 0.570618198838044 |
| ACGTCTAAGTCA  | 459.861063236651 | 0.462742426304434 |
| TAGTGCGAGTCA  | 459.861088498339 | 0.630349573171797 |
| GATCAAGTCATA  | 459.878109625193 | 0.369239880575567 |
| GTCATCGGAACA  | 459.909103832381 | 0.509980159044446 |
| AGTCAACCCAAAG | 459.927455877994 | 0.548706414223837 |
| TACCTGACGTCA  | 459.932332046844 | 0.246692031777718 |
| ACAAATTAGTCT  | 459.958788982442 | 0.660618757684869 |
| TGAGTAAGTGAA  | 459.96857684243  | 0.49852870000028  |
| CACAAGGATGAC  | 459.998076196911 | 0.709901351043228 |
| TGACTTAATAAAA | 460.012166217456 | 0.502002336465003 |
| CTCGCTGACACA  | 460.070095355336 | 0.401434991480265 |
| GATGAGTTGGCC  | 460.080256678271 | 1.35868537686442  |
| GTCATAACTATA  | 460.113155445273 | 0.609806330456523 |
| CGGGTCTATGAC  | 460.131739997547 | 0.815921847997577 |
| AGTCACTTCGCA  | 460.160901154892 | 0.565483200328148 |
| CATAGGTATGAC  | 460.195798754486 | 0.293332627569999 |
| GATTCGGTCACC  | 460.203102133727 | 0.594129919686707 |
| AATGAGTTAGTC  | 460.214642797946 | 0.404037033955303 |
| GTCAGACTGACA  | 460.215917612    | 0.283174722275185 |
| GGTCATCGATGA  | 460.234577112491 | 0.6339608612812   |
| CATCAGTGACGC  | 460.240780357499 | 0.308020344501295 |
| GACACCATGTCA  | 460.288111213168 | 0.74332480970071  |
| TACTCTGAATCA  | 460.317478422863 | 0.57697339802795  |
| AGTGTCATGAAA  | 460.369792441191 | 0.34616616377444  |
| GTGTCACGTAAC  | 460.37046375493  | 0.427859196740638 |
| CGACAGGAGTCA  | 460.38657150414  | 0.678338303176729 |
| CAGTCAGTATGC  | 460.392312493492 | 0.405605382134236 |
| AAGAACGATGAC  | 460.404396456702 | 0.263926079897271 |
| CTTGCTATGAC   | 460.412430486652 | 0.306460648124037 |
| GTCATTCTCTTA  | 460.41279954931  | 0.578268782676079 |
| ATATCTGTGTCA  | 460.436216988282 | 0.711293213638374 |

|               |                  |                   |
|---------------|------------------|-------------------|
| TCTCTTACGTCA  | 460.439603660653 | 0.225147640509338 |
| CATCACGGTGAC  | 460.454459326969 | 1.03586265845489  |
| CTGACTCGGAGA  | 460.468134771309 | 0.434529305802707 |
| GTCATACAAGAC  | 460.46938928918  | 0.316586779489506 |
| AAACGTTATGAC  | 460.474061458788 | 0.725590901038988 |
| ACATTTGGTGAC  | 460.525534000168 | 1.11918373554155  |
| GTCATACAGACA  | 460.539560207022 | 0.725063263902177 |
| TGACGGATTCCA  | 460.574556516949 | 0.924460441517256 |
| GTGACAGACTTA  | 460.577325256313 | 1.36281027256     |
| TAGCACACGTCA  | 460.581522138096 | 0.310776565472997 |
| ACACATGAATCA  | 460.597094407287 | 0.548624581085124 |
| ATCGAATTAGTC  | 460.601257445945 | 0.415216519723039 |
| TGACGTGCCGCA  | 460.603591211822 | 1.02333185353621  |
| GTC AAGTGACAC | 460.620881669745 | 0.816021158442698 |
| TAAAATCTGTCA  | 460.643562401908 | 0.533808407095364 |
| AGGTAACGTCAT  | 460.662355195186 | 0.488511932394235 |
| GTCATGTGACGA  | 460.690386813661 | 0.379366718175289 |
| GTCATCGGGTCA  | 460.692551452332 | 0.247695489821699 |
| CCACTGGGTGAC  | 460.696733849674 | 0.517793272434218 |
| AGTCTTGCTCAT  | 460.697234459696 | 0.343240486320851 |
| AGGACCTATGAC  | 460.705919665266 | 0.790759546308434 |
| GACTCACGTGAC  | 460.721102146168 | 0.187171624265688 |
| AATCACGAGTCA  | 460.733301031844 | 0.902872360848305 |
| GGAAATTATGAC  | 460.741521950875 | 0.392196292637819 |
| AGTGAGTGAGTC  | 460.770757277625 | 0.310765128458923 |
| ATGACTTGGAGC  | 460.779710743484 | 0.488789670721818 |
| GTCATAAACCGA  | 460.792257134608 | 0.310734290578321 |
| CTCTGGTGTGAC  | 460.795688160447 | 0.490575716657217 |
| TCTGACATGTCA  | 460.807315908379 | 0.347514085586987 |
| CGTGTCAGTGAC  | 460.810485203895 | 0.57920802965558  |
| GTCATGCTGCCA  | 460.831422414432 | 0.570607717148689 |
| CGTCATTCGTAA  | 460.835054505108 | 0.607777881864705 |
| ATGACAGCTAAC  | 460.838056950969 | 0.382605418788568 |
| GGCTCGTATGAC  | 460.842136548095 | 0.696743677878418 |
| CTCTAGGGTGAC  | 460.846171808812 | 0.904546590532565 |
| GCGTACTCGTCA  | 460.848448451473 | 0.573562300447045 |
| CGGTGCGATGAC  | 460.859627511115 | 0.514694724891446 |
| GCGCTACAGTCA  | 460.872010791786 | 0.933997574898167 |
| CGTAATTAATAA  | 460.878308083333 | 0.63928583490869  |
| AGTCACGCTGAC  | 460.884864549052 | 0.276248251139414 |
| GATCCTGTCATA  | 460.887062124174 | 0.203227472580768 |
| GCGTTTGCGTCA  | 460.896341454813 | 0.750020143501358 |
| AGTCATGAGCTG  | 460.929610989272 | 0.389624357410464 |
| GTCATCTTGAAC  | 460.948642525784 | 0.259128308745089 |
| CCAACATATGAC  | 460.978977468262 | 0.222419913819765 |
| AGTCACCTCCAA  | 460.981723676151 | 0.544030783348338 |
| CCTACCTAGTCA  | 460.987290484535 | 0.426437821647446 |
| GTCATCATCGGA  | 460.991672353158 | 0.489213528286653 |
| GTCATAGACAAC  | 461.010581260627 | 0.821783183472814 |
| CGTCATCGGTGA  | 461.016645401262 | 0.501283295345756 |
| AGTCACTCTGCA  | 461.046663430163 | 0.20314141856728  |
| GAAC TTGTCACA | 461.057284010899 | 0.463992565195154 |
| GTCATCAGGCCA  | 461.072983071481 | 0.733717743586511 |
| ATCAACTGTGAC  | 461.104089017104 | 0.630009132494556 |

|              |                  |                   |
|--------------|------------------|-------------------|
| CTATATACGTCA | 461.120461273655 | 0.434448855073885 |
| GCCTTGTGTGAC | 461.124769377417 | 0.837371735107819 |
| GTCATATAGGCA | 461.139744142732 | 0.684085456578751 |
| ACGTAAGTGTCA | 461.175390889612 | 0.834382009875506 |
| CCGATAAGTGAC | 461.182643569979 | 0.828370506580944 |
| CGAACAATGACG | 461.192113984589 | 0.446359425914516 |
| TAGACTTTGTCA | 461.195905282911 | 0.483646465372516 |
| GGCCTAGAGTCA | 461.241213236422 | 0.339601001584363 |
| GCCGACTATGAC | 461.241430921108 | 0.762825374436389 |
| CGTCATATGGCA | 461.243150178791 | 0.345813306768027 |
| TAGTAGCAGTCA | 461.272047161836 | 0.622357195891497 |
| CCTCAGTAGTCA | 461.27858250678  | 0.485483659951898 |
| AGTCACCTCGCA | 461.280232646578 | 0.258195580425064 |
| CGGTCTGTGTCA | 461.319114563988 | 0.706113018695584 |
| AGTATCGATGAC | 461.323270644506 | 0.360909327463403 |
| GTCATCGAGTAA | 461.323916821386 | 0.378109071233866 |
| AACCAGTCAGCG | 461.328416564895 | 0.476712283836753 |
| AGACCGTATGAC | 461.330188211894 | 0.65772901031843  |
| AGTCACTCTTGC | 461.337311766026 | 0.429551671983381 |
| ACGTCACCAGGA | 461.350330309938 | 0.409814557013126 |
| CGGTCCTATGAC | 461.355848737467 | 0.643512754680556 |
| GAGTCAAACATC | 461.357392907969 | 0.777571210698038 |
| CTTATATATGAC | 461.359597567468 | 0.676711424661499 |
| GTGATATATCAC | 461.376626906748 | 0.559134372101067 |
| ACGGCGAATGAC | 461.385460084725 | 1.16525779968318  |
| GAGTCAGGTATC | 461.39255178425  | 0.558126484581585 |
| AATGGCTATGAC | 461.39922661721  | 0.617221519067219 |
| CTCAATTCGTCA | 461.413699739321 | 0.512573599975947 |
| ATGACGTCGACG | 461.415390532581 | 0.449888330792251 |
| GTCATTCTAGAA | 461.430103669359 | 0.561424736588165 |
| GTCACAGTAATA | 461.433801531874 | 0.457199651014203 |
| AGTCATGGTCTC | 461.460359509663 | 0.461590058657109 |
| GTTAGCGAGTCA | 461.461876315087 | 0.534704938136759 |
| CTCATGGGTGAC | 461.466801132909 | 0.604143114108395 |
| AGAGTCAAATGA | 461.505259761003 | 0.297626482617371 |
| CGTATGTGTGAC | 461.506396674854 | 0.428921030374414 |
| GTCACTATCTGA | 461.515103781741 | 0.267299007571589 |
| CGTTGCTATGAC | 461.51985268671  | 0.602767146472182 |
| CTCTTCGACTCA | 461.538222829128 | 0.517502718320039 |
| TCATCTACGTCA | 461.541930409928 | 0.620629008356891 |
| ATGATGTAAGTC | 461.559008861317 | 0.420836137954589 |
| GTCATCTGGTGA | 461.566357511785 | 0.391813572393868 |
| AACGGGTATGAC | 461.571520468357 | 0.694203391585677 |
| CCTCTAGTATGA | 461.597344691852 | 0.932603815711744 |
| CGATAGAATGAC | 461.615157767043 | 0.486141274705489 |
| GTCATCCAGTGA | 461.62388410186  | 0.770886729452102 |
| ATGATGTGTACA | 461.636528687403 | 0.381346757072657 |
| GTCATATTGCCA | 461.636856872009 | 0.641216890785336 |
| ATGACAGAGCGA | 461.649311063499 | 0.16834964188132  |
| GTCATCACGAAC | 461.656127785169 | 0.943870797649472 |
| ACATATTATGAC | 461.663327091504 | 0.31144400957546  |
| CCACAGTGTGAC | 461.68416488005  | 0.396797524266502 |
| GCACCTGCGTCA | 461.693483727436 | 0.460339395660295 |
| ATCGTGGAGTCA | 461.708993998406 | 0.470174425048751 |

|              |                  |                    |
|--------------|------------------|--------------------|
| CAATTGGATGAC | 461.729032309158 | 0.615206352311859  |
| AGGCTTGACTAA | 461.764016174792 | 0.357717799772834  |
| CAACACACGTCA | 461.768077648615 | 0.542434508824214  |
| CCGTACGTGTCA | 461.775733328013 | 0.392142747143921  |
| GCCCGGTATGAC | 461.776617107751 | 0.411687656195838  |
| GCCCACGGTGAC | 461.777190504369 | 0.703840206649476  |
| CAACTGTAATGA | 461.783452174463 | 1.16186186233315   |
| GGCATAGATGAC | 461.800158287074 | 0.290783970613987  |
| CGTTTGACTCGA | 461.811250786695 | 0.340305614999873  |
| TCAGTCAAGTCA | 461.852649327985 | 0.483213591184826  |
| CATACTGACACA | 461.883490278377 | 0.753181123316283  |
| GTCATCTATAAA | 461.884149531673 | 0.359076465702947  |
| GCCTTCGACTCA | 461.901281642962 | 0.48185794345842   |
| ATGACTTGTGAC | 461.91833220332  | 0.571993163102177  |
| ATTCCGGTACAC | 461.947729246653 | 0.238604049716666  |
| GCAATCTGTGAC | 461.966022841224 | 0.827429395514773  |
| CGCGATCCGTCA | 461.978237665388 | 0.639850338795667  |
| ATGAAATATGAC | 461.983179718918 | 0.424646066930124  |
| ATGACAAGCCAT | 462.008698786457 | 0.768277177417376  |
| CATTAATGTGAC | 462.00925133772  | 0.640391741644841  |
| GCTTTCGACTCA | 462.04472091069  | 0.473479454304999  |
| GTCATCTTTGGA | 462.054724769718 | 0.671888599000565  |
| CTCGATCTGTCA | 462.075131675092 | 0.54774129866764   |
| AGTCACTCTGAT | 462.075556098108 | 0.322556353843147  |
| AGATCGTATGAC | 462.091923686223 | 0.181526939104424  |
| CTAAATTGACTC | 462.094489745663 | 0.423604951433868  |
| GTCATCCGTGGA | 462.101881315746 | 0.706727873358655  |
| AAACCGATGACG | 462.123122177144 | 0.368861559520954  |
| ATGACGAACATA | 462.127725306775 | 0.575858794443667  |
| ATGACACGGCTA | 462.13507408238  | 0.216630392879976  |
| AATGAGTGTGAC | 462.136296872213 | 0.382967106757424  |
| AGTTCCTATGAC | 462.147399966027 | 0.471700379676778  |
| AGTCACTCTCC  | 462.160920994922 | 0.223626495391562  |
| ACTCATTTGTCA | 462.189794339228 | 0.351809613315299  |
| ACGTGCGATGAC | 462.212154227912 | 0.653392804225198  |
| GTATTGACTCA  | 462.213446277325 | 0.800726145368997  |
| AATAGTCAACTA | 462.214095711186 | 0.343026686477861  |
| AGTCACTCTGTC | 462.237645935977 | 0.372888660215898  |
| ACTTCCGATGAC | 462.237972088365 | 0.0795342585064094 |
| TACTTCGACTCA | 462.246262442014 | 0.33074638093576   |
| CAGGAGGATGAC | 462.335174265455 | 0.407869009272656  |
| AAGGCGTGACTA | 462.33842591351  | 0.352578766569207  |
| AACGTGAATGAC | 462.339105921707 | 0.728955058555621  |
| CACGCTGATTCA | 462.377776156622 | 0.446862849544704  |
| ATGTGTGATGAC | 462.380909208838 | 0.55392925947195   |
| AAACTGTGACGC | 462.390788960332 | 0.327419786253377  |
| GCCTTGGATGAC | 462.410618180252 | 0.571155897799768  |
| TAGAGTGAATCA | 462.420727272389 | 0.554490188687499  |
| GTAACGATGAC  | 462.424703555354 | 0.590161627686721  |
| GTGACGCTGACA | 462.425046334281 | 0.279532569419786  |
| TGACTTAGTTAA | 462.432417898464 | 0.535514659495183  |
| CTGTTGGATGAC | 462.436528501237 | 0.810803694262467  |
| GTCACAGTGTGA | 462.449785051633 | 0.772777095672988  |
| AACCTAGAGTCA | 462.458270807309 | 0.611055323134062  |

|              |                  |                   |
|--------------|------------------|-------------------|
| GTCATATACGGA | 462.463701796959 | 0.818313231854433 |
| GTCATTATAATA | 462.477134641941 | 0.497557743568158 |
| AATGTCTGAGTC | 462.488254095701 | 0.660614017894653 |
| ACCTAGATGACG | 462.494744602584 | 0.576844322419499 |
| CATAATACGTCA | 462.506159453642 | 0.63679449366644  |
| TGACACAACCAA | 462.508735455577 | 0.412899319744012 |
| ATGACCGAATCA | 462.517370360694 | 0.415084397614528 |
| AACTTACAGTCA | 462.520996488465 | 0.869528714399769 |
| ACGTTGATGACG | 462.530284116297 | 0.665422136779043 |
| ACATCACGTGAT | 462.532352171847 | 0.517389385541548 |
| GTATGTGAATCA | 462.533952414113 | 0.800401202437067 |
| CGTCATTGGTTC | 462.539977212679 | 0.46479549477511  |
| GTCATCCCGTCA | 462.587410638673 | 0.35720181196986  |
| GTGAGTCGGTCA | 462.591042045303 | 0.5235035627805   |
| CTTGCGGAGTCA | 462.607837429526 | 0.780511702196326 |
| ACGTTAATGACA | 462.613607108342 | 0.454867283875043 |
| CTCGACGACTCA | 462.621359478982 | 0.597035465125185 |
| GTGACTCGGGCA | 462.641005793541 | 0.321514205765951 |
| CGACTTCGATGA | 462.650854836479 | 1.04241898042117  |
| CAGTATTGACTC | 462.652393716742 | 0.517379395475995 |
| GTCATGATTTGA | 462.685233120726 | 0.528130677532206 |
| CTAAACGACTCA | 462.701486033473 | 0.42723625374972  |
| ACACTAGAGTCA | 462.709866176546 | 0.421815675702864 |
| GAGCTTTAGTCA | 462.718881653469 | 0.363363080709025 |
| AGTTTTGTGTCA | 462.720027621979 | 0.391134984356017 |
| CTAACGTATGAC | 462.735884746675 | 0.600648220275365 |
| ACCTCCACGTCA | 462.743665395687 | 0.330442157967442 |
| CCGTAGCGTGAC | 462.746385684871 | 0.648565340854011 |
| ACAACCTACTCA | 462.776534449519 | 0.253568378618711 |
| CCCTATCTGTCA | 462.79761544425  | 0.421876774518811 |
| AGTGCTCGGTCA | 462.815570424965 | 0.610240305877989 |
| CCTTATAAGTCA | 462.845095950886 | 0.49869760582937  |
| CAACACTATGAC | 462.847514389875 | 0.427684967312554 |
| ACATTGACGTCA | 462.90536761489  | 0.373865634309783 |
| GTCATCATATTA | 462.906746587784 | 0.516387908330674 |
| CTAAAGTGAGTC | 462.921691957881 | 1.11866589535514  |
| ACAATTGTGACG | 462.922196030045 | 0.529614303844855 |
| ATAGCTTACTCA | 462.95004127912  | 0.411950600854384 |
| GCTCCTTATGAC | 462.956008092763 | 0.435260908125246 |
| TCCCAGATGACA | 462.960371097642 | 0.816145305407919 |
| GATGACAGCTAC | 462.965506925299 | 0.549761380509836 |
| TGACAGATACCA | 463.038254121818 | 0.802296996940185 |
| ACTAAAGATGAC | 463.074280353485 | 0.641943441379122 |
| AGCTGGTATGAC | 463.07731823443  | 0.29253508053867  |
| ATGACCCAGAGC | 463.078066696525 | 0.538732294362716 |
| CATCTTACGTCA | 463.088437801558 | 0.559827106516997 |
| CTCACTTATGAC | 463.09554470097  | 0.474636146326669 |
| ATGACGTTACAA | 463.100413612461 | 0.371536113055043 |
| AGTCACGGATAC | 463.10403635713  | 0.39066707915314  |
| AATACGTATGAC | 463.152567528597 | 0.406983852395458 |
| CCTGTGATGAC  | 463.195972956589 | 0.385298847136758 |
| TCGATCTAGTCA | 463.259541434492 | 0.305788107708442 |
| CGTCATCAGCAA | 463.263707077274 | 0.419798223938534 |
| AGCGTTGATGAC | 463.302421364428 | 0.700557362150415 |

|               |                  |                   |
|---------------|------------------|-------------------|
| ATTCTTGACTAA  | 463.309687996336 | 0.447751819150029 |
| GTCATTGTTAAA  | 463.311494541755 | 0.438828144376143 |
| ACCATGAATGAC  | 463.322046729949 | 0.29620696710236  |
| TATTTTGTGACA  | 463.331541519427 | 1.37265311829357  |
| TCTGTGGAGTCA  | 463.335218630648 | 0.402200200976574 |
| CGATAACAGTCA  | 463.361425173573 | 0.871740026210802 |
| TAACTACAGTCA  | 463.414538423651 | 0.412016487626866 |
| CGGTCCCGATGA  | 463.415151701704 | 1.44866721017894  |
| TGACTGCATACA  | 463.422776068915 | 0.679317236869273 |
| CTCTCCACGTCA  | 463.423078350239 | 0.375559406715365 |
| ACCGTTGACTGA  | 463.439392936757 | 0.846767847044797 |
| CTTCGTTACTCA  | 463.444027876308 | 0.319187912772693 |
| GCAGATTATGAC  | 463.461505202516 | 0.68101116941886  |
| ACGGACTAGTCA  | 463.483163775643 | 0.936800370817507 |
| TCTAATATGTCA  | 463.488704625991 | 0.299441642277798 |
| ACCGAAGTGTCA  | 463.501662222859 | 0.535750938667593 |
| TGAGTCGAAGCA  | 463.517670784321 | 0.430265134417126 |
| ATAGCGTGAGTC  | 463.521258806644 | 0.911818376378918 |
| TATCGTGAATCA  | 463.548070354803 | 0.518176269503804 |
| GTCATTATTGGA  | 463.607338515685 | 0.402153671448803 |
| GTGACTACCAAC  | 463.620409687728 | 0.412607391782177 |
| AGAATGTATGAC  | 463.632206188807 | 0.271382930451124 |
| GTCATCGGCGCA  | 463.659116299261 | 0.214335910445885 |
| AAGCCCAGTCAT  | 463.661065500737 | 0.295888914909635 |
| CGAGTTCGAGTC  | 463.669619346179 | 1.52661737660329  |
| GTCATATGCAAC  | 463.67414574089  | 0.471998803418399 |
| GAAC TTGATGAC | 463.699803891197 | 0.525466846803555 |
| ATGACAGACATC  | 463.734536777312 | 0.532739044049639 |
| AACTATTATGAC  | 463.741844532194 | 0.515643052861804 |
| TAACTCGGTCA   | 463.750586731586 | 0.534260529938981 |
| ATGACTTGTGGA  | 463.779199312385 | 0.477679528170815 |
| TCGTACCAGTCA  | 463.783392933815 | 0.328807409442268 |
| CAACTAGAGTCA  | 463.853305806787 | 0.624782588250362 |
| AGTCACTCCGTG  | 463.85650943756  | 0.795115246191764 |
| GTCAATCTGTCA  | 463.873830542126 | 0.823679538439043 |
| ACTGTAAGAGTC  | 463.883017859458 | 1.02470973932478  |
| TCACCTGACTGA  | 463.909462287712 | 0.329868873365756 |
| TCTGTCCAGTCA  | 463.924601223294 | 0.317054663076478 |
| CACAAAGTGTCA  | 463.929043732902 | 0.816234518190821 |
| TACAATCTGTCA  | 463.933063464018 | 0.577403889089921 |
| ATAATGCAGTCA  | 463.954351919506 | 0.917260958287283 |
| AACTTTACGTCA  | 463.955182048191 | 0.454268406497516 |
| AGTATGGATGAC  | 463.977512865964 | 0.376043787215164 |
| GTCATCGCTGAA  | 464.016284411003 | 0.94824643385643  |
| GTCATGCATGAA  | 464.029062797737 | 0.475463125244372 |
| AACGTTCTGCAT  | 464.044626135531 | 0.756727665813089 |
| GGTTATTGTCTCA | 464.060978424045 | 0.828051241698075 |
| GTCACACTAGGA  | 464.064940317956 | 0.581707469630214 |
| CCTCGGAGTGAC  | 464.091327460637 | 0.99655468794931  |
| AAGCAGTGAGTC  | 464.133644086997 | 0.347977025753107 |
| CACCAAGGTGAC  | 464.13648380829  | 0.680733029439531 |
| CTCTATTATGAC  | 464.147528917189 | 0.253860543770749 |
| AATCCTGTCATA  | 464.182421170993 | 0.40865849470307  |
| GAGTCAGGCAGA  | 464.184551299243 | 0.241731725789671 |



|              |                  |                   |
|--------------|------------------|-------------------|
| GTCATAGTATCA | 464.193505021095 | 0.50042503307055  |
| CGTCATGCATGC | 464.193851305603 | 0.896118001662755 |
| CCTGTGTAGTCA | 464.194163094265 | 0.769362477928906 |
| GGCACACAGTCA | 464.233141541104 | 0.584644806022813 |
| CCTCGTGGTGAC | 464.269722137851 | 0.881586933734398 |
| ATGACTAGCGTG | 464.280381875534 | 0.352502228600548 |
| TGACAACATTAA | 464.280603265492 | 0.390225890597494 |
| GAAGTTGTGTCA | 464.314516825214 | 0.430846122059736 |
| GTCATATCGGAA | 464.336015872945 | 0.524481539500098 |
| CCTAATATGTCA | 464.356529451146 | 0.703301446205422 |
| GATATATATGAC | 464.361406177137 | 0.711283939956915 |
| CACGAAGATGAC | 464.363404229817 | 0.649594361468564 |
| GACCCATATGAC | 464.40672083118  | 0.493434865693097 |
| AAAAGCGATGAC | 464.406733034423 | 0.441539828733336 |
| ATGTTGTATGAC | 464.406904425418 | 0.685481516690161 |
| CGTCATTAGTAA | 464.423181227665 | 0.876977914809701 |
| GTCACCCAGGA  | 464.423301413502 | 0.488082516784316 |
| TGATTAGAGAA  | 464.426485920138 | 0.428624202218684 |
| GGACCTTACTCA | 464.468598174738 | 0.441072025683009 |
| TGACTTAATTAA | 464.476209203276 | 0.709533730328056 |
| GACTCACTTATA | 464.493903313905 | 0.394830580068349 |
| AGAAACGATGAC | 464.538377690841 | 0.449987958393887 |
| GTCATTGTCGAC | 464.548311355157 | 0.510722895772119 |
| CTCAATCGGTGA | 464.564499295488 | 0.952957774327359 |
| AAATCGGATGAC | 464.565682185894 | 0.446967580052648 |
| GGCCTGGATGAC | 464.575384620998 | 0.497474747753087 |
| CAAGTGGAGTCA | 464.578795435267 | 0.380350933377721 |
| ACAACATAGTCA | 464.599623374293 | 0.645664290073153 |
| GAATCCGATGAC | 464.60369059179  | 0.756689844096195 |
| GACTAATCCGGC | 464.604875504885 | 0.862921752014628 |
| ATGACTTGGCGA | 464.623059576117 | 0.102460649000921 |
| TGAACACGTCAA | 464.63589170436  | 0.544885495434871 |
| AATGGAGTGACT | 464.636231225686 | 0.441799936731434 |
| CATATTTATGAC | 464.639146130143 | 0.491045590997885 |
| GAACACTATGAC | 464.651917549164 | 0.218665218791923 |
| AATCAAGACTCA | 464.667149962817 | 0.531844892868684 |
| AGCTTTTACTCA | 464.694859745528 | 0.460101050831761 |
| ACGTAACGTCAT | 464.711738694824 | 0.33371494356694  |
| ACTAAGTGAGTC | 464.715179442064 | 0.560503427362985 |
| CGAGCGTATGAC | 464.724057568185 | 0.740824509017995 |
| GTCACCTTTTGA | 464.765798714248 | 0.706049872577177 |
| CACGACTATGAC | 464.766793982736 | 0.552501620741623 |
| GTCATCTAACGA | 464.784013470705 | 0.351768128523547 |
| AGTCACCTTGGG | 464.824213264538 | 0.563905463682979 |
| GATGGTGAATCA | 464.888981420288 | 0.295963545243209 |
| GTCATAAGCCAA | 464.890103598532 | 0.865912951590422 |
| ATTTGCGATGAC | 464.899582051353 | 0.460025488614867 |
| GTCATTAGCTGA | 464.911614001958 | 0.87957517557972  |
| GATGACCGGTAC | 464.915300389437 | 1.3704249928684   |
| AGATAGGATGAC | 464.926027512233 | 0.216017481946131 |
| CCACGATATGAC | 464.928739153833 | 0.324104624922273 |
| GTCATCCGTCTA | 464.929803076799 | 0.445225626972135 |
| GTCATTTAAGAA | 464.950275585619 | 0.643292015668484 |
| ATTGGAATGACG | 464.979988818292 | 0.51409755583268  |

|               |                  |                    |
|---------------|------------------|--------------------|
| AAAGCTGCATC   | 464.985901103346 | 0.4678412205123    |
| TCATATTTGTCA  | 464.989407545675 | 0.127893429257646  |
| GTCATATCCTGA  | 465.001551558697 | 0.624253207272856  |
| ATCGGGGAGTCA  | 465.004822426801 | 0.30953309189524   |
| TGACGTAAGCAA  | 465.008498240773 | 0.40256736404356   |
| ACTGACAATGAC  | 465.066199931203 | 1.05125130202142   |
| TCTCTGTAGTCA  | 465.076617531869 | 0.393611695720233  |
| CAGGACTGTGAC  | 465.140393348166 | 0.483938250026187  |
| CGTGCTGCGTCA  | 465.164195138505 | 0.9098669224682    |
| ATGACGATCCCG  | 465.177198250838 | 0.0609606457453444 |
| ATGAACTGTGAC  | 465.19378307785  | 0.487275929020726  |
| CGAGTCTATGAC  | 465.197764024396 | 0.700761188514433  |
| AGTGGTCACACT  | 465.209375154183 | 0.397858081019631  |
| CAGTGGGAGTCA  | 465.218357178026 | 0.459782259549058  |
| CGTCATCAGAGA  | 465.248898611771 | 0.48955887090929   |
| ACGAACGACTCA  | 465.277179660951 | 0.68835229086891   |
| TCGAGTCAAAGA  | 465.294386910723 | 0.470828309686329  |
| GGTTCGAGTCA   | 465.29591775456  | 0.453167506677451  |
| CTGCGCTATGAC  | 465.299752290856 | 0.892454709030866  |
| AGTTCTTATGAC  | 465.310914925586 | 0.536155806838072  |
| GTCATATTAGTA  | 465.33660039105  | 0.298792767181457  |
| GTCATCAGGTGA  | 465.340734136281 | 0.46926517899287   |
| CGTTCTGATTCA  | 465.350431931193 | 0.277737454341351  |
| ATGACCATGACA  | 465.361971965713 | 0.559760248582688  |
| ATAGCGTCATC   | 465.37179096796  | 0.44838453739136   |
| GTGTCACCTATA  | 465.393981117879 | 0.328420442134707  |
| ATGACGTTGCTA  | 465.414095566144 | 0.50311811986979   |
| ATGAGCAAACAAT | 465.420034343948 | 0.31876387727184   |
| GGTGCTTAGTCA  | 465.42873941044  | 0.295541241743311  |
| CGATAAGATGAC  | 465.432447678176 | 0.654263647988605  |
| GTCATCGTTAAC  | 465.437059608822 | 0.742831299591922  |
| ATGCAAAATGAC  | 465.446176401549 | 0.741089982640296  |
| AATCGCTATGAC  | 465.462433489439 | 0.653707198205927  |
| ACTAAGGATGAC  | 465.478961145781 | 0.46847644366045   |
| TCCGTAGACTCA  | 465.485694385342 | 0.669843830972629  |
| CAGTGCGAGTCA  | 465.506462364788 | 0.589623204372715  |
| AATGAGGTGACT  | 465.511162873078 | 0.274720070987632  |
| CTCGAAGTGTC   | 465.530491148291 | 0.441770089193425  |
| AATGCTCAGTCA  | 465.535547122493 | 0.62109817859593   |
| TCGACTGAATCA  | 465.550596924179 | 0.554094913321909  |
| ATGTTAAATGAC  | 465.566215775809 | 0.68615713127109   |
| GGGTCACAGTCA  | 465.567129186357 | 0.578776982401168  |
| AAACTTGTACC   | 465.592413094328 | 0.410657174084585  |
| GTAGGTAGTCAC  | 465.592599141475 | 0.26723303109503   |
| CACACTGACACA  | 465.595556530727 | 0.355156198285026  |
| ACAAACACGTCA  | 465.600315791578 | 0.612614222325717  |
| CATATGAATGAC  | 465.605695107195 | 0.505941639151551  |
| GAGTCAGTTAGC  | 465.613086272878 | 0.416788216708161  |
| GCTCACACGTCA  | 465.617885961334 | 0.615459972586296  |
| CCTCTAGATGAC  | 465.625460202929 | 0.538039104527756  |
| GCACTACTATGA  | 465.626383616887 | 0.81864666493688   |
| CGGTTGACTCA   | 465.63446938282  | 0.489132687152554  |
| ATGACGCGCCAT  | 465.634932181673 | 0.419162204034986  |
| AGTACCCTCCA   | 465.642490592192 | 0.45242600218574   |

|               |                  |                   |
|---------------|------------------|-------------------|
| CGTTCTACGTCA  | 465.646737330748 | 0.333285659094964 |
| ACTCATAGTCAG  | 465.667221149518 | 0.619015249709146 |
| GTCATATTAATA  | 465.712070128852 | 0.844088423805904 |
| ATTTGTAATGAC  | 465.721456861615 | 0.661177044963067 |
| ACCAGGGAGTCA  | 465.735855982693 | 0.797698972533869 |
| TGACTAGACGAA  | 465.758603938968 | 0.4920998423659   |
| ATCTATTTGTCA  | 465.759611841011 | 0.255967446539126 |
| GTCACGCAATCA  | 465.767889231222 | 0.822557145031674 |
| TAATATAAGTCA  | 465.788561913436 | 0.365896473611805 |
| CAAGACGACTCA  | 465.794078161046 | 0.569633068170365 |
| AACCTGTATGAC  | 465.80124141831  | 0.40267571646449  |
| CGAACCTAGTCA  | 465.806962391926 | 0.504512930986469 |
| CAGTAATGACAA  | 465.841870791071 | 0.8489362442934   |
| CATTATCCGTCA  | 465.844729308737 | 0.379915807554203 |
| GTCATGCTTTGA  | 465.845162884579 | 0.716861257822484 |
| GTCATAGGGTAA  | 465.855660471671 | 0.324399826561696 |
| ATGACACTCTGA  | 465.894949535936 | 0.49703672233496  |
| AGACTCCGTCAT  | 465.912675160409 | 0.371891902725459 |
| AACGGATTAGTC  | 465.928463154347 | 0.533036634909362 |
| AGAGTCAATGAT  | 465.940531851217 | 0.407984265315506 |
| CCAACTTATGAC  | 465.942831801078 | 0.128806961175051 |
| GTCATACCAGCA  | 465.944191738075 | 0.34693306459272  |
| CTTTGGTATGAC  | 465.978931074466 | 0.526602438796445 |
| CTTCAGGATGAC  | 465.984284744663 | 0.895994203305258 |
| TAGTCACGCTGA  | 465.987476444514 | 0.436724422445521 |
| CTAAGTGATGAC  | 465.999669256814 | 0.503565013754075 |
| GTCATCAGTATA  | 466.013042608432 | 0.609377287561796 |
| GACGTCTATGAC  | 466.022583406199 | 0.78501754938662  |
| CCGATTAAGTCA  | 466.029677906902 | 0.472840427828841 |
| GTCACAATTTGA  | 466.050782077789 | 0.569471068313134 |
| GCCTGTTATGAC  | 466.061166987728 | 0.737591672610245 |
| GAGTCAGTATCA  | 466.080660960627 | 0.578841745491474 |
| AGCAATACGTCA  | 466.095299498578 | 0.339786929607347 |
| CAGCAATAGTCA  | 466.152574338401 | 0.308651834296416 |
| ATTTTCGTGAGTC | 466.16271322064  | 0.608512680511519 |
| CTGGCATGACAC  | 466.163529238467 | 0.710085869821193 |
| AAGTCGTGACTG  | 466.178993034578 | 0.452944107091591 |
| GCTGTTGACTGA  | 466.200997231913 | 0.775372333001308 |
| TGATTACAGACCA | 466.201686957763 | 0.708714813993422 |
| CTCTGATATGAC  | 466.22374698156  | 0.35249915565682  |
| CGTCATGAATCA  | 466.224732571445 | 0.509409631739888 |
| TGACTACTCACA  | 466.263829083419 | 0.179786131750695 |
| AGTGTCATGTCG  | 466.265531492914 | 0.286931455882373 |
| TAACAAGACTCA  | 466.278674712505 | 0.51019149074179  |
| TAGGTTTACTCA  | 466.280389433031 | 0.390373407030507 |
| AGGAACGATGAC  | 466.29959247535  | 0.464907586721093 |
| ACATACGTGTCA  | 466.33214743835  | 0.521423836860263 |
| AGTCACCCCTAC  | 466.34184215897  | 0.271583226394984 |
| ATGACATTGTCA  | 466.395168931482 | 0.428714206742237 |
| TAGAATTGTCTCA | 466.396360811704 | 0.39716678915677  |
| AAACCTGTGACA  | 466.397003211137 | 0.553261552984729 |
| CGAAAATTAGTC  | 466.406225906553 | 0.82838013767454  |
| TACTACACGTCA  | 466.417130527411 | 0.477960557250215 |
| AATTTGTGACGT  | 466.421189315846 | 0.237177798238566 |

|              |                  |                   |
|--------------|------------------|-------------------|
| CCATGGTATGAC | 466.45245446934  | 0.720147699382183 |
| GTCATAGGCAAA | 466.472684471829 | 0.673999258200574 |
| AGAGTCAATATG | 466.481607543473 | 0.49494193231081  |
| AATCAGGAGTCA | 466.485551323037 | 0.529313517682434 |
| CATCGTTATGAC | 466.490469817478 | 0.446052422410264 |
| AGTCAGACTGAC | 466.496035424979 | 0.611465787919326 |
| ACACATCGTCAT | 466.513015701558 | 0.231013792121235 |
| ACTAATCAGTAA | 466.523851029265 | 1.1017222850758   |
| GTAATATGTGAC | 466.54844795936  | 0.552169318201036 |
| GAATGTATCACC | 466.561807095367 | 0.480467588505903 |
| GACACGCATGAC | 466.572061017079 | 0.914615523366588 |
| GGCACGTATGAC | 466.61915200804  | 0.731427559179658 |
| ATTGGGTACCCC | 466.63088746931  | 0.106003016690946 |
| GTCACCGCAACA | 466.660104861546 | 0.487817624582879 |
| GTCATACATCGA | 466.687781630893 | 0.728005991658945 |
| GTCACCACGTGA | 466.694014228822 | 0.798583069700517 |
| TCACCTAAGTCA | 466.695218963842 | 0.436236899242609 |
| CGAAGCCAGTCA | 466.708763760259 | 0.74777777419836  |
| CCACATGGTGAC | 466.724996716162 | 0.593853644676793 |
| CCCTTAATGACA | 466.72789897253  | 0.500596269136052 |
| GACGGTAGTCAC | 466.73793937946  | 0.768042382209102 |
| ATGTATGATGAC | 466.768507553174 | 0.582883182514983 |
| GTAAGATTCATA | 466.77707946846  | 0.399016796288031 |
| GGGAATTCGTCA | 466.789921009653 | 0.792669321237406 |
| AAGGGGTGTGAC | 466.834284153438 | 1.37213463886447  |
| CCTGCTGTGTCA | 466.858206427313 | 0.547110479144982 |
| ACTGACCAGTCA | 466.858238340828 | 0.942616251851642 |
| AAAACGGAGTCA | 466.863382730292 | 0.466856518884117 |
| ACGCTTACGTCA | 466.864600379822 | 0.48303442087632  |
| TGACGTGCCAAA | 466.866527032343 | 0.781574386412905 |
| ATTACGTAGTCA | 466.871175934998 | 1.0467027506542   |
| GCGTCACGTAAC | 466.880624197105 | 0.397406949921577 |
| GAGTAATATATA | 466.883152611552 | 1.37983010770603  |
| GTCACCGTGGAC | 466.904478503103 | 0.889355872899249 |
| ATAAACGACTCA | 466.913341200011 | 0.96856259469154  |
| GATAATGATGAC | 466.917420556902 | 0.452541164891324 |
| AATGATGTAACA | 466.973903643293 | 0.272087338600937 |
| ACGACTTCGTCA | 466.981596797934 | 0.245315609049092 |
| ATTATAGTGTCA | 466.991872294868 | 0.666314036413392 |
| GTCACGTTGTCA | 467.0005499566   | 0.234981124916347 |
| GTGAGCAAATTA | 467.023622738677 | 0.455927420092828 |
| GATAATCCGTCA | 467.031407590608 | 0.756860134391093 |
| ATCGGCGTCATC | 467.061814025216 | 0.522717607001138 |
| GTCATCAGCTAA | 467.069599967496 | 0.74781243927336  |
| GTCATAATTCTA | 467.074039352437 | 0.508924246228357 |
| AAATTAGACTCA | 467.088680715055 | 0.421200490382133 |
| CCTCCGATGACG | 467.091811362343 | 0.423754291897057 |
| ACGGACGATGAC | 467.102749878488 | 0.737852265710282 |
| TAACAGATGACA | 467.105947066089 | 0.383757188601546 |
| ATGCATCTGTCA | 467.131680491779 | 0.166880359726789 |
| CTTAAAGATGAC | 467.146842039502 | 0.437830897131358 |
| TATGACAGTGCA | 467.164268140959 | 0.583037066987225 |
| TCTGCTGACACA | 467.172163503814 | 0.536762208159696 |
| GGTCACGATGAC | 467.173570400774 | 0.455656902345749 |

|              |                  |                   |
|--------------|------------------|-------------------|
| CTTGCATAGTCA | 467.201134007462 | 0.616005307288507 |
| ACGTTATGTGAC | 467.21600577413  | 0.47622547653819  |
| GTCATCACGAGA | 467.235886863106 | 0.476166265096431 |
| CAGCCGAATGAC | 467.240514702289 | 0.768449355829128 |
| GTCATAGATAGA | 467.251045972392 | 0.240220291231413 |
| CTTCATTGACTC | 467.262469808875 | 0.199900657915885 |
| CATTCGGGTGAC | 467.270342086529 | 0.566572926280342 |
| AATCGTGATTCA | 467.273830961032 | 0.727056215226598 |
| ATGACACGGTAC | 467.28293601455  | 0.382315027404565 |
| CAGCGTGTGTCA | 467.300957936672 | 0.742304149743907 |
| TGACCTGCGTCA | 467.301567254777 | 0.701722306942728 |
| AGCGTCACGTCA | 467.315570684817 | 0.47520295355057  |
| ATTAATCGGTCA | 467.344823043541 | 0.68056338185488  |
| ATGACGAACTGC | 467.357461176976 | 0.289634524488869 |
| GCTATGTATGAC | 467.358686971684 | 0.505681736021975 |
| ACGAATATGTCA | 467.365928493835 | 0.644566945830637 |
| GTCATCAGATTA | 467.379773491252 | 0.518513474958021 |
| ACCTCATAGTCA | 467.382030517529 | 0.440370046606444 |
| GCGTCATGCTTA | 467.382489104389 | 0.509680990562607 |
| GTATCGCGTCAC | 467.386310768859 | 0.422684692519451 |
| CACCGGTATGAC | 467.407800339512 | 0.686215564213264 |
| CAGTCACGCTCA | 467.426161382547 | 0.565831948833367 |
| CATCGGAATGAC | 467.438719594465 | 0.750117798758684 |
| AACGGCAATGAC | 467.438891552624 | 0.649095187498658 |
| GACTAATACTTA | 467.440038572321 | 0.504903734185769 |
| TGAGTCTTGAA  | 467.445694154307 | 0.584474556741292 |
| GACGCTGTCATA | 467.453805498199 | 0.82286063178336  |
| TAGCGTGCCTCA | 467.460481938399 | 0.431530171707433 |
| AAATCGAATGAC | 467.501355885578 | 0.434839268421224 |
| GTAAACTGTGAC | 467.517857188069 | 0.185670663446072 |
| GTCATTCTGGCA | 467.518883706854 | 0.688142967544316 |
| GTCACATGATGA | 467.529755794655 | 0.690443801674963 |
| AGTCAGCATGAC | 467.535634998962 | 0.625467648332882 |
| ATGACTTGTTA  | 467.562684696946 | 0.473133473870187 |
| GACCTGGTCATA | 467.573537736457 | 0.36631318675761  |
| TCGCTTCAGTCA | 467.587789230522 | 0.277941505393984 |
| CTACGTGATGAC | 467.607495505982 | 0.73813417613539  |
| AGTCACCTCCCG | 467.621537601246 | 0.288536359308108 |
| ACGACCGAGTCA | 467.634599096455 | 0.895141362994108 |
| TACGCAATGACA | 467.665778011253 | 0.405594854489126 |
| ATATCATAGTCA | 467.680030385957 | 0.560067671200228 |
| GCACTATAGTCA | 467.682402846954 | 0.741270034617872 |
| TCACAAATATGA | 467.698072402578 | 0.962278268575632 |
| GTCATCACATGA | 467.709020189913 | 0.799590834665453 |
| CGCTCTGTGTCA | 467.722035727936 | 0.210002451236174 |
| CACCTTACGTCA | 467.731978384526 | 0.391871958969918 |
| TGACGAAGAAAA | 467.761307530825 | 0.197265986596451 |
| GTTACGTAGTCA | 467.765215717445 | 0.533666446750031 |
| GACCAAGAGTCA | 467.791015343511 | 0.676652923373515 |
| GAGTGGGAGTCA | 467.797996588465 | 0.316849240711058 |
| ATGACGGAGCCG | 467.803544350876 | 0.218410738004897 |
| CGTCTCGATGAC | 467.849507610983 | 0.404771997110703 |
| ACGTCACCGAGA | 467.859279276294 | 0.746012147409845 |
| ACGTCACCCGAG | 467.863694492232 | 0.138271023390212 |

|               |                  |                   |
|---------------|------------------|-------------------|
| AAGAATTATGAC  | 467.87176759808  | 0.5200905954662   |
| AGGATGTATGAC  | 467.886121188293 | 0.218801025630629 |
| CTCTGACGTGAC  | 467.900817392244 | 0.234202479492369 |
| GGTCATACATGA  | 467.920088861032 | 0.491437127393978 |
| GAGTCAATGGAA  | 467.943558051165 | 0.336560393952482 |
| CTAGTGGAGTCA  | 467.945963215015 | 0.497023678557616 |
| ACTGAGTGTGAC  | 467.971542692456 | 0.492452774192862 |
| GCAGACTAGTCA  | 467.992104990479 | 0.779757455660561 |
| ATCAACTTATGA  | 467.997955929479 | 0.757136942186246 |
| GAACTCGATGAC  | 468.008046515941 | 0.495766338589828 |
| ATGAGTCCGAGC  | 468.011970734831 | 0.473881728674517 |
| CTGGATTTGTCA  | 468.048733062857 | 0.720285904061249 |
| CATTAATATGAC  | 468.05761861109  | 0.602982962461332 |
| ACATATTGACTC  | 468.10434262304  | 0.569424184859613 |
| ACTCATTGTGAC  | 468.105167153581 | 0.351542657887859 |
| CCTGACGACTCA  | 468.107368325541 | 0.38432534690143  |
| TGAGTCTTGCAA  | 468.120699868318 | 0.615354187726584 |
| AGTCAGGAGTCA  | 468.128340806596 | 0.387682751564741 |
| ATGACGTCGTTG  | 468.161945086754 | 0.314005031377754 |
| CTAACAGAGTCA  | 468.172349287084 | 0.697082960134033 |
| AACCTGTGACGC  | 468.20963768899  | 0.469830807930802 |
| GCGAACAATGAC  | 468.229062142855 | 0.360553491029755 |
| TCAATTGACACA  | 468.250844410109 | 0.614547554564985 |
| AGGTATACGTCA  | 468.277778732226 | 0.544168595363093 |
| TCCTGAGAGTCA  | 468.324057304762 | 0.673932627424292 |
| TCTTATTTGTCA  | 468.328108167393 | 0.51135728544716  |
| GTGACAGAGTCA  | 468.337773032903 | 0.581460732239425 |
| CCGAACCAGTCA  | 468.338907706587 | 0.631949735636716 |
| CGTCATTACGTA  | 468.344534645684 | 0.257992038002578 |
| TAGCACGAGTCA  | 468.347651684678 | 0.703290475908087 |
| CGACAGTGAGTC  | 468.350471451733 | 0.402746519257782 |
| ATACACGGTGAC  | 468.373124213462 | 0.7061393715613   |
| TCGAACGCGTCA  | 468.375051217335 | 0.582521989910489 |
| CGAATGGATGAC  | 468.377683773506 | 0.537119786896023 |
| CACGTCACCTCGG | 468.381721160451 | 0.254088096304989 |
| GTCATAACTAGA  | 468.384382967344 | 0.32034066947649  |
| ACGTCACCCATA  | 468.405118292961 | 0.354406372467006 |
| AATTATTGACTC  | 468.407352506723 | 0.719371972382358 |
| GTCACACATGAA  | 468.438030583379 | 0.542705773316674 |
| TCAGTCAACAGA  | 468.452102102841 | 0.437385909084377 |
| GCTAGATATGAC  | 468.456394999783 | 0.522906700884359 |
| GGTCTAGATGAC  | 468.458206319617 | 0.487473415413995 |
| GGCTTATGTGAC  | 468.482957745518 | 0.728099283535736 |
| GTCATCCTCGAA  | 468.501523979898 | 0.323496087819771 |
| GCCTCGTATGAC  | 468.502706498792 | 0.776182986419481 |
| CTTGTTGATGAC  | 468.535829338289 | 0.165574454010822 |
| AGAGTCAGGGTC  | 468.561057343274 | 0.478743810437421 |
| AACAGTGACGTG  | 468.571123206214 | 0.358315796928907 |
| GCACCCTATGAC  | 468.591209108084 | 0.580673765213839 |
| CTCCTTCAGTCA  | 468.624932448375 | 0.387096372638669 |
| CAGTCAACTATG  | 468.625741484357 | 1.06776069238906  |
| CAAACCTTATGAC | 468.641490860811 | 0.764791320978128 |
| CGTAATAATGAC  | 468.658018045606 | 0.511461876835567 |
| ATCTGTAAGTCA  | 468.666299528715 | 0.897769058760945 |

|              |                  |                    |
|--------------|------------------|--------------------|
| AGGTGGTATGAC | 468.671587458719 | 0.278672885605396  |
| GACCTGAATGAC | 468.685303509321 | 0.473953414751133  |
| GTGACCATGACA | 468.704585557066 | 0.390361838189477  |
| GGGTTTTACTCA | 468.737091400344 | 0.551622467850087  |
| ATTTATCCGTCA | 468.765227353774 | 0.463523372424138  |
| GAGTAAGATGAC | 468.771679807489 | 0.400383267469465  |
| AAACTACAGTCA | 468.80306599765  | 0.487293190765382  |
| GTCATAGCAAAA | 468.803113380234 | 0.435863811599947  |
| AAAACATGACC  | 468.861481019793 | 0.974691909360179  |
| GTCATCGCGACA | 468.878589109526 | 0.755120237274341  |
| CGGTGGTATGAC | 468.912459743239 | 0.694952419979212  |
| CATATTGAGTAA | 468.919319334395 | 0.849890659874968  |
| ACGCGAGATGAC | 468.928505944739 | 0.482751664950758  |
| ATAGCATGACGC | 468.929806571106 | 0.788747384035144  |
| ATACATTGACTC | 468.929966061338 | 0.644430175372482  |
| GTCATCCAAGCA | 468.961673927562 | 0.679957144872689  |
| CTAGCCGAGTCA | 468.977905550383 | 0.233893061817689  |
| GCGTATTGCTCA | 468.987003992297 | 0.672322273006591  |
| GTCATTATAGAA | 468.999188089087 | 0.659868951520809  |
| CTATCACAGTCA | 469.007643728164 | 0.334637653069641  |
| CGTCATCTGCAG | 469.081366147798 | 0.61040127178152   |
| GTCATAAACCAA | 469.088346626341 | 0.583268163298216  |
| ACTTATAAGTCA | 469.144045340111 | 0.790443953877623  |
| CCGATATATGAC | 469.15047367185  | 0.458355389594554  |
| GTAGCCAATGAC | 469.172512770662 | 0.624460438813704  |
| CAACTATATGAC | 469.174784379637 | 0.922592643431217  |
| TCCGGACAGTCA | 469.179800987475 | 0.750333353252128  |
| GTCATCTCGGAA | 469.189051627125 | 0.811316619364892  |
| ATGACAGCTTTG | 469.206614196492 | 0.443355820694983  |
| CAAAGGTGACGC | 469.208034037923 | 0.502073325395497  |
| AGACTCACTCGA | 469.235589203913 | 0.522584209334178  |
| GCGTCACCCGTA | 469.23770638975  | 0.523206389361806  |
| CGGTCGTGACTA | 469.243699445542 | 0.241458034288393  |
| ATGACGTGAACC | 469.252241164388 | 0.501021543021665  |
| GACGACGACTCA | 469.26305906701  | 0.707126250362778  |
| CTGAGTAAGTCA | 469.276833713427 | 0.996244360781201  |
| ACATCGGGTGAC | 469.284628096665 | 0.0871783795279608 |
| AGGCATCGTCAT | 469.304259398697 | 0.254638304852705  |
| GATGACAGCTTA | 469.311174043613 | 0.30898011950161   |
| CCAAAGTAGTCA | 469.348696385096 | 1.00616118005048   |
| GCCCAGATGAC  | 469.366680161846 | 0.541105127834632  |
| CTTGAAATGACA | 469.432909580552 | 0.449697617287798  |
| TGACGTCAAACA | 469.448195107366 | 0.811029494921834  |
| AGAGTCAAACGA | 469.454235680509 | 0.505608618219983  |
| ATGACTTGACTA | 469.456994502727 | 0.597163938108553  |
| ACAGACTATGAC | 469.457696302222 | 0.688278162512807  |
| CGATTGAATCAC | 469.463110116561 | 0.296078909701515  |
| GTCATACGGACA | 469.4640329199   | 0.723282163962733  |
| GACTATTGACTC | 469.465369163441 | 0.448547873231936  |
| AATAACTGACTC | 469.508414167475 | 0.524859667289337  |
| CAAAGGTATGAC | 469.527210634565 | 0.499275051626254  |
| GCAAGTGATGAC | 469.56148024404  | 0.0550232083272245 |
| ACTCATTCGGTG | 469.562124783731 | 0.575866919961763  |
| ACCGACGACTCA | 469.56499375474  | 0.337341169069148  |

|               |                  |                   |
|---------------|------------------|-------------------|
| CACGTATATGAC  | 469.584678064265 | 0.699691064095041 |
| AGTATAGATGAC  | 469.592094763114 | 0.28580795724362  |
| GGCATCGACTCA  | 469.598035907317 | 0.746649917505504 |
| CGATAGTGAGTC  | 469.616375844218 | 0.660689075736796 |
| ACTGAATATGAC  | 469.628425738302 | 0.332021128839074 |
| CTGCTGACGTCA  | 469.629014980226 | 0.524407409039212 |
| GTCATTCTGCAC  | 469.648402133142 | 0.732849798434334 |
| AGACTAATAGTA  | 469.652289208376 | 0.142837185058253 |
| CAGTCACGCTAC  | 469.661858314641 | 0.261531525431458 |
| GACGAGGATGAC  | 469.681803225649 | 0.38836809996258  |
| AACACCTAGTCA  | 469.694549140173 | 0.515390121091133 |
| GAAAAGGATGAC  | 469.6974161121   | 0.187585330815337 |
| TGAGTAAAATAA  | 469.70534986394  | 0.5664759361647   |
| GACGCATAGTCA  | 469.705651119478 | 0.767660795913581 |
| ACACCTGACTGA  | 469.709860694296 | 0.381576295388597 |
| GTGACAAACTCA  | 469.710628329077 | 0.540631711031184 |
| CTCGGCGTCATA  | 469.73881181089  | 0.322775999553319 |
| CACCTGTATGAC  | 469.74466438059  | 0.603560798580527 |
| ATAATATTAGTC  | 469.754979488739 | 0.792826745333735 |
| GCATCGTGACAC  | 469.76231485053  | 0.531726313813909 |
| ATTCTGGATGAC  | 469.793667852067 | 0.420014409147119 |
| CTGACTCCGAAA  | 469.800996459034 | 0.558792976910215 |
| AGTCACCTCCG   | 469.803655112048 | 0.316963111773477 |
| CAGTGTTCTGTCA | 469.83202793246  | 1.04887802184701  |
| AACTCCGATGAC  | 469.84458646758  | 0.765930192701729 |
| AAACTCATGACT  | 469.869394567444 | 0.496066518852444 |
| GAACATTATGAC  | 469.879455804277 | 0.426049529305312 |
| ACTCATCGTGAC  | 469.889229569675 | 0.416650986418479 |
| CAAATAGTGTC   | 469.908207596411 | 0.519391216008765 |
| AGTCATGGGTTA  | 469.946639484848 | 0.402825235435206 |
| AAGTCAGACTCA  | 469.965994125004 | 0.411434258849828 |
| ACTTTTGCTCAT  | 469.973749100133 | 0.344311896505171 |
| GACCCTGTGTCA  | 469.975290621612 | 0.545460531499866 |
| GTCATCCTACAA  | 470.006991572471 | 0.217387635011858 |
| CGACTGTAGTCA  | 470.009257996579 | 1.07824469295618  |
| GATGACGTCTAA  | 470.016790835395 | 0.299301968036207 |
| ACTAGGTGTGAC  | 470.061754677637 | 0.664611987936399 |
| GTTCAAGACTCA  | 470.124781101071 | 0.460209568704473 |
| GTGAGCAAATCA  | 470.15443425806  | 0.564387480494941 |
| GATGCTTACTCA  | 470.15695854141  | 0.726225296868966 |
| AACGTTTACTCA  | 470.15955498641  | 0.463988448791057 |
| ATCAATTGCTCA  | 470.180734738215 | 0.789460682585788 |
| CTTTGAAATGAC  | 470.186212026085 | 0.497771497377736 |
| CGTGACAATGAC  | 470.19047902257  | 0.863183600371431 |
| GTCATATCACAC  | 470.19319973274  | 0.417444471810818 |
| TGAGTACAATAA  | 470.203332640075 | 0.400866258095116 |
| AGGGAGGTGACT  | 470.217650404327 | 0.253437544380813 |
| ATGACCTGACTC  | 470.233585274745 | 0.416009018678953 |
| GAAAATGATGAC  | 470.234935134996 | 0.456429763141888 |
| TAACCAGTCAGA  | 470.265441373331 | 0.296510623249557 |
| AACCTGGGTGAC  | 470.281803688306 | 0.651255342741481 |
| CACGTCACTACG  | 470.291495265344 | 0.665718323872779 |
| AGTCACTAGACT  | 470.309542116411 | 0.384530507073851 |
| TGACGAAATTA   | 470.310283323776 | 0.794188644407358 |



|               |                  |                   |
|---------------|------------------|-------------------|
| GTTACTGTGTCA  | 470.34901427228  | 0.715754183296056 |
| GTCATCATTAGA  | 470.368046455777 | 0.329394505961706 |
| TGACTGTAACAA  | 470.378770201297 | 0.565479422481882 |
| ATGACTGGGCGC  | 470.405781931066 | 0.599533427202208 |
| CCTGCATGACAC  | 470.422826514586 | 0.42945339091569  |
| CCCGATTGCTCA  | 470.43387924762  | 0.555260649458465 |
| TCATCGTAGTCA  | 470.441917939765 | 0.725645809722131 |
| AGTCAGTGTAC   | 470.446682962395 | 0.646518288990245 |
| AGTCACCTTAAT  | 470.460730454899 | 0.443688996755279 |
| TGACGTAAGCCA  | 470.47861286795  | 1.0770254719643   |
| ATGTTGACACAC  | 470.48627950406  | 0.135632041774138 |
| GTCATCGCACTA  | 470.48839979935  | 0.584067674230672 |
| ATCCACGATGAC  | 470.500629111034 | 0.224961536599862 |
| AGTCAGAGCTTG  | 470.525099369131 | 0.48026357977262  |
| TATAAAGTGTCA  | 470.525486015193 | 0.708074514572046 |
| CTGTACGATGAC  | 470.529671239015 | 0.450715329960518 |
| AATTCATGACAC  | 470.540515970512 | 0.685405618712013 |
| ACGCACTATGAC  | 470.553710213339 | 0.666429600148145 |
| CCCTGAGAGTCA  | 470.584010508432 | 0.447420238180778 |
| AACTTGTACCCG  | 470.601366545401 | 0.442786613718722 |
| GGGCATTATGAC  | 470.60230971738  | 0.514411636659896 |
| GACTAATTAATA  | 470.604703173495 | 0.405607702171884 |
| GTCATACAAAGA  | 470.61638317383  | 0.527315707257554 |
| GAGTCAATATGA  | 470.680316150391 | 0.418248697273254 |
| CGTCATGCGTGA  | 470.684071428432 | 0.146403646861053 |
| CGTCCGTATGAC  | 470.72117482424  | 0.721848297575528 |
| CAGTGCGATGAC  | 470.721840626679 | 0.380473997894568 |
| ATGACAGACACG  | 470.725812914147 | 0.344050804188342 |
| ACCGACTAGTCA  | 470.729944452531 | 0.584759817147444 |
| GTCACACATCGA  | 470.752004000155 | 0.761693616908276 |
| AGCATGGATGAC  | 470.799786550131 | 0.499066590640289 |
| AGAAATCCGTCA  | 470.812267084059 | 0.29374805820918  |
| AATTACCTATGA  | 470.814723882273 | 0.64008953372763  |
| ACGTCATGTTTTG | 470.815066239929 | 0.366164281641649 |
| GTCATCCTCTTA  | 470.833777987229 | 0.183249967539847 |
| GAAGCTAATGAC  | 470.84239754295  | 0.695478999542893 |
| GTCATCAGGTTA  | 470.843832742193 | 0.280563652232584 |
| CCTAATGATGAC  | 470.854236439299 | 0.486268463310109 |
| ATTCCGTATGAC  | 470.866493393963 | 0.419617738262122 |
| CTCATGTGTGAC  | 470.885549622384 | 0.593125331149419 |
| ACTGACGCGTCA  | 470.888928387478 | 0.457407399971103 |
| GTCATCACCTAA  | 470.91183979559  | 0.352003489633587 |
| GTCATACCGGGA  | 470.912628750635 | 0.333381539207647 |
| CTTGAGGATGAC  | 470.925430757624 | 0.437269684542988 |
| AGTCAGACTTAC  | 470.935047719306 | 0.468160395447465 |
| ACTGGAAATGAC  | 470.95877309848  | 0.363495489032699 |
| TCACCGGTGACA  | 470.96882206126  | 0.517583173873148 |
| CCCCGATATGAC  | 470.986882508804 | 0.427149128961807 |
| CGGAATCTGTCA  | 470.995149530943 | 0.368462822127764 |
| ATTCATGATGAC  | 470.996955180173 | 0.644090307577318 |
| AGTCACTACGTC  | 471.016341263283 | 0.321293222264928 |
| CACGAATTAGTC  | 471.01802891955  | 0.336162805381498 |
| TGACAAATCCAA  | 471.030701901448 | 0.643495619429376 |
| CGCCTAGTGACG  | 471.03382793103  | 1.63180924696805  |

|              |                  |                   |
|--------------|------------------|-------------------|
| ATGACACGGATG | 471.076797182951 | 0.614283164965904 |
| GACTATTGAGTC | 471.082858345272 | 0.859652029366615 |
| CTAATCTATGAC | 471.095073318141 | 0.437187009403933 |
| GTCATCGCTACA | 471.105866992478 | 0.319343588482225 |
| TGACTACGCTAA | 471.109721842093 | 0.774192349696429 |
| CGTGGATATGAC | 471.11360460573  | 0.714066768672308 |
| ACATACTATGAC | 471.123079386666 | 0.538673628180553 |
| AGCAGTGACGTG | 471.137012151585 | 0.512412834308214 |
| GATTCTAATGAC | 471.143057560078 | 0.807495396594587 |
| GCCTAAGATGAC | 471.177321551611 | 0.413186469866496 |
| AATTCGTGACGT | 471.222765193473 | 0.830527929029731 |
| CTAGTCTATGAC | 471.231725172677 | 0.38991124108192  |
| CATGCTTATGAC | 471.262162479897 | 0.591285406822167 |
| ACTAGCTGAGTC | 471.274797692934 | 1.03976171091177  |
| ACATAAGGTGAC | 471.27913225622  | 0.921176283410932 |
| TATATTGACTGA | 471.287377660587 | 0.212835501938681 |
| GCTCTTACGTCA | 471.293341023476 | 0.276915893032433 |
| ACTCGATATGAC | 471.299616454355 | 0.599853807961511 |
| AGTCACCCCTCG | 471.342878514461 | 0.441809416814951 |
| GTAGAATATGAC | 471.369413570282 | 0.290934186482303 |
| CTGTTGACGTCA | 471.390081711277 | 0.726856235024    |
| ATAATTCATGAC | 471.406732671123 | 0.600841195177477 |
| CAAGAATATGAC | 471.412176328989 | 0.580709053736984 |
| GATGCATGACAC | 471.427955023989 | 0.66263540415559  |
| AGTCACGCTATA | 471.451270641236 | 0.585980990742395 |
| AGTCACGCTAGG | 471.458726906865 | 0.494827669677779 |
| GCACCTCAGTCA | 471.483882604714 | 0.573407155793541 |
| ATGACGTTACCC | 471.495031964623 | 0.248112037415824 |
| TGACGTGACGAA | 471.498436408983 | 0.481468318336188 |
| TGTCATTAACA  | 471.507357606031 | 0.55099056355621  |
| ATCTATAAGTCA | 471.508864321744 | 0.34277034336997  |
| AGTCACGCTTGG | 471.524073169263 | 0.341706953928403 |
| ACTCATGACACT | 471.540058063951 | 0.126662385813602 |
| ACGTCACCGATA | 471.555205342291 | 0.294230834388815 |
| ATGACGACTCAA | 471.596286508196 | 0.321218948135641 |
| CTAGTTGACACA | 471.615944988822 | 0.389773088508301 |
| CCATGTAGTGAC | 471.621858224757 | 0.528618622634554 |
| GATTACTGACAC | 471.639036983725 | 0.603984028582621 |
| AAGTTACATCAT | 471.640644409863 | 0.130267670935798 |
| CAACGATTAGTC | 471.643069578196 | 0.47783518008897  |
| TGACACTTAGAA | 471.648473738274 | 0.671576347764343 |
| ATGACGATGCAC | 471.650114309382 | 0.446414893298157 |
| ACTGAGTGAGTC | 471.66436640804  | 0.593639014233184 |
| GCCATCGACTCA | 471.669398011437 | 0.323985589167663 |
| GACTCACTTCGA | 471.67169524798  | 0.490244810828789 |
| TCATGCGAGTCA | 471.676427659793 | 0.639952203486957 |
| ATTCTCGATGAC | 471.709750514085 | 0.594993305128289 |
| ATCAGTGACGTG | 471.73998195078  | 0.311653437102997 |
| CATCCGTGATGA | 471.740664031936 | 1.13813893183831  |
| CGATGCATGACA | 471.743549357174 | 0.812504555723533 |
| GTGACAAGTTTA | 471.821447955036 | 0.36838150075475  |
| CTGACCGATGAC | 471.831235691618 | 0.675139328326961 |
| CGTCATCGGTTA | 471.84699568157  | 0.563267142164877 |
| GTCATCGACTTA | 471.848396639166 | 0.807634189111897 |

|               |                  |                    |
|---------------|------------------|--------------------|
| CACGAGATGACA  | 471.849071034581 | 0.286801041980239  |
| TAGTCACGACAA  | 471.857208297115 | 0.0778691430984328 |
| GGGTGACGCCAC  | 471.857437807242 | 0.426028875364105  |
| GTCATCCTGTAA  | 471.869361731847 | 0.711968232409795  |
| CCACTTCAGTCA  | 471.879963418717 | 0.406954042324864  |
| TAAGTTGTGTCA  | 471.91986302615  | 0.590211695580399  |
| TGACTCCGCAAA  | 471.928525999884 | 0.665910607101238  |
| GCCGCTGAATCA  | 471.957724339278 | 0.37997382887577   |
| CAGGCGTGACTG  | 471.96766663046  | 0.458120375475064  |
| CGGTAGAATGAC  | 471.981698540039 | 0.292826810892825  |
| CAGTGCGGTGAC  | 471.984894960685 | 0.886428345716335  |
| AGTCACGCTGTC  | 471.9876260384   | 0.262547047202138  |
| CAATACTGACTC  | 471.989544797327 | 0.363887165567088  |
| ATAACTGTGACA  | 471.991780160083 | 0.289196146708236  |
| CAGATACAGTCA  | 471.995558739687 | 0.477574532736064  |
| CTACATGAATCA  | 472.011242910317 | 0.437687879506161  |
| CTCTCGTATGAC  | 472.013466166735 | 0.420894795312539  |
| CACGTATGACCG  | 472.033756795836 | 0.658564458787284  |
| ACTAATCGTGTC  | 472.054601037311 | 1.39546358550801   |
| GTCATAATACCA  | 472.076275659808 | 0.367226770286569  |
| CCGGAGGACTCA  | 472.078510541045 | 1.20116732623072   |
| ATCACCTAGTCA  | 472.084997434641 | 0.200141127446499  |
| GCGTCCGATGAC  | 472.095751771    | 1.03034711284127   |
| GACACTTCGTCA  | 472.111432318708 | 0.884219226667619  |
| GTCATCTTATAA  | 472.121571475398 | 0.558609333632393  |
| CGTCACTGCGGA  | 472.166450236701 | 0.865338317770546  |
| CTAACGTAGTCA  | 472.198135969208 | 0.680583831270646  |
| AAACAGTGAGTC  | 472.199168211637 | 0.35344723188177   |
| TGACGCAAGACA  | 472.203418787883 | 0.795875974686298  |
| GTCATCAGCTTA  | 472.209340568074 | 0.976674771419584  |
| AGTCACGCTTTA  | 472.215874146281 | 0.45603398374702   |
| CGTCATTTAGAC  | 472.223752615091 | 0.676831779322772  |
| GGTAATGATGAC  | 472.231650183955 | 0.286255859237339  |
| GAGTCAATACCC  | 472.231971307436 | 0.698734168690544  |
| AAGGTTTACTCA  | 472.237812022986 | 0.882587131572022  |
| CCCTACACGTCA  | 472.25668376453  | 0.177471974879177  |
| AGAAAATATGAC  | 472.263079832664 | 0.177849177207636  |
| GGTAACGATGAC  | 472.270528818279 | 0.513270017177451  |
| TCATTATAGAA   | 472.296538203215 | 0.832804459955814  |
| GTAATTCGTCA   | 472.297962529196 | 0.40140294735023   |
| ATCTGGTATGAC  | 472.327909757212 | 0.530345472169539  |
| AGTCACTCTCCG  | 472.344556082091 | 0.476919802135263  |
| ATTACTCAAAG   | 472.344920954441 | 0.613186031810187  |
| AAGATTTTCGTCA | 472.347269496437 | 0.443811725078161  |
| TTAGTCAAGCAA  | 472.381873310834 | 0.329632099607633  |
| CGCCGAATGACG  | 472.391616807062 | 0.426591591581129  |
| AGTCACCCCGAT  | 472.41067881062  | 0.314749206340877  |
| CTGTTGATGAC   | 472.417121222314 | 0.422778018101524  |
| AAAGGGGAGTCA  | 472.439376720728 | 0.240529652890041  |
| CCGGATGAGCCA  | 472.441243546161 | 0.701943336287806  |
| GTCATTCATGCA  | 472.443749527206 | 0.621969158787247  |
| GCCACGTATGAC  | 472.449262258668 | 0.507692829517094  |
| ACTCATAGATGA  | 472.45069668934  | 0.918873807463395  |
| GAGTCAGTAAAA  | 472.480356089383 | 0.372337469177935  |

|               |                  |                   |
|---------------|------------------|-------------------|
| CGGTCTGATGAC  | 472.50967319938  | 0.55948066784747  |
| CTCACGTATGAC  | 472.520633786327 | 0.275600651730375 |
| ACTCATCAATGA  | 472.521481585442 | 0.668771647245275 |
| CGCTAAGTGACA  | 472.548633584234 | 0.503365113751071 |
| CTCTGGTATGAC  | 472.558979563209 | 0.409408767309376 |
| GTCATCGTGTTA  | 472.560787983507 | 0.613374557119594 |
| CAATAGTGACGC  | 472.572954272592 | 0.942922938372158 |
| CGAACACAGTCA  | 472.604775682795 | 0.623916034314295 |
| GTCATCAGCCAA  | 472.634665706095 | 0.609238068686044 |
| CATGCTGACACA  | 472.638992687758 | 0.433834297856067 |
| AGTCACCCTCAA  | 472.641729368716 | 0.375120133528155 |
| CCGATGGTGTCA  | 472.648918588218 | 0.697501281855429 |
| GCTATCGACTCA  | 472.649924223304 | 0.55629488458965  |
| AGTCACGCTAGC  | 472.655212538757 | 0.71340854663553  |
| CTGTTAGATGAC  | 472.655509453639 | 0.519631385012932 |
| AGGCCCTGACTC  | 472.674424087034 | 0.546423484143564 |
| AGCAAGGTGACT  | 472.686479618782 | 0.246969409158367 |
| CACGCGTGAGTC  | 472.690468121137 | 0.987267145647041 |
| TAGTTGGAGTCA  | 472.691451567272 | 0.628484541340088 |
| ATGACGCCGCTG  | 472.695426605688 | 0.492788238512926 |
| CGTAGGTGACAC  | 472.697083319317 | 0.463410354001783 |
| GTATTTTATGAC  | 472.697209848745 | 0.7008317266922   |
| AATCCAAGTCAT  | 472.703952480455 | 0.16954795333351  |
| ATACGTGTGACA  | 472.747559420674 | 0.476426655232893 |
| ACGATGCAGTCA  | 472.750690834717 | 1.02470406993296  |
| CAAACAAATGAC  | 472.756837757512 | 0.461513921609168 |
| CTACGTTACTCA  | 472.759109783053 | 0.560117253512266 |
| CTTGAGTGAGTC  | 472.765018139031 | 0.463252803169852 |
| CGTCATTTAAACA | 472.77263680745  | 1.00308269214376  |
| ATAGTTTATGAC  | 472.809433835908 | 0.6217959824604   |
| ACTCGTGAATCA  | 472.82254834698  | 0.484326670715664 |
| CCTCAAGGATGA  | 472.829325305065 | 0.968781848548404 |
| GTCATCGATTTA  | 472.829546233038 | 0.42748796543254  |
| GTATCTGTGTCA  | 472.849370336683 | 0.277965904616241 |
| TGACTGTAGTAA  | 472.868110097598 | 0.539915967053866 |
| GTCATCGAAGCA  | 472.880519908068 | 0.342955346918928 |
| ATTCCGAATGAC  | 472.885932388286 | 0.357925554774128 |
| CTAAATATGTCA  | 472.908103444491 | 0.47083329492848  |
| ACACTTGATGAC  | 472.92408507806  | 0.431635200626128 |
| GGTCGTTATGAC  | 472.936480828118 | 0.51602877110302  |
| CGATTTGCTCAC  | 472.938003102595 | 0.33646553639505  |
| TACAATGGGTCA  | 472.938591137286 | 0.195349353894078 |
| GCCTTAGACTCA  | 472.952604643417 | 0.671704657701432 |
| CGTAAGTGAGTC  | 472.96309581227  | 0.700836298753789 |
| AGTGTCATGCGG  | 472.96458533797  | 0.282345151825155 |
| TTAGTCAAGAAA  | 472.977376022801 | 0.559140851144308 |
| CTTTTCGACTCA  | 472.98252578128  | 0.355097928079269 |
| CGTGTTGACTGA  | 472.987082351949 | 0.454823324445917 |
| CAATCCGAGTCA  | 472.996013872419 | 0.720496947547605 |
| ATCTGCTATGAC  | 473.004917469919 | 0.703369344642618 |
| AGTCACGCGAAT  | 473.008376619822 | 0.670585250157974 |
| CGCTATGATGAC  | 473.035329678521 | 0.277018022528244 |
| CCTGACATGTCA  | 473.058872171364 | 0.751697963202469 |
| GTCATCACAGAC  | 473.061001931017 | 0.730709959302669 |

|               |                  |                   |
|---------------|------------------|-------------------|
| ATTAACGATGAC  | 473.064517619424 | 0.541401140221766 |
| GTCATCTGCTGA  | 473.102487326699 | 0.671670685711829 |
| AGCAATAATGAC  | 473.160939644521 | 0.682989636902729 |
| GGATAGGATGAC  | 473.163705147747 | 0.310407000006157 |
| GATACTAATGAC  | 473.18639590937  | 0.555946793750689 |
| GCTCTCTATGAC  | 473.230805728138 | 0.496350118510112 |
| AGATTTGCGTCA  | 473.24846351354  | 0.604027443060721 |
| ACGACTTACTCA  | 473.27161284939  | 0.32101757473721  |
| CTCACAAATGAC  | 473.272434007871 | 0.450909496859213 |
| CGGCATTCTGCA  | 473.275002553184 | 0.648626302180499 |
| AGTCACCCCGTA  | 473.27587628383  | 0.332378171937215 |
| CACCATGTATGA  | 473.299767881667 | 0.847651342794532 |
| ACTGGCTGTGAC  | 473.30919527294  | 0.679491607502229 |
| GACTAATCGTCC  | 473.329037707591 | 0.723395746506724 |
| AATATTGACTCT  | 473.331353320957 | 0.728807958126755 |
| AGGAGGGTGACT  | 473.339520939693 | 0.354888263624559 |
| AACTTGTACTCA  | 473.341000904378 | 0.583247423951281 |
| ATCCCGATGACG  | 473.342980585265 | 0.557101517519181 |
| TGACTATTGACA  | 473.363118501771 | 0.394214318144336 |
| GTCATCGTCTTA  | 473.378310910674 | 0.68731759200212  |
| ATAACAAGTCAT  | 473.388619227224 | 0.561336794599355 |
| GTCATCGGCCAC  | 473.416339512973 | 0.525864928088938 |
| CCGATGATGTAA  | 473.423617015105 | 0.803471241299019 |
| CTTCGTGATGAC  | 473.437759552688 | 0.720155437570141 |
| GGAAATTTATGAC | 473.442710757925 | 0.418218578708585 |
| AGCTCGTATGAC  | 473.463996011014 | 0.265233111273661 |
| CACTAGTGTGAC  | 473.470180441202 | 0.530170143243896 |
| GTAACATATGAC  | 473.496375317399 | 0.689086181754356 |
| ATCCATCGATGA  | 473.517290520088 | 0.829057287073953 |
| AGAGCGTACTA   | 473.556856326309 | 0.275940527539627 |
| TCAATTAAGTCA  | 473.592933459185 | 0.24622070183306  |
| GCTAAATATGAC  | 473.60300347065  | 0.563518688641935 |
| CGTCATTGTTGA  | 473.63888035601  | 0.696090557044549 |
| TAAGCCTAGTCA  | 473.645121816451 | 0.520886105302793 |
| ATGACACGGCAG  | 473.674472061509 | 0.232497077918102 |
| ACAGAAGATGAC  | 473.694224951282 | 0.428868432415981 |
| TAGCTTGACTAA  | 473.707221915804 | 0.724560811247014 |
| CTCCGTGCGTCA  | 473.733132007    | 0.420147360780847 |
| ATAACTGCGTCA  | 473.745415829526 | 0.589913401646038 |
| GGCTCCGATGAC  | 473.747168229982 | 0.527165095636091 |
| ATTTTCGAATGAC | 473.753561371932 | 0.555595462901505 |
| ACCATGGTGACG  | 473.754053996951 | 0.733250439939512 |
| ATGACTAGCCAT  | 473.765410459104 | 0.383444296462908 |
| ACGTGAGAGTCA  | 473.78588758325  | 0.191049242106514 |
| ATGTAGTGACGC  | 473.817495673258 | 0.209383292646712 |
| GTCATCGCGCTA  | 473.820644411437 | 0.462482646028606 |
| CCCACGTATGAC  | 473.829977287774 | 0.30939244090108  |
| CGATTCTATGAC  | 473.834122201035 | 0.537346178574814 |
| AGGAAATATGAC  | 473.837521419975 | 0.282202349187101 |
| CCTTGCTATGAC  | 473.847469368135 | 0.302380785687618 |
| GTGCACACGTCA  | 473.853832208424 | 0.555591048581275 |
| AGTACATGACAC  | 473.857000670691 | 0.498796787237925 |
| CTTAGCGAGTCA  | 473.892344082513 | 0.341142259513265 |
| ATCGCTGTGTC   | 473.903266088267 | 0.452630825499693 |

|              |                  |                    |
|--------------|------------------|--------------------|
| TGACGTATCGAA | 473.909744898484 | 0.315383442267128  |
| GGTGAGTCTGAA | 473.960239565865 | 0.227061312847685  |
| ATTTTCGATGAC | 473.982205323557 | 0.582128101611734  |
| AACTATATGTCA | 474.003524560599 | 0.734545289467965  |
| GTCACCTAAGAA | 474.009771756799 | 0.499258523858622  |
| AGTCACGCCTTG | 474.011916235233 | 0.305903814367676  |
| GTCACTGTATGA | 474.018329730576 | 0.447181955836936  |
| CTGACTAGTGAC | 474.030609937809 | 0.423133797240644  |
| CCGAACGATGAC | 474.032193059574 | 0.641638665300345  |
| ATCGACGTCATC | 474.037243628847 | 0.267471994076242  |
| TGACTCCCAGAA | 474.047006459714 | 0.631589902822864  |
| GACCTATAGTCA | 474.049261996399 | 0.667007437564091  |
| ACATCATGACAC | 474.077425074617 | 0.24308003370029   |
| GTCATAGTATAA | 474.100590140915 | 0.732487438359662  |
| TCTGGTGACCCA | 474.106043909902 | 0.652703558641732  |
| GAGCAATATGAC | 474.112624825006 | 0.357759067504026  |
| AGAGTCAGGGAA | 474.11454686288  | 0.274279374915372  |
| ACAGCTCAGTCA | 474.149947178085 | 0.325545886528469  |
| ATGACGATGCAT | 474.167792723286 | 0.300180408530347  |
| AGACTAATCTTG | 474.168675697473 | 0.533863108644933  |
| CGTACGTGTGAC | 474.187873685346 | 0.706362958120459  |
| GTTGCACAGTCA | 474.200597554673 | 0.504576522355951  |
| ACCATTGACTCT | 474.202896122115 | 0.236582003942678  |
| GTCATGACCAGA | 474.203839217012 | 0.512226351771334  |
| GAACATGTCCAC | 474.211172626209 | 0.584802591385427  |
| AGTCACTCTCAC | 474.218705344525 | 0.224225701583503  |
| AATACGAATGAC | 474.226365319173 | 0.694671356628382  |
| GATCCGTGTGAC | 474.267743014061 | 0.801069039658825  |
| CGTCATCTGACA | 474.285517523179 | 0.570800758947816  |
| AGTCACTCCAG  | 474.290151063089 | 0.235087000196075  |
| CGAACATGACGC | 474.315433642613 | 0.486180208186027  |
| GTACTAGATGAC | 474.329061119412 | 0.700756508359423  |
| TCATTACAGTCA | 474.37439827153  | 0.573101021430101  |
| TGTCATGGTCAA | 474.40208357558  | 0.809257280472763  |
| AGGCCCTATGAC | 474.421167277888 | 0.615939352300951  |
| ACCGGAATGACG | 474.421800167353 | 0.429201523133868  |
| TCACACCAGTCA | 474.422702245755 | 0.55242865609952   |
| CGACATTGACTC | 474.428643075857 | 0.308043213246929  |
| CCTCACGAGTCA | 474.428898079647 | 0.673991654648258  |
| AGGATTTATGAC | 474.436135608965 | 0.503799716500595  |
| AACGTAGTGACT | 474.439719774103 | 0.458101391802786  |
| AAACCCACGTCA | 474.453686789162 | 0.207655721835576  |
| CGTCATCAGTAG | 474.459617444915 | 0.264641825675342  |
| CGTCATCGGGTA | 474.461457064065 | 0.226859464330273  |
| GTCATTACGCAC | 474.498870345197 | 0.437785187240909  |
| GTCATACAGCAC | 474.503526546843 | 0.489441408959916  |
| AACTCTGATGAC | 474.504358121905 | 0.393533292413068  |
| AAGACTGATGAC | 474.527687610419 | 0.0909101214320907 |
| AGACTCACTCAG | 474.531808949647 | 0.578633608596351  |
| TGACACAACGCA | 474.544111418672 | 0.458207418917439  |
| GAAGCCTGACTC | 474.564909560995 | 0.353099277508044  |
| ACTCATGACCCA | 474.565003542232 | 0.325117887638053  |
| GTGTGTCATGA  | 474.589208681345 | 0.398831829440592  |
| CTCCGTTACTCA | 474.590640228749 | 0.428799015504412  |

|              |                  |                   |
|--------------|------------------|-------------------|
| GGTGCGAGTCAC | 474.612000925927 | 0.711887862634747 |
| GTCATCGAATAA | 474.613944686702 | 0.84790555756192  |
| AGACTTGTGTCA | 474.631690923298 | 0.650902985791371 |
| CGACAGATGACG | 474.639397030961 | 0.844666522261636 |
| ACGGTCGATGAC | 474.639667717359 | 0.857785062866144 |
| ATAGACGATGAC | 474.665070052515 | 0.608427614923655 |
| CAATCGTAGTCA | 474.670509970096 | 0.859954374085648 |
| CCATTTTACTCA | 474.694967567946 | 0.123372427791405 |
| AAGACGTATGAC | 474.754503167108 | 0.128910675325722 |
| GTCATCGTGCTA | 474.755045597472 | 0.839283149148926 |
| TAGTACGTGTCA | 474.772065530478 | 0.607903004310847 |
| ATACCGTACTA  | 474.775548601609 | 0.579489194137845 |
| CCATTAGACTCA | 474.780208452854 | 0.421701859937221 |
| GTCATTTTACTA | 474.785715283001 | 0.674368914598665 |
| AAGCATGACACT | 474.787568782606 | 0.318544196268221 |
| ATCTCCGATGAC | 474.817665442099 | 0.531177866053718 |
| CTGCGATATGAC | 474.837555049278 | 0.636736032819031 |
| CGTCATCGGCTA | 474.852575489796 | 0.884727097032178 |
| GTAGTCTATGAC | 474.862435179307 | 0.537264984929983 |
| ACTCGAAATGAC | 474.867148594648 | 0.499667872102788 |
| ATAGTGAATGAC | 474.874486960581 | 0.770114585310505 |
| ACTCACAGTATG | 474.876361510736 | 0.897152101650609 |
| TATCTCGAGTCA | 474.890823208005 | 0.684766135134987 |
| ATATGATGACCA | 474.902755057947 | 0.878879060321334 |
| ACATGCGAGTCA | 474.924595477425 | 0.785137367275413 |
| CAGCGTGAATCA | 474.944140719736 | 0.798681665117596 |
| GGAGGCGTCATA | 474.975185857041 | 0.260076276287444 |
| CTGACGCGTGAC | 474.989578587858 | 0.512939804636523 |
| CATCAAGTCATA | 475.004830632285 | 0.519816455231449 |
| GTCACATAGTAA | 475.006301964708 | 1.11287934128311  |
| GAGAAAGATGAC | 475.048974404809 | 0.174360267003803 |
| GTCACCTCTGAC | 475.05179707417  | 0.291100518081923 |
| GTCATTCTCACA | 475.053419812862 | 0.390612037747708 |
| AGTCACGCCGTA | 475.056636637728 | 0.504295900021759 |
| ATGCGGTATGAC | 475.061887864732 | 0.539396653952795 |
| CGCACTTATGAC | 475.096463850854 | 0.461580120438485 |
| ACCTGTTATGAC | 475.097392624324 | 0.231243184764334 |
| GTCATAGAAAGA | 475.098673057343 | 0.319727213212681 |
| GTCATTACGTGA | 475.101693317861 | 0.586021877135901 |
| GAGTCAATTA   | 475.103826541966 | 0.259323057996598 |
| CTTCTCGATGAC | 475.10721197649  | 0.39367976264537  |
| TGACTATTGAAA | 475.110188109223 | 0.807007769500511 |
| ATATATTGACTC | 475.125945406516 | 0.287758840467743 |
| ATCGTTGACACA | 475.166848651663 | 0.251953080107565 |
| GTCATAATACAC | 475.168171831886 | 0.631233705617188 |
| ACACTAGATGAC | 475.180415706806 | 0.69864946463341  |
| CTTAATTGCTCA | 475.183938348559 | 0.441811771835196 |
| GTCATCCGACGA | 475.186531577717 | 0.697011504719156 |
| ATGACAGCTTTA | 475.197172007603 | 0.40932123593134  |
| TCTGTCACGTCA | 475.198203256244 | 0.414388701987533 |
| CTCGCTAGTCA  | 475.236166623805 | 0.46273064397534  |
| TACATTGACTGA | 475.243035816463 | 0.465368725233962 |
| AATTGGGAGTCA | 475.247387648364 | 0.283013906682485 |
| ATGACGGGGCAG | 475.254706498668 | 1.38713866285431  |

|               |                  |                   |
|---------------|------------------|-------------------|
| ATATGGTGACGC  | 475.255752131957 | 0.509576855710092 |
| AGTAAATTAGTC  | 475.258174835014 | 0.466179262086144 |
| CTACTTGACTAA  | 475.258374119603 | 0.212308738386712 |
| CGATTTCGATGAC | 475.266515930895 | 0.78505626315408  |
| GTTTCGTGAATCA | 475.272165515838 | 0.468661336863409 |
| ATGACGTGATGC  | 475.275159990768 | 0.487721801838559 |
| GTGACACTGCAC  | 475.302035730521 | 1.03851794211427  |
| TAATAAGTGTCA  | 475.306514758089 | 0.603713399601312 |
| ACGTCATGATTC  | 475.308418962673 | 0.164552539721753 |
| AGTCACTCTAAT  | 475.318057716208 | 0.285179541636056 |
| GTCATCTATGTA  | 475.324463499043 | 0.410735632254576 |
| ACTCATAAGTGA  | 475.326067094663 | 0.564984723717388 |
| TGAATCACGGCA  | 475.329287695936 | 0.615162794727958 |
| ATTTCCACGTCA  | 475.353582075627 | 0.258716915974307 |
| ACGATTCATGAC  | 475.357970528    | 1.05978464180624  |
| GTCATCAGAGAA  | 475.36116314835  | 0.77230219089435  |
| TCACAGGTGACA  | 475.36809561116  | 0.586677629106882 |
| GCACTTGATGAC  | 475.381512152782 | 0.566781193831871 |
| TGACTGTGATAA  | 475.392954799408 | 0.56113021720215  |
| CCGATAGATGAC  | 475.455195021492 | 0.589698571936073 |
| GAGTCCGAGTCA  | 475.491049454651 | 0.648779239528111 |
| CCCGCAGAGTCA  | 475.492918714899 | 0.521519812495709 |
| CTTATCTAGTCA  | 475.493963211572 | 0.636529980020933 |
| GACTAATACATC  | 475.4964972663   | 0.230172208176336 |
| AGTCACCTCCTC  | 475.536510673338 | 0.265819262680625 |
| GTCATTCGGACA  | 475.551968741881 | 0.682229348024884 |
| CAGATAGATGAC  | 475.559490307753 | 0.330193822162834 |
| ACGGCTGGTGAC  | 475.56311941066  | 1.38188391322572  |
| ATCCAATAGTCA  | 475.59095815374  | 0.943016594917002 |
| ATTACATAGTCA  | 475.607172290729 | 0.517592693713996 |
| CGTCACAGTCAA  | 475.616758826263 | 0.591509445593171 |
| GTGACAACCTCAC | 475.618699072464 | 0.290573484142317 |
| GTGTCATGCTAA  | 475.638632653352 | 0.847460450645027 |
| GTCTGTGAATCA  | 475.6968388784   | 0.446579004414442 |
| GTCATCACGCCGA | 475.696963260021 | 0.929430477400532 |
| AGCCGTGATTCA  | 475.711443593107 | 0.382221126557579 |
| AGTAGTGACGTG  | 475.737397468191 | 0.314410029122234 |
| ATTCCGTGACTA  | 475.740336757343 | 0.504342146272841 |
| AATGAATTAGTC  | 475.769858914076 | 0.486273160304646 |
| AGTCACTCTACG  | 475.77129115784  | 0.150207182182444 |
| AAGTACCAGTCA  | 475.792534254282 | 0.596784919065971 |
| AGTCACGGTTGA  | 475.804802807182 | 0.209174029305887 |
| GAACCTGACACA  | 475.805975057704 | 0.503715485362275 |
| GCGATCCAGTCA  | 475.830280937902 | 0.680608154384626 |
| ACTCATACTTGG  | 475.846517894114 | 0.112560558559742 |
| GGCGCTCAGTCA  | 475.854477608477 | 1.00027232518552  |
| AAACCGTGTGAT  | 475.856630100049 | 0.383277245181587 |
| GTCATCTAAGAC  | 475.867257412759 | 0.741098535458968 |
| GTCATAGCTCAC  | 475.901241674094 | 0.999120957484397 |
| ATATGGGAGTCA  | 475.90690156885  | 0.525697879179143 |
| TGACAGATCGAA  | 475.908945519837 | 0.429800385383284 |
| ATACATGGTGAC  | 475.909991447896 | 0.365683531930548 |
| CGTCACGTCAAG  | 475.91558844632  | 1.17761474714173  |
| TCAGCCGAGTCA  | 475.923000796152 | 0.905486165819867 |



|              |                  |                   |
|--------------|------------------|-------------------|
| GATGTATATGAC | 475.934980435004 | 0.444428654579896 |
| CAGAAATTAGTC | 475.937934332416 | 0.63351225224106  |
| ACTTATTTGTCA | 475.947554152245 | 0.571408668122633 |
| GTCATACATAAC | 475.97159386211  | 0.561063070046534 |
| CGTGAATATGAC | 475.97886340462  | 0.375534713082455 |
| GTCACAATTGCA | 475.9814421342   | 0.652267362992396 |
| CGCAAGTAGTCA | 476.003598861705 | 0.686808851707586 |
| GGTACTCAGTCA | 476.015253753076 | 0.396238991169619 |
| AGAGTCAGGCCT | 476.018150880085 | 0.356838811338908 |
| GTCATTCCGGAA | 476.02098868525  | 0.535581847025479 |
| GAGCTTGCCTCA | 476.025038269488 | 1.0800171614774   |
| CGCTATACGTCA | 476.038342585067 | 0.87638860713611  |
| ACGTCATGCATC | 476.040424327217 | 0.462424557856308 |
| AAATATCACTCA | 476.044147756696 | 0.408166144041542 |
| CAAAGGTGACAC | 476.069681995536 | 0.427098892736808 |
| ATAAGTGAATCA | 476.070751930699 | 0.752514291279035 |
| ATGACAGCGTAA | 476.074968700031 | 0.197684723347258 |
| GGTACTGACACA | 476.081856979485 | 0.391914611091843 |
| AGAGTGGAGTCA | 476.084016060063 | 0.218504431387567 |
| ATGACAACGTTC | 476.106485491292 | 0.15949729048256  |
| ATGAACGACTCA | 476.151998781005 | 0.440265846507585 |
| AGTAATGTCATC | 476.158087860475 | 0.497768004709249 |
| CATTCTGATTCA | 476.17832882243  | 0.593837622032489 |
| CGTAATTCGTCA | 476.184717470847 | 0.886271707094094 |
| CAACGCTGACTG | 476.19032303466  | 0.472913668250574 |
| AATGTGGAGTCA | 476.195347260552 | 0.223502815338084 |
| AACATCATGACA | 476.197775519246 | 0.279936507730973 |
| TGACTGGTTGAA | 476.201424291395 | 0.610492657891437 |
| GACCGTGATTCA | 476.203739041536 | 0.596221634788418 |
| GGTACTTATGAC | 476.203957227644 | 0.443499353291496 |
| ATGACATGACAA | 476.220014971977 | 0.268703799656125 |
| GGAATGTATGAC | 476.248833683258 | 0.391328436784604 |
| CCAACGTATGAC | 476.266277728942 | 0.482433038572949 |
| GTAATAAATGAC | 476.280646908987 | 0.427476678736471 |
| CGTCATTAATGA | 476.322933439279 | 0.59069264241165  |
| CTGGTACGTGAC | 476.324443895943 | 0.749547886482575 |
| CTCTGACGTCAG | 476.333407521275 | 0.564371788547182 |
| AACTTGGATGAC | 476.3438829135   | 0.463251929757543 |
| AAGCCGTGTCAT | 476.35979239967  | 0.467476090542493 |
| AGTCACTTGTTG | 476.406858285446 | 0.317920461739721 |
| GTCATGGCCCTA | 476.411018960483 | 1.38450502156869  |
| CTACTTCAGTCA | 476.423456911539 | 0.255068952321822 |
| GTCACTGTGACA | 476.424339311131 | 0.279354101396094 |
| ACCGCATAGTCA | 476.432951555308 | 0.453539043392531 |
| TACGACCAGTCA | 476.44550507356  | 0.560054957171827 |
| AGTCAGGGTGAC | 476.450816963923 | 0.365400196877676 |
| CGTGCTAGTCAC | 476.486946446246 | 0.511040494385622 |
| CTTATGCAGTCA | 476.508568650553 | 0.521727074348598 |
| GTCACAGGTACA | 476.521005412841 | 0.413932698862113 |
| AAGAGCTATGAC | 476.53139280426  | 0.461228595309167 |
| AAGTATTTGTCA | 476.556550818136 | 0.291305555489904 |
| CGTCATCTGCCA | 476.564307891906 | 0.336746122491947 |
| CTAATGGAGTCA | 476.567464092946 | 0.406237379736996 |
| CTCGAACTATGA | 476.588727836389 | 0.905159866640343 |

|              |                  |                   |
|--------------|------------------|-------------------|
| GAATGCGAGTCA | 476.618976369847 | 0.426618848711551 |
| CGCGACGACTCA | 476.669014536936 | 0.503552168676837 |
| AGTCACTACTTC | 476.697948303851 | 0.332895184958075 |
| AGTTCCGAGTCA | 476.716362235362 | 0.511356182861681 |
| ACTCTGGATGAC | 476.723571270644 | 0.603997447337295 |
| CGTGGTGACCCA | 476.725255193969 | 0.560852168058373 |
| GACTCACTCAGA | 476.759320259362 | 0.537815875888222 |
| AAGAATCTGTCA | 476.764427855618 | 0.538526155996166 |
| GCACACAATGAC | 476.777575171824 | 0.679680006751067 |
| TGAGTAAACAAA | 476.799392018554 | 0.383660813530562 |
| AGAGTCAATTGC | 476.800954382546 | 0.438314036910237 |
| TCGCACACGTCA | 476.805174525042 | 0.641819845240878 |
| ACGGCGTGACAC | 476.81914981167  | 0.520486514842086 |
| ATCTTTGACTGA | 476.857750460139 | 0.432980562081993 |
| ATGACTAGCCTA | 476.861097765383 | 0.471400528259597 |
| GCTCCCAGTAC  | 476.861799350806 | 0.33822671782623  |
| ACGTCATGTGAC | 476.871589697185 | 0.516603169041326 |
| GTCATACCTTAA | 476.883787406511 | 0.365283748734244 |
| GACATTTGACTC | 476.884205219666 | 0.442621501038724 |
| TCCCTTGACTAA | 476.887276581227 | 0.313799081265833 |
| GATGACGCCGAA | 476.914206679982 | 0.440841574779733 |
| ACGACACAGTCA | 476.953963510166 | 0.428007632008806 |
| CTAGGTGAATCA | 476.956575855905 | 0.159053473566006 |
| AGTATTTATGAC | 476.956971378501 | 0.316648093095024 |
| TGAGCAATTCOA | 476.962038934913 | 0.750769106240269 |
| CGTCATGGGTCA | 476.966303810366 | 0.780288676153314 |
| AATCTAGTGACT | 476.971442930463 | 0.490980088677308 |
| CCAAAGGATGAC | 476.975376259301 | 0.461834833353397 |
| AGAAGCGATGAC | 476.986515828936 | 0.511116786358162 |
| CGGTCGGAGTCA | 477.012918017679 | 0.280406067407259 |
| ATGAGTCCGTAG | 477.032535876838 | 0.370915796962927 |
| ATCCGGTATGAC | 477.049963889913 | 0.494040367299491 |
| AAAACGTGAGTC | 477.096236631764 | 0.490976077509505 |
| GACTAATTTCTA | 477.101982886144 | 0.642939650127874 |
| ACCTACACGTCA | 477.116177217888 | 0.54451153360842  |
| GTCATCTAAAGA | 477.133205682475 | 0.822265283426706 |
| TGCGTAATCACA | 477.145709536293 | 0.905631506968629 |
| GTCATTCGGTTA | 477.163364308236 | 0.583496371739655 |
| CGCATTGATGAC | 477.17729275347  | 0.434636106743482 |
| TGACTAGATGAA | 477.199770869849 | 0.45033840567987  |
| GTCATAATGGAC | 477.209635596978 | 0.40507039173213  |
| CCGTTTGATGAC | 477.215210373776 | 0.365076123817269 |
| GTCATATGTTAA | 477.225756428012 | 0.324220688329087 |
| CCAGCGGTGAC  | 477.241835443261 | 0.779587933253916 |
| GTCGTTTACTCA | 477.247854884397 | 0.626315411430076 |
| CGTACTGTCATC | 477.253219392894 | 0.22225317873564  |
| GCGACTTACTCA | 477.256125227271 | 0.490063466271597 |
| CACGACCAGTCA | 477.258888595331 | 0.568830623998172 |
| AGTCCGACTCAC | 477.276878400161 | 0.262182726892296 |
| ATGCTGACTATG | 477.287781112455 | 0.951403268548812 |
| GACTTCTATGAC | 477.288348614994 | 0.711662822662767 |
| GCACGTGAATCA | 477.292553809738 | 0.982391070725105 |
| GATAGATATGAC | 477.297101539947 | 0.566093227048521 |
| AAGATGCCTCAT | 477.303698509132 | 1.00471296679699  |

|               |                  |                   |
|---------------|------------------|-------------------|
| CCCTAGTGTGAC  | 477.334609501004 | 0.418042847496694 |
| AAAAGGTGACGT  | 477.358600886642 | 0.424661679810183 |
| ATAGGATGACCA  | 477.388724638905 | 0.413799078384965 |
| AATGTGCGATGAC | 477.417907606994 | 0.489317330293329 |
| TGACTCGAGCAA  | 477.42444587308  | 0.467043191568856 |
| CTGCTGTATGAC  | 477.424832554784 | 0.598211075033297 |
| ACCGTTGAATCA  | 477.436289021693 | 0.621098123053583 |
| CTCATTGACTGA  | 477.457569446776 | 0.228923678705752 |
| GAAACTGATGAC  | 477.474693562594 | 0.340617026074488 |
| CCTCCCAGATGAC | 477.491354909842 | 0.406938555524753 |
| GTCATACCATA   | 477.510633004573 | 0.435060462913598 |
| GTCACAATAACA  | 477.512819987626 | 0.821064818693782 |
| ATGACAAAGAAG  | 477.521253998336 | 0.266939589601058 |
| ATTATAGATGAC  | 477.524225160466 | 1.0787627843232   |
| ATTCAAGACTCA  | 477.535184878831 | 0.827078343615311 |
| AGAATGGATGAC  | 477.554000909747 | 0.183121330702382 |
| GAAAATGTCATA  | 477.571649235429 | 0.270525425933364 |
| CCGTATCCGTCA  | 477.580562117186 | 0.106356581214494 |
| CTGGATGATGAC  | 477.61450492909  | 0.409021233021012 |
| AGTCACGCGTGC  | 477.62797244135  | 0.47540785620512  |
| GGATGCTATGAC  | 477.636008079779 | 0.471863060520289 |
| ATAAAATATGAC  | 477.645934378868 | 0.621558968366973 |
| AGAGTCAGGACA  | 477.658510391014 | 0.494386256150731 |
| AATCCGTGACTA  | 477.661190068563 | 0.341396774493128 |
| ATGACGAACAAA  | 477.681055328172 | 0.229531634944664 |
| ATGCACTATGAC  | 477.709829765679 | 0.67383601140481  |
| CAGGATTATGAC  | 477.726838449522 | 0.676606387761716 |
| CGTCATTGCTAG  | 477.746955364205 | 0.730666255059342 |
| GAATGGTATGAC  | 477.748693804591 | 0.56535125810087  |
| CACCTATGATGA  | 477.750254871127 | 1.20365853671795  |
| AATCTCAATGAC  | 477.77405157911  | 0.719412235482535 |
| TGACAAATATAA  | 477.791988730784 | 0.682951984476726 |
| ATGACGAACTAG  | 477.83309969636  | 0.392936602348815 |
| CCTCGTAATGAC  | 477.837162703338 | 0.558983463742912 |
| GTCATCATTGTA  | 477.839546652783 | 0.431561505085425 |
| AGTCACCCTAAC  | 477.855260855742 | 0.48495568254937  |
| GCTTCCACGTCA  | 477.882867520849 | 0.421353253090074 |
| TATGTTGACACA  | 477.903764320631 | 0.512987663845844 |
| AGTATTAAGTCA  | 477.920784578365 | 0.531974213818431 |
| ACACACGAGTCA  | 477.925876883097 | 0.37120125743656  |
| ATTAGATATGAC  | 477.964146284311 | 0.373552059702531 |
| TACCCTGACTGA  | 477.986794711018 | 0.247401140377859 |
| GTCATAGTAGGA  | 477.987593337809 | 0.298640597185981 |
| AGACTAATATTA  | 478.01983219863  | 0.712437288086895 |
| ATATATTGCTCA  | 478.037575144026 | 0.236454053424956 |
| GCTTGGTATGAC  | 478.051893026822 | 0.627393658222046 |
| GTCATATACAGA  | 478.057033567888 | 0.493025063317925 |
| GTCATGCGATGA  | 478.065141070127 | 0.821415779089278 |
| TGAGTCGTCCAA  | 478.066083818581 | 0.390455362905704 |
| GAACGGTATGAC  | 478.100536074319 | 0.481132343835784 |
| TGACATCACTCA  | 478.104920986918 | 0.546283072873929 |
| CTCCCGTACTA   | 478.116786320776 | 0.153314487654602 |
| GTCATAATTTAA  | 478.138680768675 | 0.365621908159859 |
| TCTCTACAGTCA  | 478.145607984277 | 0.562311270559382 |

|               |                  |                   |
|---------------|------------------|-------------------|
| CCAATACGTCA   | 478.151089945661 | 0.527996733897087 |
| GTCATATGATCA  | 478.153549937901 | 0.723797301459843 |
| AATGAGACTCAT  | 478.159302918971 | 0.416389334994397 |
| CTACTGTATGAC  | 478.161580801794 | 0.421202164581333 |
| CTAACACAGTCA  | 478.19275454224  | 0.452950133442404 |
| ACGGGGACTCAT  | 478.199214238    | 0.496805386848443 |
| CTCAAAGGTGAC  | 478.212490518087 | 0.982995722851712 |
| ACAGAATTAGTC  | 478.215181177628 | 0.914895151625195 |
| CTACTGTAGTCA  | 478.230996116906 | 0.414440130281616 |
| ACTCTGAATGAC  | 478.236749310605 | 0.560588257057664 |
| GGACCCGATGAC  | 478.24938428126  | 0.608612405779127 |
| CGTCATCAGGAC  | 478.261516179518 | 0.721954629909257 |
| AGGTAACAGTCA  | 478.262870129798 | 0.219996576777609 |
| GTATGACTTGAA  | 478.275350739395 | 0.450962373320877 |
| AGCTTTTATGAC  | 478.282879590931 | 0.441244440157736 |
| CTAACGGAGTCA  | 478.288511543492 | 0.533858070104408 |
| CGTCTTGATGAC  | 478.295844476313 | 0.540651857133676 |
| GACTAATAGCCA  | 478.296557591019 | 0.976346909783898 |
| CCGAGAGAGTCA  | 478.298536429662 | 0.538093708046433 |
| AAGTGCGATGAC  | 478.323032405668 | 0.404679647683127 |
| TCATGTTTGTCA  | 478.366390279454 | 0.988698914115508 |
| GACTAATAGTGC  | 478.382653869916 | 0.871970847471937 |
| CATGCCGAGTCA  | 478.387822647789 | 0.589626787557339 |
| CAGTGTGATGAC  | 478.388935186171 | 0.506896999199419 |
| AGCGGTGAATCA  | 478.392903411166 | 0.436666530459737 |
| TGACTTGTACAA  | 478.398427487106 | 0.787195375980322 |
| ATGGGTTATGAC  | 478.413151693522 | 0.410463650212117 |
| GCCGCTTACTCA  | 478.429771975183 | 0.438939940303963 |
| GTCATACAATA   | 478.435745719624 | 0.678291775023229 |
| GCCGTTTATGAC  | 478.440828135343 | 0.436866077252108 |
| GAGTCAGGCTCA  | 478.454739609323 | 0.523654861108161 |
| CTACCTGACTGA  | 478.500475078551 | 0.37335195126319  |
| ATCACGTAGTCA  | 478.50204463646  | 0.421093845753162 |
| TACGGATGACCA  | 478.513785246985 | 0.476045599497286 |
| CGGTGAATCAAC  | 478.518330532482 | 0.661812775158335 |
| AGTTATTATGAC  | 478.519672508066 | 0.443497436978573 |
| ACGTCATGAAAT  | 478.521056325091 | 0.707954287391188 |
| CTGCCTGCGTCA  | 478.529544050396 | 0.606620197597495 |
| ATGACACGGTGA  | 478.536595137146 | 0.283657544734645 |
| ATGACGAGGACG  | 478.562819142797 | 0.475774013221504 |
| GATACCGTCATA  | 478.569245901834 | 0.586267339301009 |
| GTCATCACACTA  | 478.570868613183 | 0.444944417775441 |
| ACCTTGTACTCA  | 478.589369903048 | 0.507611907318353 |
| GTAICTATGACA  | 478.59506273094  | 0.914784170872092 |
| GTGATTCACACTA | 478.598590227947 | 0.155817908465433 |
| CTGACGCAGCAG  | 478.610473836508 | 0.412046917879103 |
| ATATACCACTCA  | 478.627798227817 | 0.753169896731014 |
| CATATGCAGTCA  | 478.631519323485 | 0.716901106669793 |
| CGATGATTAGTC  | 478.640123599198 | 0.670307791754098 |
| CTGCTTGACTAA  | 478.645148051299 | 0.403995040585959 |
| GCAATGGATGAC  | 478.693734049357 | 0.473659906768838 |
| TCAACTGTGACA  | 478.696877007114 | 0.349042586682731 |
| GTCAATGATGAC  | 478.746419485497 | 0.577303628980407 |
| ATGTGTCAAGGG  | 478.750867067883 | 0.249625683417034 |

|             |                  |                   |
|-------------|------------------|-------------------|
| GACTGACGTC  | 478.791702151771 | 1.01824508998614  |
| ACACTTAGTG  | 478.814196953602 | 0.243658998850127 |
| CAGTTCTGTG  | 478.81975991848  | 0.901524016062103 |
| GCTCTGAATG  | 478.824815410884 | 0.459589906493546 |
| CGCTGGAATG  | 478.830187280338 | 0.676952313779898 |
| TGACTGGTCG  | 478.843879093492 | 0.55762541092576  |
| ATAGATGATG  | 478.859135502873 | 0.346123511561786 |
| AACTGGTATG  | 478.872598747443 | 0.453213145712707 |
| AGTCACGCTT  | 478.878683195305 | 0.763918036045178 |
| CTATCGTATG  | 478.881939584828 | 0.190715673237823 |
| CACGCAATG   | 478.884598845325 | 0.856965306974809 |
| TCACAGATG   | 478.888888921674 | 0.727091521944309 |
| GTCATATACA  | 478.889744587917 | 0.783158957728867 |
| CGTCATCGGA  | 478.901063150955 | 0.499393009869905 |
| GTCATCAGTAA | 478.905278115576 | 0.393223737791678 |
| AGTCACTAC   | 478.908777139506 | 0.566009083726652 |
| CGTGAAATG   | 478.909211163386 | 0.643341182658428 |
| GTCATCGTGA  | 478.910349975431 | 0.515689098981721 |
| GAACTATATG  | 478.984972850288 | 0.504859565470372 |
| GACACATGTG  | 478.986641085942 | 0.809575620989647 |
| ATGACTTGT   | 479.008527980808 | 0.438107289669825 |
| GTCATAAAT   | 479.012575420022 | 0.710979307648779 |
| AGATTTGCT   | 479.035306479571 | 0.235346567721659 |
| CGTGGTGA    | 479.044599156361 | 0.895592155381569 |
| TGACGGATAG  | 479.058384742197 | 0.285431475251744 |
| CGCGGATAT   | 479.075402129129 | 0.44583324462562  |
| AACCGCGTG   | 479.087185639355 | 0.336976390934002 |
| ATGACGAGAT  | 479.092781563153 | 0.349573811937416 |
| CGTCATCTAG  | 479.112941801928 | 0.545177064934976 |
| AGGGCCTAT   | 479.117435916466 | 0.348572660209405 |
| ATGAGTCCC   | 479.129504130482 | 0.357850205584237 |
| TGTGATTA    | 479.168956031614 | 0.528468292633806 |
| GTCACCACAT  | 479.192071527651 | 0.590272711461883 |
| GGCTCCTAT   | 479.209211145226 | 0.815012725983144 |
| AGTCACTACA  | 479.211124541201 | 0.609549088981425 |
| AGTCAACC    | 479.211459412873 | 0.454496423547531 |
| AACGACGTC   | 479.218155128129 | 0.438402004690238 |
| AAAAGGGAG   | 479.221894869501 | 0.273378795574378 |
| GTCAAATCG   | 479.224576836521 | 0.578054263037615 |
| GTCATTACAG  | 479.279985978356 | 0.735928135211805 |
| GCATAAGAT   | 479.287564936765 | 0.719668784061035 |
| GTCATCATCT  | 479.304388887548 | 0.414950132722273 |
| TCAAACCTG   | 479.305683793285 | 0.447632386750601 |
| CGCTACACG   | 479.320794538194 | 0.485455788025227 |
| TATGATGCA   | 479.329019799535 | 0.453737931259055 |
| ATCCCTGTC   | 479.329162419672 | 0.286652402701893 |
| CCTAGTAAT   | 479.351575697995 | 0.917929969525566 |
| AATATACAG   | 479.360830927441 | 0.77522778389923  |
| AGGCGTGAT   | 479.364846180693 | 0.307571035829483 |
| AGTCACTCA   | 479.367189356463 | 0.165407699792508 |
| GAGGCCTAT   | 479.370959043489 | 0.565744719469632 |
| AAACGGCGT   | 479.373434354686 | 0.340660103893424 |
| GACTCACTA   | 479.380093078799 | 0.31022174446909  |
| ATAATATAT   | 479.380366493872 | 0.766614224354081 |

|               |                  |                   |
|---------------|------------------|-------------------|
| GTCATATGGCAA  | 479.380473968991 | 0.351014258695103 |
| GACGCCTGACTC  | 479.385068086555 | 0.346563206798646 |
| CATTCTGACTC   | 479.401806196091 | 0.243156227380219 |
| AGTCTTTAGTCA  | 479.415667318284 | 0.449309908373083 |
| CAGTCATGGGTA  | 479.434411843263 | 0.139344613306872 |
| ATAACTACGTCA  | 479.436439738637 | 0.725125898173575 |
| ATAGACTCGTCA  | 479.439687222415 | 0.757365927426961 |
| AATTATTAGTCT  | 479.445197645303 | 0.555633718863587 |
| GTCATCATTGGA  | 479.448105963548 | 0.503811031135557 |
| GCTACACAGTCA  | 479.470335909933 | 0.465084218610765 |
| ATGACGTCGTCA  | 479.477398976532 | 0.639507646952243 |
| GATGACGTCTAC  | 479.483405435862 | 0.359322763779731 |
| GAGTCAGTAGCC  | 479.491849945566 | 0.548328915518868 |
| AACGACGATGAC  | 479.494078139531 | 0.420520402694483 |
| ATGACATGATTC  | 479.503865278529 | 0.295367099425531 |
| CCAGTCTGAGTC  | 479.509643452797 | 1.12048963202712  |
| CTCATATAATGA  | 479.510993088565 | 0.693797095204724 |
| GGTCGTTAGTCA  | 479.547059342982 | 0.554024241851343 |
| ATCAATAGTGAC  | 479.552131611241 | 0.761889506371161 |
| CTGGATCCGTCA  | 479.570807670455 | 0.471528441902407 |
| CTGATAAATGAC  | 479.579203150633 | 0.46582049791359  |
| ATGCCCTATGAC  | 479.594714905127 | 0.428833928302983 |
| AGATCTCGTCAT  | 479.595289766952 | 0.392287333854335 |
| GCAACTGCGTCA  | 479.600013823554 | 0.436453834975374 |
| TCTTACTAGTCA  | 479.608067107342 | 0.310253608960127 |
| GTCACACCTTGA  | 479.625076330591 | 0.263868067985807 |
| GTCCAGTAGTCA  | 479.629944435561 | 0.678370734707244 |
| TCTGAGCAATCA  | 479.635093803108 | 0.674523554483179 |
| ATGAGTCGGGCA  | 479.651298456048 | 0.283062758080433 |
| CTAATGTATGAC  | 479.666805742702 | 0.66612002867052  |
| CTGTATCCGTCA  | 479.66695104828  | 0.455325825019821 |
| AGTCACCTTAAG  | 479.674847041347 | 0.444974964213107 |
| CCGCGTGATTCA  | 479.676788751563 | 0.688009894790069 |
| CACGTAAGTGAC  | 479.681881000339 | 0.867983458396078 |
| GAAACATATGAC  | 479.682456932036 | 0.365103381138381 |
| CATTTGCTCACC  | 479.690599588008 | 0.261714427097322 |
| TCCGTCTAGTCA  | 479.695198655489 | 0.314713121472197 |
| GATTGGGAGTCA  | 479.718446950742 | 0.187061337021944 |
| CAGTCCGAGTCA  | 479.754050481999 | 0.562409241470039 |
| TATGATGTAACA  | 479.778743264265 | 0.608415659685347 |
| AGTCACTCCTGC  | 479.783517085793 | 0.30170296651511  |
| AATTTCTGAGTC  | 479.788677066206 | 0.831001857143675 |
| CTAAGGGAGTCA  | 479.794174801853 | 0.596973709168962 |
| AGTCACCTCATC  | 479.804379718963 | 0.222430667412435 |
| CGTCTTACGTAA  | 479.818269058992 | 0.942572262186099 |
| GAGTGTGAATCA  | 479.830843968572 | 0.229497002605393 |
| CGCCTACAGTCA  | 479.832161494982 | 0.301765521651222 |
| ACGACTAAGTCA  | 479.840919724816 | 0.395365680482892 |
| ACGACTGACACA  | 479.841674154791 | 0.477876422812189 |
| ACGAATAATGAC  | 479.858540694614 | 0.684999789316824 |
| CAGATTTCTGTCA | 479.873511026091 | 0.633591050888865 |
| CGAAACAATGAC  | 479.873858427458 | 0.698772084226719 |
| GTCATATTGAGA  | 479.883922429642 | 0.521153111345283 |
| TACACGTAGTCA  | 479.885523142912 | 0.695065559010671 |

|               |                  |                   |
|---------------|------------------|-------------------|
| CTTTACGCGTCA  | 479.909235104346 | 0.193462049737622 |
| TGACGTATAGAA  | 479.922390327417 | 0.610099125367471 |
| GTCATTC AACGA | 479.931021938427 | 0.276661693184644 |
| AAACTCGAGTCA  | 479.932579970096 | 0.430566694535455 |
| GTCACACAGTGA  | 479.938601694697 | 0.752294513869204 |
| GTCATAGTGAAA  | 479.943308191656 | 0.524848349243087 |
| AAAATCAATGAC  | 479.95012697426  | 0.276264536706695 |
| GTCATCTTT CGA | 479.971422384858 | 0.289740306462041 |
| AGAAATCTGTCA  | 479.977457682723 | 0.524245071931218 |
| ATAAGACGTCAT  | 479.993559149899 | 0.38800497206525  |
| AATCGGCGTCAT  | 479.999663725716 | 0.305165018531379 |
| GTGATTCAATGA  | 480.004580300279 | 0.492500242829473 |
| GTCATGTTGTCA  | 480.016513120746 | 0.945509092804773 |
| GTCATCCACTCA  | 480.021622754948 | 0.284760976294904 |
| CGCTAGTAGTCA  | 480.053424699622 | 0.604118038785274 |
| CGCAAGGATGAC  | 480.055874513122 | 0.491855091106416 |
| CGACTCTATGAC  | 480.084074147638 | 0.604552995676135 |
| GAAGTATTAGTC  | 480.088412810409 | 0.50005751070509  |
| ACGTTGTAGTCA  | 480.093930479792 | 0.695822157449009 |
| ATTGCTGTGTCA  | 480.107960082446 | 0.651711464119794 |
| GTCATTCCTAAC  | 480.126550121644 | 0.398012610816408 |
| CACGGCGTGTCA  | 480.128117872081 | 0.736305534131425 |
| TAACTGGAGTCA  | 480.130988692747 | 0.597621977479137 |
| AGTGTCATGGAT  | 480.146165062691 | 0.353343058888029 |
| ATGACAATATAC  | 480.151949834592 | 0.595360315600426 |
| AGTTACGATGAC  | 480.167581762891 | 0.712759585127633 |
| CGTCATTTGTTA  | 480.167997839294 | 0.574198097173249 |
| GTCATTCCTGA   | 480.174959144931 | 0.292636112350374 |
| AGTCACCCTACC  | 480.177363516678 | 0.366600141571636 |
| ACGTCACATATCA | 480.184736040955 | 0.427710193290486 |
| GTGACTCACCCC  | 480.187764704751 | 0.311469981141939 |
| GAGTCAAAGTCA  | 480.191725413109 | 0.451058570551036 |
| CAATCTTATGAC  | 480.203764680069 | 0.228817758505149 |
| GTCACCCTGGGA  | 480.215842229887 | 0.319530888624207 |
| GAGTAACAGTCA  | 480.223689743245 | 0.659651793297168 |
| CAAGTCTGTGAC  | 480.225244094386 | 1.10742275870619  |
| ACCCTGTAGTCA  | 480.254334144517 | 0.612330378267021 |
| ATAACGTCATGA  | 480.25591768607  | 0.450624490027405 |
| GTCATCATTTTA  | 480.261043845849 | 0.303199057169238 |
| ATGCACACGTCA  | 480.269095822286 | 0.745302252696827 |
| CTGTACACGTAC  | 480.271397054775 | 0.168671588571386 |
| AAAATCCAGTCA  | 480.277497381016 | 0.574828614625179 |
| AAGATCTATGAC  | 480.28295728158  | 0.176491420224415 |
| GAAGAGTGAGTC  | 480.283673952408 | 0.552920182829862 |
| ATGACGGAGTAA  | 480.32541939283  | 0.321520919524742 |
| TGACTGAGCTCA  | 480.336185831899 | 0.850947070325958 |
| GAACACGTAAACA | 480.35273960584  | 0.555909544276975 |
| GTCATAGATTTA  | 480.357577586203 | 0.497981446320232 |
| CCAGCACAGTCA  | 480.359697845542 | 0.695345436808524 |
| CAACGCTGTGAC  | 480.378659835888 | 0.603354160282995 |
| GTCATAGGGAGA  | 480.383440931434 | 0.45060667827902  |
| TAGTCACGGATA  | 480.387988349446 | 0.285443362591986 |
| GACTACTGACTC  | 480.394193693976 | 0.407326474822767 |
| AGTCACTCTAAG  | 480.398819149839 | 0.435113735440407 |

|               |                  |                   |
|---------------|------------------|-------------------|
| ACATTCGACTCA  | 480.399712113558 | 0.28088607088028  |
| TGACTATGTACA  | 480.440760008325 | 0.564882102458863 |
| TATGACTTGTGA  | 480.446374759796 | 0.449894757449779 |
| CTTCGCTATGAC  | 480.457595711992 | 0.288215626159574 |
| AGTCACTAGGCA  | 480.470556113766 | 0.292773223731214 |
| ATGAGTACGATC  | 480.473297906574 | 0.320481754390406 |
| CGTAATATGTCA  | 480.47911422266  | 0.606466172053147 |
| GTCACTGAGTAA  | 480.481782709854 | 0.25159737804871  |
| TATACTTACTCA  | 480.488197819348 | 0.433959343961635 |
| GTCATATCCGAA  | 480.510623658711 | 0.588321166314947 |
| AGGCCAAGTCAT  | 480.525730136813 | 0.547767206619606 |
| TAGTTTTACTCA  | 480.536268352266 | 0.173770312983481 |
| GTACGTGCGTCA  | 480.564221606874 | 0.861882935011369 |
| GACTGGAATGAC  | 480.572136665681 | 0.40630961223862  |
| CGGCTACAGTCA  | 480.577146719841 | 0.68436396510998  |
| ATTTCGAGATGAC | 480.595812701369 | 0.623165469808999 |
| AGACTAATCGAC  | 480.608104484065 | 0.642750918614782 |
| GCGTGCACGTCA  | 480.642436561637 | 0.866781871385967 |
| TAGTCACGGTCA  | 480.65396145445  | 0.604809795152005 |
| CAGCTTACGTCA  | 480.674380618396 | 0.411186043646708 |
| CCGCAGTGAGTC  | 480.695968989492 | 0.948491228811559 |
| ACAACCTGCGTCA | 480.724927469027 | 0.669278104997258 |
| TACGCTGATTCA  | 480.749583523879 | 0.3472079076686   |
| TGACGAGTTTAA  | 480.750290712257 | 0.661967280602089 |
| AGTCACCTCTGC  | 480.755633210366 | 0.360021858899057 |
| CCTATAGGTGAC  | 480.80465995668  | 0.926765339986441 |
| AGGCTTCTGACT  | 480.869983222838 | 0.366280843668112 |
| GGTCATAACTCA  | 480.87440438958  | 0.763974856090822 |
| TCATATTGATGA  | 480.876637605392 | 0.836151586956555 |
| AGTGTTTATGAC  | 480.879380943238 | 0.485901778142491 |
| GTCATCCTTATA  | 480.8841101341   | 0.581516901919608 |
| GTCATTTTATTA  | 480.892124661356 | 0.474655078637895 |
| TGACAGATTGCA  | 480.943919338572 | 0.571472460820127 |
| AATACCGTCATA  | 480.966110651988 | 0.310135547727005 |
| AGTCAGAGCCTA  | 480.983166556092 | 0.410151149881541 |
| CAAGTCTAGTCA  | 480.99461727402  | 0.784541355458054 |
| GTCATCGAAAC   | 481.00234187521  | 0.806866687702347 |
| GAGTGGTATGAC  | 481.017641152622 | 0.423464105800516 |
| GTCATCACTACA  | 481.032772040706 | 0.567097588478136 |
| ATATCCTGACTC  | 481.037066204578 | 0.476885235618669 |
| ACACAATATGAC  | 481.039711943213 | 0.307388722388458 |
| CTTGTTTATGAC  | 481.043344533107 | 0.360200975447491 |
| TGAGTCTACCAA  | 481.059260961528 | 0.533476895177544 |
| GTCATCGTGATA  | 481.077854892783 | 0.725673975691442 |
| GTTTCCTAGTCA  | 481.079333464981 | 0.403166034907627 |
| CGAGCGTGA     | 481.080148619974 | 0.531946365804143 |
| GTCATGCATCAA  | 481.099058645657 | 0.62104420150117  |
| GATGAGGATGAC  | 481.110243060711 | 0.243772385004154 |
| GAGTCAAACAGA  | 481.126027331358 | 0.424765557502535 |
| GGCCACGATGAC  | 481.127423163912 | 0.591130308063746 |
| ATGACAGAGCGC  | 481.133661417001 | 0.453495433857135 |
| ATAGAAGATGAC  | 481.146951895179 | 0.237063310378821 |
| GAGGATTATGAC  | 481.151786662992 | 0.435919243243848 |
| AATTTGGATGAC  | 481.15377747364  | 0.390137797349824 |



|               |                  |                   |
|---------------|------------------|-------------------|
| AGCTCCACGTCA  | 481.160649341688 | 0.284571566918949 |
| ATGAACGATGAC  | 481.1643550496   | 0.488250056861664 |
| TGACTCCACTCA  | 481.187427177536 | 0.320272754798283 |
| AGTCACTTGATA  | 481.19290866958  | 0.677808484008843 |
| CAGTCTGATGAC  | 481.204468227284 | 0.688042570925039 |
| CGTCATATGGAA  | 481.235209553513 | 0.425098841742544 |
| ATGAGTACCAGC  | 481.258302819741 | 0.65690901194304  |
| GCGTCATGATGA  | 481.26104056688  | 0.473645835701915 |
| ACTAATTGAGTC  | 481.279399242005 | 0.977463298271487 |
| AGTCGCGACTCA  | 481.286027270925 | 0.842160242343351 |
| CCAATGAATGAC  | 481.286763964623 | 0.411355769021937 |
| AGTCCTCAGTCA  | 481.287548466239 | 0.581389988411978 |
| TCAATGGAGTCA  | 481.294293645502 | 0.467852653672657 |
| GGATTGACACAC  | 481.295181942645 | 0.49851913374337  |
| CCTGAAATGACA  | 481.297908584435 | 0.478583739018031 |
| ACATTCTATGAC  | 481.311061441092 | 0.536039868924282 |
| GACTAACATGAC  | 481.311678853456 | 0.56203875549163  |
| GCTTAAAATGAC  | 481.315473743022 | 0.485687052577996 |
| CCACAGAATGAC  | 481.32434302146  | 0.708057429619257 |
| TCACCAATGACA  | 481.324686730042 | 0.457601531834191 |
| AGAGTCAGGAAA  | 481.346531145791 | 0.281068212810304 |
| CCTACTGATGAC  | 481.371553335453 | 0.169822523617553 |
| AAGCATCGTCAT  | 481.373773277956 | 0.344498094994124 |
| AGTGTCTGTCAT  | 481.374966913704 | 0.283733490346378 |
| GTCATGTCAAAA  | 481.378405668043 | 0.415640192936972 |
| AGCTGTTATGAC  | 481.382795901386 | 0.494178345902016 |
| CGCAATTGACTC  | 481.388230377319 | 0.721331193752143 |
| AAGTATTGACTC  | 481.395936122732 | 0.401803237195713 |
| ATGACAATGACC  | 481.398087241284 | 0.539552619170446 |
| ATCTCGAGTGAC  | 481.405561336177 | 0.877112111486962 |
| CAACAGGATGAC  | 481.416015514356 | 0.552311012114123 |
| ATGACAGAGAAA  | 481.446256237538 | 0.338000717129361 |
| CCAGCGTACTA   | 481.448806935769 | 0.459679529035523 |
| GTCATACAGAAA  | 481.452763496298 | 0.687659939069563 |
| CGATTGGAGTCA  | 481.476363380491 | 0.483324338368735 |
| ATGAGTCCGAAC  | 481.476930976789 | 0.670401863638524 |
| ACGCGTGCATCA  | 481.480635862427 | 0.767166946000137 |
| GTCATTCAATAA  | 481.496691340297 | 0.480198678578233 |
| CATTCTACGTCA  | 481.50974012294  | 0.357526832401065 |
| GTCACCATGTTA  | 481.516966162822 | 0.750339842357061 |
| GTCATCGTATCA  | 481.518268308947 | 0.685975461526327 |
| GCCATTGGTGAC  | 481.518716398066 | 0.758835724166378 |
| GTCATACGTTCA  | 481.546474984511 | 0.52821003425133  |
| AAAACCTTTGTCA | 481.55935708354  | 0.490802950407863 |
| TGACTCCTGCAA  | 481.563069640293 | 0.710998363096179 |
| TACATAGTGTC   | 481.568675391903 | 0.38915413189755  |
| GTCATAATGTAA  | 481.57611889909  | 0.238619162595767 |
| AAAGAGTCTTAC  | 481.580202806624 | 0.527176997112224 |
| TGACGTGTGCCA  | 481.585511335109 | 0.41658498389263  |
| ACGCATTGACTC  | 481.599128083502 | 0.444512621225313 |
| TCAGTCAATAAA  | 481.603339665535 | 0.813545038837436 |
| AATGTCTGTCAT  | 481.642712469732 | 0.415514983429647 |
| ATTGCTGACACA  | 481.643886618132 | 0.681861886689129 |
| AGAGTCAGGACT  | 481.647552367014 | 0.445053773154492 |

|               |                  |                   |
|---------------|------------------|-------------------|
| TGACGGATACAA  | 481.693292008887 | 0.54900984687374  |
| TAGAACTCGTCA  | 481.73171345165  | 0.572582755690448 |
| GTGTGTCAACCA  | 481.734735456211 | 0.340675900646665 |
| GCTCGTTACTCA  | 481.736310494765 | 0.629429236613823 |
| CACGCTAAGTCA  | 481.73844333178  | 0.452222628639632 |
| GTCATATTTGCA  | 481.746130744839 | 0.196250974096757 |
| CGTCATCAGTGA  | 481.749240150709 | 0.607148130345966 |
| CTTTATTGTGAC  | 481.76339823572  | 0.491843268836415 |
| CTCTGGGAGTCA  | 481.766408195727 | 0.784348251484126 |
| CTGTGAAATGAC  | 481.771088230381 | 0.354626271487467 |
| AGTCACGAGATC  | 481.779079294807 | 0.323044831386314 |
| ACGTCACCTATA  | 481.789747194307 | 0.603557699167214 |
| CGCACGTATGAC  | 481.804061528276 | 0.45046448318591  |
| CAGTCAGAACAC  | 481.806126327018 | 0.6693028079997   |
| CTCCCGTATGAC  | 481.819742147467 | 0.418642147062606 |
| CTGACTACGTGA  | 481.836246347599 | 0.595084443767834 |
| ACGTCACGTGCA  | 481.850900586554 | 0.326639041568359 |
| GTCATAAATCCA  | 481.880048152481 | 0.173851849707129 |
| ATTTTCGTGACAC | 481.884207306661 | 0.439095793714107 |
| GACTGTAATGAC  | 481.915793851412 | 0.70086212854477  |
| GCTACGCAGTCA  | 481.924934337296 | 0.670884374365756 |
| AATAGCTATGAC  | 481.930019141    | 0.523211872393497 |
| TCGCAAGACTCA  | 481.932156822942 | 0.883606494961612 |
| CCGAATGGGTCA  | 481.95664915326  | 0.471124461158565 |
| ACTCATAGGGTG  | 481.958402424329 | 0.453972693427275 |
| CCGTATACGTCA  | 481.962073335814 | 0.9127224588466   |
| CCAATTTGTCGA  | 481.963376917857 | 0.483266810022152 |
| AATCCGTGAGAA  | 481.967679228768 | 0.499098925211349 |
| GACCATGTCACA  | 481.968518397431 | 0.473386174024037 |
| AGACTCACTGAT  | 481.971358412211 | 0.444192081910424 |
| GTCATACAATA   | 481.972568459441 | 0.203030209735951 |
| AACAAGTCATCC  | 481.973814324464 | 0.50776684070653  |
| CAGTTAAATGAC  | 481.97415277142  | 0.597351730288314 |
| GTCATACACACA  | 481.988814223921 | 0.592017601827914 |
| CTCTAGTGAGTC  | 482.025026281241 | 0.811963251011502 |
| TCATACTGGTCA  | 482.034387098277 | 0.504261707639019 |
| AATAGTAATTAC  | 482.059151626772 | 1.38918510148584  |
| GCGGCTTATGAC  | 482.079327097184 | 0.613952486597483 |
| GACTTGTGTGAC  | 482.098052925362 | 0.241357959275518 |
| GTCACCGATGTA  | 482.100698715595 | 0.656373710670671 |
| GTCACATTCGGA  | 482.108584893006 | 0.475981892785751 |
| CATCTACAGTCA  | 482.115677052239 | 0.610185170231992 |
| GCCTTGACGTCA  | 482.127488943508 | 0.596483149585672 |
| AACGGCGTCATC  | 482.154836398059 | 0.478094229178934 |
| CGAACATATGAC  | 482.164170497841 | 0.881046714259194 |
| GTCATTTGACAC  | 482.192807683159 | 0.532714800062939 |
| CATTCATGACAC  | 482.195257849646 | 0.50423829737492  |
| AGACGGACTCAT  | 482.229254490077 | 0.410975741446142 |
| CGGTTATATGAC  | 482.239942737411 | 0.642832391996036 |
| ATGACAGACTTC  | 482.241233933318 | 0.56798202498941  |
| CAAATTAGTGAC  | 482.249454044705 | 0.535996380246085 |
| GTCATAATCGTA  | 482.277946188051 | 0.652839847102438 |
| GCTCATAATGAC  | 482.278943221124 | 0.591765499548302 |
| AGCACTGCGTCA  | 482.279765169571 | 0.553185095671881 |

|              |                  |                   |
|--------------|------------------|-------------------|
| GGCCAAGTCACA | 482.290106112306 | 0.402918906998937 |
| AAGTGCGAGTCA | 482.301728718636 | 0.242589726894961 |
| CGTATTGACTGA | 482.302956135947 | 0.771323128630978 |
| AATGCCTGACTC | 482.337966103767 | 0.681538012580236 |
| TACCGTGATTCA | 482.339392246935 | 0.264465905591455 |
| GTCATCCTAGTA | 482.351107792962 | 0.587757855589413 |
| GTCATTAGTAAA | 482.353431368648 | 0.439952893534907 |
| CTGCAGGAGTCA | 482.356734650517 | 0.765011264826271 |
| ACTTTGCAGTCA | 482.357153516698 | 0.64979701626766  |
| GTCATAAGATCA | 482.360668997304 | 0.664289482646228 |
| ATGACGAGATCG | 482.363416961358 | 0.231154862247963 |
| GAGTCAGGATAA | 482.402838845053 | 0.203775247589942 |
| AGTCATGAGCTC | 482.440187847565 | 0.643574279922203 |
| GATGATTATGAC | 482.444149395689 | 0.508253575170176 |
| AAACATCGTCAT | 482.449572654532 | 0.268344759238371 |
| CCGGTCGATGAC | 482.457702145097 | 0.838912360685235 |
| AACTGACTATGA | 482.458179178946 | 0.736831467022106 |
| GTCACCGTGACA | 482.465629127625 | 0.911881073195099 |
| GTATGAATCTTA | 482.468091708319 | 0.520367949257247 |
| AACAAAACAAAA | 482.469998666206 | 1.39512641722532  |
| ACGTCAGACTCA | 482.494303869122 | 0.33355994393317  |
| GTCATCTGGTAA | 482.494350822383 | 0.672460364376775 |
| TCCGAGCAGTCA | 482.500763930811 | 0.795773693518019 |
| CCAAACGACTCA | 482.514100152218 | 0.560268463705776 |
| AATAGTCAACCA | 482.534161920837 | 0.307192746729488 |
| GCGTTCAATGAC | 482.535475596734 | 0.853152469245541 |
| ATGACAAAGTCC | 482.55779764242  | 0.347559169747528 |
| TGACGGATCCAA | 482.57461950919  | 0.493485393805852 |
| GACTCACTTTAC | 482.574732859203 | 0.220572972072523 |
| AGTCATGGTCTA | 482.575344954836 | 0.628556179873838 |
| ACGAGATATGAC | 482.60304523626  | 0.733788105848729 |
| GTCATCGCGGAA | 482.615622584005 | 0.439240971256615 |
| CTGTTTACGTCA | 482.62912370732  | 0.483568066606727 |
| GTCATACGCAAC | 482.632914809507 | 0.168834337880901 |
| ATCAAGTCATAG | 482.652130772668 | 0.242992335074071 |
| CAACATAGTCAG | 482.673078671281 | 1.52548160734676  |
| GGAAGGTATGAC | 482.684944545893 | 0.45368437020337  |
| GTCATAAAATCA | 482.729804500963 | 0.45992430317263  |
| ATGCTATAGTCA | 482.738321951762 | 0.358422380280864 |
| AAATCATAGTCA | 482.739292052749 | 0.664753383291093 |
| ATATATAAGTCA | 482.74726797115  | 1.05736253537254  |
| ATTGACGTGTAC | 482.758637270618 | 0.521733554111377 |
| AACGATTGCTCA | 482.762510349675 | 0.888869970023811 |
| TGATGTGAATCA | 482.79012895139  | 0.530291513719759 |
| AAGTATTGCTCA | 482.794911504838 | 0.347189814553503 |
| CTATTGACTCA  | 482.798486695734 | 0.188766901793706 |
| AAAAGGTGACGC | 482.809358209747 | 0.677873270348092 |
| CCTAGAAATGAC | 482.817754518016 | 0.621196002321594 |
| AAGCTCGATGAC | 482.836709918917 | 0.158305424773271 |
| ACGCTAGATGAC | 482.851665520468 | 0.558885268060522 |
| CGCTTTGTATGA | 482.875111019094 | 0.958791670331621 |
| GTCATATAGCTA | 482.878013120026 | 0.573981960541483 |
| ACCACCTATGAC | 482.892391426357 | 0.396290116460138 |
| ACTAGGGATGAC | 482.899828774873 | 0.732347828616    |

|              |                  |                   |
|--------------|------------------|-------------------|
| GCGTAATCGTCA | 482.910409290841 | 0.535576194050582 |
| ATGAATCAACCG | 482.913299511308 | 0.561278939215461 |
| ATCATCGGTGAC | 482.943490145352 | 0.460185352257064 |
| GCAACTTATGAC | 482.948927917441 | 0.81513667988011  |
| AGTCAGATGACG | 482.971339209479 | 0.335815774758779 |
| ACCGATTATGAC | 482.977305290655 | 0.293530744470353 |
| ATACGCGATGAC | 483.002397673489 | 0.485020602596954 |
| ATGGGGTATGAC | 483.00319348449  | 0.322534758917884 |
| CAATCATGACAC | 483.01242880234  | 0.416292330575557 |
| CGTAAGGATGAC | 483.03529821335  | 0.426300632759199 |
| CTCTGCTATGAC | 483.05290536231  | 0.329059072389568 |
| AGTACTGACACA | 483.07212730452  | 0.605645400462021 |
| GATGAATAATAC | 483.080881970426 | 0.547669869506785 |
| AAAGCGTATGAC | 483.088414786391 | 0.48379251690653  |
| CGTCATCGGTAG | 483.091717917964 | 0.306115772589936 |
| AGGATCTATGAC | 483.118635256172 | 0.643776625947906 |
| CAGCCTAATGAC | 483.138809820047 | 0.646573573415038 |
| GCGACATGACAC | 483.148618199154 | 0.546717812591604 |
| ATCTCACAGTCA | 483.152848966746 | 0.350440045430279 |
| TGTCATCTGTAA | 483.169422680204 | 0.574087904572271 |
| ACGTCACCCTTG | 483.185478031593 | 0.562964405983739 |
| AATCATACTCAT | 483.191084257946 | 0.398839218572172 |
| GACCCGTGACTA | 483.195541922412 | 0.608310458136063 |
| AACTTCGACTCA | 483.200076971365 | 0.528427977002593 |
| ATGACAAAGTAG | 483.20577612958  | 0.272401826308128 |
| ACGAGTGACGTG | 483.228165379701 | 0.421781975443948 |
| CGAGCTGTCATA | 483.23251924019  | 0.345986092541647 |
| CGTCCTGACTGA | 483.242910880302 | 0.240447548188977 |
| TAATTACAGTCA | 483.252863513902 | 0.625496118557688 |
| GTCATCCCAAAA | 483.256308930993 | 0.376168336604556 |
| ACGTCATGAATC | 483.259300059469 | 0.584700591883586 |
| ACAACGGAGTCA | 483.270841492685 | 0.594893831710597 |
| GATCTTTACTCA | 483.303406859578 | 0.53443075205945  |
| TCTATACAGTCA | 483.308834167158 | 0.300881162660254 |
| TAACTGACTGA  | 483.321730354659 | 0.223954033172842 |
| CCTTTGATGAC  | 483.323902970864 | 0.54433028766387  |
| CTCCTGTATGAC | 483.353193950314 | 0.445595155006213 |
| AATTCGGAGTCA | 483.354241161746 | 0.303713615126312 |
| GTCACTCTGTCA | 483.365215560026 | 0.312520977980973 |
| CAGTACTAGTCA | 483.38336077621  | 0.466306148463696 |
| AGCAAGGATGAC | 483.38555288291  | 0.349814582083492 |
| CGTGACGACTCA | 483.386534630072 | 0.536401378362003 |
| AATTTTGACTCT | 483.402544385975 | 0.474809317364505 |
| CACCGCTATGAC | 483.430291183482 | 0.596318512542838 |
| GTAAGCTATGAC | 483.433478991421 | 0.56198573683617  |
| GACCGTTACTCA | 483.441508307401 | 0.488593670406905 |
| GCTTTACAGTCA | 483.454903446427 | 0.792199096742052 |
| AGAACTTATGAC | 483.45686882309  | 0.511986177558285 |
| TCTTAACAGTCA | 483.459126437936 | 0.650231874137815 |
| CTAGTTGATGAC | 483.472026121162 | 0.521469009422996 |
| GTCACACGAAAC | 483.525940428319 | 0.555981342126976 |
| ATACGTTACTCA | 483.530331913233 | 0.78893510280611  |
| CCGACGGAGTCA | 483.53409857749  | 1.02021578705882  |
| CACACTGATGAC | 483.544156871427 | 0.390073844924173 |

|              |                  |                   |
|--------------|------------------|-------------------|
| GTGTCACTGTCA | 483.568424078774 | 0.751578093006542 |
| ATAACTTATGAC | 483.582706115539 | 0.619588305871307 |
| AGCCTGCATGAC | 483.60626552122  | 0.891225106083503 |
| GTCATCCGCGAC | 483.637973788578 | 0.486679136203251 |
| GTCATCGGCTTA | 483.644975902338 | 0.631637942160557 |
| CATTCTGAATCA | 483.687863196268 | 0.577370002414823 |
| AGTCGCGATGAC | 483.721696987908 | 0.670504391174553 |
| GCTTCTGTGTCA | 483.72323434185  | 0.813444955778651 |
| TGAGTAACGCAA | 483.731690240704 | 0.495705980845628 |
| ATCAGGAATGAC | 483.78177498832  | 0.595238194374436 |
| GTCATTTTCTCA | 483.7878657446   | 0.723778674230768 |
| ACGCGTGTGTCA | 483.788601303167 | 0.791546839198031 |
| CGAGCTGATGAC | 483.789238328376 | 0.627140242297717 |
| ACGTCACCTTTG | 483.790854691019 | 0.100046501545161 |
| TGACGTAAGAA  | 483.831019443741 | 0.443389964459092 |
| ATGGACGACTCA | 483.848395852961 | 0.41198480243856  |
| TGAGTACCAACA | 483.870021569056 | 0.689108198965491 |
| ATGACACTCGAG | 483.870217493563 | 0.491849850206196 |
| AGTCACCTTACG | 483.873732960425 | 0.610606871617997 |
| AAGCCCTATGAC | 483.885303855307 | 0.44965695493645  |
| GGTGATACGTCA | 483.890925966541 | 0.274427966474865 |
| GGACACGTGTCA | 483.891385240584 | 0.51596691149924  |
| AGTCACCTCCAG | 483.90208578235  | 0.560713949292143 |
| CAGCTCGGTGAC | 483.903613402416 | 0.56702275912559  |
| GCAGCTTATGAC | 483.911864824229 | 0.31678645574716  |
| CCCAATTGCTCA | 483.936497006894 | 0.24860080632923  |
| ATCGATTTGTCA | 483.941720836264 | 0.567712004702019 |
| GTCATACGAAAA | 483.95268141712  | 0.352261990822959 |
| CAAGGTAATGAC | 483.95367205368  | 0.776082185340058 |
| CACAGGGATGAC | 484.025012787487 | 0.438766118326528 |
| AGTCACTAGCAC | 484.034469873467 | 0.871278363807072 |
| GTCATCGACATA | 484.044466313752 | 0.593050508813801 |
| CGTCAGGGTGAC | 484.048225095064 | 0.471584725172563 |
| GTCATAGCGATA | 484.065256598524 | 0.469100299169982 |
| GTCACCGTTTGA | 484.080623655458 | 0.457919094127007 |
| CTGTGACATGAC | 484.082949722812 | 0.622786201990266 |
| AATTCGGTCATC | 484.096309927125 | 0.505387240069792 |
| AGACTAATTTAA | 484.098991812096 | 0.188450934910492 |
| CTGAGCTATGAC | 484.112310278462 | 0.331632281301319 |
| CAATTGAATGAC | 484.125716242611 | 0.687337985316129 |
| CCTCAAATATGA | 484.135723398613 | 0.80607612577915  |
| AAGCTTCAGTCA | 484.157177013351 | 0.641402582871585 |
| TAAAATGTCATA | 484.159317240242 | 0.584447621741175 |
| ATGAGTAGACTC | 484.16443985222  | 0.554356130768814 |
| GTCATTTACAAA | 484.164597922256 | 0.691814321301882 |
| AGTTAATATGAC | 484.173994324157 | 0.365257435204126 |
| ATGACTAGCAAT | 484.19695295443  | 0.541761718633426 |
| ACTCATCGTAAG | 484.220894287537 | 0.701023281433073 |
| CAAATAATGACG | 484.225022636776 | 0.352859885378431 |
| ATAAATGTCATC | 484.268067064328 | 0.312679429424896 |
| GAGACCGATGAC | 484.270654941771 | 0.42179936238784  |
| GTCATTCTACAA | 484.27955543535  | 0.518762283099544 |
| CAATTGTAGTCA | 484.287617801191 | 0.618579822117553 |
| GTCATAGTGAGA | 484.297793222379 | 0.234742639567409 |

|              |                  |                   |
|--------------|------------------|-------------------|
| CATTGTGAATCA | 484.29946207823  | 0.665689797454465 |
| GTCATCTGTGTA | 484.308385895563 | 0.601221660505962 |
| CAGAAGGGTGAC | 484.309598609664 | 0.365580673445793 |
| TGACTGAGCCCA | 484.325648131537 | 0.715901699934738 |
| TCAAACGTGTCA | 484.342702923295 | 0.720242033192994 |
| ATGAATGGGTCA | 484.34272546887  | 0.352157053625749 |
| AAGCTTGGTCAC | 484.359471096068 | 0.386976874654433 |
| ATAATCGATGAC | 484.386845276002 | 0.536785282816136 |
| GTAATAATGAC  | 484.393433219472 | 0.475512416559725 |
| ATGAATCAACTA | 484.40259137268  | 0.435263085656966 |
| AGTCCTGATGAC | 484.402830988801 | 0.438638785392226 |
| GTCATCTACGCA | 484.406937615464 | 0.48593041538375  |
| GATGACGCCTCC | 484.414737239503 | 0.372102938826149 |
| ACTCACCAGTCA | 484.45348883939  | 0.152622759786887 |
| ATGTTCCAGTCA | 484.456125802758 | 0.525612818916189 |
| GTGTTGGAGTCA | 484.481415138763 | 0.655696335729951 |
| GTCAAAGTGTCA | 484.510172504521 | 0.703804475144428 |
| TGACTCCCTCAA | 484.525439522983 | 0.39360352132722  |
| GTCATAATTCCA | 484.568636529369 | 0.724493046482811 |
| AGTCCGTGACTA | 484.573957415111 | 0.690545195719073 |
| AGTCAGAGCAAT | 484.58350937559  | 0.216709695394205 |
| GTCATAACCTAA | 484.590746290473 | 0.347381136190686 |
| ATTTAACAGTCA | 484.601830306651 | 0.610081037071334 |
| ATGACAGACGTC | 484.61634444055  | 0.434237364239187 |
| AACCCAGTCAT  | 484.61797956141  | 0.345111386396509 |
| GGTCATGATGAC | 484.637269601594 | 0.577770998250234 |
| TGACGGATAAAA | 484.683480510258 | 0.236452035719666 |
| GTCATACGAGGA | 484.690015453415 | 0.563033017843643 |
| CAACTGATGACG | 484.693870700118 | 0.663277647865936 |
| CGGATTGACACA | 484.698799986247 | 0.566656779776156 |
| CAGTCAGTAATG | 484.699499036546 | 0.799832190639018 |
| CGCGTGACAGAG | 484.701194795616 | 1.39461599346617  |
| CATCAGGATGAC | 484.713018996363 | 0.500504238458708 |
| AATACCTGACTC | 484.729088301393 | 0.366236303995349 |
| CACAAGTCATAC | 484.74503544515  | 0.54592056363203  |
| CATTTGCTCACA | 484.76946593684  | 0.499670016301662 |
| GTCATAGCTGGA | 484.780789092485 | 0.502692997428527 |
| CTCAACCACTCA | 484.784267894114 | 0.545149025077727 |
| GATTGCGATGAC | 484.794029605418 | 0.46518388113816  |
| GTCCGTTACTCA | 484.816044156546 | 0.549581205016836 |
| AGTCAGACTACG | 484.827645176718 | 0.616238463107493 |
| AGACTAATTTGG | 484.827776656876 | 0.244509061985185 |
| GACAAACATGAC | 484.835813599739 | 0.833003716824456 |
| GCGATGTATGAC | 484.855184947614 | 0.665722217570986 |
| ATCGGATATGAC | 484.896996912763 | 0.247270922128728 |
| CATCATACGTCA | 484.92625821205  | 0.347738883266524 |
| AATACTGAATCA | 484.928096612338 | 0.632358107423536 |
| CTAGGCGTCATA | 484.92859558742  | 0.20340643131123  |
| ATGACGGAGAAT | 484.937895176841 | 0.146170570155957 |
| ACGGCATGACGT | 484.943514169268 | 0.557203611580076 |
| ACGTCACCACGT | 484.968129313489 | 0.673890909295496 |
| ATAGTAAATGAC | 484.971741885235 | 0.27532264175653  |
| GCTCTTGCGTCA | 484.9759074894   | 0.264354863267681 |
| TCATTAGACTCA | 484.985652536249 | 0.4363751341152   |

|               |                  |                   |
|---------------|------------------|-------------------|
| ATGACGCGCAGC  | 485.019012832894 | 0.713485247753167 |
| ACTTCGAATGAC  | 485.03163743242  | 0.53006251674812  |
| GTCATGGCCTAA  | 485.032627350052 | 0.797022241308482 |
| GGGTCAGACTCA  | 485.043388243272 | 0.274826744012374 |
| CGTCATATGGGC  | 485.060854176714 | 0.457036069237785 |
| AGACAAGTGACT  | 485.065460783746 | 0.150442252883592 |
| CATTCTAATGAC  | 485.070516617134 | 0.672161232868306 |
| GGATGACTTGGA  | 485.078309242283 | 0.326664509293225 |
| ACTTACCAGTCA  | 485.081128420023 | 0.562816591483193 |
| ACGTCACCGTAC  | 485.082502296809 | 0.452778442490592 |
| ACACCCTATGAC  | 485.086428480524 | 0.348927869823504 |
| GCATGGTATGAC  | 485.090527851485 | 0.700609711792451 |
| ACTTACTGACTC  | 485.090921125595 | 0.38895970704164  |
| ACAACAGAGTCA  | 485.093831587334 | 0.680671571532239 |
| CGGACATATGAC  | 485.096209044741 | 0.466314490658444 |
| ATTAGCGATGAC  | 485.133504434501 | 0.474177087769488 |
| ATGACTTGTAAAG | 485.142316711736 | 0.32593648345487  |
| CGGGTTTACTCA  | 485.148794403794 | 0.699252431787203 |
| GAGTATTGCTCA  | 485.152452220165 | 0.747127424848691 |
| ACTCAATATGAC  | 485.162088091144 | 0.417588303720668 |
| GACTCAAATGAC  | 485.163671321393 | 0.663574542016163 |
| GTCATCGTGGAA  | 485.167716865428 | 0.715488257251799 |
| GTCATAGATGTA  | 485.17920181006  | 0.546985926629862 |
| ACAGTTTATGAC  | 485.202528111762 | 0.784709415736246 |
| ATGACAAGCTCA  | 485.222030877182 | 0.38533330861099  |
| GTCATCGGTAAC  | 485.23423441883  | 0.496085852402136 |
| GTCACAGCTGAC  | 485.242509316537 | 0.703231214123608 |
| ACACTGGATGAC  | 485.25190109174  | 0.829696819720412 |
| AGACTAATACGG  | 485.256674673214 | 0.296717808165188 |
| GTCATTGACGGA  | 485.257042096182 | 0.599882017647868 |
| GCATATCCGTCA  | 485.258274102376 | 0.451436224769152 |
| AGCCTGTATGAC  | 485.266981933717 | 0.580043257030888 |
| TCGAACGACTCA  | 485.284521900418 | 0.393162066985921 |
| AGGTGTTATGAC  | 485.297481767818 | 0.552613102591545 |
| CCCACATATGAC  | 485.313456606984 | 0.374460100642869 |
| ATATGATTAGTC  | 485.331254357415 | 0.3084777829299   |
| ACTCTGATGACG  | 485.335431030799 | 0.419434955234716 |
| GTTACATCATAA  | 485.336099349596 | 0.364674853933779 |
| ACGCGTGATTCA  | 485.364242894346 | 0.53338386714571  |
| GTCATCCATGCA  | 485.373427195401 | 0.519603871621356 |
| GACTCATGGTGA  | 485.384208816997 | 0.262838254533721 |
| CGAGTTATGACC  | 485.431854253681 | 0.714294989760461 |
| CAGAACTGGTCA  | 485.432103285173 | 0.725976898925764 |
| GTCATCTCCGAA  | 485.46953885014  | 0.453641376117594 |
| ATGACGAGGTGC  | 485.475940071855 | 0.46863679156174  |
| CGTAATCGTGAC  | 485.537011989226 | 0.66160928477095  |
| CTCGATTTGTCA  | 485.54015355271  | 0.548531095459975 |
| AGTATTATTCAT  | 485.543985494671 | 0.610931252788971 |
| GAGTCAGGCCGA  | 485.561799251614 | 0.637445321514885 |
| CAACCGGATGAC  | 485.565787474338 | 0.754734450806215 |
| ATAGGTGATGAC  | 485.580677732325 | 0.46364163780009  |
| CGCAATTATGAC  | 485.587253014051 | 0.556680852838588 |
| CCATAAGATGAC  | 485.591176983507 | 0.634203768362575 |
| AGCCATGTCACA  | 485.612313722592 | 0.366231252369801 |

|              |                  |                   |
|--------------|------------------|-------------------|
| AGTAATCTGTCA | 485.621197960715 | 0.463922909862986 |
| CGACACAATGAC | 485.625342440045 | 0.493807809615131 |
| AGTCACGCTACG | 485.653608673247 | 0.311662043807804 |
| GTCATATTA    | 485.65629648538  | 0.357721987671904 |
| GTCATTCCCGGA | 485.664593973222 | 0.683212181275123 |
| GATGTGTCTTAC | 485.667112924529 | 0.53257621679076  |
| CGTAATGCATA  | 485.667301073681 | 0.39219344410087  |
| AGTCGATTAGTC | 485.675894418682 | 0.689261645183923 |
| CAGAGTAATGAC | 485.690405134264 | 0.522175820648488 |
| AGTCACTCCTCA | 485.708410598311 | 0.275302022698003 |
| CATGTGTAGTCA | 485.708697882226 | 0.735691101721723 |
| ATCTGCGATGAC | 485.737979965371 | 0.751021651162367 |
| ATGACAAAGCGG | 485.740541086884 | 0.262644584182723 |
| CTTGACTAGTCA | 485.741077444478 | 0.718680365776653 |
| GATGTTTATGAC | 485.751566563198 | 0.431323924643553 |
| AGATGGGAGTCA | 485.7606003373   | 0.436954437379259 |
| CGCTAGCAGTCA | 485.77041703664  | 0.548085849445819 |
| ATGTCGGAGTCA | 485.799402702265 | 0.723170974571395 |
| ACAGCGTATGAC | 485.805100408199 | 0.315119183326346 |
| GAAGCCGATGAC | 485.850469898897 | 0.665681936564815 |
| CAGTGTACGTCA | 485.864084932434 | 0.476420525773358 |
| GTCATTCTGCAA | 485.878251743526 | 0.717619299316191 |
| GTGAGTCGCCCA | 485.901323604887 | 0.203594657765627 |
| GTCAGAAATGAC | 485.930663764072 | 0.469389729676586 |
| ACGGTGTATGAC | 485.939147703524 | 0.878798876830309 |
| GATGACCTGGCC | 485.939486196935 | 0.30596091122136  |
| GCTGCTGTGTCA | 485.949132816248 | 0.44967001012803  |
| ATAGATCTGTCA | 485.994182851867 | 0.92975090828956  |
| AAGACTGATTCA | 486.05496666991  | 0.261146797431629 |
| ATTGCATCATAC | 486.060934293845 | 0.328907022356665 |
| CTAGACGACTCA | 486.063063353581 | 0.203214701393103 |
| CATTTACAGTCA | 486.065615517641 | 0.528796085919919 |
| CATCGCTATGAG | 486.076083376166 | 1.00490606369449  |
| GTCATAGAATAA | 486.098762755394 | 0.607493828161156 |
| CTAAAGGGTGAC | 486.103291570075 | 0.372336979578244 |
| AGTCACTCCTCG | 486.140093656309 | 0.325294992050513 |
| CAATGGTGACGC | 486.140729294561 | 0.591213300995913 |
| AATCTCGATGAC | 486.159880489932 | 0.584490128386696 |
| AGCCTAGTGACT | 486.165063435304 | 0.415342811864581 |
| ATTAGAGATGAC | 486.165753879447 | 0.432631836715296 |
| TGAATCAGCCAA | 486.167984081543 | 0.546489527329922 |
| GTATAAGATGAC | 486.174330570849 | 0.45494989133508  |
| ATGTATCACTCA | 486.186602050236 | 0.555024297077446 |
| AGTCAATAGTCA | 486.190208050663 | 0.399448447850715 |
| ACAGATTGTGAC | 486.192151640893 | 0.707213803235376 |
| AATGATGAGCCA | 486.220047003726 | 0.957526132673146 |
| CCCTGAGATGAC | 486.230187393981 | 0.685018967283335 |
| ACGGTAGTGACT | 486.231020868228 | 0.269338433688369 |
| ACTTCCTATGAC | 486.235056084874 | 0.177550798963801 |
| GTAATAATGAC  | 486.278068942229 | 0.693278344787532 |
| CGGCATGAATCA | 486.279912207141 | 0.489831887430699 |
| TGACATGACCCA | 486.282111048206 | 0.320344372188503 |
| CATACGTAGTCA | 486.313525524205 | 0.823936699575981 |
| GTCATAGGCCCA | 486.313803709922 | 0.568127996902345 |



|               |                  |                    |
|---------------|------------------|--------------------|
| CACCCGTGACTA  | 486.342958462239 | 0.456162779661507  |
| ACTCATCCGTCA  | 486.343141814626 | 0.326533660906116  |
| ACCGATGGGTCA  | 486.343828380722 | 0.743476272546817  |
| GTCATAGATCAC  | 486.346795689885 | 0.588300011667734  |
| ACTGACTTGTCA  | 486.353492538505 | 0.833760945201279  |
| CGTTCTTATGAC  | 486.40139083381  | 0.574695727045085  |
| GTCATCGTTAGA  | 486.403903612472 | 0.272458914246897  |
| CAGTCACGAGAA  | 486.407999160084 | 0.201645254810364  |
| CCTCATACGTCA  | 486.42675548323  | 0.411680733972344  |
| CGTACACAGTCA  | 486.451351549216 | 0.682594641272948  |
| GTATCCGAGTCA  | 486.481087307312 | 0.430550374187851  |
| GACTAATTATGA  | 486.486327584802 | 0.902510507151647  |
| ATTTGCTACCA   | 486.506580134938 | 0.0700080616036781 |
| CTGAACACGTAA  | 486.555494899426 | 0.828827945039778  |
| ATTATTTATGAC  | 486.567231688651 | 0.525252930075996  |
| GACTAATTATCA  | 486.57557893071  | 0.492377772008421  |
| CACTGCGAGTCA  | 486.579478898008 | 0.393026523520817  |
| AATGTTGCTCAT  | 486.593874228059 | 0.499935145856891  |
| AGAGTCAATGCA  | 486.595846071933 | 0.391880245944463  |
| CCTTTGTATGAC  | 486.601664072309 | 0.436103952864042  |
| CGCTGGTAGTCA  | 486.605821185531 | 0.646458861223327  |
| CCTTAGATGACG  | 486.61028379322  | 0.744028308495529  |
| AGTCACCCCGGC  | 486.627535309762 | 0.488852098477151  |
| ATGATTGATGAC  | 486.627883768373 | 0.210688525390836  |
| CTTGACGTATGA  | 486.629058184314 | 0.95908657386063   |
| CAGTACAAGTCA  | 486.652613950876 | 0.457503571319598  |
| CACAACAATGAC  | 486.65620884757  | 0.713173576965612  |
| TGACAGATTACA  | 486.664711089461 | 0.716064690209055  |
| ACTTGCATGACA  | 486.67935376971  | 0.745860506692908  |
| GTCACACGCGGA  | 486.683535690603 | 0.523686685999067  |
| TCACAGGAGTCA  | 486.69241407352  | 0.484160992273247  |
| CGAGCTCAGTCA  | 486.705218353677 | 0.526353692717902  |
| GCCAGGTGTGAC  | 486.713287428493 | 0.560500283898153  |
| CTTAGCGGTGAC  | 486.716740495651 | 0.586097830268369  |
| AACTTGTACAC   | 486.723199453973 | 0.228519602701814  |
| AGAGTCAGGAAG  | 486.734986925748 | 0.377699504497428  |
| GTCATCAATAAA  | 486.736185089019 | 0.695167025373511  |
| ATGACTGGGAAT  | 486.737668424983 | 0.465552451350633  |
| GTCATAAATGAA  | 486.751531248448 | 0.518878963303895  |
| AGACCCGATGAC  | 486.785004512665 | 0.750679587121614  |
| GTCACAATATCA  | 486.78727825882  | 0.537225961751063  |
| GTCATCGATCAC  | 486.811730379471 | 0.438513603435982  |
| ACGTCACAAGTC  | 486.83178056157  | 0.332304567238481  |
| CGATACATGACG  | 486.845386644362 | 1.21746146135495   |
| CCAGTTTCGTCA  | 486.847091308461 | 0.462176678804839  |
| GTCACCTTGGTCA | 486.922046656624 | 0.49615459310601   |
| CGGTGACAGCAC  | 486.930505384937 | 0.583971389555098  |
| GTCATCCGCAAA  | 486.961202285333 | 0.522069181002709  |
| ATGACGCCTATG  | 486.97015154271  | 0.57397028968259   |
| ATGACGTTGCAT  | 486.979812221508 | 0.429115499795438  |
| GTCATTCTCAGA  | 486.993453521858 | 0.828256114209821  |
| CTGTCAGACTCA  | 487.002649045582 | 0.51621523598383   |
| AAGACAGAGTCA  | 487.009437884202 | 0.211203874925788  |
| GGGATACAGTCA  | 487.010176258888 | 0.333647319938528  |

|              |                  |                    |
|--------------|------------------|--------------------|
| AGTACTACTCAT | 487.018353385581 | 0.547123731845546  |
| ACTCATATGTCA | 487.02776893377  | 0.425183079377033  |
| GAAACCGATGAC | 487.030885810839 | 0.723088641022118  |
| TAAACTTACTCA | 487.093719951191 | 0.330803863248369  |
| CAAACAATGACG | 487.118916586251 | 0.870721937467901  |
| CTTGATGGGTCA | 487.118993704434 | 0.622078717512431  |
| TGAAAAGTGTCA | 487.134939143058 | 0.386046383360709  |
| TGAGTCGAATAA | 487.137764823168 | 0.451536992063684  |
| CAATAGGATGAC | 487.206661055181 | 0.472925424693511  |
| GTCATTCTATCA | 487.214951141498 | 0.542535503810614  |
| GTCATCCGGTCA | 487.231788140008 | 0.525049166476772  |
| CGATAGTGACAC | 487.246019005703 | 0.71489290057599   |
| GAAGTAGAGTCA | 487.275286897533 | 0.472881976484355  |
| ATTGACCAGTCA | 487.275678042239 | 0.680262448351042  |
| ACAAATTGACTC | 487.283615830543 | 0.353499392688621  |
| TCTGAGTCTAAA | 487.293908173578 | 0.451440799898375  |
| GAGTCAATGTCA | 487.296417170883 | 0.325656327477603  |
| ATAGTGGAGTCA | 487.302500900846 | 0.191977481081457  |
| ATGACGACGTCA | 487.305425163115 | 0.953604988027186  |
| AATCGTATGACC | 487.314075814062 | 0.788460723757569  |
| CACTCTGAATCA | 487.322642637839 | 0.477787225616051  |
| GTCTCATGACAC | 487.327317319733 | 0.756039793090112  |
| AGTGAATTAGTC | 487.333447114547 | 0.270160915123568  |
| TGACGCACGTCA | 487.33581825465  | 1.00082665216915   |
| GAAAATCTGTCA | 487.337424756542 | 0.701846941804635  |
| AGTTACCAGTCA | 487.337924179548 | 0.20473946214275   |
| GCTTATTGCTCA | 487.347016307001 | 0.566187216152761  |
| TGACGTGGAGCA | 487.367074147783 | 0.329843011677717  |
| CAATCTGATGAC | 487.369218744121 | 0.818480647429429  |
| CACTCAGGTGAC | 487.370283311335 | 0.693220318253801  |
| GAGTCAATATTA | 487.372869513301 | 0.51709770543569   |
| CAGCGATTAGTC | 487.389255673672 | 0.886119052330555  |
| TGTCACCGTAAA | 487.400024120502 | 0.377109601192884  |
| ATGAGTCTCACA | 487.40578229695  | 0.512468796078698  |
| CCTTAATATGAC | 487.415463662221 | 0.360962541068084  |
| ATGACAGAGTAC | 487.417277663901 | 0.230776364637566  |
| GTCACACCGAAA | 487.422751304391 | 0.40564132413596   |
| ATGCCCTGACTC | 487.436403463714 | 0.341468509494495  |
| CTGAACCTGTCA | 487.454598446205 | 0.449253940689149  |
| GCCTATTTGTCA | 487.459038015545 | 0.266568416012656  |
| TCCTATCTGTCA | 487.477455893919 | 0.236789418029995  |
| ATCAGACTCACA | 487.490245147427 | 0.640548730483695  |
| ACTTCTGTGTCA | 487.490315483638 | 0.494088255581847  |
| ATGACGAACCAC | 487.492270056752 | 0.408393962115564  |
| AGTCACCTCAAA | 487.497375477824 | 0.154587174099466  |
| TGACGTAGAGAA | 487.524593845804 | 0.0765242865392209 |
| CTCACTAAGTCA | 487.531207028028 | 0.636520925862129  |
| TCCGCTTACTCA | 487.547070872815 | 0.453662867103882  |
| GATAGCGATGAC | 487.552345619634 | 0.622789212637534  |
| CCCGAAGTGTCA | 487.554177946801 | 0.5598850194652    |
| TGAAACCAGTCA | 487.569218902366 | 0.735152469082355  |
| TGAATCAGACCA | 487.584678395977 | 0.354679653763526  |
| CTCGCCGAGTCA | 487.590986730971 | 0.229900991647032  |
| CCTGGCAATGAC | 487.600539194014 | 0.458766146991863  |

|              |                  |                   |
|--------------|------------------|-------------------|
| AATTCGTGAGTC | 487.600668277689 | 0.856040576358985 |
| CACATAAATGAC | 487.601267251264 | 0.661097798953713 |
| GTCATCATCGAA | 487.622987141    | 0.286579488147028 |
| AGTCACTCTCGC | 487.627293451451 | 0.33698674935509  |
| AACACGTATGAC | 487.638742826286 | 0.140074121156275 |
| GACGGTGATGAC | 487.638950757937 | 0.25376910297053  |
| ACATAAGATGAC | 487.644010673495 | 0.372102677060592 |
| CTTGATCCGTCA | 487.666006503604 | 0.650588460670378 |
| TACACTGACACA | 487.684033762664 | 0.269045600712602 |
| GACGTTTACTCA | 487.699690565156 | 0.732667759441837 |
| AAAATACAGTCA | 487.700937020205 | 0.388919272853723 |
| ACGTCACAGTTA | 487.715368190276 | 0.574642832977988 |
| CCTGGCGATGAC | 487.718711101445 | 0.475355888618983 |
| TCCTGCGAGTCA | 487.721079061298 | 0.767136679805296 |
| TAACGTGAATCA | 487.744597900624 | 0.728757748375056 |
| ATGAACTGACTC | 487.757882415764 | 0.337627524191777 |
| GTCATACGGCAC | 487.764345935171 | 0.394187859897654 |
| GTCATAGATACA | 487.772317344103 | 0.334898716640827 |
| TGACCCGAGTCA | 487.794898584499 | 0.463603130180599 |
| ATATGATGTAAC | 487.800229854929 | 0.435382662255607 |
| CTTCTGTAGTCA | 487.811939738146 | 0.466752967931603 |
| CACGTAAGTCAC | 487.815770457037 | 0.596839090162026 |
| AGACAATATGAC | 487.835145280163 | 0.46906235263169  |
| CGTTCGTATGAC | 487.838150785927 | 0.31047698648574  |
| GCTTTTACGTCA | 487.846609431583 | 0.328578451295757 |
| AGGTATTGCTCA | 487.849443168436 | 0.525108803890969 |
| CAAAGTACACA  | 487.871558691176 | 0.768499442244165 |
| TCATTTGCGTCA | 487.896566340195 | 0.597867932797826 |
| GTCACAGCGTGA | 487.899894379133 | 0.75671413389297  |
| AGTAGCGTGACT | 487.905671406707 | 0.232040380060865 |
| CACTCGTAGTCA | 487.917224262664 | 0.696017110820474 |
| GACAGCGAGTCA | 487.927388816753 | 0.596753706681717 |
| ATGACAAAGTAA | 487.944130726145 | 0.662255199571536 |
| AGTCACTCTCAT | 487.945247853067 | 0.392024288575656 |
| CTGAGTCGTGAC | 487.97264249063  | 0.553497778135108 |
| GTCATCACTCTA | 487.978740096632 | 0.280361017074994 |
| ACGGATTATGAC | 487.985286358435 | 0.318527518413183 |
| GTCATTCTCAAA | 487.988296177733 | 0.187754818023264 |
| AGTCACGACTTA | 488.001524012931 | 0.379572390415032 |
| CAGTCGCATGAC | 488.031276536787 | 0.879699730480441 |
| GTCATCTTAGCA | 488.044285428775 | 0.711639254118617 |
| ATGATTGGTGAC | 488.083334549091 | 0.404902200674436 |
| CAACTTGACTGA | 488.102916243389 | 0.509992812883493 |
| GTCACACGTGAC | 488.110011974697 | 0.472849852755152 |
| AGGTAGTGAGTC | 488.115132837366 | 0.201180548936742 |
| AGAGTCAATGTC | 488.165391165458 | 0.696686253787556 |
| CCGATTTGCTCA | 488.180359143554 | 0.193113842453361 |
| ATGACGCCGAAA | 488.18190236542  | 0.374060363444878 |
| AATTGGTGACGT | 488.185163272128 | 0.368259889123957 |
| ATCGAAAATGAC | 488.193535251045 | 0.339487708334749 |
| CTTAATCCGTCA | 488.216786972599 | 0.451855703816349 |
| GTCATACGCCGA | 488.232390553762 | 0.622430323377868 |
| ACCGACCAGTCA | 488.244146410633 | 0.298804912288308 |
| AGACTGTGACGC | 488.267394721288 | 0.660728487548396 |

|               |                  |                   |
|---------------|------------------|-------------------|
| GAATTATGACCC  | 488.291585755421 | 0.775221225204865 |
| ACCATCTAGTCA  | 488.291795365441 | 0.185229103408038 |
| CACTTTAAGTCA  | 488.298789849803 | 0.435896687162884 |
| GTCACACTCATA  | 488.306172261856 | 0.468863428142392 |
| GTTTCGTGCGTCA | 488.308038863085 | 0.561080492672388 |
| AGTCGCTATGAC  | 488.333657883605 | 0.373919304407277 |
| AACGCACAGTCA  | 488.334508103485 | 0.632409332743763 |
| ATACTGGTGACA  | 488.344077395523 | 0.556545547516933 |
| ATCGATTACTAA  | 488.350842084504 | 0.775276650223675 |
| ATCCTGACGTCA  | 488.354052564991 | 0.469798538750537 |
| AATACAAGTCAT  | 488.366242838639 | 0.575067726865331 |
| AAAAGTGCAGA   | 488.396153363786 | 0.226250984233581 |
| AGCTACTGACTC  | 488.425732205515 | 0.546988528735418 |
| ACTACGTGACAC  | 488.428667262596 | 0.613678759340972 |
| GCTTACGATGAC  | 488.435643830892 | 0.86026303641895  |
| AGTGGTGAATCA  | 488.437387556132 | 0.222100873321484 |
| TGATTCACGAAA  | 488.440355525478 | 0.484373502733693 |
| ATTCATATGACG  | 488.456964461135 | 0.441497795491117 |
| AGATCGTGAGTC  | 488.459039525022 | 0.414192240706523 |
| GTCATCAGCGAA  | 488.460560868996 | 0.596767572333188 |
| ACCAAGTCATCG  | 488.47019231592  | 0.558053662567457 |
| CTATTCCGATGAC | 488.482662770012 | 0.145926683490794 |
| GCCCTGTGTGAC  | 488.483310828377 | 0.660961647626402 |
| GGACATACGTCA  | 488.485237340777 | 0.563002942869428 |
| TAACTCAGTCA   | 488.513605499291 | 0.292287458447468 |
| GTCATCGAGATA  | 488.526247505994 | 0.239960821380028 |
| GACTCAATCATA  | 488.541259985167 | 0.572186821369816 |
| AGTCACTCCCTG  | 488.546944549804 | 0.479346763444431 |
| CGCTCGGAGTCA  | 488.552660467367 | 0.909552589830784 |
| TGACTGGAATCA  | 488.55308230313  | 0.375013190489452 |
| CATGCTACGTCA  | 488.556933448349 | 0.694857408069029 |
| AACATATATGAC  | 488.577026688363 | 0.479172965973517 |
| CAATAACAGTCA  | 488.579799720813 | 0.53090249646295  |
| CATCTCGATGAC  | 488.617248612013 | 0.527644073643973 |
| ATGACAGACAAG  | 488.62289606281  | 0.425156743031612 |
| CAATCTGGTGAC  | 488.641396670441 | 0.561386174087249 |
| ACACTTTAGTCA  | 488.64426458671  | 0.670480411234439 |
| AGAGAAGTGACT  | 488.653282403747 | 0.210902447423497 |
| CACTTATTATGA  | 488.653982871568 | 0.684715923067175 |
| GTCATCAAAGA   | 488.658447832262 | 0.360622136434954 |
| GCGACTGACACA  | 488.667767041529 | 0.585115328507158 |
| GCTATAGATGAC  | 488.669654649385 | 0.537267246575036 |
| CACGTCACTTCA  | 488.677187580591 | 0.573862274911483 |
| ACATATGGTGAC  | 488.680952557107 | 0.470765798792552 |
| ATTGTTGTGTCA  | 488.714392742773 | 0.64827580733391  |
| TATTTAGACTCA  | 488.715908690163 | 0.426889051781309 |
| CTCCTCGAGTCA  | 488.719333478559 | 0.376733354077467 |
| AGTCAGAGCCCG  | 488.722766585701 | 0.52759645640738  |
| ATGAGTCCGAAG  | 488.723239625211 | 0.611480723098886 |
| TCTAACCAGTCA  | 488.724906249882 | 0.197491501577373 |
| GCGAACTCGTCA  | 488.756906606347 | 0.606298665808048 |
| CAGACTGAATCA  | 488.772014147522 | 0.528503102454643 |
| CACAGCTATGAC  | 488.783596725011 | 0.243780379057771 |
| AGAGTCAGGGCC  | 488.806550200821 | 0.479858963162193 |

|                |                  |                   |
|----------------|------------------|-------------------|
| GTCATCGTAAAA   | 488.834474677068 | 0.112208713966266 |
| CCCCTATAGTCA   | 488.834779373392 | 0.295669351361119 |
| GTCATCGCTTAA   | 488.838709024046 | 0.383678101461588 |
| CCCTGCTATGAC   | 488.843414288098 | 0.457212281557019 |
| TGACTTATACAA   | 488.850390112446 | 0.633657166374712 |
| AGCGCTTACTCA   | 488.86199004289  | 0.491156358859412 |
| GTCATAAACATA   | 488.89164098104  | 0.49621712919608  |
| GCTCAATGTGAC   | 488.909313620836 | 0.795318305673922 |
| TGACGTAATCA    | 488.91138163653  | 0.700423770852271 |
| ATGCAATATGAC   | 488.92218105934  | 0.554303056439719 |
| GTTACCGAGTCA   | 488.949117426343 | 0.361619540222264 |
| AGTCTTTATGAC   | 488.960208319089 | 0.561404505536772 |
| CCTATTGACACA   | 488.969180166766 | 0.226307970981807 |
| TGACTCCGTA AAA | 488.987930193334 | 0.765583363055691 |
| ATGCGTGACGTG   | 488.989207383287 | 0.335421036016134 |
| GTTCTTGACTAA   | 488.996380358777 | 0.323882497629147 |
| ATCGAAATGACG   | 488.998731080265 | 0.489449667830404 |
| CGGGTTTGACTC   | 489.008423925218 | 0.428254788766936 |
| TGAATGCAGTCA   | 489.033020189539 | 0.431144561465737 |
| CGTAACGGTGAC   | 489.043870573691 | 0.5440397531052   |
| ATGACGCCTTTG   | 489.053599985854 | 0.331671578019599 |
| CCATGATATGAC   | 489.114868290159 | 0.502405694843165 |
| GAGCCGTGACTA   | 489.116860092253 | 0.618055005662985 |
| AGACTAGATGAC   | 489.161296604893 | 0.397301635545095 |
| GACCTACTATGA   | 489.163820523454 | 0.858740993770081 |
| CGTCACCGTGAC   | 489.175288352787 | 0.640780726362722 |
| GTCATCAAATCA   | 489.268523570488 | 0.582237434745517 |
| TGACTGCGTACA   | 489.286478708001 | 0.727541566593619 |
| CAATTTACGTCA   | 489.298942870573 | 0.583777207456579 |
| GTCATAGCGTAA   | 489.302365507887 | 0.41826938959912  |
| GTCATCGCAGAA   | 489.303515216567 | 0.398366985928132 |
| CCACGTGGTGAC   | 489.312594072943 | 0.607581202727729 |
| TCATTTAAGTCA   | 489.319935726356 | 0.307929075332818 |
| CCAGTTTGTGAC   | 489.33453387392  | 1.14221102760453  |
| CTTACTACGTCA   | 489.336681834412 | 0.613598301958829 |
| GTATTATATGAC   | 489.370502112293 | 0.917392046938604 |
| ATGCCTAATGAC   | 489.38048368033  | 0.628826133143452 |
| ACGTAATAATAA   | 489.385602408206 | 1.30512539315337  |
| CTATAATATGAC   | 489.389739624847 | 0.544229918303718 |
| CTGGATTGAGTC   | 489.411215342297 | 0.800759696943592 |
| CTCGTTTGACTC   | 489.431137030729 | 0.121386565654973 |
| GGTCACGACTCA   | 489.446844230943 | 0.389545342185112 |
| TAATCTGTGTCA   | 489.482266295883 | 0.271426264536977 |
| ATAGCTGACACA   | 489.492333280343 | 0.654145187040519 |
| GTTGCGCAGTCA   | 489.498740243507 | 0.947741946235298 |
| GTCATACAAGAA   | 489.503179644406 | 0.652121726053382 |
| CCGTGATGTGAC   | 489.526065025816 | 0.876048682969327 |
| GAGTCGAATGAC   | 489.554273644873 | 0.346782484463015 |
| ATGTGATAGTCA   | 489.56665844094  | 0.681331203734675 |
| ACGCTACTGACA   | 489.566944678627 | 0.402229275152871 |
| CGCTATTGACTC   | 489.584829321379 | 0.390752202260459 |
| GTCATCCTGTTA   | 489.586792200885 | 0.382514354837995 |
| CCTTTGACTCGA   | 489.602294587193 | 0.313179186287499 |
| AATGCATAGTCA   | 489.611619598426 | 0.512846350260873 |

|              |                  |                   |
|--------------|------------------|-------------------|
| ATGACGTGAAAT | 489.637804218128 | 0.437474768602524 |
| GTCATCATCGCA | 489.640448876736 | 0.600203410761372 |
| GTCATTGTCGAA | 489.651044232681 | 0.630883492057992 |
| CGCCTGTGTAC  | 489.651584831001 | 0.418115213508586 |
| GTCACCACTGGA | 489.661063297736 | 0.57795278889614  |
| ACGTCACCTTAT | 489.665494397761 | 0.497974599579578 |
| TAGACCTAGTCA | 489.683338495157 | 0.734865105704049 |
| CATGCGAATGAC | 489.703742271464 | 0.511210546933178 |
| ATGCATACGTCA | 489.705350095995 | 0.42012499483565  |
| ACTGAGCTATGA | 489.707778482902 | 0.848549933873663 |
| GAGTCAGGCGAC | 489.707954127538 | 0.411863322539817 |
| GAGTCAATATCA | 489.710579339685 | 0.41175004403912  |
| TCATATCCGTCA | 489.72367212922  | 0.173292730912089 |
| GATCTGACGTCA | 489.73599730718  | 0.811323826602446 |
| AGTCTGGGTGAT | 489.751119252473 | 0.40526091770964  |
| AATGATCTGTCA | 489.764995161377 | 0.50985685027678  |
| GATTGCTATGAC | 489.769034741051 | 0.305345268491795 |
| ATACTCGAGTCA | 489.769163870982 | 0.580315653689354 |
| CCAGATTGTGAC | 489.79110812832  | 0.492340630678027 |
| TACCAATAGTCA | 489.800535635648 | 0.638955788739097 |
| GCAACGGATGAC | 489.812111943533 | 0.453221649665179 |
| GGTAACACGTCA | 489.812835315237 | 0.471278361949495 |
| AGTCACTTGTCA | 489.842454589078 | 0.21924801645761  |
| GTCATAAAGTGA | 489.867400615977 | 0.403089414601514 |
| GCCTGGTATGAC | 489.88291706993  | 0.387312186728879 |
| GTCGCGTACTA  | 489.894315970852 | 0.240020581521528 |
| TAGCTGACGTCA | 489.918270130379 | 0.739797651985894 |
| GTCATAAGCACA | 489.931049815791 | 0.754614702549044 |
| GAAACATGACGC | 489.932467046701 | 0.265992496059778 |
| TGACGAAAAGCA | 489.967872238505 | 0.49116395550249  |
| GATGCTCAGTCA | 489.968107993249 | 0.644334169049593 |
| ATGACATCGTAA | 490.008830767097 | 0.452994112443572 |
| GTCATATATATA | 490.00948380135  | 0.652202269960427 |
| CGAGTCAGGTGC | 490.0104456857   | 0.87477062533545  |
| TGACTAGTCTAA | 490.016578009045 | 0.879391285372032 |
| ATACTCTGTGAT | 490.035260866529 | 0.576693122410788 |
| GGCTCCGAGTCA | 490.038674688755 | 0.792048819738835 |
| GTCATCGACAAC | 490.075038856417 | 0.475481332478536 |
| CCTATAGTGTCA | 490.076726193641 | 0.429731158278095 |
| AATGTATATGAC | 490.106508453167 | 0.565657291842709 |
| ACAACCTAGTCA | 490.116803404052 | 0.429996574645269 |
| AGTCAGAGCATC | 490.120319378518 | 0.400593133374587 |
| AATTACTATGAC | 490.124837700922 | 0.661406506892331 |
| AGTACCATGACT | 490.140519898524 | 0.464096642971566 |
| CACGTCACTGAC | 490.15461642958  | 0.541992285403143 |
| AGTCATGAGGTC | 490.162252438803 | 0.356860457356732 |
| CTGGCTTACTCA | 490.176324300039 | 0.388918144098885 |
| ACATCATATGAC | 490.191494268324 | 0.417439868778905 |
| CTGGAATGACCA | 490.19903948137  | 1.13589748144359  |
| ACCCGTGAATCA | 490.201415348461 | 0.649316560501782 |
| GTCATTCAGAAC | 490.211382587615 | 0.400510160881127 |
| CGCAGTAATGAC | 490.2131959455   | 0.748239978488137 |
| TGACTCCAACAA | 490.215666748473 | 0.274497345563226 |
| CTGTACTATGAC | 490.268505675469 | 0.504903460548239 |

|               |                  |                   |
|---------------|------------------|-------------------|
| CATTTGGTGACG  | 490.30966972611  | 0.767688762317498 |
| TGACTCCTGGAA  | 490.344178241098 | 0.601906988310634 |
| CCGGACATGTCA  | 490.352413767196 | 0.537963317075411 |
| CGTATTTTGTCA  | 490.357003577051 | 0.489354158140862 |
| GTCATAAAGGCA  | 490.368305077899 | 0.224601412524788 |
| CCGGGTGAATCA  | 490.37994125558  | 0.625597987749987 |
| CATAGGTGTGAC  | 490.383647789572 | 0.448051625299894 |
| AAACTTCTGACT  | 490.384539590445 | 0.336450339124346 |
| AGCATCGACTCA  | 490.39183958745  | 0.494649335734504 |
| CGGTGATATGAC  | 490.398688242449 | 0.202644792510915 |
| GTCATCCATTCA  | 490.403748509279 | 0.229857428852084 |
| AGTCACCTCACG  | 490.406086212122 | 0.23739644988724  |
| CTTACGGATGAC  | 490.408045754147 | 0.511230887798679 |
| CACTATCTGTCA  | 490.416415660164 | 0.50505189046238  |
| GCTAGAGATGAC  | 490.431481660558 | 0.400500287190564 |
| CTCACCGGTGAC  | 490.431918026957 | 0.438139943259565 |
| GACGAATATGAC  | 490.443041204239 | 0.209322388555459 |
| CGTCATATGACG  | 490.445492568386 | 0.658906635156156 |
| CCTATAATGACG  | 490.449250173821 | 0.790068193802193 |
| GACGCGTATGAC  | 490.489615194534 | 0.670500824633736 |
| ACTCATTGTGAT  | 490.494467910338 | 0.385793806123953 |
| CGGTCGTGACAC  | 490.50657614102  | 0.269414988881176 |
| ATGACTTGCTC   | 490.509718061624 | 0.228657854006063 |
| ACGCACCAAGTCA | 490.521694950471 | 0.427958426940117 |
| ATCGTAGATGAC  | 490.583720670785 | 0.408760349461582 |
| GTCATACCAATA  | 490.589023571144 | 0.285016809197638 |
| GTCGCTTACTCA  | 490.600455667157 | 0.428008255747846 |
| GTCATCCTTGTA  | 490.611617227519 | 0.581557237640823 |
| GTCCTAGAGTCA  | 490.611879505706 | 0.516196677721001 |
| GATCCTTACTCA  | 490.618586368496 | 0.437286605396984 |
| GTCATTGCTTGA  | 490.622149779237 | 0.798803224291106 |
| GCGTGGTATGAC  | 490.627270268417 | 0.577486635895906 |
| CCGTTTACGTCA  | 490.637182529164 | 0.652924835162278 |
| CCCAGGGATGAC  | 490.643312814507 | 0.395320930973018 |
| GTCATCGTCAGA  | 490.648770964828 | 0.550252992786938 |
| AGTCACCCCGAG  | 490.673982685836 | 0.435617800028083 |
| AAATAGGATGAC  | 490.692301457217 | 0.422069157064278 |
| CAGACCTGACTC  | 490.697079421123 | 0.334427988312085 |
| ATGACAATACAG  | 490.707582244268 | 0.593020527314784 |
| ACTGTGCGTGAC  | 490.712705492068 | 0.642734894768285 |
| TCGGATCCGTCA  | 490.723479869929 | 0.360822939529411 |
| ATGACGATGCTA  | 490.743251153841 | 0.468903687234787 |
| AAGGAGGTGACT  | 490.747219888902 | 0.211595970149351 |
| CTGACCGGAAGC  | 490.765392735823 | 0.941490675396235 |
| GTCATACGTGAA  | 490.769319216572 | 0.698000432916584 |
| ATTTACAGTCA   | 490.770908662339 | 0.49127220176856  |
| CTGACTGGTCGA  | 490.790344741044 | 1.20798125994714  |
| AGGACTTGTGAC  | 490.806118262076 | 0.467179008326215 |
| TCCAGCGAGTCA  | 490.829799014422 | 0.534246541815065 |
| TAACCTTTGTCA  | 490.831526302973 | 1.39506284852579  |
| AAATTTGACTCT  | 490.834353123654 | 0.549201046241237 |
| AAAACCAGTCAG  | 490.836179414305 | 0.585891188910937 |
| GTGCTTCAGTCA  | 490.838116887333 | 0.458574116533908 |
| ACTCATATATGG  | 490.845432740167 | 0.575071066015487 |

|               |                  |                   |
|---------------|------------------|-------------------|
| GCTTCATGACAC  | 490.846010513761 | 0.316694689801845 |
| ACACGTAACATG  | 490.895195308742 | 0.554572244126064 |
| CGCTATTGCTCA  | 490.910534323336 | 0.826896982925132 |
| ATGTCTGACGTG  | 490.912582920872 | 0.43378967685111  |
| ATCTCGTACTA   | 490.928799417608 | 0.251265511244518 |
| AGAACGGATGAC  | 490.933481971549 | 0.384895599191922 |
| CCATTAGATGAC  | 490.943175607347 | 0.55215157181897  |
| GTCATCGACGGA  | 490.943482254201 | 0.361925801551838 |
| ATCAGATATGAC  | 490.967152366389 | 0.72729522236311  |
| GTAACATAATGAC | 490.990447137645 | 0.596569069890676 |
| CAGTATCCGTCA  | 490.99390955991  | 0.774950566277982 |
| GACTCACTGAGA  | 490.994976193157 | 0.636886407433605 |
| CGGTAATATGAC  | 491.014404193734 | 0.463619198576339 |
| CGTCAGATGACA  | 491.017439295074 | 0.520193264994131 |
| AAAACAGAGTCA  | 491.02903148018  | 0.235042870317383 |
| TCCACCTAGTCA  | 491.036704669004 | 0.505444239442588 |
| GTATACTATGAC  | 491.040125257352 | 0.627573187749592 |
| CTAGGACAGTCA  | 491.04034377958  | 0.665940981108363 |
| CGTTAGGATGAC  | 491.042431316317 | 0.575876224964233 |
| GTGTGCGACTCA  | 491.045561464296 | 0.661043821978422 |
| GCGTCCTAGTCA  | 491.046270227881 | 0.584788434409606 |
| GATATTGTCACA  | 491.051417031953 | 0.271555599578044 |
| ATGAGCAAACCG  | 491.055097325642 | 0.398783504208586 |
| CTCCGGAATGAC  | 491.070202152378 | 1.1339595300337   |
| CGTAGATGTGAC  | 491.075018473201 | 0.68873684477755  |
| AGTCACTCTTCG  | 491.081175194074 | 0.380150570887336 |
| CATTATTAGTGA  | 491.08136651806  | 1.03278567259138  |
| GCTACTGTCATA  | 491.083415138521 | 0.425985335544935 |
| CTATTGGATGAC  | 491.106926305392 | 0.352764583620516 |
| GTCATATCTACA  | 491.108968381892 | 0.246109126578715 |
| GAGTCAGGGTCA  | 491.109000677954 | 0.229235210485301 |
| GTGCTACTACGA  | 491.13693935912  | 0.960208849202615 |
| TCGAGTGACGAA  | 491.141621769895 | 0.368608187651607 |
| AGTCACCTTACC  | 491.169277046261 | 0.267026512193433 |
| AACTTGTATGAC  | 491.177521256189 | 0.578636765186262 |
| ATTACGTATTAC  | 491.186891944421 | 0.64805997692196  |
| CGCAACCACTCA  | 491.218137029887 | 0.201936057748578 |
| ACTAATCGTGAC  | 491.237589447113 | 0.750793961623338 |
| GACTAATTCAGA  | 491.248777905956 | 0.895358309902661 |
| TGATTACCACACA | 491.256506750699 | 0.43149324134982  |
| CGTCAAGGTGAC  | 491.268125500182 | 0.389621946293586 |
| AAATCTGTCAGC  | 491.270384341922 | 0.582355631100792 |
| TGACGCAGGAAA  | 491.293371507415 | 0.547037230541    |
| TGACCAATGCAA  | 491.294617225077 | 0.542685253387318 |
| GTGCATGACCCA  | 491.295872682944 | 0.728078968325947 |
| CGCAGGCCTGCG  | 491.316064373379 | 0.757102885231883 |
| ACTGCTGACACA  | 491.328392066367 | 0.330195969956818 |
| CCAGTTGGTGAC  | 491.33228037573  | 0.838405711435395 |
| ACAGATTGGTCA  | 491.338612134252 | 0.562439475456014 |
| GTCATCTGCGTA  | 491.349301320651 | 0.701804720352489 |
| AGTCACCTTGAT  | 491.360104316065 | 0.631075348876041 |
| GTCATCGAGGAC  | 491.376638538192 | 0.659925523620648 |
| AAGCCTGCGTCA  | 491.386971202122 | 0.485054701872266 |
| ACCACTTACTCA  | 491.394049277318 | 0.373550318800382 |



|               |                  |                   |
|---------------|------------------|-------------------|
| GAAAATTCGTCA  | 491.399053355273 | 0.653272449206436 |
| CAGTCAGCGCTA  | 491.43665266137  | 0.614401779232865 |
| ATATATATGTCA  | 491.441892148752 | 0.299484084049882 |
| ATCCGTGCGTCA  | 491.458946157165 | 0.590459193207815 |
| AGTCATGAGACT  | 491.486445951897 | 0.454008432167964 |
| AACATCAATGAC  | 491.486455756326 | 0.517812982127988 |
| TCACGTTACTCA  | 491.49192803014  | 0.454566757070125 |
| GTCATTGCAGCA  | 491.507460211567 | 0.439219387137444 |
| AATCGAAATGAC  | 491.525705413517 | 0.481545395332293 |
| CATTTTGTGTCA  | 491.530409791626 | 0.442720052504456 |
| CCCTATTGCTCA  | 491.531777883991 | 0.413303274518706 |
| ATAGGTGAATCA  | 491.558571919897 | 0.549746376040555 |
| GTCATACCGCAC  | 491.576405149206 | 0.331849927166141 |
| CTATAGGATGAC  | 491.578658920506 | 0.411949999206882 |
| GATGATGATGAC  | 491.581328629681 | 0.317491792902382 |
| TATTACGCGTCA  | 491.58174929218  | 0.201963202191415 |
| AACAGTGATGAC  | 491.582256672492 | 0.557353168053182 |
| GATACATATGAC  | 491.583820242048 | 0.481748531291322 |
| GTCATCTTGTGA  | 491.59526892852  | 0.679594545337944 |
| AGTCACTTGATA  | 491.606496270585 | 0.368091846913369 |
| TGAGCAATCCAA  | 491.610657882249 | 0.681856988438192 |
| GAGTCAATGTAC  | 491.618638139127 | 0.458860346455252 |
| AACCGTTATGAC  | 491.622858324914 | 0.59526302698115  |
| ACTCTCGATGAC  | 491.630511903964 | 0.43635200539267  |
| ATGACAATATTG  | 491.64568773069  | 0.610268010574016 |
| GCTTAGCAGTCA  | 491.673234693208 | 0.788547439937486 |
| AAAGTGTATGAC  | 491.689400476583 | 0.36821125244616  |
| CCCGACGGTGAC  | 491.706113748718 | 0.688844759600257 |
| AGGTCTTGTGAT  | 491.708837989743 | 0.466118805382482 |
| GTCATTTGCGTGA | 491.731867736675 | 0.727141329295862 |
| GATGTGCGATGAC | 491.732452963958 | 0.634890108012426 |
| GCCCGTGTGTCA  | 491.745146598296 | 0.482203125709259 |
| TCAACGCTATGA  | 491.745980177107 | 1.20829507860373  |
| ATGACAACGCTG  | 491.749469346123 | 0.227201073121026 |
| CGTTATACGTCA  | 491.750965061011 | 0.542647805785746 |
| CCGACTGACACA  | 491.752189203322 | 0.383033936866122 |
| GACTCACGATAC  | 491.753182160148 | 0.35608574449233  |
| AGAGTCAATAAA  | 491.764728964829 | 0.499153429608948 |
| CATGAAGATGAC  | 491.775648746203 | 0.482232890060307 |
| CGGAACCTATGAC | 491.796646686362 | 0.258303116831674 |
| TGAACCCAGTCA  | 491.805065031165 | 0.490729541000239 |
| GAGTCAGTAACA  | 491.818284760453 | 0.75954968542042  |
| TGACTGCACCAA  | 491.858000039842 | 0.656466483452671 |
| CGTACAAATGAC  | 491.896378041637 | 0.570866484498838 |
| ACTAATTAATAA  | 491.899102684935 | 0.509382111850113 |
| AATCCGGATGAC  | 491.9164922588   | 0.683868809478569 |
| ATCTTACAGTCA  | 491.920543592532 | 0.433946360593758 |
| CTGAATTACACA  | 491.934289886941 | 0.720576505319992 |
| CGGAATTGACTC  | 491.979091522942 | 0.800289868155485 |
| AAGATGGATGAC  | 492.038218167844 | 0.287354978378959 |
| CTTATTTGCTCA  | 492.044754901655 | 0.538991847866611 |
| ATGACAGAGGTC  | 492.045569122518 | 0.111627258464608 |
| GTCATCAGGCGA  | 492.068045168315 | 0.498666856863111 |
| AAATTCTATGAC  | 492.093535695599 | 0.455291885239675 |

|               |                  |                   |
|---------------|------------------|-------------------|
| CAGCATTGACTC  | 492.105625419548 | 0.575464139286589 |
| ATTGCGGATGAC  | 492.136301670079 | 0.395218860443548 |
| ATATAGTGAGTC  | 492.140428066011 | 0.446153785814754 |
| AACTTGAGTAAT  | 492.144556701023 | 0.258640004466177 |
| GATGCTGATGAC  | 492.150232447542 | 0.406245492430354 |
| CGTCCATGAGTC  | 492.179971539663 | 0.783515880426905 |
| CCTCTTGACTAA  | 492.182220606829 | 0.330551449372065 |
| GTAACGTATGAC  | 492.185875306023 | 0.43857267283743  |
| TCGAATCTGTCA  | 492.188473951715 | 0.497138361562703 |
| CGAACTGCGTCA  | 492.189515244185 | 0.623459024835298 |
| AACGTTTATGAC  | 492.207124595751 | 0.482239147580828 |
| GTCATCGTTGAA  | 492.211613843799 | 0.439179040041641 |
| CGATATCGTCAC  | 492.213630617857 | 0.160766046776396 |
| GTCATTCTACCA  | 492.214970578259 | 0.372843630396125 |
| ACAGCTAGTCAT  | 492.229157282656 | 0.360323290726696 |
| GTCATCGACCTA  | 492.23317895867  | 0.357381189811759 |
| CACATTTATGAC  | 492.261066249527 | 0.28221345686998  |
| GTCATCCCGGTA  | 492.266190041303 | 0.359178825342244 |
| ATAGGATTAGTC  | 492.294727220156 | 0.44612859736553  |
| CTAGACTATGAC  | 492.302385134466 | 0.496324537213056 |
| GTGACTACCGTA  | 492.324342931138 | 0.335123470810275 |
| GAGTCAATATGC  | 492.33494585762  | 0.529988574125696 |
| GGCCACTATGAC  | 492.345561633794 | 1.07475036594893  |
| CACGCCTATGAC  | 492.34974851756  | 0.506322980518432 |
| ATTAGAAATGAC  | 492.350800916574 | 0.652765137847689 |
| CTAAAGCATGAC  | 492.37659259881  | 0.598057467267855 |
| CGACTCACGAGA  | 492.389676800629 | 0.444290306706097 |
| CAGTCTGATTCA  | 492.391731638706 | 0.702831105237849 |
| TAGGTGGAGTCA  | 492.416361539783 | 0.259505456779936 |
| ACCCTAGATGAC  | 492.42985278973  | 0.580503799842453 |
| CAAGTTAATGAC  | 492.440850258502 | 0.801401545674837 |
| GCCCCGAGCATGA | 492.448368919947 | 0.935897243935503 |
| TCTGATTTGTCA  | 492.477586485487 | 0.369605045048496 |
| CGCTTAAATGAC  | 492.483083205469 | 0.709868849111437 |
| GGTATCCAGTCA  | 492.490379677893 | 0.566975236922424 |
| CGATGATGTGAC  | 492.52314280817  | 0.445165619198266 |
| CATGCAATGACG  | 492.532684812687 | 0.722358589735635 |
| CATCGAATGACG  | 492.540884318704 | 0.573878146374728 |
| GACTCACTCCTA  | 492.556719829913 | 0.203839919251543 |
| GATGGGTATGAC  | 492.568769055232 | 0.37721797321838  |
| AGACGGTATGAC  | 492.589211598718 | 0.460769557009143 |
| ATAACCTATGAC  | 492.593123237065 | 0.775616041984822 |
| GTCATTGGCCGA  | 492.599131539165 | 0.624704105431979 |
| CAACTACGATGA  | 492.605501613374 | 0.70829441041245  |
| CTGTAAGCGTCA  | 492.627992752226 | 0.56590874370829  |
| CGTCATATGGTC  | 492.641664146116 | 0.715986555145524 |
| GGCTGCTATGAC  | 492.646808119368 | 0.611734839890582 |
| GGTTCACAGTCA  | 492.664375674481 | 0.455022478080779 |
| CACGCGGAGTCA  | 492.724016226038 | 0.735428042694981 |
| GTCATTCGATCA  | 492.731437262115 | 0.49960003703436  |
| GTCGATTTGTCA  | 492.743400080718 | 0.509033669960435 |
| GCCGAATATGAC  | 492.750289090394 | 0.528245448320614 |
| GCCGGTGACCCA  | 492.782457321409 | 0.583762563642436 |
| ATTATTGATGAC  | 492.795756683455 | 0.553091203585203 |

|               |                  |                    |
|---------------|------------------|--------------------|
| GTCATATACGCA  | 492.813449393858 | 0.504501739459164  |
| TCCGTTGTGTCA  | 492.83787704803  | 0.664051241060392  |
| GTGACAGACTCA  | 492.864194612291 | 0.453720394534063  |
| ACGCATAGTGAC  | 492.865199510227 | 1.13099945807403   |
| ACATAACGTCAT  | 492.871125480284 | 0.686817836226916  |
| AACGACGGTGAC  | 492.919470939608 | 0.272840128269273  |
| CCTTCTGATTCA  | 492.933944762486 | 0.160236830931156  |
| GTCATTCTAAGA  | 492.948758402057 | 0.478933083774955  |
| AAAATAGATGAC  | 492.949652503975 | 0.30394677782091   |
| ACGTTTAAAGTCA | 492.969245493356 | 0.495104952760412  |
| CTCGCTGCGTCA  | 492.97919793565  | 0.390760744505637  |
| GCCAAGTCATCC  | 492.983767390996 | 0.299950791451228  |
| ACTAATGCATA   | 492.989457244978 | 0.503120921484611  |
| CTTTCGTATGAC  | 493.00091033252  | 0.315400496807695  |
| GTCATATCATCA  | 493.003164401049 | 0.540840526159683  |
| GAATCCGTCAGA  | 493.005478655381 | 0.365781736116591  |
| CACCATTGACTC  | 493.026757539268 | 0.393577838720751  |
| GTGTCATGCGGA  | 493.036064063716 | 0.350453564270055  |
| ACGCGATATGAC  | 493.042527805223 | 0.584805476620926  |
| CTCACATGTGAC  | 493.061824975125 | 0.551456504217361  |
| GTCATCGAGCGA  | 493.107421404248 | 0.672380000723645  |
| AGTCACGAGTTC  | 493.128401321229 | 0.689707606007717  |
| CGGATTGATGAC  | 493.131692714989 | 0.499090192219069  |
| CAGTGTATGAC   | 493.142418495562 | 0.692652764040576  |
| AATACTAATGAC  | 493.149901941079 | 0.653851226906526  |
| CTTGCGTGACAC  | 493.153835716249 | 0.263526416870352  |
| ATAGAGTGAGTC  | 493.162245121108 | 0.472375587508348  |
| GTCATTCGCTGA  | 493.172202870574 | 0.44175556622978   |
| CTTTTCGATGAC  | 493.175897859283 | 0.384740608528834  |
| GTTAGACTCAGA  | 493.177751337525 | 0.379652438367986  |
| CTGCTTTGTGAC  | 493.179144969887 | 1.39545120600903   |
| GCTATCCAGTCA  | 493.189936484181 | 0.355671441126536  |
| GTA CTGCAGTCA | 493.211250239262 | 0.917066614645411  |
| GATCCCAATGAC  | 493.213502225953 | 0.397551281991474  |
| GGCGACCAGTCA  | 493.223769061674 | 0.586286418619474  |
| AGAAAGGATGAC  | 493.231877946138 | 0.364365364579023  |
| ATGTCGCGTCAC  | 493.259670000203 | 0.0977766159364655 |
| CCCCTGCGTCA   | 493.275825516438 | 0.435719859355794  |
| GACGCTGATGAC  | 493.278568688223 | 0.281196400666624  |
| GTCAATTGTGAC  | 493.285178790182 | 0.294607218668603  |
| ATGACATGCATG  | 493.307856674697 | 0.550781645090171  |
| CGTTCGGATGAC  | 493.3092142419   | 0.493178497607318  |
| TACCTCGAGTCA  | 493.311494015993 | 0.707419736816336  |
| CCACGTTATGAC  | 493.312249569988 | 0.472446735789491  |
| ACCTACGATGAC  | 493.3149886578   | 0.362265703351732  |
| AAATTGCAGTCA  | 493.325346080919 | 0.447456254457794  |
| AGCATCTAGTCA  | 493.325411275585 | 0.529319448003232  |
| AAATCCGTCAGA  | 493.337877007068 | 0.561792927389525  |
| GACGATTTGTCA  | 493.363643743801 | 0.864594798995836  |
| GTCATAAGTGTA  | 493.365552765222 | 0.258105475244147  |
| CAACTGGTGACA  | 493.39728593425  | 0.704942596655385  |
| CAAATATTAGTC  | 493.4324999647   | 0.573829824929818  |
| ACTCTTGCTCAT  | 493.450206269095 | 0.363683467639483  |
| GCTTTATATGAC  | 493.456185624918 | 0.555186408001086  |

|              |                  |                   |
|--------------|------------------|-------------------|
| TATGGCGTCACA | 493.463572384745 | 0.36402135329825  |
| ATAAACGATGAC | 493.47329692767  | 0.726930440875368 |
| CGGCCTCAGTCA | 493.486577296992 | 0.408696642357345 |
| GTCATTGACCAA | 493.505107219417 | 0.454281171458692 |
| AAATTGGAGTCA | 493.518533341099 | 0.325196471313969 |
| ACACTATAGTCA | 493.537325994357 | 0.482286576647768 |
| TACATGCAGTCA | 493.556710336826 | 0.530409775356065 |
| AACTGATATGAC | 493.558467896112 | 0.282809046998336 |
| CAACGTTACTCA | 493.576824502066 | 0.691861715137686 |
| AACAACGATGAC | 493.593277325061 | 0.618702278691675 |
| AGTCACCTTCCC | 493.597131849974 | 0.227486368805322 |
| CCTGTTGACTGA | 493.60107003143  | 0.522641323027141 |
| GTCATCGAGAGA | 493.602013990484 | 0.543249689219258 |
| CGTCATTGTTAG | 493.605903107966 | 0.372805768720788 |
| AGTCACTCTTAC | 493.609033468418 | 0.322854351377606 |
| GGCGATCTGTCA | 493.609767948433 | 0.719110245443736 |
| AAAGCCTGACTC | 493.613178475101 | 0.330678636996773 |
| AGTCACTCTTAT | 493.619129763748 | 0.382367479852512 |
| CGACATGATGAC | 493.625976551518 | 1.09147685417952  |
| GGTTACGTGTAC | 493.627170030558 | 0.481771223047644 |
| TGAGTCGCACAA | 493.627964013246 | 0.521776773116651 |
| ATGACAAAGCGC | 493.629630268047 | 0.32898805014138  |
| CAGTCATGGTGG | 493.629781518796 | 0.501338676612767 |
| TCTGATCCGTCA | 493.659107676004 | 0.753696138947359 |
| GATACAGTCAGC | 493.685828029792 | 0.215835995905798 |
| AGACCTGACGCA | 493.686556866628 | 0.330370264486079 |
| CGTCAGGAGTCA | 493.701448484857 | 0.619611665116822 |
| CGGAACGACTCA | 493.703399453414 | 0.650348417854319 |
| ATGGTATTAGTC | 493.708968462237 | 0.521783065331755 |
| GTAATGCAGTCA | 493.753242285796 | 0.579944085010626 |
| CTGGTGGATGAC | 493.75562494379  | 0.310644173910807 |
| GAATGTTATGAC | 493.75665997242  | 0.474184402340065 |
| GTCATAAGTCTA | 493.75737783402  | 0.334196727852577 |
| CGTCATCAGGTA | 493.782727962441 | 0.472017477613771 |
| CTCTAAGTGTC  | 493.784133793608 | 0.690074410383533 |
| CACATTATGTCA | 493.785631761582 | 0.543899478158705 |
| ATGACAGAGCAC | 493.799306927869 | 0.227922054396733 |
| GCGTGCTATGAC | 493.806560634972 | 0.852267300303992 |
| ACCGCAGGTGAC | 493.81034706291  | 0.781125923219407 |
| AAACTCGTGACT | 493.83702548705  | 0.442696732058108 |
| ATAATGGAGTCA | 493.844335704397 | 0.277992641136155 |
| GAAACTACGTCA | 493.853098661374 | 1.02531230466929  |
| GAGTCAGGATGA | 493.856539901481 | 0.254313644719538 |
| CTTGCTACGTCA | 493.871837569754 | 0.425878145384885 |
| CTATCCTATGAC | 493.875879336588 | 0.274689659075533 |
| GCAGCATATGAC | 493.876450029017 | 0.424792589139535 |
| GCATCATAGTCA | 493.878063737942 | 0.207434518126719 |
| AGAGTCAGGGAG | 493.89686680892  | 0.216316385312762 |
| ATTGCACAGTCA | 493.928904762192 | 0.491612666783587 |
| CACAACCACTCA | 493.934154853893 | 0.721222282389736 |
| AGACTAATCACG | 493.939399599235 | 0.444468697410495 |
| GTCATTAATGA  | 493.956062837321 | 0.57389500142211  |
| AATCTTGACTAA | 493.966800768223 | 0.516146815272178 |
| GGTTTTGTGTCA | 493.972474507221 | 0.473218256119926 |

|              |                  |                   |
|--------------|------------------|-------------------|
| TGACTCGGGACA | 493.976583676048 | 0.660359988116516 |
| GTCATCATCCAA | 494.004854298015 | 0.32669113234613  |
| CGGAGGTATGAC | 494.014651928512 | 0.484336551759528 |
| CACGAGAATGAC | 494.027313745754 | 0.710184963915142 |
| TGACTCCATCAA | 494.029872979206 | 0.369959735398065 |
| ACCATGGATGAC | 494.033011927956 | 0.465387745656308 |
| GATACACAGTCA | 494.033305472038 | 0.656390687150211 |
| AGTCACGCGTTA | 494.035006290471 | 0.49311350731326  |
| GACGACGCATC  | 494.055244710625 | 0.415280372138794 |
| CCGAACTAATGA | 494.055512526739 | 0.483481041579453 |
| AGTCACTCTCGA | 494.071017128555 | 0.42488895117603  |
| GCTATGAATGAC | 494.074065771349 | 0.776667465244822 |
| GCCTAGTGACGC | 494.075550822989 | 0.445433927407357 |
| AAACGTTACTCA | 494.094298205134 | 0.480798494257702 |
| CCTAACTGACTC | 494.10953111014  | 0.418682758658349 |
| CTGAGTGATGAC | 494.11260985351  | 0.684348595750258 |
| CACTCCGATGAC | 494.122573947313 | 0.38121850058007  |
| AGTCACGACTGC | 494.12904147851  | 0.64579201174246  |
| GTCACCGACGAA | 494.133289429873 | 0.678132436741116 |
| ACAGTAGTGACT | 494.141155222569 | 0.42925534467649  |
| TGACGTATGAAA | 494.173262808011 | 0.277194343020202 |
| ATGAGTACCAAT | 494.182964366759 | 0.50888098377802  |
| GTCATTCATCA  | 494.183123075262 | 0.481612551430358 |
| ACGAGTGAATCA | 494.20441776362  | 0.711557153357905 |
| CATAGTACTATG | 494.205881739342 | 1.09019364650843  |
| CAACTTGCGTCA | 494.207982050535 | 0.597845769660591 |
| TTAGTCAAGGAA | 494.242380584369 | 0.450996881765993 |
| GTCACGATCTGA | 494.251956881745 | 0.821411060721843 |
| GAAACTTGTAC  | 494.25700132442  | 0.493226889558639 |
| GCATATTATGAC | 494.27655841188  | 0.653100723087636 |
| ATACTCCGTCAT | 494.279143261988 | 0.324694017510948 |
| GGATCTGATTCA | 494.283500340239 | 0.938328024600999 |
| CACACCTAGTCA | 494.293153902568 | 0.501018108957061 |
| GGATTGTATGAC | 494.319636782821 | 0.423071504992452 |
| GTGTCATGCATA | 494.320809406769 | 0.399944886883347 |
| AGTCAGAGCCAA | 494.35507499599  | 0.45038006296352  |
| CGGTGTGATGAC | 494.355825134207 | 0.305381513446436 |
| CAACAGTGAGTC | 494.367289546365 | 0.777941016156198 |
| TCCACTTACTCA | 494.403640142182 | 0.180984904020078 |
| ATACGTACTCAT | 494.406816122232 | 0.429099946915369 |
| AGGACCGAGTCA | 494.407437473363 | 0.626701782185156 |
| CCTGCATAGTCA | 494.427014323004 | 0.467642898257892 |
| GTCACATTAGTA | 494.432386124497 | 0.607338898458492 |
| ATGACGACGCAT | 494.441620936717 | 0.331932957235673 |
| CGTCATTCCTGA | 494.448337944791 | 0.414140895941168 |
| CACAAAAGAGTC | 494.473443109848 | 0.959129452835583 |
| ACATATCTGTCA | 494.495192092546 | 0.401135274435813 |
| GTCATATCTCAC | 494.500985663479 | 0.427427549443726 |
| GAGCCGTATGAC | 494.516390910578 | 0.47254597899103  |
| AGTGATCCGTCA | 494.522911778489 | 0.449500932027405 |
| TAGACTGTGTCA | 494.532171663963 | 0.716229936947388 |
| GAGTCAATTATA | 494.535062537395 | 0.436244877610564 |
| CGTCATCTATAC | 494.542349049593 | 0.210642846966464 |
| ATGACGCGCAAG | 494.550154594746 | 0.389031855043569 |

|                |                  |                   |
|----------------|------------------|-------------------|
| GTGTACCAGTCA   | 494.552042946046 | 0.660545292758475 |
| TCCCTCGAGTCA   | 494.580216036828 | 0.456556782397165 |
| CTCGTAATGACA   | 494.581921799635 | 0.496747080135775 |
| GTCATTCATCCA   | 494.584786932908 | 0.387600869337009 |
| ATGACAACGAAA   | 494.594058013733 | 0.424482486756148 |
| GACTAATTCGTA   | 494.594472627976 | 0.459673978942112 |
| TCAGCTTACTCA   | 494.605602482803 | 0.340893954277955 |
| CGATGGCGTCAC   | 494.622471159512 | 0.617656575901076 |
| CAGGCATGACGC   | 494.638979899156 | 0.391562113256986 |
| AAATTTGCTCAC   | 494.641355069943 | 0.341667546847491 |
| GTCATGCAATGA   | 494.652461745136 | 0.610412144146684 |
| GGCCTAAATGAC   | 494.664050362856 | 0.53634537770254  |
| GTCACACTGATA   | 494.690453263911 | 0.593026884658654 |
| TGACGCGTATCA   | 494.690984374686 | 0.746918567589795 |
| AGTCACCCCACT   | 494.706335554924 | 0.412779502154058 |
| GAACCGGATGAC   | 494.709901316297 | 0.416496140032006 |
| CACCCGTGAGTC   | 494.711792922781 | 0.836233766159974 |
| ATTAAATATGAC   | 494.712527509781 | 0.674644823692164 |
| GTCATAAGGTGA   | 494.735065424138 | 0.466499528785222 |
| ATAAGGCGTCAT   | 494.735191858292 | 0.367284387561981 |
| GTCACACGATGA   | 494.738172473201 | 1.15150108423189  |
| CACTTCCAGTCA   | 494.741788360309 | 0.44492364646589  |
| ATGACGATGAAT   | 494.743160981169 | 0.234957430411966 |
| GACCAATTAGTC   | 494.753799000545 | 0.646517247958067 |
| GACTAATAAGTC   | 494.760199379587 | 0.626826242024205 |
| GCATCAGCGTCA   | 494.76679287961  | 0.277215528062773 |
| GTCCTACAGTCA   | 494.767728713116 | 0.730391158072742 |
| GTCATAACCAAA   | 494.784505425746 | 0.298444876374513 |
| ACTCTCGGTGAC   | 494.817326957935 | 0.838590432997984 |
| ACAAATGGGTCA   | 494.824639165438 | 0.235887936100901 |
| ACAGTAGACTCA   | 494.830892539972 | 0.89558595944729  |
| AGTCACCCCATATA | 494.842076349431 | 0.505833785310514 |
| GCGTCACTTACA   | 494.843138315382 | 0.675393429821556 |
| GTAATTGACACA   | 494.844146412733 | 0.520568731379379 |
| GCATAGAATGAC   | 494.897473964614 | 0.533847482415155 |
| AAGCGTGC GTCA  | 494.920919692925 | 0.588469631129801 |
| TGACGTAGTTAA   | 494.936724151902 | 0.578986958458581 |
| GCGAAATCGTCA   | 494.940867583254 | 0.779769182110112 |
| AGGTCCGAGTCA   | 494.99479875012  | 0.410110485972403 |
| GTCACATATCGA   | 495.015222054209 | 0.441633281614069 |
| GTGACGCCATGA   | 495.020455480577 | 0.519048319793345 |
| CAAAAGCAGTCA   | 495.020485082413 | 0.43686507362056  |
| AGAGTCAATGCC   | 495.057724282695 | 0.733511917380753 |
| GTCATCTTACGA   | 495.061828416926 | 0.733216888462836 |
| CAAACCTTTGTTG  | 495.068330934846 | 0.976719548575505 |
| GTCATTTAGTGA   | 495.085216108162 | 0.424530856570298 |
| TCCATTGAGTAA   | 495.091263204435 | 0.42916606389385  |
| ACCTTTACGTCA   | 495.101559571281 | 0.395656205156842 |
| CAGATGGATGAC   | 495.124797147174 | 0.139558229473647 |
| CCCACGGAGTCA   | 495.130676879033 | 0.25713949749269  |
| GGTACCTATGAC   | 495.137421969368 | 0.87631147139424  |
| GTAGCGTACTA    | 495.18009284291  | 0.285391159285552 |
| ATTATTTGCTCA   | 495.187715669977 | 0.381616558624199 |
| CGATCGTGACGC   | 495.189268485105 | 0.833179813824762 |

|              |                  |                   |
|--------------|------------------|-------------------|
| ATTCATTATGAC | 495.190613700329 | 0.751830451708104 |
| GCGGCTGATTCA | 495.192682050382 | 0.672669478785442 |
| ACAAATCGTGAC | 495.22177900338  | 0.517023268499823 |
| AAACGACGTCAT | 495.227142986521 | 0.448298382127488 |
| ACTTCTGATTCA | 495.244911017642 | 0.497420060161585 |
| AATGCATGACGT | 495.273429335691 | 0.337402651315762 |
| CGGCCAAATGAC | 495.277451322706 | 0.654833019819527 |
| AAACACGAGTCA | 495.290973662142 | 0.404412756737355 |
| GCGGTTTACTCA | 495.293445573929 | 0.853748468549062 |
| ACTAATGCATC  | 495.302520565456 | 0.554840887170769 |
| TGACTCCGAGCA | 495.307776159021 | 0.662967641377316 |
| CACGTCACTCGA | 495.312366272993 | 0.486487258400932 |
| AATCTCATGACT | 495.325857205595 | 0.553455142685201 |
| TGATATGTGACA | 495.336418861813 | 0.46046874324035  |
| GACTCACTCGGA | 495.339792505582 | 0.632192783787087 |
| ACTCGCGATGAC | 495.341199072283 | 0.550277431680659 |
| CAGGGTCATGAC | 495.350589873623 | 0.224043167222049 |
| GGTAGTGATGAC | 495.362232684287 | 0.234850639056421 |
| AAATGCGAGTCA | 495.382854179853 | 0.42751832968941  |
| CCCAACGATGAC | 495.410298962411 | 0.517409827165023 |
| GAAAATTGACTC | 495.414697555698 | 0.530139117496467 |
| ACTGGGGTGACT | 495.421219590676 | 0.645412118977866 |
| TGAACAGACTCA | 495.431494705591 | 0.533211458225122 |
| GTCACGAGTGAC | 495.448603457938 | 0.497646056006417 |
| TGACTGCAGTAA | 495.470831018568 | 0.525039695138922 |
| GTCATATTAGGA | 495.47950784825  | 0.58919306504904  |
| TCTATCGACTCA | 495.535206938686 | 0.26681779097564  |
| TAAACTCAGTCA | 495.576660408214 | 0.429694257191865 |
| CTGGAATATGAC | 495.585649240904 | 0.482428391431266 |
| AATCCTGACGCA | 495.586611821132 | 0.457751881849138 |
| GACCCCGATGAC | 495.587332562654 | 0.549268536524968 |
| CGTACTAAGTCA | 495.593760608771 | 0.493976466476315 |
| CTGAGGAATGAC | 495.613963529668 | 0.150945070589193 |
| CATAAACGTGAC | 495.616097646608 | 0.490323189175796 |
| AGTCACTCTGGG | 495.672123220165 | 0.468577577890219 |
| CGAGCATGACAC | 495.692928652027 | 0.497757127652004 |
| CACGAAAATGAC | 495.694019648175 | 0.285943550191209 |
| CGGTCTTATGAC | 495.71369769494  | 0.366168710004708 |
| ATATTTACGTCA | 495.714048127854 | 0.527179723089768 |
| GACTAATACACA | 495.732448075532 | 0.529163744920831 |
| GAGTCAGTTTTA | 495.734392422583 | 0.437792521542874 |
| ATACCAGAGTCA | 495.750702071658 | 0.873299113870165 |
| GTCATTTTCTAA | 495.777030898819 | 0.137513264888284 |
| GAACCTTATGAC | 495.786549678855 | 0.804908208467048 |
| CTGTCCGAGTCA | 495.793873845276 | 0.481208899262325 |
| TATGGTGACCCA | 495.798658594328 | 0.224305579967595 |
| GGCACCGAGTCA | 495.838062511857 | 0.538533050034536 |
| CGGACCTGACTC | 495.844074948762 | 0.596099505577674 |
| AGTCACTACTAG | 495.846917400604 | 0.564758572907449 |
| CCAAATCCGTCA | 495.858409628616 | 0.225208580343633 |
| ATGATGAATGAC | 495.868143719168 | 0.307733433897715 |
| ACACAGAATGAC | 495.869499653801 | 0.674245157597441 |
| CATATCGATGAC | 495.870799471085 | 0.903418438328195 |
| ATGTTGACTCA  | 495.883007938957 | 0.483114075820866 |

|               |                  |                   |
|---------------|------------------|-------------------|
| ATACCTCGTCAT  | 495.891202567902 | 0.256602754941278 |
| GCTGCTGACACA  | 495.893419374886 | 0.778996160354101 |
| CCGCACTATGAC  | 495.906979638603 | 0.42271440707861  |
| ATGACAGAGTGC  | 495.908339018989 | 0.404218727219424 |
| TGACTTAATGAA  | 495.908520192406 | 0.692110687055703 |
| GTGTCATGAGTA  | 495.917349875605 | 0.2608008663983   |
| ACGATTATGTCA  | 495.921287493657 | 0.424434786603961 |
| GATTCATAGTCA  | 495.947157972673 | 0.670719334994115 |
| CTCTACTAGTCA  | 495.978928633622 | 0.476695473392278 |
| GATTCACAGTCA  | 495.998762871993 | 0.463123554243926 |
| CACACAGAGTCA  | 496.007631690462 | 0.583245844456274 |
| GTCATAGTGGAA  | 496.009430869795 | 0.727818102798813 |
| AACATGAATGAC  | 496.027418403046 | 0.480708050698841 |
| CCTGACCGTCA   | 496.058805745697 | 0.337711154030078 |
| ATGACTTGTCCG  | 496.060594661323 | 0.438993459695282 |
| ATTCTATAGTCA  | 496.063993474935 | 0.724662642152607 |
| ACTCAGATGACA  | 496.064920585421 | 0.427955294460475 |
| ATGAGTCGCGCG  | 496.078781546819 | 0.495049855528869 |
| AATGCCGTGATA  | 496.091653143332 | 0.300889955704919 |
| GTCACACGATTA  | 496.14369719684  | 0.386202102902084 |
| CCAGCTTATGAC  | 496.1444315065   | 0.292525999172304 |
| AGCAGATATGAC  | 496.155679400612 | 0.2096163068799   |
| GTCATAGAACTA  | 496.188251826765 | 0.525210532714693 |
| GAGCCATGACAC  | 496.205572832199 | 0.275831402919072 |
| GAAATGGAGTCA  | 496.207796676605 | 0.436197158475683 |
| AGTCATGAGGCC  | 496.210074850282 | 0.456914901423789 |
| AATACATGACAC  | 496.217271531735 | 0.290317624366086 |
| GAAGCTCAGTCA  | 496.2583854968   | 0.519699073406814 |
| GAATGATTAGTC  | 496.281413954321 | 0.483028888032042 |
| ACTCATACTTAG  | 496.302373155583 | 0.267707308336795 |
| CGTCATTGGTGA  | 496.312035025406 | 0.597807745278864 |
| TGACAGACTCAA  | 496.315347319812 | 0.7184610236627   |
| GTCATAGCTTTA  | 496.322867526398 | 0.407743389514716 |
| AACGCCGATGAC  | 496.339243814497 | 0.692193466857025 |
| AGACTAATACAT  | 496.341317476884 | 0.405332425673249 |
| GGTCATTGCTCA  | 496.35701768354  | 0.562656284407886 |
| ACGGTAGACTCA  | 496.362028527683 | 0.300081023637498 |
| GTCATAATCGCA  | 496.375365259263 | 0.77133912014181  |
| ATCGAGCATGAC  | 496.38912096757  | 0.484409400504288 |
| ATGAGCAAACCTG | 496.396504678444 | 0.336833037349814 |
| GCAGCTGTCATA  | 496.408554048946 | 0.427433249854689 |
| GTCATTCGCACA  | 496.409676119442 | 0.518300661237462 |
| TCGAACTGGTCA  | 496.420771564641 | 0.477037910822471 |
| CCGATAGACTCA  | 496.425871368619 | 0.613899676995736 |
| CAATCCTGACTC  | 496.449242615522 | 0.446175358463317 |
| CACCTGGATGAC  | 496.495190228098 | 0.539866478670453 |
| ATGAGTACGTTG  | 496.518715105082 | 0.437199019419144 |
| ACTCATAATGGG  | 496.519993414643 | 0.513302047425206 |
| ACTCATGAGTGA  | 496.534955497885 | 0.700967845735781 |
| CCGCACACGTCA  | 496.54580194302  | 0.204611948024601 |
| GTCACCTGGTGA  | 496.558302714015 | 0.730935642757978 |
| ACCGAAGTGACT  | 496.564202967687 | 0.768306272880654 |
| GCATATACGTCA  | 496.571938402577 | 0.614636029771538 |
| CATCTGCAGTCA  | 496.574939268648 | 0.561276647440563 |



|               |                  |                   |
|---------------|------------------|-------------------|
| TCAGACGACTCA  | 496.583690051106 | 0.219716025772643 |
| TCATGAGAGTCA  | 496.619159036905 | 0.702803577204942 |
| AAGAAATTAGTC  | 496.61986692292  | 0.521047712936267 |
| ATCACAATGACG  | 496.626257487171 | 0.815019941341854 |
| AGTAATACGTCA  | 496.6313219535   | 0.416969574465673 |
| GTCATCTTTCAC  | 496.632290643874 | 0.398579088001856 |
| GGTACCGTCATA  | 496.643307211958 | 0.47873082573524  |
| GATTCAGATGAC  | 496.64487310573  | 0.287075733145187 |
| CAAACCGGTGAC  | 496.648170195187 | 0.48751189687857  |
| AGCCCTGACTGA  | 496.657485534472 | 0.544803170261663 |
| AAACGTGATTCA  | 496.673877678127 | 0.499856815523022 |
| AGTTGATTACC   | 496.676527705869 | 0.414010455397677 |
| ATCATGCAGTCA  | 496.683642569592 | 0.528172481897961 |
| CCGCACGATGAC  | 496.683996624205 | 0.403159716804803 |
| ACTCATAGTGAT  | 496.685034813196 | 0.289264857276993 |
| CTGCTTGCGTCA  | 496.693537562295 | 0.678090067413998 |
| GTCACCGTTGAA  | 496.696628506245 | 0.873342690490954 |
| GTATCTGATGAC  | 496.709752888415 | 0.377710856038353 |
| TGACTTAATACA  | 496.719637672504 | 0.8453542892768   |
| GCATTACATGAC  | 496.725096722747 | 1.02036991058883  |
| AGTCACGCCTGA  | 496.733500944032 | 0.381670756850434 |
| ACTGCATGACAC  | 496.736317820364 | 0.396948365538416 |
| GTCTAGTAGTCA  | 496.74552570286  | 0.708845668908619 |
| ATTAATCTGTCA  | 496.754866372632 | 0.429076391619028 |
| CAGTATTAAGTGA | 496.756522436827 | 0.928515033139392 |
| ACGGTTTCGTCA  | 496.775313148296 | 0.711212927672571 |
| ATCAGTCTTACG  | 496.776909832922 | 0.315544456454754 |
| AATTGTGGTGAC  | 496.789335510861 | 0.382072481461395 |
| CCTCGGGAGTCA  | 496.794170123574 | 0.472654893973655 |
| CAGTGCACGTCA  | 496.821794304716 | 0.870437570752764 |
| ATGAAACATGAC  | 496.82693902453  | 0.612280726117772 |
| TAGTCACGGGCA  | 496.83033192832  | 0.479406056181251 |
| ATTGAATATGAC  | 496.84128580296  | 0.856404139329519 |
| CGATGGGAGTCA  | 496.866027370851 | 0.360500339119296 |
| GGCGGCGTCATA  | 496.867881149982 | 0.422062932074822 |
| TATTGGGAGTCA  | 496.86963494276  | 0.389218336508145 |
| GTCCTCGAGTCA  | 496.88837477384  | 0.485071397541039 |
| ACTGCCGAGTCA  | 496.89407034686  | 0.439089840981143 |
| CGTCATTGTGGA  | 496.907408990763 | 0.335543189795256 |
| AGACGTGCGTCA  | 496.91633130585  | 0.375830331324892 |
| AGTCATGAGGAG  | 496.921190410155 | 0.426834607897274 |
| GTCACAACGTGAC | 496.933526552117 | 0.687862154446686 |
| ACATGGTGTGAC  | 496.93803870456  | 0.445013659303298 |
| GTTACGCAGTCA  | 496.985500270791 | 0.342926764089003 |
| ATGACAGACATA  | 497.016885623764 | 0.392437933452483 |
| CATTTGATGACG  | 497.02351411375  | 0.669720486372428 |
| AAAGACCATGAC  | 497.058963108489 | 0.513997293854888 |
| GTGACCAAGTCA  | 497.068233943447 | 0.284720406819752 |
| TGACTGGATGCA  | 497.073798254961 | 0.578980367616203 |
| CTTGATATGAC   | 497.089930654554 | 0.456428902997905 |
| ATATCGCAGTCA  | 497.100581358378 | 0.203584053732389 |
| CAACTTACGTCA  | 497.1127058797   | 0.472797022498971 |
| ATGTCGAATGAC  | 497.113253981418 | 0.69273459708924  |
| GTCACAACGGAA  | 497.137851496303 | 0.616567382604131 |

|              |                  |                    |
|--------------|------------------|--------------------|
| CTTTCGGTGACA | 497.138783692774 | 0.572684850772378  |
| GCATAATATGAC | 497.152908613154 | 0.616640749092878  |
| AGACAGGATGAC | 497.158602582563 | 0.200482545210959  |
| AGTCAGAGTAAT | 497.163503871643 | 0.225577045564451  |
| AGTCATGGTGAT | 497.192717805101 | 0.306620553667009  |
| GTCATATTACCA | 497.201916164995 | 0.378701466197271  |
| AATTGACACACG | 497.209474924054 | 0.489402689448796  |
| GTCATCGTTCAC | 497.227817583667 | 0.333800427178835  |
| CAGGACGATGAC | 497.246313695782 | 0.580117365459925  |
| AGCCTAGATGAC | 497.257732270531 | 0.688810282775467  |
| ATGACAATACAT | 497.272498507817 | 0.389910473366149  |
| AGACTAATTGTG | 497.273822781232 | 0.262523235762763  |
| AGGCAATAGTCA | 497.27439414349  | 0.605339016299711  |
| ATGACGTTGATA | 497.283095350325 | 0.486714828228321  |
| CGTCATTTGGAA | 497.291501948579 | 0.451116173538253  |
| CACTCGTACTA  | 497.314579447508 | 0.470971898173557  |
| TCCATAGTGTC  | 497.325930474295 | 0.589643486167289  |
| GAATTCTATGAC | 497.327290142003 | 0.727812248446389  |
| CAAATTTGCTCA | 497.337247859855 | 0.377655270268354  |
| GAGTCAATGAGC | 497.345245863877 | 0.451932234606037  |
| CAGCTTCAGTCA | 497.352429022216 | 0.64379756971503   |
| ACATTGACTCA  | 497.358879127045 | 0.60381433694962   |
| AGACATTCGTCA | 497.359062889934 | 0.391023526813702  |
| AGTCAGACCGTG | 497.359468523528 | 0.415595242143484  |
| CTCTCGTACTA  | 497.381820136257 | 0.130310349743034  |
| CATCCTCAGTCA | 497.383209743751 | 0.328936524456947  |
| ACAGGTTATGAC | 497.393940981397 | 0.384505147517701  |
| GTCACCATATTA | 497.401920458775 | 0.0847122195034482 |
| CAGAAGTGTGAC | 497.446538426713 | 0.55886086454123   |
| CCGGTGTATGAC | 497.449036066316 | 0.486265192609495  |
| AGAGTCAAGTCA | 497.450482969703 | 0.301404834757233  |
| GACTGAGTCTGC | 497.451259995221 | 1.34083330323722   |
| TCAAACGCGTCA | 497.455404213478 | 0.392103151284944  |
| AAGTCCGTGACT | 497.486285288735 | 0.735837073875366  |
| AGACTAATAATA | 497.499110144609 | 0.376168857343673  |
| GCATCTGTGTCA | 497.522940220233 | 0.690200626878968  |
| CGTCATTATACA | 497.533902966046 | 0.416241690182075  |
| ACACCGATGACG | 497.560270109985 | 0.531674192274724  |
| TAGTTAGACTCA | 497.588450094996 | 0.584901619439813  |
| TGACACAACGAA | 497.59692234674  | 0.416722908483637  |
| ATTCTTACGTCA | 497.605521507217 | 0.346954696123164  |
| ACAGTTTCGTCA | 497.616953529964 | 0.690069513186291  |
| AAGGTGGAGTCA | 497.622370479965 | 0.23048165071121   |
| ATGAGTCCGTTC | 497.625613886442 | 0.396742108633659  |
| GCGACAGATGAC | 497.655194634625 | 0.619656581512702  |
| ACGTCACATTGA | 497.698898856039 | 0.376955914079007  |
| ACGAAATATGAC | 497.712988338607 | 0.581937276486026  |
| GTCACCCAGTGA | 497.714352890802 | 0.624663751972266  |
| TCCCTGGAGTCA | 497.728919206409 | 0.288549227073626  |
| GTCATCGGACCA | 497.739257713321 | 0.577463747452745  |
| CGCACTGTCATA | 497.745819291839 | 0.338259569373835  |
| CTGAAATGTGAC | 497.774219419347 | 0.700322661229699  |
| ACTAAATGTGAC | 497.77989436796  | 0.664867516974813  |
| AGACTTGACTAA | 497.790342628398 | 0.577624490437289  |

|               |                  |                   |
|---------------|------------------|-------------------|
| GTCACGGTCATA  | 497.796234085653 | 0.519205546114789 |
| ATGAAATTAGTC  | 497.808306761918 | 0.258925976578284 |
| GAGTCAGGGATC  | 497.81060849101  | 0.29077787265112  |
| AGAAAAGATGAC  | 497.815516071561 | 0.366360279476477 |
| GTCATAGCAGGA  | 497.84815441583  | 0.353110077655261 |
| GTCATCACACGA  | 497.854747352547 | 0.375960855769574 |
| AGATACTATGAC  | 497.859079189442 | 0.316806446583373 |
| ACGGAGGTGACT  | 497.873864793131 | 0.369463394956312 |
| ATTACGCAATAA  | 497.88759284438  | 0.478302764150287 |
| GTCATCGCCCGA  | 497.923346396938 | 0.465239224642435 |
| ACTGGTAGTCAC  | 497.935321298445 | 0.873686981522476 |
| ATGACGGAGACA  | 497.93930450429  | 0.288739845051658 |
| GTCATTAATCAA  | 497.946393792949 | 0.902201510079173 |
| GTCATCAACTCA  | 497.964295088077 | 0.326508294568964 |
| CCCACTGATGAC  | 497.969808050218 | 0.909594340650963 |
| ACTCATCTGGCG  | 497.977186013352 | 1.40904545790722  |
| AACTTGTACCCC  | 497.981790859412 | 0.374372708232932 |
| CGAATGTGACGC  | 497.990640357062 | 0.781970666794988 |
| ATCGCGTACTA   | 497.999014562011 | 0.308737618556306 |
| AAAGTGTACAGAG | 498.00773987976  | 0.12706421910476  |
| AAATGAGAGTCA  | 498.023616517912 | 0.394280654444479 |
| AGTCACGCCACA  | 498.048640175834 | 0.220189051697633 |
| GAAGGGTATGAC  | 498.05005688121  | 0.291511863067    |
| GTCATCGTTAAA  | 498.064464607606 | 0.410360069390274 |
| AATCTGTACAGAG | 498.071157074924 | 0.117090582893754 |
| TGACGTGGAACA  | 498.084732190108 | 0.303374791602391 |
| TATTACTCGTCA  | 498.085520615506 | 0.415608198379949 |
| AGCCATGACACT  | 498.103705231534 | 0.527754707818389 |
| AGGCTAGAGTCA  | 498.128805606051 | 0.196565156848246 |
| CTGAACGCGTCA  | 498.141869563006 | 0.642862954450338 |
| GACTATAATGAC  | 498.150994995931 | 0.87218364026482  |
| CGGCCTAATGAC  | 498.153673761044 | 0.691453605785873 |
| CTCATCCAGTCA  | 498.156186006789 | 0.441523014464505 |
| AGAGTGTATGAC  | 498.158943542309 | 0.254255821694727 |
| GACTAGGATGAC  | 498.159833815853 | 0.440963494148738 |
| CGATAACATGAC  | 498.19181826284  | 0.282197283610952 |
| ACAATATATGAC  | 498.195136602821 | 0.506017047071949 |
| GTCATAGACTTA  | 498.203610273749 | 0.195970049732094 |
| GTTCATACGTCA  | 498.209768861449 | 0.502284581416813 |
| CGTCATCGGCGA  | 498.212948665106 | 0.454868438596676 |
| GCATACGGTGAC  | 498.217923145356 | 0.410169519519044 |
| CGTCATTATTGC  | 498.230706739239 | 0.568852799539741 |
| ACGACTCAGAAAT | 498.238736306776 | 0.581241455471277 |
| ACCGCGGAGTCA  | 498.266397685765 | 0.778883367525897 |
| GTGCTTACGTCA  | 498.268407540436 | 0.367027367999667 |
| CTCACCTAGTCA  | 498.279703878761 | 0.378676368456396 |
| TGCACTGACACA  | 498.288223368476 | 0.565706748989373 |
| CGATAGTGTGAC  | 498.293909729564 | 0.719816424389637 |
| AATTAGCAGTCA  | 498.298304969538 | 0.545360286580665 |
| CGTGCTGACACA  | 498.30653833579  | 0.52292135760839  |
| GGGTATTATGAC  | 498.332550990379 | 0.334914282173921 |
| AGGGTATTAGTC  | 498.356690632394 | 0.33478070666626  |
| GTCATCACATAA  | 498.36510105505  | 0.256535788130334 |
| ATCGCCGATGAC  | 498.375298552746 | 0.568509848223211 |

|               |                  |                    |
|---------------|------------------|--------------------|
| AGACGCGTGACT  | 498.381559917061 | 0.367704139315396  |
| GTATATACGTCA  | 498.428415561785 | 0.598641894006113  |
| CTCTGACACTTA  | 498.434531624264 | 0.375055596756164  |
| CATAGGAATGAC  | 498.446171454007 | 0.148429223043897  |
| CAAGAGTGAGTC  | 498.455438270938 | 0.361723047515769  |
| GACTAATAGTAC  | 498.467290592374 | 0.528545052615401  |
| CCTTTAGACTCA  | 498.479698586287 | 0.579946561202103  |
| AGAAATTGACTC  | 498.484773735355 | 0.441159476399263  |
| TCATAGTTAGAA  | 498.508680926953 | 0.690648596994179  |
| GTAATCAATGAC  | 498.513901068845 | 0.7347123852823    |
| AGACTCACTCAA  | 498.525156728166 | 0.31229406446139   |
| CCTACTTACTCA  | 498.539407049533 | 0.373453651142449  |
| CACGGGTGTGAC  | 498.542316256909 | 0.697169673221112  |
| GCGTCTTATGAC  | 498.556059686304 | 0.420659654609154  |
| ACGTCACCTCGAG | 498.566832908632 | 0.575375831255414  |
| GTCATCCTATAA  | 498.578024498772 | 0.614660138150656  |
| CCTGTCTAGTCA  | 498.592733662058 | 0.415092911707921  |
| GCTAATCTGTCA  | 498.609900320311 | 0.69642878472594   |
| GCACAAGATGAC  | 498.640108288726 | 0.172188655141826  |
| CTGTATTGCTCA  | 498.653637762022 | 0.530615354963353  |
| ATGACTAGCAAA  | 498.661793014298 | 0.184453239325341  |
| AGACTTGATGAC  | 498.675430773788 | 0.398051846502083  |
| CAAGCTTACTCA  | 498.675935322921 | 0.488041643752502  |
| GCTGACTAGTAC  | 498.689773277232 | 0.17713049863833   |
| ACTATAGTGTC   | 498.69241289162  | 0.0562024805210905 |
| CGTGTTTGACTC  | 498.714910343792 | 0.60270420832802   |
| CGACAGCATGAC  | 498.721547036102 | 0.674936835565924  |
| GGCGCGAGTCAC  | 498.730753050462 | 0.506447564486622  |
| ATCTTTGACGCA  | 498.733549668968 | 0.522546815954105  |
| GCGTATTTGTCA  | 498.77270270228  | 0.799209840646428  |
| ATGATGACCGAA  | 498.776710256725 | 0.432485343504219  |
| GTCATCGATTCA  | 498.78873099859  | 0.444421590588308  |
| GAGTCAGGGTTA  | 498.812708609199 | 0.420329777326117  |
| CCTATTGGTGAC  | 498.82217249415  | 0.624231272017869  |
| TGACGTGATCAA  | 498.834875551175 | 0.514836590753911  |
| GCATCTAATGAC  | 498.840471803737 | 0.473452718508428  |
| AGACTAATTTAC  | 498.840711269586 | 0.37899344057054   |
| ATGACAGCTTCG  | 498.854399610258 | 0.543097501471116  |
| GAAAGCGATGAC  | 498.856187869585 | 0.38183329562614   |
| AGTGTGATGAC   | 498.871424636172 | 0.294530428593332  |
| GAGTCAGTTTGC  | 498.887025258659 | 0.456274911184557  |
| GTCATCTCGAGA  | 498.88932548698  | 0.682203393752768  |
| CTCAACTGTGAC  | 498.893653259205 | 0.490061156754358  |
| CACACTGTCATA  | 498.897868552344 | 0.273397906545795  |
| AGTGAAAATGAC  | 498.919564089609 | 0.325226073504342  |
| CTGCTGTAGTCA  | 498.921258737468 | 0.675932164048807  |
| GACTCAAAATGA  | 498.93626320801  | 1.14489182602507   |
| GACTAATCATTA  | 498.937987227981 | 0.603329915955718  |
| GTCATCGACCAA  | 498.942099777972 | 0.766676840277696  |
| ACGTCGTATGAC  | 498.95333976715  | 0.375235531193233  |
| AGTCATGGTAGC  | 498.955195057524 | 0.149475320076045  |
| ATGCATAATGAC  | 498.966394578155 | 0.781962863341062  |
| ATGACTAGCTCC  | 498.976377571276 | 0.361982445035917  |
| ATTTAGAATGAC  | 498.984169123758 | 0.431813183756256  |

|               |                  |                   |
|---------------|------------------|-------------------|
| ATGAGTACCACC  | 498.997553513264 | 0.538884559280629 |
| AAGAGACTCATA  | 499.00342247096  | 0.266081290280983 |
| ATACGTGATGAC  | 499.011503024187 | 0.383283947820364 |
| GTCATTCTGATA  | 499.021145380583 | 0.473245289604267 |
| CGTCACCATGAG  | 499.043878384844 | 0.916459907619901 |
| AAGTCTTGTGAT  | 499.054639398785 | 0.494743217749751 |
| ACTGAGGATGAC  | 499.06665116912  | 0.322605675610997 |
| AAATAGATGACG  | 499.070200587145 | 0.282887953470414 |
| ACCTCTGAATCA  | 499.076704793101 | 0.296287362736989 |
| TTAGTAATCGAA  | 499.089323695595 | 0.731591898997807 |
| ATCAGCTGTGAC  | 499.093678118742 | 0.575722417982892 |
| GTCATACAGGCA  | 499.11520195069  | 0.227783470988486 |
| AGCAGAGTGACT  | 499.128137201232 | 0.455256324598056 |
| ATGACGAGGTTA  | 499.1285187562   | 0.234205705818625 |
| GTGTCATGTGCGA | 499.135720098819 | 0.393911555195666 |
| CTAAACGTGTCA  | 499.140192919145 | 0.489786521028749 |
| TCAGATTGCTCA  | 499.145607160412 | 0.673639246278339 |
| ACGGGGTATGAC  | 499.151921017318 | 0.420713047016239 |
| GTCATCAGTGAA  | 499.184297165983 | 0.331917398581971 |
| ACGTTGCATGAC  | 499.18532667056  | 0.824433797228702 |
| ATAGTCTATGAC  | 499.210121115005 | 0.458482945613241 |
| ATAGCGTGACTA  | 499.228904076785 | 0.251308219998363 |
| TGAGTCTAACCA  | 499.236734558289 | 0.472597453007291 |
| ACGTTCTAGTCA  | 499.242455534874 | 0.747072775976266 |
| CTGCATACGTCA  | 499.243066019893 | 0.676991616207036 |
| GACTAATTTATA  | 499.272777238297 | 0.881451769709083 |
| CAGTCATGGGAG  | 499.274859902193 | 0.396447386053844 |
| ATACATTGTGAT  | 499.288480113985 | 0.522462737961333 |
| CGTCATTGATGC  | 499.291080308753 | 0.473988098682363 |
| AGTCATGGGTCG  | 499.308276696335 | 0.121753476184862 |
| GAGTCAGTTGGC  | 499.324617403492 | 0.350413462810645 |
| CCTGATTGCTCA  | 499.33878458177  | 0.628265239351046 |
| ATCGTCCAGTCA  | 499.347399031032 | 0.244859015563938 |
| ATTTAGTGTGAC  | 499.350067025166 | 0.44094755214348  |
| GTATCTGAATCA  | 499.361030806224 | 0.442382539316008 |
| AATAGTGACGTG  | 499.372384032028 | 0.447998492536218 |
| AGTCACTCTTTA  | 499.376372598562 | 0.384372920568828 |
| GATGACGGCATC  | 499.379186226859 | 0.479758469058725 |
| GGTCATGACCCA  | 499.386598763861 | 0.736925543415318 |
| GTCATTTACATA  | 499.390508252596 | 0.627048687357488 |
| ATAGGGTATGAC  | 499.400124687831 | 0.532608201024827 |
| GTCATCGGTGGA  | 499.401206428738 | 0.229842412760505 |
| CTCGCAGAGTCA  | 499.414670575641 | 1.0037156847798   |
| CGTCACCGCTGA  | 499.428383806862 | 0.842302287781933 |
| CGTATCTGTGAC  | 499.439687564328 | 0.5163752734111   |
| ATGACGTTAGTC  | 499.456294347675 | 0.61038568413755  |
| TCACCGTGATGA  | 499.464588013765 | 0.841619195743173 |
| CGTCCGAATGAC  | 499.468049265266 | 0.407531495940931 |
| AAATGTGATGAC  | 499.474539158979 | 0.532602738600087 |
| TGAGTCGAGGCA  | 499.496976802866 | 0.467683496950314 |
| GAACACGAGTCA  | 499.525820052871 | 0.457406765930192 |
| CCACTTGTGTCA  | 499.534839434564 | 0.673299429361032 |
| AACAACATGAC   | 499.534907465078 | 0.617384642502553 |
| TCAGTCGTGACA  | 499.552782424069 | 0.950664922939405 |

|              |                  |                   |
|--------------|------------------|-------------------|
| CTGTACAATGAC | 499.572508370169 | 0.606783367555356 |
| ATCAGATTAGTC | 499.582437169921 | 0.537768309286308 |
| ACTCGCGGTGAC | 499.595806796972 | 0.703900946483377 |
| CGTCATCTAGAA | 499.598079396183 | 0.768360176267617 |
| CTTGGGGAGTCA | 499.606172063239 | 0.419740636680828 |
| AACGTATATGAC | 499.617111021279 | 1.31278651944989  |
| AGAAGTGACGTG | 499.63389305084  | 0.253241871152004 |
| AACCATTGGTCA | 499.638118450449 | 0.594033824342356 |
| CAGTTAGACTCA | 499.641197325438 | 0.608956097165454 |
| GAGTCAATATAA | 499.645811974165 | 0.36519486303707  |
| GTAAGTGCAGA  | 499.647240858476 | 0.223280748026135 |
| CATGATCGTGAC | 499.666062505316 | 0.851031644818853 |
| AACAGTCGTCAT | 499.668021987639 | 0.476264992700595 |
| CAACACTAGTCA | 499.687720041634 | 0.603730391797672 |
| AGTAACCAGTCA | 499.703199943395 | 0.666119147615471 |
| AACCCGTATGAC | 499.711130944543 | 0.370980165232848 |
| GACTCACTCGAA | 499.72159774022  | 0.452959635181433 |
| CAGTCTGGTGAC | 499.735143293443 | 0.647674316893288 |
| GTGATTCAACAA | 499.777089311445 | 0.155958203426513 |
| ATTGGGTACCCG | 499.779684242009 | 0.373137757904157 |
| CTCTCTGAATCA | 499.785050290569 | 0.167984840377609 |
| GCAATGTATGAC | 499.787314313585 | 0.769208454519724 |
| GTAAGTGATGAC | 499.790404463845 | 0.244358768137692 |
| CATTGTGATGAC | 499.799896528683 | 0.444746145678289 |
| ACGACCAGTCAG | 499.80208208569  | 1.08886008467562  |
| GACAGTGATGAC | 499.81152440021  | 0.526864950211877 |
| GTCATGCTCACA | 499.834514663482 | 0.42074717941811  |
| ACCGTAGTGACT | 499.836696403211 | 0.565774330987551 |
| ATGACAAAGCCA | 499.849490889363 | 0.432094097589436 |
| GTATACGTGTCA | 499.915905471373 | 0.699152582550163 |
| ATACTGTGCTCA | 499.936765278245 | 0.999089405617689 |
| CGGTACGCGTCA | 499.953406750413 | 0.823662527879137 |
| AGTGTCATGGTC | 499.958374349996 | 0.491875099857293 |
| CGTCATCTATAG | 499.963644684877 | 0.534519908640981 |
| AGTAACGTCACC | 499.968982505945 | 0.24353204884293  |
| TCACCCGAGTCA | 499.982092090357 | 0.402123203477201 |
| CGTTATTGCTCA | 499.984172821891 | 0.506144771952956 |
| ACTGGCGATGAC | 499.996194378743 | 0.854452934577814 |
| AACGATGGGTCA | 499.996741396483 | 0.548667652073628 |
| ACTTAGGGTGAC | 500.000158754215 | 0.516246144690253 |
| GTCATTGTCGGA | 500.002029741848 | 0.462819105243962 |
| CCTAATTGCTCA | 500.008883635629 | 0.479994331143421 |
| GACCCAGGTGAC | 500.026742527241 | 0.463733742544116 |
| GTCATTCGAAGA | 500.054839210541 | 0.539033831794877 |
| CGCTAGATGACG | 500.058176567557 | 0.640656928401114 |
| GACTCACTTATC | 500.074494260864 | 0.15342910266862  |
| AGAGTCAGGCAA | 500.074557341275 | 0.249503803916846 |
| GGTAACCAGTCA | 500.103796360704 | 0.482523204984147 |
| GTGTGAATCAAC | 500.110867131643 | 0.319938577563132 |
| GAGATACAGTCA | 500.111318505161 | 0.496411329292644 |
| GTATCCTATGAC | 500.119495076838 | 0.430168916090236 |
| ATGAGTCCCACA | 500.12115073228  | 0.552162612097328 |
| AGTCATGAGGAA | 500.126842974568 | 0.3400097204512   |
| AAACTACTCATT | 500.142590045819 | 0.36414793680954  |

|              |                  |                   |
|--------------|------------------|-------------------|
| CTGACTATGTCA | 500.158279466793 | 0.348243212711233 |
| CACAACGTGAC  | 500.169939252314 | 0.769306668053515 |
| GTCATTCGATTA | 500.179337335091 | 0.456928855343251 |
| ACCAAGTGACGT | 500.20605898248  | 0.780746476593523 |
| ATGAGTCTCTAA | 500.212405965359 | 0.521907777817969 |
| ACTACTATGAGT | 500.218110816878 | 0.561032319807219 |
| GGAATCGACTCA | 500.227530682167 | 0.617727805749243 |
| GCAGCTCAGTCA | 500.228865751628 | 0.805791656442347 |
| GTATCCGATGAC | 500.239057678282 | 0.696246486114856 |
| CGTCATTTACAG | 500.242107978388 | 0.666322310114045 |
| CTATCGGATGAC | 500.251083995169 | 0.239268633808674 |
| CGACTAATGACA | 500.25927175283  | 0.453673282532894 |
| GTGTCATGTCAA | 500.279453227125 | 0.524839980933303 |
| ATTGTTTGACTC | 500.284571749479 | 0.246067756546942 |
| ATGGCGTACCA  | 500.289055663309 | 0.348898001370741 |
| TCAATCGACTCA | 500.301875853351 | 0.501172058855824 |
| ACTATCGACTCA | 500.302801439738 | 0.444989569886923 |
| GTAATTTGTGAC | 500.304040265318 | 0.416250885079334 |
| AGCCAGTGTGAC | 500.32196401737  | 0.474951487898651 |
| AGTCAGATGACA | 500.338337326373 | 0.507632017678331 |
| TGACACAAACCA | 500.34803666429  | 0.674093824138713 |
| ATGACAAAGGTC | 500.376976283933 | 0.411202183930273 |
| CTCCTTGATGAC | 500.381069689746 | 0.485383562610873 |
| GGCCCCGGTGAC | 500.388667263336 | 0.805842536559587 |
| AGATCCAATGAC | 500.393921619808 | 0.613268768735094 |
| GTCATACCGGCA | 500.406737767012 | 0.515950044892095 |
| TGACGTCAATAA | 500.411088079907 | 0.718391495823198 |
| CATAACCAGTCA | 500.411363684799 | 0.207715289295505 |
| CCCGATTACTAA | 500.426637692738 | 0.58431746785752  |
| AAGACCGAGTCA | 500.436469558132 | 0.299550447823244 |
| ACTGTTCGTCAT | 500.459564250024 | 0.49257533961441  |
| TCGCAGATGACA | 500.460602226265 | 0.382526284982992 |
| GTCGCTGTCATA | 500.51852758928  | 0.2369820371643   |
| ATGTCCTTGTCA | 500.54039552559  | 1.40745198716548  |
| ATGACGTTATAG | 500.547344199692 | 0.393147671736417 |
| CGATTACGCAAC | 500.548776037661 | 0.455313336940935 |
| AAATTGTGTGAC | 500.549172801644 | 0.446702216257285 |
| ACGTCGTGACTA | 500.568585891289 | 0.527709190619863 |
| TATGTGGAGTCA | 500.586713211689 | 0.416329656592257 |
| GCGCATTATGAC | 500.598003462981 | 0.901469668209318 |
| ACTCATCGGAGC | 500.629865023411 | 0.338571163046532 |
| CGTCATCGGAAG | 500.634679709848 | 0.171377357900521 |
| ACTGATGGGTCA | 500.639929198557 | 0.310634528972167 |
| GTCATAACTCCA | 500.647593411308 | 0.475253403189768 |
| ATGACGAGATAC | 500.661994713553 | 0.467692073199114 |
| CCAATGGGTGAC | 500.719857586738 | 0.978936939113471 |
| TGAGTCTAGTAA | 500.72947338588  | 0.566866582917526 |
| ATGTGTCAAGTA | 500.736007693105 | 0.349776178172364 |
| CCCGATAGTGAC | 500.738400547803 | 0.674425835515209 |
| GCGTAACAGTCA | 500.740490233846 | 0.732108414526954 |
| GTTCTACAGTCA | 500.761965637676 | 0.613407411187782 |
| GGATCATATGAC | 500.766578609604 | 0.455865112130725 |
| CAGTGAGAGTCA | 500.774098414424 | 0.477980201366296 |
| GTCAGAGAGTCA | 500.782177597318 | 0.333595846565133 |

|               |                  |                   |
|---------------|------------------|-------------------|
| AACATCCAGTCA  | 500.789118897973 | 0.45400115908901  |
| GTCATAAGATTA  | 500.813209570205 | 0.290678319603781 |
| CCGTTATATGAC  | 500.822955992587 | 0.474068373594959 |
| TCCGATATGTCA  | 500.845098182619 | 0.507919977535341 |
| GTCATTCGAGAC  | 500.875909243253 | 0.610333519746319 |
| AGTGACAAGTCA  | 500.895105307999 | 0.550102143297984 |
| GCCTCTGATTCA  | 500.911497464436 | 0.709976747473624 |
| GATTTGGATGAC  | 500.913259954391 | 0.402048708799742 |
| CGTCATGTGTAA  | 500.92369668515  | 0.623560925319816 |
| CCACGTGTGACG  | 500.931295005006 | 0.523995306529087 |
| TCATACTTGAAA  | 500.9378639434   | 0.811475849705553 |
| GTGTCACGTGGA  | 500.97273890493  | 0.684345262350306 |
| CTGAAAGATGAC  | 500.989427429457 | 0.40591736242876  |
| CAACATTGACTC  | 500.99502802984  | 0.451061758377264 |
| ACGTGATATGAC  | 500.996137859033 | 0.555347199195617 |
| ATCATTTTGTCA  | 501.011250623868 | 0.397281177008105 |
| AAATTCGGTGAC  | 501.051539257346 | 0.475640867689518 |
| AGTCATGGGCAA  | 501.065502315382 | 0.376697687822172 |
| GTCCTATAGTCA  | 501.067317568702 | 0.363831447168391 |
| CGTCCAGTCAGA  | 501.079942852247 | 0.542815242011452 |
| GCGATCGATGAC  | 501.093577081097 | 0.730708733484686 |
| ACCAGGTGACAC  | 501.107494057197 | 0.513284369548861 |
| AACACTGTCATC  | 501.109342253255 | 0.23257867038356  |
| CCATTGCAGTCA  | 501.123428661413 | 0.538338474505046 |
| CCAGTGTATGAC  | 501.124787745141 | 0.795439912740609 |
| GTCATTGAGCCA  | 501.126678914068 | 0.749461306086311 |
| TCATCAGTGACA  | 501.131236752478 | 0.294693156450547 |
| TATCTAGTGACA  | 501.1329636617   | 0.623604785400697 |
| GGTTTCGACTCA  | 501.142622918303 | 0.414759461989662 |
| ACAATAAATGAC  | 501.162222850259 | 0.714594983986324 |
| GTCATTACCGCA  | 501.163400498602 | 0.576321882233918 |
| CAGTGATATGAC  | 501.165521358185 | 0.674729307389428 |
| CGAGGCGTCATC  | 501.183313388685 | 0.416808107749543 |
| TCATCGAAATGA  | 501.183596823622 | 0.839522210549957 |
| TAAGATACGTCA  | 501.187803341362 | 0.638792829151661 |
| TATGGTGAATCA  | 501.194902231087 | 0.665969503412884 |
| CAGTCAGAAGCC  | 501.196036874963 | 0.621306589119923 |
| GACGTCTAGTCA  | 501.201722567245 | 0.574823024384006 |
| CAGGGTGAATCA  | 501.203901565866 | 0.441132538389758 |
| CCGTTGCATGAC  | 501.204597961816 | 0.778664689370379 |
| GAATTGGATGAC  | 501.231575802513 | 0.365310383683491 |
| CAACCCGATGAC  | 501.233069916472 | 0.779992672163978 |
| CTGGTTGTGTCA  | 501.235104115515 | 0.751842590711921 |
| ACAAGCTATGAC  | 501.248132318111 | 0.667933973152226 |
| CTAGACGCGTCA  | 501.248601452643 | 0.396730848939365 |
| TGACTATAGGAA  | 501.258646417548 | 0.434736842062981 |
| GCCGGATATGAC  | 501.259122590743 | 0.677074772416236 |
| TCAGTCAGGTCA  | 501.269717962717 | 0.366111423723377 |
| ACAACCTTATGAC | 501.273141735882 | 0.314695870481062 |
| GTTTCACAGTCA  | 501.27836694436  | 0.591021577699183 |
| ATGACGGAGCGA  | 501.320859650154 | 0.172002876312316 |
| GTCATTCAGTTA  | 501.332201286254 | 0.367336173284275 |
| CGGACGTATGAC  | 501.334299690677 | 0.574790032374733 |
| ACACTGAATGAC  | 501.357156331113 | 0.648126581868482 |



|               |                  |                   |
|---------------|------------------|-------------------|
| ATCTTAGATGAC  | 501.358556249035 | 0.784772965756128 |
| CATACCTGACTC  | 501.362892079213 | 0.271658859751303 |
| GGTACCGATGAC  | 501.369043520242 | 0.632871093519127 |
| AATGGTGAATCA  | 501.369530165729 | 0.779913089893127 |
| CGGATAAATGAC  | 501.390145981629 | 0.452323614378768 |
| AACACTTATGAC  | 501.424099221274 | 0.359680598690996 |
| CCTCGTTACTCA  | 501.430112002646 | 0.437916131036064 |
| ATGTCTGATTCA  | 501.430657112093 | 0.662036897298356 |
| AATACCTAGTCA  | 501.435656976993 | 0.47396088766191  |
| AGTCATGGGATC  | 501.44382070393  | 0.430108727923517 |
| CAACTTGTGTCA  | 501.461797764354 | 0.395392658865632 |
| AGTCACTACCAT  | 501.462591010115 | 0.34647763466003  |
| AGTCACCTTGCG  | 501.467439518137 | 0.531863490014507 |
| CATAATTGTGAC  | 501.476296310581 | 0.590801439025257 |
| CTTACTGTGTCA  | 501.478601541004 | 0.490533816242035 |
| GTCATCTGTGCA  | 501.499901947767 | 0.644462600588954 |
| AAAGATATGTCA  | 501.516264661656 | 0.505205938405663 |
| ATAACGTATGAC  | 501.548995447023 | 0.881527308444569 |
| CGAGCTGACACA  | 501.606204429486 | 0.7192037336301   |
| CGTCATTGCGTA  | 501.618988603192 | 0.603487940314429 |
| AGTCCAAGTCAT  | 501.634574027322 | 0.420689654589407 |
| CGCGATTTGTCA  | 501.643772224571 | 0.662099975067402 |
| CTTCCAATGACA  | 501.646796775215 | 0.221114723137647 |
| ACGGTCTGTGAT  | 501.651677656947 | 0.451582491507093 |
| ACAAAGTGAGTC  | 501.654906230569 | 0.593846153694195 |
| CGTCATCTAGGA  | 501.689563689083 | 0.354955772655392 |
| TATGCATAGTCA  | 501.700211891301 | 0.640042912979358 |
| GAGTCAGTTCGA  | 501.703895132118 | 0.438229049637438 |
| AGTCACTCCGCG  | 501.709747465754 | 0.479501421328512 |
| ACCGAGTGTGAC  | 501.718016197031 | 0.764814308226826 |
| AGTCATGGTGGC  | 501.731939271553 | 0.444571982913719 |
| CAGCAAATGACA  | 501.736756766813 | 0.268042256785125 |
| CAATCGGTGACA  | 501.738911795171 | 0.339879664964172 |
| GCTTTGGATGAC  | 501.743253883938 | 0.88722143720336  |
| CATGCCTGACTC  | 501.745038716479 | 0.21625861301655  |
| GCTTACTATGAC  | 501.767134495114 | 0.794447151010279 |
| GCAATCGATGAC  | 501.767652155936 | 0.550383711318244 |
| GAATCGTATGAC  | 501.771858197802 | 0.691316505356221 |
| ACGTGGGAGTCA  | 501.813354084836 | 0.584121080581879 |
| ATACTTTATGAC  | 501.814797800673 | 0.282302327654349 |
| AATCAATTAGTC  | 501.8178689373   | 0.737281631635625 |
| ACTGGATTACTC  | 501.82624129671  | 0.64262973078942  |
| ACGTGAAATGAC  | 501.83984027059  | 0.866212413090433 |
| AGTCACTACGCA  | 501.840720906549 | 0.505629045242131 |
| ATGTGTCAAGGA  | 501.841555360846 | 0.266166365906926 |
| AATAGTCAACAG  | 501.863765127824 | 0.74947584946185  |
| CGCATTTTCGTCA | 501.894049585543 | 0.463601486875379 |
| GTCATTTTCGGA  | 501.899559743537 | 0.52115845319456  |
| GTCATGGCGTCA  | 501.908609684377 | 0.359030650822229 |
| GTCATAACGAAA  | 501.910692644252 | 0.451694674605498 |
| GTCATTCACGGA  | 501.916455201714 | 0.681288555108869 |
| TCGTACTIONGTC | 501.935565499086 | 0.529378193185936 |
| CGCATTAAAGTCA | 501.93900054092  | 0.817710893718898 |
| GTCATCCTTTTA  | 501.948089708535 | 0.295688142611208 |

|              |                  |                   |
|--------------|------------------|-------------------|
| ACGTCACCAAGG | 501.978855756827 | 0.852639492239108 |
| GTCATATCGCAA | 501.979558861675 | 0.516642596998297 |
| ACGTCACCGTTC | 501.995037444209 | 0.29435925538098  |
| AACTGGGAGTCA | 502.00307873326  | 0.570988481458566 |
| AACTATTACTGA | 502.006170410712 | 1.07171575621506  |
| AACACACAGTCA | 502.016258173449 | 0.679828017037979 |
| ACTGAAATGACG | 502.094956439441 | 0.367170297389833 |
| CTGTTTTGGTCA | 502.103435644937 | 0.967817975379662 |
| GTAACCTATGAC | 502.117901703186 | 0.5844830905234   |
| AAGTACTGTCAT | 502.126053473655 | 0.364856012339273 |
| CTTGATTGGTCA | 502.130028095932 | 0.587927917935799 |
| CGTTCGGAGTCA | 502.132489945129 | 0.574002567160968 |
| ACGTGACGTGAC | 502.140370790598 | 0.292077503814203 |
| CGCCATGATGAC | 502.161604566872 | 0.393591724795501 |
| CAGTTGGATGAC | 502.209960334363 | 0.345119526276074 |
| TCACGGTGACCA | 502.228439060671 | 0.766486484302753 |
| GATGACCCGTCA | 502.245835459493 | 0.34141815656857  |
| ATCCATTGGTCA | 502.249941306531 | 0.80190386555737  |
| ATGACTTCGTAA | 502.272397195783 | 0.464361762909649 |
| TGACAAATCACA | 502.295891186882 | 0.639511137091633 |
| GTCATACCCGAC | 502.31203913869  | 0.111586603467054 |
| CACTTGAATGAC | 502.314279747114 | 0.488489228751002 |
| GTCATAAGCGTA | 502.324482561577 | 0.53392741847615  |
| GTCATAGGTGTA | 502.327194163081 | 0.151888168177192 |
| CTGTGACATGGC | 502.34392528256  | 0.605456117309059 |
| ACATCGCAGTCA | 502.351070561042 | 0.540564105815576 |
| AAATCGCGTCAC | 502.352218914658 | 0.411898846758801 |
| ACTCATACTTAT | 502.373814515468 | 0.28183455522921  |
| ACGGAGGATGAC | 502.412040900358 | 0.252575227866841 |
| CGATGACTTGGC | 502.444673590865 | 0.787654002992178 |
| GTCATGCGACGA | 502.453845796303 | 0.503700434281808 |
| TCATTGGAATGA | 502.457718671191 | 0.870369034098227 |
| TCATGCGACTCA | 502.464986496651 | 0.15024429888301  |
| AACCATGACTGC | 502.465692565484 | 0.487090635932919 |
| CTGACCCGCTCA | 502.4676961868   | 0.456623649270308 |
| ACAAACTTGTCA | 502.481288970996 | 0.689693087431839 |
| AGTCACGACTAG | 502.482766402291 | 0.716504491298755 |
| ACGAACGATGAC | 502.488763668242 | 0.459727618815433 |
| GCACATGAATCA | 502.499498204828 | 0.866079890798542 |
| ATGACGAGATCA | 502.501315240988 | 0.547590098342002 |
| AGTCACTACAA  | 502.506808248469 | 0.493893360328844 |
| GAGTCAATGTTA | 502.508632530138 | 0.36029072263806  |
| ACTCACCGATGA | 502.517989721119 | 0.283132550982611 |
| ATGAGTCCCACC | 502.520573106112 | 0.365332056674796 |
| TATATCTAGTCA | 502.531424887006 | 0.686903870200039 |
| AACCCGAGTCAC | 502.542721510496 | 0.169165046374556 |
| GGCCCCGATGAC | 502.550508677041 | 0.606485270907919 |
| GGAAATGATGAC | 502.555221580575 | 0.536964310748262 |
| TAGTCACGGGAA | 502.565236749268 | 0.417932931469968 |
| GTCATAATAGCA | 502.565244587166 | 0.696830965009023 |
| CAACGGAATGAC | 502.566691770543 | 0.276862496229911 |
| ACTGTAGTGACT | 502.567579719044 | 0.647199519810198 |
| GTCATTCATAGA | 502.584924645578 | 0.271621858183517 |
| GACTCACTTCCA | 502.617928605712 | 0.270486358421594 |

|               |                  |                   |
|---------------|------------------|-------------------|
| CGAATTTTCGTC  | 502.675459505288 | 0.566632125884809 |
| TGACCTTACTCA  | 502.681099017172 | 0.493813255025538 |
| CACGTGGATGAC  | 502.69629390751  | 0.24297028041699  |
| GGGAGGTATGAC  | 502.699186927096 | 0.256882345469381 |
| CAGGTGACCCAA  | 502.700411072156 | 0.760286585073329 |
| CAGCTCGAGTCA  | 502.704676954814 | 0.488721633194748 |
| ATCTATGATGAC  | 502.714587884872 | 0.101544409088581 |
| CGAACACGTCAA  | 502.719835721296 | 0.536533860300347 |
| CCTGTTTACTCA  | 502.721513078653 | 0.43267275313139  |
| CCGGTTTATGAC  | 502.724798526485 | 0.467311829641101 |
| GAATGACCACGC  | 502.726700875401 | 0.695034822527148 |
| GTGACGCGATGA  | 502.737438854488 | 0.171515606099594 |
| GGTCTCGAGTCA  | 502.754426264583 | 0.902286697286581 |
| AGAGTCAAATTC  | 502.755724733327 | 0.671997476401865 |
| ATTGTTGACACA  | 502.765042492615 | 0.563341528967523 |
| AATGCTTACTCA  | 502.792889819306 | 0.729978325719349 |
| GTCATATAAGAA  | 502.816135664615 | 0.585583249707083 |
| CCAATGGCGTCA  | 502.817801688363 | 0.942060228922092 |
| TATGACGCCGAA  | 502.81869182711  | 0.691810346347369 |
| GTATCACAGTCA  | 502.845338050831 | 1.10367516157942  |
| ATCCAGAATGAC  | 502.845877523348 | 0.538098907774898 |
| GTACAGAATGAC  | 502.845962688659 | 0.479961644951691 |
| GTGACATGACAC  | 502.851852771884 | 0.363373227805098 |
| ACCGATGAGCCA  | 502.89406041789  | 0.517458678955978 |
| ATCAGAAATGAC  | 502.905158334504 | 0.536702891233751 |
| ATGAGTCCGCCG  | 502.913289556421 | 0.64884335301542  |
| AATTCGTGACAC  | 502.916383880811 | 0.551446829655824 |
| GTCATCCTAACA  | 502.940970173014 | 0.252930146859684 |
| AGTCACCCCAAT  | 502.942706702193 | 0.23275774658216  |
| AAAGAGGATGAC  | 502.969662469824 | 0.303787570657607 |
| AATGCCGATGAC  | 502.972325733347 | 0.748715424155539 |
| CCATTACAGTCA  | 502.976349128587 | 0.563500986285369 |
| ATGACTTGTGCC  | 502.989308087793 | 0.637179119689799 |
| GCGAATTATGAC  | 502.994712318754 | 0.694500509354775 |
| ATGACAACGATG  | 502.999312995186 | 0.610098249482118 |
| AGTCACGCCTCAA | 503.01658096567  | 0.1793597745679   |
| TCAGTCAGGGGA  | 503.037042212242 | 0.464664300081442 |
| ACTCTAGACTCA  | 503.041800389084 | 0.488233774008352 |
| ACGTCACCTTTA  | 503.056669831555 | 0.430817541313807 |
| CGCTTAGATGAC  | 503.094464010925 | 0.710726137642663 |
| GGGGCTTAGTCA  | 503.128353857255 | 0.202281309990902 |
| GCTCGTGATGAC  | 503.145271791274 | 0.382255150716983 |
| GCCTTCGATGAC  | 503.176046901055 | 0.539208800869225 |
| ATTTATTTGTCA  | 503.179350321672 | 0.326413530840636 |
| AAACATGATGAC  | 503.181178744774 | 0.376896301367611 |
| GGTTCTGATGAC  | 503.212368158116 | 0.571553347890877 |
| ATGTATTTGTCA  | 503.219091183437 | 0.279156473215351 |
| AGACGTACTCAT  | 503.237761652971 | 0.784404613160177 |
| TGAGCAATTGCA  | 503.24346432456  | 0.652461628701303 |
| TCATGACAGTCA  | 503.260040609998 | 0.396618821692226 |
| GAGACCTGACTC  | 503.263032032071 | 0.532029464903816 |
| ATACGGTCATAC  | 503.275846082228 | 0.316929377962007 |
| GCCCACTATGAC  | 503.293589398077 | 0.432172244341085 |
| TCTCTAATGACA  | 503.305986005787 | 0.421225644957749 |

|              |                  |                   |
|--------------|------------------|-------------------|
| ATTTTATATGAC | 503.31466484802  | 0.59502476522286  |
| TGACTGGATACA | 503.317912298606 | 0.458628850802527 |
| TCACGGGTGACA | 503.320190975348 | 0.663546563781775 |
| ACATGACAGTCA | 503.323930409755 | 0.851190944853184 |
| GTCATAGATCGA | 503.337322308786 | 0.405472707057011 |
| GCAGCCAATGAC | 503.341307713445 | 0.91255989458997  |
| ACTCACGTGGTG | 503.37463254384  | 0.994440054813759 |
| ACACGTAAGTCA | 503.383588158684 | 0.476799660167362 |
| ATGACGTTACGG | 503.386983567263 | 0.33601806686632  |
| GTCATCAACGAA | 503.388676233684 | 0.617589638754624 |
| ATTACTCAAGAA | 503.407755292307 | 0.64624393475248  |
| AGAAGTTATGAC | 503.424903074887 | 0.401274047968186 |
| CTCATTGGTGAC | 503.4298473754   | 0.524881970412056 |
| CCATATTATGAC | 503.437983083561 | 0.509356518521244 |
| GACTTCGACTCA | 503.442225129717 | 0.384243900606983 |
| ATACTGAATGAC | 503.442376533122 | 0.253780088280838 |
| GACTAATCGCCA | 503.445969664451 | 0.515401409444411 |
| GATTGTGATGAC | 503.446301362346 | 0.310537273675187 |
| AAGTCCTGACTC | 503.472830845831 | 0.354909178782734 |
| ATGACTAGCTAG | 503.478572267609 | 0.638584791803758 |
| AGTTCTGAATCA | 503.494367466391 | 0.708449063789649 |
| ATTATACAGTCA | 503.501434219465 | 0.761598921525443 |
| CGCTTGTAGTCA | 503.502938673292 | 0.513943415019901 |
| ATTGCGTGTAC  | 503.51343964751  | 0.457754804984961 |
| TGACGGATACCA | 503.514211779632 | 0.422949146245505 |
| ATCCGAGATGAC | 503.52349626539  | 0.60080842204304  |
| TGAACTTACTCA | 503.548957777994 | 0.402569934379825 |
| AGACACTGTCAT | 503.581845360627 | 0.446414689628549 |
| ACAAATCCGTCA | 503.594095578688 | 0.637661560455475 |
| CACAATCCGTCA | 503.597935262859 | 0.49556962876896  |
| GTCATACGTCA  | 503.62003735619  | 0.481891112394004 |
| ATGACAAAGCTC | 503.624557331634 | 0.605127162150472 |
| GTCATCTCGTAA | 503.63988271275  | 0.749002260273256 |
| GTCATCGTCGAA | 503.644433901555 | 0.375796571310858 |
| TAATGATGACCA | 503.646484635125 | 0.206577390535156 |
| AGGGCTCAGTCA | 503.647078143367 | 0.515384503944621 |
| CGTCACTTATGA | 503.651867290373 | 0.462246960958269 |
| TGTGTCAGCCAA | 503.66542876257  | 0.396198511998688 |
| CGTGAATACTCA | 503.671354580996 | 0.708080388208462 |
| GTCATCCTTTCA | 503.676619584868 | 0.292566583522603 |
| CACAGTGACGAA | 503.683669742078 | 0.41145010575596  |
| GAGACTTGACTC | 503.684804426479 | 0.572153704061576 |
| CTCACGTAGTCA | 503.689513756593 | 0.742668628921786 |
| CAGCCGTGACTA | 503.699124230802 | 0.490115354812361 |
| AGAGTCAGGGTG | 503.703776941546 | 0.370295108236629 |
| ACTGTTGCTCAT | 503.707877881759 | 0.430798582029784 |
| AAGTGGTGACGT | 503.716865421845 | 0.366975563300878 |
| GTGTCAGACTCA | 503.718358996191 | 0.564190616526704 |
| CTCGCGTACTA  | 503.734598821783 | 0.334919143411078 |
| CTTCATGATGAC | 503.737490657451 | 0.161260975947238 |
| CCTCCTGACTGA | 503.748873075771 | 0.306047448266113 |
| ATATTACAGTCA | 503.767343940144 | 0.530836360740467 |
| GTCATCGGTGTA | 503.775435050275 | 0.437559379037306 |
| AATTGCCATGAC | 503.77745417095  | 0.675105036393849 |

|                |                  |                   |
|----------------|------------------|-------------------|
| CGTTGCGAGTCA   | 503.77823108218  | 0.474596077473017 |
| CCTCGATATGAC   | 503.781825292841 | 0.472660532523184 |
| CGTAAGTAGTCA   | 503.79578960854  | 0.710494012748588 |
| ATTGATCCGTCA   | 503.798124134152 | 0.597635962748012 |
| AGCCATATGACG   | 503.799086762491 | 0.279348570320996 |
| AGTCACTTGAGC   | 503.802151607328 | 0.40961702407201  |
| AATACTTATGAC   | 503.820767457248 | 0.651007353969109 |
| ATTACTCAAAC    | 503.822843634286 | 0.489012184808409 |
| GCGTCACCACTA   | 503.849418215344 | 0.2395491315643   |
| GTCATAACGAAC   | 503.867481291848 | 0.427689944707467 |
| AGACTAATTGCA   | 503.879784776021 | 0.474454346795778 |
| ATGACACGGCTG   | 503.901543192038 | 0.49180592241359  |
| ACGTGGCTGACT   | 503.913082242054 | 0.429255713175939 |
| AGTACCGATGAC   | 503.91630447585  | 0.727509725046396 |
| CGACGGTGTGAC   | 503.92486013431  | 0.637602303793042 |
| GTCATAAACGAC   | 503.944194555357 | 0.572999749578501 |
| GTCATCCACAAA   | 503.945374338836 | 0.658128023593293 |
| CCAGCGTAGTCA   | 503.962409697951 | 0.840132174970664 |
| TGACTGTTACAA   | 503.963622313149 | 0.467027432225766 |
| GTCATCGACACA   | 503.965847121136 | 0.426255003130789 |
| GACACCTGTGAC   | 503.967062015217 | 0.903249787235236 |
| AGATGATGTAAC   | 503.967609412044 | 0.300995831072058 |
| CCAGTAGACTCA   | 504.00827813412  | 0.607150420613032 |
| ACGTCACGTAC    | 504.009112209976 | 0.130630195126934 |
| GCCATAGGTGAC   | 504.014912918967 | 0.762242988078636 |
| TGACTCCCCGCA   | 504.018772496086 | 0.413644496534368 |
| ATGACAGACTTG   | 504.021707820039 | 0.473208090296915 |
| ATGACGCGCATC   | 504.0411841094   | 0.310541615851953 |
| ATGACGAACCCG   | 504.042020736791 | 0.658636146470986 |
| CCCGAGTAGTCA   | 504.050478749719 | 0.966106134711225 |
| AATTAGGTCATC   | 504.0823098963   | 0.731987747585595 |
| AGACCAAGTCAT   | 504.104372755542 | 0.423679299355771 |
| GCATTACAGTCA   | 504.13890634781  | 0.73771701608019  |
| CACACCGAGTCA   | 504.151363517773 | 0.601219639982089 |
| TGACTCTGGCAA   | 504.152507851571 | 0.855799865257656 |
| GACATACATGAC   | 504.158723686952 | 0.71565653161866  |
| CTAAGGGATGAC   | 504.167216665561 | 0.504088958131184 |
| CACCACGAGTCA   | 504.179167572489 | 0.476958954476483 |
| CACTAGGGTGTGAC | 504.20683430578  | 0.697979824072097 |
| TCAATAATGACA   | 504.214501355981 | 0.762284108472165 |
| ACGATGAATGAC   | 504.223553141398 | 0.685295424156866 |
| CTAGGTGACCCA   | 504.23623293535  | 0.264007260328668 |
| GCCTGCGAGTCA   | 504.239065955576 | 0.511312023010554 |
| CAAGTGAATGAC   | 504.247696582975 | 0.490689447370086 |
| CCCGTATGATGA   | 504.263610728202 | 0.677157725080726 |
| CGTCATCTGTAG   | 504.287184035913 | 0.544129441244313 |
| CGGTGAGAGTCA   | 504.291556423346 | 0.410973832932314 |
| ATGAGTACGATG   | 504.301074846303 | 0.49134349333657  |
| GTCATCGGCACA   | 504.302326496899 | 0.698022080987947 |
| ATGACAGTGTCC   | 504.304491193015 | 0.418193679505419 |
| AGTATCCAGTCA   | 504.305099172361 | 0.516758374530352 |
| CCTATCGATGAC   | 504.313425010159 | 0.449034134745562 |
| ATATTGGGTAC    | 504.31681371017  | 0.537051594839807 |
| AGAAACCAGTCA   | 504.318332756138 | 0.638083524274593 |

|               |                  |                   |
|---------------|------------------|-------------------|
| CGTGACAAGTCA  | 504.328370007632 | 0.460346789389495 |
| ACTCATAATGAA  | 504.333962717961 | 0.845397804536531 |
| CGGTGACGATAC  | 504.336024559275 | 0.297964914523325 |
| ACCATTGACTGA  | 504.355727613139 | 0.727868362375066 |
| CGCACCTATGAC  | 504.358280519736 | 0.393813558952516 |
| GTCATCGCTAGA  | 504.368312267579 | 0.329495104714308 |
| TCATGTAAGTCA  | 504.375478834404 | 0.480053449883578 |
| ATGACGATGTGA  | 504.385272166748 | 0.319927343176388 |
| GCACACACGTCA  | 504.385319956485 | 0.303491487102623 |
| AAGCCTGACTCG  | 504.386910092397 | 0.47879441580134  |
| ATGACAAAGAGC  | 504.409238545788 | 0.489237950638377 |
| CTACAGAATGAC  | 504.413441808052 | 0.522931518639028 |
| AGACTCACTGCG  | 504.42075153715  | 0.517366619298473 |
| GACTCAGAGGAC  | 504.45861367845  | 0.646830878546773 |
| GAGTCTTTGTCA  | 504.47255966475  | 0.590470677378189 |
| CTCTTAGATGAC  | 504.491273177509 | 0.513644258821479 |
| GACTCGTACTA   | 504.49401732345  | 0.122359069451502 |
| TGAGTCGGACCA  | 504.507886018401 | 0.645026764881646 |
| GCTGCTAATGAC  | 504.509907883597 | 0.666609581148513 |
| ATCAATCTGTCA  | 504.520186320674 | 0.626413335565797 |
| AGCATCCAGTCA  | 504.522958278365 | 0.742523399963726 |
| AATCTGAATGAC  | 504.528597687138 | 0.728275576433543 |
| ACTGTTTATGAC  | 504.534582922832 | 0.506992947765673 |
| ATGACGTTGCCA  | 504.549726788288 | 0.383203882102215 |
| ATGACTTGTCTC  | 504.550218610586 | 0.256265259365421 |
| GAACGTGCGTCA  | 504.560178873427 | 0.585873345992379 |
| GTCATTTCTTTA  | 504.566056240173 | 0.624909536346442 |
| CATCTTGATGAC  | 504.583062541097 | 0.79312113036902  |
| CTTTACTGACTC  | 504.593402347785 | 0.25651506930351  |
| ATGAGGGAGTCA  | 504.598109803227 | 0.431894610660193 |
| CTTGGGTGACGC  | 504.603697375174 | 0.268142732806778 |
| GACATATTAICTC | 504.611637764065 | 0.555541235766085 |
| AATTTAGATGAC  | 504.619693696184 | 0.552596146235931 |
| ACATGAGAGTCA  | 504.627545801455 | 0.572937462005763 |
| TCTGCACAGTCA  | 504.65403741634  | 0.504029146026871 |
| GTCATCAGCGAC  | 504.681154880972 | 0.982701563672104 |
| AATAATGTCATA  | 504.686608245052 | 0.447479981264101 |
| AACGAATATGAC  | 504.697503109069 | 0.405991072213766 |
| GTCAGACAGTCA  | 504.707304913876 | 0.646523255548858 |
| ATATCCGACTCA  | 504.715849792149 | 0.357499535840178 |
| ATAGGTAGTCAC  | 504.720808279301 | 0.239863842814043 |
| CAGATATTAGTC  | 504.721596137649 | 0.614352089753362 |
| GTCATCCAACTA  | 504.732449019604 | 0.250135904025624 |
| AACACCGGTGAC  | 504.749435703532 | 0.806518589690501 |
| GTCATAGTACTA  | 504.759414321768 | 0.401073057821636 |
| ACCGATTACTAA  | 504.761809983592 | 0.58605638625434  |
| ATACTCGACTCA  | 504.768752195218 | 0.361546629923599 |
| AGTCTCCGTCAT  | 504.799971630149 | 0.245808920606947 |
| CGTCGGTGACAA  | 504.805930205295 | 0.607784784730736 |
| CTCCTCGATGAC  | 504.809710335903 | 0.150183644765912 |
| AGTGCGGAGTCA  | 504.8102780568   | 0.153462081295084 |
| ATAGACTCAGCA  | 504.816674903064 | 0.691143953832484 |
| CAAACATGACAC  | 504.835073852187 | 0.669839786181369 |
| AATACCGCGTCA  | 504.849799023032 | 0.561132882200706 |

|                |                  |                   |
|----------------|------------------|-------------------|
| ACGCTAAATGAC   | 504.85585790697  | 0.690220656767348 |
| ATGACTTGAAAA   | 504.860194117788 | 0.300549836899455 |
| TAGTCAGTGACA   | 504.871248955272 | 0.324185071083831 |
| ACATAGATGACG   | 504.884124234566 | 0.54623548644321  |
| CTAAGCGAGTCA   | 504.889543701571 | 0.521615122327175 |
| GACCTCGATGAC   | 504.927234767741 | 0.309687354384696 |
| CAGGTGGAGTCA   | 504.929052212378 | 0.394797733834385 |
| TGTGAGTCCACA   | 504.951867377872 | 0.302739632191132 |
| GTCATCTTAGAC   | 504.958542764757 | 0.507935840818135 |
| ACTAATTGACTC   | 504.965007049626 | 0.247689985649002 |
| ATGAGCCAATGA   | 504.988117513934 | 0.69183128727394  |
| ATGACACGGCTC   | 504.990574842453 | 0.373229882219518 |
| GTCATGCGCTGA   | 504.992247689856 | 0.772372814049173 |
| AGCACTGTCATC   | 505.005326584664 | 0.214109044098653 |
| CGTCATCAATGA   | 505.026912871324 | 0.69726545123195  |
| CACGTCAGCGTA   | 505.029768880439 | 0.74488866679753  |
| AAGTCACCTTAG   | 505.030111695787 | 0.335790877937615 |
| CGGAATCATGAC   | 505.040856351895 | 0.865027420536782 |
| CAGAGAGATGAC   | 505.049714293047 | 0.304747995553729 |
| ATGACATTATTC   | 505.069437978148 | 0.59240833526633  |
| CCAACTCAGTCA   | 505.092390238915 | 0.739564015719742 |
| AGTCACTCTGCC   | 505.101189569649 | 0.255498744335194 |
| AGACTCGATGAC   | 505.110408294951 | 0.264833463759158 |
| AGGCCGTATGAC   | 505.125886403993 | 0.483604293256927 |
| TGACTACGTCAA   | 505.130349860627 | 0.441200000844173 |
| GGCGACTATGAC   | 505.132123292657 | 0.764111362684973 |
| CTACGTGATTCA   | 505.163897280021 | 0.467054835277709 |
| GTACTIONTATGAC | 505.175377954007 | 0.597289965832639 |
| CAAGATTAATAA   | 505.205835688835 | 0.749128793546254 |
| TGACAAATAGCA   | 505.215186881684 | 0.501532875826825 |
| CACGCTGTCATA   | 505.221754050412 | 0.306578537431719 |
| AATGTAGACTCA   | 505.241045875869 | 0.6273631509064   |
| ACCCATGAATCA   | 505.245473931931 | 0.526999772244109 |
| CTTACGCAGTCA   | 505.24931454362  | 0.812387120055642 |
| CCTATGGATGAC   | 505.249358243078 | 0.522406801946891 |
| GCTTTCGATGAC   | 505.278707204759 | 0.666081067951685 |
| GGTATCTATGAC   | 505.2805113269   | 0.774550575974432 |
| GTCATTCTGGAC   | 505.282162031206 | 0.557991195610654 |
| CTGGCATATGAC   | 505.292069796524 | 0.69418704155358  |
| GTGTGTCAACGA   | 505.312446214479 | 0.402322392766932 |
| AGTTTCTATGAC   | 505.321149610093 | 0.594383746277837 |
| ACGTCACAGTCT   | 505.330088771338 | 0.217778168269555 |
| TATGACGCCATA   | 505.352788541146 | 0.162146706642144 |
| AATTAATGACG    | 505.355680077497 | 0.396809388107475 |
| CTGGTTTCGTCA   | 505.361928375889 | 0.786074337882494 |
| GACATTTATGAC   | 505.373234234315 | 0.651094574389835 |
| ATTACTCAAGTG   | 505.377058830738 | 0.362188137946674 |
| ATGAATCCGTCA   | 505.389446487833 | 0.436069869260493 |
| CGTCATCTAGTC   | 505.389727021599 | 0.383742520453831 |
| ATAAGTAATGAC   | 505.410046683833 | 0.528647743587158 |
| CGATTTTACTCA   | 505.41261736661  | 0.535781916017146 |
| TCTATGCAGTCA   | 505.424937259867 | 0.543038905316552 |
| ATTTAAGTGTCA   | 505.427210756848 | 0.535797690271352 |
| CATTCGTGACAC   | 505.436714445348 | 0.470916618509193 |

|              |                  |                   |
|--------------|------------------|-------------------|
| ACCCAGTGTGAC | 505.446074272347 | 0.307967071443632 |
| CGTCACTGAGTC | 505.460151955379 | 0.543733678893988 |
| GTCATCTATTAA | 505.460389268826 | 0.485839533823711 |
| TGAGCAATAGCA | 505.46365101527  | 0.649164882787279 |
| ATTAGTGACGTG | 505.488953813656 | 0.433986500550895 |
| CAAACCTGTGAC | 505.498772970529 | 0.152160360192182 |
| AGTCAGAAGAAC | 505.503055491385 | 0.288306034417907 |
| CGGTTTGTGTCA | 505.527006700997 | 0.756553508937145 |
| GATTAATATGAC | 505.536065122521 | 0.427173835393121 |
| CGAGTTTATGAC | 505.546870055921 | 0.667244629973993 |
| GGACTGTGTAC  | 505.568110843145 | 0.633110013121266 |
| AGAGCTAGTCAT | 505.574692888732 | 0.78209687103363  |
| GTCATTCCATTA | 505.577563264156 | 0.387926348104604 |
| GAGACTGATGAC | 505.587092325586 | 0.287646407831396 |
| GTCATCCTTCAC | 505.591135652436 | 0.27828721632223  |
| CTGTAGGATGAC | 505.597288404879 | 0.643741698592468 |
| ATGACGCGCCTG | 505.616822351108 | 0.371092375816709 |
| AGTCAGCTTATG | 505.627238192816 | 0.914576086134966 |
| GGACTCGAGTCA | 505.627568106503 | 0.617995795385798 |
| TCTACGGAGTCA | 505.631463944573 | 0.216154976984064 |
| GTCATAAGGTAA | 505.639432520068 | 0.298705955139762 |
| ATGACTTGTCAA | 505.639510331397 | 0.600143455376944 |
| GGCAATTGCTCA | 505.644589046527 | 0.629213579299589 |
| CTACACGATGAC | 505.65247891444  | 0.493090565547156 |
| CAGTCAGGCTCG | 505.653603281052 | 0.598460960513443 |
| CTCGTTGAGTC  | 505.663343659322 | 0.997117352971691 |
| AGTCACTTCATA | 505.665181119465 | 0.38766053443669  |
| GTCATCAAGCCA | 505.684109056944 | 0.146448566769252 |
| CTCGAAGATGAC | 505.761067938434 | 0.601635349292966 |
| ATTCACTGTGAC | 505.7665869696   | 0.294086056988307 |
| CTGACTTCGTCA | 505.791869849876 | 0.496550073014797 |
| CCCGTCGATGAC | 505.795244034814 | 0.828556816025311 |
| AAACCGGTGAC  | 505.79714318713  | 0.584337307879507 |
| AGGCCTGACTGA | 505.801236225752 | 0.553347940361648 |
| GTCACTACGTCA | 505.807091832071 | 1.07473818007366  |
| AATGTCCGTCAT | 505.848865976395 | 0.584051677572558 |
| ATTGCGGAGTCA | 505.865922385899 | 0.362789421521206 |
| GCCCTCGAGTCA | 505.868062586609 | 0.61347260775665  |
| AGTTCTACGTCA | 505.869339112035 | 0.690702910781449 |
| ATGAGCAAAACA | 505.873879548231 | 0.275146248195292 |
| CACCTGACGTCA | 505.874270417248 | 0.71818940103754  |
| ATGCTGTATGAC | 505.884660094336 | 0.812983800870218 |
| GTGATTCAATCA | 505.903636882331 | 0.231298417459739 |
| GCACGTTATGAC | 505.906953903053 | 0.269485175148793 |
| ATGACATGACAT | 505.908901311676 | 0.355402434555656 |
| GTCATCATTCAA | 505.921788961036 | 0.489852623959126 |
| CTATTGTATGAC | 505.928541195061 | 0.397869590530914 |
| CAGTCATGGTAG | 505.933899263735 | 0.345963994144763 |
| AACACAAGTCAT | 505.935851903077 | 0.58567926517944  |
| ACGGTTGTGTCA | 505.936473158141 | 0.30197333016431  |
| AGTTCGGAGTCA | 505.947752626701 | 0.443529455752082 |
| TGACCTGACACA | 505.982040845582 | 0.180971889873087 |
| GTCACGTTCTGA | 506.015421950074 | 0.483133139492342 |
| TCTCGTGAATCA | 506.029513844515 | 0.43603802509396  |



|               |                  |                   |
|---------------|------------------|-------------------|
| CTCGAATTAGTC  | 506.047619818122 | 0.652226824546884 |
| ACGAATCGTGAC  | 506.062180254607 | 0.39873949750017  |
| CGACGTGCGTCA  | 506.08498681085  | 1.06310735431445  |
| GAATCGTGAGTC  | 506.088419135053 | 0.408023492924784 |
| GTCATAACAATA  | 506.09081825052  | 0.627918313387295 |
| CGGACTTACTCA  | 506.102465850242 | 0.503623980173695 |
| ATGACTTGGCTA  | 506.107727119873 | 0.187501388249175 |
| CGACAATATGAC  | 506.13488558279  | 0.78414966588253  |
| GTCATAGTCTGA  | 506.151105395789 | 0.454482139431909 |
| GCTGAGAATGAC  | 506.17669790072  | 0.656095897991958 |
| GCTCTAGAGTCA  | 506.180154136082 | 0.548273252161964 |
| GGCTCATAGTCA  | 506.181031867327 | 0.63902891003752  |
| AAGAGTGACGTG  | 506.18509673096  | 0.1817995405089   |
| AATATGTGACGC  | 506.196973909454 | 0.426265848500752 |
| ATTAACATGAC   | 506.200795930042 | 0.475093124080397 |
| ACGTCACCGTCG  | 506.200825586235 | 0.756915310322432 |
| CCTTAAATGACG  | 506.211653047794 | 0.552967611108069 |
| ACGTCACCCAAT  | 506.219196043296 | 0.425071745559998 |
| AGTCATGAGAAG  | 506.226808021475 | 0.293058023612703 |
| GCTTCGGAGTCA  | 506.231548915937 | 0.738444237271689 |
| CGTCATCTAGAG  | 506.269248267939 | 0.559332245001565 |
| TGAGTAAGCACA  | 506.304239017349 | 0.690156068051207 |
| TCGGCTCTGTCA  | 506.316546623615 | 0.495506211084892 |
| CCCTTGATGACG  | 506.319224210926 | 0.320318795385653 |
| CTTCCCAGTGAC  | 506.381105333608 | 0.338224795425921 |
| CCTTACTGACTC  | 506.386966204881 | 0.391480001686003 |
| CGCGTTTACTCA  | 506.407457931712 | 0.882665306326764 |
| GACGCATGCACA  | 506.408413751338 | 1.00830678682719  |
| GTCATATATCAA  | 506.413932173444 | 0.452325021986087 |
| GTA AATTGTGAC | 506.417718367609 | 0.482899144254984 |
| CAATCAATGACG  | 506.429899744536 | 0.485634276416402 |
| GTCATTAACCGA  | 506.446311976549 | 0.890131599566322 |
| AGTCATGAGAGA  | 506.456259089841 | 0.536490687162832 |
| GAGGTCTATGAC  | 506.457317472814 | 0.364263037827995 |
| GTCACACGGTCA  | 506.465682131901 | 0.708395055108885 |
| GGCCCCGTCATA  | 506.49466633087  | 0.315694282169307 |
| GTATCATATGAC  | 506.497854870334 | 0.644243172925452 |
| CAGTCATGGGCG  | 506.516398781664 | 0.57843373455223  |
| ATGAGTCGGGCC  | 506.523517950141 | 0.372304903568642 |
| GAATCAGTCTTA  | 506.525975135814 | 0.343061140131019 |
| GACTCACGAGAC  | 506.53143836497  | 0.736690081658374 |
| AGACTAATATGG  | 506.531556502373 | 0.434180176935963 |
| AGTCACTTCGGG  | 506.540545924456 | 0.323145157354629 |
| GAAAGATATGAC  | 506.542345474379 | 0.316757516558291 |
| GTCACCTGTTGA  | 506.546600217709 | 0.677702708577163 |
| ATGACAGAGTCC  | 506.551177712689 | 0.511878398754269 |
| CAGTCGGATGAC  | 506.56184608344  | 0.474061477454281 |
| GTCATCGCGTTA  | 506.56249601881  | 0.302691340106993 |
| TAAATGGAGTCA  | 506.576797102476 | 0.389428370328741 |
| GACAATGCATA   | 506.582606923575 | 0.549207592093373 |
| TGACTAGATACA  | 506.586135352387 | 0.841977028036262 |
| GCCTCTAAGTCA  | 506.590141733396 | 0.68506184917204  |
| TCCGTGCAGTCA  | 506.598274739811 | 0.53647727957237  |
| CGACTATGTGAC  | 506.599090295748 | 0.139172198156353 |

|              |                  |                   |
|--------------|------------------|-------------------|
| ATGACGTTGACG | 506.603711488955 | 0.197207070122684 |
| AAGCGGTGACGT | 506.609329832125 | 0.368661781194033 |
| ATGAGCAACAAG | 506.624001801302 | 0.22193317960084  |
| GTCATGTTACCA | 506.625733312463 | 0.319843823084599 |
| GGCCATACGTCA | 506.631880354673 | 0.723415102722436 |
| CGTCATCAAGTC | 506.639003185285 | 0.671293794697663 |
| GTCATATCTTCA | 506.658532729459 | 0.45531702324621  |
| ACTACATATGAC | 506.661110794946 | 0.730606277471744 |
| ACGGCAGAGTCA | 506.667108620397 | 0.48653425007502  |
| CAGATTTGGTCA | 506.671833300033 | 0.629390398902406 |
| GATCAAAATGAC | 506.675447927794 | 0.47939097334106  |
| GATTGCTAATAC | 506.690482469621 | 0.208217733478898 |
| ATGACGATGTAC | 506.701999505352 | 0.623824523016468 |
| CGTTAATGACAA | 506.721231911547 | 0.706108807030726 |
| TATATGGAGTCA | 506.726683836686 | 0.637815531854054 |
| TAAGGTGAATCA | 506.729710519411 | 0.451024125579973 |
| TCGAATTGCTCA | 506.731765935246 | 0.578874943488924 |
| ATGACAACGTAA | 506.741828403298 | 0.39859130139279  |
| CATCTGTATGAC | 506.746359864919 | 0.882738291167575 |
| AGACTAATATTG | 506.75610412028  | 0.427076524601827 |
| GGCCTGACGTCA | 506.758575655078 | 0.663706630447393 |
| CGAGGTGATGAC | 506.772675045061 | 0.294220773016098 |
| GGGATCGATGAC | 506.782855283559 | 0.319231192888507 |
| GCCTACGGTGAC | 506.798755970349 | 0.262849066932282 |
| ATGACAGTATCC | 506.818897160687 | 0.473630865929432 |
| GTCATATACGAC | 506.824310402513 | 0.493081758523608 |
| CAGCGTGATTCA | 506.835402953876 | 0.702474130564622 |
| CACGTCACGATC | 506.836914137513 | 0.402607734886355 |
| CAGGAAAATGAC | 506.847017623009 | 0.567865307058508 |
| ATGACAATATTA | 506.851784956549 | 0.509045128627701 |
| AAATACTGTGAT | 506.882067959777 | 0.449551169516437 |
| TAGACAGAGTCA | 506.885128911547 | 0.334045719141895 |
| CAATTGACTCA  | 506.894086314753 | 0.341902034129941 |
| GTCATAATCAAA | 506.897874290352 | 0.678151682635324 |
| AGTCACTAGTAT | 506.905919808237 | 0.315001002144838 |
| AACCATATGACG | 506.908540584833 | 0.635942721582999 |
| CGAACTTGACTC | 506.929351358828 | 0.362105101563428 |
| ATGATCGATGAC | 506.939031156824 | 0.454280158199056 |
| GTTGTTGTGTCA | 506.953117486229 | 0.584921201388375 |
| CGAACTATGTCA | 506.984696345175 | 0.367385253962875 |
| TCCTACTAGTCA | 507.013564962864 | 0.695796057798153 |
| AGACTTTATGAC | 507.033205054519 | 0.531916561412083 |
| ATGAGTCCGTCG | 507.043047427693 | 0.528679461373584 |
| ACTAATCGTGTG | 507.084493338393 | 0.636297258589333 |
| GTCATAACAGAA | 507.115182271672 | 0.390952058792998 |
| TATGTTTCGTCA | 507.117029453115 | 0.423175989387672 |
| CAACCAGTCAGA | 507.119988497559 | 0.605973711358053 |
| ACTTTGACTCGA | 507.122276591049 | 0.244841837394323 |
| AGAGTCAAATCG | 507.123876023662 | 0.15703091197137  |
| GTCATAGACATA | 507.12736477753  | 0.395780452689731 |
| GAGTCAGTAGTA | 507.131723911596 | 0.362745677715943 |
| GCTTGTTATGAC | 507.139551448361 | 0.48477099206285  |
| ATTCTCAGTCA  | 507.144594232256 | 0.514118409499338 |
| CAATATCTGTCA | 507.191519745552 | 0.496238077626685 |

|               |                  |                    |
|---------------|------------------|--------------------|
| AGTCACCTCATG  | 507.193623666972 | 0.444260474915459  |
| CGAGTTATGTCA  | 507.202513222247 | 0.504994333333288  |
| GACTAATTAATC  | 507.219224857447 | 0.873905574849367  |
| CGATAGGATGAC  | 507.227412133955 | 0.437175964197261  |
| CAGCAAGACTCA  | 507.248487899684 | 0.603795345246898  |
| GACTAATGTGAC  | 507.299563330307 | 0.684425503986113  |
| GTCATACGGAAC  | 507.299750272524 | 0.49784809471435   |
| GAGACATATGAC  | 507.33365047202  | 0.568420011191782  |
| GACTAATACTGC  | 507.346726470656 | 0.814865023168507  |
| TCAGAGCAGTCA  | 507.349430065761 | 0.714541600357905  |
| ATCGGCTATGAC  | 507.353941926321 | 0.511158380789824  |
| CATCTCATATGA  | 507.354662224066 | 1.0095335323594    |
| CGCTGTGAATCA  | 507.376201441655 | 0.689849627176022  |
| GTGTCATGCTGA  | 507.376469234489 | 0.4365090015257    |
| ACGAATTACACA  | 507.386186355962 | 0.609137097812075  |
| GTCATTGTACAA  | 507.404748008464 | 0.697760301737982  |
| ACAATTAAGTCA  | 507.436881553965 | 0.710925429452891  |
| CCCTCTGAATCA  | 507.461619656984 | 0.41778854847531   |
| GTCACACCTAAA  | 507.462720270644 | 0.607912772170143  |
| CATGTTTACTCA  | 507.467470087615 | 0.482355161751983  |
| GACCAACCATGA  | 507.472196265205 | 0.831319491871617  |
| CTGGCCTATGAC  | 507.474980048523 | 0.437337986581306  |
| ATGACGAACTTA  | 507.478108614673 | 0.269216629868773  |
| ACTCATCATGAC  | 507.479377205352 | 0.24314397633646   |
| CTGATCGATGAC  | 507.480718579587 | 0.834590888018101  |
| GTCACCGTCAAA  | 507.491528032444 | 0.909849426942549  |
| ATGAGTCCGCAT  | 507.492631411387 | 0.289610673266958  |
| ATGAGTTGTACAC | 507.518532386515 | 0.4605775536001    |
| AACGCCGTGACT  | 507.519382575721 | 0.20446442884094   |
| ATGACGTTGCCG  | 507.522368581971 | 0.218279126383151  |
| GACTCAGTCTGA  | 507.531617774044 | 0.911704735255839  |
| CCGCGAATGACG  | 507.54597380925  | 0.464068672942183  |
| AATAGACTCAGA  | 507.553944031305 | 0.365823349222468  |
| ACGGCGTGACTG  | 507.581359799175 | 0.559259075543301  |
| ATGACGAGATAA  | 507.615568258663 | 0.365021095472893  |
| CAGTCACGCTGA  | 507.624680556537 | 0.599704766773291  |
| AATCACACGTCA  | 507.637930052238 | 0.607982697334795  |
| CCGTTGACGTCA  | 507.641667787728 | 0.379217842606337  |
| ATGCAGGATGAC  | 507.658097780414 | 0.546476172009923  |
| CACTTTGATGAC  | 507.66690754019  | 0.328009943362338  |
| GAGAGCTATGAC  | 507.667909438423 | 0.59711116473646   |
| ACTGGTTATGAC  | 507.670246987612 | 0.613335897367453  |
| ACAGCGTGACTA  | 507.67167402274  | 0.23378616161664   |
| GTGTGTCAACTA  | 507.692823641964 | 0.37689999039255   |
| TATCTGACGTCA  | 507.720752542221 | 0.49591292001835   |
| ATGACGTCGATG  | 507.734683999298 | 0.442661419890648  |
| CACTACAATGAC  | 507.750500080599 | 0.76792710211945   |
| ACACACCAGTCA  | 507.777955061136 | 0.45167873745557   |
| ATGACGCCTCAG  | 507.810160367917 | 0.471694590610343  |
| AGTCACTACCTA  | 507.843291608142 | 0.0835169533650731 |
| CAGTCATGGGGA  | 507.844659894609 | 0.352587201179497  |
| GAGCCGAATGAC  | 507.849598327428 | 0.411521743401984  |
| CGTCTACAGTCA  | 507.853786563526 | 0.482302931126713  |
| CAGTTTGTATGAC | 507.854437374254 | 0.272181214430927  |

|              |                  |                    |
|--------------|------------------|--------------------|
| TCACCAATATGA | 507.855611335513 | 0.930522634224306  |
| ATGACTTGGAGA | 507.865359955649 | 0.103376209685889  |
| AGATCTGATGAC | 507.869560001189 | 0.399966059703838  |
| CCTACCTATGAC | 507.869564345145 | 0.169958831880412  |
| GCCTGCTATGAC | 507.872308004616 | 0.228722436528005  |
| ACCGCTGATGAC | 507.877308159651 | 0.531492045440923  |
| CGCGAAGATGAC | 507.879586683935 | 0.285254676409961  |
| ACCCTCGAGTCA | 507.882006872338 | 0.551094787666246  |
| CAAATGGGTGAC | 507.88669942105  | 0.521193429812903  |
| TGACTCTGTACA | 507.892852657012 | 0.731072287212057  |
| CACTACTGACTC | 507.898126515792 | 0.224911384362939  |
| ACTCCCAGTCAT | 507.907973287298 | 0.290740779134975  |
| CGTCATATGTAG | 507.90845616578  | 0.406294519988252  |
| AATTGGAATGAC | 507.915675392831 | 0.37780773530403   |
| CAATGTTATGAC | 507.91756867079  | 0.644356824335372  |
| AATCAAGTCATA | 507.919245579623 | 0.408654201727873  |
| CTGATTGTGACA | 507.927180731843 | 0.353115203831563  |
| TGACAGATCAAA | 507.928733058264 | 0.715533214185267  |
| GGTAACAATGAC | 507.932868356149 | 0.53613072411688   |
| TATCTATAGTCA | 507.933664075185 | 0.404025143792745  |
| AGGACCATGACT | 507.946398320157 | 0.273318180281304  |
| GACTTGAATGAC | 507.949882407366 | 0.512496933613457  |
| ATTTTGAATGAC | 507.960346338611 | 0.534237712275365  |
| GCCGTCTAGTCA | 507.991525389296 | 0.727675971195679  |
| ACTCATCGTTGG | 507.996185084139 | 0.825636122161858  |
| GTGTCACCTTGA | 508.002486072195 | 0.179796477889484  |
| GAGTCAGGTCCA | 508.0091554265   | 0.306909588168014  |
| GTAGAGGATGAC | 508.017206291982 | 0.383504631842297  |
| GTCACTCTGACA | 508.017595063251 | 0.734999278745602  |
| AATACTGTCATC | 508.024497932258 | 0.389197786787201  |
| TGACTGTGTGAA | 508.035516563769 | 0.522675462242666  |
| GAGTAATTCTAC | 508.037123916999 | 0.550423094600618  |
| ATCATGGAGTCA | 508.041816158514 | 0.407013459207485  |
| AGACTCACTTAT | 508.047925485962 | 0.714812358357897  |
| GTCATCCTAATA | 508.051428961858 | 0.462210069734047  |
| GTCTGAGTCTAA | 508.064206595341 | 0.294907330916601  |
| GTGGCCGAGTCA | 508.06832426887  | 0.83670415706225   |
| ATTGCTACGTCA | 508.069003489458 | 0.439301377786007  |
| CGACTTGACTAA | 508.089509682145 | 0.566399222602882  |
| CTTGTTTATGAC | 508.0914198052   | 0.331555872142336  |
| TAGACTGATTCA | 508.124872892652 | 0.316123986136294  |
| TCACACACGTCA | 508.126226641447 | 0.538712388284013  |
| GTCATCGATAAC | 508.140249946697 | 0.469007275442798  |
| AAGCCGTGAGTC | 508.161995475318 | 0.964988638758985  |
| CCTTAGGATGAC | 508.168600507312 | 0.676060364180615  |
| ACTCGGAGTCAG | 508.18034176291  | 0.60804043405013   |
| GCATCCTAGTCA | 508.195905082986 | 0.0893889718784725 |
| TGACAAATATCA | 508.21127473851  | 0.499754745905952  |
| GTCACAGTCAAC | 508.255915036346 | 0.517762070815536  |
| GTAGCGAATGAC | 508.256095109134 | 0.49708991944527   |
| GACGCCTATGAC | 508.30075422526  | 0.602033629812732  |
| AGTCACTTCTGG | 508.303358070592 | 0.692628626982628  |
| CCAAGATATGAC | 508.323165591056 | 0.708214435611914  |
| AGCACCTGACTC | 508.337099817413 | 0.317017963204646  |

|               |                  |                   |
|---------------|------------------|-------------------|
| GTCATAACTCTA  | 508.367493279299 | 0.346878681457603 |
| CGTCATCTGGCA  | 508.369938117752 | 0.634408833880265 |
| GCGCACAATGAC  | 508.385690231006 | 0.604299331211183 |
| CAACAATTAGTC  | 508.424756443803 | 0.783030013594503 |
| GTCATGTCGACA  | 508.430858995982 | 0.767042324683974 |
| ACCCGCGAGTCA  | 508.463813729539 | 0.317792866779062 |
| GTCACCCTTTGA  | 508.46405649118  | 0.477629131553127 |
| TAAGGTGACCCA  | 508.464105372525 | 0.865474503473861 |
| ACAGAAAATGAC  | 508.505476556352 | 0.574543988310246 |
| ATACCGTGAGTC  | 508.52509443236  | 0.845831766920111 |
| AGTCACTTGGAA  | 508.546163625627 | 0.525833584599316 |
| CACAGTGATGAC  | 508.546438285253 | 0.574528442165303 |
| TGACGGATCACA  | 508.581316798989 | 0.529695214282185 |
| GATACAGATGAC  | 508.584158123975 | 0.376605675456401 |
| TGACACAACACA  | 508.593983826399 | 0.28568815077404  |
| AGACTAATGACA  | 508.598282669308 | 0.101635246590828 |
| ACGTCACCGGTC  | 508.603164195655 | 0.498479997254252 |
| CTAGCTCAGTCA  | 508.611418677107 | 0.407509988927608 |
| ATTACATATGAC  | 508.614626648562 | 0.50860953255968  |
| AGTCAATGTGAC  | 508.622635105299 | 0.123758946916315 |
| ACTCATACTTAA  | 508.626511192601 | 0.322189765138867 |
| ACTGAGAATGAC  | 508.648414130942 | 0.576468458785147 |
| GTAATAGTGTCA  | 508.66860768342  | 0.382463793342762 |
| CCCTTTGTGTCA  | 508.672655757087 | 0.249576938904925 |
| GACTTCAATGAC  | 508.725642911502 | 0.665478419208006 |
| AGTCACGCCTTC  | 508.727016641667 | 0.35794463195029  |
| AACAGAGTGACT  | 508.727705394904 | 0.467151477416961 |
| GCAATACAGTCA  | 508.74353757414  | 0.541879441841887 |
| AAGCAACGTCAT  | 508.745756878202 | 0.221676649478447 |
| AATGCTGTCACA  | 508.762363596488 | 0.541793863679862 |
| AGTCTTACGTCA  | 508.768124988369 | 0.456213299397859 |
| AGTCAGAGCTGA  | 508.776904747469 | 0.415721971746638 |
| TAAGACGACTCA  | 508.777951330303 | 0.707477711642545 |
| TATCCTGCGTCA  | 508.78299919222  | 0.540092571698229 |
| AATAACGTGTCA  | 508.802800239209 | 0.700017742261955 |
| AGTCACCTCAAC  | 508.816057908953 | 0.406099376033572 |
| CGACGAAATGAC  | 508.838642482258 | 0.8111003201819   |
| AGGTTCCGATGAC | 508.840810337336 | 0.388048249103746 |
| ATGACTTGGAAAT | 508.844812837012 | 0.404149358063482 |
| GTACTTGCAGTCA | 508.851328174576 | 0.441438072516925 |
| ACTCATAGAGTC  | 508.855027490038 | 0.876864118240839 |
| GTCATATAACGA  | 508.873420710566 | 0.503230220580781 |
| TACGTGTAGTCA  | 508.873819324073 | 0.67292844787475  |
| CTTTCGCGAGTCA | 508.909630849568 | 0.638312698131364 |
| CGGGAGTGAGTC  | 508.92116495786  | 0.207243710350772 |
| CTAAGTTGTGAC  | 508.921996449099 | 0.367944725160671 |
| ACTGCGCAGTCA  | 508.93273378031  | 0.192945960160239 |
| GTCATTGTCGCA  | 508.943359758946 | 0.658852852148977 |
| ACGAAGGATGAC  | 508.970759361864 | 0.60421421246035  |
| ATGACCCAGATA  | 508.99287348039  | 0.118886067299583 |
| CCAAATGATGAC  | 509.011897836541 | 0.357713197118002 |
| GTCATCATAAC   | 509.022868195274 | 0.432781947508745 |
| CTCACTGAGTAA  | 509.033404489817 | 0.769624733625529 |
| CCCTAGTAGTCA  | 509.037140876596 | 0.506851075755678 |

|              |                  |                   |
|--------------|------------------|-------------------|
| CTAACATATGAC | 509.048126701043 | 0.529262096133472 |
| GACTCACGCATA | 509.052010573512 | 0.885425166542972 |
| ACCAGATGAGCC | 509.062456241805 | 1.4205995807204   |
| GTCATTCTAGGA | 509.076104648466 | 0.632986835851709 |
| ACGTCAGTGATG | 509.09037764181  | 0.734049599828956 |
| AGATTTGATGAC | 509.107397936281 | 0.46454341043947  |
| ATGACGAGGACA | 509.11817801778  | 0.326945392845801 |
| CACGTCACTCAA | 509.128034131952 | 0.535048203700479 |
| GAAAACGTGTCA | 509.136734055527 | 0.492600489647052 |
| AGTCAAGTCATC | 509.137833417123 | 0.412605147792883 |
| GGCGGGTATGAC | 509.139199274015 | 0.541869383121226 |
| ATTGTGTGTGAC | 509.147678013441 | 0.407102345630794 |
| TGACTACACTAA | 509.149825726536 | 0.890007657257345 |
| ACAACCATGACT | 509.152514586686 | 0.51297317550741  |
| GTCATTCCGGTA | 509.164516054589 | 0.552875438687285 |
| CATACCGTCATA | 509.168402727905 | 0.290879224416047 |
| CTCTAAGATGAC | 509.171163505879 | 0.527835760414898 |
| GTCATCTGCCAA | 509.172392576557 | 0.441043100317908 |
| GTCATAGGTCTA | 509.217525507344 | 0.511470527335697 |
| CCCGTTGACACA | 509.218019785649 | 0.204111148956993 |
| ATGTTATATGAC | 509.220348720761 | 0.676706857946496 |
| CAAGCTACGTCA | 509.221799621528 | 0.350840222853337 |
| GCAATATGTGAC | 509.228118193331 | 0.809107622594883 |
| TCCACTGACACA | 509.229444649774 | 0.358300597558341 |
| ATATACTAGTCA | 509.23475682623  | 0.681447319065958 |
| TCATAGATTGCA | 509.256037295384 | 1.1659354346996   |
| AAAGACCAGTCA | 509.25887288733  | 0.223545816843217 |
| GTCATCCATAGA | 509.268312720256 | 0.412166868230478 |
| GACCTTGACTAA | 509.269164382628 | 0.727332716688921 |
| CCGCCTGTGTCA | 509.278374732034 | 0.256626196841078 |
| TAAACGTAGTCA | 509.285074008145 | 0.681049976822687 |
| ATGACAGCTATG | 509.291338092619 | 0.230704955383419 |
| CAGCTTGATGAC | 509.327409573172 | 0.443953205265014 |
| TCACATAAGTCA | 509.356269174002 | 0.778226509516375 |
| CAATTGCAGTCA | 509.364215280069 | 0.900967755916593 |
| GAGTCAGGGCCC | 509.364995052109 | 0.570825234067099 |
| TACGGTGACCCA | 509.40606713528  | 0.456119576691546 |
| GCCCATGATGAC | 509.416891351338 | 0.643952261240304 |
| CGGTCTGATTCA | 509.420032436561 | 0.519279213202333 |
| CGGTTGGATGAC | 509.434461868486 | 0.113719221768823 |
| GTCACATTATTA | 509.439585993527 | 0.537587093824668 |
| ATGAGCAAGAAT | 509.440684525352 | 0.23450288703846  |
| TGACGTATAACA | 509.444400697141 | 0.449297781936398 |
| TGACGCGACTCA | 509.452245445291 | 0.830169838841954 |
| AAGAGGGAGTCA | 509.452311302101 | 0.249497453444038 |
| GACTAATCATGA | 509.45989022581  | 0.552319585529913 |
| CCTGTGTATGAC | 509.463298966389 | 0.589797061501485 |
| ATATCCAATGAC | 509.465689655596 | 0.650607201844692 |
| CGTCACATATGA | 509.465936831318 | 0.522614749034223 |
| GCTAACGATGAC | 509.471185498981 | 0.328136444668972 |
| GTCACCTTCTGA | 509.475389345227 | 0.305065056675652 |
| CATCTGGAGTCA | 509.495371186037 | 0.853382277460178 |
| AGTCACTTGACA | 509.506797728893 | 0.816419071245304 |
| AGCACATAGTCA | 509.516041326627 | 0.529320591971055 |

|              |                  |                    |
|--------------|------------------|--------------------|
| CACAAATATGAC | 509.526525695903 | 0.852183732742513  |
| TCATACGTGACA | 509.52944032362  | 0.773029210949348  |
| AGCGTGTATGAC | 509.535583974062 | 0.413284044680037  |
| TCGTGGGAGTCA | 509.535596195781 | 0.378156443921116  |
| ATGAGTCCCAT  | 509.542740964556 | 0.312724178324996  |
| ATAGCTGCGTCA | 509.545381644789 | 0.621513717236968  |
| ACATCTTATGAC | 509.552256965579 | 0.45956840820985   |
| CATCATGGCTCA | 509.557958261261 | 0.571081004504435  |
| GTTCAATAGTCA | 509.571178348058 | 0.725179234210141  |
| GTCATTTTCGAC | 509.586831051387 | 0.240765143823465  |
| ACGCAAAATGAC | 509.588879428474 | 0.480776990349265  |
| CGTTGATATGAC | 509.595933488119 | 0.506209015555564  |
| AATCAGGATGAC | 509.612075880084 | 0.255029837189102  |
| CTTATTATGTCA | 509.613109845171 | 0.22419843032655   |
| ATGACAAAGACG | 509.622040911051 | 0.217806233178872  |
| TGACTGTCAGAA | 509.623094072376 | 0.617082463882684  |
| GTCATCCATGTA | 509.629455815901 | 0.520180087292363  |
| AGAGTAAATGAC | 509.638324879646 | 0.478408129732748  |
| TCTGCGGTGACA | 509.652874199505 | 0.517306251549655  |
| GCTGGCGAGTCA | 509.660578769027 | 0.574443853293459  |
| GCTTATCCGTCA | 509.668834842863 | 0.454148540729102  |
| TGACGTTTAGCA | 509.67428439064  | 0.385032432141661  |
| GTCATAGCCAAC | 509.674623158295 | 0.600442505932414  |
| GACTAATCGCTC | 509.68123204478  | 0.73070004142838   |
| GTCATTTTACAC | 509.704045879224 | 0.256549746608256  |
| TGACCCATCGAA | 509.708530100952 | 0.77887894918317   |
| AAGTTTTGACTC | 509.725677912566 | 0.54992506701883   |
| AGTCACCCCGAA | 509.754640812337 | 0.477823062348836  |
| GCCATTTATGAC | 509.764991595048 | 0.72348546021198   |
| GTCACAAGATAA | 509.771981087082 | 0.580427678987949  |
| ATCCGCGATGAC | 509.795629408667 | 0.675060111947674  |
| CTGACGCAGTAA | 509.795829445159 | 0.395941624553858  |
| GCCAAACATGAC | 509.807504389643 | 0.572879468242986  |
| GAGTCAATAGTA | 509.852803092009 | 0.19870650011798   |
| GTACGTGTGTCA | 509.854584036282 | 0.699056630132203  |
| GAGTCAAATTGC | 509.861690951041 | 0.481209636650762  |
| GTGTCATGTTAA | 509.876548778196 | 0.0822748303018503 |
| CATTAATGAC   | 509.879223605336 | 0.557623382252115  |
| AACGTCTATGAC | 509.882297826354 | 0.507964072980169  |
| CAAGAGAATGAC | 509.906143877385 | 0.581940496454153  |
| AGTCCCAGTAC  | 509.90876235778  | 0.45023168427901   |
| CGTCATTACATA | 509.912964834547 | 0.697627816337981  |
| AGTCACGCTTGC | 509.920992831721 | 0.446795374826204  |
| ATCGACGATGAC | 509.928907612377 | 0.549881473150406  |
| GTCATCGCTTCA | 509.934440332    | 0.356670895970499  |
| ATATTTGATGAC | 509.944917911426 | 0.608922769993098  |
| TGCATATGACCA | 509.947660056386 | 0.446394447779137  |
| GCGGATCCGTCA | 509.949864113282 | 0.769917014231224  |
| ACATTTTACTCA | 509.951032214435 | 0.502207602957448  |
| GCGTCATGCATA | 509.963384265445 | 0.531115189064968  |
| AGACAGTGAGTC | 509.970004544665 | 0.455915867923863  |
| GTCATCAAGCGA | 509.971781475382 | 0.341242099613872  |
| CTACAAGTCATC | 509.983588507925 | 0.417353862872537  |
| AAAAGGTGACAC | 509.99008007552  | 0.36296496039457   |

|              |                  |                   |
|--------------|------------------|-------------------|
| CGATCCGAGTCA | 510.033684264859 | 0.789952346637693 |
| GTCATGTCAGCA | 510.038902796741 | 0.650987503772321 |
| ACTGATCCGTCA | 510.082482391373 | 0.411744650546607 |
| AGAGTCAAGTTC | 510.084208716426 | 0.433558746108791 |
| CTTGACTGAGTC | 510.086671684086 | 0.75874067619882  |
| GACTCATGGATC | 510.096617483345 | 0.53713646689684  |
| CTTAGTGATGAC | 510.107139489885 | 0.7392611951877   |
| CTCGCATGACAC | 510.115461650779 | 0.258726920388696 |
| CGTCAGTGTGAC | 510.124741733755 | 0.647557735762681 |
| AATCTTTGACTC | 510.140195166398 | 0.40243531378423  |
| TCATAGATACGA | 510.142880034014 | 0.419145871312368 |
| CCTCGGAATGAC | 510.155779408204 | 0.703207601789899 |
| CATCTCGGTGAC | 510.175291877878 | 0.746392253822542 |
| AAACTGGAGTCA | 510.177946207256 | 0.593278262403224 |
| GCCTGCGATGAC | 510.18403009871  | 0.742699180984298 |
| GTCATCTCCGGA | 510.202572007416 | 0.182702642921365 |
| ATGACGACTACA | 510.218596518702 | 0.586704734694904 |
| ACGTCACCCATG | 510.218655479714 | 0.438699152437873 |
| AAAAGATATGAC | 510.242163926957 | 0.319176138941817 |
| ACGTAAGCGTCA | 510.242925251641 | 0.485799474360918 |
| TGACGAAATCAA | 510.249997962125 | 0.697352494253521 |
| AACCCCTATGAC | 510.275603241693 | 0.268815583936923 |
| AACAATCCGTCA | 510.278827940152 | 0.41741872797497  |
| CTCTGGTGACGC | 510.286258294414 | 0.453078932497179 |
| ATGACAACGCAC | 510.292568887606 | 0.490895974015586 |
| GTCATAGCGAAA | 510.308730512043 | 0.37999520447993  |
| GAAACCGAGTCA | 510.309228371926 | 0.606946907146304 |
| GTCATCTAGGAA | 510.318263206511 | 0.621791573084087 |
| CCCTCCGATGAC | 510.324305771288 | 0.469666100474142 |
| GACTCTGACAGA | 510.370934058399 | 0.849173290265056 |
| AGGACGGATGAC | 510.371092712467 | 0.300426622265942 |
| GCTATGCATGAC | 510.374121281266 | 0.584044161859825 |
| CGTCATCGGATA | 510.408014375436 | 0.40385357628584  |
| CGTCATTTGAG  | 510.422246788308 | 0.273920218895448 |
| TCATAGAGCTAA | 510.42832344546  | 0.710226191253137 |
| GTCAGATCTGAC | 510.429072900064 | 0.606063442443764 |
| GTCATGTACTGA | 510.436277881926 | 0.642117334907894 |
| GTCACCTATTGA | 510.437352949404 | 0.667564875689056 |
| GAGTCAATTACC | 510.43899559596  | 0.47384964652271  |
| AGTCACGACGCA | 510.449620257358 | 0.495916801851079 |
| AGAGGTTATGAC | 510.460701811825 | 0.202178343505876 |
| AGAGTCAGGAAC | 510.461574119779 | 0.589326135812363 |
| CTGACTCCGACC | 510.465650893228 | 0.266673362607126 |
| ATGACGTTATGC | 510.466956062215 | 0.284913435096705 |
| ATGACGTCGTGC | 510.468378595092 | 0.427117990885959 |
| CTTTCTGATGAC | 510.483101160161 | 0.246411458670725 |
| ACGTCACAGCTG | 510.491098436773 | 0.569590148306193 |
| GACTCACTCAAC | 510.493112404912 | 0.290721804068317 |
| GTCATATCTTAA | 510.495964945231 | 0.503547932330092 |
| GTCATTATATTA | 510.497286610831 | 0.639622930770459 |
| ACGTTGACGAAT | 510.520518894413 | 0.33040845373794  |
| GTATCGAATGAC | 510.527212947632 | 0.498773921689298 |
| CCAAGGTGTGAC | 510.54213729177  | 0.621225318360411 |
| TCGCTACAGTCA | 510.543842508613 | 0.199894090108899 |



|              |                  |                   |
|--------------|------------------|-------------------|
| CAATTTGCTCAC | 510.544040685588 | 0.175927923314121 |
| CTCTTTGATGAC | 510.557751154122 | 0.515489518116992 |
| GTGTCATGATTA | 510.567888588085 | 0.577107358404701 |
| GAAATGGATGAC | 510.584969410651 | 0.263029724337009 |
| GTCCATAAGTCA | 510.585044417177 | 0.385040233660133 |
| TAGAATATGTCA | 510.594281440803 | 0.271120277581964 |
| TCAGTCAATGGA | 510.598654395643 | 0.599682255157933 |
| CAAGTACATGAC | 510.602640167988 | 0.668674693411737 |
| TCAATGCAGTCA | 510.648824479087 | 0.68056425758415  |
| GCGCTTTAGTCA | 510.655586887841 | 0.643592937806244 |
| TCACTTGTGTCA | 510.668786704136 | 0.411896152092262 |
| ATCGTAATAGTC | 510.678560668607 | 0.995614997222659 |
| TGTCATTTCAAA | 510.698371640173 | 0.561829258154474 |
| CGTCATCAACAA | 510.707074227901 | 0.545710237056172 |
| TGACTGGACGAA | 510.723164371623 | 0.540243593766138 |
| CACAGTGGTGAC | 510.729045533391 | 0.472277217648079 |
| TCGACTTCGTCA | 510.744399603907 | 0.588743629311677 |
| AGCTCCGAGTCA | 510.756935805159 | 0.367414419045776 |
| TAGGATCCGTCA | 510.761851765016 | 0.454136719362677 |
| GGTGTCTGACAC | 510.771778706134 | 0.591066980818456 |
| CGTAAGTGACAC | 510.772120740917 | 0.59470383257942  |
| TGACTATGCGAA | 510.772194763458 | 0.534620282949994 |
| GTCATCCGACAA | 510.79935548575  | 0.484785966082486 |
| GTCATAGTGGTA | 510.812214197983 | 0.340104715710473 |
| ATGACAACCATG | 510.81429646477  | 0.424558289206679 |
| TATAATTGCTCA | 510.830334552588 | 0.88661565093075  |
| ATGACGCGCTTG | 510.836204027468 | 0.408642923422296 |
| GAGTCTGATGAC | 510.851201654799 | 0.605023983585677 |
| CCGTTGACGTCA | 510.871152241099 | 0.711342392427142 |
| GTGCCTGCGTCA | 510.871951563633 | 0.641887393919977 |
| GGGACTTACTCA | 510.880108264074 | 0.576066960086216 |
| ACGCCTATGAGT | 510.903826966029 | 0.663325337056156 |
| ATGACGATGTTA | 510.909000942834 | 0.542289898476744 |
| AGCTTCCAGTCA | 510.915004224251 | 0.412443889036313 |
| TACATACAGTCA | 510.927927433607 | 0.493959954991085 |
| TGAGTACTCTCA | 510.929680931046 | 0.655732910775008 |
| GTGTGACCACGA | 510.933812102964 | 0.421252281174121 |
| GTCATCCCAGGA | 510.935298513636 | 0.442289467704171 |
| TAATGGGAGTCA | 510.937542547894 | 0.286837618005579 |
| AGTCACTCCAAA | 510.946243828194 | 0.620103209817863 |
| GACCAAGTCACC | 510.955722910891 | 0.394062848748429 |
| AGGTGACGCCAT | 510.985030627406 | 0.206028599195015 |
| CATACCCAGTCA | 510.985699811892 | 0.785478934683023 |
| AACCATACGTCA | 511.009044579735 | 0.588312598156106 |
| ATGAGCAACATG | 511.023408515963 | 0.617326038303565 |
| AGCAAACATGAC | 511.035120411867 | 0.313443876019107 |
| CGTAGAAATGAC | 511.054851706915 | 0.52923549038187  |
| TGACGGTGACAA | 511.064493846374 | 0.259916825387058 |
| TGACTGTATGCA | 511.069609886117 | 0.682814816903314 |
| GCATCCGGTGAC | 511.085592930068 | 0.485615363168181 |
| GACAATTGCTCA | 511.090694595741 | 0.472699862175065 |
| CGGAACCACTCA | 511.096063842891 | 0.681028429610438 |
| GATATCGACTCA | 511.097620283363 | 0.465926454313696 |
| ATGGCACAGTCA | 511.101605950448 | 0.806433226074119 |

|              |                  |                   |
|--------------|------------------|-------------------|
| AGATGTGAATCA | 511.118488043223 | 0.218910173475672 |
| ACACATGATGAC | 511.127575150707 | 0.364034609751799 |
| CTCCGGGTGAC  | 511.130556672884 | 0.701623300589098 |
| CACGCATATGAC | 511.144696053419 | 0.625623252039952 |
| GACGGCGTCATC | 511.161399477546 | 0.618921572153999 |
| ATTGGCGATGAC | 511.170760597959 | 0.414139013982811 |
| GAGTGTTATGAC | 511.201279070401 | 0.414076796895464 |
| TCATACTGATGA | 511.216174210455 | 0.537547769084862 |
| CGCAGGTATGAC | 511.244223154848 | 1.07089138569409  |
| AACACTGACACA | 511.246956399849 | 0.408498966355339 |
| ATCCGGAATGAC | 511.26706387077  | 0.560059025923459 |
| GTCACCGGCTAA | 511.277440904917 | 0.331301662493287 |
| ATGATCTATGAC | 511.294154486431 | 0.437583295770333 |
| ATCAGTGAATCA | 511.302730440688 | 0.794684269711171 |
| ATTTATAATGAC | 511.307443883346 | 0.555399202817196 |
| CAACCTTATGAC | 511.321425628243 | 0.839966973721112 |
| CAACTTGGTCAC | 511.321792037899 | 0.498371552775383 |
| ACGTCATGCTGC | 511.342012774817 | 0.55878608056783  |
| GTCATCTTCA   | 511.343396645392 | 0.329602145621094 |
| ATGACAAAGTAC | 511.344320660217 | 0.338999559649413 |
| CTATACTGACTC | 511.346134517633 | 0.295462647642195 |
| ACGTCATGCTAC | 511.351843266858 | 0.569925182539758 |
| AATAGTAATGAC | 511.359563550202 | 0.485870780873159 |
| CTCATTTATGAC | 511.361932708447 | 0.528536192356345 |
| ACTAATTTGGTG | 511.385498947367 | 0.630695556856762 |
| ACATCGAGTGAC | 511.418370000942 | 0.536107338347957 |
| AATCGATTAGTC | 511.424997994119 | 0.467692832711296 |
| TGACTCCATGCA | 511.462240231685 | 0.540142230022346 |
| ATCTTAGACTCA | 511.4650830646   | 0.277785312783923 |
| GTAGCACAGTCA | 511.471631118497 | 0.76402525268396  |
| GAGTACGATGAC | 511.477357183553 | 0.203019487630028 |
| GGTCCGACTCAC | 511.480047176194 | 0.425503773721982 |
| ATACAACGTCAT | 511.483047567855 | 0.488902380701654 |
| CATTGAGATGAC | 511.489498991767 | 0.444808638104282 |
| ATCGCTGCGTCA | 511.526356278223 | 0.35713569948715  |
| AATTACGCGTCA | 511.527775947572 | 0.411359762343239 |
| ACACTTTATGAC | 511.530241516462 | 0.368014104495363 |
| AGACTAATCATC | 511.545046186251 | 0.40507164662188  |
| GCTATAGTGTC  | 511.549216944857 | 0.886218573607908 |
| TGACGAAGAACA | 511.553761474008 | 0.570192482377122 |
| GTCATATTACAC | 511.577795996401 | 0.428623665033384 |
| AAGTGAGAGTCA | 511.592218323532 | 0.245331169247015 |
| GACTCAGGGCCC | 511.596376210593 | 0.646174201021992 |
| CCGATAATGACA | 511.605987038261 | 0.575358591191955 |
| AGTCACGGTCAC | 511.614074966641 | 0.435143625075526 |
| TGACGTAGAAAA | 511.618607385441 | 0.228676729777843 |
| TCATACATGTCA | 511.63149212535  | 0.336238519177945 |
| ATAATTTGTGAC | 511.650797752559 | 0.536727102754424 |
| TGACCTCAGTCA | 511.675833567332 | 0.496826303747906 |
| ATGACGTTGCAC | 511.686669684504 | 0.348896089796647 |
| CTTATTGATGAC | 511.693184812687 | 0.844894193232006 |
| CGTCATCTGTGC | 511.7029266341   | 0.514107043704359 |
| ACGGATGATGAC | 511.71391924108  | 0.606777272591073 |
| AGTTACTGTCAT | 511.719218003045 | 0.462006296699664 |

|              |                  |                   |
|--------------|------------------|-------------------|
| CTACCGTATGAC | 511.765412305308 | 0.306751644726418 |
| GACGATCCGTCA | 511.776536340591 | 0.641682735797253 |
| TAAACGGAGTCA | 511.791420839911 | 0.541184222751883 |
| ATAATTGAATCA | 511.792420045593 | 0.751577253382154 |
| GGCTCGGAGTCA | 511.806058698383 | 0.347919738905852 |
| CCATATATGTCA | 511.821620433904 | 0.290940423571104 |
| ATCGAATATGAC | 511.824101615696 | 0.559457432066296 |
| GCCCATACGTCA | 511.831493948356 | 0.43743608503862  |
| GTACACGTAACA | 511.837586806613 | 0.464382592678471 |
| GGATACGATGAC | 511.840498991137 | 0.290206984972134 |
| GTCATACCAAAC | 511.841671165762 | 0.678162570846986 |
| GTCATCCCATCA | 511.855092514927 | 0.337605118794512 |
| ACATCATAGTCA | 511.85571354365  | 0.84352032637689  |
| AAACATATGACG | 511.86025058479  | 0.561084662803954 |
| TGACTAGTCCAA | 511.86134014055  | 0.907577353336904 |
| CATGTGATGTCA | 511.891127329722 | 0.487212013908767 |
| TAAGCTGTGTCA | 511.925988061861 | 0.843748874977193 |
| CGCGATGGGTCA | 511.948813207798 | 0.884117224969791 |
| CCTTGCGATGAC | 511.953607318863 | 0.586853436167821 |
| AGCGATTACTAA | 511.962009097708 | 0.622862733119162 |
| ATAGTTACATCA | 511.977397873147 | 0.721074357808603 |
| GATACTGTCACA | 511.978874823549 | 0.859599824591051 |
| AGAGACGATGAC | 511.985095911652 | 0.308672902642405 |
| AAATAATTAGTC | 512.001651100516 | 0.756100985393307 |
| ACTGATGGTGAC | 512.002696735117 | 0.810385680491582 |
| GCAACCGGTCA  | 512.00303342024  | 0.851596953861194 |
| ACCCCATGACTG | 512.003708861042 | 0.338892973340746 |
| TCTAATGGGTCA | 512.004795165751 | 0.368139076720776 |
| AATAGTCAACCT | 512.005040423456 | 0.33967998402271  |
| GTCATAACACGA | 512.008154734322 | 0.634476461049069 |
| GTAGACTCAGAA | 512.024943390374 | 0.321274040221367 |
| CCCGCATAGTCA | 512.036607188195 | 0.444066125987185 |
| AGTCACGCTAAC | 512.08675849425  | 0.608553625010287 |
| GTCCTGGAGTCA | 512.089590323885 | 0.843712609177999 |
| AAGTCCGATGAC | 512.091189672404 | 0.655095229488431 |
| AACGGGTGACGT | 512.097465941991 | 0.446450580478451 |
| GTAATGAATGAC | 512.101985824503 | 0.266077114394481 |
| ATGCGCGATGAC | 512.102593526976 | 0.485118310415739 |
| GCACTGAATGAC | 512.103499492607 | 0.698508549947997 |
| CACTGTACGTCA | 512.106019981631 | 0.492884753336505 |
| CAGGGTATGACC | 512.134525166835 | 0.727471151239495 |
| GCAACATGACGC | 512.145982013679 | 0.452485906453121 |
| AATTTTGCTCAT | 512.168021821966 | 0.503246245155731 |
| CGGATCTAGTCA | 512.182934760573 | 0.486815714374585 |
| GAACCAGTCAGA | 512.183609180351 | 0.481397293422642 |
| AGTCACGGTTAT | 512.188018687561 | 0.589798330292547 |
| CGGCGTTATGAC | 512.213598607326 | 0.628430377539542 |
| ATGACAGCTTGC | 512.232807164742 | 0.498898407198592 |
| ATACTTTGACTC | 512.239138433817 | 0.319531959168147 |
| AGAGTAGTGACT | 512.24574692076  | 0.331302743688864 |
| CGAGCATAGTCA | 512.274988808689 | 0.678282132285892 |
| ATGACAAGGCCA | 512.279412014106 | 0.393313265563152 |
| TGACACGTATAA | 512.288932225263 | 0.532821692103127 |
| GATTTCCGTGAC | 512.292434431954 | 0.720703834635871 |

|              |                  |                   |
|--------------|------------------|-------------------|
| ACGTCACATTAT | 512.294013972876 | 0.647338298538917 |
| GTCTACTAGTCA | 512.299304732646 | 0.68758990939639  |
| GTCATAGCATAA | 512.303240456365 | 0.47848346194541  |
| AGTCACTTCATC | 512.309087277896 | 0.353932220019056 |
| ACCTAAGATGAC | 512.326627494833 | 0.81753381195843  |
| ATGACGTTGAAA | 512.340087329445 | 0.373124616554051 |
| GTCATAGTAATA | 512.350923457281 | 0.556679272765198 |
| CATGAATGTGAC | 512.356010967039 | 0.691582909867001 |
| CATGAAAATGAC | 512.35920313664  | 0.484289343231186 |
| ATTTTCGAGTCA | 512.374372705264 | 0.420823641980262 |
| GTGTTACTCTTA | 512.387333231084 | 0.458369980208665 |
| AATTTGCTCACA | 512.388035137473 | 0.520587753997788 |
| GTTTACCAGTCA | 512.417761179095 | 0.40356481288826  |
| ATCCAGATGACA | 512.42908947372  | 0.415414789800339 |
| ACTCTTGATGAC | 512.431384495582 | 0.448031718702675 |
| AGATACCAGTCA | 512.43962664585  | 0.305206915593477 |
| ACACCCATGACT | 512.448474227066 | 0.398766634626102 |
| GTCATCCAGGGA | 512.450437430416 | 0.644743145162874 |
| CATTAGTGACGC | 512.475055934806 | 0.550546966200084 |
| GATTCTGATGAC | 512.481645811034 | 0.443403673114022 |
| AGAGCCTGACTC | 512.492011089973 | 0.725450732667309 |
| TAGAAAGTGTCA | 512.500339042897 | 0.269355557203332 |
| GTCATAATCCAC | 512.501850712732 | 0.32843635714742  |
| GTATATGATGAC | 512.508482506555 | 0.557156665670232 |
| TCAGACGCGTCA | 512.520963612394 | 0.369968404385521 |
| TGAGTCGTCGCA | 512.53177711787  | 0.601461019422    |
| ACTGTTGACACA | 512.533033736439 | 0.382739331294526 |
| AATCATGATGAC | 512.533218616431 | 0.62964206741737  |
| GTCATTCCTATA | 512.53878307765  | 0.140609182820931 |
| TGACTGCATCAA | 512.545781402163 | 0.397524178478675 |
| ACAATCTGTGAG | 512.548275332282 | 0.584384964467377 |
| CTAAAGGATGAC | 512.558098134282 | 0.481965759745525 |
| GATTAGCAATAC | 512.583877181627 | 0.466672112052178 |
| GAGTCAAATATC | 512.587808968434 | 0.765398801458092 |
| TCACGGGAGTCA | 512.591267692189 | 0.440210295352331 |
| TAAACTACGTCA | 512.626079179549 | 0.775937152493518 |
| GTCATCTTAAAC | 512.630647489405 | 0.459438799166206 |
| TGTCACACGGAA | 512.638271416656 | 0.620568703637881 |
| GTCTCTGATTCA | 512.6411071235   | 0.454652531064441 |
| TCATAAGCGTCA | 512.657672480917 | 0.545182828687204 |
| GAACAACCTATA | 512.659298500411 | 0.369982208200248 |
| CGATGAGCTGTC | 512.665780932982 | 0.728168181579278 |
| ATACAGATGACG | 512.666306456578 | 0.354693676441199 |
| CGTAAAGTGTCA | 512.679825220145 | 0.190962868097121 |
| GATTAATGAC   | 512.684496323    | 0.701392458741394 |
| AGAATCCAGTCA | 512.694575513724 | 0.452776777103612 |
| CGACTGATGACG | 512.702830325981 | 0.434187830184332 |
| ACAGTCCAGTCA | 512.741391555708 | 0.808931275070044 |
| GTCATATATACA | 512.744734402895 | 0.639626008573019 |
| ATAATCTATGAC | 512.766769995082 | 0.483263909770109 |
| TGGGTCACCAAA | 512.767338542141 | 0.574055373329596 |
| TGACGAAATGAA | 512.774064878761 | 0.258871266054954 |
| CAGACTACGTCA | 512.79418433294  | 0.83646546180947  |
| CTCCATTATGAC | 512.799457673188 | 0.35208719287276  |

|               |                  |                    |
|---------------|------------------|--------------------|
| ACTCATTATGCA  | 512.800297426123 | 0.645209118612252  |
| CTAGTGTAGTCA  | 512.804459473304 | 0.315139526615967  |
| ATCGACCAGTCA  | 512.809898337018 | 0.890811492411928  |
| TGAGTCGTTAAA  | 512.818937722898 | 0.204839663742741  |
| ACAATCGACTCA  | 512.835603602292 | 0.340402805754193  |
| GACTCAGAAATGA | 512.853369948256 | 0.920502672583353  |
| AGTCACTACTAT  | 512.872446791774 | 0.798498043496968  |
| GTCATGTATACA  | 512.876604952771 | 0.458162054253948  |
| AATCAGAATGAC  | 512.8790891107   | 0.297239294232564  |
| ACCGTTAAGTCA  | 512.882692634645 | 0.544317478341785  |
| CAGTAGTGTGAC  | 512.894174417006 | 0.349252928446585  |
| AATCGGAGTCAG  | 512.909414695425 | 0.322745273568977  |
| CGTCATTGAGCA  | 512.909436193707 | 0.681222100915046  |
| GATTACGATGAC  | 512.918742893622 | 0.891264131275679  |
| TGAGTCTATAAA  | 512.923811711821 | 0.843032018279734  |
| GACTCACGCGAA  | 512.924118238587 | 0.498390885810276  |
| CGATCAGATGAC  | 512.944410232466 | 0.663547063754619  |
| CTGCCTGACACA  | 512.951546290717 | 0.541887357095097  |
| CAGCAGAATGAC  | 512.958036895068 | 0.493232094683356  |
| TCGATTTCTGTC  | 512.96374446409  | 0.70615512630364   |
| ACTACTGATGAC  | 512.983948724799 | 0.354949569606418  |
| CCTGCCTATGAC  | 512.995238826336 | 0.278244427573088  |
| CGCTAATTAGTC  | 512.996925034307 | 0.799680932438111  |
| GTCATCCATCAA  | 513.009559125166 | 0.596046349885032  |
| CAATGCAATGAC  | 513.011355166437 | 1.10782569827624   |
| CACTGGGAGTCA  | 513.014548587584 | 0.459371293061176  |
| GTCATCAATCTA  | 513.031699210574 | 0.543900863432958  |
| AATTAATCGTCA  | 513.046530464147 | 0.922630277981557  |
| GGTCACACTGAC  | 513.056291851866 | 0.487556764586929  |
| CCACTTACGTCA  | 513.076312825382 | 0.497996444407807  |
| GATTAGGATGAC  | 513.08581999206  | 0.189962238691386  |
| CCCGAATATGAC  | 513.099011509141 | 0.47928905118673   |
| CAATTGATGACG  | 513.105392842826 | 0.284814612278102  |
| GACTCACTGTGA  | 513.107959364528 | 0.600071576496358  |
| CTAAAAGGTGAC  | 513.133177862997 | 0.471490481926027  |
| ACTCATAGGGAA  | 513.137775455881 | 0.715347225641565  |
| CTACATGATGAC  | 513.13908235868  | 0.402317781978696  |
| CAAGCGGATGAC  | 513.152426870243 | 0.506439847599692  |
| CATCGCTATGAC  | 513.158640806427 | 0.379007346391774  |
| AGTCACCTCCAC  | 513.158873640574 | 0.327070688838166  |
| GTCATTCTAATA  | 513.160666982383 | 0.538240245114201  |
| AGTGTATGAAAG  | 513.162101914358 | 0.199588893990576  |
| ATGAGTGAGCCA  | 513.173655571025 | 0.331113517733744  |
| CGCACGGAGTCA  | 513.185316471872 | 0.521538877124114  |
| AGTCACCCTCGC  | 513.202044184053 | 0.0550551614668373 |
| CCACATACGTCA  | 513.212677412081 | 0.659820183484093  |
| ACAAATCATGAC  | 513.213596834782 | 0.550330271504467  |
| TCCTTGTAGTCA  | 513.217381086383 | 0.473576704164608  |
| AGCCGATTAGTC  | 513.224811314263 | 0.435204385604771  |
| GTCATTAGTTGA  | 513.225208754913 | 0.397529172705992  |
| ATCGAGTGTGAC  | 513.244981240664 | 0.373779096210217  |
| CTCGAGTGACAA  | 513.260512233482 | 0.846544773326361  |
| CAACCGGTGACG  | 513.271284138669 | 1.0667759641519    |
| GTCATTTCTGCA  | 513.2737723213   | 0.594367612983237  |

|              |                  |                   |
|--------------|------------------|-------------------|
| ACTGGTGATGAC | 513.276174774542 | 0.609320341077591 |
| TGTCACCGGTAA | 513.278136962391 | 0.616436786864436 |
| GCGTCCGAGTCA | 513.315875689486 | 0.754417474598478 |
| GTTCTGTAGTCA | 513.344192350875 | 0.469088146945054 |
| CGTATCGGTGAC | 513.369470723552 | 0.629744687554189 |
| GAGTAACATGAC | 513.377212087257 | 0.576927270650653 |
| CACGTGATGTCA | 513.390321146068 | 0.446781639567176 |
| ATGACTAGCGTA | 513.393341551886 | 0.525838575194942 |
| TGACACTATAAA | 513.418924008918 | 0.728456580153494 |
| CACGTCACTGAA | 513.420079578078 | 0.421863804930916 |
| AAACTGGTCAGA | 513.438721043467 | 0.314627167270749 |
| GCATTGGATGAC | 513.454368199111 | 0.366744825539243 |
| ACGGTCAATGAC | 513.464604572802 | 0.604774985946444 |
| CGTAGACTCAGA | 513.46921490914  | 0.304393667033147 |
| CGTCAGCATGAC | 513.477945021853 | 0.477225730612655 |
| TGAGTAACGCCA | 513.477977176811 | 0.441569736445749 |
| TGAATCACGCAA | 513.501692694391 | 0.485751725125169 |
| ACTAATTGTGTC | 513.515505651949 | 0.897532568051472 |
| AGTCAAGTGACT | 513.565695592615 | 0.397455471652145 |
| GTAGGTGAATCA | 513.567707972599 | 0.128427494612048 |
| CGGCCGGATGAC | 513.575345472262 | 0.544722544472072 |
| GTCATTTGCGTA | 513.594621228537 | 0.722417056007649 |
| CGTTGTGGTGAC | 513.596752665168 | 0.565239615030854 |
| ATATGTCAGACA | 513.598569419319 | 0.251751224736571 |
| CAGTTTGTGTCA | 513.598707071928 | 0.61438657953501  |
| TTACTCAGTCAA | 513.604591446118 | 0.501266334068924 |
| CACATAGGTGAC | 513.61797826779  | 0.391357270595978 |
| CCGATTTGTC   | 513.623271246828 | 0.759960518302207 |
| TCACATTTGTC  | 513.62786204593  | 0.234308363623416 |
| ATGACATCGTAC | 513.631750936327 | 0.60741929755321  |
| AAGCTAGAGTCA | 513.639422466503 | 0.226627046641285 |
| CGTCATATGTAA | 513.648810589845 | 0.542347849465878 |
| CAATTTTACTCA | 513.658751472742 | 0.487062136442155 |
| GAATATCTGTCA | 513.659897958897 | 0.61858860326169  |
| TCATATGAATGA | 513.683210469903 | 0.863612460690026 |
| CAAAGGGATGAC | 513.699746497664 | 0.425199756689304 |
| GACAAATATGAC | 513.700507172725 | 0.435898533613864 |
| CTAGTTTATGAC | 513.702182768435 | 0.65383606726132  |
| AATGGCGAGTCA | 513.70832417698  | 0.303536233518461 |
| ATATCGTACCA  | 513.710258347445 | 0.372672763508415 |
| ATGACGTTAGTG | 513.710327871121 | 0.407051419751395 |
| TCAACTGTGTCA | 513.738904871052 | 0.507680881448199 |
| AGATGACCGAAT | 513.745836629033 | 0.56822740523899  |
| GCAAACCGTCA  | 513.756624038143 | 0.494441551686199 |
| GTCATCTCAGAA | 513.760357458405 | 0.633266056615399 |
| CAGTTAGATGAC | 513.770137196146 | 0.559940309538461 |
| TGACACTTTGCA | 513.771828602248 | 0.697510094164237 |
| ATCACTGAATCA | 513.773792923324 | 0.34524020307626  |
| AAGCCGATGACG | 513.8021814602   | 0.637571692278302 |
| GTCACGTATCAA | 513.814147770416 | 0.548616712175997 |
| AACGTTGATGAC | 513.826004320456 | 0.4943060241937   |
| ACCTGAGAGTCA | 513.840131538971 | 0.847639541715534 |
| AGTTAACGTCAT | 513.842447435329 | 0.291315353214769 |
| CCCGTTGACTGA | 513.846892935621 | 0.467803290892532 |

|              |                  |                   |
|--------------|------------------|-------------------|
| CCCCTTGACTAA | 513.85046677202  | 0.195952015674395 |
| TAACTGTAGTCA | 513.865989653767 | 0.54500011109198  |
| GTCATAGCCCA  | 513.875040986847 | 0.338691776824881 |
| GTCATCATAGAC | 513.901050159534 | 0.644951924493045 |
| AAATCAAGTCAT | 513.902479343076 | 0.493404576598619 |
| CGGTCCGAGTCA | 513.904851823927 | 0.511646624202598 |
| TCAAGCCAGTCA | 513.90771351134  | 0.543837467674384 |
| GTCATACAAGGA | 513.917503964592 | 0.626938933924461 |
| GTCATCACGGAA | 513.949388131075 | 0.386539467446562 |
| CTAGCTGTGTCA | 513.966083872329 | 0.298436429271458 |
| CGACGGTATGAC | 513.982311143034 | 0.931173507820565 |
| TGACGTGTGAAA | 514.00031371337  | 0.505737060206085 |
| TGACTCTGTGCA | 514.018276331405 | 0.332044847036679 |
| GTCATAAAGCAC | 514.019397491404 | 0.495954615485428 |
| CGTCATTCGCGA | 514.027626519669 | 0.80351549337509  |
| TAGTACACGTAA | 514.029909999098 | 0.456882043631142 |
| GTCATAGAATTA | 514.033172730487 | 0.42250134854768  |
| CTTTGCGAGTCA | 514.044683668122 | 0.441833764663181 |
| ACCGGGTGACGC | 514.048749267181 | 0.55254375244258  |
| CAAAGTGATGAC | 514.054281401352 | 0.666817010928141 |
| CGATTAGATGAC | 514.061261133062 | 0.237870165803999 |
| CGTCACAAGGAC | 514.072084025461 | 1.11533064557874  |
| AGCCAAATGACG | 514.076641886865 | 0.672527342805301 |
| CATAATAGTGAC | 514.090144257737 | 0.420997594011032 |
| AAGACTGTGTCA | 514.10559063656  | 0.366708020195352 |
| CGACCATGAGTC | 514.129272880131 | 0.546204141048852 |
| TGATTCACCCAA | 514.130759031275 | 0.362386672622126 |
| AAAGCTGACACA | 514.141805497368 | 0.466954379087344 |
| GTCATTTGCGGA | 514.177813668742 | 0.610028529415891 |
| CGTCACAGATGA | 514.181412006824 | 0.339838111298048 |
| ATCCCTCAGTCA | 514.186365168599 | 0.376453268775657 |
| ATGCAAGATGAC | 514.187889918935 | 0.735954207520936 |
| GTCAATGTGACA | 514.189018224054 | 0.475326149880823 |
| GACCGTGATGAC | 514.197158390979 | 0.260533795711528 |
| GTATGATTTCTA | 514.200752692366 | 0.58927858488889  |
| GTCATCAGACAA | 514.207840175222 | 0.33401073734749  |
| CGCTTTGTGTCA | 514.213255747551 | 0.312511764889653 |
| AGCACCTAGTCA | 514.213366426458 | 0.475916288718072 |
| GCTTCCGGTGAC | 514.233299301782 | 0.504535758970202 |
| CAATCATAGTCA | 514.237175175116 | 0.612623899704323 |
| GAGTCAGGAACA | 514.238172421197 | 0.378437621785188 |
| GAACGCGATGAC | 514.240662244315 | 0.376862101847029 |
| GGGACTCAGTCA | 514.254169613122 | 0.426395590973714 |
| GCGAATGATGAC | 514.254381916156 | 0.247483473527639 |
| GATATGTCAGAC | 514.265805275672 | 0.448128500350542 |
| AACGGGGTGACT | 514.294998383098 | 0.261485578741332 |
| GTCATGTGACAA | 514.303733109508 | 0.430602096970592 |
| CCTTCCTATGAC | 514.317965455721 | 0.313694241048914 |
| AGATAAGATGAC | 514.322267150241 | 0.351422003727013 |
| ACTGTCGGTGAC | 514.333990831183 | 0.811973165213107 |
| TCTAATCTGTCA | 514.338572370148 | 0.294223164468835 |
| GCTGCGTATGAC | 514.364108618163 | 0.553564758373168 |
| ATAGTCTAGTCA | 514.373175710795 | 0.699573680101769 |
| AAAGAAGATGAC | 514.384325376414 | 0.246597707095374 |

|               |                  |                   |
|---------------|------------------|-------------------|
| ATGAGTAGGTCA  | 514.407295827237 | 0.370614920546655 |
| ATCAACGATGAC  | 514.420342736634 | 0.872011648829351 |
| TCCGGGGAGTCA  | 514.427475805419 | 0.690463412045472 |
| TGACGAAATCCA  | 514.434735339007 | 0.408183278380969 |
| AGGGAGAATGAC  | 514.439028201006 | 0.278382506660712 |
| GATTCCATGAC   | 514.441449312303 | 0.532801955112359 |
| CGCGTCAATGAC  | 514.449552213992 | 0.981324818284335 |
| CCGACTGGTGAC  | 514.450953128825 | 0.786700396806442 |
| AAACAGTAGTCA  | 514.453373857828 | 0.540053230392964 |
| CCTATGTGACAA  | 514.492258867966 | 0.619252677615879 |
| GTCATATTATCA  | 514.49522126171  | 0.45841761062653  |
| CATAAGTAGTCA  | 514.517695017709 | 0.542682969225528 |
| AGTGAGCAAATC  | 514.521031999875 | 0.393709572471892 |
| CAGACGGATGAC  | 514.568254295302 | 0.317775590806125 |
| ACGTCACACTGAC | 514.581611460441 | 0.267152528754905 |
| CGACTATATGAC  | 514.597595323261 | 0.620445862376364 |
| CGTCATGATTGA  | 514.603702199752 | 0.305964491099114 |
| AGAGTAATAGTC  | 514.622864276074 | 0.567211027539417 |
| GTCATAGCCGGA  | 514.639403097654 | 0.612123590180308 |
| GAGTCAGGAAAA  | 514.6478315534   | 0.270536687010884 |
| ATGAGTAGTGAC  | 514.648076020282 | 0.286487656731813 |
| CTCCATTGACTC  | 514.652814688136 | 0.426444428366383 |
| CATTCCACGTCA  | 514.657429924541 | 0.448279020606377 |
| ATGACAGAGAAC  | 514.666658368274 | 0.417676124485488 |
| AACCTATATGAC  | 514.683435077291 | 0.516156112928183 |
| GTCATTATCTAA  | 514.684535600495 | 0.428567781179994 |
| AAGCAATATGAC  | 514.692542544414 | 0.442925710518772 |
| CAGCACACGTCA  | 514.696940315471 | 0.466125602267896 |
| ATAAATTATGAC  | 514.705760197812 | 0.175718059432502 |
| AAATACCAGTCA  | 514.706898466892 | 0.673401557428066 |
| GGCTCGGATGAC  | 514.711982701754 | 0.696077205362532 |
| AGTTCCACGTCA  | 514.71287526388  | 0.452082930011201 |
| AAATAAAATGAC  | 514.715953022972 | 0.481027138565936 |
| TATTATATGTCA  | 514.72779606621  | 0.638051510370689 |
| CTGATGTGTGAC  | 514.732707046801 | 0.6365812218999   |
| AGGAATTCGTCA  | 514.742560599763 | 0.242717581587745 |
| ATGAGTTGGTCA  | 514.763602556268 | 0.291879328883388 |
| GTCATCCCTGTA  | 514.767183157601 | 0.543829869793896 |
| ACACGGAATGAC  | 514.771387482022 | 0.544868592954314 |
| ACGTTACATCAT  | 514.772792074085 | 0.430731466596158 |
| ATGAATGAGCCA  | 514.786236309103 | 0.330377735394686 |
| CGACGCGTGTC   | 514.802023575491 | 1.129885154923    |
| TAAGTTTTGTCA  | 514.805058690366 | 0.504270184620982 |
| GGTGATGTAACC  | 514.807021678548 | 0.442995171803827 |
| GAGTATTATGAC  | 514.827079840404 | 0.628674142671727 |
| ATAGCAATGACA  | 514.849798246825 | 0.237383767068315 |
| GTCATCGAAGGA  | 514.883150349281 | 0.377674289130584 |
| GACTAATAAATC  | 514.902438662944 | 0.734308794018898 |
| CTGCATGACATA  | 514.903561988038 | 0.350439876576057 |
| CTGATGGATGAC  | 514.914643408873 | 0.653555524613377 |
| CCTTCCACGTCA  | 514.92334679147  | 0.323582329081904 |
| CTAAACGCGTCA  | 514.924229277684 | 0.49109860904562  |
| GACTACTGTGAC  | 514.927585786694 | 0.520968448333374 |
| TATTTACAGTCA  | 514.929612831863 | 0.59338099400433  |



|              |                  |                   |
|--------------|------------------|-------------------|
| GTCACACACACA | 514.946882508112 | 0.140684468864694 |
| AGTCAGAGCTAC | 514.966098527228 | 0.412450691574097 |
| CCGGCCGAGTCA | 514.974670041563 | 0.64061283807807  |
| GTCATCATGTAA | 514.982430648457 | 0.592005254138643 |
| GTCATCGTCCAA | 514.988558070473 | 0.763352918534888 |
| GCGATTAATGAC | 514.995494530711 | 0.389169122215384 |
| CTAAAGCAGTCA | 514.999159320811 | 0.549398173868288 |
| AGTCATGGTTTC | 515.000329856736 | 0.714578831832148 |
| GGATCACGTAC  | 515.001413594359 | 0.28341343378004  |
| ATGACTTGGTAA | 515.026759709765 | 0.420027133052889 |
| GTCATAGGCTCA | 515.034140301411 | 0.550931709452799 |
| AGTGTCATGTAC | 515.037520302579 | 0.660745522678328 |
| GATGACAGTACC | 515.042937214061 | 0.139618341200981 |
| GTCATCTATTGA | 515.067081336438 | 0.402126442468615 |
| CACACGAATGAC | 515.07056961147  | 0.62678239124122  |
| GGTCTCGGTGAC | 515.081152774109 | 0.43498037940048  |
| GTCATTCACTGA | 515.08789334267  | 0.50051064728084  |
| CGCTACTATGAC | 515.090033967059 | 0.309958365460687 |
| CAGTAATGACAG | 515.108469518307 | 0.541458196345082 |
| ATAATGAATGAC | 515.112811034896 | 0.444865096887532 |
| GTGCGTAATCCA | 515.139265424837 | 0.829181989418408 |
| GGAACCTACTCA | 515.144009538507 | 0.402333544328325 |
| GCCAGAGATGAC | 515.146624315804 | 0.368406786840179 |
| AGACTAGAGTCA | 515.162296014426 | 0.565955472201805 |
| TGACTATGATAA | 515.170620431886 | 0.628598613934853 |
| ATGGCTTACTCA | 515.176374898576 | 0.697960060602723 |
| GTGTCATGCAGA | 515.185221133253 | 0.335777883732336 |
| ATTACGCAATCA | 515.223265852505 | 0.669112378806956 |
| TGACTGTATGAA | 515.237615487537 | 0.689889409777757 |
| ACAGTGGATGAC | 515.242703251027 | 0.231445262203004 |
| ATGACGAGACCA | 515.259782018697 | 0.654046806889805 |
| ATAGACTGACTG | 515.262371968492 | 0.507336995984297 |
| GATTACGCGTCA | 515.280736125181 | 0.728665715167754 |
| CCTGTAGCGTCA | 515.320419258788 | 0.591993672533055 |
| GTCATTTAAGCA | 515.321672524248 | 0.494253331985393 |
| CTGGACGATGAC | 515.35190860719  | 0.317319891133507 |
| AGACATAAGTCA | 515.352713013064 | 0.815467992299007 |
| TGCCATGACCCA | 515.359532074694 | 0.421060177687532 |
| TCAGAGATGACA | 515.36105999988  | 0.307463826007769 |
| AGTCATGGTAAT | 515.399279191339 | 0.310794712783594 |
| GTAGAGAATGAC | 515.402200750444 | 0.270873677972293 |
| TGGGTCACCACA | 515.417412124658 | 0.561009782371004 |
| CGGCCTTATGAC | 515.430728183413 | 0.478262410928751 |
| CACTAAAGTGAC | 515.441153341531 | 0.628178940258556 |
| AAACCTGACTCT | 515.442233826586 | 0.251827463620811 |
| GTGTTGACTCA  | 515.457743392533 | 0.480377448867042 |
| GATCTCGATGAC | 515.461769973258 | 0.606370095250643 |
| AGTCCTTATGAC | 515.464410083153 | 0.685962081189574 |
| CAAACGTGTGAC | 515.471079109773 | 0.473929986848722 |
| CGGTTACATGAC | 515.47646936638  | 0.70376595265617  |
| GACTAATCATCA | 515.480326122874 | 0.384259416845851 |
| TGACTGGTTGCA | 515.495523391036 | 0.646029241476188 |
| ATGTCATTTCAA | 515.496149962132 | 0.38289862212208  |
| ATGACCACGTAA | 515.523348283029 | 0.248801317693011 |

|               |                  |                   |
|---------------|------------------|-------------------|
| CTGAACAATGAC  | 515.534101323987 | 0.627906596556839 |
| CAAGACAATGAC  | 515.540613893283 | 0.661688796134533 |
| GAGTCAGGTCAA  | 515.543520363588 | 0.500997976291649 |
| AAGACTTATGAC  | 515.555770868159 | 0.56353814229886  |
| CAAGTAACGTCA  | 515.559628560643 | 0.723626814884349 |
| GACTAATCTTAA  | 515.573769323557 | 0.917766686253333 |
| GTCATATTATTA  | 515.592672971132 | 0.416168422118877 |
| ACCGATAATGAC  | 515.603284498611 | 1.19606596882263  |
| ACTCATGGGTCA  | 515.603967136019 | 0.78581923417484  |
| TAACAATAGTCA  | 515.621455739024 | 0.498515763422688 |
| GTCATACCGCGA  | 515.630801454165 | 0.347576405591006 |
| GTCACAACATGA  | 515.632497814292 | 0.409269210713903 |
| ACCACAGAGTCA  | 515.633694967602 | 0.644992781414518 |
| AGAAGGCGTCAT  | 515.640997674153 | 0.295101400583269 |
| GTCCTTGACTAA  | 515.642183684686 | 0.337230290574567 |
| GCCACCTATGAC  | 515.644573729219 | 0.516552023521584 |
| ATGCTTTATGAC  | 515.656824358543 | 0.711346539658875 |
| ACGCATTTGTCA  | 515.656904192651 | 0.501701166005421 |
| GTCACCAGTTGA  | 515.658139019604 | 0.654022247984305 |
| ATGTCAAATGAC  | 515.664676548892 | 0.404985738596756 |
| CCGCTTCAGTCA  | 515.682837609109 | 0.629932009733205 |
| AGTCACCCCTGC  | 515.696974381472 | 0.239944980741119 |
| ACAGTAATGACG  | 515.708124101009 | 0.538363172303215 |
| GGGACCGATGAC  | 515.751222854679 | 0.366668645567097 |
| ATACCTTATGAC  | 515.769209579855 | 0.546092984541024 |
| TATGATTGGTCA  | 515.77870898649  | 0.198668929121587 |
| AGTAAGTGAGTC  | 515.782105614631 | 0.399588693365072 |
| TACAATCCGTCA  | 515.787800643582 | 0.431602947909271 |
| TGACTGCTCGAA  | 515.80737901509  | 0.602950101393314 |
| TCTGACGTGACA  | 515.847367633594 | 0.770628842715684 |
| ATGACGACTACC  | 515.86138463909  | 0.310607608325861 |
| CTCTTCTATGAC  | 515.872222402322 | 0.199213707163755 |
| TACGATTGCTCA  | 515.875845554125 | 0.470314996960908 |
| ATCATCACGTCA  | 515.884550457134 | 0.484388533219079 |
| ATCTATTATGAC  | 515.891485320494 | 0.191128029108722 |
| ATCAGGTGTGAC  | 515.896621635369 | 0.255225697380193 |
| GTCATAAATTCA  | 515.90654392158  | 0.614382076256217 |
| GTCTTTAAGTCA  | 515.918035356402 | 0.577119748383723 |
| GTCATCGAACAA  | 515.928729123071 | 0.437136456523145 |
| AAGTTGACTATT  | 515.932739416313 | 0.5134227410802   |
| CACGGCGTCATA  | 515.956103071954 | 0.340045531458188 |
| ACGCGTGACTAG  | 515.969927509905 | 0.241997806845382 |
| CACGTCACTTAC  | 515.984576996353 | 0.554329321512019 |
| GAGTCAGTACAA  | 515.986892650256 | 0.393163161824357 |
| TAGTCACGGCAA  | 516.011665606084 | 0.241274522758067 |
| CAATAGTGTGAC  | 516.021101384827 | 0.547639701364931 |
| GTGTCACTGCGA  | 516.029921346808 | 0.260719309179222 |
| AACGATGATGAC  | 516.037350542504 | 0.422293840423677 |
| GTTTCGTTACTCA | 516.066057556418 | 0.494502601933756 |
| AAGTAGGATGAC  | 516.068563634985 | 0.248049201246179 |
| ACTGTAATGACG  | 516.072693942417 | 0.398035280177356 |
| GTCATGGTGTCA  | 516.085395658134 | 0.583359900745999 |
| ACATTACAGTCA  | 516.08864091731  | 0.653889728748119 |
| CTTAATGAGCCA  | 516.117156024904 | 0.137178874377942 |

|              |                  |                   |
|--------------|------------------|-------------------|
| GTTGCCGACTCA | 516.121529850472 | 0.543424560580236 |
| AGCTTTGCTGAA | 516.125852166385 | 0.835719116291289 |
| CACGTCACTCAG | 516.140353550355 | 0.589427643666102 |
| ACGTATTGTGAC | 516.147244891193 | 0.500821151100662 |
| AAAGTGTCAGCG | 516.15466608425  | 0.279515278968922 |
| CGAGGATATGAC | 516.15980675079  | 0.419743773118501 |
| AGTATTGATGAC | 516.213729466855 | 0.348627931998453 |
| TGACTGTCTGCA | 516.220635725435 | 1.06642909407547  |
| CATAGCTGTGAC | 516.222767028787 | 0.493519806215574 |
| GTCACATGTTGA | 516.223847806024 | 0.683721266238891 |
| GACCTAGATGAC | 516.225432095531 | 0.606413771752578 |
| ACAGCTGCGTCA | 516.239151788226 | 0.900241666815217 |
| GTGACGTGATCA | 516.242852778941 | 0.467071214799754 |
| ACGTCACCCAGT | 516.260481398469 | 0.414117237745794 |
| GTCATCAGGGCA | 516.266237643757 | 0.635484746240962 |
| AACACTGAGTAA | 516.267633333364 | 0.69253149441066  |
| AATAAGGATGAC | 516.271283306567 | 0.345329660460039 |
| CACTGAGATGAC | 516.279685586374 | 0.655965336481025 |
| ACACCTGCGTCA | 516.284175073618 | 0.360942365491185 |
| ACTATCAGTGAC | 516.296419114552 | 0.463084334262152 |
| ATCCAATATGAC | 516.303106594227 | 0.664043602605655 |
| GTTGTCATGTCA | 516.308145379423 | 0.642202864781618 |
| GTCATGACCATA | 516.329202323431 | 0.595049110003237 |
| GTCATACCAGGA | 516.34384612521  | 0.494369771061834 |
| CGTCATTGTTTC | 516.347473291636 | 0.439162616367491 |
| CACGTCACGCCG | 516.348803184385 | 0.815239919582656 |
| GCACTATGAC   | 516.357809115963 | 0.398618071085239 |
| CCTTTCGACTCA | 516.358106668398 | 0.310943125133235 |
| AATGACGTCGAT | 516.364681210461 | 0.442971701768058 |
| AAATTACGCAAT | 516.381734586093 | 0.390852730120537 |
| TCGCCGGAGTCA | 516.393952648642 | 0.616961185067053 |
| CGGCTATAGTCA | 516.405010476442 | 0.605568532378633 |
| GCTTAAGATGAC | 516.418404821091 | 0.270064021035386 |
| ACGTCATGTTAC | 516.422652400687 | 0.558883876340091 |
| CGGAAGGATGAC | 516.430042861301 | 0.222211922827179 |
| AATTAGATGACG | 516.438996552115 | 0.607911604968277 |
| ACTACGGGTGAC | 516.441364124447 | 0.322292498872186 |
| GTGTGGGAGTCA | 516.441884423468 | 0.243898717835934 |
| ATGACAGTCAAA | 516.458901636067 | 0.334409095475611 |
| GATCTGGATGAC | 516.46047756648  | 0.584292451840225 |
| AGGFACTATGAC | 516.470432082813 | 0.325716590921524 |
| ACGATGGAGTCA | 516.473122422591 | 0.530677667228272 |
| CAGTCAGTGACG | 516.483408233551 | 0.31106470102631  |
| CATATAATGACG | 516.497537797603 | 0.246603975097935 |
| ATTGCGAATGAC | 516.499146392273 | 0.327371490885789 |
| GTCAGAGTGACA | 516.501679344424 | 0.516444987595067 |
| TGAGTCGGAAAA | 516.505997286061 | 0.364724613425554 |
| AATCTGGATGAC | 516.535862143665 | 0.194321202617655 |
| AATGCTGTGTCA | 516.570604401872 | 0.482279108536668 |
| CCACACGAGTCA | 516.59366101427  | 0.732083358652711 |
| CTGTGGAATGAC | 516.593701160338 | 0.230798954219939 |
| AGTCAGACCTAG | 516.59378917906  | 0.390915365978266 |
| TGACGCAAATAA | 516.598676925464 | 0.598437286575604 |
| TGACCGTAGTCA | 516.603125015869 | 0.957397712356237 |

|               |                  |                   |
|---------------|------------------|-------------------|
| ATTATCTGTGAC  | 516.618905848783 | 0.702764824550534 |
| AATCTCCGTCAT  | 516.623031708891 | 0.230179372770041 |
| ACCGGCGATGAC  | 516.626144888779 | 0.65498924807744  |
| CGTATTTATGAC  | 516.654375270189 | 0.657623328902468 |
| ATGCTACAGTCA  | 516.656582054049 | 0.588165864386386 |
| CTAACCGATGAC  | 516.65705732214  | 0.495327648873412 |
| GACTATTACTGA  | 516.693800742648 | 0.542850408533427 |
| CACGGAGATGAC  | 516.704005808157 | 0.85257882841189  |
| AGTCAGTGAGTC  | 516.717735633504 | 0.560109851831284 |
| GTCATCCACGGA  | 516.743707041479 | 0.757983727763995 |
| GAACCATGACGC  | 516.771615307096 | 0.7426629517472   |
| CTTGCTGAGTAA  | 516.776693279814 | 0.73150993860057  |
| ATGACGCCGACA  | 516.788300612904 | 0.411131846502313 |
| GTCATACAATCA  | 516.802007599601 | 0.514148642742365 |
| ACGGCATATGAC  | 516.812846807828 | 0.419101210004225 |
| GGTGACGCCACC  | 516.819236637358 | 1.14936195555542  |
| ATGTCTACGTCA  | 516.823228884783 | 0.561354199120168 |
| GACTCAGCATGC  | 516.845653776316 | 0.809325503494405 |
| CTGATTAATGAC  | 516.88370905255  | 0.688132255345925 |
| CTGTTTTACTCA  | 516.884783808644 | 0.442078389473471 |
| GTCATCCGAGAGA | 516.898494045956 | 0.621505300530925 |
| GTCATTGAAAAA  | 516.903301253577 | 0.431522888035066 |
| AGTCATGAGAAA  | 516.933579769277 | 0.126693111147666 |
| ATTGGCGAGTCA  | 516.936241388037 | 0.231211847853541 |
| TGACTACTATCA  | 516.945270937853 | 0.627443084781734 |
| GTGACAGTGTC   | 516.950291744807 | 0.16158659586408  |
| CACCTGATGACG  | 516.955680442847 | 0.40412641430985  |
| GATGTACATGAC  | 516.97365015595  | 0.72358847736612  |
| GGACGTAATGAC  | 516.978299318788 | 0.525690725962559 |
| ACGCAATATGAC  | 516.984864824184 | 0.605237057070178 |
| CGATTCCGACTCA | 517.012346337309 | 0.364489434351695 |
| AATTTGCAGTCA  | 517.016484074647 | 0.40335719667014  |
| AATCCGTCAGAC  | 517.047515115507 | 0.570444616733139 |
| CCGGGTGATGAC  | 517.054606330029 | 0.62546158982499  |
| GTCACTCCGTCA  | 517.05834543079  | 0.391771556831256 |
| CAGGCCGAGTCA  | 517.059586642438 | 0.931413628297021 |
| GCAAGCAATGAC  | 517.073866883322 | 0.458306623874999 |
| GCCGTTGTGTCA  | 517.07738373883  | 0.801213853308192 |
| CACGTCACGATA  | 517.086780068345 | 0.429423714294514 |
| ATTAGACTCAC   | 517.090290580145 | 0.149525967809406 |
| CGGTAAGTGTGAC | 517.095005080392 | 0.479325236096122 |
| GATTATTCATCA  | 517.127186169322 | 0.360982414675914 |
| CCGGGTATGAC   | 517.130163411732 | 0.415757032353146 |
| GTCATCCTAGAC  | 517.133525725337 | 0.224400558295934 |
| ATGACGAACTTG  | 517.134289931137 | 0.591954035397043 |
| GTCATCTACAAA  | 517.152865169414 | 0.508922753671395 |
| CATCATTGCTCA  | 517.176159049394 | 0.406025662372561 |
| CGAGAGGATGAC  | 517.179285901677 | 0.397863196298005 |
| AGTCACTACTACT | 517.196726826479 | 0.244399206432858 |
| ATTAAGCATGAC  | 517.208231858112 | 0.528958753686493 |
| AGTCACGGTCTG  | 517.210516919847 | 0.661155995836398 |
| CAAAATCTATGA  | 517.230605168108 | 0.694406258992285 |
| AGTCGTGTGTCA  | 517.24982104279  | 0.720057649673917 |
| CATGTAATGACG  | 517.261060378493 | 0.398791563636088 |

|              |                  |                   |
|--------------|------------------|-------------------|
| ATGAGTACGAAC | 517.261970319709 | 0.429157496165777 |
| CCGAAGGATGAC | 517.263216735528 | 0.404892817445249 |
| GGTCCTAATGAC | 517.266710751797 | 0.739082694104889 |
| TCTTGCTAGTCA | 517.270831447969 | 0.539932813655353 |
| AGGCCTTATGAC | 517.272919946545 | 0.592571839617448 |
| GTGAGTCGGA   | 517.282677533869 | 0.203981648338754 |
| AATTAGGCATA  | 517.283199058354 | 0.236640821775896 |
| CGTCATTGTGTA | 517.287768990438 | 0.483729423553462 |
| CCCGCTGTGTC  | 517.313416148129 | 0.520380794196064 |
| AGAGTCAGGCC  | 517.313544235093 | 0.398007108647862 |
| CGTACTAATGAC | 517.316495530175 | 0.617793919320346 |
| GTCATCATTAA  | 517.318997600206 | 0.402623820569877 |
| GTAATGCATA   | 517.321576649486 | 0.231814662258308 |
| ATGTACCAGTCA | 517.322952545808 | 0.814500978975706 |
| GTCATGAATCA  | 517.38941345395  | 0.591367472434093 |
| AACTCTTCGTCA | 517.397748698848 | 0.34241520776336  |
| ATAGGATGACCC | 517.404064751545 | 0.42460608648944  |
| ACGTCACGTAA  | 517.436611669969 | 1.06605879165996  |
| CAGAATTGACTC | 517.448091976409 | 0.410715796317132 |
| ATTGACAATGAC | 517.453952659788 | 0.578050808989354 |
| GTCATATGTTCA | 517.458910077495 | 0.749623474729564 |
| AGATATGATGAC | 517.459266042805 | 0.409982500186898 |
| CTCCAGGAGTCA | 517.459513680517 | 0.662555387893174 |
| CACGTTAATGAC | 517.472405400157 | 0.673035893580438 |
| GTCATATCCATA | 517.473664007581 | 0.466887303978304 |
| GTCATCAGAGTA | 517.475676128281 | 0.547206763663416 |
| CATTACGCGTCA | 517.480384759462 | 0.61298060740183  |
| CATGTATTATGA | 517.494347040947 | 1.16284976818767  |
| TCCC CGAGTCA | 517.54528663177  | 0.441159738328693 |
| ACCGCTCGGTCA | 517.558552042796 | 0.54092234049349  |
| ATGACAGAGAGA | 517.56795841223  | 0.476528986254147 |
| GACAACCAGTCA | 517.594692330897 | 0.939761456615879 |
| GTCATCGCAAAC | 517.600645996955 | 0.265002646997323 |
| TCATAGCTACGA | 517.602854352433 | 0.831373588463457 |
| GTTGACGCGTCA | 517.607517249986 | 0.463443653288703 |
| GGTGCAGAGTCA | 517.641123724406 | 0.197670239522833 |
| GTCACCACATGA | 517.657120993903 | 0.219756810021014 |
| AACTCAGACTCA | 517.661546586366 | 0.552172805999426 |
| GTCATCGATATA | 517.662294199725 | 0.266880189605321 |
| AGTCAGAAGTTG | 517.684493801113 | 0.344636585500389 |
| ATAACTGAATCA | 517.688472273535 | 0.719341428154192 |
| GCTGCTACGTCA | 517.710117557623 | 0.456547411799249 |
| CATAACTGTGAC | 517.71086909457  | 0.412001907066976 |
| GATTACTGTGAC | 517.720107461485 | 0.379645166865874 |
| ATGCCGATGACG | 517.72440004653  | 0.627263530522639 |
| AAAAGGAATGAC | 517.734825821726 | 0.303859891352528 |
| ATGACGTTACCA | 517.74130168625  | 0.474354012932939 |
| CACCTGGAGTCA | 517.742208488362 | 0.407840345291218 |
| ACGGATAATGAC | 517.751541418382 | 0.24930084222977  |
| GTGTCACGCACA | 517.760711541001 | 0.214864627727517 |
| GTCCTGACGTCA | 517.777739093613 | 0.64010924551565  |
| GTCATTGGGTCA | 517.778318342384 | 0.438472207686181 |
| AACAGCTGTGAC | 517.779640577157 | 0.415636858093411 |
| AGACTCACTGAG | 517.780654686097 | 0.550754623485138 |

|               |                  |                   |
|---------------|------------------|-------------------|
| CACTCATATGAC  | 517.785672738174 | 0.568898469165395 |
| GTGTCTACGTCA  | 517.796436870317 | 0.461110367833301 |
| TCCGTTAAGTCA  | 517.803477581619 | 0.939870558207684 |
| GCACCTGGTGAC  | 517.807921510092 | 0.573650040288893 |
| AGCCCGACTCAT  | 517.810277134165 | 0.423839235991296 |
| ATGACAACGTCTG | 517.813813524077 | 0.409647104620437 |
| CAAAGACAGTCA  | 517.819065381223 | 0.499137941206549 |
| GACTAATTAGCA  | 517.822040292725 | 0.602551838167057 |
| TGAGTCTAATAA  | 517.831755089082 | 0.554464769461011 |
| CTGCCTCAGTCA  | 517.838231807022 | 0.362221502197908 |
| GATGGTTATGAC  | 517.848888078239 | 0.216646558052399 |
| GTCATACGGGTA  | 517.84909602221  | 0.477155404617449 |
| ATGCCATAGTCA  | 517.868580104343 | 0.551150554460302 |
| CGTCATTAGCAA  | 517.868868270501 | 0.392886252339158 |
| TAGGACCAGTCA  | 517.869954353286 | 0.640538741344858 |
| CCATCGTATGAC  | 517.870624850849 | 0.742544941692918 |
| ATACTGTAGTCA  | 517.874705602092 | 0.806874830632545 |
| CAGGCGGATGAC  | 517.875323223492 | 0.739005960720178 |
| GAGTCAGGGTAC  | 517.884982691513 | 0.243893170241908 |
| CAGTTCGGTGAC  | 517.898617688432 | 0.636125279905566 |
| GTCATTCGGGAC  | 517.90032497892  | 0.339835930993286 |
| CCAACGGGTGAC  | 517.901838114693 | 0.400451771239029 |
| ATTTATTATGAC  | 517.905561935193 | 0.553276097900884 |
| CCGCATTATGAC  | 517.908859046991 | 0.480222319762321 |
| TGACGCAAGCCA  | 517.919465309145 | 0.554000580446564 |
| TGACGTATCAAA  | 517.92846145467  | 0.447879314776689 |
| AATGACGTCGAC  | 517.990462603661 | 0.4911204464853   |
| CGATTCTAGTCA  | 517.995091416275 | 0.686514091580827 |
| GTCATCTTAAAC  | 518.002414402693 | 0.318487744373864 |
| CATGCCGACTCA  | 518.004810113098 | 0.573216475082025 |
| GTACCTGTCACA  | 518.00706861815  | 0.364569400780756 |
| ATGACGGAGACG  | 518.007822400157 | 0.322521696767961 |
| GGTGAGCCACAC  | 518.01214662494  | 0.563589282340401 |
| TCATAGTGTTC   | 518.012158589068 | 0.79493399434697  |
| AATCTATAGTCA  | 518.018639308514 | 0.697389874477439 |
| GTCACCTAAGA   | 518.024622519849 | 0.512221152504333 |
| AACGATTTGTCA  | 518.031872001189 | 0.389003891775709 |
| GACTACGATGAC  | 518.050305525392 | 0.528781656380662 |
| AGAGTCAAAGAT  | 518.057406520337 | 0.300775106059276 |
| GGTTAGGATGAC  | 518.061036445428 | 0.467472119930973 |
| GCACCAGTCAGA  | 518.091555665912 | 0.582363848688695 |
| CTCTACTGACTC  | 518.108549064966 | 0.447693074520573 |
| GTCATCCCGTAA  | 518.111533586111 | 0.41857710062976  |
| GTCATCACGTGA  | 518.113275317534 | 0.51629476570961  |
| ATGTAAGATGAC  | 518.122342395361 | 0.409274985672577 |
| GTCATATCCAA   | 518.129473788323 | 0.494374236039898 |
| CTCGATACGTCA  | 518.134440169077 | 0.601384620995486 |
| GTCATATGCCAC  | 518.165785702273 | 0.839855078627077 |
| CGTCATTTGTAC  | 518.201962020005 | 0.374826424630763 |
| AGTCACTCCAGC  | 518.220440631756 | 0.427805017968794 |
| ACGTCACCCAGA  | 518.229032683632 | 0.559062353630004 |
| TGACGTGGAGAA  | 518.23036854019  | 0.366277452102532 |
| AATGTGCAGTCA  | 518.233913220153 | 0.567116979041156 |
| ACGGTTCGTAT   | 518.245684076536 | 0.525711992281288 |

|              |                  |                   |
|--------------|------------------|-------------------|
| GTCATACGGATA | 518.260399317461 | 0.41078214493088  |
| ATTAGTGATGAC | 518.262538866632 | 0.355985111730859 |
| TGACTCCGCGCA | 518.276646233558 | 0.473918441141492 |
| AACTGTGATGAC | 518.293910746902 | 0.588523624990773 |
| AGGTTGGATGAC | 518.296699422403 | 0.278681988574859 |
| CTGGCTGTGTCA | 518.300403216808 | 0.484007277394226 |
| CGGTTGAATGAC | 518.309745050932 | 0.21000943393768  |
| CAGACATGACAC | 518.312453646556 | 0.537520202607758 |
| CCATATGATGAC | 518.31437740862  | 0.529807368043116 |
| ACTATTGACTCT | 518.32642886388  | 0.273029479016344 |
| GTCATCAACCTA | 518.360704397712 | 0.419293991166243 |
| AAGCGCGTGACT | 518.367525034061 | 0.309042720465821 |
| TGACTCGCATCA | 518.382095971588 | 0.411412685994449 |
| GGTCATCTATGA | 518.390513348482 | 0.929433308108512 |
| AAATCTGATGAC | 518.394769159047 | 0.418747091917608 |
| GATACATAGTCA | 518.396725780921 | 0.275520158013293 |
| GTCATCGCAGTA | 518.426092097958 | 0.411505697176976 |
| CTTTAGGATGAC | 518.438628160953 | 0.784158234983921 |
| CTAGGCTATGAC | 518.454166173792 | 0.380434863920439 |
| AGTCAGTAATAC | 518.460919246798 | 0.318725288263775 |
| AGACTAATAAAT | 518.469980106764 | 0.603852686825225 |
| CCGACTGTGTCA | 518.471301955097 | 0.383040534769429 |
| TATACCTAGTCA | 518.478545872187 | 0.525258736050726 |
| GAAACGGATGAC | 518.496494315319 | 0.355271118575216 |
| AACATTGATGAC | 518.514742650309 | 0.586168928325689 |
| CAGTCATGGTGA | 518.530562694975 | 0.684749946241195 |
| ATATCTAAGTCA | 518.545415474424 | 0.710963187470935 |
| AACGATTAGTCG | 518.549520663682 | 0.756999562123645 |
| AACCAATAGTCA | 518.553121403028 | 0.404842380291292 |
| GCCATGAATGAC | 518.567195204782 | 0.572746538901432 |
| CCGTTCTAGTCA | 518.581324086933 | 0.492068700893306 |
| ACTCACATGTGA | 518.58285004528  | 1.21794989914508  |
| GAACCCGAGTCA | 518.596535484275 | 0.69650820519608  |
| GTCATCTGTAAC | 518.601069604963 | 0.485800871511139 |
| AGACTTACGTCA | 518.64146551331  | 0.675512325247936 |
| ACCGATTAGTCT | 518.64826005706  | 0.646533476065833 |
| GTCATTCCTTAA | 518.675251385415 | 0.57685948447347  |
| GTCACCGGGTGA | 518.68345894724  | 0.84295623606049  |
| TGACTCCAAGCA | 518.689803657999 | 0.526936676306643 |
| AGTCACGCCTAG | 518.690011036186 | 0.581892150986918 |
| CTAGTCACGCTA | 518.697253648456 | 0.30917725982417  |
| ACGTAATCGATG | 518.697675791255 | 1.16615151357933  |
| TCGACTAAGTCA | 518.708779673063 | 0.276982991845972 |
| CGCATTGACACA | 518.711722964261 | 0.555357878664021 |
| CACTAGCTATGA | 518.721446414224 | 0.811709367403997 |
| CGGGCGTATGAC | 518.764753899237 | 0.492041111327411 |
| CTAGTGAATGAC | 518.766961519487 | 0.383846747753131 |
| CACACATGTGAC | 518.792799099615 | 0.660053272969111 |
| CCGGAAGATGAC | 518.809694277834 | 0.369505822086879 |
| GCTTATGATGAC | 518.812052647513 | 0.429456811929919 |
| ACCGGATATGAC | 518.820361597196 | 0.43313930209571  |
| GTGACCCAATCA | 518.823148269356 | 0.46983291823933  |
| ATGACGTTGCTC | 518.826334702733 | 0.639307737635737 |
| GTATTGACACAC | 518.836093081653 | 0.434622331623148 |

|              |                  |                   |
|--------------|------------------|-------------------|
| TGAGTCGATACA | 518.83789547369  | 0.264458512171372 |
| AGCGCCTATGAC | 518.85919903095  | 0.78703796664346  |
| GACGAAATGACA | 518.875939211351 | 0.53010992184983  |
| CGACGTTACTCA | 518.897705241335 | 0.459933826397276 |
| GTCATTATTAC  | 518.900718256546 | 0.550644630127551 |
| CTCTTGATGAC  | 518.906947145402 | 0.582846960522085 |
| CTGGTGAATGAC | 518.915422256775 | 0.452319754123653 |
| GTCATACGCCTA | 518.918606774027 | 0.495257872688586 |
| AGCCTTGTGTCA | 518.971391801912 | 0.539639579012561 |
| GTCACCGTTGGA | 518.991321753785 | 0.820416934437892 |
| GTCACCTCGAGA | 518.999676481737 | 1.02047774006437  |
| AGACTAATTCTG | 519.001696728318 | 0.787992903908254 |
| GTCATAGCAGAC | 519.010004814198 | 0.716684336546605 |
| ATGAGTTGTTCA | 519.014886553668 | 0.365387520457506 |
| CATTCGGTGACA | 519.024463714862 | 0.886580158079875 |
| AAATCTTGTGAT | 519.032801609141 | 0.259288066966095 |
| AGAAGACGTCAT | 519.036615863817 | 0.194657737577876 |
| CTTGGGTATGAC | 519.060480617933 | 0.48715753271027  |
| GCAGAGGATGAC | 519.063173700953 | 0.36089864710735  |
| AACCCTGTCATA | 519.069898735465 | 0.509667961914173 |
| AATGGTTATGAC | 519.085019586262 | 0.534527861648898 |
| TAATTAGCGTCA | 519.121404430742 | 0.670902448414139 |
| AGTAACGACTCA | 519.124000240055 | 0.474865650686875 |
| ATCCTCGGTGAC | 519.134328036237 | 0.60715319360448  |
| AGAGTCAGGCTC | 519.155431389303 | 0.859358449877416 |
| GATGGTAGTCAC | 519.170605029546 | 0.54961287013509  |
| GGGCGTGGGTCA | 519.175624721728 | 0.322260322604911 |
| GGCCTCGAGTCA | 519.177341660216 | 0.487354765803786 |
| ATTGAGGATGAC | 519.190680061149 | 0.505626546323755 |
| CAACTAATGACA | 519.194932528089 | 0.408871254124654 |
| AGTCACCTCAAG | 519.228396974106 | 0.274442174329219 |
| GGCCATAATGAC | 519.230438252859 | 0.626781556843601 |
| CGTGCATATGAC | 519.239119925988 | 0.338825480214546 |
| CTCAGTGATGAC | 519.245801842275 | 0.457010989630598 |
| CTCAATGGTGAC | 519.245885887301 | 0.458659927977109 |
| ACAGATGATGAC | 519.24842666374  | 0.353638598816142 |
| CACCTTGACTAA | 519.268566312109 | 0.392537383290304 |
| CAAGGCTGTGAC | 519.271552954896 | 0.659959959338806 |
| TCTCACACGTCA | 519.287898557313 | 0.437507116129838 |
| CAAACCTGACTC | 519.29642130626  | 0.500160891066684 |
| GTCATCCGTGTA | 519.299119494964 | 0.601002191120482 |
| AGTCAGACTCCA | 519.313080690103 | 0.377337979442106 |
| AATATATTAGTC | 519.323906078625 | 0.659391342561598 |
| GTGAATACGTCA | 519.344154497138 | 0.724862667808674 |
| GTCATACACTTA | 519.35152982352  | 0.489470287441435 |
| ACGATATGACCA | 519.36163856056  | 0.619192919803973 |
| AGACTCAGTCAA | 519.374340840818 | 0.477824032226516 |
| ACAGCCGAGTCA | 519.391000092835 | 0.484719977279666 |
| GGTGGCTATGAC | 519.39416907578  | 0.593239462135264 |
| CACGTCTATGAC | 519.420522715888 | 0.527823479816326 |
| TATCATTGGTCA | 519.42200699168  | 0.26171550008327  |
| AGATTACGCAAC | 519.431365798508 | 0.430777573072777 |
| GTCACGATATGA | 519.449317009276 | 0.508096396415923 |
| CGTGGTAGTCAC | 519.46447593642  | 0.468844528685896 |



|              |                  |                   |
|--------------|------------------|-------------------|
| CTTGTAGCGTCA | 519.472621379069 | 0.428216706715179 |
| CATCCAGATGAC | 519.474597809908 | 0.682384725169921 |
| GTCACCCATTGA | 519.484526968584 | 0.60220035146516  |
| CATGGGTGACGC | 519.515103869798 | 0.807658647703544 |
| TAGCTGTAGTCA | 519.525213600497 | 0.656919611206631 |
| CGATATGATGAC | 519.533374971764 | 0.451594436692367 |
| ACTCATACCTGA | 519.572412026544 | 0.274475274461408 |
| CTAATTGATGAC | 519.58586154775  | 0.649538856335734 |
| GATCGTTATGAC | 519.589508415285 | 0.706576830404366 |
| ACCAATCCGTCA | 519.593067116673 | 0.299492605706042 |
| GTGACACTCATA | 519.601359627345 | 0.136041077966825 |
| GCGACGGAGTCA | 519.610053921044 | 0.375041335234774 |
| AGGTTGCGTAAT | 519.626691967698 | 0.452509882282145 |
| CGTCATTGGACA | 519.62675789227  | 0.560962564674739 |
| CAAATGGATGAC | 519.639193682772 | 0.604318541490654 |
| TGAATCAGAGAA | 519.64134403458  | 0.479327914178856 |
| AGCCTGTGTAC  | 519.642747861435 | 0.410232468284228 |
| CAACTTTGACTC | 519.654842300156 | 0.348145785574379 |
| AGGCTTTAGTCA | 519.658529986158 | 0.588835484808033 |
| AACTTTGACTGA | 519.661287708668 | 0.499221869092873 |
| CGTCATCTAACA | 519.662073267517 | 0.580461139337914 |
| GTCATCCTCTAA | 519.666051641331 | 0.209096101309091 |
| TGACACAATCA  | 519.676049260483 | 0.573546995314096 |
| TACTATTTGTCA | 519.676681500847 | 0.382876562401924 |
| GTAATCTGTGAC | 519.703362849755 | 0.531534026982714 |
| GTCATAGGCTTA | 519.725861690477 | 0.64840637347824  |
| TGACTCGGTAA  | 519.732310611498 | 0.661635945693299 |
| TGATTCACAACA | 519.742607040267 | 0.730140544430154 |
| CACGCGTGACAC | 519.781300860091 | 0.562663962579216 |
| GGGCACGACTCA | 519.808930578705 | 0.517848036025597 |
| ACTGACATGTCA | 519.814891565719 | 0.407885874432193 |
| TCGATATGACCA | 519.824354945921 | 0.699531119808493 |
| AACAGTAATGAC | 519.832829179882 | 0.614103268340847 |
| TAGCGTGATTCA | 519.834314643206 | 0.575609709482875 |
| ATGACGGAGAAC | 519.86216512567  | 0.357625231509124 |
| GAGTCAATTGCC | 519.866408415838 | 0.285062399502888 |
| ACTCATCGATGA | 519.869773808119 | 0.197248065172831 |
| GCCGGACAGTCA | 519.875423073565 | 0.319169987352878 |
| ACAACCGATGAC | 519.889394137914 | 0.630488408037294 |
| AATAGTCAATGA | 519.918204901568 | 0.551877061980493 |
| CCGATTTGGTCA | 519.928299320007 | 0.475998401498775 |
| GTCATTTAGACA | 519.92940586919  | 0.457375903935232 |
| ATTATCGACTCA | 519.950248429586 | 0.235314071365872 |
| GTAGACTCAGAC | 519.95201133437  | 0.428313749928579 |
| ATGACGCCGATA | 519.957891033917 | 0.211521619514826 |
| CACTGCGATGAC | 519.965727006284 | 0.531393825718158 |
| TATATATGACCA | 519.972870417123 | 0.646405820987731 |
| ATCTTTTATGAC | 519.976671125421 | 0.631009453463677 |
| CGTCTAAATGAC | 519.978762561785 | 0.817669832812804 |
| AGTCACCTCGCG | 519.984693710508 | 0.311045701899308 |
| CAGAATGGTGAC | 519.99078714548  | 0.555155854522529 |
| ACGGCGCGTCAT | 519.996551441914 | 0.562945882069132 |
| CACCCGGATGAC | 520.035454915655 | 0.605794924097365 |
| ATGACGAGATTG | 520.063542878079 | 0.305194213364515 |

|               |                  |                   |
|---------------|------------------|-------------------|
| ATCAATTGACTC  | 520.077276306998 | 0.520719036092305 |
| GCCACCGATGAC  | 520.079486088934 | 0.644169494035956 |
| CATGATAAGTCA  | 520.081230582331 | 0.572348927980895 |
| GAAGCTTATGAC  | 520.09746268048  | 0.254627681766456 |
| GAGCATTATGAC  | 520.106564336863 | 0.397340666745016 |
| GATAATAATGAC  | 520.152033002543 | 0.682000867400162 |
| AGTCGTGCGTCA  | 520.155740947545 | 0.165544960861903 |
| CACTTTACGTCA  | 520.170592689683 | 0.481251106664654 |
| GTCATTACTATA  | 520.188325436192 | 0.726262763518325 |
| GGCAGACTCACA  | 520.19374953749  | 0.38015730127209  |
| CCGACCCAGTCA  | 520.196107906901 | 0.490420073168628 |
| TACTTGCGTCA   | 520.19922566077  | 0.308328809542177 |
| AACTCATGACGT  | 520.200165856982 | 0.619653944531319 |
| ATCACCCAGTCA  | 520.202150215103 | 0.376413917222003 |
| TCATACATGACA  | 520.202638253879 | 0.528284176948452 |
| TGACTGTGCGCAA | 520.211016892754 | 0.378116498829979 |
| GAGCCATGTGAC  | 520.212592517437 | 0.383982620487358 |
| AAGCTGTGACGT  | 520.218862557797 | 0.588632284907575 |
| AGCACGTAGTCA  | 520.220181115265 | 0.534023172498692 |
| GCGTCACGTTTA  | 520.232480163246 | 0.326387066712489 |
| GTCATAGGTTAA  | 520.2523021458   | 0.26314445691191  |
| AGAGTCAGGTGA  | 520.271634745584 | 0.393838448912155 |
| CCATGGTGACGC  | 520.279573179029 | 0.585815520990778 |
| CCTGTGGTGACA  | 520.285823499848 | 0.36844488966922  |
| GCGCCATATGAC  | 520.29057792413  | 0.700286375766747 |
| CTGGCTGATTCA  | 520.292502521643 | 0.510627657008536 |
| ACAAGTAATGAC  | 520.29437267033  | 0.372555974658258 |
| ATGACTTGTAAAC | 520.299514144966 | 0.349805314342907 |
| CCACACTATGAC  | 520.300268334645 | 0.480272264249132 |
| GTCATTCAGCCA  | 520.301654694079 | 0.582678708332348 |
| AGTCACGCATATG | 520.3104007046   | 0.212583299622972 |
| ATACTATTAGTC  | 520.320847272276 | 0.408026587041928 |
| ACATCTGATGAC  | 520.32158107623  | 0.468013567508536 |
| AAGTATTAGTAC  | 520.332155249129 | 0.309383659335559 |
| CTTCGATGTGAC  | 520.344608679844 | 0.41274473118375  |
| ATCACCGATGAC  | 520.345899964519 | 0.531459334468055 |
| TCAGTCAATCGA  | 520.386718389962 | 0.776662227741327 |
| AGATCCTGACTC  | 520.392507138058 | 0.458565595862232 |
| CAGGCTTGGTCA  | 520.416668867055 | 0.862614215022964 |
| AGTCACTCCTTA  | 520.41863267158  | 0.418242343844622 |
| ATGAGCAAGACG  | 520.442721145904 | 0.123271615919179 |
| TGACGGATTGAA  | 520.448959268752 | 0.543378278420791 |
| CCGCCTGACTGA  | 520.468202870363 | 0.407477215410631 |
| GTCATCAGAACA  | 520.475573117131 | 0.733809416720928 |
| ATCTCAGACTCA  | 520.484604716415 | 0.43873440844431  |
| GTCATCTCTTCA  | 520.486429959488 | 0.264849457627543 |
| CGATAGATGACG  | 520.492539042295 | 0.622343660857858 |
| ATGACTTGATCA  | 520.503402657647 | 0.328860458603885 |
| GTCATCAGTAAC  | 520.510164012459 | 0.651308225581344 |
| GATTACCATGAC  | 520.512620152623 | 0.537800421567139 |
| GTATCATGACAC  | 520.525444100365 | 0.449927638976626 |
| CGTCATTATGGA  | 520.529034467462 | 0.562604712720725 |
| AATTGCTCAGAT  | 520.539811886259 | 0.470765060125173 |
| ACACGTGGTCAT  | 520.554368644844 | 0.440898544334192 |

|              |                  |                    |
|--------------|------------------|--------------------|
| CAGCCGGATGAC | 520.557052861198 | 0.608364751928648  |
| CCTGGGAATGAC | 520.558138776256 | 0.875245213197248  |
| GGTTACTATGAC | 520.578556029153 | 0.692109968350398  |
| GGTTCCTATGAC | 520.585752769034 | 0.317285869643857  |
| GTCATGGACTCA | 520.59281847211  | 0.595544306392602  |
| ATAGATAAGTCA | 520.593157967079 | 0.47937430930328   |
| CACACTTCGTCA | 520.596016250885 | 0.614052261192027  |
| AAAAGGGATGAC | 520.60284045283  | 0.0760259194694727 |
| GTTCTCGAGTCA | 520.603227306953 | 0.585156231883949  |
| CTGTCGCAGTCA | 520.608146034609 | 0.543102607576508  |
| AGTCATGAGACC | 520.614125240179 | 0.598169353427485  |
| AGTCACGGCACT | 520.624294525195 | 0.402647475013268  |
| AAATGATGACCA | 520.649469715521 | 0.617859709901653  |
| ATGACCGAATGA | 520.65005834935  | 0.292082602835461  |
| ACTCGCGAGTCA | 520.66522683016  | 0.789649721354945  |
| GCTGCATAGTCA | 520.675322720483 | 0.694515634105235  |
| AAACGAGATGAC | 520.679273592458 | 0.305806711118102  |
| TCAACTACGTCA | 520.68075425325  | 0.592029404123363  |
| GTACAAGACTCA | 520.693493139687 | 0.688794278194856  |
| CCGCCGTATGAC | 520.693706024319 | 0.741846824455545  |
| CAAGTGTAGTCA | 520.710084834577 | 0.782220256388916  |
| TAGTAGTAGTCA | 520.720229377778 | 0.46942504524071   |
| TCTGAGTCGTCA | 520.758032899459 | 0.486192022578831  |
| AAACTTGCTCAT | 520.766553493181 | 0.1124709069118    |
| AGTCACTTCATG | 520.774306547776 | 0.393459270850338  |
| AACGACTGTGAC | 520.787728430911 | 0.86785714837287   |
| GACTGCGATGAC | 520.794215661415 | 0.72671292705269   |
| GCAAGCTATGAC | 520.804805013563 | 0.678849244565877  |
| CCCAGTTATGAC | 520.809238852306 | 0.173459632963286  |
| CTGAATCGTCAG | 520.811445358248 | 0.936483669192108  |
| GTCATGCTTCAA | 520.811894882789 | 0.666317414056876  |
| GTCATCGTTCCA | 520.831955412865 | 0.395617228440945  |
| GCCGTGGATGAC | 520.83949564     | 0.59655155416527   |
| AAGATTGATGAC | 520.860467146521 | 0.276024319809791  |
| TAGTTTGCGTCA | 520.864397166291 | 0.490525991894855  |
| GTCACAATTTCA | 520.864566061473 | 0.509567696481165  |
| GGTGACAATGAC | 520.874393806749 | 0.312050196541144  |
| GTAGAAGATGAC | 520.876185209637 | 0.523508425539996  |
| GAAAATTATGAC | 520.880722497885 | 0.371685206298154  |
| CTGACGGAGTCA | 520.881335673719 | 0.931014935837628  |
| CACACTTATGAC | 520.882011066411 | 0.67833290755396   |
| AGTTTGCAGTCA | 520.8911999706   | 0.651950133186482  |
| CGCTTATATGAC | 520.900664643364 | 0.631902819631016  |
| GAACAATTAGTC | 520.908187538613 | 0.826588027029368  |
| GGACACTGTGAC | 520.908710146084 | 0.574255768826346  |
| ATGAGCAAGACA | 520.912669205772 | 0.264424639665614  |
| ATCGCGTGACGC | 520.913579243493 | 0.515126208028975  |
| GTCACACTCCGA | 520.926936881269 | 0.299387352936044  |
| AGACTGAATGAC | 520.928678689565 | 0.43315703234042   |
| CTGAACGACTCA | 520.964258988238 | 0.702118266512543  |
| GTCATTACCGGA | 520.986553035387 | 0.551276647429641  |
| TACCCGTGACTA | 520.989267694654 | 0.290086415886965  |
| CGTCAACAGTGA | 520.989934479199 | 0.557618809509248  |
| CATAGCGAGTCA | 521.00326933246  | 0.796480639442466  |

|              |                  |                   |
|--------------|------------------|-------------------|
| GTCATGCAGAAA | 521.004958479623 | 0.288333084139013 |
| GACCGTGCCTCA | 521.008713981931 | 0.550791507085154 |
| ACAGGAGTGACT | 521.021421694173 | 0.466750754440221 |
| TGACGCACGCAA | 521.028009148266 | 0.79645032649265  |
| AGAAGATTAGTC | 521.035010466206 | 0.38234258251631  |
| TACTCGTACTA  | 521.036235825865 | 0.54710940361409  |
| GGTCCCAATGAC | 521.041183331014 | 0.390193946031507 |
| GATAATATGTCA | 521.046416597979 | 0.633323733770358 |
| AGAATCTAGTCA | 521.054126404142 | 0.763929550685541 |
| ATGGGATATGAC | 521.075188120951 | 0.503867949398067 |
| ATGACACGGAAA | 521.099581007154 | 0.458019275992138 |
| CGATACAATGAC | 521.122242488233 | 0.728517040683857 |
| CTCAGTTGTGAC | 521.130584626743 | 0.484300630510644 |
| GCGTCACCTATA | 521.135825747773 | 1.01843765534576  |
| CAGATGAATGAC | 521.138454100501 | 0.171342393522229 |
| ATGACGTTACGA | 521.153254207895 | 0.424683915971859 |
| CAGCTTGACTAA | 521.173584563551 | 0.57416743561813  |
| ACGAGTGATGAC | 521.17670679699  | 0.282810860760241 |
| GTCACATCGAAA | 521.185053292003 | 0.541487176435163 |
| GTACCATATGAC | 521.185691409241 | 0.439173193774534 |
| CATTAGATGACG | 521.185838746605 | 0.622450401024065 |
| AAGTCACCTTGG | 521.213996130325 | 0.342533865778626 |
| GCGTCGTACTA  | 521.249221092269 | 0.42341320893292  |
| CGCGGGTATGAC | 521.254532876098 | 0.452310727155997 |
| GTGACCTGGTCA | 521.258169979052 | 0.499700602912309 |
| ATATCTTATGAC | 521.289191711514 | 0.821077750358738 |
| CGAGCTAGTCAC | 521.301606750527 | 0.648804813156908 |
| CGAGAGTGTGAC | 521.302474320514 | 0.719687911304713 |
| GGTTACGATGAC | 521.303668851404 | 0.619902498123087 |
| AGTCACCTTCGC | 521.305947494904 | 0.352278007275771 |
| GATGTAAGTCAC | 521.307446546938 | 0.311187250630513 |
| AAACTAGATGAC | 521.312244438937 | 0.570296874619855 |
| CCAACAATGACG | 521.321326796134 | 0.574015933156743 |
| TCAGTAATGACA | 521.325986705457 | 0.452294577828232 |
| GTCATATCAAC  | 521.333843382733 | 0.433298647868817 |
| GAACGTTATGAC | 521.34827465911  | 0.512455934084642 |
| GTCATAGCTTCA | 521.352609351588 | 0.375309833838691 |
| AACAAATACTCA | 521.358787312733 | 0.449905412330067 |
| CTGATTGACTGA | 521.364481956899 | 0.418437862466998 |
| GCTACATATGAC | 521.383347048702 | 0.711747556355007 |
| CGGCGTGAATCA | 521.396515925764 | 0.563732648302561 |
| GACTAATACATA | 521.414370724777 | 0.598867706018094 |
| AATTCATATGAC | 521.432211777737 | 0.769978966347285 |
| CGACAATTAGTC | 521.455273227359 | 0.480765924252139 |
| GTCATCGAGGCA | 521.457534006231 | 0.566859597847207 |
| GTCATACAGGAA | 521.462597913328 | 0.435035042191263 |
| ATGACAGCTAAT | 521.469709093989 | 0.48366190499236  |
| CACCTTTGACTC | 521.479464427323 | 0.18914888201766  |
| AACTTGTCACAA | 521.483339562561 | 0.466308721273965 |
| AGTCACTCCGA  | 521.484614838299 | 0.560365841714758 |
| AATAGAGTGACT | 521.489996264271 | 0.443867399033443 |
| CGTTAGTAGTCA | 521.493180212915 | 0.521380796675151 |
| GCACAATAGTCA | 521.498747747316 | 0.61425780865107  |
| TGAGCAAATCAA | 521.49893895695  | 0.574946027691353 |

|               |                  |                   |
|---------------|------------------|-------------------|
| CAAGGCTATGAC  | 521.537292345952 | 0.802754291768176 |
| AAATATCTGTCA  | 521.541235163285 | 0.783647540796906 |
| GTCACGCAACA   | 521.548250550547 | 0.768369707491516 |
| GTCATCACAGAA  | 521.549658856979 | 0.603956855484267 |
| GAACCCACGTCA  | 521.556859501144 | 0.623970141646115 |
| GAGTCAGTTTAC  | 521.561673261507 | 0.794293750769047 |
| TCATTGGACTCA  | 521.583039877663 | 0.650520842084512 |
| ATTTCTGATTCA  | 521.609325232295 | 0.515388566315975 |
| CGCAGCTATGAC  | 521.619110100661 | 0.545475390956995 |
| CACATATTAGTC  | 521.62158314738  | 0.706279547349361 |
| CCAGTTTACTCA  | 521.625321122016 | 0.644080752433967 |
| GGGCCTTAGTCA  | 521.632418775078 | 0.494412457972249 |
| GTGAACCAAGTCA | 521.633882752844 | 0.637101128837231 |
| CAATCGAATGAC  | 521.647186754694 | 0.502941388359759 |
| CGCTCCACGTCA  | 521.652529926278 | 0.330273000508017 |
| ACCTGCTATGAC  | 521.657381789812 | 0.44494435698203  |
| TGACTGTGAAAA  | 521.659790775479 | 0.632433435279472 |
| CAAAACGTGTCA  | 521.672686420684 | 0.415559364185466 |
| ACTCATTTAAGA  | 521.690701677776 | 0.578234875284368 |
| ACTAATAGTGAC  | 521.691840450212 | 0.449499838510146 |
| ATCGTATATGAC  | 521.710845746316 | 0.357661140084336 |
| AACGTTCTGTCA  | 521.748695666596 | 0.533268235970228 |
| AAATTCGATGAC  | 521.756626520593 | 0.376623105123171 |
| ACTATAATGACA  | 521.761201264378 | 0.363368281457214 |
| ATAACGGAGTCA  | 521.767039672769 | 0.481421793380547 |
| CTGACCATGACA  | 521.775183331598 | 0.253849701678242 |
| GCGTCACTGTGA  | 521.783501218632 | 0.530351957493371 |
| CACGTCACCTCTC | 521.788372079794 | 0.296400535687248 |
| CCCCTGATGACG  | 521.790718115878 | 0.611956566446631 |
| ATGAGTCCGCGA  | 521.790870508271 | 0.572111018192955 |
| AGTCACTACTAA  | 521.797710861831 | 0.313787210619362 |
| CGTCATATGTGA  | 521.800390705285 | 0.491173656021817 |
| GTCATCGACGAA  | 521.801208093084 | 0.735843987667699 |
| AGTCACTCCAGG  | 521.802957960333 | 0.199913903934193 |
| TGACGTACATAA  | 521.826842127844 | 0.374400995074263 |
| CCAGTTAATGAC  | 521.829126698046 | 0.405063181240087 |
| GTAGACTAGTCA  | 521.83836649917  | 0.429148448401566 |
| ATGAGTACCAAG  | 521.847186844602 | 0.258756057548428 |
| GAGTCAGGGTGA  | 521.875296578968 | 0.181415152367286 |
| GAATATTGACTC  | 521.875742579746 | 0.484412523603323 |
| ATCGTTAGTGAC  | 521.897682061979 | 1.42389989266064  |
| CTCTATCCGTCA  | 521.898060710494 | 0.188198162240336 |
| AGCACGAATGAC  | 521.912468686666 | 0.825414829443752 |
| GTCATAGCTGTA  | 521.918860703564 | 0.420547426770177 |
| AAAAGTGTGACG  | 521.921837678403 | 0.330083837450381 |
| AGGTCGTATGAC  | 521.931911039479 | 0.513035853312752 |
| CGACCGGATGAC  | 521.940672694187 | 0.487041591062717 |
| TCGGATTGCTCA  | 521.943018812594 | 0.761410216108669 |
| AACTTAAATGAC  | 521.945804607693 | 0.565104115177021 |
| CTTACCTATGAC  | 521.948745340776 | 0.377295192440318 |
| ATGACTTGGTAC  | 521.954760552671 | 0.450055364755962 |
| GTAAGAAATGAC  | 521.956650586334 | 0.377686449212005 |
| GACTGTGATGAC  | 521.962844520005 | 0.438796351230068 |
| ACTGCACAGTCA  | 521.963834795658 | 0.801501738630029 |

|               |                  |                   |
|---------------|------------------|-------------------|
| AGTTAGTGAGTC  | 521.965749867925 | 0.394013402883857 |
| GTAAGGCTCACA  | 521.977447213049 | 0.504259002521313 |
| GTCATACAGATA  | 521.979092070118 | 0.654081741166089 |
| ACGTCACAACTCT | 521.98123539173  | 0.249446769897876 |
| CAACCGAGTCAG  | 521.99912671131  | 0.516371985035833 |
| CACTATAAGTCA  | 522.006417220663 | 0.673926021618885 |
| CGTGAAAATGAC  | 522.006998073422 | 0.381805394221383 |
| GACTCACTCTAC  | 522.008732984615 | 0.224019242452124 |
| CTTGGTAGTCAC  | 522.010604314365 | 0.743738159458767 |
| GGCTCAGACTCA  | 522.014918277153 | 0.573167726295607 |
| GAAGTGATGAC   | 522.039858407238 | 0.244983523388063 |
| AGTCATGGTTGG  | 522.040070980403 | 0.275134366274884 |
| ACGTAGGATGAC  | 522.040770706896 | 0.486176504749811 |
| ACGAAATGACAT  | 522.04956320318  | 0.628180397241745 |
| ACTGCCTATGAC  | 522.055052686696 | 0.474458679239576 |
| CCGGAGGATGAC  | 522.055481279986 | 0.283241127993213 |
| GATGCTAGTCAC  | 522.059915171704 | 0.429436859496064 |
| CATTGCATGACG  | 522.080675581061 | 1.04387183999147  |
| ACGCAAGTCATA  | 522.092545131102 | 0.541729773146332 |
| ACTCATCTGTCA  | 522.119395219826 | 0.12312714199586  |
| TGACTGTGTTAA  | 522.128204638949 | 0.399695872383102 |
| CCCGCTGCGTCA  | 522.142713978681 | 0.527646672300916 |
| ACTGCTAAGTCA  | 522.150569764831 | 0.650272922473906 |
| CGTCATCTGTTA  | 522.221512728048 | 0.343800312876096 |
| ATAAGGAATGAC  | 522.226420777672 | 0.265132746320317 |
| ATATCGCGTCAC  | 522.233841384575 | 0.296806305359289 |
| CAGAATCCGTCA  | 522.234283555842 | 0.585791282327969 |
| CGGCTCTATGAC  | 522.268936980006 | 0.613348205110984 |
| GTCATTTGATAA  | 522.269743440185 | 0.443562030519247 |
| TGACGTGGGCCA  | 522.274335895217 | 0.420092326710864 |
| ATGAGTACGAGC  | 522.287782213618 | 0.334832676698805 |
| GTCATTTCTAAA  | 522.302590961708 | 0.681743891043755 |
| GCGTCGGATGAC  | 522.310829528612 | 0.736075767205287 |
| CAGTCAGATTTA  | 522.310870130074 | 0.48948825963183  |
| CAAGGCGTCATA  | 522.318025706687 | 0.506545901114597 |
| CTTTCACAGTCA  | 522.321398004035 | 0.417314024501781 |
| GCTAGCGACTCA  | 522.321673672829 | 0.424335949532467 |
| GACTCACTGAAA  | 522.323238048622 | 0.422098825001914 |
| GTAACCTGTGAC  | 522.341027856332 | 0.525312819114972 |
| TGACGCAAGTCA  | 522.341554311825 | 0.746296284734945 |
| CTAGCGTACTA   | 522.349267156219 | 0.364980484638377 |
| GAGTCAGGGCAA  | 522.361135461293 | 0.203496317291223 |
| CGAATAAGACTC  | 522.376708949844 | 0.777655975606307 |
| CCATTCTATGAC  | 522.39371439074  | 0.458406098724991 |
| GTCATACGGGCA  | 522.434565469213 | 0.625065844932619 |
| TCAAACGACTCA  | 522.454514579341 | 0.419790734377586 |
| GAAGGGTGACGC  | 522.454720208508 | 0.473625178971799 |
| TCAGCGGTGACA  | 522.456844231576 | 0.362730128360236 |
| CACTAGGTGACA  | 522.46117339179  | 0.708744745923623 |
| TCATCGGTGTCA  | 522.487115072396 | 0.144990856616842 |
| GCATGACATGAC  | 522.493190591378 | 0.23900027019646  |
| CGATATCCGTCA  | 522.499339158771 | 0.547160259959224 |
| TGACCGATATAA  | 522.509911383817 | 0.5113771055642   |
| CACTCAGATGAC  | 522.510197095157 | 0.616019009459368 |

|               |                  |                   |
|---------------|------------------|-------------------|
| CTAGTAGACTCA  | 522.520978410152 | 0.389436373730833 |
| GTCATAGCCACA  | 522.534367458555 | 0.669923075677357 |
| CCAAAAGCGTCA  | 522.541193715006 | 0.660316589259255 |
| GTCATCGTTATA  | 522.548732748181 | 0.669031929756438 |
| GTCATCTGAACA  | 522.581115454469 | 0.73926713316702  |
| GTCACACTGTGA  | 522.597999479655 | 0.629908647323056 |
| ACATGGGATGAC  | 522.604675709785 | 0.414535359965422 |
| TCCATCGACTCA  | 522.618323290432 | 0.288042971580767 |
| ACCGGTGACCCA  | 522.625253400104 | 0.213373980283821 |
| GGTCAAGTCATA  | 522.645829768255 | 0.475580174766945 |
| CTCCTTGACTAA  | 522.65905649857  | 0.407287151667543 |
| CATGATGTGTAC  | 522.691209661659 | 0.57074635759636  |
| ACTGAGATGACA  | 522.691582572311 | 0.479230824372274 |
| CGCAGAAATGAC  | 522.708818886896 | 0.526827215408594 |
| CTGATTTTCGTCA | 522.714742748294 | 0.373380598018773 |
| ATGACGTTGTTA  | 522.722485609483 | 0.420353742116367 |
| ACATTTGACTCT  | 522.731865326423 | 0.454501490442921 |
| GAGTCAGGGCTA  | 522.753414346317 | 0.46873863653307  |
| AGTCAGCCAGTC  | 522.754450028293 | 0.31316821072536  |
| CCAGCCGAGTCA  | 522.790194064905 | 0.855047005592049 |
| GAACGTGAATCA  | 522.834803708102 | 0.514562240483597 |
| CTCCCTCAGTCA  | 522.853099540248 | 0.38094081259136  |
| CCGACTAAGTCA  | 522.867263974381 | 0.448025391249488 |
| CCAGTGCAGTCA  | 522.875563080758 | 0.944025870703908 |
| ACGTCACCTTAA  | 522.894215973607 | 0.455171791463106 |
| TCACGAGAGTCA  | 522.900057847237 | 0.592812417847031 |
| GAAATTTATGAC  | 522.988602593904 | 0.560384665952463 |
| ATTGATTTGTCA  | 522.991674059089 | 0.355198310991111 |
| GATGACAAGACC  | 522.99343510716  | 0.44352375366115  |
| AACGATTAGTCT  | 522.994501608529 | 0.44578915882676  |
| ATGACGCGCCAG  | 523.020354181171 | 0.410837909651495 |
| CGGATACAGTCA  | 523.022812832886 | 0.236553032105895 |
| CGTGCTTATGAC  | 523.028132554354 | 0.328752424096318 |
| GTCATCAGGATA  | 523.059831688075 | 0.499191338066157 |
| GTCATATTTGTA  | 523.060150193109 | 0.340204683519138 |
| ATGACACGGGTC  | 523.097784978176 | 0.385011330743888 |
| CCTGAGAATGAC  | 523.103349590842 | 0.599545441465904 |
| CATTGGCATGAC  | 523.129877233255 | 0.705728781942639 |
| AAACTCTATGAC  | 523.142716437638 | 0.63477504212401  |
| ATGACAGACAAA  | 523.150630884957 | 0.429901904124797 |
| GCGTACTAGTCA  | 523.151144831277 | 0.434017691891048 |
| GACACAGTCAGC  | 523.162614394677 | 0.618458968033123 |
| TATTCACAGTCA  | 523.187364742414 | 0.343030866976662 |
| AGGTCTCGTCAT  | 523.199131919379 | 0.671474037853011 |
| GACTGATGACCC  | 523.201327321691 | 0.610781606931833 |
| AGTGTACAGCAA  | 523.212619327261 | 0.560693126436004 |
| AAAAGTGAGTCT  | 523.21326957934  | 0.468053800734041 |
| AGACCATGACTG  | 523.222275900152 | 0.54740019780488  |
| ACTACTTATGAC  | 523.23704086827  | 0.509327665328067 |
| GTCACCGGGTCA  | 523.261292126307 | 0.758402183360372 |
| TCCTCTGATTCA  | 523.261638011457 | 0.323194534759781 |
| AGTCACTTGATC  | 523.262017916701 | 0.290647501616716 |
| GTCATTCAGTA   | 523.274743214406 | 0.21895106921837  |
| GTAACCCAGTCA  | 523.294796533801 | 0.723598927323092 |

|              |                  |                    |
|--------------|------------------|--------------------|
| ATGACATCGCAA | 523.29722766786  | 0.480212121844353  |
| AGTCACTAGAAC | 523.307745440953 | 0.349318303600382  |
| GAAACACAGTCA | 523.321255078853 | 0.616251088390879  |
| TGTCATTGCTAA | 523.323628718116 | 0.833888997918396  |
| CAATCATGTGAC | 523.324730917996 | 0.733381844678222  |
| GCCATAAATGAC | 523.360522593481 | 0.497621647069437  |
| AGTGAGTGTGAT | 523.364770714162 | 0.247257241405969  |
| GTCATTCCATCA | 523.36839729239  | 0.308165579975021  |
| AAAAGTGACGTG | 523.370065628596 | 0.20925601167592   |
| TACAACGCGTCA | 523.391441426894 | 0.594665918092939  |
| TGACATAGTCAA | 523.415910210387 | 0.308339106470861  |
| GAGTCAGTAGCA | 523.41893157675  | 0.431702953822453  |
| AAACGCGTGACT | 523.462563365586 | 0.241398757575981  |
| GCCGCAATGACA | 523.474455488935 | 0.643879118213994  |
| GTCACACATAAC | 523.480308520516 | 0.428727787100998  |
| AGTCAGACTATA | 523.491186964564 | 0.385486366318385  |
| CCAACATGACAC | 523.494943977793 | 0.404986900571528  |
| ACTGGTTCGTCA | 523.494991259984 | 0.383488673884578  |
| GACCAATTATGA | 523.523896263848 | 0.644367505021697  |
| AACAAGGATGAC | 523.529507172315 | 0.417628626201091  |
| ATCGACGGTGAC | 523.530560487318 | 0.347865157359517  |
| AAACACGATGAC | 523.558743683078 | 0.577557325511639  |
| AAAACCGAGTCA | 523.560899449274 | 0.196712529914418  |
| GCAAGCCAGTCA | 523.565634607515 | 0.684297949218749  |
| GCCATCGATGAC | 523.588037850059 | 0.260162617610991  |
| ATGACGCGCTTC | 523.598729289283 | 0.524378696398033  |
| ATAATATGACCC | 523.601948801297 | 0.971043062281335  |
| TGTGTCAGCGAA | 523.602491314337 | 0.327849170421956  |
| ATGACAACGATA | 523.615781164697 | 0.267270635271449  |
| TGACACAAAACA | 523.626192121733 | 0.444264913193681  |
| TCATCTGATTCA | 523.645424681085 | 0.38042502959191   |
| CCAGCTGTGACG | 523.652705341101 | 0.700530423185695  |
| TATTCGTAGTCA | 523.667814947544 | 0.606165066041024  |
| AAAAGGCGTCAT | 523.674820796975 | 0.0915725591803058 |
| ATCTATACGTCA | 523.685912251641 | 0.299805721527202  |
| TACTCTGTGTCA | 523.692715538817 | 0.392902650612357  |
| AACGCGTACTA  | 523.763544575017 | 0.49513606679709   |
| ATCGTTGATGAC | 523.788309489109 | 0.923738294924618  |
| AGTCGGAGTCAG | 523.794194808948 | 0.250708048436049  |
| ATGTTGCATGAC | 523.795766108352 | 0.333143081548717  |
| CAAGGATATGAC | 523.79838282139  | 0.454268632727534  |
| AGTCACTTCTCA | 523.799330085324 | 0.274433257945302  |
| ATACACTGTGAT | 523.803285349813 | 0.305524358021153  |
| CTTCCGATGAC  | 523.845120113388 | 0.453031226042256  |
| GACCCGAGTCAC | 523.849101188115 | 0.52264214224359   |
| AAATATTAGTCT | 523.862405619577 | 0.566304598744125  |
| CGGTATAAGTCA | 523.886638721252 | 0.809396587611728  |
| TCGCATGAATCA | 523.917689406314 | 0.62123200701686   |
| GCGTCACCACAA | 523.920910495324 | 0.803546127323425  |
| CCTTATGATGAC | 523.931292705441 | 0.753211008385718  |
| GACGTGGATGAC | 523.933890800319 | 0.426577747952159  |
| CGTCATTATGAA | 523.9362509097   | 0.514796884890234  |
| CTCCGAGATGAC | 523.951885145485 | 0.581883582832511  |
| AGCCTCATGACT | 523.953156171505 | 0.288469878031253  |



|               |                  |                   |
|---------------|------------------|-------------------|
| CGTCACTGACTA  | 523.96132692408  | 0.36103107699606  |
| AGTCACTACCGG  | 523.962303340319 | 0.455102791911523 |
| ATGACGCCGTTA  | 523.966167495872 | 0.477516558244365 |
| TGACGTAGCAAA  | 523.981517809685 | 0.370279845267189 |
| ATGACGAACCAT  | 523.991509543415 | 0.497988472860988 |
| ATACTGATGACG  | 523.997777072173 | 0.467596397957057 |
| ATGACCACTACA  | 524.005310951111 | 0.123953129112507 |
| CACCAATATGAC  | 524.019605678151 | 0.463715300734065 |
| CAATTATGTGAC  | 524.020569014955 | 0.434991883394854 |
| GACTCACTATAC  | 524.031299963726 | 0.230106643620047 |
| ATGACATTTACA  | 524.036404534687 | 0.277089708951795 |
| ACAGGCTATGAC  | 524.06006286384  | 0.364595458163912 |
| ATGACGGCATCA  | 524.097636373263 | 0.436989312999146 |
| GTCATTCACGTA  | 524.109544338014 | 0.582373504735679 |
| AGTCACTCTTCA  | 524.148817658515 | 0.389981482632188 |
| AAGCCTGTGACA  | 524.161084537412 | 0.625516334321752 |
| CCGGATGATGAC  | 524.172316013792 | 0.528906318256601 |
| GGCCATTATGAC  | 524.17981306516  | 0.516577546633794 |
| ATCTTCGATGAC  | 524.184513678855 | 0.663884237535119 |
| GTCATCGTTACA  | 524.185579851969 | 0.909938342014169 |
| CTTAGGGAGTCA  | 524.206724958072 | 0.343005264761774 |
| TGACTACTGCAA  | 524.213099003092 | 0.715644515134842 |
| ATGAGCAAATGC  | 524.220771759489 | 0.641573674220527 |
| GTCATAGGTGCA  | 524.221800444159 | 0.952837898382688 |
| AGACTAATTCGA  | 524.22707068064  | 0.307454931944768 |
| ATAAGCTATGAC  | 524.23205896464  | 0.630645317646581 |
| CGACCTTACTCA  | 524.232566280713 | 0.157519540991328 |
| CTGACGCAGTCA  | 524.282301265645 | 0.518842757606634 |
| CATCATCGGTGA  | 524.307516352792 | 0.519120109063548 |
| GCTTGTAATGAC  | 524.320740804124 | 0.634312148035546 |
| CTGGCGCAGTCA  | 524.324535853968 | 0.922078878762428 |
| GTCATCGCTGTA  | 524.331821122207 | 0.425232671373267 |
| AGTCAGAAGATG  | 524.336764969406 | 0.227516839882522 |
| GTCATTTTAGAA  | 524.355552202843 | 0.384030231227666 |
| CGATTCAAGTGAC | 524.37984452695  | 0.791734189938405 |
| ACACTCTGTCAT  | 524.384875812399 | 0.164693535082562 |
| GAGTCAGTACAC  | 524.40859369108  | 0.733779760638163 |
| GATACTACGTCA  | 524.443014355115 | 0.485255127463516 |
| GCAGTTTATGAC  | 524.445176232457 | 0.470510426384225 |
| AAAGTCGATGAC  | 524.457188011574 | 0.389976907081793 |
| GACTAGAATGAC  | 524.481618949094 | 0.287910666556748 |
| CGAATATATGAC  | 524.482733686942 | 0.436695635496296 |
| CAGATTGGTGAC  | 524.494224911753 | 0.255771382766323 |
| AAGTGTGATGAC  | 524.497494745223 | 0.203520279397834 |
| CAACTCGGTGAC  | 524.50207635942  | 0.71549781974612  |
| CGGGTCGATGAC  | 524.518139635468 | 0.35120745309409  |
| CTGCTTCAGTCA  | 524.544913029374 | 0.807999960774825 |
| AGTCACGCCAT   | 524.553409552404 | 0.758781913877568 |
| GTCATTCTGAGA  | 524.554656599326 | 0.684593230214476 |
| CATATTGAATCA  | 524.557945021893 | 0.591065087124136 |
| GCACCATATGAC  | 524.613208190605 | 0.580190739504209 |
| GTCATATGAATA  | 524.61575830072  | 0.537126340881202 |
| TCATACATATGA  | 524.615946703989 | 0.508053043504457 |
| GTCATCCGCGGA  | 524.644468148604 | 0.618303008030029 |

|               |                  |                   |
|---------------|------------------|-------------------|
| AGAGTCAATGCG  | 524.666497930456 | 0.267864326668178 |
| CCCATAGACTCA  | 524.683707711058 | 0.429335285152834 |
| AACATCGGTGAC  | 524.691155657113 | 0.576833846156517 |
| ACTCATACTAAG  | 524.701392009979 | 0.304520672261738 |
| CGAACACGTAAC  | 524.701677102137 | 0.496864102930785 |
| GTCATAGAGGAC  | 524.719898073353 | 0.500326825311608 |
| CGCCGTTACTCA  | 524.723409595894 | 0.385197459712696 |
| TACCAAGTCATA  | 524.756881726837 | 0.32128944451925  |
| CGTCACACCTGA  | 524.761357559341 | 0.615468131970844 |
| GTC AACAGTGAC | 524.771617192033 | 0.443161455122581 |
| AAACTCGATGAC  | 524.776181591574 | 0.780354852966674 |
| AGAGTCAGGCTG  | 524.800535475526 | 0.349775325095975 |
| ATACCAGTCAGA  | 524.827965889359 | 0.144628848373228 |
| ATACAGGATGAC  | 524.833212615083 | 0.225530155283674 |
| AGAGTCAAAGAG  | 524.836523525826 | 0.379412468655192 |
| AGTGGGTGTCAT  | 524.839039110934 | 0.34555907850378  |
| TAACTTACGTCA  | 524.845562178763 | 0.650474854681137 |
| ATATGGTATGAC  | 524.867626804323 | 0.566518429364657 |
| CAGTCAGCGTTC  | 524.86910220412  | 0.491973593348919 |
| CCAATGTTGTCA  | 524.889286221883 | 0.541104343814953 |
| CAGTCAGATTTCG | 524.926987893024 | 0.894096316356519 |
| TCGATACAGTCA  | 524.929189874106 | 0.417869042223982 |
| GATCAATAGTCA  | 524.933902281305 | 0.452241563087054 |
| ACCTGCGAGTCA  | 524.934601897785 | 0.430307328530648 |
| ACCATAGTGTC A | 524.944305164425 | 0.774081262868185 |
| CCTTTGCAGTCA  | 524.948411017153 | 0.790152677027815 |
| AGAGTCAATGGG  | 524.955586400431 | 0.386547039910292 |
| TACGATCTGTCA  | 524.95693336668  | 0.517756291566966 |
| CAAGTTTCGTCA  | 524.957584508659 | 0.716796862608018 |
| CCTACTTATGAC  | 524.958696022196 | 0.431398033018341 |
| CACACTAAGTCA  | 524.973308386909 | 0.639686113140811 |
| ATGACCGAATTC  | 524.974411359878 | 0.588679363506606 |
| GCAACTTACTCA  | 524.975234154712 | 0.535438206875301 |
| GACTGATTACTC  | 524.975762914671 | 0.598564030209642 |
| CGTCATGTATGA  | 525.001139910427 | 0.468294651410627 |
| AGCTTGACACAT  | 525.001833543714 | 0.410223931109004 |
| ATCCATTGACTC  | 525.02602987988  | 0.45215673474734  |
| CCATTGACTGAA  | 525.026791409744 | 0.31441343329587  |
| ATGAGTAGTTTG  | 525.027834551505 | 0.380910262210008 |
| ATGACGAACCAA  | 525.033582059206 | 0.129645614616931 |
| GTA CTTTATGAC | 525.034318162037 | 0.964319786604017 |
| ATTGCCAGTCA   | 525.034617703576 | 0.338503981938752 |
| CAACTTGTGACA  | 525.041676915395 | 0.651341970142979 |
| GTCATACATCCA  | 525.05297358921  | 0.296361528160299 |
| CGTCATCCCTAG  | 525.053162363454 | 0.34600993749608  |
| TGTCATTTCGAA  | 525.059729585486 | 0.365042822426901 |
| GTCATCGGCCGA  | 525.060367111036 | 0.85650442311554  |
| GTCATGCACAGA  | 525.062893057404 | 0.660761678217526 |
| CCGATCGGTGAC  | 525.071074855078 | 0.692919346467135 |
| CAGGCTGCGTCA  | 525.082329973791 | 0.361524527027073 |
| AATCATGACATA  | 525.087733048396 | 0.267051377478549 |
| ACGAATTAGTCT  | 525.088579162425 | 0.392515673346818 |
| CGTCATTTATAG  | 525.113353576601 | 0.38586029997124  |
| ATGGCACATGAC  | 525.124207380508 | 0.801450566057537 |

|              |                  |                   |
|--------------|------------------|-------------------|
| AGCCTTTATGAC | 525.124595357464 | 0.78521280498914  |
| ATGACGAGACTC | 525.152170201468 | 0.282899222693288 |
| CATAGCAGTGAC | 525.16130036535  | 0.844782444187755 |
| TCATTGACGTAA | 525.161867765309 | 0.589146815533955 |
| AGTCACGCGACT | 525.174486775718 | 0.490279889266426 |
| ATGACTTGGCAG | 525.174577859892 | 0.491400519803692 |
| GTCCTGTGATA  | 525.178542293914 | 0.242433115495953 |
| TGACTCGCTCAA | 525.201254057009 | 0.506313744250643 |
| GGCGTCGCACA  | 525.214270919441 | 1.43095812399967  |
| TGTGACCACGAA | 525.223827916417 | 0.442291465633099 |
| CCCTTCGACTCA | 525.22578983231  | 0.427524890180561 |
| GCGTCACAGTAA | 525.232232153377 | 0.307906966529683 |
| ATCTCTGATGAC | 525.244159427834 | 0.391333009968648 |
| ATCTGATGACCA | 525.253071321428 | 0.506701946440961 |
| GTCATAGCCAC  | 525.261393988954 | 0.51329883217492  |
| ATGACGTTGATC | 525.271706579648 | 0.510453244757445 |
| GTCATATAGGAA | 525.282503225656 | 0.419646874686081 |
| ACCACGTAGTCA | 525.284710063494 | 0.333862442688484 |
| AAGATGGAGTCA | 525.319719553085 | 0.38687856755404  |
| ACGATTAAGTCA | 525.322263691656 | 0.549874314916791 |
| GTCACCGTAATA | 525.338364016124 | 0.448829099865968 |
| CTCCGCGAGTCA | 525.341828721257 | 0.695193755201024 |
| GATGAGGTCATA | 525.352379698565 | 0.287718172002709 |
| CGTCACCGTGGA | 525.368489904962 | 0.512998165444407 |
| ATGCCTCAGTCA | 525.382141834252 | 0.170854337439676 |
| CAGTCAGAAATG | 525.39218558589  | 0.653637665448265 |
| TCATCTGAATCA | 525.401303023099 | 0.514673125677738 |
| ATATCGTGAGTC | 525.417172771416 | 0.519297789274263 |
| CCGAAATGTGAC | 525.424420771147 | 0.629373210157609 |
| GATCACGATGAC | 525.429096315627 | 0.672857892691049 |
| GTCATGTGGTCA | 525.456939487292 | 0.302984203548339 |
| TGACGTACACAA | 525.466237354081 | 0.604589013921621 |
| CTGACATATGAC | 525.466813575418 | 0.322683559512218 |
| GTCGTGGAGTCA | 525.47569139601  | 0.401549133774734 |
| TATCATTGCTCA | 525.498459976036 | 0.431900521669386 |
| CCACGGAATGAC | 525.501561403883 | 0.550233967673443 |
| GTCACCCGTATA | 525.502938403393 | 0.38933314353044  |
| CAGTGCGACTCA | 525.513072851168 | 0.385965940430316 |
| CACATTTGGTCA | 525.518650172372 | 0.561082843461301 |
| TACGTTGACACA | 525.52544344665  | 0.668604665662188 |
| CCAAGTGGTGAC | 525.527598400515 | 0.64475553723075  |
| AACGGTTCGTCA | 525.531884758457 | 0.560541887300701 |
| GGACAAGACTCA | 525.543376009358 | 0.393682924537141 |
| ACCTGATATGAC | 525.552732044881 | 0.382650528854486 |
| GATCACACGTCA | 525.558084642361 | 0.47974001408195  |
| GTAGTGAATGAC | 525.579945517386 | 0.242955767920606 |
| AATGATTTGTCA | 525.59177114641  | 0.740746192091782 |
| ACCGGAGTGACT | 525.608972007435 | 0.502387450423842 |
| GTCTCTGACGAA | 525.61560352416  | 0.634791377996785 |
| TGACTGGTAAAA | 525.618318413929 | 0.615474581197518 |
| ACGGTCGTGACT | 525.628239582622 | 0.491788670424836 |
| TGACTCTGTAAA | 525.631963760144 | 0.589598061763682 |
| TCGGATAAGTCA | 525.656700509031 | 0.279351623971173 |
| GTGCAAGACTCA | 525.681880829051 | 0.75972780447392  |

|               |                  |                   |
|---------------|------------------|-------------------|
| ACGTCACAGTGC  | 525.711321543237 | 0.776535362185419 |
| GAATCGGAGTCA  | 525.713165349498 | 0.248346045634779 |
| AGACTAATAGGG  | 525.716996664066 | 0.471168422068925 |
| AGAGGGACTCAT  | 525.724182626432 | 0.388892889667302 |
| CGGCCCTATGAC  | 525.725305562762 | 0.539304289442099 |
| GTCTATTGCTCA  | 525.759628648347 | 0.382983152454251 |
| GTCGATTGGTCA  | 525.771579409364 | 0.488583249263976 |
| CTATATATGTCA  | 525.785179460212 | 0.726335882844434 |
| GCAATTGTGACA  | 525.789403923984 | 0.656243282122618 |
| GAGTACCAGTCA  | 525.802155956637 | 0.492237904142833 |
| AGGGAGTGAGTC  | 525.80219287405  | 0.256734102679257 |
| CCGGTTGACACA  | 525.806730923208 | 0.434664938237749 |
| CTGTGGGAGTCA  | 525.812161821594 | 0.163060497548195 |
| ATTCATGTATGA  | 525.814067991409 | 0.472726852436933 |
| AGTTTGACACAT  | 525.815166899718 | 0.36659044385198  |
| GAGAGGGAGTCA  | 525.817776828142 | 0.235152889870493 |
| CAAATTTCTGTC  | 525.823888883303 | 0.447387972958425 |
| GTCATAACACCA  | 525.827360580631 | 0.398226460493782 |
| ACGAACATGTCA  | 525.833182621012 | 0.419143458203188 |
| CGAGATCTGTCA  | 525.844139532249 | 0.563945461547964 |
| GTCATCCTCACA  | 525.87096382131  | 0.463031607182285 |
| ACATTTGCTCAC  | 525.922744016453 | 0.369779732344511 |
| AAACCTGACTGA  | 525.943952862774 | 0.430593642402614 |
| GTACCCGATGAC  | 525.944601852369 | 0.661638792454787 |
| CTGACTGTATGA  | 525.95068350234  | 0.375066086794077 |
| ACTCATACATGA  | 525.956780727677 | 0.260673959335673 |
| GTTTATTTGTCA  | 525.959195071408 | 0.596989883743136 |
| ACTGTGTAGTCA  | 525.97432401966  | 0.524890417250719 |
| ACGACTGATGAC  | 525.974852364364 | 0.734380036624273 |
| AATACATGACGC  | 525.999280488847 | 0.317135508813455 |
| GCAGAATATGAC  | 526.000198558483 | 0.484354956106977 |
| ATTACGGAGTCA  | 526.018726496077 | 0.558865826761072 |
| AATGGCGTCACC  | 526.034086931675 | 0.37324774746495  |
| GACCTAAATGAC  | 526.040643652108 | 0.87554508196591  |
| ATGAGTACCAGA  | 526.055505967403 | 0.387907795755544 |
| AACATTGACTCT  | 526.057004938261 | 0.515389905402152 |
| ACCGGCGTGACT  | 526.081569667089 | 0.278664838180484 |
| AGTCGTTACTCA  | 526.116050740696 | 0.219391966026851 |
| CGTCATTCGAG   | 526.139238896135 | 0.370794734254444 |
| CATTACTAGTCA  | 526.163802955668 | 0.759028404111642 |
| GTATATCCGTCA  | 526.178586236563 | 0.665161904092329 |
| GTCATCAAAGAA  | 526.1983865823   | 0.639789142410819 |
| GTCATTCACCTA  | 526.206611399578 | 0.499454912655119 |
| CCATCCACGTCA  | 526.2113145648   | 0.260340162593086 |
| AGTCACTACTGC  | 526.226065512589 | 0.206562609311353 |
| CAAACCTGCGTCA | 526.233248903782 | 0.583036564412611 |
| GTCACATACGTA  | 526.243315385579 | 0.710376921819685 |
| CAGAACTCGTCA  | 526.243593538022 | 0.598387528604222 |
| CTCACTGAATGA  | 526.257754515066 | 0.809942483553237 |
| GGACCATATGAC  | 526.265542092353 | 0.508638714089203 |
| CACTGACAGTCA  | 526.270677012056 | 0.63602367614576  |
| CCTCAGATGACG  | 526.27861796505  | 0.496129216351635 |
| GCCTATACGTCA  | 526.283604201885 | 0.565599635236662 |
| ACTACGAATGAC  | 526.289491872255 | 0.27320485184232  |

|               |                  |                   |
|---------------|------------------|-------------------|
| GACGTATTAGTC  | 526.305782846727 | 0.554387513356778 |
| TCTACTTACTCA  | 526.308790576235 | 0.20850202314519  |
| AAGACTGACACA  | 526.312166454836 | 0.499381257861791 |
| CGGATATGACCC  | 526.338206621003 | 0.866760479234213 |
| ATCATGCGTGAC  | 526.353826246313 | 0.574885250747415 |
| GGCTTACAGTCA  | 526.375457398629 | 0.707996209709918 |
| AGTCACGGTAGC  | 526.399187654648 | 0.417346231827133 |
| CAAATTTGACTC  | 526.423845789021 | 0.726315318348625 |
| GTCATATATGTA  | 526.42648612099  | 0.497699189462583 |
| CGGTACTGACTC  | 526.451222287658 | 0.586228195637658 |
| GCAATAGATGAC  | 526.467297701645 | 0.358102243138668 |
| ATGACCTAATTG  | 526.469883486569 | 0.268463244186925 |
| CATTGCTGAGTC  | 526.47754110465  | 0.740621280428366 |
| ATGACAGTACCA  | 526.486565084081 | 0.594202684346192 |
| GATGACATTTAC  | 526.504489208974 | 0.231935723232703 |
| GTCATATGCAAA  | 526.505385168001 | 0.591343749753556 |
| CATCGTGGTGAC  | 526.51657535731  | 0.698815117056577 |
| GTCATTACCTTA  | 526.523432113503 | 0.373952608622905 |
| GCTCAAGACTCA  | 526.541718581656 | 0.699464402976049 |
| ACTCATAGGTGA  | 526.576481827425 | 0.727536797642646 |
| CAATACGCGTCA  | 526.583873491188 | 0.75946958183852  |
| CAATCTGATTCA  | 526.585017652138 | 0.352178151828174 |
| CTCATCTGATGA  | 526.585644178274 | 0.654231551820053 |
| GTGTCACCTAAA  | 526.597687822521 | 0.590096873624574 |
| GTGGCGTGACTA  | 526.602723345159 | 0.172245553431875 |
| CACCTGTGTAC   | 526.615409908283 | 0.340822769840754 |
| ATGAGCAAAAGA  | 526.616597083856 | 0.323438604477196 |
| ATTTAATTGTCA  | 526.617924101273 | 0.426189416647836 |
| ACGTTTACGTCA  | 526.620082306599 | 0.454582559366554 |
| CGTGGCTCTGAC  | 526.625747419821 | 0.541136054673217 |
| CCAGGTAGTCAC  | 526.627032727597 | 0.464474786730597 |
| AGAGTCAGGCCG  | 526.65431037642  | 0.398178434106882 |
| GTCATCTGCAAA  | 526.668311558465 | 0.670499121606197 |
| CAATCTACGTCA  | 526.687750390857 | 0.27183219634491  |
| ATCACACAGTCA  | 526.702900518882 | 0.55820105509581  |
| CTCGGATGACCA  | 526.738570799065 | 0.42330196638167  |
| ATGACGTTGCGC  | 526.743287987401 | 0.431281056019306 |
| CGTTGAGATGAC  | 526.790355181221 | 0.750687185725173 |
| ACAGGCGAGTCA  | 526.792774182767 | 0.660361766658795 |
| GTCATCCCGAAC  | 526.798516363174 | 0.478263927528859 |
| AAAAGTATGAC   | 526.804407536776 | 0.284786082191591 |
| ATTGACGCGTCA  | 526.804433318652 | 0.752348869155634 |
| ATCGAACATGAC  | 526.824818619051 | 0.877430838521907 |
| GATGACTTGGCA  | 526.837401226371 | 0.370140230936449 |
| TCTAGCGAGTCA  | 526.856025935379 | 0.281008647433805 |
| GACTCAGAGCCA  | 526.864526739341 | 0.86134040692669  |
| GTCATAGTAAAC  | 526.869109078311 | 0.699460875993225 |
| ATTACTGTCATA  | 526.869505908821 | 0.256082717638035 |
| AGACTAATAACG  | 526.87309010984  | 0.445250329033233 |
| ATGTGTCAAAGAC | 526.874276347966 | 0.208549517842665 |
| ATGACAAAGTTG  | 526.87911619665  | 0.458107326634319 |
| TCATCCGTGTCA  | 526.885037424843 | 0.403747280997498 |
| GTCTATCTGTCA  | 526.886226574059 | 0.491646698805879 |
| CCCAGATATGAC  | 526.896865887013 | 0.33960715900253  |

|              |                  |                   |
|--------------|------------------|-------------------|
| ACCCATTGGTCA | 526.907040821255 | 0.606908732707107 |
| CAAAGTGACGTG | 526.910540303558 | 0.414808514144661 |
| GTCATCGGGGAC | 526.913853743894 | 0.203011179243119 |
| TGAAATTAATA  | 526.916258706774 | 0.760339568347915 |
| GTCATAGCAATA | 526.937004452835 | 0.405664344359787 |
| GATGACTTGCAC | 526.969129371391 | 0.477797687267898 |
| GCCAGCTAGTCA | 526.977693582055 | 0.73067482596053  |
| GCCGAACGTGAC | 526.980311723027 | 0.706554035388252 |
| CTATGTAATGAC | 526.980333557658 | 0.4925907784347   |
| TGACGAATGAAA | 526.980352470964 | 0.365067773396679 |
| GATTCTGATTCA | 526.984675611402 | 1.00263388719132  |
| ATCGCTTACTCA | 526.990741913507 | 0.462717442339544 |
| CTGGCCTGACTC | 527.013566540041 | 0.475278323845542 |
| CTACAATAGTCA | 527.027245993892 | 0.625598216605478 |
| CCGTGACATGAC | 527.049535890325 | 0.566051667435789 |
| ACTATGCGTGAC | 527.090219606869 | 0.645068127863754 |
| GCCTATCTGTCA | 527.094560902409 | 0.26554736672079  |
| ATGCATATGACG | 527.097599155391 | 0.596156926594406 |
| ATGACACGGATA | 527.146008217676 | 0.183394652333558 |
| AGACTAATACAA | 527.168973849036 | 0.368438360377324 |
| ACAATGTGTGAC | 527.174739943993 | 0.752731923286442 |
| CAAGTAGACTCA | 527.193889587944 | 0.676865184310436 |
| GTGAGTCGGACA | 527.214173339827 | 0.342694278902978 |
| GGACAATATGAC | 527.221434567976 | 0.608077697988151 |
| ACAGGGAATGAC | 527.221916240886 | 0.568631654495017 |
| CGAAAGCGTGAC | 527.225668407882 | 0.884514481107716 |
| TGACATGGCTCA | 527.234428250028 | 0.368420167000945 |
| AAGGCTCTGACT | 527.242370541998 | 0.514080581974018 |
| GTCATATATCGA | 527.252347604515 | 0.447928639902227 |
| GAAATAAATGAC | 527.279699606195 | 0.456644988163163 |
| CACGTTTGTGAC | 527.283247894185 | 0.744571510717609 |
| CGCCGTTATGAC | 527.286062450816 | 0.489028347353409 |
| AGCCCTGATGAC | 527.292328370645 | 0.600359591120334 |
| TGAGTAAGCAAA | 527.29568621821  | 0.414349878349936 |
| TACAATTCGTCA | 527.296433686406 | 0.129292446592575 |
| GCCGGTGAATCA | 527.311040119392 | 0.676389883700116 |
| GAGTGTGACCAC | 527.312825305681 | 0.406997598982896 |
| ACACATTTGTCA | 527.322989164152 | 0.423556600209327 |
| AAGAGTTATGAC | 527.337203549425 | 0.289806732244406 |
| GATCACCTATGA | 527.357271371473 | 0.82009797929269  |
| GTCATAGGCACA | 527.361937311721 | 0.198171115438205 |
| GCATTTTACTCA | 527.370984964607 | 0.417835766104196 |
| TAGACGTAGTCA | 527.374057401769 | 0.509703779000254 |
| ACGGGCACGTCA | 527.424747808021 | 0.77856780095445  |
| AAGTTGTATGAC | 527.432193637639 | 0.288429763280227 |
| ATGACGATGAAA | 527.44839948545  | 0.613535354324633 |
| GAGTCAGTTATA | 527.457629406003 | 0.302085331061421 |
| CGGGATCCGTCA | 527.487335231022 | 0.342143449514201 |
| GATCCGTATGAC | 527.488765398138 | 0.35791081542537  |
| ACTCTACAGTCA | 527.489190295287 | 0.452804693250089 |
| AATTAGAATGAC | 527.50421091158  | 0.679901682007288 |
| CCTAAATATGAC | 527.515744541153 | 0.377248494895087 |
| GAACATGATGAC | 527.519052030954 | 0.487193716410964 |
| GGCCAAGTCAC  | 527.521882625628 | 0.517938049926704 |

|               |                  |                   |
|---------------|------------------|-------------------|
| AAATACTGACTC  | 527.524994375805 | 0.411366316008179 |
| GTCATCTGCAGA  | 527.534238179537 | 0.558961650079567 |
| GTCATTGCGTAA  | 527.54113070052  | 0.420180336708468 |
| ATGTCACGTCAC  | 527.545406701371 | 0.251649966606892 |
| GAGTCAAAGATC  | 527.55051629456  | 0.441921773946241 |
| GCGTCACGCCGA  | 527.557616849063 | 0.889103562506854 |
| ATGGTGGAGTCA  | 527.562630423874 | 0.463520038035522 |
| CGAAACTGAGTC  | 527.565077732542 | 0.938045658394948 |
| AACAATGGTGAC  | 527.600546413495 | 0.959711975979326 |
| ATGACGTCTTAA  | 527.618625455647 | 0.389218388820325 |
| CGCTGCTGAGTC  | 527.618938763913 | 0.959232025782013 |
| AGTGTGTAGTCA  | 527.619989554552 | 0.515367461746908 |
| GTCACAAACTGA  | 527.639319309239 | 0.403528948241236 |
| TCAAGTGACCCA  | 527.644743092033 | 0.371857851978592 |
| CGCTCGGAGTCA  | 527.654701839435 | 0.499797282244026 |
| GACTCTATATGA  | 527.657535944819 | 0.666741503896162 |
| AACACTGATGAC  | 527.668130468763 | 0.540450054927517 |
| AATATGTCAGAC  | 527.668584768945 | 0.519062704496193 |
| CCAGTTGTGTCA  | 527.681371674957 | 0.294948990250266 |
| TCCATGGAGTCA  | 527.684386286737 | 0.781298849146764 |
| TCTACTGTGTCA  | 527.69285981709  | 0.338357579836141 |
| GTATGACTTTTA  | 527.716567505023 | 0.455704915346267 |
| CGTCATTCCGGA  | 527.72080110419  | 0.564785008000902 |
| TCCTCTGAATCA  | 527.745919618214 | 0.459209350658116 |
| ATGTGTCAAAGAG | 527.756821741835 | 0.206585303803658 |
| GACTAATAATGA  | 527.769524033361 | 0.541931010968216 |
| AGATCTACGTCA  | 527.789387778937 | 0.521529670234665 |
| ACGTCATGTCAC  | 527.792340899659 | 0.321171313906064 |
| CACTGAAGTGAC  | 527.796676215725 | 0.906327348083143 |
| GCTAGTTATGAC  | 527.812653771833 | 0.323115818300425 |
| GATACCGAGTCA  | 527.824278632763 | 0.577433383800165 |
| TGACTAGATAAAA | 527.825310992392 | 0.477778140287956 |
| GACAATAATGAC  | 527.826463517561 | 0.316346667363749 |
| GACATCGATGAC  | 527.83571709199  | 0.367556784815437 |
| AATGACGTCTTC  | 527.84598671439  | 0.202909493094314 |
| CAGAATATGTCA  | 527.847678974242 | 0.362271011765645 |
| CACGTAATGCTG  | 527.848536727792 | 0.771157780088576 |
| CAATCTTCGTCA  | 527.901920669092 | 0.430912344969204 |
| CATCATAAGTCA  | 527.902820430572 | 0.510441151432873 |
| GAGTCAATACTA  | 527.931903560949 | 0.479730815901177 |
| GACTCACTAAGA  | 527.946003297227 | 0.667067491433137 |
| ACAAGGAATGAC  | 527.962842533881 | 0.481960749296205 |
| GAGAAATATGAC  | 527.984053912215 | 0.3776734998397   |
| GTCATTCATCAC  | 527.992040911185 | 0.487397207026573 |
| TCATCATAATGA  | 528.002793398124 | 0.549454191848188 |
| ACTCATACATGG  | 528.009963178712 | 0.382902370845049 |
| GACTCGAGTGAC  | 528.03037762595  | 0.830267026114841 |
| TCCCGTGCCTCA  | 528.060269945895 | 0.556225263453679 |
| CTAAGCGGTGAC  | 528.061889860385 | 0.539205057732743 |
| GTCATACCAGTA  | 528.06651901102  | 0.708251776609311 |
| GTCATTCACGAC  | 528.084417936912 | 0.216259797306315 |
| CGATAGCAGTCA  | 528.127121290314 | 0.962148940147358 |
| CCTCATTATGAC  | 528.129565520673 | 0.221072093049432 |
| ACGAACCAGTCA  | 528.130115683644 | 0.444977009746183 |

|               |                  |                   |
|---------------|------------------|-------------------|
| GTCCAAGTCACA  | 528.133540435235 | 0.59746941198818  |
| CACTGTAGTGAC  | 528.143233099554 | 0.812629820300081 |
| GAGTCAGGTTAC  | 528.143294804013 | 0.259430906645167 |
| ACGACTGTGTCA  | 528.15655452783  | 0.776076532320831 |
| ACGTACCAGTCA  | 528.188855816819 | 0.481682506957067 |
| TAGTCACGACCA  | 528.191681123246 | 0.300785536242664 |
| TCATGGGAGTCA  | 528.195690072772 | 0.541298140831977 |
| GTGACGTGACCA  | 528.205302379752 | 0.322031403595359 |
| ACGTCACATGCG  | 528.206390379789 | 0.675304114945748 |
| AAACGTGAATCA  | 528.217497593542 | 0.462580183386442 |
| GTCACTGACGAA  | 528.225778808878 | 0.84022512180312  |
| GTGCGAGTCAAC  | 528.229940379238 | 0.283331126715376 |
| CGACGTGTGTCA  | 528.242041115476 | 0.624850781223544 |
| ATAGGCGATGAC  | 528.24689002372  | 0.410756685705595 |
| CCCTCTGATTCA  | 528.250818930099 | 0.130758978269557 |
| TCATTCATGACA  | 528.254567332308 | 0.617673198163125 |
| GTCACTGACGTA  | 528.258077527581 | 0.814423406670276 |
| TGATTCAGAGCA  | 528.262330961607 | 0.553301159507359 |
| ATTAAAGTGTCA  | 528.271424163798 | 0.510872699715498 |
| GATATCGTCACC  | 528.298946637889 | 0.377789008485462 |
| ACACGTTATGAC  | 528.299363063674 | 0.253189531503962 |
| GAGTCAATTCTA  | 528.300130059812 | 0.387017854787534 |
| ATGATGTAAGTCA | 528.300145179941 | 0.273471778210347 |
| GCTCTACAGTCA  | 528.301703270163 | 0.341917489498819 |
| GATCCGACTCAC  | 528.303303174662 | 0.305428852334325 |
| GTCATAGCAAAC  | 528.307246830351 | 0.34301419005351  |
| CGGATAGATGAC  | 528.322424352164 | 0.512973679058589 |
| GACGCGTACTA   | 528.337881898311 | 0.225985427741165 |
| GACTAATCATAA  | 528.369713063911 | 0.431565661078319 |
| GTCATAGCGTTA  | 528.374521388544 | 0.517901234315141 |
| GTCACCTTTAAA  | 528.383131968585 | 0.512711370020676 |
| ACTCGTGGTCAT  | 528.401586445377 | 0.759639079973429 |
| CAATTTCCGTCA  | 528.409704856409 | 0.41115438059546  |
| GTCATCGAGCAC  | 528.41012050674  | 0.705385147918455 |
| TGACGCGTAGAA  | 528.41970848938  | 0.451070036703259 |
| CATATGTGACGC  | 528.426380709533 | 0.503283553591126 |
| GACACAGATGAC  | 528.42900234815  | 0.561439155169583 |
| AGAAGATATGAC  | 528.42963757358  | 0.148951312786075 |
| GTAGATGATGAC  | 528.431732712555 | 0.178056496625443 |
| ATGACAGTAACC  | 528.438719994964 | 0.250483952710885 |
| GTCATATGTGTA  | 528.445469498711 | 0.133702084715465 |
| GTCTCACAGTCA  | 528.451429873403 | 0.49286644233881  |
| CGATACGATGAC  | 528.46290109099  | 0.540921183391899 |
| ATCCTCGATGAC  | 528.482439303808 | 0.230390753944499 |
| GCAGTGTATGAC  | 528.482853717462 | 0.387233872412415 |
| ATGGTTGTGTCA  | 528.484527162359 | 0.543626430010376 |
| GTCATACCAAAA  | 528.489638356017 | 0.730584744492498 |
| ATCGCGTACTG   | 528.49928113429  | 0.519582211102854 |
| GTCACAAGTTGA  | 528.502092725643 | 0.40041106341267  |
| TCTGATCTGTCA  | 528.513733302545 | 0.597605141962302 |
| CTCACGAGTGAC  | 528.515801426778 | 0.604919253057075 |
| AATTCTAATGAC  | 528.517740245401 | 0.758148582427569 |
| GTCATAATCAGA  | 528.530364983764 | 0.508961453387128 |
| ACGCTTGCTCAT  | 528.564720742936 | 0.46243359364395  |



|              |                  |                   |
|--------------|------------------|-------------------|
| CAGAATCTGTCA | 528.566357226952 | 0.241644834872914 |
| GCCCCTGACTGA | 528.574770140126 | 0.701771640974885 |
| ATACCCTATGAC | 528.579739973069 | 0.574959389339896 |
| CAATATTGACTC | 528.583357833287 | 0.576981173061031 |
| ATCCCCGATGAC | 528.591511727913 | 0.495907500882036 |
| GTCATCAATTAA | 528.596022688278 | 0.431828516757336 |
| GTCACACAAGGA | 528.596077202313 | 0.834624485632796 |
| TGACTGCACTCA | 528.604752639419 | 0.608062422426836 |
| GTCATTAACAC  | 528.638194190259 | 0.424561814996692 |
| CCCATTTATGAC | 528.652808650743 | 0.268703748642816 |
| ATGACAGAGCTG | 528.682555588896 | 0.346989304418695 |
| CTAATAGACTCA | 528.683663991078 | 0.214960541208346 |
| ATGACAATGCCG | 528.692251794581 | 0.607528103825045 |
| CGTCATGCAAGA | 528.692584693111 | 0.773383537847854 |
| ACACGTGTGTCA | 528.694846052162 | 0.523939410653865 |
| GACTCACTGCAC | 528.69738215918  | 0.459725978568642 |
| GTCATTGATAAA | 528.707219521696 | 0.435351430531123 |
| CGACACTATGAC | 528.709202506948 | 0.312164228802981 |
| GTCACCAGGTCA | 528.717933351761 | 0.56307979100951  |
| ACTACGTGTGAC | 528.779041807934 | 0.631470632566731 |
| ATGACAGAGTAA | 528.785499973627 | 0.319132354361006 |
| GACTAATATTTA | 528.826766058369 | 0.820744901774829 |
| CTGTAAAATGAC | 528.847574092319 | 0.519305743148316 |
| CGCCATGAATCA | 528.851522939609 | 0.76098761580155  |
| CCTCGAGATGAC | 528.856085854759 | 0.651859524828028 |
| GTGTCATGCAAA | 528.8613251061   | 0.585278658559124 |
| CTCGGGTATGAC | 528.87811185671  | 0.581491639398797 |
| GTCATCCTGGAC | 528.880463944221 | 0.572315083674525 |
| GTCATTAGCTTA | 528.880688824793 | 0.422854838221693 |
| GCATCGAATGAC | 528.913005766791 | 0.382941130309619 |
| ATGACCACTACG | 528.915776785988 | 0.42855334079209  |
| ATGACGAACCCC | 528.922503276021 | 0.280889815363879 |
| AAGAGCGATGAC | 528.928695702172 | 0.129864808254052 |
| CTTAAGTGACAC | 528.934468202916 | 0.637209646475865 |
| AAGGATTATGAC | 528.943790924546 | 0.384013154751406 |
| CGTCGTGATTCA | 528.943816858287 | 0.466554033172484 |
| ATGACGCGCGTA | 528.946479162824 | 0.23685359374522  |
| ATGACGGACAAA | 528.952131619666 | 0.460960472356994 |
| GTCATATCAGCA | 528.964170800355 | 0.487841662326235 |
| GCGCGTGATTCA | 528.991560756888 | 0.776185426044436 |
| AGCGATCCGTCA | 528.997136311798 | 0.887574946218444 |
| GAGTCAATTCAC | 529.007888349386 | 0.544242024020417 |
| ATCCGTGAATCA | 529.012895153489 | 0.418982043783536 |
| CATGCAGTCAGA | 529.061596146673 | 0.416215908877959 |
| AAAGAATATGAC | 529.083794656217 | 0.323490875889546 |
| AGTCATGAGGTA | 529.090793082117 | 0.179432473386063 |
| GTCATTCTTGGA | 529.094670766484 | 0.605804158328873 |
| AGCCAAGTCACC | 529.097752488382 | 0.383159209613015 |
| CAGCTCTATGAC | 529.122556335365 | 0.361858877436132 |
| ACTGCCTGACTC | 529.129656062243 | 0.332472211257811 |
| GTGTGCGAGTCA | 529.133845617905 | 0.554873831523264 |
| GTCACGTAGTCA | 529.145417517158 | 0.585550668807661 |
| GTCATAGCGGAC | 529.166424390565 | 0.664220130778869 |
| GATGACTTGGTA | 529.17077544707  | 0.312015721846354 |

|              |                  |                   |
|--------------|------------------|-------------------|
| ACTCATAATGTG | 529.196008914347 | 0.561263283359622 |
| ACACGAGATGAC | 529.198047066203 | 0.726988547251178 |
| CGCGCTGTGACA | 529.200643310416 | 0.736859798788987 |
| AGTCACTCCAC  | 529.207133109897 | 0.326531506483339 |
| TCAGTTCTATGA | 529.222890845408 | 0.794518270810753 |
| GTCATCCACGAA | 529.229742281196 | 0.499437715767564 |
| GACTAATCCGGA | 529.233424073977 | 0.951816435454359 |
| AATCGTACTCAT | 529.234150587188 | 0.42368522193444  |
| GGTTGTATGAC  | 529.247210785277 | 0.354467959078913 |
| AACTAGTGACGT | 529.250587975166 | 0.660475381709724 |
| ATGACTTGCGGC | 529.253146706145 | 0.437570425564215 |
| GATGAGTGTGAC | 529.254052153914 | 0.239430666353503 |
| GAATGTGATGAC | 529.255580931386 | 0.415869493764094 |
| CTTGCGCGTCA  | 529.255917232519 | 0.94967873866945  |
| AGTCACTCCATG | 529.263034416281 | 0.397594175296371 |
| GCATGTGAATCA | 529.265896372758 | 0.639444742494257 |
| CGAGCCCAGTCA | 529.284467158393 | 0.69117701731331  |
| ATTAATCCGTCA | 529.28585589186  | 0.546764541362421 |
| ATGACGATGATC | 529.295309811968 | 0.39337400810055  |
| GTCATTTATCAC | 529.296343578122 | 0.467006880991403 |
| GATACGAATGAC | 529.303434762206 | 0.59848023064177  |
| ACGCACACGTCA | 529.311705585363 | 0.400315516424361 |
| AATACGCATGAC | 529.312737627492 | 0.707006088508103 |
| GTCATTTCTGGA | 529.335909017158 | 0.21075020732464  |
| GGTAACTGTGAC | 529.338347584303 | 0.679613826459295 |
| TAAATCTAGTCA | 529.344475666832 | 0.583075643364392 |
| ATGACGCCGAAG | 529.352316169773 | 0.337086348248271 |
| GTCATCCCATTA | 529.356965503108 | 0.409945085118715 |
| AAATAGCAGTCA | 529.359768345162 | 0.494346326317275 |
| CAGTCACGCTAG | 529.359769374732 | 0.470860106570759 |
| ACGGGTGACCCA | 529.377182514811 | 0.627670872939606 |
| GATTGCGAGTCA | 529.380220321661 | 0.216297046026788 |
| ACTCACTGTGAC | 529.381960532691 | 0.399054097811785 |
| GTACGTAATGAC | 529.386475771056 | 0.451042558958972 |
| ATTCATGACCCA | 529.401038327871 | 0.476993037214035 |
| AACATTAAGTCA | 529.406082797758 | 0.422246928306871 |
| GACTCAGCCACA | 529.411255838071 | 0.858811237872677 |
| GACTCATGGTAC | 529.41870545833  | 0.555017139669887 |
| GTCATCTGTTAA | 529.42121234249  | 0.511854558642621 |
| CATGTTTATGAC | 529.429718200266 | 0.740454148109321 |
| CTGGCGTACTA  | 529.443499681437 | 0.39218146693386  |
| TGACGAGTTCCA | 529.446783480257 | 0.613713950364759 |
| ATTCAGTGACGC | 529.46365960317  | 0.641743445294655 |
| GTCACCGGTACA | 529.491335526228 | 0.452365812413133 |
| GTCATATAACAA | 529.502757943201 | 0.632061173924472 |
| GTACGGTATGAC | 529.511343837649 | 0.431600317407602 |
| ATGACGAGGTGA | 529.516430281343 | 0.305296297653501 |
| AGTTTGGATGAC | 529.525151484655 | 0.613352355901409 |
| CACGTCACGAAC | 529.531476928    | 0.399283723463859 |
| ACTTAAGATGAC | 529.543285685989 | 0.491537853501045 |
| CCTTCTGAATCA | 529.555475737961 | 0.33161767903102  |
| TCCTACCAGTCA | 529.563353384119 | 0.375263325647863 |
| GATCACGAGTCA | 529.576575071003 | 0.677919633320791 |
| AACTGCGGTGAC | 529.596270175266 | 0.625255345277074 |

|              |                  |                   |
|--------------|------------------|-------------------|
| CATGAGATGACA | 529.606025546539 | 0.499416207192631 |
| CAGCACTATGAC | 529.606996821426 | 0.735596591159937 |
| AGAGTCAAGTTG | 529.620540664747 | 0.433232404618603 |
| GTCATATTGGAA | 529.636789935689 | 0.50528819156725  |
| GCGTCATGCCAA | 529.642047039443 | 0.34549294131493  |
| AGACCTCAGTCA | 529.663116221336 | 0.44578202080629  |
| ATTCACCAGTCA | 529.667319792357 | 0.636028661378769 |
| AGTCACTAGTTC | 529.66782683877  | 0.387570568576916 |
| AGTAATCGTGAC | 529.680077008668 | 0.32580440759528  |
| GAATTCGACTCA | 529.68392340927  | 0.535996460967834 |
| GAGTCAAATAA  | 529.703113361463 | 0.402289278487253 |
| GTCACCTTGTC  | 529.708030451163 | 0.490284901530061 |
| TACGATGAGCCA | 529.723677757363 | 0.227370713138475 |
| CTAGGGAATGAC | 529.726733778148 | 0.575184047930942 |
| CATCCAATGACG | 529.726891279655 | 0.578544999005566 |
| AGTCACTTCTAC | 529.733205869852 | 0.221532797686679 |
| CATTTGTGTGAC | 529.733471277375 | 0.533842371809017 |
| ATCTAGGATGAC | 529.741105115924 | 0.194164046003561 |
| CACAATGAGCCA | 529.771357140091 | 0.895023665699088 |
| ACGTCACCACGA | 529.786875348654 | 0.319911036484402 |
| AAGCTCCGTCAT | 529.792893095888 | 0.368673487303817 |
| CCTATCTATGAC | 529.793289937822 | 0.203450718772325 |
| ATGAGTGAGCAA | 529.793962776674 | 0.366036890899533 |
| GTAAGAGATGAC | 529.815513115246 | 0.299646016039118 |
| AACAACACGTCA | 529.826505951472 | 0.611893242807862 |
| AGAAGGGAGTCA | 529.834742193911 | 0.310902988114043 |
| AATCTGCGTGAC | 529.916198651594 | 0.678576648244325 |
| AGAATGACCACG | 529.922864271089 | 0.47159360472916  |
| ATGACGATGTGG | 529.923718722279 | 0.482860877703196 |
| TATACAGAGTCA | 529.946716632099 | 0.209032457252517 |
| GACTAATATACA | 529.963256741871 | 0.218126002565366 |
| TGAGTCTTGAAA | 529.968892859392 | 0.606792026647748 |
| AATTTGTGTGAC | 529.978282819578 | 0.465661094921403 |
| GAGTGACGTGAC | 529.996970145582 | 0.293061831263865 |
| ATTCTACAGTCA | 530.012166886498 | 0.612198569490971 |
| GTCATCTATCGA | 530.018248593102 | 0.656025684144258 |
| TGACTCCACGAA | 530.030770222553 | 0.841194486041063 |
| CATATTTTGTC  | 530.037112940515 | 0.597442393505131 |
| ACTACCTAGTCA | 530.04262399282  | 0.665353248835076 |
| CCGAAAGTGTC  | 530.084843273015 | 0.381139504682075 |
| GAGCTGTGACGC | 530.086096246103 | 0.437667850401783 |
| CCTTAATGATGA | 530.105766927918 | 0.720761174005519 |
| CTTCCTGATGAC | 530.109921812795 | 0.227927894089675 |
| TGAGTACAACAA | 530.113169227681 | 0.365516409105877 |
| ACAAACTGGTCA | 530.115449715429 | 0.800323816276812 |
| GTCACCATAGAC | 530.125349812725 | 0.437712712423066 |
| TGTCATGCAAAA | 530.128154774895 | 0.480896261507944 |
| GACTAATATTAA | 530.139173590557 | 0.69976295191668  |
| TCGTCGGTGACA | 530.169586200077 | 0.288603918605873 |
| ATCGTGAATGAC | 530.18088229279  | 0.465197292033053 |
| GCGTTGGATGAC | 530.187999009327 | 0.39851514876339  |
| CAGTTGTAGTCA | 530.193480621779 | 0.46469539625058  |
| TGACTATGTCAA | 530.203987571035 | 0.57511575659929  |
| TACAGCGAGTCA | 530.206006906498 | 0.655448453874972 |

|                |                  |                   |
|----------------|------------------|-------------------|
| CACACTGTGTCA   | 530.209614409597 | 0.578523866461807 |
| GATTCAGACTCA   | 530.217389740381 | 0.408443322822541 |
| TATAATGGCTCA   | 530.231837563649 | 0.815381889997476 |
| GGCAATATGTCA   | 530.237238472961 | 0.401633804854154 |
| AGTCACGCCGAG   | 530.264823374453 | 0.46261996832112  |
| CGCCTGGAGTCA   | 530.275157305177 | 0.458236178331125 |
| TGAGTAACGACA   | 530.277285879222 | 0.755610404112713 |
| CAAAGTTTGTCA   | 530.278061057616 | 0.744504977398463 |
| AGAGTCAGGTCA   | 530.279613264975 | 0.413141593123207 |
| GTCAGTGACGAA   | 530.289200131704 | 0.390545747462223 |
| GAAGCTGATGAC   | 530.297704486461 | 0.190835114161125 |
| CCGGTCTGTGAC   | 530.303197976334 | 0.402491470598819 |
| AACTGCGATGAC   | 530.305007001635 | 0.577930510926263 |
| CTGACTCCGTCA   | 530.321058161677 | 0.222882552720246 |
| TATTATAAGTCA   | 530.328159872312 | 0.577069432206671 |
| AGACTAATCTGG   | 530.353427342914 | 0.656715043421057 |
| ATTGAATCAGTC   | 530.356580612065 | 0.611531732163616 |
| TGATTAATGACA   | 530.359018133853 | 0.426084121452101 |
| ACCGGCGAGTCA   | 530.366075793357 | 0.717012009225912 |
| CTCACTGACACA   | 530.372091719871 | 0.315264808654087 |
| GAGTCAGGTA AAA | 530.406391634043 | 0.295112121094254 |
| AGGGTATATGAC   | 530.410944047454 | 0.261497367900105 |
| CGAGCTGATTCA   | 530.425563227191 | 0.731603960620705 |
| ATCAGGGAGTCA   | 530.42867169943  | 0.392013433785957 |
| CCGACATATGAC   | 530.433292185615 | 0.218353080390971 |
| AGTCTAAATGAC   | 530.439958712547 | 0.617663077177523 |
| GTCATTCCGTAA   | 530.454411517415 | 0.480823192489429 |
| CGTGTGGAGTCA   | 530.494051576802 | 0.605233313681732 |
| TCGTGAGAGTCA   | 530.501363846428 | 0.347075488880918 |
| AAGCCTGACGCA   | 530.520987050072 | 0.271126258472854 |
| AACTGCGAGTCA   | 530.53904184756  | 0.657983365391128 |
| CCATCACAGTCA   | 530.54618188086  | 0.473134786452088 |
| AGTCACGCCACG   | 530.549853757333 | 0.473964814020752 |
| GAGTAATCGTCA   | 530.552976713133 | 0.569185108271666 |
| AAAGACTGTCAT   | 530.554275740116 | 0.459730780171196 |
| GTCACTGATTCA   | 530.571713308661 | 0.526502188309877 |
| CGTCATGCATTA   | 530.576200571814 | 0.765580463109257 |
| CAACGGTGACGA   | 530.578419525375 | 0.50780449059593  |
| CCGATGTGTGAC   | 530.615836540521 | 0.68901220604081  |
| CCATGTTATGAC   | 530.615893628359 | 0.447846590522656 |
| AGAGTCAAGATC   | 530.633355750017 | 0.238795707682244 |
| CATTGATGAATC   | 530.641690083552 | 0.600450926523513 |
| AAAAGTGAATCA   | 530.666766901716 | 0.565815456925669 |
| CCCTAATATGAC   | 530.678532098675 | 0.690848628243906 |
| CTTAACCACTCA   | 530.680009671776 | 0.657551919331348 |
| CGCCTGGATGAC   | 530.693464864194 | 0.718273965273723 |
| GCACTTTATGAC   | 530.694766175769 | 0.34356534892728  |
| GACTCGAGTCAA   | 530.698385367385 | 0.75591380589762  |
| ATACCGAATGAC   | 530.700410833728 | 0.489077582838323 |
| TCTATAGACTCA   | 530.706570692202 | 0.372665494446429 |
| AGTCACTTTGA    | 530.71019898801  | 0.428966410457031 |
| GTGGCGTACCA    | 530.719502607782 | 0.378758664581433 |
| GGATTACGCAAC   | 530.728173315331 | 0.522676246072877 |
| CAACGTGAATCA   | 530.736904463976 | 0.542740800401833 |

|               |                  |                   |
|---------------|------------------|-------------------|
| AATCATACGTCA  | 530.742027011438 | 0.510558287268145 |
| GTCACATTACAA  | 530.767831875705 | 0.569918387079931 |
| ATCATACTGTGA  | 530.775168274825 | 0.75072330564303  |
| GAGTCAATTGGA  | 530.775830035747 | 0.471896515147681 |
| GCCCACGAGTCA  | 530.778316327022 | 0.403453632932801 |
| GAGTCAGTTTGA  | 530.781293399504 | 0.230564643129605 |
| GTCATTGTGATA  | 530.794278139669 | 0.406525835578452 |
| ATAAACGTGTCA  | 530.809241381476 | 0.508762635770251 |
| GACTAATATATC  | 530.817094989875 | 0.522405782546197 |
| TGTACTGACACA  | 530.8320633972   | 0.336764667671975 |
| GGTGGTAGTCAC  | 530.835427514222 | 0.452337008654035 |
| GCTACGGGTGAC  | 530.849588294557 | 0.506616630442374 |
| CCAGAAGATGAC  | 530.858094369145 | 0.706703260487395 |
| CACCGTTATGAC  | 530.867097856642 | 0.551864963471274 |
| AGTCACGGCTTA  | 530.879324046519 | 0.260711665908871 |
| CTACATTATGAC  | 530.884689019335 | 0.288747605518401 |
| CCGGGTGACCCA  | 530.898060661306 | 0.529865039414723 |
| GGACGGAATGAC  | 530.902414346709 | 0.342195277280007 |
| GTCATAAGACAC  | 530.921168909419 | 0.391103175361275 |
| CGAATATGACCA  | 530.943545887926 | 0.454366240125827 |
| ATATAATGTGAC  | 530.948405494074 | 0.694274225803445 |
| GACTAATACGTA  | 530.95746726003  | 0.911456427330517 |
| GTCATCGCAGCA  | 530.961466032493 | 0.798753233883251 |
| TGACAAATACCA  | 530.962739260614 | 0.451564773265383 |
| CTGCACGAGTCA  | 530.968859442962 | 0.814299543848072 |
| GACTCTTCGTCA  | 530.978741999306 | 0.461854861947602 |
| ATGTTACATCAC  | 530.98739627053  | 0.358474156874444 |
| CTTGCTGACTC   | 530.992456962165 | 0.388276680826112 |
| GAGTCAGTTTGC  | 531.002673913586 | 0.640652494869946 |
| TGATTCATGAAA  | 531.009556521601 | 0.803087294353113 |
| GTCATACTACTGA | 531.016885618502 | 0.500404425344205 |
| AAAGTGTGACAG  | 531.020161077833 | 0.245233173181161 |
| AGAGTCAAAGGC  | 531.029936410199 | 0.175553119710453 |
| CCTCTGTAGTCA  | 531.042098648213 | 0.237773048371536 |
| CGTTATGATACA  | 531.043532948854 | 0.311840894633325 |
| CGTCACGTCACG  | 531.050455511686 | 0.177624744794851 |
| ATACCTGTGTCA  | 531.058048073281 | 0.565499172636004 |
| ATGGCATGACAC  | 531.068345067092 | 0.635730751420981 |
| AGACCCGAGTCA  | 531.072415122462 | 0.397946625024009 |
| ACGTCATGCGAA  | 531.073689686361 | 0.461750060435043 |
| GCTAATAATGAC  | 531.097482354904 | 0.423109709684103 |
| ATGACGGTATCA  | 531.102103248662 | 0.457233053421962 |
| CTCGTCACGTCA  | 531.120124985112 | 0.27064343181552  |
| GTCACACCTGAA  | 531.120360598165 | 0.533324396788722 |
| GTCATTCAGAGA  | 531.127364266138 | 0.586204807052649 |
| TATCAGGAGTCA  | 531.140860366141 | 0.390010989686224 |
| AAACATAAGTCA  | 531.152879492038 | 0.377864874333517 |
| GACGATTAATA   | 531.154807463541 | 0.639307256335205 |
| CAGGTCTGACAC  | 531.159338096421 | 1.12266215714827  |
| TGACTGTACAAA  | 531.168437643409 | 0.27126674707255  |
| GTCCCGAGTCAC  | 531.177594322547 | 0.363010962671726 |
| CACTCGGATGAC  | 531.180666381241 | 0.579830877229706 |
| ATGACAGCTTTC  | 531.19318694558  | 0.415494931396857 |
| CGCGTGACCTAA  | 531.202697492477 | 1.19258483225991  |

|              |                  |                   |
|--------------|------------------|-------------------|
| GTAATACATGAC | 531.206872594888 | 0.617611320989048 |
| CGTCACTGATGA | 531.223437990827 | 0.493801976240731 |
| GTATGATTCGAC | 531.23665660092  | 0.361210352422008 |
| CTAGTTAAGTCA | 531.240371450211 | 0.526199511570399 |
| CTTTTGAATGAC | 531.262094801096 | 0.485735612130474 |
| AATTCACGTCAT | 531.263715161923 | 0.504969511478987 |
| GTCATAGGCGCA | 531.313131040151 | 0.557845010752205 |
| CTTGAAATGAC  | 531.324851813141 | 0.746458836229185 |
| GAGTAGGATGAC | 531.354167781865 | 0.286174888042105 |
| ATGACAACGCTA | 531.362152571055 | 0.404611306244558 |
| GTCATAATGGAA | 531.365783747772 | 0.430633418315749 |
| GGCCTCGATGAC | 531.368836083952 | 0.504037013423499 |
| GCAATGGAGTCA | 531.400028562585 | 0.425176035374119 |
| CGGCATGATGAC | 531.401304505202 | 0.33846035757489  |
| AATAGCTGTCAT | 531.401993020837 | 0.521694109629291 |
| GGCCAAGTCACC | 531.410952757563 | 0.399904360855185 |
| AAGAACCAGTCA | 531.416178270879 | 0.301288861661743 |
| GAGTCAGTAGAC | 531.417080233457 | 0.527055958548194 |
| GTCACAATCGGA | 531.422345507466 | 1.01306308758822  |
| CACTGAGGTGAC | 531.432709274913 | 0.748748413572083 |
| GTCATCACTCA  | 531.44217299117  | 0.464382166237609 |
| AGTGTCATGCCC | 531.443871553689 | 0.491412241181354 |
| GTGGCTCACTCA | 531.4611159091   | 0.594542095202815 |
| GATAATGTCATC | 531.477217456264 | 0.300388486191753 |
| ATGACACTCACG | 531.50012330427  | 0.383448229107307 |
| GTAGCTTATGAC | 531.515365393911 | 0.340769455834964 |
| GACCTACAGTCA | 531.516900506745 | 0.363088964499982 |
| TAGATACAGTCA | 531.522992652457 | 0.347481227889904 |
| ACTCAAGTGACT | 531.538561624246 | 0.545562482169613 |
| GTCATATAGGAC | 531.539822982062 | 0.323977712718119 |
| GTCATGAGCAAA | 531.545250485639 | 0.598462916655902 |
| GGTGTCATGTCA | 531.562489427368 | 0.305425720601715 |
| ACAGCATATGAC | 531.572393515961 | 0.596777488287148 |
| AGAGGGGAGTCA | 531.600621726212 | 0.279260216415561 |
| ATTTACATGACA | 531.602578342085 | 0.495865104340431 |
| ACAATTGACTGA | 531.612810053168 | 0.690241069781771 |
| AGAATGTGACGC | 531.625830729114 | 0.273108296030207 |
| GTGACGTGCCTA | 531.626279038642 | 0.320210293007099 |
| CTGTCGGTGACA | 531.631549039093 | 0.882724192268172 |
| GTCACATAGCTA | 531.648303578697 | 0.752256861454731 |
| AACAGAGATGAC | 531.652361740113 | 0.59459892646157  |
| CGCATGGTGACA | 531.654003069985 | 0.880870364315626 |
| ACACTTGTGTCA | 531.659189733669 | 0.514670300211617 |
| CCACATTATGAC | 531.661869524266 | 0.618360360218848 |
| CCAGATTGCTCA | 531.675896352706 | 0.619994635182626 |
| TCATTAGTGTC  | 531.724764446926 | 0.551503765871346 |
| AGATAGAATGAC | 531.730750246311 | 0.260540763114186 |
| GAGTCAGTTGCC | 531.733983891905 | 0.572250749944295 |
| GTCATGCATGCA | 531.741155585156 | 0.218171029496272 |
| CGCAATCCGTCA | 531.74928711535  | 0.435912447152508 |
| GTCATCATTCA  | 531.753212718002 | 0.416523083943926 |
| CTGCCTGATGAC | 531.755527037986 | 0.500679085836147 |
| GAATTATTAGTC | 531.763317213078 | 0.372388050238887 |
| CTTGTGTAGTCA | 531.774262012784 | 0.612601198925798 |

|              |                  |                   |
|--------------|------------------|-------------------|
| AGTCAGAGCCCA | 531.78721937883  | 0.405245218291326 |
| GTTACCCAGTCA | 531.788866760343 | 0.430052710288503 |
| ACGAAATGACAA | 531.800570557499 | 0.353059185731068 |
| CAGAATAATGAC | 531.815566519808 | 0.60029826711589  |
| CGTCTTGACTAA | 531.819472460077 | 0.444674957670543 |
| GTCATACGTCCA | 531.8214478568   | 0.565629879498778 |
| CTTCTACAGTCA | 531.823163517183 | 0.409492833910991 |
| ATCGCAAATGAC | 531.832473491224 | 0.503977472862524 |
| CGTACCGTCATA | 531.839740304307 | 0.438099328415774 |
| AGACAGAATGAC | 531.842105076105 | 0.426756967396981 |
| GAGCTGACGTCA | 531.862146081357 | 0.590251706151378 |
| AACTAAGGTGAC | 531.863088991347 | 0.805508838890782 |
| GTCACATTTCGA | 531.867204393567 | 0.666532625001387 |
| GAGTGATATGAC | 531.867543490069 | 0.509823943747287 |
| ATTTAGTGACAC | 531.868402082697 | 0.451084792918083 |
| GTGACCGGATAA | 531.869309286487 | 0.500338395120418 |
| ACTTCTAAGTCA | 531.873634970292 | 0.528866703173775 |
| GCCAATTATGAC | 531.887545126918 | 0.367612514515517 |
| TATGCCGAGTCA | 531.891890673161 | 0.454925441127991 |
| GTCATCCGATCA | 531.897314201555 | 0.432495672345269 |
| CTCATAGTCAGA | 531.899010561385 | 0.637158423865805 |
| CCGGCAGATGAC | 531.911528883329 | 0.51907561523843  |
| AATCCAAATGAC | 531.914308340697 | 0.671701966532158 |
| TAAGGGGAGTCA | 531.940287690493 | 0.272333836397283 |
| ACGTAGTGACAC | 531.966238414737 | 0.993024019546727 |
| AGGCCTGCGTCA | 531.972040681082 | 0.752245041977229 |
| ACGTCACATCTA | 531.974006505134 | 0.370856097179607 |
| AAAGACGATGAC | 531.987497945619 | 0.435904120261697 |
| AGTCACGGCTTG | 532.034748372491 | 0.453489761295685 |
| CGCGTCTAGTCA | 532.040057322084 | 0.681500191702458 |
| GAATAATATGAC | 532.051006377492 | 0.56096074485517  |
| GTCATTTCTTCA | 532.05737976875  | 0.506557946886236 |
| CCTCTGTATGAC | 532.083729498434 | 0.23779353603213  |
| CACATATATGAC | 532.087071493918 | 0.648728911303448 |
| ACGTCACCTAGG | 532.08762657047  | 0.466737977646951 |
| CCGTGCGATGAC | 532.089829334678 | 1.0106240271282   |
| AGATTGGAGTCA | 532.104473228253 | 0.298548131009768 |
| AATTTCTATGAC | 532.104709466128 | 0.346005002519794 |
| ATCCTGTGTCAC | 532.113246164138 | 0.22689847137084  |
| GCGATCTATGAC | 532.119728760344 | 0.329335159562703 |
| GTCATTATTTGA | 532.134456669269 | 0.422183884767545 |
| GGGTCACGTCA  | 532.14630797874  | 0.361382816675496 |
| ACGGGCAATGAC | 532.149992221072 | 0.465904955768205 |
| GATTATTTGTCA | 532.152293658197 | 1.04522919509338  |
| CGTCTATAGTCA | 532.168969696196 | 0.825236666175036 |
| AAGCTCTGTCAT | 532.180367322208 | 0.610591212753729 |
| ACTCATCGGATA | 532.182280150762 | 0.528402075358874 |
| TCTTTACAGTCA | 532.184901555946 | 0.643244279358443 |
| TAGCCTCAGTCA | 532.192108414504 | 0.397383924267381 |
| ACTCTTGGATGA | 532.264879220246 | 0.491490232866884 |
| TGACATAATTAA | 532.265040243692 | 0.773772878349717 |
| GTCACCTATCTA | 532.272170689641 | 0.543296752182806 |
| GTCATCTGGACA | 532.278086412671 | 0.793751584986994 |
| GTCATAGACACA | 532.285760517027 | 0.754414798032855 |

|                |                  |                    |
|----------------|------------------|--------------------|
| GTCATTGGATGA   | 532.292562354991 | 0.548321952735263  |
| CAGCACAATGAC   | 532.295411299493 | 0.786723060590191  |
| AGCCAAGTCATG   | 532.306906191681 | 0.139268716659216  |
| AGTCACTCCACA   | 532.310159302032 | 0.532791979547158  |
| TCACATTTATGA   | 532.314678620701 | 0.646808535981889  |
| ACCGACGATGAC   | 532.331108007619 | 0.7002535617657    |
| GTAAGGTGACAC   | 532.343200604359 | 0.68186085054479   |
| AGCGTCGTGACT   | 532.374861849069 | 0.307869073853937  |
| AACACTGGTGAC   | 532.385204102908 | 0.575009163299048  |
| ACTCTGGGTGAC   | 532.393453639848 | 0.607236618793786  |
| ACGTCACCGATC   | 532.413802453446 | 0.385714912663934  |
| GTCACAGTATTA   | 532.41409427638  | 0.396794288714044  |
| TATGCTGACACA   | 532.436777433912 | 0.504686044475469  |
| CTTGATGACGA    | 532.437701346901 | 0.808115098759911  |
| GATCGTGTGTCA   | 532.441431732425 | 0.28329622040606   |
| CGTCATATGATA   | 532.444669890602 | 0.532923554861708  |
| GTCACACATATA   | 532.451774948985 | 0.448208130482829  |
| CTGTAGAATGAC   | 532.45520296757  | 0.642448469910361  |
| ACCTATTGACTC   | 532.460015196786 | 0.122399533344721  |
| ATCGGTGATGAC   | 532.464983155494 | 0.230338396055875  |
| CGAGTGGATGAC   | 532.466341045022 | 0.439946103614906  |
| CCAATCGACTCA   | 532.482129188482 | 0.533372494364485  |
| CAATGTGTGACC   | 532.491234989687 | 0.870987016923903  |
| ACGTCACCATCT   | 532.492254289893 | 0.317772889875055  |
| TGACTACACCAA   | 532.52179780914  | 0.454113729395173  |
| AAGAATTGACTC   | 532.527592437163 | 0.416605913931096  |
| ACTCTGGAGTCA   | 532.533709815833 | 0.592844374975169  |
| AGCTCTGATTCA   | 532.53453266293  | 0.392845343989636  |
| CGTCATTA AAAAG | 532.549749020002 | 0.701723371754394  |
| ATTTTACAGTCA   | 532.552823634713 | 0.568650620559474  |
| ACAGCGTAGTCA   | 532.558692349606 | 0.244825645326268  |
| ACCTGCGACTCA   | 532.56203215586  | 0.0725010000387075 |
| GTCAGCTGACAA   | 532.562928757506 | 1.07475608588696   |
| AACGTCAATGAC   | 532.625056385668 | 0.250330575883843  |
| TATGATTCGAAA   | 532.626096543785 | 0.645074786079258  |
| CTCCATGATGAC   | 532.629608317023 | 0.413207190545137  |
| AGACTACTAAT    | 532.638426568471 | 0.292299809707231  |
| ATCAATCCGTCA   | 532.639655040522 | 0.392008848470297  |
| GGCGCTTACTCA   | 532.665341905844 | 0.470843624885985  |
| ACCACTGACACA   | 532.679130313595 | 0.266519274951618  |
| AATATCGACTCA   | 532.683912246421 | 0.739267424432083  |
| ACGGCTGACACA   | 532.704862645071 | 0.548125363788432  |
| ATATAGTGTGAC   | 532.718669597954 | 0.468340523116441  |
| AAGCGTGACTGC   | 532.720343931043 | 0.449019363856906  |
| CGGCTGACGTCA   | 532.720430660444 | 0.659856583277478  |
| GCCCATTATGAC   | 532.738223647163 | 0.538757914143828  |
| TGTCACACGTAA   | 532.743528341462 | 0.493147320981334  |
| CAAAGCATGACG   | 532.753924119969 | 0.759686897321403  |
| GCCTAGTAGTCA   | 532.75813506719  | 0.739927848118673  |
| ACGCCGTGACTA   | 532.771487955909 | 0.248307117726533  |
| GTCATCTAAGCA   | 532.782268498765 | 0.636098040191799  |
| GTAAGAGTCTTA   | 532.785608468056 | 0.428053843118003  |
| GTCATACGGCCA   | 532.788917532283 | 0.472651839761298  |
| ACATTTACGTCA   | 532.790102536173 | 0.425912759889595  |



|              |                  |                   |
|--------------|------------------|-------------------|
| AAAGCATATGAC | 532.792079880379 | 0.382578748481708 |
| TACCTTCAGTCA | 532.827855307106 | 0.430202955639538 |
| CTTGCATGACAC | 532.841311444586 | 0.491230943727393 |
| GTCATATCGCGA | 532.878160538207 | 0.39162389536314  |
| CGACCATGACAC | 532.894068152356 | 0.466870703753432 |
| GTCATAGCTCTA | 532.899597853272 | 0.305093716583547 |
| GCTCTGTATGAC | 532.909732812891 | 0.786136819128788 |
| GTCATTGCCACA | 532.925143079386 | 0.491212386419339 |
| CGTCATTGGCTA | 532.927074746684 | 0.326063779962313 |
| CTTAATTGACTC | 532.92931323336  | 0.532040032610346 |
| CTCTATGTGACA | 532.93316883028  | 0.633077394698495 |
| CGACCGGTGACA | 532.952338346373 | 0.591757574997777 |
| ATGACTTGAGG  | 532.970095120347 | 0.338469594269188 |
| ATGACCACTAAA | 532.972444251747 | 0.566427662592863 |
| ATTGGGGAGTCA | 532.979744299542 | 0.382867676947745 |
| GTCACATATAAA | 532.984350465577 | 0.337527998565556 |
| AATGATTAGTCT | 532.986086815571 | 0.453782281423659 |
| GCAATTTGTGAC | 532.991419436814 | 0.656884847780564 |
| GTCATATTGTTA | 532.991826191385 | 0.658729735745075 |
| ATGATCTAGTCA | 532.99502663405  | 0.708865885981337 |
| GTCACCATGTCA | 533.012458800917 | 0.32740202041648  |
| ACTCATTAGTAA | 533.031685396436 | 0.466109831721737 |
| GAGGGTGAATCA | 533.031836543038 | 0.230996380711916 |
| AGGTTTGGCTCA | 533.03196859709  | 0.597569957512629 |
| AATCGTTGTCAT | 533.039739958329 | 0.521511621078092 |
| TAAGATTACGCA | 533.0445278728   | 0.567242521288492 |
| GTCATACCCAAC | 533.059168112797 | 0.264752656775981 |
| AGTCACTCCGGA | 533.076786106413 | 0.569282090379902 |
| CTTAGAGGTGAC | 533.089656066844 | 0.385252989389594 |
| ATCAGGTGACAC | 533.099402528622 | 0.37477865058348  |
| TGTGATGTAACA | 533.108191430484 | 0.740883211741066 |
| GTCATGACCGAA | 533.120744862533 | 0.568890516002192 |
| GAGTAATCTTAC | 533.126096021307 | 0.641345056860707 |
| AGAACGTGAGTC | 533.127926702139 | 0.318678571435896 |
| GTCATTACGAAA | 533.136080815772 | 0.553867612807119 |
| CTGGTGTATGAC | 533.146836255136 | 0.483924251723102 |
| CTAATTTGGTCA | 533.15070267011  | 0.561090441021101 |
| AGCTGTGATGAC | 533.174576995202 | 0.524020392564727 |
| ATGACTCTCGTA | 533.199884106545 | 0.618940683501505 |
| TAATGGTAGTCA | 533.205147638421 | 0.35714488072666  |
| TGACTCTAGACA | 533.210269383187 | 0.470404441500874 |
| GTCATTTTCCTA | 533.221263304179 | 0.297350517317132 |
| GTCATATGTCCA | 533.225747546897 | 0.216436681986493 |
| GAATACCACTCA | 533.227392851062 | 0.463072099213295 |
| TATAACCACTCA | 533.237536314561 | 0.58145595922105  |
| ACTCGTGTATGA | 533.241927110867 | 0.592328361325999 |
| CGAAATGATGAC | 533.2478298814   | 0.584184114322402 |
| GGTACTCATGAC | 533.252149691466 | 0.370705851755315 |
| TGACGCGATCAA | 533.254614595652 | 0.559650224351928 |
| GAGTCTTATGAC | 533.29065459603  | 0.531851856138916 |
| GAGTCAGGGTAA | 533.294862129152 | 0.227535321974583 |
| CACGCTTACTCA | 533.302500143322 | 0.285269822025152 |
| AATCATTACTAA | 533.303799932648 | 0.675531089366702 |
| CGATCCCAGTCA | 533.322026783927 | 0.387907473137765 |

|              |                  |                   |
|--------------|------------------|-------------------|
| GTCATCGCAACA | 533.347437179598 | 0.596284748730804 |
| ACTCCGGATGAC | 533.352730696906 | 0.540365182761139 |
| GTGTCACCTACA | 533.357878618359 | 0.442842506322863 |
| AGTCACGGCTCC | 533.362071374147 | 0.373773082365572 |
| ATGACCACGCAA | 533.377592925749 | 0.530481208181391 |
| ATGATATCATA  | 533.379517695985 | 0.513357454544298 |
| GGATGGTATGAC | 533.383478747013 | 0.13459700367256  |
| GTCATCTCATCA | 533.41261503433  | 0.244240530781505 |
| GTCACACGTTTA | 533.414713902203 | 0.465203523806796 |
| GCGGCGAGTCAC | 533.417171808756 | 0.393783465883755 |
| AAAGCCGCGTCA | 533.41928618539  | 0.302061953242764 |
| ATTTTAGCGTCA | 533.43051419724  | 0.567438947395518 |
| GTGACATGGCCA | 533.443297617721 | 0.242992000346559 |
| GTCACGACCGAA | 533.444749644382 | 0.704067501796812 |
| AGTCACTCCAAT | 533.446251055083 | 0.48376358057601  |
| GAGTCAATGCGA | 533.450922790622 | 0.274188822531437 |
| CTAACTGACACA | 533.492857265984 | 0.265998632212373 |
| TGACAGATAGAA | 533.495281341564 | 0.366224757481758 |
| CAGTCATGGGCA | 533.514439450959 | 0.601102355571618 |
| GTCATCCTAAAC | 533.519795605292 | 0.306272526004783 |
| CATGCAATGACA | 533.521670230291 | 0.93093158543482  |
| AATTCTGAATCA | 533.529535564396 | 0.478494939649789 |
| GCTACTGGTGAC | 533.534864253094 | 0.588739610647949 |
| AGTCAGAATTC  | 533.53668859394  | 0.677693061191964 |
| GTATTCCAGTCA | 533.548485000047 | 0.500582396754441 |
| CCTAGATATGAC | 533.554674000389 | 0.438019518469807 |
| CGCGACATGTCA | 533.563909026087 | 0.556107169537307 |
| CATGCATATGAC | 533.594689956906 | 0.527258421694135 |
| CGCGATCTGTCA | 533.603417162612 | 0.730818156217977 |
| AAACCGTACTA  | 533.60418664052  | 0.170331485005244 |
| GAAGATTGGTCA | 533.604678386052 | 0.335174635633597 |
| ACTAATTACGTG | 533.610965942622 | 0.475719449171923 |
| TGTCATTACAAA | 533.623590476379 | 0.368084319020607 |
| GAATTGTATGAC | 533.643462811269 | 0.469774091329376 |
| TGAGTCGGTAAA | 533.651736016764 | 0.184522302765621 |
| CGCATGACGTTA | 533.661318402394 | 0.783689345370096 |
| CGCTACCACTCA | 533.663861601334 | 0.382376377530394 |
| AATAATGTGAC  | 533.68205595138  | 0.752001580710439 |
| GTGACTACCAAA | 533.704263146008 | 0.328013837493915 |
| CAGGGGTATGAC | 533.710858194112 | 0.156306866126021 |
| GTACACCACTCA | 533.736118352625 | 0.480263837300833 |
| CGACACTGTGAC | 533.746024189301 | 0.404854164518418 |
| AATCGCGATGAC | 533.746974509865 | 0.371179918417957 |
| CAATTAGATGAC | 533.752027852802 | 0.483566298821723 |
| ACGTTATACTCA | 533.769148899784 | 0.42726336887668  |
| TCACCACAGTCA | 533.773208409376 | 0.57157010286315  |
| GATCGAAATGAC | 533.775307690424 | 0.318403447656912 |
| ATCGGCGAGTCA | 533.805810292799 | 0.678885622647699 |
| AGAGTCAATAGG | 533.813895262486 | 0.282360079286495 |
| GTCATATTGCAC | 533.830332291852 | 0.74947091672804  |
| AGACTCACTTAG | 533.844343563733 | 0.450290242199418 |
| CCAATTACTCA  | 533.84539278116  | 0.273786541348251 |
| CGCGAATATGAC | 533.849323622978 | 0.585430811348918 |
| TATACTGTGTCA | 533.854903626535 | 0.625237130333274 |

|               |                  |                   |
|---------------|------------------|-------------------|
| AGCTCGGATGAC  | 533.855765439757 | 0.597016734752318 |
| GTAAGTGAATCA  | 533.858603094013 | 0.502915999221875 |
| GATGTTTACTCA  | 533.881791460345 | 0.49076499515381  |
| AACCTTGATGAC  | 533.882830138433 | 0.595010652219183 |
| AAAGTCTGTCAT  | 533.888047534994 | 0.525348101235213 |
| GGTAATGCATA   | 533.89283714976  | 0.395525241819465 |
| AGGCTCGTGACT  | 533.934814573666 | 0.373685122631661 |
| GTCACTTTGTA   | 533.972905923548 | 0.61534010166737  |
| CCATATAATGAC  | 533.976271740034 | 0.7680444444361   |
| GCAGGTGATGAC  | 533.993657331308 | 0.296703024284494 |
| TGACACGACTCA  | 533.995898523778 | 0.692766967096644 |
| ATGACGAGGATG  | 534.030705844833 | 0.203511360106689 |
| AATGCGTATGAC  | 534.03905944588  | 0.300989889164256 |
| CCGGCGTATGAC  | 534.060103748027 | 0.882288118307795 |
| GTGTCGTGACTA  | 534.074340417973 | 0.186979944522441 |
| GAGTCAGGCATA  | 534.084907658911 | 0.209801470691254 |
| GATCACAATGAC  | 534.108420244398 | 0.836334482031986 |
| TAGTCACGAGCA  | 534.114784037439 | 0.384844629852198 |
| GACTCAATGTCA  | 534.131963063327 | 0.603264241223458 |
| CGTCATTGTTAA  | 534.141898195462 | 0.454589319526869 |
| AGTCACGCGTTG  | 534.146541151702 | 0.546037735054313 |
| GCATGTTATGAC  | 534.147668908434 | 0.633733312821221 |
| GTCATGAATCGA  | 534.147830177694 | 0.528528138370383 |
| CTCCTGACGTCA  | 534.170814034613 | 0.430640745352613 |
| AGACAAGACTCA  | 534.170977592865 | 0.590365010773981 |
| CAAATTGGTGAC  | 534.171138222658 | 0.623060081571428 |
| CCTAGTGATGAC  | 534.174323737478 | 0.862074990979171 |
| GACGTGTATGAC  | 534.180570100546 | 0.267608879718721 |
| CCCGGGTGACGA  | 534.184042764886 | 0.657079283366753 |
| AGTCACTCTCTC  | 534.184283123724 | 0.197810546500724 |
| AAAACGCATGAC  | 534.210926222058 | 0.828345349565299 |
| ATGACGCCGTCG  | 534.219412257299 | 0.402187091933983 |
| ATATTACGTGAC  | 534.222952580413 | 0.624991130963614 |
| GTGTGACCACTA  | 534.236479055753 | 0.613881037001647 |
| GTAATAGATGAC  | 534.260186001485 | 0.528963131888905 |
| CTTCGTGAATCA  | 534.266715100673 | 0.436993586313947 |
| GTCATTGTTCTGA | 534.272680933651 | 0.363597854870859 |
| GTATGAGAGTCA  | 534.283695675287 | 0.259368082006787 |
| CGAAAGCAGTCA  | 534.284255694002 | 0.628759460523506 |
| AGTACGTGAGTC  | 534.315370434799 | 0.401652348725436 |
| ATGACAATGCAG  | 534.315938005833 | 0.452024294838604 |
| ACTCATACTAGA  | 534.331092677035 | 0.416632763135954 |
| CAGTCTGAATCA  | 534.354558919758 | 0.600079526022594 |
| AAAGATTTGTCA  | 534.358952906377 | 0.085375284390491 |
| ACGTAAGGGTCA  | 534.375388243418 | 0.556672491793216 |
| AATTAGTGTGAC  | 534.378347249891 | 0.514165881850763 |
| TGACGGATCAAA  | 534.389712523806 | 0.199459453871875 |
| GGTACCGAGTCA  | 534.40851750648  | 0.410250164270648 |
| GTCACAGTTTCA  | 534.415475923568 | 0.767360927530924 |
| ATTAATTGCTCA  | 534.429586730936 | 0.670900272438277 |
| CGGTGGGAGTCA  | 534.437135922336 | 0.359162390560082 |
| ATGACGTTAATG  | 534.439518462769 | 0.278834160707326 |
| CTCTGGGTGACA  | 534.442935633006 | 0.816847618612775 |
| ACTTGGTGACGC  | 534.462443400925 | 0.203234306922901 |

|               |                  |                   |
|---------------|------------------|-------------------|
| ACGTCACTATAG  | 534.465110249867 | 0.557028552027957 |
| ACTTGTGAATCA  | 534.468198056286 | 0.429628818772774 |
| CCGGGAATGACG  | 534.468726870005 | 0.436266243421539 |
| GAATCACAGTCA  | 534.481193912403 | 0.507107338517005 |
| GTCACCGCACTA  | 534.484226339849 | 0.440697677520388 |
| GTCATCTATTCA  | 534.510907842997 | 0.779431837363102 |
| GTCACACAATCA  | 534.51270912467  | 0.388435597314074 |
| CACACTGTGACA  | 534.51591838421  | 0.411603159290883 |
| ACACGCGATGAC  | 534.52205407434  | 0.519210133034343 |
| GCCTTTGATGAC  | 534.524824687935 | 0.55089297454343  |
| TGAGTAAGGTAA  | 534.558552484852 | 0.264070094179749 |
| AAAGCCGGTGAC  | 534.561162463089 | 0.56458144255099  |
| GGACCTTATGAC  | 534.565267766431 | 0.764340492765708 |
| TCTCGGGAGTCA  | 534.567681042299 | 1.02509003729898  |
| GTCATGGTTCAA  | 534.569801818007 | 0.540224541154018 |
| CATCGAGAGTCA  | 534.58685344697  | 0.648765514797718 |
| GCGTCATGTTAA  | 534.597082977465 | 0.742485277513614 |
| TGACTCCAAACA  | 534.611480038391 | 0.527320191033465 |
| CCGGCCTGTGAC  | 534.62270449644  | 0.402031722863736 |
| TGACGTGGGCAA  | 534.625644905218 | 0.640615931921077 |
| AATTCGCGTCAC  | 534.629031695895 | 0.389614704825524 |
| ACCTAATTATGA  | 534.632549089335 | 0.765033290688108 |
| ACCTCAGATGAC  | 534.63266658018  | 0.806951432163885 |
| CCTAACAGTGAC  | 534.636953935993 | 0.381226119737764 |
| ATATATTGTCAT  | 534.637915076974 | 0.600134529971169 |
| GCATTCCGGTGAC | 534.640276591657 | 0.483812478851331 |
| GAACAGTGTAC   | 534.645687521751 | 0.336789077055214 |
| AGTAAGGATGAC  | 534.657929519389 | 0.312647843769041 |
| ATAGGAGATGAC  | 534.664353881284 | 0.292395797856207 |
| GTCATCTTGGAC  | 534.674354876872 | 0.613218813328939 |
| GATGGAAATGAC  | 534.677187672126 | 0.322014232930437 |
| TACGCCGAGTCA  | 534.681804375191 | 0.370695241980835 |
| ATGCACGAGTCA  | 534.689236903032 | 0.533396943231594 |
| CACGGCATGACG  | 534.702946009271 | 0.576620652836624 |
| GTGTCATGTAAC  | 534.718224995161 | 0.651809645354035 |
| ATAATTTGACTC  | 534.718391928358 | 0.209811696556729 |
| ATGGTTTATGAC  | 534.720550542406 | 0.56161689570477  |
| GTGACTACCTCA  | 534.726864874798 | 0.340710420025926 |
| AGTCACTTCCTG  | 534.731440437557 | 0.136266854511911 |
| CATGGGAATGAC  | 534.738521816795 | 0.594897226044481 |
| CATCGTGTGTCA  | 534.765491660183 | 0.768208371021662 |
| ACCTAGTGTGAC  | 534.772821385025 | 0.663217671335667 |
| AAGTTATATGAC  | 534.785097776018 | 0.378674770690063 |
| GTGCGGACTCA   | 534.796470336384 | 0.376348245258196 |
| AGATCTTGTGAT  | 534.806719043452 | 0.388963280906802 |
| TCTACACAGTCA  | 534.814928462264 | 0.132242468820389 |
| TATGTTGACTGA  | 534.835380541127 | 0.112658029471672 |
| ATGATTCGTGAC  | 534.847614841842 | 0.704489291127433 |
| GCTGGTTATGAC  | 534.861987307221 | 0.661798491476723 |
| CTCGAAATGACA  | 534.865428860555 | 0.468199631298379 |
| GGCGCCTATGAC  | 534.871457813927 | 0.473227903323186 |
| CTCGTTCATGAC  | 534.877185500807 | 0.549340371547476 |
| AACTATTAGTCT  | 534.888964473529 | 0.409198359786503 |
| AGTCACTTCCAA  | 534.905495337391 | 0.356169434383442 |

|               |                  |                   |
|---------------|------------------|-------------------|
| CTACCGTACTA   | 534.922341213474 | 0.301601505474555 |
| GTCATATGCGTA  | 534.93048952975  | 0.481592369912976 |
| TGACTAGGATCA  | 534.948639300952 | 0.454260790548038 |
| CCATGGTGTGAC  | 534.954997355221 | 0.611113918567081 |
| ATGACGACTATG  | 534.956583591391 | 0.650507094624703 |
| CTGTTAGACTCA  | 534.95732285981  | 0.659657340076374 |
| CATCGTAATGAC  | 534.957349445421 | 0.471555781786174 |
| GTGACACAGGCA  | 534.958615418828 | 0.28597525597794  |
| GTCATCAGCATA  | 534.967800114491 | 0.597205254664036 |
| GTGACGTGACGA  | 534.991274005671 | 0.192014466499737 |
| GACACATCGTAC  | 534.994615795405 | 0.590669768742598 |
| TAGTCACGCTCA  | 535.00361511003  | 0.248935383300823 |
| AACAACCAGTCA  | 535.005157134051 | 0.352002660293904 |
| GTACATATGTCA  | 535.006145238231 | 0.698551067037698 |
| ACGTCACCTTTC  | 535.010826554671 | 0.304049853765116 |
| AGTCACTACCTG  | 535.012830114817 | 0.407421448561884 |
| CGCCAGAATGAC  | 535.019435896737 | 0.833207965553417 |
| CGTTTTGACTGA  | 535.023542719095 | 0.839195345493944 |
| GACCCGAATGAC  | 535.032849449339 | 0.610264234480773 |
| TGACGGATCGAA  | 535.041900241429 | 0.488005562363098 |
| ACTCACACGTCA  | 535.082046690276 | 0.522471763151711 |
| AGACTAATAGGA  | 535.084174340376 | 0.308682904178812 |
| CAGATTGTGACA  | 535.095017194026 | 0.459367053539405 |
| GTCATTTTCATA  | 535.097607283023 | 0.310264223694698 |
| CCATGGAATGAC  | 535.098316181051 | 0.572751983776145 |
| GTACCTGACTGA  | 535.117055226315 | 0.586500532865466 |
| CGCGTACATGAC  | 535.121522589821 | 0.599070573984118 |
| GTCATCAAAGGA  | 535.143175729246 | 0.368735656732098 |
| GCAATTTTCGTCA | 535.145749632376 | 0.557833597946447 |
| CGCTAATATGAC  | 535.148227476537 | 0.581716249934788 |
| CAAGAATGTGAC  | 535.156169111152 | 0.597717860632739 |
| CAGCCCGATGAC  | 535.156363910438 | 0.273768090986325 |
| ATTACCTAGTCA  | 535.170996301158 | 0.285407135786257 |
| CTGCTACAGTCA  | 535.178822918473 | 0.651574322223396 |
| GGTCATTCTGAC  | 535.180963769502 | 0.69081333497731  |
| AGTCACGCGTAG  | 535.183644432279 | 0.358432500462395 |
| ATGCCGTCATCA  | 535.193097113965 | 0.510387999876774 |
| GCACGCGATGAC  | 535.206264432077 | 0.518683881234596 |
| AGTCACTAGTGG  | 535.212049891672 | 0.374891967001778 |
| AGACTAATAACA  | 535.218544489152 | 0.311840673190107 |
| AATTCGACTCA   | 535.221727853544 | 0.467061953601677 |
| GGTATAGATGAC  | 535.229345994183 | 0.336415493925167 |
| GTCATTAATCTA  | 535.236429093127 | 0.412102236145018 |
| AGTCACCCATC   | 535.243446281988 | 0.380006318081555 |
| ATGACAATGCAC  | 535.248622795676 | 0.365507785933951 |
| AGCCCAGAGTCA  | 535.251705710289 | 0.643683821266279 |
| ATGACTAGCTGC  | 535.260919988223 | 0.356468416377666 |
| AGTCATGAGTTA  | 535.27077224159  | 0.344144087013747 |
| CCAATAAATGAC  | 535.272817768452 | 0.177045126316212 |
| AATGTTTACTCA  | 535.277090622921 | 0.633309722196972 |
| CGTCATTGGGTC  | 535.279416843658 | 0.584066971121728 |
| ATTGTAGACTCA  | 535.288896179627 | 0.587555882786694 |
| ACAGGATATGAC  | 535.311941120494 | 0.598308857218032 |
| ACTTGTAATGAC  | 535.321774755693 | 0.40343741694272  |

|               |                  |                   |
|---------------|------------------|-------------------|
| GTCACAGATCGA  | 535.329076171626 | 0.239321972680371 |
| ATTCCCCGATGAC | 535.338976589771 | 0.456468186900248 |
| AGTCATGGTTCC  | 535.362164667174 | 0.426540596074432 |
| CTTAGATGTGAC  | 535.364972130715 | 0.646916760562612 |
| ACGTCACCACTG  | 535.379891769208 | 0.249994232440406 |
| AAACGTGATGAC  | 535.391502542722 | 0.41397267381108  |
| AAATAAGTGTCA  | 535.398102759615 | 0.537341828527418 |
| GTGTCACCTGGA  | 535.420179988289 | 0.232209221748938 |
| GTCATGGCTAAA  | 535.428532714964 | 0.183267071050691 |
| AGATAACAGTCA  | 535.446826296329 | 0.480627453839058 |
| CCTAGTTATGAC  | 535.453963536321 | 0.767904976192335 |
| GTCATCAACCGA  | 535.463748438714 | 0.440184125469168 |
| AGATTAGACTCA  | 535.482040485191 | 0.2624743103057   |
| ACCCGCGATGAC  | 535.503762269019 | 0.420396048348044 |
| GTCATCAGTTCA  | 535.529838033561 | 0.830004142849604 |
| AACCCTGACGCA  | 535.542684394316 | 0.399765430606047 |
| AGAGTCAGGATG  | 535.570764412309 | 0.273498684158601 |
| GTGACTCGCGCA  | 535.581490739469 | 0.566872146229811 |
| CATGTCAGTGAC  | 535.582937344649 | 0.567247934122443 |
| ATGACGACGCTG  | 535.588596768767 | 0.389733569282259 |
| ATAGTTTGTAC   | 535.606905836482 | 0.622136326179036 |
| AGAAATGTCATA  | 535.613936412566 | 0.302931692146168 |
| TATCAGATGACA  | 535.639660934673 | 0.420645842144032 |
| ATGAGTCCCATG  | 535.640090967713 | 0.582561781272837 |
| GACTGAATGACC  | 535.650114393108 | 0.859308373729887 |
| CTGAGCAATGAC  | 535.660637719119 | 0.430277055689727 |
| ATGACGAGGTCA  | 535.666980173886 | 0.47044668934631  |
| ATTAGTGACCCA  | 535.670039171492 | 0.679970110773586 |
| TAAGATTGGTCA  | 535.670735631686 | 0.297855864888258 |
| AATTGCAATGAC  | 535.671642039213 | 0.759505668001512 |
| GTCATCCACCTA  | 535.689964732187 | 0.226853958724265 |
| ACATTGAATCAC  | 535.713178306578 | 0.251729601862132 |
| ATCGGTTATGAC  | 535.723521478133 | 0.305812384112511 |
| ATTCATTGGTCA  | 535.742719820702 | 0.583538582866005 |
| TCTTGCGACTCA  | 535.750397241996 | 0.439227020708543 |
| AGTCGTCGTCAT  | 535.758813328365 | 0.350178847127755 |
| ACGTCACCTCTA  | 535.765345079605 | 0.421710275113698 |
| GTCACATCGGCA  | 535.780050779281 | 0.676367918014581 |
| GATGAGCTGTCC  | 535.80242974296  | 0.168615384654814 |
| TAGATCCAGTCA  | 535.805844699831 | 0.428201486772741 |
| CTTATTTTGTCA  | 535.80671252934  | 0.271976416443103 |
| GTCACCCTCTGA  | 535.828523753864 | 0.451599179784429 |
| AGTCTTGCGTCA  | 535.849710629365 | 0.3523589661971   |
| ACGTCATGTACT  | 535.864082113156 | 0.320685188299977 |
| GACTAATTCGAC  | 535.865851695383 | 1.15968891751096  |
| GACTCGTAATTA  | 535.865878688479 | 0.600727675747508 |
| GTGACATCGTCA  | 535.87900148941  | 0.257820438363736 |
| ATGACCGAATCC  | 535.88431557683  | 0.222082828970933 |
| GTCACCACTGAC  | 535.885603466444 | 0.555101766910482 |
| AGGACTGTGTCA  | 535.886588312493 | 0.471246801970241 |
| ACTCATCGGGAC  | 535.904619057752 | 0.588465531269566 |
| ACTGTGCAGTCA  | 535.905769479008 | 0.559209550914498 |
| ATGACAAGACAT  | 535.908906719354 | 0.43576553131953  |
| ATGTCAGACTCA  | 535.917786483829 | 0.746241198200431 |

|               |                  |                   |
|---------------|------------------|-------------------|
| GTCAC TTTGGCA | 535.925074770504 | 0.640257698716025 |
| CCCAT TTCGTCA | 535.93592467571  | 0.48264083880159  |
| GATTTACATGAC  | 535.939499540017 | 0.489526649901498 |
| GTCATCTGAAAC  | 535.949669623166 | 0.534789292951258 |
| ATGACAGAGATG  | 535.958179854544 | 0.404647237782281 |
| GCGAGATATGAC  | 535.997546152014 | 0.585484131499473 |
| GAACTATTACTC  | 535.999623879195 | 0.567432228699177 |
| GCATTTGTGTCA  | 536.004123216469 | 0.70481444989298  |
| GTCATCGATGAA  | 536.027635974429 | 0.760853982445785 |
| CGCGCATGACAC  | 536.056957394762 | 0.357129250140274 |
| AGAACACATCAT  | 536.067400443347 | 0.511629889371226 |
| GTCATACCGTAA  | 536.067483821897 | 0.463163675886867 |
| CTCTATCTGTCA  | 536.083893044274 | 0.386790640972958 |
| CCATGAGAGTCA  | 536.097024662204 | 0.596246841722295 |
| ATGAATCAACCA  | 536.11931203397  | 0.428658121055529 |
| AAAACGAATGAC  | 536.11983646415  | 0.484795075735377 |
| GGAAATGTCATA  | 536.119865740111 | 0.326926166083319 |
| ACTCATCAGATG  | 536.127415990882 | 0.481709056767821 |
| AAGTACTAGTCA  | 536.135072803206 | 0.193955584418946 |
| TATGCGTAGTCA  | 536.137699365734 | 0.585890600146403 |
| ACTCATCGGAAG  | 536.148527199592 | 0.639868960382865 |
| ATTGATTACTAA  | 536.159837279298 | 0.625137166947754 |
| CCAATAATGACG  | 536.170950901174 | 0.27222334060118  |
| CATACACAGTCA  | 536.187042743187 | 0.37782066193969  |
| CGCCAGGATGAC  | 536.207862700908 | 0.427480446807082 |
| ACGTCACCACAA  | 536.217214532936 | 0.23071996813153  |
| CGGTTTTACTCA  | 536.218938679748 | 0.523341794756546 |
| CGATATTATGAC  | 536.220747927766 | 0.246498139911844 |
| GTAACCGTCACA  | 536.233774603807 | 1.06630259060425  |
| CAAAACGGTGAC  | 536.237753070664 | 0.398310524840285 |
| AGGTCCGATGAC  | 536.244251023718 | 0.555775728142177 |
| GTCATCGTAGCA  | 536.263947603705 | 0.669329159016731 |
| AACGTTGACACA  | 536.264482959041 | 0.699313781935324 |
| GCTGTCTATGAC  | 536.264879603067 | 0.576285111714754 |
| TGACCAATCGCA  | 536.286079879148 | 0.466642862762316 |
| ATAACGTGAGTC  | 536.322873167832 | 0.660266671510711 |
| CAGTCAGCTTTA  | 536.327254402858 | 0.946574095588756 |
| TCAGTCAGGGAA  | 536.330920419497 | 0.506998723317723 |
| CTAGGCGATGAC  | 536.334093884654 | 0.469552543907427 |
| AGACTAATCATA  | 536.369902233374 | 0.505309840863603 |
| ACGTCACAGTAT  | 536.394691677604 | 0.5165346650467   |
| CTGGGTGACCCA  | 536.396990697778 | 0.736061044056582 |
| CGACCCTATGAC  | 536.397082895381 | 0.366492537445477 |
| GTCATAGGACAA  | 536.400300608282 | 0.724864212241561 |
| CCACTGGAGTCA  | 536.435867674198 | 0.663137890623885 |
| CGTACAGAGTCA  | 536.446688901885 | 0.691466261237064 |
| GATGCTGTCAAC  | 536.452263406779 | 0.461222829260579 |
| ACGTCACCTCGGA | 536.455000272071 | 0.384531180973512 |
| ATGACGCCGTTT  | 536.456411828731 | 0.625029018711422 |
| AGATCTGATTCA  | 536.465665771085 | 0.553527388233745 |
| AATTTGAATGAC  | 536.467683773432 | 0.586080567632922 |
| AGCGGGTATGAC  | 536.470013450233 | 0.431763848363048 |
| AGTGTAAGTCAC  | 536.471403373505 | 0.306049238254209 |
| ATTGCGTATGAC  | 536.494932910677 | 0.404102771208566 |

|              |                  |                   |
|--------------|------------------|-------------------|
| GTCATCCCTAAA | 536.54425219513  | 0.456662735170693 |
| GGCGTCTATGAC | 536.564080624766 | 0.374077264003077 |
| CGGATTTGACTC | 536.567454005776 | 0.670976031783256 |
| CTGTCAGATGAC | 536.570135586837 | 0.358540420608369 |
| CTCGCGGATGAC | 536.610700714989 | 0.464854353406839 |
| TCTGTTTACTCA | 536.612039964366 | 0.393432257263322 |
| CCATTATGAGTA | 536.636657660571 | 0.479451061036691 |
| CAGGCGGAGTCA | 536.636881915962 | 0.267413946382053 |
| GCAGACAGCTCA | 536.642210806697 | 0.610349282352237 |
| ATACACTATGAC | 536.647187472837 | 0.232941913287423 |
| CACTGTGGTGAC | 536.664308282887 | 0.670602774308264 |
| ATCCTGAATGAC | 536.671418214818 | 0.412347974123142 |
| AACATGTGACGT | 536.672253240168 | 0.449498419122149 |
| ATGAGTCCATA  | 536.684515715993 | 0.242764728649109 |
| AGTCACTCCACT | 536.685995943431 | 0.256663149116913 |
| GTCATCATATCA | 536.690496180649 | 0.660526247522431 |
| GTCGATGACCGA | 536.695926636784 | 0.668485487537261 |
| ACGTCACCAAAG | 536.699833167345 | 0.510923663214304 |
| GACTCCGATGAC | 536.706543637824 | 0.386302167843138 |
| GTCATCATCAAC | 536.710571978439 | 0.482219093290316 |
| GAGGGTAGTCAC | 536.711131822767 | 0.327188099193025 |
| GTCATCTGGAAC | 536.722776933501 | 0.245895278248942 |
| GTCACCTATGCA | 536.736535067703 | 0.389831327801178 |
| AATCCTGACACA | 536.737827150829 | 0.426403215007891 |
| ATCATCCAGTCA | 536.746950438541 | 0.310900722918128 |
| CAGGCGTACTA  | 536.750579240187 | 0.316016192658538 |
| CACGCTGAATCA | 536.789467469205 | 0.619538595774939 |
| ACTCATAAGGTG | 536.802341748667 | 0.505984700341382 |
| TAAGCGGAGTCA | 536.819150643506 | 0.556457262646155 |
| CAGCCATATGAC | 536.859804608343 | 0.664895928431697 |
| ACCTAGGGTGAC | 536.863329857085 | 0.524374179699356 |
| GAGTCAGGTACA | 536.864104245174 | 0.252607330940294 |
| GACGGATTAGTC | 536.879483749653 | 0.37611417297906  |
| CCCTACCAGTCA | 536.88018570907  | 0.368565649799923 |
| GTCATATCATTA | 536.925380502731 | 0.110199933572049 |
| CACTAATATGAG | 536.931683200377 | 0.958189019575694 |
| ATTGACGATGAC | 536.9320599916   | 0.734811119588482 |
| CACGCTTTGTCA | 536.938230889586 | 0.192105007501318 |
| CCCAATATGTCA | 536.946137082899 | 0.521734415658785 |
| AAAGTGGATGAC | 536.964421030097 | 0.201807644290266 |
| AATGCTCTGACT | 536.969893876643 | 0.384351708348234 |
| ATGAGCATGACA | 536.970636628749 | 0.661156490239592 |
| GTTGACCAGTCA | 536.99166947128  | 0.307643665688442 |
| GCGTCACGAGCC | 537.005835026277 | 0.958706337399326 |
| GTACACGCGTCA | 537.007205052996 | 0.679850717207592 |
| AGTCACTCCTTG | 537.00727614377  | 0.485606271428079 |
| ATAATCCAGTCA | 537.009062261295 | 0.350580026323225 |
| AGTCAGCGTGAC | 537.021713137188 | 0.531432927290008 |
| GCGTCACCTGA  | 537.024309239684 | 0.641457066616168 |
| TGACTATGGCAA | 537.031603369758 | 0.441993256611722 |
| GTCATCCGCTGA | 537.065960619739 | 0.830810971212654 |
| GGCCGTTAGTCA | 537.084369257719 | 0.640425694943799 |
| CCTCATTGACTC | 537.09131814588  | 0.329001504737561 |
| GTCATCTTTAAA | 537.099221702761 | 0.802290590464662 |



|               |                  |                   |
|---------------|------------------|-------------------|
| GTCATCGACTAA  | 537.108715756925 | 0.510641993963523 |
| AGTCACTTCCTA  | 537.131605017965 | 0.219530020913113 |
| AATCATGACCCA  | 537.134673544186 | 0.417537032927324 |
| TGCCAAGTCACA  | 537.167983089004 | 0.621987876611327 |
| CTTAGGTGACAC  | 537.17296868274  | 0.390182380000827 |
| GACACGGGTGAC  | 537.176000763234 | 0.529861024471474 |
| GTCACTGCTGAC  | 537.178060493264 | 0.625921048650973 |
| CTGCCTTACTCA  | 537.187175401818 | 0.228427356041046 |
| CTAGGTAGTCAC  | 537.194057129055 | 0.291322661871962 |
| CAGTATTGCTCA  | 537.194240684923 | 0.976596397774559 |
| CATACATGTGAC  | 537.213230253914 | 0.6012906416075   |
| AATTAATGGTCA  | 537.215819891493 | 0.615922874652842 |
| TAATTGCAGTCA  | 537.229814081066 | 0.359497198690801 |
| CCTATGCAGTCA  | 537.236313094711 | 0.576091181406462 |
| AACTAATCGTCA  | 537.237272280035 | 0.583525651694247 |
| ATCATCTAGTCA  | 537.241924543315 | 0.513602338606046 |
| TATCTACAGTCA  | 537.244052153292 | 0.645351254461783 |
| ACGCATGACGCT  | 537.252386422725 | 0.630685234857998 |
| CAGTCATGGTGC  | 537.263992332859 | 0.587241673360085 |
| ACTCAGATGACG  | 537.280900908299 | 0.452469714997231 |
| GAAAAGTCATAC  | 537.293294180246 | 0.326971158133922 |
| ACTATATATGAC  | 537.294808456878 | 0.597208493312522 |
| GTCATCCTACCA  | 537.304195299028 | 0.375859799689964 |
| CCCATTAAGTCA  | 537.308958410675 | 0.647529040257832 |
| AATTTGCTCACT  | 537.325122405025 | 0.237139125815068 |
| AATGCGAATGAC  | 537.351923828101 | 0.364324292254884 |
| CAAGTTTTGTCA  | 537.374430597385 | 0.586124079875784 |
| AGTCACGCCCTA  | 537.382016685065 | 0.147890694891638 |
| ATCCTATAGTCA  | 537.388231326382 | 0.473884253888706 |
| CCGAGGAATGAC  | 537.39345656177  | 0.410668338256263 |
| ATGACAGTGTGA  | 537.406311411636 | 0.314511835275526 |
| AGTCACTCTCCA  | 537.411689994016 | 0.497022539487302 |
| GTCATTCATTAA  | 537.428302820673 | 0.478972761053817 |
| ACGTCACATAAT  | 537.444893165704 | 0.428579892378174 |
| ATAGTCGGTGAC  | 537.453464099401 | 0.284829790997049 |
| AACGAGGTGACT  | 537.469946866982 | 0.566476232468539 |
| TAGGCTCAGTCA  | 537.471712507883 | 0.592545004229288 |
| ATGATGTGTTTCG | 537.497027203581 | 0.501780793431484 |
| CGTCATTGACAC  | 537.506909074346 | 0.610692372191392 |
| ACGACAGATGAC  | 537.53305255031  | 0.643124784200596 |
| ACCGGTAATGAC  | 537.53892677481  | 0.663003559215842 |
| GTCGCTGACACA  | 537.544209727494 | 0.747475863476059 |
| GAGTATGATGAC  | 537.560007682017 | 0.298125122361939 |
| GCCACTGCGTCA  | 537.560748654721 | 0.442213362617255 |
| TCATTGCAGTCA  | 537.561835345436 | 0.525389196655982 |
| ACAGTGTATGAC  | 537.563802081254 | 0.506206506664035 |
| CGGCTAGATGAC  | 537.56486953339  | 0.620465012454243 |
| GTCATCTTCAAC  | 537.589278016266 | 0.141912253448262 |
| CATTGCGATGAC  | 537.591207763222 | 0.49266142044488  |
| ATGACAGTACGA  | 537.599709349926 | 0.379830332320256 |
| AGGTCATATGAC  | 537.610554633066 | 0.478336171587877 |
| CACTTCTGACTG  | 537.618474075147 | 0.303823659414133 |
| AAATGCGGTGAC  | 537.623131082184 | 0.428585953981765 |
| CCAGCGAATGAC  | 537.6238979366   | 0.64389723036956  |

|              |                   |                   |
|--------------|-------------------|-------------------|
| AGTCACTAGATC | 537.630999535861  | 0.227332798502546 |
| TGAGTAAGCCAA | 537.639170163137  | 0.626820943243331 |
| ATCGGGTGACGC | 537.648695402477  | 0.505307762430327 |
| CCACGGTGTGAC | 537.654152513225  | 0.544456770695716 |
| GTCATCAATACA | 537.657924035861  | 0.394245315412201 |
| CAGTGAGATGAC | 537.658023977796  | 0.389575630464922 |
| CATAGATGTGAC | 537.678279148903  | 0.403573602231325 |
| CTGTTTGCAGCA | 537.696754176624  | 0.427144325013762 |
| GTCATATGTGAA | 537.698770824915  | 0.514823511008956 |
| AGTCACTTCAGC | 537.729013468039  | 0.394602249514118 |
| AAATTCGTCAAC | 537.739577933523  | 0.413866443149024 |
| CATCATCTATGA | 537.755812021444  | 0.625419689338176 |
| AGCTACCAGTCA | 537.760128490473  | 0.179944086920759 |
| ACCCAGTGAGTC | 537.768431271219  | 0.780825237111634 |
| GACTAATGTTCA | 537.769444189365  | 0.775566701335239 |
| GTACGATATGAC | 537.770557967862  | 0.479672088242573 |
| GAATTTGCTCAC | 537.810987228996  | 0.442764357473441 |
| ATGACTTGTCCG | 537.824138973671  | 0.426053789973017 |
| CAGTCAGCTGAC | 537.824303535793  | 0.508960980670152 |
| GGAAAAGATGAC | 537.836340334148  | 0.448011855564503 |
| GAGTCAGTATCC | 537.849424991604  | 1.01775211343504  |
| ATGAGCAACAAA | 537.857518429488  | 0.301595451610893 |
| AGATCGGATGAC | 537.8644449937144 | 0.30142830979658  |
| TCATCAGGATGA | 537.868813038928  | 0.450692070542381 |
| AGTGATGATGAC | 537.874839191984  | 0.290696485823305 |
| ACTTGTCACAAG | 537.875601640474  | 0.81211174563194  |
| GCGGTGGAGTCA | 537.876337333694  | 0.645214410611661 |
| GAGTCAAAGCCA | 537.882938251649  | 0.287049776336206 |
| CTAATCGATGAC | 537.888474850647  | 0.595932203259145 |
| ATGACGAGACCG | 537.889224364411  | 0.459789039167514 |
| GTCATCTGAAGA | 537.889928648761  | 0.365462782031844 |
| AGAGTCGATGAC | 537.905066585764  | 0.55492833872816  |
| GCAATAAATGAC | 537.907403246269  | 0.382788311540032 |
| GTCATTGCATCA | 537.909060778359  | 0.462016624863749 |
| ATCTCATAGTCA | 537.913705933419  | 0.648854505966564 |
| CTCGTGTAGTCA | 537.927833315402  | 0.420503209018995 |
| AAATGGGAGTCA | 537.92951679518   | 0.435308601521901 |
| AATGAGTGTGAT | 537.93305930514   | 0.151996408376873 |
| AGCTCGGAGTCA | 537.939742983081  | 0.247613481074624 |
| CGTCATTTACTC | 537.948178076966  | 0.420765713746084 |
| GGCGTGTATGAC | 537.958591084904  | 0.611546751836954 |
| ACTTAAGTGTCA | 537.962246460464  | 0.52559492326211  |
| CAAATTATGACC | 537.98281046767   | 0.498585619226614 |
| TACTACCAGTCA | 537.996926507744  | 0.456160560162504 |
| GAGGAATATGAC | 538.012564848909  | 0.149164195621165 |
| GACGAAGATGAC | 538.02068234835   | 0.396106334601878 |
| CGCGATAATGAC | 538.026416082174  | 0.368570564726063 |
| GTCATAGGGCAA | 538.032639257573  | 0.475795207916953 |
| TCAGCATAGTCA | 538.04616781664   | 0.234025102676422 |
| TCGTCGGAGTCA | 538.047626699267  | 0.436272726961661 |
| GAATCACGTCAC | 538.056149268961  | 0.332647806875044 |
| GTCATCGAAATA | 538.064350010542  | 0.278842380762888 |
| TGACTACAACAA | 538.070748011367  | 0.685499043822893 |
| ACGCGTTGTGAT | 538.082548444563  | 0.28218783309791  |

|              |                  |                   |
|--------------|------------------|-------------------|
| GTCATCTTCTA  | 538.091678594329 | 0.27774204185076  |
| CGCACTGATGAC | 538.114967524299 | 0.39885115505767  |
| GACTAATATCTA | 538.120709594071 | 0.337871081505378 |
| GTAAGACTCTTA | 538.125448850156 | 0.476829826744463 |
| AGAGTAATGACA | 538.127094552492 | 0.305526291463477 |
| GAAGTGGATGAC | 538.136010374465 | 0.543773460886576 |
| CTGGCTGATGAC | 538.143410936005 | 0.652649847668729 |
| CGAACATGACAC | 538.145975409236 | 0.53827180837669  |
| TCATCCTAGTCA | 538.15273303642  | 0.267406086294843 |
| GTCATTCGCCTA | 538.158374026493 | 0.574659273931352 |
| AACTGCGACTCA | 538.165736735941 | 0.58004355114637  |
| GTCATTGTTAAC | 538.166708037852 | 0.882478024556089 |
| AAACAAACAAAA | 538.186075388635 | 0.460148333620931 |
| CACCTATAGTCA | 538.200785886876 | 0.40542878586036  |
| CGCTGCGATGAC | 538.204058482371 | 0.537000777220511 |
| CGTCATCAGATA | 538.228013359568 | 0.52551715998749  |
| AATTGGGTCAAC | 538.229260372779 | 0.353186167066007 |
| AGTCACTTCGTA | 538.253477265231 | 0.478189548819604 |
| ACTTAGCAGTCA | 538.255714216441 | 0.514054130852613 |
| GCACTCCAGTCA | 538.266590209949 | 0.768167588238941 |
| AGTCACTTGCTA | 538.276489640282 | 0.297580801679306 |
| AACAAATATGAC | 538.280195196836 | 0.428421188167275 |
| ACGTCACAACGG | 538.304154992317 | 0.395328462720024 |
| TAACTTGGGTCA | 538.318262503903 | 0.497551074246267 |
| CCCAGTGACGAA | 538.319210976217 | 0.50345980830649  |
| GAACACGTGTCC | 538.320982232499 | 0.71189474099134  |
| GTCACCGGTAC  | 538.346237952204 | 0.601956225997211 |
| GTCACACCAGGA | 538.355195524314 | 0.699746617314078 |
| CAGGAATGATTC | 538.364696183821 | 0.753976237365483 |
| GATCCCCTCATA | 538.37251765212  | 0.324353791005797 |
| ACACGTGTGACA | 538.378042963509 | 0.504847815407971 |
| GTCATCAGCCGA | 538.390442065708 | 0.379301527689647 |
| ACTCGTCAGAGT | 538.3995352698   | 0.945655502222388 |
| AGACTTCTGACT | 538.402037183008 | 0.686604724350688 |
| AGGTAGAATGAC | 538.419386867658 | 0.262607370157022 |
| AAGGTTTGACTC | 538.423112080758 | 0.643294666160113 |
| GTCATATTTCAA | 538.459782285099 | 0.977303671282956 |
| ATTGCATCATAG | 538.462888182059 | 0.414811737596758 |
| AGCGTCGTGTCA | 538.472699055151 | 0.386686893174625 |
| ACGTCACAGTTC | 538.472783266633 | 0.347771593273476 |
| GTCATTATGGCA | 538.474026199359 | 0.510270050586301 |
| CGTCATGCTGAC | 538.488821718463 | 0.474093616622719 |
| ACTGGTGAATCA | 538.502113799951 | 0.827773336264151 |
| CTACGTTATGAC | 538.504076483971 | 0.523191146582454 |
| CGTTTGACGTCA | 538.509028098271 | 0.53749041079317  |
| ATGACAGCTTAC | 538.546453655018 | 0.350917498988177 |
| GTCACCCGTAC  | 538.621995734134 | 0.249726008738238 |
| TATATTTGGTCA | 538.632817644658 | 0.563410632808586 |
| ACGCCCGATGAC | 538.633088723693 | 0.505074272444762 |
| AGGATATTAGTC | 538.633638495766 | 0.575030981663448 |
| CTAAATTATGAC | 538.650174066115 | 0.232459330739295 |
| AAGAGTCTTATT | 538.65866283161  | 0.344009648771481 |
| ATGACGGACAGC | 538.658826418009 | 0.624323218369009 |
| ACGTGTAATGAC | 538.659950589726 | 0.38233423072242  |

|              |                  |                   |
|--------------|------------------|-------------------|
| TGTCATCTGCAA | 538.665231355876 | 0.674266892176812 |
| GTGTCACGCGTA | 538.667342939463 | 0.413001640394868 |
| AGCACTCAGTCA | 538.686495361139 | 0.732069718699543 |
| AAACACAATGAC | 538.69641757209  | 0.413031071925055 |
| ATATGCCAGTCA | 538.706826028346 | 0.601172386997918 |
| GTCATTTGTAAC | 538.709499922188 | 0.447803011790943 |
| CTTGAAAATGAC | 538.710920897621 | 0.638798376926295 |
| AGTTTAGACTCA | 538.71753884853  | 0.526970894813995 |
| ACGTCTACGTCA | 538.718792988756 | 0.549658244330568 |
| AACCCTGCGTCA | 538.720971521083 | 0.507102965018924 |
| CAGAGAAATGAC | 538.72269914408  | 0.318423192117423 |
| CGTCATTATTCA | 538.736121122795 | 0.319079806129091 |
| GACTCGGAGTCA | 538.752936034387 | 0.48266476549621  |
| CCCGCCGATGAC | 538.75826859064  | 0.428600961505527 |
| GAACATGAATCA | 538.765909528697 | 0.257969287509898 |
| GATTATCTGTCA | 538.772556262752 | 0.812978768860783 |
| AGTCACGCCTGG | 538.784390575364 | 0.348093042739232 |
| AGTCACTCTGGC | 538.784864534283 | 0.51991926393066  |
| GTCATCTTGCCA | 538.790309576091 | 0.399338725101469 |
| GTCATCCTTAAC | 538.790840432288 | 0.326705189595793 |
| GTCATGTTACAA | 538.794757712051 | 0.622517434122121 |
| AGACTCAGTGAC | 538.803257793872 | 0.485383062307028 |
| CCCATCGATGAC | 538.807203891015 | 0.490969445607118 |
| ACTCATACTCAC | 538.810145400992 | 0.272978352848504 |
| GTCACGAGTCAA | 538.873083074382 | 0.439343776291739 |
| GTCATTTGTACA | 538.886137300257 | 0.489636079860941 |
| CATGAGTAGTCA | 538.887150586159 | 0.550397627325132 |
| CTGTCCTATGAC | 538.922123293004 | 0.464634085223811 |
| ACCAAGTCATCC | 538.922358298677 | 0.258894752117331 |
| GACACGTCTGAC | 538.926904392714 | 0.599025843445276 |
| CGTCACAGTAAG | 538.92942961991  | 0.418497517571557 |
| CATAGCCAGTCA | 538.959712006445 | 0.688918218838583 |
| ACAGGTATGAGT | 538.964992633396 | 0.364298950096178 |
| CCGAGTGATGAC | 538.966230639299 | 0.666397470192263 |
| CTTGCCAGTCA  | 538.988346035824 | 0.392622028612077 |
| CTTCTATATGAC | 538.996449360095 | 0.561953961458886 |
| AGTGTACAGTCA | 539.006481539268 | 0.611718770013077 |
| AAACCAAGTCAT | 539.007630847577 | 0.374197992587328 |
| TGACTGCGTAAA | 539.009417946755 | 0.542439735799047 |
| GACGGATGACCC | 539.017576486313 | 0.783254227097567 |
| CGTCATTCGGAC | 539.038676020568 | 0.503567251360629 |
| AGTCGTGACTAG | 539.070926467388 | 0.214447917818612 |
| AATATTGTCACA | 539.074306320861 | 0.477412224913114 |
| AAGCCTGTGTCA | 539.0902833136   | 0.576346572152209 |
| TGAGTCGCCATA | 539.105084287911 | 0.868014080147782 |
| TGACGCGTGCCA | 539.106376908406 | 0.998261706465852 |
| GGGTCACACTCA | 539.125052115732 | 0.543513661573426 |
| AGTCTTCAGTCA | 539.125274033743 | 0.49537117219065  |
| GGAACATATGAC | 539.129095146837 | 0.536163695158005 |
| CGTGTATGTGTC | 539.129801757233 | 0.716479453739328 |
| CCTTCGGATGAC | 539.133447822449 | 0.421248732677042 |
| ACTCTATAGTCA | 539.133731775173 | 0.216084404690996 |
| AAATGTAGTGAC | 539.147449205461 | 0.37032917312536  |
| ACTCATCGGATG | 539.167313091036 | 0.346489558316146 |

|              |                  |                   |
|--------------|------------------|-------------------|
| ATGCCAATGACG | 539.192228108681 | 0.523932947266926 |
| CGTCGGAATGAC | 539.195830255342 | 0.335180473012919 |
| GACCATACGTCA | 539.200883827833 | 0.61617993298506  |
| ATGCTCGATGAC | 539.203186842226 | 0.385390925455514 |
| ACGTCACCTCT  | 539.204167056834 | 0.31357424922779  |
| CGTTACCAGTCA | 539.205343502995 | 0.632554630900737 |
| GATCGTGACCCA | 539.235667763661 | 0.208937771859786 |
| ACCGTGGGTGAC | 539.239104121153 | 0.523478361800745 |
| GTCATATCGCTA | 539.244697900096 | 0.423061759265063 |
| CTGTGTTATGAC | 539.261481142439 | 0.698085250340809 |
| CGGTCACAGTCA | 539.280242262278 | 0.69660851542354  |
| CCGATGCAGTCA | 539.281571126596 | 0.561507303785377 |
| GCGATAAATGAC | 539.282928302167 | 0.469730419543396 |
| CAGATAGGTGAC | 539.300951458726 | 0.594722383915219 |
| AATCGGTATGAC | 539.314531939563 | 0.452253482654676 |
| GACCTCTATGAC | 539.315902856308 | 0.541096539548085 |
| CACATAATGACA | 539.321729505075 | 0.383500031016831 |
| CGACTAGATGAC | 539.339590202078 | 0.669520740920488 |
| AGACTAATTTAG | 539.370822347804 | 0.366101277875006 |
| GACTCACTTACA | 539.377301998832 | 0.34439508428947  |
| CATGGCGGTGAC | 539.378683198855 | 1.00013573454804  |
| CCACCATGAGTC | 539.405504791687 | 0.393566898362264 |
| CGATCACAGTCA | 539.414153682163 | 0.518558438775553 |
| AGTCACCTTAGC | 539.430214744892 | 0.136787987649777 |
| AATTGTGACCGA | 539.438784168941 | 0.623042947040357 |
| CTTGATAATGAC | 539.459064989911 | 0.594678374837826 |
| CCTGGAGAGTCA | 539.468769294273 | 0.5839029710435   |
| AAAGGATGACCA | 539.480015035184 | 0.398871771436965 |
| ATCTGGTGTGAC | 539.493864369577 | 0.402264489977815 |
| ATACTAATGACG | 539.509919947491 | 0.55227119332858  |
| CTGACTGGTCAA | 539.532947927459 | 0.392938675652699 |
| CAGTCACGACGC | 539.543015600818 | 0.647820169586575 |
| AAAACATATGAC | 539.559197203477 | 0.476548717059065 |
| GTCATATCTAGA | 539.575706962057 | 0.258096921915781 |
| CGGCTCGACTCA | 539.595428039555 | 0.552894185717364 |
| ACTCTGTATGA  | 539.604474233515 | 0.513662920991926 |
| GTCATATCCGGA | 539.608161438564 | 0.663271461763781 |
| CTCCATGAATGA | 539.611502034548 | 0.854878974884381 |
| GTGCCTGTGATA | 539.617865977701 | 0.125766981784489 |
| GTCATCTAGCTA | 539.6269265652   | 0.496483058014844 |
| CACTTAATGACA | 539.629083308099 | 0.640889514103983 |
| AAAGTAGTGACT | 539.635617875007 | 0.46492349572786  |
| GTCATCGGGTTA | 539.647790268998 | 0.721897524502549 |
| GTGTCATGTTTA | 539.660436006251 | 0.316816476995527 |
| AGTCACTTGATC | 539.678050678392 | 0.551916312446946 |
| TGTGTCAGTGAA | 539.683953684593 | 0.395491638961341 |
| AGTCACTACCTC | 539.703696657375 | 0.277116552763768 |
| ATGGGAATGACG | 539.706424016108 | 0.33917346112983  |
| TGACGAGTTCAA | 539.725211666089 | 0.610297504180363 |
| AGAGTCAGGTAA | 539.726410678708 | 0.280579634630729 |
| AGCTGGAATGAC | 539.726828545917 | 0.281616374504861 |
| ATGACTTGTAGC | 539.727202356626 | 0.537685738133831 |
| TATGACATTACA | 539.742197505858 | 0.344811420140862 |
| CGATACTTGTGA | 539.765202443469 | 0.712007773775341 |

|               |                  |                   |
|---------------|------------------|-------------------|
| ATGACGGAGATA  | 539.781759365329 | 0.266683390388141 |
| TAGGCTGTGTCA  | 539.788956370793 | 0.465584775870022 |
| ACACCTGACTCT  | 539.790778734696 | 0.264605430322634 |
| CCGCGGAATGAC  | 539.791093026148 | 0.589399298424641 |
| TGACACTATTAA  | 539.810714310689 | 0.588077011740881 |
| CGCGAGGATGAC  | 539.812633439306 | 0.642091102282933 |
| GACTAATCCGAC  | 539.833195962823 | 0.516385179963608 |
| CGTCATTTCTTC  | 539.83392982853  | 0.43980317859935  |
| ACTCAGCAGTCA  | 539.835037758411 | 0.46420917108999  |
| AAAATTTATGAC  | 539.840584661743 | 0.524027522807704 |
| ATCTGATCAGTC  | 539.842214272132 | 0.94101754344352  |
| ACCTCGTACTA   | 539.84535259017  | 0.386342852965087 |
| AGCAATCCGTCA  | 539.856923624535 | 0.545532815610999 |
| ACGTCACCC TTC | 539.876090460231 | 0.378643926336153 |
| TGACTAGGACCA  | 539.90604737079  | 0.160664644375942 |
| GTCATCAGAAAA  | 539.927213653298 | 0.482213133617902 |
| CAAGCCGATGAC  | 539.932864518298 | 0.995621453617551 |
| AGTGACGCGATC  | 539.937504257386 | 0.397689559938775 |
| CGATGAATCTTA  | 539.937717075826 | 0.516044445231039 |
| GTCATCACAGTA  | 539.939314034579 | 0.468369899529692 |
| GTCACCTAGTGA  | 539.948873923685 | 0.702172766491789 |
| AGTGC GGATGAC | 539.959561272085 | 0.433316163480274 |
| CGCTATATGTCA  | 539.97450100295  | 0.61191917128353  |
| GACAGTAATGAC  | 539.97558036749  | 0.565938321162956 |
| ACGTCAC TTGTA | 539.981018473464 | 0.197482591843224 |
| AGACTAATACTA  | 539.981334601476 | 0.578719818247323 |
| CCTGCAGATGAC  | 539.988017397441 | 0.842816471940553 |
| GCTTTGAATGAC  | 539.992837214699 | 0.430538839181477 |
| AACCATTGACTC  | 539.994381598478 | 0.504677480716553 |
| AGTCACGCTCAG  | 540.020521033537 | 0.312971573627305 |
| GTCATCCTCGGA  | 540.02115560755  | 0.676479521861671 |
| AAAGCTTATGAC  | 540.021787469337 | 0.409132772336181 |
| GCGCTAAGTGAC  | 540.030346458712 | 0.598043203436441 |
| GAGTCAGGAATC  | 540.040872266271 | 0.429059754140838 |
| CACCATATGACG  | 540.042375520861 | 0.243457214774256 |
| ATGACCACGACG  | 540.055310849742 | 0.319016193512221 |
| ATGACGCGCGCA  | 540.066109255545 | 0.548238067649658 |
| CCTTTGATGACG  | 540.077589894397 | 0.336806898106321 |
| GAGTCAAAGCGC  | 540.078890931473 | 0.523923936896434 |
| ATGAGTCCGCAC  | 540.082710841175 | 0.475035381263387 |
| ATGACGAGGTCG  | 540.096117807298 | 0.436424241466495 |
| GTCATCTTGAA   | 540.102438114543 | 0.576333900570879 |
| AACCATGT CACA | 540.104585943786 | 0.168762933827915 |
| GCTAAGGATGAC  | 540.105462579759 | 0.295966559805656 |
| CAGTCCGACTCA  | 540.10909233497  | 0.34558987069427  |
| TATCGTTACTCA  | 540.127512710259 | 0.584107624637227 |
| AACAACGACTCA  | 540.141589013967 | 0.545974203576068 |
| AGTCAGAGCCAG  | 540.142652858091 | 0.216282633349217 |
| GACTCTAAGTCA  | 540.155290438764 | 0.54959886949078  |
| GCGTAGAATGAC  | 540.155428816705 | 0.610517387395899 |
| GCTAACGGTGAC  | 540.168849952559 | 0.752941787038899 |
| CGCTTCTATGAC  | 540.169587449845 | 0.262822188379747 |
| AGTCACTTGAGG  | 540.17208461273  | 0.119047025053352 |
| GTCAC TTTGTCA | 540.172412484094 | 0.343152587990545 |

|               |                  |                    |
|---------------|------------------|--------------------|
| GCGTCATGTTCC  | 540.172965107991 | 0.463821802868418  |
| CACGCTGTGTCA  | 540.174607232083 | 0.638124489234472  |
| ACGTCATGCATG  | 540.177222947931 | 0.448253207261876  |
| ATGTCATGAATC  | 540.181011788785 | 0.517134903065309  |
| GAGTATCTGTCA  | 540.182290133983 | 0.811580998978072  |
| AGTGTATTAGTC  | 540.186854268081 | 0.281564100693094  |
| ACTTGGTAGTCA  | 540.213725722309 | 0.802930588683814  |
| TGACTACTTGAA  | 540.218523273349 | 0.443149198375215  |
| GCTTGTGAATCA  | 540.219249442406 | 0.717262515032445  |
| GACAAATCGTCA  | 540.221398153051 | 0.759767486242854  |
| CGAAGAAATGAC  | 540.240683300305 | 0.387557107293047  |
| AAGCACCAGTCA  | 540.244980229694 | 0.562264940145303  |
| AACTCCGACTCA  | 540.253475228835 | 0.190520281718503  |
| AATAGTCAATTC  | 540.253735371958 | 0.395380887398231  |
| TCCGACGACTCA  | 540.271623463651 | 0.195562931541523  |
| CACCCGAGTCAC  | 540.281130156354 | 0.22698105231423   |
| GTTTCGTGATTCA | 540.286287043419 | 0.493304157832169  |
| GTAGACGATGAC  | 540.301000001666 | 0.775836610334254  |
| GTCATCTTCTAA  | 540.315125433903 | 0.354553770554732  |
| ATGACGTTAAGA  | 540.319498601979 | 0.321190315945547  |
| GTCATTACCAC   | 540.329202113748 | 0.323780665515737  |
| CATCCCTATGAC  | 540.331798672027 | 0.338474214227952  |
| CGTGTTAATGAC  | 540.335530210445 | 0.709038897852659  |
| ACGTGTGTCAAT  | 540.342123786546 | 0.354309444590179  |
| AGACCATGAGTC  | 540.342673567134 | 0.416506061319685  |
| AGACTCACTGCA  | 540.342950722856 | 0.546029233969339  |
| AAGGATGATGAC  | 540.344660917198 | 0.270836423660549  |
| TGACTACCATAA  | 540.347616765667 | 0.827847649592961  |
| CGAGCGTGAGTC  | 540.375173808816 | 0.486322666945436  |
| CTAGTGGATGAC  | 540.431599176498 | 0.520622034492545  |
| GCTCGCTATGAC  | 540.462389307712 | 0.42555320091203   |
| AAAGTGTGAGCC  | 540.470261781763 | 0.313421769741582  |
| CTCACATGATGA  | 540.492951656849 | 0.829251402347615  |
| GATAAGGATGAC  | 540.531897624855 | 0.151564673048851  |
| GGTCATTGTGAC  | 540.544416500715 | 0.482546753772194  |
| AGTCAGACTTAG  | 540.548673029142 | 0.362763227418361  |
| GACTCAGTATGA  | 540.551093087097 | 0.439956907924089  |
| GGAGCTGTCATA  | 540.557917746027 | 0.241403204714146  |
| AGGCTTAATGAC  | 540.55842063541  | 0.598493413373004  |
| GCGTGACGTGAC  | 540.561612225476 | 0.266943222563274  |
| CGCCACTATGAC  | 540.561788536121 | 0.582681817972666  |
| AGACCTGACACA  | 540.562516312129 | 0.345094589991455  |
| ATTGCTAATGAC  | 540.563379245085 | 0.301141779304291  |
| ATATAAATGACG  | 540.56814647805  | 0.506347108470807  |
| GCTACATGTGAC  | 540.57147202394  | 0.637648008403377  |
| GTGACCGACTCA  | 540.581797611973 | 0.545135537116896  |
| TGACTGAGGAAA  | 540.620569024    | 0.437982620268934  |
| ATGACCTAGTCA  | 540.640095052768 | 0.366425631393299  |
| CATATGGATGAC  | 540.666192946157 | 0.564121369872239  |
| CGCATGGATGAC  | 540.669711757923 | 0.0342643788446384 |
| CGGTCTTGTGAC  | 540.671835625374 | 0.504927029441513  |
| TAGTGCGACTCA  | 540.687830020814 | 0.632737309034942  |
| AGTCAAGATGAC  | 540.692431292559 | 0.244738548257644  |
| AGTGATTTGTCA  | 540.693798772158 | 0.369137341863367  |

|              |                  |                   |
|--------------|------------------|-------------------|
| GAGTGCGATGAC | 540.694897953689 | 0.402186246469616 |
| ACGTCACATCAT | 540.697659794075 | 0.391033273647707 |
| GTCATCACCTTA | 540.700912244711 | 0.259010705699838 |
| GTGCCTGACTGA | 540.707573798304 | 0.394669071492886 |
| TGGCTCATCGAA | 540.748079270939 | 0.370247174013375 |
| ACATATTGTCAT | 540.766221368568 | 0.187414028764876 |
| AGTCAGAATCAT | 540.77012524015  | 0.510833773920296 |
| CAGTCGTagTCA | 540.775215622608 | 0.778084936459736 |
| GGTTCATAGTCA | 540.77631043407  | 0.662079707053279 |
| GTCATAAAGACA | 540.782479068946 | 1.1430522810884   |
| GACTCACGAGTC | 540.78327549491  | 0.68792974834525  |
| GTCATTCGACCA | 540.785652239474 | 0.370660097612232 |
| ATGACGTTAGAA | 540.790378312583 | 0.274993657560747 |
| GGCTTCGACTCA | 540.817058441263 | 0.483470026051025 |
| CGCCAAGTCATA | 540.831394979524 | 0.19742780658565  |
| GAGTCAATAGGC | 540.845551716782 | 0.418136768841424 |
| AGATAATATGAC | 540.867127668019 | 0.697562074011118 |
| TCGTCCTAGTCA | 540.871509618277 | 0.447006089004158 |
| AGCCATAATGAC | 540.884110290358 | 0.584501267161555 |
| CTGAATTGCTCA | 540.88530605069  | 0.873760954567864 |
| CTAAGGTGACAC | 540.894809115112 | 0.475198872387009 |
| CGCCGATATGAC | 540.909527712428 | 0.54962533484388  |
| ACTCTCATGACT | 540.915823606181 | 0.358306516627217 |
| CCGGTCTAGTCA | 540.948136803869 | 0.425548717190734 |
| GTAATAGGTGAC | 540.949972908369 | 0.455349556678945 |
| GTCATTCATTA  | 540.966289673962 | 0.481821572241874 |
| AGACCGACTCAC | 540.97201363444  | 0.366991965915028 |
| AAAATATATGAC | 540.977685341431 | 0.712912099333228 |
| AGCCAATAGTCA | 540.982290324191 | 0.529228340707367 |
| TCATAGCTAGGA | 540.987611469057 | 0.576541370291293 |
| CATCCATGACAC | 540.989155960749 | 0.481907866370018 |
| AATCCTGAATCA | 540.993281640188 | 0.354989518423564 |
| ATGACGAACGTG | 540.994118252778 | 0.375114474560765 |
| ATCTCATATGAC | 540.997544256377 | 0.320999713306691 |
| CGCCGGGATGAC | 540.999768111422 | 0.732297840958368 |
| CATAATAATGAC | 541.025851287523 | 0.707987708701997 |
| CGTCATCGGAGC | 541.026455067997 | 0.368326241503612 |
| CGCAAAGATGAC | 541.032928787693 | 0.554250989384877 |
| CGGAATAATGAC | 541.0380087524   | 0.378607460195805 |
| GCTTATACGTCA | 541.038214744753 | 0.457443517067008 |
| CATTGGAATGAC | 541.054128155354 | 0.308576016546489 |
| GTCATTTAGCAA | 541.083492074447 | 0.686850295852428 |
| GTCATAGGTATA | 541.090521662372 | 0.224809003528996 |
| CGGATCAATGAC | 541.097737683987 | 0.531983309455942 |
| ATAGTTGATGAC | 541.09840500227  | 0.485813174034393 |
| CGCAATGGTGAC | 541.099501848379 | 0.754537737708725 |
| TGACTAGTAGCA | 541.1084910215   | 0.597196209067283 |
| ATGACGAACGAA | 541.111180313086 | 0.273065491795034 |
| AGTGTCATGTGA | 541.123815979692 | 0.395719588646988 |
| CCGCTGGATGAC | 541.124194454621 | 0.575396532078773 |
| ACAACGTGTGAC | 541.130635744957 | 0.580938079798671 |
| GGGTCTATGAC  | 541.148740781984 | 0.555153699771754 |
| AGGCGTGTACC  | 541.153100427307 | 0.435620638969075 |
| GAGTCAAATACA | 541.161447657561 | 0.555241200929654 |



|                |                  |                   |
|----------------|------------------|-------------------|
| TGAAACTTGTC    | 541.163686423341 | 0.57541996027252  |
| ATTAATTACTGA   | 541.170898699875 | 0.795057463974835 |
| AGTCAGACGCAT   | 541.171913406624 | 0.587327184095393 |
| GTCATACGGTTA   | 541.173210788109 | 0.305696833342401 |
| GTCACACAGAAC   | 541.180278197845 | 0.586584411517046 |
| AGTGCGAATGAC   | 541.180609730573 | 0.355747290043298 |
| GAGTCAATTTAA   | 541.192965730722 | 0.325755877600384 |
| GTCATCGCTATA   | 541.205759593087 | 0.522818370069809 |
| TCAGGCGAGTCA   | 541.215206459217 | 0.39074248627634  |
| TTGAGTGACCAA   | 541.229220267536 | 0.509994271070156 |
| CGTCATTATAAA   | 541.232187187844 | 0.724876220331957 |
| GTATGATTCGAA   | 541.23795257713  | 0.402790696906975 |
| ACTTTATATGAC   | 541.239587152494 | 0.450754777778387 |
| TGACGAATTCCA   | 541.266142987441 | 0.609015900201083 |
| GGTGACCATGAC   | 541.267930371796 | 0.344083029200997 |
| ATCTTCGGTGAC   | 541.286116988342 | 0.556181422887643 |
| ACCTGGTGTGAC   | 541.300145085992 | 0.709670670907478 |
| AATGCAATGACG   | 541.301592301466 | 0.436482747316739 |
| GTCGTCCAGTCA   | 541.305118081859 | 0.451056589369526 |
| ATGGCCCAGTCA   | 541.310786278979 | 0.634296162056259 |
| AGTCATGGTGAG   | 541.314638701597 | 0.358204868344855 |
| ATGAGTCTCATC   | 541.324273341643 | 0.639143585821448 |
| CAGGCTTACTCA   | 541.325783386858 | 0.429888938532289 |
| GCACAGGATGAC   | 541.329406219589 | 0.183597010273806 |
| CGACTCAATGAC   | 541.342146660378 | 0.380815315855885 |
| AATAGGTGACAC   | 541.364166416142 | 0.45266860752344  |
| AGTCACCCCGAC   | 541.367843013616 | 0.335045395752657 |
| GGTACTGTGTCA   | 541.370058077473 | 0.85525061186678  |
| CATCTTGTGTCA   | 541.371170934685 | 0.683368149332406 |
| CCTACGTAGTCA   | 541.378819986606 | 0.369637963107352 |
| GGAACTGATGAC   | 541.388441320705 | 0.328805721669406 |
| CCAGCGGAGTCA   | 541.39924537655  | 0.79543729833766  |
| ACGTGTTATGAC   | 541.403922537049 | 0.510081202897785 |
| GTGTCATGGATA   | 541.429824749495 | 0.229757441865622 |
| CTTGCTTACTCA   | 541.43509560278  | 0.537270671206862 |
| ATGCTTAATGAC   | 541.435541897097 | 0.716318836001839 |
| CCGACGGTGACG   | 541.451115993518 | 0.90857690003146  |
| AAACTTGCGTCA   | 541.467612942633 | 0.651124055354857 |
| CTTGTTTACTCA   | 541.484278603768 | 0.288546552304088 |
| GTCATAGTGCGA   | 541.488478722635 | 0.371644779575716 |
| GAATGGGAGTCA   | 541.495397611454 | 0.391084875476858 |
| GTCACTGTCATA   | 541.505065199506 | 0.590198037032837 |
| AGTGCGCATGAC   | 541.515984063991 | 0.522139047133842 |
| ATATTGGATGAC   | 541.519631307707 | 0.303666611858508 |
| TAGGCTGCGTCA   | 541.520066218673 | 0.36196635451764  |
| CCTTGATATGAC   | 541.524675454764 | 0.407492825720292 |
| AAATGTTATGAC   | 541.532588139101 | 0.582444336806816 |
| TGACATATTACA   | 541.539504537042 | 0.269832895401081 |
| TCTGACTGGTAA   | 541.559085666029 | 0.145847725294896 |
| GGTTACACATCA   | 541.563861225    | 0.27174675537828  |
| CACGCGTGACTION | 541.567304387607 | 0.594299788065171 |
| CACGCGGATGAC   | 541.580237616116 | 0.610629601752617 |
| GCGTCACTGTAC   | 541.584544303562 | 0.899917283415046 |
| GAGTTCGACTCA   | 541.587819968374 | 0.555748735295049 |

|              |                  |                    |
|--------------|------------------|--------------------|
| TCGATCGCGTCA | 541.588562871632 | 0.840729754586267  |
| CTCGTAGACTCA | 541.594870324623 | 0.636092491240421  |
| ATAAAAGGTGAC | 541.595885148758 | 0.398189141042527  |
| GATTAGTCGCAC | 541.600896709032 | 0.486605435768244  |
| GACGATAAGTCA | 541.604234244603 | 0.539022794615757  |
| GTTCCGTGACTA | 541.627623971328 | 0.442317082081732  |
| CTCTGGGATGAC | 541.642465845746 | 0.730589005938053  |
| CCAGCAGATGAC | 541.676757710654 | 1.16823223915047   |
| GTGTCGGAGTCA | 541.686809923156 | 0.237175693616659  |
| CTTCAATATGAC | 541.689303719415 | 0.406962275433441  |
| GACGGATATGAC | 541.697790779417 | 0.236291781095914  |
| CGAATTATGACC | 541.704236485009 | 0.679068569554428  |
| GTCATTTACGTA | 541.709720019927 | 0.71634811333529   |
| GTAATATGTCA  | 541.709875850469 | 0.625826985600683  |
| ACTCATCGTGCG | 541.73819047722  | 0.567323386468305  |
| ACTGATATGTCA | 541.740714813108 | 1.29169166851181   |
| ATGAGCCAGTCA | 541.743009596565 | 0.378151038446353  |
| GATGATCTGTCA | 541.749595413194 | 0.307259312111436  |
| TAGGGTGAATCA | 541.757793124897 | 0.362590605399292  |
| CACCGTGTGACA | 541.773325447465 | 0.583878594714673  |
| CTAGATCTGTCA | 541.775305140353 | 0.404736444578542  |
| AAGATCGACTCA | 541.783853014679 | 0.603662995921578  |
| ACTATTGCGTAA | 541.785122644226 | 0.486642494099211  |
| ATAACAGATGAC | 541.794709791925 | 0.657635456674374  |
| AACTATCCGTCA | 541.794799374663 | 0.0975940750167419 |
| GGACCCAATGAC | 541.803263945771 | 0.819554715047273  |
| GATTCTAGTCA  | 541.80774185148  | 0.630827063422059  |
| ATGACGAACCTA | 541.808918469572 | 0.158168051585974  |
| AATACTAGTGAC | 541.811067168274 | 1.05528874778704   |
| CCTACGGAGTCA | 541.814843219478 | 0.811585606937615  |
| AATGACGGTATC | 541.819255224234 | 0.430049346861072  |
| GTCATAGCTAAA | 541.847540371685 | 0.552025386816003  |
| GAGTCAAAGTGA | 541.851059058284 | 0.268856532117559  |
| CTGACTCGCTGA | 541.866881385499 | 0.435737985133155  |
| ATACATCTGTCA | 541.869429879326 | 0.453046523863977  |
| AAGGTAGTGACT | 541.873906922262 | 0.276493420319822  |
| AGTCACCTCTGG | 541.894650785279 | 0.375402869737229  |
| CATAAGGATGAC | 541.908628386855 | 0.310691834156259  |
| AGGTAAGATGAC | 541.908708757578 | 0.355308685714135  |
| ATAACACAGTCA | 541.932668979981 | 0.637783354306938  |
| TGTCACAGTCAA | 541.935595166797 | 0.619911985526512  |
| ATGCTCAATGAC | 541.936467499335 | 0.427342264802541  |
| TCATACCTATGA | 541.940831866813 | 0.676332371705642  |
| AGAGTCAAAGCA | 541.96447089687  | 0.543033240095876  |
| AGTGTCATGCGA | 542.016195438068 | 0.287434070696392  |
| AGTCAGACACTA | 542.031549014759 | 0.426789854075926  |
| AGATTTTATGAC | 542.034441046916 | 0.644880663950918  |
| CAGCCGGAGTCA | 542.038821322665 | 0.727539028130889  |
| ATTTGCTCACCC | 542.055519051811 | 0.309552487687144  |
| GTCATTTTCGAA | 542.080511321827 | 0.523837321599396  |
| AGTGGGGAGTCA | 542.08484801201  | 0.160102175127778  |
| ATACCTGACTGA | 542.085061033785 | 0.424720768131942  |
| CATGAGAATGAC | 542.096686549987 | 0.428433266112276  |
| GTACACGATGAC | 542.116712416492 | 0.548163843417661  |

|               |                  |                   |
|---------------|------------------|-------------------|
| GTCGCTCAGTCA  | 542.123929478239 | 0.471776637757897 |
| CTCGAGCGTGAC  | 542.133397399856 | 0.656356795133489 |
| ATACGTAATCGA  | 542.143574596273 | 0.436586266819966 |
| GCCGGTGGCTCA  | 542.154814259141 | 0.419200859099236 |
| GCACATAATGAC  | 542.169365429568 | 0.412756146784653 |
| AGAATGGAGTCA  | 542.174105389654 | 0.156643539072458 |
| CGGACTGACACA  | 542.182748725785 | 0.509370473771374 |
| ATTTTGACGTCA  | 542.183674392206 | 0.668962167793206 |
| GCGCATACTGCA  | 542.184605202352 | 0.578636817999784 |
| CGGCACGATGAC  | 542.185858983145 | 0.613504198358565 |
| ATTCCGACTCAC  | 542.218597979739 | 0.269187917531117 |
| ACGTCACATATG  | 542.235210373592 | 0.370036241364244 |
| GTCACCGATTTA  | 542.247548908936 | 0.432279420728853 |
| CATCGATGATTC  | 542.257220656905 | 0.746362672719495 |
| CTGAAGCAGTCA  | 542.266071066709 | 0.564883745614225 |
| CCGTAGGATGAC  | 542.287112065089 | 0.539744493604223 |
| GCAATGAATGAC  | 542.293100940241 | 0.449050353283976 |
| GTCACACGTAAA  | 542.29458453621  | 0.242364832643716 |
| GGATCTTATGAC  | 542.295948295734 | 0.923250076482105 |
| TGATTCACCGCA  | 542.304694798231 | 0.439843486743403 |
| TCATGAGTGTCA  | 542.306051134137 | 0.75906039914304  |
| AACAATGTCATC  | 542.307873354426 | 0.26100085956635  |
| ATGACAACGTTG  | 542.332801483324 | 0.412684468142454 |
| AAAACGGATGAC  | 542.342406669305 | 0.507555423561758 |
| ATAGACTCAGAG  | 542.352460189388 | 0.775744540071773 |
| AATAGTGGTCAT  | 542.358542057306 | 0.234413247645353 |
| TGACTGGGCGCA  | 542.38744453521  | 0.424073186807056 |
| GTCATGTACCA   | 542.393866149586 | 0.383538503256236 |
| GAGTCAGTTGTA  | 542.395990419149 | 0.501435392513462 |
| ATCGCGGAGTCA  | 542.422867607374 | 0.435283405985676 |
| CCCCGTGATGAC  | 542.438129601184 | 0.637843641060879 |
| AGTCACCCCAAA  | 542.44061071439  | 0.287916734390806 |
| AGACTCACTCAC  | 542.440613482094 | 0.280937940537761 |
| CCTACTGTGTCA  | 542.465550050407 | 0.637794303533996 |
| CTCGACGGTGAC  | 542.505347444087 | 0.913006809595483 |
| AGTCATGAGAGC  | 542.505453602633 | 0.36441360713115  |
| TGACGCGTCCAA  | 542.509175244367 | 0.71866614741632  |
| ATGAGTCCGTAC  | 542.511311521237 | 0.229954756969288 |
| ACAATTTTCGTCA | 542.512961789012 | 0.55769869521738  |
| AAAAGGTGACTT  | 542.517963478747 | 0.349258203707252 |
| GCGTGGGAGTCA  | 542.520316653674 | 0.38822806130794  |
| GTAGTGGAGTCA  | 542.535982069513 | 0.138776369297884 |
| GTAATGGTGAC   | 542.571232975215 | 0.259109848710632 |
| ATGAGTAGTACA  | 542.589427881991 | 0.393913457021962 |
| GGCTTAAATGAC  | 542.60979624951  | 0.720276629926241 |
| CAGGCCGTGTCA  | 542.618701412058 | 0.507173876368977 |
| ATGACTTGGTGA  | 542.621847308523 | 0.42686669035926  |
| CTTGCCAGTCA   | 542.62946300031  | 0.316630086358274 |
| ACGGAAGTGACT  | 542.629669116663 | 0.263654743577935 |
| ACTCATACGGTG  | 542.645810080647 | 0.342829494788238 |
| GTCACATAATGA  | 542.650490936507 | 0.39043707677568  |
| CATACCTAGTCA  | 542.660148123635 | 0.139541368511118 |
| TACTCTGATTTA  | 542.667113725773 | 0.372275882922026 |
| ATGACGAACAAG  | 542.680886737304 | 0.357355647906037 |

|               |                  |                   |
|---------------|------------------|-------------------|
| GTCATCAGTCTA  | 542.685581015666 | 0.45195773237309  |
| AGTCACCTCCCA  | 542.695780734225 | 0.281835543901891 |
| CTGACGGACTCA  | 542.706320753877 | 0.637570524911651 |
| CTCTACCAGTCA  | 542.707444797958 | 0.19297944381263  |
| TATTTGCTCACA  | 542.710902343412 | 0.272816108964901 |
| CGCAATATGTCA  | 542.711518812481 | 0.521800312043257 |
| ATGACGCGCTCC  | 542.73014767918  | 0.449258532125594 |
| CCAGAAATGACG  | 542.735349416185 | 0.402487710444847 |
| CACAGTGACACG  | 542.738029877939 | 1.19552570235113  |
| GTCATCGTCTGA  | 542.739938905358 | 0.666116622644891 |
| ACTACTGTGACG  | 542.759751660165 | 0.737389645368111 |
| CCGTAAGTGTCA  | 542.778147481175 | 0.693637667546581 |
| CGTCTTGTGTCA  | 542.782744302353 | 0.847458032256451 |
| CACAGACAGTCA  | 542.79189048654  | 0.563168055761709 |
| TCGGATTTGTCA  | 542.799461566574 | 0.480226143903658 |
| AATTCCTATGAC  | 542.801362560527 | 0.356864620839024 |
| CAGCATGAATCA  | 542.808412034237 | 0.773739006880759 |
| AACCACGGTGAC  | 542.814487782823 | 0.68120080072595  |
| AATGATGTAACC  | 542.828237867551 | 0.280246607025358 |
| GACTAATACCGA  | 542.83103581661  | 0.615576190043892 |
| AGTACTGTCATC  | 542.847898987824 | 0.424981490816766 |
| CGGATGGATGAC  | 542.859011458851 | 0.371276144440328 |
| AGTCATGGTAAA  | 542.885137952097 | 0.420271197611901 |
| AGTAGAGTGACT  | 542.886792212301 | 0.324696338282459 |
| ATTGACTGAGTC  | 542.889857842143 | 0.393115064794778 |
| CTATGGGATGAC  | 542.891604207321 | 0.786468639487966 |
| ATGACGAGATTA  | 542.899974918393 | 0.344511957905485 |
| GACTAATTGTCA  | 542.908176172446 | 0.591332691104806 |
| CGTCATGTCAGA  | 542.910593264463 | 0.729675921092357 |
| AGTATTACGTAT  | 542.912552196977 | 0.365391109636579 |
| AGATTAGATGAC  | 542.923331322089 | 0.445420930224982 |
| CGATGATGTGGC  | 542.926006149508 | 0.483085308959695 |
| CGGCCTGACTGA  | 542.926390259495 | 0.246271064718403 |
| CGATGACTTGAC  | 542.932671632917 | 0.460145758911947 |
| TGACTGCATAAA  | 542.951507213301 | 0.38937273363087  |
| TGACTCCTGCCA  | 542.958425342663 | 0.486543506111263 |
| GTCATCTAGCGA  | 542.965913784743 | 0.635995276607829 |
| AACAGTTTGTCA  | 542.974785435406 | 0.592853161933128 |
| AGACCAGTCAGA  | 542.982051763891 | 0.314333561192532 |
| ATGGTTGACACA  | 542.98249420797  | 0.708988960786388 |
| GTCATATGTCGA  | 542.984819322932 | 0.594011324439908 |
| TAGTCTGATTCA  | 542.987758206688 | 0.390558899032842 |
| AATCAGATGACG  | 542.992426581614 | 0.397334695890286 |
| TGACTCGCAAAA  | 542.99491857556  | 0.946835603362724 |
| AGACTCACTTCG  | 542.99715170122  | 0.430307176526603 |
| GTGTACTAGTCA  | 543.002620579918 | 0.421074321326643 |
| ACAAATGATGAC  | 543.005403336347 | 0.79218522888268  |
| GTCGTTTCGTCA  | 543.023339529632 | 0.436705243289731 |
| GTTATTTTCGTCA | 543.024163639427 | 0.768610981951723 |
| AAACGTCTGACT  | 543.029912538346 | 0.719984767267272 |
| GTCATCCAAGTA  | 543.036992867733 | 0.536138852444046 |
| AGATTGATTGAT  | 543.046538686929 | 0.510524953353939 |
| CACAACGTGTCA  | 543.061672512825 | 0.82133687703379  |
| AACAGAAATGAC  | 543.072329118713 | 0.464374350536485 |

|              |                  |                   |
|--------------|------------------|-------------------|
| GGACGTGTGTC  | 543.075796663762 | 0.454273042140667 |
| GCCTGATATGAC | 543.076343932458 | 0.514399039290471 |
| ATAGCATAGTCA | 543.085992892035 | 0.787947801949812 |
| ACGCGATGTGAC | 543.086770316706 | 0.910097093001479 |
| AGAGTCAGGGAT | 543.088658809836 | 0.143914478095223 |
| CGTCACAGCTGA | 543.09659369322  | 0.667984141907527 |
| CTCTCTGATTCA | 543.100485312508 | 0.30947762039671  |
| AATGCTTGACTC | 543.108297981242 | 0.579354516193875 |
| TCTGACGGATCA | 543.114133974413 | 0.486525561445541 |
| CCTGGGGATGAC | 543.115906129958 | 0.549745726614888 |
| ATGACACCACA  | 543.121564077469 | 0.409075917643838 |
| CGGCATCTGTCA | 543.125861167772 | 0.783046365117277 |
| GTCATGACCTTA | 543.128506129896 | 0.445150617065433 |
| CCCTAACAGTCA | 543.137485145399 | 0.532736777503391 |
| ATGACGTCTCAT | 543.150927688079 | 0.602391916352171 |
| AGTGCACGTAC  | 543.153707905416 | 0.372038181792342 |
| TGTCATGCAGAA | 543.15492605856  | 0.404870560945989 |
| AGACTAGTGACT | 543.161413769965 | 0.226327265781872 |
| GACCAGTGAGTC | 543.165328487346 | 0.49407286253795  |
| GTCATTGTAGTA | 543.170793263867 | 0.694802524515147 |
| TGACTTATCCAA | 543.171724940049 | 0.577961328568564 |
| GTCATCGGCCA  | 543.180091585704 | 0.236999754146122 |
| TAAATAATGACA | 543.180730418168 | 0.333259814071105 |
| GACTAATTAGAC | 543.185381081651 | 0.561085440186056 |
| ATGAATCAATTA | 543.202450754812 | 0.279903946603708 |
| CTTGCGACTCA  | 543.213147394742 | 0.655012219206241 |
| AACATTTGGTCA | 543.213658346235 | 0.422501217073006 |
| ATGCTGATGACG | 543.214506692915 | 0.635907619645663 |
| GACACAAATGAC | 543.231924139815 | 0.412023395870462 |
| TCAGATTGGTCA | 543.235014977921 | 0.410970225810693 |
| GTCATAGGGGAC | 543.239804857653 | 0.343554533267312 |
| AAAACGTAGTCA | 543.243863182838 | 0.643390337451105 |
| CACCAAAATGAC | 543.249256314927 | 0.570028354431846 |
| GTCATCATGCTA | 543.285996665686 | 0.400974170475632 |
| ACAGGCGTCATA | 543.288471635857 | 0.311965814835994 |
| AGTCAGAAGCCG | 543.289739758369 | 0.147457528170279 |
| TCAGATGTGACA | 543.290401017573 | 0.488085883689809 |
| GACTAATTGTGC | 543.318247541886 | 0.634523171203094 |
| AGTCACGCCATC | 543.323671579889 | 0.521393151530837 |
| GTGACGATATTA | 543.326052872519 | 0.293464309814374 |
| GATTAGCAATCC | 543.335401139534 | 0.582091274459445 |
| TGACTGGATAAA | 543.389923600263 | 0.576265012090599 |
| ACCTTAATGACG | 543.390533016207 | 0.395567857662114 |
| GATGATATCATA | 543.406832699848 | 0.348194764302651 |
| TGACTCGTGGCA | 543.408482078992 | 0.550006720266868 |
| AGACTAATACGA | 543.420596103893 | 0.278864712402215 |
| AAGTTTTACTCA | 543.42494122534  | 0.387155378249617 |
| CTGTGTACGTCA | 543.42778335914  | 0.456098481514798 |
| TACGATATGTCA | 543.443515075455 | 0.470218955963013 |
| GATTAACAGTCA | 543.445680277466 | 0.516568118704063 |
| TCATCTGTCAGA | 543.46178987271  | 0.421370046613332 |
| GAGTCAGGTAGC | 543.464481743218 | 0.325991604841171 |
| GTCATTACATAA | 543.465114725571 | 0.660740309391676 |
| ATAATCGGTGAC | 543.46935970632  | 0.418240896368254 |

|              |                  |                   |
|--------------|------------------|-------------------|
| ATGACTTCGAAA | 543.47509331209  | 0.243156315662449 |
| TGACTGGTTCCA | 543.476825560684 | 0.625115955892937 |
| ATACGACGTCAT | 543.477411805323 | 0.257157515152074 |
| ACCTTAGCGTCA | 543.494011955361 | 0.659831817506407 |
| AGTCAGACCTGA | 543.499119157972 | 0.763078324960871 |
| CGTCATTGGCAG | 543.500693496002 | 0.527356151869922 |
| AGTCACTTCAAT | 543.502241931839 | 0.325443052585578 |
| GAACGCTATGAC | 543.513554202405 | 0.59097571767616  |
| ATGACGTCGATA | 543.517063862011 | 0.383425081826627 |
| GTCATATGCGCA | 543.52173048649  | 0.388358314093852 |
| ACGGTGCATGAC | 543.532697116716 | 0.527274676800902 |
| ATCAACGTGTCA | 543.554650660574 | 0.561574007084041 |
| AGTCAGAGCCAC | 543.558875693465 | 0.257848624633367 |
| AGCTTTGCGTCA | 543.575350715593 | 0.512647950172705 |
| ATTGCTTATGAC | 543.588715980353 | 0.540568621408299 |
| AAGTATTGTCAT | 543.603851851999 | 0.238384895001568 |
| CACCGAATGACG | 543.604950763819 | 0.536372746322293 |
| AAACTTGTGTCA | 543.607768071511 | 0.417452063101385 |
| GTCATCAAAGAC | 543.614306456264 | 0.43789313134964  |
| TCATGTTGGTCA | 543.615591181892 | 0.382299108490852 |
| CAGGTGTGACCA | 543.622882321141 | 0.446721363428554 |
| AACAGACTCACA | 543.623162638851 | 0.37452009226703  |
| GCACGAAATGAC | 543.623640255149 | 0.577703585582532 |
| CGTCATTGATA  | 543.644906727956 | 0.38933569626625  |
| ACTCTGTGTGAC | 543.651689855329 | 0.626640726009482 |
| GTCATACCCTA  | 543.657462321881 | 0.322159607613715 |
| GAGTCAGTAGGA | 543.66663521399  | 0.260110166420213 |
| AGTCATGGTTAT | 543.668276682149 | 0.386788974288786 |
| AGTCAGACATCG | 543.690309227775 | 0.494476161338921 |
| CAGTCAGTAATA | 543.696245879237 | 0.340352591535638 |
| GTCACCAACTCA | 543.70494302456  | 0.363228353288224 |
| ATGACAGTGTGC | 543.717506610323 | 0.331213874164049 |
| AGAGTCAGGAGA | 543.728844032696 | 0.371685947548682 |
| GTCATATAATAA | 543.731430974251 | 0.800890292212275 |
| GAGTCAAACGAC | 543.757942745747 | 0.916480557878269 |
| GTCATCTTCGTA | 543.776947054135 | 0.39687179081513  |
| GTATTGCAGTCA | 543.789340248949 | 0.445841614646126 |
| CAACTCGAGTCA | 543.790510193569 | 0.55265799476334  |
| TGAATATGACCA | 543.796997302365 | 0.512919985001347 |
| ACGGGAGTGACT | 543.804400599438 | 0.306077950007143 |
| GACTTATATGAC | 543.804462266921 | 0.646317348600801 |
| ATGACAAAGGCG | 543.810242728485 | 0.438119517461051 |
| AGTCACTCTCAA | 543.82108627657  | 0.289696805939345 |
| AACCATGAATCA | 543.823030354508 | 0.518995909889666 |
| CCGATAAATGAC | 543.823880910149 | 0.537055358001023 |
| CGGCAGATGACG | 543.834430236559 | 0.520243358840791 |
| AGTCACGCTTCC | 543.836225761307 | 0.420082445858219 |
| ATTCTGTGACCA | 543.844157356933 | 0.344216995726631 |
| AATAGATTAGTC | 543.845489218489 | 0.777738672413267 |
| GCCCTTGTGTCA | 543.849740715961 | 0.369762268146573 |
| GAAGAGGATGAC | 543.850385565185 | 0.31423014753541  |
| ACTCATACTGAC | 543.851806241165 | 0.374218081550587 |
| ATCGGGAATGAC | 543.853401351929 | 0.261087315565446 |
| CTTCCAGAGTCA | 543.878321909984 | 0.566274443336581 |

|               |                  |                   |
|---------------|------------------|-------------------|
| ACGTCACTATTC  | 543.879165927141 | 0.445837948467768 |
| GCTTCAGACTCA  | 543.901892905151 | 0.332991374233908 |
| TGACACAAGGCA  | 543.921390606515 | 0.488972248730915 |
| TCAATTTTCGTCA | 543.927068439655 | 0.557869447734671 |
| ATTGCAGTCAGA  | 543.927377901422 | 0.378304482547592 |
| GTCATCGTCCAC  | 543.93023284955  | 0.466546896928169 |
| TGACAAATAGAA  | 543.94758643723  | 0.620066495778748 |
| CTCGTCGATGAC  | 543.961872062625 | 0.473620753920004 |
| CCATCATGACAC  | 543.964863831509 | 0.328386356113827 |
| ACGTCACCGACA  | 543.967453363474 | 0.447227931538261 |
| GAAACGTGAGTC  | 543.970708135649 | 0.367206710636355 |
| GGTAATAATGAC  | 543.982064107026 | 0.45523545699116  |
| AGTCACCGGAAA  | 544.000235528506 | 0.297078695381482 |
| GGTCATAGTTAC  | 544.000696087397 | 0.596895170234018 |
| GTCATTTTGCAC  | 544.010542440268 | 0.439865795031491 |
| ATAGATGGGTCA  | 544.020488760568 | 0.512524734482529 |
| GCGTCACGATAC  | 544.021321211363 | 0.614424741642479 |
| TCATATGTGACA  | 544.028972061123 | 0.500538376773371 |
| TAGTCACGACGA  | 544.046225078994 | 0.312010692344254 |
| ATGACTGGGGTG  | 544.047883067764 | 0.306332343483202 |
| GTCATAAGTGGA  | 544.055374513611 | 0.509833241413127 |
| GCGTCACATACC  | 544.062222543459 | 0.563432257419726 |
| ACATTGAATGAC  | 544.088325782468 | 0.494336481584176 |
| GCTCATCGATGA  | 544.100234138838 | 0.61181633556083  |
| AAAACCGGTGAC  | 544.11243425715  | 0.442969381998558 |
| CCGTGGCGTCAC  | 544.119353648679 | 0.393807059273398 |
| CTAATAAATGAC  | 544.122058991642 | 0.398918954695221 |
| GAACACGTCAAA  | 544.12458839397  | 0.5084433659381   |
| AAACCTGACACA  | 544.143117387457 | 0.311884513850226 |
| TGACGTAGAGCA  | 544.152453149275 | 0.423653754530317 |
| AGTCATGGTCTGA | 544.158637059875 | 0.175721116936148 |
| AGTGACGACTCA  | 544.160557619293 | 0.542072685682195 |
| GAGTGAAATGAC  | 544.163185511496 | 0.363658930496372 |
| GCCGACCAGTCA  | 544.172510489176 | 0.73409824520047  |
| ATTAGTGACGTC  | 544.203465917477 | 0.452939770514943 |
| ACTCATACTAAT  | 544.210282704492 | 0.198471327844024 |
| TCAGATGAGCCA  | 544.212819999448 | 0.570111017469374 |
| GATGAGTTGTCA  | 544.214930503928 | 0.283127410375354 |
| CATGATGTGTAA  | 544.224865266856 | 0.257581078406416 |
| CGCCAGTCAGCG  | 544.227201187378 | 1.20495892120068  |
| ACGTCACATAAC  | 544.239032337655 | 0.207664034252951 |
| AAAGCGCGTCAC  | 544.240893154711 | 0.46751954622891  |
| AGTCAGAAGTCC  | 544.251653062003 | 0.55104536899843  |
| GATCGGTATGAC  | 544.260960345461 | 0.193591767600171 |
| TGTGTCAGTAAA  | 544.269606522188 | 0.372616000576355 |
| ACTATGTCGTCA  | 544.278042492368 | 0.591195460517827 |
| CGGTGACAGTCA  | 544.281362538452 | 0.315272998180671 |
| ACAACAATGACG  | 544.286686145067 | 0.188934743653422 |
| AACCTAGTGACT  | 544.287576537782 | 0.151146055208945 |
| GTGTCATGATCA  | 544.289356713757 | 0.420252747519734 |
| ATGACATTATAC  | 544.301352954238 | 0.177438690320787 |
| GACTAATCGCGA  | 544.313331902439 | 0.30996096013359  |
| ATAAGGTGACGC  | 544.326443403976 | 0.473082970224011 |
| TGACTGTGCGAA  | 544.331893072733 | 0.55963212873662  |

|               |                  |                   |
|---------------|------------------|-------------------|
| CTGACTCCGACA  | 544.340537073912 | 0.354971105464611 |
| GTTTCTACGTCA  | 544.340565112702 | 0.399719820528663 |
| GCGGTTGACTGA  | 544.347217323259 | 0.588456127654854 |
| GTCATATGCGAC  | 544.359115120975 | 0.918328496265111 |
| TAGACATAGTCA  | 544.364585343473 | 0.615558433239189 |
| AACTCTGATTCA  | 544.369250021855 | 0.497779578688263 |
| AGTGTCACGCAG  | 544.379261213534 | 0.383492402428285 |
| TATTGATGACCA  | 544.380575521842 | 0.519418521036811 |
| AACCCAGATGAC  | 544.382883474006 | 0.943485516108948 |
| AATCACTGTCAT  | 544.399246702208 | 0.502047748203605 |
| ATATTGTCACAC  | 544.406398890848 | 0.326665718199857 |
| AGTCACCCCTAG  | 544.408642649593 | 0.502545698872029 |
| GTCAGCGTGACA  | 544.430881722624 | 0.421340021841335 |
| CCTAAAGTGTC   | 544.437425789833 | 0.31659676637308  |
| TAGAATGAGCCA  | 544.453040811725 | 0.737930508523936 |
| CGTCATTCTGTAG | 544.466640210868 | 0.352858048317421 |
| GTCATTCCGACA  | 544.491415246849 | 0.380837277840119 |
| CAGTATTGTGAC  | 544.491827095547 | 0.687746318991727 |
| CAACATAAGTCA  | 544.496429049074 | 0.442332324618552 |
| AGTCACGGTTTC  | 544.497670600301 | 0.34490185484484  |
| AATATATGACCA  | 544.52707496097  | 0.496185029711333 |
| TAGAGGGAGTCA  | 544.529752794513 | 0.147028406011942 |
| ACGTCACCACCA  | 544.541294308999 | 0.444433596793452 |
| GTCATTCTGGGA  | 544.54234278527  | 0.824560716798513 |
| AAGAAAGATGAC  | 544.544410510984 | 0.212724178016093 |
| CACGTCCTGCG   | 544.546877493561 | 0.470062162816946 |
| CCACGAGATGAC  | 544.552819439999 | 0.448271817805352 |
| CGCAGGAATGAC  | 544.55392291892  | 0.19458023789702  |
| AATGCCGTCATC  | 544.558484937644 | 0.344104900026561 |
| ATGACGAACATC  | 544.568074820035 | 0.276082133312247 |
| GGTATCTAGTCA  | 544.588407332598 | 0.527129622767818 |
| CGTAAATGTGAC  | 544.59948713708  | 0.582751295449042 |
| TGAGCAAATAAA  | 544.613687087367 | 0.310225965890603 |
| GTGAATTCGTCA  | 544.615343054398 | 0.410281688305874 |
| GAGTCAGTAAGC  | 544.624571200564 | 0.1781813220266   |
| CACGCCTGACTC  | 544.630176959809 | 0.45173985091276  |
| GTGTAATCGTCA  | 544.634922259511 | 0.449530633984914 |
| CGTAAATGAATC  | 544.637909125041 | 1.2282631620669   |
| CTGACGTAGTCA  | 544.657563991646 | 0.360337654917824 |
| CAATTTGTGACA  | 544.68258694896  | 0.310546058096819 |
| ATGACAATGATG  | 544.691755877331 | 0.719351971639398 |
| CTATTGCAGTCA  | 544.698404683381 | 0.517592190990954 |
| CACGTCAATGAC  | 544.701423280262 | 0.445889649147428 |
| ATGACGCCTTAA  | 544.717894795222 | 0.403619827460543 |
| CACGTCACGTAG  | 544.721255488538 | 0.474573794952341 |
| ATGAGTATGTCA  | 544.766005696959 | 0.467797707615429 |
| GTCAGCTATGAC  | 544.768251303557 | 0.426335850641669 |
| GCATCTGATGAC  | 544.771154504722 | 0.834101012546353 |
| AGTTGTGAATCA  | 544.778244598081 | 0.369365874187818 |
| CTAACCTATGAC  | 544.793326155716 | 0.25976307023607  |
| AGCCCGAATGAC  | 544.796287704448 | 0.623074950360201 |
| ATGACGACTATA  | 544.797215376107 | 0.330087958893187 |
| GAGGCTTATGAC  | 544.801777356549 | 0.453248665525362 |
| AATCGCGGTGAC  | 544.814456600714 | 0.662551579173052 |



|               |                  |                   |
|---------------|------------------|-------------------|
| AGACCTGTGTCA  | 544.825301599674 | 0.616871802360145 |
| GTCATCATAAGA  | 544.831349233909 | 0.467783666473943 |
| ATCGGCGTCATA  | 544.832335653113 | 0.419351620182286 |
| GGTCATCCTGAC  | 544.839277444788 | 0.724885163276301 |
| GTTTTGGAGTCA  | 544.853971119316 | 0.455569231040513 |
| CTGACCGACTCA  | 544.857213849449 | 0.465544023660221 |
| GTCATATTAGAC  | 544.880630342249 | 0.587223243708754 |
| GAGTCAGTTCCA  | 544.902023058564 | 0.39399640499489  |
| GTCATTACGACA  | 544.923001175172 | 0.509446756286329 |
| AAAGGTCTGACT  | 544.931449382706 | 0.52418436784648  |
| GAGTCAATACGC  | 544.933405435575 | 0.69732454588945  |
| CCACATGTGACA  | 544.939498154457 | 0.794926245083006 |
| ATGACAGTATTA  | 544.955539847148 | 0.278813286109117 |
| CGACTTTGTGAC  | 544.955594890305 | 0.389249432917292 |
| ACATGCAATGAC  | 544.960422175903 | 0.966702034223321 |
| CTAACCCAGTCA  | 544.960701051805 | 0.184639091608537 |
| CCAGTTGATGAC  | 544.967311933556 | 0.30048158879972  |
| CGTGAGTGAGTC  | 544.984426137771 | 0.416412758047124 |
| CTGGCTCATGAC  | 545.00124812518  | 0.633023509313815 |
| ATGACTAGCCCC  | 545.006646712242 | 0.550912609270628 |
| ATGACGGACGCA  | 545.011077988523 | 0.756599453594136 |
| CCGAATCGTGAC  | 545.014612468155 | 0.549044396028116 |
| GAGCCTTACTCA  | 545.02451091634  | 0.327693071243562 |
| AGTCACTACGAT  | 545.024893044087 | 0.264286696054768 |
| AGAGTCAGGTGG  | 545.031182803283 | 0.360626094123797 |
| ACCGCACAGTCA  | 545.044211976341 | 0.824422065384475 |
| AAGGATACGTCA  | 545.045252331127 | 0.242706395814541 |
| ACAGAGTGAGTC  | 545.061670802556 | 0.325430709085236 |
| TATTGACTATGA  | 545.063991587446 | 0.812471452082722 |
| GCCATTGACTGA  | 545.068562063988 | 0.589438436833295 |
| CCCGGGATGACG  | 545.073353538243 | 0.457412491567072 |
| GACGCTGAATCA  | 545.120652434626 | 0.520115962896579 |
| GACCGGGATGAC  | 545.128312599479 | 0.303593474858663 |
| ATGTATGATACA  | 545.136869906924 | 0.632525567728741 |
| GCCCCGCTATGAC | 545.1420950766   | 0.378346870653803 |
| TCAGTCAATGAA  | 545.159064263996 | 0.518988800402251 |
| AACGCATGACAC  | 545.170231797264 | 0.284904311688284 |
| CGGAGACTCATA  | 545.174749622003 | 0.227974725408378 |
| AGACTCACTATG  | 545.185817819268 | 0.454140586447414 |
| ACGTCACCGCAA  | 545.192265361906 | 0.37208030734606  |
| TGAGTCGAACCA  | 545.19582150195  | 0.731750393227874 |
| CGCAGTGAATCA  | 545.199718014434 | 0.702001854710769 |
| ATGGGCGATGAC  | 545.216980960541 | 0.701571567820686 |
| TGACGAAACTAA  | 545.225379831439 | 0.654720416936297 |
| TGTCATGCAACA  | 545.234476539328 | 0.456269072642172 |
| CTAATCTAGTCA  | 545.236959353262 | 0.587058727832559 |
| AAAGGGTGACGC  | 545.245098942657 | 0.364848675257418 |
| GAGTCAATACAA  | 545.260950186507 | 0.386838403785173 |
| GTCATAGACTAA  | 545.266495283865 | 0.5409881108569   |
| GTCATAACACTA  | 545.269656858721 | 0.386650467169699 |
| CGTCATCGGAGA  | 545.277395529228 | 0.555576320723105 |
| TGACTCCATGAA  | 545.31187807928  | 0.735162511656946 |
| TGAAATCTGTCA  | 545.319647109278 | 0.546330487341649 |
| AAATCATATGAC  | 545.321424230174 | 0.575553670147722 |

|              |                  |                   |
|--------------|------------------|-------------------|
| GACTGATTACCA | 545.331892702758 | 0.996384194216298 |
| CAAAATGGTGAC | 545.337419605372 | 0.749192894321379 |
| CGACCCACGTCA | 545.346632812712 | 0.416740723872712 |
| CCATGGGATGAC | 545.346634630256 | 0.518089143472406 |
| TCCTGCATGACA | 545.348955925686 | 0.318922184242267 |
| GCACGTGATGAC | 545.35936526984  | 0.37961790926438  |
| ATGACAGCTACA | 545.363958101094 | 0.321960849270808 |
| GATTTTGCCTCA | 545.375607316079 | 0.401952764046352 |
| ACAATCGCGTCA | 545.401301282229 | 0.565373602498125 |
| GTCATACCGCTA | 545.402243910597 | 0.413396787073046 |
| CGAGTCAGGCTC | 545.420817897415 | 0.523555451363639 |
| AAGTAGTGACGT | 545.427881437791 | 0.308562313427357 |
| TGACTTGTAAAA | 545.455947019517 | 0.525117276646186 |
| TCTGAGATGACA | 545.463885859683 | 0.396410354369414 |
| ATGACACCCAAG | 545.465405852171 | 0.581023619011021 |
| CGGATCTGTGAC | 545.495397993439 | 0.461310513147623 |
| AGACGTTACTCA | 545.501636511796 | 0.443428108910519 |
| AGCAATGATGAC | 545.524603541803 | 0.611873527432862 |
| TGACTGTATTAA | 545.5333308486   | 0.635874670123818 |
| AGTACTGACTAT | 545.534412216212 | 0.743687584663326 |
| GTCATCCTCTCA | 545.559108747633 | 0.340542069526751 |
| ATGACACGGACC | 545.563788080035 | 0.487313643047787 |
| GACTTAGCGTCA | 545.569379538317 | 0.75306174704767  |
| CATGGGATGACG | 545.591740782108 | 0.466966433680866 |
| GCTTTAGACTCA | 545.602313972169 | 0.57945015734373  |
| CTTCGTGCGTCA | 545.602445330557 | 0.601147861999078 |
| GTCCATACGTCA | 545.616261384228 | 0.601561909804558 |
| AGGTATTATGAC | 545.63709027241  | 0.479447546753307 |
| GTCATCAGACGA | 545.638893190735 | 0.687016702976467 |
| CACGTGGTGTC  | 545.640396093618 | 0.597723173455017 |
| CACGTGATGACC | 545.647701255725 | 0.620359669553605 |
| GTGACGCGGCCA | 545.663564200565 | 0.446375375114761 |
| GCCGATTAATA  | 545.675385656933 | 0.301084055205646 |
| ACAAAATGTCAT | 545.679076036387 | 0.362438101263327 |
| ATGCTTGTGTCA | 545.683267591869 | 0.579250847150121 |
| ACTCCGTATGAC | 545.693738347824 | 0.547011319416234 |
| AAGGGAGTGACT | 545.704037209839 | 0.198623987221143 |
| TAAGATGAGCCA | 545.705182366642 | 0.326955307095981 |
| CATCCATGTGAC | 545.70846398514  | 0.528514357245679 |
| CGCGACAATGAC | 545.71060174139  | 0.735088611786105 |
| ATTTGTGATGAC | 545.711840726027 | 0.579711579780733 |
| TCCTAGCAGTCA | 545.712041574255 | 0.396863870732588 |
| CGAAAATTACTC | 545.71923754533  | 0.503376699464695 |
| CCAGCGTGTGAC | 545.725881362342 | 0.66613919839322  |
| GCGAGTGAATCA | 545.755360104889 | 0.221251907537677 |
| ATGACTTGGCAT | 545.756903968024 | 0.285125075429412 |
| CCAAGATTAGTC | 545.79543959543  | 0.530826797060195 |
| GGCACCATGAC  | 545.798829276668 | 0.771318262037279 |
| CAGCTCATGACG | 545.825403819896 | 0.744432788787456 |
| GTCATCTAATCA | 545.881507037241 | 0.375559519492597 |
| GCCATCGGTGAC | 545.891311172719 | 0.570544232715334 |
| CGTCACTAGTCA | 545.898487653507 | 0.330754169521062 |
| CAGAATACGTCA | 545.898874635579 | 0.744808139192978 |
| TGACTACGAGAA | 545.904520755237 | 0.306390360489527 |

|              |                  |                   |
|--------------|------------------|-------------------|
| GCTGCACAGTCA | 545.911906515854 | 0.723060877072076 |
| TGGTGACAACCA | 545.933793824004 | 0.866479394665779 |
| AGACTAATCAGA | 545.945029661522 | 0.549602369660592 |
| GAGAGTGATGAC | 545.95873682964  | 0.345491025661766 |
| GAACATTCGTCA | 545.966779320071 | 0.634986781272463 |
| TAAGACGTGTCA | 545.972688799839 | 0.306370032546481 |
| TCACACGTGTCA | 545.979257767504 | 0.557710590032542 |
| AACCTTGGTGAC | 546.034911641097 | 0.564720762933199 |
| GCATATCTGTCA | 546.040618309764 | 0.486091976752592 |
| ATGACGCGCTTA | 546.044981054536 | 0.543742041020319 |
| GTCATCATTCCA | 546.053739772684 | 0.500483028866061 |
| ATATCGTACCG  | 546.057285229252 | 0.214088329081242 |
| GCGTCATGGCAC | 546.070552531014 | 0.572289181988496 |
| ACAGCCTGACTC | 546.072752983021 | 0.366380157031762 |
| ATGACAGCGTTG | 546.075357609561 | 0.350225873104724 |
| CCAACGAATGAC | 546.094267699771 | 0.651576976191675 |
| ATGTTCTGACTG | 546.101939327845 | 0.479895337727556 |
| TCACTTGACTGA | 546.114978981443 | 0.476258651460017 |
| ATATTTGCTCAC | 546.124922504633 | 0.374444591537022 |
| GAACAGAATGAC | 546.128395775289 | 0.392650601011598 |
| ACTCGGAATGAC | 546.129193959409 | 0.433151094568061 |
| ATCTGTGACACG | 546.139724490752 | 0.35008554169703  |
| TAATATCTGTCA | 546.154587321292 | 0.319154315525658 |
| CTGGCCAAGTCA | 546.168847035592 | 0.728302398177876 |
| ATTCCATGACAC | 546.173334652502 | 0.194969613144006 |
| ATGCTATGTGAC | 546.174384638089 | 0.784595310187217 |
| TCCAAAGTGTC  | 546.17984695182  | 0.555196918672605 |
| ATGCAATTAGTC | 546.182646939825 | 0.755896313139331 |
| ATCCAAGATGAC | 546.188244482583 | 0.380151066102216 |
| CCATTAGTATGA | 546.213959668234 | 1.03982921245579  |
| AGGGTCGATGAC | 546.223405246637 | 0.177993409466405 |
| AGTCATGGGATA | 546.239626937825 | 0.368268419598208 |
| GATGACCTCATC | 546.265565812761 | 0.538780544602355 |
| GACGAAAATGAC | 546.266431528072 | 0.411742545350936 |
| GTCATTATCCGA | 546.270823748279 | 0.585514123497204 |
| CGTCAACTGACG | 546.27166549748  | 0.961038836276893 |
| CCACGAGAGTCA | 546.287735924798 | 0.708999627447058 |
| ATGACTTGCGTC | 546.29030122827  | 0.661894574889545 |
| AAAGTGGAGTCA | 546.317909461026 | 0.101927239337092 |
| GTATGATATGAC | 546.330776425097 | 0.620442120129725 |
| CACGCATGACAC | 546.333484864732 | 0.510683273636477 |
| TGACGTTGTCAA | 546.340782465468 | 0.506906186864492 |
| AGTCACCCTGCC | 546.346732359039 | 0.34786708475185  |
| GATGAATCTTAC | 546.354320599332 | 0.263372776286728 |
| ACTTGCGATGAC | 546.360676028532 | 0.388172191933595 |
| GCACGTTACTCA | 546.362898988882 | 0.830246470445365 |
| CCAGTTGAGTAA | 546.364974459208 | 0.560850311117831 |
| AAGCATGATGAC | 546.366031993596 | 0.198241223269734 |
| AGCACTGATTCA | 546.370524093968 | 0.554121407209906 |
| AACCTTGCCTCA | 546.380006711054 | 0.449125069495344 |
| CCAGATCTGTCA | 546.389873903172 | 0.3237408154564   |
| CTGATTTATGAC | 546.39156376766  | 0.537525539498459 |
| CTAGGCGTCATC | 546.412820792352 | 0.309150242174417 |
| ATTCACTATGAC | 546.44625169105  | 0.563033301646701 |

|              |                  |                   |
|--------------|------------------|-------------------|
| AATATCTAGTCA | 546.448389165548 | 0.591628933223598 |
| CCACTTGACTAA | 546.44931283116  | 0.254729962720003 |
| TGAGTCGAATCA | 546.450924308834 | 0.379917786713266 |
| GTGGTCATTCTA | 546.451002480249 | 0.433465960328222 |
| AGTCATGGGTGC | 546.453078536819 | 0.313596614443666 |
| ATGAGTTGTCAA | 546.457387373156 | 0.14920715870562  |
| GTCATAGTACGA | 546.463073080291 | 0.434130769722598 |
| GTCATATAGAGA | 546.467549668693 | 0.337230375497703 |
| GAGAATCCGTCA | 546.48108455675  | 0.41842362185276  |
| GTCGCGAGTCAC | 546.481351068286 | 0.386280374943055 |
| AGACTAATTGTC | 546.501623781307 | 0.250077912152859 |
| CGCGGCGTCATC | 546.502033243169 | 0.436621819419837 |
| CATGGATGACCA | 546.518215342552 | 0.376375924394825 |
| CAGGATCTGTCA | 546.523209497196 | 0.595590587466574 |
| AATACGTGTGAC | 546.556043163655 | 0.65180861024707  |
| AACTACAATGAC | 546.559239857587 | 0.444040933581593 |
| ATCGGAGATGAC | 546.560389129787 | 0.497893846470821 |
| ATATGAATCTTA | 546.572110200982 | 0.5621494928497   |
| CAACAGGAGTCA | 546.582923780329 | 0.656857107296427 |
| GAATTTTATGAC | 546.5832491176   | 0.54194565788427  |
| TCCAGAGAGTCA | 546.594721606158 | 0.718678859206972 |
| AAGACATATGAC | 546.602589349644 | 0.512360660235586 |
| GACGTTTATGAC | 546.606121562203 | 0.721118799061665 |
| ATGACAGAGTGG | 546.616740878949 | 0.393145980963541 |
| GCTGAAAATGAC | 546.622348528564 | 0.413244215313093 |
| CGCAAATATGAC | 546.62541109406  | 0.796487093442309 |
| GATAGTTATGAC | 546.629686666442 | 0.341195199431919 |
| ACAAGTGAATCA | 546.633021934265 | 0.43731376396066  |
| GACTAATCACAA | 546.633823834081 | 0.606200015327532 |
| GTTACTACGTCA | 546.636122998523 | 0.974621897654165 |
| TAGCAAGACTCA | 546.638750706918 | 0.812835053220098 |
| ACTGCGTGAGTC | 546.656433372631 | 0.497732308514033 |
| TCATAAGGCTCA | 546.673301708512 | 0.500631284672014 |
| AATATATCGTCA | 546.67582634087  | 0.447180322807666 |
| CCGTTTGACTGA | 546.678769005966 | 0.40508922405823  |
| CATGATTGCTCA | 546.695858837276 | 0.498447784233051 |
| ATGACAGAGACG | 546.724369897901 | 0.265724165165398 |
| GTTGATTGCTCA | 546.741893292431 | 0.645009612798114 |
| CTATTATGAGTA | 546.762731974456 | 0.439872019193323 |
| GTCATTGTATCA | 546.777947201765 | 0.499563148285935 |
| AGTAATAATGAC | 546.783965393561 | 0.35160435021876  |
| CTAGTCACGCTC | 546.787951207589 | 0.187913454342158 |
| CCAGATGGGTCA | 546.78902571497  | 0.453388288756671 |
| AATCAATGTGAC | 546.794573363571 | 0.389464902692973 |
| AGACTCACTGTG | 546.796227272968 | 0.834564717088594 |
| CGAACTTGTCAC | 546.801497416582 | 0.52114112041851  |
| AGTTAGGATGAC | 546.811904369991 | 0.190145055578691 |
| GTAAGTACACAA | 546.834762229344 | 0.397526595886799 |
| GCGTCATGATCA | 546.867897793    | 0.35131600284797  |
| AAATATGATGAC | 546.879561912003 | 0.229135151133461 |
| GTCACACACAAA | 546.88139212957  | 0.136285397149237 |
| GTCATTACTAAA | 546.883470070206 | 0.457566597762553 |
| GTCATCCATATA | 546.895657696812 | 0.522638590789657 |
| AAGTAGTGAGTC | 546.900270643613 | 0.168781093376749 |

|              |                  |                    |
|--------------|------------------|--------------------|
| GTCATGTTGAAC | 546.900379334488 | 0.496128266137723  |
| ATGAGTACGACA | 546.900450617554 | 0.432806076461035  |
| ATGATGCAATTC | 546.90935982241  | 0.355148122985366  |
| ATGACACGGCAT | 546.910301351039 | 0.502637635507571  |
| GGCAAGGATGAC | 546.931761067005 | 0.230402499832891  |
| AAGCTCGAGTCA | 546.934249621317 | 0.531648724495963  |
| TACCAAGACTCA | 546.935320368135 | 0.348397770610686  |
| ACGTCACCTTCA | 546.941989739176 | 0.446638634715619  |
| GCACTCTATGAC | 546.942665863123 | 0.450448931391975  |
| AAGCTTACGTCA | 546.947117775866 | 0.790401585230139  |
| GACTAGTGACAC | 546.953212230955 | 0.447933929896332  |
| TCTGACGAAACA | 546.957055793406 | 0.779090107694231  |
| TAGCCACAGTCA | 546.959816588532 | 0.524344380083775  |
| GACGTTGATGAC | 546.961272485979 | 0.315051645960041  |
| GAAACGTGACAC | 546.962997308827 | 0.803961743049504  |
| AACCAGTGACGC | 546.974226380839 | 1.11996500562277   |
| CTTTTGTGTGAC | 546.975403960244 | 0.353712650239016  |
| AAGCTTGATGAC | 546.987996160324 | 0.158588110999066  |
| ATGACAGCTCGG | 546.992047287712 | 0.56855169548663   |
| CTGGTTAGTGAC | 546.996685977686 | 1.2968226876922    |
| GAGTCAGTAAAC | 546.999854607181 | 0.35752270720759   |
| GGGAGAGTCAGA | 547.005261021955 | 0.185883346941263  |
| CACGTCACCTTA | 547.011663479602 | 0.142604564503731  |
| TCTTCGGAGTCA | 547.014715984199 | 0.489075864135533  |
| AAGTCGTATGAC | 547.018096426678 | 0.395629941463617  |
| GACCATGATGAC | 547.022234170954 | 0.546987866276601  |
| GTGTCATGCCGA | 547.028933040392 | 0.531531289038468  |
| GTCACAGTTGAA | 547.029739007207 | 0.510336338621541  |
| ATGACTTGTAA  | 547.037407507872 | 0.541708782724661  |
| GTCATCTTCTTA | 547.042928194413 | 0.374941456175822  |
| AGACTCGACTCA | 547.044668834478 | 0.529026156448229  |
| CGTCATCGGTAA | 547.052164612244 | 0.438386494054088  |
| GTATCCACGTCA | 547.054354106185 | 0.563636162306949  |
| TGACTGTCCGAA | 547.060167510767 | 0.418885676378201  |
| GCACCTGATGAC | 547.060318068223 | 0.308188698100298  |
| GAGTCAGGTGCC | 547.073753485111 | 0.395373272611316  |
| CCTTACGGTGAC | 547.07800352759  | 0.651820938328543  |
| ATGACAAAGTGC | 547.078307254625 | 0.534374399466605  |
| ATTATACGTCAA | 547.08898609791  | 0.92457540216404   |
| CCTTCGTATGAC | 547.092892502727 | 0.0628116246256219 |
| TCGACGGTGACA | 547.098791889465 | 0.382816793043857  |
| ATCCCCTATGAC | 547.102385183277 | 0.437657127296188  |
| GTACTCAATGAC | 547.149545739831 | 0.464999319844051  |
| TAAATATGACCA | 547.156021241774 | 0.338856795271028  |
| GTCACCACATAA | 547.160473881508 | 0.560678803412782  |
| ATGACGAACCTC | 547.162230360074 | 0.257887839612205  |
| AGTTATCCGTCA | 547.180239775193 | 0.404950156025017  |
| GCTCGTGCGTCA | 547.182887591112 | 0.489467044864913  |
| CGTTGGTATGAC | 547.199885304147 | 0.578692287333374  |
| AGAGTAATGACG | 547.202279172105 | 0.416360537457754  |
| GAGTCAATGGTA | 547.212587395434 | 0.307533610780026  |
| ATGAATTACGCA | 547.222402663645 | 0.471178520600249  |
| GGACTTGACTAA | 547.223673430673 | 0.561971994464775  |
| AATTACTCGTCA | 547.227092955988 | 0.422683492830677  |

|               |                  |                   |
|---------------|------------------|-------------------|
| GCGTTCGATGAC  | 547.227728415203 | 0.480616703039195 |
| ATAGATTTGTCA  | 547.231895397605 | 0.452114128470392 |
| GTGTTTACGTCA  | 547.237705338576 | 0.804307548419082 |
| GTCACAGGACAC  | 547.253700445666 | 0.518388195530652 |
| CACTCAGAAATGA | 547.258904251302 | 0.727826090296634 |
| CGAAACGACTCA  | 547.265570824861 | 0.518700570684112 |
| AGTGCCTATGAC  | 547.270559191346 | 0.67101818570795  |
| GTCTATAAGTCA  | 547.279646046067 | 0.735171770622703 |
| ATTCAAAATGAC  | 547.291278462439 | 0.482151742852667 |
| ACTCATAGTTAC  | 547.292662745662 | 0.451480444143929 |
| AGTGTCCATGCCG | 547.29414454322  | 0.524916950833279 |
| AAAATATTAGTC  | 547.294695314987 | 0.384230737524228 |
| CCAATCTAGTCA  | 547.333636278664 | 0.349073125039619 |
| TAGCATGACCCA  | 547.338203949353 | 0.53989916485086  |
| GATCAGGATGAC  | 547.341119276599 | 0.54198095185367  |
| CTTCTGAATGAC  | 547.356960860779 | 0.169908077848385 |
| TGAGTCTAAGAA  | 547.367620472736 | 0.345392302415877 |
| GCACGCATGACA  | 547.369779978625 | 0.939272698923687 |
| CTTGTGATGTCA  | 547.382878788923 | 0.673892166693345 |
| CTATGATGTGAC  | 547.385776525491 | 0.557796763516204 |
| CTGATTTGCTCA  | 547.387800915624 | 0.280041810883425 |
| TAAGCTTACTCA  | 547.392852124473 | 0.60235770299999  |
| AGGGTGGAGTCA  | 547.396547559432 | 0.299717744196424 |
| ATTAATTAATAA  | 547.453407234386 | 0.56216774465011  |
| ACTCATCGATTA  | 547.46098283509  | 0.370506114165862 |
| CCTAATCCGTCA  | 547.464342609934 | 0.27362213781785  |
| GGTCATAGTGAC  | 547.46909849201  | 0.318813114054419 |
| ATGAGCAAGTCG  | 547.497205940445 | 0.366891218353825 |
| CCTACACAGTCA  | 547.512723260695 | 0.54360784761472  |
| ATGACTAGCAAC  | 547.512915231374 | 0.397102571039311 |
| GTACCTGTGTCA  | 547.518005267418 | 0.643991060231681 |
| GAGTCAATAAAA  | 547.524675628529 | 0.604272735865031 |
| GACTCATGGCCA  | 547.53124400167  | 0.987322512322309 |
| TGTCATGAGCAA  | 547.544494095604 | 0.17932902507834  |
| ATGACAGTATGA  | 547.562049316105 | 0.534260531491542 |
| ATGACATTATCG  | 547.571377142682 | 0.410318992035255 |
| TGACTCTCACCA  | 547.576046101604 | 0.426618591120305 |
| AAAATGTGTGAC  | 547.592250773818 | 0.37127868599454  |
| GGTTCCTTATGAC | 547.604210918312 | 0.406903250599044 |
| GTCATCCGAGGA  | 547.604691806343 | 0.478184621505813 |
| AGTGACGTGACG  | 547.610452853622 | 0.252381043574594 |
| GAAACCTATGAC  | 547.625792178644 | 0.552140118627345 |
| CCGGCAGGTGAC  | 547.62621866637  | 0.719500049313983 |
| CTGCCGTGACTA  | 547.648538171352 | 0.353092159031743 |
| CGATTCCAATGA  | 547.651205240658 | 0.558852493391502 |
| CGAATCGACTCA  | 547.671917536038 | 0.573072684637743 |
| CGGAAATATGAC  | 547.691198707588 | 0.598907835253597 |
| AGCGTTTACTCA  | 547.692478196485 | 0.539699723827432 |
| CACGTCTAGTCA  | 547.693514299625 | 0.480093759247919 |
| ACCACCGAGTCA  | 547.699227782085 | 0.35575444387059  |
| GACGTAAGAGTC  | 547.701337966309 | 0.606498932110102 |
| AAGCGTGACTAG  | 547.701673279867 | 0.361945702910184 |
| CGAGTGTGTGAC  | 547.720590760279 | 0.569541665943454 |
| CCACGGGATGAC  | 547.722609304417 | 0.490732563083536 |

|              |                  |                   |
|--------------|------------------|-------------------|
| ACTTGCGGTGAC | 547.723559205764 | 0.714955385738481 |
| ACGTCATGTTTA | 547.730213000809 | 0.40338982972353  |
| AGTCACTACCAG | 547.742606360363 | 0.194330323845676 |
| TGAGTCGTCGAA | 547.751468884134 | 0.620718118326358 |
| AGAAGTGATGAC | 547.779553918543 | 0.328641912334044 |
| GACTGGTATGAC | 547.788638088014 | 0.485491159798132 |
| TAGTAATCGTCA | 547.798804647769 | 0.67834715680929  |
| ACGTCACAATTG | 547.799908889817 | 0.579999861341775 |
| CTGCTGGAGTCA | 547.801722184783 | 0.828030341127269 |
| ATGACCGAATTA | 547.802729560575 | 0.352406603200719 |
| CTATAAGGTGAC | 547.803419833856 | 0.336033230851477 |
| GTCATAGCCATA | 547.815072149381 | 0.276505803954658 |
| GTCATATGTGCA | 547.828533176822 | 0.288079913978178 |
| AATTACGCAATC | 547.829085966233 | 0.555080387808719 |
| GTCATAGCACAC | 547.846073709671 | 0.428825835308654 |
| GTCATAAGTCGA | 547.850780439214 | 0.398314933846824 |
| ATGGCGTCACAA | 547.859541926431 | 0.358213698655545 |
| CATTCGGATGAC | 547.860904570754 | 0.725791224992096 |
| ATGAGAGATGAC | 547.865968108427 | 0.323492091226023 |
| AGTCACTACGTG | 547.885467496271 | 0.471609506537807 |
| GTCCCGTCATGA | 547.903062195639 | 0.816730522137436 |
| CACGGATTAGTC | 547.909983022879 | 0.555435441694718 |
| GAAATACAGTCA | 547.915138524745 | 0.509824169143391 |
| ACCTTCGATGAC | 547.928263204884 | 0.45928258311397  |
| GCCAAATGTGAC | 547.93081452812  | 0.450748824560694 |
| GTCATCGTAGTA | 547.933527300375 | 0.41357643001484  |
| TCGTTTGGGTCA | 547.93390750919  | 0.647465064622695 |
| TGAGTCGGTCAA | 547.948470671137 | 0.454075504240329 |
| GATGACAGTAAC | 547.953515996267 | 0.375649685488702 |
| AATAATAATGAC | 547.981750942845 | 0.339152310849209 |
| GTCATAAGCCGA | 547.98852621377  | 0.492555395052578 |
| CAGCGTGATGAC | 548.013893782334 | 0.522574142025209 |
| CAAGGTTGTGAC | 548.015117022601 | 0.481815201719712 |
| GTCATCTAGATA | 548.01714776964  | 0.420537760919932 |
| AGTCACTTCGAC | 548.027836933933 | 0.486867337242119 |
| GGAATCGATGAC | 548.044372485105 | 0.580764434074823 |
| TGACAGAACTCA | 548.045037787277 | 0.853166138911355 |
| GTCATACCACAA | 548.046638758749 | 0.395773679506541 |
| TCGATTGACACA | 548.057104358073 | 0.318346832946245 |
| ACGGAAAATGAC | 548.076729904896 | 0.678651538504165 |
| ATGACAGCGAAA | 548.091729737569 | 0.486553200189173 |
| ACAGTCAGCCGA | 548.09329815578  | 0.411326311976632 |
| ATAGTCAGTGAC | 548.107790018067 | 0.40393973662313  |
| ACCGTCATATGA | 548.120858698649 | 0.777487324476753 |
| GTCATTTACCGA | 548.127088543292 | 0.416790824246478 |
| CGGCAGGATGAC | 548.153964776005 | 0.54503363254345  |
| CCAAATAGTGAC | 548.183719930521 | 0.562750791089352 |
| GTCACGCAGCGA | 548.187575633105 | 0.656955740372654 |
| CGAAGATGACCA | 548.188394090733 | 0.74084419821845  |
| AGAAAAGTGTC  | 548.195271892114 | 0.205501546526346 |
| CAGACTGATGAC | 548.195419477211 | 0.350685844098429 |
| GAACTACTCATC | 548.205574688288 | 0.340396453950873 |
| ACGTCACCGAAC | 548.209797145813 | 0.628524255782008 |
| ATACCGTGTGAC | 548.240395294921 | 0.428439823805723 |

|              |                  |                   |
|--------------|------------------|-------------------|
| GTCACCAGGTTA | 548.246880728202 | 0.46774465183527  |
| AACATCTATGAC | 548.247413254973 | 0.425058298420261 |
| GTCATACGGCGA | 548.279253285362 | 0.58057010477676  |
| CTATCCGATGAC | 548.288511115221 | 0.27021204899375  |
| GTGACTTGCCCA | 548.291205355937 | 0.209226417098421 |
| GTGTCCTAGTCA | 548.306237571974 | 0.661053110636964 |
| TGAGTAAGTACA | 548.313346600541 | 0.359536229868578 |
| CACAATATGTCA | 548.313702143664 | 0.664987770364525 |
| GTCATACGCAGA | 548.322464548919 | 0.512174173157489 |
| GATGACATTTCA | 548.338310961832 | 0.464966323904659 |
| CAGGCCTGACTC | 548.360982609225 | 0.743706943136546 |
| AAGACCTGACTC | 548.365927247194 | 0.496586510490717 |
| TACAGGGAGTCA | 548.403397259384 | 0.167209105970609 |
| CGCCGTGTGTCA | 548.414080620355 | 0.454590463600297 |
| CAAGGGGAGTCA | 548.414527304393 | 0.354373695776809 |
| CCGTTGTACTCA | 548.414624631622 | 0.499851853811071 |
| ACTCATACTTGC | 548.42012526894  | 0.270102228018938 |
| GAGATGGATGAC | 548.421658569277 | 0.18627080031041  |
| AACCCCGTCATA | 548.426363593926 | 0.410313028311588 |
| CTCAGAGATGAC | 548.431575942357 | 0.536798115960568 |
| TCTTTGGAGTCA | 548.43841818834  | 0.229029294294825 |
| CCCATCTGTGAC | 548.44113783212  | 0.372693925642736 |
| ACTGCTAGTCAT | 548.442419008967 | 0.354622230326384 |
| AACTTAAGTGAC | 548.463376850048 | 0.831896507272299 |
| CAATGATGACCC | 548.472558766817 | 0.432642910852862 |
| TAGGCACAGTCA | 548.473401930793 | 0.579331370972877 |
| CAATAAATGACG | 548.480590016995 | 0.436186326990658 |
| TACGTTGACTGA | 548.488576810709 | 0.511060684585993 |
| ACTAAATGATTG | 548.494667898774 | 0.812165268079073 |
| ACGTATTAGTAC | 548.500263901596 | 0.538565435435992 |
| AGAGGTAGTCAC | 548.508571090506 | 0.29666019313042  |
| GTCCATGTCACA | 548.512789337057 | 0.299354126963355 |
| CCGCTGAATGAC | 548.513218337681 | 0.647620078545233 |
| GGTCATCTGTCA | 548.516651026502 | 0.349353620703985 |
| GTCATTTATGCA | 548.521116266106 | 0.843725624621372 |
| TATGATCCGTCA | 548.53462693866  | 0.415031913755339 |
| AGAGTCAAACCG | 548.535687446133 | 0.614311317870914 |
| GAGTTAGATGAC | 548.536470313001 | 0.26431601922482  |
| CTTAATCGTGAC | 548.539160456207 | 0.55241832545353  |
| ATAGATATGTCA | 548.545034913007 | 0.44983961105847  |
| GTCATTGTAGAC | 548.591431751224 | 0.495580549773375 |
| AGTCATGGGTGA | 548.59316237464  | 0.178831356811426 |
| CACCATTCGTCA | 548.616402133001 | 0.430369016044758 |
| GTCATACACAAC | 548.621970536602 | 0.424924541742299 |
| GTCATTATTCOA | 548.624338638018 | 0.682856923244033 |
| ACGGTTCGTGCA | 548.627502910195 | 0.613704630653674 |
| TAGATCGACTCA | 548.634056258232 | 0.254416546916665 |
| AGTGTATGATG  | 548.650065524227 | 0.185477277484482 |
| CGTCATTGAGTC | 548.659574590279 | 0.438502799293581 |
| ATTTGGTGACGC | 548.661103448739 | 0.366504452444891 |
| CCATGAGATGAC | 548.665804372792 | 0.485928196140976 |
| CTGGGCTCTGAC | 548.677395965732 | 0.42611220988953  |
| GTCATTCCGAGA | 548.68351800478  | 0.504249875108578 |
| GTCATTGCCGCA | 548.687763183017 | 0.378090751454675 |



|              |                  |                   |
|--------------|------------------|-------------------|
| CGTAGATATGAC | 548.704294247062 | 0.372896212928146 |
| ATGACGGTACTC | 548.70436749584  | 0.62260623935255  |
| CGTCATGCATAG | 548.717807261071 | 0.310719516987583 |
| AAATCTGAGTCT | 548.718713784694 | 0.5408399796822   |
| TATCTGCAGTCA | 548.738267208866 | 0.359855640630707 |
| ACACCGTATGAC | 548.73850830421  | 0.430813528554423 |
| CGGACATGTGAC | 548.747883061151 | 0.549280401816587 |
| ATGACATGATTA | 548.747906195036 | 0.454668820360292 |
| TGAACCTAGTCA | 548.748071187479 | 0.528950220908035 |
| TGACACAAGCAA | 548.75906093004  | 0.458236595532584 |
| CGTCATCAGAGC | 548.765910488342 | 0.467182962349246 |
| AATTCTTGTGAC | 548.775148227771 | 0.747604923385284 |
| ATGTAGGATGAC | 548.777534408866 | 0.390964716844935 |
| GTGACGTTGTCA | 548.782816617027 | 0.308770452504922 |
| CTCCTCTATGAC | 548.809425481729 | 0.325888072503311 |
| CGTGGTTATGAC | 548.822518058414 | 0.443497373981559 |
| GTCATAGCCGAA | 548.858076310317 | 0.297174850184801 |
| GGGAGATATGAC | 548.862656467034 | 0.217933870683547 |
| AGCACCGAGTCA | 548.872678998934 | 0.736739597121505 |
| AGTCACGGCTAA | 548.913066393925 | 0.367521256384349 |
| ATCCGCGAGTCA | 548.915251243562 | 0.254998134180629 |
| TGACTACGTTAA | 548.919607254822 | 0.51646046783461  |
| TCCGCTGAGTAA | 548.928779940681 | 0.511873984047197 |
| CGATTGCATGAC | 548.954174591712 | 0.419300725946217 |
| CTCCCGAGTCAC | 548.955278786029 | 0.323657780299256 |
| ATGAGTGAGTCC | 548.966156813011 | 0.261983124834309 |
| GTCATTTTCAAA | 548.986429885749 | 0.752349108503371 |
| TCGCGTTACTCA | 548.988050442176 | 0.702536178811982 |
| TCATCGTCATGA | 548.995089690874 | 0.657506659041573 |
| ATGACGTGAATC | 549.004609218176 | 0.166846286315095 |
| AGTATGAATAAT | 549.0081867568   | 0.310995403042904 |
| TCTGACTCTCCA | 549.025109802117 | 0.289831763342774 |
| AGTTCGGATGAC | 549.025960038077 | 0.405223405841162 |
| AGTCACTCTGCG | 549.029145431271 | 0.132064169102951 |
| TGACATATCGAA | 549.030948750689 | 0.646063321851552 |
| ACTTTTGACTCT | 549.058350132707 | 0.40125207772961  |
| CGTCATTTATCA | 549.079943141092 | 0.351272291557418 |
| GCTCATGATGAC | 549.08210672115  | 0.706758820856037 |
| CGAATGGAGTCA | 549.090918717752 | 0.403969394895027 |
| ATGACAATACAC | 549.1017826902   | 0.351326744699468 |
| ACTCATATATGA | 549.103909931184 | 0.451982302907216 |
| GAATACTATGAC | 549.108802379477 | 0.568411009519021 |
| CGCGTTTGACTC | 549.113799235597 | 0.323172889260081 |
| ATGACGACGAAA | 549.125524874909 | 0.317633857141056 |
| GGTTCGCATGAC | 549.131956363442 | 0.442949766199579 |
| AACGCCTATGAC | 549.145056468617 | 0.579802399849211 |
| GAAGTGGAGTCA | 549.148411177016 | 0.232996389631717 |
| CTGAATCTGTCA | 549.161926132083 | 0.720807863036289 |
| TGACAAATAACA | 549.178110481932 | 0.407078195699382 |
| AAGTTTGCTCAT | 549.210420219826 | 0.282096333123916 |
| CCGCGGGAGTCA | 549.213540742524 | 0.571643748254759 |
| AGGCGTGTGTCA | 549.231635526278 | 0.404005356929221 |
| AATAGCTGAGTC | 549.25281974215  | 0.639846380178033 |
| GATACGGATGAC | 549.256274596056 | 0.473569428968626 |

|               |                  |                   |
|---------------|------------------|-------------------|
| GGCGTTTCGTCA  | 549.262032513237 | 0.606042683056776 |
| GTCATCGCCTGA  | 549.285256133242 | 0.328986877938241 |
| GTCATCTACGTA  | 549.294340243969 | 0.585672291570656 |
| AACAACCTCGTCA | 549.303821092268 | 0.545700181856529 |
| CACGTCAGCATG  | 549.318088231913 | 1.10738171703588  |
| CGATGTGTCTTA  | 549.318977625235 | 0.482669356804694 |
| ACATTTTGTGAC  | 549.320057837466 | 0.661876209763444 |
| AGGTTGTAGTCA  | 549.329285768409 | 0.43835158950116  |
| AGCTCATAGTCA  | 549.352828848264 | 0.53218046252188  |
| CAGTCACGACAA  | 549.354688611464 | 0.507091174521176 |
| CGTCATGTAGTC  | 549.355696709544 | 0.548089833465209 |
| AGCATTGATGAC  | 549.369414989129 | 0.663601570050199 |
| ATCTCTAAGTCA  | 549.370976056193 | 0.281903947305819 |
| GATGACAGCGAA  | 549.37499718532  | 0.450281464532649 |
| ATGATTGACACA  | 549.386339856433 | 0.69204095461262  |
| TGACTCCGTGAA  | 549.398138944286 | 0.636989031312439 |
| ATATGGCATGAC  | 549.403738607949 | 0.483600477994549 |
| AATTTGGAGTCA  | 549.403880119431 | 0.579531154024303 |
| TAAGCCCGTCA   | 549.417110529954 | 0.623218288162382 |
| CCTACGTATGAC  | 549.423868626286 | 0.278231995922097 |
| ACAACAAGTCAT  | 549.444582681564 | 0.550465802564093 |
| AAACCTGATGAC  | 549.452794783753 | 0.52708793496947  |
| TACAATCTATGA  | 549.462789572297 | 0.740019997190643 |
| CTGAGAGTCAGA  | 549.471232259209 | 0.226103372361959 |
| CGATACTATGAC  | 549.478042160405 | 0.385090169693866 |
| TCGCTGTAGTCA  | 549.486475927391 | 0.865455974167857 |
| GAAGAATATGAC  | 549.499373182675 | 0.474327297039032 |
| CAGGGCTATGAC  | 549.511369283801 | 0.365053559792833 |
| GACGGAAATGAC  | 549.527829963107 | 0.314201523872772 |
| TGAAATTGCTCA  | 549.528426830746 | 0.51487693282984  |
| CGCGATACGTCA  | 549.535525715558 | 0.790939611579655 |
| GTGACGTGACAA  | 549.536696882427 | 0.324467805706779 |
| TGTGTCAACTAA  | 549.538276938228 | 0.386957618329186 |
| GTCATAAATCGA  | 549.543917659488 | 0.401863657867704 |
| ATAGCCGATGAC  | 549.56053189874  | 0.595026961710774 |
| AGGTCCTGTGAT  | 549.570606992297 | 0.386348496208409 |
| AATACGATGACC  | 549.573785149945 | 0.657100252695928 |
| GTCATATCCGA   | 549.577814004732 | 0.239984308997056 |
| CGTTGAAGTGAC  | 549.590908882069 | 0.820268377860368 |
| ATTGTCCAGTCA  | 549.617868258972 | 0.462772256906278 |
| CATGTAAATGAC  | 549.649990799744 | 0.523117923689241 |
| ATGACTAGCGGC  | 549.650241943757 | 0.513754661118321 |
| ACTTTTAATGAC  | 549.667520463925 | 0.615246341838708 |
| GACTCACTTTCA  | 549.670241437609 | 0.40297843055968  |
| AGCGATTTGTCA  | 549.706439561079 | 1.05253727501213  |
| ACATTCTGACTG  | 549.715836102665 | 0.29020054834277  |
| GTCACAATGTCA  | 549.72144128779  | 0.235985992095244 |
| TGACTAGCCACA  | 549.730479589166 | 0.564955242025741 |
| GTCATATAAGTA  | 549.734879485589 | 0.388668486954248 |
| TAGAACTTGTCA  | 549.746837029176 | 0.526294959203813 |
| CAGCGTGACTAG  | 549.751340863986 | 0.192664024936527 |
| AACCGGAATGAC  | 549.769581025049 | 0.258031487492721 |
| CGGCCGTGACTA  | 549.792983143327 | 0.670316821131642 |
| AATGATCCGTCA  | 549.801916241162 | 0.593186924763544 |

|              |                  |                    |
|--------------|------------------|--------------------|
| CAGACGAATGAC | 549.821139758721 | 0.619825035989441  |
| TGACTGAAGGAA | 549.821658120499 | 0.545936345186512  |
| AATAACAATGAC | 549.826375872641 | 0.682072689716092  |
| GACACCAATGAC | 549.83165999675  | 0.418657543098945  |
| CTGAATTGACTC | 549.835326199232 | 0.502337028914598  |
| GTCATAAGCAAC | 549.841952034759 | 0.392441090349241  |
| ATACTGCAGTCA | 549.844889774418 | 0.6899986377839    |
| GAGTCAGGATTA | 549.846952415289 | 0.351049303603664  |
| AATGATGTAAC  | 549.856083917657 | 0.357627230293161  |
| CCGTGTACGTCA | 549.886010487328 | 0.631319570471946  |
| ACGAAGCATGAC | 549.890738102335 | 0.618564294608259  |
| CATATTAATGAC | 549.895926325041 | 0.796433952589204  |
| CTGGAATTAGTC | 549.897557048905 | 0.706932466436495  |
| GCTACGAATGAC | 549.897634883669 | 0.546591066766747  |
| ACAAGTCTGACT | 549.909861111607 | 0.413125362791157  |
| GTACATGATGAC | 549.93029949108  | 0.344768438890118  |
| ACTGCTTACTCA | 549.94094181532  | 0.405534661056011  |
| GCGTCATGCACA | 549.94228874384  | 0.416020308095966  |
| TGACTCGCCTCA | 549.943690032906 | 0.34774140020895   |
| ATGTGTCAAATC | 549.95551190067  | 0.358496111063856  |
| CCCGACCAGTCA | 549.959569248689 | 0.435873358015704  |
| ATAGTAGACTCA | 549.966167787656 | 0.775400114526198  |
| ATAGTCAGCATC | 549.97048290123  | 0.609964283114888  |
| GAGTCAGTAGGC | 550.015034795466 | 0.234878088299455  |
| GTAGGCTATGAC | 550.018961306411 | 0.408909321947602  |
| GTCATAGGCGAA | 550.036194432288 | 0.367501519416358  |
| ACTCATTCTGAC | 550.045322489584 | 0.263639270913153  |
| GACTCTTGCTCA | 550.06528910232  | 0.499357127286512  |
| GGCACCTGTGAC | 550.077254476595 | 0.767026978531404  |
| GCGATTTATGAC | 550.084510384368 | 0.417795234035048  |
| AATTATCATGAC | 550.086565038266 | 0.680335795584181  |
| ACTCATTAATGA | 550.09436451648  | 0.65402464810055   |
| GTCACCAAGAAC | 550.107583065422 | 0.594216306734488  |
| CTGTGTGATGAC | 550.10806815236  | 0.573769948572374  |
| GGAGCGTACTA  | 550.125827770679 | 0.188800779723183  |
| GTCATTGCGCAC | 550.128998347704 | 0.462797206677173  |
| CTTGACTGTGAC | 550.132065394296 | 0.580130260846769  |
| GAGTAATAGTCC | 550.139944171168 | 0.320540263165406  |
| GTCATCGATAAA | 550.140132129204 | 0.395774456603532  |
| GAATCATTAGTC | 550.152080515737 | 0.383066267104271  |
| TCATAATGGTCA | 550.161589541931 | 0.540383298672354  |
| CAAACGTAGTCA | 550.171233245157 | 0.746763943430102  |
| ACTGCGCGTCAT | 550.19413086524  | 0.608233749193234  |
| GTCATAGACAGA | 550.198448072853 | 0.474548118764647  |
| AGACTGGGTCAT | 550.200745660361 | 0.3244926712076    |
| CGATCTTATGAC | 550.207742612532 | 0.497754164857689  |
| GTCATCAGCGGA | 550.208036895609 | 0.0893489427866945 |
| TCCAGTACGTCA | 550.212860525392 | 0.496782467309841  |
| GTCATAAGCCAC | 550.223337718757 | 0.556209681200592  |
| ACTCATAGTAGG | 550.224905037173 | 0.84626213586332   |
| AGTGTGACTGA  | 550.226600446574 | 0.456714444183564  |
| ATGACGAACCGC | 550.245334456313 | 0.521274531975878  |
| GGTGAGCAAATA | 550.257445438549 | 0.228712695302004  |
| CGTTGTTATGAC | 550.265435315276 | 0.693701094994138  |

|              |                  |                   |
|--------------|------------------|-------------------|
| TCGAGGGAGTCA | 550.268234733009 | 0.444192602442742 |
| ATGACACGGCCC | 550.272052420532 | 0.34489525833449  |
| TGAGCAATACCA | 550.275068945638 | 0.673179095965025 |
| GGGTCCGAGTCA | 550.280891031672 | 0.276734895714919 |
| GGTCACAGTGAC | 550.28870696348  | 0.465412742652267 |
| TGACGAAGAGAA | 550.291359135727 | 0.396134258430611 |
| ATGTCGCAGTCA | 550.298057967889 | 0.673729302087674 |
| CGAGGGGAGTCA | 550.302341370053 | 0.24613190694984  |
| CGATATTGCTCA | 550.313369357783 | 0.5167769809041   |
| GTCATAGGGGCA | 550.315356930945 | 0.445890417150625 |
| TCGACCCGCTCA | 550.324110207353 | 0.161735522809652 |
| AGGTTGGAGTCA | 550.339343759116 | 0.29041341484958  |
| CATTCAATGACG | 550.36128317391  | 0.491739393828183 |
| GACATAGTCAGA | 550.3787846994   | 0.377767558568898 |
| CGCTCGGATGAC | 550.383087386754 | 0.380172885070732 |
| AACGAGAATGAC | 550.401760256971 | 0.556688921516623 |
| CAATGTGTGACG | 550.411409187808 | 0.494277548746678 |
| GGGTACCAGTCA | 550.41946739664  | 0.599187902992205 |
| CCTGCTGACACA | 550.438483770286 | 0.245165258707436 |
| TGACTACTATAA | 550.446647570021 | 0.668161192033707 |
| CCTGACCAGTCA | 550.45866832259  | 0.348204234116565 |
| CCGAAGGACTCA | 550.460040859544 | 0.920637780686712 |
| GCACCTGACTGA | 550.467889715602 | 0.45739040301816  |
| CGTCATCTAAAG | 550.471062358021 | 0.344617091842388 |
| ATGACACTCTAG | 550.476824758229 | 0.29500119534901  |
| AGTTATCTGTCA | 550.487165406223 | 0.505075655859483 |
| CGCGTCCAGTCA | 550.490775050759 | 0.474056015388766 |
| GCAGGCGAGTCA | 550.499282875132 | 0.510052028285798 |
| GTCATCCCTATA | 550.503748422847 | 0.430657219420618 |
| CATCGTGACGAA | 550.517636331585 | 0.606407685608103 |
| TCTCGTGGCTCA | 550.518607110232 | 0.558296496501092 |
| CACAATTGCTCA | 550.522226962961 | 0.576686051644654 |
| CTGGTTTTGTCA | 550.522541711325 | 0.611778515935145 |
| TGACTGCACACA | 550.535086790381 | 0.356510522226658 |
| GTCAGACCGTGA | 550.539239531938 | 0.397121189127536 |
| AAAATGGATGAC | 550.567286949498 | 0.369882284007398 |
| ACGCAATAGTCA | 550.574069647864 | 0.818935432006326 |
| AAATGCTATGAC | 550.575501389237 | 0.217719624182228 |
| GGATTTTACTCA | 550.578074759156 | 0.632105758491956 |
| ATCCTTGCCTCA | 550.587731594431 | 0.36932150015946  |
| GCGTCACCTTCA | 550.597097770273 | 0.218138070928539 |
| ACTCAGGAGTCA | 550.601647130615 | 0.423014696795741 |
| GTCATAACTAAA | 550.6255164732   | 0.55712890596002  |
| CCGCAATATGAC | 550.626110716434 | 0.544525200868693 |
| CGAAACTGTGAC | 550.6268098843   | 0.805598515347857 |
| GTCATCGTTCGA | 550.654028582446 | 0.397342199325553 |
| CTATGAGATGAC | 550.657430578499 | 0.312868691572751 |
| GTGAGCAAATGA | 550.65909778165  | 0.264393951452244 |
| AGCAAATATGAC | 550.67089016044  | 0.441159832070748 |
| GGCTCGTACTA  | 550.676337294837 | 0.267703929656191 |
| TCTTTAATGACA | 550.684190749206 | 0.272048875215043 |
| ACTCATACTGAG | 550.687742639718 | 0.323608997010629 |
| GTCATACGCGAC | 550.691665041555 | 0.511023167238353 |
| ATGGCGTATGAC | 550.703403232785 | 0.46041806493941  |

|               |                  |                    |
|---------------|------------------|--------------------|
| ACGTCACCTGA   | 550.728498102976 | 0.227003257955708  |
| GACGTCATGCAC  | 550.729878594488 | 0.721146230071898  |
| AATACGTCAACG  | 550.752566947144 | 0.505926548800392  |
| CACAATTAGTCG  | 550.763524958358 | 0.452155473739307  |
| CGAAACTGACTC  | 550.770098475251 | 0.263840395453279  |
| GTCATCGTTGTA  | 550.779580102693 | 0.679779460577818  |
| GACATGGATGAC  | 550.80019780819  | 0.0862804673888465 |
| CATGAGTTGTCA  | 550.802630793431 | 0.406841780162419  |
| AAGTGATATGAC  | 550.811261623155 | 0.370934482473314  |
| CACATTGACTGA  | 550.821377529473 | 0.627105528256631  |
| ATGCTCGACTCA  | 550.850343296594 | 0.516231067243362  |
| CACTGACATGAC  | 550.855689054951 | 0.598847710483303  |
| AGTCAGAAGACT  | 550.860104210935 | 0.342115369827531  |
| ATTAGCAATAAT  | 550.875666424981 | 0.527961252136889  |
| CATAAAGTGTCA  | 550.886385294723 | 0.764040025687867  |
| CATAACGTGTCA  | 550.886719226534 | 0.851254801690428  |
| TCATAATGATGA  | 550.888602720416 | 0.520576793681122  |
| GACGTATGTCAC  | 550.892711754003 | 0.592160560682981  |
| ATGAGTCTCAGG  | 550.89515497666  | 0.449730263854466  |
| GCGTTGCATGAC  | 550.902042020068 | 0.655300878566817  |
| AACGATAATGAC  | 550.908754945507 | 0.70485854978351   |
| AACCTTTCGTC   | 550.92072855197  | 0.642869589372454  |
| GAAAGTGTGACA  | 550.921829354726 | 0.169674060229553  |
| CTAAGAAATGAC  | 550.939811125677 | 0.48006880972288   |
| TCGGCTGACACA  | 550.964572980826 | 0.616835122598865  |
| CGCATGGAGTCA  | 550.970075237014 | 0.692104733206589  |
| GTCATATACTTA  | 550.975384619297 | 0.569059535489213  |
| GTGTCACTAGGA  | 550.986701107218 | 0.465794750833353  |
| TGACTACGAAAA  | 550.992172809015 | 0.435053172338992  |
| CAAAAGGGTGAC  | 550.996645507759 | 0.522948213158645  |
| ACTCATCAGTGA  | 550.999176568631 | 0.49444840758324   |
| GTATGACCTAAA  | 551.007707417387 | 0.459129910568809  |
| AGATTTCGGTCAT | 551.013407780613 | 0.444058872950642  |
| GAGTAATCCGAA  | 551.017180963711 | 0.66264765140631   |
| ATTGTATCATAC  | 551.033509287036 | 0.431080261783002  |
| CGTCATTGAGGA  | 551.03966688948  | 0.39464276687393   |
| ATGACACGGAAT  | 551.042543067689 | 0.312881973822612  |
| GTCATAGAATCA  | 551.043611475495 | 0.724359267308381  |
| AGCATTTTCGTCA | 551.046441817682 | 0.643016894029166  |
| ATTCATAAGTCA  | 551.0540358608   | 0.67575748560325   |
| AAACGTGTGACA  | 551.063045698257 | 0.250031330994691  |
| CGCATGCAGTCA  | 551.077613733889 | 0.530503915678429  |
| GTCATCCTCAAA  | 551.100498481108 | 0.269816713824153  |
| TGACTATAGCAA  | 551.120077083037 | 0.485001557694099  |
| CTGATATATGAC  | 551.128321330404 | 0.747843898412522  |
| ATGCGTGATTCA  | 551.130129938601 | 0.31283438775166   |
| GGCCACGAGTCA  | 551.130942406542 | 0.859874645689264  |
| AGTCATGAGTGC  | 551.144204069225 | 0.55258468035548   |
| AACCTTACGTCA  | 551.174592755461 | 0.488570752175055  |
| GTCATGCCGAAC  | 551.203436630525 | 0.705974060268903  |
| ATGACACCCATG  | 551.21555669725  | 0.369852375051875  |
| ATGACGCCTTCG  | 551.218364504763 | 0.420387112615447  |
| ACTCATTGGATG  | 551.239034839243 | 0.352691216100857  |
| GTCACCGGGACA  | 551.239425797117 | 0.527301143477541  |

|               |                  |                   |
|---------------|------------------|-------------------|
| GATCGATATGAC  | 551.25429739906  | 0.313053524473904 |
| CCCCTGGTATGA  | 551.261133329641 | 0.71329186672178  |
| AGACTAATTGGC  | 551.264832331594 | 0.445234477092831 |
| GAGGTGGAGTCA  | 551.267903395574 | 0.157288261505464 |
| CATAATTGCTCA  | 551.285544987036 | 0.638434168737332 |
| GGATGATGTAAC  | 551.308436778384 | 0.339287721758188 |
| GAAGCTGTCATC  | 551.309010696655 | 0.227582459039296 |
| ACACGATTAGTC  | 551.309132562049 | 0.633624984514    |
| ACCTAGTGACAC  | 551.321638183023 | 0.640385993225457 |
| ATAGTCAGTAAT  | 551.322137990292 | 0.463097857453732 |
| GTCATAGACAAA  | 551.324218550643 | 0.928823924562799 |
| CCTGCCTAGTCA  | 551.352110990831 | 0.612787621488645 |
| ACCCAAGACTCA  | 551.353106688659 | 0.316877874812316 |
| TAATCTGTCAGA  | 551.367131081484 | 0.328222924353567 |
| GAGTCGTGACGC  | 551.387320134257 | 0.549491507609447 |
| ATGACTTGAAG   | 551.398081089317 | 0.152567915187718 |
| AGAAACAATGAC  | 551.40062587468  | 0.429146295306426 |
| TATACTACGTCA  | 551.414333041493 | 0.531018851296307 |
| TGTGTCAGGCAA  | 551.437866248871 | 0.226181416152509 |
| GAGTCAGTACTA  | 551.440891736452 | 0.481469386582445 |
| AAGAATGATGAC  | 551.444751516103 | 0.236742389100668 |
| CGACCCTGACTC  | 551.447982607334 | 0.372079349087824 |
| CCTACAGATGAC  | 551.453812613519 | 0.565461171542641 |
| GTCATTCTAAAC  | 551.475196742564 | 0.451346908504011 |
| CTGCATGATGAC  | 551.481453503396 | 0.315583242446177 |
| CCGCTGAGTAAC  | 551.485584164455 | 0.152471236115166 |
| GGCCAGCATGAC  | 551.486685023294 | 0.702667783467041 |
| GGCATTTATGAC  | 551.500062650346 | 0.675792499726293 |
| CAGTTAATGACA  | 551.500575846602 | 0.117998932712425 |
| GAGACGCATGAC  | 551.500784992143 | 0.599428009092923 |
| TCGAACTCGTCA  | 551.508548989603 | 0.211930121671032 |
| GACTCGTCAGAC  | 551.521610066136 | 0.507632034110038 |
| ATGACATGACGA  | 551.532574488976 | 0.404386624402924 |
| AACGTCCAGTCA  | 551.549945707176 | 0.676081618065424 |
| ACGTC AATGACG | 551.552066564494 | 0.452904576309918 |
| ACTCTCCGTCAT  | 551.555396510258 | 0.196372102348129 |
| ATGACCGAAACA  | 551.555697413317 | 0.447093855791089 |
| CAGACCTAGTCA  | 551.555875760464 | 0.625915951623901 |
| ATACCGTATGAC  | 551.55978881501  | 0.584152269316555 |
| ATTGGTTATGAC  | 551.573649101445 | 0.357074913462461 |
| CGCTTGATGACG  | 551.588232545773 | 0.388212858101827 |
| ACGCCAAGTCAT  | 551.595598298507 | 0.369289597784925 |
| ACTCGAGTGACG  | 551.606582108916 | 0.555411438115978 |
| AATACGTAATCG  | 551.611717214063 | 0.479852520242605 |
| AACGTGGATGAC  | 551.624186855762 | 0.564153404048562 |
| TAACCGTACTA   | 551.62541379128  | 0.514714310701594 |
| TCAGTCAAATGA  | 551.632177724903 | 0.440486193472377 |
| CTCATACGTGAC  | 551.638030297663 | 0.178407859934544 |
| AGTCACCCCTCC  | 551.659438634298 | 0.234781418742445 |
| ATCGATTGGTCA  | 551.675649098214 | 0.708664809097783 |
| AGTCACTAGGCC  | 551.694619792745 | 0.536650346593797 |
| ATGCACAATGAC  | 551.704796220926 | 0.680085588466984 |
| TCGGATTGGTCA  | 551.707879406226 | 0.456989533441461 |
| TGACTCGCAACA  | 551.712667353559 | 0.467667966202413 |

|               |                  |                   |
|---------------|------------------|-------------------|
| GTCATCGCCAAA  | 551.722961737141 | 0.391141681659036 |
| GACGGTGAATCA  | 551.723200905976 | 0.684230157837648 |
| CCTTGTGATGAC  | 551.728618556382 | 0.467771148393219 |
| ACATGTAAGTCA  | 551.737184314495 | 0.733761907791678 |
| CAATAGTGAGTC  | 551.737632017745 | 0.650745560898922 |
| GTTCTTAAGTCA  | 551.74433116022  | 0.576073701217503 |
| ATGACGCCTCAC  | 551.750503675273 | 0.35030390704242  |
| GTCATTCCTGAA  | 551.750516858927 | 0.664454218533172 |
| GCTGATTTGTCA  | 551.772605548651 | 0.358246299303675 |
| GAACGTGTGTCA  | 551.788741251619 | 0.438569202144153 |
| CCTCACGATGAC  | 551.800055526482 | 0.633010603329944 |
| GTCATCATCTCA  | 551.80238639776  | 0.254835580268688 |
| ATGTCATCTCGG  | 551.803713353419 | 0.443709121170771 |
| AGACTAATATAC  | 551.808954615751 | 0.554739933512858 |
| CAACAAGTCATC  | 551.809432016968 | 0.53078439955564  |
| AGTCACTAGCTA  | 551.810352070409 | 0.145021495046612 |
| CGCGCGGATGAC  | 551.82972508546  | 0.449080275588906 |
| CCTCACTATGAC  | 551.83088981526  | 0.248746469031595 |
| CGGTCAAATGAC  | 551.830895923308 | 0.540698989758145 |
| GAAATGTGTGAC  | 551.839511696477 | 0.225321838572415 |
| AAACCTTACTCA  | 551.859066380505 | 0.367954972367153 |
| AATGAGGTCATC  | 551.86500623607  | 0.408370233546096 |
| CACTGAGTAACG  | 551.875417508224 | 0.685399973118367 |
| GATGACAGTGCC  | 551.879449850161 | 0.401545159344025 |
| CGTGCGTATGAC  | 551.882521035702 | 0.529486828882325 |
| GTCATCAGTTGA  | 551.885690920292 | 0.512547321401048 |
| CGCGATTAATAA  | 551.893805523757 | 0.4019605052432   |
| CTGAGCGATGAC  | 551.907581992431 | 0.754566431244815 |
| CAGCTGGAGTCA  | 551.908070193802 | 0.801361603853685 |
| TACGGGGAGTCA  | 551.911974377683 | 0.267937911411534 |
| CATTGTCGTGAC  | 551.920553994694 | 0.568186819806935 |
| ATAGATAATGAC  | 551.939055415727 | 0.654712300359295 |
| CCATAGAATGAC  | 551.959223426577 | 0.660229463235408 |
| GATGATCCGTCA  | 551.962511584064 | 0.440185580263058 |
| CTCCACTATGAC  | 551.969337686215 | 0.31291779560038  |
| ACGTCAGATGAC  | 551.995594027477 | 0.582234729935708 |
| ATTATTCATCGG  | 552.006081456914 | 0.674926578282714 |
| ATGACATTACAC  | 552.014354931694 | 0.353654185586623 |
| AGTCACGCTTTC  | 552.018398518575 | 0.264210977888792 |
| CTGGGCGAGTCA  | 552.031637551888 | 0.750739238052122 |
| CCGAGATAGTCA  | 552.050146262193 | 0.703422590987422 |
| GGAGACGATGAC  | 552.052299661161 | 0.281721148388911 |
| AGTCACGCTCTA  | 552.055356321044 | 0.514409690679842 |
| TAAAGATGACCA  | 552.066356995569 | 0.382040640725336 |
| ATCGCGCAGTCA  | 552.077295200865 | 0.426390969670735 |
| CGTGACAAGTCC  | 552.082721070896 | 0.547670444194744 |
| ATATATGATGAC  | 552.10985273838  | 0.804942062395231 |
| CAGTCAGAAATCA | 552.150225544107 | 0.263356030200677 |
| ATTAACAATGAC  | 552.151860467239 | 0.28846212945172  |
| ATGATATTAGTC  | 552.16458898357  | 0.62442380129     |
| AGGTCCACGTCA  | 552.172117820626 | 0.640039023524795 |
| CGGTTGTAATCA  | 552.178530642614 | 0.773896715916399 |
| TGAGTAAAATCA  | 552.186167007514 | 0.184010783369359 |
| AATCTCGGTCAT  | 552.193030042644 | 0.338384055347347 |

|               |                  |                   |
|---------------|------------------|-------------------|
| GCCGGCGTCATA  | 552.203510844965 | 0.357982080552323 |
| AGAAACTGACTC  | 552.208766830943 | 0.442844838720006 |
| AATGAGTAGTCC  | 552.228578338858 | 0.398785776555146 |
| CAGAATTAGTCG  | 552.275538857984 | 0.360678551335451 |
| GGGTCATGTGAC  | 552.280098860498 | 0.546411072431331 |
| TAGTCACGACTA  | 552.289740007021 | 0.328490460327824 |
| CCAGAGATGACA  | 552.314697592014 | 0.44030147627897  |
| ATGACAAGATTG  | 552.315037916    | 0.440563989190106 |
| CTGAAGCTGTCA  | 552.320220031772 | 0.566960381251447 |
| ACATTTGACTGA  | 552.331091556927 | 0.430094596095128 |
| AACCTAATGACG  | 552.335307188927 | 0.432490394477213 |
| AGGTTTGCTCAT  | 552.341531004182 | 0.422925124986393 |
| ATGACGCGCGCC  | 552.34515675954  | 0.358522065662356 |
| ATGAGTCCCGG   | 552.348358664491 | 0.367287722299276 |
| ATGACAATACTC  | 552.360662415367 | 0.23142953129929  |
| AAAGGCGTCATC  | 552.363958136518 | 0.361823130291627 |
| CCACGGGAGTCA  | 552.365730308965 | 0.70589428109813  |
| AATATCAATGAC  | 552.368876148483 | 0.55153930978643  |
| GAATGATATGAC  | 552.38478311763  | 0.255635758906886 |
| AATCTGTGTGAC  | 552.402915785687 | 0.648855580359087 |
| ATTCCGAGTCAG  | 552.403725554672 | 0.226541780870139 |
| CGGTATCTGTCA  | 552.417830241372 | 0.367119755620918 |
| CAGAACGGTGAC  | 552.419870609271 | 0.580129473649534 |
| CGTCATCAAGCA  | 552.433199653649 | 0.407462310051779 |
| ATTAGTTGTGAC  | 552.435941246086 | 0.760133485815971 |
| GTAGCCTATGAC  | 552.441624040904 | 0.75320203747659  |
| GTCATACACCGA  | 552.46705540994  | 0.490919985067415 |
| ACTGCTGTGTCA  | 552.46810924231  | 0.540298562994838 |
| ACGCTCACTCGTG | 552.470686786272 | 0.713596368614139 |
| TGACTGGTATAA  | 552.480029547384 | 0.484748847710405 |
| GCATAGGATGAC  | 552.480054997431 | 0.514169308512373 |
| AATCGTGAGTCT  | 552.481771274872 | 0.596518916465959 |
| CGTCACTGTAAG  | 552.485475613775 | 0.894807565998654 |
| CAGTGAGTCTGA  | 552.486492010105 | 0.399526806930327 |
| CCGTTTTACTCA  | 552.498674711742 | 0.243396243986302 |
| TGACTGTAAGAA  | 552.500519397687 | 0.508263501581813 |
| GTAACATGACAC  | 552.519821864294 | 0.568703327987695 |
| CAGCATAAGTCA  | 552.534195039675 | 0.978944114647465 |
| CCAGAGTGTGAC  | 552.542090024819 | 0.44474005363712  |
| ACGCTCTATGAC  | 552.543162086685 | 0.453596233764804 |
| AATTGGTGACGC  | 552.56332362956  | 0.624214209227494 |
| ACGTAGATGACG  | 552.567421968891 | 0.443290863173644 |
| ACGACTGAATCA  | 552.57219782011  | 0.600011458779649 |
| CCTGACTGTGAC  | 552.58631403611  | 0.107733933745409 |
| CTTTTACTCGA   | 552.587047028469 | 0.156235983388535 |
| ACTTGCAATGAC  | 552.610282319494 | 0.485558031094749 |
| GCGGATGATGAC  | 552.610509061248 | 0.509066270524071 |
| ATGACGCCTAAT  | 552.619775954199 | 0.311447899060928 |
| CTTCAGATATGA  | 552.635735161985 | 1.12771174684303  |
| ATGAGTACGTGA  | 552.657334595137 | 0.152584842341405 |
| AGCTAATATGAC  | 552.662946213705 | 0.393884870137723 |
| AATCTAGATGAC  | 552.6710619635   | 0.605805548070926 |
| CTAGTCACGCCA  | 552.671174806249 | 0.278097447300617 |
| AACTACTAGTCA  | 552.694672766244 | 0.526512611198228 |



|               |                  |                   |
|---------------|------------------|-------------------|
| ACAAATAGTGAC  | 552.705750883735 | 0.591050757562542 |
| ACGACGCTGACT  | 552.70627863857  | 0.788966177165869 |
| TGAATCAGATAA  | 552.717077245533 | 0.343840302170326 |
| CCCAATTGACTC  | 552.722906155823 | 0.291398288598527 |
| GTCACATTCTTA  | 552.728176952749 | 0.556093329393182 |
| GTCACCAGGTGA  | 552.752834742237 | 0.611711914824152 |
| GCTGCCGAGTCA  | 552.764490708875 | 0.571527152764104 |
| CACCAATAGTCA  | 552.766384094321 | 0.508577549411624 |
| ACCAAGTGACAC  | 552.807876158525 | 0.808622608788814 |
| CGCGCTGAATCA  | 552.811672106724 | 0.325834401752255 |
| ACTCAAGACTCA  | 552.816733953363 | 0.502715891266615 |
| GTATAACAGTCA  | 552.831962195579 | 0.38632607618508  |
| AATTTTCGATGAC | 552.83649587758  | 0.401074909054294 |
| GAAGCCTAGTCA  | 552.845617552342 | 0.573321389022605 |
| CAAACGGAGTCA  | 552.86734880687  | 0.503732581427782 |
| AGACTACTAAG   | 552.872136980436 | 0.805126956256472 |
| GTCATCGTTTCA  | 552.872748953917 | 0.545314328762607 |
| CTCAATGGGTCA  | 552.882513700287 | 0.429793886219375 |
| GGGCCGAGTCAC  | 552.889753598321 | 0.525365982420553 |
| GGTGCTCAGTCA  | 552.89117638741  | 0.52501531709299  |
| ACGGCTACGTCA  | 552.894266524261 | 0.700787751064692 |
| GTGAGTCTGAAA  | 552.895098317343 | 0.266081070717957 |
| GCTCATTCGTCA  | 552.898073648409 | 0.338354071856078 |
| GTCATCTGTCTA  | 552.904904131116 | 0.43607369263415  |
| TATCTGGAGTCA  | 552.90917088665  | 0.723244261634814 |
| GTCACACTGCGA  | 552.923180800429 | 0.579084585713282 |
| AGTCACCCTGTA  | 552.928040773508 | 0.220595954139056 |
| CAATTGACACAC  | 552.929916182248 | 0.202977551941731 |
| GTGACTGCCATA  | 552.931865375585 | 0.463411089261422 |
| GCGTCACATTTA  | 552.939399277217 | 0.48273195265095  |
| GTTTATTGCTCA  | 552.939794423118 | 0.730613334355153 |
| ACTGGGACTCAT  | 552.941978402649 | 0.537133775994075 |
| TGACGGTGACCA  | 552.944878615755 | 0.558368283224442 |
| CTCAATTATGAC  | 552.946124257482 | 0.345751725977274 |
| CTCAAAGATGAC  | 552.946634676046 | 0.535927224375556 |
| GCATATTTGTCA  | 552.985346143279 | 0.504630123767683 |
| GACTCTTACAAA  | 552.992625251546 | 0.655762454076603 |
| CCGATCTAGTCA  | 553.015222377622 | 0.240187298356752 |
| AGGGTGTATGAC  | 553.029480171177 | 0.340160196485509 |
| GATTGCGTAACC  | 553.044493755569 | 0.442804415773372 |
| GCCGCCAAGTCA  | 553.053681428118 | 0.628933820910965 |
| TCCCTGTAGTCA  | 553.062794186456 | 0.375383378037593 |
| GCGTGACAGTCA  | 553.065827649114 | 0.74941971272417  |
| AAGAGCGTGACT  | 553.070911223771 | 0.219436026453193 |
| GGACTGACGTCA  | 553.090406970949 | 0.676653118413572 |
| CATTGCTATGAC  | 553.103657578935 | 0.629504169514204 |
| TCACTGTGATGA  | 553.10660302865  | 0.470780843625925 |
| GTCATGTTTCTA  | 553.12864195912  | 0.581136202762082 |
| ATTACGCAATTC  | 553.142147263436 | 0.322215629993247 |
| AAGAACGACTCA  | 553.15271904661  | 0.514856561480489 |
| CTCAGCAGTGAC  | 553.152782070593 | 0.758614457976575 |
| CGGGCGTGACTA  | 553.178573071781 | 0.24611991811003  |
| GCATTTGATGAC  | 553.184992993539 | 0.465877679230621 |
| AGCCAAGTCATC  | 553.185007274491 | 0.264393218520849 |

|              |                  |                    |
|--------------|------------------|--------------------|
| GGATGTTATGAC | 553.194327168975 | 0.197819634064267  |
| GTCATACCCAC  | 553.201179863607 | 0.355314567832767  |
| ATTAACATGAC  | 553.205313801767 | 0.657438221580306  |
| ATATAATATGAC | 553.207272427146 | 0.483632775339513  |
| AGTCTGGCTCAT | 553.211818853296 | 0.239466476833293  |
| GCTTCGGATGAC | 553.236253037271 | 0.441853105989674  |
| GTCATTATTCCA | 553.24211643707  | 0.328355881891974  |
| GTATTAGATGAC | 553.249863236232 | 0.265332785156169  |
| ACCAGCGTGACT | 553.252394528262 | 0.460643609467781  |
| TATGATTACTAA | 553.26141899405  | 0.539404674668333  |
| GTCACCTGGTGA | 553.267013415526 | 0.56785955167721   |
| ACGTCACCACCG | 553.270522211551 | 0.449109384057136  |
| GGTAAGGATGAC | 553.283417680288 | 0.283760646485843  |
| AGACTAATACAC | 553.292787209308 | 0.440820697459554  |
| GTCATAAAACGA | 553.297210546983 | 0.617177367886452  |
| AAGAGTCTTACA | 553.301248209589 | 0.336051515996782  |
| CGTCATTCTTA  | 553.302319747104 | 0.173757077626096  |
| ATGACGAACCGA | 553.30480247619  | 0.490324862803613  |
| GGTGGGTATGAC | 553.310454345179 | 0.302466662852531  |
| GTCATTCGGTTA | 553.314005571297 | 0.329242809952595  |
| AGACTAATAGTG | 553.352409362947 | 0.220924705055603  |
| CTGACAGGTGAC | 553.352653402756 | 0.541972525502195  |
| ATCAAGTCATCC | 553.359255743216 | 0.261787741160339  |
| CCGAATTGACTC | 553.380348307548 | 0.296185633438082  |
| ATGACTAGCCAG | 553.383178669524 | 0.557325980678373  |
| CAGCGTTATGAC | 553.408115441346 | 0.594017866182851  |
| ACGTCACGCGAA | 553.421943881635 | 0.455442170739816  |
| GAGTCAGGCCAA | 553.423516513204 | 0.475487014106279  |
| CTGGCTGAATCA | 553.425495662616 | 0.554267558985598  |
| AAGGTTGTGTCA | 553.428645276947 | 0.109006502884847  |
| ACTCATAAATGA | 553.431463395277 | 0.57334583161528   |
| GTCACCATCTGA | 553.439527469238 | 0.163984685321701  |
| CACACAGTGACG | 553.440767332163 | 0.630886760780979  |
| AATCAAGTGACT | 553.448970710842 | 0.475422871353005  |
| CTGACTGTATCC | 553.454664946295 | 0.212303923684762  |
| ATTGCTGATGAC | 553.481744676498 | 0.616111624418895  |
| ATGTTGTGTGAC | 553.48272694563  | 0.511725338616778  |
| ATACTCTATGAC | 553.497437887633 | 0.405354031717045  |
| GAAGACGATGAC | 553.499032648076 | 0.493141555889637  |
| ATCAGTGATGAC | 553.503306477521 | 0.477194865385597  |
| GCCTGATGTGAC | 553.518967596569 | 0.512348996441802  |
| GACTAATATTGA | 553.520418104499 | 0.578695637951044  |
| CACCGAGATGAC | 553.530339496377 | 0.680237815809716  |
| ACAGAGTGTGAC | 553.543189885642 | 0.255054573407588  |
| GGCTCATATGAC | 553.546329448641 | 0.459956661862215  |
| GACACTTGACTC | 553.550038609967 | 0.3815457159621    |
| GTCACACAAATA | 553.550281310708 | 0.357083912053623  |
| TACTCATAATGA | 553.591076231136 | 0.386675500939517  |
| AGTTTTGATGAC | 553.64926716042  | 0.240965043016572  |
| CGCTACTGACTC | 553.672333693191 | 0.376657654630764  |
| AGGATATATGAC | 553.675059121243 | 0.348161946091265  |
| AGAGGAGTGACT | 553.677400801923 | 0.0910286908546247 |
| CGTCATTCCAAG | 553.682305886216 | 0.452569603407044  |
| GTGTTAGTCTTA | 553.685188136945 | 0.451124535689715  |

|              |                  |                   |
|--------------|------------------|-------------------|
| ATGTGGCTCACA | 553.686332894292 | 0.344191405152853 |
| GATCATCTGTCA | 553.692160751999 | 0.378840481440365 |
| TAATGCGACTCA | 553.701700523213 | 0.431491891701261 |
| ATGCAAGTCATA | 553.708308076963 | 0.159617770209653 |
| GTCATAAATGGA | 553.709261526318 | 0.178938988392643 |
| CACGTCACTCGC | 553.709636096695 | 0.432542841771127 |
| ACCCATTATGAC | 553.711946280336 | 0.392359565797773 |
| GCTTCTGAATCA | 553.714641352383 | 0.480199792094008 |
| ACTTCTGGTGAC | 553.718469398431 | 0.639590762183196 |
| CTAGCGGATGAC | 553.723115504126 | 0.575425071811864 |
| CGTTCGAATGAC | 553.733245640572 | 0.507208447704506 |
| GTCATAGTCCAC | 553.738828196797 | 0.426167873538389 |
| CCAATTGACTGA | 553.783096637748 | 0.363477311335223 |
| GACCACGAGTCA | 553.786542093416 | 0.582926666094347 |
| CTCTGAGTCTAA | 553.794773434845 | 0.532314577724992 |
| GACTCAGATGCA | 553.795825867972 | 0.721520063466309 |
| CGACTAATTCAA | 553.79596418363  | 0.697425290779852 |
| ATCGTTCGTCAT | 553.797010061479 | 0.35902502999345  |
| GAGAGAGTCAGA | 553.798485197135 | 0.239714965109421 |
| ATTTCTGACTC  | 553.801392155768 | 0.387251657540408 |
| CGACCGTATGAC | 553.816197112667 | 0.333662187865711 |
| CATAAATTAGTC | 553.819957753506 | 0.732234930726779 |
| GATATGGATGAC | 553.825452553746 | 0.361469045886841 |
| CCAGAGGATGAC | 553.841707742527 | 0.574478486703173 |
| CACTGGTGTGAC | 553.848573792727 | 0.608402703769226 |
| CGTCATGGTTAC | 553.850439360336 | 0.612530683904779 |
| GTCATATGCTAA | 553.866978083105 | 0.713020522350082 |
| CAATTGGAGTCA | 553.868175568592 | 0.425706982049135 |
| AACGTTAATGAC | 553.882980362256 | 0.580333662580715 |
| TACCTGGAGTCA | 553.883257637848 | 0.29282544948966  |
| CCGACTAATGAC | 553.917773491393 | 0.406004182448181 |
| AATAGCAATGAC | 553.926469139112 | 0.245450950088981 |
| GAAATAGATGAC | 553.947860197288 | 0.391811587017271 |
| GACTCGAATGAC | 553.956495172471 | 0.479163264480278 |
| CATATGGTGTCA | 553.957171479302 | 0.557179972051202 |
| ACCAAATTAGTC | 553.964764845645 | 0.548918920158147 |
| ATGAATCAACGA | 553.96536540812  | 0.135936964443212 |
| GTCATCAATCAA | 553.970799720779 | 0.500890726644444 |
| CCAGACTATGAC | 553.985648815215 | 0.359574786351775 |
| GTCATCATCCTA | 553.986372907383 | 0.419208914692731 |
| CATCGCGAGTCA | 553.986394657301 | 0.216167155884695 |
| GCATCGTATGAC | 553.992064159585 | 0.647963795222769 |
| GATGACAGCGCC | 554.005335932845 | 0.20781083654408  |
| GCGTCACAAAGC | 554.00592963415  | 0.558267762841141 |
| ACTGTTTACTCA | 554.008663810555 | 0.317814938528697 |
| AACACTGTGACA | 554.012131981865 | 0.778200208842255 |
| CCCGCGGAGTCA | 554.028548561136 | 0.473252731199885 |
| CCAAGTGAATCA | 554.032888504785 | 0.446264936659578 |
| AATGATGTGTAC | 554.036905382248 | 0.374600887091414 |
| CCGGACGTGTCA | 554.050256036439 | 0.545221904045939 |
| AGTCATGAGCGA | 554.059049729975 | 0.439213879887053 |
| CGGACTTCGTCA | 554.060478738067 | 0.538415044187994 |
| CGGTCATCGTCA | 554.06433462459  | 0.387418261031245 |
| AGTCACGAGATG | 554.070729180372 | 0.325922899103119 |

|               |                  |                   |
|---------------|------------------|-------------------|
| ATGAGTCTCAG   | 554.095118080059 | 0.449661042975262 |
| GCTGACGTCAGA  | 554.095911816251 | 0.612707516647089 |
| GTCACACGCTGA  | 554.105325171681 | 0.221109054896002 |
| TCGTGACAGTCA  | 554.106831728634 | 0.580663235190168 |
| GTCATCCGAAAA  | 554.111862906329 | 0.420922855458858 |
| GAAGCATGACGC  | 554.117436516375 | 0.507706194826088 |
| CTAATAGGTGAC  | 554.120390610159 | 0.453505076586807 |
| AAGATGTGACGT  | 554.133399785963 | 0.431487498307628 |
| CTCTTTAAGTCA  | 554.137349532175 | 0.396017100057616 |
| GGGTAATATGAC  | 554.1417895329   | 0.35530113612223  |
| ATGTCACAATGA  | 554.142354991457 | 0.706418377557601 |
| CTCCTATATGAC  | 554.15258298394  | 0.374939458104412 |
| AGCTGACATGAC  | 554.174845174164 | 0.715553062347197 |
| AAATCGTGACGC  | 554.18528397318  | 0.361966934232429 |
| GAATTTTCATGAC | 554.207127559411 | 0.767456537041055 |
| TGACAAATGTCA  | 554.208693947496 | 0.713874101101576 |
| ATAACATAGTCA  | 554.228284065551 | 0.44631893609491  |
| AACGTTGCTCAT  | 554.247789956472 | 0.362366414557184 |
| GGAAGATATGAC  | 554.250629702889 | 0.320179944918082 |
| ATGACCACGTAA  | 554.282048627443 | 0.284223119568095 |
| AGTGAAGATGAC  | 554.29085648991  | 0.304273774858647 |
| ATCTTGATGACG  | 554.331573287167 | 0.31339543671862  |
| ATTTCGCTATGAC | 554.348862650468 | 0.283132393812141 |
| CTTACTGTCATA  | 554.351277649691 | 0.157361873481731 |
| GTCATAGGGAAA  | 554.354207450345 | 0.419898503230196 |
| GCGCTTGCGTCA  | 554.362102489372 | 0.346980029596165 |
| CATCGCGGTGAC  | 554.37052468845  | 0.574635651971109 |
| TATTTGGAGTCA  | 554.374835915756 | 0.438642459699047 |
| AGCGATGATGAC  | 554.378955278849 | 0.437627763984961 |
| AGTCACTCCGCA  | 554.385635541687 | 0.462379275607232 |
| GTACCGTGTGAC  | 554.387147066642 | 0.424699602667533 |
| GAGTCTGATTCA  | 554.396343212511 | 0.828441766145468 |
| CGGTGCACGTCA  | 554.402107855418 | 0.745361292760656 |
| GTCATATCTTTA  | 554.40664680953  | 0.562350258816894 |
| CAAGATTGAGTC  | 554.423636399594 | 0.664740089485787 |
| ATGATGTGTTCC  | 554.425257729486 | 0.43533989558592  |
| CCTCAGTGTGAC  | 554.437373592978 | 0.774292736096892 |
| TGACTGGTATCA  | 554.440864186376 | 0.761150065669468 |
| CCCAGTAATGAC  | 554.447336259574 | 0.326767624021623 |
| TGACTGCATGCA  | 554.463336433451 | 0.660824345846074 |
| GCCATGGATGAC  | 554.468643736072 | 0.465708006701783 |
| GTCATTACAAAC  | 554.470996164941 | 0.607352913477641 |
| AAAATTGACTGA  | 554.48477075206  | 0.400216253313396 |
| GTGGCACAGTCA  | 554.489428806492 | 0.510006176951799 |
| AGTGTTGATGAC  | 554.493988977161 | 0.460578467350857 |
| TGACGCAGTAAA  | 554.499688812451 | 0.593329236760106 |
| AGGTCAGATGAC  | 554.511313080018 | 0.247255626000165 |
| CGTCATTCTTAA  | 554.513190387495 | 0.358931620626926 |
| GACTCGATGACC  | 554.51471253314  | 0.549118594971747 |
| GTCATTCACGAA  | 554.524396397707 | 0.425153570445319 |
| GTCATATTCGGA  | 554.525206982388 | 0.426286819219629 |
| CAAATAATGAC   | 554.529163524232 | 0.419679156563669 |
| CGTCATCAAGAA  | 554.547324352472 | 0.937935290941911 |
| ATGACGCGCCAC  | 554.547936893934 | 0.632329489704838 |

|              |                  |                   |
|--------------|------------------|-------------------|
| GAGTAATCCTCA | 554.554351488881 | 0.608004178949994 |
| ACGATTAATGAC | 554.560278641204 | 0.863499539090363 |
| ATGACGGAGATG | 554.574007966421 | 0.243295691030248 |
| TCATAACGATGA | 554.583748531822 | 0.517254807492787 |
| GTACGGAATGAC | 554.586476349687 | 0.470998894454945 |
| CTCTTGATGAC  | 554.587096271705 | 0.660464531310179 |
| GGTGACAAGTCA | 554.588970775049 | 0.285659247525105 |
| AGTCACGCTACC | 554.61506326809  | 0.26353063159836  |
| AGTGAGTAGTCA | 554.62738767207  | 0.260436803101692 |
| ACATACAGTGAC | 554.632490783732 | 0.782202226195944 |
| GAGTCAGTTGAA | 554.669143291698 | 0.47908019758015  |
| CAATTGAGTGAC | 554.689409725184 | 0.578157570915292 |
| GAGTCAGGTGCA | 554.697645272808 | 0.358810507365769 |
| GCGCACGAGTCA | 554.699683399173 | 0.295355921253349 |
| AACGCCGAGTCA | 554.710113452827 | 0.338536173147419 |
| CCGTCTGTGTCA | 554.743873041112 | 0.616840158079371 |
| ACGTACGTGTCA | 554.753481695879 | 0.771585177109204 |
| CTGACCCAGTCA | 554.76021262968  | 0.532433171679961 |
| TATCGTGACAAA | 554.766116544103 | 0.566890737877236 |
| AGTCGACGTCAT | 554.768672651895 | 0.496007604626904 |
| CCGAGCCGATGA | 554.76899012149  | 0.8577737127838   |
| ATGACAGAGCTC | 554.769026921148 | 0.441628387642094 |
| GGCCCAGATGAC | 554.769923658687 | 0.42542493915223  |
| CCAGCAGAGTCA | 554.776040115514 | 0.424689700058812 |
| GTCATGTATTCA | 554.782832638462 | 0.458548535221785 |
| GTCATCTACTTA | 554.788226108726 | 0.407899506913134 |
| CGGAGTTATGAC | 554.800783408914 | 0.53475086000939  |
| AGTACCTGTGAC | 554.831415072689 | 0.759697916482801 |
| GACTAATAGACA | 554.832436198126 | 0.55004010364687  |
| CATCAAGTCATC | 554.843613716722 | 0.177532273075331 |
| GACTTGGAGTCA | 554.844531661777 | 0.66853591026717  |
| AGACTAATTGAC | 554.84539328585  | 0.499658173881807 |
| ACTCATAAGAGG | 554.850761437779 | 0.367531811462479 |
| CCCGTGTGTGAC | 554.852412806808 | 0.551244102303673 |
| CAGACAGATGAC | 554.881191131296 | 0.454514225082103 |
| ACTCATAAGTTG | 554.890121329257 | 0.540675725272268 |
| GTCATAGAAGCA | 554.905423754377 | 0.342057333284553 |
| CTAAATGGTGAC | 554.933618101785 | 0.39883993609701  |
| ACGCGAAATGAC | 554.933706616954 | 0.611825386377758 |
| GTCACCAGGGAC | 554.936674161971 | 0.382510095892279 |
| GTCATAGTGGGA | 554.948712247016 | 0.281736886743264 |
| CAGGTATTAGTC | 554.949580856683 | 0.404110381710196 |
| GCCTAAGTGTC  | 554.956870279148 | 0.669949679037874 |
| ACTCGTAGTGAC | 554.959301691385 | 0.690058139350957 |
| GTCACCGAGAGA | 554.964535525663 | 0.360255300005956 |
| GTCACAAGTGCA | 554.984550312949 | 0.528581740238794 |
| CTACTCGATGAC | 554.999336190399 | 0.287675298828975 |
| TAAAAGTGGTCA | 555.009800534227 | 0.568829423317857 |
| CGGATGGAGTCA | 555.012359138254 | 0.396347078989193 |
| CCAACGGATGAC | 555.012973807984 | 0.480047999735608 |
| AGACTCACGGTA | 555.019271739323 | 0.38377813793365  |
| AAAAGGTGTGAC | 555.036685510658 | 0.260614242276898 |
| AATCGTGAGTCG | 555.043524542782 | 0.365017423236817 |
| GTTGTAGACTCA | 555.043938845258 | 0.627522279459567 |

|               |                  |                    |
|---------------|------------------|--------------------|
| ATGACAATATTC  | 555.047458464827 | 0.306999058075515  |
| GGATTCTATGAC  | 555.063345356254 | 0.205099447482223  |
| CGATTATATGAC  | 555.085307617018 | 0.538876017159185  |
| GACTATGGTGAC  | 555.102970561949 | 0.622480956161182  |
| CCAAATTGACTC  | 555.125238440227 | 0.134886216707691  |
| CCACAGATGACA  | 555.144919933441 | 0.47111677243411   |
| GCCGACGATGAC  | 555.16526243977  | 0.57808490460516   |
| GTAATCCATGAC  | 555.17127941396  | 0.732691626709566  |
| GCACCGTTGTCA  | 555.1952683126   | 0.837017004142999  |
| ACGCAGTGAGTC  | 555.197229225072 | 0.54412983373601   |
| GGTACGGATGAC  | 555.200139369501 | 0.334330817588234  |
| AGATCGAATGAC  | 555.205397228757 | 0.407599585223237  |
| AAATCTATGAGT  | 555.209298730806 | 0.34918428820523   |
| AATGGTATGACC  | 555.254561527517 | 0.614388576889459  |
| CACCTATATGAC  | 555.255715229983 | 0.710523506567062  |
| AGTCACTAGGAA  | 555.265518535995 | 0.325161378742643  |
| GTCACCGGCAGA  | 555.275244312599 | 0.582389728661536  |
| TGTCATTGCAAA  | 555.297358689804 | 0.341972718449891  |
| ATTATGTGTGAC  | 555.303480785147 | 0.631521046625214  |
| TCAGATGGCTCA  | 555.308121327129 | 0.542856923408961  |
| GACCCTGCGTCA  | 555.315465732666 | 0.65800254269728   |
| ACGTTCCGGTGAC | 555.317311056417 | 0.540175951194123  |
| GCGATGGATGAC  | 555.329781831698 | 0.4957620499497    |
| ATTAGCATGACA  | 555.334366042447 | 0.750089861941186  |
| GCAAATTCGTCA  | 555.339325803701 | 0.581167654165766  |
| AGTCACGGAGTC  | 555.343183263647 | 0.482525064512801  |
| AAGGAATTAGTC  | 555.353617514067 | 0.157536629277666  |
| GTCATAGCGGCA  | 555.354411396931 | 0.431397765338373  |
| CATTAGGACTCA  | 555.355878598381 | 0.627034786082855  |
| CATGCCGTCATA  | 555.356971643744 | 0.0967426462560958 |
| AATGTAAATGAC  | 555.36425588492  | 0.595885882339044  |
| ACTGCATATGAC  | 555.365899209431 | 0.3552051762934    |
| CCAGTCTGTGAC  | 555.368786186345 | 0.615883655771723  |
| AGCGCGAATGAC  | 555.387642357506 | 0.757393311975849  |
| CGACACAGTCAA  | 555.395548754532 | 0.788420848867099  |
| GACTCACTTAAA  | 555.398627995653 | 0.434373805034301  |
| ATGACGATGCTG  | 555.400288498282 | 0.368826642331236  |
| GCGAACGACTCA  | 555.413133392271 | 0.590263341314125  |
| ACCTTGCACTCA  | 555.422879319402 | 0.371219813520045  |
| CTTAGTTGGTCA  | 555.423353309305 | 0.49911053411643   |
| GATCGTTACTCA  | 555.432438660335 | 0.58897691122089   |
| CTAAATGTCATA  | 555.435141270128 | 0.375363690352414  |
| ATGAGGTCATCG  | 555.437277555282 | 0.385780740640005  |
| AATAAGTGACGT  | 555.438612891933 | 0.341513647392351  |
| AAACTTGATGAC  | 555.441639891603 | 0.507416716729753  |
| GTCATGCAGAAC  | 555.443019497772 | 0.426360413174555  |
| GTCACCTCGTCA  | 555.445970578772 | 0.309512421643027  |
| AACATGGAGTCA  | 555.468254861923 | 0.266449802079992  |
| AACAACAATGAC  | 555.471793230989 | 0.64861353919505   |
| GTGTTGACTCA   | 555.474033867293 | 0.736794742851474  |
| GGTCATCGTGCA  | 555.476224412586 | 0.768932196189682  |
| TGAGCAATTGAA  | 555.479247613133 | 0.643768836500161  |
| GTCATATTATAA  | 555.486269748563 | 0.48432089781495   |
| CCCGACGACTCA  | 555.51606502615  | 0.222510540221183  |

|              |                  |                   |
|--------------|------------------|-------------------|
| ATCCCTGATGAC | 555.518297944877 | 0.636348020426685 |
| CATCGGTGTGAC | 555.531754730738 | 0.389227873177548 |
| GTGACAAACAAA | 555.535800930296 | 0.249369923024308 |
| ATTGGCGGTGAC | 555.538173149596 | 0.477029017220148 |
| TACATTAAGTCA | 555.54123931863  | 0.657207117768045 |
| AGTCACGGAACA | 555.553740491345 | 0.590291061933525 |
| ACTGACGTCAGC | 555.556090050425 | 0.751921893137269 |
| GCTTCGTATGAC | 555.558990720424 | 0.548153413447613 |
| ATGACGTTACAC | 555.55986564001  | 0.339260794151963 |
| CGAAGCGAGTCA | 555.562704237228 | 0.164254472145958 |
| GACTAATCTTGA | 555.571688763803 | 0.562923862898891 |
| GTCATCTTTCAA | 555.573348645643 | 0.730131907270193 |
| GGCCCGAGTCAC | 555.578183482458 | 0.587346988044411 |
| GGTCCAATGACA | 555.579580451687 | 0.559872044156951 |
| GTCATCAATAGA | 555.580472976629 | 0.255042503605148 |
| TACGTTGTGTCA | 555.605024751403 | 0.57200703693653  |
| ATGCCTGTGTCA | 555.61082967201  | 0.581933660765354 |
| ACAGCTGTGACG | 555.618099281496 | 0.541300879653629 |
| GATGACCTAATC | 555.620282939129 | 0.28778575107572  |
| TCATACTCGTCA | 555.640158638718 | 0.189646557012712 |
| GTCATGCCAAGA | 555.640915559113 | 0.589687658654689 |
| ATGAGCAAGCCA | 555.651553771305 | 0.437961868139054 |
| GTCATAAATAGA | 555.657875339517 | 0.309857188540944 |
| CAAAATTGCTCA | 555.666101232393 | 0.457912610352027 |
| ACTCATAATTAG | 555.670472355458 | 0.675499452932824 |
| CGCTCTGATTCA | 555.687332286777 | 0.371885167687838 |
| CCATCTGATTCA | 555.697867046256 | 0.263427198561862 |
| TCGGCTGTGTCA | 555.698097694842 | 0.643034652765654 |
| CTCATCAATGAC | 555.714724190433 | 0.26832511702809  |
| CAGACATATGAC | 555.715895416317 | 0.624602653478941 |
| AATGTTTCGTCA | 555.725573557491 | 0.240686142329804 |
| TCCTCCACGTCA | 555.729290135678 | 0.480074920774385 |
| GAACCGCGTCAC | 555.737500602487 | 0.261578906354234 |
| CGGGCCTATGAC | 555.739147747914 | 0.640412658479292 |
| AGAAGAAATGAC | 555.755628078571 | 0.33090047404831  |
| CCAAGCGATGAC | 555.765774915285 | 0.585024493672754 |
| ACCGTAGATGAC | 555.766504403696 | 0.44227283061821  |
| GTCATCACGGTA | 555.796501071831 | 0.476634010184917 |
| AGTCAGACACAT | 555.801839300261 | 0.474085377246518 |
| CGTCATTCGTGC | 555.810775302687 | 0.355730356292389 |
| CGTCATGAGCAA | 555.820711822921 | 0.685922892101422 |
| GTGACAACGTCA | 555.822838467152 | 0.477588198119257 |
| AATTAGTACTCA | 555.828885849738 | 0.290934583223354 |
| CCGCCTCAGTCA | 555.844954053038 | 0.416099044629114 |
| GGGCTTTAGTCA | 555.853672375019 | 0.855320550782635 |
| ACTACACAGTCA | 555.854091148017 | 0.410844794575364 |
| ATATCAATGACG | 555.863571838636 | 0.386953514917067 |
| AGTCAGAGCTGC | 555.864726112637 | 0.51344004613046  |
| GTGCGTTACTCA | 555.869046212202 | 0.415820870726607 |
| CTACCGGATGAC | 555.878328776794 | 0.681757785927771 |
| TGAGTAAACCCA | 555.880279701638 | 0.840555279960363 |
| ACCGCAGAGTCA | 555.883699352695 | 0.802395856329994 |
| TCAAGTGAATCA | 555.888576501078 | 0.662292963873235 |
| GACGTTTGACTC | 555.895044627787 | 0.333811826123339 |

|                |                  |                   |
|----------------|------------------|-------------------|
| TCATGCTAGTCA   | 555.91111006016  | 0.521441458200286 |
| ATGACAGCGTAC   | 555.916713027576 | 0.507846211118787 |
| CGCCCTGACTGA   | 555.948290641681 | 0.328966090820242 |
| CCGAAAGGTGAC   | 555.94834047801  | 0.337264276325326 |
| GATGATATCATC   | 555.948979427811 | 0.391125914299354 |
| AGGCACTGTGAT   | 555.952464632697 | 0.419647069189594 |
| CAATAGATGACG   | 555.957402054959 | 0.43892686958512  |
| CCCGTGGTGTCA   | 555.959114165871 | 0.911367560089864 |
| AGTCACGAGTTA   | 555.974753325845 | 0.488272982130454 |
| TATGACGGTACA   | 555.981319898922 | 0.401753569374159 |
| CCAGCATGTGAC   | 555.982538333302 | 0.409627603340208 |
| ATGACAACGCCG   | 555.991987013897 | 0.678665863002146 |
| GGCGCTACGTCA   | 555.995498219632 | 0.77318423305995  |
| CCGACCTAGTCA   | 556.010619889945 | 0.575311172420694 |
| TGACCGATAAAA   | 556.024080646755 | 0.416896386272082 |
| GTCATAGAAAAC   | 556.029866000448 | 0.650773555187754 |
| GTCATAGCCAGA   | 556.030528963948 | 0.495390567708386 |
| TATTGCTCAGAA   | 556.036946505378 | 0.621761689910738 |
| GGTCCGGAGTCA   | 556.037233859569 | 0.321329954110445 |
| ACTTAGAATGAC   | 556.041775932872 | 0.537674030753536 |
| AACAGTCAACGT   | 556.051247248988 | 0.313070365453715 |
| TCCAGGGAGTCA   | 556.067129427573 | 0.617803361554299 |
| TCAGCGCAGTCA   | 556.100648035959 | 0.810587135122484 |
| GCAAACGACTCA   | 556.100820313572 | 0.549297100940713 |
| GAAGGGGAGTCA   | 556.105064037372 | 0.252037372558128 |
| AATTGCGAGTCA   | 556.115634367561 | 0.380608193102837 |
| GAAGTGTGACGC   | 556.11733654669  | 0.391314162500011 |
| AGTGTGATGGCA   | 556.124964682784 | 0.305465970545072 |
| ATGACTTGGCCC   | 556.127257020606 | 0.312985239917242 |
| TCGTACATGTCA   | 556.128393892392 | 0.804482164837587 |
| GTCATAGGTGGA   | 556.129437180571 | 0.456586925996091 |
| AAGGCAGAGTCA   | 556.1430573853   | 0.262398711861717 |
| GTCATAGGACAC   | 556.145334697703 | 0.394141659519494 |
| ATCCAGGATGAC   | 556.157409065327 | 0.462676124192331 |
| ATGCATGGGTCA   | 556.159157744671 | 0.613998335171522 |
| GGTCATATTATA   | 556.159220435446 | 0.780567568643087 |
| ATGACGGACCTG   | 556.160467402223 | 0.434584243361483 |
| GTA AAAAGTCATA | 556.171316990095 | 0.330618854824943 |
| TCACCGCTATGA   | 556.176686947128 | 0.500172235296631 |
| ACCAATTGTGAC   | 556.178711610214 | 0.551712249880332 |
| AGAGCATATGAC   | 556.202302793921 | 0.383530053466366 |
| ACCAATGATGAC   | 556.210291003478 | 0.5486465704901   |
| CCCACCTAGTCA   | 556.22388127305  | 0.463380472700109 |
| ATGTATTGACTC   | 556.224983488253 | 0.424404636868765 |
| ATGATGGATGAC   | 556.235480892409 | 0.36507552141484  |
| CAACCTGACTGA   | 556.237699388115 | 0.317345753417186 |
| GTCGATAAGTCA   | 556.239010837098 | 0.450157277051171 |
| TGACACAATAA    | 556.23971423764  | 0.751941680874722 |
| CATGTCAATGAC   | 556.241456812192 | 0.645088333691755 |
| AAACGTTTGACA   | 556.242066120697 | 0.452846431258908 |
| CAATAAGGTGAC   | 556.260431858114 | 0.548386336613878 |
| CACGGATGTGAC   | 556.270986666503 | 0.5568368540427   |
| AGTCACTCCACG   | 556.274516330618 | 0.445767727841039 |
| CCTGAGATGACG   | 556.277924223095 | 0.701072356854303 |



|               |                  |                   |
|---------------|------------------|-------------------|
| CACTAACTATGA  | 556.295864126903 | 0.731143783809939 |
| GCATACAATGAC  | 556.304947380693 | 0.807222573791146 |
| ATGACGTTGTTG  | 556.307031928413 | 0.396460580260893 |
| ATGACGGAGCTC  | 556.307693502521 | 0.635262302682466 |
| GTCACGTTAGCA  | 556.309047137862 | 0.590740446660547 |
| ACTCATGACATA  | 556.322954246824 | 0.36712185656213  |
| GTCATTCCGGCA  | 556.32307459517  | 0.511494519464425 |
| CAGTCAGAAATGC | 556.337102633352 | 0.36409692278136  |
| CGGTTGGAGTCA  | 556.358833316266 | 0.235079961183556 |
| GAGTCAATTGTA  | 556.37666096375  | 0.560088035659889 |
| ATAGCTGTCATC  | 556.377624978904 | 0.255702175315185 |
| TGACGCGACTAA  | 556.398927124492 | 0.477719412978931 |
| CGGTTTGACGCA  | 556.399158010327 | 0.442834216470311 |
| AATAGTCAAAGC  | 556.402583790821 | 0.425382952542679 |
| GTCACCGCTTAA  | 556.407715927116 | 0.675466963670798 |
| GCCACGTAACAC  | 556.420516784789 | 0.241207910003652 |
| AGAGTCAATTCG  | 556.421223163716 | 0.410758616297502 |
| ATGGCTTATGAC  | 556.441421474313 | 0.577203467842064 |
| GACTAATTGCC   | 556.442547803375 | 0.706598028421398 |
| CTGCTATATGAC  | 556.444552424281 | 0.478514588476997 |
| CATGCTGTGTCA  | 556.445220254264 | 1.08913846571075  |
| ATGACATGATGA  | 556.472723756448 | 0.513951686138354 |
| GATGATGCAATA  | 556.474042737519 | 0.2446061087179   |
| ATCATTAAAGTCA | 556.474517855269 | 0.538854509324869 |
| ACACGATGTGAC  | 556.483413382784 | 0.612741495284515 |
| TCAAAAGTGTC   | 556.501993946649 | 0.669691667739416 |
| CAGTCAGCGTGA  | 556.516460411542 | 0.738065386298016 |
| AAACATTCGTCA  | 556.527807247083 | 0.331294266721212 |
| AAAACACGTCAA  | 556.53797743363  | 0.582617805133016 |
| AGTGAGTGTGAC  | 556.550654490893 | 0.347965550880036 |
| ACTGGGATGACG  | 556.564278892169 | 0.273254359882103 |
| ATGACGGAGCCC  | 556.565807738305 | 0.386277952090759 |
| AGTCACTTACC   | 556.588460380714 | 0.39764000461941  |
| AATGATGATGAC  | 556.591202621296 | 0.52660999932173  |
| CGATGTCGTGAC  | 556.593751017105 | 0.494063572899244 |
| AACTATTACGTA  | 556.603220440314 | 0.6884562624291   |
| CGTGACGATGAC  | 556.606523624939 | 0.460317876853348 |
| AATGATATGTCA  | 556.616752516097 | 0.698104800926242 |
| GATGCAGTCAGA  | 556.623760417259 | 0.294940547717215 |
| CAAGCATGACGC  | 556.625355527558 | 0.788072918675776 |
| GTCATCTTTGTA  | 556.630962536196 | 0.755019989254359 |
| GTCATCGGAATA  | 556.634707406035 | 0.261531910521186 |
| GTCATTCATCGA  | 556.635288608597 | 0.346717508232431 |
| AGACTAATTGGA  | 556.649525966206 | 0.176988127143373 |
| GTCATCTTGCAA  | 556.653373538148 | 0.545823821541087 |
| AAAGCCTAGTCA  | 556.656855078987 | 0.347154327762752 |
| CGCGGTAGTCAC  | 556.68473537591  | 0.512424971750363 |
| ATCTAAGTGTC   | 556.689515651537 | 0.28276241262156  |
| ACAGGTACGTCA  | 556.699801298954 | 0.447829242980676 |
| GTAGCAGTCAGA  | 556.714876021051 | 0.446383399492037 |
| CGCGATTGGTCA  | 556.716509081739 | 0.441325309595969 |
| ATGACAATGCAA  | 556.726228451186 | 0.464731128408132 |
| CTGTACTGTGAC  | 556.729780814102 | 0.881231076135258 |
| AAGCCGACTCAT  | 556.736567568    | 0.504096189694075 |

|               |                  |                    |
|---------------|------------------|--------------------|
| GTCATCTCTGCA  | 556.739131650203 | 0.391263640925509  |
| GTCGTTGACTGA  | 556.740385379314 | 0.551155895323543  |
| AATGTCTTGTCA  | 556.755613252237 | 0.746664760309905  |
| AGTACACGTCAA  | 556.760500506989 | 0.369912875481205  |
| ATGACGGAGTGC  | 556.766943355147 | 0.229294989395946  |
| ATGTCATTACTC  | 556.770118840718 | 0.298372072538602  |
| ATCCGTCAGAGA  | 556.791785339367 | 0.400212119767527  |
| ATAGATACGTCA  | 556.79254497403  | 0.564276596831227  |
| CGCATAAATGAC  | 556.797485172437 | 0.830420673217918  |
| CGTGACAAGTTC  | 556.807011770682 | 0.390191241435815  |
| ACGTCGGATGAC  | 556.808899678344 | 0.585306342932534  |
| ATACATCGTCAT  | 556.865309248896 | 0.631333220669903  |
| GTCATACGAGTA  | 556.868653908286 | 0.362071679375796  |
| CTAAAAGATGAC  | 556.880015742851 | 0.219803934432307  |
| ATATCGTATGAC  | 556.884599360329 | 0.70760047803331   |
| CCCGTGTAGTCA  | 556.900652204942 | 0.371135961171935  |
| ATGACGATGCCC  | 556.903304623694 | 0.50746387201085   |
| AGAGTCAGGTAT  | 556.908502618773 | 0.0730087653316926 |
| CTGTCTGGTGAC  | 556.909503379032 | 0.352892535403116  |
| ATTTACGCGTCA  | 556.918500118736 | 0.333763058128546  |
| GTCATCTATGGA  | 556.944369979011 | 0.577396707714524  |
| ATGACAGTACGG  | 556.946898292293 | 0.46227057085178   |
| GTTACACGAGTCA | 556.960618410267 | 1.10422295795494   |
| AGTCACTCCGAG  | 556.966664830239 | 0.50999548996245   |
| TCAGTTGACACA  | 556.984943807775 | 0.487763331986739  |
| CCGGCCTATGAC  | 557.001056820407 | 0.499827369426887  |
| GGACTGTATGAC  | 557.004006019018 | 0.757073891832938  |
| GTAAGGATGAC   | 557.037298555263 | 0.367517809875732  |
| TCATCAAGATGA  | 557.037609064818 | 0.601285492141687  |
| GCCGAGAATGAC  | 557.041448442262 | 0.49684305494178   |
| CAGCCGTATGAC  | 557.047744805098 | 0.471722295023927  |
| TACGCATTATGA  | 557.052197139832 | 0.579357361094797  |
| TACCGTTACTCA  | 557.06052883349  | 0.254065777002633  |
| CTTACGTGATGA  | 557.093596730427 | 1.11479245023559   |
| ATGACACTCAAT  | 557.096831138406 | 0.169288033114497  |
| CATGAAGGTGAC  | 557.103348307538 | 0.494145123236781  |
| TGACGATACCAA  | 557.134086995099 | 0.54855234364872   |
| CCAAAATATGAC  | 557.140136536087 | 0.586488616977433  |
| ATACGATTAGTC  | 557.146105304338 | 0.821917086414753  |
| TGACACTAGTCA  | 557.164448610677 | 0.47842761185684   |
| TGAGTCGCCACA  | 557.176280659234 | 0.450095222836644  |
| ACGTCACATGAT  | 557.178460274078 | 0.258787567489761  |
| AGGGCCTGACTC  | 557.191022682005 | 0.728059607879555  |
| GTCATTAATTAA  | 557.207187479427 | 0.467646764047245  |
| GTCACTAGCCGA  | 557.237040780771 | 1.01467960853026   |
| TACTATTGCTCA  | 557.238463660502 | 0.46853055047573   |
| ATGAATCAACTC  | 557.239656634749 | 0.283704001081066  |
| CGGAATACGTCA  | 557.240401688563 | 0.552624326180942  |
| ATCAACTGACTC  | 557.241313660022 | 0.258730088694869  |
| GACCTTCGATGA  | 557.259753345441 | 0.553463145662125  |
| ATTGGTGACCCA  | 557.262199807816 | 0.694215407559135  |
| TCAGTCAACGCA  | 557.271161287458 | 0.549754871236286  |
| CCCTATTTGTCA  | 557.275016481018 | 0.296043153332541  |
| AGTCTAGACTCA  | 557.314209198616 | 0.490036371264468  |

|                |                  |                    |
|----------------|------------------|--------------------|
| AGAGTCAGGGCT   | 557.329528239433 | 0.182251186855557  |
| TACATAGCGTCA   | 557.333580064993 | 0.689101405067984  |
| TCACGCATGACA   | 557.333979619515 | 0.393455583812722  |
| GCCATCTAGTCA   | 557.336395166257 | 0.349693807552106  |
| GAATAAAATGAC   | 557.337361342447 | 0.518228822311765  |
| CAACATGAATCA   | 557.340792308727 | 0.614194069353726  |
| ACTCTGCAGTCA   | 557.346801747684 | 0.753538701606012  |
| ATGCGAAATGAC   | 557.350664471661 | 0.664793270321229  |
| TGTCACAGCAAA   | 557.357740283832 | 0.800757919321278  |
| AGCCATGAATCA   | 557.369227757655 | 0.519697332086339  |
| TGACTACAAGCA   | 557.399003521702 | 0.539092824632136  |
| GCCTGAAATGAC   | 557.414784533666 | 0.433556909500572  |
| GTCATTGATATA   | 557.418915985899 | 0.592980630952767  |
| GTCACACGAAA    | 557.424267174513 | 0.44495927725232   |
| GTGGATCTGTCA   | 557.448482366745 | 0.341301947092793  |
| CGAGTCAGGCAA   | 557.470997898919 | 0.391246653014068  |
| AACTCTGAGTCT   | 557.475139226015 | 0.429419682305877  |
| ATCCTGATGACG   | 557.480088249014 | 0.611403845288814  |
| GTCATTGTCGTA   | 557.483603657241 | 0.560706355623443  |
| CGGCTTGCGTCA   | 557.490313241624 | 0.840682900859707  |
| ATTAACTGTGAC   | 557.494467704662 | 0.461280973819804  |
| GTCATCTGCACA   | 557.51678673742  | 0.85475197550976   |
| GTACTIONGATGAC | 557.53995113848  | 0.512327679346661  |
| CGTCATCAGGGA   | 557.548249075908 | 0.415008355267588  |
| TGACTGTGCTAA   | 557.549367630792 | 0.548391364348906  |
| ACTAAGTAGTCA   | 557.554189235858 | 0.599807135997856  |
| CACGTTTGACTC   | 557.559185925214 | 0.295638016985831  |
| ATTAGGTACATAG  | 557.562457269372 | 0.216582966015761  |
| AATCCAGAGTCA   | 557.569737022925 | 0.382697080078628  |
| CCTGCGGATGAC   | 557.573734767136 | 0.71291776231238   |
| GGACTGAATGAC   | 557.574374087901 | 0.497352304510525  |
| AACGTGTGTGAC   | 557.585208685519 | 0.294264622056517  |
| GTCACCTGCTGA   | 557.590060749008 | 0.425304823219752  |
| TGAGCCATTACA   | 557.602862102105 | 0.957795351062632  |
| AAAGATGATGAC   | 557.610275558394 | 0.345277721770785  |
| AGCGGATATGAC   | 557.611559219948 | 0.399532590022699  |
| ACGGGTGATGAC   | 557.618783618008 | 0.479138969187644  |
| CTTCCCAGTCA    | 557.627296751253 | 0.442183595253489  |
| TGATGATGACCA   | 557.63585227497  | 0.492370194855188  |
| CTGCATGACCCA   | 557.636355218723 | 0.362748094840559  |
| GGTCGAGATGAC   | 557.640087513608 | 0.225163645365766  |
| GCCTGTTGTGAC   | 557.652073370636 | 0.748162469600792  |
| CTCGGGTGTGAC   | 557.653424698858 | 0.699545012999922  |
| ACCACACAGTCA   | 557.668088079815 | 0.540307383888366  |
| ACCTATAAGTCA   | 557.682891691703 | 0.674295056483388  |
| TCCGAGATGACA   | 557.685071947178 | 0.780681712824631  |
| TGAGTCGGAGCA   | 557.690129489666 | 0.492153896866836  |
| GCTACTGATGAC   | 557.692455707329 | 0.763547334313383  |
| TCGTTAATGACA   | 557.707287196338 | 0.5254383157941    |
| AGGTGAGAGTCA   | 557.708275259377 | 0.0820926129378087 |
| TAGGATCTGTCA   | 557.718627655049 | 0.574910849011265  |
| CACGGTAATGAC   | 557.753271336091 | 0.629794806244167  |
| AGTCACCTCACC   | 557.768027282945 | 0.192358388425209  |
| AAATTTCCGTCA   | 557.785302077662 | 0.529190348308458  |

|                |                  |                   |
|----------------|------------------|-------------------|
| CTCGTGGAGTCA   | 557.799390360608 | 0.356907861436431 |
| CGGTAAGTGTCA   | 557.804163524346 | 0.375156774599704 |
| TCTCGTTACTCA   | 557.809681097989 | 0.204738612492466 |
| GTCACACTGAAA   | 557.838202445469 | 0.488381549389888 |
| AACTTTGACTCT   | 557.842929848683 | 0.514408484668693 |
| GTCATAGCTTGA   | 557.852201696493 | 0.253487473202718 |
| TCATACTAGAAA   | 557.860413529793 | 0.757394675033113 |
| GACTCTTGCCTA   | 557.872912458631 | 0.606654603131571 |
| GCACCGTGTGAC   | 557.880021634854 | 0.623605110453859 |
| ATATTGTCACCA   | 557.88306130451  | 0.412006080239175 |
| GGACCGGATGAC   | 557.901226960658 | 0.279919545272001 |
| CAAGCTAGTCAC   | 557.913947530884 | 0.444078945819808 |
| GCTAATAGTGAC   | 557.918037582551 | 0.743646840559423 |
| ATCGGTGACCCA   | 557.928539258446 | 0.564264797298206 |
| CCGTATATGTCA   | 557.936857558606 | 0.583824604886795 |
| GTCTGAGTCGAA   | 557.965490728378 | 0.527854469817725 |
| CGTACCGGTGAC   | 557.968515983892 | 0.756211341095709 |
| ATATTGTCACAG   | 557.97081522456  | 0.327629753729287 |
| ATGGTAAATGAC   | 557.990967105132 | 0.71319173267233  |
| CACGTCAGACAA   | 557.999260837909 | 0.683458909289567 |
| ACCATACAGTCA   | 558.004786975075 | 0.629399030096927 |
| TCATGACCGAAA   | 558.0051472742   | 0.565218887889584 |
| GAATAGGATGAC   | 558.006107874869 | 0.436329577294843 |
| GTCATCTCGCGA   | 558.019504814959 | 0.675130386328297 |
| GTCATAAGCTCA   | 558.025904111326 | 0.5870250265222   |
| GTTCGCTAGTCA   | 558.044462430454 | 0.671426741015153 |
| ATGGTGAATGAC   | 558.046729216597 | 0.254453536511809 |
| CGTCATTAGACA   | 558.048608697193 | 0.675245085621062 |
| ACTTTGGATGAC   | 558.059566237913 | 0.214588421722454 |
| ACGCATGACACT   | 558.084043269505 | 0.298723692800363 |
| GTCACCGGATAA   | 558.095233576065 | 0.619642195798185 |
| CTCGATTGGTCA   | 558.09596305187  | 0.586507380954257 |
| ATATTGTCACAT   | 558.104342313282 | 0.693044968944507 |
| ACAGTCAATGAC   | 558.113078776457 | 0.60759225465044  |
| GATTAGCAGTCA   | 558.12894672819  | 0.613083448167013 |
| GGTATTACTGAC   | 558.12902562485  | 0.182158744522703 |
| TAGTCACGAGAA   | 558.129139402782 | 0.4673499914326   |
| GGTTTCGATGAC   | 558.140484113598 | 0.441786002514925 |
| GTCACTATTACA   | 558.142476512865 | 0.402186148364202 |
| GGTCATTACTAA   | 558.150714758879 | 0.520792725616179 |
| CGCGCCAGTCA    | 558.173301505227 | 0.538839425962477 |
| GAATCAGATGAC   | 558.175464111753 | 0.346810268196538 |
| CAGCAATATGAC   | 558.179436265553 | 0.585670455344353 |
| CAGTCACGCGAA   | 558.185825365464 | 0.628288764748935 |
| CATTCACAGTCA   | 558.218907855478 | 0.338694218851359 |
| ATCAAGGATGAC   | 558.226184410488 | 0.165246770286062 |
| GACTGAAATGAC   | 558.227817546591 | 0.329186924311006 |
| GATGACAGTGCA   | 558.228155177323 | 0.373780379579558 |
| ACGCTGTATGAC   | 558.230526646525 | 0.716732606562623 |
| GCTCGTGTGTCA   | 558.251836059167 | 0.65598452295146  |
| GTCATGCTATGA   | 558.262349418285 | 0.528528357168067 |
| TGACATCAGAAA   | 558.262495659363 | 0.714047402699764 |
| GTCACCGGTATA   | 558.264471873479 | 0.468424972443637 |
| ATGAGTGGTGTGAC | 558.278947998867 | 0.565519783895767 |

|               |                  |                   |
|---------------|------------------|-------------------|
| GTCATATTTTAA  | 558.295592853164 | 0.621218429350077 |
| AATCTGTCAGCG  | 558.299150129813 | 0.659082937665437 |
| CGTCATCTGAGC  | 558.309089617547 | 0.482697239988371 |
| TGTCATGATTAA  | 558.313714141745 | 0.205274744031877 |
| AGTCACTACACA  | 558.319457054881 | 0.443212210239489 |
| AGCCGACATGAC  | 558.326024391115 | 0.520163986021551 |
| GAACCTACGTCA  | 558.330315491709 | 0.479646787609218 |
| ATGAGTAGTACC  | 558.331697045846 | 0.455541413664961 |
| GTGTCACGTTAA  | 558.359697084235 | 0.658734039494128 |
| TCGACAGAGTCA  | 558.376248797781 | 0.47361298385576  |
| TAAGAGATGACA  | 558.393154717818 | 0.344955773721642 |
| ACGTGTCGTAAT  | 558.394967253707 | 0.959243521325627 |
| AATGAAGTGACT  | 558.417248665368 | 0.263735321157268 |
| GCAAATCGTGAC  | 558.424182987595 | 0.572194909541363 |
| GTCATAAGTAGA  | 558.428073918801 | 0.205801814919773 |
| GCCCCGCGAGTCA | 558.431631450991 | 0.608327320754685 |
| ATTCATTGACTC  | 558.440378370778 | 0.58738054496132  |
| ACGTCACGCAAT  | 558.459385060096 | 0.346530291566665 |
| ACATGAAATGAC  | 558.482543140685 | 0.859031391352487 |
| GACACAGTGTCA  | 558.487235342534 | 0.799589305148086 |
| CGTCATGATGCA  | 558.491465524178 | 0.4050964833848   |
| GGCACTGTCATA  | 558.514138951803 | 0.272150236418718 |
| GAGTCAGGAAGC  | 558.520850872171 | 0.424244066183504 |
| ATGCCGAATGAC  | 558.534843562845 | 0.608604844279659 |
| ACGCAATTAGTC  | 558.542001495891 | 0.63599777045     |
| ATCCACGAGTCA  | 558.56835753859  | 0.402329672367271 |
| GTCATTCATCAA  | 558.586429790925 | 0.569170350239796 |
| TAGTCTAAGTCA  | 558.610577225432 | 0.486208739815966 |
| TCGGTGGAGTCA  | 558.612094702494 | 0.371680017202786 |
| CACGTCAGTCTG  | 558.616949040218 | 0.605817462820185 |
| ACTCATTTAGAG  | 558.625488743143 | 0.490736495382328 |
| CATCATATGACG  | 558.626357924985 | 0.466344301247299 |
| AATGCATGACAC  | 558.629818483976 | 0.529934740941741 |
| GTCCGTGATTCA  | 558.631399806989 | 0.545746808643817 |
| CTCGCGGTGAC   | 558.653794826082 | 0.642305153992391 |
| ACTCATAGGAAA  | 558.655769748818 | 0.49015139018528  |
| ACCTATCCGTCA  | 558.659295239072 | 0.540801448104191 |
| GTCACACTGACA  | 558.671460499158 | 0.503156905173485 |
| TCACCATAGTCA  | 558.68136782247  | 0.460071502298745 |
| CTCAGACTCACA  | 558.686305875147 | 0.291488497023624 |
| ATAACCTGACTC  | 558.69774347773  | 0.449607224643754 |
| ATAAGACACATC  | 558.700245094062 | 0.317930399404304 |
| AATGATTAGTCG  | 558.702645130416 | 0.654487978217173 |
| TGAGTCTGCGCA  | 558.710157945336 | 0.678612288384252 |
| ATACGTAATATA  | 558.735539015525 | 0.387331876703449 |
| GACGTTAATGAC  | 558.73984966356  | 0.42045566695769  |
| AAGAAGTGAGTC  | 558.749307326821 | 0.179838972623881 |
| CAGTTATATGAC  | 558.760826911521 | 0.586760975391925 |
| CATAGTAATGAC  | 558.781480484515 | 0.591018503943102 |
| AACATCCGATGA  | 558.785589704524 | 0.822891427110407 |
| GATTCTGAATCA  | 558.790802573563 | 0.771338238737904 |
| ACATCAAGTCAT  | 558.797287059135 | 0.278563684312686 |
| AGTCAGAGTCTG  | 558.800495823759 | 0.430401843941892 |
| ATGTTAGACTCA  | 558.80309221468  | 0.446089788458644 |

|              |                  |                   |
|--------------|------------------|-------------------|
| CAGAAACATGAC | 558.810429497515 | 0.704365971661929 |
| CGCTTCGACTCA | 558.82027441812  | 0.16648739173468  |
| CGATCCTAGTCA | 558.822084620988 | 0.526932298605405 |
| ACTCCGAATGAC | 558.840445227057 | 0.616458491311007 |
| CTAACATAGTCA | 558.847327687758 | 0.272098872401444 |
| ATGCCGACTCAC | 558.848772828309 | 0.309876572499826 |
| ATGACAGTATAA | 558.84938186688  | 0.41374030086514  |
| AAAACACATCAT | 558.867727948894 | 0.493321936909492 |
| TATCAAGTCATA | 558.874168703935 | 0.327208770615243 |
| CCTTCACAGTCA | 558.881605925692 | 0.397129350304027 |
| ATTACGCAATCC | 558.888014886043 | 0.314648293205244 |
| ACGTCACGTTAT | 558.903382407202 | 0.462930191997032 |
| AACAAATGTGAC | 558.908091111378 | 0.673921841624787 |
| GTTGATTACCA  | 558.935536923263 | 0.285903020617679 |
| CCCACTTACTCA | 558.94403666065  | 0.378293513185842 |
| GTATATTATGAC | 558.951180824147 | 0.430476079736247 |
| GCGTACGATGAC | 558.952132488406 | 0.602200287386574 |
| ATAGATTGCTCA | 558.973296399212 | 0.671047165198701 |
| GAGAGATATGAC | 558.973677299036 | 0.369955377584168 |
| ATATACTGTCAT | 558.983655016051 | 0.144815802270077 |
| GTCATCAGAATA | 558.990741369136 | 0.382008381602331 |
| GCTTTGTGTGAC | 558.991250516725 | 0.614778450795523 |
| ACAGGGGATGAC | 559.02138783586  | 0.454886355113537 |
| GATTTGTATGAC | 559.02410305036  | 0.490871224922885 |
| GTCATAACAGAC | 559.033797816132 | 0.476586339108232 |
| AAGTCGCGTCAC | 559.038864188995 | 0.377847547974119 |
| GTATAATATGAC | 559.055914872364 | 0.457983907383038 |
| TAGCCGTGACTA | 559.06897954021  | 0.57005124361461  |
| GTCACTAACTGA | 559.082369824986 | 0.539343801304947 |
| GGTCATCGGTCA | 559.091071351456 | 0.73193349904108  |
| GTGTCACTAAGA | 559.102149656155 | 0.507642758477166 |
| ATGAGTACGACG | 559.116149258828 | 0.223500978772048 |
| AACCACTATGAC | 559.122768203547 | 0.729291804097725 |
| AAACCTTGTGAT | 559.129931493056 | 0.4181009000916   |
| CGTCAAGTCATC | 559.133981229182 | 0.294357353262751 |
| CACGAGGATGAC | 559.141204557663 | 0.576805009300638 |
| CGTCATCAGCAG | 559.14180993683  | 0.695375619744398 |
| AGTTCGTATGAC | 559.142535755775 | 0.423112371865454 |
| AGCCAGGATGAC | 559.16254475034  | 0.560929626628825 |
| GACTCACTCAAA | 559.176722578631 | 0.21560316458509  |
| AGATGGCGTCAC | 559.18241597505  | 0.293317823714537 |
| GAGTCTTACGAC | 559.186320541858 | 0.77849846985021  |
| CGTCATTCGGAG | 559.19385204505  | 0.541739291682517 |
| CATTCTGAGTCG | 559.215201820579 | 1.03979147458223  |
| GATAGTGATGAC | 559.235104007195 | 0.333366899826324 |
| GTCATTCGGAAC | 559.256483828293 | 0.640402018234944 |
| CTTCAATAGTCA | 559.264288067948 | 0.664398491726445 |
| GACGTAGACTCA | 559.270910447101 | 0.388947952904008 |
| ATGACAATACGC | 559.284791988445 | 0.555710858449676 |
| AAGGGTGAATCA | 559.288616221433 | 0.301337265826129 |
| CCTAATTGTGAC | 559.290020065775 | 0.396619849686577 |
| AATGTCTGACGC | 559.295978924513 | 0.796567177630264 |
| ACATACTGTCAT | 559.324237118824 | 0.475067944872029 |
| AATATAATGACG | 559.325551274987 | 0.337541739953715 |

|               |                  |                   |
|---------------|------------------|-------------------|
| GTCAGTACGTCA  | 559.3295539951   | 0.607602491116397 |
| ATGTAGCAGTCA  | 559.340372027737 | 0.47198109372677  |
| ATTGGTTGTGAC  | 559.341922689219 | 0.677769067825571 |
| GACTAATTGACC  | 559.35003320488  | 0.762911241712934 |
| AGACTAATCAAT  | 559.352553426749 | 0.695803535783687 |
| CTGTCATTATGA  | 559.36309198909  | 0.878797294043899 |
| CAGGGTGACCCA  | 559.368680056996 | 0.861877752770291 |
| GCGACTGCGTCA  | 559.375474005699 | 0.38786839938792  |
| AACGTGGAGTCA  | 559.378116858401 | 0.412034020208194 |
| GTCATCTGCGAA  | 559.38193973799  | 0.752993221519616 |
| CAATTGAATCAC  | 559.391420435614 | 0.342558655315565 |
| AGCGCAGAGTCA  | 559.393118666909 | 0.387153179016553 |
| GAATTGTGTGAC  | 559.398741879317 | 0.29347416386921  |
| GGCCTGTGTAC   | 559.431964095678 | 0.249911511126209 |
| AACGCTGATGAC  | 559.444394505097 | 0.420487503082633 |
| CATGGTGACGTC  | 559.457437281817 | 0.743053465563482 |
| GTTTGCGCGTCA  | 559.466787747165 | 0.969222541093478 |
| TCAGCTATATGA  | 559.473115929276 | 0.663066153675716 |
| ATGACACCCCTCA | 559.477735295487 | 0.197930174293437 |
| ATTACAGAGTCA  | 559.484238614168 | 0.475848755284548 |
| TCCGATAAGTCA  | 559.50596218632  | 0.383254884292788 |
| CCACAGGGTGAC  | 559.513821067789 | 0.570251424824136 |
| TGAGCAAATGCA  | 559.51690137274  | 0.541322640305832 |
| CCTTCCGATGAC  | 559.523000561717 | 0.167214704035261 |
| AGTCACGGTTAG  | 559.53160453288  | 0.246012165170643 |
| GCACAAGACTCA  | 559.543506000182 | 0.24765065620162  |
| CAGCGTTACTCA  | 559.551296995664 | 0.400488937915259 |
| TGAGCAATCTAA  | 559.558529870092 | 0.554747783375157 |
| ACTAGCGTGACT  | 559.558840896768 | 0.591870289126562 |
| CAAAGTAGTGAC  | 559.561674437442 | 0.956731605882286 |
| CACGTCAGCGAC  | 559.587075129134 | 0.670379604973434 |
| AGGAATACGTCA  | 559.590072331689 | 0.600391931847713 |
| GTCACACAACATA | 559.595210415666 | 0.496924829082149 |
| GTCATAAGGTTA  | 559.59935620273  | 0.271027856725446 |
| AACCCCGAGTCA  | 559.601504884573 | 0.545288590135262 |
| GTCATGTCTGCA  | 559.614882055725 | 0.517314805466852 |
| AATTAATGACAA  | 559.620415377036 | 0.434480413233292 |
| AAGATTCATCGT  | 559.620827006109 | 0.508080825927575 |
| ATACCTTACTCA  | 559.624726982446 | 0.258037354478985 |
| TGACTAGGTCCA  | 559.632152277632 | 0.70674100461734  |
| CAGAGATTAGTC  | 559.647841582972 | 0.437505647666525 |
| AGAGCGTATGAC  | 559.650312776456 | 0.390058613428591 |
| AAGCCTTACTCA  | 559.654853665653 | 0.497265651371157 |
| TATGACGGTAAA  | 559.676245462995 | 0.244744680041237 |
| AACACGTCAACG  | 559.681542466038 | 0.371532661397852 |
| CGAGATAATGAC  | 559.685539703321 | 0.535397586351807 |
| TCCTGGGTGACA  | 559.701483131242 | 0.400488355729914 |
| CGTACCCGCAAA  | 559.711156398385 | 0.550849349255026 |
| CGATCATGACGA  | 559.717387777171 | 0.471021008362478 |
| TGACTCCGATCA  | 559.724709576029 | 0.596771295805886 |
| TGACATTAATAA  | 559.726424700199 | 0.531838196085098 |
| GTCAACTGTGAC  | 559.740274190689 | 0.466321662623642 |
| ATAGTTGACTGA  | 559.74169014981  | 0.631376960683609 |
| CAAATCGTGACG  | 559.746553246295 | 0.787173770710192 |

|              |                  |                   |
|--------------|------------------|-------------------|
| GCAGTGCATGAC | 559.746793502382 | 0.773130658959011 |
| AAACAATAGTCA | 559.747644064474 | 0.647023162876414 |
| GCATCGGATGAC | 559.7599224908   | 0.271317767904352 |
| AGTCACGCTCGA | 559.798627304422 | 0.494605966453583 |
| AGTCACTTCCAG | 559.810970801163 | 0.495499394820645 |
| GCGGCACAGTCA | 559.812585487212 | 0.462513872266453 |
| TCTGACTGCAAA | 559.813168335787 | 0.227945164737438 |
| CTGTCGTATGAC | 559.83651811867  | 0.489638653080408 |
| TGACCAATCGAA | 559.848127835262 | 0.689315025545856 |
| ATGTATCTGTCA | 559.850848966548 | 0.700092426336601 |
| TGACTAGGCCAA | 559.862784484325 | 0.378650128310137 |
| GCCCGTGAATCA | 559.87787251703  | 0.411553118210633 |
| AAACTTGGTCAC | 559.879524712147 | 0.245572925121376 |
| TCGCGAGAGTCA | 559.881153013072 | 0.539289797442801 |
| GAGCAATAGTCA | 559.882520049776 | 0.260142493204168 |
| CGAAACGCGTCA | 559.893421830411 | 0.605404391269167 |
| ACGAATTAATA  | 559.944182978586 | 0.509313710361372 |
| GAGTCAGGCCGC | 559.980929087999 | 0.512328069715863 |
| CGCGAGATGACG | 559.981206353734 | 0.606233196753687 |
| ACGTCACTTAAT | 559.983852579006 | 0.483312076863512 |
| ACACCAATGACG | 559.985288442873 | 0.460303658346381 |
| ATGATGTAACGC | 560.005114867759 | 0.555541508455251 |
| GACGTGGAGTCA | 560.010784252546 | 0.474974971527441 |
| TATGTCACGTCA | 560.019074971688 | 0.453943231049849 |
| AAACAAGATGAC | 560.020847717006 | 0.351392449285206 |
| AGATTGAATGAC | 560.026163983005 | 0.422404801095603 |
| TCGTCTGAATCA | 560.026534091839 | 0.464467699240882 |
| ACGTGCGACTCA | 560.063727139601 | 0.558272885206787 |
| GCACACCAGTCA | 560.069777747708 | 0.399709875559421 |
| AGCGTGGAGTCA | 560.075870458284 | 0.280216497385421 |
| ACTCAGAGTATG | 560.078892917444 | 0.908518419091586 |
| CATTTGGGTGAC | 560.082080450562 | 0.63846276630357  |
| ATATGTCAGAGC | 560.086939607551 | 0.396837261830452 |
| CTGATTGACACA | 560.098759156949 | 0.242457517687198 |
| CTGCGAGATGAC | 560.103321833476 | 0.351578405855588 |
| ACCGGGGAGTCA | 560.103734773341 | 0.273148207084838 |
| ATCATCATGACG | 560.104199354538 | 0.300615884720894 |
| CGTCAGTGATGA | 560.10474562054  | 0.651660243647104 |
| AGTCACCCCAAC | 560.123785626342 | 0.358308816597736 |
| AGGACATATGAC | 560.129180129426 | 0.346774271876711 |
| GAGTCAAATTGA | 560.130247654095 | 0.509427188499582 |
| CAACGAGGTGAC | 560.138262906182 | 0.705480797245717 |
| CCTACTGTCATA | 560.156507892014 | 0.231595332857977 |
| CCCGTGGAGTCA | 560.161259655849 | 0.60033486098919  |
| ACACAATTAGTC | 560.165469918741 | 0.348516560697838 |
| CTAAAATTAGTC | 560.178012911164 | 0.561525825031584 |
| TAATGAGAGTCA | 560.200779443883 | 0.448111841802785 |
| AGGAGGTATGAC | 560.20828954933  | 0.240420863946542 |
| CGGAGGTCTGAC | 560.213297960167 | 0.542599098208823 |
| ACTCATACTTAC | 560.216089912149 | 0.197343384294359 |
| GTCATATAGATA | 560.220403250911 | 0.546081740098977 |
| AGTCATGAGAAC | 560.222013002675 | 0.5101768861432   |
| ACTCGTAATGAC | 560.222697210333 | 0.66430955615358  |
| ACTGATCTGTCA | 560.227253738368 | 0.550933289921384 |



|              |                  |                   |
|--------------|------------------|-------------------|
| GACTATTAAGTC | 560.228234675806 | 0.733835350285234 |
| CTCTCGGATGAC | 560.274151450423 | 0.406338660507776 |
| AAGGTCGATGAC | 560.27732729678  | 0.191462427753641 |
| CAAGATTGGTCA | 560.27979988414  | 0.400807888270139 |
| GCCAATACGTCA | 560.284701005169 | 0.518447979315472 |
| GTCACCGATACA | 560.288665575629 | 0.409808715856075 |
| CCAAGAGATGAC | 560.295499590458 | 0.335123891945042 |
| CCAAGCTAGTCA | 560.299659917655 | 0.608962706957105 |
| ATCGAATGACCA | 560.301336178636 | 0.458652351128809 |
| AGTCACCCTACG | 560.305012067546 | 0.229745642074518 |
| ACAAATGGTGAC | 560.31999211803  | 0.397682333008519 |
| CTCGATTACTAA | 560.329220717051 | 0.532031415535614 |
| CAACCATGACTG | 560.333737239484 | 0.656866782903779 |
| GAGCATGACCCA | 560.341131664276 | 0.614058502602574 |
| GTCATTGACCGA | 560.352235329548 | 0.379108053138111 |
| GGTCTAGAGTCA | 560.364233570405 | 0.437384780329177 |
| CTGTGTCTATGA | 560.372042590775 | 0.969785880289907 |
| AGCGACGTCATC | 560.375701150611 | 0.362230223611684 |
| TATGCTGCGTCA | 560.405230116367 | 0.60724289162861  |
| GTTGGCGAGTCA | 560.413444926562 | 0.379949712896669 |
| ACACGGGATGAC | 560.418734679935 | 0.329684709439586 |
| GTGTCACGTGTA | 560.423574340832 | 0.382115324968445 |
| GACACATAGTCA | 560.425419301723 | 0.388968845546221 |
| CCGACATGACAC | 560.425502933929 | 0.357601048096055 |
| GAGTCAAACACC | 560.433293045969 | 0.629965850221968 |
| TGACACAGGTCA | 560.434977371919 | 0.868383927934982 |
| ATGACGTGAGTA | 560.458098996883 | 0.22961399588286  |
| AGTCACTACATC | 560.460998536875 | 0.374979688827471 |
| GATTTCCAGTCA | 560.463755835753 | 0.853450500893096 |
| GTAGCTGACACA | 560.46379425891  | 0.573571275501135 |
| AGACCATGACAC | 560.484758110938 | 0.330307785446418 |
| CAATTCGCGTCA | 560.515077415678 | 0.549226250002312 |
| TCATCGTATTAA | 560.516102679195 | 0.903094240557445 |
| AAAGTTAAGTCA | 560.524831201068 | 0.34797623490422  |
| CTGACGGTGTC  | 560.543518388529 | 0.566213598262757 |
| ACTACATAGTCA | 560.576404150739 | 0.623386596927453 |
| TGACGTATGCAA | 560.577702903337 | 0.432355506122161 |
| GTCATCTTGGCA | 560.590104253233 | 0.533721283228171 |
| TAGTATATGTCA | 560.592594837035 | 0.612552349527354 |
| TGACTTAACAAA | 560.594360314716 | 0.994187975257108 |
| TGGTCATGACCA | 560.601855558482 | 0.653268562370417 |
| CCGTGGTGTGAC | 560.604714765309 | 0.560640580961613 |
| CTACGGGATGAC | 560.610859320962 | 0.684510630829253 |
| GTCATAAACGAA | 560.639689521872 | 0.565968610740261 |
| TCTGACAGATCA | 560.647729419785 | 0.379967338549966 |
| CCAGGATTAGTC | 560.649761625039 | 0.721341977258509 |
| CGCAATGGCTCA | 560.651996109399 | 0.495566754297034 |
| GGATCGTATGAC | 560.659537015873 | 0.402685259796039 |
| GCTCGAAATGAC | 560.661228477583 | 0.372819485957345 |
| ATTACGGTGACA | 560.66351560366  | 0.448891292268578 |
| GTAAGCAATGAC | 560.669914594125 | 0.445290507238639 |
| ATCATAAGTGAC | 560.671620892273 | 0.399526826627325 |
| GTGTCACGCATA | 560.673375076207 | 0.704181157063689 |
| CGTCATCAGAAA | 560.675870289748 | 0.385980488275326 |

|               |                  |                   |
|---------------|------------------|-------------------|
| GACTCACGTTAA  | 560.677267498162 | 0.521038135460931 |
| GTGACGTCGTCA  | 560.686537700454 | 0.833237400385173 |
| GTCACACGGCTA  | 560.696616059306 | 0.357396599234007 |
| CTCAGATAGTCA  | 560.701368710918 | 0.382305243252483 |
| ACCTCGTATGAC  | 560.717997074496 | 0.322229365336395 |
| AACACATATGAC  | 560.737260279595 | 0.590744432055859 |
| CGATTCAATGAC  | 560.737290428132 | 0.471763522414611 |
| CGAATTGATGAC  | 560.745471179928 | 0.93437596475693  |
| GTCATAAATCAC  | 560.749304638861 | 0.632443658450469 |
| ACTCAAATGAC   | 560.756029228486 | 0.558408994468281 |
| ACGTCACATAATA | 560.757345003003 | 0.57556333788896  |
| ATATGTGAATCA  | 560.773126335343 | 0.547555690382008 |
| CGTGAATTAGTC  | 560.785426689356 | 0.598974065782256 |
| CCGACTACGTCA  | 560.808668987562 | 0.490621506592803 |
| CCTAGCTATGAC  | 560.813543229117 | 0.494500417494183 |
| ACGTCACCTAGT  | 560.826367797747 | 0.217438508423074 |
| GTCATCGCTAAC  | 560.834660078622 | 0.416172892454586 |
| ACTAATATGAGT  | 560.843651549475 | 0.457910565270049 |
| AGTCACTAGGTC  | 560.851204205566 | 0.228036215569827 |
| GTCATCGATCTA  | 560.852704800928 | 0.371472853411519 |
| GAGCAAGTCATC  | 560.867469481755 | 0.398794671438193 |
| TGACTGGACACA  | 560.884542241554 | 0.735199733031659 |
| GTCATTTAGAAA  | 560.885450482011 | 0.465525504024907 |
| ACACGGGTGACA  | 560.889544852248 | 0.451478933685197 |
| TCAGCCACGTAA  | 560.893522838119 | 0.592890790468764 |
| ACGTCACCAGAT  | 560.90522372912  | 0.613905459554127 |
| ACTATTTGCTCA  | 560.914151195464 | 0.444593736786396 |
| GTCACAGGACCA  | 560.91492946074  | 0.356047143917965 |
| CTAGATCCGTCA  | 560.915942788717 | 0.30420267149095  |
| AAGAGTCTGACT  | 560.92317807838  | 0.201714297210946 |
| CGATTTTATGAC  | 560.933669991226 | 0.834427277924146 |
| GTCACTGTCACA  | 560.943422221624 | 0.481428929963563 |
| GAAGTCTGAGTC  | 560.987242251827 | 0.506512593547791 |
| CTGGTTGACTGA  | 560.991161866643 | 0.396773344246309 |
| ATGGCGTCACAG  | 561.000581471959 | 0.256220233744772 |
| GTCATCACGGAC  | 561.008227200673 | 0.541503021314311 |
| AGGTAGGATGAC  | 561.016170545039 | 0.249149331111712 |
| ATGACAAGATAA  | 561.030640262237 | 0.295131857094029 |
| TCACCCACGTCA  | 561.049942850963 | 0.369655257761325 |
| ATGACAGTATTC  | 561.050125399076 | 0.582817251150645 |
| GGAGATTATGAC  | 561.06643955448  | 0.360148335160462 |
| TCAATTGTGACA  | 561.07259772099  | 0.437085095426725 |
| AGAGTTGTGTCA  | 561.094714763853 | 0.198793526593717 |
| AATCTCGTATGA  | 561.095824711236 | 0.617903993007886 |
| CGGCAAATGAC   | 561.100888553336 | 0.622962274489572 |
| AACAAAGATGAC  | 561.102679121629 | 0.184649200231012 |
| ATACCGGTGAC   | 561.106174812484 | 0.580385189925859 |
| TGACGCGTCAAA  | 561.110224021604 | 0.916907300373589 |
| CGGACTTTGTCA  | 561.118062175484 | 1.08952995603674  |
| ATCGTAATGACG  | 561.126267899747 | 0.457646575683237 |
| GTAGCGGATGAC  | 561.131338399748 | 0.182273840642061 |
| AAGGCATGACAC  | 561.132724358083 | 0.39193893172684  |
| TGAGCCACGTAA  | 561.151132061428 | 0.424091337557085 |
| CTTTTGACGTCA  | 561.157133178438 | 0.574234329498031 |

|              |                  |                   |
|--------------|------------------|-------------------|
| GTCATAATCGAA | 561.158192289384 | 0.485368934255677 |
| CGCGTTAATGAC | 561.164416502755 | 0.783618288517987 |
| ACTACTGGTGAC | 561.164506813578 | 0.838863601841947 |
| TAATCTACGTCA | 561.210768326524 | 0.61149443956895  |
| TGTCATTGAAA  | 561.219343026622 | 0.313954951464486 |
| GCCAGGTCATAC | 561.220984682781 | 0.428078843581799 |
| TGAATTATGTCA | 561.226262412262 | 0.409630149921887 |
| CGTCACTCGAGA | 561.238848348642 | 0.346796410464881 |
| TGAAACTCGTCA | 561.247442123806 | 0.574252923032476 |
| TGACTTAGCAAA | 561.255607222977 | 0.752931943495883 |
| CGTCATCGGTCC | 561.268008540672 | 0.36891349523218  |
| CACACTGGTGAC | 561.30235828458  | 0.429801532956492 |
| CGTTCCTATGAC | 561.321324261234 | 0.346147373866962 |
| CCTACTGCGTCA | 561.361996152537 | 0.529542679159379 |
| GCGTCACCATTA | 561.379149508595 | 0.485742515562427 |
| TGACTGTGCACA | 561.388798355427 | 0.419088935933389 |
| CTGTGCGACTCA | 561.389922202247 | 0.621086059792925 |
| CGTCATTACAGA | 561.394908665114 | 0.486352465417279 |
| ATGCAGAATGAC | 561.409061408412 | 0.619437817462006 |
| ATTTCCGACTCA | 561.427133129348 | 0.286073164443776 |
| CAATCCCAGTCA | 561.443946028085 | 0.350758815162283 |
| ACATAACATGAC | 561.457328392028 | 0.419086114985853 |
| ACGCTGTACTCA | 561.458766736108 | 0.708618872807704 |
| CCTCAAGATGAC | 561.468860730939 | 0.561382179140224 |
| CCGAATAATGAC | 561.482347224172 | 0.799990896559023 |
| CGCACTGTGTCA | 561.510601204345 | 0.508722666164128 |
| GCCTCATAGTCA | 561.5138633243   | 0.334067625180195 |
| GCTTAAACGTCA | 561.51455733103  | 0.562585011063437 |
| AAGTCACCTTAT | 561.536553253479 | 0.839553539069902 |
| GTCACACTGGAC | 561.550464510303 | 0.525642931294969 |
| GACTGTGTGAGC | 561.572721148388 | 0.192905350153314 |
| CCAATCTGTGAC | 561.578199643129 | 0.528802386860969 |
| AAACGAAGTCAT | 561.58497689298  | 0.364669994156445 |
| AGTGTCATGCCA | 561.595114241873 | 0.444267882875824 |
| CAGTTTCATGAC | 561.615209854869 | 0.469321298020488 |
| AGAGTCAAAGTG | 561.622316149798 | 0.442582248856644 |
| CATCACATGACG | 561.629807361777 | 0.909036026516748 |
| GTCATCTAGTTA | 561.65271199218  | 0.40625178730109  |
| ATTTGCTCACTC | 561.6627611705   | 0.266788817654412 |
| CCTGCAGGTGAC | 561.664189238126 | 0.727977757470957 |
| GACCTTACGTCA | 561.67735618403  | 0.461922333824145 |
| ACGGATTTGTCA | 561.688064836355 | 0.302370590738088 |
| ATTGAAATGAC  | 561.692403471713 | 0.348056856671703 |
| GTGTCATGTAAA | 561.692809747306 | 0.452324595466798 |
| AAAACCGACTCA | 561.693235485962 | 0.653069323552488 |
| ACATTTGACGCA | 561.695991232262 | 0.367703146871508 |
| CATAATGGTGAC | 561.705600587362 | 0.553752495246381 |
| GACTCACTCTAA | 561.711331596985 | 0.635628359813551 |
| CGAGTCAGGATC | 561.720496520967 | 0.560876850546804 |
| GTCATAAGACTA | 561.748677338952 | 0.667525354210001 |
| ACGTCACCATTA | 561.749251900096 | 0.358403091971183 |
| GATCCATGACGC | 561.762686281301 | 0.435012717609782 |
| AGTCACTTGTTA | 561.765421039832 | 0.2001491518653   |
| CGAGCGCATGAC | 561.8048537811   | 0.420286787710912 |

|              |                  |                   |
|--------------|------------------|-------------------|
| CAAGATGGCTCA | 561.831757629694 | 0.428005869253618 |
| GTCATGCGTTGA | 561.837565311157 | 0.6041289183004   |
| ATGACGGTACAC | 561.854422428699 | 0.522779345016139 |
| CAATTTAATGAC | 561.857498583591 | 0.511187510552257 |
| CGTCACAATAAG | 561.861015871847 | 0.666149190755413 |
| GCTGACCAGTCA | 561.869859164681 | 0.399857195573319 |
| AATCGGAATGAC | 561.881339568678 | 0.463149208647015 |
| CTTGGATTAGTC | 561.883181098276 | 0.196144500124217 |
| AACCTTGCATC  | 561.887156068127 | 0.298550941207211 |
| CGTCATGCAACG | 561.905233941674 | 0.982333488522036 |
| GACTAATCGTGA | 561.924438213783 | 0.742535802284678 |
| CCTGCAAATGAC | 561.954233102961 | 0.495536574287441 |
| GTCATATCTAAA | 561.965411798339 | 0.883765219434146 |
| ACTCATGACAGA | 561.987805952478 | 0.347989695883757 |
| GCACTCGACTCA | 562.010406110742 | 0.577870574494607 |
| CCTCGTGTGACA | 562.014707580375 | 0.548866254120974 |
| GGAAACGATGAC | 562.017886960676 | 0.524335873401532 |
| ACTATTATGAGT | 562.018592858265 | 0.781348401261108 |
| ACGTAATGACAT | 562.052532655047 | 0.196608174121532 |
| TATGACCTAATA | 562.053280858142 | 0.2598511381659   |
| AGACTAATTGCG | 562.056358342225 | 0.412499504256393 |
| CATATGGTGACG | 562.084943737183 | 0.48330212930147  |
| CTTCATACGTCA | 562.097259840899 | 0.377707716977027 |
| GAGTCAATTGAA | 562.098660104356 | 0.114609013652253 |
| CTTGAAGATGAC | 562.101444367801 | 0.483000861582142 |
| GTCATAGATTCA | 562.112220800828 | 0.631803011397197 |
| ATGACACTCAGG | 562.113317183064 | 0.345069426983731 |
| ACGGCGTGTGAC | 562.139898573396 | 0.563539261433048 |
| AGTCACGACAAC | 562.142827262363 | 0.356331339745306 |
| GTCATAAGTGAA | 562.150390440742 | 0.492727660357476 |
| GTCACACCGATA | 562.153472719056 | 0.459816233766682 |
| GTAATTTGCTCA | 562.154011103329 | 0.74653565003058  |
| CTGAATGACCGA | 562.154156587105 | 0.247570570582139 |
| TCAGTGTGACCA | 562.165945713464 | 0.274430475453704 |
| GGCTGTTATGAC | 562.174687283743 | 0.610745324769429 |
| CGCCTATAGTCA | 562.183756872766 | 0.439406583533845 |
| CCACGCGAGTCA | 562.205268476877 | 0.554954984046714 |
| CCAACCGGTGAC | 562.206820582406 | 0.619587343957497 |
| AGACTAATCGGG | 562.223877004342 | 0.525086803399255 |
| GTCATACGCGAA | 562.2258834625   | 0.477218504416752 |
| GTCATCGTTCTA | 562.226705125927 | 0.372661390079022 |
| TCACGCATATGA | 562.227719899658 | 0.573233928125356 |
| GTATTACGTATA | 562.238868170832 | 0.311451930315763 |
| CACGTCACGTAA | 562.239126478141 | 0.522125360738809 |
| CTGTTGTGTGAC | 562.242147479207 | 0.488184357010226 |
| TCCGATCCGTCA | 562.244915047048 | 0.37311630822599  |
| GTAGCCGTCATA | 562.249666094452 | 0.405818357842675 |
| AGTCACGCTATC | 562.252080411229 | 0.531442800422929 |
| CGTCACTAATGA | 562.252743395811 | 0.46360654248823  |
| GTCATAGGGTTA | 562.256908831242 | 0.29255868674193  |
| AAGCTTCTGACT | 562.258426575391 | 0.370824132304121 |
| CGCACTAAGTCA | 562.28378877613  | 0.777312067895097 |
| CTGGTGACGCCA | 562.287560602412 | 0.262128268489581 |
| GGTCACAATGAC | 562.294283499863 | 0.323324166870923 |

|              |                  |                   |
|--------------|------------------|-------------------|
| GAGCCTCAGTCA | 562.308682209021 | 0.541922116611481 |
| CTGACGTGAGTC | 562.308761726579 | 0.404008409833516 |
| ATAAACTCGTCA | 562.31159878856  | 0.462337606403581 |
| GAAATATATGAC | 562.317398779382 | 0.352164404992281 |
| CCCGTAGACTCA | 562.323687459587 | 0.746803070293103 |
| ATGATATGACCC | 562.325076332012 | 0.817619230488777 |
| ATGACGTCGCAG | 562.337365117651 | 0.520485754097997 |
| CTGAAAACGTCA | 562.348841277859 | 0.542565436018658 |
| GCCATTTGGTCA | 562.356737119236 | 0.447173267365025 |
| TGACTGCTAGCA | 562.367290886755 | 0.457617710249701 |
| ACTCATAGTAAG | 562.367671226012 | 0.580942060534805 |
| AACCCAGTCAGA | 562.379586757237 | 0.464779593980229 |
| AGTCAGAGATCA | 562.400009081418 | 0.486678311166335 |
| ATGACATGACCA | 562.411504452705 | 0.342416819865347 |
| GCAGACGATGAC | 562.422159638629 | 0.119833241332182 |
| GTCATGTTATGA | 562.424344090768 | 0.492902126156816 |
| GAGTCAATTGGC | 562.43776378748  | 0.349209964771406 |
| GTCATATTGATA | 562.442426660877 | 0.319553440994632 |
| CAGTCACGACTA | 562.466279119323 | 0.303259124219711 |
| ACCTACTAGTCA | 562.486486384099 | 0.410879092078073 |
| GTCATAGAGACA | 562.493051391458 | 0.46477547820227  |
| ATGAGTACCGTG | 562.495547049628 | 0.423887487891758 |
| TCGTCTACGTCA | 562.501328687255 | 0.559197289403816 |
| CATTAATGACAA | 562.506815143754 | 0.357029900389504 |
| ATACGAGATGAC | 562.507781836638 | 0.391075931697234 |
| GTACGTGAATCA | 562.512676832013 | 0.251572209013959 |
| ATACTTATGTCA | 562.521084442293 | 0.658711313523255 |
| TGACTTTACTCA | 562.525173908955 | 0.268997115288641 |
| ACGTCATGCCAG | 562.565170085188 | 0.527618471499783 |
| CGTATACAGTCA | 562.571193842444 | 0.690797038623322 |
| CTGAAATGACAA | 562.580140665209 | 0.65334013468456  |
| CCGTTGGATGAC | 562.589061081537 | 0.730813748383494 |
| CCCGAAATGACG | 562.589098574082 | 0.274375472080642 |
| CAGGCTCGTGAC | 562.59067657973  | 0.651051257896347 |
| GTCATCGATAGA | 562.595253016035 | 0.160217040119942 |
| CGAGACTATGAC | 562.597022314587 | 0.459022299406925 |
| TAATGCTAGTCA | 562.628051784611 | 0.73216540500875  |
| GCAGCAGAGTCA | 562.628552295896 | 0.660178953552801 |
| CATGCTGAGTAA | 562.655061415128 | 0.729646272059924 |
| GTCATAAACGGA | 562.674630082767 | 0.557262596408193 |
| CACGAAATGACG | 562.676450505234 | 0.311624280796064 |
| GAATGCTATGAC | 562.682113077215 | 0.432542764013894 |
| TGACGCACGACA | 562.693635819275 | 0.45067099420528  |
| GTCATTCTCGTA | 562.698688434497 | 0.338423290995379 |
| AGTCACGCTTAC | 562.701907393059 | 0.528140260492432 |
| GAATATAATGAC | 562.707625039867 | 0.343523685576382 |
| CATACACGTGAC | 562.722290636146 | 0.36161242688091  |
| ACCCATGACTGC | 562.734474409188 | 0.189197393626381 |
| CGTCGTGACTAG | 562.745331758045 | 0.307472813037968 |
| GTCATATGATGA | 562.748935056343 | 0.257739231722392 |
| CGTCACATAGGC | 562.754552906099 | 0.850735581551388 |
| CAAACATAGTCA | 562.76385563954  | 0.66043529542096  |
| ACTACCGTGACT | 562.766818358647 | 0.287108039013759 |
| TGACACAGTCCA | 562.781702526702 | 0.457090478427467 |

|               |                  |                   |
|---------------|------------------|-------------------|
| GACGCAGAGTCA  | 562.793982924604 | 0.369005192935011 |
| GATGACAGTACA  | 562.802705417294 | 0.49438459379985  |
| ATGACAGACCTA  | 562.814105491404 | 0.244496062453689 |
| ACGTCACCACTG  | 562.814744292497 | 0.328462822560674 |
| GGCACCCAGTCA  | 562.823445720875 | 0.359012629362676 |
| GACCCTTATGAC  | 562.845458414946 | 0.404688569289452 |
| CGTCAAGACTCA  | 562.847592988742 | 0.367681496712938 |
| ACGATGACCTAA  | 562.848093399616 | 0.599889527283431 |
| AAACCATGAGTC  | 562.853521232176 | 0.423760809588119 |
| CGGGCAGAGTCA  | 562.873219538113 | 0.295485112985286 |
| GTGACTAGCATA  | 562.87491893074  | 0.378936995421721 |
| ATGGAATATGAC  | 562.884259742577 | 0.422829141400813 |
| ACTCGCGTATGA  | 562.891785923292 | 0.727212663775476 |
| ATCGGCAATGAC  | 562.901222059759 | 0.779588492705784 |
| GCCGATGATGAC  | 562.917190693388 | 0.873755204766272 |
| AACCCGTGACTA  | 562.917242942699 | 0.463069655425985 |
| GAGTAATCTTAA  | 562.927515350579 | 0.798556049664166 |
| ACCTTGAGTAAT  | 562.934669948305 | 0.665921205999533 |
| TGACATATAACA  | 562.93623699961  | 0.61959655567566  |
| CCAATTAGTGAC  | 562.953669518106 | 0.421037373407862 |
| GCGTTAAATGAC  | 562.967007493086 | 0.671285846880514 |
| TGACCAATCAAA  | 562.97126271669  | 0.916338883323799 |
| AGTCACCTCGAA  | 562.971400938191 | 0.419307845414032 |
| GATGATTTGTCA  | 562.983555370303 | 0.515690490255886 |
| CACGGGAATGAC  | 562.990137042409 | 0.444978494260439 |
| CACTGATATGAC  | 562.99344931095  | 0.375567007017009 |
| CGCAACTATGAC  | 563.008234848566 | 0.375331973176737 |
| AAGTCACCTTGT  | 563.009559025493 | 0.506238009727925 |
| CCCACGTTATGA  | 563.012374483601 | 0.775762384523604 |
| ATAGGGGAGTCA  | 563.01448291523  | 0.229345904379321 |
| ATTCATAGTGAC  | 563.018307511018 | 0.733506316873416 |
| AGTCACGACTAC  | 563.027277832829 | 0.405350350303753 |
| AAGAAAGTGTC   | 563.027513839953 | 0.248018161915919 |
| ACGTCCTGACT   | 563.028139698884 | 0.330301320540147 |
| TATCAAGACTCA  | 563.035820701271 | 0.578201641046918 |
| GTTAATATGTCA  | 563.048641900652 | 0.45973155055875  |
| GTAGCTGTCACA  | 563.055367671355 | 0.323358966817544 |
| CGTCACAATGGC  | 563.079160291722 | 0.391264928969339 |
| ATGACGGAGAGA  | 563.081011476115 | 0.235416333358934 |
| GTCATAGAAGGA  | 563.083810932487 | 0.273960974363187 |
| TATAATCCGTCA  | 563.101229621668 | 0.42538500752564  |
| ACATTCACCTCAT | 563.142959703161 | 0.407274629969194 |
| ATGACGATGCGAG | 563.144342306249 | 0.61938837858175  |
| GTATTTGCGTCA  | 563.156176387398 | 0.220897305322018 |
| ACCGCTGATTCA  | 563.159819069566 | 0.4283965377965   |
| TGACTGGATCCA  | 563.164973819288 | 0.743308389961233 |
| CGTCATCGGGAA  | 563.165762001361 | 0.60497809174118  |
| ATATCCTAGTCA  | 563.169165464035 | 0.428013682983566 |
| ACGTCACATGTC  | 563.191142830417 | 0.190378969661758 |
| GACTAATCGCAC  | 563.194668085263 | 0.641772403386127 |
| ACTCCCTATGAC  | 563.207475869734 | 0.140849022195093 |
| AATAGTCAATCG  | 563.227566460723 | 0.480020008590965 |
| AGTCACGCCCTAC | 563.240254150664 | 0.468114517847457 |
| AGAATATTAGTC  | 563.245414992663 | 0.6964294050796   |

|               |                  |                   |
|---------------|------------------|-------------------|
| GTCATCCGAGA   | 563.250057640023 | 0.52038784678481  |
| AATCTGCAGTCA  | 563.256198567967 | 0.659843960617655 |
| GTAAGGGAGTCA  | 563.257081175617 | 0.346462175601201 |
| GAACCCTGACTC  | 563.264538767667 | 0.216679670385212 |
| ACTCATTCTAAG  | 563.268210136779 | 0.730396529205598 |
| GTCATTAGTGAA  | 563.284635483375 | 0.466749531163429 |
| TGACTGTGCTCA  | 563.285179955104 | 0.666173478237269 |
| TCGCATTCTGCA  | 563.295569994785 | 0.359456317048557 |
| CGGCAATAGTCA  | 563.302147509178 | 0.688866932683461 |
| CCGGAGATGACG  | 563.308062473261 | 0.451541530537604 |
| CAGTCACGCGAG  | 563.354478419269 | 0.536761863988413 |
| ACAGTCAGCGTC  | 563.363634406227 | 0.469109646766602 |
| AATTCCGTGACT  | 563.380305367385 | 0.202311057302334 |
| GCCAGTGATGAC  | 563.382719641312 | 0.522891959386699 |
| AACCGTGTGTCA  | 563.384612606578 | 0.465643586011794 |
| ACGTCAGACTGA  | 563.404510254076 | 0.927797066921568 |
| AATCCTTACTCA  | 563.408314063838 | 0.296175107007819 |
| ATGATGCAATTA  | 563.410444086651 | 0.438607268510449 |
| GACGGCAATGAC  | 563.418212449803 | 0.430445590535457 |
| ATGACAATACGG  | 563.419530703347 | 0.393449108249873 |
| CGCCAAGTCAC   | 563.423443125643 | 0.796179590392519 |
| TATTATCCGTCA  | 563.441662136398 | 0.548910384759167 |
| CAGTAGGGTGAC  | 563.448948200429 | 0.321133113403254 |
| GTCATCCAGCGA  | 563.452256509692 | 0.635274109233784 |
| AGTCCGCATGAC  | 563.452909888617 | 0.636573481520167 |
| CCGGTAGCGTCA  | 563.476236561598 | 0.570595319537105 |
| AATAGGCGTCAT  | 563.476426894869 | 0.417965999517456 |
| AATCGTGACACT  | 563.481810413726 | 0.278876891744205 |
| AGAAGTACACA   | 563.490045897522 | 0.464415448765998 |
| AAGTTGTGACGT  | 563.504529143833 | 0.232549626874586 |
| TGACTATGTTAA  | 563.505927757742 | 0.542435656511329 |
| CGTCAGATGACG  | 563.517434116481 | 0.464885978345345 |
| ACTACTGATTCA  | 563.523290233204 | 0.42905422314528  |
| ATGACACCCCTCG | 563.540355922648 | 0.36441360072241  |
| ATGAGCAAGTTC  | 563.586827686097 | 0.222018854019775 |
| GTCATTAGCCTA  | 563.606570218261 | 0.757488291799504 |
| CAGTCACGACGG  | 563.607313557841 | 0.741881466001195 |
| GTCACACGTAAC  | 563.611906387951 | 0.525973031057934 |
| CAGACTCACTCA  | 563.618249350733 | 0.372022106840831 |
| ACGTATAGTGAC  | 563.632017455566 | 0.400062146936221 |
| CGCTAAGGTGAC  | 563.637896665085 | 0.499269565377076 |
| ATTGGAGATGAC  | 563.645571059016 | 0.376472536632629 |
| ACGCCTGACTCT  | 563.646212097408 | 0.397110487909723 |
| AGTCGGCGTCAT  | 563.647039303634 | 0.489646576324967 |
| ATGTCTTCGTCA  | 563.673241395499 | 0.525079895518298 |
| GCCCTGTATGAC  | 563.691373131849 | 0.56759082363703  |
| GCCGTGGAGTCA  | 563.691839858569 | 0.513942420232682 |
| ACGTAGTAGTCA  | 563.712492797861 | 0.643293412107053 |
| ACCCTGTATGAC  | 563.726912897256 | 0.352586291823029 |
| ACTGGAATGACG  | 563.734020841528 | 0.664751797675071 |
| GCAAATTGTGAC  | 563.74689853134  | 0.792585904914272 |
| GATAGAGATGAC  | 563.750212184462 | 0.268528115578753 |
| CGTCATTCGAAG  | 563.781599456439 | 0.460452652062985 |
| GTCATACGTACA  | 563.791765871584 | 0.555658462200007 |

|              |                  |                   |
|--------------|------------------|-------------------|
| ATCCTAGACTCA | 563.792636581082 | 0.184814734884128 |
| CTTATGAATGAC | 563.797617633347 | 0.674692374681037 |
| GTCATAACTAAC | 563.800135387926 | 0.488266104561631 |
| CCGTGATTAGTC | 563.812090427561 | 0.579032496648771 |
| CAGAACGTGACA | 563.840257297463 | 0.817015851956526 |
| AACAAGTGACGC | 563.843210667792 | 0.649009335299567 |
| AGGTCATAGTCA | 563.8434548465   | 0.456912166817612 |
| GCAGGTGAATCA | 563.854210316107 | 0.689723100960872 |
| ACCGCTTATGAC | 563.859850228274 | 0.428829554907558 |
| TCAGTCAACGAA | 563.865651474091 | 0.413530956333486 |
| CATGATTGGTCA | 563.904740063253 | 0.525285395910939 |
| CCTTTACAGTCA | 563.908315077637 | 0.452689423901304 |
| CCTAGCGATGAC | 563.913506910172 | 0.58457758051128  |
| GCTCTAATGACA | 563.913572873645 | 0.193538855326899 |
| ATGAGCAAACG  | 563.924061650767 | 0.372131985934881 |
| AGTGGTACTCAT | 563.924745964576 | 0.405614757978363 |
| CTCTTGCACTCA | 563.934088168975 | 0.869112769303063 |
| AAGATACAGTCA | 563.954787297699 | 0.338965896972874 |
| ATGACACTCTCG | 563.955493413124 | 0.531241457049467 |
| ATCATAATGACG | 563.962176619104 | 0.313977525944004 |
| GGTACACAGTCA | 563.967594093771 | 0.747133914882072 |
| ATGACGATGCAA | 563.969581252898 | 0.494847495675553 |
| GAGTCAGGGTGC | 563.977897669185 | 0.533451296240368 |
| GTCACAGGTCAC | 563.980814324962 | 0.164660637514324 |
| CTACAGATGACA | 563.992333048009 | 0.47498546458294  |
| GAGTCAATAGAA | 563.997036514788 | 0.173165491962404 |
| ACTTATTGATGA | 564.005082122687 | 0.796905177785429 |
| GTCACAGTTTCA | 564.03343890909  | 0.684377420953113 |
| CCAGTCTGACGC | 564.039003879714 | 0.79683973133048  |
| GTCATGCTATTA | 564.057215234044 | 0.568989339997897 |
| AAAGGCTATGAC | 564.067989247912 | 0.140497126036013 |
| GTGCTACTGAGA | 564.087398930882 | 0.377269896002669 |
| ATCATATGTGAC | 564.110827064768 | 0.785664579091294 |
| ACTACAAGTCAT | 564.134834922545 | 0.354229334515316 |
| AGTATATTAGTC | 564.156050166335 | 0.454121218363078 |
| AGTCACCTCAGG | 564.17418519234  | 0.949919421634822 |
| CTCGCGACTCA  | 564.175325279763 | 0.427603934951149 |
| GTCATGCACTTA | 564.176406731315 | 0.732536970695814 |
| CTCGGTAGTCAC | 564.177836418231 | 0.40197769758651  |
| ATTCTTGTGTCA | 564.17824366956  | 0.422345132260437 |
| CACTATTGACTC | 564.178874537949 | 0.364896623480185 |
| AATGCTAGTCAC | 564.186420299032 | 0.433351114002151 |
| CATCCTTACTCA | 564.202040864159 | 0.377712995778172 |
| GTTACCGTCATA | 564.21348843286  | 0.328940021432144 |
| CACGTCTGAGTC | 564.214803337883 | 0.611210168016883 |
| AGCACTTATGAC | 564.237775277879 | 0.540456314960567 |
| ACTGGTCTGACT | 564.243185459781 | 0.645733311619958 |
| GAGTAAAATGAC | 564.248343253004 | 0.330895328044024 |
| CTCCGCTATGAC | 564.249093675928 | 0.217844945319656 |
| AGTCACTACGGA | 564.253486607367 | 0.521231370740978 |
| CAGGAATTAGTC | 564.290067048138 | 0.377232283207882 |
| AGTTGTCACACG | 564.294206236845 | 0.135724838436888 |
| GGTAAATATGAC | 564.295164447535 | 0.359549153687096 |
| AATACTCAGACA | 564.339327959868 | 0.639863858034153 |



|               |                  |                   |
|---------------|------------------|-------------------|
| CAGTCAGGAGTC  | 564.341528646058 | 0.559999540609586 |
| AAGATATATGAC  | 564.345092887773 | 0.401958127292547 |
| TATGTCTAGTCA  | 564.348587745534 | 0.464873443738397 |
| TGGCTCATGACA  | 564.359391950785 | 0.463450254841874 |
| CACCAGGAGTCA  | 564.367226333505 | 0.717530198306568 |
| CGTGTCCACGAG  | 564.374315446114 | 0.602927101060741 |
| CATGGATCGTCA  | 564.386586220378 | 0.778750792741038 |
| AAGTTTCCGTCA  | 564.399068808296 | 0.584551822334139 |
| GTCACGTTATGA  | 564.400283161791 | 0.340356449325813 |
| ACCGTCGATGAC  | 564.402623099517 | 0.580869411748378 |
| CGTCATTACGCA  | 564.416448456917 | 0.522822073422532 |
| GAGTCCCAGTCA  | 564.417714091316 | 0.534274024672937 |
| ACCTTCAATGAC  | 564.428287192332 | 0.420087045694564 |
| CGTCTCTATGAC  | 564.434927161157 | 0.517442200763285 |
| ATGACCACTAAT  | 564.451237205187 | 0.293383485952247 |
| CTTGGTACGTCA  | 564.455568847524 | 0.580219901220489 |
| CACCGAGAGTCA  | 564.480132422605 | 0.633035481048741 |
| GACTAATCGTGC  | 564.492723783551 | 0.796483774489727 |
| GCGTAGGATGAC  | 564.496739326051 | 0.187583672441185 |
| TATTACCAGTCA  | 564.518349551274 | 0.416603857821419 |
| CACGTCACGTGG  | 564.520363049804 | 0.538647584391953 |
| CAACTAGGTGAC  | 564.522781248931 | 0.770569859767935 |
| CACTGACGTGAG  | 564.540692469001 | 0.539940289338614 |
| TCGGTGTAGTCA  | 564.541834406838 | 0.48632791331068  |
| CGATATCTGTCA  | 564.552330275882 | 0.602254884777037 |
| GGTTAACAGTCA  | 564.566349100344 | 0.47631790409175  |
| CGTCATCTAACG  | 564.572396561029 | 0.228014632077594 |
| CCGTACCAGTCA  | 564.599249794436 | 0.316382533631804 |
| GTCACAATCTGA  | 564.60235165317  | 0.288977103411308 |
| ACGTCATGAGTA  | 564.606226944932 | 0.274928442578976 |
| GACCGTGTGTCA  | 564.607791436588 | 0.531730759635291 |
| AACTCTAAGTCA  | 564.62454438501  | 0.460309150037907 |
| GCATCGATGACC  | 564.624875216085 | 0.850064623543628 |
| ATAGATCATGAC  | 564.632336128487 | 0.403481203272009 |
| CTTGATATGAC   | 564.634656691306 | 0.331318630186517 |
| CCGGGCGATGAC  | 564.639992816015 | 0.637325543519292 |
| CGCCTCGAGTCA  | 564.66846581309  | 0.321960282609136 |
| GAAGTGGTCAGA  | 564.676882991189 | 0.254099924700939 |
| GTCACCTTCTGGA | 564.682602044908 | 0.520348688826741 |
| TGACACAACAAA  | 564.684705158307 | 0.754070536564478 |
| CGTCATCAAGGA  | 564.690817570846 | 0.55384152993427  |
| AGGCCTTACTCA  | 564.699901394126 | 0.428161274830321 |
| GTAGCCGAGTCA  | 564.703264842918 | 0.537893637935259 |
| ATGACTTTCGTTA | 564.715463290473 | 0.670994203212843 |
| ACGATTACGCAA  | 564.719127670105 | 0.661764772609495 |
| AGAGTCAAACGG  | 564.72387403645  | 0.446774601579381 |
| AATACGTAATCA  | 564.729408144183 | 0.391296141762406 |
| AAACGGTATGAC  | 564.731797844174 | 0.570670742315921 |
| CTGTCTGACTA   | 564.738091739126 | 0.526485483137469 |
| CTGACTATGACC  | 564.740737335741 | 0.641085583742124 |
| TGACACAGATAA  | 564.741779723559 | 0.534053825899831 |
| GCTTTGACTCGA  | 564.744912882517 | 0.350757546428688 |
| GTCACATTTACA  | 564.756906439506 | 0.502700755920412 |
| AAGAATATGTCA  | 564.768280800259 | 0.469449409780155 |

|                |                  |                   |
|----------------|------------------|-------------------|
| GTCATAGGTACA   | 564.769704583362 | 0.305484074530686 |
| CTTGACATGTCA   | 564.771989263861 | 0.43910252111567  |
| CACGTCACCTTGC  | 564.781265470172 | 0.138964805636625 |
| CTTGGGTGTGAC   | 564.785338216053 | 0.486852843191405 |
| AAGTTATGAGTA   | 564.790356807648 | 0.273964541289901 |
| ACCCTCGATGAC   | 564.799211263651 | 0.444794421050325 |
| CGTCATTGCGGA   | 564.800327763946 | 0.54236851134361  |
| GACTAATTTTCC   | 564.820277427769 | 0.559287352771652 |
| GCCGATTGCTCA   | 564.821715686298 | 0.469543268845505 |
| TCGTGTACGTCA   | 564.83187844468  | 0.533747619708275 |
| GCCCATGAATCA   | 564.854514279972 | 0.475952957464365 |
| CTCATGCAGTCA   | 564.867193390163 | 0.738805465746619 |
| AGTCACGCCAAG   | 564.86834723254  | 0.1774588855028   |
| CATCACAGTGAC   | 564.876146098113 | 0.492827314809533 |
| ATACCTGTCACA   | 564.894421266721 | 0.177564441468135 |
| CTGTGATGACCA   | 564.896142066195 | 0.568174244047915 |
| GTCATGGCTCGA   | 564.89883821624  | 0.661835848075387 |
| CAGAATTACGCA   | 564.900199531727 | 0.337142625296001 |
| AGAACC GG TGAC | 564.901774804663 | 0.278736387055821 |
| ATGACGAGACCC   | 564.902216618869 | 0.341782303617879 |
| GTCACACGAACA   | 564.902996524012 | 0.600745512132151 |
| GTCATCGCCGAA   | 564.919737675418 | 0.500548358059179 |
| CCGAGGGATGAC   | 564.92378515922  | 0.68436577472707  |
| GTCATTCGTTTA   | 564.927536061851 | 0.360161267416428 |
| GCTTCACAGTCA   | 564.929515000235 | 0.771743761087565 |
| AGTAGTGGTCAT   | 564.945130838102 | 0.299567850056102 |
| CGATTTAATGAC   | 564.959216954879 | 0.411380058835503 |
| ATAGAGGATGAC   | 564.963335336576 | 0.235991396259945 |
| GGTCATAAGTCA   | 564.970483503143 | 0.368647641240558 |
| ATAATATCGTCA   | 564.976876431981 | 0.756647714955087 |
| GATGAAGATGAC   | 564.981028554997 | 0.22914670237923  |
| ATGACACCCCGG   | 564.99215796698  | 0.552075983734039 |
| CACGATTTGTCA   | 564.997575460499 | 0.567204503766119 |
| GACTTGTACACAC  | 565.020485602793 | 0.345188713739257 |
| CAGCTTGTGTCA   | 565.026790852434 | 0.470017896684989 |
| TCAATAGACTCA   | 565.032258698449 | 0.671713881256917 |
| CTGACTCGGTCA   | 565.033442624033 | 0.403704908104062 |
| GCGCTGAGTAAC   | 565.045544308499 | 0.562647386092996 |
| GTCACCTACGAA   | 565.046456500741 | 0.614240366690086 |
| CCATACCAGTCA   | 565.057603946158 | 0.554432466672873 |
| CACATTTGACTC   | 565.059421107012 | 0.538829639720674 |
| GTCATCACGCAC   | 565.06291100737  | 0.542562364904502 |
| AAGTTTGC GTCA  | 565.072529560144 | 0.469881015412501 |
| CACATACGTGAC   | 565.081003524472 | 0.8376835123059   |
| ACGTA CTGTCAT  | 565.089180302327 | 0.337765369866428 |
| CTATCATGACAC   | 565.090498707264 | 0.236057592414995 |
| GTCATAGGCCTA   | 565.091124466828 | 0.556693427843774 |
| CCGATTGACTC    | 565.093238691463 | 0.312339415664857 |
| ACCTAGGATGAC   | 565.112422229618 | 0.463577924132028 |
| AAGTTT GACTCT  | 565.1659941851   | 0.430875419035693 |
| GGAGACTATGAC   | 565.168425319945 | 0.299892439694881 |
| GCTAAATGTGAC   | 565.170317184613 | 0.806012363245108 |
| GCTACGTGACAC   | 565.170949215711 | 0.657351542469133 |
| ACGTCACCCGAA   | 565.171644109859 | 0.401484026720987 |

|               |                  |                   |
|---------------|------------------|-------------------|
| ACAACATGAGT   | 565.175331441557 | 0.427783749106607 |
| GACTCAATAAAA  | 565.178027710658 | 0.439176347350977 |
| ATGACAGAGATC  | 565.200908387627 | 0.658203315068683 |
| TCGATGGTGACA  | 565.212478445381 | 0.448515079539996 |
| AGTCACTTCGGA  | 565.213162209349 | 0.185045736588683 |
| GTCATCGGGATA  | 565.228511699631 | 0.437231119571314 |
| GAGTCAAGTCAC  | 565.230512393117 | 0.391268282113466 |
| AGCAACAATGAC  | 565.236116446162 | 0.652603247563789 |
| CGTCGTAATGAC  | 565.236519028372 | 0.37205300087871  |
| GTCATCTGTGGA  | 565.248612164254 | 0.498613549446128 |
| GAGTCAATACCA  | 565.260353257696 | 0.592606944238427 |
| TGGGTCACCTAA  | 565.265802888851 | 0.344643313655559 |
| GGCATGCAGTCA  | 565.266789976842 | 0.582625117837744 |
| TGACGTGAGCCA  | 565.283363071607 | 0.446474292334065 |
| GACAATACGTCA  | 565.316880303704 | 0.704474647226577 |
| CTACTGGAGTCA  | 565.324844299644 | 0.479445313445256 |
| AAGCGGTATGAC  | 565.333148418593 | 0.495358361474409 |
| GTAATTTCTGTC  | 565.335993129431 | 1.01571174908192  |
| GTCATTGGCTGA  | 565.35159635926  | 0.37863058196929  |
| AGAGCCTAGTCA  | 565.37232244357  | 0.549701637600592 |
| CATGAATTAGTC  | 565.384108464964 | 0.615055251131471 |
| ATGACAAGACCG  | 565.386020905612 | 0.387807102141656 |
| TAGACTGACACA  | 565.413619108915 | 0.516307949674328 |
| GACCGGTACATAC | 565.426538381952 | 0.340687924193896 |
| ATGACGGACTCG  | 565.428194165451 | 0.376372988812947 |
| CGGTGACGATAA  | 565.43025938225  | 0.337580549339984 |
| GGTTTACAGTCA  | 565.435656821648 | 0.498971583225446 |
| GGTCATAGGTCA  | 565.440124255017 | 0.330807208318292 |
| ATCGAATGACCG  | 565.44192813947  | 0.819120475713448 |
| GAATACTGACTC  | 565.446024378258 | 0.56100820196586  |
| AATCTGTGAGTC  | 565.461245430695 | 0.426006826089658 |
| GTCACACCTACA  | 565.474320987651 | 0.239672033220444 |
| GCAGAGATGACA  | 565.482272132085 | 0.229390618083044 |
| ACTAACGACTCA  | 565.49099792084  | 0.442343244234241 |
| ACGGCATGACAC  | 565.491149830479 | 0.358518215531477 |
| ATGACTTGTGCG  | 565.496112251384 | 0.540038700309183 |
| CTGACATGTGAC  | 565.499572784322 | 0.408707517080361 |
| GATACCAATGAC  | 565.50369973722  | 0.638497039708545 |
| ATTTATGATGAC  | 565.504619476585 | 0.262142501377746 |
| GCGTCACCTAGA  | 565.514001401189 | 0.11560915663973  |
| GTCACCTGTAAA  | 565.51470229402  | 0.766652291597324 |
| CATGTAAGAGTC  | 565.525083314197 | 0.953715485550722 |
| ATGCCTACGTCA  | 565.53113971486  | 0.400345689450639 |
| TCCGACGTGTCA  | 565.54008871791  | 0.586832004035495 |
| ATGTATAAGTCA  | 565.547237171644 | 0.930633514609964 |
| GTACTTGTGTCA  | 565.587068653741 | 0.654323659389227 |
| ACAATAATGACG  | 565.602215656196 | 0.733922585931146 |
| AGTCACGGAATA  | 565.61140001294  | 0.264131959473104 |
| GGTATGACCTCA  | 565.614675147193 | 0.436590387303622 |
| GAGTAGTAGTCA  | 565.619373020565 | 0.331870395576069 |
| CCGGATTTGTCA  | 565.622154881467 | 0.464010834430278 |
| AGCAATTGACTC  | 565.626890233807 | 0.502192296279576 |
| TGACAAGTTTAA  | 565.648999718064 | 0.721312691644732 |
| ACGCGTCAGCGT  | 565.654190671954 | 0.462732353212436 |

|              |                  |                   |
|--------------|------------------|-------------------|
| CAATAGACTCAG | 565.675621198891 | 0.5509012196775   |
| AAACGAATGACG | 565.681339023956 | 0.331057491032604 |
| CCAATCCAGTCA | 565.681700774544 | 0.427872383919846 |
| ACCATCGACTCA | 565.703513300379 | 0.325228932170381 |
| CTGCCCTGACTC | 565.714111412484 | 0.207903998772236 |
| GTCATTCGGGAA | 565.730329909112 | 0.734281657655597 |
| GACTAATAGGGC | 565.731863920575 | 0.513801289763637 |
| CGATCCTGACTC | 565.738588811178 | 0.349919672506272 |
| ACTGGGTGTGAC | 565.741210261753 | 0.618790849409671 |
| ACCGTAAATGAC | 565.745771510526 | 0.3843124249685   |
| GAAGACCAGTCA | 565.749666908595 | 0.317229083386636 |
| CAGCGCTGACTG | 565.779705558523 | 0.533553583458928 |
| GATACAGTCAAC | 565.785016697838 | 0.458225259667225 |
| ACAGTTTGTGAC | 565.787399861928 | 0.375839683155779 |
| CCCAATTGTGAC | 565.791326633109 | 0.486129425782552 |
| CAAGAGATGACG | 565.797738936659 | 0.233104108224309 |
| GTCATATCTAAC | 565.808557470522 | 0.283425128909997 |
| ATGACAAGACTC | 565.811087456796 | 0.344269431314992 |
| GGACCGCTCAC  | 565.813132155931 | 0.437933450205869 |
| ACGTCATGGTCA | 565.829932863311 | 0.36967322356314  |
| ACCAGACAGTCA | 565.845749088472 | 0.618217789557148 |
| GTACATGACCCA | 565.847897021326 | 0.347767522833747 |
| GTCATGACCTAA | 565.848798779435 | 0.535102292428258 |
| ATACCCTGACTC | 565.855078028288 | 0.287458936596074 |
| GGTAATCATGAC | 565.856662930249 | 0.66276644324423  |
| CTAAACTTGTC  | 565.870268256464 | 0.308771809297935 |
| CCCCTCGAGTCA | 565.877574316813 | 0.289657438522627 |
| GAACTATTAGTC | 565.905221706081 | 0.605045072114214 |
| CTGCAGGATGAC | 565.906624356357 | 0.529889712642193 |
| TGACCGAGTCAA | 565.912471108904 | 0.663307253190151 |
| TCAGAAGTGTC  | 565.925366043393 | 0.398922561226281 |
| ACTATTATTCAT | 565.941195321303 | 0.424517339605232 |
| CGTCACATTAAG | 565.965731083181 | 0.54399702269031  |
| GATGTGGATGAC | 565.971518241384 | 0.444451996796448 |
| GTCAGATTGCAC | 565.972188701179 | 1.12530420802881  |
| AGACATCGTCAT | 565.981154495935 | 0.310204155805865 |
| CTCCAAGACTCA | 565.986374027135 | 0.334809095296288 |
| GATTATGATGAC | 565.987016956691 | 0.192770362437958 |
| GCTATACAGTCA | 565.989378565908 | 0.525343029573571 |
| CCACTGACGTCA | 566.013079578947 | 0.256785990587909 |
| ATCTAGATGACG | 566.015555327506 | 0.259874611319771 |
| CCACTGTGTGAC | 566.027562013514 | 0.383053045222075 |
| TGACTTAGATCA | 566.075419710609 | 0.937406403045811 |
| CCCCGTGATTCA | 566.08134513066  | 0.508396242173878 |
| ATATGAATAATC | 566.082403523364 | 0.466736997699819 |
| AATCTTGGTCAC | 566.095838344414 | 0.513271964810736 |
| CTATAGCTATGA | 566.108170626369 | 0.763117603959968 |
| ATCATATTAGTC | 566.109089258452 | 0.508700313201485 |
| AGTCACGACCCG | 566.121185692142 | 0.619889066812876 |
| ACGTATCCGTCA | 566.122829649732 | 0.359367262471429 |
| CGCAGGTGACGC | 566.124385326068 | 0.38305640510855  |
| GCTATGGATGAC | 566.129386916292 | 0.475715391342202 |
| GTGTCACGATTA | 566.148491217021 | 0.329269683897279 |
| GACTCACGTTGA | 566.163489379285 | 0.554039592219452 |

|               |                  |                   |
|---------------|------------------|-------------------|
| CCGACTGATGAC  | 566.163509687094 | 0.466723492844912 |
| AAATAGTGAGTC  | 566.163595121193 | 0.444964880771214 |
| TACATTTTCGTCA | 566.170421979646 | 0.412831699487457 |
| CTTGCCCGGTCA  | 566.180760689323 | 0.514862813179843 |
| ATGACTAGCGCA  | 566.199365318762 | 0.358449719137015 |
| TCCCGTGTGTCA  | 566.211282829617 | 0.496383151674399 |
| TCGATCGTGTCA  | 566.218266251914 | 0.708899555389224 |
| ACGTGATTACTC  | 566.220515459904 | 0.572381997719866 |
| GCTGTAGATGAC  | 566.223039639974 | 0.535461351296919 |
| GTCACGCCGTAA  | 566.224768805873 | 0.470963003900885 |
| GTGAGCCACTGA  | 566.229870146872 | 0.439965722292889 |
| ATGCTGACGTCA  | 566.230599004822 | 0.633711854496399 |
| GTGCGTGATTCA  | 566.232906115784 | 0.352541991558938 |
| GTGACCGGTGA   | 566.24926004005  | 0.338914111147198 |
| GTCATTATGATA  | 566.255975411711 | 0.307235939659945 |
| GTCATCTCCTGA  | 566.290074354423 | 0.48300563323103  |
| ACGACTGTCATA  | 566.298609666158 | 0.271605157237251 |
| TAGATGGAGTCA  | 566.302111292797 | 0.162346169835373 |
| GTCATAGCTCAA  | 566.312977204758 | 0.658599493603369 |
| ATCGAGTGTGAT  | 566.318846983649 | 0.389423851878756 |
| GACATCTAGTCA  | 566.330580144875 | 0.469498939491212 |
| CATCGTGATGAC  | 566.331752894451 | 0.633866848832407 |
| CAACCCTGACTC  | 566.335154821651 | 0.289666791765067 |
| CAGTCACGACCG  | 566.339468858369 | 0.616139116455784 |
| GTCAAAGATGAC  | 566.342584589463 | 0.468387709244486 |
| GTCACTGACATA  | 566.343709743216 | 0.424864347926385 |
| GGCGATTTGTCA  | 566.347778740258 | 0.390619576054013 |
| CCGTGAGAGTCA  | 566.360234411299 | 0.656451494797682 |
| CACGTCACGCTA  | 566.365799822737 | 0.307316735890661 |
| ACGTCACCGACC  | 566.380858820587 | 0.285855723596305 |
| CGTCACGTGACA  | 566.385690595875 | 0.634499291112365 |
| ATTACTCAAGTA  | 566.388113549702 | 0.426683606007784 |
| GGATAACAGTCA  | 566.396900384082 | 0.421164853540849 |
| CGTCATGGTCAC  | 566.402384348592 | 0.509633251070755 |
| AGATTGGATGAC  | 566.404745835911 | 0.33104380790888  |
| TCAGATACGTCA  | 566.428752667295 | 0.790265430670888 |
| GAGTAATTTCCA  | 566.430208278899 | 0.894456348184073 |
| GTCATATGGCGA  | 566.43615495788  | 0.647260570629129 |
| AATCATAAGTCA  | 566.436358062781 | 0.361788701705514 |
| AACTTTTGACTC  | 566.443170124728 | 0.28529932843773  |
| AATCTGATGACG  | 566.443255333266 | 0.329683380800618 |
| AGTGCACAGTCA  | 566.45520919547  | 0.275478186910832 |
| AGTTATGATGAC  | 566.463737186039 | 0.419600908432859 |
| TCTAATTGCTCA  | 566.464895624647 | 0.382393265607752 |
| CCTACATATGAC  | 566.481686619186 | 0.432757474834673 |
| AAAGCGTACTA   | 566.49118945505  | 0.396284730249365 |
| CGCTGACTGGTC  | 566.493445172444 | 0.430100088331813 |
| CGTCATTTATTA  | 566.498074179861 | 0.475355378303875 |
| CCCGTGAATGAC  | 566.538043791809 | 0.566078066923257 |
| ACAGGTGATGAC  | 566.540539907795 | 0.184113374284139 |
| GTCACGCGTGAA  | 566.550364061343 | 0.56395587614818  |
| TGACTGGTCCAA  | 566.556093324091 | 0.703980238234852 |
| CGGAGGGAGTCA  | 566.556369178337 | 0.292955713468211 |
| CGCTCTGAATCA  | 566.573397517118 | 0.4608777164203   |

|              |                  |                   |
|--------------|------------------|-------------------|
| AACGCCTGTGAC | 566.577393834842 | 0.357255643465268 |
| AATCGTGACGAA | 566.586006211893 | 0.602504766687844 |
| GTGGGTGAATCA | 566.592766848566 | 0.448967986657926 |
| ATGACAATATGA | 566.627972423177 | 0.255183431365694 |
| GTCATCCGCCGA | 566.634014556782 | 0.320110448193933 |
| TGACTGGCAGCA | 566.634243400741 | 0.609411171655959 |
| ACAGCTCTGACT | 566.639084142425 | 0.225132401691646 |
| ATTGAAAATGAC | 566.645212241245 | 0.827316783330454 |
| CAGTCGTGACAC | 566.662400403787 | 0.679654671510742 |
| ATGACAATATAA | 566.665526481141 | 0.262175846932364 |
| GCCCTTGCGTCA | 566.665607776009 | 0.539122081491467 |
| GTCATCAAAACA | 566.670522730437 | 0.347942386562002 |
| TGGCGTCACCAA | 566.674100316995 | 0.298661970852629 |
| TGACTCCAATCA | 566.677392752729 | 0.482238016338284 |
| CACCTCGATGAC | 566.679735904629 | 0.537454526407038 |
| AGTCATGGGGCC | 566.70259865524  | 0.553274049320051 |
| ATGAGTCCCTTA | 566.708219245474 | 0.371844523194774 |
| ATGACAGCGCAA | 566.709884745467 | 0.333920383065564 |
| CTGAGCTGTGAC | 566.715220071499 | 0.517682468371746 |
| CAAGCCATGACG | 566.716571724088 | 0.406770703402457 |
| GACACTAAGTCA | 566.717737844134 | 0.588438972047903 |
| ATAGAGACTCAT | 566.723705969745 | 0.496308258656775 |
| GTCACGATCGAA | 566.72926168943  | 0.755810074831469 |
| AGACGTTATGAC | 566.735513715979 | 0.206467952784113 |
| TAACTGACGTCA | 566.739315590017 | 0.614857705867735 |
| CTCGAGATGACA | 566.751008482438 | 0.495774949812048 |
| GACCGACATGAC | 566.754405534763 | 0.523692353403639 |
| ATGACATGATCG | 566.754746587618 | 0.528065104862776 |
| GATATGAATGAC | 566.760873833774 | 0.283321264212882 |
| AATCAAGTCATC | 566.762779244049 | 0.483218729666928 |
| CCGTAGTGAGTC | 566.777329972403 | 0.646232863643036 |
| CGACTGACATGA | 566.78296571491  | 0.768597785708266 |
| TATTACTATTAA | 566.783349787923 | 0.289334231667426 |
| ATGACGATGAAG | 566.792010052072 | 0.415394568945241 |
| GATGACGTCGTA | 566.794150512713 | 0.230233001430574 |
| TAAATTTGCTCA | 566.804168713014 | 0.595740609727355 |
| CGTCACCGTTAG | 566.807399915304 | 0.434981371649946 |
| CATCGATAGTCA | 566.807665501908 | 0.558266253839571 |
| GGACGATATGAC | 566.812137747655 | 0.585328714357629 |
| TCAGCCTAGTCA | 566.82557001128  | 0.323762702697509 |
| ATGGTCTATGAC | 566.849747816049 | 0.647030895856418 |
| TATCATCGATGA | 566.851808698975 | 0.549650791834029 |
| GTCATTGAACAA | 566.853100277422 | 0.560148156127523 |
| CATATCGTCACC | 566.855571266355 | 0.32734783620895  |
| GTCATATAAAGA | 566.856791589295 | 0.488313297677285 |
| GGCCCATAGTCA | 566.86047822707  | 0.787005411479425 |
| ACGCCTGACTGA | 566.862412548711 | 0.25199203969603  |
| CTCAATGTGAC  | 566.862588645207 | 0.517335422122255 |
| ACAAGTATGAGT | 566.892522501532 | 0.425814068439661 |
| GAGTGAGTCTGA | 566.897147702282 | 0.25124311704957  |
| GTCATTTCTTAA | 566.915115262226 | 0.682835982417939 |
| CACGGCGTCATC | 566.921398422713 | 0.242312696468301 |
| GACTCAGTCAAA | 566.924006163655 | 0.629432193016863 |
| GTCATTCTAAAA | 566.9336205969   | 0.321198196516447 |

|              |                  |                   |
|--------------|------------------|-------------------|
| TAAAATACGTCA | 566.939399445217 | 0.617064282167924 |
| ACCCCGATGACG | 566.944372412384 | 0.624904243078211 |
| ATTATTTGACTC | 566.945478994843 | 0.251120902463457 |
| CCTAGTAATACG | 566.946639433203 | 0.977351189524772 |
| TCACATGACCCA | 566.948492279067 | 0.390281423245677 |
| ATGAGTTGTACC | 566.948524665807 | 0.214886375837104 |
| GACGATTGCTCA | 566.952089054185 | 0.663736217238212 |
| ACGTCATGTAAG | 566.953948395386 | 0.586470598709677 |
| AGTCACGCCTGC | 566.954334495741 | 0.493169603192227 |
| TGACGCGTACAA | 566.957218580332 | 0.481176655186994 |
| ACTTGTACGTCA | 566.988865919596 | 0.258414911642918 |
| TCGCTGCAGTCA | 567.004058972153 | 0.572278695271932 |
| GCCTTTTATGAC | 567.008382765345 | 0.507086837007761 |
| CGAAGGGAGTCA | 567.01048983783  | 0.327640809973837 |
| CGTCATTTGTTC | 567.021196130722 | 0.501035801000941 |
| CCTGATCCGTCA | 567.027517013558 | 0.144585644068507 |
| ATAGCCTAGTCA | 567.05043521939  | 0.394776403031506 |
| AGTCACCCTCGG | 567.075557379278 | 0.413402187370057 |
| ACCTCGAGTGAC | 567.076902388746 | 0.713687147746394 |
| CCGGCGGATGAC | 567.08312221738  | 0.528945367920965 |
| CGTCATCTCTGC | 567.085535512758 | 0.359156415611366 |
| ACGGCGTGACTA | 567.088123286774 | 0.454677509179661 |
| GACTTACTATGA | 567.109766905454 | 0.983630507422224 |
| GTGGTTGTGTCA | 567.113357509886 | 0.179750646374397 |
| GTCATGCAAACA | 567.132344132665 | 0.500201734841748 |
| ATTCAGTAGTCA | 567.133082254029 | 0.554571203951481 |
| GTCATTCGTGCA | 567.151023588985 | 0.655655349056529 |
| GTCATCTTCGAA | 567.172360147555 | 0.784633679361652 |
| ATGACATTACAA | 567.226662414231 | 0.497544388183035 |
| GTCATTTGACAA | 567.230831945022 | 0.588322031941428 |
| AGATATAAGTCA | 567.241120680521 | 0.257008440968663 |
| CTCGTGTGTGAC | 567.246272265635 | 0.57262602401368  |
| ACAATTTGACTC | 567.249925145622 | 0.28995573086715  |
| ATGACTTGACAT | 567.26805848663  | 0.48806309365749  |
| GTCATACCACCA | 567.279216659206 | 0.414396904145488 |
| CGTACATGACAC | 567.297228786561 | 0.477845215033971 |
| CAACTGCATGAC | 567.322533686763 | 0.479903181559187 |
| CGTCATTGGCAA | 567.328302905491 | 0.438111789234388 |
| GCTGACATGACA | 567.329674327267 | 0.632474258343219 |
| CACGTCACTAAC | 567.339342972174 | 0.485054441922732 |
| GACTCACTGAAC | 567.339875454885 | 0.413475797755667 |
| AACAGTGAGTCT | 567.34553883565  | 0.182864186154164 |
| ATGACCCGTAC  | 567.349887540252 | 0.178017628789429 |
| GACCAGCATGAC | 567.350181487418 | 0.472182833543469 |
| AAATGATGTAAC | 567.362124560781 | 0.365958830579778 |
| ACTCATATTGTG | 567.365559463314 | 0.580985626492594 |
| AGACTCTATGAC | 567.366556179092 | 0.533048800688822 |
| CTGGGGTATGAC | 567.393035831612 | 0.337871793100333 |
| ATGACGGAGCAG | 567.401836289658 | 0.221149411789348 |
| GTCATACGCGTA | 567.4144042053   | 0.368651771723784 |
| ATCATAAGAGTC | 567.421584408927 | 0.668184802643406 |
| GCTGATTGGTCA | 567.434098963592 | 0.519527229012871 |
| ACTAGTTCGTCA | 567.45742320346  | 0.597040331398257 |
| ATATTGTGTGAC | 567.460359811432 | 0.4144368796782   |

|               |                  |                   |
|---------------|------------------|-------------------|
| CCAAAACATGAC  | 567.489112547547 | 0.364469709708891 |
| CAGTGGTAGTCA  | 567.491111813358 | 0.329958180624959 |
| ACTAATATATGA  | 567.503056700334 | 0.578058000091335 |
| GCGCCAATGACA  | 567.508803815268 | 0.642060923948519 |
| ACGTTGCAGTCA  | 567.536610887953 | 0.186572289035257 |
| GCTACGGATGAC  | 567.537510279984 | 0.485570552955025 |
| ATGACGGACTGC  | 567.547232757449 | 0.324664695563349 |
| AGAGTGGATGAC  | 567.553006635871 | 0.250886141483924 |
| GTCACACATAAA  | 567.570087210017 | 0.536376957292607 |
| ATCACAGATGAC  | 567.575228744745 | 0.534307038353    |
| ATACAACCTATA  | 567.578677362496 | 0.340317315910009 |
| CGAGTTAATGAC  | 567.582919598116 | 0.475453853060677 |
| ATGACGTTACTA  | 567.589520856495 | 0.285613383771941 |
| GCACATGACCCA  | 567.601920254069 | 0.567191738614379 |
| ATGACGTTAATA  | 567.631026511038 | 0.25776681446343  |
| CGTCATCTCTAG  | 567.634109400485 | 0.362771817304671 |
| GTGACACAGGAA  | 567.638746493206 | 0.25014389127864  |
| GTCACCTTTTAA  | 567.644985416258 | 0.35945541088226  |
| CGTCATTGTAGA  | 567.651560500693 | 0.452444540078363 |
| TCATCAATGGAA  | 567.655211617149 | 0.664906485355204 |
| GTCATTGAACGA  | 567.66243071919  | 0.520274358629489 |
| AGTCACGGTACC  | 567.665916790044 | 0.342175388724766 |
| TCGGTTTACTCA  | 567.667110807145 | 0.736816793959343 |
| ATTTCGTGGTGAC | 567.672460467273 | 0.496764312174941 |
| AATATGTCAGCG  | 567.678899854319 | 0.402193087900236 |
| TGACGTACGACA  | 567.701939989162 | 0.78893914495294  |
| GTGGACCAGTCA  | 567.709352649864 | 0.466557686768515 |
| ATGGCGTACTA   | 567.733627880707 | 0.306158008018325 |
| CGTTACAGTGAC  | 567.735158522154 | 0.408448099211466 |
| TCAGGTGAATCA  | 567.743992630168 | 0.301544421787135 |
| AGGTGACCCAAC  | 567.744339024895 | 0.626456442220579 |
| CATAAATAGCGC  | 567.748180757903 | 0.927547993303995 |
| GGCCCTTACTCA  | 567.763872636779 | 0.278762982206376 |
| GTCATATTTACA  | 567.767095600683 | 0.3986183392806   |
| CATACTGACGAA  | 567.775999349951 | 0.643496480198621 |
| AAGTAAGATGAC  | 567.796427840087 | 0.216061032258747 |
| AGTCACTTGTAG  | 567.799597950521 | 0.399446810218778 |
| AGTGACTCATTA  | 567.809374447399 | 0.517725061937739 |
| GTCATAGGAGGA  | 567.814886299539 | 0.252671713691361 |
| GTCATATCAATA  | 567.824347830489 | 0.530027739951111 |
| AGTGTCAATGTC  | 567.83148317466  | 0.189970295667668 |
| AGACTAAATGAC  | 567.835066562146 | 0.482479814357149 |
| ATTAGTCGCACA  | 567.837813976114 | 0.454253080871311 |
| GGGCCTTATGAC  | 567.839312528888 | 0.457442075841797 |
| GTCATGGTTGCA  | 567.842158162672 | 0.36424351740043  |
| CCGCCCTATGAC  | 567.850405475863 | 0.426300747838198 |
| GCTATACATGAC  | 567.859321930451 | 0.966046947838555 |
| GTGACTAGCCTA  | 567.873880676082 | 0.393223208724808 |
| GTTGCCTAGTCA  | 567.878406575825 | 0.395213124286054 |
| CTCATTTTATGA  | 567.882242605485 | 0.332607081752128 |
| CGACCGAATGAC  | 567.893934430928 | 0.687785748953086 |
| AGAGCCGTGACT  | 567.896156782116 | 0.597272779105785 |
| AGTCACTCTAAC  | 567.900882126651 | 0.311455379073294 |
| AAACGTGAGTCT  | 567.902793626214 | 0.388396890981794 |



|               |                  |                   |
|---------------|------------------|-------------------|
| CGTCATCGGCCA  | 567.911979854068 | 0.371525019481559 |
| CTAGCTTATGAC  | 567.931188390844 | 0.421507874372998 |
| GTCATCCTTCCA  | 567.944425250063 | 0.34181362756521  |
| ATGACGTTAAAA  | 567.946390220459 | 0.350556819066889 |
| CCAGGGTGTGAC  | 567.958297744271 | 0.519153339945143 |
| CTCATAGCGTCA  | 567.962071518892 | 0.323543479818818 |
| CACGTAGCGTCA  | 567.97032552545  | 0.462978476300607 |
| TCACAGTGACGA  | 567.986334639024 | 0.253373110831311 |
| AGTGCTGACACA  | 567.9897597852   | 0.527750873002116 |
| AGTCAGAAGTAA  | 567.99231852223  | 0.237482086162227 |
| ATTAGTGACCAA  | 568.00252925528  | 0.556737527174536 |
| AGTCACTCCATC  | 568.003564907827 | 0.174966179353387 |
| AATTTGTGACGC  | 568.009185373304 | 0.492566669338102 |
| ATGACAATATCC  | 568.016153180252 | 0.462723176398241 |
| AGCATCGATGAC  | 568.023571015377 | 0.451360685966277 |
| ACCTAATGACAA  | 568.032230714634 | 0.530098615482092 |
| AATATAGATGAC  | 568.032558825771 | 0.357843108813806 |
| ATGACAGAGAAG  | 568.04827414841  | 0.442221449385977 |
| CCGTACACGTAA  | 568.051898834972 | 0.869479966250443 |
| AGTACCGAGTCA  | 568.062117640849 | 0.41178543480566  |
| ACATTGTAGTCA  | 568.066189465925 | 0.356879295576818 |
| ATGACTTGTGAG  | 568.0748506668   | 0.406725727579333 |
| GTCATCATAAAA  | 568.077488110249 | 0.427270100994242 |
| GTCCTGTGTAC   | 568.092702841983 | 0.339826757441843 |
| AAGTATGATGAC  | 568.100987006437 | 0.30180004414513  |
| GCGTTGCGTGAC  | 568.128882460577 | 0.274912810851442 |
| TAGTATTA CTGA | 568.140665122708 | 0.482206951255733 |
| TGAATCAGAAAA  | 568.147144268557 | 0.253746726152604 |
| AGGATGGAGTCA  | 568.15510449284  | 0.154767454069467 |
| GTATCGCATGAC  | 568.155407821311 | 0.687548725657203 |
| AAACATGACAGA  | 568.164108873557 | 0.315690937423457 |
| CGGAAATTAGTC  | 568.185290038125 | 0.329450107984202 |
| CCATCTGGTGAC  | 568.188421457248 | 0.70341226562503  |
| AGTCACGACCCA  | 568.191339131027 | 0.386459577013865 |
| GCGAGCAATGAC  | 568.196969608404 | 0.52354772499282  |
| ATGAGTCTCGAA  | 568.197648650717 | 0.618546441889277 |
| GTCATTCATAAC  | 568.21859453819  | 0.315928559095615 |
| CTTGACAATGAC  | 568.222141290629 | 0.605598045498169 |
| GATCCTGATGAC  | 568.225507927581 | 0.508989825783688 |
| CATGGTGGTGAC  | 568.276312571847 | 0.381653721994761 |
| ACGTCACCGTAA  | 568.314074690602 | 0.505575197426531 |
| GATGACAGTGTA  | 568.318939166668 | 0.344721537821503 |
| TCATCCGGATGA  | 568.336892084877 | 0.491156431693294 |
| ACATAATTAGTC  | 568.339712608391 | 0.74176645800333  |
| CAGCCAATGACA  | 568.340297554963 | 0.544400007687627 |
| AAAAGTATGAGT  | 568.348113246674 | 0.328073318692658 |
| CAGAGTTATGAC  | 568.354215882143 | 0.608401278599687 |
| CAGCCTCAGTCA  | 568.355671873663 | 0.694675679949494 |
| ACGTCACCTCGAT | 568.358790458853 | 0.231642092605898 |
| ACTATCAATGAC  | 568.365408482711 | 0.931265669637014 |
| CAACTGCTATGA  | 568.36749131952  | 0.636755806583755 |
| CCTGTATATGAC  | 568.369413261672 | 0.615261474598249 |
| GTCACCGTTGTA  | 568.375229094548 | 0.356003631026829 |
| ACAACCTGACTC  | 568.380490193614 | 0.364846257182276 |

|              |                  |                   |
|--------------|------------------|-------------------|
| CAGTCAGCATT  | 568.382520678496 | 0.760943664358344 |
| GGTATGAATGAC | 568.403063363788 | 0.296142311345522 |
| AGTAGCTATGAC | 568.415583886158 | 0.155338043431084 |
| ACTCCGTGACTA | 568.421788486116 | 0.312173584102024 |
| ATGACGGAGCAT | 568.462257753746 | 0.393862213819175 |
| AAGCACGAGTCA | 568.466340359874 | 0.233375315196194 |
| TGACCTGACGCA | 568.470922381068 | 0.733876795798963 |
| CGGTATAATGAC | 568.472546662006 | 0.51657000711226  |
| CATGACTTGTTT | 568.474658375306 | 0.170997556625856 |
| CTTATAGCGTCA | 568.493351808581 | 0.85816325243329  |
| ATCATCCTATGA | 568.517088571244 | 0.394416962675811 |
| CAGTCAGCTATG | 568.532687436374 | 0.747831277367078 |
| ACGTAATTA    | 568.53272485357  | 0.678975447008832 |
| ACAATATGTGAC | 568.536771933292 | 0.53451159160517  |
| AGTCAATGACCA | 568.538630636955 | 0.457678930838136 |
| AGTTTGTAGTCA | 568.550894279458 | 0.418326603697007 |
| ATGAGTACGTCG | 568.553515700339 | 0.446983075799749 |
| CTTAGCAATGAC | 568.558056992986 | 0.240165544754848 |
| CATAATCCGTCA | 568.561901900357 | 0.364842217684087 |
| ATGGAGTGAGTC | 568.572616521759 | 0.421556467050086 |
| CGTGAGAATGAC | 568.593208713068 | 0.385960623140427 |
| GCAACCGATGAC | 568.593914537391 | 0.818253134067293 |
| AAGAGTGACCAA | 568.615778440916 | 0.358269431398816 |
| GAGTCAATAACC | 568.629906981734 | 0.543294125069561 |
| ATGTGCGGTGAC | 568.63465799567  | 0.453073704420474 |
| CATTAATCGTCA | 568.636890404085 | 0.519402543288943 |
| GCCAATTGCTCA | 568.660808120168 | 0.538542202501605 |
| GACTATTGTGAC | 568.662180247657 | 0.418848469013176 |
| GTCATCAGTTTA | 568.663636506361 | 0.396547460798653 |
| CTCCAAGTCATC | 568.673681766874 | 0.266256615648655 |
| CTGCGTGACCCA | 568.682088958252 | 0.166687168803865 |
| AACCCAATGACG | 568.682448360943 | 0.326286805470656 |
| ATGACGATGATA | 568.688326153786 | 0.295840229956391 |
| GCGTATTATGAC | 568.696902639583 | 0.51947223160597  |
| AGAGTCAGGGGC | 568.706070302825 | 0.562405267404641 |
| GAGTCGTGACTA | 568.706851515008 | 0.245924213054376 |
| GCTTCATAGTCA | 568.720753439664 | 0.738012071404362 |
| TGATTCAAGTAA | 568.73637271413  | 0.254849050546553 |
| CCGTTAATGACG | 568.742110051379 | 0.70973345964294  |
| ACGTTGACACAC | 568.751244241766 | 0.526568316996132 |
| GTAACAGTCAAC | 568.756836078289 | 0.380344367652789 |
| CATATTGACTGA | 568.759312178332 | 0.718591905038418 |
| GTCATTGTGCCA | 568.759638984327 | 0.466472805676991 |
| CGACATGACCCA | 568.764789457284 | 0.361934837163657 |
| CTGATTGGGTCA | 568.779089177756 | 0.534433312377996 |
| GCTCTGGTGACA | 568.801504422686 | 0.769148656041686 |
| AATCGTCGTCAT | 568.81085155038  | 0.366914081881218 |
| GAGTCAAAATTA | 568.821584380378 | 0.428466288471249 |
| GTCATTTCTCGA | 568.828842931095 | 0.350675030516539 |
| ACTAATCATGAC | 568.833402997816 | 0.429409122977878 |
| ATTAGCTGAGTC | 568.834302185146 | 0.84386976650325  |
| ATCAGTGACCAA | 568.837061830972 | 0.640872860603373 |
| ACCGGGAATGAC | 568.83854220073  | 0.250421283172057 |
| CTTACCTGACTC | 568.865368551318 | 0.389756109679481 |

|              |                  |                   |
|--------------|------------------|-------------------|
| GTCATCCCGCGA | 568.870199580041 | 0.505917866213794 |
| CACTAAGATGAC | 568.88165551493  | 0.257060707758791 |
| GCTTATCTGTCA | 568.886278714669 | 0.542871013124594 |
| GTCATCCAGGAC | 568.889120099381 | 0.468254311988753 |
| ATAAATGATGAC | 568.890817752613 | 0.558068663474458 |
| AACTACGTGTCA | 568.893130623389 | 0.648908758787216 |
| GTCATTTAACTA | 568.903203705476 | 0.3811160464491   |
| ATGACGGAGCTG | 568.903893250891 | 0.451684418590456 |
| GTTATCGCGTCA | 568.909534113106 | 0.531588173901793 |
| CGTCCTAATGAC | 568.928173071575 | 0.589979881677171 |
| ATGACGGTACTG | 568.932725085092 | 0.46648612919386  |
| ATTCTGACGCA  | 568.93477300194  | 0.276214127023766 |
| CGGAATGATGAC | 568.937416302346 | 0.157047156814844 |
| ATGAATCAATGA | 568.962317202478 | 0.513148939243717 |
| ACGTCACCTTGG | 568.983470799264 | 0.666513744680797 |
| AATAGTCAATGC | 568.989254022322 | 0.426656298695335 |
| GTCATCCCGATA | 569.00149963385  | 0.359765927056363 |
| TCTGATGGGTCA | 569.00624049699  | 0.403284092243912 |
| CGATTGCAGTCA | 569.018420202388 | 0.404727898073279 |
| GCGGCTTACTCA | 569.026441243207 | 0.917519288720867 |
| CGGTATATGTCA | 569.028929627459 | 0.509412259280225 |
| GATGCTGACACA | 569.04095818324  | 0.701413599722168 |
| GTCATCACAGCA | 569.045538626074 | 0.427860401066644 |
| CGATGACCGAAA | 569.04659294734  | 0.565061573365299 |
| ATAGACTCAGAA | 569.053570985713 | 0.369525163746322 |
| ACCACGTGAGTC | 569.054625137921 | 0.323650953733957 |
| AAAATGGTGACA | 569.057187295969 | 0.443458572500104 |
| CTTGCTAGTCA  | 569.058625074948 | 0.113517181517859 |
| AAATAACGTCAC | 569.06298963869  | 0.359139140208361 |
| TCTGGTGAGCCA | 569.06580795259  | 0.495492870346736 |
| CAATAATATGAC | 569.066963901393 | 0.520756277997797 |
| ACGCGCGAGTCA | 569.069989522862 | 0.736527812956463 |
| GTGACATACACA | 569.081377455827 | 0.535849293398411 |
| ACAGTTTGACTC | 569.094233888445 | 0.308036997270154 |
| GCACTATATGAC | 569.097637227077 | 0.724746357692603 |
| CGTCATCGGGGA | 569.101342903726 | 0.367256367627344 |
| CCGTACTGACTC | 569.106914610312 | 0.278405066046647 |
| AGAGTCAAACAC | 569.112918509555 | 0.46759698614829  |
| ACTCACATGACA | 569.120778751613 | 0.355367357992896 |
| TAGCTTGTGTCA | 569.146911411492 | 0.399651078744103 |
| AGGTATCCGTCA | 569.156382801171 | 0.306610646361861 |
| ATGACGAACCGG | 569.159836191483 | 0.502493717964511 |
| TCACTTAAGTCA | 569.167750904759 | 0.712459375860635 |
| ATGACGCCTTGA | 569.176581972833 | 0.566692180818232 |
| CCGTAGATGACG | 569.201866464005 | 0.611104669530991 |
| CGGTATTGACTC | 569.206075477146 | 0.460694140347632 |
| ACTGACGTCAGA | 569.214019407588 | 0.470388805404503 |
| TAGAACGACTCA | 569.216895362426 | 0.222576324002641 |
| ACGTCACCCGAC | 569.21818652073  | 0.336942031947042 |
| TGACTGGCATAA | 569.218394738868 | 0.446097942517347 |
| CGAGGTTATGAC | 569.242230552344 | 0.42550720258118  |
| CTTGAGATGAC  | 569.249692715955 | 0.376231598989164 |
| GTACCGTACTA  | 569.258587556275 | 0.185548234650663 |
| CACCATGACCCA | 569.260215948553 | 0.234038223473153 |

|              |                  |                   |
|--------------|------------------|-------------------|
| TGTCCTGACACA | 569.262437504306 | 0.476321671553894 |
| CTATCATATGAC | 569.277860174627 | 0.443318351655265 |
| GAGGATGATGAC | 569.281857843973 | 0.235992206073572 |
| GGTCAGGATGAC | 569.285550709061 | 0.521996592280123 |
| CGTCATCAGGAG | 569.292323088638 | 0.578479932726905 |
| CATGCGTAGTCA | 569.298200701376 | 0.586078510136562 |
| ACTATTTGACTC | 569.299364618463 | 0.487736893767589 |
| CAACGCGACTCA | 569.304254698466 | 0.392091577970831 |
| TATGATAAGTCA | 569.315213979806 | 0.543292908929757 |
| ATGACGCCGTAC | 569.316542971827 | 0.490705591179694 |
| AGTCAGAGCAAA | 569.330163865169 | 0.170549077415217 |
| CAAGGGTGACGC | 569.343821297075 | 0.824348536880605 |
| GTCATAACTCAA | 569.348378356323 | 0.427488931928388 |
| CACCATTGGTCA | 569.378145864758 | 0.348095648706714 |
| ATGACAGACCGC | 569.385760669305 | 0.368467001654249 |
| AGTAGGTGACAC | 569.409537661072 | 0.507720672398989 |
| AAGAAGGATGAC | 569.414273732537 | 0.408506814010466 |
| TCAGGCGACTCA | 569.418584023144 | 0.413861863954336 |
| CCCAGGTGTGAC | 569.419905585188 | 0.629085147063142 |
| CTCATAGTGTCA | 569.441274029738 | 0.392803260555878 |
| CTTCTAATGACA | 569.449994008201 | 0.296598154776435 |
| AGTCACGCCCCG | 569.463693692792 | 0.556950337416464 |
| GTGAACTCGTCA | 569.471145025606 | 0.763829625686491 |
| ACACAAGTGTC  | 569.472166475706 | 0.709068865907755 |
| AGATTGACACAC | 569.476480821618 | 0.390876458695443 |
| GTCATCGTTGGA | 569.484137861057 | 0.431444751750803 |
| ATGGATTATGAC | 569.49725351263  | 0.357202290591166 |
| CAGTGGAATGAC | 569.500181496364 | 0.329258046424688 |
| GTCATCATGGAA | 569.501777528463 | 0.227582980603576 |
| AGAGCTTATGAC | 569.50771730478  | 0.349162383821357 |
| TACCGTGAATCA | 569.508259726137 | 0.36104737000653  |
| GCAAGGTGACGC | 569.514559644029 | 0.370524410449814 |
| CACGTCACTTCC | 569.540751588932 | 0.331410913163592 |
| AAACGCGATGAC | 569.563380111551 | 0.708467328980767 |
| CACATCAGTGAC | 569.571143104969 | 0.562249629467689 |
| TGACACAGTAAA | 569.577811253013 | 0.754462650416292 |
| CAGTAGTACTCA | 569.579967068113 | 0.925232524043861 |
| AGCACAAATGAC | 569.60073835589  | 0.697503461404235 |
| ACGTCACTCAAT | 569.608976861232 | 0.152672975002976 |
| GTGGTGGAGTCA | 569.614643742871 | 0.158605104451615 |
| CTCGAAGGTGAC | 569.617707273851 | 0.728820725706229 |
| CCAGCATGACGC | 569.619104914305 | 0.533761494233566 |
| GAGTCAATTTCA | 569.633148907645 | 0.502227842151443 |
| TGACTAGTGCAA | 569.64641938066  | 0.321665534601986 |
| AGAGTCAAATC  | 569.664641445794 | 0.454532840417946 |
| ACACGTGAATCA | 569.66725418114  | 0.317831316767671 |
| CGCCAAGTCACA | 569.674926373116 | 0.741379798650774 |
| CGTTTAGACTCA | 569.67917751754  | 0.482733627079539 |
| CAAGGCGTCATC | 569.692224645557 | 0.293133501767201 |
| GTCATCCCTCTA | 569.722322677702 | 0.416434657108027 |
| GTCATTCTCTGA | 569.724906353957 | 0.455078217073732 |
| CCTAAAGGTGAC | 569.732634186546 | 0.782210606818195 |
| CATCCTGTCATA | 569.759826782699 | 0.362274306935853 |
| CGGATGTGTGAC | 569.764955962922 | 0.340133185024079 |

|               |                  |                    |
|---------------|------------------|--------------------|
| TGACTGTGCCAA  | 569.778229174588 | 0.375743459256243  |
| CACGGGGAGTCA  | 569.783741872756 | 0.329873466290576  |
| GCATTGCGTGAC  | 569.801913368788 | 0.472609377043804  |
| AGTCACGACGTG  | 569.820281464894 | 0.519002506483795  |
| ACCGATCCGTCA  | 569.839530700939 | 0.38747153976333   |
| GTCATACAACAC  | 569.865132649468 | 0.609297506535153  |
| ACCACGGATGAC  | 569.869587680577 | 0.595893862810958  |
| AGGTTACATCAC  | 569.873996908751 | 0.182706113594739  |
| ATATGTCAGCGC  | 569.875457792053 | 0.443138446897702  |
| AGAGTCAATGGC  | 569.880255078935 | 0.616795863627207  |
| GAAGATGATGAC  | 569.88482113023  | 0.424054235247265  |
| ATGACGTCTACA  | 569.89684396757  | 0.422258138322064  |
| CCGCAAATGACA  | 569.899448232383 | 0.761346423386563  |
| CGACTCAGTCAA  | 569.904619322778 | 0.266328684720035  |
| AGGTGAATCAAC  | 569.913020854838 | 0.316478866788489  |
| GTCACGCGTGAC  | 569.922353018859 | 0.610379676478911  |
| CCAAATTGCTCA  | 569.923447607535 | 0.541435111372043  |
| TCTTATCTGTCA  | 569.942656148676 | 0.156665084114244  |
| GACTAATCACGA  | 569.944794243102 | 0.400657744750114  |
| CGGTAAAATGAC  | 569.946112267049 | 0.625620841451015  |
| AGTCACGGCTGA  | 569.973254720708 | 0.485489907100634  |
| GACCAACTCATA  | 569.97811083064  | 0.252739008164779  |
| ATGAGCAAACAC  | 569.996875051649 | 0.314046814272574  |
| TGACATAACACA  | 570.010622221483 | 0.62698960129793   |
| AAATATGTGACA  | 570.013539242119 | 0.570294790791366  |
| GAGTCAGGCTTA  | 570.016926236725 | 0.34848605016976   |
| TATTTGTAGTCA  | 570.017061511507 | 0.52010139913925   |
| AAATGAGATGAC  | 570.019228910291 | 0.26467990128168   |
| AACGACTAGTCA  | 570.02414024735  | 0.331980707015726  |
| ATCATGCATGAC  | 570.026374668372 | 0.395379286402887  |
| CTCGAGTGAGTC  | 570.031448374118 | 0.744417003059401  |
| AGAGTCAAGATG  | 570.034058454164 | 0.451774995287499  |
| ACGAACTGACTC  | 570.036689796993 | 0.587188544406385  |
| GACACTTATGAC  | 570.049028673288 | 0.323243146019219  |
| CGGATTTATGAC  | 570.053617047853 | 0.708642658608107  |
| GTCACTGGTCGA  | 570.057300036337 | 0.525882103444409  |
| GTCATAGGAATA  | 570.076900402329 | 0.330874315732684  |
| TATGACGCCCTGA | 570.077065904575 | 0.306050226634895  |
| CCAAAGGTGACG  | 570.077972600685 | 0.375260145480253  |
| ATGACCCAGACA  | 570.087364459428 | 0.423872220146249  |
| AATGGGTGACGT  | 570.090339751286 | 0.310263324781568  |
| GAAGTGTATGAC  | 570.091423510427 | 0.268686265977692  |
| AGGCGTGACTAG  | 570.095052121305 | 0.284675571433802  |
| TGACTTAGAGCA  | 570.096810554581 | 0.403663445611887  |
| ATGACTCCAA    | 570.102353511047 | 0.434967046877066  |
| ATAGACTAGTCA  | 570.102980079588 | 0.546465373920751  |
| GTCATTCTGGAA  | 570.114583185941 | 0.526242952814046  |
| CCGTAGTACTCA  | 570.125093353862 | 0.430298484616382  |
| ACGCAGATGACA  | 570.135565236372 | 0.0797613728922915 |
| GTCATCCGTTCA  | 570.136912157525 | 0.230958313598507  |
| CGCGTCAGACAC  | 570.140394043841 | 0.766936196100948  |
| GTCATCGAGACA  | 570.151433236204 | 0.297842519041589  |
| ACAGGGGAGTCA  | 570.152540960849 | 0.293672669691856  |
| ACTATTGACACA  | 570.153634029194 | 0.350413248509176  |

|               |                  |                   |
|---------------|------------------|-------------------|
| GTCATTGACAAA  | 570.163141505512 | 0.760006967431238 |
| GCAACTGATGAC  | 570.163250052343 | 0.543228440669653 |
| ACTCATACCTAA  | 570.173966326774 | 0.307301736992146 |
| GCTGATAATGAC  | 570.179851161132 | 0.591308167764544 |
| GTCATCAAGTAA  | 570.180105397378 | 0.524966483051532 |
| ACCCTGACGTCA  | 570.202426724302 | 0.403515528538118 |
| TCCGCTGTGTCA  | 570.214062919369 | 0.376287227092683 |
| AAATTGACACAC  | 570.216657751509 | 0.455608823193287 |
| ACGTCACATCTC  | 570.220712919583 | 0.185440050950175 |
| ACCTTTGAGTAA  | 570.222965673866 | 0.502823628542545 |
| TATAGCGAGTCA  | 570.225971103076 | 0.519280128166684 |
| ATGACAGAGCAG  | 570.24505336959  | 0.255122553432845 |
| GAAGTTTGACTC  | 570.246727588603 | 0.339399172520123 |
| CACAGGAATGAC  | 570.255099223602 | 0.388122455655083 |
| ACTGCAAGTCAT  | 570.265013852553 | 0.325346095742326 |
| CGATTACAGTCA  | 570.265154585542 | 0.539567970587958 |
| CGAATACTGTCA  | 570.271598618345 | 0.550791661984145 |
| GATGACATTACA  | 570.272375994359 | 0.230391478978645 |
| CGTGGTCAATTCA | 570.29247143462  | 0.412404912205515 |
| GCACTGCATGAC  | 570.292790675034 | 0.658169629944485 |
| ATCTCGGTGAC   | 570.307546299494 | 0.362411092921927 |
| CAGTAATCGTCA  | 570.336107351461 | 0.546353769178492 |
| CGTCATTGCTAA  | 570.354404970589 | 0.421423623368885 |
| AGACCCTGACTC  | 570.35446377703  | 0.285801906176066 |
| AGGCAAGTCATC  | 570.357655107347 | 0.423783766763086 |
| ATGTATATGTCA  | 570.367827659237 | 0.567430510248107 |
| TGACATTGCTCA  | 570.370504469959 | 0.434783677388798 |
| GTCATAAACTAA  | 570.372743091765 | 0.402084270815187 |
| CTCACACAGTCA  | 570.381791735545 | 0.655728929426043 |
| CTAGCATGACAC  | 570.385255280502 | 0.346049876497537 |
| GCAATGCAGTCA  | 570.388548414732 | 0.494014681198555 |
| GCGTCACGCTTA  | 570.391007341439 | 0.754585953646617 |
| GCTAATACGTCA  | 570.392009471561 | 0.432640491926871 |
| AGCGGTTATGAC  | 570.401766706513 | 0.461881714197777 |
| ACCACTTATGAC  | 570.404397167386 | 0.265864026590039 |
| ATCGTCATGCGA  | 570.412156183215 | 0.997619275287736 |
| ACGCGTCAGACT  | 570.418233096729 | 0.578300612269358 |
| GCGCATGAATCA  | 570.425704986772 | 0.552406105029017 |
| ATATTAATGACA  | 570.426115175728 | 0.633723757907369 |
| TAACTATAGTCA  | 570.42781904868  | 0.553055853264219 |
| ATGACGTTGCTG  | 570.434119217353 | 0.511075826906805 |
| GTCATCTTCGAC  | 570.436524542401 | 0.404964183087991 |
| ACTCCAGGTGAC  | 570.437245454744 | 0.52323530826293  |
| GTGGCCATGTCA  | 570.4382149506   | 0.548221782610794 |
| CATCAGAATGAC  | 570.455980838285 | 0.52818862540993  |
| ACGTGCTAGTCA  | 570.465835124701 | 0.563726108672538 |
| ACAGATTGCTCA  | 570.483082131305 | 0.695824133413289 |
| TGACGCAGTCCA  | 570.505962148558 | 0.666188611217605 |
| GTCATTGCGGAC  | 570.51463823199  | 0.660949375691524 |
| CTTTAGCAGTCA  | 570.522399189779 | 0.533055851100056 |
| ATGACCTCATCG  | 570.543631951156 | 0.429213033200167 |
| CAAGCTAAGTCA  | 570.550095930018 | 0.787746017096029 |
| ACAGCAACGTCA  | 570.551445076778 | 0.75511321866288  |
| AGTCACTCCGTA  | 570.564864655908 | 0.540318141562936 |

|               |                  |                   |
|---------------|------------------|-------------------|
| ATAAACGGTGAC  | 570.571038224002 | 0.357784416074674 |
| CCTGCGAGTGAC  | 570.582028030529 | 0.461785069716913 |
| CTGACTGTGCCA  | 570.582542151913 | 0.345315537133927 |
| ACGACATATGAC  | 570.592751387828 | 0.562009656033182 |
| TCACCAAATGA   | 570.594551850775 | 0.626805654470038 |
| GCGCCTTAGTCA  | 570.605881475973 | 0.689384670108939 |
| ATGAGCAAGTTG  | 570.611809448804 | 0.281272522931235 |
| AGACTAATCTCG  | 570.619486598738 | 0.331738294107957 |
| GTCATTATCATA  | 570.626875967878 | 0.771602890981824 |
| CTGAGAAATGAC  | 570.657894776279 | 0.62757606919103  |
| TCTCAGTAGTCA  | 570.658481676385 | 0.516271169450807 |
| AAGCCAGAGTCA  | 570.667537839218 | 0.410469996168059 |
| GATGCTTATGAC  | 570.677531903639 | 0.37101391302396  |
| GACCAGAATGAC  | 570.683682966689 | 0.590135202949534 |
| GAGTCAATAAGA  | 570.688887997676 | 0.434903683809727 |
| ATGACAGTGTCTG | 570.696564850203 | 0.244837581137955 |
| TCGCGCGAGTCA  | 570.697037507396 | 0.516030906940041 |
| ATCGAGGATGAC  | 570.701488014834 | 0.380520249861138 |
| TAAGATGGGTCA  | 570.704120238779 | 0.229038634213019 |
| GTCATTACTACA  | 570.709095075092 | 0.274753998340161 |
| ACAGCGTACTG   | 570.719242559314 | 0.470780630405314 |
| GGAGGTAGTCAC  | 570.74029360607  | 0.303522498659566 |
| GCAGCGGATGAC  | 570.747758668974 | 0.423462816311374 |
| CGACCAGTCAGA  | 570.753191420175 | 0.576467572332215 |
| CTTGCGTGTGAC  | 570.76346044683  | 0.587514566891593 |
| GTCATTTCACTA  | 570.772174228455 | 0.524020422150378 |
| TCATAGATCAAA  | 570.788033959857 | 0.557373439112655 |
| CCGAATTAGTCG  | 570.799726004369 | 0.478999550876162 |
| GTCATCTTTCTA  | 570.801800993666 | 0.37197042808175  |
| CGACTAATCGAA  | 570.806099907513 | 0.682509310445463 |
| CGTTGCATGACA  | 570.807434182877 | 0.450619719142469 |
| TAGCATACGTCA  | 570.810339083914 | 0.496053067631034 |
| CATTTTGCGTCA  | 570.818312183799 | 0.687546713495232 |
| TCGTGTTTCGTCA | 570.820391175553 | 0.446487604840838 |
| CAGCTCGATGAC  | 570.825675574082 | 0.39991434952665  |
| ATGAAGTGAGTC  | 570.828154673354 | 0.644199628615229 |
| GTCACGCTGACA  | 570.831932559941 | 0.550044536978472 |
| CGTTTAAGTGAC  | 570.835544090549 | 0.5350659966384   |
| CGCTACGTATGA  | 570.840746095091 | 0.529478894904872 |
| AACTGATAGTCA  | 570.84119258856  | 0.738383624354315 |
| ATTGACTGGTCA  | 570.843205936743 | 0.582981694258136 |
| GTCACACCATTA  | 570.84618040296  | 0.393948907230689 |
| CCAGGTCATGAC  | 570.852794438451 | 0.810297769230544 |
| CGTCGATATGAC  | 570.858190159404 | 0.601727191377816 |
| GAGCTACAGTCA  | 570.864755190066 | 0.612201788804434 |
| GAGCAAGTCATA  | 570.873049614603 | 0.266926783083636 |
| GTCATTTTAAAA  | 570.874290527795 | 0.488646518293163 |
| CAGCCTGATGAC  | 570.877042921391 | 0.658371780246342 |
| AGTCGTGATGAC  | 570.879302356847 | 0.526933998199845 |
| GTCATCATGGGA  | 570.884222563018 | 0.395000260513882 |
| CGTCATCAAGTA  | 570.887882329261 | 0.424902604858709 |
| CGAACTGATGAC  | 570.890163757014 | 0.398324607295962 |
| AGTCAGACTGCC  | 570.891957630179 | 0.361695996604513 |
| AGTCACGCCGAT  | 570.912428102027 | 0.368284185558439 |

|               |                  |                   |
|---------------|------------------|-------------------|
| GAGCAGTGACAC  | 570.919264001445 | 0.555383161790485 |
| CGTCATGATGAA  | 570.928140697142 | 0.767695131903539 |
| TGATTCACGCAA  | 570.947125429439 | 0.514859348852784 |
| GTCACCCAATTA  | 570.955135611738 | 0.482538481557715 |
| GTGTCATGCCCA  | 570.957626144472 | 0.626669356218244 |
| TGACGTAGCTAA  | 570.960090847817 | 0.285157692102159 |
| CATTTGTGACAA  | 570.962645183111 | 0.455499531434143 |
| AAATTTCTGTCA  | 570.979483750659 | 0.981001076708572 |
| CTAACTTATGAC  | 571.035236409384 | 0.352835377274053 |
| ACTTGCGACTCA  | 571.046631026699 | 0.569219036230979 |
| ACTGATTACGCA  | 571.047654875195 | 0.466765357820665 |
| CTTACCGGTGAC  | 571.066348270484 | 0.573765763628892 |
| TGACTTAGATAA  | 571.07297141599  | 1.00654861417178  |
| ACTCGCTATGAC  | 571.076792814751 | 0.40032244901967  |
| CAACTTGTGACG  | 571.07685712432  | 0.775049588476345 |
| CGTCATTGTGCA  | 571.078493080219 | 0.473709938280305 |
| TATACTGACACA  | 571.078783094685 | 0.368209732506519 |
| TGACTTAAATAA  | 571.086723751209 | 0.609978518207913 |
| TGACGAAATGCA  | 571.091321697963 | 0.584916775372309 |
| ACCCAAGTCATA  | 571.100528774456 | 0.391301302453665 |
| TCTCAAGACTCA  | 571.111074338096 | 0.42182147819705  |
| CGAAACGTGTCA  | 571.12635006061  | 0.586585680153379 |
| ATCTATTGCTCA  | 571.13398059938  | 0.187194786700875 |
| CCCTTTGACTGA  | 571.135031339419 | 0.173109782915998 |
| ACCACGTGTGAC  | 571.151110626357 | 0.423755812889143 |
| ACGCCGAATGAC  | 571.15322068101  | 0.402351037766654 |
| TCCGATTACGCA  | 571.162358226651 | 0.380827204379266 |
| GACTGGGATGAC  | 571.162614272499 | 0.295791259577869 |
| AACGTAGACTCA  | 571.16398828585  | 0.712255872018392 |
| CTCTACGGTGAC  | 571.166911193211 | 0.558900218280858 |
| ACTAGGAATGAC  | 571.16982856797  | 0.284900565013048 |
| ATGACGACGTCG  | 571.171600505971 | 0.305322763119811 |
| GTGAGTCGGCAA  | 571.180079280108 | 0.372705300668587 |
| ATTTTGACTCGA  | 571.186982050293 | 0.423487027783723 |
| ATTATGCATGAC  | 571.201650360197 | 0.544271372206719 |
| GTCCTTGACTGA  | 571.203145915242 | 0.442246974420609 |
| TCTTCCTAGTCA  | 571.216202437106 | 0.323148078062329 |
| AGACTCACGATG  | 571.216438630496 | 0.464411191443431 |
| AAGCCATGTCAC  | 571.234124868624 | 0.307594977617294 |
| AACGGCGGTGAC  | 571.237577889377 | 0.575161371566337 |
| AGGGTCTATGAC  | 571.258499821802 | 0.383387626072239 |
| AGGCCTGATGAC  | 571.266496187341 | 0.762523480685515 |
| CTGGTTGATGAC  | 571.267389981348 | 0.560070284197336 |
| ACGTCACCTGTC  | 571.27227107962  | 0.394454879565011 |
| GTATACCAGTCA  | 571.280022521493 | 0.411019683701246 |
| CATGACTTGTGCG | 571.295667200283 | 0.697074387830021 |
| CGATGACTTGCC  | 571.299616257495 | 0.382807706832309 |
| AGGAACCAGTCA  | 571.31156249066  | 0.458152720695507 |
| GATCAGACTCAC  | 571.329203659863 | 0.507264608536794 |
| CACTGTAATGAC  | 571.331353889447 | 0.415074723038381 |
| GAGTCAATGATC  | 571.33397496006  | 0.542212026975534 |
| CTGGTAGATGAC  | 571.335679350505 | 0.64470475695215  |
| ACGTTCCAGTCA  | 571.353854866903 | 0.397751958300207 |
| TCGTGCGACTCA  | 571.358037129479 | 0.888219930962837 |



|               |                  |                   |
|---------------|------------------|-------------------|
| CATCTAGTGACA  | 571.364772229    | 0.59005260742267  |
| TAGCACTAGTCA  | 571.366700685969 | 0.443883619758395 |
| CGTCATCTAATA  | 571.385369746816 | 0.449354885669301 |
| TGACGCGGAAAA  | 571.386102248822 | 0.319563654909885 |
| AGACTAATTATG  | 571.386303866092 | 0.727222926278336 |
| GTACGTTACTCA  | 571.38962193171  | 0.356588779838845 |
| ACCAGTCAGCGT  | 571.390482817304 | 0.350389394798034 |
| ATTGTTTCGTCA  | 571.393033733673 | 0.75922123767609  |
| ACGAAGCAGTCA  | 571.404897867966 | 0.380983311689659 |
| AATCTGTCAGAC  | 571.405773750961 | 0.319187135451779 |
| AGATCATGACGC  | 571.419420981514 | 0.462484941094388 |
| CGTCATTATCTA  | 571.438328197478 | 0.311658897788022 |
| GTCATCCTGGAA  | 571.443287162525 | 0.421194868841069 |
| ATTTCCGGTGAC  | 571.469366755196 | 0.566550946512005 |
| ACCTAAAATGAC  | 571.483586200265 | 0.384747059075261 |
| ACGGCCCAGTCA  | 571.486373318407 | 0.56340722070484  |
| ACACTGGGTGAC  | 571.514406989844 | 0.72379936916775  |
| GAAGTATATGAC  | 571.525238823397 | 0.414291375747304 |
| GAGTCAAAGTAA  | 571.539212786316 | 0.218817735931548 |
| AGTCACGCGAAG  | 571.542753717626 | 0.338858647545092 |
| GTCATGTGCAAC  | 571.547359347067 | 0.944709144056246 |
| GCGGTCGATGAC  | 571.556125532399 | 0.434814736282122 |
| CTCAGGCATGAC  | 571.559932160139 | 0.659665328341543 |
| GTCATTTGACTA  | 571.561836879475 | 0.343220206730558 |
| CTTTATCCGTCA  | 571.566530246873 | 0.334599418670716 |
| AGTCAGAGCTAA  | 571.572852241796 | 0.313768285092776 |
| CTTCTAGAGTCA  | 571.599537658764 | 0.612976028586557 |
| AGACTAATCGCG  | 571.604667939129 | 0.575225129533134 |
| AGACTAATTGCT  | 571.606231110738 | 0.50379020108554  |
| CAATCACATGAC  | 571.608239929974 | 0.451829974360404 |
| CGCAGGTGTGAC  | 571.611693848658 | 0.6547747820156   |
| GTCACCAAGTGA  | 571.612103486326 | 0.704369143676987 |
| GTCACAGCGCGA  | 571.617688501595 | 0.37270350045794  |
| CTGAACTGACTC  | 571.619887295436 | 0.360606200132636 |
| CTGTAAGATGAC  | 571.624038908776 | 0.7481635677253   |
| CGTCATCAATAC  | 571.65116240064  | 0.515168618000692 |
| CATCGACATGAC  | 571.658294290422 | 0.533894744255753 |
| CTCTGACGCGTA  | 571.668618103471 | 0.477940302392015 |
| AGTCATGGGTTT  | 571.674899324919 | 0.136200863134054 |
| GGTCTAGACTCA  | 571.674927313862 | 0.612331176408468 |
| TGACGCGTTACA  | 571.681813511016 | 0.797885912112398 |
| CTTGTCCGGTGAC | 571.694358423572 | 0.444234006995914 |
| GCATCTGTGACA  | 571.70499474776  | 0.542507235701473 |
| CTTACGTGTGAC  | 571.729308197784 | 0.516046391544126 |
| AATCCCCTCATA  | 571.733027774784 | 0.435143470578451 |
| TCATACTTAGGA  | 571.745786879866 | 0.585518290854367 |
| GTCACACATGCA  | 571.754152339026 | 0.676876536263355 |
| GTATTCCGGTGAC | 571.760684889655 | 0.428863965719772 |
| AGTCATGGGCCA  | 571.775254525437 | 0.563146635492498 |
| GAGTCAGGCCTA  | 571.784435201388 | 0.255685978323038 |
| GTCATCGGGCCA  | 571.798136141754 | 0.616047592588435 |
| ATCGAATGTGAC  | 571.801077036721 | 0.72606813000572  |
| TGAATCAGATCA  | 571.810044351802 | 0.330846144271235 |
| ATGACGAGGATC  | 571.818431000321 | 0.333971237583269 |

|              |                  |                   |
|--------------|------------------|-------------------|
| GCTAATATGTCA | 571.821454797249 | 0.459247052948789 |
| ATCCGTCAGACA | 571.827310705038 | 0.471748637391007 |
| GCATTAGACTCA | 571.831548073014 | 0.788820206798071 |
| GACAATTCGTCA | 571.851144761562 | 0.535261156402563 |
| CGTCATCGGACA | 571.852001211976 | 0.758552320337884 |
| ACGCTAATGACA | 571.863759224507 | 0.403874236287446 |
| GATGCCAATGAC | 571.87222017116  | 0.766294659346589 |
| GGGTCACATGAC | 571.886848829071 | 0.594736144037149 |
| TAAACTGACACA | 571.892271152053 | 0.548412485401963 |
| ACAAATTGTGAC | 571.916616290507 | 0.588537774411861 |
| GTCATTACGCAA | 571.920309951355 | 0.33805058140347  |
| ATCTAATATGAC | 571.923278428732 | 0.131885884020148 |
| CCCAAATATGAC | 571.943694950234 | 0.359798223510437 |
| CCTTGCGACTCA | 571.949566897085 | 0.358429082851489 |
| ACTGTTGAATCA | 571.957778908276 | 0.538092692665256 |
| AATACGGAGTCA | 571.963230656576 | 0.331163273329642 |
| CCCCAAGATGAC | 571.990029407515 | 0.223873426101057 |
| CGACCAAGTCAC | 571.994677075264 | 0.616506917512461 |
| GATATCAATGAC | 572.001255575906 | 0.397080625845626 |
| ATGATTTATGAC | 572.013782092426 | 0.229148244390039 |
| AGACTTGCTCAT | 572.014335627075 | 0.202879776796099 |
| AGTCACGCCATA | 572.019397024555 | 0.421255762250048 |
| CGTCATGTGAGC | 572.028807025345 | 0.607677125835934 |
| CGTGACCTATGA | 572.030005673663 | 1.00581899909814  |
| CTGGTCCAGTCA | 572.042330596169 | 0.419895798909404 |
| AGTCACGCTCAT | 572.054156739549 | 0.476940831086824 |
| CACATTATGATG | 572.059906396594 | 0.568540514326693 |
| CACGTCGGTGAC | 572.06062488696  | 0.854702319321038 |
| CTCTGAATCAGA | 572.081373206427 | 0.359269514386837 |
| GAATCCTATGAC | 572.093280353003 | 0.452756430931249 |
| ACTCATCGAAGG | 572.096731200644 | 0.465651505245328 |
| TCGAGCGACTCA | 572.09851821558  | 0.776405284023007 |
| CGGGTTGACACA | 572.099842811168 | 0.265408372938939 |
| ACAACCCAGTCA | 572.10090693655  | 0.41092448230689  |
| GAACAATAGTCA | 572.112929935467 | 0.362725318976959 |
| ACCGTAGTGTC  | 572.11848702984  | 0.815128357698075 |
| GAGTTGTACCC  | 572.120681583831 | 0.464494841453965 |
| GTCATCGGACAC | 572.122657177648 | 0.64285034444557  |
| GTGACGTGCACA | 572.126197014236 | 0.111836877283069 |
| ACTTGATGTGAC | 572.145442252512 | 0.582822260433494 |
| GAGTCAATTTTA | 572.163074047221 | 0.348305939787677 |
| ATCGATTGCTCA | 572.166541219144 | 0.32192639763692  |
| GAAAATCCGTCA | 572.169756028862 | 0.464055657369845 |
| GAGTGACATGAC | 572.175584881224 | 0.194832326219063 |
| GTCAGACTAATA | 572.18115110367  | 0.306141826507317 |
| GACTCAGCTGAC | 572.184016727564 | 0.638746333940658 |
| ATTAAGGATGAC | 572.189142804435 | 0.525266805978255 |
| GCCACATCATCA | 572.193419775612 | 0.346775145037699 |
| GTCATATTGCTA | 572.200562986632 | 0.406905794780609 |
| GAACCGTACTA  | 572.214263899069 | 0.302595161684573 |
| AGGCGTGCGTCA | 572.221454236607 | 0.395361876965419 |
| ATAGACAATGAC | 572.222953473025 | 0.284642496762784 |
| CGACATTATGAC | 572.228197564954 | 0.445067480981591 |
| AGTGACGATATC | 572.22885629538  | 0.133877175752143 |

|               |                  |                   |
|---------------|------------------|-------------------|
| CACGTCACGAGG  | 572.230369979162 | 0.655487576627394 |
| GTCATATCCAC   | 572.235676557983 | 0.393172110914132 |
| ATGACAGAGCAA  | 572.240700762844 | 0.304750906758599 |
| CTAATAATGACA  | 572.26071134266  | 0.280386469753222 |
| CAGTCAACGTCA  | 572.269236185963 | 0.546538920384591 |
| ACGCACAATGAC  | 572.290747005246 | 0.469637242860053 |
| AGTATTTGACTC  | 572.29078423775  | 0.622728670714532 |
| ATGGATGATGAC  | 572.305204367974 | 0.555314404627549 |
| AAAACCGTGTCA  | 572.313007977576 | 0.361688229207452 |
| GTCACCCGTAAA  | 572.347348408895 | 0.265972437193339 |
| ATGCTGTCACCA  | 572.3499400812   | 0.246901676890503 |
| CAATCCGTCAGA  | 572.350533456799 | 0.409740135299077 |
| CAGACCGAGTCA  | 572.360297748217 | 0.717693888860193 |
| AGTCCTTGTGAT  | 572.364052852977 | 0.148762873445837 |
| CCATAATTAGTC  | 572.373773351588 | 0.448741630964071 |
| TGACTACCGTAA  | 572.376301581903 | 0.845395784753517 |
| AGTCACGGATAT  | 572.385276210963 | 0.276003350701435 |
| TATGACTTTTAA  | 572.3944538039   | 0.544087686074464 |
| GTTGATTTGTCA  | 572.395565755216 | 0.557056636993227 |
| CAGACTGTCATA  | 572.397358214214 | 0.355542097813521 |
| GTCATCCTTACA  | 572.403617892898 | 0.401972297153227 |
| GTGAGCAAATAA  | 572.408602213943 | 0.272399657269243 |
| CCGAGGTAGTCA  | 572.416491167553 | 0.704287658899321 |
| GTCATTAGATAA  | 572.436184544704 | 0.554459342420356 |
| GTCATGTAATCA  | 572.447627770144 | 0.664810344080051 |
| CACATGTTGTCA  | 572.470587438011 | 0.674196423029444 |
| CAGCGGAATGAC  | 572.482423707671 | 0.389026945891611 |
| TGACGAAGCGCA  | 572.502462403692 | 0.633750014841872 |
| GAGTAATTGTCA  | 572.502971226469 | 0.563855067159982 |
| AGACTAATATAT  | 572.515319849798 | 0.432766168082432 |
| ACTCGATTAGTC  | 572.515922915055 | 0.608092500720386 |
| TCCATGCAGTCA  | 572.520255022041 | 0.754600238761057 |
| GCTCAGGATGAC  | 572.529186652946 | 0.456068445124703 |
| GACTAATCGCCC  | 572.530968532881 | 0.628404149433181 |
| GCCGTAATATGA  | 572.532923343983 | 0.7663246128126   |
| ATGACGTTAGCA  | 572.535124413735 | 0.463901964793084 |
| ATAGGATTAICTC | 572.539121447849 | 0.516507477865726 |
| TGACTGCAACCA  | 572.557698974374 | 0.353726576296969 |
| AGGCATTATGAC  | 572.565565799782 | 0.231691104667336 |
| ATGACGAACAGG  | 572.566125120874 | 0.392983126575973 |
| CACACCGGTGAC  | 572.570516746407 | 0.292449692957049 |
| GCACCTGTGACA  | 572.576143204228 | 0.492857412888376 |
| AGACTAATCCAG  | 572.576556170385 | 0.402068515077208 |
| TAACATGAATCA  | 572.576746303019 | 0.528214412559137 |
| GCCCCTGTGTCA  | 572.577991027581 | 0.567147880497423 |
| GCCAGCGATGAC  | 572.585653491171 | 0.760341211367455 |
| CATTTAAATGAC  | 572.586572134187 | 0.780370060302267 |
| GAAGCAGAGTCA  | 572.589117367537 | 0.290514646324611 |
| AGTAATAGTGAC  | 572.602168067044 | 0.252545768761258 |
| CGCACAATGACG  | 572.606419625638 | 0.501116129375655 |
| CCCGAGTGAGTC  | 572.608474016047 | 0.431187622322925 |
| GCGTCGGAGTCA  | 572.612961911694 | 0.508023152887634 |
| ACGCTAGTGACT  | 572.613259528192 | 0.542569548068339 |
| ATGAGTACCACG  | 572.620384695256 | 0.553982033274038 |

|               |                  |                   |
|---------------|------------------|-------------------|
| AGCGAGGTGACT  | 572.627376324425 | 0.296127295213605 |
| GTTACGTGTACA  | 572.631257532974 | 0.54194853154467  |
| ACTGTATGTGAC  | 572.635539194957 | 0.258559518059642 |
| CGCGATGATGAC  | 572.639295650293 | 0.314764367920827 |
| AGTTTACTCGA   | 572.648367969446 | 0.727879886726416 |
| GAGAATACGTCA  | 572.649496987146 | 0.37809721080935  |
| GGAACTCAGTCA  | 572.658753782684 | 0.860895287867426 |
| GAAACTTATGAC  | 572.664497470428 | 0.785942752088064 |
| AGGTCTGATTCA  | 572.679426033814 | 0.28604134820136  |
| GAACTAGACTCA  | 572.68344337859  | 0.513171481540634 |
| GTCATTGTA AAC | 572.696946169773 | 0.569585305326924 |
| CTTGTGGTGTCA  | 572.704913200159 | 0.577978877681823 |
| CCGAGCTATGAC  | 572.70631851946  | 0.464826604562583 |
| CATCATGGGTCA  | 572.710112569153 | 0.448586380462999 |
| ATCACTGACACA  | 572.71192433481  | 0.191228854649929 |
| ATCTGCATGACA  | 572.714979268169 | 0.471454189094346 |
| TGAAA ACTGTCA | 572.751246769577 | 0.705222181874819 |
| GACTCTTGACTC  | 572.75677412595  | 0.248094316385197 |
| TCTCAGATGACA  | 572.773914976039 | 0.512070134126451 |
| AGGCCGTGTCAT  | 572.775876085008 | 0.313889997733244 |
| AAACGAAGTCAC  | 572.783383593741 | 0.14878627128748  |
| CTCCTAGAGTCA  | 572.837272007411 | 0.682303911624594 |
| CAACCATATGAC  | 572.842232978322 | 0.475252053905543 |
| AGTCACTACTCC  | 572.863509371471 | 0.291273248117666 |
| GTCATGTTTCAC  | 572.868989804423 | 0.614606595736523 |
| GTCATAAACAGA  | 572.869672191121 | 0.613293443271412 |
| ACTCATTAGAGT  | 572.888136466555 | 0.790650898689003 |
| ACGTCATGCACT  | 572.899573596035 | 0.298310434392883 |
| CCGTTTGTGTCA  | 572.901439309736 | 0.657365805143841 |
| ACGAAAGATGAC  | 572.91254765019  | 0.279143162695917 |
| ATGACAGACCAA  | 572.92028254367  | 0.386103591154125 |
| TGACTCCGAACA  | 572.931163202487 | 0.409034530005472 |
| TATGCTGT CACA | 572.934281105432 | 0.201065055934159 |
| ACAGGGTGACGC  | 572.936906259081 | 0.360488499770787 |
| GCTGGTGACCCA  | 572.964902228228 | 0.618829095670102 |
| GATGACATTATA  | 572.967095415132 | 0.357242992474459 |
| AATACAGTCAAC  | 572.978337748409 | 0.541488752970974 |
| GATGAATATGAC  | 572.987377263069 | 0.189438399096156 |
| GTCACAGTTAAC  | 572.992783757847 | 0.126348043635206 |
| ATGACGTTAACG  | 572.992807162162 | 0.528399703137898 |
| ATTGTATCGTCA  | 573.012590634501 | 0.524569789337325 |
| GGTCTTGATGAC  | 573.012702431314 | 0.587154683934138 |
| ATGACGGAGTGA  | 573.012861645249 | 0.282368580933362 |
| GCCCCGGTGACA  | 573.014179729024 | 0.600031923529489 |
| CATTTCTGAGTC  | 573.024620292571 | 0.857980225561901 |
| GTAACGAATGAC  | 573.033412652665 | 0.285478894236924 |
| GTATGAATAATA  | 573.038049466873 | 0.273510709830636 |
| GTTGACACAACA  | 573.042404804493 | 0.43445426654404  |
| ACGTCACCTATC  | 573.043548535176 | 0.322002120623955 |
| ACGTTTGACGCA  | 573.050065717167 | 0.390110878054336 |
| TGACTTAACGAA  | 573.052026002554 | 0.553722046992436 |
| ATGCATGATGAC  | 573.06001102232  | 0.363683959701015 |
| CACTGACTGTGA  | 573.06841490249  | 0.431814085060185 |
| CTTGTGCAGTCA  | 573.069293380058 | 0.536849684726479 |

|               |                  |                   |
|---------------|------------------|-------------------|
| GGTAATCCGTC   | 573.06969632935  | 0.379650390240673 |
| GTCATTCCACAA  | 573.072446610034 | 0.341478477402744 |
| CGTCATTCCGTC  | 573.074700401772 | 0.340803779442111 |
| GTCATCAGTCCA  | 573.076138060317 | 0.513447249302684 |
| CTATACCAGTCA  | 573.088971311777 | 0.304331641417227 |
| ACGTACATGACA  | 573.109486069436 | 0.429969978748571 |
| ACCTAAGTGTC   | 573.122116055382 | 0.71835474507605  |
| AACTGCTGAGTC  | 573.122705400027 | 0.786359608220977 |
| TTCAGTACTGAA  | 573.125476266036 | 0.957734740065355 |
| TCAATTATGTCA  | 573.127439374666 | 0.532264342258891 |
| GTCACTGACGGA  | 573.12941779693  | 0.480698247505148 |
| GGGACTTATGAC  | 573.130225137654 | 0.39351152911493  |
| CATAGTTGTGAC  | 573.149095568946 | 0.380692303998745 |
| TATGACAGGACA  | 573.15551203025  | 0.517356127385087 |
| ATGATGTAACCA  | 573.156210972302 | 0.519607984595419 |
| CACGTCAGTACG  | 573.160415465149 | 0.712270975153168 |
| CCGGCCAAGTCA  | 573.160977549306 | 0.674284670060743 |
| ATTGACGTGTTT  | 573.191761011474 | 0.559391281292736 |
| AGCGCTGCGTCA  | 573.203447741734 | 0.606445581637185 |
| CGGTAGATGACG  | 573.207810387471 | 0.504462759929818 |
| AATTTTCCGTCA  | 573.223062109837 | 0.497550758399755 |
| CTGTGTAATGAC  | 573.226945861331 | 0.383417340058194 |
| ATGAGCAACCCG  | 573.228306280728 | 0.423264513711075 |
| ACTCGTACTCAT  | 573.238221271493 | 0.272818277449099 |
| TCGACGGAGTCA  | 573.240217353163 | 0.572754944675818 |
| GTCATTCAAGGA  | 573.240458109912 | 0.289585704347367 |
| CGACTAATTATA  | 573.240618389901 | 0.56700855815616  |
| GGACCGTACTA   | 573.249053062554 | 0.395159578778936 |
| CTAATTTATGAC  | 573.260857027087 | 0.393156021782765 |
| CCTGGTAGTCAC  | 573.263403513302 | 0.202049752993159 |
| ACAAGTTGTGAC  | 573.263459317455 | 0.521756655115069 |
| CCATTAATGACA  | 573.265622600803 | 0.397864438929654 |
| CAAATAGTGACA  | 573.269727529301 | 0.666212019650375 |
| CTCTACAATGAC  | 573.276739706284 | 0.417172094433954 |
| AGTCATGGGTAG  | 573.297040741327 | 0.244124728386186 |
| CTGCTAATGACA  | 573.304916730549 | 0.553012473775792 |
| ATGACCTAATTA  | 573.321536444729 | 0.361425349669957 |
| CGAAAGGATGAC  | 573.330864494444 | 0.350239985422245 |
| GCAAGTGGATGAC | 573.337654752062 | 0.322389572238846 |
| GTCCTTACGTCA  | 573.342611904092 | 0.392227934174548 |
| GACTCACGCATC  | 573.351828913421 | 0.305392085226    |
| GCTCCTGATGAC  | 573.373252270292 | 0.530502995121014 |
| ATGAAAATGAC   | 573.375890559907 | 0.425257874668516 |
| TCTTCGTAGTCA  | 573.378306364642 | 0.55940273275285  |
| ATGACATGACAG  | 573.379562899762 | 0.117279481488052 |
| AGTCAAAATGAC  | 573.38064889833  | 0.438293892007492 |
| ACCATCCAGTCA  | 573.403515005078 | 0.491793555521652 |
| AGTCACGAGAAC  | 573.410084660867 | 0.413447902560531 |
| GTGTCCATGACA  | 573.413495465475 | 0.690249869325029 |
| CGCATCGACTCA  | 573.413796633506 | 0.442854404923338 |
| ACTCACACGTGA  | 573.416804498549 | 0.523423961420639 |
| GGGTATACGTCA  | 573.426546454303 | 0.376095336323881 |
| GGACATTCGTCA  | 573.44005653248  | 0.612495657882144 |
| CATGGAGATGAC  | 573.461138793384 | 0.421327455224851 |

|              |                  |                   |
|--------------|------------------|-------------------|
| GGGCATGATGAC | 573.469494091179 | 0.489691503786614 |
| CTCAAGATATGA | 573.472879937707 | 0.762017235352291 |
| ACGGATACGTCA | 573.473538688194 | 0.66430725700763  |
| TCCATCGCGTCA | 573.477538132577 | 0.579418254662828 |
| GGTCAATATGAC | 573.485952327805 | 0.399374703479599 |
| ATCTTAGGTGAC | 573.496681829332 | 0.566563455075034 |
| AATTGGGATGAC | 573.500023378608 | 0.400421287040515 |
| GGACTTGCACA  | 573.501640165868 | 0.478361543444549 |
| ACTAACGGTGAC | 573.509923809267 | 0.495098439579075 |
| ACACTTTACTCA | 573.512693102135 | 0.374434454560905 |
| GTCATCTACAGA | 573.526023581946 | 0.602508964284201 |
| ACGCTGACGTCA | 573.528408579324 | 0.358746879244939 |
| CATTAGGGTGAC | 573.528417739824 | 0.436121115121443 |
| GACTAATTTAAA | 573.548579869195 | 0.549135005716585 |
| TCCAATCCGTCA | 573.548841119102 | 0.449181925037082 |
| TATGATGTGGCA | 573.554038516066 | 0.402331298296388 |
| CGCTTGGATGAC | 573.556414314484 | 0.299377794928841 |
| GCCAATGATGAC | 573.561991206646 | 0.516693666124969 |
| GTCACACACGAA | 573.574080805501 | 0.976957440135123 |
| GACGATGATGAC | 573.591851272131 | 0.438993208130011 |
| AGAGGTGATGAC | 573.60532900295  | 0.262070688443637 |
| TCAATATGACCA | 573.610762312241 | 0.376562167613587 |
| GACATGTGTGAC | 573.612446425138 | 0.447159215618342 |
| CGTCACTCGTGA | 573.61583821595  | 0.586666779981799 |
| ACCAACCAGTCA | 573.631555339823 | 0.460276389024943 |
| AAAACAAAACAA | 573.637500196821 | 0.621859157869623 |
| AGTGTCATGAGG | 573.646516675156 | 0.328695620521959 |
| GTAGCTACGTCA | 573.648858641792 | 0.678829357208364 |
| GGTACTACGTCA | 573.658226390495 | 0.514550370018375 |
| CCGACAAATGAC | 573.670451193345 | 0.474499379088883 |
| GCACCAGATGAC | 573.673063149105 | 0.515516749884376 |
| AGTCAGAGCACA | 573.67706522961  | 0.295695801960656 |
| TGACTCGCATAA | 573.677393414613 | 0.557991785426708 |
| GTCATGATCCGA | 573.681861261352 | 0.60100259510051  |
| TGACTCCGCTAA | 573.692412585007 | 0.52886893848133  |
| ACGCATCCGTCA | 573.700823214053 | 0.565875990242117 |
| GCTTAGTGTGAC | 573.742725164529 | 0.318060333031248 |
| CCTGAAGGTGAC | 573.742837246406 | 0.567195350191574 |
| TAAGTGGAGTCA | 573.743037012815 | 0.295009376915789 |
| GAGTCGGATGAC | 573.757162461479 | 0.489571639524434 |
| TCACGTGATGCA | 573.759887982035 | 0.967212848060289 |
| GTCATAGACGGA | 573.76439448632  | 0.33091047397461  |
| AAGGAAAATGAC | 573.77998865123  | 0.400627107832266 |
| AGTCACTTCTGC | 573.800132390046 | 0.45438581397605  |
| AAATCTCGTCAT | 573.825944158342 | 0.322333929658381 |
| GCGTCACGGTCA | 573.832024625627 | 0.501165939439261 |
| CTGAACCAGTCA | 573.835795061927 | 0.510882957075217 |
| GCATCAGACTCA | 573.841697251217 | 0.328620562515259 |
| AAATCGTGACGT | 573.850146789822 | 0.476943444838498 |
| GTCATCCTGCAC | 573.851102313969 | 0.201273595487605 |
| ACCGCAAATGAC | 573.85314965248  | 0.694148489214402 |
| GACCATGTCACC | 573.865498325813 | 0.231342615124552 |
| AGTAAAGATGAC | 573.867927262646 | 0.229633185770844 |
| CTATATGTGACA | 573.873212464894 | 0.614175109722216 |

|                |                  |                    |
|----------------|------------------|--------------------|
| AACTTGACGTCA   | 573.892828151136 | 0.450356774418103  |
| AATGGGTGTCAT   | 573.899403042795 | 0.366902899265948  |
| AGTGTCACGTAA   | 573.90028010897  | 0.453681849187431  |
| CAAGTGATGACC   | 573.901982221303 | 0.630179805907681  |
| GCGCCAAATGAC   | 573.908427748053 | 0.482510672016064  |
| TGACACAGCTAA   | 573.912727968279 | 0.394998800984164  |
| CACTAATTATGA   | 573.933452501167 | 0.669673826294915  |
| CAGCAGGATGAC   | 573.933797294031 | 0.414207594348218  |
| AGAGCTGTCATC   | 573.93623939554  | 0.30639958645409   |
| CTCGTTGTGTCA   | 573.938478362639 | 0.449740664306529  |
| GTACTIONACTCA  | 573.939420250219 | 0.614068804364739  |
| AGCCGGCGTCAT   | 573.94323547814  | 0.514941222916521  |
| GAGTTGGAGTCA   | 573.974687972949 | 0.35699788498791   |
| ATAGCAGTCAGA   | 573.976878638434 | 0.533128767753698  |
| TCCATAATGACA   | 573.979318298984 | 0.818799633574661  |
| AAGAGCTTATC    | 573.983408498995 | 0.427321598158789  |
| AAAGTTTGTAC    | 573.984519588344 | 0.511579531050861  |
| ACAAAGTATCAT   | 573.986186473098 | 1.18061618929946   |
| AACTACTGTGAC   | 574.001219384788 | 0.533022430065193  |
| GAGTCAATTGAC   | 574.004386865093 | 0.480404850938733  |
| ACGCTTGATGAC   | 574.00444784187  | 0.668351800805319  |
| TGAGTAAACACA   | 574.010496564435 | 0.28777707180736   |
| GTCATCCAACCA   | 574.033965821421 | 0.257299362552237  |
| GTCATTGCTGAA   | 574.041930662023 | 0.476033091872803  |
| CTCGAAAATGAC   | 574.047046753437 | 0.629293832368065  |
| TGTCATCTCGAA   | 574.050782682021 | 0.307962087548714  |
| ATACGATGTCAT   | 574.064197305379 | 0.489567664600006  |
| CGCCGATTATGA   | 574.071313420542 | 0.784421076300121  |
| GAGATAGATGAC   | 574.077283076321 | 0.329570262950057  |
| GTCATTCTAGAC   | 574.086957764318 | 0.608488379244858  |
| AGTCACGGGAGA   | 574.102058056384 | 0.0650216562476453 |
| CTAAGAGATGAC   | 574.107575737929 | 0.559081488336094  |
| GTCATCCTGCTA   | 574.116559843616 | 0.261599892512183  |
| ACGTCACCTTCT   | 574.120618497652 | 0.375294526937111  |
| GTCTTGGAGTCA   | 574.122870914323 | 0.539958685820193  |
| TCTTCACAGTCA   | 574.129932612228 | 0.297260593680182  |
| ATTCTTATGAC    | 574.150233235032 | 0.901130203611143  |
| TGTCACCACGAA   | 574.172786443688 | 0.836154409906163  |
| GTCATTCCACACA  | 574.192309005572 | 0.377096862454427  |
| AAATAGTGACAC   | 574.197388583298 | 0.338613048266898  |
| GGTGCCGTCATA   | 574.205754996995 | 0.327136406396649  |
| CACGTCACCTTAG  | 574.207016335683 | 0.376640298182975  |
| ACTTCCTGACTC   | 574.210551627025 | 0.221921712396465  |
| CATGTGTGTGAC   | 574.214244013233 | 0.665386280011049  |
| CCACTGGATGAC   | 574.224317625222 | 0.360486278678709  |
| AGATAGTGTGAC   | 574.225755767657 | 0.475018976059973  |
| CAGTTACAGTCA   | 574.230804353989 | 0.53510759061023   |
| AAACGATGTCAT   | 574.234907336743 | 0.200469964906576  |
| AACGATAAGTCA   | 574.242288793768 | 0.842096350397105  |
| CCTTGGAGTGTGAC | 574.260577882604 | 0.507355589918144  |
| GTTGACTCAGA    | 574.26394064006  | 0.290966152967743  |
| ACTGAGCAGTCA   | 574.271569074308 | 0.57605706307713   |
| GTCATTGCTTAA   | 574.292494485435 | 0.35440157111441   |
| AATAGTCTGACT   | 574.293886659671 | 0.520480465446434  |

|              |                  |                   |
|--------------|------------------|-------------------|
| CTTAAAGCGTCA | 574.30543973991  | 0.58964624254463  |
| AGTTCATATGAC | 574.317078349116 | 0.359123631012447 |
| CAAATATGACCA | 574.320052320149 | 0.602780323788437 |
| ACGTCACAGGCA | 574.32267437473  | 0.381268971656006 |
| GAAGACTATGAC | 574.333048894729 | 0.526091046124415 |
| ACTAACAGTGAC | 574.335549728569 | 0.417302477983961 |
| ATGACGCCGCTA | 574.364127774427 | 0.543981780050834 |
| CGTTGGTGTGAC | 574.375715638198 | 0.659391208889765 |
| ATGACGAACTGA | 574.379715516597 | 0.285537799070559 |
| CACTCGTACTG  | 574.397151382111 | 0.888427908766198 |
| TCGTGCCAGTCA | 574.409481148582 | 0.914527094250681 |
| ATTCCTTATGAC | 574.412798694018 | 0.507608316505776 |
| ACAATCTGAGTC | 574.4256419235   | 0.688826975974797 |
| TGACTCGGTGAA | 574.430509330129 | 0.350637643729264 |
| ATCTCGGATGAC | 574.4344099428   | 0.539755693917481 |
| CAAGATGATGAC | 574.443609123505 | 0.256176557925582 |
| CATCATGACCCA | 574.445417209526 | 0.251748324269458 |
| GTCCTTGCGTCA | 574.447992914614 | 0.73588762350101  |
| GAGGTCGATGAC | 574.462444190268 | 0.296466308278167 |
| TCTGTGATGTC  | 574.466783124189 | 0.248307139514572 |
| TCCCTGACGTCA | 574.47380464463  | 0.567295333908152 |
| ACGTCACAGGAA | 574.479562998578 | 0.215807538215577 |
| CGAGCTGTGTC  | 574.502209871063 | 0.458936476074947 |
| ATGGCGTACCC  | 574.523074880323 | 0.160796515836478 |
| ATGACGACTTTA | 574.529660620242 | 0.499676308169499 |
| CAACTGACGTCA | 574.532562898085 | 0.700622782397164 |
| CGTTATAATGAC | 574.537276467485 | 0.577878965914686 |
| CAGCTATAGTCA | 574.54256916503  | 0.458316548991841 |
| CTAAATCTGTCA | 574.54503172248  | 0.374465086615155 |
| TGACTGTAATCA | 574.545073786884 | 0.489494622388816 |
| GCAGTACATGAC | 574.547522075957 | 0.609126074037149 |
| GTAGTCTAGTCA | 574.548833265372 | 0.559925082346352 |
| CTCACGGAGTCA | 574.560341205454 | 0.392750046033157 |
| GTCACATCCATA | 574.563542509862 | 0.617728617381981 |
| GCCGGGTGACGC | 574.585026571571 | 0.509534847771889 |
| TGACATATTCAA | 574.589570716227 | 0.413793320350736 |
| CGTCATTATGTC | 574.602537311995 | 0.180192276903223 |
| ACTCATACTCGA | 574.612544638207 | 0.276715141458952 |
| ACGCGGGATGAC | 574.62369585077  | 0.647323477250946 |
| GTCACATATCTA | 574.633327253965 | 0.420980772079055 |
| TGACTCCCACCA | 574.633804164594 | 0.173929328351174 |
| GTCATAGCAGTA | 574.637227327509 | 0.353507517443582 |
| AAGGAAGTGACT | 574.643700353642 | 0.272186853938801 |
| TGAGTAAGGGCA | 574.647881574065 | 0.368488658251159 |
| CTCCAGGTGAC  | 574.662702757984 | 0.442196206747446 |
| GTCATACGGAGA | 574.664643018086 | 0.644161666208513 |
| ATTCACGGTAC  | 574.668890573611 | 0.652551214398603 |
| TGACTCGGCGAA | 574.670626438872 | 0.731881219873411 |
| ACTACCTGACTC | 574.677602955921 | 0.192769895753849 |
| AGTCACGCTTCA | 574.685159915787 | 0.16499694635516  |
| CGCCAATATGAC | 574.685576008461 | 0.580023083862435 |
| TCAGTGATGCAA | 574.704870838075 | 0.436639761776644 |
| AATCATGACACC | 574.707200531231 | 0.537549237743408 |
| GCTGTTGATGAC | 574.713634910828 | 0.385452973235587 |



|               |                  |                   |
|---------------|------------------|-------------------|
| CCGAAGCAGTCA  | 574.718106600158 | 0.575485131760262 |
| GTCATCCCATGA  | 574.720226647176 | 0.413414265334425 |
| CGTCACCATTTA  | 574.726240502429 | 0.320394975301556 |
| GAAGAATTACTC  | 574.726454413097 | 0.633213250914846 |
| ATACAAAATGAC  | 574.729939054308 | 0.566182340699949 |
| AATGAGTTGTCA  | 574.752136068999 | 0.325057943466192 |
| CGGTCATAATTA  | 574.756352414598 | 0.368655069105829 |
| TAGGCCGAGTCA  | 574.757367033686 | 0.70504608428987  |
| ACGAGTGACCAC  | 574.762786646664 | 0.487860396380851 |
| GCTGAGCAATAC  | 574.788862897752 | 0.515606481552118 |
| TGACACGCGTCA  | 574.789304927458 | 0.775536998058099 |
| ATACGTGAGTCG  | 574.795630219545 | 0.380516450347085 |
| CGCACACAGTCA  | 574.801274061809 | 0.438112704786932 |
| AAGTCACTACAT  | 574.807340456737 | 0.492987294222743 |
| AACTGGGTCAAC  | 574.817847606052 | 0.422481923643159 |
| GACTTTTATGAC  | 574.819165334545 | 0.672285799949923 |
| CACGTCACTAGA  | 574.820040155493 | 0.360472342158777 |
| GGTATGGATGAC  | 574.825562412633 | 0.187541373383479 |
| ATCTTCTAGTCA  | 574.835053958676 | 0.461569109155759 |
| GTCACAGTAACA  | 574.844930645201 | 0.572808700601265 |
| AGTCACGGAACC  | 574.850115995327 | 0.219509032232696 |
| ACGCCGTGTCAT  | 574.85103487354  | 0.257856046110837 |
| ATTTCGGTGTGAC | 574.870675972984 | 0.540613956083996 |
| CGAACTTGTGAC  | 574.874664634791 | 0.462117004786888 |
| GAGTCGCGTCAC  | 574.876922561563 | 0.648247688827871 |
| GCCATGTCACAA  | 574.891453425556 | 0.295266237893038 |
| TCATAGTTTGAA  | 574.89168530833  | 0.670536176142489 |
| ACGGATTGGTCA  | 574.900715716915 | 0.483227172147375 |
| GAACTCTATGAC  | 574.901155474455 | 0.597058508830805 |
| AGTCTACAGTCA  | 574.914376192465 | 0.619683389741555 |
| ATGACTTGTGTG  | 574.935887901523 | 0.545107103893182 |
| TGACGCAGTGCA  | 574.940565720134 | 0.558165956637609 |
| GTCATTTTGAAA  | 574.946402303841 | 0.510808526228293 |
| GTCACACACTCA  | 574.947147696623 | 0.205674210885337 |
| TGACACTACGCA  | 574.949733466394 | 0.558585023303416 |
| CCTGATTAATAA  | 574.95720284176  | 0.373532316634933 |
| TACACCTAGTCA  | 574.958076851525 | 0.441081902693951 |
| GTCATCAGAGCA  | 574.958525877084 | 0.360511740830384 |
| CATCAACATGAC  | 574.959233932558 | 0.523086156285567 |
| TATTGACAGTCA  | 574.961756832698 | 0.469862898140853 |
| GCAGTGAATGAC  | 574.97168813015  | 0.351516844380021 |
| ATGACGTTGTAG  | 574.988284219446 | 0.220094614573228 |
| GTCATCAAGAAC  | 574.997390614566 | 0.532934968433412 |
| CGTATTAATGAC  | 575.002598716333 | 0.677220510707039 |
| CAATGGGATGAC  | 575.008058843606 | 0.583303884566529 |
| CCTGTAGATGAC  | 575.011430489473 | 0.388881365501932 |
| GTCATGTCAAAC  | 575.014675711244 | 0.888752116104003 |
| AGTATACAGTCA  | 575.020042250294 | 0.459972998510437 |
| CAACCTGTGACG  | 575.04277384942  | 0.485973712453642 |
| CAAATTGTATGA  | 575.050214653628 | 1.01035221245695  |
| GTCATCAGTGTA  | 575.062614835286 | 0.33428204091418  |
| AGGCTTTATGAC  | 575.073066688326 | 0.371007011001082 |
| CTGCACTATGAC  | 575.073931987411 | 0.555591050748689 |
| AGACTCACTCGG  | 575.08077943238  | 0.389468755847448 |

|               |                  |                    |
|---------------|------------------|--------------------|
| TGACAGATCCAA  | 575.084396137259 | 0.585624121871476  |
| GCGTTTGTGTCA  | 575.094927271514 | 0.602579385385075  |
| AGTGACTGCCAC  | 575.09563112126  | 0.193285545260003  |
| GCGACTGATTCA  | 575.107168107986 | 0.376879360520983  |
| CATCAATTAGTC  | 575.107755811242 | 0.437912134868362  |
| AGACGACGTCAT  | 575.11779431     | 0.254917705749477  |
| TCGTCTGTGACA  | 575.124485500773 | 0.443627677311088  |
| AGATGGAATGAC  | 575.126331516408 | 0.236309248154021  |
| ACAATTGACACA  | 575.13955630338  | 0.139885759993602  |
| CGGCATATGACG  | 575.150265418521 | 0.610218236513202  |
| GTTCTGACACA   | 575.160612206033 | 0.256697407965021  |
| AGTCACGACGTC  | 575.162647869223 | 0.382250382761431  |
| CGTCATTTAACG  | 575.167647254371 | 0.527024572461663  |
| TGACAGATATCA  | 575.16966476136  | 0.63714633116601   |
| CCACTGAATGAC  | 575.170394723955 | 0.242658269503043  |
| CTAAGGAATGAC  | 575.190430052087 | 0.551789264076739  |
| AAACTATGACCC  | 575.207920683573 | 0.228923028798587  |
| CCATCATATGAC  | 575.219579543112 | 0.440723044396425  |
| TGTCACACGAAA  | 575.220945939453 | 0.284158179327597  |
| CTACACACGTCA  | 575.223179854816 | 0.288403374588675  |
| GCCATTATGTCA  | 575.230667874991 | 0.500037556907836  |
| GTCATCCTACTA  | 575.240537167404 | 0.397885087461201  |
| CGTTTCGGTGAC  | 575.24316892927  | 0.426001880839978  |
| ATATATAGTGAC  | 575.243585775339 | 0.354527519050525  |
| GTCATTAACCTCA | 575.247614973585 | 0.53891349168897   |
| GTCATAAACGTA  | 575.249555894451 | 0.311619613984615  |
| GTCATTAACCTCA | 575.262171304044 | 0.475554089212765  |
| CGTCACTAATAA  | 575.272669196809 | 0.856508767832732  |
| CTTCAGACTCAC  | 575.277000708953 | 0.238078311194278  |
| ACTAGATATGAC  | 575.279151640625 | 0.637586892719557  |
| GGTCGTGTGTCA  | 575.281307506696 | 0.429094196161991  |
| TAGTCACGAGGA  | 575.286089617975 | 0.399125325528292  |
| CGTTGGGAGTCA  | 575.298283257904 | 0.406743523843691  |
| GAGTCAGGTACC  | 575.303002100969 | 0.391271807042205  |
| ACTTTAAGAGTC  | 575.305346697533 | 1.08999207485567   |
| AGAGTCAAACT   | 575.305664992221 | 0.253729834062739  |
| ATGAGTCCGGCA  | 575.310935903737 | 0.491971346387652  |
| ATTATTGTGACG  | 575.314121588846 | 0.838109034669976  |
| TAAAGTGTGAGA  | 575.32691487596  | 0.115809011481574  |
| CCTTATTATGAG  | 575.328001562989 | 0.654660595122714  |
| CTAGATAATGAC  | 575.329510484373 | 0.45536345211928   |
| AGTCACGCGTTC  | 575.357776026235 | 0.362002089393923  |
| GTCTGATTGAGA  | 575.38977615662  | 0.760639862288828  |
| GTAATCGACTCA  | 575.389892054842 | 0.45383189363682   |
| CACGATTGCTCA  | 575.402594778827 | 0.477420786280001  |
| AAATCCTATGAC  | 575.411143870909 | 0.0950116697523934 |
| CAGCTAAGTGAC  | 575.421190121508 | 0.29262364788626   |
| GTGTCACCTAAC  | 575.426612010248 | 0.273323790532873  |
| CTACATACGTCA  | 575.428466828471 | 0.334478200078712  |
| ACTCCGTGTCAT  | 575.453656463636 | 0.140429485018716  |
| GAATTATATGAC  | 575.461849530234 | 0.481336960968037  |
| GTCACACCGATA  | 575.469236494198 | 0.387973376646533  |
| ATGACAGAGCCC  | 575.469601092012 | 0.39129345726912   |
| AGACATATGACG  | 575.477504364203 | 0.524830623759955  |

|               |                  |                   |
|---------------|------------------|-------------------|
| GCCGCTGGTGAC  | 575.485427263718 | 0.455024723472081 |
| AGTCACGGATAG  | 575.494582345304 | 0.270171138249226 |
| AGTCATGGTTCG  | 575.498405258765 | 0.565655017106097 |
| ATGACAAGGTTG  | 575.498806584238 | 0.278710640762925 |
| GTCACAATATAA  | 575.502148927475 | 0.60921147973965  |
| ACGTCATGTTAA  | 575.503742955653 | 0.590503695831527 |
| CTAGATTGCTCA  | 575.525177679479 | 0.443133063523636 |
| GTCATTGGAACA  | 575.525736005346 | 0.559985330146894 |
| TGTCATTAATAA  | 575.530662006033 | 0.73859952164988  |
| CGTCATTGTGTC  | 575.531841604855 | 0.266742382108831 |
| GTCACAGTCTTA  | 575.532621422129 | 0.227598331570766 |
| GCCTTACAGTCA  | 575.538014332544 | 0.481282191374615 |
| GTCACAATTCTA  | 575.550283369769 | 0.279604091968917 |
| AATGTGACGCCA  | 575.550780610838 | 0.401906064881764 |
| CTTGTAGATGAC  | 575.586034549998 | 0.446442561738812 |
| GTCATATCCTAA  | 575.598355654091 | 0.26044735070079  |
| GTATCAGACTCA  | 575.600028751326 | 0.417934583735046 |
| AATGTTGACTGA  | 575.60257776573  | 0.423114867446407 |
| ACTCAGTAGTCA  | 575.625620973632 | 0.71489437021349  |
| CAGTCAGCGGAC  | 575.631203213805 | 0.539301094715887 |
| ATGTCATCTGAC  | 575.634507576739 | 0.735626617213371 |
| AACCTCTGTCAT  | 575.638721767088 | 0.341427383353125 |
| ATGTTGAATCAC  | 575.670162014941 | 0.528108544002195 |
| AAACTTTATGAC  | 575.684768245844 | 0.386354043032741 |
| GTCATACCACAC  | 575.686730930871 | 0.259641459150649 |
| GGACTTTATGAC  | 575.69014626395  | 0.488002236574928 |
| ACCTTGATGACG  | 575.714613833097 | 0.489268600181354 |
| ATGACGGACATA  | 575.7200805268   | 0.377953156976536 |
| GTCATATAGTAA  | 575.730342447372 | 0.287217636910583 |
| GGTAGGAATGAC  | 575.742735258503 | 0.208538254860311 |
| GTCACTGGCTGA  | 575.74976640637  | 0.541131403185856 |
| CGATTTCATGACA | 575.761400313593 | 0.610627422657285 |
| CAGACCAATGAC  | 575.763582417484 | 0.457037705660185 |
| CGATTGAGTAAAC | 575.786106292252 | 0.481357331993393 |
| CGCAAATGTGAC  | 575.793459852078 | 0.594288642059135 |
| AGACCCGGTGAC  | 575.804074544825 | 0.705084010237821 |
| ATGACAACGAGA  | 575.808007599479 | 0.364459241257469 |
| CTTGCGAGTGAC  | 575.814582856379 | 0.634398482949701 |
| CGCTCAGATGAC  | 575.823084418024 | 0.22510584782235  |
| ATGACAAGGTCG  | 575.823863653979 | 0.341446289966734 |
| GTCATCTGCTAA  | 575.830543460126 | 0.499539270219014 |
| CCGCTCGATGAC  | 575.833388942773 | 0.405011579145912 |
| CTAGAGTGAGTC  | 575.837706146676 | 0.477202609404661 |
| CCATTTCGATGAC | 575.837710990405 | 0.559513702879934 |
| ATGACAGACCCA  | 575.851904470432 | 0.511708291661791 |
| CTCTCCTATGAC  | 575.864004209054 | 0.489758158675638 |
| ACTACATGTGAC  | 575.865675031385 | 0.34698727271905  |
| CTGTCCGACTCA  | 575.878740652382 | 0.404273238541631 |
| GTCATAATAAAC  | 575.880909208264 | 0.497747577034017 |
| AATGTGTGTGAC  | 575.895382229211 | 0.277032784989379 |
| TCAGTCAAAGGA  | 575.899717375611 | 0.3961750922623   |
| CGTCATCAGACA  | 575.900552950745 | 0.743333596479618 |
| AATCGTTACTCA  | 575.910848319275 | 0.426032851602512 |
| GTAAGTTGTGAC  | 575.921731013878 | 0.355433099035221 |

|               |                  |                    |
|---------------|------------------|--------------------|
| GAGTCAGGGACA  | 575.955806403729 | 0.0240461309851009 |
| GTGTGTCAATTA  | 575.961842811897 | 0.268079110739593  |
| CCTCAGAATGAC  | 575.977301992892 | 0.410856479454554  |
| CCCGAAGATGAC  | 575.978345098386 | 0.427199913776245  |
| TATGAGTTGGCA  | 575.979576825667 | 0.403237251969768  |
| CGGCCCTGACTC  | 575.985323079892 | 0.390841977363832  |
| GCCTCGGTGACA  | 575.986003603452 | 0.384115354222758  |
| AGTCAGAAGACA  | 575.988738838451 | 0.374906184685256  |
| GTACGTCTGTCA  | 576.030119892003 | 0.840007841383703  |
| GAGTCAGGCTGC  | 576.033884448673 | 0.374731063403948  |
| CTCTTTTATGAC  | 576.047157090916 | 0.232869211779086  |
| GCTGAAGATGAC  | 576.091180701046 | 0.197855039985178  |
| AGCACTAATGAC  | 576.100821608312 | 0.240102486498996  |
| GTCATAGTTGA   | 576.101615764993 | 0.3478442295553    |
| TCCGAGGACTCA  | 576.10347862924  | 0.498959881422856  |
| TATGGATGACCA  | 576.10735584391  | 0.462886134702255  |
| AATAAACATGAC  | 576.10781070691  | 0.793714654520273  |
| ACCTATCTGTCA  | 576.114570072247 | 0.427217242572188  |
| ATGACGCGCTAC  | 576.122506302521 | 0.516285096506592  |
| GCCGCTGATTCA  | 576.134076868639 | 0.443243251280457  |
| TAAAACCTGTCA  | 576.141798281394 | 0.383801197795943  |
| GAATATTACGTC  | 576.150348549405 | 0.929964563974301  |
| ATGGCGTACTA   | 576.162328467062 | 0.373082351516037  |
| CGAGTGAATGAC  | 576.17209641041  | 0.382679242194073  |
| GTCAACATGACA  | 576.183906077798 | 0.409182710597898  |
| ATGATCCAGTCA  | 576.194481205804 | 0.34487187259652   |
| GTCAGTGACCAA  | 576.228593876429 | 0.616980009088018  |
| ATGACGAGGCAT  | 576.24565150098  | 0.337379468598285  |
| GACATCGCGTCA  | 576.258049692555 | 0.503925983529144  |
| CCTCGTTGATGA  | 576.261212527245 | 0.658471738608318  |
| ACTATGGATGAC  | 576.266801587628 | 0.431371002703984  |
| GTCATAGTGGCA  | 576.26733396055  | 0.514847845114707  |
| TGACTGGATGAA  | 576.270740717752 | 0.26059300038147   |
| GTGACTTACATA  | 576.274174381756 | 0.346452074809603  |
| CTGCCATGAGTC  | 576.283856981397 | 0.360960878208248  |
| GGCCAAATGACA  | 576.285480660906 | 0.353553953815181  |
| ATCGTAAATGAC  | 576.30035278822  | 0.373153439843291  |
| CAATTGTGTGAC  | 576.310802081461 | 0.336363989611836  |
| CAATTACGATGA  | 576.31410815629  | 0.555904779164941  |
| GGTCGTTACTCA  | 576.333417886394 | 0.578718477716419  |
| AATCGTGACAAA  | 576.34128695252  | 0.377941860077119  |
| CTATATTTGTCA  | 576.345683095433 | 0.425310969601337  |
| ACAGGTATGACC  | 576.389289155758 | 0.376218671775059  |
| ACTTCCTAGTCA  | 576.397339037958 | 0.354033185122878  |
| ATCTCTACGTCA  | 576.40903579312  | 0.523743659720363  |
| AAAGTGTGTGAC  | 576.412605616742 | 0.399343544966555  |
| ACGACTGAGTAA  | 576.439310501035 | 0.624347553361443  |
| CGGATTTTCGTCA | 576.453090247302 | 0.751283685704056  |
| CGTCATCTATTA  | 576.460269105765 | 0.353485719808131  |
| CCCTGAAATGAC  | 576.461630700459 | 0.660170669845472  |
| GGTCCGAATGAC  | 576.48851993778  | 0.696678411303451  |
| CCACGAATGACG  | 576.491390904199 | 0.606164955507833  |
| GACTCACGTATC  | 576.526412219339 | 0.355448509300977  |
| CGTCTGTATGAC  | 576.526540229711 | 0.634068170128701  |

|              |                  |                   |
|--------------|------------------|-------------------|
| ATGACGGAGCTA | 576.53516295256  | 0.357628775451437 |
| AGTTATTGACTC | 576.545162130364 | 0.73631024981812  |
| GTGTCATGCCTA | 576.545747178259 | 0.180182448676265 |
| CGCTTGTACTCA | 576.546743661882 | 0.59048070174843  |
| GTCACCGACTAA | 576.576407286971 | 0.730927098368676 |
| GATGACTTGACC | 576.578896887191 | 0.465530013137599 |
| GCGCACGATGAC | 576.581618524697 | 0.612412785349709 |
| TAGTGCCAGTCA | 576.594272364395 | 0.665842285613158 |
| AAACTGAATGAC | 576.603096460627 | 0.442801726069613 |
| GTCACCTTTGTA | 576.620302304445 | 0.418579235514446 |
| ATCTGTCAATGA | 576.623222533031 | 0.518043209708309 |
| GTCATCAGCGTA | 576.624258056008 | 0.405959660411705 |
| TACTATATGTCA | 576.625538828635 | 0.388294219242288 |
| CAGCTTTACTCA | 576.648527970524 | 0.499786012204181 |
| CGTTACGGTGAC | 576.654124713422 | 0.811394734985697 |
| ACCCGTGCGTCA | 576.656755380493 | 0.506884122524865 |
| GATAACGACTCA | 576.667355596392 | 0.365166189729863 |
| CACCAGAATGAC | 576.673410364255 | 0.624977928540897 |
| ATGACGGGGCTC | 576.677813831913 | 0.345260451086518 |
| ATGTGACAATAC | 576.679692219036 | 0.684471932041258 |
| TGTACCATGACA | 576.690276097145 | 0.745172559955867 |
| ATGACGGAGCGG | 576.695866109061 | 0.375642088532912 |
| ATCGAATCATAC | 576.702101362674 | 0.495134635506839 |
| GTCACAGTGTC  | 576.703103957635 | 0.651597281872175 |
| GTGACAGCATCA | 576.715434471935 | 0.139141117524787 |
| CCGTTCTATGAC | 576.718580959622 | 0.423321947927437 |
| CTAGTGTGACCA | 576.72671750601  | 0.416446142467424 |
| ACTTCAGACTCA | 576.728978438305 | 0.546686631512944 |
| ACAGATGGGTCA | 576.730622469982 | 0.467302171975408 |
| AAGACATGACGT | 576.735759310496 | 0.262433898715792 |
| ACTCCTGACGCA | 576.75464826087  | 0.443351250616173 |
| GTCATCACCGTA | 576.764083019776 | 0.585906836933546 |
| CGTGAATGACA  | 576.778445386611 | 0.445963863194822 |
| GTCATAAATTAA | 576.79170235717  | 0.449707903950266 |
| AGGCGTTACTCA | 576.807523604716 | 0.592309344112552 |
| ATACCCGAGTCA | 576.823448830252 | 0.565254612293222 |
| CGCGTATGTGAC | 576.828653290411 | 0.650351264681449 |
| GCTACTTATGAC | 576.841256438464 | 0.721531822127442 |
| AGTCACGGTTTA | 576.860175924016 | 0.365456144616712 |
| TGACATATACAA | 576.867342884945 | 0.501375467716563 |
| GATAGGAATGAC | 576.875624363572 | 0.179545846925792 |
| ATAGTAAGACTC | 576.877776187817 | 0.340771798025121 |
| GTGTCATGGCCA | 576.880501488413 | 0.743166353537708 |
| AAGCCTGACTGA | 576.896236461337 | 0.478378982364594 |
| TGACGTGATACA | 576.926605017049 | 0.359648914314385 |
| ACTATCGGTGAC | 576.933641875436 | 0.641779637007143 |
| ATCAAATGTGAC | 576.945022843666 | 0.542963103220083 |
| CGTCATTGCTTA | 576.963406230345 | 0.355782842717225 |
| CGGAAATGTGAC | 576.978646265306 | 0.489518667463969 |
| ACGTCAGTGACA | 576.987792289025 | 0.986056276231204 |
| AGTCAGAGCCGG | 576.993500735066 | 0.36350476411061  |
| AAGCACAGTCA  | 577.022943413978 | 0.260124579122463 |
| GGTCCGTGACTA | 577.032508113122 | 0.479440705727162 |
| ATGGCTAGTCAC | 577.034093013036 | 0.372079682168086 |

|               |                  |                   |
|---------------|------------------|-------------------|
| CTTCACACGTCA  | 577.035785622524 | 0.437988774415623 |
| CGGTACAATGAC  | 577.05529597018  | 0.45996538581038  |
| GATGAGTTGTAC  | 577.056500631117 | 0.388754909900218 |
| GTCACAGTTTAA  | 577.061271825687 | 0.263316608242844 |
| CTCTCGTAGTCA  | 577.061940520664 | 0.241991601828618 |
| AAGGCGTACTG   | 577.078998715869 | 0.304611922980881 |
| CGAATTTGTGAC  | 577.081250474368 | 0.496269439366522 |
| CGTCACACCGTA  | 577.087526051506 | 0.344005358777333 |
| AGTCACTTGCAA  | 577.092415592128 | 0.538572863353162 |
| CAGTAGTAGTCA  | 577.104561784439 | 0.439631708464333 |
| ATGACAGACTAA  | 577.114960539375 | 0.429689349738149 |
| CGCGATGACCGA  | 577.119524235982 | 0.469550249525149 |
| TGTGTCAGCTAA  | 577.129857991551 | 0.513525075780083 |
| AATTAGTGACGC  | 577.144449106734 | 0.465090513083359 |
| CTTTCGGATGAC  | 577.16951251098  | 0.439755229479    |
| CTTCGGAATGAC  | 577.179982599788 | 0.678179274123724 |
| ACGGCGTATGAC  | 577.202060559855 | 0.805407631010015 |
| GTCACATTATCA  | 577.213692140791 | 0.426109716924547 |
| GTCACCAACAGA  | 577.227208104992 | 0.454029859247531 |
| GTGTCACGAAAC  | 577.229750089649 | 0.697631754743194 |
| ACCAAGTGACGAA | 577.237359142109 | 0.423709051335309 |
| GTCATTGCTTAA  | 577.24081927931  | 0.404635171537379 |
| CTGGTCGATGAC  | 577.248097986966 | 0.398868800331819 |
| CGAGTAATGACG  | 577.262599623542 | 0.395716551899675 |
| CCTTGGGATGAC  | 577.264158495772 | 0.750883259683424 |
| GTCATATCTGTA  | 577.276963010809 | 0.540736008855275 |
| GTCATAGGAGTA  | 577.282606801897 | 0.184502329796513 |
| ACGTCACCGGTG  | 577.308236221362 | 0.600548601256065 |
| GATCCGAATGAC  | 577.31172190408  | 0.576673601403471 |
| CAGTTGACGTCA  | 577.319145246003 | 0.371884272170962 |
| GTCATGAGCTGA  | 577.329217445417 | 0.476369734246661 |
| CGACAAGACTCA  | 577.334638651776 | 0.548352951023439 |
| CCTACAGAGTCA  | 577.353194922679 | 0.641819901933417 |
| GTCATAACAAGA  | 577.356996768822 | 0.556936110865414 |
| ATGACGTGAGCC  | 577.367562895549 | 0.32044086363552  |
| GGTTATGATGAC  | 577.376183617396 | 0.099494686935632 |
| ATTACTGAATCA  | 577.382503783918 | 0.426899666758213 |
| GTGTGTCAACAA  | 577.391592978182 | 0.11995398535649  |
| GTATACGGTGAC  | 577.394171539323 | 0.403693351287017 |
| GGTGGCTCACAC  | 577.41388742523  | 0.391118786200832 |
| GTCACCCTAGGA  | 577.41718075927  | 0.624130685184375 |
| CACGTCACGCTC  | 577.422555776823 | 0.406151456982263 |
| CTTAGCGTATGA  | 577.422980941968 | 0.77706355238646  |
| ACCTAGTGAGTC  | 577.456071357141 | 0.510573074894677 |
| AGTCAGACTTGC  | 577.466876939213 | 0.473348221878926 |
| ACGTCACCGACT  | 577.474232085383 | 0.297819838400359 |
| CGTGCTTACTCA  | 577.489639932899 | 0.554754432361766 |
| AGACTAATTACG  | 577.50188932557  | 0.349883838374724 |
| ATGAGTCCGTAA  | 577.502901182188 | 0.308075602990261 |
| AAGCAATAGTCA  | 577.534952612164 | 0.576842858736473 |
| ACGTCACCCGTC  | 577.536874374393 | 0.438157424704924 |
| TACAAGCAGTCA  | 577.547851575693 | 0.501487517599341 |
| GTCATCAAATAA  | 577.5722575278   | 0.46663465179004  |
| GCACCGTATGAC  | 577.575389243027 | 0.537260209362521 |

|               |                  |                   |
|---------------|------------------|-------------------|
| ACCGTGGATGAC  | 577.586834147712 | 0.449725599301958 |
| AAGCGTGTGTCA  | 577.592206502762 | 0.406985996895103 |
| GACTCACTCCTC  | 577.595388109217 | 0.26582672799751  |
| GTCACACGCAGA  | 577.614884335025 | 0.352353525383396 |
| ACTCATTTGTGA  | 577.615934605514 | 0.401036977263089 |
| CCGTAATATGAC  | 577.628235784465 | 0.310668643679093 |
| CACTAGTGAGTC  | 577.637800339589 | 0.471624132349322 |
| AGTCTCTGTGAT  | 577.638414310064 | 0.302738780613523 |
| ACACACTGTGAC  | 577.638859786007 | 0.323337100981177 |
| CAGTCAGGTGAC  | 577.641712880582 | 0.227510489542008 |
| AGTCATGGGTAT  | 577.647775366109 | 0.274380206393791 |
| AGAGTCAAAGCC  | 577.650666597493 | 0.561639876194603 |
| TGACATAAGTCA  | 577.651986920835 | 0.841987551130076 |
| GCTCATAATGGA  | 577.659511496341 | 0.623980595201293 |
| TGACGAGTAAAA  | 577.680168215303 | 0.326780578193105 |
| GTCACCTCGAAA  | 577.689991901057 | 0.567031588754987 |
| AAGTCACCCCTGA | 577.701546434926 | 0.401356022050567 |
| ATATGCTGTGAC  | 577.704020268169 | 0.452250592069135 |
| ATCAGTGGTCAT  | 577.707322698775 | 0.368007375470634 |
| ATGACAGAGAAT  | 577.725835964549 | 0.428811566130073 |
| CAGGTGTGTGAC  | 577.729829150148 | 0.411957301682271 |
| ATATGTACGTCA  | 577.734863723992 | 0.759681792646806 |
| GGTAGCTATGAC  | 577.741103002972 | 0.235443934931272 |
| CACGACGACTCA  | 577.741501005929 | 0.423362788648016 |
| ACTCATCTGTGA  | 577.741658508851 | 0.465349492419818 |
| GGGTCGTGACTA  | 577.750808451088 | 0.166118138090326 |
| GGTTGCGATGAC  | 577.75939094729  | 0.435258883905864 |
| GCTTCCTATGAC  | 577.782380369738 | 0.344996723238696 |
| GTCAATATGTCA  | 577.796489860725 | 0.327177911945486 |
| CAGAGATATGAC  | 577.800297977719 | 0.411099669930892 |
| AATGGCAGTCAC  | 577.800821673812 | 0.298950835998502 |
| CAATTAGTACGA  | 577.807380954034 | 0.608793517417655 |
| GACGCGTGACAC  | 577.817190284155 | 0.328322452237009 |
| AGTCACCCCTCCC | 577.822057371915 | 0.172191117235265 |
| AGTCACTCTGAA  | 577.828489707914 | 0.429772474971952 |
| TAAGATTCATAA  | 577.842318857602 | 0.172363546206841 |
| ACTCATACTAGG  | 577.857776496965 | 0.382063518048736 |
| GACTAATCCTGA  | 577.864511512822 | 0.538105677515281 |
| TATCCTGACGCA  | 577.879215264288 | 0.264758712279014 |
| GTTAACTTGTCA  | 577.880793909316 | 0.528599437289005 |
| ATCCGCTATGAC  | 577.918948698118 | 0.523049630293399 |
| CCCCAGTGAGTC  | 577.943650776786 | 0.691432532085458 |
| CAGAACAATGAC  | 577.958166557683 | 0.741608266636428 |
| ATGACAATGTGCG | 577.966725716267 | 0.384048629235833 |
| AAGATTCATGAC  | 577.974780313528 | 0.309058267568502 |
| AGCCCTCAGTCA  | 577.994417697675 | 0.348961475405751 |
| GTCACCCGGCTCA | 577.998839948609 | 0.556877327868708 |
| CGTTAGTGTGAC  | 578.002769967174 | 0.242624933333754 |
| CGATTTACGTCA  | 578.003544171662 | 0.732013157195886 |
| GTCATTTACGAA  | 578.012021346594 | 0.329570027891281 |
| ATAGGAAATGAC  | 578.019233525993 | 0.326000951237286 |
| CGCGCAAATGAC  | 578.031829647685 | 0.582079553457691 |
| CCCGCGTAGTCA  | 578.037233650737 | 0.773209635569247 |
| ACATATTAGTCT  | 578.050975072573 | 0.554028232468159 |

|              |                  |                   |
|--------------|------------------|-------------------|
| CTCTATTGCTCA | 578.051560794217 | 0.470540027542678 |
| CGTGACGTGACA | 578.058268078374 | 0.260657902746926 |
| GGTGACAGTGAC | 578.066750527609 | 0.187500475230065 |
| ACGCTGGGTCAT | 578.08349466776  | 0.380796895678986 |
| ATTGAAGATGAC | 578.09856570169  | 0.291724653776315 |
| ATTGCTAAGTCA | 578.111548444919 | 0.526811565944379 |
| ATGACAATACAA | 578.122988411924 | 0.481977779686091 |
| ATCCTCTATGAC | 578.131958179944 | 0.417084286318216 |
| GAGTCAGGCTGA | 578.135789234701 | 0.349853570123473 |
| GTCACCGCATGA | 578.141170762382 | 0.485141039113516 |
| ATCGCTAGTGAC | 578.142910395729 | 0.617858842547108 |
| TAAGCGTACTA  | 578.143463989016 | 0.458855266631709 |
| CCTCGCTATGAC | 578.144153877058 | 0.492069822996755 |
| CCAAGTATGAC  | 578.176730607107 | 0.400720999504341 |
| ATGACAGCTTAA | 578.206776412037 | 0.802728920736015 |
| CTCAGATATGAC | 578.209403945649 | 0.581385739167263 |
| CGAATAGACTCA | 578.2236779228   | 0.528096600962636 |
| GTCATAGTAGCA | 578.227403222179 | 0.425182810242624 |
| GTCAAGTAGTCA | 578.237775057063 | 0.55636310819415  |
| ACCTTTGACTCT | 578.237986742597 | 0.276539529870569 |
| CCCCGATGTGAC | 578.245762576331 | 0.80016424023187  |
| ATATTGTGACGC | 578.248964107699 | 0.366785045723128 |
| CCAGCCTAGTCA | 578.249614783665 | 0.541493888914618 |
| CGTCATCTGATA | 578.250915735577 | 0.236682443210825 |
| AAGCCGGATGAC | 578.253651871823 | 0.309882297773454 |
| GGAATAGACTCA | 578.258704374911 | 0.241452369442168 |
| CCGCAGGATGAC | 578.258820183799 | 0.734319272733053 |
| AGTCAGACATGA | 578.297246250202 | 0.426335194976567 |
| CGAGTTTTGTCA | 578.30095315543  | 0.538556317288437 |
| CAGTCAGATTGG | 578.309006475819 | 0.743016156347514 |
| CAATGAGTAGTC | 578.323336411812 | 0.414290823205992 |
| GTTGGTGAATCA | 578.326326148589 | 0.774480593729839 |
| ATGACCACGAAA | 578.329072256709 | 0.380954085622192 |
| GACCATGAATCA | 578.334426876838 | 0.213100196368642 |
| ACACGCGAGTCA | 578.337384695067 | 0.513908007365349 |
| CGTGAATGACCA | 578.343633775901 | 0.639165369771712 |
| ACCCATATGACG | 578.346274568889 | 0.292679588402249 |
| ACTCTTTGACTC | 578.353205720384 | 0.306562078542435 |
| CCATTTGATGAC | 578.361319165627 | 0.397131258686562 |
| TAGGCAGAGTCA | 578.370799142043 | 0.282851482495796 |
| GTAAGAGTCGAC | 578.379503672714 | 0.272494879672495 |
| AGTGACGGTGAC | 578.385609177201 | 0.300157817702872 |
| AAAGCCGATGAC | 578.393206504835 | 0.304725450918144 |
| AATCATCTATGA | 578.394134693291 | 0.534183436739917 |
| ACACAAGTCATA | 578.421389160498 | 0.530543345755953 |
| TATTTGACGTCA | 578.423111565133 | 0.668960353830941 |
| ATTTAACATGAC | 578.424079373899 | 0.606707997418746 |
| GAGTCAGGTTTA | 578.427963221237 | 0.332214181652502 |
| GTTTACGCGTCA | 578.42861888771  | 0.173750571656711 |
| ACTCATCGGTAA | 578.436924514897 | 0.622467336327754 |
| AGGCCCGAGTCA | 578.461971672746 | 0.623127799942286 |
| GGACAAAATGAC | 578.462222565418 | 0.364582621295661 |
| CGTCATCTCTTA | 578.465030983688 | 0.210216903155327 |
| CGTGATTGTGAC | 578.476053801794 | 0.523080664496802 |



|              |                  |                   |
|--------------|------------------|-------------------|
| AAGTTGATTCAT | 578.484369108912 | 0.44572185450802  |
| TAGTACGCGTCA | 578.492266562589 | 0.583848493569538 |
| GCGTACGGTGAC | 578.520147934722 | 0.643192791174727 |
| GCTGCAGATGAC | 578.52024859673  | 0.544612396209765 |
| CAAGCCGCGTCA | 578.523518424695 | 0.457813957706905 |
| CCGAGATTAGTC | 578.531837841229 | 0.382211071547893 |
| CCGTTGATGACG | 578.588305500892 | 0.39162322992476  |
| GGCAACTCTGAC | 578.589618834127 | 0.662600409374538 |
| ACTGGTGGTGAC | 578.598835909764 | 0.341674506015928 |
| AAGGGTTATGAC | 578.599781019695 | 0.432490147056837 |
| AGTCACTCCCG  | 578.601397060129 | 0.37030493704708  |
| AGTCACGCGATC | 578.6107027117   | 0.324110130722235 |
| ATGAGCAAAGG  | 578.639665745266 | 0.194567607214913 |
| ATGAGTAGTATC | 578.674578303469 | 0.314190681021418 |
| CGTCATTAAGTA | 578.678052667184 | 0.383384245090387 |
| AACCATGACATA | 578.680777781852 | 0.357194147623638 |
| GTCATGCTAACA | 578.685297307432 | 0.557466113906315 |
| TCGGTCACGTCA | 578.688309294377 | 0.596873630271492 |
| TGACACAACCCA | 578.690847881695 | 0.473343328867972 |
| GGCATTTCGTCA | 578.690936076887 | 0.584974213551577 |
| AGTGACCATGAC | 578.691468937999 | 0.372840131304594 |
| AAACAAATGACA | 578.697622495644 | 0.429467297695691 |
| ACTGCATAGTCA | 578.700340577868 | 0.527977310652036 |
| CTACGCGAGTCA | 578.714060001448 | 0.478114895201779 |
| GTCATGATTGCA | 578.748743727251 | 0.641909920683597 |
| ACTCATCGGTGC | 578.749409614126 | 0.661391994054768 |
| CTTGCTCATGAC | 578.764963283535 | 0.321597266570949 |
| ATGAGCAAAGC  | 578.775708103331 | 0.421959205490448 |
| CGAATGACCGAA | 578.783323297923 | 0.465355407655871 |
| CGTCATCGGACG | 578.78664974287  | 0.42127530613834  |
| ACCCAAGTATGA | 578.79344220563  | 0.544964632890059 |
| CCAGCTTGTGAC | 578.798888758471 | 0.669852184322354 |
| AATAGCGATGAC | 578.802532938258 | 0.389059602382953 |
| ACCTAGAATGAC | 578.809627741563 | 0.507899694583208 |
| GTCATCAATCAC | 578.813252864543 | 0.423011952119016 |
| GCTTTGACTGAA | 578.816831032961 | 0.528134036793989 |
| GTTCCAATGACA | 578.837744081443 | 0.491020441406579 |
| ACGGGTATGACC | 578.851480471888 | 0.567452164696308 |
| GTCATCTCTAAA | 578.856597553238 | 0.219156010773634 |
| GAGTCAATGATA | 578.864119836147 | 0.414159200274083 |
| GCCAGAGAGTCA | 578.86812162235  | 0.780506826364252 |
| CCCAGTGACAAA | 578.872303611595 | 0.519194068030073 |
| AGTCACTAGAGC | 578.875438531156 | 0.521139495366495 |
| GAGAAGGATGAC | 578.881248214294 | 0.40109576755426  |
| GGTGACGCCACA | 578.892459483612 | 0.335246372909423 |
| GTCATAAACAA  | 578.9067569347   | 0.686658481743107 |
| GTCATGCATTTA | 578.91542605749  | 0.505026244329658 |
| TGCGTAATGACA | 578.916856543108 | 0.358910033740066 |
| AGTCACGACTCG | 578.917080379687 | 0.361393959257251 |
| CCAGTCGCGTCA | 578.924144488113 | 0.337145637155308 |
| ATGGACGATGAC | 578.924160636187 | 0.437283781508929 |
| CCTGAGATGACA | 578.929721371468 | 0.205647377856727 |
| GCGTACAATGAC | 578.960788937382 | 0.617334602198895 |
| CTGCTTGACTGA | 578.970161690355 | 0.611957550544101 |

|                 |                  |                    |
|-----------------|------------------|--------------------|
| AGTCATGGGCTC    | 578.980365005404 | 0.238696303076791  |
| CCTTAAAATGAC    | 579.006144513845 | 0.40861057782569   |
| CGAAGCAATGAC    | 579.017216307964 | 0.50752984929454   |
| CGACGCGATGAC    | 579.032202047531 | 0.732935976030324  |
| GCAAGGTGTGAC    | 579.036832877606 | 0.511936255846329  |
| CTGAGTCGATGA    | 579.037511087093 | 0.703138292309216  |
| GTCAGGGAGTCA    | 579.064998933098 | 0.313507120369427  |
| ATGACAATAACC    | 579.065884142048 | 0.577850986493811  |
| TATGACAGCGCA    | 579.070086279112 | 0.55931695569466   |
| CATGACTTGTAC    | 579.071642667855 | 0.451128219471237  |
| TAGCCTGTGTCA    | 579.087347295626 | 0.510187453957202  |
| AGGTCCTGACTC    | 579.090420998673 | 0.540755631890573  |
| CATGACTTGTCC    | 579.112807375583 | 0.3654180515369    |
| AGTCCCTATGAC    | 579.117107048491 | 0.385336076656068  |
| CGTAATTGCTCA    | 579.134532014843 | 0.61589713776081   |
| ACACATTGTCAT    | 579.145673636922 | 0.44211608085537   |
| ATGACTTCGATA    | 579.151100906115 | 0.223969779199     |
| CATATATGACCA    | 579.153912507241 | 0.446248036174749  |
| AGACGTGATTCA    | 579.157954582765 | 0.300340674644017  |
| CGTTTTGGTGAC    | 579.162885391129 | 0.0987168999067538 |
| ATGTCGTGACAC    | 579.166270867888 | 0.410250096402927  |
| ATTACCTGACTC    | 579.175145268402 | 0.293707300971414  |
| GACTCACTATGC    | 579.178543946659 | 0.501258859703829  |
| CTTGGCTGTGAC    | 579.186424149333 | 0.595075440586839  |
| TGACTGAAGCCA    | 579.189313750365 | 0.6962478834732    |
| ATGTGTACGTCA    | 579.207889705442 | 0.752092805125868  |
| CCATCGTAGTCA    | 579.212092954546 | 0.410868725663729  |
| ATGACGTTGTGA    | 579.226603828717 | 0.310642112949542  |
| CTGACTGGTCGC    | 579.229766606363 | 0.571949015938133  |
| GTAATTACTIONGAC | 579.243825081937 | 0.620246690254511  |
| GTCATAAGACGA    | 579.250981846297 | 0.360328555091601  |
| AGAGATACGTCA    | 579.260127852354 | 0.219981487584176  |
| TATGACCCGTCA    | 579.261248707858 | 0.213174323216649  |
| GCATGGTGACGC    | 579.276374019105 | 0.63963862413382   |
| AATGAGTAGTAT    | 579.293431749693 | 0.29709368075552   |
| CCTATTGAGTAA    | 579.294709938727 | 0.585280366521737  |
| GCGTCACATACA    | 579.298819482215 | 0.328692721517916  |
| ATGAGCAAACAT    | 579.317987363496 | 0.574768728702958  |
| CGTGGGTGTGAC    | 579.330822372062 | 0.472021947314912  |
| AAGTCACCTGG     | 579.331617657012 | 0.407290948252877  |
| ATGACTTGGATC    | 579.334967752517 | 0.388555215873862  |
| AGTGTGATGCTG    | 579.338527250806 | 0.382407554548034  |
| GTCATATGGTTA    | 579.341340630404 | 0.146148175184645  |
| TCCATTTTCGTCA   | 579.347549201255 | 0.507574306691102  |
| CAGCATTTGTCA    | 579.357321989542 | 0.459769117970621  |
| CTAGTCACGCGA    | 579.359483363077 | 0.194863915293787  |
| CACGTAAATGAC    | 579.379550076444 | 0.438945850100308  |
| ACCAATGGTGAC    | 579.379835751976 | 0.502622230215692  |
| GTCATTTACTAA    | 579.393554846099 | 0.54968739180749   |
| CGGAACGATGAC    | 579.394846642245 | 0.409575271949006  |
| GGTTCAGATGAC    | 579.396572048313 | 0.292595886586095  |
| ACACATAGTGAC    | 579.397731801917 | 0.424942196390424  |
| CACCCATGACAC    | 579.412009837777 | 0.440365114140015  |
| AGAGTCAAGCGA    | 579.415224457156 | 0.396574929675444  |

|              |                  |                   |
|--------------|------------------|-------------------|
| GTCATCAAATA  | 579.430288903438 | 0.23329622257547  |
| GAATCATCAGTC | 579.432095236813 | 0.543478528772175 |
| GTCACCCACTGA | 579.466071744872 | 0.388531798633901 |
| ATGACTTGACAC | 579.475884272823 | 0.461447659224376 |
| TACTCATTGTGA | 579.476450416789 | 0.345224679394218 |
| AATGACCGAATT | 579.477464896413 | 0.316182235364537 |
| GTCATTGCACTA | 579.481846230339 | 0.520910682936434 |
| CCACATATGACG | 579.489985167181 | 0.425385581587777 |
| TGACGTCAACAA | 579.503229018934 | 0.534348019812797 |
| GACCAAATGACA | 579.507895075298 | 0.530329676887093 |
| CTAAATTAATA  | 579.53028916173  | 0.362829125954049 |
| CGCGTCACGTTA | 579.532340800144 | 0.625352176978488 |
| GCCACTGTGTCA | 579.532701866281 | 0.251884918064418 |
| ACTTTTGATGAC | 579.537159629543 | 0.35644245731395  |
| ATCACAGGTGAC | 579.554702294839 | 0.325090769995149 |
| GAATTAGTCGCC | 579.555657580741 | 0.721171274302079 |
| GTGTCACGTAAA | 579.569345492003 | 0.341581898047017 |
| CATCCAATGACA | 579.575690521753 | 0.554070929916916 |
| GTCATTCCACGA | 579.585670965033 | 0.380909515546639 |
| ACTGTCACGTCA | 579.594591309799 | 0.173524687432998 |
| GTAAGAGTGTCA | 579.610284155136 | 0.334033291869458 |
| CGCTCCGATGAC | 579.626565487172 | 0.475113884686532 |
| GTCATGCCTGAA | 579.632924940362 | 0.757048951767984 |
| TATCATCTATGA | 579.635372122029 | 0.700183842878481 |
| GTCACCATTGAA | 579.635738666242 | 0.583888733949715 |
| CACGTCAGAAAA | 579.660027236588 | 0.581307004304915 |
| GTCACCACGCGA | 579.671757811459 | 0.426628000831697 |
| CCGATCTATGAC | 579.678973462231 | 0.211741467361012 |
| ACATAGTGAGTC | 579.682695851604 | 0.510977916531088 |
| GTCATTATGTAA | 579.69244751272  | 0.382062797189627 |
| ATGACTTGACGG | 579.700528892089 | 0.350080381012978 |
| GGGTTGCTCACC | 579.718299315315 | 0.578702246953249 |
| AACAATAATGAC | 579.719514317557 | 0.339925903000194 |
| ACCCATGACACT | 579.729657398165 | 0.275696284373539 |
| ATGTCATCTGCG | 579.736618431016 | 0.731020457353088 |
| AGAGTCAAATA  | 579.740871139885 | 0.267795108593225 |
| GCGTCACCTCTA | 579.773229481217 | 0.471454950808917 |
| GACCTCGGTGAC | 579.78274929233  | 0.562194011090327 |
| CAAATTAATGAC | 579.795251837847 | 0.595117133966545 |
| GAGCGATTACTC | 579.797276849113 | 0.39453912503429  |
| ACGTCACAGATC | 579.79745867733  | 0.53994684678913  |
| ATGACCCTGTCA | 579.7986055985   | 0.333642379664401 |
| AATTGCATCATA | 579.802820619828 | 0.428855512541993 |
| GATTCTGACTGC | 579.81433282672  | 0.520438838528839 |
| AATTATTACGTG | 579.815828316417 | 0.595791589138123 |
| CGTCATTTGAGA | 579.828912333027 | 0.285423129384136 |
| AGTAGTGAATCA | 579.832020542541 | 0.169466702411203 |
| AATCGTGACCCA | 579.846386439052 | 0.403199844823739 |
| AATTCGGATGAC | 579.846515493342 | 0.588303232415394 |
| AAGCATTATGAC | 579.852726439775 | 0.698882412391707 |
| GATGACGTGCAA | 579.872308477655 | 0.212000615080727 |
| CTTCGGGATGAC | 579.876140144411 | 0.727293517916662 |
| ATGACGAGCCAA | 579.885307610921 | 0.449195049073902 |
| CAAAAGTGAGTC | 579.885475496709 | 0.301594553548479 |

|              |                  |                   |
|--------------|------------------|-------------------|
| ACTCATCGTAGG | 579.893391387435 | 0.253630675837219 |
| ATAAGGCTCACC | 579.903385865338 | 0.511121099526209 |
| ACGTCACATTAC | 579.905356427155 | 0.355102311340388 |
| CCTTAGGTGACG | 579.925499772369 | 0.561624666088999 |
| TCAGAAATGACA | 579.929549048006 | 0.358996153434602 |
| ACAGACTGTGAC | 579.933334061654 | 0.621960944288844 |
| AGTAGAGATGAC | 579.935255145327 | 0.329425528432185 |
| GTCATTATAGAC | 579.946586849878 | 0.4418295173341   |
| TGACCGGAGTCA | 579.947364751137 | 0.640758229019317 |
| ATGAGTGAATCC | 579.954979551966 | 0.354233506051786 |
| GTCATGCCTTGA | 579.960409551504 | 0.482526890719188 |
| AGAGAAGATGAC | 579.963614914596 | 0.256382839559878 |
| CATCTTAATGAC | 579.965572224526 | 0.544403541172135 |
| ATCCTGTGTGAC | 579.966595599774 | 0.441273983536195 |
| CTATGCTATGAC | 579.973854985633 | 0.350153911745836 |
| CGGTATTAGTAC | 579.976202547264 | 0.518462363622832 |
| ACTACAGATGAC | 579.977827677588 | 0.599717397403325 |
| TGAGCAATCGCA | 580.004556786957 | 0.787743135393054 |
| ATCAGGGATGAC | 580.004592168613 | 0.705881764778611 |
| GAACAATATGAC | 580.017167036103 | 0.239237032098299 |
| CGCTATCTGTCA | 580.026746459424 | 0.276572311248502 |
| TCGAATATGTCA | 580.032718565139 | 0.515449838446438 |
| CAGAATTGTGAC | 580.036412898225 | 0.379975863970554 |
| AATCCGACTCAC | 580.049766656949 | 0.280648315036943 |
| CGCAGCTAGTCA | 580.060594377995 | 0.786223194315788 |
| GACTCACGTAAA | 580.092121571525 | 0.705310947098254 |
| CTGTCACGATGA | 580.092256971843 | 0.600518857124483 |
| GCCCCGTGTGAC | 580.107263522566 | 0.670333018249139 |
| GTCATTCGTGAA | 580.134480533601 | 0.583739677732335 |
| ATGCCGTCATCG | 580.135361183824 | 0.575944864467709 |
| ACGATCTGTGAC | 580.145048203362 | 0.582297219196964 |
| AGTAGCGATGAC | 580.15713171996  | 0.154870502770706 |
| GCTTAACAGTCA | 580.16786980109  | 0.651770162689084 |
| CGTCACAGTGTC | 580.171879880019 | 0.397568415595851 |
| AATTTAAATGAC | 580.184968380034 | 0.619533116626129 |
| ACGTCATGAGAC | 580.215907444452 | 0.529819415827165 |
| CGCAGGGAGTCA | 580.218262054364 | 0.530396000531827 |
| TGAACAGAGTCA | 580.224990397686 | 0.568225638612841 |
| ATGTCCTGACTC | 580.231518035365 | 0.561350795081337 |
| CGTAACAATGAC | 580.232821466515 | 0.371408773168515 |
| ACGACAGAGTCA | 580.232986294449 | 0.535613711782788 |
| CTCTGACGATGA | 580.244092728186 | 0.730909882633435 |
| GCCCAAGTCATA | 580.249570032887 | 0.360717190054436 |
| CTAGGTATGACC | 580.258465603154 | 0.198172879241629 |
| CACATCTAGTCA | 580.259597388486 | 0.333791165651294 |
| CGGATCGACTCA | 580.260232016172 | 0.586688535194502 |
| AATGGCGATGAC | 580.266929111383 | 0.375588367853703 |
| AAGAACAATGAC | 580.268050315512 | 0.44578283672983  |
| AGGTCGTGACTA | 580.273570373558 | 0.36965777581992  |
| CTCGATAATGAC | 580.274164144397 | 0.596253698559046 |
| CAGTCCTGACTC | 580.276954476019 | 0.305062088579345 |
| AGTGTGATGATC | 580.287770183296 | 0.293019113436219 |
| GAACATCATGAC | 580.29844815944  | 0.501499219581858 |
| CAAGTCGTGTCA | 580.301199649428 | 0.386000100235721 |

|               |                  |                   |
|---------------|------------------|-------------------|
| TGACGTCAACCA  | 580.310118727829 | 0.444919571917031 |
| GCGTCACCTTAA  | 580.311109651724 | 0.607966764657146 |
| TGACTGTCTGAA  | 580.318639826833 | 0.366889897403396 |
| CTGTAAGGCTCA  | 580.331447434494 | 0.602361294583988 |
| ACGTCACAATCA  | 580.335546291332 | 0.35255349130767  |
| AGAGTCAGGTAC  | 580.336198047507 | 0.448069420398501 |
| ACTCATAGGTAT  | 580.337371493999 | 0.772846767690593 |
| GCGTCTACGTCA  | 580.339041996097 | 0.552154701471151 |
| GTCATAACAACCA | 580.341015970712 | 0.689107480321376 |
| TATGACAGTCAA  | 580.345361325273 | 0.162601845285208 |
| CACGTAGGTGAC  | 580.345437908833 | 0.504896765962318 |
| GTCATACAGTAA  | 580.355502764702 | 0.546308893962836 |
| GGGTCAGATGAC  | 580.365974230152 | 0.327862474886597 |
| ACTCATTGTGTG  | 580.374073840577 | 0.338021075186883 |
| CTAAATCCGTCA  | 580.39691918324  | 0.166216478190136 |
| TGTCTTGACTAA  | 580.40237789516  | 0.542389630671106 |
| CGATGACCGCAA  | 580.403175604982 | 0.53250681942485  |
| GTTGGGTACCA   | 580.403728283516 | 0.387801704057559 |
| GTCATCGCCGTA  | 580.422782501535 | 0.421190949072546 |
| GCATAGTGTGAC  | 580.426803112135 | 0.498948478080421 |
| CATAATGGGTCA  | 580.440733229264 | 0.488523444356648 |
| CGTGTTAAGTCA  | 580.446367309662 | 0.855129921511683 |
| GTCATCTCAGAC  | 580.448820862832 | 0.56716088605377  |
| CTGTCACATGAC  | 580.457192921737 | 0.597863320005572 |
| CCTGGTAATGAC  | 580.523810233736 | 0.721942833169257 |
| AATCAGTGTGAC  | 580.525279002687 | 0.393114817468165 |
| ACCGTGAATGAC  | 580.52529297031  | 0.306191731235005 |
| CGTGCGTCACC   | 580.554317827088 | 0.445167902815641 |
| GAATCTAATGAC  | 580.554459285961 | 0.30913809669065  |
| AATGTTTATGAC  | 580.569051087689 | 0.245041804821085 |
| GAGTCAGTTCA   | 580.572415666713 | 0.382710095013879 |
| CTCGACATGTCA  | 580.581427929927 | 0.219545178012686 |
| AAACCGGATGAC  | 580.586373696834 | 0.48951230373784  |
| GCCGAAATGAC   | 580.598760749032 | 0.345178827744499 |
| AGAAGTGCCTCA  | 580.623451172888 | 0.483684241276567 |
| AGATCTTATGAC  | 580.625087873074 | 0.559054976702752 |
| TTCAGTCAACAA  | 580.626622303951 | 0.375754775281009 |
| GTCATAGTTTAA  | 580.627558311603 | 0.582243060810337 |
| ACCACATATGAC  | 580.631563584575 | 0.310382937568395 |
| ACGTGATAGTCA  | 580.634072981966 | 0.366994634576523 |
| GAGTTGACACAC  | 580.64172692274  | 0.577115403657799 |
| ATGAGTCCCTTC  | 580.642039536316 | 0.363549021623993 |
| GGGCTTTATGAC  | 580.643864148384 | 0.340866978309171 |
| AGAGTCTAGTCA  | 580.661135217687 | 0.39148084027075  |
| GAATGATTAATC  | 580.665882776755 | 0.65818935395475  |
| AGGAGAGTGACT  | 580.672332289822 | 0.243468621188573 |
| CTGCTTACGTCA  | 580.678276647758 | 0.457012744872273 |
| CCGAATGAGCCA  | 580.683316256278 | 0.607259220729845 |
| GCAACTGTGACA  | 580.692417930612 | 0.314444832823578 |
| TGTCATGTCACA  | 580.705754643021 | 0.551911801604385 |
| AGGTTGTATGAC  | 580.71263660267  | 0.335231996132948 |
| AAGGTAGATGAC  | 580.72829810236  | 0.206841998495871 |
| CGTCCGTGACTA  | 580.729635582451 | 0.503180608990349 |
| CTTTAGTGAGTC  | 580.740716776475 | 0.434842280009819 |

|              |                  |                    |
|--------------|------------------|--------------------|
| AATAATGATGAC | 580.741446814688 | 0.403939737226551  |
| CTCGCGAGTCAG | 580.756455086245 | 0.640079847579308  |
| AAGCGCGAGTCA | 580.758625371792 | 0.314026985118915  |
| AGATGCGAGTCA | 580.761291212879 | 0.204803341403489  |
| TATGACGCCGCA | 580.764775280806 | 0.254575287694372  |
| GTCACATAGTGA | 580.781663199452 | 0.502876533051518  |
| AGAGTCGTGACT | 580.791711363876 | 0.19847328605489   |
| GTGTGACAAGTA | 580.792157281218 | 0.180458956877967  |
| GATCAGTCTTAC | 580.792736938098 | 0.324918113411443  |
| GCGCGGACTCA  | 580.798903958711 | 0.85213725293862   |
| GCCAGGTCATCA | 580.808080632194 | 0.55635280853865   |
| CACTAATCGTCA | 580.813708824195 | 0.495421452011234  |
| ATCGATGGGTCA | 580.822872424966 | 0.235349625588921  |
| AGGTTGACACAC | 580.828639739599 | 0.319698093233953  |
| ATGACAGACGTG | 580.837739347698 | 0.344825831191659  |
| ACGTCACAGATA | 580.840808702454 | 0.666250186085692  |
| GTAATAATGACA | 580.841807512872 | 0.298645319290495  |
| ACTCTGAGCAAT | 580.842848206737 | 0.559461143740911  |
| GCAGGCGATGAC | 580.847057081623 | 0.336314683118278  |
| GTCATCATGCCA | 580.86935253132  | 0.479532983198893  |
| CGATGAGAGTCA | 580.870606470045 | 0.641409201134907  |
| GGTCATCATTA  | 580.873246156521 | 0.567648354127451  |
| AATCGATTACTC | 580.888167752265 | 0.403719266252406  |
| GTCACGACATGA | 580.888744094264 | 0.134968172349281  |
| CAAAGGAATGAC | 580.905481854114 | 0.417818468680175  |
| CGTCATCTCCAG | 580.912888709099 | 0.299803591663061  |
| ACGCCAATGACG | 580.929529560237 | 0.580499830860874  |
| ACCTATGAATGA | 580.92968457962  | 0.615980548198269  |
| ATTGTTGGTGAC | 580.934838989234 | 0.681439241019907  |
| ATTAAGACTGAC | 580.946981806198 | 0.554967502337354  |
| GAAAGTGATGAC | 580.957836937725 | 0.470867371250996  |
| CTCCGGGATGAC | 580.958975582509 | 0.529459640547827  |
| GTCACATGACAA | 580.971727448561 | 0.308939315868323  |
| AGTCACGCTGTA | 580.988398565665 | 0.37413567563814   |
| CGGTGCTATGAC | 581.005295712657 | 0.482017025378186  |
| TCGATCATGACA | 581.008391411336 | 0.44344988810669   |
| AGAGTCAAGGCC | 581.012056081921 | 0.449550995913558  |
| TGACGTAAGCA  | 581.020258482224 | 0.631746051378359  |
| ATAACTGACACA | 581.024340454658 | 0.32625703484298   |
| CATATCCAGTCA | 581.030914597945 | 0.182287365603316  |
| TCCAATTAATAA | 581.033249450791 | 0.396762520234533  |
| GGGTCTGTGTCA | 581.05250416842  | 0.426303233111286  |
| ATGACATTATCA | 581.06707847128  | 0.504602717573772  |
| CATAAATGTGAC | 581.067903554183 | 0.856070878900636  |
| ACCCTCTATGAC | 581.08386794177  | 0.275087057985175  |
| CCCACGGTGACA | 581.084886173403 | 0.0979620040564358 |
| GACTTACATGAC | 581.092302863329 | 0.543618646931754  |
| ATGACGCGCAGA | 581.0958614565   | 0.396619935954372  |
| ATCCGATTATGA | 581.097688293058 | 0.718173481792964  |
| ATGACAGCGATG | 581.099901464184 | 0.261147343483158  |
| GACTAATAACGA | 581.105310405511 | 0.63780075024171   |
| GTCATCTCGGTA | 581.107170891114 | 0.339714636096131  |
| GTCATATGTTGA | 581.111828688232 | 0.449901922531075  |
| TCAACTGACACA | 581.176559549787 | 0.385731026880308  |

|              |                  |                   |
|--------------|------------------|-------------------|
| TCCCTATAGTCA | 581.208449960206 | 0.350119516890118 |
| TGACCTGTCACA | 581.212652478197 | 0.22654443156919  |
| CAGCCCTGACTC | 581.226946229493 | 0.14983625510953  |
| TAAGATAAGTCA | 581.227148268887 | 0.171620645229416 |
| GTAATAAGTCA  | 581.247020867771 | 0.825346205476269 |
| CGAGTGGAGTCA | 581.250013787511 | 0.389833070454301 |
| ACTCATAACTAA | 581.254169703874 | 0.376113562636753 |
| GGCCTATGTGAC | 581.265548582879 | 0.833135702241397 |
| TGACACGTACAA | 581.279805161877 | 0.513045016001658 |
| CGGTCGTATGAC | 581.284023806256 | 0.764542960806337 |
| ATAAGATTCATA | 581.287507478979 | 0.261224952798614 |
| ATTCTGACTGCA | 581.294909229487 | 0.448597324388053 |
| GTCATATAAATA | 581.300096898101 | 0.307623518060358 |
| GAGTGGCTCACC | 581.304794582045 | 0.280233345548253 |
| TCGACATCGTCA | 581.305292848877 | 0.51884974988416  |
| CTCGGTAGTGAC | 581.305679374935 | 0.600484649219176 |
| TGAATCAGAGCA | 581.306397960914 | 0.380286979576725 |
| ATGAGTATGATG | 581.311595559695 | 0.2402653367678   |
| TGACTGGACGCA | 581.312815687269 | 0.780466234160223 |
| CAGTTTCCGTCA | 581.318637764252 | 0.460545518768033 |
| AGTCACTACCGA | 581.327301669526 | 0.509514036822075 |
| AATTTTCATGAC | 581.332904820408 | 0.483866810110031 |
| CTTTGTGATGAC | 581.339073743836 | 0.46513334788262  |
| GTCTATCCGTCA | 581.348501636969 | 0.495529918836906 |
| CATTTGACTGAA | 581.349171960589 | 0.534884047770879 |
| ACAGTTAATGAC | 581.372836491676 | 0.360789705289022 |
| ACTCTGACATAT | 581.373804665772 | 0.371757972936052 |
| CTTATGGGTGAC | 581.386747837681 | 0.967121064438301 |
| AGCCAGGAGTCA | 581.392057419345 | 0.35144029957167  |
| CTCTCGCATGAC | 581.409592465769 | 0.714990462660631 |
| AGTCTGTATGAC | 581.41218654891  | 0.490194523772676 |
| GCTTAGCATGAC | 581.427031751844 | 0.465399165306776 |
| TCCGTTATGTCA | 581.437533660686 | 0.418478212207887 |
| CGGGTAGATGAC | 581.437970388192 | 0.485525056923437 |
| AGTGTCATGCAG | 581.438513451867 | 0.232810094669484 |
| CGTCGATTAGTC | 581.445013851844 | 0.506904393594532 |
| GCACCTGACACA | 581.456448891402 | 0.287068134491768 |
| CAACGCGAGTCA | 581.464483807816 | 0.450626893397341 |
| GACTGACGGATC | 581.485752482754 | 0.57293715832545  |
| CACAAGGACTCA | 581.489756373373 | 0.73547532094907  |
| ACGTCATGCTAT | 581.493182559328 | 0.43676780834494  |
| AGAGTCAATACC | 581.506494581045 | 0.500062546983658 |
| GTCATAGGGCTA | 581.511116919026 | 0.443121265487632 |
| CACCAGGATGAC | 581.513064386307 | 0.501965193326996 |
| ATGACTTCGAGA | 581.53491722176  | 0.568818849170926 |
| GTCACATATGAA | 581.535282300802 | 0.388156491081187 |
| GTCATGTCTTGA | 581.555130522486 | 0.650844072709364 |
| CATTTGACGTCA | 581.560550700466 | 0.395429259836771 |
| TGGTCATCCAAA | 581.566489263092 | 0.221921396655621 |
| TCTGTTGACACA | 581.570031218644 | 0.40770106124541  |
| ATGACTGGGGTC | 581.577178763099 | 0.350929287388738 |
| ACGTCATGCACA | 581.589503357302 | 0.436470815971307 |
| AAGCAAGTCATA | 581.613875701083 | 0.21515094904488  |
| GACAGGTGACGC | 581.615240860518 | 0.342175785754714 |

|               |                  |                   |
|---------------|------------------|-------------------|
| ACGTTTTATGAC  | 581.617496147204 | 0.326426760607033 |
| CGTCATTGCGAG  | 581.618364479338 | 0.49654004184142  |
| CCATTTGACTGA  | 581.620226398974 | 0.450510959463108 |
| AAGCGGCGTCAT  | 581.627556157868 | 0.508766077692074 |
| GGTGCCGAGTCA  | 581.650841658399 | 0.510241902385659 |
| GACTAATCAGTC  | 581.65222529636  | 0.681245705866871 |
| AGCACCATGACT  | 581.662739353567 | 0.544759452729085 |
| GTCATCCTCGAC  | 581.663437186284 | 0.390872693872669 |
| GGTCATACATAA  | 581.668378034827 | 0.388636003385943 |
| GACAACCTGTCA  | 581.682928504173 | 0.444887375130249 |
| GTCATAGACCCA  | 581.68563662622  | 0.347761646859593 |
| GTCATTGTGTGA  | 581.685874593324 | 0.297547674278565 |
| GTCATAAGGACA  | 581.687413572049 | 0.499381822441756 |
| CGAAGAGATGAC  | 581.691854886074 | 0.425809492944125 |
| CACTAATATGAC  | 581.694033859746 | 0.373134341873733 |
| ATTCCGGTGACG  | 581.711783279625 | 0.774059684312367 |
| ATCGTGTGTGAC  | 581.712871325567 | 0.778296792006363 |
| GTCATTATCAGA  | 581.721006216672 | 0.17311975379076  |
| GAGTCAGGTCTA  | 581.73531593865  | 0.456796697012661 |
| ATCGCGTGACAC  | 581.736050611801 | 0.666857937454993 |
| AGTGTCAATGAC  | 581.759467587132 | 0.501377228507611 |
| GGCCTTTAGTCA  | 581.769582847696 | 0.605910377991757 |
| GCATTTACGTCA  | 581.790892315592 | 0.386689874726927 |
| GCAACCGTGTCA  | 581.799699986181 | 0.377638324321159 |
| CACTGACTATGA  | 581.807015701852 | 0.404631416373447 |
| CGAAACGGTGAC  | 581.811588675929 | 0.759942668863716 |
| TCGTTCTAGTCA  | 581.818373450766 | 0.605855111452476 |
| GTCATTTGTCAA  | 581.830642381049 | 0.205368632707112 |
| TCACATTGGTCA  | 581.841930045485 | 0.485320827405837 |
| TAAGTGATGTCA  | 581.850728621343 | 0.394802064102591 |
| GGCTAAGATGAC  | 581.856443696633 | 0.326720351730172 |
| GTCACACAATAA  | 581.908895195062 | 0.547816317628864 |
| CGTGTTCGTCA   | 581.919704183432 | 0.355767324355146 |
| TGAGTCTACGAA  | 581.920013285404 | 0.543380677403371 |
| CAGAGTGAATCA  | 581.922780149847 | 0.267972852074452 |
| GCATGCGATGAC  | 581.929821688174 | 0.560892051105979 |
| CCAGGATATGAC  | 581.931838753223 | 0.428324624781596 |
| AGTCATGGTAAC  | 581.936440277293 | 0.489793479947016 |
| ACTCATTCGGGA  | 581.951636169997 | 0.727664868647038 |
| GTACGAGATGAC  | 581.960346890812 | 0.675912245706592 |
| AGTCAACGTGAC  | 581.967152079949 | 0.466450579807564 |
| CAGACGTGTGAC  | 581.977532613164 | 0.519923665079194 |
| GTCATTCAGATA  | 581.994833354823 | 0.377654347668286 |
| AGTCACTACCCG  | 581.995563402169 | 0.191270247997316 |
| AGACTCACGCGAG | 581.997397838057 | 0.655302899831493 |
| ACTCATTCATGG  | 582.003938662785 | 0.541854701562246 |
| CGGAGAGTCAGA  | 582.010059177608 | 0.251374637999643 |
| TCTGTCCGCTCA  | 582.01257700648  | 0.524890896923416 |
| TGACCCATTGAA  | 582.013419678457 | 0.406635966650624 |
| TACGTTTCGTCA  | 582.023501785622 | 0.394017989500914 |
| GAGACTTACTCA  | 582.026156931911 | 0.474596789229232 |
| GTCATAGCGCCA  | 582.036804116726 | 0.543020001134304 |
| ACAACCTCATGAC | 582.062836080693 | 0.574448012587156 |
| AGTGAATACTCA  | 582.075907080512 | 0.56203175214604  |



|               |                  |                   |
|---------------|------------------|-------------------|
| GTGGTCATTCCA  | 582.091285815428 | 0.318350662001295 |
| CTCTGACGGATC  | 582.092702850554 | 0.325391916965693 |
| AGTCACTTGGTG  | 582.125660528707 | 0.575947805794857 |
| ACGACTCAATGA  | 582.139205441248 | 0.484661524051764 |
| GTGCCTGTGTCA  | 582.14291962803  | 0.496185099737382 |
| GTCATATCAAAA  | 582.151219706511 | 0.424376599029886 |
| ATGACATCGAAG  | 582.160814802333 | 0.426910835814704 |
| ATGACGAGGCAC  | 582.175642988188 | 0.494474612191887 |
| ACTCATGAGCCA  | 582.186133198481 | 0.325446180601496 |
| ACACCGGTGACA  | 582.186775345256 | 0.374823027830768 |
| CGCCGGAATGAC  | 582.200860784059 | 0.348039493518987 |
| CCAAACGTGTCA  | 582.21010528654  | 0.479624757529875 |
| CTCCGCGATGAC  | 582.222786194877 | 0.540461124831084 |
| AATAGCTGTGAC  | 582.224280348489 | 0.471020006667233 |
| AGGTCTTATGAC  | 582.230187543727 | 0.310794538051204 |
| GTCATCACGCAA  | 582.230687856886 | 0.284618585444289 |
| ATATACTCGTCA  | 582.231898050669 | 0.587825950766337 |
| GCACACGATGAC  | 582.257098407705 | 0.503297048046032 |
| AAGTTGGAGTCA  | 582.260232659571 | 0.236855658369945 |
| ACCTTTGACGCA  | 582.263829784853 | 0.128208509723434 |
| CCAAGGCATGAC  | 582.2646338789   | 0.560481126895448 |
| ACATTATGAGTA  | 582.271139779759 | 0.399582741939712 |
| AAAGCATGACGC  | 582.297071349446 | 0.438342535320438 |
| TGACTGTCTAAA  | 582.307845994415 | 0.840783396839699 |
| GGTACGAATGAC  | 582.313644574957 | 0.298310182828873 |
| TCATCAGCAAAA  | 582.314105761857 | 0.573957235656917 |
| ATGACTTGGCGG  | 582.321866958564 | 0.339623807243481 |
| TCATTTTACTCA  | 582.332971048014 | 0.243791947732675 |
| TGACATATGCCA  | 582.335661836054 | 0.535353638460505 |
| ATGACGCCTGAC  | 582.342197619401 | 0.291488191929625 |
| CCGGTAATGACG  | 582.34224684384  | 0.875738498339516 |
| GTCATCCATACA  | 582.348895520129 | 0.29443450039974  |
| ACCTTAGATGAC  | 582.364540631454 | 0.568756927502742 |
| AGCACGTATGAC  | 582.367402000541 | 0.491020631116486 |
| CTGTGCAATGAC  | 582.378169137836 | 0.692759952842758 |
| CGACGTGATTCA  | 582.382480681447 | 0.55697576345349  |
| CAAAATGTCATA  | 582.395082380659 | 0.349144511877825 |
| AAACCGTGTGAC  | 582.399432523586 | 0.404092191885447 |
| CTTTAGTGACAC  | 582.403582259254 | 0.494699042770074 |
| GTCATCAACAAC  | 582.404558841669 | 0.669536772065528 |
| CATGCTGATTCA  | 582.415950332938 | 0.355005582822796 |
| GTCACCACATTA  | 582.44195555864  | 0.317065550264282 |
| CAGACATAGTCA  | 582.445503365212 | 0.886188685573282 |
| ATGACAATACCA  | 582.453422235514 | 0.494425297137329 |
| GGGCTAGAGTCA  | 582.454839515414 | 0.214621427999053 |
| CCGGTCTATGAC  | 582.455171048995 | 0.317233740172761 |
| CAGATGTATGAC  | 582.458872708892 | 0.412761757157991 |
| AGGTACGATGAC  | 582.462628114777 | 0.267532940498061 |
| GACTCGTCAGCA  | 582.467458006176 | 0.529879744720443 |
| AGATGATTTCGAC | 582.468946545617 | 0.325987469291354 |
| GTCATTAATGTA  | 582.474257037126 | 0.23962204317073  |
| TGACCGATACAA  | 582.482980568624 | 0.526451741752358 |
| ACTAGTATGAGT  | 582.483349298532 | 0.370066786240604 |
| GGCGTATATGAC  | 582.500239956461 | 0.399223781380347 |

|               |                  |                    |
|---------------|------------------|--------------------|
| GCTACTCGGAAC  | 582.508408820499 | 0.663902313326929  |
| ATCCCAGATGAC  | 582.508774332784 | 0.411765414264098  |
| ACGATGTGACGC  | 582.528464298297 | 0.468665608679465  |
| GACATACAGTCA  | 582.573387411531 | 0.462222226209553  |
| TGACGCGTTTAA  | 582.578648241091 | 0.421926278695463  |
| CCGTGTAATGAC  | 582.583467370555 | 0.59752203167905   |
| ATGACAGTGTTT  | 582.58379629844  | 0.358286980538509  |
| GAACCATGAGTC  | 582.597956724656 | 0.607538871830419  |
| ATAGATTGGTCA  | 582.626125394537 | 0.375796598430436  |
| ATGAGATATGAC  | 582.628645184771 | 0.258038132863948  |
| ATTACTGTCATC  | 582.629483617139 | 0.197325632841919  |
| AATTCATGACGT  | 582.633991995896 | 0.447534747187985  |
| GGCCGTGATTCA  | 582.648829246756 | 0.639899076329565  |
| CGAGAATATGAC  | 582.650315962978 | 0.478216379578761  |
| CAAGTTGATGAC  | 582.667664109431 | 0.480269053543299  |
| ACTCATTTAGTA  | 582.675140930669 | 0.497295779063419  |
| CGGTCATCGGTC  | 582.693760617843 | 0.431100750828132  |
| ATGACGTTAACC  | 582.711484749214 | 0.375671682751707  |
| AGAGTCTGTCAT  | 582.71505788277  | 0.429894482980403  |
| GTCATCGACCGA  | 582.715415139618 | 0.493619238661021  |
| CACAAC TGACTC | 582.756142457589 | 0.309265285487586  |
| TGACGTAAGTAA  | 582.784400458253 | 0.0537950557403904 |
| CAGTCACGACGA  | 582.799474631724 | 0.70010856927313   |
| TGACATAATCCA  | 582.803003634301 | 0.495296480085093  |
| GACACACATGAC  | 582.813422677162 | 0.63895744485806   |
| ATAGGATATGAC  | 582.822393952874 | 0.435776534257659  |
| CATTAAC TAATG | 582.844748948937 | 0.67526346473018   |
| GACTAATTCCTA  | 582.856377368851 | 0.514161392508839  |
| GAATCCGAGTCA  | 582.857810196175 | 0.4359607019968    |
| CGGGACGACTCA  | 582.859222230472 | 0.764001608210509  |
| AGTCACTCTTCC  | 582.879335529408 | 0.231807012612939  |
| GTCCTGCAGTCA  | 582.88220391348  | 0.431504435612079  |
| TCTGATTAATAA  | 582.895423918218 | 0.503363494460941  |
| CGGTTGACGTCA  | 582.89689327637  | 0.659373234562228  |
| CGAGGTTTCGTCA | 582.904975886736 | 0.560026461897449  |
| CCGTAGACTCAG  | 582.907958084386 | 0.471103971140867  |
| ATGACAACGACA  | 582.911816582687 | 0.531779356893323  |
| TGACTCCGACCA  | 582.912792009213 | 0.366027613906181  |
| GTCATACGCCCA  | 582.914803729239 | 0.322254095495916  |
| ATGTCGTAGTCA  | 582.918849905883 | 0.316300975285064  |
| GTGAATATGTCA  | 582.937785128523 | 0.365392168214366  |
| GTCATCTCTTTA  | 582.938765488461 | 0.454274760579844  |
| CTTAAC TGACTC | 582.939648370452 | 0.333829665675618  |
| GGGTCATAATAA  | 582.944167484068 | 0.525526694190015  |
| GATGAATCGTCA  | 582.955521433003 | 0.377184902731821  |
| ACCCAGGAGTCA  | 582.982359937429 | 0.318658648193339  |
| GTCATTCGAAA   | 582.987104997726 | 0.380556397325273  |
| CGCCGAGAGTCA  | 582.991185059954 | 0.762823056354287  |
| ATGGTGGATGAC  | 583.005012535239 | 0.515277082923052  |
| ACTCAGACTCAC  | 583.007563456739 | 0.416178713047705  |
| GTGACTACCGAA  | 583.034615489058 | 0.496899351328533  |
| ATGATTAAGTCA  | 583.035434938179 | 0.314864072754711  |
| CTCGACGATGAC  | 583.035841238319 | 0.50130113914276   |
| CTATAAGCGTCA  | 583.03943903346  | 0.481921145121202  |

|              |                  |                   |
|--------------|------------------|-------------------|
| ATGACTTGTAGA | 583.047916186228 | 0.350957150725154 |
| CGTACTGTGTCA | 583.048391427799 | 0.509565635865986 |
| GTCATCACTAAC | 583.054456805842 | 0.449605838023631 |
| ACGAGTGACGAA | 583.054743728358 | 0.344790005215307 |
| AATAACAAGTCA | 583.055839359679 | 0.782482020911386 |
| AGGAGAGTCAGA | 583.056076152807 | 0.221396002781448 |
| CAGTCAAGTGAC | 583.056294282817 | 0.491841640072379 |
| GTGGCTGACACA | 583.058506675424 | 0.74818504817205  |
| ATTACTCAAGCA | 583.073572233723 | 0.445447359480044 |
| TGACTCCATCCA | 583.079661163557 | 0.381729511654054 |
| CTCCAAATGACA | 583.103531386309 | 0.451461526203168 |
| GTCACCATGACA | 583.108697483051 | 0.211742211534397 |
| AAGGAATATGAC | 583.121024383949 | 0.314904520444158 |
| GTGCCATGACAC | 583.128905271286 | 0.371130307692358 |
| ACGCGCTATGAC | 583.129875875013 | 0.501696045795262 |
| GTCATGCTTCTA | 583.135166040652 | 0.399705583778775 |
| GACTTGTCACTA | 583.142558932177 | 0.365153459875489 |
| CTGTTTTCTGCA | 583.14296109939  | 0.350347039580996 |
| AGTCAGAGCAAC | 583.155772353755 | 0.385654094191051 |
| CCTTCTGTGTCA | 583.156639294962 | 0.512873859232825 |
| CCAACGGAGTCA | 583.17584364141  | 0.392483755781567 |
| CACCTGTGTGAC | 583.183706267457 | 0.397777396722938 |
| GTCATAGGGCAC | 583.191957668048 | 0.571798539020064 |
| CAGGTGTAGTCA | 583.192131400148 | 0.429001729326782 |
| CCTGTAATGACG | 583.195847813    | 0.328599507396019 |
| GCTAAAGATGAC | 583.197496586858 | 0.324728083608835 |
| GACTGTATGACC | 583.205346124324 | 0.488892168532602 |
| AAGAGTCTTACC | 583.207895828337 | 0.357125803606083 |
| CCACTAATGACA | 583.217946299319 | 0.43547747817616  |
| GGCCTAATGACA | 583.218513207105 | 0.38500795988812  |
| AAAACCTGTGAC | 583.22361585388  | 0.336646502752613 |
| ACGACTGATTCA | 583.229663637256 | 0.408537124034159 |
| GTTTATCCGTCA | 583.24423819794  | 0.403874669732497 |
| CTTAAATGTGAC | 583.244706487607 | 0.554417848907828 |
| ACGTCACCTTGA | 583.247807449301 | 0.484549227219305 |
| ACTCATTGCTGG | 583.249542073352 | 0.554377374324471 |
| CGTGTTTACTCA | 583.254960931495 | 0.74719514342122  |
| CGTATTAAGTCA | 583.260308832285 | 0.572597639614536 |
| GTCATTAGTCCA | 583.268921843827 | 0.316631471466848 |
| ATGACGTTAGCC | 583.274359166098 | 0.390559531578255 |
| ACAGTCAGCGGC | 583.277734252313 | 0.618102663069834 |
| ACCGTGGCGTCA | 583.282151898058 | 0.454633380942008 |
| CATGCTGCGTCA | 583.284742584283 | 0.667466237700335 |
| AAATGGTATGAC | 583.286507458377 | 0.373562672213319 |
| AGTCACTCCGTC | 583.287229406368 | 0.288872246044762 |
| CCACAGTGAGTC | 583.297867814539 | 0.383039300272794 |
| CTGACTCGGACA | 583.306334578454 | 0.49078561430496  |
| CATCCTGACGCA | 583.307480541484 | 0.419502918783823 |
| GTTGCTTTGTCA | 583.337111425247 | 0.359605561723823 |
| AGTCACTAGAAA | 583.347842070241 | 0.570554007454059 |
| GTCATCTATCAA | 583.362104943107 | 0.368615036196423 |
| GACTCACTGGCA | 583.363234553352 | 0.557357470881536 |
| TCGCACTAGTCA | 583.364895674373 | 0.30201815280212  |
| CGTCATATGAAA | 583.369658438891 | 0.373968736862167 |

|               |                  |                   |
|---------------|------------------|-------------------|
| AAGGCTGATGAC  | 583.376193222313 | 0.473603034416346 |
| TGACTCGTGCCA  | 583.399689498025 | 0.903418724770214 |
| ACTTAAGACTAA  | 583.413048167499 | 0.678289940562005 |
| ACCGAAATGACA  | 583.428832764652 | 0.205451627192562 |
| CACGTCACGCGA  | 583.433495536638 | 0.243383769367372 |
| GCCACGTGTGAC  | 583.43967818003  | 0.573988438645651 |
| GCAAAGCATGAC  | 583.445062957997 | 0.469870673203749 |
| ATCTTAGTGACA  | 583.476851628416 | 0.517603544662059 |
| GTGTCATGTGCA  | 583.478099271081 | 0.367811333135561 |
| ACGATACATGAC  | 583.485547264871 | 0.543569840828579 |
| CTGTTTAAATGAC | 583.490897693472 | 0.42962344117689  |
| TAGCTTACGTCA  | 583.50060257498  | 0.686832432925558 |
| GTCGTGCAGTCA  | 583.507163809824 | 0.691948723857033 |
| ACTCATTGTCTCA | 583.51638646672  | 0.209186300128141 |
| GTCATTTTCCAA  | 583.518514165322 | 0.515106186671644 |
| CGGCTGTATGAC  | 583.520298816988 | 0.380614566180717 |
| ACGTCTGATGAC  | 583.521558205959 | 0.541652199544335 |
| TGACATTTTAAA  | 583.528992690763 | 0.603817327487699 |
| TGACTAGTAACA  | 583.530534706406 | 0.579413534805694 |
| ATGAATCAATAA  | 583.531013389685 | 0.355274204622992 |
| AGTCAGACTCAG  | 583.561346613209 | 0.402975559203035 |
| GTCACCGATTAA  | 583.578097383418 | 0.563841152035855 |
| GACTAATCCGCA  | 583.58181985572  | 0.570931837281061 |
| ACTACAGGTGAC  | 583.594114515375 | 0.390639365524019 |
| TATAGGGAGTCA  | 583.611433958077 | 0.47578767434663  |
| GTCATAACCACA  | 583.623584969478 | 0.469987314338873 |
| AGTGTCAGAGTC  | 583.628483682066 | 0.157628074191584 |
| CAGGTAGATGAC  | 583.638223359586 | 0.50646685642749  |
| CATGGCTGACAC  | 583.638955239213 | 0.565701708766686 |
| GTCTGCGGTCA   | 583.648872938941 | 0.570152430654291 |
| ATACTATGACCC  | 583.652285727175 | 0.168114611048476 |
| TGCGTCAGGAAA  | 583.652995713594 | 0.137441049462936 |
| ACGGACTTGTCA  | 583.66823757095  | 0.574069270675175 |
| ACGTGATGACCA  | 583.669178686485 | 0.43998560950306  |
| AGTCACGACACC  | 583.686309989364 | 0.363726000103988 |
| ATCGCCTAGTCA  | 583.691872834547 | 0.247624896971036 |
| CGACTTGATGAC  | 583.692090479929 | 0.52525352189738  |
| CTAAGTGAATCA  | 583.697358896914 | 0.543920392267357 |
| CATACTGTCATC  | 583.700332066155 | 0.22150276428474  |
| GTGGCCGCGTCA  | 583.700628497013 | 0.89813555833939  |
| TCCGCCTAGTCA  | 583.70529148227  | 0.574771861149204 |
| ACGTCACCTGGC  | 583.70797547205  | 0.594242061212303 |
| GTCATTTTAGTA  | 583.710404402776 | 0.529475451799573 |
| CATGTATGTGAC  | 583.725353955644 | 0.469226323463254 |
| CAGAATTAATAA  | 583.730137548052 | 0.422741279782591 |
| CATGGTGATGAC  | 583.743281954608 | 0.358291888049656 |
| AAGTATCGTCAC  | 583.748999152545 | 0.177940305945702 |
| CTTCCTCAGTCA  | 583.749518186596 | 0.188636964692481 |
| CCACAGGAGTCA  | 583.757390408439 | 0.730749908027227 |
| AACGGATGACCA  | 583.762481951288 | 0.516160873496355 |
| GTCATCTGCGAC  | 583.768274345839 | 0.767569224341828 |
| CGATGACTTTTC  | 583.77095180162  | 0.269837075828252 |
| ACAGACCAGTCA  | 583.78291609739  | 0.589216328267701 |
| GTCATTGTACGA  | 583.787719843265 | 0.563318647967786 |

|               |                  |                   |
|---------------|------------------|-------------------|
| ACTTATCCGTCA  | 583.793811535932 | 0.24998675689294  |
| TAGAGTGACCCA  | 583.793939679103 | 0.402513927540621 |
| CAAACCTAGTCA  | 583.799594418479 | 0.449350809475918 |
| ACGCGTGGTGAC  | 583.804171854114 | 0.567534881376033 |
| GACGTGTCAACC  | 583.828719382414 | 0.550290341867829 |
| GAGCGGTATGAC  | 583.83376623181  | 0.107723253706958 |
| CCGGACCAGTCA  | 583.836392829074 | 0.577639486236872 |
| TCTTCATAGTCA  | 583.837876509911 | 0.485565630605012 |
| AGCCGGACTCAT  | 583.847475191727 | 0.586330802395174 |
| GAAAGTAATGAC  | 583.84796885385  | 0.463965230942066 |
| TGACGTGGGTAA  | 583.853214287505 | 0.552945913536336 |
| TGACTCGCTTAA  | 583.865903633581 | 0.55313182063198  |
| CGAACGTGTGAC  | 583.877550745669 | 0.689352460507693 |
| CACGTCAGAGTC  | 583.88985746859  | 0.324367995968709 |
| GTCACGACTGAA  | 583.904770516252 | 0.522612231643023 |
| GTCACACAATTA  | 583.913275906736 | 0.521564310764099 |
| ATTCTGAATCAG  | 583.91853933262  | 0.463002658763262 |
| GTACGGTCATAC  | 583.925649952633 | 0.293504390702464 |
| TACCTTGCGTCA  | 583.9383037333   | 0.474949043809577 |
| CCGGATCTGTCA  | 583.947300059691 | 0.523089890229341 |
| AAGTTGTAGTCA  | 583.947786154945 | 0.394368924020053 |
| TAACTTGACTGA  | 583.977251345663 | 0.50601990477759  |
| GAGCCTGACGCA  | 583.982932626463 | 0.701947566775173 |
| GTCATGCCCTGA  | 583.98605403537  | 0.359971706395142 |
| GGACCCTAGTCA  | 583.991831739058 | 0.60722769800652  |
| ACACAGCATGAC  | 583.999053482748 | 0.6601985313081   |
| AATTTATTAGTC  | 584.017085234889 | 0.756976763528706 |
| GCCATTAGTGAC  | 584.025506642033 | 0.583239930246695 |
| ATTAGCCATGAC  | 584.048647953121 | 0.397263614801084 |
| GAACATAATGAC  | 584.050265524926 | 0.454495293705137 |
| CAGTCACGAGAC  | 584.060315203138 | 0.632679865851473 |
| AGCACCGATGAC  | 584.063578908609 | 0.316880064444937 |
| ACTCCGAGTCA   | 584.064834043193 | 0.45747796474367  |
| TATAGACAGTCA  | 584.071913588636 | 0.602617896185284 |
| GTGAGTCGGAAC  | 584.092661390092 | 0.241225456526268 |
| AGAATGACCACT  | 584.09947734371  | 0.257862494457057 |
| CCTGTAAATGAC  | 584.103757688364 | 0.581357692780417 |
| ACTGGTACTCAT  | 584.110120782668 | 0.430810429655398 |
| GTCACCTTGATAA | 584.120943685585 | 0.642767934275019 |
| GAATGATGTAAC  | 584.122632830654 | 0.203765554954845 |
| ATGCATTGGTCA  | 584.130429743888 | 0.620222930312096 |
| GTCACCATAAGA  | 584.137181268079 | 0.70693039009585  |
| CTGATGGGTGAC  | 584.15195711625  | 0.441194134633895 |
| GCGCGTGTGTCA  | 584.152932343539 | 0.512303227573876 |
| AATCATTGTTCAT | 584.15698455426  | 0.378956821604638 |
| GTCATTAGTGCA  | 584.156989677932 | 0.479036393918347 |
| ACGTCACATTTTC | 584.167989538656 | 0.388443502924441 |
| GCCTTGACGTCA  | 584.169102499621 | 0.390351198511587 |
| GTCACATAATCGA | 584.171578896697 | 0.490948629689892 |
| GTCACCGGCCGA  | 584.178904845867 | 0.543997520395052 |
| ACGACTCAGACT  | 584.188658013789 | 0.358596347704497 |
| GTCATTGCGAAA  | 584.196239434084 | 0.807356187267483 |
| ATGAGTCCGTTA  | 584.207290066824 | 0.47254969568412  |
| GAACTTGGTCAC  | 584.221470820047 | 0.497242231490486 |

|              |                  |                   |
|--------------|------------------|-------------------|
| GTCATTAECTGA | 584.227582919398 | 0.633839524911606 |
| CCATACTGACTC | 584.252460494581 | 0.426657346002567 |
| GAATAGTGTGAC | 584.256503560976 | 0.240433806131885 |
| GGACCGACTCAC | 584.259653358572 | 0.39179070695285  |
| CCAGAAAATGAC | 584.260744049173 | 0.531133745013977 |
| GCAAGAAATGAC | 584.261936705889 | 0.566615316480276 |
| CACTTTGACGCA | 584.263831443138 | 0.331497401422308 |
| CTCATACGGTGA | 584.279037096746 | 0.654734235269642 |
| CAGATGTGTGAC | 584.281865785713 | 0.535096909300486 |
| AACGTGTGACAA | 584.283649167065 | 0.363730806666721 |
| CGTTGGACTCAC | 584.291315040365 | 0.114954881619078 |
| GTGTTGAGTCA  | 584.297816809904 | 0.352099705453275 |
| ATGAATCAACAG | 584.300748702086 | 0.361396878136799 |
| CAGACTGTGACA | 584.304430773972 | 0.429879012050627 |
| GTGTCATGCGAA | 584.304755973302 | 0.44540835086116  |
| CCGATGGATGAC | 584.346928615899 | 0.525416967234614 |
| AGTCACTTGGTC | 584.352166650631 | 0.439930690198452 |
| ACTGAATCGTCA | 584.3576382983   | 0.475404996806051 |
| ATATGAGATGAC | 584.391740755053 | 0.329304328598949 |
| TGACTGGTCTAA | 584.395193999201 | 0.633997177926526 |
| ATCATATGACCA | 584.399556862959 | 0.364748245422794 |
| GCGCTCAATGAC | 584.414282712965 | 0.842359717058454 |
| GCGTAATATGAC | 584.416673130206 | 0.435901357849515 |
| CGTCAGTGACAC | 584.431044499217 | 0.694651960079153 |
| ACGCGGCGTCAT | 584.442606115144 | 0.511657789517539 |
| ACACAGTGACGT | 584.450066046039 | 0.365141219725631 |
| CAGTCAGCGTAA | 584.455854432665 | 0.587637331858651 |
| GTCATCACTGCA | 584.462882462951 | 0.653590752899663 |
| GACTCACTGTAA | 584.475743848318 | 0.405247646579475 |
| GTCACGTTACTA | 584.484882473487 | 0.546194177525374 |
| GACGACTCAGAC | 584.489357221618 | 0.34418341082365  |
| CGTGTATGTCAC | 584.490669453468 | 0.509072965543444 |
| CGGTGTGAATCA | 584.506270929527 | 0.411955184265667 |
| CAGTGGTGTGAC | 584.523472840353 | 0.185678928854896 |
| ATGACAAGATCA | 584.52983316101  | 0.493224004321591 |
| AGTTTGGAGTCA | 584.56394490195  | 0.32211273460387  |
| AAAGACGTCATT | 584.572483746902 | 0.316095442002782 |
| AGACTAATTGAT | 584.580132319909 | 0.61172771533913  |
| AAAATGTCATCA | 584.584522347871 | 0.123866752398201 |
| AGGGCGTATGAC | 584.584622377912 | 0.268739771746356 |
| GATCGTGATTCA | 584.593339827525 | 0.40056280325793  |
| GTCGTTAAGTCA | 584.631562609788 | 0.602757137475503 |
| GTACCAATGACA | 584.653760379837 | 0.502905066982989 |
| GTCATGTCGCTA | 584.655177657517 | 0.740426451922619 |
| GTCATTGCATTA | 584.655545216821 | 0.386975297946491 |
| ATGATGTGTACG | 584.682762158586 | 0.448324421096755 |
| CCTCAGATGACA | 584.684436845165 | 0.269172084738756 |
| GATGACAGCGAC | 584.68766144976  | 0.336669608546197 |
| AACCGCTATGAC | 584.707244546879 | 0.390899474060554 |
| CGTCATATGACC | 584.71210955433  | 0.324288772335725 |
| TCATACGCAAGA | 584.748711652903 | 1.13784954637345  |
| GAGTCAATAGGA | 584.760258361712 | 0.399537882147029 |
| ACTCTTGACTGA | 584.773269708887 | 0.545753358172484 |
| CATCGTGATTCA | 584.788858779952 | 0.323641948668885 |

|               |                  |                   |
|---------------|------------------|-------------------|
| GCCAAGTCACCA  | 584.80193677458  | 0.450066178752963 |
| ATCTCAGGTGAC  | 584.808454254209 | 0.424423231071843 |
| AGCGCGTATGAC  | 584.81103016846  | 0.646456360334835 |
| CACTCTTATGAC  | 584.828944259486 | 0.480509266559915 |
| CGTTTGGGTGAC  | 584.834326905765 | 0.278059053797453 |
| GATAAAGATGAC  | 584.843631604031 | 0.266809653639805 |
| ATGTCATTTGTC  | 584.846512991753 | 0.488143795238844 |
| CGTTGCGATGAC  | 584.849504194026 | 0.567439177614022 |
| ACGGCCGATGAC  | 584.870077330559 | 0.332888273251793 |
| CAAAGTGGTGAC  | 584.872009921614 | 0.588380191504847 |
| ACTCATTTTATG  | 584.87234379118  | 0.607451441042938 |
| CATGTTGAATCA  | 584.879891224665 | 0.515295995905478 |
| GTCACTATATAA  | 584.883056769564 | 0.4935172285516   |
| TGACTGTAGAAA  | 584.891649988001 | 0.58738903794047  |
| AAAGAAATGACA  | 584.89487776777  | 0.313518034740015 |
| ATATGCGATGAC  | 584.89796688402  | 0.422726489374845 |
| GATACCGATGAC  | 584.904407715499 | 0.50932521862179  |
| ATGAATCAATTC  | 584.907178328963 | 0.304836704260594 |
| GTCATTGAGTGA  | 584.908539477524 | 0.582368422606652 |
| ACTCGTGACTAG  | 584.912725199316 | 0.46273405379644  |
| CACTCCTATGAC  | 584.939563555174 | 0.389834847677177 |
| CGTCACCGCGAA  | 584.951896033374 | 0.330724555469199 |
| CATCGTCGATGA  | 584.962859319729 | 0.832282574111667 |
| ATGCGCTGTGAC  | 584.977466651394 | 0.595055063797111 |
| CCGAATTAATAA  | 584.980241467505 | 0.326380576085335 |
| GTCAGACTGTCA  | 584.984444244367 | 0.345301730145682 |
| TTAGACTCAGAA  | 584.994804265707 | 0.336024672121151 |
| AGTGCATGACAC  | 585.003737235171 | 0.159839003335805 |
| AAAATAGGTGAC  | 585.00681804798  | 0.305106702801616 |
| AATTACGCAACA  | 585.012272168635 | 0.448019862226465 |
| ACGCGAATGACC  | 585.017671257674 | 1.19280345413112  |
| CGTCATTTAGTC  | 585.033361644926 | 0.386317789097147 |
| ATGACGTTGAAG  | 585.042110895469 | 0.331036029248582 |
| TGGTCATATCAA  | 585.047232572752 | 0.190180065846953 |
| CATGCATAGTCA  | 585.08073750798  | 0.447485473513173 |
| ATCAACGACTCA  | 585.08086673005  | 0.527326660461494 |
| TGACAAACAAAA  | 585.085510908643 | 0.490937305619813 |
| ACGAGCTGTGAC  | 585.093390405536 | 0.529043940949446 |
| AGCGTAGATGAC  | 585.095998161036 | 0.523395121803885 |
| TGACACAGCGCA  | 585.096124372    | 0.81164717473236  |
| CGCGCGGAGTCA  | 585.115701186002 | 0.680198160948324 |
| AAACTGTGACGT  | 585.125183561303 | 0.354669535920069 |
| ACGTAAGTATGCA | 585.126093986004 | 0.538590034976609 |
| AGTCATGAGAGG  | 585.152127625854 | 0.105239898971915 |
| CTCGCTGCATA   | 585.174285649932 | 0.301317731233939 |
| CTGTTGAATCAC  | 585.176900236132 | 0.161076444833219 |
| GTGATATGACCA  | 585.184373358474 | 0.541715142359119 |
| CTGTTTGTATGAC | 585.193145545871 | 0.6721278415232   |
| GTCATCCACCAA  | 585.194532120617 | 0.329151865767653 |
| ATCCGATTAGTC  | 585.195139214842 | 0.405899598328156 |
| CAGCATCCGTCA  | 585.206102027668 | 0.354297666499012 |
| ATGACGAACTCC  | 585.206345299911 | 0.308966100382062 |
| GATATTGATGAC  | 585.206797565864 | 0.489503215187932 |
| ACGTCACCTCAGC | 585.207193658207 | 0.551286110176644 |

|               |                  |                   |
|---------------|------------------|-------------------|
| ACCCTCATGACT  | 585.210480696217 | 0.243458958028315 |
| CCACTGTAGTGA  | 585.210723100081 | 0.875818878109317 |
| AGTCACGCTGAG  | 585.238064684799 | 0.298366539496205 |
| CAAGTCAGTGAC  | 585.248795020698 | 0.440435781223149 |
| GGCGCTTATGAC  | 585.252695111564 | 0.451414707717227 |
| GCCGTATATGAC  | 585.291401107251 | 0.423625359648473 |
| AGTCAGCACGTC  | 585.293763277945 | 0.310986303748099 |
| GTCATGCACCAA  | 585.304092505968 | 0.927554644135187 |
| ACTCATCATAGA  | 585.31041968464  | 0.364352087542593 |
| ATGAGCAACCAT  | 585.317269241231 | 0.404569592586124 |
| AGGATACAGTCA  | 585.317338666062 | 0.199585983640852 |
| GTCATTGCACCA  | 585.317728874055 | 0.559088443128074 |
| CTTCTGAGTCTA  | 585.317917557589 | 0.342681007509177 |
| GTCATCCTCGTA  | 585.320275284899 | 0.461415113709736 |
| CTAGATTTGTCA  | 585.331410382586 | 0.31673064395254  |
| ATGACAATATAG  | 585.337951199616 | 0.356394471513676 |
| GCAACTGACACA  | 585.341091595472 | 0.442459620656069 |
| TCGGCAGAGTCA  | 585.349618114511 | 0.448637459408412 |
| ATTCAGATGACA  | 585.359810322468 | 0.858086354566796 |
| ATGCTATTAGTC  | 585.368189749129 | 0.524140619865926 |
| GAGAGACTCATA  | 585.371644892201 | 0.353618478953908 |
| TACGCTGTCATA  | 585.382857054518 | 0.397677110443913 |
| CCCGGAGAGTCA  | 585.386306080727 | 0.468738518802706 |
| GTATTGCTAATA  | 585.398670817491 | 0.287903124999763 |
| GTCAGACATGAC  | 585.400460394936 | 0.433184492007934 |
| CGTATTTGCTCA  | 585.410291744691 | 0.391542686906419 |
| GCGAATTGTGAC  | 585.415068215709 | 0.536307960159616 |
| GTCACGATTTCA  | 585.415856123758 | 0.45013857899159  |
| ATGACGGTATAC  | 585.428850890873 | 0.381702730565107 |
| CGGTGACAATAC  | 585.432418006583 | 0.607192349529887 |
| GTCACCAAGGTA  | 585.442411544986 | 0.589711759217391 |
| CATCACCAAGTCA | 585.445551628821 | 0.565071287897269 |
| ACGACATGACGT  | 585.447780263079 | 0.608304693487387 |
| CTCTAATATGAC  | 585.457296484416 | 0.441596384337125 |
| ACATAGTCAGTC  | 585.462525785092 | 0.522638393312352 |
| CTGGGATTAGTC  | 585.468999279367 | 0.469936139908506 |
| GTCATGATATGA  | 585.470836159914 | 0.496987109548837 |
| TCTGTAACGTCA  | 585.473235072391 | 0.513584543576788 |
| AGAACGTGACAC  | 585.479690861411 | 0.375166189535857 |
| ATGACGATGAGA  | 585.505687601591 | 0.300074816948026 |
| AGATACGATGAC  | 585.514434437661 | 0.512449548480324 |
| TGTACACGTCAA  | 585.52250094607  | 0.469177807787158 |
| GACTCACGCCAA  | 585.527078834513 | 0.475456753917272 |
| ATTACTGAGTAA  | 585.55722812441  | 0.641974447734991 |
| GCTCGCGAGTCA  | 585.559735359517 | 0.918501182370334 |
| TGACTGTGAGAA  | 585.573930752895 | 0.328294485442944 |
| CTGGCAGATGAC  | 585.575973699062 | 0.391476600548449 |
| ATCGTTTATGAC  | 585.590636272561 | 0.331091001893414 |
| CATAATTAGTCG  | 585.597409181756 | 0.494186437251695 |
| CACTTAGTATGA  | 585.606889174789 | 0.50457510894067  |
| AGAGTCAATGTA  | 585.612869542086 | 0.410199149683622 |
| TTCTGACTGCAA  | 585.618808769409 | 0.580063680044191 |
| GGCTGCGATGAC  | 585.634438408986 | 0.196246842695123 |
| GTCACAGTCCGA  | 585.639555811614 | 0.590246035690945 |



|               |                  |                   |
|---------------|------------------|-------------------|
| ACACGTATTAGT  | 585.649696110202 | 0.492873775089429 |
| CGTCATTGCAGA  | 585.658099940545 | 0.539651290652368 |
| ACTCGTTATGAC  | 585.667464419823 | 0.205885450604195 |
| TCATGTGAGCAA  | 585.668751138733 | 0.32378499380948  |
| CGAACCTGACTC  | 585.689155204324 | 0.387559555307637 |
| GTCATTGTTTAA  | 585.695741054614 | 0.330394886588929 |
| TCAGATATGTCA  | 585.700654275569 | 0.778608353546873 |
| ACAGTATTAGTC  | 585.701415333285 | 0.305704537874082 |
| CAATAATGTGAC  | 585.715847496375 | 0.517636102987427 |
| CGTGAGCATGAC  | 585.726630684955 | 0.690495287252019 |
| ATGACAACGTGC  | 585.727548584063 | 0.33456391286161  |
| GTCATCACTTTA  | 585.750152021246 | 0.562388463147165 |
| AGCAGCGATGAC  | 585.756725581069 | 0.558745396000429 |
| ATCAAAGATGAC  | 585.763948198694 | 0.609887702294989 |
| GACGGAGATGAC  | 585.769544885657 | 0.324930595811026 |
| ACGCGTGACT    | 585.775064398403 | 0.393278212854404 |
| ACTCATAGTTG   | 585.800451237827 | 0.522880960366142 |
| ATTGCTCAGATC  | 585.80080507479  | 0.374603225230402 |
| CGTTGATTCACA  | 585.822615807077 | 0.124762274721777 |
| CTCTCACAGTCA  | 585.823990410477 | 0.345496562994253 |
| CGAGAAGATGAC  | 585.824598073037 | 0.304254140369239 |
| GGCAACGGTGAC  | 585.845294651324 | 0.39675634478063  |
| AGCAGGGATGAC  | 585.853714176228 | 0.253888406495681 |
| CGCTGGGAGTCA  | 585.854757978039 | 0.387666654538927 |
| GTCACTGGATCA  | 585.870931580082 | 0.537703459075747 |
| GTGAGGGAGTCA  | 585.883560716904 | 0.172001233926075 |
| TAAATGTCGTCA  | 585.907309434072 | 0.323000866294847 |
| AGGGTAGTGACT  | 585.915120257227 | 0.245321117432645 |
| AGAGTGAATGAC  | 585.917435923844 | 0.369170162719197 |
| GCCAACCAGTCA  | 585.920876619586 | 0.206380106773349 |
| GGAACGGATGAC  | 585.922520313675 | 0.351963013283092 |
| CTGATTTGTGAC  | 585.92269745615  | 0.262822867745926 |
| ACTCTCTATGAC  | 585.924143567858 | 0.279413628234427 |
| ACTCATACTACG  | 585.931963697933 | 0.447739167683523 |
| CGCACCTAGTCA  | 585.936320769497 | 0.324166034397691 |
| AGAGTCAATAAG  | 585.938542274345 | 0.517186080310781 |
| ATTAGACTCAGA  | 585.95695188619  | 0.405450664730011 |
| GGCCCTGACTGA  | 585.964479704224 | 0.57403545898047  |
| TGTCATTGCACA  | 585.968189030891 | 0.315897584357585 |
| CTAATGGGTGAC  | 585.978373204213 | 0.467769237723163 |
| ATACTGTCAATGA | 585.981890242993 | 0.371987672409811 |
| CGCATAGGTGAC  | 585.989400109802 | 0.714073444686332 |
| GCAGGCTATGAC  | 585.990408741992 | 0.652051833713987 |
| GTCACCTACTCA  | 586.00946667927  | 0.223395001358143 |
| ACGATTTTCGTCA | 586.009977456847 | 0.577503554487651 |
| ATGTCCGACTCA  | 586.014608435016 | 0.203591872950933 |
| CGTACTGACACA  | 586.031213429099 | 0.540681978492051 |
| TGACTATGCTAA  | 586.034508088688 | 0.585632694934287 |
| CATTTTGACTGA  | 586.051841503479 | 0.332917394336651 |
| GTCACATAGAAC  | 586.056111652959 | 0.40443315028711  |
| CGTATTGATGAC  | 586.05803051217  | 0.634631357155    |
| AGTCACTCCAGA  | 586.070147966532 | 0.329038613775843 |
| CAACTTTGATGA  | 586.076037716453 | 0.510434392572855 |
| CAGTCACGCGGG  | 586.082686432487 | 0.449150956216814 |

|              |                  |                   |
|--------------|------------------|-------------------|
| ATGACGTTCATA | 586.086556411168 | 0.549851110085342 |
| GCCACCCAGTCA | 586.096363834116 | 0.400586768820432 |
| CAGTGATGACCC | 586.106278673159 | 0.66924986353447  |
| GGCTAGAATGAC | 586.110415337949 | 0.363890114105291 |
| ACTCATTGTGAG | 586.129992125717 | 0.303745358861946 |
| GTCACCTCGGAA | 586.155475216137 | 0.785117474737745 |
| CGTCATTAATTA | 586.162365656386 | 0.404552965561473 |
| GAAAATGGGTCA | 586.186525209863 | 0.315298780268397 |
| GACTATCATGAC | 586.201200552898 | 0.26934096365427  |
| ACGTCATGCCAT | 586.214063067736 | 0.502722441794429 |
| GGCCCCAATGAC | 586.214464009505 | 0.313685552679535 |
| AGACTGGAGTCA | 586.230084826296 | 0.396036246167437 |
| ACTCATACTATG | 586.248908231399 | 0.29710189331047  |
| AGTGACAAGTTC | 586.258668146203 | 0.489713723049759 |
| GTCATGGCCAAA | 586.270533188271 | 0.626439281535077 |
| GACACCCAGTCA | 586.273662836652 | 0.586982558151302 |
| CACGGTAGTCAC | 586.276408728    | 0.328363864656489 |
| AACAATCGGTCA | 586.280358866724 | 0.517488419847296 |
| GCGCATGACCCA | 586.28331843251  | 0.505946131825383 |
| CCGTAGTGTGAC | 586.293878963294 | 0.590064368008171 |
| GTCATTTAATTA | 586.302819796623 | 0.492601895693796 |
| ATGACGAGACAA | 586.306338506632 | 0.448587049259299 |
| CCGGGACATGAC | 586.309207688816 | 0.802804981715585 |
| AGGGCCAGTCA  | 586.335282981707 | 0.367110613132069 |
| GTGACGATATGA | 586.347766985016 | 0.364799582387677 |
| ACGTCACAAAC  | 586.356698554169 | 0.312557508659079 |
| CTTAGTTATGAC | 586.358407642934 | 0.461732139853932 |
| GCTGACTAGTCA | 586.361877156296 | 0.752538571575586 |
| GCGTCACATCAA | 586.364685123488 | 0.499680369617347 |
| ACTTACATGACG | 586.367926661687 | 0.79953505070542  |
| ATGACGAGGCTG | 586.376084215723 | 0.482082619847768 |
| TCCGTTGACACA | 586.378343824003 | 0.552742182072703 |
| GTACTAGGTGAC | 586.382174999399 | 0.678204974977603 |
| ATACATTGCTCA | 586.38910040597  | 0.369083105199633 |
| CACGTCACGGAA | 586.389749154885 | 0.54527003151591  |
| TGACTCGGATCA | 586.392172360484 | 0.547881705432212 |
| ATGAGCAACTCA | 586.393912285021 | 0.307104670544376 |
| AGTTTGTGTGAC | 586.394806664516 | 0.522920472577752 |
| TCACAGCGATGA | 586.398115617563 | 0.492757917029285 |
| AGTCACTTCAAC | 586.440043512179 | 0.479689732804232 |
| AGTCACTAGTTA | 586.444919449106 | 0.442224566601651 |
| ATGAATCAACGG | 586.451508698457 | 0.179849210874363 |
| GTCATCTTAACA | 586.451616004545 | 0.545641284173875 |
| GACGTGAATGAC | 586.456408056235 | 0.213871117996695 |
| CGTCATTAACAC | 586.479776469429 | 0.447409018188089 |
| ATGACGTGAGCA | 586.485433492336 | 0.48057239443252  |
| GCTATCAATGAC | 586.488871026351 | 0.438110094080378 |
| CTGCAAATGACA | 586.501189044936 | 0.614705774026861 |
| GTCATAGCGACA | 586.505152309423 | 0.632238280567458 |
| AATCATGACACT | 586.505794063392 | 0.357631902435742 |
| ATACAGTGACAC | 586.519477615083 | 0.510685233813167 |
| AGGCAAGTCATA | 586.528000575855 | 0.301976432593615 |
| AGTATGAATGAC | 586.536849449712 | 0.320350633145533 |
| CGGGGCTATGAC | 586.545554506097 | 0.140620707349094 |

|               |                  |                   |
|---------------|------------------|-------------------|
| AGACTAATCGCA  | 586.546341477841 | 0.448432840404798 |
| CGAGGTAGTCAC  | 586.548416351746 | 0.489055067852749 |
| ACACTGTGACGC  | 586.562295425665 | 0.411169455686484 |
| AGACATGAATCA  | 586.5736003571   | 0.348188526497255 |
| AGAAATGATGAC  | 586.582131072624 | 0.337402109916673 |
| GTCATACCCGCA  | 586.597080298774 | 0.525959575326809 |
| ACTCGTGTGACA  | 586.621204463818 | 0.379199651825627 |
| AACGCGGATGAC  | 586.624619672428 | 0.384651580715757 |
| AGTCTGATGACG  | 586.626224225989 | 0.361774068791645 |
| CCGGGCGAGTCA  | 586.640026537959 | 0.443900309825974 |
| ACAGCCGATGAC  | 586.657460241103 | 0.59020495750025  |
| GACTAATTGATC  | 586.660789642894 | 0.784683934654831 |
| TGACACTACAAA  | 586.673508485626 | 0.398217556629115 |
| TGACGTTTATAA  | 586.711585404897 | 0.479310359962297 |
| TACCGGGTGACA  | 586.719025971614 | 0.48348190015711  |
| GATGGGAATGAC  | 586.724897836586 | 0.286190263656813 |
| AATAGTCAATAG  | 586.731586653891 | 0.167172166299158 |
| GACGTAACTTAC  | 586.734453660196 | 1.00623597033617  |
| GAATTCAATGAC  | 586.73634452867  | 0.384634009924531 |
| ACATACCGTCAT  | 586.765684638277 | 0.266132791835163 |
| AGTCATGAGGCG  | 586.771076040559 | 0.248889438781275 |
| GTCACATCGTCA  | 586.775652964203 | 0.313484840802803 |
| AAGCTGACGTCA  | 586.783720825185 | 0.828468747068001 |
| GTCATTATACCA  | 586.799837821083 | 0.605775611632724 |
| GACGTAAGTGAC  | 586.802503045206 | 0.551956205383314 |
| AGTCACTACCCA  | 586.802821352866 | 0.143904882388723 |
| ACGACTCAGACG  | 586.805423471054 | 0.572969418002199 |
| TGGTCATCAAAA  | 586.827375710051 | 0.425251662808665 |
| GTCTCTCGTCA   | 586.827972694326 | 0.545529122057828 |
| ACGTCACCCGAG  | 586.839707491523 | 0.468894349349854 |
| ACTATGTGACGC  | 586.840527593444 | 0.40778470450409  |
| GAGTAGAATGAC  | 586.84752135504  | 0.390354817397365 |
| ATGACGGTATTG  | 586.849803188538 | 0.277628823121121 |
| CAGCATTGGTCA  | 586.857032092747 | 0.783015096028759 |
| GTCATTCGCAAA  | 586.867998056963 | 0.440787849264746 |
| AAGATTCATAAT  | 586.877462980532 | 0.470132609031022 |
| CAGTCGTGAGTC  | 586.886317605408 | 0.400431604557125 |
| AACGACCAGTCA  | 586.903087589777 | 0.556140709863831 |
| GGTCATCATTAC  | 586.908013490222 | 0.610602948778782 |
| GTGACTGTGACA  | 586.920574777866 | 0.518674943065926 |
| CGCAAGCGTGAC  | 586.935403671853 | 0.52125223065037  |
| GAGTCAGGATCA  | 586.938052412082 | 0.314664177858087 |
| GTCATCGTACCA  | 586.941698618563 | 0.353766120280885 |
| AATGCATGTCAT  | 586.962913188602 | 0.403047166863852 |
| ATTCATTGTCGA  | 586.965195377173 | 0.426258729937885 |
| ATGACAGGATGA  | 586.966238560904 | 0.339157523160412 |
| CACGTCAGATTA  | 586.970531558586 | 0.497405485683285 |
| GTCATAAAGCCA  | 586.980830889717 | 0.457175372845623 |
| GTCATTTCTCTA  | 586.995248864991 | 0.331552921345993 |
| GGCAAGTCATAC  | 586.998332012501 | 0.413352123037599 |
| TCGATTGGTCA   | 587.017831374978 | 0.571445018870484 |
| AGTCAGCGTGTC  | 587.018624781266 | 0.597718139408971 |
| ATGAGTAGTTTCG | 587.021716496962 | 0.372049447546424 |
| AGTCATGGGCGAC | 587.021786398861 | 0.291527563151326 |

|               |                  |                   |
|---------------|------------------|-------------------|
| CGTACTGATTCA  | 587.025903256469 | 0.52513019141922  |
| TGACGCTTAAAA  | 587.03420464559  | 0.57621745607379  |
| TGACTGCGCCAA  | 587.057466484493 | 0.523256033115845 |
| CATAGCTATGAC  | 587.061047582915 | 0.417030875568894 |
| ACTTCATGACAC  | 587.073116707736 | 0.472858772806828 |
| GTCGTCACGTCA  | 587.082832191445 | 0.44723557016748  |
| TGACTATGAACA  | 587.093234182485 | 0.515878180995396 |
| CGGGCCCATGAC  | 587.105021029889 | 0.567891235514409 |
| GCCTTTGCGTCA  | 587.112167939762 | 0.733794350060885 |
| ACCGGGGTGACT  | 587.112775294986 | 0.338549882491049 |
| ATTACTCAAGCC  | 587.126351082195 | 0.139220739978554 |
| GTGTCATGAAAC  | 587.139495565897 | 0.458870537836595 |
| TGACAGACTTAA  | 587.141329605105 | 0.581490348677259 |
| ATACGACTATGA  | 587.142579358609 | 0.750291603118412 |
| CTACAAGACTCA  | 587.148614186512 | 0.23828743881545  |
| AGATTGACTGAA  | 587.186132417761 | 0.439782485055681 |
| GCCAAGCGTGAC  | 587.190477698762 | 0.407712297457381 |
| AGAGTCAAATG   | 587.19575048576  | 0.354551437261853 |
| AAAGTTTATGAC  | 587.19718242577  | 0.233236195709803 |
| CACTGCTATGAC  | 587.202129385935 | 0.306515741184193 |
| GTATGTGATGAC  | 587.214078423235 | 0.348588533158459 |
| ATAGGGATGACG  | 587.215858082198 | 0.315831938653534 |
| TGAGACGACTCA  | 587.226435446481 | 0.808411481197096 |
| AATAATGAGCCA  | 587.233559074181 | 0.815891462107589 |
| GAGTCAATTAGC  | 587.235294068151 | 0.298603516045248 |
| TCCGCTGCGTCA  | 587.246630858961 | 0.615527641970593 |
| CCTGCGTATGAC  | 587.249272956971 | 0.468451720189173 |
| ATTGCTGATTCA  | 587.274014851458 | 0.539724264537768 |
| TGACTCCAGGAA  | 587.282626061715 | 0.491798398706855 |
| CCCCTTCAGTCA  | 587.282689447286 | 0.432059884329346 |
| AAACGTACTION  | 587.284052930028 | 0.312513180713471 |
| TCTGGCGAGTCA  | 587.284890202043 | 0.375414979543031 |
| GCGACCGACTCA  | 587.29288081418  | 0.433276467010818 |
| CAGTCAGATCAG  | 587.296147818216 | 0.486660554172388 |
| GCCCATGACCCA  | 587.321849333325 | 0.394968261227352 |
| ATATCTATGTCA  | 587.323969690736 | 0.558602301176527 |
| CTTAACGACTCA  | 587.353342373254 | 0.578116221919115 |
| ATTCCCTATGAC  | 587.357588210107 | 0.361192125310286 |
| ATTTTCGTCAGAC | 587.366282839279 | 0.301426298142876 |
| AAAGAGTGACGT  | 587.379334091249 | 0.107542649126817 |
| GATATAGATGAC  | 587.401524656613 | 0.315546493858543 |
| AGTGTGGCTCAC  | 587.401604606997 | 0.330368075835469 |
| GTCATTTTCGGGA | 587.426164645279 | 0.348329220396056 |
| GTCACCGGCTTA  | 587.4267310979   | 0.380430456009676 |
| GCATCATGACAC  | 587.431085340952 | 0.304899606907102 |
| GTACATTATGAC  | 587.436373724104 | 0.642634916505119 |
| AGACTCACTTTG  | 587.446318298185 | 0.435973084267781 |
| ACTCATCAGTGG  | 587.453839070015 | 0.59910583663256  |
| CATACTGTGACA  | 587.481156485347 | 0.471475227143515 |
| CTATCCTGACTC  | 587.489055398346 | 0.232772446856871 |
| AGAGATTGGTCA  | 587.495002776926 | 0.279309600954967 |
| ATGTACACATCA  | 587.500507387468 | 0.405823833346625 |
| AGTTGGGAGTCA  | 587.501750901881 | 0.107488931949446 |
| GTCATCCAGGAA  | 587.507091201013 | 0.473419024274004 |

|               |                  |                   |
|---------------|------------------|-------------------|
| CGATCGGAGTCA  | 587.511600242727 | 0.439316442551954 |
| CAACCATGACAC  | 587.517955117428 | 0.288407606191407 |
| CTTTCAGTATGA  | 587.537384541436 | 0.492592316782462 |
| GTCATTAGCAAA  | 587.557718395065 | 0.372057014233862 |
| TGAGTCCTCGAA  | 587.56119233026  | 0.489270105971573 |
| AGTGATAAGTCA  | 587.577619395159 | 0.216662554595538 |
| CTATTGACGTCA  | 587.578116697419 | 0.173149514472725 |
| CGAAATCATGAC  | 587.582019422559 | 0.410160500583902 |
| GGCCACGTAACC  | 587.591419888269 | 0.483409580657511 |
| AGGCAATATGAC  | 587.594000605974 | 0.453929820626599 |
| CTTAGTGACCCA  | 587.597027652432 | 0.323079787618939 |
| ATCAGTCGTCAT  | 587.599567054663 | 0.203953619981021 |
| AGAACGAATGAC  | 587.60900212366  | 0.423974739120282 |
| AAGACCGTGACT  | 587.610352094933 | 0.237549301497178 |
| GTCACATCGAGA  | 587.610484337261 | 0.435977823660694 |
| ATGACCACGAAC  | 587.637940521707 | 0.312878485547139 |
| AATAGTCAATAA  | 587.642059499414 | 0.39917418443218  |
| AAGATCGATGAC  | 587.644193952653 | 0.167355154710733 |
| AGCGGGGAGTCA  | 587.650270666113 | 0.191420100980121 |
| CACCCTGGTGAC  | 587.651029042471 | 0.580731504592357 |
| CCCCTTGC GTCA | 587.65112028184  | 0.333170439031508 |
| CTAATAGATGAC  | 587.652337583766 | 0.212526909432856 |
| CGAGTAAGTCAC  | 587.661831636946 | 0.297348489752059 |
| ACCGCTGAGTAA  | 587.67004449958  | 0.469886604959936 |
| CACACAGATGAC  | 587.67244180191  | 0.474784048891551 |
| GAAAACCCGTCA  | 587.678432605771 | 0.450341438355564 |
| GTTACTCAATAA  | 587.691777507881 | 0.539628582583676 |
| ATGACTTGTAGG  | 587.704541700432 | 0.615572835472231 |
| TGACTTAGTGAA  | 587.707977214088 | 0.410016482484643 |
| AACGGAATGACG  | 587.715717715726 | 0.29313840414749  |
| ATAAGGGAGTCA  | 587.721967692248 | 0.263180346098345 |
| CGTCGGGATGAC  | 587.731753873791 | 0.498374001634896 |
| TGCAATTAATAA  | 587.738154191176 | 0.53938253200159  |
| ACGTCACGTGCT  | 587.742724594343 | 0.565715404566207 |
| ATGAGCGATGAC  | 587.786626472869 | 0.623128040177023 |
| CTGACGTACGTC  | 587.787582138424 | 0.697744806635742 |
| GCTGAGGATGAC  | 587.795265070012 | 0.257985450668699 |
| GATCTGTCAGAC  | 587.801954842183 | 0.28819622489381  |
| ACCCGTTACTCA  | 587.813957773047 | 0.470444452636206 |
| GATGCGGATGAC  | 587.826614263761 | 0.33342226368696  |
| ACTAATTACGCA  | 587.828196010431 | 0.58337872711326  |
| CGTCATCTACGA  | 587.831921706933 | 0.379315411955089 |
| GTCAGTCTGACA  | 587.832109478383 | 0.412213368096455 |
| TGACTATGAGAA  | 587.837644219995 | 0.446386836818486 |
| TCATGCCAATGA  | 587.86755521951  | 0.651434097248215 |
| TGACCATTAATAA | 587.867895528881 | 0.490510718979842 |
| ATACATTAGTAA  | 587.880923427177 | 0.727257025556142 |
| AATTCAGACTCA  | 587.888895024244 | 0.497014860738455 |
| GTGTCACATTA   | 587.889217653797 | 0.502018884071383 |
| GGTCATATTTGA  | 587.893279506584 | 0.534686025856473 |
| AATATCGTCACC  | 587.8988218799   | 0.460734951021882 |
| GGTGATATGAC   | 587.899154784358 | 0.300766227626764 |
| GTCATTAAGCAA  | 587.904582385668 | 0.693534884588025 |
| GTCACACAGGCA  | 587.906614697278 | 0.722388614317656 |

|               |                  |                   |
|---------------|------------------|-------------------|
| CATGCGTGTGAC  | 587.910885101773 | 0.348231498615309 |
| CACGTCACGAAG  | 587.915828857144 | 0.536599267584904 |
| GGCTGATATGAC  | 587.924255381796 | 0.608718882306215 |
| GTCATCCGCGA   | 587.93006608118  | 0.443302455505375 |
| AGTACCCCGCA   | 587.946153844089 | 0.309984337534227 |
| TAGGTCATATCA  | 587.950037588426 | 0.839086717146604 |
| GTACACGTGTCA  | 587.955265213726 | 0.537971039043947 |
| GTCATAGCGAAC  | 587.95712593549  | 0.748949576693148 |
| ACGCCCGAGTCA  | 587.959112836172 | 0.558073546081721 |
| ACATTTAATGAC  | 587.980859565362 | 0.280617137393994 |
| AGCCTGACGTCA  | 587.991644397832 | 0.625146257562085 |
| AGTCATGAGCAG  | 587.995869657842 | 0.351475898462842 |
| ACGTGTGATGAC  | 587.998133758838 | 0.435944881974482 |
| ACACACAATGAC  | 588.015330431698 | 0.479010366026807 |
| ACTGGATGACCA  | 588.015820570229 | 0.399076361735495 |
| ACTCACGTGTCA  | 588.036329657851 | 0.295017047613529 |
| AAGAGTCGTCAT  | 588.036762052048 | 0.319322902465675 |
| AAACATGACACT  | 588.042338696105 | 0.173473192365912 |
| ATTCTGAATGAC  | 588.049988230068 | 0.431677690180561 |
| GACATGAATGAC  | 588.051738450572 | 0.292207110521729 |
| GTCATCGTGAAA  | 588.059784382372 | 0.231423865305741 |
| ATGACAAGATTC  | 588.082054460504 | 0.366562336007725 |
| CACGTGAATGAC  | 588.08259443057  | 0.471046215843693 |
| CGACGCTATGAC  | 588.095844821214 | 0.511929843836808 |
| CATGCAGAGTCA  | 588.096513317202 | 0.582881784696022 |
| AAATCATGACAC  | 588.09940189423  | 0.519273554862928 |
| GTCATACGAAAC  | 588.115253986672 | 0.884940049056646 |
| CCCAGGGAGTCA  | 588.11947224197  | 0.555584530530031 |
| ATGAGTCGGGAA  | 588.12137093744  | 0.33677517425388  |
| ACGTCACACGCT  | 588.13235712557  | 0.339097486466964 |
| CGTTAAGGTGAC  | 588.159213188408 | 0.48203840114126  |
| ACACCTATGAGT  | 588.160642230372 | 0.769631480910198 |
| ACTTGAAATGAC  | 588.161433490384 | 0.572021829252508 |
| CAGTCACGAGAG  | 588.175129885951 | 0.615010876007825 |
| CGTCATGAGTAC  | 588.177552523861 | 0.421849138624969 |
| ATGAGTCCCCTC  | 588.192170072572 | 0.446075779251848 |
| TCAGATCCGTCA  | 588.196242822415 | 0.477157289507819 |
| ATGGAATTAGTC  | 588.214863747098 | 0.487536042803285 |
| ACTTGCTATGAC  | 588.220172469094 | 0.284696609987027 |
| AGCACATATGAC  | 588.22202538436  | 0.403918692679708 |
| TCGCGCATGACA  | 588.228063267961 | 0.594328060079906 |
| CGCCTATATGAC  | 588.249860228043 | 0.771341587737302 |
| ATGAGCAAACCTA | 588.264938986801 | 0.133276166495195 |
| ATGGCCGATGAC  | 588.272749186038 | 0.371917817298188 |
| GTCATCCTCATA  | 588.276435451451 | 0.3366311642775   |
| CTGTAACGTGAC  | 588.294558952489 | 0.478439788445423 |
| CCTACGAATGAC  | 588.295252540553 | 0.516592367811464 |
| AACACGAATGAC  | 588.296546499758 | 0.59146781482851  |
| CCAATTGGTGAC  | 588.306865385878 | 0.592069978597074 |
| CGAGCTTACTCA  | 588.314632811408 | 0.574511525127448 |
| AGCGAGACTCAT  | 588.31770646445  | 0.23225671391104  |
| CAAACGTATGAC  | 588.318066635902 | 0.53064748878793  |
| ACGTCACCATGA  | 588.322477611992 | 0.343168991870771 |
| ATTTAGGTGACA  | 588.335750520347 | 0.435792371034802 |

|              |                  |                   |
|--------------|------------------|-------------------|
| AGTCACTCCTTC | 588.341927859584 | 0.271307259897013 |
| CCCGATATATGA | 588.354831196777 | 0.812727415130832 |
| AGGATGGATGAC | 588.379616039967 | 0.219073910480503 |
| AGTAATTAGTCG | 588.3817194784   | 0.157525635687628 |
| AGTCAGACTCTA | 588.395203989435 | 0.60793091155701  |
| CTGAGGCATGAC | 588.405047360035 | 0.451782709808884 |
| GCCGATTGGTCA | 588.415873291224 | 0.936236377155713 |
| CTTAACGCGTCA | 588.416572630247 | 0.518695405877    |
| ATGACAGAGTAG | 588.418625612139 | 0.277076099563293 |
| GACAAAGATGAC | 588.429089426188 | 0.430771604168557 |
| CGTCATGGTGAC | 588.436152625822 | 0.268403751910877 |
| AACGGCGTGACT | 588.448139798997 | 0.53903729524537  |
| ATCGCATGACGC | 588.464114047476 | 0.555404165365833 |
| CATCCGAGTGAC | 588.472679527369 | 0.528585609256533 |
| GTAACAAATGAC | 588.480095964342 | 0.418171691805532 |
| TCCCGTGAATCA | 588.482075794349 | 0.380229519677813 |
| AATATTGCTAAT | 588.486804890509 | 0.676851860964629 |
| CGTCATTAGTAG | 588.487829620672 | 0.266850003134919 |
| ATAGCGTATGAC | 588.488213810035 | 0.398694323523932 |
| CAGTCATGGTCC | 588.50339293574  | 0.431341631506924 |
| ACCAATTGACTC | 588.508284884134 | 0.296139612072628 |
| TACATCTAGTCA | 588.510719804315 | 0.427172575562084 |
| AGTCAGAGTATC | 588.513280836478 | 0.344181722951669 |
| ATGTCATGGTCA | 588.513740469723 | 0.392070797893847 |
| AATAATATGTCA | 588.52046281332  | 0.428951324746275 |
| TCACAGGTCTGA | 588.520585991771 | 0.507674148258139 |
| ATACTTGTGTCA | 588.531293572495 | 0.713710014577499 |
| ATTGCAGAGTCA | 588.53925116117  | 0.347886695890209 |
| AATAGGAATGAC | 588.540468241747 | 0.366859266797782 |
| ACAGAGATGACG | 588.545380497285 | 0.434106813471523 |
| CAGGTTCTGTCA | 588.55165042449  | 0.484922723890499 |
| GAGTCAGGCTAA | 588.564146546061 | 0.427781212672811 |
| ATCCGTCAGAGG | 588.58380937786  | 0.758347188454784 |
| CCATTATATGAC | 588.588622029203 | 0.446432677756216 |
| GGTGACGATAAC | 588.596948559284 | 0.284263478163848 |
| ACTGGGCATGAC | 588.603896045979 | 0.499078102551197 |
| ATCATGACGATG | 588.61711736575  | 0.66209874484472  |
| AGCAGTGGTGAC | 588.631403032026 | 0.393733551466366 |
| GTCTATACGTCA | 588.631723052788 | 0.358162465843926 |
| GAGTCAGGCAAC | 588.632395149063 | 0.303433156466635 |
| GACTCAGCCTGA | 588.633627993582 | 0.608017184063455 |
| CTGCGTAATGAC | 588.634487568074 | 0.346230031933654 |
| ATCCTGTATGAC | 588.641524779347 | 0.37028436700833  |
| ACTGGCGTGACT | 588.649481077951 | 0.440764448644758 |
| ACACGTTGTCAT | 588.655756005557 | 0.215883470046772 |
| AGCCGCGAGTCA | 588.670361738479 | 0.538706169812836 |
| CCATGATTAGTC | 588.679312334076 | 0.482844706690664 |
| ATTTAGTAATCC | 588.684407615365 | 0.542225012314903 |
| CCGTGGAGTGAC | 588.693890946129 | 0.660960959977512 |
| GACTCAGCGAAC | 588.702453116549 | 0.974360763088021 |
| CGTCATATGCCA | 588.707608770786 | 0.582955283789    |
| CCGAAGGTGTCA | 588.710576122176 | 0.760105397932792 |
| CGTCATTTGCA  | 588.711935155378 | 0.489028947571186 |
| ATGAGCAACATC | 588.720477487112 | 0.31613072474456  |

|               |                  |                   |
|---------------|------------------|-------------------|
| AACCAATATGAC  | 588.735557759116 | 0.542104757642161 |
| CTCGCCTATGAC  | 588.737164444874 | 0.424635591127264 |
| AGTCAGACTAGA  | 588.742784060451 | 0.244960250206028 |
| CTGTTGAATGAC  | 588.745604509201 | 0.401130565979752 |
| TCTGACGCGTCA  | 588.746930456949 | 0.290644296315553 |
| TGATTCACCCCA  | 588.768296829967 | 0.342533172732244 |
| TCACACTAGTCA  | 588.771156064797 | 0.503244302211405 |
| CGAAGTGGTGAC  | 588.776174371446 | 0.490077587961631 |
| AGCTCACGTCAT  | 588.780243147435 | 0.2759722269591   |
| GTCACATAACGA  | 588.783387369521 | 0.552771887615328 |
| GTCATCCAGCAA  | 588.790334406359 | 0.415118277136484 |
| CCTAAGGACTCA  | 588.79357632071  | 0.443663312343742 |
| GAGTCCAATGAC  | 588.812630556062 | 0.539562066046762 |
| TCAGTCAACTAA  | 588.814172141146 | 0.352650200262522 |
| CTGGCGTATGAC  | 588.815823846001 | 0.737289114079413 |
| ACAGCCTAGTCA  | 588.821704725465 | 0.531626448823295 |
| ACCTGTCACAGG  | 588.823428565888 | 0.45301109806697  |
| CAGGGAATGACG  | 588.827298340995 | 0.3147038442194   |
| GTCATCGTGGTA  | 588.82977895928  | 0.192220978315085 |
| AGAACC CGGTCA | 588.846099658625 | 0.572411078946952 |
| GTCATCGGGGCA  | 588.852886132843 | 0.49106414211679  |
| ACTTGGTGTGAC  | 588.856280576093 | 0.301110909693594 |
| CCGACAGATGAC  | 588.862039962541 | 0.581614433184796 |
| AGAGGCGTCATC  | 588.862134326234 | 0.141566979429536 |
| TCGTCTAAGTCA  | 588.864726038671 | 0.376910739813965 |
| CTGTTGTAGTCA  | 588.872202845671 | 0.395825376924507 |
| TGATTCATGCCA  | 588.874378699701 | 0.722680390314721 |
| TATATAGACTCA  | 588.886837587518 | 0.578952591036533 |
| AAATTGGTGACA  | 588.887358087084 | 0.230497512134324 |
| CAGGCGCGTCAC  | 588.901113467055 | 0.457775077431517 |
| CAATTAGTGACA  | 588.912850984606 | 0.60139399929373  |
| GCAGATCCGTCA  | 588.925126821718 | 0.311724222777938 |
| CTAGTCCAGTCA  | 588.959461883788 | 0.35253830246195  |
| GACTCACGAAGC  | 588.962862940631 | 0.36863300084062  |
| CAGTGACGATAC  | 588.962894392752 | 0.365071808510221 |
| AGCACGCAGTCA  | 588.966511589138 | 0.558194825676678 |
| CTCATCGCGTCA  | 588.997500272451 | 0.274471728900197 |
| CCCAGCGAGTCA  | 588.997721305618 | 0.466548967920219 |
| GAAAGGGAGTCA  | 589.041703574504 | 0.198048478884147 |
| TGACGCAGCCAA  | 589.043328431897 | 0.542713038758962 |
| CCGCATGACAGA  | 589.063190325102 | 0.46012188215853  |
| ATGGAAGATGAC  | 589.065044240215 | 0.423851044732545 |
| CAGATATGACCC  | 589.067940643728 | 0.510008625952471 |
| TGACAAGTTCAA  | 589.068878162684 | 0.231684491090026 |
| ACGAGCGTGACT  | 589.099504580064 | 0.36486646001513  |
| ATGAGTCCGCAA  | 589.113616309345 | 0.389134975714881 |
| ACGTGATGTGAC  | 589.115622385428 | 0.343449388711188 |
| AACAATGTCATA  | 589.121946087127 | 0.280143492473295 |
| GTCACTCGTGAA  | 589.132214572555 | 0.708657170226141 |
| CGTCTCGAGTCA  | 589.15145852154  | 0.640669797622097 |
| GTAGGGTATGAC  | 589.16294988298  | 0.43269608673869  |
| GATGATATGACC  | 589.17365266758  | 0.587168410106399 |
| GTTTGGGAGTCA  | 589.174726781636 | 0.151303997150347 |
| ACTCATAATGGA  | 589.174844114072 | 0.451351752025407 |



|                |                  |                   |
|----------------|------------------|-------------------|
| GAACTATGTGAC   | 589.178249016965 | 0.771375963461543 |
| CCCCAGATGACG   | 589.180172428896 | 0.428774214272091 |
| AACCTAATGACA   | 589.185505604165 | 0.412444285817803 |
| ATGTGTAACACG   | 589.187192726399 | 0.519067148150185 |
| GTCATAACACAC   | 589.198125933297 | 0.511665939043762 |
| ACGTCACCTAAC   | 589.205215731478 | 0.333339804059683 |
| ATCCCGTATGAC   | 589.221983339473 | 0.483817169671896 |
| AGTCAGAGCCAT   | 589.232720762855 | 0.238936389194492 |
| CCTAGGTGACAC   | 589.233867539767 | 0.515737071547487 |
| AATCGTAATGAC   | 589.239740880626 | 0.696147220136345 |
| GTGCAAGTCATA   | 589.246209147449 | 0.279765364577673 |
| CAAAATGTCATC   | 589.256473541217 | 0.40307081208074  |
| AACTTTGACGCA   | 589.259179262566 | 0.561634614662154 |
| CATGACGTTATC   | 589.261987203097 | 0.472706721282162 |
| AGTGTAGACTCA   | 589.262557849435 | 0.413126548461145 |
| ACTCCGACTCAC   | 589.277178958292 | 0.100330187246958 |
| CAAGCGTATGAC   | 589.28271367978  | 0.680874560905548 |
| TGACAATTTAAA   | 589.288580653541 | 0.346705368906339 |
| GAATCATGACGC   | 589.290018412529 | 0.435802571488685 |
| AGTCACGGTCAT   | 589.297740946268 | 0.26610236311095  |
| ACGAGGTGACGT   | 589.320731642153 | 0.513910488597877 |
| GTCTTTGCGTCA   | 589.323962100868 | 0.627028629106374 |
| TCATCGAAGTCA   | 589.337929977345 | 0.671212470112418 |
| CTATAGTGTGAC   | 589.352580797271 | 0.489793596988524 |
| GCTATTAGTGTGAC | 589.367219015041 | 0.707696605330004 |
| AAATCATGACGT   | 589.368620195847 | 0.510122321379544 |
| TCGTAAGTGTGAC  | 589.375596799517 | 0.620794226899193 |
| CAGTCAGAACAG   | 589.387826841634 | 0.274733453706698 |
| CTAGTCGATGAC   | 589.392781182138 | 0.464076019561977 |
| ATGACAATGCCC   | 589.409486465222 | 0.529354073748444 |
| GAGTCAATTTAC   | 589.412601057782 | 0.544355245199145 |
| GTAGGGGAGTCA   | 589.413615252997 | 0.251526264005766 |
| ACGCTCTGTGAT   | 589.413810966319 | 0.288928755035148 |
| GTCACCGGAAAA   | 589.416123750941 | 0.311099732776932 |
| AATCGCGTGACT   | 589.423232139282 | 0.318417991725213 |
| GTACAATGTGAC   | 589.424473891328 | 0.372911777509564 |
| ATTAAGTCAGTC   | 589.427018395582 | 0.496799985182742 |
| CCTCGGGATGAC   | 589.43933998551  | 0.552048497459867 |
| ACTTGAGATGAC   | 589.444770717901 | 0.446474287889413 |
| ACGTGACGCGGC   | 589.448581479815 | 0.871397956358499 |
| CATGTGGACTCA   | 589.451864258271 | 0.67219930381317  |
| ATACTAGACTCA   | 589.45191366085  | 0.543730017798523 |
| ATATCGTAGTCA   | 589.452611074995 | 0.771371351500076 |
| ACATTATATGAC   | 589.462094448945 | 0.501895327514106 |
| ACTAATGAGTAT   | 589.469972387933 | 0.533512619934574 |
| GTCATCGGAGTA   | 589.477432378581 | 0.204779337866167 |
| TCTCCCGAGTCA   | 589.540580810463 | 0.416776423322219 |
| CAGTCACGCTAA   | 589.554194875753 | 0.385316306054399 |
| CATCTGTGTCAG   | 589.563998592133 | 0.677900936724448 |
| GTGTCATGATAA   | 589.586229625896 | 0.551230002656894 |
| GACGCCAGTCA    | 589.607444994828 | 0.394755586790085 |
| TGACGAGTTACA   | 589.6187545566   | 0.433628717838525 |
| CGTCAAGTCATA   | 589.634981426289 | 0.395315076844953 |
| ACACGATATGAC   | 589.648330832963 | 0.520161151500777 |

|               |                  |                   |
|---------------|------------------|-------------------|
| GACTAATCTTAC  | 589.649689186533 | 0.377891387913491 |
| GTCATCAACCAA  | 589.654714262744 | 0.340682335697224 |
| GTCATAACCCAA  | 589.656511977522 | 0.44462358231773  |
| TAGTTTACGTCA  | 589.674180986862 | 0.468023792615904 |
| GTGACAATATTA  | 589.679691460112 | 0.495740367651204 |
| GCCGCGTACTA   | 589.680948827816 | 0.340587134793954 |
| CCCGGTTATGAC  | 589.69222457278  | 0.411087769246476 |
| AGGTGACACGAC  | 589.699280094019 | 0.479397593123013 |
| CCATAGGTGACG  | 589.703939522198 | 0.547915069835255 |
| CAACGCGATGAC  | 589.712600167557 | 0.391753253074282 |
| AGTCAGAGCACC  | 589.717907345904 | 0.363862591632752 |
| TCAGAATGACCA  | 589.721251869286 | 0.334317800946254 |
| CTCGATTATGAC  | 589.731800161858 | 0.589030984388466 |
| TGACCAATGGAA  | 589.738599401879 | 0.365763187300238 |
| TAGTCAACGTCA  | 589.73936778654  | 0.231641906531804 |
| TGTCACAAGTAA  | 589.744804971177 | 0.525040542864471 |
| GTCATATAGAAA  | 589.747453267062 | 0.621004548730925 |
| AGTCACTAGCAT  | 589.748439971863 | 0.640385513386176 |
| CGGGCCAATGAC  | 589.758102527246 | 0.564519262135242 |
| TGAGTCGGATAA  | 589.774919876366 | 0.401307260115601 |
| CATCATCCGTCA  | 589.790673481323 | 0.338196041035309 |
| AGTCACTTGAAC  | 589.794410018593 | 0.52159501393598  |
| ACGGCCTATGAC  | 589.819603147169 | 0.65869143350096  |
| GATGGCGAGTCA  | 589.822532830177 | 0.509127019241984 |
| GCGCCGTATGAC  | 589.823756161417 | 0.412506983277631 |
| CAACCTGGTGAC  | 589.82659442451  | 0.391068368833193 |
| ATTGAATTAGTC  | 589.834153451013 | 0.577052674046074 |
| CCATAAAATGAC  | 589.836304613521 | 0.562911734614485 |
| CGATCGCATGAC  | 589.857919742555 | 0.355876724471844 |
| AGTCACTACGAA  | 589.869438722754 | 0.41567299105096  |
| CAGTCGTATGAC  | 589.876213800757 | 0.395789812019533 |
| TCTATTAAGTCA  | 589.877981369511 | 0.378066046623305 |
| GACTCACTATCA  | 589.884758305945 | 0.461496357874565 |
| GTGACGCGCACA  | 589.897176576388 | 0.507043028290559 |
| TCTGACATGACA  | 589.897444591741 | 0.699550503840265 |
| GGTCGCTATGAC  | 589.915042060768 | 0.488576152399754 |
| AATCAGACTCAC  | 589.91667855301  | 0.317393841412814 |
| CGGTGTACGTCA  | 589.920985015911 | 0.572510901992804 |
| TATAATGGGTCA  | 589.922255696584 | 0.731991382524218 |
| ATTAGATGACCA  | 589.952956971934 | 0.600635495703849 |
| ACGTCACAATAA  | 589.957523760538 | 0.299695478428941 |
| CACGAAGGTGAC  | 589.972260804184 | 0.873841880721925 |
| CAGTCAGAAATGA | 589.977002480416 | 0.444234331703567 |
| AAACAAAATGAC  | 589.979292379695 | 0.374353978172524 |
| GATTACCGTGAC  | 589.986666772576 | 0.697835829606149 |
| CAAACTCGTCA   | 589.991897991701 | 0.727195126557861 |
| ACTGGGAATGAC  | 589.995371355004 | 0.495953903683033 |
| ACTAGAGTGACT  | 590.00169555863  | 0.417092852194957 |
| CGATCGCGTCAC  | 590.009772062159 | 0.273926875452618 |
| GGCCGTGAATCA  | 590.012673475834 | 0.231275416702135 |
| GACCCCTGACTC  | 590.015800083182 | 0.319903345862125 |
| CCGGTGCAGTCA  | 590.018398085532 | 0.580389027377744 |
| ACCTCAATGACG  | 590.019910824237 | 0.508461320366206 |
| ATTTGCTCATGA  | 590.026108768724 | 0.383245658467418 |

|               |                   |                   |
|---------------|-------------------|-------------------|
| AGTCACTAGAAT  | 590.026760362927  | 0.347658480077744 |
| GAAACCTAGTCA  | 590.027917550961  | 0.772740211677249 |
| GTCATCCTGAAA  | 590.034329759866  | 0.340249828173294 |
| AGAGCGTGAGTC  | 590.045673350016  | 0.190873706315927 |
| CACTATCCGTCA  | 590.059714346952  | 0.30609261966807  |
| GTCATGGTCACA  | 590.059753928027  | 0.397124541690271 |
| GGCATGTATGAC  | 590.069932006144  | 0.542623623130882 |
| AGGAGGGAGTCA  | 590.076008983964  | 0.23480540300377  |
| ATGAGTCTCAAC  | 590.081258475744  | 0.508631459573788 |
| CGTGTGCAGTCA  | 590.088259142631  | 0.606846223493463 |
| AGGTCTGTGTCA  | 590.095042701391  | 0.56489380211469  |
| TGACAAAGTCAA  | 590.09711143922   | 0.567163340897355 |
| AATTACAATGAC  | 590.116075214437  | 0.709318994227676 |
| AGTCATGAGGAT  | 590.12607570559   | 0.139564289791031 |
| CGCGTGCATGAC  | 590.139179185392  | 0.547650978552386 |
| GTCATCCAAAGA  | 590.148081779293  | 0.5031392496919   |
| CGTTAATGTGAC  | 590.165211840941  | 0.345350841792887 |
| CGTACTTACTCA  | 590.1701444054036 | 0.210887812671    |
| TGACACAGCCCA  | 590.173475691419  | 0.547430240329703 |
| AGTCTTGACTAA  | 590.182003378628  | 0.429019075982281 |
| GGTTTCAATGAC  | 590.183004026932  | 0.407154033071005 |
| CCCTCGTACTA   | 590.190715293538  | 0.244583420987253 |
| GTCATTGCGCAA  | 590.19119978607   | 0.479008378188003 |
| GACTAATACCAA  | 590.203258441196  | 0.399116425937501 |
| CGTCACACAAAG  | 590.209843157895  | 0.491173468207925 |
| CGTCATTATAGA  | 590.219254766346  | 0.319563230979686 |
| CGTTATATGTCA  | 590.223084065389  | 0.663064523793866 |
| GGACCTCATGAC  | 590.223204344854  | 0.592765831259961 |
| GTCATATAATGA  | 590.224440957848  | 0.545751038206272 |
| GACGGCGTCACC  | 590.225127076392  | 0.305580222409769 |
| ATGACAGACCAC  | 590.225787795227  | 0.457983922553166 |
| CCTAATTGACTC  | 590.23786989124   | 0.217214547645492 |
| TCGTCACCGTCA  | 590.243291674878  | 0.465033224370874 |
| GTCATCCTTCGA  | 590.245196216955  | 0.448760919792073 |
| ACTTTGTGTGAC  | 590.248872396975  | 0.2929940645575   |
| GTCATATCCGCA  | 590.264880256805  | 0.329949126778355 |
| GTCATTCAGGGA  | 590.270024893577  | 0.235693144927207 |
| TCATAGTACTCA  | 590.274986930344  | 0.523793154689732 |
| ATTGCGAATGAC  | 590.281804924997  | 0.367307460445014 |
| TATAAAGTGTCA  | 590.306231944147  | 0.40468330129686  |
| ATCTTTAAGTCA  | 590.355623745689  | 0.288310848267581 |
| ATGGATCCGTCA  | 590.371952048427  | 0.58953810449664  |
| CCCTCGTATGAC  | 590.377188134594  | 0.33513601647456  |
| ATATCTTGTGAT  | 590.382030577896  | 0.379946917496095 |
| CTCCTAATGACA  | 590.387801545704  | 0.4235106780661   |
| ATGACCAGGTGCG | 590.389754083356  | 0.136434840156313 |
| CTCCGTTATGAC  | 590.39299341723   | 0.264709069078566 |
| CAAAATGGGTCA  | 590.407121141573  | 0.347868734170616 |
| ACGAATTAATCG  | 590.409973711863  | 0.747378681129858 |
| GTCATTTCCCTTA | 590.421212993591  | 0.3191210960748   |
| ATTGGCGTCACC  | 590.432537175995  | 0.572854552334215 |
| CGTCATTCGGGA  | 590.433458174787  | 0.310023622427847 |
| ATTGCATCATAA  | 590.440598476113  | 0.476926096691613 |
| CCAGATTAATAA  | 590.442596086604  | 0.643279700774501 |

|               |                  |                   |
|---------------|------------------|-------------------|
| TGTCATGCGGAA  | 590.444576625559 | 0.285314335743914 |
| ATCGGTAGTCAC  | 590.447161391364 | 0.319799515688231 |
| GTCATTTTGAGA  | 590.461509451152 | 0.494605604124664 |
| GTGACGCGGTTA  | 590.465532322341 | 0.256271404653043 |
| ATTATATGACCA  | 590.468456903868 | 0.722195177373706 |
| GCGTCACAATAC  | 590.46943916592  | 0.233856916593848 |
| CAATTGGCTGAC  | 590.47347209605  | 0.794714296259172 |
| ACCCACTATGAC  | 590.478459248135 | 0.38252913355368  |
| CATGCAGATGAC  | 590.482822789608 | 0.568802843741039 |
| AATCATTTGTCA  | 590.492886164367 | 0.488067372963896 |
| GAACCTGCGTCA  | 590.499980209938 | 0.37081072172561  |
| GTCATTTGTGCA  | 590.51861034947  | 0.626511190087973 |
| AAGACCGACTCA  | 590.529127344625 | 0.39385739481788  |
| CTAGAAAATGAC  | 590.534721951434 | 0.455986274664409 |
| AATTAGTAGTCA  | 590.556491612297 | 0.400324927928352 |
| AAACCTGACTCG  | 590.559729572529 | 0.419305833258498 |
| GTCATATGCCGA  | 590.565662621844 | 0.532652504709628 |
| AAGCCTCGTCAT  | 590.568329326898 | 0.358612058939009 |
| CGAGAAATGACG  | 590.570918765268 | 0.492471874066206 |
| CGCAATTAATAA  | 590.594280032438 | 0.698839668855073 |
| CAGTCACGCTGG  | 590.607419018852 | 0.57724882884531  |
| GACTCACTGTTA  | 590.608548199665 | 0.525683199367961 |
| GTGATTCACCGA  | 590.608914240674 | 0.391536796432374 |
| CACAATTGTGAC  | 590.61289323153  | 0.544703703951512 |
| ATCCAGTGTGAC  | 590.636000709777 | 0.477395864582529 |
| CGAAATGGGTCA  | 590.638483002752 | 0.401355197057765 |
| ATCAACTGAGTC  | 590.640503862146 | 0.672459868072738 |
| CATAGTAAGTCA  | 590.65013640845  | 0.538712453109494 |
| TCTACGTAGTCA  | 590.652753229603 | 0.345214615925893 |
| AGTACTGATGAC  | 590.674445363394 | 0.46945158795655  |
| GTCATCAGCCAC  | 590.678194832345 | 0.423254117446949 |
| ATAGTGTAGTCA  | 590.689768512346 | 0.623063323957356 |
| GTCTCCCGATGA  | 590.699325595435 | 0.543930959827209 |
| ACAACCTGACACA | 590.701345384631 | 0.455518499928179 |
| GTCACGCGTTAA  | 590.739803717318 | 0.573800885295731 |
| AGCACCGTGACT  | 590.7483550174   | 0.363392008436455 |
| CAAACCTATGTCA | 590.750471516533 | 0.527226873346973 |
| CGGCACAATGAC  | 590.769539067668 | 0.607207901386466 |
| CTTGTAATGACA  | 590.777767326714 | 0.332552876686817 |
| CACCAGTGTGAC  | 590.7845211138   | 0.641272974368015 |
| CCCGCGGATGAC  | 590.784665565665 | 0.535529287662694 |
| CTGACTGTCATA  | 590.792413566873 | 0.184972415567195 |
| AATGCCATGTCA  | 590.798383678136 | 0.385607489237421 |
| TAAAATTGCTCA  | 590.809704900082 | 0.489544028385768 |
| CATCTCTATGAC  | 590.817353829156 | 0.664812033195863 |
| AATGGGAATGAC  | 590.818830918001 | 0.148147771329101 |
| GTCATTGCTAAA  | 590.827875398224 | 0.60632626936097  |
| CCAGTGTGTGAC  | 590.851378069916 | 0.543316621966422 |
| TGTCATGGCCAA  | 590.857969649363 | 0.432589854790854 |
| AACTGAGAGTCA  | 590.870799985109 | 0.316031564805033 |
| AATGGGGAGTCA  | 590.883867304909 | 0.386219845019082 |
| AAGGCAGATGAC  | 590.892549363297 | 0.197940433593843 |
| CGTCATTTGCGA  | 590.893266837122 | 0.417030668726643 |
| GTCATTTCTCTA  | 590.923982997982 | 0.321381365510204 |

|              |                  |                   |
|--------------|------------------|-------------------|
| CACAAGTAGTCA | 590.940403744992 | 0.479862796290275 |
| GAGTCCTAGTCA | 590.952077203509 | 0.461724830091527 |
| GTTACTGCGTCA | 590.957059526102 | 0.282011090624882 |
| ACCACAAATGAC | 590.960914351901 | 0.339204677757904 |
| CAAAGCGGTGAC | 590.963614892092 | 0.299878033422056 |
| GTCGACATGACA | 591.006009600644 | 0.492645295952363 |
| CTTACTGATTCA | 591.009790449985 | 0.328549765280629 |
| AATCGATGTCAT | 591.017929541949 | 0.313474220419646 |
| TAGTCACGGTAA | 591.032813621216 | 0.194572920749513 |
| ACCTTGGTGACG | 591.036110374762 | 0.638754345236089 |
| AGGCTTACGTCA | 591.043926914361 | 0.605701722042653 |
| CGAAATTGCTCA | 591.050256922106 | 0.362634422931256 |
| CTCAACAGATGA | 591.060223214591 | 0.612238935385292 |
| GTCACATAATTA | 591.067875304564 | 0.383271210900942 |
| CAGTCTCTGACG | 591.086959304528 | 0.48539654565488  |
| TGACACCTGTCA | 591.101332710199 | 0.648040369534539 |
| GCGTTGGAGTCA | 591.103966083557 | 0.372685579617595 |
| GCCCAAGACTCA | 591.11092385201  | 0.379293513861831 |
| TCCGCACAGTCA | 591.113521479341 | 0.69358338779541  |
| ATGACGGAGTGG | 591.12925370414  | 0.270046737138389 |
| GGTAGCGATGAC | 591.16919647193  | 0.379234034695163 |
| CCCGATTGGTCA | 591.171188646027 | 0.398690783728158 |
| GTCATTAGATGA | 591.181063037543 | 0.377663445011079 |
| CGTCATCTGACC | 591.193580400774 | 0.284673685603797 |
| CAGCAAGATGAC | 591.216062621396 | 0.445385748325089 |
| AAACGTTGTCAT | 591.229998309572 | 0.220345909322135 |
| ATGACGCCGATG | 591.231791861929 | 0.452275430718309 |
| TGACTGGTGGCA | 591.242596720685 | 0.520320391075298 |
| GCCTAAAATGAC | 591.243115989398 | 0.709565216088194 |
| GTCATCCGCTAA | 591.251482865214 | 0.448209389373193 |
| ACTCATACCTAG | 591.256014957862 | 0.385429108585495 |
| AATGTGGCTCAC | 591.260049989763 | 0.261390004936531 |
| ACGTCACCACCT | 591.276897757581 | 0.225730299053574 |
| AGACTCACGACG | 591.286678615554 | 0.541593164386441 |
| CCAGTTAAGTCA | 591.290362167965 | 0.687276759577531 |
| GCACATCTGTCA | 591.294154005347 | 0.513648461739096 |
| ATGAGCAACATA | 591.306470023383 | 0.23771547654917  |
| GTCATATTCCTA | 591.310100703059 | 0.297818146791692 |
| CAACTCAATGAC | 591.316744293246 | 0.549635594425673 |
| CTTCTAGATGAC | 591.316964339507 | 0.347520001599235 |
| ATAAGTGTGAGA | 591.327471383899 | 0.425391438612967 |
| TGACTGGTACCA | 591.33022919885  | 0.436226669900427 |
| AGTCACGCGATA | 591.335695239958 | 0.461262507118771 |
| TCCCCTTACTCA | 591.340103708835 | 0.361189352966292 |
| GTCACGCTGTCA | 591.351143791921 | 0.289356036537534 |
| GTCATTCGCCGA | 591.354970973049 | 0.347500207267434 |
| AAAAGTGATGAC | 591.367941420655 | 0.542210065440024 |
| GACCATTGACTC | 591.37213178447  | 0.265018615928116 |
| GCAGCAAATGAC | 591.374421152256 | 0.433842439811113 |
| GCGTCATGCAAC | 591.378554244426 | 0.547115351280254 |
| GCGTCATGTCAA | 591.395327052005 | 0.67514613218429  |
| CTCATACTATGA | 591.407374643421 | 0.545930484106858 |
| ACTAGGGAGTCA | 591.42140266619  | 0.352172507266418 |
| ACAGGCGTGACT | 591.446578853706 | 0.336582918028385 |

|               |                  |                    |
|---------------|------------------|--------------------|
| GACAGTGAATCA  | 591.447364128458 | 0.291994253730495  |
| CGTGCTGATTCA  | 591.454881377259 | 0.619436309419238  |
| TATGTCATGCAA  | 591.459657899458 | 0.351672816117893  |
| TCCTTGCACTCA  | 591.471930076853 | 0.292842805937256  |
| ACAAGCTGTCAT  | 591.472620996115 | 0.367758832020804  |
| CAACTGTAGTCA  | 591.483831435139 | 0.370223211310971  |
| ATCATCGTGACA  | 591.485427987462 | 0.531257809906778  |
| ATTCAGTGACAC  | 591.487863094328 | 0.498715156740029  |
| AACGGCGATGAC  | 591.499922321532 | 0.358800882201557  |
| AACCCTGACTCG  | 591.505667937266 | 0.210989854332865  |
| AGTCACTTCTTC  | 591.534148665771 | 0.345046621090563  |
| GTATTGGAGTCA  | 591.534163302418 | 0.4519389781842    |
| CGGTCACATGAC  | 591.535394922114 | 0.386040695172079  |
| ACTAAGCATGAC  | 591.537375569526 | 0.484744511189455  |
| CATCTAAATGAC  | 591.542727916469 | 0.727442667597162  |
| CAGTCACGAGGA  | 591.545812907615 | 0.438044346192693  |
| AGAATTGATGAC  | 591.550635011175 | 0.388087413917825  |
| CGTTACGTGTTT  | 591.557416119094 | 0.280567182708888  |
| TGAGTCTACACA  | 591.558231586533 | 0.479744765078786  |
| AGTCATGGGAAG  | 591.559821377342 | 0.262450196353876  |
| AACAGCGTGACT  | 591.565368302534 | 0.0835848836579434 |
| CTGCGTGATGAC  | 591.586456787738 | 0.772791160164075  |
| ATGACAGACTCG  | 591.58962899298  | 0.685722159442825  |
| GACTCAGACTTA  | 591.595886001688 | 0.571164340309269  |
| CGTCATCTAAAA  | 591.612813723783 | 0.493997348423257  |
| CAGTTGACTGAA  | 591.615150929735 | 0.217024044890331  |
| GTCATTTACCCA  | 591.627521909555 | 0.37722935852252   |
| AGTCACGCCGAA  | 591.645880750479 | 0.546861191508395  |
| AGTCACTTGGGC  | 591.648405462663 | 0.210325119601405  |
| CGCAAACATATGA | 591.669519499591 | 0.846368737325792  |
| ACGTCATGCTTG  | 591.672137766328 | 0.71212704229673   |
| AGTCAGAGCAGA  | 591.673255963971 | 0.412712205850919  |
| TGACACGTTGCA  | 591.712614162103 | 0.301312199138774  |
| CTGATCACGTCA  | 591.748458924802 | 0.490475579150166  |
| AGACGCTATGAC  | 591.74971348199  | 0.518125301630386  |
| GTACGTGATGAC  | 591.757043640111 | 0.613769910134587  |
| AGTGCAAATGAC  | 591.782306612696 | 0.269375737361046  |
| CGGCATTGACTC  | 591.793126616155 | 0.692550633007892  |
| GCCCTTGTGACA  | 591.797593543955 | 0.696182921406605  |
| CTTTGTACGTCA  | 591.80628604429  | 0.490904797152445  |
| CGTACTTGACTC  | 591.806627278388 | 0.692706773449496  |
| GCGCTTTATGAC  | 591.841846422716 | 0.423300429837904  |
| ACGTAGGACTCA  | 591.847943630547 | 0.643878289551464  |
| CGTAACATGACA  | 591.852590146215 | 0.420168970862448  |
| GTCAACTTATGA  | 591.863299010664 | 0.907248315054787  |
| GTCACTCTGTGA  | 591.890506233238 | 0.743577710032016  |
| TCAACGCAGTCA  | 591.890730897553 | 0.571308326533692  |
| GTCATTCTACTA  | 591.90050550825  | 0.27064805357813   |
| CATCTAGGTGAC  | 591.900664723228 | 0.387342026243307  |
| GAGTCAATTCGA  | 591.903877848808 | 0.478799609000305  |
| CTATGACTTGCA  | 591.917069914584 | 0.24960814291181   |
| CACATCAATGAC  | 591.918552877597 | 0.450897838949905  |
| AATCTTGATGAC  | 591.921734983258 | 0.517459557908164  |
| ATGACGGAGAGG  | 591.93915368333  | 0.257211033429569  |

|              |                  |                   |
|--------------|------------------|-------------------|
| AGACAACGTCAT | 591.940308887435 | 0.317836683201085 |
| AAACTCTGTGAC | 591.940823026275 | 0.331237944769148 |
| GTCACAACGTCA | 591.942001293308 | 0.621634354603552 |
| AGCCAAGATGAC | 591.94872092679  | 0.775236074850483 |
| ATGTGCGACTCA | 591.961224464332 | 0.546930533504014 |
| AATTAAGATGAC | 591.984082424817 | 0.623336551304888 |
| GGAAAGGATGAC | 591.993156465827 | 0.421871423620943 |
| CTAGAAGTGTCA | 591.996259259642 | 0.619962362778814 |
| AGTCAGAGTCGC | 592.018843841104 | 0.527553162074577 |
| CAGCTGTGACGC | 592.024145582294 | 0.756512687943496 |
| CCTATTTGACTC | 592.038584396522 | 0.428818399613179 |
| TGAGTCGAGTAA | 592.041874469255 | 0.453785531756521 |
| ATGACGACGACG | 592.043913066222 | 0.568884699188924 |
| GATGTATGTCAC | 592.05141776177  | 0.373981643902118 |
| GGTCATACCTCA | 592.076415063956 | 0.585683666982364 |
| CCTCATGTATGA | 592.078019004668 | 0.515795448886143 |
| AGTAATTAATAA | 592.080337945298 | 0.319129577184257 |
| AGGAGCTATGAC | 592.091532339646 | 0.53693515499556  |
| CCGTTGAATGAC | 592.099238745172 | 0.524890529168812 |
| CCGAAGCATGAC | 592.100958856602 | 0.699004523740109 |
| CGTCGCGAGTCA | 592.112450560677 | 0.548387202268039 |
| ATGACGCCTGTA | 592.113055642491 | 0.367079866492015 |
| ACGTCACATAGT | 592.115160493051 | 0.603255498350192 |
| GTCATTTTGCGA | 592.11731674596  | 0.46870475781577  |
| AGTCAGATCAGA | 592.131653437973 | 0.435595152070211 |
| GGCTGTGATGAC | 592.133490240391 | 0.310572374281216 |
| CAGGCCTAGTCA | 592.138283726376 | 0.706453906556471 |
| CATGGGGATGAC | 592.15073209372  | 0.404998809888318 |
| TGACGGAAAACA | 592.156409545414 | 0.385145332297835 |
| ATGAGTCCCATC | 592.159791239121 | 0.526057314641781 |
| GATTACTAAATC | 592.168742455527 | 0.420533500104397 |
| AATGAATAATAC | 592.171239448858 | 0.496695205190272 |
| GTTGATACGTCA | 592.176523315544 | 0.649617664353485 |
| GACGACGGTGAC | 592.18226406687  | 0.42897830652107  |
| GTCATCCAGGTA | 592.18777696645  | 0.559062264606117 |
| ACCCCTGACTCT | 592.193559636616 | 0.136185690717223 |
| CGAATGAATGAC | 592.203321330646 | 0.548600890186045 |
| AGTCGTGATTCA | 592.208506388776 | 0.531110474582061 |
| GTCATCGATTGA | 592.22692483909  | 0.622581998149923 |
| AGTCACGCCAGA | 592.239945533077 | 0.331379188629191 |
| AATATGTCAGTC | 592.241380292445 | 0.464283777162632 |
| CGTCATATGTGC | 592.253295973718 | 0.265510169106676 |
| GCGCTGGATGAC | 592.26661735366  | 0.560268298598011 |
| GGTAGACTCAGA | 592.266710719431 | 0.201563638692875 |
| TCTCTAGACTCA | 592.292234837588 | 0.427245330850569 |
| ATGACAGCGACC | 592.295482391589 | 0.450898962082757 |
| ATGACCCAGCGA | 592.299119127586 | 0.467671029464647 |
| TCAGCTTGGTCA | 592.301133257228 | 0.436442521695959 |
| ACCCATTGACTC | 592.305479139939 | 0.318380265118677 |
| CAGAGGGAGTCA | 592.31184499798  | 0.272488084062508 |
| ATGCGAATGACG | 592.325873132798 | 0.152056609947467 |
| CATTCGGTCATC | 592.328857280309 | 0.400513148868361 |
| ATGATCTGTCAG | 592.334744514047 | 0.327320778172359 |
| AGAGTCAAACAA | 592.344425654958 | 0.314667769460175 |

|              |                  |                   |
|--------------|------------------|-------------------|
| GACATAGGTGAC | 592.36062965289  | 0.489834353748476 |
| GTCACAAGACAC | 592.391995592518 | 1.05128074959551  |
| AACGCGTGACGT | 592.392739170069 | 0.479581954629179 |
| ACCACAGATGAC | 592.394524530461 | 0.487956389412492 |
| CGTCATTGTGGC | 592.400753693532 | 0.871728302597121 |
| GACTCACTTCCC | 592.40731571272  | 0.257688635361614 |
| CGCATAGTGTCA | 592.422239112753 | 0.60505605595994  |
| AGTTTTGCTCAT | 592.434738442484 | 0.365471851375039 |
| TCAAGATGACCA | 592.445807562515 | 0.613800385057174 |
| AACGATTACGCA | 592.449598267038 | 0.263546106603907 |
| CAGGAAGATGAC | 592.455559382378 | 0.188302672311232 |
| ATGCGTGATGAC | 592.482650758003 | 0.4678202308449   |
| CGTCAATTAGTC | 592.49666267589  | 0.54898347055642  |
| TCCTGGTGACAA | 592.500585358056 | 0.262530189268949 |
| TGACCCATGACA | 592.50411493635  | 0.43410384492601  |
| AAATCAGTCTTA | 592.506850016806 | 0.24773501598635  |
| CAATCGAGTGAC | 592.513162650753 | 0.493824609427915 |
| GACACATTGTGC | 592.524517180381 | 0.731197985702417 |
| CGTCATATGCAG | 592.525331369235 | 0.618263011556079 |
| ACTTAGTGACAC | 592.528245730264 | 0.253452769099017 |
| GAGGCTTACTCA | 592.545677589804 | 0.407072477892028 |
| GATATGTGTGAC | 592.554188460007 | 0.435742223564444 |
| GTCATCTTAGAA | 592.556117391056 | 0.72073465950592  |
| GTCATTAACAAC | 592.557641600863 | 0.556743430143547 |
| TATACCGTCATA | 592.567093953473 | 0.325578523384553 |
| CTGACTCGGAAC | 592.568395407053 | 0.519990043893957 |
| GTGTCACTGACA | 592.56876598214  | 0.479398783481479 |
| AAGCATAATGAC | 592.578108559732 | 0.475036184942382 |
| ACCCGATATGAC | 592.596374238602 | 0.3972005432951   |
| AAGCCTTATGAC | 592.607548477194 | 0.394916667701573 |
| AGTCACGCGGAT | 592.609007087098 | 0.164443460892909 |
| ACTCATATGAGA | 592.613396857177 | 0.506210485879151 |
| AAACATGACCCA | 592.613427503592 | 0.432172632118865 |
| GTAGTCAGTGAC | 592.644075163451 | 0.381862439349328 |
| AGTACTTACTCA | 592.651229307151 | 0.276144735802963 |
| ATGAGCAAACAA | 592.658373094529 | 0.357755651804219 |
| ATAAATGTGACC | 592.660338899741 | 0.591446905700213 |
| GTCATTCTCCAA | 592.668971074151 | 0.310736158334997 |
| CGTGCATGACAC | 592.676797984083 | 0.391966609986916 |
| TCATAATGACAA | 592.676866475924 | 0.216946736434464 |
| GTCACCAAGTTA | 592.682949470656 | 0.714665776359045 |
| AGGTTACTCTTA | 592.684183934279 | 0.35757326063884  |
| ACTCATAGAGCG | 592.693863026105 | 0.672253259983149 |
| GGGAACGATGAC | 592.701021698276 | 0.297257280049919 |
| AAACCCTGACTC | 592.724536298217 | 0.256263675327894 |
| ATGAATCAACAC | 592.729950775431 | 0.369756221051794 |
| TACATTTGGTCA | 592.730172430068 | 0.407341949955656 |
| TGACTAGGTGCA | 592.731957812591 | 0.47137461155866  |
| GTAAGGGATGAC | 592.744789399345 | 0.39981733575329  |
| TGAGTCTACTAA | 592.757958838388 | 0.364681371250339 |
| TCTGGCGACTCA | 592.75953693108  | 0.545250939549779 |
| GTCACCTTGACA | 592.782748460077 | 0.428260989009725 |
| CGGCCCGATGAC | 592.788049616976 | 0.592518435946229 |
| GTCATAGCCAAA | 592.790669414297 | 0.526500145646342 |



|               |                  |                   |
|---------------|------------------|-------------------|
| GCTGGCTATGAC  | 592.812240995676 | 0.34738127631616  |
| ACCCACTAGTCA  | 592.812333337581 | 0.253884358486147 |
| CATCATATATGA  | 592.871914183625 | 0.790923120505497 |
| CACGGAATGACG  | 592.876443929203 | 0.311820729465038 |
| TAATATGTGACA  | 592.881681014283 | 0.565310693014299 |
| ATTCCGAGTCAG  | 592.885492702362 | 0.482547401866419 |
| ATGGCGTCACAT  | 592.914138617927 | 0.30054572805182  |
| GTCATCGTGGGA  | 592.918064531838 | 0.303806369791409 |
| ATTACTCAAGGG  | 592.924062084776 | 0.471427253414946 |
| GTCACTAAACTA  | 592.932268138223 | 0.721667881621015 |
| AAAGCTTGACTC  | 592.933047638306 | 0.50488755031831  |
| CGTCACCGTCA   | 592.947754946784 | 0.257997138657094 |
| ATGTTCTATGAC  | 592.959763909386 | 0.558261998146762 |
| CGAAATGTGACG  | 592.966831735406 | 0.639737650312147 |
| ATTGCGTGACAC  | 592.996208368601 | 0.412938952991083 |
| ATGAGTACGCAC  | 593.001863534333 | 0.495630205169363 |
| AGTCCATGAGTC  | 593.009432526849 | 0.617988187030798 |
| GTCACGATTACA  | 593.009462798901 | 0.297669592444022 |
| CGTGAAATGAC   | 593.014328933605 | 0.564378414080194 |
| ACGTCACCTACT  | 593.019016610063 | 0.276538153149754 |
| GACCGCGATGAC  | 593.071561350809 | 0.635880278787145 |
| GTCATATTACGA  | 593.10278503468  | 0.433798663312057 |
| CCTGAGCAGTCA  | 593.111252976376 | 0.421655419115952 |
| TGACTCGCGACA  | 593.123010484811 | 0.404062243247636 |
| TGTCACCAGGAA  | 593.128173826081 | 0.592977645342748 |
| GGATGACTTGAC  | 593.136094363524 | 0.476298842512901 |
| GTCACAAAGCAA  | 593.145554533597 | 0.704095987093096 |
| GTGTCACCTATA  | 593.160390668943 | 0.466069134182367 |
| TGACGTAGTGCA  | 593.164851606301 | 0.463248403603652 |
| ACCTAAGCGTCA  | 593.169664176671 | 0.53044049197303  |
| AGTCAGTAATCG  | 593.16973688744  | 0.219809554875142 |
| GGTCGCGATGAC  | 593.172958951731 | 0.456492251861842 |
| ACGAACTTGTC   | 593.178826547664 | 0.528178205319631 |
| GTCATTAGGTAA  | 593.23109008385  | 0.651494502065946 |
| ACGATTTTGTC   | 593.235681782467 | 0.292664266274823 |
| AAAACCGATGAC  | 593.262027108964 | 0.637054519177901 |
| AGCCTGAGTGAC  | 593.263899991262 | 0.64366150082395  |
| TTCGTCACGAAA  | 593.267660763433 | 0.333159524973174 |
| ATATAGAATGAC  | 593.284648656536 | 0.544507724134349 |
| AACTCATGACAC  | 593.285495291459 | 0.353222986014665 |
| ACTTACGCGTCA  | 593.287527536819 | 0.372985864423359 |
| AACCATGATGAC  | 593.287935343404 | 0.378211046315393 |
| CTAGATTGTGAC  | 593.295062731193 | 0.502197312981245 |
| ATGTTATTAGTC  | 593.297652301944 | 0.167777425497525 |
| ATGACAGCTGAC  | 593.299625187932 | 0.590180613478302 |
| CCGTC AATGACG | 593.29986268693  | 0.750294886479293 |
| GCGTCACTGTTA  | 593.320562202252 | 0.382027699712153 |
| ATCGTATGTGAC  | 593.32110478259  | 0.527480581202368 |
| ATAGTCAGCAAT  | 593.328974192368 | 0.515494879264158 |
| GTCATTTGGTAA  | 593.355368625109 | 0.31052095999479  |
| AAGCACTGTCAT  | 593.358783112955 | 0.422803732776029 |
| GTCACACTAAAA  | 593.35933116529  | 0.354100894426824 |
| ATAGCCATGTCA  | 593.368353129264 | 0.686995599842032 |
| CGTACACGTAAC  | 593.372343700566 | 0.22009721937504  |

|              |                  |                    |
|--------------|------------------|--------------------|
| TGACACTTAAAA | 593.381444034716 | 0.388955727351043  |
| GCGTCACCTTCC | 593.390792852236 | 0.144513780322132  |
| ACGCTTTACTCA | 593.391725184587 | 0.257485973222907  |
| ATGCATGACATA | 593.398151874657 | 0.2142315925891    |
| TCTGACAGATAA | 593.423989521124 | 0.114092360069105  |
| CTAACGTGAGTC | 593.42417004623  | 0.44128736743349   |
| GTCATTCCATA  | 593.427391101214 | 0.303997979164928  |
| CATCCATGAGTC | 593.437205178678 | 0.394505543704837  |
| GTCACCCAGGGA | 593.440488020868 | 0.578266387460007  |
| TCATAACTGTCA | 593.443034037902 | 0.729547886867197  |
| ACTCATTCTGTA | 593.444944258135 | 0.366767254741304  |
| CGGTTTCATGAC | 593.452604351241 | 0.460971695132774  |
| GCATAGTAGTCA | 593.470161459865 | 0.429385540044528  |
| AGCCACATCATA | 593.474146939158 | 0.369332820382746  |
| AGTGCAGAGTCA | 593.475475653009 | 0.0607570002922066 |
| AGATGGGATGAC | 593.477716552518 | 0.360717425994974  |
| AGCACAAGTCAT | 593.494494395098 | 0.370853586324886  |
| AACGGCTATGAC | 593.500872891327 | 0.575405651176349  |
| CCATAGGATGAC | 593.507485431246 | 0.425253771998943  |
| TAATATCCGTCA | 593.507514198439 | 0.509520571656336  |
| CCTCAGTGACAC | 593.507715162898 | 0.661957498601408  |
| CATCCTGCGTCA | 593.507798899728 | 0.320018045419498  |
| GCTGACAATGAC | 593.511662844916 | 0.4451977372054    |
| GCTTTAGGTGAC | 593.516266537621 | 0.77881380059959   |
| ATGGATCATGAC | 593.518295273749 | 0.503820326496065  |
| ATGGCGTACTG  | 593.524182619113 | 0.608152306543112  |
| ATCGCTGTCATC | 593.533567315194 | 0.333385647546773  |
| GTCATTCTACA  | 593.552219059678 | 0.387669916695708  |
| ACCGGCTAGTCA | 593.564642439669 | 0.583987491372456  |
| GAGTCAGTTAAA | 593.581913010944 | 0.369029274957951  |
| ATGACACTCACC | 593.588262117128 | 0.207444746449387  |
| CGACTCACGATA | 593.590060864148 | 0.402641012076691  |
| CGTACTGAATCA | 593.609067517319 | 0.730336620074403  |
| TCGGCATAGTCA | 593.609505161603 | 0.658637746208949  |
| AGTGGCAGTCAC | 593.612720422839 | 0.186873528147168  |
| ACAAAGCAGTCA | 593.617762612634 | 0.465869352625162  |
| TCCATCCAGTCA | 593.621948809553 | 0.336127426796946  |
| CGAACATGTGAC | 593.637859716306 | 0.365955355733425  |
| GTCATCTGCTTA | 593.642856335056 | 0.333555698200805  |
| ACGTTACTCAGT | 593.646513328674 | 0.689510125000752  |
| ATGACAGTGTAC | 593.653359175346 | 0.47405839186316   |
| AGTAACGATGAC | 593.654338844813 | 0.399966967992511  |
| ACTGAAGCGTCA | 593.655604563077 | 0.471984797322838  |
| GTGACGCGATCA | 593.660386101836 | 0.392637501278422  |
| AGCTATTTGTCA | 593.664657196206 | 0.6744926561434    |
| CGGGTGTATGAC | 593.670500892106 | 0.493106577550876  |
| GCCAAATGACAA | 593.677048224418 | 0.366449173073265  |
| ACCATAGATGAC | 593.683298056439 | 0.616926714927512  |
| ACAGTATATGAC | 593.683563645324 | 0.511729175535933  |
| ACGAGATGTGAC | 593.701041143472 | 0.452261621906143  |
| CCGATTTGACTC | 593.704760236446 | 0.134336490518797  |
| ACATCGAATGAC | 593.705546675547 | 0.433157832515632  |
| CGATTTTGACTC | 593.706528977897 | 0.292717354032988  |
| CGTCATTATAAG | 593.71670771215  | 0.456386737034689  |

|               |                  |                   |
|---------------|------------------|-------------------|
| ACGTCACTACTG  | 593.723308508067 | 0.445355535679647 |
| ATGACGGAGTTG  | 593.726474424785 | 0.348839418838156 |
| AGACTCAGACGA  | 593.728766186336 | 0.676484981111532 |
| CAACACAATGAC  | 593.740777237793 | 0.392681351950742 |
| TCGAAATGACCA  | 593.755085293461 | 0.457461707510725 |
| TAGAGTGACGAA  | 593.772954123175 | 0.376129729256493 |
| CATGTTGGTGAC  | 593.80221335916  | 0.285202136656916 |
| GTCACTGACCGA  | 593.802741456969 | 0.52741299079476  |
| AATGACAAGATC  | 593.820952257862 | 0.247887323661772 |
| GTAAGGAATGAC  | 593.828279572675 | 0.42716493464975  |
| GTCATTTTCATCA | 593.838923294794 | 0.344880576029733 |
| AAATTGATTCAT  | 593.840072716455 | 0.377813969298768 |
| ACTTTGTGACGT  | 593.841564633438 | 0.453035654546533 |
| GAAAGAAATGAC  | 593.848904581907 | 0.404810422178525 |
| ATGACAAAGCTA  | 593.858235756523 | 0.42693322422609  |
| CACATCCAGTCA  | 593.861069901828 | 0.497973960731571 |
| CCACTAATGACG  | 593.863709472544 | 0.124128092845561 |
| GATTACTCGTCA  | 593.881055353539 | 0.356291700625112 |
| ATTTTCCAGTCA  | 593.889243913355 | 0.379930233796588 |
| AACCAGTCAGAA  | 593.911007485661 | 0.411892828632822 |
| GCCTATAATGAC  | 593.92520967475  | 0.398861879754627 |
| ATGAGTACCAGG  | 593.926005007521 | 0.310154556837991 |
| ACGTCAAATGAC  | 593.935032652379 | 0.420430640367978 |
| CCAACTGAGTAA  | 593.952040990358 | 0.82115947004448  |
| GTATGCAATGAC  | 593.955015581075 | 0.538632282226624 |
| ACCCGTTATGAC  | 593.971525480415 | 0.493755626943393 |
| AGTCAGTCTTAG  | 593.977668460724 | 0.173124341224064 |
| ACATTAATGAC   | 593.990003988567 | 0.509915558802329 |
| ATACACTGAGTC  | 593.990384989817 | 0.573806183932845 |
| TACGCGGAGTCA  | 593.991189589094 | 0.455063020508282 |
| ACTAATCGGTCA  | 593.99258420412  | 0.431148760105881 |
| CCTTTGGATGAC  | 593.998928480775 | 0.406032717534465 |
| AGTCACGCCAAA  | 594.001485807799 | 0.577009853590244 |
| GTCATAGCGGTA  | 594.002946941656 | 0.264823879046325 |
| TGACACAGACCA  | 594.010288728361 | 0.499795227604648 |
| GCGTCATGAGCC  | 594.043477403963 | 0.436081552382541 |
| CCCGAATGACG   | 594.048504253228 | 0.534791955977619 |
| CTGGATTATGAC  | 594.05136064652  | 0.254929253741517 |
| GTCATCGCTCGA  | 594.055440417861 | 0.597813872330276 |
| CGGCCTTACTCA  | 594.056910880441 | 0.277212155784054 |
| GCAAATAGTGAC  | 594.063671674531 | 0.449795485440509 |
| GTCATTAACAAA  | 594.068427446028 | 0.702437545414456 |
| ACTCCAAGTCAT  | 594.077769000553 | 0.309416667561248 |
| CAACGGCATGAC  | 594.07859609157  | 0.469979276156189 |
| GCTTTCGGTGAC  | 594.079300151372 | 0.434018155323341 |
| ACTCCTGACTCT  | 594.089257805414 | 0.211554631815649 |
| AAACTATGAC    | 594.091243490775 | 0.114317054134258 |
| CATAATGGCTCA  | 594.095739689958 | 0.531759090062284 |
| ATGACATTATAA  | 594.09658821307  | 0.331442984172896 |
| TCGTCAGTGACA  | 594.106697113166 | 0.60247869926949  |
| CACCACTATGAC  | 594.128033725537 | 0.274625549001616 |
| GACACTGGTGAC  | 594.128506322423 | 0.402644515482192 |
| ATGACATGCTCA  | 594.143065585599 | 0.435149835469783 |
| ACGACTAGTCAG  | 594.159698472128 | 0.371110681843575 |

|              |                  |                   |
|--------------|------------------|-------------------|
| ATTTGTTTCGTC | 594.159891608345 | 0.500653434755403 |
| ACTCGTTGTCAT | 594.160569113063 | 0.441133026902606 |
| AGGCATTGACTC | 594.163795029737 | 0.378155283226562 |
| GTCGCTGATTCA | 594.187908926249 | 0.570075173148063 |
| CTAGAGGATGAC | 594.190327562219 | 0.589352234269572 |
| CAGCATGACCCA | 594.190685013825 | 0.563883020982577 |
| CGCGCTGCATA  | 594.203249188548 | 0.490358057357985 |
| AACAGCTGTCAT | 594.225286871579 | 0.404712517127105 |
| TCATGCATGAGA | 594.230410617061 | 0.484487930926728 |
| ATGACGTTATGA | 594.234030706352 | 0.305025163284412 |
| ACTCGAGTCAAC | 594.249596708892 | 0.33065835813518  |
| AAGAGTCTTACG | 594.252158957021 | 0.36408591607636  |
| AGTATGACCTCA | 594.25546646961  | 0.442087434362501 |
| GCGAGCCAGTCA | 594.263208745728 | 0.643619759921226 |
| TATGACTTGCAA | 594.271042166729 | 0.355041335846396 |
| TGACTCCGCACA | 594.27131713723  | 0.307568456430456 |
| CCTGTAAAGTCA | 594.272144310138 | 0.658228405030005 |
| TACTATCTGTCA | 594.274024382839 | 0.509988178585997 |
| GACTCATGGCTA | 594.27740083863  | 0.580785306966679 |
| CAGTGACAAACA | 594.279623008874 | 0.475982733829928 |
| CATACCGACTCA | 594.289687158572 | 0.262123537853899 |
| ACTTTTGAGTAA | 594.316511256578 | 0.595375246555328 |
| GAATATGTCAGA | 594.327144722421 | 0.341906200263871 |
| CCAGCAAATGAC | 594.347124419606 | 0.321382270452041 |
| CAGAAATGACCA | 594.351220989224 | 0.349835109651549 |
| CCCATACAGTCA | 594.352671256021 | 0.687291491096087 |
| TGACTGGGCTAA | 594.361286051457 | 0.498233238452408 |
| ACTCATCGCGTG | 594.373340773573 | 0.651443527751438 |
| GTGTACTCGTCA | 594.389019427836 | 0.820402371059171 |
| GTACACAATGAC | 594.397268382472 | 0.498913229647416 |
| CCAGCAATGACG | 594.408489802179 | 0.821504554155481 |
| CTACGAGAGTCA | 594.412561183407 | 0.376575880055084 |
| GGATGACAAGAC | 594.415228489153 | 0.156371159146916 |
| TCCCTTGCGTCA | 594.422885278784 | 0.10555134290471  |
| AACGTTTGTGAC | 594.441253926967 | 0.312639512911891 |
| GTAACATAGTCA | 594.443428093584 | 0.299252652899953 |
| AATTTCTGACTG | 594.448806928413 | 0.451115607012487 |
| CACCCGATGACG | 594.450151925734 | 0.607791142941393 |
| ATACTACTCATC | 594.471476560338 | 0.238070665614063 |
| TAAATGTATCA  | 594.474922473898 | 0.222673803647866 |
| AAGCCGTGACTA | 594.480203438034 | 0.333283129457671 |
| GCAGTATATGAC | 594.480891522671 | 0.537503926164095 |
| GTCATGCGAATA | 594.483547690184 | 0.433247874455674 |
| CCTATGATGTAA | 594.484805410412 | 0.429521254904091 |
| AGGCCATGACAC | 594.48585134973  | 0.32730506105808  |
| GTCATCAACTTA | 594.491758004658 | 0.517119060636152 |
| GTCACCCAGACA | 594.492162932284 | 0.48961769301999  |
| ATGAGACAGTCA | 594.497024732038 | 0.509346019049773 |
| TATAATGTCATA | 594.500628257127 | 0.286378697866256 |
| CGTGCTGATGAC | 594.509505294981 | 0.559827652304412 |
| GTATGACCCGAC | 594.510130925151 | 0.453121637570965 |
| ACGTCACCTGTG | 594.523193915367 | 0.357610953881383 |
| CGTTTGACGTCA | 594.529870504306 | 0.551256180644301 |
| ACACATGACACT | 594.536898648354 | 0.329906195711618 |

|               |                  |                   |
|---------------|------------------|-------------------|
| AATCTAGACTCA  | 594.55614079942  | 0.807093070183096 |
| ATGACACTCGAA  | 594.556447261098 | 0.326732788097094 |
| CAATAGTCAACG  | 594.571256490757 | 0.505832994229144 |
| GCAGATCTGTCA  | 594.588209640755 | 0.502843699105912 |
| ATGATGCAATAA  | 594.591047201644 | 0.289772545074242 |
| TGAATCAGACAA  | 594.606341429763 | 0.277958342025233 |
| TGACGTACCGCA  | 594.611269681265 | 0.682836469127849 |
| GTCAATCGTGAC  | 594.61813303772  | 0.663551166118588 |
| GGGTCATAATGA  | 594.618912009171 | 0.444226410725924 |
| GTA AATTGCTCA | 594.634200548087 | 0.5009456925756   |
| ATGACGAACTAA  | 594.644082089697 | 0.324610006390147 |
| GCAGGTGACCCA  | 594.657239203058 | 0.463044367282656 |
| CCCAACGGTGAC  | 594.659187264124 | 0.555974369184298 |
| GTCATAGAAGTA  | 594.660419170028 | 0.321111727601329 |
| AGACTCACGATA  | 594.664158356851 | 0.827017541822154 |
| GTCATAACCAAC  | 594.677207205602 | 0.667103579806952 |
| CAGGTGTGACCC  | 594.68479198603  | 0.973236816658244 |
| AGACTAATCGAT  | 594.695560931099 | 0.586357614570587 |
| ATGCTCGGTGAC  | 594.704329133289 | 0.545977739915759 |
| GTGACTACCTTA  | 594.704604978815 | 0.548034124124338 |
| ATGACTGGGGAC  | 594.715400832859 | 0.356487541466476 |
| ATGACGAGCATG  | 594.721270850232 | 0.246359441756667 |
| ATAGTACTCACC  | 594.721705969115 | 0.207906693547629 |
| TCACCGATATGA  | 594.729537269761 | 0.473981868952855 |
| ATCGTTTCGTCA  | 594.734322536467 | 0.758547860644419 |
| GAAGTCCAGTCA  | 594.737825979166 | 0.367486147683776 |
| TATGAGCAGTCA  | 594.737826182314 | 0.235272627130599 |
| ATGTTTAATGAC  | 594.745082641931 | 0.822529530673109 |
| CGTTCCAATGAC  | 594.748104668535 | 0.619227317282083 |
| ACGTTTGACTCG  | 594.757529197711 | 0.348098384996782 |
| TCTGCCTAGTCA  | 594.763860679049 | 0.567399085172138 |
| CATCGCATGACA  | 594.777909519184 | 0.419695564150908 |
| GGCTATCTGTCA  | 594.780178083253 | 0.569345425862155 |
| GACTCCGACTCA  | 594.784382664517 | 0.366457910030096 |
| TCTACTGCGTCA  | 594.806930100622 | 0.259136191811191 |
| ATACTTTGTGAC  | 594.813825074053 | 0.451175589367755 |
| GTCATTATGCGA  | 594.816994394114 | 0.322134711132908 |
| ACCAGAGAGTCA  | 594.819077367996 | 0.682678354722011 |
| GTCATAACGCCA  | 594.819929627324 | 0.541085333854296 |
| AGTCACTTGAAA  | 594.835043001904 | 0.76172311989073  |
| TATGACATTTCA  | 594.837531495433 | 0.272481706413144 |
| AAGCCCTAGTCA  | 594.853041112373 | 0.479192399906889 |
| AGTACGACCGA   | 594.867792351606 | 0.723902100850119 |
| GAGTAATCATAC  | 594.8765582407   | 0.579875446596321 |
| AGGCCATGTCAC  | 594.878521561224 | 0.30420790224588  |
| AGTGCGAGTCAG  | 594.885067497117 | 0.188611912506488 |
| CACTGGGTGACA  | 594.888212316091 | 0.612378539710629 |
| TGTGACAGGTAA  | 594.890566002413 | 0.166698596181162 |
| ATTTGGTATGAC  | 594.897166719958 | 0.464556961993413 |
| GTCTTTGACTGA  | 594.903843169664 | 0.345672506046149 |
| AAACCGACTCAC  | 594.90904286237  | 0.402302438722459 |
| GACTAATAGGAC  | 594.911285820069 | 0.889011699689681 |
| GTCATCTCCGCA  | 594.919946186342 | 0.502079502706462 |
| GTCACTCTCTGA  | 594.926239190081 | 0.280342628566399 |

|              |                  |                   |
|--------------|------------------|-------------------|
| GTCATTAACATA | 594.927374578162 | 0.386889687599059 |
| GTCACATCATT  | 594.933098602198 | 0.567061641523363 |
| ACTCGCGTGACT | 594.944999270031 | 0.18549650653397  |
| GTCATCCGCATA | 594.949267059265 | 0.326258471597255 |
| CATTGATGTGAC | 594.956218310091 | 0.360176505033846 |
| AGAGCCAATGAC | 594.997276940991 | 0.311940358928652 |
| CACTAGCAGTCA | 594.997804535476 | 0.476222947088929 |
| GTCACATATTTA | 595.001604354076 | 0.499976854696047 |
| CCCTATTGACTC | 595.00195490322  | 0.289441056552884 |
| CGGACAGATGAC | 595.027765083025 | 0.518043533657845 |
| GTCCCAGAGTCA | 595.028646883455 | 0.746444796795323 |
| GAGTCCGACTCA | 595.036961299672 | 0.503737841523483 |
| ATGACCATAATA | 595.04278378662  | 0.537043058854628 |
| ATTTGTGGTGAC | 595.050194270824 | 0.559202055482754 |
| GACGCATTAGTC | 595.053076014489 | 0.500241452989075 |
| CCCAAAGGTGAC | 595.074800153266 | 0.243224000155333 |
| GCGTCCGGTGAC | 595.081018210018 | 0.497180931332006 |
| AGAACTTGTCAC | 595.087142649136 | 0.342532344049763 |
| GTCATGATGAAC | 595.087921765748 | 0.622977415600073 |
| GTCACAGTCGTA | 595.089097654745 | 0.545679404814322 |
| AACTGGTCAGAG | 595.096453284764 | 0.317495599161949 |
| AATCGCTGTCAT | 595.098067959703 | 0.349740155352171 |
| ATAATAGATGAC | 595.098829662071 | 0.502292617276339 |
| ATATCGTACCGA | 595.107156712272 | 0.402652389790916 |
| AGTCATGGGGTC | 595.145474103088 | 0.557682877769234 |
| AGAGAGTGTGAT | 595.155193967582 | 0.354909921059466 |
| CTCCCCGATGAC | 595.161639205583 | 0.36069870122845  |
| ACAAGCGTGACT | 595.163889974681 | 0.446516095791574 |
| TATGACTTGCCA | 595.188900742469 | 0.36035612573052  |
| GTCATAACAGGA | 595.192340433866 | 0.423539412653454 |
| ATACAGTCAGCA | 595.201983307344 | 0.266598227015834 |
| ATTAAACTGTCA | 595.201992357957 | 0.318861564795325 |
| CGCGCATTATGA | 595.204426302978 | 0.644143833878022 |
| AGATAAAATGAC | 595.212329270235 | 0.192424030181735 |
| ATTGTTTACTCA | 595.239847953311 | 0.376798343098649 |
| CAAGTCGATGAC | 595.252802649433 | 0.575554075033484 |
| GATGATGACCGA | 595.256203254112 | 0.431287883344371 |
| ATACCTGCGTCA | 595.259105406652 | 0.41689916651515  |
| ATGACGGAGCGC | 595.273860743679 | 0.434896111550876 |
| AAACTAAATGAC | 595.282970461717 | 0.491558905307255 |
| AGTTGTAATGAC | 595.28385412071  | 0.470818813780255 |
| GTCATATCGCCA | 595.285440400098 | 0.33849961005872  |
| CAAGATGAGCCA | 595.291524663331 | 0.46384460165177  |
| CATTGTATGACC | 595.292477094324 | 0.493084656144447 |
| ACGTCACCTACA | 595.302170221903 | 0.556956155518687 |
| ACGTCACATCGG | 595.313659171151 | 0.275183034815863 |
| GGCCCGTATGAC | 595.340834321327 | 0.451623961288647 |
| ACTCACATGACG | 595.341794455051 | 0.149589150826075 |
| CGAGTATATGAC | 595.347420241355 | 0.42027522600725  |
| ATAATCTGTGAC | 595.359950129522 | 0.602149520608737 |
| ACGCAAATGACG | 595.377048925115 | 0.389375446187923 |
| GCATTGTAGTCA | 595.390482302057 | 0.464507626215482 |
| CCTGCTTACTCA | 595.392226360737 | 0.177972886332884 |
| TGTGACTTGAA  | 595.397027050071 | 0.392615782500265 |

|              |                  |                   |
|--------------|------------------|-------------------|
| AGATATGGTCAT | 595.400267216725 | 0.313039092235821 |
| CCAATATGACCA | 595.401205116542 | 0.420971063514974 |
| CCAGAAAGTGAC | 595.405893995583 | 0.744510477966797 |
| CTATTACAGTCA | 595.42278134075  | 0.219590396175619 |
| TGACTCTCACAA | 595.446878743362 | 0.327841061288124 |
| GCGTCACCTGAC | 595.447129176818 | 0.267466194540063 |
| AATGACCGAATC | 595.451103314858 | 0.35233315717139  |
| GTCACACCGAAC | 595.462253741266 | 0.382137445250062 |
| AGTGAGAGTCAG | 595.463496429601 | 0.175923525242021 |
| AAATAATGTCAT | 595.475615084691 | 0.480299782820868 |
| ACGAGGGAGTCA | 595.484863175849 | 0.164544233015732 |
| GTGTCATGGGCA | 595.528591116793 | 0.325228471483475 |
| CGCATTGACTGA | 595.530883765658 | 0.217980154443056 |
| CACTAATGACGG | 595.544397958059 | 0.562491476192375 |
| ATGAATACGTCA | 595.556921393864 | 0.43302219610167  |
| TATGTCATGTCA | 595.559881423643 | 0.465852038757967 |
| AGACTCACGAAG | 595.58184815998  | 0.404312643472397 |
| ATACAATGACCA | 595.582892558296 | 0.385672402248391 |
| GTCATATAATTA | 595.584339011318 | 0.595054557915388 |
| CCGATGCATGAC | 595.587272467871 | 0.478366212069498 |
| GGTCATCGTTCA | 595.605070270304 | 0.509063653385453 |
| CGTCACATGACA | 595.617452751305 | 0.39223248156043  |
| ATCGCTAGTCAT | 595.621056281521 | 0.349887065681047 |
| GCAAGCGATGAC | 595.626340382838 | 0.342739160031511 |
| CCTTATATGTCA | 595.632803543644 | 0.355051180344319 |
| TGAGTCGTGACA | 595.641673798113 | 0.555536373735658 |
| ATGGGCTATGAC | 595.653718004009 | 0.473790378701045 |
| GCGACCGAGTCA | 595.683911581545 | 0.304937595052233 |
| GGTCATCGTCAC | 595.697622210382 | 0.476948596988828 |
| GTTGCAGTCAGA | 595.698928464714 | 0.322668536055218 |
| ATTACGTGACAC | 595.705072610327 | 0.378493584955098 |
| ATAGATTGAGTC | 595.706889501816 | 0.502528137175603 |
| GACGTGTACGCC | 595.716809515229 | 0.476385165152118 |
| TGACTTATGCCA | 595.721390266472 | 0.619734950667529 |
| CAGTGGTGACGC | 595.74036091278  | 0.482043508977398 |
| GACCGGTATCA  | 595.741212054432 | 0.722284399637447 |
| AATCCGATGAGT | 595.754242836046 | 0.745877259441196 |
| CCGTTTGGTGAC | 595.773841907266 | 0.685705025034781 |
| TCGCTTACGTCA | 595.787704646691 | 0.637121791576909 |
| AGACTCACGTTA | 595.796044166052 | 0.718392594396016 |
| GTCACACTGAGA | 595.797489281145 | 0.508133017159417 |
| GATGACAGCTCA | 595.79830303292  | 0.471737519405585 |
| GGTCACACATGA | 595.799244227902 | 0.576242258812537 |
| AGATTTCCGTCA | 595.800170056443 | 0.385317717177472 |
| CAGTTGAATCAC | 595.813196092291 | 0.378952104914703 |
| GACTACTATGAC | 595.818225101681 | 0.672202941408788 |
| ATTTACTGTGAC | 595.819540638122 | 0.410176874766219 |
| ATGACGCCTTTA | 595.822236572004 | 0.261627601912304 |
| TGACCAAATTA  | 595.823645256486 | 0.583048814527498 |
| TCGCCACGTCA  | 595.827229573776 | 0.299193499054478 |
| GTCATGTTTTGA | 595.828969034145 | 0.278618558585546 |
| TCACGCGTGACA | 595.835150639916 | 0.484980446862327 |
| GAGACAGAGTCA | 595.8366144054   | 0.375114477126911 |
| AGACTCACGTGA | 595.838010668846 | 0.660201340432822 |

|               |                  |                   |
|---------------|------------------|-------------------|
| CAAGGTGATGAC  | 595.849005577366 | 0.323846038153534 |
| GGACATGAATCA  | 595.864891546619 | 0.336259160805166 |
| ATGACACTCAAC  | 595.865052800403 | 0.16526770105795  |
| ACTGTTTTGTCA  | 595.869148426333 | 0.353201639528101 |
| CAGCATGATGAC  | 595.888998599827 | 0.648834325982877 |
| ATGCCAGAGTCA  | 595.898873291113 | 0.494788199952914 |
| CTTCTGGAGTCA  | 595.903118562764 | 0.298669097974942 |
| AGTAGACTCAGA  | 595.9162959702   | 0.326527570771885 |
| CTTTTCTATGAC  | 595.930964012315 | 0.426481136212892 |
| ACACTAAATGAC  | 595.984895993741 | 0.393491187313222 |
| AAGTTCTATGAC  | 595.994886723668 | 0.191204126007871 |
| ATGACAACGTTA  | 596.01229055222  | 0.485843639861169 |
| GACTCAGATGAC  | 596.017607043766 | 0.509037492919315 |
| AGGTATTGTCAT  | 596.02831131305  | 0.439126704060701 |
| CCAGTGTGACCA  | 596.032671483762 | 0.466284696643112 |
| ACGTCACCTGCT  | 596.033011891273 | 0.279785033886367 |
| AGTATCAATGAC  | 596.040194572153 | 0.40603921567068  |
| CGTCATCAATTC  | 596.056063445996 | 0.332279868427537 |
| ATGTTTACGTCA  | 596.067952228983 | 0.669712101225875 |
| TGACGTAGCGAA  | 596.08952031025  | 0.431560345110644 |
| AATTACGCAACT  | 596.094397883573 | 0.222709764833609 |
| GTGTCATGATGA  | 596.101166475214 | 0.360314991084856 |
| TAGCCTGACTGA  | 596.104102252846 | 0.446258921680541 |
| CAAACGTGACA   | 596.107390581422 | 0.388052422215127 |
| AGAGTCAGGTTG  | 596.107557682209 | 0.533518303904503 |
| CCCGGTATGAC   | 596.116044744409 | 0.315607787364176 |
| ATCACTGTCATC  | 596.116147177275 | 0.29873730922499  |
| AGTATTAGTACG  | 596.117898591562 | 0.452629205876154 |
| ACGATCTATGAC  | 596.11808995275  | 0.457453280467016 |
| GAGTCAAGTGAC  | 596.149804231081 | 0.341194813875622 |
| ATGACTTGGTAG  | 596.159168737196 | 0.316241346798213 |
| ATTTACTAGTCA  | 596.173870536566 | 0.575189206226523 |
| AGTCACTACGGG  | 596.187919146583 | 0.5822367268855   |
| ATGACGACGATG  | 596.210206067064 | 0.336659102930134 |
| AACATTTTCGTCA | 596.212483494917 | 0.520155275414215 |
| AATCGTGTCAAC  | 596.22025972517  | 0.192186923985318 |
| ATATACGCGTCA  | 596.22559739434  | 0.475480437626072 |
| CGTCAATGTGAC  | 596.234302593818 | 0.682982566894234 |
| AGTCAGACCCAC  | 596.235987129941 | 0.473490385492919 |
| TCGCTTGACTAA  | 596.254648160456 | 0.550377913998219 |
| ATTTGCGACTCA  | 596.255938474096 | 0.339802493612227 |
| CACGATGACCTA  | 596.25852377799  | 0.351379422074557 |
| ACATGACATGAC  | 596.260027043942 | 0.725808636560939 |
| GCAATAATGACA  | 596.267914451751 | 0.403010830140511 |
| GGCTTGAATGAC  | 596.276935848046 | 0.640883355104383 |
| GGGAATTGCTCA  | 596.280951758168 | 0.701413313213282 |
| CGCTCGTATGAC  | 596.282753110015 | 0.308118236278417 |
| GTCATAATCTAA  | 596.282872773502 | 0.804342708357106 |
| GACATCGACTCA  | 596.294682717661 | 0.513855705740288 |
| GTCATTGGCGAC  | 596.295856660508 | 0.402832880501149 |
| AAAAGATGTCAT  | 596.304603130189 | 0.31553018582957  |
| GTCATCCGGATA  | 596.308896148022 | 0.222732441804253 |
| ATCGTCAATGAC  | 596.31177679245  | 0.56339127754434  |
| ATACGCTGTCAT  | 596.334829974285 | 0.288949481974203 |



|              |                  |                   |
|--------------|------------------|-------------------|
| CGGGTAAGTCAC | 596.340020435548 | 0.661482977644148 |
| AGACACTGACTG | 596.342691576202 | 0.491909559459766 |
| GCAAATGATGAC | 596.342699766469 | 0.58767454728287  |
| CTAAGTACGTCA | 596.354725712114 | 0.302549545374526 |
| CAACCGTAGTCA | 596.355457490382 | 0.480952867914135 |
| ATCTCGGTGACG | 596.363348232333 | 0.369362984242377 |
| AAGTGTCAGAGC | 596.369293871345 | 0.193625184492306 |
| GTCATAAATGCA | 596.385820622115 | 0.277611226278483 |
| TCTGACTCTCAA | 596.39186452666  | 0.225054842646349 |
| CCACGCTATGAC | 596.391865416793 | 0.302568815150968 |
| ATTCTAGACTCA | 596.395507378508 | 0.500301484097548 |
| ATGACCGAACCA | 596.415501665753 | 0.352588187361779 |
| GAGTAATTACCC | 596.428719309654 | 0.673896991956702 |
| GCGTCACTAGAA | 596.450276059807 | 0.525021585811117 |
| GTTTACTCGTCA | 596.452581224271 | 0.246031569542742 |
| GTCATGCATCCA | 596.460033976953 | 0.334055285921798 |
| GGACGGTATGAC | 596.462709304024 | 0.153013477438548 |
| GATCATCGTGAC | 596.470633028625 | 0.602365022341884 |
| CTAGCTTACTCA | 596.483457282234 | 0.319104585255657 |
| GTCATGCCGTCA | 596.485144296695 | 0.407784254353145 |
| CGTCATCAAGGC | 596.49295209198  | 0.63374475527525  |
| GTGACTACCTGA | 596.501044305988 | 0.490509350801335 |
| GATAGACTCAAC | 596.50333046986  | 0.838879339708959 |
| ATCGATGATGAC | 596.509329654657 | 0.379061372812808 |
| CGTCATCTCGTA | 596.522287937517 | 0.396007972411526 |
| ATTATACGTGAC | 596.534203087523 | 0.558762607744258 |
| CGGACCGGTGAC | 596.543100634134 | 0.53426537951688  |
| CCATTGAATGAC | 596.551282584921 | 0.430435718849702 |
| GTCATAAATCAA | 596.557028613381 | 0.416552908206877 |
| AGCTTGGATGAC | 596.566033741585 | 0.452564834694316 |
| GTCATAGGCCAA | 596.569276161565 | 0.352706046050957 |
| GTCATTTAGCCA | 596.57013564738  | 0.422144938754431 |
| GTCACACTACTA | 596.57019779264  | 0.192778116556828 |
| TCAGTCAGGAGA | 596.580043553912 | 0.415237512674787 |
| GCTCCGTGACTA | 596.585021645111 | 0.306536676199914 |
| CGATTGACACAC | 596.585462379701 | 0.246784309365679 |
| TCTGAAGCGTCA | 596.587489846882 | 0.589790021981265 |
| GTCATCCTTAAA | 596.601487960009 | 0.370553643032472 |
| GGATTGATGAC  | 596.603053228301 | 0.417311455746218 |
| ATGACGGTACAA | 596.615699563871 | 0.244057727537687 |
| ATACACACGTCA | 596.61642526463  | 0.510440529482704 |
| GGTTTCTATGAC | 596.650116275334 | 0.433673143010527 |
| AATAGTCAAAAT | 596.654364112493 | 0.349814645177648 |
| CAATAATGACAA | 596.665121589395 | 0.371729329986034 |
| TGACTGTAAGCA | 596.677836295735 | 0.628372062564425 |
| CAGCTGTGACGA | 596.70144359476  | 0.473584575095236 |
| AGAGTCAAATCA | 596.706020467855 | 0.274304478728113 |
| ACCAAGGATGAC | 596.706816108994 | 0.415877654035663 |
| CTCAGCTGTGAC | 596.70943802128  | 0.546433824882405 |
| AGCCTTAATGAC | 596.714111807881 | 0.47133052469395  |
| GTCATTAGCCAA | 596.740017696271 | 0.487045392396635 |
| AACCAGAATGAC | 596.74252420485  | 0.514027351141091 |
| CGTTTTGACACA | 596.750320245936 | 0.15071347224225  |
| GGTTACCAGTCA | 596.764629728524 | 0.519519237569193 |

|               |                  |                   |
|---------------|------------------|-------------------|
| ACCCTGTGTAC   | 596.767805495964 | 0.219713110566355 |
| AAGTGCTATGAC  | 596.774236335369 | 0.291191995625523 |
| CGAAGGAATGAC  | 596.775797501029 | 0.382874833400143 |
| CTCTAGTAGTCA  | 596.784195610518 | 0.503440865632848 |
| GTCACTACGTGA  | 596.8005769313   | 0.788912474745289 |
| GTCATCCAGAAC  | 596.819599274084 | 0.503179016729081 |
| GTATCGGATGAC  | 596.843487468997 | 0.246520084433831 |
| TATGCTGTGTCA  | 596.849177616106 | 0.560992865980442 |
| GAAAGCTATGAC  | 596.849566632657 | 0.303867544475917 |
| CCGAACATGACA  | 596.865737930419 | 0.555652400584898 |
| CTTGTGAATGAC  | 596.877559770206 | 0.568120916021611 |
| ACTCATATGATG  | 596.879563270708 | 0.498059727647705 |
| AGATTCTGACTG  | 596.88133421712  | 0.390145060189783 |
| CTACTTTATGAC  | 596.881574882295 | 0.274892135702339 |
| CCAAACTGTGAC  | 596.895843994884 | 0.360489932910425 |
| CGGGAGAATGAC  | 596.899189619829 | 0.147227860706976 |
| AAGTGTGAGCAA  | 596.901352145342 | 0.213670385657834 |
| CATATTGCACA   | 596.911055271938 | 0.620827123296084 |
| GTGTCACCTCGA  | 596.913770549342 | 0.10197064114884  |
| GTCATGTATTTA  | 596.921923485246 | 0.443539918297406 |
| GGTCTTACGTCA  | 596.928710664658 | 0.515601993183397 |
| GCCATGTACCCC  | 596.937742545344 | 0.313304709133354 |
| CGACAGCGTCAC  | 596.946204474971 | 0.356920046818444 |
| ATGACAGACCAG  | 596.957006597611 | 0.355744344719512 |
| AACCTGATGACG  | 596.985826295588 | 0.338617214586043 |
| TGGGTCACGAAA  | 597.002167360184 | 0.18416840765579  |
| CGTCATCGGTGC  | 597.012196789584 | 0.548504027943093 |
| ATGACCACGCAT  | 597.029642426003 | 0.407678828473625 |
| CGTCACACAGAA  | 597.032313057018 | 0.405851065633428 |
| CATTTTCCGTCA  | 597.035840989659 | 0.216801936128567 |
| ACTCATACTGAT  | 597.040941696224 | 0.311323648023578 |
| TCAGTAATGTCA  | 597.044536924126 | 0.47293291839991  |
| AAACGTGAGTCG  | 597.05849061041  | 0.415202168294097 |
| AACCGCGACTCA  | 597.0587921749   | 0.310051958395093 |
| CGCACGAATGAC  | 597.059364304451 | 0.475847806270424 |
| GAAACATGACAC  | 597.067456795746 | 0.332882102307869 |
| AGGACCTAGTCA  | 597.073767259584 | 0.538081488887372 |
| GTCACCATCGAC  | 597.083650372734 | 0.442802663635918 |
| ATGACCACCTTCA | 597.103684106026 | 0.251435797512669 |
| ATGACAAGGTTA  | 597.104716852166 | 0.261759107076521 |
| AGTCAGCAGTCA  | 597.105955332939 | 0.296860919871039 |
| ACTCATAATATG  | 597.106963896675 | 0.363767337183455 |
| ATGATGTGTTCA  | 597.107885640535 | 0.395186179988212 |
| ATACGATATGAC  | 597.154539019054 | 0.335869998336923 |
| CGAATTTGACTC  | 597.172148454039 | 0.321923426424951 |
| CGCTCTGATGAC  | 597.188861287401 | 0.551190130978056 |
| CGTCATATGAAC  | 597.194331182977 | 0.408595964853983 |
| ACAACCTGACT   | 597.197947234627 | 0.32225668913578  |
| ACGGATCATGAC  | 597.205702148737 | 0.729540328064774 |
| CTTGTCTATGAC  | 597.207782816085 | 0.274742720304895 |
| CTTGTGTGTCA   | 597.222985461045 | 0.274616360398092 |
| GAGTTTTATGAC  | 597.227083063159 | 0.420890383593167 |
| ACTCCCTGACTC  | 597.232076820479 | 0.193560209006947 |
| GAGTCAGTTTAA  | 597.234162063591 | 0.327900586868939 |

|               |                  |                   |
|---------------|------------------|-------------------|
| ATGACGTTAGAC  | 597.235038401105 | 0.170785099585356 |
| GAACCTGACTGA  | 597.256339062322 | 0.197946097381798 |
| AAACCCATGACT  | 597.257744498455 | 0.477291847817096 |
| GTCATATCAAAC  | 597.26036958864  | 0.642387031462951 |
| GTCACTCAGACA  | 597.262974931845 | 0.74573888561396  |
| AGATTAGGTCAT  | 597.263365013102 | 0.307126714109986 |
| CATTGGGATGAC  | 597.267731870375 | 0.441839690549743 |
| TCACCTGAGTAA  | 597.269872463248 | 0.165570968793324 |
| GAGTAATGTGAC  | 597.279655271895 | 0.357850808826033 |
| GGGCCGTATGAC  | 597.295334095892 | 0.393161984578973 |
| GGTTTGTATGAC  | 597.315947345078 | 0.341479091750582 |
| GTAATCGTGTCA  | 597.32199215729  | 0.500119055275285 |
| ATGACACTCGAC  | 597.323435743858 | 0.360003570720634 |
| CATGAGTGTGAC  | 597.324154997135 | 0.51397480598391  |
| GAGGCATGACAC  | 597.330581922747 | 0.296813657803792 |
| CTTACGGGTGAC  | 597.349118436081 | 0.51172165155592  |
| CGTCATTAAGCA  | 597.361720737957 | 0.416843382857601 |
| GTCATCTATAGA  | 597.367246427348 | 0.146152849157528 |
| GTGTCACTATGA  | 597.371908559738 | 0.26977408164052  |
| CCAGTCTAGTCA  | 597.383442239775 | 0.587926873880666 |
| AATCATAATGAC  | 597.40034555418  | 0.402354373863408 |
| GTGAGCCTTACA  | 597.401724200929 | 0.336927162359499 |
| AGTCACGACCAG  | 597.404665933103 | 0.529327633752226 |
| GCCCGTATGAC   | 597.407287045628 | 0.612574252270568 |
| GAGTAATCGTCC  | 597.419192507808 | 0.762971806099645 |
| AACTTTTATGAC  | 597.422380051783 | 0.322979074900016 |
| CCTGAGGATGAC  | 597.423915883397 | 0.446474799249834 |
| CTATGATGACCA  | 597.429218662156 | 0.16969156918794  |
| CGGGATGATGAC  | 597.436214105125 | 0.498467295794282 |
| CAGACAGAGTCA  | 597.445210349754 | 0.572072062142464 |
| ACATGTTTCGTCA | 597.453553402363 | 0.457537366892606 |
| ATGAGCAAGTTA  | 597.464139955225 | 0.222455820118026 |
| GTCATTTAAGAC  | 597.470133626136 | 0.45738238740978  |
| ACACCGTGAGTC  | 597.497715525613 | 0.692804755260581 |
| CGACGTGTGACG  | 597.510376723013 | 0.40736669361293  |
| ACGGAAATGACG  | 597.513878573773 | 0.347151402632416 |
| AGAGAATATGAC  | 597.516255365693 | 0.30384861001399  |
| CCTATTTGGTCA  | 597.525707123697 | 0.349007968076039 |
| GTCATCCAGACA  | 597.527060227009 | 0.363641473140744 |
| CAACACGTGTCA  | 597.531891288704 | 0.538067698299072 |
| CAGTCAGCGCAC  | 597.533868438405 | 0.504372809579409 |
| GTTCTGCAGTCA  | 597.534473294032 | 0.441900036153916 |
| GTCATCGGTCCA  | 597.558146340982 | 0.379211860092502 |
| GTCATAACCGAC  | 597.56042507938  | 0.602082434517923 |
| TGACTCTGGAAA  | 597.581036715773 | 0.532976669043742 |
| CAGACAAATGAC  | 597.590021709939 | 0.535159105961856 |
| GTCATAGTCTCA  | 597.596941577732 | 0.647218126239298 |
| TGAGTCCTAACA  | 597.598636948275 | 0.345321034679902 |
| GCAACTAATGAC  | 597.612483424928 | 0.472496253440029 |
| GTCATCCTTGAA  | 597.612792004544 | 0.343084172075442 |
| ATGATGTGGCTC  | 597.615695756735 | 0.353430415102821 |
| GTTCACTAATGA  | 597.625101792902 | 1.05085213553944  |
| TAACTTGTGTCA  | 597.628057309384 | 0.279518729455001 |
| CCATGGGTGACA  | 597.643231949715 | 0.604343402563808 |

|                |                  |                   |
|----------------|------------------|-------------------|
| CTGCTTGTGTCA   | 597.648473388356 | 0.421840632657183 |
| CCGTTGAGTAAC   | 597.650836448805 | 0.335282787099844 |
| ATTTATCTGTCA   | 597.65519662002  | 0.382819844393757 |
| CGTCATTAGTTA   | 597.659191254244 | 0.463499666455633 |
| CAATGCGAGTCA   | 597.66564593417  | 0.631864718979926 |
| CCTCATGATGAC   | 597.667075368899 | 0.502878634624533 |
| GCCTATAAGTCA   | 597.671349000855 | 0.47043264426475  |
| CCTCCGGAGTCA   | 597.673239158028 | 0.332269145633042 |
| ATATACCGTCAT   | 597.696142965704 | 0.415863072754477 |
| GTTGATCCGTCA   | 597.697671322734 | 0.50829780906053  |
| CTTTACTATGAC   | 597.703235784174 | 0.210134282019306 |
| CAATTCATGACA   | 597.715874095025 | 0.494650411443461 |
| GTCATCCTTCAA   | 597.725121081431 | 0.364501996165442 |
| ATTTGGTGTGAC   | 597.726637573669 | 0.413475483139648 |
| GAAGATACGTCA   | 597.752076100163 | 0.525134944906556 |
| GTCATATATCTA   | 597.760711618081 | 0.371622094814971 |
| GTCATTAGACAA   | 597.775238637558 | 0.620952424117115 |
| CAAATCTGTGAC   | 597.7806486073   | 0.296384340985325 |
| CAAAACGACTCA   | 597.781522876988 | 0.784589493731815 |
| ATGACGTCGTAG   | 597.794827748691 | 0.249160646697515 |
| CAAAATGAGCCA   | 597.83419869754  | 0.642296511346241 |
| GCGCTCGACTCA   | 597.834638255614 | 0.271999636998495 |
| CCGTCTGATTCA   | 597.858507116842 | 0.236076677896792 |
| ACGTGGGATGAC   | 597.859653363441 | 0.404642674690183 |
| TAACTTACTCA    | 597.860179704367 | 0.270485592113194 |
| GATTAGTACTCA   | 597.881120191955 | 0.22572491949716  |
| GCCTGTGGCTCA   | 597.888038587016 | 0.805515674011374 |
| GTCATCGATGTA   | 597.888533835582 | 0.293380579864976 |
| CTGTCTGTGTCA   | 597.890584933213 | 0.534575501068738 |
| CAGTCACGCCAA   | 597.903072247744 | 0.485210887652858 |
| TATCTAATGACA   | 597.918066031359 | 0.192626147176539 |
| CCCTACTATGAC   | 597.92519927026  | 0.202683564309599 |
| AATAATGTCATC   | 597.941811059652 | 0.502174210961713 |
| ATTACGATGACC   | 597.972350367741 | 0.350998226377397 |
| AAATAGTAATAC   | 597.973362057216 | 0.436880233524062 |
| ACGTCACCAAAT   | 597.979009479921 | 0.461392805275831 |
| TAAGCCGAGTCA   | 597.982021484889 | 0.442798504651    |
| ACGTCACCGAAA   | 598.001332781509 | 0.373344494043474 |
| TGACCAATCTAA   | 598.018951822475 | 0.768319559187594 |
| ACGTCATGATAC   | 598.030798002619 | 0.451214341796285 |
| ATGACCCAGTTG   | 598.044351832968 | 0.35753992019624  |
| CTAGTCAATGAC   | 598.04835699677  | 0.383052553508694 |
| ACCGTTCGTCAT   | 598.055904774961 | 0.131386985716882 |
| AGATCCGACTCA   | 598.058146390627 | 0.480939406225578 |
| CGCGACTAGTCA   | 598.085413031194 | 0.351459034987486 |
| GTCATCACAAACA  | 598.093400019367 | 0.557188930201975 |
| GATGCGTATGAC   | 598.096511540419 | 0.327669507515805 |
| ATAGCGCGTCAT   | 598.096906688803 | 0.731985233530926 |
| TCATAGTGATGA   | 598.097442412775 | 0.803442945812814 |
| AACTGATGTGAC   | 598.098966553923 | 0.402458801647675 |
| CTAGAGGGTGTGAC | 598.101669316193 | 0.2590539446877   |
| GTCACGTACCGA   | 598.125580977574 | 0.874242850642023 |
| GACTCACTAAAC   | 598.144097824088 | 0.236582410493367 |
| GGTACACGTCAA   | 598.153551587615 | 0.41805767556092  |

|               |                  |                    |
|---------------|------------------|--------------------|
| AGTCGTGCACC   | 598.1668891255   | 0.518279980218237  |
| ATATGTCAGAAT  | 598.172878152242 | 0.289641968676527  |
| AACCGTGTGACG  | 598.173367811871 | 0.517036238309086  |
| GTCATTTTACAA  | 598.173679181923 | 0.574475334121021  |
| ACTCATACCTGG  | 598.177274495393 | 0.433823863473169  |
| ATGAATCAACCC  | 598.180001585861 | 0.407971264456456  |
| AATCATGACGTC  | 598.181096823699 | 0.458433772931155  |
| AACATTTGCTCA  | 598.194144079537 | 0.371238346322885  |
| ACGTCACATACT  | 598.197150064774 | 0.244355402056483  |
| CAGCATTTATGA  | 598.20146149761  | 0.830058613917885  |
| GCCAAGCAGTCA  | 598.212174235109 | 0.587883642773339  |
| AAGGTGGATGAC  | 598.212746327079 | 0.314889909373015  |
| TGACTGGAACAA  | 598.220437689525 | 0.342174460512199  |
| ATTTGGCGTGAC  | 598.242090448533 | 0.833877560496877  |
| AAAAGAAATGAC  | 598.248631426041 | 0.517248523980544  |
| GTCAGCCAGTCA  | 598.257481847455 | 0.473528591864299  |
| ATCTCGTGTGAC  | 598.265822602123 | 0.330929624171279  |
| ATGAGTCCCGC   | 598.274184715392 | 0.440979135944444  |
| ATAAACCAGTCA  | 598.282932297671 | 0.444127848482072  |
| ATCCCTGACACA  | 598.29992471722  | 0.317615728779811  |
| CGTCCTGTGACA  | 598.303667644357 | 0.613481474059469  |
| AGAGGCGAGTCA  | 598.304735411875 | 0.348053413521107  |
| TGACTGTTACCA  | 598.30811751867  | 0.771294989932221  |
| GAGGCTGTGTCA  | 598.315049755392 | 0.341022658129769  |
| CCCTGGTGTGAC  | 598.319589832068 | 0.591983664688966  |
| CAGCCTTACTCA  | 598.322789273495 | 0.606888182840587  |
| CTCAGAGAGTCA  | 598.323101846115 | 0.493596674864206  |
| CACCCAGATGAC  | 598.326946547342 | 0.479240793608064  |
| ACTGCGTATGAC  | 598.332444851043 | 0.434537783410124  |
| CAACTCATGACA  | 598.345010778818 | 0.573289224694064  |
| AATTTGACTAA   | 598.348796725007 | 0.971732769753341  |
| CTGTACATGTCA  | 598.353526576378 | 0.552427465786427  |
| CGTCATTGGGAA  | 598.359252750045 | 0.451506938512653  |
| AATGTAAGTCAC  | 598.379864361611 | 0.371262416224888  |
| GTCATCATGCAC  | 598.384632440919 | 0.472975337065846  |
| ACTCATTGACTA  | 598.396166544245 | 0.372573116839433  |
| GAACATAAGTCA  | 598.396279195338 | 0.455763654042074  |
| GTATGGGAGTCA  | 598.399707449936 | 0.450852851773393  |
| CCATGCGGTGAC  | 598.402858408845 | 0.469615807033991  |
| CGTGAGAGTCAG  | 598.404933996791 | 0.0749850584602128 |
| GTATTGTCACAC  | 598.410221733804 | 0.500954258503794  |
| ACGCAACGTCAT  | 598.413524830218 | 0.394667146121922  |
| ACGTCATGCCGA  | 598.415607624464 | 0.431925777937991  |
| GTAGCGTATGAC  | 598.423660126415 | 0.422311148422554  |
| ATTGCGCGTCA   | 598.435274815426 | 0.383910633090422  |
| AGTATGATTCTGA | 598.435889584182 | 0.344579163128314  |
| TGTCATCTCTAA  | 598.441225645695 | 0.258335433176486  |
| CACACGTGTGAC  | 598.444935189563 | 0.37390636208182   |
| AATTACTGACAC  | 598.454250519188 | 0.318417018131517  |
| GATGACGCCGAC  | 598.467203476808 | 0.36384936120956   |
| CAGAGTGATGAC  | 598.480824308472 | 0.324522501396139  |
| CTGGCGTGACGC  | 598.482258594974 | 0.529498122836883  |
| GTTTCTGAATCA  | 598.48270190688  | 0.427845951556468  |
| ATTATGGATGAC  | 598.484033769189 | 0.535872294273088  |

|               |                  |                   |
|---------------|------------------|-------------------|
| ATGATATGACCA  | 598.488774985418 | 0.306032408415716 |
| AGCTACGGTGAC  | 598.494046425282 | 0.397276522396508 |
| GTCAAAGGTGAC  | 598.500543826919 | 0.575990811712139 |
| AGTATTGCTCAG  | 598.500658899283 | 0.352596387201529 |
| ACTAATAGTAAT  | 598.518694997962 | 0.401157290115059 |
| GATGGGGAGTCA  | 598.521715182408 | 0.27989635268649  |
| ATCACTGATGAC  | 598.52225873943  | 0.379085589218706 |
| AAATTCTGACTG  | 598.53537807825  | 0.480183345023863 |
| ATGGCTGCATA   | 598.540637353104 | 0.446487148640408 |
| CTGACTCCGATA  | 598.55453511394  | 0.423441479591495 |
| CCATGTGTGACG  | 598.569946045609 | 0.325306503941635 |
| TATCATTGTCA   | 598.606662821196 | 0.497045189654562 |
| CCAAACTGACTC  | 598.609594429851 | 0.407761814519606 |
| ACATTACGCAAT  | 598.613016629652 | 0.429859477949154 |
| GTAGTAGATGAC  | 598.627945896807 | 0.482844246529972 |
| CAGCGCTATGAC  | 598.635849596179 | 0.692020037621176 |
| GCACGTGCGTCA  | 598.651364634946 | 0.49361691183435  |
| GTCACGCAGTAA  | 598.65235197847  | 0.611054813067256 |
| TCGTCCCAGTCA  | 598.657410221296 | 0.470660523269322 |
| ACTCATACGAGT  | 598.676088750209 | 0.390817891003579 |
| ACTCATACCTTA  | 598.686555576718 | 0.235897722474695 |
| GTCACCACCTTTA | 598.691512681449 | 0.39670124789756  |
| ACGTCACCAATC  | 598.696930609878 | 0.356937762689289 |
| ACTGGTAATGAC  | 598.699153357765 | 0.345166440510168 |
| CTGCACGGTGAC  | 598.701450606544 | 0.522704965288461 |
| ATGAGTCTCTGA  | 598.709877229777 | 0.477235182050015 |
| CGTTCTAGTGAC  | 598.713975226912 | 0.415525790328172 |
| GGTGACTTGGAC  | 598.723330753495 | 0.539870712156773 |
| ACGTCACCTCCGA | 598.727545318463 | 0.120336199790791 |
| ATGACGAGGCAG  | 598.730722859591 | 0.418286923064963 |
| GTCACAATTAATA | 598.743876461251 | 0.401573036572622 |
| AATTAGGATGAC  | 598.749275235668 | 0.467823233748018 |
| GTCATATCCGAC  | 598.772591447547 | 0.393198262136907 |
| ATCAAAGTGTC   | 598.779329705104 | 0.502433770505685 |
| ACGGAAGATGAC  | 598.781460342274 | 0.204291899078736 |
| AACGGTGACCCA  | 598.784441250482 | 0.321794032927769 |
| GTCACTGACAGA  | 598.791268276364 | 0.540679475804087 |
| AGTCAGACACCG  | 598.793827651316 | 0.39717839639772  |
| ACTACTAAGTCA  | 598.804779101512 | 0.374003956216458 |
| CTCGGAGAGTCA  | 598.804938724245 | 0.641016719247553 |
| GACACGTGACAC  | 598.820844601776 | 0.207664396067108 |
| TCATTCCAGTCA  | 598.822415292137 | 0.364447507413288 |
| GCATTTTATGAC  | 598.832574584803 | 0.49744438989802  |
| AACTAGTACTCA  | 598.833566502815 | 0.704953272884307 |
| TGTGTCAACACA  | 598.84449546861  | 0.474039576045719 |
| GTCACGTAACGA  | 598.847692687711 | 0.5648541149008   |
| CTCGTGGATGAC  | 598.851803228191 | 0.520575686810885 |
| TGGGTCACGACA  | 598.852692009479 | 0.509867284767582 |
| CATAGTGACCAA  | 598.875708375222 | 0.505242959808102 |
| ATGACAGAGGTG  | 598.876837545015 | 0.292103937226928 |
| AACGCGTGACAC  | 598.879958387474 | 0.469114565894706 |
| ATGACAGTACTA  | 598.892928857917 | 0.351081775107411 |
| CCCAGGCATGAC  | 598.898729935198 | 0.368792621141495 |
| GTCATAAATACA  | 598.899104953216 | 0.651379372812469 |

|               |                  |                   |
|---------------|------------------|-------------------|
| AATACGGTGACA  | 598.93482755139  | 0.497162042734963 |
| ACTCTGACAGAT  | 598.940462553377 | 0.27822335000324  |
| GTCATTAGAAAA  | 598.955353317004 | 0.552639816587615 |
| CATTCCGACTCA  | 598.961882857196 | 0.426438837160784 |
| ACGACCCGCTCA  | 598.973781842592 | 0.508963252953961 |
| AGTCAGACTTCC  | 599.031250234475 | 0.366907188159105 |
| ATGACGTCCACG  | 599.031591932113 | 0.376322036745498 |
| ACTAACGTGAGT  | 599.059001237027 | 0.469385909057091 |
| TATGACTTTTCA  | 599.069997440263 | 0.297409552856225 |
| GTCATAAGAGTA  | 599.07395618434  | 0.122042879136811 |
| CCTACGTGTGAC  | 599.1301359361   | 0.521738559603632 |
| ATGTTGATGACG  | 599.136670283937 | 0.265295106331306 |
| AGGCTCCGTCAT  | 599.157918587896 | 0.561701547280946 |
| GTCATCTTGACA  | 599.189942063599 | 0.42548570441382  |
| TAAGATATGTCA  | 599.209053165935 | 0.47077835713896  |
| CATGACAGTGAC  | 599.217461300424 | 0.418525144538952 |
| AGGAGCGTGACT  | 599.219544606435 | 0.205221300832112 |
| ATGACAGTAGTC  | 599.233572029378 | 0.55243604266622  |
| CGGCTTACGTCA  | 599.235718147302 | 0.525267652165579 |
| AGACATTGACTC  | 599.2798124846   | 0.564242909512278 |
| ACCAGTGATGAC  | 599.284692765471 | 0.504426887883791 |
| ACAATCGGTGAC  | 599.293709607827 | 0.344925784988715 |
| AATGCCGTGACT  | 599.296102897636 | 0.192524522103646 |
| GACCTGCAGTCA  | 599.305462478867 | 0.551949071309846 |
| AACCATCAGTCA  | 599.342987276658 | 0.326787811937609 |
| TATGACAGCTGA  | 599.355823635143 | 0.253812912579691 |
| GTCATTTATTCA  | 599.371927449028 | 0.376921259951471 |
| AGTTAGAATGAC  | 599.380439797947 | 0.311311270609684 |
| AGTCACGCGGCC  | 599.385997268419 | 0.21736653791884  |
| ATCGCGGTGACA  | 599.399991394554 | 0.625740362868808 |
| CAGTTAGTGTC   | 599.405081241996 | 0.608117803769252 |
| TGACGCAGGCAA  | 599.405208542545 | 0.392361031923526 |
| GTCACCAGTCGA  | 599.444967041677 | 0.244994012453112 |
| CGGGTGGAGTCA  | 599.448016731949 | 0.344825352115226 |
| ACTAAGCAGTCA  | 599.47068430795  | 0.448087006196425 |
| CAACCTTACTCA  | 599.472209946453 | 0.361851707130084 |
| GACTAATAAATA  | 599.474000333351 | 0.304962315170046 |
| AATCCTGTGTCA  | 599.479880746138 | 0.634458466362082 |
| AACGCTCGCTCA  | 599.505706204024 | 0.511395866237362 |
| TGGTTGCTCACA  | 599.512192792774 | 0.717780325006641 |
| ACAACATGACGC  | 599.527481627201 | 0.250311220323188 |
| AAGCCTGTCATA  | 599.543139693893 | 0.296474706280323 |
| AGTCAGAGCCTG  | 599.54758341499  | 0.577663623820913 |
| CAGTCAGAAATAG | 599.556074769164 | 0.294791824826724 |
| GTGACGCCATAA  | 599.562212246787 | 0.388050755932794 |
| CGTCATTAGACG  | 599.562443748644 | 0.462026602808991 |
| ACTAACTGACTC  | 599.563985898158 | 0.276853595830193 |
| GTCACCGATAAA  | 599.56747458181  | 0.641375446704898 |
| CACTTGTGTGAC  | 599.590920140582 | 0.577422628950182 |
| ATGACGTTGCAG  | 599.604960917223 | 0.365773045115948 |
| GAGTCAGGCAGC  | 599.629350847038 | 0.366646120340298 |
| CAGGGGTGACGC  | 599.631689791545 | 0.277002124721381 |
| GGACTATGACCC  | 599.635491248235 | 0.646666778525598 |
| AACCATTCTGTC  | 599.637130713021 | 0.512513212455975 |

|               |                  |                   |
|---------------|------------------|-------------------|
| GAAGGATATGAC  | 599.64405168414  | 0.207531351551271 |
| ATTTTGGATGAC  | 599.648936944685 | 0.451381925013049 |
| TTCAGTGACCAA  | 599.66077678345  | 0.527264413140994 |
| ATCCTTTGTCAT  | 599.67012978173  | 0.224118003880246 |
| GTCACGCACAGA  | 599.672004062619 | 0.450103687108436 |
| AATCCTGATGAC  | 599.674264568542 | 0.404555986198784 |
| GTCATGGTGCCA  | 599.694519147835 | 0.44931049230293  |
| AGACTCACGTAA  | 599.698109989791 | 0.647401188864408 |
| AACGAAGTGACT  | 599.703538898109 | 0.373822480564406 |
| GTCATGTCACTA  | 599.725192964139 | 0.470913816877168 |
| CTGTCGTAGTCA  | 599.74301802758  | 0.616018335317774 |
| GGTATAGACTCA  | 599.743861536868 | 0.213894819150388 |
| CCACTCGATGAC  | 599.750768462442 | 0.414487489143568 |
| GTCACCGCTGAA  | 599.782365312564 | 0.746728848729832 |
| GTCACAGGTCTA  | 599.786090916542 | 0.603630396167006 |
| AGTCCATGACAC  | 599.788820459362 | 0.473188593245072 |
| ATGGTGGCTCAC  | 599.803993222195 | 0.329741708900738 |
| GACTAACTCATC  | 599.81235469991  | 0.393892414046061 |
| CAATTGCTGTCA  | 599.81425891818  | 0.682800860094641 |
| TGACAGATCTAA  | 599.817429550782 | 0.455838070235818 |
| GATGACCGAATA  | 599.827114548903 | 0.379581958569586 |
| ATGACGAGCCTG  | 599.82865914121  | 0.362194759347068 |
| CTCACTGGTGAC  | 599.832173342995 | 0.436444775177879 |
| GTCACAATAGGA  | 599.838602851901 | 0.60803188989526  |
| GTCATCCAGAAA  | 599.850283281259 | 0.327556348214998 |
| CGTCATTTATAA  | 599.866157759443 | 0.683475625652034 |
| AGTCATGGTGGA  | 599.883357410618 | 0.29803590576389  |
| CTAGGTGGTGAC  | 599.885170204293 | 0.645618715846188 |
| TCATGGGTGACA  | 599.8889313453   | 0.510319964257929 |
| ACGTAATGACG   | 599.898932701693 | 0.649908810776243 |
| GATGAGTTGTCC  | 599.901546571047 | 0.318258701606879 |
| TGAGTACAAATCA | 599.903535546375 | 0.56619302108131  |
| AACACGTGAGTC  | 599.906893151495 | 0.777545263728272 |
| ACGGAGTGAGTC  | 599.906964997394 | 0.461896348377794 |
| ACGTCACCAT    | 599.907244069301 | 0.457413883305651 |
| TCTTCAGACTCA  | 599.915004028062 | 0.327474914695166 |
| GCGTGACATGAC  | 599.91806699429  | 0.433011541159265 |
| GTCATATAGAAC  | 599.918210851114 | 0.537748902165943 |
| GTCATGCAAGAA  | 599.922863096577 | 0.354398087880107 |
| AATTTACAGTCA  | 599.927698863564 | 0.730099082119429 |
| CATGTAAGTGAC  | 599.93311660383  | 0.479733270449608 |
| AGTCACTCCAT   | 599.939256976478 | 0.136435792203828 |
| ACACCTCGTCAT  | 599.940985738767 | 0.365267171590416 |
| CTAGCGGAGTCA  | 599.943735239577 | 0.460057162329094 |
| CGTCCTGATGAC  | 599.950586273678 | 0.589575938914695 |
| GATCGACAGTCA  | 599.965241265287 | 0.550304764832495 |
| GTCACAGTAGAC  | 599.981810326588 | 0.589870574395193 |
| GAGGACGATGAC  | 599.990123895163 | 0.129187014763329 |
| GTCATCGCTCTA  | 599.990742852042 | 0.353752327589406 |
| ACTGTAAGTCAC  | 599.992786383235 | 0.370568880867673 |
| GGTGGTTATGAC  | 599.997048668186 | 0.205868283928324 |
| GTCATCAGCACA  | 599.997174294753 | 0.541870687277903 |
| AGTCACTCTGTA  | 599.999644079351 | 0.357702807291287 |
| AAAACGTGACGC  | 600.003146700195 | 0.682155553334145 |



|               |                  |                   |
|---------------|------------------|-------------------|
| ATGACGGAGAAG  | 600.012050179988 | 0.378197440089588 |
| CTGTCCTGACTC  | 600.036574939849 | 0.319033119457429 |
| ATATGACCTAAT  | 600.047442919014 | 0.297697845475653 |
| GTC CCTTACTCA | 600.054625281516 | 0.356131512804223 |
| CCAAGATGTGAC  | 600.060750002253 | 0.690945564381565 |
| AGTCATGGTATG  | 600.062472392799 | 0.206328868740934 |
| CTTTACATGTCA  | 600.088498058063 | 0.188566557105737 |
| GGTCATTGGTCA  | 600.096518533503 | 0.513550858547372 |
| TAGCGCGAGTCA  | 600.110348815035 | 0.732447174034971 |
| AGTCACTCTCC   | 600.110861385949 | 0.334561645389023 |
| AGGCCTTGTGAT  | 600.113644686229 | 0.326590315842865 |
| GCCAATAATGAC  | 600.118408744931 | 0.180200205782838 |
| AAGTATTAGTCT  | 600.131814680149 | 0.392375477898494 |
| AACTATGATGAC  | 600.135037428451 | 0.432278158352364 |
| AACATTGAATCA  | 600.142128502503 | 0.332059650505226 |
| ATACTGGGTCAT  | 600.173794088784 | 0.402454528849778 |
| TCCCCGGAGTCA  | 600.176358720113 | 0.438914899752906 |
| GGTGCGAATGAC  | 600.184217582969 | 0.40936658741745  |
| CTAATCGCGTCA  | 600.188148852873 | 0.279779063712395 |
| ACAGTTTACTCA  | 600.19344404847  | 0.588468342329032 |
| ATAGAACGTGAC  | 600.200748395358 | 0.445128420043396 |
| GTCATTATACTA  | 600.206685672272 | 0.318659032861947 |
| CTTTTAGTGTCA  | 600.207331290257 | 0.482911385485228 |
| GTCATTTCTGAA  | 600.210733730722 | 0.420475743074496 |
| ACTTGGGAGTCA  | 600.212506821676 | 0.675026667670523 |
| CGATGATGCAAC  | 600.218264530398 | 0.476145673086466 |
| GACTCTTAGTGA  | 600.218593615535 | 0.841718715887819 |
| CAGTCACGCCAG  | 600.220837583073 | 0.484308455538976 |
| GTCATCTACCTA  | 600.221269774622 | 0.24789414306817  |
| ATGTTTGATGAC  | 600.232574370003 | 0.295776933673903 |
| AGAGGTGAATCA  | 600.241098933897 | 0.261075875856511 |
| GAGTCAAACTA   | 600.244001267586 | 0.248937736074043 |
| TACCTGCAGTCA  | 600.247220255012 | 0.448245200484825 |
| AGACTAATAGCA  | 600.252746389789 | 0.549464624221113 |
| TAGTTGACTGAA  | 600.255542323134 | 0.163824814450384 |
| CGTATTGCTCAG  | 600.270512992863 | 1.00515785002317  |
| ACCATGTGACGT  | 600.2718215931   | 0.407591531526674 |
| GTCATCCTGAGA  | 600.276390317448 | 0.382619751701772 |
| GTCATTCAGCGA  | 600.279707754773 | 0.551829252967016 |
| TCACCTACGTCA  | 600.279763803223 | 0.388418419652814 |
| TCGTTGGAGTCA  | 600.296207473908 | 0.229618346987365 |
| ATGACGAGACAC  | 600.311138165256 | 0.43160731964572  |
| ACGAGTCAAAGT  | 600.311247791522 | 0.231002670927702 |
| AGCCCTTACTCA  | 600.351217063206 | 0.348532970537368 |
| CACGTCAGCAGA  | 600.366316648767 | 0.560839975479927 |
| GTCACAGGTCGA  | 600.367962960609 | 0.498510121318126 |
| ATAACTGATGAC  | 600.371401888608 | 0.448020317859477 |
| ACGTCACATTCT  | 600.373618701705 | 0.19787336727871  |
| ACATCTGTGTCA  | 600.381853924913 | 0.548683790461501 |
| GGTGAATATGAC  | 600.387702320072 | 0.376354742086987 |
| CCTTTCTATGAC  | 600.389834848243 | 0.355861059422963 |
| ATCCTATATGAC  | 600.391327459733 | 0.480683982427289 |
| AGTCAGAGTAAAG | 600.403538093021 | 0.130927784320177 |
| ATGACGCCGAAC  | 600.403884015081 | 0.377435535330709 |

|              |                  |                   |
|--------------|------------------|-------------------|
| GTCATAAGGAAA | 600.417564726601 | 0.313878105884552 |
| AGGTCACAGTCA | 600.431221535262 | 0.590155936020376 |
| CTAAGATGTGAC | 600.433491158176 | 0.668706836209653 |
| GTCATATCGAGA | 600.440920114466 | 0.55184266178405  |
| AGCTACTAGTCA | 600.444189511296 | 0.311368258211116 |
| CATGTCACGTCA | 600.446225171522 | 0.262612171058043 |
| GGATGACTTTTA | 600.465113981341 | 0.611051049745545 |
| AGGTGGAATGAC | 600.4672255545   | 0.354205085034192 |
| GTCACTCAGTGA | 600.488377782518 | 0.742675366957334 |
| TATTAGTACTCA | 600.49293843078  | 0.627623522832266 |
| ATGTCATTATAA | 600.49431202536  | 0.576945947767245 |
| TCCTTAGACTCA | 600.49667749801  | 0.248925602639425 |
| CTCAACGCGTCA | 600.497073217137 | 0.471606933351202 |
| AGGCGGACTCAT | 600.50271648235  | 0.46315239476046  |
| CTAGAGTAGTCA | 600.508812458586 | 0.486363768551311 |
| GTCATCAAGTTA | 600.512212345548 | 0.399288855627849 |
| GATGACGCCGCA | 600.524002726999 | 0.528377263155943 |
| ATGACATTTATC | 600.525053539365 | 0.313056473862867 |
| GAGCGTGACTGC | 600.537558850224 | 0.705652628296439 |
| TCATAAGTATGA | 600.543320492414 | 0.724647842666729 |
| ACGTCACAGGCT | 600.551232984193 | 0.267446217836419 |
| AACGTGTAGTCA | 600.556407031159 | 0.615745845658306 |
| TAAGCACAGTCA | 600.55650789725  | 0.178790825187738 |
| ACTCATACATTG | 600.564206594864 | 0.364088396659995 |
| AACATAGATGAC | 600.569839491344 | 0.237008051926506 |
| GAGTCAGGAATA | 600.575854954964 | 0.164819755228917 |
| CAACCCTATGAC | 600.586327042408 | 0.26973901065946  |
| CGCCAGATGACG | 600.59445124243  | 0.582491746422337 |
| ACGGCGTGAGTC | 600.604539541681 | 0.351782263739342 |
| GTCACCAATGTA | 600.606627171177 | 0.495974792963159 |
| GAGCATTGCTCA | 600.63322174037  | 0.426277377008951 |
| TATTATCTGTCA | 600.638198035935 | 0.502827169417979 |
| TGTCACCGTTAA | 600.644439765052 | 0.483289779698458 |
| AGTCACGGTCCA | 600.648648670397 | 0.650357480172139 |
| ATAATTTGGTCA | 600.665971396136 | 0.724169119380572 |
| GTCATCAAGGAC | 600.669961303585 | 0.490651005116679 |
| AATTGCGTGTCA | 600.679117928642 | 0.539376360029994 |
| GTAATTAAGTCA | 600.700108592165 | 0.334533210605251 |
| AGGTCGGATGAC | 600.715898541487 | 0.262751676438869 |
| TCCAATTGCTCA | 600.739006275643 | 0.440457148031498 |
| CGTCATTTAGGA | 600.742618924502 | 0.401867405809699 |
| AATCTGGGTCAT | 600.746299644105 | 0.20602954610827  |
| AATTCGTGTGAC | 600.753110571724 | 0.499876557581483 |
| ATGACAAGACAA | 600.753533410168 | 0.260246750911937 |
| CCATAAGTGTCA | 600.754343554993 | 0.302923500127282 |
| GTCATTTATGTA | 600.758735160352 | 0.401554439156448 |
| GCTCCGACTCAC | 600.763829543721 | 0.320451320861377 |
| GTC AAGGTGAC | 600.770646167377 | 0.340963046660291 |
| GTCACAGTCGAA | 600.773888003721 | 0.380749099245254 |
| CGAGTCAAAGAC | 600.787826432663 | 0.932559214734295 |
| CAGTGTACGCA  | 600.790850937848 | 0.790611973014304 |
| GTCATCGGCATA | 600.79734003723  | 0.707553165655113 |
| GTTACTGACACA | 600.798700450037 | 0.477396898618046 |
| AGACCTGTGACA | 600.799685232985 | 0.543037811819411 |

|               |                  |                   |
|---------------|------------------|-------------------|
| TGTGTCAACGAA  | 600.808773214727 | 0.331614420440181 |
| ATCGATAATGAC  | 600.812790119096 | 0.558921904744877 |
| TGAAGGGAGTCA  | 600.813780983561 | 0.195182479322702 |
| CACAATGTGACG  | 600.819755352894 | 0.545557989700877 |
| GATTTTCGTCAGA | 600.82744237262  | 0.423451165031595 |
| CAGACTAAGTCA  | 600.838123293764 | 0.527255162982624 |
| ACGTCACCCATC  | 600.839833757021 | 0.127416373845544 |
| CCGTCACGTCAC  | 600.841097969994 | 0.241125707692474 |
| CTACTTACGTCA  | 600.842693403787 | 0.285729855339975 |
| AATGAGTATGAT  | 600.853489036347 | 0.241189766666596 |
| CTCGATCCGTCA  | 600.859375148167 | 0.469760055619004 |
| CTGGTCGGTGAC  | 600.881203773175 | 0.515658808909451 |
| AGTCACGGTTAC  | 600.881459488172 | 0.431229246532124 |
| GTAAGAGATGAC  | 600.881835977434 | 0.579159033950516 |
| TCATGGGTGTCA  | 600.883823693488 | 0.620488984230731 |
| ACATAGTGACAC  | 600.88883649879  | 0.579039392903786 |
| TGACGTAATAA   | 600.894770596146 | 0.384806185417996 |
| GATGACTTGCCA  | 600.906564003705 | 0.413271086531499 |
| GATAGGTGACAC  | 600.916298970392 | 0.347335060303969 |
| ACATCTGAATCA  | 600.916411861921 | 0.570742516968571 |
| AGTCAGAAGAAT  | 600.927237222579 | 0.296850608471036 |
| GAGTAAGTGTCA  | 600.931075123107 | 0.499521514967978 |
| TGACTTATGAAA  | 600.951646771338 | 0.91617794455884  |
| AGTCAGAAGTCA  | 600.958782249359 | 0.366275451796206 |
| ACACAAGATGAC  | 600.960169494066 | 0.472294322866659 |
| ACGCTCTGACGTG | 600.961490971672 | 0.529534269997932 |
| TGAGCAATGCAA  | 600.969748723971 | 0.313509483577964 |
| ATGACGACTTCG  | 600.979784104197 | 0.507994207892833 |
| ACGTCACCTGG   | 600.994944175108 | 0.290019311214982 |
| TATCCTGTGTCA  | 601.006790733176 | 0.291357628812944 |
| TGACTGCAATCA  | 601.008207381124 | 0.477804688561638 |
| GTCATCAACGAC  | 601.009078979795 | 0.505299805944912 |
| ACTCATTACGTG  | 601.010971950128 | 0.260406866765565 |
| ACTCATAGATAA  | 601.045622645892 | 0.698548281400197 |
| CGTCTGACGTGA  | 601.052502918794 | 0.867335693728168 |
| CCACGAAGTGAC  | 601.055680388331 | 0.564978026008009 |
| AATCACGGTGAC  | 601.058188048239 | 0.349194932311529 |
| ACACTATGTGAC  | 601.062219495771 | 0.356656214582237 |
| ATGACAATGCCG  | 601.068544851432 | 0.324067984661765 |
| ATGACGTCGCAT  | 601.07822797757  | 0.357379963415698 |
| GTAATGTGTGAC  | 601.094612044232 | 0.609517899313589 |
| AGTCAGACCTCG  | 601.095093315716 | 0.44206089324232  |
| AAGTTGGATGAC  | 601.097485867908 | 0.214258544733012 |
| GTCATTGCAACA  | 601.100497972206 | 0.288386581664089 |
| TGACCAATGAA   | 601.101383833707 | 0.463546965331833 |
| CTAACGGATGAC  | 601.122757388009 | 0.532014038267735 |
| AGCCAGTGAGTC  | 601.152795255517 | 0.333505408452108 |
| GTCACACCCAAA  | 601.15958200654  | 0.481457037341143 |
| CACGGCGACTCA  | 601.173553390059 | 0.467054588181021 |
| GTCATCAGATAA  | 601.182489388221 | 0.289512161839078 |
| ATGACAATGATC  | 601.183229299981 | 0.348672260515732 |
| CATGCATGACGA  | 601.185014369274 | 0.556113583430589 |
| CTTATTTGGTCA  | 601.190824045201 | 0.5898498621009   |
| CAGACCGTGACG  | 601.191557227962 | 0.575244317003344 |

|               |                  |                   |
|---------------|------------------|-------------------|
| GGTCCGGATGAC  | 601.193783113363 | 0.201460364207186 |
| GACGGATGACCA  | 601.201374377591 | 0.3665206189248   |
| ATGACGACGCTA  | 601.2198555555   | 0.501754609179789 |
| CTTGACAAGTCA  | 601.226484830822 | 0.717449795306017 |
| GTCATCTAGGAC  | 601.229105206935 | 0.843875758819692 |
| GCAGCTGACACA  | 601.246654922371 | 0.511608300615564 |
| CAGACCGACTCA  | 601.248114188972 | 0.419337017277309 |
| CAAGATATGTCA  | 601.260387498234 | 0.517405840146261 |
| GTAATAGTAATA  | 601.275496033556 | 0.243654576781121 |
| ATGAGTACCAAC  | 601.277820904097 | 0.414689317380096 |
| CGACTGAATGAC  | 601.279243448077 | 0.345283203511697 |
| GTCACGTATTCA  | 601.289121054584 | 0.68987396520629  |
| GTCACATCTTGA  | 601.304218981368 | 0.618804592334632 |
| CCACAAATGACA  | 601.309131903553 | 0.207840519534431 |
| TATGCCTAGTCA  | 601.317570762926 | 0.277925398059128 |
| AATCTTAGTGAC  | 601.318137235738 | 0.469187353438979 |
| GTCATCAACACA  | 601.323309521045 | 0.443549767638061 |
| GAGTCAATGCTA  | 601.324355038571 | 0.42365349042479  |
| AACAAGCAGTCA  | 601.325675435952 | 0.522459992103847 |
| CTGAAC TTGTCA | 601.330696294899 | 0.61138494259081  |
| GACTTTAATGAC  | 601.34061559815  | 0.419897484856506 |
| ACCGAGATGACA  | 601.342427469939 | 0.578171006624525 |
| CATGACTTGTA   | 601.342794985422 | 0.318645304333196 |
| AAACTCGGTCAT  | 601.347450933178 | 0.378845488804492 |
| GTCATCCACATA  | 601.355373959796 | 0.527126801554516 |
| CACTGAAATGAC  | 601.357363249391 | 0.539920455194528 |
| AATAGTGACCAA  | 601.358209506326 | 0.372765869932082 |
| TAATTCATGACA  | 601.360509974566 | 0.596919256558303 |
| GGGTTACATCAC  | 601.365450316097 | 0.354302322194191 |
| ATTGAGTAATA   | 601.366901426722 | 0.421134527325723 |
| ATGAGAAATGAC  | 601.367700132604 | 0.402563631456058 |
| CAACAAAATGAC  | 601.372280591528 | 0.69319972400055  |
| CATGATGTAACC  | 601.37805552322  | 0.77785512701719  |
| GTCACACGTCTA  | 601.382027100269 | 0.446594960173297 |
| CGCGAGCGTGAC  | 601.390287767472 | 0.630149743012345 |
| GTATGATGTGAC  | 601.413238412874 | 0.40662361083961  |
| GCTGCATCGTCA  | 601.41985862549  | 0.690715223424994 |
| AAGATAAATGAC  | 601.432783627987 | 0.20179919808449  |
| TGACTCTCGTAA  | 601.438332420883 | 0.441716789137201 |
| GAATACGTAATC  | 601.441718811961 | 0.434139519738349 |
| GTGACACTGAAA  | 601.449187773959 | 0.564448019459026 |
| GTAATCACGTCA  | 601.455151773932 | 0.525925495505497 |
| GATCGTGATGAC  | 601.455477924703 | 0.335870297563124 |
| ACTGCTGAGTAA  | 601.459638074542 | 0.398771777531234 |
| GACTAATATCGA  | 601.46398676417  | 0.596107850411183 |
| AAGTAGTAGTCA  | 601.464131577569 | 0.166452796798512 |
| CTAGCAGAGTCA  | 601.475316118667 | 0.413120378793722 |
| GACTGTGGTGAC  | 601.498904415296 | 0.401202636187355 |
| AACTACGGTGAC  | 601.502687565387 | 0.444989033583749 |
| ACACAACGTCAT  | 601.51568573888  | 0.307011812618628 |
| GTCATACGGAAA  | 601.531028167442 | 0.410201293990561 |
| CCGGCTTACTCA  | 601.531523980022 | 0.365979139892864 |
| GCCTAGTGTGAC  | 601.536630271405 | 0.468847379985695 |
| GATATCGGTGAC  | 601.537125877491 | 0.47884738668182  |

|               |                  |                   |
|---------------|------------------|-------------------|
| GAACCTGTGTCA  | 601.540731200589 | 0.53166987811108  |
| ACTCACTAGTCA  | 601.542730887233 | 0.379616764926021 |
| AAACTGATGACG  | 601.555852801265 | 0.255181448675769 |
| CGACCTGACACA  | 601.562877547691 | 0.210319545906771 |
| TGACGCAGGGCA  | 601.572056953823 | 0.496556305038741 |
| GTGACACTGCAA  | 601.592176906795 | 0.260270081147797 |
| AATACTGACACA  | 601.601051600346 | 0.436514799054896 |
| CTTTGAGATGAC  | 601.627314184446 | 0.518455391397796 |
| ATGAGTTGTACA  | 601.641801057481 | 0.393918334659656 |
| ATGACGAGACAT  | 601.667692264063 | 0.273031147846776 |
| CGAACTCTGACA  | 601.668612233236 | 0.771686304451066 |
| AAGCATGAATCA  | 601.673751965272 | 0.373601069280228 |
| GACTCGTGTGAC  | 601.675112760268 | 0.630929870215665 |
| TCGAGCGAGTCA  | 601.707629400258 | 0.288743262932857 |
| ACTGACAGTGAC  | 601.71328125235  | 0.515591864381593 |
| GGTGTGGAGTCA  | 601.721989670247 | 0.145458300802588 |
| AGACTCGTGACT  | 601.722487951613 | 0.417321814234363 |
| GAGTCAGGACTA  | 601.7310068116   | 0.287997472930617 |
| ATTATGAATGAC  | 601.737400121152 | 0.389123027282531 |
| TCGGTCGCGTCA  | 601.739225350034 | 0.814775522393971 |
| AATTAACGTCAT  | 601.740034199272 | 0.241554366906    |
| GGTCACGAGTCA  | 601.743900424279 | 0.439629603692258 |
| CAAGCGCATGAC  | 601.745439545934 | 0.415741638678749 |
| CGACCTGTCA    | 601.754673422011 | 0.523061079308241 |
| CGTCATTATGAG  | 601.760515548333 | 0.402479624552791 |
| ATGACGCGCTAG  | 601.766735804369 | 0.369139151899231 |
| ATGAAATACTCA  | 601.773659254835 | 0.502649572009329 |
| CCATGTGGTGAC  | 601.774296717194 | 0.745194690064568 |
| CCTGTCACGTCA  | 601.783470823243 | 0.552688234187574 |
| GTCACCGAGGAC  | 601.796575400312 | 0.356650737163202 |
| ATAGCCGAGTCA  | 601.798565588145 | 0.644087594994126 |
| TCCACCCAGTCA  | 601.804871050581 | 0.281263697783357 |
| ATGACAGCTAAA  | 601.820357220642 | 0.533992252008767 |
| GGATTATTCATA  | 601.823319465815 | 0.483914710180204 |
| CAGTCAGTGTC   | 601.837389813138 | 0.574897411430071 |
| GTAGGAAATGAC  | 601.837937066127 | 0.335006676723006 |
| AAGGCCTGACTC  | 601.843399350595 | 0.482007884986715 |
| ATGACTTCGAAG  | 601.852351801835 | 0.67927964969113  |
| AGTCGTGGTCAT  | 601.855552763844 | 0.143593675362522 |
| ACGTGTCTGTCA  | 601.859137328789 | 0.163518154317814 |
| CTACGAGATGAC  | 601.866372865732 | 0.421218919357702 |
| TCCTAAGACTAA  | 601.875897757773 | 0.549427072022086 |
| TGAGTAAACGAA  | 601.893137121716 | 0.434922588137322 |
| TCTGAAATGACA  | 601.910836260089 | 0.404650416541533 |
| ATGAGTATGTGCG | 601.9128736553   | 0.296056451293486 |
| ACGCTATTAGTC  | 601.927636469054 | 0.391071512244872 |
| ATGACGGTATTC  | 601.932732149378 | 0.531810887991347 |
| CATCTTGACTGA  | 601.941446404355 | 0.562685708963932 |
| ACGTCGTGACAC  | 601.947704738654 | 0.464963672519988 |
| TAATACGCGTCA  | 601.956747273752 | 0.529635818660985 |
| CATATCGTCACG  | 601.95715064003  | 0.692183423717897 |
| ATGACACGGCAA  | 601.957588066144 | 0.437811757731707 |
| CATCGTGGGTCA  | 601.958947755117 | 0.751325757470686 |
| AATATATGTGAC  | 601.965709273638 | 0.383355165571704 |

|               |                  |                   |
|---------------|------------------|-------------------|
| CGTCATCTAAAC  | 601.984264000326 | 0.181829828365163 |
| GACGTAATGACA  | 601.990236187754 | 0.324592039235218 |
| GCTACTGTGTCA  | 601.993602039715 | 0.672366834386984 |
| GACCCTCAGTCA  | 602.007965611348 | 0.490389639043441 |
| ATGACGTGTAC   | 602.029053362378 | 0.404817566938852 |
| GTCATACGAACA  | 602.034708560493 | 0.69019534707977  |
| GGTGACCCGTCA  | 602.037627105335 | 0.535186576666993 |
| ACCTACCAGTCA  | 602.037759130082 | 0.389076982050488 |
| AGGCATCATGAC  | 602.047162478997 | 0.428733957919759 |
| GTACAACTCATA  | 602.048272486728 | 0.439527007927208 |
| GAATCTGATGAC  | 602.051450378533 | 0.572767727197013 |
| AACCGTGTGACA  | 602.055613491456 | 0.329292964406985 |
| GGTCCCCTCATA  | 602.073335700483 | 0.221126776422591 |
| GTCATTTGCGAA  | 602.10363896526  | 0.321494635771088 |
| ATGGATTTGTCA  | 602.106494299104 | 0.439116446579284 |
| ACGAGGTGACAC  | 602.121576580221 | 0.315352190572934 |
| GTCATATGCTTA  | 602.128498600595 | 0.512112480270808 |
| CTTAAGGTGACA  | 602.131467187103 | 0.476311206396324 |
| ATGTAACTGTCA  | 602.134891655267 | 0.361909343102364 |
| GTCATTCGAGAA  | 602.139919097833 | 0.681190310316403 |
| ACTGATTAGTCT  | 602.16058185202  | 0.491574907974327 |
| AAGAGTGAGTCT  | 602.164845214499 | 0.194577330627666 |
| GCTTATAATGAC  | 602.168438949856 | 0.317349302404623 |
| ACAAGGTGTGAC  | 602.189063943247 | 0.374807471039404 |
| AGAGATTTGTCA  | 602.22141004092  | 0.475206794030805 |
| CTGGAGCAGTCA  | 602.237028888333 | 0.463375903836251 |
| AGTCATGGTCCA  | 602.251621351169 | 0.537714440794718 |
| ACTCATCACTCA  | 602.261009389466 | 0.198975252421764 |
| CTCCGAGGAGTC  | 602.26355799775  | 0.550055683608106 |
| AAGCCCCGATGAC | 602.278234680998 | 0.273177339113163 |
| AGTCACGCGACC  | 602.282349860642 | 0.209711668856206 |
| GGTCATCGCTGA  | 602.298606784869 | 0.534321162750088 |
| CGGAGAGATGAC  | 602.322425321141 | 0.405411479720511 |
| AGCCGCTGACTG  | 602.330325940438 | 0.516031717507994 |
| AGAGTCAAAGTC  | 602.33837742928  | 0.673701331913939 |
| TTACTGTGACAA  | 602.374110885121 | 0.464210287689136 |
| TGAGTCTGAAAA  | 602.393680422233 | 0.29606218941964  |
| TGAAGTGACCCA  | 602.396438428484 | 0.707783226352415 |
| TCATTGACTGAA  | 602.399944418782 | 0.378541920524084 |
| GTCATCTATCTA  | 602.400176623546 | 0.360965566210964 |
| CGGCCATGTAC   | 602.406161470541 | 0.3640085153462   |
| GCCGCGTCACTA  | 602.410538635015 | 0.532255182526767 |
| ACTCATACCGAG  | 602.41731165386  | 0.466824117162998 |
| ATGTCATTATGG  | 602.425096800591 | 0.566008408411285 |
| AGAGTCAAAGCG  | 602.440258172245 | 0.189485633432442 |
| GACCGAAATGAC  | 602.446113158918 | 0.418441098093852 |
| TGACTCCAGCA   | 602.459751111522 | 0.387438894345935 |
| GTCATAGGTAGA  | 602.482461193793 | 0.161487607103594 |
| AGTCAGACATCA  | 602.486356559722 | 0.52520014822591  |
| GAGTCAATAAGC  | 602.487444721003 | 0.4064192524306   |
| GTAGATTGTGAC  | 602.494243993865 | 0.488874366358885 |
| GTCATTTCCGAC  | 602.508444043481 | 0.153460929080979 |
| GTATGGAATGAC  | 602.514828638793 | 0.496325714371853 |
| ATGCCGTGACTA  | 602.51926142726  | 0.457701990039722 |

|              |                  |                   |
|--------------|------------------|-------------------|
| GCCGGCGAGTCA | 602.529357853424 | 0.459984457942988 |
| CAGGCTTATGAC | 602.530889555847 | 0.624215742785792 |
| GGCAGATATGAC | 602.564951187756 | 0.587662050203498 |
| AACGAGTGACGT | 602.566349834961 | 0.281653531613668 |
| CCCGTAAATGAC | 602.566907637982 | 0.226405607645469 |
| ACCGACTATGAC | 602.579280697379 | 0.362738580790172 |
| ACCATTATGTCA | 602.591921063354 | 0.402224257345374 |
| GTCATTGGGTGA | 602.596002753273 | 0.431786337275879 |
| GAGTCAAGCCAC | 602.602526365614 | 0.616714214784672 |
| ATGACGATGAGC | 602.60274843082  | 0.27316188803919  |
| AAATGCCGTCAT | 602.607296262188 | 0.355414362041176 |
| AATCATTGACTC | 602.613109700866 | 0.396894147057477 |
| CGAACGGTGACA | 602.614854368384 | 0.420075241139695 |
| CGTCACGCGTGA | 602.617692324457 | 0.332121327328794 |
| CCAGCGTATGAC | 602.630825039775 | 0.478220106738555 |
| AAAAGTCTGACT | 602.634316350096 | 0.487164243499682 |
| GAGTCAGGGGTA | 602.636194849399 | 0.200598763519405 |
| CGTAATACGTCA | 602.652179954445 | 0.600960990718559 |
| TCAGTCAATAGA | 602.657445739145 | 0.20469621648937  |
| GGATGCGATGAC | 602.661186532155 | 0.322662935204548 |
| CGTCACCGTCAC | 602.673085382148 | 0.259218637169967 |
| CTTCAGCATGAC | 602.681083368067 | 0.382361841984252 |
| GACTAATCCTCA | 602.686108653726 | 0.808703773578271 |
| ACGTCACCAAGT | 602.689513564734 | 0.517541932882588 |
| AATGGCTCGTCA | 602.691522288958 | 0.320561628567769 |
| CATCCGGATGAC | 602.691908501314 | 0.544198495120368 |
| GTCACCATAGCA | 602.696483559317 | 0.575954879593549 |
| ACTGCTTATGAC | 602.698635205092 | 0.421467586047314 |
| CGTCACAGAGCA | 602.699967985899 | 0.529097055838731 |
| CAGTAATTACTC | 602.736710970297 | 0.492099420345775 |
| CTTCTAAGTGAC | 602.749766017942 | 0.45335942187318  |
| GAGTCAAACCTA | 602.759052139266 | 0.197207811277833 |
| GACCTTTGACTC | 602.761020275048 | 0.390954756368039 |
| TCTGCCGAGTCA | 602.783159253515 | 0.670802955034429 |
| CGCAGATATGAC | 602.799926557595 | 0.434743505491274 |
| CGTCCAAATGAC | 602.8075854468   | 0.378926419146033 |
| CGATGCCTATGA | 602.816457562009 | 0.978717407423648 |
| GTCACCTAACAA | 602.817636197162 | 0.398534912564923 |
| GAGTCAATAATC | 602.835213005424 | 0.328067468092049 |
| CCACTATATGAC | 602.835372597603 | 0.554267313943283 |
| TCAGTCAAAGCA | 602.840567574727 | 0.456329058252693 |
| AGATTACTGACT | 602.844012581974 | 0.264403109959011 |
| AATGTTACATCA | 602.845713469364 | 0.446137395121525 |
| CCGTGAGATGAC | 602.845761748481 | 0.601931081125794 |
| GCCCTCGATGAC | 602.85052982806  | 0.446752784976301 |
| AAATTGTATGAC | 602.856795550575 | 0.577064892784425 |
| CAACCCTAGTCA | 602.861457754178 | 0.371165936325135 |
| ACGCCTCGTCAT | 602.862112806783 | 0.451683470424739 |
| GTCATGAAATCA | 602.868299221787 | 0.627472844497047 |
| AGCAGACTCACC | 602.870485980767 | 0.350632555117632 |
| TGACAGATAGCA | 602.883214601271 | 0.408935367154018 |
| CTATCTGAATCA | 602.888945951241 | 0.288393359362437 |
| GAGGGTGATGAC | 602.89460151587  | 0.328630829796497 |
| CACTGAGTCTAA | 602.899668177304 | 0.692244470665738 |

|               |                  |                   |
|---------------|------------------|-------------------|
| GTCATTTAGCAC  | 602.911889587249 | 0.664185865485993 |
| ACAGACTTGTC   | 602.932041511035 | 0.482520160573832 |
| CCCATGGAGTCA  | 602.935688575558 | 0.53911528783161  |
| GTCATCGGTACA  | 602.940320214589 | 0.524763256647966 |
| AGTGCCTGACAC  | 602.94189999867  | 0.463030322453262 |
| CAAGGATTACTC  | 602.942557287631 | 0.526490307213943 |
| GTTAATGCATA   | 602.947512936741 | 0.336563157346324 |
| CTGGCCGATGAC  | 602.964360597646 | 0.279652754950032 |
| TGACCAATCCAA  | 602.97079158593  | 0.360143694762637 |
| GACGCTCAGTCA  | 602.975880251438 | 1.01614636766985  |
| CTCACAATATGA  | 602.980342316692 | 0.53511902682199  |
| GTCACAAAAGCA  | 603.00194509274  | 0.642190217683791 |
| CCTATGGCGTCA  | 603.006563669561 | 0.555636844851296 |
| ACGGCGGATGAC  | 603.006656033717 | 0.569239866954453 |
| CCTGGTGACCCA  | 603.017710388378 | 0.567497813514317 |
| CCTAACCGTCA   | 603.065126578098 | 0.563955092808049 |
| AAGTACGATGAC  | 603.074138953058 | 0.257310747539841 |
| TGAATCACGCCA  | 603.104395555353 | 0.635732682130853 |
| GTCATGAATTCA  | 603.11446085458  | 0.59150843684334  |
| TCCCAAGACTCA  | 603.134226672162 | 0.509971019129167 |
| GTCATCAGTGGA  | 603.135813731445 | 0.239230284339404 |
| CGCATCTATGAC  | 603.143812080135 | 0.691427630699688 |
| TGACACAAAAGCA | 603.148184475932 | 0.475953507491318 |
| CGTCACTGACAG  | 603.149817237522 | 0.314649375904964 |
| CAAGGATCAGTC  | 603.159253236119 | 0.69124962137536  |
| GTCACTCGGCGA  | 603.165443955277 | 0.598606391703932 |
| AACTTGACTAAA  | 603.171071683203 | 0.428072236337794 |
| TCAGTCAACTGA  | 603.190062223657 | 0.396247196222461 |
| TAGCTCGAGTCA  | 603.200255829423 | 0.644141162491813 |
| CCAATATTAGTC  | 603.201083192675 | 0.545155074693626 |
| CACGTCAACGTG  | 603.20587805358  | 0.823021876750751 |
| GTTATTATGTCA  | 603.208488164499 | 0.542044777217018 |
| AGACTCGAGTCA  | 603.221868715475 | 0.481723564493345 |
| AAGTATCCGTCA  | 603.236571682553 | 0.738331512544508 |
| GATTCACTGTA   | 603.248620964643 | 0.551530143878503 |
| TCATCTTGGTCA  | 603.255962079786 | 0.336260391831759 |
| ACACGTCGTCAT  | 603.263503132043 | 0.193921214042693 |
| GTCACATCGACA  | 603.270133594325 | 0.645242724892471 |
| CTTACAATATGA  | 603.274123934354 | 0.623738160623073 |
| ATTCCGATGACG  | 603.275029744263 | 0.439360519448662 |
| AGTACCCCGGA   | 603.278369605004 | 0.382466839948786 |
| TATGACCTCATA  | 603.280001213456 | 0.202210661514018 |
| GGTCTGACTGA   | 603.281809416473 | 0.508042833515665 |
| CCGAGCGATGAC  | 603.281820518392 | 0.57167203940047  |
| CTGACTTGTAC   | 603.28696535427  | 0.257680811276464 |
| GCCGGGAATGAC  | 603.300098221666 | 0.475049355434517 |
| AGTCACTCCAAG  | 603.33425896171  | 0.566783025307084 |
| ACAGCTGTGACA  | 603.33715910393  | 0.553788105584982 |
| CGAAACTCGTCA  | 603.337386814928 | 0.625427678252436 |
| GTGTCAGTCTTA  | 603.337899215192 | 0.41401065074749  |
| GTCATAAAGGAA  | 603.351767300411 | 0.394368934529453 |
| CTCGCAATGACA  | 603.352110723299 | 0.210840280035455 |
| CGTCACTGTTGA  | 603.358107561639 | 0.581866549473307 |
| CCACTGTGAC    | 603.360685081416 | 0.411229192452589 |



|              |                  |                    |
|--------------|------------------|--------------------|
| ATAGTCAGTTGC | 603.363856708929 | 0.544931227357158  |
| CATCCCAGTCA  | 603.3667948878   | 0.342342639288252  |
| GTCATCGAGCAA | 603.373616684852 | 0.508542211563569  |
| AATACCAGTCAG | 603.379011366926 | 0.370738057510463  |
| ATTGCGTAACAC | 603.384125345389 | 0.418822845815299  |
| GTATGTACGTCA | 603.401941236714 | 0.476634376378612  |
| ATTCATGACAC  | 603.403105554844 | 0.371231084945849  |
| GTTACTCAGTAA | 603.409010305685 | 0.455551758926194  |
| CAAATAGGTGAC | 603.419309164886 | 0.610285687428665  |
| CCCACCTATGAC | 603.453277747355 | 0.408474871519924  |
| TGACACCGTAAA | 603.465028883234 | 0.67083151281295   |
| TCAATACGATGA | 603.474336405981 | 0.755095864821912  |
| CAAGGTGTGACG | 603.479678048732 | 0.351915213835746  |
| GAAGTTATGAC  | 603.498366103976 | 0.375074916992837  |
| CCTGTGTGTGAC | 603.508161246974 | 0.453373228674011  |
| AATTCGTAGTCA | 603.527443507062 | 0.497513549442706  |
| ATGAGCAACACG | 603.532201134859 | 0.361041073837488  |
| CGCGTTTCGTCA | 603.551462703173 | 0.456460036563491  |
| GTGACCCAGTCA | 603.553465390301 | 0.769771383122357  |
| AAATGTGTGACG | 603.556597909893 | 0.0854747789218235 |
| TCGTCACGTGCA | 603.568949884042 | 0.508822169887511  |
| ACTTGATAGTCA | 603.575386942373 | 0.545905289433024  |
| ATATCGTACTA  | 603.580055246865 | 0.411993719314166  |
| GTCATTTAGAC  | 603.585012083167 | 0.318227579209658  |
| GAATCAAATGAC | 603.597444920495 | 0.293840234281257  |
| AAACCTGTCACA | 603.627591548402 | 0.50794159654486   |
| TCTATCCAGTCA | 603.62899020455  | 0.253685417862368  |
| GTGAGTCGGATA | 603.644980373934 | 0.232606621788528  |
| AATATTAAGTCA | 603.656411213532 | 0.379948221717014  |
| GCTGACTGTGAC | 603.659854264765 | 0.70198179832251   |
| GTCATCCAACAC | 603.66095623857  | 0.47635149547897   |
| GTTACTCAACCA | 603.695620355534 | 0.486525940375733  |
| GTCCTGTATGA  | 603.703556982545 | 0.941025958461789  |
| CAGAATTGCTCA | 603.704891687254 | 0.764082532392069  |
| CACGGCGATGAC | 603.718722042026 | 0.665953961908488  |
| TCAGCGTGACAA | 603.727058155618 | 0.481510866409189  |
| CATCCGGGTGAC | 603.728624620266 | 0.633189121960331  |
| CCGGTTTGGTCA | 603.729770462292 | 0.533583894463412  |
| AGACTACTCTG  | 603.743710417432 | 0.30164076288419   |
| ATAACGTCACTC | 603.747153340775 | 0.485147200665676  |
| ACTCTCGTGACT | 603.753102735143 | 0.14667506299012   |
| CTAGTCACGACC | 603.760154022043 | 0.180738312375786  |
| GGTCATCCGCGA | 603.760884826197 | 0.484282863087328  |
| CTATGGGAGTCA | 603.768095215947 | 0.34205797947159   |
| AGACTAATCGGC | 603.781411592412 | 0.493213044943776  |
| GTCATCACTTAA | 603.784475592692 | 0.531786858116792  |
| ACTCATTCTGGG | 603.791935531813 | 0.295015492994513  |
| GTCACCATATAA | 603.802767446697 | 0.475578893990421  |
| ACTCATCTATGA | 603.816686090925 | 0.244560874979955  |
| GTACGGGATGAC | 603.825475491718 | 0.0786404175106935 |
| AGGGATTATGAC | 603.844470140433 | 0.273091947939344  |
| GGAAAATATGAC | 603.847988978024 | 0.395567975228555  |
| GAGTTATATGAC | 603.857135235818 | 0.484847265787612  |
| ACTCTCTGTCAT | 603.871042276552 | 0.419153016768299  |

|              |                  |                   |
|--------------|------------------|-------------------|
| ACAGCATGACGC | 603.871388664638 | 0.498568892000108 |
| ACAAAATTGTCA | 603.876425948861 | 0.477599626625271 |
| ACTAGGTTGACT | 603.884049942763 | 0.791442078337043 |
| TATAGTACGTCA | 603.911790273167 | 0.381255494755971 |
| AAGTTAGACTCA | 603.914578023791 | 0.377840415893887 |
| CCGTTAGCGTCA | 603.916557490752 | 0.399530858382939 |
| GCGTCTGATTCA | 603.91956895483  | 0.361142832187616 |
| CCAATTAATGAC | 603.929024857572 | 0.633763566960643 |
| GTAATCGTCAGA | 603.931909423431 | 0.553860884227472 |
| CACACTAATGAC | 603.931970269225 | 0.3850271384851   |
| CTTGATGACCA  | 603.943625820031 | 0.331008694200787 |
| ACTGTGTCAGCG | 603.949237961984 | 0.402722028107074 |
| GGAAATTGCTCA | 603.953936185229 | 0.70997128382238  |
| GTGCCGTATCA  | 603.955268275072 | 0.481801405952903 |
| CACGTCAGAGGA | 603.957275721731 | 0.350529325671729 |
| AGGTTTGTGTCA | 603.967283624459 | 0.39122187608513  |
| AATGATAATGAC | 603.979613739522 | 0.521279178892347 |
| ACATTCTAGTCA | 603.98596561524  | 0.534383824027416 |
| CGTGATTTGTCA | 603.999020070689 | 0.674565508214268 |
| AGTCACGCTTGA | 603.99936233301  | 0.354831275628394 |
| CGTCATTTAGGC | 604.007545818324 | 0.288649645558662 |
| CTTCCGAATGAC | 604.008500022785 | 0.402042332978609 |
| TATGTAATGACA | 604.011346935321 | 0.669715601910269 |
| ACGCTGCAGTCA | 604.012709028062 | 0.663044583679195 |
| GTCATAACCTCA | 604.025287417907 | 0.510592233941401 |
| GGCGTTGTGTCA | 604.027479406356 | 0.415568197340205 |
| CGTGTAAGTCAC | 604.038020230363 | 0.509664423160219 |
| GTCATGCTAGCA | 604.043477324111 | 0.387984266101422 |
| GAGTCAGGGAGA | 604.045262014453 | 0.199036703346862 |
| TCTTATATGTCA | 604.059930621246 | 0.404692108862885 |
| AGTCACGACTTG | 604.062932116316 | 0.392885877031081 |
| TCCACTACGTCA | 604.06640686511  | 0.427217821028679 |
| GGCTACCAGTCA | 604.066724824898 | 0.483523892799755 |
| GTTCTGTGTCA  | 604.067829204454 | 0.614816787732252 |
| CCTGAGTAGTCA | 604.074981571465 | 0.671134595984513 |
| ATGACGTCGTTA | 604.076319070027 | 0.459196673464389 |
| AGAGTCAAATC  | 604.076626664454 | 0.464922189795637 |
| CCTGGGTGTGAC | 604.082306825583 | 0.674990663239854 |
| ACCAGTGACGTG | 604.08921703485  | 0.528260300663717 |
| CCGTCATCGGAA | 604.098779964066 | 0.501037497995102 |
| AGACTAATTAAG | 604.120957218586 | 0.280232964872147 |
| CATCAGCATGAC | 604.124743154852 | 0.611076222558642 |
| GTCACTTATTGA | 604.136148258801 | 0.466755299369299 |
| ACTCATTGGTCG | 604.153812774917 | 0.531666053496742 |
| ACTTGAGAGTCA | 604.157692668325 | 0.601942641652476 |
| GAATATATGACC | 604.164325165905 | 0.557896492652976 |
| AGTCATGAGAAT | 604.165768183646 | 0.179680606671643 |
| GTCATTTGATCA | 604.18726269892  | 0.196137645058688 |
| AGTCACGGCTGC | 604.189308051398 | 0.426898022450518 |
| ATATTGTCATGA | 604.190478024498 | 0.411533871472579 |
| AGCAATGTCATA | 604.19832941392  | 0.239302768240571 |
| GGTTGTGATGAC | 604.208349375241 | 0.406903219349297 |
| CCCATAGGTGAC | 604.215758041849 | 0.571556317277287 |
| CTGTAATGTGAC | 604.220212200824 | 0.356246399206173 |

|              |                  |                   |
|--------------|------------------|-------------------|
| GAAGTAAATGAC | 604.221870603569 | 0.203540964276254 |
| ATGACACTCCAG | 604.22702761234  | 0.292700773354942 |
| CAATTGCATGAC | 604.228790925094 | 0.379490845479501 |
| CTTGATTATGAC | 604.229909755555 | 0.409483362422914 |
| ATAACCGTGTCA | 604.23043578074  | 0.566878793274124 |
| GTGAGTCTGATA | 604.233262311116 | 0.268958624742622 |
| AACTTGATGACG | 604.252912354208 | 0.593416095760729 |
| CAGATGGGTGAC | 604.253266674393 | 0.505273057167226 |
| AGTACTGCGTCA | 604.254674136046 | 0.537054927787757 |
| CGGATGAATGAC | 604.269728247967 | 0.252685797174553 |
| CAGCTATGACCC | 604.272803898484 | 0.445595579208264 |
| GACTAATTATCC | 604.27558916867  | 0.850611771471738 |
| CGCGTTGACACA | 604.278214545258 | 0.80990951327423  |
| CTGACGTCAGAA | 604.279432857042 | 0.584593623883772 |
| GTCATTTATAAA | 604.318986659846 | 0.410507321926152 |
| CACCGGGAGTCA | 604.338088207696 | 0.829470312287029 |
| ACATGTGTGACG | 604.3406584921   | 0.299750815380789 |
| AACACCTATGAC | 604.361997095119 | 0.330474983216602 |
| TAGTCACGCCGA | 604.364492487921 | 0.290909710449746 |
| CGCAATGTCATA | 604.374515531286 | 0.319430197237856 |
| AGTCAGATGACC | 604.375415328812 | 0.298134291835984 |
| GATAGGTGACGC | 604.379291195368 | 0.19931186373315  |
| CGTCATCTCTAC | 604.380958581662 | 0.36411307840154  |
| CCTTCAGATGAC | 604.384339059304 | 0.497026429918804 |
| GTCATAAGAACA | 604.393865192155 | 0.445422568799733 |
| GAGTATACGTCA | 604.39428725043  | 0.342716717085404 |
| GATTATCCGTCA | 604.396289720828 | 0.463008460703532 |
| ACGTAATGACAG | 604.396955984389 | 0.331494959875572 |
| ATCCCGAGTCAC | 604.408763513295 | 0.38502029090907  |
| CGTTTCGACTCA | 604.412877988509 | 0.435883680678762 |
| CAACATGTGACA | 604.415164737241 | 0.715951534459839 |
| CAGAAATGACAA | 604.416197982417 | 0.437141985825954 |
| GTCATCTAGAAC | 604.425575271687 | 0.523760854742782 |
| GGCTAGGATGAC | 604.429636173099 | 0.269913821034971 |
| TAGAATTAATAA | 604.459079704525 | 0.370313129341644 |
| AAACAAGTGACT | 604.460089300191 | 0.149204300896915 |
| AGAGTCAGGTCG | 604.464767541741 | 0.180174856058083 |
| GGTCTCGATGAC | 604.468862622422 | 0.587637345527923 |
| CACGATTAGTCG | 604.474298419921 | 0.457619343002494 |
| CGTCACACACAA | 604.497654902798 | 0.361808173469482 |
| GTACGACAGTCA | 604.503855083267 | 0.629307580649408 |
| GGGTGACATGAC | 604.504033313794 | 0.368644603761206 |
| GGATAAAATGAC | 604.532219122147 | 0.401038379040758 |
| ACGCCTCAGTCA | 604.533539307164 | 0.536563182779577 |
| GTCATTGAGCAC | 604.538616703427 | 0.455100502154473 |
| CGGACCAATGAC | 604.564409133947 | 0.548993641362953 |
| GACGCGTCAGAC | 604.576786990565 | 0.542301200454991 |
| GTCACACCTATA | 604.576912227766 | 0.522503288496705 |
| TCGCGTGTGTCA | 604.578159085205 | 0.504939855131643 |
| TGACTGCACAAA | 604.578483100285 | 0.391094665768221 |
| AAATACTCGTCA | 604.588226684348 | 0.402569165139352 |
| GTCATCCCACTA | 604.592071293708 | 0.297006326543671 |
| AAAGATTAGTCG | 604.597998195947 | 0.312919974460342 |
| GACTAATTCACA | 604.611715995767 | 0.686819853757745 |

|               |                  |                   |
|---------------|------------------|-------------------|
| GTCACGTA      | 604.612507833637 | 0.40309474827417  |
| ACTCA         |                  |                   |
| ACGTTGGCTCAT  | 604.627516929188 | 0.272434764457672 |
| ATATTAGCCATA  | 604.651388548316 | 0.383645725919795 |
| ATACGTAATAAT  | 604.665484732902 | 0.450456733490311 |
| CGTCTGAGTCGA  | 604.700260368011 | 0.620122246314005 |
| TGACTCTCATCA  | 604.717456403543 | 0.317586131272237 |
| CTGAAGGACTCA  | 604.71751884894  | 0.496975949110549 |
| AATGAGCGTCAT  | 604.748887671807 | 0.324351715562808 |
| GTCACACCAAAA  | 604.761085401914 | 0.495478784752833 |
| AATTTTCGTCAGA | 604.764990265473 | 0.23335095659445  |
| AAGACCTGTGAC  | 604.768681763325 | 0.556545449337833 |
| GCGTCACCATAC  | 604.77398060148  | 0.414171982535016 |
| CGAATCACGTCA  | 604.783402886402 | 0.646471478127748 |
| CGAGCCTGACTC  | 604.784682954141 | 0.42601344231419  |
| GAGAGCGATGAC  | 604.785319315286 | 0.46661622538002  |
| GTACATTGGTCA  | 604.787819566482 | 0.49989878376831  |
| ACGTTGGATGAC  | 604.791139716041 | 0.657358501167964 |
| ACACGGACTCAT  | 604.791260896478 | 0.490987429892859 |
| GCAAATATGTCA  | 604.799294794776 | 0.579069877012985 |
| TATATCCAGTCA  | 604.804032781538 | 0.481352273135748 |
| GTCATCTGTGAA  | 604.804579950867 | 0.695630120066429 |
| CTCTCATAGTCA  | 604.810910551522 | 0.783781927642947 |
| AAACAGGATGAC  | 604.817205484573 | 0.289171462437578 |
| AAAGATTGCTCA  | 604.826105245313 | 0.192099649681232 |
| CGTCATTCTAC   | 604.82655764963  | 0.254338156593947 |
| GTCATAGGAGAC  | 604.835448029765 | 0.35037463069257  |
| CCCCTGTGTCA   | 604.835907179603 | 0.491777054275753 |
| GTCATTAGAGAC  | 604.849838268484 | 0.22525595292599  |
| GAATCGAATGAC  | 604.85068877059  | 0.125212721045225 |
| GACTGATCTAA   | 604.854075128562 | 0.696260654208026 |
| AAGCTCGTGACT  | 604.86976611416  | 0.225161680907672 |
| CATGCGGAGTCA  | 604.87159944926  | 0.658704083509797 |
| AGGGACTATGAC  | 604.882199405794 | 0.501128513500212 |
| GACTCGGATGAC  | 604.892215393329 | 0.352851988823552 |
| GCGTGATATGAC  | 604.893313957135 | 0.348473228299873 |
| GCTGACTGGTCA  | 604.896795788194 | 0.308013576033111 |
| AGGACTTATGAC  | 604.915410664112 | 0.518130119918215 |
| ACGTCACAGCAT  | 604.916707106955 | 0.415068343356564 |
| GTCATCCATAA   | 604.920272881102 | 0.424168942083963 |
| CAGTCAGCGTAC  | 604.921725792781 | 0.580717622478601 |
| ATTTACGATGAC  | 604.938906037309 | 0.415292793444562 |
| CCATCATAGTCA  | 604.952621995566 | 0.394935636872839 |
| AGACACGACTCA  | 604.958822834072 | 0.436655398640383 |
| CGTCGCTATGAC  | 604.974004806783 | 0.671572262827114 |
| TCGACTACGTCA  | 604.982655172388 | 0.615592124040824 |
| AGTCACTAGCCG  | 604.99669115798  | 0.36991167606432  |
| ATGAGTCTCCAG  | 605.022532227416 | 0.625526824382731 |
| ATGACGTTAACA  | 605.029560476907 | 0.260952012640543 |
| GATGAGCCAATC  | 605.044143704245 | 0.393534656448908 |
| ACGAAATGTGAC  | 605.052273755324 | 0.486192708749196 |
| GTCATCTACAAC  | 605.061906844875 | 0.609736364655963 |
| ATGACAGAGAGC  | 605.07205391178  | 0.182956210727195 |
| ACGTCACCAAGTA | 605.07635528089  | 0.424460472250295 |
| CCATAGTTGTCA  | 605.082379845203 | 0.351597504772013 |

|                |                  |                    |
|----------------|------------------|--------------------|
| ATGAGTAGTATG   | 605.085827217696 | 0.359403923007598  |
| CGAACTTATGAC   | 605.096263386717 | 0.630785492938983  |
| GGTGACAAGTAC   | 605.112049531213 | 0.291507662995958  |
| GTCATGGCGCCA   | 605.113268078366 | 0.452507153727009  |
| AATTACGAATA    | 605.117235428641 | 0.288610904459223  |
| TCAAATGTATCA   | 605.124013790693 | 0.536465269322957  |
| ATACTTGCACA    | 605.127009862501 | 0.195608228673701  |
| CCGATGACCGAA   | 605.131035482873 | 0.572091833298184  |
| ATCTGACGTGAC   | 605.14086913818  | 0.427283303385134  |
| GCTGCGGAGTCA   | 605.175133648916 | 0.620370932536106  |
| GCCACATCATA    | 605.183152567066 | 0.227085051964892  |
| ATGACGCCTTGC   | 605.193963584531 | 0.305684318084548  |
| GTCACCTCGTCA   | 605.200443972626 | 0.508017086186451  |
| TACGCTGAATCA   | 605.201125942737 | 0.565732155526821  |
| GGAAATCTGTCA   | 605.21013459904  | 0.410368903216397  |
| CATAAATCGTCA   | 605.210363939991 | 0.482615915615497  |
| TCGATGTTGTCA   | 605.224627703308 | 0.733954513412669  |
| ACGTGCACGTCA   | 605.22895617581  | 0.70361661917393   |
| CGCAAGCATGAC   | 605.239327434196 | 0.494797664663716  |
| CTAGTCACGGAC   | 605.243481510136 | 0.349489534670794  |
| ATTTTCGTACAGAG | 605.245165110982 | 0.161904317784393  |
| ACGAATCATGAC   | 605.249576900606 | 0.358111251505034  |
| GAAAGATTA      | 605.284021045438 | 0.304318472913919  |
| ATGACCACGTGA   | 605.318632403661 | 0.429812475823657  |
| GTCATAGCAACA   | 605.319299292849 | 0.517928619483601  |
| ATGAATAATAAC   | 605.320242741076 | 0.606253522648374  |
| GCATAGTGACGC   | 605.332702962302 | 0.41683429445142   |
| ATGAGTAGTTTA   | 605.341601209859 | 0.341371400113234  |
| CCTACTGACACA   | 605.355300093824 | 0.311226524598475  |
| ATCAGCGGTGAC   | 605.365932809213 | 0.444940589378118  |
| TCGTCACAATAA   | 605.368149845327 | 0.513897269819486  |
| GCTAATTGCTCA   | 605.368597894279 | 0.329937155193154  |
| CGTCACCCGTCA   | 605.374767753443 | 0.168258230633604  |
| GGGATTTTCGTCA  | 605.375198504727 | 0.453988680476642  |
| AAATATGTCAGA   | 605.380852977837 | 0.450133877042457  |
| ATATGCAATGAC   | 605.381035475787 | 0.499239742620524  |
| AGACTCACGGTG   | 605.408532380257 | 0.332168693976136  |
| CATGACTTGGAC   | 605.416010594304 | 0.425274553295075  |
| GCGTCACATTAA   | 605.417591038907 | 0.332373978073981  |
| AGTGCGTGAGTC   | 605.426274853183 | 0.502515118098026  |
| TGACTGGTGCAA   | 605.427231796513 | 0.356426222488272  |
| CTGGTTGACACA   | 605.432475444558 | 0.781072579383185  |
| CGTCATCAGGAA   | 605.433776210229 | 0.382130817848619  |
| GTGAGTCGGAGA   | 605.439459193594 | 0.255500093813645  |
| GGCCATGTCACA   | 605.451685336117 | 0.543639832034381  |
| GCCGCCGATGAC   | 605.460293897435 | 0.568170993638417  |
| ATTGCCTGACTC   | 605.466478372681 | 0.0560940020920841 |
| AGCTAGTGTGAC   | 605.467082311786 | 0.372732060054952  |
| CCGTTGGAGTCA   | 605.470135209567 | 0.322667216975667  |
| GTGACTCGGGTA   | 605.478410849379 | 0.285163807659965  |
| AGACTAATAGGC   | 605.496770402833 | 0.426513840267434  |
| GAAGACGTGTCA   | 605.49819755527  | 0.33936896315635   |
| CAGTAGTGACAC   | 605.499496410313 | 0.402323351322717  |
| ACCTGTCGATGA   | 605.503223422191 | 0.978250863298335  |

|                |                  |                    |
|----------------|------------------|--------------------|
| AGTCACGCGTCC   | 605.512539043796 | 0.37216299936463   |
| AGACTAATTCAA   | 605.515639893388 | 0.344468026153905  |
| TGACTGGACCAA   | 605.531990524696 | 0.390346741079194  |
| TATGATGGGTCA   | 605.539257191572 | 0.236285255639897  |
| AGACTAATAGCG   | 605.542043316377 | 0.32242899386288   |
| GAACGGGATGAC   | 605.544589133587 | 0.317848825287836  |
| GAGTCAGGCGAA   | 605.546129849758 | 0.307150106797842  |
| AGTGCCTGACTC   | 605.552622494742 | 0.49835230038383   |
| CATGGATGTGAC   | 605.566598751167 | 0.522254649078743  |
| TATAACGTGTCA   | 605.572475668289 | 0.492953846208868  |
| CTGACAGTGTCA   | 605.575968618878 | 0.360246228615402  |
| AGCTATCCGTCA   | 605.577271991387 | 0.424344618577629  |
| GCCACTGACACA   | 605.57943691617  | 0.100239797761727  |
| TAATTTGCGTCA   | 605.582193100106 | 0.62074408993307   |
| ATCAGGGGTGAC   | 605.599011455985 | 0.551932348214351  |
| CACGGCGAGTCA   | 605.603689420852 | 0.460424635021744  |
| TGTCATCTGGAA   | 605.608762418632 | 0.507452983309562  |
| GTCTGACGAAAC   | 605.609329782565 | 0.377024388674128  |
| GATATGTGACGC   | 605.617403077067 | 0.561311496913645  |
| CATGGAGAGTCA   | 605.618360513895 | 0.39053594815103   |
| CGATGACCTGGC   | 605.626872659614 | 0.465777967450761  |
| ACACCAGAGTCA   | 605.630228611424 | 0.603760649836476  |
| TCAAATGTGACA   | 605.675312294625 | 0.480937456720438  |
| ATAGTGTGACCA   | 605.691110439406 | 0.0771240389773226 |
| ATGACAGAGAGG   | 605.69339946875  | 0.329204679219852  |
| ATCCAGCAGTCA   | 605.700989510044 | 0.642520681621109  |
| AGTCACTTGGCC   | 605.709604265095 | 0.317639358016979  |
| GTGTCACCTGATA  | 605.727864303592 | 0.358425231389903  |
| AGTATCTGTGAC   | 605.732122238681 | 0.610546117300366  |
| CACCGTTACTCA   | 605.734126556828 | 0.400023048855669  |
| CTTCTTGACTGA   | 605.73835344559  | 0.374052696228098  |
| CGTCATCTGATC   | 605.744782790785 | 0.272729743050477  |
| GGTGAGACTCAC   | 605.750083046158 | 0.373536055669039  |
| CCCGCTTACTCA   | 605.750957110977 | 0.314489969976282  |
| CCAGTTTATGAC   | 605.756829783585 | 0.446406761210126  |
| GTACTIONTATGAC | 605.760270274365 | 0.498248011791682  |
| AGAGTCAAACGC   | 605.775943873627 | 0.587311921954909  |
| AGTCACGCCCGA   | 605.779690055302 | 0.487215224796764  |
| ATGACACCCTAG   | 605.786056189579 | 0.337704224615194  |
| AATGGTACTCAC   | 605.80660173809  | 0.399698876013268  |
| CTTCGCGGTGAC   | 605.820455915882 | 0.629486376643148  |
| GATGACAGCGCA   | 605.825125941526 | 0.274437336885583  |
| TACAACGTGTCA   | 605.830591524351 | 0.682700217122097  |
| ACGGGATTAGTC   | 605.842562814848 | 0.436768901823768  |
| GTCATGTTACGA   | 605.842941778551 | 0.76843601288553   |
| ACTAACTCGTCA   | 605.849885098249 | 0.378980769733293  |
| AGCCCTGACACA   | 605.851648709024 | 0.286979235924918  |
| AGTCACGACCAT   | 605.864990128478 | 0.394800003313931  |
| TGATTACATAA    | 605.877027139428 | 0.373433153203907  |
| AGTACGAATGAC   | 605.881745382078 | 0.429951299781084  |
| CGCCATTGACTC   | 605.895830648588 | 0.326919031442276  |
| CTGGCAGACTCA   | 605.897438535851 | 0.487479561996937  |
| ATGACGAGGAGC   | 605.902102019236 | 0.247718315196557  |
| AGCAGAGATGAC   | 605.903321737791 | 0.425984332750055  |

|               |                  |                   |
|---------------|------------------|-------------------|
| GGCGCCAATGAC  | 605.906679574111 | 0.767727893397015 |
| CCCGCTCAGTCA  | 605.915776969881 | 0.497353476556255 |
| GTGGATACGTCA  | 605.919091798221 | 0.321680069149001 |
| TCAATCTAATGA  | 605.924611080613 | 0.626736697038155 |
| TAAGCTGACACA  | 605.926007823785 | 0.431382277300535 |
| GGACTTCAGTCA  | 605.949874996242 | 0.669331270910357 |
| TTCGACTCAGAA  | 605.952935838491 | 0.384418609725967 |
| ACCGCCTAGTCA  | 605.954780539568 | 0.327899247131302 |
| ATGACGAGCCAG  | 605.963857712257 | 0.280501461575878 |
| GTCATACCTCA   | 605.979954006606 | 0.517715947828948 |
| CGTCATCGCAA   | 606.002454159412 | 0.40998119942052  |
| CCAAACACGTCA  | 606.00744618519  | 0.389613447539985 |
| ATGAGGAATGAC  | 606.015802793888 | 0.416023886226003 |
| GTGACTAGCACA  | 606.016870931806 | 0.660224535751756 |
| AGAGTCAAATAC  | 606.01824876185  | 0.639457117205041 |
| TAATACATGACA  | 606.030549990211 | 0.330455458784927 |
| GTAAGCGATGAC  | 606.039069364724 | 0.162794431483602 |
| GGATGACTTGCC  | 606.068021269164 | 0.274746855346377 |
| ATATTTAATGAC  | 606.078435086915 | 0.677636183453553 |
| GTGTCAGCGTCA  | 606.089021794642 | 0.410042440110213 |
| CACTGTGACGTC  | 606.105280030038 | 0.59128012942936  |
| GTCACATTACAC  | 606.112834668483 | 0.303682206329189 |
| CCGGAGAATGAC  | 606.127101999042 | 0.603307474169622 |
| CCCTAACGATGA  | 606.136673800057 | 0.764461682241593 |
| AAGTTGCAGTCA  | 606.148006990313 | 0.212045840947385 |
| CTACTAGATGAC  | 606.148196163956 | 0.302727314611606 |
| AATAGTCAATCC  | 606.152506642287 | 0.310887841019353 |
| GACTGACATGAC  | 606.16580992386  | 0.320256964485873 |
| ACCGACTGGTCA  | 606.177107849069 | 0.303800973667843 |
| ACAAATAATGAC  | 606.177843219709 | 0.474814469608022 |
| ATACGCGAGTCA  | 606.18272324124  | 0.708924523634987 |
| GTCCGTGTGTCA  | 606.185431705012 | 0.635275238411351 |
| ACACGTGTGACG  | 606.187327072425 | 0.603680243555719 |
| ATGACGAGCAGC  | 606.187954706426 | 0.485658246348191 |
| GTGACGCGGACA  | 606.199673207739 | 0.289004234668187 |
| GAGTCAAAAGGC  | 606.218621906631 | 0.303549548206067 |
| ATGAGCGACTCA  | 606.231266168353 | 0.565310595745198 |
| CCCGTAGATGAC  | 606.245593952048 | 0.511806262516005 |
| GGCATTAAATGAC | 606.246485757733 | 0.572230268091391 |
| TATATGTCGTCA  | 606.253293218803 | 0.567746178782345 |
| TCATCGGCATGA  | 606.262945968993 | 0.350535071282649 |
| ACGTCACGTTGC  | 606.265511276651 | 0.719440926231504 |
| TGCGTCAGGACA  | 606.268076934828 | 0.480197848742584 |
| GTCATACGGGAC  | 606.279308625648 | 0.376333748819926 |
| AACGATTGGTCA  | 606.280919577091 | 0.705806251511915 |
| TAAACTTTGTCA  | 606.28322912161  | 0.562956412563027 |
| AAGTTCTGACTG  | 606.291254315752 | 0.327310857730626 |
| CATTGCAATGAC  | 606.298569081868 | 0.525884252993477 |
| CACGGTGGTGAC  | 606.309479929471 | 0.424292806141277 |
| AATGGCTGTGAC  | 606.315391417407 | 0.572840368931895 |
| ACTCATACCTTG  | 606.317239013991 | 0.331414530225038 |
| GAATATGATGAC  | 606.327081729135 | 0.319211384974627 |
| CCCGCTGACACA  | 606.329458204319 | 0.416592569840147 |
| AAACGATATGAC  | 606.331840565444 | 0.368236235012504 |

|              |                  |                   |
|--------------|------------------|-------------------|
| ATGAGGTCATCC | 606.344629707601 | 0.411178704219948 |
| ATGACGGACCCA | 606.365574822971 | 0.40441139375733  |
| GATTCTTCGTCA | 606.375900356309 | 0.643359482650123 |
| TATATTTGCTCA | 606.387858055401 | 0.556009494207671 |
| CTCATTATTAAG | 606.393261111071 | 0.857952586735184 |
| AATCATGACGCT | 606.39858074787  | 0.488447263998047 |
| AGTCGTTGTCAT | 606.416006851468 | 0.462250093363098 |
| AGTGTGGATGAC | 606.425013653965 | 0.303686154020978 |
| AAATTAATGACA | 606.427618840765 | 0.544853036031207 |
| ACTCATGTGACG | 606.433434246941 | 0.450933126924663 |
| ACACCAAGTCAT | 606.447798302969 | 0.389894066423865 |
| AATGACGGTATG | 606.450726590423 | 0.372772562167299 |
| CCATGGTAGTCA | 606.471442307157 | 0.595696256130512 |
| CTATGACTTTTA | 606.484823158663 | 0.277582217219928 |
| GTCATGCAGTAA | 606.48649863478  | 0.394175852130333 |
| CCGGAGTGTGAC | 606.486880423008 | 0.581159268388282 |
| ATCACAAGTCAT | 606.486891698359 | 0.499488385368047 |
| ACGTCACCCACT | 606.491213920129 | 0.487468104734506 |
| CATTATGGTGAC | 606.493033817306 | 0.464874326554844 |
| GGCCTAGATGAC | 606.523187178219 | 0.444600187952084 |
| ACCTCCTATGAC | 606.523424028254 | 0.191577124591204 |
| GTATATCTGTCA | 606.531825076666 | 0.478687711089724 |
| CTAACATGACAC | 606.532189266202 | 0.344714149358551 |
| AGGGAAGATGAC | 606.537032387734 | 0.257618068371826 |
| AACACCTGACTC | 606.539912009826 | 0.198134160731382 |
| ATGTCATCTGGA | 606.540531340279 | 0.481107962328039 |
| GGTCATACGGAC | 606.54674532927  | 0.584620973705123 |
| CGAGAAACGTCA | 606.548517242044 | 0.471683540019392 |
| AACTACTCATCT | 606.593402758231 | 0.232404871700176 |
| GTAGCTGGTGAC | 606.645869386562 | 0.372224009525889 |
| CACGATTAATA  | 606.648085437184 | 0.359671114432457 |
| ACTCATCATGTG | 606.651529258323 | 0.559704419439787 |
| ACGTCACAGAAC | 606.658782419397 | 0.445289024302614 |
| GTCATCTGTCAA | 606.665968937973 | 0.341910138675761 |
| ATCTGTCAGAGC | 606.668921458288 | 0.601912964363369 |
| ATTACTCAAGAC | 606.673678349847 | 0.469759789694603 |
| CCTATGATATGA | 606.676093372357 | 0.494194951513785 |
| CTTAAAGTGTC  | 606.676468212603 | 0.604288270533863 |
| AGCGGTGACCCA | 606.691051220696 | 0.38182498621037  |
| AGATTCCGGTC  | 606.693599636327 | 0.400146966016227 |
| CGCGAGTGAGTC | 606.699563362619 | 0.588719315572371 |
| TGACCGGTGACA | 606.72049579194  | 0.407732785468814 |
| GAAATCTAGTCA | 606.721843121307 | 0.208092361017462 |
| ACTGTATGACCG | 606.729612591934 | 0.491991104850805 |
| CATAGTGACGAA | 606.733244093104 | 0.470211810469975 |
| ATGACAGTATGC | 606.740921844366 | 0.602536718542381 |
| GACTAATACGGA | 606.74416424383  | 0.309329644563289 |
| GACATTTGGTCA | 606.747140002724 | 0.737763919557034 |
| ATTGTATGTCA  | 606.748406843137 | 0.863579399868559 |
| GAATGCCAGTCA | 606.749733745259 | 0.333217007757958 |
| ACCCGTGTGTCA | 606.751221356486 | 0.442854764985238 |
| GACTCACGAATA | 606.752902866946 | 0.46508910265387  |
| CGCAAGCAGTCA | 606.763134542903 | 0.653684855916217 |
| GGAGACCAGTCA | 606.765777156363 | 0.488312470612998 |



|              |                  |                   |
|--------------|------------------|-------------------|
| ACGGAGAATGAC | 606.773432834242 | 0.165023609860925 |
| GTCATATCGCAC | 606.780013640114 | 0.428685429795056 |
| AAACACCAGTCA | 606.781786335054 | 0.158876605053423 |
| CAGGTTTGACTC | 606.79323212049  | 0.482389919288176 |
| AGTCACTCCCTA | 606.794506313364 | 0.217939837727024 |
| TATCATACTGCA | 606.797013006891 | 0.227751496710501 |
| ATAAGCTGTCAT | 606.803238042813 | 0.351945249441813 |
| TATCCTGTCATA | 606.806367940429 | 0.237645138695233 |
| CGCGTGGAGTCA | 606.808917230598 | 0.421097957422294 |
| GTCACGACGTCA | 606.810926167633 | 0.729329966957547 |
| ATATTGAATCAC | 606.83321436731  | 0.290105107099008 |
| CTCACGGTATGA | 606.836956464122 | 0.612469363488026 |
| ATGACATTATGC | 606.850934047251 | 0.455055505683434 |
| AATCATGACAGA | 606.856959475083 | 0.617944566130292 |
| CGCTTTACGTCA | 606.86793116539  | 0.355076729588851 |
| ATGACGTTGTGG | 606.869452938396 | 0.339530941531507 |
| ACGTCACAACAT | 606.871947552584 | 0.52585280881768  |
| ACTACAGAGTCA | 606.875753933682 | 0.553847801641132 |
| ATTCTGACACA  | 606.877072291974 | 0.44898848034398  |
| GCGATCGACTCA | 606.880050643899 | 0.736681174746351 |
| GTCACACTCGCA | 606.957084731339 | 0.519869684058635 |
| GGTGACAAGTTA | 606.964940930385 | 0.294419043838645 |
| GATGTGGAGTCA | 606.966210074992 | 0.212307402077316 |
| CAATGGTAGTCA | 606.972839421408 | 0.549333746522303 |
| CAGTTATGACCC | 606.976123670007 | 0.293495194135551 |
| AGAGTAATAGCC | 606.978678594988 | 0.393006716193175 |
| CGTCACACGAAA | 606.992545213728 | 0.405114892376279 |
| GTCATCTCGAAA | 606.993506363735 | 0.471425158056316 |
| GGATCCGACTCA | 607.002104246396 | 0.57788867017731  |
| ATGACACGGTAG | 607.016206883013 | 0.123838453904274 |
| ATGCAACGTAC  | 607.037021852251 | 0.520026400255632 |
| GTCAGTGACCCA | 607.039635500023 | 0.385214345300392 |
| ATGACAGCGTCA | 607.047901122578 | 0.53242398988305  |
| CCGAGATATGAC | 607.049965880065 | 0.431580587435325 |
| AGACTAATATCT | 607.066373002786 | 0.381616604937004 |
| GTCACAGGCCGA | 607.071101446815 | 0.41155375018735  |
| TTCAGTGACGAA | 607.078920475469 | 0.31824688270083  |
| ATGTTGAATGAC | 607.083709510828 | 0.3475472932478   |
| CCTCATGGATGA | 607.091237619125 | 0.597381390950628 |
| TGACTGAGGGCA | 607.100625001388 | 0.629149246927207 |
| CGAGAATTAGTC | 607.145437189481 | 0.284386797914548 |
| CTGTACGTGTCA | 607.1526036671   | 0.77232310982415  |
| CTGTAGGACTCA | 607.153737931712 | 0.574957826196338 |
| GTCACGAGTCGA | 607.156322723838 | 0.490615907752653 |
| CGGGTCAATGAC | 607.172876032305 | 0.414348205122416 |
| AGCGCGGATGAC | 607.173752301451 | 0.456866931813742 |
| CTTATTGACTGA | 607.181721068503 | 0.601032285561455 |
| ACCCCGTACTA  | 607.185961490068 | 0.234273967530992 |
| AATACCGTCATT | 607.191725163882 | 0.181836296882689 |
| CCAGCTGATGAC | 607.198990255816 | 0.268791521416118 |
| GTCCATGACCCA | 607.205568360371 | 0.181431889781829 |
| GGTGACCTGTCA | 607.211689419934 | 0.599675193010422 |
| ATGTACGGTGAC | 607.220684329644 | 0.559555247278286 |
| AATAGGTGACGT | 607.225893261195 | 0.348164756856391 |

|                |                  |                   |
|----------------|------------------|-------------------|
| GGCATATATGAC   | 607.244609366532 | 0.3416606803701   |
| GTCATATCCCAA   | 607.250892477656 | 0.224335413707048 |
| CTACTGACGTCA   | 607.251751193768 | 0.133853356322741 |
| GCCATGTGTGAC   | 607.258307708653 | 0.342702860621131 |
| AACGAGTGCAT    | 607.259625695031 | 0.45070659601457  |
| GAGTCAGTTGCA   | 607.27386458705  | 0.153459475317756 |
| ATGACAGCGTGA   | 607.284799445863 | 0.236705072322483 |
| AGGTTTGCTCAC   | 607.294901322178 | 0.45781443374644  |
| GTATATGTCAGA   | 607.298213897496 | 0.41053231498652  |
| ATCTGGGAGTCA   | 607.305241043798 | 0.584920156653267 |
| ATACTAAATGAC   | 607.312441526613 | 0.500336533608009 |
| CCACATAATGAC   | 607.317473898104 | 0.367105838686701 |
| CTGGAATGTGAC   | 607.338363913145 | 0.647469615543901 |
| AATGACCACTAC   | 607.339456468848 | 0.336797541994374 |
| ACTGACGTCAGT   | 607.345920091929 | 0.601574511100739 |
| GAACCTGAGTC    | 607.347597267219 | 0.243761748142955 |
| AGTGTGCATGTTA  | 607.351938875452 | 0.144972693887998 |
| CAAGATGGGTCA   | 607.36198201597  | 0.572410108836648 |
| CCGCCAGAGTCA   | 607.369371224228 | 0.45721249780528  |
| CGTCATCAGTAC   | 607.380971252383 | 0.394352653843819 |
| TGTATGATGCAA   | 607.3905019527   | 0.322763619788371 |
| AGTCAACATGAC   | 607.399714337541 | 0.11235388587921  |
| AGTCAATGCGTC   | 607.399963451699 | 0.553046159689779 |
| TGAGTGATACCA   | 607.412714948221 | 0.549535904702135 |
| GAGCACGATGAC   | 607.440931878591 | 0.456940289184089 |
| CCATTTGCTCAC   | 607.457349289702 | 0.211082527572861 |
| GAGTCAATGCGC   | 607.462115511276 | 0.560393093587342 |
| GAACCTGATGAC   | 607.473188368922 | 0.468182906833249 |
| TCTTTGACTGAA   | 607.495734610364 | 0.533412483759643 |
| GGTCTCAGTGAC   | 607.51172106079  | 0.703434481792793 |
| ATGAGTCTCTTG   | 607.535521665911 | 0.384984897443364 |
| TGTGATACATAA   | 607.54658939354  | 0.590614128521095 |
| CACGGTAGTGAC   | 607.563780319637 | 0.53003794724128  |
| CGGCAGTGACAC   | 607.568190495753 | 0.280790506054811 |
| ACCAGCAATGAC   | 607.584351975221 | 0.603150848840661 |
| GATTACGGTGAC   | 607.592480584574 | 0.585152059248222 |
| GTACTIONGGTGAC | 607.608243534235 | 0.489755908341513 |
| ATGACGACGACC   | 607.630276568807 | 0.622367066345375 |
| TGACATATCTAA   | 607.639394673684 | 0.604127864630034 |
| ACGTCACCTGACG  | 607.647378252555 | 0.379230564212307 |
| GACTTTGCGTCA   | 607.65459304287  | 0.816747905265484 |
| AATCCAATGACG   | 607.655379766449 | 0.380612585526994 |
| GTCATAGTCCCA   | 607.670398940433 | 0.41640144628289  |
| TGAATTTGGTCA   | 607.691754780608 | 0.321894023633355 |
| GTCATAATTAAA   | 607.704379029165 | 0.324024199782837 |
| ATGGCTAAGTCA   | 607.70699168143  | 0.474217144772428 |
| CTGTAGTAGTCA   | 607.708187998631 | 0.678451107013813 |
| CTCAAATGGTCA   | 607.712725521183 | 0.599632518442378 |
| ATGTTTTGTGAC   | 607.716204544359 | 0.513990401364811 |
| AGCCATTGACTC   | 607.716815201789 | 0.263450600223423 |
| GACTAATCCTTA   | 607.731199447127 | 0.421811379566637 |
| AAAGGAGTGACT   | 607.737826487465 | 0.369131106508711 |
| GTCAAACGTGAC   | 607.77779980982  | 0.559649399386811 |
| GAATATCCGTCA   | 607.821452985643 | 0.542259354914016 |

|               |                  |                    |
|---------------|------------------|--------------------|
| GTCACGACTTGA  | 607.83030612581  | 0.474488345133233  |
| CATTGGGAGTCA  | 607.834304402402 | 0.381796553573575  |
| GCGGGTTATGAC  | 607.840403819354 | 0.351348152530308  |
| AACTCTGTCATG  | 607.845545438949 | 0.807646917617084  |
| ATGATGCAATGA  | 607.846428524064 | 0.327890535034616  |
| ACGTCACCATAT  | 607.850324917229 | 0.429729389307169  |
| CACGCGTATGAC  | 607.858216416963 | 0.596844246798911  |
| ACCCTAGTGACT  | 607.862834371677 | 0.425555380887127  |
| ATAGTCAGCAAG  | 607.865431444511 | 0.501337588797815  |
| AAACTGCAGTCA  | 607.869921396739 | 0.3876962803801    |
| ACTCATAAGAGA  | 607.900677220458 | 0.678691925172981  |
| AGACTCACTGTC  | 607.906362779159 | 0.351190982614395  |
| TCTTCTACGTCA  | 607.926131687311 | 0.155946065030129  |
| CTCCTGTGTGAC  | 607.926587756401 | 0.350417244888353  |
| GGTGTGTGTGCA  | 607.928134765193 | 0.265428621694244  |
| CGATCGCAGTCA  | 607.930519571316 | 0.538868799448403  |
| ATGACAGTGTTA  | 607.936301577969 | 0.299813956784639  |
| ATAGGCGAGTCA  | 607.939140180982 | 0.567776008081181  |
| CGTCCGTGTGAC  | 607.945037001274 | 0.3544788777456    |
| CTGTTGACACAC  | 607.952542452708 | 0.156331714722888  |
| ACAGCAAATGAC  | 607.962649946957 | 0.466712599266426  |
| CAGGTTTTGTCA  | 607.979713316291 | 0.240262030802471  |
| AACCTGACGTCA  | 607.990337061077 | 0.348574757538875  |
| AAAGCTGTCAAC  | 607.991571512095 | 0.367155488364898  |
| TGACGCGGATCA  | 608.015644486868 | 0.401420041435423  |
| GACACCGGTGAC  | 608.043109058541 | 0.403734009836099  |
| GTCATTAGAAAC  | 608.043668187029 | 0.557148059865886  |
| AGTAATCTGACT  | 608.048616176036 | 0.444664546578882  |
| GTCACACTGAAC  | 608.051420789731 | 0.672053279007792  |
| GTCATCGCTCAC  | 608.058424702873 | 0.459625671292595  |
| ACAGGCGTCATC  | 608.058507007521 | 0.303639175328793  |
| TATACGGAGTCA  | 608.05914669068  | 0.447600481774216  |
| CTCTGAGCAATA  | 608.061462737789 | 0.525281420886999  |
| ATTACTCAAGAG  | 608.089927450461 | 0.477722862233297  |
| GGCAGTTATGAC  | 608.099432649886 | 0.464733996875673  |
| CTTACCCAGTCA  | 608.103210112596 | 0.392233526912941  |
| GGCATAAATGAC  | 608.108361062128 | 0.39042865812893   |
| ATGACAGGATCG  | 608.109180049534 | 0.311899051071552  |
| ATGACAACGCGA  | 608.112692596967 | 0.348220904736289  |
| ACCGGTCATACT  | 608.125087636446 | 0.368533704393129  |
| CTGGCTAATGAC  | 608.146422115408 | 0.376211914643299  |
| ATAGGAATGACG  | 608.165432572221 | 0.288066013129815  |
| AGCGCGTACTA   | 608.187396995442 | 0.299989806854373  |
| CGGTGACGTTAC  | 608.197467329991 | 0.411123616347962  |
| GTCACGACGGAC  | 608.200970262083 | 0.464464877350844  |
| GACTCACGAGCC  | 608.217558507971 | 0.6087301222118882 |
| TCGGACTAGTCA  | 608.220837456244 | 0.716596741053473  |
| CACTTGGATGAC  | 608.227034950847 | 0.414850519898392  |
| CCTCGAGGAGTC  | 608.242606116977 | 0.532397845650023  |
| AGACTCAGATTG  | 608.246387037713 | 0.349552988859216  |
| CACACAATGACG  | 608.247868468142 | 0.463219222704789  |
| GTCATAGAGTTA  | 608.25614338052  | 0.343372552590741  |
| AGAAAATGTCAT  | 608.2562006867   | 0.320499953962813  |
| ACGTCACCTCAGT | 608.259835895259 | 0.36215470464165   |

|              |                  |                   |
|--------------|------------------|-------------------|
| ATCGACATGACG | 608.26578650574  | 0.596196603264611 |
| ACTCATAAGTAT | 608.272056053376 | 0.433928707215736 |
| AATCGTGGTCAT | 608.278894105375 | 0.470851428912812 |
| GGATGTGAATCA | 608.280012647915 | 0.573877878929015 |
| CCGGTGATGTCA | 608.302450460875 | 0.494825009293919 |
| AAAACATGACGC | 608.303208570749 | 0.427052538330916 |
| TACGAAATGACA | 608.316294382179 | 0.311739582241192 |
| AGTTGCGTAATC | 608.317620841876 | 0.366026455801609 |
| AGCGTTTATGAC | 608.327401603915 | 0.368928396554842 |
| GTCACCACGTAA | 608.331269517903 | 0.388978159389651 |
| GTACGCAATGAC | 608.373785042934 | 0.55466868209215  |
| GTCACATACATA | 608.376284344399 | 0.344800713981375 |
| ATGGCTGACACA | 608.377928736647 | 0.505343676669044 |
| GTCCTAGACTCA | 608.382340629541 | 0.460853943638636 |
| GCGCGGTATGAC | 608.384500142206 | 0.465056310332062 |
| AGACAGATGACG | 608.396756817389 | 0.3361435644043   |
| GCTTACTGTGAC | 608.40730663394  | 0.538498204279726 |
| TGTCACAGATAA | 608.410702821384 | 0.413837180751984 |
| TAATAATCGTCA | 608.41125327924  | 0.299533264468763 |
| GGTGCTGTGTCA | 608.417384300183 | 0.542603936875884 |
| GTCATCGAACCA | 608.433672470012 | 0.608577733699734 |
| ACGGCGCAGTCA | 608.440729341178 | 0.657016906332352 |
| AGTCACGACATC | 608.443810225229 | 0.307064530644288 |
| TAGCAGCAGTCA | 608.457889147005 | 0.522016921548045 |
| GGTGAGGATGAC | 608.459330191166 | 0.250064134763485 |
| TGAGTAACGGCA | 608.468273583644 | 0.410356288417676 |
| CCTTCGCAGTCA | 608.474617541363 | 0.506951419374688 |
| GTCAGATCTGAA | 608.489183578004 | 0.697657282619389 |
| TCTGACTATGAA | 608.493252923382 | 0.466791883659353 |
| GTCATTTCTCAC | 608.495518560211 | 0.31231388787239  |
| ACAGGGTGACGT | 608.515156412949 | 0.313362323430404 |
| GGTGTCATGAC  | 608.532699435725 | 0.652944545073861 |
| GGTGATGATGAC | 608.542530453967 | 0.443663574355891 |
| AAATTAATGACG | 608.556000414875 | 0.239725303734326 |
| CCATGCGTGTC  | 608.558051233615 | 0.644315070633483 |
| GCCAAATGACCA | 608.581285643571 | 0.508053746962736 |
| CAGGAGTGTGAC | 608.606980511802 | 0.730591538510917 |
| TGAGTCTGTCAA | 608.612894855328 | 0.545454337961174 |
| GAATCTGTGAGA | 608.627737459928 | 0.468984471588897 |
| GTACCCTATGAC | 608.631145207052 | 0.425312080704809 |
| TAGTGAGAGTCA | 608.63121615539  | 0.204537973672633 |
| CATGCCGATGAC | 608.662764005591 | 0.374857277982287 |
| GACTCGTGACGC | 608.681764631198 | 0.535260679853943 |
| CACCTACAGTCA | 608.687275662182 | 0.204673607097074 |
| AATGATGACCGA | 608.690051240575 | 0.521838433381853 |
| GCTCAGACTCAC | 608.697984032565 | 0.272596682221299 |
| ATGGGTGAATCA | 608.700721752521 | 0.3993288311411   |
| AACGAATTACTC | 608.70349704314  | 0.637394979225236 |
| AACTTGCTACTA | 608.71603689825  | 0.218623478414865 |
| AATACGGTCATC | 608.72044576333  | 0.467158530536623 |
| ACTCATTTAGTG | 608.720687418967 | 0.355135268409843 |
| ACACTGGTGACG | 608.730229022392 | 0.35467505855895  |
| CTTGGGCATGAC | 608.740150661261 | 0.708926497672092 |
| CATCGTCTGACG | 608.741337003791 | 0.730846675249433 |

|                |                  |                   |
|----------------|------------------|-------------------|
| ACACTCCGTCAT   | 608.750870289099 | 0.155929149352384 |
| GTCATCTTACAC   | 608.754660073933 | 0.392919430373229 |
| GAACCATGACAC   | 608.767181239051 | 0.467770005738775 |
| GGACCTCAGTCA   | 608.767352419391 | 0.555077421270978 |
| CGCTTTGACGCA   | 608.768302770754 | 0.31858078164353  |
| AGACCGTACTA    | 608.782037474728 | 0.297479908621262 |
| GTCATTGACCTA   | 608.788551226959 | 0.387579098874054 |
| AACGCGTGTGAC   | 608.791951808707 | 0.307261676967165 |
| GGAACCTATGAC   | 608.794602828634 | 0.610788934133655 |
| ACACTAGTGTCA   | 608.801146931145 | 0.342898502477915 |
| CTAATCGGTGAC   | 608.807278488417 | 0.457248859508368 |
| ATTGAGTCGTCA   | 608.825426067606 | 0.302157902816825 |
| ACATATAATGAC   | 608.834445992527 | 0.469557111283901 |
| TCGTATAAGTCA   | 608.850976302141 | 0.358230688646431 |
| CTATAGTAGTCA   | 608.851981115943 | 0.6560050285538   |
| AATGGAATGACG   | 608.863638400018 | 0.279132361348117 |
| AACGATTGTGAC   | 608.867870617722 | 0.439424484234666 |
| AGGTTATTACTC   | 608.869199619566 | 0.827611269990146 |
| ATGTGACAAGTC   | 608.871507302158 | 0.336918311649286 |
| TCGCCAGAGTCA   | 608.877140384242 | 0.575372821692376 |
| ACGCGCAATGAC   | 608.886000032883 | 0.614417213492465 |
| GGACATGACCCA   | 608.897160243364 | 0.319043249288138 |
| TAGGATTTGTCA   | 608.901642732316 | 0.660622418795394 |
| ATTAGTATGTCA   | 608.903521967542 | 0.281640764266691 |
| GTCATAATCAAC   | 608.905032757436 | 0.32645891734569  |
| ATCCATGGGTCA   | 608.918788744347 | 0.655246154595848 |
| ATCATTTGTCAC   | 608.920200992789 | 0.524213478237952 |
| AGACTCACTCTA   | 608.923461576671 | 0.526519088224203 |
| AACGCATGACGC   | 608.928796353804 | 0.859082622628453 |
| TGTTGTATACAA   | 608.935238620726 | 0.707455283541665 |
| AGTCCATATGAC   | 608.957738527483 | 0.349396322997905 |
| GTACCTCAGTCA   | 608.965266916887 | 0.649863432713952 |
| TCTGAATGACCA   | 608.989789701584 | 0.523658173523204 |
| CCTGGATATGAC   | 608.991155517321 | 0.273441647122045 |
| AGGTCACGTCAC   | 609.008276483874 | 0.523416551783068 |
| CCACTCTATGAC   | 609.015710541759 | 0.391425912719783 |
| ACTCAGTGTGAC   | 609.020414450414 | 0.500074708626556 |
| AGAGGGTGTGAT   | 609.030677704889 | 0.262428596684306 |
| GCACAGATGACA   | 609.033530826867 | 0.363468526777668 |
| CGCCATATGACG   | 609.038902189665 | 0.324248004990894 |
| AATGCTCGTCAT   | 609.041404770479 | 0.509865446424026 |
| ATGACGTGAAAG   | 609.045313130768 | 0.23013062945344  |
| GTAGGTAATGAC   | 609.052823607064 | 0.388416528461472 |
| CGACTAGAGTCA   | 609.062572249455 | 0.599919209439278 |
| ACCCGCGTGACT   | 609.066291324576 | 0.46979446101188  |
| AATAGTCAAGTC   | 609.083192260141 | 0.391433732115068 |
| ACTAAGAGTGTGAC | 609.097088843673 | 0.413324819459727 |
| ACGGTCTGACGC   | 609.102510128579 | 0.74077087420121  |
| CCCGTCATGAGG   | 609.103241945131 | 0.519896849779852 |
| CGCCTAATGACG   | 609.117400811092 | 0.476296413774359 |
| CGTATGAATGAC   | 609.130642018811 | 0.379386831734264 |
| TCTCTGGTGACA   | 609.140353021407 | 0.525225597545518 |
| AGTCACGCCATG   | 609.144900807192 | 0.397664269263617 |
| CTTAGCTGTGAC   | 609.146631481239 | 0.532201006495122 |

|               |                  |                   |
|---------------|------------------|-------------------|
| AGTATCTAGTCA  | 609.156584790291 | 0.619585645970056 |
| AGTCACTCTAAA  | 609.163416339014 | 0.418578753338342 |
| ATGATATCATCG  | 609.170918044173 | 0.553922250809728 |
| CAGGGATATGAC  | 609.172396922353 | 0.659457689095328 |
| AAGAATCCGTCA  | 609.175911971117 | 0.209942433491618 |
| CACGATGGGTCA  | 609.196027384334 | 0.375948679915807 |
| GCCTGACTGTGA  | 609.201547584639 | 0.516649264096491 |
| CCTTCGTAGTCA  | 609.212589823005 | 0.402727042641568 |
| GTCATCTAAGGA  | 609.21427354459  | 0.545507941043839 |
| GCTGACTGCACA  | 609.226705177749 | 0.323566120374278 |
| TGACCTAGTCAA  | 609.242972947096 | 0.259302007605824 |
| GATTGATATGAC  | 609.247279812946 | 0.229397730921627 |
| AGATTGACGTCA  | 609.251800018789 | 0.531634071600182 |
| CCCGGAATGAC   | 609.256989077557 | 0.523104210355945 |
| CCGGCAATGAC   | 609.261284430511 | 0.479009886500491 |
| GAACACGTAAGC  | 609.275081802777 | 0.36332947561775  |
| GGTCATGAATCA  | 609.279065143172 | 0.383113785699729 |
| AAGACTTACTCA  | 609.326302375552 | 0.621222626175299 |
| AATTGTGATGAC  | 609.330399728219 | 0.578655392229452 |
| GACTCACGCTTA  | 609.335950754911 | 0.311959348996966 |
| GTCATCTCGAAC  | 609.340350153497 | 0.33215232299563  |
| GTCATGCCGGAA  | 609.340447028975 | 0.463190849196591 |
| ATGAGTCGGGTA  | 609.342311748869 | 0.237491435089857 |
| GTACCCACGTCA  | 609.347337553635 | 0.364753484796084 |
| ACCAACTGACTC  | 609.348971822447 | 0.242441073487508 |
| ATAAATGTCATA  | 609.349214229507 | 0.547833789758    |
| ACAGACAAGTCA  | 609.361865553905 | 0.655503301438981 |
| AACGGACAGTCA  | 609.368562241586 | 0.33827938978294  |
| AGAAATTGCTCA  | 609.368761337207 | 0.677503619374569 |
| GGTTTTACGTCA  | 609.369449532147 | 0.453608284465219 |
| AGTGTTCTGCAC  | 609.376173134457 | 0.393202726447064 |
| ATGACACCTGA   | 609.399555856507 | 0.193473712344652 |
| CTGACTCGGAAA  | 609.403715804049 | 0.629475843136547 |
| GTCACAATGTAA  | 609.406149375158 | 0.487484267000367 |
| AGAGTCAAACCTG | 609.40777262859  | 0.382406483590359 |
| ACGCGTGGTCAAC | 609.40977322488  | 0.896571564484919 |
| ACCGTATATGAC  | 609.421372971081 | 0.46129735729201  |
| TATGACAGGAAA  | 609.430501249728 | 0.276993674525171 |
| AAATTGATGACG  | 609.432915278436 | 0.341490834826445 |
| CTAGGGTGTGAC  | 609.437362754395 | 0.354149252322514 |
| CAAATCTGAGTC  | 609.467161793807 | 0.563673601620293 |
| ATGACACTCTTA  | 609.468311822514 | 0.291710051498882 |
| CGAATAATGACA  | 609.46941432857  | 0.497475857787082 |
| CCCATTGACACA  | 609.470551182362 | 0.302202390414172 |
| CTAATAGTATGA  | 609.475713796059 | 0.609220579179125 |
| TCATCGTAATGA  | 609.480818292928 | 0.520692610033588 |
| ACGAGTAATGAC  | 609.480953479859 | 0.450002063623359 |
| TCTGTTGAATCA  | 609.488935484078 | 0.444555970653546 |
| CGGTTCCGTGAC  | 609.522894171414 | 0.474796333232082 |
| GATGATGCAATC  | 609.546801950848 | 0.408126065319748 |
| TGACTACGTGAA  | 609.549663157976 | 0.526187228702623 |
| GTCCCGTAGTCA  | 609.554289379446 | 0.459606853902922 |
| TAGTCACGCGCA  | 609.55614120197  | 0.284653501845354 |
| GTCATCTCACAA  | 609.561404859414 | 0.392256382169211 |

|               |                  |                   |
|---------------|------------------|-------------------|
| GTCATCCTACAC  | 609.562176165309 | 0.155556795917281 |
| GTACACGTGTAC  | 609.571129108557 | 0.550632862089772 |
| ATCATTGAGTCG  | 609.572233373393 | 0.857616805550778 |
| GAGTAACTCCAA  | 609.578215768955 | 0.580363334937388 |
| CGTCACCGAACG  | 609.580102420265 | 0.493953272480345 |
| AGTCAGATCGTC  | 609.581041296231 | 0.440764813308348 |
| AAGGGTAGTCAC  | 609.592430700736 | 0.165023389977904 |
| ATACCGTCATAT  | 609.604556089395 | 0.387707410006856 |
| CCTGTCTATGAC  | 609.612646961814 | 0.482086249216961 |
| CGGACAGAGTCA  | 609.618986816041 | 0.571126956480094 |
| AGATCATGTTCAT | 609.627106224759 | 0.261974070022596 |
| ATCCTGCAGTCA  | 609.632251852488 | 0.497566943724721 |
| TCCAAGCAGTCA  | 609.634608871531 | 0.87953712891629  |
| TCAACTTCGTCA  | 609.635525653807 | 0.482307760196719 |
| TCTAATCCGTCA  | 609.636186065876 | 0.279526119751483 |
| CAACTATTAGTC  | 609.636385198427 | 0.453676899930683 |
| CACTGATGTGAC  | 609.641479321123 | 0.614753077415098 |
| AAACGTGACGTG  | 609.648617847198 | 0.482267475267895 |
| GCCCAGAATGAC  | 609.653536534688 | 0.460598532216832 |
| GCATTGTGTGAC  | 609.667432082109 | 0.613682726123711 |
| CTTAGTGACAAA  | 609.668223142033 | 0.429428074207538 |
| GACTCACTTCTC  | 609.675912931989 | 0.17684344189663  |
| GTCATCCGCTCA  | 609.677115320834 | 0.425924060137195 |
| CACGTCACGGTA  | 609.694370924981 | 0.464657469067138 |
| ATGAATCAATCA  | 609.695655577358 | 0.629291556953591 |
| GGATCGTGACAC  | 609.706701935126 | 0.410755147885777 |
| GTCATGCAATCA  | 609.732920663631 | 0.529522756813376 |
| ATGACCCTTGA   | 609.73638538769  | 0.204562867390797 |
| ATGACGTCTGAC  | 609.737387213829 | 0.37109344293961  |
| GCGGCAAATGAC  | 609.754570345144 | 0.327758396525664 |
| ACACTTATGAGT  | 609.763168973874 | 0.687814823145672 |
| CCGATATGACCA  | 609.765190561256 | 0.546077900745797 |
| AGTCACTACAAA  | 609.767154626748 | 0.438529668368009 |
| GTCATATACCGA  | 609.768806454629 | 0.14351291118927  |
| AGCGAATATGAC  | 609.789047578202 | 0.390736058683226 |
| CGTCATTGAACG  | 609.794594462385 | 0.654995033583786 |
| CCAATTAAGTCA  | 609.798331334427 | 0.383003730074531 |
| CTAATTTGCTCA  | 609.800857672707 | 0.399647888772056 |
| TGACGCGTGACA  | 609.801535475768 | 0.427291483109506 |
| ACGAGAGTGACT  | 609.806648649761 | 0.38615971725964  |
| GGCCATCAGTCA  | 609.813670732699 | 0.317853443153321 |
| GTCATCGGTAGA  | 609.82566188484  | 0.185161992053498 |
| CGGTGAGATGAC  | 609.829186509479 | 0.540643333373209 |
| AATCACTGTGAC  | 609.829385112602 | 0.363417007726785 |
| AGCGAAGCGTCA  | 609.833573146917 | 0.416906744456769 |
| CTAATTGACTGA  | 609.836809328493 | 0.604396738007289 |
| ACTGTCAATGAC  | 609.838073281756 | 0.351291091347962 |
| CTGTAATCGTCA  | 609.838860777958 | 0.391052800658638 |
| CTCGAATATGAC  | 609.839932966768 | 0.347848741594897 |
| TAGGCCTAGTCA  | 609.841032165093 | 0.560617355759222 |
| GAAAACGGTGAC  | 609.850687699013 | 0.198847814232671 |
| AAGCAGGATGAC  | 609.854593327744 | 0.496325657586278 |
| ACCAATATGTCA  | 609.860500268218 | 0.41158224905481  |
| GTCACTCGTTTA  | 609.865009955029 | 0.402806882395761 |

|               |                  |                    |
|---------------|------------------|--------------------|
| AATCTGTCAGCA  | 609.872555112171 | 0.645222852174222  |
| AATTCGTC AACA | 609.885059335388 | 0.386016810807812  |
| GTATATCGTCAC  | 609.886670009317 | 0.261141074045482  |
| ATCGACAATGAC  | 609.897159955743 | 0.144874447701482  |
| TCGCATAAGTCA  | 609.903431275133 | 0.611319779271325  |
| TGTGTCAATCAA  | 609.91636142283  | 0.453574485727244  |
| GAAGCGTATGAC  | 609.918152027927 | 0.178728614990712  |
| ATGAGTCCCAGC  | 609.921159929496 | 0.463518603758266  |
| TATGTTTACTCA  | 609.929863684496 | 0.259796133088145  |
| ATCATATCGTCA  | 609.935273942958 | 0.495638831770321  |
| AGTCATGAGGGC  | 609.945954267284 | 0.290073407977969  |
| ATACGGACTCAT  | 609.960041405091 | 0.376817482307643  |
| AAACCTGGTGAC  | 609.964466828679 | 0.31152813336205   |
| ATGACGGTATAA  | 609.967589616163 | 0.32528721675016   |
| AGGTCCTATGAC  | 609.971769831167 | 0.498061158361066  |
| CTGACTTAATGA  | 609.974541892832 | 0.98794897653034   |
| AGTCACTTGATG  | 609.985106469031 | 0.458154202374784  |
| GTCATAAGTTCA  | 610.000937565659 | 0.493083798967834  |
| ATGACGACGTTA  | 610.001213410231 | 0.33189529233173   |
| CGTGACGCGGTC  | 610.008846409419 | 0.420056822108953  |
| AGAGTCAGGGGA  | 610.009421593729 | 0.0862099437044619 |
| CTTTAAGATGAC  | 610.034499436973 | 0.241219640270031  |
| CAATGATGAATC  | 610.048602953036 | 0.822400238098532  |
| GACTCACTAACC  | 610.049329304821 | 0.244423906689706  |
| CGGCGGGATGAC  | 610.058501160068 | 0.321518231853531  |
| CCCATGAATCA   | 610.068535006417 | 0.339444605583395  |
| AAAACAGACTCA  | 610.070183086061 | 0.700990624517465  |
| CACTTGATGACG  | 610.07246311638  | 0.474409509335176  |
| GTCATTCGAACA  | 610.075186719483 | 0.393269171583055  |
| CGTCATTATTTT  | 610.08024390564  | 0.265299351209583  |
| CGACTAATTTAG  | 610.093803739443 | 0.429242928613738  |
| AGTGATCATGAC  | 610.096434589307 | 0.304391863836209  |
| TACTAATATGA   | 610.108683107531 | 0.46901562619482   |
| GATCACGACTCA  | 610.113080238322 | 0.452352226096875  |
| ATACCTAATGAC  | 610.118718107307 | 0.497063625278664  |
| CTAAGACTCTTA  | 610.121690216979 | 0.348415258112953  |
| CACGAGATGACG  | 610.136228220175 | 0.615586798065193  |
| GTCATCTTGATA  | 610.165240023538 | 0.383730128309374  |
| AGTCAAATGACG  | 610.16988244947  | 0.337688653384617  |
| AGTCAGATTCAT  | 610.175235752437 | 0.534232620977299  |
| GACTAATCACTC  | 610.180355845063 | 0.356083991403788  |
| GACCGATATGAC  | 610.183218801774 | 0.255282973704463  |
| AACGACTCAGAG  | 610.198698521788 | 0.532084815654287  |
| ATCTTGAATGAC  | 610.199451856826 | 0.391525724097255  |
| GCCCGTGGTGAC  | 610.216406873132 | 0.481964212028733  |
| GAGTCAGGATCC  | 610.231341815174 | 0.31830209915702   |
| CCGTGGGAGTCA  | 610.23590805737  | 0.454705435718621  |
| TATCATGACCCA  | 610.236920781306 | 0.15916943741897   |
| ATGACGACGAAT  | 610.242246378985 | 0.479519594659591  |
| TACGCAGAGTCA  | 610.249475698348 | 0.445943184818488  |
| GTCACACCACGA  | 610.266947052744 | 0.677673761795923  |
| ACTTCGGTGACA  | 610.296381931397 | 0.486918903325766  |
| TGAGTCGGAGAA  | 610.29722878673  | 0.259507150231588  |
| ACACTTGACTGA  | 610.308016051664 | 0.463206249267422  |



|               |                  |                   |
|---------------|------------------|-------------------|
| AATGACCATGAC  | 610.316551635522 | 0.431937820377781 |
| CCGCTACAGTCA  | 610.317273203949 | 0.215987590973452 |
| ATGAGTACGAAG  | 610.338855389474 | 0.310442563818346 |
| GCATTACGTGAC  | 610.345384548307 | 0.697408826707432 |
| CACGTCAGAGCC  | 610.345767323937 | 0.62944809085132  |
| AGAGCATGACAC  | 610.352149002435 | 0.285179204204913 |
| AAGGCTGCGTCA  | 610.35384572274  | 0.347911069746232 |
| CATCGATATGAC  | 610.35643174279  | 0.619318392152947 |
| CAACATTAATAA  | 610.357965843601 | 0.496727915603225 |
| CTATGAATCTTA  | 610.368308578918 | 0.202037501245871 |
| CATAGGGAGTCA  | 610.372738174543 | 0.320989582386962 |
| TAGTCTACGTCA  | 610.373085613215 | 0.380635765698841 |
| ACGTCACCTGTA  | 610.373655397822 | 0.40091795185399  |
| CATGACATGACA  | 610.391439711011 | 0.334177353570697 |
| TGAGTAAGCCA   | 610.392223396785 | 0.371983296102516 |
| ACAGGGACTCAT  | 610.395473464749 | 0.450647379979755 |
| GCAATAGGTGAC  | 610.408306827433 | 0.552435629089704 |
| CAGGGTCCGTCA  | 610.414767283184 | 0.6759442727263   |
| CAACCATGAGTC  | 610.426594654633 | 0.513556737446435 |
| CGTCCTCAGTCA  | 610.434956598746 | 0.209535759846164 |
| ACAATTAGTGAC  | 610.441585324368 | 0.628617903717545 |
| CGACATATGTCA  | 610.447132649292 | 0.781334954750146 |
| AAGACTGATTTT  | 610.467208053995 | 0.338031249075326 |
| CAATCTAATGAC  | 610.487601541049 | 0.283449120374603 |
| ACTCTGAGTCTA  | 610.501355559781 | 0.525870053541128 |
| GTAGTTGTGTCA  | 610.511108552697 | 0.222996439602085 |
| CGTCATCAATGC  | 610.511984237584 | 0.603910549691577 |
| AGTGTCATGCTA  | 610.512964841462 | 0.367569813429747 |
| CGGTACTAGTCA  | 610.525772553644 | 0.386033750221915 |
| GAGTACGTGTCA  | 610.53024464299  | 0.401888530914609 |
| GATCCGTCTGAC  | 610.531255372961 | 0.527840315239581 |
| AACTAGTAGTCA  | 610.538259825785 | 0.559855716117226 |
| AAAGATAAGTCA  | 610.543945234087 | 0.211081223017532 |
| GCCAAGTACCC   | 610.553528755607 | 0.300818166724173 |
| AAATGGAATGAC  | 610.582239320739 | 0.329963771025596 |
| TGACTGGGTTAA  | 610.582307693161 | 0.486602275489716 |
| CGCTGTTATGAC  | 610.587326497181 | 0.535947507559627 |
| AAAATGTCAATTT | 610.597440278421 | 0.486145901739421 |
| GGCTTTAATGAC  | 610.605549410757 | 0.927050194249286 |
| GTCATCCGGGTA  | 610.607286798349 | 0.367255061596056 |
| AGTCACGCTCAC  | 610.619367705797 | 0.34255830480901  |
| AGTCACCTTAAA  | 610.620734517908 | 0.349074151683058 |
| ACTCATAGTGGA  | 610.623006295145 | 0.404932621754717 |
| TGACGCTTAGCA  | 610.624021735289 | 0.479763160154812 |
| TGCGTCAGGCAA  | 610.643351135668 | 0.486451128019656 |
| CGAGTCAAGTAC  | 610.652723731196 | 0.615345746277505 |
| ACGTTATATGAC  | 610.669684210041 | 0.56643136829287  |
| CAGTGATACATA  | 610.676786704328 | 0.668182618155325 |
| GCCATTTTCGTCA | 610.690560069942 | 0.387096527817877 |
| TCATCACAGTCA  | 610.698502919814 | 0.399285404517756 |
| ACAGATCATGAC  | 610.700538250629 | 0.643018091852212 |
| GTCACCAGAAGA  | 610.71467556311  | 0.510004942879239 |
| GAGCGTGCGTCA  | 610.720540472372 | 0.392606536439664 |
| GATTCGGATGAC  | 610.729609976091 | 0.333886144738157 |

|               |                  |                   |
|---------------|------------------|-------------------|
| AGGTACTAGTCA  | 610.729676307165 | 0.590608619520145 |
| AGTGCCAATGAC  | 610.734750923543 | 0.506996600356804 |
| TCATGATGACCA  | 610.73728617146  | 0.517424718316248 |
| AGTCATGGTCAA  | 610.746251248055 | 0.495759066436551 |
| GACTAAGGTGAC  | 610.756121301623 | 0.473647738850277 |
| AACCCGTGAGTC  | 610.760945185717 | 0.947362328311624 |
| ATGACGCGCCGA  | 610.76658222985  | 0.531674323239435 |
| AGTCACTAGCGC  | 610.777581532728 | 0.64648484799721  |
| CCGCATTTGTCA  | 610.783901286941 | 0.440751746540042 |
| ATTGCGTAATGC  | 610.786549496484 | 0.49345125843963  |
| ATGACCACTGAA  | 610.787208001072 | 0.636228500444472 |
| ACCGTCCAGTCA  | 610.787963332484 | 0.156249755422263 |
| GAACCGACTCAC  | 610.805833450808 | 0.20265306993743  |
| CTCGTGTGACCA  | 610.809992370111 | 0.480640524817149 |
| CCTCCGTGACTA  | 610.818150862658 | 0.3661307636248   |
| GTCATGTGCTAA  | 610.825457829407 | 0.791453564366453 |
| CGCTGACTGCTA  | 610.832440373397 | 0.479321194060115 |
| CTAAATGATGAC  | 610.834657427211 | 0.372451338283164 |
| ACTCTTGTGTCA  | 610.835691339545 | 0.315458339464849 |
| GTCATTGGTTGA  | 610.874277202596 | 0.445788170631013 |
| GTC AACCGTCA  | 610.875236954428 | 0.427985442622608 |
| AGACTAATTATC  | 610.883236175163 | 0.480250918812876 |
| GTCATAGGCGGA  | 610.901870944695 | 0.238664213362952 |
| GGTCGGGATGAC  | 610.906006751815 | 0.333097517524319 |
| AATGGGATGACG  | 610.9132808489   | 0.283333492705817 |
| AACA ACTGTGAC | 610.920907362668 | 0.501622485606515 |
| CTTAAGAGTGAC  | 610.924684877624 | 0.374516446755093 |
| CGAACATAGTCA  | 610.925376938705 | 0.596081971954802 |
| AAGATAGATGAC  | 610.932249560376 | 0.184145663586348 |
| GTGTTACACATA  | 610.948846587897 | 0.268190237928384 |
| ACCGCTGACGTG  | 610.951232740004 | 0.7012611501207   |
| AGGGCGTGACTG  | 610.958183626627 | 0.279418694120582 |
| GTCATTGTTGAA  | 610.973950888473 | 0.636095555662591 |
| ATGAGTCGGGCG  | 610.974203873319 | 0.437381862581044 |
| CACGCTGATGAC  | 610.994065429164 | 0.411625688343363 |
| CGGTAACAGTCA  | 611.014686958943 | 0.687093338763257 |
| GACTTCCGTGAC  | 611.023794324996 | 0.388175704854112 |
| CACGATGACCGA  | 611.027821047821 | 0.467138329837783 |
| ACCCTTGATGAC  | 611.029805971038 | 0.533783483239199 |
| GTCATCCTTCTA  | 611.049129933445 | 0.332655514298435 |
| AACATGTGACGC  | 611.053405337399 | 0.705089414040027 |
| AGCCCGTACTA   | 611.053514079727 | 0.407398515351883 |
| CGTCATTTCCGA  | 611.065127736926 | 0.170186564069055 |
| TGAGTCGCAGCA  | 611.068235495179 | 0.775488229871501 |
| ACTTGATGACCA  | 611.073651715775 | 0.298636254855282 |
| ATGAGTAGTCCA  | 611.075750516531 | 0.353137980377896 |
| GGTCATATTTAC  | 611.082486856366 | 0.869591965412095 |
| AAACTAGTCA    | 611.139231145433 | 0.304969753244979 |
| GCGTACAAGTCA  | 611.150304653368 | 0.308449809904388 |
| GAGCGAAATGAC  | 611.152176320874 | 0.190889844663921 |
| CAACGTGGT GAC | 611.159512303945 | 0.295814208260507 |
| CCAGCCTATGAC  | 611.16621433425  | 0.268740681184695 |
| TAGTTCCAGTCA  | 611.177239431726 | 0.35980247686886  |
| GGCACCGATGAC  | 611.180085107577 | 0.431117209030004 |

|               |                  |                   |
|---------------|------------------|-------------------|
| GTCATGCAACAA  | 611.182649836962 | 0.401653701664112 |
| CGTCATCAATAA  | 611.186424024156 | 0.250732655525762 |
| ATGACGAGACAG  | 611.189760582278 | 0.323884680778143 |
| CAGGAAGTGTCA  | 611.192049966579 | 0.622436894896042 |
| CGACTCGGTGAC  | 611.198296510191 | 0.456715454185989 |
| GTCCTGACACA   | 611.202070616598 | 0.485250159998372 |
| CCTGTAAATGAC  | 611.208264497509 | 0.469139514532338 |
| GTCATCTGACGA  | 611.249370235816 | 0.348184865366051 |
| ACATATCTATGA  | 611.251605849666 | 0.662737205159707 |
| TGCGTCAAACAA  | 611.273654758974 | 0.430902993817475 |
| AACGTAATGACA  | 611.278049856348 | 0.216048916708644 |
| GTCACCCGTTGA  | 611.282856652565 | 0.533684854936402 |
| GTCACCAGCTTA  | 611.28333629288  | 0.234990907104461 |
| GTCATAGGCGAC  | 611.299721606359 | 0.195459427150226 |
| CTCGAGGTGTCA  | 611.300614673794 | 0.539171747000311 |
| ATGGAGGATGAC  | 611.314336438593 | 0.404967794291414 |
| GTCACCAGGAAC  | 611.318695040045 | 0.354045330364196 |
| CCGAGTAATGAC  | 611.328078028435 | 0.472099578332797 |
| GACTAACTCTGA  | 611.343950982671 | 0.471863438127663 |
| CACGTCACGGGA  | 611.34698038789  | 0.284180618285194 |
| TGACAAAATTAA  | 611.350983492615 | 0.347327330668115 |
| AGGAAGTGAGTC  | 611.365570538659 | 0.281921945337451 |
| ACTGCCGTGTCA  | 611.366723547579 | 0.536330827507209 |
| GAGTCAAGTATC  | 611.368059062361 | 0.73508995425516  |
| GGCGTTACATCA  | 611.382664364583 | 0.624358374480647 |
| GCGGGCTATGAC  | 611.386491482312 | 0.452125055805159 |
| CGTCACGTTAAG  | 611.387811554757 | 0.630093023316335 |
| AAACCGTGAGTC  | 611.390993090029 | 0.531793969099684 |
| GATCAAGACTCA  | 611.395952028726 | 0.497273311287703 |
| ACCAATGGGTCA  | 611.398962588861 | 0.479254419055249 |
| ACTGCTTGTGAC  | 611.40000190489  | 0.417509853850067 |
| ATGAGTCTCAAG  | 611.401150293972 | 0.28580355718677  |
| CTCCTGTGTAC   | 611.401902608876 | 0.301724765701245 |
| TAAGTGTACAGAA | 611.414156446891 | 0.197704287979007 |
| GCTACCCAGTCA  | 611.414814531346 | 0.318663964884667 |
| TCGGCTGCGTCA  | 611.422319055214 | 0.636411874850123 |
| GTAGGCGATGAC  | 611.432756707606 | 0.388572997668708 |
| GATACATGACGC  | 611.433699050071 | 0.622137189288716 |
| TGACGACTGACA  | 611.43389280424  | 0.381031239967515 |
| GTCATGCGTATA  | 611.437211400221 | 0.551941762027002 |
| GAATTACGTGAC  | 611.440630479135 | 0.503486942565078 |
| ATCTTGTACTCA  | 611.453511811792 | 0.399199932746403 |
| CATTGACTCA    | 611.454868231153 | 0.303802481014091 |
| CACGTCGTATGA  | 611.463435154841 | 0.791407740934389 |
| AAATATTATGAC  | 611.46537125028  | 0.389566825985658 |
| CCAAAGCAGTCA  | 611.467843279046 | 0.703004056264636 |
| ATGACAGACTGC  | 611.473679955422 | 0.439281734055113 |
| GTCACACGGTAA  | 611.478768936288 | 0.408129213563866 |
| CTGTGCGGTGAC  | 611.485235745039 | 0.451040578371644 |
| TACACCCAGTCA  | 611.500606293676 | 0.389814200613544 |
| ACGGTAAATGAC  | 611.510657974166 | 0.137693677250087 |
| GTCACAAGTGAC  | 611.531217729086 | 0.556498720595769 |
| GACTCAGACACA  | 611.531222069842 | 0.43767837815508  |
| TCTATTTCTGCA  | 611.540079346467 | 0.225646340624585 |

|                |                  |                   |
|----------------|------------------|-------------------|
| ATTCGGTCATTG   | 611.584690153373 | 0.466485961054736 |
| TGACAGATCGCA   | 611.589790031884 | 0.616517035978565 |
| GACTCACTCTCA   | 611.592379287294 | 0.321177826988725 |
| ACGCTGACTGTG   | 611.601055911007 | 0.50863524623687  |
| AGAATCGGTGAC   | 611.63055540656  | 0.375909924038805 |
| CGTCACACATCA   | 611.631254338809 | 0.31825889845143  |
| AGGGTCTGTGAT   | 611.64158364232  | 0.364302776957925 |
| ATACCAAGTCAT   | 611.645449129542 | 0.309596383871721 |
| GCGACATATGAC   | 611.658574622725 | 0.332466938532168 |
| AGTCACTTGTGCG  | 611.66679086381  | 0.624063509285903 |
| GCACAAATGACA   | 611.67732633554  | 0.469710862563258 |
| CGGCTGTAGTCA   | 611.677617468079 | 0.541948797937484 |
| CGTCATTGTAGC   | 611.678619937426 | 0.435615539877596 |
| CTGTGACAAAGTC  | 611.679742016723 | 0.340381306536781 |
| GCATGGTGTGAC   | 611.681792645584 | 0.465638366521401 |
| AACGGGTGTCAT   | 611.683968018548 | 0.274736378910911 |
| GTCGACATGTCA   | 611.694124638812 | 0.459300983489021 |
| CTAGATGGTGTGAC | 611.697179354981 | 0.345355797255686 |
| ATGACGATGTCA   | 611.706781917623 | 0.402340785682447 |
| CCAAACTTGTCA   | 611.707006157824 | 0.342392340812899 |
| ACTCATAGTCGG   | 611.713432251072 | 0.741043506923856 |
| GTGACTTACACA   | 611.715048485012 | 0.319550497876288 |
| AGTCACGGTTCG   | 611.715340471452 | 0.540469045138021 |
| ATGACTTCGGAC   | 611.726431339461 | 0.790911186902943 |
| GAGGCGTACTA    | 611.731144282334 | 0.28306271881806  |
| GAACATGACCC    | 611.733904564993 | 0.213696457031701 |
| GACTCTACGTCA   | 611.734004161705 | 0.54831487477301  |
| GTCATGCTAAGA   | 611.73603276982  | 0.748284764910696 |
| GAAAATGAGCCA   | 611.740519685212 | 0.32054092296659  |
| GGACTATATGAC   | 611.746521327415 | 0.373523708425695 |
| GTGTCACCTAAC   | 611.755888035651 | 0.288915515512191 |
| AGTCACGACTGG   | 611.762052118802 | 0.265195163871751 |
| CGTCATCAAATA   | 611.765068413124 | 0.490978915975422 |
| GTCATTTACTTA   | 611.770019682979 | 0.375014674330864 |
| GTCATGATATCA   | 611.77219212457  | 0.563552437169959 |
| ACTGGAGTGACT   | 611.777007317923 | 0.575024504723191 |
| GTCACCATTCTA   | 611.779602722686 | 0.436422794433276 |
| CCGTTTTATGAC   | 611.786713831556 | 0.472674881153443 |
| CAATTATGACCC   | 611.795715640936 | 0.27627604349758  |
| TCACATCTATGA   | 611.811536378206 | 0.790655579681971 |
| TGAGTCGTTGAA   | 611.833764252512 | 0.32914754224341  |
| GTAGGTGATGAC   | 611.838786764615 | 0.525724841696595 |
| GACTCACGTAGC   | 611.838860740502 | 0.506931093180348 |
| GTCACGTCAGAC   | 611.84173881349  | 0.264988369691406 |
| GACCGATTACTC   | 611.854272340466 | 0.359086338996421 |
| ATGATGTGTATC   | 611.862005425019 | 0.424573184715989 |
| CTGAGGTGACAC   | 611.872383209898 | 0.343772055346562 |
| ATGTGAGCAAAT   | 611.876705256134 | 0.323803781085596 |
| GAGTCAATGAAA   | 611.880162267511 | 0.325679113862591 |
| GTCATTCCAACA   | 611.88336425734  | 0.123166829810995 |
| AAGAGTGACGAA   | 611.88805833886  | 0.272867358233789 |
| AGACTGTGTGAC   | 611.893672919548 | 0.566269355885462 |
| GAGGCCGAGTCA   | 611.894305347926 | 0.326200339058247 |
| ACGCTGTGACGT   | 611.895151033085 | 0.243334073926272 |

|              |                  |                   |
|--------------|------------------|-------------------|
| GACTAATCGATC | 611.910179394943 | 0.511760843613616 |
| CGACGTGATGAC | 611.911222286644 | 0.544346014765505 |
| GAAGATAAGTCA | 611.911277789804 | 0.321336816534039 |
| TCTGTCATGGCA | 611.916290649136 | 0.473666594656615 |
| TGAATTGACACA | 611.919562118219 | 0.686307311864825 |
| CCGGGACAGTCA | 611.92367607855  | 0.7169786418414   |
| CGTGTCCAGTCA | 611.927087307414 | 0.336899032078874 |
| CTTTATCTGTCA | 611.929575513904 | 0.453618003935169 |
| GAACTCTGACAC | 611.935039954874 | 0.49980715980963  |
| AGTCACGCCTCG | 611.941380212693 | 0.415166816671329 |
| CAATTTTGACTC | 611.949328507094 | 0.557949081787919 |
| ATTTTGACACAC | 611.951410974852 | 0.295536640108605 |
| ACGGTTTGAGTC | 611.952052490408 | 0.945138823914936 |
| CGCAGCATGACA | 611.968271548711 | 0.631189539636775 |
| GAAAATATGTCA | 611.985267033896 | 0.295761042494731 |
| CTCATTGACACA | 611.992352098711 | 0.373241817821967 |
| GCCATTGACACA | 612.004840180748 | 0.510488229915133 |
| GATACTTACTCA | 612.009990392733 | 0.270282925977181 |
| CGTGCTGGTGAC | 612.013530244086 | 0.537327036746545 |
| ACTATTAGTACG | 612.01915745052  | 0.63114491443604  |
| GAGATTTGTGAC | 612.019751091726 | 0.221474854999458 |
| GCGTGCCGTGAC | 612.024933748477 | 0.817515259877337 |
| GTCACCTCGTAA | 612.032731869591 | 0.639336424657824 |
| ACTTAAGCGTCA | 612.033933857492 | 0.644138319672475 |
| GTCATCCGGAAC | 612.037007140231 | 0.333856315069708 |
| CTACCTGTGTCA | 612.040830311783 | 0.174991397248174 |
| ACGTCACTTTAT | 612.042076260454 | 0.35956366869403  |
| TACTATAAGTCA | 612.045969959927 | 0.242273786910064 |
| GCACTATGACCC | 612.050818634044 | 0.405317836763172 |
| GCCGCACAGTCA | 612.051569035172 | 0.487566106386422 |
| CGGAACCATGAC | 612.055011167444 | 0.617035816085971 |
| GATAGGATGACC | 612.068862155951 | 0.558109379238042 |
| GTATTTCCGTCA | 612.072472430143 | 0.36650919603999  |
| AATCTTGACTCT | 612.073175164643 | 0.488033458764773 |
| CACGTCACTGTC | 612.078162341855 | 0.358724678742958 |
| GGGTCATATTCA | 612.087919463362 | 0.385436683533215 |
| CATCTTTGACTC | 612.10170785637  | 0.427031091976319 |
| CGTCATCTCGAA | 612.105095911486 | 0.543355126184603 |
| ACTATATGTGAC | 612.113417279379 | 0.438637201087494 |
| TATCCTGACACA | 612.118423531747 | 0.244161339395783 |
| GGACGCAATGAC | 612.118623123409 | 0.507704064079576 |
| TACCTTACGTCA | 612.123165129717 | 0.369993772867143 |
| CACCACGGTGAC | 612.129378641196 | 0.605911197568259 |
| CAACGCTTATGA | 612.129565413504 | 0.599286299689734 |
| GGTATATATGAC | 612.131483538347 | 0.392076477009035 |
| GACTCACGCTGA | 612.131702454345 | 0.552064916679583 |
| ACTCATAGCGTG | 612.132480468424 | 0.591783535773135 |
| AGTCACGACCTA | 612.141394977832 | 0.257434866855965 |
| GTCATTTATCTA | 612.143955727005 | 0.384831092741747 |
| TAACATAAGTCA | 612.14855188972  | 0.620643860229932 |
| GTCACGACTCGA | 612.177491109657 | 0.485793903375649 |
| GAGTCAGTTAGA | 612.185266229625 | 0.22349341258332  |
| CTTGGAATGAC  | 612.196869727664 | 0.533015162670219 |
| CTGCCAAGTGAC | 612.20343154942  | 0.558219133428406 |

|              |                  |                   |
|--------------|------------------|-------------------|
| ATATCATGACGC | 612.205874934073 | 0.424907781157045 |
| CACAGAAATGAC | 612.209193143381 | 0.368989485360816 |
| GTTACGCAATCA | 612.21037916588  | 0.349020805016123 |
| CCATTTTATGAC | 612.212865283224 | 0.340771497702403 |
| CAATTCTATGAC | 612.213349274987 | 0.643489793032988 |
| CGGCACCAGTCA | 612.213792593104 | 0.475585610323087 |
| GACCCGTACAC  | 612.214019828267 | 0.270000521751219 |
| TGACGTAAGACA | 612.227037913363 | 0.789368695117956 |
| GAAATATTAGTC | 612.227471292728 | 0.377314941425283 |
| ACCAATACGTCA | 612.235448339547 | 0.51206169491     |
| AGCTATAATGAC | 612.239028970925 | 0.554582311461151 |
| GTACACTTATGA | 612.242519692329 | 0.723829648633682 |
| GTCACATTCACA | 612.260897845691 | 0.474956898298186 |
| GTCATATCGACA | 612.287863110581 | 0.527879649615491 |
| GATGTGTAGTCA | 612.291997292165 | 0.526376115027491 |
| ATGAGTCCCAAC | 612.297340092236 | 0.538864778048982 |
| ATGATTTGACTC | 612.308083088106 | 0.321861220607537 |
| CCACGCAATGAC | 612.311140804643 | 0.467886329398612 |
| ACCGAAGGTGAC | 612.313029430175 | 0.523079034637065 |
| AAGGACTAGTCA | 612.35454722676  | 0.543255993006477 |
| GTTACATCATTA | 612.383342479185 | 0.359174412631697 |
| CTAGCAATGACA | 612.383894906662 | 0.144144673574783 |
| AATCTAATGACA | 612.391351945874 | 0.46336195668795  |
| CACAAATGACAG | 612.397136567055 | 0.445551371198875 |
| TGTGTCAGGTAA | 612.425018982512 | 0.327401744575894 |
| ACCACCATGACT | 612.433028168963 | 0.113470048130904 |
| GGTTTAGATGAC | 612.445708126708 | 0.207774999622445 |
| CAGGATTGGTCA | 612.455141069503 | 0.405126784979547 |
| CTTGACGTGAC  | 612.470993896317 | 0.929025130827394 |
| TCACTCAGATGA | 612.476821903383 | 0.568350788743751 |
| AATGATGCAACT | 612.480150193938 | 0.429568339240631 |
| ACGCCAATGAC  | 612.480506019925 | 0.368263913579224 |
| GGTGCATATGAC | 612.4875636289   | 0.50530632336423  |
| CCACCGTGACTA | 612.489395313893 | 0.253061783352506 |
| ACAGTGGAGTCA | 612.490993065667 | 0.484968958379747 |
| CGAGAGTCTGAC | 612.496379002665 | 0.555119067910791 |
| GTCATATGCCTA | 612.502925706466 | 0.316620047500316 |
| AGTCACTTCCCG | 612.508066501871 | 0.366877064640475 |
| CAATGGTGTGAC | 612.516145185659 | 0.334982868907037 |
| TTAGATTAATAA | 612.534490784973 | 0.478094585015024 |
| AGACCGATGACG | 612.541536234969 | 0.299203952921091 |
| ATGACAGTAAAA | 612.560988837755 | 0.441710415454506 |
| ACCCGTGATTCA | 612.563733453011 | 0.42794194753286  |
| ATCTCAGTGACA | 612.580200568971 | 0.566629771967379 |
| ATCAATGGCTCA | 612.585227136826 | 0.538858179066825 |
| CGTCATTAGTTC | 612.595323512183 | 0.444830915437447 |
| AGAAATAATGAC | 612.598671927972 | 0.414568704914649 |
| AGTCACTCCAAC | 612.604704410078 | 0.306792182897344 |
| CGGCAGGAGTCA | 612.617105160323 | 0.285003987381049 |
| AGAGTCAAAACA | 612.620325237322 | 0.540976749034109 |
| CATCATCTGTCA | 612.63117693834  | 0.309806024971229 |
| TCAACAGACTCA | 612.638792898535 | 0.4512135331948   |
| GAGTCAGTTCAA | 612.656866906713 | 0.516811319661614 |
| CACGTCAGACTG | 612.660402109323 | 0.449826709166174 |

|              |                  |                   |
|--------------|------------------|-------------------|
| ACTTGAATGAC  | 612.682283267298 | 0.381420415504556 |
| AGTCATGGGGTA | 612.697208202877 | 0.170697526589548 |
| ACTCATATGGTG | 612.709229868896 | 0.370374051367364 |
| AGTATGTGTGAC | 612.714079737647 | 0.154685399331381 |
| GAGTCAGGAAGA | 612.7147870288   | 0.376619653711677 |
| ACATTGATTCAT | 612.7162494695   | 0.297801405714864 |
| CTCCTGTAGTCA | 612.725709340929 | 0.637681807377653 |
| ATTTCTGTGACA | 612.728484803845 | 0.598523544349621 |
| ACTTTGAATGAC | 612.735978229437 | 0.415059720025183 |
| CCGTCTGAATCA | 612.736322125683 | 0.157851803950105 |
| GCGGCATGACAC | 612.745714526056 | 0.428991494463541 |
| CGGCAATATGAC | 612.748390711251 | 0.435535840448951 |
| ATGACCACTATG | 612.763375557869 | 0.339001685379801 |
| GCTGCGCATGAC | 612.763543550877 | 0.575840224454783 |
| AATCAAGTCACA | 612.789721143565 | 0.325682265335502 |
| AAAATAGCGTCA | 612.798777202767 | 0.591128302901829 |
| CTGCAAGACTCA | 612.829599276398 | 0.476062699146885 |
| GTCATTCAAGAC | 612.83610729554  | 0.612270674927413 |
| CGGCCTGCGTCA | 612.845336110046 | 0.581801145103154 |
| GTCATTGTTACA | 612.850669931399 | 0.559736593604994 |
| AACCTTTGACTC | 612.85293763904  | 0.273158563756169 |
| ATGACACCCAAT | 612.859658048547 | 0.240632686234448 |
| TACCTATAGTCA | 612.865670865346 | 0.489663682608223 |
| CCTTACGCGTCA | 612.878149045307 | 0.368614683444959 |
| CTTTCTGATTCA | 612.88446408059  | 0.416374752104695 |
| AACTAAGATGAC | 612.89752870216  | 0.391389284436518 |
| GTCATAGGAGAA | 612.910078549382 | 0.46743073736548  |
| GATCTGAATGAC | 612.910209180337 | 0.470202589980388 |
| AGTCAGACCACT | 612.910254122376 | 0.394073968147085 |
| TATGACGGGACA | 612.914357902207 | 0.20019169467386  |
| CAATTGTGACGG | 612.920890580272 | 0.594897249514664 |
| GTCATTTGAGA  | 612.928123856074 | 0.601916390349473 |
| ATTAGTCGGCAC | 612.930969301723 | 0.730440251310852 |
| CGTACCTGACTC | 612.93142195442  | 0.336905585615997 |
| CTGTACACATGA | 612.933414046632 | 0.938795175351521 |
| AGACACGATGAC | 612.93519803454  | 0.295878361101185 |
| CATATCTAGTCA | 612.940782274693 | 0.296879813902573 |
| TGACGCGGTCAA | 612.941427861468 | 0.574238846665104 |
| GTCATGTTGTGA | 612.951348584534 | 0.496958893454372 |
| CATGTAAGTCAC | 612.958268338861 | 0.370784656742866 |
| AGTTATTTGTCA | 612.958339598002 | 0.427510073693322 |
| ACTGATCATGAC | 612.959864290122 | 0.629242731036668 |
| GGTCATACCTAA | 612.971261033382 | 0.624291041842817 |
| CCCCTGTATGAC | 612.973141248413 | 0.402783093811251 |
| CGTCATCGGGGC | 612.981094062608 | 0.400194906468334 |
| GGTCATCAGTAA | 612.984840508201 | 0.581341034008228 |
| CTTTTCCAGTCA | 612.990733322402 | 0.255140590132964 |
| CTGTTCCAGTCA | 612.991087922693 | 0.516909456445115 |
| CTCAGTGGCTCA | 613.007611405389 | 0.64221434331921  |
| CGACCAATGACG | 613.015081612506 | 0.348326072621812 |
| GACACGCAGTCA | 613.020262056046 | 0.609052825784104 |
| AGTCAATATGTC | 613.026711911452 | 0.55823573287599  |
| AAGACTGTCATC | 613.046706377607 | 0.363602024128185 |
| AGCGATATGTC  | 613.055245589528 | 0.718560497754449 |

|              |                  |                    |
|--------------|------------------|--------------------|
| ACATATGTGACA | 613.070070253202 | 0.557685259014367  |
| GTGTGACAATAA | 613.086503078936 | 0.0804733805649082 |
| CTCAGCGGTGAC | 613.086744334288 | 0.478597533726824  |
| AGATTATTCATA | 613.099152812505 | 0.371264460897459  |
| GTAACCGAGTCA | 613.107084528204 | 0.331941878037368  |
| AATCCCATGACT | 613.108272577075 | 0.308210014817166  |
| GGAATACAGTCA | 613.125748234747 | 0.416674557958675  |
| CAAAGTCGTGAC | 613.146252982102 | 0.610931764181238  |
| TACGCGCAGTCA | 613.154105292594 | 0.466502577265021  |
| GCATCAGATGAC | 613.154662020924 | 0.672891067790042  |
| AAACCCGAGTCA | 613.155296348812 | 0.319402186933899  |
| AGCCCCGTGATA | 613.165558050147 | 0.367747944016139  |
| CCGATGTCGTCA | 613.170454316443 | 0.44951325078445   |
| GACTATGACCTA | 613.178053505896 | 0.463417385612304  |
| AGTGTCATGATA | 613.180983966311 | 0.363668133581322  |
| TGACTAGTCGCA | 613.183160883094 | 0.328270912175985  |
| AATGGCGTGACT | 613.185613370006 | 0.308579370813246  |
| GTCACTGGAGAC | 613.203587599308 | 0.574853640641325  |
| GACTAATTCAGC | 613.209854852978 | 0.453862792748616  |
| AACTATTGACTC | 613.238136357095 | 0.453702021200825  |
| CGGTATTATGAC | 613.250673260431 | 0.405255482404048  |
| GTCCAATAGTCA | 613.257530450291 | 0.281655900537798  |
| GCGTGCGAGTCA | 613.264632808694 | 0.620318692910633  |
| GCCTCTACGTCA | 613.291686196648 | 0.418004156833239  |
| ATAAGCGAGTCA | 613.291916124269 | 0.330216717670679  |
| GAAGTGTAGTCA | 613.292129864361 | 0.458787094927151  |
| CACTAGTACTCA | 613.299471463024 | 0.33175315933816   |
| ACAACAAATGAC | 613.309258639336 | 0.559116141693267  |
| GACACTGTCACA | 613.311190094656 | 0.239506103848484  |
| TCGTTCCAGTCA | 613.322051832849 | 0.180245394610711  |
| CGAGATGATGAC | 613.326106541115 | 0.422572364392035  |
| GGACCAAGTCAC | 613.327660387469 | 0.411667229300367  |
| GCATTGTACTCA | 613.340868116446 | 0.656799278675883  |
| GTCACCTCGACA | 613.346712648668 | 0.466310258824825  |
| ACACACTGTCAT | 613.359957135945 | 0.385890308972135  |
| AAGTGGTGACGC | 613.36293620593  | 0.331626934265354  |
| GACGCGGATGAC | 613.368787426313 | 0.427178109543136  |
| CACGTTAAGTCA | 613.374746489946 | 0.730864895113906  |
| GTTACATCACTA | 613.38401366858  | 0.181859194965441  |
| CCGGGCCAGTCA | 613.402057729946 | 0.761959258933063  |
| AGTACAATGACG | 613.409048615396 | 0.567731909408957  |
| AGCCCCAGTCAT | 613.419764262681 | 0.459003502970225  |
| CAACTATGAGTG | 613.459609222615 | 0.820124413886397  |
| GTAGTTAATGAC | 613.460166658384 | 0.411718148938971  |
| ATGACGATGTTC | 613.463893263929 | 0.34226577491094   |
| AGGAAAGATGAC | 613.463999108787 | 0.356178536262053  |
| AGACTAATACCG | 613.470447791735 | 0.450131185437648  |
| TAGAACACGTAA | 613.482785148754 | 0.428135066399902  |
| GATGATCATGAC | 613.484673854256 | 0.424261818048934  |
| GCTGCCGATGAC | 613.486940211236 | 0.358103082607968  |
| GGAAGGGAGTCA | 613.492952402704 | 0.265752136511832  |
| TACCCGGTGACA | 613.496003508294 | 0.467968175792646  |
| TGACTAGAACCA | 613.49712924638  | 0.592272814694903  |
| GATTAGAATGAC | 613.499288045835 | 0.389154964064396  |



|               |                  |                   |
|---------------|------------------|-------------------|
| AGTCACGCTGTG  | 613.502473214513 | 0.322401596712022 |
| GTCCACACGTCA  | 613.502706065348 | 0.416746525298645 |
| AGACTGATGACG  | 613.517879925294 | 0.382137194657413 |
| CACGTCAGCTAA  | 613.521435244512 | 0.797659220250297 |
| ATTTGAAATGAC  | 613.54269035007  | 0.315311092894618 |
| AGTTAGGTCATC  | 613.560119950194 | 0.382266168848393 |
| GAACACGTGTCA  | 613.563139425529 | 0.527829487150932 |
| CAGGGATTAGTC  | 613.575333088315 | 0.487303221614176 |
| GTCAGGTGACAC  | 613.577370116371 | 0.546751364921169 |
| CCTTGAGATGAC  | 613.581267393147 | 0.549940189766066 |
| ATGTCATTTGTG  | 613.600845901635 | 0.506004941232606 |
| GGCCGTTACTCA  | 613.617440303677 | 0.403706812715346 |
| GATGCAAATGAC  | 613.638237713261 | 0.285994686202245 |
| AAAATTACACAA  | 613.638314248258 | 0.668194358273797 |
| TCATGGTAGTCA  | 613.64430624625  | 0.656663684618947 |
| CACTCATAAGTG  | 613.644493261744 | 0.410153867784762 |
| ACGTCACCTATA  | 613.65072398512  | 0.268755662043152 |
| TGACACTTTTAA  | 613.650957854467 | 0.359349811811743 |
| CACACTAGTCAG  | 613.651912402176 | 0.540651428312362 |
| CGATCTGGTGAC  | 613.656191411421 | 0.498678681956996 |
| CAGTCACGACAG  | 613.657638522672 | 0.698393019811751 |
| ATTTAGCAGTCA  | 613.659132754575 | 0.511250647180703 |
| GTGACGCGACCA  | 613.661520194387 | 0.515496125182744 |
| ATGGTAGACTCA  | 613.665870875873 | 0.291985770545621 |
| ATGACTTCGTTG  | 613.686944973959 | 0.731581221746401 |
| ATAACAAATGAC  | 613.687330590331 | 0.384953526851543 |
| CTCAATTGCTCA  | 613.697347421017 | 0.484653902099222 |
| CCATCCTATGAC  | 613.705904973724 | 0.455862275324311 |
| AGTCAGTACTTA  | 613.70650981663  | 0.338260600704532 |
| GCCGTTAAGTCA  | 613.71873940917  | 0.322244905263164 |
| ATCCTGGTGACA  | 613.722603713923 | 0.384411596119267 |
| CACTGCATGACG  | 613.723588368593 | 0.558166899161765 |
| CGGTCATCGCAG  | 613.727650769071 | 0.596660085392096 |
| ACCCATGATGAC  | 613.730448152521 | 0.533128131474612 |
| GAGTCAAATGTC  | 613.73854080032  | 0.471653559756547 |
| GAGTCAGGCGGA  | 613.747167048624 | 0.373304649745555 |
| GCGTCATGATAC  | 613.757415364199 | 0.468036816890953 |
| CTGCAGCATGAC  | 613.757980427439 | 0.569195549145833 |
| GCTGCTTACTCA  | 613.777341583153 | 0.417213475874143 |
| TCACGATAGTGA  | 613.789873428808 | 0.8527000010139   |
| CGAACTTGGTCA  | 613.790192479614 | 0.582598707685533 |
| AATCTGTCAGAA  | 613.793071789788 | 0.276559736324475 |
| AATTCGATGAC   | 613.798308320073 | 0.480057874022141 |
| GTCATCTTATCA  | 613.824052556658 | 0.282204604278151 |
| ACTCATAGCAGT  | 613.830556570447 | 0.58896492830158  |
| ACGTCACCACAG  | 613.835678501299 | 0.363147090090589 |
| GACTCAATAATC  | 613.846697192102 | 0.990333119433579 |
| CATACTGATTCA  | 613.868960472249 | 0.378760857562604 |
| ATGACCTAACAG  | 613.872667678306 | 0.469098400946191 |
| CTGTGTGAGCAA  | 613.882774619685 | 0.667564522047209 |
| TCTGCTTACTCA  | 613.886306600658 | 0.250715553920946 |
| GTCACCATCTAA  | 613.888157324562 | 0.217682510447899 |
| ATGTGTCAAAGCG | 613.889807394763 | 0.457970182402607 |
| GCTGATATGTCA  | 613.889885963584 | 0.423546404575323 |

|               |                  |                   |
|---------------|------------------|-------------------|
| CCCTGCGGTGAC  | 613.891743822928 | 0.410439308186736 |
| AATATTGACACA  | 613.892371842938 | 0.345532172580559 |
| CGTGATTGCTCA  | 613.903413284309 | 0.549337244438521 |
| TCATAAGACTAA  | 613.91949640377  | 0.582599136493391 |
| ACGGCATGACGC  | 613.92133751546  | 0.731176380150618 |
| ACACCTGACACA  | 613.965646371523 | 0.380975472044824 |
| CTAACCTGACTC  | 613.973498401921 | 0.157426294420321 |
| GAGTCAGGGTCC  | 613.996358208823 | 0.35203861929387  |
| GTCATAAGCAGA  | 613.997992335343 | 0.474916177967235 |
| ATGACAACGGCA  | 614.000269177341 | 0.403738221005401 |
| GTCATCAAGGTA  | 614.008274954963 | 0.398326729920939 |
| AAGTGTGAGACC  | 614.009122520295 | 0.175971862624712 |
| AGACTAATAAAG  | 614.010710136933 | 0.309012283456918 |
| CTACCAGAGTCA  | 614.011961898225 | 0.356692401738857 |
| ACGTGGTGTGAC  | 614.015954213489 | 0.663900370252719 |
| ACGGGCGATGAC  | 614.020450095416 | 0.405479397654953 |
| AGCTGTGAATCA  | 614.024783311784 | 0.473774238689668 |
| GTGCTCTGACAC  | 614.039821101031 | 0.46233330163571  |
| GTGCCGTCATAA  | 614.04264297871  | 0.30217183240342  |
| AGCTATATGTCA  | 614.043182038385 | 0.614767876000005 |
| TGACTGGGTCCA  | 614.043841915088 | 0.506150407519947 |
| TGTCATGTTGAA  | 614.04539826689  | 0.543229990845122 |
| ATTACGCACCGG  | 614.048834398041 | 0.582266201542629 |
| GTCACCTTAGTAA | 614.058019365453 | 0.640468165444833 |
| GCCAACGATGAC  | 614.064436088001 | 0.498293149936248 |
| TGACGTACTION  | 614.073410563838 | 0.969695916914338 |
| TCGACCGACTCA  | 614.090956951383 | 0.23133163716845  |
| ATGACAGCGACA  | 614.092405046175 | 0.243853034083367 |
| CCAAATCGTGAC  | 614.099839134709 | 0.636303392847176 |
| ATGACAGTGCTC  | 614.106277279048 | 0.418567092379806 |
| CCACCTGCGTCA  | 614.108392634743 | 0.429100727717425 |
| GTATTATGTGAC  | 614.108803246698 | 0.383132829123067 |
| TGACTCGCACAA  | 614.126549363457 | 0.350849309970424 |
| CCCGATATGTCA  | 614.131870640089 | 0.406140439234021 |
| ACGAATAGTGAC  | 614.132677521399 | 0.448729231492928 |
| CCCAAATGTGAC  | 614.13479183306  | 0.589000137146937 |
| GTGATGCATCAC  | 614.135146254462 | 0.831420745087768 |
| GCCGCTGAGTAA  | 614.136954312695 | 0.460067882418049 |
| GAAACCCAGTCA  | 614.15797247964  | 0.60430552738772  |
| CGCGGTAATGAC  | 614.159548723628 | 0.592407129813447 |
| GTCACCCGTGAA  | 614.169727040763 | 0.504872758399225 |
| ACTTAGTGAGTC  | 614.176179926915 | 0.393139608010068 |
| CAAGTAGATGAC  | 614.195930405492 | 0.603961975547448 |
| ATTACTGGTGAC  | 614.209000430643 | 0.35651953448954  |
| ATGACAATCATG  | 614.229759665321 | 0.535135857651957 |
| CCGTACAGTGAC  | 614.24557644457  | 0.478873510616797 |
| CCAGTTGACACA  | 614.255719673339 | 0.455809038337949 |
| GTCACCCGTCA   | 614.261117263506 | 0.419346543923158 |
| GAATCAGCGTCA  | 614.267163868818 | 0.455584206074587 |
| TCTTTAGCGTCA  | 614.285341449337 | 0.698244023353008 |
| CGCACGCGTGAC  | 614.2922121312   | 0.46135979874183  |
| CTAAACTCGTCA  | 614.293794976264 | 0.478325377844933 |
| TGACATAATCAA  | 614.301007994242 | 0.630732303311726 |
| TGGTCATATTAA  | 614.310300077007 | 0.721959133661785 |

|               |                  |                   |
|---------------|------------------|-------------------|
| ATAGACCAGTCA  | 614.327551382699 | 0.566581272467848 |
| TCATGTCTGTCA  | 614.341707180622 | 0.296543403113273 |
| CCACTACAGTCA  | 614.342321732798 | 0.42964023002379  |
| AATGTCGTGACT  | 614.353922464266 | 0.267314005670909 |
| CGACATTGGTCA  | 614.380967593023 | 0.643750335126246 |
| GGTTCTGTGTCA  | 614.390955170329 | 0.168201516500658 |
| GTGCTTGCCTCA  | 614.39765140295  | 0.6102319625737   |
| GTTGTGGAGTCA  | 614.402563894595 | 0.171273562480816 |
| GTCATATGGAAC  | 614.402945065839 | 0.332725114991724 |
| ACCATAATGACA  | 614.405988050506 | 0.386443463809009 |
| TACGTGTGTCAA  | 614.41416402802  | 0.360385682622999 |
| CGGAGATATGAC  | 614.415840952983 | 0.195927943901534 |
| GTGACGTTGCCA  | 614.427740285529 | 0.337571263256724 |
| CAATCGGATGAC  | 614.438127783397 | 0.215015248767534 |
| GTCCCGTCATA   | 614.451700690255 | 0.143929377512692 |
| ACGTCATGCCGG  | 614.453564694319 | 0.476544281452201 |
| TCGCTAGACTCA  | 614.45424563596  | 0.465036436363895 |
| AAGGTTTATGAC  | 614.462940878614 | 0.350078800849907 |
| ATACAGTCAGCG  | 614.464596560299 | 0.379577055741616 |
| AGCATAAATGAC  | 614.465441742616 | 0.339672154513835 |
| GACTCACGGCCA  | 614.471703850087 | 0.359680264140929 |
| GCCCTTGACTGA  | 614.495124225409 | 0.208786912516303 |
| TATGACAGGGCA  | 614.495388518585 | 0.154522428155961 |
| TCATGTCTAAGA  | 614.496264461035 | 0.894958192510668 |
| ATGACCATGACG  | 614.520684098105 | 0.393271230182963 |
| GTCATAAGAGCA  | 614.545536533789 | 0.603362917029047 |
| GCTCGATATGAC  | 614.552505727058 | 0.660594270166501 |
| AGAGTCAATAGC  | 614.552811112969 | 0.446271404875621 |
| CGTCATGTTTAA  | 614.564806548045 | 0.482837963908679 |
| ATACTGCATGAC  | 614.565336432919 | 0.644554565806219 |
| GAGTTTGTGTCA  | 614.575470703172 | 0.565197412731609 |
| GAGTCAGGTATA  | 614.590222443973 | 0.171824937851712 |
| TCTTACATGTCA  | 614.592089388864 | 0.389484875205288 |
| CTCGGTGACCCA  | 614.610269617994 | 0.425072772726848 |
| TAGGACGACTCA  | 614.619267315183 | 0.434175965914492 |
| CATCGTGACAAA  | 614.634329151412 | 0.395094681345751 |
| TCCCTTCAGTCA  | 614.636582544228 | 0.175857575681007 |
| CGAGTTTGACTC  | 614.647369887868 | 0.431002191871226 |
| CGACTTGACACA  | 614.650874571214 | 0.356091655028466 |
| ACTCAGTGACGC  | 614.653248060226 | 0.574854087524512 |
| ATGACGATGTAG  | 614.653275760888 | 0.2073056922515   |
| TGACTTGTGACA  | 614.662343072664 | 0.256903963200381 |
| CGTCATCTCCTA  | 614.664282348452 | 0.392674565758912 |
| GTCATCTAGACA  | 614.670847025282 | 0.488576328199349 |
| ACGTCACATAATC | 614.684334093195 | 0.392253446496638 |
| AGTATTAATGAC  | 614.686460130209 | 0.512756243356444 |
| GTGTCACCTGAA  | 614.688625877744 | 0.504469102765118 |
| AGTACTTATGAC  | 614.694645564602 | 0.492431512578623 |
| AATAGTGAGTCT  | 614.695675188029 | 0.392665070759983 |
| CGAGTCAGGTGA  | 614.704860486052 | 0.461134743276474 |
| ATGACGTTAATC  | 614.723571475649 | 0.291523663047664 |
| ACTCATCCGGGG  | 614.746640242817 | 0.758959257044378 |
| CATAAGCATGAC  | 614.75753388075  | 0.361830078975569 |
| AATGCTTATGAC  | 614.759655675681 | 0.328318899651823 |

|               |                  |                   |
|---------------|------------------|-------------------|
| CATTAGGCATA   | 614.765042447618 | 0.13867339379729  |
| CACCCCGATGAC  | 614.768046099524 | 0.351051748955872 |
| ATGACGGACTTC  | 614.772922099437 | 0.527387578396687 |
| AGTCAGCCTTGA  | 614.773172742471 | 0.558584994544045 |
| ATAGGGTGACGC  | 614.782775874152 | 0.19977669323164  |
| ACGCTTGTGTCA  | 614.792679937197 | 0.53060251244158  |
| GTCACAGTTGCA  | 614.794977031404 | 0.320164102397052 |
| ACACGTAAGACG  | 614.801675511907 | 0.674766061922693 |
| CCCGCCGAGTCA  | 614.802506767694 | 0.576428346033453 |
| CGAACGGAGTCA  | 614.807068904079 | 0.320529687955339 |
| AGACCTTACTCA  | 614.80860885338  | 0.549620326039107 |
| AACTCGTAGTCA  | 614.826002201224 | 0.485968870825138 |
| CCATGGGTGACG  | 614.829066046541 | 0.395622996623943 |
| ACGTGCTGACTA  | 614.829451396759 | 0.499574475211762 |
| ACGCATCTGTCA  | 614.830889106316 | 0.382152840737278 |
| ACACAGGGTGAC  | 614.842980334823 | 0.493150580975319 |
| GTGTCTGTGTCA  | 614.844950426235 | 0.531320339646314 |
| CCGTCATTGTCA  | 614.852085791708 | 0.309660481201457 |
| CGTGCTGTGTCA  | 614.857020062289 | 0.579556164443048 |
| GTTGTTAAGTCA  | 614.861920651591 | 0.600116128168048 |
| CTGTAAGTGTCA  | 614.872917842618 | 0.55541079445548  |
| GACTCAGTGACA  | 614.889010536595 | 0.354283464819139 |
| CCTTTTACGTCA  | 614.90064555506  | 0.154338758976398 |
| GTCACAGTTATA  | 614.902391393657 | 0.361816435235682 |
| CGGGCAATGACG  | 614.905334929276 | 0.370247199126506 |
| AGCTTTGACACA  | 614.91513223955  | 0.494331592431309 |
| ATGAGTCTCCTA  | 614.93054336646  | 0.281124779235931 |
| GACTCACGTGTA  | 614.93612814232  | 0.472538891472969 |
| ACGTCACCATCA  | 614.936353205833 | 0.35212382871444  |
| ATGATTTTGTCA  | 614.939679776649 | 0.461153175527512 |
| TGACTGGGATCA  | 614.943777065642 | 0.508166824779479 |
| CGGTCACGTAC   | 614.943966747226 | 0.190462868263368 |
| GTCACTGACAAA  | 614.949773861831 | 0.371134747540526 |
| CATGCGTGACAC  | 614.953672268128 | 0.572496642154473 |
| AAGCACTATGAC  | 614.973143909799 | 0.450861739211733 |
| CGTGAGCAAATC  | 614.981302121903 | 0.361643027119796 |
| GTCATGCCAATA  | 614.988269427216 | 0.786075233080419 |
| CAGCCATGACAC  | 615.011609329991 | 0.464882584023664 |
| CACAACATCATGA | 615.015440648413 | 0.867856845617752 |
| GATGACCGAACC  | 615.023212617932 | 0.230322251351899 |
| ATGAGTAGTCCC  | 615.026085910958 | 0.354633065775778 |
| GTCATTAAGACA  | 615.034856338008 | 0.712674531361676 |
| CGTCACAAATTA  | 615.040160040808 | 0.595385152398948 |
| ATCCATGTCACA  | 615.040194689776 | 0.271422076844841 |
| CGTGACGCGGCC  | 615.043714061195 | 0.629453864622671 |
| AAGGTCAATGAC  | 615.063658787837 | 0.346055796525592 |
| AGTCACGGTGCC  | 615.066571474018 | 0.758691021947091 |
| GACCGATGTGAC  | 615.090998294828 | 0.357289884824327 |
| GTCATATTCAAA  | 615.100958733221 | 0.511579959883399 |
| AGACGATATGAC  | 615.107942695739 | 0.459890978047155 |
| GTAGCTGTGTCA  | 615.110643415056 | 0.568451891859555 |
| GCGCAAGATGAC  | 615.114212362653 | 0.373491483755228 |
| CCCGTGTATGAC  | 615.116417068321 | 0.392098640539972 |
| CCCTTTGACGCA  | 615.116880270975 | 0.269495153325408 |

|              |                  |                    |
|--------------|------------------|--------------------|
| GAGATGGAGTCA | 615.126033431283 | 0.227683040724536  |
| CAAGACGTCATC | 615.133749015677 | 0.332501376890456  |
| CGTAAATCAGTC | 615.142727875599 | 0.579354698365023  |
| GTCACCCAAGCA | 615.145086576301 | 0.54501006232295   |
| GCACCAATGACA | 615.15197415338  | 0.473618563952508  |
| CATACAGTGACG | 615.175399004353 | 0.678041550420191  |
| GACTCACTTTCC | 615.180032633594 | 0.246446598680106  |
| ATCATTTGGTCA | 615.181423021945 | 0.399418483672617  |
| ATGACGCGCAGG | 615.188491898392 | 0.315989079725814  |
| GACTAATCGTAA | 615.193284761559 | 0.416043121562747  |
| GTCATAGGGAAC | 615.201341589572 | 0.394490111181102  |
| GCGTCACAGCTA | 615.204511955537 | 0.522790071688494  |
| CACGTCACCTTC | 615.22320137074  | 0.35854018870599   |
| GACTCTGACGAA | 615.232868838033 | 0.6188685803585    |
| AAAGAATTAGTC | 615.238704077708 | 0.301934115193132  |
| ACCCTAATGACG | 615.242946705071 | 0.509939098137142  |
| GCCGATCTGTCA | 615.267292615335 | 0.616786619078393  |
| AGTCACGCGTAA | 615.299821659931 | 0.48056045008134   |
| GGTTTCGACTCA | 615.302578952578 | 0.53961689692706   |
| GTCATCTCATAA | 615.3054045231   | 0.530160634058483  |
| GTCATTACGGAA | 615.335503747915 | 0.296581636189319  |
| GTCATTTGCCCA | 615.339824005011 | 0.29528649286948   |
| GTAACACAGTCA | 615.344450387094 | 0.529696024245468  |
| ATAACTTGTGAC | 615.346267414187 | 0.530310035495476  |
| CTACGTGGTGAC | 615.362770401955 | 0.437586733514438  |
| ATGACGATGCGC | 615.367227738326 | 0.422441191894902  |
| CGCATAGTCAGA | 615.368956436207 | 0.5065623315954    |
| GGCCTTGTGTCA | 615.374295784482 | 0.517300352745353  |
| CTATGTTATGAC | 615.382553427422 | 0.328632278991718  |
| GATGCAATGACA | 615.392075359914 | 0.488184005383108  |
| GTCACCCCTGAC | 615.397014321482 | 0.206392111621327  |
| ACGAGTCAAACA | 615.409295110398 | 0.587264600146959  |
| AGTCACGGGACC | 615.410751171708 | 0.38672918015023   |
| CTCGGTCATCGA | 615.418201422468 | 0.703157035220181  |
| GACTAATCTAAA | 615.418393796242 | 0.667848619847404  |
| ATGACGTTGCAA | 615.424173961155 | 0.256543159798235  |
| CAAATATGTGAC | 615.424268482616 | 0.443417162259692  |
| GTCACCTAAGGA | 615.424763065123 | 0.392613366838141  |
| GTCACCCATCTA | 615.437380865175 | 0.267239049016985  |
| TGACTATGTAAA | 615.443664533438 | 0.448735098452864  |
| ACTTCCGTGACT | 615.451932958126 | 0.313416001166053  |
| GTCATTTCTACA | 615.467508512694 | 0.233957832197856  |
| ATAATCTTGTC  | 615.471466629395 | 0.62909816742855   |
| AGTCACGCTCTC | 615.471893742869 | 0.310222480295986  |
| ATTTTGGAGTCA | 615.476387139739 | 0.0742178879245841 |
| GTGACAACCTTA | 615.483318531109 | 0.273252350353266  |
| CGATCTGATGAC | 615.500251632503 | 0.48873449719298   |
| ACCACTAGTGAC | 615.504365301756 | 0.474559832717089  |
| CAGTCAGAACCG | 615.504566469401 | 0.464215417609022  |
| ATTTACAAGTCA | 615.523159607737 | 0.561907725567511  |
| ATGACGACGTCC | 615.541536144114 | 0.399931359128581  |
| GAGTTTTACTCA | 615.55043127335  | 0.593455952578541  |
| CGATTAAATGAC | 615.552032874931 | 0.4077713694965    |
| AATCTCGGTGAC | 615.553200325587 | 0.382006672649122  |

|                |                  |                   |
|----------------|------------------|-------------------|
| GGTTGGTATGAC   | 615.566170419085 | 0.370139787635455 |
| CTTATAGACTCA   | 615.579427642722 | 0.446434321132239 |
| ATTAACGACTCA   | 615.583192988465 | 0.433115937993165 |
| CATATAGTATGA   | 615.586197678877 | 0.451299788286829 |
| ACTTTAGATGAC   | 615.609577059635 | 0.389121380692065 |
| ATAGCCGTGTCA   | 615.62247105042  | 0.646002091855602 |
| AGTCACTCCGAA   | 615.626688609396 | 0.329870184508175 |
| TGACGTAGTGAA   | 615.632992634776 | 0.220168289390271 |
| ATGTACGCGTCA   | 615.636107840909 | 0.632291432167149 |
| AGTGACGCCATC   | 615.638578041955 | 0.331566480470826 |
| GTCATTAGCCGA   | 615.65902394937  | 0.665571186035157 |
| CTGAATCGGTCA   | 615.682704445449 | 0.53831655637884  |
| GCCTCGGATGAC   | 615.686360327008 | 0.644861817452383 |
| CCTAGCATGACA   | 615.691835579395 | 0.687721902795425 |
| AATAGTCAATAC   | 615.693260028098 | 0.444102999690309 |
| ACCCCTGCGTCA   | 615.693612072186 | 0.269248053448333 |
| CAGGCTGATTCA   | 615.694241884778 | 0.450879204675406 |
| GTCACATCAGTA   | 615.706717861549 | 0.581237259542395 |
| AACCTGTGACGT   | 615.730837913945 | 0.482531564571828 |
| ACTCATACTTCT   | 615.732050067933 | 0.235531352412017 |
| ACTCGGGAGTCA   | 615.733731669472 | 0.387718010382436 |
| GTCGACTGACAC   | 615.734244798875 | 0.757935273375797 |
| ATTTCTGAATCA   | 615.739761564157 | 0.401796961791136 |
| AACTCTGGTGAC   | 615.749181720513 | 0.474957272052425 |
| GTTCCGGTCAATCA | 615.767502530017 | 0.291401256049564 |
| TATCCCCTCATA   | 615.767650226708 | 0.304502417546074 |
| CTCAACGGTGAC   | 615.779745008126 | 0.541510379988089 |
| GATGACCGTGAC   | 615.790003368861 | 0.40681565646964  |
| CAGTATAATGAC   | 615.790112038233 | 0.359820030603497 |
| GCTGTATATGAC   | 615.798918123667 | 0.59008991496566  |
| GTCACACCTGGA   | 615.809480030763 | 0.396121803864976 |
| GAGCCGGATGAC   | 615.819359861023 | 0.415976264605093 |
| CCGGCATAGTCA   | 615.824583606339 | 0.470363878577979 |
| ATGGCGTGACAC   | 615.824757378007 | 0.525207500053594 |
| GGTCTTGACTAA   | 615.843748596151 | 0.40387282949346  |
| GGTAGAAATGAC   | 615.844862455065 | 0.312774143899426 |
| CCGGCATTATGA   | 615.861825002264 | 0.4430727435514   |
| CGTCACCCTGAG   | 615.889634029505 | 0.614817058789329 |
| ACCGATGGTGAC   | 615.903214341055 | 0.445979741413747 |
| GTCATCCAATCA   | 615.911234063508 | 0.303958493598918 |
| CACAAGTCATCG   | 615.941837526822 | 0.448861480415109 |
| CGGGCCCAGTCA   | 615.983687266113 | 0.601685208665618 |
| AATCGACGTCAT   | 615.984296897125 | 0.531477705336845 |
| AGTGCTGATGAC   | 615.986074118979 | 0.335495760257969 |
| TGGTCATTCCGAA  | 615.987654629617 | 0.419362967910463 |
| AAGGCTTATGAC   | 615.992218236514 | 0.210605740139554 |
| AAGTTCACTCAT   | 615.992730582855 | 0.467823796634339 |
| AACGTTGGTGAC   | 615.993321013993 | 0.489189159469074 |
| TCCTATCCGTCA   | 615.99916167211  | 0.318554831442288 |
| ATGAGCAAGTCC   | 616.009070897543 | 0.514860870707263 |
| CAATAGTACTCA   | 616.015896308382 | 0.338851530374205 |
| AGTAATTACGCA   | 616.016294962169 | 0.58338737653588  |
| AGTTATTGCTCA   | 616.017283668266 | 0.653377516569727 |
| AGTCCGTATGAC   | 616.036296426081 | 0.225824188168208 |

|               |                  |                   |
|---------------|------------------|-------------------|
| CAAAAGAGTGAC  | 616.037407346879 | 0.351691953322089 |
| CCGTTCCGATGAC | 616.041063090257 | 0.577192200898077 |
| CTATATCTGTCA  | 616.043546960944 | 0.292198467525574 |
| GTCATTAACAAA  | 616.047742924847 | 0.592045097760529 |
| AATCAGTCTTAC  | 616.058111981213 | 0.350290485006656 |
| GTCATAAGCTAA  | 616.05951795318  | 0.358734287359215 |
| CAGAATGGGTCA  | 616.069483510933 | 0.236849323331879 |
| ACCATGGGTGCA  | 616.077605807379 | 0.324069853742827 |
| ATGACGAGGTAG  | 616.09304953645  | 0.216678841138566 |
| TCATATCGGTCA  | 616.103648020175 | 0.318721963319079 |
| ACGTCATGTTAT  | 616.104657243543 | 0.580744688606806 |
| ATGACGGAGCAC  | 616.111010297484 | 0.335827361425955 |
| GCAAGATATGAC  | 616.11610136262  | 0.501653130664045 |
| CGGCATACGTCA  | 616.116713405986 | 0.454533171945323 |
| AGTCACGACTGA  | 616.119582936179 | 0.212311301354122 |
| ACGACAAATGAC  | 616.122220587382 | 0.559483819275238 |
| AGAGTCCAGTCA  | 616.124124385149 | 0.575122481665431 |
| AGTGACGTGACC  | 616.124890016882 | 0.377801648506813 |
| AGATGTTATGAC  | 616.126899721881 | 0.239212296952428 |
| TAGGTTGTGTCA  | 616.131736950341 | 0.386719175204008 |
| ATGCCATGACAC  | 616.148566037318 | 0.37771131854018  |
| CTTTATAAGTCA  | 616.156879487358 | 0.655230358566738 |
| ACCGACGTGTCA  | 616.172368942693 | 0.31210446438233  |
| CACTTTGACACA  | 616.175997768053 | 0.25916345214048  |
| CAGAATCATGAC  | 616.183725851217 | 0.60305290299832  |
| GAACATTGTGAC  | 616.184918246159 | 0.480886558745227 |
| ACCAGATGACAT  | 616.18598583703  | 0.46272271383845  |
| CCATAGGGTGTAC | 616.186066808134 | 0.595346672794914 |
| GTCACCCGTTTA  | 616.19373907251  | 0.503193464848944 |
| AGAGTCAAAGAC  | 616.194375295329 | 0.583517142159423 |
| AGTCAGAAGTTC  | 616.197180080629 | 0.31605000433143  |
| CTCCGGAGTCAG  | 616.197481132677 | 0.942963023365803 |
| ATGACGGACACG  | 616.198735227329 | 0.161613131981167 |
| AACGTAATAGTC  | 616.205465658426 | 0.645796820063753 |
| GTCATTTATTAA  | 616.228607954504 | 0.472137661902173 |
| TAGCAGGAGTCA  | 616.239211848137 | 0.291117477067763 |
| CCTTTAGCGTCA  | 616.246073497262 | 0.743805801954924 |
| AACGTTTTGTCA  | 616.249363690496 | 0.529853952348749 |
| TGCGTAATTACA  | 616.253104303993 | 0.651225726863905 |
| CCAATGCATGAC  | 616.255463253645 | 0.311663375295133 |
| ATACGCGGTCA   | 616.255578263857 | 0.234108097262114 |
| AAGCATGACACC  | 616.262638827794 | 0.356864013542098 |
| CTATGACTTGCC  | 616.265864515812 | 0.199640246837465 |
| AGATCTCTGACT  | 616.26611562956  | 0.539129150785263 |
| CCCTATAAGTCA  | 616.266220573895 | 0.470578786210627 |
| CCCGATGGGTCA  | 616.266913426035 | 0.64142280190315  |
| ACTAATAAATGA  | 616.274713282102 | 0.439811515839593 |
| GTCACCCTAAGA  | 616.275052875877 | 0.872682857599874 |
| GCAGTGCAGTCA  | 616.282026508677 | 0.657709169639004 |
| AGAACTGTGTCA  | 616.31067380416  | 0.326086814263114 |
| GTCATAGCATTA  | 616.313137234796 | 0.479091001768051 |
| GATGCGTCTTAC  | 616.326453400471 | 0.394681120000295 |
| ATGACAAAGGCA  | 616.336947538204 | 0.119994734558476 |
| AACGTGCATGAC  | 616.342919837322 | 0.456970416086222 |

|              |                  |                   |
|--------------|------------------|-------------------|
| TAAAATTA     | 616.350357937439 | 0.541859974077788 |
| ACTCATTAGTCG | 616.351225505137 | 0.230613051619627 |
| ATGACTTGCTTA | 616.357359817194 | 0.576726062349619 |
| CGTCCCTATGAC | 616.358064880766 | 0.314061369880834 |
| ATACGTAATCAT | 616.358096390645 | 0.367730307280254 |
| GTGTCACGGAAC | 616.359387256463 | 0.356710214057043 |
| GTAATCAGTGAC | 616.368906738317 | 0.619502406843514 |
| ATGACACTCCAC | 616.37732178832  | 0.302745330636565 |
| TGACCCATTGCA | 616.378597606267 | 0.514631120409157 |
| GTAATAACGTCA | 616.379945019627 | 0.37374396741142  |
| ATATTAGATGAC | 616.384424232972 | 0.316963949956083 |
| GTCACCTCAGAA | 616.391676994764 | 0.324964326458401 |
| AAGGGGTATGAC | 616.396074432905 | 0.295052736504478 |
| GTCATACGCTTA | 616.399131415251 | 0.560707986955864 |
| CTGACGGGTGAC | 616.410017254777 | 0.437404756087877 |
| CGCGTACGAGTC | 616.420934365974 | 0.458052949289239 |
| GTCGCAGAGTCA | 616.423004294398 | 0.334570918279471 |
| GAGTAATCACCA | 616.431725645681 | 0.474406502456203 |
| CATGTGTGATTC | 616.442485110963 | 0.657548618834143 |
| AGACTCTAGTCA | 616.450267413342 | 0.429531612873252 |
| TAACTGACACA  | 616.458767274642 | 0.337853798784287 |
| GAGCTCGATGAC | 616.473890984666 | 0.5717260133012   |
| CTCGTATTAGTC | 616.516485940884 | 0.304396302886875 |
| TCCGATGAATAA | 616.519304646978 | 0.459542374595717 |
| ATGACATTTTCC | 616.520482643746 | 0.318351941156104 |
| ACTCATTGATG  | 616.526632474105 | 0.470842168000913 |
| ATCAGTGACGAA | 616.52991406289  | 0.46090673560148  |
| AACGGTGATGAC | 616.536463010311 | 0.222179111415209 |
| CGGGACTAGTCA | 616.541143353539 | 0.501420592378175 |
| CATTTATGTGAC | 616.543170522898 | 0.633823793306616 |
| GACCAGGATGAC | 616.554856140623 | 0.543404640289884 |
| GCGCATTGTC   | 616.558148634361 | 0.308507613513588 |
| GACTCGTCTGGC | 616.569131778015 | 0.77014897434332  |
| GTCATAGGAGCA | 616.57069587269  | 0.478052335657705 |
| CTGTAATATGAC | 616.583402950473 | 0.397745160242837 |
| ACGTCACCTATG | 616.585839264377 | 0.422798795786315 |
| GTCATTAACGAA | 616.593838799822 | 0.713408723074872 |
| GACTCACTAATA | 616.610191279339 | 0.449899137021219 |
| CTATGTGGTGAC | 616.611071923251 | 0.553090546550805 |
| CAGCCGGGTGAC | 616.616528724232 | 0.52280889658993  |
| GCGTCACTATAA | 616.623795857296 | 0.473971003836289 |
| ATGACAAGATCC | 616.630403337222 | 0.470310419611356 |
| CGGCTATGACCC | 616.640099140586 | 0.562360785453716 |
| ACTCGAATGACG | 616.649376473036 | 0.439463195522937 |
| GAGTCGTCCTC  | 616.65503456494  | 0.489207027803078 |
| CGTTTGGATGAC | 616.663091535656 | 0.545071351962728 |
| CATCAGTGACAC | 616.663175662354 | 0.545454470021001 |
| CTAAGATCAGTC | 616.668456311586 | 0.878714403240869 |
| TCATGATGAGCA | 616.670926088714 | 0.408242366179552 |
| GAAAGGTGACGC | 616.674399619191 | 0.19858564625438  |
| GACCTGTCACCA | 616.68199335242  | 0.305579121472763 |
| AATCATGTCATG | 616.688704524391 | 0.511609910702753 |
| CATTGCATCATA | 616.693797912123 | 0.304332421908732 |
| TGACACAGGACA | 616.695512818325 | 0.281667558203568 |



|              |                  |                    |
|--------------|------------------|--------------------|
| TCAGTCAAAGAA | 616.7047244031   | 0.412980427485619  |
| AGCTCATATGAC | 616.722090194818 | 0.634418548481963  |
| GATGGCTAATCC | 616.724319276279 | 0.434007735539084  |
| CGACCTTATGAC | 616.741845949151 | 0.399131509956216  |
| GTCATTACCGTA | 616.752049737788 | 0.343496541619714  |
| ACACCCGATGAC | 616.762033467156 | 0.316026279547737  |
| CAACATTCGTCA | 616.766361342823 | 0.519284661968593  |
| TGACATGTCAAA | 616.781055729551 | 0.464992246589532  |
| TGACACTGCGAA | 616.793301813435 | 0.478521679509205  |
| ATGATGCTGTCA | 616.807963236962 | 0.42176080524087   |
| ATGACACGGAAC | 616.818815511319 | 0.316590947358644  |
| AGTCACTCCATA | 616.823046676979 | 0.38451972343404   |
| CAGGATTAATA  | 616.826787736086 | 0.557476392535072  |
| TGGTGGCTCACA | 616.827165970986 | 0.40366394498659   |
| AAGGGGACTCAT | 616.831791956102 | 0.216514223320837  |
| CTCTGACATATC | 616.832318254265 | 0.205720476291404  |
| GTCATAGAGATA | 616.832532085693 | 0.309094416503498  |
| CGTCACATTGAG | 616.845000108577 | 0.488865313873732  |
| CCATTGAGTAAC | 616.846387199697 | 0.41168281737357   |
| CTTGGAATGAC  | 616.847619400221 | 0.32559040027057   |
| AGACTAATTTAT | 616.86257678721  | 0.33821888247575   |
| GTCATAACCAGA | 616.869449928936 | 0.361965725549002  |
| ACTCTGTAGTCA | 616.873114980221 | 0.52766637381598   |
| ATTACGCAATTG | 616.887218102127 | 0.413018277809295  |
| CAGTATTTAGTC | 616.894318773936 | 0.636953206173074  |
| CAGTAAAATGAC | 616.907882279606 | 0.3220086879223    |
| GTCATCGGCGAA | 616.911124071956 | 0.330493082222091  |
| GTCATCAGAAGA | 616.913110599054 | 0.571839810717904  |
| AGCGCGCAGTCA | 616.924206431403 | 0.479137453278468  |
| CTCCGAATGAC  | 616.926701645459 | 0.395144905997949  |
| GTGTATCTGTCA | 616.92760740364  | 0.465632731026061  |
| AACCAGTCAGAT | 616.929983887892 | 0.392431532394946  |
| GGAGCATATGAC | 616.947072305462 | 0.318414994965561  |
| CGTAGACTCAGC | 616.959641574674 | 0.583562031334796  |
| ATGACGGTATGC | 616.961936529755 | 0.380282662435484  |
| GCGAACTGTGAC | 616.962024075557 | 0.663365154466736  |
| GCCGTCGATGAC | 616.981421056694 | 0.671889937460693  |
| GGTTTGACTCGA | 616.989681938246 | 0.478764854372924  |
| GAGTCAATGGAC | 616.990187799965 | 0.263637321073753  |
| AGCCCTGTCATA | 616.995033314964 | 0.198088644446589  |
| GTATAATGTGAC | 616.996059043833 | 0.493940592903525  |
| GAACCTTACTCA | 616.998330234938 | 0.547804463869607  |
| GATTGGGATGAC | 616.999263398826 | 0.0890763453698454 |
| AAGTTGTCACCA | 617.005034313679 | 0.259115127802211  |
| TAAATTGACACA | 617.005927140956 | 0.531313280349298  |
| ATGACAAGGCTG | 617.014128679526 | 0.352817083819669  |
| GGACCCGTCACA | 617.021064306231 | 0.522607313389283  |
| CGTCAAGATGAC | 617.045502162411 | 0.89463899882593   |
| AATGACATTACT | 617.054722911546 | 0.274215847106573  |
| ATGAATCAATTG | 617.060058230393 | 0.301785559267555  |
| GTCACTGATTTA | 617.078715840551 | 0.421646286444295  |
| CGTCATATGCAC | 617.082540407271 | 0.515858414543088  |
| GACGTGTGACGC | 617.111589824521 | 0.590189835172368  |
| ATGACGAGGTGG | 617.112369753554 | 0.297201509763981  |

|              |                  |                   |
|--------------|------------------|-------------------|
| GGCCGGTATGAC | 617.129417573594 | 0.704439829093695 |
| CGGACTACGTCA | 617.134591406193 | 0.490476331511288 |
| GAAACAGAGTCA | 617.136199873734 | 0.451780405392748 |
| CCTAGGGAGTCA | 617.146510671591 | 0.542365557316632 |
| AGGACAAATGAC | 617.154778518313 | 0.296478486291501 |
| AGCCCAATGACG | 617.159871617034 | 0.484677060704175 |
| TCAGTTGAATCA | 617.167364599315 | 0.42882340655114  |
| ACACCTGACGCA | 617.169751766862 | 0.303266463587501 |
| GTCATTTTGAAC | 617.17321501708  | 0.243705573216147 |
| CTCGATAGTGAC | 617.181035842277 | 0.330705238878118 |
| AATCTTATGTCA | 617.182430281555 | 0.512207002181295 |
| CGATTCTGACGA | 617.198876743876 | 0.581330769379863 |
| GTCATTGACTTA | 617.199289642054 | 0.448644998813123 |
| GGCCCTATGAC  | 617.21289592813  | 0.341843683919834 |
| GCCAGGCATGAC | 617.229808744617 | 0.613830556876141 |
| CGTCCTGACGCA | 617.238132817483 | 0.361841608147333 |
| AGAAGAGATGAC | 617.242643344014 | 0.342370446841658 |
| CAGATTGACACA | 617.256583760076 | 0.377327949219717 |
| CAACGTTGTGAC | 617.262232437463 | 0.310555466618528 |
| GTCACAGTTACA | 617.264485495061 | 0.387656071819643 |
| CAGTCACGACCA | 617.275436292885 | 0.48309167122127  |
| CCATGGCATGAC | 617.290487343096 | 0.379179864431379 |
| CGTCCTGTCATA | 617.291952881308 | 0.510830703140685 |
| ATTCTGATGACG | 617.307900765109 | 0.596487236852041 |
| ATGCGGACTCAC | 617.308969744466 | 0.469404518003176 |
| CGACACGGTGAC | 617.31405485751  | 0.487778161812197 |
| GTCATTCATGTA | 617.335903979337 | 0.493477160529825 |
| CGGTTAGACTCA | 617.351285806445 | 0.394042049602386 |
| TCGGTCATTACA | 617.359930153227 | 0.661241297752317 |
| CGAAACAAGTCA | 617.3981502135   | 0.633881800966416 |
| GTCATCCACACA | 617.402742001915 | 0.357949698065532 |
| GTCATATTTGAA | 617.403068448386 | 0.278639099041441 |
| ACGTCACATACC | 617.409828576851 | 0.225819260205001 |
| ATGTAGTGACAC | 617.416848787778 | 0.383061347394089 |
| AATCGATATGAC | 617.431351995371 | 0.55078359061456  |
| AGTCACTTGCGG | 617.440448210242 | 0.411550958018508 |
| ATGACAGTATGG | 617.450504241917 | 0.332725900757955 |
| ATATTGTCACAA | 617.483666397134 | 0.402703566635692 |
| CGGAACTGACTC | 617.489485248339 | 0.585027895185315 |
| GAATCTTGTGAC | 617.502775149233 | 0.419368008076144 |
| TAAGCAATGACA | 617.509149540064 | 0.318714320137643 |
| CTGGAGGATGAC | 617.517966738644 | 0.322729650539845 |
| GGAACTGTGTCA | 617.520711127676 | 0.516260635526038 |
| AGTCACTAGGTA | 617.54065871279  | 0.507396215192117 |
| AATAGTCGTCAT | 617.542732380807 | 0.500439274077983 |
| GTCTTTGACACA | 617.545883221392 | 0.43941639506395  |
| CCATTGGATGAC | 617.547414730396 | 0.463661944789791 |
| AATACTACTCAT | 617.549154125968 | 0.200885890303923 |
| AAAACAGATGAC | 617.555862996997 | 0.249022379899559 |
| CGTCACGTCAGA | 617.561901433119 | 0.530152672808867 |
| AGTCATGAGCAT | 617.566267189426 | 0.385642335005688 |
| ACGTCACCTGG  | 617.572732975068 | 0.468478728493904 |
| GTCATTATGCAA | 617.581510249803 | 0.416419780439452 |
| ACGCAAGATGAC | 617.582265380113 | 0.328439898287915 |

|               |                  |                   |
|---------------|------------------|-------------------|
| GCCGA ACTATGA | 617.60769414002  | 0.74726276714976  |
| ATATCTAATGAC  | 617.607980565936 | 0.710174183971923 |
| GAGCGTTACTCA  | 617.618601852979 | 0.450678801290957 |
| GGATCGGAGTCA  | 617.623947187774 | 0.419014052688037 |
| CACTGGGATGAC  | 617.626524417222 | 0.399656119828734 |
| ACGTCACCGAGG  | 617.631030111193 | 0.546889018947916 |
| TGAGTCGCACAA  | 617.638060036888 | 0.359282178298714 |
| ATGACACGGCGG  | 617.639628613317 | 0.459060223585974 |
| ATGCTGAGTGAC  | 617.651830348735 | 0.649354017311936 |
| GCGATACAGTCA  | 617.654927029257 | 0.309555838046066 |
| TGAGTCCACTAA  | 617.688308567509 | 0.631876957010101 |
| AGAGTCAAATCT  | 617.690299099821 | 0.421255256116885 |
| ACCGCTGACGTA  | 617.698541274047 | 0.258806753358111 |
| GTCACCTCAAAA  | 617.701049857146 | 0.414710932731928 |
| GTCATTGCAATA  | 617.701144462768 | 0.341609539403196 |
| TCGCCTGACGCA  | 617.702517270869 | 0.44742228961492  |
| ATCACCAATGAC  | 617.70385592997  | 0.391130598790694 |
| GCTCTTAATGAC  | 617.712498237674 | 0.50044412292194  |
| GACAGCTATGAC  | 617.717631402744 | 0.363082873061069 |
| CCCCTGTGTAC   | 617.721418735723 | 0.160065755534271 |
| AATTGCTGTGAC  | 617.723673073226 | 0.359390255832796 |
| CACGTCAGAGTG  | 617.726643817158 | 0.307607949255711 |
| ACTGAGATGACG  | 617.737216158535 | 0.204098753478793 |
| AAATGACGGCAT  | 617.74291867913  | 0.433932973874307 |
| TTACGTGGCCAA  | 617.755229023173 | 0.534085507733183 |
| ACTTACGGTGAC  | 617.755960844053 | 0.506884389817273 |
| ATGACTTGACGC  | 617.761963448618 | 0.532465551408496 |
| CCTGGGTGACGC  | 617.763408107402 | 0.610619501912623 |
| CACACTGTCATC  | 617.77227428987  | 0.220607997931573 |
| GGACCCTATGAC  | 617.78405756084  | 0.441784299532149 |
| ATCAGACTCACC  | 617.798280045523 | 0.270430869344115 |
| GAGAATTGACTC  | 617.815230963185 | 0.352403956613569 |
| ACGAATTGCTCA  | 617.816054221684 | 0.342841381079092 |
| CATGTCTAGTCA  | 617.825250081997 | 0.57642134069641  |
| AGTCATGGGGAT  | 617.833956653458 | 0.150328063019462 |
| AGTACGTACGTC  | 617.84964575501  | 0.142783875125314 |
| ATGCTTACGTCA  | 617.852061414016 | 0.374862475330659 |
| GTGACTCGGGAA  | 617.870511471323 | 0.177262467849188 |
| GATCCATGACAC  | 617.878730612419 | 0.358662520045369 |
| CATTAATTATGA  | 617.881246763048 | 0.647034410489781 |
| CAGTCACGCTCG  | 617.891059287357 | 0.488652662902087 |
| ACGCTTTATGAC  | 617.911901598634 | 0.519991585667085 |
| GACGGTTATGAC  | 617.914395248517 | 0.507924661438824 |
| TCATCGGTGACA  | 617.923339372496 | 0.29989021560958  |
| AGGAACCATGAC  | 617.935857942058 | 0.620219833589032 |
| AAATTTTACTCA  | 617.951304096276 | 0.442776094177776 |
| ACTCACTGTCAT  | 617.953675515408 | 0.218479489619003 |
| TCAATTTGCTCA  | 617.954555830938 | 0.313551077385899 |
| ATATTACTATTA  | 617.956547983874 | 0.289459284914947 |
| ACTGCAGATGAC  | 617.960754997537 | 0.771764258080215 |
| ATGCCGTATAA   | 617.961862700341 | 0.277021895571612 |
| CGATCGCATGAC  | 617.962554827882 | 0.43764374972159  |
| TCATTGACACAA  | 617.97734505642  | 0.311156845478417 |
| CGTCATTGAAGA  | 617.987284584482 | 0.339740901277481 |

|               |                  |                   |
|---------------|------------------|-------------------|
| GTCATTTTGTGA  | 617.987767850023 | 0.402872857456738 |
| CTACATGACAGA  | 617.99021613126  | 0.424110919255224 |
| GTCATTGATGGA  | 617.99227672886  | 0.586915986992271 |
| CATCCACTATGA  | 617.998912915008 | 0.453707243935013 |
| ATACAGAATGAC  | 618.00584980321  | 0.586599263877975 |
| ATGACGCGCGGA  | 618.012651541473 | 0.392699953209379 |
| ACTGTTGTGACA  | 618.030593893284 | 0.547515518187844 |
| CAAACCTGTGAC  | 618.05185100866  | 0.449088448117928 |
| AACAGGGAGTCA  | 618.056030035473 | 0.152778484146521 |
| GGTGAGCAAAC   | 618.058060207003 | 0.211022529708032 |
| CATATTTGCTCA  | 618.06367561368  | 0.336185713147558 |
| TGACTCGCGAAA  | 618.063784865761 | 0.355224517133965 |
| AGCATTTGGTCA  | 618.090681008291 | 0.428606232916976 |
| GAGTCAGGATAC  | 618.114895436479 | 0.302379975268492 |
| CATCCAGAGTCA  | 618.124417785734 | 0.447385004976812 |
| GCCGGCGATGAC  | 618.12887330592  | 0.755439515598482 |
| ACGTCAGCGTAC  | 618.129402429556 | 0.649138876476521 |
| AACCAAGGTGAC  | 618.135698311308 | 0.691922777661997 |
| GTCATTCGCGAA  | 618.138079185405 | 0.522448716749681 |
| AGATCATGACAC  | 618.143167031119 | 0.323339884632423 |
| CTTGCAAATGAC  | 618.155074503247 | 0.561033235840483 |
| AGTATTAGCCAT  | 618.155409234201 | 0.403239109355847 |
| ATGACGACGATA  | 618.168964956493 | 0.376334660719294 |
| GGTATTTGTGCA  | 618.171180212701 | 0.277000733737664 |
| GAAAGCGAGTCA  | 618.171831650614 | 0.293375871464742 |
| AACGCGCGTCAT  | 618.175582809852 | 0.419066665114307 |
| GACTAATCTATC  | 618.187633612277 | 0.558813947589907 |
| GTCATCCGGCCA  | 618.205097079783 | 0.561846498957347 |
| AGTCAGACATAG  | 618.207022081197 | 0.269558705466321 |
| GTCACAACCTCGA | 618.212631760717 | 0.441398450806792 |
| GCTACAGATGAC  | 618.221603758418 | 0.418867840920306 |
| GTCACCCGGAGA  | 618.235084785783 | 0.373895738763909 |
| CTCACGAATGAC  | 618.251375220536 | 0.526906986043448 |
| ATTAAATTAGTC  | 618.25137522311  | 0.557952827432301 |
| CAGTGACATGGC  | 618.255687186256 | 0.396679019495733 |
| CAACTAATGACG  | 618.261455877262 | 0.298779852484876 |
| AAAGCATAGTCA  | 618.265210551468 | 0.619877886695778 |
| GTCATTGTCTCA  | 618.269889165915 | 0.420640187102442 |
| AATTCATGACGC  | 618.278210960436 | 0.562073993136635 |
| CGTAGCGGTGAC  | 618.28310376527  | 0.453398296043475 |
| ATGCTAACGTCA  | 618.290986143826 | 0.909920800371332 |
| CGTCACCCGGAG  | 618.319504235606 | 0.542225982422663 |
| ATTAGCAATTTG  | 618.321404650243 | 0.593330617772184 |
| AGTGATGTAACC  | 618.338245584278 | 0.381843633762766 |
| ATGACAAGATGA  | 618.339899972077 | 0.329674961129331 |
| ACCTGAAGAGTC  | 618.340292038747 | 0.527056575984212 |
| ACGCCGTATGAC  | 618.359232972481 | 0.147400857119756 |
| GTGTCATGCGTA  | 618.364444828354 | 0.334262492232544 |
| GTCATGCGGTCA  | 618.365274060044 | 0.536372032093091 |
| GCAGCTTACTCA  | 618.374406462664 | 0.150980942591065 |
| CATTACTATGAC  | 618.374851395391 | 0.400741172932908 |
| GTGTGTCATCA   | 618.378454991007 | 0.278254532755848 |
| GTCATATGGACA  | 618.378704352482 | 0.596745042653009 |
| GACTAATACGCA  | 618.378731657288 | 0.413335352254165 |

|              |                  |                   |
|--------------|------------------|-------------------|
| GTCATAGCCGCA | 618.385080102237 | 0.407759101268393 |
| AAGCGTTATGAC | 618.387764793947 | 0.376254593643476 |
| GTCATATCCACA | 618.398604194723 | 0.477185799191545 |
| TACGTGTGACAA | 618.401226720906 | 0.327557385086775 |
| AGAGCTCTGACT | 618.41257353914  | 0.140076137786497 |
| AATGGCGGTGAC | 618.419028596918 | 0.450240173006741 |
| CGCCCTGCATA  | 618.424580713812 | 0.246889782241302 |
| ACTAAATTAGTC | 618.434926867698 | 0.442010454959476 |
| GTCACGGAAAAC | 618.440791085062 | 0.546309981450051 |
| ACTCCGTGTGAC | 618.441792231731 | 0.779048401443056 |
| CGCCCTGATGAC | 618.442016478153 | 0.611283120655443 |
| AGCCAAGTCACA | 618.442327891541 | 0.394291551486477 |
| ATTATAAATGAC | 618.44441711633  | 0.590862021169212 |
| TTACGTGACAAA | 618.448755007401 | 0.483861803473083 |
| CGACTGGGTGAC | 618.44916901267  | 0.553050417083195 |
| AATGATGTGGCT | 618.459169999885 | 0.197606296292491 |
| GAGTCAGGGACC | 618.460401274635 | 0.274753959810682 |
| ATGACGTCTTCA | 618.466254806531 | 0.312093141478102 |
| CGCTTTGACTGA | 618.480820723264 | 0.33230278694617  |
| ACGCTCGATGAC | 618.490714812744 | 0.500929398861205 |
| GTCAAGTCTGAC | 618.499444941583 | 0.300176175474376 |
| ACTCGGTGACGA | 618.521341931038 | 0.431405204740787 |
| ACACGTTTGTCA | 618.530308233797 | 0.363387158061678 |
| GTCATTTTCGTA | 618.531023571125 | 0.238971653912004 |
| CTCTCTGATGAC | 618.537047336453 | 0.421672941126834 |
| CCGGTAATGACA | 618.542370577624 | 0.411028080885457 |
| ATGTCAACGTCA | 618.547010651047 | 0.714297619932008 |
| CACGTAATAATG | 618.552542604236 | 0.761443440067623 |
| CCAATCTATGAC | 618.559406386196 | 0.365617891024252 |
| TGACTCCATAA  | 618.5754744289   | 0.405420388424279 |
| CAGTATAGTGAC | 618.577759894742 | 0.563766141717237 |
| ATCTCCTAGTCA | 618.598696735809 | 0.333222029701903 |
| CTGTTGTGTCAA | 618.600889867281 | 0.665267166454029 |
| ATACCGTCATGA | 618.603089782954 | 0.465723434111195 |
| ACGTCATGCTTC | 618.610922512659 | 0.206036506443366 |
| GTCATTCGTCAA | 618.63818520438  | 0.648612023050653 |
| CAATTCAATGAC | 618.652920214978 | 0.486444749513316 |
| ACGCCTTATGAC | 618.659985914871 | 0.423265464667804 |
| AATGATTGAGTC | 618.66211837922  | 0.492750048878955 |
| CACATCTATGAC | 618.663966380393 | 0.402672488734692 |
| ACAAGGGATGAC | 618.665628546523 | 0.33022298799363  |
| CGCATCCAGTCA | 618.665758501475 | 0.321141041051571 |
| GAGTCAGTTACA | 618.671641977977 | 0.42921981623461  |
| GTCACTGTATAA | 618.696101511018 | 0.850488659589413 |
| CCATCGGTGACG | 618.705115068367 | 0.628709073118038 |
| CCGAGGTGTGAC | 618.708269074815 | 0.333664766690867 |
| ACCGTCTATGAC | 618.73088092654  | 0.477663786162138 |
| CACGCTTATGAC | 618.737204733276 | 0.346421676696515 |
| AGACTCACTCGC | 618.741280757173 | 0.346088869667172 |
| CTCGGGAGTCA  | 618.748004148631 | 0.721661567177025 |
| CGTATGCGTGAC | 618.764795466001 | 0.270902680448381 |
| GTATGATGCAAC | 618.768660367748 | 0.20494856655703  |
| GTCATCCATAAC | 618.77249851381  | 0.132264739186876 |
| ACTATGGAGTCA | 618.778445660704 | 0.311454072323745 |

|               |                  |                   |
|---------------|------------------|-------------------|
| CCACAAGTCATA  | 618.796711652507 | 0.578967592529698 |
| CTTGTCTGAGTC  | 618.807547202103 | 0.673691874502199 |
| CCCTCGAATGAC  | 618.816529666641 | 0.535207577337539 |
| GAACCATATGAC  | 618.817939472297 | 0.589300548473163 |
| AGCACTGACACA  | 618.848315946725 | 0.401254337768805 |
| CTGTCACGACAG  | 618.850566182198 | 0.984324174999704 |
| CTGATGCAGTCA  | 618.864199317778 | 0.479211038076874 |
| GTACATGAATCA  | 618.866394862922 | 0.597489903306108 |
| ACGTGACGTGCC  | 618.884617148911 | 0.583350825442638 |
| CGTCATTCCATA  | 618.888416062164 | 0.294347554375607 |
| CACCTTGCGTCA  | 618.892665945633 | 0.238772828753072 |
| AATGCGTAGTCA  | 618.903503775184 | 0.626243245425626 |
| ATATCGGATGAC  | 618.904707613334 | 0.251849129319191 |
| GACCTGTGACGC  | 618.910207755734 | 0.284284041261267 |
| CGTCATTCTGTT  | 618.931955451006 | 0.351902194671315 |
| ACGTCACCCATA  | 618.932574238063 | 0.276209481805378 |
| AGTCACGCCGCA  | 618.93859351797  | 0.309862240981937 |
| ACAATTAATGAC  | 618.96247532976  | 0.419296372248387 |
| GGCACGAATGAC  | 618.966340215547 | 0.270471289621666 |
| TAAACCTAGTCA  | 618.972920120937 | 0.227486679586127 |
| ATACAACATGAC  | 618.978833365344 | 0.49399255337241  |
| CCCGAAAATGAC  | 618.979810000421 | 0.558738196646105 |
| GATGACAGCTAA  | 618.987113374486 | 0.384751324112368 |
| GCCCAAAAATGAC | 618.987258409687 | 0.402407877725972 |
| AAGACACGTGTC  | 619.002074413453 | 0.315975394347758 |
| GAGTGAGTCCGA  | 619.006272723298 | 0.357721637389607 |
| TCGCAGTAGTCA  | 619.010525833233 | 0.612220836672437 |
| CCAGGTATGACC  | 619.021246932759 | 0.481242338670305 |
| ACATCAGGTGAC  | 619.022288270733 | 0.659342870921375 |
| GTCATAAGAAGA  | 619.053642478147 | 0.240754121200829 |
| CTACAAAATGAC  | 619.056770229191 | 0.395063054152991 |
| GGGCCAAAATGAC | 619.069457128602 | 0.488848038443282 |
| CAGGAGAATGAC  | 619.069989957044 | 0.42449500982268  |
| CGATTCCGGTGAC | 619.084548802439 | 0.319656344112998 |
| CGTCATGGATAC  | 619.089060972249 | 0.45724457874688  |
| GTCACAATTCAC  | 619.092809798066 | 0.328667625624533 |
| ACACGGTGACAA  | 619.094892573618 | 0.46034761571736  |
| TCAGGATGACCA  | 619.09576208392  | 0.585909015069924 |
| ACACCTCAGTCA  | 619.100120564438 | 0.145311449275706 |
| CCTTATCTATGA  | 619.106338517042 | 0.343280502398838 |
| ATTGTGAATGAC  | 619.111160650256 | 0.293373021055813 |
| CTTTCTACGTCA  | 619.120137144878 | 0.378795202785183 |
| AAAAGAGATGAC  | 619.145647857011 | 0.199679998422304 |
| CCGAAAATGACA  | 619.157688959621 | 0.370399324642687 |
| AGGTGTCTGACT  | 619.160136200264 | 0.571358976742954 |
| CTCAAATGACAG  | 619.187309423867 | 0.44716647465114  |
| CCATTGATGACG  | 619.192636292981 | 0.500662097601155 |
| ACATAGTGTGAC  | 619.196813315151 | 0.330445858487301 |
| TATCGGGAGTCA  | 619.205138352847 | 0.318271233986536 |
| ATATGCGAGTCA  | 619.221896468176 | 0.602615490323308 |
| ATCCCGGTGACA  | 619.232411177839 | 0.306867254361672 |
| TGACTCCACTAA  | 619.238718513173 | 0.303678066274542 |
| ATCTCCTATGAC  | 619.241323048818 | 0.407236824434081 |
| ACCAGAGATGAC  | 619.242506935889 | 0.438618273634918 |

|               |                  |                   |
|---------------|------------------|-------------------|
| CAATGTGGTGAC  | 619.24998194861  | 0.417694589589017 |
| ATGTCAGTGTCA  | 619.258219821362 | 0.456115801565549 |
| GAGTCAGGCATC  | 619.26500201182  | 0.334894854811828 |
| ATTACTCAAGTC  | 619.266629164159 | 0.393807705844771 |
| CCAGCTGTGTCA  | 619.267109395629 | 0.477423642938177 |
| GCCTTGACTAAA  | 619.270340376233 | 0.360187997898508 |
| GTGACCAAGACA  | 619.281692580853 | 0.349005886775    |
| CTGACTCCGAGC  | 619.283301595351 | 0.259165269558241 |
| AGCCATGACCCA  | 619.300593996162 | 0.449217461836644 |
| ACGTCACCGTTG  | 619.336798164212 | 0.563792885460036 |
| ACTATCGTGTCA  | 619.337128171205 | 0.453283306381301 |
| GCTAATGGCTCA  | 619.337601339177 | 0.464465836750414 |
| GTCATCACAAATA | 619.343038271587 | 0.446595750010394 |
| GTCACCAATCTA  | 619.344164864936 | 0.510812272737098 |
| AGTCACTTCGCC  | 619.348353285765 | 0.16356497369571  |
| GTCATAATATAA  | 619.349317934166 | 0.582798983482763 |
| TATCTTGTGTCA  | 619.365083193518 | 0.345752198060425 |
| ATCACTGATTCA  | 619.371846726242 | 0.399767325503952 |
| ACTCTAGTGACT  | 619.373159867338 | 0.318285734919154 |
| ATCTCCGGTGAC  | 619.379939693752 | 0.529108641971949 |
| TGTCATTGGACA  | 619.391491279867 | 0.466380330625771 |
| CGTCATTAGATA  | 619.391877155982 | 0.441746191438408 |
| GTCTGTACGTCA  | 619.39414289824  | 0.703015635951405 |
| CTGTACTAGTCA  | 619.399764262345 | 0.334781576062693 |
| AGTCACGGCTAG  | 619.409062493804 | 0.417371439789126 |
| AATATGTGACAT  | 619.414081529116 | 0.286789622611526 |
| TCCCCTCGGTCA  | 619.415413933147 | 0.467125149914306 |
| GGAATATATGAC  | 619.428603080229 | 0.306847538583187 |
| ACCATCTGTGAC  | 619.436565652954 | 0.517769196871555 |
| CAATACAATGAC  | 619.446295094996 | 0.323810146553799 |
| GACTAATACAAA  | 619.45413721761  | 0.303812336933473 |
| CTCTGGAATGAC  | 619.455855378191 | 0.311605579667125 |
| AGTGTCATGTTG  | 619.458884120329 | 0.456484804173353 |
| AGATTGATGACG  | 619.460072490896 | 0.210843728283378 |
| CCGATTTGTGAC  | 619.471562100653 | 0.435493792166363 |
| AATGATGCAATC  | 619.473127855616 | 0.392366196340763 |
| CGTCATATGCTC  | 619.474314985428 | 0.393543112753996 |
| ATGAGTGTACCG  | 619.474398686406 | 0.481262222950879 |
| GGCAACTATGAC  | 619.49375321487  | 0.398307953231417 |
| GTCACCCTGGAA  | 619.495768490555 | 0.581334397151434 |
| ACTGATAGTGAC  | 619.496610191877 | 0.289392055428277 |
| AACCTCGTCATG  | 619.498327393027 | 0.374382031241921 |
| ATTGGTGGTGAC  | 619.506953540493 | 0.574772947492526 |
| CTATGAATAATA  | 619.510653005806 | 0.359243838303529 |
| GACTGACTGCAC  | 619.517706676341 | 0.570597859715825 |
| GGTTTAGACTCA  | 619.520802054862 | 0.224912244113837 |
| GCTCGTGATTCA  | 619.526533185289 | 0.435354029551441 |
| CAGATGTGACCA  | 619.533078986307 | 0.443198967297544 |
| ATAACTTTGTCA  | 619.552027953142 | 0.459314138459037 |
| ACGTCACAGCTA  | 619.573363018336 | 0.481757904134891 |
| ACTTATATGTCA  | 619.575656175223 | 0.591975619715473 |
| ATTATCGATGAC  | 619.578834698684 | 0.494023264661345 |
| AAACGGAATGAC  | 619.579226324193 | 0.286312882496188 |
| TCCAACACGTCA  | 619.581870344785 | 0.648830758523568 |

|              |                  |                   |
|--------------|------------------|-------------------|
| ACGGCATAGTCA | 619.586075850701 | 0.502143335369199 |
| CGTCTAAGTGAC | 619.589051433679 | 0.948584529466684 |
| CGAAGATGTGTC | 619.59835875394  | 0.602472580614962 |
| GACACGTGTCAA | 619.617177131238 | 0.6326635795772   |
| GGCTAATATGAC | 619.622916961325 | 0.503969307036841 |
| GTCATGGTTACA | 619.622936919958 | 0.493901438277667 |
| CGTTTCGTGACA | 619.633316133274 | 0.660744169183317 |
| CGCCAAGACTCA | 619.639333391533 | 0.63850921047679  |
| ATGGGGAATGAC | 619.639795581724 | 0.562713759276342 |
| TATAATATGTCA | 619.64205501232  | 0.301476324242088 |
| AACTAGTGAGTC | 619.663506344527 | 0.30937748948515  |
| ATCAGCTAGTCA | 619.665181301389 | 0.560537618494115 |
| TAGGTTGACTGA | 619.668281804485 | 0.450278205089243 |
| TCTTATCCGTCA | 619.704802170112 | 0.341951352151204 |
| GACTCAGGTGAC | 619.715514540453 | 0.28586860635116  |
| CGTCACATGTCA | 619.722234188205 | 0.363291431583352 |
| ACCACTGAGTAA | 619.723643349462 | 0.217533463986624 |
| ACCACCTAGTCA | 619.723983747835 | 0.157646590433026 |
| CGACCTGATGAC | 619.73539448673  | 0.546756238082378 |
| GCCGTCCAGTCA | 619.738584830248 | 0.575094918773124 |
| GAATGACCACGA | 619.740115575263 | 0.134538297512826 |
| AAACGGTGTAC  | 619.742608182437 | 0.468641739054315 |
| CGGTATTATTCA | 619.743698661821 | 0.573472897771824 |
| ACTCATAGTAAA | 619.787390778409 | 0.644585593773092 |
| CGATGATGAATC | 619.788465640908 | 0.646083938017127 |
| ACCATTTGTC   | 619.789922788364 | 0.423814397013066 |
| CTGTATTGACTC | 619.793082328143 | 0.510280390325108 |
| ATACGCGGTGAC | 619.814046728831 | 0.539640851798125 |
| ACTCATCAGTAA | 619.818527232481 | 0.210725013966196 |
| ATACTGCGTGAC | 619.827467709927 | 0.659556545644365 |
| CGTCATTGGCTC | 619.833052198324 | 0.438017791855704 |
| GTATCTATGTCA | 619.841274720228 | 0.295681161742403 |
| AACCCGACTCAT | 619.842066018134 | 0.223182744861185 |
| ATGATGTAACAG | 619.853370649627 | 0.279883758508984 |
| GCCGGTCATGAC | 619.857186146557 | 0.291550203405707 |
| CGATCCGTCAGA | 619.871478436315 | 0.407181650041145 |
| CCTACTAAGTCA | 619.897043909434 | 0.372968948073047 |
| ATCACTTCGTCA | 619.898584390956 | 0.296690619368474 |
| GTCATTATAGCA | 619.902499825167 | 0.319921441979267 |
| CGCCCGAGTCAC | 619.903812150982 | 0.143831718269213 |
| ATAGTATTAGTC | 619.909173966797 | 0.500305841625908 |
| ATATACGTGTCA | 619.911049112659 | 0.55817496184499  |
| CGAGGTGAATCA | 619.927453047573 | 0.449773911040309 |
| CGTCATCTGTAC | 619.936793266084 | 0.341346587138428 |
| ATGACGGTATCC | 619.967512056558 | 0.498196129176672 |
| CGCAATCTGTCA | 619.96787730575  | 0.551407183650121 |
| GAAGTTGATGAC | 619.990439335631 | 0.315689828276391 |
| TGACTAGACCAA | 619.999957156864 | 0.642833832085455 |
| CTGAATGGGTCA | 620.01406449628  | 0.336993190882934 |
| TATAAGCAGTCA | 620.03415380558  | 0.445020824933111 |
| CGCGATTACGCA | 620.045265039628 | 0.344199669906068 |
| AGACCGAATGAC | 620.046749517292 | 0.303750077390991 |
| AGCTGACTGTAT | 620.057630589982 | 0.605845099908117 |
| AGGTCGAATGAC | 620.061108622765 | 0.368828539949559 |



|              |                  |                    |
|--------------|------------------|--------------------|
| CATAGGTGACAC | 620.070640024759 | 0.441473785807001  |
| ATGTCAGATGAC | 620.074488617452 | 0.590137669706301  |
| CCACTAGAGTCA | 620.075926543463 | 0.288832038039915  |
| GTCATTCTCTCA | 620.084140884892 | 0.318165994387994  |
| ATGAGTCCCAAG | 620.093017754954 | 0.499657876292014  |
| GTCATAAAATTA | 620.107129295021 | 0.27673572327336   |
| CGGCGTGTGTCA | 620.116205376138 | 0.502438024921609  |
| ATATTGCGTGAC | 620.124068191614 | 0.496686283842746  |
| TCTACCTAGTCA | 620.124952000081 | 0.217340760410779  |
| GTAGCATGACAC | 620.132711863922 | 0.388766350250265  |
| AGAGTCAATACG | 620.135078887248 | 0.664882091059868  |
| TGACACGTTAAA | 620.152315396159 | 0.451852522930781  |
| ATGACCATATCG | 620.161750630154 | 0.394040468243424  |
| ATACCAATGACG | 620.162684629256 | 0.583180669787124  |
| GAACTGCGTGAC | 620.166313567724 | 0.861282516732793  |
| ACTCATCCGGTG | 620.189506775873 | 0.354286083538324  |
| GTCATCCGGGAC | 620.206645830892 | 0.327153382462712  |
| GAATTAGTCGCA | 620.206981612272 | 0.395754075842167  |
| AGCAAATTAGTC | 620.229212555335 | 0.450352966448159  |
| GTCATCTCCCGA | 620.229507807009 | 0.308728376289038  |
| AATTTTGATGAC | 620.232448165477 | 0.515360342286992  |
| CGCTAAGTGTCA | 620.233876080598 | 0.616833517004956  |
| CATCTTAAGTCA | 620.240797008968 | 0.702801232790745  |
| AGCGCGGAGTCA | 620.245984724256 | 0.16975089692629   |
| TGACGCTAGCAA | 620.251461828864 | 0.545836119432382  |
| CCGTATTGACTC | 620.258863370372 | 0.389149225552087  |
| AGTCAGAGCGTC | 620.262838649288 | 0.547666635132911  |
| GCTTACTAGTCA | 620.265622065098 | 0.402093810121418  |
| CGTGCCTAGTCA | 620.268373267422 | 0.421073831041128  |
| GTTCTTGTGTCA | 620.269326731357 | 0.394099060249139  |
| AGTCACCCACG  | 620.272910987153 | 0.0869321925825533 |
| GTTCTAGACTCA | 620.277750185273 | 0.776647751398038  |
| CCAGACAATGAC | 620.325735603746 | 0.370168275725142  |
| ATCGAAGATGAC | 620.327239853318 | 0.173770473027763  |
| ACGTCATGTAAT | 620.3297111728   | 0.843703644532229  |
| ATGATTGCATCA | 620.332907191122 | 0.635069124432317  |
| TGACGCGTCTCA | 620.339419436679 | 0.506321173359272  |
| CACTTAGTGACG | 620.340562862518 | 0.607508852900481  |
| CAGTAATTAGTC | 620.352694266616 | 0.436896022767287  |
| GGGACCAATGAC | 620.357355220219 | 0.292932192434422  |
| GCGTAATGACCC | 620.357792625963 | 0.488010317449513  |
| ATGTTTGACACA | 620.358384523131 | 0.573955000412856  |
| ATCGGATTAGTC | 620.37537525555  | 0.390508211574609  |
| AGTCACTTCAGA | 620.381234570781 | 0.382014976232717  |
| AATCAGTGACGT | 620.396164860245 | 0.408809747343358  |
| CCATTTACGTCA | 620.401138635441 | 0.408175492914809  |
| TGAGTAAGCCCA | 620.404324786009 | 0.704382716170409  |
| GTCACCTCATGA | 620.405703399546 | 0.617121805848839  |
| ATGACACTCTTC | 620.410585160453 | 0.219117149728401  |
| TGACGCAGGACA | 620.420614750666 | 0.322661986719622  |
| GACTAATATCAC | 620.422855571853 | 0.502917179404358  |
| GATTCTTTGTCA | 620.434405425307 | 0.378613205385995  |
| ACTCATACATTA | 620.448458457411 | 0.154168706362677  |
| GATACGTGTGAC | 620.449457087664 | 0.632160721595899  |

|               |                  |                   |
|---------------|------------------|-------------------|
| GACTCGTGACAC  | 620.450485973041 | 0.722808821430258 |
| GAATTACACACA  | 620.466443513228 | 0.378411782471601 |
| CAGTCACGCGAC  | 620.467534137588 | 0.345469991436934 |
| AAACTTGTCACT  | 620.468065867554 | 0.300204531078755 |
| GAGTTGTGACGC  | 620.478056480616 | 0.698953962949234 |
| CAATTACGCAAC  | 620.482646301469 | 0.293804119619956 |
| AGTCACGAGTTG  | 620.504783612944 | 0.243902321037915 |
| CAGTCAGCGTTA  | 620.506028242282 | 0.526275880420349 |
| GAACACGTCTTA  | 620.506414211965 | 0.438523587091906 |
| ATTTGCGTGTCA  | 620.513737888234 | 0.715244149012442 |
| ATAAGTTTGTCA  | 620.52191796571  | 0.608232680500886 |
| AGAAAAGGTGAC  | 620.532595141099 | 0.343709116538198 |
| TGACTGCAAACA  | 620.563971907952 | 0.682114585950077 |
| GTCATTTATGGA  | 620.567908179045 | 0.452311046804769 |
| ACTATAGACTCA  | 620.56798865282  | 0.280990934231349 |
| GACTAATGACCA  | 620.574390971314 | 0.535851497576168 |
| CCTAAATTAGTC  | 620.574990750657 | 0.730079111293835 |
| CGGAGGTGACAC  | 620.5756749051   | 0.48346531526519  |
| ATCAAGTCATCG  | 620.576974138004 | 0.374468056942017 |
| GTCATTAAGCAC  | 620.597619965248 | 0.445487092177776 |
| ATACGGTGACCA  | 620.609588500869 | 0.542528628621109 |
| AATCCGTATGAC  | 620.61165843148  | 0.393507119226582 |
| GAAAGGTGACAC  | 620.622671354252 | 0.254054859029513 |
| GTCATCGGTTAA  | 620.625180008735 | 0.441008808967046 |
| GCCGACTGTGAC  | 620.635252748452 | 0.472517908658984 |
| CTGTGGCATGAC  | 620.63770805261  | 0.575693556543511 |
| CGAAGCTTATGA  | 620.645331156302 | 0.604801106708765 |
| CCATGTAAGTCA  | 620.647976561166 | 0.600281303125255 |
| GTAATGTCTGAC  | 620.650085302283 | 0.567355246676361 |
| CCAAGTGACAGA  | 620.653728477904 | 0.362739280890018 |
| CAACTGCGTCAG  | 620.654922587275 | 0.398318549129138 |
| GCTATTGATGAC  | 620.656716104228 | 0.307028081734227 |
| GTCATATGCCCA  | 620.658631441502 | 0.436611679452916 |
| GTCAGAGCCTTA  | 620.661471773159 | 0.828300603673862 |
| TAAGACCAGTCA  | 620.695338960038 | 0.533256413848606 |
| CCTCGCGAGTCA  | 620.699024763354 | 0.406495549071753 |
| CTTCAGAATGAC  | 620.699803896333 | 0.572750670666184 |
| GTGTCATGGTTA  | 620.71279160975  | 0.315146698821619 |
| CTAAGACAGTCA  | 620.717567346851 | 0.700612116320778 |
| GTCATGCCGAACA | 620.718009143835 | 0.6489193892235   |
| GACTAATTGGCC  | 620.718679423329 | 0.46965780973093  |
| AAGATTGACTGA  | 620.74316223846  | 0.401993640451036 |
| ATATCGTCACCC  | 620.749138660388 | 0.377303625402357 |
| ATGAGTCCGCAG  | 620.754016719403 | 0.422925626329256 |
| GCATCACAGTCA  | 620.754512647507 | 0.277931113890059 |
| CTCTACGTGTCA  | 620.758306203763 | 0.45306623445261  |
| AAAACCTGACT   | 620.769904898047 | 0.523094425890415 |
| AGTTACGCGTCA  | 620.772423463056 | 0.371580060725261 |
| ATGCAGTCAGAA  | 620.798224359323 | 0.27064123660254  |
| AAATTTGGTGAC  | 620.807662256298 | 0.466571098702285 |
| GGAATGGAGTCA  | 620.81986331973  | 0.187179122503379 |
| TCACTAGACTCA  | 620.824945157685 | 0.554780794691706 |
| TCCGCTGAATCA  | 620.826949099828 | 0.487274960651264 |
| GAAAATTGTGAC  | 620.829962231774 | 0.527602340346973 |

|               |                  |                    |
|---------------|------------------|--------------------|
| ATGAGGTCATCA  | 620.834123328152 | 0.329917176181162  |
| AGTTGATATGAC  | 620.837564320628 | 0.135013282930526  |
| TCACTATGATGA  | 620.856312936101 | 0.954330804431991  |
| TACTGAGAGTCA  | 620.857063950279 | 0.623282105713029  |
| GCGCTCTATGAC  | 620.857475865774 | 0.401689349128676  |
| CGTCACAAGTCA  | 620.870960686574 | 0.370606924436866  |
| TCATATCAGTAA  | 620.89638795276  | 0.0999869318282251 |
| GACTCCCAGTCA  | 620.900855582368 | 0.337054413962071  |
| CGGCGTGATGAC  | 620.912635475508 | 0.39797246638922   |
| ACAGGGATGACG  | 620.918490678095 | 0.226924172770746  |
| AGATCCGATGAC  | 620.929042527972 | 0.563519453564096  |
| CGATCTGAATCA  | 620.939503553663 | 0.496741333339605  |
| TTCGTCACTAAA  | 620.943404182397 | 0.350117505540027  |
| CCGACTTACTCA  | 620.944883995211 | 0.318145540995816  |
| GGCGATTATGAC  | 620.965171375553 | 0.437999085734213  |
| GTCACCTGTTGA  | 620.969945693134 | 0.317955140925756  |
| AATATTGTCACC  | 620.992826961542 | 0.2541090573256    |
| GTCATTGTAATA  | 620.993952945587 | 0.332378916913247  |
| CGTCATTTGGCC  | 621.000004231412 | 0.341044235311242  |
| CTGACGTGACGC  | 621.012740442346 | 0.490107942968875  |
| TGACGCGTTCAA  | 621.019429538614 | 0.458297959939888  |
| AGTGTCATGAGA  | 621.046067970108 | 0.311714189948527  |
| ATAAGTGATGAC  | 621.046801407848 | 0.41800833549643   |
| ATGAGTACGAGA  | 621.054858302695 | 0.324323106860634  |
| GATGACAGCGTA  | 621.071525131804 | 0.242739634626944  |
| AAATCTGAATCA  | 621.084379416411 | 0.347738100599469  |
| AGAACATATGAC  | 621.09039255192  | 0.412037965246953  |
| CACATATGACCA  | 621.093151399064 | 0.482119576739413  |
| ATGACATCGGCC  | 621.093850891965 | 0.658010795589649  |
| AATCTCGTCACA  | 621.09431904054  | 0.2983182931181    |
| ACTATTATATGA  | 621.108869054841 | 0.978720869367663  |
| CGCCTGATATGA  | 621.112687840963 | 0.74942108147334   |
| ATCGAGATGACG  | 621.115388593281 | 0.347922462260869  |
| ACGAATTGACTC  | 621.127103517442 | 0.567160929886945  |
| TCATAGTAGCAA  | 621.13043018063  | 0.69170698177847   |
| GTCACCTCGGTAA | 621.132759233244 | 0.654405449138793  |
| AAGTCTTATGAC  | 621.13334535236  | 0.48744664498189   |
| CCTTAGTGACAC  | 621.134380971518 | 0.328973099123518  |
| AGTGGCTATGAC  | 621.138351841337 | 0.339546777670769  |
| AGCAACGGTGAC  | 621.147537438781 | 0.492314652164093  |
| TGGTCACACTAA  | 621.154936849573 | 0.607532375949783  |
| CGCGCTGATGAC  | 621.158832585635 | 0.378669154424399  |
| CCATAATGTGAC  | 621.160203471803 | 0.51721673327895   |
| GAATGAGAGTCA  | 621.170444697729 | 0.212366233742954  |
| ACGTCACCGAGT  | 621.171366428647 | 0.63650023979356   |
| CGTCATCTGGAG  | 621.175112407514 | 0.440769413587604  |
| AAGAGATATGAC  | 621.189148353517 | 0.229931361378599  |
| AGACCATATGAC  | 621.193852814471 | 0.513681095518332  |
| AGATTCACTCAT  | 621.196433176332 | 0.410431391095071  |
| TGACATGTAACA  | 621.201918853057 | 0.638172738520706  |
| GCAGATTGTGAC  | 621.203875467952 | 0.319547523114286  |
| ATAGGGACTCAT  | 621.206207778864 | 0.390480685564849  |
| AGTAACGTCATG  | 621.213373080372 | 0.14135141026936   |
| AAAGTGAATGAC  | 621.217163818398 | 0.29564431165649   |

|              |                  |                   |
|--------------|------------------|-------------------|
| CGGTGGCTCACA | 621.219000225593 | 0.41002653388744  |
| AGCGTCAGTGAC | 621.219031604489 | 0.51950371873783  |
| CGACTGGACTCA | 621.230789908799 | 0.531144447243805 |
| CCTTACTAGTCA | 621.233161009972 | 0.234172877698896 |
| GTCATGTCGTAA | 621.242240853438 | 0.577306409301665 |
| CTGTTTGACTGA | 621.242329601375 | 0.461518373029197 |
| ACGTCACCTGCG | 621.243796309241 | 0.512447438742895 |
| ACCCTGCAGTCA | 621.248818666462 | 0.54476432721374  |
| AGTGACTAGCAT | 621.252197810479 | 0.452163689016468 |
| CACATATGTGAC | 621.271529371421 | 0.575890658792955 |
| GAGTCCGATGAC | 621.280405277587 | 0.585692454668188 |
| GACGTTTGTGAC | 621.283832683379 | 0.461888995297142 |
| GACGCAGATGAC | 621.292259622246 | 0.494453826210076 |
| AGACCGCGTCAC | 621.294553803308 | 0.570305655471325 |
| ACGCTTGCGTCA | 621.305094295231 | 0.265306703121169 |
| CATCTTGTATGA | 621.327935220494 | 1.02349867614173  |
| CCATAAATGACG | 621.334919442324 | 0.483696161640202 |
| CAACCTACGTCA | 621.346161428794 | 0.468224483132254 |
| AGTCACGGAAGC | 621.350199551256 | 0.490679189615296 |
| ATGACATTGTTG | 621.353417803195 | 0.528616112341991 |
| CATACATAGTCA | 621.35370721508  | 0.548365739830599 |
| GATGACTTGTGA | 621.35399336296  | 0.303249810173111 |
| ACAGCTGTCATA | 621.357787540426 | 0.37794100923054  |
| TATGACGGGGCA | 621.360449624445 | 0.387126211446777 |
| GCGTTGACACAC | 621.368980302887 | 0.459913432708524 |
| TCATTTGTGACA | 621.371996059339 | 0.475820607679988 |
| GGGTCATCTGAC | 621.373816667709 | 0.360765198209072 |
| CCATGTAATGAC | 621.388454078828 | 0.500382143774834 |
| TGACTTGTGCAA | 621.389806692532 | 0.495700183934485 |
| CACGCAGTGTC  | 621.395925433573 | 0.590679939741729 |
| AATCAGTGAGTC | 621.39599539301  | 0.500043860528834 |
| GATGACAGTCAA | 621.407406346284 | 0.234570121169058 |
| CAGTCCTAGTCA | 621.409669928522 | 0.419272621905652 |
| AACATGTGTGAC | 621.414268689199 | 0.559840945074162 |
| TCGTAGTAGTCA | 621.420524800024 | 0.53842128490383  |
| ACGATATTGTCA | 621.426911945257 | 0.492640511351844 |
| GGTGGCGTCACA | 621.429021219142 | 0.273378760380516 |
| ATGACCGTCATA | 621.432209019966 | 0.192992489605155 |
| ACATGCATGACG | 621.438316804728 | 0.558589648065239 |
| CTCACTGTGACA | 621.443100759293 | 0.310788128868882 |
| ATAGCCTGACTC | 621.443335367262 | 0.369912858783317 |
| ACACCGGTGAC  | 621.443550786109 | 0.203297548150152 |
| GGCACCGGTGAC | 621.449157053547 | 0.510910640725797 |
| CTCTTTGACTGA | 621.44933251542  | 0.16570479028959  |
| CAGAGTCAATGA | 621.457923987916 | 0.12832515177842  |
| TCCATGGTGACA | 621.466888048211 | 0.598813319880012 |
| CGTCATTGCCGA | 621.467961688878 | 0.52965216280063  |
| CATCATATGTCA | 621.467998247869 | 0.467164239875592 |
| CGGACTAGTCAG | 621.470158716715 | 0.426607011767681 |
| GGTCACACCGAA | 621.471931154018 | 0.730578783443667 |
| AACGATGTCATT | 621.483292788171 | 0.49064043445378  |
| CGATTGACGTCA | 621.489048480849 | 0.744698756480513 |
| AGTCATGGGGTG | 621.499924190283 | 0.273912380160673 |
| AGTAGGAATGAC | 621.504531785547 | 0.220138828577323 |

|                |                  |                    |
|----------------|------------------|--------------------|
| AGAGTCAAAGAA   | 621.507326631143 | 0.182877996750996  |
| ATGACGTCTACG   | 621.509671006548 | 0.421179559654252  |
| CCGTACAATGAC   | 621.517119159333 | 0.463830129735345  |
| GTCACCTATTTA   | 621.517875828946 | 0.480339939061849  |
| ACTAATGAGCCA   | 621.519187317308 | 0.15218420772242   |
| ACTACTACGTCA   | 621.529156079551 | 0.427132973064439  |
| CCTATAGTGACG   | 621.529561300631 | 0.737847483598988  |
| GTGTCATGGTGA   | 621.531578234371 | 0.280230568972937  |
| GATGAAAATGAC   | 621.548334514309 | 0.304188014705641  |
| GATGACAGCTCC   | 621.567118890317 | 0.186001231650404  |
| GTCACCATTA AAA | 621.574102085511 | 0.5024136290206    |
| CAGATCTGACTG   | 621.577132742255 | 0.412757589606983  |
| ACGATACGTCAA   | 621.578444817765 | 0.329921301288621  |
| CCTAATGGTGAC   | 621.584547042156 | 0.512459423282975  |
| ATGACAAAAGGTA  | 621.589807331979 | 0.178165161764439  |
| CTTCGTTATGAC   | 621.606736592535 | 0.455570834116613  |
| GCCTCCGATGAC   | 621.616082368716 | 0.342100945459684  |
| AGGTGCTATGAC   | 621.617422905923 | 0.285263222556076  |
| CGGACCTAGTCA   | 621.652271624029 | 0.389582274682299  |
| CCTACTGGGTCA   | 621.660934672881 | 0.615435516562372  |
| CAATTGTGACAG   | 621.668139296973 | 0.410573844208888  |
| CTATGGCGTCAC   | 621.668880715619 | 0.229601046899825  |
| CTTAGAGATGAC   | 621.670927041016 | 0.143560022498728  |
| TGACTATGTGAA   | 621.673914368174 | 0.483699514743411  |
| ATACGCATGACA   | 621.675241789939 | 0.319386431737046  |
| ACTCATGTATGA   | 621.675731530576 | 0.520259935398242  |
| GAGTCAATGCAC   | 621.689745101188 | 0.445412161810905  |
| ACTCATTACTAA   | 621.713323074209 | 0.448943420734076  |
| CCGTGACAAGTC   | 621.723603003165 | 0.619273656204768  |
| GCGTCACAGTGA   | 621.727004829996 | 0.273975831643838  |
| GACTGCTGTGAC   | 621.753400553352 | 0.514261922688618  |
| GGATAGAATGAC   | 621.766794498865 | 0.459152363468879  |
| GAGTCAATTC AA  | 621.773408533242 | 0.322783771626929  |
| ATATTTTGGTCA   | 621.7880984353   | 0.374288250915404  |
| CCGACCTATGAC   | 621.792736777232 | 0.510506072019163  |
| TCCTATGTGACA   | 621.811925891251 | 0.343574102178826  |
| TCAGAGTAGTCA   | 621.825204270404 | 0.473147771066007  |
| ATGACCGAATTG   | 621.828133365602 | 0.524434798909057  |
| TGACTCCTGACA   | 621.864507773118 | 0.194518380731672  |
| TCATCGACGTCA   | 621.89642617095  | 0.39547349263089   |
| CCACCGAATGAC   | 621.897323969152 | 0.226086670903107  |
| CGATAAGTATGA   | 621.897397924061 | 0.553168161798235  |
| GACTCGGACTCA   | 621.910271361843 | 0.566945879363612  |
| GGGAGAAATGAC   | 621.912450205838 | 0.272228605105017  |
| CCGACAGAGTCA   | 621.931727396153 | 0.779647975402869  |
| GTCACGATATCA   | 621.932741186671 | 0.439339062405533  |
| CTAGCTGTCATA   | 621.944805637646 | 0.0611236767771968 |
| ATCCCCAGTCAT   | 621.948607339469 | 0.338612194001955  |
| GTA ACTGCTGAC  | 621.949000228963 | 0.644453299830034  |
| GGCTCACAGTCA   | 621.964464226267 | 0.666613075131688  |
| CGACCAAATGAC   | 621.972198805362 | 0.651195503673226  |
| CCGGTGAATGAC   | 621.977963342075 | 0.427228685133719  |
| GGAAATTCGTCA   | 621.98309970782  | 0.428515103185612  |
| TCGAATTACGCA   | 622.014531072351 | 0.416035798803496  |

|               |                  |                   |
|---------------|------------------|-------------------|
| GTCATTCAGCAA  | 622.019650992945 | 0.330059290462294 |
| TATAGTGAATCA  | 622.023698644369 | 0.448511349381163 |
| ACGTCGTGACTG  | 622.055965487676 | 0.442849511759386 |
| ATGACGCCTATA  | 622.064936946673 | 0.514257033772532 |
| TACGATCCGTCA  | 622.065975443614 | 0.392473993095235 |
| GAGCCCCGATGAC | 622.066246230956 | 0.395376011190439 |
| GACTCAGTGTCA  | 622.070073566387 | 0.55300678077293  |
| GATTCGAATGAC  | 622.070942071798 | 0.133899465243733 |
| ACGTCACTACGG  | 622.078456524192 | 0.335659770218991 |
| CAGTCAGTGGTC  | 622.119643141492 | 0.55368800970607  |
| ACGTCACTACTA  | 622.138116658458 | 0.33998082244797  |
| GTCACGAAATGA  | 622.146649965245 | 0.479435886690126 |
| CTCGCCGATGAC  | 622.14862396204  | 0.411457899910568 |
| GTCATATGTATA  | 622.154473803701 | 0.557587812296831 |
| GTGTCAACGTCA  | 622.169823221738 | 0.51709810831798  |
| GCTTTCTATGAC  | 622.172653902634 | 0.224604143511976 |
| TCATCTGATGGA  | 622.174639693902 | 0.727738224292266 |
| GTCATCTGCCCA  | 622.184871288248 | 0.297214035632652 |
| CGACGATTAGTC  | 622.191797736322 | 0.56269688963416  |
| ATTAGTAAGACG  | 622.197779508511 | 0.296749947972805 |
| GGCACTGACACA  | 622.202362328093 | 0.562641148266072 |
| GCCCCTTACTCA  | 622.203739743444 | 0.360153513594141 |
| GTCACCGGTCTA  | 622.216221652521 | 0.376765150825729 |
| TACACTGAATCA  | 622.226714492506 | 0.289584706769913 |
| GCTGACTTGTC   | 622.230789259042 | 0.337107844644787 |
| GTATTGTGTGAC  | 622.232381551907 | 0.271790977270848 |
| TACTGACTATGA  | 622.232439194414 | 0.327275351862106 |
| AAGATAGACTCA  | 622.232815878492 | 0.499053939124203 |
| CAGTTACGTGAC  | 622.248420941987 | 0.584526849946889 |
| TGGGTCACTGAA  | 622.258984793957 | 0.340732248312796 |
| GTCATTACGCTA  | 622.260538149104 | 0.273810630411851 |
| TAACACGTGTCA  | 622.264247094615 | 0.690660314873608 |
| GACACTGTCATC  | 622.285552277607 | 0.439608479274034 |
| AGTATGGAGTCA  | 622.292049720602 | 0.286328506380287 |
| CGCGCAGATGAC  | 622.294905993579 | 0.500909470366737 |
| GTGATGTAACAC  | 622.307965496589 | 0.394535651571796 |
| GAGTCAATTAAC  | 622.328375639599 | 0.325499611268551 |
| AAAGGGTGTGAT  | 622.331867530176 | 0.138007052749114 |
| CAGATCAATGAC  | 622.35393316615  | 0.590006739017387 |
| GAAGTGAATGAC  | 622.354336156829 | 0.466801916368958 |
| CCGGTAGATGAC  | 622.356171237356 | 0.427986504965891 |
| GACCCGGTGACA  | 622.358396905378 | 0.57465156040379  |
| CGTCCATGACAC  | 622.360315967302 | 0.379523507696133 |
| CGTCATCAAGAC  | 622.361037438303 | 0.4667558041004   |
| CTCAAAAGTGAC  | 622.363221136713 | 0.592765963960279 |
| ACTAGTCAACAG  | 622.36453093967  | 0.863989761816334 |
| GATCTCAGTGAC  | 622.366621199916 | 0.74693029713775  |
| GTGTCATGAGCA  | 622.374007955605 | 0.52688648315052  |
| CACTCTACGTCA  | 622.377714430766 | 0.279089578329706 |
| CCCTGACTATGA  | 622.409953316502 | 0.503119050913633 |
| CTCGTCATGTGA  | 622.41644317474  | 0.447842754079766 |
| GTGACACGGTCA  | 622.417331428364 | 0.317360697933156 |
| ACGGACAATGAC  | 622.423812721346 | 0.211800732451408 |
| ACGTACGGTGAC  | 622.427351565212 | 0.345762653014454 |

|              |                  |                    |
|--------------|------------------|--------------------|
| CCGACAATGACG | 622.437189836564 | 0.402462012313787  |
| ACAGTCGCGTCA | 622.441752422029 | 0.510377034084399  |
| GTCATGCATTGA | 622.443172661403 | 0.573558620124488  |
| CAGTCAGCACAA | 622.446362720588 | 0.459515021865452  |
| CACTCCTGACTC | 622.450937725181 | 0.330138587534885  |
| CCTGACATGACA | 622.457976432804 | 0.608980705201602  |
| TCACGATAGTCA | 622.460281243189 | 0.350279060850935  |
| ATTAGTCTGACA | 622.469895049011 | 0.282498843811147  |
| AGCGTAGTGACT | 622.477099854338 | 0.319272455722131  |
| CAGTCAGTAAAA | 622.482864230349 | 0.345141051019928  |
| GTTACCTAGTCA | 622.490627302769 | 0.360967162102709  |
| ATACCGACTCAC | 622.507744963414 | 0.157106381691914  |
| ATCGATGAGCCA | 622.518324508244 | 0.227309634140048  |
| AGACTCAATGAC | 622.519028450063 | 0.435467102842997  |
| GCAAACGGTGAC | 622.528167913903 | 0.310069038102109  |
| GTATTAGTACTA | 622.53149126477  | 0.3542916010577    |
| AATATCTGTGAC | 622.531707699515 | 0.472351058796479  |
| GACTAGTCAGCA | 622.535374479625 | 0.335337834674161  |
| AACGCTGTCATC | 622.543062386246 | 0.323767860619782  |
| CCCTTTACGTCA | 622.549948122629 | 0.0865300680115786 |
| ATCATAATGACA | 622.551350260691 | 0.313130302015334  |
| TAATACTCGTCA | 622.567969095847 | 0.556594526738641  |
| AATATGGTCATT | 622.571407003542 | 0.305404413967027  |
| ACGAGAGATGAC | 622.596810560223 | 0.40629186044485   |
| ATGATGCAATGC | 622.611699778305 | 0.313580483044404  |
| GACTCACGAGCA | 622.612607349245 | 0.475992618404755  |
| ATAACATGACGC | 622.6376760672   | 0.32847770461062   |
| ATTCAACATGAC | 622.640924051015 | 0.555619863570855  |
| AGAATAAATGAC | 622.652098919836 | 0.283380623487366  |
| CAACTAGTGTC  | 622.656563080036 | 0.377344137364336  |
| GTCATCACCTTA | 622.658601879744 | 0.211911856589072  |
| ATGACAATGTTA | 622.660606650072 | 0.43812496062906   |
| GTCATCTGATGA | 622.665883352746 | 0.459822373938589  |
| CAGTTGATGACG | 622.673640197802 | 0.501044094131131  |
| TGACGCGGACCA | 622.675017370612 | 0.466652301397797  |
| ACTAAATGTCAT | 622.68737452592  | 0.285455720072253  |
| AGTCAGAAGCAC | 622.688087717312 | 0.40360495339682   |
| ATAATAGTCCTG | 622.701508426804 | 0.585445551060995  |
| CGGGTATTAGTC | 622.721408887524 | 0.584465439436346  |
| AATGCCGACTCA | 622.723301152832 | 0.188821431426496  |
| GTGACTACCTAA | 622.731176321868 | 0.539560264650982  |
| TGACTGCTACAA | 622.735610383207 | 0.569893074513098  |
| GCCGTCTATGAC | 622.743111519112 | 0.510240487014439  |
| ATCCATCTATGA | 622.752050468125 | 0.701033426489319  |
| GGTCAAGACTCA | 622.752590696227 | 0.475143212021355  |
| ACGTCACCGGGG | 622.752663893936 | 0.429385572401956  |
| AGTCACGCTGAT | 622.759641482822 | 0.446882354341159  |
| GATCATGAATCA | 622.770357922136 | 0.349791166864306  |
| GAAAGTGAATCA | 622.771861428166 | 0.325691669411203  |
| ATACCATGACGC | 622.775713985126 | 0.454269503762423  |
| ATCGCAGATGAC | 622.77590681497  | 0.461985635279998  |
| GTCATATAGCAA | 622.77914343081  | 0.425164575825504  |
| ATAATCAAGTCA | 622.805740612704 | 0.469155072654911  |
| GTCACAGTTAAA | 622.808282182311 | 0.464760622358595  |

|              |                  |                   |
|--------------|------------------|-------------------|
| CACATAACGTCA | 622.809403209613 | 0.478775196253324 |
| GTCACCGATGCA | 622.815042491917 | 0.582692992044156 |
| CCTTGGGTGACG | 622.823454442315 | 0.378759316324153 |
| CGGACTGATGAC | 622.830995099129 | 0.435171044220808 |
| CGTGCACAGTCA | 622.843656208052 | 0.510026052099431 |
| GAGTCAATGGCC | 622.851809738094 | 0.559542453696246 |
| TGATGTAECTAA | 622.870674168514 | 0.576093734281274 |
| GACAGGTGTGAC | 622.893230650173 | 0.397330878336409 |
| GTGAGTCCGTCA | 622.897786756165 | 0.423551760819305 |
| GCTGGTATGACC | 622.897921633891 | 0.532924356413864 |
| AGACCCAATGAC | 622.900197426916 | 0.468848642033961 |
| ACATAGTGACGC | 622.904531775271 | 0.379927827823703 |
| CGGACCGACTCA | 622.914519132878 | 0.412658939348311 |
| AATTCATGTGAT | 622.940270328474 | 0.506311913441293 |
| TACGAGATGACA | 622.958078176152 | 0.459241225348255 |
| GTCATCCGGTGA | 622.963486728744 | 0.435383221686743 |
| CGTCACCACGTA | 622.97553618849  | 0.592277093440286 |
| CAACAAGACTCA | 622.981340502816 | 0.594991685310746 |
| ATGACGAACGAC | 622.989906138962 | 0.330228169503906 |
| GATCCGGATGAC | 622.997519146703 | 0.349447257080074 |
| GTCATCTAACTA | 623.003756801571 | 0.411250544587716 |
| GCCACTGAGTAA | 623.017521926864 | 0.416782382908374 |
| AATCTATGTCAC | 623.027277190278 | 0.493439285975376 |
| CCAGATTGGTCA | 623.028988310454 | 0.565719669703573 |
| CCATCGAATGAC | 623.043337650406 | 0.440813203733379 |
| AGTCCGATGACG | 623.052825456941 | 0.527627088886611 |
| CTGTATCGTGAC | 623.065394184389 | 0.515538268174639 |
| ATGACACGGTGG | 623.073271155525 | 0.392467317883265 |
| CACGTCACTACC | 623.08722247714  | 0.41134580259643  |
| GTCATATAGTTA | 623.092462851019 | 0.431504988062999 |
| CTGAGCGAGTCA | 623.095186772885 | 0.288296672448919 |
| ACGACTCAGACA | 623.098660118551 | 0.392510579010784 |
| GTCATAAGAGAC | 623.104876273014 | 0.634021041721174 |
| GATGGCGATGAC | 623.106593344619 | 0.439547919475208 |
| AATTACAAGTCA | 623.109509871392 | 0.762041588561891 |
| AATCCTTGTGAT | 623.110522483827 | 0.316945600335155 |
| ACGCAGGAGTCA | 623.11397389685  | 0.465685620062066 |
| GTCATCGGGCTA | 623.119049435197 | 0.310843245940876 |
| CCGAGTGACCAA | 623.123495300154 | 0.494088386376068 |
| AGCCAAGACTCA | 623.144331728458 | 0.506144784680297 |
| AGTATATGACCA | 623.14765465657  | 0.469500245474329 |
| ACGGATGGGTCA | 623.173577388448 | 0.349690719364223 |
| GTCATACGCATA | 623.184459208026 | 0.469615840043286 |
| CTAGCTGACACA | 623.18611401537  | 0.254487379290952 |
| GCGTCACCCAAA | 623.195032242946 | 0.538789075720496 |
| AGAGCCTATGAC | 623.226661159728 | 0.311459545063306 |
| GTATTAGCCATA | 623.226718218974 | 0.353064918177847 |
| ATGACGTCTTTA | 623.227759876926 | 0.436574278200553 |
| GAAATTGATGAC | 623.238518961663 | 0.326288138346872 |
| GCTTACAAGTCA | 623.243855910363 | 0.590646514097809 |
| GCGACTGATGAC | 623.244878689187 | 0.416032783197788 |
| CGTCATTGATAG | 623.250320769173 | 0.124758074510813 |
| GGTCATCGGACA | 623.262480108064 | 0.491560655325365 |
| GCAAAGGGTGAC | 623.26811692107  | 0.204246211793583 |



|               |                  |                   |
|---------------|------------------|-------------------|
| GTCATGCTGACA  | 623.268739660524 | 0.291098417614601 |
| ATGACATGATTG  | 623.283474227589 | 0.33851268691414  |
| GAGTCAATATAC  | 623.284528975192 | 0.436285662892095 |
| ATGCGATATGAC  | 623.299815213002 | 0.475294008684803 |
| ATGCGATTACTC  | 623.309740724695 | 0.504214150986726 |
| AGTGC GGAGTCA | 623.313000046192 | 0.309043523193364 |
| ATGACAGTGTG   | 623.314999592663 | 0.322181648810429 |
| GTCATGATTCCA  | 623.320992601534 | 0.632398072164548 |
| AGCTCGTGACAC  | 623.327409395465 | 0.484804205396484 |
| GTCATTCTCCCA  | 623.327988079826 | 0.298572739944335 |
| GATTACATGAC   | 623.342491585518 | 0.624753793353842 |
| GGTACATATGAC  | 623.343709971191 | 0.278491033309374 |
| CTCGGCTATGAC  | 623.377147983939 | 0.510909029195885 |
| TAGATTAAGTCA  | 623.377925328908 | 0.247413047261362 |
| CGCCATGACAGA  | 623.382179445404 | 0.31855082176728  |
| GGTGACGATATA  | 623.382555385537 | 0.247018125841911 |
| CTAGTTTGACTC  | 623.383920865959 | 0.307352822607029 |
| CCTGAAATGACG  | 623.389495128657 | 0.34561052165219  |
| CTAGTCACGGTC  | 623.397461707685 | 0.315383824992277 |
| CACGACAAGTCA  | 623.415763609835 | 0.397503969086052 |
| ACTAATTTATGA  | 623.426474305801 | 0.632720495580036 |
| CCTCTGAGTCTA  | 623.426900911782 | 0.288921361920143 |
| GCTTCTACGTCA  | 623.430194305636 | 0.644517468659665 |
| GACGCGCATGAC  | 623.430610546821 | 0.386071406571603 |
| CTTCTGAGTGAC  | 623.441539884089 | 0.235177732664675 |
| CCACCTCAGTCA  | 623.442966024897 | 0.230544162866842 |
| AAGTGTCAGAGT  | 623.451159602599 | 0.226306702544199 |
| GTCATTCAGAA   | 623.479937209499 | 0.467732463762099 |
| ACTCACCGGTGA  | 623.482719587529 | 0.50378166937746  |
| CCGATATGTGAC  | 623.487909843772 | 0.348312526436841 |
| TACTCACAGTCA  | 623.490053153912 | 0.375977301276674 |
| ACAGTAAATGAC  | 623.498862798191 | 0.675317159523976 |
| ATCGACAGTGAC  | 623.504560179172 | 0.509893126939266 |
| CATTTAATGACG  | 623.515675698381 | 0.680373214659019 |
| TGACTCCCTAA   | 623.521100957693 | 0.244127324528698 |
| CGGAACGCGTCA  | 623.525666788623 | 0.508062933114698 |
| AGTCAACTATGA  | 623.533409389161 | 0.626100585616939 |
| CGATGACCGAAC  | 623.535119675105 | 0.316751379476871 |
| AACATGGGTGAC  | 623.540469100161 | 0.471643589438131 |
| AAGGGTGATGAC  | 623.545749184116 | 0.267090134568322 |
| AAGATGAGTAGT  | 623.553234881219 | 0.227367000852211 |
| ACGTCACATTTG  | 623.572362981422 | 0.380894383259745 |
| ACATATTA CTGA | 623.591217623235 | 0.416933367411278 |
| CTTAATTATGAC  | 623.595991631014 | 0.319231882751871 |
| AAGTCACCTCAA  | 623.598638809528 | 0.241225913280097 |
| AATTTTGACACA  | 623.601813089933 | 0.241525278742489 |
| GAGAGGTGACGC  | 623.607789830928 | 0.232924964771505 |
| CGACGTAATGAC  | 623.617475212658 | 0.508410730588266 |
| GTCATACGATAA  | 623.62308384989  | 0.436429431786658 |
| GGTCAGTGTGAC  | 623.623937258356 | 0.53146784144689  |
| TCATAATTACGA  | 623.63360242139  | 0.412016250175846 |
| ATTACGCAACGA  | 623.652353890352 | 0.451538777952417 |
| TAATTCGCGTCA  | 623.65657720411  | 0.35835500502709  |
| AGTCAGAGCCGA  | 623.658515538581 | 0.366235510452763 |

|               |                  |                   |
|---------------|------------------|-------------------|
| CGTCATTGTATA  | 623.661723383761 | 0.554175709333664 |
| ATTAGTAAGAGA  | 623.665458139179 | 0.398913299169312 |
| ATGACGCCGCGG  | 623.670238589422 | 0.392379911078686 |
| ATGTACTGGTCA  | 623.675958048245 | 0.53029007598641  |
| GCGTCAGCTGAC  | 623.685003582925 | 0.876542060315171 |
| ACGTCATGGCTG  | 623.690910803196 | 0.71008023317044  |
| ACTCATATGTGG  | 623.69353721998  | 0.667082566157118 |
| CGCATTAGTGAC  | 623.703220467512 | 0.4876629270505   |
| AGTCAGGCTGAC  | 623.703670290405 | 0.410773396413912 |
| CCTCTATAGTCA  | 623.708755396942 | 0.441644192583512 |
| ATGACAACGGTC  | 623.71564653742  | 0.308432276112173 |
| ATTGCGTAATTC  | 623.718296860047 | 0.301531189071806 |
| AACGACTCAGAA  | 623.721253362462 | 0.472178841141971 |
| CAGTCAGAACTA  | 623.724031893096 | 0.55961598779592  |
| AACCACGATGAC  | 623.745671720988 | 0.420495302587352 |
| TGCGAGATGACA  | 623.748851126619 | 0.16725037027902  |
| CCGCATGACATA  | 623.749320334266 | 0.337846425431713 |
| TATGACATTTAA  | 623.750128854102 | 0.435278254700987 |
| GTCATTCCCTTA  | 623.76321843616  | 0.295071821863081 |
| CGTCATTGTTCA  | 623.765579303729 | 0.339162434823234 |
| AATGACATTGAC  | 623.767223239116 | 0.68414459081729  |
| GCTTCATATGAC  | 623.775724693816 | 0.309701540766599 |
| ATGACGCCGCAT  | 623.782213846675 | 0.425282108048225 |
| CAGTCAGTTTGC  | 623.783623401616 | 0.471514255941644 |
| AGATGGTATGAC  | 623.794265897884 | 0.22850007809668  |
| GTCACACCAGCA  | 623.795328988671 | 0.374534160938611 |
| CCACCAATGACA  | 623.807099789385 | 0.391184017269085 |
| TGACAAAATACA  | 623.808087896802 | 0.608959200776474 |
| CATATGTGACAA  | 623.816588278709 | 0.132242244608649 |
| GTCATCCCTGAA  | 623.844239472144 | 0.853532287890626 |
| CGTGTAAATGACA | 623.857939771795 | 0.382455658629265 |
| GCGGACTATGAC  | 623.872726116207 | 0.486701491046743 |
| GTCAATTAATAA  | 623.879241820588 | 0.365622848610502 |
| CACCTTGTGACG  | 623.886710937321 | 0.449285513394898 |
| GTCATCTGCTCA  | 623.891971170267 | 0.348275294179279 |
| AGAACATGACAC  | 623.89386898905  | 0.254665472417164 |
| ATAAATTAATAA  | 623.897140777965 | 0.316285418629624 |
| CGAGAGAATGAC  | 623.900909980969 | 0.231488134807542 |
| TCTTTGCAGTCA  | 623.906271005253 | 0.390260147896461 |
| CGTCACTTAAAG  | 623.908652002628 | 0.655000658718427 |
| AAATGGCGTCAC  | 623.913477312898 | 0.307117595173135 |
| CATGCTACAGCA  | 623.914614872274 | 0.654788208928587 |
| GTCATTGACCAC  | 623.922293981132 | 0.654045714209909 |
| GTCACCCAGGAA  | 623.92286247558  | 0.471437518726936 |
| GACTCAGAGTTA  | 623.926713664015 | 0.290463187650824 |
| TGAGGTGAATCA  | 623.972531359057 | 0.371519146018948 |
| TAAGCTGCGTCA  | 623.974559786403 | 0.456812122325417 |
| AAGCTCGACTCA  | 623.983035659137 | 0.237919065783967 |
| GAATGATGACCA  | 623.985036827675 | 0.404077485413496 |
| ATGAGTGGGTCA  | 623.990863123051 | 0.283701631352679 |
| ACGTCACCTCTCA | 624.000019547537 | 0.217105715840555 |
| AATCGGTGACGT  | 624.005871851032 | 0.352534935390756 |
| GTCATCGAACAC  | 624.009454235781 | 0.292956265481069 |
| ATTACTCCGTCA  | 624.010460901889 | 0.37738240093578  |

|              |                  |                   |
|--------------|------------------|-------------------|
| ACGACTTGTGAC | 624.013683045035 | 0.32292387893025  |
| CGTCATCAACTA | 624.040804017589 | 0.478196215650295 |
| ACGAAGTGAGTC | 624.047682582322 | 0.656595483277943 |
| CCGCAATGACG  | 624.055934595872 | 0.616118951238832 |
| ATGACAGCTATC | 624.058622612874 | 0.444686166533091 |
| ATTTAGTAGTCA | 624.064719509143 | 0.759549552294605 |
| GTCATCCGGGCA | 624.070811113482 | 0.333438923171801 |
| ATGACAACGAGG | 624.078286790562 | 0.308486986596662 |
| CTGGCCGACTCA | 624.083624684553 | 0.601738299639037 |
| CATACAGTCAGC | 624.084098209051 | 0.517057523134714 |
| CAACTTGTACC  | 624.086032908413 | 0.380616071973572 |
| AGTCAGCGACAT | 624.08876263991  | 0.451028738281374 |
| TAGCATTCTGCA | 624.092183783283 | 0.347791305839301 |
| ATCATTTGTGAC | 624.10476619736  | 0.310803846692668 |
| GTGTAAACGTCA | 624.108956074455 | 0.313388994545275 |
| ATACGTAATATG | 624.113097637427 | 0.574702486865528 |
| CTTTAGAATGAC | 624.130430461068 | 0.506267534206191 |
| GTCATAACGCTA | 624.132663060953 | 0.286223628170564 |
| CCCTAGTGACAC | 624.135986188485 | 0.464373209204093 |
| GAGCACGACTCA | 624.140925155005 | 0.632068166906161 |
| ATGCCGTATCC  | 624.143281909464 | 0.206434163488389 |
| TACTCGCAGTCA | 624.144311560353 | 0.481883140415442 |
| CGCATTATATGA | 624.14869747672  | 0.504072560072626 |
| ATGAGTTAACCA | 624.149918542764 | 0.936292521394283 |
| CTCTGACAGTCA | 624.168037793458 | 0.369139050181052 |
| CCCATATGACGG | 624.173686567974 | 0.228581439673251 |
| ATATAAAATGAC | 624.17809829662  | 0.564636716621861 |
| ATGACCCAGAAC | 624.179113420027 | 0.434494398932725 |
| ATGAGTAGTCAA | 624.185763830901 | 0.409080912142217 |
| AGAGTAGATGAC | 624.195010030077 | 0.154005191045299 |
| GACAGAAATGAC | 624.223233165081 | 0.393614780410705 |
| GTCATTACTTGA | 624.240939404599 | 0.51894041805616  |
| AGTCTATGACCC | 624.243674988439 | 0.367956428787826 |
| CACCCTCAGTCA | 624.260187855668 | 0.309331006350633 |
| ATGACATTAGTA | 624.264310406818 | 0.36044329244542  |
| CGTCATTAGTGC | 624.277322188223 | 0.338379168491312 |
| GTCATTCTCCTA | 624.286793194016 | 0.352856158649691 |
| GCATTATGTGAC | 624.292949292772 | 0.618858454058253 |
| AGCCATTTGTCA | 624.297669031398 | 0.446164513042905 |
| ACGTCACCTCAA | 624.298684758058 | 0.301708330235944 |
| TGAGCAATGACA | 624.300763137633 | 0.523830873765654 |
| ATTGAATCGTCA | 624.301201490758 | 0.499897864879401 |
| AAGCCACAGTCA | 624.307149681066 | 0.40939706633903  |
| CCTCTGGATGAC | 624.312369881419 | 0.430383688542749 |
| ATGTCATCTGAG | 624.31287616329  | 0.394564803204366 |
| GGACAGAATGAC | 624.312991716308 | 0.380553742485063 |
| GTAGTGGATGAC | 624.313846341976 | 0.283761111022325 |
| CGATACCACTCA | 624.323191414549 | 0.208098725967197 |
| GGGAATTATGAC | 624.325642933089 | 0.270478505196231 |
| GACTCTTTGTCA | 624.32891879447  | 0.450770713281336 |
| GGTACCAATGAC | 624.329432497012 | 0.481295296422495 |
| CGTGACGGTGAC | 624.333096711818 | 0.456153006085932 |
| GATCCTCAGTCA | 624.338309930068 | 0.495006074571522 |
| ATTTAACTGTCA | 624.339273947676 | 0.462523281639716 |

|              |                  |                   |
|--------------|------------------|-------------------|
| ACATCCTGACTC | 624.346843839085 | 0.174286809780037 |
| CCCATCTAGTCA | 624.3494180171   | 0.353257027002247 |
| GTAAGGGTCAGA | 624.351274601132 | 0.283346759549292 |
| GCGTCACCTTGA | 624.35349525143  | 0.475286468724109 |
| TGACTCCCACA  | 624.360285989151 | 0.393649576038856 |
| CAAGCTTGACTC | 624.364460161455 | 0.579916661062787 |
| GATCAAGTCATC | 624.369973100397 | 0.421903461007992 |
| GACTTAGTAATC | 624.376895565316 | 0.403822013288624 |
| GGGTGTGAATCA | 624.380351959757 | 0.234717797952911 |
| GTCATATAAGAC | 624.389236438474 | 0.480013387440771 |
| GGTTGAATCAC  | 624.395660979101 | 0.49065993457503  |
| ATGACGAGACTA | 624.417990903634 | 0.411971768999507 |
| ACGTCACCACTC | 624.419951106037 | 0.373374821278093 |
| AAACTGGTTCAT | 624.430422482906 | 0.283499824255127 |
| AGTCATGGGAAT | 624.43546440295  | 0.29598674218195  |
| CTGTTCTTATGA | 624.44286888189  | 0.45064053111766  |
| GAGTCAATGGGC | 624.445787307302 | 0.489286320126642 |
| CGCGGATTAGTC | 624.449333250115 | 0.567125838868155 |
| ATCCATTTGTCA | 624.453234173175 | 0.489708918876172 |
| AGTCACTTCCGC | 624.467217163632 | 0.316853646137448 |
| CTGAATGAGCCA | 624.468306096099 | 0.315255512471252 |
| ACTGATGACCGA | 624.46910986635  | 0.403554640567609 |
| ATTAGCAATGAC | 624.47794245411  | 0.176787939028084 |
| TGATTCAACGAA | 624.479471472794 | 0.421666098215229 |
| CCATATTGACTC | 624.493463300019 | 0.166594311279289 |
| GATGACAGTAGC | 624.505761354899 | 0.340284857300247 |
| CATCTTTATGAC | 624.506055148894 | 0.37559852809387  |
| ACACATCATAAG | 624.508028723417 | 0.581280777806739 |
| CGTATTATGTCA | 624.515946795334 | 0.366684204508448 |
| TACGCCTAGTCA | 624.550390216606 | 0.365202928896958 |
| ATGGAAATGACG | 624.550972170049 | 0.286037786473705 |
| ACCCGAATGACG | 624.554276884931 | 0.252237718005983 |
| CTAGCATATGAC | 624.560841277137 | 0.332583390260031 |
| GTCATCGGGAAA | 624.575566866427 | 0.356402249925631 |
| AATGACCGAGTC | 624.575686393866 | 0.696757980724013 |
| CAAGTGGATGAC | 624.589022618283 | 0.313290186800522 |
| GCAGACTGTGAC | 624.590516177418 | 0.39177449520441  |
| ATGATTTGCTCA | 624.595401466607 | 0.384969081890588 |
| AACCCTGTGTCA | 624.607450716595 | 0.153496308525272 |
| TGACTGCTATCA | 624.60765289743  | 0.731888865392304 |
| CTTCGTGACGGA | 624.610665150668 | 0.629230938259508 |
| CAGTTATGTGAC | 624.610666953181 | 0.487991760439494 |
| GACATTAAGTCA | 624.625384398647 | 0.541491922669136 |
| CTTGAGCAGTCA | 624.636635352184 | 0.381963280172094 |
| CTGATTTGACTC | 624.644687373656 | 0.436224448779408 |
| ATGATGTGTACC | 624.645748671395 | 0.341704002243693 |
| CGTATCAGTGAC | 624.647460814189 | 0.290885578774933 |
| AGTCACCCACA  | 624.648928515473 | 0.347104858000295 |
| GATGACTTGCTA | 624.651634080775 | 0.280697002244574 |
| AGACATACGTCA | 624.652531909345 | 0.344693256538219 |
| ACGTAATTAGTC | 624.65367702752  | 0.514988560526627 |
| TACTTTGAGTAA | 624.65514772697  | 0.413926428194287 |
| ACGTCAGAGTTC | 624.657326879541 | 0.542448951977166 |
| CGCGTAATGACG | 624.658146761583 | 0.537543787324193 |

|               |                  |                   |
|---------------|------------------|-------------------|
| CATGGCAGTGAC  | 624.67431869351  | 0.644831151046939 |
| AGTCACGGATTG  | 624.674815392379 | 0.281097496826419 |
| TGACTCCCATCA  | 624.674980907709 | 0.393021577089954 |
| TCACCTCAGTCA  | 624.683661321218 | 0.231148891966156 |
| CTTCTAGTATGA  | 624.711128264738 | 0.594904915146993 |
| CTACTTGTGTCA  | 624.711414624079 | 0.191944620067482 |
| GTCATGAATCAA  | 624.718615433355 | 0.387247496354281 |
| CTCCAATTATGA  | 624.727807084162 | 0.5292313747085   |
| TAGATTGACTGA  | 624.730177264721 | 0.245319278650324 |
| GCGTCATGCCGA  | 624.730726421978 | 0.752309494547973 |
| GTCACGTCACTA  | 624.737991299358 | 0.487731705582171 |
| CGGCCGAGTGAC  | 624.760120194649 | 0.342079916163037 |
| ACACATAATGAC  | 624.763962312388 | 0.388651700930302 |
| CCCTGTAAGTCA  | 624.76607037097  | 0.398077441734844 |
| GCGTCACTGACA  | 624.766955828381 | 0.423745136278449 |
| ATGACACGGAGA  | 624.775410405577 | 0.29276005581386  |
| GCCGCTGACACA  | 624.776371843275 | 0.266604764489703 |
| CAATCATGACGC  | 624.777659656854 | 0.271046946319415 |
| AGTCAGACTGAT  | 624.77784462397  | 0.431427403048177 |
| AGCTGTACGTCA  | 624.778859951858 | 0.521292082274937 |
| CAGGTTGACTGA  | 624.819113731977 | 0.37414719150946  |
| GAATCATACTAA  | 624.820024899076 | 0.484227044070053 |
| GTCATTTACAAA  | 624.822220517565 | 0.492340211046097 |
| CAGGTCCAGTCA  | 624.83084613953  | 0.588805469282681 |
| GCAACAGAGTCA  | 624.841677212394 | 0.314605163448047 |
| ACAGCAATGACG  | 624.845796416265 | 0.647992582237475 |
| CCTCTAATGACG  | 624.846016311861 | 0.357956068695644 |
| GATGACTTTTAC  | 624.847512213772 | 0.402215556381045 |
| GTCATAAAACCA  | 624.850304402345 | 0.267360933387331 |
| ACGTACTGACTC  | 624.859608561159 | 0.461868846090777 |
| GATGATTGACACA | 624.871868258406 | 0.423772138582109 |
| AGTCTGGATGAC  | 624.877712135004 | 0.323611931682541 |
| AGTCATGGTAGG  | 624.880130123399 | 0.195131587924558 |
| CTGAGGTGTGAC  | 624.883678452799 | 0.221557445307141 |
| GTCATCTAGCAA  | 624.898829596886 | 0.434742858535351 |
| GCTCTAGATGAC  | 624.910064611173 | 0.490454290558349 |
| ATGACGAGGGTC  | 624.914790276526 | 0.326110100588931 |
| ACGCGTGTGACA  | 624.917031993426 | 0.340342418588608 |
| ATGAATCAAACG  | 624.917865021927 | 0.294902301524674 |
| CTGCTTTATGAC  | 624.92445119127  | 0.499198712209346 |
| ATGACGAGGCAA  | 624.928336590911 | 0.502345557974872 |
| AAGCTGATGACG  | 624.938797864693 | 0.335351841756796 |
| GGATTGGAGTCA  | 624.949085675666 | 0.183797446807103 |
| CGATGGCTAATC  | 624.959046106944 | 0.345160976235308 |
| GCGATAGATGAC  | 624.960144754869 | 0.429205623319542 |
| ATGCTGTCACTA  | 624.963981489592 | 0.434959672721273 |
| ATGACGGCTGAC  | 624.964736611313 | 0.637416143125577 |
| CGTGTAGATGAC  | 624.969407857595 | 0.313823836410051 |
| GTCATTAAGAC   | 624.972291772047 | 0.574110137983154 |
| AGGTCATCGTCA  | 624.973203724114 | 0.219902063661656 |
| ATACCTCAGTCA  | 624.974613690555 | 0.236902710126712 |
| CGCAACTGACTC  | 624.981656889125 | 0.540225413238271 |
| AGAGGGTGACGC  | 624.982039844595 | 0.262834041443384 |
| GTCATAGACCAA  | 624.989918637096 | 0.369529617730445 |

|              |                  |                   |
|--------------|------------------|-------------------|
| TGACTACGGCCA | 624.990797572046 | 0.482482374092193 |
| GCTCTCGATGAC | 624.999479187096 | 0.336745546086089 |
| ATGACAGTACAA | 625.008613053319 | 0.43459867978011  |
| TCAGTTATGTCA | 625.009992159912 | 0.416917015506478 |
| GCGTCACAGTTA | 625.016521124651 | 0.245440147900349 |
| ACGAGAAATGAC | 625.020277674451 | 0.513005061260096 |
| ACTCATCAAAGA | 625.020802787158 | 0.691664302500662 |
| GTCATTGGTCCA | 625.024165255666 | 0.596485328720866 |
| ATGACGCGCAAA | 625.030915584115 | 0.430713244762326 |
| ACTGTTTCGTCA | 625.040978340862 | 0.502336517823157 |
| GTCACACTCGTA | 625.043418554762 | 0.355774875444263 |
| CTCTATGGTGAC | 625.046695418118 | 0.558322116923325 |
| GTCATCAGCAGA | 625.050915570152 | 0.327867387665552 |
| AGAGGCTATGAC | 625.058047669438 | 0.457211972000117 |
| ACTTTAATGACG | 625.070456885365 | 0.331495233671979 |
| GCTGCCATGACA | 625.085094230828 | 0.632935461187493 |
| GCTTCCAATGAC | 625.094530007315 | 0.354765206406641 |
| TATGACAGGGAA | 625.09762191411  | 0.198457352550482 |
| GTCACCTATCGA | 625.099556941814 | 0.431703220908166 |
| GACACATACTCA | 625.100042474618 | 0.27710128586218  |
| TGAGTCGTGTAA | 625.102023666394 | 0.298033273781932 |
| GACGCTGATTCA | 625.110054351283 | 0.298093880335025 |
| AAGTGGTATGAC | 625.112036991907 | 0.268076172619151 |
| GCGTTACAGTCA | 625.11240428871  | 0.330851671731516 |
| AGTCATGGTATA | 625.129722775651 | 0.321728396178121 |
| AGTAGTCGTCAT | 625.132335534078 | 0.264000902973246 |
| GTCATTACACCA | 625.13385246275  | 0.319796400785625 |
| GTCACTCTTAAA | 625.134751537492 | 0.383367302095226 |
| GTCATCTTTACA | 625.139656521809 | 0.185924132676856 |
| AGAGTCAATTAT | 625.148788297009 | 0.296497015074362 |
| AATATGTCAGAG | 625.151080470382 | 0.352341455003825 |
| GTACCGAGTGAC | 625.151381427335 | 0.626971827335808 |
| ATTACAGGTGAC | 625.159444136944 | 0.377982311560883 |
| GACTAATGAATC | 625.161070647499 | 0.545122185493765 |
| CACCGAGTGACA | 625.163470994948 | 0.557031509251555 |
| GTATTTGCTCAC | 625.173437531128 | 0.187505997861693 |
| GTCGCGTGACAC | 625.176245518517 | 0.612259076513282 |
| GATGTTGATGAC | 625.177347619837 | 0.435088240556093 |
| CAAAGTGAATCA | 625.188276593775 | 0.484282599660651 |
| AATCCATGACAC | 625.18980755915  | 0.187618242739243 |
| ACAGTGTGTGAC | 625.192460527475 | 0.343171051722046 |
| CATTTTATGTCA | 625.196017128927 | 0.389345426665106 |
| ATAGAATATGAC | 625.206098018547 | 0.227330901136026 |
| ACACAAATGACA | 625.207134628833 | 0.39419690906123  |
| GCTGATCCGTCA | 625.208422812141 | 0.451149043777944 |
| ACTCATCGTAAT | 625.221664728412 | 0.471377732429487 |
| GTGACATGGCAA | 625.222345261488 | 0.430034073398071 |
| CCCTAAGCGTCA | 625.225731537395 | 0.444466984231701 |
| AGTCCCAGTCA  | 625.226519427132 | 0.445076964734353 |
| ACCATTTATGAC | 625.232640359637 | 0.401747889951994 |
| ACTGCCTAGTCA | 625.234007361823 | 0.493248710522594 |
| CAGTCACGAGCA | 625.236381777049 | 0.491386877290993 |
| CAACGAATGACG | 625.242356452899 | 0.42152571477353  |
| ACTACATGACGC | 625.242419246019 | 0.429610519820471 |

|               |                  |                   |
|---------------|------------------|-------------------|
| ATTCGTCAACAA  | 625.266666858383 | 0.788513150424344 |
| GTTATGCAGTCA  | 625.267545695886 | 0.439917328660728 |
| GCTAGCTATGAC  | 625.268328972659 | 0.541910088504955 |
| AACTCACGTCAT  | 625.269415079625 | 0.250007443287254 |
| TCTGAGTCGAAA  | 625.276608184723 | 0.294338392844134 |
| AGTCACTTGCCG  | 625.28409275507  | 0.230450366041919 |
| GGCCATGATGAC  | 625.28952999693  | 0.398831166601211 |
| GCCTGCGGTGAC  | 625.292167502025 | 0.672175047828192 |
| CTTTCGTAGTCA  | 625.298418942694 | 0.638586738699966 |
| ATCTAGCAGTCA  | 625.323115420443 | 0.243256676992085 |
| CGTATTTTCGTCA | 625.333863211209 | 0.449807270005328 |
| GGCAATAATGAC  | 625.334021111307 | 0.444640285772904 |
| ATGACAAGATTA  | 625.340235105253 | 0.349363729908907 |
| CTAGTCACGGCA  | 625.35274150017  | 0.104286716108235 |
| GACCAACATGAC  | 625.365516439825 | 0.359573571527839 |
| TGAACAACGTCA  | 625.365644644706 | 0.274372718625907 |
| GTCATCATATAA  | 625.368647877095 | 0.377401182772078 |
| AGTCACGCGACA  | 625.384474212394 | 0.343258035923991 |
| CCGGTAAATGAC  | 625.399493773348 | 0.500232305739825 |
| GCTAACGACTCA  | 625.412371356422 | 0.578169904811073 |
| TGAGCAATCAAA  | 625.422435962797 | 0.716305353003786 |
| GATCTTACGTCA  | 625.427077213136 | 0.410394270387212 |
| CAATGCTGTGAC  | 625.449696362967 | 0.52584877769015  |
| ATATTAATGACG  | 625.451558426203 | 0.465838206843503 |
| ACAGTCTATGAC  | 625.465941439931 | 0.613446799923042 |
| ATCTGACATGAC  | 625.467266057835 | 0.516837967730683 |
| CGCATAGATGAC  | 625.474979368064 | 0.448576424841546 |
| CAAAAGATGACC  | 625.479499335422 | 0.53192269327498  |
| ATGACCTGGCAA  | 625.489792481267 | 0.44916285195735  |
| GGCAATCTGTCA  | 625.505720771821 | 0.477533403044455 |
| TAATCTGATTCA  | 625.516084387838 | 0.485664348935583 |
| CTGAACTGGTCA  | 625.522728165895 | 0.284938478970407 |
| CATAGCTAGTCA  | 625.523054796219 | 0.461317027522926 |
| GTCATATACCTA  | 625.524273733427 | 0.423757328970868 |
| ATAGAAAATGAC  | 625.524516540362 | 0.261975735113958 |
| AGTCTGAGTCGA  | 625.534101687525 | 0.377775376370268 |
| AGATTTTGACTC  | 625.539884213319 | 0.410313454392396 |
| GAACAGTGTGAC  | 625.54537677697  | 0.468053929034132 |
| ATGAGCAAGAGG  | 625.548637046859 | 0.34140305988783  |
| TAGTCACGGCCA  | 625.549614062072 | 0.589606334800136 |
| AGTACGCATGAC  | 625.555887807296 | 0.280314610189528 |
| GTCATCATCCGA  | 625.558766886673 | 0.360089782766534 |
| ACAAACTCGTCA  | 625.567254482343 | 0.422049616758911 |
| ATTCGCGGTGAC  | 625.575563954198 | 0.372376206762008 |
| ACCTAATATGAC  | 625.584362964967 | 0.598759300173622 |
| AATTGATGACCA  | 625.599330384562 | 0.513763796778903 |
| CCAGATGTGACA  | 625.602961014889 | 0.460933842226702 |
| AGTCACTTCGGC  | 625.603266396633 | 0.412315424163496 |
| TCAGTCAAAAGA  | 625.610742064615 | 0.421078953109551 |
| GAACCCGATGAC  | 625.615538870659 | 0.532679883273871 |
| GGTCAACATGAC  | 625.621573351362 | 0.512883346558673 |
| CAGCTAATGACA  | 625.623075420352 | 0.412935745925919 |
| AGTAATTGTGAC  | 625.628768136404 | 0.376568847397348 |
| AACGGAGTGACT  | 625.638942475399 | 0.223029073415768 |

|               |                  |                   |
|---------------|------------------|-------------------|
| CGCTGACTGTGC  | 625.64922608611  | 0.501763973578918 |
| GTCATAGGACGA  | 625.653476144481 | 0.464540815800596 |
| GTGTCACGATGA  | 625.656016624353 | 0.271189885438105 |
| AGTACTATGACC  | 625.683932540747 | 0.200406374629603 |
| TCACCTAAGTGA  | 625.690232452848 | 0.547402687645541 |
| ATGACGTCTTCC  | 625.700099208035 | 0.226547197853074 |
| GCATGAGATGAC  | 625.700797775421 | 0.340281287996263 |
| AATAGTCAACTC  | 625.713217700398 | 0.16049859639283  |
| AAAGTCAATGAC  | 625.715275907255 | 0.30745906873575  |
| AAAGTAGATGAC  | 625.721585125249 | 0.250383231372931 |
| ATGACATGACCG  | 625.722296288248 | 0.511971348655066 |
| AGCCCATGACAC  | 625.726017920245 | 0.136266450971912 |
| ATATACTTATGA  | 625.73672201448  | 0.636677053825337 |
| AGTCACGCGTCG  | 625.741949325059 | 0.451201416500132 |
| AAGAGCGAGTCA  | 625.744702126502 | 0.241661304345192 |
| ATGATGCAATCG  | 625.75122267004  | 0.662090775243212 |
| TATGAAGTCACA  | 625.756738756134 | 0.193770211390784 |
| ATGACAACGTAG  | 625.761417640414 | 0.317813776465424 |
| AATTCGGTCACA  | 625.780117200513 | 0.283104306369553 |
| AATTATGGTCAT  | 625.791415049195 | 0.445209757433488 |
| AAAGCACAGTCA  | 625.796877845355 | 0.59393601244368  |
| AACTAAAATGAC  | 625.797072327327 | 0.72769210070742  |
| TAAGTAGACTCA  | 625.810255252729 | 0.530624370741701 |
| AGAAACTCGTCA  | 625.815252662722 | 0.535580974866257 |
| CTCGTGGCGTCA  | 625.821768814628 | 0.42464918587896  |
| ACGCATGACAGA  | 625.832633737482 | 0.415519273554543 |
| AGTGAGCCACAC  | 625.847496528779 | 0.352226446804747 |
| ATTCAAGGTGAC  | 625.851939827803 | 0.439800690997473 |
| GGCCTCAATGAC  | 625.853531687438 | 0.412184127550692 |
| ATATAATTAICTC | 625.866326192967 | 0.519139684299302 |
| GTCACACATTGA  | 625.87145040436  | 0.305599467499691 |
| ATGATGCGTGAC  | 625.879531436918 | 0.566345776399538 |
| ATAGGAGAGTCA  | 625.882722403334 | 0.380861251671298 |
| GATATTGTCAAC  | 625.894791328464 | 0.472445735856787 |
| TACGTTGTGACA  | 625.906985777881 | 0.377894858139729 |
| CGTCATTGTATC  | 625.912403627844 | 0.577745430663533 |
| CAATGCGTGTC   | 625.932823243812 | 0.334635116398833 |
| ACTATTTTCGG   | 625.944662975152 | 0.482235707700577 |
| ACGTCATGCCGC  | 625.948372517888 | 0.407829185331689 |
| CTCGTAGCGTCA  | 625.96305444296  | 0.253856756296451 |
| GTCATCCAGTTA  | 625.965451048804 | 0.558793468514919 |
| GTCATTATACAC  | 625.98065011512  | 0.55988694791485  |
| GCAATTTTGTCA  | 625.981108265046 | 0.487453208065945 |
| CCAAAGTGAGTC  | 625.983076288127 | 0.494969069677301 |
| GTAAGTGAATCA  | 626.003474072623 | 0.443176005759443 |
| CATCCTGACTCG  | 626.019366863069 | 0.222815646223369 |
| CGACCGACTCAC  | 626.048242681461 | 0.173903240065552 |
| AAGGAGTGAGTC  | 626.049373363251 | 0.31882045285012  |
| GAACCGTGAGTC  | 626.072921692539 | 0.611533239993698 |
| CGGTTATTAGTC  | 626.079255431901 | 0.364065994192572 |
| CCCAAGTCATAG  | 626.082291226452 | 0.306076914243172 |
| ATCGTCATGCTG  | 626.085264060057 | 0.306429543638155 |
| TCTGCCAGTCA   | 626.107065983307 | 0.268025362636407 |
| GTGTCATGGAAA  | 626.113297504842 | 0.413134764741583 |



|               |                  |                    |
|---------------|------------------|--------------------|
| AATTTAGGTGAC  | 626.116815433171 | 0.565878982650418  |
| CAATCTGTGTCA  | 626.124454651738 | 0.0879439036435749 |
| TGCCATGTCACA  | 626.141891426356 | 0.284639133292168  |
| CAGTATCTGTCA  | 626.160767615708 | 0.601621842884346  |
| ATCGAAGTCACA  | 626.162182878227 | 0.442379898198992  |
| ACTCAGCGTGAC  | 626.20709850998  | 0.31547277835433   |
| TGACGATTCAAA  | 626.214888405967 | 0.482393296067466  |
| AACACAAATGAC  | 626.218920946405 | 0.331324596258936  |
| GGCCAACATGAC  | 626.223147585544 | 0.716535014151827  |
| AATAGTTGAGTC  | 626.228688399854 | 0.472080660745142  |
| GGTGTTTGTGAC  | 626.230823821569 | 0.275837913123026  |
| GTCACCTGATAA  | 626.233835378397 | 0.594219995873296  |
| GGCAATGATGAC  | 626.239635754888 | 0.403865299531485  |
| AGAGTAATTTTG  | 626.250534501854 | 0.503591912689038  |
| AAAGCGTGACTT  | 626.270068335616 | 0.162056877854659  |
| CGATGAGCCAAC  | 626.270197760874 | 0.273054081025306  |
| TGATTCACTACA  | 626.276904461213 | 0.452774089722296  |
| ACAGAATGTGAC  | 626.288474494158 | 0.775488271911222  |
| AAGTGACGTGCC  | 626.295856936565 | 0.137964227850085  |
| AGTCAGCATTTTC | 626.29718089331  | 0.519955561659372  |
| CGATCGGTGACG  | 626.335598097921 | 0.51070742579114   |
| AGTCACTTCTCC  | 626.336639038688 | 0.270638350688972  |
| TGAGCAAATTAA  | 626.340249177423 | 0.281552475931008  |
| AATACTATGAGT  | 626.342967290589 | 0.501633262143424  |
| AATGAGTAGTAC  | 626.348676490375 | 0.417219487696834  |
| ATACTGTACACAG | 626.350409213901 | 0.676717906541075  |
| ATTTCTACGTCA  | 626.367067850846 | 0.308083816713901  |
| CGTTTACGTGAC  | 626.372257233067 | 0.567084573153635  |
| CCACCTGACTGA  | 626.375023527393 | 0.367351700587685  |
| ACGCGTGACAAA  | 626.387484309555 | 0.326777278302561  |
| AGATACGCGTCA  | 626.388756532463 | 0.603355502538898  |
| ATGACATTACAT  | 626.39336154811  | 0.292031524290947  |
| CTGGGTGAATCA  | 626.408421138752 | 0.488113883834421  |
| CAACCTCAGTCA  | 626.428047258247 | 0.363589600500602  |
| ATGACGCCTTAG  | 626.43121452358  | 0.375212723559096  |
| CATGATGGGTCA  | 626.432523591561 | 0.406745811858567  |
| AGACTCACTGAC  | 626.433681277755 | 0.584332287159556  |
| CAAGGGGATGAC  | 626.447703287078 | 0.272680036978285  |
| AACCAAGTCACA  | 626.448306718411 | 0.345988593033735  |
| GTCACATACTAA  | 626.45308306933  | 0.747766851273485  |
| CTCGACGTGTCA  | 626.453989217736 | 0.461527171584083  |
| GATTTTCATGACA | 626.459463327084 | 0.439338868991889  |
| GGCCTCGTCACA  | 626.466646530963 | 0.329850552847138  |
| ACACACACGTCA  | 626.474426488188 | 0.42973811625255   |
| GTCATTCTACAC  | 626.498515221643 | 0.296706035139636  |
| ATCTTAAGTGAC  | 626.513863673107 | 0.978298193895195  |
| TAACTCATCGGA  | 626.52198277062  | 0.784964264853719  |
| AAGCCAAGTCAC  | 626.533328378591 | 0.365706504839321  |
| GACGTAGATGAC  | 626.542033359933 | 0.294457149536964  |
| TCATCTAGGAAA  | 626.542456954663 | 0.544961207061112  |
| GATTCGGTCACA  | 626.553309694873 | 0.371835851997846  |
| TGACGCTAGTCA  | 626.55727846491  | 0.530119523710218  |
| CCGACTGAGTAA  | 626.558821622828 | 0.431859298569203  |
| GTCATCCAGTAA  | 626.567836866788 | 0.465354513673608  |

|              |                  |                   |
|--------------|------------------|-------------------|
| TGTCATGCATAA | 626.568058059521 | 0.36237891192193  |
| ACGCATAAGTCA | 626.617449692642 | 0.699313522565093 |
| ATACTTGACGCA | 626.627170828999 | 0.337668276248187 |
| GTGCCGTGACTA | 626.638892582362 | 0.243624871801249 |
| AACTATGGTGAC | 626.655438577917 | 0.484204678005482 |
| TCGAATGAGCCA | 626.657005388886 | 0.414895775494358 |
| GTGAATCAACTA | 626.659977379971 | 0.472040104496022 |
| GATGAGTTACAC | 626.66375102321  | 0.443495274002804 |
| CCTCTGTGTGAC | 626.68030471538  | 0.505429635233239 |
| AAAAGAATGAGT | 626.684543460702 | 0.317065476915725 |
| GTCATCCTAGCA | 626.693834567654 | 0.426563538989863 |
| GGCCCGAATGAC | 626.702758640901 | 0.335704445298551 |
| GTACCGTCATAA | 626.710973467462 | 0.296050759519088 |
| CGTCATTTGGGC | 626.731284171247 | 0.504742950723959 |
| ACGCGTGAGTCT | 626.737870622577 | 0.438875971596516 |
| CGTCATGTCTTA | 626.738832311074 | 0.396018676828168 |
| TGACTAGTAAAA | 626.747638202299 | 0.463246086008383 |
| TACTGCGAGTCA | 626.751315819285 | 0.320082655203771 |
| GACTAATACGGC | 626.757512351158 | 0.50000014828539  |
| CACGTCACTGCA | 626.760354802615 | 0.445394870948079 |
| CCGCGAGATGAC | 626.772985816163 | 0.460866977255566 |
| TGTGAGCCACAA | 626.782339674822 | 0.660840894447976 |
| GCATATTGCTCA | 626.794745359229 | 0.316748870770161 |
| TAATCTAAGTCA | 626.811484261469 | 0.411478356318529 |
| CTGCTAGCGTCA | 626.815633493815 | 0.440176484116345 |
| CGGCGTAATGAC | 626.831182498897 | 0.196931601440267 |
| CGACTAATTAGC | 626.836617862806 | 0.356973344137201 |
| GTGATGCAGTCA | 626.846286901672 | 0.34087458370883  |
| CTGAAGTGACAC | 626.847672303487 | 0.426425416599585 |
| AAGGGAATGACG | 626.873748068527 | 0.23414658602206  |
| AATGAATGTGAC | 626.874161327265 | 0.445728938827973 |
| GCAGGTGGTGAC | 626.886357081273 | 0.325259520097679 |
| ACTCATTCGGTA | 626.896210302622 | 0.425366503371995 |
| ATGACGACGTGG | 626.896309049246 | 0.161953017697965 |
| GTCATGCCTCAA | 626.897144920472 | 0.300338288940088 |
| GATACGTGACAC | 626.89921664054  | 0.373320570408202 |
| AGAAATGACCAC | 626.901522929142 | 0.437384447350112 |
| GCACCATGACGC | 626.903166668346 | 0.436667618573793 |
| AGCTCAGACTCA | 626.911717929858 | 0.525604843501365 |
| GACTAATGAGTA | 626.91402741216  | 0.179795674918167 |
| CCGTTGTATGAC | 626.917208792591 | 0.338247639239293 |
| ATGACGTCTTTC | 626.94239255406  | 0.367695738542925 |
| CGTCATCTCCCA | 626.967519532233 | 0.306037218240618 |
| GCACAGAATGAC | 626.969806604868 | 0.72427130960071  |
| TCATAATTCGGA | 626.972439501727 | 0.913743068951792 |
| ATTTAGGATGAC | 626.986976105614 | 0.441649248107608 |
| AGTGTCATGTAT | 626.990602919872 | 0.25501634470258  |
| AATTTTAGTGAC | 627.010149713637 | 0.420532008010754 |
| CAGAGGTGACAC | 627.017360008787 | 0.329341138954557 |
| AAAAGTGGTGAC | 627.04480433635  | 0.409332667320371 |
| AAGGCACAGTCA | 627.049375046589 | 0.422275290756459 |
| GTGTCATGAATA | 627.05148741559  | 0.300683550421223 |
| CGTTTTCCGTCA | 627.061018659432 | 0.289826711277593 |
| AATAATGGGTCA | 627.06957880969  | 0.427907596934803 |

|              |                  |                   |
|--------------|------------------|-------------------|
| ATTTTACGTGAC | 627.080929283511 | 0.393220405340998 |
| ATGAGTCTCTTA | 627.092648694169 | 0.581439485329582 |
| TGGCTCATCACA | 627.098223687285 | 0.41251311140072  |
| GGCTGGTATGAC | 627.098648407914 | 0.350015460547808 |
| AGAGTCAGGAGC | 627.114224719772 | 0.379767449250687 |
| AACTACGCGTCA | 627.118014935229 | 0.471681076702655 |
| AGTTGTGTCAAC | 627.140687394868 | 0.339505978714455 |
| GTTTCAGTGTCA | 627.145630895439 | 0.357469879388945 |
| ACGTCAGAATAC | 627.153127818317 | 0.433278792476623 |
| GAGTCAATTAGA | 627.159649368795 | 0.273325739936551 |
| ACACCCGAGTCA | 627.173651762519 | 0.369287893794322 |
| GGTTCGTGTGAC | 627.174592964302 | 0.489097044662176 |
| GAGTCAGGGCCA | 627.175581198355 | 0.29649521401473  |
| ATATGATAGTCA | 627.182990138563 | 0.44145178672266  |
| ACGGCGGAGTCA | 627.19024600888  | 0.355113564681395 |
| ATACGTTATGAC | 627.195744914057 | 0.387690557022783 |
| GTGAGTCTGCAA | 627.199176519828 | 0.471033629856864 |
| GAGTCAAGCTCC | 627.20195490607  | 0.543405615455231 |
| CTTCATCCGTCA | 627.202825817941 | 0.386464259441641 |
| GGTGAGTGTGAC | 627.203779492409 | 0.318378684193738 |
| TACGTAGCGTCA | 627.214289579532 | 0.522913599519414 |
| GTCATCCATCAC | 627.217172834605 | 0.279642059662744 |
| GTTTCGCGTCA  | 627.231905517951 | 0.614400362717457 |
| CATGCGGATGAC | 627.238206453243 | 0.647365975731151 |
| ACTCATAAAATG | 627.238914714316 | 0.610521699751115 |
| ATTGAGTGTGAC | 627.241901535569 | 0.152918287932241 |
| ATGACAGAGGCA | 627.243643029499 | 0.308585571381552 |
| ATATAGATGACG | 627.243803720443 | 0.448344238874307 |
| AGTCACTCCACC | 627.256415408971 | 0.260829216909732 |
| GTATTGCGTGAC | 627.267900069372 | 0.24776979060478  |
| AACCGCGATGAC | 627.269141316066 | 0.444557805415641 |
| AACTAGCATGAC | 627.27028413596  | 0.485426576834926 |
| AGATTATGACCC | 627.276206871554 | 0.267820606252097 |
| CATGTCTGAGTC | 627.281418794595 | 0.293760043609321 |
| AATACCATGACT | 627.291287544962 | 0.436734430131833 |
| GAGCCCTAGTCA | 627.304220353887 | 0.510699216855074 |
| CAGTCTTCGTCA | 627.310661458942 | 0.494810918083978 |
| AATAGAAATGAC | 627.315319753353 | 0.288515737479477 |
| GAATAGTGACGC | 627.316295924314 | 0.574697858854259 |
| CGTCATATGGCC | 627.325588963896 | 0.76326739880365  |
| ATGACGCCGAGA | 627.328034258937 | 0.263795486273971 |
| TCATTAGTGACA | 627.328881806381 | 0.587270453325479 |
| GATGAGCATGAC | 627.337449926878 | 0.172479583663568 |
| GATGACAAGACA | 627.369837565937 | 0.183885442367428 |
| ACGCTTTGACTC | 627.37137870542  | 0.299884493743486 |
| ATGAGCAAGAAG | 627.371566805405 | 0.233485098545484 |
| CGCGCTGACACA | 627.380947279671 | 0.515741534202103 |
| ACGGTATTAGTC | 627.384533279345 | 0.244607183200186 |
| ACAACGCAGTCA | 627.386330301978 | 0.426202223119019 |
| CAAAATTACGCA | 627.40014807043  | 0.517679904874651 |
| GACTGAGAGTCA | 627.40556094957  | 0.347010201392632 |
| ACTCATAAGTGG | 627.42238252906  | 0.548675191057383 |
| TATGTCATGTGA | 627.425858105103 | 0.592230944430166 |
| ATGACCGAGTGC | 627.432611058448 | 0.578290342600423 |

|              |                  |                   |
|--------------|------------------|-------------------|
| CCGAAGCGTGAC | 627.435478020242 | 0.547724472062779 |
| TGACGTGATTAA | 627.462037460863 | 0.396128602777848 |
| ATCCGAAATGAC | 627.462641851283 | 0.315243772098267 |
| ACAATTGTGACA | 627.465407759374 | 0.29842798769291  |
| CGGCACGAGTCA | 627.476016090606 | 0.552185987773995 |
| GTCCTCATGACA | 627.477063998171 | 0.512726329132205 |
| AACTCACAGTCA | 627.478436311918 | 0.416852136810812 |
| AGTCACTAGACA | 627.484647126957 | 0.447502329622138 |
| AGTCACTTCAAA | 627.491481747893 | 0.486065587852978 |
| GTGATACATACA | 627.50320943915  | 0.559494900894093 |
| GTCTGACGCGTA | 627.50453628611  | 0.535240090075161 |
| ATTCTCCGATGA | 627.524563112088 | 0.684053424795443 |
| ACTCATACTCTG | 627.525871568471 | 0.206526292587339 |
| CGTCATTCCACG | 627.535406949277 | 0.603181305475666 |
| CGCGGGTGTGAC | 627.539948470038 | 0.445293186842186 |
| TGACAGAGAAAA | 627.542111219732 | 0.312394380385871 |
| GTCACAAAGTCA | 627.543395890687 | 0.398921046844617 |
| AAATTGCATCAT | 627.553756992055 | 0.382318301867797 |
| GTCATAAAAGTA | 627.566804526274 | 0.408684112559303 |
| GTCATATTGGAC | 627.569639214857 | 0.358255527718906 |
| ATGCTGACTGCA | 627.569817339221 | 0.398422507347724 |
| CTGACACGTGAC | 627.60115602722  | 0.208281521974362 |
| AGCGTCATGCCA | 627.606636266303 | 0.349326078184573 |
| GAGCCACTATGA | 627.62585507227  | 0.521705856011418 |
| CGGATTACGCAC | 627.630000278773 | 0.6355230158985   |
| ATCGATCTGTCA | 627.634020668979 | 0.251942255857597 |
| TAGTAAGTGTC  | 627.63989754466  | 0.315336888683472 |
| ATTAACGGTGAC | 627.657166713972 | 0.570424001749292 |
| AGCATATGACCA | 627.658520192642 | 0.464383441108253 |
| GCTAGGAATGAC | 627.674639336407 | 0.428886026591899 |
| AGCTCGTACTA  | 627.678987023571 | 0.384790390576846 |
| ACTCGACGTGAC | 627.682384799828 | 0.577416980638149 |
| GTCACCGTAGGA | 627.682883439088 | 0.633405975797036 |
| GACGTAAATGAC | 627.693757793469 | 0.337371723058429 |
| AAGCTTGACTAA | 627.719175938423 | 0.533978500595326 |
| ACACGTATGACC | 627.72165623433  | 0.286140993896941 |
| CTCTGGTAGTCA | 627.724171760949 | 0.542193345798369 |
| GATTAGTACTAC | 627.729000951345 | 0.23134870775994  |
| AGTGTCGCGTCA | 627.734237830126 | 0.538550116754367 |
| CGCTTCGATGAC | 627.745069850015 | 0.494989043920968 |
| CGTTAAGTGTC  | 627.752119232695 | 0.172234989647341 |
| AAGACGTCACCG | 627.752524601235 | 0.470407186685975 |
| GTCACCATTTTA | 627.758782189373 | 0.186070955581486 |
| GTCATCCGTGAA | 627.772188854534 | 0.430176091469431 |
| ATGACACGGGTG | 627.783143658145 | 0.443274006925338 |
| GAGTCAGGAGCC | 627.795877006984 | 0.253424414924212 |
| CTATCTTATGAC | 627.796343536502 | 0.345450405572101 |
| AATTAGTCTGAC | 627.797654700835 | 0.326932509642563 |
| ATAATTAATGAC | 627.801202950949 | 0.639688310640435 |
| CACTTAGCGTCA | 627.80627852121  | 0.447986306846216 |
| AGCATCGGTGAC | 627.812613016891 | 0.568828078414586 |
| CAAAACAATGAC | 627.818134999793 | 0.25516219023184  |
| CTGTCTAAGTCA | 627.834842588152 | 0.620088466201208 |
| GAAACGTGTGAC | 627.835156568861 | 0.391444394344253 |

|               |                  |                    |
|---------------|------------------|--------------------|
| GACCTAGGTGAC  | 627.849609172417 | 0.433445254562414  |
| GTCCTTGTGTCA  | 627.851604493027 | 0.416579685510771  |
| AAGGGGTGTCAT  | 627.854788169901 | 0.365081112785678  |
| AACGTTTGACTC  | 627.858412353816 | 0.733078693795865  |
| AAGTATTACGTA  | 627.87601769765  | 0.332097861195092  |
| ATGACAGCTCGC  | 627.876293800846 | 0.490282548237526  |
| CAGTCAGTGACA  | 627.882806897548 | 0.565889319309084  |
| GACAGATTAGTC  | 627.883079481788 | 0.306001040070752  |
| CTGCTGGATGAC  | 627.886268826157 | 0.545147348826271  |
| TGACGCGTCTAA  | 627.893633532827 | 0.4886237804692    |
| ATCCGTGATTCA  | 627.899813333796 | 0.320415478051673  |
| GTCATAGAAACA  | 627.90661713569  | 0.332417164638947  |
| GAGTCAAAGTCC  | 627.910538791826 | 0.447749863508385  |
| TCCACAGAGTCA  | 627.914078162421 | 0.675114836072111  |
| AGTCACGCCGGC  | 627.926740259132 | 0.537298000420879  |
| GACTCACGTACC  | 627.928904409262 | 0.463142247222796  |
| AATAGGTCACAC  | 627.930208063469 | 0.556013783775884  |
| CAATTGACGTCA  | 627.93314939623  | 0.567513117843299  |
| GTCATTCGCTCA  | 627.936687829521 | 0.509842503836994  |
| TAGAACTGGTCA  | 627.938590523671 | 0.316626842075503  |
| GACTCACGGTAC  | 627.948175374935 | 0.603270272889493  |
| CAATTTGATGAC  | 627.953326475113 | 0.440478048466973  |
| GTAACGGAGTCA  | 627.953740465963 | 0.0869590834298292 |
| GTCACGTTAGTA  | 627.959768045882 | 0.401168539744025  |
| CTCCGTGTGTCA  | 627.978663759926 | 0.393740878412572  |
| CGTCATTCCATC  | 628.003187198264 | 0.256344076441002  |
| GACACTACGTCA  | 628.003909283019 | 0.38182930817174   |
| GTCACAGAATGA  | 628.015103678331 | 0.38161666829537   |
| AATACAGTCAGT  | 628.024925216935 | 0.441417315618959  |
| CGTCATTATTTA  | 628.032662925489 | 0.346020281476925  |
| GCCGTTAATGAC  | 628.03568499947  | 0.554997544049815  |
| AAGCAAATGAC   | 628.053376779412 | 0.206841094337759  |
| ACGTCACCGAAG  | 628.06496783742  | 0.335573751087986  |
| CACCAGATGACA  | 628.092658373431 | 0.325510831595595  |
| ACTCATCGGACG  | 628.100428836171 | 0.523752069445614  |
| CGCCCGGATGAC  | 628.10405033162  | 0.550041424864645  |
| GACGCCAGTCA   | 628.112686681651 | 0.396479423645445  |
| ATGACCACCTTTG | 628.12878548914  | 0.445310383101187  |
| ATGACAGTGCGC  | 628.133310927387 | 0.340020914068865  |
| GGAGGGTATGAC  | 628.135695482192 | 0.203867834173568  |
| TCACTGGTGACA  | 628.13573533443  | 0.483271936850643  |
| CAACCAGATGAC  | 628.13970590594  | 0.360371821168005  |
| GCCGCTAATGAC  | 628.140035236248 | 0.523910531661754  |
| CTAGTCAGTGAC  | 628.144781818209 | 0.343542244881538  |
| CATGAGCAAATA  | 628.151616161891 | 0.352107532505191  |
| GTCATGTACTTA  | 628.169804411188 | 0.522523933290971  |
| ATGACGATCACG  | 628.189083385438 | 0.389411946319107  |
| GAAATCAATGAC  | 628.191676949198 | 0.484347611982884  |
| TGATTAGATAA   | 628.198169314367 | 0.539794497491614  |
| GACTGGTGTGAC  | 628.207433377982 | 0.302827900454528  |
| GTCATCCATCCA  | 628.214340005417 | 0.248470814061194  |
| GAGTCAGTTGGA  | 628.216815755349 | 0.298303910427877  |
| TATTCTGATTCA  | 628.220642652276 | 0.158016257625497  |
| CTATGGTGTGAC  | 628.246927596546 | 0.218710750985826  |

|               |                  |                   |
|---------------|------------------|-------------------|
| TGAGTAAACGCA  | 628.28144965318  | 0.273829269917685 |
| CTATGGTAGTCA  | 628.288637948091 | 0.612893807778276 |
| CCGGGAGATGAC  | 628.305515749781 | 0.397297367554148 |
| CCGTCAGCGTCA  | 628.310867020376 | 0.284360795207671 |
| TACCTTGTGTCA  | 628.313750869044 | 0.46086745696635  |
| ACTTACGATGAC  | 628.317488150927 | 0.465207785989443 |
| CAATCGAAGTCA  | 628.31952255005  | 0.578142634132125 |
| ATGACTTGATGG  | 628.327178822574 | 0.440418687201262 |
| TGACATGGTCAA  | 628.331662974216 | 0.484290037435592 |
| AGTAATAACTCA  | 628.344919233074 | 0.486732198380908 |
| AGCGAGTGAGTC  | 628.346552779179 | 0.340665504424083 |
| ATTGACGTGAC   | 628.352618937292 | 0.443937523576218 |
| ATGTGTAAGTCA  | 628.356094401099 | 0.441954535175308 |
| GTCATAAGCAAA  | 628.356710400417 | 0.473070920321036 |
| CAACGGGATGAC  | 628.358189480604 | 0.473802397626236 |
| AGTAGGTGACGC  | 628.366494105744 | 0.349980881029233 |
| GAGATTTGACTC  | 628.368555265999 | 0.639950051791261 |
| ATGACCATGTCA  | 628.369803823597 | 0.312864723557455 |
| AATTTTCTGACT  | 628.370748711498 | 0.368144287609047 |
| AAGTTTGTGTCA  | 628.380960062416 | 0.262236363918903 |
| GTCATCCCAAGA  | 628.393418021492 | 0.495825697009041 |
| AGGTAATATGAC  | 628.393841470192 | 0.360787177261745 |
| GTGCCATAGTCA  | 628.396070577085 | 0.593770436690171 |
| CGTCATATGGAC  | 628.404045457457 | 0.579329202585727 |
| CAGAGGAATGAC  | 628.406930501129 | 0.213048679653156 |
| TGGTCATCTCAA  | 628.408221915171 | 0.372749483329163 |
| TCACTATTGGAA  | 628.421505373018 | 0.895761620568079 |
| CATTCTTCGTCA  | 628.42484440947  | 0.458719397371437 |
| ACTGGAGATGAC  | 628.431460414775 | 0.307604495323814 |
| GCCTATATGTCA  | 628.432243513165 | 0.75378058641368  |
| TCTGCGGAGTCA  | 628.434715540935 | 0.57166356203867  |
| CTTGGTGACCCA  | 628.44933597183  | 0.338252454929951 |
| CGGCAAGACTCA  | 628.449497184069 | 0.427883696873193 |
| AATCATTGGTCA  | 628.453219720934 | 0.385336989776745 |
| AATTCGGTGAC   | 628.458859153237 | 0.403645523294579 |
| ATGATGTAAGTCA | 628.46185406144  | 0.407437112671008 |
| ACTGCTGAATCA  | 628.468758456195 | 0.335063266260596 |
| GGCATCGATGAC  | 628.472515928356 | 0.447461185772277 |
| ATAGAGAATGAC  | 628.475958544115 | 0.368220600132789 |
| ACAAGGGAGTCA  | 628.499148276059 | 0.280623904476969 |
| ATCTTAAATGAC  | 628.501843218765 | 0.308565293123787 |
| TCAAACCTCGTCA | 628.504792683738 | 0.565092158543901 |
| CTACGGTATGAC  | 628.508478797045 | 0.559310868328359 |
| TGACAGACGTCA  | 628.508984308744 | 0.379716859563562 |
| CGCTAACATGAC  | 628.514794316587 | 0.459568445811911 |
| GAATTGGAGTCA  | 628.518707788385 | 0.4140857777913   |
| ATTGCATCATCA  | 628.520570170376 | 0.30807594202508  |
| ATGACATTGACG  | 628.52498678499  | 0.458405882675859 |
| CCCGTTTATGAC  | 628.526505690984 | 0.24633400570675  |
| CCAGTTGAATCA  | 628.536855185827 | 0.453796468754329 |
| CAACCTGTGTCA  | 628.542285870471 | 0.526613350167712 |
| CCAACCTATGAC  | 628.54774384234  | 0.414906488578219 |
| AGATGTGATGAC  | 628.549307132586 | 0.289863928500134 |
| ATGACGTTGCGA  | 628.56044831101  | 0.295100226768874 |

|              |                  |                   |
|--------------|------------------|-------------------|
| GTGTATAAGTCA | 628.576055328088 | 0.437806987482285 |
| ATCCCTGCGTCA | 628.577229587655 | 0.316979777302317 |
| ACACTAGTGACT | 628.582399357119 | 0.33861946577101  |
| ACGGCTGCATA  | 628.583608754148 | 0.41912914424575  |
| GAGTAATATGCC | 628.596169019914 | 0.465484689567033 |
| TGACGGGTGACA | 628.599454666521 | 0.148478966209646 |
| GTCATAAATCTA | 628.607166209689 | 0.495562755983937 |
| AGTCACTTCTAA | 628.63154267659  | 0.401056700533574 |
| GTCATACGCCAA | 628.642681168562 | 0.416034163445948 |
| AACTACTGTCAT | 628.643263147724 | 0.302008282386027 |
| CTAGCCTGACTC | 628.657591815745 | 0.158902489988312 |
| CTCTGTAATGAC | 628.678588229124 | 0.725518669765911 |
| CTTGACAGTCA  | 628.680835231775 | 0.740866180802246 |
| CATCCTGACACA | 628.686972266275 | 0.288398125524984 |
| GTGACACAGGGA | 628.687372614856 | 0.18383177425692  |
| GTCATCCGCTCA | 628.687778432168 | 0.218339747922775 |
| GTCATCCAGGCA | 628.704504735236 | 0.322706533266576 |
| CCACAATTATGA | 628.705311956721 | 0.497315534249512 |
| AGTCACGACCGG | 628.710693461198 | 0.420451989020182 |
| TGACACTTGAAA | 628.718377934942 | 0.743035420583882 |
| ACCGCCGATGAC | 628.736073198395 | 0.324080392441402 |
| ACAACCTCGTCA | 628.740769706605 | 0.41195842000361  |
| ACCGAGTGAGTC | 628.744102735553 | 0.441651812334418 |
| CACGTCACGAGA | 628.746318020541 | 0.589243980926849 |
| CGGCTTTATGAC | 628.77372515188  | 0.401751957854266 |
| ACGTCATGCGTG | 628.779003031002 | 0.378154099551898 |
| ATCTGTCTATGA | 628.781624571363 | 0.611343845377454 |
| GAACATGACCCA | 628.787257756493 | 0.476704314828157 |
| ATGACGCCTTCA | 628.794980307079 | 0.374719089397731 |
| GAACGATATGAC | 628.795825250066 | 0.347810125023343 |
| CAAGCGGAGTCA | 628.796379143536 | 0.409671238224618 |
| CATACGAGTGAC | 628.798337415792 | 0.254552428874752 |
| CGTCATGCCTGA | 628.805986638391 | 0.65886217276762  |
| ACAATTCTGACT | 628.809858125181 | 0.249937817959176 |
| GCTGCTGTGACA | 628.811533409644 | 0.228638067871909 |
| CTAGGATTAGTC | 628.813407810123 | 0.486772698417004 |
| GTCACGCGTATA | 628.814926596166 | 0.501798588853109 |
| TAGGATTGGTCA | 628.817119299452 | 0.353560276554379 |
| GTCACAGGTGAA | 628.835298108285 | 0.328196970975457 |
| CGTCACCGGTTA | 628.839954447974 | 0.566312534753519 |
| ACACTTGGTGAC | 628.846083635172 | 0.53946433122683  |
| AATGCTGACTGT | 628.846652872641 | 0.386481119382141 |
| CTGACTGGTTGC | 628.859892361243 | 0.388967644784893 |
| ATGTATAATGAC | 628.87295472022  | 0.203120991116906 |
| AAATTTGTGTCA | 628.873378380241 | 0.653787481000736 |
| GGTCATAGATGA | 628.906626580906 | 0.33533739859456  |
| AAAGCAGAGTCA | 628.908508395473 | 0.322262066439603 |
| AGTCAGAACGTC | 628.912061002075 | 0.454228550617758 |
| TGTCAGATGACA | 628.916811936019 | 0.456252497220147 |
| CTAATTATGTCA | 628.918367087493 | 0.506986203392879 |
| GCTAGCGAGTCA | 628.919966742331 | 0.483456171055134 |
| TCATTGTCACGA | 628.922935360451 | 0.7771849733367   |
| AAACCGAATGAC | 628.924118891561 | 0.384116547672812 |
| GTCATTGTAACA | 628.950246925264 | 0.301682278065309 |

|              |                  |                   |
|--------------|------------------|-------------------|
| GGTGATTATGAC | 628.951076522739 | 0.217228829259637 |
| CCACGCGTGACA | 628.955282513382 | 0.533453144951441 |
| CGAGTTGATGAC | 628.955820569028 | 0.447876080267833 |
| ATTACCCAGTCA | 628.969550465671 | 0.481330954033278 |
| CGCACGCAGTCA | 628.972658105185 | 0.558061881321681 |
| TAGTCAGTGTCA | 628.976551647972 | 0.59551087192658  |
| ATAAGGGATGAC | 628.976748677718 | 0.353819961695936 |
| AGAGTCAGTTA  | 628.981401175805 | 0.227265808395502 |
| GATGTTGACACA | 628.990253068793 | 0.469903454665575 |
| GTTACGTGGCCA | 628.992094463913 | 0.543664258820125 |
| ACGAGGTGTGAC | 628.995416706586 | 0.467735146408321 |
| ATAGAATGACCA | 628.995794632742 | 0.621804490548735 |
| AAGACTCTTATA | 629.020214271096 | 0.418973980690844 |
| ATGACATTAACG | 629.0332448384   | 0.541557640484479 |
| AACAGGGATGAC | 629.035921545721 | 0.150946947309001 |
| CGAACGTATGAC | 629.060167757631 | 0.399952910666837 |
| CAATCAGTGACA | 629.063028866044 | 0.434106373818735 |
| CCGAGGGGTGAC | 629.064618934217 | 0.428250080284918 |
| AATCCTCGTCAT | 629.072409339267 | 0.424744931097985 |
| AGTAAGAGTAAC | 629.077387713658 | 0.315289333603046 |
| CAAATGGTGACA | 629.078374670087 | 0.434790096023259 |
| AATGATGTATCA | 629.089693315357 | 0.763676117833564 |
| TGACGTATCTCA | 629.131461009753 | 0.661741112335584 |
| CTGCTGAGTAAC | 629.131676476582 | 0.190630845029596 |
| ATGACGAGGAAA | 629.143649752473 | 0.206048400610079 |
| AGAGTAATTCCG | 629.1449630236   | 0.472162805682248 |
| AGCGACTAGTCA | 629.155993690614 | 0.496336917563119 |
| AACTTGTGACGC | 629.157705766941 | 0.406158507113217 |
| ATGCGTGAATCA | 629.167392655509 | 0.380818087497341 |
| ATGACATCGCTG | 629.187867671968 | 0.578225047625675 |
| GTCACAGATCAC | 629.192872755542 | 0.64283501204664  |
| GTTCCACTATGA | 629.194603550124 | 0.577856243022532 |
| AGCCAACGTGAC | 629.194917326359 | 0.458729667524162 |
| GATATCGCGTCA | 629.207822744839 | 0.553927351811154 |
| GTCACACCTCTA | 629.209600531424 | 0.306976193490683 |
| GAGGTGTATGAC | 629.210464299122 | 0.425160843975683 |
| GTCATTGTAAGA | 629.222182411248 | 0.439287734471592 |
| AATTGTGTGACG | 629.224326269325 | 0.440161890013183 |
| ATGACAATCACG | 629.226336658739 | 0.434846037973271 |
| GATGCGTGACGC | 629.230569293442 | 0.589958885673641 |
| TGAGTAAGGCAA | 629.237684161645 | 0.319788415674846 |
| ATAACGTCACCA | 629.247787129188 | 0.526571817133429 |
| GTCATCGATCAA | 629.258637995991 | 0.275971402062451 |
| CGTCATCTCCAA | 629.269093177859 | 0.363785219094231 |
| ACTGAAATGACA | 629.273296825294 | 0.432617590927807 |
| CCCTAGCAGTCA | 629.275545329755 | 0.428689384658751 |
| CCCTAGGATGAC | 629.309072029523 | 0.469845145638826 |
| GGTACGTGTGAC | 629.317363160362 | 0.443263129373623 |
| GTATACAGTGAC | 629.318303490674 | 0.578553291552169 |
| CTTATCTGTGAC | 629.318727777653 | 0.163763145067314 |
| ATGTGACAGTCA | 629.319894267782 | 0.381548073758477 |
| AAAAGCGGTGAC | 629.32517935797  | 0.284859702902977 |
| CGATATGTCAGA | 629.329696195504 | 0.292225219996356 |
| GTCATAAGCCTA | 629.334368052049 | 0.326181120717024 |



|               |                  |                   |
|---------------|------------------|-------------------|
| CCTGGAATGACG  | 629.337875235056 | 0.543727898463682 |
| ATGTTTGTGTCA  | 629.344767613406 | 0.412329017800745 |
| GTCATAGAGGGA  | 629.354073973512 | 0.214948865636754 |
| CGTCAGAGTAAC  | 629.354330837187 | 0.688603518471003 |
| GCGTTGACTCA   | 629.355993620222 | 0.731148978092378 |
| TATGCAATGACA  | 629.359562076863 | 0.325305571461612 |
| GTCATAGAGCTA  | 629.375299076969 | 0.348861286980444 |
| CACCCGTATGAC  | 629.376715274829 | 0.18735340535071  |
| ATCTCGGTGACA  | 629.377576041838 | 0.783909651437262 |
| CACATGCATGAC  | 629.405202908013 | 0.407748091618394 |
| CTCGTTAAGTCA  | 629.406320805736 | 0.695281033027917 |
| AGAGCGTACTG   | 629.410888588654 | 0.272309090783822 |
| ATGACGCGCCGG  | 629.413505405701 | 0.538656750958655 |
| GTGACACGCAAC  | 629.422749384109 | 0.554100821245234 |
| GATCTATAGTCA  | 629.427387038096 | 0.22455380992632  |
| ACGATCCATGAC  | 629.428489164004 | 0.472396923175329 |
| GTCACAACCTGA  | 629.440558729076 | 0.37419609329667  |
| AAATTTTCGTCA  | 629.447912360454 | 0.62307312060053  |
| AAGCTCTGACTT  | 629.452093362328 | 0.273402599481212 |
| ACGTCACATCCG  | 629.463636324115 | 0.319324331427751 |
| AGCTCAGATGAC  | 629.465159135085 | 0.186351359592099 |
| AACTTCGTGAGA  | 629.466080306457 | 0.431028436073542 |
| AATCCTAGTGAC  | 629.466119549103 | 0.501435355304623 |
| TGACCCATCAAA  | 629.475322605744 | 0.426973591963334 |
| ATGTCACCGACA  | 629.487207959996 | 0.403129317525985 |
| ACTCATTGGAGG  | 629.487734304007 | 0.46816945101775  |
| ACGTCACATAGC  | 629.49767482236  | 0.341565825661649 |
| ACACCATAGTCA  | 629.503329079618 | 0.403394383695073 |
| ACTCACGGGTGA  | 629.532499944063 | 0.526399346050048 |
| CTTTAGGGTGAC  | 629.533432076828 | 0.484081841942205 |
| TGACGCGTCGCA  | 629.5381792405   | 0.581767438958828 |
| ACAAGCTGTGAC  | 629.54170014057  | 0.497828369404355 |
| GCCCTGTGTAC   | 629.542265373961 | 0.347097645981718 |
| GTCGTAATA     | 629.546360367697 | 0.779548318697907 |
| AGTATGACCTAA  | 629.552934972462 | 0.297236834727202 |
| TGACTGGACTAA  | 629.561302020558 | 0.436319202277054 |
| AGACTCACGAGG  | 629.56575824448  | 0.48563364784962  |
| CATCATGTGACA  | 629.581716489508 | 0.721358581356599 |
| GACTAATCCATC  | 629.584409328314 | 0.266142165600826 |
| AGATATGTGAGA  | 629.596522054925 | 0.15391956362529  |
| ACGTCACCATTC  | 629.598629460518 | 0.384040987373051 |
| AGTGACGTGATC  | 629.599327212956 | 0.324254944895852 |
| GTCATTGACCCA  | 629.600680125992 | 0.601668377517997 |
| GCAATAGACTCA  | 629.606924262594 | 0.478160506902341 |
| GTCATTTGACGA  | 629.62463237823  | 0.603430484977889 |
| CATATCAATGAC  | 629.627922941296 | 0.65476734912321  |
| ATGACGATGCGA  | 629.633107359601 | 0.489024699456361 |
| CAGAAGTACTC   | 629.633813653613 | 0.437292273208639 |
| GTCATAGAGCGA  | 629.634818615588 | 0.428129981954733 |
| ACGTCACGTGCTG | 629.636388929394 | 0.59822569425128  |
| TGAGTATTTCAA  | 629.636428644255 | 0.488699088755043 |
| GCTAATTGTGAC  | 629.644149711197 | 0.68146126269526  |
| AGACTAATACCT  | 629.652237704002 | 0.36257199310155  |
| ATGACGAGAGTC  | 629.653738952877 | 0.483669872556698 |

|               |                  |                   |
|---------------|------------------|-------------------|
| CAGTCAGATAAC  | 629.666694808552 | 0.39730339169793  |
| CGTCATCTGTAA  | 629.668383181901 | 0.367975474979088 |
| ATGTCCGGTGAC  | 629.680352460994 | 0.434117711645338 |
| CGTACCTGAGTC  | 629.681522139834 | 0.457957714399726 |
| CGTCATGCAATC  | 629.696635913176 | 0.654902479195488 |
| CCTTAATGACAG  | 629.702766642261 | 0.523582158721921 |
| CCCGGAGATGAC  | 629.708737633427 | 0.542633598718164 |
| CGTCATCTCTCA  | 629.713065991014 | 0.334307920909669 |
| ATGACAGTGCAC  | 629.718800296194 | 0.16632919797069  |
| CAGTCAGATGCA  | 629.723398099928 | 0.430272851396231 |
| CTGACGATGACC  | 629.730318074105 | 0.48310306161013  |
| ACTTGTTGTGAC  | 629.769763545908 | 0.451413992975323 |
| GCCTAGCATGAC  | 629.77729728668  | 0.514556931207112 |
| AGTCACCCTGCG  | 629.802242339682 | 0.510389784186407 |
| GGTGAGTCTCAC  | 629.802540988609 | 0.565612226350079 |
| GTCACGATACGA  | 629.811736548859 | 0.550715218715833 |
| CGTCACCCGGAA  | 629.828312733892 | 0.538834845886811 |
| TAGCACCAAGTCA | 629.828552882659 | 0.47589151682135  |
| ATAGGGGATGAC  | 629.830192795743 | 0.332959987549924 |
| AGAGTCAGGGAC  | 629.832644551205 | 0.186876861039345 |
| TGACGAAGTCCA  | 629.833185485375 | 0.403721549882614 |
| CATCTTGTGATC  | 629.840441945764 | 0.292863025061653 |
| ATACAGGAGTCA  | 629.861571750945 | 0.473501741672974 |
| GGTCGTGTACC   | 629.874038515912 | 0.272180787551622 |
| GAATTGAATGAC  | 629.880553200808 | 0.428988454603757 |
| AGTACTAGTCAG  | 629.889496620444 | 0.169758408093055 |
| ACCAAATGTGAC  | 629.890776779383 | 0.450786083261185 |
| GGGGCTGCGTCA  | 629.893787338089 | 0.410303392326212 |
| CCCGGGTGTGAC  | 629.896778254666 | 0.608722397713543 |
| CGTCACATTGAC  | 629.898883020795 | 0.323748450646415 |
| CAGGCTCTGACA  | 629.900685124624 | 0.326157589226537 |
| ATATGGTACCCG  | 629.902756342833 | 0.321860479934032 |
| CATTCTATGTCA  | 629.903148855831 | 0.603245186761871 |
| GACTAATCTGAC  | 629.916341108717 | 0.308920388889841 |
| GTCATTTGCTAA  | 629.917997061597 | 0.369622311262521 |
| CCGAATTACGCA  | 629.928200294423 | 0.24488129477161  |
| GGCAGCTATGAC  | 629.931904281245 | 0.438421847711628 |
| GACGTCACCCGAC | 629.932987277427 | 0.463814084222678 |
| AGAGTCAGGCTA  | 629.933308250849 | 0.302721381724715 |
| GGTCACTTATGA  | 629.935152891038 | 0.659364532411772 |
| CTAGGGGAGTCA  | 629.935944143411 | 0.361754079846297 |
| CTTATCCAGTCA  | 629.939181425279 | 0.332084485311138 |
| ATGACAAGATCG  | 629.941723487596 | 0.379555404318901 |
| ATTGGGAATGAC  | 629.945008568359 | 0.468611046467837 |
| CGTCATTAGAAA  | 629.956063839008 | 0.383116690750036 |
| CAACGGTGACAA  | 629.976003066747 | 0.297884478709459 |
| TCATCTTCGTCA  | 629.983811465395 | 0.303061659257677 |
| GATTTGTGTGAC  | 629.99026370788  | 0.287739974418138 |
| GGTGAGTCTGCA  | 629.998232613982 | 0.252579927940451 |
| TAGTATCTGTCA  | 630.014869792727 | 0.565446282145111 |
| GACCACATCATA  | 630.022134670714 | 0.372217800225129 |
| AGACTAATTGAG  | 630.03244829663  | 0.432451274536704 |
| GTCATATTTAAA  | 630.035595852475 | 0.559392824434198 |
| CTATCGTAGTCA  | 630.041470444598 | 0.426132793155439 |

|               |                  |                   |
|---------------|------------------|-------------------|
| ACTAATACTGGA  | 630.05606230009  | 0.779611248990449 |
| ACTCATTGGTGA  | 630.056401670618 | 0.446688309776279 |
| ACTAACTTGTCA  | 630.076351967682 | 0.554426865152007 |
| CGTGAGGATGAC  | 630.081917239752 | 0.247110470552145 |
| AATCTGTGACGA  | 630.085266411798 | 0.304475117938088 |
| ATGACATGAACG  | 630.091431884352 | 0.464097774025571 |
| CCCAATTAGTCG  | 630.09610884831  | 0.220083333155386 |
| ATGAGTACCGTC  | 630.119140099718 | 0.456624718719278 |
| ATGGACTAGTCA  | 630.138996901573 | 0.557178770505798 |
| CCGCTTGACTGA  | 630.14311413676  | 0.404078295914409 |
| CCTGGGTATGAC  | 630.147553984178 | 0.595692442629637 |
| CCTAACGACTCA  | 630.148475199016 | 0.25854575396002  |
| CGTTCATGTGAC  | 630.172475899259 | 0.522387455183337 |
| AATCCTAATGAC  | 630.177904691957 | 0.539900952168068 |
| CGGATAATGACG  | 630.199748381396 | 0.285419646315673 |
| CGGGCTTACTCA  | 630.205018715864 | 0.498562795649296 |
| AGATTGTGACGC  | 630.214856653862 | 0.330794067046675 |
| ATGCAGGAGTCA  | 630.234126321994 | 0.115409305032099 |
| CTGGATCGTGAC  | 630.237707888553 | 0.595725098715269 |
| ATGGGTGACCCA  | 630.241766852085 | 0.514183106003838 |
| GTAATAATGTGAC | 630.261070322698 | 0.404717707163099 |
| GTACTTAAGTCA  | 630.267951673808 | 0.631378689519453 |
| CGTCACATGGAA  | 630.275948471412 | 0.554050073532298 |
| CCCTTCTATGAC  | 630.284661552516 | 0.235225687897269 |
| AGAACGGAGTCA  | 630.287371005205 | 0.205101450826236 |
| AGGGCATGACAC  | 630.293026911125 | 0.274466910156207 |
| GACTAATTTTAC  | 630.295195019532 | 0.469435704577445 |
| GTCATGCACAAA  | 630.300127525553 | 0.522847256611831 |
| AGCATGCAGTCA  | 630.324877411018 | 0.569962731596869 |
| GCCCCGTGACTA  | 630.336930734129 | 0.40282960188596  |
| ACGATCGGTGAC  | 630.34077463661  | 0.461492952753256 |
| AAATCTTCGTCA  | 630.3435307717   | 0.46451872783691  |
| ACCTTGTATCC   | 630.344703116368 | 0.283154990896351 |
| CTGCTATTAGTC  | 630.350900635599 | 0.700271173456425 |
| ATGACGAGACGC  | 630.362005655511 | 0.431020233040805 |
| AATGATAAGTCA  | 630.37155798523  | 0.355260662914282 |
| TGACTTAGCGAA  | 630.378263928916 | 0.431892508422912 |
| GTCACCTCTGGA  | 630.382055479068 | 0.326642490855414 |
| AGCAAGTCATAG  | 630.384374770686 | 0.199552788416413 |
| GTGTCTCTATGA  | 630.397521010293 | 0.556568997118783 |
| GTATTTGATGAC  | 630.399251611369 | 0.234486906564515 |
| AGTAATCCGTCA  | 630.401343137152 | 0.316550197555512 |
| ACGTCACCTTTC  | 630.409878629604 | 0.27537909397659  |
| ACGGATTGTGAC  | 630.411624355806 | 0.47883320193805  |
| ATTATATCGTCA  | 630.421996099977 | 0.73900302594474  |
| GTCATTCGATGA  | 630.422251719387 | 0.507373256305508 |
| ACAAGTGACCGG  | 630.425084188507 | 0.438011294605595 |
| GTGACGTTACCA  | 630.427217249487 | 0.351276231343643 |
| AGTCAGACCGGA  | 630.427869356197 | 0.303476049814676 |
| CGACTCACGTCA  | 630.443228588023 | 0.454221558613433 |
| TCGAAATTGTCA  | 630.444039300844 | 0.552910738538681 |
| CACGGAAATGAC  | 630.449854646954 | 0.26656182410102  |
| CATGTGGTGACG  | 630.450901516711 | 0.217072429750526 |
| CAGGACTCGTCA  | 630.452981697061 | 0.440723727271474 |

|               |                  |                    |
|---------------|------------------|--------------------|
| AACCAGATGACA  | 630.474462169824 | 0.230573460104822  |
| TCAGTAATAGCA  | 630.474553651671 | 0.556290660860751  |
| CCTGTTATGTCA  | 630.478274347887 | 0.394420579221737  |
| CACGAAGTCACA  | 630.482859852532 | 0.755814634775545  |
| AAAGCGGAGTCA  | 630.486882510753 | 0.303047403472267  |
| AGTCAGAGCAGC  | 630.487176350611 | 0.396902887658121  |
| CACATTTGCTCA  | 630.489555978478 | 0.317375203712825  |
| GAGTCAAAGGGC  | 630.497845386289 | 0.203362585115683  |
| ATGTAATCATAC  | 630.51045641036  | 0.486486604214625  |
| AGTCATGGGACA  | 630.527404245683 | 0.317625266744629  |
| GCGGCCAATGAC  | 630.556582829568 | 0.623625960024294  |
| ATTAGCGACTCA  | 630.565083224267 | 0.424969128532756  |
| GACTCACGCTAA  | 630.567042559303 | 0.51851257225246   |
| CTCGGCGATGAC  | 630.569748741895 | 0.412909686862143  |
| ATGACAGCGTCG  | 630.572831576697 | 0.466685177046187  |
| CGATAGCGTGAC  | 630.581883203802 | 0.452697158237028  |
| CGTCACGATTGA  | 630.585533487544 | 0.526614131900302  |
| AGTCATGGGAAA  | 630.599653130936 | 0.290530854835383  |
| CATTACGCAATA  | 630.615841445476 | 0.358732139961611  |
| GGATGACCGAAC  | 630.6238419712   | 0.305261967738722  |
| GCCCCTAATGAC  | 630.624710328287 | 0.787324972937605  |
| AGATTACGCACC  | 630.638438051549 | 0.269313612304825  |
| AAATTTAGTAAT  | 630.639964725815 | 0.61782244420809   |
| TGTCACATAGAA  | 630.646055484151 | 0.490049504368763  |
| AGTCAATTAATC  | 630.655527053057 | 0.152981945186883  |
| AGTCACGGATAA  | 630.660459438403 | 0.423132530634293  |
| ATGACGCCTTTC  | 630.667357922633 | 0.221250658828953  |
| GTCACCTCCGAA  | 630.672770423362 | 0.63975841024354   |
| GGTCATAGATAC  | 630.687219785656 | 0.47258239274663   |
| AGCATCAATGAC  | 630.691365529419 | 0.419025055453862  |
| TGACCAAATAAA  | 630.700663386443 | 0.482471048607647  |
| AACTTGTACCA   | 630.717306564698 | 0.344782192082429  |
| AGAGCGCGTCAT  | 630.718731640262 | 0.346105857786624  |
| AGTCACGCTCCA  | 630.722593391738 | 0.333912436151681  |
| CGGACTCGGTCA  | 630.723704593806 | 0.526248749472152  |
| CGAAAAGTCATA  | 630.726354745235 | 0.445678332235308  |
| AACTTCTGAGTC  | 630.728762862348 | 0.389748287961282  |
| ATGAGTCCGGTG  | 630.737468590748 | 0.0894250664018566 |
| TCGACTGATTCA  | 630.748549470113 | 0.352721179249168  |
| GTCACGGTCACA  | 630.752711503726 | 0.601379814802747  |
| AGTGTCATGCCG  | 630.755230724972 | 0.497083393534794  |
| CACATGTGACGC  | 630.767412900196 | 0.37157127085582   |
| AATTGCATCATC  | 630.774268736858 | 0.347855210693406  |
| GACCTTGTATC   | 630.774289534461 | 0.3178108225175    |
| GCGTCACCTACC  | 630.784537902894 | 0.372173377495414  |
| CAGTAACGTCAC  | 630.798623295632 | 0.300346551770126  |
| ATGACGACTTGA  | 630.813010551437 | 0.434463936886667  |
| GAAACTGTGTCA  | 630.813645340845 | 0.531517768670321  |
| GTCACCCAAATCA | 630.814696462725 | 0.325798096560132  |
| TACTCCACGTCA  | 630.82772360068  | 0.408813062133506  |
| ATTTGCTCATGC  | 630.834281353909 | 0.378056844330869  |
| ACGTGCGAGTCA  | 630.842002029081 | 0.50601671739167   |
| TGAGTCGCTCAA  | 630.852915413352 | 0.61004458055812   |
| ATGACGTTAGAG  | 630.855787546027 | 0.39799992449084   |

|              |                  |                   |
|--------------|------------------|-------------------|
| CGACTTTGACTC | 630.860984978736 | 0.289714468566243 |
| TCATATGATGCA | 630.8666329901   | 0.640563131213955 |
| TGGATATGACCA | 630.872840608106 | 0.395766306728368 |
| GTGGTCCAGTCA | 630.881768538208 | 0.511772846498736 |
| GTCATCCGTCCA | 630.893548680955 | 0.568933618294956 |
| CCTATGTGACGA | 630.903296076498 | 0.567146315161427 |
| AGTCACGCTTTG | 630.907126295075 | 0.491605140410875 |
| GTCACCAGTCAA | 630.909862846518 | 0.505137316073554 |
| CGCAAGTCATAG | 630.930715041994 | 0.57456145285055  |
| CTAGCATGACGC | 630.93429477094  | 0.526172232250396 |
| CGTCATGCTCAG | 630.936843341936 | 0.53294761424171  |
| ATATAATGACAT | 630.944896490063 | 0.488228277188826 |
| AATGCCAATGAC | 630.960802728253 | 0.391475173732252 |
| CTACTCTATGAC | 630.968656782084 | 0.149012473106733 |
| CATGAGATGACG | 630.97512031081  | 0.517174226343625 |
| ATTACGCTATGA | 630.992704257864 | 0.43388179356551  |
| AGTCATGGGCAT | 631.001789723113 | 0.293651153420106 |
| GAGATGAATGAC | 631.00263940614  | 0.384691867886077 |
| ACTGTGACGCCA | 631.003407299383 | 0.36452913956162  |
| CGATATTGTGAC | 631.023641766239 | 0.430090774328146 |
| GGTGCGGATGAC | 631.024239984897 | 0.316630065750555 |
| GTCACACACTTA | 631.035257890126 | 0.413443810177498 |
| GTCACCTAGTAA | 631.043350272063 | 0.51221272686055  |
| AGCAACGACTCA | 631.044787949052 | 0.546312020885521 |
| CCTATGGGTGAC | 631.058887170399 | 0.423659630212728 |
| GACTCACTATCC | 631.06057057818  | 0.27693169814614  |
| AATAGCAGGTCA | 631.063292697121 | 0.412429450271958 |
| ATACAATGTCAT | 631.064717068862 | 0.443386886900127 |
| GAATTTTACTCA | 631.087848445276 | 0.449155908895678 |
| GAGTCAAAATCA | 631.092146840078 | 0.285537730325534 |
| TACGCTGCGTCA | 631.092744855831 | 0.430342064714849 |
| GCGTCACCATAA | 631.093772698594 | 0.354862272622673 |
| GACTCACTTCAC | 631.095441418128 | 0.370885770866959 |
| CTCTGAGTCGAA | 631.099122926899 | 0.476601853763977 |
| TCGACGCAGTCA | 631.106937531775 | 0.529456483975316 |
| ACTCATCGGAGA | 631.116463824152 | 0.648369483153474 |
| CCCATGGTGACA | 631.116686568527 | 0.460279400689729 |
| ACCTAACGTCAT | 631.117086731975 | 0.143679825845668 |
| ACGTTTGACTGA | 631.128111900891 | 0.260292402399275 |
| CCTCTAGACTCA | 631.130621288834 | 0.280499940583983 |
| GTCATTTCCCGA | 631.132011246551 | 0.232518155747978 |
| GTACAATAGTCA | 631.134932326246 | 0.398673449644768 |
| CAATGATGTAAC | 631.139679679649 | 0.335737519581347 |
| CCTGACGGAGTC | 631.142719775088 | 1.00331930590527  |
| AGTTATTGTCAT | 631.151335939953 | 0.372907800721014 |
| CTGTTGTACTCA | 631.16228717739  | 0.510234406568774 |
| ATGGTTTGACTC | 631.166897017875 | 0.167028939255878 |
| AAGACTGTCATA | 631.17528129948  | 0.370911062785364 |
| ACAAGAGATGAC | 631.19197264464  | 0.482120828681641 |
| CATTTCTATGAC | 631.197841800222 | 0.551662923993259 |
| GCCGGTGATGAC | 631.2004053521   | 0.608921341894908 |
| CATTACAGTGAC | 631.207745493437 | 0.375873990267635 |
| CAGACTGTGACG | 631.212737782485 | 0.542596092159145 |
| ATGAATCAACAT | 631.222918188436 | 0.326328279063787 |

|               |                  |                   |
|---------------|------------------|-------------------|
| AACCTTTGTCAT  | 631.225064722528 | 0.205681437049951 |
| GACTCTTAATGA  | 631.235896923473 | 0.602900618388624 |
| GAATTATTCATA  | 631.241215628469 | 0.300961884601166 |
| ACCTTAATGACA  | 631.246125684045 | 0.435531485478263 |
| GTCATATCAGTA  | 631.276876658468 | 0.227747438946027 |
| ACGTCACCTCAG  | 631.284454978171 | 0.40887356189325  |
| ACGACCGGTGAC  | 631.294606030579 | 0.440185663436092 |
| CGGCGTCATGCA  | 631.30297932701  | 0.370602864173676 |
| AACTGGGATGAC  | 631.316980089585 | 0.404275032373035 |
| GCTCCGAATGAC  | 631.32685084104  | 0.309388747828806 |
| GTCACCGCGGGA  | 631.333543653725 | 0.419412451515245 |
| GTCATCCCCTGA  | 631.349676785121 | 0.291466724541759 |
| GCAGTCACGCCA  | 631.35723516806  | 0.178375775343167 |
| CGAAACATGACA  | 631.361141868674 | 0.321642459902    |
| CGTCATCTAGAC  | 631.382637171479 | 0.638908731655344 |
| CGCGTCACTGGA  | 631.391169324144 | 0.343009379482587 |
| GTCACACTCGAC  | 631.39356171214  | 0.233733152641108 |
| GGGTCATAACAA  | 631.41844878675  | 0.549489265520272 |
| GCGGTTGTGTCA  | 631.419438455957 | 0.37552191979642  |
| CTATAGTGAGTC  | 631.427723368743 | 0.522691143949844 |
| AGTGACATACAC  | 631.433064396652 | 0.464274193019964 |
| ACGACGTGAGTC  | 631.445028851605 | 0.276286120059509 |
| ACGACTGTGACG  | 631.44586280898  | 0.494151585026518 |
| GACTAATACCTA  | 631.465661774859 | 0.449038547958472 |
| ACTCATCCGAGG  | 631.468528890873 | 0.648816984699124 |
| ATCGCTTTGTCA  | 631.470306832804 | 0.416001144713283 |
| GTCACCGGTGGA  | 631.47062008372  | 0.68108083569025  |
| GTCACCTACTGA  | 631.478530589413 | 0.162232019902966 |
| ACGGTTGATGAC  | 631.487504506702 | 0.292225989348381 |
| GAGACGTATGAC  | 631.493668087793 | 0.259089722416156 |
| GTCATTATCACA  | 631.498589224529 | 0.446431504770825 |
| AAAATCTGAGTC  | 631.500074977794 | 0.333122429948548 |
| CCGCGGCATGAC  | 631.500315559101 | 0.568962468559827 |
| ACGCAGATGACG  | 631.501898291691 | 0.235413812778323 |
| ACATAAACGTCA  | 631.504659523573 | 0.565362120318902 |
| GACTAGTCAGCC  | 631.507133600323 | 0.500212140084055 |
| GCGTCACAGCGA  | 631.507683842124 | 0.459162335845793 |
| GCTGACAGATAC  | 631.517935156063 | 0.63855122007598  |
| ATGCTGTACAT   | 631.518039246078 | 0.148203706973998 |
| TACTGCATGACA  | 631.520737040566 | 0.240202726455887 |
| CACCCTGTCATA  | 631.521472673585 | 0.243614928788846 |
| CGTCATTCCAAA  | 631.543996400891 | 0.257428883457122 |
| AGACTCAGACTG  | 631.544029969691 | 0.668488759588668 |
| GTCGGGGAGTCA  | 631.551859401653 | 0.257251005325341 |
| GTCACCCACGTA  | 631.552748702245 | 0.373920178491472 |
| ACGTCACCTCTGA | 631.570343495041 | 0.340377377521543 |
| ATGACAGTACCC  | 631.575661845752 | 0.519522175037676 |
| AACATAGTGTC   | 631.577950280074 | 0.537396422625863 |
| CGTACATAGTCA  | 631.585812460745 | 0.511088979918517 |
| GCTTCAAATGAC  | 631.588358131352 | 0.499709592375782 |
| TGACTAGAAGCA  | 631.594863591884 | 0.612506540274376 |
| TAAGAGTCTTAA  | 631.594979022004 | 0.239408295163957 |
| CCACGGTGACAA  | 631.598942245576 | 0.411107916154345 |
| TAGAGAGTCAGA  | 631.599097296935 | 0.135309287650102 |

|               |                  |                   |
|---------------|------------------|-------------------|
| CTGTACTTATGA  | 631.602557934486 | 0.786816464892841 |
| GACTAATCCAGA  | 631.607967976159 | 0.676495768219089 |
| CACTCACAGTCA  | 631.608753991275 | 0.370345247675503 |
| GACAGTGGTGAC  | 631.612236322573 | 0.249038144568375 |
| AAATACGTCAAC  | 631.625036308783 | 0.29438021579281  |
| TGACTGCACGAA  | 631.627307085535 | 0.605059972464247 |
| CACTTGTGACGG  | 631.649740025825 | 0.47191951252956  |
| CTAGCGAATGAC  | 631.690271858827 | 0.390192627030323 |
| GTCACATCGCAA  | 631.701782401512 | 0.49861397244949  |
| TACAACGACTCA  | 631.703090964745 | 0.517225181002633 |
| GACACAGAGTCA  | 631.706912445259 | 0.321637488101393 |
| GTCACCCCATGA  | 631.70895721346  | 0.286416874543068 |
| CAGTCACGACAC  | 631.70941728766  | 0.429639892173472 |
| ATCTACGATGAC  | 631.715326099055 | 0.265658145419918 |
| AGTCACTAGTGC  | 631.720456708035 | 0.336983449807797 |
| CTCAGGGATGAC  | 631.728039785718 | 0.566724498929983 |
| ATGACAGTGCAA  | 631.731686583964 | 0.36454359358847  |
| CCTGCGTGACAC  | 631.732405785887 | 0.530023070970531 |
| GTTAGTGACCAA  | 631.737221952262 | 0.255573932409747 |
| GTCATTGATTCA  | 631.748566769632 | 0.394610301354819 |
| CAGTTGACTCA   | 631.755671534955 | 0.530807631853274 |
| GTCATTATCGGA  | 631.763549637836 | 0.391165839237011 |
| ATTTAAGATGAC  | 631.77432964574  | 0.296794802513754 |
| GCATGTTGTGAC  | 631.787515125221 | 0.552606755757236 |
| CATTGTGTGACG  | 631.796532085084 | 0.608115085415691 |
| ACGTCACCTGCTC | 631.800809979547 | 0.447914894976925 |
| CAAACACATGAC  | 631.813940862579 | 0.55665422084969  |
| GAGTTCTAGTCA  | 631.841933165559 | 0.850310193341045 |
| GTATGACCTAAC  | 631.853047340782 | 0.396009561483157 |
| TATATTATGTCA  | 631.853457280752 | 0.621251549455413 |
| CTAAAAGTCATC  | 631.856627936008 | 0.431705388495545 |
| CTTCGGGAGTCA  | 631.863868026524 | 0.281397757829993 |
| CGTGCGTAGTCA  | 631.871947005729 | 0.597205571415787 |
| CGGGCACAGTCA  | 631.872142013762 | 0.571388761489009 |
| TGACAGATAACA  | 631.87847242257  | 0.476572753102579 |
| ACAGCCGTGTCA  | 631.88740300322  | 0.423723486342263 |
| GACTCACTTGAA  | 631.90022320819  | 0.598316088028168 |
| CGCACTTCGTCA  | 631.903460833179 | 0.283765196699047 |
| GCGAGCTATGAC  | 631.910532081453 | 0.440152071692511 |
| ACTGGCGACTCA  | 631.912550771711 | 0.45157990706899  |
| CATATAATGACA  | 631.914320978336 | 0.470136773526065 |
| ACGGATAAGTCA  | 631.91630757255  | 0.286919222484422 |
| ACTGACGGATCA  | 631.921383711835 | 0.526561169593578 |
| ACTCATCCGTGA  | 631.936743232749 | 0.297425343637755 |
| TGACTCCCCGAA  | 631.937313602649 | 0.282625000526883 |
| CTGACATGACAC  | 631.939518738973 | 0.455669701206279 |
| GATCAGATGACA  | 631.956056064703 | 0.512126247488844 |
| ATGAGTCTCGTA  | 631.963371491229 | 0.292739690503636 |
| GGACAACCTACA  | 631.969779473619 | 0.941312666968751 |
| GGGGACTATGAC  | 631.971058121468 | 0.361156079204493 |
| TATGACGGCATA  | 631.982637193478 | 0.423054418805982 |
| CCCATCGGTGAC  | 631.989735138382 | 0.60682025344119  |
| TCAATTGACTGA  | 631.990790375378 | 0.408720501190763 |
| ACTCATTATTTG  | 631.992747065402 | 0.265458908475539 |

|               |                  |                   |
|---------------|------------------|-------------------|
| AACGAGTGAGTC  | 631.995256738389 | 0.544181532689288 |
| AATTATTCATAC  | 632.002116310688 | 0.279019385832264 |
| GGCTGTGAATCA  | 632.014774859906 | 0.376913029459248 |
| ACGCCAGATGAC  | 632.015780175001 | 0.293834617443945 |
| AGATTGTAGTCA  | 632.024190659828 | 0.306691336660466 |
| TCCATTGGTCA   | 632.025023263833 | 0.380430184583406 |
| GAGTCAGGACCA  | 632.02716088508  | 0.542307501133629 |
| CCGCTTGTGTCA  | 632.02854741574  | 0.517080186579328 |
| GCTAATTATGAC  | 632.033741004523 | 0.330558094804553 |
| ACTCATAGTGGG  | 632.038630373817 | 0.289667518588879 |
| CTGGGTCATGAC  | 632.04830330854  | 0.413206135544287 |
| ACTATTGTGACG  | 632.053356932195 | 0.426761259587687 |
| CTTAAGTGTGAC  | 632.05817234985  | 0.404486850679635 |
| TGACTGGTTACA  | 632.061867915562 | 0.422438043057809 |
| ATGACACCCGTG  | 632.065087755703 | 0.438507613077331 |
| GACTAATTGCAA  | 632.066144782048 | 0.389532101343933 |
| GTCATGTCGTCA  | 632.071100377695 | 0.410881180313075 |
| AAACCGGTGACG  | 632.072604492009 | 0.227322186921738 |
| CGTGGCTATGAC  | 632.077260007171 | 0.571437211565805 |
| CTCGGTGGTGAC  | 632.077849335405 | 0.454198164136971 |
| ACATCGTAGTCA  | 632.082921996128 | 0.458621448620417 |
| AATAGTCAAACA  | 632.086376052295 | 0.449585331366332 |
| ATCTGAGTCTAC  | 632.087203107954 | 0.242944910264053 |
| AGTCACGCTAAG  | 632.091631907385 | 0.461571173666129 |
| ACGTCACCAACG  | 632.09348556409  | 0.350483301383159 |
| ACACGTACGTCA  | 632.100653111969 | 0.310246598457997 |
| ACTTATTGACTC  | 632.12075746596  | 0.179290622858183 |
| CTAATTGAGTAA  | 632.124447342634 | 0.426106836561856 |
| ATGAGTACCATC  | 632.127207498814 | 0.374672527596517 |
| CCACGTAGTGAC  | 632.138439052484 | 0.542607196307586 |
| GAACAAAATGAC  | 632.143417881765 | 0.371482767362924 |
| ACGTCATGCGGC  | 632.148812300578 | 0.47592182192455  |
| GATCTTGATGAC  | 632.164936636616 | 0.335204978190482 |
| AAGGCTTACTCA  | 632.174772012067 | 0.519228844312246 |
| CTGAATTGTGAC  | 632.180353040791 | 0.215486281032758 |
| ATGACAAAGGTG  | 632.202247031197 | 0.407630492622938 |
| AGTCAGTGACAT  | 632.214091382821 | 0.41755427911847  |
| GTCATAACAACA  | 632.215946458906 | 0.398052308259981 |
| ATGATTTGGTCA  | 632.218246466453 | 0.392963144853167 |
| AGCACGTGAGTC  | 632.218954887474 | 0.382585150088013 |
| ATGGTTGACTGA  | 632.22355082636  | 0.297889685647982 |
| AACTCAGATGAC  | 632.239276615402 | 0.331899982464687 |
| ATCATAAATGAC  | 632.250737934058 | 0.521886687851033 |
| TGATTCAATGAA  | 632.252481274336 | 0.32987367104886  |
| GACGTGATGTCA  | 632.283840207364 | 0.33069029662029  |
| AACGCGGAGTCA  | 632.284326060894 | 0.262251178945872 |
| GTATGCTGTGAC  | 632.284669359457 | 0.428044307815798 |
| AAGTTGCGTAAT  | 632.301377946335 | 0.250823655162189 |
| GAAGTTCGGTAC  | 632.303330468263 | 0.496282219338218 |
| ATGAGTCCGCGG  | 632.31292869564  | 0.561012999606562 |
| ACAGCAAGTCAT  | 632.316016863337 | 0.629075936230178 |
| ATGACTTGCCCTG | 632.322978000359 | 0.429845092477348 |
| GACGCTGTCATC  | 632.324675150987 | 0.168372916464885 |
| CACTGTGTGACG  | 632.331078151188 | 0.50747466418577  |



|              |                  |                   |
|--------------|------------------|-------------------|
| GTCATTGACGAC | 632.343782917748 | 0.419580448341212 |
| ACGTCGCATGAC | 632.346460314232 | 0.551609797084243 |
| CCTCTCGATGAC | 632.35010814188  | 0.252222081603571 |
| CTGACTCGGTGC | 632.357094851282 | 0.600391568207236 |
| CTTGCTAAGTCA | 632.367095325906 | 0.530966811119048 |
| GGGTGAGAGTCA | 632.386487668783 | 0.178231355130127 |
| CGAGACGACTCA | 632.3875600874   | 0.642634135812877 |
| AAATTATGACCC | 632.391261053021 | 0.160968612583391 |
| GGTCATAATAC  | 632.40082097082  | 0.350469620945455 |
| ACCGCGTACTG  | 632.401191169329 | 0.282939480237278 |
| CGGTTAGATGAC | 632.410224548846 | 0.362236946967828 |
| CAAGAAAATGAC | 632.410906121114 | 0.454084059122527 |
| AATGATACTCAT | 632.436149420852 | 0.356914089834059 |
| CGTTGACACAAC | 632.439468511123 | 0.134107227225348 |
| GTCATTTATTTA | 632.439860574853 | 0.549323565519811 |
| ATGACCTGGCTG | 632.440516098784 | 0.31400942193938  |
| GATCACCCATGA | 632.442491030811 | 0.662763654075695 |
| GTCATCTTGCGA | 632.444465049557 | 0.669309279970896 |
| GAGTACTTGTCA | 632.444467858004 | 0.437748216281946 |
| CGCTGACTGCGA | 632.446599742177 | 0.379618774599494 |
| CCAGTCGATGAC | 632.449651005466 | 0.816161581992592 |
| CTACATGGTGAC | 632.460818911266 | 0.460922378515267 |
| GGTCATGTGACA | 632.463945378577 | 0.366760878311755 |
| AATCAGTGTAC  | 632.466040290761 | 0.357819344621059 |
| CCTAAGTCTGAC | 632.472930256449 | 0.389729923961987 |
| CTGCAGCAGTCA | 632.478822547759 | 0.353462122084707 |
| AAAGTTGTACCC | 632.489429486802 | 0.445633189154655 |
| CCGGTTAGAGTC | 632.491975411171 | 0.633247179595088 |
| GGGTTGACACAC | 632.525930543766 | 0.471129737028483 |
| ACAATGTGACGT | 632.539708759839 | 0.185192205449221 |
| ACGTCACGCTTA | 632.548823921781 | 0.288735632436867 |
| ACGTCATGGCAT | 632.563325970251 | 0.436753276322022 |
| GTAGAGTGTGAC | 632.563856777472 | 0.193703388425871 |
| CGAGTCTAGTCA | 632.564328317747 | 0.544303121485196 |
| GACTAATCGGCC | 632.564839376655 | 0.445164071899129 |
| ACACGGTGACGT | 632.56706448586  | 0.479632831494045 |
| GGAGGTTATGAC | 632.569021175796 | 0.355128421742029 |
| GGCCACGTGTCA | 632.576379141873 | 0.41199374187085  |
| GTCATCATACCA | 632.576971035818 | 0.346777565880386 |
| TCATGGTGACCA | 632.579304592762 | 0.475479059960646 |
| TACGTCTAGTCA | 632.581883744367 | 0.485849904192171 |
| TCGACTGAGTAA | 632.585704690249 | 0.492198098061372 |
| ATTCTTTATGAC | 632.604528045225 | 0.338123062548383 |
| GCGAGACTCATA | 632.612255390306 | 0.433606849939209 |
| ACTCGGCGTCAT | 632.620664114063 | 0.588745838134191 |
| GAGTCAATTCCA | 632.623338765862 | 0.4408954425162   |
| ACACCTGTGACA | 632.631442693407 | 0.34192267400207  |
| CTCATAATGACA | 632.642919441646 | 0.719754187498651 |
| ATAAGACTAACC | 632.644326133766 | 0.453482613119091 |
| ATTCTAGCGTCA | 632.648626514914 | 0.736464849533083 |
| GTAGCGGAGTCA | 632.660040804341 | 0.40214174764441  |
| GTGTTGTAGTCA | 632.68872346578  | 0.510970454695233 |
| ATGACGTTAAAG | 632.700447388104 | 0.201718714086306 |
| GGCCAATAGTCA | 632.703266994381 | 0.628199950154149 |

|               |                  |                   |
|---------------|------------------|-------------------|
| CATTGCGTGACG  | 632.70498725653  | 0.386218506636025 |
| ACCAGCTGAGTC  | 632.711453111148 | 0.542857145058429 |
| ACTACGCAGTCA  | 632.71810659835  | 0.391974265003008 |
| CATACCTGATGA  | 632.719658040846 | 0.593938133692358 |
| TCTCGATAGTCA  | 632.720831959641 | 0.502173902594681 |
| CTATTTTATGAC  | 632.731910060545 | 0.485445001876244 |
| TACTCAGACTCA  | 632.74523850936  | 0.431312100876921 |
| CATGTTGTGACA  | 632.756877636264 | 0.721410506414632 |
| CGGGTTTATGAC  | 632.760852359443 | 0.352941330009514 |
| GTAACAATGAC   | 632.763821612132 | 0.644806131610486 |
| GTCTAAGTGTC   | 632.775215460527 | 0.508881961595182 |
| CTACACCAGTCA  | 632.775572264458 | 0.184066868546886 |
| CGGTCTTTGTCA  | 632.785528757347 | 0.47308681796971  |
| TGAGTCGGACAA  | 632.840294277277 | 0.421533194651021 |
| CCATTGACGTCA  | 632.861640712219 | 0.359733445410794 |
| ATGACAGTACCG  | 632.862540918178 | 0.391276042473865 |
| ATCATACTGTCA  | 632.872632833925 | 0.345244235728868 |
| GGCGTTTACTCA  | 632.884165348584 | 0.585693591949579 |
| TATGTGTACTCA  | 632.885604106432 | 0.465170188184057 |
| GTCATAAGTGCA  | 632.888115853436 | 0.289561413733708 |
| CAACCGATGACG  | 632.888365720058 | 0.430037482446671 |
| CAGTCAGGCGTC  | 632.893393481873 | 0.435389938441672 |
| ATGACAATAATC  | 632.921264909571 | 0.372622767007539 |
| AGTCCGTGTGAT  | 632.921293861067 | 0.446630510950608 |
| TCTTAAGCGTCA  | 632.935082821623 | 0.623648544353764 |
| AGTCACGAGCAG  | 632.937471931288 | 0.393554976074171 |
| GAATTGCTCAGA  | 632.950583241962 | 0.31099913731426  |
| GTGAGACTCACA  | 632.958746728375 | 0.467850566597652 |
| ATGACGATGGTC  | 632.961879232063 | 0.363440588368797 |
| CCTTAGTGTGAC  | 632.969014391965 | 0.372516582550306 |
| ATACGAATGACG  | 632.970562756091 | 0.384282104549167 |
| CTAACGAATGAC  | 632.975851234371 | 0.187287875320026 |
| TGAGTCGCCGCA  | 632.99625722878  | 0.361100089970267 |
| CGTCATTAAGGC  | 632.999162567215 | 0.334192208960565 |
| ATTGCTCAGACA  | 633.001624298492 | 0.881007834799788 |
| TCAACTAAGTCA  | 633.009624129893 | 0.440783246417323 |
| CTTGTTTTGTCA  | 633.023498832683 | 0.334301681793459 |
| GCACGTAGTGAC  | 633.023550879866 | 0.523261550500216 |
| TGACAATGACCA  | 633.030579129701 | 0.321699157337055 |
| GTCATCCAGAGA  | 633.061687100404 | 0.527531048516024 |
| AGTCACGAGACT  | 633.091248851727 | 0.269059256703878 |
| CGTGACAACCTCA | 633.091560343875 | 0.42966350174451  |
| CCGGTGTGTGAC  | 633.098788114139 | 0.26065825037389  |
| CGACAGTTGTCA  | 633.105659137992 | 0.521982630785244 |
| ATACTCTGAGTC  | 633.106479554209 | 0.742702917901781 |
| AACTGACATGAC  | 633.106809871687 | 0.501644444958636 |
| ATGCTCTATGAC  | 633.113128383954 | 0.436883936799661 |
| CGAAGACTCTTA  | 633.11485403001  | 0.334634174624161 |
| CGAATATGAATC  | 633.122048158878 | 0.653038904532646 |
| AGAGCTGATGAC  | 633.134119249801 | 0.445027058906192 |
| GACCTGAGTGAC  | 633.136195855805 | 0.486314634305664 |
| GTCATGATCGAC  | 633.138995592327 | 0.558198329216765 |
| ATGAGTCCCAGG  | 633.139337807371 | 0.457001070741829 |
| GATAACAATGAC  | 633.143896860345 | 0.34114899291806  |

|                |                  |                   |
|----------------|------------------|-------------------|
| GTTCAAGTCATA   | 633.165415573    | 0.518548245829607 |
| AGTCAGACTATC   | 633.166164547144 | 0.389405181693647 |
| ATGTTGCGTAAT   | 633.169064695031 | 0.333499435525478 |
| TGACTGTAGCCA   | 633.178182972129 | 0.493438229759256 |
| CGAAGGTGACGC   | 633.179416575942 | 0.54059901075279  |
| AGCGCTGATGAC   | 633.189345401301 | 0.447949930180432 |
| AGTCAGACATTA   | 633.192033976158 | 0.544015144446606 |
| CAAATCATGACA   | 633.19602479605  | 0.566424227956585 |
| AGGGTTGTGTCA   | 633.210995759254 | 0.350043672902454 |
| TACATAGTATGA   | 633.218452713741 | 0.583615359296258 |
| GTCATAGAAGAA   | 633.229177464847 | 0.55842331271307  |
| CCAAGGAATGAC   | 633.230991206275 | 0.344384682044297 |
| AATAGGGATGAC   | 633.232893627127 | 0.399520630000789 |
| TCCTTGGTGTCA   | 633.233495633977 | 0.577472746050626 |
| GTAATTCGTGAC   | 633.23497353113  | 0.417240609726073 |
| CCGGTATGTGAC   | 633.23556173666  | 0.428334610088994 |
| CGATCCGGTGAC   | 633.236629312446 | 0.466730971049376 |
| AGCCCTGACTCG   | 633.238278766007 | 0.504536482110563 |
| AATACTGATTCA   | 633.243452413654 | 0.413250033193993 |
| TGACGCACGCCA   | 633.244341548859 | 0.431329216155385 |
| ACGACCGACTCA   | 633.251827304495 | 0.276610811875878 |
| ACATCGTATGAC   | 633.259811818215 | 0.418902368718496 |
| ATATGATTACTC   | 633.263778728374 | 0.659749746067118 |
| CAGTCAACGCAA   | 633.285432035267 | 0.666164423055396 |
| ATGAGTGAATCG   | 633.287995178082 | 0.196178424149656 |
| CCTTCCTGACTC   | 633.29566770304  | 0.233443788851464 |
| CGATGCTGACTA   | 633.323155317752 | 0.487835459052636 |
| GTCATGTTTGAA   | 633.352055023459 | 0.449682100143202 |
| CATGATATGTCA   | 633.369108258376 | 0.522926998982986 |
| GTCATCCCTAA    | 633.387521631913 | 0.309980810033497 |
| AAGATTCATACT   | 633.393790195819 | 0.221323074352925 |
| GTTGCATGACGA   | 633.393986020181 | 0.559524091285961 |
| TGACTAGTACAA   | 633.39957644338  | 0.647241588911811 |
| GTCATGTATCAC   | 633.40140068146  | 0.454979203945161 |
| CGTCATTGGAGA   | 633.410035578859 | 0.460291738815815 |
| GTAACCTAGTCA   | 633.412330414034 | 0.427924177224093 |
| ATGCTTGGTGTGAC | 633.45067931697  | 0.26720791669324  |
| ACTCCAGAGTCA   | 633.45874366104  | 0.428341495971007 |
| ATGATGTGTTAC   | 633.470402331866 | 0.427879865182621 |
| CCGTTAGATGAC   | 633.485755592554 | 0.619634036135735 |
| GTCACCGCTTGA   | 633.488522058706 | 0.420895246445755 |
| ACGCTCTCGTCA   | 633.488796471256 | 0.549821042485573 |
| TGACCCATCGCA   | 633.514745797248 | 0.400761208836743 |
| GAGTCAATGGCA   | 633.522214862086 | 0.339071639474357 |
| CGTGACATGGCC   | 633.531292253522 | 0.164885621087986 |
| TGACTACTAAAA   | 633.541295122194 | 0.556396495035938 |
| CGTCACAGTCGA   | 633.541858514466 | 0.437707482211385 |
| GTCATTACCGAC   | 633.546950268274 | 0.279220453915252 |
| TCAGACTAGTCA   | 633.557182632552 | 0.463830175850585 |
| CTGACTACTCAC   | 633.569420484081 | 0.205487113655867 |
| CGACTCAGACAG   | 633.574573349365 | 0.234587042592074 |
| ATCTAAGATGAC   | 633.574754161318 | 0.384875293464994 |
| TATACAGTGTCA   | 633.581583267404 | 0.551721848376053 |
| TGAGTACTATAA   | 633.587524426093 | 0.436683191897248 |

|               |                  |                   |
|---------------|------------------|-------------------|
| AGACTCACTATC  | 633.596442073592 | 0.420135406211127 |
| GCTCATTAATGA  | 633.596491810933 | 0.554516075175301 |
| CTATACAATGAC  | 633.596589462849 | 0.434246353839668 |
| GTGAAGTCACCA  | 633.601365259304 | 0.379285287655526 |
| AGTCACGGTAAA  | 633.603295263952 | 0.275785936361261 |
| GAGGGCGATGAC  | 633.608972676933 | 0.251535022048657 |
| CATCTGGTCATA  | 633.618326419204 | 0.600328153861879 |
| GTCATAAACCTA  | 633.625940567804 | 0.443403266091747 |
| GCACACTAGTCA  | 633.627686606984 | 0.36155080369444  |
| CCGTAACATATGA | 633.628335489093 | 0.573343977756296 |
| TGAGTGAATCAA  | 633.636404934867 | 0.425486503412281 |
| TAGACTGAATCA  | 633.656799064005 | 0.414472667436882 |
| ATGACGAGCCCG  | 633.66210643484  | 0.498043011831422 |
| GTCATTCGCGTA  | 633.663369151752 | 0.551652378224047 |
| CGACTCGACTCA  | 633.66344713958  | 0.334933577427501 |
| GCATATAATGAC  | 633.664645289927 | 0.410151981724669 |
| GTCATCCATTAA  | 633.668050095123 | 0.265319349407205 |
| ATTTAAGCGTCA  | 633.673105770954 | 0.483823097899014 |
| TGACGTGCGTAA  | 633.674435475282 | 0.289182525711839 |
| GATTCAAATGAC  | 633.684914940312 | 0.470346306935556 |
| ACTGTTTGGTCA  | 633.692395826842 | 0.548293623045559 |
| CGTCATATGTTT  | 633.703208343276 | 0.404126151495047 |
| GGATTGTAGTCA  | 633.711110039563 | 0.577121427800515 |
| CAAAATGTGACG  | 633.71357281275  | 0.422675365581858 |
| ACATCAAATGAC  | 633.732480028702 | 0.627657914443537 |
| CAGCACGACTCA  | 633.736438490703 | 0.642747537019244 |
| TATTTAGTGTC   | 633.765734106344 | 0.40270122927891  |
| TACTTACAGTCA  | 633.785572547614 | 0.359124044653621 |
| ATGACGGACTTA  | 633.788713191999 | 0.321475698476717 |
| CAGTCAGGTAAA  | 633.8006974672   | 0.516398315334156 |
| GGGTCATCATGA  | 633.831717598713 | 0.502082908217569 |
| GTAGGCAATGAC  | 633.848895043886 | 0.226207085065578 |
| GTAAGGTGTGAC  | 633.850857373766 | 0.263088036172882 |
| CTAGATGTGACA  | 633.870040864706 | 0.707884885683014 |
| GTCATCCTGCCA  | 633.891019446719 | 0.583842494607426 |
| TAGGATTAATA   | 633.891142084788 | 0.374443023112789 |
| GTCATAAAGGTA  | 633.906918162383 | 0.544798461999808 |
| GACTTGTACCC   | 633.910367125316 | 0.326242600066355 |
| ATGACGAGCCAT  | 633.91624624103  | 0.380038426467969 |
| AGTCAGAGATAG  | 633.923663997427 | 0.327876807151566 |
| TCCGCGTAGTCA  | 633.931204053034 | 0.531563170640769 |
| CACATGGCGTCA  | 633.938911104717 | 0.552751276811481 |
| AGACTCACTGAA  | 633.949478127688 | 0.296229867227431 |
| CTCACGCAGTCA  | 633.950727276879 | 0.569425829535652 |
| AAGGTATATGAC  | 633.953815195247 | 0.225503658004406 |
| TATCCTCAGTCA  | 633.966074316318 | 0.369522261235593 |
| GAATTAAGAGTC  | 633.980327628786 | 0.889499843699788 |
| CTATGAATAATC  | 633.997746621738 | 0.514832391936636 |
| CGGTAACGTAC   | 634.008198613581 | 0.55431640224175  |
| GCTCCCTATGAC  | 634.010594544708 | 0.347548186601608 |
| GTCATCCCCGGA  | 634.019073671878 | 0.448802360330043 |
| GAGTCAGGCACA  | 634.045997354015 | 0.332227741870024 |
| AAATGACCGAAT  | 634.051697962825 | 0.388997433466045 |
| ATACGCTATGAC  | 634.055172010487 | 0.554141059313931 |

|               |                  |                   |
|---------------|------------------|-------------------|
| CGTCACTGTCAC  | 634.05560910755  | 0.242091316448074 |
| TGACTTGGAAAA  | 634.064833225366 | 0.36828387557112  |
| AGACTAATCACA  | 634.083677574131 | 0.43279274872403  |
| CGTCACCGGTAC  | 634.103792683501 | 0.479627947526552 |
| AGTCAGACAGCC  | 634.117446271101 | 0.473822311527541 |
| ACACCTTATGAC  | 634.118970482357 | 0.374905127687127 |
| CGTCATTTAAGA  | 634.123810168974 | 0.64837241294838  |
| CATTTGAATGAC  | 634.140634376952 | 0.497549197066577 |
| CTGCTCTATGAC  | 634.142658810909 | 0.31928286623015  |
| CTGTTATATGAC  | 634.142694853087 | 0.610575953629651 |
| CGTCATCAGCTA  | 634.151408568681 | 0.350738888768979 |
| CTAGATGGGTCA  | 634.155902390907 | 0.566866676406353 |
| ACCCAGAATGAC  | 634.172187141545 | 0.395025791979217 |
| GGCTACGGTGAC  | 634.183460247587 | 0.508271022743756 |
| ATGACAGTGCCC  | 634.199228901915 | 0.493443778011444 |
| ACACGTAACAGT  | 634.204093556443 | 0.319935135438913 |
| ACGTCACCGCTG  | 634.207097652938 | 0.880181950696125 |
| TGACACAGGGCA  | 634.207962035547 | 0.44416656658146  |
| GTCACCTTTGGA  | 634.209001907441 | 0.516725155933907 |
| AAATCATCGTCA  | 634.212695163418 | 0.466839629111324 |
| GGTGAATCTTAC  | 634.216698258311 | 0.430862462750712 |
| AAGCACTAGTCA  | 634.239253880675 | 0.49276628492354  |
| CGACTACAGTCA  | 634.240140312049 | 0.624071450230006 |
| AGTCACCTCCGC  | 634.241856620189 | 0.186361261134661 |
| AGACCTCGTCAT  | 634.253507631088 | 0.31572403228701  |
| TGACTGTCGACA  | 634.254362157693 | 0.402689666221543 |
| AGTCACTTGTC   | 634.255252433476 | 0.324146819633369 |
| ATTTGGAATGAC  | 634.262231572726 | 0.397062839597909 |
| GACGGTATGACC  | 634.26998094812  | 0.453127706455089 |
| CCGTCAGGTGAC  | 634.275598236692 | 0.378249215552229 |
| CGTCATTAGCAG  | 634.279281257921 | 0.48227178089967  |
| ACCAAGTACCA   | 634.315893405204 | 0.238804420701536 |
| CGTGTTATGACC  | 634.323465165322 | 0.387038687397644 |
| AATGGATATGAC  | 634.349812793778 | 0.287004017171493 |
| GCGTCAAATGAC  | 634.353810884224 | 0.417101387770826 |
| GACGTAAGTCAC  | 634.357467418006 | 0.286631354419458 |
| ATGAGTACGTAG  | 634.369162230651 | 0.23095431895514  |
| ACCAACAGTGAC  | 634.380239845917 | 0.39375554287843  |
| ATGTGGTGACCA  | 634.381757598977 | 0.471180114253208 |
| CAATTGATGACC  | 634.382104939093 | 0.571797634649095 |
| ACTCATTACGTC  | 634.386858211827 | 0.503153420263473 |
| GAAACCTGTGAC  | 634.389713065389 | 0.595496002850917 |
| ATGACGAACACC  | 634.402382489533 | 0.319442727238753 |
| CTCGGATGACCC  | 634.403358132904 | 0.458149194450469 |
| GTCATCTCCAC   | 634.41119744486  | 0.135490234826214 |
| AGCATTAAAGTCA | 634.416734195447 | 0.575609298985989 |
| TGATTCAGAACA  | 634.421055311455 | 0.477505977662441 |
| GGCTACTCTGAC  | 634.421161578192 | 0.44816773842857  |
| CTAAATAATGAC  | 634.422872807637 | 0.604793461401601 |
| CGATATTGTAC   | 634.432038741937 | 0.313430636077526 |
| CCTCAAATGACA  | 634.441730218306 | 0.305982224083183 |
| CATAGGTCAATG  | 634.445862094741 | 0.630297146100092 |
| CTGCAGTGTAC   | 634.446094023556 | 0.340094622571641 |
| TGACTTATCACA  | 634.448935330612 | 0.448017301711623 |

|               |                  |                    |
|---------------|------------------|--------------------|
| AAAGGAATGACG  | 634.453548665783 | 0.231226929546487  |
| GAAGCTATGACC  | 634.49403676178  | 0.551728611226326  |
| ACCCCGTATGAC  | 634.502498877229 | 0.410794382227714  |
| GCCATAGACTCA  | 634.508777396114 | 0.638880548798578  |
| GTCATTTTCGGCA | 634.512035691513 | 0.259442833118984  |
| ATCGCATAGTCA  | 634.514446702006 | 0.479616521623027  |
| GCGTTGAATCAC  | 634.537500690697 | 0.433668741003021  |
| AGAGTCAAGGTC  | 634.537659453509 | 0.332304415774135  |
| GTCATCCACGCA  | 634.539397719352 | 0.307698629545282  |
| AGAGTAATTTTC  | 634.55099503448  | 0.390483926153566  |
| ACTCATAGTGAA  | 634.552825923372 | 0.453050370335057  |
| TAATTTACGTCA  | 634.553001071581 | 0.460419884712736  |
| ATCGTGACCCA   | 634.557254944438 | 0.446907318880657  |
| AAATGGGATGAC  | 634.558218699472 | 0.279758063210337  |
| AGTGAGGATGAC  | 634.571437218585 | 0.112199275748032  |
| CGTGACAGGTCA  | 634.58189541609  | 0.355765918912379  |
| ACTAGGTGACGC  | 634.599088892566 | 0.329040333644288  |
| CACCGAAATGAC  | 634.599381432094 | 0.563998879516754  |
| CACGTCAGACTC  | 634.602664572516 | 0.535494971672972  |
| GCTTGTATGACC  | 634.607095174687 | 0.211672114186954  |
| AGTTTAGATGAC  | 634.635107258308 | 0.297023903369821  |
| GTCACACGGCAA  | 634.638707456413 | 0.551543740983833  |
| GCTGCGGATGAC  | 634.640560537458 | 0.517414557096522  |
| CGCGACATGACA  | 634.641519683382 | 0.327406961319382  |
| ATGACTAGCTAC  | 634.642395455217 | 0.378009338517302  |
| TCAGGCCAGTCA  | 634.643413565703 | 0.497375363617816  |
| GTCATGTATGA   | 634.654668112948 | 0.351953775713903  |
| GTCATTTCTGTA  | 634.659954829952 | 0.431391576878176  |
| AGACACGGTGAC  | 634.674538438296 | 0.527874850768226  |
| CTGACTGCATGA  | 634.683067970351 | 0.514813261919159  |
| AGACTTGTCA    | 634.696558145617 | 0.452656415544039  |
| TCATGCGTGACA  | 634.703159000818 | 0.510016435156619  |
| AGTCCATGTAC   | 634.711166527967 | 0.32534111827466   |
| ACGTTTCATGAC  | 634.738656638339 | 0.431517910340584  |
| CGTAGCTCGTCA  | 634.753196689368 | 0.502900432800026  |
| AATAGTTATGAC  | 634.76236198764  | 0.344844323864287  |
| AGTCACGACGAA  | 634.765626664414 | 0.494667970882999  |
| TAGTGTGGCTCA  | 634.76998347366  | 0.615062571960231  |
| CGGCTAGACTCA  | 634.773677048037 | 0.610198859632958  |
| GTCACAATACAA  | 634.782128470632 | 0.358279219291294  |
| TACTAATCGTGA  | 634.782131397027 | 0.517481901924089  |
| CCAAGCGCGTCA  | 634.793174901841 | 0.520458926294138  |
| AGCGCGTGACAC  | 634.815536270845 | 0.536280157884296  |
| CCCAAGTCATAC  | 634.816552991303 | 0.0703512944179509 |
| GTCATTCACAA   | 634.823277346017 | 0.597278137347089  |
| TCGGCCGACTCA  | 634.830213535491 | 0.559398587555116  |
| CCTTTGTGTGAC  | 634.831391922186 | 0.543395725314126  |
| ATCCCGTACTA   | 634.838992871589 | 0.29215320063013   |
| ATGACGCGCTGC  | 634.844695492064 | 0.4546042242719    |
| CATAGGTGACGC  | 634.854968381188 | 0.491822059924721  |
| AGTAACAGTGAC  | 634.868675707285 | 0.334670533395041  |
| ATGACAGACAGA  | 634.880904357279 | 0.244661917903922  |
| GACTAATTTAGC  | 634.882533585974 | 0.290348433309082  |
| ACCTTAAATGAC  | 634.893558432976 | 0.411210695327129  |

|               |                  |                   |
|---------------|------------------|-------------------|
| CCCCGTGCGTCA  | 634.893933459985 | 0.417382362044903 |
| CAGCCAATGACG  | 634.894200413589 | 0.349937990999562 |
| ATTGTTAATGAC  | 634.896563516916 | 0.423402589303996 |
| CCCAATAATGAC  | 634.899113875251 | 0.455579198290726 |
| CCGAACGACTCA  | 634.902460262752 | 0.532658512665922 |
| TGACGAAGTGAA  | 634.906286958412 | 0.31908589647183  |
| GTGCCTGACACA  | 634.909281689378 | 0.550300112139489 |
| AGTACCTAGTCA  | 634.933667709034 | 0.346353582577349 |
| CTCTGACAGATA  | 634.935174544304 | 0.173596304202226 |
| ATGCGGAATGAC  | 634.941964213185 | 0.424557526450791 |
| GTCATCTCTGTA  | 634.944854625804 | 0.456714011208914 |
| CCTGACTGGTCA  | 634.946006110492 | 0.362186037859852 |
| ATCGTGGATGAC  | 634.958051968412 | 0.373981985600552 |
| CAACTCCAGTCA  | 634.959728613002 | 0.265844500004191 |
| ACCAATGGCTCA  | 634.975875787621 | 0.428468911559755 |
| CTGTTGACGTCA  | 634.980704323614 | 0.546077554495713 |
| TGACGAGACTCA  | 634.985115032907 | 0.331711012079911 |
| CTCAGAGGTGAC  | 634.988743006131 | 0.394012410915244 |
| AGTCGTGACACT  | 634.992115565943 | 0.452606178676066 |
| AATAGCTGTCAC  | 634.995422417819 | 0.403474464469612 |
| AGTCACTCCCTC  | 634.998830429818 | 0.203152988190345 |
| GTCATCTATAAC  | 635.014570713923 | 0.543359867072095 |
| CTCTGACATATA  | 635.017960932262 | 0.261860329773539 |
| ATTGTGCAGTCA  | 635.023767057656 | 0.558590019404144 |
| GACTAATCCTAC  | 635.030664476262 | 0.424805220371802 |
| AGTCACGCCGGA  | 635.03402895409  | 0.307919525334526 |
| GATTACTGAATC  | 635.038995378414 | 0.516670237858236 |
| AGTACAGAGTCA  | 635.039140104495 | 0.314379883339901 |
| CAAACATTATGA  | 635.055012994928 | 0.578142614053253 |
| GATTGCATCATA  | 635.057079170721 | 0.457188587698121 |
| GTCTTCTGACAC  | 635.058288069226 | 0.38039026064587  |
| CTGGCGGAGTCA  | 635.071653422441 | 0.454044059410926 |
| ACAATATGTGTC  | 635.080249726096 | 0.814486511444907 |
| CAATTCATGACG  | 635.086486857365 | 0.433025789028923 |
| TGACTGGCACAA  | 635.08819330121  | 0.415019271594578 |
| GATGACATTTCC  | 635.09200646711  | 0.362274896047303 |
| ATGTGAGCCACC  | 635.10093256297  | 0.254498033800894 |
| GATGATGAGCCA  | 635.100991372313 | 0.576699104886547 |
| CGTCATCTCAAG  | 635.114500975993 | 0.421839702471241 |
| GAAAATAATGAC  | 635.127322843774 | 0.325001156339068 |
| TGACGGAAATCA  | 635.138743722064 | 0.323403680619624 |
| CCGTCAGATGAC  | 635.144015016144 | 0.419516325617301 |
| GGTCTTGTGTCA  | 635.150835688329 | 0.225127018919986 |
| CGCTTAGACTCA  | 635.155941503323 | 0.708429658236271 |
| CAACATGATGAC  | 635.158289602927 | 0.543774869024346 |
| CACCCCTGACTC  | 635.15837442023  | 0.193923189553906 |
| CAAATAATGACA  | 635.169585245202 | 0.394069204727252 |
| CGAGCGAATGAC  | 635.172943228363 | 0.545701470421916 |
| CGCACGTGAGTC  | 635.177470704455 | 0.496010297954318 |
| CGACCCTGTGAC  | 635.18004356849  | 0.564075734470811 |
| AGTATTGCTAAT  | 635.187717681636 | 0.363030103673471 |
| TGACTTACGCAA  | 635.189562771201 | 0.532993800281557 |
| GTCATCTCAAAA  | 635.203936766619 | 0.435245485890817 |
| ACGTCACCCCTCG | 635.209593094401 | 0.348704129969068 |

|               |                  |                   |
|---------------|------------------|-------------------|
| CGAGCAAATGAC  | 635.210996381973 | 0.368011032963381 |
| CGTCATTGACG   | 635.213463234634 | 0.708478711875721 |
| TGACTCCCTAAA  | 635.223788249523 | 0.446293977424811 |
| CGTCGAATCATC  | 635.226939678003 | 0.291791095098195 |
| GTCACACATCAC  | 635.228287072589 | 0.32320908374176  |
| GCACTAGGTGAC  | 635.232029406629 | 0.44509766049087  |
| GTCATAGAAGAC  | 635.241936876261 | 0.443892378258206 |
| GACATTTGCTCA  | 635.25165847405  | 0.333712990333372 |
| ACCTAATCATGA  | 635.264834408699 | 0.610116430774636 |
| CGCCTTTGACTC  | 635.272883096014 | 0.284334047923837 |
| ACGTCACCGGCT  | 635.277765274116 | 0.53155786713807  |
| GTCATAATAGTA  | 635.279677680629 | 0.288521158115757 |
| GTCACACTACGA  | 635.286130470341 | 0.383923032103711 |
| TGAATCAGCGCA  | 635.287727684026 | 0.626331955582902 |
| CCGGTATTAGTC  | 635.293913691444 | 0.371647392489345 |
| TGTCAGTAATAA  | 635.296307277505 | 0.467585174437819 |
| TGAGAGATGACA  | 635.299407341062 | 0.233225593982714 |
| GGGACGTATGAC  | 635.31504221057  | 0.417820530545179 |
| ACGTTTTTCGTCA | 635.315409353012 | 0.572385354762872 |
| AAATAATGTCAC  | 635.328400705632 | 0.362090150537366 |
| AATGCTATGACC  | 635.334886361448 | 0.592654047910847 |
| ACGATGATGCAA  | 635.337540567797 | 0.472696817888149 |
| CGCGGTCATACA  | 635.344370501028 | 0.870892526913491 |
| GCTACTGACACA  | 635.34548120187  | 0.391798930352765 |
| AACCGATATGAC  | 635.358994756739 | 0.683117128707236 |
| CCTATTGAATCA  | 635.382907940855 | 0.401809809517172 |
| ATATGACGGCAT  | 635.394374549186 | 0.306196066104706 |
| CGTCACCTTAAG  | 635.403775828841 | 0.507851298186238 |
| TACACACAGTCA  | 635.414371963978 | 0.274163231181101 |
| AGTGAATTAICTC | 635.417309829104 | 0.559987695085799 |
| AAACCCTAGTCA  | 635.42414827505  | 0.375715059011577 |
| GACAATTGTGAC  | 635.441413266752 | 0.464727327243628 |
| ACGCATGACACC  | 635.449081232764 | 0.458235342641648 |
| AACTTGGTGACG  | 635.450679990333 | 0.560883832609013 |
| CATCAAATGACG  | 635.456487403623 | 0.454863980542587 |
| ATGACATCTTCG  | 635.45800282144  | 0.306207070548652 |
| GGCGTTTATGAC  | 635.460031371972 | 0.910820845100306 |
| ATGACGCCGAGG  | 635.464670228554 | 0.219076599406543 |
| ATGACGCTCTGA  | 635.473792701349 | 0.230306631029345 |
| GCTAATCGTGAC  | 635.485583717688 | 0.323452184154248 |
| GTGTCACCTCTA  | 635.493531973916 | 0.266381407805429 |
| TAGTCTTCGTCA  | 635.494895981608 | 0.322107059217374 |
| AGTCACTAGGAG  | 635.498250473464 | 0.340807513959765 |
| ACGTCACCGTCT  | 635.501376051216 | 0.254680237175779 |
| TGACACTAACAA  | 635.503039163175 | 0.308083636280173 |
| ACCTTGGGTGAC  | 635.505085220605 | 0.201640442099841 |
| CATTTTGATGAC  | 635.511060264998 | 0.413342801098521 |
| ATTTGGGTCACC  | 635.513345862957 | 0.229504800766268 |
| CCACCGAGTCAG  | 635.5149410824   | 0.35753978532132  |
| CGCTACCGATGA  | 635.515325949551 | 0.916067009737828 |
| ACTAGGTCATAC  | 635.526690892965 | 0.485612551044359 |
| GTCATCATTAC   | 635.526855138249 | 0.269340826666962 |
| GAACACTGTGAC  | 635.530900543283 | 0.389465367588639 |
| GTCACAGCTGCA  | 635.534372379243 | 0.474754763161507 |



|               |                  |                   |
|---------------|------------------|-------------------|
| CGTGCACGTCAC  | 635.534804643098 | 0.339735789294988 |
| CTAACGGTGACA  | 635.544930198486 | 0.329454359075462 |
| CCGAGTGACGAA  | 635.557399016122 | 0.416098363354095 |
| AGCAGTTATGAC  | 635.558824698566 | 0.347331762620761 |
| CCCTAGAATGAC  | 635.558937047097 | 0.458416148641613 |
| CGCCTAGAGTCA  | 635.563513297063 | 0.491564855713431 |
| CGTCATTACGTC  | 635.568641687162 | 0.433518481843568 |
| ATGACATCGACA  | 635.604250107875 | 0.414771615399255 |
| ATGACGCCGACG  | 635.634257419964 | 0.419627881612372 |
| ATGACAGACCGA  | 635.638271022853 | 0.470755487104806 |
| CACGTAATATGA  | 635.644516070754 | 0.419681320390116 |
| CATGTAGGTGAC  | 635.662241325142 | 0.478421918270044 |
| AGTCACGCGAGG  | 635.666370737423 | 0.377862539653127 |
| CGCACACATGAC  | 635.666597750665 | 0.387310306538566 |
| GACATAGATGAC  | 635.6838975518   | 0.306274704628646 |
| GTCACCCGAGAG  | 635.693446813282 | 0.577578407785061 |
| CTCTGCGGTGAC  | 635.694432746109 | 0.457888640734673 |
| ACCGACATGTCA  | 635.694657960021 | 0.546311897665392 |
| AACTAATTGTCA  | 635.723717863452 | 0.399041103792751 |
| ATCTTAATGACG  | 635.728388942159 | 0.502599456041883 |
| ATGAGTACCTAA  | 635.743642063334 | 0.515258627420868 |
| ATATCGCATGAC  | 635.751276708745 | 0.269979440108387 |
| GGGAGACTCATA  | 635.753094993762 | 0.221628440089156 |
| TGACTACAGGCA  | 635.75489729796  | 0.402403179855637 |
| CGTGGATTAGTC  | 635.769208054774 | 0.511373407249201 |
| TATAACTTGTC   | 635.770308265574 | 0.464943916755286 |
| AGAGTCAAAGGG  | 635.774960512427 | 0.266549905835312 |
| GTCATCTACGAC  | 635.78215088251  | 0.492479760809289 |
| CGAGAAAATGAC  | 635.788024872697 | 0.453638109248717 |
| CTGTCTGATGAC  | 635.789125875831 | 0.432548755691037 |
| AGTCACTTGACC  | 635.810929189356 | 0.258987977295987 |
| CGAGTCCGATGAC | 635.843247096373 | 0.328728317990539 |
| CGAACTACGTCA  | 635.856611643364 | 0.467490986388772 |
| GAACAAGACTCA  | 635.860393339263 | 0.524974192066649 |
| GACAACAATGAC  | 635.86113717547  | 0.57059393540677  |
| AGGTAACGTCAC  | 635.862722218981 | 0.166315627353372 |
| TACGACGTGTCA  | 635.866376177958 | 0.760478939162631 |
| GTGAGGTGACAC  | 635.868436169218 | 0.57543459871795  |
| TAAGACTAGTCA  | 635.86890913037  | 0.648561354546843 |
| AATGCATATGAC  | 635.881487221024 | 0.302100835644918 |
| CGGGTCTGTGAC  | 635.889429965007 | 0.361598188085605 |
| CCATCGGATGAC  | 635.890213478466 | 0.4512117419045   |
| CCTGTGATGTCA  | 635.914496598958 | 0.533727978898877 |
| GTCATTGTTGCA  | 635.920284153464 | 0.403183567063976 |
| CACATTAATGAC  | 635.935548774711 | 0.510779979797593 |
| AGCTCTAAGTCA  | 635.94182804309  | 0.419974670253729 |
| GTCATCAAGCTA  | 635.945554759873 | 0.575773449482512 |
| GCACACAGTGAC  | 635.949228879192 | 0.445360679587181 |
| CAAGGCGATGAC  | 635.957266994363 | 0.315548890761673 |
| ACACATCATGAC  | 635.958301356844 | 0.394654517756249 |
| GACGATCACTCA  | 635.960731584364 | 0.583533239080464 |
| GTCACAACCAAA  | 635.965980140106 | 0.403338098044191 |
| AATTCTGACGAA  | 635.967267559409 | 0.35736892908875  |
| GAGGTTGTGTCA  | 635.973282383566 | 0.307062398114832 |

|               |                  |                   |
|---------------|------------------|-------------------|
| ACGTGTCAGAAA  | 635.977842636001 | 0.192372609251408 |
| AAGCTCTATGAC  | 635.981604886572 | 0.413865825101528 |
| GACCCGAATGAC  | 635.995677324728 | 0.500969791948877 |
| CGCAACTGTGAC  | 636.002618575346 | 0.455764080054709 |
| CTGTTGACTGAA  | 636.006418910162 | 0.576882133513488 |
| GCGTTTTTCGTCA | 636.028265924554 | 0.564197181883657 |
| AGTCACGGTCGA  | 636.037190960527 | 0.414627745066106 |
| AGGACTAATACT  | 636.041130028637 | 0.471320224416849 |
| AGACTAATTACC  | 636.053792816675 | 0.580082228378653 |
| ACGTATTAGTCT  | 636.058058736862 | 0.247371741219641 |
| AAATATTGACTC  | 636.076660912976 | 0.303588282404637 |
| GAAGCGGAGTCA  | 636.096017648051 | 0.282398066074414 |
| GACTATTTGTCA  | 636.098648103217 | 0.59830549883961  |
| GTTGCCGTGATA  | 636.106440191158 | 0.262843442630204 |
| AAGTCACCTTTG  | 636.108577240645 | 0.176136710600153 |
| ACACTCTATGAC  | 636.126636824435 | 0.230060133844785 |
| ATACAAGTCATG  | 636.13550021833  | 0.391089981907848 |
| GTGACGATATCA  | 636.136377864251 | 0.258484076946188 |
| GTCACACGCATA  | 636.142250631014 | 0.573284333851641 |
| GTCATAAGCCCA  | 636.149387969862 | 0.22737849565088  |
| CCTTCTACGTCA  | 636.152784703872 | 0.339161385607528 |
| ACAATCAGTGAC  | 636.160163835869 | 0.429491863079456 |
| GACCTTGGTGAC  | 636.168273672124 | 0.413394432075284 |
| GTCATCACCGAC  | 636.172172252148 | 0.227012844209758 |
| ACACTGACACAG  | 636.181938866703 | 0.356689348901287 |
| GCAAAGTGACGC  | 636.18350370448  | 0.328401356592649 |
| GTCATTCTCGAA  | 636.205596911115 | 0.533384575323791 |
| ACATCTACGTCA  | 636.216778429283 | 0.254553977767295 |
| AGCGTATTAGTC  | 636.220071455667 | 0.346555868259676 |
| TGAATCAACTAA  | 636.236184504607 | 0.424488341394433 |
| AGCCTATGTGAC  | 636.270114665204 | 0.64294507102714  |
| GTCATTGATTTA  | 636.277398959646 | 0.319615886098678 |
| CGCTTCCAGTCA  | 636.278632084637 | 0.536885944902916 |
| ATATTTATGTCA  | 636.282678589492 | 0.541481706146901 |
| TGGGTCATGGAA  | 636.283209351413 | 0.268983102696873 |
| CTGTCACCGTGA  | 636.303673175182 | 0.540472822377196 |
| ATTAGTCTGACG  | 636.308041878549 | 0.602013217159918 |
| GAACCACAGTCA  | 636.313981007624 | 0.568428361128936 |
| AAGTTTTATGAC  | 636.315552291802 | 0.245307127216195 |
| AGTCCTGCATA   | 636.319596400306 | 0.163461633922595 |
| TGACTGGAAGAA  | 636.320413695767 | 0.444218726757503 |
| ACACCGGATGAC  | 636.322072537573 | 0.458552666399615 |
| ATGGCGAGTCAG  | 636.327642625474 | 0.308813155802576 |
| GGATGGGAGTCA  | 636.332322742492 | 0.323613083503821 |
| ATGACGGTACCG  | 636.338988194402 | 0.359152441254649 |
| CGACCGCGTCAC  | 636.341291230024 | 0.393076855674173 |
| TCATCGTGACAA  | 636.346675771583 | 0.360829140946876 |
| ATCGATTGTGAC  | 636.360969737511 | 0.554272106980665 |
| GACCAAAATGAC  | 636.369593398653 | 0.393069799616618 |
| GAAATTAGTGAC  | 636.393871347505 | 0.716798332948691 |
| CATTTTGTGACA  | 636.408227884299 | 0.630462099248312 |
| GTCATCAACGGA  | 636.411106228449 | 0.357425103782711 |
| CGTCATGCTGGA  | 636.411324151918 | 0.423024750982023 |
| CTATACGTGTCA  | 636.425198585643 | 0.292928868953904 |

|               |                  |                   |
|---------------|------------------|-------------------|
| GCACCGTACTA   | 636.426341679951 | 0.477649564531277 |
| GTCATCCCTTTA  | 636.429977460143 | 0.372187389803696 |
| AGTCACTAGGTG  | 636.434270892364 | 0.470446041374672 |
| ACTCATACTTTC  | 636.449063470285 | 0.267540708886762 |
| ATTAGTCGGTCA  | 636.456286595411 | 0.571246615727929 |
| GACTCAGAAGCC  | 636.458995758126 | 0.669579796003257 |
| GAGATATGACCA  | 636.460212910604 | 0.37018976770672  |
| GTCACCGACAGA  | 636.460590131861 | 0.399975825686826 |
| GTCACTGACTTA  | 636.46650766736  | 0.42057606480468  |
| CTTAAGCATGAC  | 636.46840447496  | 0.438362208545617 |
| CACTTGCAGTCA  | 636.474046677024 | 0.34307316285197  |
| CGCAATAATGAC  | 636.474245997823 | 0.216201089377017 |
| GAATCTTATGAC  | 636.499072900172 | 0.630557342986195 |
| AACGGAGAGTCA  | 636.50102126285  | 0.466490794703912 |
| CGACTTAATGAC  | 636.506346162706 | 0.265459123041836 |
| TAAGTTCTGTCA  | 636.507717921807 | 0.460950552590239 |
| TGACTACGTAAA  | 636.514154022172 | 0.541304622816062 |
| GGCGCAGAGTCA  | 636.515771328369 | 0.457373729667263 |
| AAGGCGCGTCAT  | 636.534218414195 | 0.30829450612761  |
| CTATTGACACAC  | 636.544643524144 | 0.221057291587914 |
| GTCATTCTGAAC  | 636.547955826752 | 0.265574991985301 |
| CTGATTGGTGAC  | 636.553839299307 | 0.601910624014757 |
| GACTCATGGTTA  | 636.554339166499 | 0.35203688866452  |
| CTGGTCTATGAC  | 636.557794763941 | 0.828547461239173 |
| AAAACAAATGAC  | 636.57571289477  | 0.366797870081537 |
| ACTTCTGACGTG  | 636.579014101843 | 0.562700982380411 |
| AACGTTGAATCA  | 636.604592641026 | 0.306739644235009 |
| TGAGTCGTTCCA  | 636.607832365478 | 0.594050658391102 |
| AGTCATGGTGCA  | 636.611884131703 | 0.283616925512855 |
| GAGTCTAATGAC  | 636.622218514874 | 0.513918573134377 |
| CACGACTCGTCA  | 636.628718626812 | 0.576975937433664 |
| ACGTCATGCTGG  | 636.630957085076 | 0.735938693725671 |
| AGTCTTGGTCAC  | 636.632582950406 | 0.485400476869278 |
| AGACCGTGACAC  | 636.634185015048 | 0.381686762867441 |
| AAATCCCCTCAT  | 636.639801496732 | 0.354425523163514 |
| ACACCTGGTGAC  | 636.646580084772 | 0.582659184968025 |
| CGATTTGTGTCA  | 636.647009019947 | 0.48196135003252  |
| GTCACCTTAAAA  | 636.650679720623 | 0.736609253720015 |
| ATGATGTGACAA  | 636.654001955474 | 0.334531337209993 |
| GGGATAAATGAC  | 636.654999534267 | 0.179125756912848 |
| AAGTGTCAGACT  | 636.659850818267 | 0.312273834306709 |
| CACCGGAATGAC  | 636.671589006445 | 0.473295200756664 |
| GCCTAGGATGAC  | 636.67212952913  | 0.602877254814048 |
| CGCTTGAATGAC  | 636.678428495241 | 0.536759605373332 |
| CGTCATTGTACAC | 636.689440516001 | 0.293374281490839 |
| GTCATTGTTACAC | 636.70700581709  | 0.288851522223    |
| GCTGTCACGTCA  | 636.707870544989 | 0.489550231724383 |
| ACGTCACCTCGCT | 636.709997275303 | 0.387192090849513 |
| GAACAAGATGAC  | 636.721012857568 | 0.35292382867887  |
| CGGTCATGTGAC  | 636.721467736046 | 0.499474115229791 |
| AATCGGGATGAC  | 636.734183717269 | 0.405395553294187 |
| GCGCAGGAGTCA  | 636.736379312281 | 0.615116884116843 |
| CATGATAATGAC  | 636.736769386208 | 0.330010655143745 |
| AGTCAGAATCGA  | 636.757110477615 | 0.302621290826609 |

|               |                  |                   |
|---------------|------------------|-------------------|
| GTCACCCGATTA  | 636.757643357473 | 0.379350926802996 |
| GTTTATAAGTCA  | 636.758696056403 | 0.456289557016664 |
| AGTGACGCTGAC  | 636.775737903958 | 0.282769949578069 |
| CCACCCTATGAC  | 636.779014186703 | 0.195936084725335 |
| GTCACACTATAA  | 636.779709060263 | 0.548874810703505 |
| ACTCATACGCGG  | 636.782554433769 | 0.452500542222368 |
| AGTACCGGTCA   | 636.785438120567 | 0.545482731544904 |
| ACAATGTCATCA  | 636.813481988141 | 0.468676646507542 |
| CGACGACGTGAC  | 636.83629006425  | 0.538139689120584 |
| AAGTCCGACTCA  | 636.846953137824 | 0.311084121565255 |
| CAGTCAGCGGCG  | 636.854935673608 | 0.379118661040065 |
| GTGACTTGACA   | 636.859846715463 | 0.380711386021576 |
| AGATGTCTGACT  | 636.865308190431 | 0.623060201808013 |
| TGGGTCACGTAA  | 636.867424717242 | 0.41485021015159  |
| GCAAAATGTGAC  | 636.87304275319  | 0.454401914864667 |
| GTCATACGAAGA  | 636.874864738032 | 0.455801628079324 |
| CTTTATTATGAC  | 636.880338192762 | 0.46919787861469  |
| AGTCAGACTAGG  | 636.881018588219 | 0.528782092021523 |
| ATAGGTACTCAT  | 636.911171722969 | 0.255941480366734 |
| CACAGATGTGAC  | 636.930825341404 | 0.425799508946649 |
| CCCACTTATGAC  | 636.937805451404 | 0.40618643003188  |
| GAATTTGTGTCA  | 636.942537368713 | 0.263421216272332 |
| ATGACCTGGCCA  | 636.950799735438 | 0.519523412452126 |
| GCCGTGATGTCA  | 636.960080071495 | 0.621797624045864 |
| GCCGATGAGCCA  | 636.989084115074 | 0.441987639544156 |
| GCCACGGAGTCA  | 636.991990912288 | 0.512527090479256 |
| AAACCATGACGT  | 636.995492524857 | 0.329335045195344 |
| ATTCAGTAGTCA  | 637.000337986301 | 0.628391943540135 |
| AACTAACGTGAC  | 637.006152627812 | 0.422174697226348 |
| CGGGGATTAGTC  | 637.013538754847 | 0.494970819413099 |
| TACCAGATGACA  | 637.018967067146 | 0.308135427184061 |
| CTACGGTAGTCA  | 637.029490271408 | 0.430651455441447 |
| AGAGAAATGACG  | 637.03385221569  | 0.281631183930499 |
| CAGTCAGCATGG  | 637.035588721335 | 0.304120390124679 |
| GACTAATTCCTC  | 637.040935779218 | 0.409490037681293 |
| GCGATGAATGAC  | 637.042403532917 | 0.321653902597024 |
| GGTGTCAATGCAA | 637.04948844468  | 0.281720360039406 |
| AATGCGTGTGAC  | 637.055695823577 | 0.58116649994594  |
| ATTTAGGACTCA  | 637.056162623976 | 0.502670163076459 |
| AGTGTTACATCA  | 637.063261020505 | 0.369089544166517 |
| GCGTCACATATA  | 637.072281234459 | 0.412853262251723 |
| GTCACTTTTGTA  | 637.07755564776  | 0.43971998635714  |
| CAGTTGGGTAC   | 637.079452239494 | 0.445072186944469 |
| GAGTCAATGAAC  | 637.08856254204  | 0.460625615184849 |
| ACTCATACCGGG  | 637.090512678966 | 0.370674955915397 |
| GTCATTCGTCTA  | 637.0944930599   | 0.26252611693283  |
| GTCATAAAACAA  | 637.098759421046 | 0.529544500077958 |
| CGTGGCGACTCA  | 637.100395723204 | 0.356410269830979 |
| CGAGCAATGACA  | 637.122129397953 | 0.358723519491208 |
| ACCTGTTGTGAC  | 637.124625221748 | 0.716567884442173 |
| GTACCCAATGAC  | 637.128927045567 | 0.669706033177489 |
| CAATGAAATGAC  | 637.130996795083 | 0.46464220704453  |
| GGTGTAAGTCAC  | 637.132466610516 | 0.360870285277654 |
| CTGCCTGTGTCA  | 637.143693813776 | 0.28701894845089  |

|               |                  |                   |
|---------------|------------------|-------------------|
| AATAATTGCTCA  | 637.147449991796 | 0.576851072214566 |
| CTACGACAGTCA  | 637.158650213277 | 0.493930044690096 |
| TAAGCGGAGTCA  | 637.158824074007 | 0.426623729115214 |
| GTGACGCGGAAC  | 637.16969920403  | 0.200900384270034 |
| GGCTACGATGAC  | 637.17845902352  | 0.560449176603034 |
| CGCCCGTATGAC  | 637.200441409113 | 0.602151706007108 |
| CGTCACTATGAG  | 637.203406640233 | 0.570001093053693 |
| AATTATATGTCA  | 637.205672097809 | 0.485951307332873 |
| AACTTCCGATGA  | 637.205758228585 | 0.527062087050694 |
| CCGGCCTGACTC  | 637.206842414894 | 0.278007971042055 |
| TCTGACGACTAA  | 637.206992174095 | 0.496753959794129 |
| GTAAGTAATGAC  | 637.233940991689 | 0.23473867199737  |
| ATAACGTCACCG  | 637.245995373549 | 0.300058281861523 |
| TATGACAGTAAA  | 637.251195182555 | 0.117940068081649 |
| CTTGATGACCC   | 637.254407783246 | 0.353224135050023 |
| ACAAAGCTGTCA  | 637.256065093368 | 0.49602428910325  |
| TGACTGGACCCA  | 637.256491476558 | 0.27135650707759  |
| GTGACTTCGTCA  | 637.264337559203 | 0.42408020078501  |
| GCGTAAGATGAC  | 637.280455448457 | 0.553518558044644 |
| ACGTCATGCGAC  | 637.293699128016 | 0.532019010552545 |
| CGCGCTGATTCA  | 637.296884724699 | 0.338696836797423 |
| AGTCATGGTCCC  | 637.305647461629 | 0.312671156186941 |
| CTCACTACGTCA  | 637.314507494874 | 0.351311074523439 |
| AGAGATGATGAC  | 637.331516757392 | 0.175774660446055 |
| ATGACACTCTCA  | 637.332571982981 | 0.378056443579977 |
| GTGTGAGAGTCA  | 637.332634576326 | 0.235261784677916 |
| CACGTCACTTCG  | 637.337856085781 | 0.260284830619999 |
| ACCTTGACGTCA  | 637.338688335582 | 0.486927631170627 |
| CGTCATTTCTGA  | 637.34996986883  | 0.267260885218086 |
| CGCAATTGCTCA  | 637.356278181397 | 0.537393470308244 |
| ATGACGATGTCC  | 637.362761520206 | 0.439180835689957 |
| GTGACATACTTA  | 637.363469778671 | 0.166237261441644 |
| CGTTCGGAGTCA  | 637.365296743345 | 0.658649392518744 |
| TGAGTCTTGCCA  | 637.366022506865 | 0.523019192259248 |
| ATGACACTCAGA  | 637.385117528302 | 0.445910871770108 |
| GACCTTGATGAC  | 637.385327624795 | 0.635247269811752 |
| TCGAGTGACCAA  | 637.385808706797 | 0.370869972841237 |
| CCATTGACACAC  | 637.399433636836 | 0.323766806495401 |
| AGGCACGACTCA  | 637.40317704085  | 0.20584219887478  |
| CTAGGAAATGAC  | 637.406471401555 | 0.394529029127844 |
| GATCCTTATGAC  | 637.416460525224 | 0.509272962650167 |
| TCTGCTGTGTCA  | 637.422572030133 | 0.430501460774705 |
| ATTGAGTAGTCA  | 637.428795165208 | 0.353658146912436 |
| CTACGGGAGTCA  | 637.436302888001 | 0.310636339121144 |
| AGTGACATGGCC  | 637.43773317423  | 0.41143490823416  |
| GTCACAGACGAA  | 637.447166330021 | 0.460061932211749 |
| GTCACGAAGTCA  | 637.451352829787 | 0.248697026326338 |
| AGTGTCATGAAT  | 637.470655508271 | 0.411957982383817 |
| AATAGTATGAGT  | 637.472028270898 | 0.275126167729295 |
| AATGACGGTACC  | 637.472031490401 | 0.547507687211097 |
| ACTTCGGTGTCA  | 637.473755688249 | 0.590951413207517 |
| GCTATTTCTGTCA | 637.478268049102 | 0.405705854541381 |
| CGTCACTCGTAG  | 637.488663610712 | 0.245361769828081 |
| ACGGAGATGACG  | 637.491976602294 | 0.335758653135283 |

|               |                  |                   |
|---------------|------------------|-------------------|
| GTCACCACTGAA  | 637.539421453312 | 0.566445520668643 |
| CAATGGCATGAC  | 637.562153847445 | 0.421608573495847 |
| ACCATTAAGTCA  | 637.567554336521 | 0.504239100030701 |
| CAGGTATATGAC  | 637.574091139501 | 0.407433093249465 |
| ATGAGTACCTCA  | 637.574579011017 | 0.701006645927635 |
| AGGTGACGCCAC  | 637.584751340233 | 0.161606611599032 |
| GACTCACTAACA  | 637.590243388137 | 0.248051573598171 |
| ATGACATCGTCA  | 637.594897941774 | 0.435865524079807 |
| ATCACTGGTGAC  | 637.601769595233 | 0.281114786525963 |
| CATCTAATGACG  | 637.603359556744 | 0.575535604708682 |
| GAGTCAAACCTAC | 637.606458268276 | 0.290151244594502 |
| CGATATTACTGA  | 637.615506053577 | 0.611676757048662 |
| AACCTAGACTCA  | 637.618400917149 | 0.451950811886677 |
| CCCATTTTGTCA  | 637.623573429417 | 0.38812116087526  |
| ATAACGACTCAG  | 637.625851397005 | 0.42618197219896  |
| GAATTGTGACGC  | 637.637541111317 | 0.15395552899257  |
| CGAAGTAGTGAC  | 637.639600114307 | 0.375169978249036 |
| ACTCTGACGGAT  | 637.641926653088 | 0.325119586921976 |
| ACGTCACCCGAA  | 637.64260337124  | 0.435797780946895 |
| AAGATTATTCAT  | 637.642788574123 | 0.489303348419961 |
| CGCAAGTTGTCA  | 637.643865582607 | 0.603858569429876 |
| CAACGTGTGACA  | 637.644002674809 | 0.201638475664815 |
| CGTCATTCGGTA  | 637.651149067654 | 0.228561357765281 |
| CAGCCCCGAGTCA | 637.653556825833 | 0.540638846328009 |
| ATGACGGCGTCA  | 637.657242259701 | 0.373990167411105 |
| AGAAGTATGAC   | 637.667763677913 | 0.273821289473888 |
| GATGACGTCTCC  | 637.668552150479 | 0.336414038860802 |
| GTCATAACCCTA  | 637.679096437753 | 0.23389678515235  |
| AAACGCATGACA  | 637.681765183075 | 0.446707357447289 |
| GTGTCACGACTA  | 637.68604998574  | 0.190938974006138 |
| CAGGTCGATGAC  | 637.692423067051 | 0.25906709707377  |
| CCCGGTGACCCA  | 637.696360365717 | 0.244710318292247 |
| ACTCATTAATGG  | 637.698830411611 | 0.673530393093347 |
| AATTGGTGTGAC  | 637.704505726448 | 0.424819664644054 |
| CGTTATTGACTC  | 637.709870798746 | 0.525543083901564 |
| GACGCATACTCA  | 637.734646515209 | 0.404212823750076 |
| CTCACAGATGAC  | 637.734650946502 | 0.499091256490309 |
| AACGTATGTGAC  | 637.744831731908 | 0.399646833432909 |
| ACGTCACCCGAC  | 637.746800172601 | 0.423853306538075 |
| ATTGCTTCGTCA  | 637.749046860692 | 0.412703056155319 |
| AGTCACGCGCTA  | 637.75424884502  | 0.358980883416714 |
| TGGGCTGACACA  | 637.76408584947  | 0.3451632190372   |
| AGAGTTGATGAC  | 637.767470613074 | 0.387510267646621 |
| AAGAATGGGTCA  | 637.767990013522 | 0.37201041743974  |
| TCGACATAGTCA  | 637.777399521499 | 0.321562435232526 |
| GAGTAATCCGGC  | 637.796811896661 | 0.627015001489024 |
| CAAGCGAATGAC  | 637.799893052135 | 0.501135214304105 |
| AAGCCCTGACTC  | 637.805026762571 | 0.212325188228872 |
| ACTCATTATTA   | 637.810531134102 | 0.421307312720686 |
| AACATTATGTCA  | 637.812117483331 | 0.669974950826262 |
| AAATTCGGTCAT  | 637.813505946375 | 0.172356184760184 |
| GGTCATCAACGA  | 637.817247073736 | 0.425300419082573 |
| ACGCATATGTCA  | 637.817830875633 | 0.574689213282641 |
| CCCTCCACGTCA  | 637.843786769355 | 0.161533600035953 |

|               |                  |                    |
|---------------|------------------|--------------------|
| CCGGCGTGTGAC  | 637.848801589167 | 0.24966897047307   |
| TCGAGACAGTCA  | 637.853310135148 | 0.504779017401878  |
| GGCGACAATGAC  | 637.860254595564 | 0.398017744005829  |
| CTGCCATGACAC  | 637.86458021018  | 0.336579882060097  |
| AGTTCAGACTCA  | 637.876273506352 | 0.527147111012036  |
| CTCCTGGATGAC  | 637.886314039842 | 0.380602277430593  |
| GAGCTTTACTCA  | 637.886678557326 | 0.694648695527915  |
| GTCATCAGGAGA  | 637.894090272158 | 0.42179989733683   |
| AGAAATGTCATC  | 637.899457850782 | 0.311543366542792  |
| CGTTGACACAC   | 637.90475241769  | 0.429386757751061  |
| AGTATGTATCAC  | 637.926734252173 | 0.37747587488943   |
| CCGTAATGACAA  | 637.932233752942 | 0.683144883375603  |
| GTCACGCTTTGA  | 637.934508822441 | 0.302204974692968  |
| CATGAGCAGTCA  | 637.967958639146 | 0.816379649070787  |
| ATCCATATGACG  | 637.975204036234 | 0.19781697589854   |
| ACACGTACTCAT  | 637.988146182854 | 0.239809217771412  |
| GGACATTATGAC  | 637.999200366892 | 0.312963746035418  |
| CACTCGAGTCAA  | 638.005892330087 | 0.264617672887363  |
| ATGTGCGTAATC  | 638.009725751097 | 0.313945076871801  |
| GAAGCAGTCAGA  | 638.019244481037 | 0.344423264426114  |
| TAGAGCGAGTCA  | 638.025959937499 | 0.329492006007537  |
| GTCTTTTCGTCA  | 638.027966935606 | 0.477175830666001  |
| ATGAGTCTCCAT  | 638.03919729111  | 0.486070035206855  |
| TGACGTGCATCA  | 638.040666540035 | 0.540213141983406  |
| GTGTCACTGAAC  | 638.058357634776 | 0.542569272305922  |
| GACTCACTCTCC  | 638.06129393365  | 0.2578340889375    |
| CTAATAGTGTC   | 638.062562080386 | 0.300880085265177  |
| GGACACGTGTCC  | 638.062608973118 | 0.488333567145415  |
| GATATATGACCA  | 638.070788581006 | 0.392543612337454  |
| CCTATCGGTGAC  | 638.074928391115 | 0.549571219641861  |
| GACTCACGATCA  | 638.095361189867 | 0.621645911622702  |
| TGACGCGAAGCA  | 638.100396032163 | 0.590037074885369  |
| CCCAAGGTGTC   | 638.110325707323 | 0.61653851400059   |
| GACTCACTTGCC  | 638.123656190585 | 0.0868865474546295 |
| CTCCGAGAGTCA  | 638.12482355178  | 0.499185414916265  |
| CTAAACAATGAC  | 638.13121409136  | 0.328087485137344  |
| AACCGAGAGTCA  | 638.139916098583 | 0.445713341157638  |
| AGCCTGTAGTCA  | 638.140479392674 | 0.265056720458396  |
| GTCATACAGCCA  | 638.142070137743 | 0.71070049934001   |
| ACGTTGACTGAA  | 638.146830268523 | 0.379646563438002  |
| ATATTACTCTC   | 638.14976733783  | 0.541258436022509  |
| ATGACCGGTCAT  | 638.153505622273 | 0.352937085666669  |
| AGTCAGAGTTTCG | 638.154933305136 | 0.271193722561127  |
| AGTGACGTGCC   | 638.155429580556 | 0.416527346921006  |
| GAGTCTTGTGAC  | 638.172598306103 | 0.559051688748936  |
| AGTCACGCCGTC  | 638.178685858183 | 0.248130377913483  |
| ATCTTGTGTGAC  | 638.180978615984 | 0.417030326114455  |
| TCATCCAAGTCA  | 638.183968398197 | 0.538704178653617  |
| CAAGCATGACAC  | 638.191660729241 | 0.547998880797305  |
| CAGTCAACAAGA  | 638.195939906172 | 0.414070870719416  |
| GTCATCCCGCAA  | 638.198777401583 | 0.435232253078821  |
| CTCTGAGTCTAC  | 638.20148786737  | 0.177381529866061  |
| GGTCACCGATGA  | 638.211723065961 | 0.803986286801304  |
| ATGAGTAGTCAG  | 638.216527558713 | 0.254980929284298  |

|              |                  |                   |
|--------------|------------------|-------------------|
| CACGTCAGCGTC | 638.221399532943 | 0.480464380741228 |
| AGACAGTGTGAC | 638.226101893564 | 0.345577221519287 |
| GGTTCGGATGAC | 638.229716906629 | 0.193098322672518 |
| AGACTAATTTGA | 638.231230650384 | 0.45386698989982  |
| CGTCATTTGCTA | 638.237101286574 | 0.20150608956705  |
| GATTCGTAGTCA | 638.243304787028 | 0.447216375299153 |
| TGACAGATCCCA | 638.255888005958 | 0.297310186686239 |
| TCGCTCGACTCA | 638.264451213209 | 0.417747768787832 |
| ACTCATCGGTTG | 638.270333962157 | 0.353800153383228 |
| ATACAGTGTAC  | 638.274041892337 | 0.417484628127816 |
| ACTGATTGTGAC | 638.279475803208 | 0.385496810371797 |
| GCCGCCTATGAC | 638.283037093798 | 0.644756838125174 |
| GTCACAATCTAA | 638.284519159675 | 0.515402497767413 |
| CGGTAATCAGTC | 638.284789392517 | 0.581185700715647 |
| AATAGTCAATTA | 638.315199724809 | 0.359690363115332 |
| ATGACAGTAACA | 638.325818556049 | 0.192339996812766 |
| AGTCACGACT   | 638.33144696157  | 0.525944209236195 |
| CTGACTCGGACC | 638.33194815448  | 0.274652075885527 |
| CCATAATTATGA | 638.339689459062 | 0.259250889487433 |
| CAACAGTGTGAC | 638.358441435742 | 0.427214764034731 |
| ACTCAAATGACA | 638.369182498658 | 0.426919663177622 |
| CGCAATGAGTGA | 638.372540995898 | 0.419121032491452 |
| ACGGAAATGACA | 638.374557410221 | 0.203901006474986 |
| TATATAATGACA | 638.37946810166  | 0.479222875390609 |
| TCATTAGAGTAA | 638.387784172548 | 0.548546518454105 |
| AAATGACCACGA | 638.393998227785 | 0.167093970758563 |
| TGACACAGGTAA | 638.400367931332 | 0.369473864925472 |
| ATTCTGTACACG | 638.402212211066 | 0.444117326453852 |
| AGTCAGAGTTAC | 638.404564354478 | 0.430486683030883 |
| CGAAGTGACCAA | 638.433228126654 | 0.459445822613075 |
| ATTACTACGTCA | 638.445039984932 | 0.273614540938933 |
| GCGAGGTGACAC | 638.449187792782 | 0.516042445959728 |
| TGACAAGTTCCA | 638.449561386407 | 0.40842606440896  |
| GTTATGACCTAA | 638.452292051218 | 0.378471327992047 |
| CCACCGATGACG | 638.45230928835  | 0.234780063916468 |
| GATTTAAATGAC | 638.46075712911  | 0.292033840846715 |
| CACTAAAATGAC | 638.463758357424 | 0.536663204543898 |
| CAGTCAGAAGTC | 638.467392016526 | 0.493783882130225 |
| ATACACGTCAAC | 638.46841065282  | 0.274018597567245 |
| AGCCCTGTGTCA | 638.469636304718 | 0.420507682656792 |
| TGAATCAGTACA | 638.475521618231 | 0.455531669810585 |
| GACGGCGATGAC | 638.487497211168 | 0.343834585836005 |
| CGGAAAGATGAC | 638.493932504719 | 0.33791760827327  |
| ACTGCCGACTCA | 638.496301694603 | 0.201112748065522 |
| CGGGTATATGAC | 638.497590917813 | 0.522284476839445 |
| TCATAGCTAAGA | 638.513882567217 | 0.837456790957124 |
| AAACCAGTCAGT | 638.51871123716  | 0.264027949378176 |
| CGACTAGGTGAC | 638.519193288682 | 0.59916053798053  |
| ACGCCATATGAC | 638.521269237552 | 0.291574618202788 |
| AGAACTACTCAT | 638.530481947031 | 0.250817135600494 |
| GGGAGTTATGAC | 638.546117929718 | 0.245356201007579 |
| CAACACCAGTCA | 638.551008196116 | 0.420634650712539 |
| CCCGTTTACTCA | 638.559278452915 | 0.407792307291882 |
| GTCATATTGGTA | 638.561506582317 | 0.481371838539023 |



|               |                  |                   |
|---------------|------------------|-------------------|
| CCGGCTGATTCA  | 638.568247016492 | 0.585090528107479 |
| TACAATGCATA   | 638.574185932415 | 0.324328676564836 |
| GTCATTACATTA  | 638.581654284733 | 0.456056078734078 |
| AGTCACGGTGAT  | 638.596346772605 | 0.212758240319249 |
| GTACAAGATGAC  | 638.601702634848 | 0.510428499183531 |
| CGTGTGTAGTCA  | 638.60336823889  | 0.312357291834234 |
| CGTCATCTAATC  | 638.606106591484 | 0.243794286327774 |
| AATCACTAGTCA  | 638.608248077177 | 0.349912057005524 |
| GATGACCTAATA  | 638.608428231075 | 0.266096477798497 |
| AGTGTTCATGGTG | 638.609240845268 | 0.366165761997126 |
| TGACTATGATCA  | 638.610335908415 | 0.500904301517316 |
| CTCGCATAGTCA  | 638.61595981565  | 0.415590807589327 |
| ATGACTGGGGTA  | 638.622158722884 | 0.202031932145928 |
| CTGGACAGTGAC  | 638.625843455697 | 0.366300724265325 |
| GCATTAGATGAC  | 638.64187008546  | 0.302134565707876 |
| GTCACCATCGGA  | 638.64207331193  | 0.472490698412921 |
| CACCTCGGTGAC  | 638.653594940959 | 0.619639851272348 |
| CCGGCTGTGACA  | 638.65561832169  | 0.519969315837604 |
| GCGTCATGATCC  | 638.659556135174 | 0.17133830058674  |
| CCATTGGTGACG  | 638.663160160261 | 0.513054312084715 |
| ACGCCATGACAC  | 638.676886898401 | 0.311518829338126 |
| CCTGTGCAGTCA  | 638.69298753437  | 0.442459303323101 |
| ACGTCACCTGGTC | 638.69619629394  | 0.474541157531383 |
| CCAAACTGGTCA  | 638.728263592125 | 0.498190513179601 |
| CGTCATTAGGCC  | 638.734455534577 | 0.288580059101115 |
| CTGTCTTATGAC  | 638.767177203208 | 0.267047757344802 |
| CCGTCAGACTCA  | 638.778654556066 | 0.460845234207509 |
| CATTTAGACTCA  | 638.782107618758 | 0.471999232641873 |
| AAATTATTACTC  | 638.789284794025 | 0.339556475412694 |
| CACGTCAGAACG  | 638.806595654778 | 0.437194941258308 |
| GACTGGCATGAC  | 638.809993647865 | 0.34595201042006  |
| CTGACTCCGAGA  | 638.832782478849 | 0.334715199560769 |
| CGGACGGATGAC  | 638.837733265029 | 0.512665744325822 |
| GCCGCGTGTGAC  | 638.864893721313 | 0.554401969153923 |
| ACGTCACGCTAA  | 638.866637326586 | 0.382884478861515 |
| CTGCCAAATGAC  | 638.869188802977 | 0.487379007219675 |
| TGACGAGTCTCA  | 638.885487047565 | 0.409430250130618 |
| TGTCATGTGCAA  | 638.887208282537 | 0.22166465895773  |
| TCTGACTGCTCA  | 638.90226671805  | 0.256194470790729 |
| GACCCATGAGTC  | 638.91066049544  | 0.487721303440805 |
| CAAATTGATGAC  | 638.912414451788 | 0.395302366969767 |
| AAATCCGACTCA  | 638.918944865222 | 0.260646817771155 |
| GTGTGAGCCACA  | 638.919753129135 | 0.555664802199009 |
| GTCATTCACCGA  | 638.920648316316 | 0.301800338587876 |
| CCCGATGATGCA  | 638.921218935882 | 0.65593755079994  |
| CACGGTCATGAC  | 638.93583003947  | 0.281873289734401 |
| AGACTCACGCAT  | 638.949710311426 | 0.366426674123393 |
| ATGACGACTTCC  | 638.963334856427 | 0.230121009716798 |
| CCGATTCATGAC  | 638.966290953068 | 0.388254491323442 |
| CAAATGGTGTCA  | 638.967848427202 | 0.817736251369906 |
| ATACGTGTGACG  | 638.975147212357 | 0.397676481634103 |
| ATAGAGTGTGAT  | 638.984742612998 | 0.489180589502122 |
| GAACAGACTCAC  | 638.986340795143 | 0.316908319692145 |
| TGGGTCATGTAA  | 638.990413576406 | 0.427503219812682 |

|               |                  |                   |
|---------------|------------------|-------------------|
| GTCAGTCTCTGA  | 639.003649946368 | 0.537593490466919 |
| AGTCTAGATGAC  | 639.004581737872 | 0.581866634961826 |
| TCAACAGCGTCA  | 639.012788470919 | 0.607458417279606 |
| CAAATCGCGTCA  | 639.01386199543  | 0.325193869381667 |
| GTCATACCTCCA  | 639.024284670296 | 0.323473024829884 |
| GAGTAATCGCGC  | 639.034397401524 | 0.705988582992399 |
| CCTGCGAGTCAG  | 639.056395949176 | 0.529004593457672 |
| AAGACTTGTGAC  | 639.061400619984 | 0.447785035722466 |
| GTTACTCAGCCA  | 639.076247822302 | 0.357763807437111 |
| GAATCATGTGAC  | 639.078384035699 | 0.273648460342723 |
| ACGTCACCTGATG | 639.084949861813 | 0.433389671610991 |
| ATGAGCAAACGA  | 639.08770509812  | 0.304164507780781 |
| GAACAACCTCATC | 639.091167853475 | 0.386357160984043 |
| CTGGACTGGTCA  | 639.096658246195 | 0.310303682362689 |
| GTCACATTGGAA  | 639.10107090031  | 0.42562458630428  |
| GGGATATATGAC  | 639.103870045124 | 0.161591344127408 |
| TGTACTGTGACA  | 639.110661968703 | 0.408825183097523 |
| GACTCAGTTGAC  | 639.120223727298 | 0.440521574794976 |
| ACGGCTAATGAC  | 639.122696667367 | 0.657520568610978 |
| GCGTCACATTCA  | 639.123657656922 | 0.283719894920446 |
| GTCACTGGGTCA  | 639.133479210883 | 0.475139990424914 |
| AGTGTGACCACG  | 639.142387963645 | 0.1840986744045   |
| ACGTAATCGTCA  | 639.147977613148 | 0.465050211252553 |
| ATGACAGACAAAT | 639.160233384172 | 0.412698597106823 |
| AGACTCACTCTC  | 639.165564154038 | 0.342575789085351 |
| ACGTCACCAGCA  | 639.167132009092 | 0.399572092829315 |
| CGATCGGGTGAC  | 639.168188391875 | 0.448560951806585 |
| GTCACCGATATA  | 639.17046593379  | 0.275223387802906 |
| GTGACTAGCTAA  | 639.172656945427 | 0.329425945561959 |
| GAGTCAAACGTA  | 639.177181595932 | 0.139246599062868 |
| GCAGCGCATGAC  | 639.186130252603 | 0.685798274414694 |
| TGACGAAATAAA  | 639.189538899599 | 0.331613426966671 |
| ACTGTCGTGACT  | 639.203475406878 | 0.379122561090715 |
| TCAGTTAAGTCA  | 639.214324418381 | 0.596619755569301 |
| TCGCTTGTGACA  | 639.218240453961 | 0.488664288643675 |
| TCGGTTGTGTCA  | 639.224929168988 | 0.465393397226923 |
| ATGCGTGTCAACC | 639.226884868606 | 0.313050982679669 |
| GTCATTGATTAA  | 639.229988297458 | 0.4661382019904   |
| ATGACGACTTTC  | 639.2458469866   | 0.190529064080879 |
| GTCACATGGACA  | 639.253080974098 | 0.366800061783662 |
| ATCAACGCGTCA  | 639.262159037049 | 0.552086286252491 |
| CATGGCAGTCAC  | 639.267353380432 | 0.565687799768324 |
| CATTTTGACACA  | 639.270022792601 | 0.456589402094298 |
| GTCAGATGAGTA  | 639.273601947265 | 0.184581343752444 |
| GCACTGTAGTCA  | 639.285718049645 | 0.617247117245746 |
| AAGAGTCTTAAA  | 639.295930079074 | 0.262064101143132 |
| AGTCATGGGACT  | 639.312956607384 | 0.287573086900408 |
| AGCCCCTGACTC  | 639.316404453098 | 0.270906124326952 |
| GCGTGTGATGAC  | 639.321965356403 | 0.326486936061514 |
| CTGCAAGTCATA  | 639.328891359383 | 0.451138961350643 |
| AGTCACGGCAAT  | 639.333362114181 | 0.283714619827785 |
| GTGTCATGTCTA  | 639.346434860079 | 0.339674261180017 |
| GACGAATTAICTC | 639.372945666932 | 0.34525504092922  |
| CTGATATGACCA  | 639.377555781608 | 0.335801418916745 |

|              |                  |                    |
|--------------|------------------|--------------------|
| ATGACCACTAAC | 639.386849156043 | 0.215362331434228  |
| CTGTCCTAGTCA | 639.390165101705 | 0.298899997044399  |
| AGCCACATCATC | 639.394629147216 | 0.164251930107772  |
| TCATCGGATGAA | 639.398253642321 | 0.550916433329947  |
| GCCGCATAGTCA | 639.4019378346   | 0.410472741705456  |
| CAAGGTGACCCA | 639.426022671246 | 0.493636037694968  |
| CTACCCTATGAC | 639.432217736461 | 0.17874862577593   |
| ATCGCTACGTCA | 639.434833341388 | 0.539485464488471  |
| GGTGAGCAAACC | 639.435935564754 | 0.456563109263555  |
| GACTCTTGTGAC | 639.445568691897 | 0.4394508445354    |
| CAGATGTGACGC | 639.450237254004 | 0.479710353967456  |
| ACACTACAGTCA | 639.463168019587 | 0.620340822441425  |
| AGAGTCAAACAG | 639.466038647912 | 0.319019896471276  |
| CGTTTTAAGTCA | 639.476041352441 | 0.544814536378715  |
| GTGATGTAACCA | 639.479146126521 | 0.422587671889315  |
| ACGTCACATACA | 639.494302763221 | 0.4423407628126    |
| ACACTCGATGAC | 639.497377307958 | 0.304590437953089  |
| GTCACCACGAGA | 639.499993408282 | 0.401957511125936  |
| CTGACTTGGTCA | 639.517730063698 | 0.554604893037881  |
| CACAATGGTGAC | 639.518408866743 | 0.676604754170121  |
| ACTCATTTTAGA | 639.550145364311 | 0.132135814334453  |
| GTCATTGGATTA | 639.571211130026 | 0.223303270667513  |
| CTTTTGCTCACC | 639.572167004082 | 0.212892604308473  |
| ATGACTTGATGC | 639.581042179133 | 0.32235577599282   |
| ATGACGAGCACA | 639.585348101866 | 0.492294447137354  |
| CGACGAGATGAC | 639.591377558916 | 0.386027664931679  |
| GTCATAGAACAC | 639.599892905796 | 0.412166344579472  |
| TCATCGCGGTCA | 639.610030885359 | 0.684454935952218  |
| ATGACAGTAATG | 639.615677303586 | 0.294207280705995  |
| AGAGTATATGAC | 639.61899359146  | 0.448281581251323  |
| AAGTTGTACCCG | 639.629375038878 | 0.314232226924171  |
| GTCACCTACGTA | 639.633292392877 | 0.612782038801127  |
| TCACATGGCTGA | 639.648965350206 | 0.566616654508028  |
| GATGTGAATGAC | 639.667051203257 | 0.320807041320405  |
| ATTCCCTGACTC | 639.683194075625 | 0.169788572043069  |
| ATGATTCGACAT | 639.684196057003 | 0.301420740230505  |
| CGCTCGTGTGAC | 639.695124464002 | 0.0804291144848769 |
| CAATCGCGTCAC | 639.695941913629 | 0.480572681457366  |
| ATGACAACGCAT | 639.701028684453 | 0.417810285366296  |
| CAGTTTGACGCA | 639.701445635214 | 0.565243193553365  |
| GTACTACAGTCA | 639.7032715335   | 0.189872291675998  |
| ACGAATCTGACT | 639.720885188091 | 0.423357007288388  |
| AGGACAGAGTCA | 639.733607862699 | 0.354243074045061  |
| CATTCATTATGA | 639.73948151283  | 0.453365864248806  |
| AAGTCGGATGAC | 639.745892146634 | 0.2115856259219    |
| GAGTCAATGGGA | 639.757601901958 | 0.163314449102318  |
| ACAGATATGACC | 639.763424529808 | 0.638726627613651  |
| GTCACAGTCGAC | 639.767773728706 | 0.536873120538173  |
| AGTCACCTCCCC | 639.769753459957 | 0.299981558482338  |
| AAATAGAATGAC | 639.771737190027 | 0.34446637342942   |
| ACAGGTGAATCA | 639.777296419541 | 0.293132990584033  |
| AAAATAGGTAC  | 639.778937544492 | 0.500668944513011  |
| AGCTAGTGACGC | 639.800336798732 | 0.634522673482101  |
| GGCTAAAATGAC | 639.801221587157 | 0.468058579753395  |

|               |                  |                   |
|---------------|------------------|-------------------|
| TATCCAATGACA  | 639.811463447972 | 0.377534562157161 |
| TGACTACGGTAA  | 639.825805125525 | 0.349380629228908 |
| GGGTCATGTCAC  | 639.83095557762  | 0.502691654477832 |
| GCAGCGTGTGAC  | 639.839418465322 | 0.320839286764127 |
| ATATATGGTGAC  | 639.842427219155 | 0.389267097534608 |
| GTTCAATTTGTCA | 639.843704257692 | 0.514690886727268 |
| CCATTAGTGTCA  | 639.843996040728 | 0.314835327360926 |
| GATGAGTAGTCC  | 639.846493254397 | 0.281483297282954 |
| ATGGCGTGTGAC  | 639.856696035907 | 0.557630981788812 |
| AGAGAGGATGAC  | 639.865089451591 | 0.258420068600994 |
| AGTCATGGTGCG  | 639.866549765262 | 0.329532680446631 |
| CGTCATTACTTA  | 639.875080996308 | 0.337955657107734 |
| CAACTGTGACCA  | 639.883427607879 | 0.286901330064742 |
| ACAGCCGTGACT  | 639.887765033711 | 0.307150354802479 |
| CAGGTTACTGAC  | 639.904878211452 | 0.659280982182647 |
| TATGTTTTGTCA  | 639.91423846768  | 0.445632100270962 |
| CCTTCGAGATGA  | 639.9227866811   | 0.661498370608839 |
| CGTCATTTACTA  | 639.92861183223  | 0.361229237089589 |
| GTCATCTCAGTA  | 639.930275497586 | 0.51611882173169  |
| GTCACCGTGCCA  | 639.93867554147  | 0.646488100409636 |
| CCGATTACGCAA  | 639.939503921441 | 0.420348495619027 |
| AGTCAGAGCACT  | 639.945624842477 | 0.409370713780626 |
| GTCACACACGGA  | 639.957026394873 | 0.771681137956532 |
| GCAACTACGTCA  | 639.963206741528 | 0.659954753347984 |
| TGACGGATAGCA  | 639.964230506902 | 0.342619658373023 |
| AGGTTATATGAC  | 639.964563582889 | 0.322336582959545 |
| ACGTCACAGTCG  | 639.965765696896 | 0.438583310953887 |
| GATCATAATGAC  | 639.966520575505 | 0.291955216141865 |
| AATAGACGTCAT  | 639.98036404605  | 0.294295104413411 |
| ATGACAGGGCCA  | 639.98053262474  | 0.475334109240499 |
| CAACATTGTGAC  | 640.006067207205 | 0.369247372254335 |
| GTCATAATGTTA  | 640.006827749523 | 0.409484176587659 |
| AAAGGTGATGAC  | 640.007127490293 | 0.251986358163088 |
| ATCCGAATGACG  | 640.010459542293 | 0.245410113859284 |
| ACTCGCAATGAC  | 640.012419881505 | 0.419044645399983 |
| TGGTGAGCCACA  | 640.026602315314 | 0.388837763455342 |
| ATTATGATGACC  | 640.033186936215 | 0.467621803255794 |
| ATCATGGGTGAC  | 640.03727149728  | 0.397606252027669 |
| AAATGTATCACA  | 640.038562214507 | 0.445119245136801 |
| AGGATTTTCGTCA | 640.04037253172  | 0.440313437547866 |
| AGTCACGGTGTC  | 640.04159325697  | 0.366303322174954 |
| CCCTAATGACGG  | 640.044161369687 | 0.546229622947254 |
| AGAAGGTGACGC  | 640.046753346982 | 0.239995627063132 |
| AGACATATGTCA  | 640.04934768296  | 0.380505203506442 |
| ACGTCACGAATG  | 640.057324661128 | 0.511605870826667 |
| CTGTCACGTGAC  | 640.059525044395 | 0.35440721282608  |
| CAAGACTTGTCA  | 640.062581649699 | 0.516954355508073 |
| GTCATTCGGCGA  | 640.062763817974 | 0.265592040584985 |
| GACCCGTGTGAC  | 640.065584130659 | 0.547996198326158 |
| ATTCAATATGAC  | 640.070291218921 | 0.528797942758916 |
| CGCGCAGAGTCA  | 640.08518930603  | 0.257302227670007 |
| TGACCCATTACA  | 640.087436599122 | 0.383450569989415 |
| CTCTTTGACGCA  | 640.090230805583 | 0.390306070535983 |
| ATCTATTGACTC  | 640.092017209957 | 0.207968534125227 |

|              |                  |                   |
|--------------|------------------|-------------------|
| CCGACTTATGAC | 640.09719328418  | 0.441152081180888 |
| CTCATTGAATCA | 640.098582373437 | 0.463267913587593 |
| GGCTAGTCACGA | 640.102303432548 | 0.264230086622756 |
| GTCATGTGCTCA | 640.114186926637 | 0.328895820407245 |
| CCGCATGATGAC | 640.114516606602 | 0.489699604454153 |
| GACTCACGCGTA | 640.11684613477  | 0.408320264556689 |
| CATTCTATGAC  | 640.14786355868  | 0.277594637029056 |
| ATGAGCCAATCG | 640.150968692324 | 0.488826608159377 |
| ATCCCGTCATAA | 640.153041295056 | 0.284429275393301 |
| AAAGCGAATGAC | 640.156761419974 | 0.265170027081532 |
| GTCATGCATAAC | 640.159419913134 | 0.365034161339228 |
| CAGGCAGAGTCA | 640.169872141941 | 0.337695535570835 |
| AACACTAATGAC | 640.175870329167 | 0.417377935889794 |
| TCACCTGTGACA | 640.182333219464 | 0.283894497958196 |
| GTCACCCATTTA | 640.191321476713 | 0.3833164942314   |
| GTCATATCTCTA | 640.200454822466 | 0.290573549006471 |
| CTTAGGTAGTCA | 640.20366025431  | 0.380693624986162 |
| GTCATTTAACGA | 640.204080707965 | 0.453394189754745 |
| CTTATTGACACA | 640.205348829673 | 0.190586353948681 |
| AACGAGGATGAC | 640.209605443323 | 0.269208598314272 |
| AAGCTATATGAC | 640.221209566675 | 0.197927425834233 |
| ACCGACGGTGAC | 640.223684182232 | 0.314928202352393 |
| AGTCAGCGCTAA | 640.226836287424 | 0.321586764376028 |
| CATGAGTGAATC | 640.235227566548 | 0.617528626714059 |
| ATACTCATTGGA | 640.236040943892 | 0.314229652811555 |
| ATGAGTACGTAC | 640.238959630446 | 0.436733661306436 |
| CGTTGATGACCC | 640.239216756966 | 0.376811103157933 |
| AGCTTAGATGAC | 640.239948341247 | 0.428235009192056 |
| CATTGTTTGTCA | 640.247960717382 | 0.435590777169739 |
| GGTCATAGTCAA | 640.250334726368 | 0.417539602517793 |
| ATTTGCTCACAA | 640.253650205618 | 0.33378978051088  |
| ATGACAACGCAA | 640.257983758145 | 0.438510712577104 |
| CCATCTACGTCA | 640.264995940785 | 0.226221608700514 |
| ATGACGTCGCGC | 640.275363325408 | 0.571949043112325 |
| CTGACTGGTTTC | 640.291868749113 | 0.455113240689364 |
| GCTGGTAATGAC | 640.303713911842 | 0.450718379526012 |
| ATCAATGTGACG | 640.321307211413 | 0.394183681978919 |
| ACGTCATGCTCT | 640.322977681619 | 0.326701197548752 |
| CCGTGACATGGC | 640.328178614527 | 0.463836003532491 |
| TACGTAATGACA | 640.331182442902 | 0.159495716730056 |
| CATATATCGTCA | 640.337210382687 | 0.267977919832435 |
| CGTATGTATCAC | 640.353854166557 | 0.604184629917392 |
| TCAGACTCGTCA | 640.358347404471 | 0.45625095376561  |
| CACGTCACTCCA | 640.371066304711 | 0.33046879019081  |
| CAGTCAGATTAC | 640.386644077933 | 0.437785343928064 |
| CTGACACTGTCA | 640.393215780487 | 0.428560300393559 |
| CAAACTTGTCA  | 640.399108781821 | 0.355211548409787 |
| AACCTGTACCCG | 640.40447061324  | 0.281658828413981 |
| TCGCAGGAGTCA | 640.404475652811 | 0.400671952220615 |
| GATAACTTGTCA | 640.405367479264 | 0.408895190962116 |
| GCGTTGTATGAC | 640.409797340948 | 0.626143054928043 |
| TCTAGAGAGTCA | 640.413116854611 | 0.401884568689795 |
| ATGACGAGGACC | 640.424315421791 | 0.379882354164303 |
| ATCTCTGTCATG | 640.432777159334 | 0.610228763688329 |

|              |                  |                   |
|--------------|------------------|-------------------|
| TAGCAGTCAGAA | 640.4419351756   | 0.322819614710085 |
| GTCACCTTGACA | 640.443966705192 | 0.480145047577717 |
| GAGTAATCCGCA | 640.449262734376 | 0.727879807249258 |
| CGTCACATGTAA | 640.452680309519 | 0.462144444077601 |
| CTCCAATAGTCA | 640.464153507637 | 0.425422685240397 |
| GTCATTGGTAAA | 640.476862596771 | 0.483242474558039 |
| GAGTCAGGGATA | 640.485989774479 | 0.227139283387462 |
| AAATATGACCAG | 640.488628059229 | 0.455979818885909 |
| AGTCACGACATG | 640.505089073044 | 0.428619047487261 |
| ATGTGAGCCACA | 640.507577698895 | 0.567575612644733 |
| GTCATACAGGGA | 640.509667692348 | 0.240396847846511 |
| GTCACCACAATA | 640.526330120647 | 0.278073953525495 |
| CGTCATTAGGTA | 640.531442705364 | 0.48555661667226  |
| AATTGCATGACA | 640.531927584292 | 0.442217371378369 |
| ATGCTGTCACAA | 640.53958349309  | 0.327722638024021 |
| CATGATGTAACA | 640.540181830993 | 0.490190169889774 |
| ATGACAATACCC | 640.543127087006 | 0.268593957768879 |
| GTCATCTTCAAA | 640.547345204079 | 0.371833155586472 |
| GAGGTAGATGAC | 640.547450196951 | 0.297207700545536 |
| GTCATCTCCGTA | 640.5499576026   | 0.45652147194274  |
| TCAGCCGACTCA | 640.559145871701 | 0.252851140060453 |
| ATAGCCTATGAC | 640.57507831589  | 0.462347041340127 |
| ACACACTAGTCA | 640.579112453697 | 0.429027409094796 |
| CATATGTTAGTC | 640.591916115287 | 0.398462459557812 |
| CTAAATTGTGAC | 640.594785285544 | 0.700870194576263 |
| ACCTTTTATGAC | 640.594846958618 | 0.400043411880351 |
| ATAAAGCAGTCA | 640.620657807618 | 0.226569700980324 |
| TAGTCACGGAGA | 640.63596909721  | 0.134720612505291 |
| ACTCATAATACG | 640.636648276163 | 0.34392195261379  |
| TCCGTTTCGTCA | 640.643687178093 | 0.395376345276261 |
| CAATATCGGTCA | 640.645097735742 | 0.404666919309538 |
| ATGTTACAGTCA | 640.648016208891 | 0.419670365538887 |
| TCGATGACCGAA | 640.662616423096 | 0.311076733638526 |
| ATGACTTCGAAT | 640.664725087124 | 0.617549962148334 |
| GGTCATTCTGCA | 640.669605991224 | 0.750563873356865 |
| GGGCACTATGAC | 640.687353623353 | 0.427119578815441 |
| GTCATTATCTCA | 640.698472918393 | 0.587003222577404 |
| CATCTAGTATGA | 640.703689838146 | 0.272324482665829 |
| GACCCCTATGAC | 640.708598165865 | 0.287440361238723 |
| CGTCATTGGTAA | 640.709062140919 | 0.498640071916635 |
| AGTACGCTGACT | 640.713829160777 | 0.36186838435836  |
| GTCATCTAAGTA | 640.718351693753 | 0.524277976581677 |
| TGACGAAGACCA | 640.723225416372 | 0.691808731286328 |
| GAGTCAAAACAC | 640.724541396975 | 0.593223635050382 |
| ATTACGAATGAC | 640.748476665093 | 0.435741848537315 |
| AATCAAAATGAC | 640.750267481243 | 0.420517709782601 |
| AGTCCTGACTCG | 640.753767115418 | 0.411770445005904 |
| AAATTAGGTGAC | 640.757935569875 | 0.302273097755598 |
| TATGAGTCTCGA | 640.758981715347 | 0.523448300823907 |
| GAACGCGAGTCA | 640.764042749131 | 0.286663872727822 |
| CCCCTTTATGAC | 640.765901205497 | 0.406988575547255 |
| CTACCTGATGAC | 640.769572467353 | 0.355457979495163 |
| ACCCTACAGTCA | 640.781703451553 | 0.266780305376612 |
| ACATTTCCGTCA | 640.788832841356 | 0.405110603950713 |

|              |                  |                   |
|--------------|------------------|-------------------|
| GTACGATCTGAC | 640.791474058865 | 0.444137785136123 |
| ATTCAAGTCATA | 640.807528910709 | 0.338963925035958 |
| CGTCACAGTGAC | 640.822970941321 | 0.420378716422842 |
| CAGTTGACACAC | 640.836855059587 | 0.352530193795408 |
| CGTCACATAATA | 640.843571317252 | 0.312736819172459 |
| GATCTCGTCACA | 640.850995116054 | 0.402881455747657 |
| TATGATATCATA | 640.85796751075  | 0.45089555596856  |
| ATCGCCGCATA  | 640.861859503164 | 0.277121779390911 |
| AATCTAATGACG | 640.867786351001 | 0.406484309642665 |
| GCAGAAAATGAC | 640.869118664267 | 0.589964131365797 |
| ATGACCGAATAA | 640.870279924004 | 0.641304779375999 |
| AATGATGTGTTT | 640.877349963341 | 0.369085699125593 |
| AGTGTCATGGGC | 640.879603730628 | 0.369627357431263 |
| CGGCACGACTCA | 640.887633694381 | 0.416433011247567 |
| CAAGAGGGTGAC | 640.891324060199 | 0.153192746278422 |
| AGAATTTGACTC | 640.896003193106 | 0.601180698758183 |
| ACGTCACATAAC | 640.900511671685 | 0.466623229700883 |
| AAAGTATATGAC | 640.912028521657 | 0.288179383303332 |
| GTCCATGTGACA | 640.937749302086 | 0.271106468123923 |
| CGACGTACGTCA | 640.940676746683 | 0.607965960854064 |
| GGACTATGTAC  | 640.941238288321 | 0.709578068908147 |
| GTCACCATTACA | 640.946119276786 | 0.412920208220337 |
| ATCACTACGTCA | 640.962131725332 | 0.483815018270609 |
| GACTCAATTCGA | 640.96243039542  | 0.555752861047029 |
| GTCACATACGGA | 640.970977201917 | 0.516935349110437 |
| CAGGACTTGTC  | 640.972604529408 | 0.585972824546772 |
| CGGGAAGATGAC | 640.972936734648 | 0.194671625791485 |
| CGTCACCGATTA | 640.977348082998 | 0.259374750154227 |
| TCTGCTGATTCA | 640.981628899077 | 0.356458748918047 |
| TGATTACAGACA | 640.988241679672 | 0.418063447016531 |
| CAGTCAGCAGAA | 640.994773206942 | 0.242204104012808 |
| ACTCATATTAAG | 641.003009088295 | 0.408100534882995 |
| TGACAGTTTAAA | 641.005640807171 | 0.442998918783827 |
| AATCAATATGAC | 641.010386185682 | 0.566640949958349 |
| GACTCACGTTTA | 641.012572904531 | 0.5888683369678   |
| AACGATGGCTCA | 641.024136742519 | 0.587385031909716 |
| GGATCATGACAC | 641.033082125998 | 0.739736035905431 |
| ATGAGTAGTGTC | 641.047362751044 | 0.218532423908699 |
| ACTATTGCTAAT | 641.049046644067 | 0.461625244258597 |
| GGAGCTTATGAC | 641.066683349206 | 0.573247500874579 |
| ATGATTCTTACA | 641.067413876705 | 0.528233613711562 |
| GTCATCTGGCAC | 641.103365866502 | 0.293690547948841 |
| GAAATGCAGTCA | 641.114145127789 | 0.317495002247354 |
| CGTCACAGCGCA | 641.115662099633 | 0.756584266868248 |
| CTGATCCGTGAC | 641.115690745874 | 0.359125399476409 |
| CGCTTACAGTCA | 641.117280322011 | 0.603070202505286 |
| AGTCAGAGATGA | 641.120654213531 | 0.274055420919648 |
| CTGTCAATGGGA | 641.125152719023 | 0.737081649109183 |
| ATCTGTACGTCA | 641.126443427395 | 0.305064587179326 |
| GACTCCTAGTCA | 641.126487488229 | 0.418743571300437 |
| AGTGCTCGTCAT | 641.131626952328 | 0.50633002999486  |
| ATGACTTGCCAT | 641.138706256042 | 0.392823794951458 |
| AAAGGGATGACG | 641.142393314675 | 0.179286754978262 |
| ATGACAATAGTC | 641.145076452795 | 0.430135101288695 |

|               |                  |                    |
|---------------|------------------|--------------------|
| GAGGAGGATGAC  | 641.152763946386 | 0.278132630041131  |
| CATCAAGCGTCA  | 641.156304667096 | 0.374650606124333  |
| ATAAGTGACCAA  | 641.162513702498 | 0.312862557723664  |
| CTAGTTAATGAC  | 641.163363591301 | 0.446717794667373  |
| ACCAGGTGACGC  | 641.170932067518 | 0.250354502031159  |
| CTGCCTGACGCA  | 641.171713934076 | 0.355691118301245  |
| ATTGTGGAGTCA  | 641.175966685776 | 0.21900093610886   |
| CAGTCAGCCAG   | 641.181795314809 | 0.445318956021227  |
| ATGAATAATACA  | 641.196688080775 | 0.463211729174121  |
| AAATGTATCACC  | 641.204558907449 | 0.32859088360367   |
| ATCTGTGAGAGG  | 641.211538704666 | 0.219572818425601  |
| GACTCAACCGAA  | 641.213462593191 | 0.671074786889568  |
| CACCCCGTCATA  | 641.217222448728 | 0.266490458688352  |
| ACGACTATGTCA  | 641.217241636871 | 0.531953780647521  |
| GAGTCAATTTCC  | 641.222796555311 | 0.241003984299405  |
| GAGAAAGTGTCA  | 641.223837527373 | 0.262245595755641  |
| CAGACCTGTGAC  | 641.228184742918 | 0.32380814054739   |
| ACACCATGAGTC  | 641.229775505145 | 0.0973012392079321 |
| AGTCAGTAATTC  | 641.236496076586 | 0.194856417327701  |
| GTCATAAAACAC  | 641.248160296969 | 0.471904017404812  |
| GCTTAAAGTGAC  | 641.249144567993 | 0.669562591252644  |
| ACACGTCAACGG  | 641.25982137694  | 0.443594191470558  |
| ACAGCGGATGAC  | 641.261694307982 | 0.412651717098466  |
| CTCAAATATGAG  | 641.2646189432   | 0.604970472809182  |
| GCGCATGATGAC  | 641.273463478415 | 0.557825121229189  |
| TAAACCTCGTCA  | 641.279422082876 | 0.315646114672852  |
| GTGACATGACGA  | 641.282593725929 | 0.385319893904371  |
| AGTCACTTGTGA  | 641.28313285471  | 0.155139302518166  |
| GCATCATGACAA  | 641.289378115328 | 0.658740910569696  |
| TAAGTGTAGTCA  | 641.295559444621 | 0.382892048179963  |
| GTCATCAGCCCA  | 641.298920636931 | 0.559440813832238  |
| CCCTCATAGTCA  | 641.328993696096 | 0.422386189371161  |
| TGAGATTAATAA  | 641.36672665695  | 0.43292634641623   |
| ATACACGTAACA  | 641.367702804509 | 0.226150581573736  |
| CAGCTGGGTGAC  | 641.36816647322  | 0.367688780610774  |
| AAACTGGTGACG  | 641.375663891026 | 0.308074288285173  |
| GACTAACCGTCA  | 641.393564226328 | 0.570088872559711  |
| ATGAGGTATAG   | 641.40415460144  | 0.295598694667045  |
| AAGACTCTTACA  | 641.407440766636 | 0.489796812462666  |
| GTCACCGAACGA  | 641.407834252294 | 0.809179873282281  |
| TGAGTCGGCAAA  | 641.409156351402 | 0.11792711692163   |
| ATGGTTAATGAC  | 641.412640541648 | 0.318953658400868  |
| CGTCATTATGGC  | 641.415117302034 | 0.342495946109238  |
| ATGACACGGAGG  | 641.421354454473 | 0.299461510686346  |
| GCGTCACCTGGA  | 641.43369006324  | 0.553161108282861  |
| CGATGCGGTGAC  | 641.435625899174 | 0.455035765842777  |
| TGAGTCGCTAAA  | 641.451723653158 | 0.410944463948341  |
| TCATTGTGAGAGA | 641.476490015844 | 0.53307993557212   |
| TACTTTGCGTCA  | 641.48706634275  | 0.348291623305863  |
| GCGTCATGGCGA  | 641.494489593514 | 0.775433719545026  |
| CGTGTCTGTGAC  | 641.495913584935 | 0.536749538907846  |
| AATACAACGTCA  | 641.49712493897  | 0.542369665914723  |
| CGTCATTAACAG  | 641.506853914333 | 0.449081144010916  |
| ATGACAGCTCAC  | 641.507199215842 | 0.493512211081533  |



|               |                  |                   |
|---------------|------------------|-------------------|
| AACACGTAGTCA  | 641.513889353703 | 0.531572446211273 |
| CGAGATTGGTCA  | 641.514277802612 | 0.627278308658027 |
| GCCAATCATAAC  | 641.516658695821 | 0.307070665760083 |
| GCATAGCAGTCA  | 641.519789130505 | 0.484240799813857 |
| AAGCTTAATGAC  | 641.530178633751 | 0.460756422132594 |
| GATTACGTATAC  | 641.53511397163  | 0.306979094054025 |
| GTCATCATGCAA  | 641.541908306919 | 0.395089166678881 |
| CACAGTCAAATG  | 641.545464202778 | 0.346234178785839 |
| CCTCAATATGAC  | 641.556375760996 | 0.521430486496732 |
| AAACCAAGTCAC  | 641.559259831685 | 0.27557184179621  |
| CGACTTGGTCAC  | 641.572317495895 | 0.401830498621327 |
| ATGACATGATAC  | 641.577927659094 | 0.405676840713174 |
| CTGCCGTATGAC  | 641.578727259255 | 0.279922784020704 |
| GTCACACAGCAA  | 641.582864401402 | 0.240796007546966 |
| ATGAGTAGGCTC  | 641.590951683592 | 0.333787302866888 |
| AATGTATCACCG  | 641.592377681696 | 0.370948431237817 |
| TCTATGATGTAA  | 641.59597895999  | 0.422606945351046 |
| CAATGAGTATGA  | 641.596252644644 | 0.332707731686314 |
| ACGTCACAGTTG  | 641.598399009277 | 0.454189986284079 |
| GTCACCGACAAA  | 641.611436981253 | 0.422799307742862 |
| TGACTCGCCGCA  | 641.61287148848  | 0.44729609146273  |
| GTCATGTGAGCA  | 641.62091043213  | 0.751090431992579 |
| ATGACATCTTCA  | 641.6244376547   | 0.334873844060953 |
| GCCAATATGTCA  | 641.6409903298   | 0.473353879324403 |
| GCAACGATGTCA  | 641.644552095226 | 0.962396092445209 |
| TCATACTAATGA  | 641.648033502274 | 0.414409201900851 |
| AAGACTGGTGAC  | 641.650007534626 | 0.503781321523192 |
| GTGACACTCAAA  | 641.655991730277 | 0.31395826789894  |
| TGGTCATTATAA  | 641.658203323347 | 0.553591587993845 |
| CGTACTGATGAC  | 641.661909279995 | 0.401887208625589 |
| ATCGACATGTCA  | 641.66409901255  | 0.486006379597599 |
| GTCATTTGTATA  | 641.665001853147 | 0.285749718832632 |
| TACAATGAGTGA  | 641.671461611138 | 0.344829571528194 |
| ATGAGCAACCAC  | 641.684924697365 | 0.41086859858878  |
| ATGACGTCTAAT  | 641.691471405838 | 0.570730186550717 |
| GTCATTGTCTA   | 641.692261775319 | 0.302703193151392 |
| ATCGGAAATGAC  | 641.703320574974 | 0.554526623112181 |
| TAAGATTTGTCA  | 641.71248175217  | 0.421197586263291 |
| CTTCTGACAAAG  | 641.743483672123 | 0.424379317070397 |
| GAAGATTTGTCA  | 641.749265301029 | 0.321341850255713 |
| GTCATCTTGAAA  | 641.749325289152 | 0.459332634212336 |
| CAATCACGTCAC  | 641.751062287515 | 0.253879374896415 |
| GTCATAGAAATA  | 641.751386460233 | 0.269881891980705 |
| GAAC TTGCGTCA | 641.754300475622 | 0.671073182723343 |
| ACGATGTTGTCA  | 641.763952185601 | 0.439593739080878 |
| AGTACTGTGTCA  | 641.775810943338 | 0.431110887149606 |
| ATGACGCCTCGA  | 641.782251767986 | 0.311644530476787 |
| CGTTACATCATA  | 641.782314855348 | 0.374793914963003 |
| GGGTTCCATGAC  | 641.785048528258 | 0.48983362100133  |
| CCGTTTGTGACG  | 641.787892157762 | 0.523482739795781 |
| CTCTCGGTGAC   | 641.797995570458 | 0.789673601404988 |
| AGTCAGAGCATG  | 641.814065163007 | 0.233968743029645 |
| AAACTCAGTCAA  | 641.814139718793 | 0.309778806198294 |
| GTCATTCATTCA  | 641.826576577378 | 0.385327328782469 |

|               |                  |                   |
|---------------|------------------|-------------------|
| CACGTTGTGTC   | 641.826757160828 | 0.34969912195696  |
| AGAGGCGATGAC  | 641.827032981841 | 0.244925301939591 |
| ACGTCACATAC   | 641.832219530994 | 0.31853225258137  |
| AACCTTGTATGA  | 641.834427430218 | 0.316976639451258 |
| AATTTAATGACG  | 641.858858580313 | 0.427091298061704 |
| ACTATTTTGTCA  | 641.866974741877 | 0.326069065246223 |
| ACGGAGACTCAT  | 641.876060386032 | 0.311290699496274 |
| CACCGCGATGAC  | 641.888494809838 | 0.62344742976566  |
| GTCATAAGAGAA  | 641.891309395777 | 0.325293970146442 |
| ATTATCGTGTCA  | 641.895806035141 | 0.695216283653735 |
| GTCATCACGGGA  | 641.909075645113 | 0.464046976636351 |
| GTCATGATTCTGA | 641.914397906187 | 0.554534657809618 |
| GTGTCCCAGTCA  | 641.919936764137 | 0.475563053351847 |
| GTCACCCCATTA  | 641.920895551403 | 0.51628824670812  |
| CTGACTCGCTAA  | 641.925620408972 | 0.514301895954093 |
| GTCATCACACCA  | 641.929761156146 | 0.435102614960832 |
| GACTCATGGGCC  | 641.930294321258 | 0.649592956931085 |
| AATACTGTCACA  | 641.940552715889 | 0.647894792682033 |
| ATGACAGTGATA  | 641.950215055447 | 0.411848932159993 |
| AGTCACGACCGC  | 641.956090023654 | 0.367106929511246 |
| CCGTAGTGACAC  | 641.956929779677 | 0.777667566850573 |
| GTCACATTGAGA  | 641.957403787577 | 0.621576315661405 |
| AGTATTACTGAC  | 641.969952916803 | 0.499162612755231 |
| GATCTGCATGAC  | 641.977021560512 | 0.303501508193051 |
| CGTCATTTACG   | 641.98005627289  | 0.409373900955109 |
| ATACATGACCCA  | 641.981147105331 | 0.458362987054457 |
| CTCTCAGATGAC  | 641.985324499824 | 0.265038658262128 |
| GCCAATATGAC   | 641.986401599603 | 0.516343290524159 |
| ACTCAATGTGAC  | 641.992148359446 | 0.453846314237456 |
| GACAATCCGTCA  | 641.997337344844 | 0.292229332272828 |
| ATTTAATCGTCA  | 642.000417482124 | 0.648004087993138 |
| CACCACAGTGAC  | 642.013232480878 | 0.534795475182675 |
| AGTCTAATGACG  | 642.015406799584 | 0.437740035106993 |
| AATCGGCTGACT  | 642.017668649678 | 0.342602846793985 |
| ATTGCAAGTGAC  | 642.018435421978 | 0.493497653283095 |
| AGAATCAATGAC  | 642.02436430487  | 0.39807362309187  |
| TAACCATAGTCA  | 642.046755283302 | 0.437818954472533 |
| GTATCAAATGAC  | 642.051406700586 | 0.412125199221905 |
| AGAAGGAATGAC  | 642.056139002959 | 0.277615702076347 |
| TGACTTATACCA  | 642.076636250857 | 0.340054198399878 |
| ACCGTAGGTGAC  | 642.087644968873 | 0.432681743064215 |
| CTGGCTAGTCAC  | 642.092482443964 | 0.274008213680801 |
| TGACGTCAATCA  | 642.096920535539 | 0.618661384920216 |
| AATGACGGCATA  | 642.107667848867 | 0.306651146993802 |
| ATGAGTACGTTC  | 642.108973549163 | 0.477142743626425 |
| CTCCTGGAGTCA  | 642.120884994817 | 0.607528426139415 |
| GCTAGGGATGAC  | 642.129500176067 | 0.456665263043948 |
| GAGAATGATGAC  | 642.13480129112  | 0.199703576977803 |
| ATTTAATTAGTC  | 642.14840104324  | 0.910717991296346 |
| CCGACCGCTCA   | 642.155476767385 | 0.422218082150128 |
| TAATCCTAGTCA  | 642.156598882254 | 0.398605122975622 |
| GTCATCAGTAGA  | 642.157598848464 | 0.199139204793261 |
| AGATCGGAGTCA  | 642.170372209753 | 0.299587618304613 |
| AGGGCGTGACTA  | 642.173078034261 | 0.237345879056804 |

|              |                  |                    |
|--------------|------------------|--------------------|
| ATGACGGGATCC | 642.179920282764 | 0.356156876027427  |
| ATATATTACTGA | 642.182827589839 | 0.553387905972158  |
| CGTGCAAGTGAC | 642.183870917116 | 0.652636338053522  |
| CCTTGAAATGAC | 642.184981103463 | 0.438675110977334  |
| GTCATCACAGGA | 642.192852796214 | 0.315014781875231  |
| GACTCACTTAAC | 642.201860498423 | 0.329138966536068  |
| GGTCATACCGCA | 642.204994642438 | 0.374185113162268  |
| CCAATTTGGTCA | 642.213936866377 | 0.705227524907298  |
| GTAATACTATGA | 642.216277880827 | 0.46200119707514   |
| GACGCGTGAGTC | 642.220938211668 | 0.41539627050114   |
| ACACCATATGAC | 642.229721589139 | 0.600971558852751  |
| CGTAATCATGAC | 642.249981956246 | 0.307308676425932  |
| GACGTCACAGTC | 642.260866890003 | 0.514918269826355  |
| GCATTCTATGAC | 642.2773782588   | 0.369389988638028  |
| AATTATGGTGAC | 642.286853284448 | 0.520881400301806  |
| ACAGAGATGACA | 642.289564854631 | 0.30180450764789   |
| GTCATCGTACAC | 642.290598015735 | 0.271681818357868  |
| GTCATTCCGCTA | 642.291431239279 | 0.276996374005825  |
| GAGAGTAATGAC | 642.293777389244 | 0.335368500742997  |
| GTCATTATCTGA | 642.295826893428 | 0.735163116880251  |
| GGTCATAATTCA | 642.302858542954 | 0.406657904775072  |
| GCTCTAGGTGAC | 642.317852916446 | 0.287944289222588  |
| ATGACATTTTCA | 642.323727153603 | 0.346754520787202  |
| AAGCTTGCTCAT | 642.325219118    | 0.275506515444575  |
| ACCTCACAGTCA | 642.325233971984 | 0.319527478036417  |
| GTCATCGGGGAA | 642.346245449945 | 0.0920616332135271 |
| AACTTAGGTGAC | 642.346661226891 | 0.461511375277795  |
| ACCAGGCATGAC | 642.358002820499 | 0.450510069029425  |
| AAGACGTGTGAC | 642.359364819173 | 0.386027676205599  |
| CGTATCGCGTCA | 642.36477998328  | 0.287261467712418  |
| AAGTAATTAGTC | 642.368840070913 | 0.279298505377775  |
| AATAGTCAAACG | 642.369118347767 | 0.43824757539409   |
| CTAGATGAGCCA | 642.376371547736 | 0.41524431433073   |
| ACCTCCGACTCA | 642.37859807227  | 0.268079214754487  |
| ATTAGACATGAC | 642.418283800625 | 0.317343585991648  |
| CCCTGCGATGAC | 642.431495502187 | 0.181045776437026  |
| TATGAATAATAA | 642.448576256406 | 0.461468661260726  |
| GTCACCATCGAA | 642.451797712401 | 0.429110412717675  |
| GACTAGTGAGTC | 642.45502986693  | 0.368966233398194  |
| AGTCAGAGCTAT | 642.460154829858 | 0.411436969648035  |
| ACCGAATTAGTC | 642.470468183216 | 0.411070657021468  |
| GTCATATAACTA | 642.473938655653 | 0.537361143816536  |
| ATGATGCAACTA | 642.491922953015 | 0.441440336498596  |
| ATTAAGCAGTCA | 642.508493520718 | 0.388441322532633  |
| GTCATCTTGTTA | 642.521807001844 | 0.410142253836684  |
| ATCGAGACTCAT | 642.523566752779 | 0.197451586141209  |
| GACGTGGTGACC | 642.533065612284 | 0.198476430839805  |
| CAAACGCAGTCA | 642.535000623735 | 0.487505594073822  |
| GAGTCAGGTAAC | 642.541364300527 | 0.213292574934325  |
| AACACTGAATCA | 642.541854160551 | 0.47363578249605   |
| CATTGAAATGAC | 642.543432792321 | 0.479445292851048  |
| CGTCACTGTGTC | 642.544139710539 | 0.398455996176452  |
| ATGACGCTCGTA | 642.556321458946 | 0.332743116188529  |
| GCAGATAATGAC | 642.556894932335 | 0.357087786424004  |

|              |                  |                   |
|--------------|------------------|-------------------|
| CGATCCGACTCA | 642.560923351596 | 0.318824301776066 |
| ACCCTGATGACG | 642.561285921426 | 0.498731749155645 |
| AGGTTGACTGAA | 642.578822214928 | 0.330819181140713 |
| GTCATGTGTGCA | 642.579184967439 | 0.321751820216755 |
| TCATTGGTGACA | 642.584805757759 | 0.372823445048849 |
| ATGACAGGATAC | 642.593868120954 | 0.37634472225193  |
| CTCATCCGATGA | 642.601769983004 | 0.543717814540098 |
| GAGGATCCGTCA | 642.612945922169 | 0.37735746539968  |
| CTTGTAGGTGAC | 642.616547702559 | 0.416977037428178 |
| GGACCCTGTGAC | 642.622883524212 | 0.632680565465779 |
| TCTCTGCAGTCA | 642.628214515296 | 0.295130676147261 |
| CTGATAGTGTCA | 642.645230172018 | 0.575966125416539 |
| CTGGCCGAGTCA | 642.655016215015 | 0.328833743569791 |
| ATGCCTTACTCA | 642.665765827201 | 0.252238073507913 |
| TGAGTCGAGCCA | 642.675443359763 | 0.468292691503437 |
| GACACATTTTGA | 642.686476371198 | 0.808816465696503 |
| ATGCAGATGACA | 642.689543056995 | 0.375155153877881 |
| ACTAATACGGAA | 642.691141211396 | 0.754414990001307 |
| ATTTAGATGACG | 642.700500570124 | 0.372138238314238 |
| CGCACTGTGACA | 642.70503404791  | 0.440003720401856 |
| CATTCATGTGAC | 642.705471639482 | 0.427286805719836 |
| CCGATGCTGTCA | 642.707089301232 | 0.379198290588967 |
| ACTAACATATGA | 642.708999692166 | 0.302445367262306 |
| GAACAACGTCA  | 642.718638364541 | 0.255547387769933 |
| ATCCATGACAGA | 642.718991395163 | 0.442292721627765 |
| GAATTAATGAC  | 642.740013633046 | 0.347236957270272 |
| AAGTGAGCAAAT | 642.741558172188 | 0.295753457655711 |
| CAGGAGTGAGTC | 642.747110280646 | 0.280976518702659 |
| ACGTAATGACAA | 642.749547428603 | 0.172811163367831 |
| GATGACGGCACC | 642.755579811918 | 0.400208345042575 |
| GCGTGACTAGCC | 642.765639921098 | 0.271428569658316 |
| TGACTCCACCAA | 642.783063415906 | 0.199227097651911 |
| AACGACGTCATT | 642.796579972673 | 0.176190489905083 |
| CAGTAATGTGAC | 642.797843409394 | 0.586664956773101 |
| ATGACGTGAGTG | 642.800754477024 | 0.328604268827716 |
| ATGAATTAGTCG | 642.804763432244 | 0.515295571741219 |
| GTCATTCAAAC  | 642.80524162548  | 0.125575837246116 |
| CAGTTTATGACC | 642.819778164697 | 0.459636857725521 |
| CTTCATTCGTCA | 642.821902802447 | 0.357106904847795 |
| CCCGATCCGTCA | 642.825664546151 | 0.389241830590006 |
| ATTAGCAATACG | 642.826361346198 | 0.479259561596772 |
| TAGTCAGTACGA | 642.830703127516 | 0.476397653675013 |
| TATTTGACTCGA | 642.837181155494 | 0.385437047477545 |
| TCCATTGGGTCA | 642.845206741635 | 0.441778331991196 |
| ATGACCACTTAG | 642.846859000804 | 0.39249876196301  |
| GTCACTGATCTA | 642.857408475639 | 0.336094842326148 |
| CTTACGAGTGAC | 642.859431787372 | 0.652040882996889 |
| GGTTACGTGGCA | 642.866099166397 | 0.197266883700656 |
| TGATGCATGACA | 642.868113916177 | 0.458034386503437 |
| ACCCTGGATGAC | 642.868815534618 | 0.416422344288735 |
| TAGTTGACGTCA | 642.876218058036 | 0.493315020772401 |
| TGACGTGCTTAA | 642.881968008854 | 0.420731648530034 |
| ATGAGTCCGTTG | 642.9051780341   | 0.335512448496034 |
| ATAGCCGACTCA | 642.908731243641 | 0.140568062587851 |

|               |                  |                   |
|---------------|------------------|-------------------|
| AAATCGTGACCA  | 642.921309763008 | 0.422195647095067 |
| AGACCCTAGTCA  | 642.922945269445 | 0.35320003880775  |
| AAGGAAGATGAC  | 642.924033553234 | 0.228874756835886 |
| CGTCGAATCATA  | 642.951781495379 | 0.341968383111111 |
| ATTAGGTGACAC  | 642.959757600996 | 0.394941081845511 |
| ATACCGCGTCAC  | 642.973241235309 | 0.268866297111514 |
| CAAGGCGAGTCA  | 642.976043798481 | 0.351895914366996 |
| GACATTGACTGA  | 642.989483998862 | 0.248282897851418 |
| TGACGTAGCACA  | 642.997284268412 | 0.516337281082377 |
| CATGGCGTCACA  | 643.000084256106 | 0.345733883380863 |
| GTTGTGACGCCA  | 643.005708726185 | 0.422038829214971 |
| CCAGTATGTGAC  | 643.008191848531 | 0.684531276933693 |
| ATAGATCACTCA  | 643.014149537751 | 0.454191828725022 |
| ACTATTAGCAAT  | 643.020887219974 | 0.317712631270397 |
| GCGACTACGTCA  | 643.022511219408 | 0.641321025005461 |
| ACGTCACCCGCT  | 643.034081093583 | 0.314035744467925 |
| CTGTCCTGTGAC  | 643.034287643466 | 0.569899209711896 |
| GCTCATGGTGAC  | 643.0576374768   | 0.329636109236455 |
| ATGACTTCGCAC  | 643.068667822065 | 0.4478099579841   |
| CCTGCGGAGTCA  | 643.069217310953 | 0.325181552938754 |
| GCTCGGAATGAC  | 643.075275027428 | 0.450418666491866 |
| GGTGAATCAACC  | 643.078647818981 | 0.313857943410688 |
| GACCTATGTGAC  | 643.081679926564 | 0.380856019025377 |
| CTTGACTTGCTCA | 643.089700589867 | 0.29960535560278  |
| GGCCATTGCTCA  | 643.091722904723 | 0.594905020448749 |
| GTGTCAGTAATA  | 643.096811875183 | 0.278773358317558 |
| AATCATGTACTG  | 643.100112277714 | 0.516050408429486 |
| AGTCATGGGAGA  | 643.106142046494 | 0.192439884222388 |
| TGTATCATACAA  | 643.111713308164 | 0.657372167533874 |
| CTTGCGGATGAC  | 643.113914654549 | 0.613085609348755 |
| AATATTATGACC  | 643.115255203821 | 0.433540883837487 |
| GAGACCGGTGAC  | 643.117356481578 | 0.30902450958229  |
| GTCATAACGGCA  | 643.127166841186 | 0.53737326016262  |
| ATGAGTCCGGTC  | 643.132533251567 | 0.528527140320779 |
| GTCATGTTTGCA  | 643.138521176251 | 0.268224073801335 |
| GAATTATGAGTA  | 643.146263438752 | 0.319872104911113 |
| CCGGCTGACGTA  | 643.14873259776  | 0.685373993016022 |
| GAGTCAGGGAGC  | 643.151516462114 | 0.362491332257111 |
| AATCGGGAGTCA  | 643.156133189074 | 0.371233942576391 |
| TCTCACATGACA  | 643.158284803567 | 0.350223113844763 |
| CACTAATAATGA  | 643.159262990855 | 0.56942723057639  |
| GAACGACTCAGA  | 643.168837775028 | 0.420161992511411 |
| ACCGAGTAGTCA  | 643.173032439152 | 0.232508860107895 |
| CATATTAAGTCA  | 643.178048780892 | 0.501434611755126 |
| GACGTCACTGAC  | 643.190589903323 | 0.448866010393699 |
| GCGTCACAGATA  | 643.203201162652 | 0.439434797267726 |
| GCTAAGCAGTCA  | 643.208595773823 | 0.430662814233317 |
| CATATCGTGTCA  | 643.213206691313 | 0.412340173552351 |
| GTGACTGCCACA  | 643.219170677031 | 0.314718639790412 |
| GACTAATTCAAC  | 643.226591876117 | 0.438180314537523 |
| CATGACCATGAC  | 643.241529882979 | 0.292662002707172 |
| GGTGTGTATGAC  | 643.247302090673 | 0.420292210356399 |
| CCGGCTACGTCA  | 643.254779577165 | 0.446725470191171 |
| AAAGATGAGCCA  | 643.262329533727 | 0.438280624359601 |

|               |                  |                   |
|---------------|------------------|-------------------|
| CTGACTGGTAAA  | 643.274275532557 | 0.363857742588331 |
| CGCGGTTATGAC  | 643.27475244397  | 0.596661454203871 |
| CTGGCGGTGACA  | 643.28102307106  | 0.764508889923488 |
| GAGTCAAAACAA  | 643.294986924395 | 0.430239163797978 |
| CGTCACAGTTTA  | 643.299142026673 | 0.407320955997925 |
| CTATCGAATGAC  | 643.299821514695 | 0.39056166958334  |
| GGATAATATGAC  | 643.305641333443 | 0.354187429834565 |
| GCGAGCGATGAC  | 643.317180475934 | 0.46626638069711  |
| ACCGCGTAGTCA  | 643.318696799579 | 0.475552660058924 |
| GTCATCATCGAC  | 643.32636672322  | 0.315568609181451 |
| ATCTGTGTGACG  | 643.342299187394 | 0.358403588235621 |
| ACCCCGGTGACG  | 643.344918119501 | 0.556259276242998 |
| CACCACTAGTCA  | 643.347364753999 | 0.350715478558325 |
| CGCAATGATGAC  | 643.352043934929 | 0.321879308474218 |
| GTCATCGCGCAA  | 643.360236424188 | 0.245008928764892 |
| GTCATCCTCGCA  | 643.364002308709 | 0.496039335662468 |
| ATGACAGACGCG  | 643.365887999139 | 0.235258180866125 |
| AGATGATTACTC  | 643.365900509901 | 0.697344306870076 |
| TCATAGTGACGA  | 643.379151709881 | 0.30213914127521  |
| CGCAGTGATGAC  | 643.387696785349 | 0.579409786167092 |
| ACGGCCTGTGAC  | 643.400662024525 | 0.483080481354187 |
| ACGTCATGTAAC  | 643.400977105444 | 0.68572873675547  |
| GTCCCGTACTA   | 643.402242823301 | 0.529190912869378 |
| AGAAGTCTGACT  | 643.417000763043 | 0.448394866959811 |
| AGGAAATTAGTC  | 643.420372989428 | 0.260466441612228 |
| AGTGTCACGCTA  | 643.426329495211 | 0.383106030832656 |
| ATGACGGAGTCG  | 643.42702182092  | 0.320723817423842 |
| AAATGCTGACTG  | 643.435394551799 | 0.268359939464202 |
| GATGAGTAGTAA  | 643.440957827308 | 0.234580380898346 |
| CGCTGACACTTA  | 643.441042407949 | 0.264910998735734 |
| CGTAACAGTGAC  | 643.45299144779  | 0.542553649601893 |
| AACGCTTGTGAC  | 643.453380676107 | 0.598312536599331 |
| GGCTTCTAGTCA  | 643.456280102116 | 0.358634643566982 |
| CTAGCTGCGTCA  | 643.457518337011 | 0.478340825783467 |
| TAATTCCAGTCA  | 643.459005974077 | 0.261165731559419 |
| ATGACGTCCATG  | 643.463191794111 | 0.522535397096696 |
| CGACGAATGACG  | 643.487952283861 | 0.306550889171173 |
| GTCATCACGTTA  | 643.499636372387 | 0.374526103320752 |
| GGGCGTTATGAC  | 643.504882319468 | 0.417166666897667 |
| GAGTCAAATCGC  | 643.509721361539 | 0.493023585474338 |
| AGCGTCATGCTA  | 643.511760946963 | 0.232433489694296 |
| AGAGAAAATGAC  | 643.515089560743 | 0.334456896449417 |
| AACCGAAATGAC  | 643.518401509679 | 0.403023349756189 |
| CAAAACATGTCA  | 643.521052853857 | 0.415405614005495 |
| GTCATTACAGCAC | 643.53081019318  | 0.291124093405947 |
| AGTGACTGCCAT  | 643.534321576621 | 0.178803776254541 |
| AATCACAGTGAC  | 643.541045307158 | 0.434942952536005 |
| ACGGGTGAATCA  | 643.542141315231 | 0.36862156100897  |
| ATAAAGTGACGC  | 643.549074824752 | 0.47367440090002  |
| GATGATGTGTAA  | 643.559959583392 | 0.183325182254001 |
| GACTAATACCTC  | 643.581276359317 | 0.342618913111006 |
| GTATCGTGTAC   | 643.584567609419 | 0.505605653144035 |
| TGACTGGCTCAA  | 643.600247991274 | 0.604531435755439 |
| TCACCCATGACA  | 643.606032513588 | 0.333151926086077 |

|              |                  |                   |
|--------------|------------------|-------------------|
| GATAATCGTGAC | 643.612455570448 | 0.323459607864372 |
| CGTCATTCTAG  | 643.620054160673 | 0.353774020781872 |
| CTTCAAGATGAC | 643.627314836966 | 0.363947397160488 |
| CGCCAGGAGTCA | 643.629872572028 | 0.405727175999239 |
| GTCATTAAGCCA | 643.647327272928 | 0.405090080051832 |
| GTATCTGTCAGA | 643.649722899474 | 0.254572660464596 |
| TCGTTGACACAA | 643.663906857021 | 0.28914843474431  |
| TCACTCGGAAAA | 643.669774104703 | 0.537141921898393 |
| CTCCTAGATGAC | 643.684096732543 | 0.518378386250515 |
| AGTGTGTGTGAC | 643.697376278367 | 0.164150001439421 |
| CGGAATTCGTCA | 643.699223229936 | 0.530683333463094 |
| GACGACCAGTCA | 643.699922780692 | 0.332939793846897 |
| GTCACTCTGCCA | 643.703667067255 | 0.313774387760497 |
| ATTAGTGACGAA | 643.71226286217  | 0.422911486522843 |
| GCCTGGTGACGC | 643.722491016933 | 0.55463868374492  |
| GCTGCTGATTCA | 643.725163389381 | 0.284473110415023 |
| TTGTAATGACAA | 643.726978322106 | 0.597942199158377 |
| GTCATCCACGAC | 643.730667798004 | 0.380319019516583 |
| TGATACAGTCAA | 643.742803691013 | 0.530889554155986 |
| ATTACGTATATG | 643.744571511193 | 0.49531189666226  |
| GACAGGGAGTCA | 643.749590713253 | 0.383716317507888 |
| GTCATATACCA  | 643.753763952278 | 0.431038035883242 |
| GTCATCTGTAGA | 643.76780400907  | 0.406727905410253 |
| GTAACACTCATA | 643.770145298115 | 0.462200101057764 |
| ACGTCACCTCAT | 643.776486655604 | 0.223539859475129 |
| TGACGCGGCTCA | 643.784483573594 | 0.28837710798793  |
| AACTCGTGACAC | 643.796732252443 | 0.385125124739768 |
| GGTCATGTCACA | 643.799300944855 | 0.491255314184895 |
| GAGCGTGAATCA | 643.801991248121 | 0.351140546073845 |
| ATGAGTCCGTCC | 643.807439220139 | 0.370781631617383 |
| GACTTGACTAAA | 643.809166961525 | 0.427850615115328 |
| ATGACAAGATAC | 643.815245972478 | 0.293952316946372 |
| CTATATTGACTC | 643.827745192982 | 0.271853592603909 |
| CATAAACATGAC | 643.828197943821 | 0.588817247905434 |
| CGCGAGTGTGAC | 643.830826085195 | 0.306605799574288 |
| GTCATAAAGAGA | 643.846758407877 | 0.548609770631886 |
| CACGTCGATGAC | 643.857465342107 | 0.342777292748755 |
| ATCGCCTATGAC | 643.857513328912 | 0.334239186977672 |
| CAATGATTAGTC | 643.861361588286 | 0.309203867409176 |
| AGTCACGCTACA | 643.864658898192 | 0.372683570330317 |
| GACTCAGCAGTC | 643.868946285831 | 0.504408815808336 |
| CCAAGTACACA  | 643.890390583807 | 0.301609231075711 |
| CTAGTTTATGAC | 643.894263221521 | 0.240838951146803 |
| CAAAGATGAGTA | 643.901097383915 | 0.26153238293763  |
| CATTGGGTGACG | 643.903705148371 | 0.475780148263642 |
| CTCAGACTCACC | 643.90519061193  | 0.317972131465727 |
| ACTAGTTGTAC  | 643.906626147203 | 0.894432001279386 |
| TCACTGAGATGA | 643.913067769358 | 0.38366985888758  |
| AGTTTGCTCACC | 643.935304742855 | 0.366856583256944 |
| TATGTATCGTCA | 643.941714437516 | 0.441693213115499 |
| CAGCTGATGACG | 643.945036465681 | 0.265089935572947 |
| TAAGTTGTCACA | 643.949138653482 | 0.349364856027225 |
| CGGAGTGATGAC | 643.950917134221 | 0.430182319465215 |
| AGACTATATGAC | 643.962482117932 | 0.343569274009114 |

|               |                  |                   |
|---------------|------------------|-------------------|
| TCCTAACAGTCA  | 643.970315492534 | 0.368448666670085 |
| CGACTGCGTCAG  | 643.970805973159 | 0.565506745035618 |
| CAAGCGTGAGTC  | 643.979140989824 | 0.484494561221307 |
| CTGGCGTAGTCA  | 643.995244646458 | 0.549463751726068 |
| TGACTAGATGCA  | 644.003690242733 | 0.341752274701415 |
| ACGTCACCTTTG  | 644.009383040579 | 0.227908319390316 |
| GGGAACGACTCA  | 644.02077105194  | 0.557177406780027 |
| AAAACGACACA   | 644.023598131198 | 0.40458588476558  |
| AGTCACGCTGGA  | 644.025040468995 | 0.340279286028056 |
| CAGGAATATGAC  | 644.032609468073 | 0.473836329060518 |
| ACGTTGCATCAT  | 644.033589174224 | 0.535649838693749 |
| TGACTGGGTGCA  | 644.047178866631 | 0.502218807807721 |
| CGCACAGATGAC  | 644.050977823274 | 0.264744213709005 |
| CGTAGTAGTGAC  | 644.052125425187 | 0.65481153096033  |
| ACACAAGTGACT  | 644.05697832195  | 0.584097438946118 |
| TCGTACGCGTCA  | 644.060664047408 | 0.323427105282875 |
| ATGGCAGATGAC  | 644.07124416783  | 0.349388323835897 |
| GTCACGTAATTA  | 644.074351649309 | 0.47976665824184  |
| ATGAGTCCCTGG  | 644.074684725869 | 0.285499288146588 |
| CTTACGTAGTCA  | 644.078787860911 | 0.290025386848687 |
| GGTCATGCATGA  | 644.09570166737  | 0.50818495027906  |
| GTCACCTACCAA  | 644.100412698591 | 0.473750289630305 |
| CCCTGGGATGAC  | 644.101552569337 | 0.415429849727535 |
| ACTGAGTAGTCA  | 644.11831613475  | 0.363465793494584 |
| GGTGCTGACACA  | 644.121401353439 | 0.367194541862104 |
| GTCATCTGAGAA  | 644.129379258448 | 0.384063706519263 |
| GATGATGCAACC  | 644.138023110067 | 0.280783731304226 |
| GTCATTTGAGAC  | 644.143753550063 | 0.837626952689725 |
| ATTTCGCAACAG  | 644.146546488046 | 0.631814968067219 |
| GTCATCCATGGA  | 644.149839638011 | 0.53605749691026  |
| GTCATGTTTCA   | 644.150070912366 | 0.509368649757114 |
| GTCATTCACAAA  | 644.15558463796  | 0.320743915693059 |
| CGTATCATGACG  | 644.161784406301 | 0.268066484018476 |
| AATATTGATGAC  | 644.162118921411 | 0.120633961014638 |
| GTCATTTAGATA  | 644.182068005962 | 0.420926372291444 |
| GGCTTTTATGAC  | 644.190166599758 | 0.621658759596756 |
| GACTCACGCTCA  | 644.193670675654 | 0.313416321731346 |
| CGACGTTATGAC  | 644.196641956348 | 0.350304032117292 |
| CGCATAATGACA  | 644.233521044845 | 0.374647334641428 |
| AAATTTAATGAC  | 644.242486040298 | 0.493849960628285 |
| ATGTCATGCATG  | 644.243735313548 | 0.410015470762985 |
| GTCACCTTACAA  | 644.253661552749 | 0.443138688642658 |
| TATACACAGTCA  | 644.2549284398   | 0.378335834328898 |
| ATGACATCGCGA  | 644.264771764632 | 0.511510775143573 |
| AACCATGACCCA  | 644.269077985909 | 0.388069764058337 |
| TGACTTGTAGAA  | 644.274508752025 | 0.457124732504929 |
| ACGCGCGGTGAC  | 644.280726350642 | 0.331994254669886 |
| TAGATTATGTCA  | 644.286820582298 | 0.553059527554417 |
| ACACGTAACCTGA | 644.290134132446 | 0.477789494086051 |
| CGCTCATAGTCA  | 644.291689804928 | 0.401240301796964 |
| GACTTTGATGAC  | 644.293203367741 | 0.273321865453429 |
| CGCTATTATGAC  | 644.304485668519 | 0.581487291612739 |
| TCATACCTGGGA  | 644.311749973015 | 0.543966278164298 |
| GATGAGCAGTCA  | 644.316392017426 | 0.401604593252859 |



|              |                  |                   |
|--------------|------------------|-------------------|
| ACTCATACTAGC | 644.318375941278 | 0.351099687300773 |
| GAGTCAATGTGC | 644.318616349853 | 0.264474406818778 |
| GGACACCATGAC | 644.326914789331 | 0.290140842090814 |
| CACCAGTAGTCA | 644.3384099612   | 0.468753550510484 |
| GGACAGGATGAC | 644.347918731318 | 0.364578138356936 |
| TCTCGTGTGACA | 644.348375321829 | 0.404467595605731 |
| ACCTAAATGTCA | 644.357582819531 | 0.142115017252538 |
| GTCAGACGTCAC | 644.358387609547 | 0.481548998844948 |
| ACTCATAACGGG | 644.362803372917 | 0.754465458182443 |
| ATGACGTTACGC | 644.408590774432 | 0.476463115686449 |
| ATGACAGGGTCG | 644.410911791997 | 0.39211782742026  |
| ATTATTCATGAC | 644.413882820456 | 0.332981251558165 |
| GTCACAATACTA | 644.426803917802 | 0.628282471953189 |
| TCGTAACGTCA  | 644.443617474704 | 0.375829277107892 |
| ACGTCATGCTTA | 644.446016908413 | 0.307878073463979 |
| GCTCGAGGTGAC | 644.463405416592 | 0.545021097034377 |
| TACTCATAACTA | 644.474576253386 | 0.250420741706576 |
| ACTTATAGATGA | 644.478066473662 | 0.616020435344321 |
| GGTGTCCAGTCA | 644.480033768463 | 0.53465593637839  |
| ACCATTAATGAC | 644.494974019869 | 0.692308280216828 |
| AATGACCACGAT | 644.495833700222 | 0.268687194267697 |
| GGGAATACGTCA | 644.497733647076 | 0.499673016128799 |
| AGGCATGATGAC | 644.521027440569 | 0.168226665783056 |
| GCGCTGTAGTCA | 644.523254268402 | 0.921788091696291 |
| CTGACTGTTGA  | 644.533573693874 | 0.49465832906037  |
| ACTGTAATGACA | 644.534740770601 | 0.434822116678468 |
| TCACCTGACGCA | 644.539107535028 | 0.484109894379771 |
| ATGAGTCGGGAC | 644.544705202442 | 0.210528641576837 |
| GAGCTTTATGAC | 644.545904898402 | 0.446651292075925 |
| CGAAATGTATCA | 644.546040715373 | 0.894985782340879 |
| AACTTGCATGAC | 644.547897041024 | 0.441014080302884 |
| AGAGCCGAGTCA | 644.551767860747 | 0.509710579558793 |
| CTACTACAGTCA | 644.562286751231 | 0.262901566675757 |
| ACGCCCTATGAC | 644.562444610695 | 0.455807507375687 |
| CAAATTTGGTCA | 644.564633098084 | 0.378264220338506 |
| CCAATTTGTGAC | 644.571398822196 | 0.322988551197137 |
| AGTCAGTTCTTA | 644.582233354779 | 0.588348348102355 |
| GTCACATTTAC  | 644.595358256282 | 0.583215993959939 |
| CGTCACAACAGA | 644.6007671507   | 0.406500411879925 |
| GACTGACACTTA | 644.603404260446 | 0.321602349860176 |
| ACAACCGTGACT | 644.611534644633 | 0.335211022501739 |
| CAACCGTGACAC | 644.612067418037 | 0.352587741034754 |
| AATTACATGTCA | 644.620063446868 | 0.266985434797963 |
| GTACAGATGACA | 644.632283909321 | 0.476380702125158 |
| ATCCCTGTGTCA | 644.632418402808 | 0.341062903693938 |
| ATGTCTGATGAC | 644.633442857767 | 0.489904244116086 |
| CGATGCTGTCAC | 644.643524704533 | 0.227654206587498 |
| GATTGTTATGAC | 644.646229898142 | 0.516575981815231 |
| GAATCCAATGAC | 644.651728865349 | 0.364196387367264 |
| CGAGTTGTGTCA | 644.653776599231 | 0.621698735576461 |
| GTCATTAATCCA | 644.660145480138 | 0.301664442028263 |
| GTGCCCGAGTCA | 644.670538864057 | 0.307916464508877 |
| CGTCATTAATCA | 644.671102456477 | 0.345382953934803 |
| GTCACAGTAGCA | 644.681257263749 | 0.486138097130849 |

|              |                  |                   |
|--------------|------------------|-------------------|
| AGATGAGTTGTC | 644.682429176591 | 0.339034611201977 |
| AGTCACTCCCAC | 644.68272782778  | 0.206614007299816 |
| ATGACAAGGTAC | 644.683573720953 | 0.318742961931541 |
| GGCCAGTGTGAC | 644.685376708093 | 0.294821385112344 |
| ATCCATGATGAC | 644.687292197429 | 0.429820008588188 |
| ACTCATTGGAC  | 644.697351101187 | 0.344179283132073 |
| ACTGACTGTATC | 644.705047077269 | 0.294918633782135 |
| CAAGTTAAGTCA | 644.708849994335 | 0.282412932909144 |
| TCATTAGCGTCA | 644.734698187341 | 0.897466049909363 |
| GTCATACATTCA | 644.75176254193  | 0.361274132589324 |
| AGCTAGTAGTCA | 644.759256352955 | 0.431826632610766 |
| CTCAGGTGTGAC | 644.760782273827 | 0.551706879738813 |
| ACACGTGACGAA | 644.761097090759 | 0.450258689759819 |
| AGAAACGACTCA | 644.763236183715 | 0.161795004451602 |
| AAGAGAGATGAC | 644.779094180934 | 0.21530106269731  |
| AACACATGACAC | 644.786706332271 | 0.18330041282107  |
| AATGGTGTGAC  | 644.793734105719 | 0.339696379293311 |
| TGACTGCAACAA | 644.796451352025 | 0.333319412144636 |
| GACGTTTGTAC  | 644.8008417729   | 0.755434555390124 |
| GTCATCATGGTA | 644.824831362036 | 0.352079442855305 |
| GAGTTCGATGAC | 644.832461900113 | 0.403149055040883 |
| ATATAAGTGTCA | 644.834315073032 | 0.624880485085139 |
| AAGACGTGACAC | 644.835204201828 | 0.425005934045755 |
| AATTAGTCGCAT | 644.835348723701 | 0.407022787320526 |
| GTCATGAACTTA | 644.836288260123 | 0.731881148517718 |
| AACCATTTGTCA | 644.844649610179 | 0.206401471266664 |
| CCGTCGTATGAC | 644.84813206183  | 0.282727308985834 |
| CTGGGTATGACC | 644.858510737432 | 0.693202212337924 |
| GCGACTTGTGAC | 644.859851016794 | 0.453439589374951 |
| GGTACAAATGAC | 644.871087153263 | 0.344867488679362 |
| AAGGCGTATGAC | 644.873968805699 | 0.24987882169397  |
| GGTTCTACGTCA | 644.878773444886 | 0.601466305778003 |
| CCCGAGATGACG | 644.881923673056 | 0.226430086366793 |
| GACTACAATGAC | 644.888086146913 | 0.62789344878392  |
| ACGATTAGTGAC | 644.889677955789 | 0.410295847465332 |
| GGAACACGTAAC | 644.90217859118  | 0.267615671221473 |
| GTCATGAATAAC | 644.90836731273  | 0.66586787206267  |
| ATGACGAGATAG | 644.913986906742 | 0.228501252247163 |
| CCGGAGATGACA | 644.920559839905 | 0.289739907813389 |
| CGGCCGTATGAC | 644.924267717572 | 0.460977709207255 |
| AATCTAAGTGAC | 644.92600934392  | 0.727722653826067 |
| CACACAAATGAC | 644.926764159914 | 0.357768868365779 |
| TAGTATAAGTCA | 644.92832391242  | 0.489372243230297 |
| GTCATCAGACCA | 644.931165621317 | 0.399933863014661 |
| ACTGAATGACCA | 644.932555214801 | 0.479951595617209 |
| AATGAAGATGAC | 644.933835615839 | 0.255086162651263 |
| ATGACGCCTATC | 644.952034247317 | 0.443008191103196 |
| CGTCATCCCTGA | 644.975643066927 | 0.416309682724348 |
| CTTTGATATGAC | 644.981166803786 | 0.26385250988562  |
| ATATGATGTGGC | 644.986424045251 | 0.358034250045195 |
| AACGAGATGACG | 645.002308924755 | 0.511807711685388 |
| CAAATTTTGTCA | 645.014842524998 | 0.393740102586194 |
| ACTTTAATGACA | 645.017800603682 | 0.32069796059475  |
| GAGGCTCGCTCA | 645.027500535386 | 0.403198778380259 |

|              |                  |                   |
|--------------|------------------|-------------------|
| CGTTGTACGTCA | 645.030930244588 | 0.255404430996618 |
| GTATTAGTCCTA | 645.034732087682 | 0.285582019058263 |
| AAAGATTACGCA | 645.048141691605 | 0.30517267790542  |
| CCCGATTAGTCG | 645.063296656759 | 0.33216426514506  |
| GAGTCAAGCTGC | 645.066537662112 | 0.427524018038648 |
| GTCATGCATCAC | 645.076022601279 | 0.402400176737734 |
| AGCAATTCGTCA | 645.093328012692 | 0.273657033176783 |
| AGCTAATGTGAC | 645.095691637715 | 0.665420796254424 |
| ATGCGATTAGTC | 645.104945454008 | 0.38329074845989  |
| GGGTCTTATGAC | 645.108914732762 | 0.216123904377504 |
| ATGTCATCTCAA | 645.110183341889 | 0.278901252479052 |
| AAAGCTCAGTCA | 645.112847693623 | 0.393234989372387 |
| CGACGTGGTGAC | 645.116221982685 | 0.452663092496277 |
| GAAAATGGTGAC | 645.116976845962 | 0.243694930206131 |
| GTGTGTCAACAC | 645.124308686635 | 0.314954567792831 |
| GTACACACGTCA | 645.127927544247 | 0.462734643445042 |
| ATCCTAATGACA | 645.147469781139 | 0.297882032710911 |
| CGTCATTTAATA | 645.153455715815 | 0.454794983815699 |
| TGACGTAACAA  | 645.165635879435 | 0.736452201687692 |
| CTAATGTGTGAC | 645.171074339297 | 0.356101027000784 |
| CCGACCTGACTC | 645.185606711771 | 0.165625351973474 |
| AATTAGTATTAC | 645.189371009899 | 0.401319484458614 |
| GTGTTTGTGTCA | 645.191925107237 | 0.44708924566895  |
| GGAGGGGAGTCA | 645.199751055519 | 0.264550876881014 |
| ACTGAGCGTCAT | 645.209265091394 | 0.286097472545064 |
| CGTCACTGTATA | 645.21226088883  | 0.453240030112595 |
| AGTCATGGGTGG | 645.215657230565 | 0.188265664061437 |
| ATAGCTGTGACA | 645.22335953809  | 0.32124377412459  |
| GGTGACAACTCA | 645.234746821048 | 0.184544204054072 |
| CGCTAATGACAA | 645.240013170182 | 0.258601889169077 |
| CCTTATGTGACA | 645.249763504862 | 0.274237445801973 |
| CCGGAGTGAGTC | 645.255809764682 | 0.254428654182846 |
| GTCACCCAAGGA | 645.256877874804 | 0.487545567192916 |
| GCTATGGAGTCA | 645.2719120301   | 0.475591044515566 |
| CGTTCTAAGTCA | 645.276272658572 | 0.408003170093601 |
| GAATAACATGAC | 645.278658439709 | 0.479531563848128 |
| CATCCTGTGTCA | 645.280498366335 | 0.528553333139324 |
| CGGTAGACTCAG | 645.286400869319 | 0.286695211241053 |
| ACCAACATGACA | 645.289775925128 | 0.548190441810839 |
| GGAACGTATGAC | 645.303474757342 | 0.396968467107641 |
| ACCTCTACGTCA | 645.313483324896 | 0.257224686198682 |
| CTGGCATGTGAC | 645.316962067554 | 0.317141679273906 |
| ATACGCATGACG | 645.31742548769  | 0.814139684702853 |
| CGCTTTAATGAC | 645.340103717944 | 0.70000349650277  |
| AGAAAACGTGCA | 645.350302843133 | 0.652770602071265 |
| GTCATTCACAAC | 645.354230142334 | 0.386610580404402 |
| ATCGATTACGTG | 645.35512909334  | 0.549353713544072 |
| AGTCACCCCGTC | 645.35606686333  | 0.353458679957436 |
| GTCACTAGGAAC | 645.371772939235 | 0.280087055752195 |
| ATGACCATATTG | 645.37289203451  | 0.554711578848864 |
| AGGCCGGATGAC | 645.382676674617 | 0.268539009562304 |
| GGTGACGGTGAC | 645.384980443094 | 0.215892617328681 |
| GTAGACTCGTCA | 645.38753411558  | 0.423397557557308 |
| GTCACAGTTGGA | 645.403326115683 | 0.344444789339218 |

|               |                  |                   |
|---------------|------------------|-------------------|
| GGCCTCCAGTCA  | 645.414274458942 | 0.401674704774014 |
| GTCATCTTACTA  | 645.427026726904 | 0.333873945685083 |
| GTTTTGTAGTCA  | 645.42960528771  | 0.25191075156319  |
| AAGTATCTGTCA  | 645.432928933719 | 0.19700852773831  |
| GACACTTTGTCA  | 645.447987064961 | 0.329994695514768 |
| ATGACAATAAAA  | 645.46283289973  | 0.484620558746908 |
| CAGGCGAGTCAG  | 645.467604949317 | 0.201151243177354 |
| ATGACGCCTCCA  | 645.478385817368 | 0.273781443168546 |
| AATGATGTGACA  | 645.492900567631 | 0.381855385212839 |
| AAGCGTTGTTCAT | 645.495805505407 | 0.491519090109072 |
| GGACGTATGACC  | 645.506471005424 | 0.652193312088659 |
| TGACTACAACCA  | 645.522042830234 | 0.321165241868012 |
| TATCTGTCAGAA  | 645.533221505448 | 0.432220493623814 |
| CGATTTAGTGAC  | 645.545884478973 | 0.524512225361609 |
| CTCGTCTAGTCA  | 645.552871187535 | 0.533928066374118 |
| CCGTACTGTGAC  | 645.559011914464 | 0.270734966360902 |
| GTCATGAGCCAA  | 645.560542624798 | 0.188895577577915 |
| ACCGGTAGTCAC  | 645.563014884791 | 0.274354797925177 |
| GCGTCACATCCA  | 645.577710143579 | 0.383107487564168 |
| ACGTCACAGGTC  | 645.580584285098 | 0.419639349087865 |
| GGCTTGGATGAC  | 645.583559154282 | 0.270659719989753 |
| GGCTCTAATGAC  | 645.599587334322 | 0.387840655778416 |
| AACGATCTGTCA  | 645.619489084426 | 0.353849181447457 |
| ATCGCGTGTGAC  | 645.621857625232 | 0.371669622669136 |
| CGCGACTCGTCA  | 645.631673131826 | 0.425665146194231 |
| ATGACAGACAGG  | 645.635381604523 | 0.216694615707197 |
| ATGCACGTGTCA  | 645.645197756089 | 0.474823264383575 |
| AATGATTGGTCA  | 645.651277266169 | 0.509289355625199 |
| GAAGTGCATGAC  | 645.656163196569 | 0.416604856259325 |
| ATGACGTCGTCC  | 645.671150873312 | 0.257502991486379 |
| AACGCTGAGTAA  | 645.673021538966 | 0.735408259008752 |
| CGCTGAGTCGTC  | 645.678285963672 | 0.386383325225266 |
| GCCTTGTACTCA  | 645.684230135196 | 0.323787490557998 |
| GTCATCTGGTTA  | 645.685377901712 | 0.370193217676513 |
| TGTCATCGGTAA  | 645.687070411933 | 0.300825083277889 |
| AATATCTGTCAG  | 645.690799612549 | 0.454524660946082 |
| AAATGTATGAGT  | 645.691424415764 | 0.355709699871678 |
| CACCTAATGACG  | 645.695244175962 | 0.230924325996821 |
| CGTCGAGATGAC  | 645.698798649017 | 0.385157709840381 |
| CAAGTTGACACA  | 645.700434374083 | 0.4313368504562   |
| AATACGTGAGTC  | 645.717238979533 | 0.593038426146516 |
| CGCATGCATGAC  | 645.720114379867 | 0.560361428235542 |
| CAGCGTGACAAA  | 645.727280311326 | 0.426049130438623 |
| ACCGGGATGACG  | 645.727345609101 | 0.217287795884574 |
| GGTCGTGATGAC  | 645.730446367509 | 0.292973405886086 |
| TATGAATCGTCA  | 645.741720296794 | 0.298791104293066 |
| GTCACAAGTCTA  | 645.745115379169 | 0.391014773688551 |
| GTCATTTTCGTTA | 645.75298559602  | 0.344031818457698 |
| ACGTCATGGTTC  | 645.755117674115 | 0.406598025043149 |
| GTGTCATGTACA  | 645.755357553799 | 0.475563766698676 |
| CAACATCATGAC  | 645.758423911642 | 0.41673900927623  |
| TCTGACGTCAGA  | 645.773516346407 | 0.572327874951365 |
| TACTTGACTAAA  | 645.792742681412 | 0.318971096061661 |
| ATGAGTACGAGG  | 645.803314045391 | 0.311114580414912 |

|               |                  |                   |
|---------------|------------------|-------------------|
| GGACCTGTCACC  | 645.804179267288 | 0.284462773483087 |
| ATTGGTAATGAC  | 645.821605560506 | 0.446374095179676 |
| AGATAACGTCAC  | 645.835220162123 | 0.214470855680797 |
| AGGGAAGTGACT  | 645.838710580113 | 0.241677952568311 |
| GTCACTACTCAC  | 645.854311344292 | 0.389657980590817 |
| AGAAATATGTCA  | 645.859960230842 | 0.471265628311352 |
| ATGAGCAAGAGC  | 645.870333604008 | 0.207381191385444 |
| AGTGTCACGCCA  | 645.873887651451 | 0.538168891061737 |
| GACTCCTGTGAC  | 645.878540618041 | 0.40364170123339  |
| CGACTAATGACG  | 645.890507723327 | 0.585901205335028 |
| ATTACTGACGTG  | 645.894991097179 | 0.488275261112412 |
| CACTCTCGGTGA  | 645.897909473363 | 0.827799816347786 |
| GACCCTGACACA  | 645.900625259816 | 0.281651322661431 |
| TAAACCCAGTCA  | 645.901889296123 | 0.170551484852027 |
| TCCTACGTGTCA  | 645.903562496826 | 0.350123837278591 |
| TGACATATAGAA  | 645.917566170114 | 0.617397898121497 |
| AGTTGGTGACGC  | 645.928641880761 | 0.41036349472958  |
| CATCTCAATGAC  | 645.932333257864 | 0.35100595435453  |
| GACATATCGTCA  | 645.93470794303  | 0.424306333394397 |
| CACGCTGGTGAC  | 645.947616530786 | 0.664866978164464 |
| GTGGTGACCCAA  | 645.955612946336 | 0.41497695293907  |
| CGTCATATGATC  | 645.956943907444 | 0.388505993165976 |
| GAAATGTGACGC  | 645.962466378708 | 0.369703076152664 |
| ACAATTACGCCA  | 645.975696108314 | 0.581565667414024 |
| CACACGTGACAC  | 645.979278541763 | 0.557277897731182 |
| ATTTATTGTGAC  | 645.979344112683 | 0.383046353643693 |
| CCTGACTTGTC   | 645.995231313363 | 0.290435273489938 |
| CGTACTGGTGAC  | 646.000123727103 | 0.56274917151779  |
| CGAACTGTGACA  | 646.000226887585 | 0.610769580948166 |
| ATAAGTCTGTCA  | 646.002968243748 | 0.416972259299506 |
| GTCACCAAAGAA  | 646.027390089363 | 0.341889460402953 |
| ACGTC AATGAGT | 646.031725718122 | 0.576846080020972 |
| AGCGATGAGCCA  | 646.032022167559 | 0.27576937825194  |
| ATGACGGACGAA  | 646.037383345618 | 0.322194903886403 |
| AGATGAATAATC  | 646.053020530502 | 0.305544730144136 |
| GGACCGTGACAC  | 646.057508903669 | 0.636975166496406 |
| GACTACTGACACA | 646.062312369147 | 0.338823139715767 |
| CGTACCAATGAC  | 646.064028679715 | 0.512055190021652 |
| TGACTCGGCGCA  | 646.088797904187 | 0.349714878732664 |
| CTGACGCGCTGA  | 646.094733167258 | 0.626785771726806 |
| CTCGGCGTCATC  | 646.099900235494 | 0.45478326955186  |
| GTGTGAGTACCA  | 646.10046987833  | 0.194818712949934 |
| AAAAGTGGTCAT  | 646.105760194966 | 0.266491317379989 |
| CCGGCGTGACTA  | 646.111371236008 | 0.33777532227417  |
| GTCACCATCTTA  | 646.112377361209 | 0.365415293952122 |
| AAACGGTGTGAC  | 646.122579128862 | 0.31979121188173  |
| GAGTCAAATCTA  | 646.132062274774 | 0.183790303508185 |
| GTCATGCTCTGA  | 646.135907577094 | 0.374791898764014 |
| CAAACCTGTGAC  | 646.138183982894 | 0.238798551150071 |
| CCACCATATGAC  | 646.140138973174 | 0.334186933679732 |
| GTGACGTGCCCA  | 646.143647517132 | 0.39154247982445  |
| AATCGTGATGAC  | 646.147967367826 | 0.442454483369416 |
| CTGTTCTAATGA  | 646.152256387815 | 0.571861538214332 |
| ATTACTAGTCAG  | 646.153425083782 | 0.406548364156962 |

|              |                  |                   |
|--------------|------------------|-------------------|
| GTCATGCAGGAC | 646.157675234582 | 0.508308642820123 |
| CCGTACAAGTCA | 646.163101545471 | 0.458876575917962 |
| ACATAACGTCAC | 646.180114674711 | 0.303977291121335 |
| AATAGTCAAAGA | 646.187580391851 | 0.37900085619223  |
| AGCCTGAATGAC | 646.197843833977 | 0.464700015185925 |
| ACGCGTAATGAC | 646.208415798227 | 0.561062204430087 |
| CGGGGTGAATCA | 646.211441006661 | 0.403934398962625 |
| AGTCAGAGTAGA | 646.219801312314 | 0.213532556718895 |
| TACTCGTAGTCA | 646.229153672381 | 0.521370335083308 |
| GGGTCATAGTGA | 646.239908556497 | 0.254454381937785 |
| TGACACACGCCA | 646.24342072986  | 0.485564802063653 |
| GAGGCCTGACTC | 646.289239657834 | 0.466555697485083 |
| CCTACGCAGTCA | 646.292955207542 | 0.515162321428476 |
| AGACTCAGACAA | 646.293782008621 | 0.403067520674021 |
| GGGCACGAGTCA | 646.31646621241  | 0.742665589051341 |
| GTCTTGAGTCA  | 646.318028074487 | 0.569324838254883 |
| CATTACAAATGA | 646.320072430442 | 0.435855823981818 |
| TGACACAAGCCA | 646.326102286885 | 0.352448691619519 |
| GTCATTCATCTA | 646.326189398629 | 0.331696960449872 |
| ACAGAACATGAC | 646.326319501403 | 0.31972536103459  |
| ACTAAAACGTCA | 646.327370862146 | 0.501571176117722 |
| CGCGCTTATGAC | 646.336436340997 | 0.459418209903903 |
| ATGACGGTATCG | 646.342457827922 | 0.450008800126045 |
| CCGGACCATGAC | 646.349426269196 | 0.436869216169205 |
| TCGACGTAGTCA | 646.385826610808 | 0.656550643098076 |
| ACGTCATGCTCA | 646.386639675341 | 0.423711521825413 |
| GTGTCATGAAGA | 646.387577671665 | 0.233782878564737 |
| CAAGTATGTCAC | 646.389001308165 | 0.386612838478201 |
| AACAGATATGAC | 646.402314354253 | 0.564316592234512 |
| CATAGTGACGCG | 646.403653578506 | 0.443552016751784 |
| TCGTTGTAGTCA | 646.403665647156 | 0.343267682241392 |
| CTGTCACCGAAA | 646.421582991114 | 0.415583265689711 |
| GAACACGATGAC | 646.423279992733 | 0.248505211462404 |
| CTCACATGACAC | 646.423853694521 | 0.416325555976089 |
| CGTCATGTCACC | 646.424496581654 | 0.27669425351246  |
| CTTTGACAGTCA | 646.44847107527  | 0.443065459247668 |
| ATGGATGGGTCA | 646.449839132637 | 0.211258832810769 |
| AGGGTTCGTCAT | 646.451439275474 | 0.265602589838862 |
| CAACTGTGTGAC | 646.462150061187 | 0.431443985507821 |
| TCAGAGTGACGA | 646.468015060544 | 0.364934965738232 |
| TGAGTCGGCACA | 646.470375165231 | 0.415036989355226 |
| CCCTCGTAGTCA | 646.470608644137 | 0.593850291714115 |
| ATTGGGTCACCA | 646.471497071018 | 0.265881603293806 |
| TGTAATTAATAA | 646.485031168366 | 0.438324501399761 |
| AGAGTAATTCGA | 646.488064343157 | 0.414468498544032 |
| TCAGGACAGTCA | 646.495409139499 | 0.488503228112929 |
| ACACTGTAGTCA | 646.502879176886 | 0.641184262620743 |
| TCAGTGTGTGCA | 646.510471963534 | 0.407655546229596 |
| GAAATTTGCTCA | 646.527513786948 | 0.39841124535085  |
| CACTCATCGGAG | 646.536612247776 | 0.478301150205605 |
| CGACCGTAGTCA | 646.543302169506 | 0.314007330889469 |
| TCACTGCTATGA | 646.562445041205 | 0.244891150468152 |
| ATGACGAGATGG | 646.565103825808 | 0.377305516277444 |
| GATTAAGTGTCA | 646.570713775071 | 0.315400689116122 |

|              |                  |                   |
|--------------|------------------|-------------------|
| CATACCTGTGAC | 646.574241922751 | 0.465040280942297 |
| AGCACGGATGAC | 646.574285657194 | 0.243170187216132 |
| CTTGAACGTGAC | 646.574980503428 | 0.714829121748965 |
| CACACCTGACTC | 646.577502816652 | 0.261089409704614 |
| GAGTCTACGTCA | 646.581612307349 | 0.402168465976736 |
| CAATATCATGAC | 646.581630277653 | 0.604917141917926 |
| GTCATCTTACCA | 646.584405712442 | 0.48858324617294  |
| TGCCTGGTGACA | 646.584876267389 | 0.573811033151435 |
| TACCCTGACGCA | 646.59362306523  | 0.230598020344348 |
| GTTGACTCGCCA | 646.595983493588 | 0.427854496316326 |
| ATGTCACCCGTG | 646.606879579243 | 0.399556835347136 |
| ACGAGATGACAT | 646.607706285062 | 0.272068294088709 |
| TCGACCCAGTCA | 646.614928267609 | 0.678611004897345 |
| ACGTGTGAGAGA | 646.617731319191 | 0.400006901941462 |
| GACTCATGGGAA | 646.633059354032 | 0.478948326180879 |
| ACTCAGAGTGAC | 646.642933000476 | 0.55169783308169  |
| ATGGTGACGCCA | 646.64310908919  | 0.401335965202262 |
| CGTCATCTGCCA | 646.651511118566 | 0.627586769410412 |
| ACCGGCGACTCA | 646.667425090764 | 0.357598126628863 |
| AATACGGTCATA | 646.669828060241 | 0.424179582909237 |
| CCTTTCGGTGAC | 646.675850326634 | 0.518145671543205 |
| AAATTATGAGTA | 646.680332350608 | 0.296730321984248 |
| GATAGCAATGAC | 646.692157719681 | 0.234954705005215 |
| ACAGCGCGTCAT | 646.693828055227 | 0.431508908137434 |
| AGATCTGTGAGA | 646.702061000656 | 0.272907858826116 |
| ACATGGAATGAC | 646.702937770233 | 0.248035005681694 |
| CATGGCATGACA | 646.704602722813 | 0.420391748200013 |
| AGCACTGTGTCA | 646.707143408213 | 0.38228528597516  |
| ATCACCATGACA | 646.712255209599 | 0.340996419105635 |
| AATCTCTGAGTC | 646.717340259009 | 0.380595873413762 |
| AGGGTGTAGTCA | 646.72099150837  | 0.343316205062094 |
| CCGATCGCGTCA | 646.723015339068 | 0.485529027662713 |
| GATTGCATCACA | 646.733423021185 | 0.510941035999525 |
| GAGCTTCAGTCA | 646.73358383242  | 0.366350090739786 |
| ATGAGTGAGTAC | 646.74553412743  | 0.338629567831014 |
| ATGAGTACCTAC | 646.766203179672 | 0.405713389249815 |
| CGTCATTTCTTA | 646.774497971968 | 0.198098750623406 |
| GCCGAGCAGTCA | 646.779850493495 | 0.469419530901675 |
| CACTGAGAGTCA | 646.784234279015 | 0.417399773710764 |
| ACTCATGATTCG | 646.785102659702 | 0.622478251468957 |
| AGTGTGATGTGC | 646.78744551147  | 0.353072964483373 |
| CGCTGATGACCA | 646.792409135706 | 0.447010505724488 |
| CCAATTTGACTC | 646.806481797517 | 0.196397166506734 |
| AGTCAGACCTTC | 646.825023114543 | 0.340326475821586 |
| ATTGCATCATTC | 646.836002719107 | 0.233549227436156 |
| GGGTAACAGTCA | 646.838368006425 | 0.32808317154542  |
| CGACCTAGTCAG | 646.847963878073 | 0.400093313445939 |
| CAGTCAGCCACG | 646.848936649254 | 0.436306844524736 |
| AGATACCGTCAT | 646.849929687537 | 0.245903815818525 |
| TCGAGTCAAACA | 646.850613046187 | 0.321298100811268 |
| AAGGCCTATGAC | 646.852586410899 | 0.339355004730368 |
| ATGACGACGATC | 646.856271076619 | 0.368715590051522 |
| GAGATGTGTGAC | 646.864813212012 | 0.274674297059633 |
| ACGTAATCAGTC | 646.868014357397 | 0.530892928258585 |

|               |                  |                   |
|---------------|------------------|-------------------|
| GGTGACAGCATA  | 646.873980900971 | 0.3106853656483   |
| AGTCAGTATTAC  | 646.874121719219 | 0.497696981030208 |
| AAAACCTCCGTCA | 646.874509507045 | 0.297393983783141 |
| ACGTCCAATGAC  | 646.887062061068 | 0.504095683649625 |
| TCACGAGTGACA  | 646.890356700976 | 0.42521575339864  |
| CTAGCTAAGTCA  | 646.90510964432  | 0.544558359587981 |
| ATATCGTGACAC  | 646.911675093415 | 0.255934716294279 |
| GAGTCAAGCGAC  | 646.923232937111 | 0.476659465666538 |
| GTCATCTCTCAA  | 646.945681251263 | 0.287774418421991 |
| ATACATCCGTCA  | 646.948519846624 | 0.503706801912002 |
| GTCATTATAGGA  | 646.952973147411 | 0.335218484441134 |
| CGTCACCTAGTA  | 646.956607795922 | 0.279125917467254 |
| CGCTTAGGTGAC  | 646.989899559509 | 0.411129206724522 |
| ATAATATGTGAC  | 647.002260744448 | 0.406444692159284 |
| AACCTCTATGAC  | 647.003184878059 | 0.420799046757087 |
| AAGCCTCAGTCA  | 647.004991463628 | 0.30236201884762  |
| AGTCACGCGCGA  | 647.016008591568 | 0.526686114091304 |
| CGACATATGACG  | 647.028819819015 | 0.354373958238635 |
| CCAGAAGGTGAC  | 647.044311790151 | 0.552250977682266 |
| CATTACAATGAC  | 647.044474838738 | 0.260173661621159 |
| GGTGCATGATGAC | 647.048754644898 | 0.355144494652487 |
| TATGGCCAGTCA  | 647.051631496086 | 0.335166190440847 |
| GTCATAGAGGAA  | 647.062401793389 | 0.370346087807407 |
| ATCCTTGTGATC  | 647.071863000082 | 0.232700531367407 |
| GTCATCCTCCAA  | 647.081484107444 | 0.274556562546309 |
| GTGTCATGCACA  | 647.084853312638 | 0.337741385290785 |
| CGTCATGTGGTC  | 647.092712253062 | 0.489464036090181 |
| GGTTAGTCTTAA  | 647.094812698253 | 0.392217101531876 |
| GTCTAGTGACAC  | 647.095203951299 | 0.632728962725668 |
| ACGTCACATCCT  | 647.095228349371 | 0.214969544842285 |
| GCGAGAGTCAGA  | 647.104781240518 | 0.285679091284023 |
| GTGCAAATGACA  | 647.112003122326 | 0.483800436093577 |
| CCGAAAGATGAC  | 647.119273862899 | 0.62306909356463  |
| GTCACAAATTTA  | 647.120043407665 | 0.329017348924901 |
| TAGAATTACGCA  | 647.136895402146 | 0.522918248165044 |
| ATAAGACGTGAC  | 647.137571076981 | 0.250131299193142 |
| GGTTCGGAGTCA  | 647.139292643462 | 0.312972027193367 |
| AAATGACAAGCC  | 647.139854355878 | 0.18846194263169  |
| AATTGTTATGAC  | 647.140567346072 | 0.314014780135703 |
| CTGAATGATGAC  | 647.150843830299 | 0.529900519192393 |
| ATGTAATTTGCA  | 647.179305303584 | 0.606005779678377 |
| CCGGTGCATGAC  | 647.186701056471 | 0.552154183793677 |
| ATTGATGTGTC   | 647.195375339717 | 0.622646928818037 |
| ATGACGACGCG   | 647.204262002748 | 0.32213290737537  |
| CAGCGCATGACG  | 647.207723789765 | 0.634388209510752 |
| CCTCCAATGACG  | 647.209333762204 | 0.20725573756162  |
| GATTGATTCACA  | 647.220729987171 | 0.369010807645275 |
| AGTCACGCTAGA  | 647.222158560766 | 0.136521393617332 |
| CAGTATAAGTCA  | 647.231526735368 | 0.321863033831452 |
| ATTTTGTATGACG | 647.262546648958 | 0.645788238911387 |
| TCATAGGTGTCA  | 647.280219552134 | 0.404756435174386 |
| GGAGGCTATGAC  | 647.284038860741 | 0.299739414238571 |
| ATGACGTCGAAA  | 647.290077400003 | 0.357951800674938 |
| GCGTCACCAAAA  | 647.29241613034  | 0.423756191411344 |



|              |                  |                   |
|--------------|------------------|-------------------|
| TGACTTATCTCA | 647.293222974556 | 0.445873100183741 |
| GGACAATAGTCA | 647.307277189506 | 0.303469215891792 |
| CTTCCGTGTGAC | 647.32290461039  | 0.415339724941512 |
| AGTCACGGCCGA | 647.32722982524  | 0.323968115870642 |
| CTGACTCGGTGA | 647.330750435737 | 0.277533714158742 |
| GTCATTTCCGAC | 647.335800246163 | 0.421947659950979 |
| GTCACCATAGGA | 647.341294384548 | 0.326182081470571 |
| ACTAATCTGTGA | 647.345901956338 | 0.547382660118031 |
| AGTGGTGATGAC | 647.347022971685 | 0.39471953116483  |
| AGCTTAATGACA | 647.360582210403 | 0.253358090921229 |
| CGTCATTGTTGC | 647.365103247223 | 0.268280791846243 |
| ACCTGCATGACA | 647.374655851522 | 0.377672452532355 |
| GCGCCCTATGAC | 647.378163099971 | 0.503028707001569 |
| CGCCTGATGACG | 647.394278764651 | 0.556944071054418 |
| CAAACTGGTCA  | 647.397995235949 | 0.597943535551177 |
| ACTACTAATGAC | 647.404056851259 | 0.414988493270882 |
| GTCGTTCTGTCA | 647.404589259728 | 0.519962208734602 |
| AGTTTGTGACGC | 647.40646953001  | 0.35619292797836  |
| TAATTATGAGTA | 647.406745891385 | 0.105107557411174 |
| TCATATGCATGA | 647.4216186692   | 0.532270045629348 |
| ATGACATTTTAA | 647.432924586007 | 0.375891873062035 |
| TAAGTTATGTCA | 647.433538204556 | 0.513869384254303 |
| CATTTGCGTGAC | 647.43755336317  | 0.681054556294747 |
| GTCATCTCAGGA | 647.438621007695 | 0.773809656571571 |
| GAGTAATCCAGA | 647.439874910538 | 0.551694165193679 |
| GATTAGTCCATA | 647.441922126631 | 0.277069859662913 |
| CAGGTCTGACAA | 647.445922314846 | 0.43557129929372  |
| CTCCTTTATGAC | 647.44720758086  | 0.242131925758754 |
| CAAGACCAGTCA | 647.449015599199 | 0.58928249314174  |
| ATAGTAATGACG | 647.449724173599 | 0.318659578828726 |
| CAGAGCAATGAC | 647.468894935843 | 0.453072642193091 |
| ATGACAAAGGAA | 647.469316450761 | 0.309803306100473 |
| GACCTACGATGA | 647.477105141836 | 0.469437823442368 |
| AGCTCATGACAC | 647.489585516803 | 0.46344532602643  |
| ATTGATTACAC  | 647.495934338036 | 0.294242046857687 |
| ATGACATGCTTA | 647.506745235063 | 0.518025528100852 |
| GATGGCGTCACA | 647.51210845027  | 0.325915866523335 |
| CACGAGTAGTCA | 647.512691578972 | 0.482599911373025 |
| TAAATTATGTCA | 647.528962535608 | 0.348571738860499 |
| GTCATGCTTCGA | 647.529418220241 | 0.436641142988712 |
| GACTAATCTACA | 647.531514926528 | 0.547404768836378 |
| ATGACGCCTAGA | 647.548014879209 | 0.217938076639541 |
| CATTGCGGTGAC | 647.555229018434 | 0.530105234745391 |
| GCGGAAGATGAC | 647.559546712563 | 0.264167940764168 |
| CCAATTGACACA | 647.562585648341 | 0.397804273864272 |
| ATGACAATGAAT | 647.563540036247 | 0.486670901132962 |
| CCAGATCCGTCA | 647.565148964339 | 0.372437403679597 |
| AAAACACAGTCA | 647.588127003869 | 0.656903202927491 |
| ACCAGGTGTGAC | 647.591025367747 | 0.370254412024348 |
| TGACGAATGCAA | 647.605739936642 | 0.317309220051613 |
| CAGCTTAATGAC | 647.613248704118 | 0.525351838444547 |
| CAGTGTGGTGAC | 647.614951074034 | 0.534019082036914 |
| GTGACTTACCTA | 647.631486514924 | 0.363936193288416 |
| CATGAGCTGTCA | 647.631881777586 | 0.550903223660037 |

|                |                  |                   |
|----------------|------------------|-------------------|
| GGCTATGATGAC   | 647.633460739712 | 0.524698097356392 |
| GGATGATATGAC   | 647.639659253915 | 0.408766032415941 |
| GTCATCCGCAAC   | 647.650617423325 | 0.52229595280598  |
| AGTGTCATGGAC   | 647.651276286997 | 0.276102928739882 |
| ATGACATCGTAG   | 647.652855414097 | 0.268797778682245 |
| CGTACGCGATGA   | 647.657736639038 | 0.520203129957253 |
| GGTGTGGATGAC   | 647.662850093018 | 0.314136241336171 |
| GTCATGTCTGAA   | 647.687852610794 | 0.475824396723882 |
| AATAATTGTGAC   | 647.694601468422 | 0.493192909929886 |
| TATGCTTACTCA   | 647.695197591884 | 0.351904256795064 |
| GAGTCAAAGGCA   | 647.701982366907 | 0.317806537433981 |
| CCAATTTTGTCA   | 647.702001646937 | 0.58164752095901  |
| ACAAGTGACGTG   | 647.724953483425 | 0.283302464962304 |
| CGAGTTTGTAC    | 647.727957787635 | 0.459804700642393 |
| ACTGAGTGAATC   | 647.728956275855 | 0.673275347337647 |
| TTGTGTCAACAA   | 647.73304156362  | 0.311564032979422 |
| ATGACAGCGAAC   | 647.747386231346 | 0.281286592228673 |
| GTCACAATTTAA   | 647.750019726911 | 0.180620197647002 |
| CGTCACGATATA   | 647.754360623481 | 0.583351948314064 |
| ACTCATAGCGTC   | 647.767632130352 | 0.393378821614167 |
| ATGAGCAACCGG   | 647.771835996775 | 0.32527286132334  |
| ATGTATCGTCAC   | 647.778060091559 | 0.29588823360339  |
| ACTTTTGTGACGCA | 647.784437967472 | 0.4089518806053   |
| ACAGCTGACACA   | 647.78459645643  | 0.272675090579233 |
| ATGACACCCTAA   | 647.792941642713 | 0.252657582262669 |
| AGTAGGGAGTCA   | 647.796332055072 | 0.258940477815638 |
| ATGACACTCAAG   | 647.821106775548 | 0.35159971992407  |
| CTCGTTTGTGAC   | 647.821126936004 | 0.515871190088631 |
| GCCGCAAGTGAC   | 647.82143668974  | 0.610134716282377 |
| AACGTGTGAGAA   | 647.822971776942 | 0.360477437937491 |
| AGTCTTGTGATC   | 647.824007939422 | 0.244112848756858 |
| AATGACATTACA   | 647.839263717298 | 0.371577937093126 |
| GACCACGACTCA   | 647.847269540024 | 0.259902450187848 |
| GTTTGTCTATGA   | 647.850836349567 | 0.475232261080307 |
| AGTCAGAGATAT   | 647.855263234926 | 0.27072473221839  |
| ATGAGCCAGACA   | 647.875182934182 | 0.293083525647899 |
| TCAGCGTAGTCA   | 647.883464405607 | 0.358847218812288 |
| GACCTACTCATC   | 647.889973795624 | 0.280092158837359 |
| ATTTATAGTGAC   | 647.890606289545 | 0.402726907763244 |
| GTGCGTGTGTCA   | 647.900106133271 | 0.541682928869286 |
| ATGTAGTGAGTC   | 647.914080163498 | 0.448256199020826 |
| CTGCAGATGACA   | 647.933953278537 | 0.420658795919941 |
| CGCGTCAGTGAC   | 647.934474640148 | 0.456045065767439 |
| ACTCTTACTAAT   | 647.936985344669 | 0.269862392940654 |
| CCCATCGACTCA   | 647.938334413436 | 0.233491293658017 |
| ATAAATGGCTCA   | 647.939898758959 | 0.338582634472488 |
| ATGGGTGATGAC   | 647.948176769009 | 0.334510328108925 |
| AACCAGTGACAC   | 647.949903168371 | 0.554117070156655 |
| GAGTCAAACCGC   | 647.959735484456 | 0.562942543592067 |
| GACTTGTGACAA   | 647.960642295868 | 0.550267597195863 |
| TCCACATAGTCA   | 647.964126289301 | 0.475662514302745 |
| AGTCACGCTCGG   | 647.971922211483 | 0.572324436699427 |
| ACAGTCAGGTAC   | 647.982991355285 | 0.34798032374932  |
| GATGACGGCATA   | 647.994690959124 | 0.375864022359872 |

|               |                  |                   |
|---------------|------------------|-------------------|
| AGACTAATTTTCG | 647.996505510945 | 0.287002261950035 |
| CACACGGTGACA  | 647.998623741048 | 0.504030326588623 |
| CCCGATGACGGG  | 648.001664482973 | 0.452085470998078 |
| CGTCACCGAGTC  | 648.012202188248 | 0.6202279691515   |
| GCGTTGACGTCA  | 648.014479565901 | 0.555298632928003 |
| CTGCTTTGACTC  | 648.035523142601 | 0.334726527154801 |
| CCGGCTAGTGAC  | 648.03672858711  | 0.521391158849078 |
| ACAGAGAATGAC  | 648.039240915727 | 0.142733737343328 |
| ACCGCGTCACTA  | 648.052590243376 | 0.29351737804101  |
| CTGCGGGAGTCA  | 648.054387313088 | 0.534611460394989 |
| ATAAACCGTGAC  | 648.055175457204 | 0.658073250870148 |
| TATTCGACTCA   | 648.058337265506 | 0.122242338075861 |
| TGACGAAACGAA  | 648.079655287276 | 0.43555637009009  |
| AACATGTCGTCA  | 648.098226768021 | 0.476376027600247 |
| AGCGAGAATGAC  | 648.100981865621 | 0.433505673954316 |
| ACGAATTAGTCG  | 648.105439842396 | 0.420216179270936 |
| GACTATTATTCA  | 648.109094836242 | 0.279913461549095 |
| GTATTACAGTCA  | 648.110765146453 | 0.492462157233443 |
| CGAACCGGTGAC  | 648.110964517264 | 0.344521153600343 |
| TGGCTCATTCAA  | 648.113170294403 | 0.405965331605267 |
| TGACTCCGGCAA  | 648.115534780708 | 0.619110708024479 |
| CTTGCCGACTCA  | 648.133509523878 | 0.305849672803798 |
| CACTTGACGTGA  | 648.135969768114 | 0.770790987579396 |
| AAGTCAGTAATC  | 648.142153667025 | 0.265138462954584 |
| ACCGCATATGAC  | 648.142158291244 | 0.340838993234004 |
| TAAACATCTGTCA | 648.144172475168 | 0.53678477125718  |
| CCTTGGAATGAC  | 648.144665050581 | 0.338042021971699 |
| CAATTTAGTGAC  | 648.146093953203 | 0.495647789365635 |
| AAGTCTTGACTC  | 648.149080192002 | 0.405696890825488 |
| CAGACTGTGTCA  | 648.150630442625 | 0.618193406472359 |
| AGGGTCGTGACT  | 648.155590671549 | 0.158045840625006 |
| GCCTCCACGTCA  | 648.158936649455 | 0.442018453518824 |
| CCTCCCTGACTC  | 648.16260177768  | 0.233449159154851 |
| GGAAACAATGAC  | 648.164901309425 | 0.392277529452002 |
| ACTCATCCGTGG  | 648.164933449126 | 0.330154727212336 |
| GCGTTGACTACA  | 648.16808209664  | 0.414759765053431 |
| ATTCAAATGACG  | 648.176641907298 | 0.517125514496747 |
| AGATGATGCAAT  | 648.18624711818  | 0.240981326412302 |
| GACAGATCAGTC  | 648.188820588799 | 0.397099385722779 |
| AATCGCGTCACT  | 648.190557562106 | 0.485617496792014 |
| ATGACGTTCAAA  | 648.196788877401 | 0.388102603142843 |
| CCAGCTGACACA  | 648.201053047234 | 0.12816855754811  |
| TACATGGTGACA  | 648.204169644988 | 0.374391545428471 |
| GAGTTACGTGGC  | 648.236072013931 | 0.255082260864745 |
| AGAGTCAATAAC  | 648.242788101771 | 0.313067130947134 |
| ACCAATAGTGAC  | 648.251389416498 | 0.432957953612395 |
| ATTAACATCATCG | 648.251575713202 | 0.290243248194937 |
| AGATCTCATGAC  | 648.275154963794 | 0.584232919212149 |
| GTCACCCGAAGA  | 648.283882083356 | 0.473918035647812 |
| GTCACAGCCAAA  | 648.289253810958 | 0.502830605486808 |
| TAAATTAAGTCA  | 648.29167988349  | 0.48296419737512  |
| AGTCATGGGCTA  | 648.294466184525 | 0.317772820097254 |
| AGCGACGATGAC  | 648.297591658017 | 0.354462827551494 |
| CTGGTATATGAC  | 648.300609462884 | 0.496338937862757 |

|               |                  |                   |
|---------------|------------------|-------------------|
| ACGTCAGCCATG  | 648.301821050877 | 0.953480174041654 |
| ATAATCAATGAC  | 648.303883326599 | 0.713277306850975 |
| AGGTATGATGAC  | 648.312605566269 | 0.181445308438171 |
| TCATAGATAAAA  | 648.334113460436 | 0.522441939780397 |
| ATGGCGTGAGTC  | 648.341546814514 | 0.388857823190021 |
| TGTCATTAGGAA  | 648.358437862946 | 0.369853154722776 |
| GCGTCACATCGA  | 648.368071526763 | 0.392372790518844 |
| GTCACTGTCAGA  | 648.390133601476 | 0.212029564155612 |
| CGTGTCTAGTCA  | 648.396338498599 | 0.518773603672253 |
| GTCATCCTCCTA  | 648.411841449432 | 0.197401077646584 |
| CGGGCACGTCAC  | 648.421951592013 | 0.43587601134694  |
| TGAACCGAGTCA  | 648.424501667917 | 0.190336666071577 |
| ATGAGTGCATCG  | 648.427408282801 | 0.4192107238822   |
| AACGGAGATGAC  | 648.432869716964 | 0.37916313797407  |
| AGTGTGCATGGAA | 648.433728801449 | 0.313568014498672 |
| CTGCGTGACGAA  | 648.437831652808 | 0.491552463638558 |
| ACTGAGGACTCA  | 648.441610080027 | 0.463465065845277 |
| CAAATGCAGTCA  | 648.45449870736  | 0.447411544975166 |
| GTACCAGATGAC  | 648.456138573871 | 0.521311727508862 |
| CCGGCCATGTCA  | 648.460154989419 | 0.269956499856404 |
| GACGGGGAGTCA  | 648.460710694195 | 0.227801105104034 |
| AGTCAGAAGCAG  | 648.465034547073 | 0.311559782150484 |
| AAGTCAGATGAC  | 648.468468422616 | 0.326488001255104 |
| ATGTGTCTGTCA  | 648.47914922331  | 0.268778344031934 |
| CGTGCCGGTGAC  | 648.481268719369 | 0.630354382883331 |
| GAATAAGTGTC   | 648.493033630495 | 0.470112599316409 |
| ATGATTCGAATC  | 648.501434592864 | 0.576476487122041 |
| GCATGATGTAAC  | 648.50317972518  | 0.407274090234253 |
| GTCACGTAACCA  | 648.505582305672 | 0.376908738795525 |
| GAAGAAAATGAC  | 648.506005594921 | 0.415431465727635 |
| ATGGCAGACTCA  | 648.508447545483 | 0.612486375492784 |
| CGTTCTTCGTCA  | 648.51210665199  | 0.601366113679501 |
| TCTAACGACTCA  | 648.514301393227 | 0.276477474766444 |
| CTAATGGTGACA  | 648.514313910062 | 0.374497850387101 |
| TACGATGGCTCA  | 648.517330939326 | 0.462013771119357 |
| CGCGCTAGTCAC  | 648.528287763566 | 0.374560764311431 |
| GTACCGACTCAC  | 648.531343898068 | 0.228859985034367 |
| GACTTAGATGAC  | 648.535942579953 | 0.419622523076225 |
| AGGCAGGAGTCA  | 648.552514427364 | 0.411848343123862 |
| TACACGGTGACA  | 648.553184928037 | 0.318674596392057 |
| TGACCCATGAAA  | 648.557802939814 | 0.700195380918293 |
| ACTATAACGTCA  | 648.570026719697 | 0.590852993242636 |
| CTTGATTAATAA  | 648.573611117897 | 0.30976700548843  |
| CTGTAGTGACGC  | 648.578819358193 | 0.314229191116061 |
| GTGTCTGACAAA  | 648.581901071615 | 0.493086230055112 |
| ACGTCACAAATTC | 648.590203422695 | 0.254236874565255 |
| ACCAACTGTGAC  | 648.592348864967 | 0.378426194561722 |
| GCTTGGAATGAC  | 648.599094221331 | 0.31631544926746  |
| GGTAACGACTCA  | 648.605835431856 | 0.426665670975385 |
| AGTCACCCACC   | 648.609938339312 | 0.300281798029761 |
| AACTCGCAGTCA  | 648.612493635303 | 0.681765424224482 |
| CACGTTCTGTCA  | 648.614604961257 | 0.578418885766656 |
| CTATCATAGTCA  | 648.615990745673 | 0.193771446723094 |
| ATGACCCAGAAA  | 648.618222163389 | 0.317564579217705 |

|              |                  |                   |
|--------------|------------------|-------------------|
| GTCACCGAACCA | 648.619860204385 | 0.247777330114091 |
| CGGTCATAATGA | 648.629050120569 | 0.517470235020731 |
| AGTCACGGAATC | 648.635555842094 | 0.362148024103665 |
| AAAGGATTAGTC | 648.643333071272 | 0.238489653434606 |
| AACCATGACACT | 648.657970159825 | 0.123447232291129 |
| GACAGCTGTGAC | 648.671350468119 | 0.519662084714656 |
| ATGACGGACCAA | 648.67475845554  | 0.253872451167527 |
| ATGCAGTCAGCA | 648.676846367609 | 0.377760329986451 |
| ACGTCACAAATG | 648.677377993296 | 0.436721844736894 |
| CGTCATCTCAGA | 648.679032360009 | 0.432488502153231 |
| CAAATTGCATCA | 648.682207078829 | 0.465449979070595 |
| AGTAAATGTCAT | 648.710095067704 | 0.312501872884569 |
| ATAAATATGTCA | 648.712278587722 | 0.342384737503221 |
| GACTTTTCGTCA | 648.715406620059 | 0.651684085170029 |
| GGAAATCCGTCA | 648.722399113692 | 0.613921878844219 |
| GTAGGATATGAC | 648.741947104029 | 0.28264188453753  |
| GGGAAATATGAC | 648.745261990165 | 0.160439179902275 |
| GGGTCATCTTAC | 648.749230323748 | 0.237355714054645 |
| TACAACCAGTCA | 648.77015719881  | 0.540200668848662 |
| ACTCATGCAGTG | 648.77358542235  | 0.369212417406378 |
| CTCATCAGTGAC | 648.773968649232 | 0.531166413135424 |
| AGACTAATTACA | 648.780762146729 | 0.47298174077547  |
| AGATCCCCTCAT | 648.786360605677 | 0.443634831535942 |
| GTGACTCGGGGA | 648.786745190565 | 0.110492718908396 |
| GACTGCGACTCA | 648.793440421281 | 0.503483329614949 |
| CTAAACAAGTCA | 648.794601623256 | 0.419270096731311 |
| AGCAACGTCATG | 648.798908292534 | 0.348096534856799 |
| AGTCACCCCTGG | 648.799696641124 | 0.524091901422259 |
| GCGTATCCGTCA | 648.804832182063 | 0.224351053689969 |
| GTCATTTTATAA | 648.808382184987 | 0.480227238544882 |
| CCATTGGTGACA | 648.811801270516 | 0.432930721205907 |
| CGTCATTTCTCA | 648.829171451283 | 0.311428389951185 |
| CCGTGAGGTGAC | 648.852616675165 | 0.42757156624168  |
| GGACTCCATGAC | 648.865197018709 | 0.624848401676911 |
| TCATCAGTGTC  | 648.866300055013 | 0.495809551088572 |
| ATGACATTGCGC | 648.889068673016 | 0.316767819545629 |
| AGGCAAGACTCA | 648.90521421765  | 0.613714328711013 |
| GTGTCACGTTGA | 648.907640095854 | 0.267312017364886 |
| ACGTCATGTAGT | 648.909902269149 | 0.420150077450626 |
| CTGACTCGGTAA | 648.924325976696 | 0.313759015592078 |
| ATCTGACGATGA | 648.930720291475 | 0.384115033239458 |
| ACTGACGTGACG | 648.931377341317 | 0.358112523286054 |
| ATGACCCAGAGG | 648.943836940593 | 0.28732554623248  |
| CAGAGTGACGAA | 648.952455442901 | 0.312781453298133 |
| ACAGTGGGTGAC | 648.958491661761 | 0.411773682800046 |
| CGTGATTAATAA | 648.965878407054 | 0.443136019983289 |
| CGAAATGTCATA | 648.971578991963 | 0.127130795118524 |
| AGTCACGGTAGA | 648.980543094417 | 0.227606742127893 |
| CCTAAGTGAGTC | 648.986614031624 | 0.343562535859604 |
| GAATCTACGTCA | 648.986740182157 | 0.655810080718686 |
| CGTCATCTCGTC | 648.997573602474 | 0.370244591102068 |
| CTTAGAGTGACA | 649.002218365247 | 0.568945268220888 |
| CATTAAGATGAC | 649.014209143102 | 0.413317782019729 |
| CACTATGACCTG | 649.016057905072 | 0.395303616512687 |

|               |                  |                   |
|---------------|------------------|-------------------|
| CGACCACAGTCA  | 649.020837752724 | 0.581202290268298 |
| AGACTAATACAG  | 649.025408694594 | 0.246247993235909 |
| GAGTCAGGC GCC | 649.034843698834 | 0.476048183449637 |
| ACGGGTCATAAT  | 649.038975538964 | 0.291954547912825 |
| AGTCGGTGTGAC  | 649.040822938568 | 0.234589874634358 |
| ATCACTATGTCA  | 649.042926455571 | 0.539173929893872 |
| AAGTTATTACTC  | 649.051956218732 | 0.515247383065869 |
| GGGTACGATGAC  | 649.052268301125 | 0.322030646403539 |
| CCACTGAGTAAC  | 649.054465767032 | 0.188278778303986 |
| GAGTCAGGGAAC  | 649.070346272172 | 0.362327107296904 |
| CATTCAAATGAC  | 649.071212216779 | 0.280269069178075 |
| ATACTAGATGAC  | 649.084205333409 | 0.448373497024295 |
| GACCTTGT CACA | 649.095074024727 | 0.27214240379631  |
| ATGACATTAGAC  | 649.095518594595 | 0.402622482516964 |
| GTCATCTAGTAA  | 649.103482077442 | 0.551524100684885 |
| GACTCACGGTAA  | 649.118559301205 | 0.53387781443345  |
| CGACGCATGACG  | 649.142151361061 | 0.527090831942237 |
| ATACCAGATGAC  | 649.142609413641 | 0.527546586299687 |
| TACACTGTGACA  | 649.142815798219 | 0.211190249852887 |
| TGACGCGTAGCA  | 649.15167649627  | 0.487596524516071 |
| GTCACACACATA  | 649.15569345967  | 0.277824529761207 |
| AGCGACTAATTC  | 649.156001747076 | 0.267759041151866 |
| CCTACTGAATCA  | 649.157106337046 | 0.255754772479463 |
| TCATAATAATGA  | 649.157521158866 | 0.523301529143574 |
| AGGATTGATGAC  | 649.16025723254  | 0.300479576453439 |
| GCAGATGATGAC  | 649.160383511303 | 0.519828834421946 |
| ATGATAGTG TCA | 649.165417841004 | 0.496033716044668 |
| TCATTTGACGCA  | 649.184575555034 | 0.336811230924897 |
| GTAGCCGATGAC  | 649.18955549041  | 0.436275673009443 |
| CGAGAAGTG TCA | 649.191913039998 | 0.317153652725401 |
| GTCATAACGACA  | 649.198235273222 | 0.169251890435164 |
| ACAAATTACGCA  | 649.209329949216 | 0.441507666877188 |
| ACCACCGATGAC  | 649.216035831281 | 0.311063196163226 |
| AAGAGAGTCAGA  | 649.228674818578 | 0.224570810580032 |
| GTCATGTCTCAA  | 649.231488324448 | 0.338158320235895 |
| GCGTCACCC TTA | 649.238965536022 | 0.32029922812407  |
| TACATTGACACA  | 649.24800615168  | 0.246493358342981 |
| AGTCAGTGACGA  | 649.250777854991 | 0.362000443053545 |
| AATGAGGATGAC  | 649.25584520443  | 0.425384487944219 |
| CCGGTTTGTGAC  | 649.275985240607 | 0.516791434183479 |
| ATTACTAAGAAC  | 649.282869994624 | 0.40608724703718  |
| GCTTAATGACAA  | 649.287284602593 | 0.40384744252267  |
| CATAACATGACG  | 649.303276845244 | 0.514560571645765 |
| GTCATGCCATCA  | 649.307008276361 | 0.396236648075751 |
| GCCCGAAATGAC  | 649.316633016483 | 0.353934494047322 |
| CAGAACGTGTCA  | 649.325557133056 | 0.314154699289077 |
| GACTCCTGACTC  | 649.326938398903 | 0.352873105103698 |
| GTCAACGTGTCA  | 649.339565448619 | 0.43553707730227  |
| AGTCATGGGGAC  | 649.343606406122 | 0.278568884471919 |
| GAGCATGATGAC  | 649.344489585917 | 0.334421988660583 |
| GAGTCAGTTCGC  | 649.351672106262 | 0.389486449075901 |
| GTCACATCCTGA  | 649.351848070207 | 0.246571909952    |
| CACTCCTAGTCA  | 649.35853619359  | 0.390769370143973 |
| GACCGGTGTGAC  | 649.364338058139 | 0.494072662194178 |

|               |                  |                   |
|---------------|------------------|-------------------|
| ATTCTATGTGAC  | 649.369983000859 | 0.559561412425116 |
| AGTCAAGGTGAC  | 649.374608364484 | 0.284578357601284 |
| TCACCATGACGA  | 649.375694884    | 0.258383708848094 |
| ATGAGGTGACGC  | 649.375751484661 | 0.409630294881182 |
| CGTGAATCGTCA  | 649.376214649285 | 0.275442079280645 |
| TGAAGTGAATCA  | 649.379297931864 | 0.308612603309242 |
| CTCAGGGAGTCA  | 649.39406436362  | 0.37992049937985  |
| CTCAATAATGAC  | 649.423824812875 | 0.578695181503305 |
| GTCACCGTGTA   | 649.424375313151 | 0.619946575406378 |
| CCGAAATGACAG  | 649.429541720364 | 0.434684532989881 |
| GTCATTGTGCTA  | 649.439358287829 | 0.52806941593973  |
| ACCCGTGACAAA  | 649.441786912736 | 0.371356471539673 |
| ACTAAGATGACC  | 649.442208156118 | 0.478961006577007 |
| CATAGTGCAGA   | 649.442238263872 | 0.657633591464741 |
| ATTGCTTGACTC  | 649.444301210606 | 0.416279621369138 |
| TCATGACAGTAA  | 649.445056949527 | 0.484931279321869 |
| GACTCACGAAAC  | 649.445799197389 | 0.398181008506077 |
| ACCACTGATGAC  | 649.447997242284 | 0.306565596899656 |
| AATTTTGTGTCA  | 649.455396694672 | 0.464844664978101 |
| AGTACAGATGAC  | 649.455827853517 | 0.403184953023862 |
| CGAACTAGTGAC  | 649.471166282831 | 0.468276109147726 |
| AGTGTCTGTAC   | 649.478491788995 | 0.145752425679655 |
| GTCACCCGAACA  | 649.498852632215 | 0.402450821141986 |
| AGCTGGGAGTCA  | 649.500559869047 | 0.331856523768869 |
| GACTTGTACAAA  | 649.500972470463 | 0.467402165829081 |
| GTGCGTCAAAGA  | 649.533336108239 | 0.339731377095298 |
| TTAGTAATCCAA  | 649.53730224137  | 0.383555483260056 |
| CCGATGGAGTCA  | 649.543880449191 | 0.539064854884167 |
| AGTCACGCCCGG  | 649.550686063847 | 0.432055614842575 |
| ATGAATCTTACG  | 649.554023098243 | 0.358460742008541 |
| GTCAGTCTGTCA  | 649.554664183334 | 0.432251337618654 |
| ATGTACAATGAC  | 649.557880333312 | 0.390691191338484 |
| ATACCGGAGTCA  | 649.559950833631 | 0.613916450967261 |
| ACTCATAGGGAT  | 649.561300353409 | 0.367489791599591 |
| GTAACACTGTC   | 649.562512462765 | 0.806202063946772 |
| ATTAGTAAGTCA  | 649.566414188387 | 0.294119190033073 |
| GTGCCAGAGTCA  | 649.569789920684 | 0.465391082319475 |
| GTCATTACGCGA  | 649.576965354674 | 0.259233753984653 |
| TGTCATTATAAA  | 649.579629580651 | 0.185865335597389 |
| TGACTGCAGACA  | 649.58930994868  | 0.717781587664498 |
| CTAGAATATGAC  | 649.590025460497 | 0.397114067522235 |
| CTGGTTTGACTC  | 649.590160715283 | 0.764653280302731 |
| ATGAGTAGTACG  | 649.597201933254 | 0.284800577955226 |
| ATGACTTGGTGCG | 649.608386890598 | 0.402236354989454 |
| AAAGCAGATGAC  | 649.617015377244 | 0.304984404222395 |
| GCGAAGGATGAC  | 649.619784140649 | 0.370026438511953 |
| CCTTAAGTGTCA  | 649.63817545326  | 0.429755819108155 |
| GAAGGTAGTCAC  | 649.65648035169  | 0.369186573215213 |
| GGTGAGCCACAA  | 649.663422489773 | 0.326791142187668 |
| ACGTCAGTCTGG  | 649.668231675322 | 0.555589129145015 |
| TGACTATGCCAA  | 649.668379639223 | 0.321679885168237 |
| GACTCACTTCGC  | 649.668520906208 | 0.299278025219446 |
| AAACAGTGACGT  | 649.675923622431 | 0.208697547372598 |
| CTGACGGATTCA  | 649.678054516437 | 0.527375312872594 |

|               |                  |                   |
|---------------|------------------|-------------------|
| CTGTCATGCGTA  | 649.687592209994 | 0.276997480973765 |
| AGAGGCGTGACT  | 649.695885454281 | 0.336283558352813 |
| CGACCCTAGTCA  | 649.707597964868 | 0.446365843293077 |
| GTCACACATCAA  | 649.707611324402 | 0.44800982563919  |
| ATGAGTCTCTCG  | 649.725559989787 | 0.558064747801159 |
| GGCTCCCGATGA  | 649.733549992936 | 0.402868791859157 |
| CCGCGATATGAC  | 649.738561497792 | 0.652149186046724 |
| GTCATCAAACATA | 649.745752837365 | 0.182541566118341 |
| AGGCCATATGAC  | 649.750226191366 | 0.392393246392695 |
| AGATATTGCTCA  | 649.750319556729 | 0.451739880527069 |
| CATCGGGAGTCA  | 649.757544487616 | 0.456744204382472 |
| CCGGCCGATGAC  | 649.757711940754 | 0.425899620458212 |
| GTCACCCGTTCA  | 649.758523679116 | 0.738522357554967 |
| GTCATCCAAACA  | 649.803345888308 | 0.434925928181331 |
| CTACAATATGAC  | 649.811830425101 | 0.386498337020137 |
| CAGTTTACGTCA  | 649.824967052215 | 0.398858368623355 |
| AGGCACACGTCA  | 649.829835219217 | 0.505375007980006 |
| ATGAAGTACCCC  | 649.841914623594 | 0.299680435457113 |
| GGCGCGTATGAC  | 649.84297614046  | 0.792770763232038 |
| ATGAGTAGTAAT  | 649.84493902559  | 0.259502057787865 |
| AATATCGCGTCA  | 649.845290857981 | 0.474649697828323 |
| GCTAATGGTGAC  | 649.853012209458 | 0.264425821246337 |
| GATGCATAGTCA  | 649.859111137329 | 0.205207883430845 |
| AGGGAGGATGAC  | 649.861330897563 | 0.170293481070297 |
| GCACAAGCGTCA  | 649.865529644361 | 0.265858715479627 |
| AATGCCTAGTCA  | 649.873240901686 | 0.401010288309205 |
| CGGACGTGAGTC  | 649.873830351718 | 0.264785560376075 |
| GAGCTTAATGAC  | 649.874975110196 | 0.485291193111265 |
| GTAATTGGTGAC  | 649.875446782551 | 0.281168342814302 |
| GTCACACGTTCA  | 649.87983734772  | 0.326338695786139 |
| GGTGACACGATA  | 649.882454704088 | 0.330428600714016 |
| GACTGATCAATC  | 649.883723006652 | 0.512501970721362 |
| AGTCACTTGGGA  | 649.883999651236 | 0.339375209439775 |
| CGGACCCGCTCA  | 649.898709354191 | 0.423297162598768 |
| GACTTAGGTGAC  | 649.899826861811 | 0.292615384940251 |
| GTCATAGGATTA  | 649.909396664587 | 0.358954103588281 |
| AACCCGTGTCAT  | 649.920999829139 | 0.325095773791361 |
| CGCAGATGTGAC  | 649.92532286069  | 0.319875629776583 |
| AAGAGGTGACGT  | 649.936317043453 | 0.293647536059845 |
| CCGATATTAGTC  | 649.945931995681 | 0.52470805216503  |
| GGACTCACGTCA  | 649.951055711181 | 0.339548049880172 |
| ATGACACTCAAA  | 649.954006604132 | 0.344216548412295 |
| AGTCACGCCTCA  | 649.954430295167 | 0.30016436081136  |
| AGTCACTTGAGA  | 649.972777819429 | 0.398303014710897 |
| CGTCATCGGGAC  | 649.975813245003 | 0.590512491885353 |
| AGAGTAAGTCAC  | 649.980406872065 | 0.180314863326237 |
| CTCGCCTGACTC  | 649.991120029383 | 0.32988245729853  |
| GAACATGACACC  | 649.992964095079 | 0.399590914190206 |
| ATGACATGCATA  | 649.996287103611 | 0.635414588967294 |
| CTTTGGCATGAC  | 649.997496162669 | 0.363861404823344 |
| GTGACACGATTA  | 650.000160717098 | 0.278315853554392 |
| AGTCATGAGCCC  | 650.006807217035 | 0.421558624895308 |
| CCGTCGTAGTCA  | 650.012653374305 | 0.460572099901834 |
| ACGAATCATCTG  | 650.01723983379  | 0.720041162772467 |



|              |                  |                   |
|--------------|------------------|-------------------|
| GGCACTTATGAC | 650.021909938723 | 0.597776237551041 |
| GGTCTTTATGAC | 650.024060386405 | 0.52296261796251  |
| TAATAGGCACA  | 650.027109410701 | 0.283398155333144 |
| ACGGATCACTCA | 650.03530809469  | 0.400797201333099 |
| ACAATTCGTGAC | 650.035813135369 | 0.341957940606391 |
| CCTCATTGGTCA | 650.036224874221 | 0.453981395849536 |
| CGATTGCTAATA | 650.040115386621 | 0.411619376214271 |
| ACCGTTGACACA | 650.040166264862 | 0.285741061018074 |
| CGGTCATCGTGA | 650.041743827751 | 0.547914558500268 |
| ACGCGATTAGTC | 650.056592150212 | 0.532076916855006 |
| AGTCATGGGCTG | 650.083975409127 | 0.404615897071281 |
| GTCACCACTTCA | 650.096888082555 | 0.417997609244416 |
| GTCTGCACTTA  | 650.100077388635 | 0.331917701365984 |
| AGTCAGTAATAG | 650.108977277188 | 0.284787376880026 |
| CTGGCGTGACAC | 650.114369724034 | 0.498039481976662 |
| CTGTTTGACACA | 650.124515405876 | 0.459956182354468 |
| AAAGAGCGTCAT | 650.126086389214 | 0.224828696193244 |
| GTCATGCACACA | 650.136674820225 | 0.356981338798591 |
| ATGAGTACGTGC | 650.13926957756  | 0.193206948485514 |
| GATTGCTAATCA | 650.149098844759 | 0.606206796725764 |
| CGTCATTGTAAG | 650.150668225831 | 0.247983282201817 |
| ACTCACAGGTGA | 650.155985802697 | 0.578586684964324 |
| GTACCGCGTCAC | 650.158050727055 | 0.395758861215519 |
| CCACTTTATGAC | 650.159208704889 | 0.224157892132335 |
| TACTTGACGTCA | 650.172483439016 | 0.439781699705761 |
| CGTCATCTCCGA | 650.177205265033 | 0.193873064640272 |
| CTATTACTATTA | 650.18604435141  | 0.111777900462916 |
| AGTCACTCCCAA | 650.188514352488 | 0.313281686539092 |
| CAGTGGCGTCAC | 650.194670760767 | 0.291475899908007 |
| CGTTTGTGTGAC | 650.196333076535 | 0.280376167655784 |
| GCGCTATAGTCA | 650.201148028805 | 0.33405542875602  |
| ACTCCAATGACA | 650.20140043847  | 0.297700121564815 |
| CACATGCATGTG | 650.203102579745 | 0.613375789785434 |
| GTCACCACTCTA | 650.214429758057 | 0.252615486246482 |
| AGAGTCAAGCCA | 650.217990492019 | 0.473427016986463 |
| CGTCACGGATTA | 650.219984833893 | 0.386250402393128 |
| ACCGCTACGTCA | 650.233904227381 | 0.307024649145583 |
| TGACCATGACAA | 650.250455959545 | 0.239702985315378 |
| GGTCCAAGTCAC | 650.250639554616 | 0.39620033329592  |
| TGCGATTACTAA | 650.255576394043 | 0.356317452802665 |
| AGAGTCAAGAGC | 650.264553783481 | 0.328126072254561 |
| GCCACATGACAC | 650.267215190166 | 0.44383254642541  |
| GTGAGTCCACCA | 650.274974201156 | 0.537364140480377 |
| GACTGACTGTGA | 650.287888197475 | 0.400617139593192 |
| GTTAAATACTCA | 650.298482023697 | 0.397128445668421 |
| ACGAGTCAAAAT | 650.313107973982 | 0.348307831582802 |
| GTGGTGTAGTCA | 650.319349139343 | 0.310210147861152 |
| AACCAAGTGTCA | 650.323441920892 | 0.55026966866977  |
| GTCATCGAGGTA | 650.325144917601 | 0.3650476415502   |
| ATAGTCAGTACA | 650.331326561126 | 0.361065832765828 |
| TGACTGCTTAAA | 650.339544716788 | 0.563363718024589 |
| CGGACACAGTCA | 650.339759535745 | 0.445831731440535 |
| ATGACATTAATG | 650.343153892067 | 0.461584516188637 |
| ATGACAGAGATA | 650.343617711089 | 0.303274228948731 |

|               |                  |                   |
|---------------|------------------|-------------------|
| GTCATCGCGGGA  | 650.343922234487 | 0.176144969866639 |
| AATATATATGAC  | 650.345580966103 | 0.405879525632341 |
| AGATGGTGACGC  | 650.367653370987 | 0.213025469450498 |
| GTATATATGTCA  | 650.372457061249 | 0.570200734703184 |
| GGAACATGACAC  | 650.375633293886 | 0.442656091108348 |
| CCATTGGGTGAC  | 650.376823379897 | 0.502624746277403 |
| AGTCACGACACG  | 650.381917422544 | 0.330381214538702 |
| TGACGTTTATCA  | 650.408826683096 | 0.859002941802962 |
| ATCTGCGAGTCA  | 650.432163639111 | 0.503658698502935 |
| CACGTAATAGCG  | 650.434521513195 | 0.491096461879084 |
| CCATGACTTGTC  | 650.437429565106 | 0.246140634540434 |
| CCTTGGTGTGAC  | 650.443989846202 | 0.407746331153429 |
| TCGGAAATGACA  | 650.449100918277 | 0.386196597838149 |
| AGTCACGCCCCA  | 650.450918146669 | 0.40518306578261  |
| GAATGAGATGAC  | 650.454042844387 | 0.310574433758651 |
| GTCATTGTACAC  | 650.457534740806 | 0.472668717264275 |
| GACTCAATCAGA  | 650.458430060846 | 0.601811439201686 |
| GTCACCATAAAA  | 650.46476729051  | 0.259485485178799 |
| GTCATTGTACCA  | 650.469424110183 | 0.561895627950557 |
| CTGTCATGTGAC  | 650.472676383961 | 0.463761960499964 |
| CGTCATTGTACA  | 650.475753014561 | 0.462586742697753 |
| GTCATAAGAAAC  | 650.488469788027 | 0.207424557040256 |
| TGAGCAATTAATA | 650.495438930895 | 0.399787721871492 |
| GTGTCACGTGCA  | 650.504399987848 | 0.583251509519562 |
| GGTCACATGACA  | 650.52156562241  | 0.491802628961908 |
| AAATGCCATGAC  | 650.523008777774 | 0.252482724289899 |
| AAATCTCTGTCA  | 650.524164639337 | 0.432887325243589 |
| CACTGGAATGAC  | 650.528814606489 | 0.422430418051398 |
| AAGTCACCTTCG  | 650.548384428029 | 0.201030552192875 |
| CTAATGGTGTCA  | 650.55301567303  | 0.436059668528106 |
| TCAGTCAAAACA  | 650.553296272437 | 0.451670432074257 |
| GCCACATCATAA  | 650.557427882391 | 0.294594967376922 |
| GGCAGCCATGAC  | 650.568356103963 | 0.825205323182504 |
| GAGCCTGACTGA  | 650.571289001912 | 0.436729045843319 |
| CGTCAGAGTTAA  | 650.585444134597 | 0.598250139810353 |
| AACACTGTATGA  | 650.597205186543 | 0.691237351438487 |
| GTCGCGTCACTA  | 650.599142842197 | 0.20533073788938  |
| ATGACGAGCCTA  | 650.631489598342 | 0.470014900110579 |
| CCATCCTGACTC  | 650.637131149113 | 0.188167645630741 |
| TGAAGTGACCAA  | 650.643582982302 | 0.324971266541954 |
| AGTCAGAAGAAG  | 650.649310724099 | 0.308258134735596 |
| TAAACAGAGTCA  | 650.651701533122 | 0.487700870541432 |
| GTCACGGACTCA  | 650.652560358844 | 0.201623662455708 |
| GTCATCTTCGCA  | 650.669621286205 | 0.245313889765232 |
| CAGTCAGTCTAA  | 650.678567428788 | 0.297479491421765 |
| ATACGTACTAAT  | 650.67875902787  | 0.230911176331862 |
| GTCATGTACTAA  | 650.680589324784 | 0.285241617437693 |
| ATGCCACAGTCA  | 650.694340893566 | 0.353798341128974 |
| GGGTGGGAGTCA  | 650.700957865506 | 0.268299303189479 |
| TGCGCAATGACA  | 650.709417364069 | 0.444230574090855 |
| ATGCCGAACGG   | 650.713864601791 | 0.707917685363525 |
| CACGTCAGAACC  | 650.726787383809 | 0.501760638961934 |
| ACGTAAGTGAC   | 650.733353778066 | 0.488492603061048 |
| ATGACAGACTGA  | 650.737837718124 | 0.392789744453068 |

|              |                  |                   |
|--------------|------------------|-------------------|
| AATGTATGTGAC | 650.741720866691 | 0.313512098946781 |
| ATGACAGGGTTC | 650.742629483851 | 0.452429480633414 |
| AATCGAATGACG | 650.753511326738 | 0.249644124434866 |
| CTTTGGAATGAC | 650.756447889669 | 0.516513226549164 |
| GAGGTATATGAC | 650.759866201473 | 0.288150762230485 |
| GGAGCGTATGAC | 650.779368304534 | 0.349636999307164 |
| CGTCCGGATGAC | 650.781012479955 | 0.675165130909328 |
| CATCCCTGACTC | 650.782805256644 | 0.207114203674112 |
| AGCGCACAGTCA | 650.801539924549 | 0.380650553687517 |
| ATACGTGACCCA | 650.813929839517 | 0.508893457366661 |
| CACACCCAGTCA | 650.823477360937 | 0.407611607837882 |
| GTAGTTGATGAC | 650.832531828668 | 0.295974047724289 |
| GGTAGGTGACAC | 650.838263476181 | 0.351401327259782 |
| GTGTCACTGGTA | 650.83829378551  | 0.437773169860074 |
| CATCTGATGACG | 650.842548981751 | 0.364107022395369 |
| CCTTATGGTGAC | 650.844363143685 | 0.456875119433049 |
| ACGTTTGAATCA | 650.857855330484 | 0.42715884742544  |
| CTTCCCACGTCA | 650.861777947025 | 0.265448252156138 |
| CTGCCCGAGTCA | 650.869234008257 | 0.465331370564478 |
| GAAATTGGTGAC | 650.871166953815 | 0.333172090598758 |
| ACGTCACATAAG | 650.873155213737 | 0.526990211074901 |
| ATGACAGTGATC | 650.874176686284 | 0.317634449657051 |
| ATGACAAGACCA | 650.88832286165  | 0.419507051295505 |
| ATGACGACTTTG | 650.891953281455 | 0.599135559416696 |
| CCATCCGATGAG | 650.892719095301 | 0.592364794634353 |
| TAATGAGTATGA | 650.896250001466 | 0.298626570931323 |
| GCTATAATGACA | 650.90053082489  | 0.46169567083406  |
| TGACCGGTGAAA | 650.90318133504  | 0.58490735185462  |
| GCCAGATATGAC | 650.903377975079 | 0.575936390794674 |
| GTCATGTTTATA | 650.908388807149 | 0.495841888718267 |
| GTCATCTTTCCA | 650.917355235784 | 0.381738820726001 |
| ATCCGATGTGAC | 650.921504726138 | 0.533558037479094 |
| CACGTAATAGTA | 650.923733542806 | 0.43317208049676  |
| CATTCATATGAC | 650.93975395279  | 0.20484475392808  |
| CATAAGAGTGAC | 650.944293152284 | 0.354419770122513 |
| GTCACAACAGAA | 650.949783470545 | 0.418524135178619 |
| TCAACGGTGACA | 650.957867981836 | 0.323003442179822 |
| AACCTAGATGAC | 650.984261469544 | 0.333939521534487 |
| GCCCATGGTGAC | 650.99586154888  | 0.362027566284664 |
| GCAACCTGTGAC | 651.017965001216 | 0.465711503948435 |
| CGATTAGCCATA | 651.024429030727 | 0.427828055834229 |
| GTCACCGTTACA | 651.029034853859 | 0.49365245556036  |
| CATAAGGTGACG | 651.035326917558 | 0.276796489800358 |
| ACATTTGACACA | 651.036304861544 | 0.386251467753186 |
| CAAGATAATGAC | 651.064881276149 | 0.406273486074236 |
| CCGTCGTGTGAC | 651.092560020209 | 0.566057944727492 |
| ATAGCGTAGTCA | 651.097994174252 | 0.50808276538399  |
| GAACGAGATGAC | 651.098712059714 | 0.336050042865384 |
| ACACCGAGTCAG | 651.1016821616   | 0.608106775498374 |
| ATGAGTCTCTTC | 651.118567849453 | 0.34463100079693  |
| AACTCGGTGACG | 651.125276613659 | 0.338865273231244 |
| AAGTCACCCTTG | 651.12679669727  | 0.401544361720357 |
| AAAGCGGATGAC | 651.146881048576 | 0.268201643813883 |
| AGATAGTGAGTC | 651.158777555384 | 0.303892872010051 |

|               |                  |                    |
|---------------|------------------|--------------------|
| ACTCATCGTGGA  | 651.162964540948 | 0.733480606091265  |
| GTCATATACGAA  | 651.166089561006 | 0.412118013832522  |
| CTGCATTGACTC  | 651.169811332275 | 0.213688253546869  |
| GTCACGCATACA  | 651.173337065934 | 0.450948423641406  |
| AAAACAATGACG  | 651.173730301987 | 0.401743165510246  |
| ACCGATTAGTCG  | 651.174103562204 | 0.433264251544418  |
| AGTCAGAACAGC  | 651.186571705418 | 0.419436427971568  |
| AATTCTCCGTCA  | 651.192406476019 | 0.388151209003482  |
| GTCATCCCGCAC  | 651.212290446026 | 0.275053130856541  |
| GGTGATGTAACA  | 651.216078948224 | 0.350242157411076  |
| ATACGAGTGACG  | 651.220336803018 | 0.680147028401199  |
| GGCCTTACGTCA  | 651.240853073564 | 0.252513522618003  |
| CGGTCGTGTGAC  | 651.24229569458  | 0.34552795070599   |
| CTTATCAATGAC  | 651.242773422012 | 0.344214665765948  |
| GAAGTGAATGAC  | 651.245748785681 | 0.472436398436695  |
| TTACGTGTAATA  | 651.246738846471 | 0.575917172556745  |
| AGACTCACGAGC  | 651.250711339841 | 0.553032046320423  |
| TATTATTCATCA  | 651.251122766782 | 0.266444854458027  |
| CCTGCTACGTCA  | 651.274927377901 | 0.15158595554637   |
| AACTGGTCAGAC  | 651.276328920912 | 0.433249074073662  |
| CGAATTCATGAC  | 651.278043747596 | 0.528126177306547  |
| AGCGTTTGACTC  | 651.283165408146 | 0.419957046613044  |
| GACGCCAATGAC  | 651.28470467593  | 0.614043689411668  |
| CGTCATCAATTA  | 651.292272123619 | 0.314602353932854  |
| CGACTCAGTGAC  | 651.297324847899 | 0.434253333865635  |
| GTCATGTATGAA  | 651.298079055291 | 0.434604294168545  |
| AGGGCCGATGAC  | 651.29986570549  | 0.395384029972169  |
| GTCATATGATAA  | 651.301294634418 | 0.51642643260303   |
| ATGACGATGGAC  | 651.3083418723   | 0.298601648920014  |
| TCATAGTTGTCA  | 651.30834397649  | 0.356765562248466  |
| GACTTACAGTCA  | 651.318529350094 | 0.587099474179252  |
| AAGTCATGGTCA  | 651.321028926102 | 0.321669489993689  |
| GGCGCTGCATA   | 651.32602579212  | 0.320773026801517  |
| AGAGTCAATGTG  | 651.336461610598 | 0.190262660394297  |
| TGATGTATCACA  | 651.337338714031 | 0.669492339235909  |
| CAGAAGTTGTCA  | 651.353071187718 | 0.389015252162173  |
| CCCGATTTATGA  | 651.354895288088 | 0.516284754411384  |
| CGTCATTCGGGC  | 651.359609137372 | 0.51408993299898   |
| TAAGAAATGACA  | 651.361438388195 | 0.262043740425275  |
| GTCACCTTAACA  | 651.375514171076 | 0.441597088296011  |
| ATTGACGTATCA  | 651.389317447462 | 0.395821419844169  |
| CGAGTCAAACCTA | 651.418329615769 | 0.325148996596072  |
| AGACCTTATGAC  | 651.421006491516 | 0.271317451408847  |
| CTGCCACGTCA   | 651.425092430091 | 0.512096072181467  |
| ACAGCAGATGAC  | 651.426843750981 | 0.490351507338393  |
| CAGACTGACACA  | 651.429024392765 | 0.347108460994302  |
| ATCACCGACTCA  | 651.441711265617 | 0.263248419320613  |
| ACGCACTAGTCA  | 651.443982952771 | 0.442397316191233  |
| CTCACTGCATA   | 651.449153461551 | 0.175080771542835  |
| AATTATTCATAA  | 651.470269759103 | 0.387520461190246  |
| GCTCCGGATGAC  | 651.48268541078  | 0.430037324360321  |
| GTCATGCCGATA  | 651.489350071038 | 0.388172524265909  |
| ACAAGATGACCA  | 651.492457958524 | 0.666649262166194  |
| CCCAATGATGAC  | 651.493236353632 | 0.0694120279002642 |

|              |                  |                    |
|--------------|------------------|--------------------|
| AGTCACTCCTAG | 651.498285149137 | 0.441833394010369  |
| CCGAGGTCTGAC | 651.501302600994 | 0.509687921777326  |
| CGCGGTGATGAC | 651.508863808669 | 0.430359202384554  |
| ACGTTGTGACGC | 651.518414800561 | 0.486105362679343  |
| ACATGACAATAT | 651.522222920049 | 0.27052952021273   |
| GTCATCGCCTAA | 651.526495488785 | 0.372628909289945  |
| ACTCTATATGAC | 651.534313510165 | 0.461240326201836  |
| GTCACATTTAAA | 651.548638278378 | 0.148450589922722  |
| GAGTACAATGAC | 651.552356934488 | 0.276098395779294  |
| CACTTAAATGAC | 651.558978807405 | 0.550926865515811  |
| AGTAGTAATGAC | 651.568786818308 | 0.335031286273088  |
| ACAGAGAGTGAC | 651.570230016759 | 0.472104200326718  |
| AAGACGTCATGC | 651.572778581092 | 0.456205622636073  |
| GTACGAAATGAC | 651.573134218267 | 0.501900185736728  |
| AGGATGAATGAC | 651.57603153088  | 0.373002862860895  |
| ACGTATTGTCAT | 651.577456787066 | 0.446159862952368  |
| ATCCTTACGTCA | 651.585668748879 | 0.471657372070604  |
| CGAACGTGACGC | 651.601850711589 | 0.514338898281337  |
| AGGTAGATGACG | 651.602611756054 | 0.215689667010582  |
| GTCACTCAAATA | 651.625539726517 | 0.318377782938061  |
| TCCTTTTGGTCA | 651.629171322609 | 0.345160904737079  |
| GAGATCGACTCA | 651.645072494302 | 0.492412835001497  |
| AGTCACGAGGCA | 651.649348959952 | 0.28533039185132   |
| ATGACAAAGCCC | 651.651925922338 | 0.328696094470834  |
| GTCATAAACTGA | 651.652101534785 | 0.547599363050285  |
| CTTGCTGTGAC  | 651.653952077529 | 0.502449906828015  |
| CCTGGTGACAAC | 651.655282478157 | 0.561748069717754  |
| CTTAGCATGACA | 651.661558561576 | 0.508938968033215  |
| TGACTGCAGTCA | 651.663780164432 | 0.413066352961556  |
| ATGACGGACAAC | 651.666508490511 | 0.286205169543491  |
| GCTTTTGGGTCA | 651.66842928718  | 0.585001201137319  |
| CGCTTTTATGAC | 651.670662029033 | 0.400696972641973  |
| ACCGATTACTGA | 651.67071159351  | 0.106163868946954  |
| AATATTATGAGT | 651.673509084559 | 0.509442075720409  |
| ACACATGGCTCA | 651.676389177423 | 0.4100983172545    |
| ATGACGTCGTGA | 651.682385574888 | 0.206152289842206  |
| ATGAGTACCAAA | 651.697792680893 | 0.187598238482014  |
| CCTTGGGTGACA | 651.700876946418 | 0.55576689476361   |
| AAACATTACTAA | 651.701082073019 | 0.35223394228223   |
| ACTCATAAAATA | 651.705630583747 | 0.406017954349808  |
| GTCATCTGAGCA | 651.706914803201 | 0.367375249791882  |
| CAGCTTGTGACA | 651.729278817179 | 0.497557992068935  |
| GTGACTTTGTCA | 651.730933600594 | 0.470347456375264  |
| ATGACACCCCAT | 651.732014326939 | 0.0416070346738645 |
| GTCATTACGAAC | 651.740785125575 | 0.428323337002604  |
| AATGAGTATGAG | 651.759910534227 | 0.289330462334519  |
| AATGACCACTCG | 651.75996274491  | 0.321409219177693  |
| GAGTGACAGTCA | 651.761822684016 | 0.311726112041799  |
| ATTAATGTCATC | 651.770440818233 | 0.434264252290336  |
| CACCAAGACTCA | 651.783429063594 | 0.257603484450209  |
| ATGACACCCTTG | 651.786731640973 | 0.358918660309554  |
| AAGCCCCTGACT | 651.792046081774 | 0.470274866455049  |
| ACCGACAATGAC | 651.792465373028 | 0.363139998884241  |
| AACATTTTGTCA | 651.798724378499 | 0.374591235128699  |

|              |                  |                   |
|--------------|------------------|-------------------|
| CGGAAGTGAGTC | 651.805059570836 | 0.156102427597275 |
| TGACTCCCGGAA | 651.813696045295 | 0.679009116528552 |
| CAACGGTGTGAC | 651.819254119622 | 0.61319458064781  |
| GTCACTGTTTGA | 651.824755682585 | 0.424263277736922 |
| ACTCATAGAACG | 651.83490580899  | 0.596937053943534 |
| AGTAAAAGTCAT | 651.835808920281 | 0.294654062580141 |
| ATGCTAGATGAC | 651.857466663206 | 0.591953914533014 |
| ACGCAGTGACGT | 651.865381040956 | 0.257991595962327 |
| CGAGTGTAGTCA | 651.872881441788 | 0.295416864951335 |
| AGGTCATGTCAC | 651.873188102859 | 0.318153601491692 |
| ATACTCAATGAC | 651.880159627253 | 0.42221834877426  |
| CGGATACGTGAC | 651.889919780107 | 0.535538236169094 |
| ATACATTCTGCA | 651.907410086687 | 0.29826002210619  |
| CGTCATTGATCA | 651.925363566931 | 0.26113006011379  |
| AAATTGAATGAC | 651.926042702399 | 0.346745448847261 |
| GCTGTGACAGCA | 651.927439757052 | 0.445556851675621 |
| ATGGCTGTGTC  | 651.931483988981 | 0.611148128720553 |
| CTGATCGGTGAC | 651.951141533324 | 0.519501375423217 |
| CTGACTACTACA | 651.955677722565 | 0.385173178544258 |
| AATACAATGACG | 651.970129785613 | 0.275170125185554 |
| CTTGCCTATGAC | 651.995563979292 | 0.308300418562192 |
| ACGGGGTGTGAT | 651.999246302021 | 0.377060742073622 |
| GGACGCGATGAC | 652.000892909534 | 0.109719576553688 |
| AGTCACGGACGA | 652.003763104493 | 0.308298897871084 |
| CTGGTATGCGTC | 652.00736775529  | 0.42318733312078  |
| GTCACCCATCGA | 652.00928648921  | 0.329834428809769 |
| TAGGTCCAGTCA | 652.011990854241 | 0.41608808966408  |
| GCCCCTTATGAC | 652.015386994826 | 0.238288865587112 |
| GAGATTTATGAC | 652.024909427661 | 0.385809302893107 |
| CACTCATGACAC | 652.030334877053 | 0.305942494024789 |
| GACTAATCTGGA | 652.035293645291 | 0.417322907255065 |
| AAGTAATGTCAT | 652.038232078143 | 0.287672149267212 |
| ATGACGCCTCTG | 652.047431451026 | 0.306440974373045 |
| AGTCACGGGTAC | 652.068210821618 | 0.455141244019393 |
| GTCATTATAAGA | 652.068341495398 | 0.361725238349452 |
| GTGCTACTGCTA | 652.077076681282 | 0.432372586745833 |
| CCTTCGGTGACA | 652.095051278925 | 0.369491739962612 |
| CTCGATGGCTCA | 652.104460769582 | 0.43128059809457  |
| CCCAGCAGTGAC | 652.104819973355 | 0.45432754189083  |
| GGGCAAGTCATA | 652.118191128845 | 0.273961210953754 |
| CAGTCAACGTGA | 652.120826845491 | 0.395306758429317 |
| CGTTAGCGTGAC | 652.124833209966 | 0.389689911575173 |
| ACCATTGGTGAC | 652.142745539264 | 0.366802594546097 |
| GTAACGCGTCA  | 652.143767684751 | 0.533703571417732 |
| GTCACGCAATAA | 652.145147508082 | 0.589335275920635 |
| AGTCACTAGGGA | 652.146554045523 | 0.313767246193049 |
| ATTTGATGACCA | 652.150468261555 | 0.42641861116591  |
| ATTATGACCTAA | 652.151297183886 | 0.324458574625082 |
| TGACGAAAAGAA | 652.151856369087 | 0.329309173010664 |
| ACTCATAGGTGC | 652.155205406045 | 0.56764556650384  |
| CTCGGGGATGAC | 652.180703253645 | 0.430968902129851 |
| CGTTATCCGTCA | 652.181208552566 | 0.354513961604502 |
| ATATGGTCAATC | 652.189786831364 | 0.354357065759372 |
| ACGTCATGTGCC | 652.214498675289 | 0.614987590425929 |

|              |                  |                    |
|--------------|------------------|--------------------|
| TCAGCTGTGACA | 652.222404174378 | 0.327903276740848  |
| GATTACGCACAC | 652.225216437146 | 0.409597791868853  |
| GTAATAGACTCA | 652.227147520192 | 0.348191730456067  |
| AAACATTGTCAT | 652.23288377949  | 0.226924328597202  |
| GTCATAGGGGTA | 652.24281332863  | 0.255222305627292  |
| GTCATAGACGTA | 652.245895154736 | 0.357904111002588  |
| CAAGCGGGTGAC | 652.252074055173 | 0.359855160881052  |
| ATGACAGGGTCA | 652.25241218947  | 0.0469382327120697 |
| CCTAACATGTCA | 652.267184390015 | 0.457049864455227  |
| GTCATCGCTGGA | 652.267553821671 | 0.518188205834036  |
| CATGGTATGACC | 652.273297266477 | 0.463988759643942  |
| AATGTCTATGAC | 652.274887850782 | 0.415059219463353  |
| CTACTGAATGAC | 652.28125565882  | 0.426466028597522  |
| CATCTCGTGTGA | 652.290712704417 | 0.747437124219876  |
| ATGACAGTGCTA | 652.294001215107 | 0.282306679229852  |
| TCATGACAATGA | 652.311209845719 | 0.55871948287611   |
| AACTTAATGACA | 652.315396770454 | 0.407103262413987  |
| GACACTGTGACA | 652.323042072623 | 0.273079250280033  |
| CCACATTGTGAC | 652.329110926722 | 0.39446242005496   |
| ACTCATAATGAT | 652.334561846189 | 0.272367280724752  |
| GCGTCACAATTA | 652.334909907039 | 0.518501148483026  |
| CTTAAGGACTCA | 652.338506028081 | 0.557969073947531  |
| TACCTAATGACA | 652.344213767626 | 0.206743399389271  |
| CTGGTGCACTCA | 652.346080952716 | 0.73855063991098   |
| GTCATAGGGGAA | 652.348363641371 | 0.269617635401123  |
| GTCACCGCTTCA | 652.354894382247 | 0.341799810878819  |
| CTGACTGTGTTA | 652.374128696056 | 0.305550640303064  |
| CGACGGAGTGAC | 652.374918372156 | 0.48532876534486   |
| AGCTCTAATGAC | 652.379869210211 | 0.438270712552004  |
| AGTGTCACGTTG | 652.382152091932 | 0.330377320435009  |
| CGTCACAGTTAA | 652.384388490261 | 0.433090922728722  |
| GGTATCGATGAC | 652.38610189813  | 0.392692204504904  |
| GTCATTCTCGAC | 652.394608035911 | 0.319610687564925  |
| GCCCCGTATGAC | 652.403047318967 | 0.419438677309945  |
| GACACATTGGTC | 652.40784241331  | 0.69455470959965   |
| AGAAGCTGTCAT | 652.412885793305 | 0.246334225106392  |
| ATGCGTGTGACA | 652.436303401353 | 0.377529166881976  |
| AGACGGAATGAC | 652.436630733558 | 0.296414874524239  |
| GACGTTGACACA | 652.443776304204 | 0.401147498370505  |
| GCGGTGGATGAC | 652.451037615725 | 0.57482751109353   |
| TCGTTGCTGTCA | 652.454039856205 | 0.402736424112516  |
| ATCCGTGTGACG | 652.459679998392 | 0.39380617498008   |
| AGAGACTAGTCA | 652.477056604141 | 0.347067658525645  |
| GGTCATCCGTCA | 652.47857116863  | 0.271566413479333  |
| ATGAGCAAATG  | 652.483311969464 | 0.166822044734675  |
| ATTATATATGAC | 652.48494596114  | 0.426967702521076  |
| ACCGTAGTCAT  | 652.486225750016 | 0.28835611315504   |
| CCCGTGGGTGAC | 652.492177191517 | 0.297419867165041  |
| GGAAACTCTGAC | 652.514490982287 | 0.674280193615629  |
| CATCGGTGACGA | 652.514878753695 | 0.29717854339884   |
| CACTCGCAGTCA | 652.526382629047 | 0.403745866815724  |
| ACCAAATGACAT | 652.534140699076 | 0.491083321187099  |
| AGCAATCTGTCA | 652.536308916007 | 0.458721534880949  |
| CACGATTACGCA | 652.537958927848 | 0.231590097532623  |

|               |                  |                   |
|---------------|------------------|-------------------|
| AGGTGCGATGAC  | 652.53875343606  | 0.360336436281116 |
| AGGTGGGATGAC  | 652.546388964236 | 0.217385420107701 |
| ATTCATGGTGAC  | 652.560031749417 | 0.477163895915452 |
| AGCGACAATGAC  | 652.573562013678 | 0.447298219959513 |
| CCCTAATTATGA  | 652.574637244448 | 0.441639385386107 |
| TCACCTGTGTCA  | 652.58313419681  | 0.254029331243845 |
| CCCTGGGTGACA  | 652.584294930107 | 0.342852055211767 |
| CTTCAAGGTGAC  | 652.585989407065 | 0.338196537129133 |
| GTCATCCTCCAC  | 652.587829469284 | 0.160756240069018 |
| GCGATGACCGAA  | 652.604404441627 | 0.259993251606083 |
| AGTGAGAATGAC  | 652.605662176165 | 0.382094693600414 |
| AATTTTGACTCG  | 652.605662894385 | 0.704040548159163 |
| ACGCGTCAGAAC  | 652.606292814477 | 0.632887473087073 |
| GCCTACTATGAC  | 652.628013465124 | 0.315091511477419 |
| AACTCGGGTGAC  | 652.632455374509 | 0.578478634026432 |
| CGGTGACAAGTC  | 652.655683922677 | 0.214550708876957 |
| AGCTTTGACTGA  | 652.657612254428 | 0.335832682531604 |
| GCGTCACATAAC  | 652.65906840513  | 0.470885813774971 |
| CGCCACGTAACA  | 652.682537138067 | 0.404899157414588 |
| TCGAAGTAGTCA  | 652.68774013147  | 0.542781844127735 |
| CGTCATGGTTAA  | 652.699811048843 | 0.61978391830334  |
| CGACTTTATGAC  | 652.712261304406 | 0.396701509189157 |
| GATACGCATGAC  | 652.725378010388 | 0.39510513080424  |
| GTGAGTCTGAGA  | 652.727773436414 | 0.187316117273604 |
| ACTAGAGATGAC  | 652.746322016053 | 0.587056926319928 |
| ATATGAATAATA  | 652.769100235384 | 0.441594480508985 |
| ACTCCTGATGAC  | 652.786230915987 | 0.511429490911256 |
| TCACAGGTATGA  | 652.800032407803 | 0.420074352051934 |
| ACGGGTACTCAT  | 652.812590092628 | 0.18067447548859  |
| GGTTACATCACA  | 652.813219519546 | 0.249593382073164 |
| ATTTTCATAGTCA | 652.825209557824 | 0.589564104889178 |
| ATCCTAGGATGA  | 652.82658062126  | 0.455654150080137 |
| CCTATTATGTCA  | 652.829937882675 | 0.452418080800032 |
| TGAACTGTGTCA  | 652.834807639983 | 0.408545077702623 |
| CCAAGTTGTGAC  | 652.835649788454 | 0.496915791051525 |
| GTCACCATCCAA  | 652.837126009979 | 0.323066262443105 |
| AGCAAGTCATCG  | 652.845100470114 | 0.268971583986042 |
| GTCACGATTTTA  | 652.85320741457  | 0.291044717513221 |
| GCGCGTGACCCA  | 652.856699884996 | 0.638868879204106 |
| AACGAAAATGAC  | 652.856926440353 | 0.505930688008322 |
| CCTTTGAATGAC  | 652.860525632966 | 0.563095271209519 |
| GACTCACTCAGC  | 652.86398790908  | 0.370125838574938 |
| CGTCGTGCGTCA  | 652.877094889429 | 0.618602918785944 |
| ATCTGTCAGAAA  | 652.886324542196 | 0.303066935086044 |
| CGAGAACATGAC  | 652.888068215682 | 0.443841022000407 |
| ACCAGCGAGTCA  | 652.89942778992  | 0.35592504642507  |
| TGACTGAAGTAA  | 652.900982983955 | 0.489217363758143 |
| AATTCACATGAC  | 652.909710960804 | 0.489773659722872 |
| GTCATGCAGCAC  | 652.912777547424 | 0.395234321107683 |
| CCGCTGTAGTCA  | 652.918891818855 | 0.55429163435013  |
| AAGCGTGATGAC  | 652.928732573869 | 0.224316007547209 |
| TGAGTCCGAGCA  | 652.930512567555 | 0.470276571207806 |
| CGACTAATTCGC  | 652.95007219312  | 0.169254815302637 |
| ATTATATGTGAC  | 652.957131849153 | 0.550442424942878 |



|              |                  |                    |
|--------------|------------------|--------------------|
| GCGTCACCCGAC | 652.958456967302 | 0.378483082668391  |
| CATACGGTGACA | 652.975974269865 | 0.278040830922819  |
| TCAGATAAGTCA | 652.977305012106 | 0.374931999680055  |
| GTCATCGCGGTA | 652.980840921254 | 0.23489655758923   |
| CTTGATAAGTCA | 652.983539784588 | 0.497015752735251  |
| CATCATTATGAG | 652.984050258154 | 0.721006258836766  |
| CCAGGCGTCATA | 652.993052440547 | 0.349613753801699  |
| CCCGCGTACTA  | 653.005240678262 | 0.439458522238174  |
| CCGGCCAGTGAC | 653.005271283277 | 0.399551361891948  |
| GTCACAGATACA | 653.010270538666 | 0.596977606493548  |
| GTCGCGGAGTCA | 653.011777289879 | 0.473439081756438  |
| GCACCTTACTCA | 653.014161361865 | 0.0959944435751975 |
| ATGAGTACCTAG | 653.020427647609 | 0.211059220018782  |
| ATGACTTGGTGC | 653.034695103119 | 0.488427270173324  |
| AATAGTCAATCT | 653.035565063674 | 0.340802641041645  |
| ACGTCACGCGAC | 653.044998407547 | 0.404003328482891  |
| TGAATGGAGTCA | 653.04737122861  | 0.202054128163427  |
| TGACATATCACA | 653.048425068849 | 0.486932597111376  |
| ACAATGCATGAC | 653.057902193975 | 0.392633315658158  |
| ACGATTCTGACT | 653.062862980892 | 0.302685039758871  |
| TCATATTTAAGA | 653.063214260685 | 0.6513574979588    |
| ACTTTCGGTCAT | 653.067443521904 | 0.544198150163242  |
| GCTAGTAATGAC | 653.072847503841 | 0.303826404826525  |
| CGTCTGCAGTCA | 653.073229808429 | 0.482097176139349  |
| AACTTATTATGA | 653.073758969648 | 0.493912286892007  |
| ATACTACTATGA | 653.090666042773 | 0.562862503730105  |
| CGTCATCGGATC | 653.106033393348 | 0.164645943283644  |
| CCTGGCGACTCA | 653.110930501128 | 0.341538873056822  |
| AGTGACCCAATA | 653.125026453042 | 0.350167292014998  |
| AGTGTCACGATG | 653.135371370367 | 0.315498125597979  |
| GGATGTCTCACA | 653.147687032847 | 0.547329773783828  |
| TGACTCCGCCAA | 653.148681425186 | 0.185560261298397  |
| ACGTGACAAACA | 653.153930199732 | 0.677000076425908  |
| ACGTCACATTAG | 653.168749299898 | 0.384448303134463  |
| AACGTCACCAGT | 653.188385232971 | 0.44604393067676   |
| ATCTGTCAAGAT | 653.193968263889 | 0.292426360954595  |
| ACAATTAGTCGC | 653.194052167074 | 0.412217921603094  |
| AGAGCCGATGAC | 653.215156848985 | 0.410475189113994  |
| CATTTGCATGAC | 653.222915248336 | 0.486473139848468  |
| ACTGACCATGAC | 653.232127917802 | 0.405332646981442  |
| GGGTTGACGTCA | 653.24684281171  | 0.706545506724195  |
| TCACTAATGACA | 653.250477292768 | 0.521684451349874  |
| AATTGCGGTGAC | 653.256741281728 | 0.189114259589219  |
| ATGTTGTGACGC | 653.262498402754 | 0.491916639630238  |
| AATAGTCAACAC | 653.262964040438 | 0.466885885594151  |
| GAGTCAAGATGA | 653.26519363875  | 0.343926217877136  |
| TAATACGTAATA | 653.277252341994 | 0.405553860576969  |
| TCCAACGACTCA | 653.289589264748 | 0.259973327449613  |
| CCCAACAGTCA  | 653.295728302649 | 0.377612210661786  |
| ACTCATCTGGGA | 653.306290642877 | 0.549473533167918  |
| CCGGTTGACTGA | 653.308458989686 | 0.323052421888289  |
| ATGACGCGCATG | 653.309479962779 | 0.312697211335254  |
| ATGTCATCTCGA | 653.311254130032 | 0.309917388868564  |
| GTCACCGACGAC | 653.31290366268  | 0.528381638411747  |

|              |                  |                   |
|--------------|------------------|-------------------|
| ATGACCACTGCG | 653.318914698764 | 0.35124634210555  |
| GTCATCCGGACA | 653.319060431478 | 0.401320486516016 |
| GTCATGGATCCA | 653.322215842472 | 0.372698138132422 |
| CCCATTGAGTAA | 653.325598074952 | 0.328535173759576 |
| TACTCAGGGAA  | 653.329175342889 | 0.46330606608475  |
| GTCATTCCACTA | 653.331209196174 | 0.252518916970879 |
| CAGTTGAGTAAC | 653.336510803532 | 0.377200840652808 |
| ATTAAGTACTC  | 653.339746618525 | 0.411908068161776 |
| TGATTCACTCCA | 653.340944131029 | 0.263818777443033 |
| AACAGTGGTGAC | 653.3600178086   | 0.353889696597206 |
| CTACATTGACTC | 653.377160823119 | 0.166328497771247 |
| CAGTCAGTGTGA | 653.380580744331 | 0.451135450418802 |
| TCCGCTGATTCA | 653.381173447953 | 0.463598166639627 |
| ATCTTCTATGAC | 653.385436509247 | 0.395873574859357 |
| CGTCACCGAAGA | 653.391843073589 | 0.244847816379168 |
| CATTACATGAC  | 653.400315453675 | 0.503202276516193 |
| AAATTACTGACT | 653.401759364882 | 0.385931506265493 |
| ACGTCACCGCGA | 653.40751472561  | 0.466313015519558 |
| AGTCAGACCCAT | 653.407879170441 | 0.398565907439544 |
| AGTACCTGACTC | 653.423444406146 | 0.386276125186948 |
| GAGTCGAGTGAC | 653.425572851008 | 0.576105052073082 |
| AACGTCACCAAG | 653.42961501801  | 0.73123952141769  |
| GATGACCTAACA | 653.43017839651  | 0.221092260304143 |
| TGAGTGGTCACA | 653.432290124031 | 0.285613411926719 |
| CTCGACAATGAC | 653.432696946588 | 0.395687988689643 |
| GGCCATATGAC  | 653.440247432691 | 0.481770501132639 |
| GTCATCAGAAAC | 653.453895882476 | 0.402806164364159 |
| GAATTATGAATC | 653.473056263186 | 0.553784738314319 |
| GATCTGTGACGC | 653.473852653585 | 0.479834524934307 |
| ACCGCGAATGAC | 653.478805309947 | 0.351475254736037 |
| CCCAGGAATGAC | 653.482665810161 | 0.205683683099006 |
| GTCACTAGGCAA | 653.483234851054 | 0.437000256358803 |
| ATGACGACGTGA | 653.495373752488 | 0.251391265679144 |
| ATGAGCAAGTAC | 653.497008652808 | 0.290717480260005 |
| ACTCATAATTAT | 653.498443400773 | 0.399773998521848 |
| ACCTGGTAGTCA | 653.50356509108  | 0.727166958511712 |
| GTCATTAATTGA | 653.517234094788 | 0.19540932560639  |
| TCACGTTAATGA | 653.52614623364  | 0.43835770172829  |
| GCGTCCCAGTCA | 653.531203823807 | 0.39126902024467  |
| CGTCTGGAGTCA | 653.535081904156 | 0.336831158446232 |
| GCGTCACGTTAC | 653.559569213879 | 0.596938832782392 |
| TGACGAAGTCAA | 653.563347542431 | 0.457632025483326 |
| CGGTCCTAGTCA | 653.574219915473 | 0.396160187929507 |
| GAGTGAGAGTCA | 653.574849669232 | 0.264337493759327 |
| CTTAACGTGTCA | 653.576755818351 | 0.410000917983203 |
| CATATTGACACA | 653.578555294247 | 0.430271956865533 |
| TCGATAATGACA | 653.591262170579 | 0.437797028914332 |
| ATGACCATACCG | 653.591469596439 | 0.165494299654832 |
| ACGGAGATGACA | 653.599263209151 | 0.374042533788539 |
| CTGTATGTATGA | 653.603785697166 | 0.373592975317038 |
| GAGTCAGTTACC | 653.608783414393 | 0.4026231420519   |
| ATGACGGTACTA | 653.61625675388  | 0.377925649838212 |
| ATGACAAGGTCA | 653.618255632147 | 0.444486295373522 |
| GACAGCGGTGAC | 653.621365780698 | 0.270256053402595 |

|               |                  |                    |
|---------------|------------------|--------------------|
| CGTGAGTCGGTC  | 653.622072516107 | 0.322001169983997  |
| ATGCACGATGAC  | 653.631140025965 | 0.585048612808658  |
| CTCATACATGAC  | 653.634026802611 | 0.505343047396091  |
| ATGGCCGAGTCA  | 653.638369208171 | 0.308669378170579  |
| GTCATTCATGAA  | 653.64101369274  | 0.457031268802133  |
| GTCATTTGTTGA  | 653.644956385537 | 0.575906316539317  |
| ATACGTAATAGC  | 653.672712593287 | 0.373676564821372  |
| CGGTAGGATGAC  | 653.673125610483 | 0.404869769698459  |
| AGTCATGGTCTG  | 653.677608298977 | 0.326908143965745  |
| GTGACACCGAAA  | 653.677819622596 | 0.278292807841671  |
| GCTGTGCATGAC  | 653.678682221211 | 0.560097953270241  |
| CTTATATGTGAC  | 653.686141240448 | 0.302659548977068  |
| AACGATTACGTG  | 653.701441094096 | 0.425563844124606  |
| GACCAGATGACA  | 653.702306743769 | 0.413651636218684  |
| AACCGTCGTCAT  | 653.710569652659 | 0.28662426312475   |
| CAGTGAAATGAC  | 653.711345493514 | 0.3890428297972    |
| GTTGTTTACTCA  | 653.716016250264 | 0.492076867971084  |
| TAGCATAAGTCA  | 653.721317756642 | 0.465565958499812  |
| ACGTCACCTCGGC | 653.721676323325 | 0.407761099476571  |
| CACGTCACTCTA  | 653.728188706387 | 0.257403530394363  |
| ATGACGACGCCG  | 653.738233611921 | 0.433397603394746  |
| AGTGTGAATGAC  | 653.738778170115 | 0.266820774902876  |
| GTACCTTACTCA  | 653.741471367234 | 0.428306344192037  |
| GTGACAGGTCAC  | 653.743112679657 | 0.581917155467015  |
| AACATGCGTGAC  | 653.745096069302 | 0.435642242135962  |
| AGCGCTGTGTCA  | 653.746753569825 | 0.275111266914228  |
| AACTCTGACGTG  | 653.750530073728 | 0.313994612811934  |
| GACGATTACGTA  | 653.772113009123 | 0.544788108655608  |
| CATTAAGGTGAC  | 653.783123553441 | 0.585953964515319  |
| ATCGACTGTGAC  | 653.786357129636 | 0.448058716758273  |
| GTCATATGTAAC  | 653.793084025291 | 0.579057320276958  |
| GTTACTCAATGA  | 653.804773872698 | 0.360309186316214  |
| GTCATGATAGCA  | 653.829982918407 | 0.708905618092164  |
| TCTGCTTGGTCA  | 653.843003325356 | 0.576550636674966  |
| AAGACACAGTCA  | 653.843495245784 | 0.331885449667752  |
| GATTTAGATGAC  | 653.847106390973 | 0.312465358014517  |
| CGTACTCATGAC  | 653.856917188284 | 0.162301139924065  |
| GACTCAGATCAC  | 653.864328419844 | 0.618384375360344  |
| ACGTCACGAGTC  | 653.880350421815 | 0.268194362638871  |
| AGTCACGAGGTA  | 653.884190512908 | 0.229018630844875  |
| GTGAGATGACA   | 653.885650845172 | 0.058462052879342  |
| GGGCCACGTCA   | 653.894225358276 | 0.582249860514622  |
| ATTTGGGAGTCA  | 653.897051861075 | 0.51377328514925   |
| AGCCAAGGTGAC  | 653.898378362941 | 0.29100028339505   |
| GATACTCGTGAC  | 653.900919553006 | 0.444725981722096  |
| GCCAGCGAGTCA  | 653.902190172415 | 0.346612245464242  |
| AAGAATTGCTCA  | 653.909491560343 | 0.375585287721493  |
| GACTAATACGAC  | 653.920012403095 | 0.492020691426695  |
| GACTAATATAAC  | 653.921358938952 | 0.405177065474567  |
| CTACCTCAGTCA  | 653.929848589179 | 0.0554880780559482 |
| GCCTCATATGAC  | 653.941047257455 | 0.414492604004348  |
| CGGACTGGTGAC  | 653.947224468365 | 0.545774661221027  |
| TCAAGGGAGTCA  | 653.95345208235  | 0.120417981927516  |
| ATTGCGAGTCAG  | 653.954023300538 | 0.331919934860995  |

|               |                  |                   |
|---------------|------------------|-------------------|
| AACTTCCAGTCA  | 653.954744217863 | 0.289667000004111 |
| ATCAGCAATGAC  | 653.956045421365 | 0.462179455045118 |
| CCGGCTGACACA  | 653.96500317096  | 0.512840708581689 |
| AGGGTCCGTCAT  | 653.968024760649 | 0.3572160398422   |
| ATATGTGTGACG  | 653.973704103466 | 0.292546518136825 |
| AATGAGATGACG  | 653.973733386923 | 0.384119060980193 |
| GCGTCACGCTAC  | 653.988514200849 | 0.31227594890305  |
| AGATTACATGAC  | 653.991119115416 | 0.404343561201392 |
| ATGAGTCCGTGG  | 653.997622819504 | 0.466336119160551 |
| GCCTAGGGTGAC  | 654.007938849676 | 0.404675938517511 |
| GTCATATATAGA  | 654.012274911905 | 0.34782973481718  |
| AATAGTGACGCG  | 654.025503095632 | 0.444339188859607 |
| CATAAACTGTCA  | 654.028309017871 | 0.627274800048904 |
| GATCTCTGTGAC  | 654.029680966776 | 0.524510589478269 |
| CAGAGAGAGTCA  | 654.029935334561 | 0.468538584375999 |
| AGATGATGTGGC  | 654.035348612632 | 0.271281509551626 |
| GTCATTCACCTA  | 654.03865410534  | 0.316375708900718 |
| CACGTCACTATG  | 654.040917193669 | 0.435733067230991 |
| TACGACTGGTCA  | 654.051678483518 | 0.509849942333371 |
| GCGTATGATGAC  | 654.052863835001 | 0.173138739442959 |
| GGTCGAAATGAC  | 654.054912962187 | 0.376183002308035 |
| GCAAGTCAAGTAC | 654.055866039069 | 0.511470239884405 |
| ATCATTGAGTAA  | 654.084084719346 | 0.727751782250387 |
| CACGTCAGCTCG  | 654.099934608918 | 0.452317797071169 |
| GTGGTCACACTA  | 654.106163118994 | 0.277791476903858 |
| ATCCACTAGTCA  | 654.107502822584 | 0.540618238968954 |
| TAGCAATAGTCA  | 654.107831930951 | 0.24366017748516  |
| AATTTAGTAATC  | 654.111313517946 | 0.230584889141486 |
| ATGTATGACCTG  | 654.130031925798 | 0.343344413699891 |
| AGTCATGGGCGA  | 654.130771818363 | 0.153109501183547 |
| ATGACGCCGTTG  | 654.134524750843 | 0.260271615787288 |
| TGACTGAGTCCA  | 654.139994757731 | 0.396303054800819 |
| AATTCATGACA   | 654.145974621292 | 0.344858128070117 |
| ACCTCGGGTGAC  | 654.148763958874 | 0.565781692202615 |
| AGATTATATGAC  | 654.153176333657 | 0.468857549528895 |
| CTGACTTGTGAC  | 654.154881755773 | 0.365583434437372 |
| CGTCAGTCTGAC  | 654.165695571438 | 0.382157972125562 |
| TGCGTCAAATAA  | 654.177175520324 | 0.417837523913761 |
| CATCGTGAGTCG  | 654.178318586578 | 0.270098430136015 |
| ACGCACTGTCAT  | 654.180525563122 | 0.282957627302714 |
| GTCATCTCACGA  | 654.183429219615 | 0.304751569798543 |
| AGTCAGACATAC  | 654.199036959164 | 0.536681499728427 |
| ATCAGACATGAC  | 654.19938713998  | 0.395603857776845 |
| ACACAGCGTGAC  | 654.20168699919  | 0.215576372064695 |
| CGTCATCCCGAA  | 654.203438387676 | 0.339661781009269 |
| GTCATCCTGGTA  | 654.204414727621 | 0.176510400544062 |
| GTACACGACTCA  | 654.204439016085 | 0.376884657497805 |
| ATCTGTGATGAC  | 654.212003859236 | 0.427792913245912 |
| ACGCTGACACAG  | 654.21595526743  | 0.405951853952626 |
| AGAGTCAAGACC  | 654.21839453254  | 0.259741717712461 |
| ATCATTGACACA  | 654.223005856679 | 0.299316227155564 |
| GTCATCTGTGTA  | 654.22766823242  | 0.203336031874675 |
| ACCCCGAATGAC  | 654.228909884294 | 0.185218408995953 |
| GGCCGATATGAC  | 654.243957703605 | 0.382943745477905 |

|               |                  |                   |
|---------------|------------------|-------------------|
| ATGACGTGAATA  | 654.253682088804 | 0.133083947795606 |
| ATCGCGTCACTG  | 654.258692205633 | 0.365590419894532 |
| CGCTGAATCAGA  | 654.265901512518 | 0.459441300551606 |
| ATGACGGCATTG  | 654.268151327774 | 0.379486698888857 |
| ACCGCTATGAGT  | 654.305978662581 | 0.690923851385147 |
| GTCATATACGTA  | 654.336785316914 | 0.2641102716327   |
| ACGTCACCCCTAG | 654.356897323721 | 0.161474719325218 |
| GCACGAGATGAC  | 654.356920033965 | 0.3709532962161   |
| GTCACAGCTAAA  | 654.366018166593 | 0.464121322358685 |
| GTACACGTCAAA  | 654.374672030681 | 0.203183670766591 |
| GATAGGGAGTCA  | 654.37863389951  | 0.238059804265585 |
| ATTAGTCGCACG  | 654.39582935639  | 0.391417886123397 |
| CAGCATGACATA  | 654.416918483849 | 0.361587280833194 |
| CAAATGTGACGC  | 654.422351431929 | 0.295857651162721 |
| GACGCATGACCC  | 654.42273386485  | 0.252867571841585 |
| AGTGACGCCATG  | 654.444435706699 | 0.168425522238434 |
| CTGAAAGTGTCA  | 654.457552902401 | 0.359436371441441 |
| AGCATGAATGAC  | 654.458701945708 | 0.288239657807334 |
| ATGACGAGGAAT  | 654.46499660036  | 0.162496293290304 |
| ATGACGATCATA  | 654.470399527856 | 0.367480033628483 |
| GGCCATGTGAC   | 654.476895052775 | 0.540724791939729 |
| GGTCTCAATGAC  | 654.479898440593 | 0.502200786606902 |
| GTATCATACTCA  | 654.485393247906 | 0.391867709738241 |
| CAGTCAGAATTC  | 654.506216511037 | 0.395193425830289 |
| CCTTGTTATGAC  | 654.514872312044 | 0.259623779850247 |
| CGAAAACATGAC  | 654.530508164652 | 0.618529193459666 |
| ATGAATCAACTG  | 654.532164076452 | 0.643760647185213 |
| CATGTTATGACC  | 654.54257460522  | 0.610044114630291 |
| GCTAATCATGAC  | 654.542980513313 | 0.631962285555324 |
| ACCAGTGAGTCT  | 654.547273620092 | 0.791410615563999 |
| GTAATTATGTCA  | 654.547448877525 | 0.31596310672921  |
| ACGAGTATGAGT  | 654.555984450516 | 0.360108824055851 |
| CTTTAGTGTGAC  | 654.565204752944 | 0.384783230081552 |
| GTGACATACATA  | 654.565828631983 | 0.226780167471884 |
| AGTCACGGAAAC  | 654.567168991834 | 0.375355878561922 |
| AGTGCCGTGATA  | 654.575046854132 | 0.271261260750046 |
| AACGACGTGTCA  | 654.576126856066 | 0.415295235718454 |
| ACGTGTTGGTCA  | 654.581102356382 | 0.52222850805368  |
| ATGATTCGAAAA  | 654.597620437698 | 0.481771767854773 |
| GTCACTCAACTA  | 654.6073042422   | 0.293226591653877 |
| GACTCAGCTTTA  | 654.619990068043 | 0.589227680786203 |
| CATTTCTGTGAC  | 654.620930721232 | 0.299181137186754 |
| TGACTGCGACAA  | 654.622170450329 | 0.150892532789648 |
| ACTAGACAGTCA  | 654.623523019172 | 0.373811121455671 |
| CGGCCGACTCAC  | 654.636545614197 | 0.340700852351399 |
| GTCATTGAATGA  | 654.648205867345 | 0.394428855667679 |
| GCATCATGACGC  | 654.649245692209 | 0.455105510950226 |
| AGTGACATAGTC  | 654.650511749175 | 0.296162132939527 |
| GTCATCTTTGAA  | 654.65070635064  | 0.289826342668076 |
| CTATGACTTGAA  | 654.656861854484 | 0.387878354511087 |
| ATAATAGCGTCA  | 654.658453602425 | 0.480000511773436 |
| CAACGATGATTC  | 654.675145083324 | 0.4561944478303   |
| ACTCATAATCGG  | 654.679214975916 | 0.221835825645836 |
| AAGCAACGTGAC  | 654.685165904422 | 0.273345999547924 |

|              |                  |                    |
|--------------|------------------|--------------------|
| GTCATCCGACTA | 654.6894512599   | 0.257203131317875  |
| ATGACACTCGCA | 654.690088402608 | 0.378648798122272  |
| TGACTGTCAAAA | 654.691299293868 | 0.619695879903101  |
| ATGTCTGACGAA | 654.691691760739 | 0.416538766728253  |
| ACGTCACAATGC | 654.695870146097 | 0.292673171160633  |
| CGCAGTGGTGAC | 654.701389254752 | 0.51254035890932   |
| ACGCGGACTCAT | 654.710684593535 | 0.505069554953041  |
| CACGTAATACTG | 654.712838029875 | 0.689679761657372  |
| CTCATAAGTGGC | 654.71489844254  | 0.72744911947122   |
| CACAAACATGAC | 654.715082060263 | 0.570643419180809  |
| GCGCCGCATGAC | 654.716240363403 | 0.731681668218207  |
| ATTCCAGAGTCA | 654.721876202156 | 0.335845710853084  |
| GTGTCACGCGAA | 654.764425092508 | 0.420323472658964  |
| ATGTAATCGTCA | 654.765756590324 | 0.622571070183052  |
| GACTGAGATGAC | 654.76832169734  | 0.195727080949418  |
| TGACACAGGGAA | 654.819707203005 | 0.419966957612782  |
| ATGAGCAAACGC | 654.822251446568 | 0.347735110415406  |
| TGACTGGGTACA | 654.838273852639 | 0.294817693145908  |
| GTAATTGATGAC | 654.838535810296 | 0.429111331377952  |
| GGAGAAGATGAC | 654.839772182129 | 0.106533103304221  |
| AGGTTATTAGTC | 654.848140809763 | 0.487485292931212  |
| TATGTCATGCCA | 654.852547336633 | 0.292879391697371  |
| ATGACGACTGAA | 654.856318142332 | 0.264540562955723  |
| CCGTGGTGACGA | 654.869482659981 | 0.413638548981584  |
| GAATTAGTACCA | 654.890974361323 | 0.518002068457691  |
| GACTCAGATTGA | 654.893245994288 | 0.425653400835276  |
| ACCGGTGACGAT | 654.895651425213 | 0.395834957383253  |
| CTACCTTATGAC | 654.899353155895 | 0.27202659510739   |
| GATGAGTAGGCC | 654.904989075002 | 0.0835518117067763 |
| CGAAAAGTGTC  | 654.927179256225 | 0.402152843266442  |
| GATGGCAGTCAC | 654.932795695081 | 0.22038751295862   |
| ACGATCCAGTCA | 654.935393646233 | 0.389366217078632  |
| ATGTCCAATGAC | 654.937897980605 | 0.439558736840317  |
| TCTATGGTGTC  | 654.942405050832 | 0.427934978692945  |
| CGTTCTAATGAC | 654.946239119248 | 0.249004966852397  |
| GTCATAGCGAGA | 654.950745325684 | 0.314805083654949  |
| CATGTTGAGTAA | 654.952636816383 | 0.401294260949606  |
| ACAACACGTGAC | 654.952965357475 | 0.433830802675664  |
| CGTGACGCTGAC | 654.956883742927 | 0.52152374452163   |
| CATATTTGGTCA | 654.957576104746 | 0.3272888911367    |
| CCCGTGGCGTCA | 654.96877927818  | 0.611304775519252  |
| AGTCACTTACC  | 654.98102375699  | 0.265471116598664  |
| CCGATCAATGAC | 654.983333712271 | 0.278602978325293  |
| GATGCACTCATA | 654.989109259201 | 0.496940604747531  |
| TGACTGCTAAAA | 655.008365658876 | 0.532574374017692  |
| CTGCCAGGTGAC | 655.016737677046 | 0.552744581267153  |
| GTCACTGCGAAC | 655.034761459737 | 0.718065128772765  |
| CGGGTGAATGAC | 655.042172473307 | 0.177197527957884  |
| AAAACAGTAA   | 655.043223504767 | 0.625523699589363  |
| GCTAACGTGTCA | 655.047898735578 | 0.668805122124003  |
| ATGACCACTAGA | 655.049130998955 | 0.305779623538685  |
| GCTGAGTCGAAC | 655.053281742802 | 0.324388862478976  |
| GCCGCTTATGAC | 655.053638162042 | 0.347629202034321  |
| ACTCATACCTAT | 655.057547360502 | 0.324586569133247  |

|              |                  |                   |
|--------------|------------------|-------------------|
| AGACTAATTGCC | 655.059553877558 | 0.457700294544397 |
| ACGTCACAGGGC | 655.060369495325 | 0.419015066683684 |
| GGATGCAATGAC | 655.073434000175 | 0.681194534852636 |
| GAATCATTGTCA | 655.078656331003 | 0.453840423993101 |
| GTCATCTTCATA | 655.087259557748 | 0.326184600911583 |
| AATGCTGTGACA | 655.10238658429  | 0.757895061202903 |
| ACTCGTGACGTG | 655.10278881034  | 0.366192539486153 |
| CCTCTTGATGAC | 655.10291001087  | 0.433723418769783 |
| CAACAAGTCATG | 655.104069833943 | 0.82964808672905  |
| GAGGACTATGAC | 655.109211793355 | 0.316963187128316 |
| CGTCACGATTAC | 655.123159236819 | 0.422084721458235 |
| GAAAGGAATGAC | 655.145321865992 | 0.306587327040604 |
| AGACTCACGAGA | 655.154188605147 | 0.499068471201696 |
| ATCCTTAATGAC | 655.155574038259 | 0.407658741271586 |
| AACTAACTGTCA | 655.16720736435  | 0.411013496974634 |
| GTACTAGAGTCA | 655.180805937822 | 0.365925140605201 |
| AAATGTCATGCA | 655.181269543021 | 0.558137691952791 |
| CACGTCAACAGG | 655.185202572413 | 0.49756074892519  |
| GTCATTTTGATA | 655.187065036691 | 0.23953344998651  |
| CGAAGGGATGAC | 655.192545306229 | 0.171227419065586 |
| GTGCGCATGACA | 655.209233155212 | 0.60814686308369  |
| TCAGTCAGCCCA | 655.218741314142 | 0.394032604925371 |
| TCAGACTAATCA | 655.24556041796  | 0.442517035536255 |
| CATGGGGAGTCA | 655.250631249009 | 0.321228895947786 |
| GGCCTTGATGAC | 655.252977128379 | 0.413686262358377 |
| GCCTCTTCGTCA | 655.255885573795 | 0.323913847617599 |
| GCATTGAATCAC | 655.256642133152 | 0.396925199151064 |
| GTCACTGCGACA | 655.266614628254 | 0.728023525818988 |
| TGACTCCAACCA | 655.270499783254 | 0.257924955675832 |
| AAAATTTGGTCA | 655.270739981189 | 0.368159812679826 |
| CATTGACGTGAC | 655.289367206955 | 0.30831330051312  |
| AATCGCTGTGAC | 655.299398473515 | 0.295225292109451 |
| TGACTACACAAA | 655.303683491434 | 0.445464319083638 |
| CGTCACGCAGTA | 655.307567671282 | 0.530906963798335 |
| ACGCTATATGAC | 655.30832984202  | 0.341561752625181 |
| CCGCTATATGAC | 655.312841763828 | 0.252052310364905 |
| TCATAAATATAA | 655.318538882816 | 0.580862192186298 |
| CTCTATTGACTC | 655.350933842402 | 0.273431446259173 |
| CATGAGTTAGTC | 655.353610489582 | 0.463217801934958 |
| CAGGTTTATGAC | 655.355650303828 | 0.337194399853958 |
| GTCATCCTTTAA | 655.356882025008 | 0.370483935294635 |
| ATTTACTCGTCA | 655.359636167674 | 0.574085560959897 |
| ATGAGTCGGGTG | 655.361107118697 | 0.235896122540024 |
| ACAATTGGTGAC | 655.372826183284 | 0.312575215569743 |
| TCGCCATAGTCA | 655.379700398239 | 0.445855775871271 |
| ACGAATGGTGAC | 655.389607578485 | 0.589029816608858 |
| AATGTAGTGACT | 655.398946346983 | 0.363771874313503 |
| GAAAATCGTGAC | 655.405755405169 | 0.422962384101319 |
| GCCGATGTATCA | 655.416187465435 | 0.55369934096944  |
| TACCGTGACGAA | 655.418140607411 | 0.673084168452627 |
| GTATCCGGTGAC | 655.420456007706 | 0.281585747936477 |
| AAATACGTAATC | 655.427790729224 | 0.365824470949593 |
| CTATGTAGTGAC | 655.430613839246 | 0.425611012442815 |
| GTCACCTTCAGA | 655.436098433816 | 0.528214901115227 |

|               |                  |                   |
|---------------|------------------|-------------------|
| GAGAATGGGTCA  | 655.442158426782 | 0.267984260577305 |
| ATGAGTGTGACC  | 655.444156222208 | 0.356005175924582 |
| CTTACCAGTCA   | 655.450589631904 | 0.395175434547379 |
| ATGACAGCTACG  | 655.462053509396 | 0.252913746211362 |
| ATACGGTGACAT  | 655.46514571931  | 0.439183017621428 |
| CTACCCGATGAC  | 655.48036861037  | 0.305912629447783 |
| ACGTCACCTCTG  | 655.48133100596  | 0.163660417560916 |
| ATGATGCAACAT  | 655.503800322554 | 0.338118709142516 |
| GGGATTTATGAC  | 655.508348092319 | 0.483899116974377 |
| GTAATGTCATCA  | 655.517830394594 | 0.216336218531157 |
| CCCGCGAGTCAC  | 655.531208533952 | 0.189034148038399 |
| GACGGCATGACA  | 655.532711505418 | 0.410147011073144 |
| GCCAACATGTCA  | 655.533452788589 | 0.392947099791329 |
| GAGGCAGATGAC  | 655.561649912258 | 0.449553413810438 |
| GCTGACTGGTAC  | 655.56622320499  | 0.458181660345522 |
| ATAGCATCATA   | 655.567183525026 | 0.339196207395953 |
| CATTTAATGACA  | 655.573667906656 | 0.243941725294799 |
| AGGCTTGCTCAT  | 655.576905526115 | 0.526680230026195 |
| CGCTGGCATGAC  | 655.583596578365 | 0.539115866792936 |
| GACTTAGACTCA  | 655.592016737401 | 0.439888759417885 |
| ATGATGTGCCCG  | 655.60196263211  | 0.42111795959153  |
| GGACTTGTCA    | 655.610701317118 | 0.302000196269749 |
| ATGACTTGGGTC  | 655.611635808662 | 0.342277810514687 |
| AACCACAGTCA   | 655.613934549381 | 0.493356261370023 |
| TATCACCAGTCA  | 655.631648662137 | 0.262547793885604 |
| AGGGTAAGTCAC  | 655.635591050879 | 0.280070210129462 |
| GCCGCATGACGC  | 655.636843083606 | 0.479178849668019 |
| AATGTGAATGAC  | 655.640426027003 | 0.29385528740061  |
| ACGTCACCGGGA  | 655.641843909051 | 0.154011451210526 |
| CTGACGCAGCCA  | 655.648865199991 | 0.561532727965785 |
| AATTACTGACTA  | 655.652973083802 | 0.340476439881582 |
| CAACTTTGTGAC  | 655.66169908969  | 0.570644587324202 |
| ATGACGAGACGG  | 655.664322175688 | 0.27787998905538  |
| ATGACACTCCGG  | 655.671325459349 | 0.29581643998625  |
| AGGAGTGATGAC  | 655.673365900215 | 0.31826739307621  |
| GTTACATAGTCA  | 655.679615954912 | 0.344826383174701 |
| CGCAGTGACAAA  | 655.683785043643 | 0.475028764799695 |
| ATGAGTGTATCA  | 655.684119222302 | 0.283557307460654 |
| ACAGATCGTCAT  | 655.689176483315 | 0.404330745910905 |
| CCGCTGAGTAAA  | 655.699334630251 | 0.270857033375265 |
| ACTGGATATGAC  | 655.699590216032 | 0.294639818299028 |
| CGGCATGACCCA  | 655.7048633296   | 0.650977327332971 |
| GTCACCCCGTGA  | 655.71168648558  | 0.381510831047505 |
| GTCACCACTGCA  | 655.716880562248 | 0.201552344903123 |
| ACGTCACCTAAC  | 655.720818286414 | 0.483619021322025 |
| CTATGATAGTCA  | 655.729259363783 | 0.498927261861938 |
| AGTCACGCCAGC  | 655.740079624337 | 0.305631755673879 |
| GTCACAACCTGCA | 655.741779105938 | 0.431066694322158 |
| CAAGATTTGTCA  | 655.746133097185 | 0.393505522571487 |
| AGTATTGTCA    | 655.746815999444 | 0.367859612953072 |
| ATGAGTCCCAC   | 655.758901293315 | 0.287110168385911 |
| AGTCAGACGTTA  | 655.766427824354 | 0.370785688157207 |
| ACGTGACATGGC  | 655.775818682137 | 0.530355728594029 |
| AATACACTGTCA  | 655.776016230652 | 0.397828618906812 |



|              |                  |                   |
|--------------|------------------|-------------------|
| TGGTGACCCAAA | 655.777728770531 | 0.236333184512501 |
| CAGGGTGATGAC | 655.781853618637 | 0.359870898218786 |
| CGTCACCGAGGC | 655.803575543749 | 0.404642213648574 |
| AATCAGCAGTCA | 655.812718117458 | 0.481686954325188 |
| CCCGCTGATTCA | 655.813339730547 | 0.372547389063753 |
| GTCATTAATACA | 655.827436419327 | 0.423442218124326 |
| AGTGTCATGGGA | 655.82844777838  | 0.152353296511362 |
| GAGTCAGGAGAA | 655.829749202886 | 0.281864673725417 |
| GCTGGTGAATCA | 655.850805492197 | 0.561371580479942 |
| CATCTGGCGTCA | 655.860125538273 | 0.589465270777266 |
| CCACAAAATGAC | 655.888066583368 | 0.385973517675909 |
| GCCGTCACGTCA | 655.893231665267 | 0.311290044105346 |
| GTCATGCAGATA | 655.896157134453 | 0.459112823131502 |
| GGCCTATATGAC | 655.897432270417 | 0.459926647534104 |
| CACTAGGTGACG | 655.907813604221 | 0.343558114644584 |
| ATGACGATCATG | 655.911453593427 | 0.485000951806733 |
| TGACCAATCTCA | 655.915164237984 | 0.453057409461797 |
| GTGAGTCCGCCA | 655.915532074932 | 0.610830227888581 |
| ACCCAAGTGACT | 655.91560827758  | 0.186483077150202 |
| GCCGATATGTCA | 655.916412025455 | 0.592678965854378 |
| AGTCACGGATGC | 655.918478483984 | 0.288928426313569 |
| TCATGCCAGTCA | 655.931116861866 | 0.443709164243891 |
| GACGAATCATAC | 655.938927051433 | 0.307450313213846 |
| ATGACGCCTACC | 655.939541139112 | 0.290134181207861 |
| GTCACCCGTCAA | 655.955965349858 | 0.189710374879206 |
| CACCGTGATGAC | 655.978174198386 | 0.533425712383376 |
| ATACGTCGTGAC | 655.981380995268 | 0.428731503863018 |
| CGGATCACGTCA | 655.983998690379 | 0.565949928918638 |
| GGTTGACACAAC | 655.984760343027 | 0.370767635186968 |
| CGCCTCGATGAC | 655.987450053921 | 0.441816668759905 |
| ACGAAGTGACCA | 655.994873289211 | 0.423983346191197 |
| GTCATTTATTGA | 656.003701347922 | 0.44257633670905  |
| ACGACAATGACG | 656.00570452351  | 0.400266430627287 |
| GACTGATACTCA | 656.013318312681 | 0.516113138537363 |
| CTCGCGCAGTCA | 656.020011815625 | 0.681751715415859 |
| CTTTGCGATGAC | 656.021261119594 | 0.259593830312141 |
| CGCAAGTCATAC | 656.022426635894 | 0.447107639704203 |
| AGGAGTGAATCA | 656.027520940579 | 0.246115220177856 |
| AGTCAGAGCTCA | 656.029590812249 | 0.402172236984991 |
| TCTGAGTCTACA | 656.030728229327 | 0.394219947337904 |
| ATGACAGCTTCC | 656.031461402849 | 0.187892272258908 |
| ATGACGCCGTCC | 656.036868495992 | 0.490405972530877 |
| ATTCTGCATGAC | 656.037351039664 | 0.516989095178188 |
| AGACTAATTCGC | 656.039543102848 | 0.361449798399834 |
| CATAGTGACAAA | 656.046158571299 | 0.507596229300406 |
| CGCAAAGTGTC  | 656.071097485445 | 0.513887166853856 |
| TCTCCTCAGTCA | 656.07296330248  | 0.247154809814887 |
| AGTCGAAGTCAT | 656.082758942079 | 0.329672913936217 |
| CATGCATGACGC | 656.084451022258 | 0.491805703404837 |
| GAGACATGACAC | 656.092764362685 | 0.446500222566576 |
| GTCACGAATCAC | 656.094882539296 | 0.413547970229389 |
| GCGTTTAATGAC | 656.094940661938 | 0.386713081081462 |
| CCCCTGTAGTCA | 656.095847898334 | 0.45837938217017  |
| ATATATCCGTCA | 656.096249854728 | 0.569933721267491 |

|              |                  |                   |
|--------------|------------------|-------------------|
| CCCTACTGACTC | 656.096305564829 | 0.194741852858177 |
| ACTCATAGGTCA | 656.096777628752 | 0.227797492041137 |
| GTCATACGCTGA | 656.100170541902 | 0.357998974602793 |
| AGCGCTAGTCAC | 656.102624874393 | 0.322325993386554 |
| CGTTTCAATGAC | 656.117584202397 | 0.603331162415365 |
| GCATATAAGTCA | 656.150702372258 | 0.467240723503311 |
| ACGAGACTCATA | 656.152402552408 | 0.370227034956388 |
| ATGTATGACCGC | 656.158376792694 | 0.403567811066867 |
| GTAGCGTGACAC | 656.160455061227 | 0.311397155445606 |
| AGACTAATCGTA | 656.171926116319 | 0.31315404856323  |
| TCTATTGACACA | 656.190844007412 | 0.189279868426354 |
| GTGGCTGACTTA | 656.193039355031 | 0.493536625918593 |
| CGCCAAAATGAC | 656.197536686936 | 0.319506189792707 |
| ATGACGACTTAC | 656.204494823305 | 0.278224569072607 |
| ATGACGACTTGC | 656.208468252322 | 0.374978115069757 |
| CAACGTGATGAC | 656.213241191451 | 0.583467615135217 |
| ACGTAGAGTAAT | 656.217836728984 | 0.384780709520072 |
| GTGACTTACTGA | 656.218818308907 | 0.443471318551681 |
| AGTCAGTAGTCA | 656.22062851662  | 0.198913268138303 |
| ATTTGTATGACC | 656.225721486941 | 0.471520424332235 |
| CATACATGACAC | 656.228632687845 | 0.430753035750792 |
| CAAAGAAATGAC | 656.23111235262  | 0.38333826314832  |
| GGATATACGTCA | 656.238244716053 | 0.387479598720401 |
| ATGACATTATGA | 656.251005838267 | 0.224434376012232 |
| GCTGTGTGTGAC | 656.253048845646 | 0.428285456820243 |
| CACAATAGTCAA | 656.259599962832 | 0.553443910964692 |
| CAACTACTCATC | 656.26320157088  | 0.384668690430126 |
| CGATGAATAATA | 656.266818381492 | 0.349522036934546 |
| ACGGAGTGTGAC | 656.272515130548 | 0.449044860804052 |
| GTGTCACCTAGA | 656.273238474976 | 0.321711197383807 |
| CGACCATGTCAC | 656.273636386044 | 0.38593008891312  |
| GTCACACCGTCA | 656.273759921779 | 0.410071776480268 |
| GTCACATAGGAA | 656.285217911473 | 0.351361141141632 |
| AGACTAATCAAA | 656.28593122706  | 0.331909774465611 |
| AGTACTAATACT | 656.297318401342 | 0.338090563286867 |
| ATTAGGGATGAC | 656.309934419525 | 0.366861450133928 |
| CTCATCTGTGAC | 656.314542274835 | 0.351567062262906 |
| AACCCGGTGACA | 656.318121141981 | 0.739592465582371 |
| CGTTAGTGACAC | 656.32386046351  | 0.482483856257347 |
| ACAGTCAGTAAT | 656.327188823982 | 0.336657950393912 |
| CAGTCACGAGTA | 656.332067382603 | 0.508646121901381 |
| CTACAGGAGTCA | 656.336460703562 | 0.339793174370466 |
| CCCTTTTATGAC | 656.349514940831 | 0.292732753339648 |
| CAAGCCTAGTCA | 656.358577644703 | 0.538708349542047 |
| CGGGCATATGAC | 656.359712448848 | 0.411168397839538 |
| AGTGTCCGTCAT | 656.360385243816 | 0.294269913445533 |
| CAGTCAAGACTG | 656.370119299162 | 0.483536191694264 |
| AACAATATGTCA | 656.370813409695 | 0.471121450903211 |
| GACACGTGTCCA | 656.378006102045 | 0.401454948224761 |
| CTTTATTGCTCA | 656.385638716666 | 0.253709333446781 |
| AGAGGTGACCCA | 656.395125446184 | 0.407999609108492 |
| ATGACAAAGCTG | 656.414100523759 | 0.468408478493111 |
| GATGACAGTAAA | 656.425293783531 | 0.321551627495212 |
| ATGACAGGCACC | 656.43066036217  | 0.358215615530353 |

|               |                  |                    |
|---------------|------------------|--------------------|
| GACACGTTGTCA  | 656.44490903133  | 0.136406207837429  |
| AACTGGCGTGAC  | 656.451914142121 | 0.392370111461456  |
| GAACCTCAATGAC | 656.455907246594 | 0.479459820523592  |
| ACTCATATGACC  | 656.457368646664 | 0.392753527351464  |
| ACGAGTCAAAC   | 656.464184230766 | 0.466291468733579  |
| AGTCAGACAGAT  | 656.466250754977 | 0.4098972230367    |
| GGCCTTTATGAC  | 656.466873952984 | 0.436866562580469  |
| CCCGGGAGTGAC  | 656.469195476541 | 0.457342590099773  |
| GAGCGATATGAC  | 656.472898456529 | 0.394557068855621  |
| AGTGCATGACGC  | 656.476917706284 | 0.429955733141203  |
| GTAGTAAATGAC  | 656.479004132491 | 0.448403669642733  |
| CGTCACAGGAGC  | 656.482209668432 | 0.619874277808252  |
| CCAATACATGAC  | 656.489280891746 | 0.489055533521658  |
| CGTCATTGATC   | 656.527645508536 | 0.241482151615865  |
| TATCACACGTCA  | 656.537586882266 | 0.360755336623317  |
| GCTTCCAAGTCA  | 656.544315517733 | 0.372358284033765  |
| GTCACACATCCA  | 656.560554783599 | 0.0995765934367291 |
| ATGACGACTAAG  | 656.568317751229 | 0.396808748433206  |
| GATTCCGTGTCA  | 656.571297779271 | 0.390278447538097  |
| ATATAATGACAA  | 656.579467735818 | 0.436499800002931  |
| AGCTCGTACTG   | 656.591234044488 | 0.542172729834441  |
| ATTCAGTGAGTC  | 656.597692974108 | 0.223822090262237  |
| CAGTAGCAGTCA  | 656.60922872597  | 0.484930158552446  |
| ACGCATGACGTC  | 656.615227494483 | 0.594124128297913  |
| GTCACACCTGTA  | 656.615879284719 | 0.460943968860197  |
| GCCGGTAGTCAC  | 656.618645323265 | 0.442789874379695  |
| AACTCGTGACGC  | 656.623013215728 | 0.64791269706067   |
| GTCATTTAATAA  | 656.629817916696 | 0.323420796524768  |
| TGACTGTGACGA  | 656.630237174134 | 0.317437513423876  |
| ACGGATATGTCA  | 656.643045707465 | 0.347420304258682  |
| ACGTATGATGCA  | 656.645864253123 | 0.0647013938419483 |
| CCGGTCCAGTCA  | 656.649863698296 | 0.24663586329977   |
| ATTCTGATGAC   | 656.653367579961 | 0.250124430352365  |
| GAGATTGATGAC  | 656.659509514225 | 0.197402114906414  |
| GACTCGTACTGA  | 656.665930228377 | 0.833945196220628  |
| TCGTCAGTGTC   | 656.671166265177 | 0.657045177000469  |
| GGCCAATATGAC  | 656.674613713567 | 0.603462242614122  |
| CGCCCATGACAC  | 656.683671265222 | 0.243656142609067  |
| CGTGGCAGTCAC  | 656.686849793374 | 0.328113143505934  |
| CTGACTCCGAAC  | 656.698718681904 | 0.199404694634057  |
| AGTCCTCGTCAT  | 656.700919076228 | 0.256421502690276  |
| GTCATCGCTCAA  | 656.701189288386 | 0.304839961426089  |
| AATAATGTCATT  | 656.712709753172 | 0.449125784053837  |
| AAGGAGAATGAC  | 656.714108094744 | 0.352276862747787  |
| CTAGCCTAGTCA  | 656.716114468476 | 0.270498316737591  |
| ACTATATGACCA  | 656.719449766766 | 0.309376609794882  |
| GTCACAGGCTGA  | 656.725493512063 | 0.516473023843916  |
| ACTCATCCATGA  | 656.725894141996 | 0.422324635274761  |
| AGTCACTCCCGC  | 656.738701215068 | 0.379241934875075  |
| ACAATGTCGTCA  | 656.743075878282 | 0.500718869535691  |
| CGTCATTTATGC  | 656.752696302191 | 0.34056421269583   |
| GTCCGACAGTCA  | 656.755614566342 | 0.35742788018861   |
| GGCAGTGATGAC  | 656.757683510602 | 0.499683490764752  |
| TAGCCCCGAGTCA | 656.758708026    | 0.378763951337064  |

|               |                  |                   |
|---------------|------------------|-------------------|
| ACACTGTGTGAC  | 656.76640924289  | 0.449652552834112 |
| GTCATCGCGCAC  | 656.782968510284 | 0.501532476920931 |
| GTCACACCAATA  | 656.784018840096 | 0.643792127586557 |
| ATGACCCTCAC   | 656.791502162261 | 0.257162159703536 |
| GCTACTTTGTCA  | 656.794587279357 | 0.312945471886494 |
| TACGAAGTGTCA  | 656.795324281723 | 0.719164489370019 |
| GTCAGAGCCGCA  | 656.796986933243 | 0.360027910638581 |
| ACGTCACCTGTCG | 656.818024013641 | 0.43188425183235  |
| GTCATCAGCGCA  | 656.819064006635 | 0.532138420021009 |
| CCTCAGGGTGAC  | 656.820047806578 | 0.202234704219004 |
| GCTACCAATGAC  | 656.828943838271 | 0.367081498239352 |
| CCTCAGGATGAC  | 656.838911824858 | 0.441941682069421 |
| GTCACAGACTGA  | 656.845231842424 | 0.418649814079141 |
| GTCACCGTAGAA  | 656.845641813954 | 0.369267261806236 |
| CTGACTCTCACA  | 656.847602392986 | 0.335483094803394 |
| CAATGTTGACTG  | 656.860222788114 | 0.573031586754912 |
| GGCGACCATGAC  | 656.874945881072 | 0.333355630756893 |
| GTAGCCGACTCA  | 656.881379211461 | 0.578731322848117 |
| CATTCTTGGTCA  | 656.883706050996 | 0.51484673242086  |
| TGAGGATGACCA  | 656.904335958367 | 0.317053719015346 |
| TCATCGAAGAAA  | 656.946434390682 | 0.48824616221534  |
| ACAACCTGTGAC  | 656.949995226091 | 0.322385149042856 |
| CTCGCTGTGTC   | 656.956301977446 | 0.401768404804449 |
| ATCTTCCAGTCA  | 656.969724145983 | 0.413754054200314 |
| ATGCTAATGACA  | 656.975547559116 | 0.396978373068865 |
| ACACCCTGACTC  | 656.985869044483 | 0.27236347384565  |
| CACCGTGTATGA  | 656.994983727114 | 0.578489307122976 |
| GTCACCTCTGTA  | 656.997124702547 | 0.32257739478121  |
| GTCACCAACTTA  | 657.002472458499 | 0.283845980662692 |
| TCTGGTACGTCA  | 657.007979322843 | 0.501651758005474 |
| TCCTCTTCGTCA  | 657.012071712462 | 0.1855297891849   |
| GCGTCGCGTCAC  | 657.016770027388 | 0.466591742668527 |
| TGTCACAGTTAA  | 657.017654925607 | 0.37407654050968  |
| GTCACCCGTCGA  | 657.026146507275 | 0.433401995427392 |
| TAACTGCAGTCA  | 657.028916188118 | 0.341841340762249 |
| TATACGCAGTCA  | 657.030882864618 | 0.401014234244037 |
| GTCATTCTGTTA  | 657.036394765162 | 0.391595521597149 |
| CGTCATTTGCTC  | 657.060232734462 | 0.325781476642848 |
| ACGATGTGACGT  | 657.061548630942 | 0.545112742072643 |
| AAGTTACTGACT  | 657.064789784633 | 0.169924619229265 |
| CGTATATGACCA  | 657.077940573522 | 0.465293760193348 |
| GAAAATTGCTCA  | 657.085924300937 | 0.487371800743783 |
| GTCACCGAAGTA  | 657.090342205156 | 0.125675425721343 |
| ACCAGTCAGAAC  | 657.096809906162 | 0.456378624499554 |
| GTCACCGATAAC  | 657.099694848705 | 0.399218046598602 |
| CCTACATAGTCA  | 657.107383207473 | 0.368188850933129 |
| GCGGTCCAGTCA  | 657.11465149427  | 0.25530395691737  |
| ACTCGCTGACTG  | 657.11891098826  | 0.219712820695345 |
| CTAAGTGACGAA  | 657.119925717582 | 0.334218133909963 |
| AATGAGTAGTTC  | 657.152730294855 | 0.293595418409979 |
| AAGCTTGTGATC  | 657.161487610926 | 0.292639029959921 |
| GTCACACTATCA  | 657.165526928756 | 0.48584698502469  |
| GAGTCAGGTCGG  | 657.172676967916 | 0.385823170238952 |
| ATGACAGAGCGG  | 657.174434816807 | 0.269402977004087 |

|              |                  |                   |
|--------------|------------------|-------------------|
| AGTCACTACTGA | 657.175621765504 | 0.670262908984674 |
| GTCATCTCTCTA | 657.180893699909 | 0.36584271603162  |
| GTCGCACAGTCA | 657.187899854665 | 0.422649506713431 |
| GTCACCCGCACA | 657.188084158645 | 0.674251318401195 |
| GGGTCCGATGAC | 657.20028220658  | 0.425260852179427 |
| TCATTCTAGTCA | 657.206147139212 | 0.437671424766322 |
| CAAAGTTGTGAC | 657.209400533123 | 0.419380809390224 |
| GTCACACATCTA | 657.249752823162 | 0.533862715738723 |
| GCTGTGACGCCA | 657.259506670677 | 0.399902194131779 |
| ATGACAATAACG | 657.266397662052 | 0.265345030174049 |
| GCGACTAATTAA | 657.270042693287 | 0.510948120790361 |
| GAAGTACGTCA  | 657.277843639857 | 0.496887945765768 |
| CGACTGACGTCA | 657.281905948324 | 0.407014087436408 |
| TGGGTCATGAAA | 657.306280736158 | 0.316141421179059 |
| ATTGACATGTCA | 657.310767246394 | 0.442152912255609 |
| CGCTGCTGTGAC | 657.313044435229 | 0.330031143605936 |
| CACTTTTATGAC | 657.334262135093 | 0.426937794441975 |
| AACGGTAGTCAC | 657.334720628481 | 0.278515794585219 |
| AGCCGATGTCAT | 657.354162265501 | 0.294438881787701 |
| GGCAGCGATGAC | 657.361896575125 | 0.536773461918627 |
| CATAGATGACGG | 657.36485802438  | 0.430127821434797 |
| AGTACACGTAAC | 657.36536171331  | 0.40203438176534  |
| ATGACGACTCGA | 657.367878844836 | 0.386292930115817 |
| AACCATGGTGAC | 657.379289460397 | 0.441623610066882 |
| GTCACCCATGAA | 657.385142233854 | 0.398007185469997 |
| ACAAGTGGTGAC | 657.408520280346 | 0.29930332847809  |
| ATGACAGTAGCC | 657.41513193636  | 0.321506785088871 |
| ACTGACATATTG | 657.422865481859 | 0.709653227573448 |
| GCAACGTACCA  | 657.432363943362 | 0.155770101021365 |
| ATTTAATGGTCA | 657.449105009587 | 0.697843873617429 |
| ATAAACTGTCA  | 657.451968543932 | 0.328099019406022 |
| ATATTAGTCAT  | 657.461685348029 | 0.342140461048914 |
| AGTGAATGACG  | 657.461887537403 | 0.222154359772048 |
| AACTGAAATGAC | 657.46513323834  | 0.273374311419778 |
| CCAGAACTATGA | 657.466971357132 | 0.41913399392905  |
| TCAGTTTCGTCA | 657.474924689124 | 0.466431481485677 |
| AGTGAGCAAATG | 657.486075802412 | 0.210588694215536 |
| GTCATTAACACA | 657.494552702535 | 0.597770158919944 |
| ACTCATAGAATG | 657.516891186559 | 0.342404649720045 |
| ATGACGCGCCTC | 657.523013605875 | 0.284801810809915 |
| ATTCTCGACTCA | 657.533572366105 | 0.346301348322206 |
| TCAGAGGTGACA | 657.535734746921 | 0.292246417559914 |
| CTGGGAGATGAC | 657.538564700542 | 0.465388009283277 |
| ACTCATAACGTG | 657.547556564878 | 0.566215308156053 |
| ATACGTAATACA | 657.552644862311 | 0.469546599278099 |
| ATGACGTCTAAG | 657.568254808884 | 0.251697706930479 |
| ATGACAGGATAA | 657.586181863288 | 0.208443953392443 |
| AATCTCTATGAC | 657.602627029157 | 0.417085258231319 |
| GGGTAAGATGAC | 657.604865317053 | 0.316191530836429 |
| GTCATCACACAA | 657.610238170992 | 0.416883322678883 |
| AAAGATCTGTCA | 657.610295313841 | 0.394506895450144 |
| GTCATCGAACTA | 657.610606029805 | 0.41867767244915  |
| AGGCATTTGTCA | 657.611610844666 | 0.471651999043356 |
| CACCAGATGACG | 657.63940183674  | 0.396512265187831 |

|              |                  |                   |
|--------------|------------------|-------------------|
| AGCGGCTATGAC | 657.643355824888 | 0.273088744237954 |
| CCTCTATATGAC | 657.657658862031 | 0.216870402773006 |
| ATGTATGCATCA | 657.657661037069 | 0.513167407124521 |
| ATGAGTACGATA | 657.664427756506 | 0.278405384908165 |
| GAGTCAAATTAC | 657.664860139369 | 0.529824332177247 |
| ATAGTATTACTA | 657.669831373503 | 0.416257513769066 |
| ACGCATACTCAT | 657.674794121628 | 0.327994070767503 |
| CATCAGATGACA | 657.682992179056 | 0.497135137768992 |
| TAACATATGTCA | 657.684307226293 | 0.344620714503058 |
| GATTTTACGTCA | 657.68825332095  | 0.590951957658661 |
| CTAGCCTATGAC | 657.694241573475 | 0.368373552207971 |
| GAGGCCTAGTCA | 657.70558796146  | 0.653603582135909 |
| ATCTCACGATGA | 657.719776159627 | 0.532282734712489 |
| AAATTTACTAAT | 657.724579811908 | 0.406802159712948 |
| GCATGGCATGAC | 657.731043757387 | 0.396383620999522 |
| GGTCACAGTCAA | 657.736122569732 | 0.442913179377425 |
| GCTACCGGTGAC | 657.736621697414 | 0.428763230885459 |
| GTCATTAGGATA | 657.756417297941 | 0.287891573945064 |
| GCAGCTGATGAC | 657.756938352831 | 0.512444215867082 |
| TATACGGTGACA | 657.757364789927 | 0.400742175057103 |
| CTGTCCATTGGA | 657.758873836935 | 0.339516748728185 |
| ACGATGGATGAC | 657.770532917819 | 0.36713682022344  |
| GCTCAGGAGTCA | 657.779502776872 | 0.562441704757655 |
| TCATCGATAGAA | 657.780696362415 | 0.467105974300227 |
| ACTCATGGTCAT | 657.782038925876 | 0.438732227688081 |
| AATTGCTCAGAG | 657.789128639745 | 0.317636053590247 |
| CTGACTCGCCAA | 657.790039768137 | 0.334408261919935 |
| TCACATTCGTCA | 657.809854489771 | 0.242456900693544 |
| ACTAATTGACTG | 657.809957333765 | 0.306482760772512 |
| GTCACAGCATGA | 657.810726546045 | 0.42767128495045  |
| CAACTTTTATGA | 657.817792681395 | 0.43168055616106  |
| CCGGATGGCTCA | 657.823217219264 | 0.373748086378972 |
| TGAGTCGGAACA | 657.830339213771 | 0.399321823072866 |
| CTGAGACTCATA | 657.83066090361  | 0.506913484855592 |
| CATGACATGACG | 657.831197193209 | 0.160173752730291 |
| GGTGGCTCACCA | 657.832708140033 | 0.507984486670189 |
| GCTTGACAGTCA | 657.836013793302 | 0.71436752816292  |
| ATGACGAACGAG | 657.848219954722 | 0.340753285162119 |
| GTCATCCGCCAA | 657.869043492236 | 0.369610303800432 |
| CGCATGAATGAC | 657.873794511908 | 0.311828050564158 |
| GTTGCAGAGTCA | 657.874283972148 | 0.487433545686934 |
| TAGCCCACGTCA | 657.875373189734 | 0.323010074498147 |
| GGATACCAGTCA | 657.879274521059 | 0.434498666724914 |
| CAGTCAGCATCA | 657.886139793326 | 0.391449132981874 |
| AGATCCGGTGAC | 657.889653952023 | 0.390435068777575 |
| ACGAGCAATGAC | 657.899202475988 | 0.369281491187226 |
| ACGACGAATGAC | 657.909215564893 | 0.356958019967417 |
| GGACCAGTCAGA | 657.910373195752 | 0.401581507930075 |
| ACTCATAACAGG | 657.922558941985 | 0.466907536339764 |
| ATGTCACCCAGG | 657.925780840295 | 0.301047625283239 |
| TGACGAGTATAA | 657.927280003236 | 0.18892613253185  |
| ATAAAGGGTGAC | 657.932401268628 | 0.264376520260431 |
| CCTGTCCAGTCA | 657.942066020515 | 0.238459573510866 |
| GTGACGGTGACA | 657.94320196649  | 0.309452226600353 |

|               |                  |                   |
|---------------|------------------|-------------------|
| ACGACATGACAC  | 657.947789608975 | 0.244612041621252 |
| AAATAGTGACAT  | 657.957839344929 | 0.403637431962739 |
| GTCACAGAATTA  | 657.961550295933 | 0.321773735492769 |
| ACTCGTGACAAA  | 657.965134445509 | 0.444057862604446 |
| GTGACGAACACA  | 657.967129440535 | 0.514354112131186 |
| CAGTCACGCCTC  | 657.970602279598 | 0.107060942473532 |
| ATCTCTTCGTCA  | 657.973792821022 | 0.233968757563095 |
| AATGGTAATGAC  | 657.976248546151 | 0.468660023570443 |
| TGACTTCGTCAA  | 657.979992363753 | 0.438914771783032 |
| AGAAGATGTCAT  | 657.987204268024 | 0.287502355460968 |
| GTCACCGAATCA  | 658.008098522765 | 0.586153461689712 |
| CAAATCGTGACA  | 658.014624265282 | 0.412786303012077 |
| ATGTATCACTGA  | 658.021750457049 | 0.552905718895856 |
| CTCACTGAATCA  | 658.037839143744 | 0.501490077424255 |
| CCCGTTCTGTCA  | 658.048390425796 | 0.289332011084117 |
| AGAGTCAA AAC  | 658.049377033339 | 0.394331568310258 |
| CGCATTGGTGAC  | 658.077072041661 | 0.463501424164346 |
| ACTCTGAGTCGA  | 658.08155636172  | 0.357496939860589 |
| GTCATCACTTCA  | 658.084288136657 | 0.276140695537957 |
| GAAA ACTGGTCA | 658.090747945258 | 0.635742325844068 |
| GTCACATTAATA  | 658.093783748047 | 0.398339805907005 |
| ATTACGTGAGTC  | 658.106231396894 | 0.455826197371036 |
| CTTGTGTGTGAC  | 658.109985897902 | 0.359779066908045 |
| ACTACATGACAC  | 658.119527784715 | 0.315962443777838 |
| GAGCTTGACTAA  | 658.121378545373 | 0.354289317931293 |
| AACATATGACCA  | 658.128155578055 | 0.306883765516805 |
| GACGCTAGTCAC  | 658.137885968223 | 0.472750987808635 |
| ACACTGTGACGA  | 658.13822007462  | 0.600157132312461 |
| ACTCATTATTAG  | 658.14588022229  | 0.254907928821459 |
| GAGTAATCTATC  | 658.155837569597 | 0.594591223594064 |
| AATCTGTGACGT  | 658.158775978736 | 0.430589663532777 |
| ATCGAGAATGAC  | 658.15935058562  | 0.436276280704344 |
| ACGTCACCTAAC  | 658.168700934028 | 0.359220503431028 |
| GTCACACTAATA  | 658.170161758906 | 0.383931406438438 |
| GCAGGGTGTGAC  | 658.1715423246   | 0.443502447195312 |
| GGAAGCGATGAC  | 658.194512456848 | 0.292711519085613 |
| ACGTCACATTTCG | 658.200415655948 | 0.377255655001028 |
| TAGACGCAGTCA  | 658.204664536056 | 0.423692610063777 |
| ATTGCTTACTCA  | 658.205557687853 | 0.2806227910917   |
| GTGACGCCATCA  | 658.215115447845 | 0.263828840371099 |
| ACAGCACGTAC   | 658.217965308882 | 0.192514075474354 |
| GAGCAGGATGAC  | 658.22264493377  | 0.258479445971418 |
| AGGCTCGAGTCA  | 658.227220209332 | 0.471856363547776 |
| GTCACCCATTCA  | 658.227819193331 | 0.359097388091331 |
| GTCACCAGCAGA  | 658.253618131047 | 0.34102355147863  |
| ATGACCACGAGA  | 658.258980486736 | 0.279993088004055 |
| GGTGATTGGTCA  | 658.259465965885 | 0.328723966198516 |
| ACACTCATGAGT  | 658.260526368094 | 0.392011820657319 |
| TGAGTCGGATCA  | 658.263688201757 | 0.272298349279734 |
| ACACTTGCTCAT  | 658.281894670005 | 0.298940755588727 |
| CATACGATGTCA  | 658.294830238952 | 0.59035045236419  |
| ACGTGGCATGAC  | 658.308634084257 | 0.431345660431574 |
| CTCATAAATGAC  | 658.309634895843 | 0.379259593449913 |
| ATATGTCAGAAC  | 658.312330066818 | 0.354301125891484 |

|               |                  |                   |
|---------------|------------------|-------------------|
| ATGACAACGAAG  | 658.3151477243   | 0.340821421401278 |
| GTACACGGTGAC  | 658.321213926882 | 0.279132862240845 |
| CGTACTACGTCA  | 658.342077710353 | 0.467606055184888 |
| ACATTAGACTCA  | 658.348432986943 | 0.65564748628462  |
| ATTTGGCATGAC  | 658.360435513187 | 0.42906337620944  |
| AGATACTAGTCA  | 658.372362190847 | 0.437917764357442 |
| ACGTCACAGTAC  | 658.376467917682 | 0.228352819390719 |
| CGATTCATGACG  | 658.384956977885 | 0.469062816337368 |
| CGCGTGGATGAC  | 658.385974133377 | 0.287009740127683 |
| CGGTCGGATGAC  | 658.386451831465 | 0.237614531327378 |
| CCTATTAGTGAC  | 658.3910223012   | 0.545749725871377 |
| CATTGAGTAACG  | 658.401103549423 | 0.468586808264078 |
| GGTGACACGCAC  | 658.403404657873 | 0.334763224031727 |
| AATGACATCTCA  | 658.413941724563 | 0.318208286505233 |
| AAGTCTACTCAT  | 658.420150674763 | 0.204170684827472 |
| AGAGTCAATTCA  | 658.423038332755 | 0.743114549407967 |
| ATTAGTAAGAGG  | 658.436510645466 | 0.26440391152157  |
| CCTGGCGGTGAC  | 658.440314760382 | 0.403663361699205 |
| GGTGACGCCATA  | 658.449432512347 | 0.307878305171472 |
| CCAACGGTGACA  | 658.452622359204 | 0.281267601384678 |
| GACTAATAGACC  | 658.454911548064 | 0.478146129228947 |
| CTGATTTGGTCA  | 658.468425155199 | 0.263314138720172 |
| ACAATTTGTGAC  | 658.477056232605 | 0.432746986187812 |
| ACGTTGTATGTC  | 658.477733735533 | 0.317515159475321 |
| ATACCACGATGA  | 658.479114088712 | 0.495304176868614 |
| GTCACCCGGA    | 658.481182605843 | 0.396454937381682 |
| ACGTCACGTATA  | 658.517225875384 | 0.452486209296169 |
| CGAAGAATCATC  | 658.517962109518 | 0.31078897923026  |
| AGTCAGAACGGC  | 658.518111045666 | 0.390102867916334 |
| GCTGCAGAGTCA  | 658.535505375178 | 0.415759689181097 |
| CATGTCTGTGAC  | 658.53611398004  | 0.495174223925254 |
| AGTCACTTGGTA  | 658.541212158529 | 0.304444572163724 |
| ATATTACGTATA  | 658.557189934008 | 0.286970047838013 |
| GTGCGTGCGTCA  | 658.567675849557 | 0.43571173925004  |
| ACTCATCGAGAG  | 658.569304067606 | 0.294101500253569 |
| CTTTGACGATGA  | 658.591080659671 | 0.49555647773934  |
| GCGTCACGTCTCA | 658.597789888011 | 0.419620025891785 |
| AGTGTCACGTAT  | 658.601153510169 | 0.444666930301889 |
| CGAACAGAGTCA  | 658.617309419196 | 0.358708714690942 |
| CTGGATGACCGA  | 658.617566977474 | 0.632076540649476 |
| TCATAGTACTAA  | 658.620267779071 | 0.585406754683426 |
| AGTCAGCGATGA  | 658.629633051717 | 0.372241550227117 |
| ACGTCACGTATC  | 658.632175317431 | 0.349467142546367 |
| ACCAGTCAGAAG  | 658.645212945735 | 0.365924587139873 |
| CCGTAATGACG   | 658.64868002126  | 0.567743725501135 |
| TGAGTCGAGAAA  | 658.649388421223 | 0.354513177320976 |
| GCTGTGCGGTGAC | 658.659911373337 | 0.575792393913661 |
| GTCATCCTGGGA  | 658.66273214462  | 0.374308286132407 |
| TCTCGTAAGTCA  | 658.665302565881 | 0.642987380936343 |
| GTGACAGGTCCA  | 658.680254530476 | 0.276639096715959 |
| TCACCGGTATGA  | 658.686920272096 | 0.458359499125848 |
| ACCTTGGTGACA  | 658.687830670338 | 0.43453893635164  |
| CTTAGTACGTCA  | 658.700886867577 | 0.399407541573337 |
| GTATCATAGTCA  | 658.712135017055 | 0.42186188137959  |



|              |                  |                   |
|--------------|------------------|-------------------|
| TCCGTTTTGTCA | 658.712309904663 | 0.366525472431885 |
| CTCATATTAGTC | 658.713057096175 | 0.380108209792146 |
| ACCGCGTACTA  | 658.721327381521 | 0.362394160091957 |
| ATACAATTAGTC | 658.724057299017 | 0.384849971483808 |
| TGACTGAGGGAA | 658.729853886281 | 0.455868516231779 |
| AGTCACTAGCCA | 658.732073128074 | 0.524874449288399 |
| ATCGTGCACTCA | 658.732485915588 | 0.390445861522851 |
| CCTACTACGTCA | 658.732645416369 | 0.527786750167027 |
| CGTCACCGAGGA | 658.744701515904 | 0.2779128738896   |
| AGAATGAATGAC | 658.748157568922 | 0.139905279303217 |
| CATCTATGTGAC | 658.751577404912 | 0.732360930811953 |
| ATGACAGTGCAT | 658.757681154035 | 0.388419963524317 |
| GAGACGGATGAC | 658.758841140522 | 0.388057431850377 |
| GACAGATGTGAC | 658.76971450028  | 0.280587588580351 |
| CGTCACGGATGA | 658.770348081437 | 0.776022797242954 |
| ACGATAAATGAC | 658.779389385329 | 0.551846729521725 |
| AACAACCGGTCA | 658.78792938121  | 0.525173377175968 |
| CATCAACGATGA | 658.79394810499  | 0.524162143826711 |
| GACAGTGACGAA | 658.795853513149 | 0.248482919612281 |
| GTCACCCAAAAC | 658.799905085359 | 0.290700707410388 |
| CAGTACTGTGAC | 658.820917531704 | 0.582458409870217 |
| CAGTCAATCTGA | 658.829771206383 | 0.287803589600844 |
| CATGGCGTCAAC | 658.837324863149 | 0.325029384767873 |
| ACGGCACATGAC | 658.839690571706 | 0.419576739679438 |
| CATAAGATGTCA | 658.841430233408 | 0.517927958152282 |
| CAGCGACATGAC | 658.84193655766  | 0.34447757656571  |
| GTCATGGCAGCA | 658.841936742274 | 0.479178655106637 |
| CGTCATTGACA  | 658.842837401207 | 0.375949750276663 |
| CGCTAGTGAGTC | 658.847517289071 | 0.275354448015108 |
| ACGAGCGAGTCA | 658.848098203504 | 0.478534377922794 |
| GTCACCTCAGAA | 658.874575606028 | 0.330024492691016 |
| GTCACCTGGTCA | 658.876286445491 | 0.230648608648973 |
| AGTATCTGACTG | 658.883932787191 | 0.54448148039256  |
| ATTGTAAGTCAC | 658.884246414618 | 0.475472398850612 |
| ATTACGCAACAC | 658.889089758015 | 0.291823837054027 |
| GTCAACCATGAC | 658.897719014936 | 0.540230739649396 |
| GACTAATTGTAA | 658.902551304751 | 0.451145599910592 |
| ATATACATGTCA | 658.906502314959 | 0.64865688004639  |
| AATCGTCTGACT | 658.912832395847 | 0.448233479779608 |
| ATTTCCAATGAC | 658.916109185039 | 0.264506005472064 |
| GACTCTTACAGA | 658.92470022404  | 0.568549127982899 |
| AAAAGCTGTAC  | 658.928585225762 | 0.517766761978395 |
| AGTCAAGCGTCA | 658.930098533356 | 0.506742080262038 |
| GGGTAACGTAC  | 658.9347800456   | 0.277481415804681 |
| ATCCTACAGTCA | 658.947194623637 | 0.286204646078874 |
| GTCATTAGCGCA | 658.959211634806 | 0.494142411133397 |
| CAGTCAGAAGAA | 658.971748213357 | 0.239161214833099 |
| GTGTCATGTGTA | 658.97495041314  | 0.277926605025146 |
| GTGATTAAGTCA | 659.000319345057 | 0.330978054964705 |
| CCCGACGATGAC | 659.002661154103 | 0.517424807352609 |
| ATTGGTCAATCC | 659.006061769545 | 0.34828731665404  |
| ATGAGTAGGTCC | 659.032056681659 | 0.301884139474497 |
| TCTGTCGTGTCA | 659.035075722854 | 0.319967864837186 |
| GACTAATCTAAC | 659.036138761195 | 0.584651732396522 |

|              |                  |                   |
|--------------|------------------|-------------------|
| GTCACCCGGCGA | 659.046051129101 | 0.216313641069497 |
| GAGTAATAACTC | 659.051270520837 | 0.565169495411552 |
| GTTTGCGAGTCA | 659.054271130392 | 0.398122631420026 |
| GTATTAGTACCA | 659.060819952589 | 0.358898842408762 |
| ACAAGAATGAGT | 659.063522035811 | 0.378414025087018 |
| ACAAACATGACA | 659.078146352058 | 0.139049017668964 |
| ATGACCTCATCA | 659.079790864902 | 0.124480585683357 |
| GAGTCAAGCACC | 659.086002219629 | 0.434498850236226 |
| CAGCCATGTGAC | 659.088968241347 | 0.402699501033177 |
| ATATGTAATGAC | 659.101800111509 | 0.446317639924686 |
| CTGCCGACTCAC | 659.103671406909 | 0.27057302419616  |
| AGCCATCTGTCA | 659.105662748725 | 0.549196354210742 |
| GGATGAGATGAC | 659.112052444765 | 0.273028239311982 |
| ATATCGGTGACG | 659.121511878046 | 0.269566512946423 |
| GTGACGTGATAA | 659.12518658099  | 0.176248552712214 |
| TGACTGCAATAA | 659.125402517095 | 0.534393022488477 |
| CACTATTACGTA | 659.128904363734 | 0.656518080338035 |
| AGTCACGGTGTA | 659.135545207132 | 0.255840278801393 |
| CCTCGTGACGAA | 659.149174651208 | 0.477315076547893 |
| TGAATCGCGTCA | 659.152598724408 | 0.609468271162541 |
| ACTCAATTAGTC | 659.172851962772 | 0.454937533400025 |
| ATCACATGACAC | 659.185278856155 | 0.457915733077331 |
| TGACTACACGAA | 659.187472973593 | 0.759415078700743 |
| AGGGGTAGTCAC | 659.192748502331 | 0.280408270594253 |
| CGTCACAGTCTA | 659.193249829821 | 0.301908399457854 |
| CTGGAAGTGTC  | 659.207153222874 | 0.412884160517718 |
| GATGCCCAGTCA | 659.209214727415 | 0.493367832051249 |
| AATGACCACGAA | 659.215501845668 | 0.433874988483751 |
| CTGTCTGAATCA | 659.217706019949 | 0.345902676986878 |
| AATGACATTTAT | 659.228634061242 | 0.251095286321022 |
| ACGTTTTGACTC | 659.230833832163 | 0.3347807435087   |
| GTCACATTCGTA | 659.244650168492 | 0.237095151784064 |
| GACTCGGGTGAC | 659.24512051411  | 0.442037307434116 |
| ATACCCACGTCA | 659.252121010824 | 0.427458393234101 |
| GAATCACGTGAC | 659.263036030964 | 0.664296097583692 |
| AAATGACGGTAC | 659.26337186322  | 0.388473868018031 |
| CATGACTTGTTA | 659.26947434043  | 0.319954178974583 |
| GTCACACCTCAC | 659.27838997123  | 0.409112730256668 |
| AAGGTCCGTCAT | 659.281090491749 | 0.377554085185054 |
| CGTCACACAATA | 659.282519703684 | 0.378402897570117 |
| AAGTCACCTTAA | 659.292397631072 | 0.406563293893313 |
| ATGTCATTGCTA | 659.294166632039 | 0.144384004766782 |
| CTAATATGACCA | 659.295053963362 | 0.22737039499436  |
| ATGAGTTGGCCA | 659.309285127257 | 0.401566625467699 |
| GCTGACTGGTAA | 659.318853202225 | 0.476313290057444 |
| ATCCATGACCCA | 659.322561408291 | 0.206410736655894 |
| TGACCTACGTCA | 659.33177888403  | 0.573777654244481 |
| AGCGTCATGATC | 659.341744045483 | 0.299787051501718 |
| ATATACGTAATC | 659.344822398593 | 0.457454751033972 |
| ATCGGGGATGAC | 659.353887580814 | 0.331578273352843 |
| CTCGGACGTGAC | 659.354786454145 | 0.524537453414514 |
| ATGCTGAATGAC | 659.361188900057 | 0.343109503732779 |
| CAACTCATGACG | 659.375497282626 | 0.406692306894439 |
| TATAATGACCGA | 659.383731210955 | 0.325149753335057 |

|              |                  |                    |
|--------------|------------------|--------------------|
| TGACTGGCTAAA | 659.387604778773 | 0.38961857680973   |
| ATAGCTCGTCAT | 659.393869743874 | 0.495580134255254  |
| ACCCATTTGTCA | 659.402521488975 | 0.436456438926891  |
| CCGCTGACTGTA | 659.403411172907 | 0.216910411860524  |
| ATGACAATGTGA | 659.411217012644 | 0.275091181339595  |
| GTCGTTGTGTCA | 659.420397523462 | 0.282364233259416  |
| CTTACCGTCATA | 659.431263360251 | 0.285564979635911  |
| AGTATAAATGAC | 659.436402053515 | 0.265910952119962  |
| CGGGAATTACTC | 659.439309915255 | 0.606557715499696  |
| TGACACTACGAA | 659.440590346009 | 0.485848991384194  |
| GATCCAGATGAC | 659.452367586312 | 0.30510458303589   |
| CACCGATTAGTC | 659.456948494989 | 0.316985101117543  |
| AAATCGCGTGAC | 659.458876708659 | 0.262598986820161  |
| AAGACTGACTAT | 659.465551043948 | 0.290725251337945  |
| GTGCAGTGACAC | 659.470599896285 | 0.589860114901679  |
| CCTATTGATGAC | 659.483142791414 | 0.314393071124581  |
| CATCCAGTCAGA | 659.485349214138 | 0.067376938606889  |
| GCCACGAATGAC | 659.487200002869 | 0.384566923807904  |
| ATGACTTGATCG | 659.501925022841 | 0.548414973920331  |
| ATGACGTTAAGG | 659.506947192438 | 0.0770084135718913 |
| TAACTCGACTCA | 659.519126607005 | 0.142999932423558  |
| CTCAATCCGTCA | 659.521711372684 | 0.352025310547835  |
| CCGAGCAGTGAC | 659.526855580535 | 0.621738785988858  |
| GGCCTTGACTAA | 659.532584436432 | 0.442570494119292  |
| GACCATGACCCA | 659.541244872514 | 0.481770662255527  |
| TTCGCATGACAA | 659.553315262669 | 0.719974005961203  |
| AGAGCGCGTCAC | 659.555170512181 | 0.613401074547878  |
| TCAGTGGTGACA | 659.555285736874 | 0.311265473637156  |
| CAGCGCTGTGAC | 659.557006158259 | 0.49258583588702   |
| GTGTCACGCAGA | 659.562054042426 | 0.372236857232709  |
| AGTACCAGTCAG | 659.568715791724 | 0.342824794152321  |
| ATGTGTGACCAC | 659.5764833993   | 0.539871498136097  |
| ACTCATTTAAGG | 659.577244330344 | 0.442265433615906  |
| GCGGTTAAGTCA | 659.587850802707 | 0.766582197720924  |
| GTCATTCTCATA | 659.590995563392 | 0.348439000472271  |
| GTCATGTGCGGA | 659.593355913857 | 0.482907917213264  |
| AGTGTCAGTAAT | 659.598566028254 | 0.247112413698603  |
| GTCACCTACTGA | 659.604857900081 | 0.367016020219808  |
| CTCATTATGTCA | 659.606375816485 | 0.256996854907992  |
| ACCATCAGTGAC | 659.610834932413 | 0.533120118882979  |
| GCTGAATGACCA | 659.613001313744 | 0.437839945708068  |
| ACATGCCGTCAT | 659.617382356959 | 0.25925781217263   |
| GGAGCCTATGAC | 659.62963138207  | 0.446416785296278  |
| ACGTTGTGTGAC | 659.633008598754 | 0.595342519536856  |
| CCATAGTGAGTC | 659.646424032667 | 0.396522824287808  |
| CTGGCTACGTCA | 659.648508520552 | 0.258158746066973  |
| AATAACTGTGAC | 659.649081723819 | 0.504213371702467  |
| CTGACTGTATTA | 659.653023989423 | 0.329616484048788  |
| CATAAAGGTGAC | 659.656256433977 | 0.472144167189233  |
| GTCATGCGAAAA | 659.664696302882 | 0.38092426799102   |
| CAGGTAAATGAC | 659.675175378801 | 0.61544528781496   |
| CACAGCTGACTA | 659.693192606885 | 0.415803722498961  |
| ACAGCCATATGA | 659.700488130297 | 0.478187399943131  |
| GTCACATCTTAA | 659.70985736634  | 0.419275302388321  |

|               |                  |                   |
|---------------|------------------|-------------------|
| ACACTAATGACA  | 659.71173961276  | 0.516736931781442 |
| ACCTGTGATGAC  | 659.72032084879  | 0.440651440236673 |
| AAGAGGTGACGC  | 659.725195433977 | 0.192510317557004 |
| AAACCAATGACG  | 659.725864901381 | 0.330678096719184 |
| TCGAACGTGTCA  | 659.745143231729 | 0.461553482523024 |
| CGTCATTCTCA   | 659.745626065679 | 0.236885998797295 |
| CACGTCACGGAC  | 659.748515302812 | 0.512142686973398 |
| ATTACGCGTGAC  | 659.756417417883 | 0.434444941942682 |
| CCAATAGACTCA  | 659.758709112508 | 0.313321454669647 |
| CGTCACCATGAC  | 659.761109409092 | 0.201840542513417 |
| GTAACGTACCA   | 659.763999403692 | 0.347157783618759 |
| ATCTTTACGTCA  | 659.771146633256 | 0.433434034197303 |
| CTCATAGGTGAC  | 659.77405037717  | 0.50403395491167  |
| GTGGCTACGTCA  | 659.775860647372 | 0.453633341813429 |
| GCCCAGTTATGA  | 659.783543106581 | 0.648846797299584 |
| CCAGGTGGTGAC  | 659.787362315233 | 0.3013022095761   |
| CCTGTTTGACTC  | 659.789734048232 | 0.315890685846833 |
| ATGAGTAGTTAC  | 659.808221371595 | 0.518554538071496 |
| GTGTCCCGTCA   | 659.810115343092 | 0.488785343099151 |
| CGCGTAGATGAC  | 659.813874861747 | 0.388086428171975 |
| CTGACTGTCACA  | 659.822285169426 | 0.353758813779631 |
| TGTCACTGAGAA  | 659.82942221795  | 0.585400664064758 |
| GACTCGTGTCA   | 659.840599323812 | 0.694908397467402 |
| TCATCAGGTCGA  | 659.846642230849 | 0.616815889116288 |
| GTCATTGATCAC  | 659.848269386668 | 0.396490280911786 |
| ACCAATCATGAC  | 659.849290664086 | 0.486978788192697 |
| AGATCTATGACC  | 659.852591517529 | 0.260547968650407 |
| ACGACGCAGTCA  | 659.853569399019 | 0.795075748714903 |
| ACCGATGGCTCA  | 659.854239252584 | 0.490799406638692 |
| ACGCCCGGTGAC  | 659.857043843951 | 0.449946115182746 |
| TGACACTACTCA  | 659.860718150047 | 0.422983331744906 |
| CTTAACCTCGTCA | 659.87061768766  | 0.506056156304945 |
| CGTAAATCGTCA  | 659.871023597902 | 0.348195537669225 |
| ACAGATCCGTCA  | 659.87205774042  | 0.338182437936925 |
| CATTACGGTGAC  | 659.881823952051 | 0.209652156080675 |
| AGAATGCAGTCA  | 659.886891169501 | 0.33512450789861  |
| CCAGACATGTCA  | 659.888192791525 | 0.407754752151146 |
| ATATTGATTCAT  | 659.892820996839 | 0.414148116446548 |
| GCTCTGTAGTCA  | 659.910452764218 | 0.518652874411819 |
| GGACACGGTGAC  | 659.920576845336 | 0.602981678752882 |
| GCCAAGTGACAC  | 659.930048521556 | 0.455799569274648 |
| AGCCGAATGACG  | 659.951728644639 | 0.30796591628268  |
| CATGTTGTGACG  | 659.954585949897 | 0.25891500600488  |
| AATCATGTGACA  | 659.958843746987 | 0.326460496185687 |
| CACGTCACGTTC  | 659.964887122746 | 0.293764261298993 |
| ATTACGCACCTG  | 659.96550559338  | 0.32736039914451  |
| CGTCATCGGCTC  | 659.981998696525 | 0.53097763536175  |
| CGCGAGAATGAC  | 659.98438184401  | 0.463118692550971 |
| GAGACATGACGC  | 659.985020964662 | 0.350498741771182 |
| AGTCAGAATAGA  | 659.996009579271 | 0.201058032818321 |
| GTCACAACAGAC  | 660.008875421056 | 0.28421264135115  |
| AATGAGATGACA  | 660.010622341819 | 0.27888508793806  |
| GTGACACGACAA  | 660.02189007917  | 0.445154338484454 |
| AGAGTCAAATGG  | 660.022519812727 | 0.128397659664146 |

|              |                  |                   |
|--------------|------------------|-------------------|
| CCCCTGACGTCA | 660.032813759494 | 0.425002417254075 |
| ATGTGTATGACC | 660.038630406334 | 0.363130730259595 |
| CCCCGTGTGTCA | 660.04106981562  | 0.273884939951888 |
| ACTCATACGGAA | 660.047186223465 | 0.520703024382823 |
| CATCGGGGTGAC | 660.048381405179 | 0.569610202008266 |
| AGATAATGTCAT | 660.057264906089 | 0.328146437127561 |
| GTCATGATGAAA | 660.076741949647 | 0.50066844131746  |
| CCAGTCAGAACA | 660.083457213519 | 0.475373450363291 |
| GTCATTGATCTA | 660.090930609074 | 0.281173162212283 |
| GTCATGATGGAC | 660.09582747621  | 0.549335212691217 |
| CGCGCCTATGAC | 660.095962409949 | 0.60554054958625  |
| CAAATCGGTGAC | 660.108115403809 | 0.212402830031277 |
| GACACCTGACTC | 660.114575513926 | 0.28427670671187  |
| ACTCAGTATGAG | 660.130811553428 | 0.415634961316744 |
| CTTGCTGAATCA | 660.130860201069 | 0.473040904086662 |
| GCGTCACATTAC | 660.143538922823 | 0.571093525866825 |
| ATCACATGTGAC | 660.166546579451 | 0.492005960865165 |
| CGGCATATGTCA | 660.168567825236 | 0.57056098758279  |
| CACCACGTGTGA | 660.173182105444 | 0.445223816171677 |
| CCTATGCATGAC | 660.175363269438 | 0.464041805537947 |
| ACTCATAATTTG | 660.192110854868 | 0.353037154903511 |
| CTTCGTGACAAA | 660.200105827019 | 0.26267792181418  |
| GTCATCATCCAC | 660.200310843856 | 0.245526672097989 |
| GTCACCACGACA | 660.201292311904 | 0.314450956141837 |
| ATGACCCAGTTA | 660.209722471402 | 0.3132483979597   |
| ATGACACGGAGC | 660.211715876325 | 0.300496789438297 |
| ACCACATGTGAC | 660.243655035311 | 0.365059135432082 |
| AAATTCACTCAT | 660.246656279295 | 0.349151048307699 |
| AAGATTATGACC | 660.260486847792 | 0.247389407731728 |
| GTAGAGATGACA | 660.266552951226 | 0.178429185869673 |
| TCCGTCCAGTCA | 660.297740001487 | 0.482636706882502 |
| ATTCTGTGTCA  | 660.299282775019 | 0.515772982896807 |
| CTTTAATGACAA | 660.303187196906 | 0.428002585023925 |
| AGGTCTGATGAC | 660.304028003934 | 0.433191700508935 |
| CATTATTGTGAC | 660.306428767824 | 0.69674910622185  |
| CACCATCGATGA | 660.311150271492 | 0.645682702628482 |
| GTCATGTATCGA | 660.31514804439  | 0.356084565220776 |
| ACGTGTGGTGAC | 660.318364064418 | 0.52690733713776  |
| GTCACTGAAGA  | 660.320728058303 | 0.54349970848291  |
| ATACTGTACCG  | 660.324456110842 | 0.368318020437589 |
| CTTTATTGACTC | 660.327674391457 | 0.325093039516186 |
| GTCAGACATCAC | 660.330137454415 | 0.419215531786451 |
| GAGTTAAATGAC | 660.336423023931 | 0.376863381208239 |
| TCTCATGACCCA | 660.336527761281 | 0.208034254436944 |
| AGTGGTCATTTT | 660.337484127212 | 0.506395743930185 |
| AATTGTATCATA | 660.342764229752 | 0.35080827600991  |
| TGACGTTGCTAA | 660.353104317032 | 0.377458559852796 |
| CGTCATCTCTAA | 660.35404768958  | 0.309642245532988 |
| ATGACGGGATCA | 660.357066847827 | 0.371304649945141 |
| AGTGACTTGGTC | 660.365980609883 | 0.442791856076401 |
| CCATTAGGTGAC | 660.36793491573  | 0.655741350567981 |
| GCACCTTATGAC | 660.368216414204 | 0.295770418981003 |
| CATAATTTGCAG | 660.369215930634 | 0.433642086983733 |
| CATTTCTCAGA  | 660.369695864473 | 0.375971874200269 |

|              |                  |                   |
|--------------|------------------|-------------------|
| GGGTCATCTTTA | 660.377310657539 | 0.415116163475423 |
| ACGTAAGTATGA | 660.37781641672  | 0.463338303956062 |
| CAGTCAGAAAAG | 660.393603723859 | 0.381621231073542 |
| GCGGCGTGACAC | 660.398342725631 | 0.484936754704495 |
| ATGACGCGCGTC | 660.403653321589 | 0.412120726300836 |
| CGTCATTAGGCA | 660.417206407093 | 0.355435202503977 |
| ATGTCGTGTGAC | 660.425961987025 | 0.200776724156537 |
| CAGTCACGCCTA | 660.430757591049 | 0.292776737116284 |
| ATCGCGTAGTCA | 660.441549229603 | 0.492530467621403 |
| ATGACAACGACG | 660.443811744838 | 0.177757830511556 |
| GTCACCGTTCCA | 660.451155837479 | 0.284596879537172 |
| GATCGTGACGAA | 660.454683552903 | 0.330245014157737 |
| GGTCTGGATGAC | 660.460714814641 | 0.417130826079988 |
| GACTATCCGTCA | 660.460814389234 | 0.472407757084928 |
| CGTGTTTTGTCA | 660.470928795623 | 0.515837812217361 |
| AACCGTGAGTCG | 660.474186926339 | 0.525048361716147 |
| CTGTCATTACTC | 660.476769591411 | 0.262485684585061 |
| CCAGGGAATGAC | 660.48349309101  | 0.374543757185936 |
| AGGCGCGATGAC | 660.487945374379 | 0.30796476715533  |
| CCACCTGTGTCA | 660.490609330924 | 0.418335954641001 |
| GTCAGACCTGAC | 660.491983064084 | 0.629742955651286 |
| GCCCTGACGTCA | 660.502631946603 | 0.431607878885901 |
| AGTCAGAGTAGC | 660.515387052317 | 0.182409642299296 |
| AATTGTGACCAC | 660.522810074135 | 0.524544163203574 |
| ATGGATATGTCA | 660.523795962346 | 0.425684937866268 |
| AGTCAGAAAATC | 660.54314121844  | 0.419651057504085 |
| CCCCACGATGAC | 660.545020065562 | 0.303955296102793 |
| ATGACTAGCGGG | 660.551054250143 | 0.27582893290154  |
| GCGTCACTTCAA | 660.569161992324 | 0.325770059916331 |
| GTTTTACAGTCA | 660.574874574417 | 0.464087169032853 |
| GCCATACATGAC | 660.580691838353 | 0.521708687584914 |
| GGCACTGATTCA | 660.585390483322 | 0.425155514871379 |
| GAGCTCGAGTCA | 660.587188612599 | 0.402426348565165 |
| ATATACCTGTCA | 660.588033306365 | 0.31436307748683  |
| AATCCCTGTGAC | 660.590220423047 | 0.535480961375542 |
| AGTGAGTCCGAC | 660.616811187562 | 0.390763592333362 |
| CGTCATTGTTTA | 660.617105411712 | 0.439595543293712 |
| CCTAGAGATGAC | 660.621117610932 | 0.397358807372062 |
| GCATGCCATGAC | 660.622487558322 | 0.454460241635474 |
| GTCATTACACAC | 660.623481091307 | 0.516434646590484 |
| ACATGTCTGACT | 660.62578789223  | 0.280718457896247 |
| ATCGCAGGTGAC | 660.633479979216 | 0.519981694283192 |
| ATTCTGACTCG  | 660.647787590092 | 0.31616682060659  |
| ACGTCACCCACG | 660.648952252202 | 0.179710331285732 |
| GTCACCGGATCA | 660.652896775986 | 0.405328820916319 |
| AAATATAAGTCA | 660.655581439659 | 0.268013783593109 |
| GATCATGACACC | 660.661119940783 | 0.307852545140328 |
| GACGCCGACTCA | 660.663095426749 | 0.320667109315219 |
| GGCCCGGTGAC  | 660.688642909995 | 0.403660404084244 |
| ATGACGAGGCTA | 660.700383454469 | 0.36061981155223  |
| AATGACGGCATC | 660.70050842198  | 0.522267415902821 |
| AGAGTCAAGCAT | 660.712575425002 | 0.457899057981422 |
| GTATTAGACTCA | 660.717042534471 | 0.565304468223623 |
| AGACCGGATGAC | 660.725174605078 | 0.297796835385846 |

|               |                  |                   |
|---------------|------------------|-------------------|
| ACGGGCTCTGAC  | 660.72762686301  | 0.423416054736727 |
| CCCTATATGTCA  | 660.736682497994 | 0.390986895359583 |
| AGTCATGGGCAC  | 660.73731423362  | 0.488454909003133 |
| GATCACCAGTCA  | 660.743833506658 | 0.545083100539662 |
| ATGACGCTCATC  | 660.744663448779 | 0.418283242244613 |
| ATTACTTGTGAC  | 660.761329443863 | 0.45598769741139  |
| ACGTCATGGACA  | 660.761525650034 | 0.388078146711743 |
| GTCAAACATGAC  | 660.765057644669 | 0.321825724818111 |
| TCGATGGCGTCA  | 660.766926782401 | 0.418375307906783 |
| GACGGCGAGTCA  | 660.774821555783 | 0.68547373732122  |
| GTGACACCAGAGA | 660.783171533655 | 0.290356799095913 |
| ACTAGTCAGTGA  | 660.787024043004 | 0.438245259498409 |
| GTCATACAGCGA  | 660.79841725092  | 0.529439514322238 |
| GCGCCTGACACA  | 660.801756452955 | 0.535919217339222 |
| AAAGGGACTCAT  | 660.827495327251 | 0.240612310355954 |
| CCTTATCTGTCA  | 660.828268931056 | 0.282812613495732 |
| AGTCACTACCAA  | 660.837218518517 | 0.42053608282089  |
| AGAGCTGACACA  | 660.847112020059 | 0.553282848322727 |
| CGACTCAGAATC  | 660.850795351989 | 0.426543894559705 |
| GTAGATTGGTCA  | 660.860372615243 | 0.22380630256309  |
| CGTCATCAAAC   | 660.862560749149 | 0.460004899999024 |
| CAGTTGTGACGC  | 660.864316944623 | 0.338650235455872 |
| TCTATTATGTCA  | 660.868006902961 | 0.207547171169019 |
| CACTCTGAGTCG  | 660.90543281572  | 0.350559386335696 |
| CAACTGCCTGAC  | 660.911184098841 | 0.384141333407882 |
| AGTTGTCACCAT  | 660.919582778564 | 0.420027895571006 |
| GAGTCAGGACGC  | 660.922615852232 | 0.446910201315354 |
| TGACACTTACCA  | 660.923343899827 | 0.450793430248771 |
| CGTTGGAATGAC  | 660.924851980594 | 0.427511318024989 |
| GTAATAATGACA  | 660.927450951422 | 0.432878976754288 |
| GACACGGTGACA  | 660.92816721496  | 0.426755876470082 |
| AGTCACGGTATG  | 660.929342805449 | 0.395732591800079 |
| ATGAATAACTCA  | 660.940206741194 | 0.780327033999041 |
| ACGCTACGTGAC  | 660.942160471958 | 0.54714859783562  |
| AACTTGTACCGT  | 660.944961149632 | 0.385752510057256 |
| CACTCAATGACG  | 660.955080956775 | 0.298949866326833 |
| GCCCTGAATGAC  | 660.957387635967 | 0.464884231833832 |
| ATAACTTGTAC   | 660.9759714255   | 0.293472749049859 |
| CACGCAAATGAC  | 660.977130954765 | 0.412801750935861 |
| CGGGCTCATGAC  | 660.977578454173 | 0.428571127911812 |
| CCTGCCTGACTC  | 660.983535716099 | 0.188706483757343 |
| GTCATTCAGAAA  | 660.984194973307 | 0.662302736621727 |
| GTCACCATACTA  | 660.98830127072  | 0.48887365425849  |
| AAAAGATGAGTA  | 660.989927568548 | 0.157796886969303 |
| GCGTAAAATGAC  | 661.006137566716 | 0.28287309585974  |
| GTCATTTCAAGA  | 661.006678506088 | 0.339919775712212 |
| TCGGTGATGTCA  | 661.023209293909 | 0.373266324157161 |
| GTCACCGCGTTA  | 661.028513752554 | 0.416850506499021 |
| GTACCATGTGAC  | 661.036897704512 | 0.218466420221189 |
| CGTCATCTACTC  | 661.037208818153 | 0.307937395034279 |
| CGTCATGCTCGA  | 661.044089195261 | 0.441731519956326 |
| CGTCATTAATAA  | 661.051391791051 | 0.384062041346667 |
| ATTGGGTCACTC  | 661.05266588278  | 0.281635357987342 |
| GGCGGTGAATCA  | 661.056755422316 | 0.409060540651013 |

|               |                  |                   |
|---------------|------------------|-------------------|
| CCAGTCTATGAC  | 661.057405761548 | 0.362359485394835 |
| TCGTAATCGTCA  | 661.061279507447 | 0.375403091559552 |
| ATGTCATTACCG  | 661.079506560238 | 0.253303738858861 |
| GATCCGCGTCAC  | 661.081222082448 | 0.300781872275921 |
| ATGACAGTCAAT  | 661.087798167809 | 0.194739681319888 |
| CGTGGTAATGAC  | 661.100037329245 | 0.189150856744849 |
| GTGACACTGTGA  | 661.100225643061 | 0.281292648459663 |
| ACGGTCCAGTCA  | 661.107592478347 | 0.318949045311409 |
| ATCGGAATGACG  | 661.125304665519 | 0.357819191762356 |
| GGTGTACAGTCA  | 661.144117420575 | 0.440402046696671 |
| ATCAAGTACTCA  | 661.146402681926 | 0.464663589600438 |
| GTAACCATGACA  | 661.147605509543 | 0.374725700553118 |
| CTGCTTAATGAC  | 661.148939646516 | 0.446845389222578 |
| AGTCACGGCTTC  | 661.153048407141 | 0.421370579458988 |
| GTCATTGATTGA  | 661.154221951373 | 0.404050130265489 |
| ACACGTGACACT  | 661.164847144215 | 0.255667807206546 |
| GTCATCTGAATA  | 661.173726806542 | 0.485539473164449 |
| ATGTCACAAATG  | 661.202101986165 | 0.5605544547953   |
| CGCAGTGACGTC  | 661.203566842982 | 0.61678065087023  |
| TGAGTAAGCTAA  | 661.203874643742 | 0.451115251956202 |
| GATGACGTCGCA  | 661.204661357426 | 0.351092267988305 |
| CATCGAAGTCAC  | 661.206444450656 | 0.500492734349538 |
| CGCTTAATGACA  | 661.206901200326 | 0.368219990379855 |
| GTCACTGCCAGA  | 661.216974682644 | 0.48320376607936  |
| ACTAGCTGTCAAT | 661.218719428144 | 0.57882619763414  |
| CAGCTAATGACG  | 661.226960655079 | 0.580963046752806 |
| GGTCAGACTCAC  | 661.240713899033 | 0.326439056452135 |
| ATTCATGACACC  | 661.251074072606 | 0.251296612836013 |
| GGTGACTTCATA  | 661.262375736964 | 0.391660292909549 |
| AGTCTGAATGAC  | 661.262510027059 | 0.4249811693616   |
| ATGAGCAACTCG  | 661.2657068713   | 0.454135916997168 |
| CACGTATGAGCA  | 661.284322608834 | 0.400713772181926 |
| TGACGCAAGGAA  | 661.285498002728 | 0.528957685576243 |
| ATGAGCATTACG  | 661.303523770665 | 0.287003238618527 |
| ACGTCACCGGGC  | 661.306763737768 | 0.558636471614148 |
| AACAGACAGTCA  | 661.315134884727 | 0.540429853860271 |
| AATGAGTTGTTC  | 661.318720133035 | 0.435143524995706 |
| CCGTCCTAGTCA  | 661.322724561262 | 0.366969315576044 |
| GGCTTGACTAAA  | 661.335491646146 | 0.286069190909995 |
| GTCATTGGCCAA  | 661.347969067623 | 0.465450717370037 |
| CCGTAATGAC    | 661.355087774983 | 0.405968055877597 |
| TAGTGACAAACA  | 661.359430507388 | 0.194433682234104 |
| AGCGGTGATGAC  | 661.359683569225 | 0.19381268900049  |
| CGTTTGACGCAC  | 661.361151731543 | 0.171647691064619 |
| GTCATGCGGAAA  | 661.387468586829 | 0.612796677395117 |
| GGATTACGCACC  | 661.39440601898  | 0.502190844900646 |
| ATTACACGTCAA  | 661.412071749553 | 0.310824368650254 |
| GGTTTGGATGAC  | 661.420581058578 | 0.185779069111779 |
| CTCTTGAATGAC  | 661.423212680531 | 0.298000036572877 |
| ACTAACAAGTCA  | 661.428002520451 | 0.315121067060605 |
| TAACTTTGGTCA  | 661.437720601594 | 0.385980213026439 |
| ATGCCCGATGAC  | 661.46213395495  | 0.392715904520363 |
| TAAGACTAACCA  | 661.485092028992 | 0.399765817017728 |
| CTTGGGTGACA   | 661.48652318112  | 0.478114156408979 |



|              |                  |                   |
|--------------|------------------|-------------------|
| ATGAGCAAGTAA | 661.503781157826 | 0.312996854341456 |
| TATGACCAGGCA | 661.50415070396  | 0.505973445040112 |
| CGTCACCAAAG  | 661.506188166016 | 0.538672564376409 |
| ACTATCTGACTG | 661.506631778204 | 0.300073771286427 |
| GAGAATCATGAC | 661.511031818292 | 0.461692142022042 |
| TGACACTAAGAA | 661.513586100423 | 0.373480983265414 |
| AGTCACGCTGCA | 661.51390896087  | 0.320335327029297 |
| CTCGGGTGACGC | 661.518269181666 | 0.643355865871385 |
| CGCGCTAAGTCA | 661.526822229485 | 0.542160263594936 |
| GAATACTGTCAC | 661.531872434431 | 0.423210666200346 |
| GTATGCTGTCAC | 661.532284705801 | 0.358735640340601 |
| GTCACGTTTTGA | 661.541243504487 | 0.40478417983297  |
| CATGACAGAGTC | 661.550617172986 | 0.358928178345786 |
| TCTAAAGTGTC  | 661.554899551175 | 0.240402756489005 |
| AGTCAGAAGTAC | 661.563735672254 | 0.417052783360178 |
| GTCATGGACCAC | 661.566412839877 | 0.539943422501795 |
| CGTGAGTGTGAC | 661.574174900046 | 0.403090276121542 |
| GCTTAAGCGTCA | 661.593202164412 | 0.52681088397593  |
| GACTAATCGGCA | 661.609506529365 | 0.282908475976586 |
| GTCATATAACCA | 661.615161922171 | 0.267384463620243 |
| AAGTCCTAGTCA | 661.617754851217 | 0.475640743523851 |
| GAGTGGTCACAC | 661.62226760821  | 0.402115505714888 |
| CTTGTTAATGAC | 661.625584737715 | 0.890037262007731 |
| ATACTTGACTGA | 661.627793828432 | 0.539480891063001 |
| CACGTCACTGGC | 661.633380832868 | 0.501553070803603 |
| CATCCGAATGAC | 661.635257012186 | 0.309673251178712 |
| ATGACCTAATCG | 661.637513666546 | 0.297688831812386 |
| GACGTCCAGTCA | 661.648603059588 | 0.516667107595418 |
| CGGCTATTAGTC | 661.651479210248 | 0.419017836035477 |
| CTCTGACACTTC | 661.653796468285 | 0.260777518013577 |
| AATGCGTGTAC  | 661.6913186942   | 0.397977884612516 |
| TAGCAAGTCATA | 661.695505507131 | 0.404814433929414 |
| TCATCCCAGTCA | 661.704811253738 | 0.436083458006954 |
| CGTCAAGTGACA | 661.710818210831 | 0.510313752445803 |
| ATGGTGCATGAC | 661.721984601743 | 0.314879506720523 |
| AGTAACAATGAC | 661.722403156692 | 0.539727423151649 |
| CGCCTAATGACA | 661.725747171223 | 0.430109003395304 |
| GTCATGGTTCAC | 661.726393715201 | 0.41041699249661  |
| AGTATAGACTCA | 661.733220751463 | 0.267242247196761 |
| TGACGATTAGAA | 661.734241871706 | 0.432006129215353 |
| AACGTCACGTCA | 661.734766345833 | 0.321664390150839 |
| AATTAGTCGCCA | 661.741793365504 | 0.272994600009979 |
| CGATGAATAATC | 661.742124068    | 0.33347585322431  |
| GGTAGAGATGAC | 661.751288980999 | 0.270071413722013 |
| CGACCTGTGACA | 661.755942779527 | 0.386471457219705 |
| CCAATATTATGA | 661.757683177287 | 0.439461800623696 |
| ATGAGTGAACCG | 661.765064195911 | 0.429328252296282 |
| AGACTCACTTTC | 661.76526295689  | 0.266987824717444 |
| CGCCATACGTCA | 661.778416522695 | 0.443876868501813 |
| TGACACAGGAAA | 661.780161419365 | 0.345674756645272 |
| GCCCATTCGTCA | 661.781181613421 | 0.263071318849789 |
| GGAGATGATGAC | 661.781192857855 | 0.224249125485585 |
| ATGAGGGATGAC | 661.781859495302 | 0.28731024465356  |
| GCATGCGGTGAC | 661.787317613247 | 0.471483589596835 |

|              |                  |                   |
|--------------|------------------|-------------------|
| GACTATTCTGAC | 661.790643400119 | 0.448865926495102 |
| GCTGGTGATGAC | 661.792342931486 | 0.507049086594478 |
| AAAACCATGACG | 661.797273226991 | 0.569239626027543 |
| AAATTCTAGTCA | 661.797324271872 | 0.614599787243349 |
| GTCATAGCCTCA | 661.804664581235 | 0.492914010266383 |
| TGAATAGACTCA | 661.808164183625 | 0.481428745812879 |
| GTGACAAGTCAA | 661.816932162078 | 0.242258323056098 |
| ATGACGTCGTCG | 661.817315386144 | 0.484447390802413 |
| ATGTAGTGTGAC | 661.818505951205 | 0.51077539818855  |
| ACGCTTGGTGAC | 661.818656099108 | 0.566171495641736 |
| GTCACCGTAAAA | 661.829205487042 | 0.51793437775799  |
| TGAGTCCTAAAA | 661.839572771188 | 0.49213980538676  |
| GTCACCCTTATA | 661.83977586904  | 0.278066618847941 |
| AGTCACGCTAAT | 661.854423620756 | 0.407802220931045 |
| ATTGACAAGTCA | 661.854495231095 | 0.54591065843065  |
| TGACAATATGCA | 661.857646003925 | 0.480898965995145 |
| CTAGCCGATGAC | 661.86283272016  | 0.357678143622836 |
| ACAGATAATGAC | 661.867937304581 | 0.427348456860649 |
| GTCATGTTACTA | 661.868508753559 | 0.484728276211207 |
| GTCATATACCCA | 661.872803825893 | 0.29394187837962  |
| GGAATGTGTGAC | 661.877095257216 | 0.284216837518655 |
| ATTCAATGTGAC | 661.881899290922 | 0.517379953830637 |
| TGACTACAAAA  | 661.883049903716 | 0.296317734605019 |
| CGATTAGTCGCA | 661.890843918558 | 0.473270043734407 |
| GTCATCGACCCA | 661.898690734082 | 0.298840330717373 |
| ACGTCATGGGCT | 661.902150851705 | 0.381336446029743 |
| ACTTAACGTCAT | 661.916033300375 | 0.35946761898795  |
| GAATCGGATGAC | 661.927005426919 | 0.328504137024318 |
| GTCACAACGGAC | 661.933151716953 | 0.398786744042447 |
| GTCACCGATCGA | 661.946608346101 | 0.537830186068421 |
| CGTCATATGGGA | 661.951628987674 | 0.414349800337202 |
| CGACATTCGTCA | 661.959360478043 | 0.433685242818933 |
| CAATTCGGTGAC | 661.965936072695 | 0.269579799919118 |
| GAGTGATGACCA | 661.975864443561 | 0.292705630749212 |
| TGAGTCCTATAA | 661.987149641634 | 0.515435324376734 |
| GATAGGTGTGAC | 661.992830161305 | 0.361065513711394 |
| ATGACCCCTAGG | 662.012131820952 | 0.558950576606864 |
| GCAAGTTATGAC | 662.018729678334 | 0.45302806795976  |
| GCAACAGATGAC | 662.024423575688 | 0.42339617667078  |
| ACGTCACCCAAG | 662.028424249976 | 0.450322096352449 |
| ATGGCATGACGC | 662.03641021671  | 0.28605523849074  |
| GGTCACGTGACC | 662.041648267442 | 0.575346508794654 |
| ATAGACTCAGCG | 662.041875359109 | 0.323840809417135 |
| GGAGTCGATGAC | 662.043323032562 | 0.271587436960499 |
| AATCTTGACACA | 662.043941105184 | 0.249855020112431 |
| AATGACATTTTC | 662.046264012647 | 0.175039672485081 |
| CCCTGGAGTGAC | 662.064189666358 | 0.489491371938129 |
| ATTTCTGTGACG | 662.064986641847 | 0.273549977235397 |
| ACTCATAGTCGC | 662.07320681024  | 0.292511607572677 |
| CGTCATCCCAAG | 662.073971608346 | 0.56083748257003  |
| ATAAGATGTCAT | 662.075296409553 | 0.287778398803201 |
| GTAAGATGTGAC | 662.076479783811 | 0.454639904679308 |
| CAATGCAGTGAC | 662.090345593854 | 0.527311634128967 |
| CACAGTCAGTGA | 662.108291239661 | 0.443705119336468 |

|               |                  |                    |
|---------------|------------------|--------------------|
| ATGACAGCGCAT  | 662.119979464297 | 0.256569753354867  |
| AGTCACTCTGGA  | 662.123462444298 | 0.279313804783888  |
| AGTCAGAATCCG  | 662.126676939772 | 0.402031218522642  |
| GGTCATGACCAC  | 662.134476115816 | 0.620792396640641  |
| ATTATGTCAGAG  | 662.135846916518 | 0.265328895049917  |
| TGACTAGCGTAA  | 662.138914383427 | 0.38525724171779   |
| CTCAGCGAGTCA  | 662.140567747343 | 0.471579901343755  |
| ATCTGAGATGAC  | 662.142094015181 | 0.429446552219517  |
| GTCCGTGCGTCA  | 662.146182701154 | 0.349859777601335  |
| GGCTCAGATGAC  | 662.156863857177 | 0.0241533160216038 |
| GTCATTAECTAA  | 662.163434045392 | 0.353952293350184  |
| TATCATCCGTCA  | 662.169496197174 | 0.282225900831449  |
| GAGTCAAAACGC  | 662.172778204901 | 0.263893593741362  |
| AGAAGTGAGTCT  | 662.185579228336 | 0.239783756831247  |
| TGACTCCGTTAA  | 662.194416752981 | 0.509395907089294  |
| GGCACATATGAC  | 662.204040737666 | 0.378563424313893  |
| GTGACATGGTCA  | 662.208390366803 | 0.451053011699656  |
| CAGGCTCTGTCA  | 662.230245881307 | 0.328866542466207  |
| ACTCATTGGAAT  | 662.237836076773 | 0.389464302850422  |
| AAACGGTGACAT  | 662.253991394172 | 0.185407080768725  |
| GCTCCCAGTGAC  | 662.257912975047 | 0.582772732753171  |
| CTGGTCCATGAC  | 662.258851939806 | 0.444228449361847  |
| ACGTGCTGACTG  | 662.260902360399 | 0.375732902389377  |
| GGTTGGAGTCA   | 662.26310441647  | 0.234648200110949  |
| CACTTGACGTCA  | 662.277201786085 | 0.36630435606269   |
| CCTATAAGTGAC  | 662.279315819684 | 0.837141081899578  |
| CTAATTTGTCA   | 662.285977520971 | 0.422164668956217  |
| CAAATAGTCGC   | 662.286638282084 | 0.6817348089934    |
| CCCTGTTATGAC  | 662.287430391859 | 0.481560016861174  |
| ATGAGTACCTGA  | 662.292235674955 | 0.37406818222067   |
| GTCACAAGTACA  | 662.295507042899 | 0.390941547535394  |
| CGATTATTCATC  | 662.315513345421 | 0.122535966815781  |
| GTGAGTCCGCGA  | 662.316237772176 | 0.248997161458832  |
| CTGGGGTGACGC  | 662.320674413246 | 0.350430603722785  |
| AACCGAGATGAC  | 662.322652283545 | 0.53209298697303   |
| TGCCACGTAACA  | 662.331981001197 | 0.196761769510236  |
| GTCACACCGACA  | 662.341473659818 | 0.323688742549926  |
| GCAAGTCTGTCA  | 662.351448616396 | 0.285116599263934  |
| CAGATAAATGAC  | 662.361064992796 | 0.46010961360415   |
| CTTTACAATGAC  | 662.375753680226 | 0.525766603038227  |
| GTCATGACCGTA  | 662.391380066544 | 0.458990062147223  |
| GAGTAGTGACAC  | 662.401520160374 | 0.37397270909071   |
| GCGCTCTAGTCA  | 662.407866106683 | 0.566473539895484  |
| ATCGTAGTGTC   | 662.414446295806 | 0.411451415359056  |
| CATTGCGTGTC   | 662.416085796651 | 0.303784187499411  |
| TCAGTAGTGACA  | 662.420072215939 | 0.777944688501224  |
| GGAAAGTGAATCA | 662.429147879106 | 0.234144500754584  |
| AGTCAGACCTGG  | 662.429885306077 | 0.354612833756765  |
| AAAGAAATGACG  | 662.430886130856 | 0.432032493737255  |
| ACCATGGGTGAC  | 662.433219877395 | 0.40476004991063   |
| CGTCCTAGTGAC  | 662.441659216667 | 0.511525643762669  |
| ATGGATCTGTCA  | 662.450686720296 | 0.231815813390998  |
| GATGACGCCTGA  | 662.46211851395  | 0.478768407267255  |
| ATTACGCAACCG  | 662.475397286262 | 0.415930438987767  |

|              |                  |                   |
|--------------|------------------|-------------------|
| ATGGCGGAGTCA | 662.483458079809 | 0.302909235526161 |
| ACTCATACTCAG | 662.487839544714 | 0.304797456885465 |
| CGTCATTCGTAC | 662.501433792554 | 0.291381332461988 |
| GTCACTGAAGAC | 662.502948315613 | 0.493650449428598 |
| AACGAAATGACA | 662.512057212061 | 0.410200417411862 |
| ATGCTGAGTAAC | 662.515366253797 | 0.428316201218739 |
| CTTTTGGGTGAC | 662.515589319184 | 0.553059057138574 |
| ACCGGGGATGAC | 662.520500543481 | 0.21865585232941  |
| AATCAGTCTTAG | 662.524745770154 | 0.391445662769089 |
| GTCACACGATAA | 662.529589215266 | 0.287977215156628 |
| GTCACTAGGTAA | 662.532713630752 | 0.408071826069788 |
| GTCATCAAGCAA | 662.545242550845 | 0.447220033342498 |
| CAGGACGACTCA | 662.548837399005 | 0.451180711611435 |
| CTGTGAGTGAC  | 662.549569622746 | 0.568128036484257 |
| GAATCATAATAC | 662.550304283846 | 0.44905970337798  |
| ACGTCACCGCCT | 662.550499987223 | 0.159921819007502 |
| GCGTGAGAGTCA | 662.550635039948 | 0.188827597538668 |
| GCGTCACTGCCA | 662.557786364863 | 0.435551597405697 |
| AGTCACGCTTAG | 662.563138563288 | 0.422444454256635 |
| GTCACCTTTTCA | 662.565195940061 | 0.369484399450197 |
| CCATATGACGGG | 662.573283126525 | 0.387846078326902 |
| GACTAATTTTGC | 662.577468335739 | 0.421443176621276 |
| ACATCTGATTCA | 662.581610171401 | 0.384064351666839 |
| GCTGACACAGAA | 662.582499785439 | 0.283720633408251 |
| TCATAGCTGTCA | 662.606760027979 | 0.389497638589727 |
| ATCTGAGGTGAC | 662.612040493091 | 0.505686048380136 |
| CGTCTGTGACGC | 662.622008062859 | 0.66565482314931  |
| GATCATTTGTCA | 662.627333399691 | 0.465590397218644 |
| AGATAGATGACG | 662.630345094481 | 0.292753439447694 |
| CGATGAGTGTTT | 662.637493484988 | 0.481378195198657 |
| GCGCTGACTGCA | 662.637936685757 | 0.354665774642297 |
| CATTTTGGTGAC | 662.659896668886 | 0.23943080193636  |
| ATGACGGCATT  | 662.661961009691 | 0.369487814209066 |
| CGACCTCAGTCA | 662.667103565143 | 0.268235900702747 |
| GTCAGAGTGTC  | 662.668235031079 | 0.303768942750183 |
| AAAGCTTTGTCA | 662.668878446835 | 0.238456706532151 |
| ATGACATTGTTC | 662.68027513968  | 0.29528150182534  |
| CTGGATGAGCCA | 662.682655648528 | 0.396452569928206 |
| CGTCACTCTGGA | 662.683130395202 | 0.339556226934743 |
| AGGTCATGTCAT | 662.683328393715 | 0.312530905370396 |
| CCACGATTAGTC | 662.68469604223  | 0.434655613123397 |
| ATTAGGAATGAC | 662.694335316649 | 0.338874219039173 |
| AAAAGTTGTAC  | 662.697408523172 | 0.212706193045576 |
| AGACATTGTCAT | 662.705339808453 | 0.35080147546054  |
| GGAACCAATGAC | 662.707473988903 | 0.45138042605079  |
| GTCACCTCGTTA | 662.712341514446 | 0.508828311958508 |
| GTCACCCAGATA | 662.718005935185 | 0.489084045882378 |
| GCGTACGCGTCA | 662.72125618607  | 0.556593599011074 |
| CGTGTGAATGAC | 662.735290250489 | 0.314855124544355 |
| ATCGCCGACTCA | 662.742273720411 | 0.337791483815131 |
| AATCTATGAATC | 662.748095992619 | 0.522694385286396 |
| GGTTGCATCATA | 662.751390118657 | 0.348454288773997 |
| GTCATCTGAGTA | 662.75273109195  | 0.146133179476968 |
| GATGATTCGACC | 662.759095430894 | 0.24109355939292  |

|               |                  |                   |
|---------------|------------------|-------------------|
| AGTCACGACGGA  | 662.769496814683 | 0.326636123387557 |
| GCATCAAATGAC  | 662.771697260758 | 0.381944463778648 |
| GAGCAAAATGAC  | 662.771847211284 | 0.269406558034029 |
| AGGACACGTGTC  | 662.77977194358  | 0.287283415011005 |
| ACTACCCAGTCA  | 662.781074671771 | 0.375969100627743 |
| ACACACGACTCA  | 662.782554183157 | 0.392784788392101 |
| CGAACCCAGTCA  | 662.783393950274 | 0.236828465793913 |
| CAGCAATGACAG  | 662.785334168491 | 0.613821042021165 |
| GTCACGAGATGA  | 662.79646307988  | 0.424098198227917 |
| CTGAGGGAGTCA  | 662.822906423634 | 0.219944359703049 |
| ATGAGCAAACCC  | 662.831947463174 | 0.419117371635907 |
| ATGACAGTGCCA  | 662.842451484396 | 0.205217053657682 |
| ACACCGCGTCAC  | 662.84951030798  | 0.381209788626004 |
| ACGTCACCATAC  | 662.858199939059 | 0.453997458203074 |
| CGAGGAATGACG  | 662.87349395757  | 0.323807784338702 |
| GAGCGTTATGAC  | 662.878817569639 | 0.640186341184717 |
| CGACCGAGTCAG  | 662.889661335948 | 0.445897379961644 |
| GTCACATGCGCA  | 662.901918260408 | 0.538990285492472 |
| AGATTGAATCAC  | 662.902735706864 | 0.523017266620031 |
| ACTCATAGTGAG  | 662.910375623628 | 0.262438250565783 |
| CGTCCGACTCAC  | 662.916701323755 | 0.280017503659751 |
| CATGTGTGACCC  | 662.918431528931 | 0.54595288756635  |
| TAGTCAGCATCA  | 662.921332586766 | 0.402954140886188 |
| TATGTTAAGTCA  | 662.928187864363 | 0.387321057090316 |
| AGTCAGACCCGAC | 662.92892053836  | 0.245094793388178 |
| GTCACCCTATA   | 662.93133030922  | 0.313233998142638 |
| GACTCTTGATGA  | 662.937184706801 | 0.514404004234881 |
| CCGTGCTAGTCA  | 662.938349444076 | 0.540325842932147 |
| TCACGACGATGA  | 662.9492036207   | 0.543046246604184 |
| ACTTGAGTGACG  | 662.949568462855 | 0.387264767960274 |
| GTAGAAAATGAC  | 662.952454214369 | 0.311205725023634 |
| ATCAATGTCATA  | 662.970541406837 | 0.37363349353194  |
| CGACAGTGTGAC  | 662.975228197663 | 0.239756946760006 |
| TAGCCTTACTCA  | 662.986244265995 | 0.241972737182218 |
| GGATGCGAGTCA  | 662.991357043026 | 0.226322432831663 |
| GATCCTGTGTCA  | 662.993040217058 | 0.261454416064287 |
| CAATTTGGTGAC  | 662.998639515018 | 0.469077238569864 |
| GTAATCGTGAC   | 663.000752536518 | 0.388023421117737 |
| ATGACAGTGCAG  | 663.024729567893 | 0.378138929381201 |
| AGTGAATATGAC  | 663.031010481927 | 0.257655209427801 |
| GGCTGACTATGA  | 663.031796232716 | 0.342317908358156 |
| CGTGTATATGAC  | 663.035529372154 | 0.233450964379965 |
| AAAGCGGAGTCA  | 663.057132172614 | 0.295732217358383 |
| ACTTTTGACACA  | 663.060974057904 | 0.297269288848152 |
| ATTATTAATGAC  | 663.072782939274 | 0.518465269032151 |
| AGTCAGACGTAA  | 663.081953670366 | 0.238003394535203 |
| TCACTCGACTCA  | 663.082690473943 | 0.234208086096577 |
| GGACTCAGTCAA  | 663.08375379745  | 0.315634116548687 |
| ACCGAGGATGAC  | 663.084625559068 | 0.6081339241318   |
| GGTTGTGAATCA  | 663.09050253195  | 0.251844953121082 |
| AGACTAATCTAA  | 663.092110478952 | 0.294923328833462 |
| AACAAATGACAT  | 663.10872377209  | 0.490663434772796 |
| GTAATTTGTGCA  | 663.117052593489 | 0.294148486019958 |
| ACTCATAATGCG  | 663.119355343568 | 0.582262113264771 |

|               |                  |                   |
|---------------|------------------|-------------------|
| GTCATTGTTCAA  | 663.135783100578 | 0.339375632970096 |
| ATAGAGATGACA  | 663.143993936023 | 0.29425215654124  |
| CCTCTGAATGAC  | 663.14984057856  | 0.459657239674152 |
| AGTCACGGGTC   | 663.155647614026 | 0.295300984516193 |
| AGTCAGACCGGG  | 663.160192940808 | 0.438807121911341 |
| ATGACGCCTTAC  | 663.165681899945 | 0.183072385669974 |
| TAAATTCGTC    | 663.166579191847 | 0.423256112166955 |
| CGTCATTATGCA  | 663.178158930233 | 0.222101608121953 |
| ATGACTGGGGCG  | 663.184752295525 | 0.246450364017876 |
| ACGTCACTACAG  | 663.187115795784 | 0.361995258140328 |
| TAAATGCAGTCA  | 663.197140624292 | 0.468674316611239 |
| ATGACGGAGAGC  | 663.205769158419 | 0.315937235625061 |
| AATATCGGTGAC  | 663.206385808057 | 0.513247854403183 |
| GACGTGTAGTCA  | 663.209747476782 | 0.336083774140901 |
| GTCATTGAGAAC  | 663.215767043496 | 0.327540065161126 |
| CGACTGAGTAAC  | 663.220633465813 | 0.298279157350567 |
| GGAGTGGAGTCA  | 663.233016076283 | 0.279404777244074 |
| CCGACTGTGACG  | 663.240494360864 | 0.340228609719669 |
| GTCATAAAGGGA  | 663.244178826414 | 0.307776590885315 |
| CAATGCCAGTCA  | 663.245399453633 | 0.396651692031256 |
| AGCCGATATGAC  | 663.250488786627 | 0.384705654216403 |
| CAAACCCAGTCA  | 663.25665704217  | 0.31945169348395  |
| GTTGACGTGAGA  | 663.257616038978 | 0.306715060464923 |
| ACTAATTGACTA  | 663.259968373811 | 0.405852408920577 |
| CCACTTTGACTC  | 663.263195222701 | 0.260048735540937 |
| TGGTCATCATAA  | 663.271731129103 | 0.553931059962231 |
| GACTCGCGTGAC  | 663.278498167674 | 0.628702386978896 |
| ATAGTTATGTCA  | 663.280463279395 | 0.61849214831768  |
| TCGCACCAAGTCA | 663.280778115722 | 0.425595768070908 |
| TGACGGATGCCA  | 663.282654090647 | 0.499403563601932 |
| AAAGCTGTGTCA  | 663.284551610966 | 0.159157995906176 |
| TATGAATCTTAA  | 663.290426302556 | 0.385668599858074 |
| ACGCGTAAGTCA  | 663.297515683801 | 0.450294039659235 |
| GCCCACGATGAC  | 663.307664122481 | 0.424359188738602 |
| AATCCTCGGTCA  | 663.310447375251 | 0.545515954463822 |
| CGAACCTATGAC  | 663.31317066522  | 0.261334497124108 |
| GCCTGGGATGAC  | 663.322058149676 | 0.24180963447156  |
| ACGTCACCCAAC  | 663.322280619333 | 0.247923793157701 |
| CTGCGAAATGAC  | 663.324523266425 | 0.283978070587404 |
| TGACAGATTTAA  | 663.332851891784 | 0.523884296254284 |
| GTCACAGTTTAA  | 663.333097063851 | 0.335540556701969 |
| GACTCACTGCTC  | 663.337328134883 | 0.391903623234671 |
| AGAGTCAGGGCG  | 663.367859729801 | 0.217137362679016 |
| CACCAAGTCATC  | 663.371281003998 | 0.425345864821632 |
| GACGTGTCACA   | 663.375031358081 | 0.302961009762215 |
| ACGTCACCCCTA  | 663.384273680341 | 0.304415935746721 |
| CCTTGGGGTGAC  | 663.384757721385 | 0.462526440857496 |
| AGAACTACGTCA  | 663.399865392189 | 0.470026155799158 |
| ATGAGTCCGCTA  | 663.40436851857  | 0.315733398222585 |
| AGTATTTGTC    | 663.441713936614 | 0.413703229900783 |
| ACCGTAATGACG  | 663.445959573515 | 0.472585589977945 |
| ACGTCACCGAAT  | 663.446117450555 | 0.153329864767521 |
| ATTTTAAATGAC  | 663.460622076744 | 0.394972669706837 |
| AACACAGATGAC  | 663.468656533131 | 0.445809878592711 |

|              |                  |                    |
|--------------|------------------|--------------------|
| GTCACTAGATTA | 663.474717051084 | 0.513532959921556  |
| GTCATTCTCCGA | 663.482728816584 | 0.405916204562178  |
| ATGAATCAATCG | 663.485088041317 | 0.483903345597355  |
| GTCATGTCGCGA | 663.495893468807 | 0.376188322841105  |
| AGTCATGGGCGC | 663.497009818854 | 0.414530824423929  |
| ACTCATAATGTA | 663.503237750811 | 0.326501470098486  |
| AATCATCTGTCA | 663.503446771284 | 0.327179139850503  |
| CTTAACAAGTCA | 663.508032148561 | 0.834079323487071  |
| AATCAGTAGTCA | 663.511196234424 | 0.520018422939719  |
| ATGACAATGCCA | 663.518862407753 | 0.29297610238323   |
| AGTCAGTAATCC | 663.519533179407 | 0.475568330956185  |
| CATTTGAGTGAC | 663.520645936763 | 0.333271568469087  |
| ACGTCACCCCTG | 663.523548779988 | 0.294561708807294  |
| AAACATTGACTC | 663.525688980976 | 0.225275996096978  |
| TAAGACTGACTA | 663.555135927354 | 0.176576646574262  |
| ACATTAATGACA | 663.576914779658 | 0.330049459798571  |
| ACGCAAATGACA | 663.585076946248 | 0.556634755669639  |
| CACGTCACGGGG | 663.585670577522 | 0.268315843523606  |
| ACGTTAATGACG | 663.585862986468 | 0.557090073177947  |
| GGCGCGTACTA  | 663.588080133233 | 0.273582515484885  |
| TCCGGTGAGCAA | 663.588894109657 | 0.468436191479873  |
| ATTACTCAAGGA | 663.592645770726 | 0.398256707194445  |
| CTATTATTCATA | 663.597054641898 | 0.260829373365145  |
| AGCGATTTAGTC | 663.611225681478 | 0.549946101784036  |
| CAAGAGCATGAC | 663.620366161596 | 0.254921049052497  |
| CATTGACACAAC | 663.621469932846 | 0.0971696314946836 |
| ATGGTTGATGAC | 663.622984343474 | 0.342771772990488  |
| CACAGCGGTCA  | 663.624934175144 | 0.557544721103528  |
| CCAACTGCGTCA | 663.633069615638 | 0.459794532340118  |
| AGTATTAGCAAT | 663.644638184825 | 0.16560537464196   |
| GACACAATGACC | 663.649481521531 | 0.546927916570536  |
| AGGCCACATCAC | 663.650225154239 | 0.39799026179081   |
| CATTATTGACTC | 663.66009533621  | 0.224037109172573  |
| GTATGACCGGAC | 663.671148281664 | 0.416868161988777  |
| CTGAGCAATCAG | 663.678872094102 | 0.578896153029417  |
| GTCACAAAGTGA | 663.688193182919 | 0.470841336111937  |
| CCTGAATTAGTC | 663.689197453169 | 0.388387622592535  |
| AAGGGATATGAC | 663.692622493935 | 0.155277568743851  |
| ACCTGACTATGA | 663.692918317725 | 0.554948601552658  |
| TGACTGTGGTAA | 663.705450861925 | 0.61099815896363   |
| CTGATTACGCAA | 663.715730651319 | 0.35892513393202   |
| AGGAGTGACGTG | 663.71663404488  | 0.246242200087575  |
| AGTGTCACGACA | 663.732902947388 | 0.543486350746146  |
| AGTCAGAATCTG | 663.733080888156 | 0.660349287857332  |
| AGTCAGCGCGTC | 663.736408570213 | 0.462509280468209  |
| GCGCGTGTACC  | 663.745012929451 | 0.236254291524225  |
| GCGTCACAGACC | 663.746547730392 | 0.552266285623605  |
| CGAGCTGTGACA | 663.770578254427 | 0.49606044735691   |
| AGTCACTCCCA  | 663.775655795641 | 0.270874129439185  |
| GTCACAGTTGA  | 663.779254558091 | 0.283640531679663  |
| ACACGGTAGTCA | 663.77988837298  | 0.397795005083854  |
| AACGTCCGTCAT | 663.781688194565 | 0.426568648764426  |
| ATGACCACCTTC | 663.788729183521 | 0.355910188132886  |
| TGACGCGTTAAA | 663.7899589271   | 0.495983180920211  |

|               |                   |                   |
|---------------|-------------------|-------------------|
| GTGCATGAATCA  | 663.790051076004  | 0.39115710861762  |
| CGTCATTGCATA  | 663.797329471618  | 0.378285032894704 |
| AATCCGGTGACG  | 663.802932522995  | 0.455239315617571 |
| GGCAGAGATGAC  | 663.815819862596  | 0.222539056185381 |
| GGTCAGATGACA  | 663.818615854694  | 0.493133306935446 |
| AATCCCAGTGCA  | 663.820070036699  | 0.38449158136092  |
| GACTAATTATGC  | 663.825899521187  | 0.474125268003994 |
| GGTTCAGACTCA  | 663.831209987909  | 0.302921109313553 |
| GCCCTAATGACA  | 663.835111688436  | 0.31330306675804  |
| AAACCCGGTGAC  | 663.835324407224  | 0.292494549173047 |
| AATTGGTGACAT  | 663.842390089105  | 0.290198315230054 |
| AGAATATGACCA  | 663.846125323273  | 0.302539949093148 |
| ACGTCACAAAAC  | 663.846863479662  | 0.467611027248621 |
| TATGCTGATTCA  | 663.848362377266  | 0.235991076106393 |
| ATTGTATCATAA  | 663.850763247447  | 0.289258777141822 |
| CATGCATGACCA  | 663.862561513731  | 0.490214606504502 |
| ATTAGCAATCGG  | 663.86352817647   | 0.671545756798524 |
| ATCGAGATGACA  | 663.868440481341  | 0.45589534166265  |
| GTCATCCACAGA  | 663.879111078831  | 0.683127862948832 |
| GATCGAATCATA  | 663.88499684309   | 0.32261823170459  |
| TGACACGGTCAA  | 663.88880985065   | 0.335018822859349 |
| GTCACAATGGCA  | 663.889367271108  | 0.509421853895912 |
| CTATATCCGTCA  | 663.898794997366  | 0.233839641926447 |
| AGCCCGGGTGAC  | 663.906434988098  | 0.245977499952138 |
| AGTCAGAAGCCA  | 663.91121061833   | 0.42981346258702  |
| AATTTGCTCATG  | 663.912621867954  | 0.412213778037417 |
| AGACTCTGTAC   | 663.912727612027  | 0.274986246253087 |
| CGGAGATTACTC  | 663.920190216034  | 0.431936147316255 |
| CGGTGAGCCACA  | 663.921873976056  | 0.410037398596659 |
| CCGTCATCGGCA  | 663.925319635138  | 0.560352230618675 |
| GTCAGAGTATGA  | 663.932624887144  | 0.358254371797256 |
| AAACTATGACCG  | 663.942285284772  | 0.553119668708933 |
| ACATTAGGTCAT  | 663.951706376102  | 0.226610046240735 |
| CTCCTTGCGTCA  | 663.963753175301  | 0.451964904607446 |
| ACTAATTGATGA  | 663.967364662133  | 0.690088673796683 |
| ATCTAAATGACG  | 663.9711112820112 | 0.213483428516895 |
| AGACGCTGTGAT  | 663.975553592468  | 0.414259789200113 |
| AACCCATGAGTC  | 663.981475393674  | 0.401209562590479 |
| ATGACGGACGTC  | 663.989567386419  | 0.288524614795644 |
| GCTTCGCGTAC   | 663.999158618569  | 0.395865968415085 |
| CCGAGACAGTCA  | 664.006075239984  | 0.392145412093364 |
| AACACCATGACT  | 664.017295797524  | 0.273694151305251 |
| TGAGTCGCGACA  | 664.023868081558  | 0.57573824074712  |
| AGTCGAATCATA  | 664.027548847757  | 0.401980818468032 |
| GTGACAGTATCA  | 664.036374122517  | 0.332020803535181 |
| ATCTCCCAGTCA  | 664.038232737768  | 0.193892356176303 |
| AGATACAATGAC  | 664.040985964927  | 0.420014523170391 |
| CGCTGACGTGAC  | 664.061443506319  | 0.454843359874364 |
| CATTCAGGTGAC  | 664.064469707496  | 0.407648709193044 |
| ATGAAATTAICTC | 664.073180173567  | 0.54930315957773  |
| TGACGAAGTTAA  | 664.082808791186  | 0.493770930559524 |
| AGTCAGCGCACA  | 664.085313642448  | 0.466475970702999 |
| GTGACAGAGAAA  | 664.086521929145  | 0.364934158684795 |
| CGTCATTTAAGC  | 664.089347030598  | 0.255306162727199 |



|               |                  |                   |
|---------------|------------------|-------------------|
| ACTCATACTTCG  | 664.093771195572 | 0.342766135237008 |
| GACAGAGATGAC  | 664.096213242403 | 0.497025989139081 |
| ACATCACATGAC  | 664.11030006819  | 0.724565664605828 |
| ACACAAAATGAC  | 664.119984489963 | 0.317916615149778 |
| AATGGGACTCAT  | 664.13035044156  | 0.322968153021793 |
| GACTAATTGTGA  | 664.145594972937 | 0.438280972238829 |
| AGCCGCCAGTCA  | 664.149559280841 | 0.529765213109623 |
| ATGACGACGCAC  | 664.149889944852 | 0.284889182661657 |
| ATGACGCCTCGC  | 664.155324916018 | 0.361891880562368 |
| TATTACCGATGA  | 664.159975436625 | 0.686262682515596 |
| GCTAGGTGTGAC  | 664.166750620441 | 0.559616990716398 |
| ACCAGATTAGTC  | 664.169953198492 | 0.412205236085206 |
| AAGAGATTAGTC  | 664.177716911528 | 0.214139213716537 |
| CCAAACATGTCA  | 664.178911132454 | 0.448754171536496 |
| GAACTCCATGAC  | 664.186080143258 | 0.423081909122745 |
| ATGAGCAACCGA  | 664.192238545032 | 0.279050429476462 |
| GACTCACTCCCA  | 664.193536304863 | 0.381058484848945 |
| AGCGTCATGCAA  | 664.20095566907  | 0.713018858929331 |
| CGTCACCCGTAA  | 664.204431059762 | 0.43895955633187  |
| AAAATTGACACA  | 664.206401888718 | 0.38525412256274  |
| GCTGCTGATGAC  | 664.211090254753 | 0.546855380605438 |
| CTTGCGGTGAC   | 664.216073727065 | 0.700080659948366 |
| ATGTGTCAAGCC  | 664.234331432967 | 0.280632192833333 |
| GAGCCATATGAC  | 664.243764369668 | 0.456377776838125 |
| CAATTCTAGTCA  | 664.260566982696 | 0.260518501625065 |
| AGACCGAGTCAG  | 664.271576282448 | 0.260152879059928 |
| CGAGACGCGTCA  | 664.273791397708 | 0.555008608575006 |
| ATGACGTTAAAT  | 664.28034620653  | 0.328527398491879 |
| GATGTGTGTGAC  | 664.282474402282 | 0.270289570336533 |
| ACGCATGATGAC  | 664.286231233392 | 0.510774541458484 |
| CCGATGACGGCA  | 664.290496007416 | 0.486844659544935 |
| CCAGACGTGTCA  | 664.295949872992 | 0.537140325700116 |
| AAAATTACGCAA  | 664.297937707431 | 0.47919049622832  |
| CTTCCGGTGACA  | 664.303733249565 | 0.380856958345389 |
| AACAATTAGTCG  | 664.306816574843 | 0.277545818221466 |
| GGGTAGGATGAC  | 664.312473030853 | 0.259087177485458 |
| CCTCGTGATGAC  | 664.321605580209 | 0.448509794212754 |
| AGCCAACGTCAT  | 664.336093174462 | 0.14164828590502  |
| GTCTACCAGTCA  | 664.341755429518 | 0.522328819271853 |
| ATGTCACAGCAA  | 664.365500315363 | 0.795690870914584 |
| ACTCATCGCTAG  | 664.365882462866 | 0.296865197491096 |
| ATAAGTGGTCAT  | 664.379008703374 | 0.321181021815722 |
| CGTACAGTGTC   | 664.380137396635 | 0.738012639461744 |
| CTTGGGGATGAC  | 664.383540978711 | 0.403502058829222 |
| ATTGTGAGCCAC  | 664.395471646085 | 0.387364472287386 |
| AATAATTAGTCG  | 664.400159222813 | 0.394584106728007 |
| ATATTCCGGTCAT | 664.40193242232  | 0.383030309734357 |
| CCGCGTGGTGAC  | 664.41595221068  | 0.29957515426727  |
| AGCTCTGAATCA  | 664.417008673296 | 0.346309005329107 |
| CGTCATGGTTCA  | 664.429408221901 | 0.441776129143786 |
| GTCATTAGGTGA  | 664.43033882532  | 0.233067405536517 |
| CTTGCAATGACA  | 664.433383485704 | 0.425911556672652 |
| CTCGGATATGAC  | 664.43589739036  | 0.47255575272742  |
| ATGAATAATATC  | 664.441787461576 | 0.270068099527866 |

|               |                  |                    |
|---------------|------------------|--------------------|
| CTGCCATATGAC  | 664.443225519896 | 0.256054255724674  |
| ATCTAGTGTGAC  | 664.47500327636  | 0.230292233798933  |
| GCAGCCTAGTCA  | 664.477073574285 | 0.515793964025119  |
| ATGACGGGGTTC  | 664.48462058579  | 0.514564309329017  |
| GTCACCTTTGCA  | 664.494579686815 | 0.666513174544803  |
| TGACGTACCAAA  | 664.494683730578 | 0.456134633561308  |
| GTAATCGTGACA  | 664.50228838101  | 0.367322298053468  |
| ACTAGTCAGTCCG | 664.503628487039 | 0.246577782278135  |
| CGCCCCGTGATA  | 664.50471104074  | 0.293355883211817  |
| GCTTATAAGTCA  | 664.510535710666 | 0.401243060799311  |
| GCACCCTGTGAC  | 664.511616730946 | 0.512281564097116  |
| AGCCACGACTCA  | 664.512475966024 | 0.383119610510747  |
| ACCGTGGTGACG  | 664.519651409465 | 0.454692845613984  |
| GTCACCGATCTA  | 664.522133179643 | 0.393696206879288  |
| ACCTTAGTGTCA  | 664.524035733705 | 0.585624005888953  |
| ACGTCACTGGCG  | 664.52416069156  | 0.422465829014272  |
| CTTTATATGTCA  | 664.533150131934 | 0.44005244695141   |
| ACGACGTGTGAC  | 664.534282746956 | 0.81968587201946   |
| AGGGGTGAATCA  | 664.534529977852 | 0.122721575542773  |
| CTGAACATGTCA  | 664.53911069837  | 0.511441037430069  |
| CCCGTTAAGTCA  | 664.54558616078  | 0.471530799095056  |
| TATGGGGAGTCA  | 664.545616203195 | 0.115390915813959  |
| AGACCAAATGAC  | 664.55194258256  | 0.382398061410414  |
| ACCATTTGTGAC  | 664.55417205603  | 0.507683405962164  |
| AGACTAATTAAT  | 664.554784620314 | 0.389110014756628  |
| ATGACAATAAGC  | 664.563194419777 | 0.286724825381079  |
| CAGGTCAATGAC  | 664.568080118081 | 0.471652381373016  |
| ACTCATAGACAG  | 664.573305778178 | 0.600533206221419  |
| AATGAGTGAATC  | 664.576951195717 | 0.256712411384307  |
| ACTCCCATGACT  | 664.578822394078 | 0.399212063851151  |
| GCCTTGAATGAC  | 664.58335339159  | 0.289005187297116  |
| AAACACAGTCAG  | 664.584878346292 | 0.0740401702024017 |
| ACCTTCTAGTCA  | 664.600317534797 | 0.312469536442847  |
| CGGTCATAATAC  | 664.605087317127 | 0.552374540024993  |
| AACCTGGTCATA  | 664.608495346508 | 0.377739346779323  |
| AATGACGGGATC  | 664.621118573203 | 0.415041744503456  |
| ACTTGTCACACG  | 664.638315382117 | 0.189417633911988  |
| ACGTCACAGAAT  | 664.642819702645 | 0.397558912559597  |
| AATTTCCGGTGAC | 664.64680811112  | 0.524388273399358  |
| ATGAAGTCACCA  | 664.648481475211 | 0.34905446698065   |
| GTCAGCATGACA  | 664.658664646138 | 0.405190561700054  |
| ACGTCACATAAAT | 664.659209698007 | 0.43151516059058   |
| CCGTAGAATGAC  | 664.672435255895 | 0.549803164414295  |
| CTTAGGAATGAC  | 664.673471488176 | 0.438944894504011  |
| GACTGCTGACTA  | 664.676555351311 | 0.589614599048848  |
| ATCAGATGACAT  | 664.682256404715 | 0.509332229700066  |
| GATCTGTGAGAA  | 664.688832958191 | 0.250834576204138  |
| CTCAGTGACAGA  | 664.696906512585 | 0.365863918661512  |
| GTCACACACGTA  | 664.709339692194 | 0.157186474113193  |
| GATGAATGTGAC  | 664.726395256066 | 0.22991593491694   |
| GTCATTATGAAC  | 664.734576306158 | 0.614511091622858  |
| GTCACCATTTC   | 664.742395498965 | 0.420892644534593  |
| ATCTCCGACTCA  | 664.745330753279 | 0.166267760891215  |
| TGACAAATACAA  | 664.748115372991 | 0.240379237393803  |

|              |                  |                   |
|--------------|------------------|-------------------|
| GGATGTATCACC | 664.752619374442 | 0.624763245060353 |
| ACCCCGGAGTCA | 664.76826255908  | 0.27698493184266  |
| AACTCCTGACTC | 664.784881978073 | 0.116092574044817 |
| GACCCAGATGAC | 664.785726736005 | 0.375287375128411 |
| CGGGATTATGAC | 664.786121696136 | 0.17161586584655  |
| ATCGTCATGCAA | 664.79191004532  | 0.576729084018947 |
| TGACACGTCTAA | 664.804366628516 | 0.520385503451411 |
| AAAACCGTCACA | 664.804379099051 | 0.43692101576487  |
| ACACAGGAGTCA | 664.809033675875 | 0.229307982440318 |
| GAGTTGTAGTCA | 664.811158606969 | 0.585780877238987 |
| CTATTATTAGTC | 664.827287566869 | 0.464179702478632 |
| ACCGGTCTGACT | 664.836627703067 | 0.25274830099049  |
| AAGCTATTAGTC | 664.836668678947 | 0.358005980679977 |
| AATTTGCTCACG | 664.839204804904 | 0.279009500663774 |
| CAGACACGTGTC | 664.841123796195 | 0.304460272808799 |
| GTCATTGTCTTA | 664.848263562995 | 0.565188396586493 |
| ATTTCTAAGTCA | 664.855701558179 | 0.341823770662494 |
| TCATCGTGGTCA | 664.858088212646 | 0.591253004060035 |
| CAGTGATTAGTC | 664.864849095073 | 0.295965991777764 |
| ATTAGTAAGACC | 664.882464208243 | 0.287479583181476 |
| CATCCATATGAC | 664.890144252381 | 0.140481490321223 |
| ACGCTGGATGAC | 664.895783689126 | 0.340460842699995 |
| ACAAAAGGTGAC | 664.909366606492 | 0.467861033417777 |
| GTCACATTTATA | 664.913904051593 | 0.391140083533529 |
| CGTAATGGTGAC | 664.914776631245 | 0.310540368683154 |
| AAGCGGACTCAT | 664.919777543784 | 0.212640223792966 |
| ACGTCACCGTAT | 664.924516385106 | 0.421036261058881 |
| AAGATATCGTCA | 664.927204485163 | 0.325766483873221 |
| AGTCATGGGAAC | 664.938205237482 | 0.421226006032965 |
| GTCACAAGACTA | 664.939871481249 | 0.476687080136309 |
| GTCACATGTAAA | 664.940184772247 | 0.508815092814574 |
| TGACTGCACGCA | 664.941857980079 | 0.49481178467201  |
| CTTTGGGGTGAC | 664.942792788006 | 0.54749130290879  |
| ATGACACCCCAA | 664.944436160263 | 0.268932960992086 |
| ATAGTGATGTCA | 664.953279150763 | 0.409454412589977 |
| CACGAGCATGAC | 664.953935692253 | 0.402130513132427 |
| GTCACATGTCSA | 664.95457714703  | 0.675652942620491 |
| AGTGATTGGTCA | 664.971524188663 | 0.246600469003766 |
| CGTCCGTGACAC | 664.972931554347 | 0.436791160210389 |
| ATGACAAGACAC | 664.982917228927 | 0.284352857723228 |
| GTCATTATTAGA | 664.983177180632 | 0.25280718624052  |
| AGTGATGTAACA | 664.990771714203 | 0.302522453828347 |
| AGTCAGATATGA | 664.995896947497 | 0.275813083125542 |
| CAAATGCATGAC | 664.997973020895 | 0.512533784100243 |
| CCACGACATGAC | 665.00868004136  | 0.54734701529918  |
| GTAATAACAAA  | 665.010220075728 | 0.476707132224962 |
| GAAACTGGTGAC | 665.010839362492 | 0.414423766368975 |
| TCTTACATGACA | 665.014505896264 | 0.385841678220146 |
| AGGGCACGTCAC | 665.014868965356 | 0.277048668954399 |
| GATGACTTGATA | 665.01510891647  | 0.336602069167295 |
| AGCTCTGATGAC | 665.029332432066 | 0.568729916722904 |
| GACGACTCAGAA | 665.050608931646 | 0.332493458579509 |
| GTATTGAATGAC | 665.078177617935 | 0.25397014553515  |
| ATGATGTGGCAA | 665.083573627818 | 0.224493778888416 |

|              |                  |                   |
|--------------|------------------|-------------------|
| GACTCCGTATGA | 665.086889129676 | 0.673082417671926 |
| ACCCTATATGAC | 665.108504779041 | 0.356206100162119 |
| GTCATTATGAAA | 665.11160964923  | 0.352673694099834 |
| TGACTCCACCCA | 665.127670660284 | 0.326488623678979 |
| GTCATGGCATCA | 665.129290990392 | 0.375459166876956 |
| GTCATAAAGATA | 665.136917495683 | 0.272740878723897 |
| ATCCGTGACTAG | 665.139787993504 | 0.25975670480865  |
| AGTCACTTGAAT | 665.171135803924 | 0.381592380836643 |
| GCGGCTCTGACA | 665.177484958621 | 0.419333870456855 |
| CCATAAGGTGAC | 665.18198618858  | 0.312110988869431 |
| ACACATTGGTCA | 665.184599584228 | 0.411989449057753 |
| GCAGTCACGACA | 665.202079332958 | 0.339081299384962 |
| ACAGTCAGCGTA | 665.21120322926  | 0.357065019195225 |
| GCCGGTAATGAC | 665.212072042609 | 0.445241866769794 |
| CATCATAATGAC | 665.21577308497  | 0.408057521908166 |
| ACTCATCTCTGA | 665.240928993018 | 0.150004747387189 |
| AGTGTTAATGAC | 665.243389769147 | 0.454784483350393 |
| ACTCATGACGCT | 665.245706049845 | 0.248122386722072 |
| AAAGCTAATGAC | 665.26071031636  | 0.337222666722782 |
| AGTCACGCCAAT | 665.263030504869 | 0.196814381926836 |
| TGTGAGTCCAAA | 665.263357761517 | 0.267174002252234 |
| CTTTCATGACAC | 665.277241443078 | 0.188347898382948 |
| GTCATGTGGAAC | 665.281092674677 | 0.227411043316999 |
| CACCCTGACTCG | 665.287351831996 | 0.362434423243059 |
| GCATGGGATGAC | 665.287896241988 | 0.436094033495232 |
| CTTGATGTGAC  | 665.294735381209 | 0.373106206112829 |
| GCATGACAATAC | 665.295576302418 | 0.267851000772146 |
| ATGACATGACCC | 665.297795817881 | 0.509083285876987 |
| CAATAGGTGACA | 665.305215685826 | 0.54703760182614  |
| ACACGTCAACGT | 665.308072989006 | 0.461730388718895 |
| ATCGTATTAGTC | 665.316816715183 | 0.408452499938649 |
| AGCGTCACTGAC | 665.327185291871 | 0.546301815197985 |
| CCTCTTGTGTCA | 665.335926819142 | 0.404662573830327 |
| AGTCAATGAGTA | 665.338618383675 | 0.221060621041249 |
| ATATAAGCGTCA | 665.339723201027 | 0.596850696037506 |
| GTCACCTAGCAA | 665.341852361741 | 0.670161766648216 |
| GTCATCTGGGAC | 665.344873174235 | 0.515193899414351 |
| CCACAATATGAC | 665.361175277149 | 0.429450076891303 |
| CGTCACAATATA | 665.371370202775 | 0.513519732556718 |
| GGCTATTACTGA | 665.378046853106 | 0.468449783833724 |
| ATGATGCAATTG | 665.380645440713 | 0.40204447756695  |
| GACTGACGTGAC | 665.384923464151 | 0.463235247086823 |
| CTCTGACAAAGA | 665.387676871973 | 0.295530880666415 |
| CCTCCGTATGAC | 665.388235637763 | 0.199882149276396 |
| ATCGTCTAGTCA | 665.400161136812 | 0.399585410525349 |
| ATAGTTGCTCAT | 665.402127923952 | 0.339862843235387 |
| GGTGAAGTACC  | 665.405945095797 | 0.601598972086283 |
| AGTCATGGTGCC | 665.407782190648 | 0.246999065989275 |
| CATGATTAATA  | 665.408333505566 | 0.368340409545336 |
| ACTGTCCAGTCA | 665.411406632476 | 0.563535078244985 |
| ATGACGTGGAAG | 665.422718607988 | 0.354020363643658 |
| AATCGGTGACAA | 665.430340387311 | 0.211355402464811 |
| CGAGGGATGACG | 665.430874050193 | 0.269916452027585 |
| ACGTCACAAGGC | 665.439485297458 | 0.403499348211988 |

|               |                  |                   |
|---------------|------------------|-------------------|
| AAGACGTCACAT  | 665.443647410244 | 0.38806049100458  |
| GGATATGATGAC  | 665.447361030209 | 0.4783556939821   |
| CACGCTGTCATC  | 665.449196706944 | 0.338483041191136 |
| ATGGCGTGTAC   | 665.456186760628 | 0.557197277662006 |
| AGCGTGCAGTCA  | 665.465308872415 | 0.49000563577004  |
| GATTGGAATGAC  | 665.481503056863 | 0.238767958453472 |
| CTACAAGATGAC  | 665.48415245966  | 0.516140169229719 |
| CGCCACATCATC  | 665.491794078146 | 0.226313610947353 |
| GCGTCATGGTAA  | 665.498117568529 | 0.277163115701341 |
| AGTCACTACAGG  | 665.505062530004 | 0.300747868738106 |
| GGTGTCTATGAC  | 665.518723649083 | 0.563056960759015 |
| GTGACAAACTTA  | 665.522243944874 | 0.499465542772492 |
| ATATGCAGTGAC  | 665.533977266091 | 0.666845927370823 |
| AGTCACTTGCTG  | 665.543087222167 | 0.322750480715899 |
| ATATCGTGTGAC  | 665.547881407642 | 0.370678391743243 |
| CCGTTTTCGTGAC | 665.551861105273 | 0.522588860328211 |
| GTTAGGTCATAA  | 665.552656371103 | 0.163828775637123 |
| TAGTCACGGGGA  | 665.554269334051 | 0.493258558458537 |
| CTGACACTTTTA  | 665.566761690573 | 0.246135331248007 |
| CAGTGAACGTCA  | 665.571782799737 | 0.54786535804749  |
| GTCATGATAACA  | 665.59697586335  | 0.489096217007905 |
| ATCGCTGATTCA  | 665.598350545273 | 0.51469487629781  |
| CGTCATCGGACC  | 665.601999342838 | 0.374283214635279 |
| AAAGGTATGAGT  | 665.604320677937 | 0.327538912236044 |
| ATGAGCAACCTC  | 665.608095122741 | 0.528271020003791 |
| ACCAATTAATAA  | 665.626381786411 | 0.261283893644794 |
| GAAAGATGACCA  | 665.630262181279 | 0.299378312684406 |
| TCGTCACGTCAC  | 665.637972180533 | 0.276916474870446 |
| ATCGCGCGTCAT  | 665.642831228917 | 0.342049734479654 |
| TGACGAATGGAA  | 665.644368429488 | 0.384851617898809 |
| GTCATCGCACCA  | 665.648889076856 | 0.346206779190957 |
| GAGTCTTAATCA  | 665.649315770544 | 0.421010348788956 |
| AAACCCTATGAC  | 665.666095088445 | 0.208310542391377 |
| GGTGGGGAGTCA  | 665.675185122804 | 0.157104456124828 |
| GACTCAGTTCGA  | 665.675523349761 | 0.607531423104124 |
| ATAAGATTAGTC  | 665.676158308484 | 0.576246116880317 |
| GAAATTGACTGA  | 665.677958152642 | 0.378518279301746 |
| GTCATCGTCTCA  | 665.682721610272 | 0.508564850677061 |
| AGGAATCCGTCA  | 665.684212535089 | 0.551823337441164 |
| GAATTATTAATC  | 665.686194429391 | 0.256764299086067 |
| ACGTCACATATGA | 665.690141732388 | 0.320293956572236 |
| TCAGACGACTAA  | 665.710942435827 | 0.513020585100316 |
| TACGGTGAGCAA  | 665.715758226967 | 0.300060819021921 |
| ATTACTCTGACG  | 665.719481945571 | 0.428342453876302 |
| GCTCGGGAGTCA  | 665.735405077194 | 0.452009893787889 |
| GTATCCATGACA  | 665.741116174118 | 0.449294387332142 |
| CTCCTGGTGACA  | 665.747457376977 | 0.508215152092179 |
| CGTTTGTAGTCA  | 665.74816146156  | 0.328107773710629 |
| AGTGTATGGCC   | 665.775227211594 | 0.362566273507454 |
| CATCGCGTATGA  | 665.779000533485 | 0.645979663746347 |
| CCTTTGACGTCA  | 665.788362986137 | 0.4268089773061   |
| CAGGTATCAGTC  | 665.788519083681 | 0.484269529361929 |
| CCAACCTAGTCA  | 665.791980625054 | 0.488301545456301 |
| CGTGATGAGCCA  | 665.793181801083 | 0.472827093990727 |

|               |                  |                    |
|---------------|------------------|--------------------|
| AGCCAAGTGACT  | 665.795985208739 | 0.530482225267749  |
| GGTGACAATACA  | 665.802252204167 | 0.335137967552445  |
| AAACCTGACGCA  | 665.819988579767 | 0.334035371554734  |
| GACTAATTAGAA  | 665.82320136951  | 0.452486451977204  |
| AGACCTGACTCG  | 665.830619143027 | 0.270395443183668  |
| GGACCTGATGAC  | 665.832909609326 | 0.407336639243177  |
| TCCGTAATGACA  | 665.837739946149 | 0.653589558957139  |
| TCCATAGCGTCA  | 665.838915269758 | 0.600312167591146  |
| ACGTCACTAGTA  | 665.846631470482 | 0.376391749433672  |
| GTCACCGTTAGA  | 665.851771237936 | 0.318807694046956  |
| GGGTGGTATGAC  | 665.868078634783 | 0.278902185017903  |
| CAAATCGACTCA  | 665.873189817725 | 0.35739590220479   |
| GTCATAGGAAAC  | 665.875280623094 | 0.2414708501673    |
| GTCACACCGGAA  | 665.881336096005 | 0.345762483553456  |
| ATGACGGAGGTC  | 665.886152773636 | 0.299349191417458  |
| GCGAGTGATGAC  | 665.890640413102 | 0.449215568215133  |
| GAGTCAGGACGA  | 665.893349888027 | 0.44570721935136   |
| AATATAATGACA  | 665.895813039035 | 0.339507684363006  |
| AAATTGAATCAC  | 665.901060465017 | 0.360220891815147  |
| GCGGGTGAATCA  | 665.904513018473 | 0.39440398534448   |
| ACTATGGTGACG  | 665.907610304685 | 0.657179635743448  |
| ACACGGGGTGAC  | 665.915215222314 | 0.460282984965705  |
| GTCATTACGCCA  | 665.915252745112 | 0.351541078213799  |
| CTAAGATTCATA  | 665.923168134807 | 0.365075853619692  |
| CCACCCGATGAC  | 665.931572006215 | 0.322676388524919  |
| GTATTGTCATGA  | 665.938918744971 | 0.271873328580161  |
| ACGTGTCAGAGC  | 665.940668755659 | 0.534709934114375  |
| CATTTACATGAC  | 665.941745767368 | 0.57006336910044   |
| TCAGTCAAATCA  | 665.95352732665  | 0.51940604082433   |
| ACTGACTGGTAC  | 665.956045176518 | 0.318776086013215  |
| AAAGTGTCAGAA  | 665.956201436736 | 0.0207920344452206 |
| CCTATAATGACA  | 665.960148852019 | 0.466908535073446  |
| AGTTCATGACAC  | 665.978580896201 | 0.269932421210929  |
| ATGACGAGCTTC  | 665.997779110215 | 0.513369101454799  |
| ATTGAGTGCAC   | 666.000727338401 | 0.314775759969627  |
| CAATCCATGTCA  | 666.001104175945 | 0.26979255389212   |
| CCAATCAGTGAC  | 666.009246652413 | 0.674328845714881  |
| GCGTCATGATTA  | 666.016487715144 | 0.328241210681049  |
| CTGGGTGATGAC  | 666.022750443649 | 0.288616949440811  |
| GTTGCGTAATTA  | 666.024085279965 | 0.254181006664224  |
| CAAGGCTGAGTC  | 666.029101889024 | 0.681781386405233  |
| CCAAACGGTGAC  | 666.034590371413 | 0.232851911582578  |
| CATAGGCATGAC  | 666.041834750088 | 0.46085747944181   |
| GCTGCTGGTGAC  | 666.043433689558 | 0.762246631478245  |
| ATAATTTGAGTC  | 666.045674002013 | 0.651945289241425  |
| TATGGAGAGTCA  | 666.04654887748  | 0.445051369953286  |
| ATGACAACCATA  | 666.04719223775  | 0.203354382969114  |
| GGTGACAACCTAC | 666.049008162463 | 0.358421106844078  |
| TAATCAGACTCA  | 666.066861124095 | 0.380504720152332  |
| GAGTCAATACGA  | 666.073623450131 | 0.286719593090555  |
| TGAGTCTGAGCA  | 666.076286535432 | 0.351965530052352  |
| GACTAATCCGA   | 666.078996401846 | 0.344143877488136  |
| TGACTCTCCCAA  | 666.096168321526 | 0.317577237514641  |
| GAAAGGGATGAC  | 666.106367320201 | 0.232625296698692  |

|              |                  |                   |
|--------------|------------------|-------------------|
| ATTACATGACAA | 666.110580480223 | 0.540768550388473 |
| CATCCTGTGACG | 666.123774487155 | 0.404638795588352 |
| AATCTTGCATT  | 666.152952929994 | 0.279194604840475 |
| CACACGCATGAC | 666.155382452534 | 0.542386310907276 |
| GCAGTCATGGGA | 666.164001051865 | 0.317770598041054 |
| CAAGTATGAATC | 666.177086528184 | 0.757978204404233 |
| CGCGTCACGCTA | 666.181376365759 | 0.39945868250775  |
| CTTAGTAGTGAC | 666.182490780601 | 0.739297736729881 |
| TGCGTTGACACA | 666.199253515369 | 0.482422460730262 |
| ACGCTCCGTCAT | 666.205941200709 | 0.328288639935211 |
| AAATTTGATGAC | 666.221186653944 | 0.366566211329769 |
| GACTAATACCCA | 666.232160328264 | 0.327072443446129 |
| GACCATGGTGAC | 666.232860577325 | 0.470782060594374 |
| TGACATGTTCAA | 666.237150112968 | 0.447923923693871 |
| AGCCTTTGTGAT | 666.246813068214 | 0.425566981294405 |
| GTCATTCAGGAA | 666.250456233495 | 0.278258646632274 |
| CACTGACGTGAC | 666.252476122722 | 0.363384151816727 |
| CGGACGAATGAC | 666.26033564549  | 0.524968988311747 |
| AATCACAATGAC | 666.260830989494 | 0.396843603426567 |
| GTCACCGTCAGA | 666.268360665657 | 0.489013739916996 |
| CGCGTCAGAGTC | 666.272612567688 | 0.560759717213852 |
| CACGTCACTCCG | 666.288292570731 | 0.287493152508485 |
| GACCTATGACCC | 666.290365678082 | 0.337847674007739 |
| AACTCATTATGA | 666.291680256895 | 0.568053378013711 |
| CAGTCAGAAATC | 666.302062103281 | 0.406093100475295 |
| GACGTCACAATC | 666.303553428613 | 0.319166316810489 |
| TAGATTTGCTCA | 666.312292992116 | 0.337681113226924 |
| CTAGTCACGACA | 666.315957738395 | 0.291326466632089 |
| CGACCGGTGAC  | 666.324566808326 | 0.471224995150242 |
| GTCATGGCTTCA | 666.327232189164 | 0.452896389968738 |
| ATGTACATGTCA | 666.331424591578 | 0.531901853060344 |
| AAGAGGTGACAC | 666.333571216449 | 0.305446193094458 |
| CATGACGTTGAC | 666.343673824511 | 0.424037564895034 |
| CATTGGTCTGAC | 666.343955004395 | 0.405010811678316 |
| GTCCGCATGACA | 666.34667660437  | 0.381855727318966 |
| GGTCAAAATGAC | 666.347483039173 | 0.534943017954309 |
| ACGCATGACATA | 666.361377751272 | 0.318493013357668 |
| CACGTCACGCGG | 666.36313682477  | 0.34360346095625  |
| CAATCGTGAGTC | 666.372409786265 | 0.377719783029892 |
| TCCTATGAGACA | 666.374079487581 | 0.446899482742813 |
| CGCAACATGACG | 666.377099551769 | 0.511272663888617 |
| CTACTTGATGAC | 666.378183003671 | 0.362663809583275 |
| GTGATTAATCAC | 666.392426471879 | 0.410156363338242 |
| ACTCATACTCTA | 666.401238560116 | 0.211633228804042 |
| TCATAACTTAGA | 666.413993025718 | 0.676394400671599 |
| ATCCGTGAGTCG | 666.41732427192  | 0.273977025980424 |
| GAGGATTTGTCA | 666.419803482748 | 0.205143442106391 |
| AGGTTCACTCAT | 666.421754984126 | 0.291081593512508 |
| CACTGCGACTCA | 666.423799008564 | 0.385537521681149 |
| ACTAATCTGACT | 666.429983643144 | 0.25592732228929  |
| GCGGCTGCGTCA | 666.436421798145 | 0.706637132958478 |
| GCCAGGTGATCC | 666.438954589363 | 0.209349440472984 |
| GATGAGTAGTTA | 666.442940747117 | 0.214911751185377 |
| AACACATCATAG | 666.445489686599 | 0.323864689890894 |

|              |                  |                    |
|--------------|------------------|--------------------|
| GCCCAATAGTCA | 666.445891091728 | 0.506168085853579  |
| CAACAAATGACG | 666.44693425119  | 0.418920723730567  |
| AGACTAATACTC | 666.446939492412 | 0.393249017846515  |
| AGCGCGAGTCAC | 666.450822993641 | 0.392485529053978  |
| CCCGGCTGTGAC | 666.45145274607  | 0.213172906322386  |
| ATCATAGTGACG | 666.451919071973 | 0.458800340535334  |
| ATGACAATGTAC | 666.454694966596 | 0.361636943393278  |
| GTCACAGAGAAC | 666.474480381956 | 0.0657969457281333 |
| TCTGACTGGACA | 666.489693872389 | 0.658887523105928  |
| ATAGTAATGACA | 666.496552161103 | 0.249691089210207  |
| ATGACATGCCAA | 666.51404704247  | 0.257711548979016  |
| AGCTCTACGTCA | 666.514320921418 | 0.335402042153108  |
| GCGCAGGATGAC | 666.514884538063 | 0.384780130949215  |
| ATGCGGCATGAC | 666.514950771825 | 0.3870551893114    |
| ATGACATCTCAT | 666.521037652179 | 0.338368215341448  |
| CGCGTGACGTCA | 666.537697297561 | 0.485197941740444  |
| CTGCGGTGACAA | 666.541602036257 | 0.352698305840885  |
| ATCCCCGTGATA | 666.563365436772 | 0.294489610510819  |
| GTCACAGCGTCA | 666.568479851177 | 0.429531526135048  |
| AAACTCTAGTCA | 666.574878002786 | 0.417966420505115  |
| ATTCCTTACTCA | 666.580302890597 | 0.341163918401908  |
| AGCCGTGACTAG | 666.589846913261 | 0.349986531528041  |
| AGTCAGGTATGA | 666.601341240111 | 0.462679291908838  |
| ACGTCACATTTA | 666.610179690696 | 0.239653187915298  |
| GTCACCGGTAAC | 666.622391004735 | 0.593698797064976  |
| AGTGACGCGGTC | 666.628388196102 | 0.22356913799859   |
| CATTTGGTGTC  | 666.642151944273 | 0.459431303816093  |
| CGTAGTACTCAC | 666.648172689493 | 0.357843177541357  |
| GGCCAAGATGAC | 666.658279101126 | 0.57878172513481   |
| ACTCAGTAATGA | 666.670114607976 | 0.349623180356603  |
| CTTAGTGACCAA | 666.670858203495 | 0.372038520073408  |
| AGCAAGTAGTCA | 666.671491450925 | 0.543614381064869  |
| CTCCAAATATGA | 666.676334899481 | 0.519426309715668  |
| CTCGCAGATGAC | 666.691663554131 | 0.303145216720138  |
| CCAAGTAAGTCA | 666.692094014244 | 0.534157112196488  |
| CAAAATGACCGA | 666.709834026675 | 0.435309390618678  |
| TAGCCTGACGCA | 666.723438656242 | 0.270633298859963  |
| ATGAGTAGGTTC | 666.723576427134 | 0.271390910187389  |
| GGACAGTGACAC | 666.729417546431 | 0.364767960550881  |
| ATGAGTTGTTCC | 666.733299964587 | 0.175067849532998  |
| GTCATTCTTAAA | 666.733413218633 | 0.306854117454015  |
| CGCGCACAGTCA | 666.735833504546 | 0.370897037067192  |
| CGGTAATGTGAC | 666.743045704482 | 0.445827403719455  |
| ATGACGTTGAAT | 666.747125419583 | 0.453976153653657  |
| GTGACGCCATTA | 666.758969366169 | 0.235651503170081  |
| ATTGTAAATGAC | 666.761761651997 | 0.507083047078822  |
| ATAGACGTGTCA | 666.763162765832 | 0.370436200129427  |
| AGTTGCATCATC | 666.776691714336 | 0.25551722002373   |
| GTCACATTCTGA | 666.780833890973 | 0.415724849284188  |
| ACCATGGAGTCA | 666.781064009347 | 0.537294424382383  |
| CGGAGGTGACGC | 666.786035052469 | 0.371520291760397  |
| CAATGGCGTCAC | 666.792563138709 | 0.47724673089179   |
| GAACCTGACGCA | 666.803473839984 | 0.591141892305929  |
| GGCTCATGACAC | 666.807096177595 | 0.430619215179577  |



|              |                  |                   |
|--------------|------------------|-------------------|
| CGGACGGAGTCA | 666.807729342872 | 0.542071648182447 |
| GGTTACAATGAC | 666.80792402478  | 0.403602237842469 |
| AATGCACTCATA | 666.815111759533 | 0.211880645187259 |
| CGTCACACACAG | 666.82403675235  | 0.55231745820632  |
| GTATTACTATTA | 666.832977126222 | 0.4778301274388   |
| GTCATTATGTTA | 666.833456472109 | 0.430018701765355 |
| TCATCATGACGA | 666.843723039676 | 0.694243975570421 |
| ACAGCGTGTGAC | 666.847558433573 | 0.55706080711848  |
| CTCACCTGACTC | 666.848364744669 | 0.338510956714768 |
| ACCCGATGTGAC | 666.871898209674 | 0.378349107543318 |
| ATGACCACTACC | 666.888696420592 | 0.242449548121434 |
| AGACTCACGACT | 666.906008032487 | 0.461771549541915 |
| CAAGGTGAATCA | 666.909896818915 | 0.562807089845235 |
| CCTCATATGACG | 666.910146978544 | 0.397322432357782 |
| CACATACATGAC | 666.914076903592 | 0.562245339838734 |
| GCGCTATGTGAC | 666.920602012482 | 0.49426803964454  |
| CTAGATAAGTCA | 666.941968424909 | 0.407035972962241 |
| ATTCATCGTGAC | 666.947421483907 | 0.466839912261464 |
| CTGATAGTATGA | 666.951316842796 | 0.343630565685124 |
| ACGGCTCGTGAC | 666.952447349105 | 0.312359431120349 |
| CTGCTGCGTGAC | 666.954853903053 | 0.38665414279039  |
| ATGACGACGAAC | 666.957724621276 | 0.361253485661982 |
| TGACGTAGGTAA | 666.960828447556 | 0.469094205390049 |
| GTCACCCTAGTA | 666.962192176433 | 0.374184896924401 |
| AACCCTTACTCA | 666.970818657485 | 0.363078975017601 |
| CCGAGTGACCCA | 666.996240236534 | 0.432379089598754 |
| GCGTCACAAACA | 667.000335971682 | 0.488452440112855 |
| ACTCATAGTTTA | 667.020134715706 | 0.606609645317973 |
| GTCACAATCGTA | 667.02282670195  | 0.404779608239042 |
| ATAAGAGTCTTA | 667.035205278468 | 0.232757460293513 |
| GTCATTGTGCGA | 667.038831329184 | 0.416065451607932 |
| CAGCCAGATGAC | 667.044595929725 | 0.386339840642912 |
| AGACTACTCATC | 667.045608800668 | 0.213286414555741 |
| GGAGAGAATGAC | 667.065842156369 | 0.159078718669317 |
| ACACGGCTGACA | 667.068241164947 | 0.80516030246805  |
| CTCACTAATGAC | 667.074395790351 | 0.353345790586918 |
| AAGGCGTGAGTC | 667.077150250554 | 0.244475903446219 |
| TAGACGGAGTCA | 667.079302747195 | 0.272570240770629 |
| AGCATAGTCAGA | 667.110434090936 | 0.430852604019066 |
| GCTAACTCGTCA | 667.124988531172 | 0.43176982382555  |
| GCATTAATGACA | 667.130896089334 | 0.265529420514432 |
| GTCATTTAGCA  | 667.132219947259 | 0.463346433557361 |
| ATGACAGGATTG | 667.14272470403  | 0.179882924562545 |
| GCAATCCATGAC | 667.145028982421 | 0.548716597538209 |
| CAACAAGGTGAC | 667.149272586551 | 0.352011655379738 |
| GTCACATCACGA | 667.151107649597 | 0.493360213836251 |
| ACGTCACCCGAC | 667.16378310247  | 0.353667551782987 |
| ATGACAGACGAA | 667.172283543702 | 0.279127166649536 |
| AGAGTAATTCAT | 667.175679336653 | 0.507436927729588 |
| CGTCATCTACGC | 667.184737489146 | 0.208807268717765 |
| ACTTGGGATGAC | 667.194741018089 | 0.493517289229409 |
| GTCATTGTAGCA | 667.194999313684 | 0.31985166596319  |
| TCTATGGTGACA | 667.196351067274 | 0.275371357044705 |
| TATAGACTCAGA | 667.202449980385 | 0.297821624804908 |

|              |                  |                   |
|--------------|------------------|-------------------|
| AATACTACGTCA | 667.210213417514 | 0.297209792201557 |
| CAGTCATGGGAC | 667.223001854687 | 0.393197118057203 |
| GTCATGTAAATA | 667.237796636397 | 0.328650926086824 |
| GTGAGTCGGTAA | 667.23935616609  | 0.230387898248669 |
| AGCGTCATGCGA | 667.24195549817  | 0.417802333269486 |
| GTCACCCATGTA | 667.260003458044 | 0.482497530208018 |
| TGACACGATTAA | 667.260352191773 | 0.267706548539912 |
| CGTCATTAGGGC | 667.260423910813 | 0.33724697959196  |
| ACATTGCAGTCA | 667.265274954116 | 0.615988148083261 |
| ATCAATCATGAC | 667.275493139349 | 0.441238919956178 |
| TAACTCGTGTCA | 667.279908033091 | 0.409739679322404 |
| GTCACTAGTTGA | 667.281280566482 | 0.658736466146359 |
| TGACTGCATTAA | 667.285417542183 | 0.39496239768017  |
| AATCGTACGTCA | 667.28583565954  | 0.457900747752648 |
| AGTGATCTGTCA | 667.300235458163 | 0.270767667024691 |
| GGTGACATGGAC | 667.300621959199 | 0.192208734067536 |
| GGTCACCATGAC | 667.307721648676 | 0.381644769157922 |
| ATTATTCATACG | 667.316809072458 | 0.315269762645758 |
| CGCGCTTTGTCA | 667.332456989315 | 0.268311766765628 |
| CGTTCTATGTCA | 667.338745640082 | 0.208550386487934 |
| GTCATCTCAGCA | 667.349179616901 | 0.450328519625184 |
| GAATTAGACTCA | 667.349200097859 | 0.38155431425055  |
| GACCTTTACTCA | 667.34931341394  | 0.587742311215081 |
| GTCACATAGCCA | 667.377082055392 | 0.293731850918628 |
| ACCATCGTATGA | 667.379460084808 | 0.377744669929362 |
| CGACGTATGACC | 667.391794472196 | 0.467732441366346 |
| CGCTTGTGTGAC | 667.393565899742 | 0.384781323186606 |
| CTCTCTACGTCA | 667.395132069712 | 0.293363095395223 |
| AGTCTATTAGTC | 667.396313714952 | 0.445341515257123 |
| AGTTCCGCGTCA | 667.403631478914 | 0.37023984781117  |
| GTCATCCTCCCA | 667.405071593637 | 0.296167859348422 |
| ATTGACTCAGA  | 667.411843309202 | 0.354405470861249 |
| GCTGGCGGTGAC | 667.417898815515 | 0.447181951506422 |
| GACTAAATCACA | 667.439323786929 | 0.559426421857494 |
| GGCTCTTCGTCA | 667.445094046882 | 0.340416501160399 |
| CCAGCGTGACAC | 667.446278545794 | 0.51262290988783  |
| AAAATGTGACGT | 667.45012767743  | 0.315624956587184 |
| GCTGATCTGTCA | 667.45388972455  | 0.471685800748232 |
| GGTTGATATGAC | 667.454116577226 | 0.391341640637533 |
| TGTCATTAGAAA | 667.468503085108 | 0.413679681522688 |
| GTCCTGTATGA  | 667.471418326467 | 0.430377284797702 |
| GCTGTTTACTCA | 667.474023332141 | 0.374725028483234 |
| AGTCACGGCTCG | 667.487762662078 | 0.450043720428537 |
| ACTCGATGTGAT | 667.491919929107 | 0.357105116278522 |
| CATTATATGTCA | 667.492250834323 | 0.340948819003415 |
| CCTAGTGACGCG | 667.494547487182 | 0.475608957682503 |
| ACCGTGCGTGAC | 667.50218778161  | 0.462549566291932 |
| TATCATGACATA | 667.502729871985 | 0.464671954542954 |
| GTCACAAAATGA | 667.518391925559 | 0.448917632631994 |
| AAGGGATTAGTC | 667.526429067769 | 0.219307909477018 |
| ACCCTATAGTCA | 667.527986632162 | 0.47430689309331  |
| ATGCCACGTAAC | 667.535901267968 | 0.27927778679118  |
| GGTTACTCTTAC | 667.541389139764 | 0.330182733763007 |
| AAAAGATTACTC | 667.55444325735  | 0.630099288020145 |

|               |                  |                   |
|---------------|------------------|-------------------|
| GTCAAATGACAA  | 667.558768981105 | 0.299600882850857 |
| ACGTCATGAGCC  | 667.559125175026 | 0.312722417251045 |
| ATATTGCTCAGA  | 667.565522955857 | 0.578793705153124 |
| GTCAATGAGCCA  | 667.571975438953 | 0.372267526150261 |
| GTCATATGCGAA  | 667.576856602812 | 0.264421250946688 |
| CATTACGCAATC  | 667.578140172908 | 0.306147950320289 |
| CGCCATCGATGA  | 667.580305187635 | 0.44655989350239  |
| AACATAATGACA  | 667.580675605046 | 0.400556736117732 |
| CAATTAAGTGAC  | 667.585963233497 | 0.435782881199505 |
| ATCCGATGACGG  | 667.60483179474  | 0.436310504121188 |
| GGGAACCAGTCA  | 667.604963857053 | 0.309847474039207 |
| ACACTAGGTGAC  | 667.609501282692 | 0.785960245469885 |
| GACTCAATTGAC  | 667.612112798196 | 0.407801420652758 |
| ACTCCCAGTCA   | 667.623992780111 | 0.375404240177971 |
| TAACACATGACA  | 667.625046941399 | 0.410634185836659 |
| CTGACTAGGATC  | 667.64112452831  | 0.633569875499813 |
| GAATCCTAGTCA  | 667.646608460235 | 0.34576132508619  |
| ATGACACCCATA  | 667.652542503621 | 0.402282693346095 |
| CATCACACGTCA  | 667.657786636147 | 0.288266542417131 |
| CAGTCACGACCC  | 667.662290407923 | 0.497874084260637 |
| GTCACACCCAGA  | 667.665913243468 | 0.386948011156276 |
| TGAGTCTAGGAA  | 667.667958049691 | 0.212306066313787 |
| AAAGATCCGTCA  | 667.677306898978 | 0.187690155652982 |
| CATGCGTGTAC   | 667.68013478879  | 0.318806763586453 |
| ACGGAATGACCA  | 667.700579955397 | 0.478829879385686 |
| CAGTACTCGTCA  | 667.704825142208 | 0.471954636850582 |
| GTCACTCTAAGA  | 667.713967824156 | 0.37134760148023  |
| ACTCATAGTGTG  | 667.727998241247 | 0.39445206165297  |
| CGTCATTCGCAA  | 667.73063244776  | 0.388685228648138 |
| GTGACGCGGTAA  | 667.732564890287 | 0.115646843732603 |
| GGTGAGTAGTCA  | 667.745559362764 | 0.233758342681311 |
| AGTTACGTGTAC  | 667.752287823788 | 0.372601573740735 |
| CGAGTCAGGGTC  | 667.791840488173 | 0.180204686836702 |
| ACTCATAGAAGG  | 667.800782187429 | 0.462073809336615 |
| ACACTTGTGACG  | 667.803035398016 | 0.410324041373426 |
| GACTAATACAGA  | 667.806405569132 | 0.235795294245014 |
| ACGGGTCATGAC  | 667.812967757265 | 0.425104993163821 |
| CGCAAAGCGTCA  | 667.815043128655 | 0.340160310629552 |
| ATCATTAAATGAC | 667.824011716971 | 0.282145930535342 |
| GTGACTGCCAAA  | 667.824635206983 | 0.334963528398144 |
| AGCATGACACCC  | 667.829981280342 | 0.410528099615426 |
| CTCCAGATGACA  | 667.831602100245 | 0.11772971967972  |
| GTGTCAGCCTGA  | 667.834801160936 | 0.619442905973662 |
| ATCACGTGACAC  | 667.836302637891 | 0.162664976739721 |
| GGCGCTGTGTCA  | 667.837732291312 | 0.466584123328865 |
| GTCATAGGATCA  | 667.847119075223 | 0.22428158578146  |
| ACTCATAATTCG  | 667.855648505673 | 0.405275804261307 |
| GTAGACTGTGAC  | 667.857114709189 | 0.359969260352253 |
| GTCATCGGCGTA  | 667.878755717522 | 0.274966263086307 |
| TACTATGTGACA  | 667.879457961969 | 0.392290976874125 |
| GAAGGTGACCCA  | 667.886117422313 | 0.413022532583909 |
| ATGAGCAACTGC  | 667.897472266108 | 0.392166775016026 |
| AGTCACGCCAG   | 667.900812352309 | 0.414243327509154 |
| AAGTGTGAGAGA  | 667.901773729962 | 0.278601058873826 |

|              |                  |                   |
|--------------|------------------|-------------------|
| ATGACGTGAGAC | 667.902162940199 | 0.27499384138243  |
| TGTCAAATGACA | 667.90230671797  | 0.520763822356935 |
| AACGTCATGCGT | 667.922600830236 | 0.441398787086974 |
| GAATCTATGTCA | 667.927842952743 | 0.427384135991043 |
| GTCATCACCTCA | 667.932674023619 | 0.381861938878197 |
| GAGTAATCTTTA | 667.932705266004 | 0.262577796108029 |
| AACAATGAGTAT | 667.937167091458 | 0.308227387791779 |
| CTCGCGTGTGAC | 667.940669294789 | 0.395157618670548 |
| AAATTGTTGTCA | 667.942807346377 | 0.709980488960075 |
| CCACAAGGTGAC | 667.944324120965 | 0.393333939939533 |
| AAGTTACAGTCA | 667.944990002263 | 0.336493321867893 |
| CGTCACAATTAC | 667.946176268655 | 0.343479735537703 |
| ATGGGTAGTCAC | 667.951761441504 | 0.330994575824036 |
| CCGGTTTTGTCA | 667.968575970879 | 0.452984659838569 |
| AGTCAGGTCAT  | 667.970678169285 | 0.256218184463215 |
| ACTCATTTAAGT | 667.991703084038 | 0.439070334658609 |
| ATTAGTCGCAAC | 667.995819189605 | 0.457407702629985 |
| AACTTTGACACA | 668.002194431503 | 0.480994174589364 |
| GACTAACTAAGC | 668.002276057553 | 0.428590691757827 |
| AGTCACTAGGCG | 668.006402867974 | 0.279564204236097 |
| GTCATTGGCACA | 668.016246256255 | 0.400384639301545 |
| CTGTCATTTGGA | 668.02124272674  | 0.298828422052162 |
| ATTTGAGATGAC | 668.036657160571 | 0.388560838256695 |
| CCGGCTGGTGAC | 668.040944873248 | 0.46256029024645  |
| GAGACAAATGAC | 668.058035324904 | 0.31039915682011  |
| CGGCACAGTGAC | 668.058109036618 | 0.375994238703589 |
| AAATAGTGTGAC | 668.074233016289 | 0.385933858641231 |
| AGCAGTCAGAAT | 668.076943753048 | 0.30131746188711  |
| GTCATGCAACCA | 668.088160935314 | 0.374397616782138 |
| TGACGCTTTAAA | 668.094300636858 | 0.357785227418777 |
| AGGCAGTGAGTC | 668.10351056472  | 0.237713156979766 |
| GTGTCACCTCCA | 668.109627025876 | 0.279308679058949 |
| ACACCAGGTGAC | 668.109977689027 | 0.302222052418757 |
| ATACCGTCATTA | 668.113680901529 | 0.2787298241321   |
| AAAATTGGTGAC | 668.122299809763 | 0.244732956037518 |
| CGTTCGTGTGAC | 668.134382625339 | 0.273036948189288 |
| GTCACGATGTGA | 668.141307542674 | 0.214398703907358 |
| ATGACGATGGTG | 668.142588173713 | 0.345149235112268 |
| GTCATTGGCAGA | 668.14943496626  | 0.311399671966762 |
| GCGTCACATCTA | 668.149979198946 | 0.35511528874494  |
| GTGGTAGACTCA | 668.155790715658 | 0.385114062640294 |
| AGTCAGTACTGA | 668.155841564479 | 0.418120525777907 |
| GGCTTGAGTCA  | 668.15775365183  | 0.465787294362633 |
| GACTGATTCAGC | 668.159172759352 | 0.392175860339236 |
| ATGACTGGGGAA | 668.170507559745 | 0.324267465812132 |
| TATGACAGCGGA | 668.201939001678 | 0.369419120349676 |
| GTCTTTGTGTCA | 668.206530936122 | 0.527948400647071 |
| ATGACCCTTCG  | 668.213692949715 | 0.441915878317909 |
| AATCTGCATGAC | 668.219108615632 | 0.400320666051686 |
| TCATTTTGGTCA | 668.23505469967  | 0.468948138407815 |
| ACTCATCTGACG | 668.235358079492 | 0.311530746020076 |
| ATGAATCGGTCA | 668.235450553052 | 0.603488519934482 |
| ACATGATATGAC | 668.242511595545 | 0.300224153170073 |
| CCCAACTGACTC | 668.242519417579 | 0.314799245547827 |

|              |                  |                   |
|--------------|------------------|-------------------|
| GACCAGTACTCA | 668.244338292707 | 0.473169896795441 |
| GTCATGATTA   | 668.244963062303 | 0.378290014455079 |
| AAGCTCTGTAC  | 668.252334144873 | 0.488522724308073 |
| ACGTCACCGTGA | 668.273651512518 | 0.301309657531859 |
| CATCGGAGTGAC | 668.281832621655 | 0.420331826811839 |
| GAGGTGAATGAC | 668.303272530294 | 0.175035858481791 |
| CTATGCAATGAC | 668.304086525982 | 0.431410770486935 |
| CTGAGAATGACC | 668.322349447979 | 0.429657890828378 |
| AGTCCGACTAAT | 668.329737178277 | 0.421015073758872 |
| ATTTGCTACTA  | 668.341332225005 | 0.205859851143972 |
| CACGTCACTATC | 668.345894299185 | 0.256318743941714 |
| CAGCTTAGTGAC | 668.349302689708 | 0.313669439691834 |
| CAAAACATGACG | 668.374898477351 | 0.473320760986906 |
| CGTAGGAATGAC | 668.380916699488 | 0.176147713965215 |
| CCGTACGTGACG | 668.384552438563 | 0.819899529930742 |
| ACGTCACTTAAG | 668.384918714872 | 0.288066716828433 |
| CGCTGAGAGTCA | 668.385541989304 | 0.361967956505145 |
| ACGTCCTGTGAC | 668.390248520935 | 0.368983477861685 |
| AGTCACGAGGTG | 668.407124609662 | 0.34372698365831  |
| AGATGATATGAC | 668.415549453234 | 0.11008192685221  |
| TCACACAAATGA | 668.440849201492 | 0.640051538391469 |
| CGCTATCCGTCA | 668.44491285469  | 0.345176811013528 |
| GTCATGCTGGAC | 668.447817974759 | 0.468434538246649 |
| ATGACATTTATG | 668.459492886046 | 0.40403106492735  |
| CAACGAGAGTCA | 668.460381491554 | 0.437736208509959 |
| CGCGCGTGAGTC | 668.469221498228 | 0.497294482844076 |
| AACCGGTGTGAC | 668.471135739356 | 0.754240372008993 |
| TGAGTAGACTCA | 668.47356980136  | 0.374515599456476 |
| CAACTTGGTGAC | 668.480923850607 | 0.497989835109057 |
| GAAATTTGACTC | 668.490214450904 | 0.434062399458567 |
| ACGTGGTGACCA | 668.502716114342 | 0.385480752587078 |
| AAACAAATGACG | 668.503745306208 | 0.21286634949118  |
| AGTGTCATGCAC | 668.514247312949 | 0.204330377323142 |
| CGTCACACGTAA | 668.520299908569 | 0.222276245472194 |
| CCTAATCGGTCA | 668.521285356088 | 0.503219130121326 |
| ATGTTGACGTCA | 668.52260622192  | 0.582991404526196 |
| ACTAATGACAAG | 668.527301662315 | 0.279455813587993 |
| GATTGCATCACC | 668.531785115492 | 0.28901920029028  |
| GAGTAATTCGAC | 668.532295366751 | 0.439964091970574 |
| ATCGTCACTAAT | 668.542975186035 | 0.376579829800691 |
| GAGCAGGAGTCA | 668.546212478156 | 0.185049634571262 |
| TCAGCGTCACGA | 668.554279384075 | 0.496556771658528 |
| CTATTCGGTGAC | 668.55792005166  | 0.383397193128149 |
| CACTCGTGTGAC | 668.564387288182 | 0.476855942008925 |
| TATTGCGCGTCA | 668.564865217458 | 0.410221178132588 |
| CACCGATGATGA | 668.594529611047 | 0.464651822743793 |
| AAGACATTAGTC | 668.596408207918 | 0.588074098868728 |
| GTCAGTGACAAA | 668.596496120277 | 0.19671519408829  |
| TCTGAAGTGTC  | 668.617962155902 | 0.525656222483276 |
| TCCGATTAATAA | 668.624598211298 | 0.478953873173941 |
| AGGCAATTAGTC | 668.631557017143 | 0.402311544656655 |
| AGACTACTAGA  | 668.645316169401 | 0.339374725662082 |
| ATATGTATGACC | 668.646495040582 | 0.319998597441935 |
| AGGTGTGATGAC | 668.648708071903 | 0.259326893836389 |

|               |                  |                   |
|---------------|------------------|-------------------|
| CTGCGGATGACC  | 668.653117549288 | 0.6427879625937   |
| ATGACATCGTGC  | 668.655647035395 | 0.473318436235056 |
| GATGACATTAATA | 668.661870810026 | 0.258064940286863 |
| ACAGTTATGACC  | 668.667408532105 | 0.556670788204254 |
| AAGCTGGATGAC  | 668.671544666454 | 0.347844823659493 |
| AGTCGATATGAC  | 668.675473809634 | 0.34886001214128  |
| GTCACATTTAAC  | 668.675508978626 | 0.28710035428586  |
| GGCCTATAGTCA  | 668.679324015255 | 0.620025794444204 |
| ATGAGTTGTCCA  | 668.689237991414 | 0.262056250447972 |
| GTGACTTACGTA  | 668.704675403483 | 0.252989107757969 |
| AGTCACTAGGGC  | 668.71133555261  | 0.291741790716376 |
| GTCATTCGACGA  | 668.721194746611 | 0.329659933964006 |
| ATAGCAGTCAGC  | 668.725815385527 | 0.551745210678019 |
| GAGTCAAATAAA  | 668.729936438951 | 0.429838106469091 |
| GTGTCATGTTCA  | 668.732147949109 | 0.531336973698182 |
| AGTGTCATGGCG  | 668.733388501545 | 0.308499789412653 |
| CGCCGTGAATCA  | 668.740157196492 | 0.413509585507346 |
| CGACTTGTCAACA | 668.743310592519 | 0.195274110724769 |
| AAACCTGGTCAT  | 668.743916290549 | 0.354102319435915 |
| CAGGGGTGACCA  | 668.751805302749 | 0.251282736573717 |
| GACCACACGTCA  | 668.7523874455   | 0.45470023582133  |
| CGGTTGATGACG  | 668.754078748489 | 0.382026437271735 |
| GAGTCAAAGGAA  | 668.764762102682 | 0.164273616414383 |
| TCCCGGTGACGA  | 668.765081991451 | 0.607136003702778 |
| CAGAACTTATGA  | 668.767998481615 | 0.410437290645728 |
| CGGGTGACCCAA  | 668.784834814568 | 0.545591847978344 |
| CGTAAGACTAAC  | 668.787394332722 | 0.407591575734171 |
| ATGACTTGTTCG  | 668.789426396151 | 0.440992499441817 |
| CTGCATTTGTCA  | 668.796994345869 | 0.295045177334131 |
| CACAATAATGAC  | 668.799028181004 | 0.284665040922717 |
| AAGAGATGACAT  | 668.816985979006 | 0.131229216676697 |
| GGGCAGACTCAC  | 668.817349475202 | 0.356939845983457 |
| GTTGCCAGTCA   | 668.824429928056 | 0.258520581343229 |
| GTCACATTGAAA  | 668.827160453301 | 0.361623429749356 |
| AAACGTGACGCT  | 668.827729799579 | 0.275152858764166 |
| TAGAAATGACAA  | 668.83345191295  | 0.255821044677375 |
| CAGGTTGATGAC  | 668.833873934613 | 0.464808014831566 |
| TGACGTAGCCAA  | 668.841429220021 | 0.396769889753475 |
| ACAAGTTGAGTC  | 668.843805437166 | 0.447982085023819 |
| ATGACACTCCTA  | 668.846673477452 | 0.264443986622488 |
| GTCAGGCATGAC  | 668.851291332723 | 0.301322912223621 |
| GTCATTACAATA  | 668.853419115276 | 0.280711539562461 |
| TAGATTGACACA  | 668.85946949357  | 0.37470556635861  |
| TCATCTCAGTAA  | 668.871108465522 | 0.541764800229694 |
| ACGCATTGCTCA  | 668.874511640217 | 0.274438685628442 |
| ACTCGAAGTCAT  | 668.877335713111 | 0.344124523473836 |
| CTGAGTCTGACA  | 668.882468700885 | 0.421417588991046 |
| CAGTAACCGTCA  | 668.885290173252 | 0.516085862906037 |
| CAAGTCGGTGAC  | 668.9238990455   | 0.395349558960852 |
| GTCACATAGGCA  | 668.926744952471 | 0.280737930357285 |
| ACGTGTATGAGT  | 668.930268409731 | 0.177839045729309 |
| GATTTGGAGTCA  | 668.936438756472 | 0.255130747721646 |
| CGAGTCTGACAC  | 668.942827684144 | 0.438172000310067 |
| CGATAAAATGAC  | 668.944270716813 | 0.460569669736872 |

|               |                  |                   |
|---------------|------------------|-------------------|
| AACGTCATGTGA  | 668.945191992762 | 0.589889747645674 |
| CCTCCCTATGAC  | 668.947286589573 | 0.294293940210821 |
| AGACGTTGTCAT  | 668.970312964634 | 0.295550432116169 |
| AGCTCCGACTCA  | 668.978253680419 | 0.329331829149556 |
| GTCATTTTGTTA  | 668.980971492998 | 0.370370467044019 |
| ATATTATTCATC  | 668.990486066699 | 0.246956235807374 |
| CAGACGTAGTCA  | 668.990723452852 | 0.550469080044847 |
| CTCTGGTGACAA  | 669.012320647803 | 0.354442548372727 |
| GTCATGTGCGAA  | 669.014298098368 | 0.241347120031096 |
| AGTCAGAACGAC  | 669.029975161127 | 0.836704076971701 |
| AATTCGGTCACC  | 669.038728116511 | 0.378766926626854 |
| ACTCACAATGAC  | 669.041329647007 | 0.253166701378264 |
| ATTCTCTATGAC  | 669.044691858271 | 0.399122361388214 |
| ATGACACGGAAG  | 669.047536438027 | 0.301853120671113 |
| CTGACGTGACAC  | 669.047968104719 | 0.415473827006941 |
| CAAGCCGAGTCA  | 669.052350310676 | 0.341564641415222 |
| CATCTTAAAGTGA | 669.059298068552 | 0.424652986500099 |
| ACAGAAGTGACT  | 669.064957080642 | 0.318306224827241 |
| CTCCAATGACA   | 669.068612019345 | 0.170106342550769 |
| AGGTTAGATGAC  | 669.070442012378 | 0.247133695483966 |
| AAAGTTGGTGAC  | 669.097610586794 | 0.295511448013452 |
| ATCCTTCGATGA  | 669.112191731698 | 0.582137785983044 |
| ATGACAATAGCG  | 669.112424094051 | 0.15973780812517  |
| AGTAGGCGTCAT  | 669.11526815052  | 0.349194843222072 |
| GTCACATGGTCA  | 669.116251712983 | 0.368619149627992 |
| GTGACGCGCAAA  | 669.135279976819 | 0.280811190274077 |
| CGCCGGTATGAC  | 669.137453548593 | 0.501408830816407 |
| GAAAACGCGTCA  | 669.14898884269  | 0.442614913531506 |
| GTCACCTTACTA  | 669.153558520514 | 0.495076586130826 |
| ATCCATTATGAC  | 669.161051920962 | 0.350126005057238 |
| CGAGATGAGCCA  | 669.161731121045 | 0.449194138525122 |
| AGTCAGACATAA  | 669.163494434166 | 0.421022780196072 |
| AGTCATGAGACA  | 669.165318243551 | 0.279252856666704 |
| ACTTTCTATGAC  | 669.174831343592 | 0.440733312615713 |
| GAGAAGTACTC   | 669.178886460338 | 0.23030955200412  |
| ACGTGACAATAT  | 669.179293656103 | 0.451838984516026 |
| AGTCAGTCGACT  | 669.18111966142  | 0.615912002187333 |
| ACGTCACCCGGC  | 669.183959291217 | 0.521489586972301 |
| AACGTTGACTGA  | 669.191605555613 | 0.3722216195985   |
| ATTTTCAGACTCA | 669.193533174805 | 0.348276437652845 |
| TGACACTTGAA   | 669.211274842639 | 0.486452898065175 |
| AACTAAGCGTCA  | 669.216557422489 | 0.303732592843733 |
| GATACTGTGTCA  | 669.217844074234 | 0.322503856318606 |
| CGTACGTGACAC  | 669.220116254047 | 0.445046962754105 |
| ACAGTAGATGAC  | 669.221646330463 | 0.319144300236374 |
| AGAGTCAAAGGA  | 669.225536681194 | 0.300535124275198 |
| GATGACGTCTCA  | 669.229741360431 | 0.334741576203856 |
| ACAAACAATGAC  | 669.256315079544 | 0.298518928095795 |
| GGTGGTGAATCA  | 669.25889901774  | 0.272268748582196 |
| ATGACCATATGA  | 669.265823128357 | 0.354839736483536 |
| TCCACGTAGTCA  | 669.266219545986 | 0.427675664781677 |
| AACCCGGAGTCA  | 669.267076981164 | 0.379047227394589 |
| CATCATTGAGTC  | 669.267530526604 | 0.352176465382034 |
| CTACATTGGTCA  | 669.29942894374  | 0.38821623212225  |

|              |                  |                   |
|--------------|------------------|-------------------|
| AATTACCTGTCA | 669.312684953241 | 0.349531075291145 |
| AGAGTCAAAGC  | 669.317933402267 | 0.348980294839591 |
| CGGTCCCTATGA | 669.332821444838 | 0.457364102268922 |
| CAGTCACGCTGC | 669.349705675151 | 0.28945393779976  |
| AGTGATACATAC | 669.372838066491 | 0.3508396952599   |
| ACACATCATAGA | 669.380647564685 | 0.243624662404742 |
| GACGATTGTGAC | 669.383327684293 | 0.367059175290145 |
| CGGCTTTGACTC | 669.390044376809 | 0.429855942836884 |
| CGCGTCACTGAC | 669.405980573349 | 0.283472139185565 |
| TTCGGTCACAAA | 669.408865421969 | 0.477473960996201 |
| CACTAGAATGAC | 669.41995667832  | 0.402716619538432 |
| CATGTAATGACA | 669.431783593626 | 0.525095652083878 |
| TGATTCACCTAA | 669.433518300985 | 0.300466946184523 |
| GTCACCACGCAA | 669.439172633273 | 0.259432209382713 |
| CTACGTAATGAC | 669.444541963773 | 0.241878973227205 |
| AGACTAATTCCG | 669.453531794858 | 0.224760104028925 |
| ATCTCGTCACAG | 669.462831034049 | 0.388104293634441 |
| ATGACGCTCATG | 669.474148474796 | 0.43712802661722  |
| TCTCATTCGTCA | 669.475641783989 | 0.444714296676734 |
| CCAGGAATGACG | 669.47707481832  | 0.48149963927575  |
| GTAGATAAGTCA | 669.49092822617  | 0.197320327264358 |
| AATGTCACGTCA | 669.491072590002 | 0.618498833791928 |
| CATTGTAATGAC | 669.491556461017 | 0.388374826141216 |
| AATGCTCCGTCA | 669.497833484374 | 0.480573451015146 |
| CATATTGTGACG | 669.505713596774 | 0.383168765073131 |
| GCCTCTGACGAA | 669.509627062709 | 0.54510303581093  |
| TGGCACAGTCAA | 669.51154716579  | 0.450795353645292 |
| ATATCGTCACTC | 669.517321500907 | 0.415994263955341 |
| TGAAATATGTCA | 669.518636790244 | 0.409202176016306 |
| AAATACGCGTCA | 669.527630166801 | 0.345013723541358 |
| ATATGAGTTGTC | 669.538300234771 | 0.202298161968747 |
| GTATGACCGCTA | 669.549210173801 | 0.289094577827519 |
| CTGACCAAATGA | 669.5519536189   | 0.390657396716763 |
| CCTGTGGTGTCA | 669.563474641704 | 0.470621594200286 |
| GTCATATCAAGA | 669.563955142331 | 0.441059169328617 |
| CCGGCGTGACAC | 669.575915699775 | 0.339682574431922 |
| ATGACTTCGACA | 669.584627874943 | 0.498718095364315 |
| TCATCGGCGTCA | 669.584676136417 | 0.461489407848484 |
| AGTCAGAGGCAT | 669.594255555051 | 0.504133013115672 |
| AGGTTGCAGTCA | 669.609639777991 | 0.368345111531828 |
| TAAGTAGTGTCA | 669.617984659598 | 0.508758121515326 |
| GCATCGTCATGA | 669.618921522894 | 0.461646971911308 |
| AAACTCTGACGT | 669.623317889017 | 0.255704715327422 |
| GTCATCGGTGAA | 669.625532133905 | 0.324060426472128 |
| GCGTCATGTCTA | 669.635529931643 | 0.23039611798467  |
| CAGTCTGTGTCA | 669.637301366362 | 0.411778201407022 |
| GTGACACCGTTA | 669.64727353521  | 0.412542639213822 |
| ATGAATACATCA | 669.655110326727 | 0.447117175713578 |
| TCATCGGAATGA | 669.658322494776 | 0.509729880984427 |
| ACGTGTATGACC | 669.664922934481 | 0.425410227362378 |
| CAGTCAATTATG | 669.66553076585  | 0.404457671022923 |
| TATGATGCAACA | 669.667768307268 | 0.154849509742302 |
| CAACGTGACGCG | 669.672490470755 | 0.271103000203036 |
| CTCATGTAGTGA | 669.689754187935 | 0.388957012896724 |



|               |                  |                    |
|---------------|------------------|--------------------|
| AGGGAGTGCAT   | 669.695538670917 | 0.311010815791663  |
| TAATTTTACTCA  | 669.721669629615 | 0.402303952785626  |
| GGTCTCTGTAC   | 669.729839575702 | 0.432227063311143  |
| GTCATCTCTCAC  | 669.737452917417 | 0.353411290526142  |
| AGGCTGGGTGAT  | 669.745316626141 | 0.18893194680863   |
| GAGTATCCGTCA  | 669.746174387783 | 0.525802104542241  |
| GTCATCCAACGA  | 669.752163953376 | 0.318551544918625  |
| AAATGCATCACC  | 669.762331182416 | 0.234177057989347  |
| AACGCGTGAGTC  | 669.765433181771 | 0.441627307243173  |
| CAATGAGATGAC  | 669.774634408186 | 0.531227866682762  |
| ATGACGGACCCG  | 669.77780130386  | 0.331711381852176  |
| AATCGCGACTCA  | 669.779057213529 | 0.306112864666927  |
| AGATTGGGTGAC  | 669.785871074264 | 0.313030439152019  |
| TCTGATTAGAA   | 669.787353882211 | 0.49855594145561   |
| AGTCACGGACTG  | 669.804920101281 | 0.610197257983832  |
| ATGAGTGAATAC  | 669.81712307439  | 0.173698532454218  |
| ATGACTTCGAGG  | 669.818310272462 | 0.411234297451566  |
| GTCACCGTATCA  | 669.820933172357 | 0.0947399109159005 |
| CGCCTGTGTGAC  | 669.825954658238 | 0.37985877599027   |
| CAGATATCGTCA  | 669.837325995859 | 0.417359336898783  |
| TGACTGGGCGAA  | 669.84575425857  | 0.307205436095279  |
| ATTAGCTGTGAC  | 669.858194299548 | 0.480843334194966  |
| TGACTCCATTAA  | 669.859209851723 | 0.48180130557458   |
| GTCATTGCCAAC  | 669.86921186165  | 0.427611057711104  |
| GTCACCTACGTA  | 669.88316169344  | 0.4746442734452    |
| TGACATGTACAA  | 669.888358725517 | 0.251181618776272  |
| CGCCCGAGTGAC  | 669.896572545274 | 0.239531970830025  |
| CCGATTGGTGAC  | 669.931873553411 | 0.443972439468841  |
| AATAACTCGTCA  | 669.934237241242 | 0.379702404400645  |
| GGAACATAATGAC | 669.936267364496 | 0.34739899617847   |
| GCTCACCTATGA  | 669.940766775742 | 0.845476847439329  |
| TGACTCCTGAAA  | 669.943444248554 | 0.427464145575527  |
| CACGTATTAGTC  | 669.951493980339 | 0.533093272115019  |
| GCTTAATATGAC  | 669.953550045887 | 0.789103368068142  |
| TGAGTCGGCCCA  | 669.967484575113 | 0.403798365014276  |
| AAGATTCTGACT  | 669.97880649885  | 0.301698676078364  |
| CTTTAATGACA   | 669.982137780764 | 0.379181474930245  |
| AACACCATGACG  | 669.986515266893 | 0.502302119241871  |
| CAACATCCGTCA  | 669.987028345443 | 0.349137684290286  |
| GTCATGCGCATA  | 669.996678419171 | 0.424564702607399  |
| ACTCTAATGACG  | 669.998798590494 | 0.289794853529073  |
| ACGCGGTGACGT  | 670.001679099503 | 0.336431081422431  |
| CTAACTTCGTCA  | 670.002399799951 | 0.277253850632983  |
| CGCACGGATGAC  | 670.007316450182 | 0.215444265317213  |
| ACGTCACCAACT  | 670.007468398791 | 0.38376263784943   |
| GAGCTAGAGTCA  | 670.033571477721 | 0.407938769227454  |
| CGTCATTCTTA   | 670.049399674459 | 0.375486499771636  |
| GACTGCAATGAC  | 670.050724481996 | 0.601090685598503  |
| AATTTTGGTGAC  | 670.060710010221 | 0.423053246249645  |
| TCCTTGACTAAA  | 670.062493213367 | 0.467127025558577  |
| TCAGCGGAGTCA  | 670.068900682025 | 0.485045820125135  |
| TATAATGAGCCA  | 670.072444312027 | 0.648900060679011  |
| AGGTTAAATGAC  | 670.085181165919 | 0.386960902402742  |
| AAGTAAGTGTC   | 670.089126500853 | 0.313437704482341  |

|                |                  |                   |
|----------------|------------------|-------------------|
| GTAGTCGATGAC   | 670.091582899811 | 0.37976401535309  |
| CTCTGCAATGAC   | 670.100098999744 | 0.54267884609428  |
| AGTCACGAGTAT   | 670.121783077753 | 0.380989474738248 |
| CCGCCGATGACG   | 670.127935166204 | 0.612297485993472 |
| CGTATGCATGAC   | 670.140162115276 | 0.315136768282746 |
| ACTCACGCGTCA   | 670.143313139592 | 0.504188643891421 |
| GATGATGCAACA   | 670.14770484077  | 0.282542264256578 |
| ATTATGTCGTCA   | 670.157268055314 | 0.289614716974008 |
| TTAGTAATTA AAA | 670.159326330456 | 0.65115554365539  |
| TCATAAGTACGA   | 670.165873439422 | 0.477020846222892 |
| TGACGTATGGAA   | 670.170187317833 | 0.593967182947091 |
| CCGTTGACACAC   | 670.178420885742 | 0.321271263287772 |
| CGATGATGACCA   | 670.178686414256 | 0.27364127146337  |
| AATAAAGTGTCA   | 670.197298742716 | 0.438966653887722 |
| ATTATGTGACGC   | 670.202043506131 | 0.375252150926377 |
| CGAGTCAGGCAC   | 670.208602448807 | 0.300599564310425 |
| ACGTCACCTCTC   | 670.214334957123 | 0.150540949438434 |
| CTGGTGACCCAA   | 670.221292573593 | 0.258242114069958 |
| AAATGTGTCTTA   | 670.246670285774 | 0.242670517349789 |
| ATATCAGATGAC   | 670.24714526443  | 0.455271637724862 |
| GTA CTTGGT CAC | 670.257071993872 | 0.317413080422631 |
| ATGGTTTCGTCA   | 670.26487789102  | 0.407247303930168 |
| CAATGGTACTCA   | 670.271505523253 | 0.507519978902217 |
| CGACGACTCAGA   | 670.277165818398 | 0.236387345038222 |
| AAACAGCAGTCA   | 670.280833879868 | 0.373042565853558 |
| AATGCCTATGAC   | 670.28383196055  | 0.318476823569893 |
| ACTCAGTCAACG   | 670.289400101383 | 0.291748331966967 |
| CACGTCACTCCC   | 670.292349781135 | 0.341347733350431 |
| GTACGCTAGTCA   | 670.302023275695 | 0.540641325388073 |
| CAGGTGAATGAC   | 670.302946489767 | 0.368197443990284 |
| GCAGGCGTCATA   | 670.3121358383   | 0.171748045947552 |
| CTTGTTGAATCA   | 670.323036684421 | 0.409746374741696 |
| TAGGGTGACCCA   | 670.327205122936 | 0.281671248886775 |
| ACTCGTTACTCA   | 670.333832070405 | 0.247781183578057 |
| GTCACCAGAGAC   | 670.340898830692 | 0.52393452205448  |
| GGAACCTAGTCA   | 670.34693306059  | 0.437958842585502 |
| AGTCACCTCGCC   | 670.35136240371  | 0.344325596918958 |
| TCGAAGCAGTCA   | 670.359650596161 | 0.493120935284123 |
| AACTTTGGGTCA   | 670.383443394457 | 0.369108835226389 |
| TGAGTAACGAAA   | 670.41400295628  | 0.301502650528699 |
| AGTCAGCGTCAA   | 670.414226176272 | 0.2492657557512   |
| ATGTCACCAGTC   | 670.419285503357 | 0.207311862053413 |
| TCAGTAGTGTCA   | 670.423129453976 | 0.797985365381741 |
| CATCGTGACACG   | 670.431649909351 | 0.528789208188789 |
| GAACCGGTGACA   | 670.434483772417 | 0.255369945715545 |
| ATGTCATTTGCG   | 670.439359602666 | 0.375365562839033 |
| CACCAAATGACG   | 670.444398778131 | 0.350123948992188 |
| AATCTGGTGACG   | 670.449066887365 | 0.485981996457022 |
| GACACATTATGA   | 670.458502835682 | 0.508062436955819 |
| GGATGATTCGAC   | 670.462058164913 | 0.321129467395021 |
| GATGATACAATC   | 670.462494798488 | 0.402865179237229 |
| AACCCTTATGAC   | 670.474337346792 | 0.377114841923187 |
| TGACTGGGTAAA   | 670.480817772816 | 0.3486094048639   |
| GCCTGGCATGAC   | 670.481873993303 | 0.416993082560275 |

|               |                  |                   |
|---------------|------------------|-------------------|
| GGATCGAATGAC  | 670.484099882411 | 0.474994410836028 |
| AACGTAAATGAC  | 670.486910430335 | 0.429981710674106 |
| GTCATCATACGA  | 670.502287017669 | 0.272166366058992 |
| ACTAATGTGACA  | 670.5054134812   | 0.422288725426661 |
| ATGTAATAATGAC | 670.507381579393 | 0.470614550986354 |
| CATGCAGACTCA  | 670.518852685559 | 0.42026534089502  |
| TCCAATGGGTCA  | 670.521928798393 | 0.333206020544674 |
| ACGTTGATTCAT  | 670.534925515809 | 0.41417223480669  |
| AGTCACTTGGCA  | 670.547099184002 | 0.576620707707872 |
| GTGAGTACTATA  | 670.558524542625 | 0.42580301811494  |
| CAGGACTAGTCA  | 670.570208978292 | 0.241145251354379 |
| GTCACCCTGTCA  | 670.572449747374 | 0.371879656778061 |
| ATGACAATGATA  | 670.576461855883 | 0.314399614246754 |
| GTCACATATACA  | 670.57964173028  | 0.610484164156652 |
| CAAGCAATGACG  | 670.580696140556 | 0.419907284466341 |
| TGATTCGAATCA  | 670.582495947098 | 0.743580242544948 |
| CGTCATTTGGAG  | 670.592522007458 | 0.271424219758296 |
| ACGTGACATGAC  | 670.59832251512  | 0.310483052849042 |
| GGATCGGATGAC  | 670.59980570127  | 0.253329668369635 |
| AAGTTGAATGAC  | 670.60848708906  | 0.377386728199108 |
| CGAATACATGAC  | 670.609897950519 | 0.232626750537315 |
| ACCGAGTGACGT  | 670.611782436976 | 0.308525657919702 |
| ATTACGTGACAA  | 670.627971875239 | 0.425356085143489 |
| ACTCTTTATGAC  | 670.629850437608 | 0.410174107116633 |
| CTTATGGCGTCA  | 670.633261936675 | 0.447659978650664 |
| ATGTTGAGTAAC  | 670.638774407777 | 0.344533872119727 |
| GTGTCACGTCAA  | 670.639468356867 | 0.297282421608125 |
| ACGTCACTTTTA  | 670.643929732944 | 0.528150890373196 |
| GACTAGGGTGAC  | 670.646388971815 | 0.463381805681812 |
| TGACGCGACAAA  | 670.647114746823 | 0.274949468036147 |
| GTCACACGAAAA  | 670.65025257274  | 0.192624725443317 |
| AGTCAGTAATCA  | 670.653413171032 | 0.375061448273248 |
| GTCATGTCGCCA  | 670.661610250223 | 0.403585099670752 |
| ATGACGTTAGTA  | 670.671593939197 | 0.383339715194617 |
| ATGAGCCAACCA  | 670.671937725437 | 0.645577625592516 |
| GTCACACAGGAC  | 670.683703979577 | 0.397678264297525 |
| ATGACGACTATC  | 670.685459657432 | 0.337280580741052 |
| ATGACTAGCGAC  | 670.696111976533 | 0.330003357865624 |
| CGGGCATGACAC  | 670.699803371972 | 0.494319327257907 |
| ATGACCACGATA  | 670.703199552344 | 0.245772524116855 |
| CTGAACGGTGAC  | 670.705596780236 | 0.348303385529809 |
| ATGACGGTACGA  | 670.708330554703 | 0.335038906637818 |
| ATGACACGGACG  | 670.70906464427  | 0.412062188166495 |
| CCAAGTCGTGAC  | 670.712010601072 | 0.553119441142488 |
| TCATTGTTGTCA  | 670.720600207306 | 0.501932908885456 |
| GGTCACAACCTGA | 670.721426566191 | 0.58581594943692  |
| GAGTCAAAGGAC  | 670.721900781378 | 0.249545456268947 |
| AAGTTGTGACGC  | 670.726029054321 | 0.275900901477453 |
| ACTGTGACCTAT  | 670.736726521763 | 0.381003767024323 |
| AGTCAGAATTCG  | 670.7460974728   | 0.232243790717432 |
| ATCATACATGAC  | 670.751265536786 | 0.402524906501046 |
| CACTTTAATGAC  | 670.753283885073 | 0.416310292491258 |
| ATGCCTGACACA  | 670.754346863519 | 0.306314459423473 |
| AGTCAGACAATC  | 670.75843724282  | 0.321220441014435 |

|               |                  |                   |
|---------------|------------------|-------------------|
| GACTAATTTTGA  | 670.760719459107 | 0.378170672575559 |
| GATGCAGAGTCA  | 670.768774991609 | 0.251204901399557 |
| AAACTGTCAGTC  | 670.777323461802 | 0.497147091232405 |
| GATGACCGGTCC  | 670.780130954421 | 0.338787105853068 |
| CGTCACAGCTAG  | 670.786428007019 | 0.547900548763331 |
| ATCCGGTGACAT  | 670.78645592799  | 0.453261272073525 |
| CGGCCACGTCA   | 670.786876407074 | 0.530208597118844 |
| CCAGGTAATGAC  | 670.792288405643 | 0.450214196979149 |
| CTATGGGTGACA  | 670.803130613472 | 0.321489548163101 |
| GACACATTCTGA  | 670.806880402511 | 0.323516808399985 |
| GTCATGCTTCAC  | 670.809666537286 | 0.382025617877299 |
| TGACTCCCTTAA  | 670.816937307334 | 0.103981161395733 |
| GGGTGATATGAC  | 670.822996321635 | 0.292969440704036 |
| CAGATCTGTGAC  | 670.839083403526 | 0.37253172303201  |
| CCGATTAATGAC  | 670.839990564024 | 0.515275888676869 |
| CGTCATTAGAGA  | 670.840566821274 | 0.355031031195699 |
| GTCATCTCGATA  | 670.840830753385 | 0.249326556155813 |
| AGTCGGACTCAC  | 670.845731531422 | 0.298455261434139 |
| GATTAAGATGAC  | 670.857868956952 | 0.299927430194672 |
| AACCTGCGTGAC  | 670.864775561039 | 0.448254661038529 |
| ACGTCACCTCTGC | 670.86978082892  | 0.357227057723087 |
| GCTGCCCGTCA   | 670.880682582688 | 0.456840833312633 |
| TATTGAGAGTCA  | 670.881867655177 | 0.328993830084011 |
| CATTATTAATGAC | 670.890650301956 | 0.388869488431104 |
| ATCGAAGTCAAC  | 670.895309223366 | 0.205155551413482 |
| ATGATGTGACGC  | 670.903312181271 | 0.372178097951089 |
| GGGTCATCTTAA  | 670.920807891817 | 0.373989776486425 |
| GATTGAAATGAC  | 670.921195138644 | 0.433515475348968 |
| GAAGTAGACTCA  | 670.921696516847 | 0.583296190640139 |
| GCGTCACGCGGA  | 670.930146740571 | 0.566228322988381 |
| CCCCTAAATGAC  | 670.948255755105 | 0.269944794424168 |
| ATTGTGGCTCAC  | 670.951453608561 | 0.332383723278644 |
| GGTTCATATGAC  | 670.956106224299 | 0.338801239693492 |
| CAGATTGTGACG  | 670.965927028362 | 0.259157759561573 |
| GTATCCTAGTCA  | 670.968861052164 | 0.50487893316421  |
| ACACGCAGTGAC  | 670.979968579157 | 0.575051025230929 |
| AGATCTGTGTCA  | 670.981804103854 | 0.444702118323871 |
| ATGACGAACGGC  | 670.98931806294  | 0.201249881380513 |
| AGGCATGACACC  | 671.018276409678 | 0.159281023905836 |
| GAACCTAATGAC  | 671.026629251112 | 0.761652255101732 |
| CAGTCACGAGCC  | 671.031639385694 | 0.336701273087556 |
| ACTGGTGTGACG  | 671.035380925214 | 0.267479553158754 |
| CAATAGTGACAA  | 671.043460969922 | 0.642358915866628 |
| ACACTGATGACG  | 671.05153153495  | 0.415167600107278 |
| TGACTAGGGTAA  | 671.064317596164 | 0.263277991356232 |
| GCACTCGGTGAC  | 671.065306041578 | 0.460322860472093 |
| CGTCATCAAGAG  | 671.067909003928 | 0.203270154097624 |
| AATTATGTCAGA  | 671.077332806853 | 0.261058851266519 |
| AGTCTTAGTAAT  | 671.082627674626 | 0.543009477112171 |
| ACGTCTGACGAA  | 671.084615389065 | 0.588248484122482 |
| GACGCTATGACC  | 671.094061697615 | 0.354410470634646 |
| GGTGACATGGCA  | 671.097539391562 | 0.134741570650975 |
| CTGAGTCGTTAC  | 671.100248843983 | 0.367284129239314 |
| GCTCAGATGACA  | 671.102813516696 | 0.312402075786365 |

|               |                  |                   |
|---------------|------------------|-------------------|
| AGTCAGACCCAA  | 671.121545749428 | 0.363081189972584 |
| GTCATTAGTTCA  | 671.124886311787 | 0.637512568474916 |
| ATCATCTGACTG  | 671.134786612262 | 0.529722412457909 |
| CCCGCATGACAC  | 671.140434497414 | 0.330863975817293 |
| ATGAGCAACAGG  | 671.142264408874 | 0.325968024063532 |
| GATGATATCACC  | 671.14697208023  | 0.494512477247946 |
| AAGCATGACATA  | 671.149401334042 | 0.294705815966302 |
| GTCATTACCTCA  | 671.188465748095 | 0.437347115494075 |
| GGTAATATGTCA  | 671.194696774608 | 0.545178051763974 |
| CGCTGCCAGTCA  | 671.205557917747 | 0.53949178502403  |
| AGTCACGGGTCG  | 671.211317779426 | 0.261281955408411 |
| CTCACTGATGAC  | 671.219231136601 | 0.439923304709293 |
| CAAACCTGAGTAA | 671.223322910587 | 0.393332528419137 |
| CTCTGACGTCAA  | 671.223415092817 | 0.404703905315035 |
| ACGCGTTATGAC  | 671.22888698998  | 0.51888448185985  |
| CTTGCCACGTAA  | 671.231626967015 | 0.354964373214265 |
| CAAGGAAATGAC  | 671.235225123247 | 0.257005085533011 |
| GCGTCACCCAAC  | 671.240663741611 | 0.425213739788224 |
| CACTCATACTCA  | 671.248009733674 | 0.306891851642565 |
| ATGCGTCTTATG  | 671.252864077239 | 0.53097798342135  |
| AATGACAGGGTC  | 671.254924545455 | 0.369299903646238 |
| GATTATTCATAA  | 671.287746768417 | 0.371554090010261 |
| CTGACTCGGCCA  | 671.304252773917 | 0.365623908192866 |
| AGTGACCCAATC  | 671.310337029593 | 0.216544537733489 |
| GACTCACTACAC  | 671.313831439479 | 0.248330474882162 |
| TCCAATCTGTCA  | 671.31589722234  | 0.234127709178492 |
| TGACAGAACTAA  | 671.332652987933 | 0.31049440436212  |
| GTCATCCGTAGA  | 671.344888910517 | 0.425869641306278 |
| CTGCTCGACTCA  | 671.346984712179 | 0.241017211976476 |
| ATAGTTGAGTAA  | 671.349029960716 | 0.407754934221121 |
| ATTGTCTATGAC  | 671.353918121018 | 0.303326531293261 |
| ATGTAAATGACG  | 671.364111225997 | 0.313255226468405 |
| GACCATAATGAC  | 671.366526325054 | 0.566139955099708 |
| CATACAGTGACA  | 671.367657015108 | 0.59300395220179  |
| GTGATCTAGTCA  | 671.376493650971 | 0.475477156345254 |
| TCATCGAAAGAA  | 671.376837217804 | 0.379953786184546 |
| GAGTCAGTACGA  | 671.385188724448 | 0.165716473123278 |
| CTATGATTACTC  | 671.393776512089 | 0.464748849265548 |
| GTTTCTGATTCA  | 671.409729013743 | 0.43219320890415  |
| GGCTTCGGTGAC  | 671.414209687063 | 0.306901260666798 |
| CGAGGATTAGTC  | 671.414317880223 | 0.459523934107365 |
| AGAGTCAAATCC  | 671.426784116897 | 0.365625457978205 |
| AAGCAATGTCAT  | 671.427916414287 | 0.232550228180338 |
| ACGTCACAGCCT  | 671.431621335345 | 0.437979184304138 |
| ACTGTTTGACTC  | 671.434903308417 | 0.300234029492208 |
| AATAGTCAAAGG  | 671.435192215559 | 0.414572363753332 |
| TGTGTCAGTTAA  | 671.443894578743 | 0.39243191963772  |
| GTCATGCTCTAA  | 671.444670073607 | 0.443580742711812 |
| GTCATTCCACCA  | 671.46213149011  | 0.318421239353138 |
| ACACCTGATGAC  | 671.463127209558 | 0.374310293928928 |
| GAGCCGCGTCAC  | 671.469276178889 | 0.284993654808268 |
| CACTGATTACTC  | 671.470728242659 | 0.54756345251026  |
| CATGCCCAGTCA  | 671.470915444694 | 0.431827146399489 |
| ACTCTATGTGAC  | 671.47104462656  | 0.400107258970593 |

|               |                  |                    |
|---------------|------------------|--------------------|
| AGTCAAGTCACA  | 671.47962979489  | 0.168981814431222  |
| CGCACATAGTCA  | 671.48646592722  | 0.587053638943711  |
| TGAGTGTGACCA  | 671.504718745081 | 0.371289712543876  |
| GTCACACCAGAC  | 671.512368075228 | 0.542474600298331  |
| GCATGACACTCA  | 671.517314052669 | 0.180532409444925  |
| ATGTCATCTCAG  | 671.520284277391 | 0.500340939429451  |
| AGTCACGAGTAG  | 671.520773265986 | 0.323599273074018  |
| GTCATTTAATGA  | 671.532693173145 | 0.667754347483101  |
| GGGAATGATGAC  | 671.543738790448 | 0.307939009251979  |
| CAATGTTGCTCA  | 671.546330126585 | 0.558526757277894  |
| TCGCAAATGACA  | 671.557146181253 | 0.313129947575259  |
| GTCATAGCCGTA  | 671.558278360449 | 0.5352156259371    |
| ATACGAATAGTC  | 671.561272472738 | 0.581903269795726  |
| AGCCTGGTCATC  | 671.561459739174 | 0.390565785728409  |
| CCTATTTCTGCA  | 671.565120753289 | 0.433545521273384  |
| GAAGCGAATGAC  | 671.581400555964 | 0.299314774203206  |
| ATGACGGAGTAG  | 671.58316952406  | 0.288926299076271  |
| GTCACITTCGCA  | 671.585466780752 | 0.670253632900012  |
| CATACAAATGAC  | 671.586777283728 | 0.498812379985239  |
| GTCACITACAGA  | 671.592923315803 | 0.549181244138167  |
| GTCATCTCGCTA  | 671.596054491974 | 0.231548450293158  |
| ATGGCTAATGAC  | 671.599098405839 | 0.256329698715113  |
| CATACGTGAGTC  | 671.60500614296  | 0.414015189337151  |
| ATTCCGCAGTCA  | 671.615184218892 | 0.272262583400057  |
| AATGAATCTTAC  | 671.626874182961 | 0.37799770488371   |
| CTAGACGTGTCA  | 671.643491587944 | 0.31337692212636   |
| CGGTAICTGCTCA | 671.645552836812 | 0.494690393473634  |
| CCGATGCGTGAC  | 671.65241632053  | 0.499590649617581  |
| ATTATTATGTCA  | 671.661605675031 | 0.501403934884534  |
| AATAACGTCACT  | 671.662450873811 | 0.332114031476499  |
| TGACTCGGCACA  | 671.667392294125 | 0.467342193413897  |
| AGCTGGCATGAC  | 671.668139819546 | 0.543549495609531  |
| GGGCTGTGTAC   | 671.668507219748 | 0.512730294776889  |
| ACTCATATTGCG  | 671.673214943485 | 0.328692047520493  |
| AAGTTGAGTAAC  | 671.685524283638 | 0.287523875751698  |
| GGTGACGTTAAC  | 671.689043647068 | 0.286544386528738  |
| ATCTACTGACTC  | 671.696558765201 | 0.182992858040047  |
| AGTTCGGTCATC  | 671.701338959254 | 0.370287971877928  |
| CGTCTTTGACTC  | 671.706702243956 | 0.540117174631042  |
| GACTCACTCTGC  | 671.719393881216 | 0.209803740970039  |
| TATGGTTCTGCTA | 671.736164273161 | 0.71219478884567   |
| ATACGTTGTGAT  | 671.739714715978 | 0.343818656652508  |
| ACTCGGTGTGAC  | 671.754429573394 | 0.27099589222676   |
| ACGTCACATAATG | 671.758561656899 | 0.507139052231523  |
| TCATTCGTGACA  | 671.766424056734 | 0.29602293142801   |
| AAACCATGACGC  | 671.766717272219 | 0.325410154260356  |
| CTTGCGGTGTCA  | 671.770016368545 | 0.427062093772742  |
| GCCTTGGGTGAC  | 671.779594186871 | 0.422737181662119  |
| CACATCTGTGAC  | 671.78073504333  | 0.227995960695873  |
| ATGACTTTTAGA  | 671.781406734795 | 0.453764394596616  |
| CCAAATTGTGAC  | 671.785233322674 | 0.580474636121036  |
| CTTTTAAATGAC  | 671.788154514378 | 0.315741814987879  |
| CTATGATGTGGC  | 671.789501336718 | 0.402700750196267  |
| GGATCATAGTCA  | 671.797358532405 | 0.0895430439203039 |

|               |                  |                    |
|---------------|------------------|--------------------|
| GAATGATGCAAC  | 671.804670963278 | 0.411546750994523  |
| TGACACGACTAA  | 671.806040761636 | 0.270653758744935  |
| ACGTCATGATTA  | 671.812536131555 | 0.529596493258     |
| ACTCATCCAATG  | 671.816982775219 | 0.378346551733044  |
| AAAATGGTGACG  | 671.830787994332 | 0.26086776299207   |
| GTCACTGAAAAC  | 671.838269557268 | 0.3608513017575    |
| AATGACGTCGTC  | 671.838456914879 | 0.387288488275028  |
| CAGGCTTGACTC  | 671.845659133141 | 0.512282038762344  |
| ATATTAGACTCA  | 671.851288654888 | 0.3749061788025    |
| AGTTGCGACTCA  | 671.859414345737 | 0.454607199382339  |
| CTTCACAATGAC  | 671.867056543708 | 0.392305634121323  |
| ACTCGACAGTCA  | 671.870081220729 | 0.232023010397799  |
| GCTGGAAATGAC  | 671.877242924522 | 0.484563717519008  |
| GTATTAGTACGA  | 671.87882948079  | 0.530436050562982  |
| GCCTAGTGACAC  | 671.904764006265 | 0.264132983609629  |
| ATTATGCAGTCA  | 671.909842034349 | 0.565098360605139  |
| ATGACCCGATGA  | 671.912888742226 | 0.508139507758018  |
| ATGAGTACGTGG  | 671.914653744947 | 0.21315776094994   |
| ACGTCACCAACA  | 671.922958488497 | 0.366540416830934  |
| CGCTGCTATGAC  | 671.929436098209 | 0.214136895090659  |
| CGGTTGCGTGAC  | 671.937651631793 | 0.276785948513874  |
| GACGTCTGACAC  | 671.939832804662 | 0.527877993734612  |
| CGTCATCTCATC  | 671.940076655315 | 0.222834171833887  |
| GTCACCCCTAGA  | 671.942387398404 | 0.477160136254324  |
| ATCTTGTCATCC  | 671.952227178133 | 0.269440106546009  |
| AAGTAGAATGAC  | 671.968249239272 | 0.180982532075919  |
| GTCATAACGCAC  | 671.972122508609 | 0.263545787803897  |
| AGTCACTTGACAG | 671.982620908553 | 0.433693487821142  |
| CAAGCTGTCATC  | 671.983761543481 | 0.333849105775163  |
| CTTTTGGATGAC  | 671.987866191562 | 0.393221621923987  |
| GTCACTCAACCA  | 671.999152091148 | 0.515329682073286  |
| GGTGCGGAGTCA  | 672.005347529819 | 0.280758350995973  |
| AGCGTCATGTTA  | 672.005786644374 | 0.284466957576589  |
| GTCTGTAAGTCA  | 672.008095068913 | 0.42058342725563   |
| AAAAGTAATGAC  | 672.009649933188 | 0.33365117997959   |
| CCAACTACGTCA  | 672.015541981379 | 0.403594225848159  |
| GCCGGTGAGCAA  | 672.02457255126  | 0.465914238997975  |
| CTGCGTGAGCCA  | 672.038183465539 | 0.368435300644209  |
| ACAAGGTGACAC  | 672.045236138643 | 0.169377097383825  |
| TACCCTGTCATA  | 672.055907890286 | 0.252822048782239  |
| AACAGCGGTGAC  | 672.05706316704  | 0.391297974245364  |
| GTCACACGGATA  | 672.061667279413 | 0.30824625072998   |
| CCGGCGAGTCAG  | 672.06901465418  | 0.411041071885317  |
| CGCAGTGACCAA  | 672.070491606054 | 0.404679532128565  |
| AGCGCCGACTCA  | 672.080288171292 | 0.324200655619189  |
| CGACATCTGTCA  | 672.085345560982 | 0.533861192160815  |
| GAAGTCGATGAC  | 672.089905633376 | 0.416224456811348  |
| ACGTCACCAAGC  | 672.101713788361 | 0.280798848025758  |
| ACGTCACCTGAC  | 672.104491550398 | 0.461903503489084  |
| GTCACAATTGTA  | 672.107309434915 | 0.118862026796753  |
| AGGCTCTGACAC  | 672.109026492462 | 0.403662111982944  |
| GCGAGGGATGAC  | 672.110793929522 | 0.0934959186056433 |
| AAAGAGTGTGAC  | 672.117680955067 | 0.384050972413767  |
| GATGTAGATGAC  | 672.132223922449 | 0.248496284998285  |

|               |                  |                   |
|---------------|------------------|-------------------|
| AAATCTGTGACA  | 672.134957649814 | 0.33832822605918  |
| TGACGCGATGAA  | 672.138116822508 | 0.44904638719654  |
| GCTCAAGATGAC  | 672.142910383036 | 0.51823552741299  |
| CGTCACCGGACG  | 672.144004162958 | 0.256767774622825 |
| CCCTTTGAGTAA  | 672.160338165902 | 0.488824343764304 |
| GTCCTCGACTCA  | 672.175107793831 | 0.340890936764156 |
| GCAATGGGTGAC  | 672.186327767201 | 0.334000104103006 |
| CTCGAAACGTCA  | 672.205515903879 | 0.468233679162947 |
| ACTCGTGAGTCG  | 672.207886245914 | 0.290853161963388 |
| AGTCAGACTCGA  | 672.210127764612 | 0.318179892549285 |
| CACGTCACTAGG  | 672.211463867824 | 0.470041608664268 |
| GCAAGCACGTCA  | 672.215329354185 | 0.344969780125292 |
| AGTCAGACACAC  | 672.219341157747 | 0.525437943274124 |
| ATGCAAGTCATC  | 672.224734619315 | 0.453504473034848 |
| CGTATGTGTAAC  | 672.23542866119  | 0.394686484595417 |
| TATCTGGTGACA  | 672.248371284531 | 0.360082393690992 |
| ACGTCACCTCTCT | 672.250138390756 | 0.153159705818264 |
| ATGAGTGAATTG  | 672.254907798268 | 0.233269925235442 |
| TATGACGGCACA  | 672.261857769257 | 0.2984701610804   |
| GAATAGAATGAC  | 672.265536541613 | 0.26189771899529  |
| CTATCGTGAGTC  | 672.271003637085 | 0.389708021837937 |
| ACTCATTATAG   | 672.275692847894 | 0.27089068095474  |
| GTCATTTAGTTA  | 672.277875474576 | 0.533399274250711 |
| AATCGTGACGCT  | 672.286809497455 | 0.504570080041231 |
| CACTCGGGTGAC  | 672.292817397945 | 0.398817823142308 |
| AACTTGTCACCT  | 672.303055957464 | 0.195202950683578 |
| CCTATCAATGAC  | 672.303104120386 | 0.391015027629315 |
| GGGCATGAATCA  | 672.310862420308 | 0.418948564678857 |
| TCTTAGCAGTCA  | 672.336900660852 | 0.452995344223929 |
| CTAGGGGATGAC  | 672.343662212466 | 0.318886010519793 |
| ACGCACGGTGAC  | 672.353295888631 | 0.321089384840917 |
| GTGAACTACTCA  | 672.355993770327 | 0.663931073182764 |
| ACGGCGCTGACT  | 672.368396583084 | 0.419920885082701 |
| ACGTCACCTTCT  | 672.370286868384 | 0.277875740887112 |
| GAATGCGATGAC  | 672.370855645109 | 0.511227071036487 |
| GTCATGCACAAC  | 672.372217499885 | 0.451691287878893 |
| ATACCAGTCAGC  | 672.378321716195 | 0.443379448615363 |
| AGTTAATTAGTC  | 672.379479164997 | 0.239914027598199 |
| ATGTATTGTACAC | 672.409955796877 | 0.3175164525441   |
| GAATCATCGTCA  | 672.417653873711 | 0.325559010098025 |
| CGATGACCGAGC  | 672.419109770025 | 0.372704457703847 |
| AGTCAGAAGACC  | 672.423704755086 | 0.297435621849542 |
| GATACGTCAACA  | 672.424526750833 | 0.472336226361181 |
| ACGCATGTGACA  | 672.425061761708 | 0.354435166875717 |
| ACTAATTAGTGA  | 672.435021681127 | 0.459225192467993 |
| GCCTAGTCAGCA  | 672.437883808463 | 0.241998270066184 |
| GTCATTTAGTAA  | 672.442171219808 | 0.314489733057126 |
| AGTCAGACCTTG  | 672.443321057287 | 0.264573491623001 |
| ACGGATGGTGAC  | 672.444823903845 | 0.341727633368919 |
| AGGACCCAGTCA  | 672.445285064632 | 0.373942035580884 |
| TGCGTCAGGTAA  | 672.456480496393 | 0.148461393899431 |
| ATTGTGTAGTCA  | 672.471196812408 | 0.389190944167063 |
| AAGCCAACATCAT | 672.483610378124 | 0.314033228431455 |
| AACACGTAACAT  | 672.486829152866 | 0.343317435823318 |



|              |                  |                    |
|--------------|------------------|--------------------|
| CGCTCGAATGAC | 672.487395952002 | 0.622676370854805  |
| GAACACCAGTCA | 672.4954019011   | 0.442393047682761  |
| GCTCGCGATGAC | 672.495881939524 | 0.746107186399832  |
| GTCGATTGCTCA | 672.51187775744  | 0.649776281548556  |
| AATAACGCGTCA | 672.515875187755 | 0.257157217787467  |
| GTCATGTATTAA | 672.519851634663 | 0.36503293819651   |
| CTGTCTGATTCA | 672.542087773314 | 0.435836530614513  |
| ACGTCACCAACC | 672.556499252667 | 0.305354614561977  |
| GGGCACACGTCA | 672.556929055678 | 0.366321952614922  |
| GGATATAAGTCA | 672.564915038678 | 0.269269326102498  |
| ATGACGTGAGCG | 672.566047187458 | 0.288278640297004  |
| CTCCAGGTGACA | 672.567591410757 | 0.391845045815124  |
| GTCATGTCTTCA | 672.573545040785 | 0.643119016360819  |
| AAGGAGGATGAC | 672.592976013952 | 0.19729075700145   |
| GCGCGTAATGAC | 672.601792524022 | 0.396819145623286  |
| ACGAGTCAAAGG | 672.618539073587 | 0.278070623846294  |
| CAAGCACGTGAC | 672.62628453452  | 0.591365554397649  |
| GGGCACGATGAC | 672.627060701519 | 0.414338701344728  |
| GCAACTGGTGAC | 672.633176464805 | 0.397042063276624  |
| CCTTCTTATGAC | 672.636341144242 | 0.251719361794903  |
| ACACAGAGTGAC | 672.637089139375 | 0.343109951974766  |
| GACTAATTTGAC | 672.644625256684 | 0.420396723358363  |
| CAGTCAGATGCG | 672.660337894363 | 0.304592896813422  |
| TCCGTTGAATCA | 672.662802960241 | 0.439460017588008  |
| AACTATAAGTCA | 672.668140536157 | 0.472156097073371  |
| TAAACTGAGTAA | 672.669324205261 | 0.498813896369336  |
| CCACTTAATGAC | 672.674189688566 | 0.408130220852338  |
| GTGACGTGCTAA | 672.685268402824 | 0.31538057054116   |
| CGATGCCTCATA | 672.696347488181 | 0.425363352849611  |
| AAATTAGGTCAT | 672.713957633712 | 0.239124582482448  |
| GTCATAAGAAAA | 672.732507924707 | 0.322192497085721  |
| GGGTCACGTGAC | 672.743336906339 | 0.545426598014991  |
| GTCATCTAAAC  | 672.749617907579 | 0.45171022657256   |
| ATGAATCAATGG | 672.784711434042 | 0.31226875728114   |
| AGTCACGACTAT | 672.796310092111 | 0.343781731375556  |
| AGACCAGTCAGC | 672.803697077052 | 0.0831951651594222 |
| ACGTGACAAGTC | 672.807719440646 | 0.289181905083125  |
| ATAAATATGACC | 672.81003984157  | 0.505562877302905  |
| TGACACAAGTCA | 672.817069941334 | 0.377505732137517  |
| GCCAGTGACCAA | 672.820600813418 | 0.308728525293091  |
| ATACCCGGTGAC | 672.831318199997 | 0.14174333204291   |
| CTTTCTTATGAC | 672.834362768314 | 0.264063492808986  |
| CTTTCGAATGAC | 672.834779691216 | 0.366299719668671  |
| ATCGCCTGACTC | 672.839694351653 | 0.421504522099797  |
| ACGACTCAGAAG | 672.845757890745 | 0.27843502731184   |
| CTCACATATGAC | 672.853156479334 | 0.356188556472708  |
| ATATTGACACAC | 672.857553049181 | 0.37426809098414   |
| CATGACGTTGCA | 672.859802450894 | 0.25584648826251   |
| GTAAGACATGAC | 672.882442831691 | 0.304889112386591  |
| ATAGACTGACTA | 672.886931800131 | 0.570928755882444  |
| CCAGAGTAGTCA | 672.889633195474 | 0.476730670805119  |
| ATGACGTTGACC | 672.896103509663 | 0.196726864381866  |
| CTTGACTCACA  | 672.903237097601 | 0.451881093405953  |
| ATCCCGACTCAT | 672.906423844767 | 0.193820249854945  |

|              |                  |                   |
|--------------|------------------|-------------------|
| AACCATGACGCT | 672.909107768245 | 0.340375574477653 |
| AATGCTATGTCA | 672.953354964916 | 0.457126709123222 |
| GTCATCTCATTA | 672.957925806252 | 0.289945953749793 |
| ACAGTCAGCACG | 672.960103836054 | 0.227572719486503 |
| GTCACCGACAAC | 672.962152871581 | 0.309691754910368 |
| AGAACCTGTAC  | 672.962641765302 | 0.328045816978744 |
| CGGTCCATGACG | 672.96466836761  | 0.747573317090437 |
| AACAATTAGTAC | 672.96743330264  | 0.345391068094472 |
| CGTCATCAAAGA | 672.969638289807 | 0.484329680598832 |
| GATAAGTAGTCA | 673.001436171127 | 0.342751562930327 |
| CTGTGCGTAC   | 673.005662654521 | 0.369185095864954 |
| CCACCGTATGAC | 673.015357168955 | 0.399068365537995 |
| CTCAACCGTAC  | 673.033018840369 | 0.299907941613804 |
| CAAGCACAGTCA | 673.03596287645  | 0.406403100402302 |
| GATGTAAAGTCA | 673.042850885491 | 0.37052812459388  |
| CAGACACATGAC | 673.043945276886 | 0.384215619609194 |
| TGACGTCAGGAA | 673.044208789725 | 0.378395168212513 |
| GATTGAGAGTCA | 673.044889879562 | 0.30653943327145  |
| GATGCCGACTCA | 673.050857951622 | 0.436166641012352 |
| CCACGAAATGAC | 673.053429418387 | 0.404067721646634 |
| AAGATGAATGAC | 673.053481857116 | 0.298484088627558 |
| ACGCGTCAGACA | 673.08848162392  | 0.404253841119511 |
| CGTCACGACTCA | 673.101079784867 | 0.326959511708683 |
| CGCGTTTGTGAC | 673.112200501035 | 0.473747709697279 |
| TACTAATTGTCA | 673.134857868717 | 0.237072021898    |
| ATGTCGTGACTA | 673.135522183877 | 0.269914440470086 |
| TCCGTCACGTAA | 673.139588830343 | 0.344652887495458 |
| GCACTAATGAC  | 673.140059228322 | 0.508223231078283 |
| GCTCAAATGAC  | 673.140889142149 | 0.285793537362095 |
| TGAGCCATCGAA | 673.141206977314 | 0.532702249035966 |
| ATGTGTAACACC | 673.141559669549 | 0.443229434695152 |
| TAAGAGGACTCA | 673.153262504184 | 0.622974080255783 |
| GGTCATACATCA | 673.153483601435 | 0.111283356121125 |
| GCGACCCAGTCA | 673.157004283612 | 0.532971773179244 |
| CGCGTGAATGAC | 673.157482135665 | 0.36728985563835  |
| GTCAGACTATGA | 673.159044698329 | 0.376223072799079 |
| AGGGTTGCTCAT | 673.165719944859 | 0.317270059848046 |
| ACATAATGACAA | 673.16576385735  | 0.29839570586971  |
| ACGAGTCAAAC  | 673.165771705662 | 0.283158175667593 |
| ATTGGAATGACG | 673.185395295905 | 0.148632096369731 |
| TGTGCTGACACA | 673.192733132527 | 0.376173505794389 |
| ATGACGTTACAT | 673.200890308862 | 0.380438968523923 |
| GCTTGAGAGTCA | 673.201072062848 | 0.567799336305065 |
| CCATGCGACTCA | 673.203926103644 | 0.593556378939612 |
| GTCACGCTTCGA | 673.208416560767 | 0.497226580694096 |
| GACACCGTGTCA | 673.211964291121 | 0.328158584651665 |
| AGAGTCAAGTGA | 673.213666064402 | 0.178138647407296 |
| ACATAATCAGTC | 673.216148813175 | 0.566736763786348 |
| GGTTTGCTCACA | 673.216766330181 | 0.387839246853898 |
| CCAGGAAATGAC | 673.222457296496 | 0.328911967703173 |
| TCCTAGGACTCA | 673.222504551779 | 0.539588193805142 |
| GACTCAGCGTCA | 673.225517906786 | 0.494354611888152 |
| CGTTGCTGTGAC | 673.227544284212 | 0.407531540620311 |
| ACTCATACGAGG | 673.232554809484 | 0.377035359272323 |

|              |                  |                   |
|--------------|------------------|-------------------|
| AATGAGAATGAC | 673.239031667404 | 0.449937982600714 |
| CGTCACGCATAA | 673.242410434338 | 0.828613888461765 |
| ATGACATGATGG | 673.245037875527 | 0.355664541374945 |
| GGCACAGATGAC | 673.257714042334 | 0.390731503173001 |
| CGGGCCGACTCA | 673.258052443504 | 0.417349444503281 |
| AATTACTCTGAC | 673.259336378647 | 0.288765411491038 |
| GACTTGGTGACA | 673.260042792705 | 0.415210135478996 |
| AGAGCTGCGTCA | 673.270936565747 | 0.342358130744949 |
| CGGTGACATGGC | 673.279432699702 | 0.285786772997694 |
| AAGAACGTGTCA | 673.279878962277 | 0.276721400474764 |
| TCTGACGGGTCA | 673.284529392447 | 0.359118808219744 |
| AACAGCGATGAC | 673.28525346265  | 0.202353844057761 |
| ATGGGTCAACGC | 673.291273351415 | 0.417583295382989 |
| AACTCGTGACGT | 673.314954260238 | 0.590465869069    |
| GTCACGCCGTGA | 673.325682481172 | 0.654509854593537 |
| CCAGTGGTGACG | 673.333652203812 | 0.433087894350722 |
| ATATCTGAATCA | 673.334758917946 | 0.511702706641834 |
| CAGTGTGAGCAA | 673.337943705749 | 0.378227802787066 |
| TCTGACTGCACA | 673.340842850607 | 0.361619652155299 |
| AGTGGTGACCCA | 673.340907724172 | 0.419582694517103 |
| ACTAAAAGTCAT | 673.349524807464 | 0.305212239960262 |
| CCAGAAGTGTCA | 673.352701260086 | 0.485104766347993 |
| GCCGAAAATGAC | 673.389299773591 | 0.493741113985879 |
| TCCAGTGACGAA | 673.391611715989 | 0.510997484715286 |
| CGTCATTCGGTA | 673.391873947511 | 0.34369044376813  |
| GTCACCGAGTGA | 673.403619086502 | 0.560352670393518 |
| CGTGTCACCTAG | 673.419632317436 | 0.344923642378426 |
| GTCATTTAAAAC | 673.420822668986 | 0.42101910889777  |
| ATCGTCTGAGTC | 673.426536668674 | 0.562321192535927 |
| GTCACAACCCGA | 673.428528347014 | 0.392761379729592 |
| CCGATTGACACA | 673.451222078726 | 0.492854472641941 |
| ACTCATAACTCA | 673.467367079916 | 0.256913722558623 |
| ACTACTGTCATC | 673.472201441961 | 0.193330396770577 |
| TGTCACATGACA | 673.481795481135 | 0.405431859585086 |
| GTCATGGTCAGA | 673.483168424931 | 0.49559111007361  |
| CACCCTTATGAC | 673.486358102666 | 0.329568952005718 |
| CGTGACGATACA | 673.490477618286 | 0.370010696787471 |
| ATGGCAGTCACG | 673.494874133256 | 0.236864749434989 |
| CAACATCTGTCA | 673.513782038115 | 0.578895595728476 |
| ACTTTCTGACTG | 673.514734740053 | 0.395083378723628 |
| CTTACATGACAC | 673.516123391938 | 0.510592141731984 |
| CGCCTAGGTGAC | 673.53111390294  | 0.555887937724708 |
| AGCAGGAATGAC | 673.573033364793 | 0.204976167363446 |
| GCTGACTGTGCA | 673.586146560355 | 0.379736954821157 |
| CGCATTTATGAC | 673.593633221809 | 0.373405974046472 |
| TGAGTACTCACA | 673.603531251137 | 0.424953791566412 |
| ACTCATTTGTGG | 673.616336578811 | 0.225134564458816 |
| AGTCACGCGGTA | 673.616610971038 | 0.292672025314913 |
| GTCACCTTATAA | 673.619038119779 | 0.51175402349533  |
| CTCCCTGATGAC | 673.631071561131 | 0.205996780401777 |
| GACAACCTATAA | 673.636275696845 | 0.386300963671558 |
| AAGTAAAATGAC | 673.641087361559 | 0.333572632726143 |
| GTCACTCCGATA | 673.643850042227 | 0.393732266475974 |
| CGGCACGTGTCA | 673.645831475172 | 0.692194986909818 |

|               |                  |                    |
|---------------|------------------|--------------------|
| GACGCAGACTCA  | 673.666507793046 | 0.293390691888795  |
| AGTCAGACACAG  | 673.672392972988 | 0.362660793099809  |
| GGTATAAATGAC  | 673.684242815944 | 0.109203966110967  |
| TGTCATTGGGAA  | 673.684896361843 | 0.322996014617649  |
| GTCACACGCGAC  | 673.687710922766 | 0.451697043056517  |
| CTTAACAATGAC  | 673.690381814727 | 0.451066691700452  |
| TAAATAACGTCA  | 673.708028648582 | 0.443179301862003  |
| CCACTGATGACG  | 673.733684351469 | 0.561176487948465  |
| ATGACCACTATA  | 673.742344706592 | 0.361007791757499  |
| ATGACGGGATTG  | 673.744095911588 | 0.22225120396766   |
| AGCGCTACGTCA  | 673.762485354498 | 0.349577186670211  |
| GTGAGCAAGTCA  | 673.765279948721 | 0.259309186873711  |
| ACGCTGTGTGAC  | 673.770427701523 | 0.386730666797378  |
| AACGATGGTGAC  | 673.774277700275 | 0.276805496448721  |
| AGTCATGGGAGC  | 673.783204295369 | 0.343845761494577  |
| ATAAAATGTCAT  | 673.788707110274 | 0.373101761591454  |
| AATGGTTTGTCA  | 673.805902911717 | 0.572791175675174  |
| ACGCGTGACATA  | 673.805983760113 | 0.465479122079128  |
| GTGAGTCGGTGA  | 673.809178861933 | 0.11951893479227   |
| CTCGGATAGTCA  | 673.810412022486 | 0.365377486015058  |
| ACGAGTAATTAC  | 673.825931196255 | 0.478505672906615  |
| GAACCTTACTCA  | 673.829027293357 | 0.460682288018461  |
| ACTCATTCTTAG  | 673.833178375407 | 0.17434718810409   |
| GCGATTGATGAC  | 673.837685430577 | 0.383297553308978  |
| CGTCATCAGACG  | 673.838995381482 | 0.664177862495389  |
| ATGACTTGATTG  | 673.843707682559 | 0.686262343776876  |
| TATTGCGTAAACA | 673.848026648053 | 0.227511047228443  |
| AAGCGTGACGTG  | 673.854939803118 | 0.391999104619261  |
| CTTCTCTATGAC  | 673.858468323505 | 0.0562376934282609 |
| CAGCATACGTCA  | 673.86525004821  | 0.373193770096023  |
| GACTGACTGCTA  | 673.865684422465 | 0.382230457455158  |
| CGTAGGTGTGAC  | 673.875463097681 | 0.375651405602689  |
| CATACGCGTGAC  | 673.876228628343 | 0.584077731811163  |
| GAGGGCTATGAC  | 673.880741139879 | 0.275811204731328  |
| GGGAAGGATGAC  | 673.884011001968 | 0.305560373893203  |
| ACGCGCGTGACT  | 673.886980534206 | 0.336187290391004  |
| GCTGTAAATGAC  | 673.888626423818 | 0.554799882623051  |
| CTTTGCGACTCA  | 673.890234214696 | 0.252510345425293  |
| AACTGTGACCAC  | 673.894974178798 | 0.405223767754268  |
| ATGACAGCTTCA  | 673.903876709549 | 0.331129333658767  |
| ATGACGTTGTGC  | 673.906462858858 | 0.172702667110642  |
| CTATATAATGAC  | 673.915986626977 | 0.374516749225669  |
| TCGTGTTTGTCA  | 673.922973365688 | 0.295902695743308  |
| GTGTCACGTGGA  | 673.93263826264  | 0.307574270776024  |
| AAAATCATGACA  | 673.937359863266 | 0.273388681260525  |
| GTCATCGTCAAC  | 673.940671172871 | 0.221479298253625  |
| ACATAAGTGTCA  | 673.94196763856  | 0.479933012778268  |
| AGATCTAATGAC  | 673.948306064489 | 0.216328216245898  |
| ATGACGCGCCGC  | 673.961935421942 | 0.46946801986854   |
| GCCTTGCGTGAC  | 673.965494777836 | 0.549623633042901  |
| ATGACGTCTATG  | 673.972622237477 | 0.308397102342485  |
| ATGACGCCTCGG  | 673.987332792473 | 0.515363667134713  |
| TGCGGTCATACA  | 674.003527288443 | 0.440828114944664  |
| GATATAATGACA  | 674.004712369548 | 0.37242062005185   |

|               |                  |                   |
|---------------|------------------|-------------------|
| CGTATGGGTGAC  | 674.005628362747 | 0.405156627467734 |
| AGCGTTGTGTCA  | 674.016784557473 | 0.506624596774745 |
| GTGTATTTGTCA  | 674.025442390776 | 0.339592283853584 |
| GTCTTGTCATTA  | 674.028749344161 | 0.426783309074732 |
| GCCGAGATGACA  | 674.038097636424 | 0.423523430003998 |
| TCACAAGTATGA  | 674.041858092379 | 0.511710993789323 |
| ATGATAGACTCA  | 674.044395963604 | 0.421344855057634 |
| AAGTGAGTCTGA  | 674.046502541406 | 0.192412104986893 |
| TGACATGTCTCA  | 674.059176045845 | 0.519964113919495 |
| ATTTTCGTAGTCA | 674.081296210201 | 0.727315951826832 |
| GCAAACCTGGTCA | 674.090532602934 | 0.486779055201365 |
| ACTGCCGTGACT  | 674.091405075568 | 0.38269987062954  |
| GTACGTGACGAA  | 674.103230240804 | 0.325657843250494 |
| CGATAATGACAA  | 674.103236007356 | 0.532252701840871 |
| ACTCATAGTTCA  | 674.105670563881 | 0.273502745616032 |
| GCTGTGGATGAC  | 674.108501750594 | 0.397441282067672 |
| CCGTGGTAGTCA  | 674.109688005119 | 0.390602887005452 |
| AACGCGAATGAC  | 674.115240346892 | 0.381007854070723 |
| AGAGTCAAAGA   | 674.133004685444 | 0.299236781869751 |
| AGACTCAGTATG  | 674.143210817872 | 0.378409588339677 |
| ATGACATCGTTC  | 674.180896539727 | 0.424508212155244 |
| AAAGGTAGTCAC  | 674.181002880887 | 0.29505221012185  |
| AACTGTATGAGT  | 674.185142938504 | 0.497773850734418 |
| AGTGTCAGTCA   | 674.186725379496 | 0.381575558049185 |
| ACTCATTCTTGG  | 674.187280126161 | 0.33943397031661  |
| GTTCTAGTGTC   | 674.189731028015 | 0.405043516613575 |
| CAACAGAATGAC  | 674.198153267424 | 0.449683699183506 |
| ATTTGCGGTGAC  | 674.207866270051 | 0.498531910891871 |
| CATCATTGTGAC  | 674.212841428851 | 0.350752852703982 |
| GATTTTGATGAC  | 674.218629007457 | 0.117594102858878 |
| CTAATGTGACGC  | 674.221460261639 | 0.557302696290799 |
| GTCATTAGCAGA  | 674.225083148855 | 0.379539381638259 |
| ATTCTGAGTCGA  | 674.241541840883 | 0.51379247746536  |
| GATCCAAATGAC  | 674.251733422788 | 0.207771402192871 |
| GGTAAGGCTCAC  | 674.252696291283 | 0.506047135996184 |
| GTCACGTAACAC  | 674.262648808184 | 0.361593770546936 |
| ATTGAACATGAC  | 674.269254644679 | 0.507447847736575 |
| CATTGCGTAATC  | 674.276020012618 | 0.478243027271003 |
| TCTATTTGGTCA  | 674.281490790534 | 0.252944530792579 |
| CTAGGGTGACGC  | 674.28690399977  | 0.356917473229745 |
| TAGAACGCGTCA  | 674.288093116973 | 0.157860425737506 |
| CAGTAGTGACGC  | 674.288822677178 | 0.553917248063512 |
| TGACTTAAAGCA  | 674.291010883509 | 0.617888744855113 |
| TGTCATGAATAA  | 674.312144314691 | 0.461591130836005 |
| CACATAGCGTCA  | 674.313406535884 | 0.504690763771895 |
| CATGGTATGTCA  | 674.320878128992 | 0.451647034654236 |
| GTCACCTTCGAA  | 674.340221733843 | 0.375551223896225 |
| CAGTACCTATGA  | 674.352965525314 | 0.757489714022582 |
| TAACAAATGACA  | 674.355737687375 | 0.436440060625856 |
| GTCATTGTAATA  | 674.358853200316 | 0.317831643924172 |
| GTCATGAGTGAA  | 674.36212368964  | 0.114713042986807 |
| GTCATTCGTGGA  | 674.363487727488 | 0.320492223485674 |
| GTGACTAGCTCA  | 674.366784360166 | 0.269647340040659 |
| GTCATCTACCGA  | 674.370253128199 | 0.367908187291771 |

|               |                  |                   |
|---------------|------------------|-------------------|
| TCAGTTGGCTCA  | 674.388010874126 | 0.414973160291752 |
| AGGTTACGCAAT  | 674.388253007968 | 0.289935057522884 |
| GACCTGTAGTCA  | 674.401097573749 | 0.360065977734115 |
| AGTCACTTCGTG  | 674.406339062569 | 0.500708970861966 |
| CGTGACCATGAC  | 674.408728842109 | 0.289149868755367 |
| GTCACCAACTGA  | 674.412257754567 | 0.40502984498836  |
| GTCATCAGGGAA  | 674.416846895525 | 0.164549871881536 |
| GTCACGCATAAA  | 674.425493140127 | 0.385678532203542 |
| ACGTCACATTCC  | 674.427234620482 | 0.28047132741959  |
| GGTTGACATGAC  | 674.427287796904 | 0.278924880234009 |
| AAAACATAGTCA  | 674.429290997004 | 0.414429279517704 |
| TCAGACTCACGA  | 674.432371766543 | 0.344535758416765 |
| GCATCCTATGAC  | 674.436493442263 | 0.585267372058109 |
| CAATCCGGTGAC  | 674.441902879997 | 0.537781810325122 |
| TACGATGTATCA  | 674.444652397429 | 0.231932729813781 |
| GCCTTTACGTCA  | 674.445158916804 | 0.44093798780017  |
| GCGTCACAACGA  | 674.452493066382 | 0.539540464639972 |
| GATGACAGTGAA  | 674.479343375917 | 0.323779325347117 |
| CTATAACTGTGA  | 674.491989085713 | 0.466944942081729 |
| GTGTCATGTTGA  | 674.497325528707 | 0.369503901197356 |
| ACGTCACGAAAT  | 674.497864789946 | 0.592182968687266 |
| AGTCACGGCGAC  | 674.508975313852 | 0.392791367494734 |
| GATTGAGTCTAC  | 674.50945727355  | 0.361507735624991 |
| GTGACGTTATCA  | 674.513371067324 | 0.347838205736314 |
| ACTCATACTTCA  | 674.514944026352 | 0.289686425803667 |
| CGAGTCAGGAAA  | 674.518625156923 | 0.316874139217075 |
| AGTGGTACACACA | 674.521579120112 | 0.457332090494323 |
| CTGAACCATGAC  | 674.530499794499 | 0.375514433485887 |
| TATATCGTGTCAC | 674.53174097092  | 0.501559161131129 |
| GATTTCAATGAC  | 674.539474808426 | 0.5606262346613   |
| ATGTCATTATTC  | 674.542373711726 | 0.304198414342136 |
| GGAACGAATGAC  | 674.554122225208 | 0.268651815013335 |
| CACCGTGAGTCG  | 674.557741960523 | 0.294680089637571 |
| ATGACGCCGACC  | 674.572678267771 | 0.247978526661853 |
| ACGTCACATCGA  | 674.577772591154 | 0.356393625270136 |
| AGTCAGCGATAT  | 674.583813621014 | 0.266490534861154 |
| GGTACCTAGTCA  | 674.589477934043 | 0.397967230429026 |
| CCATCAGTGACA  | 674.595475469906 | 0.588247105429147 |
| ATAGGTGGTGAC  | 674.602223088939 | 0.378095956843227 |
| AACGGATATGAC  | 674.604392144792 | 0.372137895699941 |
| GACTAATCGCGC  | 674.623403349729 | 0.489819657108814 |
| CGTCATTGCCTA  | 674.62396410463  | 0.305411891940878 |
| CGTCTTACGTCA  | 674.624853240965 | 0.465169086046909 |
| AGCCCGTATGAC  | 674.636127183106 | 0.523304133411108 |
| ATTATTCATAGC  | 674.641143423866 | 0.4115956764032   |
| AGTCACGAGCCA  | 674.643646486034 | 0.39682608074302  |
| CGTACGGGTGAC  | 674.643690398588 | 0.392852879843723 |
| AGAATGTGTGAC  | 674.648090453299 | 0.225009858278711 |
| GGTGATACATAC  | 674.650435939777 | 0.151579046086677 |
| GACTGTGACGAC  | 674.652205819188 | 0.460109348653375 |
| TCATTGGTGTCAC | 674.658757970655 | 0.391020539373508 |
| AGTTATGGTCAT  | 674.664788984672 | 0.265658833621152 |
| ATGAGTACGGTC  | 674.668348773418 | 0.395889743008225 |
| AGCATAGGTGAC  | 674.671297853387 | 0.313719343970028 |

|               |                  |                   |
|---------------|------------------|-------------------|
| CTTGTGGCGTCA  | 674.672964193083 | 0.559576582343503 |
| GTTACACGTCA   | 674.674971641612 | 0.513016575637795 |
| ATTCCGGTGACCA | 674.676848531096 | 0.368132504701076 |
| ACGTAGACTCAG  | 674.687282440202 | 0.382622504195198 |
| GATTTTGTGTCA  | 674.710127139628 | 0.479053226366117 |
| AAATATTTGTCA  | 674.717858367316 | 0.607088354310108 |
| GGCACATGACAC  | 674.724355029736 | 0.391282532447305 |
| AACCAAGATGAC  | 674.727293139295 | 0.562890724650242 |
| AAAACGGTCTAG  | 674.728102917136 | 0.311606821712811 |
| GGTGACGTCTAC  | 674.731146533206 | 0.281292694711025 |
| GAGTCAAATGGC  | 674.7464023133   | 0.53587232346728  |
| AAAATAATGACA  | 674.762625400575 | 0.21599469764743  |
| CGAGTCAAAGTC  | 674.765747110059 | 0.482633909036101 |
| GAAACTAATGAC  | 674.771214017373 | 0.331571541305857 |
| AGTCCAAATGAC  | 674.776236924716 | 0.420122687401612 |
| CAAGAATTACTC  | 674.782327687896 | 0.374756795650916 |
| TCCTTAATGACA  | 674.782408244334 | 0.287009688126223 |
| ATGACTTGACACA | 674.790717994348 | 0.325864186586553 |
| CTGACCTGACTC  | 674.800525334103 | 0.299807256845171 |
| TCGGTCATCGAA  | 674.800894153043 | 0.263010665848336 |
| CGGACTAAGTCA  | 674.805016263835 | 0.617975764708338 |
| ACGCGTCAGAGT  | 674.807632661408 | 0.34443762102257  |
| CCGCGTGACTAG  | 674.837170699803 | 0.377734288993392 |
| CAGTTCTTGTGA  | 674.84350806478  | 0.494581731733684 |
| AACGGTGACGAT  | 674.858913338764 | 0.442651218561203 |
| ATGCCATATGAC  | 674.859095007105 | 0.349604424983284 |
| AGTCAGAGGTAG  | 674.860527911106 | 0.264282860085449 |
| CCGTTGGTGACA  | 674.866420078349 | 0.516243122134872 |
| AGTCAGAGTGAT  | 674.873372188079 | 0.214051785880095 |
| GAGAACGGTGAC  | 674.878838146601 | 0.271627213150254 |
| GAACTTTGACTC  | 674.888325632534 | 0.408361345049496 |
| CCGATAATGACG  | 674.904347345812 | 0.443622726560541 |
| ATGTTCCGATGAC | 674.90996602038  | 0.466646246396338 |
| CAACGCGTGACA  | 674.913964338459 | 0.597468652814935 |
| ACGTCACATGAT  | 674.918809354157 | 0.134070366225333 |
| GGCGTCACGTCA  | 674.933228949581 | 0.300320684328585 |
| ACGTAATCTGGC  | 674.938032889802 | 0.577818933037471 |
| ACGTAACTATGA  | 674.949837638189 | 0.621380497742034 |
| ATGAATTGTGAC  | 674.954007475013 | 0.215224720329126 |
| ACACAAATGAGT  | 674.966453372153 | 0.497252793223699 |
| TGACTCGGTACA  | 674.976340981588 | 0.522934741815354 |
| CAGTTATACTCA  | 674.978136466659 | 0.481045878255358 |
| CCGTCGAATGAC  | 674.978686630466 | 0.238805523447511 |
| ATTCTCGGTGAC  | 674.979157496569 | 0.397767116884168 |
| CTGAAACATGAC  | 674.982805928531 | 0.53972814508186  |
| AGTCAGAAGCGG  | 674.983303469069 | 0.23899060638734  |
| TGACATGTTTAA  | 674.990585708466 | 0.398236005556583 |
| GGCGCATATGAC  | 674.992793039063 | 0.390431369809103 |
| GTCAGCCAATGA  | 674.995085623441 | 0.44829653173837  |
| TGTGTAATTAAA  | 674.996683530486 | 0.284336089103857 |
| CATTTCCGGTGAC | 674.9988100458   | 0.327656943550463 |
| CGTGCGGAGTCA  | 675.012079292667 | 0.451176219724589 |
| ATGCGTTATGAC  | 675.018036563494 | 0.456914968615589 |
| GTATTTCTGTCA  | 675.033161592557 | 0.462499399173469 |

|              |                  |                   |
|--------------|------------------|-------------------|
| GTCACCTATGAA | 675.034802908651 | 0.404232711836421 |
| ATGACGCCTTCC | 675.037325989255 | 0.378028390139304 |
| ATGACGTCGCTC | 675.040343991885 | 0.53409617194912  |
| GATGACCGGTCA | 675.044482930342 | 0.347549247537302 |
| GATGATTGGTCA | 675.063026792473 | 0.58773553622314  |
| GTCACGTAATCA | 675.063786574474 | 0.249785295082742 |
| ATGAGTTGGCAT | 675.09531472211  | 0.234151087983105 |
| TAGCTTTACTCA | 675.098421958655 | 0.248726371433331 |
| TGTCATCTGAAA | 675.107628986872 | 0.361872564712162 |
| AGTCAGAGTTTC | 675.110138447427 | 0.306936037393345 |
| CCTCGTTATGAC | 675.119722759121 | 0.515503658843898 |
| GTCATCTCCGAC | 675.120045365109 | 0.143294864305253 |
| AACAGCCAGTCA | 675.122691403947 | 0.383623547358366 |
| AGTCCTATGAC  | 675.123389966238 | 0.270331899223582 |
| GTAAGAATCATA | 675.125573568109 | 0.260132284025264 |
| GTCACTAATGAA | 675.136385847802 | 0.584544724504322 |
| GTATTACTACAA | 675.145493882492 | 0.456869555737758 |
| CAGTTGCAGTCA | 675.150908320708 | 0.526656247822464 |
| CCGCGTGATGAC | 675.155126878387 | 0.361394805705808 |
| CTGACTGGTTTA | 675.156467817302 | 0.431875963004857 |
| CTAACTACGTCA | 675.156883516115 | 0.338318587286788 |
| ATCGATTACGCA | 675.15968976153  | 0.15204206018211  |
| AACGCTGTCA   | 675.161060750505 | 0.423463600128139 |
| GTCACCCCTTGA | 675.161826246988 | 0.411153774587152 |
| CGTCATTTACGA | 675.162873588288 | 0.537635827167795 |
| ACGTCACAATAC | 675.16535348554  | 0.418243500154881 |
| GTCACATTATAA | 675.171324669029 | 0.48014173498552  |
| ACGTGCGGTGAC | 675.172269191512 | 0.416852274556264 |
| CATAGATGATTC | 675.173701199054 | 0.339092232403338 |
| CGAGAATGATTC | 675.187745730253 | 0.335837053173146 |
| GACCAGGAGTCA | 675.200196506725 | 0.370457238938905 |
| CATCCGGAGTCA | 675.204349299613 | 0.360804364577042 |
| AATCTGACATAT | 675.20687689063  | 0.445236761766856 |
| GTCACCCGCTGA | 675.208677094433 | 0.293609323048585 |
| CTACAGGGTGAC | 675.212284822594 | 0.331058606817398 |
| ACGTCATGATCA | 675.214608378979 | 0.546940567824411 |
| GTCATCTCGCAA | 675.216614696701 | 0.319636717969243 |
| CGACAGATGACA | 675.227231986267 | 0.394266298870196 |
| TGACTCTCCAAA | 675.230743852162 | 0.481964786956258 |
| AGTCAGACATTC | 675.254868815262 | 0.632716986312314 |
| GCGGACCAGTCA | 675.254914939639 | 0.403822807681955 |
| CGATTGAATGAC | 675.25748644121  | 0.23770329112778  |
| GCTGCGTGACAC | 675.268366690463 | 0.305976152559701 |
| AACATTGTGACG | 675.275092715497 | 0.588247304470866 |
| CGATTGCGTGAC | 675.279557984091 | 0.502328585400567 |
| AGTCATGGTCGC | 675.280191613139 | 0.327775439141503 |
| GGGTGAGCCACC | 675.284686108399 | 0.584321699619997 |
| CAGTTTGACTCG | 675.287221002018 | 0.542841508272115 |
| AGTGTGTGTAAT | 675.295459569721 | 0.260248213652489 |
| TCATGGAGTCAA | 675.309422085526 | 0.354412304404051 |
| TCATCTATGTCA | 675.313177324997 | 0.309215994631383 |
| GTGACTTGGCTA | 675.316746561811 | 0.342732486746125 |
| CCAATAGTGTC  | 675.318711187435 | 0.454089002697004 |
| AATGACGGCATT | 675.324529181955 | 0.394465777671008 |



|              |                  |                   |
|--------------|------------------|-------------------|
| GTCACTAGACCA | 675.32628554308  | 0.464291163415281 |
| CCTCTGAGTCGA | 675.332807185075 | 0.518194799237765 |
| GTCATCTCTATA | 675.335454714447 | 0.321318206911508 |
| CAATTGTGACGC | 675.341860712348 | 0.314314582026747 |
| GCGAATTACGCA | 675.350438234692 | 0.3092249673813   |
| ACAACAGATGAC | 675.354619545947 | 0.255942855901761 |
| GTCACCACAGAC | 675.36129749411  | 0.256345823667286 |
| CACGGTGACGTC | 675.368398878999 | 0.595643712056299 |
| GTCATTTAGAA  | 675.381465646976 | 0.379893127780338 |
| CTCCAAAATGAC | 675.385011765531 | 0.602917172658647 |
| TGACGATTAACA | 675.391751137627 | 0.732645649161895 |
| AATCGATCAGTC | 675.397244116559 | 0.489777421826084 |
| ATGACAATACTA | 675.403335817595 | 0.367848822544423 |
| GTCACATCACTA | 675.413252026227 | 0.405321338085414 |
| CGTTCCTGACTC | 675.4132837712   | 0.384400635871698 |
| GACTCATGGAAA | 675.417925014482 | 0.28081621501177  |
| CGGACCTGTGAC | 675.417981011461 | 0.391439624229442 |
| ATGTTTCCGTCA | 675.42001221153  | 0.401967950416822 |
| AGTGTAATGAC  | 675.432209400686 | 0.278031915062908 |
| ATGACCTAATAA | 675.433024431802 | 0.260756164687246 |
| GTGTGTCTCATA | 675.437301093694 | 0.265399359128918 |
| CAGTCGGACTCA | 675.438187556733 | 0.406614454054422 |
| ATGACATTATGG | 675.442888256612 | 0.312650241302412 |
| ACGTCACAGGCC | 675.446225632173 | 0.282438977467102 |
| ATCTATCCGTCA | 675.463383761523 | 0.191824886287164 |
| ACGCCTGACTCG | 675.47619166988  | 0.305418090878205 |
| GTCATTGACAGA | 675.487051824129 | 0.405908970041782 |
| CACTTCGGATGA | 675.488683934544 | 0.538653733204001 |
| AAGATTACTCCT | 675.494033603781 | 0.293470956746673 |
| AACACCGTGACT | 675.494250945188 | 0.423137059506366 |
| CGTCACCGTAAG | 675.496789165612 | 0.523641962952193 |
| AAAGACTCTTAA | 675.500771963567 | 0.33382913944448  |
| AACAGAGAGTCA | 675.501611863658 | 0.272655038591826 |
| ATGACAATATGG | 675.520265579919 | 0.297324606704371 |
| TAGCCAGAGTCA | 675.526413874397 | 0.591408251235511 |
| GCCAGCGGTGAC | 675.526513316951 | 0.43577815264302  |
| AGTGTGAGCCAC | 675.533512390342 | 0.360414498080739 |
| CGTCATGGCATA | 675.537969405916 | 0.400842917980566 |
| CACATAATGACG | 675.538644208287 | 0.572109111007151 |
| ATAGCAATGACG | 675.540263069045 | 0.244116696543609 |
| TGACGGATAACA | 675.540383152306 | 0.436757245497542 |
| AGGGCCGAGTCA | 675.545788219256 | 0.554360948055043 |
| ACGCCCTGACTC | 675.547574394786 | 0.298970783644438 |
| GAGAATGACCAC | 675.562572251362 | 0.233329143322226 |
| GACTAATTTATC | 675.563206056238 | 0.315868952922482 |
| ATGACGTCTATC | 675.563494206821 | 0.38695230864277  |
| GTCACTCTAGAC | 675.565784521335 | 0.493104696477285 |
| CGCCACGATGAC | 675.578507826861 | 0.485223632472759 |
| CCTAACGTGTCA | 675.581181298154 | 0.35959032312885  |
| TCAGACATGTCA | 675.605240378523 | 0.632320772439222 |
| GATTACTATTAA | 675.605379158936 | 0.323099861600229 |
| ATAAGCGGTGAC | 675.612180311943 | 0.512418561020142 |
| TAACATGACCCA | 675.630714365636 | 0.266142197069945 |
| CGTCATTACTAG | 675.633337192347 | 0.382257440456105 |

|               |                  |                   |
|---------------|------------------|-------------------|
| TACACTACGTCA  | 675.640755764657 | 0.24548721952419  |
| ACTTCATAGTCA  | 675.653485818852 | 0.413249157023627 |
| ACATTATTACTC  | 675.654179549708 | 0.388538097124752 |
| GATGACCTGGCA  | 675.658138098688 | 0.281558611911437 |
| GAGTCAGGGAAA  | 675.658206867699 | 0.209925330781067 |
| ATCATGTCACAG  | 675.675051970012 | 0.226595783451672 |
| ACCTCTAAGTCA  | 675.690329672331 | 0.387604508888842 |
| AGAGTCAATATC  | 675.692605412748 | 0.417044193801941 |
| GCATTATATGAC  | 675.706626811969 | 0.368725638657314 |
| ACGTCACCTTAC  | 675.707715901518 | 0.257221123564003 |
| GCAAGACAGTCA  | 675.719250839546 | 0.388016020249343 |
| GAGTGCGAGTCA  | 675.722072197407 | 0.13616033054665  |
| ATTCACGACTCA  | 675.731649415725 | 0.37507714204623  |
| GTACTIONGTGAC | 675.755228654703 | 0.361852467942647 |
| ACTCATAACTGG  | 675.755291515001 | 0.55069621122638  |
| GAGCACACGTCA  | 675.758786805475 | 0.426233181711888 |
| GGTCATCCATTA  | 675.76228021682  | 0.471447345163588 |
| CGAGTAATAGTC  | 675.763259872977 | 0.141278393114117 |
| GACTACATGACA  | 675.765401343483 | 0.45433627889965  |
| GTCATCCGAGCA  | 675.773800599898 | 0.508934387007326 |
| AGTCAATGACGG  | 675.783515669599 | 0.278454950571843 |
| GCCGCATGACAA  | 675.792268485992 | 0.340639090393255 |
| GTCACCCGAGACA | 675.795113537386 | 0.562637218787314 |
| CAGTCATGGGGC  | 675.795403456294 | 0.393192748072876 |
| GCCAAGGATGAC  | 675.79848095977  | 0.401861292830022 |
| TGACTCGGCTCA  | 675.808464392959 | 0.475756665865367 |
| ATCAGCTGTGAT  | 675.811656991095 | 0.493030724049001 |
| CTAGCTGATTCA  | 675.818200721121 | 0.33145933244876  |
| CACATCGGTGAC  | 675.818930223063 | 0.413898151538103 |
| CTAAACTGGTCA  | 675.819105232146 | 0.432615210773599 |
| ATGACACCCATC  | 675.820131061109 | 0.296210969709464 |
| ATGACGACGTTT  | 675.821069407941 | 0.272967050994789 |
| TCGCCCTAGTCA  | 675.825584810063 | 0.416646497272985 |
| AATGAACGTCAT  | 675.843804897936 | 0.459315925967034 |
| AGTCACGACTAA  | 675.846343498694 | 0.331681345623634 |
| GAGTCAAATGCA  | 675.851433440826 | 0.406576883951418 |
| CTAATATTGTC   | 675.877665866843 | 0.394379156843389 |
| ACATTGTGACGC  | 675.879519122718 | 0.363125873820437 |
| GTCACCCACGAA  | 675.880990282198 | 0.431028897468616 |
| GTGACGACTCAA  | 675.897837053295 | 0.220564177683693 |
| GTGACACTGAGA  | 675.905955496257 | 0.307237450494028 |
| GACACGTGTCGC  | 675.906370730339 | 0.487341694983251 |
| ATGAGTCCGCTC  | 675.906627962542 | 0.145835960639182 |
| TAACATGACATA  | 675.917129347713 | 0.358253021118007 |
| AAAACTGGTGAC  | 675.924832120805 | 0.283675629403001 |
| GTCATGCTACAA  | 675.938709697665 | 0.450751791962616 |
| CCAGTTTGACTC  | 675.941859430283 | 0.175156377052877 |
| AGCGACTGAGTC  | 675.982951697045 | 0.374248853511472 |
| CGAATTAATGAC  | 675.986880908503 | 0.387917341098609 |
| CGGAGCCATGAC  | 676.006446117399 | 0.566876086252421 |
| AACAGGCGTCAT  | 676.01513732232  | 0.284334869790483 |
| CCTGTAAGTCAC  | 676.01718405546  | 0.545072432416922 |
| CTGTAATTAGTC  | 676.017204372214 | 0.428668133477692 |
| CTGACGTCAGCA  | 676.018880649515 | 0.583713797175608 |

|               |                  |                    |
|---------------|------------------|--------------------|
| AGTCACTTGCGC  | 676.018936439102 | 0.492670609029107  |
| ACTGACTGTCAT  | 676.019908902727 | 0.207453476892268  |
| ATGACACTCTCC  | 676.020253682269 | 0.312801132839463  |
| TGACTTAAGTCA  | 676.028420795967 | 0.505881911483163  |
| ACATCTGGTGAC  | 676.034386493595 | 0.534112822644463  |
| ACCACGGAGTCA  | 676.062274484578 | 0.714902400269347  |
| ATCCATTGTCAC  | 676.063043442823 | 0.303905148911049  |
| CATATGGTGACA  | 676.074476205685 | 0.417270744484336  |
| CTGATCGCGTCA  | 676.076429573043 | 0.425920648204449  |
| GATGACAGGGCC  | 676.080478387359 | 0.232677332442772  |
| GTCATCTCTTAA  | 676.080914897197 | 0.400620340181742  |
| CTCCAATGACAG  | 676.085605443874 | 0.366718380995127  |
| ATCTGACTGGTC  | 676.096445316235 | 0.298868983911604  |
| GTAGATCCGTCA  | 676.098698154839 | 0.379427876836393  |
| GCTGTGAATGAC  | 676.103086205582 | 0.4451754574224    |
| CACCAACGTGAC  | 676.106793724057 | 0.390352254347468  |
| CTCACGCATGAC  | 676.112707188802 | 0.420626842835881  |
| ATTTTCGTGTGAC | 676.11440572402  | 0.486849734713445  |
| GTGTGATGTAAC  | 676.119713641989 | 0.0656363640051825 |
| CGTCATTTTCGTA | 676.126218893883 | 0.374100396775961  |
| AAACTTAGTAAT  | 676.136131378465 | 0.451866404966812  |
| GGGAATCCGTCA  | 676.153876692847 | 0.346541405815307  |
| CGCAACGTGTCA  | 676.154935020875 | 0.48234821646755   |
| CGCCCTGTGTCA  | 676.157234271482 | 0.249098277075354  |
| CATCAGTGTAC   | 676.157704578235 | 0.365111853716968  |
| ATTTTCGACTCAG | 676.172881018582 | 0.374273983853852  |
| ATGACGCTCATA  | 676.191611882515 | 0.322626001111403  |
| GCAACGGTGACA  | 676.197359268183 | 0.370667066697861  |
| AGGTAAAATGAC  | 676.211308281386 | 0.202707878860587  |
| TGACTTGGCTCA  | 676.220711599274 | 0.433967551372774  |
| ACACGGCGTCAT  | 676.222615717535 | 0.471020953854711  |
| GTCAGATAGTCA  | 676.224305543127 | 0.358557894051515  |
| GTCACCCGTTAA  | 676.225096618141 | 0.387623764516398  |
| CTGACGTCAGAC  | 676.226930410962 | 0.359651270323614  |
| GGTCATACATTA  | 676.233969765896 | 0.522854649450581  |
| AGATCCTGTCAT  | 676.234608989167 | 0.358270405641127  |
| CGTTGCGTAATC  | 676.242666167347 | 0.333560889893506  |
| ACGTCATGTCTG  | 676.252871393316 | 0.585490063195988  |
| TAATACTGGTCA  | 676.266574129079 | 0.449735833979432  |
| ATGACAAAGGAC  | 676.281720481406 | 0.280010878179568  |
| CAGTCAGATGAG  | 676.284551319246 | 0.487043050388601  |
| ACGCGATGACCG  | 676.28495555385  | 0.37099936212182   |
| ACGTCATGGGCA  | 676.298345982851 | 0.561544937386586  |
| ATGACACTCCCG  | 676.300886567117 | 0.266161559558972  |
| ACTGGCTAGTCA  | 676.302936236276 | 0.552703733561488  |
| CTCCTATAGTCA  | 676.307644253113 | 0.454561952335641  |
| GTTGCATCATCA  | 676.308443978957 | 0.224926317231444  |
| AGTCAGACTTTA  | 676.320497787258 | 0.242636498036295  |
| ACACAGTGTGAC  | 676.33004230962  | 0.320768113790686  |
| AAAATAACGTCA  | 676.3376405505   | 0.365822651853546  |
| GTCACCAAAGAC  | 676.338666121564 | 0.388039237534466  |
| AATCTTTATGAC  | 676.339446092523 | 0.323396862082816  |
| GCGTCACTTCAC  | 676.340529240887 | 0.31841225478117   |
| ATGGCCTAGTCA  | 676.340742156309 | 0.507534520814969  |

|               |                  |                   |
|---------------|------------------|-------------------|
| AATACTGTCACC  | 676.342527167915 | 0.383244679926521 |
| GTTAATGGGTCA  | 676.361183636762 | 0.414815004558728 |
| CAAACCTTTGTCA | 676.380573970274 | 0.395927693422357 |
| ACGTCACATATA  | 676.397854661703 | 0.397565896206827 |
| CTGACAGATTAA  | 676.402642717508 | 0.475801310664478 |
| ACCTAAGACTAA  | 676.403578958526 | 0.423657067625025 |
| ATGACTTGACCA  | 676.403908628339 | 0.464033245563536 |
| ATGACGCGCTCG  | 676.404311701222 | 0.258605011744048 |
| AGTCACGGTAAT  | 676.422761660604 | 0.399177477776906 |
| ATGAGCAACCTG  | 676.432153124198 | 0.430632848679114 |
| GACTCACGGAAC  | 676.435469661787 | 0.339587257291766 |
| GGACGTTACTCA  | 676.446310250389 | 0.456431795329076 |
| CGTGACGCGACA  | 676.446769509192 | 0.346905458359145 |
| CACGTTATGTCA  | 676.450342036472 | 0.248073974980152 |
| CGTCATTTCTCC  | 676.459847803869 | 0.24368971490746  |
| GTCATTAACGTA  | 676.463732190129 | 0.325836447674925 |
| CGTCATCAACAC  | 676.468168241754 | 0.275105685734719 |
| ACAGTTGTGAC   | 676.501863514073 | 0.367019263719609 |
| ACCGTTTGGTCA  | 676.506755640535 | 0.488836874711705 |
| ACCCAAGATGAC  | 676.509002172705 | 0.582942168892136 |
| GAGATTACGCAC  | 676.519968601696 | 0.40480968563533  |
| GAGTAATTATGC  | 676.535288433469 | 0.493681869005822 |
| GTGGGACTCACA  | 676.541429089014 | 0.480146830491326 |
| GGTCATAGCCAC  | 676.543541137975 | 0.569834936407609 |
| GTGTCTCGGTCA  | 676.54541494929  | 0.637787574034753 |
| ATGCCATGAGTC  | 676.548338039629 | 0.417652994949025 |
| GTCACACGGAC   | 676.549192944189 | 0.165570916177428 |
| TGTCACTAGGAA  | 676.556248730957 | 0.20878102232502  |
| GCAACGTATGA   | 676.55929047082  | 0.248509052949525 |
| CCATAGCATGAC  | 676.570665544305 | 0.52255941878272  |
| GTCACCAGCAAC  | 676.58329611439  | 0.301268081200089 |
| GCTCCTGACACA  | 676.584135781169 | 0.282830429832817 |
| ATGACTTTTCAA  | 676.590858737264 | 0.408782993553308 |
| TGAGTCTGACCA  | 676.595209112517 | 0.360011199121247 |
| CCGCCCGAGTCA  | 676.595455654149 | 0.283822178898958 |
| ATCCGTCATGA   | 676.598067505395 | 0.397243167476182 |
| ACATAGCATGAC  | 676.601938646855 | 0.229846189777369 |
| CATCAAATGACA  | 676.606766544476 | 0.375127023631292 |
| CTGATATCGTCA  | 676.611452291197 | 0.402444458783417 |
| CACCGGTGACAA  | 676.614350055329 | 0.416935032197528 |
| ACACTTGACTCT  | 676.622462472981 | 0.242826855398668 |
| GGATTAGATGAC  | 676.626085473364 | 0.189086663142993 |
| GCGGCTACGTCA  | 676.629645725754 | 0.498855028160439 |
| ATGACAAGGTGA  | 676.633248770902 | 0.308390602545057 |
| AATTC AAGTCAT | 676.633255449609 | 0.357358792369515 |
| GCGTGCGACTCA  | 676.641836531166 | 0.420068628965621 |
| CCTTTGACTGAA  | 676.641840625884 | 0.285687043303039 |
| ATGACAGCTACC  | 676.647219253774 | 0.34919105471035  |
| ATTTTGTGACGC  | 676.649889843888 | 0.308923802579468 |
| AGTGAGCGTCAT  | 676.654206971195 | 0.185851701357411 |
| ATGGTGTAGTCA  | 676.660867211854 | 0.275621740651    |
| CCTGGCTAGTCA  | 676.661848365772 | 0.384357211305217 |
| ACTGTTAATGAC  | 676.665619952772 | 0.438642576980936 |
| ATGTGGAATGAC  | 676.66948818076  | 0.240369152608674 |

|              |                  |                   |
|--------------|------------------|-------------------|
| GAACGTGTCAGA | 676.671048238817 | 0.187017833891022 |
| ACCGGCGTCATA | 676.675160781655 | 0.434699423689595 |
| CACGGGATGACG | 676.682086905361 | 0.477623044516744 |
| CGAAATATGACC | 676.705145816835 | 0.442471017439272 |
| AGAATCGACTCA | 676.711519614237 | 0.222342890834521 |
| ATGCTAATGACG | 676.71195682198  | 0.275752433306424 |
| ATGACAATGTAA | 676.712133170628 | 0.38176910396805  |
| AGTCACGGCATA | 676.713429769151 | 0.402385673191518 |
| GTCTGCGAGTCA | 676.763049555377 | 0.32698118451373  |
| ATGCTATGACCC | 676.76621462141  | 0.241040621659467 |
| ATGACGAGGAAG | 676.768909047456 | 0.179138717821029 |
| GTCACCCGACGA | 676.771540938092 | 0.345969858466536 |
| CAGTTTTGACTC | 676.784921233618 | 0.33339701446465  |
| GCGTCATGGTCA | 676.785363825059 | 0.451210816905358 |
| ACATATGGTCAT | 676.788590454609 | 0.315927975220933 |
| AGCGAGGATGAC | 676.801646638954 | 0.221557926881646 |
| ATGATTACGCAA | 676.802049685241 | 0.513003811645047 |
| GTGAATCCGTCA | 676.803891567978 | 0.405231951694856 |
| ACAGTGACACGA | 676.804235449013 | 0.472301391798917 |
| AAGTATAAGTCA | 676.80599064035  | 0.252115609944605 |
| CCATGATAGTCA | 676.831148767039 | 0.425759841692395 |
| TGACTCCACACA | 676.842234181049 | 0.28368598383973  |
| GAGTGAGTCTGC | 676.843836727807 | 0.184871818124799 |
| TACCGTGTGACA | 676.845669353855 | 0.335027584303773 |
| AGAGCTTGACTC | 676.853947570986 | 0.605371169990133 |
| GTGTCACGTATA | 676.85517813172  | 0.494374254467794 |
| ATATAGTAGTCA | 676.867650154711 | 0.580145094736506 |
| ATGACCGAAATG | 676.869748548705 | 0.323595798666735 |
| ACACTTGAATCA | 676.872076709423 | 0.431165750154647 |
| ATGACAGCTAAG | 676.874879190957 | 0.380967743529672 |
| ATCCAAGTCAAC | 676.880424823439 | 0.261930596941665 |
| TAAAGGGAGTCA | 676.890563673076 | 0.232433046600529 |
| ACAGAGTGACGT | 676.895102395998 | 0.382923206297182 |
| CAGTAAACGTCA | 676.895799224623 | 0.514247918456212 |
| AAGCACCATGAC | 676.896093238389 | 0.422237770735754 |
| CGATGACCGAGA | 676.90817247925  | 0.326384841036635 |
| GTCACGCATTTA | 676.913354123634 | 0.417568151138407 |
| AACAGTCAACAG | 676.915151137397 | 0.077364366638679 |
| CATGACAATATC | 676.923654181434 | 0.281404307829115 |
| GTCACCTACAGA | 676.924065581482 | 0.65917177166416  |
| ATAATGGATGAC | 676.931140220953 | 0.191296466327919 |
| ACGTCACCATCC | 676.948663190279 | 0.223208491000429 |
| AGTGTTTGTAC  | 676.956503238962 | 0.319285994315901 |
| TCACTCACGTCA | 676.957960719675 | 0.404428806864452 |
| CTGCTTGATGAC | 676.958325049575 | 0.292732720017048 |
| ATGACGTTACG  | 676.961144634281 | 0.411109629395908 |
| TCACCAGAGTCA | 676.963598330007 | 0.446032524827254 |
| AAATCATGACGC | 676.975289020671 | 0.422164565799272 |
| AGCATAGATGAC | 676.982741749235 | 0.326564776338835 |
| CGTACAATGACG | 676.998456011012 | 0.363078091165293 |
| CGTCATTAAGAG | 677.001645572016 | 0.383872751085912 |
| ATAGACGTCATC | 677.010995558337 | 0.473439243520438 |
| AGAAGTCGTCAT | 677.021265094526 | 0.163734874541806 |
| CAACCTAAGTCA | 677.022973346255 | 0.384909864053185 |

|               |                  |                   |
|---------------|------------------|-------------------|
| AAAAGTGCAGT   | 677.024612572911 | 0.263395893631146 |
| AGACTCAGAACG  | 677.032616061305 | 0.544454383640618 |
| CTTACTAAGTCA  | 677.036708850111 | 0.534288565335648 |
| GCGGAAAATGAC  | 677.066314874805 | 0.437501211353668 |
| ATGAGTACGCGC  | 677.070383228338 | 0.448010938775164 |
| GTCATGCTCTGA  | 677.073655708157 | 0.37065595123605  |
| ATGTCATTATTA  | 677.077594351825 | 0.271832548463027 |
| TAGTTGCAGTCA  | 677.081808117295 | 0.487455901640542 |
| ACCAGTCAGCAC  | 677.084671439739 | 0.31883912679211  |
| AAGAGAAAATGAC | 677.086549266885 | 0.33439382943722  |
| CTCAGTATATGA  | 677.091367926416 | 0.455817517727029 |
| CGAACCGACTCA  | 677.09370075506  | 0.279354002992393 |
| GTAATAATCTGA  | 677.108054431823 | 0.481341968094709 |
| ATGACCTGGTCA  | 677.108355334231 | 0.379228550116061 |
| CGTCATCAGCGC  | 677.117126750899 | 0.30472584022291  |
| GTATGAAAATGAC | 677.123697018659 | 0.51084034028797  |
| CGTCACATATAA  | 677.13009791708  | 0.564613175682003 |
| AGTCACTAGCTG  | 677.134397302096 | 0.36371292865409  |
| ACGTCATGCGGG  | 677.142835595684 | 0.267727477957159 |
| CGGGGAAAATGAC | 677.152465971439 | 0.373630238914489 |
| CTCTGACCTTA   | 677.157260967739 | 0.269608745512259 |
| ATATCTCGTCAT  | 677.159066785543 | 0.448083313047496 |
| GTCACACGGGAC  | 677.164279019931 | 0.541341666248627 |
| AGAAAACGGTGAC | 677.16576136179  | 0.238914129736017 |
| AAGTATAATGAC  | 677.167372616389 | 0.218117978724554 |
| CACTTATGAGTA  | 677.174950334042 | 0.512877985508263 |
| TATGAGCTGTCA  | 677.178231221225 | 0.280819819625184 |
| CGACTCGTGACG  | 677.190769505146 | 0.225645501435243 |
| ACGGCTGATGAC  | 677.194817088833 | 0.284481000712011 |
| CGATGTATGACC  | 677.198319544752 | 0.406888511708013 |
| GATGACAAGGAC  | 677.204946910666 | 0.3339653755607   |
| AATCTTGTTCATG | 677.205034923569 | 0.36190338014835  |
| ACAGGATTAGTC  | 677.208322827253 | 0.536070818458453 |
| GGGATGTATGAC  | 677.217814497789 | 0.149133254171212 |
| CACAAATGACAA  | 677.217969768068 | 0.389784188709804 |
| TCATAGGTCACA  | 677.219606295987 | 0.444318130068551 |
| ACTGACTACTCA  | 677.220615040033 | 0.281026921779177 |
| CATGTGGCGTCA  | 677.223177994564 | 0.521055678404909 |
| ATAGTTAATGAC  | 677.23231982129  | 0.687105650312459 |
| AGACATTTGTCA  | 677.236910583543 | 0.424594703717864 |
| AATGAGTTGGCT  | 677.24252131145  | 0.325324352204996 |
| AAGGCATATGAC  | 677.250016765846 | 0.307409216284691 |
| ACTGAACATGAC  | 677.259148194316 | 0.38021859499538  |
| ATCTGTCAGCGG  | 677.262133405424 | 0.370574509881331 |
| TACTCATAATCA  | 677.265929485649 | 0.422992158111421 |
| ACTCATTGAAAA  | 677.267119646314 | 0.304337970592208 |
| GAACTTCGTGAC  | 677.27623328615  | 0.433183746217756 |
| AGAGTCAAGACT  | 677.2907376703   | 0.430452197442565 |
| GATTTATATGAC  | 677.290812683205 | 0.492393196675224 |
| ACCGGACAGTCA  | 677.296384272879 | 0.471626967682391 |
| GTCACATACACA  | 677.318071472046 | 0.612046255247248 |
| GACGCTGTACACA | 677.325847293516 | 0.340873054209785 |
| ACTCATTTTAGG  | 677.342551661934 | 0.258690715961581 |
| GACGACGATGAC  | 677.375594831354 | 0.402072624627359 |

|               |                  |                   |
|---------------|------------------|-------------------|
| AGCTAAGATGAC  | 677.387439857475 | 0.422989585506123 |
| ACGTCACGATTA  | 677.3966431724   | 0.443479495811439 |
| GGTCATACCGAA  | 677.410362700262 | 0.655160265622597 |
| CAATCGCAGTCA  | 677.420431828022 | 0.432677027862896 |
| GAGTCAGGTGTA  | 677.428733412858 | 0.17339165908264  |
| GTCACACCTCGA  | 677.432070306382 | 0.174803772984885 |
| GACTAATCGACC  | 677.443913523509 | 0.249233794317353 |
| ACTCATCAGGAG  | 677.446782200914 | 0.482272683831356 |
| ACACGCGTGACT  | 677.454191118977 | 0.473597014459908 |
| GACTTGCATGAC  | 677.455611990873 | 0.502526892205028 |
| AAGCCATGACAC  | 677.455949689811 | 0.445056621746879 |
| ACAATTTGCTCA  | 677.483125040257 | 0.380339367185115 |
| AGCGAAATGACG  | 677.484126021754 | 0.395780913391494 |
| TCACCAGAAATGA | 677.485000156138 | 0.605059072639248 |
| CCGAACATGTCA  | 677.49059509452  | 0.318059219685906 |
| TGATATATTACA  | 677.498347209527 | 0.761375257437106 |
| ATGACCCAGCAT  | 677.501836732098 | 0.621910090896297 |
| GAACCAGTCAGC  | 677.505518993506 | 0.222598224300426 |
| TGACGGGAGTCA  | 677.516962423687 | 0.194060417311519 |
| TCACTCGTATGA  | 677.517001496859 | 0.378449716681008 |
| ATCACGGTGACG  | 677.518133936263 | 0.567832285029942 |
| GTAAGTGTGTC   | 677.520851014144 | 0.257039545623522 |
| ATGACGGTACAT  | 677.522831591633 | 0.308338915930214 |
| GGAGTTGTGTC   | 677.529106898339 | 0.302158246945867 |
| GCATTGAGTAAC  | 677.540153335408 | 0.245074013150234 |
| GCCGCCGGTGAC  | 677.541728350105 | 0.429888894680678 |
| GAAACTGACACA  | 677.543416860744 | 0.408186467855024 |
| CATCCGCGTCAC  | 677.54535391123  | 0.340482423226623 |
| ACGCATGACAGT  | 677.548001906334 | 0.462952736936048 |
| GTCATCGCGGCA  | 677.552524337984 | 0.328204278382864 |
| CAACATTGGTCA  | 677.555819313602 | 0.590150999732175 |
| ACTCATATTGAT  | 677.564967869807 | 0.123265215618902 |
| CGCTGACACAGA  | 677.566900644363 | 0.382752562669122 |
| AACGCAAATGAC  | 677.567943243401 | 0.480920999363293 |
| ACGTCACATTGC  | 677.569989302431 | 0.363861181735872 |
| GTGTCACCTGTA  | 677.57474767436  | 0.333735880023291 |
| ACGCTAGTGACA  | 677.584644871057 | 0.414167093358138 |
| ATCCGTCAGAAT  | 677.587864475367 | 0.413922511987663 |
| ATATTAGTGTC   | 677.590057115346 | 0.419669818334806 |
| CTGCAGACTCAC  | 677.590861842482 | 0.264070152511049 |
| GGTCATCGCAAA  | 677.59358151834  | 0.630229702830056 |
| ACGTCCTGTGAT  | 677.597714596617 | 0.437728558013966 |
| GACTCTTACACA  | 677.603018589994 | 0.569828294062841 |
| AAGATGTGTGAC  | 677.607075915278 | 0.215576425942326 |
| GCCTCGCGTGAC  | 677.617446567128 | 0.438602812063062 |
| ACGACTCAGACC  | 677.620361478348 | 0.256559130572644 |
| GAATCGATGACC  | 677.622024699663 | 0.542685061045055 |
| GTCATTTATCCA  | 677.62251750482  | 0.337664383318345 |
| GTCACACACCGA  | 677.623816355657 | 0.326515342307521 |
| CGTCTCAGTGAC  | 677.63075503596  | 0.428215998090876 |
| GTGACCAAGTTA  | 677.63121819409  | 0.364435211111705 |
| ACTCATCACAGG  | 677.634653487079 | 0.30631653449489  |
| CCCATTGACTGA  | 677.634810322747 | 0.264574522777252 |
| ATCGCCGTGTC   | 677.6362612755   | 0.396244942526588 |

|               |                  |                   |
|---------------|------------------|-------------------|
| GGTTAGTCTTAC  | 677.637838610442 | 0.515640310176666 |
| GTCATCATAACA  | 677.651493130689 | 0.497726585316261 |
| AGTGGTCATTCA  | 677.655391829864 | 0.177245781229124 |
| CACGCCGAGTCA  | 677.657137784404 | 0.203732859275426 |
| CGTACCAACAG   | 677.659796331905 | 0.499609015135447 |
| ATGACCACGCCA  | 677.670713127674 | 0.264827020142096 |
| CATTGCGACTCA  | 677.673041694458 | 0.394660138374962 |
| CCGCCATAGTCA  | 677.675452061493 | 0.409579735032904 |
| GTCATGATGCAA  | 677.679765678513 | 0.357713189744177 |
| GCTGACATATAA  | 677.682431297758 | 0.316519139741321 |
| CTGTTTAAAGTCA | 677.686861931154 | 0.413339126011518 |
| AGTCACGCCCAA  | 677.692113813237 | 0.340437732216355 |
| GTGACGACGTCA  | 677.736764835719 | 0.501171937106595 |
| TCGCGTCACGCA  | 677.739774199821 | 0.501044216419921 |
| AAATGTGAGTAC  | 677.751756102284 | 0.369107902218858 |
| GTCATGTGCGCA  | 677.753451601219 | 0.342957968811484 |
| TACGCTGAGTAA  | 677.75434221784  | 0.27554453926966  |
| CCCTTGACTAAA  | 677.759590992521 | 0.231932290373088 |
| GGGTCATATTGA  | 677.801468277506 | 0.428058518285756 |
| ACCCCTGACGCA  | 677.808637036305 | 0.287139733286586 |
| ACGAACTCGTCA  | 677.819713505573 | 0.534241599625846 |
| GACTAATCGAAA  | 677.829390219479 | 0.308925353006619 |
| TCACCAGTCAGA  | 677.831757377193 | 0.28551752171306  |
| CATCGATGTGAC  | 677.833666816777 | 0.366515317442137 |
| GTCATGATTTTA  | 677.840124658484 | 0.370258988800916 |
| CCGATGAGTTAA  | 677.851921553189 | 0.392619075267801 |
| ACGTAGTGTGAC  | 677.852268561947 | 0.289992930172209 |
| ATACCAAGTCAC  | 677.858845623135 | 0.402620017096554 |
| GGAACTGCGTCA  | 677.859441645464 | 0.647407429644968 |
| CAGTCACGCCAC  | 677.870907366417 | 0.163342502008061 |
| CGTCATTAAGCC  | 677.875739047024 | 0.430363201392756 |
| ACCTTAGGTGAC  | 677.880036129083 | 0.397503947535845 |
| AGTCAGACTAAC  | 677.890397473667 | 0.425205062790273 |
| CTAAGATGACCA  | 677.893993208923 | 0.524028235591947 |
| AAGTGTCAGAAG  | 677.906135057954 | 0.25576417018504  |
| ATGACGGCATAA  | 677.909952998479 | 0.415199453771278 |
| CAGTCAGTCTTA  | 677.934556679833 | 0.48110589899889  |
| AATCCATATGAC  | 677.936689454741 | 0.333157738848312 |
| CACACCGCGTCA  | 677.937367280491 | 0.3571137582448   |
| ACACGAGAGTCA  | 677.942868076834 | 0.339924855122668 |
| CAATACAGTCAG  | 677.947522068381 | 0.423114078245482 |
| GTCACCACTAAA  | 677.961090390778 | 0.255463986626997 |
| CCGATGGGTGAC  | 677.965466295075 | 0.515332258318777 |
| GAGTCAGGTGCA  | 677.966066825161 | 0.115224695888323 |
| AATTCTGACTGG  | 677.976232598039 | 0.35595227874703  |
| CGATACGTCAAC  | 677.976288757653 | 0.388399268354231 |
| GAGCAGTGACGC  | 677.984563391041 | 0.410424015041995 |
| GTCACCACTCGA  | 678.00383991326  | 0.321944452381745 |
| AGACTCACGAAC  | 678.018004876155 | 0.398570135221296 |
| GTCACAACCTGGA | 678.030229118525 | 0.354765592308491 |
| AGTAACCGTGAC  | 678.030888571722 | 0.705097528722654 |
| AATAATGTGACG  | 678.044465752975 | 0.734701676909396 |
| AGTCACTAGATG  | 678.061689861115 | 0.186802938649289 |
| CACGTCACGTAC  | 678.064922129749 | 0.393990834678704 |



|                |                  |                   |
|----------------|------------------|-------------------|
| ACCTATTAGTCT   | 678.067431383572 | 0.362270863718016 |
| CATATTGTATGA   | 678.075504544303 | 0.426789186092992 |
| AATGACCGTCAT   | 678.091460580747 | 0.333869897488482 |
| GCGCTCGATGAC   | 678.092044166049 | 0.370759212824962 |
| ACCCCTGATGAC   | 678.09415820999  | 0.357939245889812 |
| CCCGTCTATGAC   | 678.096565472125 | 0.38117563112005  |
| AGTTACAATGAC   | 678.108500659563 | 0.484082569275746 |
| AAACTTTCGTCA   | 678.115146670107 | 0.483981637081353 |
| CGGTGAGCAAAC   | 678.120388868664 | 0.373364346849827 |
| ATGACGATCACA   | 678.120964732724 | 0.450283483897192 |
| ATGTCGTGTAC    | 678.122402523099 | 0.188271858896015 |
| GTCATGCGTAAC   | 678.126379076505 | 0.575210709444813 |
| AAAGCATGACGT   | 678.13706835556  | 0.369801653855647 |
| GAGTCAGGCGTA   | 678.139096068061 | 0.300815911201549 |
| AGTCACTCCGGG   | 678.140966132475 | 0.354820869348858 |
| CCCCAGGATGAC   | 678.148740267435 | 0.394948844948548 |
| CTAACGTGTGAC   | 678.160903315398 | 0.349298558848398 |
| GTCACAACCTCAA  | 678.16418503189  | 0.359642930655951 |
| GTCCTGGCTCA    | 678.171705211215 | 0.180160039539674 |
| ACTAGTGACGTG   | 678.172516504179 | 0.281431496746833 |
| AGCATACGTGAC   | 678.177366648983 | 0.8080925119552   |
| GTAAGTAGTCA    | 678.184790319418 | 0.380173500276998 |
| GTGTATCCGTCA   | 678.191816845396 | 0.399286208640787 |
| GACTCACTTACC   | 678.218891555483 | 0.296165710649669 |
| ATGACCACCTTTA  | 678.21894172984  | 0.362259145604793 |
| AGTCACGGACCA   | 678.223432339991 | 0.442237106901677 |
| AGTGACTTGGAC   | 678.231367945093 | 0.2397571137928   |
| GCGTCACAAATCA  | 678.242083670695 | 0.479323069291234 |
| ACACATGACCCA   | 678.249765602741 | 0.351276153143618 |
| GTCATAAATTGA   | 678.258413676192 | 0.302664830982196 |
| AACCTACTCATT   | 678.263807425823 | 0.202799860337322 |
| ATTGGGTGTGAC   | 678.269728849151 | 0.172129638659462 |
| ATTATTGACACA   | 678.27684599353  | 0.581185147096768 |
| AGTCAGAAGCTG   | 678.299268795067 | 0.363344073356834 |
| TGAGTAAGGAAA   | 678.300919014017 | 0.265109346985705 |
| AGTTCCGGTGTGAC | 678.305769186734 | 0.598419431061605 |
| AGTCAGAGGATC   | 678.307410588002 | 0.342428171498956 |
| AGAGTCAATGCT   | 678.323281612768 | 0.336415913607998 |
| GACTCAGAGACC   | 678.331900337647 | 0.36008516238505  |
| ACGCCAGGTGAC   | 678.342000082447 | 0.693052133036012 |
| TCCGGCGTGACA   | 678.35238358726  | 0.392934397582793 |
| ATTAGTCTGCAG   | 678.36719282914  | 0.508515288104863 |
| GAACACAGTGAC   | 678.374591059908 | 0.521968994079557 |
| CCTTGACAGTCA   | 678.378088772923 | 0.605740350036672 |
| AGTCACTTAGC    | 678.379982408085 | 0.239743935273983 |
| ACTCACAATGA    | 678.38014987809  | 0.325959317140454 |
| CGTCATTAAGTC   | 678.384475045257 | 0.375782825373306 |
| CAAGATGACCGA   | 678.389408997929 | 0.528118883165439 |
| ATTACTAAATCA   | 678.395216939367 | 0.351134980639472 |
| AGTCACTCTCCC   | 678.402072577155 | 0.165633322595602 |
| AGCGATAATGAC   | 678.402486338728 | 0.521257176631324 |
| GATAGCGGTGAC   | 678.403452387298 | 0.48873420447666  |
| CTAAAATATGAC   | 678.404957590117 | 0.354717924832639 |
| TGACTGTAGGCA   | 678.42981713994  | 0.359261867932105 |

|                |                  |                   |
|----------------|------------------|-------------------|
| ACGAAAGTGTC    | 678.431439015079 | 0.513753012005335 |
| CACTGCTGACTG   | 678.436665714063 | 0.466322478057573 |
| ACGTCACTTTGC   | 678.437237982611 | 0.37062011638695  |
| GTCACATAGGTA   | 678.445301249111 | 0.356651242473365 |
| CTAACCGGTGAC   | 678.458290193794 | 0.468446800346508 |
| ATGACTGGGGAG   | 678.461525153781 | 0.278168845667026 |
| AGTCACTAGACG   | 678.469006832843 | 0.372160263531171 |
| CCGCACGACTCA   | 678.476456006737 | 0.38552669714011  |
| CAGCGCGGTGAC   | 678.480651623738 | 0.401274330066388 |
| AGAGTCAGTTC    | 678.496802920119 | 0.138448764486379 |
| AGTCAGACTCAA   | 678.497099966721 | 0.334587440812058 |
| ATATGGTGTGAC   | 678.498384356182 | 0.427026134059067 |
| ACGTCATGGATG   | 678.504219380947 | 0.417446639149351 |
| CACCCTTACTCA   | 678.509090236647 | 0.181636651772264 |
| GTCATTCCTGCA   | 678.511332823901 | 0.377046751073324 |
| CGTCATTGGCGA   | 678.516653160013 | 0.392246162601491 |
| GCGTCGTATGAC   | 678.517191690648 | 0.311802596472609 |
| ACTTGATATGAC   | 678.518611398162 | 0.652079369561452 |
| ACCGGTGGTGTGAC | 678.529895068384 | 0.579009226786139 |
| ACAACCTTGGTCA  | 678.53049393223  | 0.615664123104418 |
| CGGATTAAGTCA   | 678.534422792759 | 0.48554513452989  |
| ATAGAACATGAC   | 678.538463623712 | 0.319479179375202 |
| CCGCTGCGTCAG   | 678.556599236534 | 0.590235345155996 |
| TAATTGTGACCA   | 678.56353929078  | 0.564067871931341 |
| CATCATCGTGAC   | 678.566708224935 | 0.365852261278658 |
| TCGCGTGACCCA   | 678.567574514602 | 0.338791126467084 |
| GCGACTATGACC   | 678.575541694888 | 0.454138915182672 |
| ATCGAAACGTCA   | 678.593963870594 | 0.623607409206573 |
| ATGACATTTCCA   | 678.598472906583 | 0.226026549347727 |
| GTCATGTGAGTA   | 678.604203847937 | 0.35367628950815  |
| CATTGGGTCACC   | 678.605459459094 | 0.391318694995528 |
| ACGCCGGATGAC   | 678.607630827636 | 0.430752922439638 |
| TTACCGTCATAA   | 678.617625042197 | 0.512433887336519 |
| CCCCGTGAATCA   | 678.629130410198 | 0.243883244984222 |
| AATGTAGGTGAC   | 678.639240116306 | 0.343072858492684 |
| TGAATAATGACA   | 678.647251940138 | 0.277285626735316 |
| AATGCTGGTGTGAC | 678.647309758578 | 0.259279747532704 |
| AGCTAGGATGAC   | 678.647515403871 | 0.320195482748114 |
| GTCACATTAGGA   | 678.657711691344 | 0.471480806129521 |
| CTAAAGTGACAC   | 678.662974669516 | 0.272535971673981 |
| CTGCCGAGTGAC   | 678.663993666319 | 0.372743509546119 |
| GCCTATGGTGTGAC | 678.675128891247 | 0.177159191188556 |
| ACACGTTGACTG   | 678.680579859212 | 0.542445188940301 |
| CACGTCAGCTGG   | 678.686981274798 | 0.356862471278265 |
| CTCCCTTATGAC   | 678.691089130426 | 0.231377422126336 |
| CTATTAATGACA   | 678.699083905705 | 0.393738867189744 |
| CAAGCAGAGTCA   | 678.708129496716 | 0.317787536775683 |
| GACGCGCAGTCA   | 678.721427423661 | 0.41093888348244  |
| CGTCACTGATTA   | 678.730788335847 | 0.356599872837882 |
| AACATCGTCATG   | 678.734323567757 | 0.255015299474989 |
| GGCATTATGAC    | 678.737638964943 | 0.527314738104714 |
| TACCAAATGACA   | 678.738832613688 | 0.386196073656156 |
| GACTCAGTGTA    | 678.75013474329  | 0.397361276310792 |
| ATGACCATGCAT   | 678.751944240556 | 0.392786266722221 |

|               |                  |                   |
|---------------|------------------|-------------------|
| AAGTGACCCAAT  | 678.752023512739 | 0.421006371581054 |
| CGTATGACCGCA  | 678.757368738673 | 0.464752213994392 |
| AGTCAGCATGAT  | 678.765912112719 | 0.318025092932775 |
| ATGTGTAACCTCA | 678.778228138234 | 0.30585007026567  |
| CATCCCGTCATA  | 678.784376687178 | 0.282195939794222 |
| AACTATTGTCAT  | 678.789354591173 | 0.418962524209328 |
| GCGACCCGCTCA  | 678.791566360923 | 0.435295824345305 |
| CGTTGATTACCC  | 678.793661160787 | 0.273135525725637 |
| CTATGGCTAATA  | 678.800253183625 | 0.211130198786496 |
| CTTCAGAGTGAC  | 678.813445995628 | 0.759086567797737 |
| CCGCGTAATGAC  | 678.814420720643 | 0.266119139866021 |
| GACTTATGATGA  | 678.814522871458 | 0.63522959992251  |
| CGCGAGCAGTCA  | 678.818063981919 | 0.484935174306189 |
| ACAGGTAATGAC  | 678.818300281766 | 0.479038805496511 |
| TACACTAAGTCA  | 678.823377221791 | 0.368934211861476 |
| CTCGCAAATGAC  | 678.829843316435 | 0.448101609695665 |
| CATGCTATGTCA  | 678.836683514613 | 0.421595941772971 |
| GACGTGTGACCC  | 678.838913587944 | 0.452435969164393 |
| GTAAGATGACCA  | 678.845528610739 | 0.428480649867652 |
| CATAGTCAGTAC  | 678.846566804184 | 0.480485750704426 |
| AACTACCAGTCA  | 678.847109309546 | 0.327407488460372 |
| AAGTCACTCTTG  | 678.853008247073 | 0.177345051674291 |
| GACTGCCATGAC  | 678.858195000797 | 0.404137947634189 |
| GACGAGTGTGAC  | 678.873727856288 | 0.174845877190805 |
| GTCATCCACTAA  | 678.874259319487 | 0.337043029551148 |
| CCATTCTAGTCA  | 678.887958826577 | 0.376689920348523 |
| AGTTCCTGACTC  | 678.890051654062 | 0.275072364700702 |
| CGGCTTGTGTCA  | 678.891427218134 | 0.321709646026908 |
| TGACACGTGTAA  | 678.895681375717 | 0.369150242730113 |
| GTCATTTAACCA  | 678.904208383947 | 0.38846435032305  |
| CGTGTTGACACA  | 678.907774375959 | 0.380438266652987 |
| CTTGTTGTGAC   | 678.909486424786 | 0.556458715816051 |
| CGTCACCTGGCA  | 678.913211241913 | 0.666947282697813 |
| TAATGTGAGCCA  | 678.919070213883 | 0.4558708693683   |
| TTATTGACTGAA  | 678.922776667795 | 0.400393482284422 |
| GGCATTGGTGAC  | 678.935018307995 | 0.371554468537386 |
| CCGCGGGATGAC  | 678.94462025117  | 0.406228409244562 |
| GATGACGTCCGC  | 678.94916186035  | 0.368590014235939 |
| CGTAGTACGTCA  | 678.956916875506 | 0.460170732616277 |
| AATAGGTGTGAC  | 678.958717111483 | 0.115804472428887 |
| GCGTCACTATCA  | 678.960874103488 | 0.283963884330988 |
| ACTCATACTATC  | 678.963494005906 | 0.25901776278685  |
| CACACTACGTCA  | 678.967642917385 | 0.525352398643676 |
| AAAGACGACTCA  | 678.983237008828 | 0.269589131748721 |
| AATAACCAGTCA  | 678.994625776367 | 0.268199435245704 |
| CGACTAATTAAC  | 679.004824546547 | 0.307504627022285 |
| GGCTACAATGAC  | 679.004940334435 | 0.485385312802829 |
| CCGTTGAATCAC  | 679.009329351255 | 0.254672282538503 |
| CCCATCAGTGAC  | 679.016076700208 | 0.213694835323424 |
| ATAACGCATGAC  | 679.023194714003 | 0.444211051753504 |
| AATTATTACTCT  | 679.027970228204 | 0.312958817297548 |
| TAATAATTGTCA  | 679.03087045862  | 0.479027889680906 |
| AGACTAATTAAC  | 679.033340979307 | 0.408225681901087 |
| GCGTCACATTCC  | 679.044152730074 | 0.371240749841403 |

|                |                  |                   |
|----------------|------------------|-------------------|
| CCTAGCGGTGAC   | 679.059831315632 | 0.408575201111882 |
| GTGACGCCACAC   | 679.061250328448 | 0.372799128038678 |
| ATGAGCTGGCCA   | 679.077889419883 | 0.272075909730942 |
| GACTCAATTATA   | 679.082845924669 | 0.380179537881306 |
| ACAGTATGTGAC   | 679.088561343781 | 0.444037231940604 |
| ATATGTCAGAGG   | 679.090308830839 | 0.20310377160384  |
| ATGACGTGAAGA   | 679.098818481313 | 0.329774824750803 |
| AGTTAATGTGAC   | 679.099635975126 | 0.426745059414085 |
| GTAGATATGTCA   | 679.102832657585 | 0.208022833087903 |
| TGTGTCAATAAA   | 679.106687607714 | 0.272230833712245 |
| CGACCAATGACA   | 679.120098106252 | 0.336557326243162 |
| GCTTGCGACTCA   | 679.126741070511 | 0.401899640872019 |
| GGTCATTGACAC   | 679.129433372891 | 0.503234170696032 |
| ATGACAGAGGAC   | 679.147299343948 | 0.37956773278507  |
| AAGGGCGAGTCA   | 679.154483315726 | 0.239231391886967 |
| ATAACGTCATGC   | 679.156696221449 | 0.273992943988885 |
| CCGGCCAATGAC   | 679.157961572183 | 0.321444218627655 |
| ATTTGATATGAC   | 679.16319338301  | 0.429069178477838 |
| CGTCATTGACAC   | 679.172109822502 | 0.379565961533055 |
| ATGACATTGACA   | 679.188265333459 | 0.367751232145131 |
| CAAAGCTGACTG   | 679.191160634755 | 0.524816903351623 |
| ACAGCAGAGTCA   | 679.207943200261 | 0.409020504028013 |
| ACTACTGTGACA   | 679.210306800094 | 0.288987995812255 |
| GCCTCACAGTCA   | 679.219079806828 | 0.318134158024542 |
| GTGAGTACCACA   | 679.219284271609 | 0.466364974913353 |
| AGACTAATTGGG   | 679.226369759085 | 0.287083310072227 |
| ATGACCCAGCAC   | 679.226370804177 | 0.380622813428043 |
| GTCATTTATAGA   | 679.232086972046 | 0.237060039990194 |
| AGTGACGTGCCG   | 679.243137398637 | 0.248802124969604 |
| GTTACACAGTCA   | 679.247341129018 | 0.358495475337605 |
| GTACTIONGTGACA | 679.260592927716 | 0.448169531137044 |
| TAAGTTGACACA   | 679.269234494692 | 0.458008992462787 |
| GCCGAACATGAC   | 679.277713242883 | 0.567550728044472 |
| GACTTTTGACTC   | 679.296805843809 | 0.24862745370668  |
| AGAGTCAAGGGC   | 679.310984349369 | 0.318848323451022 |
| CGTCATCTAGGC   | 679.31747585202  | 0.332388135433749 |
| GCTGTATGTGAC   | 679.321095981117 | 0.288574572355581 |
| ACGAGTGGTCAT   | 679.340794633868 | 0.372886089050355 |
| GCATACTGTGAC   | 679.345698626246 | 0.622715103899786 |
| ATTAGTAGTCAG   | 679.348681215793 | 0.317572541827321 |
| GTCACATTAAGA   | 679.355600447707 | 0.475893852768334 |
| AGCTCACATGAC   | 679.35897888418  | 0.465630230449209 |
| CCGGCCGTGTCA   | 679.361639905781 | 0.360778198012043 |
| GTCATCCGCCTA   | 679.376386972262 | 0.433498913752858 |
| CCCTACGGTGAC   | 679.37953302807  | 0.55033147269796  |
| CGTGATTGGTCA   | 679.379863952991 | 0.344500562616176 |
| AAGTTACATCAC   | 679.381102349238 | 0.162166581278283 |
| ACTAGGTCTGAC   | 679.383520855819 | 0.559819996896468 |
| ATGATGCAACTG   | 679.391342361361 | 0.571411481842441 |
| AAATGACATTAC   | 679.401450688389 | 0.288565409166388 |
| AGAGTAATAATG   | 679.411222101573 | 0.347544172669302 |
| TCGTTGACTGAA   | 679.41585433085  | 0.429953406320852 |
| CTTGGCATGACA   | 679.419430246245 | 0.462156061243126 |
| GCGGATCTGTCA   | 679.421482633455 | 0.297643385019048 |

|              |                  |                   |
|--------------|------------------|-------------------|
| ATCGCTGAATCA | 679.421551545862 | 0.417917067898019 |
| AAATCTACTCAT | 679.437232012905 | 0.281309115489346 |
| CACTTCTGAGTC | 679.440152421543 | 0.367735991635993 |
| GGGTGAGCCACA | 679.446233662407 | 0.414918910127209 |
| GACTGATGACCA | 679.449291538632 | 0.471436906794787 |
| CTAGTCACGGAA | 679.451248151503 | 0.344802883507226 |
| GAAAAGCAGTCA | 679.466221583365 | 0.364479074049509 |
| ATACCTGACTCG | 679.468696631176 | 0.42028045332547  |
| ACGTCATGGATC | 679.477567177414 | 0.41103560424975  |
| TGACTATGCACA | 679.480098007224 | 0.442531701829065 |
| ACTCATGACATG | 679.485296091986 | 0.396345734688128 |
| GCTCTTAGTGAC | 679.502473155086 | 0.5578759104274   |
| CCTACATGACAC | 679.503959206271 | 0.121746325494354 |
| CATAATTGACTC | 679.510690115548 | 0.370356650576147 |
| GGCTCGAATGAC | 679.521349547481 | 0.267612932024393 |
| ATACTGTCACCA | 679.523316521503 | 0.365878948434762 |
| AAGTGTAATGAC | 679.52794703323  | 0.312161240202627 |
| CGTCTTGGTGAC | 679.530305750815 | 0.28040277110091  |
| GTCATTTAATA  | 679.542731644688 | 0.360338584290912 |
| ATGACATGATCC | 679.544954634151 | 0.148403875587511 |
| GCGTGGTCACAC | 679.55347333842  | 0.422885344476936 |
| CGTCATTATTAC | 679.55632565695  | 0.309959006065508 |
| GTAATATGACCA | 679.560499183364 | 0.397078839429123 |
| ATGTGTGAGCAA | 679.57220926155  | 0.37341910554203  |
| ACGATAATGACG | 679.57380294128  | 0.355996490656608 |
| GATGACCGAAAA | 679.575585726186 | 0.372708923815387 |
| AAAATCGCGTCA | 679.577377228464 | 0.385811760527777 |
| CATACTAAGTCA | 679.580673898256 | 0.55182296841182  |
| ACATCTCTGACT | 679.595966695849 | 0.185038725764013 |
| TTCGTGTGACAA | 679.596540808854 | 0.417523120010333 |
| AGGTGACGATAT | 679.603586215375 | 0.29787314293372  |
| ATGAGCAAGCTC | 679.608185777961 | 0.668468208548464 |
| ATAAACTTGTC  | 679.615059404274 | 0.402503729175737 |
| ACTATTCTGACT | 679.619724585012 | 0.36883464552395  |
| AGTGACGTGCAC | 679.624720085295 | 0.206423530378012 |
| GACCACGTGTCA | 679.62754400264  | 0.442804131719312 |
| GAGTCAGGCACC | 679.630178760681 | 0.334990082943918 |
| CCATTAAATGAC | 679.648459306574 | 0.454962638719984 |
| TCATAAGACGCA | 679.648779122636 | 0.605089476340216 |
| ACTCATACATAA | 679.657100834092 | 0.319485754097876 |
| CGTCATTTGGGA | 679.669102312931 | 0.323642825829873 |
| CTACATTCGTCA | 679.673414590449 | 0.201696705550724 |
| AACGGAAATGAC | 679.693718146527 | 0.263746710896424 |
| GTCATAAAAGAA | 679.694601242305 | 0.404711720480819 |
| CTCTGATTCAGA | 679.70431746085  | 0.36989450693385  |
| GTCACGGCACGA | 679.72186786104  | 0.503886863644877 |
| GGATTAGACTCA | 679.724961920545 | 0.373053520436484 |
| GAGCTTGATGAC | 679.730268231381 | 0.316685949554299 |
| CGTTCGGTGACA | 679.731852187604 | 0.567423207613576 |
| GTCATAAACTCA | 679.749540679273 | 0.30611235190136  |
| GGTGTGCATGAC | 679.757653569872 | 0.262347632099892 |
| ATTGATTCATGA | 679.775611653718 | 0.22232336735612  |
| GACTCAGAACGA | 679.789231601133 | 0.379284166093966 |
| AACTAGGTGACA | 679.792082437343 | 0.3319028672371   |

|               |                  |                   |
|---------------|------------------|-------------------|
| AAACCTGTGAC   | 679.801032924177 | 0.369417331082719 |
| AAATTACGCAAC  | 679.8014446543   | 0.387314087909587 |
| GGTTTGACGCAC  | 679.802028439707 | 0.285921224423354 |
| ACTTCCGCGTCA  | 679.80773721663  | 0.282817997152923 |
| CAAGCATTAGTC  | 679.811371041995 | 0.648477392936321 |
| ACTCATCGGGGA  | 679.819610583666 | 0.479195601317921 |
| AGTTTCCAGTCA  | 679.824404556334 | 0.503020338762588 |
| ATTAGGTGACGC  | 679.825247486581 | 0.274534654252405 |
| TGACAAATGGCA  | 679.850134300602 | 0.406944566100845 |
| GGTGTTGACACA  | 679.852713846201 | 0.499897028212477 |
| GTCACGGCTGAC  | 679.873890685944 | 0.483314486217034 |
| CACCCAATGACA  | 679.874553262115 | 0.395554493885722 |
| AGTAATACTGAC  | 679.882605691506 | 0.404036776648357 |
| ATTACACAATGA  | 679.886429388663 | 0.533516063508426 |
| CCGGAATGTGAC  | 679.908496818002 | 0.398735425328084 |
| GTCATTTCAATTA | 679.928088002672 | 0.397867982110695 |
| CTGAATTACGCA  | 679.928264292033 | 0.571676171913413 |
| GTGACGCTGTCA  | 679.931216173026 | 0.679834001950122 |
| ATGACGTCTCAC  | 679.949072989283 | 0.398774762873057 |
| TGACTATCGCAA  | 679.95332799356  | 0.421507588970699 |
| GGGCATGACACC  | 679.956547718511 | 0.378388872494521 |
| GTCATATGCATA  | 679.960237635849 | 0.459474397467658 |
| AACAGGAATGAC  | 679.973547697258 | 0.214900673647722 |
| ATAAACCTGTCA  | 679.983668716309 | 0.325446987666554 |
| TGACGCGGTGCA  | 679.986090253061 | 0.363172705341532 |
| GAGACAGATGAC  | 679.986898514921 | 0.434059681107192 |
| AACATTGACTGA  | 679.992379554333 | 0.404568444652391 |
| ATTGACGGTGAC  | 679.997102811566 | 0.372304973935397 |
| AGTCACTACACC  | 679.998141306041 | 0.20218073316573  |
| CACCTTGTGACA  | 680.002858690103 | 0.452322573385635 |
| ATTCACAGTGAC  | 680.020392173976 | 0.435432291001297 |
| AACCAGGAGTCA  | 680.02153805519  | 0.33354970843193  |
| CATCGGACTCA   | 680.022061567865 | 0.453883863302065 |
| TATACGTAGTCA  | 680.022533961474 | 0.548992419877728 |
| AGACTAATTACT  | 680.023538720453 | 0.403331174299044 |
| ATTAAATCGTCA  | 680.030548060769 | 0.459693290617289 |
| GGCCTTGCGTCA  | 680.032588543016 | 0.434141692612151 |
| CTGGCTTGTGAC  | 680.047141172081 | 0.262567589632836 |
| AGATGACATTAT  | 680.049517482263 | 0.381288753511118 |
| GGACCAGATGAC  | 680.053098491691 | 0.377683322525877 |
| TCCTGGGAGTCA  | 680.054443825181 | 0.556110590260831 |
| CGGTGCGAGTCA  | 680.059298992321 | 0.412636059275128 |
| CGTCAACATGTA  | 680.063821526745 | 0.363068879442039 |
| GTCACATAACAC  | 680.075599742178 | 0.323894807286373 |
| CCCTAGGTGACG  | 680.089496205602 | 0.400193690698033 |
| TCACATTGATGA  | 680.090021110947 | 0.722801199281426 |
| CGGATTTGCTCA  | 680.094538241309 | 0.319088609290948 |
| AGATACGTCAAT  | 680.097799718808 | 0.447727246549344 |
| GCCGGTATGACC  | 680.109256001911 | 0.537009866692622 |
| ACTCATACTGTA  | 680.116132503969 | 0.295240087887409 |
| GAGTCAGGAACC  | 680.1163333732   | 0.388518396180129 |
| GTAGTTCTGTCA  | 680.11787279969  | 0.493528471189414 |
| ATGACAGCGATA  | 680.123438473655 | 0.402806984945859 |
| CTGATGACGGCA  | 680.129666408521 | 0.244567557141226 |

|              |                  |                   |
|--------------|------------------|-------------------|
| CAGGCACAGTCA | 680.130205629719 | 0.441163181199636 |
| AACTAACTATGA | 680.132214083289 | 0.409010950145097 |
| GAGTCAAAGACA | 680.133568151429 | 0.411136128914342 |
| ATGACCATGACC | 680.143973851596 | 0.403278148544576 |
| GATGACAAGATA | 680.146780469589 | 0.22361836869397  |
| CAGCGTGACGAA | 680.159436648497 | 0.477256705563034 |
| CGATACCTATGA | 680.16559457856  | 0.551079252684678 |
| AGTCAGAGGTTA | 680.166783433414 | 0.237799032387508 |
| CGATGAGTTGGC | 680.169891939138 | 0.363573243519887 |
| ATCGTCTGTGAT | 680.177902530129 | 0.331481654869767 |
| GTACCAGTCAGA | 680.183618973405 | 0.413242316802541 |
| GTGACAGCACCA | 680.185678722115 | 0.388167850200511 |
| GTGAATGACCAC | 680.1905557942   | 0.199198255650022 |
| CGCGTGGTGACA | 680.190617352705 | 0.396328099334747 |
| CATACGTGTGAC | 680.206949566479 | 0.442507328816257 |
| TGAGTGATGTAA | 680.213492080716 | 0.334640537272062 |
| ACCAACTGGTCA | 680.220989541151 | 0.57715752758404  |
| TGACGCGGAACA | 680.241719875232 | 0.354373745466033 |
| GGTCATGGTGAC | 680.245793257137 | 0.305172397407043 |
| GATAACGGTGAC | 680.250058194649 | 0.358039612727431 |
| ACTCATTCTGAA | 680.250525848152 | 0.438217800305095 |
| TAGGATGGGTCA | 680.251601765961 | 0.290083268219197 |
| ATACTTTACTCA | 680.254726396488 | 0.476362724658567 |
| GCTTTGAGTGAC | 680.256839231618 | 0.327952426886072 |
| TGCGTAATTTAA | 680.257266301472 | 0.400784541879463 |
| GAGTCAAACATA | 680.258727916231 | 0.305510936608241 |
| AATAGGGAGTCA | 680.265543990117 | 0.288451468456291 |
| ATGACTTGATAA | 680.270158368959 | 0.218384137105081 |
| ACAGCAGACTCA | 680.273968892414 | 0.306915770940074 |
| TCAGCCGCGTCA | 680.28019319326  | 0.739554738898611 |
| GATCGTGGTGAC | 680.298354246293 | 0.361564345256202 |
| ACCGTGTGACAA | 680.305077804749 | 0.402341170585526 |
| CAGCTGTGTGAC | 680.32130440141  | 0.394343329340036 |
| AGGGGCGAGTCA | 680.324469244235 | 0.238105296962868 |
| GTGTTAGACTCA | 680.339070992259 | 0.419111884095828 |
| GTCACCGAAGGA | 680.342453127217 | 0.556190075895864 |
| TAGAATGGGTCA | 680.349561207846 | 0.332856214265249 |
| CGCGTCACGAAG | 680.352875307376 | 0.420484893084667 |
| AGTCAGGTACTC | 680.356735054715 | 0.541388281644185 |
| ATGACAGGGTCC | 680.358497194835 | 0.383554924618973 |
| GATCTTGTGATC | 680.374594835845 | 0.501975853829696 |
| AGTCACGCCCAT | 680.397605854486 | 0.273699385503625 |
| CCCTTGAGTCA  | 680.404061846146 | 0.53737819550888  |
| CTTACTAGTCA  | 680.404343981825 | 0.198174997798717 |
| GCAACGCGTGAC | 680.418066833825 | 0.587371688318015 |
| ATTTGTTTGTCA | 680.423090380457 | 0.327276604552844 |
| GTCACTGACCAA | 680.443599865785 | 0.193129069245679 |
| TGACCAACGTAA | 680.444415606456 | 0.499891205109616 |
| CTATGAGACTCA | 680.444593338023 | 0.479808962664728 |
| GTATCCATATGA | 680.445941685509 | 0.453843061006024 |
| GTCATTTAATCA | 680.446292063578 | 0.527995611651634 |
| CAGTCAGATCGA | 680.450569156416 | 0.339593005097648 |
| GTCACAGCTACA | 680.45117677017  | 0.255029037549915 |
| GACTAATATGAA | 680.456681144259 | 0.480978184524931 |

|              |                  |                    |
|--------------|------------------|--------------------|
| ACGTGTTGTGAC | 680.458506193628 | 0.462944873351538  |
| GCCCCAGATGAC | 680.461278510511 | 0.43018237556298   |
| GTCATGCACTAA | 680.46200228023  | 0.774525472750369  |
| AATCTTAGTAAT | 680.464758643429 | 0.409876739613843  |
| CCAGATATATGA | 680.478166345224 | 0.45683082246769   |
| GATCACTAGTCA | 680.480290765084 | 0.381327496027989  |
| ACGTAAACGTCA | 680.480930142886 | 0.561642582684237  |
| AGGACAACTCAT | 680.49130227288  | 0.232603857106376  |
| AATTGGACTCAC | 680.495593340298 | 0.327608028212514  |
| GCCGTTGATGAC | 680.511748861079 | 0.31724179696808   |
| GTCACATCTCAA | 680.529363258136 | 0.531358240153849  |
| CTATTGAGTAAC | 680.535176880117 | 0.364566308049507  |
| ATGGCCTGTGAC | 680.548916205762 | 0.626629194374896  |
| ACTGTCTGTGAC | 680.558516055551 | 0.237582766526633  |
| AACTAATTAGTC | 680.560789051758 | 0.354818846849468  |
| CATCCGTGACAC | 680.584601837036 | 0.416804302870129  |
| ATTAGGTCACAC | 680.599566372643 | 0.212845788309175  |
| GAGTAATATCCA | 680.607449617253 | 0.281944041176639  |
| ACGTAGACGTCA | 680.610859850613 | 0.43106023426078   |
| ACCAGTCAGCGG | 680.615347569326 | 0.443243261567888  |
| ATTTTCGTAGCG | 680.625639250757 | 0.324240769530956  |
| GAGTATTGTGAC | 680.627192928637 | 0.343946999892788  |
| GTCATCGGCCTA | 680.627286253348 | 0.330253494084985  |
| CGTCATCTAGCA | 680.634470043159 | 0.436515211285723  |
| CCCCACTATGAC | 680.640590048081 | 0.385638447700632  |
| AGTCACTTCACA | 680.643991738295 | 0.422373410600926  |
| GCTGACACTTAA | 680.644230635721 | 0.446738673098022  |
| ATACATTTGTCA | 680.65243402832  | 0.364656477929087  |
| CCAACAGATGAC | 680.673539759435 | 0.402148811041316  |
| GCTCAAGTCATA | 680.678376377049 | 0.309033756707995  |
| TGACTCCGTCCA | 680.688276749136 | 0.362582755565995  |
| CGTGATCCGTCA | 680.696691647305 | 0.278311269554953  |
| ATTCATAATGAC | 680.698673493753 | 0.460110960118675  |
| CACGAATTACTC | 680.705641632609 | 0.333583195351855  |
| AACGTCACCGGA | 680.722538119813 | 0.358641893712571  |
| CACGACGTCATC | 680.727437267499 | 0.335827988616522  |
| CAACCTGACACA | 680.737146086921 | 0.254951196541849  |
| AATGAATGACCA | 680.739121213725 | 0.41591584068568   |
| GTCATTCTCAAC | 680.767282736406 | 0.383166439705883  |
| TAATAATGAGTA | 680.768495907922 | 0.0931672452659735 |
| CAATATAAGTCA | 680.774532760171 | 0.380866626839231  |
| TGTGACAAGTAA | 680.805828206969 | 0.176535371482048  |
| GGATCGCGTCAC | 680.812673354846 | 0.247335514375974  |
| CGTCAATTATGA | 680.82332591101  | 0.289731490442185  |
| GTCATCTGATTA | 680.824572524993 | 0.279796363709959  |
| GTATGACCTCAC | 680.828437039444 | 0.350935649259089  |
| GGGTCATATAAA | 680.848307637458 | 0.571531821657344  |
| ACTCATAAGAAT | 680.84970894452  | 0.288115807505409  |
| ATGAGCAAGCTG | 680.858136608083 | 0.35022133022822   |
| AGAGAGATGACA | 680.873015106655 | 0.28464560301918   |
| ACTCATTATAG  | 680.883314767098 | 0.361116050534852  |
| GGTGAGTCTCAA | 680.884080496645 | 0.206081887138372  |
| GTCACCTGAAAA | 680.893991912467 | 0.376813346039574  |
| AGTCACGGATTA | 680.894879808633 | 0.428261878781354  |



|              |                  |                   |
|--------------|------------------|-------------------|
| GCGCCTGATGAC | 680.894973771897 | 0.649583982770682 |
| AACCCATGACAC | 680.913218630434 | 0.160918286430596 |
| ATAGTCAGGATC | 680.92287492951  | 0.499827329028187 |
| GTCATTAGAACA | 680.923975127285 | 0.22172853447678  |
| CAGTCTTGTGAC | 680.92888852959  | 0.491584352662472 |
| CGTCACTCTGAC | 680.932831046544 | 0.577990667563665 |
| GAGATCCATGAC | 680.933046608226 | 0.295229162964871 |
| AGTCACGAGATA | 680.934946634631 | 0.311273548036168 |
| GTCACGTGCGAC | 680.945385563543 | 0.358657995901668 |
| AAAATGTCATCT | 680.970374865057 | 0.231785575516734 |
| TGACAAACTTAA | 680.972568669532 | 0.421335335309087 |
| ATAGCGAATGAC | 680.982500389031 | 0.379392883415083 |
| CCCTAAGTGTCA | 680.984583079243 | 0.419435598725326 |
| ACTTCCGACTCA | 680.985551004602 | 0.432836667930275 |
| ATGACGAGACGA | 680.987701087325 | 0.280322776538072 |
| AGACCTGACTGA | 681.005155509168 | 0.377939126990397 |
| ATTACTATTACG | 681.015163454709 | 0.389023323608222 |
| CGTGACATAGGC | 681.01829194182  | 0.429983376989833 |
| GCAGTCATGGTA | 681.018629727188 | 0.432035926115794 |
| GTCACGTATAAA | 681.020504021174 | 0.588022117931349 |
| CTAGCAGTCAGA | 681.027521545756 | 0.277173398616064 |
| AACCGTGTCAAC | 681.036640398165 | 0.316146935013147 |
| CACTTTGACTGA | 681.038645710789 | 0.48399820965667  |
| GTCCAGGTCATA | 681.044176190221 | 0.35920663881485  |
| ACTGACGTCAAT | 681.051198661209 | 0.505643777456531 |
| CGTTTATGTGAC | 681.052586563892 | 0.30024872155535  |
| ACGTCACTATAT | 681.052787482393 | 0.520158558165049 |
| AAGCGGAATGAC | 681.063285312373 | 0.189151107901454 |
| GTCACCAGTATA | 681.063480776722 | 0.352202763818109 |
| CGAGCGGATGAC | 681.067088858192 | 0.345869926245558 |
| TCATATAAATGA | 681.076891285396 | 0.545915202411422 |
| AGAATAGACTCA | 681.080426550007 | 0.21967848431183  |
| CGGGAATATGAC | 681.082068948206 | 0.227323475291099 |
| GTGACCCAATGA | 681.099407875189 | 0.499659112575933 |
| ATGATACAATCG | 681.110328881923 | 0.39351306529466  |
| GCGTATATGTCA | 681.115036256131 | 0.283506608627302 |
| AAGCCATGAGTC | 681.116544114665 | 0.424269907057805 |
| GAGTCAAGGTAC | 681.117098273574 | 0.462280523197426 |
| ACTTCTACGTCA | 681.12061184312  | 0.143418323834688 |
| GTCATAACGATA | 681.12748230333  | 0.413698547554964 |
| AGTCAGAAGATA | 681.130835232236 | 0.178844446385668 |
| AACCAAGTGACT | 681.147439941824 | 0.258516734790788 |
| GTCACCTAATTA | 681.147480736792 | 0.519396341701087 |
| GTCACACTGTAA | 681.150387211781 | 0.426783487015341 |
| GTCTTTACGTCA | 681.154554278785 | 0.571250107996772 |
| ATCAGCAGTGAC | 681.160062391976 | 0.435239142420195 |
| TGACGCGACGAA | 681.17138513526  | 0.703979085921832 |
| ATCACTGACGTA | 681.179533833021 | 0.421868690151498 |
| CCAAGCAATGAC | 681.193081903719 | 0.296494447590429 |
| GTTTGCCAGTCA | 681.194835175311 | 0.464737227770939 |
| CTCCTACAGTCA | 681.196225152065 | 0.321305672587853 |
| GTCACACACCAA | 681.201950043939 | 0.51039832313491  |
| AATTTGATGACG | 681.203083466195 | 0.389929810556907 |
| GACAACGGTGAC | 681.221150018807 | 0.316422027962814 |

|               |                  |                   |
|---------------|------------------|-------------------|
| ACTTATGTGACA  | 681.221419194639 | 0.480717905716337 |
| AGTAGTCTGACT  | 681.225620061308 | 0.289929382441729 |
| CGTCACACGGAA  | 681.229823156078 | 0.527284034418486 |
| AGTCAGAATTAT  | 681.230493348306 | 0.403139981730985 |
| GGATTATATGAC  | 681.232741339423 | 0.332625435970955 |
| ATAACTTCGTCA  | 681.2425497549   | 0.368553906066491 |
| ATGTCATGTCAG  | 681.248761779712 | 0.41360678287263  |
| GTCATAGAGAGA  | 681.252334798481 | 0.2182427787243   |
| TAATCCGTCAGA  | 681.260512094918 | 0.345735791372039 |
| ACAATAGGTGAC  | 681.270425503684 | 0.299840337087364 |
| CCATGACATGAC  | 681.275284924823 | 0.248119340079123 |
| CAGGCTACGTCA  | 681.281323200589 | 0.500225694381969 |
| CAGGAATGACCC  | 681.281815481007 | 0.449190295382786 |
| TGACGCGAATCA  | 681.282542475098 | 0.396959065931653 |
| ATGACATTAGTG  | 681.286323812314 | 0.366375118327774 |
| GTTGTCACCATA  | 681.290090199153 | 0.347746125710207 |
| ACGGTAAGTCAC  | 681.290987062308 | 0.409319148211683 |
| GCCAGTTGTGAC  | 681.296718617618 | 0.336838906610133 |
| CCAACTTGTGAC  | 681.303479860483 | 0.224182907264347 |
| GACTAATAGCTC  | 681.312359803127 | 0.424149315229217 |
| CTCTGTGAGCCA  | 681.315160789206 | 0.391432820810669 |
| ACATTGTGACAA  | 681.320888248886 | 0.387636337393384 |
| CAGGTGGATGAC  | 681.324155961765 | 0.486265563931907 |
| CTCTACGATGAC  | 681.327126787234 | 0.285437085003821 |
| ACATTTTCGTCA  | 681.336743885786 | 0.40969297519591  |
| CACGTAATATAA  | 681.336782530711 | 0.198158811885491 |
| ATCACTCGGTGA  | 681.339561969468 | 0.408338406451955 |
| GTCATCATCCCA  | 681.340260758028 | 0.353059134776926 |
| TTGCGTGACAAA  | 681.342428946761 | 0.393723020295904 |
| CGGGTTTGTCTCA | 681.353154329999 | 0.507060136800935 |
| AACTATTACTCT  | 681.354274214476 | 0.27092034951303  |
| CTGGACAATGAC  | 681.356394630353 | 0.526238212320936 |
| GACCCGCGTGAC  | 681.358068251921 | 0.401330045199692 |
| CGAGTTGACACA  | 681.359093400084 | 0.286762429937635 |
| CGGCCCGAGTCA  | 681.362230705686 | 0.302936272763747 |
| GTTTCATCCGTCA | 681.36866643784  | 0.335626175350891 |
| ACACGTGGTGAC  | 681.375057937378 | 0.333971744720208 |
| TCAACGGAGTCA  | 681.375591275436 | 0.475533518240388 |
| ACTCGACGTCAT  | 681.379601253854 | 0.317477577714656 |
| ATGACGAGGAGA  | 681.386262417671 | 0.364612534660064 |
| CATGTCACATGA  | 681.388497236847 | 0.352644680549362 |
| AACGTTTGGTCA  | 681.39420279108  | 0.441232536403205 |
| GTCATTTTAGGA  | 681.395094729521 | 0.390752301490312 |
| AAACGTGGTGAC  | 681.399488796076 | 0.339284871088202 |
| CATTTTACGTCA  | 681.400014392272 | 0.284641128702907 |
| AGAATAGATGAC  | 681.403373069828 | 0.288886796413715 |
| GTCACAGTATCA  | 681.413737648534 | 0.336281712324137 |
| ACCCAAATGACG  | 681.415066451443 | 0.306352449069596 |
| AGTCAGAGTGTC  | 681.423169952913 | 0.262313629623826 |
| AGCGCGTCACTG  | 681.425052825366 | 0.427375023233025 |
| ATGTTCCGTGAC  | 681.427917341875 | 0.271239019999917 |
| GCACGTCGTGAC  | 681.430034710142 | 0.24899819025894  |
| AGGTTACAGTCA  | 681.431198172747 | 0.259197240730325 |
| GGATCACAGTCA  | 681.432366076793 | 0.280816528791625 |

|               |                  |                   |
|---------------|------------------|-------------------|
| GTCACACTCTTA  | 681.458146366096 | 0.307932424055092 |
| GCCAAGTCACTA  | 681.460426013808 | 0.331718499818988 |
| GTATTCAATGAC  | 681.463745536451 | 0.236815012380404 |
| ACGTCATGTCAA  | 681.471336977708 | 0.455144818578937 |
| ACCGAATTGTCA  | 681.472387860964 | 0.232702912829032 |
| GAGTCGTGTAC   | 681.475314664971 | 0.478072761061627 |
| GTGTCACGATAA  | 681.495514845473 | 0.454052023227369 |
| AAGTCACTCTGA  | 681.505486451892 | 0.17939268841961  |
| CCCCGAATGACG  | 681.50952837435  | 0.326041344733076 |
| ACAACGTCACCG  | 681.523049803288 | 0.435587136097454 |
| CACTTAAGTGAC  | 681.533617554725 | 0.453355722349449 |
| GTATTGATGAC   | 681.538525449087 | 0.379282620333328 |
| ACCGACGCGTCA  | 681.540177561186 | 0.328872221622186 |
| CCGTCCTATGAC  | 681.55194420754  | 0.336628570551578 |
| ATGACACGGGTA  | 681.569688566748 | 0.356768096771473 |
| CGTCACACGCCA  | 681.573301915569 | 0.459716919920884 |
| CAAGTATGTGAC  | 681.575578923172 | 0.586590605429445 |
| ACGTCACGCAGT  | 681.576644462927 | 0.53271040723312  |
| GGGCTTGGTCAC  | 681.577365470106 | 0.345580564511417 |
| AGTCAGACTCTG  | 681.585679410981 | 0.270313151407499 |
| GTCACCCTTCGA  | 681.58762672442  | 0.398931932272444 |
| AAGGGAGATGAC  | 681.59040852286  | 0.210103699546009 |
| GAGCGTAATGAC  | 681.591270592556 | 0.360856966998596 |
| ATAATTGATGAC  | 681.624813986678 | 0.462614327154569 |
| ATATATAATGAC  | 681.624992693263 | 0.302675833061379 |
| ATGTCATTTGAC  | 681.643551414036 | 0.311653155327947 |
| TGACGGATCGCA  | 681.644020023433 | 0.459671531721183 |
| GGTCATACACTA  | 681.644731521357 | 0.406256830049315 |
| GGAGATCTGTCA  | 681.651209939015 | 0.533520248943672 |
| ATGACGATCGTC  | 681.651954737867 | 0.367627494512741 |
| GAGTCAATAGAC  | 681.654193647195 | 0.409981679577418 |
| CAATAGAGTGAC  | 681.654897569788 | 0.510305511093036 |
| ATTCAAGATGAC  | 681.660923739657 | 0.374741941355127 |
| GTCACGATGATA  | 681.664349251113 | 0.117439366536962 |
| CACCTGAATGAC  | 681.676747841831 | 0.388644485076806 |
| AAGCCGTGTAC   | 681.696898935362 | 0.268574537076611 |
| CATATCGCGTCA  | 681.698476316008 | 0.27296765747019  |
| ACGTCACGTGTTG | 681.700699375549 | 0.534481353025941 |
| ACGTCAGCCAAT  | 681.703911621629 | 0.440741407918961 |
| CTGTGACAGGTC  | 681.71940272942  | 0.317641162097939 |
| GTCATTTATAAC  | 681.734200643289 | 0.367820515227895 |
| CGATATGTGACA  | 681.741739612462 | 0.383884152106229 |
| TATTGCGTGTCA  | 681.748814534882 | 0.508980348080273 |
| ACTCATTTTCTG  | 681.753849285896 | 0.291980879021979 |
| TGACGACGTAAA  | 681.759554985934 | 0.40911906677741  |
| TTAATGATGTAA  | 681.801858310182 | 0.35623569447377  |
| ATGACGGCATGA  | 681.8129861451   | 0.242766574852894 |
| GTCACAGACTAA  | 681.813560792281 | 0.568899148640214 |
| TCTCACTAGTCA  | 681.820252482635 | 0.44544951293691  |
| AAGATTAATGAC  | 681.822203202933 | 0.368940855775842 |
| AATGAGTGCATC  | 681.824228334642 | 0.461461134544472 |
| ACACTATTACTC  | 681.835888595945 | 0.14848725167026  |
| CATCGAATCATA  | 681.843650283733 | 0.407114772678288 |
| ACGACTACGTCA  | 681.854021833582 | 0.563418833850361 |

|               |                  |                   |
|---------------|------------------|-------------------|
| GCAGCTCTGTCA  | 681.862173055605 | 0.648143022770161 |
| TCAATTTGGTCA  | 681.862912991356 | 0.728359000927588 |
| AGCGAAGATGAC  | 681.873064255132 | 0.343638120855397 |
| CCTTCCTAGTCA  | 681.898676922665 | 0.289822690827084 |
| ATACGGGAGTCA  | 681.909247468358 | 0.470230899320688 |
| ACTCATAATGTC  | 681.91029306824  | 0.411934318975437 |
| TCAGAGTTGTCA  | 681.924824902445 | 0.349495624705942 |
| ACCATTTGACTC  | 681.927069931492 | 0.310060127722018 |
| CGTCATTTCTGC  | 681.930648188352 | 0.310756550381472 |
| CTATTTGCTCAC  | 681.933502841655 | 0.244637688785967 |
| TGAAGTCTGACA  | 681.94552957756  | 0.700004305826164 |
| ATGACGGACACC  | 681.946082926009 | 0.21795435726621  |
| ACCGGAGAGTCA  | 681.946318311035 | 0.229090685342635 |
| CGCGTTGATGAC  | 681.948996064423 | 0.442089531800708 |
| CGTCATTGAGAA  | 681.956865330469 | 0.285008588504377 |
| TAAGATTCAATCA | 681.958649410596 | 0.23676665779249  |
| GGCGAGGATGAC  | 681.976242889414 | 0.230613911528825 |
| CGTCACACGGCA  | 681.979996523348 | 0.666063690553725 |
| CTCGAGAATGAC  | 681.981863233517 | 0.428990964876234 |
| CATAACGGTGAC  | 682.007701866175 | 0.345437303002919 |
| GTCGAATCGTCA  | 682.012503204659 | 0.464949720113176 |
| AGTTTCGGTGAC  | 682.013998181973 | 0.345975649671688 |
| CAGCTAAATGAC  | 682.018289105337 | 0.384755454867044 |
| ACTAAAGGTGAC  | 682.020136385033 | 0.374056482540736 |
| GACTAATAAAGC  | 682.024987723773 | 0.312306933271882 |
| GTCACCCGCAAA  | 682.041145911364 | 0.454367258904136 |
| AGCCACAATGAC  | 682.090529248905 | 0.368552170172378 |
| CATCAGATGACG  | 682.09915993017  | 0.280101150748334 |
| GGTATTGATGAC  | 682.102029278313 | 0.318154282639212 |
| CAGGTTTGGTCA  | 682.123277784355 | 0.653031702002564 |
| CTTCCATGACAC  | 682.130876712434 | 0.251291541950455 |
| TAAGACTCTTAA  | 682.134575633709 | 0.238277086303288 |
| TAATAGGTGACA  | 682.140967361408 | 0.192836896927486 |
| GCCGCAGAGTCA  | 682.157842013046 | 0.342370700870646 |
| AGACTAATCCAT  | 682.176196486141 | 0.481767564928199 |
| ACCTTCTATGAC  | 682.179124093248 | 0.305238610912697 |
| CGCTACTAGTCA  | 682.179903512293 | 0.410743212827439 |
| CACTATTGACTG  | 682.187761600387 | 0.467629319091122 |
| GTCATCACGCTA  | 682.194868004211 | 0.249421014531934 |
| ATAAGGTGTGAC  | 682.206672829341 | 0.395027454484034 |
| ATACATCATGAC  | 682.207073883795 | 0.296042007547904 |
| AACTTGTGTGAC  | 682.216331803368 | 0.458993769517561 |
| GTCACAGCACTA  | 682.229070264619 | 0.284075343371937 |
| AGTATCTATGAC  | 682.233825446775 | 0.224929144479834 |
| AAGTAGATGACG  | 682.235853262274 | 0.113742038504312 |
| CAGGCCTGACTA  | 682.241882978293 | 0.292794281036757 |
| AGACATCTGTCA  | 682.259842003518 | 0.343217387351075 |
| AATTTATGTGAC  | 682.272919441106 | 0.395893942112436 |
| GAACATACGTCA  | 682.274290173285 | 0.52394400104119  |
| AAATATTAGCCA  | 682.283842916332 | 0.236080248548722 |
| AGTTTATATGAC  | 682.285837354259 | 0.485572188001638 |
| GTCATCCGACAC  | 682.28681864374  | 0.312179407654875 |
| ACGTGGTGACCC  | 682.288699226812 | 0.381289887248692 |
| ATCGTGGCGTCA  | 682.29669091425  | 0.461181065859958 |

|              |                  |                   |
|--------------|------------------|-------------------|
| AGGCGTTATGAC | 682.300390682371 | 0.51094565085713  |
| ATGAGTAGGTGA | 682.30420694702  | 0.308801013637996 |
| AGCGGGTGACT  | 682.306407903944 | 0.201395963792174 |
| ATGACGACTGCA | 682.310142782412 | 0.484188571261578 |
| ATACGGTGACAA | 682.313045042481 | 0.301235662979503 |
| GCAGTAGACTCA | 682.313235270125 | 0.337562742128489 |
| AAAAGTACTAC  | 682.315598709401 | 0.696876861811412 |
| AAGTGTGAGAGG | 682.316944239317 | 0.249706599979261 |
| CCTGCGGGTGAC | 682.32992630237  | 0.283920765103138 |
| GTCACACCCGTA | 682.341892226649 | 0.357932565482662 |
| ATATCGTGTAC  | 682.345854455516 | 0.529622695795421 |
| GAATCTGGTGAC | 682.349063346808 | 0.569771568113274 |
| CCAGGCTGTGAC | 682.364466148379 | 0.391666307176084 |
| CGTCATATGGTA | 682.365118086879 | 0.281714558444496 |
| ATATTATTCATA | 682.370321483674 | 0.495047684043257 |
| ATGACGTTCTCA | 682.375691848285 | 0.326799395860091 |
| GAATTACTCGAC | 682.376141747742 | 0.279065525359183 |
| AATGTTTGTAC  | 682.381496555091 | 0.250609151728765 |
| ACTTAGTGGTCA | 682.392430592662 | 0.525514832400467 |
| ATACAATGTGAC | 682.397340906845 | 0.293174485457957 |
| AGTGATCGTCAT | 682.397943612046 | 0.174319568674982 |
| AATCCATGACGC | 682.411174338317 | 0.466719650079182 |
| ACTACTTGTGAC | 682.413547265347 | 0.617713106671263 |
| TAAATGGTGACA | 682.414157170782 | 0.395114298363226 |
| CGCCAATGTGAC | 682.416982699753 | 0.430580816860879 |
| GAGTAATCATGA | 682.42511103291  | 0.445812691106225 |
| AGTCAATGTGTC | 682.429643160937 | 0.559857269559361 |
| TAGTTGACTCA  | 682.430011390019 | 0.22149955681288  |
| GTCACATTTCTA | 682.442240274964 | 0.639488283113782 |
| ATGACAACCACG | 682.450311386602 | 0.390613490822653 |
| ATGTATTAGTAC | 682.450756384969 | 0.27012557210745  |
| GGCATCATGACA | 682.451670866922 | 0.363016340084629 |
| AACTTGTACGC  | 682.451834472258 | 0.350410765689347 |
| GCGAGAAATGAC | 682.460087283651 | 0.449476256168274 |
| AGTATCGACTCA | 682.477068329214 | 0.185146531553011 |
| GTGTCACGCGGA | 682.483471764883 | 0.395079024565791 |
| TGACGATACAAA | 682.502378343203 | 0.397917979081153 |
| GTGTATATGTCA | 682.506262392185 | 0.57886818447485  |
| CAGTAATTGTCA | 682.508847297242 | 0.539061979579021 |
| GCACGGTGTGAC | 682.513375668692 | 0.466134998876232 |
| AGTGCAGATGAC | 682.513778823107 | 0.256341033761976 |
| GTCATCCAATA  | 682.520797168835 | 0.467552069633587 |
| ATGATGTGTAAA | 682.521545191274 | 0.279266476476124 |
| CGTCATCTCTTC | 682.52653169461  | 0.296068639849324 |
| TGACCCATCTAA | 682.528177571696 | 0.327938421170472 |
| ATGAGTAGTTGG | 682.543388311509 | 0.360923989253119 |
| ATGACGTTGAGA | 682.543512328185 | 0.356066901133074 |
| CTCCGATTAGTC | 682.545813753689 | 0.316730926166269 |
| GAATATGTCAGC | 682.548671399666 | 0.275718826501617 |
| CACTCTGATGAC | 682.553924543082 | 0.266474978347765 |
| TCATAGGATCAA | 682.561523391853 | 0.380546510758759 |
| GTCATAAGGGTA | 682.569976421315 | 0.176535445966255 |
| TCGATTGAGTAA | 682.579582343168 | 0.147813110438359 |
| GTCATTCCTCTA | 682.579900593145 | 0.338659423740235 |

|               |                  |                   |
|---------------|------------------|-------------------|
| GGCATAGTCAGA  | 682.584594891214 | 0.123749517665842 |
| ACCGCGGTGACA  | 682.594372658423 | 0.450497631894222 |
| ACACCAATGACA  | 682.595680510285 | 0.451479927500579 |
| CGATATCATGAC  | 682.601666945979 | 0.486042141427947 |
| CTGGCGAATGAC  | 682.609749586956 | 0.149308135169717 |
| CCTAGGGTGACG  | 682.611352527724 | 0.370936415122855 |
| TAAAAGCAGTCA  | 682.615699758128 | 0.258750620739255 |
| CTCTGATAGTCA  | 682.643444543427 | 0.387848394856474 |
| CGTCATATGCGA  | 682.659028655619 | 0.335916946818513 |
| CGTTCGTAGTCA  | 682.664665859563 | 0.516437732266644 |
| AATGATCGTCAT  | 682.665791451165 | 0.450496960527651 |
| CAACTATGACCC  | 682.674931488456 | 0.278346362060916 |
| CGTCATTCCCGA  | 682.682814210108 | 0.323628402505063 |
| ATATTATGACCC  | 682.690532912342 | 0.304482007758566 |
| GTGTCACGCCA   | 682.694775108384 | 0.320827700886524 |
| GACTAATCAAGC  | 682.699952155221 | 0.251869875222275 |
| CCGGATCATGAC  | 682.700262804724 | 0.508999652755335 |
| CTTGTCACGTCA  | 682.730071761299 | 0.394752152617139 |
| CAGGGCGATGAC  | 682.731409114342 | 0.367006932631548 |
| AGTCACGCCCTG  | 682.738018186339 | 0.444090239118461 |
| CCTGCTTATGAC  | 682.738187008063 | 0.361384469528077 |
| ATGATGTGGCAC  | 682.738444655469 | 0.265889572954109 |
| CCGAGGGTGACA  | 682.740364568379 | 0.507605228459765 |
| CATCGTCACCGG  | 682.748718947958 | 0.414422717244687 |
| AGTCAGAGTTTA  | 682.763953083874 | 0.454641829390848 |
| GTACCTGACACA  | 682.779768191536 | 0.334122029401955 |
| ATTGTCTGACAC  | 682.783582934615 | 0.33440288198332  |
| ATTTTGAGTGAC  | 682.806080951897 | 0.570882930154892 |
| GCACATGATGAC  | 682.808560606814 | 0.472773486404091 |
| GTCACCGCTATA  | 682.815271080337 | 0.537265933732141 |
| AACGCGTGACGC  | 682.822506071276 | 0.360998047178238 |
| AGCTAATTAGTC  | 682.826440403255 | 0.502054190295845 |
| TGACTCCACAAA  | 682.828555774909 | 0.376031744327081 |
| GGCTTTGTGTCA  | 682.835087467924 | 0.456479811654141 |
| AAAACATGTGAC  | 682.83761416541  | 0.69817469505285  |
| ACAACGTATGTC  | 682.837981924013 | 0.230417702212701 |
| GAACGTGACCCA  | 682.839182062447 | 0.41230725530846  |
| GACTAATTCGCC  | 682.842099367047 | 0.432414396241338 |
| AGCGCCGAGTCA  | 682.848075028887 | 0.380204869472158 |
| ATGACGAGCCCA  | 682.852104672662 | 0.409158724386751 |
| GCGTTCGTGTCA  | 682.857751421536 | 0.412895935371667 |
| CCACGTGTGTCA  | 682.861573409689 | 0.447905516273891 |
| ACATTTCTGACT  | 682.863480769582 | 0.509503203331934 |
| ACTGACTGTATG  | 682.865780620776 | 0.469029563292243 |
| TACGACATGTCA  | 682.866819245038 | 0.359211935157886 |
| ACTCATCGCAGT  | 682.869276554369 | 0.630469355356015 |
| GTCATTTGACAGA | 682.879198445487 | 0.428014919645269 |
| AAAGTGTGACGTC | 682.88120614713  | 0.236826928704748 |
| AACACTAAGTCA  | 682.885139743303 | 0.383960670233972 |
| GAACTGTGACGA  | 682.889555834401 | 0.482035877665606 |
| GTCACCCAGGAC  | 682.894754472611 | 0.53322332236992  |
| GTCATTAAGGTA  | 682.899759825852 | 0.355057344784653 |
| CTAAGCGATGAC  | 682.911822469543 | 0.51834563159715  |
| GACCTGCATGAC  | 682.933389482976 | 0.375921752754306 |

|               |                  |                   |
|---------------|------------------|-------------------|
| CGGTATCATGAC  | 682.934968603404 | 0.358642056979357 |
| CAAAGCTATGAC  | 682.936663403684 | 0.673494742959254 |
| TGACTATGTGCA  | 682.940605582143 | 0.574169239369434 |
| AACTTGGTGACA  | 682.941854744126 | 0.59098736705151  |
| ACTCATAATGAC  | 682.943706959211 | 0.230233536050272 |
| AAAGCCGTGACT  | 682.956863317891 | 0.179108018881466 |
| AAGATATTAGTC  | 682.958512968639 | 0.250451181701857 |
| TATTAGTCTGAA  | 682.962198928045 | 0.151978300180831 |
| CAGATTACGCAA  | 682.967155358245 | 0.231095280916989 |
| AAGCGTAATGAC  | 682.995613548562 | 0.555551020485691 |
| ACGTCATGATGC  | 683.001401579467 | 0.226334913113184 |
| GTCATGATCATA  | 683.010312130386 | 0.404398402423056 |
| GAGTTGACTGAA  | 683.014602386084 | 0.478756824352936 |
| GTCATCAAGTGA  | 683.021323689631 | 0.376147363062095 |
| CTTCATGGTGAC  | 683.02504156988  | 0.494155245846126 |
| CTCGCGGTGAC   | 683.034383631827 | 0.489001383382496 |
| CGTCATTGGTCC  | 683.035890868699 | 0.238270468854155 |
| GACGTCACCAAA  | 683.071160893761 | 0.389858984703843 |
| TGGCTCATCAAA  | 683.074234879054 | 0.357604402310185 |
| ATGACCACTTGC  | 683.077737617752 | 0.432250657663149 |
| GTCAGAGCCTAA  | 683.084846873008 | 0.405194410805197 |
| CCGCCCGATGAC  | 683.085992821498 | 0.289543210416259 |
| GTTACTAAGTCA  | 683.086419528805 | 0.323042945720429 |
| AGTCATGGTACG  | 683.096527987739 | 0.475364317507535 |
| CACACCAATGAC  | 683.106899773709 | 0.332341043663039 |
| AACATAGTCAGA  | 683.114557473904 | 0.309799285815685 |
| ACTCATAGTTCT  | 683.122422141826 | 0.258320669378008 |
| GTCATCAAGATA  | 683.123503538426 | 0.45525612570888  |
| GCATCCAATGAC  | 683.125873846469 | 0.469001096374732 |
| GTAACAGATGAC  | 683.127847044918 | 0.436296796718192 |
| CTAGAAATGACA  | 683.145038390817 | 0.264971039100778 |
| AGAGTCAAACCG  | 683.16266323714  | 0.402620048366247 |
| CGAATGGGTGAC  | 683.177373505541 | 0.501286786692107 |
| CTCGTCATGTCA  | 683.180722893097 | 0.30989502024475  |
| AGGGTCATTTAT  | 683.182885192058 | 0.3935137904286   |
| CAGCGCACGTCA  | 683.183551406249 | 0.42164935989216  |
| TAACGTACGTCA  | 683.185255106386 | 0.571408850423078 |
| CAACCGTGACAA  | 683.202968349266 | 0.30734203152796  |
| AAAGTCCGTGAC  | 683.204125380069 | 0.293731228688593 |
| CGACCGATGACC  | 683.208380666023 | 0.406206211743447 |
| ACATCGGTGACG  | 683.211704293875 | 0.435303865826849 |
| CTTAGAGAGTCA  | 683.214084003425 | 0.467169961865065 |
| GCCAACGGTGAC  | 683.226941650154 | 0.361206323150821 |
| TGACGTACCGAA  | 683.226987314785 | 0.405287504728708 |
| ACACCGTGTGAC  | 683.241992104862 | 0.35636718312863  |
| ATAGTGTGACAG  | 683.243114966543 | 0.20261212524025  |
| ATGCTAGTCACG  | 683.246524183937 | 0.29381157068103  |
| AGGGCAGAGTCA  | 683.256592175694 | 0.287488501628652 |
| GCAGCGTACTA   | 683.258231855224 | 0.328512576751102 |
| ATTACTAAATGG  | 683.2690904646   | 0.31735390796211  |
| ACCTAAATGACG  | 683.269500364026 | 0.322403247873546 |
| AATGTCATTACG  | 683.27032946095  | 0.575596125949382 |
| ATCCTTTATGAC  | 683.27068082077  | 0.284084964485207 |
| CGGAACCTCGTCA | 683.288259677384 | 0.556021107797314 |

|              |                  |                   |
|--------------|------------------|-------------------|
| GGAAGGGATGAC | 683.29394559152  | 0.19549335573984  |
| CAAGTACTGTCA | 683.296279334893 | 0.348939107483429 |
| TGACTCCCAGAA | 683.299432833234 | 0.53269425268281  |
| TCATCATACGGA | 683.30047550572  | 0.482446027332519 |
| ACAGAATATGAC | 683.308847304024 | 0.350542133850381 |
| ATTCTAGGTGAC | 683.327522927734 | 0.449504866703613 |
| GCTTAGGATGAC | 683.327998236478 | 0.281665082182891 |
| AGATACAGTCAG | 683.353309536688 | 0.251342979638379 |
| AACCGCAATGAC | 683.354311265731 | 0.284192684103097 |
| ATGACGATGAGG | 683.360551968061 | 0.326133535473029 |
| ACCCCTTATGAC | 683.367638092592 | 0.266331003030388 |
| GGTGGCTCACAA | 683.376020481603 | 0.294338034858984 |
| ATAGAGATGACG | 683.376705134669 | 0.314449157224322 |
| AGTCACTCTCAG | 683.378998696441 | 0.47836272096305  |
| TAACTAATGACA | 683.395021460807 | 0.399749759076134 |
| TGACAATTTGCA | 683.400586353604 | 0.400354205685462 |
| TGACTGTGGCAA | 683.40111414101  | 0.503622051030131 |
| CAGCGTGTGACA | 683.402455197977 | 0.308079909887828 |
| CTGGATCATGAC | 683.414918213437 | 0.359292970583256 |
| AGTCAGCACTTG | 683.420264394931 | 0.511970097602087 |
| CCTATCGACTCA | 683.424363855273 | 0.280394107081785 |
| GTCATTATGAGA | 683.427482401476 | 0.378680492838589 |
| TAATCGGTGACA | 683.427922661035 | 0.137769954981147 |
| AATATCTGACTG | 683.448075765704 | 0.133845408539884 |
| GCCATCCAGTCA | 683.450714973672 | 0.421590619687286 |
| AGTCAGACCCCA | 683.4713274629   | 0.303823476880301 |
| GGGCCGTGACTA | 683.490857184419 | 0.358565138030609 |
| ATCACGTCACTG | 683.492518240283 | 0.245834927414933 |
| GCAAATCCGTCA | 683.496948941151 | 0.765918617256741 |
| GCAATTGGTGAC | 683.496949297031 | 0.367402146448196 |
| GACTCAGCGCGA | 683.499064648658 | 0.496134608274424 |
| ATGACATGCCTC | 683.501363721384 | 0.299841793084278 |
| CATTAGTGACAA | 683.514755521309 | 0.420008555581593 |
| GGGACTTGTAC  | 683.515827416999 | 0.294779881098515 |
| GTGAGTCTGCAC | 683.529430761426 | 0.436533663044386 |
| GTATACAATGAC | 683.539325075231 | 0.429378822159132 |
| AGTCGGGAGTCA | 683.54609162481  | 0.197067491874067 |
| CACGTCGACTAA | 683.546551699907 | 0.434971266186209 |
| TGACATGCTGCA | 683.54676335095  | 0.489371178194359 |
| GTCACCGCCGAA | 683.551266400039 | 0.702545829648373 |
| GTCATTCCAGAA | 683.561057963665 | 0.469728433461127 |
| CATTTCAATGAC | 683.56945197365  | 0.625142827410536 |
| ACATTACATGAC | 683.569601802229 | 0.372445363384373 |
| AGAGCAGAGTCA | 683.572728164701 | 0.206734950181965 |
| TGACTGTGGAAA | 683.577877596593 | 0.460288189380978 |
| TGACAGTGTCAA | 683.578371376586 | 0.286751869206246 |
| CCTATCCAGTCA | 683.585315121274 | 0.416788011030772 |
| GTCATTACTGTA | 683.586087089538 | 0.530286933771352 |
| CTGACTGCAAAA | 683.595821732631 | 0.379941675047796 |
| CGGGGTGATGAC | 683.598878930221 | 0.532516895249455 |
| TATGCAGTCAGA | 683.607846044947 | 0.278605856210973 |
| CAATTAATGACG | 683.620280589598 | 0.489310601448543 |
| CCGAAGTACTC  | 683.620384432787 | 0.435610317118394 |
| CATACATGACGC | 683.662322328968 | 0.344005287915679 |



|               |                  |                   |
|---------------|------------------|-------------------|
| AGTCACGGCAAC  | 683.672608143326 | 0.419293752713121 |
| GAGTGTGATGAC  | 683.675073246856 | 0.313685434639206 |
| TGACTGGAGACA  | 683.67642297158  | 0.39984657332877  |
| TGACGCGGCCAA  | 683.678400549339 | 0.522508718371944 |
| GCTTTGCATGAC  | 683.683228904583 | 0.386794477481957 |
| GTCACCAAATA   | 683.689484942095 | 0.274286570265699 |
| GTCATAAGACAA  | 683.693772689959 | 0.393263362888103 |
| TATTGACTGTGA  | 683.696872809387 | 0.333120984733585 |
| CCGATCCAGTCA  | 683.702290724134 | 0.272724274153158 |
| CGTCACCCGGTA  | 683.702600100643 | 0.274370423128197 |
| AGTGAGTCTGCC  | 683.704324266568 | 0.257970349563185 |
| CCTTAGTGACGA  | 683.710832347096 | 0.724448787317611 |
| CGCGCTAATGAC  | 683.711001465432 | 0.290059755215257 |
| AGTCAGAACCTG  | 683.721631388038 | 0.496419849850381 |
| GTTAGTGAATCA  | 683.724399413898 | 0.368917832996093 |
| ATGAAACGTGAC  | 683.738873832166 | 0.380167831542217 |
| CTGAAGTGACGC  | 683.742085565629 | 0.4706655749034   |
| GTGACGATAACA  | 683.744542685901 | 0.322034814796662 |
| GTGAGCCACCGA  | 683.747270996967 | 0.317669879829525 |
| AGACTTTGACTC  | 683.747556827062 | 0.411318953607316 |
| GTC AATAGTGAC | 683.765541011324 | 0.421655898927873 |
| CTCCATGGTGAC  | 683.768441883185 | 0.371535473708706 |
| AGGACCGATGAC  | 683.785555757969 | 0.364676215670277 |
| ACAATGGAGTCA  | 683.788419775853 | 0.367593709652639 |
| ACATCGATGAGT  | 683.79257878492  | 0.387739926958006 |
| GCAAGTAATGAC  | 683.822820472681 | 0.287952117807757 |
| AGTCACTTCCTC  | 683.824033849305 | 0.260513042019847 |
| CTTATTTGCTCA  | 683.834108345241 | 0.452245995557259 |
| ACTTTTGTGACA  | 683.841871886295 | 0.496143050538993 |
| TTCGTCACTCAA  | 683.84209851677  | 0.278652939858034 |
| CGTCATTTGGTC  | 683.849991736721 | 0.357245054169537 |
| GAATCGTGACGC  | 683.855462174    | 0.477127891729282 |
| AATAATAGAGTC  | 683.860507836584 | 0.831277881963814 |
| GACATCCGATGA  | 683.872657095975 | 0.382182685555745 |
| GGACGCTATGAC  | 683.880961682805 | 0.278638482991215 |
| GGCAAAGATGAC  | 683.886313208353 | 0.320414697070536 |
| GTCATTCGCCAA  | 683.898001898139 | 0.252491187196174 |
| GCGTCATGCGTA  | 683.901349721363 | 0.424192123238365 |
| ATAGATGTGACG  | 683.904154210446 | 0.397332735634181 |
| ACATCTCGTCAT  | 683.906284465391 | 0.23592220823894  |
| GGTGTATATGAC  | 683.908335151279 | 0.302631996010521 |
| TCATACAAGTCA  | 683.910934842427 | 0.457688228701316 |
| ACCAGTGACGCG  | 683.91177668159  | 0.404346205061221 |
| CTATATGGTGAC  | 683.913309652397 | 0.406417139346296 |
| AGTCAGACCTAC  | 683.926287539573 | 0.236265703750908 |
| GCCAGGTCTGAC  | 683.941051057799 | 0.438775564151973 |
| GATGAATAATAA  | 683.951770559335 | 0.237992991916228 |
| ATTAATGTCATA  | 683.963189474536 | 0.397780347366006 |
| ATGACAGTGCCG  | 683.993699411614 | 0.206740267986161 |
| GCATTAAATGAC  | 684.01203041606  | 0.378673873513801 |
| GTCACATTGCGA  | 684.013568749261 | 0.270375028385948 |
| AGAGTTTCGTCA  | 684.021771079901 | 0.429783000200975 |
| GTCATCCACCAC  | 684.043107252723 | 0.224169413061439 |
| CACCCTGTGACA  | 684.045178242786 | 0.446976671579925 |

|              |                  |                   |
|--------------|------------------|-------------------|
| GTTACTCAATCA | 684.051980558392 | 0.377848555952793 |
| GATCTGTAGTCA | 684.056857258573 | 0.306685275489239 |
| AAGAATTAGTCG | 684.058569039282 | 0.293173615689623 |
| CGTCATCAAAAG | 684.061857416918 | 0.292932084047114 |
| TGAGTCGGTGCA | 684.064469202727 | 0.335178999968694 |
| CTCGACGCGTCA | 684.068351151027 | 0.24862273828415  |
| AATAGGTCACCC | 684.070643865498 | 0.419050246672451 |
| AGTCATGAGGGA | 684.074418546108 | 0.230617501282286 |
| ATATCTGTGACG | 684.07913618132  | 0.36669782007815  |
| ATGACATTTAAT | 684.082483686451 | 0.263663510636191 |
| AGGTTTTGACTC | 684.090590003018 | 0.388849203576997 |
| CGCGTCACGTCA | 684.095274401305 | 0.326915067790767 |
| ACAACGGTGACG | 684.096273462345 | 0.450219696713092 |
| ACTCATTATTGA | 684.106390804699 | 0.477801343378699 |
| GTCATTAGCTAA | 684.108314054644 | 0.376231753448958 |
| AACACATGACGT | 684.108315368959 | 0.567553096616725 |
| GCTGATTAATA  | 684.113711942841 | 0.728759511919896 |
| ATGAGTAGGTAA | 684.120380525092 | 0.196967723469162 |
| GTCACATGCACA | 684.12528595494  | 0.386475102116261 |
| AGCGTAGACTCA | 684.133996641983 | 0.252858017201982 |
| GACACATTAATC | 684.134205453147 | 0.242926041728038 |
| GCATCATATGAC | 684.134496381111 | 0.380205256607309 |
| GAGAAGTGTGAC | 684.142848290814 | 0.358647335675585 |
| CATTGTTGGTCA | 684.143471445556 | 0.54412915952993  |
| ATTAGCAATCGA | 684.149152724304 | 0.518715461713571 |
| CATGTCACAAAG | 684.149266668347 | 0.327182640657132 |
| GAAATGTATCA  | 684.158331527244 | 0.474982261867379 |
| GAATCACCGTCA | 684.163359960718 | 0.502263260151366 |
| GTCAGGGTGACA | 684.169179030029 | 0.346993053583388 |
| CGTGACGTTGTC | 684.174301223389 | 0.740759718745307 |
| AGCTTGACTCGA | 684.176140850591 | 0.119039014651323 |
| GGTCTGAATGAC | 684.179528336952 | 0.462493519325013 |
| ACAGCTGATGAC | 684.188895755979 | 0.345105938096325 |
| CACCTTAATGAC | 684.19515331346  | 0.611249605854838 |
| CTACACGACTCA | 684.202247353489 | 0.234104964057364 |
| AGTGTCACGAAA | 684.204327785872 | 0.295003034986801 |
| CTGACTCGGAGC | 684.212871838314 | 0.344275174498097 |
| GTGTCATGGCTA | 684.213321148093 | 0.255289115651101 |
| ATTACGCAACGC | 684.220129728646 | 0.382052447434151 |
| GTGTCACATAAC | 684.227574137831 | 0.407211855481178 |
| ACAGACGTCATC | 684.230801804487 | 0.360346181068202 |
| CGAAGACATGAC | 684.235448657801 | 0.44576605701803  |
| GACGATTGGTCA | 684.238051483543 | 0.525101842455195 |
| CGAGATTGCTCA | 684.24594436579  | 0.373187252323229 |
| GTCATGACCGGA | 684.246959345999 | 0.423969653462038 |
| AGGGTGGATGAC | 684.247157545346 | 0.12805531513362  |
| CTGCCCGGTGAC | 684.249054018631 | 0.393861391883907 |
| TCAATGTGCTCA | 684.249787863741 | 0.514485194371475 |
| CCGAACGTGACA | 684.250518422434 | 0.586178399617318 |
| TCGCACGTGTCA | 684.25970972094  | 0.411104986037401 |
| GTTCCGTGACGA | 684.259995221091 | 0.409610913960518 |
| ATGACGCTCTTG | 684.26049807648  | 0.288526139348236 |
| TCTGACATCACA | 684.260855791308 | 0.347571160882054 |
| GTCAGAGCCCGA | 684.267583188877 | 0.582107328842897 |

|               |                  |                   |
|---------------|------------------|-------------------|
| CGTTACATCATC  | 684.283618728118 | 0.259592820964111 |
| CAACCTGTGACA  | 684.292527270778 | 0.372667346299465 |
| AGTATTACTTAT  | 684.297729144198 | 0.713957962781026 |
| GCTGACATGTCA  | 684.30428406858  | 0.430317179514778 |
| CGCCATGCACA   | 684.322038777783 | 0.244058846942108 |
| TGACGCGTGCAA  | 684.326506440033 | 0.431947799025476 |
| ATGACACTCGTC  | 684.332871857044 | 0.239992337540819 |
| GATAGGGATGAC  | 684.33523633767  | 0.290926240787016 |
| ATTATCAATGAC  | 684.337321397355 | 0.353000901933437 |
| TCCAGCGACTCA  | 684.348652475672 | 0.399469945451154 |
| ATCGGGATGACG  | 684.353012377573 | 0.241682292639949 |
| CCTTCAGTATGA  | 684.357931585365 | 0.272956547338834 |
| GGTCGATATGAC  | 684.368803614464 | 0.348128921253717 |
| ACTTTCAGTGAC  | 684.373617909049 | 0.362989666209181 |
| CATCGTACGATG  | 684.378551314734 | 0.395034116326649 |
| GCATTGGAGTCA  | 684.379666636399 | 0.241311816397685 |
| TCCTAAGCGTCA  | 684.388368606694 | 0.339339060355614 |
| GTCACGACTAAA  | 684.399274024164 | 0.467953537605894 |
| CATGTTTGGTCA  | 684.400958053065 | 0.376079641543126 |
| GTCACCGAACAC  | 684.409302168127 | 0.393272662873015 |
| TGACGTTACTAA  | 684.418231666201 | 0.405793364739649 |
| CAGTCAGATATC  | 684.424523935858 | 0.282633736236436 |
| ACTCAAATATGA  | 684.432023483572 | 0.441664315301788 |
| GACGCACATGAC  | 684.438265756826 | 0.563991597086143 |
| GTCACCCTAATA  | 684.442676348631 | 0.284907895237152 |
| CGTCATTGACAA  | 684.448422368202 | 0.424350459760489 |
| TCCGTCACTCAA  | 684.453152020288 | 0.3626234856769   |
| AATTAAGTGTC   | 684.465653357142 | 0.145871486174076 |
| AACTCGAATGAC  | 684.471629155353 | 0.325373399449582 |
| AATCATCGTCAC  | 684.486080214038 | 0.241892617216392 |
| ACGTCATGCAAC  | 684.503877075193 | 0.329579933315952 |
| GTGTCACCTCGA  | 684.504336642411 | 0.420113875123194 |
| GCCTCGTCATGA  | 684.507764187435 | 0.434400801159882 |
| TCACATGGGTCA  | 684.508194628376 | 0.356762209708925 |
| GAGAGTGACGAA  | 684.508446339666 | 0.297984530196957 |
| ATCATCAATGAC  | 684.526812805724 | 0.553448872282677 |
| GACCGAGAGTCA  | 684.529695072553 | 0.359648608814062 |
| GCATGAATCAAC  | 684.536313834894 | 0.394080784069871 |
| GTCACAGCAAGA  | 684.538252538419 | 0.296529330367819 |
| AACTAGAATGAC  | 684.538864472742 | 0.37390343810069  |
| CTAACTAAGTCA  | 684.539116732272 | 0.30679199471499  |
| ATGGTAATGACG  | 684.553425761363 | 0.259640482300947 |
| GAGTATGGTGAC  | 684.560799172474 | 0.368946340221076 |
| GCTCATTAGTAA  | 684.577938984078 | 0.502745612904554 |
| ACGTTCCGGTCAT | 684.585045796664 | 0.247759416942961 |
| ACATGCTAGTCA  | 684.596449659073 | 0.291200558471214 |
| CCTGCTGATGAC  | 684.598127589804 | 0.434238458863917 |
| CACACAATATGA  | 684.601123574142 | 0.410715918294709 |
| CAACGTGACGTG  | 684.603535988991 | 0.308346455181945 |
| TGTCACCAGAAA  | 684.613483097875 | 0.708428344334062 |
| CAAACATGACGC  | 684.613616703084 | 0.649614687752712 |
| ACTCATCCGATG  | 684.613844200656 | 0.227727865997018 |
| GGTCGGAATGAC  | 684.614158821877 | 0.352094023425163 |
| AAGACTGATTAC  | 684.62038037388  | 0.367017630907697 |

|                |                  |                    |
|----------------|------------------|--------------------|
| GCTTCAGCGTCA   | 684.632449345739 | 0.400991277153422  |
| ATGTGCAATGAC   | 684.636362628545 | 0.282625342814934  |
| ACGTCACITCAA   | 684.6585748061   | 0.384453265858039  |
| GCGTGTGTGAC    | 684.661810915212 | 0.346756428086869  |
| TACCCTGACACA   | 684.663832046721 | 0.287025248882524  |
| ATGACAAGGGTC   | 684.669080228196 | 0.0782332963992345 |
| CATACAGGTGAC   | 684.670635690435 | 0.458762892533822  |
| AGTCACGCGGAA   | 684.671625073773 | 0.29154064466422   |
| CTTGCATGACGC   | 684.676195830901 | 0.513220625246013  |
| CGCAATGAGCCA   | 684.676502695648 | 0.247313721598817  |
| GACTCTGATGAC   | 684.679284872939 | 0.36270281011445   |
| CCAGAGAGTGAC   | 684.681287696936 | 0.453477271238169  |
| ACCGTATGTGAC   | 684.690901451214 | 0.299092020711003  |
| GTCATTTAGGAA   | 684.696325840813 | 0.253430113201062  |
| CAGGTTTGTGAC   | 684.704960983986 | 0.262843066721436  |
| ATGAGTAGGTTA   | 684.723981732391 | 0.246961702039899  |
| GTGTCAGACTTA   | 684.725542368076 | 0.365604527621446  |
| CAGTCTTTGTCA   | 684.730950113723 | 0.40517414524814   |
| TCAGTAATTCGA   | 684.738020066247 | 0.357224477802695  |
| CGGCACTGAGTC   | 684.748511812509 | 0.507499437935068  |
| GAGTAATCTCAA   | 684.7518876385   | 0.375090681692512  |
| CTGCATTGCTCA   | 684.75385401156  | 0.504322297008856  |
| ACTCATCGTATG   | 684.778986129038 | 0.416776826268646  |
| GTCATAAGTAAA   | 684.781734574313 | 0.338456223070093  |
| GCGCCGTGTGAC   | 684.787909726639 | 0.304835448321503  |
| ACGGGTGAGCAA   | 684.791999549893 | 0.271694852780491  |
| GCGCCACAGTCA   | 684.79256192821  | 0.514349707891036  |
| GAGGACGTCATC   | 684.799683102954 | 0.184498275605787  |
| GTCATTAGTGTA   | 684.799849842824 | 0.519240754626228  |
| GTCACCCGACAA   | 684.810061367906 | 0.365279703372475  |
| CATTTGACATGA   | 684.816296411727 | 0.432920774586426  |
| CCGCTGTGTCAG   | 684.825522491003 | 0.408500442768948  |
| ATGACGGAGTAC   | 684.826567882496 | 0.237653753010384  |
| GACTGACTGTCA   | 684.831073241201 | 0.415611897419643  |
| CGGCAGACTCAC   | 684.831183532815 | 0.553903640235326  |
| GAATATACTCAC   | 684.831778781662 | 0.286954508091649  |
| GATCCAGAGTCA   | 684.834269239608 | 0.467813759333403  |
| AAACGTCGTCAT   | 684.835609843063 | 0.336734385427908  |
| CGATTATGAGTA   | 684.841942381549 | 0.199758681599413  |
| GTCATTCGTA AAA | 684.84769115754  | 0.498797688551343  |
| ACAGCGTGAGTC   | 684.852530918776 | 0.301475571444946  |
| CCTGTTGACACA   | 684.856669878323 | 0.441254431529772  |
| GCGTCACITTTAA  | 684.859184461541 | 0.349207674663869  |
| ACGGCTGTGTCA   | 684.86638423118  | 0.44933293265854   |
| ATGACATCGTTA   | 684.872515982521 | 0.149033648380862  |
| ATTAGGTATCA    | 684.883288589742 | 0.376062269302626  |
| ACGTCACITTTTC  | 684.89134277827  | 0.109179184654235  |
| AACGGGATGACG   | 684.905709513857 | 0.180399316806413  |
| TCATAAACGTCA   | 684.905773005798 | 0.215236088242486  |
| GACTCGTGACCA   | 684.908335408496 | 0.457885407114212  |
| CCTAGGAATGAC   | 684.90967231633  | 0.366446390996444  |
| AGGAAATGTCAT   | 684.916065448945 | 0.152278723169803  |
| ATAGGGTGTGTCAT | 684.921396006471 | 0.149038011331222  |
| CACGTGTCGTCA   | 684.924711965834 | 0.485884921859085  |

|              |                  |                   |
|--------------|------------------|-------------------|
| ACGTCACTGCCG | 684.927310692163 | 0.271285837541959 |
| GTCATGTACGCA | 684.934480006974 | 0.518115467774533 |
| AATGGCTGACTA | 684.942310916268 | 0.507264522038151 |
| AAGAAATGACAT | 684.95208008456  | 0.171465209646335 |
| CTTTCGTGAGTC | 684.961766653006 | 0.435384975153792 |
| GACGATCATGAC | 684.974679936901 | 0.352465508872093 |
| AGATTGCTCAGA | 684.983260861407 | 0.317989895779306 |
| AATACCGTGACT | 684.988484818114 | 0.404238208840502 |
| CGAAAATCGTCA | 684.997197964803 | 0.502140463857492 |
| CCCTTCGGTGAC | 685.005694114379 | 0.248877232301949 |
| GTAATCTTATGA | 685.010730027764 | 0.433009991037139 |
| GACTCACTCCGA | 685.011047835391 | 0.309918282568251 |
| ATTAGGTCACCA | 685.014447466935 | 0.421098640659665 |
| AAAACCGCGTCA | 685.037273511644 | 0.449627806773942 |
| TGACGAGTGACA | 685.043904760718 | 0.264060835039731 |
| AATCACGTCACT | 685.049211762017 | 0.262666876524757 |
| ATAAATGGTGAC | 685.049885809808 | 0.387724043416729 |
| CTTCATGTGACA | 685.056809957337 | 0.417763400043954 |
| GCTGCTTATGAC | 685.089052218992 | 0.266040860495355 |
| CGTCACATTTGA | 685.097987504529 | 0.387056996541769 |
| CAATGATGTGAC | 685.113420865189 | 0.278765793613176 |
| CAGAGTGACCAA | 685.116880508825 | 0.227447340995583 |
| CGATTACGTATC | 685.14380495315  | 0.51733424439227  |
| ATCGGAGAGTCA | 685.14448012608  | 0.36518285825452  |
| GGACCGTGTGAC | 685.145461573931 | 0.335189844087014 |
| TACAGCATGACA | 685.148778247579 | 0.261858031509373 |
| ACAGACTCGTCA | 685.149430982625 | 0.474293935703206 |
| ATGACGATGTGC | 685.155039520805 | 0.35662422291553  |
| GGTAATCGTGAC | 685.158451023615 | 0.514059109797436 |
| CTCCACGATGAC | 685.169094298703 | 0.247931397161366 |
| ATGAGTGAATAA | 685.171729086104 | 0.23229719365295  |
| AAAGCGTGACT  | 685.174696508776 | 0.240789328373331 |
| CCATTTGGTGAC | 685.178816296651 | 0.311944651109653 |
| AATACTCTGACT | 685.185863893966 | 0.435429043377011 |
| TATAGTGACCCA | 685.190464703805 | 0.510115200477869 |
| AGTGTGACCTAT | 685.195082949968 | 0.280824968502514 |
| GCAAGTACGCCA | 685.209960603527 | 0.397042918236268 |
| GTCACCCTGAAA | 685.215155790636 | 0.547831937146211 |
| TGACGCGATAAA | 685.220783726453 | 0.375966695910402 |
| GACTCTAGATGA | 685.233345131121 | 0.480688110674887 |
| TGACTGCCATAA | 685.234786578749 | 0.495637453331479 |
| GTATTGTAGTCA | 685.239959988467 | 0.242760859796884 |
| GCACCCTAGTCA | 685.249189284858 | 0.32101180541452  |
| ATGAGCAAGATG | 685.24985078018  | 0.267581921120566 |
| GAAGTAGATGAC | 685.252571155423 | 0.489532988311004 |
| TATGACAGTGGA | 685.257486738585 | 0.328606122207125 |
| CGACTTGTGACG | 685.259969236106 | 0.565864224451662 |
| CGTCAGCGATGA | 685.261458946535 | 0.341095307638037 |
| CAGTCTTGCTCA | 685.272476044643 | 0.283298111091767 |
| GTCACAAAACGA | 685.273464251888 | 0.363821188336683 |
| GACTAATACCAC | 685.284150786383 | 0.408982753389693 |
| GTCACGCGTCAA | 685.285200567894 | 0.437614567956563 |
| GCGTAACGTAC  | 685.285983664244 | 0.53930881121268  |
| GAGTCAGTTCC  | 685.293102880086 | 0.612381333419707 |

|               |                  |                   |
|---------------|------------------|-------------------|
| AGTCATGGTCGG  | 685.300505708688 | 0.271978158057689 |
| ACTCCATGACAC  | 685.302976484857 | 0.242231141224694 |
| GTCACCGCCGGA  | 685.3074171769   | 0.50407611622586  |
| CGTCACACCCAG  | 685.310506297933 | 0.279284851265363 |
| ATTATGTGACAA  | 685.313266979762 | 0.318809888855522 |
| GCGGTTTATGAC  | 685.319739329356 | 0.575717817142802 |
| CAATAGGTGACG  | 685.321997349385 | 0.371434056547244 |
| AAGGGGTGACGT  | 685.324282133446 | 0.200693962043873 |
| GCAAACCTGTGAC | 685.332202903285 | 0.448573817718905 |
| GCGTCTAAGTCA  | 685.347992225966 | 0.499585475989218 |
| CTAGAGTGTGAC  | 685.355089897758 | 0.507929648913479 |
| ACTCATCTGGAG  | 685.361363654489 | 0.258982997207264 |
| AGAAGTGAATCA  | 685.379178117185 | 0.224168250761821 |
| ATTACGCAACCC  | 685.387017309279 | 0.314565943097607 |
| TATCCCCGAGTCA | 685.388342217465 | 0.272282514934638 |
| CGGTATTTGTCA  | 685.43221626801  | 0.11365459977946  |
| TCGGTCTAGTCA  | 685.441356623353 | 0.560275533601453 |
| GCACAGTCAGCA  | 685.446478362327 | 0.348449732369402 |
| GAAGCCTATGAC  | 685.450661790891 | 0.205778585478564 |
| AACCTGTGTGAC  | 685.450942354437 | 0.355402619174844 |
| AAGTGTGAGAAT  | 685.458420390337 | 0.224958123877239 |
| TCATCCGTGAGA  | 685.463302924638 | 0.517846533313495 |
| GATGTTGACTGA  | 685.466476101374 | 0.408369670601435 |
| ACCACATAGTCA  | 685.472250314244 | 0.689780757010521 |
| GTCATTTCCATA  | 685.480734306961 | 0.354677550055804 |
| GAGTCAGGGCCG  | 685.481021862121 | 0.291193452755546 |
| GTCATGGTGTA   | 685.482827726808 | 0.384032806563737 |
| ACGAAGGGTGAC  | 685.4846602511   | 0.271632202795954 |
| ACTCATCCAGTG  | 685.496786540427 | 0.312742941999639 |
| CAGTCAGCCAAG  | 685.498666206173 | 0.427555582302235 |
| GTCACAGGTATA  | 685.499816049356 | 0.350313771086177 |
| ATTGAAAGTGAC  | 685.506578704536 | 0.356311788524055 |
| GTCACCTCGGTA  | 685.509104109096 | 0.364398666075765 |
| GACTCAGCGTGA  | 685.519172719513 | 0.36951511964425  |
| AATCTTGTCAT   | 685.532254282212 | 0.213872656020102 |
| AGCGCGTACTG   | 685.543360898579 | 0.360237005087692 |
| AGTCTATGTCAC  | 685.570055720742 | 0.308988297554687 |
| AGTCATGGTGAA  | 685.571275165097 | 0.317683972856368 |
| CTCATTAAGTCA  | 685.577200179264 | 0.596177920356085 |
| ATGAGGTGACAC  | 685.58422527785  | 0.308510733689049 |
| CCAAACCCAGTCA | 685.59727248479  | 0.539173141898134 |
| CAGTCCTATGAC  | 685.615509195794 | 0.252662996478716 |
| CGACGGAATGAC  | 685.621801768834 | 0.227739843815044 |
| AGCTGGTGTGAC  | 685.626118683189 | 0.316771062549111 |
| AGTCAGAGAATC  | 685.626144602575 | 0.337307534632632 |
| CGACCAAGTGAC  | 685.634267832196 | 0.637751093925172 |
| CCAAAGCATGAC  | 685.6512232098   | 0.460325324497506 |
| AATTACTGACGT  | 685.661974314503 | 0.548908295913508 |
| AAACCTGTGACG  | 685.668906151999 | 0.266317596469171 |
| CGTCACGGGAAC  | 685.680433270806 | 0.528835540964601 |
| CACCTGCAGTCA  | 685.685096775413 | 0.219590331946806 |
| GCAATCAATGAC  | 685.688792902012 | 0.251568326880322 |
| AATGACATTATA  | 685.689718429764 | 0.389536555021522 |
| AGTCACGGCGTA  | 685.690069727319 | 0.219354425051593 |

|               |                  |                   |
|---------------|------------------|-------------------|
| CTGTGCCATGAC  | 685.710533444223 | 0.471121886576872 |
| GGTATCGACTCA  | 685.711107951581 | 0.388412509663764 |
| ATCGGTGACGAC  | 685.718521580569 | 0.289710675790178 |
| GAGTAATTTGAC  | 685.732190196059 | 0.280033641734839 |
| CATATTGTCATG  | 685.733953620829 | 0.236658543286229 |
| ATATGAGAGTCA  | 685.740569646017 | 0.356907229000752 |
| ACTAGTGACAAA  | 685.743195236337 | 0.391117359744225 |
| CGTCACCGGCTA  | 685.747902643525 | 0.580600352959252 |
| CCAACACAGTCA  | 685.763203941188 | 0.322556154482086 |
| ACTCATACTGAA  | 685.76409161186  | 0.207555986782452 |
| AATCGACATGAC  | 685.765447555682 | 0.373051635551542 |
| GAAGACGACTCA  | 685.768732476902 | 0.195961822783412 |
| CATCCAGTATGA  | 685.777703487287 | 0.587728854321401 |
| AGTATACGTAAT  | 685.78360197245  | 0.278621386723356 |
| AACCATGTCACC  | 685.784074770027 | 0.294519971360215 |
| TCTATCTAGTCA  | 685.78472056274  | 0.256418921877686 |
| ACGCTAGTATGA  | 685.792183341647 | 0.625261888034444 |
| ATACAGATGACA  | 685.798977704981 | 0.397661590413737 |
| GTCATAGAGCAC  | 685.805638009029 | 0.311825444978701 |
| TCGGTCACACAA  | 685.808009740586 | 0.265751131186538 |
| CTAATTGACACA  | 685.808323829933 | 0.25474762074959  |
| ATTCTGTGACGC  | 685.836532699775 | 0.406737031090494 |
| GTCATCTCTACA  | 685.848332795387 | 0.216737369152508 |
| CATAGTCGTGAC  | 685.850200126832 | 0.382859011372966 |
| ATGCTGCGTCAG  | 685.853250542748 | 0.619301402569925 |
| AGCATGCGTGAC  | 685.866515797436 | 0.433057644274032 |
| ACACGAATGAGT  | 685.874713385929 | 0.320753903454775 |
| GTCACCAAGTAA  | 685.876260351383 | 0.375791815025818 |
| TGACCAATCACA  | 685.876947133126 | 0.247155481304548 |
| AGAGTCTAGTCA  | 685.883284222325 | 0.451314426087462 |
| GACACGTGTCTC  | 685.884493483518 | 0.498466701922063 |
| ACTAATTGTCAG  | 685.888821279259 | 0.255050052538046 |
| ATGACGAGGAAC  | 685.912344987299 | 0.367275292760081 |
| AATAATCTGTCA  | 685.920294126933 | 0.379106492605996 |
| ATGAGCAAGAGA  | 685.928018376243 | 0.232639392865129 |
| CGTTTGACTGAA  | 685.937653656183 | 0.269033628975384 |
| CACCGTGACTAG  | 685.942413340872 | 0.192031711763227 |
| CTTCAACGATGA  | 685.9461963491   | 0.472110907882162 |
| ACGTCACAAAT   | 685.949638857905 | 0.327630651768987 |
| GCCACACTATGA  | 685.954569556424 | 0.407545863297994 |
| ACTCATTGAGTG  | 685.964441798897 | 0.359394938210463 |
| AAGTGACGCGAT  | 685.965841062356 | 0.146457701811654 |
| AACCTGGATGAC  | 685.967639432797 | 0.503660595801655 |
| GACGCCCATGAC  | 685.976416762422 | 0.46069664325191  |
| AAATACTGTGAC  | 685.977101228032 | 0.420162689673984 |
| GTTCTGTGACATA | 685.992223346323 | 0.217218304290677 |
| ATGAGGCATCAT  | 685.993297801352 | 0.551074878580287 |
| CGTACTTCGTCA  | 685.993387682414 | 0.432741155108401 |
| CTATACGGTGAC  | 686.004850953598 | 0.353361108175093 |
| GGCACTGATGAC  | 686.013669167744 | 0.393160541358992 |
| AGACTACTCCA   | 686.014170456556 | 0.220384842721822 |
| GTCATAGCTACA  | 686.015620093934 | 0.422991887780633 |
| AAGGTCTGTGAT  | 686.01747814233  | 0.225009221551919 |
| ATGCATGACGCC  | 686.018381689212 | 0.396706177334878 |

|               |                  |                    |
|---------------|------------------|--------------------|
| AGAGTCAAGCTG  | 686.02280121702  | 0.183379676703588  |
| AGTATTCTGACT  | 686.043177479157 | 0.398053140773217  |
| ATGACATGACGG  | 686.054624176587 | 0.380452033251061  |
| GCACATGGTGAC  | 686.057917702434 | 0.460624091084524  |
| GTCACCGACGGA  | 686.058666255748 | 0.52935291185656   |
| GCCAGTCGTGAC  | 686.069066677211 | 0.527571742465363  |
| GATAAACATGAC  | 686.075718539871 | 0.394287375717071  |
| GAGGAAGATGAC  | 686.080418477491 | 0.329687133810986  |
| TAGGCTTTGTCA  | 686.083543514043 | 0.485135419145892  |
| ATTAGTACTCAC  | 686.086542380442 | 0.192513778400032  |
| TCCATGGTGTCA  | 686.088185963089 | 0.380251183427734  |
| GTCATTCCTTTA  | 686.095505021325 | 0.152963286766967  |
| AGACAAGATGAC  | 686.099271693939 | 0.4980478529279    |
| GTATACGTAATA  | 686.102691284204 | 0.234909200496688  |
| TCATGAGCAACA  | 686.113425324443 | 0.372117957873987  |
| GATTAATCGTCA  | 686.127505700902 | 0.237842962394816  |
| TACCCGTAGTCA  | 686.130548109884 | 0.449146506572241  |
| TAAACTTCGTCA  | 686.132311193104 | 0.58981639652594   |
| TGACTCTGTCTCA | 686.137994721895 | 0.303191094529906  |
| GAAACTTACTCA  | 686.140613102378 | 0.0896942679473197 |
| AGATGAGAGTCA  | 686.146410825549 | 0.294544758702785  |
| AATATGACCAGC  | 686.152687256083 | 0.246713797389452  |
| CGTTCAAGTGAC  | 686.153962502402 | 0.322144095576353  |
| CACTTTGGGTCA  | 686.156528635293 | 0.500517319706975  |
| AACGTCACCGGT  | 686.164354039624 | 0.3714005716146    |
| ATGCCGAGTGAC  | 686.173438994856 | 0.352651565788736  |
| ACGCCTGTGACA  | 686.176665861089 | 0.424195818728975  |
| CAGCCAAGTCAC  | 686.177414759625 | 0.350562099091762  |
| CGAGTTCGTAC   | 686.181479847584 | 0.355369682420629  |
| GTCCTCAGTCA   | 686.193006624535 | 0.30144220100349   |
| CGACTACGTGAC  | 686.19727338622  | 0.408051499562483  |
| CTTATTGTGACA  | 686.208549928785 | 0.528492752955339  |
| AACTACCCTCAT  | 686.21542550544  | 0.285500921287853  |
| TGCTTAATGACA  | 686.222583661588 | 0.338864733336689  |
| GATTACGTATCC  | 686.224344155927 | 0.311269998344202  |
| ATTTATTGACTC  | 686.2303251837   | 0.496027984363677  |
| GTCATCAGAGAC  | 686.232032156868 | 0.495225368079422  |
| GTACCTGCGTCA  | 686.237506140031 | 0.293927397646565  |
| GAGTCAATGTCC  | 686.24276321651  | 0.378428180145169  |
| ACTCATACTTCC  | 686.244254107843 | 0.267620771186674  |
| CCTATGGTGACA  | 686.247535644172 | 0.475161543553242  |
| ACGGAACATGAC  | 686.25359513981  | 0.303181538027852  |
| GATCCTGTCATC  | 686.254662557686 | 0.376730814620459  |
| GCTTCGGGTGAC  | 686.258933024717 | 0.40353001445175   |
| ATGACAGACATG  | 686.266380863111 | 0.248739856682977  |
| TCATAATGACCA  | 686.272716350349 | 0.408431723693777  |
| ATGTGGCATGAC  | 686.275553938247 | 0.516767616233082  |
| ACGGCTCTGACT  | 686.294597656312 | 0.296039773768899  |
| AACAGTATGAGT  | 686.301888912496 | 0.102189101433348  |
| CCGAGAATGAC   | 686.317838506337 | 0.346560752238952  |
| ATGACCCAGTAA  | 686.323227072379 | 0.36352498339747   |
| ACTGCTTTGTCA  | 686.333844853789 | 0.45344085854651   |
| ATGAGTCTCCAA  | 686.335736750642 | 0.628498747634842  |
| GGGTGCGAGTCA  | 686.34027422406  | 0.29600213626291   |



|                |                  |                   |
|----------------|------------------|-------------------|
| TGACTTAAAGAA   | 686.357698540144 | 0.113507939252253 |
| GTCAAGACTGAC   | 686.362350698837 | 0.453920060385682 |
| GGGCGCTATGAC   | 686.364506375244 | 0.302085139510607 |
| ACTAAGGTGTCA   | 686.373078772851 | 0.413599949872328 |
| AGTCACGGGTGA   | 686.381065713963 | 0.364839052809826 |
| TGTCACAGCTAA   | 686.392315028209 | 0.4396716493278   |
| ATCGAATCATAA   | 686.402745749538 | 0.288874609337013 |
| TGAACATAGTCA   | 686.402874009915 | 0.507437868740955 |
| ACTCATCATAGG   | 686.410147410992 | 0.395666507726985 |
| ACCTGACGTGAC   | 686.411474291938 | 0.503613834473179 |
| GAACGTGATGAC   | 686.417557599414 | 0.409061406557289 |
| TGACATGTAGAA   | 686.418995254194 | 0.321409387305831 |
| CATACGGCGTCA   | 686.419329595513 | 0.490511919759891 |
| TAGAGACTCATA   | 686.426649255829 | 0.297662470362525 |
| GTGACGCGGCAC   | 686.432049358113 | 0.356379555286731 |
| CAGTGACCGGC    | 686.432886237333 | 0.50498350932056  |
| GAGTCAGGGGCA   | 686.437944244859 | 0.360357067152762 |
| ATGACTTTTACA   | 686.479544388544 | 0.466387945408979 |
| AATCCCTATGAC   | 686.480622419891 | 0.421297694014728 |
| TAGCCTGTCATA   | 686.482252468693 | 0.301515510147011 |
| CACAATTACGCA   | 686.490786648753 | 0.402603924448525 |
| CCTTAAGGGTCA   | 686.49571253171  | 0.460197058540333 |
| GCTATTAATGAC   | 686.496997789548 | 0.48084453941287  |
| ACTCATACATCA   | 686.504544033358 | 0.233560865148946 |
| ACTGGCCATGAC   | 686.511663049034 | 0.351602022206414 |
| CTTAGGGATGAC   | 686.513804497623 | 0.463591812211595 |
| ATCCCGTGTATGA  | 686.518272818169 | 0.453395210227719 |
| GTACTIONGACTCA | 686.528739838167 | 0.468805124136924 |
| CGAGAGATGACG   | 686.539370586276 | 0.255841062899747 |
| CGCCCGACTCA    | 686.540135615958 | 0.43901187332442  |
| CCGCAGATGACG   | 686.543991140319 | 0.463406264781188 |
| AATGGAAATGAC   | 686.544661091252 | 0.289323719883369 |
| CCTGACAATGAC   | 686.549558810588 | 0.192445545890018 |
| GCGTCACCTCAC   | 686.559295883077 | 0.247590539860609 |
| AGCTAACGTCAT   | 686.56483615807  | 0.437510235035091 |
| GCGGAACATGAC   | 686.566886019165 | 0.415074271086379 |
| ACGAAATTAGTC   | 686.567782184758 | 0.330360451167289 |
| AGTCACGCTGCG   | 686.569445683954 | 0.297722587289576 |
| ATGGCACGTCAC   | 686.574904665671 | 0.360619402536584 |
| AATGAGCAGTCA   | 686.584634221079 | 0.409127244588549 |
| GAATGTACGTCA   | 686.590674676548 | 0.361164685688812 |
| AACAATTGTGAC   | 686.60051651996  | 0.315691894364695 |
| ATAGTCAGTAAC   | 686.60895891022  | 0.529660091147076 |
| GAGTCAGGGCAC   | 686.609048598742 | 0.30595706517196  |
| CATCATGACACC   | 686.619282180751 | 0.192754921103793 |
| CCTGTGCGGTGAC  | 686.62170346808  | 0.36697516764266  |
| GAGTCAAAGCCC   | 686.627228571171 | 0.345232934227244 |
| CCCGACTATGAC   | 686.641848286312 | 0.341277295311339 |
| CACGGCGGTGAC   | 686.642698357332 | 0.430455118647607 |
| ACGCCTTACTCA   | 686.648462940359 | 0.30154852083602  |
| AGTCACTACGAC   | 686.653245746613 | 0.412527664220406 |
| GACAAATTACTC   | 686.653646454163 | 0.552285480421625 |
| CAGAGTGGTGAC   | 686.659598358676 | 0.461912479868936 |
| GCGTCGATGACC   | 686.667181118737 | 0.455961479395324 |

|               |                  |                   |
|---------------|------------------|-------------------|
| GATCCATATGAC  | 686.668610504826 | 0.431987499406115 |
| TTGCTCATGAAA  | 686.683128259055 | 0.269020787599114 |
| TAACCGGTGACA  | 686.695461088735 | 0.31293159446792  |
| CGTCACATGAAG  | 686.698108624912 | 0.681034035436541 |
| ACGGTACGTGAC  | 686.704382699437 | 0.214796155428728 |
| ACTTCGTGACAC  | 686.706829062786 | 0.352632429378716 |
| AAACCGGAGTCA  | 686.718588882898 | 0.480085041702453 |
| AAGGTCGTGACT  | 686.723872985317 | 0.325639542865113 |
| TATCCTTACTCA  | 686.727785594952 | 0.142490665038888 |
| GATGAGTTGGCA  | 686.743565899736 | 0.312694997399104 |
| AATAAGATTCAT  | 686.744901930758 | 0.511048616669126 |
| ACCCGTGAGTCG  | 686.747966697651 | 0.358102283362498 |
| CTGTCATTAGGA  | 686.752477795876 | 0.440606239452032 |
| GTCATTAGAGGA  | 686.757338199173 | 0.301163370707066 |
| CCGCTGTATGAC  | 686.766600460944 | 0.457484039075184 |
| CCTATTGTATGA  | 686.773147791806 | 0.724442529467732 |
| ATTCATCATGAC  | 686.788256423791 | 0.478409348925868 |
| GTCATGGTACAC  | 686.78963082474  | 0.493549239512818 |
| GTGCTCGACTCA  | 686.794196384605 | 0.434085336797072 |
| GACTCAATGACC  | 686.8147565932   | 0.378500765510109 |
| GTCATTAACAGA  | 686.816603658684 | 0.481697631263623 |
| ACGTCACCTGCCA | 686.81877112432  | 0.747530584314714 |
| GATCAATATGAC  | 686.821320049378 | 0.325482281475108 |
| TCGGCCCGTCA   | 686.822744663932 | 0.485639370454992 |
| AATCTTGTGACA  | 686.829975292726 | 0.423496835262256 |
| CGGATAGACTCA  | 686.841853487485 | 0.51721159449253  |
| AGTCACTACAGC  | 686.847227003546 | 0.483729429961607 |
| CCGACTATGTCA  | 686.85436957004  | 0.301756945616267 |
| GAAGCGCATGAC  | 686.857929750053 | 0.322555436090677 |
| ACGTCACCATGC  | 686.862770629028 | 0.330124135964187 |
| GTCACTCCATGA  | 686.869554349567 | 0.627020849701832 |
| AGTCAGACCAGC  | 686.871638036206 | 0.38093630861109  |
| AATGACGTCGTA  | 686.873226138529 | 0.336275280727058 |
| GTCATTTCTAAC  | 686.878794938296 | 0.345788282393653 |
| CAGGCCTATGAC  | 686.88062244163  | 0.447696436141687 |
| ATATGGGATGAC  | 686.882398370072 | 0.537920689371808 |
| GCATGACGCCGA  | 686.893502339683 | 0.359632453462356 |
| ACGTCACCTTAG  | 686.898691379107 | 0.372572180401685 |
| AATATGAATGAC  | 686.904103285835 | 0.366235217536846 |
| ATGACGCTTAG   | 686.906371316992 | 0.453565849718518 |
| CCAGCATGACAC  | 686.907168760754 | 0.369487067735536 |
| ACTGATTACTGA  | 686.909290364704 | 0.348542121044773 |
| GTCATTGCGTGA  | 686.909396202512 | 0.336204444415413 |
| CAGACATGACCA  | 686.910038852396 | 0.330045047925539 |
| CATCACGACTCA  | 686.910626388589 | 0.471686107036709 |
| AAGCTAGTGACT  | 686.916822035473 | 0.220926097886028 |
| GTGTCATGGACA  | 686.931606491956 | 0.167555788445084 |
| GACAGGAATGAC  | 686.94305528419  | 0.309820914673784 |
| CCAGAGATGACG  | 686.943106920002 | 0.405991785377917 |
| CAAACCAATGAC  | 686.943742601057 | 0.202107422883525 |
| ATGAATCAATAG  | 686.94508053034  | 0.186141990516572 |
| GTGACGCTGCCA  | 686.945265848649 | 0.618735959883041 |
| ATGAGTATGTCC  | 686.951439646089 | 0.416744924021437 |
| TAGATTGTGACA  | 686.952909709634 | 0.43744383912825  |

|               |                  |                   |
|---------------|------------------|-------------------|
| AGTCACGGGTCC  | 686.953717130586 | 0.349542482861811 |
| TCCGATGACCGA  | 686.962307444126 | 0.298023863690066 |
| CGGCAAGGTGAC  | 686.968094172153 | 0.412339357584813 |
| AGTTACTAGTCA  | 686.970762986249 | 0.618347314272585 |
| CGTCACTTTGAA  | 686.983482160549 | 0.425155957988937 |
| CTGGTGTAGTCA  | 686.985107274613 | 0.465815373450263 |
| AACCGATTAGTC  | 686.986520790114 | 0.22309210204726  |
| AGTCAGATCTGC  | 686.986781402465 | 0.235417249697377 |
| TCTCTTGTGTCA  | 686.990117509514 | 0.301329887029574 |
| GTGACGTGATTA  | 686.999438324397 | 0.246113763111896 |
| ATATCGGACTCA  | 687.014079582951 | 0.408801974214344 |
| CATGGCGACTCA  | 687.015076791635 | 0.245291615229024 |
| CCCTTATATGAC  | 687.019541291242 | 0.440109910064226 |
| ACGTCACAAGTA  | 687.026023807761 | 0.554478150195122 |
| CAGCTATTAGTC  | 687.03352381074  | 0.492892765299432 |
| ATACGACGATGA  | 687.053478461864 | 0.35684381526762  |
| CCGTCGATGACC  | 687.057231137172 | 0.401576269975635 |
| GTGCCACAGTCA  | 687.059008399082 | 0.18557359335956  |
| TACTGGTGACAA  | 687.070289915823 | 0.47636500800175  |
| AGTCACGACTCC  | 687.070696273599 | 0.280206918327323 |
| ATACGCACGTCA  | 687.076342376533 | 0.376538783252208 |
| CAGTCAGATTAG  | 687.103050196647 | 0.301500232016589 |
| GTCATTGTGTTA  | 687.107188418006 | 0.296559601329211 |
| AGGAATGATGAC  | 687.117617057277 | 0.218589720974813 |
| ATGGCTGACTGC  | 687.121102963644 | 0.620260969554089 |
| TGACTCTCAAAA  | 687.134033480966 | 0.272080538271985 |
| GACTAATCTCGA  | 687.139942166558 | 0.440553980968453 |
| ACATAAGACTAA  | 687.140259192891 | 0.357200907160831 |
| CATCGTCATGAG  | 687.154202111275 | 0.445752438508734 |
| CGTTCTGAATCA  | 687.158014792017 | 0.445577316152296 |
| TCACTTTACTCA  | 687.16037862174  | 0.345626223545806 |
| ATTACTTGTACAC | 687.161336431043 | 0.340072979227567 |
| CAATTGTGACCA  | 687.162124138747 | 0.307875834251793 |
| GCCATATGTGAC  | 687.16413244087  | 0.390753061944166 |
| CAAAGTGGTCAC  | 687.167929059455 | 0.521125964987687 |
| CTGGCCCAGTCA  | 687.172271472155 | 0.477142029293385 |
| AGTGACCAAGTC  | 687.181775581635 | 0.293848267379189 |
| TACATGGTGTCA  | 687.182222967024 | 0.507513126588441 |
| ATGACCACGAAT  | 687.184122525891 | 0.532330125340118 |
| ATAGTCGTGACA  | 687.18901582332  | 0.471522210263167 |
| CGTTTTGACGCA  | 687.190561497173 | 0.432415929537849 |
| AGTGGACTCACA  | 687.206887894511 | 0.327224779670849 |
| GGTCTTCTGACA  | 687.213845628852 | 0.5551443749826   |
| CAGTCACGAGCG  | 687.218290257249 | 0.277919823370226 |
| AATAGATTACTC  | 687.221840851008 | 0.571398466975723 |
| CGTCACAAATGC  | 687.228966727739 | 0.515651428526514 |
| ATGTCATTTCCGG | 687.228984908183 | 0.366016778698717 |
| AAGTCACGCGCA  | 687.231470744357 | 0.295455145582007 |
| TGACTTAACGCA  | 687.234759695631 | 0.345481255090732 |
| CATCGCTGTGAC  | 687.236420486695 | 0.370055486620522 |
| ATGACGCGCCCA  | 687.238061038035 | 0.24544970279278  |
| GTCATCTTCCCA  | 687.23945647179  | 0.352810843580179 |
| TAACGACTCAGA  | 687.239728935657 | 0.294980545892452 |
| GAACGCCATGAC  | 687.240406195727 | 0.511446486757677 |

|               |                  |                   |
|---------------|------------------|-------------------|
| GGCATCAATGAC  | 687.249212589681 | 0.438475282880929 |
| GGTCATTGACTA  | 687.262261795726 | 0.345313474733839 |
| ACTCATACATAT  | 687.276364680637 | 0.191017162715681 |
| GTCATTGCCCGA  | 687.278097089894 | 0.237588755436918 |
| TGACTGTGTCCA  | 687.279638726455 | 0.630881817164236 |
| GCAATCGGTGAC  | 687.279744157057 | 0.193303456482442 |
| ATGGCTGACGTG  | 687.280015792542 | 0.397388305279622 |
| GCTCTAAATGAC  | 687.286035676111 | 0.349923109647311 |
| GGTTATCCGTCA  | 687.290527187418 | 0.450069745552397 |
| GGTCATACCATA  | 687.312681136594 | 0.458529310044982 |
| ACGATTACGCAC  | 687.341147992564 | 0.247589262698005 |
| GTCACACCTAGA  | 687.346711442308 | 0.248141430016488 |
| GAGTCAGGACTC  | 687.351459782788 | 0.59768356174429  |
| GCGTCACCAATA  | 687.351975099087 | 0.24421177358397  |
| AAGAGCTGTGAT  | 687.371764332755 | 0.25329908842599  |
| GGCATCGGTGAC  | 687.377786459556 | 0.449394652560719 |
| ACGTCACTTGTG  | 687.377847572073 | 0.258154464681672 |
| AGACCTACTCAT  | 687.379194612117 | 0.397574583749118 |
| ATCCCATGAGTC  | 687.380615493276 | 0.366368479553033 |
| GTGTCCGACTCA  | 687.381170936825 | 0.435772740301029 |
| GTCACAGACAAC  | 687.387155101472 | 0.430568865922934 |
| GTCATCGTCGAC  | 687.407790837498 | 0.152433373429642 |
| CATAGCACGTCA  | 687.409892872436 | 0.401124257223168 |
| TATCGCGAGTCA  | 687.413317944582 | 0.371024188906715 |
| GCGCGACGTGAC  | 687.414276949844 | 0.59408191121391  |
| GTTGGATGACCA  | 687.432359675629 | 0.411678854864884 |
| TGTCACTTAGAA  | 687.432746024227 | 0.487806616624129 |
| CTGGGCAATGAC  | 687.441463348607 | 0.362829495937318 |
| GTCATAAGGCCA  | 687.444168336862 | 0.340833105474478 |
| ACCCGAAATGAC  | 687.446232586214 | 0.330832214487383 |
| AGAGACCAGTCA  | 687.447453117634 | 0.152713209583132 |
| GTGTCAGCTACA  | 687.451553131163 | 0.349495473967434 |
| AAACTCAATGAC  | 687.456535021246 | 0.361233641210562 |
| CCACTTGTGACA  | 687.461939035612 | 0.41843596696784  |
| GTCAGAGCCGAC  | 687.470380585714 | 0.499728916993236 |
| GGTAACTCGTCA  | 687.471065372289 | 0.355438338554247 |
| CGATGGTGTGAC  | 687.484174174371 | 0.378330741482639 |
| CTGACTGGTCTA  | 687.491194657707 | 0.510570753040739 |
| ATAGCGTGACAC  | 687.495727911044 | 0.303391613194468 |
| CACGTAAAGTCA  | 687.498352901881 | 0.481591331187041 |
| ACTGCTACGTCA  | 687.498862229705 | 0.348311654521043 |
| GTCGATGAGCCA  | 687.499998190143 | 0.372038920870156 |
| CAACAAATGACA  | 687.503686655698 | 0.418149908287683 |
| ATGACGGCATAAC | 687.50500451603  | 0.468921959396022 |
| CAGCATGACGAG  | 687.524002618738 | 0.339561829959465 |
| GTCATGATGCAC  | 687.525528606636 | 0.390657031607097 |
| ATTAATGGGTCA  | 687.526876753306 | 0.30882420783715  |
| ACTCATACTCGG  | 687.543182714672 | 0.316252154562168 |
| TAGTCGCAGTCA  | 687.547120211893 | 0.318200045422782 |
| ATTGCATCACCG  | 687.552305939029 | 0.349941188198523 |
| AACGAGTGTGAC  | 687.567308545882 | 0.414366572628611 |
| CCATAACAGTCA  | 687.575646124715 | 0.556359685973489 |
| ATGCGTGAGTCC  | 687.576819194882 | 0.735487265718392 |
| GTATAAAATGAC  | 687.580813795454 | 0.356521117087989 |

|               |                  |                   |
|---------------|------------------|-------------------|
| CAGTCAGTATAA  | 687.583814321598 | 0.453947326953561 |
| AGCCTTGCATC   | 687.584825443764 | 0.257608263479304 |
| GGCTCCAATGAC  | 687.597120947787 | 0.508499379242329 |
| ATGTCTGAATCA  | 687.597405149046 | 0.337985451330838 |
| CGTATTTGGTCA  | 687.597432741364 | 0.503284729491426 |
| CAAGATTGACTG  | 687.599507357769 | 0.415476000552903 |
| AGTCAGCGAGTC  | 687.60848218319  | 0.24932917176743  |
| AGTCAGACTGAG  | 687.610840953973 | 0.355786945506986 |
| GATTCGTGACAC  | 687.61229884772  | 0.358156324947487 |
| GTGTCACGGTCA  | 687.625729798959 | 0.300834789191977 |
| ATTTTCGAGTGAC | 687.64466274812  | 0.244986039440718 |
| CTGCGGAATGAC  | 687.650622346827 | 0.523925862151567 |
| AGGTGGCTCACA  | 687.659136206764 | 0.54875131680139  |
| AGGGCATGTCAT  | 687.660869133375 | 0.303265344786229 |
| GAGCCATAGTCA  | 687.666695599816 | 0.307764480274172 |
| ATACGGAATGAC  | 687.667018405377 | 0.133548135739307 |
| GTCATTGTGAAA  | 687.677731984052 | 0.297353940441171 |
| GCCACTGATGAC  | 687.678883805836 | 0.430054462824992 |
| ATGCATTGCTCA  | 687.680835684289 | 0.537914758962681 |
| ACGCTATAGTCA  | 687.68378498503  | 0.389195797623218 |
| AGTCACGGTTAA  | 687.68532470092  | 0.303410652398118 |
| ACGATGTCACAA  | 687.691199565408 | 0.531006843722227 |
| CAGCAGTGTACAC | 687.691624582239 | 0.341301231537586 |
| ATCCCTGACGCA  | 687.703256067988 | 0.19352258985394  |
| CGAGGGTGTGAC  | 687.717354025014 | 0.282974592977147 |
| CGTCGGCATGAC  | 687.734156293423 | 0.248424299452184 |
| AATAGTCAAATA  | 687.738719553552 | 0.215864695052678 |
| TGTCATTTCAACA | 687.749404031766 | 0.259166184587753 |
| GCTCCCAGTCA   | 687.760147638731 | 0.258822771132752 |
| ACTACTACTCAT  | 687.771910333085 | 0.244823840697578 |
| AGTTGTACGTCA  | 687.781177208596 | 0.484127309921867 |
| AGTATCGTCACC  | 687.781880792209 | 0.418842390613278 |
| GCTACTTGTGAC  | 687.78843536241  | 0.429979191877789 |
| AAAATATGTGAC  | 687.792384000099 | 0.210002045270579 |
| CATCCCACGTCA  | 687.793883172687 | 0.424101251213467 |
| GAGTCAAACGAA  | 687.793946106084 | 0.245234397205043 |
| ACGTCACCCCGG  | 687.796655306125 | 0.321169175265505 |
| GTGATGTAACAA  | 687.800952963974 | 0.324099280156944 |
| TCAAATTACTGA  | 687.803342600695 | 0.44859553290045  |
| GACGTAATCTTA  | 687.821676492958 | 0.456973745716217 |
| AGGTCACATGAC  | 687.824437525512 | 0.371931526941015 |
| GTCATGCTTACA  | 687.841548684021 | 0.326619808922767 |
| GGACGTGATGAC  | 687.848305683054 | 0.287301501573184 |
| CTCTAGTGACAC  | 687.850988695547 | 0.333059561613258 |
| AACCATGGCTCA  | 687.851265430384 | 0.415002910301711 |
| AAACTAATGACA  | 687.8538633278   | 0.338443658421009 |
| CTTACATAGTCA  | 687.85437029399  | 0.302167314570274 |
| ATTTTCGACTCA  | 687.854872217884 | 0.352650093146729 |
| GAGTCAGGTGGC  | 687.881582039623 | 0.212415713487529 |
| GCAGGGAATGAC  | 687.897910536718 | 0.507698854955476 |
| GTCATTCCAAGA  | 687.898347082309 | 0.298219642876046 |
| AGACTCGGTGAC  | 687.9032118219   | 0.619255892140791 |
| CAGGTAAAGTCA  | 687.904879470256 | 0.543662080148514 |
| AGCGTCATGGCA  | 687.907092098677 | 0.258243110236628 |

|               |                  |                    |
|---------------|------------------|--------------------|
| GCTGTTTGTAC   | 687.907751410267 | 0.226763150121448  |
| GAGTCAGGACAA  | 687.91113522664  | 0.307784724923159  |
| CTCGAATGATGA  | 687.917953748545 | 0.736883411912997  |
| AAACATGAATCA  | 687.918426778372 | 0.343798873715238  |
| ACACGCGGTGAC  | 687.93543440284  | 0.106606058199746  |
| CTACAATGAGTA  | 687.943614264795 | 0.507832941633208  |
| CGAAGCGCGTCA  | 687.945589068625 | 0.377275906614332  |
| TGACCAAGACAA  | 687.948097239845 | 0.497397758236556  |
| AGTCACGGCAGC  | 687.955196747103 | 0.275224478152585  |
| AGTCACGGTGAG  | 687.955616238006 | 0.217874970430309  |
| TATCATAAGTCA  | 687.958841628098 | 0.716922362892265  |
| GTCACAAGCCA   | 687.960388661396 | 0.294167101117334  |
| CAAAATAGTGAC  | 687.991863665179 | 0.372587431698667  |
| ATTATTCATCGC  | 687.994639764135 | 0.0851355812247077 |
| GTTCCCACGTCA  | 687.994971750749 | 0.440791097106797  |
| CTGGCGGACTCA  | 687.996544158444 | 0.682573779363593  |
| CCCATTTGGTCA  | 687.999505258294 | 0.289553734273616  |
| CAGTACACGTAA  | 688.005626304765 | 0.595910369464323  |
| ATGAATCTTAAA  | 688.006806218949 | 0.212259224822618  |
| AGTAGAAATGAC  | 688.009403210155 | 0.242473054632542  |
| CCTATTAATGAC  | 688.012594273107 | 0.322254223763179  |
| AGCCAACTCATA  | 688.019339835852 | 0.266155509013385  |
| AACAATCATGAC  | 688.020350585201 | 0.369841846792754  |
| CATTGGTAGTCA  | 688.026003823389 | 0.431017324190731  |
| AGTACACAGTCA  | 688.034929162159 | 0.392568332059898  |
| GTGTCACATAA   | 688.040022859183 | 0.353978790787206  |
| AAAACCTCGTCA  | 688.043554232207 | 0.450047738940523  |
| CAGTCAAGTATG  | 688.05121063558  | 0.470882859332937  |
| CGTAATGAGTGA  | 688.056597307703 | 0.379756737774547  |
| TGATTTGACGCA  | 688.056823033983 | 0.454213703551429  |
| GTCATTCGAGTA  | 688.060320839639 | 0.364493040848438  |
| TGACAATTAGAA  | 688.065999026734 | 0.2256897128279    |
| ATGACCACGCTG  | 688.071856458947 | 0.427187611862339  |
| AGAATTGACTCT  | 688.084001211623 | 0.240511475715886  |
| GTCACCGATTCA  | 688.088757159595 | 0.428777132641287  |
| AGTCAGAGTTAG  | 688.088910701738 | 0.203056793438823  |
| GACGCTGAGTAA  | 688.089087188428 | 0.515307441205316  |
| ACAGAATGACCA  | 688.091469422354 | 0.210714598938676  |
| TCACCTTACTCA  | 688.093195858904 | 0.25473669259325   |
| ACTCATAGTACG  | 688.093365803798 | 0.477155784561794  |
| ACGTCACCTTTA  | 688.098294715401 | 0.143115685819627  |
| ATGAATACAACA  | 688.100898971687 | 0.455531192166916  |
| TCACACGTATGA  | 688.101796316953 | 0.557130422297572  |
| AGTCACTAGCGG  | 688.102402358214 | 0.345708727014762  |
| ATATTAAATGAC  | 688.104532916204 | 0.334538198106799  |
| GCGCTTGTGTCA  | 688.118799657856 | 0.362702364691926  |
| ACGACACATGAC  | 688.119655009675 | 0.562860577179926  |
| CGTCCAATGACA  | 688.125061198521 | 0.329156359580089  |
| TGTCAATTGCGAA | 688.128377320488 | 0.452048673613257  |
| AGACTCAGACAC  | 688.129448666093 | 0.575177504857794  |
| ATGACCCAGCCG  | 688.133943182392 | 0.302560263733107  |
| ATGACAGTGAAA  | 688.143678983924 | 0.30398156660937   |
| CCCGACAATGAC  | 688.158001656648 | 0.299126041205072  |
| CTTACTCAGTGA  | 688.163062065212 | 0.519628820182599  |

|                |                  |                   |
|----------------|------------------|-------------------|
| GACACGTGGTCA   | 688.163814309312 | 0.238071966560927 |
| AGCCATGACATA   | 688.167352300517 | 0.380013553294512 |
| AGTGAGTCTGAA   | 688.170513512791 | 0.212081252151456 |
| CATGTTTGTAC    | 688.185930353319 | 0.356733596478374 |
| ATCTCAGATGAC   | 688.213095899919 | 0.363044317230388 |
| CAGTTCTACTGA   | 688.214862351447 | 0.545471417965917 |
| AGTCACGGGAAT   | 688.224605824393 | 0.367983883173151 |
| TGACCAAAAGCA   | 688.240440149131 | 0.40387983317453  |
| TCGGTGCAGTCA   | 688.241171789123 | 0.447701077289151 |
| TAGTTGTGACCA   | 688.241523497408 | 0.349872017036416 |
| CCGCAGCAGTCA   | 688.245353786946 | 0.359240975007688 |
| GACCCGTCTGAC   | 688.253139539993 | 0.421128556516924 |
| GTCATACCCCGA   | 688.258083904925 | 0.577072540002128 |
| TCATAATTAGCA   | 688.272646481847 | 0.644020526380572 |
| ATTACATGACAC   | 688.27676294325  | 0.343570693468548 |
| ATCAATGGGTCA   | 688.278998759042 | 0.333755281268679 |
| ATGCATGACACC   | 688.282473745611 | 0.149261122425878 |
| CATCCTAAGTCA   | 688.28782466095  | 0.310019082866493 |
| GTCATAGCGGGA   | 688.293701990304 | 0.312656891016218 |
| ATGAGTTGTATC   | 688.301413427532 | 0.243893889786361 |
| GTCACACAGTTA   | 688.313536012971 | 0.404066786526794 |
| GAGCAGACTCAC   | 688.317349709072 | 0.211556924310657 |
| CGGCATAATGAC   | 688.317899405202 | 0.345254805005873 |
| TACATGTGGTCA   | 688.32689319048  | 0.378014150898248 |
| ATCATTGTGACA   | 688.341615896049 | 0.226868086741104 |
| GTCATCGCCCAA   | 688.341632663094 | 0.358548269277362 |
| GTCATTACCTAA   | 688.35310648706  | 0.437596592833005 |
| GACTCACGGTGA   | 688.359131586077 | 0.381986088610058 |
| AATTCACGTCAC   | 688.360388006662 | 0.264194038224279 |
| GCGTCACTATTA   | 688.362248504517 | 0.513341882310155 |
| ACTCATAGTATA   | 688.368275758605 | 0.384700123304256 |
| GTCATATCCCGA   | 688.369110027886 | 0.329017412218631 |
| AAGTTCCAGTCA   | 688.371380074077 | 0.498094605092948 |
| GTATACTGTGAC   | 688.374920730761 | 0.473900879558246 |
| ACATTGCATCAT   | 688.376240096813 | 0.448655426160311 |
| CAATGACGGTAC   | 688.382731088627 | 0.286558452141681 |
| GCCGCTTGTGAC   | 688.388401307907 | 0.504570344382465 |
| ATCTGACGAGTC   | 688.389473896196 | 0.300680615901553 |
| GATGATTACGCA   | 688.406032201355 | 0.469922128024027 |
| AGACACTAGTCA   | 688.406396883403 | 0.549779420042751 |
| CGAATCGCGTCA   | 688.415373454263 | 0.411647277542105 |
| GATTGCGACTCA   | 688.418125101099 | 0.537407435513004 |
| GTCACCGTTATA   | 688.435393565946 | 0.380950612963515 |
| ATTGATGAGCCA   | 688.435597167338 | 0.436333932336965 |
| GCGTCACAGGCC   | 688.440472102528 | 0.409579957458067 |
| AGTCACTTGCTC   | 688.443583538446 | 0.369731697970786 |
| ACGTTTGACTCT   | 688.444447099528 | 0.255434351445176 |
| TGCAAATGACAA   | 688.454580215489 | 0.444518644319561 |
| GTA AAAATCGTCA | 688.460040391017 | 0.582650299684226 |
| GTGCGTGACCCA   | 688.477012181174 | 0.499878999454441 |
| CCGTCACATGAC   | 688.478392702366 | 0.473115051481275 |
| ATGACATTTCTA   | 688.484746415467 | 0.228623040261728 |
| CGTCATTAGAGC   | 688.491301571196 | 0.275977944055548 |
| CGTGGGGAGTCA   | 688.493802119833 | 0.312666203138903 |

|                |                  |                    |
|----------------|------------------|--------------------|
| ACTACTCTGACT   | 688.49654693152  | 0.302241035490029  |
| AATTAGTCGGAC   | 688.501361269298 | 0.385012212811028  |
| ACAAATGAGCCA   | 688.513833670473 | 0.23095573306862   |
| GGAACCGATGAC   | 688.514921150971 | 0.370514755947872  |
| ACTAGTGACGAA   | 688.518370883137 | 0.481394602975419  |
| ATGATTGTGACG   | 688.51975762452  | 0.578277034499032  |
| CTCCCTGCGTCA   | 688.523750527076 | 0.406485285685891  |
| TCGGTCATCAAA   | 688.531633383494 | 0.326937981684369  |
| ATGACAGTACTC   | 688.534104786496 | 0.287278567375849  |
| ATGGCGGATGAC   | 688.536738905457 | 0.190936784423832  |
| GGCAGTGACCCA   | 688.539237266445 | 0.347431340911274  |
| CGTAGTGACAAA   | 688.546701956165 | 0.514055042767281  |
| CCCGATGTGACA   | 688.552268093273 | 0.378462743455538  |
| ATGACGTTGGCC   | 688.554869787126 | 0.27509532750493   |
| CTTCATGGGTCA   | 688.556362403999 | 0.418665859937178  |
| AGCCTGATGACG   | 688.569204294736 | 0.420927551111795  |
| GACTTATTACTC   | 688.583398179625 | 0.219937201322864  |
| GACCAGTCAGAA   | 688.583584856809 | 0.359197084439693  |
| TGTGACATTA AAA | 688.588215573339 | 0.332209332381451  |
| ATGACAAGAGTC   | 688.594354747441 | 0.488611429232831  |
| CATCTCGGATGA   | 688.608072526957 | 0.539622744593649  |
| GAGTAATTACGC   | 688.610700042666 | 0.335030180042946  |
| GCCGTGTATGAC   | 688.614816723029 | 0.366856049621656  |
| GTCACAGCCAGA   | 688.637065622405 | 0.6054437144414353 |
| CTGAGTGGTCAC   | 688.638762854913 | 0.464179509382153  |
| TAATTGTGACAA   | 688.641857084712 | 0.414095043386754  |
| GAGGTCAATGAC   | 688.651821756487 | 0.180233690596695  |
| CGAACGTGAGTC   | 688.679190100137 | 0.557950128893603  |
| GCAAGCCGATGAC  | 688.680318424469 | 0.475366393341706  |
| ATACGTGGTGAC   | 688.686555120147 | 0.227400924514026  |
| ATGTCACCATCG   | 688.690082652985 | 0.342163638549441  |
| CTAATCCAGTCA   | 688.707370107065 | 0.280428469746495  |
| ACCCTTGTGTCA   | 688.708747921083 | 0.262688458484576  |
| AATCCTATGAGT   | 688.722202089823 | 0.35597573908047   |
| TGACAATTACAA   | 688.733712545644 | 0.383696586122185  |
| ACGGTGTGTGAC   | 688.735279503035 | 0.250696759230148  |
| TGACACTTTAAA   | 688.736012501079 | 0.761032032137034  |
| AAGGCATAGTCA   | 688.739371287869 | 0.272422806237614  |
| CATGAGCTATGA   | 688.746982164973 | 0.576942844128049  |
| GACTAACAAATGA  | 688.747523446847 | 0.376114948804728  |
| AGACTCACGGGA   | 688.749890733078 | 0.463691387144813  |
| ATGAGCTGTACA   | 688.758936163065 | 0.303972440891116  |
| GTCATTACACGA   | 688.761025073089 | 0.129174582031467  |
| GGTTTTGCGTCA   | 688.770099990249 | 0.283874607836243  |
| CATTGATGACCA   | 688.775735537791 | 0.453185230892515  |
| ACGTCACCTCGTA  | 688.779950581856 | 0.338847262376785  |
| TAACTGTGACGA   | 688.78545257394  | 0.61389851519293   |
| ATCACTTTGTCA   | 688.791064578848 | 0.226885916787937  |
| ATGTTATGTGAC   | 688.795641860881 | 0.226041226790833  |
| GAGTAATAGCCA   | 688.796125872988 | 0.608032264329828  |
| CGGCAGTGTAC    | 688.806357889777 | 0.286596346702812  |
| AAATTCGTGTCA   | 688.808326250953 | 0.345893587092491  |
| GACGAATCATCA   | 688.811150171759 | 0.307148328735512  |
| ACTGTGAGCCAC   | 688.815840999617 | 0.341121438903273  |



|               |                  |                   |
|---------------|------------------|-------------------|
| AGTCACTAGCAG  | 688.828458422969 | 0.454934512500764 |
| GGGCAAATGAC   | 688.837419269827 | 0.171415477963308 |
| CGCTTTTGACTC  | 688.839245081814 | 0.251503139191308 |
| ATAGTCAGTAGC  | 688.84281959264  | 0.376566988764675 |
| GGAGGATATGAC  | 688.858316378325 | 0.336083242403349 |
| CCTCTTTATGAC  | 688.861366663847 | 0.364138125004368 |
| GGCTAACAGTCA  | 688.870802807399 | 0.460509336621102 |
| CTCATGTGCTCA  | 688.872645765773 | 0.38357338930623  |
| AAACCTAGTCAG  | 688.873102834867 | 0.355919459949761 |
| AATCCAGATGAC  | 688.893228154918 | 0.573390158143922 |
| GACTCTTAGACA  | 688.913846131376 | 0.443864852918675 |
| ACTGCGAATGAC  | 688.923713982934 | 0.440970258915586 |
| AACGGCGAGTCA  | 688.92570141421  | 0.361951880478495 |
| CGTCAACTATGA  | 688.927699860562 | 0.351471869305391 |
| AAAAGCTGTGAC  | 688.93204733732  | 0.454243335453454 |
| GTCACAGCTTAA  | 688.938277522997 | 0.343156617048296 |
| TGTCACAGGTAA  | 688.942017394222 | 0.175330262729463 |
| AGATAAATGACG  | 688.949160637268 | 0.124821550195983 |
| AGACCCTGTCAT  | 688.955978104659 | 0.242201574252283 |
| CCTAAATGTGAC  | 688.958918895337 | 0.358855860675519 |
| ACCCCTGACTCG  | 688.959337566795 | 0.27847932355509  |
| TGACTATGGAAA  | 688.960741438111 | 0.399557869953695 |
| CTTTTGTATGAC  | 688.961316928921 | 0.441712807832617 |
| GAGCTATAGTCA  | 688.968054738028 | 0.315259139613096 |
| GATACAGAGTCA  | 688.972759393167 | 0.379023318019119 |
| GAGCTTGTGTC   | 688.975086851651 | 0.439816894007143 |
| ACCGACGTCATC  | 688.978635651383 | 0.285166858589993 |
| GGAAATGGATGAC | 688.979208472139 | 0.358789077847911 |
| GTGACTACCCCA  | 688.985902279806 | 0.257846334505346 |
| CGATTGACTGAA  | 689.000026509986 | 0.43767657504806  |
| GACTATAGTGAC  | 689.004766205906 | 0.371104460098118 |
| TATTCTGTGACA  | 689.007609428041 | 0.366290183537641 |
| ACGTCTGACAGA  | 689.012046613214 | 0.421373463872464 |
| CAAGCGGTGAC   | 689.022545452002 | 0.21615359363838  |
| AGTCAGAGGTTT  | 689.022852795312 | 0.288348722765112 |
| ACCTGTTGAGTC  | 689.034788821031 | 0.378041223721221 |
| CCCTATTGTGAC  | 689.048562743534 | 0.425691035842572 |
| ACACAGATGACA  | 689.053535123299 | 0.27628740408762  |
| GTCACATTTAGA  | 689.056490415286 | 0.164293664348031 |
| CAGAAAGTGTC   | 689.066480538721 | 0.426529012826078 |
| CTATGACTTTTC  | 689.066541167305 | 0.255879415819986 |
| CTATCAAATGAC  | 689.068033711279 | 0.170592094318091 |
| CAGGGTAATGAC  | 689.072969355446 | 0.337158387663233 |
| GATTTGTAGTCA  | 689.07405777182  | 0.33051090842275  |
| ATAATGTGACGC  | 689.083362397501 | 0.307974274982036 |
| AACCGGGATGAC  | 689.088016815122 | 0.365499753381685 |
| GTCACACGTTAA  | 689.092653576638 | 0.397010116599191 |
| AACGTGACGTTT  | 689.096545093015 | 0.528565132657484 |
| ATGTGCACGTCA  | 689.105624994942 | 0.616631147363728 |
| GTTCTATAGTCA  | 689.11719095513  | 0.503621580289365 |
| CCGTCATATGTA  | 689.119917586075 | 0.442691899871173 |
| AAGCAAGATGAC  | 689.126651010539 | 0.185856550711227 |
| GCGACGAATGAC  | 689.131538484492 | 0.269487381312147 |
| TGACTGCTGACA  | 689.135899616374 | 0.343150351341037 |

|              |                  |                   |
|--------------|------------------|-------------------|
| ACAAGATGACCC | 689.154295819712 | 0.364117116771083 |
| ATTCATATGTCA | 689.166614531099 | 0.4204119794484   |
| AATATTATTCAT | 689.183029331689 | 0.434785843709136 |
| CAGTCTAATGAC | 689.185064377644 | 0.572086553580711 |
| GACGAGAATGAC | 689.188239849574 | 0.362538825203815 |
| ATGGCTAATACA | 689.188430832063 | 0.400489493529629 |
| TGAGTACAACCA | 689.191442309847 | 0.524639995622841 |
| GCAAAGTAGTCA | 689.19489732817  | 0.513971568971924 |
| CACGTCACGCAC | 689.20090515854  | 0.455643681881583 |
| CATAAGGGTGAC | 689.201802838499 | 0.170528215957224 |
| GACTAATCGGAC | 689.211366541771 | 0.509596981936241 |
| CTAAATGGGTCA | 689.215651066178 | 0.36590611096688  |
| ATGAATCAACAA | 689.216571834295 | 0.323735429640319 |
| GGTGTTTACTCA | 689.232050992544 | 0.302767162937046 |
| CTAGGATGACCA | 689.233419829086 | 0.253742851828511 |
| TAGGTTGACACA | 689.23898849119  | 0.285092371431911 |
| CGCAGCGTGTCA | 689.251084801673 | 0.451068606920309 |
| CTGCGCGAGTCA | 689.260216315373 | 0.428485516721063 |
| ATTGTTTGTAC  | 689.263273532314 | 0.261364771317499 |
| CGTGCCTGACTC | 689.266118165117 | 0.117751625080635 |
| GTAGATGGGTCA | 689.270187167655 | 0.126901099026826 |
| ATTCTATATGAC | 689.278687642474 | 0.448363833409833 |
| CAAAACGTGACG | 689.279256608018 | 0.540912146322834 |
| GCTAGTGTGACC | 689.281005638604 | 0.701081575595371 |
| CCCGAACTATGA | 689.297897468903 | 0.453382040822155 |
| ATTGGGTCACTG | 689.301839689856 | 0.275486728924248 |
| GCTCATATGTCA | 689.306922514311 | 0.401565451233785 |
| AATGCAGTCAGC | 689.317604942945 | 0.43052991666257  |
| AGTCACGCCGAC | 689.318068089493 | 0.265911806906976 |
| GAGCATTGACTC | 689.322086875999 | 0.405272883480489 |
| CTGCTAAATGAC | 689.336176960301 | 0.471061511872322 |
| AGGCTCTGTAC  | 689.339798909806 | 0.348547082549728 |
| ATGAGTCTCGAG | 689.341201341345 | 0.299693058894566 |
| GATACCGGTGAC | 689.345738529746 | 0.390110422469747 |
| AGTCAGATGTCA | 689.354865880388 | 0.302579555641779 |
| GTTACGCATAAC | 689.364803841908 | 0.349031165561834 |
| GTAACTTTGTCA | 689.36524268647  | 0.397067359333484 |
| CTATTTAAGTCA | 689.36955766082  | 0.358881947658429 |
| ACTCATACCTCA | 689.372474957686 | 0.213603996842524 |
| ACAAACGTGTCA | 689.373208899098 | 0.397430035365868 |
| CCCTTGAATGAC | 689.373235815162 | 0.372143388904431 |
| GAGTCAAAGAAC | 689.380949975091 | 0.345983289403294 |
| GGTGTACCGTAA | 689.386961413085 | 0.30990683483615  |
| TCCCCTCAGTCA | 689.390165319447 | 0.152953723931798 |
| CTAGGCCAGTCA | 689.402547091654 | 0.328950470779802 |
| AGACTAATTTTG | 689.407469098531 | 0.288850943774504 |
| AACAATTAATAA | 689.415296273084 | 0.402779624745903 |
| CGAATCGTGACA | 689.41894833279  | 0.353408990793451 |
| CGATTGTGACGC | 689.419297001291 | 0.373244173142575 |
| ATTCTGTATGAC | 689.419946912734 | 0.341821738608874 |
| GAACAGTGAGTC | 689.422367879172 | 0.129275418422722 |
| CGAATAGATGAC | 689.425710684755 | 0.225686285509228 |
| CCGAGTTGTGAC | 689.43142892453  | 0.498002312520195 |
| ACGCCTGAGTAA | 689.437127095638 | 0.349170566848015 |

|               |                  |                    |
|---------------|------------------|--------------------|
| ACCCTAATGACA  | 689.447558667274 | 0.353067981318621  |
| ATGACGAGGCCA  | 689.449461077504 | 0.53651377233731   |
| TGACACAAGGAA  | 689.454758295316 | 0.324935185190945  |
| AGTCACTAGCGA  | 689.458400400671 | 0.377878538733622  |
| ATGAGCAAATA   | 689.461325409578 | 0.2391031868696    |
| TATGACGGCAAA  | 689.466973601024 | 0.187920626278694  |
| CGAATGTCTGAC  | 689.470502260686 | 0.49246704495691   |
| GTCATCATGGAC  | 689.472342493213 | 0.207735840683624  |
| GCGGAGAATGAC  | 689.478490184974 | 0.188675644171457  |
| CAATGATGTGGC  | 689.488880436258 | 0.40873610741507   |
| CAATGAGAGTCA  | 689.499174897486 | 0.172031013978219  |
| GCTGGGTGTGAC  | 689.499252996794 | 0.173806141258039  |
| AACAGTCAATTG  | 689.516817156043 | 0.397088704449713  |
| AGAGTCAGCGCG  | 689.527282687292 | 0.318367526898667  |
| GACTTGTCACTC  | 689.531175275321 | 0.430051371991872  |
| AGTCACGGCCAA  | 689.533057215177 | 0.425101207338982  |
| AAATGTATGACC  | 689.533153482721 | 0.49680801668065   |
| CTACGATATGAC  | 689.53676798009  | 0.351764655951184  |
| CAGGTTTCGTCA  | 689.541567991699 | 0.411150003806954  |
| ATATACAATGAC  | 689.54371330622  | 0.243039969837647  |
| ATGACATTTCAA  | 689.545991347425 | 0.393720081801724  |
| TGACAAGTATAA  | 689.550192027104 | 0.444184171012174  |
| ATGACTTCTGAC  | 689.565300918562 | 0.458067994442072  |
| ATGACACTCCGA  | 689.567765415412 | 0.398049208014733  |
| GGCCAACTCATA  | 689.578299276833 | 0.27633231531673   |
| GTCACATATCAC  | 689.620070199511 | 0.223826716042491  |
| ACGTCACCTTCC  | 689.622294957158 | 0.21126722563636   |
| AATAACGTCATG  | 689.626777640854 | 0.233554757929784  |
| AAAACCAAGTCA  | 689.638171363896 | 0.256896664678715  |
| ATTGGTGATGAC  | 689.640253822035 | 0.446642533643457  |
| ACCGCAATGACA  | 689.642704933762 | 0.339543622913626  |
| ATTACTGAACGG  | 689.657005859306 | 0.41977109669305   |
| GGCCATCATGAC  | 689.663166604404 | 0.519395507265936  |
| GTACAGGATGAC  | 689.680554897742 | 0.0744603307192137 |
| CTGCAAAGAGTC  | 689.688855603315 | 0.580301117804672  |
| GTCATTTCCGTA  | 689.707312878441 | 0.353468430534125  |
| ATGTACTCGTCA  | 689.709445424417 | 0.328055155336045  |
| CTGTAATTGTCA  | 689.713306319169 | 0.416979626919919  |
| GCATGCTATGAC  | 689.726189278807 | 0.376057473702411  |
| CCGACTTTGTCA  | 689.731716502182 | 0.615688908149879  |
| TGAATCAGCGAA  | 689.73278627534  | 0.589765820420441  |
| GATGTTCTGTAC  | 689.734189167557 | 0.514676991405812  |
| CAAATTCGTGAC  | 689.746187806034 | 0.332903325158542  |
| CAAGAGATGACA  | 689.758291387292 | 0.416549792251196  |
| TCATCATGGTCA  | 689.772093086377 | 0.501635272090837  |
| GTCATGCAGCTA  | 689.773776197418 | 0.267272052826573  |
| GGACGAGATGAC  | 689.778048478184 | 0.281200210127201  |
| ATCGAAATGACA  | 689.78095650862  | 0.297720654790976  |
| CTTAACCTGGTCA | 689.788034727531 | 0.400191113259835  |
| CAAACCTAAGTCA | 689.794779080125 | 0.397265207172583  |
| AGTGTATATGAC  | 689.807213297542 | 0.28061499119525   |
| GTCATTTAGTCA  | 689.808259290236 | 0.307332526399348  |
| GGACCCACGTCA  | 689.80947954828  | 0.516367460434405  |
| CAGTCAGAACAA  | 689.818348683668 | 0.530774380163918  |

|               |                  |                   |
|---------------|------------------|-------------------|
| GTCACCGTACAA  | 689.821281500474 | 0.490745339134467 |
| AGATTTTCGTCAG | 689.822345043014 | 0.579747557841016 |
| CAGTCAGCGATA  | 689.831294830679 | 0.454454913389384 |
| CTTTAATGTGAC  | 689.83157433498  | 0.372057955412062 |
| GTGGCTCAGTCA  | 689.836701611973 | 0.566243841831256 |
| GAGGTTTATGAC  | 689.846423202982 | 0.24534683068035  |
| GTCATGACCGCA  | 689.848879254638 | 0.429949457019658 |
| CTGATCAATGAC  | 689.852831270378 | 0.403501171452569 |
| AAGTGTCAGACG  | 689.861005141003 | 0.245484994965914 |
| AGTCACTACAAC  | 689.868767819846 | 0.142879193322299 |
| TAACTGTGACA   | 689.87376691399  | 0.329514414720619 |
| ATTGGTGACGAC  | 689.877775903824 | 0.455317739836075 |
| ACTCATACGTGG  | 689.87846201119  | 0.415800631047897 |
| ATGACGTTTCATG | 689.891648293727 | 0.343326751781765 |
| AACTTACGATGA  | 689.891961211628 | 0.515680972619666 |
| CTGCTGAGTGAC  | 689.895414527393 | 0.27294483485486  |
| GATCATTGTCTCA | 689.900975230572 | 0.362626969405646 |
| AATCCGTGTGAC  | 689.901227744097 | 0.476905116026042 |
| TGACAATAACCA  | 689.912266006834 | 0.763173702016842 |
| AGTCACGGTTGC  | 689.926262630788 | 0.313341316289221 |
| ACTGCTGATTCA  | 689.934385369794 | 0.384968334254315 |
| CCCACTGACACA  | 689.936496329573 | 0.307071019663725 |
| AGTTCGTCAGAC  | 689.944790766223 | 0.596792334621745 |
| ATGCACTCATAG  | 689.95695901932  | 0.342323812976217 |
| CTGATATTATGA  | 689.959147611485 | 0.439218389399783 |
| TAATGCTGACTA  | 689.965160295432 | 0.415886424782697 |
| CCACGTGACGAA  | 689.966099566911 | 0.313796951573021 |
| CTGATGTGACGC  | 689.96779635692  | 0.434654919213868 |
| ATTAGGCATGAC  | 689.974593199707 | 0.425849249072075 |
| AGTCCTGACACA  | 689.986474859374 | 0.244695465730092 |
| GTCATGTGCAAA  | 689.989070368288 | 0.345147799341433 |
| GTCATCAAACGA  | 689.991915681379 | 0.485172153002732 |
| GAACGCTGACAC  | 689.994789545437 | 0.514090994864891 |
| GTCACAGTCCAA  | 690.010406033751 | 0.66758321158847  |
| ACGTATGATACA  | 690.017481068505 | 0.48353923594319  |
| GCTCCGGGTGAC  | 690.017670217452 | 0.471597023709881 |
| ACTCATCGCGAA  | 690.019905620572 | 0.378132597588473 |
| ATGACCTCGTCA  | 690.020813072204 | 0.458381585077856 |
| GTGACGTGCCAA  | 690.034791701614 | 0.289792933160995 |
| GTCACCGGGAGA  | 690.03755024268  | 0.303284608565821 |
| ACGCGTCGTCAT  | 690.042338414932 | 0.288691777660626 |
| CATTAATGGTCA  | 690.043693681862 | 0.402887137525816 |
| ATCCATAGTGAC  | 690.045699725649 | 0.558368362810515 |
| TCAGTAGCGTCA  | 690.045992415271 | 0.467945719385903 |
| ACTATGACCTGG  | 690.048092969763 | 0.264997767420252 |
| AATGAGTTAATC  | 690.052612283405 | 0.363112564265565 |
| AGACTAATCGAG  | 690.067753801135 | 0.233963952248161 |
| AGTCACGCGATG  | 690.068726726784 | 0.237211888265401 |
| ACTCATCTTGTA  | 690.06914239277  | 0.399180797994529 |
| AGTCATGGGTTG  | 690.076473227855 | 0.188793602445415 |
| GGGAGGGAGTCA  | 690.090094238318 | 0.248949311724334 |
| ATGTCACCTGACG | 690.108506478204 | 0.469509370304945 |
| CAGGCTGAATCA  | 690.111479251095 | 0.324290356963696 |
| TCAATTGAGTAA  | 690.112035548654 | 0.575411357584252 |

|               |                  |                   |
|---------------|------------------|-------------------|
| CAACCGCATGAC  | 690.125020486508 | 0.289111603060109 |
| ACGTCACAGGAT  | 690.131277391643 | 0.313884749471631 |
| GCCCAGGGTGAC  | 690.139231511031 | 0.777407530358795 |
| GACCCATGATGA  | 690.142504452584 | 0.449358288721486 |
| GTCACCGACCCA  | 690.159725057131 | 0.323245797757894 |
| AGGAGATATGAC  | 690.1643266253   | 0.1202245878938   |
| GCGATTACGCAA  | 690.174601357865 | 0.4661499249171   |
| ACAACCTGTGACG | 690.176494686908 | 0.506311927828732 |
| CAGGTAATGACG  | 690.179707601005 | 0.327668870110579 |
| TACAGTTCGTCA  | 690.183038590425 | 0.344175574167845 |
| GGGACATATGAC  | 690.185588954482 | 0.236579243074453 |
| TCACATTAGTAA  | 690.19208993107  | 0.454966596541417 |
| TACATAATGACA  | 690.196204866482 | 0.352466208826231 |
| ATAGATGGCTCA  | 690.197267798895 | 0.62269722700752  |
| ATTAACCTCGTCA | 690.213121469766 | 0.52716151853823  |
| CGCCTCGGTGAC  | 690.218142175558 | 0.352336784700266 |
| CGTGACGTGACC  | 690.218357309766 | 0.346191593297289 |
| ACGTACTTATGA  | 690.218400875911 | 0.375409076703834 |
| GTCTCCCAGTCA  | 690.221385743613 | 0.327325260228216 |
| ATGTGATATGAC  | 690.221817200448 | 0.289707964553061 |
| GTTGGGGAGTCA  | 690.228569113069 | 0.282837527063704 |
| AGTCATGGTGTG  | 690.230829459571 | 0.29650413675082  |
| CGGGTTCATGAC  | 690.234061575286 | 0.349675070579583 |
| CATACTGAATCA  | 690.243053008966 | 0.452386555502386 |
| CAAGTAAGTCAC  | 690.249885417676 | 0.328059497264372 |
| ATGAGTCCCGAA  | 690.250739224803 | 0.237481574637116 |
| CCTTCGAATGAC  | 690.259181685819 | 0.313311607171352 |
| CGTCATCCCGAG  | 690.263529721217 | 0.263202919477423 |
| CCTGTGCATGAC  | 690.270985817276 | 0.375590743437583 |
| GTCATTGAATA   | 690.272828689893 | 0.628335425362241 |
| CTCCATGACAGA  | 690.275174643627 | 0.349588276179721 |
| GTCATATGAGAA  | 690.283211571734 | 0.250440727453296 |
| CACAGGGTGACA  | 690.283896321001 | 0.390614761620245 |
| ACCGTCGTGACT  | 690.289979786098 | 0.251981242901619 |
| CGCGAAATGAC   | 690.291603960445 | 0.637348159377473 |
| ACTCATCGATGC  | 690.292171379075 | 0.401603092415002 |
| AGTGACGCGGCC  | 690.295519049205 | 0.21094718515568  |
| AGTCACTACGAG  | 690.296777657135 | 0.492187986299367 |
| GTCATGTCGTGA  | 690.30455355758  | 0.318973856457635 |
| ACGGCTCGTCAT  | 690.306103056038 | 0.303757265759969 |
| ATGACAGTCTTA  | 690.308823521023 | 0.300436714339888 |
| AGGGAATTAGTC  | 690.318164703317 | 0.240613401256352 |
| CAGTGACAAACC  | 690.318949827412 | 0.219946807882176 |
| AACCTGAGTGAC  | 690.319621675787 | 0.299444889802985 |
| AAATACTAGTCA  | 690.320667322147 | 0.367201136988516 |
| AAACCTCGTCAC  | 690.327030158629 | 0.276127725889696 |
| AGTAAATGTGTC  | 690.332699400307 | 0.415381891309482 |
| CAGGACAATGAC  | 690.337770563534 | 0.341907059494737 |
| AGTAATAGTAAT  | 690.341091725104 | 0.267865647693703 |
| TCTTATGTGACA  | 690.341752883895 | 0.189514942238337 |
| TGAGCATGACCA  | 690.347042681249 | 0.406559653223357 |
| CTTTTGCATGAC  | 690.360604634541 | 0.401897432886207 |
| ACTTTATAATGA  | 690.364267985377 | 0.531912263241704 |
| ACTGACGGTGAC  | 690.365615508819 | 0.505787002222058 |

|              |                  |                   |
|--------------|------------------|-------------------|
| CACCATGATGAC | 690.379849882711 | 0.39956149414256  |
| GACCCACAGTCA | 690.382766796317 | 0.279020075519737 |
| CAGTCCAATGAC | 690.391828601222 | 0.387132144477451 |
| ATGAGTCGGGGC | 690.393830722638 | 0.385544857020871 |
| GTCACACATTCA | 690.418475855108 | 0.27828231499588  |
| CGTCATTTCA   | 690.418811970711 | 0.338898196337123 |
| CCCCATTGACTC | 690.421301034361 | 0.154645300470826 |
| TGTCACCGCACA | 690.42279418387  | 0.354313805236346 |
| CAACGTCACCGG | 690.426862878508 | 0.418955543165569 |
| GCAGCCTATGAC | 690.429201239682 | 0.448966240495021 |
| TCGAAGACGTCA | 690.434376203758 | 0.388692046798687 |
| AGAGTCAAGTGC | 690.447207189844 | 0.29471271134063  |
| GCCGTCGTGTC  | 690.447425852809 | 0.673784439878057 |
| CACTTCGTGACA | 690.449817629657 | 0.371054846235409 |
| GCCTACAGTGAC | 690.452881760866 | 0.463885194493054 |
| TCGCGGTGACGA | 690.455401820392 | 0.24745712073803  |
| AGACTAATAAAA | 690.464490568849 | 0.451582286015519 |
| TACTTGTACTCA | 690.467539965493 | 0.226708997764576 |
| CACGAAGTGTCA | 690.470848679035 | 0.464999214889426 |
| CAAGGGATGACG | 690.472907354493 | 0.378483260218146 |
| CAGTCAGCGTGC | 690.489353562979 | 0.113580633140099 |
| ATCAATAATGAC | 690.490060009786 | 0.324936318861108 |
| GACCAGTCAGCA | 690.493252820055 | 0.169614234015363 |
| CACTCATTATGA | 690.499012574287 | 0.371389973102911 |
| CGTGCTTTGTCA | 690.507188956877 | 0.351966888623093 |
| CGAACAGTCAG  | 690.509653789473 | 0.408383121606795 |
| GCCAAAGATGAC | 690.52240754898  | 0.389929743401298 |
| AATATATGAATC | 690.528986759358 | 0.346696783552679 |
| GACCGTGTCA   | 690.536347142327 | 0.292431711271033 |
| CTGTCATGGTAA | 690.564595053711 | 0.449619824253421 |
| AATACCGACTCA | 690.565888009703 | 0.303126365052096 |
| GTGACACCGCAA | 690.569614906903 | 0.386235082072619 |
| ATTGTGTGACCA | 690.570394505913 | 0.450572596502533 |
| ATACTGTGACAT | 690.57945519628  | 0.513615865940767 |
| GTCACCGCCGTA | 690.591980875429 | 0.575358855021337 |
| CTCATATAGTGA | 690.596482743315 | 0.519429258127125 |
| AGGCCAAGTCAC | 690.602092383603 | 0.190708448485906 |
| TATTATCTATGA | 690.605762324773 | 0.434493080657195 |
| CCCATCTATGAC | 690.607071224094 | 0.279914700361437 |
| CAAGTGTCTGAC | 690.618203981555 | 0.471699339256081 |
| ATCGTCATGAAT | 690.639082257586 | 0.226199808238127 |
| CTTAATCTGTCA | 690.648666513793 | 0.392400145255685 |
| ATTATTTGCTCA | 690.652598934197 | 0.402798695029168 |
| CACATCATGACA | 690.653334073834 | 0.238589759404235 |
| AACATTTGACTC | 690.653833854677 | 0.300673405299817 |
| GACTGATGTGAC | 690.655156225822 | 0.462406650821503 |
| AGATGATTAGTC | 690.663977173677 | 0.144530052573445 |
| ACTAGAATGAGT | 690.667493067511 | 0.282737326241503 |
| ATTGCGTAATGG | 690.67089430865  | 0.29028907232427  |
| ACGAACCTGTCA | 690.671547452003 | 0.381781706222233 |
| ATATTCATCAT  | 690.677413391779 | 0.348717619088051 |
| TCACGTGACAAA | 690.680325431362 | 0.393146202575758 |
| ATATTATGAATC | 690.682708858375 | 0.653707759932079 |
| ATATCACGTCAC | 690.685900300423 | 0.329555245761538 |

|                |                  |                   |
|----------------|------------------|-------------------|
| GTCACAGTAAAC   | 690.686569977947 | 0.378684634572    |
| GAATGATGTGAC   | 690.692694902843 | 0.361629864294559 |
| CATCTTCGATGA   | 690.701785390504 | 0.239313206536546 |
| TAGATTTTCGTCA  | 690.703026605944 | 0.487850820341369 |
| ATCTAGAATGAC   | 690.709359022313 | 0.135305507692256 |
| CGTCATCCCGAC   | 690.727845727418 | 0.40588095082184  |
| CCCGCAATGACA   | 690.729567438554 | 0.180611424856629 |
| AGTCAGACCGTC   | 690.732694388193 | 0.450183156870638 |
| GTACTIONGTCACA | 690.740254242664 | 0.383757886890978 |
| CACCATGACGAG   | 690.751230696712 | 0.429712321157501 |
| GACTCACTTAGA   | 690.761433258572 | 0.290002581380981 |
| ATGACGAGCAAA   | 690.769060858004 | 0.342752267237407 |
| GTCATTCGCCGA   | 690.771174260404 | 0.219711085046754 |
| GACGGGTGACGC   | 690.788218065196 | 0.124551716596326 |
| ATGACCACGACA   | 690.793875886323 | 0.283182861763567 |
| CGCTCATATGAC   | 690.798932414583 | 0.47554326602733  |
| GAGTACAAGTCA   | 690.802670615355 | 0.405491041294143 |
| CCGAAGATGACC   | 690.816161571519 | 0.628009663791953 |
| ATCACCGGTGAC   | 690.838588684916 | 0.385917248046759 |
| ATAACGCAGTCA   | 690.850823257518 | 0.710549096326079 |
| GGCCAGGATGAC   | 690.868745145689 | 0.290847399426786 |
| GCGTCACTAATA   | 690.875646391357 | 0.366242414199401 |
| CGGTCCGGTGAC   | 690.875877433333 | 0.476827422494325 |
| CCGTGCAGTCAG   | 690.877491172585 | 0.283275232919007 |
| TCAGCCAAGTCA   | 690.890966646491 | 0.46487339982194  |
| ATTGGATGTGAC   | 690.89265552147  | 0.26010527964707  |
| ATGACCACGACC   | 690.902238034293 | 0.293280838849152 |
| GGTCATAGCTGA   | 690.919339113672 | 0.398043708330085 |
| ATGGCAGAGTCA   | 690.921638322444 | 0.295935578705359 |
| GAGAGAGATGAC   | 690.954599418079 | 0.237222058537676 |
| GTTCAGCAGTCA   | 690.97783140781  | 0.417834444690538 |
| GCTAATTAATA    | 690.983095979171 | 0.55063901315328  |
| TCCAATGGCTCA   | 690.986441476493 | 0.45453884576146  |
| CAGAGACTCATA   | 690.987507300436 | 0.351149493527989 |
| AATATCGTCACG   | 690.991905876349 | 0.216559812593525 |
| GTCACAAAGTTA   | 690.99775787563  | 0.380231168802585 |
| CGTCATCGGTAC   | 691.003229928911 | 0.15092025503771  |
| CATGATTACGCA   | 691.006186845325 | 0.345036414561334 |
| GTCATCAGAGGA   | 691.008669181317 | 0.330379379160667 |
| CCAATAGCGTCA   | 691.017484344809 | 0.48237440232708  |
| ATTAGCGGTGAC   | 691.027641071415 | 0.38421680718333  |
| ATTGACGATGAC   | 691.028144204226 | 0.377983215242667 |
| CGAATGACCACG   | 691.028422400379 | 0.345247684748197 |
| GAAATTAATGAC   | 691.034101909186 | 0.498698047594373 |
| CGTCATTGTAAC   | 691.034458952896 | 0.461041279711468 |
| CTGAAGTGAGTC   | 691.036437688376 | 0.370252678195016 |
| AGGTCGTGACAC   | 691.03720683427  | 0.390291652486735 |
| GTATTGATTAC    | 691.03788845592  | 0.444942961480078 |
| ACAATGGGTGAC   | 691.040679422729 | 0.147173986966122 |
| AGGACTACGTCA   | 691.065889574341 | 0.464205811680269 |
| CATTTAGTAATC   | 691.066887771254 | 0.248844576042394 |
| AAGGGCGATGAC   | 691.07048936708  | 0.36296812183354  |
| CTCCTTTGACTC   | 691.076144648325 | 0.190221189015983 |
| AATTCGAATGAC   | 691.077334138154 | 0.466710160423791 |

|                |                  |                   |
|----------------|------------------|-------------------|
| GGGAACAATGAC   | 691.079078878146 | 0.364725885343548 |
| AGACTCAATTAT   | 691.082704535686 | 0.334134653040977 |
| ACAAAATGAGCC   | 691.083530232738 | 0.266309210784387 |
| GTGACTAGCCAA   | 691.093757097386 | 0.350181477537281 |
| AACGCATGACGT   | 691.108969272345 | 0.311035581579486 |
| ATTTGCTCATGG   | 691.112029547979 | 0.385723171522182 |
| CGAAGCTCTGAC   | 691.124060510454 | 0.512646016142159 |
| TATGACAGCGAA   | 691.124184874607 | 0.338091695690163 |
| GTCACAGGCACA   | 691.129166044906 | 0.350659671016731 |
| GTCATTGGGCAC   | 691.150669244354 | 0.330794827517687 |
| ATGCTGTACCCC   | 691.170477886855 | 0.337353581014934 |
| CCATGTTGTGAC   | 691.176351174074 | 0.564717463296357 |
| GACGGATTACTC   | 691.178634613492 | 0.333889654568454 |
| CCACACGTATGA   | 691.180176262519 | 0.450546173270973 |
| GTCACAGATTGA   | 691.209020997058 | 0.375572016422113 |
| AGAACAATGACG   | 691.210901278146 | 0.267524146052939 |
| CCCACCGAGTCA   | 691.214969946255 | 0.134697250203824 |
| CGTCATCGGCCG   | 691.229301407872 | 0.476708068818633 |
| GAGTCGACGTCA   | 691.231018324771 | 0.26494596167963  |
| GTCATCGCCCTA   | 691.233903056408 | 0.308336999110942 |
| GTCATAAACCCA   | 691.233968925012 | 0.317231982626521 |
| GGTCCATATGAC   | 691.234801129752 | 0.437569999242394 |
| ATGATCGGTGAC   | 691.241296110854 | 0.366297161884156 |
| ACGTAGTCAACA   | 691.242620067263 | 0.601724204410204 |
| CGAGGGAATGAC   | 691.251624831011 | 0.312362177874881 |
| ATCTGACGGATC   | 691.254783867863 | 0.300271222207851 |
| CGAGTCAGGTAA   | 691.25891173589  | 0.344158020163566 |
| AGTCTTAATGAC   | 691.25960157711  | 0.426328856223513 |
| GTACTIONTACTCA | 691.266922322485 | 0.284061560769869 |
| CAACTATTACTC   | 691.268073120113 | 0.321150607467191 |
| GACTCTAATGAC   | 691.272741327418 | 0.473428375953818 |
| ACGTACTAATCA   | 691.274010536008 | 0.605760952719729 |
| ACCTTTGAATCA   | 691.274564879898 | 0.265417986585978 |
| TCCTTGTACTCA   | 691.277885657254 | 0.242177268195652 |
| GGATTACGTGAC   | 691.286164466161 | 0.544733523261631 |
| AGTCATGGGGCA   | 691.293988624856 | 0.365056432864861 |
| TCTTTTGACACA   | 691.296455438108 | 0.369528815436702 |
| GGTATATGACCA   | 691.296903223847 | 0.306909403433954 |
| GATGGAGATGAC   | 691.298024863645 | 0.302758931212142 |
| AATATGTCAGAA   | 691.301122744331 | 0.428170772336207 |
| ATGACAGACACC   | 691.308413084933 | 0.227213764748377 |
| AGTCACTTCACT   | 691.313083490261 | 0.159668051873917 |
| GTCAGATGACCA   | 691.320275250844 | 0.497824093244382 |
| AAGCATGACGCT   | 691.338077854606 | 0.217707276620003 |
| ACGTCATGGCCG   | 691.346784638642 | 0.424766080874915 |
| GTCACACCACACA  | 691.349709485408 | 0.225211548215702 |
| AGACTCACTATA   | 691.349971645861 | 0.2624997434658   |
| TAAACGGTGACA   | 691.35204887611  | 0.262626541664129 |
| ATATTGTCGTCA   | 691.359031870006 | 0.539086317997323 |
| ACTCATATGGAT   | 691.36107626738  | 0.286041665243525 |
| AGTCAGACTTAT   | 691.370703012405 | 0.456227978098951 |
| CAACCTGCGTCA   | 691.371640273047 | 0.356621752431063 |
| CCTGAGAGTCAG   | 691.374358038171 | 0.444900175679904 |
| GTCATTAGGCAA   | 691.376245358724 | 0.457851044588588 |



|               |                  |                   |
|---------------|------------------|-------------------|
| AAATCCGTGACT  | 691.384604051705 | 0.321566621228158 |
| CATGCTGTCACC  | 691.390531323387 | 0.344059337580475 |
| CGACGTAGTGAC  | 691.402921403546 | 0.438746616814027 |
| ACCAGTCAGCGA  | 691.408264985821 | 0.24560624658684  |
| ATGTCATTACAC  | 691.409388019742 | 0.230547015703862 |
| CTTGATGACCGA  | 691.423830069226 | 0.33334811745442  |
| GATGACCGAAAC  | 691.428115187888 | 0.413233088786595 |
| CGTGGGGATGAC  | 691.444267595454 | 0.596310415091082 |
| AAGCTTGCGTCA  | 691.44480262358  | 0.508838723991623 |
| GAGTCAGGAGCA  | 691.447949152804 | 0.194376119110476 |
| ACTATTACTCTA  | 691.450517706911 | 0.299007754773951 |
| ACCAACGACTCA  | 691.451689931249 | 0.335813620974101 |
| GCCTTAGGTGAC  | 691.456206836374 | 0.36938608300402  |
| ATGACAGCTCTA  | 691.459800747796 | 0.258561644747622 |
| CTGCCTTATGAC  | 691.477607223466 | 0.607017477025185 |
| CGTCACGTTAGC  | 691.485729665901 | 0.508607277160332 |
| GTCACCCGTGGA  | 691.497217564011 | 0.484970033061353 |
| ACTTAGCGTGAC  | 691.506862324051 | 0.304345008691284 |
| GTC AATTACACA | 691.5252827093   | 0.362128193930276 |
| ATGACGTCCAG   | 691.528346531926 | 0.531581940391014 |
| GCTAGTGATGAC  | 691.53430361143  | 0.451768600227098 |
| AGTCAGAAGGCC  | 691.535486996563 | 0.310814316704302 |
| GTCATACGACAC  | 691.538379283724 | 0.389565405843753 |
| ACGTCATGCAGC  | 691.542075145102 | 0.564933717174312 |
| GTC ACTACATGA | 691.545686924061 | 0.384969132748635 |
| ATGCAAATGACG  | 691.550723537814 | 0.377451946598488 |
| TAACTGACGCA   | 691.556187333663 | 0.226801935609223 |
| GTCATCCCGTTA  | 691.562278654074 | 0.224476663334636 |
| ACTAATAGATGG  | 691.571274156474 | 0.178772241865848 |
| CGGGAATTAGTC  | 691.57177942997  | 0.508505405943466 |
| CTATTATATGAC  | 691.576044456651 | 0.496114473847132 |
| GTCACCCGCTAA  | 691.578939503243 | 0.285734768503808 |
| CGTCACTGCTGA  | 691.586827333681 | 0.316216497561097 |
| GACTACCTATGA  | 691.599208807804 | 0.496218632312441 |
| GTAATCTTGTC A | 691.612952077696 | 0.459790596201056 |
| ACGACTTATGAC  | 691.614040041627 | 0.521095000776383 |
| AAAGGATATGAC  | 691.618776527467 | 0.151113488112373 |
| GACTCACGGCAC  | 691.619429290429 | 0.387778703764594 |
| AACACATCATCG  | 691.620349556167 | 0.360416522026659 |
| ACTATGATT CGA | 691.623313353923 | 0.324308780959534 |
| ATT CACAGTCAG | 691.634178691195 | 0.466781669198304 |
| GTGCATTGCTCA  | 691.634928689371 | 0.300753375996725 |
| AATTACGGTGAC  | 691.635460047659 | 0.385973412074712 |
| CCGATGATGCAA  | 691.643624831479 | 0.337688334743309 |
| GCCACGTAACCC  | 691.667518046577 | 0.120009569631423 |
| CCATCGCGTCAC  | 691.670033113266 | 0.296897853240286 |
| GATTTGCGTGAC  | 691.687868915779 | 0.259707914651925 |
| AATGACGGCTCG  | 691.689819069634 | 0.641870780521474 |
| GATCTCAATGAC  | 691.690916078001 | 0.236252648909402 |
| CAATCTGAATCA  | 691.699242623192 | 0.409112591788029 |
| ATACAACGTGAC  | 691.699777283389 | 0.678210996924335 |
| ACGACTCAGAGT  | 691.70073850592  | 0.410067904164461 |
| ATGACCCTTGG   | 691.705145651765 | 0.144938825037104 |
| TCCTAATGGTCA  | 691.708230619679 | 0.433736162225128 |

|               |                  |                   |
|---------------|------------------|-------------------|
| AGAGTAATAACA  | 691.711113177747 | 0.236466621988714 |
| GACTCACTGACA  | 691.714221062945 | 0.254434541438701 |
| CGATATAAGTCA  | 691.715069803813 | 0.233636944090787 |
| AGTCAGAACCAC  | 691.71772401173  | 0.227146406523866 |
| CGTCATCTAAGC  | 691.725907558373 | 0.338187085256403 |
| AGAATACAGTCA  | 691.732845069661 | 0.257488962763647 |
| GTCACAGTCAAA  | 691.737269833152 | 0.3728480322648   |
| GTCACCTTGCGA  | 691.739249571748 | 0.337519240209171 |
| AGTCAGATAGTC  | 691.740687816165 | 0.458793215792758 |
| ACATCGTCATGT  | 691.753079327298 | 0.342813186725762 |
| GGGAACCTGAC   | 691.758712103817 | 0.44743497229039  |
| CAACCATAGTCA  | 691.765092653532 | 0.526265015389351 |
| GCATGACAGTCA  | 691.766794794867 | 0.383876729230597 |
| ACGTCACAAACC  | 691.771545384677 | 0.289919551815832 |
| CGACACAGTCAG  | 691.780719840626 | 0.483996958628651 |
| CTTCGTGTGACA  | 691.783416778011 | 0.455638417766836 |
| GTCAACCAATGA  | 691.783791769813 | 0.542017193224307 |
| TGACATGTCGAA  | 691.784977865959 | 0.318054349896109 |
| CACGCGTGTGAC  | 691.786845818771 | 0.444247230054369 |
| CTTTGTAATGAC  | 691.788972389453 | 0.242358836940644 |
| GTCACTGAAGAA  | 691.79079749252  | 0.36048648207815  |
| GACTAATTTGCA  | 691.791569463953 | 0.419114294065063 |
| GTCATTTTGGAC  | 691.792276136706 | 0.461192630041842 |
| GTCACTGATCAA  | 691.800607160426 | 0.659696750255992 |
| GCAGCACAGTCA  | 691.805663140673 | 0.461740115775073 |
| AAAATGTCAATGA | 691.816172261665 | 0.343739418933942 |
| AAATTGCTCAGA  | 691.819340909401 | 0.166572046600275 |
| GACTCACGTCGA  | 691.826406728018 | 0.369381104137036 |
| AATCATATGACG  | 691.828496113493 | 0.205618369936642 |
| GGGTCATTTCTAA | 691.829861397767 | 0.516094395897154 |
| ATGACCCAGAAG  | 691.829875581137 | 0.270463090240049 |
| TACCATAAGTCA  | 691.832626895618 | 0.300565602264816 |
| TGACTGGTCTCA  | 691.838246070418 | 0.401223676263186 |
| GTCATTTAACAC  | 691.857957965881 | 0.378593576403884 |
| ATGACCACGAGG  | 691.861788571256 | 0.339095030585085 |
| CCCGTTTGACTC  | 691.866145056528 | 0.360573686155986 |
| AGTTTGACGCAC  | 691.866598858224 | 0.356370010834461 |
| CGAGTGTGACCC  | 691.867390960564 | 0.485380939285328 |
| TAAGTTAAGTCA  | 691.873116979335 | 0.431966608309544 |
| ATCACTCAGAAG  | 691.880585265778 | 0.767761229729294 |
| ACTGACTGTAAT  | 691.888826783469 | 0.526795363819621 |
| ATGTCATCTGCC  | 691.899610419487 | 0.226477081071332 |
| ATGACAATGAAC  | 691.89998799745  | 0.405995283517082 |
| GCGTCACGTATA  | 691.902645660429 | 0.41561244081155  |
| AGCCTCGATGAC  | 691.931500586732 | 0.364879903661637 |
| CAGGGGATGACG  | 691.932151112    | 0.31092092880073  |
| ACCATTTGCTCA  | 691.945540712644 | 0.346503766477821 |
| TGACGGATCTAA  | 691.963249011908 | 0.47169473124441  |
| TCTTCAGTGTC   | 691.984349793088 | 0.3333281896351   |
| GTCACCGTACGA  | 691.999310541412 | 0.494984814193622 |
| GTCACAGGGTCA  | 691.999541387722 | 0.422849210359663 |
| GAATGGAATGAC  | 692.00153945996  | 0.210272756242627 |
| CTCTTTACGTCA  | 692.010706463177 | 0.295551975351436 |
| GATGACATTACC  | 692.043515985148 | 0.257452743908421 |

|              |                  |                   |
|--------------|------------------|-------------------|
| TGAGTATTCGCA | 692.045907563419 | 0.56428660822888  |
| GAGTCAGTACCC | 692.049864892049 | 0.397376727114733 |
| CATGTAGATGAC | 692.063665436014 | 0.452555025545466 |
| CGTCATTAGTAC | 692.068923326158 | 0.439591590740795 |
| AGGCCAAATGAC | 692.073418817471 | 0.406809632149366 |
| GTACAGTGACAC | 692.07574765062  | 0.335761198766361 |
| AAGGGCGTGACT | 692.086007139623 | 0.345243301619911 |
| ACTCCAGTGACG | 692.086146940706 | 0.544673992560644 |
| ATGAGCAACTTA | 692.088133186524 | 0.317071768026851 |
| ATGAGCAAGTGG | 692.088958540403 | 0.308723014065776 |
| GTCATTACAACA | 692.093253707379 | 0.482627786704681 |
| CTCGTAACGTCA | 692.098705673735 | 0.373273599148506 |
| ACACATATGTCA | 692.107400094054 | 0.323221977218702 |
| CGATATAATGAC | 692.107835786597 | 0.34725803906993  |
| ATTGCATCATCC | 692.108339521181 | 0.356995962010264 |
| ACTCATAGATTA | 692.115012321004 | 0.444457035164912 |
| ATTCATAGTCAG | 692.117280291506 | 0.462316333198237 |
| ACTCTAATGACA | 692.119992254735 | 0.322208658570532 |
| GTATACTAGTCA | 692.125848617543 | 0.39495668189851  |
| CGCCAGATGACA | 692.127282436667 | 0.464082104572482 |
| CATGACGCCGTA | 692.12773227902  | 0.437504710906057 |
| ATGACAATAATG | 692.142324854047 | 0.274209757607057 |
| GTCAGTGAGCAA | 692.142422392402 | 0.359723146074028 |
| CAGTCAGTGATC | 692.144121494262 | 0.373266790450063 |
| GGACAACCTATA | 692.152072751438 | 0.403829555919986 |
| AGCAATTGCTCA | 692.16190477034  | 0.538113421960344 |
| GTCACACATAGA | 692.163313978008 | 0.25764710032965  |
| CAATTATTAGTC | 692.166188972473 | 0.545622128081635 |
| ATTACATGATGA | 692.16763799988  | 0.627890163035302 |
| GGCCCTGACGCA | 692.170855233309 | 0.33125209989788  |
| ATTATTCATAAA | 692.1738077659   | 0.269686963271035 |
| CGACTAATTTGA | 692.185399283361 | 0.406651149865999 |
| GCTTTGGGTCAC | 692.196097444791 | 0.42978320382335  |
| CAGTTATGAGTA | 692.201849590187 | 0.190317863119825 |
| CATCGGTAGTCA | 692.21086627095  | 0.444863391209373 |
| CTAATTTGTGAC | 692.216899072745 | 0.366033857075766 |
| CTCTAGGTATGA | 692.218780043933 | 0.501844512593354 |
| TGTCACAGTAAA | 692.224745797692 | 0.211278260483725 |
| ACTGGGTGTCAT | 692.22871584407  | 0.543572724346587 |
| GTGTTGCTCACA | 692.240819024063 | 0.122667873697336 |
| ACTCATGATTGG | 692.257283809111 | 0.359547786184404 |
| GCATATAGTGAC | 692.25777635166  | 0.367918218661143 |
| GGGACAGATGAC | 692.259186710152 | 0.244367947524769 |
| CAGATCGGTGAC | 692.262745087833 | 0.379636534568778 |
| CGTTGACTGGTC | 692.264888080651 | 0.248334550585434 |
| CTCATTGGATGA | 692.274450364884 | 0.382014303972978 |
| CCCCTGTGTGAC | 692.27498532839  | 0.268655783181867 |
| GCAGCTTGTGAC | 692.275304527567 | 0.583205425242005 |
| GCCTTTGACTGA | 692.29042662577  | 0.383554639803381 |
| CTGACTATGGAA | 692.300117157113 | 0.450806935609076 |
| ACATACTGTGAC | 692.303076367262 | 0.179953891458961 |
| AGATCTCCGTCA | 692.303725887104 | 0.361321235252581 |
| GACTCACGCAGC | 692.308295432306 | 0.335363861925009 |
| AACGACGCCGTC | 692.309842396338 | 0.488155698553732 |

|               |                  |                   |
|---------------|------------------|-------------------|
| GGCACTAATGAC  | 692.31849667484  | 0.412633036364451 |
| GTCATTTCAAAA  | 692.328045059049 | 0.438848964924382 |
| AGTCACGGCCAT  | 692.331027848329 | 0.515162527354421 |
| TAATGCATGACA  | 692.331529679104 | 0.480010321111066 |
| CGTCACAATTTTC | 692.33446025386  | 0.266691303431543 |
| CGCCATAATGAC  | 692.346914100312 | 0.447809455884252 |
| ATCCGTCAGTGA  | 692.348825621718 | 0.45125919598871  |
| GACTAATCTGAA  | 692.354846782694 | 0.556234410291802 |
| GTCATGGCGCAA  | 692.370329021915 | 0.395475993867783 |
| AAGTCAATGACG  | 692.371165077797 | 0.19611892714322  |
| CGCGGTGACGTC  | 692.371834357079 | 0.380458779822314 |
| GTGACGTTGACA  | 692.377015549815 | 0.330694332727102 |
| ATACGCTAGTCA  | 692.394658055878 | 0.602145880990619 |
| AGTGTCACGAAT  | 692.407559402359 | 0.338227826453437 |
| GACTCACGAACC  | 692.413935104042 | 0.421192603801254 |
| GTCACCCATTAA  | 692.436169473088 | 0.239837911199183 |
| AGGAAGGATGAC  | 692.441100645298 | 0.286087712387617 |
| ATTTAGTGAGTC  | 692.445604524441 | 0.496799996734254 |
| GATACACTCATC  | 692.453963089012 | 0.189460317380055 |
| ACTAAGGACTCA  | 692.457547361894 | 0.543324829755963 |
| CGGCTGAGTAAC  | 692.462257110014 | 0.337373297702582 |
| AATACATGACAA  | 692.479140211126 | 0.595321572016083 |
| TCAGTGGTGTCA  | 692.489330248236 | 0.264059555913665 |
| GCGTCACATGGA  | 692.490158030951 | 0.506173838957014 |
| GTCACGTTCAAA  | 692.490612838401 | 0.657048233633233 |
| ATTATTCATCGA  | 692.490703014532 | 0.386167664576081 |
| TAGAGTGACAAA  | 692.495415482467 | 0.157133092763312 |
| ACAGCGTGACAC  | 692.499304668138 | 0.338576484941016 |
| CAAGCAATGACA  | 692.501827355229 | 0.384768594633135 |
| ACGTAGCTGACT  | 692.509815374996 | 0.359914801181842 |
| AAGTCTGACGTG  | 692.521763989326 | 0.219014537875943 |
| CGGCAAGTCATA  | 692.524854228648 | 0.354795310816781 |
| CCGAGTGGTGAC  | 692.527416927846 | 0.554838144795759 |
| GAATGACCACTA  | 692.533147756893 | 0.333875326184856 |
| GCCCTAGACTCA  | 692.540043311978 | 0.31993052423996  |
| ACCAGGTGACGT  | 692.540669327851 | 0.531940054474229 |
| TGTCATTACACA  | 692.544636998323 | 0.243011487346462 |
| ACTGGACAGTCA  | 692.547913119447 | 0.697499871190793 |
| TGACAGGACTCA  | 692.565926064165 | 0.320305077492457 |
| CAATCTGTGAGA  | 692.567291979998 | 0.37503153139214  |
| ACGTCACATAACA | 692.57716387805  | 0.238795312711944 |
| AACTCCTAGTCA  | 692.589834054375 | 0.268082002566849 |
| GAAAGATTAGTC  | 692.592287235018 | 0.472883679816643 |
| CCCAGGTGACAC  | 692.593084096095 | 0.381721489929085 |
| CACCGATGTGAC  | 692.600426713807 | 0.308772726026788 |
| ATGACGACTCTG  | 692.603709792472 | 0.403452036520868 |
| CGCAGGCGTGAC  | 692.604412292143 | 0.500814017675062 |
| GTCATATGAACA  | 692.611718838938 | 0.374008935109302 |
| GTCACCCATGGA  | 692.614234792183 | 0.453930184184525 |
| AGCGTCATGCGG  | 692.626799487956 | 0.316195176921958 |
| CAGCAACATGAC  | 692.634841800897 | 0.371629490382441 |
| GTCATTTAAAGA  | 692.652772763606 | 0.430226460991421 |
| ATGACATTTAGC  | 692.673910318863 | 0.508781742059442 |
| CGTCATGCCGAA  | 692.674420793663 | 0.41064464219845  |

|              |                  |                    |
|--------------|------------------|--------------------|
| ATGACGACCACG | 692.678127565057 | 0.516801269953666  |
| ATAGCGGAGTCA | 692.680436096738 | 0.213013675670213  |
| AATGACCATATA | 692.693722846781 | 0.206906479721237  |
| GGTGACCCAAAC | 692.701956125059 | 0.383371466185492  |
| TCCTTTGACGCA | 692.704848296428 | 0.22976894826553   |
| AGAGTCAAGGCG | 692.70637947822  | 0.335865333203309  |
| ACGTCACCTTAC | 692.718404157848 | 0.188885144613612  |
| AAGATATGACCA | 692.721763215122 | 0.0711079481538088 |
| ACAGGTGGTGAC | 692.725839281438 | 0.384771345635439  |
| TGGCGTCACAAA | 692.727088955156 | 0.33181513814958   |
| TGACATATATAA | 692.729089237084 | 0.361623872700004  |
| CGTCACACGTGA | 692.736410121602 | 0.465969258880732  |
| GACGTGGTTCTC | 692.741439037727 | 0.519544723860761  |
| AATGCGTGACAC | 692.742370542274 | 0.382594072229899  |
| GATCACCATGAC | 692.74813916496  | 0.250702026473376  |
| GAGTAATCGGAC | 692.760661850781 | 0.318813308428862  |
| ACCACGTGATGA | 692.762760507436 | 0.584396193470194  |
| CAAGATCCGTCA | 692.764932380346 | 0.209214570098523  |
| GTCGAATCATCA | 692.766359829163 | 0.269111459229942  |
| AGTCATGGGAGG | 692.773081714424 | 0.298179113225986  |
| AAAGAGATGACG | 692.777930329689 | 0.321823158971388  |
| AGTCCCAATGAC | 692.779819485182 | 0.454413745331798  |
| TCTGTAGCGTCA | 692.794018522742 | 0.420829986331767  |
| AATGAGCCAGAC | 692.802149117463 | 0.424172051475102  |
| GGCCCTTATGAC | 692.803126211337 | 0.478863948872943  |
| TACTACGTATGA | 692.810694486525 | 0.457024931029252  |
| GCCACTAATGAC | 692.820374198021 | 0.381318443175129  |
| ATCGTAATGACA | 692.823655348658 | 0.427162673839748  |
| ATTACGCAACTG | 692.824111711212 | 0.480562206352962  |
| GTCATTTTGGTA | 692.827130613113 | 0.42733725151965   |
| CCGGTTACATCA | 692.832862233876 | 0.455479943871151  |
| TGACGGATATAA | 692.841783796836 | 0.383094608263679  |
| GACGCATGCGTC | 692.847743977032 | 0.58738182707989   |
| AGTCACGCCACC | 692.849945697836 | 0.293127238955663  |
| ACTGGCAGTGAC | 692.850303402866 | 0.423112419476609  |
| ACGAGCGATGAC | 692.860084868628 | 0.36935076987542   |
| AATTCTGATGAC | 692.863673090022 | 0.446762447721197  |
| TATCGTGACAGA | 692.865501572006 | 0.405828768658539  |
| TCATATGAGACA | 692.869547254645 | 0.413923441759926  |
| GTCACTATGAGA | 692.875534752527 | 0.503627965061421  |
| GCGTCACCACGA | 692.876059797433 | 0.445874724094697  |
| CCTAGGCATGAC | 692.885457467161 | 0.52161493047106   |
| ACTAACTGTGAC | 692.887948007733 | 0.358743774258617  |
| ACCGTTTCGTCA | 692.888011090148 | 0.348999067151993  |
| AAAACACGTAAC | 692.889481290914 | 0.263317608635286  |
| ACACATCATCGG | 692.906465695211 | 0.450556106489477  |
| TCATCATCGTCA | 692.907728238271 | 0.597223450851573  |
| GATGTGGCTCAC | 692.918284319245 | 0.578075289248961  |
| ATACTCGGTGAC | 692.922328010709 | 0.330606743065986  |
| ATCCCCTGACTC | 692.924674852487 | 0.161353215315876  |
| GAGCATGAATCA | 692.934872728195 | 0.315049658934473  |
| GAGTTGGATGAC | 692.943858919098 | 0.390184617320226  |
| ATGAGTACCCCG | 692.944151493547 | 0.342077663803587  |
| GGATTACTATTA | 692.945206041016 | 0.174136430541618  |

|              |                  |                   |
|--------------|------------------|-------------------|
| AAATCTGACGTG | 692.949694004046 | 0.307270163102127 |
| CGTCATTACGGC | 692.951051200205 | 0.395121768260392 |
| GACCCCGGTGAC | 692.958130072095 | 0.480242359167675 |
| GGTCCTCAGTCA | 692.976634005852 | 0.321686395561444 |
| GTCATTGGCAAA | 692.982106426296 | 0.354475856767253 |
| ACCTATGTGACA | 692.982352676954 | 0.490406073202206 |
| GGTCATATATTA | 692.992506880112 | 0.366051736046125 |
| TACAGCGACTCA | 693.004076441043 | 0.263395107293612 |
| ACGTATGACCTA | 693.006469599265 | 0.345442103058556 |
| CCGGTTTGACTC | 693.007885309371 | 0.427909440651848 |
| CGTCATTCGCA  | 693.009462754477 | 0.384147236411764 |
| TCACGTGCATGA | 693.022989504658 | 0.496693568027913 |
| GTGACACGATCA | 693.028360326547 | 0.414975721125793 |
| GTCACAATGATA | 693.034983120793 | 0.258067059631142 |
| TACCAGGAGTCA | 693.041663391154 | 0.308717710125231 |
| ATGACATTACTA | 693.041842333532 | 0.247270036082555 |
| AGGATAAATGAC | 693.04736682028  | 0.269908389704709 |
| ATCTTCATGACG | 693.053501005647 | 0.648188660623287 |
| CGTCACACAGTC | 693.064357595281 | 0.457192875319929 |
| CTGCTAAGATGA | 693.067019131666 | 0.428937354679041 |
| ATGCACTGTGAC | 693.070752573767 | 0.429305584533943 |
| GCGCGTCACTGA | 693.073639805196 | 0.448638620357973 |
| GGAGTGGATGAC | 693.083767261415 | 0.117021359786921 |
| GACTGGTGACCC | 693.095094080859 | 0.425486910229175 |
| CATTTTCGTGAC | 693.099898195721 | 0.316559533207442 |
| ATTGCCTATGAC | 693.108127336554 | 0.378061716669746 |
| CCTGACAAGTCA | 693.116644842246 | 0.401466809067958 |
| ATCCGTCAGAAG | 693.119862335804 | 0.416069722906227 |
| AATATTCATGAC | 693.125320661779 | 0.473775297461093 |
| AGTGTTGTGTCA | 693.125702670981 | 0.488350502856299 |
| GAGACCTGTGAC | 693.131600540148 | 0.406762156766958 |
| ATGACGGCACAC | 693.133792715634 | 0.377289851248132 |
| GTCACCATACGA | 693.139223939158 | 0.505789304087131 |
| ATGACCGTGACG | 693.142906930054 | 0.35928214621911  |
| GACCATGACACC | 693.142935487287 | 0.299723491379224 |
| ATCGCATGTGAC | 693.14681201214  | 0.518034870951991 |
| CTAATCATGACA | 693.147744739225 | 0.290645813852692 |
| ACTCATAGCTGG | 693.148947408547 | 0.708206947268594 |
| GTCAGAGTAATA | 693.155588983102 | 0.221657973924156 |
| CCAGGGGATGAC | 693.155695644262 | 0.267064154212652 |
| TCAGTGTACCGA | 693.161041612678 | 0.417180947459229 |
| GTCATTCCCGAC | 693.162112188855 | 0.364116731786817 |
| ATGACGATGGCC | 693.164038454063 | 0.266122022626198 |
| GTCATGCTAGGA | 693.173208427946 | 0.244989147153445 |
| CTATGGTGACAA | 693.174106408764 | 0.337538549239556 |
| TCAACATCGTGA | 693.175016360681 | 0.520719590037216 |
| AGTCAGACCCTG | 693.181983213977 | 0.416061442171716 |
| ATGACACCCGTA | 693.186002385192 | 0.234664583139489 |
| AAAAATTTGTCA | 693.199843359698 | 0.38880313770407  |
| GCAAAAGTGTCA | 693.200903722954 | 0.381486582291447 |
| CTGGTCGCGTCA | 693.205467216358 | 0.438817661193321 |
| GTCACAACACGA | 693.206503696908 | 0.468260285398046 |
| ATGATGCAATAG | 693.213725552539 | 0.261587263973835 |
| AAATGACCACTA | 693.229655340175 | 0.288221974221823 |

|               |                  |                   |
|---------------|------------------|-------------------|
| GCGTCATGTCAC  | 693.230311325684 | 0.262677483750868 |
| AAGGCTCAGTCA  | 693.236822381862 | 0.217633706844834 |
| AATGACCACGAC  | 693.237709484248 | 0.191281979443405 |
| ACAGCCGGCTGT  | 693.238795948409 | 0.484907431899607 |
| GCTACTGTGACA  | 693.253738729028 | 0.512348064860843 |
| CCAATACGTGAC  | 693.254204272735 | 0.495221692109427 |
| ATGACATGCCAC  | 693.257806852584 | 0.425468227833235 |
| ACGTCATGTCTC  | 693.262694540702 | 0.387677655702528 |
| GCCTATCCGTCA  | 693.266838032178 | 0.20506000393581  |
| CAATTCGTGACA  | 693.267385231258 | 0.514557277877531 |
| CAGATTGAGTAA  | 693.272359046923 | 0.445990169758038 |
| GATTCATAATAC  | 693.272745775924 | 0.427264046954094 |
| CGTACCCAGTCA  | 693.272928958935 | 0.363056470717211 |
| AGGTTGATTCAT  | 693.275398112497 | 0.44449521051131  |
| GTCACCAAGGAC  | 693.283178030701 | 0.435416371679868 |
| GTCACCTTATAGA | 693.286907617224 | 0.226711459232877 |
| AATTCTTATGAC  | 693.292560127543 | 0.504546174273942 |
| ACCATATGTGAC  | 693.296560247748 | 0.361658216899922 |
| ATCGCTTGGTCA  | 693.306459064532 | 0.362850035022991 |
| AGTCAGAGTACG  | 693.308972869246 | 0.246938384038262 |
| TGTGACAGCACA  | 693.309026156849 | 0.281567113463589 |
| CGACAAGGTGAC  | 693.314420939149 | 0.332308575946493 |
| CAATCTATGTCA  | 693.315916073629 | 0.328672517224635 |
| TCATATTTGAGA  | 693.324940468554 | 0.490055182896313 |
| TACGTTGAATCA  | 693.336590580379 | 0.30236206299456  |
| AGTCAGCCGTTA  | 693.350348727043 | 0.415909465565766 |
| CAATTGAGTAAC  | 693.354240844379 | 0.307959312843162 |
| AACCAGATGACG  | 693.354390667433 | 0.198700717189201 |
| TAGACTCAGAGA  | 693.355073375152 | 0.402457496434181 |
| CGCCCTAATGAC  | 693.358551708159 | 0.371771057288518 |
| CGTCCCCTCATA  | 693.365216058085 | 0.284970455654649 |
| CATGTCATGGTC  | 693.36621380878  | 0.603078889834037 |
| CCGGATTAGTCG  | 693.37504152187  | 0.330751155962976 |
| CCAACCTCGTCA  | 693.375155124122 | 0.353457385974438 |
| AGACTAATGACC  | 693.379384830037 | 0.378996434150328 |
| GATCATCATGAC  | 693.383520715857 | 0.568844941485783 |
| CGAACGTTGTCA  | 693.385162124962 | 0.502152935105768 |
| GAGCTGGATGAC  | 693.391062809548 | 0.260360599060392 |
| ATGACACGGCGC  | 693.407672407669 | 0.424155706947991 |
| GTCATATCACGA  | 693.408239556182 | 0.4241585054866   |
| AGTCAGACTAGC  | 693.409694056264 | 0.373592996205343 |
| GTTATTGACTGA  | 693.418919187998 | 0.344080660325004 |
| GTTACCGACTCA  | 693.423924096488 | 0.540640971551745 |
| ACTCTGTGTCAG  | 693.432558713959 | 0.238061288408675 |
| GCACTCTTATGA  | 693.434284987818 | 0.447044115954139 |
| AACGAATGTGAC  | 693.448974618918 | 0.352643287410054 |
| GTCACCCGTAAA  | 693.44900743409  | 0.231654229342927 |
| AAATCAGTACAT  | 693.458243493017 | 0.30858365981046  |
| CGAGGGGATGAC  | 693.462696258473 | 0.260666647330213 |
| CACGAATACTCA  | 693.463408813567 | 0.376088486051735 |
| ATGACGTTCTCG  | 693.47223986484  | 0.220222535575343 |
| ATTCTTTGACTC  | 693.47275203298  | 0.06974858152909  |
| ACTCATATTTAA  | 693.485938465184 | 0.251961760156161 |
| ACGCATAATGAC  | 693.487943724422 | 0.518608233180455 |

|               |                  |                   |
|---------------|------------------|-------------------|
| AGTCACGCCCGC  | 693.48991845966  | 0.236091634542263 |
| GGCATCTAGTCA  | 693.497567912862 | 0.364036675310462 |
| AGTCAGAATTTTC | 693.501626251901 | 0.380061144254752 |
| CAAGTTGACTGA  | 693.503827395116 | 0.419502474440758 |
| GGTCATCCAAAA  | 693.51811395751  | 0.527282867183357 |
| AAGGATGACCGA  | 693.520179146403 | 0.378805932679151 |
| AATCGGACTCAC  | 693.5308312335   | 0.294526932982051 |
| CCGTCTGAGTCG  | 693.532921339008 | 0.795568482868986 |
| CAGAAGTGACGC  | 693.537897761612 | 0.397000336893662 |
| TAGGATTGCTCA  | 693.542357646619 | 0.390426716133039 |
| GTCATTACGAGA  | 693.542695942148 | 0.246991505294235 |
| AAAATCATGACG  | 693.542874598065 | 0.407194984045274 |
| TCTTTTCCGTCA  | 693.544473636896 | 0.215998515630928 |
| ACAACCTGAGTAA | 693.550691019001 | 0.23531898593709  |
| GCGTCACAAAAC  | 693.552663815179 | 0.449510029115132 |
| ATCGTTAAGTCA  | 693.553565368145 | 0.435595044920389 |
| AGATGAGATGAC  | 693.558306434015 | 0.335368721939769 |
| GTA CTCTAGTCA | 693.586387995685 | 0.353280367472722 |
| AAAGGTGACCCA  | 693.590719382116 | 0.338986343542168 |
| CACTTATGTGAC  | 693.59377897367  | 0.311661240258008 |
| ATAGTCAGCCAT  | 693.596597072234 | 0.493509383971771 |
| AGTCAGAGAGTC  | 693.599143136975 | 0.249479727708203 |
| ATGTCATCTCCG  | 693.601944710595 | 0.368172758262527 |
| TCCAAGTAGTCA  | 693.602608291333 | 0.459642685055894 |
| GTC ACTATATGA | 693.614782079616 | 0.364976202765233 |
| ATATATCGTCAC  | 693.619001775932 | 0.268058542682139 |
| CACCAAATGACA  | 693.632618869029 | 0.261575471732101 |
| CCAGGAGATGAC  | 693.639005316192 | 0.461579313167582 |
| AATTTTCTGTCA  | 693.640158961098 | 0.278496999791477 |
| GCCGGCGACTCA  | 693.655156428344 | 0.686152397187187 |
| GTCATTATACAA  | 693.664411731741 | 0.340879567996004 |
| AGACTCACTTAA  | 693.679118836411 | 0.248878756465597 |
| CTCGTCCAGTCA  | 693.685072941446 | 0.599924484401521 |
| GGTGACAGGTAA  | 693.687221877564 | 0.342452988569221 |
| ATTTCTTATGAC  | 693.689861935022 | 0.438898163637351 |
| GTGTGTC AATAA | 693.691294674658 | 0.456907368723288 |
| GACTAATCCATA  | 693.695441884109 | 0.283016548479033 |
| ATGACCGAAAGA  | 693.700174299884 | 0.468437052444261 |
| ACTCATACGTTA  | 693.717924581416 | 0.360020020922087 |
| GAGCTCTATGAC  | 693.725468212606 | 0.232387711698252 |
| AACAGTCAACTG  | 693.727313815629 | 0.475079528070186 |
| AACCTACTCATC  | 693.729676007154 | 0.140648206197966 |
| GTCATGCCATGA  | 693.73482957743  | 0.491042827610602 |
| TGCGGTGACCCA  | 693.739697020344 | 0.284583411578812 |
| TCACTGGTG TCA | 693.740957038414 | 0.348894159813854 |
| CGTCACACATTA  | 693.751458133583 | 0.492433441984644 |
| ACTCATTGTGCG  | 693.761825713511 | 0.454298645397113 |
| AGGCATCTGTCA  | 693.767392564756 | 0.56837211848637  |
| AGTCAATGATTC  | 693.767961486502 | 0.362783106456868 |
| GGTATGTGTGAC  | 693.782527583969 | 0.248685787671289 |
| ATGACCATGTTG  | 693.786521489588 | 0.373840836144583 |
| ACGTCACGATTC  | 693.80118638382  | 0.252630562984195 |
| CGATACTGACTA  | 693.806719264113 | 0.43003349863949  |
| CTCAAACATGAC  | 693.813458822179 | 0.465778494419795 |



|               |                  |                   |
|---------------|------------------|-------------------|
| TAGGCCATGTCA  | 693.817810686918 | 0.358085541006001 |
| GATTCACGTAC   | 693.820913963285 | 0.164278682028615 |
| CGACCATGTGAC  | 693.830046990389 | 0.542401048060811 |
| TATAACTGGTCA  | 693.839542179309 | 0.245909403604173 |
| ACGTCACCCACA  | 693.84229695067  | 0.341625143372511 |
| CCTTTAATGACG  | 693.846935103835 | 0.284175448891683 |
| ACTCATTGGAGT  | 693.847241851811 | 0.357470862998687 |
| GAGTAATCCCA   | 693.848175550473 | 0.539917792651889 |
| ATGACGAGCTAC  | 693.868814651935 | 0.282938272280905 |
| CTCCTGGGTGAC  | 693.876225152652 | 0.380897861345118 |
| GACATATGACCA  | 693.87804547561  | 0.394115054174285 |
| AATGCAGTCAGA  | 693.88717593923  | 0.359509773133987 |
| AGACACGAGTCA  | 693.891860360037 | 0.409659426536952 |
| CGTCCGCGTCAC  | 693.909343065997 | 0.357190830293069 |
| TAACTGTGACAA  | 693.924621377383 | 0.214734954140441 |
| CACGTAATCGGA  | 693.930595651973 | 0.44205895330478  |
| AATATGTAATAC  | 693.941133537093 | 0.432596801676127 |
| AGTCAGAAATCG  | 693.945038645804 | 0.399557251216909 |
| CGTGCATTAGTC  | 693.947787688354 | 0.505930561288333 |
| TGAGTCGCAGAA  | 693.948186068431 | 0.270249032087594 |
| CACGTCGTGTCA  | 693.954227971659 | 0.282201406125955 |
| ACTCATGAGCTG  | 693.955102818703 | 0.483502473741081 |
| CAGTATATGTCA  | 693.958533542254 | 0.643783447181633 |
| GACTGGCTCATC  | 693.969815550274 | 0.348564166300555 |
| GCTAGGGAGTCA  | 693.972130878608 | 0.282840212622206 |
| GAGTCAGGATGC  | 693.972941530881 | 0.293843649880459 |
| GTCATATGCAGA  | 693.982967421076 | 0.458345728118509 |
| GTGTCATGTATA  | 693.99058507704  | 0.32526303485736  |
| GATTGTATCATA  | 693.993057149685 | 0.367754403097612 |
| GTAGATTGCTCA  | 694.000065609748 | 0.369614989588206 |
| TCGGTTAAGTCA  | 694.016579652197 | 0.432200546691735 |
| GCTATTGACTGA  | 694.019284168364 | 0.450366224066476 |
| GATTCGGAGTCA  | 694.025317463931 | 0.334189569224145 |
| CTTTTATATGAC  | 694.026225094146 | 0.305270582853679 |
| GTCACTGTA AAA | 694.026824730576 | 0.395811356925515 |
| ACACTTGTGACA  | 694.027077978109 | 0.473022320532565 |
| GGATCGTGTAC   | 694.037669519397 | 0.310510114235311 |
| AGGCTAGATGAC  | 694.038930338781 | 0.300863696612864 |
| GTGTGAGCAAGA  | 694.03961484398  | 0.229904301371113 |
| ACGGCTCGGTCA  | 694.047760769985 | 0.42097999796607  |
| GAGTAATGACCA  | 694.049664375138 | 0.505014984718881 |
| ACGGTCGGTGAC  | 694.060045871695 | 0.379718091927737 |
| TACGTTAAGTCA  | 694.062800331402 | 0.600881559105225 |
| CTTGGCACGTCA  | 694.063438385436 | 0.263316913432043 |
| GATGTCATTACC  | 694.075951419811 | 0.431533192517596 |
| AGACAATGTGTC  | 694.081866847676 | 0.770718067740587 |
| CCCAACGTGTCA  | 694.087460302538 | 0.299144175505306 |
| ATAACGTGACAC  | 694.092009344841 | 0.26757512991358  |
| TGACTGAGGTAA  | 694.102414197844 | 0.158118945327539 |
| GTCACCAGGACA  | 694.108104293626 | 0.433686938378425 |
| AACTTGAATGAC  | 694.110911192332 | 0.49801001353101  |
| ACTGTTGTGAC   | 694.113944424911 | 0.334129084927756 |
| AGTCACTAGAGA  | 694.138506481304 | 0.38009910371041  |
| AGTCACTAGCTC  | 694.141348225912 | 0.400950972625944 |

|               |                  |                   |
|---------------|------------------|-------------------|
| ATAGTCAATCGA  | 694.143580192326 | 0.337024534280388 |
| CCGTCATCTAGG  | 694.15803358891  | 0.223505753760893 |
| ATGACAAGACTA  | 694.162022403507 | 0.261685346564547 |
| ACGTCACAAATC  | 694.162386504427 | 0.288176972767308 |
| CTCCGGGTGACA  | 694.177315852572 | 0.499810453092838 |
| AATACATGACGT  | 694.182193232873 | 0.198212181090263 |
| ACCCATCTGTCA  | 694.183197683965 | 0.293212643182157 |
| ATGACCACTCGC  | 694.188930905204 | 0.273698099407584 |
| ACTCAACGTGAC  | 694.192653214355 | 0.399569731414428 |
| AGTCAGAGGGTG  | 694.194299926757 | 0.168081039752886 |
| AATTAGTTAGTC  | 694.194333295403 | 0.694769452086306 |
| ACAAAATGTGTC  | 694.195409428292 | 0.437126084901831 |
| TAACCCTAGTCA  | 694.200233169838 | 0.222598158040548 |
| ACGGGTGACGCC  | 694.204656159013 | 0.371755328986542 |
| GACTCACGACTC  | 694.208059052404 | 0.518636074823414 |
| AGACATGGTCAT  | 694.213206732356 | 0.410319968665789 |
| CAACCTGACGTG  | 694.220082738201 | 0.767665827588248 |
| GTCACCACTCAC  | 694.228199273355 | 0.286858248879834 |
| AAACCGGTGATA  | 694.229066484046 | 0.280153782555901 |
| CAAGTTTGAAGTC | 694.231068856535 | 0.377215586796732 |
| CGGGACCACTCA  | 694.232247393339 | 0.286574392033694 |
| CTGAGTCTGTCA  | 694.264045467891 | 0.579379370517288 |
| CCCTATGGTGAC  | 694.270746847049 | 0.333394087743795 |
| GGAACTCTGTCA  | 694.280947558374 | 0.440232792478191 |
| GAAGAGATGACA  | 694.282826439548 | 0.224233347100887 |
| CTGCCGGGTGAC  | 694.30343393748  | 0.361934751718035 |
| GCTCTTGACTAA  | 694.312369909161 | 0.196674074346085 |
| AGTTTAGTAATC  | 694.317355355005 | 0.337326092446288 |
| ACTTCTTATGAC  | 694.322645790665 | 0.296833654828377 |
| AGTCACGAGCGC  | 694.325654755996 | 0.505789160996083 |
| ATGTCACCGGTA  | 694.326193544988 | 0.488171521213843 |
| GTCACACCCTTA  | 694.326513518461 | 0.362872316891159 |
| GCGACATGACGC  | 694.32933846121  | 0.650153344870185 |
| ATGACTTCGACC  | 694.343156602842 | 0.333579855670782 |
| GCCGTATGTGAC  | 694.344432674097 | 0.346385239709751 |
| CCGTTCAATGAC  | 694.349982523919 | 0.411163996339396 |
| ATGACCATATTC  | 694.349997086229 | 0.253170693785946 |
| TGACTCGCCTAA  | 694.355702701412 | 0.331379382033669 |
| CATTGCTGACTA  | 694.358401543552 | 0.257324686252816 |
| ACTTCATATGAC  | 694.359018104168 | 0.299283833511222 |
| GGGTGAGATGAC  | 694.361637802282 | 0.280470178863757 |
| CAGTCACGAGGG  | 694.361936641645 | 0.287985009475106 |
| AGTCAGAATCTA  | 694.362374919852 | 0.413015769841934 |
| AGAGTCAAGCCG  | 694.364865544734 | 0.583105318690068 |
| ACTAATTAGTAT  | 694.372055700687 | 0.487681825086387 |
| CATGCCAATGAC  | 694.382255058938 | 0.497562872480534 |
| TGTGACCTATAA  | 694.396185872126 | 0.54156702597873  |
| GCTTCCTAGTCA  | 694.402051911969 | 0.322164566163042 |
| GCGTCATGTTTA  | 694.42271785499  | 0.441032856849636 |
| GTCATCACCATA  | 694.423178513533 | 0.431989955027321 |
| TCGGATCACTCA  | 694.425739058545 | 0.306464194293904 |
| ATGAGCGAGTCA  | 694.431421110583 | 0.42194968500177  |
| GACTATGTGACC  | 694.43363224545  | 0.332014291713646 |
| CAAAGAGGTGAC  | 694.439036580829 | 0.439006293412038 |

|              |                  |                   |
|--------------|------------------|-------------------|
| TATGTTATGTCA | 694.445678608992 | 0.384809504396523 |
| GATACGTATGAC | 694.446457474761 | 0.53094420279821  |
| AAGACTCTTAAA | 694.452198488173 | 0.322200802995905 |
| AGAACGTGTGAC | 694.459178816145 | 0.182986910370963 |
| ATCACGCATGAC | 694.459322321028 | 0.35432161729064  |
| GACTAATTCATA | 694.467819855213 | 0.397071775947206 |
| GGCTGGAATGAC | 694.468132176336 | 0.363886915115064 |
| GTCACATTTGCA | 694.468185913783 | 0.360757743344336 |
| AATGGGTGTGAC | 694.474568642452 | 0.42096783849159  |
| AGACGTGTGACA | 694.4756272158   | 0.348946989543559 |
| ACATGTATGAGT | 694.483853766877 | 0.361173765815655 |
| ATGACCGAAATC | 694.484970738359 | 0.383283810353383 |
| GCGTCAGGTGAC | 694.48818046216  | 0.331384843541446 |
| CAAGCATGACGA | 694.489881359849 | 0.408438292067033 |
| GTCTGACATATA | 694.508742999812 | 0.132679220698912 |
| ACGTCACCACAC | 694.512300747966 | 0.191954580443155 |
| GAAGTGTACGTC | 694.513524249057 | 0.279942488183253 |
| GATTCAGGTGAC | 694.515966172185 | 0.357163272583904 |
| CTAGTGTGTGAC | 694.518799798407 | 0.39126703860912  |
| GAGATAAATGAC | 694.549525128458 | 0.26874523043608  |
| ATGACGTTGAAC | 694.564552963058 | 0.367723475629673 |
| GTAGACAATGAC | 694.570911139581 | 0.271748317309062 |
| GGTGACCTATTA | 694.572447188374 | 0.443804346595935 |
| GGATGGAATGAC | 694.600884272479 | 0.233715845234581 |
| ATTAGGGAGTCA | 694.601091482334 | 0.338461211466791 |
| CGTCATCCCATC | 694.620086333215 | 0.24639518342412  |
| ACTCATCGGGAT | 694.62411026732  | 0.548159256639916 |
| TGACTTAGGACA | 694.633379603815 | 0.469992033502841 |
| CTCGTGAATGAC | 694.637334478533 | 0.33176671678508  |
| CATCCGACTCAC | 694.639722417144 | 0.350023125880311 |
| AGTGTACGAAG  | 694.646802965283 | 0.354972424862578 |
| AGTCACTAGAAG | 694.647991088295 | 0.388726447171826 |
| AGGTTGAATCAC | 694.649119561964 | 0.243049168125245 |
| TCCTAATGACAA | 694.649428767611 | 0.448440166722223 |
| ATTGATCGTGGA | 694.650815915249 | 0.405721146518754 |
| ATGACATCGTCG | 694.652581960649 | 0.254227542793891 |
| ACGTCACCTACG | 694.656445551602 | 0.389115137756236 |
| CGATGTACGTCA | 694.664134653355 | 0.430757760120502 |
| GTTTCGATGACA | 694.678148241682 | 0.498529345370865 |
| ATGACGCCTGAA | 694.678989696762 | 0.325423153084382 |
| ATGACAGCGAAT | 694.680843338031 | 0.37227555780359  |
| TCCCCTGTGACA | 694.69490596477  | 0.105568133914739 |
| TAATAGTAGTCA | 694.695607603167 | 0.33789351969251  |
| CTCTCGGTGACA | 694.696531795142 | 0.636735360132505 |
| CGGCTTGGTCAC | 694.70099890318  | 0.344639407711438 |
| TTGACTACTAAA | 694.701077318004 | 0.565942799282831 |
| TGACATAGCGAA | 694.705281186094 | 0.288358431427141 |
| CCAATAGATGAC | 694.710343485133 | 0.506765752040637 |
| AACGATGTCTCA | 694.716752118021 | 0.474628492679892 |
| GATTCTACGTCA | 694.737766704918 | 0.210966594051137 |
| GATGACAAGGTA | 694.739249059968 | 0.289174859021325 |
| ATTTGCTGACTG | 694.74566069641  | 0.258470857493424 |
| AGGCCGCTCAC  | 694.746868109049 | 0.354990507556284 |
| CAATTAGACTCA | 694.769922355169 | 0.135651769380711 |

|               |                  |                    |
|---------------|------------------|--------------------|
| GATATATGTGAC  | 694.776469093782 | 0.0790972531912407 |
| CTGACTCGGCAA  | 694.778238567153 | 0.370259799500045  |
| TCAGCAGTGACA  | 694.778746052229 | 0.422573284360318  |
| CTTAGTGAGCCA  | 694.782027208801 | 0.454814796692474  |
| ATAGACGCGTCA  | 694.782033276987 | 0.412014947865863  |
| AAGTCGCAGTCA  | 694.783230130978 | 0.42655712114179   |
| AGACGTGATGAC  | 694.784545684928 | 0.294337053960638  |
| GTCACGATATTA  | 694.799208143132 | 0.370564482523959  |
| TATGACGGCAGA  | 694.799872720563 | 0.399812814986875  |
| CGAATCATGACG  | 694.801398670404 | 0.478816057663235  |
| GAGTCAATACAC  | 694.811458397894 | 0.382856065093615  |
| AATCCTGTGACG  | 694.832598384643 | 0.291783933850917  |
| GCTTTAAATGAC  | 694.835807633982 | 0.313905556081959  |
| AGTCAAAGTGAC  | 694.842044640426 | 0.323540178128783  |
| ATTTGAAGTGAC  | 694.85238608123  | 0.485814576318098  |
| ATACGTGACAAA  | 694.856472924568 | 0.695463264728932  |
| CCCGCAATGACG  | 694.864917704968 | 0.534579021301264  |
| TGAGCATGACAA  | 694.865076931129 | 0.308511279490071  |
| CTGAGATGTGAC  | 694.875258937222 | 0.501436045457157  |
| GGTTTACATGAC  | 694.876475735447 | 0.422345243912509  |
| ATGAATCAATCC  | 694.881155852042 | 0.377075834985534  |
| GCACTGCAGTCA  | 694.883036236482 | 0.496801305158186  |
| CTAAATGGCTCA  | 694.885911164813 | 0.244593433774016  |
| CATCACTGACTA  | 694.896904979321 | 0.349327528264526  |
| GTCATTCGGCCA  | 694.903475762048 | 0.545234453374285  |
| ATGTCTGACAGA  | 694.915291302883 | 0.630787724543639  |
| GTGACGCGCCAA  | 694.915665786986 | 0.296751921336998  |
| CGTGGCCAGTCA  | 694.930012362577 | 0.333345619996051  |
| AGTCAGCGTAAT  | 694.933263710434 | 0.366854071634892  |
| AAGGCTGTGTCA  | 694.933815875742 | 0.223477039917704  |
| CCAGGTGACCCA  | 694.939341316486 | 0.158191912535893  |
| CTGACGAAATGA  | 694.957779647457 | 0.326699522866797  |
| AACCTTGTCAAT  | 694.965203332095 | 0.403751733406384  |
| GACAACCTGTCA  | 694.976517970753 | 0.351017739139488  |
| CGCAACTGGTCA  | 694.985420828197 | 0.404938572432357  |
| ACTGAATGTGAC  | 694.985638275811 | 0.377519659022826  |
| GTTAGGGAGTCA  | 694.989726578963 | 0.183662689555956  |
| AGATTTGTGTCA  | 694.993155610517 | 0.256948790791321  |
| TAGTCACGCCCA  | 694.995190555004 | 0.282833308498498  |
| ATTGCGTAATTG  | 694.997312610131 | 0.320988616562863  |
| GTGACACTGAAC  | 695.045778567777 | 0.227353034062713  |
| CCGACTGAATCA  | 695.063031161267 | 0.252853734061834  |
| AGTCACTTGCAT  | 695.070576055065 | 0.355403315455254  |
| CGCGGAATGACG  | 695.072661535898 | 0.308140128924249  |
| GAAGCGGATGAC  | 695.077729070725 | 0.305493307174072  |
| AGTCAGGTCCAT  | 695.107235846961 | 0.373373235437639  |
| ATGACGTGAGAA  | 695.110190879544 | 0.327317374724582  |
| GAGTAATTCAAC  | 695.113303954702 | 0.597568410410034  |
| GAGAACCTGTCA  | 695.114354967456 | 0.222159971549068  |
| AAGTGGTCATTC  | 695.116227201887 | 0.214928669959056  |
| AACTCTTATGAC  | 695.11654723756  | 0.309912419175593  |
| ATTCTGTGACGCG | 695.117941926924 | 0.337552047426834  |
| CGCGCGGTGACA  | 695.124631620787 | 0.339625086091567  |
| ATCTGATGTGAC  | 695.124729086341 | 0.34047405009257   |

|               |                  |                   |
|---------------|------------------|-------------------|
| GCGGGCGAGTCA  | 695.140310080342 | 0.439507515028753 |
| ATGACGCTCACC  | 695.172838315048 | 0.336044888653326 |
| CCGACTTGGTCA  | 695.174889929531 | 0.458057330125156 |
| GTCATACGACCA  | 695.183889312417 | 0.487627358904929 |
| CCGCGTGTGACA  | 695.184078587781 | 0.420174285287719 |
| TGACTAGCAGAA  | 695.204195529023 | 0.225986827853299 |
| AGACTAATCACT  | 695.204895608724 | 0.373481640331851 |
| AAATGGTGTGAC  | 695.251469846186 | 0.197412230406567 |
| GTCACCCGGGAC  | 695.269048538269 | 0.579707588684479 |
| CTGCACATGACA  | 695.270744283485 | 0.494665695290564 |
| GGACTTGATGAC  | 695.273371416    | 0.321096253211521 |
| GAAGTGGATGAC  | 695.27452875994  | 0.175560803299679 |
| ATGCTGACTGTG  | 695.277831997749 | 0.341342758423004 |
| GTAATAGTGAC   | 695.287367867892 | 0.407065922920018 |
| CGGCGTGATTCA  | 695.290201262774 | 0.430983070758925 |
| GTCATTAACCAA  | 695.290343906619 | 0.214408105331012 |
| AAGGGTGACCCA  | 695.296720431459 | 0.29847694848132  |
| CTATTGAATGAC  | 695.298434615282 | 0.110334488263967 |
| CTCCACGAGTCA  | 695.303106063191 | 0.616395720364051 |
| TACTGTAAGTCA  | 695.312601148375 | 0.285686517185153 |
| AATTCGTC AATG | 695.318189174662 | 0.411101846989265 |
| TACAAAACGTCA  | 695.328352550036 | 0.448476719986241 |
| ACGTAAGAGTCT  | 695.335687937316 | 0.288941407822758 |
| ACATCCTAGTCA  | 695.346526626675 | 0.369860755899454 |
| ACTGAGTCGTCA  | 695.351956631631 | 0.446540027573838 |
| CTAAGTGGTGAC  | 695.361312565382 | 0.399184465224881 |
| ACTCATTCTGTG  | 695.363122115667 | 0.47290001483184  |
| ACGTCACATGAG  | 695.366520269381 | 0.530999345969319 |
| GTCACACAAGTA  | 695.367995918977 | 0.29665007290461  |
| ACAACGTGTCAG  | 695.374383426721 | 0.392825428018415 |
| CGACATGACAGA  | 695.376934563074 | 0.248995099927415 |
| GTCATGACCTCA  | 695.377313418891 | 0.442472053966984 |
| GTTACCGCGTCA  | 695.381171089272 | 0.490321383109143 |
| AGTCACCCCGCG  | 695.392298632302 | 0.452465458045253 |
| ACGTTGGGTGAC  | 695.392639578377 | 0.437476236680428 |
| AAGCATGACAGA  | 695.401565409989 | 0.333238472159517 |
| CTAGAGAATGAC  | 695.404975813274 | 0.393893806046299 |
| GGTGTGACTGA   | 695.42350162735  | 0.302671948756689 |
| ATGGTCCAGTCA  | 695.444747315124 | 0.397718260729228 |
| CTTTAGAGTGAC  | 695.44641897056  | 0.3779426167317   |
| CACCGTGGTGAC  | 695.449906487241 | 0.388957260399888 |
| CTTACTCTATGA  | 695.457780897913 | 0.318024622070017 |
| ATGACTTGTGTC  | 695.468571196042 | 0.493516153926323 |
| TATTACGTATGA  | 695.472689267481 | 0.211804116285294 |
| CAGGCTGAGTAA  | 695.472875908685 | 0.519985142277617 |
| ATATGATGCAAC  | 695.48121091948  | 0.315816737167605 |
| GTGATACATCGA  | 695.48866107517  | 0.26824617664349  |
| GAGCAGTGTGAC  | 695.497691975632 | 0.2886346359274   |
| CGGAATTGTGAC  | 695.502877790409 | 0.364219225288846 |
| GGAGCATGACAC  | 695.50766023491  | 0.289202959928914 |
| GATCCATGTCAC  | 695.50814731032  | 0.283250512809475 |
| TACGATTACGCA  | 695.509006662817 | 0.25939350584276  |
| GATGAGTGCATC  | 695.509839644507 | 0.346949252160338 |
| GGCAAGATGAC   | 695.51433080437  | 0.3522826034094   |

|              |                  |                    |
|--------------|------------------|--------------------|
| GTGACTAGCTGA | 695.51984368816  | 0.342393342391355  |
| CTCCGACAGTCA | 695.521101582175 | 0.207699656479346  |
| TCGCATGAGCAA | 695.527713208607 | 0.335348458221827  |
| ACAGTCAGTCGT | 695.531490678487 | 0.381582859199946  |
| CGGCCTGTGTCA | 695.538556961427 | 0.432391889908675  |
| ATGACACCCTTA | 695.549678678659 | 0.169748362923625  |
| ATGACAGACCAT | 695.552395740238 | 0.0587696000870952 |
| GTCACCATGAGA | 695.553661683419 | 0.366347398208122  |
| CGAATTGAATCA | 695.558908078635 | 0.310322095422096  |
| AGTCATGGTCCG | 695.558938502835 | 0.334331012710268  |
| ATCGTTGAATCA | 695.573071444947 | 0.416205341773886  |
| ATGTGACATGAC | 695.57590012502  | 0.36253448531911   |
| GTCATAAAGAAC | 695.580180900168 | 0.456367238025732  |
| GTGACCTGTACA | 695.587408417715 | 0.403744718205178  |
| CCACCAGAGTCA | 695.58987297482  | 0.625332164712476  |
| TGTCACCAGCAA | 695.595058637519 | 0.50048850571375   |
| GCGTCGAATGAC | 695.6103340914   | 0.425547259980122  |
| CGTCACTCGTCA | 695.613256491083 | 0.242272745004458  |
| AGTCACGGCAGG | 695.614975684261 | 0.152251009155679  |
| AATTACGCAACG | 695.620172525478 | 0.379787346258561  |
| CGTCACAGTGTA | 695.622865514131 | 0.353972591454255  |
| GTCATGCCCCGA | 695.640901757277 | 0.16804481299548   |
| CCTTACCAGTCA | 695.642676770538 | 0.283168953133089  |
| AGTGACGTCTTA | 695.649146692347 | 0.433506841410787  |
| CAACAGTGTAC  | 695.657198470201 | 0.541196254486726  |
| TCACCCTAGTCA | 695.667229422602 | 0.257119625920058  |
| GCGCCTTACTCA | 695.673929784599 | 0.342520075865076  |
| GCGGCGTACTA  | 695.678152957108 | 0.322774163393988  |
| CAAACAGGTGAC | 695.678650361039 | 0.471520191987317  |
| ACTTATTGTCAT | 695.705063552104 | 0.337250553783672  |
| CTCAAGTGAGTC | 695.705491429792 | 0.411952908507836  |
| CGGAGGGATGAC | 695.706378151808 | 0.380913252362977  |
| GTCACATCCGA  | 695.706605354055 | 0.395680184243996  |
| AAAACGGGTCAT | 695.719507883386 | 0.330795782913021  |
| CGCAATTACGCA | 695.722458938139 | 0.338363261272218  |
| GATGTAAATGAC | 695.729859973105 | 0.444628331242417  |
| ACTCATATATAG | 695.7323415482   | 0.441780261628058  |
| ATTACGCAATTA | 695.733950874331 | 0.275548725431569  |
| GTCATGATCGAA | 695.745171875162 | 0.335973273306904  |
| ATACCCCGATGA | 695.745842765206 | 0.479525743088893  |
| GTAATGGGTGAC | 695.75466750955  | 0.220725995927146  |
| AGCCTGGTCATA | 695.760320324848 | 0.470973882324726  |
| GTCATCTTCCAA | 695.772542657462 | 0.424126614238516  |
| ACACATCATATG | 695.773463960205 | 0.336236075994117  |
| GTGCTCCAGTCA | 695.774255071094 | 0.377977692435699  |
| ACAGTTGACACA | 695.774760183449 | 0.352289220372385  |
| AGGGATCCGTCA | 695.790873720421 | 0.341026493327209  |
| GTCATCAGGCAC | 695.797825485595 | 0.261275629413912  |
| CTTTCTAATGAC | 695.800924288133 | 0.33092259503435   |
| CGCATTTGTGAC | 695.811038231565 | 0.49529678756715   |
| ATGACCAGGTCC | 695.814994376151 | 0.436118739605123  |
| GGTGACGGGTCA | 695.832818152183 | 0.233753803183688  |
| ATATGTCAGCAC | 695.846187499126 | 0.442987845524825  |
| CGTCATTACTAC | 695.853107892434 | 0.251526830603848  |

|               |                  |                   |
|---------------|------------------|-------------------|
| ATGAGTACGTTA  | 695.858406173395 | 0.367396145496317 |
| CGAGCTTCGTCA  | 695.859164526832 | 0.424307019441012 |
| TGACGTAGAACA  | 695.8642467868   | 0.495690889020662 |
| CTGCCATAGTCA  | 695.86855048366  | 0.324589187184205 |
| GTCACGGTTGCA  | 695.882610002711 | 0.509024550692799 |
| GAGCCTGATTCA  | 695.891007249847 | 0.446463675812376 |
| CGTAATAAGTAC  | 695.897972677767 | 0.520341559492003 |
| CGTCGCGGTGAC  | 695.900947506274 | 0.492833367742721 |
| CAAGTGTGTGAC  | 695.904218001247 | 0.343700778083389 |
| ACGTCACCTACT  | 695.909211891707 | 0.348493027242641 |
| ACGTCATGTATA  | 695.911095835963 | 0.653159943647836 |
| ACCTTGTCACAC  | 695.91861793583  | 0.223948696114996 |
| AAACAGATGACG  | 695.92258598388  | 0.285169918123154 |
| TCGCAAACGTCA  | 695.930019759249 | 0.393654615335545 |
| AGAATTAGTCGC  | 695.932318314614 | 0.347733340201909 |
| AGATTTACGTCA  | 695.932378752955 | 0.33208419228174  |
| ACGGTGTGTAAT  | 695.935765368939 | 0.319837189830269 |
| GTCTCATGACAA  | 695.943445002443 | 0.49663058345177  |
| CTGTCCGGTGAC  | 695.955607143266 | 0.477953945681612 |
| CGCCGTGACTAG  | 695.957753350082 | 0.252536839545404 |
| GACCATTTGTCA  | 695.959327828511 | 0.448489497853914 |
| ATGACATTACAG  | 695.963112660711 | 0.44116680098583  |
| ATGTCACCGTTA  | 695.967327922744 | 0.338652668439184 |
| TCGATCACGTCA  | 695.970062807764 | 0.402442058790517 |
| ATGCGACTAATC  | 695.975649986679 | 0.291519463509511 |
| AGGTTTGTATGAC | 695.979777407811 | 0.234981589209252 |
| CGTGCCGAGTCA  | 695.981152410986 | 0.159421116478456 |
| CATTTGGAGTCA  | 695.982582492671 | 0.407544003488968 |
| GAGATTTTCGTCA | 695.990751328098 | 0.342219604380888 |
| GTCACACGTTGA  | 695.993044570718 | 0.293494103641365 |
| CGTAACATGACG  | 696.009089368623 | 0.581221107217097 |
| GTCACATCTCGA  | 696.011157140234 | 0.439599497745145 |
| CCATATGTGACA  | 696.016908865329 | 0.334944868054061 |
| CGTCACTGTGAC  | 696.018285496499 | 0.320805832774824 |
| AAAGTGTGAGAT  | 696.018795350524 | 0.211512930603322 |
| ATTCTCAGTGAC  | 696.02000528978  | 0.367986717057763 |
| ATGACTTTTACG  | 696.020789045201 | 0.407246465730516 |
| GGTCAAGATGAC  | 696.029618290808 | 0.344225474417728 |
| GTAATTCATGAC  | 696.032278772327 | 0.613805762067687 |
| GTCATTGAGACA  | 696.048286576194 | 0.508536033626266 |
| TATGTGTGACCA  | 696.051731797619 | 0.342835344371398 |
| AAACGTGTCAGA  | 696.059090317801 | 0.266824820353673 |
| AATTCTGACTGC  | 696.059940881412 | 0.538196197951127 |
| CTTCTAAATGAC  | 696.06450071205  | 0.294757015127916 |
| CGCGCCGGTGAC  | 696.071097732483 | 0.587445620711132 |
| ATGACGTGAATG  | 696.088006091151 | 0.320756918377035 |
| ACTCCTGCGTCA  | 696.094999568458 | 0.238307756433507 |
| GCCGAAACGTCA  | 696.096415145712 | 0.702560542111691 |
| GTCATAGCCAC   | 696.100904085121 | 0.29112797024682  |
| TCAATGATGTAA  | 696.110729071493 | 0.521353846490298 |
| TGACCGATCGAA  | 696.114217833419 | 0.298179147512654 |
| CAGGTGGTGACG  | 696.119329098385 | 0.335278173585458 |
| GTGCGTGAATCA  | 696.122724414858 | 0.313514471755373 |
| AGCTTCGACTCA  | 696.128848989132 | 0.264851196954134 |

|              |                  |                   |
|--------------|------------------|-------------------|
| GTTACAGACTCA | 696.140299884839 | 0.359304144971814 |
| CGGCATGACAGA | 696.153377662826 | 0.351165799144879 |
| GTCATAGCGCTA | 696.164954541877 | 0.3203281001287   |
| ACGCAACGTGAC | 696.166536736696 | 0.292894470934306 |
| GACCAATAGTCA | 696.167259190988 | 0.339101620092155 |
| CTAAGGCATGAC | 696.171559807118 | 0.227523865216173 |
| GAGTCAGGAAAC | 696.183617269584 | 0.421766172527491 |
| TGACTAGACTAA | 696.183970284313 | 0.313285080870903 |
| GTCATCCGGTTA | 696.19935152822  | 0.338647375430532 |
| GTCACTAAATGA | 696.208081025599 | 0.35749347141936  |
| CAGCACCGTGAC | 696.210163971261 | 0.368521807713526 |
| ATATCGGGTGAC | 696.210413410549 | 0.404775993849617 |
| ATCACTTGGTCA | 696.210806453245 | 0.336253983633651 |
| ACTCATCGTTGA | 696.220925986536 | 0.367406739029687 |
| ATGACGGACAAG | 696.223317219871 | 0.28849253333437  |
| CAGACTAATGAC | 696.228506840173 | 0.297241027281356 |
| GTGCTAGAGTCA | 696.246375773785 | 0.249710150483974 |
| GTGAGTCTGAAC | 696.246901589206 | 0.321138586382913 |
| CAACAGCAGTCA | 696.258177791366 | 0.450401651886699 |
| TGACAGTTATAA | 696.259976544221 | 0.394484446824545 |
| CGTCACATCGGA | 696.275692609901 | 0.41476609548445  |
| ATGAGTTGTACG | 696.277799090192 | 0.364966972161363 |
| GTATCGTCAGAC | 696.28044459594  | 0.297574775735159 |
| AGGCCTGACACA | 696.280922487651 | 0.333197194210276 |
| ATGACCACGCGA | 696.287807653374 | 0.313884105196137 |
| GCAGCGGAGTCA | 696.296200107359 | 0.255390562721784 |
| GACATATTCTGA | 696.299316201261 | 0.470580748970248 |
| GCAACGAATGAC | 696.299708729276 | 0.329533124075743 |
| GTCACCAGTCTA | 696.30680456863  | 0.340881328077483 |
| GTCATTATTGCA | 696.310659508598 | 0.32923500836855  |
| CGAGACTGTGAC | 696.31349335786  | 0.482674854536439 |
| AGTCGACATGAC | 696.316545882491 | 0.401936631978662 |
| GTCACTACAGAA | 696.318933461994 | 0.224035188721661 |
| CGCCAGTGACAC | 696.319627300133 | 0.327998997161802 |
| ACCCTAAATGAC | 696.320252859115 | 0.343879475687312 |
| ATGTAGTAGTCA | 696.322554851735 | 0.381832419945611 |
| CAGCGTGACTGC | 696.340332322532 | 0.340085637621366 |
| GCAGCTACGTCA | 696.343658024027 | 0.387382427864939 |
| CGCAACGTGACG | 696.3507728359   | 0.377853851717165 |
| GTCATATCCCCA | 696.355347208397 | 0.173160761046088 |
| TGACGTTATCAA | 696.356503934    | 0.384525597151574 |
| CTTACTGTGACA | 696.357833924552 | 0.267648790577365 |
| TACTATCCGTCA | 696.358363942404 | 0.386868077769021 |
| GTCATAACGTTA | 696.358880753781 | 0.261436946926672 |
| ATTCCGAGTGAC | 696.358975460643 | 0.464834054896813 |
| CTTGTTAAGTCA | 696.360854531117 | 0.554069518935591 |
| GAAGCTGACACA | 696.369259179964 | 0.333608628775747 |
| GTCACTGTATTA | 696.394647516031 | 0.338412786487317 |
| AGCGTCATGTCA | 696.404811016849 | 0.458488354432426 |
| ACTCATTATGAG | 696.415923130282 | 0.411642407511814 |
| CGGTGCGTAATC | 696.428394533707 | 0.32747252318641  |
| CTCGTAGATGAC | 696.429964814711 | 0.403875025211342 |
| AAGCAGGAGTCA | 696.433412310181 | 0.259173176332388 |
| TACATCCAGTCA | 696.451934491247 | 0.298252308767965 |



|              |                  |                   |
|--------------|------------------|-------------------|
| ATGACATGCACG | 696.452183556472 | 0.361657153877961 |
| ATGATGCAATCC | 696.452322431    | 0.250000358624797 |
| ACCCTATGATGA | 696.468276541195 | 0.467609230740024 |
| ATGACCATATAG | 696.470307829783 | 0.298672106892527 |
| AGTCAAATGACA | 696.470330618553 | 0.252496673359759 |
| GGCGTGGAGTCA | 696.471183408714 | 0.335638312569903 |
| GAGTCAAAGAGC | 696.472846756325 | 0.240570700053743 |
| GTCATATCGGTA | 696.473063640347 | 0.296727366238455 |
| ATAGGCGTCACC | 696.475188197284 | 0.634577778545656 |
| ATTCAGTAATCA | 696.482716435857 | 0.354026445372004 |
| ATGACACCCCTA | 696.487609767509 | 0.288829687837937 |
| AGCGAAGTGACT | 696.508547183568 | 0.305274104182718 |
| CGTCATCTCGAC | 696.510318390903 | 0.290872054846164 |
| GTCATATCCCA  | 696.512068410582 | 0.314267639566314 |
| GCCGATGGGTCA | 696.514709333793 | 0.300450867633167 |
| AGCCCGGATGAC | 696.515318387727 | 0.399829370775146 |
| CACGTGTGGTCA | 696.530651354129 | 0.548622610947279 |
| CCGAATTCGTCA | 696.533925873462 | 0.41289515416648  |
| GCGCGGAATGAC | 696.534023948503 | 0.336832460552348 |
| CGTTACATGTCA | 696.535156497889 | 0.379029280948221 |
| ACCCTTGCGTCA | 696.537038906973 | 0.205413804074477 |
| CGGGAGATGACG | 696.538112285931 | 0.277030019962762 |
| AGTGTCTGTGAC | 696.540333313342 | 0.424186628658483 |
| ATGATAGGTGAC | 696.555924693961 | 0.452356796435731 |
| GTCACCTATTCA | 696.567364042457 | 0.335074645898385 |
| AGTCAGATCCCG | 696.570393313682 | 0.394793560062539 |
| TCATGGCAGTCA | 696.573036758611 | 0.42438362179616  |
| ATTCTCGGTCA  | 696.575057873212 | 0.16451891969636  |
| CTGTGACCAGGC | 696.576231837128 | 0.551094999830484 |
| CGACTTCGTCAG | 696.58045271693  | 0.35227370902135  |
| CAATATTGTAC  | 696.590676262469 | 0.181882509778453 |
| CGAACTCTGTCA | 696.593894132694 | 0.389039972198357 |
| GACACGTGACGC | 696.59714631998  | 0.365677119979195 |
| ACACCTTACTCA | 696.601717563567 | 0.302030257748685 |
| GCGTCACTATCC | 696.603449820458 | 0.28269573673822  |
| AGACTCACTAAA | 696.603841839659 | 0.26726778462844  |
| GCACTACGCCC  | 696.604986244099 | 0.306336520103426 |
| GTCATTACAAA  | 696.606471522882 | 0.464661020107151 |
| TCGCGTGACAAA | 696.614652763076 | 0.214763393227459 |
| GATGACAAGGCC | 696.620844886925 | 0.397172847867873 |
| CTGCAATAGTCA | 696.634564267037 | 0.62265512490676  |
| CCGTGATGACCA | 696.636889035508 | 0.311419938961134 |
| GACTGCGGTCA  | 696.638340892951 | 0.492193744691266 |
| ACTCATCGTGAA | 696.639052099242 | 0.415883169435942 |
| CCTACCTGACTC | 696.641362398742 | 0.15912358450832  |
| GTACGTGACCCA | 696.643868543156 | 0.444774958756152 |
| AGACTCAGAAGA | 696.652744762087 | 0.383845183666605 |
| ACCCCATATGAC | 696.657802455528 | 0.403468219198991 |
| AAATTCGTCAAT | 696.662691598964 | 0.256234755904418 |
| ACTCATACAAGG | 696.669918156821 | 0.216979406166759 |
| AAACCAATGACA | 696.673298375021 | 0.354236796383723 |
| CACGGTTGAGTC | 696.676815659479 | 0.33767088571289  |
| AACTCTGACGAA | 696.679358749685 | 0.416023710570397 |
| ATCAAAGCGTCA | 696.684979580274 | 0.389893838231915 |

|               |                  |                   |
|---------------|------------------|-------------------|
| GGTGACGTCGAC  | 696.689275262657 | 0.332129138854086 |
| CTACCTGACACA  | 696.692733097952 | 0.328179883983012 |
| CTTCCTTATGAC  | 696.697158178157 | 0.384802180460837 |
| TCGGCCATGACA  | 696.69861208044  | 0.276800396894729 |
| ATGCTGTCACAG  | 696.699012027838 | 0.287402817069591 |
| ATTACATCGTCA  | 696.703613650033 | 0.364937963180884 |
| ATTGCCAATGAC  | 696.71137175481  | 0.265187768504327 |
| AGACTAATCTTA  | 696.711868274238 | 0.370675066025823 |
| CACCATCATGAC  | 696.714251039121 | 0.209530729046195 |
| CTCTTGTGTGAC  | 696.715719103594 | 0.376308718288578 |
| TCCGTAGTGACA  | 696.715751715723 | 0.267962809142102 |
| TGGTCATCAGAA  | 696.71580213555  | 0.329805251802342 |
| CCGTCGGACTCA  | 696.726323444473 | 0.462422638407208 |
| GCGGTCACGTCA  | 696.726606139915 | 0.396685097771724 |
| GTGGCTCACCAA  | 696.726747957272 | 0.45581015285713  |
| ACCCCGACTCAT  | 696.729285108334 | 0.222163271992458 |
| TCACAATGACCA  | 696.747814941693 | 0.345377843315442 |
| ACTCCAATGACG  | 696.750266024558 | 0.324977435141459 |
| CGTCATGCAACA  | 696.76176845931  | 0.240460133953435 |
| ACTCATACTCAA  | 696.765968236564 | 0.291094527938127 |
| ATCTTTGACACA  | 696.769034228709 | 0.158183185941803 |
| ATTGTATGACCG  | 696.774301285191 | 0.417772612253713 |
| AATGCTGTCAAC  | 696.775349357767 | 0.383081124747481 |
| CCAGCGCTATGA  | 696.778404326264 | 0.376929732766399 |
| ACGTCACCTGTGA | 696.784071047363 | 0.243880436449377 |
| GTCACCTAATCA  | 696.784412521021 | 0.350209308437291 |
| CTATTAGTGACA  | 696.792683499062 | 0.54628749151238  |
| ACAATAATGACA  | 696.794970666808 | 0.438862825178163 |
| GTCACCGGTGAA  | 696.798387468078 | 0.393474701131723 |
| CTGATAATGACA  | 696.80947743391  | 0.308762208563764 |
| GAGAGGGATGAC  | 696.814905118594 | 0.247624625225428 |
| AGTGGTCACACC  | 696.829471423118 | 0.215839713859081 |
| CTAATTGTGACA  | 696.836778811022 | 0.474443500630339 |
| GCGTTGGACTCA  | 696.838649564868 | 0.365007325197714 |
| GTCTTAGTGTC   | 696.840071163576 | 0.464674291088304 |
| ATGACGACGCAA  | 696.843437816172 | 0.452019661637184 |
| CTTCAAGACTCA  | 696.856011231295 | 0.434695392630025 |
| CGGTCATCATTA  | 696.862234751156 | 0.367465092464907 |
| ATTAGTACTAAT  | 696.869837833333 | 0.432396574735006 |
| GTCATTATTATA  | 696.876588365427 | 0.429053344169811 |
| CAGTTTCGTGAC  | 696.886019816878 | 0.372535245301924 |
| CGTCATTACACA  | 696.886594806538 | 0.432884362708563 |
| GAACCTATGACC  | 696.899535881531 | 0.399971168467794 |
| ACTCATTGACT   | 696.902186161455 | 0.359697725349595 |
| TCTACATAGTCA  | 696.925085092768 | 0.190420843645041 |
| AGATTGTGACCA  | 696.928683299444 | 0.421636499020072 |
| ATCACTGTGACG  | 696.94470253672  | 0.324829341489032 |
| ACGTCATGTCCG  | 696.948212734755 | 0.454897618813533 |
| CGTCTATTAGTC  | 696.968699626061 | 0.403916273615273 |
| CATCGGCATGAC  | 696.977744986398 | 0.463156499981259 |
| ACTCATACTACA  | 696.977975373126 | 0.239955720518118 |
| ACGAATTTAGTC  | 696.979183452203 | 0.510638626298802 |
| CATCTATTAGTA  | 696.989243030982 | 0.486193321948669 |
| AATGTATCGTCA  | 697.004536982239 | 0.224636267272951 |

|               |                  |                    |
|---------------|------------------|--------------------|
| AGTCAGAATGTA  | 697.01289947995  | 0.297532868564253  |
| CGGGCTGACACA  | 697.01516568638  | 0.19776255439189   |
| AGTCACGACCAC  | 697.015631690042 | 0.303195381359537  |
| CGAGTCGCGTCA  | 697.016293263708 | 0.295050623293391  |
| CGACTAATTCAG  | 697.054333720307 | 0.314171186683794  |
| ATATACAGTCAG  | 697.05872278893  | 0.439706033328066  |
| CCGGGTTTCGTCA | 697.05964038564  | 0.536379574854652  |
| CAAGCGCGTCAC  | 697.067362991721 | 0.230135747294896  |
| GTCACACGCTAA  | 697.070033682647 | 0.402576227300614  |
| AGTCACGACATA  | 697.071738719133 | 0.57445475682232   |
| TCATAGCTGAGA  | 697.07338608871  | 0.49671679796789   |
| ATGCCGTGACAC  | 697.082640454594 | 0.332484471193882  |
| AAGATCTGACTG  | 697.09040107072  | 0.124280920882693  |
| GTCATGTGTACA  | 697.095773014139 | 0.285537677689251  |
| AGCAATTCAGTC  | 697.10545659814  | 0.539947110026585  |
| TGTCACAGGCAA  | 697.122356563559 | 0.488616030707169  |
| CAGTGCCGTGAC  | 697.130313861329 | 0.270650565509856  |
| CACGTCACGCCA  | 697.13639466025  | 0.46432722450904   |
| GCCACATCATCC  | 697.13757941325  | 0.226975168104351  |
| CGAGGTGACCCA  | 697.142297782153 | 0.364199517089069  |
| CTATGCTAGTCA  | 697.143747872918 | 0.35897289552383   |
| GTGACTTACCAA  | 697.148311425035 | 0.265871392376298  |
| ACTTGTCACCGG  | 697.149910419442 | 0.294053863333849  |
| AACGCTGACTGT  | 697.151558425457 | 0.295506496832365  |
| CTAGAAGATGAC  | 697.155426037992 | 0.408499206224525  |
| TAGCGGTGACGA  | 697.170116720936 | 0.452743653848616  |
| AGGAATCTGTCA  | 697.170754685028 | 0.32075169068828   |
| TGACGGAAATAA  | 697.174040481296 | 0.331720730963742  |
| ACACGGTGACGA  | 697.176455421001 | 0.358238257856351  |
| ACCTCTTCGTCA  | 697.180372820649 | 0.40973713447155   |
| TCCCATTTCGTCA | 697.192376260947 | 0.445111206429089  |
| GTCACTATGTCA  | 697.193558867196 | 0.307342015169507  |
| GTCAGACTTATA  | 697.193803433763 | 0.396353410370459  |
| GTATGATGACCA  | 697.199465376662 | 0.332332018097173  |
| CGACAAAATGAC  | 697.204753524234 | 0.403181705661178  |
| GAGTAATGAGTA  | 697.209429925009 | 0.101059315238797  |
| GTGACGTTATTA  | 697.210810064825 | 0.442979476321953  |
| ATAGTCAACCAG  | 697.215324763684 | 0.444259843721895  |
| GTCACCATGTAA  | 697.222420885216 | 0.352545597737936  |
| CTACAGTGAGTC  | 697.239650067969 | 0.268930804590067  |
| ACGCGTGAGTCG  | 697.246338863194 | 0.463488494390854  |
| CAGCAATTAGTC  | 697.262472263207 | 0.372074367160983  |
| CTAGCGTATGAC  | 697.27533934428  | 0.384926230145583  |
| ATGACTTGGGCC  | 697.275503937066 | 0.350635132786336  |
| CTTATGCGTGAC  | 697.28104382747  | 0.491023887938308  |
| ACTAACTAGTAT  | 697.286644910838 | 0.678312666405334  |
| GCCAACTCATAA  | 697.287475173145 | 0.319731139345321  |
| GACCACGTAACA  | 697.296502620036 | 0.247210307737664  |
| CAGGTTGGTGAC  | 697.299883644756 | 0.379175633951615  |
| ATGACAACGTGG  | 697.316134138123 | 0.0817945172808732 |
| CCGGGATTAGTC  | 697.31902347973  | 0.445093432531858  |
| CCATGCAGTCAG  | 697.329649097422 | 0.397646078270565  |
| AGATTAGTCGCC  | 697.331048161696 | 0.283222854607721  |
| GAGGCGGAGTCA  | 697.336282646621 | 0.300523307534747  |

|               |                  |                   |
|---------------|------------------|-------------------|
| ACGTCTGTGACG  | 697.340323843838 | 0.29228091338085  |
| GTATACTAATAC  | 697.347563198304 | 0.397002706387229 |
| AATGCAATGACA  | 697.360953546115 | 0.309642478444427 |
| GATGGGTGACGC  | 697.368963347807 | 0.240713865456397 |
| ATGACGATCGCA  | 697.37312766549  | 0.379916684017703 |
| ATATGCGACTCA  | 697.373755979273 | 0.50118357425621  |
| TGGCTCATCTAA  | 697.374939084613 | 0.428896863136168 |
| TCAACGTCATGA  | 697.37678027305  | 0.410554178174981 |
| TGACGCTAATAA  | 697.380188507021 | 0.321061031062265 |
| AAAGATAATGAC  | 697.386667365814 | 0.284532313292768 |
| ACAAATTACACA  | 697.38681068625  | 0.480087897151882 |
| ATGACAGCGAAG  | 697.401930993538 | 0.232111566831383 |
| CCAAGGTGACAC  | 697.410833780211 | 0.411327250928122 |
| ACTCATACACGG  | 697.410999781347 | 0.285384024478844 |
| AACGACGTCACA  | 697.416643510299 | 0.134490829597911 |
| CGACTAATTTTA  | 697.428206321893 | 0.384116206091082 |
| ATTACCATGACG  | 697.435243440617 | 0.377522393338799 |
| CTCACTTGACTC  | 697.461175256691 | 0.417898000329456 |
| GTCATATTGGGA  | 697.4705700914   | 0.361390312976263 |
| GTCACATACTGA  | 697.478761052331 | 0.392850376402285 |
| AGCTGACTGGTC  | 697.493093510337 | 0.332639452623366 |
| ACGATGCTGTCA  | 697.495108787785 | 0.255597517407999 |
| AACCTAGGTGAC  | 697.507692447877 | 0.370074123977877 |
| TAGGATAAGTCA  | 697.518729916354 | 0.351735452586342 |
| CTTTCCTGACTC  | 697.523707279216 | 0.26366306014291  |
| GTCATCGCCTCA  | 697.523832862402 | 0.388024421021059 |
| GTCATTCGAAAA  | 697.525469879061 | 0.160257272150803 |
| AGCCGTGTGTCA  | 697.531580729689 | 0.360713601046099 |
| GACTAATTCAAA  | 697.533170457652 | 0.374735276106873 |
| ACTCGAGAGTCA  | 697.55533691118  | 0.348045278412274 |
| GTCACCTGAAGA  | 697.556482544962 | 0.558544207599908 |
| AGTATGATGCAA  | 697.561857892613 | 0.213921523369994 |
| CGACTAATCGCA  | 697.577881311231 | 0.44123654385934  |
| CGTCATTGATAA  | 697.58018593203  | 0.432138572964494 |
| CGAGGGTGACGC  | 697.580231907014 | 0.201834287807942 |
| CAGTATTAGTCC  | 697.59841496782  | 0.551888620225057 |
| GTCATAAGCGGA  | 697.600841426924 | 0.403897330902772 |
| GTGACACCGATA  | 697.602093440326 | 0.277494404771222 |
| AACCGATTACTC  | 697.604452481382 | 0.43649826974687  |
| TCAGCTGATTCA  | 697.605985359387 | 0.331130515424126 |
| GTCAGTTGTACAC | 697.6137560133   | 0.343203408954353 |
| ATGATGTGACAT  | 697.615871750538 | 0.375458761591125 |
| TGACTCCCTCA   | 697.62631806346  | 0.211551437906855 |
| AGATGATGTGAC  | 697.632752103453 | 0.283112229887418 |
| GGTGACGATACA  | 697.632910863987 | 0.352439349502696 |
| TCCTGGTGACGA  | 697.640184407282 | 0.332242177356858 |
| CGCCAGTGAGTC  | 697.640399949092 | 0.321630568093492 |
| AGTCAGACTGAA  | 697.646452857948 | 0.203288933160496 |
| GTCACGCCTTGA  | 697.647493267278 | 0.4091153584227   |
| CGTCATGGACTC  | 697.651061005094 | 0.50767296891008  |
| GCGCATAATGAC  | 697.65290410587  | 0.475561376682756 |
| CCCTCGGTGACG  | 697.6550073659   | 0.428422119293809 |
| GTCATCAAGAGA  | 697.663660508745 | 0.289847026822549 |
| GTCACGCTTGTA  | 697.663766103298 | 0.516910189579342 |

|               |                  |                   |
|---------------|------------------|-------------------|
| CCCTCAGATGAC  | 697.688494103562 | 0.173120685631351 |
| TAATCTTCGTCA  | 697.690676721797 | 0.457351728826996 |
| AGCCTACAGTCA  | 697.692488241539 | 0.554989673013245 |
| CCGGACTGTGAC  | 697.694247727359 | 0.354676358310347 |
| GCTGGGACTCAC  | 697.699432612475 | 0.373809703889137 |
| CGTGAGACTCAC  | 697.702321508264 | 0.360925678332313 |
| ATGTAATGTGAC  | 697.710523314163 | 0.382266336781564 |
| ATATGTGGTGAC  | 697.715408021622 | 0.342952737126457 |
| GTCATGCTTCA   | 697.728354454668 | 0.442633638922791 |
| CTGACATATTTA  | 697.736010846857 | 0.249905553807941 |
| ACCGCATGACAC  | 697.746963278263 | 0.37649749353479  |
| GAGTCAAGATCA  | 697.762105882577 | 0.278808356828285 |
| GTCATTGCCGAC  | 697.762175085503 | 0.301978275644041 |
| AGACACACGTCA  | 697.776708906471 | 0.334857830262559 |
| GCTGACTAGGAC  | 697.778573891449 | 0.308900753377777 |
| TAGTGACAGTCA  | 697.783461239678 | 0.350840028839893 |
| ATGACAGGGTTA  | 697.788849988676 | 0.204121086915825 |
| GCGTATAAGTCA  | 697.794610011322 | 0.423043753692548 |
| ATTCCGGTGACA  | 697.804433184394 | 0.261933230510828 |
| GTCACAACATAAA | 697.8091682302   | 0.400199979160687 |
| ACCAGCTGTGAC  | 697.821872929698 | 0.430716103640672 |
| GACTCTTAAGAC  | 697.822819056245 | 0.803846586636303 |
| GACTCACGAATC  | 697.823099725052 | 0.299404230956994 |
| GTCATGCCGTAA  | 697.824508001319 | 0.477821621381692 |
| CGATGCAGTGAC  | 697.835094297868 | 0.385088683782702 |
| GTCATGTACAAA  | 697.854282126809 | 0.351791766236041 |
| ACAAAGATGAGT  | 697.856884742707 | 0.27293310430629  |
| ACACTGATGTCA  | 697.858783389312 | 0.350065296724981 |
| TGACTGGGTGAA  | 697.872229081989 | 0.283384681850542 |
| AATTTCCGGTCAT | 697.875008870515 | 0.348911752268021 |
| AGACTAATAACT  | 697.876080910286 | 0.390074100612103 |
| ATGGTTCGTAC   | 697.878049034113 | 0.334483951041062 |
| CACGCTAATGAC  | 697.879975384111 | 0.296441948133013 |
| AAGACAGATGAC  | 697.88468699275  | 0.288469021920278 |
| GTCATGCAGTGA  | 697.891174502986 | 0.419075042401637 |
| GTCATTGGCGTA  | 697.904492661111 | 0.346458695193319 |
| ACGTGTCTGACT  | 697.920710321623 | 0.596168325281607 |
| ACGAGGAATGAC  | 697.924306878919 | 0.320896771887708 |
| GGCCTCGGTGAC  | 697.925454366498 | 0.482249488384852 |
| TAGTCAGTTGCA  | 697.930429827292 | 0.490688688750561 |
| CCGTGAGTACCA  | 697.932833778631 | 0.335213484836708 |
| GTCACCCTTAA   | 697.942318561078 | 0.152158795926714 |
| ACGTGTTACACA  | 697.942771322541 | 0.417146448102994 |
| ATAGTCAGCCTA  | 697.955496049764 | 0.377897894539886 |
| AGGCTACAGTCA  | 697.971171563053 | 0.316403934645979 |
| GACAGGTCACTC  | 697.976254668133 | 0.238138939727683 |
| ATTGACATGAC   | 697.988530523362 | 0.445837617024314 |
| TGAATTTTCGTCA | 697.994235976732 | 0.474434180955233 |
| GGGTCACCGTCA  | 697.999818975531 | 0.444276683730007 |
| TCTTTTACGTCA  | 698.005903326505 | 0.278745456943661 |
| ATCCCAGAGTCA  | 698.005903407739 | 0.432954217920876 |
| ATCTGTCAGAA   | 698.006793294426 | 0.427494858073931 |
| CCTAGTGACAGA  | 698.021381729917 | 0.36063463948894  |
| TATTCGGTCACA  | 698.02792743474  | 0.205016806869144 |

|               |                  |                   |
|---------------|------------------|-------------------|
| TATGAAATGACA  | 698.031443787457 | 0.42056904048547  |
| TATGTCCAGTCA  | 698.031896127403 | 0.262726833958898 |
| CTGGTCATCATA  | 698.035712400131 | 0.37289280968656  |
| ACCAGCTGACTA  | 698.04303049516  | 0.617293151611656 |
| CATAATGCATC   | 698.046448338819 | 0.287044521890465 |
| CGGCGAATGACC  | 698.061618801043 | 0.597932624415646 |
| AGTGAGTCTGAT  | 698.06611523133  | 0.283711813374358 |
| GTCATTTCCAAC  | 698.066138319572 | 0.448003968730477 |
| ATCTCTGTGACA  | 698.073081819788 | 0.391274865987731 |
| GTCATTTGTGTA  | 698.079282670475 | 0.205763661712443 |
| ATATTGAGTGAC  | 698.083221668857 | 0.282195338535862 |
| GAGTCAAGCTCA  | 698.099046253728 | 0.250792264488256 |
| TCACCACAGTGA  | 698.099424510898 | 0.486803149876847 |
| ACGAGTCAAACC  | 698.111580265519 | 0.315463036927702 |
| CGAAAACGTGCA  | 698.11269487853  | 0.322243798886334 |
| AGATTCTGAGTC  | 698.125845638634 | 0.559283353777113 |
| CTCCTTGACTGA  | 698.130431207547 | 0.28295997804324  |
| CATTCCGGTGAC  | 698.133697356124 | 0.373088934640286 |
| ACGTTCTGACTG  | 698.133958103841 | 0.362884559508154 |
| CGTCATCTATTC  | 698.134361682554 | 0.172620280469751 |
| GTCATTGCACAC  | 698.153823342031 | 0.575176585147421 |
| TGACGTTTCGAA  | 698.158674590017 | 0.364389259130021 |
| AGTCAGTCTATA  | 698.163242014334 | 0.52225776405013  |
| GTGCCACGTCA   | 698.166135194404 | 0.372533994263505 |
| CCTTTGACGCAC  | 698.169626745622 | 0.266323825541384 |
| AGAAGGGATGAC  | 698.183406002175 | 0.148650635097534 |
| AGACGTGACGTG  | 698.18415268457  | 0.237555905037199 |
| ACGGACTGACTG  | 698.186818186865 | 0.463672674569167 |
| TATCGAATCATA  | 698.187192386728 | 0.413482618478242 |
| CATACGTGACAC  | 698.191163953612 | 0.606649010093648 |
| CGAGAGCATGAC  | 698.19888336052  | 0.280014768275656 |
| AGATGCTGACTG  | 698.206638628205 | 0.389750077618686 |
| AGTCAGAGGTGA  | 698.213101090158 | 0.242488777171703 |
| AAGGGTCTGACT  | 698.214534132    | 0.256871278843283 |
| AGACTGGTGACA  | 698.217988301662 | 0.507585506807211 |
| CACATGTCGTCA  | 698.241436758155 | 0.443739760689002 |
| TGACAATCGTCA  | 698.249941760278 | 0.495762917514923 |
| AGGCTGTGACGC  | 698.269086688093 | 0.435180828569203 |
| GTCATCGGGGTA  | 698.272881359315 | 0.143495489530179 |
| CGGGTAAATGAC  | 698.274614085797 | 0.333712544266812 |
| ATGAGTCGGGGA  | 698.277782595181 | 0.226562013073276 |
| ACGTCACGTGAAG | 698.287191677461 | 0.324547384060237 |
| AGTCACGGATGG  | 698.298078793823 | 0.331111021103686 |
| AGCCAATGACAG  | 698.300394068609 | 0.320365853828954 |
| ACCGTCACGTCA  | 698.301006833753 | 0.292251323186221 |
| GAGTCAAGTTAC  | 698.301627294966 | 0.363023057720737 |
| CCTCCCAGTCA   | 698.312527290733 | 0.244907227472519 |
| GACTAATCAATC  | 698.314302640221 | 0.334918970809018 |
| TCGAACATGACA  | 698.31433533575  | 0.227117280811527 |
| GGATCAGTCTTA  | 698.324358345577 | 0.350668329145184 |
| TCCACTTCGTCA  | 698.328950708721 | 0.225942928213541 |
| GCGTCACAGTCC  | 698.330047543487 | 0.425687070955795 |
| ACATCTAAGTCA  | 698.33005407684  | 0.367390404996021 |
| ATGGTCATGACC  | 698.33282393925  | 0.340414161721798 |

|               |                  |                   |
|---------------|------------------|-------------------|
| CGATGTCTGACA  | 698.355905280301 | 0.581045221110163 |
| GAGTTTACGTCA  | 698.356089471064 | 0.369852491785297 |
| CCTGGTGTGACG  | 698.360337737733 | 0.418921055490622 |
| ATAGTTTGTGAC  | 698.376802080826 | 0.342221361127856 |
| AGACAGTGTAC   | 698.385715701356 | 0.289362957216806 |
| ACGTGTATGTCA  | 698.395551388868 | 0.462484978979868 |
| CACGCTCGATGA  | 698.402356811881 | 0.476102280566691 |
| CATTGACTACAA  | 698.406503185516 | 0.365892619903428 |
| ATCAGCATGACA  | 698.421048997791 | 0.539277009113542 |
| ATACCCTAGTCA  | 698.425469657788 | 0.524807410067064 |
| TCGTCACAAGCA  | 698.427687418624 | 0.649180849260914 |
| ATGACTTCGCCGA | 698.428509636515 | 0.309674655877247 |
| CGCCTTACGTCA  | 698.4345479743   | 0.159958669554801 |
| CATCACTGTGAC  | 698.438918493975 | 0.174422820703719 |
| GTGATGCAATCA  | 698.44404396615  | 0.341477462424533 |
| CAAATCAATGAC  | 698.444213011896 | 0.421065069695285 |
| CCATCAGGTGAC  | 698.448385749426 | 0.370822353438796 |
| GTCATTGAAGAC  | 698.450235767791 | 0.359881538724625 |
| AATGAGTAGTCT  | 698.454414582521 | 0.362180500954853 |
| CTCGCCAGTCA   | 698.462301641591 | 0.245620382743501 |
| GCGCAGATGACA  | 698.465742672595 | 0.573848051362937 |
| GGATCCTAGTCA  | 698.47371935891  | 0.274466881421868 |
| CGTTGATGACCA  | 698.4761845662   | 0.483059800866906 |
| AGTCAGCATCTG  | 698.498320460778 | 0.387705515313991 |
| GTCATCAGGCAA  | 698.5053561767   | 0.41177897249799  |
| AAGACTGATCTG  | 698.509575992481 | 0.371036422589057 |
| CACGTCACGAAA  | 698.530203393824 | 0.497208016557869 |
| CTGGCATAGTCA  | 698.544323804002 | 0.276567688501182 |
| ATGTTGTACTCA  | 698.550343367173 | 0.329677078144115 |
| TCTGTAATGACA  | 698.551431763926 | 0.292003320838222 |
| ATGACGGGCTTC  | 698.553800123351 | 0.519923443440528 |
| GAGCCTGTCATA  | 698.556383607197 | 0.331316652659684 |
| GCCAACATGACA  | 698.561657127951 | 0.402996717721938 |
| CTCTTGTACTCA  | 698.565293009701 | 0.344769041100755 |
| GTCACACGTCCA  | 698.574389405563 | 0.373880626774482 |
| ACATATCGTCAC  | 698.587081565314 | 0.368501467375931 |
| GTCACCGTAGCA  | 698.587644348801 | 0.424170039001179 |
| ATGATGGTGTCA  | 698.598242631397 | 0.343507174453341 |
| GACAACGCGTCA  | 698.602051862161 | 0.355895785794485 |
| CCGTCTGATGAC  | 698.609986596755 | 0.46223372766814  |
| ATGCTGTACCCG  | 698.612529282571 | 0.316468765088747 |
| GTGACTACCCAC  | 698.614220544045 | 0.179144167723731 |
| ATCCCTTACTCA  | 698.61841503691  | 0.221641245161952 |
| TAGTCAGCCGAA  | 698.61865834406  | 0.442586580475461 |
| CACTACGTGTCA  | 698.626656781448 | 0.424089038761693 |
| TAGGTCTAGTCA  | 698.62763408778  | 0.283028124301978 |
| ATTACTGACCAA  | 698.629621984122 | 0.214989051237146 |
| CAGCTAGACTCA  | 698.630509827618 | 0.480404608108525 |
| GATAGTAATGAC  | 698.637698589885 | 0.402389624661918 |
| GTCATCCGACCA  | 698.642979147854 | 0.165596845366773 |
| TGACGTACAAAA  | 698.663332590514 | 0.542555984860262 |
| GGATATTGTAC   | 698.668960215504 | 0.346317189064108 |
| CTTGATGTGTCA  | 698.669618252383 | 0.63242928188441  |
| GATATGTCAGAA  | 698.670188301326 | 0.265044622026191 |

|              |                  |                   |
|--------------|------------------|-------------------|
| ACTCTAGATGAC | 698.673470282901 | 0.570166063526483 |
| AGAGAGATGACG | 698.688652275323 | 0.202924809771996 |
| ATGACATTACGG | 698.703786712276 | 0.224207351056331 |
| TCAGTAATACGA | 698.709222239209 | 0.283280964913691 |
| TCACGGTAGTCA | 698.710350959472 | 0.470267538693514 |
| CGTGTCACTGAG | 698.716069471659 | 0.536046438304545 |
| CACCTCAATGAC | 698.716299226003 | 0.367760960823654 |
| CGATTATGACCC | 698.716903263911 | 0.467161149666675 |
| AACCGGCGTCAT | 698.718689393683 | 0.296977128225077 |
| ACTCATCGTAAA | 698.725875025129 | 0.325695889278728 |
| GACAGTGACGTC | 698.728373743092 | 0.382977006307722 |
| CATCGAGTGACG | 698.733273179194 | 0.459820373450682 |
| GACCCTGTCATC | 698.750994018902 | 0.152218077726079 |
| CCGCAGTGTGAC | 698.753302077175 | 0.472171497904562 |
| AATGACGTCGCA | 698.759219549241 | 0.437993866195113 |
| CTGGATAAGTCA | 698.76259767867  | 0.346535397837816 |
| TAGTTTTGGTCA | 698.774922786318 | 0.348006875540827 |
| GTCACCCTTGTA | 698.775842998733 | 0.185152439695836 |
| AGTGCCTGACGC | 698.777682179352 | 0.474706086513275 |
| CAGTCTGTGACG | 698.779520604554 | 0.398283844194282 |
| CCGACATGACAA | 698.782270657508 | 0.382755117447234 |
| CGTCATCTACCA | 698.782718617116 | 0.326108477384745 |
| AACGCTGTGACG | 698.78507169889  | 0.474629377049095 |
| CGTCATTTGATA | 698.787473490599 | 0.239983551263284 |
| CTGTCTAATGAC | 698.789700928853 | 0.416276763928415 |
| ACGGTCTGAGTC | 698.802953012117 | 0.323194526870782 |
| GTCATCTAGGTA | 698.803185381156 | 0.476876625232431 |
| CGATAATGTGAC | 698.808172520257 | 0.422008087617702 |
| AAGGGAGAGTCA | 698.812114644011 | 0.274829809466121 |
| GACTAATCGCTA | 698.815418811516 | 0.459756951253116 |
| CTTGCTCACTCA | 698.817176775823 | 0.370588667668553 |
| CGTTCGGTCATC | 698.832124157569 | 0.385953345155496 |
| AGTCACGGAAGA | 698.842922234252 | 0.321876042086373 |
| GCTATGTGTGAC | 698.844713371475 | 0.363866889029312 |
| GACTAATAGTTA | 698.848570864782 | 0.262085078069318 |
| AAATCTACGTCA | 698.857844581887 | 0.372828381498325 |
| CGTCACATTTAG | 698.86225898409  | 0.290589609128521 |
| GTCACACCTTTA | 698.87193596991  | 0.345218657443975 |
| AGACTAATCAAC | 698.877845180539 | 0.436183417284386 |
| GTCACAATATTA | 698.887453014225 | 0.232401826646876 |
| CGTCATTGAGGC | 698.890645866237 | 0.24903974573042  |
| CAGTCAGCATAA | 698.911870280183 | 0.417690252263231 |
| CATGACTTGGTC | 698.917393075849 | 0.307508757546596 |
| GTATCAGCGTCA | 698.924243166568 | 0.542951404758572 |
| CGTCGTGACTGC | 698.928182834098 | 0.297882577582452 |
| AAGTCCTGTCAT | 698.934651209573 | 0.260714593134178 |
| ATGTGACAGCTC | 698.948892237097 | 0.271976442875074 |
| ATCATTAGTGAC | 698.953619612778 | 0.422662931973308 |
| AGTTGCAATGAC | 698.955258292182 | 0.438410247772517 |
| CCAGTTTGGTCA | 698.958591728713 | 0.492356595757242 |
| GCCAACACGTCA | 698.960091520014 | 0.410839071070265 |
| CTCACTTCGTCA | 698.96810141662  | 0.245820226386937 |
| AACGATGTCACA | 698.968347478814 | 0.39106041883169  |
| GTGACGCGGCTA | 698.971266791619 | 0.337428748473014 |



|              |                  |                    |
|--------------|------------------|--------------------|
| TGCCAAATGACA | 698.97241752993  | 0.375438406710553  |
| ATAAGATGAGTA | 698.974127281511 | 0.212715059975421  |
| TAAATTGTGACA | 698.982129951593 | 0.19665041581269   |
| GACGATTACGCA | 698.9843862979   | 0.41176313191598   |
| GTCACAAATCGA | 698.989253374191 | 0.34488085965803   |
| GTGTGAGCAACA | 699.00099661225  | 0.0853799564458545 |
| GTCATTTGCATA | 699.005380110585 | 0.320451066385882  |
| AAATCATGACAT | 699.007800888881 | 0.468033966819413  |
| CGAGTCAGGATA | 699.008935961709 | 0.203791497139868  |
| ACTGTAGCGTCA | 699.016384533282 | 0.383295471579503  |
| AGTAGACGTCAT | 699.021471391145 | 0.14992540233063   |
| AGTCAGATCCGA | 699.049719112144 | 0.32261804853909   |
| TCAAATTGCTCA | 699.055414541918 | 0.104539859269635  |
| ATCCTAATGACG | 699.055625935113 | 0.384523379078607  |
| CCCGTGTTATGA | 699.057109724578 | 0.388862899168656  |
| ACTCATACCGTG | 699.057429146622 | 0.371407654967496  |
| CATATATGAATC | 699.05907837307  | 0.336597069690924  |
| AGTAATGAGTAT | 699.060336360548 | 0.237016542723777  |
| GAAACAAATGAC | 699.061337894286 | 0.250576745825408  |
| GCCCAGATGACA | 699.079189974108 | 0.318276196808954  |
| GAATGATGTGGC | 699.086588068913 | 0.107049681497154  |
| GCGGGAGATGAC | 699.103291674142 | 0.247811897142651  |
| AGACTCACTTTA | 699.103423328874 | 0.309918856283335  |
| TGGCGTCACCCA | 699.106323147927 | 0.277391963284015  |
| TACATATGACCA | 699.109460716439 | 0.172910206777896  |
| AGTCAGACCCTA | 699.114656835568 | 0.327095355418512  |
| GTAGATCTGTCA | 699.12380242767  | 0.381274805971127  |
| CGTCATTGTTAC | 699.125612473372 | 0.413894392748146  |
| CAACGTTGCTCA | 699.140001761506 | 0.382646568794406  |
| TGACTCCGGAAA | 699.16044129998  | 0.358366007332132  |
| TGACGAGAGTCA | 699.163070401809 | 0.353929929948214  |
| TCGATGGAGTCA | 699.182987141602 | 0.246663299396737  |
| TCCTAAGGGTCA | 699.185483138912 | 0.60976468289833   |
| GTCACCTTAGCA | 699.187900458013 | 0.286005953877958  |
| CCGTGGGATGAC | 699.199801641365 | 0.290624670941198  |
| GACACGCAATAC | 699.204897764386 | 0.449834568107781  |
| ATGACAGACTAG | 699.207688142195 | 0.206316237064866  |
| AATAAATTACTC | 699.218636512025 | 0.329609774533477  |
| GTCACCGCAGAA | 699.219041532526 | 0.37314883142996   |
| CAGTCGTGACGC | 699.248795425885 | 0.362767197251076  |
| AACAGTGACCCA | 699.261222636821 | 0.388065315483968  |
| TCCCCAGAGTCA | 699.267316784431 | 0.544329349596746  |
| ATGACCTCATAG | 699.267455209194 | 0.350353107963686  |
| CATCTGCATGAC | 699.275403841058 | 0.291225747954263  |
| GTGAAAGTGTCA | 699.275406303174 | 0.341315179057283  |
| AGTACCCAGTCA | 699.276367814714 | 0.341862591649782  |
| CGATGACTTTTA | 699.277615014794 | 0.247222246947722  |
| ATGCTGTCACTG | 699.27774378165  | 0.462548436945571  |
| GTCACAATTACA | 699.279565838777 | 0.368182963735666  |
| AATAGTCAATGT | 699.286632799505 | 0.15568568960243   |
| CACCGCAGTCA  | 699.289069894257 | 0.452885197084422  |
| GAGGTAAGTCAC | 699.289764886856 | 0.368083138033255  |
| TCGTTTAAGTCA | 699.290322568473 | 0.237250020290419  |
| GGGTCATAATTA | 699.293300046157 | 0.27289504056889   |

|               |                  |                   |
|---------------|------------------|-------------------|
| AAAAGTGAGTCC  | 699.293410493966 | 0.243310155764821 |
| ACGTCATGAAGC  | 699.295937631011 | 0.391594112087008 |
| CCTCCTCAGTCA  | 699.300312303095 | 0.361472848345095 |
| CACGTCACGTCG  | 699.300484201416 | 0.454819558637272 |
| ATCGCGTACTA   | 699.305180175992 | 0.207213006248407 |
| ACGATTAGTCGG  | 699.314057258168 | 0.336050052195102 |
| ATCCGTTGACTA  | 699.315675413544 | 0.45264437042276  |
| CGTCACAGGCCA  | 699.32116104817  | 0.384194715151313 |
| ACTCATACGATG  | 699.328084947424 | 0.211747115333364 |
| GCGTCACTATGA  | 699.333710619488 | 0.528604345741006 |
| CCTTAGGTGACA  | 699.335424298099 | 0.456610003802638 |
| CACCCTGATGAC  | 699.34570195682  | 0.371821031862992 |
| GTGAATTACACA  | 699.359834183168 | 0.457594919284208 |
| TCTTGCATGACA  | 699.360474336842 | 0.522242856406928 |
| ATGACGAACGCG  | 699.360643760037 | 0.390088583961882 |
| ATGGCCACATCA  | 699.367241607464 | 0.33088020063381  |
| CCCAATCCGTCA  | 699.368524529549 | 0.234133183535521 |
| CGGTGGCTCACC  | 699.369160317583 | 0.430130585102103 |
| GTCACGCACTGA  | 699.371490636437 | 0.346365341468021 |
| CATACATGACAA  | 699.380019049667 | 0.520723087104    |
| GTCATTACTCCA  | 699.380793913922 | 0.279519296084633 |
| GTCATCCGACAA  | 699.381153164533 | 0.279043020184767 |
| GTCACAGCAAAC  | 699.387735981348 | 0.45784099072186  |
| GCCTACAAGTCA  | 699.401030501761 | 0.43169475619713  |
| ACTCATAGTTAG  | 699.413825016742 | 0.144608856788352 |
| CAGGTTCTGTGAC | 699.420205091588 | 0.394520646100048 |
| CTCATTTGCTCA  | 699.425960658926 | 0.333971074886173 |
| CCCGGTGTGACG  | 699.4275971633   | 0.218102859862067 |
| GACTCACGGTCA  | 699.427621735063 | 0.37045313636478  |
| TCTAATTAATAA  | 699.433013425343 | 0.283618707277822 |
| GCTCACCAAGTCA | 699.44061898471  | 0.422563478566041 |
| GTCATTTTGGCA  | 699.441083316022 | 0.451927525087621 |
| AGTACGGAGTCA  | 699.442857031434 | 0.302646244575145 |
| AACTTGAGTGAC  | 699.447679394616 | 0.347929969753656 |
| GTCATGATCTAA  | 699.451542176125 | 0.463094136268076 |
| TCATTGTGACAA  | 699.457421309688 | 0.326622797549836 |
| CTTGTGCTATGA  | 699.460551877643 | 0.379320900287411 |
| ATGACATTTGAC  | 699.461992290443 | 0.285214377607558 |
| CACTTTGTGACG  | 699.462652859958 | 0.406518745819946 |
| AAGCCGACTCAC  | 699.463207038384 | 0.161328577990007 |
| ATGACAGGATCA  | 699.466107575933 | 0.298771357527421 |
| ATGACAGGATTC  | 699.483660852928 | 0.228054201207384 |
| ACATTATGACCC  | 699.486359409834 | 0.283451729961643 |
| GCTCATGACATA  | 699.489832531419 | 0.381066075615288 |
| GTGACAGACACA  | 699.499566618251 | 0.316711595116869 |
| AGGCAGATGACG  | 699.529059334768 | 0.361906371622643 |
| GCAAACAATGAC  | 699.52996603437  | 0.338229347753993 |
| CAGGTCAGTGAC  | 699.544064187377 | 0.516733291862957 |
| CCACATATGTCA  | 699.547473057233 | 0.307154178776084 |
| GTTGACTCGGCA  | 699.554366162407 | 0.3366332738422   |
| CTGTCATTAATA  | 699.56191278329  | 0.277795582252599 |
| CAGGTCTAGTCA  | 699.565017937106 | 0.571017280341032 |
| ACGGATTAATAA  | 699.565095631988 | 0.308007873512857 |
| ACGGGAGATGAC  | 699.57251292856  | 0.402695406453428 |

|               |                  |                   |
|---------------|------------------|-------------------|
| ATGAACGTGTCA  | 699.574444892238 | 0.47460777211771  |
| CAATCGTGTGAC  | 699.585458493796 | 0.530623847924629 |
| CATGTCTTATGA  | 699.586239606496 | 0.575172889982877 |
| TACGGCGAGTCA  | 699.58655835637  | 0.283147914497194 |
| ATGGGAGATGAC  | 699.58818983134  | 0.299677729184333 |
| ACGTCACAACCTC | 699.602003258741 | 0.320814659495462 |
| CTCGAGGATGAC  | 699.61799264155  | 0.340120804903117 |
| CACAGCGAGTCA  | 699.6321748729   | 0.3669542466741   |
| ATGACCATAAGC  | 699.632430204976 | 0.397755833087933 |
| AGAGTCAATTTA  | 699.634359775121 | 0.422322388386811 |
| TGACCGATTTAA  | 699.635670076768 | 0.475217040017118 |
| GAGTCAAAGAGA  | 699.648765402921 | 0.308602287165207 |
| GTCACACTAGCA  | 699.65680942759  | 0.539367385731847 |
| AGAACACTCATA  | 699.671494122984 | 0.337844084113955 |
| AGTCACGCCGTG  | 699.679525047208 | 0.389546001590824 |
| GTCACCAACAAA  | 699.690257407846 | 0.375464196588892 |
| CAACTCTGATGA  | 699.691573438308 | 0.430655231078222 |
| CGAATATTAGTC  | 699.694378520554 | 0.307175969646034 |
| CAGACAGACTCA  | 699.694690987329 | 0.344027479791676 |
| CATGCAAATGAC  | 699.703996059646 | 0.338169636680521 |
| ATGACATTATAG  | 699.710419523672 | 0.334104684881769 |
| ACCGTAATGACA  | 699.720337259944 | 0.267094559468796 |
| GACTGATTATGC  | 699.723261809143 | 0.346318952837632 |
| CAATACGTGTCA  | 699.725168228259 | 0.408979416074864 |
| GGAGCACAGTCA  | 699.729348066705 | 0.276690124196243 |
| ACTCATTAGGAA  | 699.744120212356 | 0.423668832321769 |
| TGACGCGGACAA  | 699.747730172272 | 0.457219907966021 |
| GTGGTCACACCA  | 699.764226484819 | 0.396965864352448 |
| GTCATAGAGCAA  | 699.76668093533  | 0.364622305950231 |
| ACAAGAAATGAC  | 699.778824049124 | 0.578356609544865 |
| GAGCTCTAGTCA  | 699.785621530537 | 0.492859730009461 |
| GAATATTGTCAC  | 699.785841289231 | 0.403637503276194 |
| GTCATTGAGTTA  | 699.786688495012 | 0.375047484565195 |
| TATGTTTGGTCA  | 699.788188246303 | 0.331187256414359 |
| GTCACGTACGGA  | 699.789560613271 | 0.52492386810028  |
| TCACGCTGATGA  | 699.793995707522 | 0.463596289342156 |
| TGACATATACCA  | 699.798243498564 | 0.26977578917924  |
| ATTAGATGTGAC  | 699.800175264814 | 0.407668169240938 |
| GTCATCCCCGCA  | 699.810938011495 | 0.216690113522332 |
| CATACCGTGTGA  | 699.811835317542 | 0.51696814671611  |
| ATGACGAACTGG  | 699.813038981997 | 0.284187850429811 |
| GCTGTGTCAGCC  | 699.838616572091 | 0.347566574804944 |
| AGAGATAATGAC  | 699.84419547227  | 0.217738527500788 |
| CACTAATGACAG  | 699.847749634338 | 0.370759284140824 |
| ATGCCTGACGTG  | 699.861707631051 | 0.361694159610208 |
| GACTCACGACTA  | 699.868331706817 | 0.283644001572439 |
| GACTCACTTTGC  | 699.871398486556 | 0.322214271737189 |
| ATGACGTTAAGC  | 699.884064912752 | 0.347383989558698 |
| AGTCAGTAATAA  | 699.886441508822 | 0.235760391579049 |
| ATCAGTTGTGAC  | 699.89733861666  | 0.601185885816079 |
| ATTGTATCATAG  | 699.898593392683 | 0.380976213424991 |
| CAGGACCAGTCA  | 699.899109086567 | 0.332738438375651 |
| TAAATTGAATCA  | 699.900050387898 | 0.39196126296213  |
| GTCACGTCAAC   | 699.909074878364 | 0.210629801034566 |

|               |                  |                    |
|---------------|------------------|--------------------|
| AGAGGGAATGAC  | 699.918983495141 | 0.272986241995154  |
| AATCCAATGACA  | 699.927060960254 | 0.0977306218121405 |
| GAAGATTCATCC  | 699.927319459932 | 0.522595628589007  |
| AGACCTCTGACT  | 699.938788272626 | 0.330176679336384  |
| ACTAACGCGTCA  | 699.946717480822 | 0.617918145520357  |
| CGTGTACGTGAC  | 699.94958882668  | 0.446680374158515  |
| ACGTCACCTCAC  | 699.956511910407 | 0.300294365509938  |
| TCATCACGATGA  | 699.957339047956 | 0.402830914223227  |
| CGATGAGTGTCA  | 699.957808348521 | 0.495547069657369  |
| ACGAAATACTCA  | 699.984783676514 | 0.502717610363674  |
| AGGACTGTCATA  | 699.988132151276 | 0.36940458484048   |
| ATGACGTCGAGC  | 699.989738031499 | 0.480893296674123  |
| GTCTCGTACTA   | 700.000821965255 | 0.256382707041634  |
| CGTCATTCGTC   | 700.012088403113 | 0.410398667733314  |
| GCCCCTGATGAC  | 700.013860501323 | 0.395110817771932  |
| GACGTGCTCTGC  | 700.018846735448 | 0.341243362811361  |
| TGTCATTTGTAA  | 700.023582603976 | 0.320487886214575  |
| ACGTCACCTCAGA | 700.027351189288 | 0.339343018897625  |
| ATAAACTGTGAC  | 700.034306372647 | 0.292794473083267  |
| GTCACCAAATTA  | 700.047919094707 | 0.275982550095192  |
| GTA CTACATGA  | 700.048710746931 | 0.294688955750306  |
| AGGTGAGCCACA  | 700.052260317525 | 0.314392451621847  |
| CTGCAGTGTGAC  | 700.085467590998 | 0.239773552174847  |
| AAAATGTGACGA  | 700.091616146877 | 0.206088334335188  |
| GATGATTGTGAC  | 700.094205866628 | 0.389122517503505  |
| TACATATCGTCA  | 700.11054388025  | 0.327404153237524  |
| ACCGCAATGACG  | 700.128506888469 | 0.501242197988662  |
| GTCACATTGTCA  | 700.130993404502 | 0.339221676005107  |
| TATGATATGTCA  | 700.132378863542 | 0.338233678863837  |
| ATGAGCAAGAAA  | 700.133204330017 | 0.278190702686006  |
| ATGTCATTAAGG  | 700.140141812577 | 0.306145964989792  |
| AGAGTCAGGAGG  | 700.141867291851 | 0.141326403375452  |
| CACTCGGTGACG  | 700.159234372935 | 0.425689008951886  |
| CTTATTTGTGAC  | 700.163909019233 | 0.194612744674381  |
| CTTTAATTAGTC  | 700.179850589717 | 0.37790551453367   |
| TCAGTCAACTCA  | 700.181114333359 | 0.398126263338346  |
| GGTGTTAATGAC  | 700.181147466682 | 0.357581120647933  |
| AGTCAGACTGTA  | 700.186852629308 | 0.216851654253961  |
| ATAGAGTAATAT  | 700.190895340438 | 0.225867311394712  |
| GAACCGAATGAC  | 700.199135578147 | 0.440675713778803  |
| ACTCATCGTGAG  | 700.199326715391 | 0.484384080386495  |
| AGTGACGCCACA  | 700.207706086628 | 0.330736492375694  |
| CGATAAGGTGAC  | 700.209213292319 | 0.440740467819011  |
| ATTAGTCGCAAT  | 700.221568701667 | 0.389669380552911  |
| AATGCAAGTCAT  | 700.227491947393 | 0.345293228610489  |
| CGTTAGTGACGC  | 700.230531161881 | 0.294148047057951  |
| GTCATGGCTAAC  | 700.235538316174 | 0.448261304363533  |
| TAGTGTGAGCAA  | 700.240945044661 | 0.282268784944188  |
| CAGGCATGACAC  | 700.242165203313 | 0.350021026303693  |
| AATCCCTGACTC  | 700.249602876649 | 0.22543849276314   |
| CGTCATCCCTGC  | 700.253883462502 | 0.336894092716236  |
| AATCACGTCACG  | 700.254991504216 | 0.393758412801701  |
| AGTGAGTCTGAG  | 700.258469392256 | 0.112652362956013  |
| CGGATACGAGTC  | 700.259992534765 | 0.338123417998638  |

|              |                  |                   |
|--------------|------------------|-------------------|
| GCTGACGGATCC | 700.265725794742 | 0.225844634764566 |
| ATGTCATCTGCA | 700.273996335764 | 0.299219635028217 |
| AGAAATGGTGAC | 700.280997733626 | 0.283430343487534 |
| GTCACCCCTGAA | 700.281573138324 | 0.469728263588931 |
| ACTGTGGTGACA | 700.282957960528 | 0.43793993914983  |
| CATGACGTTACG | 700.284375846516 | 0.409380951879988 |
| GTCATGCTGGCA | 700.296181467447 | 0.348133926772319 |
| CGTCATTTGAC  | 700.300189787674 | 0.341929117834649 |
| ATCAATTGTGAC | 700.300762953506 | 0.31565400438918  |
| GCCCCGAATGAC | 700.305737959275 | 0.388129129303963 |
| TCACTGTGACAA | 700.307338899122 | 0.263119076132517 |
| CCGACACTGTCA | 700.311078248477 | 0.236994927638323 |
| CACGCATGTGAC | 700.312158127506 | 0.491249130698839 |
| GGTCGTGCGTCA | 700.318207072552 | 0.267764829306029 |
| TCGGATTACGCA | 700.328524101578 | 0.421640532190117 |
| TGACTTATAACA | 700.336139381867 | 0.536563378129222 |
| GCATTGACACAC | 700.336279391001 | 0.252800251019386 |
| TAGGCTGATTCA | 700.33640708813  | 0.371587378822258 |
| GACTAATACTCC | 700.339500368509 | 0.353959897673566 |
| CTATTACGTGAC | 700.343571879149 | 0.266472610241406 |
| CATCGGTGTGAC | 700.349854122249 | 0.311228035441106 |
| CTACGCGATGAC | 700.363911322279 | 0.136254809244696 |
| ACGACGGTGACG | 700.364632678427 | 0.481928667637812 |
| CTATTGACTGAA | 700.368002043407 | 0.223442442558798 |
| CGGATTCATGAC | 700.368787524511 | 0.441194142843102 |
| AGGCAGATGACA | 700.376105539863 | 0.219100927158367 |
| CAGTATCGTGAC | 700.378910545625 | 0.430631230607323 |
| CCCAGGAGTGAC | 700.379198026215 | 0.371106401524121 |
| GTCACGATTATA | 700.382596926848 | 0.427668287693168 |
| ACTCATCAGCGG | 700.383980230387 | 0.360252681243682 |
| CACGTAATAAAG | 700.394786856715 | 0.381189031925092 |
| CCCAAAGTGTC  | 700.399721515368 | 0.66791397771362  |
| ACGTGTGTCAAC | 700.39985343012  | 0.225837906257918 |
| ATGACGCCGCGC | 700.401114893322 | 0.358403193666973 |
| GCTGCATATGAC | 700.402146315522 | 0.363204248371204 |
| GTCATCCCCGAC | 700.408871761405 | 0.312227930738075 |
| CGTCACGTCGAG | 700.432405313367 | 0.356933137706731 |
| TCCTCTACGTCA | 700.433431406965 | 0.243189334147593 |
| GTCATTAAGA   | 700.436624508222 | 0.387856356213104 |
| ATGCCATGTCAC | 700.44853155978  | 0.205579772185562 |
| CGGCCTGTGACG | 700.451687617483 | 0.538290112479691 |
| AGAAAATTAGTC | 700.452099764622 | 0.246300897335265 |
| CCTAAATCGTCA | 700.456486376801 | 0.443743698595594 |
| TAAGGGTCAGAA | 700.457739152241 | 0.257679187982539 |
| CTGTTTGTGTC  | 700.46057526102  | 0.29291002682836  |
| GCTCGTGAATCA | 700.461998066711 | 0.345227105443524 |
| CAGACTCTGTCA | 700.462611570099 | 0.290140535225186 |
| CAAGTGTTAGTC | 700.469767311151 | 0.764341189603697 |
| GCATGACGTTAC | 700.481689065005 | 0.18557338322166  |
| ATGACAGCGTTA | 700.483038197849 | 0.25623458735588  |
| GACTGGTACTC  | 700.485053404414 | 0.496387815373695 |
| GTCACTGGGCCA | 700.48570581473  | 0.45997093523071  |
| GCAACATATGAC | 700.509331376422 | 0.518906297487664 |
| GTCACCTCGTAA | 700.533916778703 | 0.553383321654031 |

|               |                  |                    |
|---------------|------------------|--------------------|
| GTCACAAATGAA  | 700.541272416398 | 0.371152300790165  |
| CCGTCATTGACG  | 700.544512941122 | 0.461022088271981  |
| ACGTCACGGCAG  | 700.550651942442 | 0.332536964155799  |
| AGATGAGTAGTC  | 700.555047920851 | 0.0921917134578182 |
| CTGACTGTGTAA  | 700.556249349758 | 0.293714533207421  |
| GCTATTGACACA  | 700.562392062603 | 0.353010638362561  |
| CCAAACATGACA  | 700.566462513807 | 0.28593715530526   |
| TCAACATTATGA  | 700.573317835423 | 0.37416146185356   |
| CCATGACAGTCA  | 700.578499079567 | 0.429228682095485  |
| ATGACAATGAGC  | 700.583221990916 | 0.148653657895838  |
| AAAGCTGACTGT  | 700.591778735963 | 0.228154082955533  |
| ATTACGTCGTCA  | 700.605259257156 | 0.216915181663139  |
| CAGTTCTGAGTC  | 700.615775547808 | 0.646551768315864  |
| TACTAATAGTAA  | 700.61753681296  | 0.472804477358185  |
| GCTATAAATGAC  | 700.629190475221 | 0.462450165214505  |
| CGACAAATGACG  | 700.635541994611 | 0.275290682869213  |
| GGAAAAGTCATA  | 700.64343143461  | 0.160937440156285  |
| CCTCCGACTCAC  | 700.646413457184 | 0.276158717010201  |
| CAAACACAGTCA  | 700.650649511729 | 0.491260260347065  |
| CCATGACGTTAC  | 700.669579685983 | 0.42484167311242   |
| TCATTGTGACGA  | 700.676367321039 | 0.391823817739028  |
| CAATTAAGTACG  | 700.683230125774 | 0.42416586892869   |
| GAATTCGATGAC  | 700.689954338322 | 0.316287724768353  |
| ATCATTACTGAG  | 700.696475927626 | 0.485657813271441  |
| CAGGAGATGACA  | 700.704313990057 | 0.183473507811796  |
| TAGCCTGACACA  | 700.70431598659  | 0.413116804950683  |
| GTCATCGTGAC   | 700.705479977793 | 0.372441078918505  |
| AATGGTCTGACT  | 700.712960441435 | 0.421588482050441  |
| GTCATGTTGCGA  | 700.712984552389 | 0.356925912074214  |
| CCAAGGGACTCA  | 700.714883402099 | 0.411611832291303  |
| AGCCTCTATGAC  | 700.720835088312 | 0.308098413369422  |
| TACCATGTGACA  | 700.723936614238 | 0.390121789803857  |
| GTCATAAGGGCA  | 700.726126699825 | 0.398782108099336  |
| ACGTCACAAATGA | 700.729546421323 | 0.586829114995809  |
| ATATCCGCGTCA  | 700.730606516934 | 0.33949877348286   |
| GTCACACTCCAA  | 700.733553533387 | 0.346464075538551  |
| GACAAATGACAA  | 700.735357540118 | 0.333499652505906  |
| ATGAGCGGTGAC  | 700.748592227084 | 0.188072662603343  |
| AGTTACTGTGAC  | 700.75086217659  | 0.362106096196406  |
| GCGGTGAATGAC  | 700.761983864592 | 0.391379375211929  |
| GAGTCAGGAGGA  | 700.767944794092 | 0.19123567323749   |
| ATTGGAAATGAC  | 700.771337597556 | 0.259751261130817  |
| AAAACGGTGAACA | 700.783996869883 | 0.187767795889436  |
| GCAGGATATGAC  | 700.784942061913 | 0.350980253567642  |
| GTCGCCGCGTCA  | 700.794747129564 | 0.473054057694378  |
| GTCACGTGTACA  | 700.803497863302 | 0.382599618832421  |
| ATGAGCAAGCGG  | 700.803943054234 | 0.14921145028835   |
| ACTATTCCGGG   | 700.812569684514 | 0.408572651474583  |
| TCATCGTGAAGA  | 700.814206544288 | 0.372587867306288  |
| CGATTGATGACG  | 700.822398352973 | 0.3472364775708    |
| ATGACGAGGCGG  | 700.829954283866 | 0.312939218481325  |
| GTACAGTGTGAC  | 700.837483473936 | 0.350550908332534  |
| ACGCCACGTCA   | 700.837739206569 | 0.312722890450184  |
| AATAGAGGTGAC  | 700.838168137536 | 0.369148094605066  |

|              |                  |                   |
|--------------|------------------|-------------------|
| ACAATCCAGTCA | 700.848827913137 | 0.341877681734875 |
| CATCTGCGTGAC | 700.849114904748 | 0.330922102131515 |
| GACACGCGTGAC | 700.851797091502 | 0.382640598671261 |
| ACTTCCGGTGAC | 700.852311426859 | 0.182911441270962 |
| CGATCCAATGAC | 700.854746317012 | 0.270005353879225 |
| GGTCAGCGTCAC | 700.86542669624  | 0.447713038835452 |
| AACTTGTCACGA | 700.87114888976  | 0.268883086074946 |
| CGGAGCGAGTCA | 700.878616520497 | 0.339765161608178 |
| GTATTAATGACA | 700.89010967358  | 0.2898723671017   |
| TCATAGTAATGA | 700.890328490809 | 0.65018264040335  |
| ACAGCTTATGAC | 700.90118564532  | 0.325704611630857 |
| TCAGACTAATAA | 700.905866834984 | 0.207865202447076 |
| AACATGGTGACA | 700.913722858116 | 0.515788308986527 |
| GAGTCAAGTCGC | 700.921744607065 | 0.168795256148505 |
| ACTCATCGGTCA | 700.929012576046 | 0.375816224277049 |
| ATAAAAGTCATA | 700.929616842324 | 0.219260895842374 |
| CGGAGTGAATCA | 700.931700070753 | 0.396979709285997 |
| CCGCTCTATGAC | 700.950066844635 | 0.334930000042161 |
| AGTCTGACAGAT | 700.959324467378 | 0.239781225046363 |
| CATGTCACCGAC | 700.968508292771 | 0.386320471614316 |
| CTAGTATTAGTC | 700.978915042208 | 0.328236019086555 |
| CTATTGAATCAC | 700.991261713442 | 0.186747169838445 |
| GAATTAGATGAC | 701.000036917364 | 0.359223995584619 |
| CGTCATCTGGTA | 701.001614097343 | 0.404549471113667 |
| GCGTCACCCACA | 701.004230558535 | 0.247950112353393 |
| AGGTACCCTCAT | 701.007248757197 | 0.283128922848968 |
| ATATGCACGTCA | 701.008708637652 | 0.374606630601505 |
| CTCAAGTGACAC | 701.008891577698 | 0.321060324808401 |
| CTGGTAGTGTC  | 701.017091816778 | 0.267459104187194 |
| AGTTGGACTCAC | 701.021979054192 | 0.368751464802725 |
| CTGTGATGTGAC | 701.023912637251 | 0.345220949664491 |
| TCAGTCTTCGGA | 701.06746545756  | 0.436604758346203 |
| GCGTCACGCAAC | 701.070756612188 | 0.483976710166489 |
| ATCGCGAATGAC | 701.072358743567 | 0.602449886040874 |
| GTCACAGTGAAC | 701.076249007386 | 0.363077836187708 |
| GTATGAATCGAC | 701.083348361446 | 0.358981951988628 |
| GAGTCAAGTCAA | 701.100253705737 | 0.186736934314715 |
| GTCACCTCACGA | 701.10142003843  | 0.30072488172903  |
| TCACCAACGTGA | 701.101631409891 | 0.460121141793469 |
| ATGACCTGGTCG | 701.103160562641 | 0.352875708283643 |
| ACTCATCCGTTG | 701.103626474626 | 0.340193072156293 |
| GTCACGCTCGGA | 701.109987350041 | 0.369764344401759 |
| AGTAATACTAAT | 701.119394399428 | 0.217103307723131 |
| CGCTGAGATGAC | 701.123344047934 | 0.407461662059314 |
| AGCGGTAGTCAC | 701.124650506359 | 0.445867261740191 |
| ATGACATGCTAC | 701.132875524301 | 0.372550392410577 |
| GAAGATGGTGAC | 701.13579542552  | 0.220702300439389 |
| GTCACGAATACA | 701.136302267617 | 0.281228753977358 |
| AATAATGCTCAT | 701.15423063918  | 0.378066934735158 |
| CACAATGTCATA | 701.155111555846 | 0.338538068983091 |
| CCATCCTAGTCA | 701.158248086043 | 0.305579203792216 |
| AGTCGAAATGAC | 701.158328748188 | 0.253247946342914 |
| GACACTTGCTCA | 701.173536372572 | 0.442458132980554 |
| AGTCAGACATGG | 701.184597232849 | 0.308438822397732 |

|               |                  |                   |
|---------------|------------------|-------------------|
| CGTCACTAGTAA  | 701.193909437663 | 0.456126816137472 |
| GATGACCGTACA  | 701.199740900901 | 0.613158839938211 |
| GAAGACTCTTAC  | 701.217036517835 | 0.357909308919733 |
| CATGATTACTGA  | 701.217566277195 | 0.497225312502918 |
| ATGACACCTGG   | 701.218601731076 | 0.265097592383191 |
| CATGGCCTGTGA  | 701.222973224972 | 0.390341003676667 |
| GTGCACGACTCA  | 701.232752590148 | 0.397593834783392 |
| ACGATGAATAAT  | 701.23278833638  | 0.398659875031703 |
| TGACACTAGTAA  | 701.234659727571 | 0.37807369785903  |
| CAGTCAGCAATG  | 701.247061866596 | 0.359516206646389 |
| CCAGTACATGAC  | 701.247293539673 | 0.38011469130416  |
| CCGAAATGACGG  | 701.25306012582  | 0.470879755029193 |
| CATGACGGGACC  | 701.258608979939 | 0.566369184125559 |
| ACGTCCGACTCA  | 701.259375278773 | 0.314196399906804 |
| ATTGTCACAATG  | 701.266073712671 | 0.306079034190768 |
| AAACTAGACTCA  | 701.273723723275 | 0.35569814735278  |
| CAAGCATATGAC  | 701.275751438479 | 0.451251344793932 |
| AATTACCGTCAT  | 701.275820587333 | 0.370124614723555 |
| TCCGATGGCTCA  | 701.277055036151 | 0.491008732653079 |
| AATGACCACTTG  | 701.278479613065 | 0.254026250286888 |
| ACCCAGGATGAC  | 701.281420899097 | 0.4190362428534   |
| GTCATTCAACAC  | 701.289395492216 | 0.411559923748175 |
| AACCGCTGTGAC  | 701.297627467724 | 0.420362781737802 |
| CCGAAACATGAC  | 701.307701817323 | 0.430997941182912 |
| ACGGCTGAATCA  | 701.311736970529 | 0.514798966777968 |
| CTTGCTAATGAC  | 701.312146989836 | 0.2994872232846   |
| CGTAGTTGTGAC  | 701.324551285598 | 0.403700310345358 |
| TAGACTACGTCA  | 701.332634249027 | 0.115894537539861 |
| GTATTACTGTGA  | 701.337123156246 | 0.331101957732473 |
| ACGTCACCACTA  | 701.339869125629 | 0.443734975285483 |
| GGCGTCACCACA  | 701.342640708455 | 0.311747307460768 |
| GTCATCTAGAGA  | 701.359152638262 | 0.31847376216741  |
| CAGTCAGAACTG  | 701.367169394894 | 0.297060760253435 |
| ACGAAGTGACGT  | 701.370536305996 | 0.24467179140488  |
| CCAAGCATGACA  | 701.372701514946 | 0.422791039824783 |
| ACCTGATGACGG  | 701.381551082901 | 0.417532639791642 |
| GTCACTCGATGA  | 701.384714855287 | 0.340747534729482 |
| GGCCATCTGTCA  | 701.391141045411 | 0.418078708109796 |
| TTGACTGAGCAA  | 701.39775883766  | 0.43274905413399  |
| CTCGGCCGTGAC  | 701.409745518184 | 0.359482684882545 |
| AACTGCTAGTCA  | 701.411604351028 | 0.378081614517659 |
| GAAGTCTATGAC  | 701.418990530806 | 0.255392915510514 |
| GTCATCTGTTTA  | 701.420635645886 | 0.655306312325716 |
| ATCGATCATGAC  | 701.425309906553 | 0.293292747345765 |
| TGAACACAGTCA  | 701.426452316103 | 0.680367879868276 |
| ATGACAGTAAAG  | 701.442118183624 | 0.189294943686137 |
| CGGTTTGGTGAC  | 701.457673509205 | 0.352946309575346 |
| ATATGGAATGAC  | 701.46653777804  | 0.551321185247748 |
| ATGACATTGTGA  | 701.472549932103 | 0.399303720825073 |
| AGAACAACATCAT | 701.472799722069 | 0.268761055787955 |
| CCGTGTTGGTCA  | 701.484498637093 | 0.455009419057515 |
| AGTTCCAATGAC  | 701.489843196981 | 0.505599673814857 |
| GGGTGACGTTAC  | 701.495850899909 | 0.484448660329926 |
| GACATCCAGTCA  | 701.500798355299 | 0.35076536847035  |



|              |                  |                   |
|--------------|------------------|-------------------|
| CAGTGACAATAC | 701.507394033766 | 0.227109171369377 |
| GCACCGACTCAC | 701.509316814384 | 0.305518382497435 |
| CTTGACAGTCA  | 701.514286153377 | 0.233462794425298 |
| AACCAGGATGAC | 701.528505522492 | 0.299364659152895 |
| CCAACTGGTGAC | 701.529006518664 | 0.414272643204263 |
| CAACTTGAGTAA | 701.53220164456  | 0.373734082453387 |
| GTGACAGGTACA | 701.539309568559 | 0.335450522787981 |
| CTGCGGTGACCA | 701.540229134998 | 0.502602258253836 |
| GCTCAGTCAATA | 701.542778736767 | 0.365001328361709 |
| CTGTCTTGGTCA | 701.543268893127 | 0.473857183688865 |
| ACCGGTGAGCAA | 701.556405400249 | 0.223344405307489 |
| CAAAGGGTGACG | 701.557353513632 | 0.268453511503386 |
| ACCAGGGATGAC | 701.560429321481 | 0.472907540597524 |
| TGACTGGGACCA | 701.568633370222 | 0.459636890119255 |
| GAGTACTAGTCA | 701.570695043604 | 0.54509142483136  |
| CCTCTAATGACA | 701.580640776421 | 0.343503280181371 |
| AATCCTGGTGAC | 701.582696004808 | 0.381334480303579 |
| CCGCATATGACG | 701.591578289826 | 0.359974439286781 |
| ATACATGGTCAT | 701.594037601314 | 0.436394555159249 |
| GACCATGACGTC | 701.595836362411 | 0.446567852392985 |
| TGACAGGTTCAA | 701.596521528281 | 0.512579940296032 |
| AAAGTTATGACC | 701.59661297169  | 0.312078027161185 |
| CGATCTCGTGAC | 701.598739442978 | 0.381742186772098 |
| ACATAAATGACG | 701.601079587294 | 0.346238885165369 |
| ACTCATAAATTG | 701.601868255177 | 0.392282170959494 |
| GTCATTAATTTA | 701.60599930145  | 0.602383404070916 |
| TATTACATGACA | 701.623082164118 | 0.449006464365436 |
| ACGTCATGCACC | 701.634385364568 | 0.503476070852563 |
| CAGATATGTGAC | 701.63496286998  | 0.378702994067513 |
| AGGTGACATGAC | 701.636819465037 | 0.283648836555999 |
| ACGTGTCAGAAT | 701.63987839657  | 0.368530103952128 |
| ATACACATCATC | 701.642270040204 | 0.295107601621475 |
| ACCATTGTGACA | 701.644704953544 | 0.326364027755235 |
| GTCACCATCACA | 701.656666674847 | 0.344289809563827 |
| GTAATCGCGTCA | 701.667524707004 | 0.401946454026351 |
| AAGAGGGATGAC | 701.668009462657 | 0.245269538853655 |
| AAGAGAGAGTCA | 701.674405742534 | 0.227888837695903 |
| CAACAGCATGAC | 701.696076038842 | 0.381968852156349 |
| GTCACACGTGTA | 701.702194987096 | 0.309045172572436 |
| GAACCTGTCACC | 701.703658386687 | 0.440793334455308 |
| ATAATAGGTGAC | 701.708210395277 | 0.319633414520068 |
| ATGTTGGATGAC | 701.729562437059 | 0.277846189678092 |
| ACGACTCAGAGA | 701.73922937029  | 0.279527151205872 |
| CTGTGTCAGTGA | 701.747715841702 | 0.327467920257558 |
| ACCATGTTGTCA | 701.754863946598 | 0.577787110754655 |
| CGAGCCGACTCA | 701.761370331157 | 0.239764399968964 |
| AACGAATCGTCA | 701.767371389988 | 0.368608912607676 |
| AGAGTCAGGGTA | 701.768078586353 | 0.218099215471261 |
| GTCATTCGGCTA | 701.769674987112 | 0.480897664893351 |
| CTGAGGGATGAC | 701.779598923448 | 0.356409339855416 |
| AGTCACTACCGC | 701.780395119047 | 0.398478463271812 |
| CCATTAAGTGAC | 701.786674615135 | 0.566581539033002 |
| ATACTACTCAT  | 701.787551869156 | 0.137685165976703 |
| ATATCACATGAC | 701.792347213796 | 0.432862025768613 |

|               |                  |                   |
|---------------|------------------|-------------------|
| AGATTGTGTGAC  | 701.793088011736 | 0.158660566345585 |
| TGACGGAAACCA  | 701.793752318171 | 0.371071260247419 |
| ATACTGACGTCA  | 701.799544592139 | 0.449754176033457 |
| ATGACGCCTGAG  | 701.806893645988 | 0.197523276151932 |
| GACTCACTACTC  | 701.810711648584 | 0.134304513005124 |
| AAGTGTGAGACA  | 701.8151496205   | 0.237481961656831 |
| CGTAATCGGTCA  | 701.815652027433 | 0.227250099827062 |
| CGGTCCACGTAA  | 701.81734843168  | 0.400853788559038 |
| GTCACAGTCTCA  | 701.826276440338 | 0.474108451916062 |
| GATCGGGATGAC  | 701.827830217123 | 0.238136454852972 |
| TCTATTGAGTAA  | 701.832994718778 | 0.301530694047913 |
| ATGAGCAAGAAC  | 701.850810270845 | 0.208525500404083 |
| GGACCGTCTGAC  | 701.857313896267 | 0.404589952936403 |
| ATGATGTGGCCC  | 701.862665815849 | 0.357182561340197 |
| ACATATCATGAC  | 701.864923403883 | 0.287116832245978 |
| GTCACCAACGGA  | 701.876083032342 | 0.449722584722855 |
| AGAGAGTGTGAC  | 701.879393122013 | 0.259665064112781 |
| CGATGACCGTGA  | 701.899145921424 | 0.419128528685234 |
| AGGCCAGGTCAT  | 701.905949622765 | 0.282295956701578 |
| ATGACAAGGATA  | 701.916746896218 | 0.144571470901432 |
| GTCAGACCTGAA  | 701.924219784993 | 0.466775993929707 |
| GTCACATGATCA  | 701.928988140916 | 0.42508475425459  |
| GGAGTCTATGAC  | 701.93514823417  | 0.369542027457873 |
| GAATCCGTCAGC  | 701.937391869971 | 0.442111591108095 |
| ACCCCGAGTCAC  | 701.950203260048 | 0.289428195983954 |
| CATAGATGACCA  | 701.951047550255 | 0.2842363993728   |
| ATAATGTGACCC  | 701.951562578926 | 0.430790704533718 |
| CTAATTGGTGAC  | 701.952376818151 | 0.331776424206897 |
| AGTGACGCGATA  | 701.966712722557 | 0.232362780925421 |
| CACGGCCAGTCA  | 701.969606553592 | 0.399500745913343 |
| GACTGTGAGCCA  | 701.971969261559 | 0.410785273396719 |
| AATTGATTAGTC  | 701.976141596037 | 0.436871482965939 |
| CGAATATGTGAC  | 701.979870019113 | 0.367272020111098 |
| ACGTCACAAATGG | 701.980951888696 | 0.411425639974542 |
| ACAGCTTACTCA  | 701.984873209955 | 0.241403362195335 |
| CATCACAGATGA  | 701.995770795914 | 0.435091697483642 |
| GATTCCGACTCA  | 701.999787236993 | 0.296506469936537 |
| GTCATCATACAA  | 702.000616415593 | 0.495924638208802 |
| GAACGGGTCATC  | 702.003522008549 | 0.243732787187223 |
| ATGACGGACGAC  | 702.021803542064 | 0.435858217931982 |
| AACAGACATGAC  | 702.024748675645 | 0.484619849847395 |
| GTCATTACAAAA  | 702.029018906053 | 0.230777525347009 |
| CTCATTAAATGAC | 702.030852880573 | 0.298083299953323 |
| GACTAATCTAGC  | 702.037736974731 | 0.390500641489601 |
| GACTAATCCAAA  | 702.039049354279 | 0.384200817677354 |
| GTCATCTTGCTA  | 702.045968623977 | 0.411815993590835 |
| CTGACGCAGTTA  | 702.066722916025 | 0.398389384071262 |
| GTCACTAACAGA  | 702.073031300822 | 0.254458632771988 |
| CGTTCCTTGGTCA | 702.073777881029 | 0.387056105192853 |
| TAATAGCAGTCA  | 702.077575607865 | 0.493005306744447 |
| ACCTTGACTAAA  | 702.085423443982 | 0.254697214756896 |
| ATGACACTCTAC  | 702.088487424435 | 0.23708168488745  |
| CTGGTGTGTGAC  | 702.090747827812 | 0.172457321870877 |
| GGTTCGTATGAC  | 702.090913384251 | 0.227610736658837 |

|               |                  |                    |
|---------------|------------------|--------------------|
| GTCATTCGGATA  | 702.098077618909 | 0.403215348484334  |
| CTGACTAGGTAC  | 702.100534428013 | 0.314106016520187  |
| GACTTGC GTGAC | 702.103815940938 | 0.5857392814389    |
| AAGCTATGACCC  | 702.106586161974 | 0.287850474232464  |
| AGACTTGACTCT  | 702.110382917923 | 0.383115015438358  |
| AGTGAAGTCACC  | 702.115532858697 | 0.287187753100376  |
| GAGTCAAAGGGA  | 702.124316124314 | 0.201969845242566  |
| AGTCACGGGTTA  | 702.124729073893 | 0.292107496884468  |
| AATGCGGAGTCA  | 702.127613298124 | 0.30570953418297   |
| GAATGAATCTTA  | 702.134307699661 | 0.262910974321162  |
| GCCGACAAGTCA  | 702.137345477136 | 0.339656417112295  |
| CGTCGACTCTTA  | 702.163250391888 | 0.328666054966199  |
| GGTGGTGATGAC  | 702.16956248383  | 0.150710907048677  |
| ACTCATACGTTG  | 702.179566347921 | 0.121927292961081  |
| AGCGGAGTGACT  | 702.188461063503 | 0.41943869349467   |
| TAATAGTGACCA  | 702.193516435439 | 0.358018721727506  |
| TATGATGGCTCA  | 702.194896047803 | 0.387835114860041  |
| GAAGCTAGTCAC  | 702.208725739457 | 0.27901792361924   |
| GTCATGAATATA  | 702.209199952866 | 0.374012990032793  |
| AACACGAGTCAA  | 702.220822983638 | 0.361322696541816  |
| GTCATGGCGCTA  | 702.223537065948 | 0.237445688108211  |
| CGTCATATGCTA  | 702.223613255124 | 0.383197616939595  |
| CTAGGTACGTCA  | 702.226465133425 | 0.412917157748571  |
| ATTGAGAATGAC  | 702.266117781401 | 0.0906721173673614 |
| CGCGGAGATGAC  | 702.287294957226 | 0.357327148874942  |
| CGTGGTGATGAC  | 702.291095396738 | 0.16404005577392   |
| GACTAATGTGCC  | 702.298184536919 | 0.534355416900253  |
| GGCGATTGGTCA  | 702.307796924398 | 0.37993643072205   |
| GTCAATGACCAC  | 702.308623455755 | 0.333677898618486  |
| CAATACGTAATA  | 702.312891540926 | 0.322505513606169  |
| GCTCGTTATGAC  | 702.31391200585  | 0.487168947600234  |
| GTCATTCGGGGA  | 702.318099091035 | 0.135676367576106  |
| TCATTAGTCGGA  | 702.327502240309 | 0.373513427055423  |
| ATCTTGGTGACA  | 702.330877290817 | 0.281600289847126  |
| AACGGGGATGAC  | 702.333225043927 | 0.248512096247848  |
| TGTCACCAGTAA  | 702.33532622289  | 0.34084627137286   |
| ATGACGCCGTAG  | 702.335947064521 | 0.303746515403553  |
| GATGCGTGACAC  | 702.338014440796 | 0.350316330474309  |
| GTGACGAGGTCA  | 702.338196421315 | 0.119641170954194  |
| AGTGCGCATGAC  | 702.33951076282  | 0.389912256545382  |
| AGCACGTGTGAC  | 702.34584957758  | 0.33823106538089   |
| GTCAAATGTGAC  | 702.362641470661 | 0.516210313703785  |
| CTATGACCTGGC  | 702.364401799158 | 0.217279149804773  |
| ATTTCTAGTCA   | 702.379859811733 | 0.283142623812845  |
| GATGACTTTTCA  | 702.38018334033  | 0.396086384185951  |
| GCAAGGGAGTCA  | 702.403687745287 | 0.181887557433553  |
| CGTCATGGGCAC  | 702.412209719896 | 0.494000936820794  |
| CTAGTAGATGAC  | 702.41287345079  | 0.610368452910871  |
| AGTCACGCGAGA  | 702.429762147899 | 0.265729187226423  |
| GTGTCACTAGAA  | 702.434549043562 | 0.375639435983616  |
| GTCACGTATGCA  | 702.442471566601 | 0.458103328947333  |
| CAGTAATACTTA  | 702.44352060999  | 0.433110845370119  |
| GTCATCACCCAC  | 702.448517428179 | 0.268889377517419  |
| AATCGGTGACGA  | 702.454277416017 | 0.304415006718434  |

|               |                  |                   |
|---------------|------------------|-------------------|
| TCAGCTGCGTCA  | 702.454327954621 | 0.224483426596824 |
| TGACTAGGCGAA  | 702.458986617247 | 0.465190871137607 |
| ACTACCGTCATA  | 702.465064478815 | 0.350991508233369 |
| TACTCATAAGCA  | 702.465509965385 | 0.244889413920922 |
| GCCAATCGGTCA  | 702.481518108577 | 0.400755778078151 |
| GTCATGCCGGAC  | 702.483015963431 | 0.454515614901597 |
| CGCGTAATGACA  | 702.49156816489  | 0.244431020329431 |
| GCATTTAAGTCA  | 702.492028881203 | 0.4155379813531   |
| AGCTGCGAGTCA  | 702.505313590984 | 0.229136319364385 |
| ATCTTATTAGTC  | 702.509305273007 | 0.550135045371452 |
| AAAACCTGATTCA | 702.510337071437 | 0.300433514839402 |
| GCACACTATGAC  | 702.511169928001 | 0.308405055606115 |
| GACGCCATGTCA  | 702.515251021847 | 0.249380238885302 |
| CGTCATTGGGCC  | 702.527984207136 | 0.32650635933073  |
| CAATGCATGACG  | 702.531244061241 | 0.247822779914162 |
| CTGTCATTTCGA  | 702.536707053752 | 0.228653840481741 |
| CGACTATTAGTC  | 702.549444869479 | 0.42175623898614  |
| GCCAGCAGTGAC  | 702.559090795039 | 0.487305800478436 |
| AGCCCAGATGAC  | 702.571633707338 | 0.361401587352261 |
| AGTCACTTGCCA  | 702.572234769149 | 0.448725628584193 |
| CAGTCAGAATAC  | 702.591138360932 | 0.407616185957533 |
| GTCATTCGCCAA  | 702.593293631576 | 0.471392491502739 |
| ACTCATGGCTCA  | 702.598136138999 | 0.354443956872534 |
| GGATATGTCAGA  | 702.602169275932 | 0.281889791610794 |
| AGAGGGGATGAC  | 702.611799188382 | 0.19135358239556  |
| CATAGAGTGACA  | 702.614966384314 | 0.425345826175947 |
| ACGTTGGGTAC   | 702.616203358429 | 0.196943476082546 |
| TGACATAACTCA  | 702.616671983148 | 0.329856029216183 |
| TCTGCGCAGTCA  | 702.621814424167 | 0.285254731731508 |
| GCAACCTCGTCA  | 702.622957244011 | 0.472070558927634 |
| CTGCATGGCTCA  | 702.625851114951 | 0.426311114622425 |
| TACTCATTGGGA  | 702.630822990014 | 0.581338089263165 |
| GACGCTGTGTCA  | 702.631447215592 | 0.48547248311706  |
| ACCGGATGACCA  | 702.636523085959 | 0.530787618843011 |
| GACTCAAAGTCA  | 702.638424506506 | 0.598652186118928 |
| CCGGTCAGTGAC  | 702.64038888453  | 0.339398400915939 |
| ACGCCTGACACA  | 702.660323294137 | 0.211904441816636 |
| GACTGATTAATA  | 702.667555325914 | 0.433811271323134 |
| ATCCGTGACAGA  | 702.669216795959 | 0.248447643097126 |
| ATCCGTGACCCA  | 702.669272841974 | 0.289583041487303 |
| GGCCAGGTCATA  | 702.669656585917 | 0.30149770741536  |
| GACGTAATCGCC  | 702.676212489133 | 0.368159575881418 |
| TAGTCACGGCGA  | 702.67658470834  | 0.341467217643757 |
| ATAACTGAGTAA  | 702.683048510361 | 0.387371559985685 |
| ATGACACTCTAA  | 702.684295832656 | 0.356063153227011 |
| AACGCTACGTCA  | 702.689868296    | 0.486951891519951 |
| ACTTTCCGGTGAC | 702.690929317448 | 0.134487921315057 |
| CAAATTTGTGAC  | 702.703215098756 | 0.329548018227658 |
| ATGAGCAAGCAG  | 702.710499454795 | 0.218207630358224 |
| GTCACCTCCGAA  | 702.720926006058 | 0.361940817150097 |
| GTCATGTGCTTA  | 702.723374348382 | 0.430104911423542 |
| AGAAGTGGTCAT  | 702.733408571115 | 0.119274393598466 |
| AGGCCTCTGACT  | 702.738816067455 | 0.203233425255382 |
| ACGTCACAAAGCT | 702.739577634369 | 0.376420287504945 |

|                |                  |                   |
|----------------|------------------|-------------------|
| GTCACCTGTTTA   | 702.746898959597 | 0.328505131453935 |
| CCACACACGTCA   | 702.748746487411 | 0.342939361216758 |
| ACGTCATGCAAT   | 702.754225107522 | 0.38563196523466  |
| TCTAACGTGTCA   | 702.755955221334 | 0.139926913712099 |
| ATCTATCTGTCA   | 702.763786148425 | 0.215042970700694 |
| CATGTTTCGTCA   | 702.765163050222 | 0.276036256287455 |
| TCGTCTGATTCA   | 702.784575285271 | 0.363705542718662 |
| ACTCATAGCAGA   | 702.786045521087 | 0.366778193178767 |
| CAAGTTCTGTCA   | 702.788201094933 | 0.415856841576153 |
| CTAATGATGACC   | 702.79360487583  | 0.423269441120104 |
| ACAAGCGATGAC   | 702.794652593925 | 0.395203223164328 |
| CGGGCCTGACTC   | 702.795617199724 | 0.435616224152551 |
| GGTCATAGATCA   | 702.800194978015 | 0.377224863756602 |
| GTCATTGGACAA   | 702.807269239202 | 0.458856420219125 |
| ACAGAATTAICTC  | 702.836343667065 | 0.345842821820838 |
| CACATGTGACGG   | 702.841031160264 | 0.513111372869864 |
| ACCCGGTGTGAC   | 702.844828494371 | 0.325274378118952 |
| GGTTACGCAACC   | 702.846708216133 | 0.301205254393188 |
| CTCGGACTCACA   | 702.847974043333 | 0.331314504055227 |
| AGACTATTAICTC  | 702.854937627697 | 0.299458955421068 |
| ACTGCAGAGTCA   | 702.863631129642 | 0.105239805261904 |
| GGACATAATGAC   | 702.870665134519 | 0.2407690990591   |
| GTCTACGGTCA    | 702.87103783887  | 0.555092306717482 |
| CCAACGTGTGAC   | 702.889720869453 | 0.542431513140698 |
| ACGACGACTCAG   | 702.905996685255 | 0.33310318121249  |
| GGTTAGAATGAC   | 702.90703138369  | 0.280038769397803 |
| TACAAAGCGTCA   | 702.921145409422 | 0.398587253513713 |
| AGTCAGAGATAA   | 702.925893086179 | 0.293788525948293 |
| AATGACGTCTAT   | 702.927568830621 | 0.359248507346216 |
| ACCCATACGTCA   | 702.938472225232 | 0.138035891085238 |
| TGACTACTGGCA   | 702.944880035176 | 0.440472691963918 |
| TCGTCCGACTCA   | 702.958343067249 | 0.363223157293748 |
| CAATATTTGTCA   | 702.958352527716 | 0.314302948495937 |
| TATGTTGTGACA   | 702.969655964514 | 0.390557812172367 |
| CTTTATGGTGTGAC | 702.976903380409 | 0.24940735135612  |
| ATGACAATGCGA   | 702.982288077952 | 0.307724118916056 |
| ATCGATGACCGA   | 702.992847389409 | 0.392549490509429 |
| ATAAGTCGTCAT   | 702.996419302943 | 0.415660350573349 |
| AATGACGGTATA   | 703.000606837997 | 0.325490382580665 |
| AAGACATGTGAC   | 703.004735509931 | 0.248930852277373 |
| GCCCTTACGTCA   | 703.017862043406 | 0.376420776968367 |
| TAGCCTACGTCA   | 703.019976870492 | 0.344802308976019 |
| GAATGGTACGCG   | 703.040741514624 | 0.251985479421171 |
| CAGTCAGATGTA   | 703.050177476514 | 0.388007772530396 |
| CTCATCGTGACA   | 703.051588105785 | 0.314360065975812 |
| GACTTTGGTGTGAC | 703.051637474569 | 0.474356032868914 |
| ACGTCACATGTA   | 703.054548859453 | 0.40317769172202  |
| GGTTATTTGTCA   | 703.055533991094 | 0.555094747195709 |
| CACCCGAATGAC   | 703.056748351722 | 0.41173476166571  |
| GTCATCAAGGAA   | 703.076142758514 | 0.23152280196375  |
| TACGCGGTGACA   | 703.077543962333 | 0.355316958388581 |
| ATTAGTGACACG   | 703.085551961086 | 0.442930767596127 |
| ACGTCATGCAGG   | 703.098641862617 | 0.470908336786965 |
| AATATTGACTGA   | 703.098899987029 | 0.208430661522915 |

|                |                  |                   |
|----------------|------------------|-------------------|
| GACTAATTTCCA   | 703.099298916994 | 0.38352196826525  |
| AACAAGGGTGAC   | 703.100761309154 | 0.370232629104539 |
| ACGAGTCAAAGA   | 703.110937055981 | 0.281292863713347 |
| GATGTGTAACAC   | 703.114236485359 | 0.319131706310915 |
| ATGACAAAGGGC   | 703.115545948767 | 0.22240764391495  |
| GATAGACTCAGA   | 703.115843755638 | 0.421870218463878 |
| AATTGAGGTGAC   | 703.132799063232 | 0.261980712184056 |
| CTGACTGGGTAC   | 703.134463702086 | 0.313263530000542 |
| AATGTCCAGTCA   | 703.137207602265 | 0.491142288746324 |
| ACAAGATGATTC   | 703.138584167859 | 0.568491671911068 |
| GAAACGGAGTCA   | 703.143238031961 | 0.241980853860074 |
| GTCACTGTCTCA   | 703.145613336412 | 0.277704852924711 |
| CCAACCTGACTC   | 703.146287121753 | 0.369697116018165 |
| GACTAATTTCTTA  | 703.146854150514 | 0.342436234006656 |
| AGCCTTGCGTCA   | 703.150972972729 | 0.400664828262668 |
| ATTGACAGATCA   | 703.153626180771 | 0.510786082407952 |
| GATGGGGATGAC   | 703.155338659271 | 0.188879284292231 |
| ACTCCAGATGAC   | 703.157955253715 | 0.362803306784597 |
| ACGTAATAGTAA   | 703.163596600094 | 0.32479823979002  |
| CTGAGTACGTCA   | 703.17448019839  | 0.577226199888632 |
| GTCATGATACAA   | 703.175365544609 | 0.281348362778542 |
| GATGAGCTGTCA   | 703.182844091258 | 0.385655501315428 |
| ATATTACTGTCA   | 703.183145119446 | 0.330408876836376 |
| GTCATTCGTCCA   | 703.183476867928 | 0.178894778227246 |
| CCTTCATGACAC   | 703.186473824044 | 0.336311096996541 |
| CATTGCACGTCA   | 703.206843820313 | 0.43546125709729  |
| CATAATGTGACA   | 703.210386740086 | 0.383043610748521 |
| GCAGACAATGAC   | 703.226280162813 | 0.155360036502597 |
| GCCGAGTGTGAC   | 703.227488008817 | 0.270938292276521 |
| CACTGTGACAAG   | 703.234943860536 | 0.276303141205294 |
| CATGTTCTGTCA   | 703.241468584362 | 0.197302568715878 |
| ATGGACTCGTCA   | 703.245316242792 | 0.445586146970664 |
| CTGACTGGACAC   | 703.245502793359 | 0.496491573110232 |
| GCGCAAGACTCA   | 703.254675325826 | 0.332047039376869 |
| AGTCAGCGTCCC   | 703.262576957202 | 0.381823362400393 |
| CGTACATGTGAC   | 703.264254387222 | 0.280963808279757 |
| TGACTCGCCCAA   | 703.265308280579 | 0.243105649346019 |
| CCATGGCGTCA    | 703.267553690669 | 0.281102119060745 |
| CTGAAGTGTGAC   | 703.267695276808 | 0.445128311607532 |
| AGTAGTAGTCAG   | 703.269008129585 | 0.187796592941534 |
| AGAGATGGGTCA   | 703.272075607949 | 0.270521519111952 |
| CCAATCACGTCA   | 703.277629941513 | 0.410760464803127 |
| GTCACTCTGGAA   | 703.277748550206 | 0.459020136422005 |
| AGTCGCGGTGAC   | 703.284581974328 | 0.228346393615333 |
| GCTTTAGATGAC   | 703.285505593823 | 0.462564595416892 |
| ACGTCACAACAG   | 703.290110128299 | 0.384494039527039 |
| ACGTCACATATC   | 703.291423742852 | 0.418687442038305 |
| AGGCATTGTCAT   | 703.297432757122 | 0.36668243021625  |
| CACTCATCGTCA   | 703.299293308972 | 0.224513009853738 |
| CCATGATGTGAC   | 703.299388768855 | 0.294189171186913 |
| GCGTCACGTCAA   | 703.300074046103 | 0.360932215984765 |
| ACACTTTGACTC   | 703.300100264798 | 0.250004768082135 |
| CAGCACGGTGTGAC | 703.303160608702 | 0.615324766898183 |
| ATGACATCGTGA   | 703.307118572611 | 0.324087967506942 |

|              |                  |                   |
|--------------|------------------|-------------------|
| GAATGGGATGAC | 703.311450015921 | 0.350727202545106 |
| GTCATGGCCTGA | 703.325279939987 | 0.486679494601289 |
| AACGAGATGACA | 703.345729545691 | 0.31090450199099  |
| ACTCATTGAGTC | 703.346303904179 | 0.397769985711706 |
| ACTTAGAGTGAC | 703.352772712182 | 0.473050975231599 |
| AGACTAATACCA | 703.355886298392 | 0.478023871971428 |
| GGGACCTGTCAC | 703.358367383268 | 0.267775688868806 |
| GTGACAGCTCAC | 703.359142012712 | 0.372889415940732 |
| GTCATTAGGCCA | 703.361469841971 | 0.225083116717732 |
| AATTGCATGACG | 703.37121038953  | 0.255740534625026 |
| CCGGAATATGAC | 703.375545076892 | 0.476202964148314 |
| TGACAACGTAAA | 703.379903744081 | 0.307886728715523 |
| ACGCTGACTGTA | 703.381760898653 | 0.165454734158384 |
| TGACAAAGTACA | 703.389698334402 | 0.413746634209161 |
| GCTTCTTCGTCA | 703.394042853682 | 0.429220161531055 |
| ATGCCACATGAC | 703.402780285924 | 0.343777405195899 |
| CGGCAAGATGAC | 703.411124076727 | 0.2553364521563   |
| TGGTGACGCCAA | 703.415248316328 | 0.42930887225802  |
| AATTACGCAATT | 703.41738885915  | 0.374760708403243 |
| GTGTCATGGCAA | 703.417741759748 | 0.359402429677575 |
| CGCCTTGATGAC | 703.420421095426 | 0.448436226066685 |
| CGTCATTTGCAA | 703.431110723554 | 0.248773690430074 |
| GCAACATCGTCA | 703.432814952505 | 0.415544200243717 |
| TGACTAGACGCA | 703.432859633968 | 0.475806741347289 |
| CAGTCAGCGTCG | 703.432903910134 | 0.332032580578938 |
| TCGATTTGCTCA | 703.435888826235 | 0.364386709813048 |
| GGATTTGCGTCA | 703.438773671819 | 0.403504580118963 |
| AAACAAGTCATG | 703.439717293787 | 0.231491532257706 |
| CGTCACACATAA | 703.441686904344 | 0.265334262571198 |
| ATATAGTGACAC | 703.462367463256 | 0.615183632708665 |
| ACCAAGTCACCT | 703.46339544048  | 0.263575547081065 |
| CGTCGTGCACC  | 703.475635868261 | 0.49375569660203  |
| ATGATGTGGCTA | 703.479692117358 | 0.268982073109525 |
| ATACAAGATGAC | 703.492631387055 | 0.310205061273162 |
| CTCATCGAATGA | 703.509106435583 | 0.442034873342152 |
| AATATCACGTCA | 703.526565960163 | 0.474768540804456 |
| CTTACAGACTCA | 703.528056060391 | 0.582230814541683 |
| GTCATTTGATAA | 703.528798914391 | 0.439267572615535 |
| CGTCATTGAGTA | 703.532247332425 | 0.267120948034307 |
| ACCTAAGTGTCA | 703.537100471036 | 0.421003438655292 |
| GACTCTGTATGA | 703.544528902319 | 0.379060498177321 |
| GATATGACCTAA | 703.545043951192 | 0.258314922071611 |
| GGACATCCGTCA | 703.551337880903 | 0.456571537659184 |
| ACTTTTGACTCG | 703.551894250436 | 0.245930220190871 |
| AATAGTCAAAC  | 703.553181556886 | 0.241928732633142 |
| AGAAACTGGTCA | 703.560184283451 | 0.321770289810692 |
| GGGGTCTATGAC | 703.564584297128 | 0.412719900496806 |
| GTCACCTTCGGA | 703.573341751448 | 0.403535141221021 |
| GCGTTTGACTGA | 703.582369085923 | 0.363137869294636 |
| CGCTGACGATGA | 703.586999287206 | 0.455257627700665 |
| CACTTTTGACTC | 703.589442053872 | 0.337368317941592 |
| GTTTCATAGTCA | 703.592715737046 | 0.64004818888935  |
| CGATCTGTGACG | 703.594014169337 | 0.367707942181299 |
| GCGTAGCAGTCA | 703.608716835335 | 0.226805908923113 |

|               |                  |                   |
|---------------|------------------|-------------------|
| CGCGTCACTGAA  | 703.611703018442 | 0.236759457771993 |
| GTCACCCGGTCA  | 703.621337756037 | 0.27871510281109  |
| ATGAGCTGTGAC  | 703.628329295584 | 0.271908975557953 |
| AGTCACGGTCAA  | 703.633498240046 | 0.551957724004309 |
| ATCAGTGGTGAC  | 703.635056822831 | 0.434330489711029 |
| AGTCACGAGTAA  | 703.635700893242 | 0.300118977001256 |
| TCATCTTTGTCA  | 703.640135827709 | 0.390002362042166 |
| AGGGATAAGTCA  | 703.641473953627 | 0.261776137557702 |
| GGACAAGATGAC  | 703.645840721368 | 0.234714241965901 |
| AGTGTCATGTAA  | 703.660851710651 | 0.467465065580472 |
| GACGAGATGACA  | 703.661708822468 | 0.215727021186945 |
| AAGCCCACGTCA  | 703.672806159962 | 0.278479293794171 |
| GCCAACGTGTGAC | 703.681035607343 | 0.362241120559472 |
| AGTATCGTCACT  | 703.692146247293 | 0.268293756826416 |
| ATTACACACATG  | 703.696858527343 | 0.502312996736396 |
| ATCGGCTGTGAC  | 703.698229600736 | 0.32656917919664  |
| CACGTCACTGCC  | 703.698885237141 | 0.198508247075122 |
| ACGTCATGTTTC  | 703.700030569143 | 0.362926214871376 |
| ACGCGAAGTCAT  | 703.712270497221 | 0.43375483692218  |
| AGGGGAGTGACT  | 703.726113307571 | 0.200827518342386 |
| GGCTCTGTGTCA  | 703.736640074981 | 0.449677316756427 |
| CTGTCCAGTAA   | 703.737155391292 | 0.545110887557015 |
| TGACGTGTGGCA  | 703.744020695053 | 0.349308922716595 |
| GATGGCTAATAC  | 703.74605069363  | 0.447560471527338 |
| AGTCACGAGCTG  | 703.752300224614 | 0.325948368172087 |
| AAACCTGTCAAC  | 703.769072332612 | 0.293978062245026 |
| AGTCACGCTGGC  | 703.771017082464 | 0.387405491398113 |
| ACAGTGGTGTC   | 703.773696117205 | 0.457534833239185 |
| AGTCACGACCTG  | 703.787377019808 | 0.326948520869692 |
| GTAACATGTGAC  | 703.788365890578 | 0.65003647046839  |
| AAACTCTGAGTC  | 703.789077941595 | 0.326252649106466 |
| TGTCATTTGGAA  | 703.79652642884  | 0.516597356563044 |
| GTGACATGGCTA  | 703.829641881805 | 0.369439888025359 |
| GCGAAACGTGAC  | 703.830167026917 | 0.367651446937062 |
| ATTATTCATACA  | 703.831945142058 | 0.426249907704306 |
| CCAATTATGTCA  | 703.835658249884 | 0.478562827926075 |
| CAACGCTAGTCA  | 703.846608160885 | 0.465225825310174 |
| AAGTCACTCCGA  | 703.847223698495 | 0.337542639949259 |
| GTCACAGACAAA  | 703.853174003251 | 0.381613189576747 |
| GATATCCAGTCA  | 703.856132312291 | 0.408217880128634 |
| ATGACAATAACA  | 703.860319101105 | 0.25755212064999  |
| CATCTTGGTGAC  | 703.86303505307  | 0.492139093554248 |
| ATGACGACTAAA  | 703.867051989418 | 0.34716680745979  |
| CGGCTTCGTGAC  | 703.867277636495 | 0.240745083998319 |
| ACGAGCGGTGAC  | 703.874331030894 | 0.348539688432935 |
| CTGCGGACTCA   | 703.880854855075 | 0.449286321430538 |
| ACACTTAAGTCA  | 703.899222351475 | 0.282852777359836 |
| GTCATCCCCGAA  | 703.901492805399 | 0.289661911271878 |
| ATCTGCGACTCA  | 703.903131136276 | 0.689491554421929 |
| GCGTCATGTGTA  | 703.913019434589 | 0.356496349480166 |
| GCGGCTAGTCAC  | 703.920040601778 | 0.409873708726669 |
| GTAGTACTCACA  | 703.920510947391 | 0.272584274147076 |
| CAGTATTAGTAC  | 703.924787381662 | 0.396368297261885 |
| AACGTGTCAGAG  | 703.927810417505 | 0.234125436584696 |



|              |                  |                    |
|--------------|------------------|--------------------|
| GTCACTATCGTA | 703.932357890121 | 0.418013596673886  |
| AGACTCACTGTA | 703.938972694244 | 0.369329791306394  |
| GGGCTTTACTCA | 703.939990637802 | 0.552137656642976  |
| AGTTGAGAGTCA | 703.940241609278 | 0.382559603442801  |
| ATTCCCACGTCA | 703.940614645541 | 0.258932102849413  |
| CGTCATGTAGCA | 703.955870481034 | 0.221478913136393  |
| AGTCAGAAGTCG | 703.963966598008 | 0.341977018197572  |
| CTGCGTGACAAA | 703.96628808654  | 0.441968625103314  |
| ACGCTGACTGCT | 703.972840465118 | 0.456631786226584  |
| GATTAGTCGCCA | 703.976489525392 | 0.383633921124032  |
| CGTGTGTCAACG | 704.00426359982  | 0.358365434843977  |
| AGTAATATGTCA | 704.005113989641 | 0.242989710747101  |
| CGTTGAAATGAC | 704.014698161305 | 0.465633399770958  |
| CTGAGTCTATAA | 704.020532450237 | 0.338700044443749  |
| GCGCTGTATGAC | 704.03412636516  | 0.369030657438523  |
| GCTACGGAGTCA | 704.044658740346 | 0.347618336210322  |
| CGGTTGAATCAC | 704.066707295867 | 0.341811590356564  |
| GATGAGAATGAC | 704.067162607032 | 0.296062926426119  |
| CAGTAATGTGTC | 704.084966822765 | 0.614927848466275  |
| ATGAGTCTCTCC | 704.093284878567 | 0.433219519577584  |
| TCACGTCACTCA | 704.100582330611 | 0.261857127453559  |
| ATATGGTCACAC | 704.102434682037 | 0.388698346966213  |
| GACCCGAGTGAC | 704.109061881711 | 0.320501333134289  |
| AGTCACGGTACA | 704.115158812417 | 0.215450696876732  |
| AGAATCATGACG | 704.123362136848 | 0.0818105509574033 |
| GTCACCCTATTA | 704.128392775144 | 0.259583385168923  |
| CCAAGAAATGAC | 704.132848323026 | 0.340846795876153  |
| GTGAGTCCGTTA | 704.144255957435 | 0.174630841636245  |
| CAAAGACTATTA | 704.154102347189 | 0.667698545102687  |
| ATGTAGAATGAC | 704.157094072481 | 0.238212241310663  |
| TCACATACGTGA | 704.157767663397 | 0.470237318711723  |
| ATGACCAGATCA | 704.167156615341 | 0.510040185767364  |
| CGGCTATGTGAC | 704.16916470972  | 0.454528907517096  |
| AGTCAACGATTA | 704.171045602599 | 0.523861944379659  |
| TACTGATTATGA | 704.189187020149 | 0.43186373204022   |
| AGTCAGAATCAC | 704.191303796072 | 0.399103796833772  |
| CAGTCAGCACAG | 704.193951636562 | 0.413389795575995  |
| ATATCAGTGTC  | 704.195271741544 | 0.603951904744424  |
| GCACAAGGTGAC | 704.198044780636 | 0.359934040682008  |
| GCTGATGATGAC | 704.203997030863 | 0.6682130325393    |
| AACATGACAGCT | 704.208403213258 | 0.346483182711978  |
| CTCATATGGTGA | 704.21002503834  | 0.104136301596959  |
| GTCACCGGGCAC | 704.210573598902 | 0.373297860536545  |
| AGTGACGTTGTC | 704.230275132336 | 0.410990241617685  |
| GTGACACGATAA | 704.23496530914  | 0.231487670697439  |
| GTCACCAGCACA | 704.241059628316 | 0.36980420570416   |
| ACTCATGGCAGG | 704.2416702983   | 0.631890725178502  |
| ATGACAGCTCCA | 704.241880655472 | 0.277779625989002  |
| GCTCAGGGTGAC | 704.244595402779 | 0.292952418452545  |
| ACGGCCGTGACT | 704.248709394026 | 0.255941612433145  |
| CACAATAGTGAC | 704.249064711909 | 0.434868874157025  |
| ATGAGCAAACGG | 704.250125865261 | 0.212330976109139  |
| GTCATAAAGAAA | 704.263639508306 | 0.229679227625133  |
| AGAATGGTGACA | 704.265834753914 | 0.290070344517876  |

|               |                  |                   |
|---------------|------------------|-------------------|
| GATCGACTCAGA  | 704.282770067244 | 0.52276625771097  |
| TGACAACGTCAA  | 704.285685812363 | 0.29858292321218  |
| CGCCCCTATGAC  | 704.292764532067 | 0.426193688755773 |
| CACGTGGGTGAC  | 704.300116973846 | 0.399726183579213 |
| ATTTAGTAATCA  | 704.303683139186 | 0.419505816793215 |
| ATAGCCGGTGAC  | 704.308842957173 | 0.541362362498392 |
| TCACATCGGTGA  | 704.315240331131 | 0.635153854425051 |
| GTTTCGTACGTCA | 704.327234831246 | 0.51504182531639  |
| AGTATCGTCAGA  | 704.341537013181 | 0.4231197324908   |
| CGCGATAAGTCA  | 704.35938449868  | 0.505036650120822 |
| CCCTGACGATGA  | 704.367871280999 | 0.305210756922015 |
| CAGGAGACTCAC  | 704.368063288071 | 0.352776453230217 |
| ATGACCCTGCA   | 704.383399000079 | 0.202169598077658 |
| AGGAGGTGACAC  | 704.386145460863 | 0.186300375594558 |
| CTTCTTTGACTC  | 704.38775806452  | 0.303135265069955 |
| TGACTAGGCCCA  | 704.395009775611 | 0.437674278872857 |
| GTCATTGTATAA  | 704.395680525354 | 0.467162094158025 |
| GTCACGTGTGAA  | 704.397424399657 | 0.398224922479534 |
| GAGAATCTGTCA  | 704.399125276789 | 0.189675692409256 |
| ACCAAGCATGAC  | 704.411243223762 | 0.396832068529087 |
| AGAGGATTAATC  | 704.418292546443 | 0.370096075823916 |
| GTACGACGTGAC  | 704.421201201801 | 0.260951064887712 |
| ACGAGGGATGAC  | 704.429266046344 | 0.177066876664429 |
| AATTAGTACTAA  | 704.431343176952 | 0.532575106876148 |
| CAACGGAGTCAG  | 704.431659938239 | 0.322027921636693 |
| GACTCACTGTCC  | 704.432631042524 | 0.245788089611293 |
| GACAAGTGAGTC  | 704.43687347804  | 0.21968982977907  |
| GATGAGTGTAC   | 704.437835088917 | 0.298762901586902 |
| ATGCATCACTCA  | 704.440853187298 | 0.143176057188712 |
| GTCACCTAGCAA  | 704.451374962467 | 0.496232838653352 |
| GGATGATGCAAC  | 704.454367358864 | 0.181877435054085 |
| CCTAGATGTGAC  | 704.461157951571 | 0.370326441149513 |
| CCCGTATATGAC  | 704.484551322145 | 0.337839767283802 |
| ACTATATTGTCA  | 704.485371460281 | 0.362178147435015 |
| GTCATAAATAAA  | 704.486563297408 | 0.395568658701652 |
| AAGTTTCTGTCA  | 704.489449200934 | 0.337538805905    |
| TATGATATCACA  | 704.492433452225 | 0.437579850717576 |
| CTCCGATGTGAC  | 704.493766052756 | 0.330289604620005 |
| AATTTCTGTGAC  | 704.501156584935 | 0.418813483641359 |
| GTGACAGCTTAA  | 704.507163089362 | 0.355053408203362 |
| ATGACAGCTTGG  | 704.513603946113 | 0.301396371732965 |
| TGACATATTAATA | 704.518344930314 | 0.513339664738971 |
| CAGTGTAATGAC  | 704.521357888212 | 0.389828067113523 |
| ACGGGTTGTGAC  | 704.525583347121 | 0.353385430142239 |
| AACCACGTGTCA  | 704.533993476417 | 0.359414897764222 |
| CTACATGGGTCA  | 704.543787771885 | 0.261310946483689 |
| ACGTGCCAGTCA  | 704.555807138221 | 0.343114757319684 |
| CCGAATTGCTCA  | 704.556353207837 | 0.271883844287551 |
| CCCGTAGTGTCA  | 704.558544283246 | 0.374803543503177 |
| GTCATGATATTA  | 704.57128738679  | 0.562266585571258 |
| AACTTGTACAT   | 704.574722977869 | 0.290178003625549 |
| GTAGAAATGACA  | 704.578463822783 | 0.24015530225983  |
| GCTCAAATGACA  | 704.584670315646 | 0.375890591677991 |
| GAAGCCTGTGAC  | 704.596649707646 | 0.469063085512597 |

|               |                  |                   |
|---------------|------------------|-------------------|
| ATAGTTGACACA  | 704.597695679828 | 0.473840098824041 |
| ACGTCACCTCCT  | 704.598290104631 | 0.203085567471978 |
| ATTGTCACGTCA  | 704.598786499013 | 0.464891875534603 |
| TACTTTAAGTCA  | 704.602141835351 | 0.229795403045175 |
| GCCGTTGATTCA  | 704.6049590231   | 0.530373860184551 |
| AGTCAGCCGTCA  | 704.611384794613 | 0.206505958839001 |
| ATCTCGAATGAC  | 704.618728974073 | 0.491485672726945 |
| ACGCCGAGTCAG  | 704.624729800486 | 0.198662139740491 |
| CGTCATTGTGCGA | 704.625531414231 | 0.238571466350096 |
| TGACTGGGACAA  | 704.631756905644 | 0.389906687757801 |
| CCACCGTAGTCA  | 704.643922148568 | 0.42659925791246  |
| ATTGCCGTGATA  | 704.647732836316 | 0.156923363788472 |
| CAAACCGTGTCA  | 704.649420025294 | 0.333002870050686 |
| GTCACCTTGCAA  | 704.654607063673 | 0.446286939708882 |
| AAGAAGTGACGT  | 704.667823280173 | 0.236650632246246 |
| AACTTAATATGA  | 704.668560873478 | 0.358727156518853 |
| AGTCATGGGGAA  | 704.671592489422 | 0.247616099075523 |
| AGCGTGAATGAC  | 704.673066606486 | 0.289284360080668 |
| AGCAGTGACCAA  | 704.67541111964  | 0.451977230593806 |
| GGATACTCGTCA  | 704.678066483678 | 0.395671840886746 |
| CGTGAGATGACA  | 704.685846783789 | 0.322016872379386 |
| GTCATTGCGACA  | 704.686272909437 | 0.283602603722799 |
| AGTCACTTGTTT  | 704.693429994626 | 0.40043422442593  |
| CTCTAGCAGTCA  | 704.696116593992 | 0.354164930983561 |
| CTTCGGAGTGAC  | 704.70052289665  | 0.325168379411609 |
| AGACTCACTTAC  | 704.705870766891 | 0.298862485007051 |
| ATACTGTGATGC  | 704.706733795151 | 0.408247366319097 |
| TCAGCTGAATCA  | 704.708550683381 | 0.130522567748286 |
| AACAATTACGCA  | 704.711280103472 | 0.314226967455384 |
| ACATGGTGACAA  | 704.714353723231 | 0.433005379446395 |
| CAACGTGAGTCG  | 704.715350571228 | 0.466900194293714 |
| ATCGCCGCGTCA  | 704.718262453957 | 0.26980857636259  |
| AGTCAGACGTTT  | 704.71985493764  | 0.464390203664196 |
| GACTCAAATTAC  | 704.724577742907 | 0.371073989832952 |
| CCTCAGCAGTCA  | 704.725830213542 | 0.34901638676746  |
| TCGACTGACGAA  | 704.727645529692 | 0.718357270202574 |
| AACCGAATGAGT  | 704.73751010294  | 0.315600083296033 |
| ATTGCGGTGACA  | 704.746467571384 | 0.278859027426823 |
| CATTAGTGACGA  | 704.756474952392 | 0.390513978314803 |
| ATGACCCGTATG  | 704.761627582934 | 0.434296584485312 |
| GCTACAGGTGAC  | 704.771364365079 | 0.39730624687556  |
| TAATTGTCGTCA  | 704.773052167032 | 0.457174510697364 |
| AGACTCAGAATG  | 704.773980477454 | 0.479115950900411 |
| ACGTCACGTGATA | 704.778917844714 | 0.302644564427044 |
| TGAAATGTGACA  | 704.781630898666 | 0.543932796246441 |
| CGTCATTCCAGC  | 704.787224826097 | 0.277139005245648 |
| AAGTGATTAGTC  | 704.795690589    | 0.397515764893287 |
| TGTCACAGCGAA  | 704.796111532228 | 0.488712219996307 |
| CACTGTTTGTCA  | 704.801511500694 | 0.604024662039316 |
| AATGACCCGTCA  | 704.803654864389 | 0.328958463284477 |
| ATGACCACGATC  | 704.805170534523 | 0.282048894299666 |
| CCGCAGGAGTCA  | 704.81086197884  | 0.341988914562313 |
| ATATGCATGACA  | 704.817610613434 | 0.239997192541923 |
| AGCTAGCAGTCA  | 704.821773607188 | 0.499481324603663 |

|              |                  |                   |
|--------------|------------------|-------------------|
| CATTAGCAGTCA | 704.825127139748 | 0.631204245759334 |
| ATTAGCAATACA | 704.835469485305 | 0.49599749933989  |
| GTGACAATATGA | 704.848785370593 | 0.394101193665582 |
| CTCAAGCAGTCA | 704.857339169692 | 0.309325720120225 |
| AATGTGGGTGAC | 704.86643964646  | 0.3571621529003   |
| ATGACAAGTTC  | 704.870883247082 | 0.230808510717242 |
| GCCACATGACGC | 704.873694192092 | 0.409207591833296 |
| GTCACACTCACA | 704.874350147233 | 0.409866237119603 |
| GAAGATTGTGAC | 704.874605968054 | 0.325781777118146 |
| AGAGAGAATGAC | 704.880419439388 | 0.318926023892007 |
| ATGACGGCACCG | 704.881824236308 | 0.285574356264297 |
| GGTCATCGTCCA | 704.888236933329 | 0.576951985500322 |
| ACTGTCACCAGG | 704.893586794798 | 0.384407267897008 |
| GATGAGCTGTAC | 704.898820874164 | 0.412150853652239 |
| CGTAATTACTGA | 704.911015048591 | 0.355203792460773 |
| CTTTCAGATGAC | 704.912060076427 | 0.447331645855163 |
| GTCATCGCTCCA | 704.9122872285   | 0.318888215572639 |
| GCCCAATGTGAC | 704.914215209014 | 0.476614744555386 |
| ATGCAACATGAC | 704.918587806393 | 0.387095129512425 |
| ACTATTGACTGA | 704.922764481283 | 0.336270301751871 |
| TGATTCAATCAA | 704.926270202071 | 0.424591822258364 |
| CTTGAATACTCA | 704.927164949389 | 0.416569531841227 |
| CGGTGAGTACCA | 704.935475598132 | 0.377525244543671 |
| AGGGTCACCGAT | 704.942824835738 | 0.450804424836238 |
| GTTTCCGACTCA | 704.946988988877 | 0.192134155907213 |
| CAGAGAGTCAGA | 704.955857160954 | 0.325259205366896 |
| AATGATGTGGCC | 704.974384684925 | 0.252628632657481 |
| GGTCCAAATGAC | 704.980321541109 | 0.323280190669248 |
| AAAGGGAATGAC | 704.981441195422 | 0.378033829866829 |
| ACCAAAGGTGAC | 704.992935765939 | 0.435352509528325 |
| TGCAGTGACCCA | 705.005936559078 | 0.336550807167954 |
| GTCACCTGTGTA | 705.008685956479 | 0.301832195066808 |
| CAATACAAGTCA | 705.010089403653 | 0.489230937008399 |
| GCGGCGTATGAC | 705.014262826719 | 0.458520545034747 |
| GTATTAATCACA | 705.017833973303 | 0.367666576745659 |
| GAATCAGTAACC | 705.01826372229  | 0.332381032183134 |
| CATAGCGTCAGA | 705.041081171044 | 0.426229631138021 |
| CACTTCTATGAC | 705.043726770683 | 0.30338339851295  |
| GTCACACAGAAA | 705.051300900027 | 0.398597672870347 |
| AGACTAATTATA | 705.055487842026 | 0.32277316588759  |
| GACTCAGAGACA | 705.058133308142 | 0.552027671929605 |
| AGTCGCGAGTCA | 705.064197539113 | 0.103624882777646 |
| CGCGGGGAGTCA | 705.102850719951 | 0.504821056094828 |
| GACTCAGTAATC | 705.110775648986 | 0.207089185304792 |
| TAGGCTACGTCA | 705.112110010172 | 0.310497115167085 |
| AGTCATGGGTAC | 705.113742359235 | 0.275082129459767 |
| TCACGACAGTCA | 705.117243009227 | 0.304849228445641 |
| GTCACATAGACA | 705.118762342947 | 0.469703205485023 |
| ATGACTTCGATC | 705.119299979299 | 0.235196682171506 |
| TATATGGTCACA | 705.119354423987 | 0.435797619642189 |
| GCATGACCACGA | 705.140732011453 | 0.229634742045939 |
| GTCATTACTAGA | 705.146516872692 | 0.161757161536139 |
| AAACTGGCTCAT | 705.157674869873 | 0.259249555397125 |
| CCTATGACCTAA | 705.161866378373 | 0.196278075232419 |

|               |                  |                   |
|---------------|------------------|-------------------|
| AGTCACGACAAT  | 705.165975157396 | 0.224673993945731 |
| CAGTATCGGTCA  | 705.173997647175 | 0.333809854886473 |
| AAACATCCGTCA  | 705.174242335637 | 0.530508594396085 |
| AAAGCGACTAAT  | 705.187071616152 | 0.361397277850014 |
| ACGGATTACGCA  | 705.194959594477 | 0.400859018095562 |
| GCCAGCCATGAC  | 705.198627248855 | 0.195196835302555 |
| TCGTACGTGTCA  | 705.199058281918 | 0.424358662520778 |
| ACGTGGTCATGC  | 705.199244220603 | 0.259032660113459 |
| CGTCATCTGGTC  | 705.199778174691 | 0.373530524363167 |
| AACTAACATGAC  | 705.210715452882 | 0.534232844841927 |
| TCTGTGTCGTCA  | 705.211150192751 | 0.4586651918456   |
| GTGACAACCTCGA | 705.22149865902  | 0.24293163422947  |
| AGATGACGGCAT  | 705.227967267073 | 0.327789994858987 |
| GTCATTCCTCAC  | 705.231370643027 | 0.264382496111384 |
| GTCATGATGGCA  | 705.239255630775 | 0.411454116899215 |
| CCGGGAATGAC   | 705.239603144655 | 0.576981744090643 |
| GTGACGTTGTTA  | 705.242973417015 | 0.293083235525073 |
| AGAGTCAGGCAC  | 705.24479930443  | 0.158914270174036 |
| CACCTCTATGAC  | 705.245240086444 | 0.253145621277053 |
| ATGAGTACGCCG  | 705.264532028721 | 0.239181288649345 |
| AACGTCGTGACT  | 705.271712335149 | 0.378895580314672 |
| AGAATTTCTGTCA | 705.273368219832 | 0.32766387829098  |
| GCATTTCCGTCA  | 705.276213534082 | 0.285101748772777 |
| GACGTCACAGGC  | 705.280969600364 | 0.608958162908584 |
| CGTCATTGCACC  | 705.282344893172 | 0.354326699509419 |
| AAATTGGGTACAC | 705.288056049237 | 0.253443877870975 |
| GAATGTGTAACC  | 705.289178133441 | 0.224867171857113 |
| CCTGAGTGTGAC  | 705.294133520164 | 0.218362959491998 |
| GTCATGCAGGCA  | 705.297310222694 | 0.521010916298763 |
| CTGACTGGTTCC  | 705.307366345751 | 0.336890027113621 |
| CGTCATATGAAG  | 705.316780159389 | 0.281205960984489 |
| ACCTTCCAGTCA  | 705.329920407863 | 0.255317425599997 |
| ACTCATAGTTAT  | 705.343536251809 | 0.330738285233965 |
| CAGTCACGAGTC  | 705.346169597321 | 0.287432674359749 |
| GCTAGGTGACAC  | 705.351405654125 | 0.383205522775933 |
| CCAAACATGACG  | 705.354039935446 | 0.322244322702939 |
| ACCGCGTACCGA  | 705.37336726912  | 0.291954340580949 |
| AAAGGTAATGAC  | 705.37476064845  | 0.170242519275018 |
| AGACGTGTGTCA  | 705.376887645043 | 0.211918177082906 |
| CCTGTTTGGTCA  | 705.391107764592 | 0.423459692875378 |
| TGCACTGTGACA  | 705.399663600049 | 0.452045453063159 |
| ACGCTGTACCCG  | 705.401018550802 | 0.17702810560031  |
| AATCTGGTCATC  | 705.416461677256 | 0.19746996273227  |
| AGTGCTGTGTCA  | 705.420613953788 | 0.313000043562132 |
| GGTTGATTCACA  | 705.427297358125 | 0.482654902633813 |
| AACACATGACGC  | 705.428630642045 | 0.297957789528896 |
| CTTATGTGACAA  | 705.429140707835 | 0.389349006973979 |
| AATTGAGATGAC  | 705.431557945122 | 0.214610126287506 |
| ACGTCACGCTTG  | 705.444117559515 | 0.462947223452525 |
| TCACATTAATAA  | 705.445447305024 | 0.474254599031943 |
| AGTCAGAGGTCC  | 705.456751867623 | 0.520642300337667 |
| ATTAGTCGCCAG  | 705.475511523307 | 0.321576871478754 |
| CGGTCCCAGTCA  | 705.480690320848 | 0.338189281969474 |
| ACTCATATCAGG  | 705.48398033997  | 0.402381278457447 |

|              |                  |                   |
|--------------|------------------|-------------------|
| GAGTCCTGTGAC | 705.492329943189 | 0.511735578771848 |
| CACGCTTGTGAC | 705.501708600336 | 0.473887589663034 |
| GTCACCATGGAC | 705.510516051981 | 0.354176325180587 |
| AGCCATGATGAC | 705.512870822693 | 0.373333783363355 |
| ACTCATTAGTA  | 705.518279168236 | 0.51767426005166  |
| GAGCCCTATGAC | 705.533237493091 | 0.326744485977303 |
| GACCAGCGTGAC | 705.534391138824 | 0.499421660256631 |
| GTGTCACGAAAA | 705.539897253781 | 0.399211942428904 |
| ACTCATACCCTG | 705.54694499962  | 0.201295704824584 |
| AGACTTGGTCAC | 705.547474316707 | 0.373735194450051 |
| ATTGATTACTG  | 705.56244306909  | 0.550004113800152 |
| GGCCACGTAACA | 705.564070867638 | 0.219822811766616 |
| GTCATTTCCAGA | 705.605375714139 | 0.246502655727314 |
| CGTCACGCTCA  | 705.609048914885 | 0.438768602952361 |
| TGACTGTGTACA | 705.609070630022 | 0.666486314062737 |
| CCTTACAATGAC | 705.610337579603 | 0.258034348131015 |
| CTACACTAGTCA | 705.610714846483 | 0.417206024438067 |
| GATTCATACTTA | 705.61104429768  | 0.366367183784053 |
| TCATAGATGGCA | 705.612276955698 | 0.444547166613545 |
| GACCCTACGTCA | 705.617633309835 | 0.560545819313013 |
| CCGCACGTGTCA | 705.621886329779 | 0.473682758704688 |
| GGAATCTATGAC | 705.628347014542 | 0.518840167403719 |
| AAGGACGTCATC | 705.634286248451 | 0.285955129390088 |
| TCCGGTGACCCA | 705.640719515549 | 0.393912999203098 |
| AATATTAATGAC | 705.643101259343 | 0.470837421322183 |
| CGCACTGACACA | 705.645491400952 | 0.291842467763114 |
| AGCTCGTGAGTC | 705.657428453877 | 0.378110845553757 |
| AGACTCACTCCT | 705.665893739651 | 0.368854264974771 |
| AATGTATCACAT | 705.669828926958 | 0.399182944391549 |
| TCTGACATATAA | 705.675723280138 | 0.23690111942938  |
| ATATGATGCAAT | 705.67969715333  | 0.22289939367694  |
| CTCCCCTATGAC | 705.695590905113 | 0.368597183222544 |
| ATGACGTCTAGC | 705.696913374258 | 0.40546979844349  |
| AAGGCATGACGT | 705.703357483381 | 0.37778639213733  |
| CATCGTATGTCA | 705.719316976249 | 0.403111480201914 |
| TGACGGACGTCA | 705.726334810645 | 0.388131659028845 |
| AATACTAGTCAG | 705.726721626721 | 0.520659215650099 |
| AGGCGCTATGAC | 705.727263630818 | 0.287297941219182 |
| TGACTTGGACAA | 705.730865693743 | 0.324138681597242 |
| GTCACTACCTAA | 705.731206569787 | 0.273044979878524 |
| GTCATGTTTGGA | 705.736202144544 | 0.324726341461805 |
| CGACGATGTGAC | 705.738761838955 | 0.428077742521656 |
| AGCGATGGGTCA | 705.74440257269  | 0.241511801360492 |
| ACTCATTCTGA  | 705.746373518735 | 0.466650960958458 |
| CAGCGGTGACAA | 705.759823420358 | 0.368832839508028 |
| ATACTCAGTGAC | 705.774819174467 | 0.445807728111669 |
| TGAGTATTCAAA | 705.778181969396 | 0.538227528815677 |
| AATGACATTAAA | 705.779316437473 | 0.502467025560041 |
| GTGCTTTACTCA | 705.782347294493 | 0.400446210431724 |
| GGGGCCGAGTCA | 705.782793519978 | 0.479208202096226 |
| GCAGCTAGTCAC | 705.78639324241  | 0.428236779240447 |
| CCGTCTTCGTCA | 705.794670411699 | 0.305021764865075 |
| CGATTAGCAATA | 705.804816713273 | 0.293040675717879 |
| AGGCCCCGTCA  | 705.808309953935 | 0.320313896441917 |

|               |                  |                   |
|---------------|------------------|-------------------|
| TACGTGTCAGCA  | 705.811603396505 | 0.476945561764929 |
| TGACGAGCGTCA  | 705.816852888701 | 0.495370091912839 |
| ATGACGTAAAC   | 705.820741117789 | 0.355619046388772 |
| CGGTCCAAGTCA  | 705.823875785035 | 0.461634770982429 |
| GGAGCCAATGAC  | 705.831994927237 | 0.467658058451178 |
| ACGAGTGAGTCC  | 705.85071085144  | 0.384675060243164 |
| GACTCAGAAAGC  | 705.855818870561 | 0.706268662897529 |
| ATGACAGTGGCC  | 705.862703020996 | 0.312155323099726 |
| GTCATCTCGGCA  | 705.867352130497 | 0.347722249916488 |
| ACACTCGACTCA  | 705.869110640822 | 0.260000897562912 |
| GTCATTGAAATA  | 705.869944645126 | 0.363604635242868 |
| ACTCATGTGGTC  | 705.875557588345 | 0.431013970855062 |
| ACTCATTCGTGG  | 705.890869551298 | 0.220353846036661 |
| GGTGACGTTATA  | 705.905877454966 | 0.275025323400849 |
| ATGACCCAGTCC  | 705.91361950571  | 0.164267323141351 |
| AGTCAGATGATC  | 705.919441591588 | 0.540829541490665 |
| AAACTTTGACTC  | 705.92415603821  | 0.258954877612196 |
| CCGTCATCGGGC  | 705.934247564274 | 0.306247296896582 |
| GCGATTATGACC  | 705.937466715979 | 0.477160666036275 |
| GTTACATCATGA  | 705.93863865655  | 0.369156044539871 |
| AGACTCTGACAC  | 705.942151204969 | 0.337096152238483 |
| AACTCAGTCAAT  | 705.960146828985 | 0.416476896052252 |
| CCCGAATGATGA  | 705.964350945097 | 0.351712294979294 |
| AGACTAATTCTA  | 705.968971861984 | 0.419094881138263 |
| CCTTCCAATGAC  | 705.976451348606 | 0.232288686758129 |
| AGTCAGAGGGTA  | 705.982879267336 | 0.252653568588681 |
| TGAAACATGTCA  | 705.983913390329 | 0.376893264990805 |
| AACTGAGATGAC  | 705.992964939387 | 0.401410131543312 |
| CAACGCATGACG  | 705.994062260104 | 0.297186336180421 |
| AGTTAAAATGAC  | 706.011785249619 | 0.153908124581805 |
| CATCTCTGACAC  | 706.028649994417 | 0.244699559761875 |
| CAGTGATGTGAC  | 706.031115609802 | 0.398442097656848 |
| GACTAACGTCAC  | 706.036592938294 | 0.362081464331059 |
| GTCATTATCAAC  | 706.0403046531   | 0.429164249656552 |
| TAAATGTTGTCA  | 706.043460613432 | 0.272856368796715 |
| AGGTGCGTAATC  | 706.053920267988 | 0.376553106262905 |
| GCGTCACCCCTCA | 706.057535955673 | 0.346881079217631 |
| AGAAAATGTGAC  | 706.067460268183 | 0.370663741992287 |
| ACACCTAAGTCA  | 706.068599545107 | 0.300773848208394 |
| ATCAACGGTGAC  | 706.070082205795 | 0.370099752897912 |
| ACCCAGATGACA  | 706.070524153807 | 0.353744389050089 |
| ATGCAATGACAT  | 706.070796252343 | 0.297882063211265 |
| CTTCGTACGTCA  | 706.075834002777 | 0.3747388093425   |
| GGCCTCTATGAC  | 706.085563504896 | 0.223955390368075 |
| ACAGTCAGTGGC  | 706.093847123431 | 0.400435183877753 |
| AGACTCAATCAG  | 706.099848798127 | 0.359496860759685 |
| CACCTATGAGTG  | 706.102922432221 | 0.380596003023626 |
| ATGACGGACTTG  | 706.109278285076 | 0.273648894307212 |
| GATCGGACTCA   | 706.114536690004 | 0.443149550689064 |
| GTCACACGACAA  | 706.12059747462  | 0.333874091640484 |
| CCGACGAATGAC  | 706.124641853197 | 0.280577042400081 |
| AACAAAACGTCA  | 706.125913186341 | 0.427883188039055 |
| AGTCACGGGTCA  | 706.127460580425 | 0.339376181235733 |
| GTGACGTGCATA  | 706.128617656244 | 0.261485942408893 |

|               |                  |                   |
|---------------|------------------|-------------------|
| ATGACAAAGGCC  | 706.133389349933 | 0.382220231663404 |
| CGTCACACGATA  | 706.133925220438 | 0.235200148025795 |
| GAGTCAAACAAA  | 706.139809753203 | 0.139647195571596 |
| ACAGGAATGACG  | 706.14126893892  | 0.225398103822017 |
| CATCTGATGTCA  | 706.146718919131 | 0.36094304421693  |
| AAACCCTGTGAT  | 706.147209071372 | 0.13636957862539  |
| ATACGCGACTCA  | 706.147673945789 | 0.356388748194452 |
| GGTCATCGTTTA  | 706.154970084156 | 0.476913921661666 |
| CCCGCTTATGAC  | 706.162799601799 | 0.33610946053849  |
| CTCATAAGTGAC  | 706.174172562719 | 0.378697817653763 |
| ATGAGTCGGGAG  | 706.191167068393 | 0.240590754168057 |
| CAGGATGGTGAC  | 706.205078635839 | 0.446571801272391 |
| GGCGCATGACAC  | 706.207480281292 | 0.317634332918721 |
| GTCATCTAACCA  | 706.214831370269 | 0.425594400000246 |
| ACGTCACAGCCA  | 706.219841185095 | 0.22158221029349  |
| CTCATGGAATGA  | 706.240488999286 | 0.530995692092071 |
| GTCACAACATAA  | 706.241139298498 | 0.383396364328449 |
| TGACGCGCGCA   | 706.243255161038 | 0.406804553459198 |
| ATCTGGGATGAC  | 706.244197548436 | 0.172374360975786 |
| AATGTTCTGTCAC | 706.25286528769  | 0.269332452665901 |
| ACAAGCACGTCA  | 706.257973173237 | 0.337976500841612 |
| GATATGGTCAAC  | 706.258162078111 | 0.279805930530321 |
| ACCTGTAGTGAC  | 706.278184087087 | 0.33460846777682  |
| ATGACCACTAGG  | 706.283450946557 | 0.168558266219405 |
| CGTCACGGGTCA  | 706.284966212756 | 0.452295406000074 |
| ATTGTTGAATCA  | 706.294003292346 | 0.540195377713054 |
| CAATATGGTGAC  | 706.298070189678 | 0.352502268473597 |
| GAGTCAAATGAA  | 706.304075695853 | 0.227731995662162 |
| GGCCTGGTCATA  | 706.311828228552 | 0.25223651810163  |
| ACGTCACCATCG  | 706.312966261811 | 0.394111885195218 |
| GGACTCTGACAC  | 706.321032086808 | 0.474247890730368 |
| AGCCCCGATGAC  | 706.321335923823 | 0.17846144095116  |
| ATGATATCAGTC  | 706.323218319731 | 0.461931093026417 |
| CGTCACATTAGA  | 706.324432719341 | 0.395707262073028 |
| ATGACGTCGCCA  | 706.329352021738 | 0.393614793139374 |
| GCCGACATGACA  | 706.343160498266 | 0.423995361108345 |
| CGCGCGTACTA   | 706.352271594028 | 0.27660629139908  |
| AAACGGGTCATC  | 706.358426867616 | 0.369630592197347 |
| TGAAAATCGTCA  | 706.359414381607 | 0.366069416399112 |
| AAAGTTTGTGAC  | 706.361767518559 | 0.210176617663968 |
| GATGAGATGACA  | 706.373074337875 | 0.308633626719664 |
| GGCATCGTCACC  | 706.381048603921 | 0.304436013569355 |
| CAACCATGTCAC  | 706.399948051375 | 0.22983601923043  |
| GACTCAACATGA  | 706.405021065256 | 0.428221498037444 |
| AAGTCAGAGCCC  | 706.406281545753 | 0.285951961245943 |
| CGTAGTAATGAC  | 706.42245542688  | 0.49727468219261  |
| CACTCATAGGCG  | 706.425109309577 | 0.455522809895288 |
| CGTGACTAGCCA  | 706.428532672698 | 0.368095795366103 |
| ATCTCAGCGTCA  | 706.429689353431 | 0.278975250346767 |
| ATGACAATCACC  | 706.432879470515 | 0.239987361168588 |
| ACTCATAAACG   | 706.433633610642 | 0.313809873816395 |
| TGGCTCATCCAA  | 706.434014746102 | 0.283974484564137 |
| CCTCAAATGACA  | 706.435618907426 | 0.448641820531902 |
| GCCTAGGACTCA  | 706.439791816111 | 0.655643246521808 |



|               |                  |                    |
|---------------|------------------|--------------------|
| ATGTTAGATGAC  | 706.440495344872 | 0.358058243484018  |
| GTGACGCGCCCA  | 706.447233176701 | 0.470684766676238  |
| CTCATAAGGTGA  | 706.45653963076  | 0.432523506683191  |
| GGAGGTGATGAC  | 706.464846875645 | 0.268284123039653  |
| GTATCACGTGAC  | 706.46717913985  | 0.332175290447387  |
| GTCACGATGTCA  | 706.483727778077 | 0.428917338669661  |
| GTATTACATGAC  | 706.495899594298 | 0.376639171090108  |
| CGTGCAAATGAC  | 706.505012559997 | 0.257972822278698  |
| AATGTGAGCCAC  | 706.529057553735 | 0.173151320539856  |
| ACACGGGTGACG  | 706.538720460454 | 0.428031721290788  |
| GGGTCATAGTAA  | 706.549193209187 | 0.175069730000045  |
| TATGACATTGCA  | 706.551626231943 | 0.225526674722386  |
| GGCCAAAATGAC  | 706.587156928505 | 0.456947935542006  |
| GTATAGTGTGAC  | 706.594655563461 | 0.374661844546861  |
| AGTCACGGTGTG  | 706.598906700599 | 0.267148049943896  |
| CAATACTGACTA  | 706.614543935196 | 0.32370613632693   |
| GAGAATAATGAC  | 706.62541475471  | 0.313036869585893  |
| GAAGTGGTCAGC  | 706.664838598001 | 0.127686813427898  |
| TATGAGTCTCCA  | 706.666038423266 | 0.28055080885588   |
| AGTCAGTAATTG  | 706.67545235113  | 0.238915708338546  |
| TCCACTAAGTCA  | 706.684333065771 | 0.261295653459532  |
| CTTACTGGTGAC  | 706.685959933416 | 0.38418198959416   |
| CGTCATTCCACC  | 706.686457385918 | 0.353427774187781  |
| CCAGGCATGACG  | 706.686974244394 | 0.298052939641198  |
| CATTACAAGTCA  | 706.694197443452 | 0.441833585551404  |
| AGTCACTACCCC  | 706.69776047438  | 0.178231186983489  |
| GCGTTGATTACAC | 706.700346419622 | 0.215335831301093  |
| GTGTGTCAAACA  | 706.701928277709 | 0.421389152830178  |
| CATCCGTAGTCA  | 706.702182567773 | 0.32133493123423   |
| GTAACACGTGAC  | 706.713272440964 | 0.174047369007253  |
| GGTCATCGCTTA  | 706.717348947051 | 0.260568890314988  |
| TCATCCATGACA  | 706.719537895837 | 0.245402918186729  |
| GTCATTGTAGAA  | 706.725997058217 | 0.430252101625833  |
| AACGTCATGCTG  | 706.726112219924 | 0.380077142755438  |
| GAATATCGTCAC  | 706.745991756121 | 0.151023246608911  |
| AGTCACGAGTAC  | 706.746033419373 | 0.344733053109409  |
| CGTCATGCTGTC  | 706.748208058193 | 0.340905723604175  |
| GTGCACTAGTCA  | 706.769347488063 | 0.540264199354522  |
| GTCATATAAGCA  | 706.770831227649 | 0.415708621503659  |
| ACTCGGTGTGAC  | 706.773233843594 | 0.444402037458628  |
| CATATGCATGAC  | 706.774742819215 | 0.275762376185756  |
| GGCGGTTATGAC  | 706.780792894507 | 0.326473401103756  |
| GTCGATACGTCA  | 706.806460504468 | 0.226214354255419  |
| AGTTTAGACTCA  | 706.838861157823 | 0.325373080713674  |
| GTCATCCCTAA   | 706.840999835825 | 0.0910883359362649 |
| TCTCCCACGTCA  | 706.848693975253 | 0.294503238259518  |
| CAATTTGACGCA  | 706.857877944852 | 0.370702585625065  |
| GATGCGAATGAC  | 706.869259358498 | 0.34526898746115   |
| AGTCAGCTGTTG  | 706.870185011756 | 0.388909195828338  |
| AGCTTTGCTCAT  | 706.871907902156 | 0.412303009881334  |
| GTCATTTGAGCA  | 706.875867633458 | 0.212616407623317  |
| ATGAGTCTCTAG  | 706.878435524626 | 0.272784198246667  |
| CCGACATGTGAC  | 706.880608685815 | 0.202428828254797  |
| CAGTCGCGTCAC  | 706.886947574501 | 0.226704979650656  |

|               |                  |                   |
|---------------|------------------|-------------------|
| CTATTTTACTCA  | 706.891806682403 | 0.159490036145609 |
| ACCACATGACAC  | 706.897646489659 | 0.237984622573861 |
| GTCACCTCGTATA | 706.898433374329 | 0.40489984199431  |
| CCTTCATATGAC  | 706.935653996316 | 0.372558940254309 |
| TCGCTTGTGTCA  | 706.943746983211 | 0.223339222844932 |
| GAACTATAGTCA  | 706.944291104413 | 0.465742764438042 |
| GACAACCTGTCA  | 706.951499215055 | 0.35863467896436  |
| CGACATCCGTCA  | 706.967506943148 | 0.409350549356052 |
| ATAAGAATCATC  | 706.976438670212 | 0.407574252060423 |
| GTCATTACAGCA  | 706.977968606715 | 0.445560719657677 |
| CACCATAATGAC  | 706.988885204194 | 0.288845009455287 |
| GCATGTATGACC  | 706.990081261658 | 0.418212388100662 |
| GTCATGATCAGA  | 706.993937358656 | 0.416171495300097 |
| AGTCACGAGTCG  | 707.004528627335 | 0.296492018720292 |
| GTCACACCGCGA  | 707.01046211354  | 0.494397877979322 |
| GGCCGAGATGAC  | 707.017385878528 | 0.245114601156922 |
| AGCAGGGAGTCA  | 707.027152573149 | 0.284611478879711 |
| GACTGACTATGA  | 707.047324553741 | 0.340622180191601 |
| CGAATCGTGTCA  | 707.048197140623 | 0.390360957051656 |
| GGAGAATATGAC  | 707.048932608037 | 0.286140944013378 |
| AATACAAATGAC  | 707.052364589197 | 0.382450593199876 |
| GTCATGCATAAA  | 707.052904442958 | 0.168542295606099 |
| CCGAGACTCATA  | 707.058365350451 | 0.402645006380289 |
| GGATTAATAAGA  | 707.067363086268 | 0.224575258523622 |
| ATATAATGTCAT  | 707.074994826799 | 0.374852768376541 |
| CATACACTATGA  | 707.078443592273 | 0.457831723037166 |
| ATGGCCTATGAC  | 707.080768160811 | 0.249241951398501 |
| CTAACTGATGAC  | 707.082233331008 | 0.328808005985779 |
| AGTCACTACGCC  | 707.089790837236 | 0.217807711885325 |
| CGGATAATGACA  | 707.09234407417  | 0.374604191864183 |
| CGATATGGTGAC  | 707.093531765164 | 0.295978853908933 |
| CTGACTGGTACA  | 707.09531614691  | 0.485519202502645 |
| GTCACGCGATGA  | 707.100098027154 | 0.474781345119916 |
| AATACTGTCATG  | 707.103148238955 | 0.379237156810129 |
| ACGTAGGGTGAC  | 707.120617905184 | 0.249228479654053 |
| AGTTTCGTCAGA  | 707.122376749015 | 0.16419076044164  |
| GTAGTTTATGAC  | 707.122980920926 | 0.160298614083108 |
| CGTACACGTCAA  | 707.12812923584  | 0.299368716708424 |
| CGCACCTGACTC  | 707.143582416714 | 0.322486039839322 |
| GTCATTTGGCAC  | 707.148526903051 | 0.544413534259292 |
| GCACGGAATGAC  | 707.176555637615 | 0.236008259239154 |
| ACATTGGGTGAC  | 707.18391162668  | 0.372099946814277 |
| TCATAGGTCAAA  | 707.186578489456 | 0.38889635808527  |
| ATCCTGAGTAAC  | 707.193917629791 | 0.290316645825205 |
| AGAGTCTGACGC  | 707.200290227734 | 0.340509803937338 |
| CCCGACGTGTCA  | 707.212828982426 | 0.383309330999816 |
| GCATACGTGTCA  | 707.21756427978  | 0.36900293991133  |
| CAGTCAGTAAGC  | 707.218414351712 | 0.310990474053959 |
| GTCACTGGACAC  | 707.229088893353 | 0.39926506718705  |
| ATTACGCAAGAC  | 707.233188044263 | 0.327934156516602 |
| AATACTTGTAC   | 707.234679411311 | 0.265757648666982 |
| GCCGCTGATGAC  | 707.235517437158 | 0.523995267529613 |
| GTAGGGTGCATA  | 707.243712822084 | 0.221996568821962 |
| CGTCACCGTGTA  | 707.253244569877 | 0.512420273294382 |

|                 |                  |                   |
|-----------------|------------------|-------------------|
| ATTCGAGAGTCA    | 707.27274336594  | 0.381173237350937 |
| CCTATTGTGACG    | 707.275430016687 | 0.555333863082133 |
| GTCATTTCCGGTA   | 707.282930043227 | 0.438283843941322 |
| GTCACATGTAA     | 707.284953883533 | 0.461376362654639 |
| GTGTGATACATA    | 707.292210103062 | 0.23068995320159  |
| CAAGTGGGTGAC    | 707.293420017856 | 0.251129344666491 |
| GACTCACGTGGC    | 707.29517337233  | 0.445335578006744 |
| ATGACGGTCATC    | 707.296702380428 | 0.347484247061845 |
| CAGCATTAGTAA    | 707.30909258391  | 0.498354401664881 |
| GAGGTTTGACTC    | 707.312335237304 | 0.443112315474117 |
| GAAC TTGACTAA   | 707.323533858007 | 0.432842870339538 |
| CATAGATGAGCC    | 707.335249440703 | 0.437499071341073 |
| CTCGCATGACGC    | 707.336220956073 | 0.522648687925153 |
| GTCATCTATCCA    | 707.342564721239 | 0.334126666162943 |
| AGTCATGAGGGG    | 707.348320152402 | 0.217299354741682 |
| ACATGTACGTCA    | 707.351439085883 | 0.411488930826253 |
| CTACGTGTGACA    | 707.364482787539 | 0.172501365637838 |
| ACTCATACTAAA    | 707.367453635084 | 0.354915110779748 |
| CTATTCTATGAC    | 707.368805456478 | 0.280595486799342 |
| GTCATATGGGAA    | 707.368888184869 | 0.307868470941648 |
| GAGGCCAGTCA     | 707.376199001735 | 0.30475447224129  |
| CGTCATTGGGCA    | 707.387675449059 | 0.280877469374006 |
| ACTTGGCGTGAC    | 707.397415173074 | 0.382539668337664 |
| TCAGTCTTATGA    | 707.39838460997  | 0.400898330457301 |
| CGAAGGCATGAC    | 707.400501714916 | 0.660719848811613 |
| ACTCATAGGGTC    | 707.405667013144 | 0.301707243053892 |
| ACGCTACTATGA    | 707.415595780698 | 0.347326862144091 |
| AGTGATGTGTAC    | 707.418696318946 | 0.264937171645676 |
| ACTGTTATGTCA    | 707.420002616073 | 0.500837970850422 |
| TTGAAATGACAA    | 707.427838745253 | 0.321590446365652 |
| TGACGCGGATAA    | 707.432681097227 | 0.292409406185607 |
| GCACTTGGTCAC    | 707.444355042565 | 0.314085803644525 |
| AGAGTCTTATCG    | 707.444603997266 | 0.311825036387718 |
| CTTACAAAATGA    | 707.44741038533  | 0.323887081034039 |
| TGACAGATGCAA    | 707.451109388428 | 0.379116987038236 |
| CGTCACATCAAA    | 707.452212684229 | 0.362503525270593 |
| ATTCATGACATA    | 707.457675763781 | 0.115899436284603 |
| ATGACACCCAGG    | 707.462340322924 | 0.240483987946939 |
| CAGAGGGATGAC    | 707.482200775823 | 0.151367008866353 |
| TCGGATGGGTCA    | 707.489349229351 | 0.296555079552169 |
| CTCAGTAAGTCA    | 707.489547798317 | 0.352338142692019 |
| TGACGCTAGCCA    | 707.490749909002 | 0.756829798102211 |
| ACCTCATGACAC    | 707.492299422989 | 0.289205177273699 |
| CGTCATTTCCAG    | 707.496393739932 | 0.291348748267418 |
| TGACGGAGCCAA    | 707.500011228029 | 0.442007284310465 |
| ACTCATATATTA    | 707.506178589817 | 0.232384376900381 |
| ACTAGCAATGAC    | 707.508630946786 | 0.46604186424161  |
| AGCGTCTGACGC    | 707.516566604059 | 0.462671219514255 |
| GGTCACCTATGA    | 707.516995439781 | 0.422771011378084 |
| ATGGAATTA CTCTC | 707.518446073006 | 0.288784227383496 |
| GTCACCTTTCTA    | 707.522580625365 | 0.147907478616143 |
| TGACGTAGACCA    | 707.522729018014 | 0.659112118082362 |
| ATGACGTTCTGC    | 707.52664661597  | 0.390974497355921 |
| CTGACTTGCTCA    | 707.532539538058 | 0.349288133680036 |

|              |                  |                    |
|--------------|------------------|--------------------|
| CTCAACAATGAC | 707.535950037408 | 0.299173097337495  |
| ATTGATTGTGAC | 707.538959752745 | 0.325012977833183  |
| GATGTTGTGTCA | 707.543641553319 | 0.232836976900143  |
| GTCATGCGCGCA | 707.54641396989  | 0.423345472392554  |
| GCTCCGAGTCAA | 707.565998297322 | 0.353168734212272  |
| TCTCCTGACACA | 707.572227471236 | 0.272064772520056  |
| CGTTGGCATGAC | 707.584970878286 | 0.489188560454493  |
| AGAGCACGTCAC | 707.59044993149  | 0.0694363850682379 |
| ACCCGGGATGAC | 707.598018164097 | 0.377634675895201  |
| GGTTCCATGACA | 707.60215886063  | 0.497204734663564  |
| AGTGACCGGGAT | 707.606181758001 | 0.252730959017409  |
| TGACATGGGTCA | 707.609617863968 | 0.438828305588169  |
| CGTCATGTTTCA | 707.616111056618 | 0.429122935510133  |
| AATGGACTCACT | 707.621342751164 | 0.176120204967031  |
| AGACTAATCAGG | 707.630605377164 | 0.269544559508804  |
| AGATAAGTGTCA | 707.631260340797 | 0.277592475969336  |
| GGAGCAGATGAC | 707.634896395158 | 0.206238578974278  |
| TCGGATATGTCA | 707.640651537751 | 0.357933483970791  |
| GAGTCAAGTCCA | 707.646340287465 | 0.433659751151864  |
| AACACAATGACG | 707.673626646983 | 0.354254779382692  |
| AGTCACGCGGTG | 707.673932782565 | 0.161053548624556  |
| CCCGCGGTGACA | 707.682764859706 | 0.498095385623302  |
| GTCTGACCTTA  | 707.684978668671 | 0.220482814357066  |
| ACGAGTTTGTCA | 707.691941555426 | 0.341973581307325  |
| CCACATGATGAC | 707.692643204911 | 0.39806667073557   |
| GCGATTAAGTCA | 707.696864923929 | 0.441238686785435  |
| GGATGGCGTCAC | 707.697229581204 | 0.364784748545429  |
| CGTCACAGTTGA | 707.699539626531 | 0.560054186688045  |
| GACGACCCGTCA | 707.702070872943 | 0.430481524894945  |
| AACCTCCGTCAT | 707.734091858449 | 0.327758133552439  |
| AATTAAGGTGAC | 707.735304084968 | 0.404108497543746  |
| ACGTCATGACC  | 707.738430895673 | 0.23112202431815   |
| TGACTCCTGGCA | 707.775539439823 | 0.487368021750212  |
| GACCCGGAGTCA | 707.785294459785 | 0.363865712801473  |
| CAATCGTGTAC  | 707.786909642479 | 0.376581043212262  |
| GTCACGGATGAA | 707.802508667675 | 0.388240222447367  |
| CTATGAGTGCAA | 707.808021193115 | 0.377417241101609  |
| ATGACTTCGTAC | 707.816858749564 | 0.553203151475804  |
| AGGCCGTGTAC  | 707.827049835664 | 0.38516858596407   |
| CGTCATCAATCA | 707.835336533916 | 0.229323761599725  |
| GTATGAGTTAAC | 707.836034917088 | 0.240653823925669  |
| TGTAATGTGACA | 707.83658289665  | 0.20135589012574   |
| GAGTATTACGTA | 707.841607124046 | 0.417314075051822  |
| ACTCATCAGGGA | 707.846619659822 | 0.644866709139802  |
| CCTCGAGGTGAC | 707.857802458993 | 0.363524001747139  |
| AGTCACGGACTC | 707.861097291965 | 0.321938097334106  |
| AACCTCGTGACT | 707.863567464082 | 0.290623234207449  |
| CGCATGTTGTCA | 707.883624400011 | 0.346520097505788  |
| TGTGCATGACAA | 707.88631749013  | 0.371784922557194  |
| ATGACATTTCTC | 707.888051156285 | 0.267747320928088  |
| TGACTCCCAACA | 707.894293935366 | 0.324652045532944  |
| CATTGTGGTGAC | 707.905762781088 | 0.446480496648664  |
| AAGTGGTCACAC | 707.909135025494 | 0.303863322715016  |
| ACAGGATGACCA | 707.910608483777 | 0.512675484691115  |

|               |                  |                    |
|---------------|------------------|--------------------|
| CGCCAAATGACA  | 707.914311966168 | 0.316500664908388  |
| CCGTCAATTGTGA | 707.914934923539 | 0.399980880713358  |
| GTCATTTGCAAA  | 707.927575744216 | 0.367383134264616  |
| ACTGACTGTGAG  | 707.931157381667 | 0.5011141815073    |
| GAGTCAGGCGCA  | 707.931693786638 | 0.397524866746618  |
| ATTACTAAATGA  | 707.931855003512 | 0.367862726949723  |
| ATGGCGCGTCAC  | 707.938917673341 | 0.465292071419927  |
| TCTTCTGTGACA  | 707.940753975155 | 0.225345778694954  |
| GATTGTATGACC  | 707.952002855448 | 0.462041541504122  |
| GCCGACGACTCA  | 707.954545541674 | 0.367523108812087  |
| AACCTAACGTCA  | 707.955100483639 | 0.293314592018149  |
| ACGTCACATTATC | 707.95980476042  | 0.0942267914849733 |
| GTACGTACGTCA  | 707.963556028803 | 0.556222435410756  |
| CTGTACTCGTCA  | 707.964329867794 | 0.202278460694792  |
| GTCACAGTCTGA  | 707.966114187026 | 0.356318262162996  |
| AATCCGGTGACA  | 707.966471206523 | 0.319443584598611  |
| CAAGGATGTGAC  | 707.967138457564 | 0.319726413809135  |
| TGACTGGGCCAA  | 707.969262110828 | 0.456100170184011  |
| AGTCCGAATGAC  | 707.969428519187 | 0.308366737567762  |
| TACTAAGTGTCA  | 707.970459808151 | 0.1699315263321    |
| ATCGTAGCGTCA  | 707.979056722287 | 0.483174722449843  |
| GAGGCATATGAC  | 707.98056755142  | 0.471419058721367  |
| GATCAAGTCAAC  | 707.984711450771 | 0.298768791749674  |
| CCGGTTGATGAC  | 707.984937320302 | 0.450070415889933  |
| AACGCGTAGTCA  | 708.014734194149 | 0.307217484454448  |
| CTCTGACAGATC  | 708.014770381154 | 0.339405798694981  |
| GTCACCAATGAA  | 708.018989946577 | 0.573300661794748  |
| ATTATTCATAGG  | 708.020169385713 | 0.357238749678319  |
| ATGACGCCGCAC  | 708.024095250337 | 0.245058173683467  |
| AGGCGGAATGAC  | 708.025671512349 | 0.145322822692317  |
| CTTGTGGCTCAC  | 708.032910430298 | 0.433737160342104  |
| CTTACCGGATGA  | 708.037164998525 | 0.388236932339892  |
| GACAAATACTCA  | 708.040028806708 | 0.399821451674564  |
| CGTCATTAACTA  | 708.044683397721 | 0.510129380571274  |
| CAATATCGTCAC  | 708.046344214841 | 0.32505755963485   |
| GCCATGTACCGA  | 708.064656121678 | 0.381763668877048  |
| CTCGCTGATTCA  | 708.067473135383 | 0.148303734841149  |
| ACTCATTTCCGGG | 708.073316517061 | 0.316313797944137  |
| TAGTAAGCGTCA  | 708.082706920083 | 0.337278110398795  |
| AATTCTAGTGAC  | 708.098614431128 | 0.478477559170079  |
| GTCATACGGGAA  | 708.101040703768 | 0.425399828045618  |
| ACGCCTAATGAC  | 708.104127763666 | 0.38424810503831   |
| CGTCACAAGTAA  | 708.104782548325 | 0.379238592500595  |
| TAAATTGACTGA  | 708.104882881924 | 0.336749336035188  |
| ACATAATTGTCA  | 708.109059747663 | 0.431795090058656  |
| ATGACACGGCAC  | 708.110408086015 | 0.393882875988637  |
| AGTCACTACCAC  | 708.110935773051 | 0.20405116339232   |
| GCGTCACATGAA  | 708.113027287876 | 0.50466047428463   |
| GTTCTAAGTCA   | 708.125909382411 | 0.117321188971834  |
| GCATTTTGTGAC  | 708.127855192315 | 0.315590032692345  |
| CCATCAATGACG  | 708.133591291043 | 0.37880906101024   |
| AACGCATCGTCA  | 708.139083699963 | 0.3617698102142    |
| AAGTTACTCTTA  | 708.139499372769 | 0.377738811495091  |
| ACTGACTGGTAT  | 708.151475902757 | 0.317923573029874  |

|               |                   |                    |
|---------------|-------------------|--------------------|
| AAGATTTGACTC  | 708.157182507661  | 0.423026048132275  |
| ATGACGAGCCGG  | 708.163304441032  | 0.267068926496459  |
| GAAGACGTCACC  | 708.170167050298  | 0.324738637848834  |
| CAGGCTGATGAC  | 708.176577192509  | 0.0770369854394765 |
| TTCGTCACGCAA  | 708.181721699113  | 0.230671892748189  |
| GTCATGTTTAAC  | 708.189016869455  | 0.409074722483955  |
| CTAGTGCAGTCA  | 708.18989727843   | 0.351853844779693  |
| CTTCCTGTGTCA  | 708.190704974567  | 0.252673312783533  |
| CACGCGTGGTCA  | 708.199497927046  | 0.600156107095869  |
| ATCGGACTCATG  | 708.202636609025  | 0.375250262734317  |
| ATTCCAATGACA  | 708.2071110336728 | 0.295828212501315  |
| CGGTCAATGACG  | 708.210168431943  | 0.327140683217851  |
| CGATTCGTGTCA  | 708.211836876703  | 0.243691876199123  |
| GTCATACGAGAA  | 708.216001891993  | 0.320351657755247  |
| TGCATCATGACA  | 708.226026570158  | 0.314899465946768  |
| AGGAGCGATGAC  | 708.227747411142  | 0.240117203416213  |
| CTCACAGGTGAC  | 708.230449711912  | 0.505453841904927  |
| GTCATGCCAAAA  | 708.232915521035  | 0.388615279884879  |
| ATGACGAGCCAC  | 708.233412782284  | 0.239748849567412  |
| GTCATGCTACCA  | 708.237403930455  | 0.329793078208783  |
| ACTCATATTACT  | 708.237404105938  | 0.149361893180889  |
| ACAAGATTACTC  | 708.238655325063  | 0.319307910899137  |
| CTTCCCTGACTC  | 708.239163900788  | 0.204393272237286  |
| AAGCCTAATGAC  | 708.248624504632  | 0.278643619596641  |
| TGACCAATGTAA  | 708.263282650433  | 0.244921682644733  |
| GTCATTTACGGA  | 708.263594920468  | 0.475720550644917  |
| GTCACACATGTA  | 708.264854195948  | 0.359642798897564  |
| CCCGTGGTATGA  | 708.265740056507  | 0.37834137524975   |
| ATGAGTAGTCTG  | 708.274765167357  | 0.43852990280843   |
| CGGTTGACTGAA  | 708.284567248961  | 0.286939266642858  |
| AACGATATGACC  | 708.286607756501  | 0.328803576110756  |
| ACGTCACCTTAA  | 708.288013942115  | 0.267175627881762  |
| ACGAATGTACTG  | 708.294600965983  | 0.479620650883365  |
| ATGACAGCTGTC  | 708.297237847489  | 0.379537661353189  |
| CTTCGGCGTGAC  | 708.300394241135  | 0.328718497023009  |
| ATGAAATGTCAT  | 708.312361558176  | 0.391626788012492  |
| GTGTCACCTTAA  | 708.317755058149  | 0.510874051655724  |
| GAATTTCTGTGAC | 708.320882593392  | 0.35767413796727   |
| AGAAGATTACTC  | 708.326356894472  | 0.401561640813807  |
| AATTTCTGTGACA | 708.330178227148  | 0.226455036167217  |
| TCGTCATGCAGA  | 708.331797774499  | 0.590780955850859  |
| CCGAGCTGTGAC  | 708.333296088634  | 0.360983107474429  |
| AGTCAGCCACAA  | 708.334871100261  | 0.395074660487982  |
| TCGAAAACGTCA  | 708.351512409161  | 0.477890472200222  |
| GATGTTGCTCAC  | 708.353914271614  | 0.271267016175969  |
| AATCGTGTCACT  | 708.365500104898  | 0.334939144881572  |
| GACTAATCTTCC  | 708.366316072028  | 0.325482000065199  |
| GCCCCTAATGAC  | 708.375579059667  | 0.386118311488522  |
| TGACTAGGGCCA  | 708.378047078942  | 0.144970749063399  |
| TCATAAATATGA  | 708.381070058183  | 0.542866654251647  |
| TATTGTGGCTCA  | 708.385324135301  | 0.346128924683099  |
| GACGTCGATGAC  | 708.388963654074  | 0.450366393842657  |
| GGCTCATTGTCA  | 708.390498376962  | 0.447175931549812  |
| CCCTGCGACTCA  | 708.39073309173   | 0.221634411360773  |

|               |                  |                   |
|---------------|------------------|-------------------|
| ATGGAGAATGAC  | 708.39227554188  | 0.373723309606685 |
| GTCACGTCGTCA  | 708.399972020692 | 0.349205750124572 |
| AATCTTGGTGAC  | 708.407714278925 | 0.315383461666004 |
| CGTCACTGTGCA  | 708.408686789168 | 0.340199605955008 |
| TCCACGCAGTCA  | 708.410911569371 | 0.496689415438126 |
| TATGACCTGGCA  | 708.418272166251 | 0.281656515305032 |
| ATCCAGTAGTCA  | 708.443601628756 | 0.383937675644141 |
| ATGACCATATGC  | 708.45267627793  | 0.3513321472068   |
| TCTATGATGCAA  | 708.455834916171 | 0.191028934124586 |
| CAGTAACTGTCA  | 708.459304983566 | 0.355702667487574 |
| GAGTCAAAAAGTA | 708.480817189386 | 0.20147449351243  |
| ACGAATGGGTCA  | 708.500992602428 | 0.23571815077102  |
| ACATAATCGTCA  | 708.50252202573  | 0.547805366211451 |
| GGACGAAATGAC  | 708.514538472059 | 0.348674742659595 |
| TGACGTAGATCA  | 708.51616342548  | 0.451265840147274 |
| ATGAGTTAATCA  | 708.526625360256 | 0.337148328769292 |
| GTGCTATAGTCA  | 708.533364777322 | 0.632521864360376 |
| CAGAGGTGTGAC  | 708.535482832983 | 0.387590851268687 |
| CGTACGCTATGA  | 708.542498168822 | 0.308211947608603 |
| CTAGTCACGCC   | 708.542762452744 | 0.226940317391933 |
| TTAGACGACTAA  | 708.5433088051   | 0.543938028359477 |
| AGTCAGAGATTC  | 708.5487194635   | 0.326198687658675 |
| GACTCTTACTAA  | 708.552327923386 | 0.30840034652206  |
| GTCACATCAGAC  | 708.554967886482 | 0.366975720520466 |
| AAAACCTCGGTCA | 708.560045014529 | 0.46454343645103  |
| CAGTTTTACTCA  | 708.560991684    | 0.318212645613391 |
| ACGTGACCCAAT  | 708.571861767446 | 0.300230008098725 |
| GTCACCCAATCA  | 708.581668035185 | 0.256421173580442 |
| GCAGTAATGACA  | 708.595016569799 | 0.470320421602826 |
| GTCATGTATAAA  | 708.612753543268 | 0.381100341406384 |
| ATTGGGGATGAC  | 708.621979592442 | 0.262461235163821 |
| GTATTGCGTAAC  | 708.631683601499 | 0.233801372164703 |
| ACTCATATTTGC  | 708.633467753952 | 0.255349324368909 |
| CACAACATGACG  | 708.634109710232 | 0.29650888211449  |
| ATGAAGTCACTC  | 708.637961438709 | 0.420158491737546 |
| GTAATTAGTAC   | 708.638116590078 | 0.348800308346027 |
| AGCCAGATGACG  | 708.642532685643 | 0.260080535457554 |
| GCCCCGCATGAC  | 708.653743040542 | 0.386082356549516 |
| ACGTGGTCAATC  | 708.660969067304 | 0.358551514900616 |
| GACTACGCGTCA  | 708.668093507245 | 0.438204542375154 |
| TAATCAACGTCA  | 708.671015516138 | 0.35127215546029  |
| TATGACCCGTAA  | 708.672596170972 | 0.176460621965672 |
| GACTAGTCAGTC  | 708.692377026317 | 0.257691631826626 |
| ACGAAGTAGTCA  | 708.713360356824 | 0.544257634251618 |
| AGTCACGGCCAG  | 708.730364068664 | 0.451570285809688 |
| CGGTTCCATGAC  | 708.733483872338 | 0.468787870594521 |
| GACGTCAGCCAA  | 708.73519494626  | 0.665922701881578 |
| GCTGTCAGTGAC  | 708.736674981457 | 0.348503784577051 |
| TGACCAACGTCA  | 708.748416955553 | 0.324006732584122 |
| CCGATTAGTGAC  | 708.760256563559 | 0.543347538896726 |
| ACTATTGGGGA   | 708.760836895227 | 0.541356641429166 |
| ATCGTGTCACTG  | 708.771785236212 | 0.258216926920578 |
| GCTATCCTATGA  | 708.783528649429 | 0.408487602290003 |
| GCATCGGAGTCA  | 708.783842838452 | 0.325893427738055 |

|               |                  |                   |
|---------------|------------------|-------------------|
| CGTCACATCATA  | 708.78696557186  | 0.358392066346132 |
| ATTACCGTCATA  | 708.789927089708 | 0.312651120736133 |
| TGACGAACCACA  | 708.796865591274 | 0.365270279900162 |
| ACTGTTGGTGAC  | 708.801609837963 | 0.324879254936859 |
| ACTCATTCTTTG  | 708.803858390317 | 0.289883419312904 |
| AGGTCATGTGAC  | 708.805326716365 | 0.338351350743735 |
| GACTCACTGCCA  | 708.818176729368 | 0.475193696639937 |
| TGAATCTTAAAA  | 708.820661787294 | 0.5984423697403   |
| GCACTGGATGAC  | 708.822990199115 | 0.342991963702569 |
| GTAATGGAGTCA  | 708.824142210291 | 0.302133920514083 |
| ATGTCATTAATA  | 708.851038799661 | 0.333552179886771 |
| CGACTAATCGAC  | 708.869746921341 | 0.26450671879028  |
| AATCCTGTCATC  | 708.875450550025 | 0.225987996848762 |
| AATGTGGTGACA  | 708.893221486597 | 0.410944189286069 |
| ATGACGCCTCTA  | 708.89847822688  | 0.311203667879037 |
| GGCACAGAGTCA  | 708.905459089553 | 0.162450806034572 |
| CGAAGATTAGTC  | 708.91073426348  | 0.471816781050247 |
| GTCACGTTCTAA  | 708.914799144534 | 0.364732921531934 |
| AGGTGTGACCAC  | 708.915932108162 | 0.256050496713049 |
| CAAGTCTGACAC  | 708.924499295388 | 0.422942726216537 |
| GAAGCGGAGTCA  | 708.926739691633 | 0.212013860478547 |
| ACTATTACGTAT  | 708.937316770783 | 0.233068037854954 |
| GTAATCTATGA   | 708.939567334675 | 0.412821698205782 |
| AGTACTGATTCA  | 708.941613625152 | 0.322442185482174 |
| GTCACCGCCGCA  | 708.943129642116 | 0.44349376333698  |
| AAGGTGTGTGAC  | 708.944517079193 | 0.282061985347804 |
| CCACTAAATGAC  | 708.94493640728  | 0.341684379828365 |
| ATTCCGTCATTC  | 708.953117159363 | 0.224723633527933 |
| GCTTCTGGTGAC  | 708.958598285412 | 0.418797186643203 |
| AGGACAGCTCAT  | 708.972259595481 | 0.296652912562954 |
| AATACTTTGTCA  | 708.98126647918  | 0.311889458202121 |
| CGAACCAATGAC  | 708.983804886156 | 0.383581760843832 |
| ATGACGTGAGAG  | 708.986083454928 | 0.197173329975224 |
| AATGTGTCGTCA  | 709.001088775872 | 0.372701474669317 |
| ACGGCAGATGAC  | 709.003935795922 | 0.265999746977117 |
| CTATAATGACAA  | 709.004435515548 | 0.307012995211019 |
| ATCAATCGTGAC  | 709.004591447657 | 0.331978095591767 |
| TGTCATTGGTAA  | 709.020530027809 | 0.247642394915091 |
| GGTAACCATGAC  | 709.027294264464 | 0.356034163731498 |
| ATGTCACATGTC  | 709.028126963348 | 0.439122558083277 |
| GTCACCTGCTCA  | 709.031652411828 | 0.249918408782564 |
| CACAACCTGGTCA | 709.034025221914 | 0.342155064339951 |
| CGACATCGATGA  | 709.035552882881 | 0.443122653395149 |
| CGTCATTGCGTC  | 709.046142432449 | 0.324344894924834 |
| TCATAATGCGAA  | 709.051631468059 | 0.40149194138014  |
| GGGTCATCCGAA  | 709.052332056201 | 0.392250693956458 |
| ATGTACGTGTCA  | 709.064494728545 | 0.268154714661709 |
| GTCATGCGAGAC  | 709.067297451937 | 0.332594048883055 |
| CATATTTGTGAC  | 709.072371803665 | 0.394235185179958 |
| CCAGTTTTGTCA  | 709.07575364212  | 0.433875753967764 |
| GAGCCCACGTCA  | 709.081966505937 | 0.40268697540592  |
| GAAGCGTGAGTC  | 709.08780758496  | 0.254650498461199 |
| CAAGGTAGTCAC  | 709.08980196277  | 0.554351859241774 |
| AAATTGACTATT  | 709.096049261974 | 0.210370401062361 |



|               |                  |                   |
|---------------|------------------|-------------------|
| AGATCGCGTCAC  | 709.104397617422 | 0.259357857324197 |
| ACGCTGAGTAAC  | 709.106704886089 | 0.398087576246999 |
| CGTCATTATCGC  | 709.111393617984 | 0.285496929962214 |
| ATCTCGGTGTCA  | 709.114587750943 | 0.412399488501445 |
| AATTTTCTATGA  | 709.11546616861  | 0.518170952710198 |
| ACAGTGTAGTCA  | 709.121150484815 | 0.400919197355605 |
| AAGATCCGTCAG  | 709.122422893403 | 0.199356706130067 |
| GTGTCACCTCAA  | 709.123918706486 | 0.298149839897837 |
| CGTCACCGTAGC  | 709.128455049548 | 0.329894080589206 |
| AAGGCTGACACA  | 709.141189147279 | 0.298194388416413 |
| CCATACAGTCAG  | 709.147120995988 | 0.407210782530107 |
| GTCACCTAAATA  | 709.15000939189  | 0.433958950745634 |
| GAGTATTAGTAC  | 709.155166938362 | 0.367615898025055 |
| ATGAAATGTGAC  | 709.156759922298 | 0.236458350009408 |
| GTTACGTGGCAA  | 709.164940932619 | 0.282685986572672 |
| ATGACAATGTTC  | 709.175234671717 | 0.338758675434414 |
| GGGTCATCACTA  | 709.188626037865 | 0.428468706047756 |
| GTGACAACCTACA | 709.189102029977 | 0.343372955757808 |
| GTCACACGAGGA  | 709.191272222746 | 0.270560689281234 |
| GGATTACTAAAC  | 709.194033990796 | 0.408268280904133 |
| ACCAAGGGTGAC  | 709.218310635412 | 0.296171297428185 |
| TAACGCATGACA  | 709.225790490239 | 0.377199189635771 |
| TGACTCTGTAA   | 709.234707400209 | 0.408469579458561 |
| GGCGTAGACTCA  | 709.239801828509 | 0.347689562624541 |
| GCATATTGTAC   | 709.242442420669 | 0.387481610708377 |
| ATAATGTACCA   | 709.250635103975 | 0.489044634428129 |
| ATGAGTAGGTTG  | 709.252281572305 | 0.193460065247684 |
| ACTCTTGGTCAC  | 709.252830093593 | 0.120025475345827 |
| GTCATCACTCCA  | 709.256156700165 | 0.324374241898057 |
| AACTTTAATGAC  | 709.257669120815 | 0.331951733768679 |
| AGTCCTGACGCA  | 709.2729129718   | 0.329298261684405 |
| ATTGGCGGTCA   | 709.273959676329 | 0.366457869871101 |
| ATGACTTGATTA  | 709.274467391962 | 0.376180809182557 |
| AATCCGCGTCAC  | 709.288047651401 | 0.152515865834622 |
| GACGAATCGTCA  | 709.289283543396 | 0.314183075909947 |
| TCATGATAAAGA  | 709.295240379313 | 0.47416504778115  |
| GAAGTGTGAGAC  | 709.299147362176 | 0.375007422740263 |
| TGAGTCGCATAA  | 709.300984163502 | 0.582375268337239 |
| CGGGCCGATGAC  | 709.302518538031 | 0.476100570687502 |
| ATGAGTAGTTCC  | 709.306020419274 | 0.361670743266358 |
| ATGTTTGACTCG  | 709.311191779774 | 0.591399766571646 |
| CAGGGTGGTGAC  | 709.337896368661 | 0.373764703912289 |
| TCCAGTGGGTCA  | 709.341070199465 | 0.360252147873231 |
| CTTAATGGCTCA  | 709.347890815546 | 0.37674732312352  |
| ATGACCACTCAG  | 709.353492001708 | 0.248476188507884 |
| CCGAACAGTGGA  | 709.380554350677 | 0.483010160892934 |
| CCGCATGACCCA  | 709.384157215492 | 0.243277775110256 |
| AATCACCTGTGA  | 709.386351316926 | 0.427048809857291 |
| AGCATGCATGAC  | 709.392481496341 | 0.374083668954902 |
| GTCACATAATAA  | 709.397030818243 | 0.312215702009945 |
| GTCACCGAACAA  | 709.400693296885 | 0.322625536535714 |
| GACTAATTTGTA  | 709.402351136208 | 0.254092075706108 |
| ATACGGAGTCAG  | 709.419773877653 | 0.273178596084332 |
| ATGACACCCGAG  | 709.420561818351 | 0.338163011894522 |

|               |                  |                   |
|---------------|------------------|-------------------|
| AGGCCAACTCAT  | 709.423391590035 | 0.361806623090124 |
| CGTAGGGAGTCA  | 709.425846903768 | 0.360182078256466 |
| GAGGTGGATGAC  | 709.430053883622 | 0.144110054138251 |
| TGAAGACAGTCA  | 709.441546078279 | 0.244740762065564 |
| GTCATTGCCAC   | 709.447519568043 | 0.211435465486932 |
| CTGACGTAICTCA | 709.450448579236 | 0.20909144252071  |
| CAGTAGGACTCA  | 709.458461034463 | 0.430608291920234 |
| GTTTAGCAGTCA  | 709.45951089868  | 0.343650401050606 |
| AGTCCCTGACTC  | 709.459980915773 | 0.165304115627506 |
| GTCATATCCCTA  | 709.460097335203 | 0.258333893545076 |
| TACTTTACGTCA  | 709.462529867237 | 0.185674778867444 |
| GGCTTTGATGAC  | 709.469659646796 | 0.405801679562154 |
| ACTCATAGGCAT  | 709.471872385328 | 0.635137522922698 |
| GCTAACGCTGAC  | 709.481308310972 | 0.510342993346335 |
| GGATCAGATGAC  | 709.482751450864 | 0.344158035026051 |
| CGTCATTACCAG  | 709.496603266624 | 0.330866298766118 |
| ATGACGGTATTA  | 709.504692521211 | 0.162769271116453 |
| AACTCGAGTGAC  | 709.511025136477 | 0.339423623199597 |
| CATACCGGTGAC  | 709.518048889476 | 0.415479215181003 |
| AAAGACAATGAC  | 709.523115644863 | 0.344427259388549 |
| AAGAATAATGAC  | 709.524613774342 | 0.203443853087171 |
| CACGCTAGTCAC  | 709.528858417323 | 0.364345205873001 |
| AGTCTCGGTGAC  | 709.531873252146 | 0.322405218641611 |
| CTGGGACTCACA  | 709.535631125668 | 0.200601728636192 |
| ACTTCACGTCAT  | 709.546388853964 | 0.33956069520642  |
| ATACCTGAGTAA  | 709.548042351986 | 0.459867589878153 |
| GTCACCAAATCA  | 709.553040108049 | 0.443858246108707 |
| GACTAATTTACA  | 709.565919769754 | 0.464881052110738 |
| GCTTACAATGAC  | 709.576474472683 | 0.362287492420645 |
| ACGAATGAGCCA  | 709.580348423322 | 0.30737678340182  |
| ATAAGCCAGTCA  | 709.582266975573 | 0.407037326812636 |
| TGACAAACGTCA  | 709.594074434721 | 0.355701035422104 |
| GACGTGTGAGAC  | 709.598957679548 | 0.339329994473155 |
| AACAACGTCACC  | 709.601394169048 | 0.219004403516238 |
| CATAATGATGCA  | 709.615229570922 | 0.461213477805445 |
| GACGTGTAICTCA | 709.644618639772 | 0.398437533164547 |
| GACCGAGTCAAC  | 709.650993275049 | 0.428513859740662 |
| GACAGCAATGAC  | 709.661772505276 | 0.435214634839327 |
| AGCGCCTGACTC  | 709.666426755773 | 0.331706364019163 |
| ATGACGGCATAG  | 709.667553653008 | 0.301693102629675 |
| AGATATTGACTC  | 709.684134491757 | 0.334284209789124 |
| GCGTCATGAGTA  | 709.685031183553 | 0.354248531921431 |
| AATGATCGTGAC  | 709.695290414894 | 0.334874918695398 |
| TCATATTATGAA  | 709.69929731438  | 0.688997070236509 |
| GACTCAAGTGAC  | 709.710739047698 | 0.386881405209168 |
| GCACATCCGTCA  | 709.7123750391   | 0.300977609173562 |
| GTCACCTGCGTA  | 709.719532235396 | 0.349342931763102 |
| GCTGCTCCGTCA  | 709.720365499313 | 0.288420890810306 |
| GAATTTCCGTCA  | 709.724588115715 | 0.477360671374382 |
| AGACTAGTCAGC  | 709.7254829598   | 0.18722587731265  |
| TGGAGTGACGAA  | 709.72622905357  | 0.371647628485571 |
| GTGGTCTGACAC  | 709.72672127242  | 0.270860794075422 |
| CGATCCGCGTCA  | 709.728103264763 | 0.368153567306186 |
| GTTACTCAGTTA  | 709.729853161828 | 0.339864753801985 |

|               |                  |                   |
|---------------|------------------|-------------------|
| AGTCACGCGAAC  | 709.733395126972 | 0.303646273922191 |
| ACGATGTATCAC  | 709.741861752661 | 0.33273326228719  |
| AGTCACGAGCTA  | 709.748065777271 | 0.401279515048688 |
| ATACTGTGTGAC  | 709.749172179986 | 0.252760233566979 |
| ATTTGCTCACAG  | 709.752781272962 | 0.296409048076611 |
| ATTATGTGACCA  | 709.753519677149 | 0.472172680191851 |
| ATACATACTCAT  | 709.75999303963  | 0.230019643076151 |
| AAGGGCTATGAC  | 709.775998961412 | 0.142478273849631 |
| AATAGTGACACG  | 709.776444443521 | 0.354156740796221 |
| GGCGGCTATGAC  | 709.781166063894 | 0.373720158296194 |
| GTGACAAACCAA  | 709.78158945789  | 0.348303134612487 |
| CGGAGCAATGAC  | 709.785045946731 | 0.454057485197574 |
| TGAGTCGCCCAA  | 709.796357618822 | 0.40712936295344  |
| AATACAACCTCAT | 709.812799743651 | 0.363605295444659 |
| AGACATGATGAC  | 709.813643567041 | 0.311193744721062 |
| CGTCACCTCTGA  | 709.815321925028 | 0.215726950525919 |
| GCAGTCAATGAC  | 709.815649109284 | 0.33853706496413  |
| CATCTGTGACGA  | 709.82106401887  | 0.301100383866938 |
| GTGGCTGTCATA  | 709.821931882668 | 0.238758425055774 |
| GAGGATTGGTCA  | 709.826675534563 | 0.104841171339343 |
| TCACTGGTATGA  | 709.835823685887 | 0.394812469773851 |
| TAACGGTGACCA  | 709.840043948253 | 0.253725941011778 |
| ACGGGCGACTCA  | 709.85638381343  | 0.418080994538382 |
| GTTTCATGAATCA | 709.856627807673 | 0.378011481552065 |
| AATCGTGTGACG  | 709.864945738137 | 0.352671367325132 |
| CGATTACTCGTA  | 709.867337405296 | 0.345382977694552 |
| CGTCATCCCGTA  | 709.871811442592 | 0.20775893340801  |
| GGTGTGATGCGA  | 709.88717450236  | 0.324384680622896 |
| AATTACGCAACC  | 709.887630224485 | 0.292235629633435 |
| ATGACAGTAAAC  | 709.89465794442  | 0.281102571878399 |
| TCGGCTGAGTAA  | 709.89720809086  | 0.400835917166247 |
| ACGTCACGTTTC  | 709.904044742131 | 0.478500437341555 |
| CTTCATGACCCA  | 709.90526527981  | 0.129343850776854 |
| ACATGTAGTGAC  | 709.911306881698 | 0.456507896472785 |
| GTATAGGTCACA  | 709.92619645254  | 0.318092905934147 |
| AGGTTCCGGTCAT | 709.927940422162 | 0.275099321652633 |
| AAAATATTACGT  | 709.928403123858 | 0.395875614648622 |
| ACTCATACAGTA  | 709.937881573717 | 0.200986164695058 |
| ATGAGTCTCCCG  | 709.941304286435 | 0.22890430012976  |
| CTCCATAATGAC  | 709.942539060981 | 0.380591327462926 |
| CGTCACTGTTGC  | 709.949454453091 | 0.36326046826579  |
| TGCGAATGACCA  | 709.952689064428 | 0.371336389174429 |
| ACTTTAAATGAC  | 709.956934224869 | 0.297982238211246 |
| TGCGTCAAAGAA  | 709.95763230273  | 0.134336821785628 |
| CTATATGATGAC  | 709.961067622329 | 0.277534420440414 |
| ATACTATGTGAC  | 709.965448319271 | 0.344373985414527 |
| TGTCATTAGCAA  | 709.97612695232  | 0.380462969631551 |
| AGCTCAAGTGAC  | 709.978558003166 | 0.472223911402816 |
| AGTCACGCGGAG  | 709.979810374601 | 0.284240779182774 |
| AACAGGTACACAC | 709.99163916036  | 0.313557240037118 |
| ATGGTACTCACC  | 710.012970986081 | 0.10951445261273  |
| ATGACTTGCCAC  | 710.021344978289 | 0.256535749044458 |
| GGCCCTGTCATA  | 710.032585157684 | 0.256052271660655 |
| ATTAGCACGTCA  | 710.041805732571 | 0.396985066128112 |

|                |                  |                   |
|----------------|------------------|-------------------|
| GTCACCCTTCAA   | 710.044927155221 | 0.229077549862253 |
| ATTAGCAGTCAG   | 710.045912894751 | 0.512739440558524 |
| CGTAACTCGTCA   | 710.049673128104 | 0.521343169700008 |
| GACACTGATTCA   | 710.053573389268 | 0.539135106164733 |
| GTCATTTCCGCA   | 710.055338428731 | 0.3305937540873   |
| GTCACCAACCTA   | 710.058455243252 | 0.207754341170074 |
| GTCATGATTGAA   | 710.070353003383 | 0.329428096159384 |
| CGGCCATATGAC   | 710.076177964032 | 0.582674870611686 |
| TCCGTGTGACAA   | 710.079139720345 | 0.346743131740721 |
| CAGCAGGAGTCA   | 710.086976580592 | 0.424094911776832 |
| ATGACACTCGTG   | 710.091406110718 | 0.36543066457996  |
| TGTCATGTTCAA   | 710.097139494749 | 0.510590026284296 |
| ATGACATTATCC   | 710.102104213945 | 0.251463293735445 |
| AACAGTGACCAA   | 710.106463661514 | 0.295144113225844 |
| TCTGGGTACCA    | 710.107162695109 | 0.33451050130662  |
| ACCACTAAGTCA   | 710.108975748058 | 0.415726226729253 |
| ATGACAGTACGC   | 710.112281751168 | 0.385023665879965 |
| ATACAGTCAGTG   | 710.120604193512 | 0.3602337496496   |
| CGCATTAAATGAC  | 710.1268779967   | 0.347687333188241 |
| CGTCAAATGACA   | 710.12703082072  | 0.311057641687421 |
| ACGGCTAGTGAC   | 710.127644358214 | 0.43993471218677  |
| ACTCTGACGGAA   | 710.127847343211 | 0.408165161348738 |
| GTCACCAGCGTA   | 710.129849825409 | 0.350632103945122 |
| AAGCAAGTGACT   | 710.133044431289 | 0.22944250638405  |
| ACTCATAGTTTA   | 710.143512597756 | 0.467486663008478 |
| CAGACGTGACAC   | 710.145910284262 | 0.565518730282361 |
| ATGCACAGTGAC   | 710.170359412069 | 0.360883402998464 |
| CCTAGTGACCCA   | 710.19129563864  | 0.314201387237393 |
| ATCAAGCAGTCA   | 710.191851496691 | 0.483451089692659 |
| CATGTGCGTGAC   | 710.192643815088 | 0.687213891834467 |
| GACTAAGTGTC    | 710.193744194062 | 0.221523923597899 |
| CCGCTGATGACG   | 710.195928742644 | 0.363566642134827 |
| GTCACCCTGTGTTA | 710.197992984844 | 0.554229769209009 |
| AATTACTATTAC   | 710.205532794383 | 0.320127212998515 |
| ACCGCGGGTGAC   | 710.209007747131 | 0.241091769222227 |
| GTGAGTCCAACA   | 710.215503337832 | 0.319703892436076 |
| TGAGCAATTACA   | 710.242903156499 | 0.405182607553146 |
| ACTCATTCGGGG   | 710.24406105367  | 0.513962588960005 |
| ATGACGCTCGCG   | 710.252608061158 | 0.278052263350141 |
| GTCATGTCTTAA   | 710.257509276193 | 0.314199267372957 |
| ATCATTATGAG    | 710.25886439506  | 0.625230819614507 |
| GTGTCACTTTAA   | 710.262460819467 | 0.490492221027073 |
| GGGTGCGATGAC   | 710.275120308823 | 0.504356094940433 |
| AGTCAGAGCTAG   | 710.278569716199 | 0.13942460917076  |
| ATGACGCCTCAA   | 710.281947277565 | 0.424721698324519 |
| AAACTGGTCAGC   | 710.28395771875  | 0.242386493431831 |
| CTAGTCACGAGA   | 710.289072534027 | 0.285194619883991 |
| CTACGAAATGAC   | 710.289667797654 | 0.454810455773461 |
| AATACTTGACTC   | 710.289728463654 | 0.373710837480329 |
| CCATCTGATGAC   | 710.302979530646 | 0.346423078089369 |
| CGTGGTGGTGAC   | 710.304290119344 | 0.429994150167968 |
| AATCCATGTCAC   | 710.304891377917 | 0.212296878053831 |
| GTACCCGTCACA   | 710.31437153227  | 0.345539461982949 |
| TGACGTACGAAA   | 710.314778832744 | 0.472888924880786 |

|               |                  |                   |
|---------------|------------------|-------------------|
| GATGACATTGAC  | 710.315920088928 | 0.313065332969406 |
| GATTATAATGAC  | 710.316404546163 | 0.19917840383332  |
| CATTGATTCACA  | 710.31655965475  | 0.297577578908821 |
| AAACAGATGACA  | 710.330230257424 | 0.343835021567458 |
| ATGACAGTAGCA  | 710.332260472782 | 0.237087925903048 |
| GTGTCACTGGGA  | 710.332928436466 | 0.36411150699556  |
| GGTCAATAGTCA  | 710.346256314367 | 0.294517746824559 |
| TGACACTGAGCA  | 710.347414426185 | 0.316190605140752 |
| AGCCGGAATGAC  | 710.348948643279 | 0.532578527652924 |
| TGACTCGCGCCA  | 710.359817350423 | 0.537906678519403 |
| CTGACGCTATGA  | 710.362178450826 | 0.644007584938559 |
| TGAGTGATATAA  | 710.366536555071 | 0.254601127293823 |
| GTCATTTACAGGA | 710.384023325427 | 0.149456558556434 |
| CAATCTTTGTCA  | 710.423857825776 | 0.462937946077669 |
| ATGACAGGACCA  | 710.426270180693 | 0.286385715706529 |
| CGAGCTGTCATC  | 710.426818863175 | 0.292397145799283 |
| CCTTTTGACTGA  | 710.431832783081 | 0.183757481095699 |
| GGCAATGTCATA  | 710.436254137535 | 0.32612470082281  |
| ATAAATGACCGA  | 710.436731480406 | 0.379586348374874 |
| AGGCCACAGTCA  | 710.448213015379 | 0.484652947082635 |
| AGTACAAATGAC  | 710.450052105654 | 0.367848587808538 |
| GTCATCGCCGCA  | 710.451745534103 | 0.585283222024298 |
| AGACGTCGTCAT  | 710.45698890124  | 0.311853009908456 |
| TAGTTAGTGTC   | 710.459143262263 | 0.31678209086774  |
| GCCCTCTATGAC  | 710.468755047815 | 0.405031100181663 |
| AGTCAGAACCTA  | 710.480410795903 | 0.230214426560378 |
| GGACTATGTGAC  | 710.481310755392 | 0.411983186011286 |
| TCGCACGACTCA  | 710.491390053293 | 0.330511798669831 |
| TATCACTAGTCA  | 710.497758236865 | 0.33933405191277  |
| CGTCACTGCAGA  | 710.51424849367  | 0.652135003442194 |
| AATAGTGAGTCC  | 710.516604433612 | 0.45004402681713  |
| TCGCGTCACGAA  | 710.52259440856  | 0.312667957714641 |
| GTCATAGCCCAA  | 710.543289227948 | 0.268991137411923 |
| AACACTATGAGT  | 710.548797438088 | 0.27281585040821  |
| TGACGAAACAAA  | 710.561202717709 | 0.346923668463688 |
| CAGAACAGTGAC  | 710.564017381339 | 0.533133429286931 |
| AAGTAGTGACGC  | 710.565665576471 | 0.101566150183364 |
| CTCCCTGTCATA  | 710.56823939582  | 0.275063708808824 |
| GAGTTACAGTCA  | 710.568510005113 | 0.358360694951213 |
| ATTGTTTGGTCA  | 710.57333167165  | 0.265237108778068 |
| AGAGTCAAGCCT  | 710.574717540934 | 0.499928300771509 |
| CATTCTAGTCA   | 710.592978964341 | 0.219206368275157 |
| TCCGCAATGACA  | 710.59877446303  | 0.33620074640155  |
| GAGCTTGTGATC  | 710.606861365395 | 0.456198715762278 |
| GCTGGTCATGAC  | 710.611366675591 | 0.429441662783113 |
| CTTAGAAGTGAC  | 710.616055811353 | 0.41655349950034  |
| ATCACAGACTCA  | 710.616239539657 | 0.319887973962633 |
| ATTAGTGACGCG  | 710.627633330115 | 0.291780153269954 |
| CGAGTTTACTCA  | 710.634351176791 | 0.42610549140936  |
| TCATCGGCAGAA  | 710.635826136502 | 0.318058978956747 |
| ATGAGTAGTGCC  | 710.636129387362 | 0.365208160675434 |
| ATGACAAGCCAA  | 710.641316290293 | 0.196700787334733 |
| CAAGCTGACACA  | 710.665575954585 | 0.373963524476755 |
| ATGACAGCGTGC  | 710.668820439735 | 0.336397479103732 |

|               |                  |                    |
|---------------|------------------|--------------------|
| TGACGCGATCCA  | 710.66907818885  | 0.373537285316293  |
| GAGTCAAGTTGA  | 710.673273400892 | 0.330248895997792  |
| ATGACCGAACCG  | 710.679350337804 | 0.372190945833764  |
| AAAGTGCAATC   | 710.684950528121 | 0.209726024648492  |
| ACACGGTGACAT  | 710.686825585057 | 0.229141881457085  |
| AGTCTACTCATC  | 710.70671575801  | 0.264105006288206  |
| AGATATCCGTCA  | 710.71147958206  | 0.404707892548933  |
| GTCACCATATCA  | 710.712594083665 | 0.365257375685649  |
| AGAACTGTGACG  | 710.723647099433 | 0.327152236834147  |
| ATGACGGACCGA  | 710.725068117973 | 0.0739596009610275 |
| ACAAAGTGACGT  | 710.728393388324 | 0.359540031020043  |
| CACCACAATGAC  | 710.75623862966  | 0.320020384728424  |
| GAAGAGAATGAC  | 710.766257581496 | 0.245923216623747  |
| CTTTAGCGTGAC  | 710.770025118636 | 0.415365696146512  |
| GGTCTCCATGAC  | 710.777963039069 | 0.313692906868351  |
| GTGACAATATCA  | 710.779658425581 | 0.363919437993582  |
| GAGCGCGATGAC  | 710.78918778709  | 0.226989199532996  |
| ACTGGGTGACGA  | 710.798632041355 | 0.254888174141093  |
| AACCCTCGTCAT  | 710.79999552169  | 0.187659280666011  |
| CCACGTATGACC  | 710.805775799414 | 0.272967017514351  |
| CACCCGGTGACG  | 710.813880767967 | 0.607044605647892  |
| AAGTCTGATTCA  | 710.818707330363 | 0.217559789338497  |
| CGCGGATGACCA  | 710.819389438515 | 0.458430403229253  |
| ACCTCTGATGAC  | 710.820851095401 | 0.314472856952537  |
| CAGTCAGTTACA  | 710.824801541569 | 0.388046385735457  |
| GTCACCATCGTA  | 710.82610402763  | 0.370592033207951  |
| GGTTCCTAGTCA  | 710.828730675927 | 0.462312405887952  |
| GTGACACCGTCA  | 710.829239851501 | 0.41487258888297   |
| ACCTGTACGTCA  | 710.839216369063 | 0.333056652280663  |
| TGACGTGCGACAA | 710.84165776194  | 0.451203352534998  |
| CACCCAATGACG  | 710.856473611815 | 0.275711666198525  |
| GCGTCACATGTA  | 710.865665988094 | 0.221057361063935  |
| AGTGTCACGCGG  | 710.868883071238 | 0.241402860343412  |
| TCGGTCCAGTCA  | 710.871764029044 | 0.692970070559377  |
| ATACTGGAGTCA  | 710.871999897921 | 0.272428572832796  |
| AGTCCCCTCATA  | 710.874560830139 | 0.279538267748184  |
| ATACGTGGTCAC  | 710.881299309857 | 0.358170996623054  |
| CTGACTGGTTCA  | 710.888036807625 | 0.5157749391765    |
| GACTGACTTTTA  | 710.888695561636 | 0.604210075047892  |
| ATTTCGATGACA  | 710.892057373606 | 0.263097980923564  |
| CGATTACGCACA  | 710.893041638512 | 0.320191079710517  |
| CAGAAATCGTCA  | 710.905720189324 | 0.421527871819696  |
| GTCATTATTACA  | 710.914680346295 | 0.481455391378039  |
| TGACTCTCCTAA  | 710.919251581301 | 0.150323798597984  |
| GAATGATTTCGAC | 710.919436493987 | 0.0918980318936973 |
| GTCATTACCCGA  | 710.920911284395 | 0.222944920589406  |
| ACGTCACGTAAT  | 710.923428600931 | 0.396156690284458  |
| GAGTAGTGTGAC  | 710.929181312669 | 0.264013081252773  |
| CTCAGCGACTCA  | 710.93009127799  | 0.244519819846691  |
| TACTCTTGGTCA  | 710.941400698819 | 0.223470874891165  |
| CCGTTCCAGTCA  | 710.941934973301 | 0.343196799077794  |
| ACGAAATGTCAT  | 710.944224299541 | 0.280053059049842  |
| ACGTCATGGTAA  | 710.954269639499 | 0.467887045447403  |
| TGACGTACGCAA  | 710.960019901548 | 0.443097349503371  |

|               |                  |                   |
|---------------|------------------|-------------------|
| ACATCATGTCAT  | 710.960396943256 | 0.35041819619634  |
| AGTCAGACGCTG  | 710.970442116756 | 0.516406351262386 |
| CTCTATAAGTCA  | 710.974453336786 | 0.388987055107556 |
| CTGACATGACAA  | 710.986345704    | 0.431199675956262 |
| ATTTTGACGCAC  | 710.990796145554 | 0.252653396053085 |
| GTCATCTCCTTA  | 710.994270802365 | 0.289518103848054 |
| GGCGTCAGTGAC  | 711.001789898585 | 0.49654682403449  |
| GTTACTGATTCA  | 711.014545032535 | 0.445521075143205 |
| CGGTGATTAATC  | 711.017211918596 | 0.252012960585159 |
| GCCGAAGTGTCA  | 711.023284847744 | 0.319324422916003 |
| TCACAGAGATGA  | 711.040126695241 | 0.336322364252371 |
| CCGATGACCTCA  | 711.043051529958 | 0.346701956106975 |
| GTGACCAAGTGA  | 711.047915626659 | 0.319701398716528 |
| CCGGCTAAGTCA  | 711.057201124112 | 0.533781076076845 |
| CAGAGGTGACCA  | 711.061253432665 | 0.429499989846287 |
| GGCATTATGTCA  | 711.069255515125 | 0.527986041872238 |
| CCTAGTGAGCAA  | 711.071324355429 | 0.295061632840212 |
| ATGACAGTAACG  | 711.074492397766 | 0.425555378971341 |
| GAATCTTCGTCA  | 711.07574749665  | 0.264953007792684 |
| CAGTCAGCCGGA  | 711.082271327465 | 0.265109309968506 |
| AGTCACGACACA  | 711.092627678701 | 0.250709852473939 |
| CACGAAACGTCA  | 711.094805576541 | 0.271586886540479 |
| CCGCTGACACAG  | 711.095612525297 | 0.460136741194974 |
| ATACACAATGAC  | 711.09637741767  | 0.459155027414396 |
| CTGTCCAAGTCA  | 711.10237155997  | 0.341346575912589 |
| ATATTGACTGAA  | 711.105643354676 | 0.254734987993705 |
| GTTGACATGTCA  | 711.114006152948 | 0.325088142992644 |
| ATGACGGTATGG  | 711.124562420045 | 0.341890838470876 |
| CACCGTGACAGA  | 711.127130541965 | 0.56983128895962  |
| GTCCATGACATA  | 711.137719232691 | 0.359100914790535 |
| GAGCCTTGTGAC  | 711.139524018873 | 0.538405400723353 |
| AATGTCTGACGT  | 711.142012694548 | 0.467355248841594 |
| TCATATCGTGAA  | 711.144463004458 | 0.545058442016311 |
| GGTGACGTCAAC  | 711.1455737898   | 0.412743179264469 |
| AGACTCACTCCC  | 711.175787146772 | 0.296368393659545 |
| GCACTGGAGTCA  | 711.186042410833 | 0.18436251657126  |
| ACCAGAGTGACT  | 711.187502201163 | 0.12505206598126  |
| GCGATACATGAC  | 711.192714647416 | 0.438639704025962 |
| ATAAACATGACG  | 711.205119463318 | 0.459735501545309 |
| TGACGGATGAAA  | 711.210229905854 | 0.227787919774867 |
| ATTGTAAGTGAC  | 711.220133574868 | 0.387988658019473 |
| CATTCGTAGTGA  | 711.22498648843  | 0.451282152648209 |
| GATGACGCCCTGC | 711.22641663417  | 0.293199190196656 |
| AAGTGTCAACAC  | 711.232081430289 | 0.658088367798626 |
| AGCCAAGTCACT  | 711.249363471739 | 0.315212490788216 |
| GCCCCTCGTGAC  | 711.252988663784 | 0.406526781906773 |
| GTGACGCGCCAC  | 711.259137623744 | 0.402283746785448 |
| GTCACACACCTA  | 711.260168707069 | 0.26293658553315  |
| ACGTCACTATAA  | 711.261183160711 | 0.277432191765235 |
| AAGAATTGTGAC  | 711.281297340812 | 0.219812821950697 |
| ACGTCAACCCGA  | 711.283465602203 | 0.338149038028918 |
| ATACTGTGACGC  | 711.287753817201 | 0.482353030377576 |
| ATTTGTTGTGAC  | 711.291807844949 | 0.422022765692594 |
| ATCCGGTGTGAC  | 711.293009920683 | 0.369800149165537 |

|               |                  |                   |
|---------------|------------------|-------------------|
| GATCCTGGTGAC  | 711.293329648256 | 0.574618205311896 |
| GTCATGCAATTA  | 711.29949116615  | 0.583075143450909 |
| CGAGTCTGTAC   | 711.309309609398 | 0.327837833986863 |
| GGGGCGTACTA   | 711.311058611813 | 0.293507087965611 |
| TGACAAATGTAA  | 711.329598754703 | 0.287660667589514 |
| ACGGTCACGTCA  | 711.329674495383 | 0.649526736269797 |
| ACTCATACTGCG  | 711.336154461474 | 0.252575424520899 |
| GAGACCGAGTCA  | 711.336449904836 | 0.283591782580276 |
| CCAAGCCGTGAC  | 711.351080597961 | 0.344930924903183 |
| CGTCATCAATCC  | 711.359406450815 | 0.330403426469036 |
| CGATGCGTCTTA  | 711.365898258197 | 0.299071802654357 |
| ATGACAGTAGCG  | 711.367984765626 | 0.342577934874499 |
| ATGACTTCTTAA  | 711.372171850535 | 0.256896201914072 |
| CCTTGCGTGACG  | 711.385373219938 | 0.454368428128892 |
| GCTGACTGTAAC  | 711.390413994646 | 0.35190844786897  |
| TCCGAATCGTCA  | 711.391608030637 | 0.408996937015536 |
| AGTCAGAAACAT  | 711.400235831653 | 0.270088577956712 |
| ACTATAATGAGT  | 711.414296556974 | 0.619899226698568 |
| CTCAAACGTGAC  | 711.424964215977 | 0.368349714470518 |
| GACTCATGGACA  | 711.435597408783 | 0.35356480634594  |
| ACAACGGGTGAC  | 711.43776462125  | 0.314493582211968 |
| CGGATAGTGTCA  | 711.458884386645 | 0.263173762436017 |
| AGAGTCAAAAGG  | 711.466927092334 | 0.208106778816719 |
| TCGCATCCGTCA  | 711.467736601246 | 0.300379133404849 |
| CGTCATGTCTGA  | 711.467899649775 | 0.635204195457007 |
| ATGACGTCTACC  | 711.468109030468 | 0.222402730501137 |
| AACGCGCAGTCA  | 711.469397291964 | 0.415717871961919 |
| ATTGGCCATGAC  | 711.469546604204 | 0.355065934655078 |
| GGATTACGCACA  | 711.474381635547 | 0.422203598248861 |
| CTTCCTGCGTCA  | 711.480398505781 | 0.40246042605135  |
| TACTCATGACGA  | 711.481994691118 | 0.152159509528954 |
| ACATCCTATGAC  | 711.488739721788 | 0.305000736720172 |
| CATGTATTCATA  | 711.498085490551 | 0.21737515991701  |
| AAACCTGAGTAA  | 711.499403262481 | 0.287789060376847 |
| GTCATTCACCCA  | 711.506906445793 | 0.238308070998292 |
| CACGTAATATAC  | 711.508512727846 | 0.43005927754407  |
| GTCATTTACAGA  | 711.521776245572 | 0.514146585416539 |
| CAAGCTGAATCA  | 711.531940411445 | 0.365940723917486 |
| ATCGAACTGTCA  | 711.537164315423 | 0.303148152340438 |
| CGTCATTTATTC  | 711.539428370747 | 0.200811161251354 |
| ACGCCTGTGACG  | 711.552169835893 | 0.408131427020831 |
| ACTCATTGGAAC  | 711.555819758772 | 0.20813497820847  |
| GCTCTATATGAC  | 711.558576016308 | 0.349556331725177 |
| ATTGGCATGACA  | 711.56675897897  | 0.289796797528603 |
| ATATAAAGTGAC  | 711.569615881126 | 0.378920007496576 |
| TGACTACGCCAA  | 711.577258018869 | 0.364581239922607 |
| GGTGACGTTGAC  | 711.5867889464   | 0.308124231878571 |
| AGAAACTTGTCA  | 711.590024193443 | 0.317505988654126 |
| ATGTGACATGGC  | 711.597320090621 | 0.144188020208824 |
| AACGCCTAGTCA  | 711.59789125465  | 0.315702425971927 |
| ACTCATTTACAGG | 711.599070238987 | 0.403992392362903 |
| AGAGTAATTCTG  | 711.600373282706 | 0.381336468718009 |
| AATCTCTGTGAC  | 711.603482252616 | 0.251779057463457 |
| TCGGACTTGTCA  | 711.613671258469 | 0.443307716645944 |



|                           |                  |                   |
|---------------------------|------------------|-------------------|
| T T A C T C A G C C A A   | 711.614448609858 | 0.332386006952169 |
| C T G A C G G A T T T A   | 711.615062427463 | 0.417113473376045 |
| A C G T C A C T C A G G   | 711.615374839449 | 0.513728214362919 |
| T A C A T T T G C T C A   | 711.620244569719 | 0.316507010306379 |
| T G A G G T G A C C C A   | 711.628205268122 | 0.18008180884455  |
| A T C T G T G A G C A A   | 711.629810529885 | 0.46544546925044  |
| C T T A T T G A A T C A   | 711.630985805827 | 0.370135106500186 |
| G A T A C G G A G T C A   | 711.631538260414 | 0.312772917445234 |
| A C T C A T A C C T C T   | 711.633855107382 | 0.21896752570944  |
| A T G A C A T T A C C A   | 711.635575913168 | 0.349680813821421 |
| C T G T T T C C G T C A   | 711.65556011176  | 0.291440131539495 |
| A T G A T G T A T C A C   | 711.65687300022  | 0.353338195254807 |
| A T A C T G A G T A A C   | 711.657290879113 | 0.298361317638241 |
| A C A C G C T G T G A C   | 711.657869995254 | 0.430197719944397 |
| A G T C A G A G G T A T   | 711.659281227273 | 0.210049060700581 |
| G T A T C G T A C C A     | 711.661115764935 | 0.432016891360093 |
| A T G A C T T G C C A G   | 711.664002781225 | 0.390967107924338 |
| A G C T T C G C G T C A   | 711.670633670581 | 0.339887319965229 |
| G G G C G T G A A T C A   | 711.67245414021  | 0.280694111629243 |
| C A A C A G A T G A C A   | 711.675389422462 | 0.382985689374057 |
| C A T G C T G T G A C A   | 711.683049884815 | 0.376524161306537 |
| T G C G C T G A G T A A   | 711.699261853664 | 0.408779129818731 |
| G G T C A T A C C A G A   | 711.709849488528 | 0.449092590810593 |
| G C A T C A C G T C A C   | 711.723140208365 | 0.26967432046414  |
| A C T A A T T T A T C G   | 711.723826179717 | 0.467670595210964 |
| C C A G T T G T G A C A   | 711.727043306972 | 0.449824308997453 |
| C C T T G T G A G C A A   | 711.727723297195 | 0.328789937573479 |
| G A C T C A C T A C C C   | 711.728390605557 | 0.336084321054453 |
| A T G A C G A G C T A A   | 711.731218102756 | 0.327558269114876 |
| C A C T C A A A T G A C   | 711.733101561356 | 0.309868768735141 |
| G T G T C A T A G A G A A | 711.739719731678 | 0.332395119885082 |
| A C T T A A A A T G A C   | 711.742233403084 | 0.414932856601798 |
| A C T A T T A C T G A A   | 711.750445748567 | 0.266864118476515 |
| A G A G T C A A G A A T   | 711.754295450904 | 0.388848179549656 |
| C A A A T T C G T C A A   | 711.759319288009 | 0.281501620886557 |
| C G G T G G T G T G A C   | 711.767403819861 | 0.254841535605098 |
| G A C A T A G A C T C A   | 711.771469310814 | 0.496463905331652 |
| A T T G G A T T A G T C   | 711.779476361632 | 0.374484319425332 |
| G A G A G C A A T G A C   | 711.781314981906 | 0.326464761084937 |
| G A T T C A T A T T T A   | 711.793811497455 | 0.548187949316287 |
| A C C C T G G A G T C A   | 711.79431265007  | 0.219441356886017 |
| C T C G C T G T C A T C   | 711.800844058567 | 0.250359017191125 |
| A T T T G A T G T G A C   | 711.804352443897 | 0.440871264955502 |
| A T G A C A T C G A T G   | 711.812949906096 | 0.335761051000775 |
| C C C T T G T G T G A C   | 711.818160094411 | 0.313845138480556 |
| A C C G C T G T C A T A   | 711.834553821868 | 0.225151396305772 |
| C T A G C G C A G T C A   | 711.840823123107 | 0.475326927443815 |
| G T C A C A A T A A A C   | 711.841263475701 | 0.38682870499057  |
| G C A A T G C A T G A C   | 711.84663313257  | 0.312348598086061 |
| A T G T T G A C C A A T   | 711.847139512011 | 0.380759831349007 |
| G T C A T A A C G G T A   | 711.852276466945 | 0.36471386982071  |
| C C T T G T G G C T C A   | 711.860635619504 | 0.279499204331021 |
| A C T C A T C T T T T G   | 711.863409870268 | 0.320419598588517 |
| G T G A C A G G T T T A   | 711.869361013411 | 0.16301627085865  |

|               |                  |                   |
|---------------|------------------|-------------------|
| CGACCCGGTGAC  | 711.874672814958 | 0.349448344600384 |
| CTGACTGTATAA  | 711.877748851269 | 0.292958675087735 |
| GTCATGGCATAA  | 711.879390820595 | 0.424088645570966 |
| GGTGAGCCTTAC  | 711.879624572651 | 0.31936448378858  |
| ATGACGAGGCTC  | 711.885179487629 | 0.430277882458965 |
| GACTGTTGGTCA  | 711.886090049636 | 0.343353278035505 |
| TCATGACCATGA  | 711.886266046378 | 0.301751720967861 |
| AATGATGTGGCA  | 711.88861980671  | 0.308166911791415 |
| ACCGGGTGACAT  | 711.889063789992 | 0.378586364149899 |
| AAATTAGATGAC  | 711.889785056462 | 0.416123322302125 |
| CGCCGATTAGTC  | 711.889803475016 | 0.467569262385407 |
| CAGCTGTCATGA  | 711.894034553439 | 0.325290498870864 |
| GTCATCTCAATA  | 711.895037015714 | 0.388487749283831 |
| AAGCCTAGTGAC  | 711.895512766625 | 0.652805016958667 |
| ACCTCGTAGTCA  | 711.897646694292 | 0.362116710974788 |
| GAACACAATGAC  | 711.909080463828 | 0.423922700148661 |
| ACTCATAGCTGA  | 711.909166131653 | 0.549888278228819 |
| GCGTCAGATTCA  | 711.916724236645 | 0.368038689220936 |
| AGTCGGGATGAC  | 711.919013010638 | 0.256156604705853 |
| ATCGTGTACTCA  | 711.923236515565 | 0.3759025000363   |
| TAGGCCACGTAA  | 711.923243692512 | 0.354119049169207 |
| CAATTAGTCTGA  | 711.926365952344 | 0.330863512470893 |
| AACGGGTACATAA | 711.926589141364 | 0.262686065812857 |
| TCACGTAAGTCA  | 711.929845531931 | 0.382697497570181 |
| GAACGTTGTAC   | 711.933615421773 | 0.3393871901093   |
| AGGACTCGGTCA  | 711.939402934356 | 0.323953567017181 |
| GACTCACTGTAC  | 711.940806833135 | 0.463155537511362 |
| GTCATTTTACCA  | 711.947365302056 | 0.516585764740942 |
| AGGTTGAATGAC  | 711.953033113153 | 0.251856610093169 |
| GAGTTGAATGAC  | 711.967682087763 | 0.184465848941472 |
| GTCATTGTTATA  | 711.971383816674 | 0.37906573339089  |
| GACTAATTGGAC  | 711.974595954519 | 0.434986339043876 |
| AAGGACGATGAC  | 711.979910557679 | 0.182225617937674 |
| ATGACGATGCCA  | 711.987180436237 | 0.380419325516124 |
| CTGATTGCATCA  | 711.995661196121 | 0.443383112911327 |
| AAGATGACCGAA  | 712.004017324768 | 0.322127994741275 |
| AGTCAGAAATGA  | 712.012509487265 | 0.304581161105585 |
| CGATGTTCTGCA  | 712.013759600834 | 0.335142126831426 |
| CGATCCTATGAC  | 712.017113640481 | 0.460742534251048 |
| ATGACAGGGCAT  | 712.026694538809 | 0.26201512813814  |
| ATTGTAATGACG  | 712.029420440683 | 0.33599414902093  |
| GCAATCCTATGA  | 712.046318328223 | 0.404033058001042 |
| ATAATTTGCTCA  | 712.076617032944 | 0.220016463228999 |
| ATGAGCAACAGA  | 712.078515878241 | 0.31613338214481  |
| ACGGCAATGACG  | 712.082366187331 | 0.383736316971611 |
| ACTGTGTGTGAC  | 712.085918995891 | 0.296348959837157 |
| CGTGGGAATGAC  | 712.088219466248 | 0.319014877896057 |
| TGTCATTTCTAA  | 712.0894184689   | 0.140642544837009 |
| CATATGCTGTCA  | 712.095166514434 | 0.322709542173174 |
| ATGAGCAAACAG  | 712.096363955002 | 0.304883454272766 |
| ACAGCTTGTGAC  | 712.097137687588 | 0.459473580337368 |
| CACCGTAATGAC  | 712.103275382034 | 0.288112832375367 |
| ATTGCTAATACC  | 712.104819976148 | 0.267963436220208 |
| TGGTGAGCAAAA  | 712.105517926889 | 0.236835686498106 |

|                |                  |                   |
|----------------|------------------|-------------------|
| CGCATGGGTGAC   | 712.117085199105 | 0.407373034013975 |
| CAACTTTGGTCA   | 712.121029349153 | 0.324396859769344 |
| CTCATCATGACA   | 712.12634021738  | 0.308621565852112 |
| CCGTCACGATGA   | 712.144652601959 | 0.247480813700028 |
| ACCGCAGATGAC   | 712.149929670654 | 0.477768086448815 |
| ACAGTCAGTCTA   | 712.15512079587  | 0.177832038972357 |
| CGATTGGGTGAC   | 712.156896133395 | 0.318553584635315 |
| CCCGATGACCGA   | 712.175706737724 | 0.337781670458435 |
| CGGCTCAGTCAA   | 712.178948032511 | 0.297691262018518 |
| TACCGTGACAAA   | 712.190398685468 | 0.413870529379147 |
| GTCAGAGCTCAA   | 712.196203756646 | 0.457038382393795 |
| AGTCAGACCATG   | 712.208802946872 | 0.354441631677026 |
| ATAAATTAGTAC   | 712.212274205295 | 0.491434674742953 |
| GTCACCGGACAA   | 712.21919893874  | 0.371986586343719 |
| GCCAAAGGTGAC   | 712.227938069661 | 0.397426945422265 |
| AGTCACGACGTA   | 712.228126910977 | 0.378240341220401 |
| GCGTCACCTTAC   | 712.229178353046 | 0.332910563652213 |
| TGCGCTGTCA     | 712.231943634545 | 0.424596556793572 |
| GTCATTCTGCCA   | 712.232078371695 | 0.390937363779536 |
| CAACGATGAGCA   | 712.234272809943 | 0.320193685014992 |
| CGGGACAATGAC   | 712.235316693641 | 0.399205745217077 |
| GACCCCGTATA    | 712.235859202735 | 0.279184801985573 |
| CTAGACTGGTCA   | 712.242380015735 | 0.237097323452825 |
| CCGGTCTGACAC   | 712.243357581285 | 0.291102215232608 |
| GTCTGACATAAC   | 712.245975569052 | 0.320110431068852 |
| GCGTCACCAACA   | 712.262183832719 | 0.24667319583835  |
| CATTCGGACTCA   | 712.26530000699  | 0.309645747135732 |
| CGTCATGATACA   | 712.266471451782 | 0.193633007772673 |
| AGGATTACGCCA   | 712.273557087269 | 0.405073616127789 |
| GTACTIONTGTGAC | 712.27702242545  | 0.193645355642504 |
| ATTGACCTGTCA   | 712.278173123534 | 0.529090741006164 |
| ATATGTCAGAGA   | 712.281692419556 | 0.115016710054048 |
| TACACGCAGTCA   | 712.285834216521 | 0.211015110078193 |
| CCATTGAATCAC   | 712.294790113833 | 0.331444913549478 |
| CATAGCATGACA   | 712.302912779095 | 0.337505087989247 |
| ACACGAGTGACG   | 712.308628853399 | 0.352722905957717 |
| AGACTCACGGCT   | 712.314795639975 | 0.436684747947651 |
| GATCAGTGACAC   | 712.315604225079 | 0.421573980684494 |
| ACCGTTCTGACT   | 712.317244528364 | 0.213528368054905 |
| TGAGTCCTTTAA   | 712.32618992473  | 0.502488950140996 |
| AGAAGTGTGAGA   | 712.333153913435 | 0.266163990959864 |
| CCCGACATGACA   | 712.336907545385 | 0.597504242123764 |
| CACAATGTGACA   | 712.337285178884 | 0.293536980347474 |
| ATGACATCTATG   | 712.337970973188 | 0.431851604269528 |
| GACGTCGCTGAC   | 712.33951708231  | 0.452423519933442 |
| AGCGCTTATGAC   | 712.339716438625 | 0.389608722065808 |
| AGGCCACGTC     | 712.349960463745 | 0.389493095775965 |
| AATGCATGACGC   | 712.350303841034 | 0.284249020336174 |
| TGACTCTCAGCA   | 712.353422937863 | 0.471761202659487 |
| GCTACGCTATGA   | 712.35774484919  | 0.397579907714406 |
| ACTCATATTATG   | 712.358636604421 | 0.302829195332639 |
| GAAACTCTGTCA   | 712.36043174269  | 0.50083126878295  |
| AACTGTGACATG   | 712.373426457036 | 0.189090985783044 |
| GCTCAGTGACAC   | 712.374199222138 | 0.351049499794793 |

|              |                  |                   |
|--------------|------------------|-------------------|
| GATGACGCCGCC | 712.376788691947 | 0.478909091120593 |
| AACAACGTCATG | 712.377177805948 | 0.373625429754866 |
| ACCATAGCGTCA | 712.379016156805 | 0.308766909863742 |
| GATACCCAGTCA | 712.391425593608 | 0.369880370219012 |
| CAGCAGTGACAC | 712.394801672806 | 0.468566578554399 |
| TGCCCTGACGCA | 712.438666375355 | 0.340153620341841 |
| GAATTGAATCAC | 712.442038818564 | 0.230705338456849 |
| CATGAGAGTGAC | 712.447189223647 | 0.374606437568629 |
| ATGACAGTCTTC | 712.452588150523 | 0.329418503483563 |
| AATGTGCGTGAC | 712.465554093069 | 0.392276623020874 |
| CTTTCCTATGAC | 712.483699694267 | 0.178439725400646 |
| TCGAATGGGTCA | 712.485783198267 | 0.365320449462773 |
| CCTAAGGTGTCA | 712.508738717565 | 0.327076783907651 |
| CTGCGTCAGGAC | 712.512930255891 | 0.491351853223653 |
| ATTAGTGGTGAC | 712.513923510919 | 0.329496835362322 |
| CTCGAAGTCACA | 712.514063109781 | 0.274842015282044 |
| ATCCAAATGACA | 712.526050916917 | 0.180211519098812 |
| GTGACAAGTTAA | 712.531713528296 | 0.399076058776247 |
| GCGGACAATGAC | 712.540832003606 | 0.244173868063734 |
| GTCACGCGACAA | 712.54142750058  | 0.451581036625934 |
| AACCGCGTCACT | 712.55348756262  | 0.203268322492229 |
| CGGTGACGATGA | 712.562573144684 | 0.421565352271476 |
| ATGAAGGATGAC | 712.56401015887  | 0.501009785976133 |
| TGCGTAATCGAA | 712.570555499278 | 0.466471613364018 |
| CACAGTGACAAA | 712.576663094331 | 0.381137139385228 |
| GTCATTATGCAC | 712.577281730352 | 0.326124769769317 |
| GTCATGGCTGGA | 712.598763380433 | 0.243232708728682 |
| GATGACAAGCAC | 712.606192725259 | 0.400333441583841 |
| AATAGGATGAGT | 712.606711696403 | 0.246038348896052 |
| ATGACATGATCA | 712.608012078559 | 0.326038189306273 |
| AGTTGACGTATC | 712.613584426865 | 0.399603155177121 |
| CTTCCGGGTGAC | 712.617304633427 | 0.369128834739543 |
| GTCATCACCGAA | 712.618855803514 | 0.232617982645149 |
| CGTTTTGTGTCA | 712.623335414916 | 0.223130293195825 |
| GGTCCTGACGCA | 712.629162892182 | 0.302417027098899 |
| GTGATTCATAAA | 712.647279192976 | 0.357563212147992 |
| ATGACAGCGCAG | 712.657687123632 | 0.344967576816567 |
| CGTATGTATACA | 712.660455968294 | 0.371914550749231 |
| AACCCATATGAC | 712.678774421008 | 0.242636346038204 |
| GCGATTGACTGA | 712.685597914062 | 0.395882935906607 |
| GCTTCCGCGTCA | 712.690278438511 | 0.415860389795867 |
| TGGATTGACACA | 712.691192043564 | 0.283972264451524 |
| TATTGGTGACGA | 712.699282106402 | 0.128429111998684 |
| ATGACGGGGCAA | 712.699306987987 | 0.306940470339232 |
| AACCCTGTCATC | 712.701028128122 | 0.217691147901956 |
| GTGAGTCCACAA | 712.707259425794 | 0.303829933193591 |
| ACGTCATGATAT | 712.710608270048 | 0.162351684478126 |
| ATTACTCTGTCA | 712.726425073744 | 0.34981972865598  |
| CATTGAGTCGTC | 712.743682418809 | 0.322008411849661 |
| CGCACCCAGTCA | 712.753180056283 | 0.349677662085402 |
| GTCATACGCGCA | 712.753864685658 | 0.442238345001742 |
| ATATCATGACAC | 712.760819562752 | 0.251306169443096 |
| AGTCATGGTACA | 712.768465711478 | 0.166498932565157 |
| ATGACACCCACG | 712.770606363915 | 0.30755227684862  |

|               |                  |                   |
|---------------|------------------|-------------------|
| CGAGTCGGTGAC  | 712.772902914352 | 0.354840369987326 |
| GTCACCTGACTA  | 712.793244764341 | 0.330887755582005 |
| ACCTAGGACTCA  | 712.805094849648 | 0.283200982652747 |
| GATTCATCTGAC  | 712.810108034136 | 0.359355781117985 |
| CGACTCACGCGA  | 712.81301739919  | 0.322540421243937 |
| CATAAGGTGTCA  | 712.81579143621  | 0.214112579313131 |
| AGCAGTCAGCCG  | 712.844564905174 | 0.389455298638162 |
| ACTCATAGCTGC  | 712.850601302949 | 0.353037886445488 |
| AAAACCTGTAC   | 712.855402061939 | 0.352268733950889 |
| GTCATTCAGCTA  | 712.86402216131  | 0.221530306988234 |
| GCCCCGAGTATGA | 712.864687593998 | 0.598501313150571 |
| GTCACCGTCGAA  | 712.869666698703 | 0.363660042272165 |
| GCTTACATGTCA  | 712.885839099514 | 0.395409488224098 |
| GTCACATATTCA  | 712.910402519179 | 0.320090926366802 |
| CAGTCTGTGACA  | 712.919378058397 | 0.570852371106457 |
| ACGTACAATGAC  | 712.922869762893 | 0.278203705950566 |
| ACTCTCGTGACG  | 712.924150783412 | 0.536715121673106 |
| CGTCACATCGGC  | 712.927189014616 | 0.438143118473165 |
| CTGGCGTACCA   | 712.932402695376 | 0.311920323709548 |
| CTTACGTGACAC  | 712.932498233031 | 0.305563337552253 |
| CTGACGCAGCTA  | 712.93346904126  | 0.366804658487044 |
| ATGCGACAGTCA  | 712.949037883537 | 0.554347130057057 |
| ACTCATTTTCGA  | 712.950348098525 | 0.386980547532201 |
| CTAGATTGGTCA  | 712.95063714285  | 0.266341073700202 |
| GCAACCCAGTCA  | 712.96820508971  | 0.246310819226863 |
| CCACCCGAGTCA  | 712.969815615722 | 0.380848563105846 |
| GTGACGACTACA  | 712.977596162818 | 0.400542861376497 |
| TGTCACCGACAA  | 712.985798300999 | 0.258386957767071 |
| ATCGCTAATGAC  | 713.003303829482 | 0.340051703534086 |
| GTCATAAAAGGA  | 713.010653114422 | 0.318357480295803 |
| TGACGTACGTCA  | 713.011766977575 | 0.433915364781399 |
| ATTGCCGACTCA  | 713.017998371382 | 0.524802878323146 |
| TAGCCTGTGACA  | 713.023637693817 | 0.319833834504476 |
| GGGCAATAGTCA  | 713.034581286529 | 0.204851491984387 |
| ATACTAATGACA  | 713.036600569013 | 0.471153592432533 |
| ACATATCCGTCA  | 713.064737524106 | 0.263117906310854 |
| TCTCCTGACGCA  | 713.072659578269 | 0.269298037598562 |
| ACTTGGTGACGA  | 713.084483007609 | 0.495900761666637 |
| CCATAGAGTGAC  | 713.089322254689 | 0.514216950756833 |
| AAGCGGACTCAC  | 713.090366083368 | 0.340450093156207 |
| AACTTGTCACTC  | 713.092119239452 | 0.325975940775771 |
| ATACACGTGACA  | 713.10115921824  | 0.166013723771807 |
| GTTGATGGGTCA  | 713.105364570783 | 0.311808322754715 |
| AACTAATGACAG  | 713.106246333549 | 0.464032551562849 |
| ACAAATATGAGT  | 713.113361888862 | 0.2511733970473   |
| AGTCAGCGTTAG  | 713.125193550851 | 0.260871722158682 |
| ATGCGGTGTGAC  | 713.129282090393 | 0.384886605807317 |
| CTGGACGGTGAC  | 713.140817599475 | 0.425559624305684 |
| ACCACCTGACTC  | 713.146314557954 | 0.350121054653336 |
| GTCATTAGATTA  | 713.147968937302 | 0.419729462518765 |
| ACTCCTGGTGAC  | 713.157634042611 | 0.230530343136533 |
| ATGACCGAACGA  | 713.159005829329 | 0.341920410302861 |
| GATTGACACAAC  | 713.159856670946 | 0.357675091230829 |
| CGTCACAATAGC  | 713.16051529428  | 0.409223996371419 |

|               |                  |                    |
|---------------|------------------|--------------------|
| TAGTACTAATCA  | 713.161130804283 | 0.28093787275733   |
| CTGACTAGTCAA  | 713.165491706272 | 0.327339474453104  |
| TTCGTCAGCCAA  | 713.16670590368  | 0.429020723431522  |
| CACGTGTACTCA  | 713.167344567008 | 0.290580171016985  |
| CGTATTGATTCA  | 713.170592064677 | 0.28019789543954   |
| GCGTGTGAATCA  | 713.176260733902 | 0.327054145834033  |
| TCGTTACAGTCA  | 713.179030913605 | 0.230647247765815  |
| TGTGTAATTCAA  | 713.181635988678 | 0.420381220750951  |
| TAGTCTGACGAA  | 713.183821673653 | 0.388958230997864  |
| ACATGGGGTGAC  | 713.212213013989 | 0.352153647788379  |
| CGAATTGACACA  | 713.213528270141 | 0.2951007216502    |
| ATGAGTAGTAAC  | 713.218533403113 | 0.238504461696435  |
| GAACATTACGCA  | 713.219677215762 | 0.715472867269748  |
| GGTACCGGTGAC  | 713.235552183807 | 0.153337372179474  |
| CTAGGCAATGAC  | 713.249499339627 | 0.277739080448294  |
| ATTCCGGTCACAG | 713.258108997252 | 0.339169655722353  |
| GAGTCAAATGTA  | 713.264400467425 | 0.171297435443254  |
| CGACTATTACTC  | 713.265220070347 | 0.201825069213111  |
| TGACGCCGTTAA  | 713.283157736856 | 0.320516497455722  |
| CTGACTCGCACA  | 713.285370253193 | 0.339283018713101  |
| CAAAATGATGCA  | 713.29033706613  | 0.473093609346557  |
| GAAGCGTGACAC  | 713.30415970057  | 0.274314481655959  |
| AGGGGTCTGACT  | 713.306936456306 | 0.151034100719919  |
| GTACCCTGTGAC  | 713.310004230945 | 0.333590147327987  |
| CCGGATTAATAA  | 713.31146018865  | 0.647226419453067  |
| GATGACATTTAA  | 713.312562595952 | 0.362586475545641  |
| AAAGGTATGACC  | 713.329972397021 | 0.373536580516846  |
| GCAATCTAGTCA  | 713.3319808029   | 0.252176382442247  |
| GGTAGCTGTGAC  | 713.336681548909 | 0.168951545561807  |
| ATTAAATGACCA  | 713.336782373778 | 0.399986039294835  |
| GAGTCAAAGATA  | 713.339123479202 | 0.31188260300033   |
| CTGCATGACACC  | 713.342531663747 | 0.179222177606067  |
| GAACCTGTCACA  | 713.34451117888  | 0.303938042280674  |
| CGTCATCTGGGC  | 713.34963156323  | 0.378738090150689  |
| CGAAGCGATGAC  | 713.351218495994 | 0.401962700672523  |
| ACAGCCATGACA  | 713.369341170341 | 0.394341752276869  |
| AGCGTTCTGACT  | 713.385355224047 | 0.282769132555822  |
| ATCTCTTATGAC  | 713.386580227569 | 0.337823213751129  |
| AATCTCTGTAC   | 713.397593323779 | 0.310450212151846  |
| ATGACGTCGAGA  | 713.410932550866 | 0.343556161166001  |
| GTCATATCCTCA  | 713.412355709256 | 0.450634301019472  |
| GAGTAATTCACA  | 713.419131384279 | 0.418407543291259  |
| CGTCATTCGCTA  | 713.42997276597  | 0.203526497753604  |
| CTCGTGCATGAC  | 713.430176858183 | 0.482165832156899  |
| GTCACTGTACGA  | 713.437542842096 | 0.392785688926858  |
| CGTCTGCATGAC  | 713.443334481186 | 0.442780688945321  |
| GTGAGTCCGACA  | 713.455409937117 | 0.0743436787903854 |
| ACGTCACATAAA  | 713.457955186605 | 0.53191102385432   |
| ATGACGCTCTTA  | 713.462456919293 | 0.324907571879363  |
| GACTAATCACAC  | 713.467615344111 | 0.256801819067047  |
| CGTCATGTTGTA  | 713.468686141217 | 0.456841915208479  |
| GAATTCATGAC   | 713.468771856657 | 0.362379367123854  |
| GCGACCAATGAC  | 713.48037250897  | 0.33328041834785   |
| GCAAAATCGTCA  | 713.485366493745 | 0.413103837152195  |

|               |                  |                   |
|---------------|------------------|-------------------|
| GATTCCAATGAC  | 713.487277897382 | 0.49194726862569  |
| ATAAGATTCACA  | 713.489030013504 | 0.39993396692928  |
| ATGACCAGGTTG  | 713.490328306931 | 0.423038425322418 |
| ACTTATGTGACG  | 713.495552423719 | 0.341966457694389 |
| ATAGAGTCTTAC  | 713.499229818305 | 0.326780866618319 |
| AGTACTTGTGAC  | 713.506371627854 | 0.405235690753221 |
| AGGTTCCAGTCA  | 713.515108862483 | 0.417789489345662 |
| GAAGTGTGTGAC  | 713.515124596412 | 0.213861365410708 |
| ATCCTGGATGAC  | 713.524242318643 | 0.338342898874412 |
| CGTCATTGTCCA  | 713.525745894217 | 0.3369076838981   |
| ATGGACGTGTCA  | 713.537486951405 | 0.438171985627746 |
| CTCATCGTATGA  | 713.557607570914 | 0.472695501554106 |
| CGTCAGAGTCGA  | 713.557748799287 | 0.417605268455621 |
| GTCACTGCAGAC  | 713.566789779288 | 0.445900562521699 |
| AGCACATGTGAC  | 713.567488177075 | 0.436557826770396 |
| TATCACTAATGA  | 713.571968021022 | 0.365794850397311 |
| GAGTCAGGTGGA  | 713.593378561272 | 0.221728816876515 |
| AAGCTTGACTCT  | 713.596890409258 | 0.378537195320542 |
| CTCATATCGTCA  | 713.608128251088 | 0.363520810001755 |
| GGGAGTGAATCA  | 713.610233298665 | 0.403735893625198 |
| AAATTCGTGACA  | 713.61049132189  | 0.308433624996964 |
| ATGAGCAAGCTA  | 713.611930345593 | 0.231163913057825 |
| CATGAGCAAATC  | 713.614052284325 | 0.357336197782002 |
| GTCACAATCCAA  | 713.61660861584  | 0.377242252618564 |
| TAATGTTCTGCA  | 713.629158996808 | 0.342696647752214 |
| ATGACGACTCAG  | 713.633189088142 | 0.38969290432047  |
| ACTAATAGTGCC  | 713.634903237157 | 0.41378325845518  |
| ATCCGGCATGAC  | 713.637473041109 | 0.374164011239686 |
| AACTGCGTCAGG  | 713.641246801554 | 0.330665992467194 |
| CGTTGACTACAA  | 713.645478017149 | 0.229268175235227 |
| AGGCATTGTGAC  | 713.656607807634 | 0.200216104308346 |
| GTGTCACTGGAA  | 713.659788262567 | 0.237593392450439 |
| ACCTGATGACCA  | 713.665527800729 | 0.324465883320919 |
| CTCGACTCGTCA  | 713.678850984228 | 0.464861632158276 |
| CACTGCGGTGAC  | 713.68182971195  | 0.538133166761093 |
| GGCAACTGTGAC  | 713.687738938823 | 0.400123754493749 |
| CGGAACAATGAC  | 713.700033803911 | 0.341153251412479 |
| ACGTTTCTGTGAC | 713.70682494928  | 0.47530471236362  |
| ATGACAGCGTGG  | 713.709056179322 | 0.299749854629105 |
| ATGTTAATGACG  | 713.723010826687 | 0.455403403872958 |
| GAGTATAATGAC  | 713.734729749833 | 0.456994177280482 |
| GTCACGCATATA  | 713.737244720621 | 0.23043248939342  |
| AGTCACGCGCCG  | 713.740059353373 | 0.384234042737218 |
| TCTTTCTAGTCA  | 713.74229052766  | 0.262517973177911 |
| TCGGCGGAGTCA  | 713.746542981313 | 0.407294431308072 |
| ACCGTATTAGTC  | 713.749379630672 | 0.336106075502938 |
| CTCCTAAATGAC  | 713.752848993761 | 0.476363719222076 |
| GTATATTGTGAC  | 713.756988777894 | 0.319229231361893 |
| CATGACGCCTGA  | 713.767849488042 | 0.335345071155224 |
| CCCATAGATGAC  | 713.771987254132 | 0.548548284165604 |
| CGGCGAAATGAC  | 713.775403486093 | 0.42739932603971  |
| ACGTCACGTCAG  | 713.778317498565 | 0.339001017668567 |
| AAGTCACCCTTA  | 713.779038396064 | 0.29257776920819  |
| GAAATCTATGAC  | 713.779672216157 | 0.275640932522091 |

|               |                  |                   |
|---------------|------------------|-------------------|
| GTCATCACGATA  | 713.782341154254 | 0.365875717831807 |
| GTCACAACCTTAA | 713.786197882987 | 0.435939970923478 |
| CGCTTGACTAAA  | 713.787297555067 | 0.416909481687871 |
| GTCACATATAAC  | 713.788273347721 | 0.213577080237914 |
| CGTGACCGTGAC  | 713.788988391133 | 0.366077789522002 |
| CTTCCGTGACAC  | 713.790688582259 | 0.365555893496655 |
| GTCACATAGCAC  | 713.79607155771  | 0.371203230313398 |
| GTATTAGCAATA  | 713.808228966103 | 0.256786706435119 |
| GTCATTCCCGAA  | 713.809564422126 | 0.270793315849197 |
| CATGTGGATGAC  | 713.813355279825 | 0.484743170971396 |
| GCGTTGTAGTCA  | 713.813989453715 | 0.354685113090037 |
| GTCACCAAATAA  | 713.815313375307 | 0.368198691250847 |
| ACTTTGATGACG  | 713.819879993726 | 0.315827309466663 |
| ATTACGGTGTCA  | 713.831333885285 | 0.342686450814359 |
| AATGCACGTGAC  | 713.834829702754 | 0.343472653104086 |
| GTCATTGTATTA  | 713.838263950325 | 0.378733952821626 |
| TCTTCTGACAAA  | 713.838808985685 | 0.411975347105411 |
| ATAACGTCACCC  | 713.857040680026 | 0.345329090631665 |
| CACAACAAGTCA  | 713.868989734736 | 0.364298592015706 |
| CCGAGTGACGGA  | 713.873062742866 | 0.333474194233523 |
| CAATAAGCGTCA  | 713.876236928984 | 0.528841837785332 |
| ATTGCTCAGAGA  | 713.884931124648 | 0.395125951444223 |
| GCTATATGACCA  | 713.901446234651 | 0.307710583743993 |
| GACGATGGGTCA  | 713.904367546822 | 0.486232070726276 |
| CGGCAAGTCATC  | 713.904594957647 | 0.524245038332817 |
| AGTGGGAATGAC  | 713.915064753563 | 0.251808050183034 |
| CCAGGTGATGAC  | 713.916257978844 | 0.602550064287046 |
| ATGACCCAGCTA  | 713.925040609759 | 0.319069752303718 |
| ATATTGAATGAC  | 713.925550032326 | 0.359009555505209 |
| TGACTCCCAAAA  | 713.92837866968  | 0.193044540919626 |
| GACACGTGTACA  | 713.933017444232 | 0.341258569263765 |
| GAAGTTAAGTCA  | 713.945065687941 | 0.435028988476245 |
| GTGACGCGGATA  | 713.953008045648 | 0.209922291366525 |
| TCAAATCTATGA  | 713.963733865866 | 0.380686686735778 |
| ACTCATATTTAG  | 713.964754485187 | 0.43713023612246  |
| ATGAACGGTGAC  | 713.976031633287 | 0.268362959040727 |
| GATGTATACATC  | 713.980712516938 | 0.469656271812341 |
| CGGTTTGCGTCA  | 713.994978750533 | 0.573428540487006 |
| GTGTCACGCAAA  | 714.003254032149 | 0.249907738256215 |
| CGTCATCTACTA  | 714.003607566503 | 0.283247030154269 |
| ACGCGTGATGAC  | 714.004761729557 | 0.310649255179395 |
| GCCCTGGAGTCA  | 714.007912703485 | 0.377501391285426 |
| ATTTGCAATGAC  | 714.011478838833 | 0.3238917775324   |
| GGATTGCTCAGA  | 714.013396769951 | 0.342188661460682 |
| GTCATCACACAC  | 714.013695111512 | 0.352795656660239 |
| AACCCTCTGACT  | 714.028149302638 | 0.18335173949683  |
| CGTATCCGTGAC  | 714.028649514615 | 0.543401732158385 |
| GTCACCCGGTAA  | 714.030387431796 | 0.22674857298607  |
| GCAGGCAATGAC  | 714.039793249009 | 0.427016621000681 |
| ATGACCGAGTTC  | 714.045149590367 | 0.350487291996477 |
| ATGAGTCCCTCG  | 714.055380080187 | 0.261302269825869 |
| ACACGGCGTGAC  | 714.063057144569 | 0.423571484088481 |
| TAATCCCAGTCA  | 714.067634280678 | 0.420930565451371 |
| ACAAGTACGTCA  | 714.069303003667 | 0.412479471719044 |



|               |                  |                   |
|---------------|------------------|-------------------|
| CACGTCACGGTC  | 714.078677165209 | 0.439570932356597 |
| CGTCATGCAATA  | 714.080361705223 | 0.213043948857877 |
| CATCTGTAGTCA  | 714.080533744896 | 0.403120965286957 |
| TTGACTAGTCAA  | 714.081608801351 | 0.379759015228069 |
| GGATACGTCAAC  | 714.087105753711 | 0.217887299082879 |
| TACATCACGTCA  | 714.098913045713 | 0.295195406420688 |
| CCTAAACATGAC  | 714.099680713836 | 0.343279662782835 |
| GACTGACTGTGC  | 714.099731782058 | 0.292084882488001 |
| GGATGGGATGAC  | 714.110608362509 | 0.232445715730546 |
| AACAGCGAGTCA  | 714.12749037833  | 0.35517675908836  |
| GGATGACAAGCA  | 714.131661656206 | 0.258817915485013 |
| CCTTTAATGACA  | 714.133220266712 | 0.430728081707093 |
| ATGAGGTCATAA  | 714.134672182508 | 0.235010082872432 |
| CGTCGATTCATA  | 714.138834872144 | 0.21019624263776  |
| CTCTTAGCATGA  | 714.141183404207 | 0.523836283482181 |
| AGCAGTGATGAC  | 714.143336778676 | 0.382200376541123 |
| AAGTCACCCCTAA | 714.144673884102 | 0.302636848333563 |
| ATATTCTGAGTC  | 714.152260926394 | 0.4013558876237   |
| CAGTCAACATGA  | 714.161357907458 | 0.46632743642268  |
| GCCGGAGATGAC  | 714.162610128817 | 0.427703345533674 |
| ATGACGCCGTAA  | 714.171276076006 | 0.45238011437717  |
| AAATGCATGACG  | 714.177980575127 | 0.257446920878284 |
| ATGACAGCGCAC  | 714.181179707222 | 0.352115877851616 |
| GGTCATCAATTA  | 714.182851454229 | 0.445034674698806 |
| GTTATAACGTCA  | 714.193041532553 | 0.435243127743782 |
| ATATAGGGTGAC  | 714.194362572929 | 0.354503894475248 |
| AGTCAGATCAGC  | 714.198437038255 | 0.239824004390528 |
| GTCACCACCTTA  | 714.200927353787 | 0.194893834023976 |
| GTGAGTTGTCCA  | 714.201046875042 | 0.447695851082548 |
| GTCACCCGATTA  | 714.209207340028 | 0.389801817699731 |
| GTCATATCAGGA  | 714.210738175272 | 0.390709477276762 |
| CCACGTAAGTCA  | 714.217433922465 | 0.45798847432104  |
| CGTCATCAGGCA  | 714.221993088035 | 0.278501399853434 |
| ATCAGAGGTGAC  | 714.233370333432 | 0.327535895815342 |
| ATGACAATAGCC  | 714.240634267655 | 0.321559092799681 |
| ATGAGCAACAAC  | 714.240801400694 | 0.41634815182513  |
| AGGCCACGTAAC  | 714.253672118011 | 0.363459216473321 |
| AGATTAAATGAC  | 714.255440714182 | 0.337177358802277 |
| TATCTAGACTCA  | 714.258100520443 | 0.4280715770893   |
| ATGACTTCGTGG  | 714.271557563558 | 0.278226155617753 |
| ACTCCTTACTCA  | 714.272448217666 | 0.22100600778201  |
| CTAGTAAATGAC  | 714.279329623878 | 0.498756820169278 |
| CGTCATCCCTTC  | 714.282149090057 | 0.169334868469417 |
| ACAGTCAGCATC  | 714.283254112931 | 0.355828719723525 |
| CTGCATGAGCCA  | 714.284017770646 | 0.463530397951561 |
| ATTCATGGGTCA  | 714.290326957351 | 0.511965864872393 |
| CGACTAATTCGA  | 714.293690027975 | 0.451866217322418 |
| GCCAGTGGTGAC  | 714.296665013186 | 0.279003887636833 |
| TTACTCAACGAA  | 714.299722376974 | 0.399882669155097 |
| CTGGTAATGACA  | 714.307379488125 | 0.401372345461913 |
| GTCATCCCTTCA  | 714.310188999392 | 0.282406718917882 |
| CTAAGGGTGACA  | 714.333593640472 | 0.322912806378441 |
| ATGACCCTTAA   | 714.338151522042 | 0.426113689022246 |
| AGAGTAATGACC  | 714.347257228329 | 0.355555871335262 |

|              |                  |                   |
|--------------|------------------|-------------------|
| TGACTATTGGCA | 714.348248501616 | 0.450740201270442 |
| CAGTGGTCACAC | 714.350869630727 | 0.16050624441955  |
| ACTAGTCGTCAT | 714.351774601491 | 0.468433678799946 |
| AAACAGAATGAC | 714.355849615364 | 0.27315506079143  |
| AGAGGGATGACG | 714.356200871105 | 0.165587072834337 |
| AGTCACGCCACT | 714.36150516694  | 0.374451447820124 |
| GTCACCGGGGAC | 714.361640138143 | 0.507794806712066 |
| AATGACATTAC  | 714.368988518474 | 0.251980107117593 |
| ACCATTATGAGT | 714.375685682251 | 0.414067055714746 |
| ATTGAGCAGTCA | 714.376656146789 | 0.328775721955282 |
| GTCGACTTGTC  | 714.376697336995 | 0.435683782498359 |
| AGTCAGAGTCGA | 714.37990233228  | 0.298262309770222 |
| CCAGGGGAGTCA | 714.384529513025 | 0.327594545524705 |
| TGACTTAGACCA | 714.398375119426 | 0.359653365097183 |
| GTCATCCTGAAC | 714.402451774998 | 0.503634442764591 |
| GACTCTGTGACA | 714.409716536272 | 0.533282597317361 |
| GAATCATGACGA | 714.410216456207 | 0.229369573597705 |
| CCGTAGTCTGAC | 714.413381912715 | 0.483070317705507 |
| CGTCCATATGAC | 714.419580896512 | 0.346070889407986 |
| AGTCAGAGATCG | 714.426481348655 | 0.355664997739955 |
| GTCACCGTGTGA | 714.430185273064 | 0.229646312893377 |
| TGACGCGACACA | 714.442199100013 | 0.432334177836758 |
| CGTAACAGTCAA | 714.443127713852 | 0.310899349577657 |
| GCGTCATGAAAC | 714.448791458166 | 0.205900462343435 |
| GACATATGTGAC | 714.466602513267 | 0.310491031962581 |
| ACTAGTAATGAC | 714.470846947896 | 0.55676177237959  |
| GTCATTTGCGCA | 714.495472183998 | 0.366583336273418 |
| GTATTGCATGAC | 714.496410320572 | 0.401974512113388 |
| CACTCGGACTCA | 714.49789773988  | 0.509656520345693 |
| ACGTCATGTGAA | 714.502652104112 | 0.306811327473013 |
| ACTCATTCTCGA | 714.505828553967 | 0.273133627198467 |
| CTGATTAGTGAC | 714.506058254559 | 0.578897912425347 |
| CGTCACAGGGCC | 714.512245461148 | 0.307738429896609 |
| CATGCTAGTCAC | 714.512651925426 | 0.264776848651904 |
| GAATGGCGTCAC | 714.514084601435 | 0.253100665689239 |
| ATTACTATTA   | 714.515962577454 | 0.349997181550156 |
| GCAGATGGCTCA | 714.51784959248  | 0.432574405185209 |
| ACGTACTCGTCA | 714.521654307257 | 0.419502108719696 |
| TGACCACAGTCA | 714.53013133391  | 0.317718990176749 |
| GTAGGAGATGAC | 714.530624511924 | 0.25336817859035  |
| GCCAATGGGTCA | 714.547677536697 | 0.316752540864816 |
| CAAGATCATGAC | 714.548243298701 | 0.539266544424525 |
| GAGACTATGTCA | 714.549912180464 | 0.536962039764124 |
| GATGACCGAGAC | 714.554991748662 | 0.321488264543299 |
| GTCATGCAAGCA | 714.556731832848 | 0.377031342674118 |
| ACTCAGTGACAC | 714.557387744444 | 0.342391374390797 |
| GTCAGACTCAGA | 714.566556943423 | 0.149435668050913 |
| GTGACGATACAA | 714.590802566014 | 0.353847738846992 |
| CACATGTGACAA | 714.602515963909 | 0.504440861951967 |
| GGTCATAATTAC | 714.602666765473 | 0.241413059359314 |
| CACATTGAGTAA | 714.60702207892  | 0.263509310020844 |
| CGTCACCCGTAG | 714.607934568984 | 0.336236137425555 |
| GACCAATGTGAC | 714.609803226376 | 0.21992196198385  |
| CACAAGGTGACA | 714.612090151905 | 0.51553380435384  |

|              |                  |                   |
|--------------|------------------|-------------------|
| CCACATTCGTC  | 714.618483527853 | 0.385119185498298 |
| TAGTCAGTATGA | 714.622580684638 | 0.32313628234375  |
| CCGCTAGGTGAC | 714.626270542143 | 0.368095455062197 |
| AAGACGGAGTCA | 714.63057910273  | 0.202959276720352 |
| CAGGCCAATGAC | 714.631091123663 | 0.32452865444611  |
| CCTAATGTATGA | 714.637464934236 | 0.291788178074565 |
| CAGAGCGAGTCA | 714.651399633143 | 0.194809175893413 |
| CAGTCAGCTGGC | 714.658188015222 | 0.384907497888462 |
| CACCATTGTGAC | 714.665130415704 | 0.536217728607515 |
| GTGACGGACTCA | 714.670712391666 | 0.271396410180147 |
| ACCTCAGACTCA | 714.671506731346 | 0.248011536190573 |
| ATATATGTGACG | 714.671700480495 | 0.351936730004566 |
| TGTCACATTGAA | 714.675728104657 | 0.296722095508415 |
| TGACTTATGCAA | 714.676555233286 | 0.564801120700316 |
| GTCACTCTTTGA | 714.67664996065  | 0.41185840857573  |
| ATCTCGTGAGTC | 714.685929977619 | 0.384696457739612 |
| CTGACTACTATA | 714.695688993696 | 0.306679099362161 |
| AGTGTCAGTGAC | 714.704904330113 | 0.289798693061587 |
| ACTCAAGTCATA | 714.712205645931 | 0.331773687369762 |
| CTGTATGATACA | 714.713141700973 | 0.34234690734729  |
| TGACTCTCAGAA | 714.724615665596 | 0.445110106616892 |
| CAGAGATTACTC | 714.724864914745 | 0.323634161406028 |
| ATAGGGAATGAC | 714.727617752071 | 0.289984683945424 |
| ACTGTGGTGACG | 714.729883879906 | 0.133445999886878 |
| CATAATATGACC | 714.734355866235 | 0.594078687902484 |
| GTCATGATCCTA | 714.738599803007 | 0.317748544171946 |
| CGTCGTGTGACA | 714.756610819924 | 0.355579871576931 |
| TCTGCTGTGACA | 714.756808777329 | 0.481070187296339 |
| AAGACTGATTGT | 714.762160516381 | 0.193263015814106 |
| ACGCAAGTGACT | 714.764006035603 | 0.27488915212922  |
| CAACGACAGTCA | 714.777534125085 | 0.37926754804703  |
| AAACACATCATC | 714.77807418403  | 0.341047493371978 |
| AGTCACGGTCAG | 714.786524672701 | 0.354955272575237 |
| AGACTCACTACA | 714.787588781421 | 0.288904064256201 |
| ATGACAACGCGG | 714.805958274532 | 0.26207404115815  |
| AATATGTGACCA | 714.813214587912 | 0.423017255479607 |
| GTAAGAGTAACA | 714.814091793934 | 0.236325626226314 |
| TGACTTGGACCA | 714.814342177562 | 0.324903014512117 |
| CATGCGTGACGC | 714.818369948411 | 0.354597629808738 |
| CAGTCAGATTGA | 714.822755506122 | 0.422841390261379 |
| GTCTGAATCAGA | 714.825279599788 | 0.351686212222613 |
| CGTCCTGCGTCA | 714.830362350681 | 0.560606736534451 |
| AGCTGACGTCAG | 714.840360814882 | 0.326560135602656 |
| ATTACTCTATGG | 714.840876098089 | 0.394283027127973 |
| CAGTCAGATGGC | 714.843459631764 | 0.55533574956112  |
| TATTCGCGTCA  | 714.844555704235 | 0.356273444593747 |
| AGGGCCACGTAA | 714.845284214211 | 0.356392385460191 |
| CTTTGTGAGTAC | 714.848907355568 | 0.450117882681505 |
| AAGAACTCGTCA | 714.855546919342 | 0.401695276441125 |
| ATCATATTGTCA | 714.870281830282 | 0.352183314617776 |
| ATGACACCCAG  | 714.887728444809 | 0.310866977724969 |
| CGTCACTACTCA | 714.89226517249  | 0.276219720685054 |
| ATGAGTAGTAA  | 714.905814691259 | 0.217541160844322 |
| AATCCCCTCATC | 714.907523904738 | 0.306225270209183 |

|              |                   |                    |
|--------------|-------------------|--------------------|
| GGTACATGACAC | 714.913732717429  | 0.374702971302834  |
| GGTCAGAGTGAC | 714.9179022211641 | 0.343134516671196  |
| ATTATTTGGTCA | 714.923785286122  | 0.350901001568903  |
| CTTCCAGATGAC | 714.926064794278  | 0.629020660123942  |
| AGACTCAGATGA | 714.932432455981  | 0.278614556948445  |
| AAAGCAGTCAGA | 714.93332343608   | 0.0902984660012517 |
| ACGACTCAGAGG | 714.936505975204  | 0.392718095994639  |
| GTCATTGCCGGA | 714.937543625808  | 0.276691973172936  |
| CACCTTTGTGAC | 714.958442216421  | 0.256420742369336  |
| ATATTCATGACG | 714.961905093466  | 0.407682532485423  |
| AGCCGCGTCACT | 714.968888378698  | 0.317567711349161  |
| ATCCGACAGTCA | 714.976470416509  | 0.251675149509453  |
| CCGGCGGTGACA | 714.9879920234    | 0.318656203715052  |
| CGATGATTCTTA | 714.995587983369  | 0.148553259793166  |
| CACGTAATACAA | 714.997360172029  | 0.404038622715181  |
| GCTATTTGTGAC | 715.003218596281  | 0.410500803457236  |
| TAGACTCAGATA | 715.005499420538  | 0.311318883402008  |
| CATAGCCGATGA | 715.02210688823   | 0.462105234919247  |
| AAGCAGTGACGT | 715.030079331253  | 0.265323427645767  |
| CACTTCTGACT  | 715.034877151352  | 0.293029445327414  |
| GGTGCTCGTCA  | 715.047433849273  | 0.357031998874808  |
| ACTGGTGACAAC | 715.048216591579  | 0.358842246143507  |
| CTCACGCGATGA | 715.060047145546  | 0.3087901362332    |
| CCGTCATTAAG  | 715.061905100825  | 0.347506578463311  |
| AACATTGATTCA | 715.070038119503  | 0.427870351070845  |
| TAGCTAGACTCA | 715.079154634838  | 0.29027404295303   |
| ACTTAGATGACG | 715.084941295007  | 0.423005417557106  |
| ACTCTCGTATGA | 715.099365321614  | 0.411103203911634  |
| TGACCCATTCAA | 715.100815920432  | 0.234820593133047  |
| AACTTCATGACA | 715.113727402399  | 0.477871543845145  |
| ACTCATACGTCG | 715.119760521491  | 0.229478267422755  |
| GCCGGGGAGTCA | 715.126236889041  | 0.340782572463338  |
| CACTTATGACCG | 715.127599338111  | 0.421650925088001  |
| GTGACGCGGCAA | 715.148298828716  | 0.273962986873437  |
| GACTCAATCTTA | 715.149898591633  | 0.432839523904912  |
| CGTTTATGACCC | 715.155783607082  | 0.33972725865381   |
| ATAGACGGTGAC | 715.160941657791  | 0.325775984173042  |
| ATCTACTAGTCA | 715.161595145354  | 0.182412372632317  |
| CTGTGATTAGTC | 715.166738727688  | 0.441963134101037  |
| CATATGGTCACA | 715.1808977866    | 0.380085678816894  |
| AGCTCCTAGTCA | 715.185639898266  | 0.275858674769303  |
| ACCGGTACGTCA | 715.193260274119  | 0.377443019242029  |
| AAAGAGTGTCA  | 715.195188795592  | 0.21678487711045   |
| CAAGTCGTCACA | 715.195833416428  | 0.3829642246154    |
| CTATCGCAGTCA | 715.211907415582  | 0.347877841926198  |
| AAACGCTATGAC | 715.212133858909  | 0.20705282214735   |
| TATACCGCGTCA | 715.215235041586  | 0.252733045350154  |
| GGGCGAAATGAC | 715.224861834887  | 0.394394157451902  |
| CGTCACCGACAA | 715.228687269941  | 0.225010625437336  |
| AATTTTGACTGA | 715.243842762927  | 0.223777686156271  |
| ACACCATGTGAC | 715.243894067079  | 0.383366393450622  |
| CGGTGACGGGTC | 715.253570791485  | 0.233892496567866  |
| GGATAGTGTGAC | 715.263939351762  | 0.325699644519744  |
| GTGGTGACGCCA | 715.279154636819  | 0.300772019378634  |

|              |                  |                   |
|--------------|------------------|-------------------|
| AGTCAGAAGCAA | 715.284581774241 | 0.243126657955435 |
| TCATTTGAATCA | 715.297083491627 | 0.464371155583882 |
| GCCAGGGATGAC | 715.303140080322 | 0.368372592597246 |
| GATCATTGTGAC | 715.304568893842 | 0.370603685026762 |
| GTCTTGACTAAA | 715.319788455563 | 0.345846320948429 |
| GACGTATTGTCA | 715.322054854249 | 0.497930889189947 |
| ACATTAATGACG | 715.323042011204 | 0.213659424513382 |
| CGTCATGTGACC | 715.323798940113 | 0.393808791936607 |
| TGACGAGTTAAA | 715.32657080909  | 0.358095717291582 |
| CTAGTTGAATCA | 715.342076810661 | 0.322810516789493 |
| CACTGGTAGTCA | 715.351344561831 | 0.439868180198746 |
| CCACCTGACACA | 715.360588203492 | 0.17469544849014  |
| GGAGCTCAGTCA | 715.361348994399 | 0.270740560534108 |
| TGTGAGTCCGAA | 715.365748973954 | 0.228051191147818 |
| GATGACTTTTAA | 715.368305104294 | 0.366580615648673 |
| CACGTCAGGTGA | 715.370532135812 | 0.364486569404267 |
| ATGACAATGCTA | 715.373403912605 | 0.407848059508993 |
| AATTGCATCATG | 715.37525244208  | 0.354657091432883 |
| GTGACGCTGAAC | 715.377723235988 | 0.309028958723735 |
| TGACACTTGCAA | 715.37914848251  | 0.381780138928381 |
| TGACCGATTACA | 715.388015403418 | 0.445487835378498 |
| GACTAACTTTGA | 715.397427636468 | 0.498806091225983 |
| GAGCCGACTCAC | 715.403002002774 | 0.193546191615389 |
| GTTACACGTCAA | 715.408128814957 | 0.29898939905747  |
| ATATCTGTGAGA | 715.408508718486 | 0.262271332119136 |
| GCACATCATGAC | 715.411123936368 | 0.288955472698004 |
| CGAGACGATGAC | 715.417234711885 | 0.36886613489178  |
| AGTATGATGTAA | 715.420809601497 | 0.36224710598115  |
| TATGACCTAACA | 715.420867098034 | 0.277414136196633 |
| ATTAGATTAGTC | 715.420907781469 | 0.381812865350819 |
| CATCACTAATGA | 715.421243620803 | 0.483072571687586 |
| ACCATACGTGAC | 715.429974303608 | 0.303637039376345 |
| ACTGTATTATGA | 715.433156451004 | 0.359948562026206 |
| ATGTACACGTAA | 715.434647436829 | 0.406173366379651 |
| CGACTATGTCAC | 715.434686628603 | 0.222709796172866 |
| GTGACTAGCCGA | 715.454313747101 | 0.242800378203023 |
| GCTACAGACTCA | 715.458283763719 | 0.342585242667968 |
| ACTCATACCTTC | 715.458427237468 | 0.289823181316747 |
| AACTGATGACGG | 715.467002052786 | 0.238218468542338 |
| CTAGACTGTGAC | 715.468337928551 | 0.381342961837238 |
| AGACATGACACT | 715.472478447301 | 0.31916278062588  |
| GAGCCAAGTCAC | 715.472625456837 | 0.363087563185765 |
| GTATCCGCGTCA | 715.475831305075 | 0.447685345096928 |
| CGAAACCGTGAC | 715.49027012993  | 0.390196450905377 |
| GTCATCAGGAAC | 715.493672072184 | 0.466109898063116 |
| CACGATGGTGAC | 715.499467507638 | 0.239964355488904 |
| CATTGAGTCGAA | 715.506899433264 | 0.40808971703687  |
| CCCAATGTGACG | 715.511477881111 | 0.332908827622293 |
| ATGAGTAGCTTC | 715.512593587317 | 0.394866888818934 |
| ATGACAACGTCC | 715.524829119482 | 0.182265063152886 |
| GTATCGTGACAC | 715.52504464854  | 0.382933861927718 |
| GTCACACAAGAA | 715.548948339547 | 0.383179119012588 |
| ACTCATCTATGG | 715.560347227967 | 0.197225637016461 |
| ATACGGTGTGAC | 715.565106177101 | 0.433979553408945 |

|              |                  |                   |
|--------------|------------------|-------------------|
| AGATATATGTCA | 715.57247867915  | 0.164740966438311 |
| ATGACGAGATGC | 715.578301774258 | 0.167913345750073 |
| AGATGCCGTCAT | 715.584608680929 | 0.397352283628239 |
| ACATTCATGACA | 715.589286997023 | 0.256765668502569 |
| CTGTCTACGTCA | 715.589602027864 | 0.506386598452119 |
| GAGTCAAAGCAA | 715.596739576698 | 0.392232228863098 |
| CGGCTGCATGAC | 715.600624608312 | 0.228651454991182 |
| CAGTCAGATAAG | 715.611808841248 | 0.447517222866182 |
| GACTCACTTGCA | 715.624822225226 | 0.358725681420177 |
| AATACAGTCAGC | 715.642027133485 | 0.290439085663517 |
| ACAAGTCATGGT | 715.643648879569 | 0.255802032312522 |
| ATAGCATGACAC | 715.649365219555 | 0.232384605516803 |
| AACCGGTGACAT | 715.651995765551 | 0.34510715017916  |
| ATACGGTCATCG | 715.652469202604 | 0.209783698193514 |
| CTCCCTGTGTCA | 715.652957490312 | 0.258762560338767 |
| ATAGCGGTGACG | 715.654913518582 | 0.290861198465471 |
| CGGCTGTGTAC  | 715.664735022967 | 0.359320146257308 |
| ACTTGAGGTGAC | 715.669491271313 | 0.280523338513068 |
| GGGTAGAATGAC | 715.678906564167 | 0.379650141394908 |
| TGTCACACGCAA | 715.679522515545 | 0.323463151689418 |
| CTCGCTAAGTCA | 715.684511561568 | 0.33999161483737  |
| ACCAGCAGTGAC | 715.687016121157 | 0.257548772242251 |
| CGATCACGTAC  | 715.696807545117 | 0.360045054354302 |
| AAGTGACGCCAT | 715.703547675119 | 0.197311797135308 |
| TCACTACAGTCA | 715.717204535441 | 0.246391578738931 |
| GTTATATGACCA | 715.723442913121 | 0.461349259915831 |
| CACACGGGTGAC | 715.736433670272 | 0.271552650701759 |
| CAAGTCTCGTCA | 715.737395696091 | 0.35694732580032  |
| CGGCTGATGACG | 715.741404276268 | 0.437615177361354 |
| GATGGATGACCA | 715.74647056272  | 0.398686437025701 |
| TCTCATCCGTCA | 715.752907650259 | 0.240027239454361 |
| GGTTGAGATGAC | 715.754881790315 | 0.317419996058153 |
| ACTGTACGTGAC | 715.758698150121 | 0.455259930946526 |
| GTCATCTAACAC | 715.768118914059 | 0.422750010596702 |
| AGTGCATGTCAT | 715.780876045859 | 0.430971699073168 |
| ATTACGCAACTC | 715.787538653761 | 0.36802286019359  |
| AGTCACGCCAC  | 715.789476740617 | 0.406517310238724 |
| TCTGTATGCCA  | 715.789974792547 | 0.270897010915851 |
| GACCATGACTGC | 715.7981708782   | 0.188341217625741 |
| GTCATCGAGTTA | 715.812113919215 | 0.328343190437461 |
| GAAATTAAGTCA | 715.81981418486  | 0.568218548476497 |
| ATCAAGTGAGTC | 715.82355139961  | 0.444745635559536 |
| CACCGGTGTGAC | 715.8303936826   | 0.353057635791391 |
| CGAAGGTCTGAC | 715.837276177198 | 0.403933996898116 |
| ACCGAGACTCAT | 715.840298872166 | 0.374128303356238 |
| TGGGTGACCCAA | 715.843074604187 | 0.256863186178744 |
| ATAACTTACGTG | 715.856259082272 | 0.383941788783218 |
| GCGACTAATGAC | 715.858967823184 | 0.184059061728835 |
| CCGATTGAGTAA | 715.866351567339 | 0.542445484496411 |
| AAGTTCGATGAC | 715.875089213977 | 0.414329232171036 |
| ATACCCTGTCAT | 715.881201020803 | 0.228339928012635 |
| CTAATCAATGAC | 715.886226092776 | 0.269597020842371 |
| AACCATCTATGA | 715.891569396792 | 0.459781149428898 |
| CGAACTTCGTCA | 715.90270497389  | 0.322688657652557 |

|              |                  |                   |
|--------------|------------------|-------------------|
| CAGTCAGATCCA | 715.905277236477 | 0.309877654055149 |
| AGCATGGAGTCA | 715.910596284748 | 0.329407839944447 |
| TGACTTGTATCA | 715.911742765353 | 0.47971831530213  |
| GTCACTAAAGCA | 715.914787106942 | 0.62460654242215  |
| CAATTTGACACA | 715.923785736277 | 0.308090492015228 |
| CAGCTGTGACAG | 715.923895068464 | 0.321051717731979 |
| ATATTTTGACTC | 715.939507439663 | 0.297350633415609 |
| AGTTTCTGACTG | 715.957178319449 | 0.401696175896685 |
| CTCTGAGTCGTC | 715.957350070542 | 0.273119175272412 |
| CTCTAAGAGTGA | 715.957713470169 | 0.550195370020608 |
| AGTCAACGAGTC | 715.96047511884  | 0.376275707876082 |
| ATGTCACTATGA | 715.968845679781 | 0.406505075091496 |
| CCTGCAATGACA | 715.979597879588 | 0.425549158548018 |
| TAGCCAATGACA | 715.990679573818 | 0.229174025507533 |
| ATGACGAGGGCA | 716.000870422191 | 0.236483452919855 |
| CAGCCGCGTCAC | 716.001284574815 | 0.303996208009952 |
| GTCACCAACCGA | 716.005262562979 | 0.305097153070241 |
| GAGTAATAGTAC | 716.006704466936 | 0.395190405710226 |
| GAATATTGTGAC | 716.007682198898 | 0.197713225856428 |
| TACCCAGAGTCA | 716.014860896715 | 0.367179772830484 |
| CTGAAGTAGTCA | 716.026069880377 | 0.383786238804137 |
| GTTACGCAATAA | 716.035164619704 | 0.416155834745621 |
| TGTCACGTGACA | 716.03878927475  | 0.415995882960011 |
| CTCACCCAGTCA | 716.054105303978 | 0.219300185562872 |
| ATATGAAATGAC | 716.058130620731 | 0.452753421358699 |
| GTCATTGGTGGA | 716.062906815716 | 0.260639429322057 |
| AAAACCATGACT | 716.068709448832 | 0.310294147794663 |
| TAATAATGACAA | 716.08124608339  | 0.527624031323425 |
| CATTATAATGAC | 716.081815172079 | 0.333563614967674 |
| CGAGTCCAGTCA | 716.08701272812  | 0.424896743090049 |
| TGACACTTCACA | 716.087317576421 | 0.400834612755566 |
| AATGTCTGTGAC | 716.094028540946 | 0.330842712531888 |
| TACCGGTGACGA | 716.095466460322 | 0.330941199648327 |
| ATGACGACGAAG | 716.100740176679 | 0.195163273995217 |
| CGCGGCATGACG | 716.101122062712 | 0.448961989771815 |
| GAAGGTATGACC | 716.110015450919 | 0.203283409894013 |
| CAAATTGAGTAA | 716.112211549273 | 0.391142033725831 |
| CACCGCGGTGAC | 716.114053672587 | 0.315495896697848 |
| TGACTGCGAACA | 716.115413545964 | 0.454255164686969 |
| ATGACAAGGCAC | 716.128368499694 | 0.274858932198574 |
| TACTCATTGTCA | 716.135579294072 | 0.209350938843543 |
| CTATTAGCAATA | 716.146640576073 | 0.271561601932896 |
| ATTTCGGTACCG | 716.147820883446 | 0.249279942314584 |
| GACTCACTCCGC | 716.157127389989 | 0.198526849487192 |
| GGACTGGATGAC | 716.158676978953 | 0.192338929461166 |
| TAGAACGTGTCA | 716.16219663426  | 0.224608566399866 |
| GCCTATAGTGAC | 716.162511970497 | 0.484013639516407 |
| CTCGGCTGTGAC | 716.164230452581 | 0.271628909018777 |
| ATGGTATGTGAC | 716.173904880417 | 0.424622925322405 |
| GGTACCAATTGA | 716.177439200257 | 0.465269063453028 |
| AACCTAGTCAGC | 716.185639069468 | 0.323526093141548 |
| CTAAACATGTCA | 716.189006052111 | 0.31681420877944  |
| AGTCACTTGTGG | 716.1940587028   | 0.406655461775132 |
| GTCATATGTGGA | 716.207988135441 | 0.501356620377186 |

|               |                  |                   |
|---------------|------------------|-------------------|
| AATGACAAGACT  | 716.209904406271 | 0.458074342322521 |
| GTCACCACTAGA  | 716.219933087878 | 0.367021634731194 |
| TGACGACAGACA  | 716.221583881056 | 0.341398530258229 |
| AGTCACGCGACG  | 716.233140116933 | 0.330677116368505 |
| ACCTGTAATGAC  | 716.258694339447 | 0.406610386469368 |
| AAAGATGGGTCA  | 716.260523238344 | 0.227592651594486 |
| CATCTTTACTCA  | 716.26986154925  | 0.250577153156109 |
| TAGATCTAGTCA  | 716.272972163937 | 0.337810501259122 |
| GTATGAGCCTAA  | 716.277094483843 | 0.375549428425309 |
| ATTCAAGTCATC  | 716.28082073384  | 0.342405073171896 |
| GAATTGTAGTCA  | 716.282804595239 | 0.309612964154329 |
| CATATTGGTGAC  | 716.285070140758 | 0.335006213585982 |
| TACGACTGACTA  | 716.28535620754  | 0.235920046021687 |
| CCTTCTGTGACA  | 716.294862119333 | 0.343985001752869 |
| TCAATGTTGTCA  | 716.309004791299 | 0.46246785539051  |
| GACTATTACTCC  | 716.311733735442 | 0.199222119290758 |
| TCGTTTCCGTCA  | 716.315970498626 | 0.21971792834354  |
| GAAGTAAGTCAC  | 716.320745323529 | 0.256322149294949 |
| GACTAATCTCTA  | 716.327805487741 | 0.216909147133457 |
| GCGCATTGCTCA  | 716.342411754462 | 0.215008303215043 |
| GTCACAATTGAA  | 716.347256332738 | 0.452760735387702 |
| ACTTACTGTGAC  | 716.362927049199 | 0.30945855243571  |
| GTCATGATCTCA  | 716.364219098854 | 0.363716595264443 |
| ACGCAGTGTGAC  | 716.381524157901 | 0.369380468244201 |
| GAAGGTGATGAC  | 716.381589184368 | 0.264004894110844 |
| AACTCGTCAGAA  | 716.385231499217 | 0.36594262965409  |
| GCATATTGTGAC  | 716.387496538832 | 0.466158614092257 |
| CTACGGAATGAC  | 716.389968335795 | 0.344296549024825 |
| GTCATATGTTTA  | 716.394805530638 | 0.294785930406576 |
| CTTCAAGTCATA  | 716.397435773629 | 0.458054403090235 |
| GATATTAAGTCA  | 716.400896710805 | 0.57209431490541  |
| ATGAATCTTACC  | 716.40790084263  | 0.209529886646786 |
| TGACCAGTACAA  | 716.423831758862 | 0.293784090511668 |
| GCTCATCTGTCA  | 716.430045398188 | 0.217351113810109 |
| CTCAGGAATGAC  | 716.432407023049 | 0.361899029887059 |
| GTCATTGCTAGA  | 716.439131981855 | 0.248486932664896 |
| GATCTCTAGTCA  | 716.451265525363 | 0.183736115808928 |
| ATGAGTATGTGC  | 716.457267803535 | 0.213801478851582 |
| GTCATTTAGGTA  | 716.462773633933 | 0.42809715664756  |
| GTCACATGAGTA  | 716.463161418455 | 0.36297796371416  |
| CAGGTTTCATGAC | 716.467245513583 | 0.432239563703005 |
| CCTCTACAGTCA  | 716.49281619191  | 0.22555308010396  |
| AGTCAGAACTAG  | 716.527880202158 | 0.235116840090819 |
| TGACGATGAGCA  | 716.528267904185 | 0.308325584355787 |
| AAAGTTGCTCAT  | 716.528469195959 | 0.280690058579628 |
| AACCTATGTGAC  | 716.545275898191 | 0.338171710398892 |
| GGTCATAGTTTA  | 716.548356887824 | 0.330869865395457 |
| AGATGATGACCA  | 716.553308981521 | 0.382209822554876 |
| CATTTTAATGAC  | 716.567487551403 | 0.324377666467144 |
| ATCTGACAGATG  | 716.567537459425 | 0.305089776991808 |
| ATAGCTTGACTC  | 716.567903662982 | 0.346848103456815 |
| CAGCTTATGTCA  | 716.577163220717 | 0.563491856429529 |
| AGAGTCAAATGC  | 716.602903442031 | 0.443061380859526 |
| ATGTCATTACAA  | 716.609242689603 | 0.407190668851983 |



|               |                  |                   |
|---------------|------------------|-------------------|
| CTAGTAATGACA  | 716.623044269265 | 0.235716400938672 |
| TATTCGGTGACA  | 716.625554611542 | 0.315325675476259 |
| CGTCTAGTATGA  | 716.635828149052 | 0.431324161818783 |
| CAAGAGAGTGAC  | 716.639379406471 | 0.294609770206624 |
| GTTGACGTATCA  | 716.646345890279 | 0.416063127951511 |
| AGTCATGAGCGG  | 716.666921499743 | 0.230468765380137 |
| ATGACCATGATG  | 716.673306227428 | 0.423180002746644 |
| GTC AATGAGTGA | 716.687219689908 | 0.392089321259831 |
| ACGGGTAGTCAC  | 716.688522138247 | 0.230507628808496 |
| AGTTTGAATCAC  | 716.69241375359  | 0.406700207305511 |
| CTGTCTTCGTCA  | 716.702853794271 | 0.458692584969182 |
| GGTGACCCAGAC  | 716.70383616967  | 0.341630982999526 |
| GTCACCTGCCAA  | 716.704704815832 | 0.482668910819167 |
| ACGTCACCATAA  | 716.715834214591 | 0.318544508387228 |
| ATGCGCTAGTCA  | 716.724098110109 | 0.503098841246495 |
| CAGCTAGTGTCA  | 716.730246081336 | 0.449680971765168 |
| GACTAATTCGCA  | 716.732189907332 | 0.375639558811638 |
| TCCATTTGCTCA  | 716.734962334325 | 0.27313452599238  |
| ACACGTCTGACT  | 716.737703742446 | 0.229589241313868 |
| CAGGGAGATGAC  | 716.761754928467 | 0.215123758456489 |
| CTCGCTTACTCA  | 716.762377696078 | 0.133324835401915 |
| GGGACGGATGAC  | 716.767916540254 | 0.290831026652693 |
| GCTGACCGGTAC  | 716.795129988598 | 0.446599676232352 |
| AGTCACGGTAGG  | 716.798688394879 | 0.250406690404894 |
| ACACGTCAATGA  | 716.798820212231 | 0.36634979835029  |
| GACTGGGAGTCA  | 716.80984413045  | 0.384310874653226 |
| CTGTAGTACTCA  | 716.815033156379 | 0.47970319956456  |
| ATGAGTTGCTCA  | 716.826689524863 | 0.363864704574053 |
| CATGACAATACA  | 716.846553603514 | 0.253513084545777 |
| GCCGTAGATGAC  | 716.849782733973 | 0.430160616266014 |
| GTCACCCATAGA  | 716.862298465398 | 0.389085319405301 |
| ACAAAATGACCA  | 716.869939824735 | 0.337435454364484 |
| GTGTTGACTGAA  | 716.872679328124 | 0.369030892205598 |
| ATGACAGTGTAG  | 716.898287426619 | 0.251882065855589 |
| GAGCATGACACC  | 716.898724353992 | 0.335388341983651 |
| AGAACGTGACGC  | 716.90940748732  | 0.384447725524805 |
| ACGCCATGTAC   | 716.913452805634 | 0.296476866047379 |
| ACTGACTGGTCA  | 716.918043797612 | 0.325787490384171 |
| AAAATATGACCA  | 716.919302417813 | 0.142162585859734 |
| ATGACGCCGAAT  | 716.921002429047 | 0.340915366600908 |
| GTCACCGTACAC  | 716.92909597752  | 0.303093617447838 |
| TAGAACATGTCA  | 716.931967362652 | 0.255534907090809 |
| CTAGTTTTGTCA  | 716.936154163405 | 0.274996060673237 |
| ATGACGGACCAC  | 716.939786758445 | 0.483443993783239 |
| GAGTATTTGTCA  | 716.94475840315  | 0.309777071994585 |
| GTATTGGGTAC   | 716.956558339054 | 0.228036632202243 |
| ATGACGTCTGTA  | 716.958756921499 | 0.412659052447033 |
| AGTGACTAGCTC  | 716.962601894841 | 0.224631359608274 |
| GTCATGAGCTTA  | 716.972852517115 | 0.391619189240237 |
| ATTCCAGATGAC  | 716.979612610536 | 0.496504765114776 |
| ATGAGCAAACCA  | 716.9883814139   | 0.377426253103699 |
| CATTCATGACAG  | 717.002870884452 | 0.591034399479154 |
| CGGCAGTGTGAC  | 717.018102500009 | 0.309741495281272 |
| ACACAGTGTAC   | 717.018292052109 | 0.175563842390004 |

|               |                   |                   |
|---------------|-------------------|-------------------|
| ACTCATGACCAG  | 717.02014461616   | 0.318733080382888 |
| AACAGACGTCAT  | 717.02695516885   | 0.35269243036312  |
| TACCTGTGACGA  | 717.028011205423  | 0.337829667429383 |
| ATGACGTTGCC   | 717.028124341142  | 0.313617602175153 |
| CTTGCTGATTCA  | 717.02982301607   | 0.309202046424377 |
| ATTTGAGAGTCA  | 717.030251805749  | 0.35599689405044  |
| CAGTAAGATGAC  | 717.030880897818  | 0.3132582016005   |
| GTCAGTTGGTCA  | 717.031486952946  | 0.354587004465749 |
| CGTCATCCCGTC  | 717.033563390416  | 0.305915466667678 |
| AATGTATACCA   | 717.037739613729  | 0.381482277672245 |
| GTCACATTAGAA  | 717.038211351669  | 0.590858530498064 |
| GTGACATGACAA  | 717.043829445627  | 0.372843871446335 |
| AATCTCAGTGAC  | 717.044820531246  | 0.243300628610583 |
| ATGACGAACGGA  | 717.046933344242  | 0.224004435599853 |
| GACTCACTAGGC  | 717.049939181392  | 0.53920648193376  |
| CCAAAATCGTCA  | 717.056191032309  | 0.304762295382364 |
| ATGAGCCAGAAT  | 717.059033314028  | 0.384547612144055 |
| GTCATCTGGTCA  | 717.061473350876  | 0.544157999026992 |
| CGATTACGTGAC  | 717.069945071321  | 0.145152523582054 |
| CGTCACCTGCCA  | 717.074003752833  | 0.3291629117446   |
| AGTCAGCGTACC  | 717.0744445531474 | 0.313447706107469 |
| GACAGGGATGAC  | 717.078953510345  | 0.215249131761443 |
| GCTGACTGCTAC  | 717.081996961837  | 0.305069857051639 |
| AGTGAGTCCAAC  | 717.087582940473  | 0.204961396201412 |
| CAAAGGATGACC  | 717.09042237578   | 0.232085174874067 |
| CGTCATTTTCATC | 717.098393877727  | 0.456678344709131 |
| GAAGCCGTCATC  | 717.104705211875  | 0.312768132870932 |
| TGTGACGACTAA  | 717.114863622443  | 0.320203362823693 |
| TCGTGACAAACA  | 717.116706610471  | 0.302647035457158 |
| ATGACACTCTGC  | 717.123566830046  | 0.327095970512016 |
| AGCTTGATGACG  | 717.127052602119  | 0.257805962077593 |
| GTCACCTGACGA  | 717.130844522153  | 0.474907558162447 |
| AATTTGCTCAGA  | 717.142955941098  | 0.347689643765365 |
| CGTCATTTCTAA  | 717.143421629229  | 0.304934555253173 |
| ATCGTCGGTGAC  | 717.164579897903  | 0.260254809579608 |
| ACGTGTCAGCAC  | 717.167773227507  | 0.388479717650171 |
| AATGCGTGACGT  | 717.174729203252  | 0.440988930077287 |
| CGTCATTGAACA  | 717.178435718992  | 0.40690833183595  |
| ATGACCACTGAC  | 717.182235585346  | 0.227678756859617 |
| GTCACAGGATTA  | 717.186965694618  | 0.320597360595209 |
| ATTGCTCAACGG  | 717.188522221826  | 0.343723848991176 |
| CTGGGGAATGAC  | 717.189389497754  | 0.203361090266694 |
| GTCCTGCGTCA   | 717.202813375973  | 0.347531149876376 |
| CGTCATGGTCGC  | 717.210044046523  | 0.433983225463836 |
| GCGTCAGTCGCA  | 717.210314587712  | 0.305176782083381 |
| AGACGGCGTCAT  | 717.213554583174  | 0.243892113428774 |
| TAAGTTTGGTCA  | 717.220820088046  | 0.476706538770154 |
| CTATCGGTGACA  | 717.22913994233   | 0.384842862673361 |
| AACGTGCAGTCA  | 717.236572495141  | 0.356462525057134 |
| AACTGGGTGAC   | 717.242019009537  | 0.372214019680827 |
| CGGTGATGACCC  | 717.243239004222  | 0.315676853312837 |
| GTGACATTGTCA  | 717.248767331815  | 0.376310668209259 |
| CAGTAAGGTGAC  | 717.249605736527  | 0.539201325880734 |
| TCGTACACGTAA  | 717.253966825374  | 0.287095033130496 |

|               |                  |                   |
|---------------|------------------|-------------------|
| GGCCTCGACTCA  | 717.268700766687 | 0.33291009106488  |
| AGCCCCGTGACT  | 717.272043472231 | 0.33455101308441  |
| ACAACGAATGAC  | 717.280185829097 | 0.285152337920737 |
| ACTAGATGTGAC  | 717.282247548081 | 0.309622122547708 |
| GTAATACGTGAC  | 717.288285124188 | 0.432329880566599 |
| ATAAATTACACA  | 717.294367388899 | 0.401940837038257 |
| GATAGGTCACCC  | 717.312514604278 | 0.266513576303489 |
| TCAGTACTGTCA  | 717.313138511988 | 0.64434797215426  |
| ACGCGCACGTCA  | 717.314234336629 | 0.359797993201149 |
| TATGAGATGACA  | 717.316788935808 | 0.37643430170291  |
| GGTCATACCACA  | 717.317231577483 | 0.362014454543898 |
| TAGTCAGCCATA  | 717.3194563576   | 0.341166558951311 |
| CACAACATATGA  | 717.32213782005  | 0.399755364481763 |
| ACGACCTGACTC  | 717.32641352197  | 0.103191534423155 |
| CTAGTGGTCACA  | 717.333268868926 | 0.35412782055555  |
| AACATCTAGTCA  | 717.333474871962 | 0.362988910712786 |
| GATACCTAGTCA  | 717.348085281948 | 0.307430186450587 |
| GTCACCATTAAC  | 717.352086440658 | 0.317637146838864 |
| TATATTGAATCA  | 717.353259292626 | 0.313894041294561 |
| ACTTTTACGTCA  | 717.387023745841 | 0.20790139477329  |
| AGTTGCATCATA  | 717.391278169026 | 0.366691123356092 |
| TCAGCTATGTCA  | 717.392691796365 | 0.414019738044408 |
| GTCACGCGCAAC  | 717.399131775853 | 0.388308338337503 |
| AAGTCACCCAT   | 717.399994722193 | 0.22847486733071  |
| GCAAAACGTGAC  | 717.403402975534 | 0.222442172009221 |
| ACATTTTGACTC  | 717.416289739477 | 0.180968856694139 |
| AATCCGAGTCAG  | 717.418229249011 | 0.32113229109136  |
| CATGCACGTCAC  | 717.421062178307 | 0.258808191815098 |
| ATTCTGTGACAGA | 717.424359886021 | 0.311739761347764 |
| TAACGCGACTCA  | 717.426047689043 | 0.504465965732014 |
| GTGACGCGCTGA  | 717.426660414725 | 0.502825985682811 |
| AGGGAATATGAC  | 717.435993016046 | 0.194276798942598 |
| GTCACCTGTCAA  | 717.436827960769 | 0.458616466569483 |
| GACTCAGTATCA  | 717.437548072737 | 0.275340729141955 |
| CTCTCTTATGAC  | 717.451574929049 | 0.35006053336034  |
| CTGCCAGAGTCA  | 717.456624192365 | 0.312833414326596 |
| TACGTGTGACCA  | 717.461474800409 | 0.328893017928942 |
| AACTGCGTGACA  | 717.464745782879 | 0.349071295383579 |
| CGCTTGACGTCA  | 717.464963015714 | 0.424838271676075 |
| TACACTGATTCA  | 717.468840819284 | 0.225510272860876 |
| CAGCCTAGTCAG  | 717.472950143809 | 0.359119801434003 |
| ATAACTAATGAC  | 717.477654585902 | 0.41402311007033  |
| GGCTCCAAGTCA  | 717.482068905724 | 0.61810824106069  |
| CCTGACGTCAGA  | 717.483563970877 | 0.326469392934596 |
| AACTGTGACCGA  | 717.487456027712 | 0.327451666774501 |
| ATGAGTAGTTTC  | 717.488597350614 | 0.423840252302514 |
| CCCGGTGACAA   | 717.491847449404 | 0.311301070242105 |
| CTCGATTGTGAC  | 717.492537152496 | 0.420207430938713 |
| GTGAGTCTGCCA  | 717.496382780311 | 0.403080225854461 |
| GCATGAGCAACA  | 717.499584844076 | 0.31491195654475  |
| ACCGGTATGAGT  | 717.506660159854 | 0.176651490255994 |
| CACGTAATACTC  | 717.508338989103 | 0.334362168680598 |
| ATAGCATATGAC  | 717.515266635248 | 0.219803535544415 |
| TCAGTCAAGGGA  | 717.51712961876  | 0.312872294274576 |

|               |                  |                   |
|---------------|------------------|-------------------|
| CCTGGGATGACG  | 717.527789556874 | 0.258580087698261 |
| ATTACTAAATTG  | 717.532584737002 | 0.347814942053002 |
| AATCCCGTGACT  | 717.534104235085 | 0.479667185702582 |
| GTCATGTACACA  | 717.544299348814 | 0.375927159503186 |
| AAATCCAATGAC  | 717.552134156719 | 0.251403989479863 |
| TCGATTGAATCA  | 717.552364314045 | 0.415555154304105 |
| TCGGTGTGACCA  | 717.557397981106 | 0.361081113903095 |
| GATAGTGAATCA  | 717.557566454543 | 0.347017506353019 |
| GTCATTAACGAC  | 717.564151438867 | 0.249572894481868 |
| CGTGTTTGTAC   | 717.567988306254 | 0.451636316523317 |
| ATGGTCATTCTG  | 717.577179084192 | 0.378622702080829 |
| GGGCTGTATGAC  | 717.577409329539 | 0.444220446126872 |
| TGACGATACGCA  | 717.587144895034 | 0.578857147034476 |
| GGATGACTTGCA  | 717.591820779288 | 0.26647841330262  |
| TCCTCCGACTCA  | 717.593980040386 | 0.2892375480099   |
| GCTTCCTGTGAC  | 717.608279337333 | 0.267899287484477 |
| GCCTGGGTGACA  | 717.622701611326 | 0.317007643654406 |
| TGCCTTGACACA  | 717.623737775447 | 0.385286490507489 |
| ACTGCCCGATGA  | 717.627721661976 | 0.523032402946865 |
| TAACGTCATGGA  | 717.637600387565 | 0.356477434756593 |
| GTCACACTGTTA  | 717.640637070887 | 0.35138568061571  |
| GCGTCATGGTAC  | 717.648092051844 | 0.537394949770894 |
| GAATAGGGTGAC  | 717.654795412216 | 0.204329198421164 |
| ACGTGATTCAAT  | 717.662153608736 | 0.330278233818537 |
| ACGTCACCTCGA  | 717.664369372513 | 0.335890210698266 |
| ATCATAGTCAGA  | 717.66863085703  | 0.25466362808425  |
| ATGACACCCAAC  | 717.669490029265 | 0.270068084300656 |
| GACTAATAACTC  | 717.673856762224 | 0.297566883822893 |
| GTCACCCGGCGAC | 717.686790822583 | 0.32817981160491  |
| AATGAGTTACGT  | 717.686812963018 | 0.268518706541993 |
| CATTAACGATGA  | 717.687306672882 | 0.610766912436217 |
| GTCATGGCCTCA  | 717.687909282285 | 0.375340312981134 |
| ATCATGTGACAG  | 717.689740103183 | 0.224846746779158 |
| ACTCATTGTATG  | 717.700785991942 | 0.415729625582272 |
| GTCATTTGCCGA  | 717.701099650959 | 0.534033158449876 |
| ATCATCGCGTCA  | 717.70951305967  | 0.255311373768141 |
| AGTTGTTATGAC  | 717.710873368619 | 0.221844979605841 |
| GTCACCAATCAA  | 717.71143949439  | 0.287267850078693 |
| ACTCATTGAATG  | 717.725011063434 | 0.452930565730948 |
| ATGACTTCGCTA  | 717.72674391741  | 0.420322354862377 |
| GTTTCTTCGTC   | 717.72864082123  | 0.316361261300805 |
| ATGGCGTCACTG  | 717.737998486253 | 0.27076635024002  |
| AGTCATGAGCGC  | 717.746459003398 | 0.188151575857635 |
| CTACGGGTGACA  | 717.755583844982 | 0.215889182210975 |
| AGTCACGGTATA  | 717.756405977972 | 0.262318359075745 |
| AGACAGATGACA  | 717.756813180126 | 0.32618860389185  |
| CTATGCATGACA  | 717.760182418687 | 0.325474216414452 |
| ACTAACTGACTG  | 717.771925297782 | 0.457753312590354 |
| ACACAGTGACGC  | 717.777413473039 | 0.461121386849485 |
| GTCACAAAATTA  | 717.784043105299 | 0.255195476770856 |
| CGTCATCTGAAA  | 717.784891356223 | 0.263972847352388 |
| TTAGTCGACTAA  | 717.810353961635 | 0.479119347665975 |
| ACCGAGGGTGAC  | 717.813030028241 | 0.379988000064222 |
| GGTCATAATTA   | 717.814210750869 | 0.214921700122718 |

|              |                  |                   |
|--------------|------------------|-------------------|
| CCGCCTGATGAC | 717.82700739398  | 0.401074131982084 |
| ATTACGAGTGAC | 717.834057625884 | 0.200610523438297 |
| AGTATTGACTGA | 717.842779046863 | 0.349347914356862 |
| CCGTGGCAGTCA | 717.850254603999 | 0.301069575537732 |
| GGCTCAAATGAC | 717.858326968386 | 0.378673132279108 |
| TCCATAGACTCA | 717.871734831926 | 0.219852245302933 |
| GTCATTATTCTA | 717.88068876295  | 0.372282527169156 |
| ACTCATAATATA | 717.888103982185 | 0.432220325062944 |
| ATCTTTTGACTC | 717.888817952394 | 0.23821403176958  |
| ACTCATACGTGC | 717.891701376321 | 0.300731397580612 |
| GGGTGAGCAAAA | 717.895275742814 | 0.257438950089228 |
| CGTCACAGTAAC | 717.899169069313 | 0.284049029765471 |
| TGAGTATATCAA | 717.903534805122 | 0.237449061756129 |
| GTCATGTTCTAA | 717.907372645279 | 0.406338228949437 |
| AGGTTGTGACGC | 717.912654859212 | 0.288651238640083 |
| ACCGATATGAGT | 717.915163067462 | 0.324437220885914 |
| CGCTCCTGACTC | 717.915732100245 | 0.363319858993328 |
| CTTTAAGCGTCA | 717.917911459714 | 0.316706502638198 |
| GCGCGGTGTAC  | 717.918372756128 | 0.420946168961143 |
| AATGTATGTAC  | 717.931748351874 | 0.321700731572336 |
| GCCAATGGTGAC | 717.936408877543 | 0.410139836511224 |
| GTGACAGCATT  | 717.943222892029 | 0.317133168590887 |
| TGAATCGTGTCA | 717.944726758375 | 0.365841174213223 |
| CGTCATTACCTA | 717.948782300032 | 0.258433048928598 |
| ATGACACTCCTC | 717.958258554305 | 0.259601158741857 |
| GTCACACCCTCA | 717.961605963253 | 0.194224272182135 |
| CTCATGGCGTCA | 717.970462139439 | 0.504426218650226 |
| TACGAATTATGA | 717.980681823755 | 0.332109002620347 |
| GTCATTCGGTCA | 717.984138509916 | 0.204499652224599 |
| AATATGGGTGAC | 717.990086180984 | 0.218456566042614 |
| AAAACCTCGTCA | 717.994049817011 | 0.209151391803072 |
| GGATGAATAATA | 717.999782655071 | 0.209199951712699 |
| CATCGGAGTCAG | 718.002690427704 | 0.254666223240167 |
| ACGCACAGTCAA | 718.008615565576 | 0.249632474142879 |
| ACTACTTTGTCA | 718.008883927094 | 0.259908314583601 |
| CTAATCGTGTCA | 718.009870261557 | 0.187178345711239 |
| CATCAGGAGTCA | 718.010624681415 | 0.360252287580991 |
| GACACATCGACA | 718.011584531904 | 0.356229287238999 |
| AATGGAGATGAC | 718.013668886064 | 0.270280529968579 |
| AACTTATGACCC | 718.028655399557 | 0.297332900237856 |
| CTTCAAATGAC  | 718.036627656619 | 0.337322643893515 |
| GTTCTTACTCA  | 718.042851875816 | 0.191335629828359 |
| AGTCACGGACCC | 718.0464962353   | 0.213844987545765 |
| TGACCGTCATAA | 718.063628014121 | 0.14784341474075  |
| GACTCACGCCCA | 718.065239544513 | 0.239871434009752 |
| ACTGTCACTGAG | 718.066183526802 | 0.448948017761479 |
| ATTGCTAATAGC | 718.068397578133 | 0.291725203593412 |
| CTGATCTGTGAC | 718.070005722144 | 0.674292266656678 |
| ATCGTGACATTA | 718.07112251377  | 0.561412041615249 |
| GTCAGCCTATCA | 718.072280558076 | 0.452786827320068 |
| CGTCACATGACC | 718.077609397613 | 0.34804802077452  |
| AGTCAATGTAC  | 718.077974570651 | 0.456770491681775 |
| TGACACTACTAA | 718.078888934325 | 0.341516686874731 |
| CGGTGAGTATAC | 718.101458616926 | 0.21424233710222  |

|              |                  |                   |
|--------------|------------------|-------------------|
| TGACTGGGCACA | 718.108300433521 | 0.232582836598571 |
| TGACTAGGAGAA | 718.111577501728 | 0.288948729661623 |
| CTTTGCTAGTCA | 718.113452166793 | 0.367278481531571 |
| GAGCCATGACGC | 718.123438692951 | 0.258771410413342 |
| ACGTCACAGACT | 718.123934915975 | 0.301973004280864 |
| GTGTCAGAGTAA | 718.128401369486 | 0.185398261615701 |
| TGACTAGTCGAA | 718.130471014934 | 0.338976463619561 |
| CGTCACAATTAG | 718.136449558584 | 0.310110076532723 |
| CGACATAGTGAC | 718.156250726291 | 0.186338791357409 |
| AACCTGCATGAC | 718.160134028533 | 0.38612192661389  |
| CTTCCCAGTGAC | 718.175396629844 | 0.204490758697579 |
| CCGGATTGCTCA | 718.18520555878  | 0.274748456982195 |
| ATTGTAGCGTCA | 718.190185895593 | 0.333651586144693 |
| GGGTATGATGAC | 718.194787273215 | 0.332170245426296 |
| CGTTGGCGTGAC | 718.19654016365  | 0.371250464389533 |
| ATCTTCTGACTG | 718.19693140631  | 0.234405542793417 |
| ACCGAAACGTCA | 718.197520204885 | 0.421490474900834 |
| TCATCGGAGGAA | 718.198393981985 | 0.365092024495868 |
| AGAGAGACTCAT | 718.199780239457 | 0.245438938894733 |
| AAATGTCTGACT | 718.200962793067 | 0.493450055152037 |
| TGACTAGTCTCA | 718.20800245891  | 0.408171696727597 |
| GGATGAAATGAC | 718.213070203566 | 0.374395811591833 |
| GACTAGCGTGAC | 718.22996666757  | 0.337789647450544 |
| ACTGAGTCTGAC | 718.23476057414  | 0.315157981631195 |
| GAGAGGAATGAC | 718.238265274155 | 0.237681802631536 |
| ACGGATTAGTCG | 718.241374121886 | 0.319966293437741 |
| TCATGGATGTCA | 718.241742632604 | 0.417291119357928 |
| AATGAAGTCAAC | 718.25308630771  | 0.270018912620348 |
| ATGAATAATATA | 718.256151573008 | 0.324852092474005 |
| ATGACTTCGGCA | 718.269403322044 | 0.44605105227802  |
| ACGCGATAGTCA | 718.272261972872 | 0.322172704858554 |
| CATACTAATGAC | 718.285238169188 | 0.319526434194751 |
| TATAAATACTCA | 718.289789313674 | 0.339787498748194 |
| ATGACGGTACAG | 718.292051192645 | 0.360262587088791 |
| TGACAAATCTCA | 718.294140343435 | 0.317354238722421 |
| AGATAATTAGTC | 718.302538184088 | 0.244883787515007 |
| CTGTAGTGACAC | 718.302901273364 | 0.292252621549096 |
| GAGTCGCAGTCA | 718.305247878402 | 0.355527500147655 |
| GTCATTGAGCAA | 718.313012625915 | 0.372919306824728 |
| AGTCACGGACTA | 718.325992766664 | 0.430413958947472 |
| GTCATAGAGAAC | 718.333659954589 | 0.521897065473763 |
| CTATCGGTGTCA | 718.336475743191 | 0.272138283596546 |
| GAATTTGACACA | 718.34305588664  | 0.385603297863346 |
| CTGCGCAATGAC | 718.35490425633  | 0.444468781165245 |
| CGAAAAGGTGAC | 718.35892195371  | 0.246916160060289 |
| CCCGCTGGTGAC | 718.366818776416 | 0.382490557155952 |
| CTGGTAAATGAC | 718.374196460857 | 0.40032183675362  |
| TCATGGTACTCA | 718.378303388947 | 0.355530128071134 |
| AGCGGATTACTC | 718.383978923004 | 0.475774765748836 |
| CTCTACTTATGA | 718.384371054284 | 0.423483900163852 |
| AACCTTGTGACA | 718.393501885856 | 0.411803348868377 |
| ACGCGACATGAC | 718.399416335649 | 0.380999749968792 |
| CCTATATGTGAC | 718.407475984332 | 0.328729144484965 |
| AATTAGGGTGAC | 718.409178413995 | 0.295701722989518 |

|               |                  |                   |
|---------------|------------------|-------------------|
| CGAGTCAGGTTA  | 718.413391903945 | 0.340509874907806 |
| GGTCATACCTAC  | 718.436044812195 | 0.243171299055639 |
| AAACTGAGTAAC  | 718.442340490732 | 0.108075643237854 |
| GTCATTTACAC   | 718.446850645237 | 0.209024395209567 |
| ATTCATTTGTCA  | 718.457569538172 | 0.395797653707656 |
| GAGTAATAGTGA  | 718.468051240785 | 0.265589784413425 |
| ACTATGGTGTCA  | 718.474407831063 | 0.326526155229481 |
| GGTAGTGACGAA  | 718.477048162847 | 0.264005579515057 |
| CATCCGTAGTGA  | 718.487691069103 | 0.574251315177082 |
| AGAGGAATGACG  | 718.496609922358 | 0.18371941363738  |
| TAATTAATGACA  | 718.498444000009 | 0.483823978389778 |
| CGTCACACCATA  | 718.498661182469 | 0.37887471007978  |
| AGGGTTTACTCA  | 718.499265630325 | 0.370368036274918 |
| GATCGGAATGAC  | 718.508105900468 | 0.334241966094523 |
| GCATGATGCAAC  | 718.516082439023 | 0.334108049038504 |
| GCACGTGTGACA  | 718.520328659667 | 0.402420712415074 |
| CGTTGACTGTGC  | 718.520553053734 | 0.395823482544984 |
| ATGACGAACGGG  | 718.523694105708 | 0.305463294446082 |
| CCGGTTGAATCA  | 718.527101792423 | 0.416423226742261 |
| AATCTGGTCATA  | 718.531942836107 | 0.266659999898331 |
| CACCGGCATGAC  | 718.536323724166 | 0.212959308192787 |
| ATGACATGAATC  | 718.545194773749 | 0.534804530708535 |
| TATGTTGAGTAA  | 718.558361087918 | 0.363856928145448 |
| GCGATGCAGTCA  | 718.562146983716 | 0.304704092991585 |
| GGTCATCCGTAA  | 718.563272937114 | 0.446273547598634 |
| AAGATATTACTC  | 718.571926996591 | 0.233130747267209 |
| ATTCTAATGACG  | 718.577873156698 | 0.270784981745514 |
| AGTCATGGTACC  | 718.580903251596 | 0.242436252412063 |
| AATAGTCAACCC  | 718.584663413098 | 0.315821891812195 |
| AGCGTAATGACG  | 718.585049813585 | 0.362791185186776 |
| AATATATGACCG  | 718.609973674801 | 0.452935276628997 |
| CATAGCAATGAC  | 718.611493981211 | 0.151394587272844 |
| ACTCATATCATG  | 718.615178625849 | 0.258983964369794 |
| GAAAATGTCACA  | 718.617384504674 | 0.168886875432706 |
| ATGACAGCTATA  | 718.624973285073 | 0.220743884318117 |
| GACTCACTGACC  | 718.635437481551 | 0.401051806516405 |
| GACCTGGTCATC  | 718.637737849051 | 0.444776871642415 |
| TGTCATGCCCAA  | 718.659417513889 | 0.405287271350302 |
| GTCATGTCTCAC  | 718.660658921941 | 0.325240343968562 |
| GAGTCAGGTTGA  | 718.662068513232 | 0.307179934445155 |
| AGGCAACGTGAC  | 718.669462113898 | 0.398454399441363 |
| GCCGAAGATGAC  | 718.672012620055 | 0.395509587408421 |
| GGATTTTCATGAC | 718.67572741645  | 0.313882744149667 |
| CGTCCAAGTCAC  | 718.678401922005 | 0.306511931806038 |
| TATGACAGTAGA  | 718.688405789775 | 0.19318076852526  |
| AATGATGGGTCA  | 718.704450611686 | 0.209280859909366 |
| AAACAGGAGTCA  | 718.70889174169  | 0.231750061872775 |
| CAGTCAGAACCA  | 718.713171157849 | 0.313100167494474 |
| AGATATTGTGAC  | 718.715822148202 | 0.309911488931978 |
| GAGTCCATGTCA  | 718.729225643769 | 0.554860227241991 |
| CATGGGTGTGAC  | 718.733735197554 | 0.354786624233097 |
| CATCACAAGTCA  | 718.734230846899 | 0.54540167934026  |
| GTTCTGAGTCGA  | 718.739434690245 | 0.335679628222039 |
| CTGAGTGACGTC  | 718.74622227003  | 0.479027824527513 |

|               |                  |                    |
|---------------|------------------|--------------------|
| CTAAGCTATGAC  | 718.747329916527 | 0.206549547686314  |
| ATCTCTGAGTCG  | 718.74791057615  | 0.244374762139977  |
| CTTGTAACGTCA  | 718.758994469513 | 0.388195402664841  |
| ATGATTCGATGA  | 718.760845043846 | 0.460293989674226  |
| GTCACATCTAAA  | 718.778218775019 | 0.305738238687585  |
| CCTGGTGAATCA  | 718.779442699825 | 0.459948997909364  |
| CCATGGCGTGAC  | 718.779498018114 | 0.35340307907553   |
| AGTGGATGACCA  | 718.781303161741 | 0.160958894191531  |
| TCTGTGTGACCA  | 718.788312832813 | 0.362491291934927  |
| AACCTCGTCACA  | 718.790662981207 | 0.149859961258864  |
| ATACGCTGTGAC  | 718.796443304302 | 0.53926894872204   |
| ATGACGAGAATG  | 718.8051773413   | 0.278555675926523  |
| TGAGTAAGGACA  | 718.807821430556 | 0.493455357713606  |
| CAGTGGTGACAA  | 718.815012841908 | 0.319829125196913  |
| ATGACCCGTCAG  | 718.815181809528 | 0.346293188568875  |
| TGCCGTGACAAA  | 718.833868309523 | 0.297224435597205  |
| ATGAGTACCGTA  | 718.834611492467 | 0.142908581533566  |
| AGGCACGAGTCA  | 718.848830287955 | 0.487785903095565  |
| CCTGAAGCGTCA  | 718.849939350278 | 0.400667827325717  |
| GCATCCACGTCA  | 718.856251170867 | 0.396709248281164  |
| ATGCTGTGACGC  | 718.86047809611  | 0.236751500143266  |
| CGACGATATGAC  | 718.861612976747 | 0.613736199899993  |
| GTAATAACTACTA | 718.866441057041 | 0.312153430330008  |
| ACAGACATGACG  | 718.876637619777 | 0.555835172949832  |
| CGAAGTTGAGTC  | 718.881461165179 | 0.392058276339138  |
| CCACTTGGGTCA  | 718.886732039095 | 0.312552981241235  |
| TCTGAATCGTCA  | 718.891641714376 | 0.376782448565436  |
| TGACTCCCGCAA  | 718.893402465133 | 0.282703630529334  |
| GAGCCCTGACTC  | 718.901212431071 | 0.382012663943188  |
| ATTCCGGTACCA  | 718.903301318545 | 0.404752091079603  |
| GTGGCTCACCTA  | 718.911519661332 | 0.21086902447729   |
| AAAATTGTGACG  | 718.912744320455 | 0.192056138979139  |
| CTAGGAGATGAC  | 718.918096711742 | 0.170549399675654  |
| CACTAGGACTCA  | 718.927987253167 | 0.400205066508247  |
| CAGTCTTGGTCA  | 718.929578523411 | 0.501843356369565  |
| GACTTAATGACA  | 718.931506134708 | 0.260584207775211  |
| GGTTTTGATGAC  | 718.942830810579 | 0.301212401407061  |
| GTCATGCCTTTA  | 718.94334676534  | 0.3479691281568    |
| GACGTCACTTAA  | 718.944013971888 | 0.641213162928871  |
| CGATGCGACTCA  | 718.949815243682 | 0.350839649654781  |
| ATAACTGGTGAC  | 718.961259254309 | 0.398468924342822  |
| GCGGACCCGTCA  | 718.963187025019 | 0.519713779408172  |
| AAGTCACTTGTC  | 718.966964681542 | 0.0918222363126039 |
| GTCATTTCCCTAA | 718.970699538911 | 0.238599243532998  |
| AAGCGATTAGTC  | 718.989063234457 | 0.236570781034474  |
| AAGTCAGAGCCA  | 718.997812758148 | 0.215555711557292  |
| AAGGACCAGTCA  | 719.006258891832 | 0.407908970056734  |
| ACGTCACTGAAA  | 719.013208394369 | 0.269650594995339  |
| GTCATACCAGACA | 719.022193619746 | 0.298429604689278  |
| GTGACACGACTA  | 719.036344266263 | 0.463737483904407  |
| AGTCACGGAGGA  | 719.054358839707 | 0.29811706706703   |
| ATTGCACGTAC   | 719.059934151848 | 0.401699001967279  |
| ATGAGTAGATTC  | 719.06148429449  | 0.288952348706634  |
| ACTGCATGACGC  | 719.073542113817 | 0.346077333778037  |



|               |                  |                   |
|---------------|------------------|-------------------|
| GTCACACCATCA  | 719.076794158633 | 0.44724662369491  |
| AGTGAAATGACG  | 719.083314380017 | 0.34700395604061  |
| AGCGCCTAGTCA  | 719.084083988459 | 0.380845656273555 |
| CACTCTGACGAA  | 719.088829023987 | 0.257048601385729 |
| AAGCTAGTCACT  | 719.091545548139 | 0.411697434892356 |
| GTGGCATGACAC  | 719.109320084781 | 0.334072568213561 |
| GTGACAAACTAA  | 719.109328290247 | 0.38117822723064  |
| ATGGGGTGACGC  | 719.112855421487 | 0.479389095985035 |
| GTACGCCAGTCA  | 719.12690026409  | 0.478947634667277 |
| CAGTCAGCACGG  | 719.146229114868 | 0.310425922894399 |
| GAGTAATAACTA  | 719.146612669812 | 0.306647035821767 |
| ATTCCGGTCATGC | 719.151824171286 | 0.298858099354147 |
| ATGACGTGACCC  | 719.162275186034 | 0.208959511316793 |
| CGATGACGGCAC  | 719.173553020385 | 0.307476863440234 |
| TGACTACAGGAA  | 719.187469675009 | 0.332447579625731 |
| TCCACTGAATCA  | 719.193860444359 | 0.325684402403134 |
| CGTCACATTTCA  | 719.197627819377 | 0.384194210600477 |
| GGGTCATAATCA  | 719.213504717667 | 0.310322755422737 |
| CATGAGCAAATG  | 719.23130890595  | 0.296682800660187 |
| ATTCCGATTAGTC | 719.244430729291 | 0.338550011202455 |
| ACTCATACATAG  | 719.246144737852 | 0.312939027238762 |
| GATTGGTGACGC  | 719.254064159973 | 0.365117431129322 |
| GCTCATGACCCA  | 719.263609690936 | 0.182392780197634 |
| GGAAACCGTCAC  | 719.264398367508 | 0.355830879760308 |
| AAGTTGTCACTC  | 719.266667531987 | 0.271271783130899 |
| TGACTCCGGTAA  | 719.273825745712 | 0.575833393329303 |
| CATGAGAGTCAG  | 719.276567045971 | 0.201777350763433 |
| TAAAACGCGTCA  | 719.280454386474 | 0.372623825823581 |
| TGAGTATTTCAA  | 719.289107143731 | 0.303955780455506 |
| GTCATCCCACCA  | 719.302005015923 | 0.219527115710125 |
| CAATTATGAGTA  | 719.302295197788 | 0.342255266124404 |
| ATGACATTTAAAT | 719.302315126163 | 0.31459137769035  |
| GTCACCAGAGAA  | 719.304496810134 | 0.340379149288389 |
| AGTCAGACCGAG  | 719.320051780426 | 0.333465623044284 |
| GTTTATCTGTCA  | 719.321065280469 | 0.250019401772882 |
| ATGTCACAGCTA  | 719.321758570177 | 0.31349711955014  |
| AATAGTAATACT  | 719.325986892455 | 0.327679315239782 |
| GTCATTTTGCTA  | 719.326096533212 | 0.394012924087527 |
| AAAGTGGTGACG  | 719.329896528916 | 0.338732389949792 |
| GTTGTAATGACA  | 719.332239798951 | 0.368201354008615 |
| ATGACAGACCTG  | 719.333595325119 | 0.329944857231452 |
| GTCACGCGTAAC  | 719.34171328436  | 0.35980071542913  |
| ATGACCGAACAC  | 719.343398633924 | 0.393934258422403 |
| AGGTTGAGTAAC  | 719.345754426939 | 0.328747291581527 |
| GACTTGTTATGA  | 719.348167292116 | 0.601589519945982 |
| CCAAGTTGATGA  | 719.356560619617 | 0.51157280123879  |
| ACTCATAATTGG  | 719.358698811092 | 0.406783300112852 |
| GTTGCTCACACA  | 719.359542797834 | 0.419785338338444 |
| TGAGCCATGCAA  | 719.363337268504 | 0.405415276085952 |
| ATACGATTACTC  | 719.38513113032  | 0.39302313222111  |
| GAGTAATTCGGC  | 719.391528822411 | 0.428096232908459 |
| CTGCACGACTCA  | 719.39568581871  | 0.38250113511397  |
| CTCACATCGTGA  | 719.396706298443 | 0.226809199518553 |
| GAATGATCTGTC  | 719.401652922471 | 0.336451281488165 |

|              |                  |                   |
|--------------|------------------|-------------------|
| GCCCTGGGTGAC | 719.405755019884 | 0.495417205535692 |
| CTCGCCGGTGAC | 719.41594508504  | 0.424327039347812 |
| TCGCATGACCCA | 719.417693253197 | 0.362097515443593 |
| CGGATTAATGAC | 719.423535120431 | 0.270462147140972 |
| ACTCCTCAGTCA | 719.438775786107 | 0.335781851986229 |
| GACTTGTACCA  | 719.445909348203 | 0.315523432712132 |
| GAACGTGTGACA | 719.453706960485 | 0.260248351524278 |
| CGAAGTTGTAC  | 719.455599426564 | 0.345064659954259 |
| CTAGGGTGACAA | 719.466070317284 | 0.353425314862467 |
| ACTCATTTTAAG | 719.470640763431 | 0.372411375576492 |
| GGCACATGTGAC | 719.470644450103 | 0.54792149233428  |
| AACCAGTCAGTA | 719.473422306154 | 0.365155591586728 |
| ATTGCGTAACTG | 719.48529746969  | 0.355656439620972 |
| AGGATTATTCAT | 719.485772025717 | 0.309540194982917 |
| CCGTGTGAGCAA | 719.486332974832 | 0.313066990198019 |
| TCTTCTAAGTCA | 719.491309871875 | 0.198464453434255 |
| CGGGAGATGACA | 719.499481289952 | 0.24988727491091  |
| ACCAAAGTATGA | 719.50338818331  | 0.371665199346716 |
| ATGACAACGAAT | 719.511933830588 | 0.310612798322404 |
| CGGTCATAGTAA | 719.51244187141  | 0.34310572006939  |
| GTGACTACCCAA | 719.527775270276 | 0.327974146098443 |
| CCAAGTGACCCA | 719.529036569781 | 0.298396598867168 |
| TCTCTCGACTCA | 719.55362569789  | 0.315621026365204 |
| AACACGTAACCA | 719.553971903864 | 0.294718417307695 |
| AGCCCCGAGTCA | 719.555444803588 | 0.335214020347869 |
| CATGGAATGACG | 719.565673163257 | 0.238301104355038 |
| ATAGCAGATGAC | 719.567333648263 | 0.253633981549294 |
| GACCCTAATGAC | 719.576508852047 | 0.320029460125585 |
| ATGTGGCTCACC | 719.578166589242 | 0.37762041718581  |
| ACACTGTGACAG | 719.578519956343 | 0.303217554601358 |
| ACTCACGTGACA | 719.582811224467 | 0.487634476583459 |
| GAGGAGAATGAC | 719.587746359097 | 0.216243014038713 |
| TAGATTTTGTC  | 719.59180575082  | 0.457177081574781 |
| GTCACTACCGTA | 719.593117534047 | 0.499198090272952 |
| GATATACTACA  | 719.594058986731 | 0.306926757167677 |
| AAAGATCACTCA | 719.598388291647 | 0.159778300163989 |
| CGTCATCCCAA  | 719.598630982493 | 0.283162323652606 |
| ATCACGTAATAC | 719.60285985137  | 0.414377628398855 |
| ACGTCACGATAA | 719.604294691488 | 0.447029556238187 |
| GCCCGTAGTGAC | 719.606795318277 | 0.45187210625282  |
| CTACCGAGTCAG | 719.60749940715  | 0.329064863183257 |
| ATCTTAATGACA | 719.614374503008 | 0.457230233042981 |
| GCGTAATTGTCA | 719.620477885168 | 0.286652943411144 |
| CACTCTGTCATG | 719.62753464051  | 0.400077458587233 |
| TGATTACAGCAA | 719.631042785106 | 0.341205391211428 |
| CATATCACGTCA | 719.631477599226 | 0.29301777015755  |
| CATTTTGACGCA | 719.631859685897 | 0.243225252303583 |
| GTCATATGTAGA | 719.634083584882 | 0.219881694713379 |
| AATAACGATGAC | 719.637900343433 | 0.374904871188828 |
| ATACTGTCACGG | 719.642238361776 | 0.521135565460873 |
| CACAAAGTATGA | 719.654480921758 | 0.401362166424377 |
| AAAATTTGTGAC | 719.656764854176 | 0.308491329079419 |
| GGCCTATGACCC | 719.656796121768 | 0.328933628550138 |
| GCGCTGAGTGAC | 719.669632828446 | 0.39691829486785  |

|               |                  |                   |
|---------------|------------------|-------------------|
| CCCAGAGAGTCA  | 719.675723538646 | 0.273245980464298 |
| ATACCATGAGTC  | 719.67673740405  | 0.344465675605307 |
| AATACGTAATAC  | 719.680214841142 | 0.200068548385727 |
| CTTCGGTGACAA  | 719.692103333505 | 0.241739145682529 |
| ATGACAGACGCA  | 719.694723347266 | 0.252263660381177 |
| CACTAGGCATA   | 719.697800860341 | 0.420453208467748 |
| GCCACGAGTGAC  | 719.698981607675 | 0.46575757797181  |
| CGTCACGATGAG  | 719.702476812951 | 0.32624876306682  |
| GTGACTACCGCA  | 719.702560653402 | 0.536585618062424 |
| GTACCATGACAC  | 719.708701908707 | 0.545332118508355 |
| AGACTCAGATCA  | 719.715485394306 | 0.38243254546669  |
| CATGGTGAGCAA  | 719.724059330752 | 0.275588173403831 |
| GAGTGAGCCACA  | 719.734295283982 | 0.261614549590108 |
| GTCATTTCCAC   | 719.73878481814  | 0.210672025532949 |
| GATACATGACAC  | 719.746046713985 | 0.201363197646118 |
| AGATCAATGACG  | 719.747270381837 | 0.306729527001535 |
| CTGCTATGACCC  | 719.751306741931 | 0.264345337879019 |
| AGGAGACTCATA  | 719.761477073889 | 0.227190701475842 |
| GCAGACTACTA   | 719.762255748174 | 0.407389155126549 |
| CCAGGCGAGTCA  | 719.763705720676 | 0.453784221246496 |
| GGAGTGTATGAC  | 719.763841644231 | 0.359487540808871 |
| ATAAACATGTCA  | 719.76495190095  | 0.36545307304173  |
| GTCACATGAGAC  | 719.776502605167 | 0.509472421718439 |
| CCGTCGTGACTA  | 719.783957338207 | 0.255481412873549 |
| ATGACTTGATG   | 719.784004290151 | 0.314655148454063 |
| ATTAATGGTGAC  | 719.788719098743 | 0.456868254117607 |
| TCGGAGATGACA  | 719.795181657827 | 0.310589885510912 |
| AGTCAGCTTGCG  | 719.797989063495 | 0.341518606002457 |
| AATACACGTGAC  | 719.801210057088 | 0.26616555980476  |
| CACCTGTGACAG  | 719.816446518139 | 0.474689654043794 |
| GGACTCACTGCA  | 719.83386218229  | 0.574387670321079 |
| CACCCCTATGAC  | 719.835271954463 | 0.302397963126809 |
| GTCACTGATGAA  | 719.836705786618 | 0.313298284443496 |
| GTCATGTATTGA  | 719.837277544788 | 0.209919020477989 |
| ATAGGTCGTCAT  | 719.846277013054 | 0.299227230186827 |
| ATCCGGGTGAC   | 719.846422710292 | 0.422731112557875 |
| GGATATTATGAC  | 719.848545454509 | 0.177526440038928 |
| CCCCTCGATGAC  | 719.857708071714 | 0.30535681274128  |
| GATCCCTGTGAC  | 719.861345999074 | 0.280548838328507 |
| TCACTGTGACGA  | 719.870771051657 | 0.457254347735379 |
| AGGCATGACACT  | 719.88054511909  | 0.362966080087004 |
| ACAGCGCAGTCA  | 719.882592269599 | 0.428934826714631 |
| CACTCTTCGTCA  | 719.883394232162 | 0.272357162214897 |
| GTCACCTTGACTA | 719.884102045369 | 0.356544777155175 |
| GAGTATCGTCAC  | 719.893786948549 | 0.407157112535942 |
| AAATGACATTTA  | 719.903073553624 | 0.228813265303186 |
| TCAAGAGAGTCA  | 719.910942944881 | 0.301103285974586 |
| ACTCACGGATGA  | 719.916404777378 | 0.457460782637651 |
| CCTAATTAATAA  | 719.919507788287 | 0.27272856926805  |
| CCCTAAGTGACG  | 719.923942572811 | 0.534412813897686 |
| AAGCATTGTCAT  | 719.932631600126 | 0.430567961423441 |
| GACTGACACAGA  | 719.936037027014 | 0.332670579732448 |
| TATTAGTGACGA  | 719.939090816905 | 0.344407759970421 |
| AGTCACCCAGC   | 719.939510045234 | 0.399236019464219 |

|              |                  |                   |
|--------------|------------------|-------------------|
| ACGCCTGAATCA | 719.946406882265 | 0.274583031747459 |
| TCTTGGGAGTCA | 719.947052963601 | 0.535088532301391 |
| CCCGCATATGAC | 719.950485768523 | 0.458622539538223 |
| TCCGATCTGTCA | 719.950596330717 | 0.196329394160688 |
| CGTCATTTATCC | 719.953469733429 | 0.20863177200449  |
| TGAGCAATGGAA | 719.955072412688 | 0.346396181172955 |
| ATGATGACCGCA | 719.959416549514 | 0.394303381375821 |
| GCCTGAGGTGAC | 719.975616371881 | 0.380047960947603 |
| GATGCATATGAC | 719.979315597584 | 0.363218325440138 |
| GACTAAAGTCAC | 719.985786935832 | 0.458397696244546 |
| GCCCAATATGAC | 719.989715997598 | 0.463170155815204 |
| TCATATTCGGAA | 719.991434949071 | 0.467466313051066 |
| GTCGGCGAGTCA | 719.993777162629 | 0.268221726528233 |
| AACAGTGTACG  | 719.994025160657 | 0.199179442563342 |
| CGGCGGTGTAC  | 719.999368520956 | 0.364240368663669 |
| ATTTTGTCTCA  | 720.004592138008 | 0.1611729027116   |
| GTCATCCAGTA  | 720.00845981573  | 0.339760858870663 |
| CGTCATGCAGAA | 720.022204329575 | 0.447841905428641 |
| AGTGTCACGCTG | 720.022486442931 | 0.2900492308331   |
| AAGCTGGAGTCA | 720.022610472797 | 0.447266164166559 |
| CACGTCAGTCTA | 720.023825643706 | 0.381909564157124 |
| GGCAATATGAC  | 720.026949255085 | 0.315366388071374 |
| AAACGACATGAC | 720.0377058709   | 0.470564711938082 |
| GCATTTAGTGAC | 720.042111102067 | 0.311982041745932 |
| GTAGTATATGAC | 720.042606536785 | 0.322489326274802 |
| AAGTCGTGTAC  | 720.05594222665  | 0.268865535726045 |
| ATGGCAAATGAC | 720.079441462884 | 0.451721569280819 |
| CAGCGCCAGTCA | 720.088452709274 | 0.478735661059526 |
| CGTCATTAGGAA | 720.092200238822 | 0.183074646322836 |
| ACTCATATATCG | 720.103140531485 | 0.352337218192846 |
| ATGACGGCATT  | 720.104172196471 | 0.253211959169554 |
| ATCGAGGGTGAC | 720.104859704843 | 0.426690161573988 |
| CTCGTCTATGAC | 720.106517731544 | 0.42184745327554  |
| GAGAGGTGTGAC | 720.110872127504 | 0.306422306732986 |
| TGTCACCAAAA  | 720.130964261702 | 0.400659049365739 |
| ACACATGTGACG | 720.131275846158 | 0.432539697154393 |
| ACCCGTGTGACG | 720.141502452513 | 0.536404846698036 |
| CGTTCCGACTCA | 720.151481832754 | 0.277114764494178 |
| CCTACGCGTGAC | 720.153757207083 | 0.388833018213142 |
| CTGACCAAGTCA | 720.161818559059 | 0.329919263994155 |
| ACTATTCTCTGA | 720.169561146902 | 0.259184407687566 |
| GTCAGCTGACTA | 720.170629607901 | 0.321915412330344 |
| CATCACTAGTCA | 720.173327058861 | 0.321311164288863 |
| GTCACTCCGGGA | 720.177875023588 | 0.301098403263243 |
| GTCGATTACGCA | 720.179386394267 | 0.429323802490233 |
| ACACATCTGTCA | 720.183413614105 | 0.31668783625712  |
| CATGATGTGACA | 720.183627369315 | 0.268943118930914 |
| GAGTCTGAATCA | 720.201608367657 | 0.352720661440802 |
| GGCCCTCAGTCA | 720.202837511839 | 0.277804276281317 |
| GGCCTGCATGAC | 720.229300353429 | 0.416419023630666 |
| ACGTGGTGACAA | 720.232736615344 | 0.31973181780905  |
| GCCGAGGACTCA | 720.243848297296 | 0.381227970843749 |
| CGACTATGACCC | 720.244028263354 | 0.21508535103807  |
| CTCGCGTAGTCA | 720.250263668343 | 0.377568591994013 |

|               |                  |                   |
|---------------|------------------|-------------------|
| GACTCAGACTGA  | 720.264440809441 | 0.492422500580826 |
| GTCACCTGTAA   | 720.266176328344 | 0.317839857003884 |
| TGTGTCAAACAA  | 720.268389197148 | 0.266503117798799 |
| TAAAGAGAGTCA  | 720.272534312616 | 0.469024063864271 |
| GACTGATTGGCC  | 720.278043477998 | 0.381741809483233 |
| ATGTGATTAGTC  | 720.282056156845 | 0.309112969038844 |
| ATCTCTAATGAC  | 720.289878893537 | 0.328725429038622 |
| ACTCATAGGGCA  | 720.292265282942 | 0.336072764217762 |
| CATGCATGACGG  | 720.293472150977 | 0.348963537431798 |
| ATGTCACCATAT  | 720.307851245775 | 0.39128267668717  |
| GTTACTCAGTGA  | 720.316627761554 | 0.257604931829266 |
| CTTGCTAGTCAC  | 720.316994904064 | 0.240288439782925 |
| CTGGCTAAGTCA  | 720.321839406597 | 0.392852056738752 |
| ATCACCTGACTC  | 720.329919880383 | 0.171823006300047 |
| AGATTACTAAAT  | 720.333489803834 | 0.361457698837576 |
| ATTACTATATGA  | 720.33820611034  | 0.400379236985104 |
| CTATGGTGACGC  | 720.339629998739 | 0.316203114045793 |
| AGTCACGCGCAC  | 720.345773238227 | 0.330091270781559 |
| AATATGTCGTCA  | 720.360553936175 | 0.437135126636309 |
| CGAGTCAGGTCA  | 720.366832496072 | 0.327649850491411 |
| AATTAGCCATGA  | 720.373475324305 | 0.376395196656979 |
| CCGTACTCGTCA  | 720.375299288719 | 0.307019784833264 |
| AGTCACGGAAGG  | 720.37541378701  | 0.260645450480913 |
| CTTCACGGTGAC  | 720.380041271815 | 0.376260203255288 |
| CGAGTCAGGGCG  | 720.381652422839 | 0.2269579564938   |
| AATGACGTCTAC  | 720.38325995396  | 0.36193043485264  |
| AGAGTCAAGTAT  | 720.388999190278 | 0.306589080185898 |
| ACAATAGCGTCA  | 720.399872846471 | 0.345561791617484 |
| CCCTTCCAGTCA  | 720.401253568401 | 0.353163589079173 |
| ACTATGTTGTCA  | 720.407421443338 | 0.433908117865014 |
| AAAGACTGACTA  | 720.413397335776 | 0.295259444524151 |
| AATGATGTAACG  | 720.422285313349 | 0.366263612606639 |
| GTCATCCCCTCA  | 720.422988006243 | 0.270898509161184 |
| ACGTCATGGACT  | 720.433232620139 | 0.504997472107537 |
| ATTAGCGAGTCA  | 720.445216983097 | 0.527402188849292 |
| TGAGTCGGCTAA  | 720.474852030408 | 0.372142380510186 |
| ATGACCTGGCCG  | 720.486344977469 | 0.327585648085956 |
| CTGACGCTTAAG  | 720.492069568522 | 0.593278264975204 |
| ATGCGTGACCCA  | 720.507122387777 | 0.281299903978582 |
| GGGTAATAATGAC | 720.513221671214 | 0.164403939105936 |
| GTCATCACCCGA  | 720.518913110914 | 0.405014263053057 |
| GACCTCGACTCA  | 720.519086833924 | 0.333139515865212 |
| ACTGAGGGTGAC  | 720.525305935156 | 0.419635740293105 |
| GAGAATTGTGAC  | 720.530196532185 | 0.381393186304361 |
| TACCAATTATGA  | 720.531377075983 | 0.349284675524394 |
| AATAGTGAATCA  | 720.537700509188 | 0.262809200333403 |
| GTCACCCACGGA  | 720.546998958375 | 0.440393472121232 |
| AGTCAGTCTGTC  | 720.553783347318 | 0.363073076920669 |
| ATACGTATGACC  | 720.55872346666  | 0.317157629669654 |
| CCGGTCACGTCA  | 720.577165731811 | 0.432010239905952 |
| ATGAGCAGTTTC  | 720.577959447886 | 0.312045316019911 |
| ATGATCATGACG  | 720.578836074336 | 0.353998476192053 |
| GGTGAAGATGAC  | 720.586210307841 | 0.224835755676729 |
| ACTCACGACTCA  | 720.587399787642 | 0.124734991049265 |

|              |                  |                   |
|--------------|------------------|-------------------|
| TGACTACGCACA | 720.60105870019  | 0.430645518153555 |
| ACTACGGAGTCA | 720.620189976766 | 0.234638388917434 |
| CTCATCGAAGGA | 720.622029720991 | 0.477440137169522 |
| GGGCTGAGTAAC | 720.628342413141 | 0.264023816792377 |
| GCTGCCTAGTCA | 720.628725550865 | 0.393818300795806 |
| GACTCACGCTGC | 720.628788863978 | 0.302894504364459 |
| GCCGCGAGTCAC | 720.632788284225 | 0.258883020941634 |
| TATGTAACGTCA | 720.633174957519 | 0.534857959216069 |
| ACTTGATGACGG | 720.633758756868 | 0.547394605914165 |
| CGACTAATTGGC | 720.634645692345 | 0.413034634740219 |
| ACGGGGAATGAC | 720.637865457732 | 0.304818889120591 |
| AGTCACGGATCG | 720.641493968129 | 0.346727978773488 |
| AGCAGGCGTCAT | 720.643087824835 | 0.359027673817988 |
| CTCCATGACATA | 720.653690229619 | 0.210136725251332 |
| ATGCTTGTATC  | 720.667442306374 | 0.337062743091611 |
| ACGTGAGATGAC | 720.676215278888 | 0.267075705339606 |
| CGTCACTTCTGA | 720.681149715746 | 0.349723393802935 |
| AGACTCAGAATC | 720.703933665715 | 0.321633256168565 |
| ACGTACAGTGAT | 720.711252044204 | 0.230002861262009 |
| ACTGTCCGTCAT | 720.711688541946 | 0.303852825995336 |
| GAGATAATGACA | 720.739161648088 | 0.264510489710354 |
| CGCATATATGAC | 720.741977027968 | 0.36315408425185  |
| CGTGACGCGATC | 720.745950386026 | 0.444591588847626 |
| GTCATTCAGGCA | 720.747804151946 | 0.340328349814815 |
| CTGCGGTGCTCA | 720.747946775892 | 0.564051450344025 |
| ATGACTTGCTAA | 720.757475309667 | 0.550963134245093 |
| ATGGATAATGAC | 720.759918757259 | 0.34672956078726  |
| TGAGTCGAGCAA | 720.762036762978 | 0.436348561822374 |
| AGATTATGAGTA | 720.764261871723 | 0.224665328313222 |
| ATGGCTAATACC | 720.774756215842 | 0.415817052482699 |
| CGAGCGTGTAC  | 720.776475520524 | 0.253676108220901 |
| TGACGGGTGACA | 720.786792656682 | 0.207333077539493 |
| CAGTGCCAGTCA | 720.791289393877 | 0.495649870787551 |
| ACTAGTGGTCAT | 720.792245207835 | 0.387915959722611 |
| GTGTCATGTCCA | 720.793225797831 | 0.336758077653364 |
| CTGACGGATTAC | 720.797816696041 | 0.321310890013024 |
| GGTCGGACTCAC | 720.801243743549 | 0.360266403839694 |
| TGACTACTTCCA | 720.802287556945 | 0.287002190359707 |
| GCGTCACCTTTA | 720.803483531112 | 0.238815999596374 |
| GAACACTGACTA | 720.81487380497  | 0.298377522864052 |
| AATGAGTAGGCA | 720.81523623611  | 0.238289538344185 |
| AGGGTGAATGAC | 720.816527415659 | 0.157308981386329 |
| GCGTCTTGTGAC | 720.824385165469 | 0.413844010691091 |
| CTGGTTATGTCA | 720.82573314532  | 0.481885956468708 |
| ACTCATCGGCGA | 720.832764283368 | 0.227759075699926 |
| GAGGCCGGTGAC | 720.834434266104 | 0.24432740260269  |
| CATGACTTGTAG | 720.839223900089 | 0.391457855723957 |
| ATACATGATACA | 720.8396836075   | 0.411757090527364 |
| ATCACGTGTGAC | 720.842810800746 | 0.183611399124417 |
| CGTCATTAGAAG | 720.844946821058 | 0.260256415633026 |
| GCTGCATGACAC | 720.848527504681 | 0.323046779861727 |
| ATATCTGATGAC | 720.85260923449  | 0.339894031993935 |
| CAGTATGTCTCA | 720.854274908797 | 0.482963909356677 |
| TAGTGTAAGTCA | 720.867819131479 | 0.31411093520217  |

|              |                  |                   |
|--------------|------------------|-------------------|
| CCTCCGAGTCAG | 720.903656453179 | 0.14942758978655  |
| GCAATTACGCAC | 720.914636487159 | 0.274904182915495 |
| CATTATTACGTA | 720.920281085678 | 0.506546722728053 |
| ATCTGCTGACTG | 720.924705473391 | 0.594956248785501 |
| GACTCACTTGAC | 720.946154292    | 0.313033731021986 |
| GACTCAGGTCTC | 720.959675077117 | 0.546160740574164 |
| GATTAGTCGCAA | 720.962933228368 | 0.309206024359901 |
| AGTCAGCCATAT | 720.976484508945 | 0.329558253890599 |
| GGAGCGGATGAC | 720.997729230787 | 0.23693299325594  |
| GTAACGCATGAC | 721.000084656761 | 0.433300500045105 |
| AGTCACTAGGAC | 721.00518640186  | 0.336600562447284 |
| GACTCAGTCTAA | 721.009075014429 | 0.308353507449755 |
| GTCATGCTACTA | 721.010958807146 | 0.460011737604518 |
| AGATTCTAGTCA | 721.013011353026 | 0.403782340769119 |
| ACTCTCGACTCA | 721.019896551747 | 0.262052012935934 |
| CACGTCACGGAG | 721.025631204178 | 0.456057770226396 |
| CGTGGCGTCACA | 721.029984595813 | 0.460225887139459 |
| TCTGAGCAGTCA | 721.035961447961 | 0.569679834240752 |
| ATGACGGGTCC  | 721.042461385967 | 0.299162303005697 |
| ATGACTTGATTC | 721.044939715738 | 0.398707017403453 |
| ATTAGAGGTGAC | 721.049623845578 | 0.340435978466798 |
| GTCATTTGAAAA | 721.055674618273 | 0.309390989451609 |
| ATGAGTATGAGG | 721.05587617175  | 0.247062029297083 |
| GTCGCGCAGTCA | 721.064397384599 | 0.433555075031398 |
| GTAATAGGTCAC | 721.071422829789 | 0.345530149858787 |
| ATACTATTACTC | 721.071980353025 | 0.364816958212715 |
| ACCGGCTGACTA | 721.072965432081 | 0.392651377988702 |
| AGACCATGTCAC | 721.075500151911 | 0.305976203079171 |
| ACTTCGCATGAC | 721.075795370681 | 0.386761269881784 |
| GAGGCGGATGAC | 721.076632788795 | 0.302688319450985 |
| CCTCAACGATGA | 721.083693327529 | 0.574994777556419 |
| ACATGCACGTCA | 721.088270237577 | 0.489382330224086 |
| ACTCATTAGAGG | 721.093487669536 | 0.195362075085776 |
| GACCCTGAATCA | 721.107920762039 | 0.306174742413314 |
| ATCTCATGACAC | 721.10923595427  | 0.328830094650893 |
| GATGAGCCAACC | 721.113601859373 | 0.347623795520089 |
| AATCACGTATGA | 721.117865942732 | 0.366520962637374 |
| CACTTCTAGTCA | 721.11816307617  | 0.246411323154878 |
| GTCATGTGCGAC | 721.130740693798 | 0.445834179134467 |
| TCCGGATGACCA | 721.135212268817 | 0.415120809650118 |
| CGTGTGAGCCAC | 721.144965296438 | 0.431545689566437 |
| GTGACACTGACA | 721.147388228546 | 0.568993188229507 |
| TGAGAATGACCA | 721.164201975055 | 0.25641166691165  |
| AACGGGAATGAC | 721.169881807709 | 0.239419699611602 |
| ACTCATCGATAG | 721.172576569632 | 0.162096520901119 |
| TGACTCTAGCCA | 721.186013471621 | 0.234367364984761 |
| CTGACTCTACCC | 721.187586617984 | 0.204001336942153 |
| GTGACGTGCTCA | 721.195369348792 | 0.143901592694356 |
| CAAACATGACCA | 721.197101753668 | 0.339767664661286 |
| ACGTAATGAGTA | 721.197491048664 | 0.217865212881704 |
| TAAGGATGACCA | 721.199480669545 | 0.472739634628697 |
| CAAGCGGACTCA | 721.199867235228 | 0.515219746985331 |
| ATTGTTGTGACA | 721.204341689772 | 0.350774515774648 |
| CAGTCATGGGCC | 721.206973389729 | 0.397342596386084 |

|              |                  |                   |
|--------------|------------------|-------------------|
| CAACAGGTGACA | 721.216312029661 | 0.396377053464651 |
| GGTCTGACCCAA | 721.218312464146 | 0.489010833973197 |
| CACCACGTATGA | 721.223165778137 | 0.346090990973377 |
| CGAACGCGTGAC | 721.227159316095 | 0.462524055443665 |
| CAATTATGATGA | 721.228583647108 | 0.576752925969193 |
| GGTCATGACCGA | 721.228960177919 | 0.326317647777618 |
| ATAAGAGGTGAC | 721.233958374169 | 0.315258716346611 |
| ATGAGTATGCCA | 721.239831957712 | 0.371224871839515 |
| CGCAACTCGTCA | 721.24372899466  | 0.323311385323556 |
| CTGGATATGTCA | 721.245424488325 | 0.343828751141303 |
| CTGACACGTGTC | 721.248214887873 | 0.297872091286326 |
| ACCTTGTGTGAC | 721.252509397477 | 0.307321632993064 |
| GTCACGTGATGA | 721.255819063928 | 0.388822908712331 |
| AGTGACAATGAC | 721.290152868104 | 0.218303494871279 |
| ATATATCGTGAC | 721.296544974824 | 0.330316096421575 |
| GTGATGTGTAAC | 721.297725239817 | 0.298446356956352 |
| TGTCATGCGACA | 721.306166124042 | 0.577271994962314 |
| GATGTAATGACA | 721.30917710864  | 0.312835883422499 |
| TCCCTGCAGTCA | 721.318282405499 | 0.397624464259646 |
| AAATAGTAGTCA | 721.319030550778 | 0.416632098273546 |
| ACTGCCCAGTCA | 721.32324847866  | 0.234260556091195 |
| TGACGCGCCACA | 721.331769938469 | 0.406345285095819 |
| AGATTACTAAGA | 721.332434456032 | 0.249445097400781 |
| CGAATTACGCAA | 721.336175425879 | 0.304982969904377 |
| CTAACTGGTGAC | 721.338943805234 | 0.280023032326846 |
| TCCGCTACGTCA | 721.34232807468  | 0.250462293086982 |
| GAATCGTGTAC  | 721.344835013187 | 0.24046936017133  |
| AGGTGACATGGC | 721.365815574436 | 0.262612988109535 |
| AAGCATTGTC   | 721.371875619498 | 0.450994730908059 |
| CAGTTAATGACG | 721.372289466476 | 0.386131634682858 |
| ATATTGATGACC | 721.381891340177 | 0.377415656124491 |
| GATCCTGACGCA | 721.381895752039 | 0.32844322339623  |
| AGCGCGCGTCAT | 721.384516925416 | 0.376442845634516 |
| CCGGCGGAGTCA | 721.384651588038 | 0.276328179856983 |
| TCGGTCATCACA | 721.387620320344 | 0.560465029470712 |
| GTCACCCATCAA | 721.388249977375 | 0.248168968200342 |
| CGCGGGATGACG | 721.389348402451 | 0.388599196690263 |
| ACTACTGACGTG | 721.398324891085 | 0.401284427147268 |
| GTCACACTAGAC | 721.402967430108 | 0.419548636849453 |
| TGTCACCATTAA | 721.403509504715 | 0.315392873742151 |
| GAAGACTAGTCA | 721.404952829724 | 0.27633590774987  |
| ACTGATGAGCCA | 721.408685897127 | 0.447143474516612 |
| ACTCATTTGTAA | 721.408743978861 | 0.324843976172573 |
| TGACTTGGCGCA | 721.421913026362 | 0.353468128880491 |
| TAGTCAGTAATA | 721.429250055116 | 0.272877714935848 |
| CCCGGCAATGAC | 721.438639697669 | 0.356057278461534 |
| CAAGGCTGACTA | 721.439489871821 | 0.378030132723203 |
| ACTCATCGCATA | 721.443306378083 | 0.305338409561482 |
| ATTACACACCGG | 721.444618837201 | 0.397421474354994 |
| CCGGTGTCTGAC | 721.446964967279 | 0.387977841838798 |
| ATGAATGGTGAC | 721.449473254117 | 0.337652965521464 |
| AGCCCAGTCAGA | 721.450536265725 | 0.319764912481876 |
| TGTCACAGACAA | 721.47011028062  | 0.469241210238891 |
| CCGGCGAGTGAC | 721.487187386768 | 0.1978935973164   |



|               |                  |                   |
|---------------|------------------|-------------------|
| CAGTCAGTCGTC  | 721.490421443589 | 0.540751056912584 |
| ATACATGACACC  | 721.499581165416 | 0.434506773652465 |
| CCATAGCGTGAC  | 721.500104205698 | 0.328604375998632 |
| ACGTCATGCAAA  | 721.514363362732 | 0.547048919519108 |
| TCTGACACTTAA  | 721.530950331501 | 0.153793394896317 |
| GTGACTTGGTAA  | 721.53574801427  | 0.380778566394874 |
| ACGTCACTATTG  | 721.537244974308 | 0.343407301353534 |
| CTGACGGATTTT  | 721.538981723967 | 0.519790285817148 |
| ATGACTAGCTGG  | 721.539757391596 | 0.383216309119766 |
| CAATTAGTGTCA  | 721.540314412807 | 0.376111925319922 |
| ATAGAATTAGTC  | 721.545132826163 | 0.347349428955897 |
| TCAGATTACGCA  | 721.546515294329 | 0.336051410028792 |
| CGTCTGACGGAC  | 721.552430344597 | 0.326941997728347 |
| GGAGTAAATGAC  | 721.553355440262 | 0.321851767669889 |
| GTCATTTCCACA  | 721.56419066894  | 0.300266538178093 |
| GAGTCAAAAAGCA | 721.571558294066 | 0.357360120292635 |
| ATGAATGGCTCA  | 721.576506747972 | 0.487638291935121 |
| ATGTCACTAATG  | 721.578621351759 | 0.496394279983161 |
| ACACCAGATGAC  | 721.584606537022 | 0.358074456389704 |
| GGTTCCGCGTCA  | 721.59276747229  | 0.533464416130766 |
| CTGTCTTTGTCA  | 721.598831848878 | 0.321546789667981 |
| AACTTCTGACTT  | 721.603196085226 | 0.282600108940154 |
| AGCTCAGTGACA  | 721.608483574796 | 0.460483150212879 |
| AACGCCAGTCA   | 721.615042011483 | 0.263330498754448 |
| ACGTCACCTCCG  | 721.617108508695 | 0.333013576612553 |
| CACGTCAGCGCA  | 721.619338492639 | 0.412426996104513 |
| CCTTAAGCGTCA  | 721.62396311443  | 0.389482181223405 |
| GACAGCTCATCA  | 721.624616720566 | 0.287967916956438 |
| GTTCTCTAGTCA  | 721.627927256959 | 0.369712677656272 |
| GTCACGCATTGA  | 721.629176189826 | 0.488952118139633 |
| CTTGACGGTGAC  | 721.63598421294  | 0.419789723444589 |
| GCGTTTGATGAC  | 721.636739053748 | 0.218771849557219 |
| ATTCATGACATG  | 721.641725505453 | 0.294624356121248 |
| ACAATTAGTCGG  | 721.651263930053 | 0.665731087480177 |
| AGATCATAGTCA  | 721.65424756786  | 0.19353098347269  |
| CGTCATGTGGCA  | 721.658411413092 | 0.406934094513147 |
| GTCACCAGATAA  | 721.665049814622 | 0.392666844172042 |
| GCTGTCACCGAA  | 721.66625682687  | 0.420781458872733 |
| AATAAGGGTGAC  | 721.673521912381 | 0.336762832479792 |
| ACAATCATGACA  | 721.676843327421 | 0.326551335786417 |
| AACTTTTGGTCA  | 721.714326255671 | 0.340556725418716 |
| GTCAATGACCGA  | 721.716858936917 | 0.440415911711959 |
| CGGGGTAGTCAC  | 721.718115499703 | 0.338506363779944 |
| GAAAGTTGTAC   | 721.719243796933 | 0.37457222511205  |
| ACGTCACAACAA  | 721.725937103132 | 0.348090416839837 |
| CTTTCAGACTCA  | 721.732317371949 | 0.304968397029667 |
| AATTCTCGTCAT  | 721.732463015565 | 0.182043280935163 |
| GTCACCGATCAC  | 721.737203649979 | 0.27028638082167  |
| CGTCATTTAAAA  | 721.74188002112  | 0.428513826981565 |
| AAGTGGAATGAC  | 721.741944590763 | 0.219465168623572 |
| ACGCGTCAATGA  | 721.749903214445 | 0.483162757939013 |
| AACCGGTGACAA  | 721.751695147708 | 0.28857338809006  |
| GTCATTGCCGAA  | 721.752444037324 | 0.384588811961468 |
| CATCGGACTCAC  | 721.774660911783 | 0.316552759209226 |

|                |                  |                    |
|----------------|------------------|--------------------|
| CAGTCAAGTCAC   | 721.783247635876 | 0.421797197916894  |
| GCTACAGAGTCA   | 721.7834848367   | 0.380069013382574  |
| CAAATCCGTCAG   | 721.78501049019  | 0.297271262311239  |
| GGTGTGTCATGCTA | 721.785154365159 | 0.301937068267382  |
| CACCTGTAGTCA   | 721.789329775985 | 0.412627242290807  |
| GTCACAAATCTA   | 721.794367671422 | 0.20430629509663   |
| AACTTTGACTCG   | 721.794831284274 | 0.363423110428181  |
| CAGTCAGTTCGA   | 721.798066484065 | 0.471942382559914  |
| TCTCATCTGTCA   | 721.806575438824 | 0.321271922022805  |
| ACTGATGTGACG   | 721.817305278814 | 0.35183757093154   |
| AAATAGTGACGT   | 721.819352526306 | 0.163308500585069  |
| AATCATGAGTAC   | 721.829046331285 | 0.515457035439357  |
| ATGACTTGGTGG   | 721.830411791267 | 0.327493630467288  |
| AGAGAAATGACA   | 721.84193482754  | 0.301671358166891  |
| TCGGTGACCCAA   | 721.845797035767 | 0.362208248232076  |
| CCACGTGTGACA   | 721.846425386123 | 0.175514571299769  |
| CAGATATTACTC   | 721.85119429597  | 0.312255003288217  |
| CACGTAATCGAG   | 721.852303734895 | 0.269474527721149  |
| CGTCATGAGTTC   | 721.864952797942 | 0.56185438268636   |
| AATATGATTCTGA  | 721.880899698256 | 0.386914523237056  |
| CCGCAGACTCAC   | 721.884613602831 | 0.251414702270457  |
| GCGCCAGATGAC   | 721.886326496507 | 0.394280564187481  |
| GTCATAATGCCA   | 721.894812966695 | 0.222902692064705  |
| ATTGACTGAGCC   | 721.897525517165 | 0.436027055111085  |
| AGTTAAGATGAC   | 721.907630747373 | 0.359625652971825  |
| CCGATGTGATGA   | 721.909012876685 | 0.446501711582173  |
| ACTAAACTGTGA   | 721.913188188652 | 0.594977311119626  |
| GAGAGTGAATCA   | 721.928606226344 | 0.316075798603885  |
| ACATACAGTCAG   | 721.934388225587 | 0.408736068356551  |
| AGTGTGATACAT   | 721.94935004221  | 0.0901928360230365 |
| GTCATTGCTCAA   | 721.956556665612 | 0.28681990094985   |
| CACCTTGTGATC   | 721.96215760235  | 0.236998350875622  |
| GACTCACTACAA   | 721.966210885509 | 0.371090035372173  |
| CTTCAGGGTGAC   | 721.970528181672 | 0.379098338239447  |
| ATGACGCCGATC   | 721.971497278638 | 0.366326329480422  |
| AGAGTCAGGTAG   | 721.978019287536 | 0.195801223376083  |
| CGTCATCAAATC   | 721.978549552444 | 0.389488399048375  |
| AAAGCATGACAC   | 721.980541549339 | 0.279116899778628  |
| ATGTGGCGTCAC   | 721.982404928718 | 0.215147953841141  |
| ACACTGCATGAC   | 721.985213726259 | 0.493682938003147  |
| AGTTCCTAGTCA   | 722.003033233515 | 0.332408041055099  |
| GCGTCACGCACA   | 722.009011949003 | 0.306598952331736  |
| CATCTGTGACAG   | 722.011437065815 | 0.320206937636327  |
| GTCATTCCCAA    | 722.014840368849 | 0.333299432010699  |
| CATCATAGGTGA   | 722.018021096307 | 0.417839323579739  |
| ATGAGTAGGCCA   | 722.018431319004 | 0.139255164800489  |
| CTCATCAGATGA   | 722.022184801419 | 0.237370850090363  |
| AGTGTGAGCAAA   | 722.022324800039 | 0.249314141136977  |
| GCTGATGGTGAC   | 722.023658046452 | 0.223631535280166  |
| CCCAGATTAGTC   | 722.024561313225 | 0.458647767759907  |
| ACGTCACCTTAG   | 722.026361253718 | 0.361345543955881  |
| ATGAACTGGTCA   | 722.030554590871 | 0.25726591395163   |
| GCGTCACTGGCA   | 722.033695268836 | 0.397327745946322  |
| AATTAGTCGCGT   | 722.034275218045 | 0.453658735856151  |

|              |                  |                    |
|--------------|------------------|--------------------|
| ACGTCACCATAG | 722.038651480741 | 0.402016589788358  |
| AGTCAGTAATAT | 722.041988442123 | 0.33839209764284   |
| CAAGACGTGTCA | 722.04202657817  | 0.253357322601701  |
| GTCACACCTAAC | 722.059295720664 | 0.37721729933066   |
| CGTCACAAGCTA | 722.067479860362 | 0.215439672154154  |
| GTCATCCGGGAA | 722.069982951109 | 0.338001709846506  |
| CGCTCATGACAC | 722.071502272598 | 0.208149723758432  |
| CCACAGTGACGC | 722.072129937574 | 0.422706584896496  |
| GTATTATGAGTA | 722.077278796215 | 0.150554306350312  |
| CGCCGGGTGACA | 722.080141743842 | 0.343634425118711  |
| AGACTAATTTGC | 722.084759318659 | 0.243129109493962  |
| CGACGCGTGACA | 722.085740195292 | 0.308888693939858  |
| TCACCAGTGTCA | 722.086399769756 | 0.297290886927438  |
| AGCCATGTCACC | 722.087365035872 | 0.342626304279367  |
| GCCTCGGGTGAC | 722.090114801792 | 0.36560557028105   |
| ACGTCATGCGCG | 722.090791259196 | 0.367708437297872  |
| GCGTTCTAGTCA | 722.091413453001 | 0.672797141250221  |
| ATGACGATGGTA | 722.092094257164 | 0.209410477949091  |
| CTCCAAGTCACA | 722.096419170263 | 0.197334770227173  |
| AGAGTCAAGTAA | 722.104322481134 | 0.3867389143446    |
| ATGAGTCTCCCA | 722.113123503671 | 0.670000647643998  |
| GTCACCTCTAAA | 722.114768279339 | 0.181303589446717  |
| AGTCATGGGATG | 722.1187114855   | 0.109982170777085  |
| ACGTCACATGCA | 722.12235522187  | 0.321988109402807  |
| ATAGCAAATGAC | 722.13721173386  | 0.283073042865234  |
| CTATGACTTGAG | 722.140979511333 | 0.237801908420931  |
| CATGGATTAGTC | 722.145559795306 | 0.329590260330656  |
| GTCACGCTGTAA | 722.145853967281 | 0.41095940214188   |
| GTCACCCCGTTA | 722.147003726187 | 0.250167229150782  |
| AAGACGCATGAC | 722.167291340469 | 0.283280013248767  |
| GTCACAGCTAAC | 722.169251416984 | 0.246354453942212  |
| AATGAGTAGGAC | 722.171243894484 | 0.297398753673877  |
| ACTTACTGTCAT | 722.183181603225 | 0.197863872242202  |
| GTCATTATGCTA | 722.186153641631 | 0.216553686864254  |
| ATTGATATGACC | 722.193695322717 | 0.296229782786274  |
| GTCATTGCGCCA | 722.194832071784 | 0.309280378364127  |
| TCACCAGAGTGA | 722.1970339808   | 0.324333920301214  |
| TGAGCAATTCCA | 722.209872900129 | 0.474960599192752  |
| CATGACAATACG | 722.216200045278 | 0.40026660637985   |
| ATTATGGGTGAC | 722.227436112083 | 0.303469541029826  |
| GCCACGGTGACA | 722.231359637175 | 0.505528968963589  |
| AGTTGCTGTGAC | 722.236117109578 | 0.264062547182753  |
| ATCCATGAGCAA | 722.236472038336 | 0.427049537279494  |
| CATCGTACGTCA | 722.236733832369 | 0.321546665142887  |
| CCTACCCAGTCA | 722.243850597154 | 0.185126698663411  |
| AGTCAGAGTTGA | 722.244431585182 | 0.0975993468019487 |
| CTGGCATGACAA | 722.247137626789 | 0.310000762344013  |
| GATGGCTATGAC | 722.258799812445 | 0.221586884920043  |
| AGGGATGATGAC | 722.270517552368 | 0.308057881477512  |
| ACGATAGCGTCA | 722.273832161246 | 0.373541626615426  |
| CGGGACGTCATC | 722.281604599306 | 0.307268406906468  |
| GTCAGACTTTTA | 722.282891355394 | 0.255640503900459  |
| CACTCAGACTCA | 722.291637860938 | 0.288793173622973  |
| AGTAAGATTCAT | 722.291711741429 | 0.182092810909595  |

|               |                  |                   |
|---------------|------------------|-------------------|
| GTCACAGTTTGA  | 722.29681553414  | 0.460862519554695 |
| CTGTGCGCGTCA  | 722.298548259112 | 0.387813623269588 |
| CCGGTGACAGCA  | 722.301597003029 | 0.326963695381779 |
| ATGGGATTAGTC  | 722.30789846259  | 0.458976262443665 |
| GTCACTGACCCA  | 722.308160348363 | 0.298160720108844 |
| CATTTGTTGTCA  | 722.321305338835 | 0.576669333519878 |
| CGTCATTGCCGC  | 722.326956647981 | 0.277768665451443 |
| GAGCCTGTCATC  | 722.342438972904 | 0.402030067927259 |
| AGTCAGAATTTA  | 722.346960310831 | 0.286753276329641 |
| AACGTAAGTCAC  | 722.34986765282  | 0.182566990421109 |
| AGTGACAGTGAC  | 722.359098155335 | 0.240899733370825 |
| ACGTCATGCCCT  | 722.364078845814 | 0.277658955345394 |
| GAATCTGATTCA  | 722.368099857016 | 0.343366710228447 |
| CTTATCATGACA  | 722.378466461999 | 0.404179141504947 |
| ATATCGGTGTCA  | 722.388168558181 | 0.452317319043783 |
| GTCACGTCTGAC  | 722.392147517374 | 0.34779566640822  |
| ACAGTGAATGAC  | 722.392198332934 | 0.428752078807936 |
| GAAGCGTGACGC  | 722.393151907273 | 0.350700157144505 |
| CCCACGAATGAC  | 722.403299010574 | 0.302104919401332 |
| ATGACGGACATG  | 722.414295548292 | 0.410890472323274 |
| GACTAATCTGCC  | 722.417583934803 | 0.537497219741485 |
| ACTCATCACTGA  | 722.422045773086 | 0.31369508684888  |
| ACGTAACTCATA  | 722.435771449819 | 0.39002565337907  |
| AGCTCGCAGTCA  | 722.438048003635 | 0.318801499085286 |
| GTCACCCGGGAA  | 722.454328285283 | 0.399108455443905 |
| ACTCATTCTTTC  | 722.456781320413 | 0.194280042401644 |
| CGATTTGACTGA  | 722.460682340113 | 0.300411295499768 |
| GCTCCTCAGTCA  | 722.468045833305 | 0.430148904496476 |
| ATTCCGCGTCAC  | 722.472530645051 | 0.266014261568135 |
| GTCACCCGAATA  | 722.472821518232 | 0.306057567166536 |
| CACCATAAGTCA  | 722.473882555626 | 0.255531562239794 |
| CCGTTTGACACA  | 722.475107165835 | 0.403857037451672 |
| GTCACCCGGGAAA | 722.476071763347 | 0.422610887559784 |
| CTTAGGATGACC  | 722.49177190882  | 0.339866477199332 |
| GACTCAATCGAA  | 722.495766989219 | 0.516592574107132 |
| ACACGCAATGAC  | 722.509780222842 | 0.395663404692947 |
| ATGAGTTGGCTA  | 722.514591245917 | 0.23004717320831  |
| GCGGACTGTGAC  | 722.519963777998 | 0.403432079020179 |
| AGTATAGGTCAC  | 722.540501632482 | 0.200941172131173 |
| ACTCATAGGTAA  | 722.540650484582 | 0.453330259259126 |
| GGGTCATTGTCA  | 722.542589185185 | 0.391876427300496 |
| TCTGAGTAGTCA  | 722.548941128955 | 0.496975710055231 |
| AAATTGACTGAA  | 722.549041478831 | 0.531067686280341 |
| AATCTACAGTCA  | 722.557780997931 | 0.299298884054805 |
| CAGTCAAATTAC  | 722.567841947228 | 0.33198575341568  |
| ATAAATTACGCA  | 722.582819864338 | 0.423907157932701 |
| CTAGCGACTCA   | 722.582869538525 | 0.310612473237858 |
| ACGTCACTTGAC  | 722.584132700136 | 0.326278010219582 |
| CTGCGTGACATA  | 722.585574280231 | 0.204409067359443 |
| ATGACCGAATAG  | 722.586927008803 | 0.15670171129598  |
| ATGACGTTTCGCA | 722.597110206378 | 0.391551497917678 |
| ACCAGTGACATA  | 722.601088217108 | 0.344466685127309 |
| GTCATGAGTTGA  | 722.611004375612 | 0.340041502883023 |
| ACTCATTGAGAG  | 722.615886378888 | 0.290082914243829 |

|               |                  |                    |
|---------------|------------------|--------------------|
| ACGGGCGTGACT  | 722.618754258332 | 0.222017353941021  |
| ATCAAAAGTGAC  | 722.620063236489 | 0.300688106410003  |
| AGGCTGGATGAC  | 722.624708608223 | 0.347934865912443  |
| ACTGCATGACAA  | 722.626933449463 | 0.383796727304221  |
| AACGTGACCGAA  | 722.633913702455 | 0.301479354158765  |
| AATAGGATGACC  | 722.636432854518 | 0.483870767435507  |
| ATACGTAATCCG  | 722.648718850964 | 0.337014610998973  |
| GTTGAGTCGTCA  | 722.650084736001 | 0.235496697581827  |
| CAGTACGGTGAC  | 722.657422802792 | 0.419196441454552  |
| ATTGATTCACTC  | 722.659719412683 | 0.446204608933434  |
| ATCGACTGACTG  | 722.664866208094 | 0.445092495873008  |
| CGTCATGCTTCA  | 722.668820382457 | 0.361250548907894  |
| CCTCGGCATGAC  | 722.670343291195 | 0.318112558169794  |
| TGCTTCATGACA  | 722.673371865415 | 0.330689185647372  |
| ACGTATGGTCAT  | 722.675209769479 | 0.267488900079427  |
| ATGACAGAGCTA  | 722.685303815079 | 0.232038300718538  |
| AACCACCAGTCA  | 722.690143356701 | 0.333745339108921  |
| GTTTCGACGTCA  | 722.696830813967 | 0.296810109587085  |
| AGTCAGAATTTG  | 722.697608295049 | 0.332798018172346  |
| AACGTTCTGACT  | 722.708466347497 | 0.27009847406891   |
| GCAATGTCAATCA | 722.718053902892 | 0.312990210247678  |
| ATGAATCTTATC  | 722.719487898355 | 0.398413954213082  |
| CACGGAGAGTCA  | 722.720243640216 | 0.327090188860621  |
| GAATCACATGAC  | 722.722110613131 | 0.244195478956926  |
| ACTCAAATGAGT  | 722.729857939013 | 0.429724876026807  |
| CATCACAATGAC  | 722.730247354015 | 0.357599892088829  |
| TGACGGAGAAAA  | 722.731150486011 | 0.215968264940138  |
| GTAATGCATGAC  | 722.73287957392  | 0.30901161057878   |
| CACGTCAGCACG  | 722.735932038336 | 0.439239855448274  |
| GTCGACGTCACA  | 722.737671622177 | 0.195428074162366  |
| ACAAGCCAGTCA  | 722.73969056565  | 0.483373627362027  |
| ACTAGTTGTGAC  | 722.740537000947 | 0.593744585205891  |
| GTCACACTGCAA  | 722.75194397192  | 0.311758325913849  |
| AGTCAGAATTAG  | 722.759993635863 | 0.266024433685419  |
| GTCATTGCATAA  | 722.7606646837   | 0.308727440036238  |
| GGACGTGATTCA  | 722.769729959867 | 0.369406079060035  |
| GACTACTCATTA  | 722.770350945261 | 0.345298050655609  |
| CCGAAGTGTGAC  | 722.772131058776 | 0.361553646315196  |
| TCATCCATGTCA  | 722.800847883835 | 0.446659840759953  |
| ATCGGACTCACA  | 722.808732655084 | 0.304696183253042  |
| GCGGTGACAGCA  | 722.823941712331 | 0.30289035279823   |
| GTCATAGGACTA  | 722.830512456828 | 0.324638018225215  |
| ATGACGAACCCA  | 722.838548799642 | 0.0757649005145807 |
| CATCCCAGTGAC  | 722.842871417705 | 0.395093644329303  |
| GCTATGACCTAA  | 722.858490881414 | 0.22144815051897   |
| GGACATGATGAC  | 722.862548307975 | 0.375784932750026  |
| AAGCGATGTCAAT | 722.867873890496 | 0.210563660723347  |
| ATGACAAGCAAT  | 722.879306758669 | 0.475107121420148  |
| GACCGGTGACAA  | 722.886061997871 | 0.415235502861195  |
| GTGTGAGCAAAC  | 722.89613416691  | 0.354780161323275  |
| AGTTACTCTTAC  | 722.90132476345  | 0.237674616543299  |
| ATAACATGACAC  | 722.934214208055 | 0.314330081416928  |
| CAATATTGCTCA  | 722.934283791057 | 0.328539639314879  |
| ACACTGGGTCAT  | 722.942264562068 | 0.217979673742732  |

|               |                  |                    |
|---------------|------------------|--------------------|
| ACGGGAGAGTCA  | 722.943911783175 | 0.154028744054074  |
| GTCCAAATGACA  | 722.944859963971 | 0.301984104381089  |
| ATTTTGGACTCA  | 722.951810453725 | 0.301643007706544  |
| CGTCACGTAACG  | 722.955365967037 | 0.456070037149987  |
| GACTTTGACGCA  | 722.958278221282 | 0.298041719274696  |
| AAGTCAGAGCCG  | 722.959700048966 | 0.30991144495905   |
| AGGCTTGCCTCA  | 722.962297937297 | 0.238810521683893  |
| ACTGTATATGAC  | 722.96731902028  | 0.4153312556415    |
| AAGCGAAGTCAT  | 722.970768977636 | 0.300001001151744  |
| ATACATCGTGAC  | 722.984748628434 | 0.382497578253966  |
| CGAGTATGATTC  | 722.986471788759 | 0.321269163019974  |
| AGTCACGAGAAG  | 722.990189464305 | 0.274259456156963  |
| GCCCCTGCGTCA  | 722.994528751488 | 0.263074564539522  |
| GTGTCATGGTAA  | 723.011819198423 | 0.416391434119398  |
| AGAAGATGAGTA  | 723.012223400349 | 0.243433748723407  |
| CGTTACTGACTA  | 723.018289763476 | 0.34347196846182   |
| ACAGCTGAATCA  | 723.026948938452 | 0.464219598894631  |
| GGATCCGAGTCA  | 723.027147482709 | 0.428981249744251  |
| GTCAGACCTTAA  | 723.028496653288 | 0.351266552109535  |
| ATGACAATGTCC  | 723.031058602492 | 0.297445045683934  |
| ACGCTCTAGTCA  | 723.031112852034 | 0.297761106767292  |
| GGTGACAAGTAA  | 723.04437340859  | 0.190612917443195  |
| AGTTCCGACTCA  | 723.061349351256 | 0.309987709732149  |
| CCTGTCTGAGTC  | 723.073398349656 | 0.442327048706545  |
| ATTTACTGACTA  | 723.080888173845 | 0.260324970481007  |
| AATGGCCAGTCA  | 723.081484441464 | 0.372476473335327  |
| AATTAGTCGCAA  | 723.105697491003 | 0.237527302005216  |
| CCTTTTGATGAC  | 723.10720235829  | 0.38586281298932   |
| ATGACATCGACG  | 723.112101247454 | 0.387529256221308  |
| ATGACGGAGGAA  | 723.113342644906 | 0.255492824933035  |
| ATGACTTGACAG  | 723.133181487061 | 0.185496543734584  |
| CAGCCTGACGCA  | 723.133623865461 | 0.314242719155605  |
| CAGTCAGTAGTC  | 723.139016030961 | 0.494101922934119  |
| CCACCTAAGTCA  | 723.14568351072  | 0.707113179131572  |
| ATGACAGGGTAA  | 723.145771400196 | 0.321863439404524  |
| TCATTAATAATGA | 723.148509753513 | 0.255916362918899  |
| GGAGGCGAGTCA  | 723.149184911445 | 0.165659140907088  |
| ACTCAATGGTCA  | 723.150966816963 | 0.444997524338121  |
| GATAGTGGTGAC  | 723.153148918402 | 0.264318590247186  |
| CATACGTAATAC  | 723.154930098867 | 0.0724073078428563 |
| GACCATATGTCA  | 723.155593893517 | 0.348612124270396  |
| GGAGAGGATGAC  | 723.162691267836 | 0.25022893181887   |
| CGATTACTATTA  | 723.167793911913 | 0.330007192981983  |
| ACACGTCAATCA  | 723.170395317002 | 0.366333222188317  |
| CATGGATGTGTC  | 723.178263562806 | 0.420113821257891  |
| CGTCACTATTGA  | 723.182741958542 | 0.409134297891436  |
| GACTAATAACTA  | 723.182975666919 | 0.376422039241601  |
| CAGCCTGACTCG  | 723.185091258737 | 0.331774278546796  |
| ATGACAAAGGAG  | 723.200029015019 | 0.252751822956836  |
| ATGAGTACCTTC  | 723.202108664197 | 0.246450518404684  |
| AGTCACGCGTGA  | 723.213689413481 | 0.285383403251988  |
| GCGTTTTGCTCA  | 723.21401874527  | 0.466793509722033  |
| AATGACCGTGAC  | 723.221538262582 | 0.207583541732714  |
| CATCTCGACTCA  | 723.232465054584 | 0.202447833433395  |

|              |                  |                   |
|--------------|------------------|-------------------|
| GACAGTACTC   | 723.234387302791 | 0.427003854029469 |
| CTACTATATGAC | 723.238254675588 | 0.268868549673175 |
| GCCATCCGATGA | 723.242575245709 | 0.398901380575502 |
| AAACACATCATA | 723.248168559839 | 0.232977729841381 |
| TCACCGAAGTGA | 723.251022775018 | 0.355659659706701 |
| CATAGGATGACC | 723.251206513276 | 0.301223766954058 |
| GTCACTGATCGA | 723.251932405478 | 0.329480399462965 |
| CTCATTCAGGGA | 723.262157850451 | 0.344199610793434 |
| TGACTGGCTTAA | 723.266934590487 | 0.50438817339021  |
| AACGATGAGCCA | 723.267028978382 | 0.237613960472259 |
| CCGTAATTGTCA | 723.26761100777  | 0.483534692269133 |
| CTCAACGACTCA | 723.270553283957 | 0.181699392246109 |
| AGTCATGGGTCC | 723.27334949231  | 0.195450206289939 |
| AGTCGCTACTCA | 723.274230839522 | 0.244788421551331 |
| ACTCATAGTGGC | 723.284147278949 | 0.359283385726862 |
| CAGTCATGGTCG | 723.284464842785 | 0.301457298000417 |
| AGTCAGCGCTAG | 723.286326954508 | 0.380597809431763 |
| AGTATGACCGGA | 723.29107408667  | 0.254643119038462 |
| ATGAGTTGTGAC | 723.295805334142 | 0.232545689216075 |
| GCTCGGTGTGAC | 723.298591799391 | 0.253516927672886 |
| CTTCGACTCAGA | 723.315330123051 | 0.250847703941295 |
| AAGTTTGTCACT | 723.31809917516  | 0.315165625519076 |
| GGTGCAAATGAC | 723.31847229393  | 0.281853659325911 |
| AGTCAGAGTGTA | 723.327333809126 | 0.293255959660737 |
| AATCTCGTGACT | 723.329969725396 | 0.277858465127871 |
| AATGAGTTGGCC | 723.338286838515 | 0.179790934094512 |
| ACCAACAATGAC | 723.340968096681 | 0.44978979409961  |
| CTGGGTGGTGAC | 723.342248300524 | 0.335920010768657 |
| TCGGCTTGGTCA | 723.343691107415 | 0.546187907758091 |
| TCATAGGCGTCA | 723.348480533405 | 0.553076599314773 |
| GAATAGGTCACA | 723.353706111085 | 0.321165291742926 |
| GTCACATCACAA | 723.355031379239 | 0.251842963617988 |
| GTCATTGGACAC | 723.369100529949 | 0.414726976188495 |
| ACTCATTATGAT | 723.369154001523 | 0.36047071289294  |
| ACCAAGTCACGT | 723.382301593083 | 0.440860778829336 |
| CATCGACAATGA | 723.385406564166 | 0.275661257749356 |
| AGACTACAGTCA | 723.397263339181 | 0.372841928226689 |
| CATGATGAGCCA | 723.39875390123  | 0.439557398896199 |
| GATGACAAGCAA | 723.404385814093 | 0.387128036165285 |
| GTCATCCTCAAC | 723.408581768619 | 0.220576018646062 |
| GTCACACGGTTA | 723.409817722733 | 0.524854070845261 |
| CTCATCGTGAGA | 723.421572490541 | 0.405713721527984 |
| ATGAGTACCCAA | 723.422714817234 | 0.274538457613451 |
| GGGAAAGATGAC | 723.430606693444 | 0.257198898303741 |
| GGGCCTAATGAC | 723.435567128252 | 0.396488497424062 |
| CGTCACCAGGAC | 723.44227433235  | 0.373452464060114 |
| CACATAAGTGAC | 723.447505936991 | 0.388884121053282 |
| CTAGTCACGAGC | 723.449420584898 | 0.285979170518654 |
| CCGTCACCGTGA | 723.450595879855 | 0.393722558909464 |
| CCTACTGATTCA | 723.451076298419 | 0.165922706134005 |
| AAGCATGGTGAC | 723.458118089288 | 0.297280783865679 |
| CTGCCACAGTCA | 723.463446660069 | 0.260994291055562 |
| CAAAGCCGTGAC | 723.469660129679 | 0.296857631009325 |
| AGTCACGGCCTC | 723.47807503862  | 0.417306652667287 |

|               |                  |                   |
|---------------|------------------|-------------------|
| AGTCACGGCGTC  | 723.479845914032 | 0.466819382699723 |
| GAGTCAAATTC   | 723.490255911917 | 0.393709654473279 |
| GGTGCTTACTCA  | 723.500836412839 | 0.313311695952136 |
| GAAACCGGTGAC  | 723.515029362742 | 0.229150993097145 |
| ATACGCAATGAC  | 723.521821279704 | 0.504952254786293 |
| ACCGATATGTCA  | 723.543780172067 | 0.217446994606531 |
| GAGTCAGGTCCC  | 723.554076883337 | 0.33194556350735  |
| AGTCAGCACTGA  | 723.558364429241 | 0.516512109383166 |
| ACTGCATGACGA  | 723.56017284744  | 0.322325981233257 |
| AACACATCATA   | 723.573946154595 | 0.321090067850021 |
| ATGGCTCAGAAC  | 723.579802144794 | 0.307304455541391 |
| CACGTCAGACCG  | 723.581576686533 | 0.411061422930006 |
| GCGTCACCACCA  | 723.582346372886 | 0.186318351326725 |
| ATTCTGGTGAC   | 723.582615261533 | 0.36501847806429  |
| GTCACAACCTCTA | 723.589780137919 | 0.284649653931561 |
| ATTCCAGGTGAC  | 723.590916967914 | 0.271950744776013 |
| CATGACTTGGAA  | 723.592595116472 | 0.317332334214936 |
| GTCACAAATATA  | 723.59415921193  | 0.323363958594879 |
| TAAAATCGGTCA  | 723.604959283508 | 0.341361295722088 |
| TGACACTAAGCA  | 723.605074727625 | 0.302898692175981 |
| GTGTCAGTGTCA  | 723.607971629194 | 0.299960596068615 |
| AGACTAATAGCC  | 723.609032819475 | 0.409647245511848 |
| CGTCACCGAACA  | 723.633884324928 | 0.314191365144322 |
| CTCGACATGACA  | 723.636517916565 | 0.449527043738366 |
| CTCAGATCTGAC  | 723.644800544012 | 0.190421254392545 |
| ATGATAATGACA  | 723.650124411417 | 0.432231363871371 |
| CAATCCGACTCA  | 723.653284839711 | 0.18509705842541  |
| ATGACGCTCAAT  | 723.65536267369  | 0.32711545420784  |
| CATACGATGACC  | 723.670416183771 | 0.388609604061459 |
| ATTCATGGCTCA  | 723.670951253972 | 0.5035745536659   |
| AGAAGGTGTGAC  | 723.672082169311 | 0.225778747569768 |
| AATGATGTGTAA  | 723.695458045433 | 0.243376418099777 |
| TCAGTCGACTAA  | 723.701729212478 | 0.439756121870474 |
| CGTCATTGTACC  | 723.702288746102 | 0.338627151515726 |
| AATAACGTCACC  | 723.72018963671  | 0.337907858775336 |
| GTCCGAGTCAAC  | 723.721264807588 | 0.248327861227327 |
| AGACTCACGTGG  | 723.727840915888 | 0.342058910413368 |
| CAAATGTCGTCA  | 723.733122631202 | 0.486675549634874 |
| AGTCAGACTACA  | 723.743414220828 | 0.26719599190777  |
| GCGTCACCTACA  | 723.756383377051 | 0.566808348034662 |
| CTAGCAAATGAC  | 723.760887835699 | 0.266657938064168 |
| CTCGTCTGAGTC  | 723.761262431824 | 0.333398529769359 |
| ATTACTGTCACA  | 723.776336491948 | 0.208689481075483 |
| AGGTTGCTCACC  | 723.777162682396 | 0.263953985208727 |
| AACTAGCAGTCA  | 723.77891766154  | 0.331803731354764 |
| GTGAGCCACCTA  | 723.77997110748  | 0.241262933169728 |
| CATTTTCATGACG | 723.788636474096 | 0.395524324615188 |
| AGACCGGTGACG  | 723.798029159614 | 0.37737970442005  |
| CGACATCGTGAC  | 723.79942447843  | 0.577478633006873 |
| ACATATATGTCA  | 723.803359669325 | 0.39305921151812  |
| ACAGGATGTCAT  | 723.809194000507 | 0.343945761802693 |
| CATGGAGGTGAC  | 723.809657599797 | 0.443427091782431 |
| TCATCGATGTCA  | 723.810357357852 | 0.392418146536547 |
| CGAGATCATGAC  | 723.816762594575 | 0.35356845760057  |



|               |                  |                   |
|---------------|------------------|-------------------|
| CTTTATAATGAC  | 723.819776247485 | 0.354080779992227 |
| CTTGGCAGTGAC  | 723.821861467525 | 0.348692364179615 |
| CTCTTGGTGACA  | 723.82489063633  | 0.296306114103286 |
| TGTCATGCCGAA  | 723.828758267454 | 0.198984051953831 |
| CCTGTCAATGACA | 723.831109066655 | 0.41982616070211  |
| GGACCAATGACA  | 723.831353731022 | 0.3119264509946   |
| GCGTCATGCAAA  | 723.84978242758  | 0.533947065840125 |
| CAATCGGTGACG  | 723.852692788482 | 0.143856516685744 |
| CACCGGTGACCA  | 723.873750102788 | 0.440404887360056 |
| CGTCACTCAAAA  | 723.875044654789 | 0.392207329349944 |
| AGTCAGAAAAGC  | 723.88106082995  | 0.210900401717959 |
| ACTCAACGTCAT  | 723.881882075501 | 0.279617662151877 |
| CCAATGCTATGA  | 723.884502362978 | 0.398877168510385 |
| CCGTGCACGTCA  | 723.884546019817 | 0.371928678373642 |
| GTCTCAGACTCA  | 723.890049540892 | 0.340196320942755 |
| CAATAGGGTGAC  | 723.900319081324 | 0.365388053545432 |
| ACTCAGCATGAC  | 723.901074170436 | 0.46059931386958  |
| CCAATGCTGACG  | 723.915625689001 | 0.441485458660791 |
| GAGCTAAATGAC  | 723.924697942409 | 0.366808586716422 |
| ATATCGCGTGAC  | 723.926933365676 | 0.445424496958869 |
| AGAGTAATATGC  | 723.927168496141 | 0.271068488901213 |
| GGTTCTTCGTCA  | 723.930337279601 | 0.505653692286165 |
| CCAAGGGTGACA  | 723.933800909891 | 0.26123799575847  |
| TGACAAAGATAA  | 723.93471952304  | 0.280675501170099 |
| ACCGCGTGACAC  | 723.946373682622 | 0.237472577200255 |
| ACGTTGTACTCA  | 723.950084485631 | 0.409085479950669 |
| ATGACGGACCGG  | 723.952033490952 | 0.276913523616175 |
| AGATTGTGACGA  | 723.95424379477  | 0.303512269145831 |
| GTCATCCCCGCA  | 723.959957587101 | 0.377926299231139 |
| AGTCAGACCGAA  | 723.963786101943 | 0.361995558205876 |
| GATTCAGTAATA  | 723.964224294407 | 0.203121914191652 |
| AACAGGTGACGC  | 723.968511038459 | 0.307193728232501 |
| ACCCAGAGTGAC  | 723.969398652077 | 0.419729230604516 |
| TGACAGCGTTAA  | 723.982332769732 | 0.390013456554011 |
| CGTCATCAGCCA  | 723.983230134155 | 0.412190676391941 |
| ATGACATGCTTC  | 723.986017375699 | 0.214746579486269 |
| AAACTATTACTC  | 723.988432864102 | 0.330276207137696 |
| ACGTGAGACTCA  | 723.994948417047 | 0.450644010241902 |
| ACGTCACAAAGT  | 723.998000149537 | 0.29885547418719  |
| CCAACTCGTGAC  | 724.007894146359 | 0.329566284395915 |
| CAACCAATGACA  | 724.009367294161 | 0.250566616702058 |
| CGGACCTGTCAC  | 724.010269588521 | 0.418131949188564 |
| GAGTCGCTGTCA  | 724.0122072501   | 0.359203234409148 |
| ATCCCTTATGAC  | 724.01550721188  | 0.273161997592093 |
| GCCCATGTATGA  | 724.022379464998 | 0.322786084336922 |
| CTGACTGTATAC  | 724.026139166712 | 0.296343720225471 |
| TAGGCCACATCA  | 724.032059952962 | 0.313359283015036 |
| TCAGTCCTATGA  | 724.03374734003  | 0.427009311420919 |
| GCGGTAGATGAC  | 724.034903193722 | 0.267983985413886 |
| AGTGACTAGCCG  | 724.037376992803 | 0.271868507119711 |
| ACAGAGTGTGAC  | 724.039755304601 | 0.289615267121155 |
| AGACTATGTCAC  | 724.044637725091 | 0.16851011777886  |
| CTCTTTGACACA  | 724.045559660272 | 0.195066470483793 |
| AGTGACTAGCAC  | 724.046159151212 | 0.368577338490697 |

|               |                  |                   |
|---------------|------------------|-------------------|
| GCACCGGGTGAC  | 724.04796488242  | 0.422904642098049 |
| AGTCAGAGTTAT  | 724.051461756344 | 0.29584059089488  |
| ACGTCGTGTGAC  | 724.05219281005  | 0.363467105675607 |
| CGTCATGCACGA  | 724.064686498092 | 0.369554791714514 |
| AATCGAGATGAC  | 724.070545631446 | 0.347880470011597 |
| CATTGACGTATC  | 724.071322630086 | 0.372367776822954 |
| CGCTTTTGGTCA  | 724.074010732932 | 0.368356139549046 |
| GAGTCAAAGTTA  | 724.077545984225 | 0.138498241072558 |
| ATGACAACGATC  | 724.08035262327  | 0.368715271674515 |
| ATAGTCAGCTTA  | 724.080770750483 | 0.39462546604535  |
| ATGACATCGCTA  | 724.081014582351 | 0.267169739009891 |
| AAGACTAAATCG  | 724.081321227662 | 0.315438760507103 |
| GTCACATGATTA  | 724.087698603899 | 0.456840519898303 |
| GTCCAATGACA   | 724.092333605907 | 0.393843938607015 |
| ATCTGAGCAATA  | 724.094220992898 | 0.316940912760555 |
| CTCTATATGTCA  | 724.094442560615 | 0.411106010989525 |
| ACAAGTGACCAA  | 724.100596079587 | 0.537190697200122 |
| ACGTCACTACAT  | 724.101672536772 | 0.330930930089019 |
| ACCGAACGTGAC  | 724.13175532208  | 0.460985398321981 |
| CTATACAAGTCA  | 724.147159724991 | 0.197706447906444 |
| CAGATATGACCA  | 724.150555790378 | 0.398655871085685 |
| ATGACTTGATAC  | 724.154824553797 | 0.300908050065094 |
| GAGAGAAATGAC  | 724.162166192425 | 0.224719644642557 |
| CGAGTGTACTCA  | 724.166062923598 | 0.413469126160407 |
| CGTGGAGAGTCA  | 724.167382665053 | 0.481308113952861 |
| AGTCACGGCAAA  | 724.167472892741 | 0.481237716850847 |
| TAGCATGTGACA  | 724.179733642855 | 0.339827476345979 |
| CTACATAAGTCA  | 724.183440438319 | 0.355190409395233 |
| GCGACTAATTTA  | 724.186310490901 | 0.407508732078937 |
| CGTTGGGTCAAC  | 724.190837222608 | 0.414286350605968 |
| AAAATTATGAGT  | 724.192775150624 | 0.206878934139432 |
| ATAAATTGTGAC  | 724.196370441406 | 0.428641845199255 |
| AGTCACTCCCA   | 724.199175174761 | 0.151179597354468 |
| AGGGTCACCTAA  | 724.205109077165 | 0.355992788745177 |
| GCGTCAGACACC  | 724.212134297654 | 0.432718951460807 |
| CAATGATTACTC  | 724.21739795835  | 0.328482085905855 |
| CGGTAGTGAGTC  | 724.217545093079 | 0.411616662094269 |
| ACAAAGCATGAC  | 724.218709784347 | 0.446963648658354 |
| CCAAGCCAGTCA  | 724.220184513158 | 0.54395457163037  |
| AGGTGAGCAAAA  | 724.247100389656 | 0.19713310627754  |
| TGGTCATCTAAA  | 724.258750536814 | 0.264919045233597 |
| GATCAGTGTAC   | 724.263431195452 | 0.328343568912667 |
| TCTCAGGCGTCA  | 724.264732866988 | 0.367607457955815 |
| GTA CTCTTATGA | 724.269188442977 | 0.220094623823618 |
| AGCGGCAATGAC  | 724.271508218398 | 0.314241925993738 |
| GTCACATACCGA  | 724.283416187047 | 0.480480632256322 |
| TGACTCTCTAAA  | 724.285432365595 | 0.462900031306256 |
| ACGGCGTCACCA  | 724.291240729909 | 0.33531048109853  |
| CCTGCATATGAC  | 724.291244051552 | 0.582672559617243 |
| CTGTCGTGTGAC  | 724.296381754812 | 0.626308928563543 |
| ACTCATACCACG  | 724.298570015958 | 0.220575676189966 |
| CGTCATTCTTTC  | 724.316938574976 | 0.338617368154049 |
| CGTCTTGTATC   | 724.317134265415 | 0.195568386706508 |
| GCTGATTACGCA  | 724.318979341468 | 0.30084710130639  |

|              |                  |                   |
|--------------|------------------|-------------------|
| CGTCATCTGAGA | 724.323031899359 | 0.372985335376078 |
| AGGTTCCATGAC | 724.330123656904 | 0.468898027603788 |
| CACTGATTAGTC | 724.330922567121 | 0.308103100983189 |
| GACTCATGGTGC | 724.334410340475 | 0.241416481304353 |
| GCAGGATGACCC | 724.34312508296  | 0.331739416639985 |
| GATCAATGTGAC | 724.343566398251 | 0.352071995158826 |
| AAATTGCTAATA | 724.356036941141 | 0.40836879371937  |
| CTATTAGGTGAC | 724.357044340651 | 0.36926385770323  |
| GGTGGTCATGAC | 724.358197687534 | 0.443566514666466 |
| AGGCTTGTGTCA | 724.360746001562 | 0.51841742374215  |
| GATCGTGAATCA | 724.363513303402 | 0.432203967238321 |
| CGTCACGTGTCA | 724.365655280538 | 0.27159529075671  |
| ACAATATCGTCA | 724.368901590775 | 0.299479888599941 |
| GTCATTGTCCAA | 724.373930663825 | 0.326247218851076 |
| GTCATGCCCAA  | 724.376503061417 | 0.624599856385296 |
| TCGTAGGACTCA | 724.376614045294 | 0.499118299537435 |
| AGTCACGACAAG | 724.378212720842 | 0.125172410121356 |
| TAACCCGAGTCA | 724.379291364884 | 0.372669878027361 |
| ATGACAATGTTG | 724.379303761246 | 0.194471160808859 |
| ACGTCACCTGAG | 724.381062692136 | 0.22774080398405  |
| GTACGCCTATGA | 724.381188208321 | 0.296977348960312 |
| AATAGATGTGAC | 724.396741317729 | 0.408837182409296 |
| ACCCTTTGTCAT | 724.397689516334 | 0.275612724969483 |
| AGGCTTTGACTC | 724.399511936824 | 0.334826339750826 |
| CATCAGTAGTCA | 724.401884853295 | 0.415157241346975 |
| AATGAGTGAGCC | 724.403764478487 | 0.325722153855952 |
| CCCCTAGATGAC | 724.40591538632  | 0.267672506844766 |
| CGTCATCTGTTC | 724.42176550358  | 0.293438126263173 |
| GACTAATCCACA | 724.423589592261 | 0.364634805950062 |
| CTAGCCCAGTCA | 724.426026890021 | 0.219404371540513 |
| AATGACCACGTG | 724.437109012575 | 0.318064458467816 |
| GTCATATGCACA | 724.437250889866 | 0.336320749309731 |
| CTCATTTTGTCA | 724.437812487853 | 0.197151464666994 |
| ACCAGCGATGAC | 724.454721821919 | 0.358323311324358 |
| ACTCTTAAGTCA | 724.455633449908 | 0.310115576813288 |
| ATGACAACCCAG | 724.470956940713 | 0.252991081919627 |
| GTCACAGGATGA | 724.472702337163 | 0.357494041479561 |
| GTCATTGAATAA | 724.483319611549 | 0.356228627199005 |
| ACTCATTGAGAG | 724.483973985232 | 0.291196106528641 |
| GACCCCTGTGAC | 724.486818194801 | 0.253148571214142 |
| GCCCATCTGTCA | 724.492582494705 | 0.334552678016473 |
| ATGACAAGGATG | 724.503333043069 | 0.198151025114944 |
| TAGTAATTGTCA | 724.505640006475 | 0.394034060278654 |
| AGTCAGACCTGC | 724.512526539909 | 0.315530233201331 |
| GTTCTCGACTCA | 724.515141710628 | 0.350660347482668 |
| AAGCGTGTCAAC | 724.51517881285  | 0.39339742672612  |
| ACACGTGTGAGT | 724.51617073477  | 0.393433749373026 |
| ATGACAGCTAGC | 724.518063398736 | 0.312214937710915 |
| ATGACGACGTAC | 724.51922288718  | 0.259346598456102 |
| ATGTTAGTCGAC | 724.526107167752 | 0.353366583448059 |
| ATGGCATATGAC | 724.531880626626 | 0.220287814519493 |
| ACTCATAATTCA | 724.53987493346  | 0.301628964192597 |
| GATGTGTAACCA | 724.543914335111 | 0.49491370504617  |
| AGAATCATGACA | 724.551768410654 | 0.324808114035767 |

|              |                  |                   |
|--------------|------------------|-------------------|
| ACACGTAACCAG | 724.561888744504 | 0.454469058811253 |
| AGACTCACGGAA | 724.566026718959 | 0.413909220726042 |
| TGACTCGCCAAA | 724.567467189349 | 0.498119326218745 |
| GTCATACGCTCA | 724.568350359604 | 0.255067125750199 |
| AAACCGGTGACA | 724.584417773666 | 0.347654926022818 |
| CACAACGACTCA | 724.587509415853 | 0.199649165559391 |
| CTGTATTACTGA | 724.589777083745 | 0.443527432644845 |
| CCGCTAATGACA | 724.591328165376 | 0.328667609538223 |
| ATGAGCAAGCAC | 724.596696744567 | 0.44082446147577  |
| ACTATGACCTAA | 724.609950128576 | 0.241267776032752 |
| GACTTGTGACGC | 724.617217600133 | 0.271939481642834 |
| CCGGATCGTGAC | 724.621063544477 | 0.396151458181496 |
| ACGTCCGGTGAC | 724.626646311352 | 0.511791582755155 |
| ATATCGGTGACA | 724.631292943877 | 0.3885424411415   |
| ACCAACTCGTCA | 724.642025969782 | 0.414319743731952 |
| TGACAGTTAGAA | 724.643043791171 | 0.377387204820433 |
| AGTCAGAAGATC | 724.65773687749  | 0.24776298353054  |
| AATCTTAAATGA | 724.659265816633 | 0.402230271284888 |
| CTGCGGTGTGAC | 724.66119309262  | 0.361244050084094 |
| CCGGCAATGACA | 724.661853387919 | 0.380834223672388 |
| ATTGGCTCATCG | 724.664331842505 | 0.32459126032677  |
| GCGTCACCAAGA | 724.664444895864 | 0.21262114431351  |
| ACGTCTGACTC  | 724.668970474989 | 0.377829851134809 |
| ACCGTTTCGTCA | 724.671025544751 | 0.321597141415975 |
| ATGACCACGAAG | 724.67717155228  | 0.284839592686333 |
| GCGTCAGTGACA | 724.679028476931 | 0.581425902357787 |
| AGATGTGGTGAC | 724.684495276209 | 0.254280680243049 |
| AGAATTGACTGA | 724.688529167594 | 0.292453890014698 |
| AAGTCACTCCGG | 724.697802916665 | 0.333926644550748 |
| ACGTTGACCAAT | 724.699572545087 | 0.182320760557873 |
| TGACTATGAAAA | 724.706703269806 | 0.299931078697328 |
| GCACCGGTGACA | 724.716876962607 | 0.294604414146418 |
| AATTATCGTCAC | 724.717279853963 | 0.361692460082819 |
| CACCTGGGTGAC | 724.726739116441 | 0.361412683108793 |
| TGACATAACGAA | 724.728496492065 | 0.640498721825728 |
| GCGTCACCTTAC | 724.730618476983 | 0.222765555898355 |
| ATCGTTTACTC  | 724.741290460164 | 0.416462093347528 |
| GTCACTACGGCA | 724.743405287968 | 0.612986509513862 |
| CCCTTACAGTCA | 724.745942686553 | 0.275415656200674 |
| GTCATATAGCGA | 724.760740786822 | 0.419336178686608 |
| ACGACGTGACAC | 724.769359656929 | 0.237027974544823 |
| CCTGTTTCGTCA | 724.77179313371  | 0.281456569267888 |
| ATCGTTTGGTCA | 724.772569118502 | 0.214130517986207 |
| ATGACAATAATA | 724.78599909136  | 0.211359061000902 |
| CGCGCACGTGAC | 724.804838915155 | 0.312764896662147 |
| ATTTTGTGTGAC | 724.812173307442 | 0.246139588073876 |
| CACAAACGATGA | 724.818718233048 | 0.630686428960088 |
| CGCTCGTAGTCA | 724.822203435922 | 0.478434830088032 |
| TGAAGCGACTCA | 724.824178553457 | 0.367650157644132 |
| AAGTCACTACAA | 724.824676568519 | 0.249045566606792 |
| GAATCGTGACAC | 724.841450935393 | 0.198051901841564 |
| CGCCCGAATGAC | 724.843713403016 | 0.340564575560791 |
| TGAAGCGAGTCA | 724.860736415214 | 0.369889254431309 |
| CGATCATGACGC | 724.871920777805 | 0.46417379403268  |

|               |                  |                   |
|---------------|------------------|-------------------|
| ATCGGTGTGACG  | 724.874233366925 | 0.395476133861384 |
| ATCCCGTGCAT   | 724.890334846721 | 0.241442227653551 |
| GTCACACCCGAC  | 724.891089206537 | 0.305449597241349 |
| AACCTTGACTGA  | 724.891436611752 | 0.472522979678002 |
| CGTCATGTATTA  | 724.891947507445 | 0.399553372058961 |
| GACGTTGACTGA  | 724.903938219296 | 0.394979753935806 |
| CCCAGCGATGAC  | 724.904747743121 | 0.308085659378583 |
| AGAGTCAATTAG  | 724.910371754283 | 0.252636634749306 |
| ACGCTTGACACA  | 724.910709527266 | 0.411588332123568 |
| AGGTCAATGACG  | 724.914505469963 | 0.240402395323347 |
| TCTCACGCGTCA  | 724.927870182605 | 0.389148119181176 |
| GTCACGTGACAA  | 724.928907659349 | 0.178539007084876 |
| ACGTCACCTCCA  | 724.928985727272 | 0.264835308153538 |
| ATATGTGACATG  | 724.934413954092 | 0.299124316572682 |
| CGATTGGTGACA  | 724.941202366203 | 0.484236421310523 |
| GTCATAAGTAAC  | 724.953691489806 | 0.391247700500305 |
| GATTAGTGACAC  | 724.9568700033   | 0.244868890120934 |
| AAGGCGGATGAC  | 724.957018720891 | 0.250249629534621 |
| TCAGATCACTCA  | 724.962748090974 | 0.441464973375391 |
| AGGAACAATGAC  | 724.968713862593 | 0.301293131497995 |
| GTGTAAGTGTC   | 724.983511475981 | 0.269231119946623 |
| GTCACCTTGGTA  | 724.987667554588 | 0.233298703306886 |
| TCAGTCAACCAA  | 724.988709865287 | 0.297876834210318 |
| ACGACACGTGAC  | 725.005616363162 | 0.28926089741557  |
| AGTCAGAATTGA  | 725.007611188666 | 0.368343242558627 |
| CAGTCAGAATCG  | 725.00896987967  | 0.416534286459234 |
| CGTCATTGCGAC  | 725.010382289864 | 0.449398253423282 |
| CGTACGGTGACG  | 725.014524552337 | 0.394084766322543 |
| CCCTCTACGTCA  | 725.01898367749  | 0.188446389588963 |
| ATAAATAGTGAC  | 725.022754413495 | 0.35783493639795  |
| ACGCTGACTGCA  | 725.023757389802 | 0.352658024249309 |
| AACGACATGTCA  | 725.023889618003 | 0.3757990323559   |
| GACTCAGACCCA  | 725.025204815878 | 0.438782472861794 |
| ATTGTGCGGTGAC | 725.025567864492 | 0.253502492734103 |
| GAATCGGTGACA  | 725.026146048172 | 0.361484674970393 |
| AAAGCGTGAGTC  | 725.027814666699 | 0.18871113812689  |
| GTCAGTGGCTCA  | 725.037501029111 | 0.417907348966839 |
| CGAATATGACCC  | 725.038861562504 | 0.385520039252412 |
| GTCATCCACAAC  | 725.042777713438 | 0.237888733232437 |
| CGGGGTGACCCA  | 725.053972051276 | 0.343279224576212 |
| CCGGCCAGTCA   | 725.064784159603 | 0.278202800120517 |
| GAGTCAAGTAAA  | 725.072510470133 | 0.290729917572623 |
| CTGAACAGTGAC  | 725.080578409847 | 0.473712325350015 |
| GATTTATGTGAC  | 725.082222518539 | 0.401734477005272 |
| ATCCACGGTGAC  | 725.084245960119 | 0.414002322479371 |
| AATAGTCAAAGT  | 725.096655380778 | 0.312070292189712 |
| AAGCAAGTCATC  | 725.105482798619 | 0.315836666786543 |
| CGACCTTGTGAC  | 725.106772246938 | 0.230810327902641 |
| TTGTCACCGAAA  | 725.113332166375 | 0.306315424609043 |
| ATGACCATACAT  | 725.115623681279 | 0.343205126420989 |
| AAAACCAATGAC  | 725.117676014218 | 0.382581253141351 |
| GACCAACGTGAC  | 725.1219943885   | 0.393754016606156 |
| ACTCATAGTGTC  | 725.123841337493 | 0.464934138598026 |
| GTTGACAACCTA  | 725.129232229727 | 0.440777263413521 |

|              |                  |                   |
|--------------|------------------|-------------------|
| CAGCATTATGAC | 725.141128147696 | 0.420833019287031 |
| AACCATAAGTCA | 725.143209729889 | 0.375082225666926 |
| ATGACGAGCACG | 725.145904114323 | 0.268471714146333 |
| CTAAGACGTCA  | 725.149713847362 | 0.331771440991768 |
| ACGTCATGCCTA | 725.158214645293 | 0.420160644797523 |
| AGTCAGCGCACT | 725.166929930052 | 0.30841329408679  |
| GTCATTGTCTAA | 725.182814257065 | 0.246847946084088 |
| GTGATACATTTA | 725.201331647424 | 0.133536965816583 |
| ATTCATCGATGA | 725.202536184273 | 0.452571641076875 |
| CCCGCTAGTCA  | 725.22160216739  | 0.284565254675964 |
| GTCATCCCCTCA | 725.226572431275 | 0.29771030381142  |
| TTACGTCAACAA | 725.237413751327 | 0.359443835546423 |
| CAATAATGAGTA | 725.238829535267 | 0.308533555126996 |
| ACCCAAGAATGA | 725.242861623597 | 0.34893640363212  |
| ACGTCATGCAGA | 725.244160514027 | 0.448065743383558 |
| ATCCTAAATGAC | 725.256697189796 | 0.239495026253986 |
| AAACCTTATGAC | 725.25675864982  | 0.270997804402682 |
| TGAGCTTACTCA | 725.259839845573 | 0.244125295560786 |
| GGTATTGACACA | 725.264470740507 | 0.292449791180132 |
| ATATCTTGGTCA | 725.269353851949 | 0.475592272183459 |
| GCCTGCCAGTCA | 725.269585774985 | 0.365588415516128 |
| GGCGTCATGTCA | 725.274202862585 | 0.350160501139135 |
| GGGTCATAGGAC | 725.276034606101 | 0.35289324570716  |
| CTGTGACCTATA | 725.290493423333 | 0.293444842403616 |
| GTCATTATCCAC | 725.291854637535 | 0.468317567650154 |
| ACCAGTCTGACT | 725.292444682618 | 0.194299712298562 |
| AACTAGGACTCA | 725.303325859865 | 0.314818524391809 |
| ATGACTTGTGCA | 725.304725569599 | 0.314690863150144 |
| GGGTCATATACA | 725.31150868143  | 0.16090782139867  |
| ATCGTCTATGAC | 725.312846787173 | 0.627574242441311 |
| GAGGCCCATGAC | 725.316805391726 | 0.409594814629818 |
| GCGTCACTAAAA | 725.322670576547 | 0.292667023858296 |
| GGTCATTTCTTA | 725.327508545472 | 0.284955586014443 |
| AGATCCGAGTCA | 725.328428192468 | 0.367901700184007 |
| ACGCATGAGCAA | 725.333210665724 | 0.339453300270074 |
| AACTCATAGTGA | 725.33486043502  | 0.392302186573189 |
| CTCTGAGTCTGA | 725.3468135291   | 0.510941387876441 |
| CAGGTAATGACA | 725.350451797168 | 0.344940297833566 |
| GTCATACCGGGA | 725.369109136216 | 0.521003634780654 |
| GTCATGCTTAAA | 725.369357003553 | 0.284948629264295 |
| GGGCGGTATGAC | 725.390721683649 | 0.272482575949637 |
| GCCCTCGACTCA | 725.397471604482 | 0.218126072014999 |
| CCGCATTGCTCA | 725.412543861928 | 0.222952787681284 |
| GGATTACTCCTA | 725.414843450082 | 0.358697796170776 |
| ACCGGTGACAAC | 725.419910354403 | 0.374975054440692 |
| ACTCACTTATGA | 725.420788532536 | 0.314840894288917 |
| TATTGCGACTCA | 725.421823595642 | 0.318138771759066 |
| CACTTGTACTCA | 725.423111364452 | 0.349186543033858 |
| CGCATTTGACTC | 725.423729388991 | 0.329830556397707 |
| TCAGTCAACCGA | 725.428840505774 | 0.452665848281862 |
| CATGTGATGCGA | 725.438428194377 | 0.302896956622897 |
| GGTCACTACTCA | 725.438467018798 | 0.577961383914364 |
| CCTGTGAGTGAC | 725.441177545145 | 0.293623439202949 |
| ATGAGTTGTGAC | 725.448679447252 | 0.378224726936535 |

|                |                  |                   |
|----------------|------------------|-------------------|
| CCGTGAGACTCA   | 725.454196757237 | 0.525785105807305 |
| AGTCGTCACCGA   | 725.463041270959 | 0.168286378020647 |
| TATGTGATGTCA   | 725.467530545619 | 0.229800562754991 |
| GTTGATAAGTCA   | 725.474921176807 | 0.246158428513977 |
| TACGTGCAGTCA   | 725.478852661106 | 0.376752479338673 |
| CTCAAGCATGAC   | 725.485483538694 | 0.402957108449741 |
| CACAGTCAGTAA   | 725.487856755236 | 0.336722514591836 |
| GTCTGAGAGTCA   | 725.488356452332 | 0.238853534930881 |
| AGTGACTTGGCC   | 725.491137417112 | 0.317457825228861 |
| CGACTCAGAACG   | 725.49291119263  | 0.369603652693356 |
| CACGTGCATGAC   | 725.495067624329 | 0.362493781624987 |
| GACTCAGAGTGA   | 725.501833622028 | 0.54434420724309  |
| ACTCATTGTTGA   | 725.506649549101 | 0.195792638054858 |
| AGGTAAGTGTCA   | 725.509497301174 | 0.221704818603461 |
| CTACCTGCGTCA   | 725.520182388796 | 0.200440122770764 |
| ATGACAAGACGG   | 725.524685355308 | 0.262844852488199 |
| TATGACATTA AAA | 725.530627423595 | 0.308842496031728 |
| ACA ACTCCGTCA  | 725.530935495058 | 0.368219276695103 |
| CGCTAGTGTGAC   | 725.533859034312 | 0.488154508501973 |
| CGTCATGAAACG   | 725.539619605265 | 0.452326433010245 |
| TGACACGCAACA   | 725.54622408775  | 0.444647794148433 |
| TCCCTAATGACA   | 725.5462413056   | 0.249950193144813 |
| GAGTCAAAATAC   | 725.554320710378 | 0.54096296911004  |
| TCACATCTGTCA   | 725.555759664134 | 0.253292566692952 |
| GTATGGTGTGAC   | 725.560084739597 | 0.207615845564301 |
| GATGACTTGCCC   | 725.562329729964 | 0.284311937860361 |
| CCTCGTGACTAG   | 725.5665583039   | 0.290970047897405 |
| ATCTTGACGTCA   | 725.577178329751 | 0.236538431903436 |
| CCAATAACGTCA   | 725.589896848192 | 0.295942433813759 |
| TCATAGTGACAA   | 725.61077801201  | 0.422016154141885 |
| GACTCAGACCAA   | 725.612036583622 | 0.485528892190154 |
| CATCGTCATGCA   | 725.617784054912 | 0.200110046990714 |
| CTGGCACGTCAC   | 725.618065313021 | 0.404398932343571 |
| CGTGACATGACC   | 725.619600510184 | 0.516390945896286 |
| CAGTTGTGTGAC   | 725.620090347402 | 0.407488244549023 |
| CGCCGTAGTGAC   | 725.621236110879 | 0.348810114823795 |
| GGACCCGTCACC   | 725.62402006217  | 0.295674867463081 |
| AACGGTGACGTC   | 725.624557574984 | 0.337269942410556 |
| GTGTCATGGGAA   | 725.6294766761   | 0.257174214754855 |
| GGGTGACGCCAA   | 725.638188097132 | 0.350480304490779 |
| CGGACTTGACTC   | 725.640603310859 | 0.693042500060483 |
| AGACGTGGTCAT   | 725.640838973567 | 0.224353817789234 |
| CATGGATTACTC   | 725.647920650959 | 0.435969425165875 |
| AAACGGTGACGT   | 725.652912274929 | 0.263509279481004 |
| GTCATGCGCGGA   | 725.655302389705 | 0.291523037505446 |
| AGATCAGATGAC   | 725.656427134582 | 0.331748696845882 |
| AAAGAGTCTTAT   | 725.656895541809 | 0.293402005513262 |
| AAACCTACTCAT   | 725.658377967632 | 0.164609840043618 |
| GTAATCATGACA   | 725.660539207966 | 0.395334474256515 |
| AGTACTACGTCA   | 725.662151160886 | 0.353377044852529 |
| GTCACACAGTAA   | 725.672973955037 | 0.560865932969927 |
| GTTAGGTCA TCA  | 725.673244920465 | 0.200675835784411 |
| CAGAGAGGTGAC   | 725.678059645955 | 0.263878784724801 |
| ACTCATCTATG    | 725.692691599073 | 0.200248612465545 |

|                |                  |                   |
|----------------|------------------|-------------------|
| ATTGATGGTGAC   | 725.704994191671 | 0.453164495033873 |
| CGTCACAATCAA   | 725.711916856453 | 0.399103215317652 |
| CGACCTGACTCG   | 725.713851574408 | 0.307589240907031 |
| AATGACCTGGCC   | 725.719120067692 | 0.253497619880992 |
| ATGACAAGCCTC   | 725.719499695982 | 0.23618942011194  |
| CGGAACTGGTCA   | 725.719701963286 | 0.286902052938651 |
| GTCATTCGTTGA   | 725.721372046003 | 0.144961521527921 |
| GACCAGGCATA    | 725.72635929168  | 0.401072409638545 |
| TCACTTTGGTCA   | 725.728595273607 | 0.357698453548907 |
| ACCGGGTGTGAT   | 725.740171102496 | 0.502912870184426 |
| TGACGACATCAA   | 725.741089922236 | 0.425666985241085 |
| AGTGTCACGAGC   | 725.747986323335 | 0.410357554929379 |
| GCGCTAATGACA   | 725.77813962282  | 0.290949665826502 |
| AGTCGCTGTGAT   | 725.781702418669 | 0.354677223981433 |
| CGCCACGGTGAC   | 725.782336002878 | 0.233372893224082 |
| ATCGAATACTCA   | 725.788837797154 | 0.292672663793085 |
| ACGCGGTATGAC   | 725.802976281331 | 0.274081403150064 |
| ACTCCATGACGC   | 725.804415279898 | 0.300854837494087 |
| ATACTCATTACG   | 725.808231632908 | 0.253895326616246 |
| CAAAACAGGTAA   | 725.810460415182 | 0.375679304105908 |
| GAAGTTTGTGAC   | 725.830258436375 | 0.376505330722936 |
| GTCACCCTGACA   | 725.832557926748 | 0.273987328227944 |
| GTCACCGCTCGA   | 725.833585368789 | 0.433942371599626 |
| AATAAATGTGAC   | 725.834932877358 | 0.378939523072978 |
| AGTCACTTCCCC   | 725.837764147718 | 0.243180288836355 |
| GGGACTACTGAC   | 725.838370334752 | 0.312087088598013 |
| CCCGGTAATGAC   | 725.842014852727 | 0.323453260813251 |
| AGTGACGCGCAT   | 725.845769760557 | 0.38441127594108  |
| CTTCGTTGTGAC   | 725.851723143579 | 0.298671248486281 |
| TGATACATACAA   | 725.852659572123 | 0.373761372103551 |
| CCTTTAGGTGAC   | 725.853583019585 | 0.298982323057426 |
| GTCACCTTAAAC   | 725.869260490043 | 0.14412585603614  |
| GCGTCACAGCCA   | 725.878969315378 | 0.405285327482224 |
| CGTTTGACACAC   | 725.882905935332 | 0.193561635985147 |
| GTCACCGAATTA   | 725.884020460932 | 0.328197222909395 |
| CAAAGAGAGTCA   | 725.884415584804 | 0.34585778690161  |
| AGTTGGTGTGAC   | 725.891415076155 | 0.269276112250582 |
| CAGTCAGAACGG   | 725.895109566289 | 0.378328971087648 |
| CTGGCTGTGATA   | 725.917599700001 | 0.369925186461489 |
| GCTGATTGTGAC   | 725.91804205101  | 0.258159704519815 |
| TCATAGTCAGGA   | 725.923018412307 | 0.460256464848682 |
| CTGCTCAATGAC   | 725.926356836381 | 0.306490124538888 |
| GTCACACTAACA   | 725.933156416361 | 0.397535513138974 |
| CTTATATGACCA   | 725.956609530984 | 0.397536358599099 |
| ATGACAACGGTG   | 725.959209710928 | 0.421474427728058 |
| AGACTAATTCCT   | 725.960551373548 | 0.202015152379095 |
| CGCTGAGTAAGC   | 725.960698503494 | 0.557459725877896 |
| GTCACAGACACA   | 725.964039420949 | 0.461529873930567 |
| ATGACGAGCTCA   | 725.971496525537 | 0.151219968822292 |
| AAGACTCTTACG   | 725.973012632105 | 0.352242001269678 |
| CTGGCTGGTGTGAC | 725.97366582222  | 0.34908371027039  |
| CGCATGACAACG   | 725.97968553353  | 0.350299156057565 |
| AGAGGATATGAC   | 725.982073593332 | 0.14053647721586  |
| AAATGACATCGA   | 725.984989471818 | 0.2129850913922   |



|               |                  |                    |
|---------------|------------------|--------------------|
| CTATTGAGTGAC  | 725.985099292559 | 0.377187709053582  |
| TGACGAACATAA  | 725.999786433551 | 0.32186469613034   |
| AGGCCGTGACAC  | 726.006610501431 | 0.319429924085281  |
| CCGCTGTGACGA  | 726.011837550617 | 0.393846929888268  |
| CGACTAATCCTA  | 726.02534529893  | 0.323244109210657  |
| AAGCATCTGTCA  | 726.027498325137 | 0.19483167073852   |
| AACATCATGACG  | 726.028050307625 | 0.376154093130986  |
| GTCAGAGCTTCA  | 726.033721750666 | 0.556565644450088  |
| AGTAATACTATG  | 726.038732465023 | 0.384845669934982  |
| AGTCACGGAAG   | 726.045845253819 | 0.325033032993144  |
| AACAGCATGACA  | 726.051411983691 | 0.427611086156934  |
| ACAGTGAGTCTG  | 726.057431944116 | 0.388151931094851  |
| ACTCATTTGAGG  | 726.059956263044 | 0.319865778626665  |
| CTCGTCATGCAA  | 726.069821004499 | 0.312933591305355  |
| GTCACCGAAGAA  | 726.078196834518 | 0.328741983361114  |
| CAGCAGTGACGC  | 726.09318643671  | 0.259783140950691  |
| AGTCAGAATTGC  | 726.093290966428 | 0.399042745475727  |
| CGTCATTGATTA  | 726.093585029447 | 0.239600033182355  |
| ATTAATAGTGAC  | 726.095443272288 | 0.414022988003394  |
| AGCCATGTCACT  | 726.098687011842 | 0.0899506655327494 |
| GTCACCATCTCA  | 726.099725832637 | 0.397426337808969  |
| ACGCTGAATGAC  | 726.100998531187 | 0.389865091112287  |
| AGTCGCGTCACT  | 726.10389291485  | 0.232918365587556  |
| GTAGTGTGTGAC  | 726.114740765706 | 0.286560767849156  |
| TATTAGCAGTCA  | 726.121006699371 | 0.0949496392377974 |
| GCCCCTTATGAC  | 726.129053291337 | 0.503935855280434  |
| TGTAACATGACA  | 726.130662167636 | 0.331220927773663  |
| ATCAATGTCATC  | 726.138342617033 | 0.293722483412726  |
| GAATCTTGACTC  | 726.140351816687 | 0.452802210975879  |
| TGTCACAATCAA  | 726.1441744339   | 0.329201990424772  |
| AACCAGTGAGTC  | 726.145831493355 | 0.434849313931595  |
| CAAAGTACGTCA  | 726.149071178835 | 0.43745263435122   |
| CTAAAGATGACC  | 726.154034814363 | 0.303304012393405  |
| ATCCTTTGACTC  | 726.157323193396 | 0.253726818000282  |
| CTTCCTGTCATA  | 726.158057830529 | 0.240498060835518  |
| AATCTTTGGTCA  | 726.158290783772 | 0.287978724645772  |
| ATGAGTGAGCCG  | 726.1630159031   | 0.194953400935891  |
| ATGACCATAAAT  | 726.165995996319 | 0.397021061807415  |
| CTACGCTATGAC  | 726.188571610477 | 0.257636255322147  |
| ACGTCTAATGAC  | 726.19256389024  | 0.364005939990812  |
| CAGCGCATGAC   | 726.194095189883 | 0.565729130268985  |
| CGTCACAGGCAA  | 726.194266034799 | 0.368362558368943  |
| AATCAAGATGAC  | 726.201715287765 | 0.3074537548152    |
| GTCATGATCCAA  | 726.204888888363 | 0.341940647424134  |
| GTCATTTCCGTA  | 726.213744543883 | 0.327506707223951  |
| TAAAGCGAGTCA  | 726.223622810344 | 0.215855718533737  |
| CACTTCGGTGAC  | 726.232042976477 | 0.124530266716888  |
| CCGTTATGTGAC  | 726.237026058332 | 0.470098488084307  |
| AGTGACCAAGCC  | 726.241364743616 | 0.445044935447607  |
| GCCTTAGTGACA  | 726.24403832265  | 0.391448849665323  |
| TGGCGTGACCCA  | 726.257883052468 | 0.377615199083058  |
| AATTCCTTTGTCA | 726.257990189401 | 0.552742536820547  |
| AGACTCACGCAC  | 726.263851706625 | 0.472620825882884  |
| ATTACTAAGACA  | 726.271465614429 | 0.469030055361187  |

|              |                  |                   |
|--------------|------------------|-------------------|
| AGTCACGGACAA | 726.277924619769 | 0.337992800780011 |
| AGTCGAATCATC | 726.279708766648 | 0.31390866603131  |
| ATGACCACGCCG | 726.283081393432 | 0.305434117686478 |
| AATTCCAATGAC | 726.299797685378 | 0.502165728577564 |
| CCGTGACGTGAC | 726.30033458058  | 0.362787959972454 |
| CACCTAAATGAC | 726.300935712559 | 0.216213487020456 |
| GTCATGAAAACA | 726.302312538675 | 0.304900397615184 |
| AATGAGTGTAC  | 726.304398817109 | 0.380259621164885 |
| CGTCATTAGTCC | 726.318049381759 | 0.217417804501432 |
| GCCATTAATGAC | 726.324678761029 | 0.30807006713179  |
| TAAAATGGCTCA | 726.326336941004 | 0.49208651291593  |
| CGTCAGTGAGTC | 726.332382326629 | 0.316852155625852 |
| AGGCTGCGTCAG | 726.33354533105  | 0.417506015095561 |
| AATCTGTCAACG | 726.337098261084 | 0.375707557368599 |
| GTCACGAAATCA | 726.356937609221 | 0.260099570954388 |
| CCTGCCAATGAC | 726.357154997495 | 0.342452623372509 |
| ACGCCTGACGCA | 726.365655296648 | 0.391476433487713 |
| ATGATTAATCA  | 726.368473451338 | 0.349304794448395 |
| TGGTCATTGACA | 726.371576647463 | 0.355977479629029 |
| CGTCATTTGAAG | 726.375762160819 | 0.305322342643303 |
| TCAAAGCAGTCA | 726.377772549807 | 0.362173628717467 |
| ATGAGCTGTTCA | 726.378763026996 | 0.339045323630346 |
| AATCAGTGACGC | 726.383533246593 | 0.340052196362865 |
| GTCACCATCAGA | 726.387794032884 | 0.254111082463365 |
| ACAGACTAGTCA | 726.391273762131 | 0.334732102710138 |
| GTCATTCGTGTA | 726.39354472405  | 0.42460411256209  |
| GTCACCCGAAGA | 726.399336629347 | 0.40070352542804  |
| CGAATTAATGAC | 726.403278968968 | 0.340529211369764 |
| GATTACTAATA  | 726.405440142723 | 0.20287889732438  |
| GTCACATTTTAA | 726.409946425881 | 0.311098934639344 |
| ACTCATCTAAA  | 726.410786214606 | 0.33393508280611  |
| GGAACTATGACC | 726.414015939079 | 0.304131174591278 |
| CGTCATGCAGTA | 726.41435672965  | 0.400046708573682 |
| ATTGTTATGTCA | 726.419625829954 | 0.327236991553497 |
| GTAAACTGGTCA | 726.423444975609 | 0.293180989173801 |
| CGTGAAGTGTCA | 726.423756272446 | 0.394172119207321 |
| GGCGACTAATTA | 726.425092985862 | 0.435114785354659 |
| ACGCTACTCAAA | 726.426714151411 | 0.238473814387562 |
| CACGGTGACCCA | 726.438922408557 | 0.254103546137592 |
| GTCATGTTCTTA | 726.439506428317 | 0.45892836727992  |
| ACACGTATGAGT | 726.440753509807 | 0.374860204255193 |
| GAGGGTTATGAC | 726.445567453718 | 0.338376637734482 |
| ACTCCTGTGTCA | 726.445980812271 | 0.316605913975526 |
| AGTCCGTGTGAC | 726.448440677876 | 0.379480037853133 |
| CTCAGTCAATA  | 726.451715526355 | 0.375949729873232 |
| GTGCCTTACTCA | 726.468109851613 | 0.205374344486982 |
| ACGCCACTATGA | 726.484630000582 | 0.590043378642272 |
| TGCAATAGTCAA | 726.499932021155 | 0.519715379930909 |
| GGCCCTGATGAC | 726.503322514017 | 0.308855187644301 |
| GAATTAGCAATC | 726.503496913534 | 0.313409839280232 |
| GTGCATCTGTCA | 726.511089350378 | 0.422735992060568 |
| GTGACGATGTCA | 726.511974548462 | 0.217286891400846 |
| ACTCCGAGTCAG | 726.512030145333 | 0.147132848824136 |
| GACGACCGTGAC | 726.514575455366 | 0.552851859542358 |

|                |                  |                   |
|----------------|------------------|-------------------|
| ATGACAAAGGGA   | 726.515694987819 | 0.281961876233388 |
| ACTCATCGACTG   | 726.517965801897 | 0.327149607890333 |
| ATCGGGTGTTCAT  | 726.518409777965 | 0.312383343669466 |
| GTCACGCGTTTA   | 726.525041435256 | 0.416656867829251 |
| GTCATTGGAGGA   | 726.52754976442  | 0.27655386886939  |
| ACTGTCTGAGTC   | 726.531227137701 | 0.293799211190382 |
| ACTCATAGATAC   | 726.557804761502 | 0.402701222126943 |
| GGTCACCGCTGA   | 726.565555303104 | 0.576586698071651 |
| CTCTGAGCAATC   | 726.5689591042   | 0.385676801109544 |
| CACTGCATGACA   | 726.571114903122 | 0.334444534984832 |
| TGCGTCAGGCCA   | 726.573351249327 | 0.204652654019373 |
| ATTATTACTCGA   | 726.573563377241 | 0.483901935250504 |
| GAGTGAATCAAC   | 726.574478828811 | 0.224947202688734 |
| ACCCCTTACTCA   | 726.581178844785 | 0.230218649468076 |
| GACTCACTGCGC   | 726.586214848895 | 0.356025881189718 |
| TAGTTGTCACCA   | 726.59161960093  | 0.291836093825395 |
| GTTTCTGTGTCA   | 726.5925869836   | 0.366847939701875 |
| TAAAGTACGTCA   | 726.593866042806 | 0.361032949795789 |
| GTCACCAGCGAC   | 726.604874598368 | 0.310319308871935 |
| GTCACCTATTTA   | 726.610431051644 | 0.339234272421684 |
| ATATCCATGTCA   | 726.623817647462 | 0.392749495909253 |
| ACAGAACGTCA    | 726.645447724948 | 0.397191591020302 |
| ATCGCCACGTAA   | 726.652384486082 | 0.386390488781236 |
| GTGTCATGTGGA   | 726.653512980243 | 0.177573052714806 |
| GTCATTCGCATA   | 726.655363601183 | 0.301699818997687 |
| GACCTTGGCTCA   | 726.662013966356 | 0.45971075608444  |
| CACAATTCTGAC   | 726.66681130689  | 0.300109656991672 |
| TGATTGACTAA    | 726.693298433839 | 0.412409766324472 |
| GTCACCATTGGA   | 726.710667448331 | 0.440575925908333 |
| TCAAGTCTATGA   | 726.7127415252   | 0.362465537823617 |
| AAAACGTGACAC   | 726.714860531525 | 0.354169182176446 |
| CGTTCGGGTGAC   | 726.719670668645 | 0.309765868679205 |
| AACAGGTGTGAC   | 726.726575153967 | 0.321992522182438 |
| TCAGCAGTCAGA   | 726.734203934611 | 0.387849379135798 |
| GACTCACTCGCA   | 726.73904070931  | 0.490381896449052 |
| TGTCATGATGAA   | 726.741673119741 | 0.423785332223895 |
| CGTCATGGCTGA   | 726.751305318726 | 0.446679051800339 |
| CCTCTCTATGAC   | 726.754982926815 | 0.256405611197046 |
| ACCTGTGTGACG   | 726.766511442509 | 0.470537310325621 |
| TAATTTGTGACA   | 726.777317240294 | 0.350178604961055 |
| CTATGCGACTCA   | 726.784758939338 | 0.211056356433059 |
| AAATTTTCATGAC  | 726.790451255331 | 0.338906349956478 |
| CCGGCTTGTGAC   | 726.795761461693 | 0.390370785976269 |
| ACCAGTGACCCA   | 726.795842645607 | 0.45765002471024  |
| GTCATCAGGGTA   | 726.831451579023 | 0.371650452840995 |
| GTCACATCATCA   | 726.83501048176  | 0.345840448306477 |
| CCGTAGCATGAC   | 726.848858611667 | 0.530640280925678 |
| GCTGCCGGTGTGAC | 726.849855976092 | 0.311903212283527 |
| GAGTCAAACGGC   | 726.850701862793 | 0.398944196272405 |
| GGAGCTCCGTCA   | 726.851063304031 | 0.383215905913637 |
| AATATGTGACGC   | 726.856517401456 | 0.28193008559612  |
| CGTTCCAGTCA    | 726.86904688922  | 0.554623642614405 |
| AGGTATCGTCAC   | 726.869836915982 | 0.223920467365212 |
| CGGAAATGACAA   | 726.871172660295 | 0.30270705900808  |

|              |                  |                   |
|--------------|------------------|-------------------|
| CGACTCTGTCAC | 726.875974979153 | 0.230938299517492 |
| ATGACAGGGGTC | 726.877493973139 | 0.2370909863427   |
| ACTAGACGTCAT | 726.880670763156 | 0.505563108041317 |
| AAGAATGCATA  | 726.886558075387 | 0.253576987259481 |
| ATAAGACAGTCA | 726.888024051766 | 0.443728927846183 |
| ATCGCATGACAC | 726.899878617665 | 0.318642102920773 |
| ACTAATTAGTAC | 726.906998580669 | 0.341680146625934 |
| ACATCCGACTCA | 726.917437961473 | 0.364925534046011 |
| ACTCATATTTAT | 726.917957130045 | 0.271234650582711 |
| CGTCATTTCGAG | 726.938110665649 | 0.266266653218392 |
| TAAGACTGATCA | 726.941931199967 | 0.128516090370851 |
| CATTCAGTAATA | 726.944014113776 | 0.302993075987601 |
| CGTCATTAACGC | 726.944243814045 | 0.368017721705041 |
| ACAGCTACGTCA | 726.946221246114 | 0.244888272976238 |
| CGCTACGTGTCA | 726.94972047912  | 0.298589955156843 |
| CATCCTGAGTAA | 726.950227932332 | 0.401595081133989 |
| TCATAGGGGTCA | 726.959449594807 | 0.400867966191258 |
| ACTCATTAGTTG | 726.960453002255 | 0.269111050524611 |
| GTCACCTTGTA  | 726.964256317813 | 0.392007019507133 |
| AGTAGGTGTGAC | 726.973985816122 | 0.183809573528445 |
| GTGAGTCCGATA | 726.975661819302 | 0.303343651510337 |
| AAATAAGGGTCA | 726.977004097136 | 0.389345724234005 |
| ACAGCTAGTCAC | 726.978011313633 | 0.235370306600783 |
| ATTAGTGACATA | 726.980139688489 | 0.265980350177153 |
| ACGTGGTAGTCA | 726.98220667525  | 0.291953261775181 |
| AAATTATGACCG | 726.985063176078 | 0.242683733124064 |
| AAAGGTGACACG | 726.989854151232 | 0.227954010231802 |
| CATAAGCTGTCA | 726.991808349152 | 0.446820798795279 |
| CTGACTGCTCGA | 726.994687569946 | 0.443596765988752 |
| AGACTAATAATC | 726.996753887502 | 0.251767906136188 |
| ACGTCAGCGTTG | 727.016889084959 | 0.45950221201862  |
| CTGATCATGACA | 727.035591121851 | 0.301338683940322 |
| CTTCCGAGTCA  | 727.039379509782 | 0.249023092348096 |
| AGAGAATTAGTC | 727.04119129277  | 0.194487109441906 |
| CGTAAGGCTCAC | 727.041416472908 | 0.311910818587904 |
| GCCATTTGCTCA | 727.053695522447 | 0.371417555748197 |
| GACCCGTCACAA | 727.072160672446 | 0.404921743365013 |
| CGGATCCGTCAG | 727.08666511505  | 0.509553927957282 |
| CCCAACGACTCA | 727.092646784536 | 0.21145967266548  |
| TAGCCCTAGTCA | 727.106037861996 | 0.294563561291098 |
| AGTAATCATGAC | 727.125782817973 | 0.357075980948984 |
| AACCTCAATGAC | 727.127897602257 | 0.205230264063751 |
| CACGATATGACC | 727.129629341986 | 0.588866783976073 |
| ATCTGAGCAAA  | 727.130710694198 | 0.339035722626778 |
| GGAACAGATGAC | 727.139072200285 | 0.336396417779417 |
| ACTCATAGTAAT | 727.140988975974 | 0.269572167753577 |
| TGACTGGCAAAA | 727.144762905805 | 0.365850720689855 |
| GTCATATGAAGA | 727.158430673887 | 0.394007084025465 |
| TGACTACGGAAA | 727.170217028668 | 0.240607365393864 |
| GTCAGAGTTACA | 727.175295689071 | 0.538281267665483 |
| GTATGCCATGAC | 727.179240217945 | 0.455857950343856 |
| GAGTGACCAAGC | 727.185253429543 | 0.334334407780366 |
| GTCATTCAAATA | 727.190306130177 | 0.433013188176587 |
| CTATTTGACACA | 727.193731944518 | 0.312068942966699 |

|               |                  |                   |
|---------------|------------------|-------------------|
| AACGTAACAT    | 727.19416522924  | 0.289369182574455 |
| CCGGGCATGACA  | 727.19688044241  | 0.452292156062934 |
| GTCACACGAGAA  | 727.206357131095 | 0.466063968014874 |
| ACGACTTTGTCA  | 727.209425026185 | 0.216854895546195 |
| CTGGGCCATGAC  | 727.216988346583 | 0.525676556835489 |
| AATACGTGACCA  | 727.234461588957 | 0.450189137073317 |
| TAAGACGTCACA  | 727.236217801442 | 0.197891801146266 |
| GAACCCTATGAC  | 727.243820059703 | 0.51256909271263  |
| GTCTGAGTCGCA  | 727.245749355799 | 0.491961847379522 |
| ATGACATGCCGG  | 727.254506425082 | 0.325637584412065 |
| CGCCACTGTGAC  | 727.254862011745 | 0.338679169901676 |
| TGACACAGCTCA  | 727.268980765334 | 0.347629983810638 |
| ATGCATGACATC  | 727.269078859722 | 0.416084224979119 |
| ACATATATATGA  | 727.27402018014  | 0.393592168401194 |
| GTGCTTGTGTCA  | 727.286225022614 | 0.328973399638435 |
| ATACGAAATGAC  | 727.288947953586 | 0.221677484897638 |
| CATCGGGTGACG  | 727.29091389169  | 0.331875480251501 |
| ACACGTAAGACA  | 727.298076210129 | 0.402389310255025 |
| ATTGGATGACCA  | 727.303970500681 | 0.289284980575827 |
| ACGATAGGTGAC  | 727.30428115873  | 0.301438351687431 |
| ATCCTGCGTCAG  | 727.304908855774 | 0.383041940772766 |
| TTACTCAGCGAA  | 727.313101846809 | 0.25624278307905  |
| AGTGTCATGTGG  | 727.317458284365 | 0.186827936722796 |
| ACGAGTCAAAGC  | 727.319427939719 | 0.188416532267465 |
| AACTTGTACACAG | 727.336272545154 | 0.345140513851024 |
| TGAATTTGCTCA  | 727.337496144169 | 0.383507821980572 |
| AATAATGACAAG  | 727.343926536819 | 0.335372805978937 |
| ATATAGCATGAC  | 727.344026992021 | 0.283953586404063 |
| TACTAATTGTGA  | 727.34542040856  | 0.662064232068397 |
| ACGTGACGCGAT  | 727.362699281651 | 0.33002276425925  |
| GTTGCTGCGTCA  | 727.371005329814 | 0.219342307147501 |
| AAATCGGGTGAC  | 727.374781056215 | 0.136389234386594 |
| ATAAATTAGTCG  | 727.375318902191 | 0.182831444385982 |
| ACGTGTGAGCAA  | 727.376921921755 | 0.199878948933373 |
| CCCAATCTGTCA  | 727.382213550343 | 0.199099550961812 |
| ACCTACGTGTCA  | 727.387033729712 | 0.275952233640612 |
| GGATAGCAGTCA  | 727.387967988775 | 0.34509660535477  |
| CTTATGTGTGAC  | 727.389534843634 | 0.553416363037885 |
| ACTCATCGTCAC  | 727.389591247103 | 0.276020560272108 |
| CAGTCAGCGGTA  | 727.390260639694 | 0.272766043374367 |
| CCGGGATGACCA  | 727.396923980825 | 0.292478226715448 |
| GTCACATACAGA  | 727.404667101682 | 0.254987349346343 |
| GACGCAATGACA  | 727.407530446142 | 0.159360977880471 |
| TAGTGTACGTCA  | 727.411087559493 | 0.296969776410155 |
| ACTCGTAGTCAG  | 727.420286488953 | 0.317586195799566 |
| AGTCAGATCGTA  | 727.422607012684 | 0.403527967938373 |
| AGATATCGTCAC  | 727.42628637435  | 0.345227395865542 |
| CTCTTATGAGTA  | 727.437790960293 | 0.334723498043673 |
| AGAGGAAATGAC  | 727.448958380581 | 0.221456321961091 |
| GTCATCGCCAAC  | 727.449501615092 | 0.177717271372973 |
| AACTGCTGTGAC  | 727.451946266961 | 0.303729906550101 |
| GCCAGTGAATCA  | 727.460898636528 | 0.397820067693361 |
| CACTTTTGGTCA  | 727.48727797483  | 0.435232096990751 |
| CACAGGGAGTCA  | 727.48933838504  | 0.239816003722548 |

|                |                  |                   |
|----------------|------------------|-------------------|
| ATATGACCTCAT   | 727.49610040616  | 0.218805091808022 |
| GAAC TTGTCAGA  | 727.503583679145 | 0.315501653354188 |
| CTGACGTCAGGC   | 727.505968756945 | 0.214725217959871 |
| CGTTGACGTGAC   | 727.511263046183 | 0.393818419632113 |
| GAGCGTGTGTCA   | 727.514313882577 | 0.382224241103578 |
| CTATAGAATGAC   | 727.533967463953 | 0.163645223754479 |
| CGACTAATCACA   | 727.535526682071 | 0.33312609258188  |
| CTCGCTGAGTAA   | 727.541735623696 | 0.415300735407071 |
| CGAGCCACGTAA   | 727.542610220999 | 0.321750089523127 |
| AATAAGCAGTCA   | 727.556796597319 | 0.253442687568306 |
| ACTAATGAGTGA   | 727.563183376991 | 0.232701005951423 |
| TCGTCATGCGCA   | 727.576962753335 | 0.288976410415816 |
| GGAGGTGAATCA   | 727.588686899858 | 0.107771117047641 |
| CATTGTCATGCG   | 727.590566734346 | 0.498965070406013 |
| CGCCTTTACTCA   | 727.592221186445 | 0.325716196151454 |
| ACATCTTGTGTCAT | 727.609530205263 | 0.217179348403257 |
| CATGTTTGACTC   | 727.614661414884 | 0.354226316596109 |
| AGTGGTGATTAT   | 727.615932366398 | 0.302920815193982 |
| CCAACAGGTGAC   | 727.616899995848 | 0.430449374347976 |
| ATGACATTATTA   | 727.618679331932 | 0.28303310269991  |
| AGTCAGCTCATG   | 727.630482258199 | 0.406098395029052 |
| ACGTCATGCTCC   | 727.633015041999 | 0.239681240113577 |
| GGGACTAATGAC   | 727.641934751517 | 0.465599149672838 |
| ACTGACGCTGAC   | 727.644769742012 | 0.289496157207364 |
| AGTCAGTACTCA   | 727.645928727491 | 0.301223762908143 |
| GTCACAGTTCAC   | 727.646743007573 | 0.363461409289881 |
| GAGCTCAATGAC   | 727.651993425638 | 0.353780529884924 |
| GTGACGTCTTAA   | 727.652292950001 | 0.49495042254605  |
| CTTTTACGTGAC   | 727.658243984541 | 0.431785017212581 |
| CAGTCAGGGATC   | 727.662172852703 | 0.145749330950705 |
| ACATAAGTGACA   | 727.664431685819 | 0.552865113562375 |
| CAGTGACGTGCC   | 727.66830199562  | 0.341590906480673 |
| CCAGTGACGTGC   | 727.668575063957 | 0.299298836547652 |
| AGTACCGACTCA   | 727.672753349653 | 0.299896958798931 |
| ACATGCGATGAC   | 727.673542758547 | 0.435108091404283 |
| GTGTGAGCAAAA   | 727.673679814845 | 0.243098896417532 |
| GTA AATCTGTCA  | 727.683464253703 | 0.271464733778428 |
| ATAGACTCAGAT   | 727.688942767976 | 0.182235137757126 |
| GACTATGATGAC   | 727.692976224825 | 0.427584514629625 |
| CGTCATCTGGAA   | 727.697113880114 | 0.356014266464355 |
| TACAGAATATGA   | 727.702722938217 | 0.428155316257732 |
| ATGTACATGACG   | 727.712792687571 | 0.282057973477756 |
| CTATACAGTCAG   | 727.71377777504  | 0.239919874051641 |
| CGATTGCTCAGA   | 727.716898954874 | 0.287853135103482 |
| CGTTCTGTGACA   | 727.723227412327 | 0.295698811290614 |
| CGATGTGTAACC   | 727.743412820258 | 0.54691964390862  |
| CGGAAAATGAC    | 727.746231660128 | 0.350410393853303 |
| GCAACATGTGAC   | 727.76041296397  | 0.633198728635673 |
| CGATTAGGTGAC   | 727.766379537544 | 0.302598998831153 |
| CAAACTGTGAC    | 727.777550521962 | 0.437764894980532 |
| AGTCAGATTGGC   | 727.779830516387 | 0.315166498757922 |
| ACATCGCGTCAC   | 727.795445386696 | 0.406870113815007 |
| GTTGACTGGTCA   | 727.7961617346   | 0.292636006330214 |
| TCATCGTGACGA   | 727.801439736666 | 0.354823732551686 |

|               |                  |                   |
|---------------|------------------|-------------------|
| AGCACAGCGTCA  | 727.80460226241  | 0.503666595752604 |
| CTGTCATGCAAG  | 727.804625660279 | 0.299055650413783 |
| TGACACCGCGAA  | 727.826917971746 | 0.340232255335641 |
| AGTCAGATCTTA  | 727.834008133063 | 0.319409975030489 |
| ACTCATAACAATA | 727.835322525061 | 0.218740782066011 |
| CTAATGCTGTCA  | 727.846042604428 | 0.331164900516551 |
| GTCGCATAGTCA  | 727.90051211298  | 0.357725888763393 |
| CGTCTTTGTGAC  | 727.908119664547 | 0.451245315296215 |
| GACCGTGACCCA  | 727.913228559577 | 0.198670991773719 |
| GTCACTACACGA  | 727.921951456303 | 0.299685856209868 |
| AGCGTCATGATG  | 727.925299993936 | 0.16709555118566  |
| ATGTCACATGAC  | 727.926560413349 | 0.370880789116103 |
| GTGACAGCACAC  | 727.927100095877 | 0.355499527247704 |
| CCTTTAGATGAC  | 727.930534295571 | 0.315197450842232 |
| AAGACTAACACT  | 727.935871078871 | 0.255373720240125 |
| ACCCTGGTGACA  | 727.938169865421 | 0.362294389330782 |
| ATGACGTGAAGC  | 727.945860585954 | 0.232788230423256 |
| ACAGGCCTGACG  | 727.966332902524 | 0.330678243445332 |
| CGCAGAGAGTCA  | 727.966550717635 | 0.297751924849835 |
| GTTACTGTCACA  | 727.973024556273 | 0.230273409453411 |
| CTTAAGCAGTCA  | 727.986000366306 | 0.248331503727321 |
| CCCTCACAGTCA  | 728.012659606171 | 0.29985261027126  |
| GATTATGTCAGA  | 728.021079185935 | 0.256864787744904 |
| GGATTACAGTCA  | 728.031479976527 | 0.35314760778124  |
| TGACTACCGGAA  | 728.038872633737 | 0.368976969187315 |
| GCCTACAATGAC  | 728.047035330542 | 0.378226592125032 |
| CCGTTAAATGAC  | 728.04736105455  | 0.430319430004937 |
| CATGAAATGACG  | 728.067757801104 | 0.385825891688258 |
| GGTCACGGTGAC  | 728.070633765867 | 0.375050977097925 |
| GTGAGAGAGTCA  | 728.08186446232  | 0.316533998932567 |
| GATCAGGAGTCA  | 728.082134226256 | 0.352443921071488 |
| AGAGTAAGAGTC  | 728.091012774825 | 0.302931445868697 |
| GGTCATAACACA  | 728.100470951915 | 0.51907028509924  |
| GTTACTCAACTA  | 728.132934667658 | 0.223916719567092 |
| GTCACCCTCTCA  | 728.136108694586 | 0.248869074226111 |
| TACGACTAGTCA  | 728.141883096618 | 0.267098110793455 |
| GCCGCTTCGTCA  | 728.142869409551 | 0.298613500868518 |
| CCGCAATGTGAC  | 728.143059540793 | 0.326414617961593 |
| CAAATACTGTCA  | 728.14730007926  | 0.640031541912097 |
| AGTGACGATACC  | 728.148727415393 | 0.333249244203436 |
| ATGAGTTGTCTC  | 728.175168876398 | 0.361105341910161 |
| CATAGAAATGAC  | 728.198569709368 | 0.342013881553881 |
| ATGAACTCGTCA  | 728.199040127471 | 0.419149336225814 |
| GGTATCGTCACC  | 728.200938856099 | 0.302249928029331 |
| GACTCACTGCGA  | 728.214772072451 | 0.365549847191346 |
| ACGTCATGAATA  | 728.219397479482 | 0.282852990434718 |
| TGACAGGTCACA  | 728.222297214723 | 0.574776355994441 |
| CTGCCCTATGAC  | 728.228581144728 | 0.301944361924463 |
| AGGACTCTGACT  | 728.233633801696 | 0.305986781478715 |
| GTCATCAAGGCA  | 728.2406695191   | 0.403166906458925 |
| GTCGTCAGATCA  | 728.248053999502 | 0.53202325022922  |
| TGACGAAGCCAA  | 728.251657017976 | 0.413504167607059 |
| CTACCAATGACA  | 728.253346134739 | 0.283644495085897 |
| CGTCATCAACGC  | 728.273384706113 | 0.302485408493007 |

|                |                  |                   |
|----------------|------------------|-------------------|
| CGTCACCGATTC   | 728.278351764737 | 0.348404772267397 |
| GTCATGCTCGAA   | 728.282146932508 | 0.330591872505325 |
| CGTCACAATCTA   | 728.288914060973 | 0.33209397846339  |
| GATTTGAATGAC   | 728.28916730563  | 0.282151681528952 |
| GGACGGTGTGAC   | 728.290505094948 | 0.278824499048639 |
| GAGTTATGTGAC   | 728.293066764647 | 0.349215918284353 |
| ATGACAGGGTGC   | 728.293805740019 | 0.298312058115696 |
| CTGACACAGACA   | 728.294041366343 | 0.467279924466775 |
| GCCGCTGCATA    | 728.294717750643 | 0.576257461255882 |
| GTCACCGTTAAA   | 728.299692067292 | 0.457058686248818 |
| GCAGTTTCGTCA   | 728.29996342883  | 0.485503851335827 |
| GCATCGCATGAC   | 728.30774794636  | 0.206746679195605 |
| GTCATTGAATTA   | 728.31131766596  | 0.50744381653127  |
| CGTATCGTCACC   | 728.313044540432 | 0.368675565287093 |
| CAAAAGCATGAC   | 728.317560237409 | 0.3957863600331   |
| TCTGATATGTCA   | 728.319622367404 | 0.228387693711576 |
| ATGAGTCTCGGA   | 728.321214912417 | 0.275974298571886 |
| AGTTAGGTGATA   | 728.324477573114 | 0.226562754815635 |
| AACATACTCATT   | 728.326586221307 | 0.237143601642855 |
| TGACTGGAATAA   | 728.329862052324 | 0.304697370227488 |
| ATTTTCGCATGAC  | 728.351815431367 | 0.350707550350261 |
| ACGTGAGTCTGA   | 728.353522011009 | 0.301168768703405 |
| AGCTGATTACTC   | 728.359015174381 | 0.441286262868607 |
| AAGATTTGGTCA   | 728.365946110557 | 0.264203754228572 |
| CCTAGAGGTGAC   | 728.369611883081 | 0.214756738903813 |
| GGGACTGACACA   | 728.3817899653   | 0.476589422085102 |
| GTCATCACATCA   | 728.385400092573 | 0.440686949747392 |
| GACTAATTGGCA   | 728.38856853024  | 0.303411783072718 |
| GCGTCACGACAA   | 728.389053455899 | 0.40070276191574  |
| GACCACCGATGA   | 728.395319015321 | 0.593961438922197 |
| CATGACCCGTCA   | 728.406136748936 | 0.244560135514055 |
| GTCACCTATACA   | 728.415269438674 | 0.26615142708035  |
| CCCTGTGGTGTGAC | 728.424210749041 | 0.349778481007478 |
| ACGTCACTCTCC   | 728.44392268648  | 0.301073259273779 |
| GTCATGAGGCAC   | 728.445346648359 | 0.40808179875616  |
| CCAAATGTGACA   | 728.447852720438 | 0.341866559441293 |
| CAGTCAACAGTC   | 728.456142000569 | 0.172065029166542 |
| CTAATACGTGAC   | 728.466877619442 | 0.286284728605736 |
| CGATGTATGTCA   | 728.501630414694 | 0.298434265380053 |
| ATAGTCAGCTGA   | 728.50345701878  | 0.474121212525108 |
| CAGTCAGCTCAG   | 728.51488167096  | 0.623077288128272 |
| GGACTCTGTACAC  | 728.517884689173 | 0.311480927491316 |
| TCACGTGACCCA   | 728.520199590436 | 0.316338272571917 |
| ACTAAGTCAGTC   | 728.524108961699 | 0.435219405304393 |
| GCTTGACATGAC   | 728.524677148789 | 0.404813225134951 |
| GTCATTACTGCA   | 728.532975559358 | 0.492076779001666 |
| ATGCCGTCAATTG  | 728.533519992628 | 0.430228196187132 |
| GTCACGCTTGGA   | 728.541285912426 | 0.433289342303206 |
| ACGTCACTTTTG   | 728.562739263989 | 0.237077202145405 |
| ACCTCTTATGAC   | 728.56679641751  | 0.380625830955557 |
| AGAAAGTGACGC   | 728.580585335105 | 0.345275669904833 |
| TGACGTATCCCA   | 728.603165181165 | 0.319023904585098 |
| AATCGCGTCACG   | 728.604002602609 | 0.383984588980111 |
| CCACATTGACTC   | 728.605037559076 | 0.163551763306617 |



|              |                  |                   |
|--------------|------------------|-------------------|
| ATGACGCCGGTC | 728.605425782312 | 0.227540390396598 |
| CCCTGATGACCA | 728.605438385117 | 0.167222050661508 |
| ATTGACTACAAG | 728.623243361515 | 0.320099618456914 |
| CATGAAGTCACC | 728.624122836608 | 0.358712821362053 |
| CGTCATTCCCAA | 728.624647692007 | 0.283292878979726 |
| CCGCGTCACTGA | 728.627324346461 | 0.217249681050689 |
| TGCCACATGACA | 728.628153629465 | 0.421469155830406 |
| CCTTGTGACCAG | 728.63055545078  | 0.424338148019623 |
| ATTCAGGAGTCA | 728.631809930046 | 0.340877959333686 |
| TCTTGGTGACAA | 728.642029065209 | 0.338361297355902 |
| GTCATCTACCAC | 728.650975679853 | 0.273501282470591 |
| ATAGTCTGTAC  | 728.653348639368 | 0.416751025283363 |
| GTAGCAGAGTCA | 728.654854337224 | 0.270803748240645 |
| GCACGCTATGAC | 728.655537930419 | 0.35551208042157  |
| ATGAGATGACAT | 728.663053865753 | 0.296142181036075 |
| ATCGCGTAATCA | 728.682591881541 | 0.326845603049721 |
| GGATGACAAGGA | 728.685249889513 | 0.258600448530573 |
| GCCCCGTGTGAC | 728.700775764133 | 0.38383712896375  |
| CTCTAATGACAA | 728.701893451612 | 0.391934775293157 |
| GTCATCGGCTCA | 728.720498821186 | 0.386660961966219 |
| GATGACAAGGCA | 728.721475243403 | 0.198478896574678 |
| CTTGGCGTGACA | 728.722438234605 | 0.461765116485863 |
| ACTATATACTCA | 728.737700731037 | 0.361567334230077 |
| CCACCTTATGAC | 728.745221346022 | 0.290571871274564 |
| TGACAAAGAAAA | 728.74662564577  | 0.225066154910444 |
| CGTGGTCATGCA | 728.750794776068 | 0.213948484011455 |
| CTGATACATGAC | 728.754277130627 | 0.270502892759841 |
| CGACCGCAGTCA | 728.754486721044 | 0.550203730484932 |
| ACTTACCGATGA | 728.756780792628 | 0.351904573301131 |
| AAACGCAATGAC | 728.768711694816 | 0.225716035459438 |
| CATAGTACGTCA | 728.775107279951 | 0.390390723480762 |
| AAAGAGATGACA | 728.78461228242  | 0.145068992264272 |
| CGGCCATGACAC | 728.786686984843 | 0.154878740526023 |
| TGACGTATGTAA | 728.796048669073 | 0.328217494881946 |
| CACAAGCATGAC | 728.799058143758 | 0.317918223660207 |
| TGACAAGTTAAA | 728.812692247506 | 0.368418684092436 |
| ACCCCTATGAGT | 728.812856941852 | 0.41038103979324  |
| CTGTACTGGTCA | 728.814264426146 | 0.436423545993446 |
| ATTAAGTCAGCG | 728.817085610373 | 0.23244953046241  |
| CTACATTTGTCA | 728.82184605414  | 0.306730497806987 |
| CTAATGTTGTCA | 728.825455447174 | 0.391396172613969 |
| GTCTGAGCAATA | 728.834685027176 | 0.325853577541334 |
| CGGTCATCATGA | 728.838063363718 | 0.316934524894056 |
| ATGAGCCAGATC | 728.840604884815 | 0.24724685109779  |
| GACTAATAGCGA | 728.859278789101 | 0.352820385257749 |
| CGGTAACGTCA  | 728.859312058297 | 0.268761825472217 |
| GCCAGTGACGAA | 728.860850075331 | 0.350907978082914 |
| AGAGTCAAATAT | 728.861992665207 | 0.305358626944274 |
| GCGTCACCATGA | 728.866349836866 | 0.189400532347876 |
| TGACGCACGGCA | 728.880046895829 | 0.435693380448632 |
| ATGAGTACCCTG | 728.886363149921 | 0.400785254648553 |
| GCTCGTGGTGAC | 728.913963231305 | 0.380661307352185 |
| CATCATGACAGA | 728.920963806535 | 0.355719700904195 |
| ATGACGCTCACG | 728.925395117266 | 0.206257866848503 |

|              |                  |                   |
|--------------|------------------|-------------------|
| TAGTCAGCATAA | 728.92810334774  | 0.263155206061106 |
| GATTCAACGTCA | 728.937027082144 | 0.417788147977973 |
| GACTAATCTCTC | 728.938892720163 | 0.224663530550483 |
| ACGTCACCTAAA | 728.938939324146 | 0.374881351041814 |
| GTGAGTCGGCGA | 728.958263337746 | 0.153953850663063 |
| CATGTTACATCA | 728.964973933495 | 0.390089924061137 |
| CGACCGGAGTCA | 728.973732789777 | 0.32544565805219  |
| ATGTCACCACGG | 728.975309062547 | 0.304856002261547 |
| CTCACTGTCATC | 729.023094027241 | 0.158000666107285 |
| CTTACGGTGACA | 729.024081109324 | 0.3755868206658   |
| CGTCATTCTGTC | 729.048696031371 | 0.262527765146638 |
| GGGGCATGACAC | 729.052506420325 | 0.388330613161125 |
| ATAGTGGCTCAC | 729.062152692012 | 0.409323519852557 |
| GACTCACGGAGC | 729.063682023805 | 0.384299872543761 |
| CGTTATGACCTA | 729.072603165566 | 0.409970832480722 |
| ATGACGTTAGGC | 729.077094629327 | 0.441712111631686 |
| CATATGTGTAAC | 729.079054441243 | 0.282169433972477 |
| CGTAACACGTAA | 729.080812440119 | 0.317167132380183 |
| AGCGACTGTGAC | 729.08251243541  | 0.468873145555615 |
| TCTGACAAGTCA | 729.086393260485 | 0.431178026212259 |
| GAATTGGGTGAC | 729.096472519901 | 0.2481830766436   |
| GTCACCGGTGCA | 729.097819752341 | 0.290974115279316 |
| CTACTGGTGACA | 729.101412972819 | 0.229368811554026 |
| AGTCATGGGACC | 729.102680514838 | 0.365824239616588 |
| ACTCATCTAGGG | 729.135195457159 | 0.405792099664665 |
| GTACCATAGTCA | 729.135864756407 | 0.403338079477458 |
| GTCTCGTCATGA | 729.142947414754 | 0.308663403521429 |
| GTCACCTATATA | 729.143728974275 | 0.315950374194011 |
| AAGCGCGTCACT | 729.144260724654 | 0.333813710892114 |
| ATGACGACCCTG | 729.147448086239 | 0.288249119092795 |
| ACATATCACTCA | 729.15189778767  | 0.321133107405183 |
| GACAGACATGAC | 729.155352231252 | 0.288368245354684 |
| TACACTTCGTCA | 729.157976743975 | 0.378962139961113 |
| AGTCACGGTCTA | 729.158998095098 | 0.387638016425907 |
| ATGACGTTGGAC | 729.162122760444 | 0.238880550323548 |
| CGAGTAGATGAC | 729.16969002089  | 0.373985781971791 |
| CATAGGTGACGA | 729.172117256025 | 0.324911241534476 |
| TATAAGTACTCA | 729.175286467706 | 0.52500331480254  |
| GTAGACCATGAC | 729.206740049786 | 0.404910567673303 |
| CATGGCAATGAC | 729.209438281768 | 0.3979748873279   |
| ACTCATTACGCG | 729.211520089007 | 0.267521263841887 |
| AACTAATGACCA | 729.212897713859 | 0.480507461375984 |
| AATATATTACGT | 729.22039593079  | 0.366916895295911 |
| ATACTGTATGAC | 729.22124669404  | 0.345840316729568 |
| CGAATTGTGACG | 729.222588815282 | 0.396906709471999 |
| CAAGGATGTGTC | 729.222682464279 | 0.408606445959664 |
| GCAACGTAGTCA | 729.224200557068 | 0.259271826569398 |
| TATGCAGAGTCA | 729.230304473948 | 0.188290310952228 |
| AGCCGTGACCCA | 729.236341887367 | 0.278457647180396 |
| ACGTCGCGTCAC | 729.238137734642 | 0.187901070168358 |
| AGGTATAATGAC | 729.24682350137  | 0.254181354050348 |
| GGTTTATATGAC | 729.256411553237 | 0.274859314505501 |
| AAAAGAGTCTTA | 729.272475626752 | 0.30157466700194  |
| CATAGTGACATG | 729.279577056152 | 0.329937114003559 |

|               |                  |                   |
|---------------|------------------|-------------------|
| AGCTGACGAGTC  | 729.282940510297 | 0.372805384623984 |
| GTCATCTAGCAC  | 729.298352292687 | 0.269704490561981 |
| TCGGACTCGTCA  | 729.305993646647 | 0.216465900013144 |
| ACGTCACATGCT  | 729.30776412156  | 0.209224893185725 |
| GACGCCGCATA   | 729.312246181787 | 0.365566392447671 |
| TGACACTGTCAA  | 729.315509320674 | 0.312060595424749 |
| GAGTCAATATCC  | 729.330739364658 | 0.398069429860102 |
| ACGTCCTAGTCA  | 729.334504848915 | 0.430642550493178 |
| GATCCCCGAGTCA | 729.335296117356 | 0.317637417219449 |
| CTGCCTAATGAC  | 729.337039775324 | 0.253092755622917 |
| AGAGTCAAAGTA  | 729.337178637736 | 0.250315333556527 |
| AATACGTAATCT  | 729.351405134889 | 0.323585511868667 |
| CGTAAGATTAC   | 729.358430214143 | 0.287616476779063 |
| GGTCATATGTAC  | 729.3592054783   | 0.309841924738238 |
| GTCACTACATCA  | 729.368111678353 | 0.299131000781136 |
| GGCAGCGGTGAC  | 729.372884206585 | 0.480363263323379 |
| CAGTCAGAAACG  | 729.373715450656 | 0.37193920696509  |
| ACAAGAAGTCAT  | 729.374202419212 | 0.364500109292791 |
| GAGCCCCGCATA  | 729.375335837376 | 0.209616504933662 |
| GCCTTCTATGAC  | 729.382207540402 | 0.162140744510321 |
| AGTCAGAGCCCA  | 729.385506554844 | 0.276969763625586 |
| CCCTTAGATGAC  | 729.386185373296 | 0.42570692247457  |
| ACAGCTGTGTCA  | 729.390981507958 | 0.532995531700711 |
| GTCACAAAACCA  | 729.399669653558 | 0.291700364774664 |
| ATGGAATGACA   | 729.403417871284 | 0.219302480708227 |
| CGTCACTGAAGA  | 729.407238958595 | 0.339306747066647 |
| GCGTCACAATAA  | 729.407241964173 | 0.4739300190912   |
| ATTTGACTATGA  | 729.411875177909 | 0.376965541353096 |
| AATGACATTATC  | 729.414159929187 | 0.205146512947926 |
| TGACTCTGCCAA  | 729.417030297482 | 0.428299469626436 |
| ACGTGTGAGTAC  | 729.418677753616 | 0.318844324342707 |
| ATTGTGGTGACG  | 729.420598696037 | 0.256772250743331 |
| GTAAGACTAACA  | 729.422006196031 | 0.247750771381198 |
| ATCTCCTGACTC  | 729.430269221846 | 0.305167881699807 |
| CTTTGAGGTGAC  | 729.443723697712 | 0.417131234190354 |
| AATGAGTATGTC  | 729.444446446157 | 0.36820831020344  |
| TGAATCAGCAAA  | 729.449986418588 | 0.369618562391425 |
| AGCCTCGGTGAC  | 729.452225084061 | 0.28130195410952  |
| ATGACAATAAGG  | 729.465635991083 | 0.364054891328942 |
| GTCACGCGGTCA  | 729.467659906232 | 0.458855607179197 |
| CTATCCTAGTCA  | 729.4761060028   | 0.273737552063071 |
| ACGTCATGCATA  | 729.48605202243  | 0.228520148181399 |
| GTCATGGTCGAC  | 729.489667816583 | 0.34354187288145  |
| GTCACAGTGGAC  | 729.495257106156 | 0.240914613248007 |
| CAGGAATGACCA  | 729.496523096806 | 0.340641944865231 |
| GACGTATCGTCA  | 729.496878993749 | 0.343786875761967 |
| ATGAGTAGTTGA  | 729.524550843601 | 0.356734539390015 |
| CTATCGGTGAC   | 729.526369423876 | 0.314496175687086 |
| AGGGACTAGTCA  | 729.527934226704 | 0.265732017479401 |
| CTTCTTTATGAC  | 729.537706159091 | 0.364864188348988 |
| CCCGCTATGAC   | 729.550318255937 | 0.189889253618283 |
| ATTAGTGACAA   | 729.552872119522 | 0.338398561694231 |
| GCTAACATGACA  | 729.553665103127 | 0.276550816467128 |
| CGTCCTTATGAC  | 729.560870694833 | 0.444405050492477 |

|              |                  |                   |
|--------------|------------------|-------------------|
| ACTTCTGAGTCG | 729.574506317246 | 0.360931563090648 |
| GTCACTGAGACA | 729.580228682949 | 0.198348628766641 |
| CGTCACACAACG | 729.586491253004 | 0.297798927777893 |
| AATATTGTGACG | 729.603812203551 | 0.258615567182969 |
| GTATACCTGTCA | 729.628580862661 | 0.30290991971258  |
| CGACACGACTCA | 729.635333884636 | 0.346715599718249 |
| GTCATTTACACA | 729.644858884274 | 0.237706455431471 |
| GATCACGTGTCA | 729.659148216523 | 0.317008510388109 |
| GTAACCTGTGAC | 729.662464808338 | 0.292726417883184 |
| GAAATGAATGAC | 729.664984595616 | 0.199588056046225 |
| GCAATTGAATCA | 729.679429398902 | 0.396403851417015 |
| AAGCACGACTCA | 729.682875395079 | 0.43218573645374  |
| TGACTAGAGTAA | 729.698164079364 | 0.220870701678311 |
| GTCACTATTTTA | 729.702671465777 | 0.331486929911138 |
| CAGTCAGCATGC | 729.705827188343 | 0.423725609019031 |
| AATTATTCATCG | 729.710845655992 | 0.285328670498586 |
| TAGTCTTTGTCA | 729.712050766214 | 0.237724396948957 |
| ACAAGAGGTGAC | 729.724674509361 | 0.321593304129319 |
| CGTAATATTACA | 729.730272666529 | 0.43513300168251  |
| ATGAACTTGTCA | 729.733448251638 | 0.420607238638815 |
| GTCATCTGCATA | 729.750178642152 | 0.347843276794357 |
| ACAGTTTTGTCA | 729.752141297012 | 0.322108023945184 |
| CACGTGTCAGAA | 729.753176463014 | 0.378895336392344 |
| CATAAGCGTGAC | 729.755101222082 | 0.455855225884754 |
| GACATCGTCAAC | 729.757153907741 | 0.15471523116122  |
| AAGACTTGACTC | 729.758092416709 | 0.32502076165756  |
| CGAATTCTGTGA | 729.761013222208 | 0.351162779759491 |
| ACGTGAGGTGAC | 729.76197020403  | 0.307915781951947 |
| GACGTGTGTGAC | 729.770369067388 | 0.163684685167438 |
| ACAAGACGTCAT | 729.774744459883 | 0.341720223119931 |
| GGGACTGATGAC | 729.777594161883 | 0.383510560222561 |
| CGGTTACATCAC | 729.779340459688 | 0.344524672932657 |
| ACATCGGTGACA | 729.792063414714 | 0.410405873398269 |
| ATTTCTCCGTCA | 729.799772687875 | 0.263961706702779 |
| ATGAGTAGATCA | 729.802506577706 | 0.392246801815071 |
| GAGTAATGACAA | 729.814898851542 | 0.271937020071119 |
| AGGATTCATCAT | 729.81660058056  | 0.463864383636695 |
| ACCGAGTGACGA | 729.824954343649 | 0.309850048210453 |
| CGATCATGACAA | 729.832785838421 | 0.25519628829894  |
| AACGATGACCGA | 729.833432488667 | 0.246210639431546 |
| CTGAGCATGACA | 729.833533224773 | 0.362867699739167 |
| TGATCTGTGACA | 729.835189550832 | 0.354375868823873 |
| CTTAGTGGTGAC | 729.836181406962 | 0.260603539401768 |
| ACCGCCTATGAC | 729.839169008691 | 0.254162454759731 |
| CGTCACTGGTCA | 729.840320115908 | 0.251222394023262 |
| TTAGTAATTGAA | 729.840522830493 | 0.332889705607555 |
| ACAACGCATGAC | 729.86119416179  | 0.383999371836705 |
| GGAGCGCATGAC | 729.864562141102 | 0.34088153913297  |
| GTCACCCTCGTA | 729.868939778872 | 0.288169597450836 |
| CTATGATTAGTC | 729.871954696642 | 0.22124524527031  |
| TCGGTCATCGCA | 729.872124351462 | 0.216074009830179 |
| CTCATATGTGAC | 729.876574776335 | 0.382998996315198 |
| TATCGTGACGAA | 729.877277635352 | 0.389796480592488 |
| AATCATCATGAC | 729.879854973707 | 0.312255869592311 |

|               |                  |                   |
|---------------|------------------|-------------------|
| ATGACGGGCACC  | 729.883305944896 | 0.337532545558685 |
| CCGGCTAATGAC  | 729.893316603322 | 0.204949401940828 |
| AGTACGCAGTCA  | 729.893815153052 | 0.378884604842175 |
| GTGACAGGTAAA  | 729.895842705749 | 0.230245830808265 |
| AGATTACTATTA  | 729.897525896594 | 0.251622967491355 |
| ACGGGTATGAGT  | 729.915968186085 | 0.219717047413142 |
| CAGCATGGGTCA  | 729.930130993788 | 0.347541384817974 |
| CATCTCTGTGAC  | 729.946009240035 | 0.437692502429413 |
| ATAGGTATGACC  | 729.947999902936 | 0.280152711378482 |
| GTCACTCTTACA  | 729.9526512178   | 0.297810200223715 |
| TAGCATGACATA  | 729.954493862297 | 0.346320169104948 |
| CTTTCTGGTGAC  | 729.954497391795 | 0.497519611875352 |
| AGCTGGGATGAC  | 729.955174242606 | 0.227365463671645 |
| AAGTGAAATGAC  | 729.9565729352   | 0.267583153461115 |
| TCCATAACGTCA  | 729.974175713075 | 0.528855242469319 |
| CAAACCTTGACTC | 729.980230094535 | 0.22472179585073  |
| CGTCATTACGAA  | 729.983998580615 | 0.203823885011752 |
| ACACGTTGTGAC  | 729.997455940389 | 0.211048048696855 |
| AGGCAACGTCA   | 730.00062366749  | 0.339690321413012 |
| CACTGTCGTGAC  | 730.015828283818 | 0.361468031020175 |
| GGATGACCTAAC  | 730.015837500405 | 0.190442182216823 |
| AACGCGTGACTG  | 730.018418809097 | 0.276639713410442 |
| ACAACACTCAT   | 730.018969425725 | 0.306356062604538 |
| TCAGACTCAGCA  | 730.033375059984 | 0.319094684102457 |
| ATGCCGGAGTCA  | 730.034981543615 | 0.360018795795987 |
| GTCATGTAGATA  | 730.037429234104 | 0.346467553264772 |
| GGGTACGTGTCA  | 730.041578410957 | 0.397661921204737 |
| AATTCTCTGACT  | 730.042000859424 | 0.193199049318414 |
| AGTTCTCGTCAT  | 730.045475593665 | 0.461658533965599 |
| CATTATCTGTCA  | 730.050730221198 | 0.287930923147275 |
| GAACGTAATGAC  | 730.058483148732 | 0.294211371172594 |
| GAGTCAAAGGCC  | 730.062198734889 | 0.196410916658946 |
| GTCACACGGCCA  | 730.075521929172 | 0.219191333267433 |
| GCTTCACATGAC  | 730.077173693481 | 0.425694208699475 |
| TCGTCATGCTAA  | 730.081015700933 | 0.311650662848654 |
| CAGTCAGCAGAG  | 730.085270716221 | 0.388511529245899 |
| ACGCGTGGTCAT  | 730.085595510591 | 0.208290386543557 |
| AAACGTGACGCG  | 730.104505120227 | 0.206263685556505 |
| GTCACTTTTGGA  | 730.118027947981 | 0.24035069058272  |
| CGAATTACGCAC  | 730.118874652468 | 0.312757808428834 |
| AGTGACGTGCCA  | 730.127565669519 | 0.261520677663332 |
| TCAGAATCGTCA  | 730.13123830316  | 0.333544845182471 |
| ATGACCACTCTG  | 730.132881921297 | 0.23243368405299  |
| ACTATAATGACG  | 730.134367760355 | 0.433407847188535 |
| GCGCCGACTCAC  | 730.134515150592 | 0.192877572753563 |
| ACGTACGCGTCA  | 730.136011032715 | 0.319842167200473 |
| AAGAGTCTTAGC  | 730.140028447673 | 0.21268631626957  |
| ACCGGTGAGTAC  | 730.14429662975  | 0.431340805880306 |
| GACTAATAATAA  | 730.168387140748 | 0.398898265023361 |
| ACACCCGGTGAC  | 730.172401410683 | 0.37097615643168  |
| CAGTCAATTTGA  | 730.176331468586 | 0.391535331253781 |
| CAAGTATGAGTG  | 730.176553736123 | 0.285266324240403 |
| GTCCACCACTCA  | 730.184713292789 | 0.526412223788538 |
| CACGATTGGTCA  | 730.188581268122 | 0.509555357671845 |

|              |                  |                   |
|--------------|------------------|-------------------|
| GTCACAACGAAC | 730.190188443451 | 0.431834400244815 |
| CGTAAACATGAC | 730.191431259048 | 0.423393926029874 |
| AAGTATGAGTTA | 730.192504850736 | 0.216562464679751 |
| CAATCTTGACTC | 730.192991609521 | 0.331325741953029 |
| CAGACACGTGAC | 730.20040426469  | 0.506280300105706 |
| TCAATCATGACA | 730.203040296002 | 0.458115397133102 |
| ATGCCGTGTGAC | 730.206748074177 | 0.391040362395721 |
| AAGGTAGACTCA | 730.206765921601 | 0.254143830756356 |
| CTAAGTGCAGA  | 730.219372894309 | 0.251957334156576 |
| CTGTGGTACTCA | 730.230866899302 | 0.568340335148349 |
| GAAGCATATGAC | 730.253971217194 | 0.382768838901012 |
| AGAGCGAATGAC | 730.255630704509 | 0.191205332901496 |
| AATAGGGGTGAC | 730.266288291601 | 0.291617425451154 |
| CAATGTATGACC | 730.269250304391 | 0.315859944419813 |
| AATGACGGCATG | 730.275907942217 | 0.410509315588368 |
| GAGAGGTGACAC | 730.281514063368 | 0.236291082465058 |
| AATGAATAATAT | 730.283605545512 | 0.229988624074348 |
| ACTCATTGGGAC | 730.287071228012 | 0.255381137981734 |
| CGGGCAGATGAC | 730.291716727733 | 0.303920039981887 |
| GCGTCACAACAA | 730.293779252254 | 0.354542463238555 |
| CTCACATAGTCA | 730.300128756245 | 0.127624203937845 |
| AAGTCAGAAGAA | 730.302734366766 | 0.245719427477037 |
| AAATAATGACAA | 730.303143803542 | 0.269142005839396 |
| TCGCCTGTGTCA | 730.303422950512 | 0.215733202497183 |
| TGACAGCACTAA | 730.310037813778 | 0.427761658624913 |
| CAGTACGTGTCA | 730.313349056572 | 0.389153379495742 |
| ACTAATAATATG | 730.317681918268 | 0.405983511047513 |
| ATGACCCAGACC | 730.320551787799 | 0.46803594543871  |
| GTCCTGGTCATA | 730.320685818999 | 0.240345856160178 |
| CTGTGATACATA | 730.324571246356 | 0.326805471587037 |
| GACAACGTGTCA | 730.32501323092  | 0.346309173345789 |
| ACTCACAGATGA | 730.332328937602 | 0.30673407219374  |
| AGGATTCATGAC | 730.340418008331 | 0.409513497805256 |
| GATCTTAATGAC | 730.346762785111 | 0.568468474471582 |
| CCAGTCAGTGAC | 730.355868497052 | 0.225723443366803 |
| TGACTACTACCA | 730.362861110488 | 0.222465699900857 |
| ATATGGTCATTA | 730.366650069212 | 0.259898021876945 |
| ATTAAAGGTGAC | 730.376555764578 | 0.305540403625476 |
| GCCACTGTCATA | 730.379963913878 | 0.288247161441878 |
| ACACGCTGACTG | 730.380587559626 | 0.316949179946149 |
| GACCTTCAGTCA | 730.384105884894 | 0.362150450129495 |
| GGTCATGAGTAC | 730.394855171261 | 0.274958134536422 |
| CCGACAGCGTCA | 730.397074970556 | 0.472051995967635 |
| ATGAGTTGGCCC | 730.397891437947 | 0.149616865679458 |
| ATGACGACGCGC | 730.40377829847  | 0.403014684679054 |
| ACAGCATGTCAT | 730.405727396246 | 0.310125558301958 |
| TGGTCATGCGAA | 730.410021457167 | 0.240814697791663 |
| TGTATTGTGACA | 730.417104039135 | 0.201080536888449 |
| ATGATACGTCAA | 730.440289318531 | 0.306568876558484 |
| GGTCATAGCACA | 730.441060295138 | 0.563636609216335 |
| GACTTAGTGACA | 730.441131893036 | 0.422212009024458 |
| GATACTTCGTCA | 730.444470879168 | 0.411687368034512 |
| ATCGGATGACCC | 730.444678640862 | 0.425131433388944 |
| TACGTTATGTCA | 730.459391577113 | 0.315077563769185 |

|                |                  |                    |
|----------------|------------------|--------------------|
| CTGACGCAGCGA   | 730.468834273296 | 0.319901593272183  |
| ATGGTACTCACA   | 730.470161503488 | 0.264515409489741  |
| AGTCACGGCGAT   | 730.482886536135 | 0.199214376433286  |
| CATATTAGTGAC   | 730.488779244271 | 0.387521827850628  |
| AAAATGTCATTG   | 730.489057707348 | 0.19964455725417   |
| TCACATCCGTCA   | 730.490725925218 | 0.228685380073428  |
| AGACTCACTGGC   | 730.504177437964 | 0.232562393566352  |
| AATTGAGTCGAT   | 730.505860886527 | 0.309081092029174  |
| AATGATATGACC   | 730.509661768571 | 0.288562137792525  |
| TGACGTGCAGAA   | 730.512238070195 | 0.270578877639721  |
| GTCACCTCGATTA  | 730.514087143072 | 0.385990407221149  |
| ACAGCGCGTCAC   | 730.516916278841 | 0.278194285506609  |
| ACAGTCAATCTG   | 730.521014266285 | 0.498642846019767  |
| AGCTTAAATGAC   | 730.522530553368 | 0.299531580812075  |
| GTAGATACGTCA   | 730.526008818616 | 0.308745226072438  |
| CATGATGATTCTG  | 730.539261971683 | 0.339633507875262  |
| GTGATTACGCAC   | 730.541243370959 | 0.270646612792676  |
| AGTATTAGTGAC   | 730.547758044097 | 0.198392801662839  |
| CCAAGAGAGTCA   | 730.549025224338 | 0.538195684764899  |
| AATAATTGAGTC   | 730.552614079076 | 0.31880141324186   |
| TCTTAGGACTCA   | 730.555495808477 | 0.294361870019276  |
| GGTGACACGGAC   | 730.565122423672 | 0.319998279552408  |
| CTGTCTGTTCAC   | 730.569796639644 | 0.28265180485652   |
| CGTATAGTGACA   | 730.569894348891 | 0.31174360137209   |
| GGCGTGATGAC    | 730.582281426384 | 0.239871784503448  |
| CTCTATGATTAA   | 730.587955751608 | 0.349053789969023  |
| CAACGGGAGTCA   | 730.603081406332 | 0.295196691439334  |
| TAATGGTGACAA   | 730.612517206859 | 0.14527417460396   |
| TGACACGTAGCA   | 730.614881349532 | 0.250706883116947  |
| ACGGTAATGACA   | 730.619954258621 | 0.33308487587078   |
| GTCATTATCGTA   | 730.647905588639 | 0.392426533820632  |
| ATGTTGGGTACAC  | 730.667590986391 | 0.192990106734763  |
| CGTGGGTGTTCAC  | 730.67146079431  | 0.378381086795377  |
| GTCATGCTGCAC   | 730.674541877916 | 0.406059926880228  |
| GGCCACATCACA   | 730.682403927533 | 0.287201138290732  |
| ACCTTGAATGAC   | 730.701213831837 | 0.474884061188059  |
| AGTGATACATTC   | 730.710329282423 | 0.26416345460982   |
| GACTCCATGACA   | 730.713897972847 | 0.348509256045205  |
| ACGTCACGTGCC   | 730.715146414373 | 0.292016698193846  |
| TCAGTCAAGACA   | 730.722101248631 | 0.389765280967553  |
| ATGACCGTATTA   | 730.72231384244  | 0.18617933399838   |
| CCCTCTTCGTCA   | 730.727166364503 | 0.312711036155544  |
| GACTCAATTGTA   | 730.732294488317 | 0.619630096991275  |
| CAAGATTGTGAC   | 730.73878633092  | 0.242287002000912  |
| CCTCCTGACACA   | 730.739167456528 | 0.266691928741773  |
| GATGGTGATGAC   | 730.763741457579 | 0.0935081183528951 |
| AGTGACACGCAC   | 730.774287363198 | 0.321113798442871  |
| GTATGACCGTCA   | 730.77725727973  | 0.340816671416739  |
| GTCATATTCGAC   | 730.782780228995 | 0.470927790933017  |
| AGTTCTAAGTCA   | 730.784151059021 | 0.394369814972653  |
| GTCACCTGTGCA   | 730.78714752597  | 0.304434641900419  |
| AGTGAGTCCGAT   | 730.78928738606  | 0.277754017281461  |
| GCAGCAATGACA   | 730.801754312919 | 0.29618980335392   |
| ACGTCACACTACGA | 730.80225514777  | 0.297949771584405  |

|              |                  |                    |
|--------------|------------------|--------------------|
| GCTGGGTCACCA | 730.809634174191 | 0.232821083909318  |
| ACTCATAATAGA | 730.813161627991 | 0.303741915428816  |
| ACGGCATGACAT | 730.825781611967 | 0.371173919057471  |
| TGACTTACGTAA | 730.835347100253 | 0.355952526649732  |
| CGTCATTGAGAC | 730.845570669932 | 0.448738654334226  |
| GGTGATTAATAC | 730.848938481495 | 0.313511911768656  |
| GAATTACACACC | 730.850181218596 | 0.228875797214753  |
| ACATGTGGTGAC | 730.855405281648 | 0.0672675967921254 |
| GTCATAACCCGA | 730.856346369855 | 0.37346069711435   |
| ACACTGTGACAT | 730.859889054523 | 0.294212766302348  |
| AGTCAGAGCACG | 730.870170025633 | 0.412996042279508  |
| ATGGCTGGTGAC | 730.884619452937 | 0.263244918830973  |
| CTTTACGGTGAC | 730.890384108584 | 0.307380988446273  |
| AAATGTGACCAC | 730.897788202852 | 0.354355837968996  |
| AAAAGAGTCTTC | 730.911263247566 | 0.407872169259241  |
| AGCAAAGTGTCA | 730.913491993113 | 0.146647464490116  |
| AGTCAGACAGTG | 730.91530215307  | 0.423767219195928  |
| CAAGCGTGACAC | 730.91653361849  | 0.345210953564273  |
| TGACCAGTCTAA | 730.919774418111 | 0.243804468675641  |
| GAGGAAAATGAC | 730.931649343721 | 0.265926693468818  |
| ATGCAGTAGTCA | 730.935147338001 | 0.560619541401467  |
| CTGTTGCATGAC | 730.935736111505 | 0.353632624247184  |
| CGTTACAAGTCA | 730.939124494887 | 0.324318098032023  |
| GCCATCTGTGAC | 730.940269869597 | 0.297150812833259  |
| GGCGATACGTCA | 730.951465407664 | 0.547607076821891  |
| AGACATTGCTCA | 730.951484684433 | 0.600868670409605  |
| TCGCCTTACTCA | 730.958038317747 | 0.413775081785919  |
| ACCGCGTGAGTC | 730.962216219569 | 0.66472160048056   |
| TGTGAGCCAACA | 730.965949249443 | 0.472777719800779  |
| AAGCTATTACTC | 730.968686821437 | 0.326073383181673  |
| GGGTCATAACAC | 730.982636282982 | 0.318723818615304  |
| AATCAGGGTGAC | 730.994694947934 | 0.310916837445294  |
| CAACGTGTCAGA | 730.999231386413 | 0.22822987854354   |
| AAGAGGCGTCAT | 731.005670280194 | 0.258332033152298  |
| ATATGTCAGAAG | 731.006391596905 | 0.381576950078195  |
| ATGAATAATTCC | 731.006424787891 | 0.433142271293544  |
| CATCTTGGTCAC | 731.008524540846 | 0.208584738000257  |
| TCATCTAGGGGA | 731.009395533212 | 0.437568656657278  |
| GTTACGTGGTCA | 731.011590387561 | 0.318040118435164  |
| CCCATTGATGAC | 731.016554668625 | 0.194279816374849  |
| CGTCACAAATCA | 731.021413773463 | 0.485214824217701  |
| AACAGTCAATAA | 731.028290028405 | 0.260788849691731  |
| GTACCTAGTGAC | 731.02981465596  | 0.285055401240493  |
| ACGTTAGGTCAT | 731.030431331686 | 0.313382523047352  |
| GTCACCAGCTGA | 731.050011051639 | 0.43345970979005   |
| CTGTCCGCGTCA | 731.063477803003 | 0.373408322027099  |
| CTATTATTATGA | 731.072346961766 | 0.301763379800064  |
| GTCACGCCATGA | 731.083739831065 | 0.587943146896906  |
| CACCTTGACTGA | 731.084263097022 | 0.345172705023091  |
| AATCCGTGACGT | 731.089135385733 | 0.296341063009987  |
| GCATCGGTGACA | 731.091730503231 | 0.215340686736765  |
| GTTTCCAAGTCA | 731.094607365975 | 0.338419484738787  |
| GTCATTTCTAGA | 731.098856820036 | 0.265311281968008  |
| AGTAATTACTCC | 731.101020783608 | 0.283318555981438  |



|              |                  |                   |
|--------------|------------------|-------------------|
| AGACAATTAGTC | 731.108148768494 | 0.198412889976451 |
| CAATATCGATGA | 731.128720131509 | 0.354332511449259 |
| GCTATCGGTGAC | 731.16668355801  | 0.147497663523889 |
| AGCAGTCAGAAC | 731.169463515245 | 0.31842345438355  |
| CACATGTATGAG | 731.170375479271 | 0.428815134901072 |
| CGTGTCACTGTA | 731.174820291101 | 0.303640039372639 |
| ATGACTTCGTCC | 731.180521466938 | 0.239611860076977 |
| AAGTTGATTAC  | 731.184960303048 | 0.289945376952499 |
| CTGTACACGTAA | 731.185937553233 | 0.211364312559012 |
| CGTCACCAAATA | 731.186219482871 | 0.37087640715287  |
| ACAGTAATGACA | 731.187175111892 | 0.370234007081351 |
| CGGTCATAGTTA | 731.188380365303 | 0.30649766832441  |
| GGTTACGTGTAA | 731.191426179944 | 0.196490070695835 |
| TGACTGCGCGAA | 731.19610895348  | 0.394205234935417 |
| ATGGCGTACGA  | 731.196139458664 | 0.30615234625369  |
| ATGATCATGACA | 731.196542609941 | 0.324263505235238 |
| ACCATTGAGTAA | 731.197059522076 | 0.56787988912891  |
| CATCCAAGTCAC | 731.197516798686 | 0.238409821655523 |
| TAAGTTGACTGA | 731.205209684428 | 0.2627236233305   |
| GTCACATTGATA | 731.210589749485 | 0.415919754204847 |
| CTTAGGCATGAC | 731.211251445253 | 0.333121123228599 |
| ATCGTCACCGCA | 731.212214109707 | 0.318945825177479 |
| GTCACCAAGATA | 731.212523945859 | 0.325709330784757 |
| GTCATAAGGAAC | 731.213149934344 | 0.159829505459287 |
| ACCAGTCAGAAA | 731.214183251434 | 0.309618860841548 |
| CCAGGGATGACG | 731.217243772662 | 0.416803481370715 |
| CATTTAGTGTC  | 731.222228761001 | 0.370438218713008 |
| GGATGACGGCAC | 731.232451435324 | 0.292014416006847 |
| CTAGGAGAGTCA | 731.246031389417 | 0.229051828672489 |
| CCTATGTGACCA | 731.246979135047 | 0.290766042407008 |
| TATGAATAATCA | 731.255645366516 | 0.196586770252099 |
| GAGTCAAGATTA | 731.262259717133 | 0.265768916614932 |
| GCAACATGACAC | 731.263070012506 | 0.424172935396948 |
| GACTAATCAGCA | 731.272822619031 | 0.390326919478262 |
| ACGTCACCTCC  | 731.275330191298 | 0.147930663157103 |
| CTAGTCTAGTCA | 731.275772913838 | 0.201523114368243 |
| CAAGGCGTCACC | 731.284267924808 | 0.443984084580879 |
| ACTCATAGGCAC | 731.284608118921 | 0.488979112145139 |
| ACGTCACTTTAC | 731.293031838265 | 0.177065822759258 |
| CTGTACATAAAG | 731.298843677656 | 0.501292647972355 |
| ACGTTCAAGTCA | 731.304836572222 | 0.33652815833871  |
| ACGACTGCGTCA | 731.311879421473 | 0.298509357517666 |
| ATCGAGTAATCG | 731.315066124956 | 0.23042494517494  |
| TGTCATGATCAA | 731.323751164556 | 0.361280947126637 |
| CGTGCTGACCAA | 731.33147534176  | 0.388694004249632 |
| AATGACCACGCA | 731.332200693136 | 0.199155370916438 |
| AATACCAATGAC | 731.333368720263 | 0.19652176674834  |
| GTCACAACCAGA | 731.342070201986 | 0.368622701790134 |
| GTCATGCCTCGA | 731.356810651185 | 0.222340902560978 |
| AAGACATGACGC | 731.35999711509  | 0.303328188374518 |
| AGTCAACTTGAC | 731.366329828333 | 0.490742499100169 |
| TCCGAATACTCA | 731.374018025652 | 0.29793955898843  |
| CAGTTGAATGAC | 731.382882150161 | 0.406810302614225 |
| GGTACGCGTGAC | 731.389981383913 | 0.310030230283569 |

|              |                  |                    |
|--------------|------------------|--------------------|
| CGTCATTCCACA | 731.390477318604 | 0.142686479432333  |
| ATCAACTCGTCA | 731.39208838805  | 0.333814629090586  |
| GTCATGCGAAAC | 731.405497122845 | 0.376759652524726  |
| ACACGTGACCCA | 731.414852017613 | 0.215175398844583  |
| TACAGTGACCAA | 731.41847955939  | 0.191277905703456  |
| GACTAATTTTAC | 731.431576523143 | 0.278923216019874  |
| AAATGCGACTCA | 731.434386047788 | 0.163666540176662  |
| GTCACACGCGTA | 731.436862529903 | 0.321032458430407  |
| AGAACATGTGAC | 731.439660331841 | 0.413429439797671  |
| GCGTCACCCGAA | 731.441854251646 | 0.336693781919471  |
| CTCTAAGCGTCA | 731.454411067412 | 0.440729450818931  |
| CCCGCTGATGAC | 731.456256421742 | 0.387194132587502  |
| ATGAGTAGTAGG | 731.461502693386 | 0.272437408353592  |
| ACTCATATAATA | 731.462241021655 | 0.409645014994688  |
| GGACTAATCATA | 731.466718475746 | 0.0954670185441616 |
| GAATCATCATT  | 731.495706469996 | 0.487527676052041  |
| AGCGGAGATGAC | 731.509301538936 | 0.32776748368771   |
| ACTCATAGTGTA | 731.520103546746 | 0.496193158149505  |
| AACGCAGATGAC | 731.528650602125 | 0.319412198198286  |
| ATAATTACGCAA | 731.561649235147 | 0.420716951769156  |
| ACTAATAGTTTG | 731.56937877273  | 0.393792765079104  |
| GAGGGGTATGAC | 731.575325903615 | 0.190186624126821  |
| CGTCACAGTTAC | 731.577376934679 | 0.280833478144306  |
| ATGACAAGCCGC | 731.578380170502 | 0.326369405056501  |
| AACTTGATATGA | 731.578835764794 | 0.432745562349325  |
| TAAAAGTACTCA | 731.579413428842 | 0.41175706219412   |
| ACGCATTAATA  | 731.598809353961 | 0.304495916493639  |
| GATCAGAGTGAC | 731.600170509719 | 0.294587679575798  |
| AGTCAGACATCC | 731.606242510103 | 0.472385763942431  |
| ATCGAGTTGTCA | 731.619134647074 | 0.227331970123381  |
| TATTGTACGTCA | 731.632366503532 | 0.459145558393506  |
| GTCAGACTCTGA | 731.635281708658 | 0.444167914941984  |
| AGCAACAGTGAC | 731.649163548188 | 0.246904131348795  |
| CCGACACAATGA | 731.654511735259 | 0.500757913048182  |
| GTCACCAATTTA | 731.671351167583 | 0.201599100589707  |
| ACTCATAGTCTG | 731.675310488172 | 0.432019922931553  |
| CTCTTGACTAAA | 731.679262782531 | 0.321292713519956  |
| ATCTGTCAGAAC | 731.68086533     | 0.386098308325343  |
| ACTCAGTCAATC | 731.688132514506 | 0.237118385995475  |
| TGACGTAAGGAA | 731.699851906531 | 0.320322926380704  |
| CCGGTTGTGACA | 731.700667862495 | 0.286460697023087  |
| CTGTCATTATTA | 731.71671966061  | 0.337206963229354  |
| ACTCATACTACT | 731.722842903404 | 0.19867502293751   |
| ATATGATTCTTA | 731.726424300888 | 0.271139953041591  |
| ATGACATGATAG | 731.732892067334 | 0.317489314671636  |
| ACGCCGACTCAC | 731.73454680703  | 0.258012350812847  |
| CAGTAAGGGTCA | 731.738167054521 | 0.332027239606052  |
| ACTCATAGGCTA | 731.748932100085 | 0.599781079158406  |
| GCTATTTGGTCA | 731.750824066212 | 0.419781333205971  |
| TCATAGCCGGGA | 731.752346715639 | 0.270643039825373  |
| TGACTCGCACCA | 731.753269482748 | 0.287442898989874  |
| TGAGTCTAGCAA | 731.756746951778 | 0.238222837506438  |
| ATGACGGCACCA | 731.759025853513 | 0.552875147342306  |
| GACTCACTATAA | 731.760346163421 | 0.226229220820052  |

|               |                  |                   |
|---------------|------------------|-------------------|
| AAACTTATGAGT  | 731.761836575288 | 0.240837117952809 |
| GCGTCACCTTAA  | 731.763356601409 | 0.101124126234402 |
| ATCTGCACGTCA  | 731.772630077338 | 0.316131313467849 |
| ACTGGTCAGAGC  | 731.777682384138 | 0.327133765515127 |
| AATCCGTCAGCG  | 731.782636272412 | 0.294722458992063 |
| ATGACGAGGCC   | 731.805029326852 | 0.291208390180717 |
| GTATTGGGTGAC  | 731.805708233579 | 0.292432496119239 |
| GACCTGACGTCA  | 731.807190823209 | 0.512837801577755 |
| CGCTCATGTGAC  | 731.807359044847 | 0.412830435741033 |
| ATGTCACCGGCA  | 731.809380054409 | 0.354750164572181 |
| AACTACTATTG   | 731.814253070447 | 0.312762783899834 |
| AACGATAGTGAC  | 731.81562808737  | 0.424575535115932 |
| CGACAAGATGAC  | 731.819659487964 | 0.264027662195322 |
| CAGATTAATGAC  | 731.830905703888 | 0.296713099670145 |
| CGACACGTGTCA  | 731.835255459252 | 0.369272632486432 |
| CCACATTTGTCA  | 731.83558044261  | 0.336277395163119 |
| GACTTCGCGTCA  | 731.836118429926 | 0.352905124506257 |
| GCCGCGAATGAC  | 731.838642159374 | 0.473348758882083 |
| GATCCGTCAGAC  | 731.847635234451 | 0.322453910775654 |
| TGACTTAGTAAA  | 731.849244540101 | 0.450941384959104 |
| AAGCCAGATGAC  | 731.861374342242 | 0.299009559131146 |
| CACCGGGATGAC  | 731.86815157388  | 0.283558428589526 |
| CGTGTACAGAAA  | 731.87659454222  | 0.336906802868313 |
| TGATTCTGTGACA | 731.884017372123 | 0.388388915163465 |
| CTTCAGTAGTCA  | 731.886130646166 | 0.297263875777129 |
| ACGTGTCCGATGA | 731.887640737462 | 0.381205901846751 |
| CCTGATTGTGAC  | 731.889403130779 | 0.364785584460872 |
| TGAACTGACACA  | 731.894728971783 | 0.330105398068481 |
| TCATGCACGTCA  | 731.895669816114 | 0.289936326229435 |
| AATAAATGACCA  | 731.898822365648 | 0.354633904679234 |
| ACTCATACTATA  | 731.90348434768  | 0.271925113301571 |
| ACGGGTACGTCA  | 731.909076308925 | 0.37004510696563  |
| GACTAATTTCTC  | 731.911480294888 | 0.47010269190904  |
| GTACAGACTCAC  | 731.913389724697 | 0.351100526635974 |
| GTCACCGGCAAA  | 731.92174391616  | 0.312021961977499 |
| GTATGCGACTCA  | 731.926956307973 | 0.445666269476473 |
| TGAGACATGACA  | 731.929084986039 | 0.35916242318289  |
| GTCTTAATGACA  | 731.9310438499   | 0.305973601639748 |
| ATGAATAATCGC  | 731.932576125793 | 0.317850445114887 |
| CAACCTGACTCG  | 731.956107745567 | 0.210337668460762 |
| CTGCTCTAGTCA  | 731.957385656292 | 0.442368103133887 |
| GGGTGGAATGAC  | 731.96471319689  | 0.314652254981963 |
| CATTTAAAGTCA  | 731.965214621131 | 0.42679671940634  |
| GGACCTTGTGAC  | 731.969879863967 | 0.3777643314947   |
| ACACGGTGACCA  | 731.972737963637 | 0.306751355966846 |
| ACTAGCCAGTCA  | 731.976216727028 | 0.272562587408848 |
| CGAACACTGTCA  | 731.980808774316 | 0.213751062872973 |
| CCGAGAAATGAC  | 731.988607292    | 0.302893556951654 |
| CATATCATGACG  | 731.995662847547 | 0.285217010209606 |
| AAGGCACGTAC   | 731.998129432733 | 0.36701299036783  |
| GTCATTCTCAA   | 732.00221466431  | 0.215472204708454 |
| CATTTTGTGACG  | 732.003797622186 | 0.376040727936554 |
| GTCACCCGTCTA  | 732.008451358164 | 0.401987730995908 |
| GACTCAGACTAC  | 732.010947205917 | 0.237923496672643 |

|               |                  |                    |
|---------------|------------------|--------------------|
| ATTGTCACCGAG  | 732.012341245873 | 0.317812453581181  |
| GGCCACCAGTCA  | 732.014713494817 | 0.464210911158073  |
| AGCGGCGAGTCA  | 732.015078574294 | 0.317057015617557  |
| GTCATGTCTGTA  | 732.01719265133  | 0.250103998754914  |
| TGACGGTACACA  | 732.01904032134  | 0.376134994053517  |
| AGACTAATAGCT  | 732.01957278846  | 0.316287821306812  |
| AACTTATGAGTA  | 732.026293645775 | 0.302850011848389  |
| ACATTGAGTAAC  | 732.029462528914 | 0.218920485679682  |
| CGACACAAGTCA  | 732.032570482422 | 0.301288629263893  |
| TATACCGACTCA  | 732.043223098578 | 0.180026926951856  |
| AACTCATCGTCA  | 732.046848653419 | 0.295078377896895  |
| ATACGGTGACCC  | 732.047949376053 | 0.416619690342467  |
| ATTACACAGACA  | 732.05032833327  | 0.23090902130861   |
| TAGTAATGGTCA  | 732.055263387959 | 0.243104590704956  |
| ACTTTCGTGACG  | 732.066612826369 | 0.353593733798884  |
| AGTCAGACCTAA  | 732.068092536925 | 0.426022878466551  |
| AGTGTCACGTGA  | 732.068511124877 | 0.227733291695986  |
| AAGACGAATGAC  | 732.073156616608 | 0.242764249034733  |
| ACTCATTATTCG  | 732.082424077982 | 0.346730585503101  |
| GTTCCGGTACAAA | 732.087130824073 | 0.363561633813433  |
| ACTAAAATGAGT  | 732.093192250129 | 0.371142976143074  |
| AACTAGGGTGAC  | 732.119514141777 | 0.320274807290285  |
| AGCTTATATGAC  | 732.12142950057  | 0.417097264929535  |
| ATGAGCAAGCCG  | 732.122405470732 | 0.246899411200259  |
| GATTACTATTAC  | 732.135932179732 | 0.39014622260371   |
| CGAGATGGTGAC  | 732.138512503305 | 0.235585821898309  |
| AAGCTATGACCG  | 732.138678518786 | 0.227892820400391  |
| AGACTCACGTAT  | 732.156559628826 | 0.334443979343807  |
| CCTCCTGTGTCA  | 732.157405727832 | 0.407165977292287  |
| CGTCATCAGTCC  | 732.161062295407 | 0.285007940373822  |
| AGTTCGCATGAC  | 732.161206496091 | 0.327945562380883  |
| AGATGAGCCAGA  | 732.163818074592 | 0.132917536056246  |
| TCACACGAATGA  | 732.167486063937 | 0.40232997306766   |
| ATGACGAGGATA  | 732.174166136281 | 0.222618357833571  |
| ACACGAAGTCAT  | 732.179540899836 | 0.408219431604763  |
| GCATTTGACGCA  | 732.184808307288 | 0.30327967802068   |
| ACCTTATGTGAC  | 732.189788991049 | 0.476311517333214  |
| CCCATGCAGTCA  | 732.19160969345  | 0.476952376959604  |
| AGCTATAAGTCA  | 732.193745430089 | 0.250684939752188  |
| AGTCACGACGAT  | 732.199059772505 | 0.196123671045595  |
| CACCGGTGACGA  | 732.200241123578 | 0.341479819868637  |
| ACCCCGGTGACA  | 732.202356491456 | 0.442712074877498  |
| ATGACGCCGCC   | 732.204170879426 | 0.453264172105814  |
| ATAGTCAGTGTC  | 732.204890243041 | 0.382107810324535  |
| GTGACATGACCA  | 732.20495222109  | 0.480887353594166  |
| GTTTCGCACTCA  | 732.212370764713 | 0.18069338146962   |
| AAACTCGACTCA  | 732.219245672604 | 0.0906070253327006 |
| TCTAGTGACCAA  | 732.22390326778  | 0.312271525245902  |
| AGTCAAAGAGTC  | 732.228452504895 | 0.389915192501996  |
| ATGACAGTGTGG  | 732.22981847997  | 0.300063048558567  |
| CGACTAATTTAC  | 732.232016579688 | 0.291021579067068  |
| TGAGAAATGACA  | 732.235487682365 | 0.21359895409542   |
| TCATAGGATACA  | 732.235784382275 | 0.378116836580525  |
| CCTGCCGACTCA  | 732.244854118876 | 0.332540134385633  |

|               |                  |                    |
|---------------|------------------|--------------------|
| AGAAACTGTGAC  | 732.245898359064 | 0.205407042300332  |
| ACGCCTAAGTCA  | 732.246883423681 | 0.326717902091072  |
| TACAAGCTGTCA  | 732.251693203125 | 0.286409590099145  |
| GACTAATCGATA  | 732.260019964471 | 0.330916420402488  |
| AGCGATAAGTCA  | 732.265558177789 | 0.145076766353312  |
| CACCAATTAGTC  | 732.268436087066 | 0.319107562507291  |
| ATCGACTCAATC  | 732.273165384946 | 0.216113836130487  |
| GGGTCATATTTA  | 732.275297691797 | 0.0588369352793981 |
| CCATGAAATGAC  | 732.294304252112 | 0.359600846081828  |
| TGTCATTATGAA  | 732.309960514925 | 0.286709825801931  |
| CAGTCAGAAAGTA | 732.318115212638 | 0.260965754592406  |
| GTGACAAACCCA  | 732.324115517215 | 0.395576492907     |
| ATACCTGTCACC  | 732.336649917289 | 0.248274607836933  |
| ATCACATAGTCA  | 732.345628080407 | 0.486274383217375  |
| GTCATCAGGGAC  | 732.346253923183 | 0.205609570185259  |
| CGTGGACAGTCA  | 732.354207397723 | 0.393957943626422  |
| TAAACCGACTCA  | 732.354329577661 | 0.407157768529757  |
| TGACTAGCAAAA  | 732.36369110613  | 0.39879878369934   |
| ATGACAGTGAAC  | 732.385745197783 | 0.420681216161401  |
| ATAGTCAGCAGA  | 732.397553177477 | 0.380295479768384  |
| AGCCCCTATGAC  | 732.398227405485 | 0.295820034213286  |
| GTCATTCCTTCA  | 732.39896850881  | 0.291803323231325  |
| GATGTTTGTAC   | 732.39965106153  | 0.236016802325189  |
| AACCTTCTGACT  | 732.400484340252 | 0.181897447498745  |
| CAGTATGGTGAC  | 732.406911731577 | 0.425213998729333  |
| GTCATATCAGAA  | 732.415856982988 | 0.27431627079986   |
| AGGCTTACTAAT  | 732.43155887535  | 0.312397537334328  |
| GTACGCACGTCA  | 732.44631420568  | 0.473171237583481  |
| AACTCATACTCA  | 732.44640224211  | 0.350589223896951  |
| ATCCCTGGTGAC  | 732.450958752212 | 0.285603904148394  |
| CCACCAATGACG  | 732.45151383082  | 0.305707704668844  |
| AGTCACGGTAAG  | 732.455189254275 | 0.152177563850206  |
| GTCATGGGCCAC  | 732.457790153345 | 0.478877247686855  |
| GACTAATTTGGA  | 732.460229908665 | 0.312281402681961  |
| CGAAGCATGACG  | 732.464873610603 | 0.432013398618959  |
| CAGATTATGACC  | 732.467064632214 | 0.351300406334372  |
| ATGACGTTACCG  | 732.478808349031 | 0.283907174961153  |
| GCGGCATATGAC  | 732.481332330245 | 0.342999709795652  |
| GACATATACTCA  | 732.482873246709 | 0.337563208996966  |
| CGTTCTTAGTAA  | 732.487859484773 | 0.402014456201306  |
| CGTCATTGCACG  | 732.488851315967 | 0.316177654159119  |
| CTTAGTGTATGA  | 732.49284102861  | 0.371238627585786  |
| ATATTAGCGTCA  | 732.493477479086 | 0.550769024070342  |
| GAGATTAATGAC  | 732.503133295091 | 0.318868134708908  |
| AGACTAATCGTC  | 732.508078023073 | 0.448956494092509  |
| CGTCACAGAATA  | 732.515357069869 | 0.294400756356742  |
| ACGGAATGTGAC  | 732.528727909651 | 0.446235431792957  |
| GCCCTGGTGACA  | 732.534064703066 | 0.2842907671109    |
| GTCACCGTTTTA  | 732.542391329171 | 0.100013069073678  |
| GAGTCAAAGCAC  | 732.545891593272 | 0.315432454561175  |
| ACAGTAAGTCAC  | 732.549203341718 | 0.24755726501421   |
| ATCTCACGTCAT  | 732.559527406432 | 0.228271354730725  |
| TAAGCTGAATCA  | 732.572669280641 | 0.393944811325858  |
| AGAATTACACAC  | 732.572707064312 | 0.292676820221996  |

|                |                  |                   |
|----------------|------------------|-------------------|
| CAGGCAGATGAC   | 732.579760999899 | 0.378381551478468 |
| CGCTGACTGTGA   | 732.607289725278 | 0.393440928918368 |
| ACTATGGTGACA   | 732.607660380954 | 0.374554777229446 |
| ATGTCACCGATG   | 732.610484727001 | 0.23554783392762  |
| AATCTGTCAGAT   | 732.614985813387 | 0.286131877667738 |
| GAGTTGTGACCC   | 732.618496323591 | 0.296509485913604 |
| AGTCAACTTCTA   | 732.62498938353  | 0.288789948393215 |
| TCGCTCAGTCAA   | 732.625018731754 | 0.363456805793351 |
| TCGTCTGACGAA   | 732.637006253237 | 0.320306138113608 |
| GTA AAAAGGTGAC | 732.644259073622 | 0.293272400618967 |
| CTGGGTGAGCAA   | 732.644893545627 | 0.311474862182658 |
| CAATGCCATGAC   | 732.6501030689   | 0.437666559738956 |
| CCATCGGTGTCA   | 732.654854166779 | 0.365122688588094 |
| CCTTGTGTGACG   | 732.66176339245  | 0.305254991118398 |
| TGTATGACCTAA   | 732.664287577559 | 0.292079149859639 |
| CACTAATCGTGA   | 732.667334553856 | 0.35438616706941  |
| CCTCTAGGTGAC   | 732.678707579297 | 0.340144375749851 |
| GTCATTCGAGAA   | 732.682951058682 | 0.149999906953853 |
| AAACGTGACCCA   | 732.685663676332 | 0.299892164496192 |
| GCCCTAGGTGCA   | 732.696576946249 | 0.338827473685099 |
| ATCTAGGGTGAC   | 732.698246636737 | 0.303066688433418 |
| AGTCAGAAAGGTC  | 732.714084883882 | 0.234672990391998 |
| TCATCCGACTCA   | 732.716071592485 | 0.254657216050858 |
| ACGTCCCAGTCA   | 732.725017366359 | 0.290395920368804 |
| AATACTGGTGAC   | 732.729471103138 | 0.326011508893605 |
| ATGTAATGACAT   | 732.735250987576 | 0.400181069001144 |
| GTCATCTGTTCA   | 732.735529212915 | 0.152042520485876 |
| CAGTTTATGTCA   | 732.738734475214 | 0.240439513575273 |
| CAAGACAGTGAC   | 732.746793746211 | 0.332577537896943 |
| TCCGGCCAGTCA   | 732.757939903287 | 0.277354687686605 |
| GTCACCTTGAA    | 732.759170375991 | 0.370821290745861 |
| AGTCCAGATGAC   | 732.763725741528 | 0.407799185639183 |
| AGGCATTCGTCA   | 732.764898659794 | 0.396108912161635 |
| GTCACGGGACAC   | 732.766079245128 | 0.354131615366735 |
| GATGTAAATGAC   | 732.767235662493 | 0.403607607868774 |
| CCGTAAGGTGAC   | 732.772242603736 | 0.408465252822917 |
| AGGCATACGTCA   | 732.77361099994  | 0.398731084296287 |
| AAACGTCGTAC    | 732.779875021653 | 0.252399801994929 |
| GTCACCTTGATA   | 732.78222813763  | 0.38789796862283  |
| AGAATAGTGTC    | 732.788635929094 | 0.303506625169199 |
| CGACGACAGTCA   | 732.790694373833 | 0.572259220399739 |
| TAGCATTGCTCA   | 732.795342984547 | 0.311654201853803 |
| GTAACCGGTGAC   | 732.795508475732 | 0.305555333602981 |
| CCGTATGGTGAC   | 732.796023449269 | 0.353597227755544 |
| ATGTTCAATGAC   | 732.802848458439 | 0.453506263401285 |
| GACTAATCGTAC   | 732.808527755301 | 0.399770112533977 |
| GTGTCATGAGGA   | 732.809341641958 | 0.199381220651682 |
| AGACTCACTTCC   | 732.811659754468 | 0.146658966348916 |
| ATCTATATGTCA   | 732.813268656555 | 0.195613724173784 |
| AAAGATTAATA    | 732.818495539554 | 0.35075403414259  |
| AAGAATCATCGA   | 732.82574206882  | 0.22226862078346  |
| TCCGACTTGTC    | 732.829609406392 | 0.306161258179204 |
| GTCACCAACGAA   | 732.829868564218 | 0.349789502047825 |
| CTAGCTGATGAC   | 732.833106800869 | 0.308968887746276 |

|               |                  |                    |
|---------------|------------------|--------------------|
| ACATTACGTGAC  | 732.833656814303 | 0.402113771234558  |
| CAGTCAATGCGA  | 732.834306891152 | 0.16467329332716   |
| ACTTTGACTGAA  | 732.838336854828 | 0.239365627419978  |
| ATGCCACAGTCA  | 732.840519330001 | 0.410511567966753  |
| GGCAACGACTCA  | 732.844803663441 | 0.352047934756466  |
| CGTCATGATTAA  | 732.847046489028 | 0.400435921137537  |
| GGCTGACTGCAA  | 732.850769492831 | 0.402831028254016  |
| ACTCCGGTATGA  | 732.852210779561 | 0.482588671692559  |
| ACTCCATATGAC  | 732.860801132876 | 0.425787193554484  |
| GTGTCACGCTAA  | 732.861682875877 | 0.367529356282915  |
| ATGACAGCGCGC  | 732.862246621026 | 0.312181848923639  |
| CTACCAGATGAC  | 732.866761721505 | 0.337441963088424  |
| CTGACTGTCATC  | 732.869674690244 | 0.285604271343949  |
| TATTATTATGAC  | 732.871366097366 | 0.319502047043901  |
| GTCAGATCGTCA  | 732.87802223078  | 0.33528601197315   |
| AGTCACGGAAAT  | 732.878659876785 | 0.274425854990605  |
| ACTTCTGTGACA  | 732.88074372407  | 0.303104355967274  |
| ATGACGACTAGG  | 732.884722662914 | 0.348355914280837  |
| CCGTGGCATGAC  | 732.904166463052 | 0.338883585486912  |
| AAGGCTAGTCAC  | 732.914778053852 | 0.210292528793704  |
| GCCGTGAATGAC  | 732.916618050705 | 0.288516630488404  |
| GTTACTGTGACA  | 732.91976639172  | 0.195271663056311  |
| ATGGTCACACTG  | 732.920587145704 | 0.366976317637861  |
| TCTATAGCGTCA  | 732.926769696191 | 0.301246881123149  |
| GACTCACGCAAA  | 732.934288883397 | 0.389423019980955  |
| AGGGAAAATGAC  | 732.945451421718 | 0.246859387162094  |
| GCCGTTGAATCA  | 732.94972931617  | 0.327691837994897  |
| AGTCAGACTTCA  | 732.951533523861 | 0.232133942968111  |
| AGGCCCTGTGAC  | 732.954387977731 | 0.275805708127158  |
| CTGTATGTGACA  | 732.964828770062 | 0.419999042419208  |
| ATACTTCGTGAC  | 732.983889505955 | 0.431308400279702  |
| TGTCACCGCCAA  | 732.984468351748 | 0.305162711743403  |
| CATTGAGTCTAA  | 732.988492138246 | 0.308358643149742  |
| ACCACGGGTGAC  | 732.992593534582 | 0.335231857928836  |
| GAGTCAAATAGC  | 732.998270746933 | 0.178898238560572  |
| TACACTTTGTCA  | 732.998887034478 | 0.395339906553606  |
| TCTTTTGTGTCA  | 733.004367018235 | 0.0417918310619949 |
| CACCACAGATGA  | 733.008604850002 | 0.386701185573894  |
| TCACGTCACTAA  | 733.013851235011 | 0.32050055965632   |
| AACAGTCTGACT  | 733.02217045703  | 0.265271945333575  |
| AACAACCTCATCG | 733.042313059137 | 0.28998987914598   |
| GACCATTGCTCA  | 733.042822117693 | 0.298020246674261  |
| ATGACAACCTCA  | 733.047684710821 | 0.291678084211282  |
| GCATAAGTGTC   | 733.055424003261 | 0.285874037650888  |
| ATGACATTTACC  | 733.070754007456 | 0.364756090993827  |
| GTCACTAGTCAA  | 733.070758454355 | 0.412080878850192  |
| AAGTTGAATCAC  | 733.071917266269 | 0.307624173019254  |
| GAATTCGTCAAC  | 733.079173337632 | 0.366872748744606  |
| CGGCCATGAGTC  | 733.08144691502  | 0.321379749618261  |
| CTGTACTGAGTC  | 733.096562424781 | 0.303749930393763  |
| GATCAGTGACGC  | 733.106808858767 | 0.401293476668151  |
| AGCTATTGTCAT  | 733.120985453683 | 0.325369976750046  |
| GATTACGCACCA  | 733.12444446204  | 0.431763841974886  |
| CAAGAGTGTGAC  | 733.124942018364 | 0.352690215529975  |

|               |                  |                   |
|---------------|------------------|-------------------|
| GACATATAAGTC  | 733.126757264694 | 0.311844167179389 |
| TATGATTGACA   | 733.12985288138  | 0.219501507593174 |
| AAGGCTGCATA   | 733.130149577385 | 0.279306783623976 |
| CGAAGATGACCC  | 733.130987504372 | 0.265267048315895 |
| ACCAGTGACCAA  | 733.143446813922 | 0.341203382823981 |
| TACGGAGAGTCA  | 733.146757290898 | 0.371935563565949 |
| ATCTTCATGACA  | 733.15092413095  | 0.408075889510078 |
| AGTCAGAATAGG  | 733.154645863523 | 0.18607928225833  |
| ATGGGCGAGTCA  | 733.164905174651 | 0.232734336891113 |
| AGTCAGATCGAC  | 733.16977926863  | 0.360109171030346 |
| TGACATATCAAA  | 733.175276069514 | 0.359286005367562 |
| ACAGTAACGTCA  | 733.182640390701 | 0.354399101602338 |
| AACGAGTGACCA  | 733.186129165479 | 0.348107402078577 |
| CGGGGTTATGAC  | 733.186748692889 | 0.347376661046485 |
| ATGCGCAATGAC  | 733.188101620655 | 0.415013760284093 |
| CAGGTTTGTGAC  | 733.188542373936 | 0.463813228714562 |
| ACGCCCATGACT  | 733.196528421119 | 0.170961355542968 |
| GTCAACATGCAA  | 733.199085716526 | 0.431495945377173 |
| ATGTGAGATGAC  | 733.215385796623 | 0.205685501187144 |
| GTCATTTGCGAC  | 733.218720044747 | 0.217083010063778 |
| CTGTGGCTCACC  | 733.219183083738 | 0.249182848080099 |
| ATGTAATGTGTC  | 733.224101673938 | 0.514173526557354 |
| TCGTCATGTCAA  | 733.23086977303  | 0.195888930009086 |
| GAGACTATGACC  | 733.234375215054 | 0.365830285966567 |
| GTATATCGTGAC  | 733.243318819517 | 0.311538085287875 |
| CTTTACTGTGAC  | 733.25133138838  | 0.214440368733311 |
| CACGGAGGTGAC  | 733.252271004349 | 0.417442758469596 |
| GTCATCGCGATA  | 733.25301733492  | 0.324240319022318 |
| TGCGTGATTCAA  | 733.255818242455 | 0.279351903757071 |
| GTACGTGGTGAC  | 733.262902219898 | 0.527964089032334 |
| CCATGTGTATGA  | 733.266653665772 | 0.503476888013917 |
| GACCATGAGTCC  | 733.277812318007 | 0.485833487094631 |
| GGCGATGATGAC  | 733.298958221673 | 0.305364903325748 |
| AGCGTCACTAAA  | 733.31142290718  | 0.267663201525637 |
| CAAATTACGCAA  | 733.329324851233 | 0.417805995106695 |
| GACTAATGAACC  | 733.330367002372 | 0.428472397031598 |
| CAGTAAGTGTC   | 733.338487293574 | 0.511151758431091 |
| CTTTGGTGTGAC  | 733.342616082958 | 0.237791288052033 |
| CCTCCAGAGTCA  | 733.34935573149  | 0.3049285560386   |
| AGTCAGAGTCTA  | 733.353129659692 | 0.290961108914765 |
| ACTCCACAGTCA  | 733.354980625206 | 0.308682503022992 |
| GCGTAACCGTCA  | 733.357851179442 | 0.41523923678845  |
| GACTCAGAATTA  | 733.369945537998 | 0.291518804527121 |
| CGTTAATGACA   | 733.380827712426 | 0.507528873241925 |
| ACGTCACCTAGC  | 733.386347415686 | 0.593323111126171 |
| GTCACGATCACA  | 733.398924886687 | 0.299422436617024 |
| AAATGACATCGT  | 733.399711555391 | 0.163694647971851 |
| CTAGCTGAATCA  | 733.419767434163 | 0.253917168524818 |
| GGTAGCAATGAC  | 733.427981955778 | 0.429358283739502 |
| AACGTTGTCATG  | 733.434171800512 | 0.305575354018043 |
| AGGTGACAAAGTC | 733.439997307961 | 0.253298217363476 |
| AGGAGCTGTCAT  | 733.441714933392 | 0.330461954181737 |
| ATGGCTGTCACA  | 733.450782882523 | 0.59734597245002  |
| GAAGACTCTTAA  | 733.452984450098 | 0.325054740829283 |



|               |                  |                   |
|---------------|------------------|-------------------|
| GACATTTGTGAC  | 733.459471499982 | 0.311805493872678 |
| GTCACCAATAAA  | 733.470828750108 | 0.420202085680903 |
| ACTCATACGTAT  | 733.493389425136 | 0.37808737509447  |
| ATTATCGTCACC  | 733.495845009527 | 0.346926637132898 |
| CAAACCATGACG  | 733.49608421168  | 0.448940037267302 |
| AAATAAGGTGAC  | 733.497066635949 | 0.157849834868053 |
| CGTCACAGATAC  | 733.498588655094 | 0.370722191225915 |
| CAGGTCATAGTC  | 733.500669073525 | 0.440060261506659 |
| ACTCATCCTAAG  | 733.500798359691 | 0.300216879317734 |
| GGGTTTTATGAC  | 733.512932511301 | 0.344829282806    |
| TCGTGCACGTCA  | 733.514527947977 | 0.331133325449455 |
| AGCGTCATGTGA  | 733.523359651178 | 0.370913952526994 |
| GTCTTCCGATGA  | 733.525386495261 | 0.486866737010975 |
| GTTGCACTCATA  | 733.528851846001 | 0.309914587021252 |
| CGAATAATGACG  | 733.531030511795 | 0.357027622761826 |
| GGTGAGAATGAC  | 733.533732726869 | 0.282799832251617 |
| GTCACAACCTTTA | 733.534080039578 | 0.27156683156479  |
| GCACTACAGTCA  | 733.541000891762 | 0.448534798177232 |
| GGTGACAGGTCA  | 733.541530482848 | 0.219881618372842 |
| AGTCAGAGGGTC  | 733.554959791305 | 0.192065012814994 |
| CTGTCAATTTGCA | 733.555366430158 | 0.294080906766455 |
| GTTCTGTGACCA  | 733.556716699457 | 0.439600236074792 |
| CCAATTGTGACA  | 733.558578545135 | 0.221213066003595 |
| ACGTGCATGAGGC | 733.564498187679 | 0.258562067217046 |
| TAGTCAGTGTGA  | 733.566805365582 | 0.319175912094536 |
| CAAGATTAGTCG  | 733.569152436559 | 0.346700846234362 |
| ATCCACACGTCA  | 733.570982926359 | 0.246255376955162 |
| ATGACTTGACAG  | 733.571166881445 | 0.315705508373826 |
| GTGAGTACGTCA  | 733.571342293336 | 0.314256768101074 |
| GCTGCGAATGAC  | 733.581235972866 | 0.252723807236141 |
| ATCGGCAGTGAC  | 733.585724285777 | 0.23093085449465  |
| AGACATAATGAC  | 733.595383786746 | 0.261501601675596 |
| TATACTGAATCA  | 733.599001653009 | 0.253445926550483 |
| AGCCGTTGTGAT  | 733.600078564348 | 0.176480414728279 |
| AGAGCAATGACA  | 733.601926769411 | 0.304372800255116 |
| ATAAGTCAACTG  | 733.602651209002 | 0.283909308138441 |
| CAGCCTTATGAC  | 733.606220339824 | 0.362261096200666 |
| TGAAGTGACGAA  | 733.615017498258 | 0.194058497553586 |
| AGCGTCATGCAT  | 733.618172523603 | 0.260910364382976 |
| CCTAGCGACTCA  | 733.620019025994 | 0.637312772365159 |
| GTCAAATGACCA  | 733.623526540257 | 0.440376917554929 |
| GCGACGACGTCA  | 733.626665803567 | 0.355004424323633 |
| GGGTCATAACGA  | 733.633724653549 | 0.158943702065071 |
| AGTATGCATGAC  | 733.650193312919 | 0.374030773753675 |
| CTACCGGTGACA  | 733.651971652548 | 0.297495269011547 |
| ACACCGATGAGT  | 733.664011946147 | 0.255655665560303 |
| AAGTCTAAGTCA  | 733.668816495509 | 0.308744996445421 |
| GTCAGTCGTAC   | 733.672465396016 | 0.312743869061358 |
| CATATATGACCC  | 733.681079683735 | 0.357835016945007 |
| TGGCTCAGTCAA  | 733.699590425669 | 0.541060182449292 |
| GGGATGGATGAC  | 733.716266108103 | 0.226029005596599 |
| TGGCCTGTGACA  | 733.717095668531 | 0.527310828977073 |
| CTTACTGCGTCA  | 733.729986289977 | 0.2870208544173   |
| GACTAATTGCTC  | 733.730183332488 | 0.341967828625581 |

|              |                  |                   |
|--------------|------------------|-------------------|
| AGTCAGAGGATG | 733.734227427247 | 0.280212790058463 |
| AGCGCTGAATCA | 733.737946190989 | 0.282267043196137 |
| GTCACGCATCGA | 733.738770415259 | 0.284677498517241 |
| TCATAGATTTAA | 733.740329096564 | 0.588024201480441 |
| ATATTGTCACCG | 733.751289515205 | 0.251317383700275 |
| GACCGCAATGAC | 733.753974127746 | 0.32049233219267  |
| ACCCGCAATGAC | 733.758587332404 | 0.287502162553973 |
| TCTATAATGACA | 733.760691309232 | 0.234544139407905 |
| ATGACGCTCTAA | 733.762026223306 | 0.186156943232494 |
| GAGTTATGACCC | 733.768969254806 | 0.391761617695079 |
| CGAAAAGTCATC | 733.779702555592 | 0.374414508446864 |
| ATGACATCGGCG | 733.786158017493 | 0.280393739332007 |
| GACGTGACGCCA | 733.790944981901 | 0.242999528583538 |
| GCTGACGCTCA  | 733.796049856292 | 0.424343957170523 |
| ACTCCAGTGACA | 733.796450538495 | 0.42954654468296  |
| GTGTGACAATGA | 733.812483314878 | 0.180279920612854 |
| ATCCATGGTGAC | 733.817577376274 | 0.329370166423544 |
| CTGAGTCGTCGA | 733.819425346195 | 0.40850387131668  |
| CTAGGTAATGAC | 733.822806155208 | 0.240495859561562 |
| CTCGATGATGCA | 733.823086256546 | 0.442511746193554 |
| CATGAGGGTGAC | 733.823286967962 | 0.295536409106547 |
| GTCATTAGCCAC | 733.831139584768 | 0.33373800825796  |
| GTCATCCCTCGA | 733.839693959284 | 0.371809753212559 |
| GATCCCCTGAC  | 733.842989586568 | 0.291622003531394 |
| GCCCAAGATGAC | 733.8439669778   | 0.262002459608891 |
| CGCTACCGGTGA | 733.853237617318 | 0.400403480393822 |
| GTCATCTGGCGA | 733.861420274809 | 0.432913631621821 |
| CAGCAGGGTGAC | 733.862885704386 | 0.222099993986581 |
| GATTACGTATTA | 733.868800294451 | 0.396504785710902 |
| GTCACGCATGAA | 733.872975838325 | 0.481559584955018 |
| ATGTCATCTCAC | 733.877516758759 | 0.26103163859542  |
| CTGGAGTGAGTC | 733.877524343011 | 0.402679749374856 |
| ATGACGTCGCTG | 733.88115082346  | 0.208876139399703 |
| GGTGAGTATAAC | 733.885952053534 | 0.303304134657891 |
| GTGACCCAATTA | 733.887319533076 | 0.202523226954151 |
| GACTAATCCGC  | 733.891467240864 | 0.298088197277007 |
| ATTACCGGTCA  | 733.891539410797 | 0.282634596047975 |
| CAATCTCATGAC | 733.895573415698 | 0.298049870860216 |
| TCAGCTCTATGA | 733.898483578629 | 0.433577860637731 |
| CGTCATTGTTCC | 733.899864854146 | 0.270287890237127 |
| TGACGTAGGCAA | 733.901445492837 | 0.391566040550299 |
| CAGGAAATGACG | 733.909594795554 | 0.216733825313045 |
| ATGACGGTACCC | 733.910026423782 | 0.34524561948499  |
| ACACCGGTGACG | 733.912522530288 | 0.382376463780714 |
| ATGACGGTATAG | 733.912946817926 | 0.283995622143295 |
| GGACCTGTCACA | 733.918779164135 | 0.440282225365577 |
| ACTAATAATGAG | 733.926836769895 | 0.405633530933262 |
| TTGACTCGGCAA | 733.944206402283 | 0.526691680771239 |
| ACTGTGACAAGT | 733.944928278954 | 0.297838621383701 |
| AGGTGACGTTAT | 733.948166517838 | 0.28590462916702  |
| TATGAGTTAACA | 733.951618574017 | 0.268063144452236 |
| AATAGAGATGAC | 733.964432911205 | 0.309721116194346 |
| GCTGTTGACACA | 733.966649090626 | 0.392257105247986 |
| TAGTCAGCAAAA | 733.968938656935 | 0.303048265124129 |

|               |                  |                   |
|---------------|------------------|-------------------|
| CACTGGCATGAC  | 733.980569002565 | 0.302593343214044 |
| AATATGTGTGAC  | 733.987386659422 | 0.285245585473801 |
| ACCTGTCACCGA  | 733.990419222199 | 0.289676342629536 |
| GTCACCAATGCA  | 733.994586928758 | 0.332976295220237 |
| AAGGCTAATGAC  | 733.996707882311 | 0.206001921996207 |
| ATGACTTGACGA  | 733.997194958516 | 0.398913257453171 |
| GTTGGACTCACA  | 734.006250385991 | 0.310296641306256 |
| GTCACTTTATCA  | 734.011826038391 | 0.386444970997197 |
| ATATTGAGTAAC  | 734.013206933952 | 0.388437919881212 |
| CAGTCAGATCAC  | 734.018037929029 | 0.227568812445383 |
| ACTCATATTGTA  | 734.020736967975 | 0.360132913598603 |
| ATTACTATTACA  | 734.022409395927 | 0.373511937615918 |
| AGGTAATGACAT  | 734.032991390634 | 0.359774149736156 |
| ATGACAGTAGGC  | 734.034574808924 | 0.224512043223683 |
| GTTTCGTGTGCA  | 734.036233163738 | 0.348335673914869 |
| CGCATTGAATCA  | 734.039400811803 | 0.336010299027847 |
| ACTCATTACGCA  | 734.045376598737 | 0.339097081546316 |
| AATACAGTCAAT  | 734.054082382515 | 0.409877391112837 |
| CGATGGGTC AAC | 734.066542319777 | 0.340105658891515 |
| CTCTCCTGACTC  | 734.075385554938 | 0.272039754909852 |
| GTCATCTCTAAC  | 734.077657550296 | 0.343299194071111 |
| CGTCATGCGTTA  | 734.078168080894 | 0.43007068503237  |
| CAAAGGGTGACA  | 734.078935721608 | 0.251372701551632 |
| GTCACGAATGAA  | 734.081300224982 | 0.316573230507278 |
| TAGACTTCGTCA  | 734.088589769608 | 0.410944449962883 |
| CGACTAGCGTCA  | 734.103850386156 | 0.443950904449929 |
| AGAATTGGTGAC  | 734.113146641939 | 0.293632720715518 |
| ATGACGGAGGAC  | 734.115632216584 | 0.1337824384997   |
| ATGACGACGAGG  | 734.120152776334 | 0.228639390148545 |
| ATAGTGTACAGAG | 734.120986859439 | 0.209730900519594 |
| AGGCACGTCACT  | 734.123634803303 | 0.194609202430455 |
| TACTAGGTGACA  | 734.124840474568 | 0.529095377636016 |
| ATTACACCGTCA  | 734.12499956974  | 0.366920493451476 |
| GACGCACGTCAAC | 734.128109287262 | 0.410000674697494 |
| TCTGACTTGTCA  | 734.128140611407 | 0.377081932867123 |
| CGTCACTATTAC  | 734.128722963419 | 0.301124329636537 |
| TGAGTATTTAAA  | 734.132058007737 | 0.396087299627162 |
| AGAAAAGTCATA  | 734.13680906793  | 0.253993234442701 |
| ATGAAGGGTGAC  | 734.1380000151   | 0.247204588821292 |
| GTCATTGAAAGA  | 734.142773538975 | 0.479412255420171 |
| ACTTGTATGACC  | 734.145587929794 | 0.37540113802768  |
| ACAAGATGTCAAT | 734.14895276633  | 0.35838017146789  |
| GCGTACGTGTCA  | 734.152565626732 | 0.245638688231431 |
| CGTCATCCCTTA  | 734.154655467476 | 0.31065418770719  |
| ACCCAGTCAGAA  | 734.164418872822 | 0.386852593239133 |
| ATGACGTCTCAG  | 734.171063301514 | 0.365847807347781 |
| AGTCACGCGTGG  | 734.175033025068 | 0.410501766907747 |
| TGGGTCACTCAA  | 734.175787360259 | 0.31266351592344  |
| CTGGATTGTGAC  | 734.178598202272 | 0.188694143838084 |
| CACAGAGTCAAA  | 734.179501431246 | 0.378564774840966 |
| ACGACGGAGTCA  | 734.191713516435 | 0.382564320275722 |
| AAACCATGACTG  | 734.191843936664 | 0.222051065808881 |
| CATGACGCCGAA  | 734.195582513758 | 0.282278454594561 |
| AGTCAGCCTATC  | 734.197651174189 | 0.298455023773166 |

|               |                  |                   |
|---------------|------------------|-------------------|
| CGGGTTGTGTCA  | 734.206402062974 | 0.274834632892936 |
| CCCGCTATGAC   | 734.208760968707 | 0.248185520339412 |
| ATCGGCTGAGTC  | 734.209874812009 | 0.261336801808746 |
| GCACCGAATGAC  | 734.210092586905 | 0.372560535449904 |
| GCTCCTGTGTCA  | 734.218497832798 | 0.271347194936077 |
| TCTGACGCTTAA  | 734.222070773816 | 0.377466089542322 |
| CGTATGACCTAA  | 734.22782981634  | 0.379554026484697 |
| ATGAGCAAGCGA  | 734.2386869863   | 0.239964132658198 |
| GAGTAACTGTCA  | 734.244125348045 | 0.37061229253444  |
| CGTCATTGACCA  | 734.252538213125 | 0.25279819109986  |
| GCTTACGGTGAC  | 734.254068845616 | 0.214965380357176 |
| GCGTGGCGTCAC  | 734.260692092552 | 0.310239041031834 |
| AGGAATTAGTCG  | 734.266856897827 | 0.195161326738135 |
| CCTTTGTGACAA  | 734.267820115844 | 0.341986720029053 |
| CTGAGTCGAACA  | 734.274008355758 | 0.290583637954828 |
| CGCGTAAAGTCAC | 734.274217898937 | 0.318934904508337 |
| ATAGTTGATTCA  | 734.274929178863 | 0.521078868685116 |
| ATTGGAGAGTCA  | 734.280132398547 | 0.236732341933551 |
| CAGTGCATGACA  | 734.288425384318 | 0.351518746375475 |
| AGTGACACGCCA  | 734.300753763197 | 0.330055200723553 |
| GATATACATGAC  | 734.301207025406 | 0.332234413111612 |
| GCTATTACTCTA  | 734.304124498351 | 0.212135366468627 |
| CATAGTTGAGTC  | 734.306490176021 | 0.302421112503685 |
| CACAACAGTCA   | 734.30930385231  | 0.352961352319074 |
| CGACTCACGCAG  | 734.312337882808 | 0.356046064568194 |
| AATCGACTCAAT  | 734.314006964189 | 0.288109998044655 |
| CACGTTGGTGAC  | 734.31880869582  | 0.571654011771651 |
| GTCATTACGTTA  | 734.337257528409 | 0.254982006663697 |
| CATGCCATGACG  | 734.338546674108 | 0.326675143200751 |
| CCCATATGACG   | 734.344479481192 | 0.22429054078085  |
| GAAAGGTGTGAC  | 734.350645875816 | 0.199453644550228 |
| GAGTCTTGTAC   | 734.354263744898 | 0.603908250846816 |
| GAGTCAATAGCA  | 734.363599594426 | 0.316357848083405 |
| TATGTCATGGCA  | 734.36696542781  | 0.236812336944107 |
| TACCATGACCCA  | 734.369565450437 | 0.254549528813157 |
| ATGACGTCCACA  | 734.37685332192  | 0.328727196366611 |
| ACCATGCTGTCA  | 734.376936499755 | 0.288781199808254 |
| TCATCCCGATGA  | 734.378338814354 | 0.33896668620683  |
| AAACCATGACTT  | 734.38073826573  | 0.234488684182795 |
| AAATGTTGTGAC  | 734.381548798018 | 0.211412817465855 |
| GCGGCCAGTCA   | 734.399609888429 | 0.440045157288324 |
| AGATTAACCTAT  | 734.402168244798 | 0.287300422062853 |
| TGACTTAGGTAA  | 734.40477949788  | 0.299074943655959 |
| CGTCATTGGTGC  | 734.407804462853 | 0.19659511776681  |
| GGTCATAACTGA  | 734.409749255558 | 0.306000190116289 |
| ACGTCACCATGG  | 734.411814501449 | 0.250406968743925 |
| AATCTATTAGTC  | 734.421220192732 | 0.322942536267369 |
| GTCACGCATAAC  | 734.425013770204 | 0.35387365270862  |
| CAGGGTTGTGAC  | 734.433169835153 | 0.365727231544102 |
| AATGACGGTACG  | 734.442876819189 | 0.319476053119063 |
| GATAATGTCACC  | 734.443810673714 | 0.341050635744305 |
| AGTCAATTATGA  | 734.44721592341  | 0.297569523800819 |
| GGCTCACGTCAC  | 734.448218055201 | 0.318248581476078 |
| GGCTCGAGTGAC  | 734.451317138099 | 0.312054629039154 |

|               |                  |                   |
|---------------|------------------|-------------------|
| TCAACTTGGTCA  | 734.458314263683 | 0.330140978635436 |
| ATGACAATGGTC  | 734.459032413703 | 0.218288382221487 |
| GTCACACGTAGA  | 734.461006365822 | 0.19565148085836  |
| GTTACTCAATTA  | 734.463199783845 | 0.233885807995867 |
| TAGCATTGTGCA  | 734.481383437036 | 0.345689166826393 |
| CACTCATGAGTG  | 734.501376143022 | 0.290851329517058 |
| GCCTCTGAATCA  | 734.501667317651 | 0.232940862314136 |
| ATTTCCGGTGACA | 734.50479627008  | 0.199586643292304 |
| GTCACACACTAA  | 734.50513798254  | 0.472840924368142 |
| ACTATGTGTGCGA | 734.507335813274 | 0.303793915595195 |
| CGGTGAGCAAAA  | 734.509715260259 | 0.163015689413079 |
| ATCCCGGAGTCA  | 734.51032323036  | 0.293643894323446 |
| TGTCACCGGGAA  | 734.512972199451 | 0.317869374537216 |
| ATGACATTTAGG  | 734.537986425057 | 0.228562572653224 |
| TGACAGCAGTCA  | 734.540021490975 | 0.440529570070386 |
| ACTTGTGACGTC  | 734.541912658601 | 0.523275602566036 |
| CCGCGTGACGAA  | 734.553940214478 | 0.290810206607908 |
| AACTCGTGTGAC  | 734.555942237778 | 0.333115043275304 |
| GACTCTGACCCA  | 734.559179434133 | 0.286848878401424 |
| ATCTCTGACGTG  | 734.562305201416 | 0.399966863974814 |
| AAAATGTATGC   | 734.569133065455 | 0.237226231569887 |
| ATTTTCATGTGAC | 734.569626167044 | 0.414676069118378 |
| GCCCCGAGTGAC  | 734.57089359619  | 0.545406026279506 |
| GACTGACTTAGC  | 734.575750298702 | 0.289415083715075 |
| AGTCACTTGCCC  | 734.588310481066 | 0.299806379309206 |
| AGAGTAATAACT  | 734.598757954815 | 0.268445778079808 |
| GTCACCGTTTCA  | 734.601618066655 | 0.391940681271753 |
| ATAACCGGTCA   | 734.604204902144 | 0.591752376754909 |
| CATCACATATGA  | 734.607753309271 | 0.530733428081189 |
| AATTGTGACGTC  | 734.611400085072 | 0.373583299535589 |
| AGGTGACAGCAT  | 734.612040074252 | 0.427681704522148 |
| CTGTAAGTGACA  | 734.615925324457 | 0.459742893880816 |
| ATTCCGTGTAC   | 734.616524909966 | 0.230153971094091 |
| GATAAATGTGAC  | 734.627625018921 | 0.37189883088373  |
| GCGTCACATTGA  | 734.638602988112 | 0.334991362434116 |
| TGAGTTACATCA  | 734.657016820829 | 0.33195578464225  |
| CCCAAATGGTCA  | 734.657497912421 | 0.459341067498458 |
| GGTCATCGTTAA  | 734.658975067752 | 0.435233267506659 |
| ATTAGTCGCCGA  | 734.660909564811 | 0.309972861995238 |
| ATGACAGTGGTC  | 734.662118162262 | 0.294889587865294 |
| ACGGCATTGTCA  | 734.665507928682 | 0.409020639472216 |
| GTCATCTGCCTA  | 734.670865360486 | 0.282842890767269 |
| CCGCCTGCGTCA  | 734.671332100168 | 0.227315648011385 |
| GCAATTGACACA  | 734.672113837998 | 0.372968168677811 |
| ATGACGGGACCG  | 734.678032333699 | 0.291360560389203 |
| GGTCACCGGTCA  | 734.687215674718 | 0.472446433946337 |
| TACCTGGTCATA  | 734.69497702248  | 0.262015554938462 |
| CTGTCATTAGCA  | 734.695035308732 | 0.479316834978826 |
| ATCGATATGTCA  | 734.710765829471 | 0.328464868199204 |
| ACCCGTGGTGAC  | 734.71502696946  | 0.350269484966749 |
| GGGTCTAGTCA   | 734.727175332427 | 0.361271632137712 |
| AGAGTCAAATTA  | 734.731422809364 | 0.285204479598888 |
| ATCACCAAGTCA  | 734.734653745286 | 0.408088178606975 |
| CAGTTTGACTGA  | 734.734895868944 | 0.309198444858674 |

|               |                  |                   |
|---------------|------------------|-------------------|
| AGTATTCATGAC  | 734.736222523511 | 0.345833913153125 |
| GTCCCAATGACA  | 734.738170439547 | 0.336330404392717 |
| CAATGAGTTGTC  | 734.738404690698 | 0.222954857804272 |
| AGTCAGACCGTA  | 734.745829626123 | 0.257719692345485 |
| CTGACTAGTACA  | 734.756462272447 | 0.322384798025952 |
| GTATGTGACCAC  | 734.762474029951 | 0.349979080266144 |
| TGACTCCCCAAA  | 734.762826845402 | 0.114398040189263 |
| CATACTGTCACA  | 734.763708939893 | 0.23495843199531  |
| GTCATCTTGTA   | 734.767943113296 | 0.671114848732655 |
| GAGTCAGGACCC  | 734.773375839221 | 0.283340053693316 |
| CGTCAGTGACGC  | 734.773475550577 | 0.35257186371296  |
| CTCAGCTAATGA  | 734.780570963872 | 0.453858168372432 |
| TGACAAGTCTAA  | 734.782261328604 | 0.508041236419151 |
| TCACGGTGACGA  | 734.78313587163  | 0.221760888624885 |
| ACCTTTGACACA  | 734.790771472653 | 0.337752665619923 |
| GCTCCTTACTCA  | 734.790935316652 | 0.226603419099781 |
| GACGTGAGCCAC  | 734.800181601081 | 0.328226246245583 |
| AGTCACGGCCTG  | 734.807349369235 | 0.324480120373681 |
| GTCACGTGCTAA  | 734.808530933471 | 0.281803848349471 |
| CGAGTCAGGCCA  | 734.812125947688 | 0.332362180276211 |
| GCGTCATGAATA  | 734.817065361942 | 0.291997904147978 |
| CGGCGAGATGAC  | 734.822626040706 | 0.372023630266225 |
| TCTGAATCAGAA  | 734.8300810078   | 0.385482200242613 |
| CTTTGCCAGTCA  | 734.837732953705 | 0.297216227652321 |
| CGAGGCCAGTCA  | 734.843027926261 | 0.378991649709224 |
| GAAGTCCGTCAC  | 734.846345244289 | 0.414060504049815 |
| ATGACAGACAAC  | 734.856904840097 | 0.114018029668818 |
| GCCTCGTACTA   | 734.85915754835  | 0.329806182727947 |
| GCCACAGAGTCA  | 734.860399301929 | 0.47190743756252  |
| CCATATCCGTCA  | 734.868606526692 | 0.31463387092596  |
| GGCCGTGTCACC  | 734.885935460227 | 0.245741639808351 |
| GTCATAGAGCCA  | 734.894777534652 | 0.381072449357522 |
| TGACTCTGGGAA  | 734.899544794576 | 0.262212948722981 |
| GGGTCATCATAA  | 734.900340535371 | 0.243038163603121 |
| ATGCTGGAGTCA  | 734.920435875968 | 0.389986902579528 |
| AAGCCTGGTCAT  | 734.926447467745 | 0.283587390983394 |
| GATGACTTGAAC  | 734.934046926055 | 0.28547487933425  |
| ACTCATAATGGC  | 734.937726736485 | 0.283381599726685 |
| CATCTGGATGAC  | 734.94555539665  | 0.265462113039854 |
| CTGAGTGGTGAC  | 734.947257321245 | 0.164034879045244 |
| TCATCATGGGAA  | 734.952775076614 | 0.593460067384955 |
| CACGCGTAGTCA  | 734.957774160101 | 0.407635952850925 |
| ATTGCTCAGAAC  | 734.960064754846 | 0.414539423312369 |
| ACGCATTGTCAT  | 734.970225081471 | 0.424755149668623 |
| AACTAGTGACTT  | 734.971868179345 | 0.262460188643467 |
| ATGACGTTTCGTA | 734.975756447153 | 0.376078880794703 |
| AGTCACTTCGTC  | 734.980362218126 | 0.457614935254093 |
| GTCTCTACGTCA  | 734.986542316896 | 0.467526095880579 |
| CTATGATGCAAC  | 734.998954068905 | 0.240233300125253 |
| GCGACTTGTAC   | 735.001988585342 | 0.208654301658796 |
| ACCATGTACACG  | 735.007074727708 | 0.308187857374502 |
| ATGACGACGCCA  | 735.013982996223 | 0.298456974031247 |
| TGATTACCGGCA  | 735.019803985069 | 0.329787106150007 |
| AGTCAAATCGTC  | 735.023400819905 | 0.41381140295489  |

|               |                  |                   |
|---------------|------------------|-------------------|
| ATTGAGTCGATC  | 735.030673356333 | 0.311143052797543 |
| ACAAGCAATGAC  | 735.038651219471 | 0.384403369520146 |
| TCACCAGTATGA  | 735.04002240828  | 0.390417587432717 |
| GGTACAGAGTCA  | 735.040286944101 | 0.132377892990846 |
| GTCACCTTGACAA | 735.043376342014 | 0.366279646132126 |
| TCATTTTCGTCA  | 735.059033116343 | 0.429550571665238 |
| CGTCCAGATGAC  | 735.059685942401 | 0.26140565271397  |
| GATCAGCATGAC  | 735.066157981812 | 0.275790685483583 |
| CCAGCTTACTCA  | 735.067115334758 | 0.339259638134389 |
| AATAATTAGTCT  | 735.070024090001 | 0.409007323463394 |
| CGTCACAGGTGC  | 735.073539379098 | 0.296265915769667 |
| TGACTACTCTAA  | 735.074105708788 | 0.409095661460665 |
| CTACTAATGACA  | 735.094449460425 | 0.262389365238025 |
| ACTGACACAGTC  | 735.100154667352 | 0.166371722510365 |
| GTCATAAGGATA  | 735.100683361631 | 0.245853089819598 |
| ACATCGTGTAC   | 735.10180693589  | 0.370261207093819 |
| TATTGATTCACA  | 735.106560983714 | 0.258016099502503 |
| ATGACCATGAAT  | 735.10790427018  | 0.356168398046433 |
| ATGTTGATTAC   | 735.112486602422 | 0.301502316014543 |
| GTCACGGTATGA  | 735.112633738348 | 0.330231989956965 |
| TATCCCACGTCA  | 735.120451517067 | 0.390239135021865 |
| GGTGTTCATGATA | 735.120592612962 | 0.294252466625434 |
| ATGATGTGCTG   | 735.122580619232 | 0.28418708844398  |
| TGATAATGACCA  | 735.130670027963 | 0.311481610418263 |
| CGCACTTGGTCA  | 735.137918236467 | 0.282201558958197 |
| TCGTCATGGTCA  | 735.139695545096 | 0.33409315971321  |
| AGGCCGTGAGTC  | 735.140775333385 | 0.424933339093325 |
| CAGCGTGTGACG  | 735.150990226053 | 0.366852057409118 |
| ATGACGGACTAC  | 735.161349999272 | 0.408580002880494 |
| ACATGAGCAAAT  | 735.168335293278 | 0.130747633062455 |
| ACTGATTAGAAA  | 735.180168319573 | 0.370799089303516 |
| ATCCAGATGACG  | 735.185628829442 | 0.390072358601225 |
| GATCTCGGTGAC  | 735.187050530743 | 0.407435519377923 |
| AGTGTACCGCAT  | 735.188806502688 | 0.371657402271795 |
| AACTCCTATGAC  | 735.194473910631 | 0.415692667544866 |
| ACTCACAGTGAG  | 735.195015383788 | 0.297534246594811 |
| TATGTCACGTGA  | 735.206706058244 | 0.28457499805255  |
| CATTTATGAGTA  | 735.209915113895 | 0.331592150767971 |
| GTCATGCATCGA  | 735.21574327429  | 0.292405227041975 |
| GATCAGTAACAC  | 735.240547200296 | 0.300504748521224 |
| CCCATATGTGAC  | 735.252973657315 | 0.272367192280554 |
| GTGACTTACTAA  | 735.255204230142 | 0.241035557525344 |
| ACGTCACCAGAA  | 735.268365694752 | 0.217389823374451 |
| AGTCAATTGACA  | 735.26839406685  | 0.414901752011096 |
| ACTCATCATGAT  | 735.271282881733 | 0.338684624340652 |
| AGCACATGACAC  | 735.275640496604 | 0.261000899928381 |
| ATGAGTATGCAC  | 735.275651679714 | 0.403256268057456 |
| GAATCATACAAA  | 735.279827172242 | 0.563906023320206 |
| TGTAATTACACA  | 735.280671191263 | 0.44307303476952  |
| GTCTGACGATTA  | 735.28564655857  | 0.276736033701545 |
| CAATGGGGTGAC  | 735.288141008721 | 0.294495733684364 |
| CGATGCAATGAC  | 735.288148120484 | 0.336883557887956 |
| AGTCACGCGCCA  | 735.29493483653  | 0.321717401033128 |
| ACGATGGTGACA  | 735.302338235618 | 0.183800874339188 |

|               |                  |                   |
|---------------|------------------|-------------------|
| TGACGATTATAA  | 735.303687407323 | 0.332912460714529 |
| GATCTTGACTGA  | 735.30710283469  | 0.259686303376881 |
| ATTCGTGACATG  | 735.318066622191 | 0.251238995870349 |
| CGTCACAGTAGC  | 735.321752736316 | 0.37421910467033  |
| CAGAAGGTGACG  | 735.324411822605 | 0.241807032304967 |
| AAGTAGTGTGAC  | 735.325299622906 | 0.234734608157818 |
| GTCATTGCCTCA  | 735.328218311091 | 0.388072583873755 |
| GATAACAGTGAC  | 735.351099345332 | 0.286912666300104 |
| CCTAATGTGACA  | 735.357815238207 | 0.396810730292621 |
| AAGGATCCGTCA  | 735.361174840383 | 0.449713662486122 |
| CAACGTATGACC  | 735.371607951401 | 0.622536252409141 |
| ACACTCATGACA  | 735.372806838112 | 0.234188401104281 |
| CTTGACGTGTTT  | 735.376689865015 | 0.214418261295398 |
| AGCCGTGTCACC  | 735.376827591402 | 0.371556971415733 |
| CGAAACCATGAC  | 735.382483106751 | 0.388083968075    |
| CATTGCCATGAC  | 735.388162345376 | 0.233176345037588 |
| GTAATGTCACA   | 735.389921632791 | 0.270297982289287 |
| ACAGTTGCTCAT  | 735.395511174237 | 0.325047360225479 |
| ATGACGCCTAGG  | 735.395694208198 | 0.119480485420586 |
| CACCCTGACGCA  | 735.397013554784 | 0.213659017057502 |
| GCCTTGTCATCC  | 735.398195189309 | 0.180435155175819 |
| ATCGTCACCGTC  | 735.404989430872 | 0.181338118488525 |
| CGTGACACTGAC  | 735.415699541537 | 0.201117459163497 |
| ATTGTATCATCG  | 735.416252224394 | 0.238809129991874 |
| AGAAGTAATGAC  | 735.427511579848 | 0.32879039945062  |
| CTGTAAGGGTCA  | 735.435058635414 | 0.373720638892794 |
| CGTTACGGTCA   | 735.436696007048 | 0.285559582966002 |
| ACGTCACATATCT | 735.452668826315 | 0.238493707235838 |
| ATATTTGACGCA  | 735.475062077582 | 0.283824532205901 |
| CATTCGGTCACA  | 735.475224339162 | 0.32067550829502  |
| TGTACTGTCACA  | 735.476505743758 | 0.275016340079066 |
| CGTCACAGTGGC  | 735.479754936166 | 0.311914465893094 |
| TGAGTACAGTAA  | 735.482297577984 | 0.576139185669919 |
| AAACTTTACTCA  | 735.483474851755 | 0.338839888083348 |
| CTAACTTGTACAC | 735.489471206558 | 0.198091068789658 |
| AGAGCCGACTCA  | 735.493992767783 | 0.242928686162163 |
| ACGTGACACCGC  | 735.50675314848  | 0.239462754159254 |
| CGCTAGGTGTCA  | 735.507285499637 | 0.366333301619147 |
| AAGCGTGAGTCG  | 735.518729170908 | 0.179763991818292 |
| CGTAGCGTGACG  | 735.51930910909  | 0.405332583229356 |
| GGTGTGTCATGAC | 735.519341820193 | 0.187829389509332 |
| GCCGATCCGTCA  | 735.529497311792 | 0.316692799962843 |
| ACACTCGTGACT  | 735.545700942498 | 0.301641306382147 |
| CAAGACTGTGAC  | 735.550914754024 | 0.340914403617511 |
| CCTTCATAGTCA  | 735.552594116091 | 0.359046330141118 |
| AGCTCGCATGAC  | 735.560973438625 | 0.417032823725867 |
| TAGACCGTGTCA  | 735.565773362826 | 0.357877654017934 |
| GTCACCTATCCA  | 735.579231983067 | 0.308366224785768 |
| CATCCGATGAC   | 735.58285651005  | 0.304469224129852 |
| CTGGAACGTCA   | 735.589221917578 | 0.430068697112758 |
| CGAGTAATGACA  | 735.589573069421 | 0.220037007465999 |
| GAGCATACGTCA  | 735.593180677472 | 0.389408058883096 |
| AAGCATGACGTC  | 735.594270982002 | 0.433147171211462 |
| GATCCCCTCATC  | 735.60067693358  | 0.190872384379485 |



|              |                  |                    |
|--------------|------------------|--------------------|
| ACGGGCAGTCAC | 735.602467456729 | 0.415507433985932  |
| CGAATCATAGTC | 735.610257747174 | 0.450351913386182  |
| CTTCCTGTGACA | 735.612302376116 | 0.256295194817833  |
| CGGAGAAATGAC | 735.629535464744 | 0.190941346007798  |
| AAGTTTCTGACT | 735.636929357947 | 0.289195546676147  |
| GTCACAACAAGA | 735.637488394572 | 0.487419116992918  |
| AATACAGATGAC | 735.640571182978 | 0.27915757164947   |
| GTATTGACGTCA | 735.642498015652 | 0.416837022132111  |
| CACCATAGATGA | 735.669033696817 | 0.405417071614457  |
| GTTATCACGTCA | 735.669427913588 | 0.303325105083153  |
| CGTCATTAAGGA | 735.672287457118 | 0.408555919751503  |
| ATTCAGCAGTCA | 735.677744500772 | 0.44027702582204   |
| GCCAAGAGTGAC | 735.683576338151 | 0.401297054601007  |
| GTCATGCTCAAC | 735.695795199874 | 0.326882725677835  |
| AGTTGTCCGTCA | 735.699708470637 | 0.289883332679433  |
| GCACCTGAGTAA | 735.705018148955 | 0.424027513637639  |
| AGTGTCAGACCA | 735.706011418187 | 0.34460454380584   |
| GCGCCGTGTAC  | 735.710032177049 | 0.422860820931995  |
| ATTATGACCGTA | 735.710684054799 | 0.377628700816976  |
| AGATAGGGTGAC | 735.742170012317 | 0.223435479624161  |
| GCGTCATGCGAA | 735.749633793973 | 0.49493019043957   |
| CCTAGTGGGTCA | 735.75168799     | 0.286401728318154  |
| CTCGGCAATGAC | 735.754469036919 | 0.382490888049467  |
| ACGCACAGTCAG | 735.755378170689 | 0.369071319546681  |
| AACGATGTATCA | 735.755805376699 | 0.370902128652932  |
| GGTATTGTCACA | 735.758041734407 | 0.185243366803649  |
| TAATGTTACTGA | 735.760925084373 | 0.653709620297762  |
| CGAATTCTATGA | 735.76253608858  | 0.443593322414691  |
| TCATTGAGTCGA | 735.76940800317  | 0.24896096942185   |
| CTCAAGGGTGAC | 735.780888810936 | 0.262772812233915  |
| AGTTCGGTCACA | 735.783871857095 | 0.264754202188454  |
| CCTGGGCGTGAC | 735.786152225495 | 0.427399013517646  |
| ACATCATGACAA | 735.799571752959 | 0.407113884142987  |
| GACTCACGGATC | 735.801301444098 | 0.343467612688723  |
| GTCACCGAAAAC | 735.803447302075 | 0.181208920953488  |
| TGTCGTGACGAA | 735.805143842016 | 0.313216578817203  |
| GTCATGAGTTAA | 735.805263381039 | 0.429661966608849  |
| ATTATGTCAGAC | 735.810261618787 | 0.104462088371608  |
| CTTAATGTCATA | 735.827463371437 | 0.0562470124781944 |
| ATGACCGAATAC | 735.830473593234 | 0.343256698833101  |
| AACGGGTGTGAC | 735.832459153656 | 0.360018073272018  |
| GTCATTCATGGA | 735.834764076914 | 0.416113005689944  |
| GTCATGCATTCA | 735.859505621216 | 0.445301336533163  |
| CGTTTTACGTCA | 735.862481378842 | 0.441136132426332  |
| CCGGTCAATGAC | 735.869013333346 | 0.337843972480163  |
| ATATAGAGTAAT | 735.869225819114 | 0.209562270001598  |
| CGCCCATATGAC | 735.870832196483 | 0.41025158115422   |
| GTCATTTACAAC | 735.871109464952 | 0.439217918493347  |
| CAACGTACGTCA | 735.871356850613 | 0.414497817809973  |
| CGTCATTGGATC | 735.880354865578 | 0.399347406897762  |
| CAGTTTGACACA | 735.884846656628 | 0.527254925537263  |
| AGTTTGACACAC | 735.892769258475 | 0.292395633462348  |
| ACCATTGACACA | 735.898476400011 | 0.236549290615257  |
| CGTCATTATTGA | 735.903370155909 | 0.38012275871666   |

|              |                  |                    |
|--------------|------------------|--------------------|
| GAACTAAATGAC | 735.910267816767 | 0.234870879973149  |
| ACTGCTGACGTG | 735.912692996794 | 0.422986887301131  |
| GATAACGTCACC | 735.916285974983 | 0.25441642379805   |
| ATACGCTGACTG | 735.920013199882 | 0.364779523665003  |
| GAGTAATAATCA | 735.931120240781 | 0.301744360924578  |
| CATTCTTATGAC | 735.933137129463 | 0.440429731593748  |
| GTCATTCCGAAC | 735.933965349287 | 0.205810847745479  |
| ATCCAAATGACG | 735.934223005176 | 0.313039834771229  |
| CAAATTGTGACG | 735.937523411293 | 0.0933043378383139 |
| GTCACCGGTTTA | 735.940988101502 | 0.450948299673742  |
| AACTTGTCACGG | 735.955460170908 | 0.339222359375995  |
| GACTCACTACGA | 735.961662185025 | 0.363795736009582  |
| TACGTGGACTCA | 735.96612356193  | 0.323502218675022  |
| AGTCACGAGTGA | 735.969064502811 | 0.249552673947995  |
| GAGTTACACATC | 735.973185259003 | 0.351020063640018  |
| AATGGCGTCACT | 735.977874669293 | 0.315550246122145  |
| GACGTCATGCCA | 735.997178868066 | 0.361327016254607  |
| ACGAATCATACT | 735.997492104253 | 0.24007724118833   |
| GTCATCTACCAA | 736.000920468112 | 0.347842782103588  |
| GTCACCCTCATA | 736.002642514677 | 0.217667640228094  |
| AGGACATGACAC | 736.00271904522  | 0.340698184053555  |
| CAAACCTGTCAC | 736.032261192773 | 0.206328606252369  |
| GTCACACAGACA | 736.034856421025 | 0.41840748063565   |
| GCTGACAGATCC | 736.035349779992 | 0.181666025477356  |
| TCCTCGTAGTCA | 736.036377552237 | 0.546530349392332  |
| ATGACGATCTGA | 736.043042155059 | 0.31535005535541   |
| CAATGACATTTA | 736.045136983778 | 0.257278219471222  |
| ATGACGTCGAAC | 736.048508464836 | 0.200667301630146  |
| CGTCATGATATA | 736.050017624566 | 0.258459936395208  |
| CTGTAACGTGCA | 736.055615612823 | 0.460356323443112  |
| GTCATCACCCAA | 736.071347381976 | 0.244486170864213  |
| CAATGCATGACA | 736.071620936188 | 0.192818604430761  |
| TGAGTCTAATCA | 736.082571940156 | 0.330768765103756  |
| CTCTGCGACTCA | 736.084933740476 | 0.41670228365055   |
| AAGAATGAGCCA | 736.091078578107 | 0.281193134652725  |
| GTAGCTGATGAC | 736.093997075655 | 0.285435359107841  |
| ATACTGTGACCA | 736.103166080232 | 0.304934516785677  |
| CTAGTCACGGTA | 736.103877887706 | 0.172203469756401  |
| ACGTCAGCTGAC | 736.115396963156 | 0.522573262636706  |
| CCGCAAATGACG | 736.119873530024 | 0.427026003782324  |
| ATGACAGACCCC | 736.123969489363 | 0.220225374009798  |
| GAGTGACCCAAC | 736.125896135363 | 0.237853677635975  |
| GATGATAATGAC | 736.135635621418 | 0.282793271723506  |
| GTCACTGTTTTA | 736.151107020351 | 0.584135435529561  |
| AGTGAGCAGTCA | 736.162202345877 | 0.211333325245669  |
| ATATACTCACAT | 736.163252699752 | 0.184767099242156  |
| TAAGACTGGTCA | 736.178726435376 | 0.334403599043928  |
| CCTTTTGACGCA | 736.186989168033 | 0.290486611534008  |
| ACGTAAGTGACC | 736.1921348814   | 0.402271848684669  |
| TGACACGTATCA | 736.200646129693 | 0.271293341423695  |
| GGGTCACACAAA | 736.202189866777 | 0.240657257066468  |
| GATTGCTCAGAC | 736.20668231604  | 0.394588669710703  |
| GCCCAGGAGTCA | 736.212521946783 | 0.3865239896287    |
| GTCACCGACATA | 736.221049593693 | 0.29587854699296   |

|              |                  |                   |
|--------------|------------------|-------------------|
| ATTATGGACTCA | 736.23555313743  | 0.437865653695694 |
| GTCATTGTTTGA | 736.23560793077  | 0.330742032383827 |
| CAGAAGCAGTCA | 736.239534957398 | 0.227270119773347 |
| ATGTGAATCAAC | 736.241044395282 | 0.413292042914307 |
| TGACACTGGTCA | 736.247516610115 | 0.313728326401972 |
| TACGACTCGTCA | 736.247758348368 | 0.23990392870894  |
| GGTCACGTGTCA | 736.249738737128 | 0.350655110847495 |
| GACATATTAGTC | 736.258817278989 | 0.330728591639137 |
| CGCTTGGTGACA | 736.263760282271 | 0.31616842793652  |
| CGTCATTGCAGC | 736.273066782986 | 0.318391508178415 |
| TCTAGGGTGACA | 736.280202710351 | 0.440940629985633 |
| GTGTGAATCTTA | 736.282150215754 | 0.252789489099635 |
| TACAACCTATGA | 736.283507951383 | 0.383615476725221 |
| GTCCCGTCATAA | 736.284396170927 | 0.347455678966763 |
| CTCAGACTATGA | 736.299021043208 | 0.605156956658298 |
| ACCGGGCTGACT | 736.299745801683 | 0.392027462908658 |
| AGGTCGTGACTG | 736.309310520663 | 0.287557786865612 |
| CATAACGTCACC | 736.310272388222 | 0.316340439768275 |
| CAGTGTATGTCA | 736.317312305338 | 0.556161955272971 |
| ACGAGTGAGTCT | 736.31910482736  | 0.182641461215168 |
| GAGTAATAGTTA | 736.319128702788 | 0.170096428958362 |
| GGGTCACACGCA | 736.334012780882 | 0.291950058717728 |
| CGTCACCTTTTA | 736.334610492237 | 0.345187331043879 |
| GCCGTATCGTCA | 736.349901836807 | 0.657030203838799 |
| AAGGCTCGTCAT | 736.357278025597 | 0.209020313117238 |
| TGCGCTGACACA | 736.374881387997 | 0.382402033149515 |
| CGCGCGGTGTCA | 736.378002950983 | 0.525411421905329 |
| ATACAACGTGGA | 736.37910541544  | 0.41906299791166  |
| GCGTCACTTACC | 736.392468799463 | 0.310701684785571 |
| GACAACCTATCA | 736.413408354947 | 0.339922454438665 |
| ATGCGTACGTCA | 736.414613355965 | 0.378814825913873 |
| ATCACAGTGACG | 736.418500394978 | 0.475166500994711 |
| TCACACGCGTCA | 736.424273783895 | 0.418131301255606 |
| CATGCTCGATGA | 736.426405707797 | 0.292528540003923 |
| GTCATGTGCTGA | 736.430487114212 | 0.364140738804899 |
| TCATATATAGCA | 736.438987263699 | 0.510033622000643 |
| ATGAGTGAATGG | 736.440538192767 | 0.317210211304147 |
| TGAATCAGTGAA | 736.443009403481 | 0.271835677075899 |
| ACGTCATGCCAA | 736.449283677746 | 0.305868551417058 |
| AATGACGTGCTG | 736.459019124929 | 0.255545234409301 |
| TCATACGTGTAA | 736.462191344365 | 0.348412411370158 |
| TATGACTTGCGA | 736.4655600627   | 0.416825629982706 |
| AAGCGTGACAAA | 736.4713307503   | 0.336676782741219 |
| CCTGGATTAGTC | 736.480258705962 | 0.323976639537886 |
| CGTCATGGGTGC | 736.489147738404 | 0.404984212672937 |
| ACTACAAATGAC | 736.489317667    | 0.453730584649923 |
| GTCACATACTCA | 736.493759261851 | 0.304667899387387 |
| AGCCGATTACTC | 736.501062419249 | 0.429062453095634 |
| GACGTGTCAGCA | 736.501087106052 | 0.332111442005409 |
| TACTAATAACGA | 736.502455966781 | 0.585226876779594 |
| AGACCGGTGACA | 736.506539666737 | 0.416940124934271 |
| TGACTGGGAGAA | 736.518024372124 | 0.256969824187486 |
| CGATTACTAAAC | 736.525442628206 | 0.19824983434154  |
| ACATAGCGTGAC | 736.526214159222 | 0.343300832812405 |

|                |                  |                   |
|----------------|------------------|-------------------|
| GCAGGTGTGACC   | 736.527474735798 | 0.339392423767518 |
| ATGACCACTCGA   | 736.530150014714 | 0.37991982200365  |
| GTCACGTGTCGA   | 736.547065389928 | 0.454034998251143 |
| GACTAATAAAAC   | 736.55054800039  | 0.284671065147429 |
| ATGGGGTGTGAC   | 736.55700503433  | 0.273989627051555 |
| AACCGTGACACT   | 736.558870610766 | 0.31235327654124  |
| GAAGATAATGAC   | 736.559759008541 | 0.317048974845611 |
| TCTTAATCGTCA   | 736.562354073968 | 0.260884546123255 |
| AGCTGAGTCTAC   | 736.568646171505 | 0.382460033402371 |
| ATGAGTAGTCTGA  | 736.572658770454 | 0.294015456608138 |
| CATCCATGACGC   | 736.588352106179 | 0.380996644337236 |
| ATGTAATTAATC   | 736.602116166946 | 0.356090751654939 |
| AAGATTCATCAC   | 736.606826882985 | 0.255194277697531 |
| ATGACCAGGTAC   | 736.607682916471 | 0.357685628442198 |
| GGAACACAGTCA   | 736.609964886173 | 0.258502688616093 |
| ATTTGGGATGAC   | 736.618275836793 | 0.419341290081673 |
| CGTGACAAGGTC   | 736.621571304068 | 0.282251111097186 |
| TGACGATTAGCA   | 736.639189528591 | 0.472966148874316 |
| GTCAGTGAATCA   | 736.639684089022 | 0.317489943197229 |
| ACGTCACAACCT   | 736.643409894784 | 0.364314085138809 |
| TCCAGTGACAAA   | 736.655887214636 | 0.226758622198546 |
| CATTGTTGTGAC   | 736.662062552681 | 0.251819944400674 |
| GTAAGTGAATAC   | 736.665953080686 | 0.307624070227691 |
| CACGTCACCTGA   | 736.668725888034 | 0.406632473768416 |
| GGGTCTGATGAC   | 736.674822312937 | 0.295517427098999 |
| GATTCATCATAC   | 736.674988488267 | 0.364844659919659 |
| GTAAGTGAATAC   | 736.677026887804 | 0.523866701796646 |
| GTCACAACGAAA   | 736.695801873439 | 0.47674669585052  |
| CTTAGCCAGTCA   | 736.69890975304  | 0.309967165247614 |
| TATGACATTGAA   | 736.706620615345 | 0.284482342321999 |
| AGCATAATGACG   | 736.709563261883 | 0.298100051399756 |
| GAAATTACACAC   | 736.70980396252  | 0.282816981367721 |
| GTCATGGAATGA   | 736.711286142024 | 0.2497257352898   |
| CATAGTAGTCAG   | 736.715831173196 | 0.319063267581021 |
| GATCATGACATA   | 736.715934457109 | 0.228374212594368 |
| TGACTAGCGCAA   | 736.716580621669 | 0.392914602502892 |
| CGCGATGAGCCA   | 736.722861542302 | 0.299476899149533 |
| GTCATATTGAC    | 736.730437103182 | 0.422744011646216 |
| CCGTTATGAGTA   | 736.737139086771 | 0.348105707288697 |
| AGTGTCACGCAC   | 736.737359787695 | 0.272433018236546 |
| AACCGGGTGTGACC | 736.73743858183  | 0.443571364997711 |
| ATGACCTGATGA   | 736.754422683199 | 0.370626617340896 |
| ACGTCACCCCTCA  | 736.764274522969 | 0.226741479624013 |
| CGGTCATGACCG   | 736.769357787367 | 0.348572882040767 |
| AAACACGTCAAC   | 736.772697100269 | 0.160792850908539 |
| AATCGTGAGCAA   | 736.778053826367 | 0.280613301449602 |
| GTTACTATTACA   | 736.782401370287 | 0.383343263481257 |
| GTCACATTCATA   | 736.793902404814 | 0.25725187429501  |
| CACGTCACCTACA  | 736.798274904743 | 0.370072913109801 |
| ATTGCTCTGACG   | 736.799293037112 | 0.289291190995865 |
| GCAGCGTGTGAC   | 736.810307923514 | 0.41009954857982  |
| CGTCACTGACAA   | 736.810465021663 | 0.355101561517087 |
| ATGAGTAGTCTA   | 736.814489665542 | 0.224819714084483 |
| CATTCGCATGAC   | 736.818682019794 | 0.454508444530854 |

|               |                  |                   |
|---------------|------------------|-------------------|
| AGTCAGCCACCG  | 736.824984286798 | 0.351494978967975 |
| CGTTGCGACTCA  | 736.826154107158 | 0.38606428270841  |
| CGTCATTATCAC  | 736.831705250809 | 0.367590974112813 |
| CCCTGATATGAC  | 736.832576354518 | 0.377048497664584 |
| GTCATATATCCA  | 736.838949158269 | 0.294180157738423 |
| GACGTTAAGTCA  | 736.841979954634 | 0.296994303679677 |
| GCCGCTTGTCAC  | 736.842366210878 | 0.351837929798205 |
| AGTCAGAGAGTA  | 736.865150551189 | 0.261906519817196 |
| AGCTACGCGTCA  | 736.869012893787 | 0.358010432812158 |
| ACTCATAGGATG  | 736.871114759514 | 0.407068473697194 |
| CTAAGTGACCAA  | 736.887061699718 | 0.178229074034656 |
| AGAGTCAAATAA  | 736.887318776311 | 0.387760875352085 |
| ATGACAAGAAAC  | 736.893201261034 | 0.326189639156682 |
| CTCTATAATGAC  | 736.894326155006 | 0.350020021402511 |
| AGACTTACTAAT  | 736.894629521385 | 0.334341984100348 |
| TGTTACACGTAA  | 736.906499470127 | 0.456850687413131 |
| ATGAGCCAGCAC  | 736.908713743598 | 0.337751269014546 |
| ACGTCACTTTGA  | 736.910828283599 | 0.259797590429458 |
| CAGCATGACACC  | 736.911729096091 | 0.309812637570789 |
| ACTGTTGTGACG  | 736.920106032127 | 0.320183227421529 |
| AGACTATGACCG  | 736.924959515114 | 0.287038629624881 |
| AATGCAAATGAC  | 736.927877766833 | 0.247178039462666 |
| GGCTAGTGTGAC  | 736.931372309798 | 0.294066039441151 |
| CAGGTCTGTACAC | 736.940263768619 | 0.467901770065994 |
| TACCGAGTGACA  | 736.941982882247 | 0.35646073242261  |
| CCGTGAGTCTGA  | 736.943750734017 | 0.446745592571589 |
| CGTCACAACCTTA | 736.972571871764 | 0.300694070364743 |
| GAATCCGGTGAC  | 736.978039459398 | 0.424735762403889 |
| TGTCACCAATAA  | 736.981489504038 | 0.296544184102539 |
| CTTTAGTGACGC  | 736.986268608499 | 0.477695956979522 |
| GGGCTTCATGAC  | 736.990028248287 | 0.288258243159478 |
| GGTCATTAACC   | 737.000112600387 | 0.429747829904931 |
| ATGACACCCCGA  | 737.008104899471 | 0.325656252371614 |
| CGGTCGAATGAC  | 737.021147836824 | 0.340725799047908 |
| ATGACAGTAAGA  | 737.027212518012 | 0.211943072484632 |
| CTCAGTGACCAA  | 737.030318872121 | 0.416953177658727 |
| CTCGCTTATGAC  | 737.030705237844 | 0.301216618201202 |
| GTGAGTCGGCAC  | 737.030844932804 | 0.317493550910029 |
| AGTCAGAATTCC  | 737.041326395588 | 0.465462424701498 |
| TCATGTTAGTAA  | 737.043820765959 | 0.307158472495552 |
| AAAAGCCATGAC  | 737.044369995951 | 0.325040834477106 |
| AACGTCACCGTG  | 737.052272518067 | 0.139524258144837 |
| ACGTGTCAGACA  | 737.05512787049  | 0.318064218917818 |
| CGCTGTACGTCA  | 737.05651223116  | 0.287748345172373 |
| CAACGGCGTGAC  | 737.061437214076 | 0.552981433703589 |
| GAGTCAAAGAAA  | 737.063273616701 | 0.237416524031575 |
| TGACTCCACAAA  | 737.06649018799  | 0.295026688165323 |
| ACCAGTCAGAAAT | 737.072473746763 | 0.489243859576458 |
| ACGTCACGTTTG  | 737.073530361875 | 0.425603327466141 |
| TAAGACACATAA  | 737.091978686014 | 0.271457275181633 |
| GTACGGTCATA   | 737.093341329895 | 0.158066189843881 |
| TCATTTGACACA  | 737.103272555164 | 0.361086576980852 |
| ATTACGGAATGA  | 737.106131100646 | 0.307648829896356 |
| ATGACCAGCTCA  | 737.10692617247  | 0.365736078677737 |

|               |                  |                   |
|---------------|------------------|-------------------|
| GGTTAGTGACAC  | 737.110762550171 | 0.272182535174687 |
| ATGACAACCTTA  | 737.116189490971 | 0.327129883969741 |
| ATGACGGACTGA  | 737.116376423194 | 0.279180577262235 |
| CGTCATTAACG   | 737.118386545242 | 0.378807286754831 |
| GTAAGATTCACA  | 737.120308851601 | 0.285128576948472 |
| TCTCGTGACGAA  | 737.120389336032 | 0.40071204575718  |
| ATGAGCAAAACC  | 737.123350264892 | 0.419480709180646 |
| TACGGCATGACA  | 737.124734084141 | 0.372260362541088 |
| CGACAACCTATA  | 737.128687254712 | 0.309731969483257 |
| GTGAGTCCCTAA  | 737.132751165068 | 0.556767218253528 |
| GGGAGTGATGAC  | 737.134189090842 | 0.156291321586507 |
| GGACAACGTCAC  | 737.139094930549 | 0.278731428945259 |
| GCGTCATGGACC  | 737.146579782147 | 0.405912255042637 |
| GATTCATCAATC  | 737.149483216282 | 0.404557346392328 |
| AATGAGGTCATA  | 737.151481119368 | 0.283121856852458 |
| ATGAGTACCGCA  | 737.153480040681 | 0.431667440603436 |
| CTGACTAGGTTA  | 737.153800141381 | 0.366063841503391 |
| TACGTAGTGTCA  | 737.164712712057 | 0.363058116355975 |
| GTCATGATACAC  | 737.171629901174 | 0.349385714631593 |
| GTGCTGTACCA   | 737.175172221689 | 0.401071145677323 |
| CGTCACAGGTAA  | 737.175227211756 | 0.230037669264242 |
| CGTCATGCATAA  | 737.177132094265 | 0.300657422498843 |
| CGGTGGCGTCAC  | 737.178522991533 | 0.298596806376045 |
| CCTGCTGAATCA  | 737.181245887788 | 0.369628931441758 |
| AATCATTAGTCG  | 737.183091469917 | 0.452250457572422 |
| ATATGACGGGGC  | 737.192565699186 | 0.362758273158645 |
| AGTAGAGAGTCA  | 737.193536661325 | 0.232245679546281 |
| AAACGTGTCAAC  | 737.194264083067 | 0.186993872740532 |
| GACGACTGGTCA  | 737.200046089335 | 0.554479394649933 |
| CGGCTGAATGAC  | 737.205603426975 | 0.298712231602676 |
| CGTCACAGCGAA  | 737.210343546138 | 0.402930091876928 |
| GAATCGTAGTCA  | 737.211075146794 | 0.419285615832159 |
| TCTGCCATGTCA  | 737.212126820978 | 0.340158714464426 |
| ACAAGTGGTGAC  | 737.218658953907 | 0.426105023060934 |
| GTGACACGATGA  | 737.225611564058 | 0.245683680733076 |
| AGTCACGACGAG  | 737.226843185994 | 0.556746392374901 |
| AAGGAAATGACG  | 737.228993598009 | 0.333227877365769 |
| GGACTCGTCAGA  | 737.237505288739 | 0.385186253350407 |
| AGGACTAATCAT  | 737.242907070041 | 0.412433194817774 |
| ATGTGTCTTAAA  | 737.244271539509 | 0.277410010871702 |
| CCTCGGTGACAG  | 737.244442025832 | 0.490416321326723 |
| GGTTCGAATGAC  | 737.246912811312 | 0.249793113723002 |
| CAACGCTACTGA  | 737.252927201563 | 0.352118393394549 |
| CGTCACGTTGTA  | 737.257561515262 | 0.337546704603632 |
| ACCGTTAATGAC  | 737.258400879081 | 0.379193680330939 |
| AGAGTCAAATAG  | 737.259665024705 | 0.201353156694305 |
| ACTCATAGTTGG  | 737.266563886137 | 0.442341475844532 |
| GCTGCCTGTGAC  | 737.269253200518 | 0.214449914050396 |
| AGCGATTAGTCG  | 737.28057678477  | 0.215002606743563 |
| ATCTTACATGAC  | 737.281150403027 | 0.359337503491205 |
| CATTCAAGTAATC | 737.282465352955 | 0.299582591487622 |
| GTCACACGCTTA  | 737.288222274398 | 0.239850412968948 |
| GAAGGGTGTGAC  | 737.288524309489 | 0.217507808765879 |
| AATGTTGCTCAC  | 737.294232444895 | 0.395698155799181 |

|              |                  |                   |
|--------------|------------------|-------------------|
| AGGGCGGAGTCA | 737.294624584088 | 0.219004097470469 |
| TCATCCGCGTCA | 737.296452458891 | 0.163512839225191 |
| GCGTCATGCTCA | 737.298363138936 | 0.340389482251262 |
| GTCACCGATCCA | 737.302332520313 | 0.335048603872482 |
| CACTAATGACCA | 737.302412530696 | 0.297078253076273 |
| ACTAATTAGTCT | 737.306139527883 | 0.263908162575109 |
| CAATGCTAGTCA | 737.306218989474 | 0.40619501916397  |
| TGACCAAGTCAA | 737.307535930409 | 0.438970353635788 |
| GACCTATTACTC | 737.312684250845 | 0.292195430602894 |
| TAGCAGATGACA | 737.316172048053 | 0.235191541984806 |
| CGAAGGTGTGAC | 737.329783711562 | 0.295166163177141 |
| ACAGTCAGTTCG | 737.334461538664 | 0.44076494183813  |
| CCCATGGTGTCA | 737.349857862554 | 0.418992253897161 |
| AACCCTCAGTCA | 737.352839351997 | 0.207976564848036 |
| CCTGCGGTGTCA | 737.357199688664 | 0.37702140169825  |
| ACTCATTGAGT  | 737.361052394347 | 0.271259228257963 |
| CACGTTATATGA | 737.365444605348 | 0.329124066058889 |
| AAGACACATAAT | 737.365969961239 | 0.148599067267711 |
| GACGAGTGAGTC | 737.366787532118 | 0.333530537476484 |
| AACGCTAATGAC | 737.367635211376 | 0.372363082970622 |
| TCATTTATAAGA | 737.369471494569 | 0.509024443550252 |
| ATCTGACACTTA | 737.371772171234 | 0.216247859188819 |
| AAGTACTCACAC | 737.376475208417 | 0.256506199321137 |
| CAAGTTGTCAAC | 737.376682239302 | 0.333201103755128 |
| ACATCGTGACAC | 737.380283782883 | 0.365542253759416 |
| TGACTGGGCTCA | 737.388951320131 | 0.474347881432227 |
| GCAAAAGGTGAC | 737.395695184594 | 0.274369425522014 |
| AGCTAGTGACAC | 737.397048443542 | 0.371748917224331 |
| TCGTAAGACTAA | 737.399353602035 | 0.610819015332972 |
| AGTCAGTGACCA | 737.405592299319 | 0.445573008624793 |
| AATTGGCTCATC | 737.420712978407 | 0.260944230713151 |
| GTCATTCATATA | 737.426346684832 | 0.395434234937416 |
| AACCGCTGACTG | 737.430331131213 | 0.283036111865672 |
| TCAGATCTGACA | 737.432276590692 | 0.359409260445563 |
| ATACAGTCAATC | 737.433909771736 | 0.362934713477993 |
| ATGACGTCTTTG | 737.438557577545 | 0.324993077857695 |
| GCGCGCATGAC  | 737.441493608878 | 0.522479958447326 |
| CGGTGATGTAAC | 737.443328752441 | 0.374880105377875 |
| AGCCTGGATGAC | 737.453846789452 | 0.292704338857666 |
| ATGATGCAACCG | 737.457919051443 | 0.306060264983714 |
| GTCATTTTCAAC | 737.46114007459  | 0.318241352292205 |
| GTCATCAGGAAA | 737.463390307209 | 0.29123989418756  |
| AAGTCACCCCGG | 737.47377293761  | 0.187099730413966 |
| AGGAAATGACAA | 737.473981687636 | 0.279642661639414 |
| CCTGATAATGAC | 737.479094224296 | 0.32430870685063  |
| GACTTGGGTGAC | 737.479356930983 | 0.381501380752763 |
| GGACCGAATGAC | 737.48218319731  | 0.217273443588102 |
| ATGACAAGGATC | 737.49048313316  | 0.32223199632898  |
| AAACCCATATGA | 737.506330234778 | 0.314597912787737 |
| GATTAGCATGAC | 737.510398964755 | 0.340683144325382 |
| AGATGATGCAAC | 737.514293363942 | 0.246932209744473 |
| ATAGACAGTGAC | 737.530828563649 | 0.559399778630741 |
| TATGATGTGACA | 737.553278157578 | 0.333111633198375 |
| ACCTTTAAGTCA | 737.555371599733 | 0.398899359671303 |

|               |                  |                   |
|---------------|------------------|-------------------|
| ATAACGGTGACA  | 737.558407144489 | 0.398247941633501 |
| TGGTCACCGAAA  | 737.579106680386 | 0.320530810012139 |
| AAGAATCATCGT  | 737.585809698717 | 0.343055373819304 |
| CTTGTATGTGAC  | 737.594436299963 | 0.202601690120471 |
| AATCAGTTGACT  | 737.596398074242 | 0.536362717734194 |
| AGGTAATCGTCA  | 737.602278470225 | 0.399557161695312 |
| CATTCTGTGACA  | 737.602322927685 | 0.222187476502454 |
| GTCACTCAGCTA  | 737.604438793038 | 0.375360490914145 |
| AGTCAGAATAGC  | 737.621716357261 | 0.287906557025352 |
| CGTTGACCAATC  | 737.624035564088 | 0.221319480058616 |
| ATTCATGACAGA  | 737.634059543235 | 0.391166273590911 |
| AGACGATGTCAT  | 737.63816426123  | 0.300462851043894 |
| AATCGTGGTGAC  | 737.64812496167  | 0.260235889818602 |
| ATAGATTGTCAT  | 737.648678428533 | 0.394077019980864 |
| GGTTTGCATGAC  | 737.660581205367 | 0.397134375855484 |
| ATAGGTAATGAC  | 737.667525784818 | 0.300771960910818 |
| TATGACCGGTAA  | 737.667852930186 | 0.293815388132878 |
| CCAGATTACGTA  | 737.67157595332  | 0.390769591941466 |
| CGCACCTGTGAC  | 737.677845982188 | 0.288135365023901 |
| GTCACACCGCTA  | 737.681946076362 | 0.371093319278611 |
| ATCTGTGAGAGA  | 737.687680384352 | 0.366414775971341 |
| AGTCACGAGACA  | 737.703291816796 | 0.20598020767606  |
| AAGTCAAGTCAT  | 737.706823018045 | 0.106022291825424 |
| ACGTCATGCGCA  | 737.710087433785 | 0.312227393473848 |
| GTCATGCTCCGA  | 737.718786071027 | 0.274794880818982 |
| ACTCATAGAGAT  | 737.726896217254 | 0.347664329789157 |
| CCAAGTGACCAA  | 737.738670832161 | 0.334639478453296 |
| CCATTTGTGACG  | 737.74461444132  | 0.441825689806785 |
| GGATCCGTCAGA  | 737.756169770362 | 0.260361290247105 |
| CTTCTGCATGAC  | 737.756696203689 | 0.388299751922541 |
| AGACTAATATCG  | 737.765932500376 | 0.194296294575244 |
| GTAGCGGAGTCA  | 737.77078911505  | 0.1354469708633   |
| TGACATGTGTAA  | 737.772970237685 | 0.362174912809521 |
| AGTGACATGACG  | 737.778357056992 | 0.294985041193477 |
| AGTCAGAAGTTA  | 737.792192116154 | 0.161152612725855 |
| TATTTGCAGTCA  | 737.792371537789 | 0.436877480139008 |
| CACGTGGCGTCA  | 737.793840136796 | 0.54135145640174  |
| GTGCGTGACAAA  | 737.796691073208 | 0.251697451237214 |
| GTAGTAAGTCAC  | 737.798607540714 | 0.231481407565332 |
| CTGCCATGACGC  | 737.806219463334 | 0.407881324949912 |
| GTCATTCTCGCA  | 737.806724908526 | 0.137311398186999 |
| CCGAATGTGACA  | 737.81326197295  | 0.375546410647429 |
| CATACCTGTACAC | 737.816417350349 | 0.342096655917535 |
| ATCAGTGACCGC  | 737.818832433754 | 0.233645222612977 |
| CGGCGCGATGAC  | 737.822574914831 | 0.289281461807347 |
| ATTGAGATGACA  | 737.822768729833 | 0.187454959114889 |
| GTAACAGAGTCA  | 737.832685733701 | 0.265104997447542 |
| AATTCGTGACGC  | 737.840778998683 | 0.492058532932045 |
| CTCTACTGTGAC  | 737.843211587638 | 0.164741074474388 |
| CGTATAACGTCA  | 737.845428903829 | 0.458278286135241 |
| CGAATTGTGACA  | 737.849022647608 | 0.289266138160661 |
| CAAATTATGTCA  | 737.85020752901  | 0.346743720119329 |
| AGCTTAATGACG  | 737.856675774767 | 0.394091687454868 |
| CTGTGAGCCACA  | 737.858027627114 | 0.663091144597413 |



|              |                  |                   |
|--------------|------------------|-------------------|
| GCCTCGTGTGAC | 737.866338381428 | 0.405067080962988 |
| GACTCAACTTAA | 737.875076695366 | 0.275478140893604 |
| GACGCAGTCAGA | 737.886745864724 | 0.212095661534151 |
| CACGTCAGCGAA | 737.891356376944 | 0.43369619747094  |
| GTCACCCCGGTA | 737.899348138903 | 0.207809368000805 |
| GTAATGGGTCA  | 737.901360551518 | 0.208182281550112 |
| CGCTGCGACTCA | 737.911477142147 | 0.265834973061261 |
| GTCATAAAGCGA | 737.930494595936 | 0.190710525917681 |
| ATGCCACGTCA  | 737.930636253501 | 0.320175689357873 |
| GACCAGGGTGAC | 737.934886027755 | 0.391809688394135 |
| TAGGCGGAGTCA | 737.936094123248 | 0.391868968887747 |
| GTATCATGACCA | 737.958621891263 | 0.334898455648813 |
| AACACTACGTCA | 737.959343426371 | 0.351237064179346 |
| AGTCATGGGCC  | 737.965145680256 | 0.357416953727398 |
| AGTCAATCAGTC | 737.981738103698 | 0.365203976148055 |
| TAATTTGACTGA | 737.985961065408 | 0.193962778890956 |
| AGAGTCGGTGAC | 737.986499621321 | 0.24315861633701  |
| ACGTCACCTAAG | 737.986938874998 | 0.372079246793911 |
| ATGACACTCCTG | 738.004356502243 | 0.269559891835171 |
| ACATGCTGAGTC | 738.005116536416 | 0.448183767526773 |
| CGTGGTTGTGAC | 738.018796888094 | 0.245600590896334 |
| ATAACCGGTCAT | 738.019940372545 | 0.374885052444367 |
| TGGCTTGACTAA | 738.023282678738 | 0.276496283043498 |
| GGGAGGGATGAC | 738.030943372748 | 0.216128729062729 |
| AACAGTCAACAA | 738.036610573099 | 0.352792465266253 |
| AATACTTGTGAC | 738.048588659044 | 0.271612739221515 |
| TGACTATCGAAA | 738.05244868335  | 0.377555018701605 |
| GTCCGTGTGACA | 738.061301701845 | 0.39743079897644  |
| GTCATTAGCATA | 738.06591870055  | 0.284896339874042 |
| GAGTATCACTCA | 738.073843650883 | 0.416242624416777 |
| GTCACGCGGAAA | 738.074798824551 | 0.495536700416512 |
| GCCAACAATGAC | 738.078561558098 | 0.346463297948094 |
| AGGTCTGACGTG | 738.093290309349 | 0.34419610882521  |
| ATTGTCAATGAC | 738.096629623816 | 0.288461140417149 |
| AGCAGTGAATCA | 738.097109420294 | 0.237405958588739 |
| ACCCGGTAGTCA | 738.107695601481 | 0.457792729975648 |
| AGTCACGGTGCA | 738.110559656628 | 0.314902397176367 |
| CTGGATAATGAC | 738.114602147689 | 0.398670877577131 |
| ACCTTTTCGTCA | 738.116241081819 | 0.359021823360004 |
| GCCCCTACGTCA | 738.119764942775 | 0.305464714232848 |
| GTCATGAATGCA | 738.122968788535 | 0.337301952939953 |
| CGGTGCGACTCA | 738.123483113415 | 0.417127470821286 |
| AACAGACTCACC | 738.127782488051 | 0.203332508111301 |
| GTCACACACCAC | 738.128507110838 | 0.279065646370961 |
| AGTCACCCCGGG | 738.131423432095 | 0.313904863722249 |
| ATGCCTGACGCA | 738.131862536688 | 0.297973003233096 |
| AACTTGACTCGA | 738.132603736203 | 0.294513529760233 |
| AGATTGCATCAT | 738.134524204035 | 0.243115650792774 |
| CGCTGTGGTGAC | 738.14240721021  | 0.355221800938881 |
| CGTTCTGACAAA | 738.145166272225 | 0.298426601711958 |
| GAGTAATCTCCC | 738.168416469446 | 0.46561182118165  |
| ACTCCGGGTGAC | 738.172479181641 | 0.204879388709132 |
| ACTCATCTGAC  | 738.172745818046 | 0.291232012214353 |
| AAGAACGGTGAC | 738.183292531759 | 0.116411619515903 |

|              |                  |                   |
|--------------|------------------|-------------------|
| CCATTTAAGTCA | 738.197144844989 | 0.517476851313243 |
| CTCTGAAATGAC | 738.206874271487 | 0.278961339617059 |
| CCAGGTGAGCAA | 738.207159163851 | 0.27636778527528  |
| AAACCTGACTAT | 738.210640751262 | 0.231067259675235 |
| AAACAGTCACC  | 738.215853057373 | 0.166734818024439 |
| ACATAAAATGAC | 738.217861301202 | 0.293725505688842 |
| AACCTGGTGACA | 738.22167940641  | 0.265015349140066 |
| GTCATCCCCGTA | 738.24987571458  | 0.257181508087587 |
| CCTCGGAGTCAA | 738.250229785406 | 0.282007915850107 |
| CTTGCTTATGAC | 738.260288735995 | 0.638309104467927 |
| ACTCATAGATTG | 738.265682272752 | 0.266378130951118 |
| AATGTTGGTGAC | 738.267668215356 | 0.429585600669713 |
| CCAGGTCATAGG | 738.267919355747 | 0.347510610367994 |
| AGACTAATCCTA | 738.280212055341 | 0.165228933400511 |
| ACTACCGCTCA  | 738.281613443255 | 0.267042514220039 |
| CACCCATGAGTC | 738.29536739421  | 0.302988220204087 |
| ACGCTTCTGACT | 738.29785903772  | 0.231255783955272 |
| TAACACGTATGA | 738.299541660305 | 0.383851409383169 |
| CTCTGGCTCATC | 738.302758593955 | 0.16804285946375  |
| AAAATGATGAGT | 738.309267206743 | 0.198119834774643 |
| CCATACTTGTC  | 738.319244107481 | 0.291066390099217 |
| AGTTGTCACCCA | 738.320398505728 | 0.346641078034688 |
| CCTAAGCAGTCA | 738.328433437673 | 0.396185149812869 |
| CAGCTCACGTCA | 738.329731969329 | 0.419061514880239 |
| GGGTCATCCTAA | 738.334852223581 | 0.397272677472343 |
| AGGGCTTATGAC | 738.340467279181 | 0.371435705957155 |
| GAGTGATGTGAC | 738.341535216835 | 0.252111314819443 |
| ATAATATGACCA | 738.342119018287 | 0.373298359427312 |
| CTATTTGATGAC | 738.34775300734  | 0.243014738248126 |
| GTCATCACCAAC | 738.349254834672 | 0.376891311898485 |
| AGGGCGGATGAC | 738.372323274772 | 0.231310292706284 |
| GGGTCATATATA | 738.379696398303 | 0.461253260845126 |
| GCGTCACTATAC | 738.381508039775 | 0.332667303621642 |
| AGACGTGACACC | 738.387504286096 | 0.350119162940637 |
| AGTCAGCATCGA | 738.404867104847 | 0.323092560427025 |
| TGACTGGCGACA | 738.404905593885 | 0.331732870246191 |
| ACAGCATGTGAC | 738.405355911256 | 0.337612589489254 |
| GGATTGACGTCA | 738.409589300816 | 0.348270894736422 |
| TCATTGAGAGCA | 738.420866956329 | 0.320481191930977 |
| ATGAATAATCCG | 738.425076169688 | 0.318817355982622 |
| TCACAGTCAGCA | 738.425963771448 | 0.29991351403807  |
| TCCGTTCTGTCA | 738.436289363259 | 0.407428249131888 |
| AGATGTGTGACG | 738.436626252138 | 0.197958129405842 |
| CATGAGTGTAC  | 738.437737747096 | 0.291683210497331 |
| AAATCGTGTAC  | 738.451112058722 | 0.200520015163257 |
| AGCCCTTATGAC | 738.4599811649   | 0.379154165342741 |
| GTCATGCTCCAA | 738.460200251866 | 0.20821350385933  |
| GCACTGACTGTA | 738.460635540044 | 0.25951319137491  |
| GAATCATACTAC | 738.463073834743 | 0.340731072416863 |
| CCCTTGGGTGAC | 738.463347538529 | 0.207894768327749 |
| ACGTCACATTCA | 738.466295316031 | 0.338217025948531 |
| GAGTAATCCTGA | 738.472674430295 | 0.349322317022123 |
| ACTTTAGTGACG | 738.4740667184   | 0.318904384836703 |
| AATGCAGAGTCA | 738.477830753111 | 0.40109757552408  |

|              |                  |                   |
|--------------|------------------|-------------------|
| GCCGAAGTCACA | 738.480282510839 | 0.395060301304498 |
| GTTGATTGGTCA | 738.480693356674 | 0.279059360390759 |
| ATGTGGTGACGC | 738.485132957297 | 0.302174305648621 |
| ATCTGTTTGTCA | 738.500145265485 | 0.230092760350529 |
| ATGACAGTGAAG | 738.505064896785 | 0.309987096482808 |
| GCGTCACAAGAA | 738.506990049493 | 0.367064087413609 |
| AGTGAGTCTGTC | 738.513582176783 | 0.245433923605978 |
| CTCCATAAGTCA | 738.516131974973 | 0.40201280858191  |
| AATGTACCGTCA | 738.522721630354 | 0.295178254886792 |
| AATGCGAGTCAG | 738.523276780182 | 0.250053587672414 |
| GTAAGTGGTGAC | 738.523363972414 | 0.346297612361183 |
| CTGCAGTGACGC | 738.535358382634 | 0.338349006220374 |
| ATGAGTAGTAAA | 738.545162516292 | 0.294713544267306 |
| CATTGATTAGTC | 738.547501137969 | 0.61162600647075  |
| GTGTCACGCTTA | 738.547988746382 | 0.229013355970924 |
| AACATGTGACGA | 738.548335406707 | 0.295649362766131 |
| ATGTTTACTGGA | 738.549563226514 | 0.361989241244104 |
| ACAAATGAGTGA | 738.558430950867 | 0.433442908394254 |
| GATACTGACTTA | 738.567064556521 | 0.346753235488085 |
| ATGATATCATCA | 738.568741142637 | 0.28264591253012  |
| CTTCATGACAGA | 738.573521071014 | 0.274649872256846 |
| ACGGGTAATGAC | 738.577476116074 | 0.376574747635043 |
| AGTTACATCATG | 738.599731277739 | 0.166448864556762 |
| GATTCATCGGAC | 738.600481481499 | 0.302939710119693 |
| AGTGACAATATC | 738.605003103515 | 0.253084388656178 |
| CTGCCGCTCAC  | 738.611968238936 | 0.196934575597287 |
| CTGACTAGGTGA | 738.619978780473 | 0.48428498383991  |
| CATAAGGTGACA | 738.623998071459 | 0.405397383237427 |
| GATTCATCTTTA | 738.624396842038 | 0.321926468804995 |
| CGACCTAATGAC | 738.624572664506 | 0.24988224488206  |
| AGCTTTGTGACA | 738.626033415255 | 0.453509994545436 |
| TATGAATCGAAA | 738.62899633729  | 0.338817503196494 |
| GTAGGGGATGAC | 738.636055567227 | 0.191180162039281 |
| GACATGTGACCA | 738.641426226085 | 0.39033683159841  |
| AATCATATGTCA | 738.641670212681 | 0.239209096786001 |
| CGCCCTGCGTCA | 738.658883148836 | 0.136423285883407 |
| CTCCCGGTGACA | 738.662307021385 | 0.364727006989747 |
| GCACTAAGTGAC | 738.665786639751 | 0.339457424681095 |
| ACTGACTATGAG | 738.672250064581 | 0.374299920659446 |
| ACCATGTGACGC | 738.672564439168 | 0.378617483445982 |
| CTTAGTAAGTCA | 738.679208171839 | 0.434009299393353 |
| GTCATTAATAAA | 738.689494741634 | 0.306549481371877 |
| ACGCACGACTCA | 738.691489470063 | 0.239168748065276 |
| GTCATCGAGGGA | 738.694718909392 | 0.274932417945266 |
| AACTTTGCTCAT | 738.700507821516 | 0.341672512927265 |
| ATGAAATGACAA | 738.705586315624 | 0.375153832318946 |
| GTCACCCTTAAA | 738.713097725793 | 0.320076276311184 |
| ATGTCACCTGCG | 738.71326796377  | 0.352706894011596 |
| GCGCCGCGTGAC | 738.717818599017 | 0.556310509398632 |
| AGTCAGCGATCA | 738.722816526363 | 0.343801439611236 |
| TACGTATCGTCA | 738.732680018761 | 0.426374916035356 |
| ACTGACGTGACA | 738.739100211283 | 0.138870917872197 |
| GTGACATACTAA | 738.754602251096 | 0.364068702344132 |
| GTCACGTACGAA | 738.755734008253 | 0.406960050180497 |

|              |                  |                    |
|--------------|------------------|--------------------|
| CTGATTGAATCA | 738.759573833148 | 0.39853338936209   |
| GTGTCACGGTAA | 738.760264331697 | 0.338197634617466  |
| TGAGTAAAGCAA | 738.770260680855 | 0.262985868629956  |
| CCGCTTGATGAC | 738.796293898611 | 0.305742181618049  |
| AATGTGACAGGT | 738.798131048794 | 0.143318297869791  |
| TTGTCACCTAAA | 738.818692641728 | 0.30762380178646   |
| ATACCATGACAC | 738.824362647271 | 0.273559891026755  |
| CAAACGCGTGAC | 738.82594436376  | 0.288274994254862  |
| AGAGCCGCGTCA | 738.827155989641 | 0.302353137806003  |
| CCACAGGTGACA | 738.829800414295 | 0.277161155951182  |
| GATGAGTAGGCA | 738.837611839644 | 0.240920776118033  |
| CCCTCAATGACG | 738.849737491408 | 0.295742288875184  |
| GAAACACGTCOA | 738.875577825591 | 0.308371437838436  |
| ATGGTGAGCCAC | 738.886043369224 | 0.247481504178689  |
| AGGGACCAGTCA | 738.893889627592 | 0.228782704409933  |
| AGAGATCTGACT | 738.897663982037 | 0.464117141531455  |
| TGACTGCTCACA | 738.901385438587 | 0.320681683694546  |
| CCTGTAATGACA | 738.903575829025 | 0.413277278003661  |
| GTGTGTCOAATA | 738.90790058447  | 0.272193774899784  |
| AATATTACTCTA | 738.913889293508 | 0.347515804160225  |
| CAAGTTGATTCA | 738.915912617929 | 0.421163175536604  |
| CTCAACCGATGA | 738.919480352546 | 0.242721499216244  |
| CAGATCAGTGAC | 738.93208406619  | 0.333807234536955  |
| CTGTTACGTGGC | 738.933379291475 | 0.319387317307651  |
| AAGAGTCTTATA | 738.934418427756 | 0.29036473809282   |
| CGATCAATGACG | 738.939476957211 | 0.37687835361954   |
| TCACCAGTGACA | 738.961325629171 | 0.354517064750016  |
| ATACGTGTCAGC | 738.965075554822 | 0.247385158815283  |
| GTGACAAACATA | 738.965466251919 | 0.317280013798801  |
| AACACGTGACAC | 738.96556471807  | 0.320657487825851  |
| TATGGCGTGACA | 738.969395240571 | 0.441813761480816  |
| CGCCAGTAGTCA | 738.97079153589  | 0.528865132380559  |
| ACGGTTTGTAC  | 738.970865146911 | 0.283862875499881  |
| AATCGGGTCATA | 738.973762482674 | 0.266173824791268  |
| CCGAATGGTGAC | 738.977414662253 | 0.332642822444267  |
| GAGTCAAGTAGC | 738.982117354863 | 0.326057205499839  |
| TCGGTCATGTCA | 738.984121512458 | 0.294549682552153  |
| GACACCCTATGA | 738.986999701608 | 0.460203496394681  |
| GGCAGCTGTGAC | 738.991853518715 | 0.326195056176592  |
| CCATACGCGTCA | 738.999423564497 | 0.0960358137748937 |
| GACGTCACGTCA | 739.003832883764 | 0.386815079799346  |
| AGTGCCAGTCA  | 739.004644370956 | 0.350080408576655  |
| AATTCOAATGAC | 739.007632214276 | 0.411997747176259  |
| AGAGAATGACCA | 739.017245477981 | 0.227997702035587  |
| ACTGGCGGTGAC | 739.01764768579  | 0.279652953817621  |
| GCGTCACCCCTA | 739.023644177228 | 0.377584658389103  |
| ATCCGTGAGAAC | 739.028041839115 | 0.239014004273844  |
| ATCACCTGTGAC | 739.029006113426 | 0.307309641132596  |
| AGTCATGAGACG | 739.030292440097 | 0.474736682862518  |
| AAGCAGTGACGC | 739.03504310857  | 0.287698891782227  |
| ACCGATGACCGA | 739.042743189429 | 0.318685004175729  |
| GTCACAGTGAC  | 739.05227451512  | 0.425043861439036  |
| ATGCTTGGTCA  | 739.064477543722 | 0.292142241426389  |
| CCCTCTGATGAC | 739.065072687118 | 0.324034565776189  |

|               |                  |                   |
|---------------|------------------|-------------------|
| TATATGTCAGAA  | 739.066630168514 | 0.248110991887098 |
| ATAATCGTGACC  | 739.075481744439 | 0.335122031827753 |
| GTCATCAACGCA  | 739.077013213568 | 0.351805117485279 |
| CCGCACCAGTCA  | 739.085404970088 | 0.273267148984495 |
| GGAAATGATGAC  | 739.093637038813 | 0.311585664307382 |
| TATTCTACGTCA  | 739.096449904351 | 0.26553079608995  |
| GAAACCTGACTC  | 739.103654037122 | 0.250989086928941 |
| CCTGGGTGACAA  | 739.106885323661 | 0.294441043111225 |
| AAATTATGATTC  | 739.113131028027 | 0.407092225652843 |
| ATACGGCGTGAC  | 739.127241792928 | 0.31992332037907  |
| ATGACACCCTTC  | 739.129224100156 | 0.245429605718206 |
| GCGTGAGTCTGA  | 739.131598206669 | 0.313583518966787 |
| ACGTCACCTCTCG | 739.133388302206 | 0.376043875945272 |
| TCACATAAGTGA  | 739.136087657125 | 0.430645727791644 |
| CCGTCAAATGAC  | 739.138090690597 | 0.316091034569546 |
| GTCATTGACATA  | 739.141949687522 | 0.308810181003758 |
| GCCTTTGACACA  | 739.152665124702 | 0.308945153057743 |
| CCATATGTGTAA  | 739.161734599976 | 0.393827372089521 |
| ATGGCTCTGTCA  | 739.164628717014 | 0.29277483330429  |
| GTCACGTTGTGA  | 739.184498330473 | 0.411368078881585 |
| CTTCCTGACGCA  | 739.192829516866 | 0.156980153851431 |
| CGGATTTGTGAC  | 739.200934129717 | 0.308831012641032 |
| GCCTACGTGTCA  | 739.212149543421 | 0.339121444161472 |
| AGATGCTGAGTC  | 739.215878397981 | 0.3508977984514   |
| CCGTATTGTGAC  | 739.225544565466 | 0.434660028885942 |
| ATGACATTTCCG  | 739.232577947073 | 0.322774570822958 |
| TGTGTCAAAGAA  | 739.243766536667 | 0.301624237286924 |
| TCTTCGAGTCA   | 739.245915940884 | 0.286151991168163 |
| GTCATATAAGGA  | 739.248292505667 | 0.369178950228023 |
| AGAGACGTCATC  | 739.2566019018   | 0.373990777899792 |
| ATCAGTGACATA  | 739.257615892991 | 0.337782954620862 |
| ACTCATGACACC  | 739.260022362876 | 0.174882110530816 |
| CCGGACTCGTCA  | 739.269739563041 | 0.427680242026784 |
| GTCATTTTCCGA  | 739.281770140726 | 0.20004079522102  |
| CCTATGTTGTCA  | 739.287786291867 | 0.343283716019303 |
| ATTGATGTGACG  | 739.293762376866 | 0.357902523389606 |
| AACTTTCCGTCA  | 739.303502263144 | 0.328593287487672 |
| GTCATGCAACAC  | 739.312889784418 | 0.512985442279226 |
| CTCTAATCGTCA  | 739.314278369099 | 0.234060851715898 |
| CTAAATGTCATC  | 739.318020231224 | 0.142975651975159 |
| TGACAATTTGAA  | 739.320366854267 | 0.403599712344402 |
| AACCAAAATGAC  | 739.321551783434 | 0.291391846696692 |
| CGCAGCCATGAC  | 739.322953797308 | 0.345190773660582 |
| CATTACAGTCAG  | 739.3315340814   | 0.436085262110165 |
| ATGACATCGCAG  | 739.332613100487 | 0.332096386141003 |
| AAGTCACGCCGT  | 739.34227107636  | 0.514238786536973 |
| CGTFACTATGAC  | 739.345257301092 | 0.316850729129742 |
| CCCTGTGATGAC  | 739.349080440274 | 0.384644897411799 |
| GATAGGCATGAC  | 739.349944225528 | 0.340793386151564 |
| CGGTTACACATC  | 739.351149239863 | 0.328766762814245 |
| GGCTGAGTCTAC  | 739.363362940631 | 0.391646065217969 |
| AGATCGCTGACT  | 739.364760730356 | 0.470172189985925 |
| GTACGACATGAC  | 739.380449406828 | 0.269910588146887 |
| AATCTGAGCAAT  | 739.384434539281 | 0.284412141541528 |

|              |                  |                   |
|--------------|------------------|-------------------|
| ATGAGTACGGCG | 739.392693031331 | 0.280012977695741 |
| GCCTGCAATGAC | 739.401541768347 | 0.452022012275753 |
| ATACGATACTGA | 739.406268470568 | 0.413748651269884 |
| AGACTCAGATAT | 739.421585347772 | 0.277566168820869 |
| ACGTCACATCAC | 739.421620944159 | 0.256345538507767 |
| ATTTTGACTGAA | 739.422773689445 | 0.101698757716243 |
| GTGACAGTGACA | 739.432165271993 | 0.277509052041891 |
| TAATTATTCATA | 739.442824341088 | 0.293833841821434 |
| GGTGACGTCTTA | 739.44315463333  | 0.417892851188273 |
| CAGTAATGAGTA | 739.451256078084 | 0.232189375287312 |
| CAGAAAGGTGAC | 739.461305830103 | 0.212008928098051 |
| ATCCTGCATGAC | 739.461736460034 | 0.283215522507012 |
| ATGACGGTACGG | 739.463053904237 | 0.309038478635569 |
| TCGACTCAGAGA | 739.463519559127 | 0.20571427706112  |
| GGGACAGAGTCA | 739.467840998046 | 0.294099446264312 |
| ACGTCACTTTCA | 739.467933459348 | 0.220672595922482 |
| ACGAGTCAAATG | 739.478611104266 | 0.178313668271717 |
| CTATAGCAGTCA | 739.481104450608 | 0.512823357420131 |
| CCATTATGACCC | 739.491318212069 | 0.200245129766443 |
| TCATCATGACCA | 739.49857630892  | 0.362993040476585 |
| ACAGTCAGCAAA | 739.503128523617 | 0.180846042217204 |
| AGTCACGGTTTG | 739.507446390708 | 0.248321017058001 |
| AACCCGGGTGAC | 739.509555727963 | 0.31030864006347  |
| AGTAAACATGAC | 739.519717414501 | 0.230371438961518 |
| CACTGAGTCGAA | 739.522551020286 | 0.421097750346936 |
| TAGTGACGCGGA | 739.528359119532 | 0.305097897257405 |
| ATGACCAGGATC | 739.528871423534 | 0.408919471104573 |
| AAGGGTGACGTC | 739.541703792018 | 0.26817076248488  |
| CTCCAAGGTGAC | 739.541706870183 | 0.370858273927438 |
| GAGTCAAAGGTA | 739.54921903584  | 0.264093542560667 |
| CGTCATATGGAG | 739.553631940037 | 0.373449736497713 |
| TGACTGGTGTA  | 739.557948841654 | 0.355183976853714 |
| ACACGCATGACG | 739.575539956865 | 0.440110942424703 |
| CTACCTGACGCA | 739.578245093405 | 0.214861260502584 |
| TGACTGCGATCA | 739.57948105987  | 0.385726879632678 |
| TGTCATGGTTAA | 739.582455399224 | 0.483898387905921 |
| CGGTATGGTGAC | 739.594161588491 | 0.182896089594489 |
| GGCCAGTATGA  | 739.600459233754 | 0.508768277936718 |
| CGTCACAACGAA | 739.602917204736 | 0.31919674187022  |
| GTCACCATTGGA | 739.603394022256 | 0.291707990221042 |
| GTCACAACCGTA | 739.615264689697 | 0.388542501331941 |
| ATAAAACGTGAC | 739.616045758969 | 0.332659913969806 |
| CCTAATCGTGAC | 739.623291845788 | 0.373125394091441 |
| CACAGGTGACAA | 739.629419313902 | 0.158661267303018 |
| GGAAATAATGAC | 739.650027526865 | 0.231017875526004 |
| ATCATCGTGACG | 739.652262809693 | 0.403241795226565 |
| AACACGCAGTCA | 739.662429068812 | 0.305218102618144 |
| CCGTCATGGTCA | 739.66305633582  | 0.280783285606756 |
| GGGGTGTATGAC | 739.663695356174 | 0.162100984064456 |
| AGTCAGAAATAC | 739.669262281528 | 0.297493423271343 |
| TAAGATCACTCA | 739.682575405552 | 0.415017003088735 |
| CTTACGCATGAC | 739.697797807139 | 0.216868040424714 |
| AGGAGCGAGTCA | 739.706313692255 | 0.268998082206031 |
| ATGACGGGATAC | 739.708541996328 | 0.264483182960171 |

|                |                  |                   |
|----------------|------------------|-------------------|
| TGACGAAACACA   | 739.719948117948 | 0.549554765681362 |
| CCTGATGGCTCA   | 739.721279563511 | 0.282957158380152 |
| ACAGTCAAGTCA   | 739.733552436961 | 0.275242048144417 |
| TGACTCCAGACA   | 739.744738428474 | 0.419820618022699 |
| CCGGCTGAGTAA   | 739.74936720697  | 0.434482398296567 |
| CTCCAGAATGAC   | 739.74947943092  | 0.414491471435803 |
| TAGAACCTGTCA   | 739.761536853602 | 0.383703517961123 |
| AATTA AAAATGAC | 739.766844322447 | 0.371053374295119 |
| TCGCTTTACTCA   | 739.76689627265  | 0.308734359851276 |
| GAGTGACATGGC   | 739.77014901096  | 0.240433731194818 |
| TGATTAGTCGCA   | 739.770790884928 | 0.408003160124887 |
| ACAAAGGGTGAC   | 739.77088204443  | 0.226655738788699 |
| GCTTGAGATGAC   | 739.786400469937 | 0.397818330319658 |
| AATATACTCACA   | 739.793129171946 | 0.198426130299058 |
| GTCATGGTTTTA   | 739.799319699997 | 0.405903538561705 |
| CAACGTCACTCA   | 739.807330812541 | 0.246970904681664 |
| GTTTCTAAGTCA   | 739.814797322989 | 0.176522916003856 |
| ATGATACACTCA   | 739.81693561767  | 0.306369423332979 |
| TCAGTCAACACA   | 739.817196691193 | 0.323820083875973 |
| GTCGACCGTCA    | 739.826346218011 | 0.337226442162176 |
| ATGATAAGTGAC   | 739.827188524423 | 0.339296805610425 |
| CAGCGTGAGTCG   | 739.831484870403 | 0.262853041870458 |
| AGTCACGCGAGC   | 739.835305413365 | 0.186388198978956 |
| ATGACATTGCAT   | 739.843460584868 | 0.440103922681055 |
| ACTACTGACTAT   | 739.866106073176 | 0.358406630300889 |
| TGATGTGGCCAA   | 739.882090816627 | 0.334674060082866 |
| CGTCATTGTCAA   | 739.882463496827 | 0.306656967442585 |
| CTCGAGTTGTCA   | 739.882752821868 | 0.424509887227869 |
| AGTCAGGTGACG   | 739.886536658839 | 0.292542259279399 |
| ACGTCACCTACA   | 739.887075347215 | 0.24168614525936  |
| AAATTACAGTCA   | 739.88979970444  | 0.228936523430078 |
| AGTAGCAATGAC   | 739.893755895942 | 0.241517698896782 |
| TGACAAAGAACA   | 739.896441346224 | 0.381224893983045 |
| GCGACCCATATGA  | 739.898778065285 | 0.345283696950786 |
| ACCAGATGACCC   | 739.900987541704 | 0.402852988928634 |
| CCAGTCCAGTCA   | 739.903963368413 | 0.441048117114606 |
| AGTTGGGTCACC   | 739.907516339121 | 0.316800227287451 |
| AACACCAATGAC   | 739.912141020141 | 0.280664739087789 |
| TCGGAGCAGTCA   | 739.91467476642  | 0.558585459015774 |
| CCACCCACGTCA   | 739.916411915947 | 0.196626395761887 |
| GGTCAGTGTAC    | 739.919145691012 | 0.332094899419406 |
| GAACTCTGTAC    | 739.922282054413 | 0.379347564942863 |
| TAATTTCCGTCA   | 739.940530951857 | 0.274143583890496 |
| CAGCTTGC GTCA  | 739.941962240306 | 0.260044241822526 |
| GTCAGACTATAA   | 739.944811117619 | 0.394232291197795 |
| ACGCCAATGACA   | 739.964477136056 | 0.196768775498276 |
| TGTCACCGAAAA   | 739.967582696027 | 0.195412728499728 |
| AGTTGTCACCGG   | 739.968407047527 | 0.205473488157739 |
| ATAACACATGAC   | 739.971149136481 | 0.419816768126311 |
| CGTCACAGGAAA   | 739.991732093881 | 0.277463352774203 |
| CTACTTGC GTCA  | 739.994060414189 | 0.131612189937173 |
| ACCAGTAATGAC   | 739.997461440162 | 0.226730464152587 |
| GTCACCATTATA   | 739.999007378282 | 0.235594686422853 |
| AATGGCTGACTG   | 740.003140075107 | 0.566256976013003 |

|               |                  |                   |
|---------------|------------------|-------------------|
| ATGACCATACTA  | 740.003794788318 | 0.282196667838341 |
| AGTCAGAGCAGG  | 740.004724705919 | 0.182947081602072 |
| ACAGATCTGACT  | 740.005398897474 | 0.323391691925039 |
| ATCAGACTCACG  | 740.018108980998 | 0.23098117838203  |
| GTCATTGCGTTA  | 740.026051340479 | 0.329906175459098 |
| CGTCATTATCCA  | 740.043522057685 | 0.321341103756021 |
| GGCCAGCTCATA  | 740.045840469486 | 0.193197626544755 |
| AATAACGTGACG  | 740.05931378944  | 0.418852892784368 |
| GTCATCATAAAC  | 740.061700112068 | 0.313925778364052 |
| ATGTCACGAATC  | 740.066901777568 | 0.498892036133008 |
| AAGTCTATGACC  | 740.073830953436 | 0.218555132371138 |
| ACATGACACTCA  | 740.080917741119 | 0.214751454665978 |
| ACTCATATGTGC  | 740.080962254609 | 0.447771225113367 |
| AGTGACCGGTA   | 740.082775175707 | 0.198010162014856 |
| ACCACGTGACAC  | 740.087517089505 | 0.290751263923515 |
| ATAGGTCACACC  | 740.089857768324 | 0.325745229716007 |
| ATGAATGTGACA  | 740.096389697683 | 0.234782401923491 |
| AAGTCACTACGT  | 740.09971588297  | 0.279116548422482 |
| ACGTCACAGCAA  | 740.106310752028 | 0.280419083689162 |
| TCATTCCAATGA  | 740.107902689814 | 0.279510334264777 |
| GTCACCGTGAAC  | 740.109101814615 | 0.394020393773072 |
| CCGGGAAATGAC  | 740.11166224106  | 0.33329254085978  |
| AATCGGCGTCAC  | 740.112383240529 | 0.339904944060084 |
| GTGAGCCAGTCA  | 740.121243351137 | 0.305996701973141 |
| GGATCCAATGAC  | 740.123922936516 | 0.66600719162695  |
| CTGTCACCAGGA  | 740.128740522412 | 0.410573371477047 |
| GTCATTTGACCA  | 740.135501521066 | 0.25764051120088  |
| AGTCTGTGTCAA  | 740.138114584333 | 0.339510133430321 |
| ATGAGCAACCAA  | 740.138402330036 | 0.243558262573256 |
| ATGACCCGCGTGA | 740.139758077824 | 0.325218504473045 |
| ACGTCACTTTAA  | 740.144784422155 | 0.255251526299076 |
| ATCCGGGATGAC  | 740.147476886165 | 0.342567887934572 |
| ACGAATTGTGAC  | 740.149100272863 | 0.28881426711229  |
| CACGATTAGTCC  | 740.150577737809 | 0.386676734818232 |
| GACTCAGTGCAC  | 740.15331687402  | 0.462591874442639 |
| ATTGACTACAAA  | 740.154317837368 | 0.227885232511455 |
| CAGCAAGTCATA  | 740.155431596392 | 0.146896491155989 |
| ACAGTTGTGACA  | 740.160741273362 | 0.40368308176263  |
| ACCTGGCATGAC  | 740.160971886141 | 0.450390097358638 |
| ATGAGTAGGCAA  | 740.168227919857 | 0.214692906712493 |
| CTCCATACGTCA  | 740.168934624447 | 0.241418853306775 |
| ACTCATAGCTAA  | 740.171842938941 | 0.386679847020651 |
| GTCATGCATGTA  | 740.1760197703   | 0.39822242392715  |
| GTCACCGGAACA  | 740.177022567027 | 0.448158151281529 |
| CTCGGCGAGTCA  | 740.195637089877 | 0.23916523547758  |
| ATGACATTTATA  | 740.200098392811 | 0.296401031527051 |
| CGTCACCACATA  | 740.202235778819 | 0.327433475268492 |
| TAAGAGTCGACA  | 740.206811881502 | 0.275062505992322 |
| AGTCACGGGTAA  | 740.213324261932 | 0.257077609798982 |
| ACTGCAAATGAC  | 740.217199009308 | 0.282287240637293 |
| CAGCTGGATGAC  | 740.222761609422 | 0.221829463367305 |
| AAGCATCATGAC  | 740.230913076933 | 0.342930151324262 |
| CGTCCTTACTCA  | 740.236176456808 | 0.243562367235312 |
| ACTTCGGGTGAC  | 740.240163562002 | 0.44408840995558  |



|              |                  |                   |
|--------------|------------------|-------------------|
| CTGCTTGTGACA | 740.240321696827 | 0.191808806136761 |
| GACAACGTGACA | 740.240533558909 | 0.389208058464194 |
| CGTAACGTGTCA | 740.242438096925 | 0.429581120235403 |
| ACTGACAGGTCA | 740.249929727915 | 0.272667044086171 |
| AAACCCCGTCAT | 740.267701777816 | 0.21554706435568  |
| CACAAAGGTGAC | 740.274797420661 | 0.199268301699313 |
| TGACGATACTAA | 740.28178002907  | 0.485472673423919 |
| TCATCTGACGAA | 740.286499453243 | 0.487075007160921 |
| TGACGCGACGCA | 740.286616456479 | 0.314240599232711 |
| TCCTGCGACTCA | 740.305390658312 | 0.258021338691257 |
| GCATGAGAGTCA | 740.308110488761 | 0.217602951854861 |
| TCGATGATGCAA | 740.316523128017 | 0.235413798883479 |
| ATGACAAGGCAT | 740.324019289535 | 0.304771400499848 |
| TCTTAATTGTCA | 740.33130495484  | 0.305436311824621 |
| ATGACATTTTAC | 740.332467596412 | 0.316413344747945 |
| CAAGATAACTCA | 740.344928384018 | 0.430014661260757 |
| GGTTATCTGTCA | 740.346937694515 | 0.451954603054017 |
| AGCCCATATGAC | 740.348158844957 | 0.221505410680854 |
| ATGAGTATGAGA | 740.35834554549  | 0.20326578494625  |
| TAAAATGGGTCA | 740.360603668708 | 0.42448537385347  |
| CGGGCGGAGTCA | 740.366272647663 | 0.233149008139459 |
| ATGACAGACCGG | 740.372784073807 | 0.469925306241993 |
| TCTGCAATGACA | 740.390304788993 | 0.411606692037465 |
| CAAGTTTATGAC | 740.391481427566 | 0.49722135658765  |
| GTGACACGCCAA | 740.399626764017 | 0.27860325441364  |
| ATACAACCTATC | 740.401363731952 | 0.262406046875633 |
| AGGTTCTATGAC | 740.401742397081 | 0.370111568386913 |
| AATGATTAATCG | 740.404245025652 | 0.26729302380626  |
| ATGTCATGCTGA | 740.408201585112 | 0.341554623309921 |
| ATGACGATCTCG | 740.410494455002 | 0.190117540647604 |
| TGAGCAAGTCAA | 740.412631858956 | 0.1757232204963   |
| CACTTAATGACG | 740.422601640567 | 0.336655525497516 |
| GTCACGAGTACA | 740.427928255181 | 0.408550495880228 |
| AGATATTTGTCA | 740.431929045955 | 0.137351300186838 |
| CATAGTGGTGAC | 740.436523541943 | 0.254150460011728 |
| TAATTGCTCAGA | 740.450735646065 | 0.306491819780198 |
| TCCGTAGCGTCA | 740.490684918538 | 0.476229434933787 |
| TAATAGTAATAA | 740.517062701249 | 0.232886960425568 |
| CTAGAGGACTCA | 740.51812679386  | 0.369130973032372 |
| GATGTGCATGAC | 740.521657497748 | 0.426660268990529 |
| AGTCAATCTTAG | 740.545840392768 | 0.319956822722829 |
| ATGACCGAACTA | 740.552656181771 | 0.209810624876347 |
| CGGACGTGACAC | 740.558775116972 | 0.353841997092988 |
| GATGACAGGGCA | 740.559783291996 | 0.228105942444945 |
| GTCACCTGTGAC | 740.56015876255  | 0.370444231384947 |
| CCCCACGAGTCA | 740.562832920797 | 0.217607316591014 |
| CACGTAATATTA | 740.575592044056 | 0.380277350164035 |
| AGATGAATAATA | 740.578332312248 | 0.208388723778973 |
| CCGCCACAGTCA | 740.583695310281 | 0.400691986582523 |
| CTCAATCAGTAA | 740.584535249398 | 0.237558922714247 |
| GCCCATAGTGAC | 740.591606510417 | 0.479627291585753 |
| ATGATGGGTGAC | 740.593553773344 | 0.275426270098721 |
| GTGTGACCCATA | 740.602652067287 | 0.269594707244711 |
| GTCACCCAGCGA | 740.605768690577 | 0.368633460936723 |

|               |                  |                   |
|---------------|------------------|-------------------|
| GCTTCTTGGTCA  | 740.608459433261 | 0.359168501768876 |
| GTCCTCCGATGA  | 740.616309469965 | 0.266371190565842 |
| ATTAGGGTGACA  | 740.633161317409 | 0.199440413871392 |
| AACGTCACCGTA  | 740.633935685457 | 0.283077171941495 |
| GAGGGTGACCCA  | 740.636785844125 | 0.176030012159584 |
| GTCACCATGCAA  | 740.647345037193 | 0.30751222083473  |
| TCATAGCGATGA  | 740.655328856629 | 0.39158120494024  |
| GATGAATGACCA  | 740.664311269757 | 0.240706503576113 |
| GTCATCTCCAAA  | 740.672176066376 | 0.296005609152011 |
| ATGACGCCGTGG  | 740.691199261386 | 0.240133268848121 |
| CATTGACATGAC  | 740.692915905496 | 0.288762753007816 |
| ACGATGACCGCA  | 740.697782200996 | 0.294485141380344 |
| CAGTCAGAAGAC  | 740.704283684027 | 0.176820931533929 |
| AACTAATGACAA  | 740.704765760918 | 0.262143394508259 |
| GAATACAATGAC  | 740.707800528961 | 0.348027929173493 |
| AAACCTAATGAC  | 740.709238694712 | 0.343584816428617 |
| ATACACGTGTCA  | 740.718067460598 | 0.4492352012389   |
| AAGAGTTGTGAC  | 740.719668659679 | 0.238229363400598 |
| ACGTCACGTAT   | 740.719683794835 | 0.364192784738301 |
| GTCATCTCTCGA  | 740.729061624847 | 0.301424150542322 |
| GCCGGAGAGTCA  | 740.730175494045 | 0.317715165339167 |
| GTCATGCCGCGAA | 740.73984553394  | 0.367083354356962 |
| ATTACGGTGACC  | 740.749702787843 | 0.476395001014599 |
| GGCTTGTGACCA  | 740.762231617278 | 0.405381971245795 |
| ATTAGGTATAA   | 740.762801150997 | 0.363221263679458 |
| AAATTTATGACC  | 740.762812227392 | 0.409021843272436 |
| ACTGGCCAGTCA  | 740.773472236325 | 0.278555146556697 |
| TCCCAGTGACAA  | 740.780911850585 | 0.3415938150622   |
| GTCATTAGGCAC  | 740.788863785571 | 0.390757714285791 |
| ACTCATAATTAC  | 740.789877114108 | 0.257563194212214 |
| GTCACCACCTGA  | 740.793515782076 | 0.267557832154879 |
| ACTCATGAGCAA  | 740.799434798449 | 0.348924216552083 |
| ATGACAGAGGTA  | 740.8074399918   | 0.282907838874431 |
| ACTAAGATGAGT  | 740.815434947297 | 0.227278437811596 |
| TGATTCAGCGCA  | 740.816181830419 | 0.389033210218171 |
| CAGTGGGATGAC  | 740.832785722328 | 0.218901822794326 |
| ATCCGTGGTGAC  | 740.834074948331 | 0.309329279341396 |
| CCTGCGAATGAC  | 740.837847829035 | 0.33589828430496  |
| CCTCGCGGTGAC  | 740.851118394305 | 0.402470551072099 |
| CACGTCACGTCC  | 740.852812127417 | 0.400586319958394 |
| ATGATCTGTGAC  | 740.852961457105 | 0.476205310585986 |
| TCTGGCTCATCA  | 740.856815437301 | 0.404111506592493 |
| GTACGTTGACTA  | 740.857334664109 | 0.34122990479112  |
| ATGCCTTATGAC  | 740.857555615083 | 0.316596018518735 |
| ATCCATGACACC  | 740.889197065414 | 0.19330329010312  |
| GTAGACGCGTCA  | 740.893482156491 | 0.44903330933592  |
| ATTTCAAGTGAC  | 740.898281994157 | 0.31257093797446  |
| GGGTCACAATAC  | 740.900407636742 | 0.345218492056918 |
| CTGACTCGGTAC  | 740.913528089926 | 0.202673245464062 |
| AGCTCTTATGAC  | 740.917169642459 | 0.349929521396901 |
| AGTGAGTGTAC   | 740.922370937695 | 0.196863108239121 |
| GTGAGTCTGTTA  | 740.924405235317 | 0.328633572080948 |
| TCTGGATAGTCA  | 740.925408000285 | 0.45665835576159  |
| GGCCAAGGTGAC  | 740.930232017695 | 0.518572096525272 |

|              |                  |                   |
|--------------|------------------|-------------------|
| ATTAAATTACTC | 740.940228239185 | 0.525946383655611 |
| GTCATTTGCCCA | 740.958189485095 | 0.281550340580125 |
| AGGTGGTGACGC | 740.961968338996 | 0.155537519204853 |
| GCTAGTCACGAC | 740.969258295485 | 0.239462622507686 |
| GTCACTGCCGAA | 740.993571114987 | 0.304046878754067 |
| GTCACGCGGTAA | 740.996554618551 | 0.407867328090916 |
| GTAGTGCAGTCA | 741.004928892471 | 0.241143056081768 |
| AACGGTATGACC | 741.027413830098 | 0.395828528385407 |
| ATAGTTGTCACC | 741.03343436157  | 0.28329132536429  |
| ATGGGCCATGAC | 741.040721326796 | 0.319465878117757 |
| AGTTACGTGGCC | 741.054579351968 | 0.303912599425177 |
| GGAATTAAGTCA | 741.05591805577  | 0.452172983536948 |
| GACTAATCGAAC | 741.060097732024 | 0.331337076240591 |
| AGTCACGGGATC | 741.073265421913 | 0.196856952107567 |
| ATGTGAGTATAC | 741.095048827894 | 0.377233281491851 |
| GACTAATTTGAA | 741.095516447351 | 0.356484384156856 |
| CACCACTGTGAC | 741.096020959863 | 0.339218113581712 |
| AGAAAGTGTGAC | 741.10125712425  | 0.184419097729545 |
| GTCACAGGCAAC | 741.107540147506 | 0.551607614095131 |
| GAGTCAGGACAC | 741.110047827597 | 0.245586197658769 |
| CTTATAGTATGA | 741.113824534568 | 0.296340438912638 |
| GAAGACCGGTCA | 741.123507954913 | 0.272859857211325 |
| AACGTGTGTCAT | 741.124690499121 | 0.585190710405456 |
| TCTACTGACACA | 741.130936970351 | 0.220777065862734 |
| CACTCATCAGTG | 741.131097617878 | 0.283743572382684 |
| GCCCAGTGTGAC | 741.148745508465 | 0.260364177761768 |
| AACGGACGTCAT | 741.151316057041 | 0.509615973317531 |
| GTTACTCAGCAA | 741.151840282657 | 0.216300380755958 |
| GTCATAAACGA  | 741.152174487691 | 0.460623610704144 |
| GACACTGTCACC | 741.157979032846 | 0.319826900268046 |
| TGACGTTATAAA | 741.162490723676 | 0.435130233437845 |
| ACTCAAGTGTCA | 741.172684746556 | 0.454219846315994 |
| CGTCATTACAAA | 741.176307658162 | 0.342534496550387 |
| CGTCATTGAGAG | 741.176521672576 | 0.31897977364785  |
| ACTAGTTGAGTC | 741.182211344317 | 0.282481999868056 |
| ACCAGCGTGACG | 741.184451339885 | 0.286116874036406 |
| ACAGGTAGTCAC | 741.1975658275   | 0.2720669110877   |
| GATTAGTGTGAC | 741.205163931603 | 0.325356076218016 |
| CTTTCCGACTCA | 741.207211790892 | 0.215492285067701 |
| ATGTATGACCTA | 741.217138468822 | 0.370660476138317 |
| TCATTAATCGGA | 741.219490324522 | 0.301621591357508 |
| ACACCGACTCAC | 741.225189899859 | 0.219540635958737 |
| ACTCATAAGCAG | 741.226466051473 | 0.449930577675639 |
| TGCGTCAAACCA | 741.22745374666  | 0.354600737585245 |
| CTATTGGGTGAC | 741.228202535523 | 0.172474657257035 |
| TGGATGACCGAA | 741.229947010368 | 0.103190163204321 |
| CTCTGACACGTC | 741.234965010607 | 0.330022697666912 |
| ATCCTCAATGAC | 741.237909042694 | 0.38380909854511  |
| GCGTCACCTGAC | 741.240800979286 | 0.298837101181877 |
| GCGTCATGAGCA | 741.243381487755 | 0.518441336035458 |
| AGTCTCGGTCAT | 741.248641845872 | 0.262673149264706 |
| GTCACCTATGGA | 741.252661190024 | 0.337705787669892 |
| AATCTCGACTCA | 741.26302024962  | 0.309355791172732 |
| ACCATATTAGTC | 741.270342548319 | 0.317230214171044 |

|               |                  |                   |
|---------------|------------------|-------------------|
| AGCACAGTCAGC  | 741.271395431858 | 0.29728274223484  |
| ACATTGCGTGAC  | 741.271687566993 | 0.364983490529561 |
| AATTGGGTCACG  | 741.272100565404 | 0.2114955077537   |
| CATAGACGTGAC  | 741.273064350284 | 0.314685629582308 |
| ATATAATTGTCA  | 741.274498138922 | 0.347278268267766 |
| GTCATGATCCCA  | 741.281013931094 | 0.371674487511401 |
| AGTCTGCAGTCA  | 741.286215190368 | 0.24322802711897  |
| AATAAGTGACGC  | 741.288628873574 | 0.280331797659963 |
| CATACCAATGAC  | 741.295953901987 | 0.41945837659631  |
| AACATGGTGACG  | 741.301389642305 | 0.318284114697531 |
| ACTTAGGTGACA  | 741.302015462823 | 0.288943211727886 |
| AGAGTCAAACCT  | 741.304895211117 | 0.239877568159605 |
| GTCACACTCAAC  | 741.310886929571 | 0.262955612698422 |
| TGGTCATCACAA  | 741.31135945979  | 0.282622006382961 |
| CCGACCGTATGA  | 741.311709263647 | 0.363430134388914 |
| AGTCAGAAGTGG  | 741.312047602207 | 0.289649912847248 |
| CTAACTGAATCA  | 741.313415561294 | 0.283244688337936 |
| CCAGAAATGACA  | 741.318412024399 | 0.288820685649544 |
| AACTGGTGTGAC  | 741.321895877882 | 0.240618572928163 |
| GTCACGGCTAAA  | 741.329623632396 | 0.275721840388891 |
| TCTCTGGAGTCA  | 741.336323790427 | 0.320781450794282 |
| TGACTAGACACA  | 741.336547797562 | 0.325573850187367 |
| ATTAACGTGTCA  | 741.336724395085 | 0.421286204409099 |
| AGATGACCGAAC  | 741.341589181164 | 0.315727478701504 |
| AATGCTGAGTCT  | 741.342674707624 | 0.284112076440622 |
| GTCACTGATACA  | 741.346293338608 | 0.271782126024838 |
| GTCATATCCAGA  | 741.347785973253 | 0.322685795433402 |
| GGAGCTGTGTCA  | 741.352382948564 | 0.283537428219872 |
| ACGTCACACTAGT | 741.356281314987 | 0.436091775632854 |
| AAGACACATGAC  | 741.356407465396 | 0.333343222066541 |
| TGGCATGACCCA  | 741.356952372007 | 0.53473412504311  |
| CGACTCACGAAG  | 741.357613951249 | 0.267189661418057 |
| AGGCCTACTCAT  | 741.364579775359 | 0.256264653218522 |
| AAGGCATGACGC  | 741.374710313381 | 0.273895784504968 |
| TACTTAATGACA  | 741.387939905652 | 0.298763136771956 |
| GTCATGATTACA  | 741.389387635027 | 0.214943602666767 |
| TGACTGTGCCCA  | 741.390171310931 | 0.397101143652577 |
| CGGCGGAGTCAG  | 741.398728053652 | 0.124093459174615 |
| TACTTTGACACA  | 741.400161535897 | 0.277652368054777 |
| ATGATTTCGTAAT | 741.401324228021 | 0.410494560612049 |
| ATGACGAGCTTG  | 741.409105388048 | 0.481997975427273 |
| ATGACCATACAA  | 741.409108134388 | 0.319767379143309 |
| GTCACGTCCTAA  | 741.414321240199 | 0.387199693732583 |
| TTAATTACGCCAA | 741.419929067188 | 0.463297551748112 |
| CCTTACAGTGAC  | 741.422609304993 | 0.30553915666172  |
| GTCAGTGACAGA  | 741.425271905002 | 0.31129469739766  |
| AGTCAAACGTCA  | 741.430365878451 | 0.461583177144345 |
| TCGACCATGTCA  | 741.442004105285 | 0.232553363571385 |
| ACACATATGAGT  | 741.44648425675  | 0.298639784824319 |
| ACTGACATGACA  | 741.451643714359 | 0.326283289005777 |
| GATGATGTGGCA  | 741.460387440752 | 0.228695671142708 |
| TCAGCAATGACA  | 741.466613143305 | 0.42709564941807  |
| CAGCTTGGTCAC  | 741.472499271721 | 0.346621950795369 |
| GGGAGGAATGAC  | 741.478150268647 | 0.206483416928728 |

|              |                  |                   |
|--------------|------------------|-------------------|
| GTCACGTGGTAA | 741.485028999241 | 0.372577576506262 |
| CTCACGATGACC | 741.493180484225 | 0.403644128801846 |
| AGTCACGCCTCC | 741.496871606241 | 0.242712852952148 |
| CGGCCGTGTAC  | 741.497149268662 | 0.309284903997706 |
| ACACAATGACCA | 741.498148390812 | 0.261979192274932 |
| GATGATTAGTAC | 741.498782898693 | 0.235704050662426 |
| ATCGCCCAGTCA | 741.520922400286 | 0.314116442345809 |
| AATCCGGAGTCA | 741.532027429333 | 0.314028049368404 |
| ATGACGTTCCAG | 741.537767653986 | 0.279439922012915 |
| CACGTGGTGACG | 741.537854129181 | 0.462077559184592 |
| GGTGTCAATGAC | 741.545074264901 | 0.41840843309193  |
| AGCCCTGACGCA | 741.546404952495 | 0.368663631988312 |
| ACTCATACTA   | 741.548030137564 | 0.300052989867811 |
| TGAGTTGTGACA | 741.548773993966 | 0.371053549843144 |
| ATAAGTGACGTC | 741.55824618133  | 0.276665386383371 |
| CATAACCATGAC | 741.560024829559 | 0.304039758898463 |
| CGTCATTGGGTA | 741.564820346683 | 0.204636239259773 |
| GTCATCCCGGAC | 741.57864334301  | 0.279437879219443 |
| GTCACAGCTTCA | 741.57915190775  | 0.47355527162945  |
| AACGAGACTCAT | 741.580949163046 | 0.174846361085019 |
| AGGGATCTGACT | 741.581077917436 | 0.307445248027939 |
| ATGAGTACCTTA | 741.582982544368 | 0.288353798956806 |
| GTCACAGCATCA | 741.583068457365 | 0.273151563526655 |
| CCTATCATGACA | 741.584308654783 | 0.302303073386359 |
| GTCACAATCAGA | 741.585804706843 | 0.380524593248226 |
| GAGCAAGATGAC | 741.592420197989 | 0.441929404043674 |
| ACGAGTCAAGCT | 741.594801859666 | 0.269398422107343 |
| TGACATGTATAA | 741.596551447455 | 0.484007235804948 |
| AGGCCTGGTGAC | 741.596715356057 | 0.391052773489411 |
| ATACGGTGTAC  | 741.60082500702  | 0.322933204531849 |
| TCACACAAGTCA | 741.605769336053 | 0.16319138640398  |
| GTGACATCGCAC | 741.61404310931  | 0.356399154696518 |
| ACGTAATGTCAT | 741.629829872773 | 0.282171648579168 |
| ATCCTCTGTCAT | 741.635504927377 | 0.211114064023224 |
| AAAACGATGACC | 741.635695452623 | 0.28526277575503  |
| ATGACGGCAGAA | 741.643950804779 | 0.278842609909682 |
| GGTCATATTCGA | 741.649386439116 | 0.377348071478883 |
| AGTATGTGACGC | 741.653384713104 | 0.317832088802523 |
| GTCACCAATTGA | 741.659827887004 | 0.288739386141007 |
| ATGTATCACATG | 741.664854767886 | 0.337267899812829 |
| GCAAGTGGTGAC | 741.671034933904 | 0.392436410526642 |
| CCGGTCATAGTC | 741.672328903553 | 0.32171058534886  |
| CACGTCACTGGA | 741.674300495122 | 0.374163906004108 |
| CGACATTTGTCA | 741.676501766989 | 0.375189537585764 |
| CATATGTGACGA | 741.684888436528 | 0.408917998783318 |
| AGGTACGTGTCA | 741.69637065361  | 0.37538355534362  |
| TAAACTTGGTCA | 741.708875154107 | 0.330205629683792 |
| CGAGCCTGTGAC | 741.714829375876 | 0.357987292244404 |
| ATAAGACGCATC | 741.72107410627  | 0.276233696366594 |
| ATGACGTCGCAA | 741.722094287938 | 0.279603570342931 |
| TACTCTGACGAA | 741.724021529671 | 0.316474575958381 |
| GACTTCCGTCA  | 741.732092784953 | 0.333003188720538 |
| AATCAGTCTGAC | 741.73229761016  | 0.434504775933532 |
| CGATAACGTGAC | 741.739770149865 | 0.381069947664061 |

|              |                  |                   |
|--------------|------------------|-------------------|
| ATCATTATGACC | 741.742549071703 | 0.415204140018283 |
| GTCACGAGGCAC | 741.744045748225 | 0.350074068492313 |
| CAGGCCTGTGAC | 741.778086094679 | 0.304301244115595 |
| ATGTGTTGGTCA | 741.796490845864 | 0.367593472027068 |
| CGTTGAGGTGAC | 741.803049625924 | 0.385325022355065 |
| GTCATTATAAAA | 741.807902181585 | 0.316149548627749 |
| TACGTAATAATA | 741.816894862118 | 0.355399237498153 |
| GTCACCGTCAAC | 741.819559473933 | 0.210332332250885 |
| GAATTGACTCA  | 741.820713666578 | 0.209074131834521 |
| AGTCAGACGACT | 741.826108617445 | 0.232683000375047 |
| TAAGCAGTCAGA | 741.829519610928 | 0.349639178871121 |
| AATATTACTCGT | 741.835627480233 | 0.382855948067683 |
| ATTCACATGACA | 741.836139704982 | 0.350261829178166 |
| AGTCTGACGAAA | 741.836515825332 | 0.312631095607546 |
| CATTTAAGTGAC | 741.841220297756 | 0.27698086792021  |
| GGCTATTTGTCA | 741.841224401965 | 0.277097258279788 |
| AAGTCACCCGTG | 741.841361642371 | 0.174926581245316 |
| ATGTGCATGACA | 741.842784152402 | 0.384897845497607 |
| GTCAGACTCTTA | 741.846524131817 | 0.47234894572593  |
| CCTGTTGAATCA | 741.847958258517 | 0.336775481057973 |
| AAGAACCGGTCA | 741.849573174109 | 0.293118085508505 |
| TGCGTGACCCAA | 741.850035807774 | 0.308211658626186 |
| TGACTCCGTAA  | 741.850509220779 | 0.281901224711972 |
| GTCTCTGACAGA | 741.851118708619 | 0.389632347752225 |
| GCTCTTTGATGA | 741.854055091355 | 0.367357316999708 |
| CCTCATGACCCA | 741.858836517887 | 0.21326971174099  |
| ATGTCATTAGTA | 741.861882890877 | 0.116144698000925 |
| ATGTTGCAGTCA | 741.865311565872 | 0.320620173809968 |
| ATGAATCTTATA | 741.874825261544 | 0.283744104090225 |
| CACTAGCATGAC | 741.879339790963 | 0.519690846586151 |
| AGCCACGTGTCA | 741.896126087353 | 0.299016756571713 |
| ATTTGCGTGACA | 741.913948854456 | 0.29437089456915  |
| GAGTAATAGTAA | 741.918264012122 | 0.18268888089588  |
| GTATATTTGTCA | 741.920963265469 | 0.326885879077394 |
| GACTAATAAACA | 741.927913100098 | 0.303738503640244 |
| ATACACGACTCA | 741.935604551412 | 0.317414562089555 |
| CGCGTCTGTCA  | 741.938193850074 | 0.305145406841926 |
| GTTTCTCCGTCA | 741.939622770967 | 0.387904820413532 |
| ATGACGAGGCGC | 741.940328677847 | 0.343064448895298 |
| ATGACACTCAGC | 741.941690017235 | 0.193243077978639 |
| ATATGATACACA | 741.944739247147 | 0.363149943241402 |
| TGACGCTGAGAA | 741.950528650696 | 0.368233734970613 |
| TGACAACAACAA | 741.97164208636  | 0.459209568087321 |
| GCTGACAGTGAC | 741.974009252701 | 0.260181190905667 |
| GAGACGTGACAC | 741.984701153921 | 0.299564975018527 |
| CTCCGTGTGACA | 741.985762068158 | 0.421554477732146 |
| TGACATAACGCA | 741.98724777783  | 0.272599458676075 |
| ACCCGTGACTAG | 741.988796331304 | 0.379837447514821 |
| AGAGTCAAGGTG | 741.989026382424 | 0.28530926055367  |
| GGCAACCATGAC | 741.989268448373 | 0.384060690207178 |
| ATGACAAAGGGG | 741.993065717161 | 0.249330553446479 |
| CGGGCGGATGAC | 741.998180779845 | 0.426229920364251 |
| GCATGGAATGAC | 742.000448965121 | 0.270988089684861 |
| CCATACTCGTCA | 742.002273392733 | 0.310082587117429 |

|               |                  |                   |
|---------------|------------------|-------------------|
| GTCACCTTAGCGA | 742.020367872079 | 0.121482873019863 |
| CAGACATGACGC  | 742.032873646853 | 0.465240304781143 |
| GGATACTGTCAC  | 742.034946106601 | 0.214672403378951 |
| CCCCTTTGACTC  | 742.035709077859 | 0.262762784520483 |
| GTCACAGTGTTA  | 742.046271983907 | 0.223811438768476 |
| GTATGTATCACA  | 742.047322873458 | 0.395566004461289 |
| ACACATGACGCT  | 742.052410524878 | 0.3120916900555   |
| AATGCATGACAT  | 742.067189330634 | 0.393724135400998 |
| ATAGCATGTGAT  | 742.085811573017 | 0.14190062822026  |
| AGTAATATGACC  | 742.086896140357 | 0.341265177038936 |
| GGGTATTTGTCA  | 742.089738104629 | 0.279823638624049 |
| CTGCATAATGAC  | 742.099727766077 | 0.306870892784012 |
| CCGGTTATGTCA  | 742.099733860521 | 0.364635209694905 |
| ACCAGAAATGAC  | 742.106493219591 | 0.402964285019787 |
| GTCACAATGTTA  | 742.112814122795 | 0.414565835704822 |
| AGACTCACGCTC  | 742.115649449251 | 0.207041992531237 |
| ATACTCCAGTCA  | 742.126180555634 | 0.380389269217515 |
| GTCACGACTCA   | 742.1323303467   | 0.29079513383024  |
| GTCATAGGGATA  | 742.140732258252 | 0.14432664230592  |
| TGACACGATAAA  | 742.142204633206 | 0.361832093503195 |
| AAGAAATGTCAT  | 742.1424461138   | 0.201366609119447 |
| ATGACCCTCTA   | 742.142554139601 | 0.154334519315525 |
| GGGCATACGTCA  | 742.143725663094 | 0.400380616699609 |
| CTGTTATTATGA  | 742.144395037025 | 0.319990755249416 |
| TCGGTCATCCAA  | 742.146139316994 | 0.154480883914885 |
| AAGTCACCCCTCA | 742.151398904592 | 0.281541324133119 |
| GGTGATCTGTCA  | 742.159740611547 | 0.448757437058714 |
| ATTACTCGTATG  | 742.159791636502 | 0.230988832626846 |
| ATCCAAAGTGAC  | 742.166133551747 | 0.368031559424217 |
| GATTCATGTGAC  | 742.18026265709  | 0.299565565153766 |
| AATATGCGTGAC  | 742.194867419759 | 0.286467429076413 |
| AATCTTACTAAT  | 742.195285035585 | 0.359126363212318 |
| CGGCAGATGACA  | 742.203469293158 | 0.203270771620999 |
| GAGTCTACGCCAA | 742.210251194984 | 0.290824088695574 |
| GCAACTTGTGAC  | 742.216627597939 | 0.389204550890641 |
| CGTCATTGGGAG  | 742.219070184049 | 0.193263456649745 |
| CCTAGCATGACG  | 742.219599663372 | 0.27861260605941  |
| CGCCTCTATGAC  | 742.226942765245 | 0.35211099075207  |
| GTCATTCAAAGA  | 742.229777002666 | 0.384189564193043 |
| ATACCGTGACAC  | 742.231044800886 | 0.177606231714388 |
| CGAAATGTCATC  | 742.231634549909 | 0.24231707660119  |
| GTGATACATTCA  | 742.235082142956 | 0.349912976479129 |
| GGCCGTGTGTCA  | 742.237398888309 | 0.306436369021421 |
| AATGACATTGCT  | 742.237745477208 | 0.283971479339352 |
| CGTTAGTCTGAC  | 742.242289353543 | 0.344505537016838 |
| ACGTCACCCAAA  | 742.243713876854 | 0.321517683235267 |
| GTCATGGTTATA  | 742.248811851993 | 0.451623106989683 |
| GTCACCCTCTTA  | 742.250740563478 | 0.317726845575997 |
| ATCCTCCGTCAT  | 742.254023432322 | 0.284177647479953 |
| CAGCCTGACACA  | 742.254042713838 | 0.322514723554577 |
| AAAATATGTCAG  | 742.258032830371 | 0.289412875692416 |
| ACTGAGAGTCAG  | 742.261088553765 | 0.206830132220533 |
| CTCCCATATGAC  | 742.268863498073 | 0.371755714302529 |
| ATGCGTGAGTCG  | 742.283240481357 | 0.312115180470402 |

|              |                  |                    |
|--------------|------------------|--------------------|
| AATAGTCAAATG | 742.291473916776 | 0.332720816900492  |
| ATGAATCAACGC | 742.304180853749 | 0.373068078693348  |
| CACGCTAAATGA | 742.310097258735 | 0.219072378563469  |
| AAGAACACGTAA | 742.310888918825 | 0.310132534098508  |
| AATGACCGAATA | 742.318887499142 | 0.162770985288669  |
| CGATGGACTCAC | 742.326077294379 | 0.300401149009561  |
| GACCTAGACTCA | 742.340652522282 | 0.227553138143925  |
| CAACCGTGTAC  | 742.342759648912 | 0.308627561828879  |
| ATCTAAAATGAC | 742.343153418971 | 0.203304274113633  |
| CATGGTGTGACG | 742.358998075949 | 0.371297535170422  |
| TCAAAGTAGTCA | 742.362959525819 | 0.499306040700712  |
| AGCCTTGTGACA | 742.366502952078 | 0.187321402480913  |
| GCGTCATGGTTA | 742.3673523828   | 0.0945433740037823 |
| ATAGCGTGTGAC | 742.374257279294 | 0.418382694541715  |
| CCCCAGATGACA | 742.375898157099 | 0.208204793261382  |
| GTACCTGACGCA | 742.382362940597 | 0.211956098252628  |
| AATCGCTGACTG | 742.39529002643  | 0.354068611998594  |
| TCATCAGAGACA | 742.407881420612 | 0.294715106510595  |
| GATTTGACTCGA | 742.418840754351 | 0.279540706254103  |
| ACGTCACAGTGA | 742.421177031818 | 0.299164283492548  |
| AGGTCTAATGAC | 742.427075206405 | 0.382630886445525  |
| TCTGGACAGTCA | 742.427458493625 | 0.264674127209807  |
| ATGATTATGTCA | 742.432744333417 | 0.479915241136868  |
| CGAATCTCTGAC | 742.446218972054 | 0.419153181138116  |
| GACTAATTACAA | 742.448466028645 | 0.393913864410778  |
| AGGTGCAATGAC | 742.461635132917 | 0.223360203449224  |
| GTGACCCGTAC  | 742.468206740629 | 0.214250828919872  |
| ATCACGGTGA   | 742.480725666447 | 0.289241899090937  |
| ATACCTGATTCA | 742.485178688842 | 0.188999182110673  |
| ATTGAGTCTATC | 742.496750721081 | 0.241482610776746  |
| AGTCAATGACG  | 742.498058511622 | 0.26707885798952   |
| CCACGTCTATGA | 742.506526959183 | 0.296526215097765  |
| AACCCGACGTCA | 742.5084081421   | 0.330354860119866  |
| CTCCGGCGTGAC | 742.51272312342  | 0.393914294112751  |
| GAACCCGTCACA | 742.518977953157 | 0.334420729562029  |
| GTCCGGTAGTCA | 742.537819551735 | 0.221315187142831  |
| GTCACGTAAGAA | 742.541989670552 | 0.275455012923099  |
| AAGCCTTGTGAC | 742.546332647412 | 0.297146859440295  |
| GTCATAGATGCA | 742.548491987561 | 0.385316688011942  |
| GACCACAATGAC | 742.565955571334 | 0.3937477998081    |
| GTCACCGTTCTA | 742.578598210787 | 0.33648509193829   |
| CAGTCTGACCCA | 742.580511522373 | 0.362018762899473  |
| CTATTTACGTCA | 742.585170731889 | 0.2811056476395    |
| CGTGGCTGTGAC | 742.586080703627 | 0.376039076762464  |
| TGTCACCAGACA | 742.59922753291  | 0.318165961853933  |
| CTGGACATGTCA | 742.599726518981 | 0.546350032355742  |
| GTCACAACGTGA | 742.600726218764 | 0.26772884354141   |
| ATGACCTGACTA | 742.605994714893 | 0.189497790449965  |
| GACTGATTTACA | 742.612468492051 | 0.320150533707786  |
| CAGGATCACTCA | 742.627972181887 | 0.22469182384661   |
| AGTCAGAGTTCC | 742.63051030999  | 0.203928103072529  |
| CGTCATTGGCCA | 742.636869074078 | 0.226134641178738  |
| CGCGTAAGTGAC | 742.641191131561 | 0.39890623357766   |
| CTGGTGACAGCA | 742.641614733975 | 0.22462862397752   |



|                |                  |                   |
|----------------|------------------|-------------------|
| GATGACTTGTC    | 742.647208239541 | 0.207908146085633 |
| AGTCACTCCGCC   | 742.655778232225 | 0.215433686901679 |
| CGCTGAAGTGAC   | 742.662125771651 | 0.374759783787204 |
| CATACGCAGTCA   | 742.6691446189   | 0.303397445198691 |
| AGAAATGGGTCA   | 742.671643164021 | 0.211147002988033 |
| GTA CT CATGCTA | 742.677911556773 | 0.208439980191247 |
| CCACCGTGAGTC   | 742.680265228748 | 0.428787283247894 |
| CACATGACAATG   | 742.686929748598 | 0.411553381591054 |
| ATAGGTCACACA   | 742.692533433801 | 0.328033516028573 |
| TGACTGGAACCA   | 742.69754097733  | 0.413382627191101 |
| CAGTGATTACTC   | 742.697697862628 | 0.396011698818824 |
| ATTCTGAGTCTA   | 742.706460177139 | 0.302740699559945 |
| GTCATATTGGCA   | 742.706549473406 | 0.169150934522627 |
| ATTACTATTATG   | 742.719965389078 | 0.197418161601043 |
| ACCATGTGACGA   | 742.722997011201 | 0.263596827708831 |
| GTCACCGAGTTA   | 742.730291271031 | 0.329371020738165 |
| AGTCAGCATATG   | 742.735899775359 | 0.404949722449102 |
| AATTACTGTCAT   | 742.742222732727 | 0.299936983697644 |
| GTCATTCACATA   | 742.746068993518 | 0.221277193007588 |
| CGTCATTCCGCA   | 742.747113799651 | 0.380238295312792 |
| AATTATGACCCC   | 742.747328097463 | 0.207760308072379 |
| ATACAGTCAGTA   | 742.752103932195 | 0.183007689805352 |
| GGTCTAAATGAC   | 742.752932168178 | 0.414981938476751 |
| GCTGACACTTTA   | 742.758086593802 | 0.176334447308775 |
| GAATCGCATGAC   | 742.762570327837 | 0.374581791748427 |
| GCTTGTCGTGAC   | 742.76635787119  | 0.55452709348633  |
| CAGAAATGTGAC   | 742.77351580896  | 0.272217248478348 |
| ATGCGACTCAGA   | 742.775061255034 | 0.29935069912227  |
| GGGTCGGATGAC   | 742.776641913266 | 0.211236009238028 |
| GCTGAGTGTGAC   | 742.781345101253 | 0.321667695664023 |
| AAAAGATGACCA   | 742.783309685963 | 0.363854624798272 |
| GGACGTGGTGAC   | 742.787511530694 | 0.229002920250276 |
| GCTCAGTCAACA   | 742.789349200927 | 0.217413484541145 |
| GTCACCTGCGAA   | 742.790028241178 | 0.380622794885129 |
| CATCAATGACGG   | 742.793466355869 | 0.426780890701289 |
| AGTGATTAATTC   | 742.802174826223 | 0.228084595948504 |
| CAAGCCTGTGAC   | 742.810235342085 | 0.333139612274233 |
| ATTTAATGACG    | 742.816031198283 | 0.560114746852886 |
| GTCTCTGAATCA   | 742.819191295495 | 0.199946978261888 |
| AGAGACAATGAC   | 742.820606296538 | 0.276919167730763 |
| ACGTGCGTAATC   | 742.824360625249 | 0.314456615115762 |
| GAGTTTGC GTCA  | 742.826010412972 | 0.395018215181766 |
| AGCCGAGGTGAC   | 742.833618786515 | 0.285671615287618 |
| ACGCTTTGTCAT   | 742.84080980817  | 0.24856878098434  |
| GTCATGACCCCA   | 742.853935406073 | 0.345330736899581 |
| CCGGTGTAGTCA   | 742.860495342728 | 0.436069183713022 |
| ACGTCACCTCCT   | 742.866702807995 | 0.253993373605087 |
| ACACCTCTGACT   | 742.867166588663 | 0.272288359144397 |
| CACATATCGTCA   | 742.870082252997 | 0.454879769603885 |
| ATACAGTCAGCC   | 742.872837387736 | 0.325972079357074 |
| ATGCTCTGTGAC   | 742.879339355822 | 0.399072529728049 |
| CGGAGTAATGAC   | 742.889186464809 | 0.169018270054129 |
| GTAGCTAGTCAC   | 742.894227039926 | 0.190029295834596 |
| ATTGATTACAG    | 742.899965111626 | 0.321576060054487 |

|               |                  |                   |
|---------------|------------------|-------------------|
| GAGTCAAAGTGC  | 742.905647083056 | 0.339415853841007 |
| CAATCTTGTGAC  | 742.905718174954 | 0.275796091910963 |
| AGTCAGAAGCTC  | 742.909461972645 | 0.471678532523616 |
| ACACTGCGTCAG  | 742.914302851207 | 0.284918110115735 |
| TGGAAATGACAA  | 742.917307244699 | 0.373673918166648 |
| ACCCCTGTGTCA  | 742.917666786136 | 0.399072126216639 |
| ATCGTTGGTGAC  | 742.919905413498 | 0.275654546976374 |
| ACTGCCGCGTCA  | 742.934949049435 | 0.176656583054463 |
| TGACTCCATAAA  | 742.938303976707 | 0.484628222391764 |
| ACCCATGACCCA  | 742.938577475641 | 0.282964569220598 |
| GATGACTTTTCC  | 742.944925842059 | 0.294886131336791 |
| AAGAGGTGTGAC  | 742.94900711237  | 0.216139498146589 |
| CGATTACACGTA  | 742.950789732892 | 0.334340145752577 |
| TATTAAGTGTCA  | 742.957921717743 | 0.414119265938467 |
| GTGACGATACAC  | 742.971360627913 | 0.563150961759892 |
| GGTCATTACCAA  | 742.982838100315 | 0.434339765565862 |
| CCTAGCAATGAC  | 742.991335779034 | 0.382837431088009 |
| GGTCATAGTTAA  | 743.002570230536 | 0.317835964277453 |
| ATAGCAAGTCAT  | 743.010565759292 | 0.555679533371105 |
| AATACGTGTCAG  | 743.018883008115 | 0.278459289525227 |
| CAGACGGAGTCA  | 743.019554740984 | 0.302476267085444 |
| GTCACCTTTATA  | 743.032919272376 | 0.278781102932445 |
| GGGAATCATGAC  | 743.040927222429 | 0.163916511480986 |
| GGACACGAGTCA  | 743.042549094542 | 0.313089231684803 |
| GTGTCACGACGA  | 743.045312818608 | 0.332046927950892 |
| CAACAGTGACAC  | 743.0456956564   | 0.26651433698764  |
| TGTCACGTA AAA | 743.047874025037 | 0.255980392569507 |
| CGTCACTTGAAA  | 743.049004956163 | 0.548857627684529 |
| CATAGCCATGAC  | 743.050482316166 | 0.422964706926349 |
| CTCATGCTATGA  | 743.051120371456 | 0.424334666799963 |
| CCTTTGAGTAAC  | 743.053125189948 | 0.373870821470545 |
| GTCGATCTGTCA  | 743.0576265574   | 0.24679811313766  |
| GTCACTGTAATA  | 743.063190220503 | 0.27152518977543  |
| TCAGAATGGTCA  | 743.065935530826 | 0.383203758982045 |
| GACAAATCATCA  | 743.074756872426 | 0.406982366621888 |
| ACCGTTATGTCA  | 743.080239300905 | 0.320153028393981 |
| GTCACAATCAAC  | 743.080720280224 | 0.370299429881649 |
| GTGAATGGGTCA  | 743.080997938144 | 0.2313670954404   |
| CGCAGACTCACA  | 743.081021116326 | 0.245092974690121 |
| ATCACGAGTGAC  | 743.085590105664 | 0.471262187080766 |
| AGCTAGATGACG  | 743.087256938238 | 0.268230128286455 |
| AATTGCGTAATG  | 743.093674135539 | 0.170417688822575 |
| ATGTAGATGACG  | 743.093679085972 | 0.319306151206704 |
| CGTCATTGGTAG  | 743.103936739382 | 0.234097601581551 |
| CGACATTGTGAC  | 743.107302761659 | 0.367367404849346 |
| GGCAGAAATGAC  | 743.109454043554 | 0.378484682249304 |
| CCGAACAATGAC  | 743.114097195653 | 0.243128232604053 |
| CTGGCACGTGAC  | 743.115487290809 | 0.366236220490069 |
| GAATCATCGCAA  | 743.119894770073 | 0.462904261228221 |
| TGACGTGAGCAA  | 743.124255262647 | 0.181059940102922 |
| AGACTTGTCACT  | 743.125143657649 | 0.327738526766727 |
| AAGCAGATGACG  | 743.129179131552 | 0.163468716045205 |
| GGCCCTAGTGAC  | 743.129929028364 | 0.248818269635833 |
| CATTGCATCATC  | 743.144299781904 | 0.265322463995471 |

|              |                  |                   |
|--------------|------------------|-------------------|
| ACATCCGCGTCA | 743.1546609483   | 0.295844039436116 |
| TCCTCCTAGTCA | 743.161034959796 | 0.166779678170784 |
| ATGATATACTCA | 743.167301111943 | 0.274200959140682 |
| GTAGCAATGACA | 743.198096529848 | 0.332695470986383 |
| AATTAGTGACAT | 743.1981902576   | 0.294627428449979 |
| CGGTTGTAGTCA | 743.205243951588 | 0.386848991835392 |
| GGACAAATGACA | 743.207408940632 | 0.300625093617637 |
| GTATTTGACACA | 743.210064542104 | 0.323441113934672 |
| GACGGGAATGAC | 743.210590238492 | 0.2215445223623   |
| ACGCGTGACACG | 743.212922824244 | 0.388163038756976 |
| GTCATGGTTTGA | 743.213564012478 | 0.345759988165861 |
| AAAGCGTGACGT | 743.215191994428 | 0.286658040847029 |
| CATTTATTAGTC | 743.217630119446 | 0.260490996628339 |
| CAGTCAGAATTA | 743.220642495998 | 0.387341301969164 |
| GCGAGAGATGAC | 743.228138364985 | 0.163243154770109 |
| TCCATTGAATCA | 743.231418972602 | 0.34245505951922  |
| AAATGCAATGAC | 743.232634440255 | 0.38057947576509  |
| ATACAGTCAACA | 743.233985012176 | 0.323359104186983 |
| ATGCCGTACAC  | 743.247124400643 | 0.263111319578317 |
| GTCATGTCTCGA | 743.247252035314 | 0.318588897821538 |
| GCGCGTACGTCA | 743.256062779264 | 0.375264692201681 |
| GATGACTTGACA | 743.26208927217  | 0.180278156218651 |
| GAGAATATGTCA | 743.265529176724 | 0.204119466486347 |
| GTCACAGGGTAA | 743.269144846777 | 0.423897354384628 |
| GACTAATAGCTA | 743.26953638596  | 0.25231488914059  |
| CGTCATGGCACG | 743.280291953464 | 0.219909822753877 |
| AACTTGTCACTG | 743.284646736706 | 0.385299152863126 |
| AGGTGACACGAT | 743.302978442833 | 0.382541773622873 |
| ACGTCATGGGCC | 743.314320630676 | 0.322144703568979 |
| CTGCTGGGTGAC | 743.315348890418 | 0.348510241588422 |
| AGTCACCTCGGG | 743.323040582708 | 0.325946605381974 |
| ATTACTTTGTCA | 743.323839999941 | 0.311255200006454 |
| GTCATTTACCTA | 743.338243314907 | 0.230257157562097 |
| ATTTGTGGCTCA | 743.340162093974 | 0.565844279584084 |
| CCCAACCGTCA  | 743.340740766342 | 0.455466995590571 |
| GCGTCATGCTGA | 743.351763695706 | 0.249431556958144 |
| AAGAGTCTTAAT | 743.357530437811 | 0.192947397785497 |
| GCTGAATCGTCA | 743.365675625712 | 0.307130989441608 |
| CCGGCGTGAGTC | 743.381833859349 | 0.535780304355992 |
| CTCAGTCAAGAG | 743.38789747192  | 0.323360368318437 |
| CGGTGATGAATC | 743.394973092454 | 0.348300400894132 |
| CGTCATCCCGGA | 743.401035181683 | 0.303689996477201 |
| CTGTGATAGTCA | 743.404257929115 | 0.27584583538375  |
| CACAGTGACCCA | 743.414062081472 | 0.375783946649869 |
| CAGCCGATGACC | 743.416742202648 | 0.62849403122748  |
| CCCGAATTAGTC | 743.419021350875 | 0.202265088477624 |
| GCCGCGGGTGAC | 743.426807113921 | 0.420960843710223 |
| CGTCATTCGGAA | 743.433419867963 | 0.369866611848775 |
| CTGGACCGTGAC | 743.440552460237 | 0.374488653817964 |
| ACTTCGAGTCA  | 743.447124858382 | 0.428259299114184 |
| TATACTGATTCA | 743.447143305515 | 0.285689469407511 |
| GGGCTTGATGAC | 743.46048198019  | 0.344067905407205 |
| GTCATAAGGGGA | 743.463569468839 | 0.208968127114138 |
| TCGAACAAGTCA | 743.4742619347   | 0.294018427840733 |

|              |                  |                   |
|--------------|------------------|-------------------|
| AGGTAGTGTGAC | 743.474767956237 | 0.177324333917599 |
| GGTTGCGAGTCA | 743.476131876688 | 0.287643004555515 |
| GGTACCCGTGAC | 743.485665885815 | 0.384789301226465 |
| AATCCGGGTGAC | 743.490507063246 | 0.356631043436966 |
| TGACAATTCGAA | 743.49636515305  | 0.335510035854243 |
| CAAAGGGAGTCA | 743.500364183151 | 0.208501791535383 |
| GAGGCTGACACA | 743.50092884772  | 0.367247580814499 |
| CCATCGGTGACA | 743.505675564075 | 0.389254147727204 |
| CGACTTGTCAAC | 743.506461742333 | 0.277749913682357 |
| AAAATAGTGTCA | 743.519737800303 | 0.385762322356052 |
| CCGGTTTCGTCA | 743.522578493389 | 0.378677315188707 |
| CGCTTGTGACCA | 743.524382865832 | 0.580824723860844 |
| CCACGTGTCTGA | 743.531425764164 | 0.458302536836086 |
| AAACAATCAGTC | 743.53255489306  | 0.403316366877503 |
| GTCATTTAGCTA | 743.541392665758 | 0.197802841560165 |
| GTGTAACAGTCA | 743.544978076815 | 0.25904802949021  |
| AATCCGTGACAC | 743.568200931817 | 0.323396741530354 |
| CATGACAGTATA | 743.57041931025  | 0.357713932206699 |
| AGCCTGGAGTCA | 743.571235172294 | 0.526548282414259 |
| ATAAGTGACGCG | 743.572158742803 | 0.31993985494796  |
| AGTGTGAGAATC | 743.580447392335 | 0.29202224487918  |
| TGAGTCGTTGCA | 743.58656110104  | 0.396754261142007 |
| CGTCACAGGTTA | 743.588474929755 | 0.286229187938783 |
| CGATCCATGACA | 743.596006352637 | 0.31020352554782  |
| ACGTCACGCACT | 743.596117108503 | 0.466578124266996 |
| GTCATCTCCATA | 743.597017639149 | 0.395326912611675 |
| GTCACAATCACA | 743.604981568149 | 0.365364062291794 |
| ACGAACGCGTCA | 743.605336013675 | 0.470439816707282 |
| ACTATGCATGAC | 743.608403423736 | 0.470396450492192 |
| GTGTCACGTGTA | 743.612993421137 | 0.38969202664182  |
| GTTTACTAGTCA | 743.620759706887 | 0.328176687925971 |
| CTACATTGCTCA | 743.635095650425 | 0.261114485354642 |
| GTCACACCGTAA | 743.639766227757 | 0.36001026330213  |
| GTCACGAACATA | 743.640838832864 | 0.540276758453185 |
| AGCGTATATGAC | 743.647032804575 | 0.268645361726966 |
| CTCATCACGTCA | 743.648801259197 | 0.242014148445374 |
| GTCATATCCAC  | 743.65108359814  | 0.334435299831852 |
| CTATGTTTGCTA | 743.660336407981 | 0.278221835319337 |
| TCACAGAGTCAA | 743.67321913097  | 0.290940812663976 |
| ACGTCAGAGTAA | 743.677506604993 | 0.365707156844983 |
| CACCTATGTGAC | 743.68136205867  | 0.332229648970977 |
| CATGTGTGACCA | 743.683635462903 | 0.243595778071454 |
| AATGACATCTTG | 743.683985997298 | 0.404759692698475 |
| ACTCATTGAGCG | 743.687634211414 | 0.453639202804349 |
| GAGTCTTGCGAC | 743.695764127242 | 0.412668484800939 |
| TGAGCAAATACA | 743.702583870358 | 0.251464176317211 |
| AGCCCCATGACT | 743.70261554563  | 0.283466214239761 |
| GAGTCGTAGTCA | 743.712585966056 | 0.131721855945339 |
| ACAAAGCGTGAC | 743.71381490026  | 0.45237410173952  |
| CTGCCTGAATCA | 743.714098732281 | 0.272671748471498 |
| ACCACTGGTGAC | 743.717163913679 | 0.339618486907571 |
| GGGATAGATGAC | 743.732820412895 | 0.295927242418448 |
| GACGGGTGATCC | 743.734264432707 | 0.304168656064985 |
| CACGTCAATGAG | 743.750787412387 | 0.36524808346392  |

|               |                  |                   |
|---------------|------------------|-------------------|
| GCGATCTGACAC  | 743.757896020668 | 0.149502794837674 |
| AGAGTAATTCTA  | 743.761371909753 | 0.198567866284772 |
| ACGAATCTGTCA  | 743.771755281264 | 0.353205198969343 |
| CGCTCGGTGACG  | 743.773324717463 | 0.280535240594525 |
| GATGACAGGCAC  | 743.779652320787 | 0.273975416735262 |
| ATACTCTGTAC   | 743.781319153286 | 0.2779958100871   |
| GTCACGACCGGA  | 743.783551947707 | 0.372867669807148 |
| ATGACGCCTAAC  | 743.79397910094  | 0.284141174608422 |
| ATATCGTACGG   | 743.809304992098 | 0.243274127045349 |
| ACTCATACATCG  | 743.814362871783 | 0.279900238814339 |
| TAGTGCTAGTCA  | 743.815584364395 | 0.439571290546775 |
| AATCCACAGTCA  | 743.823777388209 | 0.399129783394963 |
| CGTCGGTGACGA  | 743.82515647197  | 0.320976366515161 |
| CAGCTGCATGAC  | 743.826016311474 | 0.342028409727615 |
| ACCTTGACTCGA  | 743.828465918957 | 0.279502627736162 |
| ATTACATGTGAC  | 743.830836100313 | 0.302042568844374 |
| GACGTTGACTAC  | 743.844008764963 | 0.386788324842204 |
| TACCGGTAGTCA  | 743.844359500478 | 0.379069797217141 |
| AGCACGGAGTCA  | 743.863411690909 | 0.352361446122338 |
| AATGTCATTTGT  | 743.871754510351 | 0.437242969306489 |
| ATCGGCGTCATG  | 743.876507555914 | 0.258466763583457 |
| CTCCCATGACAC  | 743.88048015923  | 0.203701477267066 |
| CCACACAATGAC  | 743.883964753716 | 0.20831517643045  |
| GTCACCCGGAAC  | 743.889139295846 | 0.440584776297766 |
| CAGCTCTGACAC  | 743.901600932536 | 0.297638826690966 |
| AGCCAATTAGTC  | 743.916551950333 | 0.454520109267544 |
| AGAGTCAAGTCG  | 743.920160557039 | 0.289938368768777 |
| AAACTTCTGACG  | 743.920743285941 | 0.213295247685299 |
| CTGAGTCGTCCA  | 743.927198003303 | 0.31283460794183  |
| AATGACGGTACA  | 743.931415000571 | 0.393100917617388 |
| AGAAACGCGTCA  | 743.938109170045 | 0.370345318173908 |
| TATGTCACGAAA  | 743.939817466858 | 0.255612303747691 |
| GATCGCCATGAC  | 743.940528251261 | 0.263352256066576 |
| ACTAACATGACA  | 743.944421714049 | 0.404309222688538 |
| TAATGGCAGTCA  | 743.946597160521 | 0.27128575951047  |
| GTCATCATGAGA  | 743.950059021142 | 0.283116689670608 |
| ATGACATCTTTA  | 743.95431549914  | 0.248994768516045 |
| ATGACGGACAAT  | 743.960550550801 | 0.249028843362289 |
| AGAACCCTGACT  | 743.967420732905 | 0.191062378843203 |
| GCTCAGTGTAC   | 743.970505067379 | 0.298961531602358 |
| ACTCAAAGTGAC  | 743.988744726866 | 0.414298047642247 |
| AGCCATTATGAC  | 743.989822800921 | 0.202147392183417 |
| GTTGACACTTAA  | 743.993264930532 | 0.408373898124889 |
| ACTCATGCAGAG  | 744.002307463241 | 0.305459636766594 |
| AATGCCGTACACA | 744.005139969685 | 0.424666445349952 |
| AAACGTGACGAA  | 744.008956346071 | 0.26917802065031  |
| CGGTACCTGTCA  | 744.017140020779 | 0.485171330804016 |
| CCTCAGTGTATGA | 744.021928715947 | 0.564283840542546 |
| TGACTGCGTGAA  | 744.026810572238 | 0.291962978276162 |
| AATTAGGTGACA  | 744.03855266819  | 0.342960789591523 |
| GGGTCATATTAA  | 744.039804464803 | 0.309564679028425 |
| ACTCATCCTTAG  | 744.047539186076 | 0.234195183289168 |
| ATATTTAGTAAAT | 744.059432131905 | 0.330125149819329 |
| GTCATGCAGACA  | 744.060982883195 | 0.373691110294127 |

|               |                  |                   |
|---------------|------------------|-------------------|
| GACGTCACCTTA  | 744.061901336303 | 0.207939295003163 |
| GCTCCATATGAC  | 744.070231025351 | 0.326685246640736 |
| CCTAACTCGTCA  | 744.07475555526  | 0.313506391180311 |
| AAGCCTGTGACG  | 744.081321513132 | 0.255504219154099 |
| TGTCAGCTGACA  | 744.083115504528 | 0.289406782526148 |
| ACGTTGACTACA  | 744.088926493265 | 0.246055144500313 |
| GTGTCACGTCCA  | 744.089669864961 | 0.281824882792956 |
| ACGTCACCTGCCT | 744.096891379879 | 0.281219290839569 |
| AAATCGATGAGT  | 744.10268946445  | 0.359672017892597 |
| CCTGCAGACTCA  | 744.105199982429 | 0.271942138506602 |
| AAGTATTGTGAC  | 744.105865236801 | 0.308277671580535 |
| CAACGACTATGA  | 744.11053779117  | 0.246701743023427 |
| ACTTTTGAATCA  | 744.111782558025 | 0.334689264870598 |
| AGTCACTAGTAA  | 744.118289208514 | 0.282532276203697 |
| AACCCTGATTCA  | 744.119337634784 | 0.224075360553208 |
| GAGTCAAATTC   | 744.12244892041  | 0.29245445518632  |
| TGAGTAAAGTAA  | 744.127656108949 | 0.288599497377169 |
| GTCACGATTGAA  | 744.127930401774 | 0.290250211523077 |
| ACGTCACAGGTA  | 744.132431222628 | 0.306332206618222 |
| AGTGGTGACGTC  | 744.148357114193 | 0.247143754389943 |
| GTCACATTCGAA  | 744.152207360016 | 0.302149817026503 |
| ATGACAGTAAGC  | 744.152468798785 | 0.22867120989817  |
| AGACGTGTGAGC  | 744.15441781016  | 0.279142053984138 |
| GTCATGCAGCCA  | 744.160149133722 | 0.439899133761813 |
| GGAGATTGGTCA  | 744.175165853597 | 0.289718389900061 |
| AGTCACTAGTAC  | 744.176257506743 | 0.208700476704758 |
| CGCTGACATGAC  | 744.179549187519 | 0.339836597016739 |
| GACTAAAGTGAC  | 744.181924631635 | 0.236061698726513 |
| GTCACACTGCAC  | 744.187994749556 | 0.356319468223061 |
| AACAACATCATGA | 744.193319701791 | 0.357701228995565 |
| AATAAATGATTC  | 744.194794062903 | 0.256451066268579 |
| ACTCATCCGTTA  | 744.195433394772 | 0.267580242374493 |
| AGTGAATCAACT  | 744.197263597587 | 0.357413071126768 |
| AACCATCGTCAT  | 744.206808254865 | 0.229889314890417 |
| AGACTAATAAGA  | 744.207119681914 | 0.280148965446684 |
| TCATCTAAGTCA  | 744.218306916254 | 0.177212992910579 |
| CATGTTCTGCAC  | 744.219882240924 | 0.301169436599544 |
| AACGTGACAAAC  | 744.230680751768 | 0.287923932318204 |
| CTGAGTCGTCGC  | 744.237156301815 | 0.298432393600725 |
| AATCTACGATGA  | 744.242671530549 | 0.301828886096137 |
| ATGACTTGATCC  | 744.247136608878 | 0.301939524890605 |
| CAAGGTGAGCAA  | 744.25199379201  | 0.302524532354074 |
| ATGACTTGCCCC  | 744.252734989971 | 0.281691451914548 |
| TGACGCAGGCCA  | 744.264675678145 | 0.343758127681576 |
| GGGCTCGAGTCA  | 744.269815456671 | 0.375368600908308 |
| CAGGATAATGAC  | 744.293440566027 | 0.328128132148875 |
| ATGACTTCGCTG  | 744.294939029763 | 0.359422210689935 |
| AGATGGTAGTCA  | 744.297597016338 | 0.396446358501426 |
| GACCCACGATGA  | 744.310438076042 | 0.272713314029669 |
| ATATAAGACTAA  | 744.336582769636 | 0.276648949052425 |
| GATACGTAATAC  | 744.341333356358 | 0.345370550265861 |
| GTCATTGGCTAA  | 744.348118339681 | 0.336883725789811 |
| AATGTGTCTTAC  | 744.34979167169  | 0.285003102348227 |
| CATTGTTGCTCA  | 744.351307259528 | 0.348721372168414 |

|              |                  |                   |
|--------------|------------------|-------------------|
| TCACGGCAATGA | 744.351432479883 | 0.470617870454989 |
| CACCAGTCAGAA | 744.351542686912 | 0.388842230030967 |
| CGCTAGTGACCA | 744.361843884889 | 0.316147943223084 |
| AAATTGTGACCA | 744.374098514575 | 0.412110371020432 |
| CCGTCTGACTC  | 744.376708142981 | 0.309775103304289 |
| CGTATTGCACA  | 744.381338780882 | 0.31202305094002  |
| CGTTAAGCGTCA | 744.385498430337 | 0.504677470862368 |
| AATACGTAATCC | 744.385805555703 | 0.305092963282772 |
| GTCATCCCTCAA | 744.390942876751 | 0.210833935727603 |
| AGGTAATGTCAT | 744.394690725928 | 0.259277714250185 |
| CGCGCATGACAA | 744.395832595093 | 0.254211660638568 |
| GAACTGAGTAAC | 744.398229953163 | 0.398131906186431 |
| CAGAATTACACA | 744.400337054982 | 0.404452980808277 |
| CTGACTCGCAAA | 744.423154407386 | 0.293600772188415 |
| TCGATTGTGACA | 744.426775096849 | 0.233807432255068 |
| CACTGGTGACGA | 744.431327557926 | 0.311960592584959 |
| CTATGCGATGAC | 744.43231179232  | 0.284916710661658 |
| AACCCAATGACA | 744.440814916252 | 0.190799674420067 |
| CCCGATTGTGAC | 744.44805683604  | 0.331758891738495 |
| TGACTACTCCAA | 744.453630321859 | 0.444691450431435 |
| GCTTAATGACCA | 744.455225002664 | 0.351184361898614 |
| CATTTGACGCAA | 744.466314491795 | 0.17549264799306  |
| ACGTCAAGTCAT | 744.467465440349 | 0.264347647057144 |
| GTCACAATTAGA | 744.468605402856 | 0.268571100124355 |
| TATGATTGATA  | 744.471330346848 | 0.319971744937794 |
| ACGTCACCAATA | 744.477403096598 | 0.233325386331908 |
| GTCATGCGATCA | 744.478631817333 | 0.26175814876353  |
| AATATGGAGTCA | 744.48039630506  | 0.280053546151724 |
| CCGAGCTTATGA | 744.489809623994 | 0.327566185692168 |
| AAGTCAGATCTG | 744.496912607298 | 0.241460907599401 |
| ACTTGTGAGTGA | 744.497972558942 | 0.52243774604001  |
| ACTACTCATTGG | 744.505453888819 | 0.346946812822316 |
| CAACTATGTCAC | 744.506034952915 | 0.332142004766553 |
| CGCGGTGACGAC | 744.511244766202 | 0.29663697579036  |
| ATGGCATGACAA | 744.536420472408 | 0.307960531513282 |
| CCCTTAGGTGAC | 744.540410247896 | 0.216399350312621 |
| TATCACGTGTCA | 744.544135595165 | 0.266978034977977 |
| AGCAATGGGTCA | 744.550900678692 | 0.270126292127365 |
| TGAGTCTTGGCA | 744.553099070479 | 0.393055543212275 |
| GGGCCTGGTGA  | 744.558947696958 | 0.386981600279214 |
| GTCACCACGTTA | 744.560151948778 | 0.435133003781419 |
| GTCACATTCAAA | 744.568054472234 | 0.554916541096254 |
| TGACGTTTACCA | 744.568879754263 | 0.373389779824876 |
| AGTCACGGTTCC | 744.569415303229 | 0.366723987799513 |
| AAACTCATAAC  | 744.578090590986 | 0.334487290441229 |
| AACTCTGACCCA | 744.580158886213 | 0.214805577828885 |
| GATGAGACACAC | 744.583867191607 | 0.303021243033852 |
| GTCACGCCGACA | 744.586118712079 | 0.465810463575961 |
| ATGTGACAGCAC | 744.608998606825 | 0.230500901535898 |
| TAATACGTGACA | 744.611958092994 | 0.329438203964975 |
| AGCTCTCGTCAT | 744.620359476045 | 0.26346631445134  |
| CAGTCTTGACTC | 744.6258686761   | 0.33059189499941  |
| AAGAGTGACGGA | 744.629523900495 | 0.211522141796737 |
| ATGACCCCTAAG | 744.631393558482 | 0.319607496105708 |

|               |                  |                    |
|---------------|------------------|--------------------|
| CAGAGTTGTGAC  | 744.633159663641 | 0.238875554589442  |
| TAGGTCATAGCA  | 744.654597434341 | 0.371018483024965  |
| GGTATGCAGTCA  | 744.660016695042 | 0.482406125098099  |
| CGTAGATGACCA  | 744.661062142544 | 0.445418886174547  |
| GAACGGGCATA   | 744.661241380138 | 0.204163761486212  |
| TCGATTACGCAA  | 744.679033899362 | 0.289997029492141  |
| ACTCAATGAGTA  | 744.682259928678 | 0.376010124361697  |
| AGCGTAAATGAC  | 744.682934986509 | 0.392113221218382  |
| AGTGAGTCCACC  | 744.686491691313 | 0.334333928386107  |
| CACTCATGACGC  | 744.694173942012 | 0.29360622052136   |
| ATGATTCGACTA  | 744.698915567041 | 0.337947568374781  |
| AGACTCACGGAG  | 744.707790413403 | 0.370570250839833  |
| ACTGAGTAAAC   | 744.709639952616 | 0.301508623375963  |
| TCAGTAATTACA  | 744.728051764209 | 0.378258590587164  |
| AATTACGTATCA  | 744.72941855184  | 0.308592310450722  |
| ATTACGTATACG  | 744.734146928094 | 0.27512298370461   |
| CCCATTTGGTGAC | 744.735513738341 | 0.301223449206649  |
| CTATTGTGACGC  | 744.739366770174 | 0.338563840066591  |
| GAACTACGTGAC  | 744.747020855286 | 0.348099099590315  |
| GGGTCATATAAC  | 744.750147487787 | 0.330398498181572  |
| ATTTACTAATGA  | 744.755673583361 | 0.516191511425759  |
| GCGTATTGTGAC  | 744.759615785365 | 0.477528832286554  |
| TGACAGGTAGCA  | 744.76527801809  | 0.275586954219994  |
| ATATTGGGTGAC  | 744.776423610045 | 0.356332743954525  |
| ATGACGAGAACA  | 744.783323476564 | 0.0567979988619268 |
| CTCAGGTGACGC  | 744.785102662741 | 0.335882117235366  |
| GACGTGCAGTCA  | 744.786409550866 | 0.474483263346326  |
| AGATGAGTAGTA  | 744.794070517283 | 0.211368158984991  |
| AGCCTTGACTGA  | 744.795588421131 | 0.300866305092662  |
| GGACTACTAAA   | 744.797118322216 | 0.307919038129687  |
| CATGAATCGTCA  | 744.801863853245 | 0.367254200063475  |
| GTGACAGTATGA  | 744.815656640644 | 0.212460198579124  |
| AGCTCGAATGAC  | 744.827001338232 | 0.325891657585352  |
| TAAACACGACTCA | 744.82757315686  | 0.193679238237695  |
| CGTCACCCTTTA  | 744.832280023567 | 0.26534387376561   |
| GCGTCAGTTTCA  | 744.850776035174 | 0.318262772865584  |
| TCGACCACGTAA  | 744.851133300048 | 0.384715526413225  |
| CTGAAGGGTGAC  | 744.854612251087 | 0.299330816289334  |
| ATTACATGACG   | 744.856789600445 | 0.411136319045096  |
| AGAAAGGGTGAC  | 744.859526331795 | 0.280811579878026  |
| AAGACTATGAGT  | 744.860154224766 | 0.254662470261692  |
| ACCCGTTGTGAC  | 744.865248729382 | 0.414281015704639  |
| GTCTCTCGATGA  | 744.869950351701 | 0.559078927515863  |
| GTCACATGGGCA  | 744.874898714567 | 0.199313640716032  |
| ATACACCGATGA  | 744.879043433724 | 0.467225546402306  |
| AGCCGTGGTGAC  | 744.879984093936 | 0.336121121281937  |
| AGAGTAATAGTG  | 744.890209771966 | 0.289886901377213  |
| CAATGACCGAAC  | 744.892066593139 | 0.40144042155455   |
| GAGGATCTGTCA  | 744.893270855845 | 0.171087309141512  |
| GCTCGCATGACA  | 744.894846111771 | 0.316665038958927  |
| AGTCAGAGCGAA  | 744.900114725194 | 0.209925970490716  |
| GTCACCGCTCAA  | 744.902728818615 | 0.344105479752975  |
| GTCTTGTATGA   | 744.905588536048 | 0.380512284700929  |
| ACCATGTACAAA  | 744.908907640634 | 0.250178780399816  |



|              |                  |                    |
|--------------|------------------|--------------------|
| GTCACAACCGAC | 744.913256180914 | 0.395379939792581  |
| ATTGCGTGGTCA | 744.924005321057 | 0.276090549138216  |
| GTCATACGGGGA | 744.924047058512 | 0.0913835153846593 |
| CTCGTATATGAC | 744.925223109531 | 0.297263741435071  |
| CTCGGACATGAC | 744.926434535799 | 0.444619241750732  |
| AGTGACGCGGCA | 744.932306116422 | 0.264273564578657  |
| CACTAATGAGTA | 744.941284025544 | 0.295423980022863  |
| GTGCCTCAGTCA | 744.943639140688 | 0.339653124677903  |
| ATGAGTACCTGC | 744.97806256935  | 0.295217736487332  |
| GTCACGGTATCA | 744.98690828094  | 0.499896344521703  |
| GTCATCTCCGA  | 744.989192257971 | 0.342718008437187  |
| ACGTCACCGCTA | 744.992515954073 | 0.270748058081206  |
| GATTCGCGTCAC | 744.993686058839 | 0.347480493625731  |
| CCCTGGTAGTCA | 745.013052078619 | 0.20881022585974   |
| ATGACGCGCGCG | 745.019081119519 | 0.489356574979845  |
| GGTTTTAATGAC | 745.033852109462 | 0.447940164591599  |
| TGACACGGTAAA | 745.042198653765 | 0.318966441716435  |
| CATAACGTCATG | 745.050494700254 | 0.370573692615431  |
| GGCTAGCAGTCA | 745.065897513941 | 0.501750002222691  |
| TCAACTCTGTCA | 745.066052415969 | 0.280525559301504  |
| CGAAATTAATAA | 745.068768125282 | 0.331709164820241  |
| AGCCACGTAACA | 745.076923086422 | 0.312363452121211  |
| GGTAACGGTGAC | 745.077691242876 | 0.40077491332622   |
| GTCATCTCCTCA | 745.079031936637 | 0.242625826389688  |
| CGAGTCAAATGA | 745.085867104673 | 0.36701412007177   |
| AGAGTTTATGAC | 745.088933180097 | 0.21816865644435   |
| CCACCTAATGAC | 745.090370725448 | 0.276255303722846  |
| ACTCATAAAGGG | 745.099042797144 | 0.423556059417279  |
| ATTATCAGTGAC | 745.106874928989 | 0.383979013832334  |
| ATGACATTTTAG | 745.108361840219 | 0.243742251584755  |
| AATTGCTGACTA | 745.111386669523 | 0.429004468029888  |
| AGTCACGGCTAT | 745.12289053683  | 0.344621719271755  |
| TGTGTCAGGAAA | 745.124543782333 | 0.0462692465738974 |
| TAGGTCACGTCA | 745.124688200783 | 0.300628241451337  |
| TGACTCCCTCCA | 745.146157804683 | 0.341551293544155  |
| CGTCATGAGTGA | 745.147947546967 | 0.266962973484096  |
| ACTGACTGTGTC | 745.154786987274 | 0.363218596731067  |
| ACAGCGGTGACA | 745.159260651484 | 0.235910923912963  |
| GTGACACCGCTA | 745.162139121877 | 0.363468937800851  |
| ACCTACTCATCT | 745.179036546499 | 0.195223636553221  |
| GGTCATATCTGA | 745.182568381926 | 0.41590324763335   |
| GGGTCATCATCA | 745.183079787523 | 0.326817657520968  |
| TGACATGGCCCA | 745.187040983135 | 0.44925222361168   |
| ACAGTCAGTGTC | 745.187626549434 | 0.280868075203507  |
| AGACTAATTAGG | 745.2030011766   | 0.298853949687564  |
| ACTGGAGAGTCA | 745.204823389546 | 0.346053799705828  |
| AGTCAGCGCTAT | 745.207664160136 | 0.400025914322405  |
| ATGACAGCGTAG | 745.216881770435 | 0.24780470278876   |
| GCAGCATGACAC | 745.222710566116 | 0.546064789298086  |
| CGTACCAATGA  | 745.222963809843 | 0.273473230339872  |
| CAGTCAGATCGC | 745.228623699666 | 0.314820172603619  |
| AGGTAATGACG  | 745.234938362499 | 0.208636912612366  |
| CATCATCAATGA | 745.237950354291 | 0.309584653048606  |
| CATCCGGTATGA | 745.239329102916 | 0.403457887586065  |

|               |                  |                   |
|---------------|------------------|-------------------|
| CGTCATCAAACA  | 745.247151071351 | 0.290270010192042 |
| ATGAATAATAGC  | 745.24750720715  | 0.253988198275098 |
| ACGTCACCTGCAG | 745.250992696401 | 0.444079067590245 |
| AGCTTCAGTGAC  | 745.252327166556 | 0.38982114757433  |
| AATGATTGTGAT  | 745.252826122839 | 0.275888538226158 |
| ACTCATCAGAAT  | 745.262255995442 | 0.317362159165726 |
| ATCGTCACCGAA  | 745.263838474268 | 0.240660371059114 |
| CGATCTGTGACA  | 745.271667343022 | 0.371811560517039 |
| GTCGTCATGTCA  | 745.27448385325  | 0.337030240548447 |
| TATGACGCCGGA  | 745.282913164592 | 0.22005515893579  |
| ACAACACTGTC   | 745.288573344102 | 0.422730751017271 |
| GGGTCATCCTAC  | 745.299642099573 | 0.315820995589948 |
| AGTGCTAATGAC  | 745.303423501469 | 0.353360053135046 |
| AGGCCCATGACT  | 745.305979681036 | 0.287468702468819 |
| ATTACCGTGACA  | 745.313880682107 | 0.403307539330965 |
| ACAGATTACGCA  | 745.313887385435 | 0.187926483650348 |
| CGTCATTCTGCC  | 745.315361930415 | 0.329699344172688 |
| GGCCCGTGACAC  | 745.316530059996 | 0.241172579455506 |
| TGCATCGTGACA  | 745.325981829508 | 0.252837374690216 |
| CGGGTGGCTCAC  | 745.33232157219  | 0.319444234772492 |
| GTCACAAATAAC  | 745.336579675831 | 0.193254042987806 |
| ATTGGGATGACG  | 745.336669104106 | 0.203454036850793 |
| CGATTAATGACA  | 745.340809011938 | 0.320478629645972 |
| CCCGATTACTGA  | 745.351454010182 | 0.21912245139206  |
| CGTCATTGTCTA  | 745.353997305776 | 0.28138137283455  |
| GCGAATGACCAC  | 745.373572763309 | 0.310043692468743 |
| ATTAATCACACA  | 745.379854278193 | 0.291724094142484 |
| CGTCATGTTTAG  | 745.380440130062 | 0.279079640069663 |
| ATGGACTATGAC  | 745.386182389273 | 0.167250461489484 |
| ATAAAACATGAC  | 745.386803802397 | 0.37788654406788  |
| GACGCTTTGTCA  | 745.386826640836 | 0.4760886443103   |
| CGTCACATCAGA  | 745.388235629802 | 0.341208993257467 |
| GGTTACCATGAC  | 745.394451254848 | 0.337161414235626 |
| CCCGGATGACCA  | 745.402491316979 | 0.37423148497058  |
| GAGCCTATGACC  | 745.407680512713 | 0.330374025631473 |
| GTCATTCGGCAC  | 745.424167779224 | 0.403995667764881 |
| GCATTTGCTCAC  | 745.436281073548 | 0.198544609734886 |
| ATGATATCGTCA  | 745.437270007368 | 0.398410599201572 |
| CGCATCGTGACA  | 745.442197723611 | 0.278807618601994 |
| AACACGGAGTCA  | 745.446507657247 | 0.28752269004623  |
| ATTGTGGGTGAC  | 745.451986871845 | 0.290645439721099 |
| ACGATCTGACTG  | 745.453043813541 | 0.165264340015283 |
| ATTACCTGTGAC  | 745.456768095109 | 0.383300598451045 |
| AGCGATTGGTCA  | 745.457544427679 | 0.268589628984014 |
| CGAGCGTGACGC  | 745.463704942407 | 0.439184449260157 |
| GCAAGTCTGACA  | 745.466431668235 | 0.367013269110011 |
| GACATCACATGA  | 745.47447291063  | 0.329332441075845 |
| CAGTGATGACCA  | 745.480474343865 | 0.508781272337733 |
| GTCATTGTGAAC  | 745.485523178246 | 0.368706531521439 |
| GTCATAAGGAGA  | 745.496051687937 | 0.211008693340321 |
| CGTCATTACCCA  | 745.498197475635 | 0.334155096598845 |
| GTCACAACCTTA  | 745.498903203381 | 0.354834615944436 |
| CGTCATTTGACA  | 745.500764997536 | 0.286304629603471 |
| GGAACCGGTGAC  | 745.509506511551 | 0.326980219333758 |

|               |                  |                   |
|---------------|------------------|-------------------|
| TCGGTTGACACA  | 745.510386984014 | 0.278024654357333 |
| AGTTACATCACA  | 745.516421231903 | 0.240429917749872 |
| ATTACACACACA  | 745.531546237829 | 0.376354319708413 |
| AAAACCTTGGTCA | 745.537356212797 | 0.446445551437142 |
| GCCCTATGACCC  | 745.537625281959 | 0.287667424523288 |
| TCATCGGACTCA  | 745.547414230512 | 0.359488444689395 |
| ATAACAGTGACG  | 745.552045257868 | 0.475636010151609 |
| CTAACAGATGAC  | 745.555088362667 | 0.118317750031936 |
| GTCACTGTCAAC  | 745.581826490489 | 0.328710686086852 |
| GTCATTGCTTCA  | 745.582361478446 | 0.560701098620709 |
| CATGGACAGTCA  | 745.583066056348 | 0.310440112037067 |
| ATGAGGCATCCG  | 745.59668482029  | 0.3217274263398   |
| GACTAATTCGGC  | 745.59701877022  | 0.387134695982907 |
| GAATTGGGTGAC  | 745.59932418639  | 0.251822819846966 |
| AGCAGTAGTGAC  | 745.601981983438 | 0.307372085498844 |
| ATTGAGCAATAC  | 745.604284778348 | 0.317826435777417 |
| AGCCTTGATGAC  | 745.612133939178 | 0.32483380313723  |
| CGGATGCATGAC  | 745.614639024071 | 0.30031268957619  |
| AATAGTAATCAT  | 745.619458522598 | 0.255407892001851 |
| CGTGCCTATGAC  | 745.621691907208 | 0.293615530745071 |
| CGTGCATGACGC  | 745.624147018891 | 0.560013033191802 |
| TAGGCCGACTCA  | 745.637610835292 | 0.336706419278113 |
| AGCGCTGTCATC  | 745.641621241172 | 0.223865838636222 |
| AATGAGTAGACT  | 745.643116688562 | 0.295227480520483 |
| CGTATTAGTGAC  | 745.648903394835 | 0.466765783251537 |
| AAATATCTGACT  | 745.649908149826 | 0.222017231806085 |
| CGTCATTAGCCA  | 745.657150419646 | 0.318353906379418 |
| GTCTTCCAGTCA  | 745.660753090596 | 0.307294557584315 |
| GTAACGTATGA   | 745.660835833581 | 0.264942025226971 |
| AGGACTAATGAC  | 745.666775679018 | 0.207823417573046 |
| TGACAAGCGTCA  | 745.672180698593 | 0.28718625356985  |
| GACTAATCAACA  | 745.676409702063 | 0.287337855165713 |
| AGCGCTGCATA   | 745.682582802912 | 0.293319611968605 |
| GCGACGTATGAC  | 745.70797741679  | 0.343708282495242 |
| GACTATTGTACC  | 745.712773668237 | 0.474501648484259 |
| ACGCTTGGTCAC  | 745.725123563267 | 0.215502026020893 |
| AGTCAGAGGTCA  | 745.726705050879 | 0.166484789974588 |
| GAACAGGATGAC  | 745.737163668289 | 0.251081414485026 |
| ATGACTTTTATG  | 745.73901279584  | 0.282645468928619 |
| AGCCGGGATGAC  | 745.742083607261 | 0.272074108374322 |
| GACCCAATGACA  | 745.742491896436 | 0.179712892322589 |
| ATGAGTAGTATA  | 745.743522155604 | 0.249315357470566 |
| CATTCTTGTGAC  | 745.746378253933 | 0.363217942450509 |
| ATGACAGTCGTC  | 745.76145981117  | 0.263999837292367 |
| GTCACTGGTACA  | 745.765299982314 | 0.276499704763247 |
| AGCGAATTAGTC  | 745.765938892497 | 0.192216976091397 |
| GTGTAACTCATA  | 745.766379491541 | 0.355735182023712 |
| CGTCAGCGTCAC  | 745.768705957731 | 0.380744823873775 |
| TGACTCGCCCA   | 745.769451445098 | 0.468657335870554 |
| GTCATGCCTGAA  | 745.776047327469 | 0.29489387026308  |
| ATAAACGCGTCA  | 745.784829421553 | 0.318878753394401 |
| GCGTCACCAGCC  | 745.794276581252 | 0.261707090973649 |
| TGACACGTGACA  | 745.797367662965 | 0.206774996206608 |
| ATATACTGTGAC  | 745.800311380204 | 0.374616435028991 |

|               |                  |                   |
|---------------|------------------|-------------------|
| ACGTAATTGTCA  | 745.805848989588 | 0.242047773419655 |
| CTGCAGTCAGAA  | 745.80615975583  | 0.268836374892485 |
| AGACCTAGTCAG  | 745.836113320136 | 0.453663105823267 |
| GACACTATGACC  | 745.837836749009 | 0.240242402047037 |
| CACAACGTATGA  | 745.854164866559 | 0.287634041830315 |
| GGTCGGTGTGAC  | 745.854731514904 | 0.279801335826858 |
| ATGATGTGTAAG  | 745.861602667502 | 0.17572820681902  |
| GTGTCTTCGTCA  | 745.863294417609 | 0.598955056477166 |
| ATTGTTCTGTCA  | 745.876871010429 | 0.271839244320312 |
| GTGACCCAATAA  | 745.877474186925 | 0.414169389253995 |
| GCGTCATGCCTA  | 745.878111552961 | 0.382411176686581 |
| ATGAGTAGGTAC  | 745.892138817637 | 0.276437311496869 |
| AACTCATACTGA  | 745.905338627395 | 0.437004182801397 |
| AATAGTCAAACC  | 745.916463306809 | 0.276473706191302 |
| AGTCAGAGAACG  | 745.928991343728 | 0.262540942778132 |
| GTCACAATCTTA  | 745.929519317974 | 0.192518113348187 |
| ACTCATAAGTGC  | 745.938632241454 | 0.381479376349573 |
| CTGTCATGCAGA  | 745.958254479822 | 0.304469271682266 |
| CTGGGTTATGAC  | 745.967109733425 | 0.269205547834616 |
| GTATGAGGCATA  | 745.976090706266 | 0.22800328668493  |
| GTCATGGACCCA  | 745.976486195964 | 0.400427639240408 |
| ACGTGTCAGAAG  | 745.988980288432 | 0.308927066117243 |
| GAGAATGGTGCAC | 745.991514462158 | 0.199433061217987 |
| GCGAAGTAGTCA  | 745.991978477743 | 0.311970376721092 |
| GTGGCTGAGTAA  | 745.993968785137 | 0.32721510513821  |
| TGACAAGTGACA  | 745.996789221666 | 0.296037925125155 |
| ACTCATCTTATA  | 745.99933436644  | 0.13349692069868  |
| GTCACCTATAGA  | 746.00235124418  | 0.437460793573328 |
| CTTCCATGAGTC  | 746.003516870142 | 0.232376385136441 |
| CCAATTGTGACG  | 746.003821081598 | 0.454323783888373 |
| GTCAGACTCAAA  | 746.01087697804  | 0.199283674091769 |
| CCATGTATGACC  | 746.014231855614 | 0.347391108004643 |
| AAATGATATCAT  | 746.015981777072 | 0.245636914588872 |
| AGTGTATGTAG   | 746.024262513702 | 0.132885399714875 |
| CCACATTGGTCA  | 746.024764387836 | 0.349877158589339 |
| GTCATTTTCA    | 746.033935625361 | 0.299091400408404 |
| GACTAATATTAC  | 746.036576305887 | 0.24669348888327  |
| AGATGATATCAT  | 746.037738145244 | 0.377466306591265 |
| AGGTGATGACCA  | 746.040322329777 | 0.390164919087847 |
| ATCGAAAGTGAC  | 746.057489368291 | 0.278829561516438 |
| CTGTGACGGTCA  | 746.059158163772 | 0.350264197050645 |
| CAAGGGTGTGAC  | 746.061400548846 | 0.199826262919581 |
| TGAAGCCAGTCA  | 746.070185896489 | 0.338977054860113 |
| ATGAGTAGGCC   | 746.082322837166 | 0.268034591217948 |
| AGCAAGTGACAC  | 746.085474200081 | 0.500352587733531 |
| CGTCACCGAGAG  | 746.099136069003 | 0.286922795372728 |
| GTAACCCATGAC  | 746.101929031926 | 0.383120479196713 |
| ACGACTCTATGA  | 746.109358791426 | 0.344078400302256 |
| GGTAGTGAATCA  | 746.116752653007 | 0.222597472119477 |
| CGTGCGAGTCAA  | 746.120261832797 | 0.267589215253926 |
| GTTTGACAGTCA  | 746.128352203949 | 0.347430012313455 |
| GTCATGCCATTA  | 746.140869841092 | 0.339828611451077 |
| AATTGCAGTCAG  | 746.167224571631 | 0.37345532399607  |
| AAGGTTGACTGA  | 746.177440725897 | 0.210142441645326 |

|               |                  |                   |
|---------------|------------------|-------------------|
| ACGTCACAATCC  | 746.181211961819 | 0.361026155681162 |
| TCCGGCGACTCA  | 746.183424105882 | 0.320696714835799 |
| GCCGTTTTGTCA  | 746.188122329862 | 0.333360983464129 |
| AAAGACTGATTC  | 746.202668545961 | 0.236205323212588 |
| ACTCATTGTAA   | 746.205027677675 | 0.265198464577649 |
| AGTGTCATGAAC  | 746.205557770096 | 0.284495884378759 |
| ACTTTGTATGAC  | 746.208055283179 | 0.334620823172645 |
| CTGGACTACTAA  | 746.212155176771 | 0.350336402200006 |
| GTGACCTCGTCA  | 746.213249949152 | 0.332733548537379 |
| ACTCATCGTTCG  | 746.223864342692 | 0.36317127993992  |
| ATCGTATGACCG  | 746.226693533786 | 0.414297663334466 |
| ATCGTTTTGTCA  | 746.242395320576 | 0.218457628629293 |
| AGTCAACGTCTA  | 746.2519362213   | 0.374189530014842 |
| ATGACGGTCATG  | 746.252261977403 | 0.188487341215001 |
| GTCACATCGTTA  | 746.256062279784 | 0.296113000083903 |
| GTATTAGTCTGA  | 746.261218507638 | 0.209034857464987 |
| GCTTGGATGACC  | 746.263714409087 | 0.401590389831391 |
| GTCATCCCCTTA  | 746.267912453334 | 0.14207567038194  |
| CTATGTATGTCA  | 746.270915032861 | 0.391167744477752 |
| GAGACGTGACGC  | 746.278410582612 | 0.311756537210541 |
| CTAAGAAGTGAC  | 746.280798239252 | 0.40176796910018  |
| ACCGAACATGAC  | 746.281279315992 | 0.41714644983541  |
| GAGACCTAGTCA  | 746.286398782951 | 0.571554997182911 |
| GTCACAGCCTTA  | 746.286701946927 | 0.271731855352023 |
| ACATGCCAGTCA  | 746.291068355129 | 0.404036170749858 |
| GCTTTGTAGTCA  | 746.291817464953 | 0.514115163746946 |
| GAACAGGTCACC  | 746.293282244351 | 0.317440653827508 |
| CGTTGACATGAC  | 746.31300342308  | 0.381267882753589 |
| GTCATGATTCTA  | 746.313752250911 | 0.303427117543272 |
| GTAATATCGTCA  | 746.319606587131 | 0.36058115779066  |
| TAATTTATGTCA  | 746.324281375467 | 0.317560722776807 |
| GTCACAACGCCGA | 746.350971769248 | 0.269042866733453 |
| CCTTCGTGACAC  | 746.353307561373 | 0.467774693461511 |
| CAGACCATGTCA  | 746.354758788207 | 0.454839507161614 |
| TCGATCTCGTCA  | 746.359920410166 | 0.250287395456457 |
| AACGTGCGTCAA  | 746.363533568656 | 0.31280182548312  |
| ATGATATCACAT  | 746.387581226418 | 0.417397485892977 |
| TGTCACATACAA  | 746.404772910211 | 0.329479767904888 |
| ATGTCATTGGAC  | 746.407511382689 | 0.376781063299446 |
| GCATCCTGTGAC  | 746.40980067442  | 0.393266608871294 |
| GACTCACGACGA  | 746.411451213621 | 0.264003565604119 |
| ACTCATTTTGAG  | 746.415171749995 | 0.422966137389206 |
| ACGACTCAGAGC  | 746.420377494185 | 0.22603874626063  |
| GGGTCAAATGAC  | 746.420542144271 | 0.351577253767926 |
| GAAAAGTCATCC  | 746.420717101285 | 0.471973401308457 |
| AGATTATGTGAC  | 746.425796030005 | 0.496296907105686 |
| CACCAGTGACGC  | 746.429297649386 | 0.394260723934638 |
| CGTTTAAATGAC  | 746.432494685089 | 0.283849900782634 |
| ACCCCGTAGTCA  | 746.440746866599 | 0.305589846847433 |
| ATCATTTGCTCA  | 746.447796392001 | 0.211822633103137 |
| TGACATAGATAA  | 746.453187619909 | 0.456230927301069 |
| GGTGCTAGTCAC  | 746.460082228524 | 0.277700731544863 |
| AAAAGTGACCAA  | 746.464676069262 | 0.304662026505217 |
| ACGTAATAGTTG  | 746.464813113164 | 0.394630379151031 |

|              |                  |                   |
|--------------|------------------|-------------------|
| AATCAAGTCATG | 746.495241315896 | 0.455320386947201 |
| AGGGAGATGACG | 746.497691633565 | 0.213220321501178 |
| AGCGAAATGACA | 746.506098518551 | 0.259260956371105 |
| GGAATCGGTGAC | 746.509990573188 | 0.292083613883989 |
| ATGAGTCTCACC | 746.523181043101 | 0.209945260248849 |
| AAAATTTGCTCA | 746.526237668216 | 0.362104914409942 |
| ACACGACGTCAT | 746.528000882956 | 0.264852471072435 |
| ATGACGTCTCTA | 746.530182576526 | 0.167546676893433 |
| CGGAACGGTGAC | 746.539908138914 | 0.390850244045702 |
| GCAATGCTGTCA | 746.541433461844 | 0.400274479510703 |
| ATATAAATGACC | 746.541812505676 | 0.268431679453241 |
| ATGACTTCGGTC | 746.542768106606 | 0.239170550302937 |
| GAATTCATGACA | 746.551638530063 | 0.386356626670258 |
| CAACCTGACGCA | 746.554077092162 | 0.270717852488119 |
| TCTGACGCGTAA | 746.556663312523 | 0.273178334066174 |
| AAGACTAACATT | 746.561025368299 | 0.236716362074179 |
| TCAGGTAAGTCA | 746.578170043725 | 0.335955694593738 |
| TATTAATTGTCA | 746.583293964254 | 0.303096462420462 |
| ACGAGTCAAACG | 746.594951143671 | 0.292941353397263 |
| ATGACCCGTAAT | 746.599375186264 | 0.443611555116576 |
| AATACCGGTCAT | 746.602807614781 | 0.319055954845448 |
| GAATCATGATTC | 746.611995310028 | 0.449170652343152 |
| TATGAAGTGTC  | 746.626540181629 | 0.315601556018863 |
| TATTATGTGACA | 746.627869681891 | 0.354529922768096 |
| AGTCAGACTTCG | 746.631972454304 | 0.324591273492274 |
| GTCGGTGACCCA | 746.632839246725 | 0.297015543732501 |
| CCTCGACATGAC | 746.637312875967 | 0.368759866557773 |
| GCAGATCACTCA | 746.645041791758 | 0.367322033223815 |
| TGTGACAATAAA | 746.648872978482 | 0.265625074240333 |
| CTATTACTGACA | 746.64937604299  | 0.245177633560396 |
| CGGGTCATAGAC | 746.649970264655 | 0.517740528621285 |
| ATCGCAGTCAGA | 746.652368978886 | 0.32267096412365  |
| GTGACGCGACTA | 746.656247736805 | 0.318866590416646 |
| TCGATGTCGTCA | 746.656749334264 | 0.463402804143888 |
| ATTCATCGGTCA | 746.658221369402 | 0.539792178217304 |
| GTGTTTGACACA | 746.660701069931 | 0.55092388624969  |
| GAGCATTGTGCA | 746.669043017184 | 0.274025699150912 |
| GATGATAAGTCA | 746.669157148378 | 0.287408226864669 |
| CCGTTGATTAC  | 746.669174498358 | 0.254132951208213 |
| AACTGTTACTAA | 746.683677880596 | 0.353589260908904 |
| ATGAGGTGTGAC | 746.684742094579 | 0.253799540241965 |
| AGTCAGTGATTC | 746.685051036184 | 0.313818383772799 |
| CGTCACAGTGCC | 746.68707633771  | 0.348655678804976 |
| ATGACACTCGGC | 746.714496280554 | 0.310776092119643 |
| GCCAGGGAGTCA | 746.715827966886 | 0.166286560844824 |
| GTCACGTGGCCA | 746.725497581134 | 0.29937221029087  |
| ACACATCATACT | 746.726945935764 | 0.168275550031153 |
| GCCGTTCTGTCA | 746.72716476614  | 0.286562432656243 |
| ACCGAAATGAGT | 746.729116188193 | 0.26743554594824  |
| TATGGACTCACA | 746.736886626152 | 0.148569665469461 |
| GATAACTGTGAC | 746.737070550624 | 0.420912581869277 |
| CACGTCTGACAC | 746.738295968183 | 0.28403355392174  |
| CAAACGAATGAC | 746.73944917598  | 0.237194269168642 |
| ATTGACTGAGCA | 746.7400942969   | 0.294261529359333 |

|               |                  |                   |
|---------------|------------------|-------------------|
| GTTGTCACCACA  | 746.741456969805 | 0.279059611379371 |
| TAGAGTGACCAA  | 746.750699531361 | 0.187064757685981 |
| ACCAGTCAGATG  | 746.764177245895 | 0.29750867052894  |
| ACTAATTCGAGT  | 746.765629807841 | 0.340638711793501 |
| ACTCATCATTAG  | 746.774966377212 | 0.213672607566388 |
| GCGTTCGGTGAC  | 746.780507166364 | 0.426046139219667 |
| GTCACATCAAAC  | 746.783957533261 | 0.29173597494521  |
| CCACCGGAGTCA  | 746.804269302901 | 0.456169254390644 |
| ATGTCGGTGACA  | 746.804624170081 | 0.372438512719461 |
| AACGTGCTGACT  | 746.805547910819 | 0.281650075338373 |
| ATGACCACTGGG  | 746.806877638447 | 0.456941581760934 |
| CACGAGTGTGAC  | 746.807095572138 | 0.241515847526317 |
| GTAGCACGTCAC  | 746.812464908738 | 0.435154122355842 |
| ACACGAGTCAAC  | 746.812465131737 | 0.222286279206631 |
| GGTATGATTCTGA | 746.821236191386 | 0.21764034153905  |
| CGTAGGGATGAC  | 746.823386809264 | 0.37606769521706  |
| TAGCATCTGTCA  | 746.824284840511 | 0.187649391394028 |
| GGACCATGTCCAC | 746.83949895487  | 0.325682439571509 |
| AGACACAGTCAG  | 746.84585581355  | 0.294588783541342 |
| GTCATCACGGCA  | 746.847928183166 | 0.30709162971078  |
| AGGTATTTGTCA  | 746.856581491785 | 0.305233004282109 |
| GTCATTCGACTA  | 746.856830874727 | 0.351517557445618 |
| AATTGACACAGA  | 746.865840685052 | 0.220172144429766 |
| CTAGCTACGTCA  | 746.866789549874 | 0.28474251733928  |
| ACTCATAGGTCT  | 746.880188881448 | 0.349892896555621 |
| GTCATCTGCCAC  | 746.882605689607 | 0.382606307397627 |
| AGTATGACCCGG  | 746.887731214168 | 0.300035161863214 |
| GAGTGACAAACA  | 746.893969655377 | 0.207420989578279 |
| ATGGCCTGACTC  | 746.895352044596 | 0.198492658966816 |
| GGGACCTAGTCA  | 746.910063025295 | 0.298343072956899 |
| AACCTGGTCATC  | 746.911496962684 | 0.347232047489389 |
| CGATCGTGACAC  | 746.921884380877 | 0.357766121186713 |
| AAGTACGTGTCA  | 746.924248865172 | 0.257243179933279 |
| ACTATCACGTCA  | 746.927115513087 | 0.19833736081933  |
| ACCCTTACGTCA  | 746.928616407425 | 0.267229036202921 |
| ACTTAGTAATCG  | 746.930461897422 | 0.200802733399184 |
| TGATGACCGAAA  | 746.935653326683 | 0.307223640345768 |
| ACACCAGTGACA  | 746.944051568833 | 0.48585953978424  |
| ATGATGCAACAA  | 746.953693937101 | 0.232050719734822 |
| CCAGACGACTCA  | 746.966844596521 | 0.381164543534686 |
| ATGACGTCTAAC  | 746.967741567206 | 0.211889964211245 |
| CAATTCGTGAC   | 746.978580992674 | 0.403601775713238 |
| ATTACTAAGACG  | 746.982183530729 | 0.305805161799763 |
| GTGCTACTGCCA  | 747.00360824838  | 0.368600763866597 |
| GAGTGTGAGCAA  | 747.004650339134 | 0.168156025190595 |
| GTCGGAGAGTCA  | 747.004886904288 | 0.171879965166353 |
| CATACTTGACTC  | 747.028790957314 | 0.268059341869736 |
| AGGTAGTGACAC  | 747.039486497404 | 0.290457074167105 |
| AACGTGACGCGA  | 747.060718597488 | 0.267514579565237 |
| AGCCTAATGACG  | 747.06725415747  | 0.275050425452172 |
| AAGTCGTAGTCA  | 747.078115870303 | 0.353996307551481 |
| CGCACTCTATGA  | 747.084182282354 | 0.386142803784311 |
| AGTTAATGTCAT  | 747.090428563437 | 0.181938505508019 |
| CCCTTAGCGTCA  | 747.090976388428 | 0.279296850707774 |

|              |                  |                   |
|--------------|------------------|-------------------|
| TATGATTACGCA | 747.102514618581 | 0.325673570742444 |
| GTCATTATGGAA | 747.104453033917 | 0.288703200334684 |
| ATGACGCCTAAA | 747.116525090215 | 0.475568046236926 |
| CGGGTGGATGAC | 747.124376547817 | 0.238963750999634 |
| CTCCATGGGTCA | 747.128735665891 | 0.270874685590394 |
| CTAATGTGACGA | 747.133227526464 | 0.131586662852152 |
| AAGTCTGATGAC | 747.134209369821 | 0.319081072877495 |
| GTCACAGATTTA | 747.13785932753  | 0.298754586316467 |
| AAGCTTCGTGAC | 747.138706249865 | 0.315505760577957 |
| CGTTCGGTCACA | 747.139793197707 | 0.504964440245126 |
| TCATATAATGAA | 747.141566045201 | 0.456703251895897 |
| CACGTCACGTGC | 747.143374344564 | 0.261656848596649 |
| CCGCTGATATGA | 747.178241993231 | 0.511581827800076 |
| AATAGTCAATAT | 747.186452358607 | 0.273943589901207 |
| ACTCATACTCCG | 747.187312016943 | 0.194706284298873 |
| CATCGTATTACG | 747.189083842777 | 0.612399058588265 |
| TGAGTATAACCA | 747.192910267123 | 0.356189296945336 |
| CTGACTCGCATC | 747.197983173532 | 0.257377771822179 |
| CGACTGGTGACA | 747.201412649067 | 0.647346269853642 |
| CCTTAGAGTGAC | 747.216214494676 | 0.388139570530919 |
| CAATTGGCGTCA | 747.217772378352 | 0.349147059219726 |
| GCACAGTCAGCC | 747.223255014906 | 0.29690131949614  |
| CGCACTGTCATC | 747.225794777088 | 0.151556898073468 |
| ACTTAGTGTGAC | 747.227146537232 | 0.31602713184767  |
| CGTCACTCTAGA | 747.239594290756 | 0.389848969952541 |
| ACATTCCAGTCA | 747.242674649657 | 0.274063281833194 |
| ATTCACTCATTC | 747.250497917957 | 0.266005693655887 |
| TCGTGACACTCA | 747.25583862965  | 0.398214264791476 |
| GACTAATCCCTA | 747.25737381328  | 0.281111561403436 |
| ATTGCGTAATTA | 747.262408745842 | 0.259647539998588 |
| GTGTCACGTTTA | 747.263925920454 | 0.327502899420885 |
| GTGGCGTCACAA | 747.265827140253 | 0.321559500789449 |
| CTTTACGGATGA | 747.270874853991 | 0.583549806864094 |
| AAATAGTGACGC | 747.283893997245 | 0.166464652130913 |
| AATGACATTTTA | 747.284442272847 | 0.287307436861083 |
| CTGGTTCTATGA | 747.285448310545 | 0.433087717898868 |
| TACTCGGTGACA | 747.290156005988 | 0.301670863320956 |
| CAGAGAGTGACA | 747.300983152104 | 0.335096073969982 |
| ACTCATAACGTA | 747.301482284157 | 0.303407740955067 |
| CCTACTGTGACA | 747.308017148342 | 0.389196857167565 |
| ATAGATTCTGAC | 747.30924428289  | 0.385845593405988 |
| AAATACAGTCAG | 747.311050659191 | 0.246398641625174 |
| ATGTTGCTCACA | 747.31313535268  | 0.301977605207225 |
| GTCATTAATTCA | 747.313536365038 | 0.357295043915215 |
| CTTATTAATGAC | 747.320401725035 | 0.348226123695436 |
| CAGACATGTGAC | 747.326940662186 | 0.325341355326528 |
| ATTTGGATGACC | 747.327138821458 | 0.571697852673189 |
| CGGTAATTAGTC | 747.328969907437 | 0.415858250423451 |
| GTCATGAGCAAC | 747.333894133793 | 0.435954113555879 |
| ATTGCATCACCA | 747.338017821011 | 0.303916648570458 |
| GTCATATCCTTA | 747.343052511881 | 0.321843626429058 |
| GCTTGCTGACTA | 747.348657751837 | 0.397421773179872 |
| TTAACTGAGTAA | 747.351152416299 | 0.461282088775261 |
| GTGCGTGACAGA | 747.353239284555 | 0.309451278014047 |



|               |                  |                   |
|---------------|------------------|-------------------|
| CTTCAAGTATGA  | 747.3534297975   | 0.318462311772422 |
| ACTCAAATGACG  | 747.359721812934 | 0.313992175127198 |
| CGATAGAGTGAC  | 747.36749648353  | 0.270324459703544 |
| ACCAGCCAGTCA  | 747.36833256944  | 0.297942438394662 |
| TATAGAGTAATA  | 747.373084719919 | 0.222518348849709 |
| GTCACCACCCTA  | 747.377151073468 | 0.28143780496765  |
| ACACGTCAACGA  | 747.378950499371 | 0.274060986460222 |
| CGTCACTCGGAG  | 747.386511977495 | 0.376042701397239 |
| CCGTACATGTCA  | 747.394496107997 | 0.24035355978877  |
| AGAAATCATGAC  | 747.419883517959 | 0.293500875580376 |
| ACTCGGTACATCG | 747.4208957677   | 0.299035115231339 |
| CAAGTATTACAC  | 747.427659895585 | 0.210614770958188 |
| ATACATTGGTCA  | 747.43029981841  | 0.443934561778502 |
| CGACAGTGTAC   | 747.432015144561 | 0.331281392139704 |
| GTCATTAAGAA   | 747.432226159037 | 0.30525277746386  |
| GCACATCACTCA  | 747.433302539175 | 0.310922894965305 |
| TGACGCGGTAAA  | 747.440979039411 | 0.271169332131471 |
| TCAGTCAAGAGA  | 747.442538570979 | 0.266482446151026 |
| AATCTTACGTGT  | 747.44739219545  | 0.481950058018598 |
| CAGTCAGCCATA  | 747.448955785807 | 0.340428439898286 |
| ATGGAGTGTGAC  | 747.449025952714 | 0.232340356817466 |
| TTACTCAATAAA  | 747.452918242644 | 0.293504806263486 |
| TACTCTACGTCA  | 747.471736163649 | 0.198926826168671 |
| CTTAAACATGAC  | 747.47212567628  | 0.384517808051644 |
| CGTCATTGCTC   | 747.478096971543 | 0.089315383091373 |
| GTGTCAGACCGA  | 747.488541839873 | 0.302258731871478 |
| CTGGAGAGTGAC  | 747.49465164912  | 0.289841028969047 |
| AGTCACGGAGAT  | 747.496576139135 | 0.283950904166602 |
| GAACAACCTACA  | 747.501370638235 | 0.4932154238344   |
| GACATGGAGTCA  | 747.502592674743 | 0.179425712107686 |
| ACTCATCAGGTG  | 747.515530788638 | 0.357227570158047 |
| ATACTTGTCAAC  | 747.517123009667 | 0.283334357653229 |
| ACACTATATGAC  | 747.517561458383 | 0.433499068054668 |
| ACTCGTGACATA  | 747.523115118071 | 0.29540720046083  |
| AGAATTACGCAC  | 747.524711646753 | 0.272588843393895 |
| AAGGATAAGTCA  | 747.542014046392 | 0.237358435994097 |
| CTATTGGTGACA  | 747.544381222022 | 0.198864361007308 |
| TGTCATGTCTAA  | 747.546311277175 | 0.19281057588059  |
| CATTTGACTCGA  | 747.556616459949 | 0.395663427209482 |
| ATGAATCAAAG   | 747.559974354149 | 0.36050036062981  |
| ATCATTATGAC   | 747.563839245278 | 0.365194638839006 |
| AAGCATACGTCA  | 747.56441971687  | 0.253657965040544 |
| TAGGATGACCGA  | 747.565900124793 | 0.411890382380005 |
| TATTCCTTTGTCA | 747.566190718445 | 0.132694685825313 |
| ATATCATTGTCA  | 747.583514701531 | 0.320460669076612 |
| GAGCTATGACCC  | 747.594762337343 | 0.307172614135741 |
| CACTTTGACTCG  | 747.597208620728 | 0.194693972346543 |
| GCAAGTGAATCA  | 747.604702609948 | 0.19093055692518  |
| ATTGTCATGCAG  | 747.616817584037 | 0.302926313086005 |
| GAGCTACTCATC  | 747.627871073668 | 0.310317647163471 |
| AGAGTAATAATC  | 747.630759285031 | 0.241289793255548 |
| AAGCTTTGACTC  | 747.632055570015 | 0.301589406488086 |
| GTGTCACGCTGA  | 747.632597548141 | 0.310492504616469 |
| CCGAGGGAGTCA  | 747.633493979263 | 0.277326536773475 |

|               |                  |                   |
|---------------|------------------|-------------------|
| ATTACGTATCTG  | 747.641952597292 | 0.276861102935795 |
| CCGTATGTGACA  | 747.651427541883 | 0.341683158785193 |
| CCAATTACGCAA  | 747.660486629918 | 0.441137802213155 |
| ACTGTGACATGA  | 747.663223031369 | 0.368298492212321 |
| AGATTAGCCATA  | 747.667087919795 | 0.208609730512978 |
| GTCATGTCGAGA  | 747.67229713278  | 0.273446596768456 |
| CATTTAGTGACG  | 747.673015739402 | 0.301119374575658 |
| GCGACGGATGAC  | 747.690041206793 | 0.479579236013123 |
| ACTCATTGTAGG  | 747.696103507141 | 0.491330272004786 |
| TGACAAATGAAA  | 747.698138706147 | 0.252449243512746 |
| ACCCTAGACTCA  | 747.709167088048 | 0.27934996547117  |
| CACTACAAGTCA  | 747.723875045838 | 0.288585187362673 |
| GGACAGTGCAC   | 747.724552905924 | 0.268210481144918 |
| CCCGTCAATGAC  | 747.73468026754  | 0.390663709975397 |
| CCCACCTGACTC  | 747.736938665247 | 0.271918204679496 |
| ATGACGGCAACG  | 747.739180046602 | 0.204043923084574 |
| CAATCCTGACTG  | 747.74375689599  | 0.295107636869161 |
| GTCACATCTTCA  | 747.744646518751 | 0.321352235280423 |
| CACAAACTGTCA  | 747.751584945731 | 0.347326421575553 |
| GTCATTTGACAA  | 747.759127163281 | 0.197713940633533 |
| GGTGAGATGACA  | 747.76058445277  | 0.259856346282396 |
| CAGGCGTGACAC  | 747.7607263463   | 0.265996999364402 |
| GTCATCCGGGGA  | 747.767748839606 | 0.273657949863635 |
| CGTCATTCCAG   | 747.776447522303 | 0.348923279784076 |
| TCATCTATGAAA  | 747.779102121529 | 0.505707378793765 |
| GTCACTAAGTGA  | 747.785203959638 | 0.485455505090916 |
| CTAGTCACGCCG  | 747.789838688174 | 0.248886069261018 |
| CAGAATGACCAC  | 747.79386477641  | 0.233570856234841 |
| AGTCAGAGGAAT  | 747.795412153705 | 0.28319990853758  |
| CGGTGATGACCA  | 747.821445449958 | 0.525443078668109 |
| ATTGCGTAACCG  | 747.822636427153 | 0.281170271516471 |
| AAGCGTCTGACT  | 747.826762232213 | 0.386828357326335 |
| TAGTTTGACACA  | 747.828199913936 | 0.13815882077937  |
| CGTGCCAGTGAC  | 747.828345110029 | 0.273717966237079 |
| AACACAGTCAGT  | 747.834470112071 | 0.128072926814701 |
| GCAGATGAGCCA  | 747.840437991346 | 0.469701684553436 |
| CGTGATGACCGA  | 747.843247944238 | 0.384169850464529 |
| CATGACCGGTGA  | 747.845104938626 | 0.28447353290569  |
| AGAGCATGACGC  | 747.84717705575  | 0.563481215839117 |
| GGTGTACATGTAC | 747.856501192798 | 0.44740343255916  |
| TCTAGACAGTCA  | 747.85651564687  | 0.240901306100688 |
| TCCTGTGAGCAA  | 747.857279620373 | 0.576674395648846 |
| GTGACTGCCTTA  | 747.859126277247 | 0.350691949507851 |
| ACGTCACCCACC  | 747.867729392706 | 0.107755624116463 |
| CGTTTGAATCAC  | 747.869058335012 | 0.221458523575938 |
| GCGACCTCGTCA  | 747.870027747767 | 0.545523636538948 |
| CCGTCATCGGTA  | 747.89217266033  | 0.313302588659098 |
| ATGACGCTCCTA  | 747.896779056458 | 0.389519527361469 |
| TATCGTGTGACA  | 747.902847006561 | 0.424531962638481 |
| GACGCACTCATA  | 747.909652569181 | 0.287140302885807 |
| CCGTCATTATGA  | 747.912805725877 | 0.224826786303763 |
| CATCATTGACTA  | 747.924619956324 | 0.428404323183819 |
| ATTATTCGGTCA  | 747.926264315455 | 0.427032940859458 |
| CCTGCTGAGTAA  | 747.929487549928 | 0.372190722668137 |

|               |                  |                   |
|---------------|------------------|-------------------|
| GTGACGCGACAC  | 747.931191792907 | 0.301031603756234 |
| TAACCACAGTCA  | 747.937403188939 | 0.361958465436123 |
| AGTCAGAGGTCG  | 747.942808593788 | 0.250673845182157 |
| GTCACAGGGCAA  | 747.94751531631  | 0.388125958877946 |
| ACTCATTACGTA  | 747.948422213087 | 0.261406498148478 |
| ATGACACCTGTC  | 747.949319525325 | 0.282591166558247 |
| ACCCGAGAGTCA  | 747.953091279478 | 0.304606259694112 |
| CAGTGACGCCGA  | 747.95929322487  | 0.331269761778705 |
| GAACTCGACTCA  | 747.962409516039 | 0.34471563340668  |
| CACCGCGTCACG  | 747.965419777904 | 0.3587559177985   |
| AGACTCAGCATG  | 747.971970026967 | 0.269846841871722 |
| AGATGCAATGAC  | 747.980648072206 | 0.183999544964747 |
| ATGACACCCCTC  | 747.983892481565 | 0.171036704688981 |
| ACAGTCCGTCAT  | 747.985500979213 | 0.423133960420585 |
| ACGGTTAATGAC  | 747.987570532364 | 0.276853197802128 |
| GGTACTAATGAC  | 748.007638674943 | 0.338591528177077 |
| GTCATCCTGATA  | 748.012495155463 | 0.175213820205846 |
| TACTGCCAGTCA  | 748.014053616081 | 0.309607715236539 |
| GCCTTTGACGCA  | 748.019620510405 | 0.296671209305382 |
| ATGCGGTGACGA  | 748.034957818025 | 0.342791657491568 |
| CATAAAAGAGTC  | 748.036077713323 | 0.471152317544463 |
| GGCGAAAATGAC  | 748.03776361957  | 0.292553000802412 |
| GTATCATGTGAC  | 748.040044990711 | 0.575114908228743 |
| TACAGGTAGTCA  | 748.046277272069 | 0.412077926073532 |
| ATACACTCATAG  | 748.053642567252 | 0.339428331492328 |
| ATGACATTTTAC  | 748.057231417164 | 0.323183677831513 |
| GTTTCATGACCCA | 748.065188672932 | 0.300046709557862 |
| CAATTGTGACAA  | 748.066772476049 | 0.284292958991928 |
| ACGTCATGAAGT  | 748.085818495023 | 0.366890331453759 |
| ATGACCCAGATC  | 748.088139534096 | 0.269909634308371 |
| CTATCACGTCAC  | 748.091289794538 | 0.227585715238278 |
| CTTGATGATTC   | 748.093306425643 | 0.273591458524926 |
| CATGTTGGCTCA  | 748.101110717633 | 0.250179818926754 |
| CAGGGAAATGAC  | 748.113052168121 | 0.290755749578216 |
| AAATTAGTACGA  | 748.114204208936 | 0.341015655453585 |
| ACTTGCATGACG  | 748.117163608194 | 0.362675606727091 |
| CCAGTCAGCGTA  | 748.117436610036 | 0.425710865107709 |
| TACGGACAGTCA  | 748.119260181816 | 0.507042134728113 |
| TAACAATGAGTA  | 748.119611621563 | 0.150443833457414 |
| GTCACCATACAA  | 748.128975579549 | 0.21310068505564  |
| ATTGGGTGACGC  | 748.131889706843 | 0.374816769633803 |
| ATGACGGTACCA  | 748.132131028189 | 0.409193030808576 |
| AGTCTGACATAT  | 748.135267391406 | 0.3390289270265   |
| CCCACCGATGAC  | 748.135439949008 | 0.27129081155691  |
| GCGTCATGTTAC  | 748.143488128209 | 0.290789380009544 |
| AGGTAATTAGTC  | 748.151484357721 | 0.322308246924521 |
| ACAACATAATGAC | 748.154342734495 | 0.363107523826072 |
| AAAACATGACGT  | 748.163433315053 | 0.266639524108488 |
| TCTGACACGCAA  | 748.165213537894 | 0.325272160760547 |
| ATCGCTTCGTCA  | 748.17171101661  | 0.447915430653156 |
| GCAACACGTAAC  | 748.186180082573 | 0.396226271290393 |
| GGTAACTCTGAC  | 748.190603104304 | 0.19590122798603  |
| GAGTAATTCATC  | 748.201721055706 | 0.254263906640868 |
| GGGAGCGAGTCA  | 748.211584856191 | 0.193375074200921 |

|              |                  |                   |
|--------------|------------------|-------------------|
| ATTCGGTCATTA | 748.233686099133 | 0.251022499367443 |
| GTCACCACCTCA | 748.23578925201  | 0.261935540034879 |
| TCACGTACATGA | 748.239458953423 | 0.594935118849137 |
| AGTGTCACGGCA | 748.240480827693 | 0.245293473861876 |
| AACCTGTCACCA | 748.248188696145 | 0.145945477512487 |
| ATGACAGACTCC | 748.255449880905 | 0.305525475714921 |
| AGTCACGGAGCA | 748.255479297928 | 0.347433931533946 |
| GAATGATGACCC | 748.276273605152 | 0.422812917570177 |
| AACCAGTCAGTC | 748.276695858022 | 0.320935125561747 |
| ATGACGTCGTTC | 748.286895920465 | 0.307857053169744 |
| ACTAATGACCGA | 748.287665489349 | 0.346608572127802 |
| CGTATTGGTGAC | 748.289044695581 | 0.503647625284449 |
| CTATCTGATGAC | 748.292038228585 | 0.228926360986499 |
| AGTATGACCGCA | 748.299596532517 | 0.219902918785473 |
| TATATGTTGTCA | 748.30280758527  | 0.39436717941207  |
| ACTCATAACGGA | 748.303290224594 | 0.225904983761158 |
| ACCTACTCATTG | 748.304884127481 | 0.187665167762484 |
| ATTCAAATGACA | 748.306020256386 | 0.317839457016984 |
| CGCTTTGACACA | 748.306411092481 | 0.197844287983511 |
| CACATTTGATGA | 748.309372291399 | 0.444100511459668 |
| GTCATAAACACA | 748.311996287546 | 0.24532439103411  |
| ACATACATGACA | 748.314015889977 | 0.371712487019538 |
| GAGGCTAGTCAC | 748.318173957316 | 0.280850796635705 |
| CATTCGATATGA | 748.323606935023 | 0.300931284617428 |
| TGATTACGCACA | 748.323805238734 | 0.256070700457204 |
| ACTTGTGGCTCA | 748.326315585289 | 0.28038726342593  |
| AATCGAATGACC | 748.332451095931 | 0.498439036918243 |
| ACGTCACATCAG | 748.332590118123 | 0.252113270022514 |
| GTCATCTCCAC  | 748.333210681416 | 0.245190491864397 |
| CGACTAATCGGA | 748.33339227336  | 0.275312655231414 |
| GACTGATCTGGA | 748.335304883741 | 0.51666118764116  |
| CATCAAGACTCA | 748.346646110827 | 0.276781777227043 |
| CGTCATGTGTTA | 748.350966682058 | 0.515784821034355 |
| GAGGCGTATGAC | 748.351052323965 | 0.361965407602682 |
| GTTATTTTGTCA | 748.351456339654 | 0.481520510301274 |
| ATTAAGACTAAC | 748.371425937002 | 0.27079501590157  |
| ATTACAGCTGAC | 748.40761457451  | 0.61458953204902  |
| CGCTGACTGCAA | 748.410234474673 | 0.334036268305465 |
| AGTCAGAGAATA | 748.41126655263  | 0.248063652370372 |
| ACCCCGGATGAC | 748.422415889278 | 0.549161979346971 |
| CAAGTGTGCTCA | 748.423685283125 | 0.417737394380925 |
| GTGTCACCTAGA | 748.434281942162 | 0.262602747359672 |
| GAACGGTGACCA | 748.438299944213 | 0.276392642786864 |
| ATGACGGTACGC | 748.438835210543 | 0.297269511479699 |
| CTACTTGTGACA | 748.449586011125 | 0.251077909844424 |
| GCAACAAATGAC | 748.450309958013 | 0.371889172132535 |
| CGCCGTCAGTGA | 748.451910764539 | 0.31238176255107  |
| CAAACATGACGA | 748.45656069784  | 0.333731814081539 |
| GGATGACAAGCC | 748.459688061769 | 0.109947906304638 |
| GTAGTATCGTCA | 748.460549573802 | 0.402153419987221 |
| GCTGCCGACTCA | 748.462916538037 | 0.315914473704602 |
| CCTGGAAATGAC | 748.463291445656 | 0.387397817098853 |
| ACTCGTATGAAT | 748.472043693537 | 0.272126598479842 |
| AGGTGATGTGAC | 748.474192898869 | 0.257128603022838 |

|               |                  |                   |
|---------------|------------------|-------------------|
| ATTGTCGCGTCA  | 748.476649009367 | 0.378637145397356 |
| ATACGTCAATCG  | 748.476867522468 | 0.499350251869286 |
| TAGGCGCAGTCA  | 748.479036997105 | 0.328228785206235 |
| CTACTTTGACTC  | 748.50046326662  | 0.213423816541173 |
| CTCAGTGACCCA  | 748.506148757058 | 0.20588385530297  |
| CGTCATTTATAC  | 748.514133539724 | 0.212964700497894 |
| GACTAACAGTCA  | 748.522818499439 | 0.292724022512659 |
| GTCATGAGACAC  | 748.525567423594 | 0.249539793653339 |
| ATGACAGTCAAC  | 748.532719627506 | 0.199616608328321 |
| AGTCACGCTCTG  | 748.534542239001 | 0.31531247996663  |
| GCCGTCTGTGAC  | 748.53873000402  | 0.279406806221681 |
| GTAACACTGTCA  | 748.541349175829 | 0.272464982230734 |
| CATGACAGTATC  | 748.542147641546 | 0.329899152071527 |
| GCAACTATGTCA  | 748.542494489685 | 0.249876029254207 |
| AATGACATCTTA  | 748.548210563864 | 0.289963580573291 |
| CATTAGTCTGAC  | 748.552967310391 | 0.390804794145709 |
| ACCGTAGTATGA  | 748.571739671905 | 0.279539004496145 |
| GTCATGATTTCA  | 748.578568140579 | 0.273383958912617 |
| TGACCCATCTCA  | 748.578996810976 | 0.442450790345806 |
| AGTCACGACAGC  | 748.579428030353 | 0.367445412876115 |
| AACTCTCGTCAT  | 748.581452634521 | 0.271232705320657 |
| ATAGAAGGTGAC  | 748.58436722984  | 0.269999797427014 |
| ATAGGTGACATC  | 748.590141565569 | 0.474710988516125 |
| TCACTCTAGTCA  | 748.591586205557 | 0.329589483161236 |
| GTAGTTCGTAC   | 748.597022108823 | 0.267841981096462 |
| GCGTGCTGTAC   | 748.598396023832 | 0.176508251439164 |
| GTTAACCAGTCA  | 748.598570439567 | 0.489900611574204 |
| ATGACGAACGCC  | 748.608609087154 | 0.224200852959339 |
| AAACAGCATGAC  | 748.616066057179 | 0.258231402336381 |
| ACGGATGACCGA  | 748.61644587371  | 0.365679590961072 |
| GTCATTGACAAC  | 748.616498691875 | 0.399373803794487 |
| AGTCAATGAGTG  | 748.618406519415 | 0.319334939984701 |
| GGCCCATGTGAC  | 748.622871079915 | 0.276284714876811 |
| GTCATTTTCGCA  | 748.62781857196  | 0.377420971776456 |
| CGAACGTAGTCA  | 748.631704000068 | 0.245324884734262 |
| ATCGGTGGTGAC  | 748.638150808761 | 0.246175779900744 |
| AAAAGTGACGAA  | 748.645584677146 | 0.257354532192803 |
| AGTCACGAGGGA  | 748.647750367892 | 0.229608776715724 |
| ATACCGTCATTG  | 748.655551908424 | 0.272892704530241 |
| TGACAAAGCGAA  | 748.664898538345 | 0.312758572969439 |
| ATAAGCATGACA  | 748.677583981764 | 0.249355560780695 |
| AAAGCATGTGAT  | 748.682715819216 | 0.175520640063689 |
| TATGACAGGCAA  | 748.684018233634 | 0.217226471490273 |
| GAGTCAAAACCC  | 748.688377381856 | 0.264723511509288 |
| TCAACCGCGTCA  | 748.691075224746 | 0.37010866349341  |
| GACCACATCATC  | 748.696672327254 | 0.248891331500379 |
| CGATGACTTGAA  | 748.697113938347 | 0.253073016664045 |
| CTATCTGATTCA  | 748.698223256674 | 0.217325886584922 |
| GGAAGAAATGAC  | 748.69940604879  | 0.290354718054907 |
| ACGTCATGCCTC  | 748.715724624918 | 0.307881128484611 |
| GTGCCTGACGCA  | 748.721252654707 | 0.186960620800748 |
| CCCTGACTGTGA  | 748.721346225159 | 0.268561188786538 |
| ATGACCACGCGAG | 748.721522091868 | 0.362237084896768 |
| AGGCTGTACTCA  | 748.72443817963  | 0.402762942027392 |

|                |                  |                   |
|----------------|------------------|-------------------|
| GTCACCCGGGTA   | 748.728091300187 | 0.306822992607858 |
| GTCATGAATCCA   | 748.728146668773 | 0.21361049417037  |
| GTCACGATGGCA   | 748.72874639747  | 0.230965294216201 |
| GTGACGTGCTGA   | 748.744556626493 | 0.37578504492946  |
| AGTAGTACTCAC   | 748.750270166832 | 0.317935826716533 |
| GTCACTACGAGA   | 748.751540581244 | 0.417288559998521 |
| AGGACCCGTCAC   | 748.752598943607 | 0.43946579944404  |
| CCAGAGGGTGAC   | 748.755024825507 | 0.268585140247474 |
| GCACGTCACTGA   | 748.755279943509 | 0.375087511161319 |
| GAGTAATTTTCC   | 748.760906753927 | 0.253115931702057 |
| ATCATGTTGTCA   | 748.775284238593 | 0.447818429263143 |
| ATGACGGCATCC   | 748.776806645662 | 0.480251623731974 |
| ACTCATAAGTAG   | 748.780523169547 | 0.353559819832759 |
| GGCCCGTACTA    | 748.781993599845 | 0.278287861383446 |
| CTGTCCGTGTCA   | 748.804557151491 | 0.302005309534409 |
| TGACGCGGTTAA   | 748.814926072401 | 0.11118114975393  |
| ATTACTGAACAA   | 748.814926707104 | 0.379556161192406 |
| GTCACATAAGGA   | 748.82514693843  | 0.348036592044077 |
| GAACTCTGTGAC   | 748.82864683358  | 0.371916909563202 |
| AGCCAGGTCATA   | 748.834704690624 | 0.263146240925647 |
| TGTCACAGGACA   | 748.853073834049 | 0.396678050332053 |
| TCATCATAGGGA   | 748.869601981783 | 0.356202635291428 |
| CATAGCGACTCA   | 748.872394654986 | 0.294799497896959 |
| GTTGAAATGACA   | 748.880901064114 | 0.238278211920039 |
| ATGACGAGAGCA   | 748.884223185126 | 0.222010908500654 |
| CACGTCAGACCA   | 748.886532301449 | 0.342624737121678 |
| TGACGGAGTCAA   | 748.892061002595 | 0.307911348719147 |
| ACCTCGTGTGAC   | 748.898119363438 | 0.332805640653364 |
| GAATTCTGACAC   | 748.903054865181 | 0.350626211988764 |
| GTATCTGGTGTGAC | 748.906004664647 | 0.279590403971223 |
| GCGATTGGTGTGAC | 748.911373857629 | 0.350199643316473 |
| AGATTGCATCAC   | 748.913364348851 | 0.289765206686106 |
| AATTAGTCGGTC   | 748.915079258663 | 0.415594645380995 |
| ATTCTGTGACATA  | 748.929779784008 | 0.307087713156097 |
| AGACTGAGTGTGAC | 748.93093289961  | 0.317380369643707 |
| ACAGGAGATGAC   | 748.931284718742 | 0.262375041010114 |
| GTCATCTCTTAA   | 748.932483904986 | 0.339806633720252 |
| AACGTCATGTCA   | 748.933014440548 | 0.340653279224155 |
| TACATTGAGTAA   | 748.93752950965  | 0.337189792266729 |
| GCAGAAGGTGAC   | 748.949870275624 | 0.339920106646738 |
| TACTATTTATGA   | 748.958632830419 | 0.359544171829586 |
| AGCATTATGTCA   | 748.96069973446  | 0.270457408444341 |
| GAGTCAAATTTA   | 748.963288127191 | 0.196565607797833 |
| ATGACAGGAACC   | 748.964135976911 | 0.265014223414779 |
| CTACCCTGACTC   | 748.969582718654 | 0.235054859770979 |
| GCAATTACGCAA   | 748.971874556957 | 0.296001941073217 |
| CAGCTTCATGAC   | 748.973519839833 | 0.471939319945847 |
| GATTCGTGTAC    | 748.973980139985 | 0.271299329253283 |
| GCATCCGCGTCA   | 748.975160904077 | 0.220729196395711 |
| ATGACTTGCGTG   | 748.97572425267  | 0.268584878883488 |
| ATACGTCAACGG   | 748.978001414425 | 0.287007162159408 |
| TGACTCGGGGCA   | 749.005309816762 | 0.295528784556338 |
| ACTCATAGGCGG   | 749.010829602939 | 0.237999708929098 |
| ATGAGCCAGAGG   | 749.012158131668 | 0.197581313444438 |

|               |                  |                   |
|---------------|------------------|-------------------|
| CTAGCATAGTCA  | 749.021159430641 | 0.371344486299892 |
| AGAGTTGACTGA  | 749.022337044788 | 0.228812370557176 |
| TCTGTGGTGTCA  | 749.024788075268 | 0.349733678696487 |
| GACTTATTACAA  | 749.025074145737 | 0.432047764264499 |
| GGGTGTGACCAC  | 749.028502122552 | 0.36496572539096  |
| GACAGCTGAGTC  | 749.030693143773 | 0.280017117437593 |
| TCAGTAACGTCA  | 749.047959985466 | 0.182774977773551 |
| TGTCATGAAGAA  | 749.063699432953 | 0.275598431145745 |
| TCCTTTACGTCA  | 749.065340745588 | 0.180893640559529 |
| GAACGGAATGAC  | 749.066089062648 | 0.168643991272956 |
| GATCCGTGACTA  | 749.068525757479 | 0.177427683347845 |
| GAGTCAAATCGA  | 749.073558798618 | 0.237011878433305 |
| CACCACGATGAG  | 749.078830574507 | 0.369157986345595 |
| GGTTGTTATGAC  | 749.090349409886 | 0.288741963046762 |
| CGCCAAATGACG  | 749.091883191515 | 0.304153562234345 |
| CGTCTGTGACCA  | 749.097543162429 | 0.319669751736994 |
| ATAGCGTGTAC   | 749.107309960114 | 0.267255863851145 |
| ACTACAGTGTCA  | 749.108314965564 | 0.375498245763652 |
| CTAAGAGAGTCA  | 749.111040145416 | 0.267079489297731 |
| ACCACAATGACG  | 749.111371261828 | 0.21081800791317  |
| ACTTTTAGTGAC  | 749.114387319919 | 0.312639572917691 |
| ACCATTCATGAC  | 749.115462936313 | 0.269586596332341 |
| CTTAAGTGTGAC  | 749.124244680789 | 0.32098903326257  |
| CTATTGTGTGAC  | 749.126718017087 | 0.38531403013112  |
| AGAGTGTAGTCA  | 749.126861984325 | 0.373240141886496 |
| AGCACCGACTCA  | 749.138447190285 | 0.295903738851337 |
| ATACAGCAGTCA  | 749.142027550767 | 0.589087220594902 |
| AACTCTGACTACT | 749.145412816146 | 0.378460240008128 |
| TGAACGGAGTCA  | 749.147488513617 | 0.226877318272296 |
| TACTTTGACTGA  | 749.147976284076 | 0.196666536860256 |
| CTTGAGATGACA  | 749.14947158713  | 0.308568173852539 |
| TGATTCACTGCA  | 749.150922962907 | 0.301521841723097 |
| CTCTGATGTGAC  | 749.152050275498 | 0.198135000701651 |
| GTCATTTGGGAC  | 749.152500868674 | 0.267994177972918 |
| ATATGAGTGCCA  | 749.16543416003  | 0.484075434525268 |
| CCTTTTGACACA  | 749.172422985994 | 0.298546200353136 |
| AACCATAATGAC  | 749.17496686227  | 0.493291759276417 |
| ATGACTTCGTCG  | 749.175535643067 | 0.37648210418404  |
| AGACGCGTCAGA  | 749.187962507724 | 0.295340391281276 |
| AGAGTAATAGCA  | 749.201871600702 | 0.287311215405406 |
| AATGTGAGTACT  | 749.202858184782 | 0.280753009666586 |
| ATATACTAATCA  | 749.203295900322 | 0.138991557716247 |
| CCTGTTTGTGAC  | 749.210094843708 | 0.482323129494254 |
| CATGCGGTCATA  | 749.222750485109 | 0.296800250641019 |
| AATGGACTCACA  | 749.229940477923 | 0.262077448657333 |
| CACCATGTCACA  | 749.239047098091 | 0.197448017069438 |
| CACGCATGACGC  | 749.244634521536 | 0.304481038958921 |
| CTGACGAGTTCA  | 749.250297728894 | 0.266376080653445 |
| GTCATTTCAATA  | 749.253083750993 | 0.357487753825956 |
| GACTAATTATAA  | 749.255691144923 | 0.563479800889801 |
| GTCACCAGCTAA  | 749.259702816309 | 0.380820558234745 |
| GTACCAGGTGAC  | 749.271623773458 | 0.18703505673062  |
| ACGCGTCAGAGG  | 749.289139097517 | 0.288278147603845 |
| AAGCCAGCTCAT  | 749.294240906152 | 0.291396893852403 |

|               |                  |                   |
|---------------|------------------|-------------------|
| ATGTCATCTCTG  | 749.310092579505 | 0.284074128398767 |
| GATGACAGGATA  | 749.313292049076 | 0.205624442670691 |
| GAGTCAGGAGAC  | 749.313530628516 | 0.30463545057705  |
| ATGACATTGTTA  | 749.315639295871 | 0.353830155498878 |
| AGGGAGACTCAT  | 749.315694968066 | 0.297921974108766 |
| ATACGTACGTCA  | 749.319934413811 | 0.387881734327741 |
| CGCGACAAGTCA  | 749.320242539363 | 0.499240250648266 |
| GACTCATGGATA  | 749.335088141731 | 0.387762487264341 |
| AAGTGTGACGCG  | 749.340925572673 | 0.215641118001115 |
| AAGACTGACGTA  | 749.341592804037 | 0.350937475669494 |
| TCTGTGACAGCA  | 749.345193301565 | 0.489046989508793 |
| CTCTGACGAAAC  | 749.346035167783 | 0.291772361509177 |
| ACACATTAGTAA  | 749.365845683012 | 0.298312323793984 |
| CCTACGGTGACA  | 749.366871307128 | 0.24696705764211  |
| AGATGTTTGTCA  | 749.37109035394  | 0.282810776672855 |
| GGACAGTGTGAC  | 749.380846199463 | 0.299937922871573 |
| TCATATGGTGAA  | 749.383283113284 | 0.324997868896517 |
| CAGTTAGGTGAC  | 749.388685956608 | 0.285186315996528 |
| ACGTCATGTTGA  | 749.390777650354 | 0.442945027466943 |
| GAAAATGTCACC  | 749.393507155128 | 0.457370082808519 |
| CTACGCAATGAC  | 749.397892767414 | 0.289521401807756 |
| ATACCTGACACA  | 749.398442286537 | 0.298964396492258 |
| GACTCATGGACC  | 749.403153713793 | 0.407675531313651 |
| ACGTGTGACGACT | 749.408803612339 | 0.138060813568671 |
| AACTTGTGACAA  | 749.414728688374 | 0.397755556616813 |
| GCAGTTGTGTCA  | 749.423441197405 | 0.277530811915362 |
| AGTTGGCTCATC  | 749.425774400169 | 0.391575207691377 |
| ACAAATTA CTGA | 749.434715677929 | 0.268372186817123 |
| CGTCCACGTCAA  | 749.439038959602 | 0.199450659524224 |
| ATGACGGACCAG  | 749.439244035949 | 0.297483860921158 |
| GTCACCTGT CGA | 749.442932444185 | 0.287321587656736 |
| GTCATGTTCCGA  | 749.445448733373 | 0.347305055015566 |
| CGTCACTATCAG  | 749.447168425606 | 0.482726172743845 |
| AGTGAGATGACA  | 749.449929248121 | 0.191566232929297 |
| GGACTCTGTGAC  | 749.451851045077 | 0.404151480350976 |
| GACTCTGACATA  | 749.454477487684 | 0.231226621315717 |
| TTATAATGACAA  | 749.456129394465 | 0.247582496856574 |
| ATGACAGCTCAG  | 749.458945553572 | 0.294912521852909 |
| ACGTGACGATAT  | 749.464319589029 | 0.228958609412661 |
| CCCATCCAGTCA  | 749.480708127484 | 0.381741935195051 |
| GAGTGGTGTGAC  | 749.481923720617 | 0.213385109080912 |
| CTATTAGTCTGA  | 749.502391763969 | 0.206949684514377 |
| CAAACGGTGACA  | 749.508923358181 | 0.285938725050128 |
| GGTGACTTGGTA  | 749.529320358239 | 0.222722648989313 |
| ATGCATAGTGAC  | 749.531796121917 | 0.344562262334137 |
| GGTTTCCAGTCA  | 749.535560684118 | 0.369245336306942 |
| CGTCATGTCACG  | 749.537943563141 | 0.289743629121419 |
| AAATTAGTGACA  | 749.539485835298 | 0.478574092367084 |
| ATATTGATTACAC | 749.53988197215  | 0.273376736238365 |
| CTTGGTGACCGA  | 749.543393262209 | 0.316662624090132 |
| CGTCATGATCCA  | 749.545070296216 | 0.316471486475237 |
| GTGACGCTGCAA  | 749.553723419364 | 0.360798198964789 |
| GTGATTCAAATA  | 749.557958364479 | 0.296538672234615 |
| GTCATTTGGATA  | 749.566271376596 | 0.31415483772952  |



|               |                  |                   |
|---------------|------------------|-------------------|
| ATCGCAATGACA  | 749.579331942927 | 0.405812294457878 |
| AATCCCCGTCAT  | 749.591616174278 | 0.269546574409778 |
| ATAATACTGTCA  | 749.593916259932 | 0.394715116522905 |
| TGCCCTGACACA  | 749.598503185856 | 0.313414028228573 |
| GTCACTGTCGTA  | 749.603660948338 | 0.358164201704783 |
| CGAAATTGTGAC  | 749.615203612813 | 0.396886342264886 |
| GTCACCTAGGGA  | 749.622079981708 | 0.235443340734223 |
| GTCACCTGACAC  | 749.638002787069 | 0.268856611571953 |
| GTCACCCGCGCA  | 749.643169776508 | 0.398819026914021 |
| CAAGATTAGTAC  | 749.645354150627 | 0.363206784152058 |
| ACGTCACCTCCC  | 749.649086962617 | 0.3023784865019   |
| ATGAATAATAAA  | 749.651689657371 | 0.283599291448166 |
| ATGATGATACAC  | 749.667724360297 | 0.325008878515815 |
| GCCGGGCATGAC  | 749.680175291745 | 0.313389643920743 |
| GAAGTTTATGAC  | 749.68571924427  | 0.279783417199858 |
| TGACGCTTTGAA  | 749.693958690394 | 0.400941346343022 |
| ACTCATCTAATG  | 749.69572012047  | 0.328308502049242 |
| ATAACAACGTCA  | 749.6969671567   | 0.342914482360638 |
| AAAGACCTGTCA  | 749.707936481391 | 0.427788913430308 |
| GGTTAGTGTGAC  | 749.711948231072 | 0.340180687351519 |
| AGTTCTTTGTCA  | 749.716203270068 | 0.268486546640006 |
| ACAGTTCTATGA  | 749.723460582979 | 0.368613130048339 |
| CGACTAATTCCG  | 749.725759953133 | 0.377545864410535 |
| GTCTACATGACA  | 749.72862016275  | 0.217128517775187 |
| ATTCTCTGTAC   | 749.734149220324 | 0.116113780279955 |
| GTCACTGGACAA  | 749.737852400445 | 0.542100414124991 |
| ATGATTCTATGA  | 749.755132459805 | 0.54016859268996  |
| GTGATTGACACA  | 749.757502078114 | 0.473279366218684 |
| ACGTCACCTCAA  | 749.765540175023 | 0.231686032548669 |
| TCATAAATGGCA  | 749.77260205382  | 0.534015595223003 |
| AATGACGGTACT  | 749.777677200424 | 0.321412613821334 |
| AGAGTCAAGAAC  | 749.783698370523 | 0.398991046236981 |
| TAGTTTCTGTCA  | 749.784710539281 | 0.341232129272461 |
| AGTCGGTGTAC   | 749.784879791088 | 0.353442685815498 |
| ATGACGTCGAAT  | 749.790632090105 | 0.315302096693815 |
| GCTTAGGGTGTG  | 749.791337539841 | 0.297894502718316 |
| CGTCATCTCAAA  | 749.792104430354 | 0.241645119689062 |
| AGCTTACTGACT  | 749.795051270945 | 0.316879681878421 |
| GCCCAAATGACA  | 749.808423386379 | 0.208523015480128 |
| GTCACCTGTACA  | 749.812024393804 | 0.26976115297083  |
| GAAGAAATGACA  | 749.836958946361 | 0.297582058768605 |
| AGTCAGAAAGAC  | 749.838499285664 | 0.258588821120126 |
| TAGGATGAGCCA  | 749.845012883905 | 0.449134803493391 |
| ATTGCGGTGTCA  | 749.848611548162 | 0.328879346996509 |
| CGTCATCAGTTC  | 749.86635990759  | 0.327483555861412 |
| ATTAACCTCATGA | 749.867997908506 | 0.352558999768311 |
| GACTCACTGCTA  | 749.870883680716 | 0.252023611807628 |
| CACTATTACTGA  | 749.872713378997 | 0.26878147503162  |
| AGCTGTCACATA  | 749.879179310373 | 0.223974059637703 |
| CGTATAATGACG  | 749.883388286493 | 0.278508995658331 |
| CGACTAATCGGC  | 749.889981646809 | 0.349849055694278 |
| GCGGCCATGAC   | 749.89529131061  | 0.301001753124544 |
| ACTCATATGCAG  | 749.898937986216 | 0.40181817656644  |
| AACCTGTACAG   | 749.916337141602 | 0.226091407572373 |

|              |                  |                   |
|--------------|------------------|-------------------|
| CTACGTGAATCA | 749.918833554744 | 0.394914513155302 |
| CGCTCAGTGACA | 749.924374847531 | 0.266408699648918 |
| GCTCGGTGTGAC | 749.925054855584 | 0.416979954303009 |
| CAAACGAGTGAC | 749.930719967527 | 0.271629119342854 |
| AAAGCCATGACA | 749.941045058692 | 0.381418233075084 |
| GCGTCACCACAC | 749.946512961682 | 0.246688525188295 |
| AGAACCTGACTC | 749.959620317734 | 0.256100952484331 |
| CGATGATTACTC | 749.968210971693 | 0.442297737932441 |
| AACCAAGACTCA | 749.97455902726  | 0.405011755856329 |
| TGACTTAGACAA | 749.976769007787 | 0.274516482250476 |
| ATTCATAGTTGA | 749.978186291436 | 0.556812017512807 |
| AGATATTGTAC  | 749.978688370956 | 0.185361058060025 |
| GCTAAAGTGTCA | 749.984125161153 | 0.31502629329403  |
| ATGAGTACGAAA | 749.986767382915 | 0.204028011257199 |
| GATAAAGTGTCA | 749.987182792775 | 0.288501880073333 |
| GACATACTATGA | 749.991696514934 | 0.413216688505456 |
| GTGTCATGGGTA | 749.992685258006 | 0.206751152998421 |
| GTAGCTAATGAC | 749.993401824823 | 0.370362947319058 |
| GCGCGAAATGAC | 749.993577645771 | 0.242508247260531 |
| GCTCACAATGAC | 749.997570010747 | 0.40519450219172  |
| GAAGGAAATGAC | 750.006175287529 | 0.270338423982339 |
| GGTGAGTACCAC | 750.010605544938 | 0.304026323743491 |
| AGTCAGATATCC | 750.012236594332 | 0.411251736922402 |
| CCAACCTGGTCA | 750.028729009224 | 0.314047533592037 |
| CGTCATGCCAAG | 750.035999348153 | 0.409685645511859 |
| CGACTAATCGTA | 750.037989469749 | 0.349860965767045 |
| TGTCATGAGACA | 750.038533292654 | 0.223947375465514 |
| TGACAATTATAA | 750.044289215721 | 0.440803820218701 |
| TCCACTTTGTCA | 750.044566750748 | 0.287925966480397 |
| ATACCTAGTGAC | 750.050489618148 | 0.310013077918594 |
| AATTATTAGTAC | 750.055485904666 | 0.266145231016872 |
| GTCACCACACAA | 750.070107969026 | 0.284773823998793 |
| CCCGAACATGAC | 750.077344172608 | 0.542482513469853 |
| ATGACCGAGACA | 750.084214309981 | 0.354022792185965 |
| CGTCACTTTGAG | 750.095031808522 | 0.43062296430297  |
| CAAAGATGACCA | 750.106995538427 | 0.432816106215433 |
| CAGAATAGTGAC | 750.11173415239  | 0.309987412420214 |
| TAGATTGAGTAA | 750.111875060369 | 0.289949433271071 |
| TCGATTTGGTCA | 750.113895026133 | 0.271940946899625 |
| TCACTCGTGACA | 750.127003964885 | 0.61599780363189  |
| GCGGCCTAGTCA | 750.13160056105  | 0.410668665152285 |
| AACGGACTGACT | 750.136760802572 | 0.411227578298645 |
| ATAGCATGACAT | 750.145581235258 | 0.230365734101584 |
| ACTCACAGTGAC | 750.151066986197 | 0.161618838014579 |
| CTGACACTTTAA | 750.157142341844 | 0.305695619057094 |
| AATCTCGTCATG | 750.157724107288 | 0.293178274546543 |
| AGTCCGCGTCAC | 750.160157175725 | 0.252778285026096 |
| CGGATACATGAC | 750.171022822801 | 0.281145989959344 |
| GTCATAAAGCTA | 750.17624597889  | 0.309368790112017 |
| CGAATGTATCAC | 750.178492395719 | 0.261757273801556 |
| ACTCATTTTGGG | 750.19283218311  | 0.264191987937351 |
| AGTCAGAGCGCG | 750.193191988756 | 0.358007346903292 |
| CTCGTCATGGTA | 750.19543130154  | 0.317122363634237 |
| ATGACTTCTTCA | 750.198769049883 | 0.327137598522872 |

|              |                  |                   |
|--------------|------------------|-------------------|
| ACATGCGACTCA | 750.207246252528 | 0.331544439046174 |
| CCGCAGTAGTCA | 750.233665349557 | 0.331939704870532 |
| TCAGTCAATGCA | 750.236797916898 | 0.350228548455418 |
| GTCACAACAGGA | 750.240620119371 | 0.262860038099476 |
| GTGACCATATCA | 750.240690363545 | 0.342344249882162 |
| GTGACAACATA  | 750.243434017348 | 0.285244683799288 |
| GTGTGTAATTCA | 750.249550091274 | 0.299007196536436 |
| TGAGTCTATGCA | 750.251263868725 | 0.482661946645567 |
| AAGAATTAGTCT | 750.253123755959 | 0.138838690228442 |
| TGAAATGGGTCA | 750.256160566017 | 0.424591865270051 |
| GTCACCTACGA  | 750.257373904891 | 0.271546188449874 |
| AGCTGAGATGAC | 750.264466359856 | 0.217828318517556 |
| ACGTCACATCAA | 750.272878590964 | 0.329012245632529 |
| GTAACCTCGTCA | 750.282333645493 | 0.332103937351843 |
| GAAATTTCTGCA | 750.299693832574 | 0.422614014337162 |
| CGCCATTCGTCA | 750.300761355647 | 0.179914297603575 |
| ATGTAAGGTGAC | 750.32932300342  | 0.323003170741422 |
| AGTCAGAGTCCA | 750.337078594722 | 0.313842948339249 |
| AAGTCACCTCGG | 750.342551638091 | 0.204263457334895 |
| TCGTTGAGTCA  | 750.359742547959 | 0.234351367539659 |
| TAACTGTGTCOA | 750.370701713467 | 0.292889334041103 |
| CGCCTTTATGAC | 750.375868106645 | 0.320808279293806 |
| GGCCCGTGTGAC | 750.383140557774 | 0.333004409710686 |
| GGTGATACATCA | 750.386675990728 | 0.275185014578841 |
| CGAAAGTCTGAC | 750.390821487201 | 0.279192123141379 |
| TAATTGACTCA  | 750.410144947656 | 0.222826181302576 |
| TAAGACATGACA | 750.41150528778  | 0.393177566057934 |
| CTGACTCCGTTA | 750.41294339818  | 0.174061945213248 |
| AGTCACGGAGAG | 750.418447558142 | 0.208493760505836 |
| CGGCTCTGACAC | 750.432521503914 | 0.207025997807845 |
| ACTAGTGACGTC | 750.443798504123 | 0.388256811336312 |
| ACGTCACCTCCG | 750.44835583886  | 0.296852635962702 |
| CGTCATTAAGAA | 750.449860464818 | 0.42416067638754  |
| TGACAGTTTAA  | 750.452416935334 | 0.390848745019729 |
| ATTAGTACTAGC | 750.453495370615 | 0.374697146386092 |
| TGAACGTAGTCA | 750.45676065005  | 0.285250282839863 |
| CTAATTGAATCA | 750.45797536536  | 0.401520729630204 |
| ATTACGCGTCAA | 750.458637805143 | 0.476571164388156 |
| AGTTATAATGAC | 750.460819120776 | 0.280833421580395 |
| AGTCAGAAATCC | 750.461162742281 | 0.466170876299653 |
| ACTCAGATGAGT | 750.463975871128 | 0.237819676141539 |
| AGACGTCACCGG | 750.473677922919 | 0.263138210468826 |
| CGATTTGACACA | 750.475644928679 | 0.235324295963565 |
| AGGTCGTGTAC  | 750.487257942829 | 0.283743025778021 |
| ATGAGGCATGAC | 750.491472602362 | 0.236608514874466 |
| AGTCAGAGTACC | 750.501205920304 | 0.151242398277603 |
| ATCCTAGTGTCA | 750.504151664868 | 0.292168020902291 |
| GATGTGTCGTCA | 750.505733184563 | 0.467644130303447 |
| CAACAGTGACGA | 750.514755148117 | 0.263737180633564 |
| CGACTTTACTCA | 750.519779473127 | 0.297971106125931 |
| GATGTATGTGAC | 750.519931754294 | 0.339475128516365 |
| GAAGTAGATGAC | 750.520627709527 | 0.27270504365676  |
| ACTCATACTAAC | 750.522565996349 | 0.23587357138739  |
| TGAGCCATGACA | 750.528541086608 | 0.360948521154285 |

|               |                  |                    |
|---------------|------------------|--------------------|
| GAGTAATCATAA  | 750.529338589767 | 0.284759388863774  |
| AAGTAAATGACG  | 750.529946239482 | 0.265864555226682  |
| ATGACAATACGA  | 750.539477931067 | 0.306334093147287  |
| AATACTGACTGT  | 750.541200093323 | 0.418577462591465  |
| TCAACCGTGTCA  | 750.543788205733 | 0.35155911010644   |
| GTGACGTGCAAA  | 750.560045813329 | 0.255992759082135  |
| ATCAGTGGGTCA  | 750.560801903257 | 0.310032662621928  |
| CACGCAATGACA  | 750.562160849367 | 0.251587730850931  |
| AAAACCTTGCTCA | 750.565819850111 | 0.355063510001282  |
| CTGTGACGTGAC  | 750.566913740133 | 0.23584955581884   |
| CTTATGTTGTCA  | 750.567013216952 | 0.181161873048031  |
| AAGTTGCATCAT  | 750.570599932597 | 0.311906869030087  |
| GACAAATTAGTC  | 750.576886332844 | 0.315488022230118  |
| ACAGTAGGTGAC  | 750.578112396897 | 0.303880950968327  |
| CGTCACCAGGAG  | 750.582485121204 | 0.336051916242239  |
| CCCGGAAGTGAC  | 750.585937322478 | 0.171542106520271  |
| AGTGACGCGCGA  | 750.592769679904 | 0.276768717323884  |
| GCGATGGGTGAC  | 750.595370183495 | 0.20043073646445   |
| ATCCAATGACAG  | 750.59648554865  | 0.211932932309788  |
| GAGTCGGTGACA  | 750.596613985979 | 0.245305786041199  |
| AAGTCACTACCG  | 750.60171466988  | 0.264787883236531  |
| GACTAATGCTTA  | 750.608458980631 | 0.373687048702229  |
| CCCACGGGTGAC  | 750.61261240063  | 0.328444061694681  |
| AACCGGTACATAC | 750.613085557198 | 0.241836157797007  |
| GTCACAGACAGA  | 750.616574355222 | 0.418951682869472  |
| CGTCACATTACA  | 750.617733322613 | 0.273674757370559  |
| CTGTGTGACCGA  | 750.622783362684 | 0.250069174517877  |
| ATGACAGAGGAG  | 750.623114185422 | 0.215642849061413  |
| ATTGCGTAATGA  | 750.634171888172 | 0.172774095072078  |
| AGCCGCGACTCA  | 750.635151718916 | 0.347552014094516  |
| ACGGGGTGTGAC  | 750.637012269453 | 0.349876826135338  |
| CTACATGTGACA  | 750.64325623409  | 0.346141019187199  |
| CCGCCATATGAC  | 750.64884963753  | 0.320517138425082  |
| ATGAGTAGTGCA  | 750.650056695522 | 0.294543530054431  |
| GTCAGCAAGCAC  | 750.666739887693 | 0.263727784023968  |
| ATGACAGGCTCA  | 750.670706334293 | 0.26502674567106   |
| CTTTCCTAGTCA  | 750.673521501757 | 0.144071176669582  |
| GTTAGACTCAAC  | 750.677814907701 | 0.206463502435733  |
| TGACAGCATCAA  | 750.684311739862 | 0.281148374879362  |
| ATGACCGAGAGA  | 750.689861449861 | 0.302812634041151  |
| ACTGTATCGTCA  | 750.690500248435 | 0.262420339609188  |
| AGTCAGAACTAA  | 750.690626156119 | 0.250268837383374  |
| GACACATTAGTC  | 750.690933828114 | 0.415726347327131  |
| GGAAATCATGAC  | 750.69266173704  | 0.424455545694519  |
| TGAGTGAGTCCA  | 750.701486473888 | 0.245657252189789  |
| AGATTGGGTGAC  | 750.704886032183 | 0.330730772311269  |
| GACTCTATCGTA  | 750.716632367999 | 0.483650500287004  |
| GAACCGTGTGAC  | 750.721215121971 | 0.241453661789949  |
| TGACGCGGTACA  | 750.726117135072 | 0.278511757077115  |
| ACCTGCAGTGAC  | 750.729205167321 | 0.306139869092359  |
| CAGATAATGACG  | 750.734905638235 | 0.369494284163045  |
| AGTCATGGGGAG  | 750.73932657206  | 0.0931625099193072 |
| ATGACTTGATAG  | 750.743235895159 | 0.2898980850033    |
| AGTCAGAAGTAT  | 750.743924909336 | 0.227006387967099  |

|               |                  |                   |
|---------------|------------------|-------------------|
| CCTCATCCGTC   | 750.751196202625 | 0.254474927407568 |
| GCCCTTGATGAC  | 750.755508305115 | 0.282315160339254 |
| ACCTAATGTCAT  | 750.75682698055  | 0.249743545676435 |
| ATGACGGACAGA  | 750.776388096884 | 0.323700589110791 |
| AAAATGTCGTCA  | 750.777282949316 | 0.180936837363042 |
| GTCATCCCGGCA  | 750.781611367377 | 0.369246896748936 |
| GACTCACGACAC  | 750.786241735076 | 0.290609980921484 |
| GTCGTATGTCAC  | 750.788756859536 | 0.389138320376215 |
| CCCTTGTACTCA  | 750.793863701811 | 0.244046854023094 |
| CGTCACCAGTAG  | 750.794136134451 | 0.394122497788922 |
| AACGGTCTGACT  | 750.798764116355 | 0.354590615169956 |
| ATTAGTGACAGA  | 750.806004029468 | 0.302500885489925 |
| AACTAGATGACG  | 750.806620125143 | 0.39233493654741  |
| GTCACCTCAGCA  | 750.806735028034 | 0.476404896637831 |
| TCATAAATGTAA  | 750.807277843713 | 0.515345145838337 |
| ACGGGTCATAAC  | 750.814659174162 | 0.240088854034324 |
| CCAGTCAGCGCA  | 750.820344966019 | 0.431937905354421 |
| CTACCGGAGTCA  | 750.820485115806 | 0.235006684573679 |
| AACGGTATGAGT  | 750.824935493207 | 0.20478529839324  |
| AGTCAGAATGGA  | 750.827590328492 | 0.315024982672775 |
| GGCACGTGACAC  | 750.835717407851 | 0.191618326492818 |
| ATTCTGCAGTCA  | 750.835768160601 | 0.53642239090728  |
| GCGTCATGTAAC  | 750.83846929539  | 0.392322324977818 |
| CTTGTTGACACA  | 750.839132941136 | 0.274465282397135 |
| AAGTCACTCTGG  | 750.839193588943 | 0.263456081624547 |
| ACTCATAGATGG  | 750.867661025776 | 0.367637261942392 |
| ATATATGGTCAT  | 750.869751925341 | 0.236106004957606 |
| TGACGTGCTAAA  | 750.871533511591 | 0.221623672206029 |
| GTACCCCGATGA  | 750.872757322106 | 0.392483566089868 |
| CAATAAATGAC   | 750.874901853687 | 0.330990174439661 |
| ACTCATAATCTG  | 750.88270931855  | 0.22887468192517  |
| ACGTCACCTTGCT | 750.884173168993 | 0.316815844671647 |
| GTCACTGTGCCA  | 750.886438700689 | 0.26947919378807  |
| ATTGCGATGACC  | 750.888325008098 | 0.32703375189168  |
| CTATAATTATGA  | 750.897544800337 | 0.295279282763113 |
| GTCATTTGTAAA  | 750.908656156557 | 0.373820311858307 |
| ATGAGTATGTTC  | 750.915828307277 | 0.337721512748991 |
| GTCACAGATAAC  | 750.933779718979 | 0.402854708296431 |
| TAATATCGGTCA  | 750.941925178465 | 0.372882456095736 |
| AAATACCTGTCA  | 750.957689580906 | 0.177593038288571 |
| GTCATGAACCAC  | 750.957919327386 | 0.288974336307024 |
| CTGCACTAGTCA  | 750.958964712242 | 0.354456641244743 |
| AGTCACTTCGCG  | 750.960997759449 | 0.308113884292992 |
| GAAAGTGTGAGC  | 750.961766619836 | 0.226929281395129 |
| AGTCAGTCTTCG  | 750.969122970609 | 0.428525234994436 |
| ATTGCTGTGACG  | 750.974351523699 | 0.384718300082587 |
| CTTGTAAGTCA   | 750.985666991663 | 0.323969906155685 |
| CAGCAGCAGTCA  | 750.987591723272 | 0.520067229217437 |
| AGAGTCAATAGA  | 750.99076681628  | 0.164776690035505 |
| GAACCTGTGTCA  | 751.000847321987 | 0.280272823191884 |
| GTACTAATTCTA  | 751.005000928389 | 0.274145091218224 |
| CCGCTGGTGACA  | 751.007239599772 | 0.30463767590899  |
| ACAACCATGTCA  | 751.015204850424 | 0.311311729769555 |
| GAGACTTTGTCA  | 751.018478925298 | 0.365606417406075 |

|              |                  |                   |
|--------------|------------------|-------------------|
| AAGACTGATTTA | 751.028636768058 | 0.222643814303686 |
| ACTCATTGGTA  | 751.034729958738 | 0.384317942502581 |
| GTGACGAACCCA | 751.040647484095 | 0.32433398977976  |
| CCATCAGTGACG | 751.055586307397 | 0.280890150216814 |
| AGGCTGACGTCA | 751.069950759848 | 0.237701376849207 |
| TACTAATGAGTA | 751.07257753533  | 0.264237277060364 |
| ATGCAGTGTAC  | 751.072694543081 | 0.353121781871871 |
| CTTAAGGGTGAC | 751.093175528605 | 0.191399302098478 |
| ATGACAGCTGCC | 751.094803996325 | 0.219285978389174 |
| ATTGATTACCG  | 751.098265282563 | 0.280096538422787 |
| AGGATTTGACTC | 751.099748477415 | 0.26381552461482  |
| CCTAATCATGAC | 751.103227758555 | 0.273925443069404 |
| ATGACAACGCAG | 751.111958681595 | 0.294020994078508 |
| GTCACCACTGTA | 751.118553006539 | 0.340893487761404 |
| GACGGGGATGAC | 751.123536959174 | 0.169804357561451 |
| TGTCATCTCAAA | 751.124070108504 | 0.241923800712902 |
| ACTGTCACAAGT | 751.124640360743 | 0.298291798953719 |
| ACCCAGATGAGT | 751.125463866773 | 0.273125732332279 |
| CGAAGACGTGTC | 751.132274241175 | 0.208324730365936 |
| CAGTCAGAAGAG | 751.133846281179 | 0.312826880256565 |
| AGTCAGAGTTG  | 751.152559090909 | 0.256699624287038 |
| GAAAATTAGTAC | 751.153585803528 | 0.337671912714014 |
| GTTTGCATGACA | 751.162359560035 | 0.188281505372037 |
| AATGACAAGGCC | 751.164478628818 | 0.266121309315717 |
| ATGTCTGTCATG | 751.166320257558 | 0.200429788857276 |
| CCCCTTACGTCA | 751.168899536041 | 0.350489645468289 |
| ATGACACTCCAT | 751.175856667106 | 0.33007696574992  |
| CAGTAACATGAC | 751.192598647261 | 0.401672636591121 |
| AGCATATGTGAC | 751.19526666357  | 0.363280799506915 |
| CGAGTGTGACCA | 751.196790693899 | 0.423744335343124 |
| GGTCGCGAGTCA | 751.198968864776 | 0.293939911267766 |
| GATGTGTGACCA | 751.206817713418 | 0.403384348088446 |
| ATTTTCCGTGAC | 751.223699186568 | 0.298037543981603 |
| CCTAACTGTGAC | 751.228167517673 | 0.337965915320924 |
| AGCGCTAATGAC | 751.2294397289   | 0.500789220889763 |
| AAACGTATGAGT | 751.236866334393 | 0.242652928507924 |
| ACACCCGTGACT | 751.240638270615 | 0.311787680963886 |
| ACGAATGACCAT | 751.241228351323 | 0.367970436046287 |
| ACACCATGACAC | 751.24832901528  | 0.250588435164861 |
| ATGACATGCGCG | 751.273985357341 | 0.330552729973811 |
| TAGCATGGCTCA | 751.276129684714 | 0.23264983860067  |
| ATCTAGTGACAC | 751.282405678931 | 0.209617361478186 |
| GGCAGGAATGAC | 751.283201436716 | 0.209749013926995 |
| GCTCTAGACTCA | 751.289631915704 | 0.3274057566343   |
| CCGTCATGGGCA | 751.303124953317 | 0.331082570535806 |
| CGTCATCTCAGC | 751.306885891515 | 0.390170896329824 |
| AAAAGCACGTCA | 751.309012283762 | 0.266421283547249 |
| CTTGATTGCTCA | 751.309176362116 | 0.245500012097107 |
| CACAATGTATGA | 751.318217849231 | 0.394454437063755 |
| TGACGTGATAAA | 751.318459102162 | 0.281058920547574 |
| TAGCAAATGACA | 751.318715680808 | 0.21138127539937  |
| TACGTGATGTCA | 751.3196149825   | 0.510745246231527 |
| ACGGCCTGACTC | 751.328647745611 | 0.320713406164018 |
| CTGAGTAAGTGC | 751.332033997248 | 0.275091266871054 |

|              |                  |                    |
|--------------|------------------|--------------------|
| CACGTCACGACA | 751.332976405322 | 0.250569956508643  |
| CGATTGACGTAA | 751.336171594676 | 0.265025597501223  |
| GCTGACGTGACA | 751.336499739473 | 0.418891908923698  |
| GCCTTCATGACA | 751.336867455821 | 0.35591237421884   |
| ATGACCACGATG | 751.33852150666  | 0.234867203966562  |
| AGTCAGATACTC | 751.338671662056 | 0.38426637697623   |
| GGGCGATATGAC | 751.342136119647 | 0.171984815192425  |
| CTAGGGTGACCA | 751.350019533967 | 0.302933468226508  |
| CGCATCATGACA | 751.352741779022 | 0.333014505954159  |
| CTGTCATTAGTA | 751.35653511319  | 0.233452286242465  |
| CTTCCTTACTCA | 751.359740765646 | 0.227440629144391  |
| GTCATTTTAGAC | 751.366143196007 | 0.387834457151261  |
| CTTTCAGTGTCA | 751.380781902893 | 0.395907538432954  |
| AGATGTATGACC | 751.392334314193 | 0.0678870293617463 |
| GTCATTGGTACA | 751.392880205407 | 0.288931793202507  |
| ACGTCAAGTGAC | 751.409523258198 | 0.113081964283017  |
| AGCGATGACCGA | 751.409955898455 | 0.301637448613652  |
| ACACAAGTCATC | 751.418038586033 | 0.298859913853727  |
| ACTCACTGACTG | 751.421298538303 | 0.312073008159031  |
| AGTCACGGGTAT | 751.426971918615 | 0.16396748942643   |
| ATGTTGACTGAA | 751.429744816248 | 0.439098314809832  |
| CAACTGGTGACG | 751.433125417547 | 0.257428932947381  |
| AGTCAGAGTAAC | 751.434718480581 | 0.27228582022769   |
| CCCGGACAGTCA | 751.449687538396 | 0.439369963150411  |
| AATACGTGACGT | 751.467094272821 | 0.352299517735471  |
| GCCTTTGGTGAC | 751.477870231724 | 0.391488451069776  |
| GTCACGCTATGA | 751.488850470636 | 0.275332483192909  |
| CATAGATAGTCA | 751.491535563727 | 0.471669138930439  |
| ACTGCTAATGAC | 751.492417312979 | 0.374896203319952  |
| ACGTCACTCCAG | 751.500380654426 | 0.249420578615895  |
| CATTTGTGACGC | 751.508003715777 | 0.286963505832495  |
| GATGATATAATC | 751.508411318034 | 0.20615512035274   |
| GGTACTGTCAAC | 751.510073397428 | 0.21808419461665   |
| GACACGTGGCCA | 751.513723502828 | 0.426970900100616  |
| GTGACGCGATTA | 751.517982755968 | 0.11169044109621   |
| GTCATTATAAAC | 751.524000461781 | 0.224335551133187  |
| AATGTCTGTAC  | 751.530850229856 | 0.293980560138823  |
| ATAACACGTCAA | 751.541612084236 | 0.283054772063085  |
| AAGAATGAGTGA | 751.54171752544  | 0.246284261154349  |
| CAGGTGGGTGAC | 751.544235654763 | 0.31157734927373   |
| CGTCACAGTTAG | 751.544767515095 | 0.26145727783227   |
| TCCCGGGAGTCA | 751.553116553994 | 0.290731589841043  |
| CCAGATCATGAC | 751.558939468654 | 0.260092991843472  |
| TCAGAAGGGTCA | 751.560011555526 | 0.4761020147928    |
| GTCACCATTAGA | 751.562532903914 | 0.259209654437131  |
| CGAGTCAGGAAC | 751.569045676725 | 0.2795703415711    |
| GACACACTCATA | 751.57183758401  | 0.229575113810077  |
| GTGTACGCGTCA | 751.576770670503 | 0.237669526543572  |
| GTCATGTTAGAA | 751.577599602877 | 0.194701912252108  |
| GTCATGGATTCA | 751.584411162843 | 0.284249773026791  |
| GTCACTCTTAGA | 751.584444984726 | 0.270117234600075  |
| GGATTGCATGAC | 751.593021387827 | 0.293236298374845  |
| AGTTGATTAGTC | 751.596704359557 | 0.295393241223392  |
| AAGTCAGAAGCC | 751.598467359277 | 0.286680494228369  |

|               |                  |                   |
|---------------|------------------|-------------------|
| GTCATGAATTTA  | 751.601203013114 | 0.269862228000602 |
| CCTACTAATGAC  | 751.608470862749 | 0.325727378062795 |
| TGAGTATAACAA  | 751.628079531515 | 0.214946783825259 |
| AGTGACCGTGAC  | 751.628493154687 | 0.265575796422486 |
| ATCGTTGTGACA  | 751.637001060514 | 0.408098531737374 |
| AGACTCAATAGC  | 751.643730071089 | 0.504723636944774 |
| CCTACTGTCATC  | 751.65120805322  | 0.235091322407276 |
| ATTGCCGCGTCA  | 751.66549000196  | 0.303901068016686 |
| CGTCACATCTAA  | 751.673970841353 | 0.246667019180182 |
| TGAGCTGTCACA  | 751.678507960127 | 0.474111695654405 |
| CTATTTTGACTC  | 751.678726212539 | 0.266154423950065 |
| CGGTGACCGAAC  | 751.679624148876 | 0.308779798048971 |
| AACGTGTAICTA  | 751.680596440325 | 0.390368071130925 |
| ACTGGTGTGACC  | 751.681863854752 | 0.388134247286764 |
| ACAGTCAGTAAA  | 751.696419044233 | 0.194979750994993 |
| TACTCTTTGTCA  | 751.704336410325 | 0.108496070519647 |
| CCACACGTGACA  | 751.704520024421 | 0.421617090444939 |
| ATGACATTACGA  | 751.709239034153 | 0.28998410201548  |
| GCGTCACAACCTA | 751.722897166474 | 0.23047544527211  |
| GACGTGTGACAA  | 751.726162750139 | 0.29447105272671  |
| GGTGACAGCTAC  | 751.730538587278 | 0.23221758120206  |
| TACCATGGGTCA  | 751.73237471719  | 0.090787666647633 |
| TAAAATGTGACA  | 751.735653896406 | 0.263734304453739 |
| ATGACAGTAATA  | 751.73933788408  | 0.136175319324567 |
| GTCATCTCTAGA  | 751.745721789091 | 0.35139504855335  |
| ATGTGGGATGAC  | 751.751556781365 | 0.320436163479521 |
| ATCGGTGACAAC  | 751.753916701086 | 0.315622761446528 |
| CAGTCAGTTATG  | 751.755249030178 | 0.287965594499513 |
| GTCATGGTTTCA  | 751.761727505168 | 0.265168206984508 |
| TAGCTGTGACGA  | 751.764188883714 | 0.274140075890843 |
| AATCCTACGTCA  | 751.76845303107  | 0.471374033627972 |
| AGTCGACAGTCA  | 751.770972462781 | 0.462724332847085 |
| CGTCATGGAGTC  | 751.780044036754 | 0.264043337485607 |
| GCTTTAGTGTC   | 751.79233835849  | 0.278138215423517 |
| GTCATAAGAATA  | 751.800038213413 | 0.290215763965674 |
| GACATGTGACGC  | 751.805946631884 | 0.428937615160602 |
| GATTCATAATTA  | 751.806210235203 | 0.268044001482616 |
| TATGCATGACGA  | 751.811423798523 | 0.282749718905307 |
| ACTCATCATCTA  | 751.815444888657 | 0.257671066235553 |
| AACGTATTGTCA  | 751.817037675424 | 0.327396195545126 |
| TGACACAAAGAA  | 751.826337839084 | 0.602766159190952 |
| ACGGGGATGACG  | 751.842659159757 | 0.20823537646694  |
| AAAACCTTGACTC | 751.855941515486 | 0.168009117123749 |
| GTCACAATACCA  | 751.856147322307 | 0.358058036767618 |
| ATGACAATCAAT  | 751.860967357932 | 0.206550252059218 |
| CTATTAATGAC   | 751.861521722806 | 0.29162683172631  |
| AGTCAGAGACTA  | 751.875519602829 | 0.268581711367662 |
| GTATATAAGTCA  | 751.875548579268 | 0.439197012655715 |
| GTCACTATCTTA  | 751.876701492001 | 0.38654417174701  |
| CTCATCTGAGTC  | 751.879602084068 | 0.220025419389677 |
| GCTTCGTGTGAC  | 751.885388524869 | 0.277826385316398 |
| CAGAGTTGTGAC  | 751.886279971828 | 0.235548475394021 |
| ATTTTATGACCC  | 751.886319462831 | 0.15290442519257  |
| GCCGTTAGTGAC  | 751.898102867604 | 0.313571831306454 |



|              |                  |                   |
|--------------|------------------|-------------------|
| ACGTCACTCCAC | 751.9019513894   | 0.312853051253427 |
| CGTCACTGTGAG | 751.904383307053 | 0.434800543383392 |
| CCATCTGAATCA | 751.91004723503  | 0.352859183501788 |
| ATCGCATATGAC | 751.911717530804 | 0.35353171433966  |
| ACGAAGATGACC | 751.919506014976 | 0.390506981418807 |
| ATACCGACTAAT | 751.922960236823 | 0.260346020728947 |
| AGTCAGACCACG | 751.928930706228 | 0.303807161608972 |
| AAGTCACCTCTG | 751.949196415857 | 0.278873598900532 |
| CAATACATGTCA | 751.958822079483 | 0.446287543104856 |
| TGACTATGCAAA | 751.959193311389 | 0.363319861624294 |
| TCACATAGGTGA | 751.974225373548 | 0.240339183324796 |
| GGGCCTCAGTCA | 751.974436758571 | 0.347846474750764 |
| TGATGTGAGCCA | 751.979413069108 | 0.166573786512303 |
| CCTAAGCTGTCA | 751.980359447309 | 0.358169916631774 |
| ATCCGCGACTCA | 751.981433712048 | 0.316474966839136 |
| AAAGAGAATGAC | 751.984887254025 | 0.25857578561278  |
| AGCGTCACTATC | 751.993467624631 | 0.197125235362142 |
| CGTCAGCTATGA | 751.995890794365 | 0.345585263003846 |
| AGGATATGACCA | 752.008839319018 | 0.347115677834675 |
| CTGAGTGACGAA | 752.017684482696 | 0.201685110479294 |
| CATTAAGTATGA | 752.02645089852  | 0.330642418996698 |
| ACGCAATGACAT | 752.030468111037 | 0.184038998187779 |
| CCAACTGAATCA | 752.034145693224 | 0.315796157117928 |
| CCTTAGACTCAG | 752.040817834288 | 0.453626955832595 |
| GACTAATCCGTA | 752.054773511528 | 0.349620188859581 |
| ATGACAACGACC | 752.060311684684 | 0.282837435124371 |
| CTGACACAGAAA | 752.064826559892 | 0.231523498278441 |
| ATGACTTGCCTA | 752.065070429883 | 0.214596346033383 |
| GTCATGCGGCCA | 752.066497796793 | 0.220110588219254 |
| CGGAACATGACA | 752.072095336185 | 0.316008728376467 |
| GATACCGACTCA | 752.08503052904  | 0.354878844521027 |
| AAAATTATGACC | 752.094800696421 | 0.313986888520212 |
| TGAGTCGCCAAA | 752.105758578209 | 0.182435993652228 |
| AGTCTGACACTG | 752.106622289884 | 0.286303151339986 |
| ACTGACTAGGTC | 752.107471584509 | 0.268454501843224 |
| ATGACTTGAACG | 752.118893457672 | 0.317648460285645 |
| CGTCATGTCGTA | 752.12171795786  | 0.285307874361242 |
| AGCCTGTGTGAC | 752.122033633316 | 0.312749378586339 |
| GTACCTGATGAC | 752.125184169878 | 0.317480366463335 |
| AGACTCACGGTC | 752.126783705061 | 0.402937314067728 |
| GCAAGCTGTGAC | 752.138952285049 | 0.36473378448491  |
| AACAGATGACCA | 752.141509851807 | 0.293583642628298 |
| GCATTTTGCTCA | 752.14279853968  | 0.298322724881905 |
| GGAAGGTGACAC | 752.146330575816 | 0.124346173140697 |
| ACAGTGGTGACG | 752.17137691141  | 0.195566556105484 |
| AGTTCGTGACGC | 752.172190657101 | 0.434718500649413 |
| AAGGGTAATGAC | 752.172866507324 | 0.237905401525811 |
| CACGATTGACTA | 752.176366230263 | 0.388164228277939 |
| GTACCTGTGACA | 752.180479010835 | 0.483443248408724 |
| CACATTGACACA | 752.182226154699 | 0.267044411030727 |
| ACGTCACTACAA | 752.182580692564 | 0.35637052276849  |
| GTCAGACTGCGA | 752.192413420806 | 0.310983977079475 |
| CAGTCGGTGACA | 752.192944457634 | 0.297091760123589 |
| CGCATGTGACGC | 752.193567435826 | 0.39719596822126  |

|               |                  |                   |
|---------------|------------------|-------------------|
| AAATCGGTGACG  | 752.195224396716 | 0.261550812325673 |
| GACTCAGATGAA  | 752.201491736049 | 0.339715457934737 |
| ACACTATGACCC  | 752.207004808932 | 0.248969770167695 |
| GTCACTAGCATA  | 752.209683514589 | 0.29818022975771  |
| CAATAACGTCAC  | 752.226460396999 | 0.332139243858655 |
| CGCGATGCGTAA  | 752.232967862258 | 0.271233186071688 |
| CTAGTGATGTCA  | 752.233303400557 | 0.172425472992936 |
| AATCAGTGACAT  | 752.235799778154 | 0.313520325197714 |
| AGACGGCATGAC  | 752.254179507571 | 0.28642454613648  |
| AAGTAATGAGTA  | 752.25539672537  | 0.223650195734434 |
| CGCCAGCATGAC  | 752.256619691002 | 0.277807962943075 |
| CATTAGCATGAC  | 752.257842390072 | 0.309216823019407 |
| GGTGCGCATGAC  | 752.261466330744 | 0.309038284983526 |
| GACCTGACTGTA  | 752.262822557723 | 0.55601640199456  |
| ATGACATTTAAA  | 752.26498763072  | 0.291970430770044 |
| AATTCGTGTAC   | 752.271603309231 | 0.326396178964689 |
| ATGCTATTACTC  | 752.273590462311 | 0.227732156629675 |
| GACATAGTGTCA  | 752.278305544173 | 0.263669622697427 |
| AATGACATTACC  | 752.282249827537 | 0.401463671374188 |
| CAGTCAGAAGGC  | 752.291403168701 | 0.271395864038225 |
| GTCACAAGTCGA  | 752.29311284772  | 0.464960457528895 |
| GTCATTTAGGCA  | 752.295420162808 | 0.287651311264054 |
| AGCACACAGTCA  | 752.296493691822 | 0.224502493891546 |
| CGGTGAGCAAGA  | 752.301279789474 | 0.279255629806206 |
| CATAGTTGTAC   | 752.302847872786 | 0.378576198800529 |
| ATGACGCTCACA  | 752.322383580064 | 0.364483613276475 |
| GGACGACTCAGA  | 752.324671159517 | 0.244356272469423 |
| AGAGTAATTTAA  | 752.329568483074 | 0.257042639256165 |
| ATCCATGTGACA  | 752.330757290594 | 0.488772607234992 |
| TATGACTTGAAA  | 752.334825938907 | 0.182961315051278 |
| ACGTCACGTTCCG | 752.337510931905 | 0.44134621470689  |
| TGACATAATAAA  | 752.340264958416 | 0.310472765744993 |
| CTATGCTGTAC   | 752.341463145438 | 0.237791438558695 |
| GATCCCTAGTCA  | 752.345216314547 | 0.313100354057645 |
| TCCAAGGACTCA  | 752.34554068633  | 0.406294082611872 |
| CAGCATGGTGAC  | 752.34812272502  | 0.41676131855382  |
| GTCCGAGTCAAA  | 752.348139730432 | 0.321715620642361 |
| AATCCCACGTCA  | 752.350865627236 | 0.230825251022046 |
| AGTCAGCCTTTG  | 752.353675997754 | 0.328313800217563 |
| CCGAGGCATGAC  | 752.359978870528 | 0.211164468490353 |
| CCGGGCACGTCA  | 752.363462743576 | 0.29182851190628  |
| GGTAGACATGAC  | 752.367512464979 | 0.180152317988639 |
| ACTCATACACTG  | 752.375034170422 | 0.24877466149351  |
| CCCCTGTGACG   | 752.375785779195 | 0.288927266507509 |
| GATATGGAGTCA  | 752.391816149042 | 0.290414973308481 |
| AAGAGCCATGAC  | 752.394425480022 | 0.257015597722364 |
| CAAACCTGACTA  | 752.402141169903 | 0.267851667509097 |
| TGACTCCGTACA  | 752.404142071436 | 0.309297090020875 |
| GATTACTAGTCA  | 752.405606490744 | 0.228308721983572 |
| ACCGTCGTGTCA  | 752.408005556736 | 0.361674105475963 |
| GTCATTCCGATA  | 752.4139843247   | 0.328439419763333 |
| ATGACGTCGTGG  | 752.416674579071 | 0.298108550206137 |
| ACCCAAAATGAC  | 752.420733338367 | 0.277596684668454 |
| AAGACTCTGACT  | 752.448071279033 | 0.202050141977897 |

|               |                  |                    |
|---------------|------------------|--------------------|
| CATGACGGTACA  | 752.449521679997 | 0.199102581032608  |
| GCAATCACGTCA  | 752.452111550406 | 0.455387757856969  |
| ATGTCACCCGGA  | 752.452334320614 | 0.345274195342445  |
| ATCATATTACTC  | 752.453902349096 | 0.157420435254936  |
| CCGTGTCACTGA  | 752.458579253342 | 0.398352836734027  |
| AATTCTGTGACA  | 752.45958584398  | 0.267727472002692  |
| CTGACTCGCCTC  | 752.460180372969 | 0.269851001799321  |
| TGAGTAAAGACA  | 752.468591651763 | 0.252864587285143  |
| ATTTCGTATGTCA | 752.468643999803 | 0.268816652375088  |
| ATTATTGGTGAC  | 752.474331630016 | 0.271499611394471  |
| ATGTTAGTGTCA  | 752.475039029998 | 0.257334043184687  |
| ATACCTTGTTCAT | 752.475551212651 | 0.260146092372268  |
| GTTATCCAGTCA  | 752.483023628295 | 0.339294789888487  |
| CACGTCAGAATA  | 752.487892006213 | 0.401955760138117  |
| GAGCCGGGTGAC  | 752.488842234496 | 0.318556458745214  |
| GCGTCACAACCA  | 752.494643603557 | 0.230845582469625  |
| CGAGTCAAAGGC  | 752.496692421704 | 0.48473756663179   |
| GATACCGTCACA  | 752.503703836871 | 0.312199157025308  |
| GGTTTTCCGTCA  | 752.50697848199  | 0.235099181411008  |
| TGAAGATGACCA  | 752.5074017961   | 0.325411076272368  |
| CGACCTGTGTCA  | 752.513377057971 | 0.22215215111685   |
| ACGAGTAATAAT  | 752.524346735945 | 0.277528867616408  |
| AATAGTTATTAC  | 752.525174183052 | 0.395862142841902  |
| ACGACTCAATCA  | 752.530045669813 | 0.26753139172495   |
| GTCACGCCAGAA  | 752.536224397307 | 0.266464857968083  |
| ATGACGATCAGA  | 752.538560469717 | 0.264266063535921  |
| GTCATTCGCGAC  | 752.539144231975 | 0.267638103258528  |
| ATCGCTGGTGAC  | 752.547140180071 | 0.287982569804802  |
| GACTCAATCCGA  | 752.548465282726 | 0.384301111556672  |
| AAGAAGCAGTCA  | 752.557403808732 | 0.3404844441459977 |
| AGGGCGAATGAC  | 752.561015368596 | 0.245236321473272  |
| GTGTCACGACAA  | 752.565534957754 | 0.298374788517122  |
| GACTGCATGACA  | 752.580131505796 | 0.322521917572451  |
| GGACAACCTACC  | 752.590695534476 | 0.319674444223182  |
| ACCCTTGTGACA  | 752.597675943123 | 0.337605848490937  |
| ACTCATCTTAA   | 752.60530799821  | 0.192154961191215  |
| AACTGCACGTCA  | 752.607520088131 | 0.39052553793241   |
| CTAAGTCTGTCA  | 752.619091150851 | 0.34063484400188   |
| GTCACCTTAGGTA | 752.6246828955   | 0.33793683465798   |
| CTGTCACCGAAG  | 752.629510817974 | 0.33303733258708   |
| ACTTGTCGTGAC  | 752.631678499469 | 0.530441887511469  |
| ATGACACCCAGA  | 752.632068860994 | 0.363540449201925  |
| GCCGACTAATTA  | 752.63415287917  | 0.389317060575525  |
| ACTAGCCGTGAC  | 752.638863068344 | 0.307432497626193  |
| TATCCACAGTCA  | 752.640305608178 | 0.270386210447716  |
| CGTCATTATCGA  | 752.643655023564 | 0.450445384350449  |
| CAGTGTGACCAC  | 752.643971374149 | 0.368571630127044  |
| GAACAGGAGTCA  | 752.665361982334 | 0.29452377369283   |
| AATACATCGTCA  | 752.669592510347 | 0.359035099088052  |
| AGTCACGGGTTTC | 752.669804365117 | 0.345265004766288  |
| ATCGATCGAGTC  | 752.670916881783 | 0.393829689592544  |
| ACTCGTACGTCA  | 752.672040441841 | 0.246103887254982  |
| ACAGGACTGACT  | 752.672757514776 | 0.286388575212343  |
| GTCACATTAGAC  | 752.674378934523 | 0.171914998962994  |

|               |                  |                   |
|---------------|------------------|-------------------|
| TCGCTATAGTCA  | 752.679582447587 | 0.402508158738511 |
| GTCATTAGCAAC  | 752.681027068356 | 0.260026254913963 |
| AATCAAATGACG  | 752.681500112393 | 0.287779126697959 |
| ACTATGTGTGAC  | 752.689276259126 | 0.276152298934042 |
| GTGACACGGCAA  | 752.690954925596 | 0.29400952584698  |
| CGTGACGATATC  | 752.698362792664 | 0.274632215893286 |
| CCATTAGTGACA  | 752.703751200986 | 0.37733731738068  |
| CGCGCATAGTCA  | 752.708168189167 | 0.309751729903994 |
| CATGGTAATGAC  | 752.708459133315 | 0.304921759863853 |
| AAGATCTGAGTC  | 752.710233065326 | 0.336192599933986 |
| GAGTTGATTAC   | 752.712800882147 | 0.171149257650637 |
| ATGTCATTAACG  | 752.723691546391 | 0.299659828687228 |
| AATCACCATGAC  | 752.724679572432 | 0.252151034038352 |
| GTCACTACTGTA  | 752.729297021128 | 0.366177869482154 |
| AGAGAATGTGAC  | 752.729565102833 | 0.309261709769684 |
| ACACACAGTGAC  | 752.730968339925 | 0.281054911246067 |
| GGGTATCCGTCA  | 752.732931713388 | 0.369336839117462 |
| CCGCCGTGACTA  | 752.733492109048 | 0.200175259234106 |
| GAACTATGAGCC  | 752.737812717837 | 0.380539818170385 |
| AATGGTGTGACG  | 752.746436669315 | 0.201026147070615 |
| ACCTCCTGACTC  | 752.74911785263  | 0.264670057936436 |
| AGTCAGACTGGA  | 752.753339740231 | 0.282843368024933 |
| CAAAAGTGACGC  | 752.760774504713 | 0.331559769368298 |
| CTTGGAAGTGAC  | 752.76440503853  | 0.293550648739904 |
| GATAGACTCAGC  | 752.771683276964 | 0.372053484728427 |
| ACTGACCAAATG  | 752.788473357078 | 0.294012503596572 |
| GACTCACGCACA  | 752.790763674271 | 0.331013161156424 |
| GCCACGTGGTCA  | 752.827761457717 | 0.394912593962655 |
| ACGAGGCATGAC  | 752.833481258906 | 0.339579588498188 |
| ATGACATCCACG  | 752.835339664494 | 0.272977578076768 |
| TCAATCAAGTCA  | 752.85646138945  | 0.292525031937299 |
| GTCACTGATAAA  | 752.858846948726 | 0.490824251896206 |
| AACTATTAICTCG | 752.861774347087 | 0.291029175970384 |
| GTCATTACCCAC  | 752.873544784409 | 0.303509168520438 |
| AATATCGTGACA  | 752.891423484368 | 0.311111253271563 |
| GTCACTAAGTAA  | 752.894655460349 | 0.387710504904618 |
| ACGGCGCATGAC  | 752.904426518984 | 0.355959492307219 |
| ACTTGTCACGAT  | 752.906161575232 | 0.271579913233261 |
| TGCTTTGAGTAA  | 752.907145267994 | 0.341858980079609 |
| AGTCAGATAATA  | 752.911770785615 | 0.260898908013057 |
| CGATTATGAGCC  | 752.913147768052 | 0.495243936959067 |
| GGATACGGTGAC  | 752.918180798821 | 0.44115146508535  |
| CGGTGACCCAAC  | 752.926580283321 | 0.267885737090623 |
| GAAGTCAATGAC  | 752.936847215951 | 0.400092246956369 |
| AGGCAGCTGACT  | 752.938202246518 | 0.379105157501989 |
| CTGACTGTGCAC  | 752.940626169714 | 0.2238012087006   |
| GTGACGTCGACA  | 752.942168888015 | 0.250422891153306 |
| AAGTCATGGTTA  | 752.944310505099 | 0.278318003449317 |
| GTATGACCGTGA  | 752.95085152673  | 0.220477952533084 |
| ATGACGACTCGG  | 752.967629607761 | 0.209741228438631 |
| ACCCTTGACTGA  | 752.969694849628 | 0.378266104631546 |
| GTGAGTCCCCTA  | 752.971738257613 | 0.296793371340243 |
| ACGTGGACTCAC  | 752.974648037222 | 0.250750269321557 |
| AGACACGTGTCC  | 752.98061592885  | 0.241472865863109 |

|              |                  |                   |
|--------------|------------------|-------------------|
| ATCTGTAGTGAC | 752.980715302185 | 0.292110986162047 |
| AGCCATAAGTCA | 752.997822368534 | 0.234186514468159 |
| GCTGACTGTCAC | 753.000207703307 | 0.291385225741585 |
| AGTTCTAATGAC | 753.002957006695 | 0.370321652029522 |
| AAGCAGTCAGCC | 753.003112045013 | 0.290287400881021 |
| GTCACAGCTTAA | 753.005578023638 | 0.187327172398275 |
| ACAGCATTAGTC | 753.007413740741 | 0.390899017508384 |
| AAGCCATGACGT | 753.014234146298 | 0.370101931082385 |
| GTGTTACGCAAC | 753.015298278901 | 0.371730192817392 |
| CTGACAGATTGC | 753.020704417074 | 0.298340834941833 |
| GTGGCTCACACA | 753.021573939156 | 0.251596110561138 |
| GTAATGTCACCA | 753.024943901486 | 0.44124944933353  |
| GTCACCTAAATA | 753.027227542286 | 0.328097475194912 |
| GAAACAGATGAC | 753.029165499787 | 0.233002325910642 |
| TGAGTCTCATAA | 753.042712196692 | 0.476596506780096 |
| TGACTGCGAGAA | 753.042990546674 | 0.210525463033487 |
| ACAATATGACCA | 753.04471481195  | 0.309885603897149 |
| CAGTCAACGATG | 753.047718755261 | 0.455411335057479 |
| ATAATAATGACG | 753.055501837061 | 0.271404872382835 |
| GTCACAGGGCAC | 753.05627693495  | 0.30753920908928  |
| ACGGTTAAGTCA | 753.058051632185 | 0.526299107857811 |
| TCCTACATGTCA | 753.058511090105 | 0.394848981314294 |
| GATGCATCACAC | 753.064648805522 | 0.28337376785112  |
| AGCTTTGTGTCA | 753.086370840105 | 0.327945736977815 |
| AACCTATTAGTC | 753.095971007555 | 0.384502734283746 |
| TAAGTTGTGACA | 753.098064673681 | 0.208419412207338 |
| AAGCATGAGCCA | 753.104560866591 | 0.297162682294061 |
| CGTCATTTAAAC | 753.105082955856 | 0.257545022780303 |
| GGCGATCCGTCA | 753.109933757853 | 0.394451345199629 |
| GTCCAGTCAGAA | 753.11665881134  | 0.295536670642466 |
| GAGTATTGACTC | 753.118633772151 | 0.274300778706247 |
| CAATAGTCAATG | 753.123507261304 | 0.400581132684117 |
| GTGTCACCTAAA | 753.134186088952 | 0.339507284790125 |
| TACTAATAATGA | 753.134532798094 | 0.361362184118727 |
| CTACCTTACTCA | 753.134740618306 | 0.192226497416544 |
| GCTTTTGACTGA | 753.143052415995 | 0.34011290121626  |
| AAAAGACAGTCA | 753.143891406929 | 0.316398657110215 |
| TGCCGTGTGACA | 753.144628898404 | 0.148432074112933 |
| AGTCAGACTAAG | 753.146984636796 | 0.310681655389005 |
| AGCTAGAATGAC | 753.147285146463 | 0.321092783358396 |
| CGAAAGCATGAC | 753.171947860311 | 0.338302332506123 |
| TACTTTTGGTCA | 753.175459845439 | 0.310821744740413 |
| ACTCATTCTTAT | 753.184582422198 | 0.264592726078643 |
| GTCACGCTAAAC | 753.189465004113 | 0.223404789730922 |
| ACTCATTTGGCG | 753.190391403488 | 0.38861563971944  |
| CGCAACGGTGAC | 753.195489420161 | 0.297176991130561 |
| AGCCTTTGACTC | 753.196188761591 | 0.2807942337154   |
| AGGCGATATGAC | 753.201190035468 | 0.304764884253107 |
| ATGACCACTAGC | 753.2101680996   | 0.259201877177628 |
| GCGTCACCTAAA | 753.213914151904 | 0.37649946963567  |
| CTTGACTGGTCA | 753.216385150985 | 0.219846329819843 |
| TGACGGCATACA | 753.217064220759 | 0.204530393059166 |
| CGGCTATTACTC | 753.219246834305 | 0.26918576476847  |
| CCAATGGTGTCA | 753.232699768483 | 0.251545903787647 |

|              |                  |                   |
|--------------|------------------|-------------------|
| CGTCACGATAAA | 753.2380698663   | 0.352674143619245 |
| TAGTTTGACTGA | 753.241875812479 | 0.169039181714118 |
| ATCACTGTGACA | 753.242049233842 | 0.388910733945524 |
| CACAAGTACTCA | 753.245210358936 | 0.310839982026346 |
| ACTCATCCTTGA | 753.245301776025 | 0.220664613050706 |
| ATCGTAGGTGAC | 753.255429618287 | 0.214144075906211 |
| GACTAGCAGTCA | 753.259582232026 | 0.192492622283143 |
| GTCACTAAGCCA | 753.26210437287  | 0.287638743897227 |
| GTCATTTATGAA | 753.264094271674 | 0.250541420148021 |
| TCCGCAGAGTCA | 753.26595476307  | 0.359422191167013 |
| CTGTCAGCGTCA | 753.267389363061 | 0.393913342319801 |
| GTCACATATATA | 753.269222774563 | 0.288700448241756 |
| ATAAAAGTCATC | 753.27325889237  | 0.268044432442315 |
| GACTCAGACGAC | 753.273263597883 | 0.260257629351443 |
| CGCTTCATGACA | 753.276843747208 | 0.26012039797561  |
| ATTAGTAAGCTC | 753.279024052565 | 0.378643854551683 |
| CTTGTTTGACTC | 753.284988780125 | 0.382186156125952 |
| CCGTTAATGACA | 753.29099468461  | 0.317676503949874 |
| CTATGTATGACC | 753.301103785558 | 0.276100914024491 |
| AGTATTAGTACC | 753.321830147545 | 0.394709330117112 |
| ACAATATTAGTC | 753.326777786791 | 0.275703434159795 |
| GATGCTGTGACA | 753.327761366068 | 0.306812681559167 |
| GTCACAGTACCA | 753.327990020296 | 0.305081317599098 |
| AGAATCCGTCAG | 753.335431431345 | 0.280777098068373 |
| TACATTTAATGA | 753.338128152084 | 0.413807593319717 |
| CGACAAGTGTC  | 753.338160096048 | 0.266304242188733 |
| GGTGACCAATA  | 753.351099802768 | 0.232185271592548 |
| AAGTTAGATGAC | 753.353060105928 | 0.247575385411435 |
| ACCAGTCAGATC | 753.359480797737 | 0.262732902301903 |
| AATGTTACGTGT | 753.359938093023 | 0.265336925792152 |
| GGAGTATATGAC | 753.361710128944 | 0.243345656479338 |
| GCGTCACAGTAC | 753.369125342422 | 0.332686982194743 |
| AGCCCGCATGAC | 753.376681953126 | 0.37931469704055  |
| GAGTAATCCATC | 753.386911376121 | 0.330145488842939 |
| ACACAGTGAGTC | 753.388677127434 | 0.289880382493234 |
| GTCACCAGTTCA | 753.389695339421 | 0.306583683949287 |
| AGAACTCTGACT | 753.389978598006 | 0.390397761011012 |
| TGACTCCCTGCA | 753.393491084868 | 0.202671946548208 |
| CGACGGTGTAC  | 753.395673345304 | 0.429700889670242 |
| GTCCATCCGTCA | 753.39701070181  | 0.264997181602312 |
| AGCTTAGGTGAC | 753.40096163241  | 0.509076587473245 |
| CATGACGTTGTA | 753.405911254478 | 0.197006365930983 |
| GTCACTAATACA | 753.411193344575 | 0.291824726387942 |
| GAGTCAAGGATC | 753.423433067905 | 0.315619336014128 |
| AGAACAGAGTCA | 753.429256955179 | 0.331567162810447 |
| TGACTCTCATAA | 753.437557193901 | 0.252440790280725 |
| CGAGGTAATGAC | 753.440409249484 | 0.207169870324228 |
| AAGCGGTGTAC  | 753.441146929659 | 0.15595884598428  |
| TACGGCACGTCA | 753.448108005688 | 0.320781583774634 |
| AGTTACCATGAC | 753.460550184657 | 0.327296708743777 |
| GCATTGACTGCA | 753.461601083799 | 0.435976620887523 |
| CACTGTGGGTCA | 753.474085638567 | 0.483299153810935 |
| AGTGTCATGCTC | 753.487027658284 | 0.237528744952079 |
| TGACGCGTCGAA | 753.488303776588 | 0.401430976105296 |

|               |                  |                   |
|---------------|------------------|-------------------|
| AGGTGCGAGTCA  | 753.490758135936 | 0.231140826529368 |
| GGGTCACCATCA  | 753.493093713548 | 0.317406821223536 |
| ATGACAGTAGGA  | 753.503937000562 | 0.287598749250893 |
| ACGTCACCTTGC  | 753.505252229026 | 0.250749048830761 |
| ATCGAGCGTCAT  | 753.508356577043 | 0.316136503994005 |
| ATAGGTGTGACG  | 753.525473219009 | 0.291355754480391 |
| CGAGAAATGACA  | 753.536713623036 | 0.263990957602529 |
| CATGCCGTCATC  | 753.53700473164  | 0.201711967437207 |
| CGCGGACTCACA  | 753.538580700476 | 0.352875283982672 |
| AGTGACCCAATG  | 753.54206303192  | 0.388228899546923 |
| TGACAGAGACAA  | 753.546827999765 | 0.227259194518545 |
| GTCATAAATAA   | 753.552439648465 | 0.527932703546704 |
| TCGACAGTGACA  | 753.555447856182 | 0.286539805634364 |
| TAATCATGACGA  | 753.56596522834  | 0.28161214951111  |
| AACCGCATGACA  | 753.567570548248 | 0.405037948910034 |
| ACTTGCTAGTCA  | 753.56764199361  | 0.203428210894273 |
| AAAGCACGTCAC  | 753.573172081774 | 0.278996980374145 |
| AGTCACGGGCA   | 753.581747384288 | 0.268383727145801 |
| CGAGGACTAATA  | 753.58962469438  | 0.315698489640519 |
| ATGCATTGTCAC  | 753.590873593748 | 0.37123308729485  |
| CCTCATCTGTCA  | 753.599538772197 | 0.262578799615919 |
| AACTGGTAGTCA  | 753.611437712204 | 0.449078407768834 |
| CTTACAGATGAC  | 753.618104224175 | 0.169468893957968 |
| TACTAATCGTCA  | 753.624015575919 | 0.262248554699793 |
| GTCATTATTA    | 753.629375888401 | 0.406785623839343 |
| GTCAGATCTTAA  | 753.636407400832 | 0.603708958331341 |
| CGTCATGATGGC  | 753.63732365008  | 0.332932666847874 |
| TCACTAGGATGA  | 753.642023896847 | 0.372543795747884 |
| CTCCCCTGACTC  | 753.643824811841 | 0.143295654530117 |
| GCTATGGCGTCA  | 753.649638701394 | 0.260980399634334 |
| AGACTTAGTGAC  | 753.651244926946 | 0.211832368354912 |
| CTTGCCGGTGAC  | 753.651301268905 | 0.342645598744627 |
| ATGAGTCCCTA   | 753.656319321376 | 0.190496831265883 |
| GATTCATGACCA  | 753.667396570421 | 0.202300031926061 |
| ATAGCTAGTCAC  | 753.669759968182 | 0.267886276302493 |
| GAAAGATGAGTA  | 753.674011499285 | 0.165084951573642 |
| ATGACGAGGGTG  | 753.674997962084 | 0.248656304687582 |
| TGTGTAATTTAA  | 753.68887562175  | 0.191760212869351 |
| CGTGTGCAATC   | 753.70402169379  | 0.335167280520469 |
| TGAGTAAGGGAA  | 753.707295558436 | 0.22388342444642  |
| ATGACGAGGAGG  | 753.719893448996 | 0.201993092870961 |
| GCATTGTCGTCA  | 753.727655918995 | 0.269353498786208 |
| AAATGTGTAACC  | 753.736558276404 | 0.299228075110155 |
| GCTGACTGTATA  | 753.739832209825 | 0.267115443004241 |
| GTGACGAACATA  | 753.740209535347 | 0.189577642622193 |
| ACAAGGCTGACT  | 753.741743545667 | 0.275912604071574 |
| TAATGTTACTAA  | 753.74201913272  | 0.26665727412226  |
| GACTCACTCGCC  | 753.747295007907 | 0.329070950634343 |
| GGGTTTACGTCA  | 753.747607789616 | 0.384712078636377 |
| GAAC TTGGTGAC | 753.749018268574 | 0.31875701607898  |
| CAAGTTTGTAC   | 753.753684765748 | 0.310060687869216 |
| CCTCAGACTCAC  | 753.754812498439 | 0.222207564353746 |
| AAACGCGTAATC  | 753.759923367566 | 0.439851098409634 |
| GCAGAAATGACA  | 753.760981165852 | 0.239721940823077 |

|               |                  |                    |
|---------------|------------------|--------------------|
| CCTGTCGCGTCA  | 753.762441025241 | 0.284476845547067  |
| AGTCAGGTGACA  | 753.763186622881 | 0.269151958297754  |
| ACTGGGGATGAC  | 753.764389145967 | 0.294721194462473  |
| GACTTCCAGTCA  | 753.771845072449 | 0.417044283917321  |
| CGGGTTCTGTCA  | 753.775411647925 | 0.448889223130645  |
| GTCATTCCACAC  | 753.784878078034 | 0.208082481556358  |
| AAGACTGATTAT  | 753.78978531078  | 0.349012309716217  |
| AAGGGTATGACC  | 753.793027814468 | 0.25906385698073   |
| AAGACTCTTAAT  | 753.796544603469 | 0.197414553560177  |
| TGAGTCCACGAA  | 753.801570548808 | 0.321307155555435  |
| CCAATATGTGAC  | 753.801625250247 | 0.270765318688959  |
| AGTGACCGGATG  | 753.816454254339 | 0.198399403985426  |
| GAATCATACATC  | 753.818982419004 | 0.380388133937975  |
| CCGTCATTTGAG  | 753.823770083273 | 0.419070694315815  |
| GTCACCTCGCAA  | 753.833745360073 | 0.303286249468582  |
| TCTGTCTAGTCA  | 753.840967047034 | 0.272588025815943  |
| CGTCAGACGTAC  | 753.845127504964 | 0.281676511443535  |
| AAATGACATTAT  | 753.845233029636 | 0.323448042569373  |
| CATGTTTGTGAC  | 753.852813488119 | 0.248314471921052  |
| GTCACAACACAC  | 753.857413281216 | 0.268073566150572  |
| CGGTCCTGTGAC  | 753.867890052236 | 0.343029363276115  |
| GCACTCTAGTCA  | 753.876737434546 | 0.253295044387049  |
| GGGTCATAGCGA  | 753.886369472777 | 0.310038313440771  |
| GTGGTCTAGTCA  | 753.890141011684 | 0.30879506168439   |
| CGTCATTTACGC  | 753.892252990853 | 0.427713547816783  |
| CTTAAATCGTCA  | 753.904633789735 | 0.430334837852607  |
| GTGCTTACGTAA  | 753.912371997868 | 0.259452569786915  |
| ACTCACCATGAC  | 753.912629850738 | 0.371228903277973  |
| TGTCATCTCACA  | 753.916394882404 | 0.189588681135501  |
| GTCACGTTTAAA  | 753.916605240949 | 0.474917561545021  |
| ATGAGCCAAACGC | 753.919593268371 | 0.299924470339532  |
| AAACGTGACACC  | 753.942133681619 | 0.28807563894146   |
| AGAGTCAAGCTC  | 753.943342556175 | 0.452299931823087  |
| GTAGCTTGTGAC  | 753.944697817646 | 0.329466699242557  |
| CTGCTGACTGCA  | 753.945827308872 | 0.268710473794657  |
| AATAATGAGTAT  | 753.94971011678  | 0.195838276059185  |
| TCACCCCAGTCA  | 753.953916030949 | 0.276828250786423  |
| ATCACAAATGAC  | 753.957028150827 | 0.535735286791023  |
| ACGACGGCGTCA  | 753.961362859342 | 0.433646802470602  |
| AACAGTGACGAA  | 753.969905672574 | 0.0851344564456462 |
| GGTGATTTGTCA  | 753.980972225925 | 0.332135781351286  |
| ATGACATTGCAG  | 753.982470165169 | 0.359640929931435  |
| AATGAAAATGAC  | 753.983648984892 | 0.397677918152529  |
| TATATTAAGTCA  | 753.985242043967 | 0.393641046585329  |
| ACGTCACCTCTG  | 753.986524563271 | 0.164431970567696  |
| CGAGTCAGGTAC  | 754.00895163043  | 0.416672691653771  |
| ATTACCTGTCAC  | 754.010767799616 | 0.253242789002657  |
| AACATTTGTGAC  | 754.021828081814 | 0.260024071331471  |
| AATTGCGTAACC  | 754.027668106722 | 0.176431941434796  |
| GCACAGTGACAC  | 754.031704659732 | 0.548998650118707  |
| ACTTGTCACCGC  | 754.0440369092   | 0.346975061132044  |
| CAAAGTTTATGA  | 754.045825492515 | 0.262140858318688  |
| GCCTATGTGACA  | 754.048285447355 | 0.175224643750057  |
| GGGAATGACCAC  | 754.051114708188 | 0.225701096090537  |



|               |                  |                   |
|---------------|------------------|-------------------|
| GTGACAAGTCGA  | 754.055499043282 | 0.314584930472778 |
| GGTGACATGACA  | 754.056235030578 | 0.316254618486086 |
| GACACATCGTCA  | 754.063266696682 | 0.258645398502014 |
| ACTCATTTATTA  | 754.064275283196 | 0.177187404675531 |
| CGACCTGCGTCA  | 754.069506299695 | 0.320273986992787 |
| GTCATCAAACCA  | 754.070517884611 | 0.407892474275024 |
| ACGCGTCTGACT  | 754.081374141839 | 0.312272995666807 |
| GTGTCACCTGCAA | 754.084991342587 | 0.297143266748586 |
| GTCACACTACCA  | 754.095746210248 | 0.34042234405984  |
| AAGCTGGGTGAT  | 754.117010193174 | 0.413345035967227 |
| AACTGGTCAGAT  | 754.125480843023 | 0.372164994684683 |
| CGAGTCAAAGAA  | 754.128334535599 | 0.259947256959048 |
| ATTATATACTCA  | 754.137940442331 | 0.308223824064641 |
| CTCACGTAATGA  | 754.154931592429 | 0.565588413787532 |
| CCTATTTGCTCA  | 754.166259428199 | 0.227552672012602 |
| CGTCACTAATGC  | 754.169439696688 | 0.496370297341297 |
| GCATTTAATGAC  | 754.170256872586 | 0.339565059571642 |
| GCAACCGGTGAC  | 754.172319065559 | 0.466441215322558 |
| TGACTGGGCAAA  | 754.175261492681 | 0.213819900141534 |
| CTGCAGGCGTCA  | 754.177562517599 | 0.601481998670263 |
| GGACTTGGTGAC  | 754.178365682656 | 0.261031057325725 |
| TCGGCAATGACA  | 754.185486835356 | 0.340384967212449 |
| ACTATAGTGACG  | 754.187227312792 | 0.337711366421857 |
| AGTAATGGTGAC  | 754.192900204664 | 0.190158320968782 |
| GAATCACTAATC  | 754.200944507131 | 0.347987191686692 |
| CGGTCGGGTGAC  | 754.204707512636 | 0.237268646288539 |
| ATGACGCTCAGC  | 754.205687864303 | 0.219740394066083 |
| GTGACACCGCGA  | 754.209515158108 | 0.253367874946333 |
| CGTCATTGTCAG  | 754.216126108951 | 0.259049475587291 |
| TCGGCTTCGTCA  | 754.218397182501 | 0.330197185766004 |
| GTGACGTGATGA  | 754.226478751974 | 0.24997724282783  |
| ACAGTCAGCGGA  | 754.227468425181 | 0.248556906799584 |
| CCCTGTGGGTCA  | 754.233722578672 | 0.241020829815009 |
| ATGGTTTGTGAC  | 754.245225307717 | 0.228653963714075 |
| GTCACCGGACTA  | 754.26001638911  | 0.156337073995911 |
| AGCACAGAGTCA  | 754.260328819116 | 0.225912318945364 |
| ACATGACCATGA  | 754.260735677098 | 0.414824751181266 |
| GACTCAGACAAA  | 754.264284452377 | 0.468263897885281 |
| ATGACAGTGAAT  | 754.269505364149 | 0.14154653855992  |
| TGACATATCCAA  | 754.284373855263 | 0.335394612673868 |
| CGTGACCCGTCA  | 754.290222540592 | 0.315514256859484 |
| CCCGCGACTCA   | 754.290294073454 | 0.307910763573867 |
| AGTGGGTGACGC  | 754.302252295559 | 0.15807618594565  |
| ATGATGCAACGA  | 754.305892179507 | 0.404840687454396 |
| AGACTTGGTGAC  | 754.310698029749 | 0.385812730915857 |
| CGTCACGACTAA  | 754.312352666608 | 0.421994738219425 |
| TGACTTAAATCA  | 754.330789813139 | 0.331014442198453 |
| CAATACGGTGAC  | 754.332331811996 | 0.340776784165476 |
| CGGACTTGTGAC  | 754.338015265009 | 0.431427097370975 |
| ACAGTCAGCGTG  | 754.347501397601 | 0.340794852701303 |
| AGTGTACCGGAA  | 754.358188373587 | 0.262808437844496 |
| AAGAAGCATGAC  | 754.36259498095  | 0.305042082233595 |
| AGATCGTGACAC  | 754.373010779313 | 0.449636855111008 |
| TCAATAGCGTCA  | 754.378139700311 | 0.236392254219455 |

|               |                  |                   |
|---------------|------------------|-------------------|
| GCCACTGGTGAC  | 754.389724309757 | 0.280393045827431 |
| CCTGGACAGTCA  | 754.394099151202 | 0.384508410191792 |
| ATTAAGTGAGTC  | 754.394516999931 | 0.404667967747172 |
| AACTTCGTGACA  | 754.395998230675 | 0.424507334352025 |
| CGCTGTGACCGA  | 754.40455566811  | 0.283098247833578 |
| AGCGCATGTCAT  | 754.40512045875  | 0.339601274348832 |
| AAGGCGTACCC   | 754.405664246195 | 0.238627470200838 |
| ACTCATAATCAT  | 754.407774631754 | 0.504442405810247 |
| GTCACCTCGGGA  | 754.411619910271 | 0.480030024901175 |
| GAAC TTGACACA | 754.419208637714 | 0.304104653262967 |
| CGGGCTTTGTCA  | 754.423118592031 | 0.242016294917408 |
| CTACACAATGAC  | 754.423559022851 | 0.309968995520645 |
| GTGAACGACTCA  | 754.428596580035 | 0.281549853809311 |
| AAGTCACCCCTCT | 754.432243905936 | 0.267111519462408 |
| GGCTTAATGACA  | 754.437171005993 | 0.385276778378175 |
| CGCCTGTAGTCA  | 754.440060942911 | 0.343360948997102 |
| GTCACGTAGTAA  | 754.444116668245 | 0.28067179751637  |
| AGTCAGAGTAAA  | 754.445545575026 | 0.258404498449937 |
| AGTCATGGGCGG  | 754.445805946023 | 0.287883675682582 |
| CCTGCTGATTCA  | 754.450833056692 | 0.339692079223483 |
| CACAAACGTGAC  | 754.457912621138 | 0.3864394752834   |
| ACGAAGTACCC   | 754.463167143512 | 0.277758573340038 |
| CCATTCATGACA  | 754.465885151758 | 0.359527249084332 |
| ATGACACCACC   | 754.473786792064 | 0.285643504945407 |
| CGGTTATGACCC  | 754.481875783468 | 0.319203629050408 |
| GACCAGTGACAC  | 754.482458192524 | 0.248432705688553 |
| TAGCGTGTGACA  | 754.486856329977 | 0.368762975206214 |
| CGTCATGGGTGA  | 754.488481347633 | 0.290189686420051 |
| CGGTGACGTTGC  | 754.489316015964 | 0.444966376891805 |
| GTCACTCGCGAC  | 754.489817551879 | 0.293792577429711 |
| AGGGGTCATGAC  | 754.501769822239 | 0.288021934194078 |
| ATCCATAATGAC  | 754.503817269704 | 0.389326345865861 |
| GTCATAAAAGCA  | 754.512290064251 | 0.159816660282283 |
| GAATAATGACCA  | 754.52172783318  | 0.37827560232752  |
| CTCGATGTATGA  | 754.528574629363 | 0.302756401344731 |
| ACTCATCGTTAC  | 754.530567551047 | 0.347236339493193 |
| CATGTATGACCG  | 754.541244635203 | 0.24836820355067  |
| GGGGAATATGAC  | 754.549060486334 | 0.241084464750207 |
| GCTAATGTCATA  | 754.561129290065 | 0.466150317818137 |
| GGCTCCCAGTCA  | 754.56327433191  | 0.327697284303739 |
| GATTCATGAATC  | 754.574972076219 | 0.38679757126192  |
| ACGACCTGTCAC  | 754.577481125408 | 0.269758579842817 |
| CAATACATGACG  | 754.584080291182 | 0.311594967334503 |
| AACCTTGTGTCA  | 754.585621175418 | 0.373114559787025 |
| GTAATTGTGACA  | 754.600850063749 | 0.265246565171939 |
| ATGACGGTAGAA  | 754.601262366569 | 0.33755429287456  |
| AGTACACGTGTC  | 754.610816010019 | 0.109381347088827 |
| GCTACCGTCATA  | 754.618770675914 | 0.192574335149712 |
| GATAGTGCAGA   | 754.620500276122 | 0.203931138292547 |
| TCGATATCGTCA  | 754.628304747862 | 0.265528532106304 |
| CGTCACTCGATA  | 754.636111137028 | 0.318612434408455 |
| GTGTCATGGCGA  | 754.639714306664 | 0.24682156810036  |
| AGTCAGACATTG  | 754.641345241953 | 0.177572860863025 |
| CGTAAGCATGAC  | 754.643648487101 | 0.264634482884457 |

|               |                  |                   |
|---------------|------------------|-------------------|
| CGAAAGGGTGAC  | 754.64538395993  | 0.29753114340795  |
| CATTACGTATGA  | 754.655569154194 | 0.359920849998285 |
| CAATTTGTGACG  | 754.657919067536 | 0.575026383467618 |
| GGAAAGTCATCC  | 754.662592908143 | 0.258660920668093 |
| ATGAGTGAAGTC  | 754.670295185968 | 0.525445139178798 |
| CGAAACTGACTA  | 754.670395033984 | 0.339303886083552 |
| AATACGTCAACA  | 754.670915895755 | 0.344989157392771 |
| AGCATCTGACTG  | 754.680390631523 | 0.191591699403009 |
| GAAAACAATGAC  | 754.680421166128 | 0.329380993908387 |
| GCACGAGTCAAC  | 754.684876640158 | 0.170609172112633 |
| CAATCCAAGTCA  | 754.710190398695 | 0.308068714370918 |
| CTCCAATATGAC  | 754.710977823088 | 0.214184097132035 |
| AGACAAGTCATG  | 754.712135160455 | 0.160339903584358 |
| GACGTCACGATA  | 754.727342744532 | 0.404892734322718 |
| CTACCCGAGTCA  | 754.728801304884 | 0.218763646069937 |
| CACTGACTAGTC  | 754.732857375617 | 0.262448098885544 |
| AATGACAAGACC  | 754.742147065505 | 0.300073963387043 |
| ATCCGCATGACA  | 754.749282860807 | 0.328362747519055 |
| AGTATGCGTGAC  | 754.75435076287  | 0.256862790003754 |
| AAGCGTGGTCAT  | 754.755418334327 | 0.225283294902421 |
| GATCTCGTACC   | 754.757924950318 | 0.280720105476468 |
| ATTTAATGACAG  | 754.778842187474 | 0.374627535306864 |
| AGTGTAAGTCAT  | 754.781379297104 | 0.215409223318607 |
| TCTAGCATGACA  | 754.78685591511  | 0.262593281848482 |
| CCCGGATGAGCC  | 754.796988977552 | 0.604202880735145 |
| GTGACTTACCCA  | 754.804021561788 | 0.221979639936336 |
| GATACGTCAATC  | 754.812823480813 | 0.329313795417694 |
| ATAACAATGACG  | 754.813477992606 | 0.499309463991133 |
| GTCATGTTCAGA  | 754.814851923906 | 0.409167334118268 |
| CTTACATATGAC  | 754.824860549087 | 0.455269419982057 |
| CGGCTGAGTGAC  | 754.833432309606 | 0.300281583656268 |
| GTCACAGTTCAA  | 754.836454723535 | 0.387494062158875 |
| CGGGCTTATGAC  | 754.843225860227 | 0.424559601656037 |
| GCTGTAACGTCA  | 754.867328369978 | 0.332445195425467 |
| CTGTCAGAAATGA | 754.8697289975   | 0.401314991735269 |
| CGTCATTGGCAC  | 754.872176439851 | 0.293996233663375 |
| ACTCCTGACACA  | 754.878902429337 | 0.171333679452159 |
| CGTCACCGGTTT  | 754.889684225223 | 0.388589963878401 |
| GAGTAATTCGCC  | 754.896456464395 | 0.25924299911461  |
| GTAAGTGGTGAC  | 754.897224822403 | 0.384935909054011 |
| CGACGTGACAAA  | 754.907752561111 | 0.403135694861571 |
| ATGACACCCGCA  | 754.908120368083 | 0.381966480549325 |
| ATGTTTGTGACGA | 754.908642552171 | 0.30383442014063  |
| ATGAATTGCTCA  | 754.909279932852 | 0.301337770033661 |
| ATATACAGTGAC  | 754.924127431488 | 0.452557350357993 |
| GTGTCACTACCA  | 754.925451654501 | 0.292696811277137 |
| GACTTGTATACA  | 754.930560144625 | 0.269632503209676 |
| AGTCACGAGGTC  | 754.935974339867 | 0.201345339302921 |
| TCGTCACCGAGA  | 754.948748238099 | 0.31622793433097  |
| GGATGATGACCA  | 754.94933029192  | 0.2625179198875   |
| AAGAGTCTTAAC  | 754.959355404453 | 0.292523524010371 |
| GCGGACGACTCA  | 754.961259570043 | 0.380831210952812 |
| AAAGCTTGTGAT  | 754.969434657138 | 0.184135530687538 |
| ATCTTGACTGAA  | 754.980143531873 | 0.332375677022699 |

|               |                  |                    |
|---------------|------------------|--------------------|
| TGACTATGGTAA  | 754.980593833155 | 0.271713327447924  |
| ATTATTAGTGAC  | 754.990891511683 | 0.459620087045773  |
| ACGGTTTGGTCA  | 754.993996011464 | 0.326565738210065  |
| AGCGTCAATGAC  | 754.995186725939 | 0.268821685876513  |
| GTCACCGATCAA  | 754.996282820219 | 0.369310006349021  |
| ATGACGATGGCA  | 755.002106668366 | 0.243798403914614  |
| ACCCCTGACACA  | 755.007405479862 | 0.282244831900133  |
| GTCACGTA CTGA | 755.013991077769 | 0.214193427764589  |
| ATAACTTGGTCA  | 755.016533277598 | 0.337814583701886  |
| AGCGGTCATGAC  | 755.019277999794 | 0.336804593655133  |
| GAGTCAAAGTAC  | 755.0324430041   | 0.320508956628047  |
| GCTGCCGT CATA | 755.036332316731 | 0.226293411733063  |
| GTCATCTACACA  | 755.04276552285  | 0.200548959499305  |
| GACCATAAGTCA  | 755.047698984174 | 0.342548525405011  |
| AAAGTTACATCA  | 755.05253892591  | 0.270399723404445  |
| ACACTATGACCG  | 755.057753936162 | 0.243619661907823  |
| ACTGACAGATTG  | 755.062707037564 | 0.297005678395001  |
| GATGACCGAGAA  | 755.065942082653 | 0.329024188207288  |
| ACTCATAACGAG  | 755.069290486805 | 0.279322058547101  |
| CTCATATCATGA  | 755.077488249837 | 0.3728570977265    |
| AGGGCGTGAGTC  | 755.081681888278 | 0.282750514697654  |
| CGTACGATGACC  | 755.089031153738 | 0.393124947351289  |
| ATGACGTCGGTC  | 755.103301169422 | 0.320334756320033  |
| GTCATCCGCCCA  | 755.107320789202 | 0.353165961271843  |
| AGGCGGCGTCAT  | 755.126282500502 | 0.275710338190974  |
| CTCTTCAGTGAC  | 755.127318853326 | 0.297313843514589  |
| AGAGTAATTACC  | 755.127752303891 | 0.309023607507596  |
| ATGACAAGGCTA  | 755.131417794029 | 0.26411763072575   |
| CGAACTGACACA  | 755.131731378669 | 0.413923671873933  |
| GCTACGCATGAC  | 755.137726719646 | 0.295653420355962  |
| TGCAATTACGCA  | 755.14271474978  | 0.26635428265194   |
| GATAGGTCACAC  | 755.145681440346 | 0.321294272897613  |
| GAGTAAGGGTCA  | 755.170822770274 | 0.276256132284827  |
| ACCCTCTGTCAT  | 755.17617130991  | 0.161108920292229  |
| TAGTTGACACAA  | 755.176792480678 | 0.240536081266107  |
| GAAACAGTG TCA | 755.185181035906 | 0.293189547007635  |
| CAGCATTGCTCA  | 755.188841678657 | 0.387610257459895  |
| CGTCACGTAAGC  | 755.18906251525  | 0.275260725316078  |
| CTTGTAAGAGTC  | 755.192791665719 | 0.349805527098814  |
| ATTACTGAGTCG  | 755.19746133479  | 0.30614383729568   |
| ATGACGGGCTCA  | 755.198300262205 | 0.218411686776831  |
| GAAGATTCATAA  | 755.198538631526 | 0.256656855872754  |
| GTCACGCACTCA  | 755.201331419106 | 0.34051258778862   |
| AGAGGGTGTGAC  | 755.206544768965 | 0.0543191939511556 |
| AGATGACCGAAA  | 755.210175078891 | 0.339809352537101  |
| ACGTCTCGTCAT  | 755.212611793603 | 0.227908226208189  |
| GGGTCATAACTA  | 755.213676030605 | 0.250740407778538  |
| GACCTCGTCACC  | 755.214477470739 | 0.15990396332674   |
| CGTGT TGTGAC  | 755.2205725119   | 0.346905989206247  |
| AGGCGTGACTGC  | 755.222169515255 | 0.243115453979955  |
| TACGTAATATGA  | 755.222720575189 | 0.286108707520761  |
| GTCACCCATAAA  | 755.226742695833 | 0.260720925376447  |
| CTCATCCATGAC  | 755.233550085985 | 0.366941356263137  |
| ATGGATTGTGAC  | 755.234509314817 | 0.268614336528839  |

|               |                  |                   |
|---------------|------------------|-------------------|
| CATGCGGTGACA  | 755.254682456964 | 0.424759795245434 |
| GAAC TGCTCATA | 755.258612530342 | 0.317362132108399 |
| GTCATCACCACA  | 755.263944581966 | 0.381353003247504 |
| AATTTGACTGAA  | 755.27801145709  | 0.329939846052819 |
| TACAAACTGTCA  | 755.283821249542 | 0.323880050760933 |
| GGTCATAACATA  | 755.28882353625  | 0.475199609495801 |
| CGTCATGATTCC  | 755.291405306576 | 0.304614382085977 |
| ACACCATGACGC  | 755.297022417395 | 0.263584342225121 |
| ACCTGTGGTGAC  | 755.298839509304 | 0.284745815883983 |
| CGATACAGTCAG  | 755.302513569769 | 0.313894823716974 |
| GTCACGCAACAC  | 755.306017732446 | 0.302548608148561 |
| ATGACGCGCGAG  | 755.317303028182 | 0.373853466755541 |
| ACCTCTGGTGAC  | 755.321466812957 | 0.170254947101785 |
| GAAATCGGTGAC  | 755.325149332809 | 0.332062717846562 |
| ATATCGTGACAT  | 755.328076432851 | 0.182196780046668 |
| CTGATGATTCTGA | 755.330358526273 | 0.333836218274055 |
| TATGATGTATCA  | 755.333623297906 | 0.407727183888221 |
| AATGCTTTGTCA  | 755.334597848173 | 0.297456916149107 |
| ATTACACAATCA  | 755.337317618245 | 0.229140122718634 |
| CAAGGTGGTGAC  | 755.343774436825 | 0.350938055374369 |
| CGCCCTGTGACG  | 755.343792364872 | 0.32585189621189  |
| CTGAATCAGAGC  | 755.359684679655 | 0.364785556100791 |
| CCGTGGGTGACA  | 755.363907714612 | 0.347983231445479 |
| GACGTCACATAC  | 755.367377479149 | 0.378028217334623 |
| ATGACGAGGCCG  | 755.368991556566 | 0.252213958873294 |
| ACTAAGGTGACA  | 755.369232272953 | 0.447567173703568 |
| ATTAGTCGGCAG  | 755.372396503333 | 0.251372246712478 |
| GGAAATCCAGTCA | 755.375461091576 | 0.354961834650737 |
| AGTCACGGATCA  | 755.377823827401 | 0.260443298288007 |
| AAGGACGACTCA  | 755.387384020069 | 0.262407208502372 |
| AATGAGTAGGTC  | 755.39059255912  | 0.203507073441984 |
| GGGTCATAGCCA  | 755.404303134271 | 0.348441060482403 |
| AAGTGTGAGTAC  | 755.40496942447  | 0.17387372727785  |
| CATGACAATATA  | 755.413131197997 | 0.312043851425169 |
| GATGAGCCAGCC  | 755.414589193142 | 0.35044350298917  |
| GATGATTCTTAC  | 755.417619115067 | 0.264677673198522 |
| ACAATTA CTGAA | 755.417803994579 | 0.384418386420861 |
| CGTGACAAACAA  | 755.419724382387 | 0.359902558312659 |
| ACGTCACATGTG  | 755.431313940435 | 0.292040808469485 |
| TACGTGGTCACA  | 755.431615255279 | 0.216932495079977 |
| GAGTCAGGTGAA  | 755.436142594466 | 0.220601567724667 |
| GTCACATTTGGCA | 755.436346494079 | 0.370451655552115 |
| ACTCATACGATA  | 755.439616641156 | 0.353638037995454 |
| CGCCAGTGTGAC  | 755.447955934724 | 0.321298935864551 |
| CGAGCGGAGTCA  | 755.455749910493 | 0.157937893573582 |
| CTCTAGGCTGAC  | 755.456345526532 | 0.424780262392784 |
| ATTACTAGTGAC  | 755.45759369186  | 0.353289184227976 |
| GTCACAGCAGAA  | 755.459683781369 | 0.259197396649506 |
| GTCATGTGCCAA  | 755.464195989347 | 0.274937944868213 |
| AACTGTGTCAAT  | 755.466031428491 | 0.223520216637417 |
| AAGTTCCGGTCAT | 755.468146807707 | 0.273087597670273 |
| CCCTTTGTGACA  | 755.473227595535 | 0.312897016932116 |
| ATGGCTGATGAC  | 755.474333989502 | 0.29908387540647  |
| AGTCAGAAGTAG  | 755.474822091041 | 0.183144242009008 |

|              |                  |                   |
|--------------|------------------|-------------------|
| CTAGTCACGGGA | 755.482679307922 | 0.276866733450019 |
| ACGACCATGACG | 755.485655363914 | 0.298759050621828 |
| CTTGGTATGACC | 755.486962511083 | 0.447573607923698 |
| GTCATTCCAATA | 755.491227386703 | 0.34747277240032  |
| GTGACGTGCGCA | 755.494165061313 | 0.294625445705885 |
| CTGACGAAGTCA | 755.49794337917  | 0.299206007147401 |
| TGCGTCGCACA  | 755.498652385602 | 0.30715537315321  |
| AGATACGTAATC | 755.498798098355 | 0.348932247512771 |
| ACCTGGTGACGT | 755.508949629179 | 0.267714987995437 |
| CGTAAGAGTGAC | 755.516319710581 | 0.294554654474145 |
| CAGTGGATGACC | 755.516495952913 | 0.422358609703342 |
| GTCACACTCAAA | 755.517721377364 | 0.317333165713051 |
| AGTCAGTCTAAT | 755.521108197282 | 0.256996125995533 |
| CCGTATAATGAC | 755.525456912096 | 0.306152836755687 |
| CTAGCGGTGACA | 755.537150750428 | 0.249163611846117 |
| ACGTTACATGAC | 755.538649640309 | 0.246023010177542 |
| CGGACTGTCATA | 755.53899097942  | 0.181106180645157 |
| TTAAGTGACCAA | 755.53974908552  | 0.300479524241235 |
| AAGATTAGTCCT | 755.540135207728 | 0.248353872114239 |
| TGACATATTCCA | 755.544287035494 | 0.490607798961131 |
| AACAGTTGGTCA | 755.545898936584 | 0.395285496977676 |
| CACGTATGATTC | 755.546951963841 | 0.304615162052122 |
| ACCAGCGACTCA | 755.547430360963 | 0.343124690674719 |
| CGTCATGATGAG | 755.552564006696 | 0.322001199040904 |
| AAGCGTGACGCT | 755.555530526026 | 0.40386236213317  |
| GACCTCGTCACA | 755.561602977551 | 0.30302732860307  |
| GAGAACGACTCA | 755.564923769478 | 0.367021033323322 |
| ATAAGACGCATA | 755.570862219023 | 0.223791506309551 |
| AGACTCGTCAGA | 755.576988520359 | 0.359921953236485 |
| CGTCACGGAAAA | 755.585320645139 | 0.409197243620331 |
| CCCTTAAATGAC | 755.591074618068 | 0.233372121367115 |
| CGGTAAATGACG | 755.604528423159 | 0.263811415914953 |
| CGTCATCCCTA  | 755.604587887852 | 0.145468370783858 |
| TGAGTCTAGACA | 755.606955746825 | 0.314193165311585 |
| CGTCACAGGTGA | 755.611560680729 | 0.34227178637878  |
| GTTCAGATGACA | 755.613135398144 | 0.31164237572283  |
| ACCTGACTGTGA | 755.613757632109 | 0.190659106513602 |
| ACTCACTGACTA | 755.617320887419 | 0.115921506363376 |
| GTCACTAATGCA | 755.620133059673 | 0.408120178882027 |
| ATAAGATTACTC | 755.635154712037 | 0.404682805466237 |
| ACTAAACATGAC | 755.636672246214 | 0.34926577185875  |
| ACAGCGTCACTG | 755.637278413129 | 0.342980171500259 |
| CCCAGCATGACA | 755.641959538676 | 0.346742919532515 |
| AAAGCTTACTCA | 755.652326841199 | 0.22028892212644  |
| GCAGAGTAGTCA | 755.654033166711 | 0.233413355913383 |
| TAGTATCACTCA | 755.655745393139 | 0.18053683080138  |
| ACTCATTCTTAA | 755.663698858282 | 0.317841865620617 |
| GTGACGCTGAAA | 755.665194968337 | 0.339224140364991 |
| TCTTGCTCACCA | 755.675661221233 | 0.171167891476139 |
| CCAAATGGCTCA | 755.67901620778  | 0.173630513512511 |
| TGACCCGTCACA | 755.681181587491 | 0.171876966060428 |
| ATGACAATCTGA | 755.689470788321 | 0.355590065237827 |
| GAACCGTAGTCA | 755.705031014924 | 0.274363943236618 |
| GTCATTAGAAGA | 755.717929328304 | 0.193687570389133 |

|              |                  |                    |
|--------------|------------------|--------------------|
| ACAAGTGACGAA | 755.719442199072 | 0.223664500523899  |
| TCACATTAGTGA | 755.729829042073 | 0.372871788315278  |
| CAAGTCAATGAC | 755.736277326482 | 0.267096075813866  |
| ATGACGACTGAC | 755.741743872372 | 0.0899515766039182 |
| AAGACACGTGAC | 755.745662160064 | 0.234884328403776  |
| CGCAACGACTCA | 755.755158830596 | 0.380344825496732  |
| GTCACACCGGGA | 755.757903232499 | 0.189776501260752  |
| TGGTGTCTGACA | 755.760808702325 | 0.42721899264612   |
| ACTCATAGAGGA | 755.76663740483  | 0.383025988070946  |
| AGAGTAATTGTC | 755.770762292065 | 0.303209559685301  |
| CCACATCATGAC | 755.770841865947 | 0.367253988327016  |
| AGAGGATGACCA | 755.771571058816 | 0.271880118000829  |
| ATCCTATGTGAC | 755.773552699475 | 0.488168411367887  |
| ATGACAGCGTTC | 755.782164717663 | 0.330401707870539  |
| AATGAGTGAATA | 755.799323837889 | 0.27449218811149   |
| CCTGGCATGACA | 755.801891802979 | 0.367971356207832  |
| ACTTACAATGAC | 755.806785226041 | 0.367153571807084  |
| GTGTCAGATCAA | 755.813353113523 | 0.393515697946419  |
| GAATGACCACTC | 755.819562381815 | 0.286472536764394  |
| AGTCACTTGTGC | 755.820957735643 | 0.34819312251246   |
| ATGCGACATGAC | 755.821573832921 | 0.488607174652288  |
| ACTCATATCTGA | 755.823315859202 | 0.366991619658513  |
| ATGTGTCCGTCA | 755.834060191066 | 0.320548956786744  |
| GGAAGTGATGAC | 755.842596699241 | 0.146898731031338  |
| TACTCATTATGA | 755.861245418333 | 0.327960847430527  |
| AGTGTGAGCAAC | 755.861553928545 | 0.342954891451412  |
| GTGACAGCTACA | 755.864445370915 | 0.337095640328345  |
| ATGACCGAGAAT | 755.868050020398 | 0.291594125794135  |
| CACTAGTGACAA | 755.868751434908 | 0.329498442515835  |
| CACGTCAGAGCA | 755.879592338301 | 0.275742060808565  |
| CGTCACCGTGAA | 755.881126222585 | 0.383566330136805  |
| GCGAACCTGTCA | 755.886939003869 | 0.381170403235863  |
| GTCACATGTGCA | 755.889571636039 | 0.274693221839056  |
| ATGAGGTCACTC | 755.89774133618  | 0.258596582151606  |
| AGAGTTGTCAAC | 755.901735094392 | 0.209027477600488  |
| TGACTAGAGACA | 755.902847932038 | 0.37072388731036   |
| GTCATACGGCAA | 755.906029884744 | 0.439130037082832  |
| GTCACTAAATTA | 755.906181564555 | 0.270612918654351  |
| ACTTATTAGTCT | 755.906387715726 | 0.243281040013049  |
| GTCTTAGACTCA | 755.907001379388 | 0.221866974681164  |
| AAGGTTTGTAC  | 755.913091235227 | 0.253535995080738  |
| CCCGTAATGACA | 755.918263651902 | 0.556367460410822  |
| GTCACCTGCTTA | 755.931997056225 | 0.342767131342238  |
| ATTACACACAAA | 755.932544916747 | 0.424994982520108  |
| ATGACGCTCTCG | 755.932764431458 | 0.233943301943308  |
| AATCTAATGTCA | 755.936210494286 | 0.45416860102538   |
| CTTAGATGACCA | 755.945077938461 | 0.352135131594663  |
| CCACATGAGCAA | 755.95147651661  | 0.247848922217384  |
| TGCGATTACGCA | 755.952755322382 | 0.342600478086451  |
| CCTCAAAATGAC | 755.953085056423 | 0.460221917149173  |
| TGTCAGTGTAAA | 755.954177185278 | 0.228420426360318  |
| GTAAGTGACCAA | 755.962122052928 | 0.404316220373613  |
| AGAGTAATGTCA | 755.963300312019 | 0.323601571875968  |
| ATGACATCTTGC | 755.964935708768 | 0.244242336695293  |

|               |                  |                    |
|---------------|------------------|--------------------|
| AACAGTCAACGG  | 755.966053766307 | 0.0562851485807162 |
| CGACTCAGAGTA  | 755.966936536212 | 0.230201129504317  |
| CGTCATTGCGCC  | 755.970907587122 | 0.301650406791076  |
| CTCCAGTGTGAC  | 755.973722469689 | 0.307298490047624  |
| AGTACTAATCAT  | 755.991774218813 | 0.261250954915341  |
| ATGACAATAGCA  | 755.999603208261 | 0.247091215702884  |
| CGTCATCTCTCC  | 756.000965152426 | 0.146773572357552  |
| AGCTACAATGAC  | 756.003419911637 | 0.343228453059728  |
| TGCTGACTGCAA  | 756.00409858184  | 0.293589663997832  |
| ATGACAGTGCGG  | 756.011811302161 | 0.239191633242808  |
| CAAATCATGTCA  | 756.025334115507 | 0.273444647588599  |
| TGACTTACTCAA  | 756.027420547053 | 0.263728275264479  |
| CGCGTCACGTGA  | 756.028030806112 | 0.379762579600589  |
| TCAATTGAATCA  | 756.032926241815 | 0.339018884934815  |
| GTC AACCTGTCA | 756.037250682349 | 0.195942493019237  |
| CTAGAGATGACA  | 756.038761804921 | 0.365077788305509  |
| ACGTCACATGGG  | 756.04383626399  | 0.293337363735135  |
| AGCGTTCGTCAT  | 756.047089018178 | 0.225939660364615  |
| GGATGCGACTCA  | 756.052956960074 | 0.322699893313436  |
| AGTGTCAGACTG  | 756.056436785028 | 0.183405675363277  |
| CAGCCGATGAC   | 756.056876264303 | 0.438861514967508  |
| ACAACAACGTCA  | 756.059489412206 | 0.329834167369649  |
| GTCACAGCGGCA  | 756.072657529933 | 0.28833709800016   |
| ACTGATGGCTCA  | 756.078480037389 | 0.230942401988983  |
| ATGACAATAAAC  | 756.079506275899 | 0.286904141345662  |
| CGGGATCTGTCA  | 756.079718814018 | 0.313553722240124  |
| AACAAGTGACGT  | 756.084684555312 | 0.312593388720409  |
| CGTCACACGGTA  | 756.091579356663 | 0.200398870015697  |
| AGGCGTGATGAC  | 756.091946669644 | 0.161647401708733  |
| GTTCTCAGTCA   | 756.093243822231 | 0.199209642141159  |
| AAGTGCGGTGAC  | 756.094357378736 | 0.267246902380668  |
| GCGTCACCAAGC  | 756.097528342816 | 0.359564787337934  |
| CGGAATTGCTCA  | 756.101916151525 | 0.382142097216407  |
| GTCACGGCTGCA  | 756.105108512221 | 0.383070742414236  |
| GTCATCAAACAC  | 756.108804446954 | 0.206412207350839  |
| GTCACAGGAAAA  | 756.114762186772 | 0.133488780206076  |
| TAAATGTGACAA  | 756.127993768922 | 0.464869375653778  |
| ATTATTGAATCA  | 756.134974266643 | 0.443514670396045  |
| AAGTTGACACAC  | 756.135556709395 | 0.190292678061721  |
| CTAAGCGACTCA  | 756.13677013965  | 0.357975814006141  |
| CCAGATGGTGAC  | 756.140439285362 | 0.287693077409885  |
| GCGTCACCTCC   | 756.143919350495 | 0.184268263159486  |
| GTCATTTCTATA  | 756.15213432782  | 0.247352703932934  |
| CCGAATCATGAC  | 756.155001685789 | 0.387664835014607  |
| ACTGTTCTGTGAC | 756.178954191901 | 0.203199143555132  |
| TACGCCAGTCA   | 756.182474698876 | 0.173868311887983  |
| AGTACCGGTGAC  | 756.184003158262 | 0.322861512058735  |
| AGTCCGGGTGAC  | 756.185877860396 | 0.334949415272406  |
| CAAGATGTGACG  | 756.192138477878 | 0.415104685032794  |
| CCGTACCATGAC  | 756.195211265337 | 0.270994904669294  |
| AAGAGTGACAAA  | 756.208710096851 | 0.187309786700532  |
| AAATTTGAATCA  | 756.21287495568  | 0.384595410170376  |
| GACTCACTAAGC  | 756.215916790239 | 0.288420164351414  |
| GCGTCATGTTCA  | 756.224461617069 | 0.281009484904033  |



|              |                  |                   |
|--------------|------------------|-------------------|
| CTTTGTTATGAC | 756.225045889515 | 0.319002712203936 |
| CTTCATAATGAC | 756.227543027744 | 0.293870940104885 |
| CCTAGTTGTGAC | 756.229894207545 | 0.396321173239625 |
| GACTGACTTAAC | 756.2379110996   | 0.3015886183978   |
| TACATTATGTCA | 756.240388699541 | 0.354307289851432 |
| CAGTGACATGAC | 756.24425107839  | 0.256815622355064 |
| CCTATTAAGTCA | 756.250517919061 | 0.305761315496086 |
| TCGTAATAATCA | 756.257626777768 | 0.234478578579285 |
| GCGATATCGTCA | 756.259656908577 | 0.287958273071352 |
| GCCTAGAATGAC | 756.265799208341 | 0.347823962525167 |
| ATGGCGAATGAC | 756.273929822508 | 0.337219824858736 |
| TACTGCGACTCA | 756.277899210833 | 0.311705710771538 |
| AGTCAGCATGGC | 756.279551611791 | 0.45313390712724  |
| GTCACTGGGCAC | 756.306402512612 | 0.268483577780192 |
| AATACGTAATAT | 756.310159720182 | 0.40894043707971  |
| GTCACAGCGGA  | 756.321096314244 | 0.486323399813847 |
| CGTCACTAAATA | 756.321703407713 | 0.272196599092275 |
| ATCCGTGACAAA | 756.323145375625 | 0.405990903451151 |
| ATGACAGACTAC | 756.344751360695 | 0.316329601370959 |
| AACTATGACCTG | 756.359489487578 | 0.241343578554771 |
| ACTCAGTGTAC  | 756.362119992633 | 0.188908250054142 |
| GAGTCAAGGCCA | 756.362692837051 | 0.367940315697471 |
| AAGCTGTACCC  | 756.365276821531 | 0.37025324131539  |
| CAGTTTTGTGAC | 756.368917727979 | 0.380885999293289 |
| AAATTAGTACTA | 756.372741821935 | 0.406497936160461 |
| GTGACGTTATGA | 756.374494478549 | 0.262270977977208 |
| CGTCACCAAGTA | 756.37847258197  | 0.33398386287247  |
| ACTCATAATGAG | 756.390495382753 | 0.266235524326285 |
| GTCGCTGTGTCA | 756.390524004166 | 0.354929873138291 |
| GAATCATCGGAC | 756.395210210987 | 0.229871528183512 |
| TGACACCACTAA | 756.396557604049 | 0.375892872828034 |
| ATTAGTCCTCAG | 756.398273316061 | 0.445928047439874 |
| CGATGTGTAACA | 756.402555865596 | 0.399874048254906 |
| GATACTTTGTCA | 756.403868770183 | 0.381077081971324 |
| GTGACAAGTTGA | 756.404259202247 | 0.319567366958917 |
| TGAACTTCGTCA | 756.405298607446 | 0.436135190006717 |
| GGCTGACACAGA | 756.411542980419 | 0.291569563109323 |
| TACTAATGGTCA | 756.412794747738 | 0.272808985068947 |
| CATGCGTGAGTC | 756.437670306706 | 0.200803077052209 |
| AAGTTGATGACG | 756.439124978191 | 0.188369920271752 |
| GGATGATGTGAC | 756.441550099509 | 0.305129687811352 |
| CTGCATATGTCA | 756.452239954832 | 0.236088322398692 |
| CATCCGAGTCAG | 756.452765972382 | 0.36978388278573  |
| CTGACATCGTCA | 756.468805397407 | 0.352989040484008 |
| TCCGATGTGACA | 756.469550785478 | 0.311069406141342 |
| GGGTATCGTCAC | 756.478302048851 | 0.250352225123997 |
| AATTTAATGACA | 756.481924094869 | 0.302375646287233 |
| GTCACTTTGAAC | 756.505258319977 | 0.295630454356658 |
| AATGAATGACCC | 756.507844531294 | 0.312898386172257 |
| ACGGCTGATTCA | 756.512825446622 | 0.274073666629441 |
| ACGTTGACACAA | 756.521021808819 | 0.28930582729297  |
| CGCCATTGTGAC | 756.526438977833 | 0.269203084612782 |
| AAATTGACTGTT | 756.52821552645  | 0.263674167261231 |
| CGTCATTACGAC | 756.530135367843 | 0.263951754230054 |

|               |                   |                   |
|---------------|-------------------|-------------------|
| TCACATGTGTAA  | 756.541187361128  | 0.325277767420535 |
| GTCATTAACATA  | 756.542204399445  | 0.185231048483363 |
| AGGGTGTGTGAC  | 756.542875185228  | 0.187189870469422 |
| ATGACCTGGCAT  | 756.557271840559  | 0.338796149786634 |
| ACTCATCCGGAG  | 756.563893121406  | 0.222117144174535 |
| GCGTGAGCCACA  | 756.565091649771  | 0.335265912667665 |
| ACGCTAGCGTCA  | 756.571117440794  | 0.374632168971286 |
| GGTCATCAATAC  | 756.575966939864  | 0.366780572221318 |
| GTCATCCCCTA   | 756.582163768357  | 0.210635409588533 |
| GTCATACGGCTA  | 756.588868370914  | 0.176534135761004 |
| CGTAGCAGTCAG  | 756.589766311862  | 0.261387430976245 |
| GCGGAGGATGAC  | 756.597229441297  | 0.200833879125779 |
| TGTAGTGACCAA  | 756.599166722078  | 0.25099519637457  |
| ATAACCATGTCA  | 756.637170455374  | 0.334027654843288 |
| AGTTAAGCGTCA  | 756.645141806616  | 0.272869561399389 |
| TGACGAGTAACA  | 756.648616792125  | 0.262880674401543 |
| AGTAATGGGTCA  | 756.661816765871  | 0.14858193451434  |
| CGCTTACGTGAC  | 756.692991920469  | 0.385234038072693 |
| CAATATGTCAGA  | 756.696928894835  | 0.210078441506742 |
| GTTGCTCCGTCA  | 756.697622829034  | 0.300849245959153 |
| GCTTCTTATGAC  | 756.698776860599  | 0.241254854613003 |
| AGTCAAAGTCAC  | 756.707009579376  | 0.214221673125898 |
| ATGGGAAATGAC  | 756.707430629694  | 0.311309892260524 |
| TAAGTTGAGTAA  | 756.707946051542  | 0.344580882017319 |
| CTAATTAGTGAC  | 756.710382957515  | 0.231171912662977 |
| TGACGTGCACAA  | 756.712794376528  | 0.389398097978495 |
| CGAAAAGTGAC   | 756.717568892407  | 0.349742691490637 |
| TAGGTCATACAA  | 756.718098694102  | 0.204016564884114 |
| AACGCATAGTCA  | 756.719501922633  | 0.316193321734426 |
| CAGGCGAATGAC  | 756.719583963406  | 0.331887872467466 |
| CGTCACCGCGTA  | 756.723009684066  | 0.170754106828448 |
| TACCCCGTCATA  | 756.727339989821  | 0.17447138827525  |
| TGAGTCGAGGAA  | 756.731205288536  | 0.301008230436414 |
| GACTCAGCCACC  | 756.743913001078  | 0.305160779157144 |
| ATGTGACGCCAC  | 756.748607400739  | 0.300273878626452 |
| GCTTATGGTGAC  | 756.75024420587   | 0.34841588202098  |
| AAACATGACGTC  | 756.750577956014  | 0.165093099626516 |
| CATCCGGTCATA  | 756.751217614476  | 0.155565379530007 |
| ATGGTGATACAT  | 756.751422722042  | 0.319876847418272 |
| ATGATGTGGTCA  | 756.753481507183  | 0.157379732367516 |
| TGATGCATCACA  | 756.753691857508  | 0.348794151435397 |
| GTCATTGGA AAC | 756.75942430252   | 0.329697216487204 |
| CAGGATTACGCA  | 756.768103233909  | 0.256318958440485 |
| ATCCAGGAGTCA  | 756.775181947515  | 0.416172613489696 |
| TGACGCGTTGCA  | 756.779573979537  | 0.452898877014951 |
| GCCACTGAATCA  | 756.780717075232  | 0.362996880204486 |
| CACTCGAAGTCA  | 756.783689416175  | 0.274749893723673 |
| GTCACCGCGAAC  | 756.788799861199  | 0.344253837124483 |
| GTCATGCACGCA  | 756.7902220282545 | 0.486684720596653 |
| GCGTCATGCGAC  | 756.793036946569  | 0.346685090094733 |
| ATGAGCCAGCCG  | 756.811407287377  | 0.323177458514243 |
| CGTACCATAGA   | 756.828436881088  | 0.261536012858225 |
| AAGTCACTTCGT  | 756.828894080009  | 0.275349292264941 |
| AACGTCTGTCAT  | 756.833261812889  | 0.309878387613811 |

|              |                  |                   |
|--------------|------------------|-------------------|
| ATGACAACGCCA | 756.83494256804  | 0.337878650277891 |
| TCGTCACTGACA | 756.842688114894 | 0.239673887150864 |
| GAGTCAGGCGGC | 756.844264032111 | 0.307641516694963 |
| AGCCAACTCATC | 756.846040277238 | 0.184832763343823 |
| ACTAATTCTGAC | 756.846736479085 | 0.16871277388048  |
| CGTCATTGCTTA | 756.847363802416 | 0.266017240746379 |
| ACGTCACCCAC  | 756.85690842749  | 0.269934503104136 |
| CCCACTGTGACA | 756.859584005574 | 0.287991958284011 |
| ATCATTGAATCA | 756.863864757864 | 0.275748281768103 |
| ACTTCAGTGACA | 756.869281846082 | 0.355223539959354 |
| ATTGTCACGTGA | 756.871339227207 | 0.452535198750762 |
| CTGACTCGCCTA | 756.882786138481 | 0.202253223867362 |
| GTCACCTCGATA | 756.886402248996 | 0.45505855476066  |
| GAGACGTCACCC | 756.887133346716 | 0.356467553966865 |
| CGACTAATTTTC | 756.887181554166 | 0.274409328626461 |
| GTCATCTGCGCA | 756.894534594069 | 0.194648804227081 |
| GTCACCTTCGTA | 756.897598661932 | 0.310163898373617 |
| ACGTGTCAGCAT | 756.902505389734 | 0.332496416484085 |
| GTCACGGCAGAA | 756.922926231129 | 0.58832562239458  |
| TCACAGTTGACA | 756.925411691162 | 0.282050147449133 |
| ATGACAAGCATA | 756.925459685659 | 0.286694367007091 |
| GTCATTCTGCCA | 756.932628025084 | 0.37454088836776  |
| AGACTGACGTAC | 756.934824731236 | 0.575028462674022 |
| AATGTTGAGTAA | 756.937101140069 | 0.227772632292201 |
| GCAGCTCATGAC | 756.938608391498 | 0.466734516900954 |
| GTCATTCGAGGA | 756.940222989975 | 0.202718547051385 |
| GTCATCCAGCCA | 756.945357085418 | 0.260406889620016 |
| GGACTTAATGAC | 756.945720338189 | 0.302787517102242 |
| GTCTGACCCACA | 756.948634055574 | 0.223062118862324 |
| AAATCTGTCAAC | 756.954171895455 | 0.216319145265292 |
| ACGTCTCTGACT | 756.957259333003 | 0.225424671595695 |
| GTCACCCCTATA | 756.96149349643  | 0.292831883932787 |
| ACTCATACAATC | 756.966969348763 | 0.259256135014487 |
| ACATTGACTGAA | 756.967908295275 | 0.183281304702142 |
| AGAAATTGTGAC | 756.968110204929 | 0.321421739454234 |
| CTCTTTTCGTCA | 756.977741155215 | 0.257776174848541 |
| GCGTCACCAGAA | 756.986909154327 | 0.296401956040655 |
| TCCGACTGGTCA | 756.999358086796 | 0.294996079774065 |
| GACGAATGACCA | 757.000677736791 | 0.268172398051669 |
| CCTGGGGACTCA | 757.000748442237 | 0.290371724955443 |
| GCCCCTTGTGAC | 757.007154646098 | 0.371928869439657 |
| GTTTAATCGTCA | 757.007884554664 | 0.445732266774288 |
| ACTCATACCTAC | 757.008422818365 | 0.20847072594209  |
| ACGGTGATGTCA | 757.009608189257 | 0.299379021785192 |
| GACTGCCGTGAC | 757.020929415765 | 0.311988375704775 |
| CCGTCATCTAAA | 757.022949276264 | 0.104903356672016 |
| AATGACAAGACA | 757.0252316951   | 0.280310821182168 |
| AGTGCCTAATCA | 757.028975907279 | 0.34789114165328  |
| GTAATGGTGACA | 757.031158184536 | 0.206451880735732 |
| ATGACTTCGTAG | 757.0409036112   | 0.323001336922129 |
| ATGACAGCGCCG | 757.042809152148 | 0.355886171964212 |
| ACTAATCGAGTC | 757.044768578295 | 0.453904968349643 |
| GTCACGACGTGA | 757.049139187811 | 0.535788258246347 |
| TATGACAGTCCA | 757.051922306036 | 0.148617570345389 |

|              |                  |                   |
|--------------|------------------|-------------------|
| AGGAGGCGTCAT | 757.056942950713 | 0.184066376585339 |
| GATGACATTAAC | 757.057920213762 | 0.321065070512706 |
| CGAATAGTGTCA | 757.066646771012 | 0.291633303126236 |
| CCGTCACCGTCA | 757.069282786501 | 0.283258310018756 |
| AGACCAACTCAT | 757.070093291502 | 0.150514606760836 |
| CGTCATGCAGGC | 757.076765931518 | 0.328504287696732 |
| CACCAATGAGTA | 757.078996554079 | 0.294467369621533 |
| TAACACCAGTCA | 757.088954292058 | 0.262399729794156 |
| AGTCAGAATATG | 757.09050345566  | 0.368538325393405 |
| AATGAGCTGTTC | 757.093273384246 | 0.363706124244864 |
| CTTATGGTGACA | 757.094316717724 | 0.41026942736349  |
| GCACATACGTCA | 757.100609881355 | 0.292524979026338 |
| ACGCTAATTAGT | 757.108359425689 | 0.455481497462353 |
| GCAATTGACTGA | 757.112632471787 | 0.472280788817316 |
| ACGAACTCTGAC | 757.11363628203  | 0.400405733933042 |
| GGACCTCGTCAC | 757.114951391825 | 0.3484331354142   |
| TAGCGGTGACCA | 757.121994008021 | 0.173386429110992 |
| AATCTATTGACT | 757.124316423037 | 0.347189639620131 |
| CGCCCAATGACA | 757.131559650457 | 0.243517771279103 |
| AGTATTGACACA | 757.134356332648 | 0.35985844040018  |
| ACACATCACTCA | 757.135866882462 | 0.171296414111081 |
| CGGAGCGGTGAC | 757.138194956743 | 0.260929805255733 |
| CTACCTGTCA   | 757.155884320984 | 0.166619181462889 |
| GATTAGTCGCC  | 757.16469238997  | 0.347828421483733 |
| TCCGCAGACTCA | 757.166670949138 | 0.203565925510438 |
| TCGTCGCGGTCA | 757.166851834657 | 0.234781119508533 |
| ACGTGACGCTGC | 757.175340128475 | 0.347643636380219 |
| AACCCGATGAGT | 757.176279622608 | 0.268194943958438 |
| TCATCTGACGGA | 757.179316534753 | 0.382033333209087 |
| GATCCTGCGTCA | 757.181564777038 | 0.357699589850694 |
| ACCCATGTGACA | 757.188290659878 | 0.353146724252734 |
| GGTACTCTTAA  | 757.194826946984 | 0.415298466002471 |
| GACTCGACTAAA | 757.195308531053 | 0.309113363727468 |
| CTAAGACTGATC | 757.195843406456 | 0.134542497262402 |
| TGCCGCATGACA | 757.198826235176 | 0.184783924205367 |
| CCTATATGACCA | 757.20756761596  | 0.207570354730306 |
| GGACACGTGTAC | 757.210645704525 | 0.251460702818182 |
| AAACCAGGTGAC | 757.213029695265 | 0.208242284480319 |
| ATGTATATGACC | 757.215976054988 | 0.310149448624692 |
| AAAATTCTGACT | 757.218730199925 | 0.171142525983928 |
| GAATTGTGACGA | 757.223185068276 | 0.264663479434058 |
| ACTGATGACGGC | 757.225660106252 | 0.331951435089941 |
| GTGCAGGAGTCA | 757.227211117194 | 0.124109593366691 |
| TCCAATGTGACA | 757.230678030821 | 0.315797482908267 |
| GATGTCTCACCA | 757.241353688893 | 0.290866417497603 |
| AAAGGAGAGTCA | 757.244488079328 | 0.252303734567206 |
| GCATCAAGTGAC | 757.250553565659 | 0.532995443149698 |
| CGCGACTGTGAC | 757.254716887525 | 0.354041023831979 |
| AATATTGATTCA | 757.256453433257 | 0.598102217688052 |
| AGTCACGGCGAA | 757.263999473428 | 0.257656997012341 |
| CTAGAAGGTGAC | 757.268622501395 | 0.363256615435012 |
| TATCATATGTCA | 757.269308618442 | 0.317170572451712 |
| ACATACGTAATA | 757.272235800011 | 0.319608076121109 |
| CAATGCTGTAC  | 757.274177382477 | 0.336327461386706 |

|               |                  |                    |
|---------------|------------------|--------------------|
| CGCTAGAATGAC  | 757.283728368035 | 0.235129573318108  |
| ATGTAATTGTCA  | 757.285467817282 | 0.41042847197889   |
| CCTAGTACGTCA  | 757.306823569375 | 0.381762873580712  |
| GTCATTCCTGTA  | 757.311203359846 | 0.377779163959012  |
| CTCTATGATGAC  | 757.331782675699 | 0.242705424843801  |
| AGACTCACGACA  | 757.333252141564 | 0.186924572683908  |
| AACTTTTCGTCA  | 757.353381200384 | 0.356642762435956  |
| GGAATGATGACC  | 757.359420055813 | 0.510700318019863  |
| TGACTATCAGCA  | 757.370065341816 | 0.38603276135413   |
| ACTATGTAATGA  | 757.371352390216 | 0.597632237614382  |
| GTGAACTTGTCA  | 757.375738636373 | 0.312658890319417  |
| CGTCATTTCTAC  | 757.377572748487 | 0.233237926356918  |
| CCCGGATTAGTC  | 757.380703177545 | 0.531059367473212  |
| GTCATTATCGAC  | 757.384520362538 | 0.345453406509129  |
| AACAATTACTGA  | 757.385673611729 | 0.293386526591732  |
| GAGCCATGACGA  | 757.394125746085 | 0.273697840043337  |
| AGTCAGTAGCTC  | 757.397244540548 | 0.322103241568806  |
| TCACGCGTGTCA  | 757.398888231364 | 0.323338897490931  |
| GATGAGCCAGAC  | 757.40260961124  | 0.218537650412592  |
| GGGTACAATGAC  | 757.403750757056 | 0.30785405093232   |
| TGTCATGCTAAA  | 757.408414833441 | 0.338861410462903  |
| ACTCATATTTAC  | 757.409100041917 | 0.263755168227301  |
| CAGTCACGCTCC  | 757.411673873095 | 0.144968528363216  |
| CCTGATCGGTCA  | 757.415795476018 | 0.354207499845787  |
| ATCATTATGTCA  | 757.41718428384  | 0.272930472279646  |
| ATATAGTAATAC  | 757.422835657744 | 0.313136953912897  |
| CGTCATTTGCAG  | 757.423580442303 | 0.310793966966466  |
| CCGTTGTGTGAC  | 757.423751754502 | 0.21424664726867   |
| GCTTTTCTGTCA  | 757.424445420331 | 0.382461679303343  |
| GCTCCGTATGAC  | 757.427858814526 | 0.302746807776594  |
| GTCCAGGAGTCA  | 757.431916758185 | 0.47127591859934   |
| CACATCGTGTCA  | 757.443536114163 | 0.394487481519462  |
| AAGACTCTTCAT  | 757.449008679459 | 0.256181171787628  |
| CTGCGAGTCAAA  | 757.464020140729 | 0.474007306205152  |
| AGACTCAGACAT  | 757.470393532611 | 0.315123071119805  |
| GGGTGGCTCACC  | 757.50696208329  | 0.313783327309389  |
| ATGACAGAGGGC  | 757.506976345349 | 0.264765806834601  |
| TGACCAAATAA   | 757.510219044295 | 0.176773958057609  |
| CTGCACCAGTCA  | 757.526770632275 | 0.331987852163038  |
| ACGTCACTCGCC  | 757.526873831359 | 0.262911067786038  |
| ACTCAAGCGTCA  | 757.527328386311 | 0.259641733671804  |
| AAGGATGAGCCA  | 757.529488678544 | 0.305632006831429  |
| CACGTCACGGCA  | 757.533334763218 | 0.22915412054235   |
| CACCACAGTCA   | 757.538894638879 | 0.283975620477233  |
| AAATTAGTGACG  | 757.545484886428 | 0.0915690624382808 |
| CTTTCGTGTGAC  | 757.560735330883 | 0.280309274255427  |
| TATTAGGACTCA  | 757.56128758329  | 0.320439339501816  |
| CAAATGACATCG  | 757.572100916882 | 0.365428894159492  |
| CGTCAACCAATTA | 757.578163842834 | 0.283920523127923  |
| CCAATTGACTC   | 757.58097366795  | 0.314309598316448  |
| CACGATTGTGAC  | 757.587708126356 | 0.260145839659956  |
| GACTGATCAGCC  | 757.589627317249 | 0.426691990317141  |
| TCACTCAAGGGA  | 757.604991318995 | 0.320601763043272  |
| CGCGTTATGTCA  | 757.606093587327 | 0.335137595100029  |

|              |                  |                   |
|--------------|------------------|-------------------|
| GTCATTGCAGAC | 757.606839440185 | 0.407192001279707 |
| ATAGGTGACGTC | 757.614049005435 | 0.224645400336921 |
| GTGACACTCCAA | 757.621271279744 | 0.279257915413916 |
| ATTGAGGTGACG | 757.63429753838  | 0.312928019897389 |
| AGACGACTCAGA | 757.635215437781 | 0.198674666435529 |
| GCAGCTGTGACA | 757.635791587293 | 0.365766854526397 |
| GTCACCCGCATA | 757.647125319589 | 0.257025214573376 |
| AAGGTGAATGAC | 757.647720920673 | 0.201024302586828 |
| GGACCCAGTGAC | 757.650719141244 | 0.26746604794353  |
| GAGATCAATGAC | 757.659822749387 | 0.275543501224445 |
| CACTGCTAGTCA | 757.661433470761 | 0.261950201251399 |
| GCATAATGACAA | 757.666546567151 | 0.211843245866242 |
| AATAGTAATACG | 757.671531462885 | 0.24155185656803  |
| ACAGACGACTCA | 757.672346997312 | 0.335043467134758 |
| GAATAGTAGTCA | 757.682743338456 | 0.221528695131276 |
| GTCATAGACTGA | 757.683006081091 | 0.249228898378035 |
| AGACAGGAGTCA | 757.684503359671 | 0.189665204525173 |
| TACGAACTGTCA | 757.686317497046 | 0.206663201917447 |
| GTCACCAATATA | 757.688247549347 | 0.288736886027645 |
| CAAACATGTGAC | 757.688472654565 | 0.382604614700217 |
| GCAAATTACGCA | 757.689225844104 | 0.297559336735058 |
| TCCGCTTTGTCA | 757.700954790994 | 0.264256534653974 |
| CTCAGGGGTGAC | 757.710640930667 | 0.317774428497463 |
| AAGTTTAATGAC | 757.715901527466 | 0.234509391750766 |
| ACTCATAGAATC | 757.719764178143 | 0.303907371777451 |
| ATCAGATGATTC | 757.727128186592 | 0.369756022747808 |
| TGCTGTGAGCAA | 757.741882547985 | 0.547498931878621 |
| CGTCATTCGACC | 757.752659313339 | 0.253678555741615 |
| TGAATCGACTAA | 757.75341683806  | 0.38880126436547  |
| GGGTCATTGTAA | 757.755911671374 | 0.272494366671946 |
| GCCTGGTAGTCA | 757.757239765541 | 0.285559412471747 |
| ACATACATGACG | 757.757871349712 | 0.322785561117614 |
| CGGGGCGAGTCA | 757.760393178408 | 0.337907786030558 |
| ATAACCGACTCA | 757.766204157395 | 0.227562183194891 |
| ATGGCCAATGAC | 757.795551315938 | 0.330337392819504 |
| ATTTCCGCGTCA | 757.798935428975 | 0.265588243209411 |
| CGGTCCGACTCA | 757.799509860225 | 0.318714340968639 |
| TGACGATAGTCA | 757.802343042035 | 0.33610178427635  |
| TCGCGTGACAGA | 757.802769540128 | 0.302429338918366 |
| AGTCAGAATATC | 757.804770304374 | 0.329388051428515 |
| CTTTGTTTGTCA | 757.808787885867 | 0.297415236391984 |
| ACGATATGACCC | 757.823661800978 | 0.465461984549474 |
| GACTACTTATGA | 757.831932785043 | 0.390425354043855 |
| ATGAGTCCCGTG | 757.841065915014 | 0.365791657072416 |
| GACGTGTGTCAA | 757.841622657636 | 0.281367955514423 |
| GCCGCTTTGTCA | 757.84829836959  | 0.311686579224703 |
| CGGTGGAATGAC | 757.849865723048 | 0.216118905367562 |
| GTGTAATACTGA | 757.850147636893 | 0.271012645868135 |
| AAGAGTCTTACT | 757.864290236415 | 0.161608446813402 |
| AATTCTTGCTCA | 757.867515579506 | 0.284705620318427 |
| ACGTGTGAGCCA | 757.868736132505 | 0.239116498187797 |
| ATACTCATTGAG | 757.886592937038 | 0.30545599589468  |
| GCAGAGTGTGAC | 757.886634333384 | 0.184050886427884 |
| ATGACGCTCCGA | 757.900966110893 | 0.314313632036954 |

|               |                  |                   |
|---------------|------------------|-------------------|
| GAATTACATGAC  | 757.913122223507 | 0.344101795766668 |
| CCAGTGGTGACA  | 757.922057309453 | 0.220516099277781 |
| CATAGCCGTGAC  | 757.922793353713 | 0.373445035521699 |
| GTAATGCATGAC  | 757.928448281314 | 0.307724378266774 |
| TGACGATGCTAA  | 757.931423921137 | 0.255753347600913 |
| ATGAGTATGTGA  | 757.935396160392 | 0.271064118573027 |
| GTGGCCTCGTCA  | 757.943208518307 | 0.483618432371364 |
| AAACGTCCGTCA  | 757.945992817824 | 0.185932087592606 |
| GTATGATGTGTA  | 757.949056502124 | 0.147761130213982 |
| AAGATTCATAACC | 757.951360976996 | 0.285105568115481 |
| GTGTCACGAAGA  | 757.955474310677 | 0.176047198955986 |
| GGCGCTGATGAC  | 757.961134277514 | 0.258998228854213 |
| AACACGTCAACT  | 757.967776252395 | 0.245404061244061 |
| ACCCCAATGACG  | 757.970216871217 | 0.294169739141822 |
| CTTCTGTGACGC  | 757.973856779817 | 0.402776287368298 |
| GTCACAGACATA  | 757.982382616478 | 0.37724346841773  |
| GTCACTACTGAA  | 757.987666850258 | 0.263587777112362 |
| GAATGACCGAAC  | 757.988174807648 | 0.274609315998772 |
| GATGACCGTCAC  | 757.994945776063 | 0.259516795338903 |
| GTGTCACTTGGA  | 757.999693794283 | 0.317444303218539 |
| AGCCTCGACTCA  | 758.006669129193 | 0.291121567578488 |
| ATGACGGTAAGC  | 758.007327498136 | 0.267252916008961 |
| CTTTCGCGTGAC  | 758.017451077506 | 0.236455226720109 |
| CCAGCCTAGTGA  | 758.018885949573 | 0.471257938579845 |
| ACTCATACTGGA  | 758.021688911817 | 0.177199197474492 |
| AATAAGCGTGAC  | 758.024905396651 | 0.404210902333093 |
| ATGGTGACCCAA  | 758.02738894871  | 0.33288017660227  |
| AAGAGTCTTCAC  | 758.032216133918 | 0.196324813570286 |
| AGACTGTGTCAG  | 758.034304541945 | 0.222247024855614 |
| ATCCGAAGTCAT  | 758.037341832853 | 0.321825017670041 |
| CGAATACGTCAA  | 758.037837253579 | 0.264256852502724 |
| AGTCAGAAATTC  | 758.058299171696 | 0.287129633840641 |
| ATCCGTGTGACA  | 758.059705305231 | 0.238485905788657 |
| AACTCCGTGTCA  | 758.068968588647 | 0.33377703090194  |
| AGATTACGTATA  | 758.071052069021 | 0.286073174387993 |
| AGTCAGTGACGG  | 758.074538759771 | 0.273964414638344 |
| GAGTCAGGTAGA  | 758.078459388431 | 0.163999341221971 |
| AACTATCACTCA  | 758.097798657306 | 0.337065533408176 |
| CTCATGTAATGA  | 758.098669863692 | 0.295707404230841 |
| ACTCATAAATAA  | 758.099080084048 | 0.299353865265125 |
| TGACAGAACGAA  | 758.09956645406  | 0.327994231838884 |
| TCACGTGACGAA  | 758.099821733191 | 0.287212932701047 |
| AACTTGCTCACT  | 758.10170478002  | 0.26562970363207  |
| ACGTCGTAGTCA  | 758.103965817125 | 0.38262149162556  |
| CACATCATGACG  | 758.104246487346 | 0.252774030625616 |
| GTCATTCTAGTA  | 758.110625242999 | 0.258165959047906 |
| ACGACTCTGTCA  | 758.114435535983 | 0.161135819284101 |
| CCCCGTTACTCA  | 758.115392066713 | 0.264010613014504 |
| CGAATCAATGAC  | 758.116206096245 | 0.309377980595322 |
| TAAACATGACGA  | 758.116241096856 | 0.232038582205753 |
| GTCACCTTTGAA  | 758.122765258811 | 0.337448264234801 |
| CCCTCGGATGAC  | 758.123689727827 | 0.259235894420577 |
| CTCATTGTATGA  | 758.125590368957 | 0.564899458677355 |
| CAGTACACATCA  | 758.125627870257 | 0.295386580500249 |

|               |                  |                   |
|---------------|------------------|-------------------|
| ACGAAAAGTGAC  | 758.133516245622 | 0.201341964229075 |
| GTCACTGTAAC   | 758.143025466999 | 0.32625934888622  |
| AGTAGTGACGAA  | 758.145752183415 | 0.262031912827381 |
| CCGCGCAGTGAC  | 758.145884666916 | 0.580908679522926 |
| ATGACCACGTAC  | 758.152403943655 | 0.408792212134992 |
| GGATCTATGACC  | 758.152571806726 | 0.228060980076891 |
| CATCGTGCACG   | 758.1527431302   | 0.328928980147941 |
| ATTATCACGTCA  | 758.155607527663 | 0.291223486665088 |
| CCTAACTGGTCA  | 758.157217467549 | 0.327517434374043 |
| GAAAGATTCATC  | 758.159577001299 | 0.308310239532319 |
| ATGAGTTGTCTGA | 758.159999512652 | 0.343633800153285 |
| GTCATGAACAAA  | 758.160738176637 | 0.291161167212466 |
| CCTGGTGAGCCA  | 758.166366295847 | 0.394574827478235 |
| CACAATGTCATC  | 758.171139559007 | 0.168283587264298 |
| ATGTCATGCAGA  | 758.178235035477 | 0.278185126290575 |
| GAAGCTACTGAC  | 758.178777683051 | 0.272885841029496 |
| TGCGTGACCCA   | 758.188018755846 | 0.349335955333589 |
| CCACATTGCTCA  | 758.19979857615  | 0.343423549435955 |
| TCATCGCGGGGA  | 758.199855646454 | 0.423476221009652 |
| CGTCACTATAAA  | 758.20286173315  | 0.48102426990023  |
| AGTAAGTGTGAC  | 758.212099880098 | 0.2486691026451   |
| CCCATGAATGAC  | 758.219363663997 | 0.28224839500995  |
| CGATGGGGTGAC  | 758.222334448799 | 0.306381191221402 |
| ATCTGTGACGCGA | 758.225608233182 | 0.164807496239858 |
| GTCACCTAGTAA  | 758.230304933513 | 0.24918233403205  |
| TGACGCTGACCA  | 758.232239790083 | 0.282426615875213 |
| CCGGTCTGAGTC  | 758.233720329298 | 0.403830869885791 |
| AGTGCATAGTCA  | 758.243533811293 | 0.308732561626792 |
| AACCCCGTCATC  | 758.245155063683 | 0.270271708331086 |
| GTCATGAGCTAA  | 758.250450041794 | 0.294022759040264 |
| GTTACGCTGTCA  | 758.250562369157 | 0.284134257094238 |
| AGTGATCATGAC  | 758.254309850511 | 0.274373644208027 |
| TGAGTCCAAAAA  | 758.25591084195  | 0.322032965464303 |
| ACAGTCAGCCAA  | 758.259248168105 | 0.371939738992813 |
| CACCGTCGTGAC  | 758.264012560453 | 0.240411227733032 |
| ATTGTCTGTGAC  | 758.266425415312 | 0.276409936697545 |
| GCGGTTTGTGAC  | 758.26681963543  | 0.312853675254655 |
| CGTCATCAACCA  | 758.273858265074 | 0.171404976720787 |
| ACGGCTGTGACA  | 758.278974891663 | 0.359810238556988 |
| ACTATTACTGAC  | 758.280453118871 | 0.300825982621085 |
| GTCACCTGCTAA  | 758.282105115689 | 0.172678034089486 |
| GTCACAGCTTGA  | 758.282789523678 | 0.456480741475356 |
| GCTTGCACGTCA  | 758.285414591081 | 0.269674621489633 |
| CAACTCGTGACA  | 758.292716431291 | 0.325220218881605 |
| GTGAGCCACACA  | 758.297746921345 | 0.26974128896322  |
| ACTCATTAGTGA  | 758.310189478774 | 0.308490476814443 |
| CGGCGTGACTAG  | 758.310306175658 | 0.273363953385729 |
| AAACTCCGTGAC  | 758.311744230037 | 0.14624558639885  |
| GGACGTGCGTCA  | 758.318545996906 | 0.279823056562356 |
| ATGACATCTGCG  | 758.322877612648 | 0.210520775077586 |
| AGTTGTACCCCG  | 758.323213069496 | 0.271187148227936 |
| GAGTCAAATCAA  | 758.325646796767 | 0.188788767333994 |
| ACTCATACATCT  | 758.329883756483 | 0.235081144726219 |
| CGATCACGTGAC  | 758.345724724592 | 0.320824985858509 |



|              |                  |                   |
|--------------|------------------|-------------------|
| CACACTGAGTAA | 758.353774071324 | 0.205644657872665 |
| CCGTCCGACTCA | 758.360348429527 | 0.33721281588985  |
| ACTCTTGGTGAC | 758.369601947966 | 0.379028139539412 |
| AGTATGTCTCAC | 758.36991791083  | 0.356487722086515 |
| CCGTATTAATCA | 758.371801421837 | 0.343090065619308 |
| TGAGTATGAGCA | 758.374586828013 | 0.318814759919771 |
| ACTCATTGAAA  | 758.377491643008 | 0.223620032048523 |
| AGGTACTGTAC  | 758.383764522962 | 0.356927530731057 |
| ACGCAGAGTGAC | 758.388536141603 | 0.278128304877115 |
| CGTCACTCGGCA | 758.394713735288 | 0.476159915184361 |
| AATGATTAGTAC | 758.402424201222 | 0.252756692290774 |
| ACTCACAGTCAG | 758.414986628483 | 0.266774031658279 |
| GCAATAGTGTCA | 758.429525961186 | 0.281479071639272 |
| GTCAGTGACAAC | 758.431995997775 | 0.29895855954098  |
| GGTGCATAGTTA | 758.449106225078 | 0.236587175732477 |
| AGGTGACCGAAT | 758.451558766711 | 0.229490349621005 |
| ACTGCTCTGACT | 758.45396685323  | 0.102944528600194 |
| CAGGGGACTCAC | 758.454902557551 | 0.266443801365764 |
| CCGGGCTGTGAC | 758.468885779415 | 0.42366781478068  |
| CGTGAACATGAC | 758.473087552328 | 0.222016056500903 |
| GATGGACTCACA | 758.47431127823  | 0.348802288151602 |
| CATCTAATGACA | 758.483463889266 | 0.334274563185685 |
| ACCCAAAGTGAC | 758.4872208699   | 0.396549954217897 |
| CGTCATGTTAGC | 758.498834259068 | 0.290345310899211 |
| GTATCTGTGACA | 758.507047861336 | 0.230162271167026 |
| TCCCCTGACGCA | 758.507083229055 | 0.323892846531468 |
| ATACGTAATACC | 758.52059417453  | 0.165466074723112 |
| ACGCGAGAGTCA | 758.521582629099 | 0.332232399175108 |
| CCGGCCGGTGAC | 758.528382826428 | 0.393506467165753 |
| GGATTGGATGAC | 758.530003262631 | 0.256646018240305 |
| AACCATGGGTCA | 758.541586886607 | 0.367640167887104 |
| TAATCGTAGTCA | 758.545728022363 | 0.265933993898899 |
| CAGGAAGCGTCA | 758.549565676528 | 0.32075372555652  |
| CGCGATCGTGAC | 758.551410939709 | 0.285604571515983 |
| ATCGTGGTGACG | 758.552180893674 | 0.301180414214102 |
| GCGGTTCTGTCA | 758.553532976223 | 0.422301995391903 |
| ATATGTCAGCGA | 758.556765015706 | 0.163644546061986 |
| GATTAATCACAC | 758.569670087879 | 0.394929582297761 |
| GGCGTAAATGAC | 758.578521317725 | 0.337682030017152 |
| TAATGTCTGTCA | 758.582692040756 | 0.383645755497586 |
| CATCAAGTGACA | 758.584492961685 | 0.291855805254655 |
| GACATAAGTGAC | 758.593747248865 | 0.432753294425986 |
| ATTATTTTGTCA | 758.600128112548 | 0.268975650860703 |
| ATATCTTGACTC | 758.600940443642 | 0.277149232551061 |
| CAGGTACACAAA | 758.604941940309 | 0.476452214691826 |
| GATTATCGTCAC | 758.621558771494 | 0.313950321693614 |
| GGGATGCAGTCA | 758.621772015027 | 0.176459117740738 |
| CTGTATGGTGAC | 758.622598874605 | 0.399048117546042 |
| GCTTTGACGTCA | 758.62328712617  | 0.284037008452433 |
| TAAAATGAGCCA | 758.62658302691  | 0.388571533938691 |
| CAGAGTATGTCA | 758.633860140478 | 0.304414769801767 |
| AAGTCACGCTAA | 758.640101552862 | 0.212015603429592 |
| CTATCTACGTCA | 758.646943382352 | 0.150688918640032 |
| CGGGTGAGCCAC | 758.652920118311 | 0.163200287865167 |

|               |                  |                   |
|---------------|------------------|-------------------|
| AGAGTAATATAT  | 758.654240521771 | 0.466121165396413 |
| ATGTTACGTGGC  | 758.657495823234 | 0.28145287831104  |
| ATAAATGTGACA  | 758.678119452291 | 0.447407022641895 |
| ATGACGGGGCCG  | 758.681303033694 | 0.264516487192518 |
| GGGTCACCCCTTA | 758.684356585969 | 0.271633365843981 |
| ACTTCGGTGACG  | 758.68570535462  | 0.350979985251173 |
| ACGCAGACTCAC  | 758.688129800473 | 0.276792004519984 |
| GTCATGGCCGAA  | 758.694334466855 | 0.354736289054633 |
| CGTCACACCGAC  | 758.699640378678 | 0.260603151760734 |
| GTCACCTCAATA  | 758.701434592115 | 0.370833014322752 |
| ACAGAAGTGTCA  | 758.714538201969 | 0.448356435075747 |
| AAATTCCATGAC  | 758.717919071079 | 0.218944039171258 |
| ATTACTAAGTAC  | 758.718666533892 | 0.425576609957548 |
| GAAATATGTGAC  | 758.721829799571 | 0.468305276226481 |
| ATATACTACCCA  | 758.724811360108 | 0.238040401592944 |
| GGGACTGTCATA  | 758.726015565662 | 0.18547180328098  |
| TCTGACACTTCA  | 758.728969026725 | 0.233095972119855 |
| CGTACAGTGACA  | 758.742439041652 | 0.446618237616376 |
| ACTCATAAGAAC  | 758.74651211563  | 0.596519082875473 |
| ATGCCTCATGAC  | 758.747463944019 | 0.275795758392297 |
| ACCTGTCACAGT  | 758.749831265304 | 0.335702562798884 |
| GGCATGTGTGAC  | 758.751887547417 | 0.28561320004218  |
| ATGACGTCTAAA  | 758.753705708904 | 0.287916217837353 |
| CACATCACGTCA  | 758.758909050472 | 0.385913969312277 |
| CCCCTAGACTCA  | 758.76098231081  | 0.302258363424103 |
| ACTCATAGGCAA  | 758.764091527949 | 0.255972757917097 |
| AACTTAGTGACA  | 758.766379793324 | 0.307738129747411 |
| GCAATTGCCTGA  | 758.766453962564 | 0.38213393176761  |
| GTCACTAATATA  | 758.770219058601 | 0.29688655296537  |
| TGTATACTCACA  | 758.770429834865 | 0.407993433617883 |
| CGATCATATGAC  | 758.783900226243 | 0.335321084635092 |
| GATGCCTCATAC  | 758.793779354376 | 0.260907116256931 |
| CCAATATCGTCA  | 758.802908012003 | 0.456725053913029 |
| TCATATAGGCAA  | 758.803364817838 | 0.442814517424915 |
| GATTAATGACAA  | 758.803993638589 | 0.357323499161956 |
| GCACCTACGTCA  | 758.806389557167 | 0.20728940529431  |
| GGACGTTATGAC  | 758.807613819142 | 0.305099427375222 |
| GATGCGGAGTCA  | 758.809312015421 | 0.181621936869335 |
| CCGATAGGTGAC  | 758.820955231148 | 0.29331695414043  |
| CTGGGTTGAGTC  | 758.833301208496 | 0.439768242917656 |
| ACAGTGTGTAAT  | 758.838744340414 | 0.328309058323298 |
| AACTTGTGACAG  | 758.847583705712 | 0.36744967216823  |
| ATTGTTGTGAC   | 758.84849889027  | 0.27100194713088  |
| AGATAGGTGACG  | 758.854521373635 | 0.253713888366818 |
| AGAGCATGTCAT  | 758.859428969033 | 0.194898495608843 |
| GAGTAATAATGA  | 758.862828268178 | 0.278515659616524 |
| CATGCTGATGAC  | 758.868252097512 | 0.310708173348223 |
| CTTACTGTCATC  | 758.869235718218 | 0.209241871048179 |
| CTAGCTGTGACA  | 758.876565170641 | 0.223899151797842 |
| GACTAACACACA  | 758.87878536325  | 0.426192669015905 |
| CATGTCACAGTA  | 758.883583370733 | 0.137581816830722 |
| CACGTCAGAGAG  | 758.885325548823 | 0.310390378209221 |
| CATTATTTATGA  | 758.888928996324 | 0.386586522619092 |
| ACAGCGGAGTCA  | 758.889411680894 | 0.289586377483113 |

|              |                  |                    |
|--------------|------------------|--------------------|
| ATTCCATATGAC | 758.889616105896 | 0.387927295208087  |
| ATGACCGTGACC | 758.891487597445 | 0.196348548027072  |
| GGTCTTGCCTCA | 758.895049139192 | 0.348597866328896  |
| AAGCAGTGACAC | 758.899037288401 | 0.242561168614218  |
| CGTCATGGTGCA | 758.900986367485 | 0.265486455209516  |
| GCCCCGGGTGAC | 758.91049411413  | 0.324439711787107  |
| CGTCACACATTC | 758.916460617583 | 0.0787878659687816 |
| ATATACTGTCAC | 758.92606583633  | 0.186968185913724  |
| CCACACTAGTCA | 758.926484058079 | 0.262808244524981  |
| GTCATTTGTTTA | 758.927898139914 | 0.214737074467378  |
| AGTCATGGGCCG | 758.930962550841 | 0.27016018240984   |
| AGTTGAAATGAC | 758.932840141148 | 0.235900010870423  |
| TAACATTGCTCA | 758.933214189086 | 0.226832950946269  |
| GCGAATCATGAC | 758.934554479522 | 0.379257520836368  |
| TGTCATGCTGAA | 758.935285294737 | 0.194711119221608  |
| TGAGTACAAGAA | 758.937862725311 | 0.153867839591575  |
| GTCACCGTCTAA | 758.941032901683 | 0.319279832553415  |
| ATAAGTGAGTCC | 758.944783116665 | 0.314958205140443  |
| GATTACCTGTCA | 758.948321419982 | 0.3637811383456    |
| AGCGAGTGTCA  | 758.950976444503 | 0.309443360119122  |
| ACTCATAAGCGA | 758.967068308535 | 0.428703206242988  |
| CACAATTAATAA | 758.967199905397 | 0.272220366527758  |
| ATCCTGTAGTCA | 758.969212124282 | 0.263108470641081  |
| CGGCCAGATGAC | 758.971169096719 | 0.413559147147534  |
| ACATCATGACGT | 758.976309860744 | 0.207368414324619  |
| CGACTGTTATGA | 758.976396828511 | 0.433841315269757  |
| GTCACATACGCA | 758.984212879897 | 0.285923336299505  |
| GAATACGTCAAC | 758.989909167287 | 0.258663413671543  |
| TGACTCCAGGCA | 758.998029495419 | 0.34323759916368   |
| ACTAATGGTGAC | 759.003030051016 | 0.296867753550931  |
| CAGTCAGAAGCG | 759.00609173016  | 0.298798047565036  |
| GTCCCTGATTCA | 759.010188818537 | 0.234523721669701  |
| CGTCACATGGGC | 759.01034287657  | 0.303608277472382  |
| CCTACCGTGTC  | 759.012706824124 | 0.234231339035332  |
| CTAGTATGAATC | 759.018268669089 | 0.432784680716753  |
| CCATGTCACCGA | 759.023426397895 | 0.338561357417146  |
| ATGTGACAGGTC | 759.048616871551 | 0.245131998525533  |
| ACTCATTGATTG | 759.052781247353 | 0.27305545913969   |
| AATATTTGTC   | 759.053006768892 | 0.296663180138777  |
| GTACGGTCATAA | 759.062325512718 | 0.387052589863393  |
| ATATACTCGAC  | 759.063764300289 | 0.236989104596362  |
| CTTAAGGATGAC | 759.0705212273   | 0.268314676947127  |
| GAGGCATGACGC | 759.074719829691 | 0.176945963513512  |
| GTCATTTACCA  | 759.085198430544 | 0.255821394244085  |
| TGACTGCAAGCA | 759.091607468816 | 0.284218909629338  |
| ATACCTGGTCAT | 759.100008181428 | 0.286586996863877  |
| AAGTTAATGACG | 759.103686361943 | 0.302879387138029  |
| AGGGTCACCACG | 759.106732722364 | 0.280141126147629  |
| GATCTATATGAC | 759.10743892976  | 0.216695196846331  |
| GCTGTTACGCAA | 759.115916899637 | 0.378522056679137  |
| CCGAAGCGGTCA | 759.125887841016 | 0.276715038153533  |
| GGTCTCTAGTCA | 759.131979234446 | 0.283121888172116  |
| CGTCATATGTCC | 759.136931251707 | 0.257758887200473  |
| TGGTCCATGACA | 759.137367938456 | 0.31773368020896   |

|              |                  |                   |
|--------------|------------------|-------------------|
| ACAGCATGACGA | 759.140097931254 | 0.292525488284178 |
| CTGTCACCGGAA | 759.157838083908 | 0.274810306701482 |
| ATCTACCAGTCA | 759.162122787943 | 0.23124097034193  |
| CGATTCCGTGAC | 759.166478068993 | 0.384864374593702 |
| TGGGTCACCCAA | 759.16753853302  | 0.344891618907843 |
| CTGGTTCGTAC  | 759.169799680459 | 0.298810145156902 |
| AGAGTCTGAGTC | 759.174072703466 | 0.286916059362505 |
| TGAGTCGGTACA | 759.188294746641 | 0.321095711573346 |
| AGAGTTGCTCAT | 759.197187675328 | 0.227231412954846 |
| GATGACATTTTA | 759.221034624148 | 0.325743661213399 |
| CGAGTCAGGGCA | 759.238031278484 | 0.21363080667765  |
| CAGCGGGATGAC | 759.240676885929 | 0.355588513434789 |
| GAAAAGTGACGC | 759.246569736421 | 0.194481392144622 |
| CGGTCAAGTGAC | 759.248383563244 | 0.462430563985377 |
| CACGGGTGACGC | 759.250709992438 | 0.354461331304164 |
| TCTGTTTGGTCA | 759.251078975729 | 0.554966780436521 |
| AGTAATTACGTA | 759.251519737133 | 0.263710784745534 |
| GCGTCACCTCCA | 759.254935128796 | 0.391360688721787 |
| AACGACGTACC  | 759.276211960106 | 0.179370238220093 |
| ACAACGTATGG  | 759.281270710751 | 0.233758963119182 |
| AACTCAGTCAAC | 759.281998622095 | 0.408667262470136 |
| GAAAATAGTGAC | 759.283762438111 | 0.279533218056754 |
| AACGTTATGTCA | 759.285547195005 | 0.24811416883273  |
| CAAGCATGACCA | 759.285571546877 | 0.414478600922295 |
| CCAGGTGAATCA | 759.28865940402  | 0.479025241715959 |
| AGGCTATTACTC | 759.288862039428 | 0.320231717450543 |
| TCCACTGTGACA | 759.291867676489 | 0.395891748399755 |
| CAGTCAGGTCGG | 759.303663305611 | 0.31393167097311  |
| ACAATAACGTCA | 759.311509742584 | 0.424278273808645 |
| TATTTTGACTGA | 759.323559643157 | 0.22326990554491  |
| ACTCATCATTTG | 759.338401847613 | 0.283748772908822 |
| AGACGTAATGAC | 759.342696257617 | 0.184809457541926 |
| GTTCTAATGACA | 759.347566122741 | 0.177775239151681 |
| TGACAATTTACA | 759.353619143837 | 0.327240063470547 |
| ATCTGTGACATG | 759.380312187683 | 0.463172348665254 |
| GGCATGGATGAC | 759.383692100865 | 0.431066409008879 |
| AAGCGTGACCCA | 759.395645607267 | 0.188378766229036 |
| GTTATACTCACA | 759.395755278283 | 0.427328923629688 |
| CTTAGTTTGTCA | 759.400766436657 | 0.340288506313527 |
| CATAGCTGACGC | 759.402368085075 | 0.582439407337378 |
| AGCCATAGTGAC | 759.407372022538 | 0.358117582269912 |
| CGAGTCAGGCTA | 759.407540225821 | 0.213581453400426 |
| AGATGATGACCC | 759.410315628873 | 0.219988676924954 |
| ACTGTGACCGAA | 759.4118252616   | 0.25171331559968  |
| ACCATAATGACG | 759.416081025712 | 0.116148487448624 |
| AATGATTCTTCA | 759.431721412356 | 0.320044964207595 |
| ATCCATACGTCA | 759.44004786672  | 0.377177387121555 |
| ATTGTAATGACA | 759.450170245496 | 0.408018067527739 |
| AGTCAGAGTATA | 759.450252547397 | 0.24110064391766  |
| ATGATCTGACTG | 759.453850209501 | 0.346226216206223 |
| GGATTAGTCGCA | 759.45456671573  | 0.186934571397251 |
| AGTCAGAGAACA | 759.45811693571  | 0.356734796753018 |
| AGCATTATGACC | 759.461182417307 | 0.333800573200884 |
| GTGACATAGCCA | 759.485407253437 | 0.269934860900615 |

|               |                  |                   |
|---------------|------------------|-------------------|
| ACTCATAGCTAT  | 759.486589494685 | 0.366686117831215 |
| AAAAGCAGTCAG  | 759.493114586579 | 0.270825371471614 |
| CTGAATATGACC  | 759.499648955848 | 0.252119466539869 |
| AGTGTAATGACA  | 759.533212409779 | 0.254705862647627 |
| GACGATTGAGTC  | 759.542435886667 | 0.314631095870102 |
| CACCGACATGAC  | 759.546603211745 | 0.36181767860521  |
| ACTGTGTCAGCA  | 759.549954701761 | 0.211174047599536 |
| CGTCATTAATAG  | 759.567252841434 | 0.249007490394703 |
| TCCAGATGACCA  | 759.572465927633 | 0.433522190217783 |
| CCGTTAGTGTCA  | 759.574140654396 | 0.252540857567929 |
| AGTTACGGTGAC  | 759.580899750158 | 0.270920897998479 |
| ATAGTCCGTCAT  | 759.582501356529 | 0.225694279898942 |
| CGGAGATTAGTC  | 759.589118593909 | 0.399384567774327 |
| AAAGCGAGTCAG  | 759.599521296758 | 0.1295650031855   |
| ATCGATTAGTCG  | 759.61012596033  | 0.399400068289223 |
| AGTCCTTACTCA  | 759.619702010224 | 0.308888931448766 |
| GGCTCAGTCAAC  | 759.624405930476 | 0.295433826197789 |
| GCTTTTAAAGTCA | 759.630179454011 | 0.375701509510219 |
| ATATGTCAGTGC  | 759.632967316801 | 0.242440002018674 |
| TCAACGTAGTCA  | 759.634855141266 | 0.353471080410746 |
| AGACTTAGTAAT  | 759.634894966159 | 0.276271207458721 |
| GTCACACACAGA  | 759.640384561323 | 0.375132780966153 |
| GTTGACCCATCA  | 759.640728583567 | 0.253027559751846 |
| GCCGTTGACTGA  | 759.642498495382 | 0.232797837110712 |
| CCTCCGAATGAC  | 759.647893575072 | 0.340636868309196 |
| ATGACATGCTCG  | 759.653015173765 | 0.300638970716156 |
| ATTTGTCAACAA  | 759.655035937445 | 0.329414470969858 |
| GTTAGATGACCA  | 759.65722509672  | 0.370265308043536 |
| AGGCAGGATGAC  | 759.658175614994 | 0.203175855277964 |
| AGTCAGCATCAT  | 759.661412176033 | 0.185537222416152 |
| GTCATTTGTCTA  | 759.676315159624 | 0.339202181050171 |
| CCAGATGAGCCA  | 759.685196598816 | 0.348038334764326 |
| CGCTTGACTCA   | 759.690835959199 | 0.268095735401619 |
| GTCATCTACCCA  | 759.693733753399 | 0.290366785373787 |
| CTGAGAGGTGAC  | 759.693982489729 | 0.251048566255915 |
| GTCCATTCGTCA  | 759.706058043128 | 0.472011213350632 |
| ACATGGTGACCA  | 759.718157762771 | 0.470943534859236 |
| CCCCGGAATGAC  | 759.725324528113 | 0.289535932478778 |
| CTGGCTTAGTAA  | 759.733492842736 | 0.343493082406547 |
| GCCCCGAGTCAC  | 759.739267364257 | 0.290635216230225 |
| GTCATTAGAGAA  | 759.749158964575 | 0.362052390317757 |
| ACACGGTGTAC   | 759.764256029084 | 0.173824922781256 |
| ACTCATAATTTA  | 759.769443811077 | 0.38842741282745  |
| GTTCCGAGTCA   | 759.777455115866 | 0.341467692717337 |
| AATCTACTCATT  | 759.786230115515 | 0.233120573220934 |
| GATTTTGACTGA  | 759.787283506888 | 0.274179132415037 |
| ACGTCATGGTAC  | 759.788039736207 | 0.241533455727128 |
| CAAACCGCGTCA  | 759.789164059298 | 0.256790988144012 |
| CGTGTGGATGAC  | 759.791109992785 | 0.332260327734677 |
| ACACACGCGTCA  | 759.79396628665  | 0.306523237091783 |
| AGGTGACAACTC  | 759.7948818781   | 0.134115698687815 |
| ACGTCACAACCA  | 759.800448267528 | 0.358142144554364 |
| TCACGAGTATGA  | 759.803510534867 | 0.370384833712994 |
| GACTGCAGTGAC  | 759.805531551235 | 0.345151545127752 |

|               |                  |                   |
|---------------|------------------|-------------------|
| GTCACTGCTAAA  | 759.814245744209 | 0.359695075622323 |
| CTCGTCAGAGGA  | 759.818501028593 | 0.414316668473545 |
| CAGTCACGCCGA  | 759.830320156734 | 0.397762599281491 |
| GACTAATCTTCA  | 759.833346235517 | 0.339363637685845 |
| CGAACCTGTAC   | 759.835629030265 | 0.31824717197114  |
| AGCCTAATGACA  | 759.847541908428 | 0.296772289539032 |
| ATGACCACTGGC  | 759.851725377659 | 0.2031643557886   |
| GGTGACGACTTA  | 759.852014891648 | 0.28487344082443  |
| CTGACTCGCCGA  | 759.85751595302  | 0.253119267310738 |
| CTGAGTCGTTTA  | 759.857798290243 | 0.297002512976152 |
| ACGTTTCTGACT  | 759.860053698664 | 0.227680878329019 |
| GACTTTAGTGAC  | 759.872317652507 | 0.341551033770508 |
| AACCATCTGTCA  | 759.879024579945 | 0.292278367554685 |
| AAGACGCATCAT  | 759.879415707367 | 0.217127053980144 |
| ACGAGTCAAAG   | 759.882048583017 | 0.290568299909154 |
| ATGACAGTAAGG  | 759.885655892572 | 0.21932583801931  |
| ATGAGTATGAGC  | 759.888800328189 | 0.171537077865407 |
| CTCAGGGTGACA  | 759.889091113126 | 0.328639581938994 |
| CCTTTAGTATGA  | 759.891493067293 | 0.556683247521465 |
| CATCTTGTGACA  | 759.892704279337 | 0.261634186268353 |
| CGTCAGGTGACA  | 759.89512612103  | 0.389027303481737 |
| GTATGTCTCACA  | 759.901471479032 | 0.21894093669769  |
| CTGAGTCGTCAA  | 759.918611426046 | 0.377945492179529 |
| ACTCATAGTGCT  | 759.919474635289 | 0.299324541504863 |
| CACGTAGTGACA  | 759.927385165251 | 0.350212509818205 |
| GTGACAAACCTA  | 759.933967637451 | 0.29255205603848  |
| ATGACATCGAAT  | 759.942495321039 | 0.368655102361734 |
| ACGCGTGACGTG  | 759.950513236967 | 0.266451620380086 |
| ACCTTTTGGTCA  | 759.95127140586  | 0.260789885960896 |
| GTCACAGCAGAC  | 759.953417794392 | 0.268327291595778 |
| CAGTATCGTCAC  | 759.954436124677 | 0.17429363612591  |
| ATACTGAGTGAC  | 759.957560923164 | 0.268306035654032 |
| ACTTATGATGTG  | 759.960420603013 | 0.267717737330103 |
| ACCCCGTCATAT  | 759.966664487901 | 0.258186115075413 |
| ACTCATCTGAGG  | 759.969931782987 | 0.269577326708137 |
| ACCGAATGTGAC  | 759.970301640279 | 0.233035366250975 |
| ACTCATAAGTTC  | 759.971945734264 | 0.273073537241297 |
| GACTCAGACATA  | 759.975086333508 | 0.235071352839378 |
| GGTGACACGCCA  | 759.975155973469 | 0.225301224518773 |
| ACGGGAATGACG  | 759.977773259865 | 0.321820669900162 |
| GTCATTGCTATA  | 759.980538646775 | 0.318371551640646 |
| CTACTTGACTGA  | 759.98311124193  | 0.164168810078834 |
| CGTCACACATAG  | 759.985369882809 | 0.249905906382833 |
| CACATACGATGA  | 759.98927325706  | 0.299841404776366 |
| GTCATTTTGGGA  | 759.990512194763 | 0.37285053138577  |
| ACTGAGCATGAC  | 759.995063442528 | 0.23223051355743  |
| AGTGTAAATGACG | 759.99886144427  | 0.425505789770882 |
| TCCATCACGTCA  | 760.006246257571 | 0.282144510433536 |
| CCGCAGGGTGAC  | 760.006407725231 | 0.372515741970609 |
| GATTAGCCATCA  | 760.007416753238 | 0.182463653711936 |
| GGCTACTAGTCA  | 760.008247373789 | 0.426507475917466 |
| ACGTGAGTAATA  | 760.015049441189 | 0.272709554488132 |
| CTGACTATGAGC  | 760.015115876217 | 0.503791370197017 |
| GAACCTGTGACA  | 760.016378124038 | 0.269889315262895 |

|               |                  |                    |
|---------------|------------------|--------------------|
| CAACTGTGACGC  | 760.01909504011  | 0.356825885794288  |
| GAGTAATATTAC  | 760.020918380509 | 0.330878376139822  |
| CGTTAAATATGA  | 760.02411422704  | 0.459924640176901  |
| TGACGAGTCGCA  | 760.028619971145 | 0.332035235453446  |
| ATTGGACTCACA  | 760.029079508583 | 0.4584375052138    |
| GTCATGTGTAAA  | 760.030643270135 | 0.237852158155934  |
| ACGTCACGCGTA  | 760.032784702077 | 0.291436401085925  |
| ATGACGTCTCGC  | 760.035904711937 | 0.296216137969902  |
| GAATTAGTCGGC  | 760.044385923983 | 0.268415018099114  |
| AGCTGCATGACA  | 760.047878873988 | 0.266990522662257  |
| CTATAGCATGAC  | 760.049572561709 | 0.29071116968655   |
| GCGTGAAATGAC  | 760.052335041982 | 0.475333944243247  |
| GCTGACGGTGAC  | 760.053761385471 | 0.251100857931428  |
| AGAGTCAGGACG  | 760.061504467452 | 0.169170990571501  |
| ATGCGTGGTGAC  | 760.066775919036 | 0.390105738359713  |
| GTCACCCTCTAA  | 760.06867565994  | 0.210930931644926  |
| CCTAACATGACA  | 760.075727973338 | 0.325608623155241  |
| AACATAATGACG  | 760.085002265073 | 0.301891304167924  |
| GCGTCATGTCCC  | 760.0888133661   | 0.300673817418896  |
| ATCGTGACAAAC  | 760.09471066937  | 0.378726835878046  |
| CACGTGGCTCAC  | 760.112489781241 | 0.214247624492353  |
| AATCTTTACTCA  | 760.125469461796 | 0.302407106756981  |
| GTCATTAGACCA  | 760.135153791047 | 0.18750503125246   |
| TCCTTTGAGTAA  | 760.142350267624 | 0.24362591199824   |
| GATGATGGGTCA  | 760.152367185908 | 0.0880714841648719 |
| AACCCGTACAC   | 760.155595717755 | 0.210406032085872  |
| CCTGAATCGTCA  | 760.159474753539 | 0.314618874292945  |
| ATGACGTGGTGA  | 760.159786101707 | 0.255370896661292  |
| GTCACACCCGAA  | 760.167535829466 | 0.196340773457657  |
| GTCACTCAATTA  | 760.169362609783 | 0.399132705264971  |
| CTCGACGTCATC  | 760.199638652035 | 0.235212038542682  |
| CTTTACATGACA  | 760.20357691715  | 0.318627646153012  |
| GTCACGCCAAAA  | 760.212530286799 | 0.256033845130879  |
| TGACAGAAACCA  | 760.212982986238 | 0.254256167493095  |
| ATGCGTGTACCG  | 760.222270278469 | 0.215136017335531  |
| GTTATATCGTCA  | 760.237072006697 | 0.271116997070477  |
| AGGATGTGTGAC  | 760.245323185    | 0.23451738153758   |
| ACTCATTGAAGG  | 760.247316792502 | 0.452954295213455  |
| CTAGGCAGTGAC  | 760.252432633334 | 0.347538455065827  |
| ATGATGCGACCA  | 760.257823103366 | 0.276520040895924  |
| TACTCATAATAA  | 760.259513631736 | 0.276600864311073  |
| GAGTAATTTTGC  | 760.259590462698 | 0.388683840880017  |
| TCGCTCTAGTCA  | 760.269341068219 | 0.34201210913758   |
| GCGCAAGTCATA  | 760.292233702317 | 0.370257370168908  |
| GATTACTGACGC  | 760.29247057198  | 0.32316910834051   |
| CGTCACGCAATA  | 760.296648309086 | 0.312951304901557  |
| GGTGACGCCCTTA | 760.297378388224 | 0.223824215412375  |
| TACTGCTGACTA  | 760.305626532131 | 0.0383510347356116 |
| AGGAATATGTCA  | 760.31183614251  | 0.267848766015168  |
| GAATTATTCATC  | 760.327029371776 | 0.294440341195864  |
| AGATTACAGTCA  | 760.328349144774 | 0.181043504676719  |
| CGTCACCCGAAG  | 760.330245177874 | 0.276318027875525  |
| GTCATCCAAAAC  | 760.331484785528 | 0.459477905028442  |
| GACTCTACGTGA  | 760.342181914465 | 0.399110458725887  |

|                |                  |                   |
|----------------|------------------|-------------------|
| ATCGCCAATGAC   | 760.357081202244 | 0.395086002404953 |
| GAGTCAAACCTTA  | 760.363017516985 | 0.462174272080347 |
| ATGATATGTGAC   | 760.365552885285 | 0.379882744778415 |
| ACTCTGACGCGA   | 760.366651036782 | 0.255730764613322 |
| AGGGTAATGACG   | 760.368751202996 | 0.247945529704274 |
| GTCATTGATCCA   | 760.372196969391 | 0.347710673231888 |
| AGTTAGATGACG   | 760.3751201287   | 0.215478456360929 |
| CGACCGTACTA    | 760.379924530049 | 0.215678113848395 |
| CGTATACGTGAC   | 760.386690270024 | 0.257266284967521 |
| AACTTTGGTGAC   | 760.386953777701 | 0.495930295942287 |
| CAGCCGACTCAC   | 760.387462716948 | 0.211930767785669 |
| CAACCTGTCACA   | 760.392355025021 | 0.201806801168551 |
| ATGACCCGTACG   | 760.392597582297 | 0.219972964275302 |
| GAGTGACAAACC   | 760.394349740568 | 0.279715123478905 |
| CTTGGCTAGTCA   | 760.397863875002 | 0.376254460777086 |
| GCGTCATGGGAC   | 760.398801036972 | 0.253216319001417 |
| CGTCATTGCGCA   | 760.401302104496 | 0.333404472385762 |
| AGACGGGTACATA  | 760.405344632666 | 0.191942452873016 |
| AGTCAGAAGCTA   | 760.409781860022 | 0.257210914430575 |
| AATGCCGTGTCA   | 760.409850011852 | 0.326987889206756 |
| ATGACCATAGAC   | 760.416947122178 | 0.219062774627672 |
| CAATGACATTAA   | 760.417174803314 | 0.340315682276974 |
| AATGAGTATGTG   | 760.428471071834 | 0.307161574514161 |
| AACTGCTGACTA   | 760.431156202012 | 0.252399934200426 |
| GCGTGAGATGAC   | 760.43288821809  | 0.232423939548229 |
| CGTCATCTCATA   | 760.440086448135 | 0.30499186050695  |
| CTGTCAATTGGAA  | 760.441692056542 | 0.375971305428164 |
| GCATTCAATGAC   | 760.465762361248 | 0.284445325575331 |
| GTCACCGCCATA   | 760.469560066955 | 0.174096908089477 |
| GATACTGTACCC   | 760.472688724648 | 0.266342500529953 |
| GACATATCTGAC   | 760.477013751424 | 0.42457425464438  |
| GAGTGACCAAGA   | 760.485966541066 | 0.296952487153626 |
| GGCAGGGAGTCA   | 760.498711147849 | 0.20468093600617  |
| GCCCTGTGACGC   | 760.504327697675 | 0.27789656132972  |
| GCAAGCGGTGAC   | 760.517301620504 | 0.258204227118576 |
| ACAAGGTAGTCA   | 760.52042688314  | 0.424772670819468 |
| AAAGCAGTCAGC   | 760.521950011009 | 0.285282113113438 |
| AGTCAGACTGTC   | 760.52932779481  | 0.351356131435338 |
| ATGACAGACAGC   | 760.531659999856 | 0.194759842130555 |
| ATGTCATCTGTC   | 760.539141612128 | 0.369803825767312 |
| TAAGTCTAGTCA   | 760.539980000403 | 0.363771561352541 |
| GTACTIONTGTGAC | 760.551447696192 | 0.256498068143106 |
| CACCTAAGTGAC   | 760.559267804303 | 0.347290859375758 |
| AAGTCACCTTGA   | 760.560493654777 | 0.240712404514699 |
| CCAAGTTTGTCA   | 760.561709918463 | 0.249810668699699 |
| GCATTATGACCC   | 760.566239078508 | 0.245048991803293 |
| AGTGACGTTAAC   | 760.570093093883 | 0.383644890970582 |
| AGTTACCGTCAT   | 760.58611060525  | 0.358973267447569 |
| GTCACGCAAGTA   | 760.587447602864 | 0.249318051743723 |
| GTCACCTGGATA   | 760.59678984333  | 0.248731553759322 |
| ACAAGCGGTGAC   | 760.604618297625 | 0.392578034925728 |
| GCGTCACTTTGA   | 760.610321344767 | 0.313889180407646 |
| AACAACCTCATAG  | 760.612154761383 | 0.208535191139841 |
| CACTGGTTAGTC   | 760.612967914293 | 0.296364829499885 |



|               |                  |                   |
|---------------|------------------|-------------------|
| AAATGTGACGAC  | 760.618304757767 | 0.350592142974852 |
| GTATCTGATTCA  | 760.620581784617 | 0.329998446554871 |
| ATCATCGTCATG  | 760.621650052871 | 0.266414015416979 |
| CGGCCTTGACTC  | 760.628427495226 | 0.226725281055878 |
| AATAGGTCACAG  | 760.63200200396  | 0.189816412176959 |
| CGGATTACGCAA  | 760.635487581119 | 0.362355041264007 |
| CGTCTGGGTGAC  | 760.643874263147 | 0.334344212936331 |
| GGGACATGACAC  | 760.645720369202 | 0.51610778616146  |
| CTGTTCCGGTGAC | 760.656509082559 | 0.265869285665258 |
| AATGCTATGAGT  | 760.665108245919 | 0.28457486990293  |
| GTCATTCCGGGA  | 760.669530436556 | 0.259711877815682 |
| GGTGACCCAACA  | 760.669902959647 | 0.291707144461641 |
| GAAATTCGTGAC  | 760.673761851993 | 0.227885307153914 |
| ATGACAGACCCG  | 760.685074818037 | 0.236922748731464 |
| AACTCTACGTCA  | 760.69371621434  | 0.297254313642195 |
| ATCGTCACGTCA  | 760.700531982807 | 0.249067114899728 |
| AGCAACGTCACT  | 760.706890186357 | 0.297187893275029 |
| ACAAACAAGTCA  | 760.707194096871 | 0.356718380594486 |
| GTGGTCACACAC  | 760.714888461465 | 0.395100938134097 |
| ACTCATCTTCTG  | 760.721988633184 | 0.224779630152462 |
| CAAGTGACGTCA  | 760.728730052683 | 0.303122372779274 |
| GGTGACCTGTAC  | 760.732288377214 | 0.360251682370592 |
| ACTCATACTGCA  | 760.736834276699 | 0.311062963204427 |
| CAGAGGATGACC  | 760.744180546699 | 0.306789781487604 |
| TGAAACTGGTCA  | 760.75123283407  | 0.261712265769635 |
| GGTCATATATGA  | 760.754979088416 | 0.340685015761638 |
| GGCATACATGAC  | 760.783374111968 | 0.286672626221618 |
| TAGCTCGACTCA  | 760.784064534997 | 0.223039603161576 |
| GATGTGTAACCC  | 760.790007719133 | 0.288399840451402 |
| ACCTAAGTGACG  | 760.796626643361 | 0.341414774326236 |
| ACCAGAGTGACG  | 760.809317498576 | 0.389532253655192 |
| CCCATGTGTGAC  | 760.811048656763 | 0.308448730842308 |
| ACCAAATGACAG  | 760.819171357874 | 0.310022407418192 |
| AGTTCTGACTGG  | 760.821212338139 | 0.311590765479229 |
| GTCATTATATCA  | 760.827988394561 | 0.49270972030906  |
| GGACACGATGAC  | 760.839391577495 | 0.203459624656716 |
| CTGAGTCGATAA  | 760.843199164365 | 0.209610730624081 |
| GTGACCAAGCTA  | 760.84451000136  | 0.384406481080174 |
| GCATGGACTCAC  | 760.846016465685 | 0.174337936158988 |
| GCGAGTTATGAC  | 760.855467309996 | 0.462806527567064 |
| TCTATAGTGTC   | 760.857490989469 | 0.190924082021347 |
| AGTCAGTCTTAC  | 760.863510597681 | 0.274760087401342 |
| AATCTTTCGTCA  | 760.872904789251 | 0.185654599189915 |
| AAGACGCAGTCA  | 760.886003426308 | 0.266245676629882 |
| GTAATTAATGAC  | 760.890858263466 | 0.307851032475826 |
| TGACATGGATCA  | 760.896057425174 | 0.248579155915837 |
| AAAGCTCGTCAT  | 760.902300234376 | 0.245741462545575 |
| TCAACGCTGTCA  | 760.91344785139  | 0.25810158202557  |
| CTGAAATTAGTC  | 760.94316982013  | 0.31627221518611  |
| AGTCAGAGGGCC  | 760.94720756727  | 0.250360706947263 |
| TGACGAGTACAA  | 760.951324988011 | 0.403773324339194 |
| ACTGGGTGATGC  | 760.961607803788 | 0.26368449486456  |
| AGTCCTGAATCA  | 760.96344943588  | 0.352107465812184 |
| GGCGGATATGAC  | 760.963708146347 | 0.300102472627687 |

|              |                  |                   |
|--------------|------------------|-------------------|
| ATACCTGATGAC | 760.963759609629 | 0.180347765757593 |
| CGGTGAATCTTA | 760.981519445813 | 0.30104128390549  |
| CTCCGAGTCAAC | 760.982129677888 | 0.227182193393674 |
| GTCATCCCATA  | 760.989766766591 | 0.303216726313212 |
| CGTCACTAAAAG | 760.996812169097 | 0.368038238093779 |
| GTAGGCAGTCAC | 761.004039342267 | 0.329900744636765 |
| CTCGAACATGAC | 761.016174544715 | 0.305797968944144 |
| CCTATGACCGCA | 761.024156302088 | 0.254608250390228 |
| ATACTCTTATGA | 761.03228093863  | 0.418464376406441 |
| ACTCATCCAATA | 761.036237406685 | 0.214931838922825 |
| ATGACTTCGTGC | 761.036628758274 | 0.278553383566786 |
| AGAACCCAGTCA | 761.037330399768 | 0.276193932904011 |
| GTCACTAGATGA | 761.038598549891 | 0.344022713338203 |
| AGTTACTGACTA | 761.040042689752 | 0.295759548247124 |
| AGCCGCTATGAC | 761.045460090694 | 0.258150945312768 |
| ATATTCAATGAC | 761.050909104045 | 0.220378737034924 |
| CCGTCAGTGTCA | 761.061327441115 | 0.339978101092977 |
| GATGATATGTCA | 761.061398758789 | 0.25608241567361  |
| GTACACCTATA  | 761.067542317845 | 0.519985584869001 |
| CGTCACACGCAG | 761.070351590446 | 0.221632911745174 |
| ATATTTGGTGAC | 761.085491198413 | 0.352561743987864 |
| CTCATCAAGTCA | 761.091713265883 | 0.309219609857927 |
| CGGTCTAAGTCA | 761.09727518442  | 0.191090728838724 |
| TCCACAGTGTCA | 761.101437754493 | 0.483383039413665 |
| CTGAGGTGACGC | 761.129747372832 | 0.397521360309145 |
| AAGATTAAGTCA | 761.130852138136 | 0.367771777754616 |
| GAGTCAAATAAC | 761.131532047097 | 0.407215179584937 |
| ACGTCACGTGTC | 761.13267325207  | 0.326499950806617 |
| AGTCAGCACCTG | 761.139839770492 | 0.420340462950933 |
| ACGGGTCATCCT | 761.140403057509 | 0.269571321496287 |
| TGGCTCATGAAA | 761.143585249329 | 0.278652889687241 |
| TCTGAAGACTAA | 761.147776467426 | 0.465695074465914 |
| ATACTCATTAGG | 761.155207102326 | 0.270151045629156 |
| TACCCTCAGTCA | 761.166446275937 | 0.280873845301548 |
| ATGACATTAACC | 761.169157548211 | 0.160603500461844 |
| GCGCGAAATGAC | 761.173230876288 | 0.354159074755536 |
| GATATTAATGAC | 761.179513432539 | 0.301498240489709 |
| CCGTTGACGTAA | 761.182796395013 | 0.373611021257145 |
| TGAACCACGTAA | 761.208410576035 | 0.285410565015216 |
| TCATCAAAGAGA | 761.217945789362 | 0.317350568930533 |
| TGACAGGTCAAA | 761.218994576887 | 0.296708883897418 |
| CATCGCAGTGAC | 761.22054132471  | 0.361510922133738 |
| ATGACAGGAGTC | 761.222268110792 | 0.334287670463771 |
| ACGAGATGACCA | 761.223268491504 | 0.389949203671264 |
| ATTGCTTGGTCA | 761.231675970081 | 0.358023810766399 |
| TAAATGTGACGA | 761.233884631348 | 0.273911204409104 |
| GTCATGGCCGAC | 761.240038977013 | 0.284455567708364 |
| ATTATTCATAAG | 761.244706161199 | 0.301367729265657 |
| ATCCTTGTGTCA | 761.252675443862 | 0.251900244880584 |
| AGAGCTTACTCA | 761.257019791104 | 0.236379342202243 |
| ATTACTGACTTA | 761.269314023906 | 0.265930849848882 |
| AAATGAGTTGTC | 761.275790515523 | 0.236788819435414 |
| ACGCGCGACTCA | 761.28132956875  | 0.203481037849358 |
| CAAGTAATGACG | 761.302042340737 | 0.311769755587097 |

|               |                  |                   |
|---------------|------------------|-------------------|
| ATATGACGGTAA  | 761.304564289475 | 0.278025962892345 |
| CCGATTACTGAC  | 761.321407631787 | 0.230209820327614 |
| GTCATCTCGCAC  | 761.323669740095 | 0.301689110909114 |
| CGATTTGTGACG  | 761.324050010939 | 0.296317582634562 |
| ACTCATCGCTTG  | 761.324067118026 | 0.280844327000315 |
| GTCTGACGTCAA  | 761.325948135078 | 0.191524214168917 |
| ACGTCCGTGTCA  | 761.32891358852  | 0.405272231969153 |
| ACGGCTTCGTCA  | 761.331465919338 | 0.404435733719247 |
| AGACTCACGCGA  | 761.336101069397 | 0.24226848411554  |
| AAAAGAGTCGAC  | 761.361183542743 | 0.231299176184896 |
| CCAGAATGTGAC  | 761.361638398536 | 0.273082725694112 |
| GTTACTCTGTCA  | 761.36274640976  | 0.2607168229132   |
| CTCTTATGTGAC  | 761.364231769524 | 0.406171055952918 |
| CTAGACAAGTCA  | 761.366348336607 | 0.230017966981619 |
| AGTCAGCGTTCA  | 761.373854409721 | 0.226175466339649 |
| ATAAGCAATGAC  | 761.385849186368 | 0.334644095217073 |
| ACGTCACCTCGCG | 761.386537841325 | 0.267764353113005 |
| GCTCTTGTGACA  | 761.391949645515 | 0.161448521800645 |
| AGTCAGACCAAA  | 761.394350307724 | 0.284710051596217 |
| CCTGCCAAGTCA  | 761.403011068169 | 0.18118777549068  |
| AATACATAGTCA  | 761.417156181905 | 0.242702302233105 |
| AGACTAACTCAT  | 761.418173990011 | 0.284424371596057 |
| ATTGCAATGACG  | 761.427327625771 | 0.270143611367333 |
| GATTAACGTGAC  | 761.442807756492 | 0.369890368647347 |
| ATGTGTAACACA  | 761.449019500123 | 0.302364646284588 |
| ATTAATGTGACG  | 761.449312419475 | 0.337172134550752 |
| AGTCAGAGCTCG  | 761.458231816319 | 0.13795434452291  |
| AACACGAGTGAC  | 761.467633342892 | 0.252870128101946 |
| ATTTTAGTGTC   | 761.471298046282 | 0.281856515786085 |
| TGATTAATCACA  | 761.497067477691 | 0.154697417466326 |
| CATCCGTGTGAC  | 761.508452082088 | 0.256650071372754 |
| ACTCATACCTGC  | 761.510688451432 | 0.184118954723398 |
| AAGACTGACTTA  | 761.516009082315 | 0.18841632779046  |
| ACGTTGGACTCA  | 761.522011806853 | 0.327230358497918 |
| AGCACCTCGTCA  | 761.526013127211 | 0.419029051824819 |
| GCTTGTTGGTCA  | 761.530170068049 | 0.34478313353312  |
| AGAACGGGTGAC  | 761.531157512579 | 0.17384934486732  |
| AACGTCTAGTCA  | 761.531549239584 | 0.284787405078167 |
| CTGAATCGTGAC  | 761.537672046716 | 0.274940942797483 |
| ACTTTGTGGTCA  | 761.542125079532 | 0.22798758503018  |
| CACTCATCTGGG  | 761.560159433853 | 0.460953455677617 |
| GTCACCAGGTAA  | 761.560705595036 | 0.355531149321848 |
| AGTCACGAGTGG  | 761.571839231909 | 0.27377585540062  |
| GATTGGTGTGAC  | 761.581298198134 | 0.283052747568415 |
| ACGAGATTAGTC  | 761.585428430795 | 0.265524272462476 |
| GGCCTAGACTCA  | 761.59518125656  | 0.390795506618245 |
| AGACTAATCGCC  | 761.5976342338   | 0.262992974842809 |
| TCGCGTGACGAA  | 761.628538592815 | 0.188213861838283 |
| AATCTTGTCA    | 761.644012786167 | 0.322644896661449 |
| ATCATGACGTTA  | 761.663340604121 | 0.301304766511495 |
| AGACACAATGAC  | 761.669379261873 | 0.26506406012753  |
| GACTCAGTTTAA  | 761.673285616082 | 0.52027432900588  |
| CAAAACAGTGAC  | 761.678617409469 | 0.198600975983664 |
| TCATACTAGACA  | 761.682056126541 | 0.370922843010001 |

|               |                  |                    |
|---------------|------------------|--------------------|
| CGTCACCTGTCA  | 761.684970508028 | 0.209765498375341  |
| CGCCGATGTGAC  | 761.685393867871 | 0.255710616652826  |
| AAAAGCGACTCA  | 761.69090212623  | 0.186394875744936  |
| GTCATGGATCAA  | 761.693940729881 | 0.418637301137978  |
| AACGTGTCAGAT  | 761.707005490389 | 0.219671187961825  |
| ACAGTCAATTAT  | 761.722029583584 | 0.350040369483519  |
| CAATTTGAGTAA  | 761.724124527675 | 0.377617635092865  |
| ATGACAGCGGTG  | 761.725173810975 | 0.166321556534954  |
| GTATATTGTCAC  | 761.725717448719 | 0.366481653338328  |
| GACTCTTAAGTC  | 761.727255976265 | 0.267471420357243  |
| AAACCGTCACAC  | 761.733786610038 | 0.198282071912553  |
| GCATCCGACTCA  | 761.74106422237  | 0.328053890973621  |
| ATGACGTCTTGA  | 761.745384823798 | 0.277514919833042  |
| CGTGACATGGCA  | 761.746920972558 | 0.237972043534057  |
| CAAGTGATGTCA  | 761.749542661949 | 0.338690300856828  |
| AGTCCAACATCAT | 761.757124189922 | 0.20417607445724   |
| ATGACGTGCGCA  | 761.765112235453 | 0.249335031310629  |
| GTCATTAGGGAC  | 761.766286448388 | 0.296027336897422  |
| ACTCATCGGTGG  | 761.766559320343 | 0.319750484896738  |
| GCGGATTGCTCA  | 761.769483303302 | 0.0853923351349562 |
| ACAACCGGTGAC  | 761.772838634931 | 0.392237205109059  |
| AAGTCTTCGTCA  | 761.776446978346 | 0.265286638901456  |
| GCGTCACATCAC  | 761.777484249216 | 0.18830778856212   |
| TGACAAGACTAA  | 761.779463025696 | 0.313349034810585  |
| TCACACTAATGA  | 761.782619080132 | 0.391905424974965  |
| AGTCAGACATAT  | 761.78303822129  | 0.307413166937493  |
| GTCACATCGCCA  | 761.788387522515 | 0.184593722655649  |
| GACTATATGACC  | 761.792553727348 | 0.3671029946498    |
| CGTGATCATGAC  | 761.800862012663 | 0.289237586645171  |
| GACGTGTAATAC  | 761.808875902174 | 0.225363209719696  |
| AGTCACGCTCCG  | 761.812814988594 | 0.344715220434126  |
| CACGTACATGAC  | 761.816113719548 | 0.299204629287023  |
| AAACACGGTGAC  | 761.827435213069 | 0.176674830104195  |
| GTCAGCAATGAC  | 761.831897017312 | 0.497942796035132  |
| CACCCTACGTCA  | 761.842076080646 | 0.279369231192183  |
| TACTTGTACCA   | 761.852397179623 | 0.200032281010495  |
| TCGTACAGGTCA  | 761.854617719911 | 0.355031442058028  |
| GTTGACTACAAC  | 761.860868101813 | 0.554239165639752  |
| ATTAACATATA   | 761.864872265063 | 0.362136016302912  |
| AGTCAGACTTAC  | 761.869790313413 | 0.318626815319909  |
| GTCAGTACTACA  | 761.872494209198 | 0.235943428014442  |
| CAAACAGTCAG   | 761.874239860389 | 0.256223571353104  |
| ACGTCACAGCAC  | 761.889458253243 | 0.278919828122999  |
| CGTCATGCGATA  | 761.893950689358 | 0.20191831286342   |
| GACTAATTTACC  | 761.90048871013  | 0.271763465010701  |
| AGATTATTAGTC  | 761.903549955764 | 0.450522084841461  |
| ATTGAGTCGAAA  | 761.905782606467 | 0.253646934956862  |
| ACTTGTGAGCCA  | 761.908326144829 | 0.336314132298938  |
| GTCATCCGGCAA  | 761.908647257962 | 0.371701370860024  |
| ACTCATTGAGTA  | 761.91468962693  | 0.251124162315245  |
| AGATTCCGGTGAC | 761.917103325896 | 0.25143713436612   |
| AGCGTTAATGAC  | 761.92039234144  | 0.322564878450969  |
| GCAGTCACGAGC  | 761.925657591553 | 0.231834791553928  |
| AGACTAATCCGA  | 761.928407748256 | 0.205238925394694  |

|               |                  |                   |
|---------------|------------------|-------------------|
| AAGCACTGTGAC  | 761.930016234795 | 0.435877155401401 |
| ATGTCACCGTGA  | 761.930381245472 | 0.304842813759655 |
| ACGTCACTTTCG  | 761.931476563749 | 0.258790408005989 |
| GTGATGTGGCCA  | 761.933068494221 | 0.28062436926066  |
| CTCGAAGCGTCA  | 761.952162069436 | 0.361442632926323 |
| CTCGGCCATGAC  | 761.955594908405 | 0.346810805528862 |
| GACTCAGAATCC  | 761.960085492433 | 0.31521649969213  |
| GATTACTCGTAC  | 761.976013069793 | 0.25314298184042  |
| ACTCATACACAG  | 761.991244824676 | 0.272909549742677 |
| GTCACAGTACAA  | 761.992499076441 | 0.310923985126269 |
| GCGGCGGAGTCA  | 761.994417096151 | 0.268251001870449 |
| AGATGTATCACA  | 762.007671186843 | 0.261684744462131 |
| TGACACTTTCCA  | 762.008347034741 | 0.189199304347628 |
| ATGGAGATGACG  | 762.008984684537 | 0.24215727592961  |
| TGACACTGATCA  | 762.01995427084  | 0.394583519559908 |
| AACCGGTCATAA  | 762.022202881208 | 0.317996270295171 |
| CCGACTAATTCG  | 762.023367408317 | 0.306658281237148 |
| CAGCTCAGTGAC  | 762.039009129111 | 0.284108815508023 |
| CGTCACACGAAC  | 762.042829710152 | 0.337765254647694 |
| CGGTCATCATAA  | 762.044974380087 | 0.456363772920635 |
| CTCTGATGACCA  | 762.049019285388 | 0.251190219620485 |
| GTCATGCAGGAA  | 762.050636135817 | 0.260652773571366 |
| CCTTATCCGTCA  | 762.055358526842 | 0.282429851673266 |
| ACGGTGAATGAC  | 762.058652081601 | 0.156097312137772 |
| ACAACATGACGT  | 762.067579198545 | 0.380852910971067 |
| CAACCATGACAA  | 762.098575861615 | 0.260494754210509 |
| ATGACAATAAAG  | 762.114436021102 | 0.16076009056571  |
| GAATGTATGACC  | 762.119666245286 | 0.365473175797562 |
| GTTCCCTTATGA  | 762.129823410694 | 0.312836178234821 |
| AGTCAGACGTGA  | 762.143950683476 | 0.247795047977522 |
| ATGATGTAACGA  | 762.14647845589  | 0.250062411468026 |
| GAATCATCATCA  | 762.146658010547 | 0.231703536905046 |
| ATTTCGTAATGC  | 762.152094601515 | 0.32048198837868  |
| AGGAGAAATGAC  | 762.155185932957 | 0.259867277654595 |
| AAGTTGTGACCA  | 762.162231034313 | 0.291191127291166 |
| CTTCTGCAGTCA  | 762.162787560333 | 0.296842801507886 |
| ATGACCACTGAG  | 762.184083758824 | 0.275232098103957 |
| TAATAAACGTCA  | 762.188015786905 | 0.341871196680058 |
| GTCACGATTAATA | 762.198680605364 | 0.349956755543345 |
| ACTCATCCATAG  | 762.199215534791 | 0.252241638849281 |
| GTCATCCCCAAA  | 762.200660671352 | 0.256455043993461 |
| CGACACTGTCAC  | 762.204078204124 | 0.192618917458821 |
| TGAGTCGGTCCA  | 762.206053463656 | 0.246099422302691 |
| GTCATGCATTAA  | 762.206552640719 | 0.109183859411323 |
| GACTTATGTGAC  | 762.23506554883  | 0.451641285058823 |
| ACATAGCAGTCA  | 762.235904542842 | 0.347784080376771 |
| AAGGTGAGCCAC  | 762.242726145961 | 0.176191274092837 |
| AGACGCAATGAC  | 762.250601851854 | 0.251470475422952 |
| ACTCATTCTGGC  | 762.251224565625 | 0.303178069899882 |
| CAAAAGTGTGAC  | 762.257471532404 | 0.315610836226032 |
| ATCGTAACATGA  | 762.261244379433 | 0.377590654984002 |
| TACCCTGCGTCA  | 762.266580260612 | 0.273128950305758 |
| AATAGTCAAGCG  | 762.280740840257 | 0.2276290806033   |
| AGAGTAATTTCA  | 762.281243342061 | 0.30358808889229  |

|               |                  |                   |
|---------------|------------------|-------------------|
| GTAGGTCATGAC  | 762.286933801169 | 0.19951374707651  |
| AATTCTCTGTCA  | 762.291461059028 | 0.258835207012163 |
| CCGCGTCACGAA  | 762.301809159562 | 0.387696992133136 |
| CGACTCAGAAAA  | 762.316360696995 | 0.393553443003042 |
| ATTTAGACTCAG  | 762.319847875479 | 0.190644297644509 |
| CGTGCTCTGTCA  | 762.334374057369 | 0.316248755927614 |
| ATTGCCATGTCA  | 762.348711273006 | 0.2578217087315   |
| ACCTTCGGTGAC  | 762.356618388198 | 0.357565956845046 |
| CCGGGAGAGTCA  | 762.363722760221 | 0.312780095956643 |
| GTCACACCAAAC  | 762.367169677901 | 0.314802162680463 |
| CTGACTCGGAAG  | 762.367457445604 | 0.184863031016506 |
| GAGTCAGGAGTA  | 762.370568767838 | 0.121879808262796 |
| ACAGATGACCGA  | 762.379032118041 | 0.330012888368651 |
| TCATAGATATAA  | 762.407792144584 | 0.380794640877507 |
| GTCATGTGTTAA  | 762.41299802566  | 0.208994497166895 |
| GCACGGGAGTCA  | 762.413243994578 | 0.339695599744693 |
| CTGACTCGCTTA  | 762.426233380678 | 0.190928133858069 |
| ACTATTACTCGA  | 762.426568674835 | 0.248707694861512 |
| TGACACTGAGAA  | 762.439066596178 | 0.31686642805559  |
| GAGTAATTTCTGA | 762.442959470831 | 0.144476868931608 |
| CCATATTGTGAC  | 762.453689171165 | 0.325982939492572 |
| ATCATGACAGAC  | 762.45802243069  | 0.267212604774281 |
| CAGACTTCGTCA  | 762.462213417332 | 0.303977726079039 |
| AGTGCTTGTTCAT | 762.468656785241 | 0.276254722256816 |
| ACATCATTATGA  | 762.474954751905 | 0.380383666902655 |
| ATGACATCTAAG  | 762.481337710389 | 0.342716661871316 |
| ATGACACCCAAA  | 762.485315682733 | 0.215836917712786 |
| CAGCGAAATGAC  | 762.48760982553  | 0.396597841277123 |
| TAAGCTGTCACA  | 762.495351710258 | 0.307173482231515 |
| GGGCCACGTAAC  | 762.501095655077 | 0.242812313325115 |
| TCAACGTCGTCA  | 762.509119542066 | 0.271323176126826 |
| TATAAGTAGTCA  | 762.518146034094 | 0.526032334810688 |
| AGTGAGACTCAC  | 762.520334497498 | 0.270625178900652 |
| ATGAGTCTCGCG  | 762.520486943312 | 0.362925971872417 |
| CTTGCTTGGTCA  | 762.526092976256 | 0.327883012323285 |
| ACGTCACCTAAG  | 762.528554791897 | 0.188616057431792 |
| ATACGGGTGAC   | 762.529483339583 | 0.211614733792877 |
| AGAAGGTGACAC  | 762.5332822896   | 0.204679630361241 |
| ATTTTGGGTGAC  | 762.535191856692 | 0.309086763891289 |
| CAACAGATGACG  | 762.541656394614 | 0.253771135690824 |
| CCCGTGTGACAA  | 762.542088911171 | 0.266224228940067 |
| GATAAGCAGTCA  | 762.561072420275 | 0.308382544572848 |
| CTGTAGAGTGAC  | 762.561119730442 | 0.310126411284011 |
| AGACCTTGTTCAT | 762.561658598935 | 0.411902063520896 |
| ATGTATGGTGAC  | 762.565505742892 | 0.280974022517093 |
| ATTGGCTGAGTC  | 762.566780953017 | 0.420878734365885 |
| AACGTCATGCGA  | 762.582208294012 | 0.322019276386005 |
| GTCACTGTCAAA  | 762.590414782497 | 0.237418445169837 |
| AATTTTGACGCA  | 762.593625504135 | 0.386512620349973 |
| GTCACACCGGTA  | 762.59910833916  | 0.227924029966588 |
| CCACAAATGACG  | 762.599927249884 | 0.264026079740534 |
| ATGTTAATGACA  | 762.600834863037 | 0.3975161660472   |
| ACGTCACTCGAA  | 762.601254120435 | 0.337780360827979 |
| GCCCATTTGTCA  | 762.603345591236 | 0.26720423577468  |

|               |                  |                   |
|---------------|------------------|-------------------|
| CGCGCTATGTCA  | 762.603978575121 | 0.25888444562636  |
| GTCATGGGTTC   | 762.609223592255 | 0.252418940489505 |
| CGATGAGTTAAC  | 762.622578650434 | 0.275390083325205 |
| CTCAAATGACAA  | 762.63103124739  | 0.431637583801868 |
| ATGAGTACGGAC  | 762.634835485937 | 0.185958703548333 |
| CAAGCGCAGTCA  | 762.635375445444 | 0.307613392657292 |
| TGTGACCCTAAA  | 762.635872528341 | 0.346335042119405 |
| GATGAGGTGTCA  | 762.636629658525 | 0.267427398892317 |
| AGTCAGAGGATA  | 762.638240729352 | 0.198465842467011 |
| AGCAGCGAGTCA  | 762.640499151409 | 0.260276918832282 |
| ATTGACTCTCAC  | 762.655250671809 | 0.212230378057749 |
| ACGTCACCTCTC  | 762.658326534298 | 0.258059461825483 |
| GTCACCAGGGAA  | 762.660208832401 | 0.401418273477545 |
| ACCACTGTCATA  | 762.661153619443 | 0.361670679224669 |
| GAAGAGTCTTAC  | 762.66869066592  | 0.202907137190042 |
| ACGTCATGTCTGA | 762.683180145671 | 0.36314543833815  |
| TGACTAGTCCCA  | 762.68331095574  | 0.27501241347877  |
| GTTCCGGAGTCA  | 762.686155422632 | 0.212864115692215 |
| GGTGAGTTGTCA  | 762.688684701207 | 0.316212949811761 |
| ATCCCATGACAC  | 762.689917592605 | 0.268758360019965 |
| CGTGTCGTGAC   | 762.690436837641 | 0.420667346068651 |
| TACCATTTGTCA  | 762.692902714423 | 0.159272831853776 |
| ATACTTGGTCAC  | 762.696866078765 | 0.279373018473569 |
| ATGACGTTGGCA  | 762.697924901354 | 0.222253264011329 |
| AGTCTGTGTGAC  | 762.702883919092 | 0.296250381856257 |
| ATGACGTTCCAA  | 762.709215448812 | 0.29020855134713  |
| AGCAACGTCACC  | 762.710129101894 | 0.327471966858584 |
| GAATTGCAGTCA  | 762.720292800887 | 0.292635403841099 |
| GTCACCCCGATA  | 762.725276338552 | 0.299396013283402 |
| CACGTGATTAAG  | 762.727372113716 | 0.399694132798304 |
| AACAAAGTGTCA  | 762.736822971385 | 0.292883069330925 |
| CAGTCAGTACAG  | 762.745814045392 | 0.278783604308883 |
| GTCACCCGAGGA  | 762.753333520963 | 0.295187333658068 |
| TACTCTAAGTCA  | 762.769760334538 | 0.526517354364978 |
| CCCGAAATGAC   | 762.773821030201 | 0.283807304283375 |
| GTATCCGACTCA  | 762.774716776937 | 0.271552120452677 |
| ACGCGTGACACC  | 762.775415192878 | 0.263625704185842 |
| ATGACGCGCTGG  | 762.785529718403 | 0.314335093581872 |
| ATCTAGGACTCA  | 762.793213051893 | 0.222903162280234 |
| AGTCAAGACTCA  | 762.794250108336 | 0.278652189469323 |
| ATCCCGAATGAC  | 762.795814472411 | 0.301769688020743 |
| ATGAACACGTAA  | 762.798842324317 | 0.452628436789186 |
| ATGACAAGATAG  | 762.808896989554 | 0.24800745514502  |
| CCATACCTGTCA  | 762.813325915171 | 0.384334713164637 |
| AGTCACGCTCGC  | 762.826182256125 | 0.34995140041546  |
| ATAAGCTGTAC   | 762.839594850881 | 0.268235653706754 |
| ATCACGACGTCA  | 762.844159162792 | 0.188789529458424 |
| ATGACGTTCCCTA | 762.855296095948 | 0.253598489682897 |
| CAGAAGTAGTCA  | 762.858980602317 | 0.244227516664601 |
| TCCTTTTCGTCA  | 762.861259614315 | 0.386599695490126 |
| ACTATGAATAAT  | 762.890491672355 | 0.25101021960061  |
| CTGCCAATGACA  | 762.89405289622  | 0.224826242285202 |
| CCCCTATATGAC  | 762.897674917549 | 0.185095202530789 |
| AGTCAGATTAT   | 762.907945121802 | 0.277351077383716 |

|              |                  |                   |
|--------------|------------------|-------------------|
| AGATCCGTGACT | 762.908499168988 | 0.320766445183514 |
| ATGACAAGGTAA | 762.909890392429 | 0.288286824235284 |
| CCCGATGAATAA | 762.910331707186 | 0.434715978974161 |
| CCAGGAGGTGAC | 762.926790285367 | 0.20860160048098  |
| CAGTCGTGTAC  | 762.927348489001 | 0.220848945778782 |
| CAATGAATCTTA | 762.935506629143 | 0.316962189480102 |
| AATGACAAGGCT | 762.938709015853 | 0.272172087072554 |
| GTCACCAGATCA | 762.939107578118 | 0.481191615073466 |
| ATGATCAATGAC | 762.943942925647 | 0.304672293537088 |
| CGTCATTGGCGC | 762.950255860231 | 0.375855101592612 |
| ATCTTATGTGAC | 762.958386146561 | 0.30845005349023  |
| AGATACGTCAAC | 762.959401313986 | 0.294420901528865 |
| CGCAATGACATC | 762.960770942585 | 0.304627953003961 |
| GCTTGACGTGAC | 762.965064585089 | 0.34437614996495  |
| GTCATGCACGGA | 762.967375007362 | 0.40788892888953  |
| CTAAATGTGACA | 762.969475955192 | 0.214392940765994 |
| CGAGACGTCATC | 762.972038838231 | 0.353830614382068 |
| GTCACACAACCA | 762.983651115141 | 0.216962992634946 |
| CGGAACATGTCA | 762.992206088038 | 0.350480873268908 |
| GTACACTCATA  | 762.997683347947 | 0.175760665244327 |
| CAGCGGGAGTCA | 763.014516227188 | 0.262951713660123 |
| AGTCAGACACGC | 763.017377300028 | 0.223839492837589 |
| CTTGTTTGTGCA | 763.019870140459 | 0.249544392443167 |
| GAAGATCTGTCA | 763.024832690703 | 0.257822511795206 |
| GTCATGACCTGA | 763.03196207796  | 0.309466206125043 |
| AGCCAGGGTGAC | 763.035005149487 | 0.401723737230826 |
| CAGGATGGGTCA | 763.042432309505 | 0.321181517053401 |
| CATATAGGTGAC | 763.05567561437  | 0.427115423294186 |
| ATGTCATTAGTC | 763.057650168228 | 0.356715259025031 |
| GTCGTTGACACA | 763.060463872106 | 0.270578249253143 |
| ATGATTGACTGA | 763.065554844569 | 0.467302908643939 |
| AGTCAGTAGAAC | 763.066927312572 | 0.186249989409333 |
| AGAACAGATGAC | 763.068381050718 | 0.231636892054469 |
| GGAGTGAATGAC | 763.0683938112   | 0.397957860614189 |
| GCCTTGTCACAC | 763.078410826016 | 0.242826844876249 |
| GTACTCTGTGAC | 763.079392422982 | 0.214824944203385 |
| ACGGCAAATGAC | 763.080534860656 | 0.306009343445854 |
| CTCAGCTAGTCA | 763.095143558184 | 0.400454647339266 |
| ATGACAGGGCCG | 763.095635738755 | 0.398227237283791 |
| TCCCATGACCCA | 763.100134777384 | 0.198058467092325 |
| AACCGACATGAC | 763.100312504764 | 0.262838277294444 |
| GTAAGTGTCAAC | 763.101933445645 | 0.226915462559884 |
| ACTCATTGTTTG | 763.118124156598 | 0.351512076730886 |
| ATGACATGCGTA | 763.119254255339 | 0.235998795380631 |
| ATACCTGTGACG | 763.126801698936 | 0.205287050331417 |
| TGACAGGTTTAA | 763.139848554306 | 0.209005249399554 |
| CAGTGTGACACC | 763.14778388361  | 0.173272557371692 |
| GTATAATGTCAC | 763.14804067279  | 0.357265890521321 |
| ATCTGCGTGTCA | 763.150908679761 | 0.318535487277131 |
| AGTGTACCGGTC | 763.153837847233 | 0.260721225307845 |
| GCTCACATGACA | 763.158721039229 | 0.273663375008928 |
| TCAGTCAAGGAA | 763.166512845896 | 0.343410881364513 |
| CGAATATGTGTC | 763.169606977166 | 0.374773297439223 |
| TGACGTGTGGAA | 763.177100297089 | 0.23986900114254  |



|               |                  |                   |
|---------------|------------------|-------------------|
| GACATCATGACA  | 763.18804220799  | 0.174193883323592 |
| ATGAGTCCCAG   | 763.191402479713 | 0.271706829712141 |
| GGTCAAACGTCA  | 763.195520092809 | 0.393563150870124 |
| ATTATGAGACAC  | 763.204433250975 | 0.331869372879855 |
| ACTCATAGGAAT  | 763.215409149172 | 0.293109317426732 |
| AAACACGTAACA  | 763.219004695861 | 0.248911697500126 |
| CTAAGTCTGACA  | 763.221689371601 | 0.263364120088043 |
| GACGTCACCCAA  | 763.226274444217 | 0.27565282934432  |
| ACGTCATGGTGC  | 763.227537020748 | 0.225493112329995 |
| TGCTCATGACAA  | 763.236913442637 | 0.297667046553296 |
| AGTCGATTCATA  | 763.239798135552 | 0.416551659443103 |
| CCACATGACATA  | 763.242724938061 | 0.304099691439823 |
| CATGACAATGCC  | 763.248445285475 | 0.421873014686017 |
| CCGCAGCATGAC  | 763.248523349163 | 0.403949775442269 |
| CATATATGTGAC  | 763.256223947104 | 0.312808316503234 |
| AGTCAGCGTCAG  | 763.257250029326 | 0.370932824262847 |
| GATATTCGTGAC  | 763.264044216205 | 0.21640428270902  |
| TGGTCATCTTAA  | 763.267317055239 | 0.280567848507887 |
| GAGTAATCTTAA  | 763.275059411756 | 0.227152129004482 |
| GCAAGGAATGAC  | 763.283040169936 | 0.258982498222079 |
| ACAGTCAGCGAA  | 763.285529581298 | 0.413415247193742 |
| ACACAATGTCAT  | 763.286662684944 | 0.232257768028895 |
| GTCATCCACCCA  | 763.294685644432 | 0.323598548419837 |
| TCACATTAGGAA  | 763.29557429729  | 0.374529851095607 |
| TGACGTAGGAAA  | 763.30992404507  | 0.2664390791919   |
| AGTTTGTCACTC  | 763.312355948828 | 0.28665789942777  |
| GCAAGTAAGTCAC | 763.312580069477 | 0.278419391120363 |
| TATTTTACGTCA  | 763.315435633821 | 0.272919340111722 |
| GGATTACATGAC  | 763.326611254533 | 0.301136031618795 |
| ATTCACTCATTG  | 763.33107279507  | 0.15621796004762  |
| ATGTACAGTGAC  | 763.340694450895 | 0.375850990349934 |
| TGCGTGTGACAA  | 763.341391535871 | 0.277564144384814 |
| CCCAATCGTGAC  | 763.34221516887  | 0.323036354295993 |
| TCAATTGGGTCA  | 763.343226463062 | 0.29440200198286  |
| AGTCACGAGCAC  | 763.356442548454 | 0.229921126578429 |
| GGGCCGGATGAC  | 763.358073884926 | 0.290599436322424 |
| ACTTAATGTGAC  | 763.362944616509 | 0.328946378800425 |
| TCATTGTACTCA  | 763.366566352186 | 0.338345991732158 |
| AGGACGAATGAC  | 763.37238349548  | 0.231220644398524 |
| AGTCAGAATTGG  | 763.372765621012 | 0.161498972949262 |
| CTCTCAGACTCA  | 763.377032937012 | 0.211602190281356 |
| AGACGAAATGAC  | 763.37832249547  | 0.338672882818412 |
| ACCCGTGTGACA  | 763.381368734558 | 0.291473116667285 |
| TACAACATGACA  | 763.383111323716 | 0.405042368829012 |
| TATTATCGGTCA  | 763.383857927973 | 0.219794715808625 |
| AAACCGCATGAC  | 763.389209807525 | 0.266857415489275 |
| GATACTGTGACA  | 763.391611423539 | 0.344961571547663 |
| ATAAATGTGACG  | 763.394115331388 | 0.293187969688924 |
| ACGAGTAATAGC  | 763.396006217306 | 0.22855842738774  |
| AGTCACGAGACG  | 763.403404627623 | 0.207717681028615 |
| CGTGAGTATACA  | 763.404582829169 | 0.317682603723207 |
| CAGCAGGACTCA  | 763.417018858114 | 0.273789140123336 |
| AACTCATGACGC  | 763.429046516546 | 0.36266018954243  |
| CTGACTCCGATC  | 763.429203813643 | 0.263313674052995 |

|               |                  |                    |
|---------------|------------------|--------------------|
| CGCGAATGACCA  | 763.430975185748 | 0.397285302914904  |
| GAGGCAGAGTCA  | 763.433838987734 | 0.251416850970075  |
| CCGTAGTGACAA  | 763.442804968775 | 0.506921040082773  |
| CAAGGCTCGTCA  | 763.444193324715 | 0.521820221932745  |
| CCCGATTACGCA  | 763.4468331706   | 0.0808703462147893 |
| CGCTCCTATGAC  | 763.449549625455 | 0.226537585664112  |
| GTAGTCCAGTCA  | 763.451092904825 | 0.462984407274143  |
| ATCCCTACGTCA  | 763.451519318501 | 0.259172615045487  |
| CATTAGTGAGTC  | 763.452791453896 | 0.261707141455909  |
| AGGGTGTCAATGC | 763.455227027851 | 0.181140901746266  |
| GTGTCCATGTCA  | 763.457800809581 | 0.412172716524828  |
| ACTCCTCTGACT  | 763.467369588858 | 0.240565409830878  |
| CTCTGTAGTGAC  | 763.4785896235   | 0.268575734984683  |
| CAGATGCAGTCA  | 763.484321061297 | 0.324612333693823  |
| GGTCATAGCAA   | 763.485778062824 | 0.387542419013322  |
| ACGGTGACAAC   | 763.48651000009  | 0.369057349865991  |
| TCCGCAGTGTCA  | 763.493095910179 | 0.250408203812698  |
| CAGATGACCGAA  | 763.493388921042 | 0.347764478754467  |
| GGGCCACGTGAC  | 763.501980624737 | 0.462627200613527  |
| GACTAATTTAAC  | 763.503681814382 | 0.330292340269286  |
| AGAGTCAAGTCC  | 763.507685926131 | 0.330774847489627  |
| GTCATCTGACCA  | 763.513336972995 | 0.328465192467789  |
| AGTCAGAAGGAT  | 763.524631453485 | 0.283647846958165  |
| ACTAGTAATAGT  | 763.546587920713 | 0.326133366882789  |
| AGACTTAATGAC  | 763.561551615385 | 0.133933910342741  |
| CGTCGACGTAC   | 763.564206081565 | 0.283530239965036  |
| ATTAGTCTGTCA  | 763.573610880213 | 0.414219503907411  |
| CTGACAGATCCA  | 763.574044449387 | 0.266850470079849  |
| CAAAGATTACTC  | 763.57653300253  | 0.417711253472447  |
| CATCATGACCAG  | 763.587230481018 | 0.329616276665713  |
| ACGCGGAATGAC  | 763.598603462114 | 0.371333498030086  |
| GTCACTACTTAA  | 763.606639602131 | 0.355420067553096  |
| CGCTTTAAGTCA  | 763.620131802289 | 0.245388327527638  |
| TAGTTTGACGCA  | 763.622029717376 | 0.269516221796224  |
| CAATCAGTCTTA  | 763.634331084058 | 0.225166046458782  |
| GCATGGATGACC  | 763.636689641676 | 0.27587567467195   |
| CTGACACAGTTA  | 763.63892339186  | 0.249405277333305  |
| CGTCATTTACAC  | 763.654688919985 | 0.276786542145717  |
| CTGAGACTCACA  | 763.662272617591 | 0.367328479098113  |
| CTACAATGTGAC  | 763.671748153518 | 0.294648091716561  |
| ATAGTCAGCCGA  | 763.683684288863 | 0.247660056093989  |
| AGACTCAGAAGC  | 763.6856868542   | 0.430354624944797  |
| ATGAGCAACGTC  | 763.68800762438  | 0.287685468646398  |
| ACGAGTCAAGAT  | 763.688132461389 | 0.22812594228766   |
| GTCACCTCTGAA  | 763.693763729586 | 0.256902209877637  |
| GTCACCTAGTTA  | 763.693782006889 | 0.235948663353562  |
| GACTGACTGGTA  | 763.701867078441 | 0.146590728613096  |
| ATGGGAGAGTCA  | 763.702672173179 | 0.124641685947637  |
| GTCACCCACTAA  | 763.714672311953 | 0.162563000806233  |
| ATACGTAATCGC  | 763.720487451742 | 0.365839459918485  |
| ATGTGAAATGAC  | 763.72609298938  | 0.420300840086736  |
| ACGATACTGTCA  | 763.745800366065 | 0.355951683691842  |
| CTGTGTGACCCA  | 763.74892942667  | 0.260752873539641  |
| GCATAGTCAGCA  | 763.767799065655 | 0.39323560536253   |

|              |                  |                    |
|--------------|------------------|--------------------|
| GAGCTGCTACTC | 763.785196467739 | 0.388186111055944  |
| GGATCAAATGAC | 763.786438580116 | 0.245417872646077  |
| AATCATGTGACG | 763.796301704615 | 0.237200861602601  |
| AACCTGTACAT  | 763.803847651237 | 0.21773603759658   |
| GGCCTACATGAC | 763.814981719522 | 0.342182076281408  |
| GTTTAGTAGTCA | 763.819800433147 | 0.284721641385412  |
| AAGATTCATCAT | 763.833478362394 | 0.210929606820697  |
| TGACACGGTTAA | 763.841640914332 | 0.394510459868623  |
| GATGACGTCTGA | 763.84725434812  | 0.295476535624355  |
| CCCGGTGACAAC | 763.850202863036 | 0.242121923717801  |
| CATGTATGTCAC | 763.856014020887 | 0.449199180980966  |
| TGCTACATGACA | 763.857746963016 | 0.470674270272685  |
| ACCTCCTAGTCA | 763.859465303432 | 0.242610287136272  |
| ACTCATCAAAGG | 763.86193646142  | 0.3082002222057165 |
| AATTGTACGTCA | 763.863596453125 | 0.245568119164747  |
| CTCAATTGTGAC | 763.866714614945 | 0.240293126410385  |
| GTGCCCGACTCA | 763.868995102771 | 0.212323940701419  |
| CTGACTACTAAG | 763.8724856621   | 0.27106592780493   |
| TATTAATCACCA | 763.899433401345 | 0.268831299349915  |
| TCATCGAACGGA | 763.904367824953 | 0.362743744654185  |
| AGACATTACGTC | 763.909315351305 | 0.300361310625621  |
| GGATTACTCGAC | 763.915131928794 | 0.251840841188468  |
| CCCTTTGTGACG | 763.916838382936 | 0.45767362671339   |
| GACAGACTCACC | 763.919184518867 | 0.300246063438034  |
| GTAACGGTGACA | 763.921264107623 | 0.27706098954737   |
| AATCGTCTGACG | 763.930068676709 | 0.26348074806213   |
| CTTAAGCTGTCA | 763.930106955328 | 0.32578807596602   |
| ATTAGTCGCATA | 763.932633775571 | 0.318909817417331  |
| ATGAGCAAGATC | 763.932713090517 | 0.292367627870467  |
| AGGAAATGACAT | 763.933021934876 | 0.307777923458914  |
| CTCATATTGTGA | 763.934053113223 | 0.283212377303326  |
| CATTGGTGACCA | 763.934312977927 | 0.334871011644098  |
| CGCCATGACCCA | 763.939853911028 | 0.264923276056856  |
| CGTCAAATGACG | 763.951303844722 | 0.404661407614512  |
| CGATCCATGTCA | 763.95801357167  | 0.392505925903213  |
| CTTATTGGTGAC | 763.96351458812  | 0.263752819483335  |
| AGCTTGTACTCA | 763.976661215709 | 0.334409128929852  |
| AGTCAGCCGTAT | 763.994879251533 | 0.296610238443553  |
| AAAGATTGTGAC | 763.99625401325  | 0.2889733056978    |
| GCTAGTTGTGAC | 764.009080168561 | 0.435427675073211  |
| AGTAGCGAGTCA | 764.015267112242 | 0.190767289352381  |
| CGGTATTGTGAC | 764.017888092759 | 0.246074490673657  |
| GGGTGACCCAAA | 764.020195716465 | 0.284142537096274  |
| TGACGAGTCGAA | 764.020731631224 | 0.281962411447566  |
| GCGCCAAGTCAC | 764.031525619425 | 0.340943990477526  |
| AAATACTGTCAC | 764.038237653456 | 0.275922303869816  |
| GATTAGTCCTTA | 764.067506392168 | 0.306976133300974  |
| ACAGTTCATGAC | 764.075242413884 | 0.37646551024633   |
| GACTAATCTCGC | 764.08322894101  | 0.349194879339922  |
| AATGAGTAGGTG | 764.091728698022 | 0.196942122170739  |
| GTCATGAGTTCA | 764.092148036023 | 0.191598382246831  |
| AATGGTTGTGAT | 764.101183648327 | 0.340607972084719  |
| GACCGTGAATCA | 764.103967626046 | 0.293561304668958  |
| AGTGACAGCATC | 764.111584437284 | 0.257188861838624  |

|               |                  |                   |
|---------------|------------------|-------------------|
| GTGAGTCCCACA  | 764.11393333794  | 0.314394558324059 |
| GTCACCCGGCAC  | 764.114507148788 | 0.285540658627717 |
| AGAAGACTCTTA  | 764.123567837845 | 0.318825925148365 |
| GATGATTGAAA   | 764.12695438979  | 0.249673481347423 |
| TGACTACCACAA  | 764.127258435221 | 0.441801259285953 |
| AACTCATACTTA  | 764.13645539361  | 0.360569183713416 |
| CCAGTAAGTGAC  | 764.139186584859 | 0.341936269728775 |
| ACGTCACCGTCC  | 764.139937205677 | 0.284913143479359 |
| AACGCAATGACG  | 764.144707068725 | 0.262160037890819 |
| GTCATATGGGTA  | 764.148621427452 | 0.245768549448901 |
| CCGGGCTAGTCA  | 764.14897392876  | 0.341651249452033 |
| AGGCATTGGTCA  | 764.149780068256 | 0.279749214567535 |
| CATTGACACACG  | 764.160354458888 | 0.341722714278011 |
| GTGTTACAGTCA  | 764.16392245151  | 0.408925477436176 |
| AGTCAATGACCC  | 764.165814925519 | 0.327135215239263 |
| AGTCAGAGAAAA  | 764.170390372694 | 0.298951843143995 |
| GCCCCGGAGTCA  | 764.172911545273 | 0.243665653026965 |
| AACAGTTGAGTC  | 764.177866795416 | 0.337524974073331 |
| ATTACACACATA  | 764.178477285137 | 0.29098884971325  |
| CGCGGTAGTGAC  | 764.182966790212 | 0.389538103311095 |
| TCTCGGTGACAA  | 764.184527578193 | 0.28070475559298  |
| CATGAATACTCA  | 764.187722490109 | 0.252181809506669 |
| GACTCACTTGTA  | 764.1878554093   | 0.366399570319433 |
| ATTTCGTCTGACG | 764.22147163218  | 0.574013627199681 |
| AGTTGGAATGAC  | 764.223048226287 | 0.158588506169908 |
| CACGTGACGCGA  | 764.231270548261 | 0.316977259322116 |
| AGTGAGCAAATA  | 764.234056660351 | 0.252838653062153 |
| CCTGTTTATGAC  | 764.235803911636 | 0.316560544411201 |
| GTCACATGCTAA  | 764.240071316364 | 0.256766654860807 |
| ATGACAGCCTGA  | 764.25648403821  | 0.29373453478024  |
| AGCCCCGGAGTCA | 764.259850615973 | 0.326120533460004 |
| CGTCACGATTTA  | 764.271578309466 | 0.270127048893432 |
| TGAGTAAAGCCA  | 764.278543859565 | 0.159214896033936 |
| ATGACAGTACAC  | 764.278864194042 | 0.33658979173163  |
| ATTGCGTAACTC  | 764.279603363696 | 0.24540562417303  |
| CAATTATTCATA  | 764.284267445705 | 0.242713195082823 |
| GCATGACATTAC  | 764.288910687644 | 0.435109644371339 |
| CAGATCATGACG  | 764.298447439115 | 0.338442364020277 |
| AAGGGGAATGAC  | 764.298859532359 | 0.191206912509194 |
| CAGCGCTAGTCA  | 764.301313290896 | 0.282940515242204 |
| GTCACCGCATCA  | 764.30352087543  | 0.267232181304652 |
| ATGACAAGCATG  | 764.305493442159 | 0.417279414715166 |
| ATGTAATCATCG  | 764.307160593937 | 0.250625196960008 |
| ACACGTGGTCAC  | 764.307928595374 | 0.266591719553949 |
| GTCATCATGAAA  | 764.317052292775 | 0.265680143965581 |
| ATGTCACAGTTA  | 764.317799646079 | 0.214267376105284 |
| ATTGAAGTCACA  | 764.32207132053  | 0.356364424342268 |
| ATGACAGGGACA  | 764.32487837187  | 0.206086835642593 |
| GCACCGCGTCAC  | 764.331410895678 | 0.265308102787034 |
| GTAAGAGGTGAC  | 764.339009019403 | 0.256994549277475 |
| CGTCACCGGGTA  | 764.342261336839 | 0.362086466802657 |
| GTTACTCAACAA  | 764.349882184508 | 0.291956628006365 |
| GAGAAGGGTAC   | 764.363335670096 | 0.221056396844614 |
| GTCACAGTTTAA  | 764.365057707216 | 0.528576373099682 |

|               |                  |                   |
|---------------|------------------|-------------------|
| AAATTCTGTGAC  | 764.3712638198   | 0.221034351061293 |
| TGACAGTAGTCA  | 764.371441649293 | 0.504923310600458 |
| GTGACAACCTCAA | 764.375712355692 | 0.321955042326727 |
| TGACAGATGTCA  | 764.387446383894 | 0.396349156194211 |
| GACTCACGCTCC  | 764.388429147346 | 0.276174589066127 |
| AGTCACGGCATC  | 764.394862416027 | 0.299299597827305 |
| TCATACGTGAGA  | 764.400412263303 | 0.402291894447331 |
| GATTAGTCGGAC  | 764.400759723725 | 0.39566120760399  |
| GTATAGTAGTCA  | 764.411336664002 | 0.327414446817287 |
| ATGATATCATTC  | 764.411533676853 | 0.276586213002731 |
| ATTCCGGTGACAA | 764.415559834972 | 0.313435771319796 |
| AATCGCCAGTCA  | 764.423169135316 | 0.2695340658359   |
| AGTCAATACTCA  | 764.433525268725 | 0.269340199743622 |
| AGTGACGAACAC  | 764.444205834571 | 0.245292405822064 |
| AGTCAGTCCGTC  | 764.446058861742 | 0.313672774970651 |
| GAATAACGTAC   | 764.448442877609 | 0.271878747526533 |
| CTGACTGTATTC  | 764.465565535359 | 0.268597844719432 |
| ACGTACTAATAC  | 764.466998805962 | 0.332857759396012 |
| TGACTTAATCAA  | 764.470336094134 | 0.373188709317705 |
| ATGACAGGATCC  | 764.471256930148 | 0.379155697270505 |
| GATGTCAGTGAC  | 764.477173677752 | 0.358463550013832 |
| CAGTCAGTAATC  | 764.48338299909  | 0.197699738389917 |
| ACGTCATGGTCT  | 764.485460314997 | 0.240509442156371 |
| ATGACTTCTATA  | 764.493266321648 | 0.38026397729564  |
| AATGAGTAGGTA  | 764.496616556724 | 0.211752407111498 |
| TGCCAGATGACA  | 764.497014089833 | 0.372977671319213 |
| GAGTAAATGACC  | 764.508513938507 | 0.305340395775992 |
| ATATACGTAATA  | 764.514229572337 | 0.157441360224689 |
| ATGTAGTAATAC  | 764.519621347562 | 0.209360386431049 |
| ACATATATGAGT  | 764.526174121504 | 0.27405199706715  |
| ATGACGAGGCCGA | 764.526739999639 | 0.408663386923481 |
| TGGTGTGAGCAA  | 764.536327264486 | 0.324954077989295 |
| AGTTTGAATGAC  | 764.541785173743 | 0.347805585034961 |
| GTGACCAAGATA  | 764.545691627298 | 0.177274628749805 |
| CGTGACGTGCAC  | 764.547732841554 | 0.340393330359402 |
| TGTCACCGGAAA  | 764.547879986282 | 0.434728234584673 |
| AGAATATGATTC  | 764.552843283696 | 0.206256538023009 |
| CGTCATCCCGAG  | 764.565258985973 | 0.194916836362997 |
| CTGACTTAATAA  | 764.565425012876 | 0.535165788786395 |
| AACTGTGACGAG  | 764.567655491286 | 0.366643724578422 |
| GAGTACCTGTCA  | 764.570662154362 | 0.320406906943256 |
| GATCCTGTGACA  | 764.584448184601 | 0.327241690194431 |
| GTCATTCTAGA   | 764.585517158032 | 0.21059001493165  |
| AAAGGAAATGAC  | 764.58822777168  | 0.188116076302016 |
| GTCACATCGGAA  | 764.589588566294 | 0.291219215747286 |
| CGTAGTGGTCAC  | 764.590130086659 | 0.155502642311619 |
| AGAACAAATGAC  | 764.605385407812 | 0.22091335413869  |
| TACAGTCAGTAA  | 764.606176296246 | 0.194494228215922 |
| ATATTACTCTGA  | 764.613096780523 | 0.186791918851179 |
| TGAACGCAGTCA  | 764.614002732169 | 0.238456617336376 |
| ATTAAAAGTGAC  | 764.614559448466 | 0.286823192443235 |
| ATTCCGGTGACG  | 764.614960816074 | 0.212876018947048 |
| TAATTACTATGA  | 764.617666413197 | 0.411445351949479 |
| CTTACTTCGTCA  | 764.620921141065 | 0.212486853319729 |

|              |                  |                   |
|--------------|------------------|-------------------|
| AGTTCCTGTGAC | 764.622185527127 | 0.252240417313733 |
| AGTCAGCCATTC | 764.625105947056 | 0.173585083813388 |
| CAGCAGTGTGAC | 764.640440539926 | 0.289341411066043 |
| GCCTAACAGTCA | 764.644817515654 | 0.273178565998265 |
| GACGGCCATGAC | 764.650522259908 | 0.239802149365777 |
| ATGACAAGGACC | 764.658178341414 | 0.35044031531523  |
| TGGCCCATGACA | 764.658679971303 | 0.201322958676592 |
| ATTGGCTCATCA | 764.664696424221 | 0.263338044461791 |
| AGTCACGCGCTG | 764.675947171487 | 0.307688127822926 |
| GTCCCCGAGTCA | 764.676381955706 | 0.310042669600564 |
| AGCAAGCATGAC | 764.680710823796 | 0.335892263860376 |
| GGGTAAGTGTCA | 764.68447338515  | 0.250563092052299 |
| GCTCATAGTGAC | 764.686838467396 | 0.277777689003519 |
| CAGTCTGTCATG | 764.695998857921 | 0.199646434497707 |
| ACCAAGTCACTC | 764.698184239536 | 0.247065789840014 |
| GACAACGTCAAC | 764.705180062828 | 0.443375180384019 |
| ATAGAGTAGTCA | 764.70661312058  | 0.292428880504159 |
| AAAACCCATGAC | 764.710964941342 | 0.306345510608513 |
| CTAATGTGACAG | 764.718304331239 | 0.28273339277536  |
| CATATCAGTGAC | 764.724039186903 | 0.437271708866586 |
| CGTCATGTGCAG | 764.728336158974 | 0.247015097223469 |
| TAGTAAGGGTCA | 764.741028045519 | 0.263289937651041 |
| ACTCCGGTGACA | 764.743011567571 | 0.160716205433624 |
| GTAGCCCATGAC | 764.747432818665 | 0.358458764312527 |
| ACTCGTTGTGAC | 764.756565099195 | 0.288438796995737 |
| CGTCACGTATAA | 764.759051421208 | 0.279561356459696 |
| GGTCATATTGAC | 764.768853112456 | 0.234028365713145 |
| CTACCGGTCAC  | 764.769842785877 | 0.188410227205186 |
| CCGCCTGACACA | 764.771715950627 | 0.316086811060731 |
| GTCACAGTTTTA | 764.784133552432 | 0.357363937719428 |
| TCATCGGATTCA | 764.784493227158 | 0.367594107051021 |
| AGTAAGAGTGAC | 764.800895967448 | 0.264171070485444 |
| ATTACGCACTCA | 764.80517970812  | 0.280083329452914 |
| GGTGATGCAATA | 764.807422238851 | 0.128013114759077 |
| GTGACAGCGTCA | 764.808723482621 | 0.349199503309285 |
| TCTCCTTACTCA | 764.814183421186 | 0.25277607174656  |
| ACGACGGTGACA | 764.814321992291 | 0.198121754228995 |
| GTCACGCCGAGA | 764.815148967579 | 0.234030297858653 |
| CGTGCAGATGAC | 764.818146258583 | 0.391401785163918 |
| AATTAATGAGTA | 764.818576561036 | 0.276307142994359 |
| GGCACGTCACTA | 764.826926176456 | 0.224258851067535 |
| GTCATGTCAGAA | 764.832142890805 | 0.434727970107286 |
| CGTCATGCTTAA | 764.834634729953 | 0.276213507065107 |
| CGTACCAGAAAA | 764.835740534173 | 0.433699880833675 |
| GAATCATGACAA | 764.848735747484 | 0.305942658538474 |
| GAAGTTAATGAC | 764.849904165586 | 0.263634683199172 |
| CGGATATGTGAC | 764.850801103888 | 0.266868325097488 |
| GGGTAGTAGTCA | 764.858036874126 | 0.186094663566098 |
| ACATGTCAGCGA | 764.87153602509  | 0.256370650099953 |
| ACTCGTGACACT | 764.878300031572 | 0.326396225049075 |
| GCTGACACTTAC | 764.878921684949 | 0.170477746221932 |
| CTCTGACGAAGA | 764.882616351136 | 0.289988040769011 |
| GAGTGGTGACGC | 764.884952783401 | 0.214736388909186 |
| TCCAGGTAGTCA | 764.887506398958 | 0.30756016656066  |

|               |                  |                    |
|---------------|------------------|--------------------|
| GTCACACCAACA  | 764.887917203593 | 0.204861793214075  |
| CGTCGGGAGTCA  | 764.888885073784 | 0.229331908541901  |
| ATGATGCTATTA  | 764.892609363687 | 0.369666964726508  |
| GTCACCCAGTTA  | 764.894407096591 | 0.215211911380339  |
| ATGAATCGACTC  | 764.899018134484 | 0.289844645386449  |
| CAGTCAGATGGA  | 764.906398762613 | 0.284100419067478  |
| GACGTGTCTGAC  | 764.912819520506 | 0.351822682471192  |
| CGTCATCTGTCC  | 764.916491367767 | 0.107256714370483  |
| AGTCAGTCGAAT  | 764.918207468198 | 0.280526855807573  |
| AATAGTAATCCG  | 764.92228326659  | 0.543636235982524  |
| ACCAGGAATGAC  | 764.924142309576 | 0.272532223339603  |
| GCGAGGGAGTCA  | 764.9318436992   | 0.187506229741098  |
| AGGTTTGTCACT  | 764.937633502857 | 0.253546508269372  |
| GTACACTACTAA  | 764.952281666464 | 0.256515495726821  |
| CGTGCTGTCACA  | 764.953951169489 | 0.338478863811349  |
| TAAGTAATGACA  | 764.955313316173 | 0.19555473780529   |
| CCGCTAAGTGAC  | 764.958650174556 | 0.496968233258171  |
| CGAGCTACGTCA  | 764.979098102448 | 0.30662381192134   |
| AGGCTCGACTCA  | 764.982441827891 | 0.345660584556075  |
| ACTTGCGTGACA  | 764.993240255537 | 0.363547029964521  |
| AAGGATTGTCTCA | 765.014189210897 | 0.254954245135547  |
| GACTAATTAATA  | 765.01447157534  | 0.337530038484567  |
| CGTCACACCAAG  | 765.014647742945 | 0.248173062192797  |
| AGCGGAAATGAC  | 765.029620191591 | 0.292636224345094  |
| ATGTACCTGTCA  | 765.034929821078 | 0.239422625727662  |
| CGATGTGTGACG  | 765.043240139799 | 0.324173019967293  |
| ATACGGTGACGA  | 765.052893550651 | 0.246277618549861  |
| CTCTTAGTAATC  | 765.053896596987 | 0.230569447141268  |
| ATACAGTGACGC  | 765.057215424398 | 0.313871091455885  |
| CAGCTACATGAC  | 765.062823111823 | 0.382435048280046  |
| GAGTTAGACTCA  | 765.068623443187 | 0.273780145494105  |
| CCGATCATGACA  | 765.071267446067 | 0.439391720159619  |
| TCATACACGGAA  | 765.072773067155 | 0.306630046978641  |
| AAAGTATGATTC  | 765.075504725212 | 0.220401986500819  |
| CGAATCATGACA  | 765.077205608728 | 0.21443835653154   |
| TACCAAGTCACA  | 765.081625057889 | 0.195673461950543  |
| GACCTAGTCAAC  | 765.088513566643 | 0.480086288955528  |
| CATTCTTGACTC  | 765.115939043121 | 0.339905948151568  |
| GCGTCACGTCCA  | 765.122746074588 | 0.254153460790944  |
| TGACTGGAGCAA  | 765.136609442489 | 0.224889439135091  |
| AGTCAGCTGACG  | 765.138421350614 | 0.54082941315696   |
| CAGTCAGAAGGA  | 765.141341596684 | 0.26294455459973   |
| TACTATTACTGA  | 765.143262606093 | 0.271243190382528  |
| GGGCCTGACTGA  | 765.143948420415 | 0.332412567453548  |
| CCTCGAAATGAC  | 765.151183883253 | 0.252287544341544  |
| ACTCATATGTCTG | 765.159353378074 | 0.36193289086105   |
| GTAACGTGTGAC  | 765.159849778929 | 0.184121828025916  |
| TGACTGGCAGAA  | 765.162004713068 | 0.256432250454106  |
| AGTCACGGGGAT  | 765.164715767287 | 0.356592131870622  |
| TGTCATGTCAAA  | 765.170104009221 | 0.347755588267523  |
| AGTGGTCAATTCG | 765.185717408028 | 0.286000594961425  |
| AGTGACCAAGAC  | 765.186307543623 | 0.266225816708456  |
| AGTCATGGGGCG  | 765.196317618504 | 0.0803033972313658 |
| GTCACCTATAAA  | 765.202485129409 | 0.370778546085439  |

|              |                  |                   |
|--------------|------------------|-------------------|
| CGTCGTTACTCA | 765.204180878695 | 0.246612307195553 |
| GCCCATGACATA | 765.223019837929 | 0.329454267480462 |
| AGGGTCACACTC | 765.227506435787 | 0.260140100045682 |
| AGCAGCGTGACT | 765.235169679355 | 0.302020973911988 |
| GTCACTATAAGA | 765.237613266888 | 0.250489707864679 |
| ACGATTTGCTCA | 765.245650140151 | 0.150656459405752 |
| CATACATGACGA | 765.246710407073 | 0.266722532793283 |
| CACTTGCGTGAC | 765.251769085365 | 0.316422178384858 |
| CCGGGTGACGTC | 765.252087318271 | 0.35908617682272  |
| GTGCTTGACGCA | 765.252567965248 | 0.338368882615423 |
| ATGACCCGTGAC | 765.260914703945 | 0.264936437120509 |
| AGTTCTGACGTG | 765.264841850659 | 0.307682082569566 |
| TGACTCTGCTAA | 765.265658742883 | 0.342734074019027 |
| ACCTTTGGTGAC | 765.268909303657 | 0.25782683984339  |
| ATGACGAGGGTA | 765.272980641965 | 0.196115000657011 |
| GTCACCCACAAA | 765.274514412742 | 0.243300174718021 |
| AACTGTGACAAG | 765.284801275347 | 0.274330632351216 |
| CGTCATTATTCC | 765.285139849662 | 0.163992818637298 |
| CAGACTCCGTCA | 765.288975163019 | 0.264564647203653 |
| GCTGTGCAGTCA | 765.291371436882 | 0.24481500694196  |
| TACCCTGTGTCA | 765.291928264492 | 0.384881068241024 |
| GGGTATCTGTCA | 765.295889996721 | 0.398725360831726 |
| GTCACCTTACAC | 765.301490219332 | 0.313051450211412 |
| ACGATACTGACT | 765.306791668239 | 0.278551837993199 |
| ATGGGATGACCA | 765.313572103042 | 0.269345745853452 |
| CTCGATCGGTCA | 765.317279280286 | 0.254124020314947 |
| GTCACCCGGGAC | 765.31845781051  | 0.161378453403633 |
| TGTCACGCGGAA | 765.319191739111 | 0.375661068557927 |
| CTGAATGGCTCA | 765.32369769689  | 0.311452901876247 |
| CATCGACTCAGA | 765.33643187847  | 0.294612298989444 |
| GGATTGAATCAC | 765.336951675727 | 0.164551951753036 |
| CCTGTCAATGAC | 765.338181408863 | 0.266637848314388 |
| AGATGTAATGAC | 765.340462035169 | 0.103136008104024 |
| AGCAGTCAGAAG | 765.348175841577 | 0.266757964032377 |
| AGGCCCGTGACT | 765.352529021343 | 0.298976269885854 |
| GTCACCACAAAA | 765.363201069768 | 0.359443761294497 |
| CACACTGAATCA | 765.370085372222 | 0.371410815730306 |
| CTTATGATACAA | 765.380476681457 | 0.285681011823611 |
| ACCGATCAATGA | 765.392058262243 | 0.396288001882948 |
| GTTTGCGACTCA | 765.395322072598 | 0.582298618310858 |
| GCTACGAGTGAC | 765.407475268361 | 0.190828307293108 |
| GTCATGGATGAA | 765.415434993404 | 0.388684688855818 |
| ACACATTGCTCA | 765.427870214245 | 0.265123997743259 |
| AGCTAACATGAC | 765.432020540864 | 0.283395949405747 |
| GAATTACTCCTC | 765.433019583033 | 0.131143499678978 |
| TAACCGGAGTCA | 765.435873632758 | 0.385885761115179 |
| GATCCGTGAGAA | 765.439723551648 | 0.333132955725723 |
| ACGTCTTGGTCA | 765.441093936673 | 0.215588091602819 |
| ATAGTTTTGTCA | 765.444424268369 | 0.405073818144329 |
| CGGCCTGTCATA | 765.452630215782 | 0.254440708701315 |
| CACTTGACTAAA | 765.461321764522 | 0.269110764593722 |
| GCGTATCACTCA | 765.478629516277 | 0.3339140413387   |
| ACCCAATATGA  | 765.480128769992 | 0.28585646858075  |
| CATAGTCGAGTC | 765.486494933519 | 0.339031268850859 |



|              |                  |                   |
|--------------|------------------|-------------------|
| ATGACAACCAAA | 765.489897687334 | 0.219486793533317 |
| CAGGTTGAGTAA | 765.502593383947 | 0.190295289777911 |
| GACAGTGACAAA | 765.509923149951 | 0.203511728119296 |
| ATGACGGAGGCA | 765.519096879701 | 0.34434124214679  |
| AACGACAATGAC | 765.52034831441  | 0.245666406929805 |
| AGGTACGGTGAC | 765.526559957208 | 0.245567215684043 |
| ATGTCGGACTCA | 765.545262055136 | 0.29560853402244  |
| GGTATGACCTAC | 765.548101424833 | 0.286198792780654 |
| CAATTGGGTGAC | 765.56149697656  | 0.209257657127639 |
| ACGACTCAGTGC | 765.561881122093 | 0.481216462477621 |
| GTTCTGTACTCA | 765.565838550104 | 0.280526726059048 |
| CAGGGGAATGAC | 765.566877775764 | 0.181274567567581 |
| AAATTCCAGTCA | 765.566905471791 | 0.269601096455752 |
| CTTCTGACTGCA | 765.577129032558 | 0.285357679707403 |
| GATGATGTGACA | 765.578239433153 | 0.221660750430875 |
| CAGCTTTATGAC | 765.585802370237 | 0.197588864739509 |
| GCCTCTGTGAC  | 765.58757099678  | 0.317269381876635 |
| ATGACTTGAACA | 765.589280542274 | 0.440472112007197 |
| GCCTCATGACAC | 765.589799987372 | 0.246810963943031 |
| AACAAGTGAGTC | 765.589928905263 | 0.277799975309411 |
| AATATGACCGCG | 765.59006905467  | 0.36414540153263  |
| AAGGCCAGTCA  | 765.59165079362  | 0.362481446936096 |
| CCGAATGGCTCA | 765.59371762305  | 0.387500908696909 |
| CATCACGTGTC  | 765.595569940774 | 0.222378623631339 |
| AGGAATGGGTCA | 765.61563490328  | 0.197709119001694 |
| CCATTGTAICTA | 765.628606151688 | 0.270880477740432 |
| ACCACGGTGACG | 765.630921052891 | 0.275476240965105 |
| ACAACAGTGACG | 765.65036514683  | 0.259373269745478 |
| GTCACCTACGAC | 765.6532038277   | 0.254667556223876 |
| CAACCTGTCACC | 765.656097219836 | 0.269594950999187 |
| GCATTGTACAC  | 765.659414735569 | 0.344502378404748 |
| AGTGACGTTACC | 765.660127838345 | 0.310579356916707 |
| ATTCAAGTGTC  | 765.663748271176 | 0.398802413216543 |
| ATTAGTAAATAC | 765.682784969136 | 0.311414178486335 |
| CTACTGTGTGAC | 765.683448141685 | 0.209140949684538 |
| CTGAGTCGATCA | 765.686800008364 | 0.215559852267411 |
| CTCCAATGGTGA | 765.688491694434 | 0.536024157638693 |
| ATTTGTGACGTC | 765.689756307404 | 0.258387819957788 |
| GTCACTAAGATA | 765.693581170382 | 0.33577608366043  |
| TCGGTAATGACA | 765.695177481412 | 0.252797779738009 |
| CGAGATTACGCA | 765.696848237028 | 0.321497404023978 |
| ATACACCAGTCA | 765.704921591249 | 0.419966068272539 |
| GTCACACTCTCA | 765.710164297592 | 0.121811377765375 |
| TAGATGCAGTCA | 765.719943884711 | 0.212539096116762 |
| CATACTCTATGA | 765.727081755565 | 0.346236741746401 |
| CCCCTAATGACA | 765.736906730064 | 0.26386110390503  |
| CAGACTGAGTAA | 765.74531584817  | 0.369938821089392 |
| GGTGGACTCACA | 765.754671909316 | 0.302496594135861 |
| GAGGCCAATGAC | 765.755971291237 | 0.226658133426496 |
| AACGCTGATTCA | 765.756706394254 | 0.2493017114048   |
| ATGAGTCCGGGC | 765.759612457093 | 0.258851552410837 |
| ACCGATTACGCA | 765.763285750856 | 0.194604777873652 |
| ACTTCAGATGAC | 765.766829332403 | 0.217489578540848 |
| AGGCAGACTCAC | 765.769790381034 | 0.256708512343088 |

|               |                  |                   |
|---------------|------------------|-------------------|
| GACAGCATGACA  | 765.770252004645 | 0.51352147187258  |
| AGGGGCTATGAC  | 765.772349346439 | 0.266989159404699 |
| CAACATGACAGA  | 765.773200293996 | 0.177894588888053 |
| CAGTCAGCTTGC  | 765.777696610364 | 0.435537961058074 |
| TGTCATGTGTAA  | 765.778842784504 | 0.32349319889292  |
| CTGTCATTACGA  | 765.78458872054  | 0.297595600394279 |
| TATTCAGTGTCA  | 765.786252009758 | 0.244061790682469 |
| GCCGATAATGAC  | 765.795197935356 | 0.379302146351448 |
| GACTCACGATCC  | 765.7965090741   | 0.247468753314955 |
| CGTCATGATGTA  | 765.801265553438 | 0.261365320052376 |
| ATGAATGACCAC  | 765.802103935869 | 0.325115038728878 |
| ATGTCACGTAAT  | 765.802985292747 | 0.253150969639255 |
| GTAACGTCACTA  | 765.819148665936 | 0.389806692392279 |
| ACACTTGGTCAC  | 765.820362408517 | 0.220573037220503 |
| CTACTACTCATC  | 765.838395094102 | 0.240410223576298 |
| GTGTCTGATTCA  | 765.842802746735 | 0.487158238681397 |
| ATGACATCGCAT  | 765.84464196871  | 0.236372740981771 |
| GGCAGGGATGAC  | 765.85868667287  | 0.302329281853334 |
| CAGTTGGTGACA  | 765.860629377515 | 0.209441734678748 |
| ATGACGCGCTGA  | 765.862975413589 | 0.305223681771539 |
| AAATTTCTGTCAG | 765.875885236266 | 0.390487404396751 |
| GACTACCATGAC  | 765.876392249168 | 0.297544488530629 |
| AGACTTGACTGA  | 765.879730010731 | 0.269477485889685 |
| AGTCAGCTTATA  | 765.882993958545 | 0.32404788302237  |
| CGGATCATGACA  | 765.88307695949  | 0.366847542746456 |
| TGAGTCGGCGAA  | 765.888661481857 | 0.306377742931325 |
| TATGGCGACTCA  | 765.890232957266 | 0.463608455514379 |
| GCAAGAGAGTCA  | 765.890781313826 | 0.255966127645431 |
| CGGCGTGACACG  | 765.894389737119 | 0.385965353661884 |
| AGGTATTA CTGA | 765.895691695462 | 0.272276954921405 |
| GCAAACCGTGAC  | 765.912713187965 | 0.30113817983397  |
| CATAGTCTGACG  | 765.912803212965 | 0.301558500156843 |
| GCAAGCAGTGAC  | 765.919213155801 | 0.322982094617514 |
| GCACATCTATGA  | 765.929379735219 | 0.390068581868582 |
| ATAGACCCGTCA  | 765.947759198132 | 0.330106986962657 |
| CAAATATGACCC  | 765.950499448862 | 0.246254322676046 |
| CAAGTATTGTCA  | 765.950775903066 | 0.342471083690842 |
| CTAATGCGTGAC  | 765.951946104831 | 0.364786528308381 |
| GTGAGCCACCCA  | 765.954027306103 | 0.194780236230214 |
| ATACGTCAACCG  | 765.964004918628 | 0.161908625568207 |
| TGAATCAGTAAA  | 765.965822405638 | 0.239597381616287 |
| TGTGAGTCCCAA  | 765.970464859911 | 0.29044733592374  |
| GAGCCTGAATCA  | 765.978785558397 | 0.350203944817061 |
| TGAGTAGTCAAA  | 765.989279362056 | 0.202970282784348 |
| CTCACATGACGC  | 765.992363756979 | 0.189702324949646 |
| CGATTTCTGTCA  | 766.010956163064 | 0.256869610241559 |
| GCTTGCTCATGA  | 766.023602983847 | 0.39207639957146  |
| GTCAGCGACTCA  | 766.030195426276 | 0.283118714641001 |
| TATCCATAGTCA  | 766.031825407396 | 0.212148875748547 |
| GAGTACAGTGAC  | 766.032720487849 | 0.293526212486526 |
| TCTGGGGAGTCA  | 766.035951533987 | 0.299809405334611 |
| ACTCGGGTGACG  | 766.050934119213 | 0.412939660018295 |
| AACGTGAGTCTG  | 766.053657756629 | 0.33750214406043  |
| ACCGGTGTGACG  | 766.070569099581 | 0.283086307346323 |

|              |                  |                   |
|--------------|------------------|-------------------|
| TGTCATTATTAA | 766.076791818201 | 0.273454532379877 |
| GTGACCACGCAA | 766.082196285088 | 0.31130093287407  |
| GCTATTATGTCA | 766.091961579562 | 0.317018722867236 |
| GAGTCAAATCCC | 766.095712158866 | 0.304935838065565 |
| ATCTTGACTAAA | 766.095839715707 | 0.324292867611408 |
| CACCGGTGGTGA | 766.101048681403 | 0.34237063801004  |
| GTCATTTGATGA | 766.101860055074 | 0.445523355265974 |
| GGTCATATCACA | 766.11126125693  | 0.398071495411449 |
| CGTCATGGCCAG | 766.113006703699 | 0.435651187147749 |
| CTGTCATTAGTC | 766.11608330561  | 0.20021401616891  |
| AATAGTCAAATC | 766.116628191534 | 0.388171688088114 |
| AACAATCGTGAC | 766.118517620156 | 0.291178723631477 |
| CTTACGTGGTCA | 766.131905352072 | 0.371175645102122 |
| GTCATCTACCA  | 766.139554860532 | 0.156893863854297 |
| GCTGCCCAGTCA | 766.146315770588 | 0.293531555821042 |
| GAGAGCTGTGAC | 766.147351389323 | 0.2061908797892   |
| ATGAAACCGTCA | 766.15243471382  | 0.24797175676745  |
| ACTGACAGATTA | 766.15931683042  | 0.340109860963305 |
| ACGTCACCTCTA | 766.163951086464 | 0.252930564044343 |
| CGTTAACGTCAC | 766.168513837343 | 0.29237384305838  |
| CACCGTGACGAA | 766.16998947349  | 0.28332905403824  |
| GAGTAATGCCCA | 766.171640530365 | 0.200583809267449 |
| CACAATCATGAC | 766.178117231523 | 0.271248496210276 |
| TCGAGTGACCCA | 766.179913594837 | 0.332739254507954 |
| CTGTCACCGTAA | 766.180886840343 | 0.426765606551654 |
| TAAAAGTAGTCA | 766.186303895162 | 0.405385072311219 |
| CCTATAGCGTCA | 766.187157676431 | 0.317639918119755 |
| GCGGTCATACAC | 766.19012429684  | 0.259121188205493 |
| ACCTGTCACAGA | 766.191916868077 | 0.171042427133194 |
| GACTCACGGAAA | 766.196087302171 | 0.282932619188704 |
| GATCACGGTGAC | 766.197457105777 | 0.345885232837499 |
| AGATGTGACCAC | 766.200244892064 | 0.299328821203254 |
| ATGACGGGGCCA | 766.202064854868 | 0.379752284146589 |
| ATGACCGTATCA | 766.203650876282 | 0.182806713317376 |
| ATGACGAGAACG | 766.203771039941 | 0.328265820945423 |
| GGTTAAATGAC  | 766.204268471947 | 0.342293090425065 |
| GATTCACCTACA | 766.20469625124  | 0.295335811583575 |
| CAGTATCACTCA | 766.210717422673 | 0.348526955751979 |
| GAAAACGTGAC  | 766.211424765754 | 0.276230125723036 |
| ATAGAGTAATTC | 766.215635642519 | 0.202825898673012 |
| ATCTGACGAAAT | 766.226532951216 | 0.17656979880833  |
| AGTCACTAGGGG | 766.226937331003 | 0.135842145370177 |
| AACCTGGAGTCA | 766.231453066227 | 0.345239472034349 |
| CGTCATTCGCCA | 766.234007478634 | 0.348146190044734 |
| CCAGGATGACCA | 766.249129741624 | 0.369701580118457 |
| CGTCACCGGGAC | 766.259074132429 | 0.222796447229584 |
| CACATGATGTAA | 766.25950849184  | 0.358618216931726 |
| AAAGCAGGTGAC | 766.263186997387 | 0.194555725442424 |
| ATACGTTGAGTC | 766.263205782751 | 0.272591964828573 |
| AAGAGGAATGAC | 766.264902626461 | 0.133519079068228 |
| CAGATCGCGTCA | 766.270487594263 | 0.31367502277922  |
| ATGTCATTTCCG | 766.272453690749 | 0.282837764427937 |
| AGCGCACGTCAC | 766.275159073471 | 0.212817503299685 |
| AGTGTGTGACCA | 766.276525903483 | 0.223421890053364 |

|               |                  |                   |
|---------------|------------------|-------------------|
| ACTTCTTCGTCA  | 766.279695159015 | 0.231080098597382 |
| CGTCATTGACGC  | 766.285336610475 | 0.348328188176688 |
| AGAAATTAGTCG  | 766.287098568904 | 0.179283687368847 |
| TGACGGACACCA  | 766.28896616835  | 0.279700512015933 |
| AAGTTGTCACCT  | 766.30822743683  | 0.173360259279902 |
| AGGGCGCGTCAT  | 766.311963414719 | 0.249175331113994 |
| ATGACACCCTCC  | 766.315136095324 | 0.19144591197351  |
| ATTAATGTGACA  | 766.317845973319 | 0.280072362365481 |
| GCCGCATATGAC  | 766.322966480155 | 0.302217828758914 |
| CGTCACAGGGAC  | 766.323176780116 | 0.451706034016154 |
| GAGGACGACTCA  | 766.326490926056 | 0.24977982428235  |
| CGTCATTTGCAC  | 766.332562414382 | 0.256806377701042 |
| GACTAATCCAAC  | 766.353213348442 | 0.364041179095688 |
| CCCGGTAAGTCA  | 766.361868021633 | 0.382270704471856 |
| AGTGTCAGACCG  | 766.365136084785 | 0.24464089810136  |
| CGAAAGGTGACG  | 766.371064513166 | 0.289011298349618 |
| ATGTCACAACCTG | 766.374870646841 | 0.289518197431846 |
| GTGACGACTTTA  | 766.375501906334 | 0.205196504004442 |
| AACGCCGACTCA  | 766.376062516852 | 0.316487782400674 |
| CGCTGACAGATC  | 766.387458039998 | 0.170862318983621 |
| TCGTAACGTGCA  | 766.392327278808 | 0.462441474197721 |
| CGCCTGAATGAC  | 766.402174250598 | 0.442288605970075 |
| CAGATTGACTGA  | 766.405456316556 | 0.518284279992283 |
| TCTGAATACTCA  | 766.412379019387 | 0.341248891974412 |
| ACCGGTGACATC  | 766.427842841649 | 0.365267026983    |
| ATGACGAGAAAG  | 766.432573069274 | 0.246324934633367 |
| GTCACTAAAGTA  | 766.432724657723 | 0.160871008002984 |
| TCCATGTACCA   | 766.433192851884 | 0.148653685308999 |
| GATCAAATGACA  | 766.43917102126  | 0.159585860159351 |
| GATTAGCCATAA  | 766.467282708835 | 0.250347580741816 |
| AGCTACTGACTA  | 766.475712122929 | 0.260053312884799 |
| GAATCGTGTGAC  | 766.479197124227 | 0.291459455212825 |
| GGTGATGGGTCA  | 766.482085478788 | 0.187460061349394 |
| CCGTTCTGTGAC  | 766.485204725769 | 0.396904235365651 |
| ACGTCATGAGAT  | 766.486262949779 | 0.417203734182698 |
| GAGGTTATGACC  | 766.492603753219 | 0.264443885305752 |
| CGTTGAGTCGTC  | 766.501532369111 | 0.273911988355941 |
| GTCCTGTGTCA   | 766.505799016112 | 0.18715880557627  |
| GACTCACGTACA  | 766.507171565764 | 0.151579194085567 |
| AGGCCCTGACTG  | 766.510598734016 | 0.323538684104367 |
| TACTCATGAGTA  | 766.524266297239 | 0.229951727901812 |
| GTAGATGAGCCA  | 766.528477111485 | 0.332487361004144 |
| AAGTCATGGGTC  | 766.541976877364 | 0.154448478219087 |
| ATTGTTACATCA  | 766.549718846035 | 0.2944877671554   |
| ATCCACAGTGAC  | 766.550744203478 | 0.248970330002625 |
| ACTCATAGGGCG  | 766.5620275008   | 0.275716056201722 |
| ATCCTGACGCAG  | 766.568605914021 | 0.186538830005187 |
| ATGACAGCGCGG  | 766.570965503782 | 0.243967460855261 |
| CTGGGACATGAC  | 766.571934549393 | 0.359328758837099 |
| AATATTGTCATG  | 766.575649127322 | 0.27030479071591  |
| ACGTCATGCAAG  | 766.576239171401 | 0.260130761477743 |
| TAGTCAGCAGGA  | 766.583261541003 | 0.152614561809541 |
| ACTAATTATGAG  | 766.583906775196 | 0.314160153336039 |
| TACCAGGTATGA  | 766.586478668366 | 0.243721541977703 |

|              |                  |                   |
|--------------|------------------|-------------------|
| ACGACTCAGTTG | 766.587361359909 | 0.403550148086675 |
| AAGCGCGATGAC | 766.593135706083 | 0.351306175079534 |
| GCAAGGTGACAC | 766.594994829512 | 0.273202852161497 |
| GCGTCACGATGA | 766.603035316792 | 0.324297265401097 |
| CAATCCGAATGA | 766.615872757869 | 0.405785926742508 |
| GTCATACGCCAC | 766.639568168327 | 0.360443080918736 |
| GTGAGTCCAAAA | 766.648223330726 | 0.290256814137298 |
| ACCGACTGTGAC | 766.662175090332 | 0.215651862026471 |
| GTCACACCACAC | 766.685145278817 | 0.267224850021394 |
| AGGGTCATTCGA | 766.691833566375 | 0.254599466211409 |
| GTCACAGAAGAC | 766.694202520554 | 0.358270399833882 |
| CAGTCAGAATAA | 766.695600737493 | 0.250465763971023 |
| TGGTTAATGACA | 766.696414607091 | 0.276979711008149 |
| ATAATGTACAT  | 766.696695158465 | 0.28961850361087  |
| GATTGCGGTCA  | 766.701780543365 | 0.52914135056986  |
| GATGACAGCCAC | 766.712056900622 | 0.293850981162077 |
| GAATTACGCACC | 766.723053636576 | 0.371178938354189 |
| CAGGGTAGTCAC | 766.727199050037 | 0.23039716870232  |
| CCAGGTGACACG | 766.729763707195 | 0.250262989051546 |
| GTCACGATAAAA | 766.735882527989 | 0.392553704663485 |
| TAATCGCAGTCA | 766.745293440455 | 0.297427814387383 |
| ACGCGTGACCCA | 766.750922541025 | 0.381809965483611 |
| ACCACGCAGTCA | 766.753591503314 | 0.330641479532149 |
| GACGACAAGTCA | 766.76093679364  | 0.307082864325871 |
| GATTGACTACAA | 766.765251994859 | 0.238966348494012 |
| ACGTAGGTGACA | 766.765374948733 | 0.266801774799857 |
| AGGACACAGTCA | 766.778098360611 | 0.310522015284049 |
| CTGCATCCGTCA | 766.780553886888 | 0.28412554667608  |
| GATTTTCCGTCA | 766.787238071292 | 0.242269349205006 |
| GTACATTTGTCA | 766.787902693011 | 0.252425856280505 |
| ATTGAGATGACG | 766.79668141014  | 0.28918756850464  |
| ATCCGCGTGACA | 766.797142929033 | 0.311038116156359 |
| TACTCATCTAGA | 766.798505603885 | 0.156028438851351 |
| AATCGCGTGACA | 766.800050511769 | 0.312556101906213 |
| ACAACGTGACAC | 766.800576117699 | 0.274861663467448 |
| GTATGCGTGACA | 766.807222409279 | 0.218366372562307 |
| ACATATCTGACT | 766.809323625226 | 0.286043313762078 |
| GCAAGTACGAGA | 766.810253583793 | 0.242058648724841 |
| ATGACAAGGTCC | 766.81621019818  | 0.356566436551799 |
| ACTCATATGTTA | 766.819243251536 | 0.288950891368458 |
| ACGCCAGAGTCA | 766.835136070263 | 0.35457771656999  |
| CTAGTAAGTCAC | 766.844190909916 | 0.226242497158198 |
| CACGTAATGAGC | 766.84485236879  | 0.482507314779565 |
| ACACAGTGACGA | 766.846897447652 | 0.261710283498609 |
| CATAGAGGTGAC | 766.863208959133 | 0.234898735410266 |
| ACTGACTGGTCT | 766.867207919042 | 0.14501055762938  |
| CACGTAATCACA | 766.872878662393 | 0.274979939226423 |
| AGCGGAATGACG | 766.874211874955 | 0.199072922851704 |
| CGAGTCAGGGAG | 766.879688311328 | 0.262652778620099 |
| AGGACCGTGACT | 766.884740149594 | 0.213633220743298 |
| TCGGTCACAGCA | 766.884866285518 | 0.318618836235525 |
| GTCACAAATTA  | 766.889558940816 | 0.336974105345845 |
| AACCTCGACTCA | 766.892915532354 | 0.261051465643117 |
| GACTAATCGTTA | 766.898128195952 | 0.169332001141475 |

|              |                  |                   |
|--------------|------------------|-------------------|
| CTCACCAATGAC | 766.899916050273 | 0.294173689241546 |
| GCTATGACCTCA | 766.902810226229 | 0.274474835391861 |
| ATTGACTCTGCA | 766.913929788933 | 0.221991850953241 |
| GTCACGGAATAA | 766.914477521646 | 0.434489933177341 |
| ATTGCTCAGACC | 766.916559540235 | 0.260910081616059 |
| TGTGACAGCAAA | 766.926603120725 | 0.206492795997287 |
| ACCGTAGCGTCA | 766.927982619443 | 0.271292722616756 |
| ACTAATCAACTG | 766.931935054648 | 0.341785564457998 |
| CGTCACCGTCAG | 766.939747478993 | 0.314097557168463 |
| AACCTTTACTCA | 766.940285562536 | 0.266766765445281 |
| AGGGTCACATAT | 766.96309779325  | 0.27992701283336  |
| GACTCACTTCAA | 766.969253382061 | 0.256248933394511 |
| AAGTCAGAGCCT | 766.972289583192 | 0.379869095953968 |
| CTAAGTGACCCA | 766.978597700899 | 0.327563308250646 |
| CCGACCATGTCA | 766.979304971088 | 0.322195550595738 |
| AAGTGATGACCA | 766.982976365159 | 0.195956588592693 |
| ACAAATTAATAA | 766.98300767161  | 0.24521782824085  |
| TCACTTGACACA | 766.984044848373 | 0.318005118513698 |
| AATCATTGTGAC | 766.984275750557 | 0.418149428490288 |
| ATGCTGTGTGAC | 766.993547759075 | 0.329586293482214 |
| GGCGAATGACCA | 767.000986944727 | 0.169466963136628 |
| GTAATAATCTAA | 767.002847631809 | 0.217222280901746 |
| ACGTCACAACTA | 767.008082269824 | 0.271830290280689 |
| TGATCGGTGACA | 767.014531367294 | 0.159975186313006 |
| ATGACAAGACAG | 767.019798362603 | 0.219330230037281 |
| CGTCATTACACG | 767.022372119039 | 0.343385389368525 |
| TGACGCTATGCA | 767.025245438366 | 0.371038709027389 |
| AGTCAGAAGCGA | 767.028019558633 | 0.276727809260642 |
| AGTCACGAGAGG | 767.02814998886  | 0.133204327972538 |
| AGTAGGCATGAC | 767.030849450931 | 0.435471207963769 |
| ACAACCATGACG | 767.034819747339 | 0.305881248973146 |
| AGACTTGTACCC | 767.043844987567 | 0.274644995553875 |
| AGACTCACTCCG | 767.046602142622 | 0.221095241240037 |
| ATTACGTATACC | 767.056886999935 | 0.19740524112945  |
| ATGAGTGCATAA | 767.061308264392 | 0.251687725484064 |
| ATGACAGAGGCG | 767.069655211997 | 0.164783144704202 |
| AGTCAGACGAGA | 767.072112566271 | 0.270912840379965 |
| CCTTCTGTGACG | 767.072765247773 | 0.301416022732435 |
| CGTGTACCTTA  | 767.083827051745 | 0.294123902410375 |
| TCGTCAGCGTCA | 767.098000297496 | 0.320773857995331 |
| CCGATATTACTC | 767.106890702065 | 0.235038252082415 |
| GTCACGACGAGA | 767.112967212414 | 0.276713548851192 |
| AGCGCGCATGAC | 767.116924916307 | 0.213693535055779 |
| CCAAATGTGACG | 767.123137612559 | 0.325484339456678 |
| ACTCATAGGATA | 767.134958764172 | 0.111177698841975 |
| ACACCAAATGAC | 767.135444631669 | 0.341404028256189 |
| AATAGTCAACCG | 767.137099657517 | 0.408030861401641 |
| GTCACGTACGGA | 767.14194446621  | 0.336645865363413 |
| GTAGTTTACTCA | 767.14251092802  | 0.306978843418461 |
| ATGAGCAACTTC | 767.148755394177 | 0.232788924022193 |
| CCTCAAGGTGAC | 767.151839657199 | 0.319294146162045 |
| GTCACCTGGGAA | 767.155729345619 | 0.251334051439902 |
| GACTTCTGTGAC | 767.16057080784  | 0.508392657542591 |
| CCGGAACGGTCA | 767.163364718899 | 0.386440277180171 |

|               |                  |                   |
|---------------|------------------|-------------------|
| GACTCACTAGTA  | 767.169468221393 | 0.43025027091467  |
| ATGACCCAGAGA  | 767.17295440159  | 0.212765400721205 |
| AAGATCAATGAC  | 767.178092660548 | 0.297954684028426 |
| GTCACCTTCTGA  | 767.184220622564 | 0.319075085748401 |
| CAGTCAGTGCCG  | 767.184848831159 | 0.294992798971117 |
| ATCATTTGACTC  | 767.185534848293 | 0.275166258538973 |
| CGTAGAGAGTCA  | 767.190959629784 | 0.32122723118787  |
| TACTAATGACCA  | 767.193438199264 | 0.276468085596415 |
| GCTATGATGCAA  | 767.195750385155 | 0.437726721647571 |
| CCATACATGTCA  | 767.197685290322 | 0.44419396327963  |
| ATCCTGACTCGC  | 767.201010723693 | 0.217973286004337 |
| ACAAAGTGACGC  | 767.206351053834 | 0.355759670881563 |
| CATACGTGACAG  | 767.208394974136 | 0.291501781681703 |
| AGTGTGCATGGAG | 767.213300896275 | 0.229520214620239 |
| CAACGCTGAGTC  | 767.2142584748   | 0.321834558155663 |
| TATACATGACGA  | 767.214582968868 | 0.343391430909287 |
| AAGCTCTAGTCA  | 767.219509843475 | 0.32016505706603  |
| GATGTCATGTCA  | 767.221442873377 | 0.348245978682231 |
| ACTTTTAAGTCA  | 767.221586380796 | 0.249567765585087 |
| ATTACTATTAAC  | 767.227454539191 | 0.318914838829798 |
| AGTCCATGACGA  | 767.234719881567 | 0.302148768400393 |
| CTACGTGACAAA  | 767.241661372826 | 0.264232416388334 |
| GTCACAAATACA  | 767.246293294524 | 0.293593829356405 |
| GTACCGTCACAC  | 767.250003168023 | 0.333121228919405 |
| ATGTCACAGTAC  | 767.258356598519 | 0.178985533677506 |
| AGCTGCCATGAC  | 767.259201787952 | 0.207474809866912 |
| CTCTCCGGATGA  | 767.270107856299 | 0.297566011517286 |
| GACTTTGACACA  | 767.278619223039 | 0.18724496730727  |
| CCACTTGATGAC  | 767.28286713001  | 0.257913906108761 |
| ATGTCACCTGCTG | 767.284458624821 | 0.300361021042778 |
| GTCACAAATGTA  | 767.287331110438 | 0.229070475068583 |
| GATACAGACTCA  | 767.302772153735 | 0.385694130919967 |
| AGAGTAATAGCG  | 767.306015669708 | 0.218269834302878 |
| TCGATTACTAAA  | 767.317179842548 | 0.360796267336307 |
| CTTATCCGATGA  | 767.322714011394 | 0.24920588043191  |
| ACGCATCATCGG  | 767.327239145428 | 0.305224198035485 |
| GCACGTGACCCA  | 767.330420690476 | 0.249297870078631 |
| GGCGCGCTCAC   | 767.339304717647 | 0.189003272463485 |
| TCGCCTGACACA  | 767.341612154381 | 0.186925651908886 |
| AAGACCAGTCAG  | 767.352177741616 | 0.167212406987505 |
| AAGTATTACTGA  | 767.354829355573 | 0.204316491976201 |
| ATGACCACGCGC  | 767.357533649381 | 0.256911112063796 |
| ATGACCGTCACA  | 767.35803754963  | 0.199150995400933 |
| ACTATGAGACAC  | 767.358152041431 | 0.308106827393228 |
| GCGTCATGTGCA  | 767.366853436314 | 0.285104737738727 |
| CCCTTTGACACA  | 767.378433382109 | 0.248381139442329 |
| GTATCGTCACGA  | 767.382536493154 | 0.275030250908214 |
| CAAGCAGTGACG  | 767.38809290911  | 0.192912748980609 |
| CGCTGAGTAAAC  | 767.404657435923 | 0.202750837174318 |
| AGGCCTCAGTCA  | 767.407537500659 | 0.213711259831374 |
| CCGCTTTACTCA  | 767.411786621872 | 0.167767316485588 |
| CAGCGAAGACTC  | 767.419788354325 | 0.546031806249742 |
| AGCCAGCATGAC  | 767.423891079859 | 0.476516151648451 |
| GAGTCAGGGGAA  | 767.435870344121 | 0.164585499015857 |

|               |                  |                   |
|---------------|------------------|-------------------|
| GTCATCTGGAGA  | 767.439605714512 | 0.138555747166687 |
| GCGAGTGACCCA  | 767.442643039973 | 0.299896077278709 |
| CGGACTCACTGA  | 767.443922723331 | 0.273134991429503 |
| GAATTTTGTGAC  | 767.451655548884 | 0.261348761329609 |
| ACACTGGTGACA  | 767.459360208864 | 0.266742661549754 |
| CGATGACCTAAC  | 767.464957432514 | 0.211792025562847 |
| CGAGTGACGAAC  | 767.47346353946  | 0.247888457967654 |
| ACGGAACTGTCA  | 767.476100935145 | 0.372162909219665 |
| CTCAGATGTGAC  | 767.492206359204 | 0.362551643940887 |
| GGGTTGTAGTCA  | 767.493716112261 | 0.21496770862813  |
| GTCACCTGAAGA  | 767.509181048616 | 0.350102420095269 |
| GTGACGCCAAAA  | 767.512612995679 | 0.370760839817308 |
| TCTATTGTGACA  | 767.515930575932 | 0.255469795787023 |
| TAATATTAATCA  | 767.516947773885 | 0.330027465273922 |
| TCAAAAGCGTCA  | 767.543276989635 | 0.255750050620339 |
| AACACTGTCATG  | 767.552082876461 | 0.319511507090402 |
| CCAAGCGGTGAC  | 767.562665021601 | 0.514135579380569 |
| GAAGCAGATGAC  | 767.56321098956  | 0.383650087599128 |
| ACTAACATGACG  | 767.566716199228 | 0.375683010980998 |
| ATGACGACCATG  | 767.568341281752 | 0.355797200718144 |
| CTTAATTGTGAC  | 767.568932967065 | 0.332936970251026 |
| CAGAGATGTGAC  | 767.573350253037 | 0.327198319378344 |
| ATGACGTGTAA   | 767.575201371328 | 0.287498106698739 |
| ATCTTCAATGAC  | 767.577565999002 | 0.353718303654976 |
| ACGTCACCTGCA  | 767.578474181385 | 0.250666958969542 |
| ATGACCCGTTTA  | 767.579532421536 | 0.4162900135545   |
| CCTTGTAATGAC  | 767.584627036299 | 0.497654079146643 |
| CGGTGGGATGAC  | 767.588086409408 | 0.257566231964177 |
| AAGTCTGTCACT  | 767.592483149369 | 0.353625805342514 |
| TAATGTACGTCA  | 767.593168854474 | 0.310356663515322 |
| AGTCAGACCGCG  | 767.596838900481 | 0.186451235685072 |
| AGTCACGGCATG  | 767.602687734603 | 0.308534491000732 |
| AGCTGTCACTCG  | 767.602861131179 | 0.258522870010517 |
| AACACGTAACAC  | 767.611155476914 | 0.277794747621499 |
| ACGTGTAATCAT  | 767.616231475577 | 0.384762122837738 |
| CAGACCAGTCAG  | 767.616244092061 | 0.258746776504469 |
| GTCACAGTGATA  | 767.617529009346 | 0.210766919789659 |
| CTAACCGGTCA   | 767.632675179992 | 0.200953614436993 |
| CCAACTAATGAC  | 767.63845119149  | 0.351672978037255 |
| GTCACCGCGGAA  | 767.644712694283 | 0.330365498596674 |
| TAGATTTGGTCA  | 767.64505188285  | 0.273340171509765 |
| ATGAGTAGTTAG  | 767.646395831666 | 0.204390702246244 |
| CTAATAAGTGAC  | 767.648154426206 | 0.283272824227142 |
| ATAGTCAGCACG  | 767.663636328511 | 0.322580431666801 |
| GTCATGAACTCA  | 767.669625172873 | 0.226968030110591 |
| GGGTGACAGTCA  | 767.671816731109 | 0.245566109971111 |
| CGTAAGGGTGAC  | 767.673000847432 | 0.271643945401958 |
| GTCCAGTGACAC  | 767.676565424423 | 0.275456877714863 |
| GGCTCATCGTCA  | 767.679745469905 | 0.365662820052372 |
| TGACTTGGATAA  | 767.679882637337 | 0.355207988533967 |
| GTCACGCATGGA  | 767.68376073415  | 0.424219494424256 |
| ACGTAATAATGAC | 767.712981725134 | 0.24178060613316  |
| CTGACTCGGCAC  | 767.719527588413 | 0.254703987432806 |
| ATTATGGTGTCA  | 767.721929427356 | 0.33330108504063  |



|               |                  |                   |
|---------------|------------------|-------------------|
| ATGACAGAGGAA  | 767.726561414618 | 0.183784006959753 |
| AGTCAGTCTGTA  | 767.737113016731 | 0.23614593008457  |
| CGGCTCGATGAC  | 767.737380644613 | 0.105556633967815 |
| GTGATTCGATCA  | 767.738628347522 | 0.237365740051881 |
| TAGGAGATGACA  | 767.749024677149 | 0.166041042737228 |
| ATGACAGGGATA  | 767.755131524151 | 0.198951985072134 |
| GACTCTTAGCTA  | 767.757345101968 | 0.343363803291279 |
| GATCTGGGTGAC  | 767.759979149363 | 0.211081480089245 |
| CTCCCAGTGACA  | 767.761013000804 | 0.40031624806383  |
| GATGACATTGCA  | 767.76389076018  | 0.20011072355067  |
| GAAATGTATCAC  | 767.764596595873 | 0.219150277604889 |
| CCGCCATGACGA  | 767.772265428448 | 0.268009832550395 |
| CCGAGCCAGTCA  | 767.778370873834 | 0.351979263825807 |
| TCATATTGCAGA  | 767.786672168298 | 0.399614898997959 |
| CGTCAGTAATAC  | 767.788118588703 | 0.296336934810222 |
| TGGTCATATAAA  | 767.788759868965 | 0.320948537822556 |
| AATACGTCAATG  | 767.793217864575 | 0.278506244143349 |
| GTACATGGTGAC  | 767.801218873192 | 0.18127572169601  |
| AACCGTGTACG   | 767.807561776163 | 0.371639380026503 |
| AGCTATGACCTA  | 767.807946112508 | 0.255324930023943 |
| ACAGGAAATGAC  | 767.809845090547 | 0.253272031319322 |
| GGCTTGTCACAC  | 767.810886716977 | 0.479033641839816 |
| CCTAACAATGAC  | 767.815555496659 | 0.252588691154872 |
| AATGTGTGTAAT  | 767.83157061554  | 0.276537350895644 |
| AACCCTATGAGT  | 767.833596815405 | 0.289486423204199 |
| ATGAGCAAGCAA  | 767.834406667705 | 0.317156760725014 |
| CAGTCAGAAATGG | 767.850486625972 | 0.270585879647159 |
| CGCACTTGACTC  | 767.85303773989  | 0.451803440566154 |
| CCAATCGCGTCA  | 767.856926164706 | 0.382339636465473 |
| TGATTGGTGACA  | 767.859277735532 | 0.304479758229751 |
| ACTCATATTTTG  | 767.863624176278 | 0.272358093254556 |
| TGTCACCACAAA  | 767.867857701499 | 0.250659485737968 |
| CGTGGTCACACA  | 767.872114061408 | 0.320637207083646 |
| ATAGCACGTCAC  | 767.87857577651  | 0.195114510848825 |
| CACCTTTATGAC  | 767.883050891945 | 0.155914729482794 |
| AGTCAGCCGATG  | 767.884925632978 | 0.555115182170061 |
| CGCTAACTATGA  | 767.885879831559 | 0.38304009009335  |
| TCTGCCACGTAA  | 767.888223427299 | 0.305463584495558 |
| ACTCCCACGTCA  | 767.892318831095 | 0.251580439154634 |
| GATCTGTGACGA  | 767.902594031114 | 0.45351729295737  |
| CATGACGAGGTC  | 767.912495646575 | 0.187941533383432 |
| CGGTCATCGTTC  | 767.92033583821  | 0.33523294789069  |
| CTAAGAGTATGA  | 767.923247481964 | 0.344245571991769 |
| CGCTGGTGTGAC  | 767.926898861056 | 0.42905602004733  |
| GCCTAATCGTCA  | 767.931711397072 | 0.25879185520798  |
| AACCTACGATGA  | 767.931995260909 | 0.343815419698169 |
| CCTTCCGGTGAC  | 767.945839443286 | 0.233132466471149 |
| CGTAATGGGTCA  | 767.948362950116 | 0.243049260899715 |
| AGTGTCACGTCG  | 767.948620811158 | 0.219931844421328 |
| ATGAAGTGACAC  | 767.954364873154 | 0.310652978489905 |
| TGGTTGACTGAA  | 767.957044343304 | 0.243395581568605 |
| ACGTCACAACAC  | 767.978276392008 | 0.281139929610747 |
| ATGGCGTAGTCA  | 767.982608589373 | 0.288359085206825 |
| ATGACGTCTTGG  | 767.984116650818 | 0.229460446921877 |

|               |                  |                   |
|---------------|------------------|-------------------|
| ATGCGTGACATA  | 767.984724924098 | 0.290537522901722 |
| CGTCACCGTCAA  | 767.986321102606 | 0.243086233336895 |
| AGCTTTGATGAC  | 767.988390962644 | 0.334081217605182 |
| CCCCGGGAGTCA  | 768.000195445734 | 0.250887313500116 |
| GGACTCACTCAA  | 768.006093096372 | 0.316861404373674 |
| AGAGCCTGTGAT  | 768.010192519348 | 0.308895219515212 |
| GTGTCAGACCTA  | 768.010718280091 | 0.235038754272905 |
| CTCGTTTTGTCA  | 768.018440307968 | 0.201396134964554 |
| GACCTATGTGAC  | 768.037295456686 | 0.387844875884577 |
| ATGACGACTCCA  | 768.050701297967 | 0.118162815858136 |
| AGACAGCGTCAC  | 768.061535919166 | 0.254835908609988 |
| TGATGTGTAACA  | 768.071835474666 | 0.254708623858205 |
| GTCATTGCTCTA  | 768.072680910292 | 0.284701042044885 |
| GTGAGTCGGTTA  | 768.076633535253 | 0.157453500850115 |
| CTGAGTCGAATC  | 768.081604532024 | 0.263893084684877 |
| ATGTCATTGGAA  | 768.082412328044 | 0.203682002015037 |
| AGTCTGACGGAT  | 768.08396850489  | 0.283060151356496 |
| CTAGCGAGTCAG  | 768.089861309741 | 0.342764151157353 |
| CCATATCGTCAC  | 768.092258243716 | 0.246274065429247 |
| GTCATAGAGGTA  | 768.095640875865 | 0.238395918023847 |
| AGATTGTGACAT  | 768.101961188097 | 0.222541695737704 |
| AAAGACGCGTCA  | 768.103090600113 | 0.17207392248024  |
| GTCTTGACTCGA  | 768.116780383923 | 0.317903931953612 |
| CCGACCATGACA  | 768.116843571698 | 0.231080246086205 |
| GAATGCTGACTA  | 768.117918995556 | 0.244230590806902 |
| ATTTACCTATGA  | 768.119007442942 | 0.361634451186006 |
| ATGACTTGCCAA  | 768.130623311769 | 0.330136719668405 |
| ATTTTGCGTGAC  | 768.136666915761 | 0.270981311963854 |
| CTTGCGTAGTCA  | 768.137050236384 | 0.299570627667545 |
| GAATAACGTGAC  | 768.138724042229 | 0.366737251912403 |
| GTCACCGAAGAC  | 768.138791022808 | 0.313650853949705 |
| CACATGAATGAC  | 768.142669311977 | 0.332644841049167 |
| GGTCGTGGTGAC  | 768.144462063648 | 0.415549083556722 |
| ATGACATTTCTG  | 768.147339327223 | 0.352006245214221 |
| GTCACAACCTCAC | 768.174776180608 | 0.242632101622247 |
| AGTGACATGGTC  | 768.175780533645 | 0.325665543482108 |
| ATGACAATCTAC  | 768.182255840161 | 0.26061259925023  |
| GCGTCACTTCGA  | 768.190062192311 | 0.268725599132751 |
| ATGACATGCATC  | 768.19431895001  | 0.450658224637428 |
| CAGCTCTGTGAC  | 768.199903476492 | 0.329829710856991 |
| ACGTCACCAATG  | 768.212298308401 | 0.320042870120393 |
| AAGTCACCTTGC  | 768.213534661913 | 0.305710147799115 |
| ACTCAGTCAACA  | 768.215730148858 | 0.426708353111966 |
| GACTCAGCCGTA  | 768.216955990362 | 0.37555502826639  |
| ATGACGCCTACA  | 768.218159151658 | 0.437576751383898 |
| CTTCAAATGACA  | 768.229224745854 | 0.401790236134924 |
| ACTCATATTTGA  | 768.232547932912 | 0.301429462970237 |
| ATGACAGAGCAT  | 768.243288273088 | 0.191756072402574 |
| GCGTATCGTGAC  | 768.250857099844 | 0.380062645274464 |
| AACGCCTGACTC  | 768.25399751815  | 0.286414098978764 |
| GGAATATGACCA  | 768.257173132057 | 0.214064957444198 |
| CGAAGACACATC  | 768.258237641669 | 0.365115639288963 |
| CTACTGCAGTCA  | 768.264953855338 | 0.297386654902043 |
| CCGATTACGCAC  | 768.270953423364 | 0.124015887454653 |

|              |                  |                   |
|--------------|------------------|-------------------|
| GTTATAGTGTC  | 768.280786216583 | 0.404072814382559 |
| TATATTGTGACA | 768.288858992637 | 0.231828225177485 |
| GAACCAAGTCAC | 768.294950381589 | 0.447217015502521 |
| ATGACCACCATG | 768.298016413697 | 0.369680625093685 |
| ATAAATTACTCG | 768.314905105394 | 0.362855872889153 |
| CAACTGTGACAG | 768.316212405994 | 0.287075990542159 |
| GGGAGCTATGAC | 768.328929750489 | 0.314372200771007 |
| AGAATTTGTGAC | 768.33317116608  | 0.277897282994878 |
| ATTATGAATAAT | 768.338830664608 | 0.295825042230636 |
| CGAGATTTGTCA | 768.347813695635 | 0.240765984696366 |
| GACGCATGACGC | 768.350004017271 | 0.380907075667866 |
| CTGATGATGTAA | 768.35204493299  | 0.432288347288538 |
| CCCGTCATTGGA | 768.352357712489 | 0.245878940709293 |
| AGAAACAAGTCA | 768.355088591065 | 0.272196807140031 |
| AGTCAGACCAGG | 768.365588839823 | 0.358866227989052 |
| CTGACCAAGACA | 768.377148840034 | 0.444149000801768 |
| AACTTTGACTGT | 768.378762499137 | 0.249067056801929 |
| CGTAACTTGTCA | 768.386955378926 | 0.268173906839691 |
| AATAGTGGTGAC | 768.389089735449 | 0.381425722501419 |
| TGACTCCTGTAA | 768.394437986522 | 0.327372290570015 |
| GACCCTTCGTCA | 768.398748662572 | 0.350830760121332 |
| ATTAAATGGTCA | 768.41785989939  | 0.350672678080714 |
| TCTTTGACGTCA | 768.422282045034 | 0.331560535114468 |
| CTTACCAATGAC | 768.427971308631 | 0.303398994928318 |
| AACCAACATGAC | 768.440564927444 | 0.440292053145232 |
| CACACATGACGC | 768.442332802019 | 0.320724157834847 |
| CGTTTCCAGTCA | 768.443749306777 | 0.317451325453144 |
| ATGCAGTGACAC | 768.447300358425 | 0.326534578793093 |
| GCGTGACGCGGA | 768.447361751738 | 0.313618586400534 |
| AATTTGGTGACA | 768.455241807284 | 0.280076569345787 |
| AATTTGTGACAT | 768.461771049556 | 0.300265278158757 |
| GTCATTCCAGAC | 768.467919079322 | 0.181704866399963 |
| CGTCCGGTGACA | 768.478014470556 | 0.314643623819737 |
| ATGACATGCAAC | 768.484505440681 | 0.386020722827654 |
| CGTTGTTGACTA | 768.487178362656 | 0.267026650800391 |
| GCAGACTAATAC | 768.487827823799 | 0.403508017434956 |
| GCTTCCCAGTCA | 768.502956202168 | 0.319010825689493 |
| ATGATATGACCG | 768.503789251317 | 0.272713393232383 |
| GATTAACTCATA | 768.508041079685 | 0.165611168775495 |
| GTCACCACGGTA | 768.516620208892 | 0.338318384587031 |
| AGACGTGACCCA | 768.519575763794 | 0.327004588825675 |
| AGAACTGACTAT | 768.51996662806  | 0.297904780734514 |
| CTTAATAATGAC | 768.527207077841 | 0.279367105133888 |
| ATGTAATGACAA | 768.53661817906  | 0.3483923657886   |
| ACGGAGTGACGT | 768.541318905594 | 0.368614753384058 |
| TCTATGACCTAA | 768.543912695137 | 0.158814261428613 |
| ACCTCGCAGTCA | 768.549684542414 | 0.353669696693573 |
| CGTCAGACGTAA | 768.553046442568 | 0.373937004573731 |
| CTAACTTTGTCA | 768.561615942741 | 0.248487025849841 |
| ATTACTAAGATG | 768.566411933639 | 0.18511123205227  |
| GAATAAGATGAC | 768.568249201293 | 0.157670996029959 |
| ACTTGTTGGTCA | 768.575200908674 | 0.257253069844251 |
| AATGAGTAGTAA | 768.57591839977  | 0.273411795833284 |
| ATAGTACTCACA | 768.582103982919 | 0.244858009895229 |

|               |                  |                   |
|---------------|------------------|-------------------|
| ATGTGAGTACTA  | 768.588212423112 | 0.176661509167607 |
| AAGCTATAGTCA  | 768.588583489723 | 0.359998130653    |
| CGCGCCTGACTC  | 768.589029098637 | 0.254362298319945 |
| GTCACCAGTGGA  | 768.596232044629 | 0.354787452625784 |
| GGGTGACCCAAC  | 768.598540404863 | 0.398495104845405 |
| ATGACGGGGTTG  | 768.598742705865 | 0.242803824986985 |
| AGCAGGTGTGAC  | 768.60261699712  | 0.17219750061797  |
| AAAGTGTGTAAT  | 768.604875909724 | 0.254719713652119 |
| GCCCTACGATGA  | 768.622096874197 | 0.314626310004726 |
| ATTCTGCTGTGAC | 768.623630999954 | 0.53768763501933  |
| GTCATTTAGAAC  | 768.634561838471 | 0.217331039386763 |
| GACTAAATCGGC  | 768.640708106889 | 0.360308181436165 |
| TGCATTGTGACA  | 768.649061236102 | 0.308357219274159 |
| CAAATCATGACG  | 768.652499026015 | 0.277965221976374 |
| ATGAGTGAATTC  | 768.654167233348 | 0.325886331838858 |
| GTCATGCAAAAC  | 768.659849036463 | 0.260986265722618 |
| ACGTCACCCCTGC | 768.663606010168 | 0.287207882526308 |
| CGTCATTGCACA  | 768.666686641012 | 0.363613256232588 |
| AGGCGAATGACG  | 768.667137223395 | 0.258662043886355 |
| ATGAGTACGCTC  | 768.668382029841 | 0.354634709679414 |
| CACGCTACGTCA  | 768.671407823864 | 0.311614607801351 |
| CAGTTATTAGTC  | 768.674449161939 | 0.211569994355704 |
| CACGTCAGATCA  | 768.682771886507 | 0.373603391710594 |
| ATGTTACGTGTA  | 768.685749183338 | 0.405704440721926 |
| AAGACTTTGTCA  | 768.692755745292 | 0.245187384150333 |
| AGGATCTAGTCA  | 768.695891036804 | 0.172463217085123 |
| GTTACGTGGCGA  | 768.695943939397 | 0.390614123093896 |
| ACTCATCGTGTG  | 768.697510083316 | 0.367695664369959 |
| CGTCATTTGGTA  | 768.698918022213 | 0.245386761416167 |
| GCTCTGAGTGAC  | 768.701604703094 | 0.242324732446185 |
| CACGTCGTGACG  | 768.709453173176 | 0.315040681913225 |
| GATTACTAAGAC  | 768.709939393699 | 0.391525932724199 |
| AACCCTGTGACA  | 768.715753061868 | 0.272078531779427 |
| ACACGCTGAGTC  | 768.71766754557  | 0.327247671174487 |
| GACTAATTACCC  | 768.718695509259 | 0.419559451439011 |
| GAGGTAAATGAC  | 768.719752869394 | 0.286443187874756 |
| ATGATACAATTA  | 768.724065057621 | 0.361522970933089 |
| AATGACCACTCA  | 768.736406167665 | 0.254478195283727 |
| GTGACTTACAAA  | 768.737444484555 | 0.234404954409456 |
| ATATGGTCACCA  | 768.742017639503 | 0.257838817892476 |
| AGACTAATAAGG  | 768.745733266948 | 0.452826231081166 |
| TGACTGGTCCCA  | 768.751968176036 | 0.444535659770068 |
| TCGCGGGAGTCA  | 768.756359326497 | 0.284950402498549 |
| ATGACAGGGTGA  | 768.775253223304 | 0.183797616847698 |
| ATAAGACTAACA  | 768.778392609395 | 0.253906411099489 |
| GCGTTGACTGAA  | 768.784145720285 | 0.309840612002125 |
| AACTCAAGTGAC  | 768.784680487211 | 0.246048897630031 |
| TATTCAGACTCA  | 768.786621334608 | 0.37488335988687  |
| ACTGAGTCGAAA  | 768.796001752066 | 0.243246080207824 |
| CATCGTGACATA  | 768.800100856749 | 0.286734894451574 |
| CGGTGAGCAACC  | 768.804915843377 | 0.28841815741013  |
| CCTCTTTGACTC  | 768.813660409082 | 0.208267708072781 |
| ATGACGAGGGCC  | 768.825025026867 | 0.285427254123291 |
| TAGTGATGACCA  | 768.829074818049 | 0.278237292971756 |

|              |                  |                   |
|--------------|------------------|-------------------|
| CCATCTGTGACG | 768.829309240611 | 0.48005308830941  |
| AATTATAACTCA | 768.843726271948 | 0.349552698794169 |
| AATTTAAGAGTC | 768.848256178013 | 0.338954106789017 |
| CGTATCACGTCA | 768.848991846886 | 0.312399988076543 |
| GGACCAGACTCA | 768.853302103375 | 0.473272120116163 |
| GATGCACATGAC | 768.862328687769 | 0.374068873845308 |
| CGCAAACGTGAC | 768.869925420231 | 0.234176080191975 |
| AGACCGATGACC | 768.879853392726 | 0.291349269852448 |
| AGTCAGACGGAC | 768.884912273059 | 0.293298967002413 |
| CGCCACACGTCA | 768.885995514568 | 0.339522950593118 |
| CCACGTGACAGA | 768.886350122167 | 0.310108863527316 |
| ACCCATGTGTGA | 768.889373430572 | 0.208029771836511 |
| AGTTTCGGTCAT | 768.89808006143  | 0.151672458884244 |
| CCATGACAGACA | 768.898489530352 | 0.262459260451152 |
| AATTCGTGACCC | 768.899956173929 | 0.307503721043944 |
| AAGTCACGCGTC | 768.922499690555 | 0.286171252222592 |
| TTACTCAGCAA  | 768.9252032848   | 0.385421734896929 |
| AGTCAGAAATAT | 768.92602078789  | 0.258491355086067 |
| CTAACGATGACC | 768.92615251383  | 0.214381191054668 |
| CGGGACAGTGAC | 768.927147074569 | 0.330456775733883 |
| AGTTTTACGTCA | 768.93117430421  | 0.22477517146543  |
| CTTTAATGGTCA | 768.946167673169 | 0.347168256499492 |
| TGAGCAATCCCA | 768.946556802351 | 0.342884471537575 |
| CGCTGTAATGAC | 768.950463789865 | 0.213855203764814 |
| CATAATGTATCA | 768.952032135366 | 0.332598133873852 |
| CTTTATCGGTCA | 768.961084223636 | 0.291745904701071 |
| AGTCACTTGGAC | 768.96210814168  | 0.280580274917403 |
| CGAGCCATGACG | 768.976692460441 | 0.313322415833151 |
| CTACATGACCCA | 768.977746705188 | 0.199688841697999 |
| TCATCGCTGACA | 768.982553278708 | 0.290911110542987 |
| ACGTCACCTCCA | 768.993065229957 | 0.163537892856477 |
| ATGTGTGGTGAC | 768.996485933297 | 0.186769717094578 |
| GGCGATAATGAC | 768.997433163143 | 0.18377223658579  |
| AAACATGACATA | 768.997670467663 | 0.208172211875815 |
| CTAAGGTGTGAC | 769.00669684048  | 0.227982385001624 |
| AACATTGACACA | 769.006888493919 | 0.296228910288547 |
| AGAGAGCGTCAT | 769.011919079283 | 0.174360317421397 |
| GGGTCATAGACA | 769.013183336253 | 0.432073110808788 |
| GGAATCAATGAC | 769.026745540362 | 0.20919827869439  |
| GTCACCATTAC  | 769.028121712062 | 0.402738361285031 |
| GGTGTGCGGTCA | 769.028470864959 | 0.286522948287024 |
| GTGACTGACCA  | 769.033508696753 | 0.262404263578338 |
| AGTCTGACACCA | 769.035067769039 | 0.233374037826001 |
| ACTCATTCTATG | 769.035913693471 | 0.269760239098476 |
| GACCTGACTCGC | 769.037532485321 | 0.257935930767744 |
| AATTACATGACA | 769.038438199264 | 0.217867151329395 |
| CGTCAGACGTCA | 769.042939904661 | 0.448294692562317 |
| GGTTCCTGTGAC | 769.047069766814 | 0.302229196117931 |
| ACAGTTCTGACT | 769.047132529268 | 0.303760193975379 |
| CGTTTGAGTAAC | 769.051988110875 | 0.253020104112384 |
| ACTGATGACCTA | 769.057441988531 | 0.159203232346021 |
| CTGTACAGTGAC | 769.064760580265 | 0.256779238756037 |
| CCCCGAGTGACG | 769.082278603968 | 0.524510939235271 |
| TGACTGGGTCAA | 769.087580769585 | 0.281239688030345 |

|                |                  |                    |
|----------------|------------------|--------------------|
| ATGATGTATACA   | 769.089205651521 | 0.392538355823091  |
| AACCCCTGACTC   | 769.090492465518 | 0.176392631850017  |
| CGTCTCTGTAC    | 769.093021034088 | 0.19891899482421   |
| ATACGGTCATCA   | 769.095431413349 | 0.299649343020857  |
| ATATTAATCACC   | 769.100131374311 | 0.280608154061498  |
| ACGTAATGTAC    | 769.100480665888 | 0.332643697432594  |
| CGATCTGTGTCA   | 769.102971935619 | 0.275017336980687  |
| ACAAGACTGACT   | 769.106515874418 | 0.583720819864173  |
| AAGGCTGACTAT   | 769.114443839041 | 0.272571555014642  |
| ACTACGTAATCG   | 769.115087444878 | 0.349822370977238  |
| GGAAAAGTGTCA   | 769.116149915832 | 0.0921241450671728 |
| AGTCGATTCATC   | 769.118857424825 | 0.33390814466691   |
| AGTCAATTCCTTA  | 769.12417942496  | 0.445619366421424  |
| ATGACGAGAAGC   | 769.125590196349 | 0.286617942407048  |
| GAGTCAAGATAA   | 769.128778730729 | 0.158617477635666  |
| ATACCTGTATGA   | 769.135768848139 | 0.436969679317662  |
| ACGTCACTTGCG   | 769.139169109479 | 0.302925761861133  |
| CGTCATCAGCTC   | 769.139891963046 | 0.365026040604058  |
| AAGTAATGACAT   | 769.142842448594 | 0.228288759313064  |
| CTGTCATGCAAA   | 769.146559024363 | 0.336319486396793  |
| CGTCACTGCGTA   | 769.150383000491 | 0.351439693016763  |
| ATGAGCAAGACC   | 769.152113733228 | 0.239423962417214  |
| GAAAGTGGTGAC   | 769.154508989045 | 0.222447428570091  |
| CAGTATGTGACG   | 769.157030362603 | 0.314893934921254  |
| CGTCACTGTGTA   | 769.163226148    | 0.288996120194903  |
| AGAACCAATGAC   | 769.168174244837 | 0.342171862644116  |
| GATTCACTATTA   | 769.172920428751 | 0.328996255132787  |
| ACTAATTGTATG   | 769.179427699439 | 0.218513639591923  |
| TACCCTTACTCA   | 769.180316609845 | 0.206352924075541  |
| CAATCTGTGAGC   | 769.182236125176 | 0.195532797711506  |
| ATGGGCTGACTG   | 769.189199718933 | 0.371216347357079  |
| CGGGACGATGAC   | 769.205209346998 | 0.249364004078662  |
| CGTAGTTGTAC    | 769.205756087172 | 0.18120796501377   |
| ATGACGCTCCTG   | 769.207073463815 | 0.346906870432106  |
| AGTGTCAGAGCC   | 769.211927805186 | 0.316760986120628  |
| CTGACTGTGCTA   | 769.21250117488  | 0.305290764159588  |
| TCATTTAGTCGA   | 769.215177172197 | 0.295121281153866  |
| ACGGTCATCCTA   | 769.21873714187  | 0.457243944997833  |
| ACTCATGAGTAC   | 769.223227874489 | 0.270078121299506  |
| CCGATTCGTGAC   | 769.231139128154 | 0.305281015594551  |
| GACATACGTGAC   | 769.23178791551  | 0.252757964958703  |
| TAACGGGAGTCA   | 769.232149330705 | 0.480094798186572  |
| ACATTGGGTAC    | 769.234277416607 | 0.154760035008793  |
| GCCAGTAATGAC   | 769.253577054393 | 0.467359638367797  |
| ATGACGACTACG   | 769.256571512869 | 0.417126349774028  |
| GTCACCATAGAA   | 769.261801369263 | 0.216017708660068  |
| AGAAAACGTGTCA  | 769.263619122326 | 0.35979442987228   |
| GGTCATTTATGA   | 769.268479796166 | 0.294160142737945  |
| CTTTCGTGACAC   | 769.270187939108 | 0.164879578459772  |
| GTCACGTA AAAAC | 769.279385306578 | 0.315318173278141  |
| GTCACCTAATAA   | 769.280927561412 | 0.437489809139179  |
| CGTCACATACAG   | 769.282561142052 | 0.342885344811768  |
| ACTAATAGGTAC   | 769.292578911505 | 0.330763282541737  |
| GAATGAATAATC   | 769.296181645092 | 0.237595800496494  |

|              |                  |                   |
|--------------|------------------|-------------------|
| CGCATGCGTGAC | 769.322962760151 | 0.484400744632259 |
| CCAATCATGACG | 769.323455165312 | 0.153721846412909 |
| AAAATTCGTCAA | 769.327394090161 | 0.221464809823805 |
| CACAAATCGTCA | 769.327891599434 | 0.207856440385955 |
| GTATGACCGTAA | 769.329259112617 | 0.491697416130848 |
| ATGACATTTTGC | 769.331523943014 | 0.243744089108945 |
| TATGACGGCGCA | 769.331608929363 | 0.219426735369221 |
| TGTCATTAAGAA | 769.337048735684 | 0.309730095373731 |
| ATGACATTGCAC | 769.340839365914 | 0.215110029300934 |
| ATCGACTCAGAG | 769.343235025089 | 0.326968633030953 |
| GAATGACCATAC | 769.350961563872 | 0.30655282823856  |
| GTCATTTGGTTA | 769.354135510567 | 0.345802546745262 |
| CTGACTTAATCA | 769.359724539483 | 0.228638896843009 |
| ATTGACTGTGTC | 769.381408860715 | 0.264856118313064 |
| ACTAATCTCTGA | 769.381522353715 | 0.297408383687117 |
| CTATGGTGACAG | 769.381755068634 | 0.353646365744889 |
| GGTCATCTATA  | 769.391670485225 | 0.312225944215337 |
| AGTCTGTGACGC | 769.399134713888 | 0.231408662334413 |
| CCGCGTCAGAGA | 769.408735672913 | 0.31158566404388  |
| ATGACCAGATTG | 769.410062562681 | 0.266066573345559 |
| CGTCATGCTGGC | 769.410992864409 | 0.246093199975018 |
| GAAATATGACCA | 769.41513532006  | 0.193921998934532 |
| GTCAATGGTGAC | 769.419016630772 | 0.31468121456574  |
| CTGACGAAATTA | 769.439562440463 | 0.127814902172288 |
| CTGGTTTGTGAC | 769.446860044931 | 0.215847531958871 |
| GGTACAGATGAC | 769.455352903126 | 0.256653082132622 |
| GTCACCATAACA | 769.457321402591 | 0.335974578628119 |
| CAACGTGACAGA | 769.464595629402 | 0.229946116924298 |
| ATAAGGATGACC | 769.468768363117 | 0.334084590087196 |
| ATGTCACATACA | 769.474552327952 | 0.296804136288866 |
| CAGTGAGCCACA | 769.479676333789 | 0.251400150354991 |
| ATGTATGTGACA | 769.488577958184 | 0.264566771049167 |
| AAACTGAGTGAC | 769.489192706514 | 0.195946528366592 |
| CATCAGACTCAC | 769.492874724417 | 0.275789282426677 |
| GCAGCCGCGTCA | 769.49505217318  | 0.347216727846958 |
| GCAGTCACGACC | 769.502075446027 | 0.35449533887073  |
| CACAGTTGACGC | 769.506145464394 | 0.243991812575098 |
| CGTCATCTACAG | 769.510296453453 | 0.271234206022012 |
| ACGTCACCGTGG | 769.513485534231 | 0.2963245112146   |
| GGGGATTATGAC | 769.515002061944 | 0.250957991051646 |
| ATGACAATAGGA | 769.516763057479 | 0.228121633132866 |
| GTTCTGACTGGA | 769.51958083455  | 0.396570135126722 |
| GGAAGGAATGAC | 769.521544999102 | 0.250122737091935 |
| CGTCATCTGCTC | 769.532618056142 | 0.108848693340518 |
| ACCGCATGACAA | 769.534159992751 | 0.225881032818213 |
| AAATTAATAAAT | 769.543959867675 | 0.248202069581843 |
| ATACCTACGTCA | 769.544418784543 | 0.276881199287918 |
| AGGGTAGATGAC | 769.549556879147 | 0.329174627266294 |
| ATTAGTAAGAAA | 769.553882742989 | 0.263197378341989 |
| GTCATCAACCCA | 769.555386524517 | 0.261093879654423 |
| ATGGTTACATCA | 769.567153983758 | 0.259846014467945 |
| TCTATATGACCA | 769.568894972449 | 0.2170968565809   |
| CGTCACGGAGCA | 769.569610048664 | 0.299829869409461 |
| GACTCACGCGAC | 769.570308758337 | 0.204103337923307 |

|              |                  |                   |
|--------------|------------------|-------------------|
| TGGTCATTAGAA | 769.583494043394 | 0.229897461164637 |
| ATGACCCAGCAG | 769.595602959837 | 0.39852435553855  |
| GCTGTCAATGAC | 769.597108963725 | 0.391615020121583 |
| ACGATAATGACA | 769.602072000721 | 0.290391508580991 |
| TCACAGTGATGA | 769.60372322856  | 0.491035417333569 |
| GCGCGGGAGTCA | 769.60589161747  | 0.258359506447269 |
| CACCTGTGACGG | 769.610883489656 | 0.323743541844961 |
| GGTATCCGTGAC | 769.620042841531 | 0.421889301332749 |
| GTCACGTAGCCA | 769.62397199132  | 0.278536471139228 |
| GTTTCCGTGTCA | 769.633134792388 | 0.404077591392649 |
| GCTCCAAATGAC | 769.634397763131 | 0.390734455200038 |
| ATGCGTAACTCG | 769.635512903281 | 0.288396875249299 |
| CGAATTGCTGAC | 769.636387856068 | 0.185291085620244 |
| AGTCAGACTGTG | 769.637054149284 | 0.158154256927824 |
| CTGACTGGTATA | 769.647050752505 | 0.251208839875194 |
| CTTATGGTGTCA | 769.651135177459 | 0.356618325671654 |
| ATAGCTGATGAC | 769.654344227979 | 0.257569258140471 |
| AGGCATGACAGA | 769.663156899347 | 0.174223709394163 |
| ATCCAGAGTGAC | 769.668969872084 | 0.253612462723469 |
| TGACTGCCAGCA | 769.673148161802 | 0.279971926463573 |
| CGAGACATGACA | 769.677024570507 | 0.285157356770826 |
| CACAGACTCACA | 769.681093049649 | 0.31805800114646  |
| ACGGTGACGATG | 769.684225903738 | 0.258842572405562 |
| TGACTGCATGAA | 769.686598055234 | 0.347902694331956 |
| GTCACATAAACA | 769.687230862001 | 0.328467503139037 |
| CAGAGTGACCCA | 769.701727799494 | 0.216596659176492 |
| GTCACCCGGCA  | 769.702595168333 | 0.495653488710135 |
| ATGACCGAATGC | 769.706575958576 | 0.487054699885586 |
| TGACTTGACACA | 769.708604008909 | 0.27334688609892  |
| TGTCACAGAGAA | 769.712124629466 | 0.325880786932806 |
| GTCATTTGTGAA | 769.72369849242  | 0.279310245626413 |
| CTTTCATATGAC | 769.725160816783 | 0.212889891286287 |
| CACACGCAGTCA | 769.737511613161 | 0.271335925071715 |
| ACTGACGGATCT | 769.738747692823 | 0.2786837821945   |
| AGGGTGACCCAA | 769.740276032795 | 0.312569708287331 |
| TGACTCTCGAAA | 769.743995415504 | 0.341025778933915 |
| AATAGGCTGACT | 769.744573253721 | 0.230222430938813 |
| CTGCCGAATGAC | 769.757393271334 | 0.348327553881103 |
| ACCTATTACTCT | 769.763529516634 | 0.217647168852495 |
| ATTTCTATGTCA | 769.779485222626 | 0.224087478275623 |
| GGTTTGGAGTCA | 769.783014804832 | 0.280490430046296 |
| AGAAGTTGTAC  | 769.790780672508 | 0.239304234819569 |
| ATACGTCAATGA | 769.796130542846 | 0.344856502550135 |
| ATTGCTGAGTAA | 769.79947707794  | 0.361056304637983 |
| CTTCCGACTCAC | 769.80878262016  | 0.215811128380368 |
| GTCATTATTGTA | 769.82829226152  | 0.473424404036617 |
| CGCGAACGTGAC | 769.830160688801 | 0.22967735000107  |
| GATATCTAGTCA | 769.838620289538 | 0.347273925654358 |
| AATAGATATGAC | 769.841210082764 | 0.355820070968653 |
| CAAAAGTCATAC | 769.843476800716 | 0.36312857763568  |
| ATCAGGCGTCAT | 769.869573944399 | 0.35945102375494  |
| AGTTCAAATGAC | 769.871613240487 | 0.222880996422316 |
| AGGGTGAGCCAC | 769.871890127911 | 0.288674742592836 |
| CGATACATGACA | 769.872304739996 | 0.167354237534421 |



|               |                  |                    |
|---------------|------------------|--------------------|
| CAGTGGTCATTC  | 769.876062909848 | 0.271813972077425  |
| CGTAATCAGTAC  | 769.879444961809 | 0.471884435400589  |
| CTGGCACATGAC  | 769.888578462221 | 0.25880608373201   |
| GGTGTGATGAC   | 769.890987655636 | 0.325438054557044  |
| CGTGCATGACAC  | 769.897318764098 | 0.366880116896219  |
| CACTACTGTGAC  | 769.899846499538 | 0.282733538679836  |
| ATTCCGTGACGA  | 769.900682102652 | 0.177568500906866  |
| CGGCCTGACGCA  | 769.901031388517 | 0.268929728448124  |
| AAATGTCACCGT  | 769.909873959065 | 0.321959335877004  |
| TATGTGTAGTCA  | 769.910192939708 | 0.213683952145929  |
| GGCATTGTCACC  | 769.911124662082 | 0.33132347242582   |
| TGACTTACATCA  | 769.913043186345 | 0.338386555437975  |
| CATGTCACCGAG  | 769.915378323701 | 0.333290756063948  |
| ATAACGGTGACG  | 769.922302368071 | 0.336590358627683  |
| GAGTCAAATTA   | 769.922509030959 | 0.37977135228875   |
| AAACGTGGTCAT  | 769.923773883483 | 0.323683579716618  |
| GGCCCAAATGAC  | 769.926813416638 | 0.401676748196491  |
| CTGACTCTCAAA  | 769.94102074674  | 0.271259718242353  |
| GTCACCCTACGA  | 769.942340137127 | 0.247882242221248  |
| ATAATTGTGACG  | 769.942643483857 | 0.273638012294151  |
| ACACGTGACACG  | 769.942906864929 | 0.312766057620224  |
| CTGACAGATTAC  | 769.94583029197  | 0.299352265341377  |
| ATACCAATGACA  | 769.94670864384  | 0.240936449263594  |
| CGTCACTCGAGC  | 769.951324694487 | 0.329254261096326  |
| GCTGTTTATGAC  | 769.956286499949 | 0.33706560212492   |
| GGCAACGTCACC  | 769.975508277661 | 0.486634742642741  |
| CGTCATTGGAGC  | 769.979419269493 | 0.259459959088123  |
| CTGACTGTGTGA  | 769.98242685962  | 0.290567402238224  |
| CGGTTAGTAACC  | 769.983441385826 | 0.375057554029827  |
| ATGACTTGACCC  | 769.986145300251 | 0.203248636277389  |
| AGCTATCTGTCA  | 769.986294173125 | 0.286287522092802  |
| CCGATGACCGAG  | 769.987768313276 | 0.314014502340076  |
| AGTACGGTCATA  | 770.003206756105 | 0.250689835703508  |
| GAACGGTGACGA  | 770.008369042821 | 0.230031290831414  |
| AGTGCTTATGAC  | 770.013036272948 | 0.280546177000935  |
| ATTCTTGGTCAC  | 770.017839591174 | 0.242883697301711  |
| GGTGACAGCAAA  | 770.018025578146 | 0.272670263853904  |
| TGTCAGAAGACA  | 770.036412830514 | 0.283796993266308  |
| GCATGACAGACA  | 770.03793305541  | 0.257233375638167  |
| AGTCACGCTGAA  | 770.038341650595 | 0.216077108075008  |
| TCGCCGTAGTCA  | 770.040252969389 | 0.324856019498654  |
| CACCACCTATGA  | 770.051687507809 | 0.294005325650092  |
| ACGCCCGTGACT  | 770.071714018277 | 0.211366573287404  |
| CAGTCAGATCCG  | 770.078108518934 | 0.343914182700801  |
| CGTCACAGATCC  | 770.078480183884 | 0.416514771113618  |
| GTCACACCTTCA  | 770.078690505322 | 0.286385822899856  |
| GAGAAGTGACGC  | 770.079343149129 | 0.270463033887037  |
| ATATTGACGTCA  | 770.080488038524 | 0.307163808322631  |
| ATAAGTTGACTA  | 770.087657544828 | 0.299968403072887  |
| GTC AAGCGTGAC | 770.093497166147 | 0.0922377974218946 |
| GTCATGAGGCAA  | 770.095478393344 | 0.234886743564707  |
| CGTGAGTCTGAG  | 770.102443116323 | 0.327733163894166  |
| CGTACCATGACG  | 770.104585180677 | 0.193084517460932  |
| ACGGGTTGAGTC  | 770.113991503093 | 0.513610025260052  |

|              |                  |                   |
|--------------|------------------|-------------------|
| AAGTACCCCTG  | 770.11896340169  | 0.172846274123461 |
| TGTCATTATCAA | 770.126103404264 | 0.386020282314915 |
| TCAGCCATGTCA | 770.135081660156 | 0.286016391925572 |
| TAAACCATGTCA | 770.139909715474 | 0.352363154592515 |
| GCGTACACGTAA | 770.141951965761 | 0.26405171496437  |
| ATTAGTCGCCCG | 770.147113818602 | 0.343850848881002 |
| CCAGATGATACA | 770.149118866975 | 0.490190303471802 |
| ACAGCATAGTCA | 770.153201821804 | 0.310790964265756 |
| ATCTGACTGCTA | 770.155959345749 | 0.288100247258795 |
| ACTCATATCGGG | 770.156876487111 | 0.347508876627261 |
| GATCACTCAGAA | 770.157330344416 | 0.356403715364128 |
| CTTTCAAATGAC | 770.16615040476  | 0.335716946611985 |
| TCCCTAGACTCA | 770.171729591529 | 0.266611259675516 |
| CATCTGCTATGA | 770.17256096147  | 0.311662406564808 |
| AACCAGTCAGCA | 770.179409596714 | 0.273185162395092 |
| ACCCTTGTGACG | 770.185265317807 | 0.328479547728108 |
| AAGCAGTCAGAA | 770.186068288474 | 0.233529039094822 |
| AATCTGTTGTCA | 770.1880205773   | 0.266401518946257 |
| GGTGACGTTGCA | 770.191023528911 | 0.284934157581657 |
| GTCTAGGTGTCA | 770.191528807076 | 0.341772512879163 |
| AGTGACTAGCCC | 770.194077235271 | 0.270504014700344 |
| CTCATCCGTGAC | 770.201199362689 | 0.325120520496244 |
| AAATGTCTGACG | 770.201975820545 | 0.426660502845816 |
| ACTCATACGAAT | 770.210568286288 | 0.258804815893192 |
| AAGTGTCAGCGT | 770.217721319804 | 0.288577043897838 |
| TACAAATCGTCA | 770.225971086953 | 0.227198160507682 |
| AACCATCCGTCA | 770.22892266594  | 0.265353296759475 |
| GAGAAATGTGAC | 770.234322094465 | 0.236291636770727 |
| CAAAGGTGACGA | 770.240533253159 | 0.30845223170046  |
| CGTCATCAGAAG | 770.245271153753 | 0.304316666637479 |
| TGCGTAATCAAA | 770.253597700407 | 0.249507295041177 |
| TCACATGTGACA | 770.268190421329 | 0.286945433144254 |
| TCTAAGACGTCA | 770.27535645092  | 0.406273810951921 |
| CAGCGCCATGAC | 770.276102511167 | 0.224831827830308 |
| TGGTCATACCA  | 770.286525274841 | 0.442481087720313 |
| AGTCACGCAG   | 770.289589304119 | 0.307217984184547 |
| ATCAGCGACTCA | 770.295915734534 | 0.440886318388558 |
| CGTCATTGCAAG | 770.300092759689 | 0.258054118099215 |
| AGAATAATGACA | 770.302440929799 | 0.243079789965777 |
| CTCAGCACGTCA | 770.319180838967 | 0.363539152913208 |
| GACGACTGACTA | 770.319225236341 | 0.168807966751025 |
| TCAGCAGACTCA | 770.320852305647 | 0.319410550285318 |
| AATGTAGTGTC  | 770.324451698287 | 0.356759543876601 |
| ATTAGTACTATA | 770.328274306719 | 0.344601468650098 |
| CGGCCTCATGAC | 770.336183824711 | 0.295622531089626 |
| CGGAGCATGACA | 770.341332932292 | 0.295905892510498 |
| CCGCGCATGACG | 770.346584975948 | 0.296800023948529 |
| CTAGCCAAGTCA | 770.365727406203 | 0.274669936399469 |
| GTCACTGAGCAA | 770.369937754133 | 0.28070787131769  |
| AGTGACGCCATA | 770.373798490616 | 0.153880748365613 |
| CATGATAGTGAC | 770.378265038938 | 0.317281748484752 |
| CAGTCAGCTTCA | 770.38066742103  | 0.349083026986114 |
| GTCACGGACTGA | 770.391104049591 | 0.253179880139499 |
| AGTCCGAGTCAG | 770.391740010115 | 0.230370754470154 |

|              |                  |                   |
|--------------|------------------|-------------------|
| TGACGATATACA | 770.393010548875 | 0.319680617905187 |
| CAGCGGTGACGA | 770.401205065259 | 0.184061293284925 |
| AACCTATTACTC | 770.40521354379  | 0.283389985251204 |
| AAAAGAGAGTCA | 770.419444832312 | 0.231798209476458 |
| AAGACGTAGTCA | 770.42433790427  | 0.199428547205686 |
| ATGACCCTTCC  | 770.426635377339 | 0.20998855002259  |
| ATACTACATGAC | 770.433146809316 | 0.287982288202392 |
| GTCACCACCTAA | 770.437985742458 | 0.216433444578004 |
| AGGGTCATTTAC | 770.438015478592 | 0.370567594405474 |
| AACACATCATCA | 770.438370120026 | 0.344990090326438 |
| AGACGGGATGAC | 770.441075618922 | 0.291752829082533 |
| ATCTGACAGTCA | 770.441849792561 | 0.307908088388971 |
| ATGACAATAGTG | 770.462266004636 | 0.256841485433176 |
| ACATCGTCATGC | 770.482845550917 | 0.240257402102075 |
| AACGCGTCAGAG | 770.484028044506 | 0.341434765504945 |
| GTCACAGTGCCA | 770.488089017093 | 0.197182108186377 |
| GTCATGTACCTA | 770.490112380556 | 0.318255803629366 |
| AAGTACTGACTA | 770.492613013068 | 0.353450834643227 |
| CGATCGTGAGTC | 770.504886428978 | 0.388060686819935 |
| GATTCACCTACC | 770.512174275385 | 0.288083278102853 |
| AAACGGTACCCA | 770.519412778612 | 0.237199114546911 |
| CGTCATGTAATA | 770.537526900385 | 0.342817939648919 |
| GTCACTGTAACA | 770.539852279602 | 0.363366267312392 |
| CAGTCAGTCGGA | 770.548264809332 | 0.294584127517066 |
| GGATCTGTGAGA | 770.551595508308 | 0.138970372750648 |
| GATCAGTGTGAC | 770.558204470834 | 0.301513391067329 |
| CTATCGTGACAC | 770.559298450472 | 0.240051122104757 |
| ACTCATTACTCT | 770.563625286143 | 0.195463914358709 |
| TGACATGAGCAA | 770.570582967704 | 0.366814481940879 |
| CTCTTAATGACA | 770.57232654043  | 0.242940020331778 |
| ATCTCCGCGTCA | 770.586395815906 | 0.272984753627827 |
| CGTGTGGCTCAC | 770.58814846699  | 0.257935269726291 |
| ATGTGAATAATC | 770.590181549648 | 0.202397247802665 |
| GGGCAGAATGAC | 770.605044617146 | 0.236722108156298 |
| ACTGTCGTGTCA | 770.607049437401 | 0.17955418622955  |
| GATAAGTGACGC | 770.609688398826 | 0.421039390630533 |
| GTCACAGCAAAA | 770.615448625632 | 0.278879538442922 |
| ACGACGAGTGAC | 770.61606642468  | 0.328228213088819 |
| ATTGCTAATCGA | 770.619209419184 | 0.314312885202495 |
| CTAACGTGACAC | 770.625242042871 | 0.268673534297834 |
| TCTGGATGACCA | 770.626593775077 | 0.265892308078741 |
| GATCATAAGTCA | 770.632255253864 | 0.342651689066573 |
| ACCAATTACGCA | 770.647237211339 | 0.240796539388774 |
| CACGACCTGTCA | 770.650285634571 | 0.290962438957941 |
| ATGACATTAACA | 770.651557760205 | 0.259930900457893 |
| CTGACGGATCAC | 770.652204786619 | 0.31190868924664  |
| GACTAACTCGGC | 770.670917130746 | 0.252767366789025 |
| CTGACTGTAATA | 770.672601284416 | 0.314859695494858 |
| CCCTTTGATGAC | 770.672836207086 | 0.294240726401205 |
| ACATGCGGTGAC | 770.674974072087 | 0.317817959331885 |
| AGACTCAGATGC | 770.699050010439 | 0.277132730379579 |
| CGCCGTAATGAC | 770.702449599064 | 0.363907117304444 |
| TGACGTACGTAA | 770.710783940105 | 0.220090378502689 |
| CATACGTGATGC | 770.722080076121 | 0.398312517466795 |

|               |                  |                   |
|---------------|------------------|-------------------|
| CCTGCTGACGTA  | 770.731371239064 | 0.26953103431042  |
| CGACTTGTGACA  | 770.7422171229   | 0.382003334734063 |
| CGTCACATCTGA  | 770.742307154096 | 0.273303165600606 |
| GATTAAGTCAGC  | 770.751955985759 | 0.274749749776592 |
| ATACTTATGACC  | 770.75360895047  | 0.324723457988128 |
| CATATATGAGCC  | 770.755061101019 | 0.327759853653833 |
| CACTGAGACTCA  | 770.756740775651 | 0.355428686205452 |
| ATTATTCATACC  | 770.760368987344 | 0.178362559869987 |
| AATAGCCATGAC  | 770.766572428334 | 0.393035025761381 |
| AGTCAGAGAATG  | 770.769969754811 | 0.245040824927689 |
| AGGTGACGATAC  | 770.771139674835 | 0.144752271345997 |
| TGAGTCTAAGCA  | 770.777510284333 | 0.276662302727675 |
| CCGGCTGTGTCA  | 770.77919254988  | 0.245663994309201 |
| AGTCAACTGTCA  | 770.784093794368 | 0.361100513245917 |
| ATCTGACGTGAC  | 770.791451412815 | 0.243768863705943 |
| AAGCGAATGACG  | 770.792460097205 | 0.106906288711742 |
| AACCGTGACAGA  | 770.809710338533 | 0.318028931491604 |
| CTCTCCTAGTCA  | 770.819803741765 | 0.280699621999953 |
| GTCATCAGGGGA  | 770.823769477702 | 0.24986630746619  |
| ATACTATATGAC  | 770.825896471544 | 0.212732535321617 |
| CATTTGACTCTA  | 770.828598143069 | 0.347401039192173 |
| ATGAGTATGCC   | 770.833950433277 | 0.225438776032677 |
| GAATCCGTCAAC  | 770.834981247936 | 0.194993888001765 |
| TCGTTCTGTGACA | 770.837391902965 | 0.453380245924172 |
| GTCACTCTTGGA  | 770.842258839828 | 0.301439929953176 |
| AAGTGTGTGACG  | 770.850229821824 | 0.222215018858877 |
| ACCCGGGTGACA  | 770.850336341257 | 0.220526821857352 |
| GAACAGCTCATA  | 770.85064814655  | 0.248948606224701 |
| CAAATCTGACTG  | 770.853189072144 | 0.335419700665822 |
| ATCTGACTGCAA  | 770.855821053633 | 0.238824513373888 |
| ATGACCACGTTG  | 770.85842989874  | 0.367292796227912 |
| ATCTGTCAGACC  | 770.858876968212 | 0.317689937029161 |
| AAAACCCGTAC   | 770.867985898322 | 0.256451397786199 |
| GATTAGCAATAA  | 770.87144485208  | 0.261510728460544 |
| GGTAAAATGAC   | 770.88051161864  | 0.243431461662583 |
| ACACTATTAGTC  | 770.884876238295 | 0.349736104717447 |
| ACCCGGGTGACG  | 770.890309520023 | 0.254301317460937 |
| AGTACCCTGACT  | 770.896605077725 | 0.258074903022748 |
| AAGACATGACAC  | 770.901845506405 | 0.375584787889684 |
| CGATTAGTCTGA  | 770.902690819347 | 0.161083451798633 |
| CATCATTACTAA  | 770.903446751477 | 0.266537254795758 |
| CGTCACGCATGA  | 770.908239706437 | 0.294675181582693 |
| GTGATACATAAC  | 770.909306883371 | 0.242650162475446 |
| AATGCGTCTTAA  | 770.909796680226 | 0.269896799212058 |
| CAAGCGAGTGAC  | 770.915078302831 | 0.286106333133655 |
| CTGGACAAGTCA  | 770.918313497214 | 0.326309960999461 |
| ACGTACCCTCAT  | 770.924265154015 | 0.399162946441602 |
| ACTCATATGTAC  | 770.926690353062 | 0.325697449063917 |
| GTCACCCTTTCA  | 770.928303391868 | 0.141132269521895 |
| TACTAGGACTCA  | 770.931645520822 | 0.264006952446951 |
| AGGCTCATATTA  | 770.934063445709 | 0.316087705131632 |
| CTCTAAATATGA  | 770.939734099006 | 0.39604634277013  |
| GACATAATGACA  | 770.949830806167 | 0.255077651717119 |
| ATCAGTCTTATG  | 770.951705764196 | 0.423437034433204 |

|               |                  |                    |
|---------------|------------------|--------------------|
| AACGTACATGAC  | 770.956465251991 | 0.24563879749664   |
| GTGACGTTACTA  | 770.963266354551 | 0.220987692998561  |
| CCGAGTGAGCAA  | 770.978592599727 | 0.314035407433499  |
| CCTCAGTGAGTC  | 770.990207086573 | 0.323465603318018  |
| ACTGAACTGTCA  | 770.998316823044 | 0.27503206528274   |
| ACCACGCATGAC  | 770.999814748444 | 0.340109438813348  |
| AATCGGGTGACG  | 771.005288809945 | 0.264380427870596  |
| TCACGTCAATGA  | 771.005598366693 | 0.337786491085714  |
| AAGATTATGAGT  | 771.012884673961 | 0.227998551275755  |
| TAAGCTGATTCA  | 771.013060349705 | 0.240940126489724  |
| GATGACGGGGAC  | 771.016073692738 | 0.218848061975932  |
| CCTTAGGACTCA  | 771.016552172622 | 0.36596147982487   |
| GCATAGAGTGAC  | 771.021832527009 | 0.287485639340972  |
| ATGACAATCCAA  | 771.026489422132 | 0.51016695482022   |
| AGTCCAAGTCAC  | 771.043188502721 | 0.211820516354736  |
| GAGTCAGGAGGC  | 771.045496214451 | 0.0738801855020388 |
| GGTCATCGTAAC  | 771.046371221343 | 0.408652007982717  |
| GCCACTACGTGA  | 771.065341462363 | 0.399181209818331  |
| GGATGAATCTTA  | 771.066605244838 | 0.276021785723929  |
| GTGTCATGGAAC  | 771.074445706533 | 0.392480475741838  |
| GTTGGTGACCCA  | 771.075546540483 | 0.25043399632454   |
| ACACTGGCTCAT  | 771.07570678898  | 0.259965288739958  |
| GCACTAGATGAC  | 771.078999200999 | 0.430946214477459  |
| GGAAAACGTGCA  | 771.079013046492 | 0.26211190485772   |
| GTCACTCTTCGA  | 771.080484316219 | 0.238499950421387  |
| AAAACACTGTCA  | 771.080524922517 | 0.345132391733871  |
| ATGGCTATGTCA  | 771.08247995349  | 0.31785324332166   |
| ACGTCACTACCT  | 771.08673108853  | 0.298455184285502  |
| CTCATTTGTGAC  | 771.100355967677 | 0.243951527470836  |
| ATAAGCCATGAC  | 771.104884034799 | 0.269190682559326  |
| TAACTAAGTCA   | 771.105009405154 | 0.17203151225059   |
| ATGACGCCTCTC  | 771.112297567581 | 0.213139266775016  |
| ATGCATGACGTC  | 771.120911091004 | 0.416957210781835  |
| CCGGCATGACAA  | 771.121103049506 | 0.253994329042723  |
| AATGCGTCTTAC  | 771.135475701876 | 0.235575274624675  |
| ACAAAATTACTC  | 771.140361150018 | 0.290058960562756  |
| CGATTACGTATA  | 771.144482787062 | 0.253264045216042  |
| TACTCAGTGTC   | 771.145141907402 | 0.0979971463295267 |
| AGTCAGAATGAT  | 771.16235883495  | 0.0613917021187239 |
| GTCACCATCATA  | 771.162992084019 | 0.230734279149613  |
| AATGCTGTCACT  | 771.172507261968 | 0.293912687969228  |
| ATGGTTGGTGAC  | 771.176104610799 | 0.328324821462138  |
| CGAAACTGGTCA  | 771.176200709369 | 0.339402055204126  |
| GTCATTTCCGCA  | 771.178489164295 | 0.197166056314439  |
| GCAACCATGACA  | 771.180455217072 | 0.304183783350282  |
| AACATGCAGTCA  | 771.183297513341 | 0.247673445858236  |
| CCCCTTTACTCA  | 771.185740509842 | 0.274161418369024  |
| GGTGTGTAGTCA  | 771.203650059733 | 0.262492942855758  |
| AGGCCGTGACTA  | 771.207837797984 | 0.406500937461821  |
| GGTGAGCAAAGAC | 771.215590265629 | 0.210599573249997  |
| CCTAGTGACATA  | 771.219646959227 | 0.18829094376145   |
| ACTCATATCAAG  | 771.225075029288 | 0.369991613393507  |
| AGACAACGTCAC  | 771.2397645028   | 0.357324800617819  |
| ATTGTCACAGTC  | 771.242340428935 | 0.248506035726121  |

|              |                  |                   |
|--------------|------------------|-------------------|
| TCATACTAAGAA | 771.245039749504 | 0.266587528520114 |
| ACGTATGTATCA | 771.247031848399 | 0.269596662764646 |
| CAGTCAGTTAGC | 771.269799040154 | 0.24523357917601  |
| CGACACATGACA | 771.272936006617 | 0.269910883515926 |
| CAAGACGGTGAC | 771.274019645718 | 0.338311053487281 |
| ATCGCTGCACA  | 771.276606129937 | 0.311072504645498 |
| CACACATGACAC | 771.283526792936 | 0.267207009400206 |
| CTGTATTTGTCA | 771.293700806282 | 0.311171508188688 |
| CGTACAGGTGAC | 771.294980044707 | 0.19517515932173  |
| ATGTCATCTCTC | 771.300915569729 | 0.261893592857631 |
| GCACTAGACTCA | 771.303229563881 | 0.272921852705895 |
| ATAGCGAGTCAG | 771.312257963853 | 0.298548862138042 |
| GTCACTGGTAAC | 771.314458922085 | 0.417293846838767 |
| CGCTCAATGACG | 771.331553168449 | 0.191834850662657 |
| GTCACCAGCTCA | 771.335852310327 | 0.336566533163797 |
| CAGTCAGAAGCA | 771.336359010249 | 0.215631677493391 |
| ACTTGCCGATGA | 771.34153269047  | 0.360104785538522 |
| ACTCATATAGTG | 771.342046656689 | 0.247190129383089 |
| GAGTGTAATGAC | 771.349319928878 | 0.322129219829211 |
| GTGAGTCGGCTA | 771.352634018705 | 0.217830158735637 |
| CTGCATCGGTCA | 771.371568899299 | 0.348746202381976 |
| CTCCCTTACTCA | 771.37237237642  | 0.259257014004039 |
| GCCAGCTCATAA | 771.377606490325 | 0.357379232487448 |
| TCGGTCATTGAA | 771.389410179455 | 0.238193355276901 |
| CGACTCACGTAG | 771.395499419941 | 0.317759617791657 |
| AGTGCAGTCAGA | 771.396869788228 | 0.285093857294895 |
| AAACTCGGTGAC | 771.396927471574 | 0.249178599976929 |
| AGTAACGGTGAC | 771.410618675447 | 0.251797429249442 |
| ATAGGCTGTGAC | 771.413094505559 | 0.263670448343608 |
| ACTCATACCGAT | 771.432092887192 | 0.204955081003403 |
| ATAAGGGGTGAC | 771.439190014257 | 0.213590410483648 |
| CACTATGCGTGA | 771.439978014143 | 0.403572725624688 |
| AGTTACACATCA | 771.443570857565 | 0.256089186137473 |
| CGAAATTAGTCG | 771.450503089299 | 0.256537297686844 |
| CTAGATTACGCA | 771.460240407877 | 0.151511709882636 |
| AAGCCGTGACTT | 771.461485343931 | 0.401162975758214 |
| GCAGTTATGTCA | 771.461612025731 | 0.265842501756429 |
| AGACAGCTCATA | 771.465063172667 | 0.318849474855648 |
| GTCATGATGTAA | 771.468979360379 | 0.318679783609355 |
| GATTGACATGAC | 771.469877121619 | 0.294733972945656 |
| GACGAAGTCACA | 771.475732148128 | 0.246851113972068 |
| GACTATGATGCA | 771.483676765983 | 0.275546866979423 |
| GTCATGCACATA | 771.484736161463 | 0.32121030473546  |
| ATGAGTGAGTGA | 771.486446330904 | 0.201561535157422 |
| GTGACAGAGTAA | 771.490610176026 | 0.111282464907863 |
| GACTCATGGAGA | 771.490677646398 | 0.196630148025132 |
| GTATTTGTCAAC | 771.49418120978  | 0.147743241607001 |
| AAGGCTTGTGAT | 771.49433224904  | 0.250639875579345 |
| CATTACTGACTA | 771.495845159477 | 0.213750389499279 |
| TTAGTCTTAAAA | 771.497598665899 | 0.294487014557031 |
| ACAATTACACAC | 771.500077117157 | 0.269861766587699 |
| AACATTAATGAC | 771.500515769086 | 0.327461282334723 |
| GGTGACAACCTA | 771.501051135469 | 0.29422032148269  |
| CGTGATGGTGAC | 771.503060459622 | 0.179114965846883 |

|               |                  |                   |
|---------------|------------------|-------------------|
| ATCAAAGGTGAC  | 771.509423343777 | 0.296218321414809 |
| GGCAACTTGTCA  | 771.518868051165 | 0.34175211568541  |
| GCGTCACGATCA  | 771.52410254126  | 0.432170522111253 |
| GACCTGGGTGAC  | 771.52641584758  | 0.224189124651104 |
| GACGCAGTTGAC  | 771.533428127867 | 0.411859711454676 |
| ATCTCTGACGAA  | 771.534257845915 | 0.251608357192375 |
| GGCTCATGTGAC  | 771.550369196028 | 0.241798112988898 |
| GACTCATGGCGC  | 771.551225654545 | 0.239805472372919 |
| AACCCTGTCATT  | 771.551834197026 | 0.24444513682815  |
| ACATGGTGACAT  | 771.569480622208 | 0.277292077218204 |
| CACGCAGATGAC  | 771.569983350052 | 0.422731020120975 |
| ATATGGCGTCAC  | 771.577406737829 | 0.284722371294623 |
| CACATCGCGTCA  | 771.58404103859  | 0.318024417251883 |
| CGAAGACGTCAC  | 771.584806904575 | 0.200071016893797 |
| ACAGATTAGTCG  | 771.586376549201 | 0.344974097711852 |
| AGTCAGAATTAC  | 771.588018935171 | 0.421044696337921 |
| GGTTGCTACCA   | 771.591451890337 | 0.319959269344858 |
| GTCATTGCCAGA  | 771.594001800664 | 0.252716340523936 |
| AATCTGACTGGT  | 771.600214710085 | 0.266252723506802 |
| GTGCCGTGACAC  | 771.608901265581 | 0.215948395965184 |
| AGTGACACGCTA  | 771.60986296484  | 0.31507957742632  |
| GCCTCATCGTCA  | 771.619463645048 | 0.186728487983023 |
| ATGACATTA AAA | 771.62180886765  | 0.174402604410125 |
| ATGAGTAGTCCG  | 771.623245184683 | 0.166265841955631 |
| GTCTTCGCGTCA  | 771.631559266064 | 0.339623093720631 |
| CATAAGACTAAC  | 771.632758187959 | 0.288782011566587 |
| ATTTTCGTAGTC  | 771.639617004642 | 0.274401431702062 |
| CGTCATTTAAAG  | 771.644770021196 | 0.238997332321032 |
| GCCGATTAGTAC  | 771.648676634207 | 0.342984556475117 |
| CTATGACCCGTC  | 771.65171749495  | 0.166547337280271 |
| ACGTCACCTCTG  | 771.663729763643 | 0.299063335360727 |
| CATTGTGGGTCA  | 771.668669223811 | 0.370814530680146 |
| CTGACGTGACGA  | 771.6707095388   | 0.213273953031725 |
| GGTGTAATGAC   | 771.674016368554 | 0.203827140972834 |
| CTCACTGATGAG  | 771.677227458107 | 0.274595062338623 |
| AGGAATTGACTC  | 771.684426130897 | 0.347349318988476 |
| CCTGGCATGACG  | 771.687518868949 | 0.410517248104394 |
| AAGCGCGGTGAC  | 771.688363722324 | 0.294776379283848 |
| CCCTTGACTCGA  | 771.700402050186 | 0.260889141849551 |
| GCTGACACGTAC  | 771.714585545208 | 0.367401499595618 |
| ATTCTGTGATA   | 771.719327945715 | 0.355229545617921 |
| TAAACAGTCGTCA | 771.721612182125 | 0.474450366125035 |
| GGGTTGAATGAC  | 771.735013559724 | 0.270146843413823 |
| ACCGGTATGACC  | 771.739389511634 | 0.280623742800342 |
| GGACGAGGTGAC  | 771.752295451907 | 0.269216608479462 |
| CGTCATTGCAAC  | 771.756504145909 | 0.251950730515946 |
| AACCCGTGACAC  | 771.763309616245 | 0.259759487535436 |
| AATGAGTAGGCC  | 771.766353816195 | 0.39765291743527  |
| ACCGCTGTCATC  | 771.766622794068 | 0.213196158826277 |
| ACCAGTTGTGAC  | 771.777865814921 | 0.287491584354528 |
| GTGAAGTAGTCA  | 771.785215246583 | 0.304273772561391 |
| CAGTCAGATCCC  | 771.803158128474 | 0.167260583541421 |
| TCGTATCACTCA  | 771.81580516788  | 0.355448094903175 |
| TAGTCGTAGTCA  | 771.816869354048 | 0.18740246771941  |

|              |                  |                   |
|--------------|------------------|-------------------|
| ACTGACTGGTTC | 771.818283683182 | 0.209302917952795 |
| AGTCTACATGAC | 771.828264431448 | 0.286044971669198 |
| GAATGATTCTTA | 771.833412280677 | 0.246993903685539 |
| AATTGCTCAGCG | 771.845943579263 | 0.353359626288799 |
| TCAGCTTCATGA | 771.846269109924 | 0.329576937283433 |
| CGAGTCAGGGCC | 771.848582594509 | 0.297986740863155 |
| ATGACGTCTGCA | 771.863513604227 | 0.354487296739816 |
| TCACGTGACGGA | 771.868803137466 | 0.308153790691254 |
| GTCACCCTCCGA | 771.889627363155 | 0.302307229601757 |
| CGTCAGACATGA | 771.894165607899 | 0.284050968762148 |
| ACTACCATATGA | 771.900864979701 | 0.337817881523726 |
| AATGTGATGACC | 771.918674843715 | 0.466271224652499 |
| CCAGATAATGAC | 771.922859177202 | 0.513733291479395 |
| CTGGTCATCCTA | 771.929117496023 | 0.265148309289957 |
| TACTCATTGGAA | 771.930837811757 | 0.235880624323813 |
| GGCTTGTACTCA | 771.943388712275 | 0.409295233917118 |
| GTGACTAGCGCA | 771.952355169716 | 0.254825307535303 |
| ATGACAGGGATC | 771.962739224545 | 0.325375169629455 |
| GCTGACTGCTCA | 771.964130935067 | 0.3818201572525   |
| ACTGTTACGCAA | 771.966367224683 | 0.432798011933906 |
| CACGAGGGTGAC | 771.96745689265  | 0.319861327925459 |
| ATCTGACTGGTA | 771.967629678848 | 0.307972012776679 |
| CACTATCGTGAC | 771.971103291606 | 0.291687566478021 |
| CTGTTACATCAC | 771.978184185015 | 0.271538472255888 |
| ATGTCATTTCGA | 771.982393689875 | 0.263176833153317 |
| GTCACCCTAACA | 772.002450319154 | 0.301160104087874 |
| ATGACGGGATGA | 772.00358400366  | 0.224166829874925 |
| ACTCATCGAGCT | 772.004668563905 | 0.291258285888175 |
| GACACTGAATCA | 772.006145624599 | 0.360451261265001 |
| TAGTCAGCAAGA | 772.006353002966 | 0.294389723170265 |
| CTGCTAAGTGAC | 772.017146808643 | 0.380639272524874 |
| GACTCGCATGAC | 772.019169694663 | 0.447673629851964 |
| TCGCTCGTGACA | 772.022119803969 | 0.372627664536847 |
| GATGCTCGTGAC | 772.034107171022 | 0.274759994506218 |
| ATGACAGCTGCG | 772.0473309533   | 0.25191846178625  |
| CTTGCTGACAC  | 772.055424449959 | 0.497607761524011 |
| GGTACTCTTCA  | 772.057625186823 | 0.224727434479227 |
| TATTGTGGGTCA | 772.065205693763 | 0.29318851708447  |
| CTCCGTGACAGA | 772.087485025571 | 0.382200683245817 |
| ATGACGATGCTC | 772.093032078636 | 0.221366017865506 |
| AGTGAGTACCAT | 772.096205969613 | 0.251217508923319 |
| GATTCATCGTAA | 772.107988908452 | 0.26955123173311  |
| GCGACTAATTAC | 772.121632430162 | 0.165996856971551 |
| AGTCAGAACCCG | 772.123004772304 | 0.263662553313508 |
| ATGAAATCGTCA | 772.123367176443 | 0.41385841188422  |
| AACCGTTGACAC | 772.129497630753 | 0.355735334036722 |
| GTCATGCCATA  | 772.135804187617 | 0.236066234552946 |
| ATGGGTCAATCG | 772.138497555101 | 0.356622306543226 |
| ATTACACATGA  | 772.140152884319 | 0.183992835991374 |
| CGTGTCAGAATC | 772.143298030391 | 0.268855397413402 |
| GTCATGTTCGAA | 772.145564495656 | 0.408769615570428 |
| GTCAACTAATGA | 772.153005374633 | 0.318778822767732 |
| ACATAAATGAGT | 772.16027037428  | 0.298091182494944 |
| GGTAGCGGTGAC | 772.170764651762 | 0.219329896886428 |



|                |                  |                   |
|----------------|------------------|-------------------|
| ATTTCCATGACA   | 772.192565313987 | 0.512601374873701 |
| ACAACCTCACT    | 772.196988364586 | 0.278495573667086 |
| CATTGACACAGA   | 772.199633923728 | 0.384193818822589 |
| ATGACCCGGTCSGA | 772.213579443403 | 0.250266369016946 |
| AAGAGTAACATC   | 772.220933865176 | 0.3189957061865   |
| ATGACACCCGTC   | 772.224254326639 | 0.322006033980986 |
| AGCTGAAATGAC   | 772.224499493786 | 0.316651449879649 |
| AAATGTCATTGC   | 772.228675034809 | 0.363411631851301 |
| TGACCTGTGACA   | 772.240438594865 | 0.266165442451251 |
| ATGTCCCAGTCA   | 772.253351556213 | 0.178103585309612 |
| ATGACACTCTTG   | 772.256332610539 | 0.208980224243045 |
| GTGCATGACAGA   | 772.25647812493  | 0.25740190040729  |
| ACTCGTCGTCAT   | 772.258360218617 | 0.329320232219401 |
| GGTGTGAATGAC   | 772.263270616466 | 0.25342421388225  |
| CGGTGACAGGTA   | 772.264403732667 | 0.210718475011517 |
| GCTGAGTCTATA   | 772.26479282138  | 0.12162005696954  |
| ATGACCACTTAC   | 772.266607813603 | 0.34169153520109  |
| ACGTCTTGCTCA   | 772.266669612512 | 0.32195923688725  |
| ATGGTCTAGTCA   | 772.266950718266 | 0.418790747765716 |
| ACGGGCGAGTCA   | 772.272453954735 | 0.220796412285473 |
| ATATTTCCGTCA   | 772.273408583664 | 0.267270379122567 |
| TAAAGATGAGTA   | 772.273513321064 | 0.197613171429099 |
| GCTCCAGATGAC   | 772.281652284034 | 0.303507004247676 |
| GATGAGCTGGCC   | 772.282513164024 | 0.207201164038911 |
| GAAACCGTCACC   | 772.282534243095 | 0.257747296501893 |
| GTCACGTGGTCA   | 772.283111788094 | 0.319408728789915 |
| ATCAGATTACTC   | 772.285390059225 | 0.340345083698271 |
| TAGTCTTGCTCA   | 772.286564081432 | 0.258913125707443 |
| TGCTCTGACAAA   | 772.286640445651 | 0.208983896242719 |
| GTGACTTCATAA   | 772.289106203814 | 0.301337543340947 |
| GCGCTCGGTGAC   | 772.289840932875 | 0.37995497911173  |
| TCATAGGCATGA   | 772.300474009322 | 0.21657100686219  |
| CCTGCCATGACG   | 772.302890579521 | 0.219158448942803 |
| CCACATCTGTCA   | 772.305246378504 | 0.367205375881907 |
| CAAATGATGACC   | 772.308242695981 | 0.346031948525507 |
| ACGACATGACGC   | 772.310506287305 | 0.26023362934443  |
| GTCACATTTCAA   | 772.312141718486 | 0.221276411719373 |
| GTCACCTAACAC   | 772.312243567693 | 0.243953673221577 |
| CACCCGGTCTGAC  | 772.314698953673 | 0.308947344461051 |
| CAAAGCTGAGTC   | 772.316885035622 | 0.23140094253496  |
| ACCACCCAGTCA   | 772.325435233988 | 0.263537015861039 |
| CAGTGGGTGACA   | 772.325904135953 | 0.241368482818825 |
| CGTTGACGTATA   | 772.327206317345 | 0.275416546279249 |
| CTGGGTACGTCA   | 772.33136478153  | 0.519493115923375 |
| ATCCTGGTCATA   | 772.331568335877 | 0.245057383860562 |
| CGTCATTACGCC   | 772.335202624884 | 0.250666821633476 |
| ATCTTGTACAC    | 772.33743678363  | 0.206814573809983 |
| GTCACCTGGTTA   | 772.341958549236 | 0.311326646017331 |
| AGAAGATGACCC   | 772.348968601573 | 0.298229067597677 |
| CCTACAAATGAC   | 772.384933330811 | 0.239634199225228 |
| CGCAGCTGACTA   | 772.389943333817 | 0.309853717466923 |
| ATTAGTAAGAGC   | 772.395900854441 | 0.331377226947799 |
| CAGACTCAGCAG   | 772.402008663527 | 0.461121123247857 |
| GTCACACAAAGA   | 772.421905601351 | 0.322834634369358 |

|               |                  |                   |
|---------------|------------------|-------------------|
| CTGTTTGAATCA  | 772.424127312173 | 0.159811281349458 |
| AAGGGGATGACG  | 772.42872719732  | 0.207619161337004 |
| ATTCCGTGAGTC  | 772.439085875005 | 0.351916336705362 |
| ACATAACTACTG  | 772.442333661584 | 0.359998631494696 |
| AAAGTGGGTGAC  | 772.443631857708 | 0.292968860454522 |
| CAGATCCATGAC  | 772.445488400909 | 0.48794746597344  |
| ATATGGTCACCC  | 772.44635738     | 0.282383111977961 |
| ACGCGGAGTCAG  | 772.453118040708 | 0.215983184275853 |
| CAAATGTGACGA  | 772.46433208063  | 0.151268165329367 |
| AGTCACGCGCCC  | 772.467148437439 | 0.28176097907597  |
| AATTAATCACAC  | 772.470247586408 | 0.318647898315325 |
| AGCCGTGTGACA  | 772.470954770535 | 0.202367656521719 |
| GTCATCACCGCA  | 772.474144236566 | 0.263703140013917 |
| ACCCTCGACTCA  | 772.474928301483 | 0.18762899366266  |
| GAACAGCGTCAC  | 772.476582293685 | 0.164734669322963 |
| ACTAGGTGACCC  | 772.477401650854 | 0.291973274880857 |
| CACAACCTGTCA  | 772.48136061762  | 0.237900090859582 |
| AAGTCATGGTCC  | 772.485874981821 | 0.20237165758388  |
| GACTTCATGACA  | 772.493311819044 | 0.396796576483156 |
| CTGTCATTATCA  | 772.499826531143 | 0.31379460717984  |
| GGGAGCGATGAC  | 772.504582438352 | 0.143740794916287 |
| GACTCACTTGGC  | 772.525053953804 | 0.330295180672665 |
| GACCACGTGACA  | 772.525625561071 | 0.320340711918673 |
| ACGCGACAGTCA  | 772.525974819791 | 0.401770308860547 |
| AACCGATGACGG  | 772.535651130131 | 0.33791951439067  |
| CCCCTTGATGAC  | 772.536061431628 | 0.31699368143846  |
| ACGGTGATGACC  | 772.536789129548 | 0.362317265749965 |
| AGTTACTGAGTC  | 772.537863646593 | 0.242415626313116 |
| CAGTGACAAGTC  | 772.552489814142 | 0.271539972226289 |
| TATCGGGTGACA  | 772.555809414766 | 0.288030334741159 |
| AGACTAATTGTA  | 772.562829252729 | 0.116863914380131 |
| ATCTAAGGTGAC  | 772.571315205615 | 0.290885576111428 |
| GAATTGAGTGAC  | 772.571563948629 | 0.37346551517998  |
| TGTCATTGGCAA  | 772.581333118764 | 0.351507287624046 |
| AGCTTCTATGAC  | 772.584000517932 | 0.28600121210288  |
| AATTGAGAGTCA  | 772.595161598388 | 0.270391012419226 |
| GCTGACAGATCA  | 772.60180675014  | 0.27806003208115  |
| AGTAATTACACA  | 772.603160708806 | 0.18296906561227  |
| ACGTTCAATGAC  | 772.607968421257 | 0.523842170498315 |
| AGAGTACATGAC  | 772.612062398343 | 0.173922745547537 |
| CATGCTATTACG  | 772.627752389141 | 0.403376635849883 |
| ATTACAGCGTCAC | 772.635585203628 | 0.40760219658495  |
| TAGTGACGATGA  | 772.641355764014 | 0.35455952069003  |
| GTCATTACGGTA  | 772.65007237563  | 0.259773064348159 |
| GGAGGAGATGAC  | 772.661817603903 | 0.271030421945972 |
| ATGTCACGTGAC  | 772.664784344459 | 0.292050661625633 |
| GTCACCATGGGA  | 772.667601460212 | 0.353153873131952 |
| ATCACAGTGTCA  | 772.678728430726 | 0.394394787336957 |
| CGTGACAAACAC  | 772.682343407989 | 0.325362941926795 |
| ATGACGGAGTCC  | 772.684034980499 | 0.307247612381689 |
| CTCTCAGTGTCA  | 772.686810100868 | 0.263501783695208 |
| AGTCACGAGTGC  | 772.693283519117 | 0.274197388416476 |
| CTTGTCTGTCA   | 772.70838108247  | 0.464083683491511 |
| GTCATGGTAATA  | 772.731234754928 | 0.218180325707317 |

|               |                  |                   |
|---------------|------------------|-------------------|
| GTCACAGATCTA  | 772.732435547962 | 0.226687860009752 |
| ATTACTCGTCAG  | 772.741502003191 | 0.300571237384658 |
| ATTTTGCTCACC  | 772.743267145252 | 0.188203320301849 |
| GAATCATCATA   | 772.752946025615 | 0.195236794513478 |
| ATGACCACGAGC  | 772.754797485638 | 0.345663522641562 |
| ATACATGACAGA  | 772.763832858377 | 0.236020754964052 |
| GGCGGAGATGAC  | 772.773761335619 | 0.294315111409314 |
| AATCAGAGTGAC  | 772.781015619928 | 0.30572407094891  |
| ATTACAGATCTG  | 772.785500604627 | 0.242845623811571 |
| GGTTGGGAGTCA  | 772.796443623798 | 0.177871751053623 |
| CGTCCACAGTCA  | 772.799599311635 | 0.341170182603866 |
| CATCAATGTGAC  | 772.802782726179 | 0.203457864123612 |
| GAGTCAATTCGC  | 772.80893107164  | 0.158320687415722 |
| CTGAGACATGAC  | 772.809484639996 | 0.397709925213304 |
| ACGTCACCTCCGG | 772.811412036914 | 0.279870515880856 |
| ATTAGTACTACG  | 772.814271719793 | 0.240295490419151 |
| AGTAGCTGTCAT  | 772.815273317532 | 0.290806360723677 |
| ATAAATCATGAC  | 772.823085290689 | 0.310733170815974 |
| TCAGGGTGACGA  | 772.831191050023 | 0.31613965980068  |
| GACACACGTGAC  | 772.84733365002  | 0.24935184493177  |
| GGGAGAGATGAC  | 772.850944158607 | 0.226035468575779 |
| CGTCATTGCCCC  | 772.854517677711 | 0.2545385695638   |
| ATAACGTATGG   | 772.855114734388 | 0.239899315673124 |
| ATTAGATGACGG  | 772.858409297929 | 0.279798055765297 |
| AGCATCTGTGAC  | 772.861468839301 | 0.328848331227433 |
| GAACACGCAATC  | 772.866336386329 | 0.218105779909384 |
| AGTCACGGGCTC  | 772.869965712293 | 0.249167890086443 |
| ACACTGACTGTA  | 772.871125892525 | 0.242678180489067 |
| GTGTCACGTTCA  | 772.873393437505 | 0.454822255855617 |
| ACTACTCATGAC  | 772.873789202493 | 0.399879242561525 |
| AACGAATGTGTC  | 772.877471882726 | 0.318963622648118 |
| AGCTAAATGACG  | 772.883492779342 | 0.236105113728946 |
| GTCATTACCAGA  | 772.894187494996 | 0.241886134819825 |
| TAGGAAATGACA  | 772.898592681904 | 0.226620132432587 |
| AGTACTCTGTCA  | 772.899595506212 | 0.278462783985574 |
| GCCGCCGAGTCA  | 772.89976970637  | 0.287113289149847 |
| ATGACGGGACCC  | 772.905288649338 | 0.277358835962252 |
| GCGGCAGAGTCA  | 772.90980230603  | 0.289383915688985 |
| CGTCATCTCAAC  | 772.917893086111 | 0.208414608797049 |
| ATGATATCATAA  | 772.924248579616 | 0.204310253353    |
| CGCGATTTAGTC  | 772.926448907892 | 0.510883681521883 |
| ACTCATCCTTTA  | 772.929962556315 | 0.18578636680001  |
| AATTTGACTCGT  | 772.933283205306 | 0.362311995261363 |
| TATGACGGGCCA  | 772.936720256468 | 0.321474197186175 |
| ACTATGATGAGT  | 772.939513255181 | 0.342563793404272 |
| AAGACTAAGTCA  | 772.941527478515 | 0.240122412020604 |
| ACGTAATACAGT  | 772.942684526772 | 0.319752144979948 |
| GGGTCATATCTA  | 772.94350194266  | 0.260961104241606 |
| TGCGACATGACA  | 772.950958339138 | 0.328699305698553 |
| ATGAGTAGTCGC  | 772.954012547242 | 0.253009410036403 |
| CTCCATGACCCA  | 772.960928912651 | 0.256671144059    |
| AAGCATACTCAT  | 772.967425479215 | 0.242627686940666 |
| CTAAGTATGTCA  | 772.972389918005 | 0.315568076125488 |
| CTTAATTACGCA  | 772.973802714484 | 0.191060009628144 |

|              |                  |                   |
|--------------|------------------|-------------------|
| GGATATCGTCAC | 772.98280160824  | 0.269904069012881 |
| TTACGGTGACAA | 773.000799968461 | 0.477386821588418 |
| ACAGCTATGAGT | 773.003253608701 | 0.211000839416663 |
| CTGACTGCACGA | 773.006521855285 | 0.247510019266262 |
| GGGTGACCCGA  | 773.008330005904 | 0.08693891216593  |
| TCTAGATGACCA | 773.016346905606 | 0.284052847113402 |
| AATGAGCATGAC | 773.039097738429 | 0.480070576086277 |
| ATGTCCGCGTCA | 773.049580959603 | 0.259689014519167 |
| CTTTAGCATGAC | 773.062894189068 | 0.349696725398888 |
| GAACTGGTGAC  | 773.067322651277 | 0.490543335748261 |
| ATCGGGTCATAA | 773.073129586877 | 0.356715269513614 |
| CTGGTGTGACCA | 773.078422057257 | 0.439704907652443 |
| CGTCATGATTTT | 773.085443912761 | 0.174303050349984 |
| ACTGTCACCGTG | 773.095709747211 | 0.357524048437641 |
| CGAACCGCGTCA | 773.096748370426 | 0.382332111102083 |
| TGGTCACAATAA | 773.102662539247 | 0.30690297126618  |
| CGGAATGAGCCA | 773.103248833531 | 0.278204468814375 |
| AGTCAGACGTAT | 773.118273530217 | 0.243026580963018 |
| GGCTCATACTCA | 773.120392213217 | 0.234667970288186 |
| AGCACTGATGAC | 773.127082007095 | 0.233194475070673 |
| GTCACCCTTTAA | 773.13091811206  | 0.158092360991363 |
| ACCTTAAGTGAC | 773.131805338152 | 0.208063822834074 |
| GGAAGCGAGTCA | 773.146173588854 | 0.141660444634963 |
| AAACATGGTCAT | 773.154366528991 | 0.191793523675976 |
| GTCACACTGCCA | 773.173281380106 | 0.207126021434383 |
| GCAATCATGACA | 773.180445093144 | 0.320362764803482 |
| ACAGAAATGACA | 773.193438434802 | 0.220963612840518 |
| GGTACACTGTCA | 773.195330273516 | 0.314556617994933 |
| AAATTAGTCGCA | 773.196764789818 | 0.19265904054242  |
| GTGAATCTGTCA | 773.21425446046  | 0.425161438423559 |
| ACGTCGAATGAC | 773.221678840795 | 0.351296259424194 |
| CATCAAGTGTC  | 773.229837571779 | 0.29620084844025  |
| GTCAGAATGTCA | 773.234087075174 | 0.306224745920321 |
| GACTCACTACGC | 773.240533173255 | 0.173956195125702 |
| CAGCTCATGACA | 773.243425241885 | 0.33608783170997  |
| AGCAAGTCATCC | 773.245528049185 | 0.311479664934078 |
| ATGATGTCTCAC | 773.246414700113 | 0.290491088698044 |
| CATACTGTCATG | 773.247525404538 | 0.31405711011561  |
| ACAAATTA     | 773.249009274965 | 0.359727148383721 |
| AGTATGAGTGCA | 773.252510627174 | 0.279263647845096 |
| AATGTATCACCT | 773.259416423948 | 0.331898517646692 |
| CATTCCAATGAC | 773.268250022661 | 0.269951946337191 |
| GACGACTCAATC | 773.270636488049 | 0.178743610035032 |
| CAGGATGTGACA | 773.275548314112 | 0.400652312744559 |
| AGTGTGAGCAAG | 773.290149253691 | 0.177877136763862 |
| CGTGAGTGAATC | 773.297587059138 | 0.239902493390494 |
| CCATGGTACCA  | 773.299073687005 | 0.247338193756521 |
| ATGATTACAACA | 773.299527440103 | 0.315046957579468 |
| ATAGCTGGTGAC | 773.317668093374 | 0.226279937027795 |
| CGCGTGCGTCAA | 773.321981340967 | 0.232704629999514 |
| CGCAGTGACACG | 773.326876963934 | 0.39131118580799  |
| GTGATCTGACAC | 773.326948743111 | 0.249788597183932 |
| GACTCAATTATC | 773.333708575526 | 0.475342283582896 |
| CTGACGAGTTTC | 773.342179579856 | 0.388731056007672 |

|               |                  |                   |
|---------------|------------------|-------------------|
| CGAAGAAGTGAC  | 773.351386150443 | 0.340917585125621 |
| AAAATATGACCC  | 773.355131744014 | 0.235894727095546 |
| ACGGTCATACAG  | 773.355197714323 | 0.301386924508765 |
| GCATGACAGAGA  | 773.357254172379 | 0.237385674124745 |
| CGGACTAATGAC  | 773.369544925232 | 0.33790670611347  |
| TGACAGAACGCA  | 773.371336230253 | 0.336664039213763 |
| ATGCCAAGTCAC  | 773.376331708029 | 0.262385479572748 |
| AGCATGGGTGAC  | 773.380739104173 | 0.523955624722399 |
| GTCCTTCGATGA  | 773.381483811226 | 0.280912407402709 |
| AGTGACGTGATA  | 773.384716588576 | 0.171873445305145 |
| ATTAAGGGTGAC  | 773.395811568946 | 0.261796074209083 |
| ATGACATTACCC  | 773.397416000944 | 0.235331544377763 |
| ATACACATCATA  | 773.397741648766 | 0.307716679819002 |
| GACTAATAGGAA  | 773.41170058425  | 0.251524501773767 |
| GCGTCACTTTCA  | 773.414155601092 | 0.199421899439721 |
| GGAAGCTGTGAC  | 773.416861006967 | 0.265405771737137 |
| GTCAGACTAAAC  | 773.417545697504 | 0.276380066252639 |
| ATTAGTCGCTCG  | 773.418290138066 | 0.151434169678891 |
| CAGATATGACCG  | 773.418886460234 | 0.352379408344632 |
| ATATTATGAGTA  | 773.42465617031  | 0.299401090232773 |
| ATGACGGTAGCC  | 773.428943196843 | 0.144817113138651 |
| TGTACGGTGACA  | 773.443046967435 | 0.452204813433752 |
| CTGCATTGTGAC  | 773.46327679373  | 0.373838535612718 |
| ACTCATATTATA  | 773.463771738261 | 0.289970425859143 |
| AATGCTACGTCA  | 773.465856033754 | 0.317426069343543 |
| TCTGGCATGACA  | 773.476219037643 | 0.340589086246857 |
| CATGTCATGCAG  | 773.477740544604 | 0.332085983957573 |
| ACTAATTGTGAG  | 773.481873635988 | 0.524374746290795 |
| TAAGACTCTTCA  | 773.49293433162  | 0.18042093755607  |
| GCCCCTGCATA   | 773.492955640898 | 0.251175059022876 |
| GATGTCTGACAC  | 773.505671182599 | 0.201782291894747 |
| TGTGCGAGTCAA  | 773.505776580169 | 0.239567148130592 |
| ACTCATTTTAAA  | 773.54716721356  | 0.26943586960559  |
| CCGTAAGATTCA  | 773.551537378651 | 0.376543550976807 |
| ATAGAATGTGAC  | 773.552089357248 | 0.33091912999122  |
| ATGTGACAGGTA  | 773.553220181041 | 0.291766599196013 |
| ATAATTCGTGAC  | 773.559211031255 | 0.378854493094798 |
| ATGACAAGCCCC  | 773.560801418476 | 0.197421833415747 |
| GGGCCGAATGAC  | 773.57430286725  | 0.340019682743924 |
| CGGGGATATGAC  | 773.579899365167 | 0.175866034121156 |
| AGCCCTGATTCA  | 773.582330394175 | 0.287174689803025 |
| ATTGCTAATTCA  | 773.583009519104 | 0.214158223922044 |
| CAATTCGTCAAC  | 773.607134967973 | 0.234600690603938 |
| GGCGAGAATGAC  | 773.610082326998 | 0.260462405694242 |
| AATAATGTCATG  | 773.624380198843 | 0.218451629791523 |
| CGAATTGGTGAC  | 773.628930498749 | 0.208990181740031 |
| AGACTAATCTAT  | 773.629966562973 | 0.329302736454939 |
| CTTAAGTGAGTC  | 773.630444517571 | 0.136171290676341 |
| ATTAGTACCATG  | 773.634331400389 | 0.343011774365117 |
| CTCGTCAATGAC  | 773.637789746109 | 0.368514649765926 |
| AGTGCGATGACC  | 773.638142709264 | 0.363852061767782 |
| ATGACAAGATGG  | 773.64533865258  | 0.283343322224696 |
| GCGAATAGTGAC  | 773.645766811633 | 0.244004589935514 |
| GTCATAAACCCAC | 773.647046325759 | 0.327278234335516 |

|              |                  |                   |
|--------------|------------------|-------------------|
| AACTCTCTGACT | 773.647994217476 | 0.25638847520945  |
| CTGACTGTGACC | 773.648753033845 | 0.242970647538333 |
| ACCTAGTGACGA | 773.657279921974 | 0.309492962067923 |
| CGCGAAATGACG | 773.675507835297 | 0.22612548062495  |
| CCAATATTGTCA | 773.687266195831 | 0.33381893624802  |
| CGGCTCCGTGAC | 773.691345335301 | 0.246439156937879 |
| GCATACCATGAC | 773.693932889563 | 0.46591463978823  |
| CTGTCTGACGAA | 773.707349487221 | 0.28924798452327  |
| GTCACGATCCTA | 773.714104853084 | 0.324562355573227 |
| ACTATAGGTGAC | 773.714259367427 | 0.350834262987329 |
| CTTAAGACTAAC | 773.714860283956 | 0.348262600823424 |
| GCACACCGTGAC | 773.715252130845 | 0.302422667156837 |
| ACGTCACCCGGA | 773.717661900351 | 0.288247279214764 |
| CTTGCTGTCACA | 773.720530976145 | 0.33401676291613  |
| CGCTAACAGTCA | 773.729493290638 | 0.340420579079107 |
| ATCTGTAATGAC | 773.736785616773 | 0.240435451641977 |
| GAGTTACTCTTA | 773.742277866318 | 0.294138097296266 |
| ATTAGTCGACCC | 773.747461298469 | 0.260330158303413 |
| CTGTTGCTCACC | 773.753003613962 | 0.266701716422146 |
| AGACTCACTTCA | 773.768235131728 | 0.247801986222621 |
| ATAAGATTCATC | 773.769763633819 | 0.341634977898812 |
| ACGTCACAGCTC | 773.777718748359 | 0.257694115467582 |
| ATGCACTCATAC | 773.786748369551 | 0.245285758196247 |
| ATTAAGTGTCAG | 773.787457295209 | 0.308295084849486 |
| ATGACATTATTG | 773.788637240897 | 0.244518658685781 |
| GAGAGTGACCCA | 773.793495213798 | 0.305646804943456 |
| CTTTGCGGTCA  | 773.793556601683 | 0.233293622703635 |
| GTTATGACCCGA | 773.796246910887 | 0.315639070731396 |
| ATGACAAGCCGA | 773.796685216142 | 0.155162466188502 |
| TATGAATCTTCA | 773.809577897284 | 0.192885949437993 |
| TGAGTAAAGGAA | 773.821955295367 | 0.209801504099286 |
| ACGCTCGGTGAC | 773.822062572005 | 0.167401508079167 |
| GTCATTTGCAA  | 773.825095058609 | 0.370371901958549 |
| TACTAAGCGTCA | 773.828476171458 | 0.311157837985969 |
| CCATGACTTGGA | 773.840408588723 | 0.295274709371696 |
| AAATATGGTCAT | 773.847210791501 | 0.161847887941655 |
| TCTTCGGTGACA | 773.848398394659 | 0.211497485008954 |
| CGCAGTACGTCA | 773.849608940128 | 0.301098763652728 |
| ATGACGGAGGAG | 773.858730174715 | 0.157065643652497 |
| ATACATGACAAC | 773.859239123791 | 0.471801966695872 |
| ACATCTTCGTCA | 773.871968951156 | 0.277662294374106 |
| TGATTACAGCCA | 773.873024459478 | 0.34007335992544  |
| CGTCAGACATTA | 773.874627749285 | 0.35564405412912  |
| GTACGGGAGTCA | 773.88356145505  | 0.217697369423752 |
| GAGTCGTCACAA | 773.884551028825 | 0.251778646314445 |
| GACGTCTGTGAC | 773.885963100147 | 0.256351536004833 |
| GTCATTGAGCTA | 773.887384488465 | 0.374066245406749 |
| GGAACGGAGTCA | 773.895667592977 | 0.224540959226866 |
| CTGTCACAGTTA | 773.89917108947  | 0.220299287458632 |
| ACTCATACCATA | 773.903209207919 | 0.200226332772774 |
| AATCGTGACGCG | 773.90832166364  | 0.247011031821292 |
| CACGGTGTGACG | 773.909662057628 | 0.212792737938947 |
| GTCACTGCTTGA | 773.912466821807 | 0.294696336926999 |
| ACTCATCCGTGC | 773.915704173555 | 0.389347273452129 |

|              |                  |                   |
|--------------|------------------|-------------------|
| ATGACAATAGGC | 773.915738756152 | 0.223887312631984 |
| AGTCAGCCATAG | 773.918035711511 | 0.291024915066196 |
| AAGTGGTGTGAC | 773.919031018693 | 0.278967825695637 |
| GTCATTTACCGA | 773.922245111818 | 0.223047939774489 |
| AGACTAATCCGG | 773.93080692657  | 0.303123295713341 |
| GCTTTTAGTGAC | 773.933642595096 | 0.341509586692298 |
| ACGTGACACGCC | 773.941286679516 | 0.295638101229927 |
| GTCATTGCCTA  | 773.942255432846 | 0.249754906259097 |
| GATTACTCTAC  | 773.965670382622 | 0.234798119758929 |
| GCTACCTGTGAC | 773.967132656306 | 0.283645598881522 |
| AAATTTGTGACG | 773.971511469421 | 0.267956165227331 |
| CGTCATTGATTC | 773.980746725916 | 0.152973723623377 |
| CCGTGACAGACA | 773.981065509664 | 0.250511504101061 |
| ATCGGCTGACTG | 773.98325112217  | 0.279762070943246 |
| CTGTATCACTCA | 773.992707880706 | 0.242730403486269 |
| GTCATTCAGGTA | 774.002754845899 | 0.243067146506501 |
| ATGATTACGCAC | 774.003119226374 | 0.310024911619437 |
| ATAGTGACAAAC | 774.010351669788 | 0.313205137261112 |
| GTGTCACGCCCA | 774.012464707653 | 0.264802654223178 |
| CAAGGGTGACGA | 774.013983691638 | 0.24410636127415  |
| AAGTGTCAGAAC | 774.015786874168 | 0.212351655784206 |
| GACTTCGTGACG | 774.021414032681 | 0.332789990058025 |
| GTCATCTCTGAA | 774.024797057724 | 0.255112987507918 |
| ACTATTACTCCT | 774.027909176652 | 0.15474439600317  |
| GACCAATGAGTA | 774.030811564008 | 0.31015652426854  |
| ACCTTATGAGTA | 774.037436145585 | 0.248375224263462 |
| TGATGCGTGACA | 774.038649066889 | 0.215711892257913 |
| CGTGATTCAACG | 774.041314724415 | 0.283628088539366 |
| GACTAGCATGAC | 774.042365176225 | 0.243511035710381 |
| AATCCTGTGACA | 774.045416640728 | 0.38373718614019  |
| AATGATTGACT  | 774.046448542989 | 0.380783669756931 |
| CTATGGAATGAC | 774.049827015556 | 0.251163889205705 |
| AGGCTTGGTGAC | 774.053331959681 | 0.217341318387069 |
| AGAATTGTGACA | 774.054481818938 | 0.239694144222966 |
| CAACTGTGACGA | 774.055980436881 | 0.212550460227161 |
| GGGTGACGATAA | 774.059623858625 | 0.148039545924632 |
| TGCACGTGAGAA | 774.065693213225 | 0.349790396456072 |
| GTCACATTGAAC | 774.072460688619 | 0.241222100210762 |
| GTCATTAGGAAC | 774.08024950832  | 0.221492416255029 |
| GTAAGCGGTGAC | 774.087171493369 | 0.341952939163279 |
| AAATGTTGGTCA | 774.088944194463 | 0.303344196495814 |
| TGTTACACATAA | 774.094270180125 | 0.377598419803905 |
| GACGTAACAGTC | 774.096583361259 | 0.17789469583767  |
| AGCTGTCATGAT | 774.097626646619 | 0.342208832599608 |
| GCGTCACCATCC | 774.109226468987 | 0.225206716254806 |
| CGCCACAATGAC | 774.109327931974 | 0.292529340904474 |
| TGACTTAGAAAA | 774.120801142438 | 0.281475620439443 |
| CACTGTTGCTCA | 774.122248686303 | 0.318334387679953 |
| AACGCTATGACC | 774.122333255224 | 0.309128630250851 |
| CATAAAATGTCA | 774.125523376554 | 0.283342248669228 |
| ATGACGGACTAA | 774.126390472613 | 0.190866662348292 |
| CCTTCTAATGAC | 774.128317409946 | 0.319332212452543 |
| TGACAGGTGCAA | 774.129303056312 | 0.412200311330834 |
| GCGTCACAGGTA | 774.134428605009 | 0.162816517920194 |

|              |                  |                   |
|--------------|------------------|-------------------|
| GCTACTAATGAC | 774.160802287382 | 0.351458704531954 |
| GCAACTTGGTCA | 774.17715508161  | 0.272804715786934 |
| GAATCATCATGC | 774.179931320813 | 0.334858072176587 |
| AATAGTGGTCAC | 774.185462316185 | 0.262634951974309 |
| GTCATTGTTTCA | 774.196043239004 | 0.298855468486274 |
| ACTCATCAGTCG | 774.198428581896 | 0.430735000960482 |
| ATGAGTAGCTCG | 774.210420786551 | 0.272574938719373 |
| AGACATGACACC | 774.213554453392 | 0.347492128223245 |
| ATCCTATGACCG | 774.222373425245 | 0.269023817182906 |
| CGTCCCTAGTCA | 774.225054537072 | 0.251523645666824 |
| ACGGGTCATAAG | 774.228513506508 | 0.273925345134051 |
| CCGTCATTGTAG | 774.229762556006 | 0.377969265018741 |
| CCGTGCCATGAC | 774.237332397671 | 0.275614992910065 |
| GATGATTAATC  | 774.237566300546 | 0.293912236446837 |
| GTCACAACGTGA | 774.238874364862 | 0.357249099212668 |
| ACTCATTAGTC  | 774.245588437291 | 0.304757031878032 |
| AATTGAGTCGTC | 774.249261281338 | 0.272940790834439 |
| AAATATCGTCAC | 774.262500706657 | 0.239865017147976 |
| GGAAGGTGTGAC | 774.272069329367 | 0.10871316186625  |
| ATGTCACCAAAT | 774.273422530188 | 0.317310131832216 |
| ACTACCTGTGAC | 774.277250326447 | 0.259393219644806 |
| CTGACGGTGACA | 774.278047088923 | 0.222830930170359 |
| TGAGTAAAGAAA | 774.285879447251 | 0.193520446348985 |
| AGTCAGCGTATG | 774.287787327624 | 0.347353401421345 |
| GTCACCCAAAAA | 774.296933990159 | 0.252706792356286 |
| GTCACGGGCCCA | 774.306168555044 | 0.334206261042233 |
| AGCGATTGTGAC | 774.309700650504 | 0.275975054961498 |
| TCAACCATGACA | 774.318307690507 | 0.254389200292936 |
| ATTACTACATGA | 774.31960405757  | 0.281447344805415 |
| ATTACGCACCGA | 774.327866297629 | 0.191535716939729 |
| AAGACTGATTCG | 774.331936578033 | 0.20072797778647  |
| CTGACGTCAATC | 774.359483154982 | 0.278160786195266 |
| GACGTCACCGCA | 774.365586941838 | 0.199967192573078 |
| CAGTCACGCTTA | 774.369066477202 | 0.32434630657816  |
| CGCAGACTCACC | 774.369541047661 | 0.15368295925225  |
| GCGCATTGTGAC | 774.372313209498 | 0.314798085579178 |
| GTGACTTCATCA | 774.375800815973 | 0.486896913758419 |
| GAAGATTGCTCA | 774.383960729198 | 0.414701543897836 |
| CTTTGTGAGCAA | 774.385836621437 | 0.223247534925767 |
| AATATTAGCCAT | 774.38880547539  | 0.120573147794784 |
| AGTCAACGTCTG | 774.393037123946 | 0.322015125533791 |
| ACTCATTTTATA | 774.394283669839 | 0.265892134027505 |
| AATGAGTTGTCC | 774.394935478625 | 0.197379336334773 |
| CTAGTTTCGTCA | 774.399579157783 | 0.205685404947949 |
| CGCGTCGTGTCA | 774.403827244033 | 0.341650235170307 |
| GAACATCCGTCA | 774.406886369073 | 0.267625802194665 |
| GTCATGTAGAAC | 774.437243343566 | 0.207527700204263 |
| GTCATCTCAACA | 774.439033894786 | 0.279215837488365 |
| ACTCATATTGAG | 774.447473642789 | 0.253153030568319 |
| AATTATTACTCG | 774.453072363766 | 0.233664227560915 |
| AGATCAGTCTTA | 774.463246122424 | 0.251346226079726 |
| AAATCCGGTGAC | 774.464514989906 | 0.206319124181235 |
| ACGGTGTACCGC | 774.466019688072 | 0.355912527932409 |
| CAAAATATGACC | 774.471717429408 | 0.402016969853761 |



|              |                  |                   |
|--------------|------------------|-------------------|
| AGGGTTTGTAC  | 774.471908660982 | 0.333727644568313 |
| CGTAGTGACGAA | 774.480698753046 | 0.289731274473462 |
| TAGGCAATGACA | 774.485651094317 | 0.118586276685406 |
| GTAAGCGAGTCA | 774.486583482005 | 0.218035803401927 |
| TGTCTTACGTAA | 774.500675211951 | 0.395664587281897 |
| TGCAGTGACAAA | 774.501411901549 | 0.209248526150531 |
| CCAAGACATGAC | 774.508357963677 | 0.248052497956783 |
| TGACTGGGATAA | 774.51438919667  | 0.134656162851688 |
| ATTCTTGACACA | 774.519925116084 | 0.247542353747242 |
| CACGACGTATGA | 774.522655509424 | 0.274835135279992 |
| AGACAACCTATA | 774.523228790023 | 0.192459024672126 |
| CATGTCATGTGA | 774.540398920327 | 0.26707542077194  |
| CCAACCAATGAC | 774.541052742134 | 0.167781559239392 |
| AGGGCGAGTCAG | 774.546839414859 | 0.161150238267994 |
| CGTCATTATCTC | 774.554100183886 | 0.232796512317844 |
| TCATTCATAGGA | 774.560308452873 | 0.322698559417477 |
| CTGACTGCTACA | 774.565777651629 | 0.233278089969421 |
| ACTCGCATGACA | 774.567718096663 | 0.22628175851829  |
| ATACAATTAGTA | 774.570344075075 | 0.541849264377853 |
| GCTGGGGATGAC | 774.583641036996 | 0.243174578223987 |
| AGTCAGAAGGTG | 774.583685989245 | 0.211079083635503 |
| TCTAGTGACCCA | 774.587556983985 | 0.202778943861345 |
| GCAACTTTGTCA | 774.588173467556 | 0.358567846423059 |
| ATGACAGGGCGA | 774.591022045059 | 0.183962861974232 |
| ACCGCGCGTCAT | 774.595249860657 | 0.3916805295704   |
| CCGGTGAGCAAA | 774.609443910917 | 0.269090553852977 |
| AGTCAGAGGTAA | 774.613043390759 | 0.250744696703464 |
| AAGTACCCTCAT | 774.613788522474 | 0.26107804732768  |
| CACGTCAGAGTA | 774.625997331379 | 0.200346530460854 |
| AGTTGTCACCAA | 774.627236091499 | 0.254505731923765 |
| ACCCGGCGTGAC | 774.627605372699 | 0.272597910208688 |
| ATGACTTCGACG | 774.629349500311 | 0.219288886446923 |
| ATGACGGACTGG | 774.632853864665 | 0.170593491516703 |
| GAAATAGACTCA | 774.635455894117 | 0.256548726220865 |
| AGTCACGGGGTG | 774.652168075703 | 0.246787265409879 |
| GACCGTGGTGAC | 774.657277656064 | 0.272159666987566 |
| ATAGTCAATGCA | 774.659019461758 | 0.24244496523225  |
| GAATCATACCTA | 774.664171867884 | 0.353029528480884 |
| GATCTGGTCATA | 774.665309454146 | 0.259606582417876 |
| AAATTGTACTCA | 774.666431320225 | 0.342575424364514 |
| ACTTGACAGTCA | 774.668047680375 | 0.320420361804275 |
| AACATGTGACAT | 774.66990771652  | 0.312594083976493 |
| TCTGGTAAGTCA | 774.67625654129  | 0.245311539610812 |
| GAATCTATGACC | 774.688076510004 | 0.271612776148229 |
| GTCATTCTCCAC | 774.697529349391 | 0.204610069884631 |
| TAGTATGAGACA | 774.700463055323 | 0.480164227488961 |
| ACGGTCATAGCT | 774.702431862898 | 0.260423861043862 |
| TCATCAAAGGCA | 774.713133643223 | 0.336429651521406 |
| ACGACTCAGTCG | 774.7212800405   | 0.321486677299263 |
| CATCATTGGTCA | 774.721702892852 | 0.354337967170358 |
| CGAATGATGACC | 774.721829473101 | 0.253847351127895 |
| ATTGACACACGA | 774.726138190113 | 0.227036642778243 |
| CTCTTGCTCACA | 774.732768654139 | 0.182132517158471 |
| TGACTCTCTTAA | 774.742419972383 | 0.282721216152582 |

|               |                  |                    |
|---------------|------------------|--------------------|
| ATGAGTACGAAT  | 774.745928059728 | 0.173701058153561  |
| ATCAGATGACCC  | 774.753444194134 | 0.498615503998895  |
| AGTACACGTAAG  | 774.757187807431 | 0.347857689649676  |
| ACCATTTGGTCA  | 774.758079746099 | 0.299896997447942  |
| GTCACCGCCTGA  | 774.764995950312 | 0.258044594789055  |
| ATAAAAGCGTCA  | 774.770903727316 | 0.268858784160559  |
| CGGCAAATGACA  | 774.771022904309 | 0.244026966383222  |
| ATCGTGGTCACA  | 774.772669289886 | 0.352191099421768  |
| CACGTTACTCAG  | 774.777831918982 | 0.279312426161811  |
| GCGTGTACCTA   | 774.78157088592  | 0.323161373338422  |
| AGCACGTGACAC  | 774.781991740117 | 0.254059046406224  |
| AGGTGATATGAC  | 774.793797424838 | 0.274136559510536  |
| CGCGTGACACGA  | 774.794732720687 | 0.327007810387422  |
| ATGCCTTCGTCA  | 774.800023741118 | 0.313258763573526  |
| ACAACCAGTCAG  | 774.803623140674 | 0.278423821596091  |
| GTCTATCAATGA  | 774.809456559537 | 0.274211791897708  |
| ATGAGTAGTTAA  | 774.810946860145 | 0.235084116443628  |
| AGATCATGACGA  | 774.811539073893 | 0.269850145214774  |
| AGTCAGCCTTCG  | 774.812735088088 | 0.332581237439228  |
| GAGTCAAGCACA  | 774.817894876271 | 0.259420596100982  |
| CTACATGAGCAA  | 774.829897532847 | 0.224643566536578  |
| AGTCAAGTGTCA  | 774.831511660594 | 0.225042614913723  |
| AGCAGATTAGTC  | 774.836887977196 | 0.217490867674017  |
| AAAGTATTACAC  | 774.837242705422 | 0.111713765368154  |
| ACTTGTACCGA   | 774.846123098673 | 0.0758625329922451 |
| GTCACTCTAGGA  | 774.851637209756 | 0.481865659582378  |
| ATGACGGCAAAA  | 774.854817895561 | 0.172229007405403  |
| CGATATACTCAC  | 774.856850077063 | 0.342313644620695  |
| AGGCTGAGTAAC  | 774.857243206577 | 0.244217991961633  |
| CCCATCATGACA  | 774.860022918249 | 0.220485100169002  |
| AATGGGTGACGC  | 774.860628949118 | 0.215495252717354  |
| ATGGCTAATCGA  | 774.872960028807 | 0.358616676425498  |
| TCACCGTGACAA  | 774.88111736544  | 0.24019560364013   |
| TCTGACGAACAA  | 774.88571753869  | 0.206215963048681  |
| ATGACCACTCAA  | 774.887183144242 | 0.0701918596537304 |
| ACCGTCATGAGT  | 774.890570529623 | 0.244620318037547  |
| GTGACGCGAACAA | 774.898458667341 | 0.266564753260123  |
| TGAGCAATGGCA  | 774.909157521875 | 0.15754429329021   |
| AGTCAGTCTTTG  | 774.911194191715 | 0.272059262334486  |
| GCGTCACATGCA  | 774.915781881543 | 0.199825143866131  |
| ATGATACGTAAT  | 774.918758850844 | 0.27921788178723   |
| AGTCACGGTGAA  | 774.943407418687 | 0.257267233994718  |
| AGTCAGACAGGA  | 774.957133525948 | 0.301919639459246  |
| AACAACCTTGTC  | 774.957782379974 | 0.243125855678706  |
| AGTGACAACCTCA | 774.95849075024  | 0.286202958052638  |
| ACCCGCTATGAC  | 774.964838378533 | 0.295593955205244  |
| CCAGCAGACTCA  | 774.965032843675 | 0.235899530623838  |
| CCGGTGTACTCA  | 774.971943923235 | 0.295823171816359  |
| CGATAGGGTGAC  | 774.973797620053 | 0.170197314405963  |
| ATGATTCGACTG  | 774.974358980626 | 0.329817812517693  |
| CAGGCGCGTGAC  | 774.988005883432 | 0.356218257448864  |
| GTCATGAGTGCA  | 774.988902287599 | 0.455784897910484  |
| AGCTACTGTCAT  | 774.991139665399 | 0.236483764618245  |
| GTCACCGGAGGA  | 774.995646535954 | 0.211480582661604  |

|              |                  |                   |
|--------------|------------------|-------------------|
| GCTCATCAGTGA | 774.997033800488 | 0.307851581872103 |
| TAGCTAATGACA | 774.99970676135  | 0.48359063308023  |
| CCTTAATGAGTA | 775.002173980499 | 0.362569166478655 |
| AGACTCAGTAAT | 775.016903768051 | 0.326665711689418 |
| AACCGTGACGAA | 775.018068250894 | 0.331609431342439 |
| CATGATTACGTA | 775.018786353724 | 0.353781212734468 |
| GCGATGTGACGC | 775.022713684104 | 0.297442306143882 |
| CAGCGTCACGAA | 775.027757880639 | 0.280006179274437 |
| AAGACTTGTAC  | 775.02781201261  | 0.307708838292477 |
| AATGAGCCAACA | 775.029646922675 | 0.344568026068338 |
| ACTCATAGTTAA | 775.031313951384 | 0.24317859968449  |
| AGTGGTCAATCC | 775.035222269265 | 0.296899949072948 |
| ACTCTATGACCC | 775.035804462353 | 0.262781499451888 |
| AGTGACGCGCCA | 775.043138633096 | 0.302274833699735 |
| GATACATGACAA | 775.051009078823 | 0.301812886909559 |
| CTCTTTAATGAC | 775.06117560458  | 0.234784068509654 |
| AAGGAAATGACA | 775.062815831012 | 0.243008554875992 |
| TATGACCGGTCA | 775.063930103278 | 0.456543981527226 |
| AGTGACCGGTCA | 775.064769825929 | 0.356454787348747 |
| CTCAATGTGACA | 775.066839850267 | 0.387264547023293 |
| GTCACAATTCGA | 775.067598324325 | 0.315269780835711 |
| GCGGATAAGTCA | 775.07550669531  | 0.174319686276668 |
| GACTGATCAGAC | 775.076172350517 | 0.332615849099211 |
| TACTCTGACAAA | 775.079605387156 | 0.185302960127954 |
| ACTGCGTCAGGC | 775.079980680899 | 0.311861051769098 |
| GACTCACTGGTA | 775.082953777689 | 0.383742708434589 |
| ACGAGTGACAAA | 775.087987518003 | 0.11456152454966  |
| ACGACTTGGTCA | 775.090327111413 | 0.228663389005718 |
| ACCAAACATGAC | 775.091587629173 | 0.285658614482243 |
| GACTCAGTGCGC | 775.094804873579 | 0.41126195330098  |
| ATATGTCAGATG | 775.102131988745 | 0.299137807915952 |
| ATGACGACGGTC | 775.102583268767 | 0.278891076453791 |
| GGCATGGAGTCA | 775.10423238192  | 0.348784353979395 |
| CCCAGATGAGTA | 775.110188746206 | 0.168428848819451 |
| CCATACTGTGAC | 775.118712000101 | 0.278794674344511 |
| GTATGATACAAC | 775.119171498368 | 0.328929148714769 |
| GTGTGAGTACTA | 775.125287186282 | 0.226673511516324 |
| ACCTTGGTGTC  | 775.125723931491 | 0.236870191982969 |
| ACGCCACATCAT | 775.132517430282 | 0.227459274061018 |
| CGTGATGATACA | 775.136110882662 | 0.294037627619291 |
| GACATAGTCAAC | 775.138038352401 | 0.287462948987049 |
| GTATTATTCACA | 775.139639734424 | 0.290261860093006 |
| GTCACTAATTCA | 775.148978402798 | 0.380477817678523 |
| ATGATGTGGCAT | 775.152524359436 | 0.217399428244263 |
| AAGTGACATGAC | 775.154661243379 | 0.306397531915138 |
| AGGTGTAATGAC | 775.160667290741 | 0.215630297933773 |
| CGCGACTGAGTC | 775.166548045789 | 0.306308447424714 |
| AGTCAGACTGG  | 775.171961570598 | 0.138722595153642 |
| CAATTGGGTAC  | 775.17384704519  | 0.459250515395235 |
| ATATACATGACA | 775.176307686038 | 0.350719884695804 |
| GTCATGCCGGTA | 775.180094020152 | 0.305644298952108 |
| ATGAGTAGGTGC | 775.205327015181 | 0.206110397847201 |
| AGTGAGTGAATC | 775.208706306979 | 0.159494238808328 |
| CGTCACTCTGAA | 775.208746619386 | 0.338614042491821 |

|               |                  |                   |
|---------------|------------------|-------------------|
| GAAAGTGACCAA  | 775.209181273282 | 0.30659263026183  |
| TATAAATGACCA  | 775.220135541828 | 0.410203925103233 |
| AGTGTCATGTTT  | 775.227295668962 | 0.461089722477679 |
| CTAAAGCGTGAC  | 775.232582778151 | 0.226105848180539 |
| AGCCGCATGACA  | 775.242871738252 | 0.329369263323291 |
| ACTCATCTGTG   | 775.243384612353 | 0.18097367286249  |
| ACAAGTGGTCAT  | 775.252687154153 | 0.36758245136435  |
| GTCCCACAGTCA  | 775.258240557777 | 0.379854104931481 |
| AACCTGCGTCAG  | 775.260603085681 | 0.240160326258184 |
| AAAGTTCGTAC   | 775.266602337909 | 0.186856960535902 |
| ATTCTGGTGACA  | 775.282726191729 | 0.301704526507368 |
| AGGACTGATGAC  | 775.283422910718 | 0.264431326701866 |
| GCGAATACGTCA  | 775.287367928988 | 0.38197911346311  |
| TTACGCAACGAA  | 775.295331916924 | 0.379316189745221 |
| GTTTCGATTCATA | 775.299262348583 | 0.255165174163287 |
| TGACGCCGAAAA  | 775.300290360852 | 0.434311706429003 |
| AAATATATGAGT  | 775.302483206913 | 0.285016500594831 |
| GGAGCTAGTCAC  | 775.311876360684 | 0.369549756219005 |
| CGTGGTCACACC  | 775.313649382943 | 0.323579781606169 |
| ATTGCTGGTGAC  | 775.329457611638 | 0.276535890047283 |
| AGTTACTGACTG  | 775.332894508903 | 0.278047688770166 |
| TAGGACTAATCA  | 775.333485171266 | 0.268263731848229 |
| AATGCCATGACA  | 775.34501742511  | 0.480921115637176 |
| CTGACTCGCCAC  | 775.34547558517  | 0.251738294253712 |
| ATAGGTACGTCA  | 775.346190973497 | 0.335263061157392 |
| ATGAATGTGACG  | 775.349070757297 | 0.235483025017055 |
| CTACCGAGTGAC  | 775.354051229666 | 0.369461209571186 |
| TGACTATAGGCA  | 775.36108016537  | 0.250108633958878 |
| AGTCAGAATAAC  | 775.365362315262 | 0.175233562724548 |
| ATGACGCCTGCA  | 775.366820511093 | 0.344610451802939 |
| TGTCACTGTGAA  | 775.367431185262 | 0.363367709020659 |
| CGTCAGATTGAC  | 775.377541641849 | 0.280815232806053 |
| CCGCCATGACAC  | 775.378522385986 | 0.277926708786163 |
| ATTTCTTCGTCA  | 775.379491220031 | 0.238020753962593 |
| AGGCTTGTGATC  | 775.380137045832 | 0.28262722348965  |
| ATCATTGTGACG  | 775.382166012873 | 0.279797132872882 |
| CGGATCCATGAC  | 775.385014136788 | 0.332037887865128 |
| ATGAGTACCGAC  | 775.390848101131 | 0.332563382107429 |
| ATCCCCGAGTCA  | 775.394028094478 | 0.14848601284688  |
| TCGAATCATAAA  | 775.400613731255 | 0.327502000812144 |
| AATCTGACAGAT  | 775.407180410382 | 0.189511860072284 |
| AGTCCGCGTGAC  | 775.408299795458 | 0.320940419250406 |
| GAGTGACGAACC  | 775.413127800684 | 0.246287189900601 |
| GTCATTCGCCCA  | 775.416185692832 | 0.273416364531232 |
| CGTCACCCCTGA  | 775.431278555426 | 0.299279056899539 |
| CCCGTGGATGAC  | 775.436778192544 | 0.417067103785905 |
| AATGTGTCGACA  | 775.437464522401 | 0.167819157194245 |
| GTATCTAATGAC  | 775.437732344066 | 0.286123879448135 |
| TATCATGACAGA  | 775.441856330992 | 0.209051592976885 |
| TGACCAAATCAA  | 775.446723566872 | 0.238618997587803 |
| CACAGTCAGTGC  | 775.459974434248 | 0.380564517059089 |
| CGGTCAGACTCA  | 775.470572779588 | 0.262756270818279 |
| ACTATTGTGACA  | 775.472573428026 | 0.327317573954828 |
| GGGACGTGTGAC  | 775.47384981355  | 0.221117228743331 |

|              |                  |                   |
|--------------|------------------|-------------------|
| GACTAATGATGC | 775.474607865292 | 0.329620417198722 |
| AATCGTTGTAC  | 775.477411577029 | 0.237636644053173 |
| TACGCGTAGTCA | 775.477485635807 | 0.318576243260684 |
| ATTCATGACGC  | 775.49029890227  | 0.26624714649749  |
| CGCAACTTGTCA | 775.497644853789 | 0.42232821054659  |
| ACTCATTGAGTG | 775.499073323475 | 0.441617842182063 |
| CTCGGTGACGTC | 775.510931683631 | 0.373274293007192 |
| CGTACTTGTGAC | 775.511678903211 | 0.269511168054957 |
| GGTGACTTCGAC | 775.513487396688 | 0.309842431187566 |
| GTTGTCACCGAA | 775.522460303034 | 0.299062843794421 |
| CGTCACCCAGTA | 775.524462932457 | 0.203101733731291 |
| AGTCAGACGTTG | 775.529920955592 | 0.29491348453326  |
| CATATGGGTGAC | 775.531465516845 | 0.367720894976899 |
| GTCATGCTAATA | 775.541986092509 | 0.264190641696294 |
| CGAAATGTGACA | 775.555776476553 | 0.337620352720842 |
| AGCTCCTGACTC | 775.557444579929 | 0.237286668837648 |
| TATTACTGGTCA | 775.559022240037 | 0.302406960522818 |
| GCTTAAGTGTCA | 775.559523816424 | 0.296160055727981 |
| GCAACTTCGTCA | 775.568213852734 | 0.294560260773825 |
| CGTCACATGGTC | 775.568262157886 | 0.252014108924642 |
| AAATCGTCAGTC | 775.572205139146 | 0.161456906159811 |
| GCGCCATGACGC | 775.58252150201  | 0.25288396447633  |
| GATTGTTGTGAC | 775.591673603086 | 0.298668040806069 |
| AGTGACGAACAT | 775.594380991654 | 0.197728042387839 |
| CGTCATGTATCA | 775.596643700446 | 0.284143433753517 |
| CAGTCAGCGTAG | 775.597047856822 | 0.143472623743407 |
| AAATTCGGTCAC | 775.598163151666 | 0.282117323741849 |
| ATCCCTGACTCG | 775.598925923433 | 0.194193462887594 |
| ACTTAAGTGACG | 775.602925601481 | 0.289845638585151 |
| ATCGACTCAGTC | 775.604068218161 | 0.18916765072989  |
| GTCATCACCCCA | 775.604303390996 | 0.331656803401133 |
| GAGTGATACATA | 775.618521728282 | 0.175701230505362 |
| ATAGCGTCATA  | 775.626156788339 | 0.27601729370309  |
| ATTGATCGTGAC | 775.642704972932 | 0.307660776159439 |
| AGTCAGCGCTTA | 775.64360090722  | 0.278577812744091 |
| CAGTATCATGAC | 775.646122879723 | 0.289267824301749 |
| ATGATTGCGTAA | 775.665801924381 | 0.2840194854223   |
| ACTCGCGTGTC  | 775.674276298126 | 0.322086009634411 |
| GAGTCAAACGGA | 775.681874015211 | 0.213598340127184 |
| ACGTCATGTACC | 775.691006414494 | 0.187472162445636 |
| GACTTTCTGTCA | 775.70814388226  | 0.379494118026496 |
| ACTCATAACATG | 775.726372949622 | 0.16824508403338  |
| TGACACGCAGCA | 775.729020224551 | 0.518174478053188 |
| ACGTCACCAAGA | 775.731220075786 | 0.217031463517599 |
| CGCTAAGCGTGA | 775.74094490703  | 0.311864027311799 |
| ACATTTGTGACA | 775.74481817851  | 0.239839814692117 |
| ATATGACGGCAA | 775.747740534891 | 0.140246119401283 |
| CGTCACGAGTGA | 775.760911027246 | 0.34856604161687  |
| AAGACCGTCATA | 775.771328323992 | 0.262342792139109 |
| AATTACTATTAA | 775.791863352645 | 0.264990060576287 |
| TGACAGAGATAA | 775.794568553762 | 0.24977331082038  |
| ATAATGTGACAA | 775.796579055549 | 0.26907367583297  |
| CTCATATGACCA | 775.798358195301 | 0.271015524526985 |
| TATTAAGACTAA | 775.800512898889 | 0.337778325329966 |

|              |                  |                   |
|--------------|------------------|-------------------|
| GTTACTCTTACA | 775.800926043185 | 0.169604600994449 |
| GTAGGAGAGTCA | 775.802642438984 | 0.237304098637444 |
| GCTCGAGTCAAC | 775.808582747825 | 0.338259540306151 |
| CGCCGCTATGAC | 775.810218836042 | 0.390408278988144 |
| ATTACTGACGTA | 775.815646610063 | 0.28279617318526  |
| GGTAGCGAGTCA | 775.816755964879 | 0.28856904572286  |
| ACGCTTGTGACA | 775.816872069969 | 0.235809121619271 |
| GTCATAAGTCCA | 775.819880630407 | 0.337688826608263 |
| AAATTGCATGAC | 775.820026169141 | 0.327327917275329 |
| GTGGATAAGTCA | 775.822967814644 | 0.162808217981582 |
| GCACAGTGTAC  | 775.82431865011  | 0.280957824524872 |
| GCACATTGGTCA | 775.824614469218 | 0.280984051877162 |
| AGAATTCGTGAC | 775.824667205329 | 0.260589515922879 |
| AACGTGTGTCAA | 775.829620718591 | 0.330926077062714 |
| ATGACATTTTCG | 775.832019049813 | 0.268483458175767 |
| CCTGTATGTGAC | 775.832471552915 | 0.294520929954186 |
| ATGATGACCTAA | 775.83332868714  | 0.266722043278874 |
| TACTAATGACAA | 775.83551660527  | 0.253702514705599 |
| AGTCAGACAACA | 775.844527991987 | 0.206301188677307 |
| ATGACGGTAGTG | 775.845956456656 | 0.234360061495483 |
| TATCAAGCGTCA | 775.857495381991 | 0.331971052066621 |
| AGCACTTTGTCA | 775.867555055726 | 0.232341929936722 |
| GGCTATAAGTCA | 775.86789819402  | 0.342664913032943 |
| AGCGCCAGTCA  | 775.868534278959 | 0.35307066047479  |
| ACGACTTGTAC  | 775.872168152609 | 0.228526551119769 |
| CTACATGTATGA | 775.874618264946 | 0.356870396690888 |
| TATGACGGGGAA | 775.875034301224 | 0.275411770504835 |
| CATGACTTGGTA | 775.881110307654 | 0.274830840747244 |
| CTGGTCATATTA | 775.888220309879 | 0.209447187688533 |
| CGTCATTAGATC | 775.89810221563  | 0.193253130086848 |
| AATATTAGTACT | 775.903005028181 | 0.376065511174944 |
| AAGTCATGGTTC | 775.907329315833 | 0.340436601006037 |
| ATTATGACCTGA | 775.91857367983  | 0.250427473106131 |
| ATGACAATGTGC | 775.935480018353 | 0.341741237431062 |
| GATATCTGTGAC | 775.940029298195 | 0.299445356030199 |
| TAGTCAATATGA | 775.94268871211  | 0.313574852694489 |
| AGTCAGATCCTG | 775.947347555265 | 0.234897263670181 |
| AGACTAATTCAC | 775.951572251524 | 0.312271953412096 |
| TCCATTGTGACA | 775.95267965398  | 0.223597715565035 |
| GCGCATGACACC | 775.962780717707 | 0.263676683706602 |
| CGTCACATTATA | 775.96800710937  | 0.164566219141565 |
| GACGCACAGTCA | 775.975461489728 | 0.404841425349089 |
| AATGTAAATGAC | 775.978606021781 | 0.292569815122665 |
| AGGCGCTGTGAC | 775.982958329373 | 0.33835495005424  |
| GGTCATAAGTAC | 775.983388838013 | 0.361836339335609 |
| GAATATAAGTCA | 775.98549068714  | 0.293763839017474 |
| AGTGGAGAGTCA | 775.998959027936 | 0.197788639208087 |
| AGGGTCATTCTA | 776.015837126811 | 0.255237487193728 |
| GTCATATAGGTA | 776.016318471031 | 0.181893034488549 |
| CGCACCGACTCA | 776.016503356541 | 0.241925081500487 |
| TTACGTGGCTAA | 776.018552416928 | 0.273214464418798 |
| GCGTGGCATGAC | 776.023268693894 | 0.307257883106103 |
| GATTGTAGTGAC | 776.035907476514 | 0.258912919902914 |
| ATCCACGTATGA | 776.039558873799 | 0.256875868928129 |

|              |                  |                   |
|--------------|------------------|-------------------|
| GTGTCACTAGCA | 776.043380582291 | 0.30020846854644  |
| AGTGAGTCTCAT | 776.043603010144 | 0.201810456511635 |
| ATTCGTCAGCA  | 776.044652024322 | 0.18024919554397  |
| AAAACGGGTGAC | 776.048735727302 | 0.415383749643285 |
| TGACCCATTTAA | 776.05067609306  | 0.261494413032541 |
| AAGGATGGGTCA | 776.059786167353 | 0.215422730104876 |
| TACTCATAAGTA | 776.074661576332 | 0.166219340968598 |
| GATGACCTCATA | 776.083346389193 | 0.206050449575172 |
| GACTAATCCCGA | 776.087319484408 | 0.237846189860347 |
| ACTCCATAGTCA | 776.087445080504 | 0.244497166577773 |
| GGCAGGTGTGAC | 776.089157672399 | 0.120696408263262 |
| CCGGCTGACGGA | 776.09262418195  | 0.371542184457092 |
| AATCGGTGTGAC | 776.095858791037 | 0.190901881549227 |
| TATAATTAATA  | 776.096741127437 | 0.273355605366307 |
| ATGACATTTAAC | 776.115219159374 | 0.317613228607935 |
| CCTAGTAGTCAG | 776.120674469651 | 0.237962123753317 |
| ATGATGTAAGAC | 776.123177634471 | 0.202470224969938 |
| ATACAATTAATC | 776.129383481836 | 0.239326224375202 |
| AATGATGTGACG | 776.162207603512 | 0.23330368118598  |
| GGGGCCAGTCA  | 776.168506001628 | 0.322055860599106 |
| ATCTGACATATC | 776.1720113446   | 0.284233867807254 |
| ATCACGCAGTCA | 776.174957587236 | 0.241634824298414 |
| ACGTTGCGTAAT | 776.192627852656 | 0.236698696474825 |
| TACATGTGACGA | 776.199996036001 | 0.29815698155926  |
| ATGGGTGACGTC | 776.202953765961 | 0.355804161075501 |
| TCAAATTAATA  | 776.203436616065 | 0.211919173953022 |
| TCAGTCGTCACA | 776.206019390565 | 0.26069787267782  |
| AGTTTGTCACTA | 776.208263452389 | 0.247475734728962 |
| AGTGACGCGGTG | 776.217240525541 | 0.248043018320871 |
| GAGTGAGATGAC | 776.218490866214 | 0.119082207213977 |
| TGACATACGTAA | 776.218833522669 | 0.333574892872517 |
| ATGACCTAATAG | 776.221327318584 | 0.373680641396463 |
| GTTTGTAAGTCA | 776.224504336791 | 0.249156487619278 |
| CATGTCACTGAC | 776.231161971571 | 0.281282561217324 |
| GTCATATAGGGA | 776.232713987243 | 0.230198025359798 |
| ACGCAATGTGAC | 776.255168588696 | 0.465279177161132 |
| GACTCACGGGCC | 776.255188789387 | 0.379208720582002 |
| CTGTCACCGGTC | 776.259044369808 | 0.282907407336104 |
| ACGTCATGTGCT | 776.259241874082 | 0.295167246902054 |
| AGAGACGACTCA | 776.260184704437 | 0.246709176523304 |
| AGTGAATGACCA | 776.262134994194 | 0.277123396707194 |
| ATGCCCATGACA | 776.272881133553 | 0.231498079755997 |
| AGTAAGACTGAT | 776.276760717468 | 0.222688513999957 |
| GATATTAATCTA | 776.277469621643 | 0.368055596971212 |
| CGTCATGCGTAC | 776.282036288261 | 0.258715235448527 |
| AGTGACGTTGAC | 776.28922974639  | 0.244262838886563 |
| AAGTCACCTTTA | 776.306022893833 | 0.240809228304353 |
| ACTCATTTGTTG | 776.315558191294 | 0.286710930487508 |
| ATCAGTGCACG  | 776.316164669691 | 0.339728569873022 |
| AGGGTCATGTCA | 776.321528715482 | 0.307700685703307 |
| AGGACTAATACC | 776.325532690092 | 0.304043508637553 |
| AGGTGAGCCACC | 776.327632640605 | 0.244388791117486 |
| ATTAGCATGACG | 776.335987236077 | 0.272762416289366 |
| GTCAGTCTTACA | 776.33808745462  | 0.277628097359841 |

|              |                  |                   |
|--------------|------------------|-------------------|
| GTCTGCTAGTCA | 776.340337504949 | 0.331722250046904 |
| CTAGACGGTGAC | 776.349171731849 | 0.303488458451658 |
| TAAGACGCATAA | 776.351500548317 | 0.142529225553425 |
| GCTTGCATGACA | 776.352552860357 | 0.42921005282241  |
| ATGCTGCGTGAC | 776.363013603709 | 0.494007401224979 |
| TACAAGTAGTCA | 776.363830280005 | 0.41049848216079  |
| CTACTCATGACA | 776.37497527737  | 0.184452206534551 |
| CGTTTAACGTCA | 776.388913101295 | 0.238282114558326 |
| ACCCCATGACAC | 776.395170076117 | 0.362457438768989 |
| CAATACAGTGAC | 776.396336059037 | 0.384481309125635 |
| ATTATTACTCTA | 776.396711927159 | 0.280598623052685 |
| GACGTCACCGAA | 776.415267296775 | 0.286783701197938 |
| ATGTCATTGGTG | 776.416798017279 | 0.345176624798244 |
| ACGACTGACTAT | 776.420319880625 | 0.315843062816641 |
| TCGAAAGTGACA | 776.438353889438 | 0.173020975586352 |
| AATAGTGACGCT | 776.446813545171 | 0.234497480016911 |
| TCTTAGTCGTCA | 776.447286750002 | 0.344801631501185 |
| CGAGGAGTAATA | 776.457417087623 | 0.1976579986173   |
| GGTCATGGCTCA | 776.46025472436  | 0.340194697069869 |
| GACTCACTCCCC | 776.462998951748 | 0.18430552466004  |
| CTGAGTGACCAA | 776.467994474673 | 0.213602289147965 |
| AGAGCGTGACAC | 776.473500981257 | 0.204421595067734 |
| AACGACTGACTA | 776.485069404475 | 0.359184365785378 |
| CATGTGTCGTCA | 776.493424268016 | 0.302563070308809 |
| ACGTCATGTTCA | 776.495576223634 | 0.506009247079222 |
| AAATCGTGACAA | 776.500935178589 | 0.164385411910595 |
| ATATACTCACAC | 776.508387440422 | 0.240675160320234 |
| TCATGACGTTAA | 776.508475115489 | 0.266975456774047 |
| CTGAGTGAGTAC | 776.511446110608 | 0.282702796567106 |
| GTCATGCACGTA | 776.518652388154 | 0.25027875467255  |
| ACACGTGGCTGA | 776.519716008463 | 0.267034654478456 |
| AATCTTAATGAC | 776.520545249146 | 0.343346254411362 |
| GTCACTATCAAA | 776.523841991296 | 0.272464672874303 |
| AAATATTTATGA | 776.538083483485 | 0.173537466718464 |
| AACCTGTACCCC | 776.55057738177  | 0.232745651662875 |
| AAGCCGATGAGT | 776.559359747417 | 0.417779506624789 |
| AGGGGTACTCAT | 776.573642797462 | 0.26051786701674  |
| CGTCACTGTCGA | 776.577985129824 | 0.460212315335704 |
| GCTGTTGCTCAC | 776.594000281265 | 0.327580216576651 |
| CGCCGGTGACAA | 776.594855306756 | 0.270528709371125 |
| ACTTATGGTCAT | 776.599825874903 | 0.284893389382454 |
| GGTCTATAGTCA | 776.601824990543 | 0.292861213925747 |
| ACCCCTGTCATA | 776.606802646193 | 0.2238072198526   |
| GCTGAGATGACA | 776.608632969572 | 0.362957812653522 |
| CCTCTGACAGAA | 776.612085734278 | 0.388059281277161 |
| ATGATGTGTTTA | 776.62176211596  | 0.212263731381618 |
| ACTCATACACAT | 776.628668750242 | 0.152074832416686 |
| ACTCATCGTTAG | 776.63038958974  | 0.290471935460163 |
| CGAATAAGTGAC | 776.637597047104 | 0.473269693573382 |
| CAATTTTGTGAC | 776.640622189608 | 0.350130563177238 |
| GACTATTCGGAC | 776.641488676943 | 0.248072391750403 |
| ACATGACCCAGA | 776.64952062739  | 0.333395499559229 |
| GAGATTCATGAC | 776.651723195329 | 0.377408006945697 |
| TAAACCGTGTCA | 776.653836552968 | 0.286511497768115 |



|              |                  |                   |
|--------------|------------------|-------------------|
| CAATGTTTCGTC | 776.654445073458 | 0.304567893941948 |
| ATCTGTCAGATG | 776.65618769073  | 0.220673447398738 |
| ACCGATGTGTAA | 776.662942526463 | 0.23973231120733  |
| CTGAATCAGAGA | 776.674616060243 | 0.306646451700733 |
| ATGACAGAGGCC | 776.679966708536 | 0.314865739063203 |
| TAGACCGACTCA | 776.682078239994 | 0.195344536606986 |
| ACACAATGACGG | 776.682801595219 | 0.271349636436384 |
| ACGTCACCTACC | 776.686857860803 | 0.139857950586129 |
| CGAGGAGATGAC | 776.68801403786  | 0.206369780183234 |
| AATGACAGGACC | 776.690656927121 | 0.319164444508687 |
| CAAATCATATGA | 776.695872030498 | 0.233943485958208 |
| AACTTGACGTCA | 776.696756960242 | 0.274050725237539 |
| CCCGAGGTGTCA | 776.696917923601 | 0.248192742027268 |
| GCTTATTTGTCA | 776.698985910643 | 0.237805434889154 |
| TCGATGGTGTCA | 776.702751575256 | 0.181110233809686 |
| TGTGAATCAACA | 776.70286888657  | 0.221150875602285 |
| ACTGCGACTAAT | 776.704230067849 | 0.310874931907052 |
| GTGACCCAGTTA | 776.71648709519  | 0.299418358601231 |
| AGCGTCATGAAT | 776.717305730142 | 0.314854823142585 |
| CCGCCCACGTCA | 776.730494897933 | 0.292182670886532 |
| GTCACCTCTTGA | 776.733655973953 | 0.310226261203463 |
| GGGTGTACGTCA | 776.747816021374 | 0.236775796266937 |
| AGTCTGCATGAC | 776.748371274952 | 0.18199057648053  |
| CAATTAAGTCAG | 776.752716447408 | 0.180932764359218 |
| CGTCACAATTGA | 776.75907513687  | 0.313479732183099 |
| CCCATAATGACA | 776.760187399794 | 0.34482454258151  |
| AGTGCCTAGTCA | 776.765780582542 | 0.214233028111315 |
| GTTACTCAACGA | 776.766469019341 | 0.365806287855581 |
| TCATCGGATGGA | 776.785308235042 | 0.192119936884183 |
| TGACTCTCGGCA | 776.804829220091 | 0.333760640769374 |
| TCATGACAACGA | 776.805303638664 | 0.270744838835673 |
| GGTCATAGTACA | 776.805720017785 | 0.319562949579994 |
| GGTCTCCGTAC  | 776.813769089385 | 0.269847848987661 |
| GTAATAATCATA | 776.814927080941 | 0.237028566387316 |
| CGACTCAGAAGA | 776.82330251578  | 0.250963691328722 |
| ATAGTTTGGTCA | 776.827902353759 | 0.391516960394703 |
| TAGGTTTTGTCA | 776.828351318358 | 0.419739753732704 |
| GAGTAATATATC | 776.839874688472 | 0.211655288398075 |
| GTCACGTACAAA | 776.855195982766 | 0.453249088608421 |
| CCGACGTAGTCA | 776.861705456781 | 0.47261039656579  |
| ACATCGTGAGTC | 776.863014029599 | 0.243096264912605 |
| CACTCATTGCGG | 776.876634903969 | 0.235869263360242 |
| ATGAGTAGAGTC | 776.877086309276 | 0.216439530735395 |
| GACGCTTGACTC | 776.878300775071 | 0.366762560171965 |
| ATGTCATCTGGC | 776.878669738505 | 0.25350566518739  |
| CGTCATGGTCAG | 776.880613303024 | 0.306635903773137 |
| AGTCAGAGCCGC | 776.886438773768 | 0.258854080207299 |
| GCACTGAGTAAC | 776.895436818999 | 0.263707264036353 |
| ACTGTCATGATG | 776.896755545145 | 0.236891012375435 |
| ACTCATCGATAT | 776.901388528599 | 0.266380242382769 |
| ATGACGTTGGTC | 776.904452931569 | 0.174026012914726 |
| GTCACATCAATA | 776.906578025851 | 0.407458478936889 |
| GTTACTCAGCTA | 776.914334292031 | 0.217516984337195 |
| CGTCATTCTCC  | 776.920472867662 | 0.232777278307677 |

|               |                  |                   |
|---------------|------------------|-------------------|
| ATGACACTACTG  | 776.920916173757 | 0.406290774371326 |
| CCTGAGGTGACA  | 776.926426492944 | 0.292970776885959 |
| TGTCATGAACAA  | 776.929105057683 | 0.339870007421711 |
| TATACTTTGTCA  | 776.953695343192 | 0.301408962600245 |
| ATGACAGTGATG  | 776.959430275268 | 0.173458029975923 |
| GGGTGACAATAC  | 776.961404192861 | 0.303200070470751 |
| AGGTGACCCAAA  | 776.971775377825 | 0.24719340953886  |
| GTCACGACTTTA  | 776.974575042682 | 0.283483402471891 |
| GACTACATGTCA  | 776.987182511016 | 0.363973031457536 |
| CTCTAAGACTAA  | 776.989523304744 | 0.196907491744221 |
| GCAGTAGATGAC  | 776.996255593133 | 0.387151688682646 |
| TAGGCCCGCTCA  | 776.998865807376 | 0.350423183715702 |
| TGACTCCAGAAA  | 777.025004522443 | 0.254957914506305 |
| GAAGGATGACCA  | 777.030335494754 | 0.185721471557498 |
| GTATTGAGTAAC  | 777.030389964204 | 0.203072637861104 |
| GAGTTGACTACA  | 777.033669197779 | 0.269853972706556 |
| GTGACAGTATAA  | 777.034648906588 | 0.198462851847173 |
| GCATTGACTAA   | 777.039120466689 | 0.261666575665579 |
| TCATTTCCGTCA  | 777.043141400295 | 0.361653353609446 |
| CTCAGTGACGGA  | 777.044059929695 | 0.267184809631502 |
| ATGTGTAACCCA  | 777.055419048477 | 0.221031056867017 |
| GTCATGGCCGGA  | 777.06034759162  | 0.322127250068741 |
| AATTGTATGAGT  | 777.06285754418  | 0.231651733767356 |
| AAGAGTAACTACT | 777.065094837164 | 0.267219781990756 |
| ATGATGTGGCAG  | 777.073447012784 | 0.162697141859759 |
| AGTGAGCCACAA  | 777.077779672099 | 0.183292090357308 |
| AAGCCCATGACT  | 777.087792249927 | 0.326689559130407 |
| CCGATGATATGA  | 777.097602801559 | 0.342938834030907 |
| ATGAGCAAGATA  | 777.097610163533 | 0.25158358723932  |
| CAGTTCGTGAGA  | 777.097923803788 | 0.23044881700445  |
| GGTTCACGTGAC  | 777.102566371486 | 0.273524487313763 |
| GTGGCTCACCGA  | 777.117084525762 | 0.244455370949894 |
| GTCATCTGTATA  | 777.118379807726 | 0.307613636824433 |
| CGTTCATGACAC  | 777.118493758792 | 0.284677108145968 |
| CGTCATTCCGCC  | 777.123769986239 | 0.181593866920256 |
| AAATGAATCTTA  | 777.125240500771 | 0.249519527706123 |
| AGTGAGATGACG  | 777.12530359891  | 0.11085545905794  |
| ACGCTACTGTGC  | 777.125858634241 | 0.363073175257021 |
| ACTCATAACTGA  | 777.127696306555 | 0.29542503369433  |
| CGGACGCATGAC  | 777.131806588386 | 0.374155871304267 |
| CACCAGCAGTCA  | 777.139386657985 | 0.33069748636135  |
| GTCACTGCATCA  | 777.151879395875 | 0.294451370554178 |
| CTAGTTGAGTAA  | 777.152659749003 | 0.224537891826546 |
| GACCTAGTCAGC  | 777.153157467004 | 0.287252000672847 |
| TGAGCCGACTCA  | 777.167382279081 | 0.3093330531472   |
| CATAATTACATG  | 777.180356037998 | 0.262936584114159 |
| ATGACGCGCGTG  | 777.186949209041 | 0.295685842834763 |
| ATCACTAAGTCA  | 777.197257425416 | 0.352196900681409 |
| ATTAGTACTAGG  | 777.211451790999 | 0.396930566028485 |
| ACAACGTCACTG  | 777.213062820847 | 0.262447367291653 |
| AATAATCATGAC  | 777.218243912946 | 0.263639712319834 |
| CAGGCAAATGAC  | 777.220698351797 | 0.297501047572247 |
| CAGTCAGTGGCA  | 777.220891603796 | 0.183172144750799 |
| CACTAATGTGAC  | 777.239510763514 | 0.275619008194331 |

|              |                  |                   |
|--------------|------------------|-------------------|
| GTAAGCATGACA | 777.245817406775 | 0.484863871968392 |
| ACTCATAACT   | 777.248164953469 | 0.212692915889682 |
| AGTCACGGAGAA | 777.250922385054 | 0.126437458830576 |
| AAAGTGCAACA  | 777.256370691832 | 0.224171308224823 |
| GCTCACTAGTCA | 777.262447656123 | 0.277447973834915 |
| TGACACGACGCA | 777.267191201551 | 0.33427185965649  |
| CTTAACATGACA | 777.268243439308 | 0.180119557084652 |
| ATGAGTACCCCA | 777.27347133154  | 0.192831881758619 |
| CTGTGATGACCC | 777.274857338829 | 0.386963414400963 |
| ATGATGAATAAT | 777.293952159945 | 0.160276910985744 |
| GTGATGACCTCA | 777.298308706922 | 0.246464768944698 |
| GTGACGTTACAC | 777.299250401478 | 0.307909146682321 |
| GTCACGTCTAAA | 777.301576731842 | 0.477477315919309 |
| GGGTCATAAAC  | 777.310634771355 | 0.359325961741532 |
| ACTCATATGGAA | 777.315491646873 | 0.152843337624988 |
| AGCTTAGCGTCA | 777.321629993471 | 0.266822793636309 |
| AATACTAATCAT | 777.32351570122  | 0.208290216396841 |
| CGTATCTAGTCA | 777.327596950386 | 0.319481223782112 |
| CACATCAAGTCA | 777.32872572624  | 0.299480680754815 |
| CCGCTCAGTGAC | 777.329046850513 | 0.257430852420359 |
| GGTAGGGATGAC | 777.337548950078 | 0.245137106323231 |
| AACAGTGGTCAT | 777.343881343976 | 0.259006752722926 |
| GTCATATGCGGA | 777.347002007254 | 0.297268341557173 |
| ATGACGACGTGC | 777.352788165657 | 0.391052329082388 |
| ATGACTTCGCGC | 777.356324223589 | 0.299565955327938 |
| ATGACAGTAGAC | 777.356482594801 | 0.292867885914665 |
| ATGACAGCTAGG | 777.358099770744 | 0.240969022227538 |
| CACAACCTTGTC | 777.35996533229  | 0.209795998088125 |
| GTTATCATGACA | 777.385665913764 | 0.247363208576769 |
| AATGGCAGTCA  | 777.389588837798 | 0.247432583226013 |
| TACTCAGTAAA  | 777.39870658045  | 0.323100068015487 |
| GCCACGGATGAC | 777.403671573139 | 0.354368061237023 |
| ACGTCACCTGGG | 777.40428194982  | 0.243326737826125 |
| ATGACATGCCAG | 777.420278124838 | 0.270935389398185 |
| TGTACCCTCACA | 777.423587669138 | 0.232781952851768 |
| ATCGTGACGTGC | 777.42540074672  | 0.236376706936577 |
| AATACGCAGTCA | 777.432090729133 | 0.428767999818899 |
| TGACTACTAGCA | 777.440745941829 | 0.241384552554858 |
| AGCGCTCAGTCA | 777.443586996037 | 0.384915335267009 |
| AAACCATGTCAC | 777.445877083882 | 0.336544044065839 |
| ACTCATATTACA | 777.457245557805 | 0.285578568460864 |
| ACGTATTGACTG | 777.464913411762 | 0.393617852705242 |
| ATAGGTCACCTG | 777.469382589282 | 0.271756110302193 |
| ACATGTTGGTCA | 777.472284208213 | 0.447320775193262 |
| ATTGAAATGACA | 777.483116542043 | 0.331719968467817 |
| CGTGGCAGTGAC | 777.484703161793 | 0.361616369621064 |
| CGTGTGTCAATA | 777.491654148127 | 0.231419501178469 |
| AGATTTGTCAAC | 777.4948641593   | 0.259389549564001 |
| GTGACCAAGAAC | 777.505309541073 | 0.373980324568536 |
| ACTCGAGGTGAC | 777.507636612489 | 0.342977453335777 |
| GACCCGTACCA  | 777.511897091118 | 0.221995830785147 |
| GATGAGACTCAC | 777.519836996449 | 0.375739506673484 |
| TCGACCTCGTCA | 777.524489448099 | 0.196943226590898 |
| CGGCAACGTCA  | 777.526617987752 | 0.239499176085242 |

|               |                  |                    |
|---------------|------------------|--------------------|
| CAACCTGAATCA  | 777.528518917093 | 0.233544371253225  |
| GCAAGAGGTGAC  | 777.532701925101 | 0.076406278115755  |
| AGTCAGTCTTAT  | 777.535387985651 | 0.299966222464893  |
| CTGACTTTGTCA  | 777.535508983665 | 0.350016683567375  |
| CGGTCGTGTAC   | 777.540268087323 | 0.322287711452075  |
| CCCCGAAATGAC  | 777.543337713721 | 0.307161996852725  |
| CCGCCATGTAC   | 777.559216387145 | 0.174321664268245  |
| TACAATTACACA  | 777.563375281022 | 0.319962748153289  |
| ATACTGTGACAG  | 777.565857659779 | 0.36955263789215   |
| CATCGCATGACG  | 777.567415562243 | 0.254589327616636  |
| CGAGAGATGACA  | 777.588075904344 | 0.203407053696977  |
| CATCATGTGACG  | 777.591760610559 | 0.39402235281392   |
| GAGACTGTCATA  | 777.593857079933 | 0.135205028602596  |
| CAGACTGACGAA  | 777.596146830948 | 0.323838058024966  |
| CGTGACCCAATA  | 777.596525958508 | 0.20587955300884   |
| AGGCCGATGACG  | 777.601835706398 | 0.333581211855441  |
| TAGATATGACCA  | 777.605719416989 | 0.406379652358888  |
| AACGTGGGTGAC  | 777.607317074756 | 0.26698306509914   |
| GCCGTCATATGA  | 777.610066160435 | 0.385101987149604  |
| GACTAATCACGC  | 777.610174804147 | 0.364621108590589  |
| CGAAGTGTGAGA  | 777.631658239445 | 0.274937315727868  |
| ACTCATTTGCAG  | 777.636599448439 | 0.288053431302882  |
| ACGTCACCGGAG  | 777.636780698573 | 0.340745602989885  |
| CTGAAATGGTCA  | 777.642042850074 | 0.345368461835139  |
| CATCGGGTACACA | 777.642426411974 | 0.272291111808017  |
| CTTCATAAGTCA  | 777.644519549947 | 0.370898347964861  |
| GACTCAGCATTA  | 777.654884907406 | 0.297509868830481  |
| GTCACCCGCGTA  | 777.658882738475 | 0.225998471291198  |
| TGAGTAGTGACA  | 777.6596217715   | 0.248349123464079  |
| AAACGCGTCAGA  | 777.661568827278 | 0.0831310882851874 |
| GGAGATAATGAC  | 777.665754375038 | 0.249771655281635  |
| AGAGTCAAGCGC  | 777.67431819254  | 0.302650566066499  |
| GACGTGACACGC  | 777.67559895782  | 0.182657967510057  |
| GCTGTGTAGTCA  | 777.677643952419 | 0.0832039442131369 |
| AGTCAGACGATA  | 777.679249458686 | 0.25559351733718   |
| GACTAATTAGTA  | 777.686258019006 | 0.235656729128197  |
| ATTTCAAATGAC  | 777.701376801488 | 0.385982935710571  |
| TACCAGTCAGAA  | 777.716943767231 | 0.283501485801293  |
| GATTCATGACGA  | 777.717347905206 | 0.277432317987638  |
| ATTACTATGTCA  | 777.719237083874 | 0.346636190743022  |
| ACCAAGGTGTCA  | 777.724502174457 | 0.268258450506115  |
| ACTGAGTCGTCG  | 777.724705981205 | 0.28189108665247   |
| GAAACCTGTAC   | 777.726980662161 | 0.378750424141799  |
| GTCACAGGTAAA  | 777.731738677416 | 0.236553201998145  |
| GTTCTGTGACA   | 777.733330280779 | 0.272359541654779  |
| ATGACCATAACA  | 777.736430502838 | 0.295349549153973  |
| CATGATGACCGA  | 777.736503184279 | 0.242008131182539  |
| ACTCATCATAAG  | 777.744993829477 | 0.232846469348436  |
| GGCCACGGTGAC  | 777.750329356248 | 0.157090338014188  |
| ATGAATATGACC  | 777.753252019804 | 0.258810701293828  |
| GATTAGTCTGAA  | 777.755127163183 | 0.269262288362321  |
| GAGACTGATTCA  | 777.756955661289 | 0.381664218269459  |
| GTCATCCAGAA   | 777.763881408516 | 0.182570693294049  |
| CTCTCATGACAC  | 777.765641851975 | 0.146358992494916  |

|               |                  |                    |
|---------------|------------------|--------------------|
| GGTCTGAGTGAC  | 777.769135850515 | 0.195967127648553  |
| CCGAATGAGTGA  | 777.776160684873 | 0.225145291552548  |
| CCCCGTGACTAG  | 777.780210099144 | 0.288006405515383  |
| GTCACACAGAGA  | 777.783768907696 | 0.311275035202367  |
| AAAGGTGAGCAA  | 777.789009969872 | 0.21748492475986   |
| GAGTAAGGTGAC  | 777.794557069717 | 0.222532783358394  |
| ACTCCTCGTCAT  | 777.813136269245 | 0.120325852938682  |
| AGTGACCTGTCA  | 777.816632548762 | 0.229650438980731  |
| AAGTCAAATGAC  | 777.821385105005 | 0.277542179541271  |
| AACCCATGACGT  | 777.822168390887 | 0.260941555291243  |
| AAATTGTGACAG  | 777.824361787014 | 0.26971426879133   |
| GATCATACTGCA  | 777.826546435653 | 0.318614553656716  |
| CTGTAATGACCA  | 777.82944962159  | 0.440918607276389  |
| AGACGGTGTGAC  | 777.829549611402 | 0.175796341332876  |
| ACCACAAGTCAT  | 777.834572680925 | 0.277928489414976  |
| GGAGCTTACTCA  | 777.836721827271 | 0.233473637252472  |
| ATACGTCAACGA  | 777.842058639684 | 0.189412024789109  |
| ATGACGTGGCC   | 777.854762618595 | 0.390790877503055  |
| TGCATTGACACA  | 777.858990846526 | 0.198303031567931  |
| GCGTCACGCATA  | 777.86319784529  | 0.241328421727227  |
| CACGTCACTGTA  | 777.866230384642 | 0.287180897646212  |
| ATGGATCACTCA  | 777.875723887287 | 0.248174066595791  |
| GGGCCTGATGAC  | 777.899215014542 | 0.1661978843308    |
| GCGGTGACCCAA  | 777.910403555108 | 0.162999767743102  |
| CGTACATGACGC  | 777.913018062313 | 0.34997810358377   |
| AGAATTATTCAT  | 777.9180088232   | 0.167359132400226  |
| CAGTCAGCGACG  | 777.92598699939  | 0.281071546765943  |
| ATGACGGTAGAC  | 777.929127910269 | 0.240450686003537  |
| AGATCTGACGTG  | 777.93323720906  | 0.29104317417855   |
| GTCACCCGAGCA  | 777.935414276718 | 0.365616758794632  |
| TCGTCACAAATCA | 777.935593299984 | 0.23239011700042   |
| AGATCTGGTGAC  | 777.943482545108 | 0.187457314587762  |
| AACCTTGACACA  | 777.952409511565 | 0.0986223320345909 |
| GATGAATAATCC  | 777.95620364172  | 0.28190031482786   |
| GTGAGTATATAA  | 777.961653724712 | 0.341320220014771  |
| ATATTATGACCG  | 777.965449897073 | 0.226916354740306  |
| AAGTACTGTCAC  | 777.974994014466 | 0.231412452093918  |
| GATAATTGCTCA  | 777.981152087222 | 0.191954744476545  |
| ATCATCAGTGAC  | 777.983759339049 | 0.2364612940069    |
| CTTGTGGGTGAC  | 777.992045394042 | 0.315205058382686  |
| ATTTGCATGACA  | 777.997865797112 | 0.398592531007073  |
| AACAGGGGTGAC  | 778.006256733796 | 0.23320799368115   |
| CGGGCGAGTCAG  | 778.010197936659 | 0.315156806103932  |
| AGACCCACGTCA  | 778.022083407049 | 0.264505376782185  |
| CACGTGACATGA  | 778.02860800922  | 0.294118829242265  |
| ATGACAGCTTAG  | 778.029543251211 | 0.200319418821297  |
| AATGATGACCAG  | 778.030857098145 | 0.345509660362966  |
| ATGACGGACATC  | 778.034247381177 | 0.242223281016622  |
| AGACTGAGTAAC  | 778.045477397663 | 0.159044265322442  |
| GTTAGCTAGTCA  | 778.056197933461 | 0.242010502751603  |
| ACGACTCTGACT  | 778.059513587301 | 0.153656620241421  |
| AGACGTGACGAA  | 778.064994392796 | 0.208272110670382  |
| GTCACATGTAAC  | 778.075491142407 | 0.252189558602347  |
| GACTGTTACGCA  | 778.075737272218 | 0.333468664576072  |

|               |                  |                   |
|---------------|------------------|-------------------|
| TCTCGGAGTCAA  | 778.082115207791 | 0.25349078245118  |
| AACAATGTGACA  | 778.085962404397 | 0.334063707902694 |
| GGTCATATGTCA  | 778.094409944852 | 0.350045833618414 |
| GGCACCACGTAA  | 778.09564141159  | 0.445023165397075 |
| GAATCATATTTA  | 778.102311090843 | 0.455601541456515 |
| AACCAGATGACC  | 778.102498966908 | 0.231914890784935 |
| AGTCATGGTGGG  | 778.103088426816 | 0.221547168809937 |
| GTAGTTGGTGAC  | 778.103447941745 | 0.21630996474045  |
| GAAACGGTGACA  | 778.103620759441 | 0.184164289103201 |
| CCTGACTGTATA  | 778.107800967028 | 0.36345022120047  |
| GAGTCAAGCCTA  | 778.109636009152 | 0.372541637442172 |
| TAAATGTGACCA  | 778.110596924578 | 0.217140840178814 |
| CTCACCGGTCA   | 778.119980632032 | 0.251692810062874 |
| AGATGTATCACC  | 778.122688994182 | 0.252355889285805 |
| CGTTGACTAGTC  | 778.12297133956  | 0.317960463742519 |
| GCGCTTGATGAC  | 778.123542613546 | 0.251846445154307 |
| ATTATACTGTCA  | 778.123591285263 | 0.156402033980433 |
| CGTCAGTGTAC   | 778.125704455837 | 0.34160268859794  |
| GGCCATGACAGA  | 778.128222400397 | 0.295278622762904 |
| CCGTCACAGTAA  | 778.136771537962 | 0.239103500262185 |
| ACACCGAATGAC  | 778.136924867426 | 0.394812812448783 |
| TGACCCATCCAA  | 778.138154200922 | 0.271520977642194 |
| CATGAGCAAAC   | 778.139314483593 | 0.376596869272708 |
| CACCCGAGTGAC  | 778.150775822111 | 0.251561991670377 |
| CGTAGGGTGACA  | 778.17196513383  | 0.241525116815015 |
| GTCATTTAAGA   | 778.1768626708   | 0.266922333781869 |
| ATTTAATGACA   | 778.185977591173 | 0.247390312641581 |
| ACGTTTGACACA  | 778.189797594082 | 0.327665056158438 |
| ACTCATTGCAAA  | 778.191261234327 | 0.3661306412952   |
| AGAATCTGTGAC  | 778.194928132666 | 0.293223660861434 |
| CTCATAGTGACA  | 778.198028496097 | 0.38570155550409  |
| GCGTCATGTAGC  | 778.208214426988 | 0.336169291166073 |
| TAGTCTATGTCA  | 778.209996930315 | 0.38521015178992  |
| ACTCATATGAAG  | 778.219673866918 | 0.320202931706542 |
| GGTCATATCTAC  | 778.220475519132 | 0.231579455150863 |
| GGAACCTTGAC   | 778.226885951722 | 0.291596451403369 |
| AGGACTAATTTT  | 778.229146567863 | 0.276122096988573 |
| ATCTGATATGAC  | 778.23238059826  | 0.235454082673336 |
| ACTCATCTCGTG  | 778.23245483961  | 0.241590267321596 |
| AGTTCTGATTCA  | 778.233041326883 | 0.245107116120811 |
| AATGATTGACACA | 778.234692928075 | 0.257360898055399 |
| TAACTGTGACACA | 778.244113905816 | 0.237696416020994 |
| AAGTCTGAGTCG  | 778.245884827115 | 0.255592778519613 |
| GAGGCCGATGAC  | 778.248727080346 | 0.409498894726458 |
| CCAAAGGTGACA  | 778.250285470663 | 0.18301157251373  |
| TAAAATTACACA  | 778.27088655683  | 0.324431462956064 |
| ATAAATTGAGTC  | 778.276647825125 | 0.45785460111626  |
| AAAGATGTCATT  | 778.278823935667 | 0.161557686262981 |
| ACAATGTGACAT  | 778.28333853949  | 0.212685871123484 |
| AAGTGCCTAATC  | 778.2877667382   | 0.271399063849318 |
| GCTAGGCGTGAC  | 778.295162493064 | 0.28421442077481  |
| ACGGTCATGACC  | 778.295545438316 | 0.317115734855988 |
| CGTCACATCACG  | 778.301051145888 | 0.23396632344557  |
| CGGTATCGTCAC  | 778.301385936788 | 0.250309264207529 |

|               |                  |                   |
|---------------|------------------|-------------------|
| AGATGACATTC   | 778.302232516611 | 0.31046069879836  |
| TCTTTGACTCA   | 778.307413697925 | 0.146397837748631 |
| CGTCCAGGTGAC  | 778.313509519186 | 0.322417225208354 |
| GAGTAATCCAA   | 778.31828195056  | 0.400833454509513 |
| GTCACCCTTGGA  | 778.328300207027 | 0.275449591690647 |
| GTCATAGGCGTA  | 778.330170648718 | 0.101499730520079 |
| CCTTTATGTGAC  | 778.33191529271  | 0.253549947776632 |
| ACTCATCCTAGG  | 778.33304569666  | 0.335641730550738 |
| CTTAGGGGTGAC  | 778.341728108478 | 0.343986590767353 |
| AGAGCTCGTCAT  | 778.349363756535 | 0.30357143197716  |
| ACACATACTCAT  | 778.355460172996 | 0.22875451715055  |
| ACGAGTGACCAA  | 778.35667793949  | 0.282537925908687 |
| CATCGAAGTGAC  | 778.359269903166 | 0.235102085322736 |
| ATACTTGCTCAT  | 778.363983881712 | 0.220849542316342 |
| TGACAGAGGTCA  | 778.369935612173 | 0.364492267627413 |
| GAGGTGTGTGAC  | 778.375070773594 | 0.194948977208868 |
| TATGATGAGCCA  | 778.37815956165  | 0.256422488220086 |
| CTGTGACAAGAC  | 778.381614046443 | 0.174161962828652 |
| AACAGTCAACTA  | 778.383255461547 | 0.352460331825718 |
| GACTAATAGCCC  | 778.386585305537 | 0.276416209007914 |
| CGTACTGTCACA  | 778.398149401674 | 0.302208449607391 |
| AATTATGATGCA  | 778.398818585147 | 0.360602597831166 |
| ATCATGACATGA  | 778.401316022503 | 0.404861152286813 |
| AGGTGACAATAT  | 778.407681349366 | 0.320533250272828 |
| TCATCTAGGTCA  | 778.409987403333 | 0.310883813706951 |
| CTGACTGCATCA  | 778.414867414497 | 0.104859037574607 |
| GAGGTTGATGAC  | 778.419297123293 | 0.299656544719964 |
| ATAACGTCACTA  | 778.419812612956 | 0.182843745168731 |
| GCTCGTGACCCA  | 778.420925688932 | 0.20819307219712  |
| TAGACTCAGAAA  | 778.424129075281 | 0.229424115196491 |
| GTCATTCCTCCA  | 778.424172449484 | 0.26440662577301  |
| AGAAGAGAGTCA  | 778.424927088715 | 0.182436082535734 |
| CGTATACTGTCA  | 778.427920543569 | 0.305257649342059 |
| CACTTCAGTGAC  | 778.429616477934 | 0.27704429838665  |
| CTACAGCAGTCA  | 778.436407148364 | 0.296758700546454 |
| CAAAGACTCTTA  | 778.43933248947  | 0.233951199086454 |
| CTTTCGGGTGAC  | 778.443551970773 | 0.441070117014927 |
| CGCATTTTGTCA  | 778.44914445747  | 0.373947563599325 |
| ATACCTATGACC  | 778.451689461809 | 0.229967612628378 |
| CGTCCCAATGAC  | 778.452837349703 | 0.426967370467506 |
| TCTAATGAGCCA  | 778.453265466401 | 0.178493153604957 |
| CTCAATTAATA   | 778.459990059078 | 0.164186896839834 |
| TATAGTGACCAA  | 778.460774587857 | 0.196303927434967 |
| TCCTTTGACACA  | 778.465323698386 | 0.196080922428254 |
| AGACAGTGACAC  | 778.4662299792   | 0.294467903927317 |
| CATTATTAGCAA  | 778.468159771309 | 0.298517912224244 |
| ATGACCACTGTG  | 778.469174647001 | 0.353344708897531 |
| GTCACAGGCCCA  | 778.46956589162  | 0.407520530579843 |
| ACTCAATAGTGA  | 778.473910058205 | 0.472544146339205 |
| GATATTGGTGAC  | 778.475184210382 | 0.246573238310659 |
| GTCATTTACCAC  | 778.480865296184 | 0.284853271166464 |
| ACAACCTTGACTC | 778.487491102648 | 0.259880202370143 |
| GCAAACATGTCA  | 778.495503266724 | 0.303227301440402 |
| CCGGTGACGATA  | 778.505594561786 | 0.220572351840528 |

|              |                  |                   |
|--------------|------------------|-------------------|
| GAGTACTACTCA | 778.520092686808 | 0.261708977562151 |
| CAATCACGTCAG | 778.530799811295 | 0.288191258779591 |
| AACATATGACCG | 778.532652153453 | 0.164804309032102 |
| CGTTGAGAGTCA | 778.536367488045 | 0.275149150307632 |
| GATGACGTCCAC | 778.541675227107 | 0.167270228128371 |
| TCACCACGATGA | 778.54193843104  | 0.338477072475753 |
| CGCTTTGGGTCA | 778.54293946275  | 0.316901244446536 |
| GACTCAGAAAGA | 778.544775963739 | 0.35111636993058  |
| ATACGGCATGAC | 778.5524087239   | 0.23390396494512  |
| CACGAGTGAGTC | 778.555728342808 | 0.37732469063258  |
| ATCTGACATATA | 778.564428975062 | 0.26026063354261  |
| CTGACTATGAAC | 778.568358435399 | 0.288571145952229 |
| ATTAGTCGGATC | 778.569263243677 | 0.23988435190356  |
| ATAACTCCGTCA | 778.579387934765 | 0.283933633040032 |
| CTTATTATGACC | 778.581514811143 | 0.237662922969085 |
| TCACACGGGTGA | 778.581579975639 | 0.514718007528528 |
| GCGTAGACTCAA | 778.58481537946  | 0.300873278027849 |
| AGTTGTGATGAC | 778.588855518525 | 0.334022609301679 |
| ACTAGGATGAGT | 778.588872935456 | 0.235005679466961 |
| ACAGGCCTGACT | 778.589500284306 | 0.336541322094556 |
| AATCCATGAGTC | 778.590401935458 | 0.179504499954944 |
| AGACATACTCAT | 778.591037686475 | 0.204354003488776 |
| GGGAAGATGAC  | 778.604606117575 | 0.156156529078205 |
| ATGCTTGTCA   | 778.616358306078 | 0.344119922352933 |
| ATGTCATTTCTG | 778.618286608466 | 0.230129659488632 |
| AGTAGATTAGTC | 778.634954026808 | 0.193579386718244 |
| AAGCAGTCAGTC | 778.637683077305 | 0.278539149071292 |
| GCAGCAGATGAC | 778.644551325545 | 0.251095095756764 |
| AATTCTATGAGT | 778.659403298328 | 0.203145339984623 |
| ACTCATCAGATA | 778.663566204238 | 0.23906955179634  |
| ATGACGTTCCAT | 778.664567697812 | 0.264758859900451 |
| ACAAGCTGACTA | 778.675077737137 | 0.314598191605386 |
| GCATCGGGTGAC | 778.67641103401  | 0.249609212524465 |
| GGCGGCAATGAC | 778.678065798301 | 0.15977784347707  |
| AGGGCATGACGC | 778.678921294612 | 0.166240497200162 |
| GTTCCGTGACCA | 778.678998191921 | 0.356253131378502 |
| AGTTGTCACCGC | 778.682980406547 | 0.20386556779044  |
| GTGTCTGAATCA | 778.688750847502 | 0.282525094227568 |
| AATTTATGAGTA | 778.691366572653 | 0.200713527340147 |
| GTCAGTAATCAC | 778.708183562607 | 0.319215314784452 |
| ACCCATGAGCAA | 778.70863947379  | 0.369920182586084 |
| CTGAGTCTACAA | 778.714209076879 | 0.273029729049121 |
| ATGTATGAGTTA | 778.714226004484 | 0.357243077853467 |
| ACGCCTGTGTCA | 778.719228706947 | 0.28047760524974  |
| GATTCGTGTGAC | 778.721335599    | 0.246748838910249 |
| ATGACGCTCCAG | 778.72388862446  | 0.30565791653007  |
| TGGTCACCGTAA | 778.726043838122 | 0.237308016596518 |
| CTGGGATGACCA | 778.728734571186 | 0.353313688021347 |
| TCCGTGTTGTCA | 778.731248940571 | 0.248090080154364 |
| CGAACTGTGACC | 778.736444362625 | 0.343503443124256 |
| ATGAGCTGTCCG | 778.743686291397 | 0.258568572069438 |
| CTCTTATATGAC | 778.750834610839 | 0.262639199135111 |
| GTCGGTAGTCAC | 778.754786112271 | 0.189153284349983 |
| GCCCAAGGTGAC | 778.757700068913 | 0.255465565564897 |



|              |                  |                   |
|--------------|------------------|-------------------|
| ACGAGGGGTGAC | 778.768679291143 | 0.260118135086233 |
| ACCACCGTGACT | 778.779376250623 | 0.24971721052127  |
| CGTGGTGAGTAC | 778.789017541475 | 0.148189902158932 |
| ATGAGTCCCAGA | 778.789245842802 | 0.388351642786393 |
| AATTAACGTCAC | 778.791232517774 | 0.202672479791579 |
| GAATACATGTCA | 778.791403416877 | 0.32380112025653  |
| GGACTCTAGTCA | 778.796741669061 | 0.177100614073838 |
| GAAGTGTAGTCA | 778.802595128262 | 0.230949952320204 |
| AGAGTAATATCA | 778.813003090265 | 0.240534926672096 |
| AGACTAATTCAT | 778.8169154154   | 0.24430067961644  |
| ACCCATTCGTCA | 778.817697843551 | 0.245788448275259 |
| TGACACGTGAAA | 778.821372401318 | 0.30455772100794  |
| CCCAGGCGTGAC | 778.824215691552 | 0.162125431857302 |
| GTCATTATGGTA | 778.829880230621 | 0.267484043180003 |
| TCATCGTACCA  | 778.837174579526 | 0.270367185748437 |
| CGACTCACGCAA | 778.84329417689  | 0.158899871044477 |
| ACTCACACTGTG | 778.857031462024 | 0.253804118425391 |
| CATGGCCATGAC | 778.857773936155 | 0.338826108913147 |
| AAGATTCATATC | 778.862715844209 | 0.233917885296119 |
| ACCATACATGAC | 778.908091719509 | 0.239129811180235 |
| CTATGACCTAAC | 778.911695493094 | 0.193697791575959 |
| CTATGACCCTA  | 778.912726331422 | 0.216969626324724 |
| CGCGGCGAGTCA | 778.917363408091 | 0.280013142887367 |
| ACCGGACGTGAC | 778.923857243068 | 0.333180688839437 |
| ATGGACTCACTC | 778.934912267722 | 0.176650174643092 |
| GAAACCGTCACA | 778.943131660341 | 0.189421506958529 |
| TATATGTGACGA | 778.944796230169 | 0.269445424830531 |
| CATTGTTGTCAC | 778.944865878013 | 0.306092787606809 |
| TCATATATATGA | 778.953140071958 | 0.431991690363582 |
| ATTGAGTCTATG | 778.965310164364 | 0.206012087347955 |
| AGGCCTGGTCAT | 778.965498039179 | 0.262251885889442 |
| CTATTGCTCAGA | 778.972825404649 | 0.264380026718689 |
| AAATGGTGACAT | 778.978921020396 | 0.154906051963682 |
| GAGTCAAAATAA | 778.99061690509  | 0.222032587701621 |
| TGACGCTAGAAA | 778.992139225374 | 0.474345091057118 |
| CGCGTCACTGTC | 778.997997001458 | 0.251111103930715 |
| ATTACACACAGG | 778.998201756677 | 0.325419489509294 |
| AGCGCCGTGACT | 779.004146298206 | 0.272268935900275 |
| TCATAGAGTCGA | 779.015430513598 | 0.42023925673792  |
| GCTGACATATTA | 779.028063286167 | 0.107386877034039 |
| GATTTGTCAGC  | 779.032445649097 | 0.357018512455097 |
| GATCATGTCACA | 779.044794872616 | 0.308495476854653 |
| CATTAAGTGAC  | 779.04605020925  | 0.213838617616317 |
| ACTCACGCATGA | 779.048082184742 | 0.269775534361968 |
| ATCGTGCGTGAC | 779.049450075894 | 0.27176873154594  |
| AAGTGTATGACC | 779.052847367469 | 0.233096384610457 |
| AATGACATTTCA | 779.056178201046 | 0.490818473712611 |
| CTATCAGACTCA | 779.056371075164 | 0.298552857272526 |
| AGACTCACTACT | 779.065146308371 | 0.217760027087824 |
| CGTCCTGTCATC | 779.067093798888 | 0.244684357129461 |
| CGTGAACGTGAC | 779.070069418629 | 0.344593575389015 |
| GTCACCCTTGCA | 779.07683994799  | 0.209086061433302 |
| GACACACGTCAA | 779.076911458381 | 0.35742843282206  |
| ATGTCTGGTGAC | 779.080338603976 | 0.231069871768536 |

|               |                  |                    |
|---------------|------------------|--------------------|
| ATGCCTCGATGA  | 779.084773094021 | 0.301126279384858  |
| ATGACAGCGAGA  | 779.093710282898 | 0.249891507080416  |
| CGGACTCTGTCA  | 779.100341206163 | 0.337108886092329  |
| CGATCATGTGAC  | 779.108713160843 | 0.422385956071006  |
| ATAGCTGTGTCA  | 779.11320157938  | 0.325340706280973  |
| CGGCTTAATGAC  | 779.132121145048 | 0.360284413599652  |
| AATTCTGACAAA  | 779.135103484983 | 0.374889270759757  |
| AGTGACCCTGAC  | 779.140721326599 | 0.416645367693298  |
| TGACGCTGACAA  | 779.150909833662 | 0.249532548587175  |
| AGTAAGACGCAT  | 779.157728474402 | 0.229151068483509  |
| CTGACCGTGTCA  | 779.163697174264 | 0.324430294633632  |
| ATGAGCTATTAC  | 779.163888988576 | 0.25178298941345   |
| GGATGACCTCAC  | 779.178011328345 | 0.2783717039719    |
| TGACAGTAATCA  | 779.184344969386 | 0.396782168774086  |
| TGCGGACTCACA  | 779.193217360118 | 0.252950327108785  |
| CAACCACAGTCA  | 779.196970710271 | 0.249284455474531  |
| GTCACAACATTA  | 779.200853671452 | 0.355476835725662  |
| CACTCATTGTGA  | 779.203448281762 | 0.293231747706766  |
| GATGACAAGCCA  | 779.209989723471 | 0.398489141591685  |
| AGGTGAGTACTA  | 779.213901403145 | 0.208086575045053  |
| ACTGAAGTGACA  | 779.217282450881 | 0.471857526881781  |
| ATGAGTCCCTCA  | 779.218645611423 | 0.29682425258665   |
| ACTCATCGAAGT  | 779.221717967046 | 0.227292265076833  |
| GTGTGTTCTGTCA | 779.224615996495 | 0.332261831345729  |
| ACTCATAACTAG  | 779.227066405926 | 0.160338952925884  |
| GGGCATCATGAC  | 779.234946669294 | 0.190621574453601  |
| ATGACAGGGACC  | 779.24100922784  | 0.334638020305226  |
| GTCACAGACCA   | 779.246174198068 | 0.325901418042154  |
| ACTGATGTGACA  | 779.247496147908 | 0.298131036664579  |
| ACAGCGTGACT   | 779.249134594661 | 0.279732898746236  |
| GAAGTTGACACA  | 779.250260640781 | 0.299988247939928  |
| GACATCGTGACA  | 779.250943279949 | 0.317257516756977  |
| CGATGACGGCAA  | 779.259956658957 | 0.361566597779104  |
| ATATTGTATGTC  | 779.263297659538 | 0.184715839400574  |
| CTCTTTTGACTC  | 779.2741944702   | 0.239160318192194  |
| ATGCGGGATGAC  | 779.279686338495 | 0.293473375165757  |
| CGGGTCTGACAC  | 779.293530008145 | 0.283698474783538  |
| ATTAGTACTATG  | 779.294364170825 | 0.275860107291585  |
| ACGTCACGCTTC  | 779.29479944683  | 0.309277004240662  |
| AGAATTAGTACT  | 779.298428405432 | 0.240822871136688  |
| ATTAGCAATAGG  | 779.29896028616  | 0.254057418890377  |
| ATGATGTGGTCG  | 779.301651692207 | 0.257904969341333  |
| ACTTTGACACAC  | 779.301819320078 | 0.233428267550752  |
| GGTGACCCGTAC  | 779.308657402809 | 0.409820719191247  |
| TTAGTCGTACAA  | 779.31696532259  | 0.301629064558619  |
| GTTAGCATGACA  | 779.317944768342 | 0.239152475355335  |
| ATGTCATTA AAC | 779.325082500147 | 0.339286319443706  |
| GTCATCCGCCAC  | 779.325825538781 | 0.0707053445233687 |
| GTCACACCCTTA  | 779.327612395471 | 0.227223528505043  |
| AGACCTGTGACG  | 779.334034765888 | 0.36850257315013   |
| AGCCTGTGACGC  | 779.336768409907 | 0.208583862886886  |
| CGTCACACGTTT  | 779.339268101347 | 0.18452510702635   |
| ACAGGTCTGTCA  | 779.341444321741 | 0.23870237490418   |
| AAACGACTCAGC  | 779.343711797872 | 0.176765801078731  |

|                |                  |                   |
|----------------|------------------|-------------------|
| GCGACTGAGTAA   | 779.353837954978 | 0.276090010632865 |
| GCACCATGTGAC   | 779.354627270377 | 0.268444084876374 |
| CTGCAGTGACAC   | 779.355701261279 | 0.334726461032563 |
| ACTCATCGGGAG   | 779.364217746731 | 0.238698039885843 |
| AAGAATCATAACC  | 779.364685840948 | 0.23253367571654  |
| AGTCACGGCGCA   | 779.378747728509 | 0.17888630459331  |
| CTACACGTGTCA   | 779.389608319524 | 0.236439208789133 |
| ATGAGCAACCTA   | 779.39212419382  | 0.343491276435883 |
| GCCTTATATGAC   | 779.404804242095 | 0.317879140500778 |
| AAGTGTCAGTCT   | 779.406579294561 | 0.187668802776892 |
| CCGTTTAAATGAC  | 779.412616652598 | 0.302605514226393 |
| AAGTCATGGTGA   | 779.421239217693 | 0.210806269976524 |
| GGGATGAATGAC   | 779.423720859023 | 0.259891414795957 |
| AGATTTAGTAAT   | 779.425055578873 | 0.280343370217847 |
| AAAGGGTGTGAC   | 779.431366820217 | 0.209514361397723 |
| ATTAGGATGACC   | 779.431599697344 | 0.239018943537532 |
| GTACCCTAGTCA   | 779.434618232323 | 0.335163708479996 |
| GGTTTGAAGTAAAC | 779.434751746514 | 0.245605513199425 |
| ATACGTAGTGAC   | 779.438506377388 | 0.279438218989614 |
| ATACGTAATAAAC  | 779.453817391854 | 0.325309937757894 |
| CCCAACATGACA   | 779.466341636103 | 0.300268970934246 |
| GACTAATCTAC    | 779.46706220366  | 0.287586734655497 |
| CGCCTGCGTCAG   | 779.467997707147 | 0.31362462891489  |
| ATTGCTGACGAA   | 779.471979994874 | 0.320550966521698 |
| CGTCATGCTAAA   | 779.494781400879 | 0.387753005857556 |
| ACACTTAAATGAC  | 779.502344797127 | 0.14520365782322  |
| ATGACAGACTGG   | 779.506759789442 | 0.274497516093195 |
| GATATGGTCACA   | 779.507373919198 | 0.310101091768762 |
| CACAGTTGGTCA   | 779.514978929475 | 0.245037574066388 |
| CTTGCTGACGTA   | 779.51525809218  | 0.270142150548225 |
| ATGGTCGGTGAC   | 779.521096271628 | 0.233304764937435 |
| CAACCCACGTCA   | 779.525619816638 | 0.292380461496539 |
| GCGGTAAATGAC   | 779.526282863125 | 0.166529159468631 |
| GCGTCACAGAAA   | 779.531736299983 | 0.227718272981013 |
| CTGACGGATACA   | 779.532389899339 | 0.40073829398291  |
| ATGACTTCGCCA   | 779.53289662102  | 0.284015807433018 |
| GGGCCCGAGTCA   | 779.533628739244 | 0.253016762083398 |
| TGACGAACGTCA   | 779.535230286353 | 0.311903350928486 |
| AAAATACATGAC   | 779.538408716724 | 0.202690971398528 |
| TAATTTGACGCA   | 779.53948984979  | 0.292944084382384 |
| ATTGTGACGCCA   | 779.546702489338 | 0.285070914299046 |
| CTTACCGACTCA   | 779.549583814902 | 0.14063689251245  |
| AACGCGTGTAC    | 779.551692831061 | 0.367373750200259 |
| AAGGGTACTCAT   | 779.554621463431 | 0.264390814496168 |
| TATCCGGTGACA   | 779.571837192967 | 0.234920398147472 |
| AAGTGGGATGAC   | 779.579192119621 | 0.232438185925605 |
| ATAGTCAACTTA   | 779.588900279188 | 0.27787584361858  |
| ATGAGTCTCGTC   | 779.590042957865 | 0.351429312697657 |
| GGCCTGGAGTCA   | 779.603467777646 | 0.292386069853261 |
| CTAACGGGTGAC   | 779.607091967924 | 0.265935385539432 |
| CCCGTTAGTGAC   | 779.610821859066 | 0.321026496885271 |
| TCGGCTTACTCA   | 779.614038732229 | 0.321905127471018 |
| CACATGACAGTG   | 779.618084670289 | 0.49332781030138  |
| CATCCGTACAG    | 779.618924175132 | 0.26342406923711  |

|               |                  |                   |
|---------------|------------------|-------------------|
| ACCCGATGACGG  | 779.622346717758 | 0.336323723487392 |
| TAGACTAAGTCA  | 779.627604798812 | 0.322347755457625 |
| CAATTCTTATGA  | 779.634427326914 | 0.290611981910152 |
| GCGTAAGTGTCA  | 779.638448592889 | 0.336289619890278 |
| GATGAATCTTAA  | 779.645091881429 | 0.356049799866497 |
| CGATCGTGTAC   | 779.656304693711 | 0.192267234764225 |
| CTAAAATGACCA  | 779.660199177798 | 0.356836266245728 |
| CTTTAAGTGAC   | 779.661343708451 | 0.289847204896509 |
| CCCCGGGATGAC  | 779.683621996178 | 0.207908621897503 |
| CGTTGCGGTGAC  | 779.692995103118 | 0.175753658145193 |
| CTCGGTGACGAC  | 779.699247467057 | 0.334571166925632 |
| CAGCCCTATGAC  | 779.702434141793 | 0.417371957575429 |
| ATTAGCCATCGG  | 779.707483110267 | 0.248672639357674 |
| ATTCTTACGTAA  | 779.707776489974 | 0.244877413444539 |
| AGCTGTCATGCG  | 779.707971993963 | 0.372365284699032 |
| ATGACAGTGCGA  | 779.710915325609 | 0.285538315977407 |
| CGCAGAGTGACG  | 779.711656936426 | 0.301459500452463 |
| ATGTCACCACAA  | 779.714878625749 | 0.241518938535769 |
| CGGTCCAATGAC  | 779.715365764112 | 0.397837325182621 |
| GTCACAACATCA  | 779.716591926571 | 0.183083963291887 |
| ATTTCGGTGTAC  | 779.717831230624 | 0.327983557427328 |
| GATGTCCGTAC   | 779.722189458717 | 0.233719775923442 |
| ACTCATTCAAAA  | 779.723068386079 | 0.200848064221476 |
| GCATAAGGTGAC  | 779.727575060768 | 0.183333050027004 |
| ATTGACGTGACG  | 779.731204206395 | 0.294675795858788 |
| AAAAGATTCATA  | 779.733012521353 | 0.174248667707396 |
| CCAGAACTGTCA  | 779.736154388595 | 0.374320932384128 |
| GGCAACTCGTCA  | 779.748625287284 | 0.198300103039889 |
| GTGACACTGTTA  | 779.750439554902 | 0.222628931121922 |
| GCGTTTACGTCA  | 779.756974717626 | 0.307044686638788 |
| CCATTGTGACGC  | 779.757728357685 | 0.22457298810953  |
| AGGGCCCGTCAT  | 779.758793854151 | 0.228940500743768 |
| ACTAATATGTGC  | 779.767327779455 | 0.299412698389902 |
| CGAACGTGACCA  | 779.76897856069  | 0.375339580317307 |
| AGTGATATGTCA  | 779.777647765482 | 0.242620220048638 |
| CATACTATGACC  | 779.782513792715 | 0.279883306660765 |
| GTATAGAGTGAC  | 779.783641971929 | 0.285119199034701 |
| GATTTTCATGAC  | 779.784150486208 | 0.323169843150469 |
| AATCTATGTGAC  | 779.7884624643   | 0.279387165093049 |
| ATGACGCCGCCA  | 779.793399241923 | 0.206758749486029 |
| AGTCACGACGCC  | 779.802798089286 | 0.161190710037342 |
| CAGGGCAATGAC  | 779.809098010825 | 0.313617770321538 |
| CCGATGAGCCAA  | 779.81053797957  | 0.337377487482983 |
| CGTGGTTCTGAC  | 779.813688073683 | 0.276560145119977 |
| GTCATGTAGCAA  | 779.82318167048  | 0.360579710096561 |
| ATTGTATACAA   | 779.827523425456 | 0.242005643030315 |
| AACAGTCAAAGG  | 779.829151765613 | 0.235552593469443 |
| ATGTAATGGTCA  | 779.829889454044 | 0.486874506365971 |
| CTGAGGTGACCC  | 779.834239273645 | 0.341974875161286 |
| GTACATGACAGA  | 779.835297686805 | 0.248655267271286 |
| GTCACCCAGAAA  | 779.842940054453 | 0.286610318654188 |
| TCGAGTCAAAGAA | 779.85762932566  | 0.213103075591468 |
| GACTCAACTTTA  | 779.864766186511 | 0.308004522137944 |
| AGTGTATGGTA   | 779.881559435927 | 0.231449134345004 |

|               |                  |                   |
|---------------|------------------|-------------------|
| GCGGTATATGAC  | 779.882706947433 | 0.228554505391544 |
| CGCTTTGATGAC  | 779.898419537384 | 0.375920132548443 |
| TCTGTGGACTCA  | 779.898628374666 | 0.277871659941735 |
| GTCACACAGGAA  | 779.912142919951 | 0.231335215834318 |
| GCACCTTGTGAC  | 779.913296354491 | 0.274977346125453 |
| TGACTGCAGGAA  | 779.916130134214 | 0.309838148284274 |
| GTCCCATGACAC  | 779.918463349071 | 0.216700729054308 |
| ATACTCATTGCA  | 779.923862667085 | 0.283885585984494 |
| GACCCTGTCACA  | 779.925956188447 | 0.2251648342205   |
| GGGCCCCGATGAC | 779.926023923806 | 0.311904067805114 |
| GACGGCTATGAC  | 779.943228818005 | 0.261985638158712 |
| AGTCTCCGTAC   | 779.94422570297  | 0.203605176508281 |
| CTCAGCGTGACA  | 779.950227556783 | 0.337343906069422 |
| CGCATCTGAGTC  | 779.951559627335 | 0.209684117794595 |
| CCCGAGGTGACA  | 779.952784463903 | 0.408857493242255 |
| CGACTAATCACG  | 779.967889585699 | 0.337356302695904 |
| ATTCTTTCTGCA  | 779.976462176723 | 0.268558555699438 |
| ACTCATTTTGCT  | 779.978733530907 | 0.160988817072361 |
| GTTTACCTGTCA  | 779.982351199387 | 0.337644061804947 |
| AGTCGATGTCAT  | 779.989288067787 | 0.252071808233792 |
| CGCTACGGTGAC  | 779.989665882913 | 0.326529501392813 |
| GTCATTGTTAGA  | 779.992641577466 | 0.223313963363715 |
| ATGACCATATAC  | 779.992996336791 | 0.163578316188773 |
| CAACGGGTATC   | 779.993421877043 | 0.217341666152878 |
| ACCTGGTGACGC  | 780.015723120547 | 0.273560959373033 |
| AGTGACGCCACG  | 780.019981396151 | 0.238026259551366 |
| AACCGAATGACG  | 780.023978866196 | 0.33001972295059  |
| GTCATTTGATTA  | 780.03175956556  | 0.20339826333422  |
| ACTCATTTCTGTG | 780.039638651691 | 0.357211830564742 |
| TCATGTTACTAA  | 780.047175736267 | 0.353580308519273 |
| TGCGGTGAGCAA  | 780.059359341391 | 0.347605116896184 |
| CCGTTTATGTCA  | 780.062180375372 | 0.330961807293341 |
| ATGACGCCTCCC  | 780.062303874629 | 0.195999409485941 |
| GACTCACTCCAC  | 780.071312060062 | 0.178184626948954 |
| ACGCTCACTCGAC | 780.072770590409 | 0.256855626826805 |
| CCGGCACAGTCA  | 780.07428848335  | 0.268464022406799 |
| GTTGTTTCTGCA  | 780.077415395053 | 0.411927110022981 |
| GTCATGTGATGA  | 780.081091117282 | 0.306871402436647 |
| GCATGACGACGC  | 780.089734151707 | 0.251214493079862 |
| CGACGCTAGTCA  | 780.090729194115 | 0.238181840643803 |
| ATGAGTCCCGGG  | 780.091137232359 | 0.288162522499643 |
| GATGAGTTGTAA  | 780.098527089651 | 0.239971713174597 |
| AAGCTGAATGAC  | 780.098613108931 | 0.173613757235885 |
| CGGTCATACAAG  | 780.114558068176 | 0.387570776314051 |
| AACATTATGACC  | 780.121507456695 | 0.237172244865356 |
| ACCCAACGATGA  | 780.123525487256 | 0.339071180590147 |
| CACGTATGTGAC  | 780.12392545538  | 0.295939675313564 |
| GACGTGACGCGC  | 780.12799790106  | 0.55044344213368  |
| ACGAGTGGTGAC  | 780.12971072949  | 0.165716556080954 |
| CTGACGCAGTTC  | 780.131229643634 | 0.257285854504515 |
| GCACGTCACTAC  | 780.134330117566 | 0.345204740295859 |
| GACTAGTCAACA  | 780.138261036967 | 0.248068375395866 |
| GTCACACCAAGA  | 780.141032612053 | 0.299170557586737 |
| CCGTCATTAGTC  | 780.141229368303 | 0.288455276344631 |

|              |                  |                   |
|--------------|------------------|-------------------|
| GATGCGCGTCAC | 780.144921969832 | 0.239002551062141 |
| CTGTATAATGAC | 780.146725083164 | 0.318576752684918 |
| CACGTTATGACC | 780.155620995294 | 0.359055942868715 |
| ATTGATGGGTCA | 780.160551900539 | 0.196139073246952 |
| GTCATGCAAGAC | 780.165271650251 | 0.287284285129629 |
| ATGACATCGAAA | 780.16715733415  | 0.306780046574379 |
| TCGAGTTCGTCA | 780.167368972578 | 0.434239905469961 |
| GTCATTTTCGAC | 780.173504048244 | 0.249176359240219 |
| CGTCCGCATGAC | 780.175265954971 | 0.228123074114545 |
| CTTCTGACATAA | 780.195215337189 | 0.309974825835876 |
| TGACTTATAGCA | 780.196853862578 | 0.468182434089805 |
| ACTCATTCTTGA | 780.203646251086 | 0.147652652486819 |
| CAAGATGGTGAC | 780.213056242582 | 0.166515426123949 |
| GACGAATCATCC | 780.214769533796 | 0.191222628752026 |
| CCTAGTTTGTCA | 780.227546024779 | 0.356122668280959 |
| AGTCACGCGCTC | 780.231913648555 | 0.192780844156141 |
| CGTCATCAGCAC | 780.234640436359 | 0.210637103853997 |
| AATGACGGGGTC | 780.234656915208 | 0.321784507664684 |
| AATCGACTCAGC | 780.236238548539 | 0.243127960431222 |
| CAAGTAAATGAC | 780.242003243463 | 0.280073214088741 |
| ACTCATAGCTAG | 780.248274477166 | 0.227971154920948 |
| ACGTGAATCAAT | 780.248549358943 | 0.346566057915004 |
| ATCCTCTAGTCA | 780.249177385435 | 0.253843966798601 |
| GTCATTATCCCA | 780.252420843199 | 0.296156049591824 |
| ACTGTCACCGAA | 780.255630623697 | 0.209909601945285 |
| CATGAGTCCGAC | 780.256042221237 | 0.172198396781897 |
| AAAGTGAGTCTG | 780.261541209188 | 0.182618929489207 |
| GTCCTGGTGACA | 780.275656012075 | 0.314014899241624 |
| TCATAGGGCTAA | 780.276224204435 | 0.344767194785747 |
| GTCACCTCATAA | 780.305792659386 | 0.333279960367363 |
| AACTGCTGACTG | 780.318683816999 | 0.28337825646017  |
| ATGACGCGCGAC | 780.320646152389 | 0.231591117274855 |
| CGGCGTACGTCA | 780.320666959396 | 0.289145637914097 |
| GTCATTCCCTCA | 780.324705031404 | 0.171070543023291 |
| CTACTAGGTGAC | 780.34758834303  | 0.225648669954928 |
| GGTGCAGATGAC | 780.34949427978  | 0.386692593058505 |
| ACACTAAGTGAC | 780.369113626247 | 0.31189717925484  |
| CGTCACATCATC | 780.369773846685 | 0.27765305456017  |
| TATGCCCAGTCA | 780.369779188502 | 0.237772571746569 |
| CGGTGAATAATC | 780.372628035176 | 0.403228620432474 |
| ACTCATTCTTCG | 780.384418479331 | 0.273098592511494 |
| GTCACTGTGCTA | 780.40513865864  | 0.256439947900426 |
| CACTGACACAGC | 780.409100183003 | 0.147811681911972 |
| CATACCAGTGAC | 780.410033445478 | 0.316511741376428 |
| CTGGAGATGACA | 780.410079428524 | 0.192071492668945 |
| ACGGATGTCTCA | 780.416852801953 | 0.224483317463652 |
| ATGTGGTGTGAC | 780.425976179995 | 0.320122350428414 |
| AGGTGACCCAAT | 780.429130627723 | 0.153611506290449 |
| GCATGTGGTGAC | 780.429710147019 | 0.259537384587744 |
| ATGACAGGGCAA | 780.4309180888   | 0.180405512062421 |
| GTCATATCAGAC | 780.431735062478 | 0.304216124744097 |
| ATTACACACCAG | 780.433936232791 | 0.261950714328137 |
| ACGTCACGCACC | 780.443428352886 | 0.237135075665608 |
| ATGACCACTATC | 780.449109433539 | 0.164390131997841 |

|              |                  |                   |
|--------------|------------------|-------------------|
| GCGTCACCCCGA | 780.463040053819 | 0.178641534574869 |
| CAGGCCCAGTCA | 780.464188930197 | 0.192315416174363 |
| GTCACGACTGAC | 780.471103182262 | 0.237988235004085 |
| ATGACCCAGTGC | 780.471453924664 | 0.336254711824502 |
| TGTCATGGATAA | 780.485686970204 | 0.236009694024009 |
| TCTGACATAACA | 780.492020017454 | 0.227785978087102 |
| CATCTTTGGTCA | 780.493668685197 | 0.30575637962056  |
| ACCACTAATGAC | 780.494527081614 | 0.237552856409771 |
| CTGTCATGCTAA | 780.501712580689 | 0.190416900261481 |
| CAGAATTAGTAC | 780.506347618363 | 0.230218724012942 |
| ATCTTTGTGACA | 780.528351293114 | 0.256147056016953 |
| CAAATTACGCAC | 780.539069973719 | 0.262207064879049 |
| TACTCAGAATGA | 780.544439017429 | 0.262506505884729 |
| AAAACGGTCACC | 780.547672986123 | 0.257282518524233 |
| ATGTTACAGTCA | 780.552803640358 | 0.297845518893689 |
| GAACCACTATA  | 780.559156816522 | 0.233978715073652 |
| AGAGTAATATCG | 780.56234987863  | 0.34387309595182  |
| CAGTCAGCCTAA | 780.566853264485 | 0.33200903206033  |
| GACTCAAGACTC | 780.571212513026 | 0.307020656511484 |
| ACTCATTCTTCT | 780.572933996352 | 0.206028240511746 |
| AGCGAATGTGAC | 780.574418871031 | 0.28667175937371  |
| TAACACTAGTCA | 780.578531670401 | 0.314350753757166 |
| CGTATGACCTCA | 780.582502028898 | 0.293909720391322 |
| CTGATGCTCTGA | 780.594312012908 | 0.322887268097488 |
| AAGGTAAATGAC | 780.606575682784 | 0.258512702081025 |
| GAGCGTGACCCA | 780.609890958956 | 0.277208439684091 |
| GTCACACGCAAC | 780.62034929175  | 0.240656062256928 |
| ACATCACTATGA | 780.627322131788 | 0.245322173887954 |
| CAGAGCCAGTCA | 780.63327160489  | 0.294119711803255 |
| ACAGTTGGTGAC | 780.63959871184  | 0.343602666546752 |
| GTGACGGAGAAA | 780.646285869443 | 0.205915802626248 |
| CGAAGTGAATCA | 780.647708603039 | 0.195961935829019 |
| ATGACTTGAGCA | 780.65693376551  | 0.284899346742264 |
| CCGATCCATGAC | 780.661974524859 | 0.285137977270546 |
| ATATATGTCAGA | 780.662674997091 | 0.149759868362316 |
| ACAACGTACCC  | 780.664846242354 | 0.103008614378489 |
| AGAGCCGGTGAC | 780.667905720105 | 0.220704355826229 |
| GCCCACAATGAC | 780.671689172131 | 0.275697223482747 |
| AATCGTTGACTA | 780.681091798635 | 0.239895169187203 |
| CGATGACGGGCC | 780.684016692742 | 0.456398335926892 |
| TGGTGACGATAA | 780.690385602769 | 0.267827264381465 |
| ACAACATCGTCA | 780.691509568456 | 0.250519358010434 |
| GAATGACCGTCA | 780.698635927458 | 0.443973981617451 |
| CAGAAGAGTGAC | 780.700147964157 | 0.273092546661559 |
| AATAGTCAAAAG | 780.700754000686 | 0.231438216584268 |
| AAACCGCGTCAC | 780.705638684603 | 0.20000797464884  |
| GGCGATAAGTCA | 780.709848496372 | 0.248665219154538 |
| AGAACTGCTCAT | 780.723665651848 | 0.290452857250379 |
| AGTACTTCGTCA | 780.728036099507 | 0.212646589783431 |
| GACTGACTACTA | 780.733325143863 | 0.307358340902688 |
| CCTACTTGGTCA | 780.743941809217 | 0.291705953565935 |
| TGTGACGGCACA | 780.749350907651 | 0.404743392366332 |
| TATTACTCGACA | 780.750501430217 | 0.185825184881056 |
| GTCATTAACCTA | 780.765211355971 | 0.343852174116578 |

|              |                  |                   |
|--------------|------------------|-------------------|
| AGTAGGGATGAC | 780.76717619158  | 0.236242031069343 |
| AGTCAGCTTTTC | 780.768691288698 | 0.339745028223189 |
| CGTGTGGCTCA  | 780.770967854562 | 0.24569847036449  |
| ATGACCGAAACG | 780.775733413842 | 0.274534725642123 |
| ACACTCAGTCAA | 780.783634830854 | 0.272682801768843 |
| CTCTGTTGATGA | 780.785544559682 | 0.360804418223113 |
| AATCAACGTAC  | 780.795933289192 | 0.245129304708072 |
| TACGTTTGGTCA | 780.797890296965 | 0.300826179913752 |
| ACACGTAAGCGC | 780.814206667629 | 0.314294507302735 |
| CTTTAAAGTGAC | 780.816852199578 | 0.282099930150509 |
| AGTCTTTACTCA | 780.822627147271 | 0.204996995688861 |
| ACGTGCATGACA | 780.824819079367 | 0.24666069132519  |
| GCCTGACGATGA | 780.829559240773 | 0.376562467309473 |
| AGATCTCTGTCA | 780.842227328756 | 0.234645647069368 |
| CCCAGTGACCAA | 780.850288201401 | 0.228882780724371 |
| CGTCATGTGTCC | 780.852068904099 | 0.401635801759891 |
| GTCACAGATCCA | 780.867667189233 | 0.279397054386997 |
| CATAATTACGCA | 780.871851465193 | 0.259267050135085 |
| CATCGGTGACAG | 780.872484086904 | 0.245391796844744 |
| AGTCTGACACTA | 780.873258593251 | 0.282766576944975 |
| CAATGACATTAC | 780.874111505398 | 0.33496276868392  |
| ATCTGTGTCAAT | 780.88122806676  | 0.318910243342447 |
| ACTCATGTAGGC | 780.886207396717 | 0.48413629079056  |
| GATCGGTGTAC  | 780.892748815057 | 0.187503652265542 |
| ACAGCCGGTGAC | 780.895188000485 | 0.250191300827405 |
| ACACGTGTGACC | 780.902279025734 | 0.280907664700997 |
| CAAGTTGGTGAC | 780.902868682537 | 0.255451144251289 |
| ATACCGTCATAA | 780.907038350207 | 0.24346482763936  |
| ATGACTTCGGGA | 780.908837390071 | 0.303375237823867 |
| GTCATGCTTGTA | 780.908994490858 | 0.248575442627521 |
| CGTCATTTGAGC | 780.909161929224 | 0.275030757054159 |
| ATGACCGAACCC | 780.912595858196 | 0.202335165951896 |
| CCACCTGATGAC | 780.912807871209 | 0.230495694534033 |
| AACACTTCGTCA | 780.92121823785  | 0.366561460559346 |
| GTTACGTGTTAA | 780.923510099135 | 0.214958961124289 |
| GCGGAGATGACA | 780.924441195806 | 0.267914547859367 |
| ACACAGCTATGA | 780.924751952469 | 0.345893399346177 |
| GACATAGCTGAC | 780.927317527583 | 0.25979065745454  |
| AGGATCCAGTCA | 780.929139684834 | 0.263120485664307 |
| CACTGTGTCAGC | 780.936517117173 | 0.2267836488049   |
| CACTATGAGTTA | 780.946989971393 | 0.351480695897316 |
| CCTGCATGACGC | 780.948343054556 | 0.26470652783651  |
| CGTCACTGGAAA | 780.964131417703 | 0.308964712268431 |
| CCGACGGTGTC  | 780.978426877187 | 0.417663331179132 |
| AGTCACTAGAGG | 781.028731175976 | 0.319578702082601 |
| ATATGATTCGAC | 781.029301533954 | 0.307479663148574 |
| CGTAGAGATGAC | 781.0408203313   | 0.233135388069766 |
| TCAGGTCTGTCA | 781.046715099096 | 0.335295370169775 |
| ATGACGAGCTCG | 781.054709056513 | 0.328367033567488 |
| CCGAGCGACTCA | 781.058057691915 | 0.466976592772862 |
| CACGTGGACTCA | 781.059528624412 | 0.263555023970481 |
| TGACTGGAGAAA | 781.06043837441  | 0.179561321655148 |
| ACTCATCGCTAA | 781.06108317456  | 0.217495355630918 |
| CGCGCGTCACA  | 781.075333846317 | 0.280887403670362 |



|               |                  |                    |
|---------------|------------------|--------------------|
| CTGGGTCATGCA  | 781.080513574987 | 0.222004374373826  |
| GGTCATAACAAA  | 781.08250759985  | 0.328716123206877  |
| CGGAAGTAGTCA  | 781.085074971824 | 0.225645430654873  |
| AATGTCATTAGT  | 781.090849515542 | 0.264015123977256  |
| TAGGTGACGCCA  | 781.106959822576 | 0.231998873058977  |
| CCGGAATGACCA  | 781.111551128491 | 0.33760237419359   |
| AAGATCATGACG  | 781.115739664264 | 0.274024448670706  |
| GAGTGAGTCCGC  | 781.11998716588  | 0.280569810828984  |
| CTAAACATGACA  | 781.131532478642 | 0.211363894890916  |
| ACCAGTCGTCAT  | 781.13155374476  | 0.274493278669408  |
| AATTAGTCGCGC  | 781.13172568     | 0.257743709116879  |
| GAATACGTGTCA  | 781.136407015168 | 0.177118998765189  |
| GCAATCGACTCA  | 781.138374842126 | 0.352814148720091  |
| GACTCATGGTAA  | 781.144390668375 | 0.193679908627939  |
| ACTGACGAAATC  | 781.145539662647 | 0.266275850617004  |
| ACTGACAGATCC  | 781.15204808457  | 0.238562913790832  |
| ACCATGATGAGT  | 781.153653303916 | 0.161585219512945  |
| ATGACATCGATC  | 781.154796036262 | 0.223816529827469  |
| ACGTTCCGCTCA  | 781.186430781485 | 0.23872151656967   |
| TCGAACTACTCA  | 781.188305027542 | 0.284468779485631  |
| CTGGGGACTCAC  | 781.193774463096 | 0.421666234565459  |
| TGTCTTGACACA  | 781.199886420164 | 0.29958855525803   |
| CTATTACATGAC  | 781.20052865981  | 0.285166679704515  |
| TCTCCTCGGTCA  | 781.204044162035 | 0.385227151900307  |
| CGGTTGAGTAAAC | 781.204574937873 | 0.231688745387505  |
| TATGACATTTGA  | 781.207506096456 | 0.24416350991755   |
| TGACATCACTAA  | 781.214304955461 | 0.246338952336085  |
| ATCTGAGTCGAA  | 781.222474052149 | 0.188818557274653  |
| AAGCCCTGTCAT  | 781.237227029961 | 0.255298671019899  |
| CGTCACCTTCGA  | 781.245831434912 | 0.298540290395366  |
| CGTCATTTCCGGC | 781.250288447814 | 0.455931223115186  |
| GCAATACGTGAC  | 781.250487898019 | 0.248048850780591  |
| GGTTGAAATGAC  | 781.263848853259 | 0.355970406707119  |
| GTCACGCGATTA  | 781.278283483877 | 0.328939392619773  |
| ACGAGTCTGACT  | 781.279347893398 | 0.219684597399128  |
| CATGACAGACAC  | 781.283297856064 | 0.24265144332297   |
| AATCCTGAGTAA  | 781.284225795332 | 0.240497747416188  |
| GTTTAGGACTCA  | 781.28572096463  | 0.335977139654321  |
| AGTGACTAGCAA  | 781.293169884553 | 0.23463877632999   |
| CTAGGTGAGTAC  | 781.294259899197 | 0.197397151797471  |
| CGAAATGGTGAC  | 781.300181700475 | 0.238179231454162  |
| AAGTTTACTCAG  | 781.30021538485  | 0.163630037434814  |
| AATAAAACGTCA  | 781.305712939418 | 0.273963832867419  |
| GGAAGAGATGAC  | 781.307752158322 | 0.0973705764004162 |
| ATGTCACCCATG  | 781.308512245167 | 0.218940062287625  |
| TAGTCAGCACGA  | 781.311673905921 | 0.345262185854633  |
| TCGTAATGGTCA  | 781.316873502094 | 0.382606435966635  |
| TCGTTGTGACAA  | 781.317742193451 | 0.26467004819676   |
| GTAGACGACTCA  | 781.323160497977 | 0.298428583769139  |
| AAATGAGTGAGT  | 781.327404710293 | 0.167767911812697  |
| GTCATCGGGCAC  | 781.33101469407  | 0.211094693324556  |
| ACAACAATGAGT  | 781.338619662204 | 0.263206537615878  |
| GTACTAATATTA  | 781.344223336029 | 0.383313622862268  |
| CACCTACTCATC  | 781.346268936476 | 0.189270152560416  |

|               |                  |                   |
|---------------|------------------|-------------------|
| TGAGTAAAGGCA  | 781.349486031805 | 0.176644586710898 |
| ATGACGTCTCGA  | 781.356907957049 | 0.391370671901061 |
| TCACTCACATGA  | 781.361364927594 | 0.380147023500224 |
| GACGACCATGAC  | 781.364233017347 | 0.38748577654684  |
| TGACGGATGCAA  | 781.371990715473 | 0.156237687482723 |
| CTCCCAGGTGAC  | 781.376577694038 | 0.186751117582211 |
| GCCCCGGTGACA  | 781.378914583043 | 0.436464848055247 |
| TGATCATGACAA  | 781.394943881265 | 0.254364552243619 |
| GGGTGGCTCACA  | 781.404267861647 | 0.280528979083633 |
| CACAAAGCGTCA  | 781.404585425653 | 0.330675435468342 |
| GCGTTTCCGTCA  | 781.406570976039 | 0.256109989766435 |
| ATGACAGGCCAG  | 781.410696893545 | 0.242163948189605 |
| CGTCACCGCGGA  | 781.410887774947 | 0.305512410339854 |
| AAGCCTGTCATC  | 781.41448681056  | 0.26225608250088  |
| AGACTATGACCC  | 781.416509421059 | 0.244710175900149 |
| GAAGTTATGACC  | 781.418765631965 | 0.265696978073568 |
| CGGGATAAGTCA  | 781.422767999155 | 0.271868893418672 |
| ATTGCTCAGTGA  | 781.426154144044 | 0.275771936341865 |
| AAAACCATGACA  | 781.428597430763 | 0.256818688274711 |
| GGAAAGTGTGAGA | 781.434241691712 | 0.243565134047094 |
| GTCATTGGCTTA  | 781.441352883731 | 0.354857226167745 |
| AATGACGTCGAG  | 781.442778220124 | 0.203808932537326 |
| CAGCCGTGACAC  | 781.452945469206 | 0.313166191449816 |
| CAATATATGTCA  | 781.45505746278  | 0.24651100067004  |
| AATTCGTCAACG  | 781.460777802952 | 0.183173925515392 |
| CAGCTTTGACTC  | 781.465120799421 | 0.218101450894495 |
| ATCGCACGTAC   | 781.466265156257 | 0.333416016284975 |
| ATATGCGTGTC   | 781.471922513262 | 0.232253390819505 |
| GACAACCATGAC  | 781.476766304168 | 0.427714304204339 |
| ATGACTTTTGAC  | 781.480362209623 | 0.374444814204968 |
| ACAACGTACCA   | 781.483281401954 | 0.205505000934057 |
| AAAGTAAGTCAC  | 781.497313993625 | 0.220497432481018 |
| TGCCTCATGACA  | 781.501463380072 | 0.256521677361097 |
| CAAGAGTGTAC   | 781.508644032341 | 0.274056050952086 |
| ATGACGCCTTGG  | 781.530905222052 | 0.346177513681085 |
| GTCATGCATGGA  | 781.534378720083 | 0.313707425308944 |
| AGGTTTCGCTACT | 781.536441901196 | 0.253854293615626 |
| AGCAGCTGTGAT  | 781.536774650151 | 0.186423860422028 |
| TGACTCCGCGAA  | 781.547483992004 | 0.152574562981804 |
| GATGACGGCACA  | 781.549644981497 | 0.250009674526923 |
| TGACTCCGCTCA  | 781.551163619179 | 0.229501446274308 |
| TAGATAGCGTCA  | 781.555571107599 | 0.324085825094579 |
| AAAGCCTGTCAT  | 781.557731152008 | 0.227974097606382 |
| CACCCATGTGAC  | 781.558332607703 | 0.306597579869105 |
| AACCATGACGAT  | 781.560051755442 | 0.264021755321364 |
| GCATCGAGTGAC  | 781.560606374692 | 0.229330689707124 |
| ACCTAGGTGTCA  | 781.564748113529 | 0.270295795556538 |
| AACGGGTACAC   | 781.566867521326 | 0.228537679794903 |
| GCCGTGACGTCA  | 781.567899176879 | 0.283959962696009 |
| AGCTGCAATGAC  | 781.57294299999  | 0.187875606849877 |
| ACGTCACCTCCTA | 781.584608118023 | 0.237649873399409 |
| ACGACCATGACT  | 781.585524971701 | 0.207859545148541 |
| CATACCGTGACG  | 781.586015621923 | 0.34797380307282  |
| TACCATACGTCA  | 781.593708738676 | 0.330657725125283 |

|               |                  |                   |
|---------------|------------------|-------------------|
| ATGACGGCGATC  | 781.595834233029 | 0.320415619110847 |
| CACGAGTGACGA  | 781.597962684599 | 0.328263127055011 |
| GTGCGTCAAATA  | 781.598338916515 | 0.195273832876527 |
| CGCCATGTCACC  | 781.604785641336 | 0.262357584414399 |
| TCTCCTGAATCA  | 781.609603368837 | 0.265276259789307 |
| GTCACACGATCA  | 781.609775803983 | 0.273049859068839 |
| TCGGTTACATCA  | 781.609917766675 | 0.363376307661747 |
| ACTCATTGACGG  | 781.614764605642 | 0.2353913931184   |
| CTCAGACTAATA  | 781.614916080505 | 0.255413985944555 |
| GAACAGATGACA  | 781.619202976519 | 0.304097593825113 |
| GTTCTTGTGACA  | 781.619746872069 | 0.374733801868427 |
| GACTCAGTGACC  | 781.61977044972  | 0.231150798761927 |
| AATGTTTGGTCA  | 781.637065146224 | 0.210829747418045 |
| CAAAGTCGTCAC  | 781.6385497302   | 0.244297997011082 |
| GATGACAGGACA  | 781.639480313985 | 0.24758275986505  |
| AGTCAGACCCGA  | 781.641890479753 | 0.148434513416223 |
| CTTGTCATGTCA  | 781.653453683501 | 0.155303038108523 |
| CTTTAGGTCATA  | 781.65711410355  | 0.264259734025323 |
| CTGGATTAGTAC  | 781.658389877118 | 0.354467865049865 |
| ATTAGTCTGAGA  | 781.661628595761 | 0.243807689034158 |
| AGCCATTGTGAC  | 781.663812295454 | 0.23549818894061  |
| ATTAATGGCTCA  | 781.672377910519 | 0.45832803003189  |
| GTCCTGTGTCA   | 781.672673784117 | 0.224459321125613 |
| GCCCTATTATGA  | 781.673732442046 | 0.340964643314042 |
| CACGCGTGACAA  | 781.674613596783 | 0.484322150033707 |
| TACCACGACTCA  | 781.674853024735 | 0.2763442879599   |
| AGAAATGACCTT  | 781.676474522062 | 0.236877924161162 |
| GCCGACTGACAC  | 781.676592310875 | 0.32925168869233  |
| TACTCAGCAAA   | 781.686110638435 | 0.257706327856844 |
| ATTACGCACACA  | 781.686348163437 | 0.274344624494766 |
| CTTTGTGGTGAC  | 781.699413834641 | 0.259120763098288 |
| CGGTTTGACACA  | 781.702043558416 | 0.401063644615965 |
| GTCACCTGTCAC  | 781.702091610643 | 0.141694571752268 |
| ACGAGCCAGTCA  | 781.704018417051 | 0.321283804872334 |
| CATGTTCTGTGAC | 781.712024554753 | 0.392478123008484 |
| GCGTTTGACGCA  | 781.717717936605 | 0.284712211758573 |
| GCGACTCAATGA  | 781.72062079509  | 0.490366775623097 |
| ATTTCTGAGTCG  | 781.728444367121 | 0.19924906017535  |
| AATATCATGACA  | 781.731492221944 | 0.361813713505593 |
| CTGGTCATATTC  | 781.745447146993 | 0.265785480646214 |
| CCGACTGACGTA  | 781.748325286959 | 0.227178728297491 |
| AAAGTCTGTGAC  | 781.748766420949 | 0.146819340199462 |
| CCTACATGTGAC  | 781.75230630915  | 0.293372797588302 |
| GCGCATTGTCA   | 781.758369751774 | 0.30947898401697  |
| AAGCGCTGTCAT  | 781.762006771991 | 0.236918588192844 |
| GTCACCTTTCGA  | 781.774586485463 | 0.3000570862588   |
| GTGTGATTAATA  | 781.776194308431 | 0.244439763498883 |
| GTGACTGCCTCA  | 781.779277054828 | 0.238256198918003 |
| AGTCTTACTAAT  | 781.78028026036  | 0.262055348052604 |
| AAGGCGAGTCAG  | 781.783092910061 | 0.291166080181062 |
| CTTGCGTGACAA  | 781.783410936827 | 0.240977983085188 |
| ATTTAAGGTGAC  | 781.791148376875 | 0.335463170265407 |
| AGTGCATATGAC  | 781.800827941957 | 0.412547798430586 |
| GGTCCTTACTCA  | 781.802352421579 | 0.412224399929126 |

|               |                  |                   |
|---------------|------------------|-------------------|
| GTCATTACAGGA  | 781.828396289193 | 0.265644616660694 |
| ATGGGCAATGAC  | 781.834294702188 | 0.269768067201551 |
| AAGTGTGAGCAT  | 781.838803621258 | 0.240816284993053 |
| TATAATGCACA   | 781.838805407175 | 0.297913699918253 |
| ATATATGCAGC   | 781.840203289149 | 0.139840135705548 |
| GACTCAGACTCC  | 781.8544162872   | 0.305114274488112 |
| AGACTCAGTTAA  | 781.873040751017 | 0.316499901951526 |
| TAGACTCCGTCA  | 781.881990517783 | 0.318662871661569 |
| GACTAATCCTCC  | 781.882678306946 | 0.246622667370745 |
| CCAAGCGACTCA  | 781.897146095134 | 0.234047040710192 |
| ATGACAAGCTTA  | 781.898223043541 | 0.356754036923189 |
| TCCCCTTACTCA  | 781.903542414002 | 0.18607098815546  |
| TAATATGCAGA   | 781.905706478832 | 0.26468444797518  |
| ATCGTCACCGGA  | 781.909416587306 | 0.275067713992761 |
| GCGCTCAGTCAA  | 781.913882261812 | 0.414310936113223 |
| ATACTAGGTGAC  | 781.928937296832 | 0.339086511963779 |
| AAAGGGTGACTT  | 781.934014075787 | 0.18119510772343  |
| GCAGTCTGTGAC  | 781.94306830369  | 0.32832014010264  |
| AGACTCAGCGGA  | 781.94484410928  | 0.282668026127271 |
| CCTTTGGTGTCA  | 781.946969181242 | 0.336876680701689 |
| ATACAAGGTGAC  | 781.952485291601 | 0.324638691346628 |
| GACAATTACGCA  | 781.958551035575 | 0.213641847960584 |
| TGACACTATACA  | 781.95887494916  | 0.313865403772525 |
| CAGAACACGTAA  | 781.960325641935 | 0.370338276803696 |
| ATGACTTTTACC  | 781.972933158941 | 0.100821509355861 |
| AAAGGTCATGAC  | 781.978638664916 | 0.240718328610358 |
| ACGGTCAGTGAC  | 781.981557118648 | 0.180289667193827 |
| CGCTGAGTCTGA  | 781.982347925701 | 0.339657760075958 |
| AGCTGATGACCA  | 781.99047632806  | 0.30307857043746  |
| TGACAGTTATCA  | 781.992697596501 | 0.453763878504524 |
| ACTGTCGTGACA  | 781.993429615371 | 0.285238575676756 |
| AACGGGTGATCA  | 781.99679318708  | 0.349439683471882 |
| CGTCACAGATTA  | 782.001600843891 | 0.310776497309732 |
| CAAGCCGTGACG  | 782.001659361685 | 0.375352454079054 |
| CGACCCATGACA  | 782.006279326868 | 0.365375519364883 |
| ATACGGCGTCAC  | 782.007250867981 | 0.297188909654305 |
| TAGTCTCCGTCA  | 782.008696352097 | 0.200226761716806 |
| ACGACGTGATGC  | 782.013996486177 | 0.19773002714644  |
| GCTGTTTCGTCA  | 782.01510010488  | 0.188886935434317 |
| CTGACAGATTTTC | 782.018247691575 | 0.353074834615816 |
| CAAGACTGAGTC  | 782.024964850971 | 0.357566863245961 |
| GCACCATGACAC  | 782.025604600248 | 0.377273666881124 |
| CGTGACAGTGAC  | 782.028489855736 | 0.326111106268264 |
| CACACTATGTCA  | 782.033761084805 | 0.282772746847001 |
| GACTCAATCACA  | 782.043326342441 | 0.260356685727978 |
| ACTCTGAATCAG  | 782.045689882889 | 0.309216170825415 |
| TCGTTGTACTCA  | 782.055009417068 | 0.211798002456569 |
| GTCACTCGCTGA  | 782.055525058683 | 0.318155729276499 |
| CTATCGCGTCAC  | 782.058969628513 | 0.166715232517411 |
| ATGACTTTTCGG  | 782.073990021413 | 0.243000420758424 |
| TAGTATGTGACA  | 782.079196537655 | 0.194652079709457 |
| CTGACTGCATAA  | 782.081615892115 | 0.328581366928275 |
| AGTGATGTGTTTC | 782.083415668391 | 0.179396504287797 |
| ATTGCTCAGAAA  | 782.083679830968 | 0.270189743840768 |

|               |                  |                   |
|---------------|------------------|-------------------|
| AGAACGGGTCAT  | 782.087790086564 | 0.243653517578819 |
| GTCACAGACCTA  | 782.093524670002 | 0.237142286811924 |
| ATATTAGTCTGA  | 782.09821795376  | 0.296686088982632 |
| CAGTCAGCCGTA  | 782.099466403848 | 0.365092635901555 |
| ATGTCATGTAAT  | 782.100088621741 | 0.234918580289641 |
| TAGACTGAGTAA  | 782.104010707752 | 0.286637113630459 |
| AGTGACTAGCCA  | 782.10607634673  | 0.307995456478075 |
| ATACGCCAGTCA  | 782.10794308111  | 0.22486254543879  |
| GTGGTCATTCAA  | 782.108966313311 | 0.390026765478243 |
| GTCTGACAGTCA  | 782.11082488986  | 0.209331152919798 |
| AGACTCGCGTCA  | 782.119015684578 | 0.276105444729657 |
| GTCATGTATGCA  | 782.124965392889 | 0.336060379530888 |
| CGTCATCCCTCC  | 782.126499798391 | 0.193440469479995 |
| GACTCAGAGATC  | 782.135910417918 | 0.340708964831934 |
| GAAGAGTGTGAC  | 782.150852155467 | 0.221491347153755 |
| ACGTCACCGGCC  | 782.156912229796 | 0.326048476191599 |
| GCGAGGTGTGAC  | 782.17952913189  | 0.190634899144571 |
| GCTGACACAGAC  | 782.1978759232   | 0.273045158069428 |
| AGTACATGACGC  | 782.207869871947 | 0.444542142878957 |
| GGTGACAGCTTA  | 782.216506221648 | 0.238023693981406 |
| CCGATAGTGACG  | 782.222716999761 | 0.279332979073925 |
| ACGAAGCTGACT  | 782.224971871881 | 0.244670435980906 |
| ATGGGGATGACG  | 782.229457353588 | 0.213805283649415 |
| ATCGTGACGAAC  | 782.236225199696 | 0.255275742840388 |
| GTCACGGCGTCA  | 782.239708526419 | 0.259596448506298 |
| CACAGTTGTGAC  | 782.240316816706 | 0.331537620183962 |
| ACGGTGAATCAA  | 782.245173063405 | 0.386955712887791 |
| ATGACGGTAAGA  | 782.252544675538 | 0.238206442950367 |
| CCTTGAGAGTCA  | 782.259272184202 | 0.238904827212376 |
| ACGTCACGCCAG  | 782.260374756421 | 0.328304341508406 |
| GGCCACGTCTTA  | 782.263771251166 | 0.27984216867759  |
| AACACGGTGACA  | 782.265655462826 | 0.477527261604462 |
| GTCACAGCGAAA  | 782.268223091334 | 0.239195263286697 |
| AAGCAGAATGAC  | 782.277871507848 | 0.281556141377473 |
| GGTGATACATAA  | 782.28309773936  | 0.286336923526964 |
| AAAACGTTGTCA  | 782.304976796366 | 0.264357983671184 |
| GTGAGTCCAAAC  | 782.30633430399  | 0.192220015104446 |
| GATAATCTGTCA  | 782.311960693384 | 0.2329354931868   |
| GTCAGACGGAAC  | 782.316052680837 | 0.348680768839827 |
| GCACTCAGTGAC  | 782.320360778989 | 0.296971343333074 |
| ATACTGGGTAC   | 782.335676004487 | 0.308175871279805 |
| ACTCATACCGAA  | 782.33821297884  | 0.204574513778522 |
| CGCCTTGTGACA  | 782.33926202151  | 0.27081091552322  |
| ATCGGCGTCACA  | 782.340973420212 | 0.161646548678817 |
| AAGGATTTGTCA  | 782.341242317192 | 0.129078137530264 |
| ACACGTCAAAGG  | 782.341792733956 | 0.293782522097289 |
| GACATTTCTGTCA | 782.348316482163 | 0.284296725592424 |
| AAATGGTAGTCA  | 782.352867495447 | 0.184037095649391 |
| ACTGTCACATAA  | 782.356818451313 | 0.227070095814912 |
| AGTCACTAGTCC  | 782.36207518727  | 0.286189443186256 |
| AGGTGAGCCACT  | 782.363153883963 | 0.252968282646726 |
| GCTGTACGTGAC  | 782.36861652775  | 0.423345907574504 |
| ATCGTGCGTCAA  | 782.370201657289 | 0.24098435009206  |
| GACTAACAAATC  | 782.373140045885 | 0.392326474802188 |

|               |                  |                   |
|---------------|------------------|-------------------|
| ATGACAGCTCAA  | 782.376813203266 | 0.176804103422292 |
| TAGTAGTACTCA  | 782.383983330452 | 0.26340187250384  |
| CTCGCTGGTGAC  | 782.385777651787 | 0.272625497322752 |
| CAACTTGTCA    | 782.387995315717 | 0.328591156423854 |
| GTGACACGGTTA  | 782.390673854744 | 0.200040353142927 |
| ATGACACGGGCC  | 782.391077774653 | 0.292199105153878 |
| GTTATAGCGTCA  | 782.394511962196 | 0.288313524731905 |
| TAGGGGTCATAA  | 782.402791275876 | 0.187032639897663 |
| GGAAACGTGTCA  | 782.408424496864 | 0.282015807883123 |
| CCCACATGTGAC  | 782.410032449988 | 0.232223510564838 |
| GATTACGTATGC  | 782.412462924626 | 0.287325571222949 |
| GATCGAGATGAC  | 782.41733152772  | 0.155813644827238 |
| ACGTCACATTCAT | 782.425922375762 | 0.256806171365891 |
| GTCACCGACCAC  | 782.430229510341 | 0.264928026174572 |
| CTATAAACGTCA  | 782.435242820191 | 0.298606887563899 |
| GGTCAAGGTGAC  | 782.435560625879 | 0.287494090400511 |
| CAGTCAGTCTGA  | 782.445658514137 | 0.24402406673799  |
| ACCTACGCGTCA  | 782.446935365631 | 0.294537799991158 |
| ACTCATTCAAGA  | 782.450705735379 | 0.261947864527757 |
| ACGATGATGACC  | 782.460027884103 | 0.31074614295412  |
| CACCTGTGACAA  | 782.460130400681 | 0.182853507578015 |
| TCGGGAGAGTCA  | 782.4716100797   | 0.256255000330068 |
| ATGAGTATGAAA  | 782.472702683141 | 0.254510226437008 |
| ACGTGACAAACT  | 782.476252439572 | 0.314984173915153 |
| ACACATCCGTCA  | 782.480214118371 | 0.320070787665495 |
| GTCCTAGCGTCA  | 782.488145668133 | 0.241194432206453 |
| AGATACCATGAC  | 782.491548618498 | 0.320274877291062 |
| GTATGTATACAA  | 782.495822599505 | 0.396710599174147 |
| GTCACCTAAGAC  | 782.497833908869 | 0.331571139928317 |
| GTGATTAACAC   | 782.49998911492  | 0.28016223198774  |
| CTATGATGAATC  | 782.502834418586 | 0.20673815331432  |
| AGATGAGCCAAC  | 782.502935379676 | 0.138671379898979 |
| GTCATTAATAA   | 782.50486088817  | 0.323648994790841 |
| CATATCACGTGA  | 782.504981168163 | 0.267134186697314 |
| TTTGCTCACAAA  | 782.510680017146 | 0.408620688852364 |
| CTCTCCGACTCA  | 782.511899008454 | 0.233093066423927 |
| GTGACAAGGTCA  | 782.520705342891 | 0.146379983823755 |
| ATCCGTCAGATA  | 782.523831910241 | 0.306850159860119 |
| CCAAATTAATA   | 782.526217356341 | 0.247360083008288 |
| AATCGATAGTCA  | 782.56195191489  | 0.238083195656459 |
| AGACTAATATCA  | 782.563310548918 | 0.342900281076349 |
| ACACATAATCAG  | 782.570333508302 | 0.372220795528118 |
| TGACTCCCTGAA  | 782.588268558343 | 0.158892210936414 |
| CCTTTCTAGTCA  | 782.599708067303 | 0.27333452053353  |
| ACCTTTAGTGAC  | 782.605805567839 | 0.388976383190071 |
| TGACACTTCTCA  | 782.61207886967  | 0.29626419017872  |
| GTCACCGAGAAA  | 782.614618717084 | 0.149538786739674 |
| TGACGATTTGAA  | 782.622776530614 | 0.248570202220866 |
| TGACTCGGGCAA  | 782.62822804329  | 0.399525387484498 |
| TGACTACTCAAA  | 782.629173666032 | 0.24091197887284  |
| ACAGCATGACGT  | 782.63497452523  | 0.254804091068643 |
| AAGGCATTACTC  | 782.635444471538 | 0.233591848648494 |
| CAACCAGTCAGC  | 782.636059907547 | 0.244551415205139 |
| GCCTTGTGACGA  | 782.646398894036 | 0.231649289767518 |

|               |                  |                   |
|---------------|------------------|-------------------|
| CGTCATGGCGGA  | 782.647960009459 | 0.303772804191756 |
| AAGCGTCGTCAT  | 782.65053287195  | 0.427026953451143 |
| CCTAGTGACGAA  | 782.651765097269 | 0.225950157407632 |
| CGTAGGGGTGAC  | 782.663030770312 | 0.298128439257768 |
| AGACACATGACG  | 782.668608360607 | 0.200947302634987 |
| CAAACCTCCGTCA | 782.670436980712 | 0.343648184204753 |
| ATAAGTACGTCA  | 782.670779301866 | 0.209219005455166 |
| ATGACACCCGGG  | 782.681228951723 | 0.302946755729937 |
| ACGTCACCAAAA  | 782.692960040024 | 0.262120102631422 |
| GACAATATGACC  | 782.695473591776 | 0.31324808394685  |
| GACTAATGGTCA  | 782.696548119803 | 0.185791618986461 |
| ACTTGTCACCAC  | 782.697229147176 | 0.223001965091111 |
| AGCGTCACGCGA  | 782.699842233097 | 0.420068515976325 |
| CCCGTCTAGTCA  | 782.704994082629 | 0.247149796614555 |
| AAGATTGTGACG  | 782.708376338293 | 0.25158621055004  |
| GTTGATTACAAA  | 782.70870374583  | 0.233601701214719 |
| GTCACCAAAACA  | 782.713753373884 | 0.238654886117178 |
| AGGATTGACACA  | 782.715816135981 | 0.207850538018688 |
| AGAACGACTCAG  | 782.717360745311 | 0.162868610219743 |
| ATGAGTATGTTG  | 782.723283235575 | 0.338467289664959 |
| ACTCATATCTTG  | 782.724234953829 | 0.152584405789766 |
| AGGGTCATGCAT  | 782.725692556706 | 0.242708979223018 |
| CAGGTGATGTCA  | 782.728209146485 | 0.388172709467816 |
| CCGCTTTATGAC  | 782.728839546447 | 0.428236411381526 |
| ATAACCTGTACAC | 782.731698337545 | 0.267011752319967 |
| AGTCAGACGTGG  | 782.7338046151   | 0.316589576598686 |
| ATGAGTGTGATG  | 782.7380673422   | 0.315479823379564 |
| GTTGTATCATCA  | 782.753871258555 | 0.264557737282959 |
| TGACTCGCTCCA  | 782.758007427881 | 0.20685178446129  |
| GATTGCTCAGAA  | 782.761300997965 | 0.317395842285678 |
| ACTAGGGTGACG  | 782.762126907363 | 0.293867806740326 |
| CGGCTGCGTCAG  | 782.766772401249 | 0.309986291632553 |
| ACCGCTGAATCA  | 782.768314420756 | 0.297329041048154 |
| AACGTCGTGTCA  | 782.784204139026 | 0.411042965001448 |
| AGCTGTCACAAT  | 782.795466714592 | 0.2480679196938   |
| ACGCCCTAGTCA  | 782.797986766984 | 0.229498329849414 |
| AAATGATGCAAT  | 782.807615742145 | 0.208402414301402 |
| ACGTGACGCGCT  | 782.814414855059 | 0.309761254653598 |
| AGATTGAGTAAC  | 782.818725691764 | 0.206972474979033 |
| GCAATTACACAC  | 782.822374051787 | 0.24671800848232  |
| GCACTTGACTGA  | 782.826726334294 | 0.314703574472939 |
| AAGGTTGCTCAT  | 782.83383326275  | 0.372271836418085 |
| CCGCGTGACAAA  | 782.834938422852 | 0.297524617278132 |
| ACGTCACTAGAC  | 782.84151304176  | 0.281514763354347 |
| ACCCTTTATGAC  | 782.84456055059  | 0.163694156412005 |
| GTCGGACTCACA  | 782.846758672076 | 0.27987800917487  |
| AGACTCACGTTG  | 782.853483130436 | 0.265127897212714 |
| GAGGACTAATCC  | 782.855175895165 | 0.356815296302357 |
| ACACAGATGAGT  | 782.85563304858  | 0.286756135452475 |
| AGTCAGAGCGTA  | 782.86664315948  | 0.281796203710379 |
| GTCATCCCAGCA  | 782.868462722806 | 0.183544354997459 |
| AGAGGTCTGACT  | 782.870160260237 | 0.310436559765441 |
| AAGACACATCTT  | 782.873386286901 | 0.307265029762425 |
| AGGAGTGGTCAT  | 782.875513303408 | 0.217595433645327 |

|               |                  |                   |
|---------------|------------------|-------------------|
| TGACGCGGTCCA  | 782.879777862679 | 0.297402745466185 |
| GTGTCACITTTTA | 782.909006356852 | 0.246016458613917 |
| TAATTTGACACA  | 782.909587516433 | 0.232358675831818 |
| CTCTGAGGTGAC  | 782.91781957751  | 0.361806107350802 |
| ACGTATGTGACG  | 782.92446229089  | 0.401542955538056 |
| GTCACCTCAGATA | 782.929172779426 | 0.237380446817918 |
| TGTCACAGAAAA  | 782.930686644669 | 0.342878804529368 |
| ACCGCCTGACTC  | 782.930875334557 | 0.214678656357713 |
| GTGACGCTGATA  | 782.95740170231  | 0.267071627120835 |
| TCTCATTTGTCA  | 782.959618250885 | 0.291621155789182 |
| CTGTGCGTGACA  | 782.967976153281 | 0.315017795202329 |
| ATGTCACCTGTGA | 782.986252293934 | 0.289089167252979 |
| ACGCTGGCTCAT  | 782.99528310342  | 0.306428220177999 |
| AAGATTACGTAT  | 782.996672651135 | 0.235825341657665 |
| AAAATTCGTGAC  | 782.997291787596 | 0.264040302124458 |
| CACAATGAGTGA  | 783.001871482162 | 0.210486238904106 |
| ATGACAAGGTAG  | 783.009476426353 | 0.211374392070413 |
| GTATGTTGTGAC  | 783.013470025289 | 0.185462237020774 |
| AGCATTTGACTC  | 783.013587027079 | 0.20193673741873  |
| ACTCATACCATG  | 783.014885850292 | 0.144809273723996 |
| GACACTGACTAC  | 783.027537856087 | 0.437549791024868 |
| CGAGCCGTGACA  | 783.036866248743 | 0.261818589596421 |
| GACCTTCATGAC  | 783.04006811819  | 0.299538104104213 |
| ACTCATCGGAGG  | 783.048206943839 | 0.228293131426068 |
| TACACTTGGTCA  | 783.060673996286 | 0.272993400839299 |
| CTCTAAGGTGAC  | 783.062157326538 | 0.386539186825842 |
| CTGACTATGAAG  | 783.068470100914 | 0.230038303090927 |
| AAGGATTGGTCA  | 783.071981095046 | 0.20836435046627  |
| CTGACTGCAAAAG | 783.074982573132 | 0.408186468347493 |
| CTAAATGTATCA  | 783.076703140681 | 0.252095086035471 |
| ATGATGTGGCGA  | 783.07695145043  | 0.225287180944742 |
| AGCTGTCACAGG  | 783.079529049827 | 0.291338411613545 |
| AATCGAGTAATC  | 783.089602894983 | 0.265830563632524 |
| TGACTGGTGAAA  | 783.101885687996 | 0.322901425056879 |
| CCACTCTAGTCA  | 783.102748732926 | 0.196118119700377 |
| CCTGACTGGTCG  | 783.109329292512 | 0.403978339539446 |
| ATTACGGTGACG  | 783.110747215573 | 0.21790963936729  |
| GTCATGCTTGAA  | 783.118737133525 | 0.285469705761579 |
| GAGTGATGTAAC  | 783.121272881001 | 0.237073208523481 |
| AGTCAGAGCTGG  | 783.137151025815 | 0.260747451713715 |
| ATGCGGTCATAC  | 783.138917860813 | 0.346213786364871 |
| AACTATGACCGT  | 783.140175037567 | 0.27542164227763  |
| GCATTATGAGTA  | 783.142971431774 | 0.198303268871638 |
| CGTGCGGTGACA  | 783.147465217736 | 0.38407253769259  |
| CACTAATGACAA  | 783.160236993779 | 0.303319615784667 |
| ACTCCGTGACAC  | 783.161718473872 | 0.346586206993409 |
| GAAAAGGGTGAC  | 783.165676054196 | 0.166370424536178 |
| AACGTGGTCATT  | 783.184360214152 | 0.257616306786341 |
| GAGTCAATAGCC  | 783.190454439309 | 0.293956163194018 |
| GGCAGACATGAC  | 783.193591430837 | 0.236360947272912 |
| AGTGCCTGTCAT  | 783.195135047579 | 0.301752109140955 |
| CGTTGCATCATA  | 783.197451138088 | 0.247556992110124 |
| ACTAATGACCAC  | 783.197609472701 | 0.233786314567136 |
| ACAATAGTCAAC  | 783.205133423795 | 0.319000770365203 |



|              |                  |                   |
|--------------|------------------|-------------------|
| CTTCGAATCATA | 783.20698990369  | 0.333070017488889 |
| GTCATTTGCCAC | 783.207486554624 | 0.35191864597575  |
| ACATTTATGAGT | 783.212531221068 | 0.252936234523077 |
| AGTTGTCACGAT | 783.221120459537 | 0.269018423097095 |
| CGATAAGTCAAC | 783.226710361489 | 0.134668175654894 |
| CACAGTCAGCGG | 783.237741496302 | 0.281206396720193 |
| AATATCTTATGA | 783.245605912021 | 0.293500003966312 |
| ACGGTCATACTT | 783.26546693395  | 0.192867418652846 |
| ACTCATTGAAA  | 783.268325616031 | 0.389012683208982 |
| GTAAGAGTCGTA | 783.272891149235 | 0.250438455257988 |
| CGACTTTGGTCA | 783.279413470158 | 0.301558025918552 |
| AACACGTCAACA | 783.285970054669 | 0.344230362160293 |
| GTTACGTCGTCA | 783.292660450721 | 0.290500807899722 |
| GACCTGGTGACA | 783.299297578781 | 0.261838818027063 |
| CGTCATCGCCC  | 783.305768403536 | 0.289519596946826 |
| CCTCTGACACTA | 783.311551811364 | 0.192147704267252 |
| AGATCTGTGACA | 783.312305342953 | 0.170344394847325 |
| ATTACTAAGAGG | 783.318732257105 | 0.176211982598709 |
| TCGCTGGTGACA | 783.322286388508 | 0.239934760809571 |
| GTCATTCACGCA | 783.322892917097 | 0.261086408084265 |
| GTGACTGCCAGA | 783.323369197461 | 0.365822442037946 |
| AGGGGCGTGACT | 783.334271314342 | 0.213695352772672 |
| CAGCAGTAGTCA | 783.34608885253  | 0.315904512104345 |
| GTCACAAACGAC | 783.346768389593 | 0.328394371353698 |
| ATCCAGTCAGAT | 783.350479891166 | 0.276424960526946 |
| CGTAACCATGAC | 783.368191441814 | 0.338414686869932 |
| TCACTCATGACA | 783.371778589687 | 0.213123396033201 |
| CCATTCGTGACA | 783.373568675172 | 0.22971858476122  |
| ATGACAATGAGA | 783.388932080731 | 0.173851356544267 |
| GTGACTTGGTGA | 783.390571949864 | 0.167118764825846 |
| CGATTATGTCAG | 783.398646560875 | 0.228508353528511 |
| CATGCTTTGTCA | 783.405774316134 | 0.271739898186542 |
| ACGGAGTGTGAT | 783.406319150663 | 0.227647751107111 |
| ACATTGTACAC  | 783.408183675897 | 0.220457089735775 |
| CATTAATGAGTA | 783.419732782254 | 0.353774819708192 |
| ATGACCACGCGG | 783.42067647001  | 0.276372586468634 |
| AGACCAATGACG | 783.421602222359 | 0.250636264034194 |
| AATAGTCAAGCA | 783.423934548463 | 0.162952544337328 |
| CAGATCTGACAC | 783.432144008539 | 0.246253147432066 |
| CGAGATGTGACG | 783.441506876973 | 0.248844124546432 |
| ATTCTAACGTCA | 783.442871657716 | 0.198402871409099 |
| CTCGATGATACA | 783.449420693491 | 0.276917587257238 |
| CATGTCACAATG | 783.451942479327 | 0.423502830389531 |
| CAATCTGACGTG | 783.454665443244 | 0.275683413474888 |
| AAACGACTCAGA | 783.454757110573 | 0.145442733598288 |
| ACGTTTAGTGAC | 783.455576801064 | 0.227968022698134 |
| CACCGAGTGACG | 783.469293040386 | 0.421871736802783 |
| CCGGGTGACGCC | 783.473022158819 | 0.304710567362572 |
| TGTTACGTGTAA | 783.473378491968 | 0.332087245211714 |
| TGAGTACTAGCA | 783.475083762955 | 0.394547735875472 |
| ACTAACTATGAG | 783.475590939054 | 0.340794751529049 |
| CATATGTCAGAG | 783.478249859586 | 0.367913130518242 |
| GTCACCCCTTAA | 783.489363683531 | 0.317160940751773 |
| GTCACCTTCGCA | 783.491064262892 | 0.290445201927815 |

|                |                  |                   |
|----------------|------------------|-------------------|
| ACTCATTTATAT   | 783.493824612047 | 0.245838721296581 |
| GGATTGACTGAA   | 783.512797239677 | 0.203169298315633 |
| CTCGGCAGTGAC   | 783.521533034919 | 0.327585519599476 |
| ATGACATGAGCC   | 783.523730816844 | 0.229694824474871 |
| ATGACGTTGCGG   | 783.539563614897 | 0.273072725230868 |
| ACTGATCGTCAT   | 783.549041120202 | 0.230628939745265 |
| AGGGTCACACCA   | 783.567623832976 | 0.285313897988198 |
| AGTGTATGTCAC   | 783.629938827134 | 0.280449628118026 |
| AAGAATCATGAC   | 783.636342522077 | 0.18903331475048  |
| GTTTTGAGTCA    | 783.636475242821 | 0.298413591699089 |
| ATTAACTCATAC   | 783.639373495544 | 0.182915518016371 |
| AATCGACTGACT   | 783.63949337376  | 0.269996127728036 |
| ACTCATATGTAA   | 783.639505339061 | 0.258845573130133 |
| TCGCAATACTCA   | 783.640370072078 | 0.221478225380982 |
| ATTGAGTGACCA   | 783.65030184817  | 0.224434341541939 |
| CCGCGTACGTCA   | 783.653873444475 | 0.334062201022109 |
| GGCGCTATGACC   | 783.657573171029 | 0.252596133891372 |
| CGGTGAGCCTTA   | 783.663707502282 | 0.325327647294814 |
| GGTTACGCATAC   | 783.664121505713 | 0.240078845278492 |
| GAGATGTGACGC   | 783.664585465771 | 0.191042324377916 |
| CGATTCTGACACA  | 783.671429936715 | 0.272197563012589 |
| ATGTCACGTGACA  | 783.671538267354 | 0.345454814119393 |
| GGTGTGCGGTGAC  | 783.674898628732 | 0.169893114498542 |
| CAATATCGTGAC   | 783.676576404604 | 0.46623240430639  |
| CGTCTGACCCCA   | 783.687874110537 | 0.282811058557992 |
| CCTACTTCGTCA   | 783.695153364613 | 0.232659330636841 |
| AATTAGTCGGCC   | 783.696236523261 | 0.276871196675407 |
| AATCAGTAACAC   | 783.701681236249 | 0.240010706324459 |
| ACACATATGACC   | 783.706932913679 | 0.327429321095351 |
| AGGTCAAGTCAT   | 783.708211728191 | 0.294860163636772 |
| AGAGTTTGACTC   | 783.708732995127 | 0.231140326255772 |
| CAATTAGTAGTC   | 783.722586508253 | 0.28100134636833  |
| ATGTCATGATTC   | 783.722933494671 | 0.284697512703069 |
| CGCTTGGTGTCACA | 783.723138139675 | 0.32584284415122  |
| AGTGCTCAGTCA   | 783.729253700102 | 0.38242666191743  |
| GGTTGATGTGAC   | 783.741891430048 | 0.160106347146692 |
| CGAAGATTACTC   | 783.752949334606 | 0.225218932749932 |
| AGGTTTTATGAC   | 783.755180338342 | 0.353952134520708 |
| ATGACATGCAGA   | 783.75624524739  | 0.31142167724006  |
| ACTATGATACAA   | 783.756758502773 | 0.263894021770836 |
| AATTATTCATAG   | 783.758201065979 | 0.265740773332451 |
| CGTCAGACGACG   | 783.758877687044 | 0.38808301230677  |
| GTCATTGGACTA   | 783.766347721592 | 0.334876288220481 |
| CCGGTGGGTGAC   | 783.767866737515 | 0.235702897902521 |
| AGGATTGACTGA   | 783.768004121355 | 0.260266147149516 |
| CTGTTGATGACC   | 783.772882743474 | 0.290328388150024 |
| CGCTGCTAGTCA   | 783.774910513295 | 0.390599841325979 |
| CGTGATTCAACA   | 783.780584683109 | 0.221759828654325 |
| ATGACACCCCTAC  | 783.794315958135 | 0.150730404078782 |
| ACTGAATACTCA   | 783.796029258819 | 0.286380397126005 |
| ATGAGTAGGACA   | 783.808679210999 | 0.285226302149669 |
| GAGTAATCGTGA   | 783.81987314704  | 0.165631240440856 |
| CTGAGCGACTCA   | 783.820085100738 | 0.230363974286871 |
| GATTAGTAGTCA   | 783.826470060479 | 0.242789362735031 |

|               |                  |                   |
|---------------|------------------|-------------------|
| CTGCACTAATGA  | 783.826503760306 | 0.315532263745149 |
| AGTCAGACTTGA  | 783.831067188481 | 0.217392753520969 |
| GCGAAATGTGAC  | 783.831128195548 | 0.455048183176489 |
| ACTCATTGCAGA  | 783.834985028659 | 0.295213871388445 |
| ACACCTTGTGAT  | 783.841678051852 | 0.326416997964434 |
| GTGCTACAGTCA  | 783.85544987231  | 0.275905324946223 |
| GTCACCTTGAAC  | 783.860278173689 | 0.243841180916217 |
| GTCACACAACAC  | 783.866436589165 | 0.232907464463855 |
| GAGACTAATCGC  | 783.881935579255 | 0.292780375923174 |
| GAGATTGACACA  | 783.890515062057 | 0.274969934979721 |
| ATTCTGTGTCAA  | 783.894819512241 | 0.420000961418557 |
| AACCCATGACGC  | 783.897792911386 | 0.383616739694304 |
| CGCGTCACGATA  | 783.898286809394 | 0.226629436017058 |
| GACGACTGTGAC  | 783.907063271223 | 0.281438626839421 |
| GAGATTACGCAA  | 783.927763758141 | 0.35052907775457  |
| ATCTTGGGTGAC  | 783.92879377206  | 0.212015342753571 |
| TAACGCGAGTCA  | 783.947289042861 | 0.360907145519992 |
| CGGTGAGTACTA  | 783.947361018816 | 0.207452916599662 |
| GACATCGGTGAC  | 783.952886834502 | 0.330419226578494 |
| AATCGCGAGTCA  | 783.960977556708 | 0.254456322499427 |
| CCTATTTGTGAC  | 783.965412337062 | 0.32324443283031  |
| GACTCACGTGCC  | 783.966861541508 | 0.225802079031413 |
| GTCACCTCAGTA  | 783.976037983242 | 0.293005184393194 |
| ATTACGCAACCA  | 783.978638388811 | 0.283050579341616 |
| GTCACCCGCAAA  | 783.979191132041 | 0.304450294119071 |
| CGCCTTGTGTCA  | 783.979373565096 | 0.267581043087502 |
| TGACGAGTTGCA  | 783.979897150551 | 0.245369945214705 |
| ATCCGGTGACAG  | 783.986912393136 | 0.285305438808393 |
| CTCTGTGATGAC  | 783.994581002891 | 0.274210105316375 |
| GTCACAAGGTGA  | 784.013271594653 | 0.238470436589517 |
| GTCACCCGATCA  | 784.043058778726 | 0.269435609583903 |
| ATGATGCAATCA  | 784.051349726981 | 0.296584395243496 |
| TGACAGTGACAA  | 784.05231486006  | 0.210215746711823 |
| CGGACTATGACC  | 784.053516112839 | 0.422090656752263 |
| ATACTAGTCAGC  | 784.061133082384 | 0.226748403072566 |
| AGTCAGGTA AAC | 784.066093914532 | 0.267952835275257 |
| ACTCATTGTGAC  | 784.068646048828 | 0.173059788559772 |
| AAGCACGTCACT  | 784.069158208667 | 0.279578771138465 |
| GTGATTCAACCA  | 784.073025862092 | 0.233989802658736 |
| CGAACCGTGTCA  | 784.083855617604 | 0.394752271059978 |
| TAACTGGTGACA  | 784.091754004123 | 0.241154039985984 |
| ATGTCACCCGGG  | 784.105179250182 | 0.361969263479798 |
| GTGTGACCGAGA  | 784.11028728321  | 0.254154027377505 |
| TGTAGACTAACA  | 784.117243993636 | 0.30778828246773  |
| ATGACGGTAACA  | 784.120450265043 | 0.290480658850422 |
| GCATGACCGAAA  | 784.125818324087 | 0.333681616551131 |
| AGACTCACGGAT  | 784.131792340877 | 0.285703635634067 |
| TCCAAATGACAA  | 784.132060447841 | 0.218949499120537 |
| AGCGCTTCGTCA  | 784.137152359752 | 0.270275824222175 |
| ACGGTCCGTGAT  | 784.138897196854 | 0.341937424504922 |
| AGCGCATGACAC  | 784.142017199202 | 0.276431779130161 |
| GGGCATATGAC   | 784.142555937186 | 0.306444308086283 |
| GACGCGTCATA   | 784.147294977426 | 0.276497005384537 |
| GGTTTCTGACAC  | 784.151678566978 | 0.349345772065366 |

|              |                  |                   |
|--------------|------------------|-------------------|
| CATCTTGTGACG | 784.152701875198 | 0.392197290580566 |
| ATGACGTCTCAA | 784.173720243812 | 0.242200577785433 |
| ATTCTGTGTCAG | 784.179420539743 | 0.274315194862019 |
| GTGCTGAGTAAC | 784.181752748493 | 0.514558222994324 |
| GGGACCGAGTCA | 784.191650433077 | 0.299365173754915 |
| GTCATGTAAACA | 784.197177684236 | 0.405702436651482 |
| GTCACAGGGCCA | 784.207262581261 | 0.276778485823963 |
| GTCATTGGTTAA | 784.211209593818 | 0.423727161860991 |
| CGACATTGCTCA | 784.213638221664 | 0.24615421466996  |
| AGCAGCAATGAC | 784.213644723319 | 0.147419755672968 |
| CAAAACATGACA | 784.217206753179 | 0.27435635753521  |
| GCGTCACCTGAA | 784.222874400354 | 0.253614722035685 |
| CCTGAGTCTGAC | 784.241937585989 | 0.295233649755994 |
| ATTAGTCGGACC | 784.247203522036 | 0.239772908481408 |
| TCCGATGATACA | 784.248209282454 | 0.324072490427366 |
| GAACCGTCACAC | 784.250555437254 | 0.213731673784816 |
| AAAAGCTGACTG | 784.251364770023 | 0.304113161325823 |
| GTCATGGCCAAC | 784.253560449163 | 0.286340330822834 |
| GACTCAGAGTCC | 784.259171392676 | 0.271427876787288 |
| GATACCGCGTCA | 784.260508724516 | 0.269526627807386 |
| AACGAAGTCACC | 784.26677425492  | 0.315435200082629 |
| GAAGTTGACTGA | 784.268011233006 | 0.296372436161787 |
| CGCACTGGGTCA | 784.277358746154 | 0.485327592455673 |
| ACTAACATGTCA | 784.292960978977 | 0.209816571495774 |
| CGACATTGACTA | 784.296890653375 | 0.313995467083543 |
| AGTCACGGCACC | 784.30458777767  | 0.132330213479823 |
| ATGACAAGGCCG | 784.305366484803 | 0.255940764656625 |
| CTAATATCGTCA | 784.315940316143 | 0.224330762120209 |
| CGACTAATCTGA | 784.316099715172 | 0.263353443305996 |
| CCACCATAGTCA | 784.320570405306 | 0.257306201114522 |
| ACTCATAGGAAG | 784.322110524347 | 0.230947333247084 |
| GGACTAGTCAAC | 784.324885931896 | 0.170761456274085 |
| GTCACCGTCCGA | 784.326098291768 | 0.313355944697918 |
| AGTCACGCCGCG | 784.328554772085 | 0.182607998410969 |
| ACTCAGTCAAGT | 784.332023351828 | 0.358074358582233 |
| GAGCTATTACTC | 784.340919058042 | 0.310013698536061 |
| AACGTGACATAC | 784.344162545118 | 0.344701118973735 |
| CAAAGCTGTGAC | 784.347657343183 | 0.265369895805124 |
| AGGGGAATGACG | 784.352399252769 | 0.138761489028551 |
| ACTCATATCTAA | 784.354417550866 | 0.229962071782943 |
| TACACATGACGA | 784.370704269326 | 0.253532285970232 |
| AGTCAACTAATA | 784.372089276393 | 0.290069344057132 |
| AGTACTGACTAC | 784.372890819107 | 0.35002414409598  |
| GACTAACTCATA | 784.380813502885 | 0.235376307941864 |
| GAAGTGGTCACA | 784.384469090998 | 0.249690174372958 |
| ATGACCTAATAC | 784.386943687967 | 0.30331082182794  |
| GTCACACCTCCA | 784.390936827876 | 0.20875953776792  |
| ATGCGTTGTGAC | 784.394991062634 | 0.291770344000613 |
| CGATGACGGGGC | 784.396412099918 | 0.304091228949333 |
| ATCAGAGAGTCA | 784.398169727195 | 0.267132488798836 |
| CAAGCACGTCAC | 784.40646743861  | 0.253911965659198 |
| AATTGGGTGACG | 784.408679571744 | 0.287553169514049 |
| ACTCATAGTCAA | 784.409077587408 | 0.280696292609849 |
| GTCATGCGTTAA | 784.420632715583 | 0.364481733412831 |

|               |                  |                    |
|---------------|------------------|--------------------|
| AAGTGACGCCAC  | 784.433426460352 | 0.335060521116548  |
| AGTCACCCCGCC  | 784.441954598385 | 0.159425219507947  |
| CAGTAGATGACG  | 784.45741568575  | 0.0887220833130551 |
| CCCACTGTCATA  | 784.461672353978 | 0.310712940079465  |
| GTCATGCTCTAA  | 784.463467846177 | 0.441941456125617  |
| GACACACTCATC  | 784.481142608251 | 0.202954407979248  |
| ACGAGAGTCAGA  | 784.488580248429 | 0.262143202724604  |
| CCATATTACTGA  | 784.494999596678 | 0.378457544943209  |
| GAGCCGTGACAC  | 784.497519636823 | 0.377502557628494  |
| GAAGTTCGTAC   | 784.499941446906 | 0.21069975029726   |
| TATGACTTGAGA  | 784.500059877425 | 0.227714158401475  |
| CAAGCTGATTCA  | 784.503975247599 | 0.338738877690561  |
| GAAGTGCAGTCA  | 784.51688181768  | 0.265103908044339  |
| CAATCTGTAATA  | 784.520093105834 | 0.260433174619199  |
| TCAAACACGTAA  | 784.521427545745 | 0.344087943018886  |
| CGTCTTGCTCAC  | 784.521520044037 | 0.14427415453494   |
| CGTCGTGAATCA  | 784.523274785639 | 0.156878096162334  |
| CATACGGTGACG  | 784.538809792673 | 0.262201663007191  |
| TGACTCTGCCCA  | 784.557053548108 | 0.200468214727968  |
| CCGTTTTGACTC  | 784.557087270951 | 0.289965354693284  |
| ATACGCAGTGAC  | 784.55717137292  | 0.307775486110504  |
| AGTCAGAGTGCA  | 784.557283781053 | 0.233256756744979  |
| GTGACTTGCTCA  | 784.560049275071 | 0.171739004619939  |
| AGAACAGCTCAT  | 784.56714398246  | 0.273246497129989  |
| GAGTAATTCATA  | 784.567930027754 | 0.31766896521639   |
| ATGACACTCGGA  | 784.568676188029 | 0.211993085176071  |
| ATGAGTTGTTCG  | 784.571286871619 | 0.276289982163545  |
| AATAAAATGACC  | 784.574176804336 | 0.238470775973457  |
| AAGTACAATGAC  | 784.575337421616 | 0.201362503442337  |
| GTTCAATTGCTCA | 784.577091476991 | 0.353941132709323  |
| GCTGGAGAGTCA  | 784.585778640094 | 0.290915932986537  |
| ATATCAAGTCAT  | 784.598383686434 | 0.267514500576419  |
| CAAAATTAATGCA | 784.599768531398 | 0.321010625534405  |
| CCTAGTCAGTCG  | 784.6027321119   | 0.266900913834809  |
| ACTAATCGTGAA  | 784.609451853761 | 0.235501860959816  |
| CGGCCTGGTGAC  | 784.610006997705 | 0.231859326936015  |
| AAATGATGTGGC  | 784.614097504896 | 0.15060643900368   |
| CGTCTTGACTGA  | 784.615461685166 | 0.37989986676031   |
| ATCTCTTGCTCA  | 784.622781133402 | 0.294004696303562  |
| AGTGACAGACAC  | 784.631970904789 | 0.229972143778471  |
| GTCGCCATGACA  | 784.639870508179 | 0.243233643032673  |
| AGCTCGTAGTCA  | 784.64951327951  | 0.431161775402435  |
| ACTCATCAAATG  | 784.65470393815  | 0.26974595211309   |
| GCACCCAATGAC  | 784.663585432551 | 0.269255272021206  |
| ACTCATAGAAGT  | 784.680082229015 | 0.207143380246545  |
| TCCTATCGGTCA  | 784.689337508072 | 0.235784480630363  |
| ATGACCGTGACA  | 784.690098448702 | 0.330373889912067  |
| CGTATAGGTGAC  | 784.701738372792 | 0.283096835771762  |
| ATTGCTCAGAAG  | 784.702143610347 | 0.404152823985778  |
| GATGATTCGTAA  | 784.705070228141 | 0.234758974574267  |
| ACCCGGGAGTCA  | 784.705285042533 | 0.254704566815809  |
| GGGTCATCCACA  | 784.707469774319 | 0.258803305087825  |
| AGCTCGGTGACA  | 784.708085091233 | 0.264472074630652  |
| AAATTAATCGAA  | 784.70836488111  | 0.447473933977495  |

|              |                  |                   |
|--------------|------------------|-------------------|
| CAATGGGTGACG | 784.70916883193  | 0.239933563338783 |
| CGTATGACCGTA | 784.726649917911 | 0.310377987162528 |
| GACTGATTCTGA | 784.732396427958 | 0.282827722535637 |
| CTATCCGACTCA | 784.760535648697 | 0.218861627839506 |
| CGTCATGCGGGC | 784.775381688018 | 0.350210736248646 |
| ATGTATCACCAG | 784.776698406478 | 0.189071118634787 |
| GACAACATCACC | 784.779204743212 | 0.328062640185435 |
| GATGCACGTCAC | 784.780239409814 | 0.314153396764942 |
| AACAGTCAACGC | 784.783242873117 | 0.293183698860245 |
| GTGGATTGGTCA | 784.785502726978 | 0.31599376577905  |
| TCACAAGTGTCA | 784.793605957142 | 0.175292143527569 |
| ATTAGCCATCAA | 784.815336459154 | 0.294577268980426 |
| AATCGTGTGAGA | 784.820197027372 | 0.479429970172423 |
| CTGAACCCGTCA | 784.823446675025 | 0.225318775579808 |
| CAATTGCTCAGC | 784.823688237413 | 0.320889618196768 |
| GTCATGCCCTTA | 784.832067565486 | 0.311552821733888 |
| GCCGATTACTGA | 784.840868696684 | 0.27538668275182  |
| ATCCGCTTATGA | 784.84569292304  | 0.249509930627716 |
| ATACACGCGTCA | 784.84618180736  | 0.417989287481935 |
| GGCACAATGAC  | 784.847118410803 | 0.2593025817523   |
| CATCATAGTCAG | 784.849130750549 | 0.293508333734163 |
| GTCATATTCGA  | 784.860702320703 | 0.397073573358097 |
| ATTGAAATGACG | 784.867473737963 | 0.189591118306459 |
| CAGTCAGCATCG | 784.873338424685 | 0.228974694429871 |
| ATGACAGGCTCG | 784.87804590634  | 0.375582725889336 |
| AGATTAGTCGCA | 784.878686019342 | 0.309323292414399 |
| CATGACCGAATC | 784.884939725273 | 0.286051068151215 |
| CGCAGCAGTGAC | 784.886993997141 | 0.41675629631336  |
| ACTCATTATAC  | 784.892359808424 | 0.223470087670708 |
| ACGTCATGGCCA | 784.907820228466 | 0.187192725889471 |
| TACTGATGACCA | 784.918257219513 | 0.348808996307905 |
| AAGCGTCAGACT | 784.918447116025 | 0.384084444511493 |
| TAATGCCAGTCA | 784.920892334665 | 0.332360780573352 |
| CAGTTCATGACG | 784.924222174377 | 0.440152764939577 |
| TGGCTGACTTAA | 784.924743104537 | 0.254345953097513 |
| GTCATGCGACAA | 784.940555885487 | 0.435434316496232 |
| CGTCACTCAATA | 784.942449072701 | 0.28520681225315  |
| AGTGTCACATC  | 784.947317857801 | 0.274171049048773 |
| AGCCATGTCACG | 784.95853892201  | 0.30350990840585  |
| GCTGTTCGTCAC | 784.960056580682 | 0.336097614157642 |
| AACACTATGTCA | 784.96243941065  | 0.224860104895428 |
| ATGAGTTAATTA | 784.969632355091 | 0.287906894243753 |
| GTAAGTGTCAAA | 784.970976228559 | 0.311652773698763 |
| GGTGATTAATCA | 784.978384237832 | 0.246303547704581 |
| TGACTCTCCGAA | 784.978609258834 | 0.248906526861876 |
| CATGACGCCGAG | 784.979756689493 | 0.475194114950544 |
| CCGCCGACTCAC | 784.985225143937 | 0.230619238606311 |
| TGCGTTACTCAA | 784.992381785732 | 0.272743038932123 |
| ATAGGCTGACTA | 785.001020413621 | 0.309581118313839 |
| ATACGTGTGAGA | 785.008863850692 | 0.169400764837435 |
| AGTATTGTGACG | 785.012857960538 | 0.215560536282388 |
| CTTTTAGCGTCA | 785.018388265165 | 0.214394432479423 |
| TCCCAGAGTCA  | 785.027079137552 | 0.32377217581707  |
| GACTCAGTTTAA | 785.035620569451 | 0.308590331828072 |

|               |                  |                   |
|---------------|------------------|-------------------|
| CAACCTGATGAC  | 785.043639335433 | 0.310884621127996 |
| GGAACAAATGAC  | 785.043927701234 | 0.26776901858207  |
| ACATACTGACTA  | 785.044192133711 | 0.30412685276583  |
| CGACCGTGTCAC  | 785.053186740935 | 0.329846102596901 |
| AATGACGTCTCA  | 785.055086338668 | 0.240024848683859 |
| AGTCAGAAATCA  | 785.059217699585 | 0.24330298090804  |
| TGACTCTGCACA  | 785.062305715172 | 0.25695156695975  |
| TATGACAGTCGA  | 785.076621753125 | 0.295647045423969 |
| CGTCATATGCCC  | 785.077875247616 | 0.154171090033959 |
| GTCACATGCGAC  | 785.08129850417  | 0.300730122391527 |
| GACTAAGATTGC  | 785.094288768806 | 0.387803311040677 |
| CGGAGGAATGAC  | 785.097108716077 | 0.181306877899649 |
| GGCGTTAATGAC  | 785.100649893839 | 0.317855550346092 |
| AGTGGTACTCAC  | 785.103125173644 | 0.490886019662401 |
| ATTTGCTCACGG  | 785.10629035845  | 0.271110570830354 |
| GTATGTGTAACA  | 785.107414728729 | 0.136157243470503 |
| CGACCGGTGACG  | 785.108445227569 | 0.262546420022446 |
| ATTAGTCGGCCG  | 785.110403348375 | 0.248267197871622 |
| AAATGACAAGGC  | 785.113365824991 | 0.195076343273612 |
| ATGTCAGTAATA  | 785.115731325798 | 0.274784250844157 |
| CATGAGTTGTTT  | 785.116682262332 | 0.323210815014783 |
| GGTAACGTGTCA  | 785.119693649082 | 0.300918595703182 |
| GCGTCACGTTCC  | 785.126917640423 | 0.272043968782124 |
| ATGACTTGACCG  | 785.129300447156 | 0.415724250118271 |
| ATACCGAGTCAG  | 785.14190332605  | 0.326605331704764 |
| GTGATGTGTAATA | 785.15337112495  | 0.197191545217299 |
| GTGACAATAAC   | 785.159685635806 | 0.318736348818836 |
| CATGGAAGTGAC  | 785.159827703143 | 0.328020918467106 |
| GATTAGGTCACA  | 785.164173582463 | 0.235950935354436 |
| ATCGGCGTCACC  | 785.164878990444 | 0.261748403902851 |
| GTCACACGCGAA  | 785.168057519833 | 0.282919213708712 |
| GCCTGACATGAC  | 785.176095098017 | 0.365733010074697 |
| ATCCAAGTGTC   | 785.183231295352 | 0.376335552725376 |
| CTGCATGACAGA  | 785.184289913044 | 0.271264595656638 |
| GCCTCGCAGTCA  | 785.192824249166 | 0.255574042770195 |
| AGTCAGCCGCTG  | 785.192904426573 | 0.221283625666118 |
| AGTACAGCTCAT  | 785.202485008351 | 0.433958130198299 |
| AGGGGTCATAAT  | 785.214409363173 | 0.247859174689219 |
| CATTACAGATGA  | 785.224395092047 | 0.375390216264858 |
| GGGTCATTGCAC  | 785.225251964638 | 0.287594959199087 |
| ATGAGTAGGCCG  | 785.225553341963 | 0.300210334988241 |
| ATGCGTGACAAC  | 785.229916473543 | 0.240595350750291 |
| GTGGATTTGTCA  | 785.230492381628 | 0.365890525044438 |
| GATCCAATGACA  | 785.235701268008 | 0.295091414221668 |
| CGTCACCGTGCC  | 785.260701350643 | 0.231937332511971 |
| ACGTATCGTCAC  | 785.26296038185  | 0.215439650096658 |
| AGGCCTGTCATA  | 785.264124023287 | 0.17085869232184  |
| GAGTCAGGGCGA  | 785.267338292954 | 0.298840602064141 |
| AGGCACCACTCA  | 785.273469774897 | 0.376716080420668 |
| ACAGTGCTGACT  | 785.285218422317 | 0.296525460431632 |
| ACATATTACGTG  | 785.288799583114 | 0.355237379407592 |
| ATGAATCGACTG  | 785.292522928784 | 0.377586855904143 |
| CATGACAATAAC  | 785.292574068639 | 0.265761066337531 |
| ATGAGTCTCGAC  | 785.294791888379 | 0.307869263466309 |

|              |                  |                    |
|--------------|------------------|--------------------|
| AAGATTGACACA | 785.298323663978 | 0.249367155942983  |
| TATCTTGACTGA | 785.301081894482 | 0.105036346460246  |
| AGACTCACTGCT | 785.305324127431 | 0.223924733170479  |
| AATTGACTGAGC | 785.305514175558 | 0.29322209498717   |
| CGTCAACGTGAC | 785.309119709638 | 0.369818446869216  |
| TAGATCGCGTCA | 785.313589866446 | 0.294674904250883  |
| AGTCACGGGGTA | 785.313866085522 | 0.0754667662912765 |
| AATGACCACGTA | 785.317915913954 | 0.380464414607799  |
| GTGTCATGTAGA | 785.321842279929 | 0.112547224972834  |
| CTTGTCGTGTC  | 785.325356922261 | 0.228270931084105  |
| GCTCATTGGTCA | 785.327714082465 | 0.268708213437721  |
| ACGTCAGTCTAT | 785.331278356741 | 0.501632045507568  |
| CGACCAGGTGAC | 785.345102561482 | 0.377169547506505  |
| CGTTCTTTGTCA | 785.347621978566 | 0.290303242367962  |
| ACAACCATGACA | 785.354227137835 | 0.192984189111989  |
| CATACCAGTCAG | 785.358966115534 | 0.325776117397514  |
| AGGTGACGTTAC | 785.361129864325 | 0.340395135191174  |
| GGTTATCACTCA | 785.370679563834 | 0.181309736070145  |
| AGTGACAGAGTC | 785.374309052673 | 0.202539592730612  |
| GTCACATATCAA | 785.377866877718 | 0.265192172498536  |
| CGTCACCAATAG | 785.385182441235 | 0.230927909833225  |
| CTAGCTGAGTAA | 785.391606263954 | 0.367369878393059  |
| GGATGACCCAC  | 785.405440606736 | 0.242289162291276  |
| AATGAGCCAACC | 785.410336188291 | 0.184362787159767  |
| CTATGAAGTCAC | 785.418204823755 | 0.229270029401422  |
| AATTAGTCGCAC | 785.423219354174 | 0.256578453901051  |
| GTCACCTGATAA | 785.425272691909 | 0.344063572392634  |
| TGACAGATGGAA | 785.447926564482 | 0.137622847150784  |
| GTGGCAGAGTCA | 785.449713891954 | 0.225479731983878  |
| CAATACTGTAC  | 785.451406769929 | 0.335779114306321  |
| TGGATGACCCCA | 785.452026185606 | 0.240009145410918  |
| CGTGACAAGTTA | 785.46720432247  | 0.210394044555004  |
| GCGGATTGGTCA | 785.467844150597 | 0.266598144042554  |
| CGTCACCATTTT | 785.469387597761 | 0.278340666240254  |
| AGCGCTGATTCA | 785.472463957203 | 0.349702640538427  |
| ATGCATTGAGTC | 785.473746713198 | 0.223829884301429  |
| CAAACGACGTCA | 785.475645284014 | 0.362143735108676  |
| GTACTIONGCGA | 785.479297396224 | 0.338780224238666  |
| ATACATGTGACA | 785.482559409598 | 0.261178514078665  |
| ATTGACACAGTC | 785.482823977491 | 0.423846187920485  |
| GTGACTTACCAC | 785.492319586019 | 0.310577137295488  |
| CACCAAGTCACC | 785.494430550259 | 0.18667306358853   |
| ATGACGACCACA | 785.494690515113 | 0.288366208450475  |
| AAGCGTGACACC | 785.495941120775 | 0.202165531405778  |
| GCCGCGTCACGA | 785.496136980816 | 0.165619106311111  |
| GAATTAGTCTGA | 785.497683065957 | 0.239010688958061  |
| AGACTCAGAGAC | 785.509902683318 | 0.224863828402075  |
| ACGCGCTGACTG | 785.516928143833 | 0.291989636846833  |
| AATATGTACGCA | 785.523579799506 | 0.245362295223533  |
| GAAAACCTTGTC | 785.526923249841 | 0.340333503124345  |
| CGTCCCTGACTC | 785.542486752281 | 0.202221908384724  |
| TACAATTACGCA | 785.54385466431  | 0.37372794620319   |
| TGACACAGGCAA | 785.550185613361 | 0.244858154220926  |
| CGCGTCACTACA | 785.55024366965  | 0.145526577863533  |



|               |                  |                   |
|---------------|------------------|-------------------|
| GCTTCGTGACAC  | 785.558826108824 | 0.272165956794121 |
| GAAGGGGATGAC  | 785.559545988765 | 0.195937615953811 |
| GACGCGAGTGAC  | 785.559746954673 | 0.356353511509858 |
| GAGTCAGGCTCC  | 785.560973344228 | 0.307656636372018 |
| GAAGAGTCTTAA  | 785.562561648055 | 0.225407115346482 |
| ACTCATTGGATA  | 785.588809278968 | 0.257325629208462 |
| CAGGCTGCATA   | 785.589064244959 | 0.285123046726641 |
| CTATAATCGTCA  | 785.602273256294 | 0.228752391931677 |
| AATACTCCGTCA  | 785.605301475013 | 0.305102397878581 |
| AAGATCCAGTCA  | 785.60758129687  | 0.25426611964856  |
| CCTTATTGACTC  | 785.610762700738 | 0.118131578634568 |
| TGACACGATCCA  | 785.614027800441 | 0.484633750775209 |
| GTCACGGCGTAA  | 785.620771029609 | 0.293876675178364 |
| GTGACCCAACGA  | 785.621064905818 | 0.259180074327175 |
| AGTCTCGATGAC  | 785.623353307621 | 0.279889003202706 |
| AGGCCCGTCATA  | 785.631893261281 | 0.220949869225615 |
| AAACTGTGACAT  | 785.632337428646 | 0.218309822007422 |
| TTCTGACGTCAA  | 785.641422385008 | 0.402333200073778 |
| CACCAAAGTGAC  | 785.645127724162 | 0.329299409320036 |
| TGCAGTCAGCAA  | 785.648245914512 | 0.308439493920323 |
| CGCCCTCAGTCA  | 785.652728739009 | 0.27003592862476  |
| AGACGTCATGCA  | 785.656250316763 | 0.35095209614184  |
| CGTCATCTACAC  | 785.65721896186  | 0.25860164923285  |
| CTATATCGTCAC  | 785.672986645704 | 0.220238860419359 |
| GCGGTTATGTCA  | 785.674228868496 | 0.273412760399633 |
| ACTCATTAGAGA  | 785.675781358487 | 0.277357756141372 |
| CGCCTTGTCAATC | 785.684923555971 | 0.17184875937516  |
| GGGTGAAATGAC  | 785.686754853639 | 0.22046125201758  |
| ACCTACTGTCAAT | 785.688656128657 | 0.136669887485496 |
| CGTTGATTACTC  | 785.690900746396 | 0.156513275481741 |
| GACCGATTATGA  | 785.694770688143 | 0.293865874679092 |
| ATGAGCTGTCCAC | 785.698809297952 | 0.156178963232039 |
| AACCTCGTCACC  | 785.714040175431 | 0.304504475549951 |
| AGTCAGAGATTG  | 785.719516197302 | 0.148774268088771 |
| AAAGCGTGACAC  | 785.720835849031 | 0.290989628305561 |
| GTGACGTTAAAA  | 785.724407342682 | 0.320966478825123 |
| GTCACATGGAAA  | 785.725254634332 | 0.369727918850376 |
| CTAGCGTGTGAC  | 785.726037898281 | 0.314536470978794 |
| CGTGAGATGAC   | 785.731364007837 | 0.226445381640193 |
| ACTCATCAATGG  | 785.739497022701 | 0.14316719404146  |
| AGTAGTGACGGA  | 785.739660767968 | 0.226053641156543 |
| CGTGTGTCAACC  | 785.740191061982 | 0.316140927060016 |
| AACTGATGATTC  | 785.745239108271 | 0.324336287991005 |
| GTCATTGATGAA  | 785.747113889616 | 0.341378907970669 |
| AGTAATGACATC  | 785.753525198106 | 0.301818423243241 |
| CATAATGTCACA  | 785.761052884682 | 0.213862861692395 |
| CTGACTTGACTC  | 785.763977058517 | 0.233049948057751 |
| ATCATAGTCAGC  | 785.769425601211 | 0.230531741695759 |
| ATGACGACTGTA  | 785.774098579918 | 0.21218625446427  |
| TCGACATGACGA  | 785.777565710382 | 0.276727884163589 |
| ATGACGGTGAC   | 785.811309733871 | 0.290034260482086 |
| ATTACAACGTCA  | 785.812499429813 | 0.260255822420363 |
| CAGTCAGCGGAA  | 785.814761323176 | 0.220745339965301 |
| GACTCAACACAC  | 785.826557369132 | 0.268203503340108 |

|               |                  |                   |
|---------------|------------------|-------------------|
| AAGATAGTGTC   | 785.836065925117 | 0.307555607377618 |
| GCGGCTATGACC  | 785.836217850981 | 0.403236924835958 |
| ATGTCGGGTGAC  | 785.837545407529 | 0.287010970920868 |
| CACTGACGATGA  | 785.838783813678 | 0.246559082490801 |
| ATGAATAGTGAC  | 785.842723208659 | 0.183226130672246 |
| TCCGGGGTGACA  | 785.846624775383 | 0.197369909635492 |
| ACTCATACCAGA  | 785.84746813086  | 0.17250327835792  |
| AGCAGTGACAAA  | 785.850142932088 | 0.261795451374314 |
| CAACCGACTCAC  | 785.859043675609 | 0.228344589758692 |
| GACTCAACATCA  | 785.861867774561 | 0.225409834207272 |
| AACGTCTGAGTC  | 785.86512524745  | 0.379081362943021 |
| TCTCTTTACTCA  | 785.867440247881 | 0.222022347717107 |
| CACGTTGTATGA  | 785.874797747705 | 0.219719624284286 |
| ATCTTTCCGTCA  | 785.881824056518 | 0.240438035778736 |
| CGCATTGTCACA  | 785.886987535927 | 0.367299596882296 |
| ATGCTCATGACA  | 785.895841872746 | 0.264158465318974 |
| CAAGCGTGTGAC  | 785.902744092231 | 0.519604505948934 |
| ATTGGCAATGAC  | 785.904912325158 | 0.29218139967584  |
| CGTCATTCCGAA  | 785.907108318603 | 0.22895415204296  |
| TGACGCGTGTAA  | 785.911556852186 | 0.233057616822274 |
| ACTTGTCACGCA  | 785.919608899348 | 0.228170561700381 |
| CGTATTCGTGAC  | 785.928639873894 | 0.229190459509071 |
| ACTAACTGAGTC  | 785.931062042237 | 0.368862119285321 |
| ACGGTGACGATA  | 785.941427043618 | 0.167665722566278 |
| AATCATCTGTGA  | 785.942119428947 | 0.257569452576172 |
| CAGGGCGACTCA  | 785.945498451335 | 0.457268253752259 |
| GTGACACGGTGA  | 785.950595004044 | 0.334309578417065 |
| ACGTCACATCCA  | 785.95244494799  | 0.226544181918752 |
| GCATTTGTGACA  | 785.953097411469 | 0.227110325036796 |
| GTATGAGTTGGA  | 785.956836920487 | 0.283584380868822 |
| CCAAACTCGTCA  | 785.961784921705 | 0.267007607751168 |
| TGGCTCACCAAAA | 785.964207297573 | 0.446093190152736 |
| GTAATAATTGAC  | 785.966413730535 | 0.306395061566487 |
| AATCATAATTTG  | 785.971288825409 | 0.279641541440113 |
| AGTTAATGACA   | 785.971995807306 | 0.225410978865819 |
| AGTCAGATCTTC  | 785.974089785318 | 0.198094048032021 |
| GAGGGCGAGTCA  | 785.983301331996 | 0.241473083407315 |
| AGTCAGTAATTA  | 786.005128992789 | 0.182994073986917 |
| TATCGCGGTCA   | 786.011584252757 | 0.367790979807781 |
| CCCATATATGAC  | 786.022247923243 | 0.229061475883302 |
| CATCGTGACAAC  | 786.025730747762 | 0.254067923949919 |
| GTGAGTATATCA  | 786.036507839345 | 0.251780124319405 |
| CGCACTGTCACA  | 786.037828684911 | 0.145787011653963 |
| GCGCCGTGACTA  | 786.041717302427 | 0.30422948569715  |
| GATTAGTCCTAC  | 786.045002161552 | 0.179614588700237 |
| AATACCGGTGAC  | 786.05187059697  | 0.230786289214755 |
| CGTCATTTCTAG  | 786.05422446708  | 0.244475915774201 |
| GAGCAGTCAGAA  | 786.061589975058 | 0.181836580310224 |
| GAGTTAGTCTTA  | 786.0667322948   | 0.253328806011838 |
| CTATAATTAGTC  | 786.073477928568 | 0.393485231979568 |
| CGACTACTCATC  | 786.078675015444 | 0.139523462135689 |
| ATGATGCAACTC  | 786.082238872331 | 0.2745973984432   |
| ACCCATGACATG  | 786.082422576096 | 0.239300828485483 |
| AGTAATGTGACG  | 786.083525482893 | 0.242374717450623 |

|              |                  |                   |
|--------------|------------------|-------------------|
| TAGAACGTGACA | 786.087640287259 | 0.349923229574098 |
| CTTGCCATGAC  | 786.090695771845 | 0.281564971495138 |
| AAACAATTAGTC | 786.092060921647 | 0.240580794572199 |
| GTCACGTTCGGA | 786.103377573085 | 0.259868522082458 |
| CACCCTGCATC  | 786.104467799077 | 0.138601136585366 |
| AGTACTAATGAC | 786.107083427057 | 0.306501382421724 |
| ATGACAACCAAT | 786.114320159771 | 0.31308561624462  |
| ATATAAGGTGAC | 786.119228476691 | 0.324189574294896 |
| ACTCATCCGGTA | 786.125097771506 | 0.24054530824036  |
| GTCATGCAGGTA | 786.127580476122 | 0.176708331583268 |
| AGACGAATCATC | 786.127643802667 | 0.270385287757668 |
| GGCGATTACTGA | 786.133348655789 | 0.444544103090078 |
| GAATCATATATC | 786.134253820866 | 0.246039084607151 |
| ATGAATCAATAC | 786.139288285953 | 0.274674175219992 |
| GTGACGCGCTCA | 786.139400293273 | 0.297193561074502 |
| GAGTCGTGTGAC | 786.149366455071 | 0.237129031442585 |
| ATGCCATGTGAC | 786.150759271772 | 0.307622827995633 |
| GGCCGCTGTGAC | 786.165050385785 | 0.221774831395771 |
| GGTAATGCACC  | 786.166381488597 | 0.416365113765256 |
| GATGTGTCTTAA | 786.17098460457  | 0.465868799308901 |
| GTCATTGGCGCA | 786.181500326165 | 0.337353607672767 |
| AATGAGTGAATG | 786.188881147577 | 0.27290089490279  |
| TAGTGACGCTGA | 786.190026730601 | 0.263665940777858 |
| ATGACATTAATC | 786.195720858511 | 0.255096676318832 |
| ATTCGTCAGAA  | 786.19641123771  | 0.392622822377954 |
| ATAGTCAGTCGG | 786.199009651578 | 0.102143098153443 |
| CGATTGTACTCA | 786.209807960508 | 0.151099567361196 |
| GGAACTCCGTCA | 786.210889662688 | 0.383602353504152 |
| GGCTATACGTCA | 786.216363379184 | 0.380795853232619 |
| CATTACGGAGTC | 786.224914050463 | 0.356963430223506 |
| GAGTGAGTCTCA | 786.226525051456 | 0.235362933725005 |
| TAAAACGACTCA | 786.228633115582 | 0.314794943435045 |
| ATTGAAGGTGAC | 786.2295572632   | 0.236935760937574 |
| TGACGACTTTAA | 786.231163861425 | 0.349883047610524 |
| TCATAATGCTCA | 786.236247655648 | 0.317733326104975 |
| CCCTATCCGTCA | 786.239470831112 | 0.171691203472047 |
| AGAGCGGATGAC | 786.241775099121 | 0.186989514561527 |
| GGTCACTCTGAC | 786.253301976633 | 0.247389650676659 |
| GCTATTACTGAC | 786.253982006037 | 0.411985053017536 |
| TGTCATGGCACA | 786.261324520988 | 0.301288820340318 |
| TGTCATGCTTAA | 786.262046274559 | 0.341281274154986 |
| ACATGACGATGA | 786.273207800977 | 0.286148818025937 |
| GTCACCGTCGAC | 786.27520960892  | 0.282831741810683 |
| GCTGAGTCTGAC | 786.292783884421 | 0.358888061886604 |
| AGTCACGCTTAA | 786.29584571505  | 0.264490257017362 |
| TCAATCTTGTC  | 786.310508005967 | 0.295590685113366 |
| TAGGGCGAGTCA | 786.314138425654 | 0.105595858137572 |
| AGTCAATTAGTA | 786.318937956723 | 0.171304653591381 |
| AGGTGTGAGCAA | 786.324336505335 | 0.164588451167813 |
| CACGTCTTATGA | 786.325344288024 | 0.382187622931976 |
| TATGGCTAGTCA | 786.327516974637 | 0.356303635656098 |
| TGTAACTCATAA | 786.337835625857 | 0.238313408600087 |
| GAGTAATAATAA | 786.339320551977 | 0.231663816963032 |
| ATACATGACATA | 786.358803558791 | 0.322256035902801 |

|              |                  |                   |
|--------------|------------------|-------------------|
| TCACCATTATGA | 786.36471874084  | 0.231427953270834 |
| AGTGGATATGAC | 786.367677448887 | 0.162994950602155 |
| CGAGTCAAAGGA | 786.369895877382 | 0.235329841540993 |
| CTTGTCTGACAC | 786.372797324985 | 0.221486270972203 |
| TAGCATTACTAA | 786.375443504833 | 0.232372322721954 |
| GAGACATGTGAC | 786.382118668035 | 0.296218912297564 |
| AGTAACTCATAT | 786.384507836328 | 0.269510531468201 |
| GACTGGCGTGAC | 786.388909736753 | 0.242985736701047 |
| ACTGATTGATGA | 786.397694536798 | 0.431061774481745 |
| ACGATTGACACA | 786.402618125645 | 0.304484337905342 |
| AATGGTGAGCCA | 786.404323927091 | 0.317840910453068 |
| GCAATATGACCA | 786.406783354006 | 0.332303592163298 |
| CTGTCACTACGA | 786.407653099157 | 0.255521802367634 |
| GGATTAGTCTGA | 786.418547811062 | 0.224962279188654 |
| TACTACGCGTCA | 786.427046971479 | 0.257120239706102 |
| ACTCATTAGTCT | 786.429204397142 | 0.220772043120332 |
| ACTCATACCCAG | 786.437236479457 | 0.100888187671485 |
| GTCATTAGAATA | 786.438846833487 | 0.196666442847098 |
| CTCAACGTGTCA | 786.440901657523 | 0.198195465818446 |
| GCCGAGGATGAC | 786.446767893994 | 0.266499424553467 |
| AACGTCAGTAAT | 786.448043532375 | 0.253415858195039 |
| AAGTGTCAGCAA | 786.448670566639 | 0.226064987844961 |
| GAGAACAATGAC | 786.453242017469 | 0.281241185972018 |
| GAATAGTGACAC | 786.455611237834 | 0.105147710060748 |
| GAGTCAAGCTGA | 786.470144266561 | 0.219326374876324 |
| ACTCATTCTGAT | 786.471283420637 | 0.218832745002133 |
| ATACTGTACAAA | 786.477656649616 | 0.299079308188198 |
| CGGTCATACGGA | 786.483819059279 | 0.332463100643777 |
| CTTAGGTGACGA | 786.485717077969 | 0.359098177687855 |
| AACCGTACTCAT | 786.486934642391 | 0.26637470427017  |
| ATAACATTATGA | 786.490011424926 | 0.220248586855406 |
| ATCACCCATGAC | 786.493081673723 | 0.226323338050438 |
| CTACAGTGACAC | 786.495260435532 | 0.262270065707655 |
| CCCACACAGTCA | 786.500087644308 | 0.186791736732223 |
| GGGCGTGTGTCA | 786.500508105859 | 0.326187284751834 |
| GAGAGTGACCAA | 786.501699518068 | 0.227678569889072 |
| TGACATATCGCA | 786.502274340543 | 0.334127858737024 |
| TAAAGCCAGTCA | 786.513126657516 | 0.32485554632471  |
| AGTTACGCAATC | 786.521919018344 | 0.225233898383661 |
| GTACAGCATGAC | 786.52360129787  | 0.206728817541992 |
| ATGACAGCTCTC | 786.527031978109 | 0.193061122226065 |
| AGATCGTGACGC | 786.529240892057 | 0.323743618112918 |
| TACAGACAGTCA | 786.544900894615 | 0.338512475675812 |
| GCATCATCGTCA | 786.548490725688 | 0.244550792477816 |
| CTGACAGATTGA | 786.551758385732 | 0.28868389144261  |
| TAATGCACGTCA | 786.553308122252 | 0.39091895339624  |
| ACACGTAAGTGA | 786.5596647786   | 0.256971117057474 |
| GGTTGTAATGAC | 786.560299508234 | 0.306329183285922 |
| AGTCACGGCGTG | 786.5643052218   | 0.287924016533995 |
| AGTTAGTCTGAC | 786.565972075713 | 0.261881172824566 |
| GGACCTGACGCA | 786.571875356597 | 0.253437065607231 |
| AACCCCATGACT | 786.573307744651 | 0.169196288801118 |
| CATCACAGTCAG | 786.576029336485 | 0.235290239183999 |
| CGAGTCAAAGTA | 786.576592601247 | 0.248732281784442 |

|               |                  |                   |
|---------------|------------------|-------------------|
| TATAGTGACAAA  | 786.581041331692 | 0.279703475526896 |
| AACCGCTGTCAT  | 786.588725209532 | 0.233353187744381 |
| AAAATGACCACG  | 786.589656161004 | 0.197843620650454 |
| AGGTGTCTCATA  | 786.590399148136 | 0.239892066267485 |
| AGACAAAATGAC  | 786.591083434722 | 0.171817646438429 |
| TTATGACCGCAA  | 786.597697426394 | 0.248941991805021 |
| AGTCAGACCCGC  | 786.604981412889 | 0.290606744239952 |
| GTCATGTTTCGTA | 786.619294691457 | 0.336763663345402 |
| ACTCATCGCAGG  | 786.622611903178 | 0.250481271541823 |
| ATTTCCGGTCATC | 786.627801080524 | 0.385348463248866 |
| AATTCAGTAATA  | 786.628010651894 | 0.12865224278998  |
| AGACTAATTCCA  | 786.628724196387 | 0.44028964607444  |
| CGGCACATGACA  | 786.631200613972 | 0.320213413114046 |
| AGAATAATGACG  | 786.641625699629 | 0.210405464973584 |
| ACTCATTCTCTG  | 786.64178646137  | 0.228643991913315 |
| CATCCTTATGAC  | 786.642482621011 | 0.263093456010736 |
| AATTGGCGTCAC  | 786.645041593862 | 0.243186315593996 |
| GTGCTAATGACA  | 786.646800170056 | 0.351837992204334 |
| CTCAATAGTGAC  | 786.650141262936 | 0.34170768206283  |
| CACAGTGACCAA  | 786.651246189727 | 0.221091323786144 |
| AGATCGTAGTCA  | 786.651609747507 | 0.330527916160902 |
| AAATGAGTGAAT  | 786.662438360886 | 0.20156808931572  |
| CGTGACGCCATA  | 786.663764740335 | 0.255057156028577 |
| CACGTAATCCGA  | 786.667614437495 | 0.352533390949577 |
| AGGGTCATTCCA  | 786.670466800401 | 0.285283132098595 |
| TCATACAGTCAA  | 786.673096414983 | 0.260279494477233 |
| CTGTGGTGACAA  | 786.691588480643 | 0.386593498742868 |
| GACTCCCTATGA  | 786.693996409945 | 0.224509665207963 |
| AAAAGGGTGACA  | 786.697704765124 | 0.221757575863756 |
| AGACTTTACTCA  | 786.702689588    | 0.232903663855453 |
| CACGTAATTTTA  | 786.712322788678 | 0.464476908705579 |
| AATCACTGACTA  | 786.712999642718 | 0.306486558472696 |
| GACTTTCATGAC  | 786.714783209492 | 0.280636874229075 |
| AGCGAAGGTGAC  | 786.71793048402  | 0.324630455308879 |
| AATTTTCGTGACG | 786.727384338427 | 0.182270807817    |
| AGAGTAATTTCC  | 786.743677219531 | 0.284608379206159 |
| CCGGTGACGGCA  | 786.747038322173 | 0.336272628565632 |
| AATCGCGGTGAC  | 786.753365916573 | 0.441883529198656 |
| CGGAAACATGAC  | 786.753625853694 | 0.280423039751226 |
| CGGCACTGTGAC  | 786.761977604063 | 0.259022169691977 |
| GAGTGGAATGAC  | 786.773244346695 | 0.134849765648786 |
| GAAGATCATGAC  | 786.778873823531 | 0.337681525363184 |
| ATGACGTCGGAA  | 786.78384381873  | 0.264170727900967 |
| AACCTGTCACAA  | 786.784177470461 | 0.159725027489511 |
| CACGTCTGACAA  | 786.785396859733 | 0.319882938422032 |
| AAAATGTACACG  | 786.788605889696 | 0.227134070558087 |
| ATCCGGCGTGAC  | 786.790283187004 | 0.338106299082827 |
| GTCGCTTCGTCA  | 786.790689792768 | 0.336799170015256 |
| CGTCACAAACTA  | 786.796723299358 | 0.377113680673453 |
| AAGAATGGTGAC  | 786.807182583663 | 0.316456389700364 |
| AGTGTGACTCA   | 786.809242818822 | 0.26242916789859  |
| GCTGAAATGACA  | 786.812414479508 | 0.243382105915558 |
| CAGCGGTACATC  | 786.822248151632 | 0.32187060152908  |
| CACGTCAGCGGA  | 786.823153048123 | 0.333529823121141 |

|               |                  |                   |
|---------------|------------------|-------------------|
| GTCACAGATGAA  | 786.824764689377 | 0.33451260272616  |
| GTCATGCGGCAC  | 786.825116371238 | 0.344622588327496 |
| CCCGTGTAAATGA | 786.825961216732 | 0.387682103333149 |
| GGCCTGTGACAA  | 786.840123630072 | 0.372710299513053 |
| CTGGGTCACCGA  | 786.840894191009 | 0.333245782796111 |
| AGACACGTGGCT  | 786.845400269708 | 0.395953622037875 |
| GGTACCGTCACC  | 786.848374500416 | 0.193068303623408 |
| CTTACGGTCATA  | 786.85204589168  | 0.35589894011004  |
| GTTACAGGAGTCA | 786.85304976392  | 0.313187863382068 |
| ACTCATCCAGGG  | 786.857014951618 | 0.219477457687956 |
| AACGTTGTGACA  | 786.876507477039 | 0.257334901619452 |
| GTACGACGTCAC  | 786.884144731254 | 0.296345608390049 |
| GTGACTTGATA   | 786.895092149884 | 0.221065982618414 |
| ACTCATAAGAAA  | 786.896631318703 | 0.230611280204033 |
| AGATGAGTAGGC  | 786.901476118524 | 0.199757404203233 |
| ATCGGTGAGCAA  | 786.903359629803 | 0.226675325731292 |
| GTAACCAATGAC  | 786.910060518471 | 0.411899264443941 |
| GCCTGACGTGAC  | 786.915756595724 | 0.267491932091145 |
| ATGACGCGCAAC  | 786.919034179103 | 0.189389046114959 |
| ATTGTTAAGTCA  | 786.926648184629 | 0.253276864207897 |
| ATGACTTCTTTG  | 786.928441982212 | 0.270307552441415 |
| ACAGTCAACTAT  | 786.933306909135 | 0.278172671368882 |
| CATAGGTACACAC | 786.934148821419 | 0.319117936493825 |
| ACGTCACAGATG  | 786.935361019945 | 0.256033717416659 |
| ACGTCATGTTCC  | 786.941395846967 | 0.17652561443019  |
| GGCTGACGTGAC  | 786.943025263546 | 0.275264003804133 |
| GACGATGGTGAC  | 786.95743941193  | 0.27727816509433  |
| ACTCATAATGCT  | 786.960771624663 | 0.240710904718549 |
| AATGAGTAGTTA  | 786.961017204186 | 0.163669882154137 |
| ATCGAATCATCA  | 786.97404287062  | 0.207182351794203 |
| ATGACATTTTCGC | 786.975529538851 | 0.207032977550096 |
| ATGAGCAAATTG  | 786.986510063315 | 0.23219425226839  |
| CGCTGACAGTCA  | 786.995485601804 | 0.250797190917058 |
| GTCAGTATATGA  | 786.996764229343 | 0.472745154006953 |
| ATGACTTCTTTC  | 787.000210631948 | 0.221956593356909 |
| AGCATGACAGCT  | 787.004181563942 | 0.333904386657261 |
| CACGACAATGAC  | 787.005269635375 | 0.406161570152136 |
| ATAATACTATGA  | 787.006332782017 | 0.332410661379034 |
| CGTCATGGTCGA  | 787.007538694423 | 0.232126774067984 |
| CTTACCGCGTCA  | 787.009863970853 | 0.214856842423354 |
| ATGAAAAGTCAT  | 787.016568486178 | 0.258260976106865 |
| GGGTCATCACGA  | 787.018978894955 | 0.314475728406484 |
| GTCACGGTCGAA  | 787.02013660126  | 0.259041617031816 |
| ACGTCACAAACT  | 787.029068918867 | 0.302206333042984 |
| TATGTCACGAGA  | 787.039032458954 | 0.219109422096056 |
| CGAAGTTGCTCA  | 787.043247350922 | 0.242392945686922 |
| AGTTACGCAATA  | 787.059376837652 | 0.168654451772231 |
| AAATGTGTAACA  | 787.060718116412 | 0.297978460228202 |
| CAACGATTACTC  | 787.064087953206 | 0.219824623106726 |
| GAAATCCAGTCA  | 787.070813878265 | 0.31456668050014  |
| ATAGGTGACGAT  | 787.074162531834 | 0.233877536222175 |
| ACGTCACCTAGA  | 787.082582856348 | 0.261702709218379 |
| CGTCATGATCGA  | 787.083577097858 | 0.419535299158469 |
| CGTAAGGTGACG  | 787.085297097712 | 0.325393842134461 |

|               |                  |                   |
|---------------|------------------|-------------------|
| AATGATTAGTCC  | 787.088470629482 | 0.339655267078008 |
| CTGTCATGAATC  | 787.093648100544 | 0.299485922516276 |
| TCGAGAGAGTCA  | 787.093700478606 | 0.309083268520973 |
| TAATGCGAGTCA  | 787.102688377945 | 0.366712543614464 |
| CTGACAACATGA  | 787.108332425616 | 0.255760266342361 |
| GCTCATATGTGA  | 787.112196127766 | 0.322340500248726 |
| ACACTTAGTAAT  | 787.116313032243 | 0.297525179914892 |
| ACTCATACTCTC  | 787.12198198171  | 0.173787992911096 |
| CAGGTCTGACGC  | 787.121983845201 | 0.435173842957166 |
| ACTGGGTGACCA  | 787.136204471388 | 0.282982425201404 |
| ACGTCGTACTCA  | 787.137483709057 | 0.318854536204984 |
| ATTCTTAGTGAC  | 787.141513472416 | 0.357733513382708 |
| GTCACAGGGCGA  | 787.143704037755 | 0.30147950757071  |
| ATGAGTCTCTCA  | 787.147958642606 | 0.302307557813569 |
| GTCATAATGGGA  | 787.150874092656 | 0.282676148254082 |
| CTCAAGTCATAC  | 787.154592150349 | 0.249791787713486 |
| AAAAGACTCTTA  | 787.171051492086 | 0.250242164792676 |
| TGACTACGGGAA  | 787.173622464558 | 0.240068471322163 |
| GCTTTTCCGTCA  | 787.174132310658 | 0.292603116596069 |
| AATAGACTCAAC  | 787.17575769933  | 0.22721286881843  |
| AGGTACAATGAC  | 787.181868838357 | 0.161988303004823 |
| AGTCAGATTTAG  | 787.188165819345 | 0.388766971897231 |
| CTGCGTAAGTCA  | 787.196634077058 | 0.423913543889086 |
| GTA AACCGTCAC | 787.201302720554 | 0.281139327014533 |
| CGCGTTAGTGAC  | 787.202290917465 | 0.216757597200336 |
| CCCGTCATATGA  | 787.204554866455 | 0.264731536751036 |
| AAGGAGTGTGAT  | 787.208457447772 | 0.254820813151909 |
| GCTCGTATGACC  | 787.211066657889 | 0.228601303522881 |
| AATAATGGTGAC  | 787.212946308122 | 0.237496891299336 |
| GTCTTGACCA    | 787.215829497629 | 0.233711298080624 |
| ACTGATTGACAC  | 787.217947913963 | 0.315253524869331 |
| GATTGACTACTA  | 787.219087252849 | 0.271557051925232 |
| AAATATGTCAGT  | 787.221594721848 | 0.150519348452364 |
| TGACGTGGGAAA  | 787.240169975087 | 0.218087209836239 |
| CAACATGACCCA  | 787.244891839946 | 0.232214954625379 |
| AAACTCTGTGAC  | 787.244926074128 | 0.17908670460356  |
| CGGATGGGTGAC  | 787.246803050043 | 0.395369720327379 |
| CGCGTCACGCAG  | 787.251254807673 | 0.274137212088513 |
| ACCCCTCAGTCA  | 787.269334263185 | 0.227173813741078 |
| GACTCAATCATC  | 787.272095304867 | 0.227078869713786 |
| ACTTTTGTGACG  | 787.272915828506 | 0.396562932760765 |
| GGTCAGGAGTCA  | 787.276530334779 | 0.194147587877829 |
| CGGTATGATACA  | 787.280027287516 | 0.183117537039752 |
| ATGAGCAACGCG  | 787.289698278062 | 0.207468765190887 |
| ATATCTTCGTCA  | 787.296556693711 | 0.243837081836265 |
| ATAATGTCGTCA  | 787.297506465077 | 0.33768371204768  |
| AACAGTCAATGG  | 787.299563473893 | 0.279011318371155 |
| AGTCAGAACTCG  | 787.301630985192 | 0.257276808549558 |
| TGAGTCCAAGAA  | 787.304067252988 | 0.316981643435139 |
| CTTCCGCGTCAC  | 787.310279382917 | 0.180567249762235 |
| GAAGTGTGAGAA  | 787.31260337975  | 0.195802253942136 |
| AGGCAAGATGAC  | 787.313821798789 | 0.270459641103789 |
| ATTAGTCGCGTG  | 787.315218783182 | 0.296091503636987 |
| GGGGATCTGTCA  | 787.317040889046 | 0.248706707129348 |

|              |                  |                    |
|--------------|------------------|--------------------|
| ATGACTTTTCTG | 787.321186073617 | 0.269204507513479  |
| AATGACGTCGAA | 787.322704387125 | 0.279184507809728  |
| CATATGAGTTAA | 787.330501767043 | 0.317722855376455  |
| CTGCGACTAATC | 787.330711214324 | 0.262276348620829  |
| GCTTACAGTGAC | 787.330829022479 | 0.250184070158531  |
| CACAAGTTGTCA | 787.33111585777  | 0.221120697543449  |
| GTTTGTCACTAA | 787.335521848557 | 0.173155907898531  |
| ATTGCTAATCCA | 787.350451778796 | 0.258737352362738  |
| AGACTCACGCTA | 787.353598145438 | 0.309308184530864  |
| ATGACGTCCTCG | 787.355603421068 | 0.358984265534327  |
| CGGTAGCATGAC | 787.361974454588 | 0.352893035269831  |
| AAAGTTGTCACT | 787.364356786763 | 0.20785660655958   |
| TCACGAGTCAAA | 787.374265176185 | 0.265208392123656  |
| ATGCTTTACTCA | 787.377423558531 | 0.268047619477638  |
| GAGGCTACGTCA | 787.393429806787 | 0.409568007305499  |
| GATACTCTGTCA | 787.416059909748 | 0.261018765308508  |
| ATTGTGACAATG | 787.42804124113  | 0.219610966334054  |
| AACGTGTCAGCG | 787.431450264335 | 0.334291793782484  |
| GGCCGCTATGAC | 787.433696076718 | 0.312212887729618  |
| CTTACCGTGTCA | 787.442129606549 | 0.41149999948927   |
| CGTGTCACGCAA | 787.445168135564 | 0.307911928741381  |
| AGCCTAGTGACA | 787.456596729535 | 0.329224101547716  |
| CCGTCTGTGACA | 787.459577857861 | 0.326113755329701  |
| GAGACTAATGAC | 787.46221903947  | 0.184376101070408  |
| GTATAGGGTGAC | 787.466568026948 | 0.200467269738925  |
| GACTGACTAGTA | 787.478517894424 | 0.296907691318339  |
| ATAGGGTACAT  | 787.485492914396 | 0.272021298681581  |
| ACAAGTGAATCA | 787.487542672656 | 0.224606214944581  |
| TGACGTTAGTAA | 787.507382804503 | 0.283215215798647  |
| ACAGAAGGTGAC | 787.510207268899 | 0.2195321331073    |
| TATTACGTATAA | 787.517375268895 | 0.245559324771809  |
| CAATTGACGTAA | 787.517453627955 | 0.264280853776834  |
| CAATGTTGTGAC | 787.519246567274 | 0.260393594182789  |
| AACAGTCAATCA | 787.520298514864 | 0.205769341035648  |
| ATGACGTTAGCG | 787.521018344388 | 0.19345012759614   |
| TAAACTCCGTCA | 787.522749964986 | 0.246963578217828  |
| ATGACGACGGCA | 787.522969421729 | 0.191670768092145  |
| ACATGACGTTAC | 787.532227834878 | 0.273868997923826  |
| ATGACGATCAAG | 787.53784289851  | 0.0404400250093783 |
| AGACTAATCTCT | 787.542466897695 | 0.141516540515182  |
| AATCGTGGTCAC | 787.548169902586 | 0.236259988861526  |
| GTCACGATTCAA | 787.559474059023 | 0.233176596119573  |
| CGATTAGTCGGC | 787.564445842461 | 0.288853216087317  |
| TGACAAAGTGCA | 787.571142301284 | 0.33258138058432   |
| ATGACGGAGGCC | 787.575176617578 | 0.139188961052834  |
| AGTCAGAACTGA | 787.578959897252 | 0.224107855279094  |
| GTCATGGAATCA | 787.586398086769 | 0.349772838927237  |
| TGCGATGAGCCA | 787.588089772496 | 0.24880181358856   |
| CCGATCACGTCA | 787.595678476351 | 0.387470863404525  |
| AAGTGAGCCACC | 787.596011181185 | 0.21188678986854   |
| AAGCTCTGAGTC | 787.600628300936 | 0.342948948906354  |
| GTGGCGGAGTCA | 787.601035908149 | 0.194183065650444  |
| ACCTGTGAGCAA | 787.601124563385 | 0.299809482073412  |
| CCCGGATATGA  | 787.604515998873 | 0.375824713657315  |



|              |                  |                    |
|--------------|------------------|--------------------|
| AACGCTAGTCAC | 787.604593392523 | 0.221351432845533  |
| GTTACATCACAA | 787.611671518397 | 0.192077981035108  |
| ACCATTGGATGA | 787.622942267681 | 0.330466088890081  |
| ACGCAGCGTGAC | 787.627076688746 | 0.199455213340019  |
| ATTGATTACGCA | 787.631809743789 | 0.24077803913556   |
| AACTTGCTCACC | 787.637276712923 | 0.122640967085214  |
| AAGGATTAGTCG | 787.649396090687 | 0.0924530994669904 |
| AATTAACTCATA | 787.666039957843 | 0.213055447869695  |
| GTCACATGTTCA | 787.666329678895 | 0.20772108593682   |
| CGTCACACCTAG | 787.667278708009 | 0.414436812666617  |
| TCAATGTCATCA | 787.67537586891  | 0.357195219540989  |
| GTCACACCAGAA | 787.677634115027 | 0.271125516572207  |
| GAATCATAATCA | 787.680104728096 | 0.268009181561338  |
| GATGAATGACCC | 787.683048281933 | 0.358910789703103  |
| ACAGTTCTGTCA | 787.684454369138 | 0.214935326700808  |
| CAACATTGCTCA | 787.684849336934 | 0.242795055539623  |
| ACGGAAGGTGAC | 787.686158471527 | 0.203925702399764  |
| ACAAAAGCGTCA | 787.689154565597 | 0.307558041325274  |
| AAAAGACGTGAC | 787.691034507733 | 0.352124187740724  |
| TACTCAGCGTCA | 787.697276394375 | 0.214367157387709  |
| ACCTAATCGTCA | 787.700523614291 | 0.212841388886395  |
| CTGCGATGTGAC | 787.703093639262 | 0.302633581738136  |
| AGGTTACTGACT | 787.706331681332 | 0.371659684292182  |
| GTCACCGTCGTA | 787.711513783432 | 0.307638579098469  |
| CCTTGAAGTGAC | 787.71583469693  | 0.202306159361096  |
| ATTATGCGTGAC | 787.724639583013 | 0.273570818394606  |
| GACAATGGGTCA | 787.749712277175 | 0.253950992504361  |
| ACTATTGAGTCT | 787.760658147459 | 0.341244947060729  |
| ATGAGTTACACA | 787.765010960587 | 0.144662512548038  |
| AACTAAAGAGTC | 787.773351483391 | 0.346090895674034  |
| AAATTATTCATA | 787.779852591553 | 0.294583576231444  |
| CGTGACATGACA | 787.806147941847 | 0.223708051294629  |
| GTGACGAGATCA | 787.808766855667 | 0.278146084007186  |
| TCAAACAAGTCA | 787.809301816316 | 0.19202018764254   |
| CAGATACTGTCA | 787.81306458142  | 0.415170814595564  |
| AGGTGAGCAACC | 787.813526809936 | 0.295539420117874  |
| ACTCATCCATTA | 787.815470900615 | 0.170960730476126  |
| GCAACCAAGTCA | 787.817966582645 | 0.271696510439884  |
| ATGTCATGCGGA | 787.825955993581 | 0.445468930283576  |
| AGACTAATCAAG | 787.829717597247 | 0.198110888540281  |
| TAGAAGCAGTCA | 787.830354830508 | 0.303993945991965  |
| ATGAGTAGGCAT | 787.838464954506 | 0.218305299222849  |
| ATTAGTCGCGCA | 787.840980810374 | 0.359435274686048  |
| AATAAGGTGACG | 787.843160229991 | 0.319769077408114  |
| TAGTCAGGATGA | 787.849117269613 | 0.335783722105453  |
| TCGTAAGTGTC  | 787.85305321928  | 0.218295130425663  |
| AACGGATAGTCA | 787.859021457557 | 0.261173851293379  |
| CACGTCCAGTCA | 787.865950903119 | 0.247650332036059  |
| CGGTGACAGGTC | 787.870413667218 | 0.290120283460004  |
| GATACCAAGTCA | 787.880247917439 | 0.257326755800816  |
| CTAAGAGTCTTA | 787.883748121843 | 0.245451614893105  |
| ATAGCCGTCATA | 787.895101374256 | 0.262218084998775  |
| GGTCATTATTTA | 787.935539926929 | 0.378852136031453  |
| GGGTGTTATGAC | 787.935623397875 | 0.217657576948634  |

|              |                  |                    |
|--------------|------------------|--------------------|
| AGTCACGAGGAA | 787.936961709104 | 0.238323299999255  |
| TGGCATTACACA | 787.943317850111 | 0.349378318377953  |
| CAGGTCACGTAC | 787.94485937943  | 0.265677010570505  |
| CGTCACAATAAC | 787.95092386266  | 0.306352498127839  |
| AGGATTAATGAC | 787.951856762812 | 0.214642687158497  |
| AGGTCCCGTCAT | 787.961002312196 | 0.168728546754723  |
| AATACGGGTGAC | 787.969979422797 | 0.432776352714896  |
| CCATGACGGTCA | 787.970107312757 | 0.268393472464451  |
| ACGTCACCGCAT | 787.975184817097 | 0.197091160635219  |
| ATCGCTGACGTA | 787.979539358515 | 0.40717533657741   |
| ACCTAAATATGA | 787.980423248185 | 0.323716493214956  |
| ATCTATGGTGAC | 787.981477686631 | 0.214716116495561  |
| GCTCACATGTCA | 787.99104177918  | 0.424404838950452  |
| ATGTGACCACTA | 787.991500509281 | 0.172987812039147  |
| GTCGCAATGACA | 788.006207569591 | 0.217679977745019  |
| CTTAGCTAGTCA | 788.008111123007 | 0.293974293009374  |
| ATGAGTACCGGA | 788.008940751921 | 0.250819185361587  |
| AATTAGCAATAC | 788.030550350667 | 0.224620342583724  |
| GAACGAAATGAC | 788.042992984474 | 0.210299554903124  |
| AGTCTTACGTAA | 788.043830008659 | 0.238028088481226  |
| AATGAGTAGTTG | 788.046858795047 | 0.211811970730641  |
| ACGCCTCTGACT | 788.047854003638 | 0.180373723441341  |
| GGGTCATCCATA | 788.048607431104 | 0.198327459692923  |
| ACGTGACCGGGA | 788.054071843078 | 0.273582071937529  |
| AGAGCGGAGTCA | 788.068693333779 | 0.0990221731930783 |
| ATACTCATTGTC | 788.069203922611 | 0.222421142327548  |
| CAGTCAGCATGA | 788.070647474245 | 0.219510734518657  |
| CATGTGAGCAAA | 788.094039542215 | 0.195097851531537  |
| ACGTGGGTGACA | 788.109639479758 | 0.258358770416509  |
| CGTAGCATGACA | 788.110946482549 | 0.240544139035679  |
| CTGCTGTGACAA | 788.111680992288 | 0.227712608726094  |
| GACTGATCAGAA | 788.113138691061 | 0.279643852930365  |
| CAAGTGCTGTCA | 788.113415570669 | 0.263166474726225  |
| ACACATGAGTAC | 788.120244284621 | 0.358122034318664  |
| ACTATGTGACAT | 788.120675328978 | 0.243634014100292  |
| ATGGTAAGTCAC | 788.12098011703  | 0.220981681441211  |
| CTGGCCTGTGAC | 788.12213109726  | 0.175073375489689  |
| GTCATCAGCCTA | 788.122899668341 | 0.177230199061018  |
| CTCATTTGACTC | 788.130050392164 | 0.218582531186128  |
| ACTCATAAACGG | 788.135427135548 | 0.323966451418904  |
| TGTGACTTCGAA | 788.136493032025 | 0.227847671878396  |
| GCGGGTAGTCAC | 788.15388433364  | 0.284614311313776  |
| AATCGAATGAGT | 788.162153416466 | 0.246733592038133  |
| CCGCGTGACATA | 788.171703461455 | 0.250105665270883  |
| CATCAACTGTGA | 788.180212441072 | 0.231625973757421  |
| ACAACCTGTGAC | 788.180419011979 | 0.22584799299494   |
| ACTCACAAGTCA | 788.189964930068 | 0.257039164926882  |
| AATGACCACTTA | 788.190067743255 | 0.39464528319783   |
| CGATGATGATTC | 788.197721689569 | 0.24352100739834   |
| CGTAAAAGTGAC | 788.201782461134 | 0.239934075402094  |
| ACATGTATTCAT | 788.202423361009 | 0.251841577557942  |
| ACAATCACGTCA | 788.203487380654 | 0.229044000223577  |
| GACTATGAGTTA | 788.203870995862 | 0.217952696140895  |
| AAATTCATGACA | 788.211107798158 | 0.323175868363919  |

|               |                  |                    |
|---------------|------------------|--------------------|
| AGCTATGGTGAC  | 788.221372102395 | 0.242197866415518  |
| GCGTCATGGCCA  | 788.222742936521 | 0.184114288926314  |
| TCGTCATGCTCA  | 788.232378663116 | 0.16519022605865   |
| GCCATACGTGAC  | 788.233144777367 | 0.270072548265611  |
| GTCATGGCGTAA  | 788.234049580308 | 0.320618997348614  |
| GCAGCTTTGTCA  | 788.241471911042 | 0.348698427435203  |
| TAGCATGACAGA  | 788.245155083964 | 0.218472669801176  |
| GCGGACTAATAC  | 788.246294005938 | 0.254882527407611  |
| GAGACTGTGTCA  | 788.246913084309 | 0.271433882258889  |
| GAACCTTTGAGTC | 788.251211145652 | 0.232181973510673  |
| CTAATCGTGACA  | 788.263579259348 | 0.18957501609399   |
| AGGGTCACCAAT  | 788.264234703687 | 0.445809947608692  |
| GGGGAGGATGAC  | 788.265267840395 | 0.162510102620532  |
| TATGATACAATA  | 788.279746004786 | 0.219471135382807  |
| CAACACGACTCA  | 788.283566306338 | 0.340787183730761  |
| GCGTCACAACCC  | 788.288605771847 | 0.299197434655503  |
| CCCTGTGTGACG  | 788.290222907609 | 0.270886922292914  |
| GTCGACGTGTCA  | 788.312381334906 | 0.258574400067951  |
| C GCGCTCTGTCA | 788.319536695707 | 0.320946061671046  |
| AGTCAGTGAGTA  | 788.326587432365 | 0.0789897306813059 |
| ACTCATATAAAG  | 788.329809043348 | 0.173543463615459  |
| AAAACACTCAC   | 788.331896281954 | 0.261292485882987  |
| GTATGACCGGTA  | 788.335683658392 | 0.225433498194365  |
| GAGAGATGACCC  | 788.338149529383 | 0.362448422159871  |
| AACCAGCATGAC  | 788.343466763482 | 0.276168143990332  |
| CATACCGTCATG  | 788.347835132243 | 0.349295928801379  |
| AGCGTCACTTGA  | 788.351927637825 | 0.196439503547044  |
| ATGATGTGTTTC  | 788.364581546188 | 0.296841749986589  |
| GTTCTGAGTCTA  | 788.367223599832 | 0.278675656018369  |
| AACGCATGACAT  | 788.368179871415 | 0.245943294665777  |
| GTGAGTCTGTGA  | 788.390386621709 | 0.227813942372905  |
| ACGTGAGCCACA  | 788.396674731221 | 0.253300829554556  |
| AAGTGAGATGAC  | 788.401587705262 | 0.198430912302434  |
| TTGCTCACAAAA  | 788.402223351502 | 0.346794860433043  |
| GGCGTCACTGAC  | 788.40989034798  | 0.305967831531164  |
| ATATTACTGAAT  | 788.412526102434 | 0.361874427919043  |
| AGTCAGCCCTAT  | 788.415935255431 | 0.451786601531205  |
| ACAGGTCGTGAC  | 788.416479508688 | 0.327640342853897  |
| GCACAACATGAC  | 788.417597115045 | 0.435570174686268  |
| TACGTCAGTCGA  | 788.423897273789 | 0.352812671058326  |
| CTTAGCGACTCA  | 788.427104972384 | 0.286586279036466  |
| ACCTTGTGACAA  | 788.433399353441 | 0.31233751214976   |
| TACGTACTATGA  | 788.434226238337 | 0.297542849233314  |
| GTCATGATACCA  | 788.437784501652 | 0.386096865916418  |
| GACTTATGACCC  | 788.443389320756 | 0.232435930027315  |
| GCAAGATGTGAC  | 788.457137412981 | 0.28785485440291   |
| TAGACTGTGACA  | 788.4598770099   | 0.215329454320826  |
| CCCCTCTATGAC  | 788.465830360647 | 0.238924958577339  |
| GGATAAGATGAC  | 788.467003982854 | 0.176839220930759  |
| ATGCATCCGTCA  | 788.479841463972 | 0.307060290223964  |
| CGGCGATTAGTC  | 788.487872232586 | 0.256060807134999  |
| CTAATCTGTCAG  | 788.50512428089  | 0.355428377732259  |
| CGAGTGATGAC   | 788.509878618125 | 0.446289741212218  |
| ATCGATTACATC  | 788.5106690181   | 0.235594812618017  |

|               |                  |                   |
|---------------|------------------|-------------------|
| GATGTCACGCCA  | 788.51711384117  | 0.365899232993815 |
| CATGACAGCGCA  | 788.522980572225 | 0.307724852728999 |
| TACCTGTCACAA  | 788.530626194016 | 0.16119173716566  |
| CGACCGCATGAC  | 788.53155475377  | 0.29652794234098  |
| ATGACCATACGG  | 788.531968298209 | 0.370253686455231 |
| GGACCCGAGTCA  | 788.535081353334 | 0.44261521827985  |
| AGCAAATGACAA  | 788.540757290448 | 0.223453496186364 |
| ATGAGCAACCAG  | 788.55419766015  | 0.214797659511014 |
| CACATATGACGG  | 788.557572832127 | 0.251006225215849 |
| ATTTCGTGGTCAC | 788.558152634144 | 0.352851146142151 |
| AAGTATTACGTG  | 788.564119316423 | 0.236868495512245 |
| GTGTCATGGAGA  | 788.569991608052 | 0.159982242855311 |
| CCAGGTCTATGA  | 788.57066406893  | 0.252482791961532 |
| GTGTCCAAGTCA  | 788.577784531334 | 0.253332672934783 |
| CTAACATGACGC  | 788.582231626742 | 0.272529642677751 |
| ATGTCATCTGAA  | 788.598560512259 | 0.152864939876779 |
| GTGTTACAGTCA  | 788.604385567488 | 0.234623047672543 |
| ACCGGTACTCAT  | 788.6098519032   | 0.16689678384157  |
| ATGACGGCTCAC  | 788.612403729596 | 0.338587318860853 |
| ACTGAGCTGACT  | 788.619490401124 | 0.32394839164871  |
| GAAGTAGGTGAC  | 788.623891246262 | 0.205834489169195 |
| CACTTGGTGTCA  | 788.625064339695 | 0.33451592437968  |
| GTCATGGTCCGA  | 788.625509483497 | 0.306372942297338 |
| AATTGGCTGACT  | 788.632359271766 | 0.310755373728975 |
| ATGACATTGATC  | 788.635536982353 | 0.181291119135174 |
| CTATATTGTGAC  | 788.635820083511 | 0.184639048546008 |
| AACTATCATGAC  | 788.640214993834 | 0.33879946857667  |
| GTCATTCCAGCA  | 788.645372003276 | 0.283146313804272 |
| AATACAGAGTCA  | 788.645731032353 | 0.261172967679683 |
| AGAACTTGCTCA  | 788.660945125457 | 0.322894661377477 |
| CAGCCCTAGTCA  | 788.662675056673 | 0.24740493031697  |
| AGATTACGTGAC  | 788.667842652255 | 0.302968536819347 |
| CTGACACTTTTC  | 788.668147973784 | 0.252327861851919 |
| AATTGTGGCTCA  | 788.678455462283 | 0.315022559849314 |
| GTCATAGTTTCA  | 788.680111004631 | 0.337140636060445 |
| GGTCACAAGACC  | 788.687361475494 | 0.340912528725973 |
| CGTAATATTACG  | 788.689744691065 | 0.213657669620903 |
| CTGACTGTGATC  | 788.696465566918 | 0.292654114731444 |
| GGTCTCATGACA  | 788.707043372083 | 0.247472781446112 |
| AGTTTCATGACA  | 788.708704833712 | 0.28358859206786  |
| GTTGACTCGTGA  | 788.720145549606 | 0.23479236389308  |
| GTTGACGTGTAA  | 788.725212380922 | 0.26477648842573  |
| GTGACGTGCCGA  | 788.732699534794 | 0.288350402294051 |
| AGCAGTGACCCA  | 788.732751586243 | 0.316682096655052 |
| GCGTGTCAGACC  | 788.73547650539  | 0.365507082234137 |
| CCAATGTGACGC  | 788.750732935199 | 0.254674060533505 |
| GTCACGGAACCA  | 788.7538701349   | 0.336973988144255 |
| CGTCATCTGAAG  | 788.753938907624 | 0.418058057793194 |
| AGGCAGAATGAC  | 788.755989592825 | 0.248306668125285 |
| GATACGTAATCA  | 788.756643080468 | 0.264582699455857 |
| AGTCAGGTACGC  | 788.771216278387 | 0.237299698725291 |
| CGGCGTCACCTA  | 788.777932100572 | 0.235404143488091 |
| TAAGAGGTGACA  | 788.779319102175 | 0.241635104972708 |
| ACTGATGCATGA  | 788.78022933989  | 0.351319043440598 |

|               |                  |                   |
|---------------|------------------|-------------------|
| CGTGATGGGTCA  | 788.787942273535 | 0.296427308360972 |
| GACGAATACGTC  | 788.788814159918 | 0.328180214423836 |
| GTCACCACAGTA  | 788.799457931858 | 0.298421313720095 |
| CGGTATGATGAC  | 788.806119417228 | 0.302604847202146 |
| ATGACCGAAAGC  | 788.813909801255 | 0.310228935933713 |
| AGTAATCCTGAC  | 788.840817533568 | 0.321850807803043 |
| CGACTAATTTCA  | 788.842493056933 | 0.232767592977771 |
| AATCTTACGTAA  | 788.852779254695 | 0.394503079303496 |
| CGTAAAGGTGAC  | 788.854412614474 | 0.321193797261636 |
| ACGGTATGTGAC  | 788.859405058252 | 0.157477539265163 |
| GTGACTAGCGTA  | 788.862013402589 | 0.243217062357567 |
| CCCAGCTGTGAC  | 788.870311683453 | 0.342871213096038 |
| ATGACCCTGACA  | 788.873314479362 | 0.307120442842143 |
| CGATCCGTGTCA  | 788.879276663033 | 0.400728579354935 |
| ATGATTACATAA  | 788.884763143089 | 0.182556072664551 |
| ACCGAATGGTCA  | 788.890955641813 | 0.292094007806286 |
| AGCAGGTGACGC  | 788.897153043616 | 0.231114352858005 |
| GGCTGAGAGTCA  | 788.898707148927 | 0.426708014009609 |
| GAACCCGTCAAC  | 788.902192405311 | 0.3061580583122   |
| ATGTCACAATTG  | 788.905866865388 | 0.364611618814391 |
| CTGAGTCTACGC  | 788.907560882294 | 0.256013519590845 |
| ACGCAGCTATGA  | 788.918097234756 | 0.330901863458942 |
| CCGAGAGTGACA  | 788.934447859415 | 0.26304452865646  |
| AAGTCATGGTTG  | 788.944317278945 | 0.149725328476512 |
| GTCACTCCTTGA  | 788.957519230865 | 0.358667194615379 |
| GTCACTATTAATA | 788.957985255338 | 0.167416754067261 |
| CGGCCATGACGA  | 788.959701474626 | 0.366338173801795 |
| CGGGTGTGTGAC  | 788.963366030832 | 0.320779547611584 |
| AGAGTAATTCGG  | 788.974626659129 | 0.29945241226542  |
| CTTATAAGTGAC  | 788.98215062807  | 0.212053600082414 |
| GACCGTCTGACA  | 788.983213231649 | 0.23161554390155  |
| TGTGTCAGGGAA  | 788.988022019467 | 0.214262897651169 |
| CGAATGCATGAC  | 788.991891136357 | 0.344937279131571 |
| AATGACGGGCC   | 788.993615033477 | 0.259728174324653 |
| TGAGTCGGTGAA  | 789.008465820851 | 0.1475576978311   |
| AGGTCCGTGACT  | 789.018232233668 | 0.264849296316502 |
| TCATACTCTGGA  | 789.019094644038 | 0.302289785071607 |
| GAATGCAATGAC  | 789.027776559123 | 0.345112043257216 |
| GATGCACTGTCA  | 789.036192025576 | 0.339528667458537 |
| CTAACAGGTGAC  | 789.037302374516 | 0.378136086543438 |
| ACCAGTCAGGAT  | 789.038893457932 | 0.343187021556796 |
| CAATTCCAGTCA  | 789.046679481965 | 0.150276376203109 |
| CCGTTGACACAA  | 789.047792630688 | 0.349500237356306 |
| TCTTAAACGTCA  | 789.049052969112 | 0.334672000037893 |
| ATATCATCAGTC  | 789.060508867581 | 0.239336174587365 |
| GGTGACACGAAC  | 789.060937993904 | 0.29228692456276  |
| GCAGACATGACA  | 789.061296601857 | 0.269324858208872 |
| ATTGGGTACCGC  | 789.067125010783 | 0.247064289110642 |
| GATACGGGTGAC  | 789.068178470581 | 0.181584325998125 |
| GATGCCTGTGAC  | 789.07336446448  | 0.386450089125044 |
| GAACACATCACC  | 789.076574351116 | 0.204100729422741 |
| AAGATAATGACG  | 789.076972908366 | 0.227422138714719 |
| CAAGGGTGACCC  | 789.080746688376 | 0.250270385943192 |
| CACTCTAGTGAC  | 789.08143242148  | 0.247084302593481 |

|              |                  |                   |
|--------------|------------------|-------------------|
| AGAATTGTGACC | 789.083117221076 | 0.293914784010687 |
| TGACTAGTGGAA | 789.086393892849 | 0.262564466881933 |
| ATTGTTCTGCAC | 789.091317508122 | 0.341313537880558 |
| ACAGGCCAGTCA | 789.095720240716 | 0.423587861015117 |
| CCAGCTGATTCA | 789.098170429698 | 0.350136363193094 |
| GCAGTTGTCACC | 789.098619956608 | 0.320091625639536 |
| GTCACACAGCCA | 789.112787357091 | 0.182451718433495 |
| TGCTGAGTCGAA | 789.11610393219  | 0.269540982793238 |
| AGTGAGTCTGCA | 789.121614855469 | 0.257429696695143 |
| CTTTATGTGACA | 789.123734113125 | 0.228257451284943 |
| TACGTGTCAGAA | 789.13719835403  | 0.195450851056868 |
| CTGTCATTGCTA | 789.144532737485 | 0.31142593842656  |
| GGTAATTGTGAC | 789.148753602459 | 0.324742286200323 |
| AATGGTGGTGAC | 789.150031227908 | 0.266164722979843 |
| ACGAGAGGTGAC | 789.151262407713 | 0.185601981230987 |
| GTCACCCTGAGA | 789.154051511029 | 0.339210945189754 |
| ATGCGTGACGCG | 789.157648867948 | 0.286637347977527 |
| GCAGCATGTGAC | 789.171578582136 | 0.190845164067337 |
| CAGCAACGTGAC | 789.172575671101 | 0.252736338398399 |
| ACGACCTGTGAC | 789.18783129878  | 0.310125603819768 |
| ATTTACATGTCA | 789.190536611534 | 0.298985833512973 |
| CGATTAATGACG | 789.197140868716 | 0.315678760421199 |
| CACGGACTCACA | 789.203753699271 | 0.370268908496619 |
| CGTCACATATGC | 789.21140965651  | 0.313877160793545 |
| GTCACCAAGCAA | 789.214672043744 | 0.321307105174163 |
| AATGATATCATC | 789.218219379202 | 0.245361542174589 |
| ATCCATTGAGTC | 789.219186267436 | 0.283247611365467 |
| ACTAGTGACGCT | 789.226281978652 | 0.324147361297025 |
| AGCCTTCTGACT | 789.227159537409 | 0.313087254314843 |
| CACCAGGTGAC  | 789.227938649753 | 0.207631795203305 |
| AAGGTCCAGTCA | 789.233232572214 | 0.204191515505614 |
| GCATCGACTCA  | 789.234801073075 | 0.285562595742529 |
| GTCACGACACGA | 789.235392160429 | 0.237271720423808 |
| ATGACTTCTTTA | 789.236913022223 | 0.205877114584299 |
| AAGTGGTCACTC | 789.237430353005 | 0.252087740973853 |
| GGTCATTCATTA | 789.241167718717 | 0.445513027420773 |
| CTCCCGATGAC  | 789.246970867931 | 0.267426263468162 |
| CGATTTCCGTCA | 789.247247972625 | 0.274027525690968 |
| TACATGGCGTCA | 789.249250521839 | 0.300370748310165 |
| GTCACCTTAGAC | 789.252209497389 | 0.249598117042525 |
| ATGCTACATGAC | 789.259554007868 | 0.356766785263298 |
| TGATCTGACGAA | 789.263159521165 | 0.174192297676068 |
| GAGACGTGTGAC | 789.2647433409   | 0.304546875165637 |
| ATGACAGTAGAA | 789.265368069482 | 0.287164285993113 |
| CGTCACAAGTAC | 789.266502968976 | 0.283908042167371 |
| ACGATTTGTGAC | 789.274854705002 | 0.314245334873422 |
| AGACGTGTGACG | 789.282118312284 | 0.275017998130962 |
| ATATGACCTAAC | 789.29280470232  | 0.15608740046095  |
| GACTGGTCAGAC | 789.298890807376 | 0.2061308168291   |
| ATGAATCAAAGA | 789.307815096102 | 0.145748913611045 |
| GACGGCACGTCA | 789.330698900004 | 0.293017119885312 |
| GGTGACGATAAA | 789.331479064068 | 0.301587906694939 |
| ACGTCACAGGCG | 789.336044530542 | 0.213671014245562 |
| ACTCATCCACGG | 789.338632088767 | 0.170132104063541 |

|               |                  |                    |
|---------------|------------------|--------------------|
| AAGATGCTGACT  | 789.344029937652 | 0.308132461148255  |
| CGTCAATGACCA  | 789.354494232282 | 0.152037850877219  |
| CTGTCACAGGAA  | 789.365900310304 | 0.265952986726882  |
| TCCAAAACGTCA  | 789.368143114103 | 0.258727242513049  |
| CGGTGTCTCATA  | 789.385006613593 | 0.248975544632979  |
| TAAAAGGTGACA  | 789.386817561787 | 0.224717258922317  |
| CCATTGTGTGAC  | 789.389605959549 | 0.353707900539043  |
| CTGACTACGTAA  | 789.39632691319  | 0.281467557631774  |
| GATGACCGCACA  | 789.398449451705 | 0.286822133316997  |
| GAAACACATCAC  | 789.403181427883 | 0.267686513363729  |
| CATTTGATGACC  | 789.426362836682 | 0.265898599562864  |
| CGTGGACATGAC  | 789.42881571409  | 0.347702861327494  |
| ACTCATCCTTTG  | 789.432230153423 | 0.129477911065759  |
| ACGATGATTAGT  | 789.435063720949 | 0.309953076492316  |
| AGTACCTGTCAC  | 789.438604170018 | 0.208601542883392  |
| GTATACCGTGAC  | 789.439497013365 | 0.246787276797913  |
| AATTAAGGGTCA  | 789.441793465467 | 0.295518186230211  |
| TGACGAAAGACA  | 789.453151918651 | 0.222329385252607  |
| CGTCCCAGTCA   | 789.457542353965 | 0.408541071966808  |
| AGTTTGATTGAT  | 789.459956503616 | 0.301078742929582  |
| GTCACGCGAAA   | 789.462979734606 | 0.143731774056318  |
| CTTCCATATGAC  | 789.466712705871 | 0.221994120373379  |
| CTCGATGTGACA  | 789.468194403249 | 0.182723929970338  |
| CTAACTGATTCA  | 789.46823246954  | 0.0291451391117753 |
| GAGTGGACTCAC  | 789.470962320091 | 0.218249770595967  |
| ACTAGGTATCA   | 789.47349174112  | 0.325682196488787  |
| AGGCTCTATGAC  | 789.477027961119 | 0.381546081398304  |
| CGTCACCAAACG  | 789.484524403754 | 0.220451108731964  |
| GTTTGAGAGTCA  | 789.48838753543  | 0.310170721109181  |
| ATGATACAACCTG | 789.495991711171 | 0.354702665187849  |
| AGTCAGAGCAAG  | 789.514335242363 | 0.252425176205247  |
| GTCACATCACCA  | 789.516472455084 | 0.168176477925342  |
| AACCCCGTCATT  | 789.516866319779 | 0.142975648392141  |
| AAGACTGTGACG  | 789.531680931005 | 0.292941157847773  |
| CATCTATGACCG  | 789.537749262936 | 0.239743278609147  |
| CAAGCTGTGACG  | 789.538177261379 | 0.267391413435493  |
| ACTGGGGAGTCA  | 789.538660193026 | 0.201287936278568  |
| GTCACGAGGCA   | 789.544563299911 | 0.220549059443803  |
| GTCACCCGTACA  | 789.555605376016 | 0.20108458571752   |
| AGAACTATGACC  | 789.562335680489 | 0.229409006048517  |
| AGATTTGACTAT  | 789.569169962937 | 0.255772953139408  |
| CTCATACTGTGA  | 789.577859397203 | 0.231077640489233  |
| GGAACCTGTGAC  | 789.578370926117 | 0.224473674117637  |
| CATCATGACGAG  | 789.579544970814 | 0.238907568946937  |
| AGTGTCACGTGG  | 789.587461027021 | 0.270006679921604  |
| AGTTACTCTTAA  | 789.605920746889 | 0.229562658639577  |
| CCATGCATGACA  | 789.606512367161 | 0.164803675542419  |
| CTGGTATCGTCA  | 789.608050547533 | 0.268340531981891  |
| AATACGTCAACC  | 789.609126471928 | 0.341604994615363  |
| CCCTGAATATGA  | 789.616386830858 | 0.397549740912102  |
| TACTCCGACTCA  | 789.617141679505 | 0.10434551711389   |
| AATGTCATTTGG  | 789.621317362544 | 0.246291286844216  |
| GGTATACCGTCA  | 789.621929593771 | 0.200673882981827  |
| CGTCATGTCACA  | 789.624409571498 | 0.270870322488713  |

|               |                  |                   |
|---------------|------------------|-------------------|
| ACAGTCAGGATG  | 789.628514495918 | 0.258157412273304 |
| AAACCTACGTCA  | 789.629057095571 | 0.221891212242629 |
| ATGACACCCAC   | 789.634491654151 | 0.249703386875974 |
| GTGAGTCCATTA  | 789.636389801521 | 0.224642712926751 |
| GCTGACCCGTCA  | 789.64327133604  | 0.198387675995701 |
| TCACTCAGAAGA  | 789.650868748355 | 0.428130061705895 |
| ACTTGGTGACAT  | 789.651025958908 | 0.227789960878188 |
| CATGAGGTCATC  | 789.653419343566 | 0.24282052873826  |
| GTCACAAGCCGA  | 789.663291775493 | 0.216690291643692 |
| CATGAGTGTGTC  | 789.671204519188 | 0.330135906806392 |
| CCGTCATTGGCA  | 789.679935071554 | 0.307612836671716 |
| CGTCACAATGTA  | 789.682293588893 | 0.123669398022494 |
| TCGTGATGACCA  | 789.688769490763 | 0.217536992851509 |
| CGAGCAGTGACA  | 789.691793286677 | 0.361544436854268 |
| ATTACTAAGCCA  | 789.693817715593 | 0.249329509702797 |
| ATTGATTACCA   | 789.698559575937 | 0.361200936930149 |
| AAAAGGGTGACG  | 789.710401645686 | 0.138267600811949 |
| GTCACCCGAATA  | 789.718594630028 | 0.272464146295215 |
| GTCATGGCCAGA  | 789.72264320949  | 0.308503093388685 |
| CTGTTGTGACGC  | 789.73568791763  | 0.310156528108936 |
| CCCCGGTGTGAC  | 789.736023240029 | 0.195490249838373 |
| ACATAATGACAT  | 789.74874814244  | 0.343480885292381 |
| CCGTACGGTGAC  | 789.761443173476 | 0.175330851997133 |
| AATATGTGACAA  | 789.763826114243 | 0.355164981720778 |
| ACGTCACGTAAG  | 789.765683282674 | 0.397646723070233 |
| GTCACGGTACAC  | 789.771724577123 | 0.242838242733305 |
| CGAAGAGTCTTA  | 789.773032125868 | 0.332105253015895 |
| TGATTGACACAA  | 789.776600100935 | 0.258500291832872 |
| CAGTCAACACGG  | 789.777487450356 | 0.234672181254706 |
| AAGGTCTGACAC  | 789.788528463153 | 0.398114232016896 |
| TACTACATGACA  | 789.792367264964 | 0.333514530910191 |
| CACGATGTATCA  | 789.798621234189 | 0.291461977294289 |
| ATGACGTCGGCG  | 789.79899580449  | 0.320379673232926 |
| AGTTCAGATGAC  | 789.806558267299 | 0.259221600647246 |
| CTTTGCGGTGAC  | 789.807941455488 | 0.222232706224669 |
| ATAAGACTAAAT  | 789.808121547313 | 0.278882802011075 |
| GGTGGCAATGAC  | 789.818327867257 | 0.324470995341547 |
| ACAATGACCCGAA | 789.821673520559 | 0.229076588836123 |
| CCGCACAATGAC  | 789.8289743928   | 0.226900313412395 |
| GATTCATCATGA  | 789.830742381985 | 0.321888688735289 |
| TGGTCACAGACA  | 789.832647804413 | 0.310813535888921 |
| ACGTCACCTAC   | 789.834455230943 | 0.129196021847243 |
| ACCGTGATGAGT  | 789.842430814204 | 0.21712122489927  |
| AGGGGTGACCCA  | 789.845507594206 | 0.343593661429787 |
| TAATTTAAGTCA  | 789.864295311163 | 0.214214343251982 |
| AACTTCTGACTG  | 789.867524291249 | 0.241204178780577 |
| GTGACTTACTTA  | 789.871048928075 | 0.274351089738239 |
| CACGTAATATGG  | 789.876478098181 | 0.384673400485318 |
| CCTTCGTGAGTC  | 789.879553838783 | 0.301600923383719 |
| TAAGTGGTGACA  | 789.881302906651 | 0.2500831313638   |
| ACCTAATGTGAC  | 789.884895684368 | 0.362684836015914 |
| AAATTACACACT  | 789.890965714881 | 0.313884154579397 |
| AAATGATTGAC   | 789.89158906919  | 0.134069760769711 |
| CAATCATGACAA  | 789.89183707638  | 0.296724706251399 |



|                |                  |                   |
|----------------|------------------|-------------------|
| AACGCGTGA      | 789.892830650303 | 0.229333658006632 |
| TTAATCCA       | 789.899181601911 | 0.248782406462207 |
| ACTCATTTGA     | 789.899425758042 | 0.237159748352974 |
| GAAATGCATGAC   | 789.900110394097 | 0.276232722854057 |
| ACCGAGTGCAT    | 789.905383653135 | 0.264877846802917 |
| GTGTCACGCCGA   | 789.908568040648 | 0.246727202190408 |
| ACGTCACAAAAT   | 789.910666664488 | 0.307082648241754 |
| GCAGGTAATGAC   | 789.911771541542 | 0.298269663476931 |
| ATGACCTACTCA   | 789.916239204973 | 0.148705052016582 |
| CCACTGGTGACA   | 789.916378730867 | 0.216513755215265 |
| AGACACAGTGAC   | 789.919054339895 | 0.365244797346371 |
| AATAGAGTAATA   | 789.92328638817  | 0.240556556554332 |
| GTATGAAGTCAC   | 789.924381920009 | 0.25854318752999  |
| GAGTTATCTGAC   | 789.924488974018 | 0.409232072116633 |
| TCATAATAAGGA   | 789.925366909698 | 0.25993844197682  |
| CGTCATCTATCC   | 789.927902691262 | 0.275104770099333 |
| ACCTCGTCATGC   | 789.93584641172  | 0.228008330841126 |
| CGAGGTGACAAC   | 789.944830253689 | 0.401770640847461 |
| TAGTTACAGTCA   | 789.948160291094 | 0.35064949203901  |
| CGCTGACAGATA   | 789.955516468005 | 0.271075031265538 |
| AAAAGTAGTGAC   | 789.958420019992 | 0.318008597028941 |
| ATGACCGAAAAC   | 789.961770341667 | 0.288970416052755 |
| ACTCGTGACCCA   | 789.973847063673 | 0.266507070049076 |
| CATCGGTGACCA   | 789.974196752572 | 0.296587430990321 |
| CCCTGTGACGAG   | 789.984583076408 | 0.450333718594037 |
| GTCACAAGATGA   | 789.98835166313  | 0.262155270021917 |
| AGTCAGACGCCG   | 789.990119625544 | 0.241602889844711 |
| AAAATTACACAC   | 789.995641761946 | 0.162790624975527 |
| ATAGGGGTGACATA | 789.998047892346 | 0.187356790339727 |
| ACGGGGTGACGC   | 790.003376319582 | 0.24725053931536  |
| GCCGCTACGTCA   | 790.006943317474 | 0.251370958210391 |
| ACTGTTATGACC   | 790.007211625648 | 0.324446993895167 |
| GGGTCATAGGAA   | 790.017484402926 | 0.287440011132134 |
| TCATCTGAGCCA   | 790.018330582149 | 0.311704175382779 |
| GAAGGAGAGTCA   | 790.018768382564 | 0.195575685254749 |
| CACGCTTGGTCA   | 790.018859351357 | 0.241053065967231 |
| ATGACAAGACCC   | 790.019058180569 | 0.168185852074474 |
| ATGACATCTTTG   | 790.020543705163 | 0.178873628920118 |
| CGTCATTA       | 790.027487976601 | 0.291059633343478 |
| CTTCTG         | 790.03150417198  | 0.310995869532374 |
| TTG            | 790.032506111439 | 0.191835381037936 |
| CGATAAATGACG   | 790.035119053292 | 0.222794992837985 |
| TGAATCAAGTCA   | 790.047021280722 | 0.317107700510016 |
| CAATCCGTG      | 790.055722767361 | 0.288959145363415 |
| CCGTTTGACGCA   | 790.05639364532  | 0.312258036099784 |
| ATATACTTGTCA   | 790.057276135804 | 0.185508346655701 |
| AAGAGTGGTCAT   | 790.058512319451 | 0.144358253426103 |
| GCGTAATCTGAC   | 790.061215305527 | 0.174708129129363 |
| CGTCACACAGTA   | 790.069817237782 | 0.344889881650594 |
| ATATTTTCTGCA   | 790.078413702974 | 0.230145131861337 |
| CGGGATAATGAC   | 790.095253423924 | 0.287193370008531 |
| GTCATTGCAGGA   | 790.099310642625 | 0.280540480239998 |
| ACACAGTCA      | 790.106568380724 | 0.165844180563543 |
| AGTCA          | 790.107338808901 | 0.267179134060286 |

|              |                  |                   |
|--------------|------------------|-------------------|
| TCTACGCAGTCA | 790.111127317345 | 0.118010598087464 |
| GGACATCACTCA | 790.116207712291 | 0.258123731859313 |
| CTTTTGACTGAA | 790.118620136455 | 0.304879780936973 |
| ATAGAAATGACA | 790.119646515162 | 0.190422583743683 |
| ATCTGTGGCTCA | 790.126195619349 | 0.224291479496646 |
| AAGTCAGTGTCA | 790.127495384173 | 0.219953990737383 |
| ACCTGTATGAGT | 790.129334975785 | 0.234604662639048 |
| AACCGTGAGTCT | 790.129815577859 | 0.193369118210957 |
| AGGAATAATGAC | 790.130929664017 | 0.228961175430701 |
| GTCACGTATCCA | 790.132341756085 | 0.25004810251977  |
| ATACAACGTAC  | 790.155453918504 | 0.3916250979561   |
| TACTTTGACGCA | 790.156243500734 | 0.268737567843789 |
| CTGAGTCTATGA | 790.157386406233 | 0.16084862249505  |
| ACAGTTGATGAC | 790.157789883986 | 0.324582177838413 |
| ACTCATCGGCAA | 790.162964793235 | 0.413050378020337 |
| CGTCATTAATC  | 790.164808140097 | 0.18074417597323  |
| TCCACCGACTCA | 790.189290490334 | 0.249639780498096 |
| CGCACATGACAC | 790.194467953989 | 0.232587080581591 |
| GACTAATCAAAC | 790.196736682727 | 0.173896746683075 |
| TGTTAGTCTTAA | 790.202172529672 | 0.233844728923572 |
| AAGAATCATACT | 790.202202753311 | 0.300603021609194 |
| GTGCCCGTCATA | 790.209035246406 | 0.225555615366056 |
| ATGGCGTGACGC | 790.211881202433 | 0.319945961153662 |
| AGACGCATGACG | 790.221084602892 | 0.25518254340409  |
| GTGACTACCGGA | 790.222188639432 | 0.426909011773325 |
| GACTAATTTCAA | 790.235871211721 | 0.239708671589464 |
| GGGTCATCACCC | 790.270515409025 | 0.280651796074536 |
| CTCTGACATCAC | 790.277849274968 | 0.203847413110492 |
| CGGTCATATTAA | 790.2785024594   | 0.412078574556993 |
| AGAGTGACGAAC | 790.282736998333 | 0.28454521993514  |
| GTACGATGTGAC | 790.28398983358  | 0.153899725946465 |
| TCATCAATGTCA | 790.286594680897 | 0.245855752775159 |
| ACTAGGTGACAT | 790.28715858998  | 0.339227858713748 |
| GTCATTGCCAAA | 790.29147294949  | 0.355294540981761 |
| CGGCAGCGTCAC | 790.292254672367 | 0.384062548845883 |
| CCTCTGACGAAG | 790.295777928903 | 0.304188317588551 |
| AGTCACGGACAC | 790.296834992448 | 0.273962856504445 |
| ACAACGTGACGC | 790.298828944837 | 0.226345790790781 |
| AGTGTCCATGAC | 790.311231631138 | 0.304376592138663 |
| CCACAAGTCATC | 790.316177147818 | 0.185434008729007 |
| AATGTTGATGAC | 790.318564540371 | 0.395061199709565 |
| ATGAGTACGCAA | 790.320936979209 | 0.390882905432085 |
| CACATTGGTGAC | 790.324363347072 | 0.354146420684957 |
| AACACATCATCT | 790.324992272001 | 0.212432144550658 |
| GCGAAATGACAA | 790.330327820024 | 0.17414879411117  |
| AAGAAGTGTGAC | 790.333506702812 | 0.228429853572913 |
| GTCATTTGGAAA | 790.359639525416 | 0.305925184676709 |
| CATCCTGTCATC | 790.360243681729 | 0.215936205982399 |
| GAAGCATGACAC | 790.37096861448  | 0.325930449566878 |
| ATAGCCCAGTCA | 790.372055444821 | 0.379410698902684 |
| ATGACCTAATTC | 790.375193194938 | 0.216931647175091 |
| ACTCATCTGGGG | 790.380715620189 | 0.250713251837397 |
| ACTCGTGACACG | 790.381798879089 | 0.288058090203722 |
| AAATCCTAGTCA | 790.383578304689 | 0.250734679349289 |

|              |                  |                   |
|--------------|------------------|-------------------|
| CCGCCAGATGAC | 790.387829350576 | 0.316832775403729 |
| AACTCGGCATC  | 790.390152108424 | 0.222113877434149 |
| ATTATTTGTGAC | 790.392385690953 | 0.219733435475032 |
| AAGCTTGTGTCA | 790.392648813113 | 0.28079489325345  |
| GTGACGCCACGA | 790.393929183889 | 0.269398963480244 |
| TATAGTGACGAA | 790.413795503853 | 0.225803334222003 |
| AACGCTGACTGC | 790.416746906024 | 0.30473007770511  |
| AAGTCACGCTGA | 790.417497790122 | 0.128349096139968 |
| AGTGTATGTGAC | 790.417761445676 | 0.294275605744498 |
| CGAGAATGTGAC | 790.421605326039 | 0.410355637063577 |
| CGGTCGCGTCAC | 790.428942630025 | 0.358348881775164 |
| GAGTATTGTAC  | 790.435303937298 | 0.255796253139661 |
| CGATATGGTCAC | 790.448268357356 | 0.270637864725166 |
| CAAATGCATCA  | 790.449383281488 | 0.2701550565393   |
| ATGAAGTAGTCA | 790.489771096294 | 0.247384636657395 |
| CTGACACTGACA | 790.489900282435 | 0.218069383384526 |
| GGTACACATCAC | 790.499066562067 | 0.385753703429537 |
| AGGCCTGCATC  | 790.500754314557 | 0.331415630483226 |
| TGTGATGTGTAA | 790.500811189087 | 0.186141441597148 |
| AATAGTTGTGAC | 790.501042305656 | 0.359749078225033 |
| AACGCGTCAGAC | 790.501188288519 | 0.241918014362659 |
| CTGCCATGTAC  | 790.506221570638 | 0.219592657430607 |
| ATGACTTGAATG | 790.508240352676 | 0.208314438595999 |
| ACACCGTGACGT | 790.50835140045  | 0.374609927255476 |
| CCATTTAATGAC | 790.5090517821   | 0.23627781106502  |
| GAGTCAAGACTA | 790.532334993243 | 0.290757860375873 |
| ATGCGTATGTCA | 790.533823830177 | 0.233342283923253 |
| ACTCATCGAAAG | 790.534047656153 | 0.303005006868822 |
| AGTCAGAGCGCC | 790.534720483968 | 0.295467077745047 |
| CATAACATGACA | 790.552267215495 | 0.311231262510496 |
| CATAAGTGACAA | 790.565236319534 | 0.250619902695056 |
| CCGTCGCGTCAC | 790.565727405746 | 0.218377153252666 |
| GAGGGAAATGAC | 790.574950368085 | 0.198141901953372 |
| AAGTAATGACAG | 790.583981544632 | 0.25804429492898  |
| AGCCAGTGACAC | 790.585373263515 | 0.2648214177895   |
| CGATAACTGTCA | 790.587582879961 | 0.344944377948756 |
| CGCTCGGTGACA | 790.592164879987 | 0.293652305774333 |
| ACTTAATCGTCA | 790.593084443749 | 0.224881962724244 |
| GCGGTCATACCC | 790.593627099792 | 0.277190573040004 |
| CGGCTATCGTCA | 790.601156792673 | 0.386979305299705 |
| CGTCATGATTAC | 790.617770543607 | 0.24093520096512  |
| TATGCGGAGTCA | 790.623964984076 | 0.381787727923608 |
| GTCATGCATATA | 790.629056008142 | 0.252550891257767 |
| TAGGATTACGCA | 790.631273899048 | 0.27335274366781  |
| ACTCATCATGAG | 790.644442278921 | 0.31958056411807  |
| AGACGCCATGAC | 790.644750125688 | 0.408710927875921 |
| ATGGATTACGCA | 790.650818767862 | 0.331748506037097 |
| ATCAAGTTAGTC | 790.660790323937 | 0.281686981500444 |
| CAGCGTTGTAC  | 790.66278040656  | 0.350493505699262 |
| GATTTGTCAACA | 790.667680039225 | 0.263502043547443 |
| GTGAGCAAACCA | 790.677783224077 | 0.27192322789339  |
| GGCGTCATGCAA | 790.696553338177 | 0.342152354775874 |
| ACAACGTTGACT | 790.699986392704 | 0.420613666148936 |
| CCTACTTTGTCA | 790.703665405582 | 0.329734692284153 |

|              |                  |                   |
|--------------|------------------|-------------------|
| GTCATTTCCAAA | 790.704073019069 | 0.21417017511787  |
| ACATGGCGTCAC | 790.709074379956 | 0.211210301284241 |
| GACTGATCTGAC | 790.718012443656 | 0.198261025792151 |
| GTGACCACTTAA | 790.723877100513 | 0.243977971502078 |
| GCATGACAGTAC | 790.73077689022  | 0.160991219403905 |
| CGTCATCGGGTC | 790.735328027872 | 0.245454116014214 |
| GTCACGCATTAA | 790.739199048325 | 0.252917201072687 |
| AACCTCATGACG | 790.739359466768 | 0.31085891138539  |
| GATCGAGTAATC | 790.739641246107 | 0.238526186377876 |
| CGTGTGAGCAAA | 790.742766490121 | 0.249513662769073 |
| AATCCAGGTGAC | 790.752397877524 | 0.370656329742075 |
| AGTCAACTCTAT | 790.752798169584 | 0.286858615997619 |
| GACTCAGAGTAC | 790.756434821674 | 0.194648951387559 |
| TATTCATCGTCA | 790.759536253058 | 0.256718373550548 |
| AGCGCTGACTGC | 790.762566248661 | 0.311376934014201 |
| AAGTCACTCCAG | 790.764074046176 | 0.277029139000473 |
| GACCGCATGACA | 790.768426493197 | 0.243527528268523 |
| AATAATGACCAC | 790.785217909118 | 0.225279294423061 |
| GCCGTACAGCC  | 790.785796054961 | 0.222196538820425 |
| GGAGAAAATGAC | 790.789740341791 | 0.227583693003338 |
| AGTCAGACGGTC | 790.792965210869 | 0.370503169735051 |
| ATGACGCTCTAC | 790.796323493979 | 0.245797968231296 |
| AAGCTAATGACG | 790.806767196505 | 0.30582196019035  |
| CGTGAGTCCGAC | 790.817697033901 | 0.270363638649786 |
| AGTGACTGCCAA | 790.818041851414 | 0.242781222629295 |
| ATATGTCAGACG | 790.824366051204 | 0.241326452674422 |
| TATGACAGGCCA | 790.837141927272 | 0.260803269341722 |
| GAATTAATCACC | 790.8435914684   | 0.385862705278674 |
| ATTAGCAATTAC | 790.848794509534 | 0.306328174136106 |
| TACGCAGACTCA | 790.851737866509 | 0.254391137893475 |
| GCGCATGACAAC | 790.851989230227 | 0.342717626062672 |
| GTGACGAACTAA | 790.854115724553 | 0.289796530127945 |
| GTCACCCACTTA | 790.859761240736 | 0.217598908839812 |
| GCGGGGTATGAC | 790.862880520977 | 0.275647465703894 |
| AGTCAGCGTTTA | 790.867086728811 | 0.207227547057465 |
| ACATGTGATGAC | 790.87662841516  | 0.325901345141007 |
| CGTCGGGTGACA | 790.877817343789 | 0.217457776571145 |
| ACTCTGACATCA | 790.884673154613 | 0.316165560547626 |
| ATCGTATTACGC | 790.893809676026 | 0.481842342882091 |
| ACACCCTAGTCA | 790.897085075163 | 0.22352155469912  |
| AGAAGAAGTCAT | 790.902105196894 | 0.201855811230983 |
| GTCACGAAGTAA | 790.903205085548 | 0.306742963456103 |
| AAACCATGACAC | 790.909926417923 | 0.246026848825318 |
| TAGGTAGACTCA | 790.914762871446 | 0.297861777177847 |
| GTCACCAGTACA | 790.915186052446 | 0.262523793127477 |
| CTTATTGCATCA | 790.918080903268 | 0.302831700984557 |
| GTCCTGACGCA  | 790.918872069052 | 0.464434820657938 |
| ATTGAGTCTACC | 790.932600156359 | 0.323382348462136 |
| GATCGAATCATC | 790.937995285185 | 0.243993827460323 |
| AAATTACGCACC | 790.948515984283 | 0.185950128860879 |
| CCAAAATTAGTC | 790.952554871722 | 0.33693027147345  |
| AATAGTGGGTCA | 790.968085377139 | 0.220722678156872 |
| GGTTGGAATGAC | 790.972717924081 | 0.133279075493634 |
| AGACATCCGTCA | 790.985944497138 | 0.250520513296875 |

|              |                  |                   |
|--------------|------------------|-------------------|
| GTCACCTTTACA | 790.986835028579 | 0.274718726383968 |
| ATTCGTAGTGAC | 790.986934596691 | 0.323636759921823 |
| AGGTCTATGACC | 790.988534004002 | 0.215952016055833 |
| ACGTCACCCCAT | 791.003395179621 | 0.166574133833673 |
| ATGAATAATCTG | 791.005375017369 | 0.231396377413571 |
| GTCATGTAAACA | 791.008558527213 | 0.445498768495895 |
| TCCACGTTGTCA | 791.009897628928 | 0.260000691078727 |
| AGTCACGAGGAT | 791.01674197297  | 0.231740782016658 |
| ATGAGTATGCAA | 791.022075637143 | 0.245826505077835 |
| GTTGACGTGTTA | 791.02359627492  | 0.128241115490697 |
| TCAAAATGACCA | 791.02557034674  | 0.282070855908773 |
| TATGACCTCACA | 791.026397836947 | 0.181763303140714 |
| CTAAGATTCATC | 791.027901141185 | 0.388068777903469 |
| ATTAGTCTGACC | 791.047759014857 | 0.141310045301388 |
| ATGACGCCGTGA | 791.048133827677 | 0.291715538702214 |
| AGGGACGTCATC | 791.048486884388 | 0.309495413507884 |
| GCCATTGTGACA | 791.052607817983 | 0.482047958878482 |
| ATACATTGTCAC | 791.06278209255  | 0.216105766871548 |
| CGTTCCGATGAC | 791.067031279731 | 0.219028300275265 |
| AGACGTCACCCG | 791.068399629292 | 0.326522858308372 |
| GGAATAGATGAC | 791.070763335703 | 0.159713380686655 |
| GCCGATGACCTA | 791.07341002974  | 0.34267773963857  |
| ATTACGCAATGA | 791.073883679382 | 0.314990546886426 |
| CAGTCAGAAAAC | 791.074578173722 | 0.289872125447696 |
| GAGTCGACCTAA | 791.077022806009 | 0.264192856423897 |
| GATTCATCGTTA | 791.082902121867 | 0.520546818206818 |
| GTCATCCGCACA | 791.082986739195 | 0.376553823242632 |
| ATTAGGTCAATC | 791.091563054636 | 0.246065319440961 |
| ATTGACGTATAA | 791.102377153105 | 0.37894238352397  |
| CGTAGGTACTCA | 791.102469118051 | 0.274177094189592 |
| ATCAATTAGTCG | 791.103154517496 | 0.232019955828366 |
| ACTCATTGTATA | 791.122417419107 | 0.145796513485893 |
| ACAATTACGTAT | 791.124085458385 | 0.322068226407859 |
| TGACAACAAGCA | 791.127126589953 | 0.378626553923632 |
| ACGACTCAGGAT | 791.130337926539 | 0.331422908036301 |
| TGACGTCAAGAA | 791.133103979815 | 0.215127073283938 |
| ATACTCATTGTA | 791.145242333033 | 0.328226352892446 |
| TGACGATGCACA | 791.147278821465 | 0.310386582403341 |
| ATGTCTCACTCA | 791.152202508835 | 0.229759731897287 |
| TAGTTTTCGTCA | 791.152828743018 | 0.286122679564852 |
| CATCTATATGAC | 791.164233340196 | 0.139024614590143 |
| CTGACGTGACAG | 791.165602047705 | 0.346836535977652 |
| ATGAGTATGGTC | 791.173018636177 | 0.227075056256204 |
| AATATGGTCACC | 791.176218935096 | 0.267926814488423 |
| ATGAATCTTACA | 791.176720477867 | 0.225780910374971 |
| ATATATATGACC | 791.183020809624 | 0.291568811426856 |
| CTAACCATGACA | 791.189551643737 | 0.156975656247873 |
| ACCAGTACGTCA | 791.204889190563 | 0.390264439201719 |
| CTTTCGAGTGAC | 791.211970172979 | 0.257342427670126 |
| ATGAGCCAGACC | 791.219055031594 | 0.219107432251537 |
| GTGTCAGACTAA | 791.22325928211  | 0.169192703008671 |
| AATTGAGTCGAA | 791.228708821662 | 0.271890300792861 |
| TGACAGCGAAAA | 791.233554004628 | 0.220993181229668 |
| GCAATAACGTCA | 791.247399961533 | 0.323879084628309 |

|               |                  |                   |
|---------------|------------------|-------------------|
| ACGTCACAGACC  | 791.263153929308 | 0.276419332409364 |
| GTTGTTACATCA  | 791.263459363636 | 0.307282948020675 |
| CAATCGTGACCA  | 791.265813573857 | 0.266290474297945 |
| CGAGCAGGTGAC  | 791.269077875121 | 0.151292439323629 |
| GGTCATACCCTA  | 791.269819077203 | 0.262096425472813 |
| ACTCATACGACT  | 791.274969816713 | 0.227839258812851 |
| CACGTCAGAAGG  | 791.276034952518 | 0.278710973272978 |
| ACAGCAATGAGT  | 791.287112346851 | 0.299082714551425 |
| ATCTGGATGACC  | 791.305574720304 | 0.320649880294156 |
| ATAAGCATGACG  | 791.324172650258 | 0.280174411824096 |
| TCTGACTATGCA  | 791.330108816835 | 0.381687652713291 |
| TATAGTCAACGA  | 791.33420731513  | 0.375690518127286 |
| AACTATGGTCAT  | 791.33517624429  | 0.318449849352105 |
| ATTTAATCATGC  | 791.342431845824 | 0.43325589891495  |
| CACGTCAGGGAC  | 791.345678609434 | 0.428095441693423 |
| GCACGGGATGAC  | 791.345848084599 | 0.374626317206565 |
| CAACATGGTGAC  | 791.348432541843 | 0.19606557708426  |
| CGTCATTACAAG  | 791.353025218302 | 0.289432634040277 |
| GCTAGTACGTCA  | 791.36102472912  | 0.165385950521407 |
| ATGACATCGAAC  | 791.363112606534 | 0.234836422190682 |
| ATGACATTTCGA  | 791.365551469901 | 0.26918774532845  |
| ACAAGACCATGA  | 791.366451101999 | 0.307223743631709 |
| CTAGGGCGTGAC  | 791.369547807469 | 0.343064093461361 |
| GTCACCGACGTA  | 791.376642936124 | 0.18256397896997  |
| CATGATTAGTCG  | 791.377247773765 | 0.252953377697551 |
| ACTGCGTAGTCA  | 791.377616247496 | 0.237388930376684 |
| AGTCACGGGATA  | 791.380336384232 | 0.17685427971338  |
| CTTCTCGGTGAC  | 791.386456469617 | 0.247350690070271 |
| GCGAGTCAGGCA  | 791.389422828313 | 0.34835483794294  |
| ATGGAAGTGTC   | 791.391125983924 | 0.221313504763948 |
| CTTCGCATGACA  | 791.392171439947 | 0.365159902474657 |
| TAGTGTTTCGTCA | 791.39433363282  | 0.240372655640804 |
| GTCACTGGAAAA  | 791.396424210295 | 0.313633297567178 |
| TGCTGCGTGACA  | 791.409378002814 | 0.187348232622939 |
| GAGTGACGGAGC  | 791.414344829549 | 0.115856854671852 |
| GGTGACATTTTA  | 791.425691738793 | 0.175242195901701 |
| ATGACCATAAAG  | 791.428269827877 | 0.299512428909357 |
| GCCCCTCAGTCA  | 791.435042747175 | 0.286154283572877 |
| CTGAGATTAGTC  | 791.444883267412 | 0.265061279452769 |
| GAAGATTCATAC  | 791.450140425957 | 0.282583524290667 |
| ACTACTGGGTCA  | 791.450784065732 | 0.359941857945042 |
| GTGTACGTGTCA  | 791.451322816259 | 0.326478212458279 |
| TAAGAAGTGTC   | 791.451746544031 | 0.310691527145406 |
| CCATGAATATGA  | 791.455370038838 | 0.281926938868939 |
| AGGAGTCGTCAT  | 791.456360664761 | 0.186512881087928 |
| ATGACAGGCTTC  | 791.456578708321 | 0.255870454478522 |
| AGAACCAGTCAG  | 791.462954750034 | 0.273934142324316 |
| GAGTAATCGTAA  | 791.468874235402 | 0.120226933285116 |
| AATGTTAAGTCA  | 791.469234032235 | 0.378260776384355 |
| GCTTTTGACACA  | 791.477127740702 | 0.221735173944518 |
| ATAGCTATGTCA  | 791.477313832054 | 0.468803192943412 |
| GAGTCAGGGGCC  | 791.480897271795 | 0.187297717856037 |
| GTAGGAGTAATA  | 791.493062322586 | 0.228583322335368 |
| ATGCAGTGAGTC  | 791.500385337484 | 0.21397209829434  |

|              |                  |                   |
|--------------|------------------|-------------------|
| ACTTAAGGGTCA | 791.503140583919 | 0.330959571756317 |
| AATTCGGGTGAC | 791.51003407092  | 0.245979854961893 |
| ATAGGGTCACCG | 791.510715540677 | 0.318953318633674 |
| CATTGCTGTGAC | 791.518880873617 | 0.273447512798287 |
| GTCAGTAATACA | 791.529674983715 | 0.382645240806569 |
| GTCACGTTTCAA | 791.532171625716 | 0.294867149623269 |
| AAACATTACGCA | 791.536852059702 | 0.296543156889014 |
| ACGACCGTCATA | 791.538680802208 | 0.248164487067976 |
| ATAAAGTGTCAG | 791.543916956044 | 0.33822673703124  |
| CGAATCATCTGA | 791.548300488063 | 0.248796849587589 |
| CATGAGCGTGAC | 791.573919054411 | 0.251127153962254 |
| CATCATAGATGA | 791.585804020386 | 0.369963805174334 |
| GTCACTGCACTA | 791.595704621001 | 0.304578895331001 |
| ATGACGCTCAAG | 791.596491576952 | 0.256946124118556 |
| AATTATGTCTCA | 791.601187462391 | 0.304235225687283 |
| ATATGAAGTGAC | 791.607804188216 | 0.293013926374572 |
| ACTCACTCGAGG | 791.609012878486 | 0.327463848015269 |
| GTGGACCTGTCA | 791.609594844387 | 0.305152860548044 |
| GAGCATGACAGA | 791.611758133883 | 0.117437052197968 |
| ACGTGCATAGG  | 791.612551400757 | 0.313803126671817 |
| GGTGAGTACTAC | 791.613279970169 | 0.190162464392064 |
| ATGACAACGGAA | 791.614526172775 | 0.261315993579841 |
| AGTGCTGACTAT | 791.616022876715 | 0.373798424947838 |
| AGAACGGTGACA | 791.618651665544 | 0.23239103643353  |
| CTTACTGAATCA | 791.620742228808 | 0.289634870774755 |
| AATAGTGTGAGA | 791.621913326344 | 0.282870333160799 |
| GACTTGTACTCA | 791.623789717416 | 0.247890823232369 |
| AGATCAAATGAC | 791.635510346016 | 0.249002883198712 |
| ATTTCTTGGTCA | 791.637585442748 | 0.359470849689549 |
| ATAGGTCACAGC | 791.641947514708 | 0.229719550636964 |
| AGTGACAAACAT | 791.647254946195 | 0.215824643195767 |
| GAGTCAATTGCA | 791.656151423126 | 0.241973921389504 |
| CGACTGTGACGC | 791.656254278006 | 0.297843012161506 |
| AGTCCATAGTCA | 791.663469493578 | 0.343800705668511 |
| CGCGGTTGTGAC | 791.663916668705 | 0.25281624632081  |
| ATTCTGAATGAC | 791.664479712238 | 0.338053947795413 |
| ACGTTGACTAGT | 791.674321547782 | 0.316490839925692 |
| GTCACCTCTGA  | 791.676557878152 | 0.236295582300197 |
| CAGGCGTGACGC | 791.678313889883 | 0.340171124246897 |
| CCTCCTTATGAC | 791.686332159238 | 0.274646350032036 |
| CGTGTCACGGAA | 791.692900345103 | 0.302066741199784 |
| GCTAGTGAATCA | 791.694266909141 | 0.244333546122449 |
| GGTGCTGTCACA | 791.697246876089 | 0.248491011730278 |
| CTCATCGGATGA | 791.703924614148 | 0.278901699281872 |
| CCTAATAATGAC | 791.711171234941 | 0.256616155295307 |
| ATGACATCGACC | 791.712735661067 | 0.226618058790163 |
| TCATAGCGCTAA | 791.71708065284  | 0.249046607990191 |
| AGAAGCGGTGAC | 791.722129610931 | 0.201449996142385 |
| GCACCTAATGAC | 791.725009248388 | 0.233313651550453 |
| ACGCGGCTGACG | 791.727926623319 | 0.440935114268821 |
| AACACGCATGAC | 791.729901104323 | 0.282140837389104 |
| GACTGACACAGC | 791.731242330519 | 0.220348313231045 |
| ATGACAGACGTA | 791.731854511845 | 0.220085935393925 |
| GCGTCACTTCTA | 791.737827746946 | 0.23405433868731  |

|                |                  |                   |
|----------------|------------------|-------------------|
| CGTCACACATAC   | 791.74038606108  | 0.312435993951308 |
| TGCCCTGTGACA   | 791.744138218705 | 0.323965258609603 |
| GGTCATAGAAA    | 791.746803800838 | 0.223228622416758 |
| AGGTGACAGTCA   | 791.748162981821 | 0.20719342574482  |
| AGGGTCAATGAC   | 791.748613671686 | 0.342563044068616 |
| GGTCACCGTGAC   | 791.75122858668  | 0.222033428219871 |
| AGTGACGTGCGC   | 791.754241735923 | 0.201598223525538 |
| AGTTCGGTCACC   | 791.757861457177 | 0.196464651381905 |
| AATTATTCATCA   | 791.759843117693 | 0.183038199147578 |
| TCACGTACGTCA   | 791.760621542622 | 0.240538442203117 |
| GGGGTGGAGTCA   | 791.76194645085  | 0.054227368664143 |
| ACGATGGTGTCA   | 791.767161803138 | 0.31187617341536  |
| CATTTAGCGTCA   | 791.768788377264 | 0.352713110282951 |
| AAAATGTCACCA   | 791.774706687651 | 0.321770007339545 |
| ACCGGGGACTCA   | 791.779650432517 | 0.301903090589908 |
| AAACTAGGTGAC   | 791.780473134652 | 0.148019775590536 |
| CAGAAACGTGAC   | 791.781980728241 | 0.271369899519653 |
| GTATGACCGCAA   | 791.796563682311 | 0.30561873697385  |
| TGTTTGACGCAA   | 791.796640956734 | 0.256987670369622 |
| ACTTCTGAGTCT   | 791.79864665233  | 0.27276985118939  |
| AAGTCACCCCGA   | 791.800210143622 | 0.289690077267025 |
| GCATGGGAGTCA   | 791.801660971034 | 0.247783936166065 |
| AAAACTCATGAC   | 791.814260880488 | 0.217051743977926 |
| CCAGCCATGACG   | 791.814926551914 | 0.36418957994571  |
| ACCATCTGACTG   | 791.815526425904 | 0.236405533708122 |
| CTGTCACCGGTA   | 791.834434586841 | 0.31494819232299  |
| GCACCGTGACAC   | 791.835055813558 | 0.375381834970535 |
| ACGTCGAATCAT   | 791.838991876459 | 0.268008915635651 |
| CTAAGATTACTC   | 791.839828621637 | 0.346965222400408 |
| GGTTAAGATGAC   | 791.851852130356 | 0.133921104761525 |
| CTTGAGGCGTCA   | 791.852888891119 | 0.326345896692537 |
| AATTCGTC AACCC | 791.85365473761  | 0.257656322372133 |
| GGATCACTGTCA   | 791.855336989041 | 0.333675659909834 |
| CGTCATCCATA    | 791.859239352784 | 0.229180006258529 |
| GAGCCAATGACA   | 791.865642353296 | 0.21657271671143  |
| CTTCATTGCTCA   | 791.891211705377 | 0.154727360362469 |
| ACGGATCTGACT   | 791.892929021216 | 0.272641204154549 |
| AAAGTGTCAACG   | 791.909168905809 | 0.292880093484487 |
| ACGGCTTGTGAC   | 791.916813757368 | 0.312904768395187 |
| AGTCAGAGAAGA   | 791.920099000661 | 0.218173307077281 |
| CAGTCAGTTTCA   | 791.925223050711 | 0.37018393311463  |
| ATTCTGATTGAG   | 791.926082588366 | 0.230892847863634 |
| AATGACAGGATC   | 791.931354621389 | 0.318047526717247 |
| AGGGCTGACACA   | 791.935173870258 | 0.226069705463021 |
| ATGACGATCCAT   | 791.93567290946  | 0.238423223797902 |
| ATGTCATCTCTA   | 791.946395495062 | 0.245143288852338 |
| GCTCACGACTCA   | 791.947756501231 | 0.358890167124832 |
| GAATCATCCGTC   | 791.95442488196  | 0.232318586976255 |
| GTCACCGCAATA   | 791.957444482794 | 0.426015602382586 |
| ACGTTGGTGACG   | 791.963395452479 | 0.20818624205411  |
| ATGACCCAGCCC   | 791.964850779309 | 0.152525198911086 |
| GTCACCTTAGAA   | 791.968077789852 | 0.22469783750109  |
| AATTAGTACGAA   | 791.971552231699 | 0.284812423616431 |
| CAGATCATGTCA   | 791.980306221751 | 0.227880100373504 |



|               |                  |                   |
|---------------|------------------|-------------------|
| AGTCGTATGACC  | 791.985037413715 | 0.212973773858883 |
| CGACTCACGTAC  | 791.988534256939 | 0.230187294225036 |
| TCCCTGGTGACA  | 791.989734699951 | 0.262858963311495 |
| GTGGAGATGACA  | 791.993117021664 | 0.153320351856129 |
| ATCTTTTCGTCA  | 791.995207498915 | 0.31190657971565  |
| CATAACTGGTCA  | 791.996689108063 | 0.367526226075373 |
| AACCCCAATGAC  | 792.003742575889 | 0.233771070460309 |
| AAGCTTTACTCA  | 792.018613336294 | 0.176524448210638 |
| TAGTAACTGTCA  | 792.022785609835 | 0.161993887530849 |
| TGACCAAGCGAA  | 792.029057795324 | 0.304253660057068 |
| CCGATCGTGACG  | 792.029400237011 | 0.223704266018518 |
| AGGGACGATGAC  | 792.036129331229 | 0.165049520031394 |
| ACCCGTGACGTG  | 792.041188700464 | 0.387400099758506 |
| GCGACTAATTGA  | 792.043275552393 | 0.260087568171861 |
| ATCCATTGTCTCA | 792.045596051441 | 0.307992735194054 |
| GATTACTAAGAA  | 792.048863117688 | 0.172621734281561 |
| CGTCTTGTGACA  | 792.051667648403 | 0.258476190723533 |
| AGAACGCTGACT  | 792.05383467087  | 0.12680451526357  |
| CGACTAATCTTA  | 792.053935171968 | 0.236342626593182 |
| TGCGCATGACAA  | 792.060790309738 | 0.272070775851003 |
| GTACACGTCTTA  | 792.068909409507 | 0.382551490040566 |
| GTCACTACATAA  | 792.071259142494 | 0.184622260112557 |
| GCACTGATGTCA  | 792.074071319538 | 0.368890956005785 |
| AAGTCACGAGTC  | 792.082667407665 | 0.218608215851486 |
| GTCATCTGGAAA  | 792.086308449014 | 0.369182555836646 |
| ACTCATACAGAT  | 792.091722881805 | 0.226998112400133 |
| GGACTACTCACA  | 792.092909931237 | 0.308499796783451 |
| AACCTGACTCGG  | 792.098473670388 | 0.318746011852762 |
| ACCCTTTGACTC  | 792.100876366873 | 0.149922134961571 |
| CGATTGTATGAC  | 792.105614130267 | 0.368315554579867 |
| TAGGTGACCCAA  | 792.105634489847 | 0.251852607165612 |
| CCTGTTGAGTAA  | 792.106359473124 | 0.328857514016761 |
| GGTCATAATTTA  | 792.108001122367 | 0.265021841939872 |
| ATCCCTGTCATC  | 792.108102628648 | 0.153891177282655 |
| GTAATAGTGACA  | 792.115827227216 | 0.431285658379136 |
| ATTACACAATTC  | 792.11647125593  | 0.258964871302432 |
| CGTAATGTCACA  | 792.121071999841 | 0.224181710737159 |
| GAGTGACGTTAC  | 792.125049458532 | 0.180146797627745 |
| AAACATCATGAC  | 792.125521613842 | 0.161735887426388 |
| CCTGTTGTGACA  | 792.133658498181 | 0.158550604296965 |
| ACTCATTTTGTG  | 792.137014746265 | 0.262158024995766 |
| AGTCAGACACCA  | 792.146468956126 | 0.198050647763699 |
| AAAAGGATGAGT  | 792.147043550111 | 0.197650312085731 |
| CTTCAATGTGAC  | 792.154259510385 | 0.313251795185966 |
| GACTAATAAGCA  | 792.156089236204 | 0.388305952372167 |
| CTCCCTGACGCA  | 792.157314234289 | 0.327141204258892 |
| GTCATCCTAAAA  | 792.157929838753 | 0.281482394324462 |
| AAGCCTGATGAC  | 792.161649668636 | 0.172660739687044 |
| ACGGTGACCCAA  | 792.163539974447 | 0.280700123614288 |
| CTGGCAATGACA  | 792.172816824661 | 0.322092716230264 |
| GGCATGACACCC  | 792.184044817783 | 0.27162793173247  |
| CGCTTGGGTGAC  | 792.184319214358 | 0.403573412969856 |
| CAGCCACGTGTC  | 792.19606359268  | 0.368923234047636 |
| CCCTGATAGTCA  | 792.197031157184 | 0.270082500192036 |

|               |                  |                   |
|---------------|------------------|-------------------|
| ATGACGATCCAG  | 792.207276282818 | 0.214458460258388 |
| GAATCATATAAC  | 792.219086300771 | 0.321331414742278 |
| ACGTCACCTGAT  | 792.233190980356 | 0.179073098678992 |
| ATGATGTGGTTC  | 792.233879499393 | 0.234816951131079 |
| TCATGAGAATGA  | 792.235150022338 | 0.387297616402502 |
| ACTCATATTCCG  | 792.238609181336 | 0.252375611041086 |
| ACTGCTCGTCAT  | 792.239978839686 | 0.258852747654952 |
| CAAATGGTGACG  | 792.24156241732  | 0.211949990419737 |
| ACTCATAAATG   | 792.244737103536 | 0.315662600120619 |
| AACGAAGTCACT  | 792.251980288675 | 0.242161282032321 |
| GAAACGAATGAC  | 792.255873517348 | 0.271316660425157 |
| ACAATTCATGAC  | 792.261824142903 | 0.331034024392689 |
| AGTCAGAAGCCC  | 792.283754989795 | 0.364144863748734 |
| ACCCGGTGACGT  | 792.286664319928 | 0.308788358324228 |
| GTGATGTGTTCA  | 792.291714806695 | 0.244716345639813 |
| CGAAGGTGACAC  | 792.294815938759 | 0.226124759452762 |
| GACTAATATCGC  | 792.302508651055 | 0.425946822540003 |
| GAACTTGTGACC  | 792.305456604982 | 0.349983069629134 |
| TGACTGGCCACA  | 792.315820676912 | 0.385739211816834 |
| TCGCGTCACTAA  | 792.316902960437 | 0.186477290340081 |
| ATGTGAGTACTC  | 792.31754733839  | 0.291521117621296 |
| AGCGTCACTTAC  | 792.322040502964 | 0.281465811554619 |
| ATTGAGTCTACA  | 792.337747859391 | 0.390377520268987 |
| CAGTTGGGTGAC  | 792.344840804304 | 0.349990143500825 |
| CAGTGGTCAATG  | 792.354133139645 | 0.360381786408046 |
| ATGTCATGGCTG  | 792.360066477978 | 0.346122733710056 |
| GTGCCACGTAAC  | 792.363153031104 | 0.277586436072674 |
| AATGTTTGTGAGT | 792.366638759683 | 0.329985307708612 |
| GGTCGACATGAC  | 792.373229209586 | 0.20599261577313  |
| CTGACCAAGTGA  | 792.374921232438 | 0.286880140665048 |
| GCGTCAGTAACA  | 792.379713824985 | 0.358633726129669 |
| AACATATACTCA  | 792.393194681702 | 0.241813162745871 |
| GGTGTGCTCAC   | 792.394934732682 | 0.228228630938651 |
| CGTGCCGTCATA  | 792.397850152108 | 0.233936208020839 |
| ATATGTCAGCGG  | 792.399652247032 | 0.184918830111967 |
| GTACGGTGTGAC  | 792.450521924299 | 0.236472400415159 |
| GTCACCAACTAA  | 792.453418732849 | 0.424921605690742 |
| ACTCATCGTTCA  | 792.4568605378   | 0.197976239106933 |
| GCGTCACCTGTA  | 792.456959159149 | 0.259834455580487 |
| ACGTTTCCGTCA  | 792.460465034651 | 0.203357817053322 |
| GTCACGCTTCAA  | 792.462610271829 | 0.237771392341369 |
| GAGGTTGCTCAC  | 792.487186130439 | 0.283660518805375 |
| ATCGCTGAGTAA  | 792.491482518127 | 0.19223669039252  |
| TCATTAACGTCA  | 792.49422964187  | 0.279595799238633 |
| GGGCAGGAGTCA  | 792.502761626596 | 0.243192816835795 |
| AGTCAGCGCCAC  | 792.503970438052 | 0.331872650581172 |
| ATCAGGTGACGC  | 792.506670559927 | 0.355452448606272 |
| ATGACAGGCCTG  | 792.510389464793 | 0.239859157320915 |
| GGTGACTTGGCA  | 792.517923811183 | 0.34672531334296  |
| GTCGACAAGTCA  | 792.523390803493 | 0.376931004006275 |
| ACAATGTGATTG  | 792.527703933535 | 0.255639066460551 |
| ATGACTTGTGAA  | 792.528932039668 | 0.35434100823336  |
| CTTACAGTGACA  | 792.539321057254 | 0.34846470233559  |
| TATACACGTCAA  | 792.546850184979 | 0.267573828274628 |

|               |                  |                    |
|---------------|------------------|--------------------|
| AGTCTGACGCCA  | 792.548836810916 | 0.348539308398291  |
| ATGACCACCAAG  | 792.564895974263 | 0.321162311794843  |
| GGATTGGGTAC   | 792.569829925284 | 0.243913333474886  |
| ACCCTCTAGTCA  | 792.580085488417 | 0.243547608432349  |
| TCGGACTCACGA  | 792.584439586103 | 0.213555855130246  |
| AATGATTACGTG  | 792.597667351165 | 0.184147386858346  |
| ACTTTATGACCC  | 792.608530574209 | 0.203035645705207  |
| GTCATTGCCCAA  | 792.612538420881 | 0.305303233870647  |
| GAGGTGTCTCAC  | 792.616122076282 | 0.314119026422604  |
| ATACGGGCATA   | 792.617620247138 | 0.165757507731684  |
| AATCTAGTCAGC  | 792.621181396313 | 0.26240877608222   |
| AGTCAACTTATG  | 792.627752772148 | 0.31462752233839   |
| GTAATTTGGTCA  | 792.632506141967 | 0.31249190025807   |
| TGGCTCATTTAA  | 792.63908018541  | 0.226850979012312  |
| TGACTACACCCA  | 792.65359944524  | 0.140347757920842  |
| AACTTTCTGTCA  | 792.654701765635 | 0.255371020659247  |
| CCACTGACTGTA  | 792.656474415108 | 0.237563669346702  |
| GCATTGATGAC   | 792.659292692341 | 0.252202482513697  |
| AAGGGTCAGACT  | 792.661621206813 | 0.2475555235111    |
| AGTATGAGGCAT  | 792.663474193883 | 0.274357260353741  |
| GACTCAACCGCA  | 792.665824188234 | 0.251852336286918  |
| GGGTCATCTCTA  | 792.667162200394 | 0.260235344638044  |
| GTGACACTGCGA  | 792.670441194285 | 0.327705725304795  |
| ATATCGAATCAT  | 792.677551303276 | 0.23274313093523   |
| CCATGACGATGA  | 792.678267768579 | 0.170068047992768  |
| ATAAATGCATCA  | 792.680596881703 | 0.316163132709819  |
| ACGATTAGCAAT  | 792.682830343907 | 0.350041800297179  |
| ACTATTAGTCTT  | 792.683525023983 | 0.220815060149424  |
| GTCACAGTAAAA  | 792.684791874861 | 0.307665487072967  |
| TCGAAATGGTCA  | 792.69032325039  | 0.231182035564432  |
| CAAGGGAATGAC  | 792.690723039607 | 0.236429656465052  |
| TGACAGAACAAA  | 792.697888930944 | 0.275588668629402  |
| TCCCCTGACACA  | 792.697956499446 | 0.180192819245222  |
| CCGGTTATGACC  | 792.698518717459 | 0.277525913167014  |
| CGAAGGGGTGAC  | 792.707105084648 | 0.287821812941265  |
| CTCTGCTGTGAC  | 792.708774914444 | 0.221398958837442  |
| AACTGGCGTCAC  | 792.712322656486 | 0.0914831969615625 |
| GGATTCAATGAC  | 792.725450893897 | 0.284504125739817  |
| CATTTGACACAC  | 792.730254739497 | 0.196733573690558  |
| CAGTGCTGTGAC  | 792.736290528115 | 0.220750079591687  |
| ATTCCAAGTCAC  | 792.752689440956 | 0.328688925727047  |
| GTCAGTAATTAA  | 792.757312713267 | 0.378758144308814  |
| GTTTGATTACACA | 792.758262833651 | 0.423079901214488  |
| ATTGCGTAGTCA  | 792.775624701566 | 0.28478510653914   |
| AGTGTCACGACC  | 792.777248240612 | 0.353871452324484  |
| ATAACTATGACC  | 792.777499339058 | 0.303998674660042  |
| CAGTGACACGAC  | 792.777901675165 | 0.310135375770671  |
| CCACTGCGTGAC  | 792.784845470472 | 0.217165776197078  |
| CATTCTTTGTCA  | 792.79873786923  | 0.203123523167517  |
| CTTCATGACATA  | 792.799069868417 | 0.177140805757563  |
| TGCGTCAGGGAA  | 792.800654997025 | 0.165086596307998  |
| ACTCATCGGAGT  | 792.806384602266 | 0.346819246708352  |
| AGCGCTGGTGAC  | 792.810356159227 | 0.246237364112701  |
| ACAGGTCTGACA  | 792.817340836429 | 0.263375792532991  |

|               |                  |                   |
|---------------|------------------|-------------------|
| TCACGTGTATGA  | 792.817705461896 | 0.25687034318952  |
| GATGCAGTCAGC  | 792.822053222421 | 0.320371528631532 |
| AGGACGTGTGAC  | 792.82342530354  | 0.196479000893955 |
| AAGCTTGCACA   | 792.828488316892 | 0.252782119821694 |
| CGCTTATGACCC  | 792.83625783202  | 0.248897172370874 |
| GTCACGGACACA  | 792.839147043131 | 0.170441540568452 |
| CAGTCAATAATC  | 792.840799393326 | 0.251032748405703 |
| CTTCTGGATGAC  | 792.842822174032 | 0.228544553628752 |
| GTCTCTGGGTCA  | 792.844073270491 | 0.256951415651017 |
| ATACGGTCATAG  | 792.851991569975 | 0.140334801833875 |
| GTCACCTGGGGA  | 792.852450288217 | 0.31886603066221  |
| AGTCAGAACTCA  | 792.865923709932 | 0.222756809212276 |
| CGGTCATCGACG  | 792.869400372343 | 0.264575908607808 |
| AGGCATGACGTC  | 792.869459564301 | 0.226184639957833 |
| GCTTACGTGTAC  | 792.873176509486 | 0.304435502106238 |
| CAAAGACGTGAC  | 792.876285935695 | 0.28764461927352  |
| GGGTCATCCTTA  | 792.877291898108 | 0.363829559620909 |
| TGAATATCGTCA  | 792.879935496584 | 0.234060627892917 |
| GAGACTTGTAC   | 792.880673178909 | 0.253516775405796 |
| AACCAAGTCATG  | 792.88306404673  | 0.324102627376998 |
| ATTATTCATAGA  | 792.885765223307 | 0.205724325572252 |
| AGAGTTGACACA  | 792.889335848018 | 0.237889455289729 |
| CTGTCAATTACAA | 792.890060409414 | 0.233311318864596 |
| TATGACAGCCCA  | 792.89175387371  | 0.211817068934173 |
| ACACACGGATGA  | 792.89466900101  | 0.304851363824142 |
| CTGTCAATTATTC | 792.898804400588 | 0.237623583928659 |
| ATGTCAATTCGC  | 792.910472289612 | 0.312942930755157 |
| ACTCATCCTTAT  | 792.910919089061 | 0.154722303198799 |
| CTCGAGGGTGAC  | 792.918603341325 | 0.1594178736534   |
| TCACGTCACGGA  | 792.920539765233 | 0.325657546599496 |
| ACTTGTCACCCG  | 792.933843951088 | 0.219112742262756 |
| GATACGGTCATC  | 792.941660521449 | 0.212229040192688 |
| GAATGAGCCAGA  | 792.943732300755 | 0.241664639404963 |
| TACGATTGGTCA  | 792.950384466983 | 0.294638386915421 |
| GAAGATTACGCA  | 792.951972413562 | 0.137878784124932 |
| CCCAATGACAGG  | 792.961071926059 | 0.484677832940168 |
| GAATTCGGTCAC  | 792.964555788158 | 0.287914161942955 |
| CTAAGAGGTGAC  | 792.964719040226 | 0.310455076400252 |
| CAAGTCTTGTC   | 792.970644029715 | 0.274293186027637 |
| CATAGACTCAGC  | 792.974041114372 | 0.221706690790327 |
| GCAGGAGATGAC  | 792.974402958548 | 0.258974358651271 |
| GACTGAGTCGCA  | 792.975796655345 | 0.129751559539131 |
| ATATTGTCACTC  | 792.988962383743 | 0.222782437401592 |
| ATATTGCGTAAC  | 792.990405787805 | 0.294262436361966 |
| AATCGAAGTCAC  | 792.99365656278  | 0.253893904742099 |
| ACTTTGACGCAC  | 792.996740585209 | 0.288403053187584 |
| GTTTGTGACCGA  | 792.999805560572 | 0.238827873490369 |
| TGACAGAGTCCA  | 793.006875156593 | 0.22747515582992  |
| AGTATGACCGTG  | 793.020813374061 | 0.228651808428696 |
| AACCTGTGACAT  | 793.023362820312 | 0.26969548908213  |
| GGATGTTGTGAC  | 793.03004166097  | 0.283062693747403 |
| AAGGCTGTCATC  | 793.032959435072 | 0.278248993177148 |
| GTCACGGACGAA  | 793.037811877642 | 0.247693562226274 |
| AGCCTGCGTCAG  | 793.038858085203 | 0.180832736020401 |

|              |                  |                    |
|--------------|------------------|--------------------|
| CACGACTGACTA | 793.043845453867 | 0.237604059413655  |
| CACGTCACGCAA | 793.048291948858 | 0.231695312707266  |
| CGTAACGACTCA | 793.052478670761 | 0.221700986723387  |
| GAACCATGTCAC | 793.058881962769 | 0.0799642288450227 |
| GTCAAGGTGACA | 793.064651354535 | 0.233254679979156  |
| ATTGCTCAGAGC | 793.065830054624 | 0.187124006483913  |
| AAGTGTCAGATC | 793.066285861813 | 0.184325903228039  |
| CATGTCCATGAC | 793.066502014257 | 0.439956180027312  |
| GGGTTAGTCTTA | 793.067937331657 | 0.328154681833966  |
| AGAGTAATTTTA | 793.076202610303 | 0.261038674355904  |
| AGCACAACGTCA | 793.08442699538  | 0.347849432220145  |
| TCTTACTCGTCA | 793.084669793048 | 0.192046829330133  |
| CGTAAACCGTCA | 793.091338451648 | 0.216776615719867  |
| ACTGTCAGTGAC | 793.091848595958 | 0.188787847468595  |
| CGCTCGGGTGAC | 793.092247323058 | 0.241366188653045  |
| ATAAATGTCACA | 793.096933644611 | 0.224198856456283  |
| ACTTTGCGTGAC | 793.098606420235 | 0.273654490248571  |
| ATGACTTGCCGC | 793.103568160938 | 0.17041272890551   |
| CTGACACAGAGC | 793.118695050112 | 0.268185346533272  |
| AGCAGTGACGCG | 793.122890901441 | 0.353810210329161  |
| GACTGATTGACA | 793.131822516164 | 0.413929230409017  |
| ACTCATTATGTA | 793.133209482819 | 0.31677776889208   |
| TCATGACCACGA | 793.137634436034 | 0.218153622780176  |
| GATGATGGTGAC | 793.142511845548 | 0.20669540733074   |
| GCTACTGACGTA | 793.154545057706 | 0.183682055954832  |
| AATGTGTGACCC | 793.156155468058 | 0.27071539371977   |
| CGTGACCGGTCA | 793.159824559604 | 0.271224813057722  |
| CCTCTTGACTGA | 793.165203432883 | 0.18004616457777   |
| CATGCATGACAG | 793.166362593801 | 0.223685952208778  |
| AATAACATGACG | 793.216734964138 | 0.376798786997742  |
| ACCTAGTCAATG | 793.218109230791 | 0.321359260745018  |
| ATAGGAGGTGAC | 793.22276455682  | 0.154812652045441  |
| CTGACACAGTGA | 793.222847470707 | 0.3130158223579    |
| TGAAACGTGTCA | 793.223494137074 | 0.256090296324284  |
| ACTCATGACTA  | 793.227458106855 | 0.302642461743988  |
| GTCACCCTTCCA | 793.230730659029 | 0.292253752256477  |
| TGACACTTCGAA | 793.249319811789 | 0.23225343638744   |
| AGTTAGTGACAC | 793.249667235351 | 0.294154066614637  |
| ATGGACTAATAC | 793.250522135144 | 0.236586997655593  |
| CCCCAATGACA  | 793.252928387922 | 0.382747799633899  |
| GAGTTACGTGAC | 793.258046105055 | 0.26705142525386   |
| ACGTCATGCGCT | 793.263976562097 | 0.234401611429927  |
| GTCACCGACCAA | 793.26813670683  | 0.224224334299398  |
| CGGACTGATTCA | 793.276040283902 | 0.381232028305187  |
| AGTATCCATGAC | 793.277577788983 | 0.156827786978159  |
| AATCGAGGTGAC | 793.292004312129 | 0.355095566122314  |
| GAGGTGTAGTCA | 793.293253185528 | 0.152257246635565  |
| CCAACTGATTCA | 793.293490142078 | 0.267672004363924  |
| TATGATCACTCA | 793.293589290198 | 0.241203185463378  |
| GGTTAGGTCATA | 793.29363687824  | 0.231635997082614  |
| CTATGATGACCC | 793.295445830831 | 0.261557188049068  |
| AGACTCACGAAA | 793.298465522313 | 0.36509444392629   |
| ACCACTACGTCA | 793.300784117799 | 0.239151912707579  |
| GTGTCACGTGAA | 793.305337035333 | 0.217742674476138  |

|                |                  |                   |
|----------------|------------------|-------------------|
| ACTAATTACACA   | 793.315404995504 | 0.342394750371521 |
| TGAGTCGGTTAA   | 793.316977968174 | 0.162458758553145 |
| CACTCTTTGTCA   | 793.317445243342 | 0.232591813508152 |
| GCGTTGAGTAAC   | 793.340290854182 | 0.199515652994417 |
| ATGATGTGACCA   | 793.341663640815 | 0.226996101457907 |
| CGCGCGCAGTCA   | 793.344612112908 | 0.228393164901143 |
| ATGACGTGCGCAC  | 793.344854224482 | 0.222130359456297 |
| CGCTGACACGTC   | 793.346023465887 | 0.211254171115268 |
| CATGACGAGATC   | 793.351173018766 | 0.289182315812541 |
| TAGAATTACACA   | 793.366017271549 | 0.283882316584239 |
| CAATGGGTGACA   | 793.368296779596 | 0.215024835293857 |
| AGTCAGAGGTGG   | 793.369247173117 | 0.169259164662359 |
| GATGTTTTGTCA   | 793.372092128357 | 0.305672088516405 |
| CGGTAATTACTION | 793.372485054444 | 0.282489578684657 |
| ATTAAACGTGAC   | 793.374548891402 | 0.246994239508445 |
| AGGATTAGCAAT   | 793.391959173773 | 0.185893334139018 |
| CTGACATATTCA   | 793.396491156956 | 0.258554016801857 |
| TCGCCAATGACA   | 793.401819633687 | 0.279223494392343 |
| CGGTGACAGTGA   | 793.405075197688 | 0.216824465465045 |
| AACCAGTAGTCA   | 793.406770253641 | 0.214542511255123 |
| ATCGTCACCAGA   | 793.416764650564 | 0.277089603772591 |
| CTGGATCACTCA   | 793.426792351891 | 0.170788617639257 |
| TGAATCGTGACA   | 793.440745746699 | 0.295517710383663 |
| AGGATGCAGTCA   | 793.452910614911 | 0.31139905161868  |
| GATAGAGTAATA   | 793.464108469496 | 0.161797737072827 |
| CGACTAATCTAA   | 793.467185039109 | 0.25955039674525  |
| TGACTAGCGGAA   | 793.483699545969 | 0.350349543664583 |
| GTGCCGGAGTCA   | 793.485784633217 | 0.281802798807906 |
| CACGTGTTGTCA   | 793.485820470827 | 0.234277851331587 |
| AGCAGTCAGCTG   | 793.504907047007 | 0.235974741571148 |
| TGACGATAAGAA   | 793.505099260647 | 0.320588574836315 |
| ACGATTACTAAA   | 793.505962009939 | 0.250499464582138 |
| CATTATGACCTA   | 793.510950548456 | 0.211216172966716 |
| ACGGGTCTGACT   | 793.516392877304 | 0.228053694582245 |
| ATCAGACTAATC   | 793.516475536028 | 0.133142565104316 |
| ATGACGATCTCA   | 793.516918356383 | 0.325198000123567 |
| ATCACTTGACTC   | 793.523158135724 | 0.295746408317961 |
| CACTGGGTGACC   | 793.526284030415 | 0.276400273808662 |
| AAGTCACGCCAT   | 793.529344715645 | 0.208149078791655 |
| GACTGAATCAGA   | 793.532935119492 | 0.301823152134596 |
| AGTATGACCGTA   | 793.535373877846 | 0.206070809871776 |
| TCCAATATGTCA   | 793.547794919402 | 0.232712225069959 |
| CTATATGTCAGA   | 793.552744485455 | 0.192509233974011 |
| GTCATGTTAGTA   | 793.563848056702 | 0.152592945385002 |
| GATGGTGACCCA   | 793.566544534531 | 0.317135208269937 |
| GTCATGCTATCA   | 793.567596862231 | 0.217889586170263 |
| GTATACTCACAC   | 793.570518298972 | 0.269911767453356 |
| ACTCATACGACA   | 793.581905702637 | 0.318932916240968 |
| ACTCATACTGTG   | 793.583972470468 | 0.189258070800393 |
| AAAGATTAGTCT   | 793.59188184223  | 0.221878864128327 |
| ACGTAGACTCAA   | 793.592368287666 | 0.172939304106434 |
| CAGACGGGTGAC   | 793.59516764042  | 0.384998239479521 |
| GAACGTGGTGAC   | 793.59610197608  | 0.16546779537336  |
| AGCATCATGACA   | 793.600687379084 | 0.179138954813503 |

|               |                  |                   |
|---------------|------------------|-------------------|
| GGTCAGGGTGAC  | 793.604149979038 | 0.208635317547454 |
| ACACATGACATA  | 793.606053920601 | 0.271384573363744 |
| ATGACGACGGCC  | 793.609460440351 | 0.274136278479928 |
| CTGACTCGCATA  | 793.610652960344 | 0.22143044137618  |
| GATGGATATGAC  | 793.619386675204 | 0.191879677588639 |
| CACGATGATACA  | 793.620925053123 | 0.326158397217743 |
| CGAGCCATGACA  | 793.630493603245 | 0.24944886036575  |
| GTCACCCTTTTA  | 793.637323104085 | 0.23195794052324  |
| CGTCACGTACAA  | 793.639585211002 | 0.286201076888093 |
| ATGTACTGTGAC  | 793.642735477431 | 0.35154330471476  |
| CAAGGCAGTCAC  | 793.648860350133 | 0.217847866193001 |
| GTCATCCCTCCA  | 793.649302639343 | 0.20890936058159  |
| ATCGATGTCACA  | 793.676733749243 | 0.228811132062562 |
| ATGACCTCATT   | 793.678502971425 | 0.219834946006669 |
| ATCACAGTGACA  | 793.689728345465 | 0.251653480411943 |
| ATCCGGGTGACA  | 793.694144981171 | 0.383392591345093 |
| GTCATGTAATGA  | 793.698134984894 | 0.390085295073346 |
| TGACAAAGAGCA  | 793.702956338874 | 0.260664973233661 |
| TAGACGGTGACA  | 793.704208274468 | 0.247604311420394 |
| TGACGGATATCA  | 793.705322663354 | 0.228078025654435 |
| ACGCTGACGGAT  | 793.707954047642 | 0.210056405078478 |
| CGACGGGATGAC  | 793.708256005981 | 0.36243639620251  |
| ACTCATACCAAC  | 793.718470488764 | 0.135137142078944 |
| AAGACTGAGTAA  | 793.723310268914 | 0.157290003961916 |
| CTGTCATTGGAC  | 793.724487244866 | 0.407192019475279 |
| CGGTCTACGTCA  | 793.728883084252 | 0.276775069532462 |
| CACGTCAGTGTC  | 793.730185067338 | 0.371529174391571 |
| CTCGAGTGACGA  | 793.736686908796 | 0.235468034172307 |
| GTCATGCAACGA  | 793.739425642501 | 0.409802823673169 |
| ATTAGTACGACG  | 793.747483861449 | 0.301100373022823 |
| GCTCATTGTCA   | 793.749568087411 | 0.231267448880378 |
| GGCTTACGTGAC  | 793.753884786293 | 0.251874326274778 |
| ATAGCCGTGACA  | 793.756649073403 | 0.316043659629336 |
| TGTCACCGTGAA  | 793.757661087697 | 0.358249294404022 |
| CTACATATGTCA  | 793.761446493349 | 0.286080487071359 |
| AATCCTGACTCG  | 793.762067869549 | 0.296365883818778 |
| GAATCATCATT   | 793.768168387919 | 0.305558006273165 |
| ATCTTTCTGTCA  | 793.781159082798 | 0.345536248724434 |
| CATCGTGACCCA  | 793.785449629527 | 0.298581833171408 |
| TAGTCAGTCTGA  | 793.78891135106  | 0.233211816696049 |
| CTCAGCATGACA  | 793.791660201451 | 0.312036551810144 |
| GTCATGAGATCA  | 793.80031831744  | 0.225404443525753 |
| AATAGGGTGACA  | 793.816743294661 | 0.204821141694381 |
| GAATCATCCTAA  | 793.82323952817  | 0.248897917391628 |
| ATGACCATAGCA  | 793.823921077693 | 0.232265143195731 |
| TCATAAGCCGAA  | 793.836381187546 | 0.26953958032007  |
| CGTCACCCTGAC  | 793.840043049112 | 0.219541674759356 |
| AGATTTTCATGAC | 793.843311868172 | 0.400580112042794 |
| ACTCATCGCTGA  | 793.847537374436 | 0.314603902571764 |
| ACGTGACACGAT  | 793.850834848227 | 0.150457463932071 |
| TAATGACCACGA  | 793.852573872315 | 0.397506656115527 |
| GGATACCGTGAC  | 793.866281028718 | 0.349528635998342 |
| ATAGGGTGTGAC  | 793.866905179604 | 0.238847076448686 |
| CAGCCTGTCATA  | 793.869943437137 | 0.224269739080534 |

|               |                  |                   |
|---------------|------------------|-------------------|
| AGTCACGGTCGG  | 793.872156553886 | 0.212837843519553 |
| GTCCTTAAGTCA  | 793.876801252157 | 0.241915475443088 |
| ATGTAAGTGTC   | 793.884967824195 | 0.213803130135608 |
| CCTTAAGTGACA  | 793.896161879892 | 0.477682618833358 |
| CATATGACCTAA  | 793.896390330747 | 0.144405047053953 |
| ACATAACTGACT  | 793.910816620367 | 0.319386668771102 |
| AGAATGTCATCA  | 793.916139503227 | 0.242729289525339 |
| CATACTTGTGAC  | 793.917445564155 | 0.269315659666614 |
| CACATAGTCAGA  | 793.930352315423 | 0.310303409547096 |
| AGTGATGGGTCA  | 793.937762117463 | 0.218542272591301 |
| CCGTAAGTCA    | 793.93781039141  | 0.417177421809248 |
| CCTAAGTGACAC  | 793.937858245018 | 0.492268998291345 |
| GATTAGGTACC   | 793.938619513463 | 0.235706446421284 |
| CGTCATGAGTGC  | 793.945300175194 | 0.316914488569788 |
| AAGTCACTACAG  | 793.948904409982 | 0.231607042069809 |
| TGACACCGGAAA  | 793.959783420217 | 0.234252834735199 |
| CGCGTGTGTGAC  | 793.966537729343 | 0.28582064933103  |
| TACGTAATAGTA  | 793.978777217579 | 0.239158814313216 |
| GAACCGTGTAC   | 793.979797304568 | 0.222697203990465 |
| AAAGCGTGACGC  | 793.980394049097 | 0.215179925625615 |
| ATGGATTGCTCA  | 793.993127793148 | 0.244739854681211 |
| GATTGAGATGAC  | 793.994903851248 | 0.168764648189933 |
| ATTCACTCATTA  | 793.995209355567 | 0.246661653824617 |
| GACCGACTAATC  | 794.000685485207 | 0.319897482147804 |
| GTCCTGTGACA   | 794.00185473543  | 0.28044089912935  |
| CGTGGTCATTCC  | 794.005091571131 | 0.211673634761194 |
| ATGTAACCTATA  | 794.006529699831 | 0.263859528772957 |
| CTAGCTGTCATC  | 794.010387992014 | 0.202998614262604 |
| AATGAATAATTC  | 794.010751417241 | 0.289319347002201 |
| CGTTGGCGTCAC  | 794.014412095503 | 0.316508800503252 |
| AACGCGCGTCAC  | 794.015326219664 | 0.308880318639431 |
| CACATTAGTGAC  | 794.024651786253 | 0.394282900798195 |
| AGAATACATGAC  | 794.031215068483 | 0.26286397490465  |
| GCGTCACGTGTA  | 794.032511659921 | 0.256120488623657 |
| CCGAGACTATGA  | 794.047954968603 | 0.323082338052995 |
| GTCACAGCTATA  | 794.048202130402 | 0.213101946317387 |
| ATGACGGACAGG  | 794.052614284466 | 0.154171334085297 |
| AATTGTAAGTCA  | 794.056454148055 | 0.28830121506203  |
| ACGCATGACCGA  | 794.05944078421  | 0.179612368769809 |
| GATCATGACCCA  | 794.062709353669 | 0.300530033026093 |
| GTCATTTAGCGA  | 794.065555450047 | 0.247689755508772 |
| AGGCTAGTCACT  | 794.065824904317 | 0.226010967917852 |
| ACTTTGAATCAC  | 794.071857236709 | 0.206240491813203 |
| GGGTGACGTTAA  | 794.080319280899 | 0.209486828223522 |
| AGTCGCTGTGAC  | 794.094538508532 | 0.274286525237943 |
| GAGCCAACCTCAC | 794.102464590363 | 0.242506100238943 |
| TACTAGTGACGA  | 794.104101820893 | 0.267914913396569 |
| GATTACTGACTA  | 794.107118630997 | 0.273480465008332 |
| CTGATTTGTCA   | 794.120910542485 | 0.250477194357551 |
| GTCAGTGCAGA   | 794.123083766507 | 0.228697243297657 |
| GTGACGATGCCA  | 794.12368621568  | 0.299972768433355 |
| TAGGCTGTCATA  | 794.133870086919 | 0.232494186096268 |
| ACTCATCGAAAA  | 794.142959837523 | 0.295586745535474 |
| AGCCCTCGTCAT  | 794.151581558719 | 0.243894374610467 |



|              |                  |                   |
|--------------|------------------|-------------------|
| TGACGATTCCAA | 794.153728697529 | 0.360656945906555 |
| ATCCAGTCAGAA | 794.170393072121 | 0.275542390739464 |
| ACATATACTCAC | 794.17553793775  | 0.180282912362338 |
| GACATGTTACTC | 794.186204677929 | 0.349374541330916 |
| ATTGGATGACCC | 794.188253704594 | 0.323396040841232 |
| CTCCCATGAGTC | 794.19126071121  | 0.30543490002098  |
| ATGACGGCACGC | 794.192382327185 | 0.230474623441575 |
| GACTAATATTCC | 794.194707895739 | 0.222155563897245 |
| GTCATGTCAGTA | 794.207024025383 | 0.194848483895551 |
| CCGTCTAGATGA | 794.215490375915 | 0.30324578273919  |
| GACACATGACGA | 794.217707857999 | 0.235250267087539 |
| ATGACGAGACTG | 794.219033110108 | 0.233555229802359 |
| AGTGATATCATC | 794.220410297314 | 0.248657735408624 |
| GCAACAGTGTCA | 794.22304812765  | 0.350217283178563 |
| TCGCCTGTGACA | 794.23461234923  | 0.272561884218355 |
| CGTCGTTGTGAC | 794.239125592038 | 0.309507482770121 |
| GACTCACGCACC | 794.246467188298 | 0.343371135805183 |
| TGTCATGGGACA | 794.250917783764 | 0.266497924441791 |
| AACTATGATACA | 794.252866462184 | 0.277414108884391 |
| CTATCAGATGAC | 794.255544018755 | 0.263594734791117 |
| GACACTTCATGA | 794.263126907217 | 0.198460051553025 |
| GTGACGCGGAAA | 794.26878721356  | 0.166318506322493 |
| CAAACCTCGTCA | 794.274889148901 | 0.299196969538606 |
| GGTCGGGAGTCA | 794.289160130592 | 0.163368823720711 |
| GGAAATTGTGAC | 794.293914506798 | 0.182257688407558 |
| CATGGGCATGAC | 794.299739725731 | 0.440043691185005 |
| ATGACGGCAATG | 794.299894100601 | 0.283371774534506 |
| GTCACAAGTCAA | 794.304843134402 | 0.242151078113566 |
| ACGTGTCAGTCT | 794.305942050778 | 0.305559732985912 |
| GAGTGAGACATC | 794.315258755372 | 0.312197112009719 |
| AGGCTAAATGAC | 794.317049215926 | 0.244045576209986 |
| CATTGCGTAACC | 794.320829230633 | 0.248907883250765 |
| TACTCATCTTGA | 794.325348641208 | 0.151551651826755 |
| ACACCGAGTCAA | 794.328984578215 | 0.2685575564899   |
| CGTCATGTATAA | 794.330439681917 | 0.323315798803176 |
| GGAAGCAATGAC | 794.33203311049  | 0.221783291432826 |
| GAAAGTGACGAA | 794.332968890044 | 0.256587148375433 |
| AGCCTTTACTCA | 794.337729512072 | 0.214884774953446 |
| CGGTGCATGACA | 794.338282603988 | 0.316744192111961 |
| CTATGACCCGTA | 794.338959938063 | 0.168839338283894 |
| AGTCACGGGCAG | 794.34651505478  | 0.190353260684237 |
| ACCGGATGTGAC | 794.347438097537 | 0.206317235586257 |
| GACTAATCAGTA | 794.348558645846 | 0.21903888423896  |
| TCCATTTGGTCA | 794.349834974393 | 0.279278883036314 |
| AGTTAGTGACGC | 794.354270262266 | 0.182132594316309 |
| AATATAGGTCAC | 794.358784419581 | 0.273171540463425 |
| AGTCTCAATGAC | 794.379047894717 | 0.431145914359611 |
| AGTCACGCCCTC | 794.381305655156 | 0.234053527806118 |
| AGGCTAGTGACT | 794.385918132438 | 0.251296499903842 |
| GCCAAACGTGAC | 794.404706067825 | 0.260785310723409 |
| ACTAGTGAGTCT | 794.405032098143 | 0.292073847118429 |
| GCATCACATGAC | 794.406511437604 | 0.316886333782688 |
| TCCATTGACACA | 794.406708910569 | 0.20634151579712  |
| AATTGCTCTGAC | 794.410013075964 | 0.203205681704745 |

|               |                  |                   |
|---------------|------------------|-------------------|
| AGAATGCATGAC  | 794.423399980775 | 0.294391133395707 |
| ACGTCCGTGACA  | 794.424244485043 | 0.331662258238116 |
| ATCACGTACGTC  | 794.42559939838  | 0.244093350502952 |
| GAGTTTGTATGAC | 794.442568346242 | 0.232744705652627 |
| ACATCCGTCAGA  | 794.448921740413 | 0.389139878437834 |
| TCCTTGACTCGA  | 794.46457724343  | 0.260415543591568 |
| ACGTCAGCATGA  | 794.470412477257 | 0.437089034639972 |
| GTACAGTAGTCA  | 794.487941529297 | 0.299069950961606 |
| CACACGTTATGA  | 794.48861386245  | 0.359536056998649 |
| GACCTTTTGTCA  | 794.494162795714 | 0.252779725492956 |
| ATACGTGGTCAT  | 794.495265524359 | 0.250546880502076 |
| ATGATTACTGAC  | 794.509113819055 | 0.296757314454391 |
| CTGACACTTTGA  | 794.513383270452 | 0.218629796265614 |
| CTACGCGGTGAC  | 794.521694679142 | 0.238437152777739 |
| TGACACTTCCAA  | 794.52245425004  | 0.263473113637132 |
| GGCGTCACATAC  | 794.524002420894 | 0.284763272441046 |
| GTGTCACGGCTA  | 794.527266937593 | 0.303751186438255 |
| AGTCAGAGGTAC  | 794.530542846526 | 0.306959521193411 |
| GGTGACGTTAAA  | 794.531757504466 | 0.240717788906945 |
| CAATTATTACTC  | 794.532115968835 | 0.305482876667488 |
| ATCATAACGTCA  | 794.548934721993 | 0.212351247384699 |
| GTATTGACTACA  | 794.549514453306 | 0.185346217374032 |
| AGATAATGACAT  | 794.554739332639 | 0.230897171284966 |
| GGTTCGCGTCAC  | 794.557288144693 | 0.273622676256315 |
| CGTCATGAATAA  | 794.557577207598 | 0.239605780121252 |
| CGATGATAGTCA  | 794.558182898209 | 0.462910130470064 |
| AAAAGCTGACTA  | 794.565131434105 | 0.207180292647181 |
| AGTTATCGTCAC  | 794.567568700087 | 0.223017222341787 |
| ATGAATAATCGG  | 794.568352404411 | 0.196941896859898 |
| TGAGACGTCACA  | 794.571493564336 | 0.240003676042013 |
| GTCATTGCAGTA  | 794.584354615284 | 0.252310637137222 |
| CATTAGGTGTCA  | 794.596145815626 | 0.352089621718939 |
| AGATCATATGAC  | 794.598431724117 | 0.265274636675202 |
| ACACCACAGTCA  | 794.599460095928 | 0.298140924939603 |
| CCGGCTTGGTCA  | 794.601030165021 | 0.259570709021981 |
| GACTCACGGCAA  | 794.60270162556  | 0.302209501691143 |
| ACCTCGTACCCG  | 794.607484436824 | 0.200476419195233 |
| GGCTTGTGTCAC  | 794.607734473647 | 0.313098753930738 |
| GTTAGTCTTATA  | 794.610296641586 | 0.263141792477413 |
| ACTGGTTGAGTC  | 794.61136527466  | 0.286044801948074 |
| CTGACTGCTGAC  | 794.617004845912 | 0.139129123175512 |
| ACGTTGATTACAC | 794.641903772828 | 0.140732573691629 |
| ATGAGTAGGACC  | 794.644552354633 | 0.299831253358191 |
| AAAGATTACGTG  | 794.646070893469 | 0.147352141526064 |
| CTGTCGGGTGAC  | 794.648276287598 | 0.271398391775211 |
| CCCGCAGGTGAC  | 794.649099723932 | 0.375068258251759 |
| CTGTTATGACCC  | 794.651004438175 | 0.176517185238017 |
| GAGTCAATGCCC  | 794.657535762456 | 0.352071408137001 |
| TCATACCTGTCA  | 794.657911636021 | 0.302891258016126 |
| ACTCATACTCCT  | 794.675810461035 | 0.228578694034118 |
| ATGACAGCGCTC  | 794.676173535078 | 0.213964189898087 |
| CGGAATCGTGAC  | 794.693614610828 | 0.244002912542501 |
| ATTTGCTAGTCA  | 794.705948772465 | 0.318182772204813 |
| CCGTCATCTGTA  | 794.710267365741 | 0.2988335828709   |

|               |                  |                   |
|---------------|------------------|-------------------|
| GTCAAGAGTGAC  | 794.724107058079 | 0.151762450890257 |
| GACTCACTAGAC  | 794.72630481417  | 0.283926193465799 |
| TCGTGTGAGCAA  | 794.729156601516 | 0.162215167623415 |
| CGAATCTCGTCA  | 794.733931435462 | 0.307216581507351 |
| CGTGACGGAGTC  | 794.735000204117 | 0.271253771822391 |
| CTGAGTAAAAGC  | 794.737043857814 | 0.297645104642028 |
| GCGGTTTTGTCA  | 794.737260651682 | 0.288783346232662 |
| ACCGTCGCGTCA  | 794.738880254106 | 0.335976810970316 |
| CTGTCATGCGAA  | 794.742906755242 | 0.237734332851128 |
| CATTGGTGACAG  | 794.745060484789 | 0.311136677466711 |
| ATTATTAGTCTG  | 794.748462368405 | 0.182471671150967 |
| TAGAGTGACATA  | 794.750020603924 | 0.214507092634455 |
| GCGAAACATGAC  | 794.755897055051 | 0.221456415323091 |
| CCAGCCCAGTCA  | 794.757954372709 | 0.305002770257276 |
| CCTACGAGTGAC  | 794.774666891881 | 0.201562798817619 |
| TGAGCCTTACAA  | 794.775230406907 | 0.223511579104127 |
| GTCACCCGCTAA  | 794.780186571801 | 0.209695902574479 |
| CTGTGAGCCACC  | 794.793272002335 | 0.229127399971714 |
| CAGAGTCAATGG  | 794.802803302925 | 0.306944433343891 |
| ACTAAATACTCA  | 794.803125088974 | 0.259587813585983 |
| AGATGAGCCAAT  | 794.807864824245 | 0.259085034529778 |
| GTCACCATCCTA  | 794.809424117793 | 0.29124611191146  |
| ATGACAACCACA  | 794.809648818895 | 0.117393213266146 |
| CGTTACAATGAC  | 794.811327800966 | 0.247036234160393 |
| GAAAATTACACA  | 794.811703810157 | 0.211253335872855 |
| TGAATTAAGTCA  | 794.818155797772 | 0.172735144776882 |
| AGAGGAGATGAC  | 794.82071892873  | 0.260119302604535 |
| CGATCGCTGTCA  | 794.823443483375 | 0.299626669885149 |
| CAGAGTAGTGAC  | 794.824292192232 | 0.270266702964145 |
| CTCGTGGTATGA  | 794.833098421702 | 0.344823387385578 |
| TCCGTGGTGACA  | 794.834600728449 | 0.258850755107017 |
| CTTGGCAGTCAC  | 794.836577392295 | 0.249914880940011 |
| GGTGGTACTCAC  | 794.840193145127 | 0.232373816363793 |
| ACTCATCGGTTT  | 794.841789873368 | 0.204585613089733 |
| GTCACATTTCTAA | 794.843165676867 | 0.256906305071137 |
| ATGACATTTAAG  | 794.850487101258 | 0.294153609785144 |
| ATTCTGACTGGA  | 794.851828113204 | 0.261694557573307 |
| TCGGAATGACCA  | 794.863886663083 | 0.269627456412848 |
| CTCTGACTACTAC | 794.87699629705  | 0.162168091039191 |
| AGATAGTGACGC  | 794.877949787178 | 0.229548741545685 |
| CATTACATGACA  | 794.87960155485  | 0.277292451419951 |
| AGTAAGGGTGAC  | 794.881363763101 | 0.227387091645396 |
| TGTCACGAGACA  | 794.892755923357 | 0.308464261784407 |
| TGACACGACACA  | 794.893860527416 | 0.252304520644139 |
| CAATAATGATTC  | 794.903063064271 | 0.314295958861865 |
| ACGGACGGTGAC  | 794.903128422667 | 0.347540700817204 |
| ATGCAAATGACA  | 794.911594276696 | 0.246801440391351 |
| CGGTGATGTGAC  | 794.911759235636 | 0.190356990557807 |
| CCTCGTGACAAA  | 794.914155675591 | 0.277867015095312 |
| ATGCCCGTCATA  | 794.915624964506 | 0.33880315310161  |
| CACTTGACTGAA  | 794.920503714127 | 0.278879370003692 |
| AGGAACGTGTCA  | 794.920881108519 | 0.241296178752138 |
| ACAATATGACCG  | 794.931393759381 | 0.253840769808452 |
| CGTCACCGATGC  | 794.932862227136 | 0.106245545598137 |

|              |                  |                   |
|--------------|------------------|-------------------|
| CAGACCCTATGA | 794.937094363145 | 0.244531441415909 |
| GAGCAGAATGAC | 794.950919526525 | 0.20891740653343  |
| GTCACCGCGATA | 794.956548937998 | 0.323840594786316 |
| TATGACTTGGGA | 794.962812147932 | 0.200368240837556 |
| TGAATCAGTTAA | 794.966967730338 | 0.233921434641419 |
| AAGCGCTGACTG | 794.973059215737 | 0.258260656490861 |
| GGAACCCGTCAC | 794.977278031374 | 0.330745343049309 |
| CGGTTCTAGTCA | 794.977318294821 | 0.235100555505869 |
| AGTCAGAATGAG | 795.002382188772 | 0.266462862954808 |
| CGCCCAGGATGA | 795.0048201644   | 0.356258690302206 |
| CATCTGACTGGA | 795.006937915816 | 0.285113702618053 |
| CTACGGGGTGAC | 795.011863081806 | 0.290556563644845 |
| AATCAGTCTTAA | 795.014860340785 | 0.164533719703564 |
| GAACACGTGTAC | 795.015492027197 | 0.320003925144499 |
| ATGACTTGCGCC | 795.017009980478 | 0.28138125943205  |
| CCGACGAGTGAC | 795.017992726711 | 0.225852530951323 |
| GCGTCACTAAAC | 795.023248625432 | 0.318466791251244 |
| GTCACATACCTA | 795.027844603923 | 0.276187487759488 |
| CGGCTTTACTCA | 795.028846443518 | 0.197897442840214 |
| ACTTTTCCGTCA | 795.034887067331 | 0.268691993909951 |
| GTTTTCCAGTCA | 795.041609974247 | 0.265534125131082 |
| GGTTCATGTCA  | 795.043754645449 | 0.232540149259497 |
| GGTGCTTATGAC | 795.046358061041 | 0.262714424351263 |
| AAGCATATGACG | 795.057473179291 | 0.109715191790414 |
| ATTACTCGACGA | 795.068788152615 | 0.234018258156217 |
| GTCACCGCACAC | 795.075527113631 | 0.367198738597761 |
| TGAGCAAAAGCA | 795.078575203537 | 0.212982259867147 |
| ATTACGCACATG | 795.08640844746  | 0.18021888054363  |
| ATTCTAGATGAC | 795.089353271584 | 0.210976483220442 |
| ATAGATGGTGAC | 795.089759696512 | 0.210696740578671 |
| CACGGTGTGACC | 795.09267136916  | 0.359623939515993 |
| CTGACACGTATA | 795.097570310188 | 0.199600592707573 |
| GTCACGTACGCA | 795.097978388187 | 0.117829496627512 |
| TCATACGACGGA | 795.098241180859 | 0.284484332660685 |
| CTTCGCGACTCA | 795.107555986834 | 0.24817083112461  |
| GTGACAACGAAA | 795.113075294307 | 0.230941413575764 |
| ATGACGGGACTC | 795.128242178908 | 0.442294092305217 |
| GTCACCTCTCAA | 795.129594717196 | 0.169468375195294 |
| AATGGCTGTGAT | 795.130637359312 | 0.297776020086831 |
| ATGACAACCTCG | 795.132353603395 | 0.252356750006136 |
| CAGTCAGCGAAG | 795.138130859285 | 0.302314578342506 |
| ACTACCGGTGAC | 795.142402769068 | 0.283826361708836 |
| ATGTCACCTTTG | 795.16220282276  | 0.225425178866022 |
| GAGTGACGAACA | 795.165045909166 | 0.222968704206051 |
| ATTGGTCAACGG | 795.181235260218 | 0.154803614305522 |
| CCGGGGTGACGC | 795.183906030344 | 0.364757142907571 |
| GAAATCATGACA | 795.188533724889 | 0.285451928447062 |
| ACGTCATGCACG | 795.188797517505 | 0.327835917330301 |
| ACAGCGGGTGAC | 795.191013960185 | 0.243432761207083 |
| ATGACGGGATTC | 795.193732869358 | 0.214233690949035 |
| GAACGTTGTGAC | 795.200819225478 | 0.414081195170023 |
| ATATATTGTCAC | 795.203785251567 | 0.225198552081726 |
| AACTCTTTGTCA | 795.218190697874 | 0.328310342662831 |
| AATAATGACCAT | 795.218413246759 | 0.243494497162049 |

|               |                  |                   |
|---------------|------------------|-------------------|
| CTAATAGTAATA  | 795.220847331729 | 0.242188831321598 |
| GTCTCGCAGTCA  | 795.223208997881 | 0.165958588166902 |
| TCATCGTCGTCA  | 795.229989652562 | 0.288175979323185 |
| CCCGCGAATGAC  | 795.234073183689 | 0.215931844212636 |
| ATGTCACCGTAA  | 795.23426844336  | 0.345127255873762 |
| ACAGTCAGCAGT  | 795.242891638486 | 0.213386489161757 |
| AGTCAGCGTGAG  | 795.243299675005 | 0.349991979673778 |
| AAAACGCTGACT  | 795.25163685096  | 0.216675874591922 |
| CATGCACGTGAC  | 795.253321237381 | 0.229250218389397 |
| TAGCGTGAATCA  | 795.255962079688 | 0.227353177267136 |
| GTATGAGATGAC  | 795.256983393612 | 0.316987044121743 |
| GACAGCTCATGA  | 795.263861170424 | 0.350641063994527 |
| ACTGACTATGCA  | 795.266844638345 | 0.283765747575275 |
| ATGACGGGGTCA  | 795.269662681843 | 0.182971098727028 |
| AGTCAGCGCCTA  | 795.273649149816 | 0.345940954330886 |
| TAACTCAGTCAA  | 795.280692873626 | 0.233418078704126 |
| GTGACGCCGTCA  | 795.282498727196 | 0.251519044325566 |
| TCATCCGTGACA  | 795.283796589809 | 0.219311925102797 |
| TGTCACCGGCAA  | 795.284091598584 | 0.272474010145386 |
| CGAGATGGGTCA  | 795.2912028979   | 0.176423031930093 |
| AACTTCGGTCAT  | 795.29176778555  | 0.284872316751712 |
| ATACGGTCATAT  | 795.291895165304 | 0.213221144396208 |
| CTCTTGACTCGA  | 795.295960731587 | 0.176226066200495 |
| CAATCATATGAC  | 795.296508627636 | 0.389389657724117 |
| AAGAGTATGAGT  | 795.296781864558 | 0.177423218116297 |
| ACTCTTTGTGAC  | 795.298755393553 | 0.209312275552723 |
| GTATCGTCACTA  | 795.300756698236 | 0.326996124072525 |
| AAGTCAGGTGAC  | 795.308215634647 | 0.246726647728672 |
| CCAGTCAGAACG  | 795.313807203729 | 0.339182749579458 |
| ACGTCACCTCGTC | 795.318786781378 | 0.235359081733423 |
| ACGTCACCTTCTC | 795.325726829758 | 0.209095843396825 |
| GCCTCCGACTCA  | 795.333319375857 | 0.237399923922137 |
| CTTGTGGACTCA  | 795.337945021596 | 0.27721945238963  |
| GTCACGAGCCTA  | 795.338170518007 | 0.34843918871249  |
| TGAGGTCATACA  | 795.339077679493 | 0.206323575598132 |
| GTCATGGATAAC  | 795.340214815548 | 0.178756432149267 |
| ATGTCACCAAAA  | 795.35260312944  | 0.401180656955439 |
| CGAACGATGACC  | 795.353183524554 | 0.505484336698109 |
| GACTAATGTTCC  | 795.362025606307 | 0.280761953523259 |
| ACGATTATTCAT  | 795.364033223192 | 0.228769043288835 |
| CAAGGAATGACG  | 795.365900729209 | 0.223396358547896 |
| ACTCTTGCTCAC  | 795.372649603526 | 0.212709906923936 |
| AAAGACGTCACT  | 795.387591163894 | 0.279147726123168 |
| CCGGGGATGACG  | 795.394574805689 | 0.274625152584967 |
| GAGTAATCCTAA  | 795.410668065987 | 0.248949442143845 |
| TGACAACAAAAA  | 795.417203945573 | 0.428575051405394 |
| ATGATAGTCAGA  | 795.419237943222 | 0.220199795599072 |
| ACTTGGGTGACA  | 795.429283199944 | 0.307635260726751 |
| ACCAGTCAGCAA  | 795.434149039513 | 0.143182529816699 |
| CGTCATTACATC  | 795.439740671051 | 0.198239032768324 |
| GTCACCTTACA   | 795.444272640372 | 0.257167688060547 |
| GATCGCCTATGA  | 795.452096718313 | 0.223811225072819 |
| CGCTATTGTGAC  | 795.452589960912 | 0.211293614124132 |
| CGTCAGACTGAC  | 795.459352113544 | 0.396325988698301 |

|               |                  |                   |
|---------------|------------------|-------------------|
| CGTCTTTATGAC  | 795.46175988453  | 0.210732009957346 |
| TAATGGTGACGA  | 795.46449276357  | 0.323168555888916 |
| AATTAGCATGAC  | 795.471167907023 | 0.249418896511134 |
| CATAAATGACCA  | 795.479486320013 | 0.259991344559461 |
| ACGCCGATGACG  | 795.483646987224 | 0.198234658653031 |
| TGACGAAGTGCA  | 795.488350858251 | 0.343973453315849 |
| ATAGTAAGAGTC  | 795.489189973985 | 0.309175835955553 |
| CCACCTGTGACA  | 795.492564661541 | 0.322913626357432 |
| ACTATCATGACA  | 795.49336280642  | 0.366946415543969 |
| TGACTAGGAGCA  | 795.501715974358 | 0.144295782372353 |
| AATGATGATACA  | 795.503840604833 | 0.2419452166165   |
| CATCCTACGTCA  | 795.511941353137 | 0.28254123614106  |
| GTCACTATTCAC  | 795.51392387166  | 0.161819452010245 |
| GTCACGCGCCA   | 795.526630604824 | 0.236040995077545 |
| AAGATTCATAGC  | 795.555841295917 | 0.235535326835213 |
| ATTAGTCGGTCG  | 795.556612285459 | 0.292086047663526 |
| ACAGTGTCACGG  | 795.558810017532 | 0.140703257521573 |
| GAGCCTGACACA  | 795.562316779977 | 0.16581274049063  |
| ATGTCATTATGA  | 795.574184709904 | 0.239092705901939 |
| TGACATATGGAA  | 795.577167997373 | 0.324404107097101 |
| GCATTATGACA   | 795.577732685876 | 0.215893044706871 |
| GCTCGTGACAAA  | 795.590086460476 | 0.220179506010791 |
| AGCTTGTGTGAC  | 795.606894851254 | 0.194134640644301 |
| GAGTCTATGTCA  | 795.613206512601 | 0.253208056618162 |
| ATGTACAACCTCA | 795.615004044085 | 0.300545841069281 |
| ACATTGACTACA  | 795.619956566433 | 0.239699858658089 |
| TAAGACTAACAA  | 795.621665204393 | 0.189167001954153 |
| ATGACCAGGTTT  | 795.645948765054 | 0.302222100988408 |
| AGGCACAATGAC  | 795.6463693605   | 0.213867407290786 |
| TCGGTGACAGCA  | 795.6482830171   | 0.231411785319779 |
| ACCTCTGACGAA  | 795.648943625453 | 0.241243782167611 |
| CCATTTTGACTC  | 795.65295987666  | 0.186315998115602 |
| CCTACTGGTGAC  | 795.661143316919 | 0.310562883997186 |
| CCGCCAATATGA  | 795.663661302757 | 0.25146361177453  |
| ATGACCATAGTG  | 795.666132106869 | 0.253691393996833 |
| CGGCGTCACTTA  | 795.666138809976 | 0.258987722915444 |
| CACTTACATGAC  | 795.671930789713 | 0.270816725412755 |
| GCGCATGGTGAC  | 795.672614586147 | 0.374716786144629 |
| GTCACACAGCAC  | 795.673822470602 | 0.273472615242924 |
| CTGCATCGTGAC  | 795.682717686791 | 0.268858262557277 |
| GGTATTAGTGAC  | 795.684490421557 | 0.19148891384939  |
| GTATATACTCAC  | 795.685061241378 | 0.163151292076497 |
| ACATTGTGACGT  | 795.686201880161 | 0.210798875405804 |
| GTTGTCACCTTA  | 795.687071182509 | 0.371404332183604 |
| GATATACTACC   | 795.691510848862 | 0.27089977091161  |
| CCTCCGAGTCAA  | 795.696630482919 | 0.222971473541653 |
| CGCGCTGACGAA  | 795.697015176533 | 0.411129379412149 |
| AACATATGACCC  | 795.699887675715 | 0.275601425635012 |
| ATAACGTGACGC  | 795.707988455698 | 0.39080301877566  |
| GTGACATACTCA  | 795.709614204654 | 0.233938641842946 |
| CAAAGGGGTGAC  | 795.710618454231 | 0.303618730863253 |
| GTCATTATCCTA  | 795.711229969165 | 0.210702859895888 |
| AGCCGTGAATCA  | 795.712614260672 | 0.158445171345888 |
| ATAAGTTCGTCA  | 795.719560995947 | 0.254636288543293 |

|              |                  |                   |
|--------------|------------------|-------------------|
| CTCATACAATGA | 795.72403383626  | 0.201219767896351 |
| ACATACATGTCA | 795.733273638825 | 0.286202064542414 |
| GGTACTGCGTCA | 795.733653539883 | 0.282787412885795 |
| TGGTCATTGTAA | 795.737525829434 | 0.210940401402426 |
| CAAATCACGTCA | 795.738328721166 | 0.382667735500568 |
| AGTGTTTGACTC | 795.743127602581 | 0.232869215893053 |
| ACTACGTTGTCA | 795.748662600778 | 0.47880425420395  |
| GTCATGATTGGA | 795.749293101102 | 0.301864708683058 |
| TCGGACGCGTCA | 795.754098719118 | 0.210378581633865 |
| ATGACGAGAAAA | 795.75963924605  | 0.19631245725447  |
| GTCATTGCCGTA | 795.776802110968 | 0.38524166106181  |
| AATACACATCAT | 795.795102407875 | 0.229194022142203 |
| CAGGGTGACGCC | 795.801647125033 | 0.241253466694031 |
| CGTCACCCATAA | 795.802623330853 | 0.311688023671093 |
| GGCCATGACATA | 795.805751337043 | 0.29462321554197  |
| CAACGTGTGACG | 795.80841810092  | 0.213385047819341 |
| GACTCAGGCTAA | 795.810296476977 | 0.301888394180598 |
| ACTAATTCGGTG | 795.812374117771 | 0.226662402287352 |
| ACGTCACGTGTG | 795.81597409834  | 0.299208846499864 |
| CACACTGTCACA | 795.818491275171 | 0.128182410861362 |
| AATCGGTGACCA | 795.818607545035 | 0.144765968719189 |
| ACTAAATGACGG | 795.820259010726 | 0.419613371588102 |
| ATGACCCAGGCC | 795.827116382873 | 0.219557558593235 |
| ATGACATCTTTC | 795.830736523642 | 0.18916650813259  |
| GAGGGAGATGAC | 795.832166247426 | 0.225228031707438 |
| AGTATCTGTGAC | 795.837323113309 | 0.268480921127915 |
| ACTCATCATTTA | 795.840215508167 | 0.280369222192373 |
| ACTCTGACGTGA | 795.841440810709 | 0.280200165947379 |
| GGCTCTGACGAA | 795.845983076997 | 0.159442084789146 |
| GTCACACGCCGA | 795.849176765335 | 0.245817185482675 |
| AACCTGTACTCA | 795.85236838118  | 0.288151692414622 |
| ACCGCTTTGTCA | 795.860033632097 | 0.279033872604842 |
| CAGATCTGAGTC | 795.86149071575  | 0.270796416411473 |
| ACTATGACCTCA | 795.882538396865 | 0.252300796515138 |
| CAAGTTCGTAC  | 795.885090909885 | 0.232095624259779 |
| CTCATCGAGAGC | 795.909050113652 | 0.23898015014603  |
| ATGAGTCTCGGG | 795.910382460691 | 0.275858282165705 |
| ATACTCTGACAC | 795.913009507397 | 0.359922372789366 |
| ATGGTTACACAT | 795.913940035229 | 0.255802728870678 |
| ATGTGATGCATC | 795.916281926557 | 0.290707490649118 |
| CATTTCTAGTCA | 795.92711157455  | 0.262658233431437 |
| ACCGATCACTCA | 795.929123883857 | 0.223323300444119 |
| GCTGACTATGCA | 795.930178376556 | 0.236646182120204 |
| TCCTATATGTCA | 795.94270830454  | 0.237091252598581 |
| ACGCTCGACTCA | 795.945659551537 | 0.137267398968763 |
| CCAAATTACGCA | 795.949314613348 | 0.28802965494251  |
| CACGTTACTCAA | 795.954741001444 | 0.339969764800902 |
| GTCACGTTAGAA | 795.979337989092 | 0.273563147733906 |
| GCCATTCATGAC | 795.987348890012 | 0.329807258467383 |
| TATAGGTGACGA | 795.9879709913   | 0.224613500578159 |
| CGGTGACCCAGA | 795.998331388373 | 0.196392643997809 |
| CGAAGCTAGTCA | 796.017035803433 | 0.360756448319625 |
| ACAGGTACTCAT | 796.018873252207 | 0.302880668548197 |
| CACGATCGGTCA | 796.019572225043 | 0.214509785955204 |

|              |                  |                   |
|--------------|------------------|-------------------|
| CAAGACGTGGCC | 796.036381092516 | 0.220555729049798 |
| CGCTGATTGAGA | 796.038314388923 | 0.326323426259601 |
| CCCAAGCATGAC | 796.039319864852 | 0.334489086341621 |
| GGCTCACGTGAC | 796.04193819368  | 0.254376227351066 |
| ATAGAGTGTGAC | 796.054363044748 | 0.138694342462988 |
| CTAACGCGTGAC | 796.061834500164 | 0.292735318687966 |
| GATCCTGTCACA | 796.06668144902  | 0.323554886794759 |
| ATGAGCAAGTGA | 796.068519294855 | 0.227733626613347 |
| GAAATTATGACC | 796.071741162866 | 0.310280255739705 |
| ACGTCACCTGAA | 796.071801879288 | 0.296307096531424 |
| GGTCATACGCAA | 796.079840881062 | 0.172346899469964 |
| ACGAATGACCAC | 796.082062651304 | 0.327407814463244 |
| ACATACATGAGT | 796.088754408207 | 0.411672253953464 |
| GTCACGATGCCA | 796.089027473996 | 0.485163260952725 |
| CCTGTATGTGAC | 796.093959917083 | 0.291879022339008 |
| TGCACAGTGACA | 796.097249856471 | 0.300780552839898 |
| TACGAATGACCA | 796.098119488964 | 0.224277369151228 |
| CACTGATGACCA | 796.099824814599 | 0.235028629648612 |
| TATGACCGCAAA | 796.10206886385  | 0.256373206281152 |
| AGCTATTGTGAC | 796.103317043947 | 0.298361462826274 |
| ACAAGTCGTGAC | 796.104870455876 | 0.316350224736536 |
| TGACCCTTAGAA | 796.116292767009 | 0.234236658348572 |
| CAATACGTAATC | 796.121832507948 | 0.218487304007713 |
| AAGTCACGGCTG | 796.124241584869 | 0.154429629588693 |
| CTTTGATTAGTC | 796.125653950988 | 0.378068205742821 |
| CATGGTTGTGAC | 796.129247527119 | 0.366498708356041 |
| AACTTGACTCA  | 796.135286748394 | 0.256345903112382 |
| GACTGACATATA | 796.145870425136 | 0.275232204611265 |
| AACTATGACCTA | 796.15244277799  | 0.251680032704404 |
| GACAGGTTACTC | 796.153425650178 | 0.243072814729534 |
| CCTCTGACGAAA | 796.154496195437 | 0.308127780384707 |
| GCTGACGTCAAC | 796.155904009339 | 0.2575342367938   |
| ATAAGACTCTTC | 796.157859580232 | 0.189232567585742 |
| CGCCAAGATGAC | 796.162632095211 | 0.288022611735104 |
| CAAACCGACTCA | 796.166899450801 | 0.255724583759692 |
| ATGGCAACGTCA | 796.168332322857 | 0.194646176761311 |
| ATGTCTTTGTCA | 796.176033663623 | 0.429691791244281 |
| CTGACATGTCAA | 796.180746900671 | 0.279117151865808 |
| CTCCGTGACGAA | 796.206856841796 | 0.32318878075583  |
| CGCAGAGGTGAC | 796.207542014327 | 0.159258252147866 |
| GAAGACTGTGAC | 796.210011779035 | 0.193949559183371 |
| CTATTATGACCC | 796.213479675841 | 0.176485602845688 |
| AAGAAGTGACGC | 796.219214733165 | 0.194200897189554 |
| CTGACTCTCAGA | 796.23186302485  | 0.167091498471825 |
| CACCGAGTCAGG | 796.242715865825 | 0.149740369667177 |
| AGTGACAAACAA | 796.243278205474 | 0.30743731954925  |
| ATTGTCATGTAA | 796.244111855496 | 0.315197667894764 |
| AGGCCGACTCAC | 796.245193727034 | 0.161808278521891 |
| CAAGACCATGAC | 796.249618489923 | 0.335157120791596 |
| CACGTTTGGTCA | 796.261846005275 | 0.189834092346186 |
| GATTGCATGACA | 796.266795193304 | 0.247236567731981 |
| AATGACATCGTC | 796.269909590115 | 0.228873793626844 |
| AGCCATTGGTCA | 796.272026818921 | 0.20755155953803  |
| ACAAAGCTGACT | 796.275507086587 | 0.405972647377634 |



|              |                  |                   |
|--------------|------------------|-------------------|
| CTCAAGTGACGC | 796.276414540909 | 0.315978119367192 |
| AATTTGACTCGA | 796.279628230603 | 0.245123603259772 |
| CGGATCAGTGAC | 796.281137171968 | 0.253605016827284 |
| CACCACGACTCA | 796.299387554118 | 0.298111054155479 |
| AGCATTGACTGA | 796.31483292782  | 0.271022761413412 |
| AAGATTCATCGA | 796.315918699635 | 0.188420373427563 |
| TGACGAAGATAA | 796.317517713211 | 0.469807216414084 |
| CGTCACACGTGC | 796.328119789744 | 0.23254116037187  |
| CATAGGTAGTCA | 796.336147103077 | 0.28016943705185  |
| CTTCGTGACAGA | 796.349799180715 | 0.232303328393318 |
| CGTCACGTCAAA | 796.350000041053 | 0.422526432094369 |
| GCTCATCCGTCA | 796.351135769856 | 0.434206744868841 |
| TCGTCCGTGTCA | 796.358113146121 | 0.324652205910686 |
| ATTTTGGTGACG | 796.364160687134 | 0.255148958455725 |
| ATGAATCTTCTG | 796.365412530889 | 0.4115036564058   |
| GACCCCACGTCA | 796.369538869905 | 0.270701589671335 |
| GATGACCCGTAC | 796.37657058876  | 0.319868727316229 |
| AGAGTAATTCAC | 796.378978640282 | 0.274860516523078 |
| AACCTGAATGAC | 796.390966611751 | 0.281064399361953 |
| CACTCATGAGTA | 796.395710426936 | 0.417997676589685 |
| TCCAAGTACCA  | 796.398075538367 | 0.346673774745757 |
| ATGAGGCATACA | 796.412740810437 | 0.234828158796408 |
| AGTATGGGTGAC | 796.413825056463 | 0.308634725785061 |
| ACGTTAGATGAC | 796.417154491883 | 0.290805829302865 |
| TGTCACCTCGAA | 796.424785851444 | 0.317584548648135 |
| ATGATGAATAAC | 796.425129094317 | 0.194348209334841 |
| GGTGACGCCAAA | 796.427867661691 | 0.168345546480429 |
| TCAGTTGAGTAA | 796.432409779705 | 0.274972802042631 |
| CTCCCTGACACA | 796.432741265591 | 0.230795333505912 |
| CAACACAGTCAG | 796.433132423549 | 0.257601497707677 |
| GTCATGTTCTCA | 796.441863805769 | 0.279647398567334 |
| ACTCATTAAGTG | 796.446541756397 | 0.245836278125905 |
| ATGACGTCCAAT | 796.447804544399 | 0.236978854807101 |
| GCAGGGTGACGC | 796.448928915685 | 0.235064670031426 |
| CAAGTTTGCTCA | 796.45336095113  | 0.42737332376892  |
| AGTAATGTCACC | 796.45588526541  | 0.291133181523643 |
| ATTGCTGAATCA | 796.46655625126  | 0.345167511270958 |
| AAGAGCAATGAC | 796.469203327464 | 0.234600141144581 |
| TCCGCGCAGTCA | 796.474674805362 | 0.312507250202996 |
| CGTGACGCCATC | 796.48293714219  | 0.266884468912811 |
| ATGACCCAGCTC | 796.484265043486 | 0.22816400282862  |
| CGTCATTCCGAC | 796.486509522651 | 0.207546354884571 |
| AGCAATTGTGAC | 796.495631058253 | 0.374498351936313 |
| TGACGGGTAATA | 796.507690260145 | 0.201332763840463 |
| GTATGGCTAATA | 796.508132422209 | 0.22690889149912  |
| GACCAACTCATC | 796.509125340316 | 0.157074811982152 |
| GTAATACTTTGA | 796.509775109861 | 0.255701975394454 |
| AGTGCGGGTGAC | 796.510271992861 | 0.202936757884694 |
| CGGCCTGAGTAA | 796.514198007397 | 0.282500325201498 |
| ACTACTTGACTC | 796.518680157286 | 0.181741617058623 |
| GATGACAGGCCA | 796.529009536089 | 0.2390549549748   |
| CTGGGTCATGTC | 796.535630893189 | 0.21856275079397  |
| GTCATGACCCGA | 796.5384143518   | 0.207441396569513 |
| AGATGACATTAC | 796.539318397707 | 0.235963764267817 |

|              |                  |                    |
|--------------|------------------|--------------------|
| CGTCATGCGGAA | 796.541536832262 | 0.324636700115409  |
| GTCACCTTCTAA | 796.542632271464 | 0.348135741722813  |
| GATGCGGGTGAC | 796.543078102189 | 0.285000250439594  |
| CAAGGATTAGTC | 796.545281296216 | 0.256784524256661  |
| CACACGAGTGAC | 796.551951305607 | 0.0770664691614443 |
| ATAGCGGATGAC | 796.552375140151 | 0.205822180405981  |
| TATACCCAGTCA | 796.554948414597 | 0.218777465134155  |
| GTCACGCAACGA | 796.556507762842 | 0.214990145178977  |
| ATGACTTGCCGA | 796.560281745636 | 0.28807709936835   |
| ACATTTCGTACA | 796.56554370497  | 0.262588465368036  |
| GAGTGACGATAC | 796.569455855583 | 0.301278664244513  |
| CGGAGCAGTGAC | 796.575474015203 | 0.25673231479803   |
| CAATTACTGACA | 796.580537387188 | 0.264452624341515  |
| ATGACGCTCCAA | 796.585678064285 | 0.222416227735392  |
| GTCACAATACAC | 796.588023504408 | 0.279226690348672  |
| TGACGATTTACA | 796.592580852755 | 0.295168343806456  |
| GCCCCAAATGAC | 796.596776470223 | 0.358627419705301  |
| CGCTTTGGTGAC | 796.601855277407 | 0.296912827425847  |
| CGGCCCAATGAC | 796.608555155205 | 0.272604020599792  |
| CAAATAGTATGA | 796.611418505256 | 0.24828417626161   |
| TACGATGGGTCA | 796.611477746186 | 0.303427046193158  |
| TCCTACGCTCA  | 796.624086260844 | 0.225917236346606  |
| AGTTTAATGACG | 796.638073967747 | 0.356379581363498  |
| GACTTTGTGAGA | 796.640651378212 | 0.225659650958533  |
| ATCATACGTGAC | 796.643695435048 | 0.232029088809756  |
| ATGTGTAACAAT | 796.649285621076 | 0.332141018111282  |
| ATGACGCTCCCG | 796.687973612595 | 0.307279598681811  |
| GGGTCACTGACA | 796.694219328612 | 0.242058137447733  |
| AATGTATGACCG | 796.695695232854 | 0.281429581826949  |
| CTATTAGCGTCA | 796.69609271134  | 0.292387688707732  |
| ATGAACATGACA | 796.697213646259 | 0.424763194614289  |
| AGTAAGCAGTCA | 796.700267408751 | 0.168600966002859  |
| ACGTTGTGACCA | 796.70059563682  | 0.247665492755638  |
| CCGCGACGATGA | 796.702838592188 | 0.420708703731395  |
| GAAGACGTCACA | 796.704112073    | 0.196468531381089  |
| GTCACATGAACA | 796.70723255698  | 0.276222944639746  |
| GGGTGTCATGCA | 796.711337535882 | 0.152037919088336  |
| GGTAGAGTAATA | 796.717532673055 | 0.176643333005914  |
| GTCACGATTTAA | 796.720158893256 | 0.218122522364495  |
| GCGTCACCCACC | 796.722832372656 | 0.309089383908865  |
| TATGACCGTAAA | 796.727042986137 | 0.296137213966998  |
| GTCACCACCGCA | 796.730573327231 | 0.228466426959614  |
| ATTTCGTAATCA | 796.734835566979 | 0.233781891364765  |
| CTCACTGGGTCA | 796.735905624737 | 0.330177405695067  |
| ACGATTCACTCA | 796.749898103247 | 0.278371834784512  |
| GACAGTGACCAA | 796.755023066994 | 0.376933080981525  |
| TGTATCGTGACA | 796.759313799208 | 0.20871666229501   |
| GATGATTGCTCA | 796.767224254222 | 0.212582316337578  |
| ATTAGTGAGTAC | 796.770324579658 | 0.356123451923934  |
| ATATCTCCGTCA | 796.771175018142 | 0.229976215489123  |
| CATATGACGGCA | 796.794751733795 | 0.265952465114917  |
| ATGAGTTGGCTC | 796.79630999938  | 0.256993759152592  |
| AGTCAGCGTATA | 796.802152525128 | 0.236254949856382  |
| GGTGACCATACA | 796.802570450619 | 0.22208883158142   |

|               |                  |                    |
|---------------|------------------|--------------------|
| GTGACGAACCTA  | 796.804172864807 | 0.271631087944261  |
| AGTGCTGAGTAA  | 796.806613048385 | 0.294237790742487  |
| AGTCACGGGTTG  | 796.806912851892 | 0.355895489833131  |
| CCGACGTGACAC  | 796.813500391921 | 0.255011836674368  |
| ACTGCTGTGACG  | 796.817859104693 | 0.320553692893897  |
| AGTCCGTGACAC  | 796.822713093295 | 0.246720213346897  |
| CAAAGTGACGCC  | 796.82686135403  | 0.246520486469085  |
| CTCGAAAGTGAC  | 796.833962499643 | 0.299944244698497  |
| ATGCCCTGTGAC  | 796.837722460158 | 0.244547298329625  |
| CGTCAAAATGAC  | 796.838656301385 | 0.226291719081774  |
| CTTTTGAGTGAC  | 796.863223356217 | 0.303926001299534  |
| AATGATGCAATA  | 796.874966348741 | 0.0498455505679759 |
| ATCGTCACCGGC  | 796.890052977449 | 0.244897317951979  |
| CAACTCTAGTCA  | 796.8910844359   | 0.270759147063057  |
| CGTCATCTGCAC  | 796.892150845758 | 0.184515056495572  |
| TGACGCGTAACA  | 796.900977026347 | 0.194742313604602  |
| AGACTCACGCGG  | 796.906360086392 | 0.182600243376363  |
| ATGAATAATCGA  | 796.940521902901 | 0.205994723879035  |
| AGATTTGACTGA  | 796.951412835706 | 0.380422466948541  |
| CTCATTGAGTAA  | 796.96162983875  | 0.304623746537018  |
| CTGACTGGGTTA  | 796.970237455781 | 0.211535861021102  |
| CGTCATTCCAC   | 796.978741988726 | 0.194818935102343  |
| CAATCAGACTCA  | 796.991805941372 | 0.122316937636967  |
| CGATCAGTGACG  | 796.992371040935 | 0.278122461663411  |
| CGATTGTGTGAC  | 796.996133532677 | 0.241537289358775  |
| GATGCCATGACA  | 797.004707726838 | 0.2935932360767    |
| TCATTATAGTAA  | 797.008619705141 | 0.223566489086174  |
| GACTCCCATGAC  | 797.011311270161 | 0.396629732686978  |
| AAGACAAATGAC  | 797.012692970601 | 0.155670713791554  |
| ATTAACAGTGAC  | 797.01320526876  | 0.244351063374391  |
| ACTCATAGGCCCT | 797.014248563445 | 0.20664619827409   |
| CCCAGTACGTCA  | 797.022367053811 | 0.363022044186469  |
| GCGACTGTCATA  | 797.027869728544 | 0.140663522859554  |
| TGCGTGGTCACA  | 797.031658458978 | 0.224728704766521  |
| GTCACCTACTAA  | 797.042444429402 | 0.207183856784392  |
| ACCTTTAGTCAA  | 797.044530471278 | 0.339674059554027  |
| CGCTACAATGAC  | 797.064351724047 | 0.370786527413259  |
| GACGAATCACTC  | 797.06446934199  | 0.221723066893022  |
| TAGGCTGTGACA  | 797.06475194776  | 0.294087211940175  |
| GGTGGTAATGAC  | 797.064842586115 | 0.244889194530595  |
| CATGACATTTAC  | 797.070862477168 | 0.400462633029192  |
| CGATGGAATGAC  | 797.074198526223 | 0.229737601931938  |
| GTCAGTTTGTC   | 797.08407424699  | 0.230134255999809  |
| CCGAATTGTGAC  | 797.089088681896 | 0.246630860549251  |
| ACTCATAAATCA  | 797.091513499316 | 0.314394747374595  |
| AGGATGACCGAA  | 797.096657457033 | 0.235463718730066  |
| CCCGTTGTGACG  | 797.101037805648 | 0.427042133821346  |
| AGTCACGAGTCC  | 797.105989847108 | 0.194799635731986  |
| AGAGTAATTACT  | 797.106100640423 | 0.332919674462295  |
| AAATAAAGTGAC  | 797.110521540727 | 0.209021338569068  |
| GGTACCTGTCAC  | 797.112286801327 | 0.209497230236928  |
| ACTCATACGGCG  | 797.113609184664 | 0.247212015898157  |
| TCGTAGTGACGA  | 797.116748711075 | 0.237977336672229  |
| CGGTCATAGCCA  | 797.118634775476 | 0.271409403373665  |

|              |                  |                   |
|--------------|------------------|-------------------|
| TCATAAAAGTCA | 797.120597964982 | 0.240811099351005 |
| AGAGTCAAGGCT | 797.12203214462  | 0.296506800426841 |
| TAGTCTGACAAA | 797.123228717849 | 0.291369151187949 |
| ACAAATGACATC | 797.132169202871 | 0.259490573132072 |
| GTGTGAGCCTTA | 797.135993449043 | 0.258144456662701 |
| ATGACAGTAGTG | 797.139744701851 | 0.190506485912094 |
| ACCTGCATGACG | 797.143031549518 | 0.244664937534052 |
| ATGCACTCATCG | 797.145373802758 | 0.316502228854424 |
| CACGGCTGACTA | 797.149412406984 | 0.370365973427436 |
| GGATGACCGAAA | 797.165017871763 | 0.238917141312038 |
| GTGACGTGCGAA | 797.171152902836 | 0.274922414832249 |
| CCATCTTATGAC | 797.174468555091 | 0.305440878469636 |
| AGACTTTGTGAC | 797.176309790802 | 0.18073033645928  |
| AAAAGTGTGACA | 797.17652854264  | 0.243103711564214 |
| ACCTAGTCAGTC | 797.181605345813 | 0.279247063519597 |
| ACTCATACGACG | 797.183911112346 | 0.244075327109717 |
| AGTCAGAGGCAG | 797.187349266188 | 0.112960860728353 |
| GTCATGGGGCCA | 797.194584797674 | 0.360913397074988 |
| CGTTATCATGAC | 797.200384463841 | 0.264165020419154 |
| AGTGTTACACAT | 797.203362373906 | 0.207128624876025 |
| CAGTGAATCAAC | 797.209267002126 | 0.131481694806749 |
| ACCCTAGTGACA | 797.213660207343 | 0.157767126486618 |
| CCTCTGCGTGAC | 797.217386563782 | 0.265225366763756 |
| TCTCCAATGACA | 797.227709162627 | 0.253302292819159 |
| ATGGACGGTGAC | 797.236999766485 | 0.240599166467531 |
| TAACGTCACCGA | 797.254493527909 | 0.382097511242265 |
| AACACGGGTGAC | 797.26313961215  | 0.207895778949449 |
| CAGAGATCTGAC | 797.267167010962 | 0.373501346657043 |
| GACATGTCTGAC | 797.268463143075 | 0.247378664375817 |
| ATAACCGTCACA | 797.272813954344 | 0.236292338670681 |
| CCGGATCACTCA | 797.283425138366 | 0.231414050607635 |
| GTAGGGTGTGAC | 797.284013892436 | 0.170982036537556 |
| TAAAACGTGTCA | 797.28781092123  | 0.379646379118049 |
| TAAGGCTCACCA | 797.289799258742 | 0.251626429846474 |
| ACTCGATGACCG | 797.297055352891 | 0.434859019235287 |
| ATGCCCGGTGAC | 797.30137368291  | 0.288617769918172 |
| AGTCAGATACAT | 797.310821852649 | 0.257050341213313 |
| TTAGGTCATCAA | 797.320268847354 | 0.223315218255295 |
| GATTCGGGTGAC | 797.321879034096 | 0.279343119190314 |
| ATGAGTATGATA | 797.325944104397 | 0.235173802065487 |
| CGAGTCAGGGGC | 797.341868261658 | 0.285057980707142 |
| GCTTATCATGAC | 797.349110753459 | 0.261193119152374 |
| CGAAAATGACCA | 797.349216121262 | 0.263706220150353 |
| CATCTTGAGTAA | 797.356011924587 | 0.40922963844797  |
| ACTCATTGTGTC | 797.359489178612 | 0.189850645006733 |
| GCTCTAGCGTCA | 797.360343267711 | 0.155940222325329 |
| CAGAGTCGTCAC | 797.361997501832 | 0.352980529618039 |
| CTTTGTAGTCAA | 797.367726841602 | 0.173461738013071 |
| ATTGAGCATGAC | 797.374901113025 | 0.281163159055806 |
| ACATGGTGACGA | 797.380581287748 | 0.258911327483547 |
| CTGCTGACTGTA | 797.385163636357 | 0.238399236844611 |
| ACGATAGTGTCA | 797.387236219092 | 0.260815536760281 |
| AATGGCATGACA | 797.39852117407  | 0.267452787097386 |
| AATGAGTAGTAG | 797.406104754656 | 0.188807323430729 |

|               |                  |                   |
|---------------|------------------|-------------------|
| CACGTGCTGTCA  | 797.416584221064 | 0.306631534410394 |
| ACGCTAGTCACT  | 797.425388063698 | 0.264559332410114 |
| ACCACTTTGTCA  | 797.428649956685 | 0.205108757411223 |
| AGCAATGTCATC  | 797.428665199776 | 0.310143463806639 |
| AGAAACCCGTCA  | 797.431568764913 | 0.23304440938887  |
| CATTGCGGTCA   | 797.442836543834 | 0.437595897981957 |
| CGTCAGAGCAAA  | 797.443930043117 | 0.281249205418288 |
| AGTACTCACACC  | 797.455823428605 | 0.254203916283628 |
| TAGAGATGACCA  | 797.456861214676 | 0.244975373269917 |
| AGCTGTAATGAC  | 797.46102290103  | 0.298559540375795 |
| CAAGTCGTGACA  | 797.463167371362 | 0.299929892950489 |
| CTATGATTCGAC  | 797.473034836681 | 0.139245953784917 |
| TAATTCACGTCA  | 797.473666808405 | 0.21830956651     |
| ATATGAGTTGGC  | 797.477055158118 | 0.154863604462007 |
| AATGTGTAACCG  | 797.490576610497 | 0.161665659372805 |
| GGGATTGATGAC  | 797.490605999425 | 0.224956627199906 |
| ATCGAATCATAG  | 797.500405765994 | 0.200536264636359 |
| AAGAGTCTTAAG  | 797.511023357341 | 0.18436435709292  |
| AAGGCGGAGTCA  | 797.515340498695 | 0.172338797789004 |
| TGATGTGTA AAA | 797.531343687022 | 0.151834550060969 |
| AGACTAAATGTC  | 797.5458378518   | 0.402670701211684 |
| TAGCATTGGTCA  | 797.549332681612 | 0.364961953581585 |
| CAAGGTATGACC  | 797.550407105212 | 0.240627850079157 |
| ACTCATACCGTA  | 797.559527523569 | 0.243673996776469 |
| TCATCGTGACCA  | 797.560790920312 | 0.315190103741604 |
| CTGAATGAGTGA  | 797.561098287385 | 0.266431668191085 |
| ACACGTGACATA  | 797.57062920538  | 0.178669584124816 |
| GTCACCAGTTTA  | 797.581991707407 | 0.393355918788664 |
| TGACACTATGCA  | 797.587579700478 | 0.210282455243124 |
| GACTTGCTCACC  | 797.599230939987 | 0.204816429413626 |
| ACATTGGTGTC   | 797.603501132816 | 0.303136794739939 |
| ATTGCTCCGTCA  | 797.604607032292 | 0.311311220793038 |
| CAACTAAATGAC  | 797.609615460636 | 0.363022752282119 |
| ACGGCTGAGTAA  | 797.616004154517 | 0.323289256753474 |
| GTCACCGATAGA  | 797.629668751346 | 0.200462691703246 |
| AAAACAAAACAC  | 797.637313192455 | 0.228632294109283 |
| CGGTGACCTGGC  | 797.639795994237 | 0.284147448387968 |
| ACGTCATGCTAA  | 797.640701668568 | 0.247264664263337 |
| ATCCTTGGTGAC  | 797.646776801776 | 0.271655122110631 |
| CAGTCAAAGTCA  | 797.646862522897 | 0.314966938033198 |
| AAGCTTATGACC  | 797.64737699537  | 0.262347734591253 |
| CTAGACTCGTCA  | 797.654428511233 | 0.207097387222433 |
| ATCACCGTGTC   | 797.658432175605 | 0.26043465034952  |
| GGGTCACCGTAC  | 797.662756814492 | 0.343921106337364 |
| TGCAGTGACGAA  | 797.667171895207 | 0.201122191528173 |
| CCCGCTGACGTA  | 797.671567255684 | 0.300865036863226 |
| ATAATTCGTCAA  | 797.677360670231 | 0.316102910440703 |
| ATGTCACCTCG   | 797.682198064811 | 0.206596033171187 |
| GGTACGATGACC  | 797.682930952799 | 0.131772980732746 |
| CGTCGAGTAATA  | 797.683884666219 | 0.217535551555265 |
| GTTGGCTCATCA  | 797.683915003018 | 0.215421758811188 |
| GTGATCCAGTCA  | 797.684159784184 | 0.301895691901408 |
| AGAGTAATATGA  | 797.684809060343 | 0.159763327555208 |
| GGTCATCCATAC  | 797.693335175284 | 0.234778480544962 |

|              |                  |                   |
|--------------|------------------|-------------------|
| AAGATTCATACA | 797.698711512005 | 0.248955626627905 |
| GAATACGGTGAC | 797.699568016357 | 0.181314196988582 |
| GGAGGATGACCA | 797.702598169859 | 0.26225663255188  |
| GTCACCACACGA | 797.707764768331 | 0.243164151073121 |
| TATGGTGAGCAA | 797.715941616234 | 0.253835856450813 |
| CCGTCATGTGAC | 797.716811968176 | 0.304249541375654 |
| ACGGGTCATAGA | 797.717564276769 | 0.130660625501013 |
| CGGGCGTGACAC | 797.718041132562 | 0.213289080352046 |
| GTCATTGTCAAC | 797.727338014549 | 0.186732568718637 |
| CAGTCCTATGAG | 797.72800851322  | 0.303719781575693 |
| ACTCATTATTG  | 797.731908303031 | 0.300617820406329 |
| CGGGTAATGACG | 797.73296064256  | 0.234720270005397 |
| ATGCGTAACCCG | 797.738125462835 | 0.276747911836632 |
| ACGTCACAAATA | 797.739544106457 | 0.221672393212512 |
| CGACTAATCATA | 797.745311298626 | 0.31759772098529  |
| CGTGCACGTGAC | 797.75238286579  | 0.247614006286385 |
| TAAGTTACATCA | 797.757401874803 | 0.259763714557399 |
| CGTCATTTCCGC | 797.760258067362 | 0.241201628144871 |
| AGTCAGTAACTG | 797.771491763326 | 0.292758040329423 |
| CGTTCAGTAATA | 797.774121902319 | 0.355131445113021 |
| ATTGACTGTTAA | 797.775478003761 | 0.244279800194527 |
| ATGAGTATGAAT | 797.791343056016 | 0.181204966025303 |
| TATGTCATGGAA | 797.805105745061 | 0.294568463335071 |
| ACACAACATGAC | 797.810227579342 | 0.158560301304299 |
| TACTGGTCAGAA | 797.811864498785 | 0.296664545520896 |
| ATTACACACAAT | 797.83709882552  | 0.237210134081083 |
| ATTATGTCAGAA | 797.838848129291 | 0.228932754557998 |
| CCATTTGACGCA | 797.840314910278 | 0.155674509230153 |
| GCTCCAATGACA | 797.863494457013 | 0.295550196760761 |
| GAATTAGTCCAA | 797.866082362872 | 0.233494696756338 |
| TATGTGGTGACA | 797.86793845767  | 0.331460792471736 |
| TAAGAGTCGTCA | 797.86844272783  | 0.210890415229567 |
| GTCACCTAGGTA | 797.870645929057 | 0.232948433036708 |
| GACGCACTCTGA | 797.870997242526 | 0.277078517795118 |
| ATCCATCGTCAT | 797.871066153846 | 0.24276867461709  |
| CTGTGAGCAACA | 797.874231553734 | 0.150450448690676 |
| ACTCATTCTACG | 797.878332577474 | 0.252614991797603 |
| GTCCATCTGTCA | 797.898423745646 | 0.261999450216975 |
| TATATGGTGACA | 797.90214717814  | 0.2560994124159   |
| ACTTTTGGTGAC | 797.902539229718 | 0.465212684226445 |
| ATTTGTCAACGA | 797.909178701974 | 0.23929038223014  |
| ATCGACTGACTA | 797.911069159942 | 0.264059281668452 |
| TAACCCACGTCA | 797.911557135564 | 0.231072761665304 |
| AGTCAGATGCAT | 797.915231675938 | 0.246341057305646 |
| ATCGTGTACGA  | 797.922737947207 | 0.298219567113805 |
| CGTGGTCATTTT | 797.922973238402 | 0.251228101373142 |
| ATGTCTGACCCA | 797.92361436353  | 0.240811038708777 |
| AGAAAGTAGTCA | 797.926289852663 | 0.103138341840037 |
| GTCACAAGTTCA | 797.928492155248 | 0.272481483633124 |
| GTGACGACGTAA | 797.935344589871 | 0.202714169605543 |
| ATGTTTTGACTC | 797.948745283048 | 0.313515435879623 |
| ACTCTGTATGC  | 797.955698866426 | 0.29837439843296  |
| ACGTCACAACT  | 797.95814573804  | 0.203460781020614 |
| CTTGGTCTGTCA | 797.959074630306 | 0.34690390642176  |

|               |                  |                    |
|---------------|------------------|--------------------|
| GATGTATCACAC  | 797.962421125682 | 0.207323363606377  |
| AACCTTGACTCT  | 797.962937284632 | 0.25801905443526   |
| CCTATGTCGTCA  | 797.981102899224 | 0.427902054074402  |
| ATGACAAGCACG  | 797.982198537522 | 0.268884265172401  |
| GCTGCTAGTCAC  | 797.994539155388 | 0.22962752692363   |
| CGCTGACGGATC  | 797.995123463008 | 0.310353156166404  |
| CCCGTTGAATCA  | 797.997307495322 | 0.279573055209815  |
| AAAACCTATGAGT | 797.997617288797 | 0.216992890523156  |
| GTCTTACGTGTA  | 798.000925728279 | 0.31334616538496   |
| ACTAATAGTTTA  | 798.005318176521 | 0.260038884212663  |
| GGAGCAGAGTCA  | 798.017981456812 | 0.182793060401183  |
| GTAGGATGACCA  | 798.021256150578 | 0.227534125257041  |
| CTGACGTAGTGA  | 798.024285939532 | 0.4077632107931    |
| AAACGGTGACAG  | 798.029630712335 | 0.18026898254874   |
| AGTCACGGATTC  | 798.036529353524 | 0.231189996744187  |
| GGGGCTCAGTCA  | 798.038852282721 | 0.164564352887433  |
| CAGGACGGTGAC  | 798.045164640007 | 0.237265142398092  |
| ATATTGCATCAT  | 798.049722557989 | 0.298269114627174  |
| CGTCATCTCCGC  | 798.05538899874  | 0.28794808538507   |
| AGTGACATGACC  | 798.057985616908 | 0.195056460816842  |
| ATGAGCAACTCC  | 798.065803816047 | 0.252440050167037  |
| GAGGAAATGACA  | 798.068812398112 | 0.178214444970288  |
| ACTAGTGACGCG  | 798.080725750746 | 0.303969992878346  |
| CGTCATTGATCC  | 798.091549950409 | 0.168903788375946  |
| CACACGTTGTCA  | 798.098808726953 | 0.177963202875048  |
| AATCCGTACAGCA | 798.099836728648 | 0.256957562096362  |
| GTCACCCAGGTA  | 798.107211685037 | 0.422264951886253  |
| AATAACTTGTCAC | 798.110088615971 | 0.279244337751174  |
| AATCTGAGTGAC  | 798.110283727112 | 0.42719900732788   |
| ACATATGTGACG  | 798.112391701466 | 0.365419145933425  |
| ATTACAATGACG  | 798.115795716963 | 0.243533108272998  |
| ATGACAGGGCGC  | 798.121360394009 | 0.26240429796595   |
| CGATCATAGTCA  | 798.127370303459 | 0.307902613013207  |
| GACCTCTGTGAC  | 798.130778063142 | 0.293516360982207  |
| AACGGACTCACA  | 798.136190841114 | 0.217657539324226  |
| TGATGTCAGACA  | 798.136542649409 | 0.334765255439331  |
| ACTGGTCAGACG  | 798.148191916728 | 0.220428678181836  |
| ATAGATTACGCA  | 798.149196782697 | 0.22560734786058   |
| ACTAATTACGCG  | 798.155018766506 | 0.24733673949538   |
| TGACAATTAATA  | 798.157192564984 | 0.383446993372049  |
| ATGACATCGATA  | 798.158928961152 | 0.196980357173381  |
| GTAATCACCGAA  | 798.163649893787 | 0.159276839456958  |
| CACGGCGTCACA  | 798.16391160836  | 0.216252907134969  |
| TACTCATAAGAA  | 798.164063585686 | 0.242965756489787  |
| ACGTCACATTGG  | 798.180476702968 | 0.215976917622795  |
| TACGTGCGTCAA  | 798.181103150791 | 0.174791899871947  |
| GTCATGATCACA  | 798.183094452637 | 0.30220929728361   |
| CTGTGTCAGCGC  | 798.188835473968 | 0.246290299356354  |
| GTCACACCGCAA  | 798.192117491916 | 0.387131537958947  |
| CAAACCTGTGACG | 798.197666621969 | 0.261100667936504  |
| CACCTATGACCC  | 798.200064380553 | 0.116639647252431  |
| CTATGAGTGTCA  | 798.211543988282 | 0.0986172344135053 |
| AAGGCCTAGTCA  | 798.213225817247 | 0.271991182741958  |
| AGGGTCTGAGTC  | 798.215103512271 | 0.240584373469001  |

|               |                  |                    |
|---------------|------------------|--------------------|
| ATGAGCCAACTC  | 798.217458612704 | 0.215411916524098  |
| GCCACTTATGAC  | 798.218286196663 | 0.208954863716271  |
| AAGTCACTAGGA  | 798.223893395554 | 0.205147722743176  |
| ATTCTAATGACA  | 798.224677401201 | 0.245815818889642  |
| CACAGATGACGG  | 798.231351877686 | 0.239990139391112  |
| ATTGCCATGAC   | 798.239752258099 | 0.369070783232915  |
| TGAGCCATTTAA  | 798.239815657241 | 0.248339502873521  |
| AGTCAGACAAGA  | 798.246361507438 | 0.472252234420879  |
| CGCTTCTAGTCA  | 798.249798259828 | 0.268632359481523  |
| CTTAACACGTAA  | 798.252371671348 | 0.279829386750644  |
| TAGGATGGCTCA  | 798.253563194668 | 0.310936020954526  |
| GTGTCACTACAA  | 798.254815280723 | 0.154602147444768  |
| CTGAGCGGTGAC  | 798.259921395397 | 0.353765503169366  |
| ACTCATAGATCT  | 798.264368807493 | 0.215656247103342  |
| GATGGCCATGAC  | 798.276092754469 | 0.260034338990425  |
| ACCAGAAGTCAT  | 798.276568178003 | 0.340002527673535  |
| GGTTCGGGTGAC  | 798.279680740783 | 0.21498422276519   |
| TAAGGCTCACTA  | 798.282206213455 | 0.226508469744661  |
| GGTGAGCCACCA  | 798.283772348147 | 0.248316436051322  |
| GTCATGCTCATA  | 798.288610882932 | 0.390130050741385  |
| GACTGACATATC  | 798.288939551817 | 0.410555312236033  |
| CTTTGGGTCAAC  | 798.296957857016 | 0.204617712773791  |
| GTCACCACAGGA  | 798.304352697693 | 0.234120653818674  |
| AACGATCACTCA  | 798.304423340926 | 0.3119522841406    |
| ACGTCAGAGCCG  | 798.308614922769 | 0.298817988712764  |
| GTTAAAATGTCA  | 798.323279652798 | 0.309616729377154  |
| CGGCAGGGTGAC  | 798.328949767206 | 0.14551681363265   |
| ATGACACCCTG   | 798.331955020904 | 0.206110893309774  |
| GGGAGTGACCAA  | 798.342805884698 | 0.266151501669866  |
| AAGACTCTTAGT  | 798.345556901975 | 0.426639703776694  |
| ATGAGTGAGACA  | 798.348549373036 | 0.198200212033409  |
| TAATTTCTGTCA  | 798.356506446266 | 0.301804112808794  |
| TGAACTGTGACA  | 798.370306556152 | 0.247952271643664  |
| TATGGACAGTCA  | 798.376387742557 | 0.300010917996488  |
| CCAGCAATGACA  | 798.384975418176 | 0.244677397362566  |
| ACATCTCCGTCA  | 798.394459600991 | 0.266779610176873  |
| GTCACCTAGTTA  | 798.400324761121 | 0.203303103693373  |
| ATGACAGTCAGC  | 798.400422467019 | 0.33192372584258   |
| CGGTCATAGCGA  | 798.406878168177 | 0.396778299128881  |
| AAACATGTGACG  | 798.416042885779 | 0.289074397684587  |
| GACTGATTGTCA  | 798.424651825264 | 0.375063772528917  |
| CGTCACCGGGAG  | 798.432861465728 | 0.331425288604998  |
| ATGACGAGAAGA  | 798.436515278088 | 0.272281433672304  |
| GATCATGACGCC  | 798.446365933128 | 0.211176903906251  |
| ACACGTGTCAGA  | 798.4581759462   | 0.221308262573833  |
| ATGACGCTCGAC  | 798.466067999609 | 0.276277238060919  |
| ATGATAATGACG  | 798.466911319454 | 0.0684970194726941 |
| GTAACCTGTGACA | 798.469562777652 | 0.217095769200329  |
| CATCCTAGTGAC  | 798.472633407306 | 0.218600268114724  |
| TCACCTCGATGA  | 798.482392609418 | 0.286353516236618  |
| CAGACCGGTCA   | 798.483534992094 | 0.291355801206406  |
| ATGTCTCCGTCA  | 798.484459735792 | 0.392585595901166  |
| AGTCTCGTCATG  | 798.486465343578 | 0.296701392833475  |
| TGACCAATCCCA  | 798.49180455577  | 0.230571250519398  |



|               |                  |                   |
|---------------|------------------|-------------------|
| CATTATGCGTAA  | 798.495990197575 | 0.219795057823544 |
| CGGCTCTGTAC   | 798.506447463047 | 0.250501466716386 |
| AGGGTCACACTA  | 798.513399669431 | 0.218482460026612 |
| CGTCATCTCACC  | 798.523133465567 | 0.214200438677583 |
| AACACTGTCACA  | 798.525381008471 | 0.202435897152135 |
| GAATCGGGTGAC  | 798.528229149174 | 0.233945531140893 |
| CTGTTTTGACTC  | 798.528388734124 | 0.213945704389134 |
| GTCACITTCCTTA | 798.531142948711 | 0.14971281068939  |
| AAAACGATGAGT  | 798.54164515079  | 0.211544370357805 |
| CACITTGACTCGA | 798.542657349322 | 0.266933302301256 |
| GACACGTCTTAC  | 798.543578579279 | 0.194434573970572 |
| GCGTACAGTGAC  | 798.543726530126 | 0.215821408555566 |
| ATGACAGGGCCC  | 798.545887473714 | 0.273687632896824 |
| GACAATGTCATC  | 798.546242136123 | 0.12314815404758  |
| AGTACATTGTCA  | 798.562554753788 | 0.209086108098345 |
| GCCTGGTCATCA  | 798.563514823062 | 0.30405212303522  |
| GATCTGTGACCA  | 798.566533357092 | 0.307996397946407 |
| CCATTTAGTGAC  | 798.579175611198 | 0.257820978556577 |
| ATTCTACATGAC  | 798.579815442322 | 0.289222037768028 |
| ACGTCACITTTGG | 798.580804771892 | 0.44755216712193  |
| CTTCCACAGTCA  | 798.581632395093 | 0.359003328669728 |
| GGGATATGACCA  | 798.582098122277 | 0.248683485679473 |
| AACTAATCAGTC  | 798.582320052139 | 0.332047817861455 |
| AGTCAGAACATG  | 798.583040913828 | 0.133037303497423 |
| ACGTCACCGCTC  | 798.59063921291  | 0.204567111731261 |
| CAGTCAGGTCTGA | 798.59638363845  | 0.218594815295385 |
| GTCAACTGGTCA  | 798.596607771609 | 0.215029317929359 |
| CTGTCACCCAAG  | 798.599977905633 | 0.227312178678229 |
| GTCACAACGAGA  | 798.600590773875 | 0.24261818510178  |
| TCCCATACGTCA  | 798.618470415348 | 0.196289830953255 |
| AGATCTGACCCA  | 798.629833394686 | 0.221445822093017 |
| CCATGTTGATGA  | 798.632262900701 | 0.466306402874516 |
| CACTCATAGTGA  | 798.635400533519 | 0.205973625843945 |
| GACGTCACCGTA  | 798.639174304554 | 0.284211477015038 |
| ATACCTGTGACA  | 798.639908514387 | 0.176410906858504 |
| AAATCTGTGACG  | 798.641760711562 | 0.224124062557821 |
| CGTCACTAGATA  | 798.641903109113 | 0.214602311527634 |
| CGTCACACCGTC  | 798.64285912051  | 0.257016650857067 |
| AACTCACATGAC  | 798.651027735698 | 0.215800752559945 |
| CGATTGCTAATC  | 798.651433504862 | 0.209368853431367 |
| CATCTGATTGAG  | 798.652327659851 | 0.181891829651699 |
| GACGACGCGTCA  | 798.658210989356 | 0.328687555177786 |
| GTCATGTACCAC  | 798.660029864136 | 0.270256366458287 |
| CAGTCAGCAAAA  | 798.664950516082 | 0.293000399365781 |
| CTTTTCTGTGAC  | 798.685334895068 | 0.306889108423813 |
| GCATTGCTGTCA  | 798.685990251518 | 0.27226616949744  |
| CCGAGITTTGTCA | 798.691133234731 | 0.30979256828137  |
| TGACGCTGAGCA  | 798.698619542902 | 0.301869253001992 |
| GTCATCTCACAC  | 798.70456307906  | 0.215887826191471 |
| AAGTATGATGCA  | 798.705115272359 | 0.133253692497729 |
| ACGGACGTCATC  | 798.705705923432 | 0.427407154900285 |
| ATGACGCTCCAT  | 798.71052269799  | 0.20851476214575  |
| CAAAGCTGTAC   | 798.716775392914 | 0.251998179874281 |
| ATCGAGTAATTC  | 798.71709044293  | 0.164289335447106 |

|               |                  |                   |
|---------------|------------------|-------------------|
| CGGTATTACTGA  | 798.721434938876 | 0.258633148390497 |
| CTATTATTCATC  | 798.723108760781 | 0.177305105802437 |
| ACCGCATGACGC  | 798.725296572454 | 0.243568097164267 |
| TCAGTAAGATCA  | 798.726070455368 | 0.328563125310311 |
| ACTCATAAAAGA  | 798.736884542352 | 0.226532076977131 |
| CAAGTGGTGACG  | 798.741522548055 | 0.190629260507529 |
| GTCATATGGGAC  | 798.750731396137 | 0.352561239024187 |
| AGCCCGAGTGAC  | 798.751508416128 | 0.202556408322098 |
| CTTGGTGATGAC  | 798.75913466617  | 0.276418367194019 |
| GTGACAAACACA  | 798.762576781728 | 0.264534716446898 |
| ACACAGTCAGCG  | 798.779615743614 | 0.282185485116551 |
| ACGGGGTGACGT  | 798.781878076757 | 0.171214874112416 |
| ACTCATTTCTAG  | 798.789705504488 | 0.152076130803109 |
| AGAAATTAGTCT  | 798.794417837258 | 0.300894871626206 |
| TGGGTCACTAAA  | 798.79773065476  | 0.360282613398058 |
| GATGACAAGGAA  | 798.803071823815 | 0.236000327739173 |
| GTCACGTGTGGA  | 798.804612772587 | 0.167361713557185 |
| AATTTATCGTCA  | 798.805199554803 | 0.269740724659258 |
| CACGCTTCGTCA  | 798.806932046101 | 0.149132011468338 |
| ACGTCACCTAAGT | 798.80708389176  | 0.31635568849184  |
| AGGTTACGTGGC  | 798.819747295334 | 0.129570390489307 |
| ATGACCCAGTAC  | 798.820588349544 | 0.26967652568651  |
| AACACTCATACT  | 798.821116533666 | 0.24797303487469  |
| GTGATTCAAACA  | 798.824560833427 | 0.294053231274492 |
| TGGTCATCCGAA  | 798.826346971961 | 0.337552113808401 |
| AGCGCAAATGAC  | 798.826572139325 | 0.246997074461076 |
| GTCATGCGTAAA  | 798.842203682808 | 0.276017475530655 |
| ATGATACAACCTA | 798.842748571651 | 0.17504385214182  |
| AATCAGATGACA  | 798.844215603883 | 0.249805853714648 |
| ACCGTTGAGTAA  | 798.845964516831 | 0.23860621604145  |
| AAACGTAGTGAC  | 798.851529668477 | 0.181631509889229 |
| CCCGGATCATGA  | 798.855691749356 | 0.392280829555601 |
| ACCACTTCGTCA  | 798.856153451032 | 0.286275211851898 |
| AACTATTAGTCC  | 798.85929841151  | 0.30957723668954  |
| AATTGCGTAACA  | 798.861071109939 | 0.248118089370748 |
| AATCAATGTCAT  | 798.869778098374 | 0.301341250956445 |
| AGACGCGGTGAC  | 798.873132786614 | 0.350735995207259 |
| GTTGACACACGA  | 798.87417902525  | 0.289640925082449 |
| TCGAGTTACTAA  | 798.875371776367 | 0.366601838492313 |
| ACAGAGGGTGAC  | 798.877328152511 | 0.116735002933601 |
| GGCACGTGTGAC  | 798.880336519465 | 0.207852409674834 |
| AACCTTGACGCA  | 798.884544240435 | 0.287954056493213 |
| ATGTCACCAGGG  | 798.891807525444 | 0.31421376109046  |
| AGCCTCCAGTCA  | 798.892711891536 | 0.305849854380319 |
| AGTTGACTACAA  | 798.901302774784 | 0.284135152545393 |
| GTCATGGGTCGA  | 798.902986268254 | 0.207817212245748 |
| GTCATGGACCAA  | 798.90618566393  | 0.207674659309452 |
| TACCCCGAGTCA  | 798.910066655421 | 0.29408310820931  |
| TGACTGCGAGCA  | 798.911284152428 | 0.2696627190868   |
| GCTACATGACAC  | 798.914868111018 | 0.303698368991734 |
| CAAACCTCGTGAC | 798.915948580904 | 0.206160030235489 |
| CACTCTGTGACA  | 798.921135040184 | 0.152861087031861 |
| ATGACATTACCG  | 798.921630905226 | 0.242386242784771 |
| ATACATATGACC  | 798.924094419455 | 0.271327638797931 |

|               |                  |                   |
|---------------|------------------|-------------------|
| CTCCTAGACTCA  | 798.925810988563 | 0.242016055992766 |
| TCGACTCAGAAA  | 798.934342620139 | 0.156993173907298 |
| ACAAATGCATA   | 798.935430599018 | 0.309885168509022 |
| TAGTCTGTGACA  | 798.938858949269 | 0.293496805646772 |
| CGTCACCGTGAG  | 798.939128867211 | 0.159635992139498 |
| CATAATCGGTCA  | 798.940571745119 | 0.296038648779082 |
| CGTGTTGTGACA  | 798.946303041653 | 0.251576225793913 |
| ACCGCCCAGTCA  | 798.956256328149 | 0.305171148893052 |
| ATAACCAGTCAG  | 798.956952977327 | 0.295774696658373 |
| TCAGCTGACACA  | 798.956975392886 | 0.282168344777416 |
| ATGTCACAATTA  | 798.961243963984 | 0.273324060512082 |
| AATTGTCTGACT  | 798.970064222459 | 0.395090338792318 |
| ATGACCCGGTCAA | 798.972558512367 | 0.255112843875378 |
| GGTGTCAATGTAA | 798.9772832022   | 0.261622138215787 |
| CATTATGTGACA  | 798.978894006273 | 0.146069992274075 |
| GTTGTACCCGCA  | 798.979656309782 | 0.194298143514613 |
| CCTCAATGTGAC  | 798.979944830194 | 0.264111439381334 |
| GTAATCACACCA  | 798.985035488565 | 0.182588147788079 |
| CCGCGTGCCTCA  | 798.985676372491 | 0.245745790798803 |
| GTGCCCCAGTCA  | 798.986497855556 | 0.29273879799921  |
| CATACCATGACA  | 798.989472709156 | 0.382282094889099 |
| TATACTTCGTCA  | 798.990992343509 | 0.206683847278235 |
| CGGGATATGTCA  | 798.993578428406 | 0.304937728097752 |
| AAATAAATGACG  | 798.999730305819 | 0.255284917708965 |
| AATGTTGACACA  | 799.007055649124 | 0.275275655327988 |
| AACTCGCGTGAC  | 799.007550273535 | 0.244904937694603 |
| ATGACGGTAAAA  | 799.008468904168 | 0.168408561008034 |
| ATGATGAATCGA  | 799.018797091656 | 0.253662270205681 |
| CATCTGTTGACG  | 799.024458984593 | 0.340614535099369 |
| GTAATGTGACA   | 799.031423035844 | 0.261048625338354 |
| ATGATGATGTAA  | 799.031587101112 | 0.164679763113928 |
| GTCACCTCGACTA | 799.03698889274  | 0.241446549335173 |
| GCTACACGTGAC  | 799.044063224678 | 0.279326384365013 |
| GTCACGTGTCCA  | 799.046130442777 | 0.330848764172085 |
| ATACCAGTGACG  | 799.052953200006 | 0.213196168792871 |
| ATTATTCATATG  | 799.058414441888 | 0.322714862398469 |
| CTGTGACCACGA  | 799.060253179172 | 0.207839147212952 |
| GGCCCATGACAC  | 799.061384461851 | 0.251526057396615 |
| TATGACCGCACA  | 799.064970107352 | 0.2243364790286   |
| ACAAACCTGTCA  | 799.075357639513 | 0.368074285453799 |
| AGTTGATTCACA  | 799.083159288287 | 0.183901418511461 |
| CACAGACTCACC  | 799.087440812972 | 0.203931184729165 |
| CACATGGTGACA  | 799.108385846302 | 0.340192679785954 |
| GGTAAGCATGAC  | 799.109711270123 | 0.174795087252699 |
| TACGACGTGACA  | 799.110761150216 | 0.239614115967142 |
| ACTCATACCCGA  | 799.114984943609 | 0.165744244249335 |
| AGCTCTTTGTCA  | 799.120755664865 | 0.307491009577818 |
| GTCATTGGTTCA  | 799.123188537525 | 0.19723450877578  |
| AATACGTCAATA  | 799.123444284721 | 0.286072559668056 |
| AGAGTCCGTCAT  | 799.13744571541  | 0.260183601054441 |
| CGACCTGACGCA  | 799.137964990172 | 0.202849125981595 |
| TATCCAGTCAGA  | 799.146095706017 | 0.173478363674819 |
| GCCCATGGGTCA  | 799.15346088151  | 0.301554451482716 |
| ACGAGAGAGTCA  | 799.158791156163 | 0.138274668311392 |

|               |                  |                   |
|---------------|------------------|-------------------|
| AGAGCATGACGA  | 799.163497889091 | 0.267628443657951 |
| GCCAAGTGACGC  | 799.164216981942 | 0.20619349644763  |
| GATTCTCTGTCA  | 799.165488144413 | 0.299502560951269 |
| GTCACCTAAGCA  | 799.165795953953 | 0.181599591424395 |
| ATCGACCTGTCA  | 799.166261281639 | 0.292437994494812 |
| ACCGGCGGTGAC  | 799.169112916314 | 0.243829936267901 |
| AGGGATTGGTCA  | 799.171352490323 | 0.125905341870315 |
| ACTCATCCCGGA  | 799.172559483919 | 0.261008821679341 |
| ACGCGGTCATAC  | 799.183259251375 | 0.244797388896984 |
| GCCAACCTCATCA | 799.190153929855 | 0.218424437352879 |
| ATGACGCCTGGC  | 799.20003337442  | 0.215995115070289 |
| AATTCGGTGACG  | 799.200425691952 | 0.211187824592512 |
| CCGGCTTTGTCA  | 799.204931341117 | 0.41253053494803  |
| CTTGGCGTCACA  | 799.216927638017 | 0.326046009514564 |
| CACTAAGTGACC  | 799.220089005951 | 0.384056291310764 |
| ATTATCTGACTG  | 799.225599723244 | 0.278051844881697 |
| AGTTACGTGGTC  | 799.226185065307 | 0.222800219404524 |
| AAATGATTACAC  | 799.228212593947 | 0.208529157889545 |
| CAGCTCTAGTCA  | 799.229264508113 | 0.336366883348767 |
| CTGACTCCGTTT  | 799.231709120326 | 0.202627012629749 |
| ACGCAATGAATC  | 799.23330293392  | 0.269001193707063 |
| AACATACTGACT  | 799.234255608477 | 0.27474084976218  |
| AATAGTAGTCAG  | 799.255441002038 | 0.285338157901635 |
| GGTCATCCTTGA  | 799.258379071131 | 0.148547847125511 |
| GCACATAAGTCA  | 799.262866639024 | 0.246378096407291 |
| ATTAGGTGACCC  | 799.263549973575 | 0.309142642823058 |
| CTGACGGATTAA  | 799.264422547644 | 0.260772516572463 |
| AAGTGCAATGAC  | 799.270320340592 | 0.277714315564944 |
| AAACATGACACC  | 799.27261614142  | 0.229902608848044 |
| GGTGTACAGACA  | 799.275180141012 | 0.382685476499377 |
| CCGAGTGAGTCC  | 799.275816703487 | 0.23146597856972  |
| GATGAGTAGACC  | 799.280082429892 | 0.19816157441267  |
| AAATGTCATGCG  | 799.280666468062 | 0.29513176015361  |
| AGAGATTGTGAC  | 799.281846660475 | 0.243477014812502 |
| CAGACCTGACTA  | 799.296892458644 | 0.359095064210626 |
| GGTGTGTGTGAC  | 799.297567635978 | 0.231477657363784 |
| TGACATATTGAA  | 799.300209367628 | 0.298244994008498 |
| ATTCCGGAGTCA  | 799.303251171147 | 0.344900089626685 |
| ACTCATCATCGA  | 799.305005004564 | 0.207779731877545 |
| GTATCCGTCAGA  | 799.308536735018 | 0.26513847392153  |
| TACAGTGACCCA  | 799.311213078201 | 0.350031239696504 |
| ACACGCGTGTCA  | 799.314335181802 | 0.228461675216158 |
| GTCACCAATAGA  | 799.318131213285 | 0.202667961560341 |
| ACGTCACAGCGG  | 799.320486312745 | 0.398909973017508 |
| ATGCGGTGACAA  | 799.320864054492 | 0.312184159377747 |
| ACGTCACCTACC  | 799.323207544035 | 0.207257496932466 |
| ACGACTCAACGT  | 799.326642342898 | 0.235038061899604 |
| GGTCATAGCGAC  | 799.327906051178 | 0.306931113045881 |
| CATCCAGGTGAC  | 799.329190679711 | 0.256361436542026 |
| AAGCGGAGTCAG  | 799.330392662822 | 0.207032334884751 |
| CGGTAGTAGTCA  | 799.332688690844 | 0.20043541864273  |
| AGTTTATGACCC  | 799.334319744721 | 0.283680284002981 |
| ATAAGCTGTGAC  | 799.334698938746 | 0.461849788259284 |
| CCCAACTTGTCA  | 799.334921677005 | 0.129842969464811 |

|              |                  |                    |
|--------------|------------------|--------------------|
| AGTTAGTGTGAC | 799.335810861837 | 0.109919252203454  |
| ATTAGACTCAAT | 799.338866555638 | 0.246996298839107  |
| ATTTTGAATCAC | 799.339046588488 | 0.257255392841363  |
| AGAACACATCAC | 799.344314994027 | 0.311162799748077  |
| GTGGCTCACAAA | 799.356180555328 | 0.269668963549033  |
| CGCTGACGAGTC | 799.360030685398 | 0.221756887776328  |
| ACTCGCTGTCAT | 799.361696839181 | 0.229766330398666  |
| AGAGGTATGACC | 799.365643107924 | 0.208486965657282  |
| GATGAGTAGTGC | 799.366915626248 | 0.143772174577903  |
| AGCCTGGTGACA | 799.396435599427 | 0.390930059412929  |
| AGGACCAGTCAG | 799.403742950997 | 0.285219324353918  |
| ACTCATATATTG | 799.40638562257  | 0.456491603935911  |
| GTCATGGACAAC | 799.408299961772 | 0.28731770906075   |
| CACATCTGACTG | 799.417341947251 | 0.180669675707162  |
| AGTGCGGTGACG | 799.418630250309 | 0.237826754497261  |
| AAGACTCTGTCA | 799.426697701761 | 0.320030334863766  |
| ATGCCTGACTCG | 799.426984686857 | 0.308581032269397  |
| ATGGATTACTGA | 799.428209631635 | 0.284176605195606  |
| ACCGGTGACCGA | 799.430758189527 | 0.23272215250995   |
| AGAGTAAGACTC | 799.432681332711 | 0.372686740892073  |
| AAAAGGTGACGA | 799.433780033257 | 0.176552744293735  |
| CCCTAAAGTGAC | 799.435529548502 | 0.237164475947171  |
| CCTGTTGGTGAC | 799.441421449381 | 0.225730426999818  |
| ACCCATTAGTAA | 799.463981351096 | 0.387790626704114  |
| GTCACCCGCGAA | 799.465737368092 | 0.306897074287397  |
| ACGTAATAAGTC | 799.471307083797 | 0.325196114140404  |
| GAAGAAGGTGAC | 799.477532836776 | 0.15705627616758   |
| CGTCAATATGAC | 799.479606800322 | 0.254524258042199  |
| ACGATTGTGACA | 799.479722473108 | 0.214409576904175  |
| GTCGAAATGACA | 799.484163897437 | 0.207665784648023  |
| AGTAATAGAGTC | 799.494275855469 | 0.231628944496812  |
| ATGACGCTCTTC | 799.500354497634 | 0.227817842524995  |
| AAATTTGACTGA | 799.506124337211 | 0.242637574227781  |
| ATCTGGAATGAC | 799.510745090757 | 0.181122989815902  |
| ATGACGCCTCAT | 799.511868423339 | 0.192768725612426  |
| CGTTGTAATGAC | 799.51392035935  | 0.181654492825573  |
| TTACGTGTACAA | 799.517586029679 | 0.329353664564235  |
| GGGCTGTGTGAC | 799.52102097137  | 0.227435261851321  |
| CCACTATGTGAC | 799.522646787859 | 0.306399181546984  |
| AATCTAGGTGAC | 799.523200634189 | 0.201649984317985  |
| CAGGCTAATGAC | 799.537137580918 | 0.220608404247925  |
| CGAGATACAGTC | 799.544899790441 | 0.307202981714705  |
| ATGACGTTGCGG | 799.548457234283 | 0.208036479828207  |
| GATGACGGGGCC | 799.565799151222 | 0.289211487288467  |
| ACGTGTGACCAC | 799.569450535506 | 0.237435348305784  |
| TGACTTACGGAA | 799.572541476942 | 0.357004139319532  |
| CCGTGCCAGTCA | 799.579050870432 | 0.247717882584103  |
| GTGTGAGTATAA | 799.579946363188 | 0.0685021275618845 |
| GATCCGGAGTCA | 799.602350762499 | 0.35167085180401   |
| GAGCCGTGTGAC | 799.607034133404 | 0.412192098732658  |
| AACGTGCGTGAC | 799.609244793761 | 0.297172456024467  |
| GATGGTAATGAC | 799.613433378691 | 0.239117644132533  |
| AGAGCTGGTGAC | 799.614371253871 | 0.25583199809429   |
| AGTGACAATTC  | 799.617681539814 | 0.204457993899884  |

|              |                  |                   |
|--------------|------------------|-------------------|
| CGTGATCGTGAC | 799.619955313575 | 0.365637376561666 |
| CACTCCGACTCA | 799.624380218234 | 0.183660886742844 |
| GCGCGTTATGAC | 799.627151151471 | 0.229103267118536 |
| CGTGACGTGCC  | 799.629493924801 | 0.171276177282954 |
| ATGGGTCAACTA | 799.633004698565 | 0.204863966360578 |
| CTGTGACAGGTA | 799.641365022632 | 0.302177263333571 |
| AAGTCACGCGTG | 799.642073015875 | 0.264416805615529 |
| AATGGTGACATG | 799.642349079219 | 0.227418339632539 |
| CGTCATGTCTCA | 799.643758624308 | 0.180485085071503 |
| ATTGCGGTGACG | 799.651740532892 | 0.268441140997093 |
| AAGGATTACGCA | 799.653424209903 | 0.293235531247675 |
| GCGATGTGACCA | 799.663875393198 | 0.248660955767969 |
| CATCTTCATGAC | 799.671179901266 | 0.287866751590571 |
| CGGGTCGGTGAC | 799.67535445881  | 0.318326256137281 |
| ATCAAGGGTGAC | 799.688506166289 | 0.220720655932675 |
| ACTGCATGTGAC | 799.689694370221 | 0.265908082486488 |
| GTCATATGGCTA | 799.692203480488 | 0.319714338619641 |
| GGACAATGTGAC | 799.692436028461 | 0.284569618722344 |
| CCGTTTGAATCA | 799.716158591101 | 0.271549477678945 |
| AGGGTCATTCTG | 799.720260387298 | 0.123121118959535 |
| AATAATAGTGAC | 799.72485235157  | 0.214778515722655 |
| ATCCCGTGTGAC | 799.726560384105 | 0.128168475083102 |
| CAAACGACTCAG | 799.729937322147 | 0.297948511800213 |
| CAGGTATGACCG | 799.732149738492 | 0.195910945796045 |
| CGGAAATGACG  | 799.733515262851 | 0.174343333776965 |
| ATGACGGTCATA | 799.73764343967  | 0.185335348360999 |
| AGCGTCAGACTC | 799.737878592927 | 0.30823610973717  |
| ATGACGGGATCG | 799.738293999233 | 0.199545646067506 |
| ACTCATACCCGG | 799.74090142049  | 0.270432196174286 |
| GTCATCCCGAAA | 799.756302692549 | 0.301862339895059 |
| ATTAGTAAGACA | 799.757287183614 | 0.28090336668817  |
| GTCATGATCTTA | 799.759951695479 | 0.255191701497288 |
| CCTCGGGTGACG | 799.764327766033 | 0.32120017133922  |
| CTACAGTGTGAC | 799.765942689622 | 0.269302884985101 |
| ACCTGTCACAA  | 799.770242989209 | 0.213144629386618 |
| ATCACGGTGTC  | 799.773013404477 | 0.383271283910648 |
| TATTACGTGACA | 799.773666332308 | 0.256526751734331 |
| ACGTGGAGTCAA | 799.785924756754 | 0.210298282058167 |
| CTGAGTAACGTA | 799.790942000716 | 0.296326494114049 |
| ACCCTAATGAGT | 799.793684584509 | 0.200385116201109 |
| CCAGAATTAGTC | 799.796723076986 | 0.229318603198886 |
| ACTATTATTCAC | 799.80147739058  | 0.295599945471164 |
| AAGGTGTAGTCA | 799.801994449791 | 0.205508961736769 |
| ATGACGACGGAC | 799.808143983749 | 0.233815142142906 |
| ACTCATACATAC | 799.810492507802 | 0.256859019348195 |
| ATAACTACTCAT | 799.813131774686 | 0.341775715454087 |
| ATCTCAAGTGAC | 799.814719348293 | 0.210439020443127 |
| CATGACTTGGCG | 799.819616627288 | 0.285962556714495 |
| TGAGTCGTGCAA | 799.821201275791 | 0.339438459594593 |
| ACTCATGATGCG | 799.825284406193 | 0.421029429494322 |
| GTCACACGCCAA | 799.825440487293 | 0.286962909482732 |
| GTGCACGCGTCA | 799.83088393139  | 0.181408610060982 |
| ACTAGTACTCAC | 799.848882433026 | 0.210700496939034 |
| GTCACAACAGTA | 799.851288007502 | 0.24689803860384  |

|              |                  |                   |
|--------------|------------------|-------------------|
| GTTTTAGACTCA | 799.858928356032 | 0.487861832605708 |
| GCTGACGATTCA | 799.861562195344 | 0.214384237018263 |
| CGTCACCACCTA | 799.861702063352 | 0.112802061433603 |
| CATGTCACAGGC | 799.862211750963 | 0.254123858086632 |
| CTTTACACGTAA | 799.87650042634  | 0.23904730396272  |
| CCTTTTCCGTCA | 799.88147429135  | 0.259497138209336 |
| AGGTTACGTGAC | 799.889976539923 | 0.207858358676053 |
| AATAGTCAAGTG | 799.891041147618 | 0.240201128423413 |
| ACTCATACGCTG | 799.893638884808 | 0.229949719108901 |
| GTCACCGCGTA  | 799.895736296932 | 0.280107970156096 |
| ACTCATCGTGGC | 799.897643960032 | 0.265133394178904 |
| ATAAGTAGTGAC | 799.898547531358 | 0.32395324813204  |
| GACTTGACACAC | 799.899535182008 | 0.211025182106808 |
| AGTCACTACGCG | 799.900737428261 | 0.210918089470058 |
| TGAATTGTGACA | 799.906753481936 | 0.187584614220749 |
| AGGTGGCGTCAC | 799.908304785701 | 0.267038996011537 |
| GTCACAGCTTTA | 799.916280529552 | 0.204141358914604 |
| ATTAAATGTGAC | 799.917671419168 | 0.348002687163615 |
| GTCACATACCAA | 799.922096975749 | 0.218393006228017 |
| CTCATTTAATGA | 799.922878899411 | 0.370154626390837 |
| ATGACGAGCAGG | 799.9343997418   | 0.182418200887296 |
| CAGGCCGACTCA | 799.935130792993 | 0.316036810730856 |
| ACGTCACTACCA | 799.935246463008 | 0.263413544029847 |
| GTCACTCTCTTA | 799.94303085773  | 0.201846824367639 |
| GTCACTGCGATA | 799.951999541257 | 0.212030641458936 |
| CGTCATGTTATC | 799.953158100712 | 0.322231967130137 |
| GAAGGGAATGAC | 799.954710560898 | 0.154854392959194 |
| GTTACATACCCA | 799.956336285351 | 0.362956626595432 |
| ATAATGTATCAC | 799.957177290735 | 0.277030463653473 |
| CAGTCGTTGTCA | 799.9682062181   | 0.341910606926874 |
| AAGACGTGTCAG | 799.972153357518 | 0.271667895375116 |
| GCGTGCTACTAC | 799.972887618615 | 0.256939486923362 |
| AACATGTTGTCA | 799.974865080284 | 0.349852407904169 |
| ATATCTCTGTCA | 799.975882768275 | 0.219899234702467 |
| AGCACCTATGAC | 799.985481323688 | 0.223865486855391 |
| GTCACCAATTCA | 799.997126432595 | 0.319918353873262 |
| CGGACGTGACGC | 799.998762774575 | 0.308688762491227 |
| ATGACCCAGTCG | 800.00007280074  | 0.24969394504876  |
| TGACTCCAGCCA | 800.007361656233 | 0.324911431173749 |
| CGTCACACCAGA | 800.009181707382 | 0.251371926741267 |
| CCTTGTTGGTCA | 800.015380446232 | 0.233958589020593 |
| CAGCTATATGAC | 800.016193801677 | 0.399523968326626 |
| AAATTTCTGACT | 800.019938349386 | 0.271519615832882 |
| ACAATGAGTAGT | 800.02149905387  | 0.295496207163796 |
| ATAGTACTAATA | 800.025712252014 | 0.336366666818574 |
| ACTCATACCGGA | 800.034569827994 | 0.317696837495393 |
| CGGAGTGGTGAC | 800.041493290233 | 0.235332845548075 |
| CACTGATGATTA | 800.041890470615 | 0.300763220372351 |
| GTGACGCGCATA | 800.054129973234 | 0.217961994763503 |
| ATGTCCATGACA | 800.072382083258 | 0.269127007204409 |
| ATGCAATGACCA | 800.073973528859 | 0.179531457672071 |
| AATCAGTCTTCG | 800.082143498107 | 0.282829035119502 |
| AATCGGAGTCAA | 800.083411814978 | 0.158172969717967 |
| ATGACATGCCTG | 800.092737045823 | 0.224779446949707 |

|               |                  |                   |
|---------------|------------------|-------------------|
| GACTAATATGTA  | 800.09465254622  | 0.200663155480177 |
| GGATCCGATGAC  | 800.095681652565 | 0.211090791500602 |
| TCTCGACAGTCA  | 800.097937034032 | 0.248348906606135 |
| GTCACAAGATCA  | 800.100099435578 | 0.192621915789457 |
| ATCTTGTGACGC  | 800.102678302305 | 0.228935411681373 |
| TGACGCTGCAAA  | 800.103489366038 | 0.248731022212674 |
| AGGGATTAGTCG  | 800.108660964877 | 0.213420726132673 |
| CAGTAATCAGTC  | 800.112686628003 | 0.209851376451531 |
| CAGCGGAGTCAG  | 800.115278976487 | 0.189285454999578 |
| GACCAGGTCAAC  | 800.116362210083 | 0.187427520065409 |
| GATAATGGCTCA  | 800.126480896195 | 0.278048705591999 |
| GTTGTTGAGTAA  | 800.128393214969 | 0.171362579898768 |
| GTCATTGGTGTA  | 800.130428612825 | 0.324861201321736 |
| TCATTGACTACA  | 800.14521464116  | 0.21482132900105  |
| ACGTAATGAGTG  | 800.156788950499 | 0.269634679001517 |
| GCCAGCAATGAC  | 800.15764062034  | 0.239276045116407 |
| ACAAATGTGACG  | 800.161628301351 | 0.246519108076369 |
| GATAGTGGTCAC  | 800.163193789917 | 0.282842485666911 |
| AGATTTGTGACA  | 800.170772218399 | 0.175111395573151 |
| GGTCATCTCTGA  | 800.172994569131 | 0.250701625413543 |
| TGACGGAACAAA  | 800.189072108687 | 0.213675352052805 |
| GCGTCATGTAAA  | 800.200985811734 | 0.277655938997054 |
| CGAAATGACATC  | 800.207007453872 | 0.360193008560997 |
| CTCGTTGAATGA  | 800.207638761008 | 0.328640217522569 |
| TCGGAAGTGTC   | 800.208163214915 | 0.189038727915506 |
| GTGACAATATAA  | 800.209428893399 | 0.234355958100166 |
| CGATGTGACATC  | 800.217566896636 | 0.397145363918851 |
| GTTGACACAAAC  | 800.21831367888  | 0.266496124819034 |
| CGTCACCGGCTC  | 800.220040494245 | 0.245122609783342 |
| GCGTCACGAAGA  | 800.221576862214 | 0.368836856396629 |
| AATAAGTGACAC  | 800.221840194207 | 0.286575110363357 |
| ATGTCATTACGC  | 800.221910545046 | 0.425036757314555 |
| CAGTCAGCAACG  | 800.233040232765 | 0.123389873559999 |
| GATACGGTGACA  | 800.254857979137 | 0.214753854488388 |
| CATTTGGACTCA  | 800.254857983034 | 0.300654760632406 |
| GCTCGCTGTGAC  | 800.255590816568 | 0.276263294815827 |
| TAAACACGCTCA  | 800.263367461024 | 0.22317568050208  |
| ACTTTGACGTCA  | 800.269823510565 | 0.282374656936846 |
| AGTCACGCTCCC  | 800.271290083601 | 0.212103476706137 |
| CCCGCTGAGTAA  | 800.275232167087 | 0.167013558057069 |
| AGCGGGGATGAC  | 800.276660895146 | 0.177295480668149 |
| GTCATCCCACGA  | 800.286146994347 | 0.293433163076818 |
| ATACTGGCTCAT  | 800.300700135749 | 0.206100597043666 |
| TACGCATAGTCA  | 800.307796911721 | 0.481232439493633 |
| TGACTTAACTAA  | 800.317903730931 | 0.222692213551935 |
| AGTTTGTATGACG | 800.31895611024  | 0.217231613998207 |
| ATGGATTGGTCA  | 800.328339049418 | 0.352921733829993 |
| TATGAAACGTCA  | 800.343938806256 | 0.309947540758036 |
| ATCGAATCATGA  | 800.344879578485 | 0.22212098850692  |
| ATGATATCATAG  | 800.348947877114 | 0.252371765624444 |
| GGTCATTCACTA  | 800.357859474735 | 0.251719828398185 |
| GGACGCACGTCA  | 800.367434203512 | 0.217963332193526 |
| GAAGATGAGCCA  | 800.368379023429 | 0.223987995995062 |
| GCTTCCGTGTCA  | 800.369707231494 | 0.237372905696765 |



|               |                  |                   |
|---------------|------------------|-------------------|
| GTCACAGAGCAA  | 800.378936584086 | 0.128644954626744 |
| GTCCTCGTCACA  | 800.399074266155 | 0.25783247189989  |
| GTCACATCTCTA  | 800.399153516634 | 0.253193796967203 |
| ATAATTGACTGA  | 800.400027250003 | 0.247615012782469 |
| ATACGAGGTGAC  | 800.400457055104 | 0.249392454186654 |
| ATTCGTGCACC   | 800.401369155305 | 0.223428759150141 |
| CCAATTGAGTAA  | 800.409171527412 | 0.309280618877125 |
| ACGTGTCAGAAC  | 800.413048295485 | 0.275697700338759 |
| ACTTTCTAGTCA  | 800.418463875956 | 0.151272855406375 |
| GACACGTATTAC  | 800.421448827697 | 0.237554491899547 |
| ACGTCACCTGACC | 800.428903623835 | 0.296503278596962 |
| ATCCATGCACC   | 800.429235739948 | 0.143263079318724 |
| ATGGGTGGTGAC  | 800.434770762401 | 0.269918294033761 |
| CTGCTGTGTGAC  | 800.435230594744 | 0.29963709733224  |
| TGAGCCATTCAA  | 800.436854139659 | 0.259808579577205 |
| AACCGTATGAGT  | 800.440230232602 | 0.296136587430047 |
| GTCACCAAAA    | 800.441239553828 | 0.300753556124642 |
| GTCACATGCTTA  | 800.442968032704 | 0.22574541361746  |
| GCAGGGGATGAC  | 800.456546771443 | 0.273886995264756 |
| ACCTACATATGA  | 800.469752555437 | 0.247153983359994 |
| ACGTCACGCTCT  | 800.471156445077 | 0.248312447203927 |
| AGATTCATGACA  | 800.471330790265 | 0.27630724261267  |
| CCTCATGACATA  | 800.472450404761 | 0.191887686557851 |
| CGTCCATGTCAC  | 800.472631164154 | 0.18319304107737  |
| TAATCTTGGTCA  | 800.482605279604 | 0.298130328124194 |
| GAAAGCTGTCAC  | 800.495772214478 | 0.208502289125193 |
| CGAATCATACTA  | 800.50931468317  | 0.444105876711047 |
| AAGCCTGACACA  | 800.515563238073 | 0.278180741712369 |
| AAAGCGGGTGAC  | 800.517637127052 | 0.150687589022379 |
| ATATCGTCACGC  | 800.518995501146 | 0.16026361489196  |
| AGTCACGGCACA  | 800.522926025833 | 0.225212485831615 |
| CTAGGAGTAATC  | 800.523658371344 | 0.205242316939275 |
| CGTCACCAAGGA  | 800.52507841902  | 0.29595745335344  |
| ACGTCAGCGATG  | 800.533173829863 | 0.214165731125246 |
| TTACGGTCATAA  | 800.537549413973 | 0.21705995449227  |
| CGTCACAGGCTA  | 800.543036704672 | 0.271118623912018 |
| ATATGACGGGAC  | 800.550251026052 | 0.196733556046124 |
| ATACTCACATGA  | 800.579708558701 | 0.234036987672414 |
| AGTCAATCAGCA  | 800.580621358199 | 0.287715726389372 |
| CGTGTCACGTAA  | 800.581004077445 | 0.311879917790142 |
| CACTAGATGACC  | 800.590343272083 | 0.316691525149256 |
| GTTATAATGACA  | 800.590786226099 | 0.22092320581994  |
| GCCTGGGGTGAC  | 800.595941575967 | 0.300387473401624 |
| AGAGGCAGTCAC  | 800.60572104084  | 0.225129677999183 |
| ATCCCACAGTCA  | 800.606627665622 | 0.237552426912749 |
| ATGACATCGAGA  | 800.612475033046 | 0.277557481296467 |
| CCGGTTAAGTCA  | 800.615057145067 | 0.316963024365826 |
| ACTGGGACTCAC  | 800.616272746188 | 0.188537017086964 |
| ACGTCATGCCAC  | 800.617384627737 | 0.395434955787578 |
| CGTCACCCTTGA  | 800.634328776485 | 0.204270467735288 |
| GGGTATCATGAC  | 800.634754143252 | 0.334741352646574 |
| CGCGTATGTCAC  | 800.638872929028 | 0.32112787029203  |
| GCTAACTGTGAC  | 800.646967270991 | 0.194623385764007 |
| AACTGGTCAGAA  | 800.6503146312   | 0.114764986670216 |

|              |                  |                   |
|--------------|------------------|-------------------|
| GCGGATTGCTCA | 800.653231471883 | 0.196441156987004 |
| TGAGTGATCGAA | 800.656094859397 | 0.293067300847022 |
| TGTCATGGGCAA | 800.657644527305 | 0.177320824537936 |
| AGGCATATGACG | 800.661856238192 | 0.245217295714129 |
| GTGCTGACTGCA | 800.665125780016 | 0.25438939801801  |
| CACTCACTATGA | 800.66548218075  | 0.207336017782808 |
| CTTGACCTGTCA | 800.667940669066 | 0.221069831830871 |
| CTCTGACCAGTC | 800.672441177567 | 0.15281881756876  |
| GTCATGTGTAAC | 800.673948572748 | 0.137219563500438 |
| AGTAAATGTGAC | 800.681637302872 | 0.178778298534723 |
| AAGCTGTGACGC | 800.682384688133 | 0.166408735118807 |
| AGTAATGTGACA | 800.685968042487 | 0.19005478904593  |
| AACTATTACGTG | 800.686446777137 | 0.226670840208691 |
| GACAGGCATGAC | 800.689338191601 | 0.21928079043648  |
| AGTCAGACGTAG | 800.690173623012 | 0.260658558979474 |
| TCGCATTTGTCA | 800.69156621542  | 0.271440357167376 |
| AGTGACAAACCC | 800.697030177773 | 0.291515719148059 |
| GCTTCCCGGTGA | 800.69779480607  | 0.428787481111895 |
| AGAGGATTAGTC | 800.700089111835 | 0.231848369791454 |
| AGTCAGTCGATC | 800.70325558902  | 0.296994004404485 |
| ATGTATCACCGA | 800.704099975725 | 0.167695829206322 |
| CATATGTTGTCA | 800.706653238503 | 0.314082933774933 |
| GTCACTATCGAA | 800.70734641729  | 0.343378329859858 |
| CATGACAGTAAC | 800.710060709357 | 0.177972516761621 |
| CATGACCCAGAA | 800.716884029654 | 0.218067125022865 |
| CGTCACAGATAG | 800.72097295172  | 0.283242382146457 |
| GGCCGCCATGAC | 800.727745252218 | 0.235600425584844 |
| ATTGAGATGACC | 800.733377238473 | 0.282448216293602 |
| GAATCATCGATC | 800.733680697972 | 0.225127480502645 |
| CGTTTTGCTCAC | 800.739281836728 | 0.295293459673223 |
| ATCGTCACCCGA | 800.740148426921 | 0.247792325588991 |
| ACAGGTCACATA | 800.743223136229 | 0.361728309956921 |
| ACGCTAGACTCA | 800.743730663512 | 0.274812058535588 |
| AATTGAGTCTAT | 800.745573444158 | 0.235078345493175 |
| GTCACGTCCGAA | 800.745887752618 | 0.379619421737344 |
| ACTCATAGTCTA | 800.746490486065 | 0.270106973835227 |
| CATTCGTGTGAC | 800.748062877616 | 0.280819587963209 |
| CCCAACAATGAC | 800.749596316782 | 0.238151674892029 |
| CATACTAGTGAC | 800.753424464134 | 0.272336380025467 |
| TCGACCGTGTCA | 800.759786734307 | 0.26464907500815  |
| GCGATGAGCCAA | 800.764416375095 | 0.214196406130697 |
| ACAGCTAATGAC | 800.783369315684 | 0.208391795364595 |
| CAATCTGGCTGA | 800.783401933246 | 0.251490653427078 |
| CGCGCGTGACGC | 800.790140096132 | 0.275985244523527 |
| AATGGCTAGTCA | 800.802462853558 | 0.269344132916138 |
| CATGAGTCCGAA | 800.805142674234 | 0.213302223158773 |
| GCGTCACTAACA | 800.825648139006 | 0.258917029343571 |
| GTCATGGGGTCA | 800.833803224214 | 0.258661839490193 |
| GCCGTGACTCA  | 800.835951605085 | 0.266807417172464 |
| ATATGAGTTAAC | 800.84911893507  | 0.328356355914645 |
| ATATGGTCACAG | 800.856239449286 | 0.296151186169161 |
| ATGAGTCTCCTC | 800.870530339753 | 0.198746954630859 |
| AGGCATCGTCAC | 800.877517360199 | 0.141887850938804 |
| GGGTATTGCTCA | 800.87951837925  | 0.262385651853198 |

|              |                  |                   |
|--------------|------------------|-------------------|
| CGAGTCAGGCCG | 800.892504331663 | 0.31415182911292  |
| GTGACACGGCGA | 800.905076929505 | 0.185386246815599 |
| CGTCATTTGGCA | 800.910267568671 | 0.306225315661905 |
| GGCTGACATGAC | 800.916154010206 | 0.365525448884985 |
| AAGTACTGTGAC | 800.918418229571 | 0.306107187498457 |
| GCGCCTGACGCA | 800.918748377656 | 0.323985967878658 |
| CCATTTTGTGAC | 800.918783589322 | 0.292918936583531 |
| GTCACCGAGCCA | 800.920038748238 | 0.334738741799499 |
| AGAGCAAGTCAT | 800.938084622419 | 0.291366196009611 |
| GTCACGGGCTCA | 800.938590243618 | 0.319263781440781 |
| CTATTTTGGTCA | 800.940627176686 | 0.270039579725273 |
| GCAGATTGGTCA | 800.944367300015 | 0.203231110462015 |
| CAACTCTGTGAC | 800.945490867094 | 0.218611148046091 |
| GTCTGCGACTCA | 800.948492057189 | 0.290982379855673 |
| ATTTGACTCAA  | 800.956564699677 | 0.22411623075409  |
| CTGTTGACTATA | 800.962196863574 | 0.243963293631911 |
| GCCTGTTGACTA | 800.96284391649  | 0.26572638026172  |
| TGACAAAGGTCA | 800.96291953381  | 0.206046608538505 |
| AGACTCAGAGGA | 800.965684563997 | 0.309715170683296 |
| TCTGACGGATAA | 800.968241455578 | 0.162430615177421 |
| AGTATATACTCA | 800.968793585699 | 0.259896920250468 |
| ATGAATAATACG | 800.978616547898 | 0.336414729177395 |
| ATGACTTCGGAG | 800.979436195982 | 0.269216610603616 |
| GGATGAGCCAGA | 800.983668956382 | 0.217461642018454 |
| ATACTAATTCAT | 800.987832696291 | 0.386945368488896 |
| ACTAATCGTTGG | 800.991384502111 | 0.279115138431077 |
| CCTCTTGGTCA  | 800.995525886108 | 0.142033057001554 |
| GGGTCACACCAA | 800.997116089775 | 0.247164461081647 |
| AATAGGTGACAT | 800.999889976103 | 0.275303113501628 |
| AATTCTGTGACG | 801.002156783359 | 0.251974488716077 |
| ATGACAAGAACG | 801.00358561227  | 0.263472405923641 |
| GTCACCTGAGCA | 801.015011269842 | 0.183857225737909 |
| ATAATTACACAC | 801.032208199691 | 0.28457781993165  |
| AGATGCACGTCA | 801.061379698129 | 0.210523825293634 |
| TAGTCCGACTCA | 801.062326573687 | 0.215732529906972 |
| ACTTCGTGAGAG | 801.063014930655 | 0.264239413660802 |
| TGATCGACTCAA | 801.063601399774 | 0.345012988320334 |
| GTCACAGAGTGA | 801.065488776574 | 0.219019094319363 |
| AGTGACGCGACG | 801.068878153681 | 0.247272781478471 |
| GTCATGTACCAA | 801.06892182659  | 0.281318504570251 |
| CAGTAGGTGACA | 801.070118206708 | 0.250561872121426 |
| CTAATGGCGTCA | 801.071467350989 | 0.250917829790914 |
| AATCACATGACG | 801.073320857408 | 0.207995783176749 |
| CCTAGCCATGAC | 801.0781933994   | 0.286809139571029 |
| CGTCACGTGTAC | 801.081727814221 | 0.312250795250178 |
| TGACGTAGCCCA | 801.087637212212 | 0.415025162618256 |
| TACCTCGACTCA | 801.091530731139 | 0.134047364455989 |
| CATCTATGAGCA | 801.091883173315 | 0.295385970832583 |
| GACAAATGTGAC | 801.094606032355 | 0.280874403033427 |
| AACGATCGTCAT | 801.094914966562 | 0.256354541432233 |
| AATTAGTCGCTC | 801.10123200658  | 0.132209169020821 |
| CGACTAATTGAC | 801.114740213586 | 0.152274614430924 |
| AAATGCTCATAC | 801.123130462092 | 0.261571122689668 |
| ATGTCACCACTG | 801.137694147833 | 0.279261022267585 |

|                |                  |                   |
|----------------|------------------|-------------------|
| GTCACTGGCGAC   | 801.141666763782 | 0.343534753774704 |
| TCTGAATCAGCA   | 801.143305347305 | 0.351236581065864 |
| AATGCGTAACAC   | 801.145061777166 | 0.15682291203394  |
| CCTTTGAATCAC   | 801.145688794013 | 0.173448434519196 |
| CGTCCC GG TGAC | 801.146866089894 | 0.233710634857482 |
| TGACAAACTGAA   | 801.149918798916 | 0.247337731172923 |
| GTGGTTACATCA   | 801.152060499629 | 0.31605206351162  |
| GTCACGCGCGAC   | 801.160040250081 | 0.285599898238646 |
| AGTTGCTACTAA   | 801.161544860629 | 0.256839153360959 |
| CGCTCGCTATGA   | 801.168625154242 | 0.24187482520849  |
| AATCGGTACAGAC  | 801.177604830449 | 0.286543035012918 |
| CCGTCATCGGGA   | 801.179244241829 | 0.371045886573147 |
| ACGCTACGATGA   | 801.182197643491 | 0.282832531796769 |
| ATATAAGTCAAC   | 801.184786081637 | 0.204871108689718 |
| GTGTAGTAGTCA   | 801.201169162454 | 0.235818144754479 |
| ATTTACATGACG   | 801.213272565587 | 0.267059772737327 |
| ACTCGCCGATGA   | 801.215218196001 | 0.294046698546346 |
| CATCTCGTCACA   | 801.217458761099 | 0.127462928015869 |
| GTCATCAGCAAC   | 801.218753273251 | 0.186219420481745 |
| AGTCACGGTCCG   | 801.222586718302 | 0.278198645730848 |
| ATGGGTGAGCAA   | 801.224841282328 | 0.219382414398132 |
| ATGGTACTAATC   | 801.228409008192 | 0.24107889074489  |
| ACTCACTCATGA   | 801.229178938949 | 0.301626179500142 |
| AAGATTCATATA   | 801.233859244982 | 0.133618428335924 |
| AATTAGTACTAT   | 801.235952675141 | 0.267830026267153 |
| AGGTCATCCAG    | 801.248924841243 | 0.283835623972813 |
| ACTCATTTTGCA   | 801.249939729716 | 0.251883810801243 |
| TGACTAGTGAAA   | 801.255187047109 | 0.143902702824907 |
| GCTGGGAATGAC   | 801.259786104054 | 0.257886003151355 |
| TGACCGATAACA   | 801.265363369892 | 0.335393910841926 |
| AAGATTACTGAC   | 801.265603038202 | 0.229523161999215 |
| AGTCAGAACCGC   | 801.266921802126 | 0.263464746521815 |
| TGACTGGTGAAA   | 801.274543842502 | 0.31268755000327  |
| ATGTCATTGCAA   | 801.275660810115 | 0.372482464205788 |
| AGTAAAGGTGAC   | 801.279331893398 | 0.204507577643187 |
| CAGTCAGATGTC   | 801.283145458335 | 0.207432391679546 |
| GGAATAATGACA   | 801.28444285518  | 0.240548462168073 |
| CGTCAGATGTCA   | 801.289406204263 | 0.235347455779418 |
| TGACATGGCACA   | 801.292564366415 | 0.417980828641675 |
| TATTTAGCGTCA   | 801.300495386781 | 0.159144592305735 |
| TAGTCAACATGA   | 801.302101961754 | 0.297997489802187 |
| CATTAAGACTAA   | 801.302685229882 | 0.282372007872106 |
| ATGAGTAGTAGC   | 801.311439925916 | 0.210021641428099 |
| AACGCTGAATCA   | 801.31432926443  | 0.224372869138847 |
| CAACGAAATGAC   | 801.31492372966  | 0.26455770374493  |
| AAAGATTCATAC   | 801.315569293586 | 0.149316809249491 |
| CCTGGTCGTGAC   | 801.328502859292 | 0.178279810357261 |
| ACCCGCTAGTCA   | 801.340357529624 | 0.254654715966158 |
| AAGATTGTGACA   | 801.34192969936  | 0.223352556565519 |
| CGTCATGCTGCA   | 801.348366656954 | 0.381081879583283 |
| CAGACTTTGTCA   | 801.349678306058 | 0.303981496892083 |
| ATTGAGTCTGAC   | 801.350501376118 | 0.230089205451076 |
| TGACAGTTAAAA   | 801.352971400025 | 0.25894053456794  |
| GGATTGAGTAAC   | 801.356751026653 | 0.241684144878291 |

|               |                  |                   |
|---------------|------------------|-------------------|
| CTATGATGTGTA  | 801.364735201551 | 0.241417356127722 |
| CAAGCGCGTGAC  | 801.364931055245 | 0.235821416066043 |
| TGATTGACGTAA  | 801.368104502802 | 0.254305548689527 |
| TGTGACGCCACA  | 801.372961498123 | 0.234744899284755 |
| CCTAGCTGTGAC  | 801.37767315151  | 0.248078918981737 |
| GATCAGTCGTCA  | 801.380416550348 | 0.202183986858163 |
| AACATGACGATG  | 801.387412608111 | 0.234883905295198 |
| ATGACGAGGGCG  | 801.388126454776 | 0.205027801253817 |
| CTGGTGAGCCAC  | 801.402754979273 | 0.292825796349299 |
| ATAGTCAACTCA  | 801.404220167812 | 0.236896007531257 |
| GTCAGAGCTTAA  | 801.404604155682 | 0.334744884962288 |
| CAGGATTGTGAC  | 801.409116526321 | 0.260709880566224 |
| AGTATTACAGAT  | 801.418361818292 | 0.212329126782473 |
| GCCATGGCGTCA  | 801.421847082541 | 0.459678658497853 |
| GCCTCTTATGAC  | 801.427722390738 | 0.281827165934086 |
| GACTACGTGTCA  | 801.434087365118 | 0.326813758184439 |
| CCACTGCGTCAG  | 801.440080474232 | 0.260203057869549 |
| GCGGGGAATGAC  | 801.445520856786 | 0.230725852336976 |
| AGATATGTCAGC  | 801.447363604296 | 0.172344021540656 |
| CGGTCCATGTCA  | 801.448731255604 | 0.427367454270708 |
| AGACTAATCGCT  | 801.450127107373 | 0.304326794296598 |
| AGTCAGAGGCAA  | 801.456672316933 | 0.192589886552198 |
| ACTCATCTAGA   | 801.462869250018 | 0.19163637392207  |
| AAGGTAATGACA  | 801.467047951414 | 0.247323711635627 |
| ATTAGGGTCACA  | 801.468418648839 | 0.248817175307709 |
| GCGTCAGCATGA  | 801.469454485311 | 0.294870456053239 |
| TGTCACCCCGAA  | 801.471354664986 | 0.246740233858499 |
| CCCGAGCATGAC  | 801.472248603056 | 0.316941846195634 |
| ACCATGACATGA  | 801.477331642469 | 0.407005307697047 |
| AGTCAGTAACCG  | 801.479374561487 | 0.15155181227297  |
| CCATTCCGGTGAC | 801.483977873832 | 0.3468091778878   |
| ACATGTATGACC  | 801.484557030218 | 0.336293936154736 |
| AGTAACGCGTCA  | 801.486085040257 | 0.210228485118038 |
| ACTAATTAGTCG  | 801.487780751171 | 0.21817318754424  |
| ACGTCAGACAGA  | 801.48857941641  | 0.284147190398657 |
| GTAGAGTAATAA  | 801.492824477483 | 0.176016949852704 |
| GATGCTCTGTCA  | 801.499144708075 | 0.217352603181945 |
| TCCGAAATGACA  | 801.501511130036 | 0.157264959217883 |
| GTCATCAACCAC  | 801.50274041996  | 0.33142090789079  |
| AATAATATGAGT  | 801.503331995361 | 0.28313456108292  |
| CGCACAGAGTCA  | 801.505308617664 | 0.179230793142219 |
| CGGAAGCATGAC  | 801.511595879963 | 0.25069766855924  |
| TATGAGTTGTAA  | 801.530027196375 | 0.316040375404393 |
| ATTGAGTCTACG  | 801.530912835926 | 0.247459954226538 |
| CGTCACATAACG  | 801.531353580533 | 0.19728186607666  |
| AACAAAATGAGT  | 801.543753978222 | 0.287597826633404 |
| ATGACGAGAGAC  | 801.548531781438 | 0.238805756929205 |
| GTCATGTAACAA  | 801.553296222367 | 0.272750244247499 |
| ACGCTGACAGAT  | 801.556456128133 | 0.276087737355755 |
| TGACCGATAGAA  | 801.557151701315 | 0.27704227394769  |
| AGAGCAATGACG  | 801.563972773322 | 0.331085977048945 |
| GACGAAGTGTCA  | 801.567758448787 | 0.15884345242593  |
| TCGATGATGTAA  | 801.581382611388 | 0.243077219676557 |
| AGTCAATAGTTC  | 801.583024424422 | 0.284798477750043 |

|              |                  |                   |
|--------------|------------------|-------------------|
| GGTCATCGTATA | 801.584980048069 | 0.343523063001216 |
| ACGCGATGTCAT | 801.585439657494 | 0.275233595235548 |
| ATTACTGACACC | 801.58717113905  | 0.207695577488436 |
| GACTCGACTGAC | 801.595499474224 | 0.37958289025866  |
| TCCATTATGTCA | 801.596254099143 | 0.271009082670862 |
| TAACTCACGTCA | 801.600234758709 | 0.242646561720539 |
| GACTGTCGTGAC | 801.603687846382 | 0.243600453056502 |
| ATAGAAATGACG | 801.609783427796 | 0.151515817463895 |
| CTACTCGACTCA | 801.615771860511 | 0.178900183256645 |
| GCGCGATATGAC | 801.623476909999 | 0.226550944057538 |
| CATTGTGTGACC | 801.63279397317  | 0.337150728463213 |
| CGTCAGAACTGA | 801.638246305054 | 0.360968944539417 |
| CCTGGTGAGCAA | 801.642671851175 | 0.336802944579237 |
| AGTCAGACCACA | 801.648568248924 | 0.255454592452073 |
| TTACGTGGCAAA | 801.658354525043 | 0.223024311566343 |
| AAAGGCTGAGTC | 801.660800244033 | 0.132409950363787 |
| GTCGATTGACTA | 801.664789642743 | 0.27265339157121  |
| CACTGATGACGG | 801.668940163916 | 0.265474568840186 |
| ATGTGAGCCTTA | 801.675460476931 | 0.2158006521639   |
| CTAACAACGTCA | 801.685853080403 | 0.216055860695802 |
| AAGATGATGTGT | 801.697006076603 | 0.202293649672559 |
| GACCACTGTGAC | 801.701955589817 | 0.17484519786687  |
| CACTTTCTGTCA | 801.710887548649 | 0.223761920202506 |
| CATTTAATATGA | 801.719975066511 | 0.238028197598098 |
| GTCACGCATCAC | 801.725542798564 | 0.209987230168011 |
| ACTGCTGAGTCT | 801.738298177817 | 0.289057836291089 |
| ACTCATACAGCG | 801.744146905902 | 0.159062209867557 |
| ACGTCACGAACC | 801.744939735996 | 0.199530786219716 |
| CCTCGGCAGTGA | 801.7464471833   | 0.456253490906943 |
| ATGAGTAGGATC | 801.748002390964 | 0.213029853670008 |
| ACGTCACGCATC | 801.749898319736 | 0.227461790359644 |
| AAAATATCAGTC | 801.752008776641 | 0.234741286066709 |
| GCTCCTAGATGA | 801.759281321482 | 0.190826572762954 |
| AGTGATATGACC | 801.761241751692 | 0.167452377915461 |
| ATGAGTCTCCAC | 801.764297718249 | 0.264054311983034 |
| CATTATGTGACG | 801.765293165248 | 0.272707187592932 |
| AAGCATTGTCA  | 801.767632629673 | 0.312831187623207 |
| ATGAGTGCATCC | 801.770478531007 | 0.218013533616599 |
| CGTCATTCCAAC | 801.773199772062 | 0.16221586442389  |
| ATGACGATGCGG | 801.778025052481 | 0.336774135193925 |
| ATGACAAGGTGC | 801.781056248291 | 0.18456914133458  |
| GGACCTGACACA | 801.781188872103 | 0.373347365700441 |
| TCAGCCTGATGA | 801.783883948963 | 0.451731425836177 |
| AGCCAGCTCATA | 801.789976556193 | 0.262511887017353 |
| ATAGTATGTCAC | 801.790181289447 | 0.233233045275667 |
| CGTCATTTCCAA | 801.795811415172 | 0.263659567197584 |
| GTTCCATAGTCA | 801.802608438402 | 0.149606388666582 |
| CTCGACAAGTCA | 801.804185561262 | 0.365277077499271 |
| AGACGAATGACG | 801.809872472693 | 0.230617709607459 |
| ATCATGACCACG | 801.812577808125 | 0.167357899820646 |
| AGACTAATATTC | 801.832756511528 | 0.258853436557512 |
| GGTGCCAATGAC | 801.836201335882 | 0.247517953646115 |
| CGGATTCGTGAC | 801.836347446629 | 0.18999368109449  |
| CTCTAGGACTCA | 801.838249186033 | 0.236148363171209 |

|              |                  |                   |
|--------------|------------------|-------------------|
| CCGACGGTGACA | 801.841649940182 | 0.248530945023025 |
| TATTCATGACGA | 801.843785439054 | 0.219350741191747 |
| GCTTTGACACAC | 801.852429870845 | 0.249284743691596 |
| TAGTAATGACCA | 801.861911598312 | 0.346757881246695 |
| ATGAGGCATTTT | 801.864028600976 | 0.253710451727205 |
| GTGTAGTGACAC | 801.867476546426 | 0.283068497254098 |
| AACGAAATGACG | 801.873180482409 | 0.235117068380282 |
| AGTCACGGGACT | 801.874542548905 | 0.244655791884468 |
| CCAGTGACGCGG | 801.87512708616  | 0.209171328032896 |
| GAATAGCAGTCA | 801.875280001633 | 0.204357908115336 |
| AGTCACGAGCGA | 801.877815306548 | 0.229773271912592 |
| CCTTGAGACTCA | 801.898690858198 | 0.201182295328526 |
| AGATCCGTGTCA | 801.899153000224 | 0.276677872498829 |
| CGCCAAGGTGAC | 801.904696769682 | 0.261082077165589 |
| ACTCAGACTAAT | 801.906954842512 | 0.232455528985873 |
| CGTCACAGCTAC | 801.919001604133 | 0.241595499479442 |
| CTCTCATGTGAC | 801.925006890596 | 0.266557391661552 |
| ATGTCATGCTTC | 801.934464080659 | 0.23811351278646  |
| CGACCTTGACTC | 801.935013411239 | 0.167723707144092 |
| CAGAGGCGTCAC | 801.935757293966 | 0.34353787099877  |
| CGTGTTACGCAA | 801.936197033398 | 0.245589702053546 |
| AATTGCCGTCAT | 801.938177579452 | 0.22002606451952  |
| ACGTCACGATCT | 801.945381560659 | 0.113025938106097 |
| CCTGGCAGGTCA | 801.949558081564 | 0.226352423601787 |
| CGTCATTATATA | 801.956339455807 | 0.310772540718923 |
| GTCACAGCCGTA | 801.962086998814 | 0.287621202269422 |
| CCCATGTGACGA | 801.962541394166 | 0.204193646806449 |
| ACTAGTCAGCAA | 801.964428380575 | 0.380299437414962 |
| AATGACATTTAG | 801.965546442724 | 0.22106973248291  |
| CGTCACCGAGAA | 801.977518862315 | 0.240842188606087 |
| CGCTGACGGATA | 801.990972092568 | 0.177853757652754 |
| ACATGCATGACA | 801.996388398355 | 0.327418225841473 |
| CGGTCACGAGTC | 802.019482189927 | 0.456341219611588 |
| CATCAGTGACGA | 802.029653643187 | 0.209904611508309 |
| AATATATGACCC | 802.030557837522 | 0.270999756669631 |
| CACCCTAGTGAC | 802.040516426152 | 0.28794011023621  |
| ACAACGCGTGAC | 802.062637094711 | 0.265556797359953 |
| GATAGTGACGAA | 802.063979393281 | 0.182573938396188 |
| TAAATCGTGTC  | 802.070836970108 | 0.226477361461624 |
| ATGACAAGCAAA | 802.07230266048  | 0.292938319278512 |
| GTCACGGAAACA | 802.083509697606 | 0.169328337015604 |
| AGTGGGGATGAC | 802.100766672    | 0.164329015125457 |
| TCTGCATGACAA | 802.102654339182 | 0.282533788383649 |
| AACTCATACTTG | 802.122757307063 | 0.175773335387947 |
| ATTTTCTGACTG | 802.131234731591 | 0.12814266552957  |
| CATTGCATGACA | 802.131282698708 | 0.197417486164856 |
| CAACCATGACGA | 802.132390105213 | 0.281008177853388 |
| TAGGCTCTGTCA | 802.140080201332 | 0.322434523799363 |
| ATTCAGGGTGAC | 802.143432711811 | 0.266291322975593 |
| GTCACACCGAGA | 802.144799332873 | 0.253162470220001 |
| ACACGATTACTC | 802.147269774252 | 0.170939199964298 |
| AGTCACTAGCAA | 802.150812058732 | 0.225511678715428 |
| CAACTTTACTCA | 802.156868106183 | 0.374460329638917 |
| ACTCATAGGTGG | 802.161079664531 | 0.308262620433647 |

|               |                  |                   |
|---------------|------------------|-------------------|
| GTCACACCCATA  | 802.161354844444 | 0.187289479169916 |
| TGGTGAGCAACA  | 802.162707581064 | 0.305167514925145 |
| ATAATGCTCATA  | 802.181372082351 | 0.164981785529797 |
| GTCACTGGTAAA  | 802.181433117415 | 0.217719222048014 |
| ATACTGAGTCGA  | 802.188086842561 | 0.222622872761851 |
| ACTTAGGACTCA  | 802.196916559074 | 0.380295543906564 |
| AGACTGATTCAG  | 802.199074236778 | 0.206058989885783 |
| GAGAGTGGTGAC  | 802.199893686014 | 0.226967940392541 |
| GTCATTGCTGTA  | 802.204829960236 | 0.222030319995186 |
| CTAACAAATGAC  | 802.206160129712 | 0.202614941350258 |
| CGTCATTATGTA  | 802.210378659275 | 0.206031930843566 |
| TCGAGTAATCGA  | 802.218876170343 | 0.259781930834355 |
| CATACTCTGTCA  | 802.220498067868 | 0.25981646505139  |
| TCAAATGGGTCA  | 802.225281058164 | 0.175775483989769 |
| TCATCGGTA AAA | 802.227224883753 | 0.271861366852574 |
| ACTCACTGATGA  | 802.228475467319 | 0.387120399554345 |
| ATGCCCGGTGAC  | 802.242408565558 | 0.214790010059121 |
| CGAACACGTGTC  | 802.246541892237 | 0.301288080359889 |
| CGTCATCCACC   | 802.248928548581 | 0.201837597636456 |
| GATATCATGACA  | 802.25415108376  | 0.242782027311738 |
| ATCACCAGTGAC  | 802.254166800681 | 0.242844597242668 |
| ACCCAAATGACA  | 802.258486238101 | 0.218142830879567 |
| ACAGTCAGTGTG  | 802.267750303039 | 0.314506908876532 |
| ACATAATGTGAC  | 802.284797105494 | 0.322286874283742 |
| ACTCATAATCAA  | 802.286817571024 | 0.266565434235284 |
| GTAGACTACTAA  | 802.289983547814 | 0.309218383203073 |
| ACGGTGTACCGA  | 802.30009289478  | 0.248203255005491 |
| ATTTTAAGAGTC  | 802.301260349837 | 0.353790806873076 |
| ACGATTAGTCTT  | 802.313637174227 | 0.264624749040704 |
| ATCACGTCACTC  | 802.31642784206  | 0.187630906944234 |
| AGTGCTTTGTCA  | 802.316472108932 | 0.339213272311241 |
| CTGAAGAGTGAC  | 802.319116559854 | 0.231488000364726 |
| CGACTAATTGTA  | 802.330114876428 | 0.30138747171924  |
| ATCTACAATGAC  | 802.336965448625 | 0.158212028034351 |
| ATTGCCTGTGAC  | 802.33877470625  | 0.339762210050705 |
| AATTGGCATGAC  | 802.351223350263 | 0.305827114411986 |
| AATGACATCGAT  | 802.358237704699 | 0.171725104361074 |
| ATGATGTCTGAC  | 802.363888378983 | 0.330401469387596 |
| TAAAGTGACCCA  | 802.366200638422 | 0.214892130049055 |
| GGTCCTTGTGAC  | 802.373288840228 | 0.307673703048083 |
| GCAATGACCGAA  | 802.373322551136 | 0.37259709603745  |
| ATTGCATCACAC  | 802.382326719536 | 0.251248894488159 |
| GGCTCTCATGAC  | 802.398497261618 | 0.30270485532459  |
| GGAAACCCGTCA  | 802.406291677013 | 0.299420004698245 |
| GAGATTACTGAC  | 802.408695743887 | 0.371093841002476 |
| CATTGAGTCTGA  | 802.408830324372 | 0.409629790739285 |
| GAAGACGTGTCC  | 802.411855884333 | 0.223341908730909 |
| CTTAGGTGACAA  | 802.413149981321 | 0.258758583585572 |
| TGATTCAATTAA  | 802.419268086128 | 0.259282862420881 |
| GTCACCCCAAGA  | 802.42659876315  | 0.30452029788091  |
| AGAATGCGTGAC  | 802.428425067788 | 0.239844794520178 |
| AAAGGGTGACGA  | 802.433331004536 | 0.211762853347797 |
| AGACAATGTCAT  | 802.434813131543 | 0.230166982438357 |
| AATCTTGACTGA  | 802.439277486878 | 0.214499860069657 |



|              |                  |                   |
|--------------|------------------|-------------------|
| AATAGATGACCA | 802.44358994018  | 0.29830001586     |
| AAATTGTGACGA | 802.44493755423  | 0.236685539889791 |
| TGAGTCTAGAAA | 802.448587859683 | 0.298729648842385 |
| ATCCAATTAGTC | 802.448972765873 | 0.267990348142694 |
| ATGACCGGAGTC | 802.452260692965 | 0.323530824868229 |
| GTGATGTGACCA | 802.453022023888 | 0.215041266308536 |
| AGAGATATGTCA | 802.454841047789 | 0.356934229427843 |
| ATGAGTAGACGC | 802.458028398872 | 0.232208519309446 |
| GGTGACGTTACA | 802.458978064821 | 0.22387285875137  |
| GACTCAGCGTAA | 802.46959589491  | 0.394210185590814 |
| GGACTGTGACCA | 802.469756628596 | 0.243448944003288 |
| AATTAGTCGGCA | 802.495246337973 | 0.296923449986733 |
| ATAAGACGTCAC | 802.496362925975 | 0.230690060589652 |
| ATAGCTTGCTCA | 802.506397485963 | 0.21014733850764  |
| TCGAAATCGTCA | 802.510248928332 | 0.282783926683006 |
| TCTATGGCGTCA | 802.512805314898 | 0.156705485452112 |
| GACTCAGATCAA | 802.514053824626 | 0.362856766280036 |
| TAGAGCTAGTCA | 802.51448172462  | 0.29145427708955  |
| GCATGACGATGA | 802.515630817729 | 0.18711715258046  |
| AGATGGTGACGA | 802.537493431201 | 0.223896762787834 |
| ATGATCAAGTCA | 802.540814867053 | 0.318388957295463 |
| ATGCCAGTGACA | 802.550794886678 | 0.452442767398744 |
| AGTGTCAGCGCA | 802.551061784976 | 0.33372569623046  |
| CGTCATGATCAA | 802.555600267702 | 0.353454904881525 |
| AAATACGGTCAT | 802.556015426512 | 0.163321184830087 |
| CGGTGATTAATA | 802.557217426654 | 0.168300294944966 |
| CATCGCTGACAC | 802.564422905386 | 0.240146396483532 |
| ACTCATTCTAGG | 802.572753178778 | 0.159811941302663 |
| GACGAAGGTGAC | 802.573177170155 | 0.285886535801525 |
| AAAGTTGAGTAA | 802.581212986417 | 0.164029404617071 |
| AATAGTAATACA | 802.601502570184 | 0.313524755996892 |
| TGACGTTGCTCA | 802.611377039245 | 0.31655305999454  |
| AGGGAGAGTCAG | 802.616527040638 | 0.224434110906246 |
| GACTCAGGATCC | 802.616567095666 | 0.390570325724159 |
| ATTACCGACTCA | 802.618573575343 | 0.311305784862206 |
| AGGACATAGTCA | 802.628896042506 | 0.28873297013933  |
| GCCCACGACTCA | 802.632972427476 | 0.29080008502163  |
| CATGATTGAGTC | 802.634778915864 | 0.464704159674006 |
| CCGATCATGACG | 802.635318525761 | 0.341329369232813 |
| ATGAATAATCCC | 802.636929953468 | 0.260090316551968 |
| GCCCGTGTGACA | 802.637830506371 | 0.297831476650213 |
| ACTCATACCGCG | 802.64181971965  | 0.232384233238246 |
| GGTCATCGGCAA | 802.647627277066 | 0.20094068358622  |
| GCGTCACTGATA | 802.655061016496 | 0.24703957938056  |
| ACTCATTGACG  | 802.662154925618 | 0.289683453638853 |
| GACTAATCGAGC | 802.68129357393  | 0.272311480577257 |
| CATTTCCAGTCA | 802.690204603228 | 0.235632416583037 |
| ATGACCACGTTT | 802.692868935481 | 0.204269769579178 |
| CCATAAAGTGAC | 802.69354938451  | 0.282730904001482 |
| CCTTCCGGATGA | 802.701055604141 | 0.230319011160921 |
| AAGTAATGTGAC | 802.705570802345 | 0.19449915048784  |
| GCGGGCGATGAC | 802.707891889428 | 0.371393775193925 |
| AGTGTTATGAC  | 802.714256713352 | 0.173141436209752 |
| ATTATTGCTCAG | 802.720096201687 | 0.283686814294926 |

|               |                  |                   |
|---------------|------------------|-------------------|
| AGTCTGGGTCAC  | 802.720143354256 | 0.34026055672508  |
| ACTAGTGGTGAC  | 802.720999875787 | 0.205795817837085 |
| CATGTTTGCTCA  | 802.72561384199  | 0.323016754323147 |
| CCAGACTTATGA  | 802.731049267922 | 0.301382406393716 |
| GTCAC TTATTCA | 802.732268617785 | 0.247949453586931 |
| TCAAGGGTGACA  | 802.735521288937 | 0.269928290300957 |
| AATTAATTGTCA  | 802.738576679448 | 0.208979732652833 |
| GGTATCGGTGAC  | 802.740593027354 | 0.267579274848156 |
| CAAACAAGTGAC  | 802.744318244657 | 0.226939252590218 |
| CCTTATTGTGAC  | 802.74639854495  | 0.217203219012971 |
| ACGACGTCACCA  | 802.749163734097 | 0.212092038386824 |
| CTCGGGTGACCA  | 802.751599411031 | 0.246818467861339 |
| AATGAATCGTCA  | 802.7556708919   | 0.474597034207117 |
| ATGACTTTTCCG  | 802.756657183333 | 0.314570420185422 |
| GTCATCTGGGAA  | 802.75785378264  | 0.350215054808258 |
| CTACGCATGACA  | 802.758810227169 | 0.218004372306875 |
| CCCCGCGATGAC  | 802.759532935215 | 0.216588558825496 |
| ATGACACCCAGC  | 802.760848138003 | 0.240016328077077 |
| CACGTAATGTCA  | 802.76434874954  | 0.368584547222619 |
| TCATGGTGACAA  | 802.765594761745 | 0.234440200078283 |
| ATTTGCACGTCA  | 802.774628076809 | 0.229939743523557 |
| CGGATATGACCA  | 802.776284250101 | 0.252920341422034 |
| GTCACGCTAAGA  | 802.778835291659 | 0.228675602620893 |
| CGTATATGTGAC  | 802.779118768141 | 0.203000048045793 |
| CACAGCGTGACA  | 802.796131750901 | 0.303294136415374 |
| CGTCATTTACAA  | 802.807054156649 | 0.384929699125521 |
| TGACTGGAAGCA  | 802.815379655036 | 0.17354160868802  |
| ACTCATTATTAC  | 802.819832101998 | 0.147929940324017 |
| GAGGTGACGCCA  | 802.822717922785 | 0.27122935889148  |
| AATACAATTAGT  | 802.824484612616 | 0.419844923177803 |
| AATAAAGGTGAC  | 802.828888102864 | 0.095985273498203 |
| AATCGAGTAATA  | 802.829135863728 | 0.227239892992317 |
| CCAATACGATGA  | 802.83854192194  | 0.259659305418347 |
| ACTCATGGCGAA  | 802.845954270536 | 0.346288391587412 |
| AGGCACGATGAC  | 802.872136922609 | 0.265883822931493 |
| CACCATTTGTCA  | 802.879529155242 | 0.254885826921961 |
| TACGCCGTATGA  | 802.881590490689 | 0.301650448792516 |
| CTTACAAATGAC  | 802.887930088579 | 0.297077072011294 |
| TCTTATGATACA  | 802.904294404044 | 0.147048063725353 |
| ATGACGGCGCAT  | 802.906276367607 | 0.26729833738111  |
| ACCTTTGATGAC  | 802.907611762365 | 0.267975038584064 |
| TGACGCAGGGAA  | 802.912906005893 | 0.259171129919544 |
| CTCGCGGATGA   | 802.91498050277  | 0.300759221810361 |
| CAACCTTTGTCA  | 802.917902743584 | 0.331531299302905 |
| CGATTAGTGACG  | 802.920929650798 | 0.40737782142985  |
| GGATTGAGTGAC  | 802.921855031898 | 0.219283476687912 |
| TGAATACATCAA  | 802.925086427331 | 0.350819395181635 |
| ACTAGGGTGACC  | 802.937983254    | 0.257059480502903 |
| GTAGTCCATGAC  | 802.945264564174 | 0.342700615305005 |
| AGTGCTGAATCA  | 802.946649082577 | 0.218588084383098 |
| AAGATTCATCGG  | 802.952903245648 | 0.235391813272949 |
| CACGTCACTAGC  | 802.953869278704 | 0.246903969113101 |
| CTACTATGACCC  | 802.964890915857 | 0.183248188791536 |
| TCATAGTGGTCA  | 802.970612297079 | 0.249765453791139 |

|               |                  |                   |
|---------------|------------------|-------------------|
| ATTACTATGACC  | 802.980201612223 | 0.192841215560413 |
| CTGTCCCAGTCA  | 802.991499038254 | 0.466426869056608 |
| TATACTGTGACA  | 802.991583951518 | 0.355647148333009 |
| GGAAATGACCAC  | 803.010082511437 | 0.283905541983066 |
| ACTCATACTACC  | 803.019236078272 | 0.187241200967248 |
| CAGCTGAGTAAC  | 803.027020197702 | 0.217312178955973 |
| AGGTTTGACTGA  | 803.03455737136  | 0.253351853648981 |
| ACGGTCATCGTA  | 803.036724623373 | 0.378224854474713 |
| AGTCACGGCCCA  | 803.040646249638 | 0.241935638560861 |
| GCTGGGTGACCA  | 803.050125275158 | 0.250208534480353 |
| GAACACGTGGCC  | 803.058704701651 | 0.29655500030955  |
| TCATCAGGAACA  | 803.061534505633 | 0.267294326640691 |
| ATTGTCCATGAC  | 803.064248939973 | 0.217396024805801 |
| ACTCGTGAGTCT  | 803.065318806743 | 0.214117970412049 |
| AGACTATAGTCA  | 803.075120189406 | 0.302394951412827 |
| ATGACCGAGCTG  | 803.077545116159 | 0.27788904960199  |
| CGCTCAGTGTCA  | 803.079634951797 | 0.335341933239128 |
| ACTCTGTGACGC  | 803.083738212451 | 0.231942690904429 |
| CATTTGGTGACA  | 803.086768388674 | 0.39363889843974  |
| AAGAGTGACAGA  | 803.099394704866 | 0.201465289393538 |
| ATACACTGACTA  | 803.107010388056 | 0.245792696599461 |
| GTCATGGTATGA  | 803.107800113223 | 0.232636978841448 |
| ATACGGATGACC  | 803.11039045361  | 0.293309366094477 |
| AGACTACTA AAC | 803.119618388942 | 0.205361369948626 |
| AATTACACACAA  | 803.122454071652 | 0.225773893544557 |
| AGCTCGTGTGAC  | 803.126716377909 | 0.186716718234947 |
| GAGTGAGCCACC  | 803.13183680398  | 0.272485704530402 |
| CGTCACTTGGTC  | 803.152228622839 | 0.308326953724935 |
| ATGACCGGTACAC | 803.162740127851 | 0.323816683113356 |
| ACTCACTCATTG  | 803.172324247495 | 0.226037583191964 |
| CACGAATGACCA  | 803.175967039641 | 0.242387614139031 |
| AGTGTCAGAAGA  | 803.179818631676 | 0.204512964997599 |
| ATGACTTGCATA  | 803.205682378543 | 0.278990682605384 |
| GTATACTGTCAC  | 803.20801253929  | 0.148557132713155 |
| CAGTGTGACCGA  | 803.212776286681 | 0.189028447506629 |
| GGCGGTGATGAC  | 803.213877217822 | 0.223325627984666 |
| ACATCGTCATGA  | 803.222288524781 | 0.144985691957543 |
| GCGCAGCAGTCA  | 803.226748837964 | 0.273449214608243 |
| TGAGTCGTGGAA  | 803.229071522056 | 0.142589105411498 |
| AGCCGCTGTGAC  | 803.229192127853 | 0.279605713202169 |
| CATGTCACCGGG  | 803.233784650634 | 0.244798018549996 |
| CACGTCGTCACA  | 803.234054446663 | 0.12192449203145  |
| CCCAGTAAGTCA  | 803.239585620714 | 0.214068046055476 |
| CATAATTACACA  | 803.242030285476 | 0.310451101649898 |
| ACTCATTCCTTG  | 803.257059835548 | 0.243080550848848 |
| AATGACAAGGAC  | 803.25912575583  | 0.230639865394354 |
| ACTGCGTGTGAC  | 803.259876757657 | 0.346460256578193 |
| CGGGCTAATGAC  | 803.266492838625 | 0.209510899949642 |
| TATGAGACGTCA  | 803.277346566765 | 0.242191182290191 |
| AGTCAGAGGAGA  | 803.286461693862 | 0.188604492878048 |
| GACTAATTGGAA  | 803.2907017108   | 0.282548983341326 |
| CAAGCTTCGTCA  | 803.291662779356 | 0.29456212459729  |
| GACTAATATCCA  | 803.292854247217 | 0.208335302297241 |
| GATATTACTGAC  | 803.304633603904 | 0.306906553805978 |

|              |                  |                   |
|--------------|------------------|-------------------|
| CGGCGGTGACAA | 803.307003519917 | 0.143344059905679 |
| CCCAGGTGACGA | 803.308267923414 | 0.232054555733038 |
| AGTCAGAGATGC | 803.312954430543 | 0.242508734479311 |
| ACGTCATGAACA | 803.316240668287 | 0.448379393750381 |
| ATGACAGTCTGA | 803.318604294507 | 0.239683479007746 |
| ACGGCGTGACAA | 803.323804390896 | 0.341701387870919 |
| GCTTTTATGTCA | 803.325529129811 | 0.205205417999711 |
| AAAGTCTGAGTC | 803.327536002853 | 0.160925901352016 |
| GACTCTTACGTA | 803.333418542822 | 0.213796035531292 |
| CGTTTGTGACGC | 803.336095748031 | 0.251057092468556 |
| ATGTCATGAGTA | 803.339930782295 | 0.203284138373393 |
| ACTCACATATGA | 803.348525402521 | 0.371158183076049 |
| GGTAAGGGTGAC | 803.35454046441  | 0.28710169456267  |
| GTCACCGTTCAA | 803.359555581819 | 0.297965669072589 |
| AGTCACTAGACC | 803.361265845951 | 0.402179301664855 |
| GTCACATTGGGA | 803.385836991979 | 0.308638178494333 |
| CAGCGTGACACC | 803.397643591676 | 0.256240777190639 |
| CGTCACCGATCA | 803.40361293697  | 0.212119402083496 |
| AATTACTCCTCG | 803.40430171824  | 0.223313787231235 |
| GTCACGTGTCTA | 803.40580369275  | 0.325953385498595 |
| TGACATTACACA | 803.412438472441 | 0.253830340258372 |
| GACTCTTGACTA | 803.416640413795 | 0.365105052867093 |
| GATCGGCATGAC | 803.427033098148 | 0.262896257121698 |
| ACATGAAGTCAC | 803.428337293315 | 0.200658189333366 |
| CATATACTAATA | 803.430124528247 | 0.395093881257303 |
| GCATGTACGTCA | 803.433627986587 | 0.257722400954678 |
| CGTCATGGTTGA | 803.436814389549 | 0.30346950462933  |
| AAATTACGCAAA | 803.440078293865 | 0.242239863091045 |
| AAATTAGTCTGA | 803.443848351923 | 0.306873701258725 |
| TCAGGGGTGACA | 803.448534978049 | 0.294967737293803 |
| AATGGATGACCC | 803.455729549808 | 0.338316428337051 |
| GTCCTGTGACAA | 803.457475359065 | 0.196569220743933 |
| CAGTCAGCTGGA | 803.460077756531 | 0.279064382714455 |
| CGCTGAAATGAC | 803.462023483317 | 0.305805393687252 |
| CATACAACGTCA | 803.468424601482 | 0.259247380365761 |
| CTCAGATGAGTA | 803.477985602959 | 0.258835045089229 |
| ATCCCAGTGACG | 803.479919307069 | 0.206768251912684 |
| AGGGTCACACTG | 803.484478593684 | 0.276493562214688 |
| GGGCAGGATGAC | 803.485245219543 | 0.213235961526185 |
| ATATGCATCACC | 803.492667546615 | 0.221432648640892 |
| AGTCAGAACCAG | 803.492911788591 | 0.214051241656409 |
| CGTCATCTGCC  | 803.493329218118 | 0.142598841486095 |
| GTCACGTAACAA | 803.501229043751 | 0.245440993735764 |
| CGATCAGACTCA | 803.508508634502 | 0.295322875238627 |
| TTCAGTGAGCAA | 803.5089465224   | 0.292405748992852 |
| CCGAGCATGACA | 803.511804183037 | 0.171844366639782 |
| ACTGCTGTGACA | 803.513085569769 | 0.207597049763541 |
| GTAACATTCTGA | 803.521651946437 | 0.280030075842613 |
| GACTACTGACTA | 803.523743987325 | 0.427067948633421 |
| CACGGTGACGAC | 803.531485185643 | 0.399558923320001 |
| CTGACGAGTTGC | 803.531500073963 | 0.315384862394281 |
| CTGGATGGCTCA | 803.532753637682 | 0.21396634237957  |
| CGTCATTACCAA | 803.533396003761 | 0.226256534447347 |
| GCCACTGTGACA | 803.534363114215 | 0.239595790478554 |

|               |                  |                    |
|---------------|------------------|--------------------|
| CGTCACACCCAA  | 803.536874682054 | 0.253285923135244  |
| GGTGACTTCAAA  | 803.540242560344 | 0.262469912860496  |
| ACGCGTGTACC   | 803.553423706542 | 0.390550716107397  |
| TGAGTTGTATCA  | 803.559494520372 | 0.245867087029244  |
| GATGGAGAGTCA  | 803.563948349418 | 0.136160650487412  |
| AGGAGTGACGAA  | 803.581941522052 | 0.235171760143082  |
| ACGGGTCATCTG  | 803.585486184837 | 0.221457056442122  |
| CAGTCAGTTTCG  | 803.585722417516 | 0.278573723747117  |
| ACCTGCAATGAC  | 803.58791948047  | 0.215347750972339  |
| CCACTATTAGTC  | 803.611231945136 | 0.146231775373812  |
| AATGAAATGACA  | 803.620238862651 | 0.254764893986881  |
| GAAAGCGGTGAC  | 803.625046115056 | 0.257597256228172  |
| CACCATGGATGA  | 803.630589949337 | 0.356122504117268  |
| ACGTCACTGCCG  | 803.631754703093 | 0.0859547239573485 |
| ATCGTCATGCAT  | 803.636944109977 | 0.310892350070155  |
| GTCACCCGCTAA  | 803.639831057048 | 0.26886061457901   |
| CGAGCGTAGTCA  | 803.655429816332 | 0.285520609244803  |
| CGTCACCGCTAG  | 803.655683115947 | 0.189846044048053  |
| GTGAGTCCACAC  | 803.676947031162 | 0.194906717381377  |
| AGTGGTGAGCAA  | 803.679045266082 | 0.225424127472373  |
| GTCACGTAAGA   | 803.681009658577 | 0.256433521455391  |
| TGACTTACAGCA  | 803.691990892223 | 0.226415334880909  |
| GGTACTCACTCA  | 803.692490062155 | 0.204110276640527  |
| GGATTTAATGAC  | 803.692802655129 | 0.282723791702872  |
| GAAGATGGGTCA  | 803.694705823311 | 0.236806664855422  |
| TGTGACTTCAAA  | 803.69486663872  | 0.185287044576271  |
| CCGATAATGAC   | 803.705917572504 | 0.176569099939424  |
| AAGTCACTCCAA  | 803.718656390472 | 0.324593098760126  |
| ATGACAGTGAGG  | 803.719583239616 | 0.135898942078485  |
| CGTAACATGTCA  | 803.720716157976 | 0.194217581579732  |
| GCAGTGTACCGA  | 803.723543407979 | 0.361083225480516  |
| GTCACCCGAGAC  | 803.72846598581  | 0.367409220907755  |
| GTCAACCGTGAC  | 803.731374623025 | 0.264821870411404  |
| ATGTGAGTAGTC  | 803.734343662137 | 0.140904149376668  |
| CTGGAGGGTGAC  | 803.735514082935 | 0.18806839495598   |
| ATTGTAAGAGTC  | 803.745994992154 | 0.195625319895829  |
| AGTCAGAACACG  | 803.749138601078 | 0.267144344276981  |
| GTACATCTGTCA  | 803.751307481531 | 0.316445114499915  |
| TACCGAGAGTCA  | 803.752600619128 | 0.332913480176462  |
| ATGATGTTGTCA  | 803.76114013296  | 0.372229424387288  |
| TAGGTCATCGAA  | 803.764628802151 | 0.281955620072492  |
| GAGACATGACCA  | 803.765686468263 | 0.285307675845677  |
| GACTCAGAGAAC  | 803.779190828295 | 0.345395131178101  |
| AAACACGCGTCA  | 803.780094509359 | 0.145821695342946  |
| GGCTTATGACCC  | 803.780406704933 | 0.297424605542419  |
| AGTCACGAGCAT  | 803.781270271312 | 0.282410406684832  |
| ACTCTGAGTCGC  | 803.783604740426 | 0.319613384124758  |
| CGTCACGTAATA  | 803.788383756498 | 0.274773992098401  |
| ATTATTCATGTG  | 803.798335980893 | 0.248259143598619  |
| CCAGTAGGGTCA  | 803.801026953228 | 0.306410864474664  |
| CGTCACAGGTCA  | 803.801995098216 | 0.35864000398642   |
| AGTCACGCCAAC  | 803.804362497452 | 0.272349750058344  |
| ACGAGCTGTTCAT | 803.810213368133 | 0.241980117028523  |
| ATGATATCATCC  | 803.812176732555 | 0.291410509210167  |

|              |                  |                    |
|--------------|------------------|--------------------|
| CGTCACTCCGAG | 803.820683621883 | 0.16876554696357   |
| GACATTCGTCAA | 803.834071981378 | 0.213990959599397  |
| GGGTCATAGATA | 803.836344700256 | 0.320348144751254  |
| CTCTAGAATGAC | 803.838887171024 | 0.390794080712097  |
| GATGCAACGTCA | 803.846657691686 | 0.28848039494147   |
| TGTCACCACTAA | 803.850445520516 | 0.26157451788581   |
| ATGCACATGACA | 803.853362966194 | 0.238584495375234  |
| CAAAGATGAATC | 803.855993094603 | 0.334272722569576  |
| GACGCGTGTGAC | 803.861869068085 | 0.344019552068622  |
| ATGACGCTCTCA | 803.876160249373 | 0.204227852723119  |
| AGTCAACCGATG | 803.877773078045 | 0.273042040825794  |
| TCGGCGGTGTCA | 803.878765421442 | 0.411619808667852  |
| ACCTCGCGGTCA | 803.879188335928 | 0.346811213878308  |
| AGTAGTGACAAA | 803.888196971789 | 0.250693900449939  |
| GAGAGCGAGTCA | 803.888807782606 | 0.237068881839415  |
| CCAGTGACGAAC | 803.890728346182 | 0.201905458010312  |
| ACGGTAGTGTCA | 803.894639055487 | 0.204574778851163  |
| GGCCGAAATGAC | 803.904830039457 | 0.333969553778662  |
| AATGACATTTCT | 803.909437368955 | 0.200737150642381  |
| CGTCAACGTCA  | 803.910034562973 | 0.176207096039063  |
| ATGAGGCATACC | 803.916990975639 | 0.203946040915127  |
| GCGAGTGACCAA | 803.917603142226 | 0.20218580113991   |
| ATGACGCCGGCC | 803.919666585399 | 0.17995955083361   |
| CCCTAAATGACG | 803.939909101975 | 0.285471635639478  |
| AATGAAGTGTCA | 803.940859341963 | 0.196374968597848  |
| AGCTTGGAGTCA | 803.943420307044 | 0.215640606400602  |
| ACATCGGTATGA | 803.948583938967 | 0.308265527073231  |
| GTCACGAATTGA | 803.953708326743 | 0.185896731550804  |
| ACTCATACCTCG | 803.95617343067  | 0.2658042727074408 |
| CACTCGTGACAC | 803.95898761067  | 0.302494866734883  |
| GTCACCTATCAA | 803.960905420819 | 0.187979369830249  |
| AACACATAGTCA | 803.961898942482 | 0.203979947636496  |
| GCGACCTGTCA  | 803.96847572931  | 0.255675276199713  |
| ACGCGTCAATCG | 803.976663838737 | 0.265715048178375  |
| ACTCATCGTCAA | 803.993943350651 | 0.205420270764178  |
| TCATACTTGTC  | 803.998347034232 | 0.0740892662549726 |
| CCATGAAGTGAC | 804.019977169229 | 0.325635265472739  |
| CACCATCTATGA | 804.025989433578 | 0.248751590666101  |
| CTATTATGTGAC | 804.035025140848 | 0.363894438325822  |
| ATGTGAGCAACA | 804.05819014233  | 0.222890434287347  |
| ATGACCCAGCAA | 804.058819765577 | 0.312007112859601  |
| AATGACCACTAG | 804.072682484594 | 0.275616028438895  |
| AATGGCCATGAC | 804.078097180436 | 0.221675218760726  |
| AGTGGTGACAAC | 804.079040607505 | 0.268084426189566  |
| ATAGTCAGTGTA | 804.086125246548 | 0.207583272153162  |
| CCTGTTCTGTCA | 804.090719368089 | 0.292595515154046  |
| TGACTGTAGGAA | 804.09750040911  | 0.242104753521431  |
| GCCTCAGACTCA | 804.099379356694 | 0.291067698379152  |
| AATGGGTGACAT | 804.107688751189 | 0.217637284820565  |
| AACAGGTGACCA | 804.117383336761 | 0.205835253515384  |
| GAGTGACGATGA | 804.127753221592 | 0.210111853107985  |
| GTGCGTCAAACA | 804.128266369955 | 0.219943943913934  |
| ACGTTATGAGTA | 804.134109294305 | 0.27146767620308   |
| CCTCAGCATGAC | 804.134416660072 | 0.261907897370574  |

|               |                  |                   |
|---------------|------------------|-------------------|
| AAGATGTATCAC  | 804.154711853128 | 0.180653873395694 |
| AATTGCTAATAC  | 804.155132533924 | 0.290749609454915 |
| ACTGATCAATGA  | 804.164835474065 | 0.248297508184455 |
| ACAGTCAGTGAT  | 804.169753967913 | 0.285119564406538 |
| AGTCAGCATTCC  | 804.180236949929 | 0.344053508290932 |
| CACACTGTCATG  | 804.190947198539 | 0.193945738593681 |
| ACAGCGAATGAC  | 804.202115554504 | 0.22705131663093  |
| AGTAACCTGTCA  | 804.209133736065 | 0.249836165789596 |
| TCATAAGCATGA  | 804.215438434856 | 0.316705022867682 |
| ACTTCATTATGA  | 804.228109498716 | 0.291387984392551 |
| CGTGGTGACAAAC | 804.229791157764 | 0.230396867553587 |
| ATCGGTACGTCA  | 804.230629562965 | 0.245680502328765 |
| CGTCATGAGTAG  | 804.235898563369 | 0.192006215656406 |
| CCTTAATCGTCA  | 804.237302565058 | 0.199305981120644 |
| GACGCGAATGAC  | 804.253218433191 | 0.139514308400876 |
| CCGTAACATGAC  | 804.254021742518 | 0.285108198163037 |
| AACCCTGACACA  | 804.277812337526 | 0.236666838483714 |
| GTCATGTCTAAC  | 804.285570747737 | 0.163289618610758 |
| CAATCCAGTGAC  | 804.29409184883  | 0.273545953364308 |
| ATGAGTCCCGGC  | 804.296888128718 | 0.204575601395762 |
| AGTCAGTACTC   | 804.299630412427 | 0.295626852878995 |
| GGGGCTAGTCAC  | 804.303502997468 | 0.191909368623841 |
| ATGAGGTACCA   | 804.307405542257 | 0.251251607697182 |
| ATGACAAGGCCA  | 804.313466898826 | 0.199704174942829 |
| ACGTGGCTCACC  | 804.316659585184 | 0.22579522077465  |
| TCATAGACTCAA  | 804.320082618867 | 0.272092422215631 |
| CTTACCATATGA  | 804.325632191394 | 0.25522255584007  |
| AACTCGTCAGAC  | 804.327316534996 | 0.280562987877044 |
| ATATCGTGACGA  | 804.328130751999 | 0.256046583655993 |
| CGAAATGACCAC  | 804.335585487113 | 0.304704493163411 |
| TGACGAAACCAA  | 804.335586764734 | 0.218472582272588 |
| AGTGATTACGCA  | 804.339352466622 | 0.242586210782904 |
| GAACATTAATAA  | 804.341980636239 | 0.273966257119763 |
| AGTCTGAATCAG  | 804.344137403579 | 0.237711345436426 |
| GTTTCGTGACCCA | 804.353526681197 | 0.204921722412618 |
| ACATTGCGTAAT  | 804.356254204371 | 0.199925749457613 |
| GAGTATAAGTCA  | 804.358736741194 | 0.243094928223212 |
| ACGCGTACGTCA  | 804.363773552793 | 0.295300497976422 |
| CGTTGACTGAGC  | 804.373084294959 | 0.272430484980902 |
| ATTTTCGGTGAC  | 804.381195292212 | 0.239711477032289 |
| GGTCACGATTAC  | 804.381987694387 | 0.28840009855106  |
| CCGAACCATGAC  | 804.383250978671 | 0.240743947981634 |
| ACGGTGACAAGT  | 804.387564279657 | 0.196348737605394 |
| TACTGACTGTGA  | 804.388596371656 | 0.282857020101001 |
| ACGCTGTGTCAA  | 804.394212339694 | 0.242796521223986 |
| AATAATTACACA  | 804.406676742715 | 0.260727506610848 |
| CTTTGCTGATGA  | 804.407321893361 | 0.2618918380586   |
| ATTAATCACCGA  | 804.407721822938 | 0.26026033334054  |
| ACCACCAATGAC  | 804.417737472941 | 0.171214554420945 |
| ATCATCCGTGAC  | 804.423170596916 | 0.193320167784926 |
| GCGTGACGCCAA  | 804.424104796565 | 0.303053609499866 |
| GTCATGTTTTAA  | 804.427240496852 | 0.287604705124929 |
| GTCATTCAAACA  | 804.430592676884 | 0.134727043157977 |
| CGTCACGTTTAG  | 804.430625486777 | 0.221622695282267 |

|                |                  |                   |
|----------------|------------------|-------------------|
| CGGCGGAATGAC   | 804.434102352836 | 0.293784471173464 |
| GCAGATATGTCA   | 804.434566301889 | 0.250252758968718 |
| ACGTCACGTCTC   | 804.442226727924 | 0.216388710754644 |
| AACAGTCAATAG   | 804.449511013129 | 0.142217394273191 |
| TCTGTGTCAACA   | 804.45168021017  | 0.367906567630712 |
| AGACTCAGAGCT   | 804.463361149846 | 0.244502649633267 |
| GGTGGCAGTCAC   | 804.464084137694 | 0.193520925192227 |
| GTGTCACCTCTA   | 804.479761661623 | 0.266631885128765 |
| GTATGAGTGCAC   | 804.483391936575 | 0.282061147474868 |
| TATGACATTAGA   | 804.488628940051 | 0.213261317537391 |
| CCACCATGACAC   | 804.494834235622 | 0.251648785054532 |
| GCGAAAGGTGAC   | 804.502848934314 | 0.194018111442886 |
| CCTCTCGGTGAC   | 804.514815961082 | 0.201031327910293 |
| AACGACTCAGAC   | 804.520864967763 | 0.199160148831349 |
| AGGATCGACTCA   | 804.548170554403 | 0.228005785426385 |
| GCACGCGGTGAC   | 804.548470558739 | 0.234374789421236 |
| AGAGGACGTCAT   | 804.557715367844 | 0.203228050337831 |
| ATAAACATGACA   | 804.560451842285 | 0.430570852085422 |
| AGATCTCGTCAC   | 804.562383389895 | 0.20451710446341  |
| AATGTGCGTAAT   | 804.56350670039  | 0.213924388563828 |
| GACGATATGACC   | 804.572183839141 | 0.422612894741544 |
| ACGCACTGTGAC   | 804.572625295058 | 0.301928305972172 |
| AGTTGCTATGAC   | 804.574164976095 | 0.249837823731554 |
| AAGCTTGTCAAT   | 804.577531021069 | 0.252197059314153 |
| GTATTAGGTGAC   | 804.579211400954 | 0.247389605923405 |
| GCTCCAAGTCAC   | 804.5824228723   | 0.179453446387772 |
| CTTGGGTGACGA   | 804.583060834819 | 0.240533738736589 |
| AGCAACATGACG   | 804.59004643747  | 0.248910436609911 |
| ATGACATCTACC   | 804.595483767571 | 0.255874209221126 |
| CACACTGATTCA   | 804.607711923096 | 0.428205762809113 |
| CACAGGCGGTGAC  | 804.609535473982 | 0.314879111483518 |
| ACCCGCATGACG   | 804.626006951763 | 0.280069904701636 |
| ATGGTATGTACAC  | 804.63176774357  | 0.234646041072516 |
| ATGTCATTAAG    | 804.635517857731 | 0.371402145509653 |
| AGCTGGTGACGC   | 804.642750152145 | 0.190541738098982 |
| GAATGCTGAGTC   | 804.644495747167 | 0.219199780513957 |
| GAACGGGAGTCA   | 804.645781184636 | 0.209877594559045 |
| AGCTACTGTGAC   | 804.657812419703 | 0.241673195254545 |
| GTCGTAGTGTCA   | 804.659553920959 | 0.344849861377657 |
| CGTCATTAAGA    | 804.664526069866 | 0.194718863012744 |
| AGTCGTGAATCA   | 804.669136602256 | 0.272652395463551 |
| TACCCAATGACA   | 804.67351475563  | 0.202468536903116 |
| ACAAATGTGACA   | 804.676798602107 | 0.255776850795253 |
| GGTCATACAAAA   | 804.678339395946 | 0.33214186744472  |
| AGTCCGTGTACAC  | 804.678951959347 | 0.207669419864972 |
| AAAATAGTGTGACA | 804.682773773574 | 0.186357989262372 |
| GCACGCGAGTCA   | 804.686505523853 | 0.301658565979613 |
| ACAGTCAGTATA   | 804.691220235581 | 0.274907059012245 |
| CAGGATAGTGTGAC | 804.693036639783 | 0.339693701848965 |
| GTGACTAGCAAA   | 804.694650562166 | 0.260881500547932 |
| GTTTACACATCA   | 804.695101600941 | 0.248956125140516 |
| AGTCACGCGGGC   | 804.700267568916 | 0.281324791765227 |
| TCATCCTCGTCA   | 804.701257651763 | 0.203036740752901 |
| ATGAGTGCATAC   | 804.706800172758 | 0.261509310552807 |



|               |                  |                   |
|---------------|------------------|-------------------|
| CAAGTAGGTGAC  | 804.707411547798 | 0.288403636435357 |
| GACGTGACCCAA  | 804.719500801875 | 0.345170335585942 |
| TCAAATGACCGA  | 804.723468341796 | 0.210797797248596 |
| AAATCTAGTCAG  | 804.72386698239  | 0.213231665522701 |
| CGTCTGACATCA  | 804.72611314115  | 0.218632036532469 |
| GTCCTGTAGTCA  | 804.740183000235 | 0.330902799960372 |
| G TTCACGCGTCA | 804.757412516281 | 0.174002440407286 |
| TGACTGTGCGCA  | 804.760689222337 | 0.275682038708232 |
| ATCATAAGACTC  | 804.764165432774 | 0.288486090692864 |
| GAGTCAAGTTTA  | 804.771897314841 | 0.307457228320208 |
| GTCACCAAATA   | 804.776738493876 | 0.43067884719188  |
| AATACTGTGACG  | 804.7771457456   | 0.182485002103598 |
| GGTTACGCAATA  | 804.777431758403 | 0.232905497418377 |
| GTGACGGAGACA  | 804.780415913687 | 0.213523242098514 |
| CTAATAGTAATC  | 804.790222256821 | 0.257377689893549 |
| GACGTACCACC   | 804.796932544617 | 0.142908896447605 |
| CTCACTATGTCA  | 804.805875845334 | 0.310498158846265 |
| ACTACATGACAT  | 804.824333896049 | 0.217318011594649 |
| ACTCATGACGAT  | 804.824496380075 | 0.268482088515875 |
| GTCACGGTCGAC  | 804.832132397232 | 0.166914665451721 |
| ATTCTTACATGA  | 804.836584944595 | 0.380130655931336 |
| ATGAGTATGCCA  | 804.840023540469 | 0.182635596931288 |
| TGACATCACCCA  | 804.840306402058 | 0.170527526862344 |
| GACTCACTGGGA  | 804.846838370843 | 0.325458020521912 |
| GTCACCAATCCA  | 804.850541237917 | 0.233598093093982 |
| GACCTGTGACAA  | 804.85322868791  | 0.36489432309792  |
| GCTCTTTACTCA  | 804.853969894275 | 0.126865361814088 |
| AAGTGATTACTC  | 804.861603527019 | 0.256177844426183 |
| TATAGATAGTCA  | 804.862100463598 | 0.343939931981988 |
| GACCCAAGTGAC  | 804.900319777651 | 0.200105797576493 |
| CAGTCTGACGCG  | 804.900796729659 | 0.16974041745361  |
| ACGTGTCAGAGT  | 804.936058195984 | 0.256185260494008 |
| ATAACACATCAT  | 804.936248645514 | 0.229403924430971 |
| GTCACCATGATA  | 804.944986143264 | 0.372239037184111 |
| AGTTGACACAAC  | 804.947660505585 | 0.236149583426147 |
| AACCGTGACGTG  | 804.950165188857 | 0.304006731328481 |
| AATCGTGTGACA  | 804.953840095486 | 0.192790689592814 |
| AAATTACGCACT  | 804.959069684698 | 0.290635810803421 |
| GACACATTTCTA  | 804.976096056955 | 0.364034123401249 |
| AGTCACGGACCG  | 804.986363814495 | 0.194266650357007 |
| ATAACAGTCAAC  | 804.991534836384 | 0.141227848772118 |
| GGGACTGCGTCA  | 804.994755707993 | 0.212290788169474 |
| AATAGCGTGTCA  | 805.005204388409 | 0.3163439188845   |
| AGTTGTGTCAAT  | 805.006458923669 | 0.206292519356078 |
| GGAACTGACACA  | 805.033367143069 | 0.341891094722429 |
| CTTGCGATGACC  | 805.034443094643 | 0.229688397818456 |
| CTCACTCTGTCA  | 805.037164791619 | 0.22844039454654  |
| AGGCCCTGTGAT  | 805.038010675406 | 0.227093719117313 |
| TGACGCTATTAA  | 805.043971514215 | 0.351774267402782 |
| AGTCAGAACACA  | 805.044124826267 | 0.210682038038789 |
| AGTCAGTAATGA  | 805.050150560007 | 0.276791206856053 |
| GACCACGGTGAC  | 805.058602275864 | 0.209590042447516 |
| CAGCGCGTGACA  | 805.059735192465 | 0.285792375617815 |
| TGAAAATTGTCA  | 805.059937908521 | 0.170933337177386 |

|              |                  |                   |
|--------------|------------------|-------------------|
| ATGTTAACGTCA | 805.063254636405 | 0.272933687312751 |
| AGCCATGGGTCA | 805.067950973961 | 0.312165711059163 |
| TCGTATCCGTCA | 805.068223997458 | 0.177416224847755 |
| GTCACTTTATTA | 805.069680463011 | 0.297853620985956 |
| AACTGTTTGTCA | 805.079110974066 | 0.229334188960599 |
| CTGAGTATGTCA | 805.079316886011 | 0.394839819204331 |
| ATGAGTACCTCC | 805.08059886221  | 0.215396547715221 |
| TGGGTCACGGAA | 805.088765854827 | 0.257988941536489 |
| AGGAAAGTGTCA | 805.090122394728 | 0.147264671250016 |
| CACGGTCATCGG | 805.093374169548 | 0.226267897546772 |
| TGGTCATTTCAA | 805.106692830992 | 0.240459027625252 |
| CGCGTGGTCACA | 805.111558459336 | 0.228505314737146 |
| AATGATGCAACC | 805.115949035493 | 0.267837881474328 |
| CAACCCGGTGAC | 805.120674752635 | 0.287555311284926 |
| AAGACTCTTAAG | 805.12121583639  | 0.169975437342157 |
| CTGCGACATGAC | 805.126235576529 | 0.212441078381209 |
| AAGCAGTCAGAT | 805.133311436909 | 0.234424263153248 |
| ACTCATCTGTAT | 805.139378702854 | 0.243734272614231 |
| TAGGCATAGTCA | 805.143831932475 | 0.287004732773767 |
| ATGCACGACTCA | 805.144786917733 | 0.302471563449334 |
| GTGACACCGCAC | 805.147888256652 | 0.210645106086804 |
| ACTGGACTCACA | 805.156538261327 | 0.253441873170021 |
| GGTCTATATGAC | 805.159751141259 | 0.199770761821419 |
| AAGCTACGTGAC | 805.174334207665 | 0.261676865643555 |
| AGGCTTTACTCA | 805.180886594058 | 0.246364323066705 |
| CCGCTTTGACTC | 805.185412964679 | 0.244572864671002 |
| ATCACTAGTCAG | 805.20507167692  | 0.321378989087297 |
| ACTACTCAATGA | 805.205382594934 | 0.211863295231606 |
| GTGACATACGCA | 805.214867266848 | 0.149970512506802 |
| GCTCCTGTCATA | 805.240279131323 | 0.216793751070282 |
| ATCCGTAATGAC | 805.240375542779 | 0.280558251291768 |
| CTCCCGAGTGAC | 805.243426626593 | 0.252600427245951 |
| GCTGACATATAC | 805.254433242808 | 0.254410537993559 |
| TACTCATTACTA | 805.25982349251  | 0.155319803280301 |
| CTCATGTGACGA | 805.261097803458 | 0.260609648807157 |
| ATGTCACGATGC | 805.262638735549 | 0.221430241505151 |
| CTAAGATGACCC | 805.263829228924 | 0.258607757545384 |
| GTCACATTACTA | 805.280767938    | 0.260989562206062 |
| GACGTTAGTGAC | 805.282907519294 | 0.246224315768599 |
| AGCCTATTAGTC | 805.288399067179 | 0.209989411622303 |
| AGTGCGTGTGAC | 805.290371843124 | 0.166597053384208 |
| AGACTAATACGC | 805.290723088815 | 0.189105210271193 |
| CGATTTTGTGAC | 805.291009947828 | 0.392419787963736 |
| ACTGCGTAATCA | 805.297384657855 | 0.245910126928518 |
| CGACTCACGCAC | 805.299937033657 | 0.221397213682609 |
| GTCATTAATAAA | 805.305236401333 | 0.156367113341063 |
| GATACGGTCATA | 805.31110073413  | 0.132650048997058 |
| TCATTTGCATCA | 805.312781387057 | 0.271118359670884 |
| TCGTTAACGTCA | 805.317708150998 | 0.285202465953011 |
| CTGTGACAGCAC | 805.320588810078 | 0.271182776395908 |
| GTGCATGGCTCA | 805.323689629524 | 0.230535355974896 |
| GAGTCAGGCCCA | 805.326368333921 | 0.256485662034196 |
| GACGGTGACCGA | 805.329971918369 | 0.270499431487901 |
| AGCTTACGTGAC | 805.334329101195 | 0.300159521593131 |

|               |                  |                   |
|---------------|------------------|-------------------|
| ACGGTCATACAA  | 805.345547907729 | 0.236935757526171 |
| GTCATGGTCTGA  | 805.348418703355 | 0.308681035192784 |
| CGACTCACGATC  | 805.349674136626 | 0.177371621627874 |
| AGTGAATCAACG  | 805.349879386056 | 0.203903285350252 |
| AAGCGTCAGACC  | 805.358390065935 | 0.275780046189111 |
| ATGACCAGATTC  | 805.359338313689 | 0.213629520197289 |
| GTCATTGGAGAA  | 805.362858172083 | 0.191394854811075 |
| AGTGAATCAATC  | 805.370079969732 | 0.256709604301432 |
| CTTCGGTGACCA  | 805.376410835719 | 0.273083289715954 |
| CAAGCAAATGAC  | 805.377144731884 | 0.136208148270218 |
| AGGATTACGCAC  | 805.398107608336 | 0.299175790006015 |
| AGACTCAGAATA  | 805.41264295213  | 0.20328980434033  |
| ACGTCACGCACG  | 805.414660705838 | 0.258122269384087 |
| CGGCCTGTGACA  | 805.417178275981 | 0.217428694816715 |
| GACTGTGACCAC  | 805.41762968984  | 0.255501494021722 |
| CGGACTGTGTCA  | 805.421407804796 | 0.28466494579266  |
| ATTGATGACCGA  | 805.428933566835 | 0.211796839251264 |
| TGAGTCGCTTAA  | 805.435895156274 | 0.224533252975656 |
| GTCACAATAGCA  | 805.445567111761 | 0.360259921714685 |
| CCGCGTGTGACG  | 805.44855351516  | 0.225520090271492 |
| GGTCATCGTCTA  | 805.451823985205 | 0.278253702494793 |
| AACAGATGACAT  | 805.457675198282 | 0.202283525222895 |
| CCTTCTTGTCAC  | 805.457741951473 | 0.195648203409308 |
| AAATTCATCATA  | 805.459955772919 | 0.401309764677039 |
| ATACGAGTAATC  | 805.46010395103  | 0.175681338098969 |
| TCATAGATGAGA  | 805.467156905214 | 0.311255384858464 |
| AGGGTATGATTC  | 805.467247353004 | 0.163299038471206 |
| GTGAATCAACGA  | 805.468121909516 | 0.231149496946061 |
| CGCTGACGTAGC  | 805.47559679856  | 0.272382018958735 |
| AGTAACTCATCA  | 805.478604571105 | 0.231244737222953 |
| ACAACGGTGACA  | 805.485403106937 | 0.256928079860394 |
| ATTAGCAATAAG  | 805.490729880875 | 0.17508686290747  |
| GATGACGGCGAC  | 805.491835901978 | 0.233047704376032 |
| AGACTCACGCCG  | 805.494505949404 | 0.236591621672464 |
| GAGTAATCGGCA  | 805.507556162599 | 0.228289894022696 |
| ACGAAATGACAG  | 805.507903231643 | 0.232628980081568 |
| ACACGTAACGGT  | 805.519268450725 | 0.343339463101334 |
| CAGGCTAGTCAC  | 805.520197786357 | 0.20395343746612  |
| GTCTAACTGTCA  | 805.526588333454 | 0.260740463344664 |
| AGAGGCGGTGAC  | 805.53009562632  | 0.24891829588982  |
| GACGTCACAGAC  | 805.53329122765  | 0.339285339608711 |
| ATGATGTGTTTTG | 805.536174695071 | 0.274846256463486 |
| TGACTGTGGGCA  | 805.540539336653 | 0.249468261553174 |
| ATCTAGTGAGTC  | 805.543180267771 | 0.220580366017145 |
| ATGAGTCCGGCG  | 805.554783542819 | 0.192033964198685 |
| ACTATTCTGTA   | 805.557999333062 | 0.217518559257024 |
| TGACGTTGAAAA  | 805.558360497956 | 0.319207951812013 |
| GCGACTCAGCCA  | 805.560356085088 | 0.30913109586827  |
| AACAACAGTGAC  | 805.560546183788 | 0.29405540054415  |
| CCGTGCAATGAC  | 805.562011873887 | 0.399249799867104 |
| ATACCATAGTCA  | 805.579915379546 | 0.24424969399794  |
| AATGATTATTCA  | 805.587347003727 | 0.199430085170682 |
| ACACGAAGAGTC  | 805.588842076638 | 0.257250535059443 |
| CGTCATCCCGGA  | 805.598874204733 | 0.219101697417961 |

|               |                  |                   |
|---------------|------------------|-------------------|
| CGTCATCCCTAC  | 805.605488856903 | 0.163883944618134 |
| ACTTCGATGACC  | 805.606750040845 | 0.274891143646611 |
| CAGCATCGTGAC  | 805.611210506071 | 0.265753388134825 |
| GGCAGTGAATCA  | 805.61345244701  | 0.203375874538729 |
| CTATTGCGTAAC  | 805.615312666743 | 0.187839710674344 |
| AGCCAGATGACA  | 805.632549129585 | 0.17986120414824  |
| GAGTCAAGTTGC  | 805.63710134284  | 0.197806083936233 |
| TATAACATGACA  | 805.641689126439 | 0.270448708700193 |
| AAGATTTTGTCA  | 805.642485481224 | 0.256145914171993 |
| AACACTTAGTAA  | 805.652509032775 | 0.334230556716671 |
| GAATTAATGACA  | 805.654917442101 | 0.224589458214818 |
| GACCTGTCACCC  | 805.657052117674 | 0.178913542165167 |
| ACTCATCTTTGA  | 805.657702330974 | 0.195537132162331 |
| GTCATTGTGGAA  | 805.659741332484 | 0.192239239755198 |
| GCTGATGACCGA  | 805.659828005505 | 0.40141002689625  |
| GTGACATAGATA  | 805.661051042469 | 0.183428343495385 |
| GGCTGGTGTGAC  | 805.662408640972 | 0.226363113944903 |
| ACCGCAGCGTCA  | 805.669801557444 | 0.323404942019251 |
| CGCCACATCATA  | 805.677827841637 | 0.257014886656252 |
| AAGGTGACCCAA  | 805.681457870226 | 0.159678904227348 |
| CCAGTAAGTCAC  | 805.693813128493 | 0.259350544567008 |
| ATATTTCTGTCA  | 805.699313006835 | 0.318864145086502 |
| AACCTTGTCA    | 805.700458024761 | 0.15330343778555  |
| ATTACTCGTACG  | 805.701249600613 | 0.285722565858281 |
| CCCAGGGTGA    | 805.702203863427 | 0.274407329511703 |
| CGCCGAAATGAC  | 805.709622474715 | 0.200979479309757 |
| CCTCGACAGTCA  | 805.712799713471 | 0.20420529363151  |
| GCACCCGAGTCA  | 805.717034214396 | 0.297277939942509 |
| ACACCCTGTCAT  | 805.719616793815 | 0.135956079350093 |
| GACTAATTTCTA  | 805.722628670698 | 0.269749744908507 |
| CAGTCAGCTACG  | 805.722733091789 | 0.199239035346709 |
| GTCATGGTCTAA  | 805.731527768477 | 0.237230248551047 |
| ACCATGTCGTCA  | 805.736231850652 | 0.282255766430131 |
| GTCATGAATACA  | 805.742822633668 | 0.255063057699538 |
| AGTGACGTGCAT  | 805.747065129192 | 0.187288705119971 |
| TCTGTTGTGACA  | 805.747558450811 | 0.198252200938231 |
| CGACTCTGACAC  | 805.749631205045 | 0.226483732114515 |
| TATCGTGACCCA  | 805.751130484448 | 0.268088632795417 |
| CATCACTATGAG  | 805.751273751217 | 0.360429759070768 |
| GTCATTTTGAAC  | 805.754884192477 | 0.219037294966041 |
| CGCCGCATGACA  | 805.760972981889 | 0.219140679011546 |
| TGAGTGAGCAAA  | 805.76478393332  | 0.287477472685405 |
| GATGAATACTCA  | 805.766902934954 | 0.243565343625991 |
| AATGACATTGTG  | 805.778120701747 | 0.219404774246506 |
| TAGGCTTCGTCA  | 805.779913955104 | 0.242520225731801 |
| AGGAGGGATGAC  | 805.781063057751 | 0.203884062795588 |
| GCAAATGTGACA  | 805.782772764584 | 0.328108460305726 |
| TGATTCAAGTCCA | 805.787178642647 | 0.305638907579813 |
| ATGCGTGTGTCA  | 805.79073382425  | 0.282571487764645 |
| AATGACGGTTCAT | 805.795929558714 | 0.224355469916522 |
| AGGACATGACGC  | 805.801488481996 | 0.315079695050681 |
| ACGAGCCGTTCAT | 805.80246384901  | 0.33246947262927  |
| GTCATTAATCAC  | 805.806819344821 | 0.210712818662604 |
| CGGGATGGGTCA  | 805.808831941735 | 0.121996368683661 |

|              |                  |                   |
|--------------|------------------|-------------------|
| AACTTAACGTCA | 805.809662411787 | 0.299756738944114 |
| GTCACGTGACGA | 805.812279640443 | 0.247750087260976 |
| ACTAGTCAGTAA | 805.813926507815 | 0.246513287400973 |
| GTCATGTCAGGA | 805.818062033636 | 0.272619219254266 |
| AATATCAGTGAC | 805.82884725005  | 0.278008606265159 |
| CTTTGCAATGAC | 805.831745683767 | 0.402472445260183 |
| GTGACGCGCCGA | 805.847114159663 | 0.274415711659131 |
| AATTACTCGTAC | 805.849928590438 | 0.223763370138872 |
| GACTCAACGTCC | 805.861253974466 | 0.259195249679389 |
| GGGTCATTATCA | 805.866117470454 | 0.223179926522399 |
| TGTCATGCCAAA | 805.868589739561 | 0.167457032466446 |
| GAGTCAAGGTCA | 805.872627544809 | 0.157589752759964 |
| CGTCACATCTAG | 805.876720207301 | 0.22683673694483  |
| CTAAATCGTGAC | 805.877505726412 | 0.260828644196287 |
| ATGACCACGGTG | 805.880349770514 | 0.349600676719763 |
| GTCTGTGATGGA | 805.887041969577 | 0.28151137254845  |
| TCGAAATACTCA | 805.889591085344 | 0.357347018578946 |
| CTGTATGATGCA | 805.88975052341  | 0.27108475082803  |
| ACTGTATTGTCA | 805.894079764218 | 0.283013654198484 |
| GCTGCGCAGTCA | 805.90605055188  | 0.20924688092939  |
| CGGTTTGATGAC | 805.907644231544 | 0.240200602401709 |
| AACGGGTGATAG | 805.913244737256 | 0.162891895031202 |
| ATATGACCGCAT | 805.9176368542   | 0.299964354535991 |
| CCTTGGATGACC | 805.927914051006 | 0.318816022876578 |
| CGTCACCAGTGA | 805.928420289826 | 0.235895400212865 |
| ATCCATCGTGAC | 805.937737959881 | 0.296677285757082 |
| ACTGTCATGCGG | 805.94495211386  | 0.20134737056428  |
| ATAGTGGTCACA | 805.946787563075 | 0.204193570345462 |
| AGTTGAGATGAC | 805.960982307598 | 0.250326659167004 |
| CTATGATGCAAA | 805.964790246759 | 0.204323928897321 |
| AGTCAGAGGCTA | 805.965816509937 | 0.218879399191213 |
| GCGTTATATGAC | 805.97199896231  | 0.300987202028113 |
| AGCAGTCAGCGC | 805.978458684339 | 0.287019729861063 |
| ATTGCACTCATA | 805.978628038562 | 0.169882667338879 |
| GACGTGCATGAC | 805.981703981686 | 0.328276674602138 |
| TGACGTGATGCA | 805.98586524086  | 0.283810398974018 |
| AATGATATCATA | 805.988513507827 | 0.19615244225481  |
| TACAGCACGTCA | 805.98922845804  | 0.133743317439148 |
| AGATGAAATGAC | 805.993244506192 | 0.187614746157445 |
| TCCCTTACGTCA | 805.999081765528 | 0.279410319134561 |
| AATTGGGTCACT | 806.004168756516 | 0.411040625960018 |
| ATGACATTGTAA | 806.00566978484  | 0.235870482179736 |
| ACGTCACAAGCC | 806.012352856615 | 0.235110839484664 |
| TACAGTACGTCA | 806.027149976512 | 0.420519422582988 |
| CCAGTGACGTGA | 806.033748847409 | 0.207426018120364 |
| AAGACTAACACA | 806.047129344284 | 0.198989230623456 |
| TACGCCATGACA | 806.055235742163 | 0.234288125541137 |
| GTCATGGCGTGA | 806.060282878476 | 0.284108250053674 |
| AGCACTTGTGAC | 806.060542202779 | 0.228114865814691 |
| ACGTCATGCCCC | 806.072349754178 | 0.238113661342716 |
| ATAGTTTCGTCA | 806.07932959769  | 0.257231804709269 |
| ACGTCATGCAGT | 806.095781339498 | 0.144759637637986 |
| AAGAAGGGTGA  | 806.098003437478 | 0.213729275134452 |
| AAGACTAACTCA | 806.101534069382 | 0.239491375992028 |

|               |                  |                   |
|---------------|------------------|-------------------|
| ATGACAGTAAAT  | 806.103475991266 | 0.209810141159643 |
| ATACACTGTGAC  | 806.104086891138 | 0.334114414675984 |
| CTTAATCGGTCA  | 806.124559139967 | 0.295408592916851 |
| AAAGGAGATGAC  | 806.130480203167 | 0.232221310227863 |
| CGTCATTTAGCA  | 806.131997716296 | 0.141376984702159 |
| CTATTCATGACA  | 806.144065341548 | 0.283941803838809 |
| GGCAGCATGACA  | 806.148926522027 | 0.266832986326785 |
| AGTCAGTGGCTC  | 806.154058999858 | 0.308048104796287 |
| GAATCATACTTA  | 806.156246772991 | 0.262061920228598 |
| GCTCTATGACCC  | 806.156587425759 | 0.158090368595644 |
| GTCACACAGCTA  | 806.160281337068 | 0.381694025508859 |
| AGCGACTCGTCA  | 806.165628569267 | 0.244133439279151 |
| ACTCATTCTGTTA | 806.182522111881 | 0.290071264992746 |
| CAGTCAGTAGCA  | 806.2037404181   | 0.288275704684442 |
| ACACTGATGAGT  | 806.210887620044 | 0.284727786019006 |
| CGAACAGGTAC   | 806.236365070151 | 0.244208049241634 |
| ACTCATCACGTG  | 806.250273259146 | 0.155530598434444 |
| GTTTGCTACCA   | 806.255654425185 | 0.2237075775305   |
| CCGTCATATGGA  | 806.261003655505 | 0.141276942810274 |
| AGCATGAGCAAC  | 806.271553032973 | 0.262030043384453 |
| GGCGTCACCAA   | 806.279593566595 | 0.250532757584594 |
| AGTCAGACGAAC  | 806.286136785203 | 0.306460421879371 |
| AGACTCAGTCGC  | 806.305204353676 | 0.208359063831091 |
| CGCCATGACATA  | 806.306609961792 | 0.125038189445882 |
| GTCATTACAAGA  | 806.3102139652   | 0.201764092351039 |
| ATGTATGATTCG  | 806.311349722783 | 0.207481927711088 |
| GACTGATTTCCA  | 806.318379170383 | 0.288015548124556 |
| ACTTGTCACCCCT | 806.320405754304 | 0.205648670864433 |
| AGACGAAGTCAT  | 806.321893573958 | 0.316320721916662 |
| AGTCAGTAACCA  | 806.323257690336 | 0.234669115870276 |
| ACTTTAACGTCA  | 806.326540546915 | 0.304939409090667 |
| GTCAGAGCGTCA  | 806.328452939521 | 0.303481231753314 |
| ATCTGACACGTC  | 806.333457138877 | 0.237936569283515 |
| CCAATTTGCTCA  | 806.334451074488 | 0.260785648206277 |
| ATGACATTTGTG  | 806.335076938356 | 0.203503308579723 |
| GGTGACAGGTAC  | 806.348330666006 | 0.223935819678731 |
| GTCATTGGACCA  | 806.350088145246 | 0.209358012906185 |
| GTTGACTACTAA  | 806.355873503162 | 0.41758904332625  |
| ATATTACTCTAC  | 806.357426044239 | 0.214053060352794 |
| ATCCCGTCATCC  | 806.370175885943 | 0.155063568191395 |
| CACAGAGGTGAC  | 806.371304662899 | 0.294941441974046 |
| ACGTCACCCCTC  | 806.374022067936 | 0.140406850770231 |
| AAATCGTAGTCA  | 806.385827953993 | 0.188927292396804 |
| TCATTGTCACCA  | 806.396533995692 | 0.174895480036586 |
| ACCTTCATGACA  | 806.39666575638  | 0.284479360909315 |
| TCCCTAGCGTCA  | 806.398758847105 | 0.221913462373389 |
| TGATGTCTCACA  | 806.398788069874 | 0.300874659938766 |
| ACGCTTACTAAT  | 806.401177653392 | 0.138595915540277 |
| AATTAAGTCAGT  | 806.414743279434 | 0.179528113859236 |
| CTATGAGCATT   | 806.415062571864 | 0.226311696273841 |
| AACGAGTAGTCA  | 806.42180313128  | 0.253341648875063 |
| TCATTCAAATGA  | 806.423131182443 | 0.29457247885041  |
| ATGTCATGATGC  | 806.430310539063 | 0.221969196533027 |
| GATGAGTAGGAC  | 806.439281105051 | 0.205337934679648 |

|                |                  |                   |
|----------------|------------------|-------------------|
| GTCATGTCAAGA   | 806.4406644429   | 0.194388919434846 |
| TCATTTCTGTCA   | 806.44163127345  | 0.2563563481478   |
| GTGACGTTACAA   | 806.44167027495  | 0.250875589052018 |
| GAGGGGTGACGC   | 806.444690260141 | 0.147922486347925 |
| AATGACATCTTC   | 806.447203476873 | 0.065323921330937 |
| ACGTCTCCGTCA   | 806.454105363027 | 0.282996121999989 |
| GTCACATATCCA   | 806.458209961334 | 0.246653312796139 |
| AACTCTTGGTCA   | 806.459974808556 | 0.24915316333994  |
| CGGTCATACATC   | 806.468163887518 | 0.161991935174602 |
| ATACTCATTA AAA | 806.469687305333 | 0.316415587616632 |
| ATTAGTAATCG    | 806.471396991861 | 0.321365964742469 |
| AGAGTATGATTC   | 806.475949764757 | 0.282528556743323 |
| GAGTCAAGGTGA   | 806.477869908628 | 0.222300198749338 |
| CCATGACGTTGC   | 806.478566283231 | 0.165546633707717 |
| GATGAGCATTAC   | 806.480880959768 | 0.14182296925773  |
| CCCGGGTGACGC   | 806.482154610574 | 0.199094862481517 |
| TGACTCCCTACA   | 806.483754551438 | 0.254380233360446 |
| CCAGCCAATGAC   | 806.492085141323 | 0.232161285991036 |
| CATCATCGGTCA   | 806.493209308583 | 0.29863611240384  |
| ATTACACGTAAC   | 806.493258387348 | 0.277023320558318 |
| TAATGATAGTCA   | 806.503446939581 | 0.22737695454503  |
| ATGACTTGACAA   | 806.519858686172 | 0.226351104063305 |
| CCGGTCTGACAA   | 806.52196477417  | 0.379869680044685 |
| GGCGATTATCA    | 806.524470881005 | 0.283969620760354 |
| GTCACTCCCTGA   | 806.525494805313 | 0.193403029573751 |
| ACGTGAATGAGT   | 806.526305548028 | 0.217462117382734 |
| ATAGGTCACAAA   | 806.530822314982 | 0.165995519934727 |
| GTCACAAA ACTA  | 806.533114859674 | 0.212371121094758 |
| CATGGGTGTAC    | 806.533874470162 | 0.23820080115933  |
| AATTTGAATCAC   | 806.53537850272  | 0.247562783224458 |
| GACTAAATGACC   | 806.538243380427 | 0.302668599539841 |
| ACTCATCGGACT   | 806.539587770782 | 0.253462439333385 |
| AGACTGCAGTCA   | 806.549758316769 | 0.301301900606803 |
| AAATATGTCAAC   | 806.550246457836 | 0.274860383104318 |
| AGCGAGTGTGAC   | 806.554226136856 | 0.328925605446092 |
| CGTGCAGTCAGC   | 806.561936866492 | 0.202242129193487 |
| CATGTCACATGG   | 806.568259216653 | 0.326766763451786 |
| ACTCATTTAGT    | 806.570154429156 | 0.208569998601233 |
| CGGTCTCTGACA   | 806.571612934289 | 0.316791275110377 |
| CTATCCCAGTCA   | 806.572185428106 | 0.23348642430763  |
| GAATCTCCGTCA   | 806.572592554377 | 0.203941325890475 |
| CGTTTGAATGAC   | 806.57268166139  | 0.195302682017644 |
| ACGTTCTGTGTC   | 806.574043732129 | 0.251208757816888 |
| GTATCTGACCCA   | 806.574124008654 | 0.265195660628872 |
| TAGTATGATACA   | 806.577224871023 | 0.186665121587859 |
| AGTGTTAAGTCA   | 806.583534005602 | 0.316940884066701 |
| GGCCACTGTGAC   | 806.58942152062  | 0.214352179041578 |
| GTCACGAACTTA   | 806.605775947127 | 0.294927898452857 |
| CAATGGTGACGA   | 806.616187265336 | 0.232705800831159 |
| CGTATTGTGACA   | 806.620075864737 | 0.253094301293284 |
| GTCATTGAGGAC   | 806.620850923313 | 0.231388859261874 |
| TGCGATGTGACA   | 806.627232213221 | 0.243156119915865 |
| AGACGGAGTCAG   | 806.640624352388 | 0.219816900683864 |
| CATCTTAGGTCA   | 806.643708067846 | 0.325503315213409 |

|               |                  |                   |
|---------------|------------------|-------------------|
| GGGTGAGCAAAC  | 806.64845040957  | 0.160820400199625 |
| ATATCGTCAGAC  | 806.649775030477 | 0.190218509310085 |
| ATGTCACAGTGA  | 806.650160025704 | 0.257035679271912 |
| CGGTGTATGACC  | 806.653550199904 | 0.322700858225853 |
| GACGCATCGTCA  | 806.653664813936 | 0.255693632638829 |
| AGCCATTGCTCA  | 806.663533895147 | 0.196877330826223 |
| GAGACTGCGTCA  | 806.67364537898  | 0.146291480952345 |
| GTCACTGAGGAC  | 806.679231932426 | 0.229145286414764 |
| ATAATGTCACCC  | 806.679692426939 | 0.237130828547675 |
| CATACTGTGAC   | 806.694960971258 | 0.132159096983469 |
| GACTCACGCGCA  | 806.698058622509 | 0.318381245872569 |
| CCTTAATTAGTC  | 806.699539891365 | 0.152241367437178 |
| CTTCTGAGTCGA  | 806.699773460026 | 0.163869621497393 |
| AAGAATATGACC  | 806.707150267204 | 0.208007161486315 |
| CGATGATCTGTC  | 806.714347863307 | 0.271857374117843 |
| CTGGCGGTGAC   | 806.720840359583 | 0.24314160631395  |
| TATAGATGACCA  | 806.72404396024  | 0.384592904468336 |
| TCGCGTAAAGTCA | 806.730020094996 | 0.200456572789529 |
| ATGGCCATGACA  | 806.734554431741 | 0.235386563438831 |
| ACAACCTATACA  | 806.738491458142 | 0.314041931515216 |
| CGAGCCAATGAC  | 806.738651368054 | 0.262674883935978 |
| ATACGTCAACAA  | 806.741472275051 | 0.210538180289993 |
| CACCTCATGACA  | 806.743341002582 | 0.28142264581204  |
| AGTCACGACAGG  | 806.747478240268 | 0.195602088780205 |
| ATTTATGACCCG  | 806.750707678978 | 0.216268257293958 |
| GCACAGTGTGAC  | 806.752169050373 | 0.206395843639993 |
| ATAAGAGTAACC  | 806.758170505968 | 0.176763987148451 |
| ACACGCTGTGAT  | 806.762363969388 | 0.300304764284455 |
| TACGTTGAGTAA  | 806.766387685162 | 0.2200866668086   |
| AAGTCGAATGAC  | 806.773573038143 | 0.220957149504921 |
| GTCTATCACTCA  | 806.777556130453 | 0.287366791200359 |
| AAACGGTGACAA  | 806.802836280155 | 0.125900622417599 |
| CTGTCATGATTA  | 806.804625698845 | 0.255017671283192 |
| CGATTATTACTC  | 806.810302296519 | 0.251834690287273 |
| GGTACACGTGAC  | 806.83254805995  | 0.21986539960955  |
| CTTTTGACACAC  | 806.835489382362 | 0.188949104019752 |
| CACCAAGTCACA  | 806.847620897627 | 0.412788959213843 |
| CTCTTGCTCACC  | 806.847658628966 | 0.178181690218912 |
| GCGTCACTACAA  | 806.849179530366 | 0.270079819195852 |
| CGTCATCAGACC  | 806.85309750059  | 0.254646163945259 |
| CTGACACAGTAA  | 806.855146220026 | 0.296719910324291 |
| AGGGCCGTGACT  | 806.85896264545  | 0.263153141141081 |
| ACGGTGTCTCAT  | 806.859125452106 | 0.262945922199739 |
| GCAACATGACGA  | 806.862183289376 | 0.279824606291622 |
| GACGTGGTGTCA  | 806.864786269097 | 0.196531067661117 |
| GGTTAGTAGTCA  | 806.868178284435 | 0.267631655967856 |
| ATGACGACGGTG  | 806.87056822797  | 0.207525519528844 |
| GCGATGATGCAA  | 806.870583663004 | 0.212479320192829 |
| CGCTGGTGACCA  | 806.872306704979 | 0.222974049679497 |
| GTCATGTCTACA  | 806.877447498705 | 0.219690600063448 |
| ATATGATACAAC  | 806.878690960031 | 0.161861994573532 |
| TCTTTTGACGCA  | 806.87998744471  | 0.278148182388127 |
| ACGCCATGAGTC  | 806.884096940804 | 0.268283004524525 |
| AATAGCCAGTCA  | 806.884670659735 | 0.427344539381283 |



|              |                  |                    |
|--------------|------------------|--------------------|
| ATTCTTGCTCAC | 806.885318884327 | 0.216443963734189  |
| TCTATTTTGTCA | 806.892924774842 | 0.145439132771367  |
| GTTGTGTCAAAC | 806.897561135689 | 0.258122955584526  |
| AGCCGGTGACGA | 806.898842604284 | 0.245576915652468  |
| ACTTATTACTGA | 806.903176816382 | 0.210370446293212  |
| ACTCATTGACGA | 806.905735093839 | 0.219543666366666  |
| AGTCAGCTTCAC | 806.911576494645 | 0.291026281988724  |
| CACTACGCTCA  | 806.918531421258 | 0.199004120761891  |
| GTCACATAAGAC | 806.920233615676 | 0.264236801608667  |
| AGTCAGCGATTC | 806.921851864399 | 0.303556789865383  |
| GCCAGACTCACA | 806.92362641396  | 0.299573895612884  |
| GACTAATTAGCC | 806.929872151711 | 0.21483438378589   |
| CGTCACCAAGTC | 806.940247768934 | 0.230918914195897  |
| TCAAGCGAGTCA | 806.941070683455 | 0.317219510965036  |
| ATCAATTACACA | 806.970311593831 | 0.0758738192656405 |
| TGCACTCATACA | 806.979887538965 | 0.21885048153772   |
| CTCCATTGGTCA | 806.985724384644 | 0.244847127599375  |
| AGTCAGAACTTG | 806.987237329568 | 0.183304511219232  |
| CGGACCCGTAC  | 806.987368678302 | 0.302906840013568  |
| CCTTTAAGTGAC | 806.996431715418 | 0.37568582389375   |
| AAAATGTGACAT | 807.003070547008 | 0.197588236003366  |
| TAAGGCACGTCA | 807.011783473815 | 0.230553195434811  |
| AAGGCGAATGAC | 807.013319822069 | 0.207495457720738  |
| ATATGCTGTGAC | 807.056054102457 | 0.319535170970122  |
| GCGTCATGTACA | 807.060038982729 | 0.197694343713657  |
| AGCGCTGAGTAA | 807.076809947024 | 0.14572326670912   |
| ACGCTATTACTC | 807.077869789861 | 0.112851480309138  |
| GATCTAGACTCA | 807.102433466271 | 0.167123575258814  |
| GATTACGCACTA | 807.10565283549  | 0.203927367767349  |
| ATGACGATCTTC | 807.121227519287 | 0.192643986962396  |
| AAGTCTAATGAC | 807.123143879179 | 0.207888882809306  |
| CCATTTGAGTAA | 807.127271426666 | 0.234300250679421  |
| GACCACCATGAC | 807.13046322503  | 0.196459845346759  |
| ACTCATAATTGC | 807.131904808346 | 0.225620334372487  |
| GCCATGGGTGAC | 807.139020829331 | 0.319277075540204  |
| ACTGTGTGACCC | 807.139359220123 | 0.314709789373996  |
| AGACTAATAAGC | 807.139556888644 | 0.20604977051293   |
| ATGAGTACCGAG | 807.139726607773 | 0.196355614367257  |
| GCGCTTAATGAC | 807.143151876224 | 0.379104735874237  |
| ACTCGGAGTCAA | 807.146963823925 | 0.18884354565983   |
| ATGACAAGGACG | 807.149554475952 | 0.181228668696017  |
| ACCGATGTATCA | 807.15218343524  | 0.250676834740199  |
| AAGAGACTCACC | 807.152638917059 | 0.316499816415504  |
| AGGGCTGTCATC | 807.154263969369 | 0.202953370312915  |
| GCAGCGTCACTA | 807.157995036581 | 0.229229211615461  |
| ATGACGTCTCCG | 807.169819191449 | 0.214937449716305  |
| ACTCATTGGTTG | 807.169939793799 | 0.215029187095954  |
| CCGCCTAATGAC | 807.176031670807 | 0.271378282363311  |
| TAGTCCAAGTCA | 807.195748248813 | 0.280166250487931  |
| CCAGTGACAAAC | 807.201075707237 | 0.436751797516373  |
| CACCAGTGACGA | 807.201664197091 | 0.21796848679017   |
| ATAATTGAGTCG | 807.202632830821 | 0.281581465557318  |
| CGTCTCTGAGTC | 807.215949704133 | 0.285704117103889  |
| ATCTGCTGACTA | 807.21865208687  | 0.250816662711629  |

|               |                  |                   |
|---------------|------------------|-------------------|
| TCTGAGTGACCA  | 807.226441911343 | 0.211112533785809 |
| GTGAACGCGTCA  | 807.227132266166 | 0.237825279571933 |
| TAACTCATATGA  | 807.227657430492 | 0.240890771642649 |
| CGGACAATGACG  | 807.229520732714 | 0.202411393288422 |
| ATCACCAGTCAG  | 807.232474833011 | 0.205339403762523 |
| ATTAGTACTACA  | 807.234896981563 | 0.318330542728964 |
| GGATGACCGTAC  | 807.235472871131 | 0.311340998450659 |
| ATGACCATACAC  | 807.243347534302 | 0.232173105669358 |
| GTGTAGCAGTCA  | 807.247201125974 | 0.302816073884895 |
| ATTCCAAATGAC  | 807.25803446499  | 0.284869363782149 |
| ATGACAGTGGTG  | 807.259833899766 | 0.162756762300321 |
| CGTCATGTGACA  | 807.263597074566 | 0.31080784550125  |
| CTTAATGTGACA  | 807.266368674343 | 0.301077741418212 |
| CACGTGTGAGTA  | 807.269552763357 | 0.188155290505849 |
| CCTCGATGTGAC  | 807.274395167378 | 0.200563425725072 |
| CACATCGGGTCA  | 807.275153319427 | 0.237163785833156 |
| GACACATCTGAC  | 807.27589107538  | 0.349536492021732 |
| TGACGACACGAA  | 807.280425614175 | 0.290346963711795 |
| GCGTTGAGTCA   | 807.28138404382  | 0.207236489205824 |
| AGCTTCATGACG  | 807.288075225671 | 0.199913276703745 |
| GCCCATCTATGA  | 807.288342584783 | 0.310478105588695 |
| ACTCATACCGCT  | 807.295630462989 | 0.196949996888256 |
| TCGACATGACAA  | 807.298119377135 | 0.214366447006019 |
| GAGACTCACTCA  | 807.302436915014 | 0.225351534709123 |
| ATTAATGAGCCA  | 807.30276117981  | 0.158156428511405 |
| CGAATGTGACAA  | 807.303362842844 | 0.208581886244195 |
| CATAATGTCATG  | 807.304133685898 | 0.196797985184251 |
| GACACATACTAA  | 807.308165967579 | 0.401226289712741 |
| ACGACTCAGATG  | 807.311065571095 | 0.224285210414192 |
| TAGTACTGACTA  | 807.328236026107 | 0.180551194642149 |
| TAGTCAGCCGGA  | 807.328763898017 | 0.246283196120431 |
| CGTCGCTGACAA  | 807.330712365068 | 0.388710428277716 |
| AATTGTATCATC  | 807.331546511532 | 0.239876509658442 |
| GGCCCTGTGTCA  | 807.332682070674 | 0.343869312482613 |
| ACATAGTTGTCA  | 807.336314839235 | 0.208845418111303 |
| ATAGTCAGGGTC  | 807.339811010743 | 0.27002281284805  |
| GAGTAATCTACC  | 807.340299195215 | 0.310827871175772 |
| ACGTCACGGCTG  | 807.348542832126 | 0.280040649566899 |
| AAAAGATGACCC  | 807.350865871923 | 0.31276337445665  |
| ACGTCATGTTGC  | 807.355779689685 | 0.336778737980482 |
| CACGTCACGCTG  | 807.38675870632  | 0.216920968949169 |
| GCGATCATGACA  | 807.388010974517 | 0.191792085466697 |
| GACTTAAGTGAC  | 807.388038997778 | 0.349987348581538 |
| TCATAGCAATGA  | 807.390440234804 | 0.322676746283265 |
| AGGTTTAAATGAC | 807.392658940536 | 0.152027231071816 |
| TAAAGTGACCAA  | 807.396671321247 | 0.311125492752179 |
| ACGATCGCGTCA  | 807.397230367824 | 0.252096617275528 |
| GTCATCTCCCAA  | 807.398834999216 | 0.264652054224535 |
| AACACTCATAGG  | 807.402704732444 | 0.288741385410842 |
| ACATTTGAATCA  | 807.403969534493 | 0.217726181598467 |
| GAATCGCAGTCA  | 807.404454720074 | 0.240822288861171 |
| ATTTGTCTGACG  | 807.405178800156 | 0.31459066609275  |
| CATCAGTGACCC  | 807.416095453331 | 0.236354768010098 |
| CGTTAACTGTCA  | 807.416896080906 | 0.242136845308249 |

|              |                  |                   |
|--------------|------------------|-------------------|
| AGGTGACAGGTA | 807.422080110947 | 0.169344038112569 |
| CAGGCCATGACG | 807.428401923295 | 0.338400571678417 |
| ACGTCACCTCAG | 807.437854056859 | 0.164613632414377 |
| CGTCTGAGTGAC | 807.453108464046 | 0.287400086381733 |
| ACGGTCATCGAA | 807.453635752027 | 0.208974414126425 |
| GAGACGGAGTCA | 807.46268997192  | 0.213195363733285 |
| CAATCGGGTGAC | 807.46400522303  | 0.274514244943185 |
| CGTCACATTTTA | 807.464401940329 | 0.251856605494327 |
| AATCCACGTCAA | 807.465765055401 | 0.241021243575872 |
| ACAGTCTGACGT | 807.470373947811 | 0.242415311808597 |
| AGGTATTAGTAC | 807.475505734343 | 0.221198612447786 |
| GTAACTCATAA  | 807.47812796235  | 0.226244551176505 |
| AAAATGCAGTCA | 807.486709451895 | 0.200364235468626 |
| ATATCGACGTCA | 807.487538899735 | 0.321004576563449 |
| GCGGCCGACTCA | 807.491969849274 | 0.209378759344766 |
| CTGACACAGAGA | 807.502067414514 | 0.218268196871634 |
| TACAATAGTCAA | 807.506772512595 | 0.263679547613873 |
| CCACGTGACAAA | 807.512719649447 | 0.335869543005244 |
| GACAATGGTGAC | 807.514872565033 | 0.214145528205633 |
| ATTTTGTGGTCA | 807.515474110588 | 0.403761780561768 |
| TGGCTAATGACA | 807.520963607932 | 0.239691960442408 |
| AGAAACATGACG | 807.52136802188  | 0.284462910502402 |
| CCACGAGGTGAC | 807.52534862927  | 0.330507263759596 |
| AATCATTACTGA | 807.532479487492 | 0.297908456524816 |
| ACTCGGGATGAC | 807.535115284065 | 0.317275346867175 |
| AGTCAGAATAAT | 807.536473622614 | 0.284619375833097 |
| TCACTGAGTCGA | 807.538840530503 | 0.296163228226743 |
| TGAGTCTATTAA | 807.540260764731 | 0.204573419080638 |
| CTCGACTGACTA | 807.542408361619 | 0.204157308327467 |
| TGACATGGCCAA | 807.543168096232 | 0.258213585614343 |
| ATGAGTATGCTC | 807.544011838634 | 0.195301845619856 |
| CTGAAGGTGACA | 807.548378971099 | 0.18321889970717  |
| ACCCATTGTGAC | 807.549380514078 | 0.238818778733549 |
| CAGGCCATGTCA | 807.550356990667 | 0.282244566197186 |
| CGTCATGAATGA | 807.553939481959 | 0.256081556837532 |
| ATGACGGAGGGA | 807.558431394471 | 0.181883175878911 |
| CGTCATTCGAGC | 807.56041291938  | 0.258233104360166 |
| CGAGTCTTATGA | 807.574346599979 | 0.260892815254445 |
| GCCGCCCAGTCA | 807.574499791238 | 0.169099079740991 |
| ACACACAGTCAG | 807.57704114426  | 0.197572510309549 |
| GATTCTTGCTCA | 807.588069841149 | 0.203959629808541 |
| GCCAGAGGTGAC | 807.589725079989 | 0.371431586078055 |
| CGGTACCGTGAC | 807.593491409411 | 0.230664900222375 |
| CATAGATGAATC | 807.605808201359 | 0.217969943599879 |
| ATGACAATCGGA | 807.60702989745  | 0.255850166406901 |
| TGACGAATGGCA | 807.625939508623 | 0.297595227657222 |
| ATGGACTGGTCA | 807.627153101861 | 0.211063857979831 |
| AAGTTGGCTCAT | 807.633145858338 | 0.221036787082449 |
| AGTCACGGCCGG | 807.633541368888 | 0.258689103522029 |
| ACATGATTACTC | 807.635542690762 | 0.222164712254753 |
| GTCATACCCCAA | 807.64642115439  | 0.211652316662581 |
| GACATTGATGAC | 807.647026679192 | 0.371601135673637 |
| AAATAATTGTCA | 807.649798597214 | 0.294603225209353 |
| ACTCATACCGCA | 807.657595044294 | 0.183034532672274 |

|              |                  |                   |
|--------------|------------------|-------------------|
| CAATCTAAGTCA | 807.662430854261 | 0.168973881957989 |
| AACTGTGGCTCA | 807.671020572622 | 0.272765883044506 |
| ATAAAATGTGAC | 807.673635451472 | 0.154783522586472 |
| CGTCACCCCGGA | 807.674597006608 | 0.294649150800324 |
| GACTAATCAGAA | 807.674648057008 | 0.201464470908339 |
| CTGACTAGTAAG | 807.682623555328 | 0.276525278606195 |
| AAGTCAGTAATT | 807.685310183477 | 0.166161623183425 |
| GGACCGTGTAC  | 807.688088358689 | 0.304269031293119 |
| CGTCATTGGATA | 807.688731615919 | 0.120356933215375 |
| ATACCCCGTCAT | 807.710999379329 | 0.221789270432358 |
| GGTATGGAGTCA | 807.712313000797 | 0.216371891063541 |
| AAAGAGCATGAC | 807.715653210787 | 0.26781902570562  |
| GCGTCACGAATA | 807.717277187717 | 0.254648048050646 |
| TCGTCACGTCAA | 807.718666821642 | 0.367306666621373 |
| AAGTCACCTCTA | 807.720891902961 | 0.28158445524158  |
| TAACAAGCGTCA | 807.727071108059 | 0.243788197217158 |
| TCATTTGGACGA | 807.732339869712 | 0.205950505680502 |
| CAGTACGCGTCA | 807.73772373567  | 0.266823992050946 |
| ACTGAGCAATAC | 807.738087221073 | 0.260214255104581 |
| CTGCACGTGTCA | 807.750852267507 | 0.321672321948427 |
| GAGCGCTATGAC | 807.762877419759 | 0.31465001465174  |
| CGCCGTACGTCA | 807.772133504228 | 0.29171409135292  |
| ATGACATGATAA | 807.782335839444 | 0.227295598450436 |
| ACCGCAGACTCA | 807.785910485968 | 0.267450771795276 |
| CACGTCAGTTAC | 807.794299830855 | 0.240977938709856 |
| GTAGTTTGTAC  | 807.794739629462 | 0.210399396601541 |
| ACTCATCTTATG | 807.800856973707 | 0.248687377460627 |
| AGTGGGATGACG | 807.808121063845 | 0.197560371445417 |
| CCCCAAGTCATA | 807.811846463884 | 0.244507371186909 |
| AATGTATGATTC | 807.815885107885 | 0.292300841073588 |
| ATGACAGGCATC | 807.824049192693 | 0.156986074792025 |
| CACATTAGCGTG | 807.830891901991 | 0.283818627451107 |
| ACACACGTGACG | 807.830957110306 | 0.366235564077661 |
| CGAAAGGTGACA | 807.832387055591 | 0.140127680217822 |
| ACGATGCTGACT | 807.834528411949 | 0.250570942718539 |
| GTCATTTAATA  | 807.834627924973 | 0.155170588614501 |
| AAGATTTGCTCA | 807.841054492407 | 0.239901022541537 |
| AACGGCTGAGTC | 807.84202962227  | 0.246960539483049 |
| AGTGCTAGTCAC | 807.842950934946 | 0.421987296172841 |
| TGAGCAATGCCA | 807.847812987499 | 0.251249518446208 |
| CAGATCAGTAAC | 807.848961084201 | 0.247017888799669 |
| AGGCTTGGTCAC | 807.851196120996 | 0.18277209296067  |
| GTTGACTATTGA | 807.860290968653 | 0.211992567809933 |
| TCTGATTACGCA | 807.860304523057 | 0.239855692888404 |
| GACTCACTGCC  | 807.869576813446 | 0.247329361818929 |
| AAAGTGGTCATT | 807.871507345983 | 0.208741449598897 |
| AAGACGTGACGT | 807.873235384468 | 0.227943708161508 |
| ACGACAGGTGAC | 807.877555522824 | 0.289884411548404 |
| GACTCAATGTGA | 807.880478244709 | 0.21340192029639  |
| ACGTCACCTCAC | 807.883153139119 | 0.265015700027723 |
| GTCATGTCAATA | 807.886751231793 | 0.279378207038051 |
| ACTCATACAGCT | 807.896099140391 | 0.132254439727002 |
| CAGTCAGCGCAA | 807.898185114062 | 0.271179356746856 |
| CATACTGTACC  | 807.89923856891  | 0.173589847037969 |

|               |                  |                    |
|---------------|------------------|--------------------|
| TAAGAATACTCA  | 807.910608364237 | 0.199126654401906  |
| ATGACGACTAGA  | 807.911743700115 | 0.105532124929407  |
| ACGTTGAGTAAC  | 807.919189557053 | 0.250279219150415  |
| GTGACTTACAGA  | 807.921548973907 | 0.239296737929522  |
| ATGTTACGTGAC  | 807.929508832894 | 0.266415741543953  |
| AATGACATCGTA  | 807.933096395151 | 0.199659500509761  |
| ACACGTCAAAGT  | 807.93999242009  | 0.21040364919059   |
| ACAAATGGCTCA  | 807.962531129391 | 0.278109069793644  |
| TGAGTCCATTAA  | 807.965119323386 | 0.207451614436397  |
| ACGTCACTACCG  | 807.96609341035  | 0.31854834284033   |
| GTCATGCTTATA  | 807.968127019917 | 0.25435470040198   |
| GAATTGACACAC  | 807.973507487028 | 0.355699025501854  |
| ATGATACAATTG  | 807.974047526444 | 0.232960992776935  |
| CCTCCTGACTCG  | 807.976443758931 | 0.270981201666316  |
| AATCTCGTCACC  | 807.978628360812 | 0.2327571716268    |
| CTTACGTACTCA  | 807.979012320779 | 0.197085952688142  |
| CATAAGCGTTGC  | 807.980429965708 | 0.217989562274577  |
| GTCATTGGGAAA  | 807.981068435374 | 0.196779396207528  |
| AGCTGCCAGTCA  | 807.982343008009 | 0.293154811909613  |
| GAGTCAATTTGC  | 807.982843738978 | 0.199000373322401  |
| TGTATTGCTCAA  | 807.983944333208 | 0.262881616609036  |
| ACTTAGTGACAA  | 807.988239576685 | 0.335478361122222  |
| ATCCAACATGAC  | 807.991591026208 | 0.302365993341461  |
| TGTCACATTAATA | 807.99270864661  | 0.249381216196118  |
| GTTTGACTATGA  | 807.993074587504 | 0.245139471389766  |
| GTCACTACCGAA  | 807.999684904909 | 0.26247732566629   |
| CGGTCTCCGTCA  | 808.005502123612 | 0.374326738376616  |
| CGCCTGGTCATA  | 808.009611099264 | 0.39557159889089   |
| TATACTGTCACA  | 808.018862110599 | 0.0880357707459803 |
| AAGAAATGACAA  | 808.036695349703 | 0.175097250471511  |
| GAATTAGCCATA  | 808.041795673868 | 0.1877633144758    |
| AGGGCAGATGAC  | 808.043993577766 | 0.0747108381706546 |
| AGATAGCAGTCA  | 808.05207750227  | 0.248770441370761  |
| ATGACAAGGTGG  | 808.054763657722 | 0.167975206847618  |
| GATTAGGGTGAC  | 808.055251620262 | 0.213028900058786  |
| AGGTAAGTGAC   | 808.061040777141 | 0.339839844988894  |
| AAGGTCGGTGAC  | 808.06471114776  | 0.199926028781714  |
| GTATGTGCTTA   | 808.074618387078 | 0.295704081041334  |
| AGCCATGACAGA  | 808.093787080515 | 0.300617338763468  |
| GCATGTGGCTCA  | 808.103445607248 | 0.355905284676103  |
| GCTATTTTGTC   | 808.106959401752 | 0.25202617650875   |
| CGGCCGATGACC  | 808.113509444447 | 0.231816213333486  |
| ACTCATCCTGTA  | 808.114177450722 | 0.195780890931751  |
| ATGCTGTCACGA  | 808.115344373174 | 0.299495684199855  |
| ACTCATTCTCA   | 808.117115079001 | 0.232690914759365  |
| GTCACTCGTGGA  | 808.125739001168 | 0.340122436814697  |
| ACTCATCAATTG  | 808.125928654451 | 0.298264021562049  |
| CAGTCAACTAGG  | 808.132806452305 | 0.31187040046555   |
| ACTAATCTGACA  | 808.133706331201 | 0.186146567574305  |
| CAGTCAGGGTCA  | 808.136353575075 | 0.253772560532736  |
| GTCATTATGCCA  | 808.14105379739  | 0.259976919746376  |
| GAGTTATGAGTA  | 808.144489973629 | 0.266874303779364  |
| GGTCGTGACCCA  | 808.145809254168 | 0.193322987300629  |
| AGTATAATGACG  | 808.146643227669 | 0.241409179666278  |

|               |                  |                   |
|---------------|------------------|-------------------|
| CTCTTGACGTCA  | 808.149623751943 | 0.221552531361523 |
| CCCACAGATGAC  | 808.15505750712  | 0.33601633447681  |
| AGTCAGATGCAC  | 808.165773175692 | 0.273503372183166 |
| AGACTCACGCTG  | 808.166328104159 | 0.248303042297196 |
| CTAACGCAGTCA  | 808.171212183718 | 0.299261544998634 |
| TGACTCTCTCAA  | 808.175818088165 | 0.291384362981582 |
| GAATCTTCTGAC  | 808.176160869286 | 0.269104834912855 |
| GGTCATAACCCAA | 808.179296876419 | 0.319135807198332 |
| GTCACATCTGTA  | 808.185362958909 | 0.268181109613582 |
| GCGCTTCGTGAC  | 808.20721438986  | 0.25588339847717  |
| ACTCATAGCAGG  | 808.207470772942 | 0.297498555276384 |
| TTGACTCGGAAA  | 808.218044286978 | 0.155589347477344 |
| GTCATAACCCAC  | 808.222309841988 | 0.169896841590307 |
| ACGTCACATATCC | 808.223946523061 | 0.247820758581721 |
| CCCATACTGTC   | 808.226417534801 | 0.241870542951146 |
| ACTAGAGAGTCA  | 808.234654273228 | 0.247144388213223 |
| CGTCTAAGAGTC  | 808.239810720613 | 0.220417505212488 |
| GCGATGTGTGAC  | 808.249532369848 | 0.219853283121633 |
| ATTACTGTCATG  | 808.249907558288 | 0.239532275421934 |
| AATTAGCAATAT  | 808.260121200929 | 0.171297106543549 |
| AGCAATGGTGAC  | 808.264466360257 | 0.193915968052813 |
| GTGACGCCGTAA  | 808.272238652353 | 0.39399137344311  |
| AAATGGTGACAA  | 808.277862004293 | 0.148647500100258 |
| TGACGACATTAA  | 808.279599910454 | 0.202033186552255 |
| GGGCTGCATGAC  | 808.281430680688 | 0.2861362035926   |
| AGAGCTAGTCAC  | 808.283341594501 | 0.146368686279915 |
| ATTGAGTCGTCC  | 808.292893845857 | 0.304727829416723 |
| ATCGATGTGACG  | 808.295786237787 | 0.219112088473368 |
| CCGGTCGCGTCA  | 808.297758068028 | 0.348322321206024 |
| GACTCAGTCGAA  | 808.297932747747 | 0.415862167101914 |
| GAGTCAAGCTAA  | 808.31361390315  | 0.240675813546179 |
| TAACAGTCAACA  | 808.319551119615 | 0.250814942447022 |
| GGGTCTGATTCA  | 808.321620126954 | 0.156065094523455 |
| CCCTTTGACTCG  | 808.322917470945 | 0.263950330489732 |
| AGTGACAGTATA  | 808.327334805382 | 0.213676520155016 |
| ACTTGATGACCC  | 808.332638423952 | 0.261930220952511 |
| AAGTAGCAGTCA  | 808.337780645734 | 0.118845400458548 |
| ATTGACTGGATC  | 808.352416140767 | 0.227218054189744 |
| ATGACGACGTAG  | 808.35597384621  | 0.240888586870741 |
| AATCATTGCTCA  | 808.356727421259 | 0.204352242745184 |
| CCACCTGACGCA  | 808.366378284192 | 0.277689249644068 |
| GGGACCGGTGAC  | 808.382669041846 | 0.274900378178276 |
| AGTCACGGGTAG  | 808.387320676566 | 0.263615940249586 |
| ATCAGAAGTCAT  | 808.388374137897 | 0.232006507894031 |
| AGGTGTGTGACG  | 808.392264657722 | 0.20054178450745  |
| CGTCACACCTCA  | 808.396273573283 | 0.236493521181164 |
| ATGACGGCATGC  | 808.402059474468 | 0.208066998148271 |
| GTCAGCAATTCA  | 808.40279834276  | 0.173056166619204 |
| GTGACCACGTAA  | 808.40319871404  | 0.22887602532503  |
| AAGATGTGACGC  | 808.420913617069 | 0.230290629617071 |
| ACAGGAATGAGT  | 808.426123456677 | 0.211083910239024 |
| GAAACTTTGTCA  | 808.436247917251 | 0.270088696006882 |
| TAATACACGTAA  | 808.439493092123 | 0.287736002479111 |
| ATTAATTAGTCG  | 808.442917649444 | 0.308472072981662 |

|               |                  |                   |
|---------------|------------------|-------------------|
| GCGTCACCAAA   | 808.452079488385 | 0.245286005731466 |
| GGAACAGAGTCA  | 808.456192806196 | 0.256205973318348 |
| GTGTAATGACAA  | 808.458316451361 | 0.138568057469414 |
| ATATTGTCACCC  | 808.460850588495 | 0.289488421563564 |
| ACAAACCGTGAC  | 808.468172252139 | 0.260281255850099 |
| AGTCAGATTTAA  | 808.469295062592 | 0.300798169401531 |
| GTGTCACCTGAAA | 808.47047372268  | 0.317335359950818 |
| AGAGTCAAACCA  | 808.472685437457 | 0.27429846776957  |
| TGCAGATGACCA  | 808.477482512027 | 0.262858738801694 |
| GATTACGTGACA  | 808.482395155599 | 0.186651986388178 |
| CGTAATGTCTCA  | 808.485210239312 | 0.208773609420784 |
| AACCCATGTGAC  | 808.498027305828 | 0.318836237945938 |
| ACGACCAAGTCA  | 808.502095629855 | 0.295348905247731 |
| TCCCAATGACA   | 808.509004332788 | 0.216609979808195 |
| ACTCATATGCAA  | 808.513284935747 | 0.284813572148161 |
| ATAGCATGACGA  | 808.51921293696  | 0.23773070666878  |
| GCGTCACGATTA  | 808.529869339198 | 0.202638175910059 |
| ATTAATGACATC  | 808.532195993337 | 0.247185373949334 |
| CGACTAATTCTA  | 808.534087470297 | 0.233793691982251 |
| AGTCAGCTTTTG  | 808.539040318854 | 0.212739100574971 |
| CCTGTTTTGTCA  | 808.540562523001 | 0.285938375889165 |
| ACCTCGTCACAA  | 808.54683077169  | 0.248831618484254 |
| CTGAGCAAATTA  | 808.549997720814 | 0.20429646873312  |
| AGTGTCTGACGC  | 808.561606592402 | 0.203803584458406 |
| GAACCGATGACC  | 808.566121044203 | 0.234835313057114 |
| GCCGCATGACAC  | 808.566170316013 | 0.245617393300325 |
| ATGTGTGACCGA  | 808.568754959626 | 0.223000484338678 |
| GGGTTAGACTCA  | 808.570412280884 | 0.226365874939173 |
| CTGAGTCGTACAC | 808.574549294177 | 0.241108507649402 |
| CGGTCATACGGC  | 808.576571629509 | 0.254136799380984 |
| ATTCATTGACTG  | 808.577701083463 | 0.174582265804793 |
| ATGAATATGTCA  | 808.589966870085 | 0.245764557527698 |
| GTGATACTCA    | 808.598686215492 | 0.216873960675261 |
| ATGACTTTTAAT  | 808.599646981833 | 0.328923228980875 |
| ATTTTGGTGACA  | 808.600596958717 | 0.195077501435961 |
| CTTCTCGACTCA  | 808.600685680773 | 0.120563382568026 |
| TGTCACAGTGAA  | 808.607914268851 | 0.338649880785922 |
| TGACTTACAGAA  | 808.609670816168 | 0.323634508626579 |
| CCGCAAGTCATA  | 808.619618996111 | 0.212286675009479 |
| ATGCATTGTGAC  | 808.623321969206 | 0.337771972543703 |
| CTGACTCGCAAC  | 808.630767807075 | 0.188043165993162 |
| AGTCAGAAACGC  | 808.633477999423 | 0.188134654118412 |
| GGTCAAATGACA  | 808.661397790673 | 0.263057362164059 |
| GAATCATCATGA  | 808.671764165256 | 0.239420457036876 |
| GTTTTGCGTCAA  | 808.680311867149 | 0.166715646108926 |
| CGGTGTCACGAA  | 808.681530672946 | 0.275184234130948 |
| GCTCCCTAGTCA  | 808.681749564064 | 0.252868833494177 |
| CGTCATCTCCTC  | 808.691284120552 | 0.214284177236916 |
| CCAACCCAGTCA  | 808.692218165689 | 0.243319400579442 |
| ATTTGTGTGACG  | 808.708875811567 | 0.30378734939616  |
| GAGTCAAACGA   | 808.711176194172 | 0.328443741816543 |
| CCGCTAAATGAC  | 808.719633111627 | 0.313872908252729 |
| TCACATAGTCAA  | 808.724527879848 | 0.253614523808857 |
| AGATGACCTAAT  | 808.727916506563 | 0.222785439426549 |

|              |                  |                   |
|--------------|------------------|-------------------|
| CGATGCATCACC | 808.729734796292 | 0.143321963944531 |
| CCAAGTTGGTCA | 808.735487850275 | 0.372047231482144 |
| ATGACGGACGTG | 808.739644215516 | 0.148887214095106 |
| AGATTAGTCTGA | 808.739829877757 | 0.25379160981223  |
| CGTACAGATGAC | 808.740620614736 | 0.255301348967692 |
| GTGACGCCAATA | 808.741299733342 | 0.252626153352717 |
| TGATACATCGAA | 808.74434859435  | 0.211670846162297 |
| AAGCATTGCTCA | 808.744589970684 | 0.38779284017461  |
| CCACGTCAATGA | 808.747615213654 | 0.237051200097632 |
| CTCATCATAGAG | 808.752025007479 | 0.299001035860802 |
| CGTCATTTAGCC | 808.758846473147 | 0.198144992116282 |
| CAAACCATGACA | 808.76055508032  | 0.282414845917542 |
| AGATTAATGACG | 808.765011346382 | 0.207305475094004 |
| AGAGCGAGTCAG | 808.770169944919 | 0.213264993042608 |
| GTACAACGTGAC | 808.771631243527 | 0.237635724185542 |
| AGTCAGCTCTTA | 808.782317074234 | 0.210386452512725 |
| AAATGTCATTAC | 808.789641026494 | 0.210291342010393 |
| CCCCGTTATGAC | 808.790145294035 | 0.251905120266357 |
| AGTGACGTTATC | 808.799036275838 | 0.130418997387482 |
| ACTCAGCGTCAC | 808.801994037055 | 0.200012148894588 |
| AGAACACGTCAA | 808.802736145446 | 0.143703450977995 |
| CCGGTTGAGTAA | 808.811281519208 | 0.21936322837607  |
| AAACAGTGTGAC | 808.812901485385 | 0.125439126386135 |
| ACGTCAGACTAT | 808.815144004145 | 0.234444546069819 |
| CTCTTCGGTGAC | 808.815719918708 | 0.197726982294372 |
| ATGACAGTCCAA | 808.821622863498 | 0.197832355274438 |
| ATAGGGTGACAT | 808.822756189233 | 0.251331443579454 |
| AAAAGTACTAT  | 808.823354698361 | 0.288307780019766 |
| CGTCATGTTTGA | 808.829468259564 | 0.154717466856106 |
| AAGCGTTGTGAC | 808.83072640965  | 0.2301294521393   |
| AAGACGCATACA | 808.846406633347 | 0.280968783474015 |
| TGACTGGGAACA | 808.847217820683 | 0.248307551469537 |
| TGACGAATGTAA | 808.861904698315 | 0.255067928885884 |
| CGATCATTGTCA | 808.863479071348 | 0.228695507482376 |
| AGGTGATGTAAC | 808.875801180342 | 0.205056436522593 |
| TGCGCCATGACA | 808.89948840003  | 0.208513218895493 |
| GTCATCGGCCCA | 808.899763265841 | 0.359901784657686 |
| GTGACAGAGTTA | 808.902306747202 | 0.165440825209509 |
| AGTCAGCCCAAT | 808.917004337161 | 0.222004053051385 |
| AGTCAGATTCCG | 808.926124198247 | 0.229097268435059 |
| AATACGTAATAG | 808.927079735264 | 0.201126528239616 |
| AGTGAGATGAC  | 808.938715906415 | 0.139031153379344 |
| ACGTCACCGCCG | 808.950104811729 | 0.228933386820611 |
| CAAAATTGTGAC | 808.952033825371 | 0.281157445822184 |
| GAGTAATTCGGC | 808.957170470057 | 0.425248668292388 |
| ATACTATGAATC | 808.95742281307  | 0.286504333343543 |
| TGACTGTGAACA | 808.965232245489 | 0.23245207828     |
| ACGTAATAGCTC | 808.976731507844 | 0.245746466931683 |
| TGTCACGTAACA | 808.980066830021 | 0.341901072930117 |
| ACGTCACCTAAA | 808.981894544914 | 0.176569887913835 |
| AGTAGCTGTGAC | 808.982098861184 | 0.157912409113132 |
| TCATATGATGGA | 808.98716800039  | 0.256330634638544 |
| GATGCCTCATCA | 808.987188876304 | 0.287246820145392 |
| GTCACCGACCTA | 808.987671711765 | 0.228230240456362 |



|              |                  |                   |
|--------------|------------------|-------------------|
| ACTCATTATCG  | 808.996891325271 | 0.237831230987176 |
| GGTGATGTGTAA | 809.006551485705 | 0.283983294142933 |
| TAGTCCCAGTCA | 809.007023876239 | 0.171730238204339 |
| GACCGCTGAGTC | 809.01874667984  | 0.279910327140097 |
| CATATGATGCAA | 809.022536296343 | 0.236203212684392 |
| ATGTCACCGCTA | 809.026106625375 | 0.121575261845659 |
| CGTCATTACCGA | 809.027921995921 | 0.290435915103842 |
| AAATCCGTCAGC | 809.02960616578  | 0.131779475232004 |
| AATGTATACCCC | 809.036006784735 | 0.252021801721019 |
| GTCATTACCTTA | 809.036671268634 | 0.214452131557503 |
| CAGGGAGAGTCA | 809.039161833155 | 0.28991437924347  |
| ACTCATCGTAGA | 809.044092063972 | 0.252307153272461 |
| AAGTTTGACTGA | 809.044369431445 | 0.150653919339617 |
| AATCTTATGACC | 809.045016801526 | 0.194340672173429 |
| GTCACAAAACAA | 809.050771538384 | 0.230783156656757 |
| AGAACCGACTCA | 809.053150118758 | 0.361001318390186 |
| ACGATATTAGTC | 809.053585848522 | 0.292069204902988 |
| AGGGCACAGTCA | 809.056604873665 | 0.301104324648839 |
| GCGACTAATTCC | 809.058173141776 | 0.200635942261353 |
| ACTATGGGTGAC | 809.065048926296 | 0.261364425956567 |
| CTGACGGATTCC | 809.067314795653 | 0.230400419898518 |
| CCATCGCTGTCA | 809.069778895261 | 0.166007738007585 |
| TAGCTTTGGTCA | 809.079626459674 | 0.198931401641119 |
| TCATGCAAATGA | 809.080701233596 | 0.234094208038672 |
| GGGTGACTTCAC | 809.083322666227 | 0.343602262962614 |
| CGGCTAGTGACA | 809.088131522827 | 0.285389614559938 |
| ATGTATTATAC  | 809.090705124599 | 0.24299287691357  |
| CTATTGCTAATA | 809.090747810128 | 0.189974251152775 |
| ACAGCGACTAAT | 809.090849793963 | 0.273809491973499 |
| AGTCAGCGCTTG | 809.092338270488 | 0.366736707720819 |
| AGTGTCATGGGG | 809.096949569719 | 0.204678064577364 |
| AGAGATGGTGAC | 809.099189768167 | 0.135766315387296 |
| CGTCAGAATCGA | 809.10195383268  | 0.217262364899933 |
| GTCACCGGAGAA | 809.107210783063 | 0.241925828930809 |
| GTTACGTGTATA | 809.110481119922 | 0.203113959103055 |
| GTACCGAATGAC | 809.116479848128 | 0.242014353687743 |
| ATCTGTGACAA  | 809.117250079364 | 0.215111212828218 |
| GGGTCATAAGTA | 809.137414684836 | 0.204579557588642 |
| GTGAATGAGCCA | 809.140970578963 | 0.237723760033271 |
| GAGTAACTCTGA | 809.154623033531 | 0.271841210582968 |
| GTCATTTCAACA | 809.165278125901 | 0.123789643942484 |
| GACTAATGCTCA | 809.167785447241 | 0.228219309020778 |
| AGTATTACTACA | 809.186197427475 | 0.207851852303249 |
| ATTACAATGAC  | 809.190398692554 | 0.248062849198156 |
| CGCATATCGTCA | 809.211697051538 | 0.266617545213718 |
| TCCCATGGGTCA | 809.213238644719 | 0.197491847743374 |
| CGTCATCCCTAA | 809.224110745234 | 0.2206400311873   |
| GTCACTGGTTTA | 809.22971841369  | 0.247834275817084 |
| GTAATTGAATCA | 809.230109356301 | 0.227214846426286 |
| TATATCGTGACA | 809.245644586154 | 0.278371441716327 |
| ATGTCTCTGTCA | 809.25304899886  | 0.240266039189475 |
| CCATTCTGTGAC | 809.258825654244 | 0.227456442821946 |
| GGTTACGTGACA | 809.258944537211 | 0.228927784568749 |
| ATTGTGGTGACA | 809.269333761186 | 0.228084608181111 |

|              |                  |                   |
|--------------|------------------|-------------------|
| GTCACAGCAACA | 809.27399993786  | 0.425388383318351 |
| CTGACTCCGCTA | 809.275473027797 | 0.206256801237787 |
| CCACAGTGACAC | 809.282180701169 | 0.194660606638414 |
| GGACGTGACCCA | 809.293568952787 | 0.325963678158943 |
| ATGTCACCGACC | 809.297784624281 | 0.235732476696896 |
| ATGACGAGCAAC | 809.301928367893 | 0.230296737782323 |
| CTTTGACTATGA | 809.303499585749 | 0.148690702690272 |
| GAGTCAAGAATC | 809.316293960793 | 0.338242783388795 |
| GTGACATTTTCA | 809.316726157182 | 0.259615288848213 |
| ACATATGAATGA | 809.328718533465 | 0.289223261058789 |
| CCCTTTTCGTCA | 809.34651013357  | 0.19706482929895  |
| AGGGTCACATCC | 809.369306272767 | 0.253850704306187 |
| GTGACAAGTCTA | 809.36984064213  | 0.176292387925334 |
| ATGAGTTAATGA | 809.371311542761 | 0.26855050741495  |
| AAATCGTACTCA | 809.387225164437 | 0.344426052983922 |
| CGATAATGAGTA | 809.390842265357 | 0.19962239277919  |
| ATGAGTACCCTC | 809.392296886977 | 0.256611868048244 |
| ACTCATTTTAAC | 809.394067843281 | 0.200945064203385 |
| CATCGTCATGTC | 809.411513598537 | 0.300235387355816 |
| ATTGGTATGACC | 809.425949059705 | 0.288729205752396 |
| AGACCATGTGAC | 809.439111212844 | 0.320441510263727 |
| CTCGATGTGACC | 809.442483779388 | 0.397563538830328 |
| CGATTAGTCCTC | 809.446495389953 | 0.280875729627019 |
| GTCTGACACGTA | 809.449950326676 | 0.198561892779439 |
| CTCCGTCACCTA | 809.465594279124 | 0.26871436459018  |
| CGTGAGTCTGAA | 809.472530933995 | 0.237148514891524 |
| GTCAGAGTCTTA | 809.475586810566 | 0.235381057982555 |
| GTGACAAGTATA | 809.484574680475 | 0.16213405093405  |
| GTAATAATTATA | 809.502361465329 | 0.255715239355163 |
| CAATGAGACTCA | 809.520872761618 | 0.362313516591542 |
| ATGAATAATCAT | 809.527055895435 | 0.229625429103497 |
| TCATAGTAAACA | 809.529585323707 | 0.347137682479818 |
| ATACTGTGTGAC | 809.533004012763 | 0.206264402507033 |
| CTTCTTTACTCA | 809.534985411708 | 0.209268670688779 |
| ATAAGAAGTCAT | 809.547563601298 | 0.294055763436983 |
| ACCCGATTAGTC | 809.554019676237 | 0.19147018188325  |
| CGAGTCAAATA  | 809.55591274203  | 0.16379481592946  |
| ATGCGTGACACG | 809.557634470219 | 0.251723543128843 |
| GTCATGGGTAAC | 809.562936851581 | 0.283783586842028 |
| CTCTGTCATGTA | 809.565602903398 | 0.270072401103023 |
| ACTTACTTATGA | 809.566294981365 | 0.416544110560958 |
| GTCATGGTCAAA | 809.571725152961 | 0.339391350433967 |
| TAAGAGTCTTCA | 809.572037868512 | 0.287582917466246 |
| CATGACGATGTA | 809.572984659175 | 0.212000637383695 |
| CACGTCAGATGA | 809.58579416075  | 0.241063552570063 |
| AGTGTGACCGAA | 809.595472995516 | 0.268643064141151 |
| CACGCTGACGTA | 809.599762525822 | 0.198723221950024 |
| AACGTACGTGAC | 809.604907509573 | 0.246384658116542 |
| ATGACCATACAG | 809.62234031369  | 0.28889786135485  |
| GAGTAATAATTA | 809.634241203047 | 0.226874290212425 |
| CGTCATGTTGTC | 809.639680933826 | 0.173426696548939 |
| ACTCATAGTAAC | 809.645095198644 | 0.165864928807427 |
| CCAAATGGGTCA | 809.651699311548 | 0.334906870617365 |
| GACTCAACCGAC | 809.656438011031 | 0.140986082636369 |

|              |                  |                   |
|--------------|------------------|-------------------|
| ACGCAGTGTAC  | 809.659001772283 | 0.208045367347502 |
| ATGACCTCATCC | 809.661459183688 | 0.140700366904186 |
| GTCACCAAAGCA | 809.665289539419 | 0.308117082721076 |
| GCTCATAAGTCA | 809.67491398285  | 0.258290306579547 |
| CGGAATTGAGTC | 809.680475914364 | 0.157401475689949 |
| AGGAGTTATGAC | 809.682387413043 | 0.265052439173123 |
| ACGGAATCAGTC | 809.689225694069 | 0.247187900632367 |
| GACTAATAAAGA | 809.690878499179 | 0.207741396337685 |
| ATGAGCAACGCA | 809.700680017311 | 0.194474413408431 |
| CACCGGTTGTGA | 809.701071189051 | 0.270151671727731 |
| GTCACTGGCATA | 809.707064263005 | 0.226272381436338 |
| AATGACCAGGTC | 809.71566007314  | 0.231901923476715 |
| ATGGCGTCACGC | 809.719624584547 | 0.357851984606384 |
| CTTGATCATGAC | 809.732219579059 | 0.238345781119936 |
| TCACTCATTGCA | 809.73695161892  | 0.206549309732055 |
| ATACTGCGTCAG | 809.754288016267 | 0.201901708404731 |
| CGAATGTGACCC | 809.758598246449 | 0.207632640309065 |
| AAGATAATGACA | 809.76029284495  | 0.239407499697368 |
| GGTACATAGTCA | 809.76265398195  | 0.222088112469257 |
| TGCGTGACCGAA | 809.765102845631 | 0.201566842131553 |
| AGACTAATAAAC | 809.766439675925 | 0.291197602758155 |
| AATCAGACTAAT | 809.772691693309 | 0.168643312728315 |
| CGTCTAGTGTC  | 809.778540920242 | 0.220194311553889 |
| GACTGACTACCA | 809.797063288962 | 0.200190719428742 |
| AGGGTAAATGAC | 809.808637054025 | 0.145953635798321 |
| ACTTACATGACA | 809.813671047926 | 0.211900544424816 |
| ATATGATGACCC | 809.81593077793  | 0.25523912143195  |
| AGACTAATGTAC | 809.827756845594 | 0.267963303732325 |
| AATGATGGTGAC | 809.830263003484 | 0.172159551795069 |
| GTGACACCGTGA | 809.831087338738 | 0.211452187808879 |
| AAAATACGTAAT | 809.832944517929 | 0.250561473818684 |
| ATGACCGCAAAT | 809.834866325943 | 0.288272341123256 |
| CTGCATCTGTCA | 809.838133084561 | 0.26670658799554  |
| CACAAGTCATCC | 809.856554161065 | 0.183328749027457 |
| GCACCGATGACC | 809.86020314395  | 0.168247261411591 |
| AGATCCGTCAGA | 809.862061049256 | 0.12653283871213  |
| CCGTCATTTACA | 809.86979219057  | 0.310958084263566 |
| ATTGCATCATTA | 809.873906062003 | 0.216566249881819 |
| AGCGGTGACAA  | 809.876086856428 | 0.223344622876177 |
| TGACGATGTCAA | 809.878130515067 | 0.193606030302962 |
| TGTCACGATTAA | 809.88239429052  | 0.221482720063133 |
| AGTGATGTGGCC | 809.88310159138  | 0.158436730725515 |
| CAAGATAGTGAC | 809.885322094138 | 0.180700752222374 |
| TGACATATGTAA | 809.885693865817 | 0.340082517325206 |
| AATGGTATGAGT | 809.891286034014 | 0.184050008414865 |
| GCGTCACGCAGC | 809.892508235487 | 0.289769272829727 |
| AATGGACGTCAT | 809.909491798404 | 0.205470229418227 |
| AGCCTACTCATC | 809.910041796551 | 0.242501753246057 |
| GCCTGATGACCA | 809.913779996755 | 0.290031051032797 |
| TGACATATAGCA | 809.921918185175 | 0.397752854383301 |
| AGGATGACCGCA | 809.922891223201 | 0.231370662680648 |
| GACTGATCTACA | 809.925240817409 | 0.246544128978682 |
| GTCACCTCCGTA | 809.941153522518 | 0.188207615341713 |
| AGTCTGACTCA  | 809.96070848217  | 0.187107573201914 |

|              |                  |                   |
|--------------|------------------|-------------------|
| GTCTACAAGTCA | 809.979985101689 | 0.265656470067369 |
| TGACGAGCTAA  | 809.980496771134 | 0.210361908820102 |
| ATCGATTTAGTC | 809.981156829383 | 0.352044500840288 |
| GTGACACTCTGA | 809.985570190041 | 0.215710423856618 |
| AGTCACTTGGCG | 809.990275871462 | 0.214130150432796 |
| GCTGACACTTCA | 809.992323763368 | 0.265778629831187 |
| CAAGACCGTGAC | 809.995512919781 | 0.365348691094961 |
| AGTCAGAGCTCC | 809.995695374225 | 0.290037169989678 |
| TCATAGCGCGAA | 810.001888420407 | 0.337575370625674 |
| AGGGGTCATAGC | 810.007794113493 | 0.149221410713627 |
| CTTAACATGTCA | 810.00803826624  | 0.219523975871844 |
| ATGACGCTCGTG | 810.012624679142 | 0.286011443557903 |
| TAGCGTGAGCCA | 810.013650655244 | 0.235898808378536 |
| CGCTTGTGACAG | 810.019514677631 | 0.21783397007117  |
| GTGACACGCCTA | 810.02426582574  | 0.140576456592193 |
| CCGCGTCACTAA | 810.03496017316  | 0.2085781747588   |
| CAGTCAGTAGAC | 810.03934465003  | 0.244166974023715 |
| CCCGATGGCTCA | 810.054134588571 | 0.346806627943257 |
| GCTTCTGACCCA | 810.059884244203 | 0.19549250426494  |
| ACCAAAGTGTCA | 810.061060018788 | 0.247590318831794 |
| CTATGTATCACA | 810.061270110709 | 0.130610254490811 |
| CAGAGTGACAAA | 810.064002830771 | 0.253557541438936 |
| AGTCAGCTGACC | 810.064211428454 | 0.271076218369547 |
| ACTCATTATCAG | 810.066206498221 | 0.237670605324321 |
| ACCGGTCATCGA | 810.066483459243 | 0.27464599425006  |
| ACGATCGTGACA | 810.068711767108 | 0.122706230028135 |
| ACGTCATGGTCG | 810.069368920683 | 0.181540797677127 |
| GAACACTCATAC | 810.069854250515 | 0.297684390567525 |
| ACTCTATTAGTC | 810.086807343413 | 0.222336817276518 |
| TATGAGGTGTCA | 810.087283756425 | 0.333344332530344 |
| CTGACTCTCATA | 810.089524040872 | 0.104939393895904 |
| AATTACGCAGTC | 810.091078794508 | 0.193179450439052 |
| ACCGTAAGTCAC | 810.111435798988 | 0.239510039719327 |
| CACGTCAGTGAC | 810.115789579428 | 0.233515904734873 |
| ACTAATTTGTAT | 810.128711062726 | 0.414319546734911 |
| ATTATGACCCCA | 810.139962581898 | 0.282847441222637 |
| TGGGTCACTACA | 810.14833934891  | 0.210719017568301 |
| GTCACAGAACGA | 810.149188808812 | 0.156270473859294 |
| TAGTGGTGACAA | 810.152472653857 | 0.218761426516482 |
| AACTTAATGACG | 810.153919291786 | 0.350069655219792 |
| GTCATTCGGCAA | 810.156430970624 | 0.291815243989186 |
| AGTCACTTCGAA | 810.157057176199 | 0.177753000812679 |
| GAATTAGTCCTA | 810.157661392746 | 0.183444270586493 |
| TCGGTCTGTCA  | 810.165363881943 | 0.22289893726093  |
| CGACAGGTGACA | 810.171030891323 | 0.256610965004247 |
| CAGGTAAGTCAC | 810.18363771126  | 0.350961660309641 |
| GACTCAACAATC | 810.185226871984 | 0.408271362996896 |
| TCATACGAGGCA | 810.202896431296 | 0.202924015682057 |
| GTCACTCGTGCA | 810.202909121065 | 0.301585070236292 |
| CCCTTAATGACG | 810.203915740362 | 0.166352621436585 |
| ATAGTAAGTCAC | 810.213412714553 | 0.199306266822434 |
| AATCTCTGACGT | 810.226123100762 | 0.288936381995519 |
| TCATCGGATTAA | 810.239745372867 | 0.336780023157723 |
| ACCTGGTCATCC | 810.241954923769 | 0.204006026876162 |

|              |                  |                   |
|--------------|------------------|-------------------|
| CATATTTGACTC | 810.247570982101 | 0.230564976709065 |
| ACCAGTATGAGT | 810.25701975926  | 0.286141017819622 |
| TAGTCAGGATCA | 810.26019116943  | 0.188337594154369 |
| CACCAGTGTGAC | 810.266758391781 | 0.278395735231079 |
| CCTAGAGTGACA | 810.281553656064 | 0.297334738751342 |
| AATAAGTAGTCA | 810.28701082066  | 0.174937933770969 |
| CTGTTGTCGTCA | 810.290182941203 | 0.27010121297745  |
| GCAATCAGTGAC | 810.291487969609 | 0.27896049211638  |
| TCTTTGACGCAA | 810.297258654057 | 0.169421409004857 |
| CAGACTCACGCA | 810.310087550647 | 0.23769757628919  |
| GTCATTTTGCCA | 810.311106472341 | 0.262046830319049 |
| TTGCCATGACAA | 810.320161902174 | 0.221296122175984 |
| CTCGAGTCTGAC | 810.324797908055 | 0.291846089069434 |
| ATTTCCGTGTCA | 810.329013948929 | 0.121430300588577 |
| CTTTAAGACTAA | 810.329448804    | 0.374107269112682 |
| CGATTGATTAC  | 810.329796409626 | 0.224418077109422 |
| CATGTCACGACA | 810.342111902405 | 0.406766153003627 |
| ATTGACTCTGTC | 810.343716802908 | 0.24181101870456  |
| ACTAATACGATG | 810.349953541311 | 0.347303411089098 |
| TGACCGATAGCA | 810.351828459355 | 0.303019153428576 |
| CCCAAGTGACAC | 810.355270231912 | 0.254739938263795 |
| ACCGCATGACAG | 810.356438131812 | 0.272604660886029 |
| GTGACACCGCCA | 810.359803149436 | 0.203736051572652 |
| CTGTGCATGACA | 810.364919334384 | 0.237067232564671 |
| ACGTTACTGACT | 810.370973098175 | 0.224122591765256 |
| AGTTCGTCACTC | 810.37352477948  | 0.141387553040708 |
| GCATGACAACGA | 810.375768549451 | 0.232121948404402 |
| GACTCTGAGACC | 810.376936423298 | 0.293759667329369 |
| GCTCTTGGTGAC | 810.387814523502 | 0.225072708968168 |
| CGCTATAAGTCA | 810.39163146361  | 0.421861222374484 |
| GTCATTATGGGA | 810.391750736734 | 0.21293937756096  |
| ATGAGTATGCAT | 810.395329480356 | 0.151556020534566 |
| AATATGGTGACA | 810.420229322745 | 0.20309353654863  |
| CATGTCAGAACG | 810.423266246034 | 0.209013261055821 |
| AACATCCGTGAC | 810.430772839493 | 0.305797765819514 |
| CAGTCAGCACAC | 810.440076521151 | 0.401467250494194 |
| ACAGTCGTGTCA | 810.440549606008 | 0.282808338135682 |
| CACGTTTTGTCA | 810.449899384888 | 0.178661623986754 |
| AATGACCACTAA | 810.455492837668 | 0.399951239975602 |
| TATTATGTCAGA | 810.456782181095 | 0.185552187368988 |
| CGTCACACAAGA | 810.459139979344 | 0.193105912627731 |
| GGTGAGCAACCA | 810.461725609678 | 0.288338925716434 |
| ATTAGTAATAG  | 810.466343828412 | 0.202693015774238 |
| CTACCATGACAC | 810.475547516473 | 0.179756848222496 |
| ACTGACAGATCA | 810.47751219659  | 0.191855448838651 |
| CGGTCGGTGACA | 810.48911209239  | 0.282062790125822 |
| GGCCGTAATGAC | 810.491158786887 | 0.192041136456215 |
| TTCTGTGAGCAA | 810.491614598993 | 0.219530008445585 |
| TGACGCGGCAAA | 810.500998741945 | 0.381097062184551 |
| ATGAGTTGTCTA | 810.502154062421 | 0.205102939740344 |
| AGTTCCTCGTCA | 810.508096209778 | 0.255931798947021 |
| AAGTATCTGACT | 810.50810571345  | 0.268966251628457 |
| ACCGGCAGTGAC | 810.512207139477 | 0.36525221019553  |
| CACTGTTGACTA | 810.514744243658 | 0.317961217478375 |

|               |                  |                   |
|---------------|------------------|-------------------|
| GACTAATACGAA  | 810.529368040055 | 0.203019096373429 |
| GACTGATCTCGA  | 810.530892332423 | 0.220550658094724 |
| CTGTGCCAGTCA  | 810.540478704989 | 0.272039168095507 |
| CAACTGTACTCA  | 810.541038159976 | 0.225784545796107 |
| GATGGTCATGAC  | 810.548733749511 | 0.331514765456952 |
| GTCACCTCTAGA  | 810.554594657201 | 0.292392116434508 |
| AACGCGTCAGAA  | 810.574102108662 | 0.192849012090888 |
| TCATCATGTGGA  | 810.574130212948 | 0.408506822074976 |
| CGGAAGTGACAC  | 810.574690395176 | 0.246184910454573 |
| TGTGACCGAAAA  | 810.574975486795 | 0.248682821929752 |
| CCCATTGTGACA  | 810.582616607225 | 0.209364372768857 |
| ATATGGCTAATC  | 810.585892185882 | 0.40616173849229  |
| CGTCCGTGAGTC  | 810.588634358609 | 0.357364283952504 |
| AGACGGTGTAC   | 810.589066181005 | 0.211178253023593 |
| CGTAAGTGACGC  | 810.59594610326  | 0.340301625369653 |
| GACTACGACTAA  | 810.612099246641 | 0.325942896469204 |
| ATCGGCATGACA  | 810.622943455964 | 0.290492673763472 |
| GATGACCGTATA  | 810.627738123912 | 0.259691514221167 |
| CTGTTGCTCACA  | 810.634330319029 | 0.208431648775045 |
| CTTAATGACAAAG | 810.636758670567 | 0.193687010956692 |
| GCGTCGTGTAC   | 810.639908169711 | 0.355252578791293 |
| ATACATCATCGG  | 810.646695028213 | 0.361750349207211 |
| GGCGACTAGTCA  | 810.652231868333 | 0.326176359283469 |
| GCTATACTGTCA  | 810.656944487773 | 0.21025240002235  |
| ACACATCATCCA  | 810.670722672664 | 0.162503799334933 |
| GTCACATTGCCA  | 810.677757585925 | 0.200507435455873 |
| ATGACGTTCA    | 810.686107315655 | 0.14590522452526  |
| CGTCACGATGAA  | 810.686378383049 | 0.1937711485326   |
| CAGAGTCAAATC  | 810.690117262001 | 0.211528035931376 |
| ACTGACTAGTAT  | 810.69275714813  | 0.209349792614057 |
| TCAGTGGTCACA  | 810.692855805476 | 0.223347974182693 |
| ATGACACCCGAA  | 810.695012547313 | 0.34677607396065  |
| TGAACGGTGACA  | 810.695980504588 | 0.234670820759659 |
| CATAAGAGTAAC  | 810.697424125496 | 0.327625992185278 |
| CCTGTCACGTGA  | 810.703075735778 | 0.301797370064559 |
| TAAACCGCGTCA  | 810.703255440057 | 0.199779598288983 |
| GATAGATGTGAC  | 810.703377155174 | 0.24293292530732  |
| TAATTAGTGACA  | 810.705261756308 | 0.327919040840513 |
| ACTCATTGATC   | 810.706455454847 | 0.2020156383749   |
| GGTCATCACTCA  | 810.706670446819 | 0.305153136292051 |
| ATGAGCCTGACG  | 810.712740514748 | 0.279729897347193 |
| CGTCAGTAGTCA  | 810.717424588918 | 0.299560008654769 |
| AGTGATGTAAC   | 810.723532226017 | 0.137650973773093 |
| GCTCTGACGAAA  | 810.735338485471 | 0.236924641799812 |
| CGGTCATACATA  | 810.740003823329 | 0.271345506266073 |
| GCCCATTGTGAC  | 810.740343610617 | 0.339727064148399 |
| GGTATTGTACCC  | 810.74866661991  | 0.180237086127587 |
| CACGTCAGATGC  | 810.749051997547 | 0.223426496554854 |
| AAAGACGTCACC  | 810.749143048121 | 0.195368499671357 |
| CAACTAGATGAC  | 810.753650201535 | 0.197060300585878 |
| ATTTCCGTCAGA  | 810.760566376469 | 0.275481862629392 |
| GCCGGTGACAGC  | 810.765931610272 | 0.192896374392416 |
| CAGTGGTCATGA  | 810.766556732329 | 0.313633443391505 |
| GCACCGTCACAC  | 810.768198088557 | 0.172107106023478 |

|              |                  |                   |
|--------------|------------------|-------------------|
| TCGCTTAAGTCA | 810.771029623751 | 0.269260642742471 |
| ATGACGAGAAAC | 810.774092785582 | 0.217266205059138 |
| TGACTTATGGAA | 810.776156594279 | 0.224704501007495 |
| CATATGTCTGAC | 810.778869581967 | 0.236531634229617 |
| GTCATAAGGGAA | 810.785296685141 | 0.27926566156853  |
| ACCCGTGACGAA | 810.795340587649 | 0.392947333817127 |
| ATCTCACTATGA | 810.801803798704 | 0.230974500384331 |
| CCCATGTTGTCA | 810.809216892223 | 0.307836218547488 |
| CACTTTTGTGAC | 810.821060979464 | 0.242471015297652 |
| GAGGCGTGTGAC | 810.833660464899 | 0.23067297827362  |
| AGGCCAGAGTCA | 810.833841457486 | 0.295746313124068 |
| GGAGGCAATGAC | 810.834341388662 | 0.228638339385223 |
| ATACTGACTGTG | 810.846239462775 | 0.20665629547299  |
| CCTTCGTGTGAC | 810.859525968857 | 0.209892057513436 |
| AATCTGAGTCGA | 810.861020486834 | 0.17772227002889  |
| CAAAGCGTGACG | 810.874564288964 | 0.193009560933025 |
| ACCCATATGTCA | 810.877124922978 | 0.299565285844605 |
| GAGACGAATGAC | 810.880734216136 | 0.210019138897153 |
| CAGTGGGTGACG | 810.891228847784 | 0.267649603569879 |
| GTATTATCGTCA | 810.891412746182 | 0.175064814207519 |
| GATGATGAATCC | 810.900450938994 | 0.357099112069663 |
| ACTCATCACTTA | 810.902429831246 | 0.177305404390708 |
| CTAAACCTGTCA | 810.903353883289 | 0.243645155202956 |
| AATGGCGCGTCA | 810.91422957701  | 0.228648837049491 |
| ATATTAGTACTA | 810.914691024409 | 0.246752795920037 |
| ATGAGCCAACCG | 810.928171105135 | 0.150306047815738 |
| AGGCGTGACGTG | 810.943908149266 | 0.291067293067827 |
| ATGAGTTGTTTA | 810.944569332932 | 0.262426898641993 |
| GCGACTAGTGAC | 810.949875993275 | 0.20985061860393  |
| ACATGACAGAGT | 810.956539610605 | 0.238493597268646 |
| GCAAATGGTGAC | 810.969850712899 | 0.225214435685489 |
| ATTACGTATTCG | 810.970301488901 | 0.259302160712386 |
| CGGACCAGTGAC | 810.975877479094 | 0.262089095960177 |
| TGAATGTGACAA | 810.976278712021 | 0.411384285908743 |
| ATTGACACAGAC | 810.982377831993 | 0.231122370326098 |
| ACTTGGTGACCA | 810.989183946559 | 0.391475912000341 |
| CACGCTGTGACA | 810.990378715053 | 0.299622151182478 |
| ATCGGTATGACC | 811.001142927873 | 0.144643172410067 |
| GTCATTCAACTA | 811.009181821    | 0.293871251032035 |
| CGTGTCAGAGTC | 811.011462124558 | 0.161519327344551 |
| AGTCACGGACAG | 811.02610242672  | 0.10332189952969  |
| ACGTCACCACGC | 811.026621779455 | 0.280028238741116 |
| CGGCCGAGTCAG | 811.033299019515 | 0.227689869115703 |
| ACCTGTCACGCA | 811.037970683747 | 0.227074478158083 |
| AGATTAATCACA | 811.045416040398 | 0.231883121568719 |
| GATGAGTAGGTA | 811.047692933242 | 0.163562240258159 |
| TGATACACATCA | 811.04919233544  | 0.322653538680723 |
| AATCACCAGTCA | 811.049302860626 | 0.291302590922292 |
| TATGATTACATA | 811.049920459174 | 0.207927900202319 |
| TATGTAGACTCA | 811.052283583938 | 0.253660258120414 |
| CTAGCGTAGTCA | 811.062867258252 | 0.359012120378036 |
| ACGGTTGACACA | 811.064036781931 | 0.265051397742144 |
| AAGACTCTTAAC | 811.076180396801 | 0.175526898140563 |
| TGTCACCGCAA  | 811.07726416195  | 0.371566166074635 |

|              |                  |                    |
|--------------|------------------|--------------------|
| ACAAAGGTGTCA | 811.08375997094  | 0.265320734570253  |
| GTCATTACTGAA | 811.085055346089 | 0.216553560001487  |
| GCCATGTGACGC | 811.085569308091 | 0.237110804548892  |
| AGTAAAGTGTCA | 811.091320807933 | 0.0845826454091103 |
| ACTCACTATTGG | 811.098807474644 | 0.274218827338651  |
| CTATAAGGGTCA | 811.107418984266 | 0.15906671074753   |
| AATTAGTACGAG | 811.108545561446 | 0.196090245490446  |
| ACTCATCCGTAT | 811.130376393976 | 0.202495557483741  |
| GTGACAGGTATA | 811.134019973975 | 0.201247100262144  |
| GCGGTTCTGCAC | 811.135944129039 | 0.252768452877137  |
| AGAATTAGCAAT | 811.137570653112 | 0.269547792960075  |
| GATTGTGACAGC | 811.137679739788 | 0.27620651104191   |
| CTAGCTAGTCAC | 811.143782391066 | 0.241224984717413  |
| CTGCTCACGTCA | 811.154693459233 | 0.236214882838133  |
| CGCGATGTGACA | 811.156799158404 | 0.191540153557776  |
| TCAGCCGTGTCA | 811.164251160121 | 0.265010971704314  |
| GGGGTTTATGAC | 811.166834791735 | 0.21561574800832   |
| CCGCCTTACTCA | 811.171529061124 | 0.215262262327107  |
| GTTGTCACTAAA | 811.1746210087   | 0.286552552024672  |
| TGACCAGTGACA | 811.1792420853   | 0.150167129264872  |
| AGCGTCATGTTG | 811.181275133293 | 0.263574746655904  |
| CACAGTGAGCAA | 811.182651137039 | 0.290674951450025  |
| GTCACAGCCCAA | 811.194809463029 | 0.326803654577435  |
| GTGCCTTTATGA | 811.195898271456 | 0.421465241966263  |
| CCATAATGACAG | 811.207220848948 | 0.219790497765546  |
| AAAACACTCATC | 811.208598366848 | 0.262501215294638  |
| ACGTCACGTACA | 811.214747325209 | 0.360053259831652  |
| AGATTCCAGTCA | 811.217175247858 | 0.386091943921071  |
| CGTCACCATTAA | 811.218312474773 | 0.194330239340033  |
| GTCACCCTAAC  | 811.225920977555 | 0.196602682652074  |
| AGTCACGAGCAA | 811.231872306784 | 0.138463088584136  |
| AATTGGATGAGT | 811.236861546274 | 0.207896993470164  |
| GTCATCACAAAC | 811.241601683666 | 0.329033570209382  |
| TCACAAACGTCA | 811.245258502468 | 0.299753840200727  |
| AGATGGCATGAC | 811.249026686129 | 0.19292895837561   |
| CACGTCAGCCAA | 811.249087801261 | 0.295138670907863  |
| CGTCATTTAGAG | 811.250647359051 | 0.216581282722484  |
| TCTCGGTATCA  | 811.25727006837  | 0.281468538713871  |
| GTTAGACAGTCA | 811.26493954855  | 0.238561575356378  |
| ATGCCTGTCATC | 811.264952720657 | 0.256575302150166  |
| ACACATCATAGT | 811.270165483373 | 0.162972923648689  |
| AGAGCAAATGAC | 811.271301870896 | 0.193066013672373  |
| AAATAGGGTGAC | 811.296497274129 | 0.150284233557644  |
| TAAGATGTGACA | 811.298331020522 | 0.276293529428141  |
| ACGTCACGTGTC | 811.312674473424 | 0.244200022442474  |
| GCCTTATGACCC | 811.314684839526 | 0.139740593885245  |
| AAGGTTGATGAC | 811.315707533164 | 0.229417405075349  |
| ACTGTTACATCA | 811.316915434631 | 0.275785703165397  |
| AGGCTAGTCACG | 811.31725077896  | 0.126383198356566  |
| CCGAACGGTGAC | 811.326153165121 | 0.216215142793042  |
| GGCGCGGAGTCA | 811.339167449245 | 0.283918780822312  |
| ACAGTCAGCAGG | 811.341847258228 | 0.368274003494022  |
| TCTGTAGTGACA | 811.343988849858 | 0.272086891526248  |
| ATATAGAGTGAC | 811.361202300933 | 0.223322193793891  |



|               |                  |                   |
|---------------|------------------|-------------------|
| ACCAAGTACCC   | 811.365627197449 | 0.236339721211262 |
| ATGATAATGACC  | 811.366891319862 | 0.307161581582514 |
| GCTGGATGACCA  | 811.391879330312 | 0.245927699892315 |
| AGTTAATGACAT  | 811.407814223402 | 0.251936756939659 |
| ATGACAGCTGAA  | 811.414138789858 | 0.217144052332879 |
| GCAAGTTTGTCA  | 811.416880562218 | 0.265513640584246 |
| AGGTGAGATGAC  | 811.41998975569  | 0.175923511133972 |
| AATGAGCTGTCC  | 811.420329852693 | 0.439140087914963 |
| ATGATTCGATTG  | 811.427681282998 | 0.24327367158691  |
| AAGTCACTACGG  | 811.436242133614 | 0.279952083604587 |
| ATCGTCATGTCA  | 811.436828408568 | 0.277437850342961 |
| ATGACCACGGGA  | 811.438544555136 | 0.282582621413231 |
| CCGTGGGGTGAC  | 811.440035827636 | 0.196308118050652 |
| ATGAGTCCCGCG  | 811.445861243405 | 0.230854554979198 |
| AAAACCTTCTGAC | 811.452499001696 | 0.196650336441851 |
| CAAACCTTATGA  | 811.452843071497 | 0.249900950421301 |
| ACAAGGCATCAT  | 811.454814860346 | 0.294165217996057 |
| ACTCACAGGGTG  | 811.457144697822 | 0.273257857730132 |
| CACAGCGGTGAC  | 811.477158563876 | 0.318712335929128 |
| GTGGCACTCATA  | 811.483603370254 | 0.341863874259587 |
| TATGTCCGCTCA  | 811.488968824593 | 0.274490907503185 |
| CTGCCTTCTGCA  | 811.492674718012 | 0.209390933751995 |
| AAACTCACTCAT  | 811.49464581291  | 0.136852388579792 |
| AACCGTGTGAGA  | 811.500274533526 | 0.203634668646542 |
| CTGGATGACCAG  | 811.507569657585 | 0.265219161764937 |
| CCCATTTGACTC  | 811.515681577004 | 0.159668729420029 |
| GTATCCATGTCA  | 811.533601449286 | 0.192349789212285 |
| ATACCACATGAC  | 811.539438413906 | 0.261800825401314 |
| ATGACAAGGCCG  | 811.545618850608 | 0.308552333347503 |
| TGACTACTGCCA  | 811.546582667929 | 0.262503059428149 |
| TACTTGACTCGA  | 811.549012435159 | 0.215990660104572 |
| TTAGCATGACAA  | 811.551714011356 | 0.266062956893785 |
| ACCCGACAGTCA  | 811.553286355406 | 0.242964642453657 |
| GGCACTGTCACA  | 811.554111518686 | 0.214920682110596 |
| AGCGAATGACCA  | 811.561984548968 | 0.32818153303899  |
| AAATGAGCCAAC  | 811.568178080156 | 0.16376198281225  |
| ATGTGACAGTAC  | 811.574936593014 | 0.21120583400406  |
| CATGGGTGACAA  | 811.578145545975 | 0.298461776783693 |
| CCACGTCAATAG  | 811.581901872675 | 0.228069956167313 |
| ACAGTCAGCTAG  | 811.5821035851   | 0.125638401742034 |
| GCAGGTAGTCAC  | 811.582389482442 | 0.173655005558843 |
| AATCACGTGACA  | 811.582905436872 | 0.340598041900319 |
| CGTTGACGCGTC  | 811.589311613982 | 0.287112975325461 |
| CGGACCAGTCAG  | 811.615133550687 | 0.261212694546212 |
| GTGACCAAGCAA  | 811.624746140928 | 0.23320881216914  |
| ATATCGTGACAG  | 811.628362904589 | 0.223576845697921 |
| ATGACAGGCTTA  | 811.628425568991 | 0.292748147408497 |
| AATACCTGTAC   | 811.629059538542 | 0.18789830761685  |
| GCCTTAGCGTCA  | 811.632725411811 | 0.167750158063495 |
| TCAACTTTGTCA  | 811.639292965022 | 0.411440020067832 |
| GTCACCGAGGCA  | 811.645883378687 | 0.30230227966821  |
| AATAATGTGACA  | 811.647633932869 | 0.160625745065181 |
| TGACTAGGAACA  | 811.649193185164 | 0.151400698690678 |
| GTATTGCATCAC  | 811.652342274819 | 0.132869249561067 |

|               |                  |                    |
|---------------|------------------|--------------------|
| AGAAGCATGACG  | 811.655981337973 | 0.252390194284335  |
| AGTCAGCTCCG   | 811.657319997883 | 0.284303198011887  |
| GTCACCTCGAAC  | 811.666482480283 | 0.462802663628973  |
| CATTGACTCTGC  | 811.666930525753 | 0.252350625722997  |
| ATAGGTTGAGTC  | 811.674250335868 | 0.19201503843351   |
| AACACCAGTCAG  | 811.677525137768 | 0.290793376539772  |
| ACGTCACTAGCA  | 811.694881378278 | 0.245141489806903  |
| ATGACGTGAAAC  | 811.699557713842 | 0.352952953517256  |
| GTCATATGGAAA  | 811.719619097298 | 0.324344413611546  |
| AAAAGCATGACG  | 811.721061032631 | 0.275059775613545  |
| CGTGAGTTAGTC  | 811.728253955602 | 0.305167270714164  |
| ACTGTTCTGTCA  | 811.729789473613 | 0.350442809996362  |
| CGATGTATCACA  | 811.732145742491 | 0.204249588659446  |
| AGCCTAAATGAC  | 811.749040047537 | 0.228200387316727  |
| AGTCAGACCTCC  | 811.750655342637 | 0.243668909706011  |
| AGTAAATGACCC  | 811.772234828561 | 0.307812329600376  |
| CGAGCGTGACAC  | 811.787388248442 | 0.25494554470249   |
| CTATAACGTCAC  | 811.793817978799 | 0.220508722378155  |
| ATCCGTTGTGAC  | 811.795355933904 | 0.169983513012468  |
| CCATGACTTGTA  | 811.801362054704 | 0.218071172494534  |
| CTGATATTGTCA  | 811.80401735525  | 0.207214793708725  |
| GATCTAATGACA  | 811.804669001432 | 0.164670779860012  |
| ATTTCGCGTGACA | 811.812935049939 | 0.193690368678283  |
| ACTCATAGTTTC  | 811.813842453218 | 0.358098786958053  |
| GTCACGAAATAA  | 811.831294971577 | 0.201306016164705  |
| CGATTACTCCTA  | 811.839850849351 | 0.264050205403091  |
| CCCACAGGTGAC  | 811.845565151131 | 0.0741668722480524 |
| ACTCGGACTCAC  | 811.84710418522  | 0.215033611791773  |
| TAATGTGTAACA  | 811.852742753049 | 0.22156803226694   |
| CCTTCAATGACG  | 811.86632386617  | 0.176269494794789  |
| GGAACACATCAC  | 811.866406747801 | 0.246487741380404  |
| GCTCGGGGTGAC  | 811.872773306088 | 0.217087028735413  |
| ATACAAATGACA  | 811.874475606755 | 0.149183733555802  |
| GTCATTGGATAA  | 811.879624462358 | 0.358076341275849  |
| CAGTGACGAACC  | 811.888694423273 | 0.215404374346583  |
| TCGTGTCCGTCA  | 811.890735460573 | 0.228077898850781  |
| GGCTACTGACTA  | 811.894342439759 | 0.251308581967382  |
| GTTATTTGGTCA  | 811.898834800145 | 0.280818512526051  |
| ATGGCTCTATGA  | 811.899703972832 | 0.238569190790613  |
| CCGTGCCGATGA  | 811.902536059995 | 0.283152005013     |
| AACCGACGTCAT  | 811.905229870876 | 0.227325587837961  |
| GTCACCTAAGCA  | 811.905232585825 | 0.229391937750369  |
| CCATCTGAGTGA  | 811.907120199978 | 0.204376887673407  |
| ATGACGAGCAGA  | 811.907740475184 | 0.259048440288168  |
| CTCTGACGCGGC  | 811.911728613424 | 0.247710794356699  |
| GACAGCTCATAC  | 811.912630263135 | 0.24715845612025   |
| GATTGTAATGAC  | 811.919965807278 | 0.266757466684105  |
| ACTCGGTGACAA  | 811.922562200587 | 0.305798360488037  |
| ACAATAAAGTCA  | 811.924276233106 | 0.291892950362839  |
| ACTCATACAAGT  | 811.930276548754 | 0.213349695320913  |
| ATTGAGAGTCAG  | 811.931548721342 | 0.19707717071575   |
| TGGCTGCGTCAA  | 811.935533262635 | 0.351785115218313  |
| ATGACACTCCCA  | 811.937793206951 | 0.224647940091358  |
| TCTCCACAGTCA  | 811.938730367421 | 0.221884903985897  |

|               |                  |                   |
|---------------|------------------|-------------------|
| CGAACGTGACAC  | 811.946500742545 | 0.272634513992788 |
| ATCCGGTGACGA  | 811.947144283712 | 0.363552481646383 |
| ATCGTCATGTTA  | 811.954641159534 | 0.349453452069527 |
| ACAACGCTGACT  | 811.959426919773 | 0.132480147221306 |
| AGTATCTGACAC  | 811.971641816771 | 0.211902373712749 |
| GCGTCACAAATCC | 811.975378631905 | 0.241497186451486 |
| GTCACCCGACTA  | 811.983344440648 | 0.330318276525996 |
| CTCGGCTAGTCA  | 811.998158851135 | 0.353200605390104 |
| AAGATCTAGTCA  | 812.012320542651 | 0.124936851614632 |
| ATGATACAATTC  | 812.013400097791 | 0.200663270105167 |
| GTCATATGAGGA  | 812.014680529985 | 0.241955351493458 |
| GGTAGCCATGAC  | 812.029952290137 | 0.251151797274511 |
| CGCTATTACTGA  | 812.034995185108 | 0.253008457625369 |
| AACCGACTAATT  | 812.037163183553 | 0.252393333572414 |
| CTGTCATGCCAA  | 812.060123084584 | 0.27053871927005  |
| GTCACAAATCAC  | 812.06982437668  | 0.289027677645046 |
| GTCACTGTTGGA  | 812.070009543549 | 0.260164072849631 |
| GGGTGACTTGGA  | 812.074669925518 | 0.202046347912039 |
| GCAGATGGGTCA  | 812.076428705827 | 0.182004741899342 |
| ATCTGTTGACTG  | 812.089202690544 | 0.219931025720244 |
| ATGACATCGGGC  | 812.09422628943  | 0.268673842828155 |
| CGGTCATACACA  | 812.095475329249 | 0.219836815301989 |
| GATCTGAGTGAC  | 812.095876370317 | 0.159917710517586 |
| AAGCGATATGAC  | 812.095983705332 | 0.290668671256075 |
| CAAAAGTCATCG  | 812.09679417428  | 0.246817532025701 |
| ATTTAGTAATTC  | 812.106106956191 | 0.265762064055077 |
| ATTACTAAATTA  | 812.106625596743 | 0.247798638212686 |
| GTGACGCCGATA  | 812.114870497639 | 0.254012217339156 |
| AGAGTCAAATA   | 812.117784862418 | 0.233963262007383 |
| TACGCAGTCAGA  | 812.12474017664  | 0.280111578889898 |
| CTTATACGTGAC  | 812.126723995574 | 0.342085120185995 |
| CTTGTAAGTCAC  | 812.126831331668 | 0.265815954794176 |
| ACAAGCTGACTG  | 812.127747976493 | 0.279526883753601 |
| CCTATCCATGAC  | 812.139191983347 | 0.211942127451519 |
| CACTGACACAGA  | 812.148266903001 | 0.209785023011707 |
| ACAGCGCGTGAC  | 812.152167635339 | 0.22741522585035  |
| TGACACGATGAA  | 812.15465341792  | 0.253848499035859 |
| AGGGTCATTCGC  | 812.158590062291 | 0.244383244519288 |
| CTGACTATGAAA  | 812.162752115555 | 0.328552804946425 |
| AGCGACTAATCC  | 812.164020497428 | 0.238886870905075 |
| CGTCACACACAC  | 812.164054798498 | 0.198588976732901 |
| CGGAGATGACCA  | 812.168155417147 | 0.20829087330853  |
| AAAAGTTGTGAC  | 812.16825811204  | 0.203698471590062 |
| CATGCAGCGTCA  | 812.170307259825 | 0.206982216821162 |
| TCACGCTAGTCA  | 812.173393864075 | 0.225400809812182 |
| GTCACGCGGTGA  | 812.177058029437 | 0.256128864548532 |
| GTGACAACGTAA  | 812.177294175375 | 0.194321041409138 |
| AAAACACCGTCA  | 812.19087725682  | 0.189964362677482 |
| ACAATGACCACT  | 812.199446033629 | 0.137125490430151 |
| GTCACCTTCGTA  | 812.202175177059 | 0.343139738496964 |
| AGGGAATGACG   | 812.207440162614 | 0.199247149430177 |
| GGTTGTGTCAAC  | 812.211119358108 | 0.181189007282476 |
| GGAGTTTATGAC  | 812.215287488859 | 0.373140620737752 |
| GCTCTGTATGAC  | 812.215772243462 | 0.209549409048942 |

|              |                  |                    |
|--------------|------------------|--------------------|
| AACTTGACTGAA | 812.217132749698 | 0.323102877442569  |
| GAAGTTTGTGAC | 812.223350707204 | 0.247397065157705  |
| ATCGTTACTCAG | 812.22599964834  | 0.161805209868163  |
| CCCAAAGTGTGA | 812.231973019623 | 0.218873643194917  |
| CTACGTGACGAA | 812.245745729997 | 0.196134186609306  |
| CGACCCAATGAC | 812.250032045682 | 0.230647927825499  |
| ATGACGTCCATA | 812.252904762721 | 0.227790705914064  |
| CGACCCGTCA   | 812.253807138282 | 0.225918971382241  |
| CATGCGAGTGAC | 812.257466751767 | 0.210908159068835  |
| AACGCCGTCA   | 812.263708411509 | 0.199304601975098  |
| ATCGCTGACGTG | 812.270560281032 | 0.196021312103975  |
| CATACGTCTCA  | 812.28528632022  | 0.315328654090611  |
| AATCGTGTACG  | 812.302676368846 | 0.198773232197818  |
| ATGACATTGTCG | 812.302885944236 | 0.206692001663352  |
| ACACCGCATGA  | 812.314722162787 | 0.285116797683302  |
| CTTCGATAGTCA | 812.318786887734 | 0.270351870758444  |
| GATGACGGCAAA | 812.324844791777 | 0.0869489408128833 |
| GTAACACGTAAC | 812.334305612872 | 0.178988977014504  |
| ACGTCACTAGGA | 812.346639899988 | 0.304346627375866  |
| AGTCAGAGTTGG | 812.349564688909 | 0.235649088364488  |
| GAATTACTCTAA | 812.367089901728 | 0.211979975961509  |
| CTTTAGTGACGA | 812.367660783937 | 0.219050482558553  |
| GTGACAACCTCA | 812.376931960586 | 0.325889043634441  |
| GCCGGCTGACTA | 812.386835715321 | 0.296987344179464  |
| ACTCATCGAGTA | 812.389011207966 | 0.269939972396695  |
| CGGTTAGTGTC  | 812.391709636591 | 0.145545863597245  |
| TCTAGTACGTCA | 812.41025436284  | 0.222985152317754  |
| AACACAGTCAGC | 812.41041671818  | 0.251866914537784  |
| CATTCTGACTGG | 812.414142280116 | 0.342312261856751  |
| AGGGCTGTCATA | 812.414417253144 | 0.118701737429267  |
| AGGGGTGATGAC | 812.425936990157 | 0.153182726596241  |
| ATTATTCATCAA | 812.432843715268 | 0.281707879737368  |
| CGACTCAGACTA | 812.437109667866 | 0.172778949584802  |
| CGTGACACGCAA | 812.444968617014 | 0.342210166660593  |
| ATGTGACATGGA | 812.445569314351 | 0.343095751091778  |
| TCACGTCACTGA | 812.44842731836  | 0.244308989938206  |
| ACTGGGTGACAA | 812.451835271533 | 0.298587567118862  |
| CTCAAGTAGTCA | 812.452721291271 | 0.193492169285267  |
| GTCAGCTCGTCA | 812.45345148325  | 0.320255019545489  |
| CACATCGTGACA | 812.45437474652  | 0.186571516758166  |
| CGGTGACGTTGA | 812.454475463668 | 0.27632334423747   |
| ACGTGTCAGCAA | 812.461494756519 | 0.288474462874268  |
| CTGAGTAAACA  | 812.467474639071 | 0.190147558149167  |
| AGTAAGAATCAT | 812.474043465598 | 0.232251232753957  |
| ACACGTGACGAT | 812.477154410153 | 0.136613101879329  |
| ACTTGGACTCAC | 812.480552321275 | 0.205601279184232  |
| ATTACTCAAGGC | 812.486014227719 | 0.286032238291573  |
| TCAATGGTGACA | 812.486999772171 | 0.24183739756626   |
| GTAAGGGGTGAC | 812.487514373943 | 0.200407473725473  |
| AAGCGTTACTCA | 812.488343877821 | 0.174464040413618  |
| ACTAATACGCAG | 812.503335122479 | 0.283220410464504  |
| ACTCTGATTGAC | 812.505219190625 | 0.245716702274515  |
| GGTTTGTGTGAC | 812.507529380706 | 0.118454806897381  |
| GGAGTAGATGAC | 812.510019021289 | 0.122443053288464  |

|               |                  |                   |
|---------------|------------------|-------------------|
| CCTCGCATGACA  | 812.510285948413 | 0.244096790314768 |
| GCACTAATGACA  | 812.514848223479 | 0.190618882402178 |
| CGTCATGAATTA  | 812.537016054711 | 0.233362089354695 |
| ACGTCATGTGAG  | 812.53959462989  | 0.208951567471386 |
| GAGTCAAATATA  | 812.542046097112 | 0.216955738771167 |
| TGACTATGGACA  | 812.552061614803 | 0.238710274607307 |
| AATTCCAGTGAC  | 812.560449742216 | 0.218148877969775 |
| AGTCAGAGACAG  | 812.565683963195 | 0.266104050628927 |
| AGTCACGGGCTA  | 812.566184408498 | 0.142684904288828 |
| ACTATTGCATCA  | 812.571798323601 | 0.237056040857083 |
| ATATTGTGACAT  | 812.575956073103 | 0.128341530399845 |
| AAACCGAGTCAG  | 812.577382801969 | 0.184495605259678 |
| GGACGGGATGAC  | 812.57752055045  | 0.170267101323392 |
| GCAACGCATGAC  | 812.580161530591 | 0.227006642053354 |
| CGATACTCGTCA  | 812.584888487712 | 0.200269821751348 |
| CAGTCAGTAACC  | 812.586387602878 | 0.310312633720793 |
| AGCCGTTGACTA  | 812.586413929966 | 0.316223949495124 |
| ACTGTGTCAGTG  | 812.589125388704 | 0.177084931684168 |
| GTCATTGTAGGA  | 812.604218478219 | 0.186564288123314 |
| TGTCACCTGGAA  | 812.606177802544 | 0.160417474431901 |
| GACAATAGTGAC  | 812.614947249545 | 0.271930513431642 |
| GCCGTAAATGAC  | 812.633296619132 | 0.340762053127844 |
| AGCCATCTATGA  | 812.634369064813 | 0.288503744176889 |
| GAAATGGTGACA  | 812.644524168084 | 0.226452585596832 |
| GCATGCAATGAC  | 812.649558877805 | 0.264949506012245 |
| ACGTTACTCAAT  | 812.651791047568 | 0.307241518887856 |
| AATGAATTACTC  | 812.655046574658 | 0.153891100971773 |
| CTGCTTTACTCA  | 812.662226892961 | 0.327475574920291 |
| TGAGCAAAATCA  | 812.67183901222  | 0.200489433311325 |
| ATCAAGTGACGC  | 812.676422668317 | 0.311170509269913 |
| ACCTCGTCATGA  | 812.677280886576 | 0.164677352725796 |
| TGACTGGAGTAA  | 812.679685682744 | 0.17835620920032  |
| GTCATTGCGGCA  | 812.690243682186 | 0.35110304721202  |
| ATGTCACCCTTG  | 812.692197342664 | 0.241230661941676 |
| CGTCGACGTGAC  | 812.692423335269 | 0.233019893006245 |
| CGGTCATCACAA  | 812.694106415281 | 0.189330508185148 |
| ATTGACGTGGAA  | 812.695696183423 | 0.21643007263656  |
| TCCGTCAGACAA  | 812.708916910252 | 0.238703417122125 |
| CGTATATTGTCA  | 812.737042636892 | 0.333722521582548 |
| CATTAGGTGACA  | 812.737181109055 | 0.374012250521787 |
| GATGACGTCCAA  | 812.737821815872 | 0.344436101645355 |
| GTCGCTACGTCA  | 812.739116308956 | 0.230426028121229 |
| CAGTCTAGTCAG  | 812.75492811682  | 0.250389756102169 |
| GTCACATCTAAC  | 812.75830946906  | 0.204328284387935 |
| ATGTATACTAAT  | 812.772756738021 | 0.216768914019187 |
| AGTGAGTACTAC  | 812.775563351207 | 0.24319375975886  |
| CGGGAGGATGAC  | 812.78107884391  | 0.243779074969313 |
| GCATGACAAATGC | 812.782649840552 | 0.246807108095201 |
| CCACCGGATGAC  | 812.783866995292 | 0.136372934891897 |
| ATGACGGGGATA  | 812.784331321154 | 0.194054667289931 |
| TCACAATAGGAA  | 812.795441349183 | 0.208593362632209 |
| GACGCTGGTGAC  | 812.804569976661 | 0.31031811071668  |
| AACGCATGTCAT  | 812.805869024458 | 0.236198334594594 |
| ATAGGCAATGAC  | 812.805913749063 | 0.259225359091221 |

|              |                  |                    |
|--------------|------------------|--------------------|
| TAACATTGGTCA | 812.807419880867 | 0.242186042538751  |
| ATTAGCCATCGA | 812.80918325719  | 0.223624197498129  |
| CTGGTTAATGAC | 812.819312254545 | 0.301638788517679  |
| ATCAACGCATG  | 812.824072949221 | 0.260611402961743  |
| CGCCCCTGACTC | 812.831389924141 | 0.206496616223371  |
| AGTCAGCGCTAC | 812.832751889026 | 0.216630623423382  |
| TGACTGCGTTAA | 812.840839423769 | 0.195792130045762  |
| CTATGCCTCATA | 812.841849306057 | 0.197951238524455  |
| GACATTCATGAC | 812.84324168129  | 0.214518064030849  |
| TCAATATCGTCA | 812.847922872465 | 0.195283054382978  |
| ATGACAGGGATG | 812.862640104713 | 0.178280026750865  |
| ATTATTGAGTAA | 812.87154361902  | 0.254006769998135  |
| GATTCGCATGAC | 812.890156272768 | 0.324709501111925  |
| GTGCTAGACTCA | 812.899534941045 | 0.173452438943088  |
| AATGAGTATGCC | 812.901428405039 | 0.246305404646729  |
| AACGTCACTAAT | 812.903787266937 | 0.18646973353232   |
| ATCGAGTAATAA | 812.912312765791 | 0.193457649213136  |
| ATGACGGGACAA | 812.913230294192 | 0.217771169327562  |
| TACCTTTACTCA | 812.925241282514 | 0.178249057954363  |
| ACGATGTCGTCA | 812.930277847657 | 0.238732775193341  |
| CACGCATGACAA | 812.932104258144 | 0.192270379328225  |
| CGATTACGCACG | 812.932284134622 | 0.115367087209705  |
| GTAATCTCGTCA | 812.933368242364 | 0.299267326321977  |
| CCGTCATCTATA | 812.93689705417  | 0.165079601927799  |
| AAAAGACTGACT | 812.947462154615 | 0.184103871702474  |
| GACTAGTAGTCA | 812.947866526195 | 0.205951763679882  |
| CCTGCGTGTGAC | 812.955959994731 | 0.287467199258505  |
| CGTCATTAGCTC | 812.969519151133 | 0.235065105837576  |
| AGGCGCCAGTCA | 812.9775187654   | 0.258361524796933  |
| CAAGAAGGTGAC | 812.978254450945 | 0.343324396160723  |
| AGAAGTGTGACA | 812.979883810751 | 0.258284746996254  |
| CGTCACTTGAGC | 812.986654093672 | 0.220088089712089  |
| ACCGTTTGACTC | 812.991713799866 | 0.0805333071206771 |
| CCTAATGTCATA | 813.002363610409 | 0.263201870784757  |
| AAATCAGATGAC | 813.002432385973 | 0.127367939153359  |
| ATGATTCGACAA | 813.007498254981 | 0.137155843716938  |
| GTGACGTGAACA | 813.00811564956  | 0.218621868055523  |
| GTCACACGTCAA | 813.021764850615 | 0.192245928403329  |
| GTGCATGACATA | 813.023387949345 | 0.194408231957943  |
| CGCTCAAATGAC | 813.036233885016 | 0.150966846134041  |
| TGACGCTATGAA | 813.038297267996 | 0.323594485659026  |
| ATGACCACGCAC | 813.045777250083 | 0.272717251414072  |
| AGTGCAAGTCAT | 813.046025122189 | 0.237526679884699  |
| AAAGATGACCGA | 813.060458839979 | 0.205084022559456  |
| GATAACACATCA | 813.077685960522 | 0.259648605481248  |
| AGTGTATGACCG | 813.080187977187 | 0.217641798041153  |
| CTAGTCACGGAG | 813.081776387461 | 0.121760323157397  |
| CATGACGTTAAC | 813.081996155106 | 0.219133230758851  |
| ATGCTCCGTAC  | 813.090795935737 | 0.345571609450591  |
| AATCATGGGTCA | 813.092562327058 | 0.272335452077244  |
| GCTGATGGGTCA | 813.100879605332 | 0.272214341849292  |
| CTCGGACAGTCA | 813.101067183876 | 0.23482039688483   |
| GATCACGCGTCA | 813.105054843527 | 0.36635229229463   |
| TAGTGGTGACGA | 813.105814227018 | 0.272018546315966  |

|               |                  |                   |
|---------------|------------------|-------------------|
| AGTTACGTGGCA  | 813.109908672292 | 0.226010271244715 |
| ACCTGTGACATG  | 813.11225598647  | 0.203687382237613 |
| CGTCATGCACCA  | 813.114221832211 | 0.25816409527899  |
| CCTGTTTGTAC   | 813.116151227796 | 0.216776458570727 |
| GTCATTATAGTA  | 813.119590550413 | 0.410705419890109 |
| GTGACGGTGTCA  | 813.124565437832 | 0.138451736941122 |
| GTAGTTGACACA  | 813.135908652171 | 0.222560909706058 |
| ATCGCTTGACTC  | 813.142228348453 | 0.263995667370569 |
| GAATTACAGTCA  | 813.152701558    | 0.16557766931444  |
| ACGATATTACTC  | 813.169933593349 | 0.216874365099887 |
| ACTCATCTGGAT  | 813.179653239068 | 0.239871391540245 |
| AGTCAGACCAGA  | 813.18043767815  | 0.195606490601531 |
| GTCATTAACGCA  | 813.184060219577 | 0.249095138142542 |
| ACCGTCGACTAA  | 813.184514521809 | 0.324100312593155 |
| TAAGAGTAACAA  | 813.189245096196 | 0.208367918901721 |
| ACGTAATGCTGA  | 813.189420839569 | 0.228492593411377 |
| AGCACCAATGAC  | 813.192169970677 | 0.229035122325    |
| GACTCACGCGGC  | 813.196544250355 | 0.19067265887408  |
| ACGGCTCTGTCA  | 813.200049377201 | 0.303945577689585 |
| CGTCATCCCGGC  | 813.204691599467 | 0.206290441346242 |
| ACCATGTGACAA  | 813.205265544316 | 0.25215921239089  |
| TCATATCACTCA  | 813.215638992847 | 0.144654967581131 |
| AGTGATGAGCCA  | 813.220886529326 | 0.333804910884651 |
| ATGACAACGCTC  | 813.222084053834 | 0.252349703469683 |
| CTAGTTTGTAC   | 813.223333503741 | 0.12507316500597  |
| AGTCTGGAGTCA  | 813.227358368142 | 0.194547835080601 |
| CACGCGAGTCAG  | 813.22754796513  | 0.217935398519991 |
| GGTCGACGTAC   | 813.230840134942 | 0.177305118679372 |
| GTA CTGTACCA  | 813.233276082477 | 0.228284484973992 |
| CTATTACTCTAC  | 813.235381951115 | 0.170460187383735 |
| AGCGTCGATGAC  | 813.235939198324 | 0.349598486474689 |
| ACGTCACCGGTA  | 813.24233461608  | 0.317681680884927 |
| GTCACACACAAC  | 813.242893264764 | 0.244172399532779 |
| AGATGACCTAAC  | 813.244027952459 | 0.121197024351236 |
| AATGACGGCAAC  | 813.247818293454 | 0.210140167983156 |
| ACTCATGTATCA  | 813.251652946175 | 0.216443298194189 |
| CCACGGGTGACA  | 813.254309455029 | 0.131667928422898 |
| GACTAAATATGA  | 813.267302989313 | 0.184202133023616 |
| ACGTTTATGACC  | 813.273647356225 | 0.268451544480672 |
| AAGCGTGTGACA  | 813.274009786619 | 0.246098641789022 |
| ACATGAGATGAC  | 813.278147229279 | 0.336464850496908 |
| AGAGTGATGTCA  | 813.311510475355 | 0.216931934165081 |
| ATGACCATAAAA  | 813.312772261689 | 0.314524767899907 |
| AAGCTTACTAAT  | 813.314218574172 | 0.249200276975572 |
| CCAATCCATGAC  | 813.317044287448 | 0.316850324102055 |
| TCGTCACCAAGA  | 813.330465151224 | 0.26744394411555  |
| ACCACATGACGT  | 813.334128940886 | 0.255335798875892 |
| GATGACAAGCTA  | 813.336712768712 | 0.183820732549356 |
| ACTACCCTATGA  | 813.338401861636 | 0.246098761934895 |
| CGGTGACAACCTA | 813.343312108673 | 0.207581624291125 |
| CCCGTTGAGTAA  | 813.348774091348 | 0.213301283098407 |
| CCGGTGACCGAA  | 813.352241461348 | 0.218069809877315 |
| CCTCGGTGACAA  | 813.352967214063 | 0.241755196684379 |
| ACATCCGTGACT  | 813.354296349135 | 0.336959483087653 |

|               |                  |                   |
|---------------|------------------|-------------------|
| GAAGAGTCTTCA  | 813.362633117752 | 0.222596099262011 |
| CCTGATTGACTA  | 813.3772804843   | 0.280917461504543 |
| ATATGTAATCAC  | 813.380448926108 | 0.329683539842449 |
| AGTTGACTGTTA  | 813.381144539515 | 0.284791384340137 |
| TGACTCTCTACA  | 813.382692514441 | 0.277148549654166 |
| CATTTGTGACCA  | 813.383950012384 | 0.262544213373892 |
| CGGGGACTCACA  | 813.40482489087  | 0.321973420933179 |
| CATACTGTGACG  | 813.411556360258 | 0.255356888899108 |
| GTGACCCAAATA  | 813.425004666596 | 0.315750925313127 |
| GTCACCGAGTAA  | 813.42905326629  | 0.261781080932036 |
| GTCATTAGCGTA  | 813.435311189369 | 0.234104022889724 |
| CAGCGTAATGAC  | 813.435869159368 | 0.194938002539973 |
| TAGTCAGCCTGA  | 813.442573366941 | 0.117652915700571 |
| ATCGCGGACTCA  | 813.445624036742 | 0.392447839485729 |
| CAAGGATGACCA  | 813.44938415051  | 0.304889252319788 |
| GTTTCTTGGTCA  | 813.451801820393 | 0.237080781413198 |
| ATGACAGCTAGA  | 813.461451354556 | 0.122751554205784 |
| CGTCATCCCGCG  | 813.469619223512 | 0.253467972243231 |
| TCAGTAATCACA  | 813.471406847814 | 0.408362153879696 |
| CTCAGTCAACAG  | 813.472224270938 | 0.235077915510928 |
| CGCGCTTCGTCA  | 813.487394226604 | 0.262097244281807 |
| CTTCCTGGTGAC  | 813.490566271229 | 0.276708332946719 |
| GAGTAATATCCC  | 813.496951384905 | 0.360986921395323 |
| ACGCTCGTGACT  | 813.500103145176 | 0.203496430140623 |
| CTCGCGGTGACA  | 813.514763004452 | 0.298229652338768 |
| AAGTCAGAAGAT  | 813.519851056725 | 0.236778443697469 |
| AAGATTGGTGAC  | 813.52404858421  | 0.215336432851813 |
| TGGTCACAGCAA  | 813.528870564791 | 0.254951269632197 |
| ATGAGTACGCC   | 813.530046748699 | 0.366390816571621 |
| ATGTGTGTGACG  | 813.5301368544   | 0.117409092234655 |
| CTTAATGAGTGA  | 813.53586491103  | 0.188583229495531 |
| CAGCCTGTGTCA  | 813.536832543795 | 0.349644834750488 |
| TCATCGTGAGAA  | 813.537638877745 | 0.20702121112327  |
| ACTAATTGCTAA  | 813.53805235616  | 0.305886933925628 |
| GTCACAGTCGGA  | 813.540359027971 | 0.340002655364942 |
| TCGTAATTGTCA  | 813.543518620736 | 0.234971251229803 |
| GACATCATGACC  | 813.556563489311 | 0.25712707518828  |
| AGCTGACATGTC  | 813.55735482569  | 0.253950953840423 |
| ATTTGTACGTCA  | 813.559567868206 | 0.204083952090919 |
| ATGAGTTGGCAA  | 813.566337270477 | 0.150702077215236 |
| ACTCATCGGCAG  | 813.567602369333 | 0.166125984971003 |
| AACTAGAGTGAC  | 813.580181026092 | 0.332291207423384 |
| GACGTTTCATGAC | 813.608098137004 | 0.241249640929512 |
| ATGAGCCAAACA  | 813.61045690007  | 0.310547854137325 |
| CTACCGACTCAC  | 813.614189492128 | 0.148844996425725 |
| CTGCCGTGTAC   | 813.631272102311 | 0.306721065257056 |
| ATGAATCAAAAT  | 813.631282550139 | 0.323799272768549 |
| ACACAGGTGACA  | 813.639885147211 | 0.182697271542354 |
| AAAGATTCATCA  | 813.649507359993 | 0.275369429513815 |
| CATAATGTGACG  | 813.651626177413 | 0.281484528311192 |
| GTCATGATAGAC  | 813.656523386952 | 0.246303317395561 |
| CTGACTAGTCGC  | 813.659121518957 | 0.248962771015688 |
| ATACCGGTGACA  | 813.661509856331 | 0.235869445505434 |
| GTAACCTGGTCA  | 813.662253896416 | 0.374114023696819 |



|               |                  |                   |
|---------------|------------------|-------------------|
| CCAGTGC GTGAC | 813.670124399996 | 0.257069976681157 |
| AAGCGACGTCAT  | 813.671126503597 | 0.168813824244657 |
| GTCATGTGGTGA  | 813.675249736055 | 0.210744788671267 |
| CCAAAATGTGAC  | 813.676207458499 | 0.215027895422407 |
| CTCGACAGTGAC  | 813.680329156074 | 0.190255476511362 |
| ATTAGTGGTCAC  | 813.686364072693 | 0.262879521817533 |
| ATGAGTAGTTGC  | 813.701020540366 | 0.199204272356294 |
| ACCATAGTCAGA  | 813.702469020599 | 0.201544398904744 |
| ATGACAGAGGGG  | 813.707354238653 | 0.154035222617951 |
| ACTCATTATAA   | 813.709090045387 | 0.303720086879012 |
| CAATTGATTCAC  | 813.716945601656 | 0.253843299373784 |
| ATTTCTTTGTCA  | 813.728804594889 | 0.318194644897343 |
| ACTATTGGGTCA  | 813.734640642103 | 0.210131872163752 |
| GAGTAATAGCAC  | 813.735641808454 | 0.222623105338063 |
| AATAGTGACAAA  | 813.747485881025 | 0.158393490765425 |
| AGTAGAGTAATA  | 813.765560741626 | 0.164744320685494 |
| TTAGTCTTAGAA  | 813.772427138305 | 0.209014751409559 |
| ATTATTCATTTA  | 813.775067202664 | 0.215053016686012 |
| CGATTACTGACG  | 813.775435059149 | 0.147033194887942 |
| TCCTTTGGGTCA  | 813.775857271281 | 0.208310445079095 |
| GTCACCGGCCAC  | 813.776192394425 | 0.246564893759396 |
| GTACCAAGTCAC  | 813.77794281655  | 0.227653933813291 |
| TCTAGTGACGAA  | 813.779212842461 | 0.182739650949591 |
| AATCTATGATGA  | 813.781038552338 | 0.197634989909962 |
| TCGTCACCCGAA  | 813.790952515115 | 0.253613241158223 |
| GCAGCTCTGACA  | 813.791812837492 | 0.353930843865906 |
| AACGCGAGTCAG  | 813.800741540027 | 0.219767042543958 |
| AGGGTCATTCCG  | 813.80287553943  | 0.31350685096951  |
| GCGTATCATGAC  | 813.805176594696 | 0.310576059993346 |
| GCCTGAAGTGAC  | 813.835033273146 | 0.214945594181998 |
| CCGGCTAGTCAC  | 813.836273174376 | 0.299085321272096 |
| GACATCCATGAC  | 813.852121830258 | 0.129504982636963 |
| ACCAGACATGAC  | 813.853020857359 | 0.188454484845117 |
| TACCGTACGTCA  | 813.85423996757  | 0.423079322643877 |
| GAATTAGTCTCA  | 813.85445711907  | 0.218072008851878 |
| ATCGACGTCACA  | 813.858538517247 | 0.284913933088386 |
| ACTCATAAAGCA  | 813.864825246306 | 0.417472186183957 |
| ATGTCACAGTTC  | 813.869859313408 | 0.267156612970472 |
| AGCCATCGTCAT  | 813.878138284452 | 0.258992553988317 |
| GTCACCTGGATA  | 813.878613585495 | 0.135150725107538 |
| ATCTTCAGTGAC  | 813.884168337703 | 0.211002135519694 |
| GTCACCCTCAAC  | 813.884960592196 | 0.205101709345089 |
| ACGGATGAGCCA  | 813.896124516183 | 0.276735937571861 |
| ACCTAACATGAC  | 813.917222613917 | 0.270643314892174 |
| AGTCACGGAATG  | 813.921971600686 | 0.263411364404041 |
| GCGTCACAGCAA  | 813.929357547341 | 0.208391702735315 |
| ATCCGTCAGGTG  | 813.929812829779 | 0.335395314717936 |
| GTCACTAGAAAC  | 813.939567009309 | 0.33691709737873  |
| GGTGAGACATAC  | 813.944689708075 | 0.184500173062413 |
| AAAATAATGACG  | 813.94615402733  | 0.26048429953282  |
| GTACGTCGTAC   | 813.947266802807 | 0.212463516973073 |
| AAGTCACGGAAA  | 813.95068180955  | 0.208960827573413 |
| CCCGAGGTGACG  | 813.951508570315 | 0.20226044247649  |
| TCGTGACACGAA  | 813.952973972255 | 0.233235010734196 |

|               |                  |                   |
|---------------|------------------|-------------------|
| AGTGGTGTGACG  | 813.957295395117 | 0.207813347658978 |
| GTCACATCCCA   | 813.963317445928 | 0.191670642781491 |
| ATGACGGGGACG  | 813.975603999246 | 0.215790789677387 |
| AAGTCACGCGAG  | 813.979893821683 | 0.185747274944384 |
| GACCAGTGTGAC  | 813.980054327046 | 0.234017150779034 |
| CATTTGAATCAC  | 813.992673459373 | 0.313251298080596 |
| AAACACGTAAGC  | 813.993797464458 | 0.14568336901007  |
| GACCAAGACTCA  | 813.995586615532 | 0.20086891216164  |
| ACTCATATTTGG  | 814.000547233679 | 0.175437363316104 |
| CACTGACTGCAA  | 814.006393168917 | 0.221819696613248 |
| AAGGTCTGAGTC  | 814.008217016724 | 0.284065293319256 |
| TGACACTCGTCA  | 814.008272934904 | 0.266292697927055 |
| CACGACTTATGA  | 814.013071301061 | 0.294113175727734 |
| ACTCCAAATGAC  | 814.016774694069 | 0.199473026167628 |
| AAAACGTCAGAC  | 814.020929421691 | 0.23278663911156  |
| GAAGGTCATGAC  | 814.021462516952 | 0.194733398972459 |
| GCGTCACGAACC  | 814.03305235945  | 0.155209928223426 |
| ATGACAGGGTTG  | 814.034693874392 | 0.183448478503921 |
| GGAAATGTCACC  | 814.035174566214 | 0.330033369308962 |
| AATTATGACCGC  | 814.036664328737 | 0.393967002799857 |
| GTCACTCTATAA  | 814.043809578826 | 0.403626601748675 |
| AAGTTAATGACA  | 814.043974580269 | 0.189214980493781 |
| AATTACTCTATG  | 814.047609668847 | 0.252189579365433 |
| TAATAATGACCA  | 814.050630999062 | 0.228172709842112 |
| CAGAAAAGTGAC  | 814.051582392201 | 0.192384076027932 |
| CTATAAGAGTAA  | 814.055177079332 | 0.248885124357499 |
| CGTCACCAGAGC  | 814.057928581225 | 0.22731395534768  |
| CGTGACGTGATC  | 814.065701588397 | 0.19405260705993  |
| AATAATTTAGTC  | 814.070050269802 | 0.25279286741035  |
| GGATTCATGACA  | 814.072078301639 | 0.289216941424322 |
| ATGACTTGCCCA  | 814.072256515845 | 0.1419153984994   |
| GAGTAATAGCCC  | 814.072455613099 | 0.227455497555995 |
| AGACCTGCGTCA  | 814.077222192116 | 0.224281195183014 |
| AAATCGGTGACA  | 814.078308905524 | 0.21010949386486  |
| CAAACAATATGA  | 814.081487432926 | 0.235968879958684 |
| ATATCCGTGACA  | 814.088724799859 | 0.32257102741975  |
| AATATCGTCACT  | 814.090490867987 | 0.217637095989705 |
| ACGCTATGACCC  | 814.093222627463 | 0.158761731478596 |
| CCTGAATGTGAC  | 814.11115731698  | 0.249479645042671 |
| TCTGCATAGTCA  | 814.113253812878 | 0.290521403949526 |
| GGTATTATGACC  | 814.12658109173  | 0.38326982698422  |
| GCTCAAGTATGA  | 814.134886450978 | 0.331853564261673 |
| GTCACCTACCGA  | 814.152723570648 | 0.188024205271623 |
| AATAGGTGACCC  | 814.156737801245 | 0.242293562196919 |
| GATCTGGTGACA  | 814.159369826885 | 0.208408613205069 |
| CGATGGCATGAC  | 814.163165326404 | 0.220149407474783 |
| GCCTGCATGACA  | 814.171014104422 | 0.198808618068146 |
| ATTATTCATCAG  | 814.171616436091 | 0.240498947313019 |
| AGATTGGTCAAC  | 814.178049509199 | 0.193062365364057 |
| GTATAACATGAC  | 814.178679936208 | 0.292968576299727 |
| AGTACAACATCAT | 814.189438731474 | 0.240967932180531 |
| CCGTGTGGTGAC  | 814.189470870297 | 0.160171730686796 |
| TCGATGACCTAA  | 814.192058878265 | 0.205681610509417 |
| ACGACTCAGATA  | 814.194710046477 | 0.204712066885894 |

|              |                  |                   |
|--------------|------------------|-------------------|
| CAGAACATGACG | 814.194724844432 | 0.273031623202926 |
| CTCCGAGTGAC  | 814.200622063737 | 0.252460362286825 |
| AGTGGGACTCAC | 814.202712054019 | 0.25389914686551  |
| ACGAGTCAAGCA | 814.205355415884 | 0.219173124735365 |
| TATCATTATGA  | 814.217815036878 | 0.219711874771819 |
| ATCCACGTCAAT | 814.219040685719 | 0.231201891144443 |
| ATAGCGGTGAC  | 814.22571329678  | 0.258852910876092 |
| CTATTAGTGTCA | 814.233214114561 | 0.121649569128042 |
| GTCATGAATAAA | 814.24030809553  | 0.295981579540949 |
| ATGACGGGACCA | 814.243395365261 | 0.219917934270632 |
| ATGATAGCGTCA | 814.249427604905 | 0.255090409288288 |
| CCATCGTATGAG | 814.252256361312 | 0.266697877347899 |
| GGCTCTTGCTCA | 814.253021168914 | 0.213591629368948 |
| CTTGTTGACAC  | 814.260053328512 | 0.313798036921873 |
| AAGATGCATGAC | 814.261162056943 | 0.24075323632663  |
| ACATCTATGTCA | 814.262431191895 | 0.316045486059673 |
| GACTCACGCTAC | 814.263656360768 | 0.202874356180823 |
| CATGACTTGTGC | 814.265910625976 | 0.276009642559087 |
| CATGACAATGTC | 814.273950718479 | 0.140229821694516 |
| GTAGAGCATGAC | 814.274373565773 | 0.195181317017133 |
| AATAGGTCACAA | 814.275311069576 | 0.207704561963217 |
| CACCTGCATGAC | 814.281630675098 | 0.399966007690246 |
| GAGAGATGTGAC | 814.282328785905 | 0.184193674328745 |
| CCCCTTGACTGA | 814.287172751599 | 0.272587179781399 |
| TGACATGTCTAA | 814.30251466872  | 0.215709071556706 |
| CGAGCGAGTCAG | 814.308610073443 | 0.212055259575007 |
| GCGAACGGTGAC | 814.311347158703 | 0.315980087713469 |
| CGCCCTGTCATC | 814.312991590898 | 0.218151823817962 |
| GTCACCGTAAAC | 814.316822182681 | 0.332714064134551 |
| GCCAAATACTCA | 814.321984815294 | 0.203913064631384 |
| CCATCGTGACAC | 814.323763827745 | 0.2513958357971   |
| ATATGACCCGTA | 814.329709097163 | 0.227893168476852 |
| GCCTCCAGTGAC | 814.333499680921 | 0.224745853141999 |
| TCCTGACTCGCA | 814.34051267207  | 0.20222010542702  |
| CGTGACTTGGTC | 814.353383670054 | 0.42005717551036  |
| CATCCTAATGAC | 814.355696447446 | 0.260682753238993 |
| AAGGGTCAGAAG | 814.361609965755 | 0.207311726808217 |
| AGGGCTCTGACT | 814.379505194589 | 0.244572801249058 |
| GTAGGCTCTGAC | 814.381836003604 | 0.308512536490021 |
| AATCGCCGTGAC | 814.38476183246  | 0.216686822819738 |
| CTCCATTTGTCA | 814.389099094938 | 0.178429459062461 |
| AGTCACGCGCGC | 814.389526367356 | 0.221354480421406 |
| GACTAATAGAGA | 814.398435479396 | 0.155423436286196 |
| CTTGTCACAAAG | 814.400665712842 | 0.244671093676358 |
| CGGACCATGACA | 814.422221183247 | 0.254234672675732 |
| TCCCAGTGACAA | 814.422653347904 | 0.300183338281097 |
| AATTTAGTCTTA | 814.426149366742 | 0.27563939918532  |
| ATGAGTAGGACG | 814.428110077104 | 0.207638700378202 |
| CACACTTGACTC | 814.437949091913 | 0.230573981762661 |
| GTCAGTACTGAC | 814.446693429305 | 0.360148266369284 |
| GTCATTAGGTTA | 814.447079357462 | 0.186127481443223 |
| AGTGACGCGGAC | 814.450030970918 | 0.217828751878349 |
| AATTAGTCGGAG | 814.450940368289 | 0.190397430115788 |
| ATGACGGACGAG | 814.451518736259 | 0.250282472967557 |

|               |                  |                    |
|---------------|------------------|--------------------|
| CGCAACATGACA  | 814.476664268198 | 0.204502363855951  |
| GTCACCAATCAC  | 814.487800235869 | 0.175484644946309  |
| ATGCCTGCATA   | 814.489243272606 | 0.102292336408118  |
| GTCACGTCCGCA  | 814.497362649704 | 0.236201208578102  |
| TATGTCACGGGA  | 814.502690198989 | 0.209696698381274  |
| GTCACAATGAAA  | 814.503322235938 | 0.33504391404353   |
| CTGCGTTGGTCA  | 814.5036810308   | 0.143691508502981  |
| ATTGCGTGTGAG  | 814.505466377859 | 0.212337291752581  |
| AACACGTCAAGC  | 814.51247678067  | 0.292721486744764  |
| CAGTCAGTGTTA  | 814.525215979368 | 0.204823662169207  |
| CGGTTATGTGAC  | 814.528964793985 | 0.314514702265901  |
| GTGACGATACTA  | 814.531137880017 | 0.239375022123444  |
| CGTACTGTGACG  | 814.532881609098 | 0.213919802032895  |
| TGTGATATCACA  | 814.533291913791 | 0.326263578051745  |
| ATTTTATTAGTC  | 814.538289654227 | 0.296673826883864  |
| CTGTTCTGTGAC  | 814.547104060685 | 0.221505480574913  |
| ACGCTGACATAT  | 814.547283076059 | 0.223704263794695  |
| GCCGCAGACTCA  | 814.553911723072 | 0.277824326962934  |
| GTGCGTGTGACA  | 814.558161470568 | 0.200676065091142  |
| CTAAGATGAGTA  | 814.55890558401  | 0.191486724164609  |
| CTGTCATTACTA  | 814.561543343925 | 0.252675693032855  |
| ATGACAACGTAC  | 814.562274511489 | 0.269405645482944  |
| ATCGCTGTGACG  | 814.564277231383 | 0.215618937415506  |
| CTACTGAGTAAC  | 814.571617008471 | 0.224470992635172  |
| GTCACCATGTGA  | 814.575309913054 | 0.301202848720492  |
| GCGCCTAAGTCA  | 814.576581812816 | 0.342534877401416  |
| AGGCGCGTGACT  | 814.585287570394 | 0.189538299689104  |
| AATCATGACAAC  | 814.605274192731 | 0.220864419431513  |
| ATGGCCCATGAC  | 814.605564016232 | 0.29444450899242   |
| CTTTTAGATGAC  | 814.610417544432 | 0.259518747936048  |
| CCTCCCAGTGAC  | 814.611579089288 | 0.239709279079455  |
| TCACACATGTCA  | 814.628221150365 | 0.187899761524158  |
| CACCGATTACTC  | 814.638757572724 | 0.25587573745101   |
| GCTCGAGATGAC  | 814.642669571476 | 0.194198109131331  |
| ACCATATTATGA  | 814.645592893804 | 0.311781982788356  |
| AAATTACTGAAT  | 814.647341228532 | 0.194978355095233  |
| GCCGCAGATGAC  | 814.648287415906 | 0.260820313694858  |
| ACTAGCAGTCAG  | 814.651250222855 | 0.115317874797629  |
| AACATATGACGG  | 814.660026186854 | 0.191484730594089  |
| CTGGTCACACTA  | 814.683073171313 | 0.332450806138902  |
| AGTCAGTCCAGA  | 814.687524104875 | 0.326977671498736  |
| TGACTAGGGCAA  | 814.696761441414 | 0.296102597024849  |
| GATGAGCCAGAA  | 814.70191444724  | 0.233219584313056  |
| CCTGCCTGTGAC  | 814.707105020864 | 0.256333524472478  |
| CAATCAAATGAC  | 814.707264395607 | 0.380777483536776  |
| GATCTTGTGACA  | 814.707334360081 | 0.191853000769375  |
| CGACGTGGCTCA  | 814.710460283662 | 0.29567195606551   |
| GCCAAGCATGAC  | 814.717916023538 | 0.232157322440565  |
| GTCACACGGGTA  | 814.718314708563 | 0.250531036521394  |
| ACACGCCAGTCA  | 814.725568761094 | 0.178610112206662  |
| GACAGAGAATGAC | 814.731868550412 | 0.0872595172531067 |
| AAGTCACGGATG  | 814.740097634927 | 0.275899211922731  |
| GAACAAATGACA  | 814.745768629866 | 0.128326657422848  |
| GTCACAATGGAA  | 814.747260380572 | 0.263652305190992  |

|               |                  |                    |
|---------------|------------------|--------------------|
| ACGAGTGACAGA  | 814.751243386993 | 0.132209998609097  |
| CGTCATGCGAAA  | 814.767045498064 | 0.218345612310071  |
| GAGTCAAAGCTA  | 814.773095229035 | 0.224350340936273  |
| GAAACTGTGACC  | 814.77325483839  | 0.276626354516292  |
| TGACCCATCCCA  | 814.77693399809  | 0.213317817495788  |
| CAGTCAGATAGG  | 814.783830761326 | 0.0875504070267473 |
| CTCCTAGTGTCA  | 814.797983075712 | 0.25844861712075   |
| AGGCTCACTCAT  | 814.798094075305 | 0.290510864277739  |
| AAGATAGGTGAC  | 814.802244321187 | 0.232455750762613  |
| TAGTCAGTCGAA  | 814.806832068866 | 0.209438913366019  |
| GAGTCAAGAGCC  | 814.809445853857 | 0.258508545893368  |
| ATTGCAATGACA  | 814.809945201144 | 0.235024063492115  |
| TGAGTCGCGGCA  | 814.822576652502 | 0.256709972221504  |
| ACGACTCTTACA  | 814.828034486608 | 0.139630031455455  |
| TAATAGACTCAA  | 814.829764928121 | 0.28534506786417   |
| GCGATTAGTGAC  | 814.832664923113 | 0.203672610589839  |
| GCTCAGTAGTCA  | 814.832886620829 | 0.256004182991316  |
| CTGGTGACGATA  | 814.834030620566 | 0.210035680401266  |
| GAAACACTCATC  | 814.845262994782 | 0.224112271517936  |
| ATGACAAGCCTA  | 814.846746653924 | 0.285370180709757  |
| CCGTAAGTGACA  | 814.849788903718 | 0.179255111894085  |
| AATGACGTCTCT  | 814.851147979183 | 0.187183314303649  |
| ATATGCCTCATA  | 814.855758513579 | 0.219821642789087  |
| CATTGATGACCC  | 814.861249290413 | 0.271015524571431  |
| ACTTAAGTGACA  | 814.864484456511 | 0.347854472205286  |
| ATGACCTAATCA  | 814.86662700798  | 0.189342154935439  |
| TACGACATGACA  | 814.887115249638 | 0.171874564795629  |
| AAGCTAATGACA  | 814.89036348816  | 0.291621490643126  |
| CATTGACTGTTA  | 814.899736864273 | 0.226954133893506  |
| TATGAGTGACATA | 814.906826094332 | 0.260865338782241  |
| GTGAGCGAGTCA  | 814.90879821559  | 0.288553237508503  |
| GTCACCACTACA  | 814.919454867191 | 0.151071147451525  |
| CCTAGTGACGGA  | 814.92012458003  | 0.392071079817403  |
| AGTCGGAATGAC  | 814.935620135133 | 0.151104663117138  |
| AGTCAGACAGTA  | 814.936671564887 | 0.164335464724059  |
| CAATGTCTGTCA  | 814.939459674512 | 0.256892672241532  |
| GCCACGCGTGAC  | 814.946258500111 | 0.160010898485552  |
| CGTCACTCAGGA  | 814.949044139956 | 0.302940458017079  |
| AGCATGTGACGC  | 814.96054550642  | 0.2167904282536    |
| CACGGTTGGTCA  | 814.963624285672 | 0.418722148034134  |
| AGTACTCACACT  | 814.967959153248 | 0.200641088528592  |
| ACCTACATGTCA  | 814.986721117461 | 0.268450097136812  |
| CAGCTTGACACA  | 814.99079538073  | 0.197067779387634  |
| GGTGACTTCACA  | 814.991689686879 | 0.315255931431473  |
| AACAGTCAATGT  | 814.994976477656 | 0.206376532090286  |
| GTCATGCGTACA  | 815.003534743479 | 0.274080388786817  |
| TCGAGTCTGTCA  | 815.01934577927  | 0.283508483958145  |
| ATGGTGTGTGAC  | 815.019602701427 | 0.201207194894335  |
| ATATGACCCCTA  | 815.026539921411 | 0.249305122963447  |
| ATGACAATCATA  | 815.028102067998 | 0.359949260113514  |
| ATGACGTCGCCG  | 815.028680730865 | 0.178879105872976  |
| GTCATTAGCACA  | 815.042406657858 | 0.282517515757724  |
| AAAGGTGTGACG  | 815.045746699064 | 0.186075576955346  |
| TCAACCATGTCA  | 815.048679191737 | 0.235323759262816  |

|               |                  |                   |
|---------------|------------------|-------------------|
| ATTCGGGATGAC  | 815.053520301166 | 0.284634094415848 |
| AGGGATCGTCAT  | 815.054165519892 | 0.19729852647857  |
| CGATGATGCACA  | 815.078786072225 | 0.302141236311033 |
| ACTCATACGGTA  | 815.080104425455 | 0.212687351598285 |
| CGACTAATTACA  | 815.085435542672 | 0.130460760455315 |
| CCGTGCATGACA  | 815.090203853717 | 0.257481553786202 |
| GTTAAGTACTCA  | 815.091845389083 | 0.373736315614802 |
| CATCAGTGATGA  | 815.098010557166 | 0.236909292450607 |
| GTGATGTGTACA  | 815.107213672854 | 0.22654069977003  |
| CAGCCTAGTGAC  | 815.107723295422 | 0.239198416743731 |
| CTTCGTGACCCA  | 815.112392637334 | 0.187049852723341 |
| CTAACTTGGTCA  | 815.122482962412 | 0.270991519562784 |
| CATGTCATGGCA  | 815.12814820274  | 0.29318883165359  |
| AATTATGTTGAC  | 815.138297088314 | 0.261461667460329 |
| ATTACGCAGTTC  | 815.140250013885 | 0.265320552632032 |
| CTTGATGAGCCA  | 815.140366419219 | 0.245117245741594 |
| AATGGTGACGCC  | 815.143336261669 | 0.207268090928453 |
| AGCAGTCAGATG  | 815.144681435494 | 0.207077578718538 |
| GATGTCACGTCA  | 815.147731392914 | 0.210824072382002 |
| CTCAAAGTTGAC  | 815.148411647197 | 0.275100209910125 |
| AGGATTAAGTCA  | 815.151488858368 | 0.27213154311159  |
| CTTGGGTAGTCA  | 815.154356240338 | 0.278486159404337 |
| CACCCGTGTGAC  | 815.156748833009 | 0.306548031647123 |
| ATTGGGTGACGA  | 815.159614292419 | 0.272416788886934 |
| GTCAGTGGTCAC  | 815.16135597928  | 0.214620152199471 |
| GTTTAGACTCAA  | 815.16147401235  | 0.18859766076073  |
| CGTCACCCGGGC  | 815.16555332509  | 0.264021987670579 |
| ACGTCATGCTCG  | 815.175579027069 | 0.15702779457999  |
| CGTCACTCAGTA  | 815.177152250973 | 0.131057349082075 |
| GTCACGCGTTCA  | 815.183245428962 | 0.252988974859404 |
| GCGTCAACGTCA  | 815.183998006534 | 0.315548810360535 |
| ATTAGTCGGCCG  | 815.186353324821 | 0.294034988234334 |
| AATATGTCAGCT  | 815.191894193749 | 0.153302972481221 |
| ACGTCAGATTTTC | 815.194355914283 | 0.281137837852436 |
| CCAGTCAGATGG  | 815.205475977163 | 0.203373467152372 |
| ATCCTCGTGACA  | 815.207333226482 | 0.243549492013912 |
| AATCATGACGAT  | 815.210135863006 | 0.243082662923676 |
| GTCACACCTCAA  | 815.217533491171 | 0.203439125551846 |
| AATCCGATGACC  | 815.219880733379 | 0.164298096928735 |
| CTATGAGACACA  | 815.224695980875 | 0.22584178778284  |
| ACATTTGGTCAG  | 815.233919951144 | 0.331125561602911 |
| ACTGCCTGACTG  | 815.234664231322 | 0.308999657327301 |
| AGTCACTAGTGA  | 815.235462633914 | 0.231056737465716 |
| AGTCTATGTGAC  | 815.236013550103 | 0.288734602485928 |
| AGTCGCCGTCAT  | 815.238216130861 | 0.322072526348458 |
| CATGCCTAGTCA  | 815.242377335108 | 0.275872187956923 |
| GGGGTGCATGAC  | 815.243013707943 | 0.25049313434065  |
| GACTCAATAGCC  | 815.246035367033 | 0.146584922430946 |
| GGTGAGCAAAGAA | 815.247919646069 | 0.14471852742945  |
| ACGTTATGACCC  | 815.255234410583 | 0.280605581832602 |
| CTCTCTCGATGA  | 815.255502681056 | 0.384584051914986 |
| ACATGGGTGACA  | 815.262296157218 | 0.263574811184996 |
| ATGTCACCCGGTC | 815.265065491588 | 0.204823406034345 |
| GTCTTGACTGAA  | 815.267617454575 | 0.358244656590993 |

|               |                  |                   |
|---------------|------------------|-------------------|
| ATCACGTGACGC  | 815.269963236816 | 0.304895700866533 |
| CGAGCATGTGAC  | 815.279318667116 | 0.295060165646577 |
| GTGACTGCCGTA  | 815.281012118575 | 0.2746624723016   |
| ATTGTGTACTCA  | 815.286639537482 | 0.256342378297453 |
| CATATACTACC   | 815.290007231284 | 0.202855345158354 |
| ACTCATTACACA  | 815.292689480952 | 0.204603546864875 |
| ACCGGATTAGTC  | 815.294866126209 | 0.233158713309839 |
| GAGTAATTTATC  | 815.300542222766 | 0.278592724275491 |
| CCGAGAGGTGAC  | 815.305705182505 | 0.366342716221801 |
| CTAGTTATGTCA  | 815.308381357237 | 0.198087297672644 |
| CAGCGTGACACG  | 815.310913422261 | 0.244440944190057 |
| CGGTGAGCAACA  | 815.312242709287 | 0.275030469190787 |
| AATGAGTATGCT  | 815.313660699313 | 0.202152725697954 |
| CTCATACTTGGA  | 815.315626092659 | 0.317475478054694 |
| GTCACCGTCTCA  | 815.317953294284 | 0.242199182676085 |
| AACCTTTATGAC  | 815.319951356109 | 0.225013315229923 |
| CAAATCCATGAC  | 815.325211434798 | 0.198265034908977 |
| GACTGAAGTGAC  | 815.326198092472 | 0.216177541996901 |
| GGTAACTCATCA  | 815.333882714594 | 0.233061875074045 |
| GTCATTTGAATA  | 815.336500159656 | 0.311342034897629 |
| TGTATGATACAA  | 815.341696478945 | 0.242589556297465 |
| TAAAATGAGTGA  | 815.349968094422 | 0.367865112124645 |
| AGTTTTGACTGA  | 815.359986984442 | 0.213215250057887 |
| GAATACAGTCAA  | 815.369292797667 | 0.24159529489646  |
| CCCGCTTCGTCA  | 815.372164292888 | 0.158434875325336 |
| GTCACAGGCAGA  | 815.377290033382 | 0.172355547355756 |
| ATAGAAGTGTC   | 815.381553117307 | 0.214286676932779 |
| TAGGTGTAGTCA  | 815.38167180153  | 0.252579956242981 |
| ACACGTAACAAG  | 815.389871193103 | 0.347055596195674 |
| AGCACTAAGTCA  | 815.392931235765 | 0.311757500023432 |
| TAAGTGTCAACA  | 815.400608769841 | 0.269972811581063 |
| AACCATGTCACT  | 815.410347826855 | 0.160005952203369 |
| CTGAGGCAGTCA  | 815.413056949571 | 0.318962335955531 |
| GAAGTCAGTCAA  | 815.426873481437 | 0.325138820638524 |
| CGCGAAATGACA  | 815.447245857581 | 0.246533254665451 |
| AGGCCAATGACA  | 815.449328075152 | 0.215573564377386 |
| TTCGTGACCCAA  | 815.452104304593 | 0.253594832650245 |
| ACTCATCACT    | 815.453000620691 | 0.153173998801562 |
| AACAGTCAACCA  | 815.456000704271 | 0.367935891875693 |
| ATTGTCACACGG  | 815.456430763356 | 0.233831929500759 |
| AAGTCGTACCCG  | 815.458312039326 | 0.205835047105244 |
| GTCACACGCGCA  | 815.459721186312 | 0.181742633072252 |
| TGTATGTGACAA  | 815.461666945779 | 0.239838454677177 |
| AGATACGGTGAC  | 815.464213004746 | 0.199586464988762 |
| ATCGTCATGTTT  | 815.465099456428 | 0.241935347455029 |
| AACTCAGGTGAC  | 815.467880642796 | 0.304248248015114 |
| GTCATGCGGGCA  | 815.474418802042 | 0.326673606673441 |
| ACGGTGACGTTT  | 815.479415229782 | 0.151848251772599 |
| AGGATACGTGAC  | 815.481770684947 | 0.254538659191319 |
| GCAGATAAGTCA  | 815.484992948418 | 0.424007994527837 |
| CTCACATGACAA  | 815.49015019808  | 0.192866544003737 |
| ATGGATTAATA   | 815.490279719882 | 0.196417391069575 |
| ATGACCCGTTTCG | 815.496356319281 | 0.210977631492069 |
| ACGCTGATGTCA  | 815.499235107209 | 0.259753651970885 |

|               |                  |                   |
|---------------|------------------|-------------------|
| GATAGAAATGAC  | 815.500243655802 | 0.188301674250996 |
| TATTTTGACGCA  | 815.505886731125 | 0.198104732805967 |
| ACGTCGCTGACT  | 815.520248489533 | 0.373069922307762 |
| AGTGGGAGTCAA  | 815.521092834296 | 0.149335699692889 |
| CATGTTAATGAC  | 815.528427472883 | 0.249158926815816 |
| CATATCTAATGA  | 815.530306313204 | 0.326403727235128 |
| AGGTCAAATGAC  | 815.534816770648 | 0.332996636684169 |
| GTGCGTACGTCA  | 815.541771426012 | 0.241255314009635 |
| ATGACGGCACTG  | 815.550114580137 | 0.211101077851977 |
| AGTCAGCGCAAT  | 815.554157808398 | 0.191998497225319 |
| GTTGTCACCTGA  | 815.562037600314 | 0.425101177995018 |
| ATACATGACGAT  | 815.562864781648 | 0.235915298130859 |
| ATGACTTGAAT   | 815.566286116415 | 0.27298657565613  |
| AGTGACATGACA  | 815.568534866543 | 0.193284182038126 |
| AGGCCGAGTCAG  | 815.573398744536 | 0.255278271630552 |
| CAGAGATGAGTA  | 815.582205389252 | 0.192049188020292 |
| CCCGGTGGTGAC  | 815.582825837106 | 0.201864206761458 |
| CAAGAGGTGACG  | 815.585748858125 | 0.235616282390951 |
| GTCAGGTAGTCA  | 815.592448589569 | 0.253947023736292 |
| AATTCGTAATCG  | 815.594385787351 | 0.366383103274773 |
| CTCAGGATGACC  | 815.594591210272 | 0.359908458880269 |
| CTTATGCATGAC  | 815.623828120399 | 0.280376429110962 |
| CGTAGACGTCAC  | 815.625236534139 | 0.230608546565674 |
| ACTTATCTGACT  | 815.632389334062 | 0.254248485716418 |
| CTGAGTCTAAAG  | 815.636438342305 | 0.20383077958518  |
| ACGTCATGGAAA  | 815.639801608506 | 0.205362753463992 |
| CGACTCTTATGA  | 815.641424199741 | 0.282540916752104 |
| CGTCACCTTATA  | 815.649826822116 | 0.174588269353843 |
| ATGACGTGAGGG  | 815.654286784436 | 0.196000290868869 |
| ATGATTCGATCA  | 815.655643682889 | 0.193125622036857 |
| CTGACTATGATA  | 815.657897259625 | 0.226533198218004 |
| ACCGAGTGACCC  | 815.663722491695 | 0.212596182217898 |
| CCTCGTGACTGC  | 815.664690592152 | 0.241590959249351 |
| AATGTGTGACCA  | 815.668602599342 | 0.268242562350412 |
| GTCACACGCAAA  | 815.668991966187 | 0.217217214803931 |
| ATAGTATGAATC  | 815.67370277721  | 0.217418161615783 |
| ATGTCACATGTA  | 815.676230386339 | 0.224883545558174 |
| TGTGACCACTAA  | 815.676642567851 | 0.227750403985015 |
| GCTCATATGAGA  | 815.689860082212 | 0.36669394710121  |
| TCAAAGGACTCA  | 815.690339873847 | 0.381612070490036 |
| CGCAAATTAGTC  | 815.694459738418 | 0.188320858410928 |
| AGGCTAATGACG  | 815.696241800525 | 0.23481551092284  |
| CTCACGTGACAC  | 815.70032968856  | 0.214551046274779 |
| TGTGACGTCTAA  | 815.701526916166 | 0.34658724010514  |
| GTCACATTGGAC  | 815.712035407971 | 0.218013726134724 |
| CCTAAGTGACGC  | 815.718283570442 | 0.251214052234657 |
| CGTCACATGTAG  | 815.720058679469 | 0.306949632527122 |
| GAGCAGATGACA  | 815.724092864254 | 0.229358300557792 |
| GTCACTCTCGGA  | 815.734684143769 | 0.283729233335451 |
| TGAACCGTCACA  | 815.737040042456 | 0.201419570763687 |
| ATGACAGGACGG  | 815.740814418695 | 0.21973407025912  |
| ACGTGTGACAAAT | 815.74870742329  | 0.149753077289183 |
| AAAGACGGTGAC  | 815.748863642202 | 0.150091966278331 |
| CGTCACCCTTAA  | 815.749010230904 | 0.246786608402661 |



|               |                  |                   |
|---------------|------------------|-------------------|
| AATACCAAGTCA  | 815.751971184099 | 0.354973696917002 |
| GCGTTTGGTGAC  | 815.752597042338 | 0.254982714631893 |
| GCGACACCGTCA  | 815.752734247013 | 0.355878525151273 |
| CTGATGAGTTAC  | 815.757011785986 | 0.221758178633587 |
| TGACGATTCGAA  | 815.766951941425 | 0.246260756862679 |
| TCAAATGGCTCA  | 815.768903412145 | 0.230883571183637 |
| AGAAAATTACTC  | 815.781885269145 | 0.25159511023649  |
| CAGGTGGTGACA  | 815.783569948488 | 0.283903717593345 |
| CGAGTCAGGGTA  | 815.788919883097 | 0.142642039911203 |
| GAATGGCTAATC  | 815.791625084878 | 0.1537359377382   |
| ATCCGTCAGAGC  | 815.793738481129 | 0.188011451211201 |
| CAGATAGTGTCA  | 815.805951931071 | 0.252314528727828 |
| ACCGAGTGACAA  | 815.808847288257 | 0.328317373278895 |
| ACGAAGTCACCT  | 815.814472899137 | 0.196086235090181 |
| CACACAAAGTCA  | 815.814683824142 | 0.259073120237302 |
| AGTGACGATAAT  | 815.815590518112 | 0.366225465393916 |
| AGCAGTGACGAA  | 815.827736852623 | 0.210239202343613 |
| CAACCCTGTGAC  | 815.828169817439 | 0.30156080232007  |
| CTATGAGACACC  | 815.834788441881 | 0.229973869646675 |
| CGATGTTTGTCA  | 815.834833907044 | 0.193026980131398 |
| ATTACATGACGA  | 815.835200571484 | 0.259193278995756 |
| GTGACAGAGACA  | 815.839975724173 | 0.246094544331699 |
| TTGTCATTAATA  | 815.842446490241 | 0.170942695019899 |
| GCGTCACCCAC   | 815.851957111285 | 0.269710286698416 |
| CCGGTCCGATGA  | 815.857159144161 | 0.241300184880317 |
| ATGGACGTCATC  | 815.858233746522 | 0.218859655822791 |
| GTAATGTCAATTA | 815.86144792936  | 0.241236751651579 |
| ATACATTGACTA  | 815.864176417693 | 0.19346427591684  |
| TACGATGACCTA  | 815.871984898794 | 0.154308819279316 |
| CAGAAGGTGACA  | 815.896502002227 | 0.288040105826047 |
| GGGCTATAGTCA  | 815.902299488799 | 0.124825788006065 |
| GCGGCTTGTGAC  | 815.910604935838 | 0.282612032158605 |
| ACTAATCATGAT  | 815.911629557663 | 0.195298887937542 |
| ACAAATCTGACT  | 815.915014781167 | 0.21684302262524  |
| AGTCAGAGGCCG  | 815.915828292917 | 0.213394039203868 |
| CGGTGACAAAGTA | 815.918835932418 | 0.1593652974233   |
| CAAGTGCGTGAC  | 815.927774658221 | 0.394279705415318 |
| ACCGTCATTGAT  | 815.931941149612 | 0.308322841867484 |
| GTAGATAATGAC  | 815.933271987585 | 0.156449114438419 |
| ACACCAGTCAGA  | 815.93348711248  | 0.191568701084661 |
| CAGTAGAATGAC  | 815.937861313864 | 0.223580581299571 |
| TGGTCACCTAAA  | 815.943723800348 | 0.187306674257569 |
| TGACAGGTTACA  | 815.943803532574 | 0.278536528344503 |
| CAGTCAAATACA  | 815.946118706069 | 0.374037464059726 |
| GTCATCTCCAGA  | 815.947799707078 | 0.214758257305572 |
| AGGATAGATGAC  | 815.950822943198 | 0.233239517571759 |
| CTAGCTGGTGAC  | 815.954017801249 | 0.287979140052594 |
| AATGTCAGTAAT  | 815.958215876777 | 0.288785060988035 |
| ACTCATTCTTGC  | 815.960319566139 | 0.188481362221043 |
| CGACTTCATGAC  | 815.963351743892 | 0.366394279612905 |
| CTTAGTGACATA  | 815.965570624334 | 0.20702558636131  |
| ATTAGTATATGA  | 815.967179540044 | 0.270880862850083 |
| AGTCAGAGACTC  | 815.972378417224 | 0.205671892888565 |
| AAGATTCATAGA  | 815.985275770555 | 0.208697247249927 |

|              |                  |                   |
|--------------|------------------|-------------------|
| GACGTGTCCTGA | 815.990041360579 | 0.438317049469652 |
| TAGGTCATAATA | 815.991161567607 | 0.237470302134003 |
| TACAGAGAGTCA | 816.006155389389 | 0.258848850131675 |
| AGAACGGTGACG | 816.019105746929 | 0.123430049139523 |
| TAGAGTGACGGA | 816.019651385655 | 0.160066284787803 |
| CGACTCACGTTA | 816.021123641808 | 0.18122223990857  |
| GACTGGGTGACA | 816.029833493217 | 0.20925536441021  |
| AGAGCTGACTAT | 816.049605475535 | 0.257721472847457 |
| TACTGTGAGCAA | 816.050859060145 | 0.128567283092583 |
| ATGTAACATGAC | 816.053023236338 | 0.267646460790517 |
| GTCGACTCTTAA | 816.063584991112 | 0.187739388904708 |
| ACAGTCAGTTTG | 816.075603845402 | 0.131343676002454 |
| ATGTAAGACTAA | 816.077238207434 | 0.22106885102875  |
| GACACGTGTCGA | 816.078810173994 | 0.189466515512857 |
| AGTAAGACACAT | 816.080432007397 | 0.2504203647921   |
| CCAATTATGACC | 816.080887976102 | 0.184677102426732 |
| ATGAGCAGTGAC | 816.098262565732 | 0.315468803821329 |
| ATTACTTGACTC | 816.100822827791 | 0.240361487383741 |
| CGACTCAGAGTC | 816.112571391913 | 0.147311284175588 |
| GGCTACTCATGA | 816.126978666626 | 0.232090570074842 |
| ACTCATATACAT | 816.130509195843 | 0.204321598733294 |
| GCGTCGTGTGAC | 816.132986232198 | 0.282978132479023 |
| ACACCGTAGTCA | 816.136035684313 | 0.131785497949309 |
| ATGACCGAGACG | 816.14257745     | 0.220731783686342 |
| ATGTGTATGTCA | 816.153201687927 | 0.200214978582299 |
| ATGGATGTGACA | 816.154446502612 | 0.284280027962032 |
| CATCGGATGACC | 816.15702924482  | 0.270757840893187 |
| GTGACATAGAAC | 816.161524821194 | 0.249924564214128 |
| ATTACGTAGATG | 816.16237613775  | 0.340874445918033 |
| ATCACTGTCACA | 816.166081494531 | 0.154790573646088 |
| TAACGTCACATA | 816.17133149848  | 0.196733146587167 |
| CAAATTGACTGA | 816.173745505869 | 0.30708433308226  |
| ACACCTACTCAT | 816.191953895396 | 0.150523012779321 |
| ACTCACTGTCAC | 816.195176633426 | 0.19462327410901  |
| ATGACGTTGAGG | 816.199753492856 | 0.293056505421793 |
| AGTGAGTCTGCG | 816.201468007054 | 0.259224091889464 |
| TCACGAAGATGA | 816.20492139949  | 0.208538704465154 |
| ACTCATAATTCC | 816.210436467069 | 0.189302274446198 |
| AATTGATTCATG | 816.214753742543 | 0.195972579691665 |
| CTCTGTGAGCAA | 816.215565407363 | 0.206375050370365 |
| TGTCACCCTTAA | 816.221662115677 | 0.231587578112118 |
| GGTCATAATAAA | 816.231003895873 | 0.257690507261734 |
| AGTTGCATCACA | 816.232434921434 | 0.275144695081927 |
| GTCACGCCTGAC | 816.240899567004 | 0.2324031356464   |
| TAGCGTGACAAA | 816.241199651332 | 0.234796313319566 |
| AATGAGTATGAA | 816.242032470894 | 0.169418549002852 |
| TATGATTCTTAA | 816.246999435569 | 0.232766935956338 |
| CCAAAAGTGACG | 816.249301288804 | 0.21527414340862  |
| TCACGGTGACAA | 816.258047503506 | 0.206530562458396 |
| GGATTATTCACC | 816.258283497546 | 0.315831314440836 |
| GCATTCGTGAC  | 816.259771006332 | 0.262052448180644 |
| AGCTCGTTCATC | 816.282504198202 | 0.25013029190663  |
| GGAATGAATGAC | 816.287041847193 | 0.259845673287572 |
| AGTAATTGCTCA | 816.288018911571 | 0.414997787938149 |

|               |                  |                    |
|---------------|------------------|--------------------|
| ACAATAGATGAC  | 816.293002803068 | 0.188591639014168  |
| CGTCAATCAGTC  | 816.294013657456 | 0.215474150184078  |
| GACGGTAATGAC  | 816.296683327097 | 0.273731875550747  |
| AGTCACGGGCGC  | 816.29897746861  | 0.231117656018276  |
| GTCACCTTTAGA  | 816.311818665327 | 0.285776839209139  |
| CGTCATTTCATA  | 816.316640570053 | 0.270433277352887  |
| CAACAATGAGTA  | 816.322471766096 | 0.193513134004901  |
| CTACGGTGACAG  | 816.323933241599 | 0.240437954084423  |
| TGACATACAGCA  | 816.327883472802 | 0.252250370428547  |
| AATTTTCGCGTCA | 816.328532232885 | 0.267471940527752  |
| CATGACACTCAC  | 816.329471939258 | 0.0907503805727383 |
| ACGTCACCCCAA  | 816.333842156684 | 0.119731917521287  |
| GCATGAAATGAC  | 816.335288827865 | 0.260072057972133  |
| CGCACGGTGACA  | 816.340128062388 | 0.211153769947125  |
| AATCGAGAGTCA  | 816.34292971771  | 0.216774767205197  |
| TCGGGTGACCCA  | 816.343899836196 | 0.227156272153679  |
| ACTTTGTACTCA  | 816.344720403249 | 0.237696950873978  |
| CATACCTGACTA  | 816.357919273366 | 0.277962030861992  |
| TATCAGTGACGA  | 816.362463372773 | 0.31669789434156   |
| GACTCGGTCAATC | 816.367540966377 | 0.27331264854706   |
| ATATCATGTCAT  | 816.382170859169 | 0.251354032349276  |
| TCGATTTGTCAA  | 816.383149733358 | 0.323809745412365  |
| ACCCATCGTCAT  | 816.391388385602 | 0.170538210809256  |
| AGTCACGAGGAC  | 816.391502001698 | 0.303207753407597  |
| CAGAAGTGACAC  | 816.392026689309 | 0.131566158227479  |
| GGCGACGATGAC  | 816.407924819424 | 0.275534655738434  |
| CATGACCCAGTC  | 816.411768084788 | 0.132341680766968  |
| ATCCACGACTCA  | 816.412834012953 | 0.217395340116483  |
| CACTCGAATGAC  | 816.419508510329 | 0.225230542149048  |
| AGCATTTGTGAC  | 816.421940563376 | 0.280324590971356  |
| ATCGCGCTCAC   | 816.422759143703 | 0.224724050896096  |
| GAATTACGCAAC  | 816.425647217782 | 0.304295064206332  |
| CGATTGGCGTCA  | 816.438953331164 | 0.387986232595493  |
| GAATGAGTTGTC  | 816.441891306095 | 0.193570499760182  |
| GTATGACCGCGA  | 816.445812052441 | 0.228373890793511  |
| ATGACGAGCTGC  | 816.447296866251 | 0.268788515523139  |
| CCACGGTGACGG  | 816.450907544757 | 0.345788369272535  |
| TATATAGCGTCA  | 816.452456976019 | 0.381026534856999  |
| ACTGATAATGAC  | 816.456574387198 | 0.235656273433799  |
| AGACCTGGTGAC  | 816.468132476756 | 0.248519127097065  |
| CGTGCGTAATTC  | 816.472155069301 | 0.27359915127288   |
| GTCGTGACAAAC  | 816.47468674367  | 0.176838311228159  |
| ATTTGCAGTCAG  | 816.474856861648 | 0.186042629331667  |
| ATTACGTTGTCA  | 816.477748096718 | 0.209150812112899  |
| CTGTTTCGATGA  | 816.478337933242 | 0.242210950947336  |
| AAAATGGGTGAC  | 816.478723656031 | 0.212896244436278  |
| TGGTACATGACA  | 816.485159235541 | 0.354964240932799  |
| AGTCAGACGAGC  | 816.48854930584  | 0.198704854416676  |
| GCCATAAGTGAC  | 816.494700902581 | 0.163911180518249  |
| ATACTGTACAT   | 816.496834205018 | 0.205235947641866  |
| GTACGCGAGTCA  | 816.500291179204 | 0.265663525821981  |
| GTCAGGCTCATA  | 816.50466566286  | 0.281867352812019  |
| AGTCAGTGCGTC  | 816.505369384065 | 0.25222449281644   |
| ATCTTTTCGATGA | 816.507783747112 | 0.203977899982824  |

|              |                  |                   |
|--------------|------------------|-------------------|
| GCGCTTGGTCAC | 816.5127476886   | 0.140617142769491 |
| AACGGCGTCACT | 816.515304231392 | 0.189744993895031 |
| ACTCATTTTGCG | 816.526207027728 | 0.247053100155294 |
| GAGTCAAATAGA | 816.529174259151 | 0.197477534091169 |
| AATAACAGTGAC | 816.534194148834 | 0.265091694853045 |
| CACGGACAGTCA | 816.543729745751 | 0.295363748318648 |
| CCACTGTGACAA | 816.545293816777 | 0.268478193239908 |
| ATTATTCATCAC | 816.554047968536 | 0.303526400036028 |
| CATTAATAGTTA | 816.557951384723 | 0.293701901540363 |
| AACACCCAGTCA | 816.558843172616 | 0.337215836108213 |
| ACAACCTGTGCA | 816.568148733619 | 0.366645182921429 |
| CGTCATGGCAGC | 816.572595574954 | 0.330488565697165 |
| ACCCGTGCACT  | 816.580765503843 | 0.317188962518189 |
| ACCGAGTCAAAC | 816.581444735728 | 0.140008907317378 |
| GAGGCTGTCATA | 816.585382965114 | 0.111576811020466 |
| ATTGTTGAGTAA | 816.591132832138 | 0.210434339242769 |
| GATAGTACTCAC | 816.597228049132 | 0.232934140958032 |
| AGGCCGAATGAC | 816.599077926572 | 0.260614275344833 |
| CGACTAATTATC | 816.614018928319 | 0.190491323450721 |
| AATCGAATCATC | 816.62618282193  | 0.169950412701608 |
| CAGCCCAATGAC | 816.627852693468 | 0.254229970387869 |
| CCAACATGACAA | 816.629653323494 | 0.190587649304685 |
| GTTACGCAATGA | 816.650031302799 | 0.194330380680537 |
| ACAGTAAGTGAC | 816.65244572743  | 0.197844346333068 |
| CATTGGTGACGA | 816.652618210797 | 0.34397452617495  |
| CCGGTAAGTCAC | 816.655390672069 | 0.194380028372865 |
| AGGAATCATGAC | 816.671576202094 | 0.219797571676975 |
| CTTGCCAGTGAC | 816.678453467027 | 0.288848557941516 |
| TCTAAGGACTCA | 816.687723424397 | 0.229490342520741 |
| ATGACAACCACC | 816.69554646281  | 0.19237810630902  |
| GATCTAGATGAC | 816.713396743922 | 0.164279056179157 |
| CAAAGCGTGAC  | 816.714929133429 | 0.222335605696448 |
| GTCACGAACGAC | 816.717208054093 | 0.27777576132823  |
| AGTCAGCGTAAG | 816.723216257022 | 0.246976394190438 |
| TCGGTGTACGA  | 816.726923439739 | 0.225158949661116 |
| TATTAAGTGTC  | 816.728417671786 | 0.202812416066709 |
| CTGTCACCAGGC | 816.730572087304 | 0.222519157031015 |
| ATCTCAATGACG | 816.741766907935 | 0.244725010233128 |
| CTGACTCGGTCC | 816.744784162731 | 0.244785077296911 |
| CAACTTGACACA | 816.744812099355 | 0.21761935328005  |
| ATGACATCGCGG | 816.746647783541 | 0.277431164820044 |
| CGGATGACCGAA | 816.752699242368 | 0.314369875745005 |
| GCTGAGTAAACA | 816.752973466128 | 0.195908272219559 |
| CGTCTGTGACAA | 816.767511092124 | 0.195384364739122 |
| ACTGTGACAGTC | 816.773873104541 | 0.228769898729728 |
| CGTACTAATCAC | 816.787385405992 | 0.228579834736487 |
| GTCACAAGCTCA | 816.789938875514 | 0.185614660220908 |
| AAAGTGTAGTCA | 816.791877436585 | 0.239881414721453 |
| AAGACTGATCGA | 816.793808881239 | 0.294199773568872 |
| CTCGTGTGACAA | 816.810697192769 | 0.185665964081665 |
| GCGCTGTGACGC | 816.810988103723 | 0.328206836602998 |
| CATTTACAGTCA | 816.821159275201 | 0.255387254955784 |
| GGGACACAGTCA | 816.822748675049 | 0.290353708906644 |
| GCCCCTGTGACA | 816.838777139974 | 0.264529647239891 |

|               |                  |                   |
|---------------|------------------|-------------------|
| CGTGTCGTGCA   | 816.841490894534 | 0.239259976599557 |
| ACTACGTAATAT  | 816.875470594756 | 0.329207473576671 |
| GTCACCCCTGTA  | 816.897267702482 | 0.245938451587237 |
| AGTTCGTGTAC   | 816.901440643253 | 0.316598236101346 |
| ACAGACTAATTG  | 816.908400118739 | 0.196979382330499 |
| TACGCCCGTGCA  | 816.908533222164 | 0.216797261964166 |
| GATGCTATGACC  | 816.919913718813 | 0.216698118455081 |
| CTAAACGGTGAC  | 816.922690457015 | 0.205936109122365 |
| GAGTAATCATT   | 816.931252196878 | 0.198663824722148 |
| ATCGGCAGTCAC  | 816.946479195689 | 0.129013437816711 |
| ATGTGGGTGACA  | 816.954809703383 | 0.246183701857298 |
| CATTAACATGAC  | 816.955464840231 | 0.213717202829993 |
| CACTCACAGTGA  | 816.963435708429 | 0.252252734839294 |
| CGTCAGACAGTC  | 816.968878968491 | 0.267910959483389 |
| ACTCATTAAGAG  | 816.973336762694 | 0.240635083337575 |
| CGTCACCGACCA  | 816.980937423149 | 0.186350726800963 |
| GTCACCAAGCAC  | 816.98713632844  | 0.279865718291528 |
| ACTCATACAAAC  | 816.996035236266 | 0.257028680980153 |
| GAACCCAGTGAC  | 816.996468690494 | 0.217619708001951 |
| GATCCGGTGACA  | 816.996954753879 | 0.285293525702357 |
| AGTCAGCAATTG  | 816.998706955644 | 0.314744932507085 |
| CTGAGTCTACGA  | 816.999537486989 | 0.352557622400419 |
| CTATTACTCCTC  | 817.00623022958  | 0.182580282020665 |
| GCGAGTGACGAA  | 817.016185257287 | 0.17012849028955  |
| GTAATAGTCTTA  | 817.04553948921  | 0.143305893786268 |
| GTC AACCCGTCA | 817.046993176454 | 0.12084972233281  |
| CAGCTCGACTCA  | 817.050904173681 | 0.194749874135359 |
| CACAGTCAGGCA  | 817.051344547264 | 0.344848921296194 |
| GTAGTCAGTAAAC | 817.053914639128 | 0.278177358120249 |
| ATGACATTTTGG  | 817.055170879963 | 0.23908477764905  |
| CGTCACTGACCA  | 817.061288656918 | 0.155713414008046 |
| ACGTCACCCGCA  | 817.063743253578 | 0.195759122756347 |
| AACGTCACCTAA  | 817.065195931053 | 0.263109135294413 |
| ATGACTTCTCGA  | 817.069978593895 | 0.244530898061743 |
| ATTTAGACTCAA  | 817.084098506195 | 0.219184673216134 |
| ACAGATTACGTG  | 817.084798516648 | 0.274263523660445 |
| GGTCCATGTAC   | 817.085903271781 | 0.222169130182426 |
| CAGCGTAGTGAC  | 817.106694993969 | 0.209109142975848 |
| CTCATCGGAGTC  | 817.131791131005 | 0.197200243215966 |
| ACTAATAGGTCA  | 817.134427987853 | 0.26064834186157  |
| ATAGACTCAGTC  | 817.135747083283 | 0.338165881696612 |
| GTCATGCAAGGA  | 817.137097809374 | 0.241600988245329 |
| CATAGGGGTGAC  | 817.142121762178 | 0.254001540492897 |
| ACGTCACTACTC  | 817.146331015355 | 0.101273687473833 |
| AATCGACTCAGA  | 817.174530606202 | 0.247120489117159 |
| AGACTGCGTCAG  | 817.190588920987 | 0.120594558718766 |
| GCGAGCGAGTCA  | 817.196065151435 | 0.390606766738259 |
| AGATGAGGTCAT  | 817.205527166203 | 0.210227823340617 |
| AGTCAGTGGTCA  | 817.207855227807 | 0.220518901990439 |
| ATCGTTGAGTAA  | 817.207974813925 | 0.224840182735189 |
| GATGACGGCGCA  | 817.215622466206 | 0.194574789515609 |
| TCCGCATGACGA  | 817.222360628477 | 0.3010424925655   |
| CAGTCAGGCTTA  | 817.222627422024 | 0.200796098010389 |
| ATGACGGCACAT  | 817.225269396787 | 0.139846794411183 |

|               |                  |                   |
|---------------|------------------|-------------------|
| CAGTCAACGCGA  | 817.228789084562 | 0.29426449520222  |
| CCTAGGTAGTCA  | 817.240234983737 | 0.441454437583102 |
| GCATTACGCAAC  | 817.240650482923 | 0.24716637065536  |
| AGGACTAATCCT  | 817.240969458128 | 0.241799077890013 |
| GGTGACGTCTCA  | 817.264752599815 | 0.174192900737658 |
| ACGCTGTCATGA  | 817.265344878194 | 0.224752911349638 |
| GACTCAGGCCGC  | 817.269386694839 | 0.259838692511156 |
| CAAACGATGACC  | 817.274071620219 | 0.265967729864281 |
| ACGTCATGTACA  | 817.277519813488 | 0.196616628047131 |
| ATACATGTATCA  | 817.280327764529 | 0.237425739023422 |
| GACTGAGTCTAC  | 817.28158948374  | 0.204764200966101 |
| GCTAAACGTGAC  | 817.283097282268 | 0.218415184319857 |
| CCATCGCAGTCA  | 817.284950373019 | 0.143174154523681 |
| GTCACATTCGAC  | 817.285430490072 | 0.252621450724946 |
| ATGTGAATGACC  | 817.297639642337 | 0.209475799347371 |
| GTCACCGAGCAA  | 817.309388470707 | 0.278244631864449 |
| GAGTCTCCGTCA  | 817.315238559444 | 0.23088677397656  |
| CTATAGTGACAC  | 817.323734596929 | 0.241775222288934 |
| ACTACGAGTAAT  | 817.324568328434 | 0.214973315171645 |
| GTCACCACCACA  | 817.33313115363  | 0.348300697963149 |
| ACCAAGTCACTA  | 817.33710674949  | 0.213159926154583 |
| CACTATGATGCA  | 817.342871482583 | 0.240510654594365 |
| TCGACATGACCA  | 817.346145809073 | 0.344330828618805 |
| GTCACGAGTTGA  | 817.351038315514 | 0.208119416922773 |
| TATGGCTAATAA  | 817.358567396437 | 0.359798565727517 |
| ACACTCTAGTCA  | 817.37037704682  | 0.241045208892834 |
| ATGACCGAACAT  | 817.374447114723 | 0.201378376795174 |
| ATACGTAATAGG  | 817.378193128345 | 0.116466428278519 |
| ACTCATAATTTTC | 817.379974940667 | 0.144681855508145 |
| GTAACCTCTGAC  | 817.37999218695  | 0.19555300845713  |
| GAGCACAATGAC  | 817.386715269813 | 0.284117671430522 |
| GTCACACGAAGA  | 817.388029132892 | 0.331970256264637 |
| CGTTACATGACA  | 817.400766647307 | 0.260572855621849 |
| GTAAGGCATGAC  | 817.403175110736 | 0.232720056911593 |
| TCATGACCTGGA  | 817.405440286216 | 0.247000845339733 |
| AACAACGTCACG  | 817.405616241572 | 0.192799930258335 |
| TGAGCCATCCAA  | 817.406280791632 | 0.190379174351925 |
| CAGTCAGATGGG  | 817.413387994384 | 0.317395893498089 |
| CCGCTTTGGTCA  | 817.425104947825 | 0.229857535459903 |
| CAATCGTGACAA  | 817.427232404974 | 0.266351103831148 |
| CTAGTACTCACA  | 817.431327244611 | 0.162551194293521 |
| CTGTCATTAATA  | 817.432819333056 | 0.281333621041106 |
| ATGACTTGTGGG  | 817.433265230581 | 0.158269885279597 |
| CGCAATAGTGAC  | 817.433445054971 | 0.33863824022764  |
| CTCTAGAGTGAC  | 817.437116550634 | 0.257022876836916 |
| AGTCACGGCTGG  | 817.43744657073  | 0.202901159338928 |
| AACCAAGTCACT  | 817.441083410917 | 0.185112364569847 |
| GCCTTCCAGTCA  | 817.449107358517 | 0.278026859767808 |
| TACCATTGGTCA  | 817.453537654723 | 0.253733846253013 |
| GTCATCAAAGTA  | 817.453604909435 | 0.219996991695775 |
| GTCACACAAAAC  | 817.458458925808 | 0.273473686800348 |
| CGGTTCCGGTAC  | 817.460089663412 | 0.238400535798659 |
| ATCGCGATGACC  | 817.46556640002  | 0.224929138282886 |
| GTCACTCGGTTA  | 817.471016661566 | 0.205376371672208 |

|              |                  |                   |
|--------------|------------------|-------------------|
| CATGCTGCACA  | 817.473381366076 | 0.390266012552287 |
| ATGACACGGGCA | 817.483198297515 | 0.193707426870493 |
| ATGACAATGGTG | 817.491312791373 | 0.167411037943124 |
| CGTGACGGTGAC | 817.506251278289 | 0.353086791738858 |
| GATGACATTTGA | 817.512778633338 | 0.180114880652817 |
| TACACACTGTGA | 817.512972535725 | 0.218051366269273 |
| GTGACACGACGA | 817.512991299028 | 0.43948103776713  |
| AGAGGTGACGTC | 817.513692824919 | 0.324998484452128 |
| CGTGCACTATGA | 817.523431357568 | 0.325521029918753 |
| GTCATGGTCGGA | 817.528080904512 | 0.243046416208148 |
| CTATGGGGTGAC | 817.528225835434 | 0.218936022684882 |
| GATCGATGTGAC | 817.531064423083 | 0.19770206792848  |
| GACCCACTCATA | 817.532655743703 | 0.234561885695104 |
| CACACCATGACA | 817.541311580425 | 0.288891573263515 |
| GCATCGTACCA  | 817.547932091096 | 0.197668738553789 |
| GTCACCACAACA | 817.558330052186 | 0.201835234081449 |
| GTAATACCTGAC | 817.571638526492 | 0.265586774294812 |
| CACCACATGACA | 817.574543336684 | 0.194822617636609 |
| GCCCGCATGACA | 817.57772210509  | 0.240625978561245 |
| AACGGGTCACT  | 817.581384603579 | 0.130024718783936 |
| CTAACCAGTCAG | 817.584800179389 | 0.191519179591522 |
| GAGTAGTGACGC | 817.585872829443 | 0.13700434913679  |
| CCTCACAGTCA  | 817.586664020245 | 0.105910747781317 |
| AAGAGGGTGACA | 817.58689828538  | 0.193922052296334 |
| AACTCAGTCAAA | 817.589106181644 | 0.301932333463518 |
| TCATACAAAGGA | 817.598333523338 | 0.188361023586853 |
| GCTCGGTATCC  | 817.607240489083 | 0.206992854054659 |
| ACAGGAGGTGAC | 817.609665779897 | 0.222509249037336 |
| ACCACATCATAC | 817.613331600029 | 0.195147245785475 |
| AGTTGTCACGCA | 817.619366872328 | 0.180718112239282 |
| GTCCACGCGTCA | 817.619691390175 | 0.200048452183661 |
| AAAGCTGTGACA | 817.620333007989 | 0.199586211285513 |
| GAAAAGTAGTCA | 817.629211419743 | 0.263546238704106 |
| GAGGAGATGACA | 817.630262972293 | 0.18403132733566  |
| ACGTCACGCTAT | 817.640054750465 | 0.186407451656882 |
| AAAACCTGTGAC | 817.656817069237 | 0.164531527104385 |
| CTTAAATTGTCA | 817.660962177146 | 0.289265375653231 |
| AGATTACATAAT | 817.664622366365 | 0.211222970901429 |
| ATGTTCAGTGAC | 817.669456875034 | 0.248032045155195 |
| ACTCCTGACTCG | 817.671276504783 | 0.162512546886172 |
| AGATATGTGACG | 817.6720068661   | 0.264163392703566 |
| ATTATGTTGTCA | 817.674230612806 | 0.236209569588803 |
| GTCATGTGTTTA | 817.676474984504 | 0.149295643080784 |
| TTCTAATGACAA | 817.684538356312 | 0.221389306609665 |
| AGACTAATACCC | 817.687125256148 | 0.132294788117967 |
| AAGTATGTCACT | 817.69108621594  | 0.213199112417961 |
| CTCTGACGGATA | 817.692529981357 | 0.205562516530107 |
| CGTCACTAGTAC | 817.698782917173 | 0.186092039285725 |
| CGTCACTACTGA | 817.699963888381 | 0.199571086295303 |
| ACTCATAGAGCA | 817.700142512965 | 0.203080591727343 |
| GCTAACTCATAC | 817.703058809644 | 0.115676740263049 |
| TAGTACTCGTCA | 817.709377947107 | 0.341119540922789 |
| ATGAATAATTAC | 817.714725855603 | 0.212499075973407 |
| ACGTCTGAATCA | 817.720858066179 | 0.255800354571289 |

|                |                  |                   |
|----------------|------------------|-------------------|
| AGTTAACTCATA   | 817.722933431153 | 0.330627585541512 |
| ACGTACATGACG   | 817.729290453675 | 0.212653838614322 |
| ATGTGTCGATGA   | 817.747160827385 | 0.198236005080039 |
| CCGCTGACTTAA   | 817.750264006229 | 0.254550450014422 |
| ATGACAGTGGCA   | 817.754802368456 | 0.310018279310639 |
| GAGAAATGACAA   | 817.756158031584 | 0.130836911781668 |
| CGACCTGTCACG   | 817.772699595811 | 0.374255265388872 |
| AAGCTAAATGAC   | 817.773314682475 | 0.215800167966876 |
| ACACATCATCGT   | 817.787076533603 | 0.20054164874987  |
| TCAGTCAAATAA   | 817.808061225132 | 0.221051494477483 |
| ATTTGACGTGAC   | 817.809017087909 | 0.21692847018507  |
| CAGAATGATTCG   | 817.809787094258 | 0.209745953480453 |
| TAGCATATGTCA   | 817.810417501853 | 0.31438060392935  |
| CAGGAAGGTGAC   | 817.818415046615 | 0.14443477099505  |
| GGGCGTGTACC    | 817.839795715484 | 0.216018382292821 |
| CGCAAATGACCA   | 817.840860202652 | 0.229506402485696 |
| ATCACCCGCTCA   | 817.84543736239  | 0.16810607466317  |
| GCTGACTGCAAA   | 817.850547718175 | 0.196190725118208 |
| ATCTCCAATGAC   | 817.860526601623 | 0.214239621717811 |
| CCCTCCGACTCA   | 817.862870279415 | 0.195490151124081 |
| GGTTTCGATGAC   | 817.867225164264 | 0.170098522309825 |
| GCATTGGGTGAC   | 817.868151590103 | 0.147310351698751 |
| GGTCATCACTAC   | 817.86936832182  | 0.280215618712283 |
| AACAGCTCATAC   | 817.873383393883 | 0.23292067326209  |
| TCATTCTGACGA   | 817.881856658379 | 0.316984315445038 |
| AAGTCACTCTTA   | 817.882008546485 | 0.185769087371401 |
| AGTCAGATATCG   | 817.884367721994 | 0.140238604399182 |
| GAATCATATGGA   | 817.885730041977 | 0.308164011419155 |
| CTTATTTGACTC   | 817.886309695054 | 0.191693639987436 |
| AATTGCTCAGCC   | 817.897083464051 | 0.294379502348979 |
| GAACGGTGTGAC   | 817.899414021795 | 0.150650040017183 |
| GACGTAATAATC   | 817.901847580338 | 0.202891673610431 |
| GACTAATCAGAC   | 817.905633357366 | 0.210062736089824 |
| GCGTCAGACTTA   | 817.916487231374 | 0.183651524235286 |
| ATGTAGCTGTCA   | 817.917508883195 | 0.240385616485224 |
| CTGTCACCGATA   | 817.917906439823 | 0.208945326677326 |
| GCGTCTCTGTCA   | 817.931754637825 | 0.198936865195191 |
| AATTTTATGACC   | 817.938675250355 | 0.270887715863058 |
| ACTACTTCGTCA   | 817.945643232313 | 0.222902417995758 |
| ACTCATAATCGC   | 817.958695570103 | 0.246685733809594 |
| CTACCGTAGTCA   | 817.959791359439 | 0.307692967532098 |
| ACGTTGTGACGA   | 817.964747103535 | 0.30460984600139  |
| AGCCCGTGTGAC   | 817.966457120817 | 0.161893010261535 |
| ATGTGATGTGAC   | 817.967353542019 | 0.221996686996274 |
| CTATAGTACTCA   | 817.979989070934 | 0.284637355253946 |
| AACCAACGTCAT   | 817.98181138719  | 0.207857670791678 |
| CACGTCAGAATG   | 817.99321342619  | 0.263211931772772 |
| AACAGTCAATCT   | 818.008022786289 | 0.204910488608153 |
| CGGGCCGGTGTGAC | 818.025859289505 | 0.224853471083442 |
| ACGATCGTTGAC   | 818.030961467339 | 0.401169598010869 |
| ACTTGTCACCTA   | 818.033804976906 | 0.18758634062577  |
| CCTGGTGAGTAC   | 818.034496181468 | 0.25239608531042  |
| GTGACCAAGAGA   | 818.043868505638 | 0.244739422780001 |
| GACTTATACTCA   | 818.04604748557  | 0.237507827618599 |



|              |                  |                   |
|--------------|------------------|-------------------|
| GTCATCCAGCAC | 818.046192543495 | 0.240715452102393 |
| GGTCGAATCATA | 818.046926188533 | 0.243268575972263 |
| GTCACGAATCGA | 818.047224863985 | 0.209501449792636 |
| ACTCATAATGCA | 818.054267108964 | 0.247523217931795 |
| GAAATTCGTCAA | 818.059219894712 | 0.18961119414331  |
| ACCTGGGTGACA | 818.066311709757 | 0.268499661746921 |
| ATGCTGTCACTC | 818.069503693969 | 0.203011723175234 |
| TGACATGTATCA | 818.07123244402  | 0.178782452173306 |
| CACGATGTATGA | 818.076071921963 | 0.222018037579658 |
| AAGTCTGACGAA | 818.076628456353 | 0.250661394146118 |
| ATCAGAGTGACG | 818.085176378606 | 0.199461292704363 |
| GTCATGTTGGAA | 818.093080660848 | 0.141442391454725 |
| CCTGATGACCAG | 818.094819198902 | 0.166504925048229 |
| CCCTCGGTGACA | 818.09555727928  | 0.27546424215519  |
| AGTCAGGCTCAT | 818.097744310706 | 0.274302827681522 |
| ATGACATTTGAC | 818.1009389954   | 0.184404747352878 |
| ACCCAATGACAG | 818.121303954101 | 0.276591081242146 |
| ACACGTCAACAT | 818.123057654359 | 0.282723311886312 |
| GTCACATGCGGA | 818.128759641867 | 0.211713234474759 |
| AAATTACGCGTC | 818.128861303315 | 0.275798549316993 |
| CAGTGTCACGCG | 818.131195586609 | 0.239758005639571 |
| GAACGACATGAC | 818.13653918953  | 0.244995942455059 |
| ATTACGTACTCA | 818.138153021875 | 0.258162688848258 |
| CCGTCATCTGAG | 818.141122201615 | 0.165587875694858 |
| CCAGCCTGACTC | 818.149946369312 | 0.235128112862272 |
| ACGGTGTGACCC | 818.152414868372 | 0.28713157452273  |
| GCCATTTGTGAC | 818.15594833333  | 0.231752525937182 |
| TACGTAATAATA | 818.156961102345 | 0.20479602236253  |
| CTTAGTTGTGAC | 818.158095197521 | 0.22225453115429  |
| GAGTAACGTCAC | 818.161480351862 | 0.380797821761482 |
| AATCATTACGCA | 818.164954345099 | 0.280108490629134 |
| ACTGAAGTGACT | 818.18969051968  | 0.143760300339473 |
| GGTGACGTTGTA | 818.190706348198 | 0.164852917941638 |
| GAATCACCGACA | 818.19281041174  | 0.296787678004552 |
| CGGTGACGGTTC | 818.194693649407 | 0.279246787320082 |
| AGGTGGTGTGAC | 818.196352738684 | 0.148798350835458 |
| GTCATGATGGAA | 818.196821528226 | 0.24714887028087  |
| AAGCTGTGACAA | 818.19765243345  | 0.161532260112587 |
| GATTCTGACTA  | 818.221526728582 | 0.183487055573312 |
| GTCATATGGAGA | 818.221584889317 | 0.199038588842456 |
| CTCTACATGTGA | 818.226430559537 | 0.232054834255057 |
| AACATTACGCAA | 818.231249808775 | 0.227827909954772 |
| ATATCACGTGAC | 818.234785150229 | 0.284378411732787 |
| ATGAGTTGGCCG | 818.241387515044 | 0.221582990050346 |
| AATGCGGTCATA | 818.241605825362 | 0.127768425316047 |
| AGAGTCAAGGGG | 818.246024809621 | 0.206247031939459 |
| CCGTTGACTACA | 818.258902639579 | 0.23880123992373  |
| TGACATAACTAA | 818.267114441279 | 0.387617045188821 |
| CATGACCGTGAC | 818.270515092186 | 0.15203091771237  |
| ATGAGAGAGTCA | 818.27763093004  | 0.219709761397312 |
| ATGTCATTTCTC | 818.287068996923 | 0.156250489369938 |
| CTTTGATGACCA | 818.287901990078 | 0.219936630027363 |
| GAAGCTGGTGAC | 818.292198052412 | 0.206204963533011 |
| ATGACGATCAAC | 818.296330937686 | 0.261099980776102 |

|               |                  |                   |
|---------------|------------------|-------------------|
| TGAGTCCCACAA  | 818.311132785836 | 0.306147421602677 |
| CAGCTAGTCACG  | 818.312023588944 | 0.223966746963457 |
| CTGTCAGGTGAC  | 818.314679731201 | 0.207516207103342 |
| TATGATGATGCA  | 818.324693610012 | 0.342419895421851 |
| CAAGGCTGACTG  | 818.324996483189 | 0.32545481465596  |
| CAGGGTGTGACG  | 818.325138481118 | 0.306555314505423 |
| ACGTCACGCCTG  | 818.327428252561 | 0.200328319972667 |
| ACTCGGTGACAT  | 818.342513144851 | 0.252904896149846 |
| AACGCTGCACC   | 818.347280735256 | 0.228216721484176 |
| CTCCAATGAGTA  | 818.34887821044  | 0.191619695139056 |
| ATGAGTGTTACG  | 818.353696609316 | 0.264976001972359 |
| AGAGTGTGTGAC  | 818.365119500546 | 0.173368134120398 |
| CCAATATGAATC  | 818.374719362461 | 0.242226525406043 |
| GACGGGTCATAA  | 818.383285675897 | 0.177692950506292 |
| CGTCACGTTTTA  | 818.414184314157 | 0.294834345566239 |
| GTCATATCCAAC  | 818.423796910902 | 0.247527960023126 |
| CACATATGACCG  | 818.427248024288 | 0.17689970564298  |
| AAGGCACATGAC  | 818.431792533863 | 0.263773744019295 |
| AGCGAATGACCC  | 818.438255307608 | 0.255488407340199 |
| AACCGTGACTAG  | 818.438990254044 | 0.268777904410925 |
| GATTCTTGTGAC  | 818.439228810919 | 0.308184846627206 |
| CACAACAGTGAC  | 818.450253296816 | 0.266336591450774 |
| ACGGCAGCGTCA  | 818.450474105961 | 0.263161577197734 |
| GTCACGCTACCA  | 818.452035738562 | 0.187596830851158 |
| ATTGCGCAGTCA  | 818.45391136267  | 0.326209655660095 |
| GCGCTTACGTAA  | 818.454673314924 | 0.207670043519926 |
| GCTCTGAGTCGA  | 818.466122926453 | 0.212416689120744 |
| TCATCAACGAGA  | 818.47399420117  | 0.217093118892399 |
| ACATGACAAATGA | 818.474326395189 | 0.274805000620988 |
| AAGATCTGACGT  | 818.494730014237 | 0.218969638184758 |
| GGCTTAACGTCA  | 818.498226999941 | 0.216203529489168 |
| ACACAGTGACAC  | 818.505742451594 | 0.21891427487719  |
| ATGTCATCTGGG  | 818.510566836488 | 0.268391402866996 |
| AGGTTGGGTAC   | 818.514874515535 | 0.230025556677918 |
| ATTACGCACAAG  | 818.518979773429 | 0.297974074370169 |
| CCTCACTGTGAC  | 818.523197528602 | 0.152335701873139 |
| CAACTTGTACCG  | 818.53195986111  | 0.184350684996194 |
| AATGAGTGCAAT  | 818.539373120072 | 0.232665481899091 |
| GCCGTGTTGTCA  | 818.54156525924  | 0.276083878756309 |
| AGATCTGACTGC  | 818.546005935834 | 0.259187568871075 |
| GAGCGTGCACC   | 818.548768002071 | 0.213386819133486 |
| ATAGTGACGCGA  | 818.559114687393 | 0.138046448933566 |
| ACGGTGTAGTCA  | 818.559862757481 | 0.240940966942872 |
| ACCTACGGTGAC  | 818.560519024039 | 0.323499677956906 |
| CTGCCTGTGACA  | 818.565321667472 | 0.196812547695097 |
| GTCACACTGGCA  | 818.570950346679 | 0.214710128385598 |
| TCCCACTAGTCA  | 818.571906940793 | 0.308673347117723 |
| ATACACCATGAC  | 818.573838644551 | 0.256006629287368 |
| AATGACAAGATG  | 818.574388451198 | 0.233804048839671 |
| ATGACACTCGCG  | 818.578360571306 | 0.1584209993499   |
| ATGACGAGAGAG  | 818.580306607959 | 0.233791055169739 |
| TCATACAATGGA  | 818.584703370285 | 0.215343331179897 |
| GTGACTTGATCA  | 818.591037865965 | 0.171376028735321 |
| AGTAAGTGACAC  | 818.592683863666 | 0.250930408778737 |

|               |                  |                   |
|---------------|------------------|-------------------|
| CAATTTTCGATGA | 818.605640416877 | 0.263143593729404 |
| CCGTGACGCTGA  | 818.607846784279 | 0.395827542767403 |
| AGCGAAAATGAC  | 818.612216032799 | 0.228358638066932 |
| AACGGGTCATCC  | 818.621202426367 | 0.284603719861731 |
| TATGACCTGGAA  | 818.621839488381 | 0.21285814171673  |
| ATCTTGATGTCA  | 818.623214149879 | 0.274294695176943 |
| ACGGGGCTGACT  | 818.632431533312 | 0.17584831011882  |
| AAGAAATGACAG  | 818.635339615693 | 0.139119711537951 |
| AGAAAAGTCATC  | 818.662862757851 | 0.176620004516863 |
| GACCACTGACTA  | 818.674576821682 | 0.322980438546938 |
| ATGTCACGTAA   | 818.676848479902 | 0.214407412096605 |
| ACGCGGCGTGAC  | 818.684277092669 | 0.28708008424069  |
| TGTTACTAACA   | 818.69034355229  | 0.217788397808828 |
| CCATCGAGTGAC  | 818.692798325455 | 0.190059482503135 |
| AATGACAAGCCA  | 818.695583038116 | 0.165850509200041 |
| AACGCTCTGACT  | 818.699109303555 | 0.189052617753841 |
| AGTAAGTGACGC  | 818.699340973208 | 0.186835336754859 |
| GGTTTGACACAC  | 818.701812483188 | 0.184139055002382 |
| ACTGATCACTCA  | 818.709183803327 | 0.226667320213425 |
| CACTTACGTGAC  | 818.715623150597 | 0.293417588604657 |
| ATTACTCTATTA  | 818.748439797198 | 0.208594427191838 |
| AACCTTCATGAC  | 818.750412011079 | 0.267142607899484 |
| GTAGCCGGTGAC  | 818.759093324612 | 0.217937760520216 |
| GGGTGAGCAACC  | 818.760142932265 | 0.320998570767744 |
| ATCGTCACTAAG  | 818.764431999548 | 0.236433828227002 |
| CTGACATGACGA  | 818.76663593659  | 0.263700114432131 |
| GACTATGTATCA  | 818.767320330793 | 0.223224855040285 |
| CGCCCGCATGAC  | 818.772371203661 | 0.300318772543135 |
| GAATCATCTAGC  | 818.774188669499 | 0.223577539177428 |
| CCAACATAGTCA  | 818.793858704531 | 0.190022329167261 |
| CTTGATATGAC   | 818.794915324575 | 0.225189248429253 |
| AGTGAATGACA   | 818.804026261135 | 0.170523409226406 |
| ATTACGTATCAG  | 818.804496907393 | 0.297323474397328 |
| ATTACGTATTGG  | 818.809269905811 | 0.187680580538781 |
| ACCGGATAGTCA  | 818.82340967914  | 0.279754004286963 |
| GTCACCTCGACGA | 818.823774788154 | 0.303934432212321 |
| ATACTAATCATA  | 818.832081804985 | 0.275997128362166 |
| TCAGTGAGCAAA  | 818.847027065741 | 0.281172947486194 |
| AGTCAGAACTTA  | 818.851068488242 | 0.23060998337802  |
| AATAGATGAGTA  | 818.851627143716 | 0.12628993805283  |
| ATCTGAGTCGTC  | 818.85490813468  | 0.184570422885229 |
| GCGAGCCATGAC  | 818.85807093036  | 0.235949173730855 |
| AACTTTCTGACT  | 818.868090825485 | 0.19662818769429  |
| ACTCTCAATGAC  | 818.875030145929 | 0.250510105612405 |
| GTCACGACAACA  | 818.877132364634 | 0.381907950113163 |
| ACTCATAGCGAC  | 818.877272241434 | 0.167078538207269 |
| CAGTGGCTCACC  | 818.881538617469 | 0.273612457498709 |
| ATATGACGGGAT  | 818.885921078358 | 0.197762029601407 |
| ATGACAACCTAA  | 818.887102727146 | 0.201679319046316 |
| GGGCACTGTGAC  | 818.889288167988 | 0.185039435873243 |
| TGATTAATATAA  | 818.893489138488 | 0.279828887200058 |
| ATAGGTCACAAAT | 818.896018168752 | 0.299829390639995 |
| AAGATGTCACCG  | 818.896984451973 | 0.191427990081478 |
| CAGAACACATCA  | 818.897314989503 | 0.321012643039902 |

|              |                  |                   |
|--------------|------------------|-------------------|
| AGCGGATGACC  | 818.900438922984 | 0.195205933208309 |
| AGTCACGGATCC | 818.903210383836 | 0.186051529198564 |
| GATTCTATGACC | 818.921228077312 | 0.254827779932005 |
| AGATCCCATGAC | 818.93139617134  | 0.273663685834844 |
| TGACGCTAAGCA | 818.941743510817 | 0.231476253303817 |
| CACGGTCTGACG | 818.946830732407 | 0.393603434339236 |
| GTCATGCAAAGA | 818.948856476477 | 0.269739307446066 |
| AGGCACAGTCAG | 818.949814493443 | 0.289610409817407 |
| TGTTACGCAACA | 818.964780755579 | 0.33740883498006  |
| ATTGGGTCACGA | 818.969366881065 | 0.169952111564465 |
| GATACTTGTAC  | 818.985799008608 | 0.21629822849257  |
| GTGGTCATTGCA | 818.986520941184 | 0.190282958476879 |
| CGTCACCCGAAG | 818.987075608666 | 0.306462319521107 |
| GTCACTAAAA   | 818.987286990916 | 0.205927414069346 |
| ATTAGCAATTCA | 818.988418284348 | 0.236831725534006 |
| CACGCCGGTGAC | 818.994221362638 | 0.33276152837477  |
| CTGATGATATGA | 818.99723163185  | 0.259080259769272 |
| CGGTGACCCAAA | 819.002955495729 | 0.169077936305227 |
| ATGACATCGTTG | 819.014670753229 | 0.146098375626927 |
| CCTCTGGTGACA | 819.015269039445 | 0.273907599257325 |
| ATATGATGTATC | 819.017448043261 | 0.32934927226101  |
| ACTTGCGGTGAT | 819.023019125734 | 0.316122634681499 |
| CAGTCAACGACG | 819.036466100123 | 0.182769325032771 |
| GTCATGACACC  | 819.040821189122 | 0.139885604066688 |
| GTCATTCAGACA | 819.040938996924 | 0.249179285157839 |
| ATGAGGTACAC  | 819.058292684409 | 0.238294262198504 |
| GTCATTTAAGGA | 819.064673719088 | 0.195930100136853 |
| AAGGGATGACCA | 819.065078078001 | 0.175048470803299 |
| AATGAGAGTCAG | 819.076417532536 | 0.15743489236611  |
| CACCCTGACACA | 819.077335020388 | 0.183807682412295 |
| CTACCCACGTCA | 819.079051543252 | 0.200069795060904 |
| AATTTGATTCAT | 819.086343945157 | 0.223316625129422 |
| CAGCTATGACCG | 819.086430639473 | 0.282560778798971 |
| ATGTATTATCG  | 819.091548316328 | 0.211978298476845 |
| CGTAGAGTAATA | 819.098326286871 | 0.248829997593633 |
| TCATCCGCATGA | 819.101399036559 | 0.26006274656172  |
| ATCGATTACTGA | 819.107521195808 | 0.196714379016089 |
| AGATTCACTCAC | 819.121521952212 | 0.151735093358069 |
| ACGATTACTCCT | 819.122056936749 | 0.185572757196642 |
| AATGACAAGGTA | 819.126023567284 | 0.141240977154015 |
| GGTATGGTCACC | 819.129557071511 | 0.237640217927412 |
| AAGTGGCTCACC | 819.133181705814 | 0.258494042414527 |
| CCCGAGAGTGAC | 819.135706008684 | 0.353169010354854 |
| ATGACAGCCACG | 819.141251379078 | 0.18554234482176  |
| AGCTATCTGACT | 819.151595470664 | 0.193210886691822 |
| AGATTAGCCATC | 819.16383263625  | 0.252268945172461 |
| ATTAGTCGCGCG | 819.172379288026 | 0.1996853614799   |
| CGGCTGACTCA  | 819.177339814994 | 0.279363861289454 |
| GGGTGAATCAAC | 819.184543075589 | 0.214826402103784 |
| TATGCCGACTCA | 819.184978077612 | 0.190347444090072 |
| GTCACCTTTCAC | 819.185541690155 | 0.182881102601327 |
| GACGTCACCGGC | 819.192463981625 | 0.194042388236783 |
| AACGACTCAGAT | 819.193455666339 | 0.290571041756153 |
| CTGCGCACGTCA | 819.200860797929 | 0.270961869480901 |

|               |                  |                   |
|---------------|------------------|-------------------|
| GACGTAGTACTC  | 819.20371630503  | 0.244723309068486 |
| AATTAGGTCACC  | 819.207705645729 | 0.272196370359987 |
| GAAGTGCAGTCA  | 819.243447621739 | 0.296990055810189 |
| GTCACACGGCGA  | 819.247321907029 | 0.187621887803532 |
| AATGACAAGGTC  | 819.247974988331 | 0.342088667700609 |
| TGGTCATTGGAA  | 819.261891912651 | 0.269374147276193 |
| ACGTCACAGAGC  | 819.270881483374 | 0.161345935201345 |
| GCGTGATGACCA  | 819.278829054747 | 0.273614176456009 |
| TCACTCCAGTCA  | 819.306336591242 | 0.168364894429917 |
| CTTACCAGTGAC  | 819.307077409117 | 0.1198088497087   |
| AGGGAGATGACA  | 819.316290254495 | 0.165704277971004 |
| GAAGTTTCGTCA  | 819.322129082163 | 0.272840203744335 |
| CAAATGATGTAA  | 819.326273563708 | 0.302030262926049 |
| GAAGGAGATGAC  | 819.331685925627 | 0.2177493213521   |
| GTCACGGGTAC   | 819.335239607723 | 0.188559600475198 |
| ACAATGTGACGC  | 819.336062601014 | 0.289263920539707 |
| AGTGAGTATATC  | 819.346501762165 | 0.15901217909647  |
| AGCGAATACTCA  | 819.346768998354 | 0.312167199103282 |
| TGACACGTCCCA  | 819.348517194125 | 0.249064696158772 |
| TCGCCCATGACA  | 819.354942992845 | 0.336621858859572 |
| CAGTGTGTGACG  | 819.357915861294 | 0.204184118439303 |
| CGTCATGATCGC  | 819.362004437476 | 0.140618763349125 |
| CAGCCGTACCGG  | 819.363680706302 | 0.301955383332371 |
| ATGTTTTCGTCA  | 819.364301231503 | 0.238620162791984 |
| GGTGACCCTAAA  | 819.368833302514 | 0.201851315856126 |
| GTTGCTTACTCA  | 819.374395087459 | 0.35415574547789  |
| GCTTGCTAGTCA  | 819.376700831832 | 0.359746410354736 |
| AACGTCACCATA  | 819.378511428916 | 0.423683250363443 |
| AAGTCACTAGTC  | 819.384919568072 | 0.215658958254048 |
| TCAGGAGAGTCA  | 819.388785324366 | 0.276207700141168 |
| TCAAAGTTGACA  | 819.396624850104 | 0.275824683383567 |
| GTCACATGGATA  | 819.401371747776 | 0.217520107884466 |
| ACCAGTAGTGAC  | 819.404675070524 | 0.217777628739692 |
| CTTTAAGTGACA  | 819.415504812558 | 0.210111380644042 |
| CGTTTGCTCACC  | 819.425989884441 | 0.189325255451173 |
| ATTTCCGTGACG  | 819.433548431747 | 0.237726908671477 |
| ATGCAATGACAG  | 819.434162218027 | 0.246905725227121 |
| CATAGGTGAATC  | 819.438696518925 | 0.312359058332328 |
| CCTCTGGGTGAC  | 819.438774902088 | 0.296860414708112 |
| GTCATGCTGCAA  | 819.445692512882 | 0.273845706658099 |
| ATACATTGTGAC  | 819.448875039457 | 0.252558247213234 |
| GAGTGACGTGCC  | 819.457361319503 | 0.257769584553755 |
| ACTCTAAATGAC  | 819.45823439141  | 0.140657065883017 |
| GAGTAATCGGCC  | 819.46264698148  | 0.234086947167458 |
| CAGTCAGATCTA  | 819.464341423627 | 0.211167647517854 |
| ATTCAATTGTGAC | 819.46476899581  | 0.172539097774467 |
| CTGACGCTATTA  | 819.465322896396 | 0.210731986072219 |
| CGACTAGTCAGC  | 819.469492673957 | 0.276270181835456 |
| CCTAGAAGTGAC  | 819.48993307515  | 0.218473366737763 |
| ATTATTACTGAC  | 819.514093973455 | 0.261975447367178 |
| CAGTGGGACTCA  | 819.518062890586 | 0.146044087106561 |
| TTGACGTATAAA  | 819.520651741686 | 0.192101664430527 |
| GTCACTGGGTGA  | 819.525856149932 | 0.262939269992336 |
| ACGGTTGCTCAT  | 819.526174186841 | 0.238825892396032 |

|               |                  |                   |
|---------------|------------------|-------------------|
| AGTATGAGACAC  | 819.53308051678  | 0.192107131633319 |
| AACTCTGAGTCG  | 819.536536103049 | 0.300474221782484 |
| CGCCAAGTCACC  | 819.541858226732 | 0.196923086634756 |
| GTCATGAATCTA  | 819.544072963752 | 0.121978202286921 |
| CGATCGATGTCA  | 819.545149176445 | 0.230892228013091 |
| GCCGCGTCACGC  | 819.559585819388 | 0.186951980769626 |
| ATGACTTTTATA  | 819.563861303606 | 0.192430760522008 |
| CTCCAATGTGAC  | 819.56488594242  | 0.249787809482958 |
| AGTTCATGACGC  | 819.571627621732 | 0.26531510938343  |
| AAGTTATGATTC  | 819.581865527461 | 0.413520953967476 |
| AAAATCCGTCAG  | 819.600111668622 | 0.209421892696175 |
| GAAGATTCATCA  | 819.602464031269 | 0.256112186988334 |
| TGTCCGAGTCAA  | 819.608716994464 | 0.259913982883207 |
| AATCTGCGTAAT  | 819.627966372894 | 0.247230116104971 |
| ATGACATGCTAA  | 819.629382150132 | 0.228996739966127 |
| GTCACAAATCAA  | 819.629393346818 | 0.209288785783086 |
| AGGAGAGATGAC  | 819.63083114015  | 0.180199981025212 |
| ATGTCATTAGAA  | 819.633435641211 | 0.213237693896792 |
| AAGACTCTTCTG  | 819.639044498414 | 0.246111533559098 |
| ACTCATCTTGTG  | 819.641011382212 | 0.286011182414182 |
| AGTCACGCCGCC  | 819.644816212264 | 0.28130066735209  |
| GTCATGAGTGTA  | 819.646148880583 | 0.221140378752033 |
| AGGGCATATGAC  | 819.646274836691 | 0.227251837133846 |
| CTAAGCAGTCAG  | 819.656566355076 | 0.232260281001813 |
| AAAAGGTGACAT  | 819.662304794236 | 0.131855417726348 |
| GATGACCCGTGA  | 819.666764492464 | 0.24407794569018  |
| AGTTATACTCAC  | 819.669345497213 | 0.186551829834544 |
| ATGACCCGTAAA  | 819.669777986589 | 0.217662810079464 |
| GTTATTGCATCA  | 819.673009401551 | 0.250019597463013 |
| ATCCAATGACAT  | 819.68466095086  | 0.27132723795225  |
| AGACGATTAICTC | 819.70030468624  | 0.226648859955396 |
| TAGGTAATGACA  | 819.705274121549 | 0.349421060497596 |
| AATTTCAATGAC  | 819.706124836198 | 0.332607533539421 |
| GTGACAGTTAA   | 819.706487561008 | 0.182478487668407 |
| ATTAGTAAATGG  | 819.708861227206 | 0.242125390744012 |
| GTGACAGAGTGA  | 819.712732525032 | 0.230693523431216 |
| CTGACTAGGCCGC | 819.712895919521 | 0.280618442701021 |
| GTCACGCCCTGGA | 819.71345599418  | 0.230700588319213 |
| ACGTCACCTAAT  | 819.717594511257 | 0.15156870965564  |
| GTCACTAAGAAC  | 819.72334399211  | 0.254382873688842 |
| ACGAAATCGTCA  | 819.731689471872 | 0.118569222992596 |
| GTAACCGGTGAC  | 819.733591474028 | 0.263666928307878 |
| CATGTGGCTCAC  | 819.733597670582 | 0.284899609946028 |
| ACATTGTCACCG  | 819.73988171426  | 0.252128077941499 |
| ATAGGTCACCGC  | 819.744393133345 | 0.251540715573508 |
| GTCACCTTACGA  | 819.75218275295  | 0.261683370779535 |
| GTGTGTCAAAGA  | 819.755012517884 | 0.145561514324722 |
| ACTCATTAAGGA  | 819.756155969022 | 0.276721653725111 |
| ACATGATGTGAC  | 819.758984056906 | 0.273737799832496 |
| GACGCGTAATAC  | 819.761924224181 | 0.15294188623015  |
| AATGTCATGTCA  | 819.778271981677 | 0.240554861936223 |
| AGTGTCAGACTC  | 819.785446106157 | 0.257974974893428 |
| CTGTGACAGCGC  | 819.788672061708 | 0.257041525040784 |
| GATGAGGCATAC  | 819.790745740763 | 0.17896004817359  |

|                |                  |                   |
|----------------|------------------|-------------------|
| CCCGATCTGTCA   | 819.793951983322 | 0.143364246588913 |
| GTCACGTGATAA   | 819.799113281167 | 0.282836708817175 |
| ACATGACGCCGT   | 819.804747394928 | 0.217522189135426 |
| GACTGTTACTAA   | 819.806291633514 | 0.330921996203703 |
| GAGTAATATTCA   | 819.810814415296 | 0.247472840647817 |
| GGAAACGACTCA   | 819.817709207337 | 0.271709531054362 |
| CGACTCACGCTC   | 819.818055096294 | 0.258884610519693 |
| CTCATCATATGA   | 819.820031402713 | 0.259927097908686 |
| ATTGAGTCGATA   | 819.83595824298  | 0.144254794063208 |
| CGTGACTTGGCA   | 819.838749811694 | 0.193883282415415 |
| CGAATCAGTAAC   | 819.842490096475 | 0.213714179417766 |
| GTGACGGTTTCA   | 819.845793334301 | 0.201600208615191 |
| AGTCAGAGTCGG   | 819.848780029192 | 0.195405198612678 |
| ACACCCCGTCAT   | 819.849875303159 | 0.239252170960352 |
| ACTCATAGACTC   | 819.855118189589 | 0.308027012644961 |
| GGATGGACTCAC   | 819.884894706634 | 0.273800357413254 |
| ATCTGGTGACAA   | 819.886843723311 | 0.197590020128333 |
| GTCATTAAGTAA   | 819.894023850054 | 0.269255169168416 |
| ACTCATCAGATC   | 819.895480334555 | 0.199423492696074 |
| ACTCAGTGACAA   | 819.895701965486 | 0.243574249828437 |
| GGGGTTTACTCA   | 819.90040823474  | 0.234410707078179 |
| CGATGATTCGAA   | 819.900623272587 | 0.268911100767505 |
| ACGTCACCTGGCA  | 819.903013424359 | 0.224086075276123 |
| ACTGAAGGTGAC   | 819.905247398918 | 0.188352247482226 |
| GCAATAAGTGAC   | 819.905649099029 | 0.183727915421447 |
| TCATAGATTCGA   | 819.908788386369 | 0.243403501326858 |
| ACTAGGTAGTCA   | 819.909795391853 | 0.298957325891078 |
| ATGACCCGTA CTG | 819.91193052709  | 0.216488054216279 |
| TATCGGTAGTCA   | 819.913418838925 | 0.203151570885082 |
| AGTCAGAGAACT   | 819.916494951665 | 0.140943913083675 |
| CGTCATTGGAAA   | 819.924577977082 | 0.169041610833486 |
| ACGTCACGATAC   | 819.928936551066 | 0.315171434547406 |
| GTCACGCACGAC   | 819.933236773717 | 0.288502394857795 |
| GACTCAGTCCCA   | 819.933366986975 | 0.14546270348623  |
| GATCCTGACACA   | 819.941072842531 | 0.174631406991321 |
| GCACAGACTCAC   | 819.946748027808 | 0.187690939214904 |
| GCGGTTTCGTCA   | 819.954457121266 | 0.261963425143204 |
| GTGACCACGTTA   | 819.954514831436 | 0.351361696506    |
| GCGATCAGTGAC   | 819.958628852266 | 0.268066496069223 |
| ACACCGACTAAT   | 819.975703190253 | 0.206152993947798 |
| AGAGTTATGACC   | 819.978131911452 | 0.355219920708653 |
| CAATAAGTGTC A  | 819.985590576149 | 0.222978980308895 |
| ATTCACTGACTG   | 819.986401187016 | 0.340021732131983 |
| ATTAGTAAATGA   | 819.98680967719  | 0.174800065881043 |
| CTGACGACTCAG   | 819.987029032113 | 0.258499230293015 |
| AGTGAACGTCAT   | 819.98764558511  | 0.25065825868394  |
| ATAAGTGGGTCA   | 819.993068733567 | 0.209714971438837 |
| CGGGTTGATGAC   | 819.994764782604 | 0.222457371863498 |
| CCCCGCGAGTCA   | 819.998717313427 | 0.271136188202268 |
| CGACGTGACCCA   | 820.000552187753 | 0.25627198572045  |
| CTTACTTGTGAC   | 820.000587621567 | 0.2904295865368   |
| AATGATTACGCA   | 820.007580173655 | 0.199628264279597 |
| AATTCGACTCAG   | 820.009489905125 | 0.185106414246909 |
| GAGATTGACTGA   | 820.015718858073 | 0.294502522352747 |

|              |                  |                   |
|--------------|------------------|-------------------|
| GCTGTCACATGA | 820.023897735551 | 0.234731826125544 |
| GGTCATACGATA | 820.033163683358 | 0.185981087433513 |
| ATGCTGCGTCAA | 820.048186578637 | 0.206577644314589 |
| TAGTCAGCAGAA | 820.051204237223 | 0.337007781162214 |
| ACTGGCTGACTA | 820.056386372136 | 0.200870449904026 |
| AACGCAATGAGT | 820.056976286133 | 0.310820690196334 |
| GACGAACGTGAC | 820.058814549917 | 0.2098697093046   |
| ATACGGGATGAC | 820.058940294398 | 0.242508853186739 |
| ACGTCTGTCATG | 820.067942541306 | 0.235564281432656 |
| CTTACCAAGTCA | 820.079587829247 | 0.219022336598775 |
| AAAACGTGTGAG | 820.082437371123 | 0.228532769592475 |
| TAAAACATGTCA | 820.085940863083 | 0.196628880247483 |
| TGTCACATAAAA | 820.086581362111 | 0.181250506073565 |
| CCTGCATGACAA | 820.086998466213 | 0.268332693198301 |
| GCAATTAAGTCA | 820.098751253164 | 0.223595576625218 |
| CATGACATTTTC | 820.100741126063 | 0.147191382930524 |
| GTCACAGTGGAA | 820.102141464747 | 0.220817484243096 |
| GGTGACACGGCA | 820.102691023163 | 0.181477918389353 |
| TCACATGAATGA | 820.104036222332 | 0.249960084692321 |
| GTCATTCTGGTA | 820.10594697028  | 0.231648292312959 |
| ACCGGTCATAAA | 820.110269496942 | 0.244501359871861 |
| ACTCATTCCGTA | 820.117431065953 | 0.189466142877802 |
| CGCCCTTATGAC | 820.117953606255 | 0.271179424544567 |
| ACGTGACAGCAT | 820.118854528082 | 0.285456202934632 |
| CTCGCTGATGAC | 820.124775591466 | 0.27496315800459  |
| GTCCTCTAGTCA | 820.126059456759 | 0.197321044277715 |
| AGATGAAGTCAC | 820.127891414724 | 0.19105302819386  |
| ATGAGCCAACAT | 820.131521518892 | 0.236363294178475 |
| ACCATATGACGG | 820.133637556617 | 0.269308654754588 |
| ATCCTGGTCATC | 820.139524120186 | 0.194471739642848 |
| GCTACCGTGTC  | 820.146398648754 | 0.294445907343012 |
| AGTCAGAACGAA | 820.147425546535 | 0.231380244451996 |
| ATGAGTCTCTAC | 820.149394273213 | 0.218267000139687 |
| GGATTAGTCCTA | 820.15557632953  | 0.151737761917875 |
| AAAAGGTGACAA | 820.177005982546 | 0.222954527875383 |
| CGTCATTCCGGC | 820.180916390103 | 0.278620363607019 |
| CGTGACTTGGCC | 820.184915155163 | 0.228884520768779 |
| GTCATGCGGTGA | 820.190665001159 | 0.441184745949821 |
| CTCTCTTCGTCA | 820.191589064767 | 0.15218979087491  |
| ATGTATCACATA | 820.193231339946 | 0.230963663092517 |
| AAGTCAGAAGTC | 820.196322793651 | 0.214389577168837 |
| ATGCAGTCAACG | 820.197019036314 | 0.226518070184299 |
| GTGAGCAACTCA | 820.197716058105 | 0.235030100053034 |
| CCTCTAAATGAC | 820.20902149307  | 0.210745258212606 |
| TATCTTTACTCA | 820.211633576072 | 0.207116346078418 |
| CCTGTGGGTGAC | 820.217283321285 | 0.284061843079455 |
| GATTTTCGTGAC | 820.220977316953 | 0.263230020552124 |
| CGGTACACATCA | 820.222894934476 | 0.218161987498492 |
| ATGTCACCCTGA | 820.2249371692   | 0.203420258332416 |
| CGTCACATGTGC | 820.225110176348 | 0.187761143421738 |
| ACGTCACTTAGA | 820.233137058627 | 0.187140454853368 |
| TGATGCAACACA | 820.234022437932 | 0.248466433733912 |
| GCCACCAATGAC | 820.235410796971 | 0.24436933747592  |
| AGTCACGGGCC  | 820.238168255615 | 0.234283953144975 |



|              |                  |                   |
|--------------|------------------|-------------------|
| AAATTGCGTGAC | 820.245441079336 | 0.324201498985908 |
| GTGACCACGAAA | 820.249828164142 | 0.233481085292007 |
| ACGTCAGTATGA | 820.252332826544 | 0.251119240831688 |
| AGTACCATGACG | 820.254579162887 | 0.264290506027194 |
| CCCTTTTGACTC | 820.254855077122 | 0.224507279577098 |
| TAATAGTCGTCA | 820.257182195056 | 0.235117190456729 |
| GTATTGAATCAC | 820.260461093596 | 0.213645225978472 |
| ATTCGGCATGAC | 820.264078646153 | 0.185538904140134 |
| GACTAATCCGCC | 820.2664312206   | 0.251175238434975 |
| TCAATTCGGTCA | 820.268066961767 | 0.295070937319255 |
| CACCCTAATGAC | 820.276120131019 | 0.197583354701613 |
| AAAACGGTCACA | 820.280117546683 | 0.262851264813665 |
| GACTCCGATTTA | 820.283932436977 | 0.218040969849686 |
| ATTCACGTGACG | 820.286778243038 | 0.197303894291727 |
| GATGACTTGCAA | 820.288689859926 | 0.166634390922608 |
| CTAACGCATGAC | 820.292127402778 | 0.195787069104937 |
| TCGAAATGACAA | 820.293281101843 | 0.262595020107116 |
| ACGCTTGACTCT | 820.294000991646 | 0.259648116133445 |
| GTCATGTTCCGA | 820.295666593493 | 0.195779249482125 |
| CATAATGAGCCA | 820.296077044338 | 0.428662179151289 |
| GGTCATCTATA  | 820.310255920841 | 0.253492546531339 |
| AGCTGACTTAAT | 820.310924530845 | 0.288639925880031 |
| GCACTCTTTTA  | 820.311669126296 | 0.195352222204702 |
| AAAAGAATCATA | 820.313365662641 | 0.233793674999118 |
| ACTAACTGACTA | 820.334515081924 | 0.203372489064098 |
| AGACTCACTTGA | 820.34752868281  | 0.241657552007269 |
| AATTACACACCT | 820.353415278764 | 0.213084674026306 |
| ACTGGTACGTCA | 820.354513289721 | 0.31421882083411  |
| GACTCACGTGAA | 820.356938785109 | 0.270864655041302 |
| ACGTGACACTGA | 820.361379349836 | 0.279625009121815 |
| CTATACATGACA | 820.361748590092 | 0.223260172784245 |
| TATGTCACGGAA | 820.3648717353   | 0.313219002102302 |
| GTGACCTACTCA | 820.371795136136 | 0.268512539307063 |
| ATGACAAGGAGA | 820.37475156073  | 0.18447871390289  |
| AAATTATGTGAC | 820.384974266907 | 0.391303667249163 |
| AAGTCCCAGTCA | 820.386579307784 | 0.183191571918804 |
| ATTGCTAGTCAC | 820.386741455428 | 0.260319293465214 |
| CGTCATGGATTA | 820.389174554046 | 0.22599598245263  |
| GGGTCATAAATA | 820.42117538582  | 0.251933219441194 |
| CGTCTGAAGTCA | 820.423126805922 | 0.363372325271653 |
| GTCACCACAAAC | 820.425636414477 | 0.316972767220394 |
| GGGTCATTCATA | 820.436104087193 | 0.299793445299156 |
| GATCGACGTAC  | 820.441465222345 | 0.186564714243694 |
| ACTAGTACGTCA | 820.444164131492 | 0.271920518779277 |
| CACGGTGAGCAA | 820.450414239074 | 0.254943965400232 |
| GAATCATCACGC | 820.451065080811 | 0.291001347051658 |
| GTCACCGTACCA | 820.451959827835 | 0.212805418097659 |
| AAGCGTGATTCA | 820.453890865415 | 0.333031093015947 |
| ATTCGGTCATGA | 820.458408230107 | 0.15654322212615  |
| GTATGGCGTCAC | 820.459376528863 | 0.274935234423968 |
| ATGACCATGTAA | 820.459379869493 | 0.339185734890203 |
| GGATAACGTAC  | 820.462018940651 | 0.174108545515597 |
| ACACTTTGTGAC | 820.471691076108 | 0.267153339983375 |
| ACAGTGATGAGT | 820.471727434502 | 0.192495692495259 |

|              |                  |                   |
|--------------|------------------|-------------------|
| ACTCATACTCCA | 820.472582424218 | 0.168633210788129 |
| CGTCATCCCAAC | 820.476980358305 | 0.199741106141288 |
| ATGTTACGCAAT | 820.482294829029 | 0.221496624864018 |
| CACATCATATAG | 820.484045771672 | 0.260771845134738 |
| GTCAGATGACA  | 820.485489322949 | 0.23850471956908  |
| CAAGTCTGTAC  | 820.486126606879 | 0.189460453903055 |
| CATGACATGCCA | 820.486683571325 | 0.337640974507191 |
| AGGTATCATGAC | 820.490455297981 | 0.128754704383061 |
| ACCGTTCTGTCA | 820.501241802137 | 0.231397252930757 |
| CACTAGTAGTCA | 820.503313220623 | 0.173917191085879 |
| GATTATATGTCA | 820.504505278337 | 0.26303860155426  |
| GCGATTACTCGA | 820.510570135736 | 0.293544237153223 |
| CTTGAATTGTCA | 820.522954031732 | 0.38481947516962  |
| AAGTCAGTAATA | 820.524330597599 | 0.175842486941778 |
| CATGACGTCGCG | 820.524730180727 | 0.282533466964959 |
| GAGTGCCTAATC | 820.530540975987 | 0.224429467033608 |
| ATCAGCGTGACA | 820.533483310312 | 0.376295158715275 |
| GTGACCACGCCA | 820.535939943591 | 0.21903165079597  |
| CGTGTCACCTAC | 820.5362118913   | 0.258387507293227 |
| GCGTCACGGCAC | 820.537340099068 | 0.338714017192546 |
| CCCGAGGACTCA | 820.54483129355  | 0.24834074959302  |
| ACATACAAGTCA | 820.544844792077 | 0.230346962810108 |
| GTATAGTGACAC | 820.550494485953 | 0.225909685052809 |
| AGCCTCGTGACT | 820.551117216398 | 0.160012151641884 |
| TGAGTACAAGCA | 820.551786025219 | 0.301022564383941 |
| CCACTTAAGTCA | 820.563464949979 | 0.234061085050578 |
| CTACTGTGACGC | 820.564002505528 | 0.137537761570212 |
| GTCATTAGAGTA | 820.564736962191 | 0.206258508558556 |
| GGATGATAGTCA | 820.571789030107 | 0.279725949314569 |
| TATGTGACAGCA | 820.572845398004 | 0.18221793122482  |
| TCCAAATGGTCA | 820.579665118272 | 0.255889367504292 |
| CCAAGTGACATA | 820.580913765779 | 0.205438353802627 |
| TAACCAATGACA | 820.581161236085 | 0.257806055383236 |
| GAATCATAATTA | 820.610192858945 | 0.410536914419477 |
| CTTCGGTGTAC  | 820.613758560571 | 0.22867261351837  |
| GGGTCATAGGCA | 820.62213500991  | 0.116193988311682 |
| AACTGAGTAACG | 820.624017676462 | 0.214787846966854 |
| GTCAGACAGTGA | 820.634363441431 | 0.198813214779789 |
| CGTCACCCATCA | 820.641178050529 | 0.199948648793784 |
| ACTCATACAAAT | 820.645859988964 | 0.167146854675203 |
| ATGATTCGATTA | 820.649039882739 | 0.285720210557876 |
| GTTGAAACGTCA | 820.652735374338 | 0.219034838085059 |
| ACATGGTGACGC | 820.654758419152 | 0.250273708666051 |
| GTGACGAGGTTA | 820.658178122358 | 0.206204498273342 |
| AAGAGATGAGTA | 820.665736444878 | 0.163026970602448 |
| GATGACAGGGTA | 820.672265429848 | 0.132003458253991 |
| AACACTGTCACC | 820.672484027125 | 0.166852508411755 |
| GACGATTCTGAC | 820.682743338854 | 0.217695891357693 |
| GTTATGTCAGAA | 820.683044557354 | 0.20415843456653  |
| GGAGTAAGTCAC | 820.689368719919 | 0.220248228388293 |
| AAGCATATGACC | 820.69017090238  | 0.216469455668229 |
| ATCTGTTGGTCA | 820.702834836216 | 0.184522099353068 |
| AGATAGTAGTCA | 820.703174430479 | 0.25223786654957  |
| CAAAGCGACTCA | 820.707352545602 | 0.258646441104422 |

|               |                  |                   |
|---------------|------------------|-------------------|
| ACCTGAGTGACG  | 820.708520552555 | 0.268186676695135 |
| CGTGCGCATGAC  | 820.714342818269 | 0.28054988351944  |
| CCACGCATGACG  | 820.714614288137 | 0.184496023127579 |
| ATGACGTCTCTG  | 820.715189370998 | 0.201052841884984 |
| AAAGCTGACTAT  | 820.717620803741 | 0.224031770135734 |
| ACGCATTAGTAA  | 820.719953114502 | 0.197020494010521 |
| TACTACGTGTCA  | 820.72013008917  | 0.36136187889661  |
| TTGACAGATCAA  | 820.724115443902 | 0.219466966023258 |
| AGCCTTGCTCAT  | 820.724408997448 | 0.139360024259518 |
| GTCCTGAATCA   | 820.732263570846 | 0.204721228679449 |
| AACCAATGTGAC  | 820.734306352141 | 0.21239519477273  |
| CAGTACGACTAA  | 820.739528362461 | 0.262344069603529 |
| CCTGCCCAGTCA  | 820.742057372814 | 0.200506084428327 |
| AGTACCGTGAC   | 820.74789742736  | 0.42598177400199  |
| ACACAGTCAGCA  | 820.748600095885 | 0.208626701408101 |
| GTCGTACATGA   | 820.753665310689 | 0.215209999690348 |
| AAGTCACGCCTA  | 820.757724103424 | 0.215191861746267 |
| GTCACATAATCA  | 820.759421136808 | 0.156995347765922 |
| CGCGATCACTCA  | 820.767323771539 | 0.223359754854881 |
| ACTCATCTTTTC  | 820.788490407532 | 0.200204565808217 |
| GTCATGTTTAAA  | 820.799675350324 | 0.24592571290334  |
| GGGTGACTTTAC  | 820.806588536218 | 0.259157618777972 |
| CTATGGCGTGAC  | 820.809382301913 | 0.18245344221201  |
| ACTCATCGTTCT  | 820.810114484568 | 0.2955956646137   |
| GTCATATGGATA  | 820.812989584163 | 0.238160367069771 |
| TGACTGCTGTAA  | 820.814315081002 | 0.267026151023816 |
| CTGTAATGACAA  | 820.820351392064 | 0.28561509120276  |
| GTCATTCGGGTA  | 820.825963468479 | 0.163006063970009 |
| CAGTCTATGTCA  | 820.830785545776 | 0.221703739857571 |
| CTAGCCGACTCA  | 820.832243814539 | 0.121252323983299 |
| GATGATACACAC  | 820.833884819956 | 0.174742489456138 |
| CGAGTCAAACGA  | 820.836882012777 | 0.245564023520606 |
| ATTGTCATGGTC  | 820.839242025433 | 0.206627866330505 |
| ATATTGTCATGG  | 820.842968627923 | 0.274479815218789 |
| GTC AATACATGA | 820.844811646965 | 0.313236358772878 |
| AGAATATGTCAG  | 820.861524242128 | 0.166008367800001 |
| CGTCACATTGTA  | 820.862450555246 | 0.290928781707355 |
| TATGACAGCCAA  | 820.864083850544 | 0.252095748920748 |
| ACTCATACGATC  | 820.867544352315 | 0.242817102476604 |
| ATTGACTGTATG  | 820.88106985126  | 0.197611182955949 |
| GACTAATCATCC  | 820.883620969311 | 0.272312635775011 |
| TATATGTGACCA  | 820.884846316578 | 0.272829584278172 |
| GTGAGTACTACA  | 820.886116407784 | 0.253878794098599 |
| ATGAGTGCATTG  | 820.889203021798 | 0.135978519298365 |
| AACCGGGGTGAC  | 820.893899941433 | 0.252080780575081 |
| GATGACGGCTAC  | 820.903633915865 | 0.211851632734624 |
| ACGTCACGACAG  | 820.911696218428 | 0.392160544417411 |
| ATAGGTCACCGA  | 820.913380053725 | 0.240194475329225 |
| GTCATCTCGTTA  | 820.916007601681 | 0.225068963663358 |
| GCAGAACGTGAC  | 820.92620574521  | 0.157136595938678 |
| TCACTCCGATGA  | 820.930092759031 | 0.119603001302777 |
| GGACGTGAATCA  | 820.935540156395 | 0.180443125105271 |
| CATCTACGTGAC  | 820.93799574475  | 0.18286878561326  |
| CGTCATTGTCTC  | 820.939516531634 | 0.244037562145169 |

|               |                  |                    |
|---------------|------------------|--------------------|
| AATTGACTGTAT  | 820.947224521609 | 0.192987091926426  |
| GAGTAATTATCA  | 820.951509061983 | 0.259453969161298  |
| CACTACGTGACG  | 820.961119873821 | 0.142964099531105  |
| TCATGACAAGGA  | 820.963279723053 | 0.192502828258703  |
| CAATCATCGTCA  | 820.963501778009 | 0.224051176024619  |
| AGTCAGAAATGC  | 820.970546830405 | 0.0812959454017689 |
| GGGTCCGGTGAC  | 820.975244371202 | 0.265542269157035  |
| GCGCCTGACTGA  | 820.980659305552 | 0.370186065364318  |
| GATGATGCGTAA  | 820.983249674754 | 0.182185204455608  |
| ATTCGAATCATC  | 820.983764152083 | 0.137534085529908  |
| GTGGTGACAGCA  | 820.985443247875 | 0.116725733885338  |
| CGTCACGCGTAG  | 820.998941134717 | 0.38035729176624   |
| GACCCATGACAA  | 821.008409087366 | 0.239340984446541  |
| GATATGGTGTCA  | 821.017666598557 | 0.186780027532641  |
| GACTCAATATGC  | 821.019785343782 | 0.273813886858943  |
| ATTCGTGACAAA  | 821.024732918757 | 0.262433113655676  |
| AAGTCAGAGCTC  | 821.026089555048 | 0.195570962585101  |
| CCGTCATTACTC  | 821.027940833316 | 0.275075609060084  |
| GTGAATCTTCTA  | 821.03172278167  | 0.239780826630492  |
| AGAGTGACAAAC  | 821.031774719756 | 0.213364124431614  |
| CAACCTCGATGA  | 821.037115103267 | 0.242506550383321  |
| ATGAGCCAAATCA | 821.039960307447 | 0.223757351140084  |
| GACTAACGTGAC  | 821.049628836672 | 0.264141134031752  |
| ATAGCTACGTCA  | 821.054970402166 | 0.246988244056366  |
| AGATGAGCTGTC  | 821.069462347452 | 0.245501111998302  |
| GTCACCCTTAAC  | 821.072710257243 | 0.189281606544881  |
| AAGGAGATGACA  | 821.073350541351 | 0.142383441652336  |
| ACATGATGACCA  | 821.0788917778   | 0.304688811395505  |
| CTTGACGTGAC   | 821.080560098922 | 0.222610233036721  |
| ACTTATAATGAC  | 821.081029796817 | 0.239300025366519  |
| CAATTGAGTCGA  | 821.095648997896 | 0.240438560236177  |
| CCGTCATATGAG  | 821.097120002707 | 0.266171213229084  |
| AACCGTCACACA  | 821.098227324051 | 0.134968990202562  |
| CTGACTGGTATC  | 821.099032213951 | 0.102827688026976  |
| CGCCTTGACTGA  | 821.101580612751 | 0.219930849560361  |
| GTGTCAGAGCAA  | 821.102044481116 | 0.2503222464295    |
| GAATTAICTGTA  | 821.103545246364 | 0.224916499011845  |
| ACTAGCATGACA  | 821.11458076289  | 0.276817067065233  |
| AAGTCACCTGTC  | 821.11520650016  | 0.196859121194746  |
| TGACGGAGTTAA  | 821.117107033694 | 0.18047740617541   |
| GACCCGTGACAC  | 821.129635282202 | 0.19892144703306   |
| GTCATGCTGAAA  | 821.13178488881  | 0.257008240801691  |
| ATCCCCGTCATC  | 821.137070263769 | 0.168808957623883  |
| ATAAATGTCTCA  | 821.150076799005 | 0.270868465575542  |
| ACTGACACTTTC  | 821.150608281196 | 0.25008815995158   |
| CGTGCTGAATCA  | 821.155427901162 | 0.277798382675124  |
| GCTTGGGATGAC  | 821.161563121939 | 0.21102014736506   |
| AGTCAGCGTTAC  | 821.16694128904  | 0.212626183586707  |
| ATCAAGTAGTCA  | 821.168301975936 | 0.224933649978391  |
| CGACGGACTCAC  | 821.176968538502 | 0.240565727665547  |
| CAGCGAATGACG  | 821.184554389673 | 0.268272356502287  |
| GAATCCATGTCA  | 821.184856245839 | 0.307484640151776  |
| AGAGTAATAGTA  | 821.187037901098 | 0.208154799368007  |
| ATCAAATACTCA  | 821.19470848837  | 0.294588158289922  |

|               |                  |                   |
|---------------|------------------|-------------------|
| AGAATTAGTCCT  | 821.196741381618 | 0.14618238267067  |
| ATCCGGTCATAC  | 821.205232418036 | 0.14872097912075  |
| GGCACTATGACC  | 821.206289893699 | 0.214805478373615 |
| ATGATTAGCAAT  | 821.212251533492 | 0.368473325178176 |
| ACACTAGACTCA  | 821.21397589399  | 0.193182057000027 |
| AAGTATTAGTCC  | 821.215787649041 | 0.164049553077329 |
| CCTCGTGTGACG  | 821.218911944063 | 0.184368806018063 |
| AGTCACGACCAA  | 821.219130312445 | 0.263123952442471 |
| ATGAGCTGGTCA  | 821.224320250792 | 0.211133872537377 |
| AAACACGTCAAT  | 821.224492212125 | 0.146759091683479 |
| AATTGCGACTCA  | 821.234707835721 | 0.120695387842002 |
| TACCCATAGTCA  | 821.236087136524 | 0.195177667648828 |
| CCCGGGGTGACG  | 821.236813787565 | 0.285920153888248 |
| ATCAATCGATGA  | 821.248627529366 | 0.373052705968624 |
| TCGTTGGTGACA  | 821.253361554823 | 0.212446848599485 |
| ATCGTTGTACC   | 821.254645842007 | 0.220819731824652 |
| CTACTGTGACGA  | 821.256741048563 | 0.185468110747041 |
| TCACTAGTGACA  | 821.259929609545 | 0.181349601977164 |
| CAAGGGTCTGAC  | 821.266405808026 | 0.206911309457512 |
| CCCTGACAGTCA  | 821.268915345583 | 0.26347300428909  |
| ATTGGCAGTCAC  | 821.274181875314 | 0.293687186321783 |
| CGGTGACGATGC  | 821.281050907477 | 0.196415867681996 |
| TGACTACCATCA  | 821.295670518307 | 0.236493088868565 |
| AGTCAGAAAATG  | 821.301080521486 | 0.230229527076773 |
| ATGACAGTGAGA  | 821.305938160427 | 0.195346128405587 |
| CCCATTGGGTCA  | 821.310391990091 | 0.282327194900429 |
| ACGTCACCTGAGG | 821.314775105978 | 0.210440946014932 |
| GTAGACTAACAC  | 821.317207481764 | 0.273854213458252 |
| TCGATGAGCCAA  | 821.321170960782 | 0.200897660858223 |
| CGACGATTACTC  | 821.328210513372 | 0.200923045785343 |
| GATTACGCAAGA  | 821.328790372094 | 0.158326826838341 |
| GTATGCGAGTCA  | 821.329854783742 | 0.211354277109819 |
| ATGGATTAGTCG  | 821.332096206349 | 0.215255982127583 |
| ACTATGTGACCA  | 821.333021166957 | 0.183279241599525 |
| CTGCCCTAGTCA  | 821.337452468643 | 0.271260057085583 |
| ATGACAAGGCAG  | 821.345178746791 | 0.227241531560838 |
| GATGACCCCTAC  | 821.353077892255 | 0.199597775807519 |
| GTCACCATCAAA  | 821.357364729638 | 0.318966179680212 |
| TACGCTTCGTCA  | 821.364594083439 | 0.359869408016026 |
| TAGATTGAATCA  | 821.368680075361 | 0.178533123251827 |
| TTGCTGTGACAA  | 821.368995405993 | 0.247888343751315 |
| AGCAAATGACAT  | 821.370111348802 | 0.208232401224721 |
| CGTCCCACGTCA  | 821.378756406898 | 0.220715569826283 |
| GACTAATCGGGA  | 821.391116769237 | 0.255479544160002 |
| AGTAACCATGAC  | 821.396955500774 | 0.191761597604551 |
| CTTATCGTCACC  | 821.411682257336 | 0.18270530962234  |
| ACCTGACTCGGA  | 821.415123017668 | 0.298774095821974 |
| CGTAGTGACATA  | 821.416491805301 | 0.222556827194279 |
| AGCCTCTGTCAT  | 821.431529409575 | 0.129453664295344 |
| ACGTCAGATCTG  | 821.433886750771 | 0.173022502000063 |
| ATGACAATCAGC  | 821.436792921998 | 0.302101137494475 |
| GTCAGACTTTCA  | 821.440339519289 | 0.291028032112155 |
| GAAAGTTGTGAC  | 821.441244936936 | 0.129406608142213 |
| AACCCGAATGAC  | 821.442114762606 | 0.260863096272272 |

|              |                  |                   |
|--------------|------------------|-------------------|
| GGTGGTGACCCA | 821.449402007545 | 0.155326960654056 |
| AGTCAGCTTACG | 821.452558480328 | 0.330973174267516 |
| AAGTGACGCGGT | 821.468736004012 | 0.191137712078369 |
| GTCGCAGTCAGA | 821.469640677458 | 0.197817540011908 |
| CTGTCATTATAA | 821.472080780081 | 0.221332938982556 |
| CGCTCGAGTCAA | 821.473151930703 | 0.217204512790536 |
| GAGTGAGTCCAC | 821.477627989417 | 0.213189610449897 |
| CGGCTTCTGACA | 821.487623278528 | 0.270545881450808 |
| ATGACGACCCAG | 821.491729874816 | 0.264215731434931 |
| TAGAAGTAGTCA | 821.503227802609 | 0.209978955451324 |
| TAATCCATGTCA | 821.506514926711 | 0.244021462919342 |
| AAATGTCTGTCA | 821.512049037964 | 0.192353142692595 |
| CTGACTCGGATC | 821.520788031826 | 0.182330935657327 |
| GAATGAGCCAAC | 821.532524677049 | 0.152866137575617 |
| ATATGGTCATTG | 821.533388583884 | 0.128461163419515 |
| ACGTTGATGACC | 821.534982017083 | 0.246561929919231 |
| TGTCACAACATA | 821.537035389519 | 0.226540357404141 |
| CAACTGGTCAGA | 821.539654688654 | 0.348651115119782 |
| ATTGCGTGAGTC | 821.542282070935 | 0.268640919354284 |
| CGTCACGATAGC | 821.54439798824  | 0.312270305855762 |
| AAGTGACGTGAT | 821.552169739027 | 0.180508270656428 |
| TAATGTGGCTCA | 821.556716557789 | 0.204542274355014 |
| CCTAGCAGTGAC | 821.558196369782 | 0.196387425953924 |
| TAATGACCATGA | 821.560961513742 | 0.257115335617413 |
| TCAGACATGACA | 821.562830666556 | 0.304447249072784 |
| ATGACTTCGGAA | 821.563874081426 | 0.188266770517259 |
| ATGAAAGGTGAC | 821.571270315747 | 0.239338936781941 |
| ATGTGAGGTGAC | 821.572666964768 | 0.286642831350651 |
| CTGAGTCGCAAA | 821.575773797915 | 0.222737276874508 |
| CAAGATTACGCA | 821.59191865959  | 0.212794192475199 |
| AGTCAGAGTGGA | 821.593110669589 | 0.18433131878841  |
| CAGTAGCGTGAC | 821.593814265632 | 0.257525613874405 |
| TACAGTGACGAA | 821.596728449955 | 0.244682151596109 |
| ACTGGCATGACA | 821.606842738502 | 0.228671897886784 |
| CGAGTCAGGGAA | 821.622674903631 | 0.171752624203865 |
| CGCCATAAGTCA | 821.624374763664 | 0.181357882726639 |
| GTGTATCTATGA | 821.625135007088 | 0.253539475498214 |
| ATTAGTCGCAAA | 821.627292472827 | 0.216988776554245 |
| GTAATTCATGAC | 821.628719772985 | 0.227256267998506 |
| ATCACATGACGC | 821.636484837168 | 0.204559726869179 |
| GCTGACTGGTTA | 821.646998480214 | 0.186274321322077 |
| TATTGTCACAGA | 821.656905648714 | 0.262572604423635 |
| GATCCGTGTAC  | 821.661137609086 | 0.304021122176049 |
| TCCCCTGTGTCA | 821.664483112639 | 0.249555241247712 |
| ACTGGTATGACC | 821.66792213271  | 0.277053906203109 |
| TTCTTGACTAAA | 821.66836722737  | 0.271504839719717 |
| ATGCAGTCAGTC | 821.671293828413 | 0.171121048464665 |
| ATTACTGACTGC | 821.675442302169 | 0.314478763431797 |
| CAAGCGTAGTCA | 821.677902597139 | 0.211085538344347 |
| CAGGATTAGTCG | 821.693871610029 | 0.272766355266604 |
| TGAGTCTGCGAA | 821.697486825631 | 0.233158035720048 |
| TCATGTGGGTCA | 821.700676538953 | 0.135019885874433 |
| GTGACAGCATGA | 821.704109377215 | 0.265294728019596 |
| CCAAACAAGTCA | 821.706662359699 | 0.22981696935003  |

|               |                  |                    |
|---------------|------------------|--------------------|
| ACTTTACGTGAC  | 821.706765776602 | 0.149295589741578  |
| AGTATTAGTCTG  | 821.7115899604   | 0.185640856717975  |
| ATTAGACGTCAC  | 821.715635983051 | 0.21826984828053   |
| AGGACTAATCGC  | 821.725851499217 | 0.244380799158742  |
| TGGTCATTACAA  | 821.734441277499 | 0.131185966302455  |
| GTCACATACCCA  | 821.735205173612 | 0.259551207202764  |
| CTGACTGGGATC  | 821.738022294092 | 0.286620526320328  |
| GGGTACTGTCAC  | 821.738540111208 | 0.155723433438185  |
| GACTCACGATGC  | 821.745144952553 | 0.291027163769166  |
| CGACTCACGAGC  | 821.749000600032 | 0.186000596783979  |
| CATGTGTTAGTC  | 821.754533656458 | 0.20837690815443   |
| GACGATAATGAC  | 821.758164021866 | 0.25193441487112   |
| ACCATTTTGTCA  | 821.761418988166 | 0.272525402434115  |
| TGAGTCGGCCAA  | 821.764287885238 | 0.21536393665265   |
| GTAGTAGACTCA  | 821.764942379962 | 0.205923709205751  |
| ACTATTACGTAC  | 821.777095788949 | 0.238278289641095  |
| TATGACAGCCGA  | 821.784395360445 | 0.143685612039911  |
| ACTAAGATTCAT  | 821.803344433111 | 0.211172775339544  |
| ACATCATCGTCA  | 821.813257413581 | 0.201097009387091  |
| GAGTATACTCAC  | 821.819645257547 | 0.246616081513118  |
| AGTCAGAACTGC  | 821.840351501219 | 0.343549764944193  |
| ACACATCATAAA  | 821.842986149161 | 0.191890937410047  |
| AATCTGAGTCGT  | 821.845049836925 | 0.181241774107141  |
| CTGAGTCTACCA  | 821.854911817635 | 0.223005164851835  |
| AGAGTAATTTGA  | 821.858542078758 | 0.180335589833543  |
| GTCACTCAATAA  | 821.863259516713 | 0.289795339196437  |
| AATGTCATTGGA  | 821.870242378837 | 0.211182895046565  |
| TCAAGTACGTCA  | 821.874331473241 | 0.22902537557387   |
| AGTCAGCGCGAA  | 821.883036448898 | 0.253441428850399  |
| GCACTTGACGCA  | 821.887867578539 | 0.219920820521656  |
| ATGACGAGCAAT  | 821.89015791442  | 0.199999143807293  |
| AGTCAGTAGACA  | 821.896281846382 | 0.308758983735295  |
| GTGACTTGGTTA  | 821.900920979721 | 0.277955450456826  |
| GTGACATGGACA  | 821.904568748711 | 0.258353422112424  |
| AGGTGAGTATAT  | 821.9074105466   | 0.192439147714534  |
| AAATTAGTCGGA  | 821.919227881408 | 0.16948202125271   |
| AATGTATCACAC  | 821.927592252563 | 0.124971539487177  |
| AAACTTGCTCAC  | 821.965223053145 | 0.128157104235711  |
| GATGACGCCGTA  | 821.976406391719 | 0.153960241100518  |
| ATGAGCAACGGA  | 821.977493446945 | 0.218664934769147  |
| TCAAACCTGTCA  | 821.982170232195 | 0.202683775464864  |
| CCCTGACGTGAC  | 822.002131745373 | 0.274735968576292  |
| ACTTCTAATGAC  | 822.00295680148  | 0.197804616003356  |
| CTGTCAATTTCTA | 822.003640901793 | 0.0710811489903689 |
| GAGTAATAACGC  | 822.003924446169 | 0.373832323468288  |
| AATTCGAGTAAT  | 822.009375374362 | 0.153494969261494  |
| GCCGAGGGTGAC  | 822.009768578963 | 0.214979109799484  |
| GTCATCCATGAA  | 822.032542316394 | 0.270456341041745  |
| GTACACGTAAGA  | 822.033720524194 | 0.26133784635876   |
| CGTAAATTGTCA  | 822.033776409413 | 0.319927855547242  |
| ATGCAGATGACG  | 822.036696529737 | 0.214433626527758  |
| GCGACCGGTGAC  | 822.055461756742 | 0.228165456437305  |
| CGTCACACGTTA  | 822.056652787125 | 0.207647623922367  |
| ATGACCTGACGC  | 822.059489560338 | 0.250797049448807  |

|               |                  |                   |
|---------------|------------------|-------------------|
| ACTGTCACCGGA  | 822.061258877393 | 0.225099764304064 |
| ACTGGCAGTCAC  | 822.063489529673 | 0.307990375362579 |
| GGTTTGC GTGAC | 822.063628083167 | 0.231822753574924 |
| GACTAATTGACA  | 822.066422143368 | 0.218227745621144 |
| AGATGTGACGTC  | 822.070065216861 | 0.246761796076827 |
| ATAGGACATGAC  | 822.070920744606 | 0.187162423559044 |
| CACATCATCGAG  | 822.077934364114 | 0.200318901141642 |
| ATGACC ACTGTA | 822.082964927487 | 0.218715797515392 |
| ATAGGCTCATCG  | 822.08742364276  | 0.421618526781795 |
| CAATATTGAGTC  | 822.095098864221 | 0.239557908493212 |
| GTGTGACCGAAA  | 822.096277733771 | 0.229027291973873 |
| AATTAACATGAC  | 822.097993106796 | 0.31225038378725  |
| CGATTAATCACA  | 822.098893439565 | 0.264301892439242 |
| CACACCTGTGAC  | 822.101683398073 | 0.258597737088548 |
| CTGAATGACCAC  | 822.104778316482 | 0.263292968981383 |
| GTCACAATTATA  | 822.104944156241 | 0.183786457039831 |
| GTCATTGTTGGA  | 822.106720630622 | 0.187406253849734 |
| AAGTTT GATGAC | 822.11238613127  | 0.204715127166789 |
| CTGTGGCGTCAC  | 822.113875559846 | 0.243302987556001 |
| ATCCGTGACGAA  | 822.115201739694 | 0.223694632030026 |
| AATCGGTGTCAC  | 822.117899740884 | 0.234033693125074 |
| ATGGA ACTGTCA | 822.138499003831 | 0.315770466843053 |
| ACTGAATCAGAA  | 822.140384448544 | 0.21091429337308  |
| AGGGATGACCGA  | 822.148534036226 | 0.214593187378684 |
| CCTTGCACGTCA  | 822.149094754768 | 0.161420991627317 |
| AGCGTCACTACG  | 822.157332158057 | 0.278693172814028 |
| GTCGTCAACCGTA | 822.161127483685 | 0.308673933633668 |
| GTCACCGCTGGA  | 822.16204377102  | 0.207740730868963 |
| CGCAAATGGTCA  | 822.165143332701 | 0.240361149423521 |
| CGTCAACCCAAAG | 822.171433366918 | 0.225038449411579 |
| TATATGTGACGA  | 822.175179155458 | 0.245150991983035 |
| GTCATAAGAGGA  | 822.1757586647   | 0.193260755092924 |
| ACAATTAGTACG  | 822.177137948509 | 0.240561302780497 |
| ACTCACCATATG  | 822.177886344332 | 0.19034555006048  |
| AAAACGCGTCAG  | 822.179667943011 | 0.179789504135821 |
| ATGAGCAGTCAG  | 822.181117503633 | 0.184474034506324 |
| CTGACTCGCTCA  | 822.182940904676 | 0.213429367773082 |
| CAGCATGAGCAA  | 822.187802291561 | 0.249912724941823 |
| CCAAACTACTCA  | 822.206372675187 | 0.195384424353497 |
| GTTCTGTGACGAA | 822.212164550618 | 0.219992312228653 |
| AGGTGACATGGA  | 822.21308628526  | 0.200266131159812 |
| CTCGATGAGCCA  | 822.213213855802 | 0.19753691047679  |
| GCGTCACCCAGA  | 822.224706675801 | 0.345780444010244 |
| GTGTCACTTCAA  | 822.230153776654 | 0.183153646830172 |
| GACTCACGTTCA  | 822.235840509677 | 0.336764830835161 |
| AGACCGGTGAC   | 822.242093692206 | 0.201532242406183 |
| GTCATTTGCAAC  | 822.245040695661 | 0.22047035729929  |
| GAACACCTCATC  | 822.250528282406 | 0.209384024297275 |
| GACTGACATCAC  | 822.250822712749 | 0.231697236471168 |
| GTACTCACTGAC  | 822.251905629877 | 0.202909041846634 |
| CTGTTTCTGTCA  | 822.253085323239 | 0.255541708513667 |
| TAGGACTAATAA  | 822.257472776559 | 0.197942976039249 |
| TCTTCATGACAA  | 822.25797501761  | 0.267081931377697 |
| GATAGTGACCCA  | 822.263471030799 | 0.16802335869699  |



|              |                  |                   |
|--------------|------------------|-------------------|
| ACTATTACTGTG | 822.271274558337 | 0.251040167391081 |
| CTGTCAACGTCA | 822.2844556338   | 0.241702769268109 |
| GAAAGAGATGAC | 822.286748474017 | 0.184342389268547 |
| ATGACTTGATC  | 822.294642463295 | 0.259393555905402 |
| ACCTGGTGACAT | 822.295210927601 | 0.230135772089007 |
| GCGGATTACTCC | 822.299121354881 | 0.294628602834117 |
| ACCAATTAGTCT | 822.315163859786 | 0.270202812659603 |
| GGTGACGACTAA | 822.317443326109 | 0.195712303169873 |
| GACGTTGGTGAC | 822.318897349715 | 0.248556479048663 |
| GCTGGTGACAA  | 822.322417069309 | 0.219588041515015 |
| AGCGTCACGATG | 822.328776312535 | 0.27386816220045  |
| AACGGCGTCATG | 822.331222108217 | 0.221733697674666 |
| ATGACGCCGCTC | 822.347351982429 | 0.164702110592023 |
| ATGACGGGGCTA | 822.347491295507 | 0.178440261867603 |
| CTGGTGTACTCA | 822.35807126591  | 0.24725129285088  |
| GCTTGGGTGACA | 822.360513448492 | 0.338791991712611 |
| ATATTTGGTCAG | 822.36063582968  | 0.254213984362766 |
| ATGGGTAATGAC | 822.366373818778 | 0.264225536644386 |
| TATCGCTAGTCA | 822.370658261788 | 0.308054431146448 |
| ACTCATTCCGGA | 822.380944161558 | 0.306990327174294 |
| ACTCTGGGTAC  | 822.383310740452 | 0.27272051688627  |
| ATTAGCCATAAT | 822.383856802542 | 0.200252705772613 |
| CAGTACTGATAC | 822.387341566675 | 0.194354419965792 |
| CTGTCTTGTGAC | 822.394149654159 | 0.251728831063633 |
| AAGTCGTCACTC | 822.403996626376 | 0.232065710995054 |
| CTCCGTGACAAA | 822.422333205607 | 0.226568728854943 |
| CGGCACGGTGAC | 822.427422626544 | 0.234384324101871 |
| AAGCATTGGTCA | 822.435148295479 | 0.231908511448188 |
| AAAAGTGACCCA | 822.439852765048 | 0.205816562599735 |
| AGTGACACGATC | 822.441820761133 | 0.248459865906361 |
| CACATGTATACA | 822.442811565708 | 0.306315823655937 |
| ACTTCGGACTCA | 822.446691386849 | 0.204598873458048 |
| CATGACGTTGTC | 822.446887669501 | 0.159314784988975 |
| CCCGACAGTGAC | 822.451676789394 | 0.277392676072308 |
| CCAATTATATGA | 822.453967092703 | 0.280386899480684 |
| ACTCATTCTTCA | 822.455863030124 | 0.220428886995794 |
| GGTCATATTGCA | 822.468698324699 | 0.247258842669218 |
| AGTCAGACTGGC | 822.472077157547 | 0.267995337903601 |
| ATTATTAGTCCG | 822.489168714373 | 0.211876310413415 |
| AATATTGTGACA | 822.493791866798 | 0.244152381448247 |
| CGTTGAGTCTAA | 822.500577662888 | 0.195745756445711 |
| TCTACTACGTCA | 822.508929774598 | 0.186611552915747 |
| GTCACCAGTGCA | 822.517785736195 | 0.194925559427857 |
| AGTAATCGGTCA | 822.519716838509 | 0.241418723990783 |
| AGTAGAGGTGAC | 822.531381886783 | 0.201199742826003 |
| TACGCATGACAA | 822.534316171709 | 0.184496628166256 |
| AGTTTTAATGAC | 822.538211125698 | 0.254859341668864 |
| CTGTCATGGCGC | 822.538865455434 | 0.282685777414588 |
| CTGACTGGATAC | 822.549323415436 | 0.238206355347116 |
| CCACGTCAACGA | 822.555140846556 | 0.252113710633373 |
| TCACCTGACACA | 822.559570782141 | 0.235683116506893 |
| TCAACGTCACCA | 822.569563423763 | 0.173743334141936 |
| ACAAGTCGTCAT | 822.57527428751  | 0.223911867044017 |
| CCACCCTGACTC | 822.575986811345 | 0.194783875406113 |

|               |                  |                   |
|---------------|------------------|-------------------|
| GCGAGTGACAAA  | 822.576229015192 | 0.122980906428413 |
| GTCACGTCAAAC  | 822.586259768252 | 0.18162588066076  |
| GAATGTGTCTTA  | 822.591797274388 | 0.262453397465891 |
| CCCATCGCGTCA  | 822.596343754481 | 0.129894053101085 |
| GAATTAGTGTCA  | 822.600846059958 | 0.206677870441076 |
| TAGGACAAGTCA  | 822.604819192501 | 0.205419509458393 |
| GAACCGTGACAC  | 822.608587705037 | 0.122063214787204 |
| ATGACAGGACTG  | 822.608809587895 | 0.148680644397762 |
| CAACCCGAGTCA  | 822.61357106425  | 0.211286370274068 |
| ATTCTGACTGGC  | 822.617738025967 | 0.144627417961071 |
| ATGACCACGTCTG | 822.633041593414 | 0.223692899129216 |
| GTCATTGCAAAC  | 822.63534999428  | 0.151133319550668 |
| AAATTATGAATC  | 822.641762665079 | 0.234200996362966 |
| ATGAATCAAACA  | 822.647439559135 | 0.157816908373104 |
| GGTCATCTCGAA  | 822.649000309685 | 0.266645758864759 |
| CTGACTCTCATC  | 822.650771460769 | 0.155335250405853 |
| GTATGCGTCTTA  | 822.651595178946 | 0.209781053197491 |
| GTCACCTTCGAA  | 822.656053067143 | 0.248883581121561 |
| AGTCAGTCTGAC  | 822.658235525632 | 0.206545614596171 |
| AATGATTCTTAG  | 822.661076363022 | 0.187605068434928 |
| ACCTGCGTGACG  | 822.667486127211 | 0.258951956173037 |
| ATACGTTGTGAC  | 822.678099195248 | 0.255081332540711 |
| ATAGTGTACGCG  | 822.691590766693 | 0.198405933652893 |
| GACAAGGTTGAC  | 822.697214983351 | 0.138143768443716 |
| ACTGGCAATGAC  | 822.697899650024 | 0.350596431035536 |
| TGCGTAATCTAA  | 822.698741701754 | 0.299431079791984 |
| AGCATAGACTCA  | 822.705836823406 | 0.330307774354975 |
| ACACGTCAATGG  | 822.706386028676 | 0.205523564969735 |
| ATCCGCTGTCAT  | 822.707358704372 | 0.198965158209694 |
| GTTGCTGTCACA  | 822.711247810427 | 0.260387004325817 |
| AGTCAGTTATCA  | 822.71930899479  | 0.234016107075783 |
| CGTCATTGCAAA  | 822.721209045157 | 0.242533975898279 |
| GCTAAGCATGAC  | 822.725830849152 | 0.252575604155841 |
| CTATGACCGTGA  | 822.73187300209  | 0.192635639807    |
| TCACTGTGACCA  | 822.734828306179 | 0.140652954911685 |
| GAGTGGCGTCA   | 822.741232620588 | 0.295981086911447 |
| ACTCATACAAGA  | 822.741321382906 | 0.249293786456952 |
| ACAGAGACTCAT  | 822.743830842575 | 0.169941431598941 |
| AATCCGGTCATA  | 822.745422485605 | 0.253863253727257 |
| CGTCATTTGTAG  | 822.755944931321 | 0.199755303047982 |
| ATCCCAGGTGAC  | 822.762332229481 | 0.257582494030984 |
| TAAGTATACTCA  | 822.776124179939 | 0.159639689142167 |
| ATACAGACTCAC  | 822.78974893904  | 0.248230129629108 |
| AAGGAAGTGTC   | 822.798328962977 | 0.149456223381411 |
| GTATCGTCAGAA  | 822.816385605893 | 0.133993143304287 |
| GGTCTGCATGAC  | 822.818360807777 | 0.13661948123556  |
| GTCACGTGAGCA  | 822.826992776937 | 0.252149282497054 |
| AGTATAGGTGAC  | 822.828781773074 | 0.287964660757075 |
| TCAGTATGAGCA  | 822.831647111504 | 0.264525885147943 |
| TGTGACGCCAAA  | 822.838562610645 | 0.293900305330025 |
| ACTCATACAGTC  | 822.844304367872 | 0.230689847513448 |
| GTCAGACGTTGA  | 822.858758600201 | 0.19184809212773  |
| CTGAAGTCTGAC  | 822.859515403387 | 0.33403314986498  |
| ACAGGGTGACGA  | 822.861431415628 | 0.255935540125692 |

|               |                  |                   |
|---------------|------------------|-------------------|
| GCAAATAATGAC  | 822.863892759081 | 0.314264994932158 |
| AGCCTATAGTCA  | 822.865134392019 | 0.363896265807771 |
| CTGACTCCGCGC  | 822.874613678024 | 0.115964797952725 |
| ATGTATTAGTCC  | 822.879456809611 | 0.227210851884404 |
| ATGCGTCTTACG  | 822.881026936981 | 0.195893957998824 |
| TCATACTTTAGA  | 822.883509245267 | 0.292883399208687 |
| CACACTGTGACG  | 822.887293703249 | 0.14972054298766  |
| CCCTGTACGTCA  | 822.893322804533 | 0.139806073977663 |
| AGGGATGGGTCA  | 822.894736945834 | 0.225211912632419 |
| CAGACGCTATGA  | 822.895617642318 | 0.22817359173814  |
| AATGACCGAACC  | 822.897230879808 | 0.187982978472611 |
| ACGATCATGACA  | 822.899782268752 | 0.335476251021788 |
| ATTCTGTGACAA  | 822.902750293381 | 0.182828381134153 |
| ACATGACCGCGC  | 822.927893834343 | 0.240053185361642 |
| TGCATAATGACA  | 822.934151565758 | 0.210819226330523 |
| AGTGTTTTGTCA  | 822.944123116718 | 0.232571055780123 |
| GCTTTAATGACA  | 822.954062309704 | 0.22919592162793  |
| ATGCGCGAGTCA  | 822.95664898724  | 0.201645792952546 |
| ATGAGTAGGGTC  | 822.960711169333 | 0.127425157203713 |
| ATAGTCAGGTAC  | 822.9639533021   | 0.192715243045661 |
| AGTCACGGGAC   | 822.966766109086 | 0.233708711946352 |
| CTGTCACAAATGA | 822.982098080938 | 0.13044252390662  |
| CGCTGATGATGA  | 822.985240006723 | 0.292016222139257 |
| ATACAGTAGTCA  | 822.985971045405 | 0.184264871226769 |
| ACCTGCCAGTCA  | 822.986751148135 | 0.22106468572551  |
| TCATGTCACGGA  | 823.012012656356 | 0.236539858174875 |
| AGAAATGACATC  | 823.012870083843 | 0.27923712467279  |
| AGGTGCGACTCA  | 823.013890823381 | 0.205446287824857 |
| GGAGAATGTGAC  | 823.035449407143 | 0.19849679681074  |
| AAGTCAGAGCAC  | 823.036587902094 | 0.219806425478069 |
| TCATCTGACAAA  | 823.040629023716 | 0.20268505465858  |
| ATGACACTCCCC  | 823.041695520276 | 0.139340556204745 |
| ATGAGTTAGCCA  | 823.049411963441 | 0.239499449977246 |
| CTTCGATAGAAA  | 823.051512527674 | 0.230142252273415 |
| CGTGACACTGAA  | 823.0573819235   | 0.201183306833031 |
| GGTGATCCGTCA  | 823.05892776841  | 0.319813957136324 |
| TCACTCAGTCAA  | 823.061128052383 | 0.141088905773768 |
| CTCACGTAGTGA  | 823.0625691448   | 0.254053784520343 |
| AAGACTGACT    | 823.067154300735 | 0.165284243253239 |
| ATGTACTGAGTC  | 823.068919538677 | 0.211363003366493 |
| ACATTGACACAC  | 823.071183017518 | 0.217987654671484 |
| AGTCAGTTAGTC  | 823.078321231822 | 0.201568069020798 |
| CGGGCGGATGAC  | 823.080419306724 | 0.350167919456185 |
| ATAGTCAGGTTT  | 823.082253281324 | 0.240489870256726 |
| ACGTCACGCGCA  | 823.082309994685 | 0.141745892651883 |
| ATCTTGACTCGA  | 823.089220069872 | 0.149878251071802 |
| GGCGAAATGACA  | 823.093744207029 | 0.155043644501414 |
| GTCTATTACTGA  | 823.100721630969 | 0.267061305520638 |
| TAGAGAGAGTCA  | 823.110846445175 | 0.260230623357241 |
| ACCGTCATTGAC  | 823.111651882694 | 0.227730343237548 |
| GTGATGATGCAA  | 823.113915767348 | 0.258900845993354 |
| GTCATGGTGTGA  | 823.116930419493 | 0.286661056731097 |
| TCAATCGTGACA  | 823.117116369305 | 0.257394329310098 |
| AGTCGCGTCACG  | 823.119810130585 | 0.258305733225413 |

|              |                  |                   |
|--------------|------------------|-------------------|
| CTCCACTGATGA | 823.125810601822 | 0.277477412187776 |
| AGGATTCTGACT | 823.130409369558 | 0.215742189829813 |
| GGACTCACTTTA | 823.137136210709 | 0.305230588867541 |
| GTGATTGACTGA | 823.13863051941  | 0.263997300005302 |
| AATTTCCATGAC | 823.159035523917 | 0.189181874693775 |
| GGTTGATGACCA | 823.168309073135 | 0.249364051103209 |
| CAATATATGACC | 823.169765666038 | 0.243555656884314 |
| GTCATTGTCCGA | 823.174073504036 | 0.18014377517236  |
| CGGCCACGTAAC | 823.192817329835 | 0.172836843598098 |
| TGGGGACTCACA | 823.1948232372   | 0.176925179638447 |
| CTGTGACGAGGC | 823.203057451491 | 0.119433564954656 |
| CGGTGACCTTAA | 823.204556186622 | 0.181230300539736 |
| GTGTCAGAGGCA | 823.205082656467 | 0.187701973991742 |
| ACAATATTGTCA | 823.207278890224 | 0.250081849045378 |
| GTGCGTGACGAA | 823.216790295897 | 0.351014204392984 |
| CAGATGCGTGAC | 823.221168344483 | 0.26422153900288  |
| ATCATATGACCC | 823.240909605647 | 0.21091406451246  |
| AGTCACGGCGCA | 823.245712916016 | 0.156830298921952 |
| GGATTGGTCAAC | 823.248087722346 | 0.146283792605871 |
| GAGTAATTAATC | 823.250521885767 | 0.261502236194972 |
| CGTCACCAGCTA | 823.256533661283 | 0.225350188551366 |
| GCGTGACGCGCA | 823.261180787719 | 0.200580946606492 |
| CCCAAAGATGAC | 823.262851663831 | 0.265961543092734 |
| CTCGTGTGTCAA | 823.26954747708  | 0.334753604435806 |
| GGGTCTCATGAC | 823.272461260675 | 0.183512789815353 |
| GTGACGCCACTA | 823.288645699566 | 0.248020455878766 |
| TCTGATCGGTCA | 823.288766904831 | 0.242606035125964 |
| ATTAGTAAATGC | 823.289344895364 | 0.242866510147403 |
| CCTACCGTCATA | 823.290258707189 | 0.187224369094998 |
| ATAACGGGTGAC | 823.295502911329 | 0.167819463307234 |
| ACTAATTGTGAC | 823.306344160478 | 0.263107140632413 |
| CGGTGTCACGTA | 823.308958828756 | 0.253491321577202 |
| CGTCATCTCGGA | 823.31522143424  | 0.202931334511563 |
| CTAACTGTGACA | 823.317226512002 | 0.214801988030678 |
| TAAGCGGTGACA | 823.32372805324  | 0.237193185567458 |
| AAGCTGAGTAAC | 823.326138752711 | 0.201733729347443 |
| ATATGTATCACC | 823.327844899952 | 0.166806365383719 |
| CCCCTGAGTAA  | 823.330114674253 | 0.252320772243818 |
| TGACGCTTTGCA | 823.346377781802 | 0.281881147688038 |
| GTCATGATCGTA | 823.360932396618 | 0.266510132778582 |
| ACTGACGAAATG | 823.373750190068 | 0.153413220468007 |
| ATCGCCGTCATC | 823.387943192349 | 0.213590414554011 |
| CCGTCATCTAAG | 823.389122013166 | 0.207625057626983 |
| AATCTTGACGCA | 823.39781869978  | 0.147696835073984 |
| TCACACTGATGA | 823.401314343814 | 0.261628440256925 |
| GTACGTGTGACA | 823.402703312943 | 0.199591013034996 |
| TCCGAATTGTCA | 823.403866410269 | 0.220272382634221 |
| GTAATAATACCA | 823.405138463274 | 0.194039949552596 |
| GAGGATGGGTCA | 823.406506971394 | 0.248319404472453 |
| GTCACCTCTCTA | 823.413633048093 | 0.196999185914503 |
| AGTGGCTCACAC | 823.417885330073 | 0.347469407635693 |
| GCCGCCGACTCA | 823.428959740668 | 0.398715019855867 |
| CCTCATTCTGCA | 823.436946388732 | 0.137614494458508 |
| GTCACACACCCA | 823.441983763551 | 0.259110310765345 |

|              |                  |                    |
|--------------|------------------|--------------------|
| GAGTACCCGTCA | 823.443987903401 | 0.190000567758437  |
| TGACGGGTCAAA | 823.460726528995 | 0.226819578160715  |
| CGCGGAATGAC  | 823.465771661219 | 0.220701394100534  |
| CGATGATCCATA | 823.474664583236 | 0.243489397642518  |
| AATACTGACGTG | 823.484934202166 | 0.208724610652301  |
| CTGTCAAGTGAC | 823.493271613379 | 0.205234997266339  |
| CAATGACCGAAA | 823.496396115071 | 0.181217832330886  |
| GTGACATAGCAC | 823.50347018228  | 0.302072313368626  |
| ATGAGTGTATCG | 823.514212370903 | 0.174038953336501  |
| CCTCTTACGTAA | 823.515482730591 | 0.216795586341285  |
| CAATGTGACGTC | 823.517740428841 | 0.204305587494028  |
| GTAGGGTCACAC | 823.520078086663 | 0.243290617648286  |
| GATCGAGTAATA | 823.521171692795 | 0.183262524654064  |
| CGTCATCCAAA  | 823.530292262309 | 0.252977081546256  |
| ACGCAAGTCATC | 823.536490372586 | 0.183095753145626  |
| AGGTCGGTGACG | 823.537648868985 | 0.136206148324811  |
| AGAGTATGTCAC | 823.53915179169  | 0.225200736673171  |
| ATACAGTCAGGG | 823.540103833875 | 0.249046574560193  |
| CTGCATGACCGA | 823.542121422983 | 0.213990914359397  |
| GAGCCCTGTGAC | 823.542159858321 | 0.240755001842936  |
| CCAGCTTCGTCA | 823.542430363614 | 0.251547155806685  |
| GTTACTCAAATA | 823.549095806821 | 0.160672163625316  |
| CCGTCATCGGAG | 823.54965685173  | 0.148091109310059  |
| AATTATTACTCC | 823.555021958899 | 0.188741362616131  |
| TATAACCTGTCA | 823.555573066401 | 0.19283938211774   |
| GAGTAATAACCC | 823.55589571448  | 0.40078573496237   |
| CGCAATGTCATC | 823.56086200239  | 0.183050031285648  |
| CAGGACTGACTA | 823.564507318619 | 0.205852376307884  |
| GTCACCCGAGAA | 823.564794875172 | 0.192617756651857  |
| CATGGTTCGTCA | 823.568883363787 | 0.366476968834777  |
| GACTGACACGTA | 823.573380452641 | 0.138637831186834  |
| ATGCGTAGTGAC | 823.584715053639 | 0.241698807333357  |
| GGTACGGAGTCA | 823.590843157646 | 0.165870586428305  |
| AGACCCGTGACT | 823.592229185038 | 0.283017660995753  |
| CGTCAATGAGTA | 823.601455607954 | 0.207853384951461  |
| AATGGTGACAAC | 823.612107847161 | 0.204013001049785  |
| CAGTATGTGACA | 823.620209270306 | 0.195612613437861  |
| TATGTTCTGTCA | 823.623164206455 | 0.221903135489188  |
| CGGAGATGTGAC | 823.625813223663 | 0.231776017470966  |
| AAAGTGAGCCAC | 823.645278136833 | 0.0829322344297092 |
| CCCGGATGTGAC | 823.650999957509 | 0.243354389021914  |
| CGCGCACGTCAC | 823.660188908015 | 0.214004934085025  |
| ATACAGTCAGGA | 823.668262024103 | 0.2009024824318    |
| ACTCATCTTTCG | 823.675159788729 | 0.296426939860099  |
| ATCGTCAGAGTC | 823.686080082138 | 0.241369065433089  |
| ACTCATAGGCAG | 823.6900436665   | 0.249899305876649  |
| ATGTCACCATTC | 823.691380795217 | 0.259991025767996  |
| CAATAAGTTGAC | 823.693083494186 | 0.287255984262939  |
| GGTCATCATCTA | 823.7015354899   | 0.178930328744264  |
| TCTAACATGACA | 823.707971996778 | 0.197291138565477  |
| CGGACCGTCATA | 823.727151820275 | 0.248776822536873  |
| CCGTCATGGTGA | 823.73032921607  | 0.217579979842947  |
| CACTGACAGATC | 823.730338863669 | 0.138071884990302  |
| AAGTTATGACCC | 823.730578487947 | 0.183989755042656  |

|               |                  |                   |
|---------------|------------------|-------------------|
| CTAGAATGACCA  | 823.733005707715 | 0.133381942083866 |
| ACTCCCCTGACT  | 823.733443176568 | 0.254030986668698 |
| CGTGTCTGTAC   | 823.735490664113 | 0.280767083925316 |
| ATGAGCCAATAC  | 823.744802245344 | 0.183515634688402 |
| GCATCTCTGACA  | 823.744816055922 | 0.295165830011619 |
| GTTGATGTGACA  | 823.746704694294 | 0.235067068406382 |
| ATCCAAGGTGAC  | 823.754613847354 | 0.266268294812642 |
| CCGTCACATGA   | 823.759088593287 | 0.263023098243632 |
| GGGTCATTGTAC  | 823.774691534226 | 0.273231905789444 |
| ATCTTACGTGAC  | 823.779765653765 | 0.213504698559931 |
| AGTACGTGTGAC  | 823.78191694615  | 0.212698646057523 |
| ACCGATGATGCA  | 823.786706845408 | 0.201335223268118 |
| AGTCAACAACCTG | 823.787801355102 | 0.317511590037783 |
| ATATACGGTGAC  | 823.787936778934 | 0.202483341547339 |
| GTCATGCCAGTA  | 823.788851554312 | 0.25745371544228  |
| AGTGATTGTGAC  | 823.794904345932 | 0.192970949179707 |
| AGTCACGGGACA  | 823.799931100449 | 0.156414654982788 |
| ATGAGTGAATGA  | 823.812550232147 | 0.11034000680019  |
| CTTCTGATGTCA  | 823.816122303277 | 0.235902444010482 |
| TAAGTTGCATCA  | 823.816513955494 | 0.280650471737697 |
| GGAGTAATGACA  | 823.817224301492 | 0.22933096260171  |
| GGGTCATCTGTA  | 823.817632832952 | 0.185340846806808 |
| AGTTGACTTATC  | 823.818976829094 | 0.254401758541344 |
| AGGTATGACCTA  | 823.841073329976 | 0.220120177602317 |
| TAACTACGTCA   | 823.856888146745 | 0.255572394456279 |
| TCGTCACCTTCA  | 823.858877353615 | 0.232724364758094 |
| GATAGCATCATC  | 823.881392876374 | 0.244451399804205 |
| AGTCTGACATCA  | 823.883646810803 | 0.290590758023372 |
| GTCAGAGAATGA  | 823.888227366533 | 0.351242617651559 |
| AAGAGTCTTATG  | 823.893072865284 | 0.150695078258201 |
| TGACGGAGATAA  | 823.918832571859 | 0.198265956223249 |
| CGTCACAAGTAG  | 823.923139212545 | 0.207044934474143 |
| ATGTATGTGACG  | 823.926012028638 | 0.360565509519125 |
| ACGATTGAATCA  | 823.92717463613  | 0.233312894378794 |
| CGTGACAGAGAC  | 823.928638042702 | 0.203572260866036 |
| ACACAAATGACG  | 823.930148018557 | 0.148444367325513 |
| ACAACGTCACTA  | 823.930827323689 | 0.209434473731417 |
| ACGTCACATCCC  | 823.941464926494 | 0.137615150123599 |
| TGGCAGATGACA  | 823.942521095124 | 0.252916441583018 |
| AAGACTAACTAT  | 823.943017728691 | 0.185192980183631 |
| ATGACCTAACAT  | 823.948184083714 | 0.139737325637062 |
| AATTGATGACGG  | 823.955931274313 | 0.248881904340536 |
| ATGACATTTTGA  | 823.956479857753 | 0.240184242402624 |
| AATACACAGTCA  | 823.957114378103 | 0.121674782806616 |
| AACCAAGTCACG  | 823.958557848669 | 0.186894845248508 |
| GTCATGAACTGA  | 823.963530527949 | 0.20829198792103  |
| ATGGCTGTCATC  | 823.965104942502 | 0.196756222641703 |
| CCCGCTGTCATA  | 823.974913798929 | 0.205718883553271 |
| CGATGGGATGAC  | 823.975913638269 | 0.075094937386416 |
| ATTACACACACG  | 823.976923744789 | 0.308689743545423 |
| CAGTCAGGCTGA  | 823.988097937462 | 0.198272390339654 |
| TCATCATGAAGA  | 823.988395500318 | 0.322592446748082 |
| GTGACGGAGCAA  | 823.988823412728 | 0.238496173137141 |
| ACGAGTCAAATC  | 823.993569457679 | 0.202120142111213 |

|              |                  |                   |
|--------------|------------------|-------------------|
| GTCACGGTCTAA | 823.99711999732  | 0.293812110308378 |
| GTCACTGAACGA | 823.998198196149 | 0.213570371698763 |
| AGTAGTGACAGA | 823.998928053333 | 0.147972852798534 |
| GATCTTGGTCAC | 824.000027811664 | 0.251219650598815 |
| TATGACAGGGGA | 824.001133932886 | 0.175632295531713 |
| GTCACCTGCATA | 824.003019183237 | 0.200110410408584 |
| ACTCACTCATTC | 824.008092461796 | 0.188685789669617 |
| AGCACTTGACTC | 824.010584185782 | 0.180646504351549 |
| TTCGTGATTCAA | 824.011663864058 | 0.256149078206851 |
| TATGTAGTGTCA | 824.015280594758 | 0.255810537120233 |
| CAAATCGGTCA  | 824.027031282405 | 0.178848745876908 |
| ACTCATCGAACA | 824.027549201973 | 0.226196580936913 |
| ACTTGTGACATG | 824.028009891715 | 0.207067927373032 |
| CGAGGAGAGTCA | 824.037391854682 | 0.2441690895778   |
| CCACCACAGTCA | 824.040513783111 | 0.273254484232779 |
| AACCATGACACC | 824.040726039246 | 0.188195312911109 |
| AAGTCACTAGTA | 824.042296123449 | 0.214953407131365 |
| GTCACCCGCTTA | 824.043035239396 | 0.330844846972474 |
| AGTGATGTGTAA | 824.051416213046 | 0.245396071724354 |
| ATGACTTTTCGA | 824.054863656079 | 0.376419367491778 |
| GCGTGACGCGAA | 824.055492339141 | 0.226742598486059 |
| ATGACAAGACGA | 824.057295200636 | 0.206399766821691 |
| CAAGCCAATGAC | 824.057561115642 | 0.196913263005817 |
| CACCTGGTGACA | 824.064178267855 | 0.292030340549922 |
| CAGTCAGATGAA | 824.076656132533 | 0.194480341008704 |
| ATCCGATGTCAT | 824.078658484352 | 0.278270307756142 |
| ACCTCACGTCAT | 824.079999429286 | 0.194919650480208 |
| ACTCATAAGGAG | 824.081007511159 | 0.322628016474419 |
| AATTAGTCTTAC | 824.081842481866 | 0.180282196866727 |
| CTTTCGGTCATC | 824.085925012195 | 0.208759031498641 |
| TGGTCACACAAA | 824.089138849731 | 0.195431999628261 |
| GATTACTCCTCC | 824.090127412358 | 0.150596262662688 |
| AAGCTGTACAT  | 824.091154705759 | 0.182181123170698 |
| TGGCTTGTCA   | 824.114534145874 | 0.218741475372342 |
| GTCACAGTCAA  | 824.115610851766 | 0.137410685111474 |
| GATGAGTGTACC | 824.128514556284 | 0.214488604522133 |
| GATAGTTGTAC  | 824.13617423887  | 0.208970866694313 |
| ACCATGACTTGG | 824.143122220138 | 0.238655352621619 |
| CCGTTAGTGACA | 824.148816237186 | 0.1960054231067   |
| CGTCGAGTGACA | 824.151373943766 | 0.207587862492111 |
| CATTACCTGTCA | 824.16056440639  | 0.199556529604741 |
| GGATCTGGTGAC | 824.167327353804 | 0.261076226489018 |
| ACTCACCTGACT | 824.170891078997 | 0.191293238002633 |
| TTGACTCTGCAA | 824.179473817466 | 0.265533715975539 |
| GTCACCCTCGCA | 824.181547008486 | 0.172000260856514 |
| AATCATGAGCCA | 824.183944683561 | 0.17679446961949  |
| AACCTAAATGAC | 824.186957370193 | 0.210899005703336 |
| TACACCGTGTCA | 824.187967503325 | 0.322920785422691 |
| GATTCACTCA   | 824.188779129173 | 0.21219053473414  |
| AGTTAGCATGAC | 824.190132691431 | 0.217079897750409 |
| TACACGTCAACA | 824.192598534272 | 0.178857375640302 |
| GACTCAGCAATA | 824.202205303204 | 0.228875063729231 |
| AGTGAGCAAACC | 824.220457543481 | 0.219623430346777 |
| ATCTCGGTCATC | 824.226539809064 | 0.235046079291777 |

|               |                  |                   |
|---------------|------------------|-------------------|
| CTGGCTCCGTCA  | 824.227970094997 | 0.140266602078167 |
| CGCATGGTGACG  | 824.23220975229  | 0.254302549217272 |
| CGACAACATC    | 824.234040602497 | 0.209649792462641 |
| TATGACCGTGAA  | 824.236193981565 | 0.223473708706873 |
| TTGACTCCGCAA  | 824.238117566516 | 0.229365031960344 |
| CTCTGTACGTCA  | 824.238303821159 | 0.308827094404927 |
| AGAGATAAGTCA  | 824.240843250865 | 0.23729920827407  |
| GGTGTCATGCCA  | 824.242863474125 | 0.197790890651585 |
| CCGTCATCGGTC  | 824.243696569716 | 0.19021270691656  |
| ACTCAGGTGACA  | 824.246544085971 | 0.181082868318188 |
| TGACACGAATAA  | 824.249355846596 | 0.309401070931483 |
| ATTCGTGGTCA   | 824.266412588293 | 0.184129216231447 |
| ATAAGAGTCGAC  | 824.267162951158 | 0.154802118034789 |
| GTCACGCCGGCA  | 824.267220617388 | 0.238418415074868 |
| CAAGTCAGACTC  | 824.272484811344 | 0.418169202926681 |
| CGATTACTATGA  | 824.273551367036 | 0.250102911077918 |
| CGGATCGGTGAC  | 824.28685631862  | 0.273817785843723 |
| ATGACGAGGGAG  | 824.30288612061  | 0.183681400828305 |
| ATGACAATCTTC  | 824.304624863153 | 0.20780952988887  |
| GGAGCGGAGTCA  | 824.319551314648 | 0.235242549676671 |
| ATGTCATTAATG  | 824.327845518296 | 0.197018201079385 |
| CTATGAGTTGGC  | 824.333684917512 | 0.294626209148987 |
| GTCACGATGAAC  | 824.340454535798 | 0.205011191643402 |
| CCTCCTGACGCA  | 824.356345827773 | 0.152574588668167 |
| CATTTTCTGTCA  | 824.363201676392 | 0.198283221845566 |
| AGAGAGTAGTCA  | 824.363283488605 | 0.262170001525686 |
| ACATTCCGGTCAC | 824.364468907691 | 0.31282483003388  |
| TGACTCGGGGAA  | 824.366928253831 | 0.147298813921106 |
| TCGAATGACCGA  | 824.367331764879 | 0.257319427545329 |
| ATGACCCGTAAA  | 824.385780013586 | 0.14197361822304  |
| GTCATCGCCCCA  | 824.39061124475  | 0.288009163974132 |
| TCCCTTGTGTCA  | 824.392489564969 | 0.202638164533785 |
| TGTATCGACTAA  | 824.392492545649 | 0.320472044079784 |
| AGGCACGTCACG  | 824.401668993738 | 0.170151656306482 |
| GCAATTCGTCAA  | 824.407351224169 | 0.132305873057769 |
| ACGTAATCGGCA  | 824.410928641817 | 0.342356304951371 |
| GTCATTAGTAGA  | 824.415541317263 | 0.159038181378716 |
| ATTGCATCATTG  | 824.419134982696 | 0.193209922569851 |
| ATTACCAAGTCA  | 824.423211989382 | 0.206874092432095 |
| CATGCGCGTCAC  | 824.423345973447 | 0.268646601939943 |
| ACGGAGATGACC  | 824.431334851959 | 0.325556863233847 |
| CGAGCAATGACG  | 824.433978338938 | 0.297644767078784 |
| AGCCAGCGTGAC  | 824.434005134933 | 0.215833548675206 |
| ACCTAGTAATAC  | 824.438496826559 | 0.204473886461264 |
| TATCGTAAGTCA  | 824.452535090773 | 0.222838821922862 |
| GAGGACAATGAC  | 824.454846378647 | 0.223321406735579 |
| GTCATCCCCAGA  | 824.455911403663 | 0.210703415209061 |
| CCCAAGGGTGAC  | 824.460973955959 | 0.203530151645784 |
| CAAAATTAGTCG  | 824.47041628149  | 0.21517711610925  |
| GTGCTGTGACCA  | 824.48655470176  | 0.274052865064571 |
| CTATGAGTTGTC  | 824.491545176506 | 0.209857940224436 |
| AGTCAGACCGCA  | 824.500073948205 | 0.35160784551735  |
| AGAGTAATAAAT  | 824.501039585567 | 0.219589785673972 |
| GACTGATTGCTC  | 824.501777107514 | 0.140514925084489 |



|               |                  |                    |
|---------------|------------------|--------------------|
| AGCCTATTACTC  | 824.503286026845 | 0.283359736025575  |
| ACGCTATGTCAC  | 824.509024386211 | 0.240352200500783  |
| GTACAATGACCA  | 824.510875699745 | 0.208982105662787  |
| GAACCAGATGAC  | 824.516205488678 | 0.229290885206804  |
| ACTCATCTTTAT  | 824.520943106186 | 0.208562970811468  |
| CGACCAGTCAGC  | 824.526356420164 | 0.233680151121913  |
| ATGAGCAACAGC  | 824.527182275638 | 0.3000379156383    |
| ACTCATAAACGA  | 824.537163826136 | 0.277937698416245  |
| ACAAGGTGACGC  | 824.538958509092 | 0.314791307504606  |
| ACACATGGTCAT  | 824.539653809186 | 0.185594370846623  |
| GGAGCGAATGAC  | 824.541962001917 | 0.0562125268514755 |
| GATTGCTAATCC  | 824.550071380305 | 0.292417538653217  |
| CTAAAGTGTGAC  | 824.550154961543 | 0.186248817227602  |
| AACCGATGTGAC  | 824.556041743298 | 0.21809284906021   |
| CGATGAGTGTAC  | 824.564734529504 | 0.217457125856993  |
| CATCGACTATGA  | 824.575559891366 | 0.218023486407847  |
| ACACATCATCAA  | 824.583452511803 | 0.167113129286581  |
| AGTAATTCTGAC  | 824.587254448625 | 0.251776747780444  |
| GCTAAGTCTGAC  | 824.590357811259 | 0.280000760978915  |
| CTTAAGTACGC   | 824.600651691261 | 0.25703290483965   |
| GTCATAAGACCA  | 824.604834018672 | 0.131455997973324  |
| TGTCACGTCCAA  | 824.612755730033 | 0.181263340412511  |
| GATGCGTGTGAC  | 824.623582539141 | 0.182807012782536  |
| CTCTAACTATGA  | 824.629535040703 | 0.256024911419707  |
| CGTCACGAAATA  | 824.63423695323  | 0.27780454150814   |
| GTAATTAGTGAC  | 824.635398842524 | 0.181160080143909  |
| CCCCAGTAGTCA  | 824.637248620301 | 0.201055541796457  |
| AGAGATCCGTCA  | 824.638948050278 | 0.186799486729935  |
| CCTTACTAATGA  | 824.646579477065 | 0.285742803549934  |
| AGGTACGCGTCA  | 824.656391292083 | 0.20739315368761   |
| ATACTAGTGTC   | 824.659223897864 | 0.211575002386021  |
| ACGTCATGGCAC  | 824.661401004835 | 0.231335741034518  |
| ATGACAGACGAG  | 824.669895333686 | 0.244755147376565  |
| AACATCGCGTCA  | 824.670963764428 | 0.215575683138829  |
| AATGAATAATCG  | 824.674767867705 | 0.267961947340543  |
| GTAAGCCGTGAC  | 824.679967927266 | 0.284470702694877  |
| TCATACACGTAA  | 824.687293042541 | 0.203679902866548  |
| ATGACTTCGAAC  | 824.705118863666 | 0.185641487692186  |
| AACAGCGCGTCA  | 824.707243331603 | 0.225573425890593  |
| TAACCGCAGTCA  | 824.710019798189 | 0.176567175815994  |
| CGTAGGTGACAA  | 824.718008557561 | 0.27049196021043   |
| ATGATTAATGA   | 824.718086276942 | 0.270962741315293  |
| CTCTACAAGTCA  | 824.720552162222 | 0.200145321503807  |
| GTGACGAAACAAC | 824.72491329648  | 0.173366478045869  |
| TCACGTGTGACA  | 824.726311584278 | 0.198182897146513  |
| GTGGTCATTTTA  | 824.73099668774  | 0.214794896273943  |
| AACCTGTACCT   | 824.733725799779 | 0.180029312761871  |
| CAATTCTGACAC  | 824.738050534846 | 0.214834851235377  |
| GGATAAGTGTC   | 824.755112296364 | 0.249239449860948  |
| CCCAGTCAGAAG  | 824.758266683219 | 0.282667359293596  |
| ATGACGTGAAGG  | 824.764555109516 | 0.124349451219812  |
| AATCGGTGACAG  | 824.782177563361 | 0.207794653822466  |
| TCACACATATGA  | 824.78816243139  | 0.184593305968103  |
| CGCCCTTACTCA  | 824.789363721718 | 0.196300148929079  |

|               |                  |                   |
|---------------|------------------|-------------------|
| TACTCTTCGTC   | 824.789492217682 | 0.116152607959205 |
| ACTTTATGAGTA  | 824.799460678071 | 0.226659635275396 |
| CATCTGAGTGAC  | 824.804856925335 | 0.230386879186005 |
| GGTTACTAACAC  | 824.80623875318  | 0.268448158678577 |
| TACCTGTCACCA  | 824.809579369975 | 0.162280816021773 |
| TCCTTGGTGACA  | 824.815568515419 | 0.256074523037513 |
| GAGTTGTCACCA  | 824.815885866439 | 0.234621336280006 |
| ACGGTGACAGCA  | 824.822041830348 | 0.209316802025984 |
| TGACTCCCAGCA  | 824.828686264988 | 0.131091904668508 |
| GTCACACTAGTA  | 824.833451793125 | 0.214475124562935 |
| CTTATGTGGTCA  | 824.836535062422 | 0.277673263491159 |
| AACGCCAGTGAC  | 824.83819107683  | 0.266217859137032 |
| ATTTCGTGAGTCG | 824.851931268583 | 0.266528937146152 |
| CACCATGACTGC  | 824.853033513776 | 0.201753784068986 |
| ACGATGATGTAA  | 824.863277484726 | 0.177810511059381 |
| CGTGTCACTACA  | 824.866313546252 | 0.193212089362792 |
| CCAAGATGAGTA  | 824.867418662503 | 0.14895950919641  |
| AGTCAGAATGTC  | 824.869360547427 | 0.233118627368011 |
| TCGAATCATCCA  | 824.88364633551  | 0.317103037409113 |
| GTCACTCGCGAA  | 824.888595543623 | 0.405771246626682 |
| GTCACAGTTCTA  | 824.891986864872 | 0.179373444359982 |
| AAGATTCGTGAC  | 824.913843410359 | 0.13197663288417  |
| CTGACTCGCACC  | 824.914310228507 | 0.229803343904932 |
| AACTGTAGTGAC  | 824.917145614086 | 0.13681870073579  |
| GACCTGTCACTA  | 824.924925525531 | 0.227640296786503 |
| ACTTGTGTGACG  | 824.92960018817  | 0.138920924624936 |
| ATACTTGTATGA  | 824.941195227716 | 0.196166027587435 |
| AGCCCTGTCATC  | 824.954856957974 | 0.122112120180695 |
| CCTCTTTACTCA  | 824.959124737221 | 0.198186581151788 |
| AAGAAGTGGTCA  | 824.961363920927 | 0.322452675652486 |
| CGGTGACAGCAA  | 824.962981211716 | 0.280852402223606 |
| CGTCAACATGAC  | 824.967843884784 | 0.247919468600082 |
| ACGATGGCTGAC  | 824.969017922441 | 0.207987794749695 |
| GCATAGCATGAC  | 824.995088072997 | 0.210921146964055 |
| ATCCGATTACTC  | 825.003054029187 | 0.267327182373619 |
| GACTAATTTGGC  | 825.003676117554 | 0.276570488592591 |
| TACAAATGACCA  | 825.004041944948 | 0.225481982507105 |
| CCTATGAGTGCA  | 825.007035797477 | 0.273286185980026 |
| ATGTCATGGCCA  | 825.007704983149 | 0.204763824584825 |
| ACTGGTTGGTCA  | 825.014100587097 | 0.303305504530905 |
| ATTAATACAGTC  | 825.014289830931 | 0.344115056007058 |
| AGTCAGACAGAC  | 825.01543394005  | 0.217552875034688 |
| ACAAGTAGTCAG  | 825.017366366443 | 0.160322406486064 |
| AATCATATGAGT  | 825.01757145902  | 0.199191194410062 |
| GTGACGAACAAA  | 825.017794635006 | 0.193164728363508 |
| ACTATCTCGTCA  | 825.022717110313 | 0.217461710357722 |
| GTACGCTGTGAC  | 825.029107605782 | 0.211715425279218 |
| CGCTTCCGATGA  | 825.031564839025 | 0.234868450952003 |
| CCAGAGGTGACG  | 825.03211407892  | 0.144783742084266 |
| AAGTTATGTGAC  | 825.032933194659 | 0.181701401989704 |
| AGGATATGACCC  | 825.035396252823 | 0.160529934787483 |
| TGACAAAACGAA  | 825.039965552211 | 0.232368590196246 |
| GCGTTGACGTAA  | 825.047102701395 | 0.337159116273929 |
| ACGTCAGAGCAA  | 825.048432239171 | 0.24564227680642  |

|              |                  |                    |
|--------------|------------------|--------------------|
| ATGGGTCAACCA | 825.060654980824 | 0.24879393774297   |
| GAGTAATCGTTA | 825.065208080584 | 0.269240178404297  |
| ATCTTGTCATTA | 825.067355202075 | 0.148622480358776  |
| CGATGACCGCAC | 825.086711762328 | 0.164457173601371  |
| GCTACTCGTAAA | 825.090804745658 | 0.287202854531609  |
| AGCCCATGTGAC | 825.09142619446  | 0.317310035473512  |
| ATAGTGGTGACG | 825.098601771419 | 0.253468713164699  |
| AAGAGTGAGCAA | 825.09902895253  | 0.179380361653307  |
| GTCACCAGTAGA | 825.100852427611 | 0.198446212434412  |
| GGATTGATTAC  | 825.100995247068 | 0.178856163060778  |
| TAATCTGAATCA | 825.11077521359  | 0.279177833594331  |
| TATTACGTATCA | 825.129577232272 | 0.176137531072792  |
| AGGATTAGTCGC | 825.134299798122 | 0.262875955127593  |
| GACTCTTACTGA | 825.135819893473 | 0.271718290434167  |
| AATGATGCAATG | 825.141960194396 | 0.263920972566057  |
| TGAGCAAGTTAA | 825.143761459282 | 0.20363214612245   |
| CCTGAGCATGAC | 825.154522835828 | 0.276670878276407  |
| CGACTGGGTAC  | 825.155728435848 | 0.137186585117611  |
| CGCGTCACGGAA | 825.167644587162 | 0.232151904334398  |
| GGCAGATGACA  | 825.17142226819  | 0.238351896784385  |
| ACTCATACAAAG | 825.175544869355 | 0.234729495677953  |
| CTGAGTGAGCCA | 825.175609763373 | 0.204394436833935  |
| ATCTTGAGTAAC | 825.176826012056 | 0.243885106386624  |
| CGTAAATGACCC | 825.17773044502  | 0.221015984405261  |
| TGACTACGTGCA | 825.180137807936 | 0.267361320827323  |
| AACCTGGTCATT | 825.189112331291 | 0.17773863410602   |
| CTGTTACTGTCA | 825.208798472932 | 0.253786999734632  |
| GTCAGTAACTAA | 825.21071165086  | 0.228999348025605  |
| CACGTCACGACC | 825.230461324296 | 0.0673661781456796 |
| TAGCTGTATGA  | 825.231682879234 | 0.232162510983515  |
| AGACTCACTGCC | 825.233014173543 | 0.110078133488544  |
| ATGAGTTAGTAA | 825.240649868666 | 0.251200124750175  |
| GTCTTCGTGAGA | 825.259163590178 | 0.246023056215407  |
| GTGTCACGGTTA | 825.273713359583 | 0.203920482347584  |
| GCTGACACGCAA | 825.279506986105 | 0.261219715331472  |
| GTATTCTGTGAC | 825.291531290591 | 0.184266332069678  |
| ATTCAACGTGAC | 825.3002215304   | 0.220378448552277  |
| CATCGCACGTCA | 825.311339438875 | 0.252121166522677  |
| CAGTTGATTAC  | 825.325382218357 | 0.207734491651291  |
| AACGCTCGTCAT | 825.327912092557 | 0.27319200643273   |
| AATCCCCTGATT | 825.333925414444 | 0.117262401080712  |
| CCGGGTACTGAC | 825.347111308754 | 0.25920846068936   |
| CTAAGTTTGTCA | 825.347425283639 | 0.319630286474902  |
| TACGAAGTCACA | 825.354599664845 | 0.200491910026264  |
| ATACTCATTATA | 825.36108149581  | 0.314508115063943  |
| GTAGAACGTGAC | 825.3678295345   | 0.270153299079945  |
| GCTTCCATGACA | 825.379252190301 | 0.259001410077597  |
| AATCCGTACGTC | 825.382044717969 | 0.25420991917093   |
| CACGTGGTCATG | 825.383921449675 | 0.320314156274903  |
| CTGGTCATATGA | 825.388440801888 | 0.282456054402747  |
| GGCCCAGTCAGA | 825.390290144511 | 0.114514602531613  |
| ATGACCAGGTTA | 825.408888462678 | 0.226726738877713  |
| GTCACCTGATGA | 825.412805439271 | 0.233328963356364  |
| ACGTCACGGCAT | 825.423173801547 | 0.225574855944118  |

|              |                  |                   |
|--------------|------------------|-------------------|
| CACTGACTGGTC | 825.427037512203 | 0.250353728758503 |
| GTCACACAGCGA | 825.428530077182 | 0.236676651764282 |
| AGTCAGAGTTTG | 825.437934143203 | 0.207607066133323 |
| GTATTAGTCCGA | 825.440344788454 | 0.191844981973182 |
| GTCACGTTACGA | 825.455405691074 | 0.219434966221606 |
| CCGGGTGTGACG | 825.455478123821 | 0.211698261541666 |
| CCCAATATATGA | 825.460773885328 | 0.246054095194319 |
| ATGACAAGCTGA | 825.464855269692 | 0.159460430882687 |
| CGGTGACAATGA | 825.484354007824 | 0.176831943065428 |
| GGACGTGTGACA | 825.487093560284 | 0.153002158433681 |
| TACCTACAGTCA | 825.488843223363 | 0.229584030005317 |
| CCGCTCGACTCA | 825.503078328342 | 0.195661762970506 |
| CCGTCATATGGC | 825.507348951857 | 0.246407716561883 |
| GTCACACCCCAA | 825.519137168218 | 0.215839850311394 |
| AATTCTGAGTCT | 825.520525688838 | 0.283943771333712 |
| ATGAGTAGATGA | 825.522410223646 | 0.18695699735314  |
| CCAGGGTGACGC | 825.523238258608 | 0.224233921170921 |
| CGTCACAGGCAG | 825.534252647671 | 0.243510199749914 |
| AGATGTCATTAA | 825.541087789261 | 0.224144808839362 |
| ACTGATGATTCG | 825.551392026647 | 0.313590009765624 |
| GTCATTTTATCA | 825.551401083527 | 0.206374350186657 |
| CGCCACCAGTCA | 825.560054361466 | 0.261770665869228 |
| AAGCCGAATGAC | 825.578341838696 | 0.199415836624438 |
| AGGCGACGTCAT | 825.597313020143 | 0.246315212351572 |
| ACATCATGACAG | 825.599789841844 | 0.273331815895795 |
| GGCCCTACGTCA | 825.602400424034 | 0.157955709818337 |
| CAAAGATGTCAC | 825.611010007073 | 0.213210998206272 |
| ACTCATTCTGGA | 825.614324412389 | 0.175620793687535 |
| ATGATGTGGACG | 825.618116649188 | 0.189581222331037 |
| GGTGACAGTATA | 825.622272880279 | 0.199257460189061 |
| GAACAGAGTGAC | 825.629697621143 | 0.259369599320337 |
| GTCATGTTCCAA | 825.632130182008 | 0.175411241897678 |
| ATTTGTCGTGAC | 825.63537369951  | 0.187794015541169 |
| ACCCATGGGTCA | 825.635376891103 | 0.220502916022568 |
| CGGCTTGGTGAC | 825.637379372394 | 0.23880537448936  |
| GCCACTACGTCA | 825.644335428192 | 0.180863513642047 |
| ACGTCACAGGTG | 825.652061717846 | 0.150289689472599 |
| GTGACGCGACAA | 825.657383353194 | 0.127696053024602 |
| CAGAGTGACGAC | 825.658864897095 | 0.316769574364399 |
| CTTCACGACTCA | 825.662632534262 | 0.25377124670737  |
| CACCTATTACTC | 825.66478671455  | 0.179841153809138 |
| ACACTGTGACCA | 825.667950759466 | 0.247816947500745 |
| CTCATTAGTGAC | 825.676856056824 | 0.187085744537572 |
| ATAAATCGTGAC | 825.686922303247 | 0.277373421252935 |
| AGGCCTCATGAC | 825.700554483017 | 0.269569770610179 |
| CATAGAGTATGA | 825.709470416026 | 0.254285672563442 |
| TCCGACATGTCA | 825.709819925752 | 0.273303821001485 |
| CAAGCTGTGACA | 825.718528655678 | 0.191368924206028 |
| CAGTATTGTCAC | 825.72332323756  | 0.198218120025383 |
| GTCATGCGCACA | 825.740495152983 | 0.118416226683149 |
| GCTTCCGTGACA | 825.755616970986 | 0.175284093151584 |
| ATGTCACCTACG | 825.761520123884 | 0.20712052779311  |
| AACAGTGACGCG | 825.76713455767  | 0.312749982198944 |
| ACCGATGGTCAT | 825.776378504462 | 0.301877427163952 |

|               |                  |                   |
|---------------|------------------|-------------------|
| ATTATTCACTCA  | 825.781554194314 | 0.162375871076908 |
| ATGACATGCCTA  | 825.806267632397 | 0.124673770444268 |
| CCTTGGTGACAG  | 825.807893262857 | 0.113848583961157 |
| GAGAATTGCTCA  | 825.809955850701 | 0.183125553234232 |
| GTCACATTA AAA | 825.813282751282 | 0.193153277846704 |
| GGAGTTAATGAC  | 825.817909626409 | 0.308436211777063 |
| ACTAATGTGAGT  | 825.830770393123 | 0.191495660627626 |
| GATCGTAATGAC  | 825.833807708774 | 0.201348627982975 |
| GTCATAAGCGCA  | 825.841048981893 | 0.21425642589288  |
| ATCTGAGTCTAA  | 825.841341916149 | 0.427871054429898 |
| AGTAAGCATGAC  | 825.84654199722  | 0.238352899974049 |
| GTCATCAAACAA  | 825.862661227084 | 0.249855709472326 |
| TAGATAATGACA  | 825.8658287622   | 0.15899515271145  |
| CCGTTGTGACCA  | 825.865832087584 | 0.304471983136756 |
| ACCTACAATGAC  | 825.874799154569 | 0.276264668721695 |
| GTGACACGGTAA  | 825.878668408808 | 0.237829478032118 |
| CTAGTACTCACC  | 825.882384072911 | 0.160652128030591 |
| GGCAGCTCTGAC  | 825.883277385464 | 0.183196721889131 |
| CGACTGTGACAA  | 825.884275309364 | 0.282915522049251 |
| TGATGGTGACAA  | 825.885529074334 | 0.212002699505644 |
| ACTCATAAGCGG  | 825.889640166758 | 0.24562945310255  |
| AGAAGCTGTGAC  | 825.893726556967 | 0.184412089171331 |
| GTCACCGTATAA  | 825.910078755306 | 0.384295721465953 |
| GTGACTAGCCAC  | 825.91233627106  | 0.339184258563424 |
| AACAACGGTGAC  | 825.914822743424 | 0.278167546491584 |
| AAGTGTCAGCGG  | 825.916837651794 | 0.175680737848293 |
| GTCAGACTGTGA  | 825.917501187718 | 0.238623483505859 |
| CGAGATTAATAA  | 825.920892409969 | 0.303454295778822 |
| ACTCATAACTTG  | 825.923739448265 | 0.338963157997395 |
| GCATCTCATGAC  | 825.927171953873 | 0.336971581043672 |
| ATATCATGACAA  | 825.929590370959 | 0.130715375079342 |
| AGGAGCAATGAC  | 825.933090234618 | 0.187177800672125 |
| AATACTGACTAT  | 825.94027407896  | 0.226265104720255 |
| ACGGTCATCCAT  | 825.950193878597 | 0.224370968377908 |
| ATGACAAGGAGC  | 825.95463087019  | 0.223449107235569 |
| TGAGTACAAACA  | 825.966150416735 | 0.352740632445551 |
| ACTAATAATAGT  | 825.968876137409 | 0.262586229134148 |
| TATGACGGGCAA  | 825.971915612407 | 0.216637233993008 |
| GCGTAAGGTGAC  | 825.976601378736 | 0.17968207443856  |
| GAGCTCATGACA  | 825.978914545705 | 0.265137245006435 |
| AGAATTTGGTCA  | 825.985007706683 | 0.235307276388579 |
| CTGTTGACGTAA  | 825.988112220482 | 0.28045578897446  |
| CAGATTTGTGAC  | 825.989445212381 | 0.201904420252775 |
| GTCACCACCATA  | 825.998981585214 | 0.260398746786328 |
| AAACGGAGTCAG  | 826.010942902134 | 0.200365588196584 |
| CATCTCGGGTGA  | 826.022165045992 | 0.343400697607901 |
| ACGATTGATGAC  | 826.036184476911 | 0.335264369899177 |
| GTCACTAATCAA  | 826.04510584838  | 0.313841289278013 |
| AGCTATGATTCG  | 826.053420185637 | 0.27686719562766  |
| CGTGAAGGTGAC  | 826.057067147944 | 0.20493667975676  |
| AACGTGATGTCA  | 826.060945342055 | 0.14348679096367  |
| AGACAATGTGAC  | 826.061123598885 | 0.184767467312606 |
| CGTTTCATGACA  | 826.063531167119 | 0.16801161258177  |
| GGTCATAGGTGA  | 826.067653720283 | 0.170894510087027 |

|              |                  |                    |
|--------------|------------------|--------------------|
| ATCATTACGCAA | 826.071626837084 | 0.204348012754544  |
| CTAAGCCAGTCA | 826.072903881023 | 0.268497503823356  |
| GTACGCGTCAGA | 826.076530071268 | 0.290198898739727  |
| CTTATGACCTAA | 826.081928770021 | 0.0591038152545832 |
| AGGGTTGATGAC | 826.088342700506 | 0.123223017510628  |
| GAGTCAAAAGGA | 826.09465628919  | 0.174960899834102  |
| TCATATGTCAGA | 826.10132114108  | 0.181428139234218  |
| AGTCAGTAACGG | 826.104370468957 | 0.234167575073006  |
| CTAGGGGCATA  | 826.105624444452 | 0.177333170800241  |
| TATGTCACTGGA | 826.116108198431 | 0.252493051044914  |
| ATGACCCTGAGG | 826.120788452273 | 0.263698782455551  |
| ATTTCTCTGTCA | 826.132040293643 | 0.214546530964818  |
| AGACTGACTCA  | 826.146969355515 | 0.17622466059489   |
| ATCGACTCAGAC | 826.158640828896 | 0.238225144348016  |
| AAATCATGACGA | 826.159117319648 | 0.052789194760362  |
| GCACATTTGTCA | 826.15949260981  | 0.116466928381822  |
| GCGTCACCTCCC | 826.166947848741 | 0.224853694715698  |
| GAGATAGGTGAC | 826.170334286121 | 0.144558525056641  |
| GTCAACTTGTCA | 826.185563774898 | 0.177039635285115  |
| CCAAAATTATGA | 826.186396529976 | 0.185078022121856  |
| CATCCACAGTCA | 826.195573249039 | 0.196792680178456  |
| TACGGCTGACTA | 826.195965637927 | 0.289999959727356  |
| ATGGTCACAGTC | 826.200568832179 | 0.349457962601948  |
| AGGACACATGAC | 826.201748135015 | 0.208260379517905  |
| CTGAGTGACCCA | 826.202336437803 | 0.177410810912809  |
| ACTCATCTTGGA | 826.207259215616 | 0.21006555115114   |
| CCATATAGTGAC | 826.207501581473 | 0.252589256836153  |
| CACCGTGACCCA | 826.21233826568  | 0.200544680859749  |
| GAATGACCATAA | 826.227985095861 | 0.195445363759338  |
| GTGACGACTAAA | 826.237417425668 | 0.161274344489689  |
| CGTCATGCGAAG | 826.238653339532 | 0.26802395470867   |
| TCTACTGAGTAA | 826.238712036932 | 0.160404600054853  |
| GAGTCAAGGTCC | 826.239825195584 | 0.183470895738749  |
| AACCAGTCAGTG | 826.255317619271 | 0.211164674766435  |
| GATGGGTCAACC | 826.255686122139 | 0.161818671196417  |
| AGGTAGGGTGAC | 826.261544600108 | 0.217785719820394  |
| GTGAGTCTGTAA | 826.270983900702 | 0.219668194707419  |
| AACTGATTAGTC | 826.279445413473 | 0.212664532806985  |
| CTCGATGACCGA | 826.281518925654 | 0.251696678695854  |
| ACTCATTGTTAT | 826.292022963632 | 0.286496866112051  |
| CGTCACTAAGAA | 826.296912787084 | 0.240144989647481  |
| GTCACCCGCGGA | 826.298105872439 | 0.227946155383662  |
| GATTAGTGACGC | 826.299495109551 | 0.192056375988754  |
| ATTGTCATGTCG | 826.303846313293 | 0.268967113208098  |
| ACTCGTACTAAT | 826.314226168268 | 0.225349286051322  |
| CGTCACAGTGGA | 826.316243599991 | 0.292439883712064  |
| ATAGATTACTAA | 826.317048846069 | 0.154655914613528  |
| ACTCATACACAA | 826.317224965308 | 0.146579501786234  |
| ACTCATCGATCG | 826.320972076323 | 0.256751169255724  |
| GTCACGACCTAA | 826.321875308627 | 0.202869512855372  |
| CTGACTCCGTGA | 826.322463041404 | 0.124525606764499  |
| CCCTTGTGACGC | 826.323368631383 | 0.293668936730043  |
| GGAATGTATCAC | 826.325563362664 | 0.284173985767553  |
| CTATAGGTGACA | 826.328008671499 | 0.185821582232319  |

|               |                  |                    |
|---------------|------------------|--------------------|
| GTCCATGAATCA  | 826.329331842075 | 0.172869270567362  |
| AATTGATGACCC  | 826.331823744111 | 0.30310064490613   |
| ATCGCTCGTGAC  | 826.335409393628 | 0.255205713172969  |
| GGGCCGCGTCAC  | 826.338383476137 | 0.238880724089174  |
| TCGAGTCCGTCA  | 826.342196970717 | 0.175172421114012  |
| AGTTAACGTAC   | 826.344682910054 | 0.195207597889726  |
| ACTTGGTCACTC  | 826.360098589807 | 0.124784270392089  |
| GAAACGTGACGC  | 826.369973236812 | 0.338422773936537  |
| GTGTCAGCCACA  | 826.374035892315 | 0.295228523054407  |
| CTGTCACAAGTC  | 826.395294024634 | 0.154374049965518  |
| CGTCATCTAGCC  | 826.400101127585 | 0.156545366663856  |
| ACAGAGTCAAAT  | 826.401712278505 | 0.254907459466417  |
| AAAGTTAGTCTT  | 826.41619955208  | 0.141224486331057  |
| CAAAGTGACCAA  | 826.416411560315 | 0.197900684025913  |
| GTCACCGCCAGA  | 826.419829171682 | 0.0664614942217891 |
| ACCGTCATTGTG  | 826.433244818377 | 0.348316694565797  |
| ACTCATTGAAG   | 826.439946617653 | 0.146120076364414  |
| ATGACGGCGTTC  | 826.440863126291 | 0.199504185868009  |
| AAGATATGTGAC  | 826.445307680188 | 0.191230164757631  |
| GCAAATGACCAC  | 826.446691878353 | 0.152858087236675  |
| ATTGTGACTAA   | 826.459083940433 | 0.210190075628619  |
| GGCGTACCAAC   | 826.460634065328 | 0.209294003241149  |
| TCGGGCGAGTCA  | 826.473414908104 | 0.189270641447896  |
| ATGACAGCGAGC  | 826.4754384585   | 0.169431199213349  |
| TCATCCGTGAGA  | 826.478945049459 | 0.318231172847807  |
| ACGCTGTACAAA  | 826.488441694664 | 0.228838138128151  |
| GACTGACGCTGA  | 826.491439617364 | 0.337354569601573  |
| AGGCTGACGTAC  | 826.495532520101 | 0.303270881877194  |
| GATCATGACAAAC | 826.496898344008 | 0.201149986976492  |
| ACTATTTGGTCA  | 826.499152967816 | 0.312954524355455  |
| ATTTGATGACC   | 826.500705598839 | 0.256904514570864  |
| ATGACGATCCGG  | 826.506949405954 | 0.258661536533425  |
| GCCCTGCAGTCA  | 826.509424542632 | 0.260944840553499  |
| GGCACATCGTCA  | 826.512876188671 | 0.36232164380101   |
| GAGAACCAGTCA  | 826.519200910261 | 0.274979951059109  |
| AAGGTTCTGACT  | 826.527470795432 | 0.265756992262458  |
| GCAGCGTAGTCA  | 826.547943401742 | 0.333138497569962  |
| GTCACGTAACA   | 826.549346868972 | 0.181262024577757  |
| CCCGCTGAATCA  | 826.550589464654 | 0.1981682294242    |
| ATGTTGACTGAG  | 826.550904847978 | 0.153756347293219  |
| CCAAGATGACCC  | 826.551748820002 | 0.12325840401588   |
| CGTGATTCAACC  | 826.554687538304 | 0.192124155285652  |
| GTACTCTAATGA  | 826.560436001244 | 0.332277705173184  |
| ATGACAATCAAA  | 826.56044363309  | 0.263791789089073  |
| ATGACGACCTAC  | 826.563550229178 | 0.177365173159682  |
| ACTCATATATCA  | 826.564075596232 | 0.338780026759167  |
| GTGAGTCCACTA  | 826.570199365076 | 0.131833275200184  |
| CGGGCTGTGACA  | 826.578875672678 | 0.193417966359435  |
| GAACCCAGTCA   | 826.598684571024 | 0.311455426716081  |
| AGTCCTGTCATC  | 826.599013324711 | 0.223940401085433  |
| ACACCTGAATCA  | 826.602332902586 | 0.228598419520127  |
| GCATTGGGTAC   | 826.606478705427 | 0.370957520142527  |
| ATGCTGACTGTA  | 826.618937057181 | 0.38497652172449   |
| AGTCAGCGTTCC  | 826.61896110311  | 0.212313206826269  |

|               |                  |                    |
|---------------|------------------|--------------------|
| GTCACCGCTAGA  | 826.638868901421 | 0.273754334307264  |
| CATCCAATATGA  | 826.641302500283 | 0.320097708097463  |
| GGATACGTGTCA  | 826.652939673354 | 0.0764120957300688 |
| CGTCATGTCAAC  | 826.654620992062 | 0.369985276051283  |
| CCGCGAGAGTCA  | 826.658102397785 | 0.240362766201287  |
| ACGCGGTGTACAC | 826.67234139737  | 0.196121555233925  |
| AAGTGACGCGCC  | 826.673159642652 | 0.222871467869222  |
| CGGTTACGTGGC  | 826.677212815716 | 0.209535343428345  |
| AGACCAAGTCAC  | 826.68888762604  | 0.233660748023184  |
| AAGTCAGAGCTG  | 826.691633467238 | 0.193903590297647  |
| ATTACTGAATTG  | 826.697421148435 | 0.229053377677435  |
| ACTCATACCGTC  | 826.699816738765 | 0.236573885577832  |
| ACTTTGTCTGCA  | 826.706733857853 | 0.26531972293916   |
| GTGATGTAECTA  | 826.708412132702 | 0.227824327173481  |
| GTCACCGGTGGA  | 826.722889353535 | 0.181251645341165  |
| ACGTCACCTAGC  | 826.723195410532 | 0.149773501712825  |
| GTTGGAGAGTCA  | 826.725708041724 | 0.274360264815306  |
| GTGTTCTAGTCA  | 826.732202725507 | 0.185034571490607  |
| AGTCAATTACTG  | 826.747222555787 | 0.182061738650163  |
| AGAGTCAAGTGG  | 826.752856713079 | 0.192589913000122  |
| GATGATTACTAA  | 826.762541295133 | 0.196805283913507  |
| AGTCACGCGGGA  | 826.766864252518 | 0.123842083288686  |
| TGAGCCACCTCA  | 826.767834183523 | 0.202732152062321  |
| AGCCTGGGTCAT  | 826.768293853796 | 0.271482962112272  |
| ATAGACTCAATA  | 826.779326977535 | 0.29723883332929   |
| GGGTCATCCAAC  | 826.78187604453  | 0.188051954621353  |
| GCCAATCGTGAC  | 826.797574027731 | 0.176528962695876  |
| ACGTCAGTCGGC  | 826.797899592496 | 0.198359084532085  |
| ACTTACATGTCA  | 826.798023155125 | 0.216212352430808  |
| CTGTGGACTCAC  | 826.79982046883  | 0.119939645276323  |
| CACTGGTGACCA  | 826.810600140606 | 0.199263950975939  |
| AATCAGTACATA  | 826.818851799376 | 0.254481039804197  |
| CATGTGACAGCA  | 826.823801134571 | 0.202172534919222  |
| CAGTTCTGACAC  | 826.82671292414  | 0.31494885493388   |
| GACTAATAACCC  | 826.828038629815 | 0.215623872191037  |
| GTCACGATACTA  | 826.828886578769 | 0.185816023013125  |
| TCTGACCTGTCA  | 826.833384730897 | 0.248058798168642  |
| CAGCGATGACCG  | 826.839809653753 | 0.269867656934866  |
| ACACAATACTCA  | 826.840862771197 | 0.24903307858724   |
| GACATGTGACAG  | 826.841141071091 | 0.278313403771469  |
| CACCCTGCGTCA  | 826.846142168213 | 0.230690298974631  |
| TGCTCGAGTCAA  | 826.847077510293 | 0.206388583878027  |
| AGTCACGGGGCG  | 826.851693071206 | 0.201614565885836  |
| AGGAACGACTCA  | 826.859586991448 | 0.299466920669684  |
| ACCGTCATTACT  | 826.859954248108 | 0.206783331165926  |
| ATGTTACTCTTA  | 826.864244642061 | 0.198536548114478  |
| CGGTCTGAATCA  | 826.880647132532 | 0.220273017354561  |
| AATAGGGTGACG  | 826.886260781365 | 0.179212051715416  |
| GACTCAACTGAC  | 826.886493838623 | 0.214406171145273  |
| CGCTCCGACTCA  | 826.892036106758 | 0.225314021034373  |
| GATGACGTCCGA  | 826.892121472312 | 0.221286664787532  |
| ATGACGTCTGTC  | 826.904877849449 | 0.206173652868448  |
| ACGTCACTGCAC  | 826.911562339611 | 0.303876370691726  |
| CACGGCGTGACG  | 826.915079069546 | 0.202550163463311  |



|               |                  |                   |
|---------------|------------------|-------------------|
| CGGCTTAGTGAC  | 826.932343348421 | 0.218694574084635 |
| ATCCCAAATGAC  | 826.936550869019 | 0.245323855237265 |
| ATGTCACCGCGA  | 826.947563771805 | 0.335355768040816 |
| TACTCACTATGA  | 826.958606495498 | 0.205957108462615 |
| GTCACAGCAGTA  | 826.960497938969 | 0.2540538896667   |
| AGAATTAATGAC  | 826.964429082484 | 0.231463612151079 |
| GAGCGTGATTCA  | 826.96715344193  | 0.20557184184698  |
| GCGCAGAATGAC  | 826.967734534268 | 0.23956290464324  |
| GAATCATTACGA  | 826.96986831767  | 0.228773336744263 |
| AGTGAAGTCACA  | 826.970795111554 | 0.278687086413579 |
| AGATAAGGTGAC  | 826.976518435675 | 0.232692743532009 |
| ACTGTTTTGTCA  | 826.98185701551  | 0.174050108929121 |
| ATATACTACCG   | 826.982921495987 | 0.273707590881788 |
| ATAGTGACCCA   | 826.983335389044 | 0.182452932147132 |
| GACTGTATCATA  | 826.983542427402 | 0.204898823150202 |
| GTAACATGACAA  | 826.985972013769 | 0.233513534319841 |
| AGTGACAAACAG  | 826.991185170621 | 0.270763104810936 |
| GAGCATGGTGAC  | 826.996370214903 | 0.143817959737177 |
| GTCACCAGTCCA  | 827.007520034416 | 0.300175281505493 |
| AAGTCGTACCA   | 827.012114810721 | 0.234547572580876 |
| CGGTCATATATA  | 827.026730081383 | 0.206551063813368 |
| GACTAATTCATC  | 827.030498033545 | 0.203529947735359 |
| TCTCACCGTCA   | 827.035129094403 | 0.173387190093548 |
| ATGACCGCTATG  | 827.039011079764 | 0.190346338306267 |
| AGTGGTCATGTC  | 827.039548292745 | 0.239923523346218 |
| ACTGACTAGTAC  | 827.050738897392 | 0.201900582948887 |
| GGGTAACATGAC  | 827.077196706369 | 0.200553128805238 |
| CAGTGACAACGA  | 827.091289422395 | 0.387012575614467 |
| CTCGAGTCAAAA  | 827.091984012657 | 0.277819864325642 |
| GTCACTGGCGCA  | 827.093549245314 | 0.295371750178829 |
| CGACTAATTAATA | 827.109734514376 | 0.364590357214323 |
| GCTTGCTGTGAC  | 827.112043434372 | 0.209166797037339 |
| TATGAGTGGTCA  | 827.118410435441 | 0.221696805572556 |
| ACCCTTTACTCA  | 827.131751489953 | 0.159377089323553 |
| AGTGACACGGCC  | 827.133299252538 | 0.114630704425933 |
| GACAAAGGTGAC  | 827.151585017366 | 0.315977300233506 |
| ACGAATTCTGAC  | 827.152768229001 | 0.247773315333318 |
| CTACATGACATA  | 827.15352984173  | 0.178515124973908 |
| CCCGACTAGTCA  | 827.154904024972 | 0.241175676879201 |
| CGACTAATCGTC  | 827.15542379832  | 0.197408924839047 |
| CGTGACACCGAG  | 827.169343157328 | 0.132022223810346 |
| AGAATTGACACA  | 827.17221609663  | 0.321251906524979 |
| GTCAGCCGATGA  | 827.17351933741  | 0.191709625412065 |
| GGCAAGTAGTCA  | 827.18113439097  | 0.209911320325107 |
| GTCACTGTTGCA  | 827.184274905606 | 0.21992922834563  |
| TGTCATGGAAAA  | 827.185650658056 | 0.271353979756246 |
| GAGTCAAGACAA  | 827.186069751451 | 0.235870707124148 |
| AATTGCGTAACT  | 827.186988372462 | 0.224197375579831 |
| CGTACCCGCCAG  | 827.191178169924 | 0.21169547860529  |
| TGAGTGATCTAA  | 827.193088968139 | 0.179992941792124 |
| GTTGTGTAGTCA  | 827.197882044161 | 0.226156147594172 |
| ACTTGTCACATA  | 827.210321776832 | 0.274604637629753 |
| AGTCAGATTGTA  | 827.211192662872 | 0.177962285669254 |
| ATGACAAGGAAG  | 827.211215712377 | 0.177877350359779 |

|              |                  |                   |
|--------------|------------------|-------------------|
| CTAGCCATGTCA | 827.214675211177 | 0.249447379302459 |
| ACTTCTCTGACT | 827.225404521032 | 0.226321678443577 |
| GTCAGTCTATGA | 827.227269183706 | 0.245224974745082 |
| ATATACGGTCAT | 827.230517533117 | 0.317183522469521 |
| AAGTTGACTCA  | 827.231762209006 | 0.233613642617999 |
| TACTCAGTGACA | 827.234591333711 | 0.241854490751953 |
| GGTCATAACAGA | 827.239449333136 | 0.237281629772409 |
| CGTCACATTTTC | 827.248525549724 | 0.182590753020031 |
| GTCACCTTCGAC | 827.25040418334  | 0.324069356464204 |
| CCTGACTGTATC | 827.252468621725 | 0.120413790477851 |
| ATGAATGTCATC | 827.263695591623 | 0.306513300942338 |
| CGTCATTACACC | 827.265407633997 | 0.246180457165522 |
| TACCGGTGACCA | 827.26684225221  | 0.234673575937283 |
| TGATTGACAAA  | 827.269391597152 | 0.246730298905669 |
| ATAGCTGTGACG | 827.27211854093  | 0.185284053912377 |
| AAGTCACCTCGT | 827.276317768776 | 0.356994116347109 |
| GTCACAGTAGTA | 827.285680865829 | 0.200910699028898 |
| ACGTCACGCATG | 827.287357921285 | 0.212221664817051 |
| CAATTATGATGC | 827.298641082589 | 0.259875841237244 |
| GTTGCTGTGACA | 827.303997982396 | 0.194084468292698 |
| ACACTGACATAT | 827.305635295612 | 0.205433149910588 |
| TAAAACGTGAGA | 827.306518239778 | 0.298100962321925 |
| ACGTCACAGTAG | 827.307144275664 | 0.151730975526818 |
| ACTCTTCTGACT | 827.309847919161 | 0.18593710882769  |
| ATGACGGCAACA | 827.31025824256  | 0.184376563568013 |
| ACTAATTAAGGA | 827.320099988615 | 0.36064988749819  |
| AGACACTGTGAC | 827.331247821608 | 0.164287052652851 |
| CACGTCAGTGCC | 827.335359290691 | 0.245452353397979 |
| AGTTACATCACC | 827.335913384154 | 0.107852206453185 |
| CCGCTCGGATGA | 827.346248521296 | 0.305680897867071 |
| AAGGCCGTGACT | 827.348693130869 | 0.218711366482666 |
| TCTGGTGAGCAA | 827.359533140141 | 0.200000497214172 |
| ATGACAGGCCCA | 827.360023657137 | 0.142710060117101 |
| ATGAGTACGCTG | 827.380589365601 | 0.15021057030042  |
| GATGACAGTGCC | 827.382068723727 | 0.112232945723247 |
| TAACGTGTGACA | 827.384155634886 | 0.216072806072401 |
| TCTTTGGTGACA | 827.384734859929 | 0.21971162633525  |
| TATATATCGTCA | 827.38650153816  | 0.185429918224608 |
| GCGTGACCCAAC | 827.388200427026 | 0.175495791871857 |
| ATTGAATCACGC | 827.393066357811 | 0.190913128956559 |
| ACTGACACAGCG | 827.393880382042 | 0.217295755463276 |
| TACGGTCATACA | 827.398364463101 | 0.275968833949708 |
| GTCACCAGAGGA | 827.408789458535 | 0.255216377000805 |
| GATTCATCATTA | 827.416920595123 | 0.17628048889023  |
| GGACTCACTGAA | 827.422267326241 | 0.234474313987578 |
| ACTCATATTTTC | 827.429353102682 | 0.221955029753976 |
| TGGTGACCCATA | 827.430249847336 | 0.144015615726499 |
| ACGTCACCTCGA | 827.431499960528 | 0.245427994609457 |
| CTTTCGAAATGA | 827.43583449573  | 0.250365834786988 |
| CGCAGTCCGTCA | 827.441439990132 | 0.201413479740173 |
| CCCGTTTCGTCA | 827.447498697482 | 0.184852781659293 |
| CGTCACCTATAC | 827.453587444856 | 0.232752482492995 |
| ATACTCAGTCAA | 827.458670926695 | 0.367252950367626 |
| ACTGGGTATGCA | 827.461946980458 | 0.251544626301037 |

|              |                  |                   |
|--------------|------------------|-------------------|
| TAAGAATCATAA | 827.462509522679 | 0.253046622484752 |
| ACGCGACGTCAT | 827.465454805251 | 0.220075462070044 |
| AGTATTTGCTCA | 827.470079326809 | 0.301636854558063 |
| ACTCGGCATGAC | 827.473430480184 | 0.227859699890697 |
| AAGTCAGACCGG | 827.475456662153 | 0.293901873090442 |
| ACGCGTCAGAAT | 827.479865480864 | 0.206381770740491 |
| AAGCCAAATGAC | 827.48039645838  | 0.218432083511289 |
| ACGTCATGATCG | 827.508319626789 | 0.300434261436527 |
| CCCAAGGTGACA | 827.508395223853 | 0.207432786459438 |
| ACGTCACCGGCA | 827.50869843552  | 0.262551288150645 |
| ACTGAGCAATAT | 827.509838080519 | 0.22566335285484  |
| GATGACCCGTAA | 827.517402651263 | 0.220604100606252 |
| GTAGTCGTCACA | 827.525768107839 | 0.150328149744276 |
| AGACTAATAGAA | 827.530131055511 | 0.192489081272613 |
| GGCGTGTGTGAC | 827.537113172538 | 0.307488240124964 |
| GTATATTACTGA | 827.541876207241 | 0.184754975416869 |
| AGATCCTGACTA | 827.546966909501 | 0.323365177678574 |
| TCTGCCGACTCA | 827.563880898963 | 0.24975253654728  |
| AACTAACTCATA | 827.567561237874 | 0.180582778698316 |
| ATGTCCGTGTCA | 827.571805005037 | 0.157829853508008 |
| ACGGAGCGTCAT | 827.588866053311 | 0.223624149251048 |
| ACTCATCAAAGT | 827.590560623778 | 0.218334061193982 |
| GGTTCACATGAC | 827.595605539726 | 0.213933144109373 |
| GTATCGTAGTCA | 827.603557033087 | 0.244783227866832 |
| TGACATAAACAA | 827.603673561731 | 0.277686607856988 |
| GATACACATGAC | 827.609200843743 | 0.251355196355616 |
| AGTCACGGTCCC | 827.610645071617 | 0.225389615274871 |
| CTATTAAGTGAC | 827.614435912756 | 0.108620019926656 |
| CACATTCGTGAC | 827.616380972393 | 0.317289121977386 |
| ACAGCTGGTGAC | 827.619462753989 | 0.320544177393265 |
| GTA          | 827.62852599471  | 0.281043897937955 |
| GCTTGCATCATA | 827.630070821095 | 0.241206967132251 |
| ATTAGAGAGTCA | 827.641088600116 | 0.217813102032223 |
| GGTGACTTTGAC | 827.643012482108 | 0.273507178356415 |
| CGCGCAATGACG | 827.643719315772 | 0.321046843034542 |
| TCATCGGGAAGA | 827.647640823267 | 0.285464404267309 |
| AGTCAGAGGTGC | 827.65689175024  | 0.223500241277031 |
| CGCGTGTGACAA | 827.659205259158 | 0.151711220078941 |
| ACAATGGTGACG | 827.659898454122 | 0.282423440105661 |
| CTATCGTGTAC  | 827.661391766274 | 0.183287764556811 |
| TCACGTGGCTGA | 827.662392144244 | 0.254348192142925 |
| AACGTTGACTAC | 827.664950989339 | 0.286618612915525 |
| GACTCATGGGGA | 827.666053415099 | 0.318677587051365 |
| GTC          | 827.667476159784 | 0.239615225563716 |
| TAACGGTGACAA | 827.669797012561 | 0.239551918728509 |
| GCGTACTGTGAC | 827.672633068563 | 0.250020509241436 |
| AAGTCTTGTAC  | 827.673067661526 | 0.152708619306074 |
| CGTCACGTAATC | 827.687508281969 | 0.201944710572898 |
| TCCCAAATGACA | 827.689544744751 | 0.330194322947728 |
| TATATTGACACA | 827.695454987642 | 0.138634697316924 |
| AGAACTGGTGAC | 827.705946539533 | 0.344256969477263 |
| GTCACAGTGAAA | 827.712024996721 | 0.188778880110142 |
| CCCGTTTGGTCA | 827.718228270533 | 0.368057649004992 |
| CAACTCTGAGTC | 827.718447212648 | 0.173610190590926 |

|              |                  |                   |
|--------------|------------------|-------------------|
| GTCACAGTAGAA | 827.722914093416 | 0.161619746066834 |
| GACTCATGAC   | 827.723439329319 | 0.224855205609767 |
| TAGGCTTGGTCA | 827.72584127992  | 0.207022079114894 |
| AAACCGTGCAC  | 827.729415009823 | 0.188243058437695 |
| TAAGTACTACA  | 827.736221219317 | 0.224821576354361 |
| ACTCATAACTTA | 827.73997236305  | 0.224143848563963 |
| TGTCACAATAAA | 827.761975637228 | 0.332750348856846 |
| GAGTTTCATGAC | 827.763148530085 | 0.188797169656639 |
| AATTAGTACTAG | 827.767086845682 | 0.245231334266272 |
| GATACATGACGA | 827.770355066363 | 0.185977225734535 |
| CCAGGGGTGACG | 827.774151410383 | 0.253166966784345 |
| ACATTGAGTGAC | 827.778471551948 | 0.210933389209005 |
| ATGAGTGGTCAC | 827.778795250569 | 0.24974672945342  |
| ACTATGACCCCT | 827.779069590528 | 0.175840891286414 |
| GTCACCTAACGA | 827.784592173733 | 0.233739224051454 |
| GTCACTCCTAGA | 827.795370200639 | 0.25880196036837  |
| CCTAGATGAGTA | 827.805989867356 | 0.188523179137944 |
| AAGGTTAATGAC | 827.806106272621 | 0.178199929709811 |
| GTCACCAGTGAA | 827.824088919395 | 0.170790048726186 |
| CTCGTAGTGTC  | 827.828939427558 | 0.217618040967611 |
| GGGATGTGTGAC | 827.83388603089  | 0.191831997764924 |
| CAAAGGCATGAC | 827.850384787659 | 0.258722297375299 |
| GACGGATGTGAC | 827.854050682173 | 0.253873384489982 |
| AGTCAGATTAGA | 827.858093480933 | 0.190065869742858 |
| AGGAGGAATGAC | 827.860250416381 | 0.184223962073741 |
| CTCGGTACGTCA | 827.865456149589 | 0.280873104247868 |
| CAGCAGACTCAC | 827.879923861527 | 0.190743219030759 |
| AGTGACGCCAAC | 827.880319427388 | 0.1728663064952   |
| GGAAATATGTCA | 827.899660514126 | 0.367409715633448 |
| ATGACTTGCTAC | 827.905774425852 | 0.194872559339646 |
| ATGGCTAATTAC | 827.913349171752 | 0.204146158124255 |
| CCAACACGTGAC | 827.925385081629 | 0.259478342323787 |
| ACCAGAATGAGT | 827.930319702745 | 0.15973695588589  |
| TCAGTGGCGTCA | 827.931938617715 | 0.230318892961533 |
| TGACATCGTCAA | 827.933802839231 | 0.249882563523574 |
| ACCAGGTACATC | 827.940952403462 | 0.300344048477275 |
| CTATAATGGTCA | 827.941273198439 | 0.245619142262662 |
| ACGAAGATTCAT | 827.94264389151  | 0.262056255002029 |
| GGAGGAGTAATA | 827.95012903626  | 0.182737113873642 |
| TCACTTGACGCA | 827.950680169869 | 0.147373061022924 |
| GTCACCGCGCGA | 827.956573476555 | 0.307979279528593 |
| AACCAGTGCAC  | 827.964756795198 | 0.22138642044211  |
| ATGACATGAGCA | 827.966496363689 | 0.193490217673707 |
| AATGACCATAAG | 827.970012488175 | 0.361773837846942 |
| ATGGCCATGACG | 827.971606772594 | 0.186843144943655 |
| GTCACTACAGAC | 827.97331743482  | 0.225790734401078 |
| CATGAGTCCCCG | 827.97338446563  | 0.257237675977684 |
| GTCACCCTCGAC | 827.984464391094 | 0.14882437478886  |
| ACTGTTGCTCAC | 827.995044850658 | 0.175952839649154 |
| AGCTAATGACAA | 827.995450098736 | 0.299811007366757 |
| GTCTGACATCAC | 828.000722973906 | 0.13123628981709  |
| ACGTCACTAGGG | 828.013778428258 | 0.210242888445399 |
| AGGTTCCGTGAC | 828.014610771603 | 0.275983708132856 |
| ATACGGTGAATC | 828.016914124254 | 0.229134643015685 |

|               |                  |                   |
|---------------|------------------|-------------------|
| CCGTTGTTGTCA  | 828.029377457103 | 0.246325876013557 |
| CGAACGGGTGAC  | 828.035874048482 | 0.159886281341734 |
| AATAGCGGTGAC  | 828.040861591673 | 0.16194737225565  |
| GATCGGTGACAA  | 828.041464036273 | 0.146296057940617 |
| GGATGAGAGTCA  | 828.054869143506 | 0.174074236046881 |
| AAAACCTGCTCAT | 828.054871062965 | 0.257408742792432 |
| AAGTCACTTGCT  | 828.061225400322 | 0.303912860596708 |
| ATAGCGATGACC  | 828.062708324551 | 0.18078293187782  |
| CTAGACATGTCA  | 828.063708850312 | 0.162166953858421 |
| AAAATTGTGACA  | 828.065226115735 | 0.185833735367582 |
| CGTCATTAGGGA  | 828.067797331702 | 0.205964193367337 |
| TATGCATGACCA  | 828.07718460045  | 0.185644101204177 |
| GAACCGGTGATA  | 828.079864162764 | 0.117314418237019 |
| ACAAGGATGACC  | 828.083164583855 | 0.244479853240234 |
| CGCTTATGAGTA  | 828.090324066006 | 0.192287632018399 |
| GTCACCTATGTA  | 828.093424242279 | 0.257794131585074 |
| GTCATTGCCTTA  | 828.096911806874 | 0.198788513245443 |
| GTCTAATGACAA  | 828.105149879924 | 0.210224189591192 |
| CCATCTGACGAA  | 828.121160693737 | 0.17334989916558  |
| ACTGTGACAGCA  | 828.125405392591 | 0.188509897437063 |
| AATCGGAGTGAC  | 828.125528415177 | 0.176282032657984 |
| CATGCTCTGACA  | 828.126176304482 | 0.232731617172849 |
| CGACTAATTCAC  | 828.128085074471 | 0.273862840277614 |
| AGGCTGATGACG  | 828.138849896155 | 0.249535186251549 |
| ACAATGTGATCT  | 828.141870208225 | 0.240473846234877 |
| AATCGGTGAGAG  | 828.145782613228 | 0.168850344915232 |
| GACTCACGCAAC  | 828.151924814026 | 0.197624559240184 |
| ATAGGGTACCC   | 828.155484515101 | 0.123808334934722 |
| AGAGGTCATGAC  | 828.157816764215 | 0.250831388433744 |
| TCCTCAGACTCA  | 828.160877730186 | 0.239461948332116 |
| ACTACTATGACC  | 828.166682825227 | 0.131115841530682 |
| AAGGAGATGACG  | 828.167239398903 | 0.143925380622004 |
| CGAAGAGTCGAC  | 828.167461863718 | 0.209177909094003 |
| CGTCATGTTCC   | 828.174726947969 | 0.340137632754273 |
| GTCATTAAGAAA  | 828.174980154699 | 0.385760895863661 |
| ACTCAATGATTC  | 828.175115631134 | 0.333808043971694 |
| CGAGTCAAACAC  | 828.176464198126 | 0.258167578502296 |
| AACGTAGTGTC   | 828.178146911881 | 0.191917740176915 |
| AAGCCATGACAT  | 828.179270394599 | 0.191177773966801 |
| AATGACCACGAG  | 828.180402708128 | 0.235761400834127 |
| ATGACCCAGCGC  | 828.182063526235 | 0.193355654568725 |
| TGACATAGATCA  | 828.183391089071 | 0.185758850320652 |
| GTCATCTCTCCA  | 828.18414453686  | 0.255981219039094 |
| AGCCGACGTCAT  | 828.192594488863 | 0.172585419097127 |
| CTACAAGGTGAC  | 828.194286582004 | 0.186792716074271 |
| CACATCAGATGA  | 828.208622956999 | 0.293112094890227 |
| GCCATGGTGTC   | 828.212703798308 | 0.189833482827429 |
| AGTGTTACTAAC  | 828.213933573332 | 0.282075462812894 |
| AAAAGAGGTGAC  | 828.233458763394 | 0.314022053759464 |
| GAACATGTGACA  | 828.235225606382 | 0.291464732553232 |
| AAAATTAAGTCA  | 828.239278900663 | 0.147816076242074 |
| GCCAGCATGACA  | 828.240758931402 | 0.168847300805775 |
| ACTCGTGACATG  | 828.243380030396 | 0.268492154215396 |
| ACGTTGAGTAAT  | 828.248877379555 | 0.182644427839434 |

|              |                  |                   |
|--------------|------------------|-------------------|
| ACTGCTCCGTCA | 828.24970593172  | 0.141985352863581 |
| AGTGTATGATTC | 828.275568642716 | 0.22982954142535  |
| AGTCAGGTAATC | 828.279981265962 | 0.177630317024549 |
| GGATGTGATGAC | 828.280969213637 | 0.227341574042625 |
| CGAGCACGTAC  | 828.284941434435 | 0.154182816852104 |
| AAGTCTGACCCA | 828.298109125623 | 0.191437360442366 |
| CCAATCTGTGAC | 828.329585837856 | 0.252778531097341 |
| ACTCATTCTTTA | 828.332939525364 | 0.202335323380699 |
| ATGTCACATATG | 828.335857490951 | 0.269546527967777 |
| CTTAACGTATGA | 828.338351918427 | 0.17605756495253  |
| CAAACAAAGTCA | 828.339962792218 | 0.241027684100338 |
| ATAGGACGTCAT | 828.340151884021 | 0.226619180682526 |
| AAGTCACTTGGT | 828.3425730906   | 0.131564317202895 |
| CAAGACTGATTC | 828.345824964151 | 0.254900033051676 |
| CGTCATTGAATA | 828.348552404314 | 0.107540051367338 |
| GGACTAATGACA | 828.352623224162 | 0.173347686364158 |
| GTCACCGTGGCA | 828.353718211755 | 0.214189091257827 |
| AGTATGACCTAC | 828.36059112973  | 0.169140444112812 |
| GGTTTCTGTGAC | 828.367505021089 | 0.286000120632679 |
| CGGCGCAATGAC | 828.368307974814 | 0.265462585499427 |
| AATTAGTACCAG | 828.36847266743  | 0.176405728422983 |
| CGATCAAGTGAC | 828.370022905649 | 0.256788975692728 |
| CGTCATTTACC  | 828.371493598221 | 0.210494437509507 |
| TATGACAGGAGA | 828.377856088285 | 0.173191877253982 |
| GAATCACCATGA | 828.38877015131  | 0.21549565997647  |
| ATGCTGTACTCA | 828.392308521609 | 0.239895889949549 |
| GGTCCTCGTCAC | 828.398391232949 | 0.245021650022971 |
| TGACGTGGGACA | 828.399951596594 | 0.229850360458314 |
| AAGAAATCAGTC | 828.408638539184 | 0.185090484050954 |
| ACTGACACAGAG | 828.40884321863  | 0.181950942100138 |
| CGACTCACGAAC | 828.413183008068 | 0.186640784538866 |
| ATCGGTTGTGAC | 828.415114751991 | 0.193779294783718 |
| GCAACGTATGC  | 828.418323279719 | 0.27906997009677  |
| GGTCACTGTGAC | 828.435108786052 | 0.198737325712505 |
| AGATGCCAGTCA | 828.437684610514 | 0.234494327789055 |
| ACGACTATGAGT | 828.437930414831 | 0.292487656876158 |
| CGTACTGAGTAA | 828.44115848133  | 0.265078922227338 |
| GATTTTAATGAC | 828.444656986419 | 0.203227983907969 |
| ATGACGGAGGTG | 828.450546898175 | 0.158221358027247 |
| TCATTGTAACGA | 828.454589961983 | 0.201058689559025 |
| AAGGTAAGTCAC | 828.454911561845 | 0.129761656161267 |
| CGTCACAGCTAA | 828.460812646949 | 0.208414725304443 |
| GACGGTGAGCAA | 828.46159059592  | 0.174263229666328 |
| GGTAGTGACCCA | 828.475264771121 | 0.16870312688266  |
| ACTGTGACAATA | 828.481618710215 | 0.276013224740397 |
| ACGTATGTCACT | 828.487093183485 | 0.193075009995294 |
| AGGTTGTGTGAC | 828.488538873378 | 0.156971806578269 |
| GTACTACATGAC | 828.49053933282  | 0.292551526874649 |
| AAGGCATGACGA | 828.497824419203 | 0.206647229378662 |
| AGATCGTGTAC  | 828.4999269559   | 0.261484595478941 |
| CTTACGAAGTCA | 828.509359112081 | 0.245517932740222 |
| AATCGGTGACGG | 828.513700012386 | 0.182850651525937 |
| CATCACGTGACA | 828.518673723753 | 0.267784193261656 |
| AGCAGACTCACA | 828.520696136992 | 0.233334607359274 |

|               |                  |                   |
|---------------|------------------|-------------------|
| GTTGACTCGAGA  | 828.521448369687 | 0.173783336623909 |
| ACGTCACCACCC  | 828.522579374337 | 0.172004619132158 |
| CACGTGACGTGA  | 828.530562252953 | 0.237211711084455 |
| GGAGATTTGTCA  | 828.538723720523 | 0.290268351877353 |
| CTGACTCGCCGC  | 828.544016319755 | 0.180456055490628 |
| GAGTGACCCTAC  | 828.552940167422 | 0.268787877482738 |
| ACCGTTTGTGAC  | 828.557721842785 | 0.210483337098551 |
| AACTACAGTCAG  | 828.571028674518 | 0.185015648493663 |
| ACGTGAGCAAAT  | 828.574731134252 | 0.217085966809971 |
| CTATCTGTGACA  | 828.57622706152  | 0.207638031930433 |
| CCGAGCCTGTGA  | 828.577388165862 | 0.287232407097006 |
| ACGTAATCTAAT  | 828.577533354003 | 0.211934997854662 |
| CGTCACCTATCA  | 828.598006034123 | 0.258983690769819 |
| GCCTACCTGTCA  | 828.598481398429 | 0.248912979430607 |
| GTACACATCACA  | 828.608392952822 | 0.230533237277944 |
| ATGACACGGGAG  | 828.61403968853  | 0.14911094266703  |
| TCAGAAGTGACA  | 828.621371399646 | 0.221903939787226 |
| ACTATGACCGTA  | 828.636033030673 | 0.220481925951311 |
| ACTCATCGGGTA  | 828.639909174507 | 0.174026696054997 |
| AGAACACGTGTC  | 828.641507194039 | 0.336975054641127 |
| TGACTTACAAAA  | 828.643550264564 | 0.223336331700614 |
| ATGACGACCGTA  | 828.660914615667 | 0.239113839915567 |
| TATTGTGAGCCA  | 828.662513668028 | 0.215394666055344 |
| ATGAGTCTCCTG  | 828.665446168057 | 0.163810735970625 |
| AAGCATGTGACA  | 828.670085852247 | 0.199796071033131 |
| CGTACTATGACC  | 828.681115597919 | 0.20865532607382  |
| GTCACTGTTCGA  | 828.68705786064  | 0.270542305180904 |
| CGCGGTCATGAC  | 828.700985027844 | 0.216315487314505 |
| ACTCATATTTCT  | 828.706604713794 | 0.163242262604952 |
| GCTCACTGTGAC  | 828.710455408083 | 0.178577721953938 |
| ATTCTCCGTAC   | 828.714072514696 | 0.153009118821393 |
| ACATGTGACGTC  | 828.714817725452 | 0.216882512639167 |
| ACTATGACCCCA  | 828.719531654224 | 0.163498191493366 |
| CCGGAGCATGAC  | 828.719876990776 | 0.324796697883396 |
| CAATACATGACA  | 828.723808539134 | 0.258811434990872 |
| ACTAGTAATAAT  | 828.727048756702 | 0.358317064590933 |
| CAACTATGACCG  | 828.728292401805 | 0.338957298812261 |
| TGATTACAGTAAA | 828.731943193015 | 0.253819748556017 |
| CTGCGGCGTCAC  | 828.734532195409 | 0.241990315773583 |
| GTCACTCCAGAA  | 828.73985442391  | 0.210674018319371 |
| AGTGTCACGGCG  | 828.756517948659 | 0.232844536236699 |
| GTAGAATGTGAC  | 828.771158761436 | 0.209633311869024 |
| ACGCCATAGTCA  | 828.771786900659 | 0.215588621216249 |
| TGTGAGTACTAA  | 828.785549005636 | 0.187110815816005 |
| CATACCCTATGA  | 828.785608566717 | 0.190622441672724 |
| GTAGATTTGTCA  | 828.79102818481  | 0.186921173157949 |
| GGGTTTGTCTAC  | 828.792524102653 | 0.30884712409062  |
| ATTAATCACGCA  | 828.799081566452 | 0.237147690785598 |
| ATCAAATGTCAT  | 828.802961938599 | 0.19556122035554  |
| GCGAGACTCACC  | 828.812280903598 | 0.171715150506963 |
| TCTGGTCATTAA  | 828.820115299273 | 0.204425805632478 |
| GCTGACGTACAC  | 828.824389574119 | 0.244457051276313 |
| GTAGGCTCATAC  | 828.830416247726 | 0.272809329411396 |
| ATGGTTCTGTCA  | 828.830914660037 | 0.214747302826853 |

|               |                  |                   |
|---------------|------------------|-------------------|
| ACTCATCATGGA  | 828.840190596509 | 0.192756176167848 |
| GGAGAGATGACA  | 828.840769970341 | 0.171003737533771 |
| AGGGTCATTCAT  | 828.84148662234  | 0.194514408224328 |
| CGTCATCAAACC  | 828.847002692142 | 0.211309568856909 |
| CAAGCCATGTCA  | 828.849389041641 | 0.222771782448754 |
| GAACGATTACTC  | 828.866762210231 | 0.222277209723557 |
| AGTAGTGACGCG  | 828.866832385678 | 0.101814179302748 |
| AGTGACGCGCTG  | 828.872052424355 | 0.193179356394325 |
| ACAAGATGAGTA  | 828.875505281216 | 0.185959588016716 |
| TCACCGGTGTCA  | 828.877011394071 | 0.316993121564035 |
| ATGGCTAATCCA  | 828.882118728988 | 0.240023122947608 |
| ACCCGTTGTTCAT | 828.884633033498 | 0.240635898704435 |
| GTCACCTGGCGA  | 828.88758444774  | 0.323247149867209 |
| AATGACGGGGAC  | 828.889457946747 | 0.218255849661712 |
| GAACACTCATAA  | 828.892681680268 | 0.213763322598342 |
| ATGACGCTCGAG  | 828.894791047329 | 0.118903057171069 |
| ATCTGATTGAGC  | 828.898864185569 | 0.220871019982687 |
| AGACTAATTTTC  | 828.898905487361 | 0.193243043513674 |
| CGTCAGCGATTA  | 828.902799616119 | 0.216774227602899 |
| AGTGACGAACCC  | 828.905567688713 | 0.182331147925323 |
| CACTGTGAGCCA  | 828.910490244697 | 0.320936031993119 |
| GTATAATGACCA  | 828.911684322586 | 0.245121154386367 |
| ATAGAGTAATAG  | 828.919538875417 | 0.17587047993991  |
| AATAGACTGACT  | 828.919634978433 | 0.173679601824524 |
| TACGCATGACCA  | 828.92407657043  | 0.260122786917624 |
| GTGACAGGTGCGA | 828.924180104346 | 0.215145928146624 |
| GCGTTTATGTCA  | 828.932914187896 | 0.247988323807043 |
| AAAAGCGTCAGA  | 828.93520581919  | 0.213414647312203 |
| AGGTATGGTGAC  | 828.937893432358 | 0.184561433621449 |
| AATACACTCATA  | 828.948775526843 | 0.250807663597583 |
| CGATGATTCGAC  | 828.950334941086 | 0.241020800625196 |
| CACATCTCGTCA  | 828.960386486532 | 0.348999207248397 |
| CATTTTAAGTCA  | 828.961240737986 | 0.20446289400715  |
| CTGAGTCGTTAA  | 828.961464308287 | 0.287498853612217 |
| CGGACTGTGACA  | 828.966513671979 | 0.241772397828866 |
| ACTAATTCGGAT  | 828.967580192386 | 0.315566053514807 |
| CTATAGGGTGAC  | 828.971169987333 | 0.272100472084042 |
| GAGTCAAAAGAA  | 828.972005900844 | 0.113197484008926 |
| ACTATGAAGTCA  | 828.977134727638 | 0.241580805697321 |
| ATATGAGTGTTT  | 828.984417378521 | 0.192868807253372 |
| ATGAGTACCGAA  | 829.008352988301 | 0.152681414847229 |
| GTCACCTACCTA  | 829.013884806217 | 0.286640847917238 |
| GCCAACCTCATCC | 829.01722570302  | 0.150859197613599 |
| GGAATTAGTGAC  | 829.028645465543 | 0.177485994054049 |
| GTCACACCACTA  | 829.033496369586 | 0.209053237762452 |
| CCGCTAGACTCA  | 829.036735690759 | 0.324419348520396 |
| GACTAATACAGC  | 829.049911807522 | 0.378161040301042 |
| CGTCACAATTGC  | 829.050925469895 | 0.222515886396567 |
| GATTACTAAACC  | 829.053088053308 | 0.175064805059989 |
| CAGTCAGCGATC  | 829.074267021824 | 0.179942851446491 |
| CGAGGTGTGACG  | 829.079370817653 | 0.245311993736524 |
| AGTCACGACTTC  | 829.091417804811 | 0.206731745728491 |
| CGGATGTCTCAC  | 829.100282893979 | 0.211499906458439 |
| CACCTATTAGTC  | 829.101349689597 | 0.176445785214543 |



|               |                  |                   |
|---------------|------------------|-------------------|
| CCTTACTGTGAC  | 829.102793559839 | 0.245085609434767 |
| TAAGAGTCGTAA  | 829.112480111699 | 0.243719343333252 |
| GTCTACTGACTA  | 829.125691383446 | 0.281522947438044 |
| GAGTACCGTCAC  | 829.142924806528 | 0.261856793077641 |
| CTGACGGATCAA  | 829.152440839069 | 0.231285602685545 |
| AAGCGTGTCACT  | 829.160226362884 | 0.228140566883491 |
| GCGACAGAGTCA  | 829.172062586301 | 0.18052128317455  |
| AGGTGACAGGTC  | 829.180840348307 | 0.21095817361465  |
| AATCAGTCGACG  | 829.183975013337 | 0.171360619164988 |
| CTGACACTTACA  | 829.184910339701 | 0.209359748477119 |
| CGTTGGCTCATC  | 829.193264402475 | 0.135101256001753 |
| GGGTCGAATGAC  | 829.20002987518  | 0.189558453397814 |
| ATCTCGTACCCG  | 829.21249069404  | 0.168053990103782 |
| GTCACATACTTA  | 829.212713221612 | 0.249725636201489 |
| GTCAGACACTGA  | 829.217443559317 | 0.315824412841272 |
| CTGTGAAGTGAC  | 829.231325891377 | 0.184904324748983 |
| GCTGATCACTCA  | 829.235511769721 | 0.27215188809351  |
| CAACGTGACCCA  | 829.254491557035 | 0.238527592610185 |
| TAACATCCGTCA  | 829.270053131406 | 0.251857799803556 |
| AAGTCACTAGAA  | 829.284786177783 | 0.147735539214318 |
| CGTCACCTTAG   | 829.287951261841 | 0.249489498559612 |
| ATCAGATCAGTC  | 829.288513805305 | 0.26175672863496  |
| ATACTGACACAG  | 829.294581802783 | 0.328409293256192 |
| CGATCAACGTCA  | 829.295390968114 | 0.116363513378895 |
| GTGACACGACAC  | 829.296398799444 | 0.248902700526486 |
| ATCTTGCGTAAT  | 829.309880232725 | 0.204740668363377 |
| ACTACTCATTAA  | 829.310193533988 | 0.25380726114337  |
| GTCATTAAGGGA  | 829.320199016626 | 0.248168132536932 |
| ACACGTAACCTCA | 829.332276942948 | 0.216707917976197 |
| CCCCAATGAGTA  | 829.333996921933 | 0.236773584376319 |
| AGTACCGTCACA  | 829.358328547351 | 0.178758608223803 |
| CGAGGTCATGAC  | 829.36106867134  | 0.233324259015839 |
| CAAGTAGTCAAC  | 829.366837537752 | 0.207024902472621 |
| CATATGTCAGAC  | 829.369543144808 | 0.177674245622261 |
| GTATTTAGTGAC  | 829.369588310507 | 0.342375305352948 |
| ATTGGCTGACAC  | 829.370769689776 | 0.222935142828123 |
| AACAAATGACGG  | 829.371339947102 | 0.186586667843164 |
| CTATAGTGACGC  | 829.374606218708 | 0.208864441217737 |
| TGACGTGATGAA  | 829.377195222036 | 0.233128175000481 |
| ACTCCATGAGTC  | 829.381644588344 | 0.181676974414125 |
| AGGACTAGTGAC  | 829.383486337397 | 0.21201956383224  |
| AGTCAGAGGAGG  | 829.388540502902 | 0.173179276173951 |
| CGAAGCGCTGAC  | 829.3972730921   | 0.221822651127171 |
| GACCGAGTCAAA  | 829.400454502767 | 0.198413663403615 |
| TCACAGCTGTGA  | 829.404178803041 | 0.229898323276589 |
| GTCACCTCACTA  | 829.40738593796  | 0.22244200475511  |
| CACGGTTTGTC   | 829.408931714442 | 0.136566919702392 |
| GAGGACTAGTCA  | 829.419756652804 | 0.173315273396573 |
| CGTCACCAATAA  | 829.428987467248 | 0.211108759441468 |
| CGTCACACAGGA  | 829.432257778421 | 0.179868890095553 |
| GCAGTGACAAAC  | 829.433265436391 | 0.158984387749714 |
| ATGACATCTTAG  | 829.442188998783 | 0.205086569965908 |
| AACTATCGGTCA  | 829.443908407141 | 0.210268799898835 |
| GTCACCCACCTA  | 829.448994847488 | 0.254815686475257 |

|              |                  |                   |
|--------------|------------------|-------------------|
| ATACTTGACACA | 829.451856937069 | 0.219788629469636 |
| ACTCATGACGCC | 829.453621560677 | 0.222290374637965 |
| GTCAGTAACTCA | 829.466174848365 | 0.200609309846226 |
| AGTGGTCATTTA | 829.468480530979 | 0.229565871158269 |
| GCGCTGTCACCA | 829.468721487009 | 0.231796037007357 |
| TCACTGTCACAA | 829.476449035679 | 0.166744551741005 |
| ATAGTACTAATC | 829.480295591721 | 0.182037191978252 |
| GGTGACCATATA | 829.480563691656 | 0.292698009652965 |
| GTCAGTACTCAC | 829.483181353971 | 0.216969449149362 |
| GAGTCAAGACAC | 829.498119020492 | 0.254957398650587 |
| CGCTGGTGACGC | 829.506371615659 | 0.218816715767138 |
| ACAGATGAGCCA | 829.510052487144 | 0.267386458379576 |
| TGACAAGTTGAA | 829.511451916214 | 0.246035114748797 |
| GTCACCGGACGA | 829.514490041119 | 0.150266111232128 |
| AAGATTCATATG | 829.521918878345 | 0.20410457895448  |
| CCGTTATGATTC | 829.531296932307 | 0.179703082936732 |
| CATGGCTGACTA | 829.531617852157 | 0.235756904579713 |
| ATCACGGTCATA | 829.532727803413 | 0.188430583715819 |
| TCCTGATAGTCA | 829.536331163011 | 0.205022695632179 |
| GTGACAGAGAAC | 829.552976795691 | 0.206216498977616 |
| CATAGATGAGTA | 829.559688169287 | 0.190716410636678 |
| CAGACTAATACA | 829.562113589938 | 0.228293896066454 |
| TGTCAAGTCACA | 829.562647091398 | 0.198534529596908 |
| AGTCAGAACGTA | 829.564032196821 | 0.193241202974446 |
| GATTGATGACCC | 829.567867522401 | 0.196661912327177 |
| ACTACAGCGTCA | 829.582877844745 | 0.262235670074236 |
| AATTACTGACTG | 829.586655285804 | 0.201459312194018 |
| AGGTGACAGTAT | 829.603868684487 | 0.178274950081035 |
| AGTGAAATGAC  | 829.605426571548 | 0.154356263781919 |
| TATGGCATGACA | 829.606688756452 | 0.249374863361327 |
| AATTGCTAATAT | 829.608922572191 | 0.247113679358498 |
| CAGCAATGAGTA | 829.611216867897 | 0.277202847687863 |
| TCGGTCACCAAA | 829.611501026376 | 0.293816023158224 |
| ATTTGGTCAGCA | 829.615597026874 | 0.243306444516112 |
| CGACGGTGACAG | 829.620261779427 | 0.232890083421221 |
| AGACTAATAGAG | 829.621725055875 | 0.210166805226484 |
| CCTCTGGTGACG | 829.629927250035 | 0.163558341821189 |
| GTGGTGAGCAAA | 829.630409773688 | 0.208293496380789 |
| AGTCACGGCGG  | 829.631032882896 | 0.255752525662848 |
| TGACACCTCACA | 829.644912710064 | 0.18563002970654  |
| AAAAGGCATGAC | 829.653991630483 | 0.276256506884966 |
| CATCGTCACTAA | 829.666877221685 | 0.176241736712917 |
| GGACTGTGTGAC | 829.671650500474 | 0.245208648550261 |
| CGTGACACGCCA | 829.672652767639 | 0.209173073322733 |
| ATTTAGGTGACG | 829.672722186068 | 0.205457389036374 |
| CATCTGTGACCA | 829.693966250737 | 0.177881920152971 |
| AGAAGATGACCA | 829.698455649429 | 0.186960686503629 |
| AGACTCACGGCA | 829.698876969027 | 0.202307562534056 |
| ACTGTCACCGCG | 829.701283154143 | 0.233624261084432 |
| CGTCATGCCTAG | 829.708718448576 | 0.250870375133707 |
| GATTGTGGTGAC | 829.708741041175 | 0.177711620152134 |
| ATGAACCTGTCA | 829.714429943633 | 0.207296428319839 |
| AAGCCTACGTCA | 829.716773160233 | 0.142755712238893 |
| GTCTTGTACAC  | 829.717093214242 | 0.301396251360189 |

|              |                  |                   |
|--------------|------------------|-------------------|
| ATAATCGTGTC  | 829.722381009834 | 0.284777593167572 |
| ACTCATCATCGG | 829.739720618944 | 0.201909023359105 |
| CGATTCCAGTCA | 829.759578765533 | 0.193085777677127 |
| GTGACTTGGCAC | 829.759665865972 | 0.24772040676535  |
| ACTCATTTGACG | 829.768786453756 | 0.258380476615264 |
| ACGTCACTGGGA | 829.772494364843 | 0.279786221034121 |
| CGCGTAATAGTC | 829.79009761889  | 0.306437205692342 |
| CATTGTATCATA | 829.793368247083 | 0.146035757386441 |
| AGTCGTGCTACT | 829.80107215434  | 0.179061636307973 |
| CAGGGCTGACTG | 829.804066071099 | 0.174652417030581 |
| ATGTGTCTCATA | 829.817678943176 | 0.263271648826204 |
| AGTCTGAGTGAC | 829.824105620621 | 0.241133982238987 |
| ACAGGCGACTCA | 829.830214952675 | 0.25400595462874  |
| CGTCATGGAAC  | 829.838437345657 | 0.131277696106322 |
| ACTCATCGAATG | 829.847276304187 | 0.246476195760482 |
| CCCATAGCGTCA | 829.852538029547 | 0.177524511984003 |
| GTTGATTACTA  | 829.855699030959 | 0.196525800631388 |
| ATGACATCTTGA | 829.856291509182 | 0.205701296599858 |
| TACACCCGCTCA | 829.859039813401 | 0.183765312531562 |
| AATGCTGAATCA | 829.861017344759 | 0.297021514804228 |
| CTGACACAGAAC | 829.872639616538 | 0.155280974948846 |
| CAAACTGACTG  | 829.879080204223 | 0.207198248229559 |
| GCAAATGAGCCA | 829.880120380159 | 0.239161764379507 |
| ATGTCATTGCCG | 829.880263432762 | 0.287278290348876 |
| ATGTGATGCAAT | 829.880287263996 | 0.196166838213718 |
| CGTCATGTTGAA | 829.880375802637 | 0.189406525043975 |
| ATGACAGGAAAA | 829.889080660601 | 0.159471851220996 |
| ACGTGTGTCAAA | 829.892356068258 | 0.222744123293082 |
| GTCACACCACAA | 829.898038634115 | 0.173838778304266 |
| ATTAGCAATATC | 829.904954230471 | 0.225622943001625 |
| CCGCCTGACTCG | 829.914812489825 | 0.217608864733268 |
| ACTCATACATCC | 829.918308129285 | 0.141788887497514 |
| AGATCTTGACTC | 829.924136695947 | 0.15662857022827  |
| ATCAATGGTGAC | 829.925690171293 | 0.247232932775685 |
| GTGACCGTGACA | 829.939744509767 | 0.203245367595697 |
| GACTGAGTGACC | 829.943206162693 | 0.215354111689041 |
| CTCTGACCACAA | 829.947110340156 | 0.181304806785667 |
| CTCACATGACGA | 829.957145515164 | 0.174452988912249 |
| AAAGTGTGACGA | 829.958162292586 | 0.144698348319796 |
| ATGACATTGCTC | 829.95858395642  | 0.266062338268922 |
| ATCCTTTACTCA | 829.959054320426 | 0.218952243005006 |
| CCTCATAATGAC | 829.961851894341 | 0.261163303092848 |
| AGTCAGATCGCA | 829.967619951827 | 0.229160623967411 |
| GAGGCTATGACC | 829.972828111044 | 0.233116363273807 |
| AGGTTGCATCAT | 829.973023446293 | 0.177052860781541 |
| GATTACTACTCA | 829.974826539762 | 0.203077342363529 |
| CGACGAAGTCAC | 829.977028964666 | 0.246195937786834 |
| TGACAGTACTAA | 829.979694772712 | 0.312204475733819 |
| CTGTGACGCCAA | 829.982799607885 | 0.193997522247783 |
| GATGACCCCTCA | 829.98704772962  | 0.174912432253228 |
| ATTAGACGTGAC | 829.989179160668 | 0.195746549486625 |
| CGCACGAGTCAA | 829.99229912458  | 0.244788775464416 |
| TAGACTCAGACA | 829.993437818735 | 0.183554612165658 |
| ACGTTGACTATA | 830.013450538509 | 0.195756352424197 |

|               |                  |                   |
|---------------|------------------|-------------------|
| CGTGACACTGTC  | 830.0153008815   | 0.170489878397271 |
| ACACCGGAGTCA  | 830.015659109156 | 0.206420345577644 |
| GTGACAGAGCAC  | 830.021573950086 | 0.296242694490839 |
| TAAACGGACTCA  | 830.030939829216 | 0.163317213051781 |
| AATGTGTAACCA  | 830.033594489411 | 0.266262044402578 |
| CATCTGACTGCA  | 830.033963609984 | 0.201055278295637 |
| CCTGTGACCACG  | 830.051419681348 | 0.161839814047555 |
| GTGATGCAATAA  | 830.060321418464 | 0.226729221261477 |
| GATCTCCATGAC  | 830.063536936209 | 0.201461482806213 |
| CGGTCAGTGACG  | 830.064742395195 | 0.291652992546206 |
| TGACAGGTCGCA  | 830.072167819533 | 0.178733515762131 |
| CCACTCGACTCA  | 830.084950356428 | 0.193270246102983 |
| GTCACAAACGTA  | 830.089193868424 | 0.269298676859346 |
| ATGACGTCTGCG  | 830.096428958761 | 0.166160090387733 |
| ATGACGAGAGTG  | 830.097051518917 | 0.16190297449709  |
| CCTGACCGGTGA  | 830.101217745469 | 0.192231199568167 |
| AATAGTACTCAC  | 830.104700976517 | 0.175668949035704 |
| CGTCACTCTGAG  | 830.106372041783 | 0.335923171533279 |
| CACTGAATCAGA  | 830.107702370152 | 0.287242775393151 |
| CCCCGCTATGAC  | 830.116948535119 | 0.201422996929625 |
| ACTCGATTACTC  | 830.118769124172 | 0.13572841075209  |
| ACTCAGGCTGAC  | 830.125266672987 | 0.180853821248643 |
| CATCTTGTCAACA | 830.125932424978 | 0.235932204248425 |
| AATCGGTGACAT  | 830.126095214235 | 0.261708361255453 |
| CGTCAATTGTCA  | 830.12931621999  | 0.199508491556285 |
| AGTCAGCGCGAC  | 830.130847454043 | 0.240759783035148 |
| CGCAGCGTGACA  | 830.136068315549 | 0.301844518849347 |
| AAGTACACGTAA  | 830.136107801241 | 0.235960095372583 |
| CCAGTCGTGTCA  | 830.136892603333 | 0.2195944029527   |
| GTGACAAACCGA  | 830.152287324547 | 0.175277484097468 |
| ACTCATCTGACA  | 830.153631407273 | 0.145394267002035 |
| CCCGCTAAGTCA  | 830.161884964677 | 0.266410233429292 |
| CTCATAGTCAGC  | 830.173698200233 | 0.389741313188296 |
| AGGTTCTGTGAC  | 830.174554427115 | 0.22688134637815  |
| TCACATGACAGA  | 830.175468891553 | 0.271261101323946 |
| AAAGGGGATGAC  | 830.181078138874 | 0.112827669193568 |
| TATGTCACGTAA  | 830.189078759441 | 0.193039133822861 |
| ATCCGGGAGTCA  | 830.190000140082 | 0.30082043757241  |
| ATGACGGTAATC  | 830.191134295181 | 0.229422892677436 |
| CGTCAATCCCTC  | 830.202850569451 | 0.154478700054069 |
| GAAACGTGACCA  | 830.210390080544 | 0.250613064268676 |
| CGACAGCGTGAC  | 830.213029062647 | 0.218784915171999 |
| ACTATGACCGCA  | 830.213646225233 | 0.247570257398161 |
| CTTAAATGGTCA  | 830.235744326877 | 0.153498755386429 |
| CGGGTAAGTGAC  | 830.244926915992 | 0.264702459672801 |
| GTCACGTAACCTA | 830.246194338414 | 0.243702302213733 |
| TCATAAGAGTAA  | 830.253088392544 | 0.184696775893715 |
| CGCGTCTATGAC  | 830.255419259542 | 0.175443017298869 |
| AATGACGTGCGG  | 830.261857880705 | 0.320654667734273 |
| GGATGATATCAC  | 830.26659935009  | 0.158659413231319 |
| AGGTATGGTCAT  | 830.269551675137 | 0.226251028099793 |
| AGACTCAATCGA  | 830.270064384238 | 0.327350546559335 |
| GAGCAAATGACA  | 830.279293727335 | 0.183553664533007 |
| GTTGCTCACTCA  | 830.282617225505 | 0.161512111872884 |

|               |                  |                   |
|---------------|------------------|-------------------|
| AAATTAGCCATA  | 830.295933401738 | 0.204137820658786 |
| CGTCATTGGAAC  | 830.299131537485 | 0.259953240865728 |
| AGCATTGGTGAC  | 830.300215679315 | 0.252013886768604 |
| ATGTCATTAATC  | 830.301706251495 | 0.129992383527697 |
| TGCCATTAGTAA  | 830.309042058265 | 0.200241558997949 |
| CTGTTTCGTGAC  | 830.309555063156 | 0.347297307872398 |
| CTACGGTGTGAC  | 830.319340708351 | 0.171098787458159 |
| CTCGCCGACTCA  | 830.325399819707 | 0.175016379921101 |
| GACTAATATACC  | 830.326378586286 | 0.23849890146496  |
| ACTAGCAGTGAC  | 830.326773647871 | 0.229274538712926 |
| TGGAATGAGCCA  | 830.33225237637  | 0.309380139886706 |
| ATGGTGAGCAAA  | 830.340365219001 | 0.150312679835612 |
| GTCACATGAAGA  | 830.341199608104 | 0.220827379644451 |
| ATTGCCGTCATC  | 830.343154287442 | 0.181127373991542 |
| AGGCGTGACAAA  | 830.347169877013 | 0.179733892491849 |
| CTTCAGCGTCAC  | 830.350694832819 | 0.209613648567335 |
| ATCGACATGACA  | 830.352042959366 | 0.222306048224483 |
| CGGCAACTACTCA | 830.360929784611 | 0.192245906269766 |
| GTGAGTCCATAA  | 830.367672511068 | 0.231654707758222 |
| GATTAGTCTCTCA | 830.367907983407 | 0.247216447916836 |
| ACACTCAATGAC  | 830.368434180408 | 0.202966370191103 |
| TGACTTAGAGAA  | 830.369817213617 | 0.216622521671241 |
| GAGTGACGTTGC  | 830.369947984496 | 0.253217260010812 |
| GAGGCGTACCA   | 830.387558133774 | 0.202762566224804 |
| GTTTATTAATCA  | 830.388695239094 | 0.2546852375732   |
| ACGTGACACTCA  | 830.39678371632  | 0.114995464591789 |
| ACGCCAACTCAT  | 830.39843974911  | 0.231422509061562 |
| AACTGGTGACGCG | 830.400080380858 | 0.137729489125214 |
| CGTCACGCGGAA  | 830.400830530531 | 0.176189736777528 |
| AGGGTTTATGAC  | 830.401044914986 | 0.222833509964971 |
| CGTCACAGTGAA  | 830.401194011508 | 0.269026479742516 |
| CGAGGAAATGAC  | 830.406113343059 | 0.171875516757929 |
| ACACTTGACGCA  | 830.414157098393 | 0.172916685800205 |
| GAAGGTGGTGAC  | 830.416538088036 | 0.187693637581333 |
| ACTTCCAATGAC  | 830.418957093601 | 0.261111474547876 |
| ATGACCATACTC  | 830.428330743926 | 0.185542232115607 |
| ATGTCACGATTA  | 830.431925596899 | 0.140630092044212 |
| ATGACTTGCTGC  | 830.441634176414 | 0.210792880050276 |
| GAGCTGTATGC   | 830.445805602278 | 0.265767253941435 |
| CTGACTCCGCGA  | 830.456973283026 | 0.168269845033553 |
| ACATTACGTATA  | 830.472179712656 | 0.231527225576117 |
| CTTATTGAGTAA  | 830.487830807897 | 0.148919279228459 |
| ATACTAGTCAAC  | 830.497344299568 | 0.26424629801403  |
| ATCGCTCGTCAT  | 830.501631182185 | 0.19576901369395  |
| ATCTTATGACCC  | 830.503750472821 | 0.164152241966324 |
| GTCAGTAATCGA  | 830.505993386833 | 0.190395617438265 |
| ACTCTTACGTGG  | 830.512538263867 | 0.236853042537424 |
| GACTAACGTATC  | 830.513287458535 | 0.176543691364062 |
| ACTACTCATCTA  | 830.519747441675 | 0.211565774642889 |
| TCACGCACGTCA  | 830.520018109535 | 0.255621466618885 |
| CTAGTACTAATA  | 830.537750778109 | 0.187763863173382 |
| ATGACTTGTGGA  | 830.541291471941 | 0.227209703406361 |
| TGTCACTGCGAA  | 830.552438718312 | 0.165406052084125 |
| CATTGATTATGA  | 830.555868648039 | 0.236002056908305 |

|              |                  |                    |
|--------------|------------------|--------------------|
| AGATCTTCGTCA | 830.556665652969 | 0.237582514327175  |
| GAAGCCGAGTCA | 830.561748143149 | 0.272409391211567  |
| TCGAGTGACAAA | 830.565876918098 | 0.167138758450847  |
| ATGACATTGAAC | 830.569573178817 | 0.216316272880263  |
| AATAGTAATTTT | 830.573199502494 | 0.229298124036506  |
| GTCACCTTGCCA | 830.576016494536 | 0.127915582812816  |
| ACTCATCGGATC | 830.578894256014 | 0.256324971332773  |
| ATTAACCTGTCA | 830.593770146464 | 0.320697271446381  |
| GTCATCTTGCAC | 830.596177959896 | 0.383769228983147  |
| AAATTAGCAATC | 830.606252584077 | 0.168644373781927  |
| CCAACGTGACAC | 830.606464224706 | 0.221603153290914  |
| TCGTTTGACGCA | 830.613230251655 | 0.355479950899344  |
| ATGACATCTCGC | 830.616363634586 | 0.191597813330188  |
| ACGAGTAATAGT | 830.6164447072   | 0.230495347657415  |
| CGATGATGTGTA | 830.621976709458 | 0.148851720267966  |
| ATGTGCTGACTA | 830.624279166216 | 0.244999999244293  |
| AGTCCAGTCAGA | 830.62605423768  | 0.297356835319546  |
| GGTGTCTCATA  | 830.628954290197 | 0.25828914253856   |
| CTTCTTGTGTCA | 830.644461340172 | 0.197150525100317  |
| AGTCGATTACTC | 830.646739890222 | 0.264335346355014  |
| ACTTGGGGTGAC | 830.650195230537 | 0.208467900952325  |
| CTCGGGGAGTCA | 830.650420024784 | 0.221278233768858  |
| AGGTGACAAGTA | 830.659554802048 | 0.177658683067602  |
| TCAATGACCGAA | 830.661432150804 | 0.200363288342941  |
| ATGACGGCGCAC | 830.665274133293 | 0.129152747057827  |
| ACGTCAGACCTG | 830.667240134822 | 0.181734492143003  |
| ATGGTCTGTGAC | 830.672944819055 | 0.188513641837255  |
| AAGTGTCAGATA | 830.675908110857 | 0.128895570550252  |
| AGGATCGGTGAC | 830.676387584361 | 0.187478230619707  |
| AAGTGTCACAT  | 830.690175916005 | 0.269889028442534  |
| AGACTCAGAAAC | 830.694116301122 | 0.23770635268833   |
| GCTTACCAGTCA | 830.695183126463 | 0.227175264438968  |
| AGTGAGTTGTCC | 830.712874141086 | 0.232658772175923  |
| ATAGATGAGCCA | 830.71771585024  | 0.244986381297996  |
| GTGAGTGAGCAA | 830.721875943711 | 0.17212588907727   |
| GAGGTTGACTGA | 830.726556814886 | 0.180238211679229  |
| AGAGTAATATCC | 830.736765137862 | 0.18389727750614   |
| CAAGCCCAGTCA | 830.739775326594 | 0.219938764763064  |
| ATCACATGACGA | 830.742864036196 | 0.181853957567594  |
| CCCGTGACGTCA | 830.746368762132 | 0.337574058449463  |
| CTGCTCGGTGAC | 830.757958427704 | 0.239509521269421  |
| TGACCAGTTGAA | 830.775731276497 | 0.239828292900097  |
| TGAAATGAGCCA | 830.779163991547 | 0.240796007666334  |
| ACTGCTGATGAC | 830.794984491227 | 0.108267946166161  |
| CACTCATACTTA | 830.796938861676 | 0.111139344019595  |
| TCCTGACACAGA | 830.797185860687 | 0.140162005145437  |
| GGTCACTGACTA | 830.799896034918 | 0.15299381037063   |
| CAAAAGTAGTCA | 830.808426632553 | 0.10706530170958   |
| GAAAGTGTCAAC | 830.828050626096 | 0.172491531405262  |
| CGAGTCAGGGAC | 830.829462821927 | 0.202344291875758  |
| CCTTAATGACAA | 830.832801387734 | 0.299555077740291  |
| ATACGTAATCAA | 830.83389526239  | 0.331640892542503  |
| TATCGGTGACCA | 830.848263424198 | 0.0825512739061381 |
| ATGCCGGGTGAC | 830.852830708159 | 0.310953659281101  |

|              |                  |                   |
|--------------|------------------|-------------------|
| ACTCTGAGTCGG | 830.853615761106 | 0.352013940858142 |
| ATAGTAGATGAC | 830.85715637438  | 0.233323273921747 |
| ACGTAATACACG | 830.86618905029  | 0.338497617271497 |
| AGTGCCTAATCG | 830.867334162902 | 0.177173772428996 |
| AGACCTGATTCA | 830.869285149234 | 0.25964213516139  |
| AAAAGCTGAGTC | 830.878550443906 | 0.194595821039215 |
| AAGTCACGACGT | 830.881356854542 | 0.185311304154159 |
| GTGGTTGACTGA | 830.887353077446 | 0.239650522659699 |
| AGTGTTACTGAC | 830.887919867926 | 0.217905727829982 |
| CTGTCATTGGCA | 830.88864745085  | 0.229678510386726 |
| GAGTATATGACC | 830.899122000039 | 0.254070304594531 |
| TGATAGGTCACA | 830.900651023242 | 0.229853071007832 |
| ACCTAATGACAT | 830.907311281877 | 0.20198384988573  |
| ATTGCCCATGAC | 830.907599922231 | 0.246005155707076 |
| CGAGTAAGAGTC | 830.907932382609 | 0.22986290283491  |
| CATGGTCATTTA | 830.912902674285 | 0.252234629018523 |
| CGCGCTGCACA  | 830.9133692513   | 0.21405658646356  |
| AGACAGCTCATC | 830.917197945766 | 0.179133358104726 |
| CGTCACCGGTAA | 830.925297871361 | 0.254905711662818 |
| AGTCAGAGGACA | 830.927066516997 | 0.182643019997166 |
| AGAATATGACCG | 830.940894676027 | 0.17166258210345  |
| GCTAGGCATGAC | 830.949694425798 | 0.217414727104824 |
| ACTCATCAATAG | 830.950482004834 | 0.170687818993588 |
| ATGACAAGGACA | 830.950837168819 | 0.174714000264295 |
| ACATAGGTGACG | 830.960826559164 | 0.109156911645683 |
| AGTCAGCTATGA | 830.962960157696 | 0.217633902576795 |
| AGAAAGTGACAC | 830.974228862544 | 0.207165028834404 |
| CTGGCTTTGTCA | 830.974939259519 | 0.193101541324863 |
| TGTCACCCAGAA | 830.976712790489 | 0.193025816149044 |
| GAGCAACGTCA  | 830.97883583195  | 0.271678505488014 |
| ACACATCGTGAC | 830.979801453311 | 0.183926005151441 |
| GGCGTGTAGTCA | 830.979839230959 | 0.249856161952749 |
| TAACTCATACTA | 830.984506222723 | 0.179831848146635 |
| AGTCAGCGTGAT | 830.993540512055 | 0.275094475452842 |
| CACTCTTGGTCA | 831.002909232722 | 0.163230613086631 |
| AAGGCGTGTCA  | 831.006056489623 | 0.125376754731189 |
| CTCATATGCGAG | 831.013841364809 | 0.340732193665373 |
| AGATTACAGTCA | 831.018130726954 | 0.161547506597293 |
| ACCGATGACCTA | 831.02794077328  | 0.170503637274911 |
| AATGACATTTAA | 831.029785834727 | 0.263044654144836 |
| AAAGATGAGTAG | 831.032082396015 | 0.180873482652663 |
| ATGAGTAGATCC | 831.033024769474 | 0.158552978299984 |
| ATTACACACGTA | 831.034916469318 | 0.239084303569224 |
| GCTGACACGTCC | 831.035181535864 | 0.162781346738863 |
| AAGAGTAACTCA | 831.042637493695 | 0.250952768485659 |
| CGTCTGACGAAA | 831.049134345243 | 0.340942184863768 |
| TATTAATCACAA | 831.051152281962 | 0.240827545240522 |
| GTCGTACTACA  | 831.051686446964 | 0.189308701271849 |
| ACGCGGTACATA | 831.057598432473 | 0.224007238182838 |
| CGTCGCAATGAC | 831.071619833241 | 0.260404521151127 |
| AACCTGTGACAA | 831.076446694249 | 0.226232447174547 |
| GTCACAGTCCAC | 831.07681389827  | 0.276828915881567 |
| GGCGTTGATGAC | 831.081283924977 | 0.171163346799344 |
| CCGCTTGGTCA  | 831.085002360443 | 0.232201588958684 |

|              |                  |                   |
|--------------|------------------|-------------------|
| GTCACCGAAATA | 831.089372693359 | 0.215123507485153 |
| ACGTCGTGAGTC | 831.08956332499  | 0.221872351965687 |
| GGCCCTGACACA | 831.106503971465 | 0.350802222846051 |
| AAGCATCCGTCA | 831.111435531662 | 0.265157943904087 |
| AGTAGTACTAAT | 831.116380285294 | 0.190277250998876 |
| GTCACATCCAGA | 831.121451824137 | 0.238281987425716 |
| TAGTGAGTCTGA | 831.123169141049 | 0.173534296661073 |
| ATACCTACTCAT | 831.127319841724 | 0.184485387501777 |
| ATGACAATAAAT | 831.128129548387 | 0.225730588263547 |
| AAAGTAATGACG | 831.132092526202 | 0.173396407494843 |
| ATATCTATGACC | 831.137366861598 | 0.232783259335171 |
| ATGAGTACGGTG | 831.144565920953 | 0.177216513849546 |
| GTCACAACCTAA | 831.145593771979 | 0.386689186808124 |
| CCACGACAGTCA | 831.15864558325  | 0.203494221747471 |
| ACTGAGTCGAAC | 831.162167434854 | 0.195816316705313 |
| GGCTTACTCAAC | 831.164521830477 | 0.331695220032193 |
| GCCTCTAATGAC | 831.16478001925  | 0.278300512833898 |
| GACTAATATATA | 831.177711583292 | 0.199345669291438 |
| ATGACGACTCCG | 831.182185517279 | 0.320930344219426 |
| ATTAACTCATAG | 831.182822551738 | 0.183167853054639 |
| CGCGCTGTCATC | 831.188743584162 | 0.171369775929828 |
| CGGAAATGACCC | 831.191607958698 | 0.262928560595655 |
| AATGAGTAGTGA | 831.194643242448 | 0.25536207854779  |
| TACATTTTGTC  | 831.200363243993 | 0.186365175742806 |
| CTGTCATGATTC | 831.205851465007 | 0.261296550043323 |
| TGACAGCTTTAA | 831.209042737636 | 0.197738570745414 |
| AAATTGGTGACG | 831.216395485642 | 0.172606905173656 |
| GTCATTACCAAC | 831.224586164746 | 0.234320967605929 |
| GGAGATGGGTCA | 831.224614076166 | 0.208849430989199 |
| CCTATACATGAC | 831.224986843853 | 0.223755523560291 |
| CGAGCTTCTGAC | 831.226030056299 | 0.224832344994405 |
| GGACTGCATGAC | 831.234844873498 | 0.240070090598225 |
| AGGAGTAATAAT | 831.251171733042 | 0.185632552607646 |
| CAGCTAGATGAC | 831.263841190004 | 0.269402433499539 |
| TCCAACGCGTCA | 831.268174713172 | 0.279378707217914 |
| TGACACTTCAAA | 831.279099599093 | 0.173408335105864 |
| AGTATTATTCAC | 831.288183419841 | 0.205836734744061 |
| ACTATTAGCCAT | 831.298179140989 | 0.128742859023664 |
| ATGACCGAGCCG | 831.299001094506 | 0.331989765762707 |
| ATGATGCAACCA | 831.299361246619 | 0.362756160908087 |
| TCAAAGGTGACA | 831.321313163319 | 0.213767988638184 |
| ACGTCACGGTCA | 831.322486882154 | 0.299104411038744 |
| TCACAGTTGTCA | 831.323145109143 | 0.143473385432334 |
| GAATAATTAGTC | 831.329010360962 | 0.300312881624265 |
| AGTCAATGAGCC | 831.335180008712 | 0.194926756976387 |
| CTGAGTCGAAAG | 831.356458442326 | 0.171243478251744 |
| ACTATATGGTCA | 831.365902149981 | 0.20260130752982  |
| AGATATCATGAC | 831.367863880674 | 0.202275288309579 |
| GGGCATGACCCA | 831.371109651468 | 0.243352650517861 |
| ATGACATTGATA | 831.377402534544 | 0.169280039509289 |
| CCCGGTGACGTC | 831.377702782426 | 0.201270426417659 |
| CCAAAGTGTGAC | 831.379623787531 | 0.213239824291642 |
| GTTGCGTAGTCA | 831.386768754552 | 0.279521210282634 |
| AGTGTGAATCAA | 831.390071418517 | 0.298539277047453 |



|              |                  |                   |
|--------------|------------------|-------------------|
| TACAAAGTGTC  | 831.396288660486 | 0.292039160111451 |
| CATCTACTC    | 831.396597053082 | 0.113880765865203 |
| GCACGCAATGAC | 831.402977274446 | 0.19898056838602  |
| AATGACGTCTTG | 831.422386528973 | 0.244186823822301 |
| GCTAGCCGTGAC | 831.428722489626 | 0.147731610284478 |
| ACATAGGCACA  | 831.42887349586  | 0.272694213123906 |
| ACTAATTTAGAG | 831.433815831724 | 0.217195828334573 |
| ATGAGCCAATAA | 831.4439457139   | 0.217791298576108 |
| ACGTCTCTGTCA | 831.44484677985  | 0.273135795613471 |
| ATCGGGTGTGAC | 831.457888186968 | 0.147920171600638 |
| CGTCATGTCCGA | 831.461269310932 | 0.338919364499222 |
| ATTTATGTGACA | 831.472346257654 | 0.130320289062016 |
| ATATGGTCACAA | 831.481533482621 | 0.256171045203937 |
| CATGAATTA    | 831.501053539441 | 0.18799147856123  |
| ACTGTCACTGAT | 831.505586573849 | 0.184149335427858 |
| TATCAAGTCACA | 831.51269314272  | 0.180201653465583 |
| ATATCAGTGACA | 831.517175554824 | 0.193057233178658 |
| GGTCATCTGAGA | 831.520451455558 | 0.175914933721822 |
| CGTCTAGACTCA | 831.535972801579 | 0.214741814001446 |
| CGAGTACCGTCA | 831.537206010299 | 0.223796734314056 |
| GATTACTCTCA  | 831.541550150129 | 0.162715567806524 |
| GTGACCCAAAGA | 831.549976273216 | 0.233177264659395 |
| GTCACGGCTTAA | 831.567841296645 | 0.341306143372575 |
| AACTCACTCATT | 831.578150609374 | 0.20715566657952  |
| AACGAAGGTGAC | 831.578238626786 | 0.217504062057104 |
| AGCAATGAGTGA | 831.584477913629 | 0.236428598814151 |
| AATCTGTGACAG | 831.59161305472  | 0.364222811510826 |
| CACAACGTGACA | 831.593333530605 | 0.358400932792056 |
| AGGTGACAGTAC | 831.598872802718 | 0.201921124918396 |
| ACAGACTCACTC | 831.617051507482 | 0.133245527996451 |
| GTCAGACTAACA | 831.638423392411 | 0.234079124812992 |
| AGCGTACATGAC | 831.643001058496 | 0.343813060896926 |
| ACTACAACGTCA | 831.646347667969 | 0.187041617133846 |
| CGTGTCACTAGA | 831.664485715697 | 0.207663685077641 |
| CCGCTATGTAC  | 831.666277220945 | 0.328144533326439 |
| GTCACACCTGCA | 831.666306587657 | 0.256687825515518 |
| ATATGCGTCTTA | 831.67779514039  | 0.249955292022661 |
| CATTA        | 831.682754318975 | 0.299935056083978 |
| ATGATTCGAAAG | 831.687804411517 | 0.218138804257013 |
| AAACAGTGACAC | 831.7069050944   | 0.193359112522345 |
| CCGATGATACAC | 831.712247712681 | 0.235855292131013 |
| ACACGTA      | 831.727310395298 | 0.208268152622691 |
| ACTATACATGAC | 831.730524997733 | 0.202879766180338 |
| AATTATCACTCA | 831.73101881197  | 0.198213843657446 |
| GGTCATAGTTGA | 831.731725104671 | 0.18292471650463  |
| TCTGACGATTCA | 831.733802201952 | 0.199397154517387 |
| AGTCAGACCCTC | 831.736526917836 | 0.176036636794873 |
| TGGAATTA     | 831.747195583089 | 0.256397633329421 |
| CAGACCAGTCAA | 831.757680390559 | 0.281766114116382 |
| TCACGCTAATGA | 831.765187776304 | 0.169987435112234 |
| GCCTGACTCTCA | 831.768622133122 | 0.228190377658007 |
| AATTGGTTGACT | 831.770667865531 | 0.267873901476346 |
| GTCACTAAGACA | 831.778205182078 | 0.184793851905478 |
| ATCGGGTGACAA | 831.781206641581 | 0.19307826027619  |

|              |                  |                   |
|--------------|------------------|-------------------|
| GCGACTCAATCA | 831.785710031825 | 0.17413183598489  |
| GACTCACGTTCC | 831.793677989882 | 0.225265155037781 |
| GACTTGACTGAA | 831.795953411563 | 0.282278919563982 |
| GACATGACACTC | 831.80199757068  | 0.200773672043512 |
| CCGCGGTAGTCA | 831.80345452201  | 0.186222265602762 |
| ATGGTGAGCAAC | 831.804306525289 | 0.269769489041901 |
| TACTGGTGACCA | 831.811323783292 | 0.30075133945263  |
| ATGACCATGCAA | 831.816712993032 | 0.227385976270229 |
| CCTTTATGTGAC | 831.823590650081 | 0.241214979632836 |
| TGACGTCGTACA | 831.828143664448 | 0.278547470550473 |
| ACAAAGAGTGAC | 831.830175794982 | 0.171930568980573 |
| TGACTAGAACAA | 831.830267751733 | 0.190411947853984 |
| TAGGACTCGTCA | 831.838506254565 | 0.217497415769297 |
| ATAGGTCACACG | 831.839625365549 | 0.311547561465465 |
| ACGACGTAGTCA | 831.839996882188 | 0.256803773730645 |
| CGCAGCAATGAC | 831.840173557332 | 0.239101230810505 |
| GAGACCCAGTCA | 831.840731405474 | 0.181687351915256 |
| ATTATGACCTAC | 831.845676352936 | 0.21102650942892  |
| AAGTAATCGTCA | 831.849253845442 | 0.180005534622278 |
| GACTAATTACCA | 831.85450346519  | 0.226829518795295 |
| TGTGAGCAACAA | 831.862392677215 | 0.190709296023799 |
| CTCAAAGGGTCA | 831.863685545685 | 0.191126484001048 |
| GTCACCATGGTA | 831.867028953199 | 0.173936640818526 |
| GGTGACGACTAC | 831.874200900003 | 0.191869471251412 |
| CCGTTTCCGTCA | 831.891424602704 | 0.151637292599523 |
| CACTTATGACCC | 831.892940947412 | 0.235171889060528 |
| TGATGCATAAAA | 831.901307028571 | 0.173801582144954 |
| ACCTGCTAGTCA | 831.903653713503 | 0.119856723676218 |
| TGACACCAAGAA | 831.910149839715 | 0.178360749290173 |
| TGACAAAATGAA | 831.91131612288  | 0.159407415900368 |
| GACTCTCGATGA | 831.913887363976 | 0.137809611582836 |
| ACCAACTTGTCA | 831.915980393759 | 0.275108832318776 |
| TGGTCACCGACA | 831.937549921051 | 0.211671406895126 |
| ATTTAATCATCG | 831.942485874058 | 0.237833421450686 |
| CATGACGAGGCA | 831.942719268823 | 0.190235749138278 |
| AGTTGACAAATC | 831.947558465421 | 0.233379416448987 |
| GTGAGTCTCAGA | 831.950505315236 | 0.1916008375378   |
| AGTGTGTAATTC | 831.951037202045 | 0.290505473683672 |
| ATACGTAATCTA | 831.952535727811 | 0.140962386614537 |
| ATGACCCAGTGG | 831.96832798688  | 0.191551710468451 |
| ACTCTTGGGTGA | 831.975809364034 | 0.238661581423229 |
| TAGACAGTGACA | 831.97846329751  | 0.186217883084445 |
| CTGGGAAATGAC | 831.979303633879 | 0.303449626807462 |
| AGAAATGACAAG | 831.984324021724 | 0.215999100135796 |
| AGGTACCGTGAC | 831.988127027277 | 0.209022338050869 |
| CTGGACCTGTCA | 832.005982282598 | 0.252420770887869 |
| ACATTGACGTAT | 832.008630604024 | 0.21142154109145  |
| CGGGGAGATGAC | 832.010486738438 | 0.110751547494481 |
| CACATGACGCCG | 832.016391775248 | 0.221578593947172 |
| CGTCATTGCCCA | 832.018163203203 | 0.137299903182703 |
| TCTATCACGTCA | 832.030163238168 | 0.210871721133671 |
| AGGTGACTTGGC | 832.042825871447 | 0.177173153166779 |
| AAGTAGTCAGTC | 832.044608847785 | 0.169189877608717 |
| CTCCGTAGTGAC | 832.046657769965 | 0.225673875623767 |

|              |                  |                   |
|--------------|------------------|-------------------|
| CGTAATGTATCA | 832.048114127935 | 0.178664802787317 |
| ATGACAGCGAGG | 832.054335806307 | 0.180782198891688 |
| CATTATGTATCA | 832.055247531785 | 0.20207332323725  |
| ATCTGATGACGG | 832.064082774582 | 0.202069860738729 |
| CTAGTGGACTCA | 832.0652906292   | 0.179532916254818 |
| CGCGGGTGACAA | 832.070058426866 | 0.295908091005652 |
| GAATCATTATC  | 832.070283135248 | 0.198227843272653 |
| AGTCAGACCCAG | 832.070532152567 | 0.266390634291983 |
| ATTTTATGAGTA | 832.07318082934  | 0.181301519540593 |
| CCACCGTGTGAC | 832.080134943709 | 0.268675206147388 |
| AACAGTCAACAC | 832.089359236565 | 0.223107197674384 |
| GAGGATAAGTCA | 832.090702983553 | 0.209190587155309 |
| ACACAGTCAGGT | 832.097504318155 | 0.225289417421792 |
| GGTCACGTGACA | 832.102402322811 | 0.235689857880008 |
| GGTACACGTAAC | 832.114945934231 | 0.262127580633301 |
| AGTCAGACAGGC | 832.115162038018 | 0.160582785996946 |
| TAGGTTTCGTCA | 832.116220640036 | 0.188599321433325 |
| GTCACAAGTCA  | 832.12273537262  | 0.206802208454075 |
| GTCACCCCTACA | 832.1321066048   | 0.177684094618048 |
| AAAATAATGAGT | 832.138144535951 | 0.207784314292504 |
| CCGTCATTACTA | 832.140555763308 | 0.19479274042936  |
| ACTCATACGCAA | 832.144069010348 | 0.160231606970302 |
| ATGTGTCTGACG | 832.145626679636 | 0.205656312498873 |
| CCAGTCAATGAC | 832.145783598796 | 0.342998472597867 |
| CATTGCTCTGAC | 832.149306838064 | 0.292055006696596 |
| ACTTGTCACAGG | 832.14933410131  | 0.302429278617032 |
| CGTCACCAATTC | 832.157637981238 | 0.212863018250562 |
| AGTCAGCCCGAT | 832.176954076649 | 0.174503208341893 |
| GACCATGACATA | 832.180771916177 | 0.170499579156856 |
| ATAAAGCATGAC | 832.181868585866 | 0.21817691565409  |
| GTGCCTGTGACA | 832.184473336698 | 0.278732973825379 |
| GTAGAATGACCA | 832.189381724467 | 0.270727401385163 |
| ACACACATGAGT | 832.196122992568 | 0.276110557083407 |
| AACCAGTCAGCC | 832.196693427826 | 0.19811082457265  |
| GTCACGCGGAAC | 832.197820052319 | 0.225754223522718 |
| ACTCATGACAAG | 832.200837862059 | 0.195035570482735 |
| ACTCATTTTCAT | 832.203444416014 | 0.276752343243531 |
| ACCTTTGACTCG | 832.203654927352 | 0.147237285859876 |
| CTGACTGGTCTC | 832.205819150912 | 0.180719213383067 |
| CCTGACTCTCAC | 832.206824060307 | 0.151501720811917 |
| ACGATCCGTCAG | 832.214057083676 | 0.263179593417523 |
| GCTGACTGCTAA | 832.229711672643 | 0.204854440779464 |
| ACGTCACGTTCT | 832.239967261966 | 0.231860092343792 |
| CCGCTGGAGTCA | 832.2410714706   | 0.269199544705614 |
| AACCATGAGTCC | 832.253350488866 | 0.20870418260034  |
| CCGTCGCGATGA | 832.257938955199 | 0.230010976454259 |
| CCTGACTAGGTC | 832.25816192978  | 0.236090451189201 |
| CAAACATGACAG | 832.259021051162 | 0.197154129501259 |
| CCAAGTCACTAG | 832.264918724885 | 0.230893914172237 |
| ATAATAGTAATA | 832.274439091178 | 0.163033642227725 |
| GTCATGCCTAAA | 832.27564173228  | 0.222304165692978 |
| AGAGTCAAGGGA | 832.282023546466 | 0.193979377563708 |
| AATTTCCAGTCA | 832.283015018908 | 0.232703124135081 |
| GATGAGTAGCAC | 832.28496186314  | 0.168570538665826 |

|               |                  |                   |
|---------------|------------------|-------------------|
| CCGCAATTAGTC  | 832.29956722667  | 0.178047697007042 |
| CAGTAACGTGAC  | 832.307819386515 | 0.204853913472088 |
| AGGGGATTAGTC  | 832.311656244299 | 0.232741554329803 |
| GTAATCCTGTCA  | 832.33449371033  | 0.279399442453108 |
| CCCGCTACGTCA  | 832.335463535833 | 0.221559377244022 |
| TGGTCATCCACA  | 832.337311901848 | 0.24184334700546  |
| AGAGTCAAGAGA  | 832.339128706631 | 0.186937996186669 |
| GTGAGTATACAC  | 832.340647576936 | 0.238391630654666 |
| ACCGCTATGTCA  | 832.343642620381 | 0.195392756686112 |
| CATGCCACGTAA  | 832.345042345946 | 0.26007216074481  |
| GGTCATACATAC  | 832.345292735006 | 0.203881450766632 |
| CGTGGTCATTTA  | 832.351855192576 | 0.246413945125612 |
| ACCTTTGGGTCA  | 832.359050364228 | 0.188287145370133 |
| CAATAGTCTGAC  | 832.360578697365 | 0.280984322793203 |
| ATAGCATGACCA  | 832.370883313108 | 0.249860273715546 |
| AATGAGTTGTAC  | 832.371561726493 | 0.185719423278594 |
| ATGACATGCAAT  | 832.380253755893 | 0.246461597470905 |
| CATACCGGTCA   | 832.396295304712 | 0.214671324127247 |
| AAATCTCCGTCA  | 832.401608955447 | 0.171939626027293 |
| ACTCATAACTCG  | 832.41911630418  | 0.228180708090592 |
| TACTCATAACGA  | 832.420374313756 | 0.242154369718563 |
| GTCACATTC AAC | 832.435834023513 | 0.242532402197785 |
| AGTCAGTAGACT  | 832.44011399173  | 0.191195056782503 |
| TGACAACATGAA  | 832.449552187105 | 0.198781844432263 |
| ATGACAGCGGTC  | 832.451023808003 | 0.197620874817243 |
| ACTAATAGATTG  | 832.465502957528 | 0.256426540195394 |
| ACGCATTGTAC   | 832.475824263791 | 0.265160508561764 |
| ACTCATCGCGAT  | 832.478547730152 | 0.151837704298337 |
| GACTAATGCCGA  | 832.481122042633 | 0.220381044134754 |
| CGGAAAGTGTC   | 832.481280855202 | 0.2316251921792   |
| GTCATTGTCCCA  | 832.487904772363 | 0.219539107832452 |
| CTTACTCGATGA  | 832.491002230078 | 0.278729836748999 |
| GGACCCGGTGAC  | 832.507379782714 | 0.201218303776889 |
| CTAGCGGGTGAC  | 832.50860536273  | 0.237218254351032 |
| CGGTGAGACATC  | 832.50968654372  | 0.123075742162274 |
| GGGTCACCGAAC  | 832.521887383444 | 0.204568876634443 |
| GTCACCTTTCA   | 832.524469399079 | 0.223774290263458 |
| ATTGTAGATGAC  | 832.526609047466 | 0.145288577586873 |
| CCTGATGCATCA  | 832.526890493123 | 0.252522853396623 |
| ACCCGGTGACAA  | 832.533456004339 | 0.140358673218709 |
| ATGACGACGAGA  | 832.536368965588 | 0.175925001048951 |
| ACTGAATGAGCC  | 832.537356249973 | 0.17381307949565  |
| GACTCAGCAAGC  | 832.543932969405 | 0.317266001467492 |
| CGGTGTGACCAC  | 832.546424847766 | 0.260812980965115 |
| TGAGGCGTCACA  | 832.548552460389 | 0.178670040821591 |
| ACGTCACTTTCC  | 832.552953106226 | 0.170449638776753 |
| CGTTTAGTGACA  | 832.554062551012 | 0.183590293258939 |
| CGACATGACACC  | 832.560984668495 | 0.185932396761194 |
| ATGACCACGGCG  | 832.576309450919 | 0.231878719729924 |
| ATTACGCACTGA  | 832.580410866244 | 0.201423408909955 |
| ATGACATTGCC   | 832.582527885493 | 0.219322233651901 |
| AACGCGTAATCG  | 832.592866490711 | 0.236839723944648 |
| GCGATTATTCAC  | 832.593222530114 | 0.18610542703918  |
| ATGAGTTAGTCG  | 832.594309915492 | 0.213389801159652 |

|               |                  |                   |
|---------------|------------------|-------------------|
| CCAAGTGACGTC  | 832.598435003551 | 0.189317448375296 |
| ATTGATCATGAC  | 832.606276608794 | 0.162671266396818 |
| GGGGCAGAGTCA  | 832.619554262961 | 0.268998748053424 |
| GTCATGTACGAA  | 832.622524102196 | 0.310876310601623 |
| CGGTTTTTCGTCA | 832.632879901776 | 0.30117880815844  |
| GACTAGGCATA   | 832.634151889978 | 0.320570712760975 |
| AATTCAGTCTTA  | 832.634416589116 | 0.175826348458846 |
| CGTTTATACTCA  | 832.634897787612 | 0.252182670154027 |
| ATCGATGTGACA  | 832.638438845213 | 0.175225830540794 |
| ATTGTATGTCAC  | 832.639096174991 | 0.18752276285747  |
| AATGAGCCAGAG  | 832.641634508314 | 0.257203485533716 |
| GACTGACTTGTA  | 832.6439123012   | 0.293102782142422 |
| AGGGCTTGTTCAT | 832.654253714155 | 0.147307912567945 |
| CGGTGACCATAC  | 832.65549189411  | 0.144761975716211 |
| GACGACGTGTCA  | 832.657462282118 | 0.214962648372232 |
| CGTCATTATCAA  | 832.659447592624 | 0.358128568271409 |
| CATCATAATGAG  | 832.66395999277  | 0.246150880604009 |
| ATGGTACTCATG  | 832.673386567613 | 0.232335328337706 |
| GAGTCAAATCAC  | 832.676553446156 | 0.163192414217634 |
| CTATTTGACGCA  | 832.677331960144 | 0.171411684500379 |
| AATGTGACGTCCG | 832.688786162067 | 0.271678716387669 |
| ATGACCCCGTCA  | 832.69313733145  | 0.186814642743453 |
| ATATTCGGTGAC  | 832.697971924354 | 0.217398607811796 |
| AGACTTATGACC  | 832.699163621427 | 0.283385257550212 |
| GAATAATGACAA  | 832.701619860064 | 0.150872450697465 |
| TATCGACTCAGA  | 832.703697904952 | 0.213085497523885 |
| CTTAGTGGTCAC  | 832.713404451451 | 0.317035613635142 |
| CCGAGTGACAAA  | 832.717086463572 | 0.207422931549384 |
| ATTTAGTCTTAC  | 832.718207154488 | 0.172957223605524 |
| AAATAGATGACC  | 832.720110056745 | 0.135300978850822 |
| GTCACATCTGCA  | 832.725813374629 | 0.239565186989491 |
| AAGAGTCTTTAA  | 832.727114007442 | 0.201118011478224 |
| GAATGAGTTGGC  | 832.729140821343 | 0.227671958723724 |
| GAAGCTTCTGAC  | 832.731157341918 | 0.229676605491913 |
| AAACTTAGTGAC  | 832.731659288306 | 0.153280460534966 |
| GTGACAGGTCAA  | 832.731724284341 | 0.229341678728104 |
| GAGAAAGGTGAC  | 832.732200929816 | 0.163774318433097 |
| GTCACCATGAAC  | 832.744709061027 | 0.352947694715632 |
| AATTGCTAATCT  | 832.744883180448 | 0.231702771870099 |
| ATGACAGAGGGA  | 832.746242679971 | 0.217024489888056 |
| ATGAATCTTAAG  | 832.754934638865 | 0.228048345500968 |
| GTAATTGACTGA  | 832.757523941649 | 0.231611055493223 |
| AAATTGACTCTG  | 832.762146198612 | 0.18637140318098  |
| TGTCATGCGCAA  | 832.773587845853 | 0.329589038927436 |
| AAGTCACGCTAT  | 832.775739696782 | 0.354110837254408 |
| CGTCATCCCAGA  | 832.782847129974 | 0.124594672988572 |
| GTCACATTCCAA  | 832.784138229973 | 0.268261349265175 |
| ACGTAAGTGACG  | 832.784196708778 | 0.307013502779808 |
| AGTCAGTCGTCC  | 832.787223476827 | 0.271864177290473 |
| GATAACATGACA  | 832.789335633787 | 0.255542003318991 |
| GTGGCTCACTAA  | 832.797701100294 | 0.148174977225476 |
| ACACCTAGTCAG  | 832.806409935134 | 0.234158698848492 |
| GAGTAATCTAGC  | 832.806598332023 | 0.19221721530277  |
| ACGTCACGTCAA  | 832.815079696755 | 0.239796776163324 |

|               |                  |                    |
|---------------|------------------|--------------------|
| AGTCTTGCTCAC  | 832.815597167577 | 0.175277044576773  |
| TGACTACGTCCA  | 832.823773084912 | 0.254564700185424  |
| AGTCAGGTGTCA  | 832.824055781142 | 0.208967726519082  |
| AAGGCCTGTCAT  | 832.82526663969  | 0.307778270883579  |
| ATGTCCCTATGA  | 832.830094135529 | 0.21870184443689   |
| AGTCAGATGTGA  | 832.830266575246 | 0.240363221882471  |
| ATAGGTGACCGA  | 832.838568407837 | 0.221894501939714  |
| GGTCATACCGAC  | 832.844814055193 | 0.167544575484824  |
| GTCACCCGACAC  | 832.846483578135 | 0.239600990712511  |
| CTGTCATTTGAC  | 832.848800091311 | 0.195403745457731  |
| CAATGCGGTGAC  | 832.861324002438 | 0.270009489350272  |
| TATAGGTACAAA  | 832.868227375223 | 0.168822683072396  |
| ATCGTCACGCAA  | 832.873448151664 | 0.158331681940471  |
| ACGTCACCTAAGA | 832.874992594796 | 0.260470991069646  |
| GCACCTGTCACA  | 832.87510965292  | 0.211401823523756  |
| GTCACATGTCAA  | 832.890089227827 | 0.123478013401994  |
| GATGAGCCTGAC  | 832.898709165748 | 0.254273440069173  |
| GACTCTTATCGA  | 832.902879100882 | 0.319509647415879  |
| GTCACGGTCAGA  | 832.90510781961  | 0.223215389466306  |
| ACTCATCCAAGT  | 832.908174844775 | 0.205297148985459  |
| TAGTCAGTAGAA  | 832.911447582583 | 0.196983931349094  |
| GTCACGTAATAA  | 832.91343050716  | 0.251665503119968  |
| CTGTCATGTTGA  | 832.914142014707 | 0.244946051090034  |
| TCAGTAATCCGA  | 832.917417677284 | 0.214281684491403  |
| GATGACCGAACA  | 832.921262601536 | 0.199615283146892  |
| GACAAATCAGTC  | 832.923804071169 | 0.1917617322098    |
| GCGTCATGCTAC  | 832.92764155048  | 0.227420701214521  |
| GTCATGAACACA  | 832.928388968284 | 0.2213473554783    |
| ACAGTGCGTAAT  | 832.94079341696  | 0.22344358699359   |
| ATGACGTTCCGCC | 832.940955020787 | 0.169789206959828  |
| GCTGCTAAGTCA  | 832.943565560801 | 0.272349326677764  |
| ACTATGTGACCC  | 832.946653877317 | 0.269445699379174  |
| CCAGGTGACGAC  | 832.97086829345  | 0.303744383901076  |
| CCTATTCGTGAC  | 832.972151676488 | 0.168768592403156  |
| CGTCATCTATGC  | 832.982239886815 | 0.211375927126104  |
| CCCTCTTATGAC  | 832.989903704378 | 0.0992491120199605 |
| AACTTGATTGAT  | 832.990618821439 | 0.246478507406374  |
| TATGCCACGTAA  | 832.99327072058  | 0.242796915177477  |
| CACGATGTCACA  | 832.993615857929 | 0.132356552038684  |
| GTCACGTTCTCA  | 833.000064405621 | 0.26006038441379   |
| AAATGAGCCAGA  | 833.007069437423 | 0.225720112729606  |
| AATTTGGGTGAC  | 833.008499780155 | 0.259162110832143  |
| GTCATGTTAGGA  | 833.015411908313 | 0.209438956134725  |
| CGTCACATTTAC  | 833.017470070736 | 0.261874927562698  |
| CTTTCGATGACC  | 833.024386195104 | 0.222403994374078  |
| TACTCTGGGTGCA | 833.029545256035 | 0.173658805727527  |
| CCCGAGTGTGAC  | 833.030193972137 | 0.23861756058108   |
| CTCACTTTGTCA  | 833.040007898839 | 0.145503001208398  |
| ATGAGTCCCAA   | 833.041528236958 | 0.21500218700771   |
| CGTCTTTACTCA  | 833.051597578637 | 0.171581235349616  |
| ATCTACGTGTCA  | 833.054400950276 | 0.177662211080486  |
| AGATACGTGTCA  | 833.073014211533 | 0.229352878461843  |
| ATTGGTCAATGA  | 833.073694201744 | 0.183680852553786  |
| TGACAATTGCCA  | 833.074860608958 | 0.17667773052418   |

|               |                  |                   |
|---------------|------------------|-------------------|
| GATGAGTTAGCC  | 833.082927176544 | 0.191682072948143 |
| GGTCCCAGTGAC  | 833.090909811318 | 0.195852898912027 |
| GACGTTCTGTCA  | 833.093806017316 | 0.25729924852101  |
| ACGTCATGGCAG  | 833.098154391152 | 0.186652153136703 |
| ACTACTCATTAC  | 833.106449453121 | 0.19851051107533  |
| CATTTTGACTCG  | 833.114633203214 | 0.194567148310935 |
| ATATCTACTCAT  | 833.116550794633 | 0.230099290909502 |
| GAATACGCGTCA  | 833.124152320776 | 0.225465491616068 |
| GTCATAAACGCA  | 833.124187387733 | 0.235001159060775 |
| ACGTCACCTCCC  | 833.129591379707 | 0.19184471210367  |
| ACTACGCTATGA  | 833.136404355479 | 0.203934736078677 |
| GAAACACTCATA  | 833.141324725767 | 0.199698307745372 |
| GTTACATCGTCA  | 833.144707666753 | 0.183796091763314 |
| AGTGACGGAGAC  | 833.145761324424 | 0.177004326610847 |
| GTCACAGTAGGA  | 833.151090093305 | 0.108324673527307 |
| GTCACAAAAGTA  | 833.154719690615 | 0.261320679825185 |
| GTCACCTGAAAC  | 833.156384571994 | 0.270236497511968 |
| ATGAGTAGGCAG  | 833.159006362234 | 0.162168511193008 |
| CCCCAATATGAC  | 833.166133794624 | 0.251193327332072 |
| ACGTCGAGTGAC  | 833.173746215784 | 0.277566586129174 |
| AGTCAGAGAAAC  | 833.173840376065 | 0.258945521866512 |
| AATGCGACTAAT  | 833.18435968588  | 0.232673006187975 |
| GACTCTTCGCGC  | 833.187137936254 | 0.201030744809571 |
| GCGGACGATGAC  | 833.188449090314 | 0.246096603854097 |
| TGACTGTAAACA  | 833.189001125578 | 0.240901575365637 |
| AGACTAATCAGC  | 833.191047979369 | 0.249355514884534 |
| CGTCATCCCGCA  | 833.210701716189 | 0.174120886317348 |
| TCGGCTCCGTCA  | 833.214071884877 | 0.166771233215822 |
| GGAGCCGATGAC  | 833.220011966379 | 0.319858266057523 |
| TAAATTTTGTC   | 833.23364330825  | 0.235350771566446 |
| GGTGAGTATATA  | 833.240417291631 | 0.190254557001805 |
| TCATCGGTGCAA  | 833.241167137194 | 0.288098340332889 |
| CCTTGTACGTCA  | 833.245759307491 | 0.154449876168416 |
| TGACATATTGCA  | 833.248046941765 | 0.230779103214243 |
| ATTGTATACCCG  | 833.248425540066 | 0.261207891347041 |
| CGTCAACTCTCA  | 833.248811369088 | 0.212301677308762 |
| AATAATGGCTCA  | 833.250893749119 | 0.270656613156109 |
| AATCGTGACATA  | 833.252496949237 | 0.281532836168207 |
| ATGTACAAGTCA  | 833.256329342741 | 0.183561762177091 |
| TGACGAGCCAAA  | 833.261143380628 | 0.275287158441612 |
| ATTTCGTCAACCG | 833.267462570213 | 0.176376122936319 |
| ATTAGTCGCCAA  | 833.272450241191 | 0.249284951166332 |
| ACCTTTGTGACA  | 833.279179673725 | 0.229827219547651 |
| TAGTACTTGTC   | 833.282800804434 | 0.246233785242575 |
| CCTAACTTGTC   | 833.295197857914 | 0.137186047422161 |
| GACTTGCTCACA  | 833.298574430507 | 0.181722801734081 |
| AGAGCAGATGAC  | 833.30025388527  | 0.143056002217584 |
| ATCGAAGGTGAC  | 833.306357737479 | 0.174658193677679 |
| ATGTCACAGAAG  | 833.307040294467 | 0.205357794557015 |
| ATGAGTCCCGTC  | 833.309851042634 | 0.156710898470603 |
| GTGACGGTCATA  | 833.312119546059 | 0.208600389831042 |
| TATCCAGAGTCA  | 833.314489126117 | 0.281277044518496 |
| TAATACTTGTC   | 833.316821588197 | 0.17219532576764  |
| GATTGCGTGTCA  | 833.317198767153 | 0.209705109883845 |

|              |                  |                   |
|--------------|------------------|-------------------|
| TGAGCTGACACA | 833.318517877571 | 0.248752721293921 |
| GAACACCTCATA | 833.343008721999 | 0.153798281911685 |
| CAGGGTGAGCAA | 833.34904136709  | 0.186649215458879 |
| CCGGTAGTGACG | 833.349609633202 | 0.163083360884075 |
| CTCGTGACAAAC | 833.352507358332 | 0.242346021316688 |
| AATATGATGAGT | 833.362344158099 | 0.251180982433067 |
| CTTTAAACGTCA | 833.366471656042 | 0.19049675167258  |
| CTGTCACCGAAC | 833.366556992027 | 0.184937640082715 |
| GTCACTTTTGCA | 833.36993332745  | 0.18692420593615  |
| ATATGAGGTCAT | 833.388360481348 | 0.241254253603089 |
| AGTTAGATGACC | 833.389604945821 | 0.251902751291501 |
| GGTATCAATGAC | 833.392296145756 | 0.275064347859821 |
| ACGTCACAACGA | 833.39398609765  | 0.190554412862855 |
| AGAGGAGTAATA | 833.396666904915 | 0.191747080395912 |
| GTCTACCTGTCA | 833.403425880287 | 0.249633432300454 |
| GGACCTGACTGA | 833.404907023576 | 0.167197087196469 |
| ATGACAACCTTC | 833.417466927874 | 0.263942776686648 |
| AGAATTAGTGAC | 833.423158782011 | 0.261151203453255 |
| AAAGACTGACTG | 833.434952991594 | 0.17749100057137  |
| TGACAGGTAATA | 833.438639584083 | 0.20134182697128  |
| CGATACTGTCAC | 833.445539066275 | 0.15212375801797  |
| AGAAGGGTGACG | 833.450921735248 | 0.179225250984295 |
| AAGCCTTGTGAT | 833.452479019904 | 0.25019428319546  |
| CCCACGTATGAG | 833.455595550233 | 0.263337988495723 |
| GTGAGTCCCCAA | 833.455696438626 | 0.20897476415776  |
| GCTCCGCGTGAC | 833.460797041934 | 0.24969498124291  |
| AATTAATAAATT | 833.471171305771 | 0.178819035310413 |
| AGTGGTCACTCG | 833.474609507973 | 0.19203937574698  |
| ATGACGCTCGAA | 833.492759751043 | 0.206725355281642 |
| GTGTACCCGTCA | 833.493515555037 | 0.209431952222165 |
| GTATGGGATGAC | 833.501556314003 | 0.216902990855728 |
| GTCACCTATAAC | 833.503109471054 | 0.244424408420394 |
| ATGACGCTCTGC | 833.506931959334 | 0.17472212647452  |
| GAGTGAGCAAAC | 833.512870048761 | 0.22303379530636  |
| CTGACCACGTAA | 833.514378277274 | 0.272777728035189 |
| ACGTTGGTGTC  | 833.514519905834 | 0.218041327959213 |
| AGCTCTCTGACT | 833.517399420832 | 0.255424971569005 |
| AGCATCATAATG | 833.519452574759 | 0.205630756631434 |
| AGTGTCACGATA | 833.522644124564 | 0.171270333279364 |
| AGTCAGAGACAC | 833.523364980816 | 0.256492193933962 |
| AGAATTAATCAC | 833.523565259746 | 0.263442923931004 |
| CGTCACCGAATA | 833.526848355267 | 0.186106924451324 |
| GAATCACTGTCA | 833.527661795383 | 0.201505847924084 |
| CTTCCTACGTCA | 833.533633857821 | 0.240281061088231 |
| AGTCAGTCGTCA | 833.543783711719 | 0.187236380763942 |
| CAGTCAATGTAA | 833.544840698438 | 0.188545688669732 |
| AATGACGGGGCT | 833.545866434531 | 0.154981038704102 |
| ATTCTGACTGCG | 833.556174573114 | 0.272201766253922 |
| GAATAGTAATAC | 833.572103612264 | 0.153476623042233 |
| GTGAACACGTAA | 833.572638621636 | 0.151942565928868 |
| ATGACGGCATGG | 833.577703430788 | 0.237371933012596 |
| AATGTCTCACCC | 833.584087466493 | 0.201714357092203 |
| CAACTTCGTGAC | 833.591086478908 | 0.269441913559229 |
| AGTTCGTCACTG | 833.598812368895 | 0.193393051627277 |



|               |                  |                   |
|---------------|------------------|-------------------|
| ATGACGTCTGTG  | 833.6089285075   | 0.209143778833561 |
| ATGACCGAGCAA  | 833.61060242152  | 0.121192652873862 |
| AAATGAGTGCAT  | 833.611745762711 | 0.148184927355743 |
| GTCACAATCGAA  | 833.617726302295 | 0.236809025951294 |
| AAACAATGACGG  | 833.626213746352 | 0.223077123255298 |
| ATTAGTAAGAAC  | 833.630566444014 | 0.184815748658127 |
| CCGCCGCGATGA  | 833.63204044702  | 0.253261948542721 |
| ATGATTACTCGA  | 833.643725450184 | 0.262668042170643 |
| ACTATTGATGAC  | 833.650522346907 | 0.256867277606137 |
| AACATTATGAGT  | 833.657724887527 | 0.192175250489117 |
| AGGTGCCATGAC  | 833.659558827705 | 0.255750815505443 |
| ACTTTGTCAGAA  | 833.666339587425 | 0.189679880590642 |
| ATGTCATCTGTG  | 833.672419122025 | 0.2484740004438   |
| GGTACTGTCACA  | 833.680003335315 | 0.21428370565577  |
| CTACACTGTGAC  | 833.684104162234 | 0.190049431247503 |
| ATATATGTGACA  | 833.689844746994 | 0.210294061911027 |
| AGCTAGTCACGC  | 833.692651703619 | 0.230506621178312 |
| GACTCACGAAAA  | 833.701230253361 | 0.223306445466095 |
| GGTTCATCAATA  | 833.70591690262  | 0.191906540403776 |
| TGACTTGGCAAAA | 833.708337804306 | 0.214049813911908 |
| ATCCAACGTCAT  | 833.712219304489 | 0.241753574211921 |
| AAGATGGGTGAC  | 833.713253305141 | 0.23550730476186  |
| ATGACAAGGCGG  | 833.72895954322  | 0.118613341533304 |
| ATGTCATTAGGC  | 833.733890794823 | 0.184059746735344 |
| ACTGACTGGATC  | 833.740078027893 | 0.183873129182148 |
| ATGTCACCAAAC  | 833.740870145335 | 0.16880081934237  |
| CATGGCGTCAGA  | 833.74591942255  | 0.224433138800767 |
| CTAGTCGCGTCA  | 833.750946451427 | 0.203938656862387 |
| ATGAGGTGGCCC  | 833.750984567214 | 0.176384840110528 |
| AATAGTAATAGT  | 833.760845818925 | 0.189485586274633 |
| GAATTTGACTGA  | 833.764019872198 | 0.255273904281816 |
| ATGATCTGTCAA  | 833.7684940689   | 0.166081859278431 |
| ATGACATCTGTG  | 833.78280217939  | 0.249593496932448 |
| GCATGACGTTAA  | 833.794637525749 | 0.172104638572062 |
| TACGTCAGGTAA  | 833.804508281838 | 0.276082445247787 |
| CGATGTGACCAC  | 833.806078776566 | 0.18974891170548  |
| TCATCATCAGGA  | 833.806877429663 | 0.260558093855699 |
| AGAGCCCATGAC  | 833.812972545284 | 0.242513442942067 |
| ATGTATCACAGA  | 833.813956642101 | 0.200010316996605 |
| GGACTCACTCAC  | 833.818816935977 | 0.133266022571007 |
| CGGACAAATGAC  | 833.821673868393 | 0.106125103710753 |
| CGTTTTAGTGAC  | 833.839079158101 | 0.255078629126463 |
| CTGTGATGAGCC  | 833.841440816031 | 0.236185362809127 |
| GAAACTATGACC  | 833.855058895664 | 0.363706344694427 |
| CACATATGACCC  | 833.855824108995 | 0.303432589258567 |
| ACTCATTACAG   | 833.860924928559 | 0.212609533424458 |
| GTTACTCTTAGA  | 833.870029752168 | 0.272884709465207 |
| ATCGTCACCGCG  | 833.874166270384 | 0.236646190291803 |
| ATAGCGTCAGTC  | 833.875947744661 | 0.185146741569878 |
| AAGGTTCTGTCAC | 833.876700045723 | 0.259553486242817 |
| CAGCCCTGACTG  | 833.891209356126 | 0.187616958415909 |
| GTGACGAACCGA  | 833.897927264087 | 0.237012672137615 |
| ATGTCATTATAG  | 833.906283516136 | 0.2534451650431   |
| GAGTACGCGTCA  | 833.914963066458 | 0.237016240494171 |

|              |                  |                   |
|--------------|------------------|-------------------|
| TCCTGTTTGTC  | 833.921143078201 | 0.207000897430951 |
| AATAACCTGTCA | 833.927433515132 | 0.166050255140309 |
| GTCATGATCGCA | 833.931132914019 | 0.262781749062961 |
| ATACACATCATG | 833.933816013615 | 0.221746224428973 |
| ACCCATCTGACT | 833.939514801595 | 0.184348195203997 |
| AATCATAGTCAG | 833.950265341968 | 0.248531816383239 |
| CATGACTTGACA | 833.955222896557 | 0.266957954888719 |
| CGTTTTGTGACA | 833.957471051727 | 0.249570515311822 |
| CTAAGGTCTGAC | 833.959630621703 | 0.235137401172351 |
| AATTCCTAGTCA | 833.966812173984 | 0.188033140604046 |
| CGTGACTAGCGC | 833.983001200161 | 0.185404107610077 |
| ATCCCGTCATCA | 833.983951630684 | 0.176460923998078 |
| ACTCATTAATCA | 833.985572633391 | 0.223638069761527 |
| AGATCGCATGAC | 833.995731061794 | 0.215409129433391 |
| CACGTAATCATC | 834.009902665212 | 0.200256831714212 |
| GGCGTTGACACA | 834.013692708947 | 0.211678385225933 |
| AATTAGTCTGAG | 834.013876092493 | 0.225554432601312 |
| TAGGTGTGACCA | 834.024777177264 | 0.17612129006841  |
| ATTAGTGACATC | 834.028330108568 | 0.182839961634102 |
| CCACCAGATGAC | 834.028547872595 | 0.278346679630815 |
| AAGCTACTGACT | 834.030347293066 | 0.203981842856359 |
| ATGACCCGTC   | 834.037633097615 | 0.179117064310817 |
| AAAGCGTCAGAC | 834.040801871821 | 0.110523755755543 |
| GTCATGCTTCCA | 834.050005752371 | 0.213716509084188 |
| ATGACAGCGCTA | 834.051054672245 | 0.216558904830789 |
| CATTCGGTCACC | 834.053152196907 | 0.192438458658032 |
| CCCGCTGTGACG | 834.058961598948 | 0.205941223295878 |
| TCTTCTCGTCA  | 834.063369254163 | 0.146475828711249 |
| CTCGATGAGACA | 834.065647379153 | 0.29519239025222  |
| ATGAGTTACACC | 834.069248617708 | 0.203262213867285 |
| AGTCACGGTCGC | 834.069771817463 | 0.191051548080077 |
| ACGAGGGTGACG | 834.083398095474 | 0.249880793059421 |
| TGCAGTCAGAAA | 834.08970486698  | 0.160809755110137 |
| TACTCGAGTCAA | 834.095037825028 | 0.236647903401681 |
| ATGCGCGTCACG | 834.107035650435 | 0.20572918372108  |
| ACACTATGTCAC | 834.112491543363 | 0.224924373667754 |
| AACGTCACCCGT | 834.115648350683 | 0.179784488034292 |
| ACCAATAATGAC | 834.120121686986 | 0.269902550637946 |
| CGCCCTGACACA | 834.131181906736 | 0.236798403109089 |
| GTCACTCTAATA | 834.136949985272 | 0.248534261403606 |
| CGTCATGCGCAG | 834.139816040586 | 0.192666302749922 |
| ATATATTAGTAC | 834.14650803392  | 0.178508810495077 |
| GTAGTGTAGTCA | 834.153917679489 | 0.211979961497872 |
| AACGTCGGTGAC | 834.167114155726 | 0.237059968006832 |
| CTTGAAGTCACA | 834.16843622552  | 0.26482963594433  |
| CGTCACAGCATA | 834.17035246983  | 0.229614434667634 |
| GTGAGCAAAC   | 834.170467365944 | 0.227341836095053 |
| GACCGTGTGACA | 834.176343172408 | 0.279415602696826 |
| GACAATGTCACA | 834.178297369767 | 0.244748017430685 |
| CGTTCGTGACGC | 834.202555371279 | 0.207570441264562 |
| GATGCGGTCATA | 834.206720130629 | 0.153027555258937 |
| GTGAAATCGTCA | 834.212459462475 | 0.262173407993588 |
| AAGACTAACAA  | 834.213984554575 | 0.132554111705048 |
| GAGGCACGTCAC | 834.215428548216 | 0.115571028378485 |

|               |                  |                   |
|---------------|------------------|-------------------|
| GTCACCTTCTGTA | 834.217419965367 | 0.166882934387783 |
| CCGATCAGTGAC  | 834.223526309246 | 0.217827297170628 |
| AGGTATTACGTG  | 834.234238203752 | 0.144686146343838 |
| ACATCGTGACAA  | 834.236245141293 | 0.157808192900006 |
| GTAATGCTCATA  | 834.2379699412   | 0.281396083896597 |
| GGGTCATCAAGA  | 834.240249680456 | 0.134498118535461 |
| ATAGGGTGACGA  | 834.244215113458 | 0.203062061534766 |
| ATTGCTCAACGG  | 834.246618192282 | 0.223774474816336 |
| GCTTTGCTGTCA  | 834.249238330585 | 0.168288900347528 |
| GTGAGCAAAGA   | 834.249301091701 | 0.1715516032474   |
| CGATTTGCTCAG  | 834.25352129891  | 0.199188721385048 |
| ACTCATGAGATG  | 834.256877052442 | 0.226561309528979 |
| ATGACAGGGCAC  | 834.258755009196 | 0.177910140630247 |
| ATGTCACATCAA  | 834.263510199409 | 0.192367105489773 |
| AGTATGTCACTG  | 834.265622831184 | 0.16701087428564  |
| ATGACGGAGGTA  | 834.272845033358 | 0.130705847922079 |
| GTGGCCACATCA  | 834.275155155474 | 0.269699174365718 |
| ATGACTAGCGGA  | 834.275932435536 | 0.256429410246219 |
| ACTCATCTTAC   | 834.280885403107 | 0.119898316722849 |
| GTTGAGCAATAA  | 834.295708248808 | 0.198829317759345 |
| AAAGACTCTTAC  | 834.304536411547 | 0.196872731854761 |
| GCTCGGACTCAC  | 834.309102863626 | 0.316334033014206 |
| ACCGTGTGACCA  | 834.309802763881 | 0.146482013148521 |
| AATATGTGAGAT  | 834.310126988276 | 0.188429188217175 |
| CGTCATGCGTAG  | 834.315559375403 | 0.289004619925544 |
| ACGTCACCGCCA  | 834.319197524267 | 0.280407568523227 |
| AGGCGTGAATCA  | 834.320215353173 | 0.280218485050544 |
| TACTCATCTTAA  | 834.321539300588 | 0.188251740475189 |
| GTCTGACAGATA  | 834.325658845138 | 0.265631991629511 |
| ACGTCGCAGTCA  | 834.326449710596 | 0.211025220953228 |
| AGACTGGTGACG  | 834.326930958529 | 0.203659534297549 |
| AACAAGTCAGAC  | 834.329413095434 | 0.313800336790653 |
| GCACGTCACATA  | 834.329562443438 | 0.195117267957987 |
| AACATATCGTCA  | 834.341982018504 | 0.266828207967946 |
| CTGTGGCTCACA  | 834.357255786298 | 0.231600559242365 |
| ATGTGATTAATC  | 834.364116407837 | 0.178455407186875 |
| CGTGCCATGACA  | 834.378385472978 | 0.208911799804822 |
| ATCTATGTGACA  | 834.385005938227 | 0.164194206722045 |
| AATGAGTAGACA  | 834.413005719156 | 0.210108835029336 |
| CAGCAGTCAGAA  | 834.421630959399 | 0.239375441454928 |
| GTAATTACACAC  | 834.432616693203 | 0.190004689126619 |
| ACTCATAAGTAA  | 834.433839913582 | 0.204073792733633 |
| ACTCATTCAAGT  | 834.433863613159 | 0.183011613207716 |
| AAAGGCAGTCAC  | 834.434221718622 | 0.131153040234583 |
| AAGTCATGGTAC  | 834.442170228777 | 0.248764475470045 |
| ATGGTGATGTCA  | 834.45596909512  | 0.307143636679544 |
| GTCACCTTGCTGA | 834.457348782921 | 0.126480514549991 |
| ATTGGCGTCACA  | 834.458139038252 | 0.295780757841193 |
| GAGTAAGAGTAA  | 834.475578289188 | 0.176299699998864 |
| GGTTTGTACCGA  | 834.491620757641 | 0.183101752608971 |
| CCGGTGACCCAA  | 834.493852707635 | 0.204104422175123 |
| AGCCGGTGACAA  | 834.495444181902 | 0.173372853969796 |
| AGTCAGATCTCA  | 834.517714354785 | 0.247339413244963 |
| TAGGACTAGTCA  | 834.522807671638 | 0.166133550772958 |

|              |                  |                   |
|--------------|------------------|-------------------|
| GAAGCTGCACA  | 834.523820461321 | 0.171818873508915 |
| ACTCATTCTGTC | 834.533002015551 | 0.16524798597092  |
| AAGTGTCAGCTC | 834.542418135774 | 0.189347218557925 |
| ATCCAATGACG  | 834.54764645817  | 0.106476699928898 |
| AATATTACGTAT | 834.556196638884 | 0.214753396476318 |
| GTTACACATCAA | 834.560663338052 | 0.24798717888358  |
| ACTGCAACGTCA | 834.562991357369 | 0.251179594607695 |
| ACTCATTCTAAT | 834.568286295511 | 0.139700309250791 |
| GATGATGTAAGA | 834.570828362046 | 0.226631288481414 |
| AAATCTCTGACT | 834.57656505322  | 0.221467543354584 |
| GGTCCTGATTCA | 834.591133684513 | 0.311975688893402 |
| TAATCCATGACA | 834.593155531442 | 0.165423188922767 |
| TAAGAGTAACCA | 834.601549673535 | 0.204294216396884 |
| AGTGTCACGACG | 834.609727053588 | 0.156074449480584 |
| GGCGAGATGACA | 834.610115520033 | 0.203001950176909 |
| ATCTAATGAGTA | 834.610639633412 | 0.168412156045217 |
| AGTCTCTGTAC  | 834.612262780254 | 0.215167949631885 |
| GCTGACTATGAA | 834.625342788887 | 0.249878835445147 |
| CCTTATTACTGA | 834.626068216143 | 0.114850217458324 |
| ATAGTCAGCTTC | 834.63097648846  | 0.2724599714591   |
| GTCACCTAGATA | 834.643624155057 | 0.315217411011038 |
| AGTAACTGTGAC | 834.652151821736 | 0.125222227049936 |
| CAGTCAATGACG | 834.654410698067 | 0.27410417337158  |
| GTGACATAGTTA | 834.673202028798 | 0.123296914174187 |
| AGCTGTGACGAC | 834.673354708659 | 0.281995499498052 |
| CCATAGTGTGAC | 834.685234461165 | 0.185963710128569 |
| ATTATGACCTCA | 834.686085170046 | 0.20863243097754  |
| GTGTCATGAACA | 834.687339399001 | 0.286514821205599 |
| CTCTTAGCGTCA | 834.689782330656 | 0.222172091306228 |
| CGTCATGTGTAG | 834.70097922713  | 0.184746345309029 |
| CGTCACACCTAC | 834.705317641886 | 0.113427994208411 |
| CGTGATGTAACC | 834.705800638078 | 0.218440481994892 |
| TGAGCCATGGAA | 834.706584886853 | 0.258374170986401 |
| GGTGCATAATCA | 834.712776155551 | 0.195819765891057 |
| AGGAAATGTGAC | 834.71421451909  | 0.175371992146477 |
| GCAAGCGAGTCA | 834.71489169503  | 0.332635052684676 |
| CGACTAGTGACA | 834.722426122225 | 0.291763561221092 |
| TACTACAATGA  | 834.73004568546  | 0.195265351145987 |
| AATGCTGACTAT | 834.732371096573 | 0.205834384837827 |
| TGATGACGGCAA | 834.735296800702 | 0.198815930513009 |
| AAGTCACGCTTG | 834.735487423917 | 0.192458715536213 |
| ATACGTGACAAC | 834.739718784156 | 0.17525514337501  |
| ATACATGACGCC | 834.761978182132 | 0.312284423090419 |
| AAGTCACTAGGT | 834.764211070791 | 0.24529375545862  |
| GGATGCCTCATA | 834.765758782816 | 0.206140552604415 |
| GATCCGTACGCC | 834.766880255364 | 0.200196487596364 |
| ACACAATTACTC | 834.77218400484  | 0.226611839632859 |
| GCTTAGGTGACA | 834.778501410924 | 0.243060495905529 |
| GCGCGAGTCAAC | 834.782968993956 | 0.250800099528017 |
| CAGTGAATGACC | 834.784868881579 | 0.24030141167965  |
| TCTAAATCGTCA | 834.789151442895 | 0.206623572316451 |
| GTCATATTAGCA | 834.7912476396   | 0.235510215383482 |
| CGTGACACGGCC | 834.807765473    | 0.221075206130218 |
| CCTCACCACTCA | 834.811215080163 | 0.249426708863705 |

|               |                  |                   |
|---------------|------------------|-------------------|
| GTCTTGACGTCA  | 834.813184263142 | 0.303371496201678 |
| AACACGTAACCT  | 834.817430174203 | 0.144072446968041 |
| ACAAGTCTGTCA  | 834.83116372861  | 0.215258650061038 |
| ATCATCGTCACC  | 834.838080179166 | 0.183479150223427 |
| CGCTTGCATGAC  | 834.859003046984 | 0.225083743852365 |
| ATCGTTCTGTCA  | 834.863415768942 | 0.182974397255055 |
| CGTAGAGGTGAC  | 834.864783478823 | 0.112357528349026 |
| GAATTTTGCTCA  | 834.872892021004 | 0.167541658803217 |
| ACGTCGTCATGA  | 834.87583641332  | 0.238551045595792 |
| CCACGTGACACG  | 834.877566259281 | 0.199146076137451 |
| ATGACTTCGGTA  | 834.881012030881 | 0.231970433344867 |
| CGGCGTCACCAA  | 834.885629780244 | 0.166520931794689 |
| CAGATTACGCAC  | 834.890608913945 | 0.266087675034187 |
| ATTGGCCAGTCA  | 834.8983190721   | 0.232203928272598 |
| AAGTGTCAGTAA  | 834.899657918409 | 0.174515447957167 |
| CCTTGCGCGTCA  | 834.908747251996 | 0.319577536394301 |
| CCATGGAGTCAA  | 834.911921939804 | 0.137201778627816 |
| AACACGTGACGC  | 834.915459465207 | 0.162014945618179 |
| GTCTCGGTGACA  | 834.930725828686 | 0.243388077361775 |
| GTTTTGTGAGAA  | 834.932120233559 | 0.221751956493827 |
| AGGTCGTGAGTC  | 834.93376592422  | 0.11067970313775  |
| AGTCAGCGAAAA  | 834.937294195886 | 0.198858158635967 |
| CACACAGTGACA  | 834.939998759396 | 0.190448720572506 |
| GTCACAATGGTA  | 834.941498273593 | 0.198639330377239 |
| ACTTGTCACAAT  | 834.942775180344 | 0.17140808880752  |
| CTTCAGTGACAC  | 834.943426226932 | 0.229024380547926 |
| ATGACGTCCCGG  | 834.947684564837 | 0.168326389421289 |
| AGTTAATGACCA  | 834.949166665571 | 0.259717535019354 |
| CTTTTGACGCAC  | 834.95639317268  | 0.252542742321641 |
| CAGACTAATCTG  | 834.960411675454 | 0.280510019569202 |
| ATTGTCATGATC  | 834.969047258692 | 0.284137239756274 |
| AGGAGGTGACGC  | 834.971153871692 | 0.107127788692491 |
| CGCTGACACAGC  | 834.973930541247 | 0.305361946605162 |
| GCGCTCCATGAC  | 834.976269318729 | 0.198021227390122 |
| AAGGCGTGACAC  | 834.978692651386 | 0.186611038698191 |
| CACAAGATGACC  | 834.979580840485 | 0.169208412364862 |
| AGATGTCTCACC  | 834.983919870063 | 0.188501992795509 |
| GCGGGTACGTCA  | 834.992684244971 | 0.16678026256642  |
| GGTGACCTCATA  | 834.998989150656 | 0.151953677939558 |
| GTAACAGTCAAAA | 834.999572638193 | 0.190656109551927 |
| CAAGCAAGTGAC  | 835.000907294893 | 0.307993539086451 |
| GCTAACATGTCA  | 835.00121144523  | 0.202142844850303 |
| TGACATACCAAAA | 835.004272333911 | 0.241520651148125 |
| GACTCATGGTCC  | 835.005307134321 | 0.223754565507407 |
| ACTCATGCAGGG  | 835.006316083684 | 0.246852412128468 |
| ACGTGATTCAAC  | 835.013093887801 | 0.240322765803159 |
| GTCATGTCTTTA  | 835.017134367527 | 0.220445014487012 |
| ACAAGTGACAAA  | 835.021616464418 | 0.208209117975468 |
| TCGGTTGTGACA  | 835.029862419793 | 0.286929267676069 |
| GGGTCATCTTCA  | 835.031759210153 | 0.228172813432744 |
| TCTCACGTGTCA  | 835.03685397527  | 0.149557534756144 |
| ATGAGTTGTAAT  | 835.04197729644  | 0.195408110081196 |
| ACTCATTACTC   | 835.043510813604 | 0.119819901032221 |
| GGGACGAATGAC  | 835.065979784168 | 0.17280294086339  |

|               |                  |                   |
|---------------|------------------|-------------------|
| ATGACATGCACC  | 835.066929805516 | 0.195650511629591 |
| AAATGCGATGAC  | 835.067556995587 | 0.217101008814283 |
| AGGTGACAATAC  | 835.072430685246 | 0.152045564052069 |
| ATGTCTTGTGAC  | 835.080446293731 | 0.233314379968647 |
| ATTCCATGTGAC  | 835.084133702439 | 0.230978300148203 |
| ACTCATACGCAG  | 835.084213296156 | 0.171066166447387 |
| ATAGGCATGACA  | 835.089443916063 | 0.197331181681032 |
| GCAGGAAATGAC  | 835.095985525333 | 0.180151331796524 |
| AGATTGACACAG  | 835.103889571789 | 0.204593303539801 |
| CGCGTCACGTAC  | 835.11166862256  | 0.220548036136315 |
| TCTAACTCGTCA  | 835.11684864443  | 0.160647902590101 |
| GGTTACACATAC  | 835.119151368232 | 0.200261225141184 |
| AGGTTCCGGTGAC | 835.119767555859 | 0.224491060024491 |
| ACGTCACCCGAT  | 835.124927670071 | 0.156578902921961 |
| GTCATCTCCCA   | 835.126665583023 | 0.184807120546428 |
| TCCAGTGACCCA  | 835.127531548234 | 0.117874490519895 |
| ATGACTTGGGTG  | 835.140766976193 | 0.164976733928983 |
| ACACGGTCATAC  | 835.142383570892 | 0.162595536269635 |
| GGCCATCCGTCA  | 835.149744318568 | 0.244842613383565 |
| TCTGGGTGACAA  | 835.150152543123 | 0.194544015162719 |
| ACTCATGACCGA  | 835.168933449188 | 0.210452753290039 |
| CCATGTCACCAC  | 835.171838811634 | 0.201031859130233 |
| CCTAAGGTGACG  | 835.173806354015 | 0.251661188113519 |
| CTGCCATGTGAC  | 835.180976107125 | 0.2235026178306   |
| AACTGAGTGACG  | 835.182581903814 | 0.17692468688193  |
| AGTCGTGACGAA  | 835.187865119048 | 0.250698586024784 |
| CAAAGCCATGAC  | 835.193461315527 | 0.115521100684533 |
| AGACTCAATATG  | 835.193492379893 | 0.209885316028882 |
| AATCGTATGAGT  | 835.195410891988 | 0.103778384920521 |
| GAGTACGGTGAC  | 835.195472408377 | 0.295631894082715 |
| AATCATGTCACC  | 835.198644780158 | 0.244675328467737 |
| GTATGATGCAAA  | 835.21178346313  | 0.133018623339845 |
| AGTAGATGTGAC  | 835.215595611364 | 0.166171749530555 |
| GTATGAGTGCAA  | 835.219008532969 | 0.280391524534621 |
| GAGTTGGGTGAC  | 835.219362149698 | 0.199515449617933 |
| GCGTCACAGCCC  | 835.238098432388 | 0.210202452835738 |
| GTACTIONACTCA | 835.243342992263 | 0.243994155056067 |
| GTCGAGTAATAA  | 835.253085465698 | 0.192430871438519 |
| GGTCATTTGTCA  | 835.257420965036 | 0.247683056586982 |
| ACCATGACGTTG  | 835.258711202955 | 0.188102239639208 |
| GTCATGCACTCA  | 835.259201991    | 0.22374731719916  |
| CAGTTGTGTCAA  | 835.263615430832 | 0.263370054179892 |
| GAAGCGGTGACA  | 835.264446183949 | 0.175479802763256 |
| ACTCTTTACTCA  | 835.286956231537 | 0.244995149408036 |
| AGGTATAAGTCA  | 835.287935650965 | 0.242554960928414 |
| AATCGCATGACG  | 835.288446222742 | 0.128278089405433 |
| ACAAGGGTGACA  | 835.288720872509 | 0.21234552705737  |
| AGTGTGCAGTCA  | 835.30039570966  | 0.311973788640524 |
| GGTGAATCAACA  | 835.30139934895  | 0.20392400049785  |
| ACCCAAGTGACA  | 835.302952292626 | 0.228195130360697 |
| GATACACGTCAA  | 835.306033189136 | 0.200217643005107 |
| GAATATGTGACA  | 835.30909274355  | 0.192214391666755 |
| ATGACATTTGGTC | 835.311820267943 | 0.270661622735225 |
| CGTCACTCGGGC  | 835.322855827598 | 0.222328079177999 |

|               |                  |                    |
|---------------|------------------|--------------------|
| AGTTAAGGTGAC  | 835.327327650219 | 0.19417609347484   |
| CTCGTCGTGTCA  | 835.330771371318 | 0.312184346979215  |
| GGTAGTGACCAA  | 835.332597991482 | 0.206152292902912  |
| ACCCATGACAGA  | 835.335396654017 | 0.24099037334698   |
| CAGAATGAGCCA  | 835.340116765428 | 0.21831802135511   |
| TAGTCAGCCCAA  | 835.340140981365 | 0.207025824339424  |
| ACACATCATA CG | 835.340579757558 | 0.205095773523639  |
| AGTGCGTCACA   | 835.342109472005 | 0.0701936353473882 |
| ATCGTCACCATG  | 835.345271988    | 0.211254741713197  |
| TGACTAGCACCA  | 835.353457118395 | 0.298398829302686  |
| CTTAGTGACAGA  | 835.356478704065 | 0.182766361185282  |
| ATACTCATTAAT  | 835.36803255047  | 0.117597089359329  |
| GATAATTACTCC  | 835.389093267492 | 0.240931855074272  |
| ATGAGTAGATTA  | 835.395042162418 | 0.189363661270924  |
| GCGTCATGTCCA  | 835.395130847487 | 0.338624384684584  |
| AGTATGAGTTAG  | 835.39705060356  | 0.169008477206056  |
| GTCACCTGTCTCA | 835.404928752039 | 0.186823806571968  |
| TCTGAGTCGGCA  | 835.404955068054 | 0.104606726765989  |
| GCGTCACCCGGA  | 835.411889912441 | 0.188287500220671  |
| ATGTCACCCGAA  | 835.420869907107 | 0.2470474428604    |
| CGCAGGGATGAC  | 835.422304654794 | 0.177250126275057  |
| GTCACTAGGTGA  | 835.426251303198 | 0.167375652292848  |
| GTGACCCAACCA  | 835.440190600851 | 0.258549331565399  |
| GGCAGTGACCAA  | 835.442568179213 | 0.202822063671691  |
| TTCGGGTGACAA  | 835.452156554748 | 0.233070814109055  |
| ACTTAGTAATCA  | 835.4557597015   | 0.134216785377759  |
| GACTGACTACTC  | 835.455866540499 | 0.221970844687539  |
| GAGTAATTTGTA  | 835.475859353563 | 0.196592805703886  |
| ATGACAGGACAC  | 835.47698263043  | 0.118559269956997  |
| ACTGATCTGACT  | 835.48345764636  | 0.177645313454426  |
| ACTGACACAGAC  | 835.486190265831 | 0.2719734586516    |
| TGACTAGGCGCA  | 835.494032258612 | 0.187144647123884  |
| AGCATGACCACT  | 835.4940446621   | 0.174008448463646  |
| CACACTTTGTCA  | 835.498067218134 | 0.187596320477305  |
| CGCGTCACGCAC  | 835.501890455456 | 0.245222751795747  |
| AGTCAGTAGCAA  | 835.504883105598 | 0.24615749754142   |
| TAGCAATCGTCA  | 835.505748774063 | 0.122572748098748  |
| CGGTCTGACCCA  | 835.515747242005 | 0.23813486925032   |
| GAATGTGGTGAC  | 835.517134533487 | 0.167248168130551  |
| CGTAATATATGA  | 835.520947701272 | 0.217664842360579  |
| GACAAGTGACAC  | 835.526153105468 | 0.230840282825158  |
| CTCCACGGTGAC  | 835.528819058523 | 0.313594335605981  |
| CCGGAATTACTC  | 835.530849435049 | 0.167371156765631  |
| CAATGATTACAA  | 835.533855039742 | 0.237932034854094  |
| GTCACTAACTCA  | 835.548685339472 | 0.175758060562476  |
| CGTCACTTTAAG  | 835.571641367126 | 0.147828943122252  |
| ATGAATCAAAGG  | 835.579067789437 | 0.230081067036106  |
| ACGTCACGCTCA  | 835.581226402703 | 0.250726394151207  |
| TCACATCACTCA  | 835.591801682038 | 0.2115285146193    |
| AGCCGTGTCACT  | 835.599199128645 | 0.16502035485106   |
| ACGTCACGATCC  | 835.60046593578  | 0.212634788290263  |
| ACAGGATGACCC  | 835.603734384033 | 0.16636160419379   |
| GATAACCTGTCA  | 835.605832087756 | 0.202681179219321  |
| ATAGACTGGTCA  | 835.610604163562 | 0.241034031280665  |

|              |                  |                    |
|--------------|------------------|--------------------|
| CACTCTGACAAA | 835.615464267378 | 0.227712528231753  |
| GTCATTCGCAC  | 835.619111228007 | 0.248741865195226  |
| AATCTTGCACC  | 835.627195557819 | 0.213110480332277  |
| ACGACGTGACGC | 835.633961034683 | 0.171497395110032  |
| ATTGCATCACTC | 835.636337188744 | 0.184187135686601  |
| AATTAATTACTC | 835.637370526829 | 0.262392125666189  |
| GGAATAAATGAC | 835.638659364254 | 0.0880535407690676 |
| GTGTGACCGAAC | 835.642011786844 | 0.236967077667418  |
| GAGTAATCTCGA | 835.654249018156 | 0.227814872118254  |
| CTGACTGTGCAA | 835.665012111503 | 0.246762098035348  |
| AGACTCACGCAA | 835.677631289368 | 0.154504034300591  |
| GTCACCGTCTTA | 835.68255028641  | 0.164849622137396  |
| AGGCTCTGTGAC | 835.683312923266 | 0.248210036178024  |
| ACGCAATGTCAT | 835.683792298649 | 0.221938097591831  |
| CAGACTCACTGG | 835.691482423167 | 0.234400814123164  |
| ATCGACTCAGAT | 835.691718527128 | 0.189091034370606  |
| AAGCGTGACGCG | 835.701215705971 | 0.194050350922196  |
| ACTCATTCTAAA | 835.703179501446 | 0.255861956267201  |
| AAGCTATGTCAC | 835.703399960079 | 0.211166322991675  |
| ACTGACTGCGTC | 835.713270714853 | 0.201728719333915  |
| GTCACATGTCCA | 835.715043581093 | 0.221326660374711  |
| AGAAGCAATGAC | 835.718144579217 | 0.23128781049163   |
| TCATACTATGAA | 835.721849201282 | 0.224986527440182  |
| TAGCGTGACCCA | 835.738235913759 | 0.206267627263671  |
| GTGACAAGTCCA | 835.742271740708 | 0.183537463294195  |
| AGTGAGCCTTAC | 835.745662548319 | 0.132283533727268  |
| AGCGTGTCACTG | 835.751662543898 | 0.237472496973907  |
| CTTTACTCGTCA | 835.75959238414  | 0.264256738299856  |
| CTACTATTACTC | 835.760460780824 | 0.158785774544537  |
| ATTTCGTCATGA | 835.763093210662 | 0.305312753449001  |
| ATGAATCGTGAC | 835.76857006806  | 0.180902495208403  |
| AAGATATGTCAG | 835.77379659093  | 0.181180152128488  |
| ACTCTGAGTGAC | 835.779662267883 | 0.158724764624954  |
| CCTGCAGTATGA | 835.780026251307 | 0.188233312710484  |
| GAGTCAAATGGA | 835.790406719079 | 0.173815952995013  |
| GTCTGTCATGCA | 835.802938304042 | 0.2014154441463772 |
| AGTATGATACAA | 835.807051654573 | 0.115090565207314  |
| ACTAGTCGTGAC | 835.813514331385 | 0.227281317978494  |
| GTCATTACCCCA | 835.815834218909 | 0.158344269360084  |
| AGTACAGGTGAC | 835.822797837008 | 0.303468444805796  |
| ACTGAGTAAGTC | 835.823525215886 | 0.199283626325498  |
| AGAAATAGTGAC | 835.824064269938 | 0.279957986317777  |
| CGTCATTAACA  | 835.834667225756 | 0.235536045615889  |
| CGAACTCTATGA | 835.84725507515  | 0.192950762649419  |
| CTCGTTTCGTCA | 835.849106505013 | 0.220324040707495  |
| ATGTCATGCAGC | 835.866971460953 | 0.238805722037017  |
| CACGTAACGTCA | 835.867349267088 | 0.239879695049939  |
| CACGTAATAACG | 835.873189890967 | 0.199023862977494  |
| CTTATCAGTGAC | 835.889734181077 | 0.188146200013283  |
| AGTGATGTCAGA | 835.91354079957  | 0.119276979646775  |
| AGAAGCGAGTCA | 835.920086147737 | 0.122804354674067  |
| CTGGTGTGACCC | 835.930701503525 | 0.263986553847337  |
| GGGTCATCCAAA | 835.934822483736 | 0.201230058610073  |
| GATTCATCAGGC | 835.938619979108 | 0.240258729908825  |



|              |                  |                    |
|--------------|------------------|--------------------|
| ACTCATATTCAG | 835.941331083596 | 0.196714220319327  |
| GTCACACTCCTA | 835.945535513541 | 0.133949054961383  |
| AACCTTAATGAC | 835.94657349459  | 0.298262036315328  |
| GGTGACTTCAAC | 835.951824174262 | 0.232010475839723  |
| CAAGAAATGACA | 835.952432644694 | 0.216789229840923  |
| AGCTGTCACCCA | 835.955500574643 | 0.186390227266773  |
| ATGTCACAGCTC | 835.959333984098 | 0.202054681574315  |
| GACTCGGTGACA | 835.965137793151 | 0.351994120202767  |
| GATAGGTGACGA | 835.978244650375 | 0.193772794334497  |
| TGAGGTGAGCAA | 835.979203181027 | 0.207421924992084  |
| ATTTCAATGACG | 835.981012985456 | 0.199848017499168  |
| GGTCGGTGACGA | 835.98904877572  | 0.14927797326751   |
| AGGATGATGCAA | 835.990283552229 | 0.168494936819858  |
| AGGACTGGTGAC | 835.990800253453 | 0.139441197443686  |
| AGAGCACAGTCA | 836.002228692057 | 0.170077229392664  |
| TCAGTCAAGCGA | 836.00618545277  | 0.21734289111888   |
| GACAGGGGTGAC | 836.012165403844 | 0.199721684698238  |
| CCCGTCACGTCA | 836.014215069489 | 0.260755465548656  |
| ATGACAGGACGA | 836.020118981641 | 0.204708443738726  |
| ACGGTGTGACCA | 836.024103270505 | 0.185289151364385  |
| AAACTACTCACC | 836.026934309985 | 0.215915856831357  |
| GGTTGAGAGTCA | 836.040987204972 | 0.114893762720244  |
| CTGGCTCTGTCA | 836.0508295328   | 0.180181487262385  |
| GTCACTGTCTGA | 836.07086916583  | 0.172615685734706  |
| ATGACGGAGGGC | 836.081328628132 | 0.166540471884832  |
| ATACGTCAACTA | 836.085959240827 | 0.147474290697895  |
| AAGGAGTGACGT | 836.088594737902 | 0.0961929608641013 |
| ACAGTCAACTGA | 836.092730655745 | 0.186431681427878  |
| CCGTCTGACGAA | 836.097881856092 | 0.258002568192448  |
| GTATCGGTGACA | 836.098374223847 | 0.290605467021565  |
| GGAAGTTGTGAC | 836.101439023953 | 0.189201827895121  |
| AGAGTCAAGCAG | 836.105647660772 | 0.210306808733774  |
| TCAATGACGGCA | 836.110716197035 | 0.21319919544294   |
| GCATATCGTCAC | 836.111520544218 | 0.206232299200708  |
| ACTGGTGAGCAA | 836.11513217811  | 0.187878641994747  |
| ACAGTCAGCGCA | 836.115875143937 | 0.281985162306001  |
| AGTCGGAGTCAA | 836.117672107325 | 0.181826183958916  |
| ATCGGATGACCA | 836.118702578139 | 0.20210889638807   |
| CGTCATTTGATC | 836.121366128617 | 0.194574735443528  |
| AACTCATACTAG | 836.128915562286 | 0.201863875766305  |
| ACTCATATTCGG | 836.134467034603 | 0.166949519080041  |
| CGCAAGTGACAC | 836.142538817702 | 0.25400026508747   |
| CAATTACACACA | 836.148259918419 | 0.198137059500293  |
| AGTGGTCATTGC | 836.172846652559 | 0.175628948877405  |
| GCTGACTAGTAA | 836.178332617433 | 0.224032110968945  |
| AGTGTGAGAACG | 836.17895162177  | 0.212948774099925  |
| GTGACGCTGAGA | 836.182232816156 | 0.190770127890571  |
| AGTTTACTGAA  | 836.18256714363  | 0.262445842632367  |
| CCTTTCGTGACA | 836.182813409685 | 0.209245937806839  |
| ATTAGTGAGCCA | 836.190278929038 | 0.324263358890625  |
| CAGAGGGGTGAC | 836.191384116673 | 0.240740969090399  |
| AGTATTGTCACC | 836.19591067804  | 0.182492758785968  |
| ATCCGTCAGCGG | 836.19993858576  | 0.206672928164996  |
| AGACTAATCCAA | 836.200282435866 | 0.129122404155097  |

|              |                  |                   |
|--------------|------------------|-------------------|
| ATGACGAGAAGG | 836.201547598058 | 0.185517621267786 |
| GGAAAATGACCA | 836.205497270772 | 0.164733352091834 |
| TAGTCAGCTGCA | 836.224233444972 | 0.323907702858468 |
| ACAGACTAATAC | 836.22639231201  | 0.254451819928027 |
| CGACTCAGATAA | 836.22829211876  | 0.184841882745312 |
| ATGTCACCCACG | 836.230499511892 | 0.208235181941223 |
| TGTAGTGACAAA | 836.230551015622 | 0.186619347962493 |
| GATGAGTAGTGA | 836.23355287097  | 0.173487549032368 |
| CTAGTGTGACCC | 836.233821671273 | 0.217436336104411 |
| ACGTCGTCACCG | 836.240901031496 | 0.164927126507649 |
| AGTCCGATGACC | 836.243377935887 | 0.163913703526083 |
| AGTCAGTAGAAA | 836.24765115461  | 0.223815499817498 |
| GCGTTAGATGAC | 836.253145334575 | 0.177053214961542 |
| TGACGATTTGCA | 836.258185300339 | 0.305050590713573 |
| CAGTCAGATAGC | 836.258939977872 | 0.263457850439134 |
| CTTGCGGTGTCA | 836.263680342547 | 0.255990157704302 |
| CACTTGCTCACA | 836.277977545066 | 0.217180920625276 |
| GGGAGTGACGAA | 836.282718389647 | 0.12750726262298  |
| TCCGGCACGTCA | 836.286404780544 | 0.162595775475795 |
| AGGTTTGACTCG | 836.287259784245 | 0.253644925128038 |
| ATGACAGGGCTC | 836.287860568312 | 0.226145561861973 |
| CCTAGGTCATGA | 836.309735297692 | 0.216338766154825 |
| CGATGTCTCACC | 836.311500737528 | 0.173922842505712 |
| ACGGGTCACACC | 836.314517594469 | 0.235914096541662 |
| CGGGTGTACTCA | 836.318088355896 | 0.275787319793169 |
| ACATACGCGTCA | 836.319764076225 | 0.298446952550799 |
| AGGTGATTAGTC | 836.332983885903 | 0.267438578744956 |
| ACTCTTGACTCT | 836.353818340538 | 0.114870833018815 |
| TTCTGGTGACAA | 836.384653846845 | 0.22544113356276  |
| AAGCCGGTGACG | 836.384731747086 | 0.214238288663326 |
| CATCAAATGAC  | 836.387932683952 | 0.312168499789745 |
| ATGATGTGGCGG | 836.389225472799 | 0.127607815024072 |
| GCGGCACATGAC | 836.393205813972 | 0.213682711486345 |
| GCGCCGGAGTCA | 836.394219358056 | 0.333806045140489 |
| CGTCAATGAGCC | 836.395179891495 | 0.267725997912617 |
| CTGTTAAGTGAC | 836.396345411998 | 0.164811643190811 |
| GTCACGTTGGAC | 836.405424401564 | 0.202375638345723 |
| AGACACGCGTCA | 836.413212971078 | 0.252759312616275 |
| GACTGACAGTCA | 836.414958284498 | 0.201538860255621 |
| ACCTAATTAGTC | 836.416435203604 | 0.223654965056511 |
| TGACCGTGACAA | 836.42229762362  | 0.226176180937319 |
| TCACCCAGATGA | 836.425583566045 | 0.249412050398615 |
| CTGTGTCAGCGA | 836.426445396125 | 0.284196609157247 |
| ACCGGCCAGTCA | 836.432242812564 | 0.30156047852928  |
| TAACTCATAATA | 836.43791390905  | 0.225964477742311 |
| GGGTACGGTGAC | 836.444992200714 | 0.172939843981835 |
| GCGTCACTGGAC | 836.452964221242 | 0.180248016740968 |
| CATAACGCGTCA | 836.454086252091 | 0.270113138965186 |
| CTCCATGTCACA | 836.465958005314 | 0.112187885122213 |
| TATTTCCAGTCA | 836.468636826086 | 0.218890872785105 |
| ACCTCCGTGACT | 836.472752914661 | 0.202476538877166 |
| ATATCCTGTCAT | 836.472911949193 | 0.233394156346384 |
| AGTCAGTGACAA | 836.498080297014 | 0.247099529300287 |
| AGGAACGTCACC | 836.503887133596 | 0.18439753818471  |

|               |                  |                   |
|---------------|------------------|-------------------|
| CTTCTCTAGTCA  | 836.507190226643 | 0.271228029247765 |
| CGCTGACTGCAC  | 836.508700838828 | 0.149562502059534 |
| TGACGTTACAAA  | 836.513909948726 | 0.278835468773559 |
| GTTACCTTATGA  | 836.515679756711 | 0.270813679224096 |
| TCACAGTCAGGA  | 836.518591893618 | 0.178792120467097 |
| AGTTTAGTCTTA  | 836.519612379941 | 0.180088674174428 |
| GGCAGTGACAAA  | 836.530262466356 | 0.251644936122162 |
| GCGTCACGGTGA  | 836.531398733102 | 0.171523816865108 |
| TCTAGTGACAAA  | 836.534932422759 | 0.136268771261137 |
| CGATGACCGCGC  | 836.538871104897 | 0.240734525030422 |
| TGTGTCAACCAA  | 836.541292813075 | 0.277402806853404 |
| ACGTCGATGAGT  | 836.558915488009 | 0.190468409532343 |
| TCAAACGTGACA  | 836.560671080508 | 0.296036673899409 |
| TGAAATCGGTCA  | 836.564087121386 | 0.170642893712185 |
| CTGATTGATGAC  | 836.564609959369 | 0.123388697338314 |
| GTCACCTCCTTA  | 836.564815463484 | 0.148079339852424 |
| ATACAGGGTGAC  | 836.566312036442 | 0.225948437276498 |
| GTACGTTGTGAC  | 836.568378832593 | 0.290259270924463 |
| ATCGAAGTCATG  | 836.586553902481 | 0.10988284477073  |
| GAACAATGACCA  | 836.589240612459 | 0.223514376298897 |
| ATGACCCAGTTC  | 836.599386459522 | 0.145810118812385 |
| GGCCGTTGTGAC  | 836.602645671474 | 0.191951287005137 |
| GCAGCCGACTCA  | 836.60664393473  | 0.170393469734405 |
| AATTACACACCA  | 836.615796797167 | 0.193164359533955 |
| ATGACGAGGGAC  | 836.616385791553 | 0.181247130280873 |
| AGTCAGACGAAT  | 836.625883587509 | 0.234660329277791 |
| GATTGGTGACGA  | 836.626475040766 | 0.172034308997436 |
| ACGTCAGTCGAC  | 836.630618214266 | 0.239124287522278 |
| CCGGCTTCGTCA  | 836.631947345256 | 0.159771300698525 |
| ATAGCGCAGTCA  | 836.641581952066 | 0.194322370967093 |
| CGGAACTGTGAC  | 836.65906558268  | 0.24021786880413  |
| AGTCAGAGTGTG  | 836.663885339197 | 0.115721323898768 |
| GTCACTGAAAGA  | 836.666160663277 | 0.207505601276225 |
| CGTCACAGCACG  | 836.667786117816 | 0.291505298942329 |
| AGTCAGTAACAT  | 836.689640401326 | 0.17914095223136  |
| AACCCATGACTT  | 836.693813952436 | 0.212914657375207 |
| ACTAGAGTGACG  | 836.696803755295 | 0.162003492894783 |
| TACGCGGTGTCA  | 836.723735288192 | 0.242485193655693 |
| CGCAGTCTGTCA  | 836.731739038062 | 0.193723078397972 |
| AGTCACGGAGCC  | 836.736566202252 | 0.139079348992304 |
| CCACTATTACTC  | 836.739142250281 | 0.196969625671854 |
| ACGCATGACAAAT | 836.745114973348 | 0.323056787910878 |
| ACATCGAATCAT  | 836.753441864905 | 0.179851298352414 |
| CCCTAGGTGACA  | 836.754056085476 | 0.290476537073785 |
| AAGCGTACTCAT  | 836.757110622461 | 0.129829556358027 |
| CTTCCTGACACA  | 836.759367085271 | 0.149256763181973 |
| ATGACAAGCACA  | 836.767328089766 | 0.175504748761685 |
| GTAGTTATGTCA  | 836.772796065187 | 0.322041992160198 |
| CAATGGATGACC  | 836.774183392525 | 0.269463526394696 |
| AATATTAGTCCG  | 836.781658365034 | 0.187963144044045 |
| TATATGATTCTGA | 836.783746896223 | 0.153386407609758 |
| AGGTATTAGTCC  | 836.784723481779 | 0.233094669823325 |
| GAGAGCGGTGAC  | 836.788546901836 | 0.253921478287868 |
| ACTCATTTTGAC  | 836.801760858591 | 0.154629208729039 |

|              |                  |                   |
|--------------|------------------|-------------------|
| CATAAATGACGG | 836.812181475627 | 0.197980882782552 |
| CTAGCGGTGTCA | 836.821473406354 | 0.193240935172581 |
| GACTCTCGTGAC | 836.823555038441 | 0.203811843441172 |
| GAAGTCGGTGAC | 836.83480589329  | 0.123718813816837 |
| CACCATGTGACG | 836.838879872208 | 0.258303712779936 |
| TGTCATTAGACA | 836.838990614866 | 0.247476325205505 |
| ATGACGTTGGTG | 836.845094304801 | 0.142167948220201 |
| CATGGCTCTGAC | 836.848887554927 | 0.127934170477404 |
| GAGTCGTACCGC | 836.851001385461 | 0.151370100377884 |
| CAGGGCCAGTCA | 836.872677313025 | 0.18694627094014  |
| CAGCCGTAGTCA | 836.875158535377 | 0.179408608719336 |
| TACACATCATAA | 836.878366228908 | 0.211339447143149 |
| CAGTGATTGTCA | 836.88298749643  | 0.169899503056855 |
| GCGGGAGAGTCA | 836.891822867201 | 0.228549527713201 |
| CATTGCGTATGA | 836.899918435614 | 0.223037321477093 |
| GTCACCTTTCAA | 836.900242096014 | 0.176288649534286 |
| CCACTTTACTCA | 836.903297408401 | 0.252612481960957 |
| ATCCTGGCGTCA | 836.90529448613  | 0.221273600050346 |
| AGGTGACGGGTC | 836.919529273987 | 0.210223385402626 |
| GTGACATGGCAC | 836.923815752713 | 0.23084877058276  |
| ACATGTAATCAT | 836.925505168939 | 0.33925612089779  |
| ACGTCATGTTCT | 836.929050195285 | 0.153329245499741 |
| AACGTTACTCAG | 836.942089356329 | 0.191698219234814 |
| AGATTACTCCTC | 836.951785323303 | 0.140030362179377 |
| ATACCGTGACGC | 836.96545707269  | 0.164527927223873 |
| AGGAGTAATCAT | 836.972865026934 | 0.188172280944672 |
| ACTCATTGGTTA | 836.97938178412  | 0.276682245977737 |
| GCGTGCGGTCA  | 836.980914029846 | 0.186156639912653 |
| CGATTACTCCTC | 836.999213127312 | 0.140053567447848 |
| ATCGGGTCATAG | 837.005048512671 | 0.165549459845411 |
| AACAATGAGCCA | 837.009191576382 | 0.250351442309997 |
| CGTCATCTAACC | 837.013024908517 | 0.181943579646082 |
| CTCGGGCGTGAC | 837.026981792921 | 0.239403604509961 |
| CATACTTCGTCA | 837.029814845911 | 0.241760331028663 |
| GACACCCAATGA | 837.030500915269 | 0.213283022187642 |
| GCCTTTGAGTAA | 837.032221974836 | 0.196975278115723 |
| ATTAGTCGCAGC | 837.059090303775 | 0.177329693412725 |
| GCTCTATGTGAC | 837.060016345614 | 0.199256018067253 |
| GTCACGTACCAC | 837.064829643797 | 0.217853405863236 |
| AGTCAGAGATGG | 837.068061613594 | 0.172016768126168 |
| GAGAACGCGTCA | 837.085969483614 | 0.166565213116788 |
| AGCCGGTGTGAC | 837.088045707969 | 0.17369934740086  |
| AGGGGATATGAC | 837.090343298667 | 0.170938901359395 |
| TCATACATGGGA | 837.098361440374 | 0.220535095015329 |
| ATTACTGACACG | 837.09954337201  | 0.20744198020263  |
| GTATGTCACGCA | 837.115009919241 | 0.102780317322125 |
| CCGGTGACAACG | 837.125339638905 | 0.274159059941107 |
| ACGTGATTCAAA | 837.127134009067 | 0.237163157563488 |
| CTCTCCCAGTCA | 837.128909785112 | 0.17138253545071  |
| CTCATGCAATGA | 837.141818314497 | 0.277264064353553 |
| CTGAATGGTGAC | 837.148491525624 | 0.167091324764629 |
| GTATTAGTATTA | 837.159306824426 | 0.282530354605423 |
| TGCGAAATGACA | 837.165471954019 | 0.291871191986084 |
| AATTAGTCGGTG | 837.168948262294 | 0.222855752105773 |

|              |                  |                   |
|--------------|------------------|-------------------|
| GCAGTTGGTGAC | 837.172571998009 | 0.187788652982579 |
| ACGTCACAATCG | 837.176127701653 | 0.197754299892705 |
| GTCACCTTCCAA | 837.187372315606 | 0.211026729102748 |
| GTGACACTGATA | 837.188833329809 | 0.213571827400002 |
| CTTTTGAATCAC | 837.189340909038 | 0.199249623481072 |
| AACTTACATGAC | 837.189429427878 | 0.179509648139201 |
| CCAGACTGTGAC | 837.192758052147 | 0.16617214332881  |
| CTATAATGAGTA | 837.193351917278 | 0.188349485129621 |
| TGACTGGGGCAA | 837.193393205686 | 0.222432960364584 |
| TCGTGGCAGTCA | 837.193811646438 | 0.245509050288612 |
| ATATTTGACACA | 837.196702461812 | 0.251236638966305 |
| ATCGCGTACCGA | 837.199096902565 | 0.215812648575348 |
| AGCCAATGACCA | 837.212854659937 | 0.254216211684709 |
| ATTGGACATGAC | 837.216050829214 | 0.182859201791244 |
| ATCATACGTGTC | 837.21884854386  | 0.263373573118008 |
| ACGACTGTGACA | 837.225391715497 | 0.209694800182735 |
| TCCAATCGGTCA | 837.232028430203 | 0.359028104149021 |
| GCATCCATGACA | 837.244417690072 | 0.219883609649582 |
| AAGATTCATATT | 837.244652713176 | 0.154851303127561 |
| TATATCATGACA | 837.249726324859 | 0.102796203074419 |
| CTTCGAAGTCAC | 837.25495157017  | 0.32528072375031  |
| GTTGTCACCCTA | 837.255533394769 | 0.216268604553316 |
| ATAGCATCATCA | 837.262721556621 | 0.167883647925311 |
| AGTCAGACCATC | 837.269595694476 | 0.169559007197062 |
| CAGTCAGTGATA | 837.274551456329 | 0.203633054343371 |
| ATGACGGGACAA | 837.278941934988 | 0.185557932091139 |
| GACATAGTCAGC | 837.286062345709 | 0.23631771059462  |
| ATGACGACTTCA | 837.294327764255 | 0.197139774818549 |
| CGTCATCCCCAC | 837.301984159931 | 0.173608818129787 |
| ATGAGTATGCCG | 837.303237471377 | 0.268257913883455 |
| GGATTGAATGAC | 837.304527155281 | 0.304421176863101 |
| TATATCGCGTCA | 837.309915798903 | 0.190150380455341 |
| ATGACATTACGC | 837.320893404406 | 0.171665224847683 |
| AGTGAAGGTGAC | 837.337881755266 | 0.201725931667514 |
| CTGACTCGGTTC | 837.339971357748 | 0.26554572242078  |
| ATGACCACTCTC | 837.344975111861 | 0.200715878377087 |
| ACTCATTCTCCG | 837.347630591766 | 0.18046511982206  |
| CCATTTTCGTCA | 837.354713373055 | 0.16344553259649  |
| ACAATATGACCC | 837.361542744756 | 0.164895718938568 |
| ATCCTACTCATC | 837.374750598739 | 0.149042260736974 |
| ATGACGACTGCC | 837.376219632469 | 0.180394216946829 |
| GCGTTAAGTGAC | 837.386902883546 | 0.278642918556623 |
| AAGCAATGACAG | 837.391081128917 | 0.120575776990206 |
| GGATAACATGAC | 837.392459343976 | 0.280519580851282 |
| AATCGGATGAGT | 837.395249599132 | 0.185837655975212 |
| GTCATGCAACTA | 837.395904586883 | 0.237753891470432 |
| ACTGACAGATGA | 837.398237307065 | 0.196755743116111 |
| CTGACATGGTCA | 837.404170172989 | 0.196870930896258 |
| ATAAGTGACGGA | 837.411480129123 | 0.18896785985057  |
| AATATGTCAACG | 837.421469357296 | 0.233900912070645 |
| TGCTGTCACAAA | 837.425908893956 | 0.245313354883647 |
| ATGGTTGAGTAA | 837.442520466302 | 0.136818421357844 |
| CTGGCTTCGTCA | 837.447652502854 | 0.295653486911416 |
| CATAGTCAGTCG | 837.46035936435  | 0.200947722833191 |

|               |                  |                   |
|---------------|------------------|-------------------|
| GGGATGGAGTCA  | 837.461072973976 | 0.205120500364673 |
| GTGCTGACGTCA  | 837.461745057984 | 0.204965893621497 |
| ATATGTGAGCAA  | 837.461818290381 | 0.272582768778678 |
| ACGACTGACAAA  | 837.464373845614 | 0.219465036246913 |
| AGTTTAAATGAC  | 837.464871103497 | 0.186516800446281 |
| TGAGGCATGACA  | 837.468658900317 | 0.172971618370246 |
| ACACGTGTCTCA  | 837.472965833064 | 0.208431111061603 |
| CATTTATGACCC  | 837.474497303916 | 0.127778545286602 |
| CTATTGTGACGA  | 837.491013527015 | 0.250725807926042 |
| ACGTCACAACGC  | 837.514862034551 | 0.177090419924375 |
| AACAGTCAATAC  | 837.519650959246 | 0.234096092612583 |
| CGTCACTGACAC  | 837.520318048337 | 0.182785042234698 |
| GCGTTCTGTGAC  | 837.523438572739 | 0.340242999602748 |
| TGACGCCGTA    | 837.526687535742 | 0.264753664040283 |
| CCGTTTCATGAC  | 837.529356250847 | 0.222046183083112 |
| ATTACTGACATA  | 837.540326921005 | 0.24201520905867  |
| GAGTAATCTGTA  | 837.541337338072 | 0.256314093992502 |
| AGTTTGAGTGAC  | 837.541702176857 | 0.135649810652467 |
| ACTGTGTACAGTC | 837.572089324633 | 0.179969436385908 |
| AAATTTGGTCAG  | 837.572692567494 | 0.215354956041612 |
| ATGACGCTCCCC  | 837.579822737551 | 0.286568054843625 |
| CTGGCAAGTCAC  | 837.585576734648 | 0.211508305621833 |
| GAGGGACTCACA  | 837.592616644754 | 0.170958110864043 |
| AATAGAGAGTCA  | 837.59301904645  | 0.198386399538902 |
| CGTCACTGAGAA  | 837.60556061115  | 0.193386067833911 |
| CTCGTGCGTGAC  | 837.613379833098 | 0.182905385064051 |
| TAGTTTAAAGTCA | 837.614478010751 | 0.265772818590666 |
| CTGAGTCTACAG  | 837.61479082821  | 0.243732006704136 |
| CCTATCTGTGAC  | 837.616409457848 | 0.256078896656587 |
| TTTAGACTCAAA  | 837.627607362039 | 0.202907270724994 |
| TTCAAATGACAA  | 837.636285052539 | 0.267057501258303 |
| CTCCGGAGTGAC  | 837.639430903643 | 0.211651150626311 |
| GCCGACTAATCC  | 837.644589050321 | 0.281840321680579 |
| GCCCTTAATGAC  | 837.645680598461 | 0.270910677013106 |
| CTCACGGTGTC   | 837.647768501102 | 0.212124995543062 |
| GCCTACTCATTA  | 837.649824367931 | 0.129015641598205 |
| CACTCATTGTCA  | 837.654022157643 | 0.166662487885506 |
| CGATAGGTGTCA  | 837.674517933619 | 0.210992709338994 |
| GGGTCATTTTAC  | 837.677267408444 | 0.20210259129938  |
| ACGACTCAGCGT  | 837.684942205797 | 0.193840720086006 |
| CGCGGTATGACC  | 837.686811142079 | 0.277780448711123 |
| TCGCCGGTGACA  | 837.69503055648  | 0.2524996648858   |
| GTCACGCACCAA  | 837.696616225508 | 0.260339819766156 |
| ACAATTGACTAT  | 837.702284733811 | 0.232201976134891 |
| CGGAGTGACCCA  | 837.702582221801 | 0.345459862061259 |
| GTCACATCGGTA  | 837.704009279717 | 0.192311238171031 |
| AACCCTGATGAC  | 837.712667967327 | 0.17770694004936  |
| ACCGCCGTGACT  | 837.720059546337 | 0.154252775456797 |
| GCGTTATGTGAC  | 837.730075668651 | 0.289534826936866 |
| GACATGTTAGTC  | 837.730287974144 | 0.229222220099225 |
| ATATCTAGTGAC  | 837.732444699779 | 0.172428242068048 |
| GTGACGGTTTTA  | 837.746257170581 | 0.251459938717343 |
| GAAATCTGAGTC  | 837.760399067666 | 0.197508344183681 |
| ATACGTGACACC  | 837.762179641865 | 0.241597604249741 |

|               |                  |                   |
|---------------|------------------|-------------------|
| AGTTGTATCATA  | 837.770933238356 | 0.2081425240546   |
| GACTAATAACAAC | 837.785544216571 | 0.229806753702733 |
| GAGGTCTGACAC  | 837.787188202076 | 0.165089237838026 |
| CGCGTCACTAAG  | 837.790841038551 | 0.194371610098167 |
| CACGTCAGTACA  | 837.794421348471 | 0.178226576477869 |
| CGTGTATCGTCA  | 837.800304968811 | 0.312261010751915 |
| TCAGTAATACAA  | 837.802569995583 | 0.252650750162618 |
| GTCAGACTTTAA  | 837.803561177144 | 0.185225683479894 |
| CCCCAATGACAG  | 837.805656998408 | 0.210385557879583 |
| CGATGACCGGTC  | 837.80955655513  | 0.240983031476169 |
| CGTGTACACCTGA | 837.82894235375  | 0.163784348278409 |
| AGAAGTGACGAA  | 837.83413665641  | 0.191076092087072 |
| CCCTTAGTATGA  | 837.83491786865  | 0.21765859059109  |
| CGTGGGACTCAC  | 837.835602758173 | 0.242468763893836 |
| ATGAGTCCCTAC  | 837.838907836174 | 0.195948523322038 |
| GTTGCATCATTAA | 837.84545936167  | 0.220105374398771 |
| ATGCCGCATGAC  | 837.848162439505 | 0.207661698176889 |
| ATCAGTGACAAA  | 837.852117727798 | 0.244501351088892 |
| GTCACCGACACA  | 837.863712221417 | 0.240112234998054 |
| CTAAGACATGAC  | 837.865948387878 | 0.229842863490835 |
| ACGCCGACTAAT  | 837.879052538586 | 0.199310872262339 |
| GTCACATGCGAA  | 837.881686444589 | 0.263804940090327 |
| GGCAATTCTGAC  | 837.881993750743 | 0.207072345094462 |
| TAGTCAACCGAA  | 837.882355660832 | 0.241144522580228 |
| AATCAGTCGTCA  | 837.885643397458 | 0.134106248204047 |
| AATTAGTCTGAA  | 837.888380697329 | 0.164979258006565 |
| ACCCCGTACATCG | 837.889589626524 | 0.236374513037595 |
| TAATCATCGTCA  | 837.891443630799 | 0.208516759707742 |
| GCATGACGCCGC  | 837.891824686176 | 0.170168744634299 |
| CAACGTAATGAC  | 837.899411159021 | 0.245231836062979 |
| ATGAAATCAGTC  | 837.903625287056 | 0.3353346070728   |
| GACGTCACCTTAC | 837.918466579263 | 0.180040600598502 |
| CGCTCCTAGTCA  | 837.929159317618 | 0.309081837449211 |
| AGGGCTGTGTCA  | 837.941346917374 | 0.162667109832836 |
| GCTTAATCGTCA  | 837.947622241504 | 0.31117963417442  |
| GTTCTTTACTCA  | 837.951758673392 | 0.135132478596001 |
| GCATACATGTCA  | 837.958665640867 | 0.24784167633355  |
| AAGACGCATACT  | 837.963467009199 | 0.266248610257335 |
| TACGTATAATGA  | 837.965183620836 | 0.200042833218982 |
| CTCATGACGTTA  | 837.968800093828 | 0.161504813713294 |
| AAGAGGGTGACG  | 837.970365215776 | 0.137766379012091 |
| ACGCCTACGTCA  | 837.974530824675 | 0.306830353565382 |
| CGGGGCAATGAC  | 837.975121583511 | 0.281469604832457 |
| GTAATAACTAA   | 837.99465399248  | 0.263612553984024 |
| CTGACTGGATGA  | 837.995056538774 | 0.170013301414821 |
| GGACGACATGAC  | 837.9976035971   | 0.196958949538976 |
| GACCTTGACTGA  | 838.010190651405 | 0.247034217019639 |
| CTTTGATGTGAC  | 838.01328457327  | 0.156102678248425 |
| GACTAATCCCTC  | 838.015301667446 | 0.232014182705606 |
| CCTAAATGACCA  | 838.015650120573 | 0.180317157754364 |
| GCATCGTACCC   | 838.016250974003 | 0.219326558463146 |
| GGTTGACTACTA  | 838.016538395966 | 0.256912565253581 |
| AGCGTGACACGC  | 838.018807122612 | 0.20067693347022  |
| ATCATGCAATGA  | 838.021951635755 | 0.328987448254354 |

|              |                  |                   |
|--------------|------------------|-------------------|
| GACGTTTACTA  | 838.023535566684 | 0.217788006048987 |
| GTTGCGTAATGA | 838.024274405898 | 0.172900859415607 |
| CGTTCACGTCAC | 838.035325242707 | 0.187798965119729 |
| GTCACCACGATA | 838.041987367761 | 0.189596219097293 |
| ACCAAGATGAGT | 838.044042491896 | 0.199295119867466 |
| CGTCACATGTTA | 838.049920721894 | 0.296728251790486 |
| CCGGCTCTGTCA | 838.053274039699 | 0.210595661779025 |
| GGCTTGCTCACC | 838.067847259041 | 0.171742435242915 |
| CCCTTGACTCA  | 838.074965631789 | 0.242774325391283 |
| AACCGATGTCAT | 838.081360723825 | 0.238349246721158 |
| CACATTACGCAA | 838.082269398575 | 0.187806964949774 |
| GTCACTGACCAC | 838.086209200638 | 0.189135692980231 |
| AGTATTACGAAT | 838.086290308619 | 0.163552408363536 |
| AGGATTTGCTCA | 838.104462353365 | 0.129807496582042 |
| ATGTCATTTGGA | 838.108828071366 | 0.230312918467694 |
| ATACTCCATGAC | 838.109471328139 | 0.174138290401234 |
| ATAAGATGTGAC | 838.113967825539 | 0.258477598957497 |
| AGACCCGTCACA | 838.124454922524 | 0.190669580822768 |
| CAATGAGTAGAC | 838.125557885672 | 0.168578333534738 |
| GCGTGTCGTGAC | 838.131111336711 | 0.17983295140507  |
| AGTCTTGACTGA | 838.134093554908 | 0.246271668842461 |
| AGGAGTCTGACT | 838.141655102215 | 0.113790136403077 |
| GACTCACGAGAA | 838.142865130093 | 0.262499269796781 |
| GACTAAACCTGA | 838.145295937415 | 0.234499090557729 |
| CATCGTCATGTA | 838.150633416198 | 0.165856812260789 |
| AAGATGAGTAGG | 838.150652966319 | 0.163241898122158 |
| GGTTCAGTGTC  | 838.154644398804 | 0.304221755363258 |
| ATGTGGCTCACG | 838.157248857622 | 0.255170328946485 |
| CTGACTATGTTA | 838.165959840151 | 0.315373954489563 |
| GATGGACAGTCA | 838.168051897337 | 0.199795783460687 |
| CCTCAGTGTAC  | 838.168131250445 | 0.255239557407808 |
| CAGATGGTGACA | 838.168661740376 | 0.194819077224102 |
| GACAAATCTGAC | 838.173161103072 | 0.222772865876708 |
| AAATCTGACTGG | 838.176511439324 | 0.110506612305265 |
| CGACCTCGTCAC | 838.189053988805 | 0.164759660036248 |
| ATAAGTGGTGAC | 838.195830509909 | 0.162492349274506 |
| TATTGCATGACA | 838.210261694676 | 0.229990837088308 |
| AGTCAGAGACCC | 838.211119828962 | 0.245867968374744 |
| CTGGAGTGTGAC | 838.213292381152 | 0.255002575558501 |
| GTGACTGCCTAA | 838.216174590287 | 0.228032237542431 |
| GTCATGCGTCTA | 838.216658764719 | 0.182356099653971 |
| GCGCGAGATGAC | 838.224288740213 | 0.208317578893832 |
| ATCATCATATGA | 838.226922296222 | 0.164368090770376 |
| TCAAGGTGACGA | 838.229298158788 | 0.197937649793108 |
| GCCAAAAGTGAC | 838.26269460632  | 0.291109135534553 |
| ACCCACGGTGAC | 838.263119553442 | 0.161650635447022 |
| TCCGCCGACTCA | 838.263590430813 | 0.221661751154242 |
| CTGCATTGGTCA | 838.267131182354 | 0.170708729531609 |
| ATCATTGTCAGA | 838.267409550474 | 0.179364610980024 |
| AATTAGCAATCT | 838.280924279744 | 0.197796713438223 |
| ACTCATTTAGAT | 838.282750581511 | 0.179789464016619 |
| ATTACACACACC | 838.284852496705 | 0.162732359861866 |
| ACATAAGCGTCA | 838.286982688334 | 0.252769515544161 |
| GGTCATCGCCAC | 838.288194047892 | 0.225376058243761 |



|               |                  |                   |
|---------------|------------------|-------------------|
| CGCTGACTGTCA  | 838.297494901732 | 0.202750340778005 |
| GTTACTCAGGCA  | 838.303408182085 | 0.196738603400433 |
| CTTGACGTCAGC  | 838.30465821606  | 0.182682863892284 |
| TTGACGCAGCAA  | 838.304962555507 | 0.134359670527055 |
| AGATTGTAICTCA | 838.328497670153 | 0.168570339670169 |
| CTGCAATTAGTC  | 838.331505898617 | 0.217237504368551 |
| CGTCTGGTCATA  | 838.33194069212  | 0.211896185938754 |
| AACGACTCAGTC  | 838.332867859146 | 0.171824496924281 |
| GGGTGAGCAAGA  | 838.336310460406 | 0.157705851949169 |
| ATGGGGACTCAC  | 838.340076987773 | 0.222601644977598 |
| CAAAGCACGTCA  | 838.355106462331 | 0.283154821418328 |
| ATGTCACAAATCA | 838.355192217538 | 0.241186188680209 |
| AGAGATCTGTCA  | 838.363085814212 | 0.106915526377434 |
| CGTCATGGTCAA  | 838.373182553647 | 0.199371358380199 |
| GTCACCCCAAAA  | 838.385541694654 | 0.191505000884301 |
| ACCAAATGACAA  | 838.398197078708 | 0.206064640798889 |
| GTACACGTGACA  | 838.405413478303 | 0.157082080701822 |
| GTGCGGTATCA   | 838.408171731714 | 0.29417152388959  |
| TATATGCAGTCA  | 838.412083614753 | 0.109948796443495 |
| TGTCTGGAGTCAA | 838.413313606615 | 0.291608031215015 |
| GAGTAATTAGTA  | 838.413528485339 | 0.11839069716465  |
| GTGACCACTACA  | 838.424282859605 | 0.281912554904986 |
| TCATGGCCATGA  | 838.424476950542 | 0.207807693671058 |
| GAGTGTGAGTAC  | 838.426381048511 | 0.172392286498545 |
| ATGAGCAAGTAG  | 838.426452713216 | 0.15410186475135  |
| ATGACAACCTAC  | 838.445479038876 | 0.172059143538687 |
| ATGACATGCGCC  | 838.447356705013 | 0.248802392541655 |
| ATCGTGTACGC   | 838.449080094319 | 0.218471862712006 |
| AGACCACAGTCA  | 838.465871978277 | 0.20842982550431  |
| GCTTTGGAGTCA  | 838.488858592313 | 0.230852177729315 |
| GAAGATTCAATC  | 838.489431013809 | 0.182281545883279 |
| AAGCATCTGACT  | 838.490431253519 | 0.272071844647447 |
| GTGACAGCGAAC  | 838.498616292768 | 0.266467299948214 |
| CTTGGTCACTTA  | 838.498728894482 | 0.211824494335692 |
| TGTCATTTCCAA  | 838.500346005047 | 0.222353608629213 |
| GTACAAATGACA  | 838.50388984007  | 0.179951417539054 |
| TGACACCGTGAA  | 838.50488687245  | 0.188170284619532 |
| AGCAAATGTGAC  | 838.513289259305 | 0.200447460213359 |
| GGTGCAGTCAGA  | 838.514116873512 | 0.299516136501199 |
| CTAAAATGGTCA  | 838.518343697044 | 0.358955566000402 |
| GTCACATGTATA  | 838.519728118675 | 0.324119249463496 |
| TCGTGACGTGCA  | 838.519764104637 | 0.171859679747235 |
| GATCGTATGACC  | 838.521252171853 | 0.183474992360573 |
| ATCGTGTGACCA  | 838.524046946276 | 0.223644959748235 |
| CGTATACTACA   | 838.525560740554 | 0.208593542848503 |
| AACGCTCATGAC  | 838.533083098196 | 0.217202849521507 |
| TGACTATGGGAA  | 838.539073750487 | 0.173925886807783 |
| CCGAAGGGTGAC  | 838.544835452228 | 0.237380797022051 |
| ACCGATCAGTAA  | 838.545818114298 | 0.315659546167029 |
| GCGTCACTTGGA  | 838.563524619971 | 0.245318001573955 |
| ATTGCATGACAA  | 838.568196098063 | 0.180380532137751 |
| ACTCAGTGACGG  | 838.583299854395 | 0.152577527397843 |
| AGTCAGCTGACA  | 838.598029207796 | 0.191418970437244 |
| ATGAGTACCCTA  | 838.601610710009 | 0.210953184123815 |

|               |                  |                   |
|---------------|------------------|-------------------|
| CCTAACGTGAC   | 838.60341905072  | 0.164779084366912 |
| CGGTTGCATCAC  | 838.604784749138 | 0.250023031414922 |
| ATATCAGTCGCA  | 838.613360964669 | 0.210568420271469 |
| ATGACGATGGGC  | 838.627391357696 | 0.25478279920441  |
| GTGTCACGTGTTA | 838.633969436016 | 0.194887269533295 |
| CCTCGTGACCCA  | 838.649458428565 | 0.16478415932534  |
| TATCGGTGACGA  | 838.650344762389 | 0.204949485233005 |
| ATAGTGTACAGAA | 838.65094522881  | 0.193592417579427 |
| GATCTGCAGTCA  | 838.651414268634 | 0.218849823277254 |
| AAAATAAGTGAC  | 838.663607385593 | 0.227829304906799 |
| CTGTGACAAAGTA | 838.670298869554 | 0.166937681331084 |
| GGGGAAAATGAC  | 838.671880813882 | 0.141670014823592 |
| CAGCGAGATGAC  | 838.674638632431 | 0.19322830367417  |
| ACTCATCAGACG  | 838.676133321954 | 0.233597352080221 |
| GTCCTTTACTCA  | 838.677633075671 | 0.192091992868155 |
| ATCACGGCGTCA  | 838.679849310219 | 0.311209005851798 |
| ATATACGTCAAT  | 838.68551435148  | 0.200636597208342 |
| ACTACTCAGTGA  | 838.688706132349 | 0.22215196276809  |
| CGTGACACTGAG  | 838.690664491036 | 0.171684809554664 |
| AGTGACGTGCTC  | 838.700161873218 | 0.260834690230906 |
| GTCATCGCACAA  | 838.703367381766 | 0.309562439212479 |
| ATGTCATTAATA  | 838.707373215098 | 0.199408499674339 |
| ACTCATCATATG  | 838.708238852071 | 0.218950857468138 |
| AATGGCGACTCA  | 838.709267088397 | 0.134322383822755 |
| GCATGATGACCA  | 838.716898853388 | 0.161014958801884 |
| TATTCTAGTCA   | 838.717879000916 | 0.181074068537305 |
| AGGCTCCGTCAC  | 838.719649001986 | 0.120623390972744 |
| AGTGTGGCTCAC  | 838.727229813432 | 0.211633653147613 |
| AAATGCTAGTCA  | 838.72771053771  | 0.261416458493967 |
| ATGATGTGGACA  | 838.72902081216  | 0.237287892185308 |
| ATTAATCACTAA  | 838.733798173615 | 0.24149957401582  |
| TCGTGTCACGCA  | 838.736231917843 | 0.239940679012706 |
| GACCCTTTGTCA  | 838.741742946079 | 0.176310148485388 |
| GTCACGACATTA  | 838.745892328435 | 0.207909505674735 |
| ACTCATATCTAT  | 838.760852724454 | 0.134503975465575 |
| ACTATATTAGTC  | 838.781054754014 | 0.249730229191508 |
| TGACTGCGACCA  | 838.792829457208 | 0.182113817229345 |
| CCAGATTACTGA  | 838.796906825212 | 0.334048900938378 |
| CGGACCCAGTCA  | 838.798738612435 | 0.258143081569486 |
| GCCCCGTACATA  | 838.803091146623 | 0.162636396232883 |
| CGTCATGTACTA  | 838.803632489429 | 0.241633849204285 |
| CCACAACATGAC  | 838.804199960479 | 0.227304759148136 |
| GTCACTATCAGA  | 838.811592028898 | 0.177821147813832 |
| ATCGCCAGTGAC  | 838.812567275638 | 0.285452460792673 |
| CGTCACTCGTAA  | 838.813280509829 | 0.200114011638926 |
| ATGACCACGCTA  | 838.815500124777 | 0.248578325143864 |
| CACGTCAAGTGA  | 838.817095621626 | 0.204008217809058 |
| ACTCATATGTGA  | 838.824643693475 | 0.235793675218547 |
| CTGACTACGCAA  | 838.843140394618 | 0.237440922111946 |
| TCACTGACTAGA  | 838.855972099574 | 0.144634829276092 |
| AGTCGAGTAATA  | 838.862838601388 | 0.179933991711306 |
| AAATGTCACAGC  | 838.863877329906 | 0.170857767972788 |
| GCCGACTAATCA  | 838.87047073049  | 0.121378684956817 |
| CCATATGTGACG  | 838.874714202686 | 0.161901640898766 |

|               |                  |                   |
|---------------|------------------|-------------------|
| TGACACTTCGCA  | 838.876939367352 | 0.344668046459144 |
| AACGTCACTACT  | 838.882185888592 | 0.145870065476727 |
| TACTATTATTCA  | 838.886334909473 | 0.165255394026865 |
| AAAACGACGTCA  | 838.894620798192 | 0.225557107425027 |
| AGTGGTCATTAC  | 838.903192436258 | 0.122974991234658 |
| ATAGGTCACCTA  | 838.91215007569  | 0.229857220354743 |
| AGAAATCGTGAC  | 838.914162953557 | 0.180917545130187 |
| CACTGGTGACCC  | 838.916225838218 | 0.173550310998055 |
| ACGGTATTACAC  | 838.918506416368 | 0.223776392675995 |
| ATCGTCATGATC  | 838.92219356059  | 0.172713459193501 |
| CCGTCAGTGACG  | 838.92916837158  | 0.230275074271154 |
| GATCTGTCAGCA  | 838.932782922781 | 0.142542041288716 |
| ACTCATAAGAGT  | 838.935763511664 | 0.216230297864655 |
| CTCAATGCATA   | 838.938369183621 | 0.172671511359613 |
| ATAAGTCGTGAC  | 838.944953486849 | 0.258764516860137 |
| ATGACAGCCAG   | 838.94943399383  | 0.234632015083843 |
| GACCGTGACACC  | 838.951467353474 | 0.17882639743665  |
| AAGCCGTGTGAC  | 838.954498804545 | 0.163641205192836 |
| CCAATGACATTA  | 838.954907491281 | 0.162066630575195 |
| AGCGTGTGTGAC  | 838.957568642015 | 0.179344267943292 |
| ATAGTCAATCGG  | 838.960859026068 | 0.195092829677877 |
| TGTCACCGGACA  | 838.970800568013 | 0.247710498122935 |
| CGAGACGTACCC  | 838.971732913151 | 0.345437256102438 |
| GCACCACATGAC  | 838.976121437682 | 0.166664875433152 |
| ACCACTCATACT  | 838.979910077738 | 0.1788947567612   |
| AATTTACTCTTA  | 838.981265822229 | 0.181095298545525 |
| ACGCCGATGAGT  | 838.981325923156 | 0.223995103477609 |
| AAGATTAGTCGC  | 838.985094710932 | 0.227141600008891 |
| GCATGCTGTAC   | 838.988179283277 | 0.142483682466439 |
| ACCAACTCATACT | 838.98855254982  | 0.203959591068699 |
| GTCACCCCTCGA  | 838.993930685032 | 0.130345422696815 |
| AATCCCTGACTG  | 838.996616187559 | 0.213668855061064 |
| GCGGAAGTGTC   | 839.008047976601 | 0.159573758972741 |
| ACGGCGTACAT   | 839.019393836198 | 0.300418868872986 |
| CTCACAAGTGAC  | 839.024668234648 | 0.165156151090936 |
| ACCACGATGAGT  | 839.028125093675 | 0.283065854086156 |
| GGATGTATGACC  | 839.032245382455 | 0.18411760568562  |
| AACTGTAAGTCA  | 839.042976778582 | 0.244895013345807 |
| CGTGACAGTCAG  | 839.049844487431 | 0.205411403501792 |
| CTCATCGTGTCA  | 839.059079888869 | 0.229166775869031 |
| GTCATTAGGGGA  | 839.062646657882 | 0.166154198681237 |
| CTGCGTCAAACA  | 839.072669807203 | 0.282927754122161 |
| GTCAGAGCTGCA  | 839.07800771508  | 0.232083781828169 |
| TGATTACAGGTAA | 839.08050846586  | 0.14225777295544  |
| CTTCCCTATGAC  | 839.082687724513 | 0.178404986685624 |
| GTCACCTGGGCA  | 839.085886505897 | 0.212329752596429 |
| AAGACTAACTCT  | 839.089796840869 | 0.215016866808405 |
| TGACCAAGTGCA  | 839.102640058956 | 0.230447636530906 |
| GCCTGTTCTGCA  | 839.108233387746 | 0.195643344890753 |
| AGGATTACGTAT  | 839.117740144607 | 0.156141916674296 |
| AACGTATGCGG   | 839.136892032856 | 0.198912291583194 |
| CGCCCCGAGTCA  | 839.13765881021  | 0.270002044898215 |
| ATGACTTGAAGA  | 839.142811233114 | 0.299684393712845 |
| ATGGTGTCTGAC  | 839.147122006134 | 0.183240852363429 |

|               |                  |                   |
|---------------|------------------|-------------------|
| GAGCATCGTCAC  | 839.150296019937 | 0.300699465612758 |
| CGAGGATGACCC  | 839.151998116664 | 0.2062703144749   |
| CGAATTACTCGA  | 839.154013556575 | 0.251400318871256 |
| AGTAGTGCAGA   | 839.154267075739 | 0.174801102269293 |
| TACCACGAATGA  | 839.16358692247  | 0.280529606311324 |
| GGATACATGACA  | 839.164098982479 | 0.292229656868002 |
| CACTGTTGAGTC  | 839.169778535203 | 0.205218007811005 |
| ACGAGACGTCAT  | 839.170063842589 | 0.201549868167711 |
| CAAGTTGTGACA  | 839.17320336284  | 0.312955452258211 |
| CGTGTCATTGC   | 839.174158908017 | 0.201706915721648 |
| ATGATTCGACGC  | 839.176828103652 | 0.160393838472    |
| CAGGTGAGCCAC  | 839.181818822478 | 0.268090205604025 |
| CATTGGTGTGAC  | 839.188162705188 | 0.278361010460572 |
| ATGAGTAGTGAG  | 839.193071552449 | 0.167251699118691 |
| ACTCATATAGAC  | 839.203957871551 | 0.303464013273323 |
| TCTGACGATACA  | 839.204986969203 | 0.234358091788162 |
| ATGACCATATCC  | 839.218163301158 | 0.126196169495008 |
| AGTCAGAAGCAT  | 839.228106269034 | 0.195447594314065 |
| ACGTCTGACATA  | 839.228799302912 | 0.252732815872644 |
| AGACCGTGTGAC  | 839.230333637198 | 0.164914825404536 |
| CGCGATCATGAC  | 839.232897834853 | 0.200429950311754 |
| ACGTCACCTCAT  | 839.236027690567 | 0.185857277470716 |
| CATTCTAGTGAC  | 839.259537253422 | 0.253434613066341 |
| AGTCACGGAGTA  | 839.260985205514 | 0.22441080006517  |
| ATCGTGGTCATG  | 839.262181189889 | 0.258518494694699 |
| ATACCTAGTCAG  | 839.267682147702 | 0.201333991694835 |
| AGGGTCCATGAC  | 839.269115911607 | 0.2150265060523   |
| GATGTCCAGTCA  | 839.271489453231 | 0.192555216066083 |
| CATGTCACATCA  | 839.27499234678  | 0.171654846384078 |
| ATGAGCAGTTCC  | 839.275468094002 | 0.384456269040179 |
| GACGCGTCAGCA  | 839.27841784057  | 0.169135248821065 |
| TGTCACAATGAA  | 839.282790942036 | 0.169118555007505 |
| AGCAATTACGCA  | 839.283665392936 | 0.248272458994876 |
| TGACTCGGGAAA  | 839.284111228283 | 0.193612453640641 |
| GGTGACCCAAAA  | 839.286015898872 | 0.188774065093823 |
| CGAGTCAGGAGA  | 839.288296374471 | 0.166071187561493 |
| GACGTATTACAC  | 839.291169852371 | 0.152219074079815 |
| ACATAGATGAGT  | 839.293087792655 | 0.24609706209962  |
| AGTCAGAAGACG  | 839.298311221716 | 0.192945073387572 |
| GTACAACGTCAC  | 839.300225020997 | 0.110972812393    |
| GGGCCTGTCATA  | 839.303571089574 | 0.163381070620703 |
| ACGTGACGTTAT  | 839.311887153032 | 0.289938043353438 |
| AGGCGTGGTCAT  | 839.313297768072 | 0.235352356174898 |
| AATGCTAGTGAC  | 839.317651872666 | 0.222107917795783 |
| GACCCTGATTCA  | 839.31861883145  | 0.280272819651992 |
| ATTACGTATAAC  | 839.320258594556 | 0.238470672969141 |
| AAAAGACATGAC  | 839.343326982685 | 0.228956350814447 |
| ACGTGAGTCGGA  | 839.343402754967 | 0.235692818543852 |
| ATGACGAGAATC  | 839.350974604617 | 0.17061098677048  |
| ACATTGATTACAC | 839.356265604145 | 0.246478102686444 |
| CGAAGATGAGTA  | 839.36487870045  | 0.183285537942881 |
| ACTCATACCAGG  | 839.383220063446 | 0.249803941557109 |
| GTAATAGCGTCA  | 839.386058744123 | 0.185622293727282 |
| CGTGTCATTGA   | 839.386827809547 | 0.204647823712603 |

|              |                  |                   |
|--------------|------------------|-------------------|
| AGATGTACT    | 839.395906536183 | 0.260196861640993 |
| CTAAGCAATGAC | 839.399435821601 | 0.281160274789943 |
| GACCTTTGAGTC | 839.4087050447   | 0.264434282113552 |
| ACACTGACTGTG | 839.420857180174 | 0.382033777030237 |
| ATGACAGGATTA | 839.425172587929 | 0.228877359273743 |
| CCGAAGTGACAC | 839.439989081351 | 0.240093609487832 |
| GTTACCTGACTA | 839.447887938199 | 0.311520747213724 |
| AGTCAGTCGTCG | 839.452669663946 | 0.182694398213741 |
| GTTCTGACTGCA | 839.457525654615 | 0.217824470823995 |
| AGTCAGAAATTA | 839.462952074993 | 0.143450318090976 |
| GAGTAATCACGA | 839.463119480528 | 0.209395224296016 |
| AATGACAAGGTG | 839.469618566914 | 0.160890519289821 |
| CTCTACGCTCA  | 839.469771202107 | 0.189959286893721 |
| CCGATTGGTCA  | 839.480082992027 | 0.246606099063088 |
| ACGTCATGTATC | 839.480592937377 | 0.257448383518259 |
| ATGACCATAAGA | 839.488982417093 | 0.177382697669659 |
| CGTCACACCTTC | 839.49082827246  | 0.133167563726028 |
| TGCCATGTGACA | 839.525212975288 | 0.219244393335979 |
| GACATGTCAGAA | 839.526950851617 | 0.170241134787347 |
| CGGTGACGGTAC | 839.530502275482 | 0.17665547041257  |
| CGCTGAGCTCA  | 839.532292296645 | 0.18046174135373  |
| CACGTCAGGTAC | 839.538494059086 | 0.149964767757375 |
| TGCTGGTGACAA | 839.553223100838 | 0.3274295783224   |
| AGTCACGGGAAA | 839.556207479265 | 0.290969736666114 |
| CTCCCTGTGACA | 839.561906964111 | 0.217871041002145 |
| GACTCACTAGGA | 839.570731559056 | 0.170232746368226 |
| AGTGACGTTGCC | 839.572159632494 | 0.204009693002405 |
| CCAACCGATGAG | 839.577082949687 | 0.17857536587639  |
| GGGTCATCATAC | 839.57808119569  | 0.212746435977701 |
| CTGTGGGATGAC | 839.581082599862 | 0.116471611821166 |
| ATTGCTCAATAG | 839.582836914569 | 0.123794930819518 |
| CGGTGCGGTCA  | 839.593762614512 | 0.208394545078159 |
| ACTCATATAAGT | 839.600254966013 | 0.17812152957188  |
| GTCATCCCAGAC | 839.61472624015  | 0.193950224818777 |
| ACGTGCATGACG | 839.615665594421 | 0.187166702293625 |
| CGTCACGGCAGC | 839.633143400193 | 0.258485769611771 |
| GCAAAATTTGCA | 839.6412983925   | 0.236186627794532 |
| CTGGCTGAGTAA | 839.642922233646 | 0.260427808477259 |
| CGCTATGTGACG | 839.648188409199 | 0.176885088667891 |
| TCTTCGGTGTC  | 839.653265267833 | 0.197107169595939 |
| GTCACCAAGAGA | 839.659693470443 | 0.195519953403939 |
| AGCTTTAATGAC | 839.661104086696 | 0.16813086261798  |
| ATTTGGCGTCAC | 839.670101342413 | 0.187812959454735 |
| CGATGGTGACGC | 839.670111185572 | 0.217050398732977 |
| AAAAGTACGCTG | 839.689322642367 | 0.264423926078069 |
| GGTCGGAGTCAA | 839.689397915107 | 0.195983277519809 |
| GATGACGGGGAA | 839.697609810824 | 0.163501013311543 |
| ACGTCATGGGTC | 839.701346459566 | 0.237079793606037 |
| GACGCAATGACC | 839.710802492129 | 0.315622827766839 |
| CCTCCGTAGTCA | 839.711045582734 | 0.208836893689042 |
| ATGGCATGACCC | 839.715997771287 | 0.183388013234015 |
| GTTGCGGTCATA | 839.716530684169 | 0.183729332050125 |
| GACTGACTGGAC | 839.723621321198 | 0.2637017683059   |
| GGTCACGTTTCA | 839.731220594507 | 0.207736626223619 |

|               |                  |                   |
|---------------|------------------|-------------------|
| GATGACTTGCGC  | 839.732028102527 | 0.194827365736872 |
| AGTCAGTAAGTC  | 839.732380690061 | 0.196590565109284 |
| ACGCCTGATGAC  | 839.73265021902  | 0.238074119345374 |
| GTCACTACCACA  | 839.739000008351 | 0.245426144311897 |
| CCGCAGTGACGC  | 839.741666166669 | 0.270443014922431 |
| GTGACTGCCAAC  | 839.747013581325 | 0.22833165923671  |
| ATGAGTATCTAA  | 839.756899912202 | 0.224941865407485 |
| CCCGGAGTGACA  | 839.758496527287 | 0.223367328410227 |
| GAAGAATCATAC  | 839.76542890329  | 0.219299855499031 |
| GTCACCTCACGA  | 839.780695808847 | 0.225714713680282 |
| GACTCAGCCAGC  | 839.784419156144 | 0.282546012247437 |
| ACTCATATCTTA  | 839.791261408495 | 0.207438253678402 |
| ATGGTGACAGCG  | 839.794440308968 | 0.202234797984027 |
| ACAAAGTGACAC  | 839.79588775093  | 0.208199654034839 |
| AGTAAATGTCAC  | 839.799305361702 | 0.338125795288553 |
| GTCACCGCTCCA  | 839.799506065955 | 0.218107069628964 |
| GCGATTCTGTGAC | 839.802573402768 | 0.146424154261795 |
| ATAATGTACCCG  | 839.809347223086 | 0.180037646409136 |
| AGTACGTGTGAC  | 839.817240385415 | 0.249632641569882 |
| ATTTGGTAGTCA  | 839.820766911109 | 0.197536952721305 |
| ATATACTGAGTC  | 839.823638899415 | 0.21159136882268  |
| ATAGCATCATCG  | 839.824645342996 | 0.269377262224328 |
| TCCTCGGTGACA  | 839.827651486568 | 0.247829279219532 |
| GCAAACAGTGAC  | 839.840380741697 | 0.223914070032749 |
| CCCATGACTGC   | 839.845542918055 | 0.181621816296728 |
| ACGCGGTGTGAC  | 839.848109482747 | 0.164160429441425 |
| ATGACGGACTAG  | 839.853587581607 | 0.165489423483203 |
| GGTAGGGAGTCA  | 839.854737673656 | 0.131178043038266 |
| GTCAGAATGTGA  | 839.862273250642 | 0.342409607582644 |
| GAATGCATGACA  | 839.862525560004 | 0.243486998143638 |
| GTCACCACCGTA  | 839.863478887891 | 0.24843158904899  |
| ACAGTGACGCCA  | 839.86584782708  | 0.205713402948265 |
| AGAAGGGTGACA  | 839.869400636261 | 0.173924017099209 |
| GATAGTGACAAA  | 839.871609338932 | 0.217792909395601 |
| AGGTCGCGTCAC  | 839.884910780357 | 0.241210716013788 |
| AAACACGTAACC  | 839.885461727018 | 0.212982729609407 |
| CTTCCATAGTCA  | 839.894539506792 | 0.155600776864326 |
| ACTTGGCGTCAC  | 839.898073243145 | 0.16348263922523  |
| ATAGTTCGTGAC  | 839.912976264872 | 0.177070512097456 |
| CGGAGTGACAAA  | 839.916490247113 | 0.159937436864731 |
| ACTCATAGGCTC  | 839.919582056115 | 0.237214381548349 |
| CGCATACATGAC  | 839.919646996696 | 0.22873450218357  |
| GACATTATGTCA  | 839.92600819459  | 0.181449764608082 |
| GTGGATATGTCA  | 839.959268171703 | 0.162138915405312 |
| CTGGGCGACTCA  | 839.963140557846 | 0.206283434634987 |
| AGAGGTGTGACG  | 839.966630337788 | 0.184935124999092 |
| AAATCGTCAGAC  | 839.966799706851 | 0.179449203582661 |
| CGACCTCGATGA  | 839.970146405857 | 0.22993674089003  |
| CAATGACATCGA  | 839.975921966143 | 0.307969770045984 |
| TCAAACATGACA  | 839.98235886349  | 0.184293336147238 |
| GTGTGTATCATA  | 839.985022489311 | 0.230361743079527 |
| ATGAGTTGGACC  | 839.988204143472 | 0.247220510682557 |
| AAGATTCATAGG  | 840.007862262573 | 0.165946038441225 |
| AAATTAATCACC  | 840.01467795206  | 0.215264461205329 |

|              |                  |                   |
|--------------|------------------|-------------------|
| AGTGTTGACACA | 840.021931878736 | 0.144200326549301 |
| AGTAACGTCACT | 840.023185293538 | 0.192979047900702 |
| GATGATACAACC | 840.031841076064 | 0.259696120717875 |
| CCATTGAGTGAC | 840.036030444581 | 0.172686966342833 |
| GGTTGCCATGAC | 840.039189138749 | 0.207459230069494 |
| CGCCCAATGACG | 840.040411262176 | 0.193305027905455 |
| CGTCACACGGGC | 840.051746567782 | 0.211949904270981 |
| ACTCATACCCAT | 840.053419637781 | 0.201015397385469 |
| ACTTTCCAGTCA | 840.059447442025 | 0.208647230367862 |
| CTCCTTGCATC  | 840.065640972101 | 0.184294675568311 |
| TCGTATGATACA | 840.073326486067 | 0.160905391341102 |
| GCGTGTTACTAA | 840.091841042152 | 0.192773062104377 |
| GCCGTGTGACAA | 840.095574589388 | 0.180041244743186 |
| GTCACGTTGCAC | 840.09574720317  | 0.193925028094714 |
| CGTCACCCTCTA | 840.096388697965 | 0.169647512382075 |
| GGCGCTGCACA  | 840.103322012296 | 0.260208818476327 |
| GTCACCCAGTA  | 840.104915507389 | 0.17997464617361  |
| GTCACGTTTTCA | 840.114118496175 | 0.313694847416548 |
| ATTGACTGAGCG | 840.116586721283 | 0.249300860068796 |
| ACACGTAGTCAG | 840.123031153519 | 0.129975382493135 |
| CGAGCCAAGTCA | 840.123798652034 | 0.217377933291303 |
| GTAATTTCTGAC | 840.131693234694 | 0.262949814734581 |
| ATGACTTCGCTC | 840.13533984863  | 0.173178946408101 |
| GTGAATCAACAC | 840.136055596836 | 0.222062926650688 |
| CGCGGGTGACCA | 840.136918358455 | 0.215993992638925 |
| CACTCGTGACGC | 840.146732740704 | 0.249295956421715 |
| CCCAGTGACATA | 840.149551855537 | 0.35533153005115  |
| TCAAAAGTGACA | 840.152474487928 | 0.198233690909093 |
| CGCCTTAATGAC | 840.154157675157 | 0.233129484761978 |
| GTCACTAATGTA | 840.15617178298  | 0.160544660922745 |
| GATGCATGACGC | 840.158639217929 | 0.180576427262947 |
| ACGTAGGTGTCA | 840.1640003785   | 0.279889405713453 |
| ACTACGGTGACA | 840.164535443816 | 0.3135162511485   |
| GTCGTGTCACTA | 840.1709403921   | 0.184978836718316 |
| AGGTTGACGAAT | 840.174051424548 | 0.160853090882634 |
| AGTCACGGGGCA | 840.179688970056 | 0.235965021241685 |
| AGTCACGGTTGG | 840.187179462345 | 0.157783118368113 |
| AGTCAGAAACCG | 840.202556621718 | 0.225666323427984 |
| AAGATTCATAAG | 840.210604518115 | 0.161679909095922 |
| ACGCGTGACGAA | 840.21623959937  | 0.164983908396111 |
| CTGTACCCTGAC | 840.223066637014 | 0.164649464933156 |
| CGTCACACCTTA | 840.231132857523 | 0.182792598990495 |
| CTTCACAGTGAC | 840.239209809685 | 0.170282720685631 |
| GTCCGTAAGTCA | 840.239792706142 | 0.227952433204315 |
| CGTGACGCGGAC | 840.245016060137 | 0.250444608686482 |
| GTGACGCGCAAC | 840.246411153637 | 0.214869691410988 |
| GACTCAGACCTA | 840.249290654418 | 0.24356931768229  |
| CACAGGTGACGC | 840.25112736452  | 0.211092490625447 |
| GGTGACATTTAC | 840.260057390646 | 0.164041076094071 |
| GGCCTGATGACC | 840.260451437836 | 0.184941873177361 |
| AATGGTGACGTC | 840.261938495045 | 0.216033806059997 |
| TATTACTGAGCA | 840.26276727184  | 0.287833871261063 |
| ATACGTGTTGAC | 840.265385197031 | 0.160628878303207 |
| GACGTGGTGACA | 840.265683844902 | 0.233558327521108 |

|               |                  |                   |
|---------------|------------------|-------------------|
| ATTACACACTCG  | 840.266595735897 | 0.212836906726569 |
| ATTCACGCGTCA  | 840.269589324958 | 0.179845693447543 |
| CAAGCCTGACTA  | 840.276718211253 | 0.197915055878519 |
| CACTCATGACAA  | 840.283372168841 | 0.194505268295207 |
| AAGCGAAATGAC  | 840.289317698528 | 0.116753639030766 |
| CAGTCCAGTGAC  | 840.291395378836 | 0.283096568657642 |
| ATGTCATCTCGC  | 840.29263894121  | 0.165598559187462 |
| TCAACTGATTCA  | 840.306271329385 | 0.243256005221799 |
| TCATCGTATGGA  | 840.309398333095 | 0.244455421726926 |
| AAATTGCTCAAC  | 840.310735870733 | 0.210153714186897 |
| CAGCTGTAGTCA  | 840.312840715178 | 0.252243446406366 |
| AATGGGGATGAC  | 840.322958110195 | 0.104947420757571 |
| TCGCAGTGACGA  | 840.323499603445 | 0.222897892857534 |
| CTGACTGGACAG  | 840.325165191701 | 0.158934691592303 |
| CAGTCAGTGAGC  | 840.345435517899 | 0.20332923739138  |
| ATAACTTGCTCA  | 840.35067932393  | 0.248352855546177 |
| AAGACTGACGTG  | 840.354546940475 | 0.142568074813262 |
| CGTTCATGACGC  | 840.362351116031 | 0.251167351167177 |
| CATTTGCGTCA   | 840.372827047606 | 0.304411800502482 |
| GTGAGCCACGTA  | 840.374572649644 | 0.243835246909047 |
| ATAATGGGTGAC  | 840.378134608008 | 0.183149091579956 |
| CTCCTTGTGACA  | 840.379976844638 | 0.207824441881518 |
| ATTAATCACCGG  | 840.382851076517 | 0.23435115478772  |
| GTAGACGTCACA  | 840.384608658499 | 0.233839690555571 |
| TATCGTCACCGA  | 840.399446943631 | 0.271105698300797 |
| ACGTCAGAGCCT  | 840.40315088953  | 0.231288373468757 |
| GACGCTATGTCA  | 840.403359112642 | 0.220503169041946 |
| TAATTAGTACGA  | 840.406152600983 | 0.23385125101908  |
| GGTCTTGGTCAC  | 840.410794513106 | 0.201171741475005 |
| CCGACACGTGAC  | 840.411562326926 | 0.168729562571474 |
| ATCATGACACCC  | 840.414423859576 | 0.139499297241598 |
| AGCACTACTCAT  | 840.414657358744 | 0.216574464133178 |
| CCGTCATTATTC  | 840.421784817545 | 0.163879974396561 |
| TCGTCACCTAAA  | 840.432069816093 | 0.179597674681615 |
| GATTAGTACGAC  | 840.436474504621 | 0.280933819071843 |
| CGTCACGCCCTGA | 840.439162016099 | 0.230266566009959 |
| ATAAGATGACCA  | 840.439207161058 | 0.186318739195211 |
| ACCTTCTGACTG  | 840.441166994012 | 0.23139563127664  |
| ATGTCATGCCAG  | 840.463163711581 | 0.203145247045478 |
| CAGTAATACTAA  | 840.469144817567 | 0.183314278220259 |
| TGACAGTTAGCA  | 840.485924577672 | 0.204873084112318 |
| AGTCAGAGGCAC  | 840.496945947137 | 0.14597855519357  |
| AGTGCGGTCATA  | 840.509451418609 | 0.160381502633901 |
| GTGACCCTAAGA  | 840.514833403356 | 0.255098855396914 |
| AAGATTCATAGT  | 840.522801008451 | 0.103337094890544 |
| AATCTGATTGAG  | 840.524994553604 | 0.209846335108211 |
| GAGGCACAGTCA  | 840.526602943799 | 0.293601485341748 |
| ACTATGTACCGC  | 840.532309358983 | 0.165942323254794 |
| ACCGCGCATGAC  | 840.532971610077 | 0.19604727334333  |
| ACTCATCGTGTC  | 840.547988705979 | 0.164914620544626 |
| CTACGATGTGAC  | 840.549779226411 | 0.241876405379902 |
| GTGGATGACCGA  | 840.553329149759 | 0.118039387833631 |
| ACTCATACGAAG  | 840.559445421589 | 0.242685546670983 |
| CTAGTCACGGCC  | 840.561172894968 | 0.252716988679386 |



|              |                  |                   |
|--------------|------------------|-------------------|
| ACGAGGACTAAT | 840.563620712705 | 0.223659376903612 |
| AGACTCAATGGA | 840.574787194105 | 0.293882517577154 |
| CATCGTGTGACG | 840.577495979999 | 0.245363495122091 |
| ATTATATGTCAG | 840.579984887312 | 0.130265397119552 |
| ATGAGTAGACAT | 840.598668009324 | 0.184042428697616 |
| ATGAATACATGA | 840.601902337876 | 0.207759237882847 |
| CACCCAGAGTCA | 840.610787015548 | 0.186285302808695 |
| TCCACGGTGACA | 840.611017233517 | 0.163862692225597 |
| AGTATGAGTTGG | 840.632602764587 | 0.238554891759866 |
| CTGACTGGTAAC | 840.633353984592 | 0.232735117756477 |
| GGTGACAGGTTA | 840.642677427199 | 0.141246008697691 |
| AAAAGGGGTGAC | 840.644567650608 | 0.160530567637732 |
| GCTGACCGTGGA | 840.645116617425 | 0.17044126402062  |
| CAGTCAGCAGTC | 840.653369225859 | 0.188886563161188 |
| CTGACTACTAGA | 840.65407779711  | 0.196044603418121 |
| GGAAAATGTGAC | 840.654928080147 | 0.251559674781031 |
| CAGGTGAGCAAA | 840.655865477399 | 0.170381774566124 |
| GTCACATGAGCA | 840.656807819777 | 0.169474555194665 |
| TAAGACTGATTA | 840.660728639461 | 0.139281225518494 |
| ACTCATACTGGC | 840.67074772305  | 0.195268485631903 |
| ATGATTAGTCCC | 840.672483073466 | 0.220930202920191 |
| AGTGTCACGCTC | 840.675751675123 | 0.28783394138298  |
| GCCGACCATGAC | 840.680854796655 | 0.165872983379826 |
| CATTACTCGTCA | 840.682537072338 | 0.158448203313789 |
| ACTCATCCGTAA | 840.694232631983 | 0.164986723675785 |
| GACAAGAGTGAC | 840.706718671672 | 0.128341475561163 |
| CGTCATCGGGCC | 840.720015694424 | 0.255762687878641 |
| GGACCTTGTGAC | 840.722131353084 | 0.16005365858915  |
| AACGACTCAGTG | 840.724652353958 | 0.264695412682028 |
| GGATTAGTACCA | 840.731485390536 | 0.158531869927951 |
| CTGTCATGAGTA | 840.742275914754 | 0.167276144052041 |
| ACTGAGTCTAAC | 840.743978682454 | 0.163969066332529 |
| TCCAAACTGTCA | 840.744537055296 | 0.205966451480138 |
| GTCACGTAGATA | 840.746098852021 | 0.285500056238698 |
| ACGTCATGAGCT | 840.747223229761 | 0.192488860808216 |
| CAGAACCATGAC | 840.750634146201 | 0.253948275622305 |
| ACTGCAGACTCA | 840.758154066246 | 0.183740586222781 |
| ACATAATGAGTA | 840.761113545036 | 0.215368681527527 |
| AGTCAGACTAAA | 840.762462839665 | 0.10223143039805  |
| GCCTGTGTCAGC | 840.766295213909 | 0.260295557606642 |
| CGGGCCATGTCA | 840.769547032981 | 0.185876439494032 |
| GTGAGTTATTCA | 840.773465090098 | 0.150288296456026 |
| CGTGAGTACCAC | 840.774616253262 | 0.261611042236382 |
| ACGTCATGATAA | 840.777009600438 | 0.218706609689117 |
| CCGTGTTTGTCA | 840.784168320582 | 0.224652266959114 |
| ACTTTGTGACAA | 840.786723123439 | 0.173534120688632 |
| ATTAGTCGGACG | 840.787095616369 | 0.254668158526848 |
| AGTGTTGTGAC  | 840.791031272691 | 0.158846279778503 |
| AAGCAGTGTGAC | 840.811033134203 | 0.108916081297681 |
| ACCACTGACTAT | 840.817313282394 | 0.165028480238847 |
| ACGTGGCTCACG | 840.826089792992 | 0.125688752922748 |
| GACTAATCTCAA | 840.831887907519 | 0.165265089119529 |
| GTCACCGGCCAA | 840.836737824785 | 0.168249267340565 |
| CCATCCGCGTCA | 840.843396192099 | 0.177067264765936 |

|               |                  |                   |
|---------------|------------------|-------------------|
| AGTGACAAGTCC  | 840.846612502899 | 0.251779414924701 |
| GATGATGTGGAC  | 840.847972169141 | 0.255987485532595 |
| CGGTAATGACCA  | 840.84941949744  | 0.291649619371024 |
| GACGTAATGACC  | 840.851744792556 | 0.319733114833999 |
| CTCCTGTGACAG  | 840.855417192618 | 0.165069853567027 |
| AGCCACTGTGAT  | 840.862666235829 | 0.220652846684843 |
| ACTTCACGATGA  | 840.878976125064 | 0.228785933339091 |
| AATGATGATGCA  | 840.883065325431 | 0.105763464208939 |
| ACAGTCAGTAGT  | 840.885290398637 | 0.218509474281231 |
| TGACTCCGTCOA  | 840.889570109121 | 0.11490281704353  |
| GGAAATGTCACA  | 840.890843435986 | 0.225679412850527 |
| AGTAAGAGTCGA  | 840.893050115538 | 0.194317413262414 |
| AGACAAATGACG  | 840.895103972691 | 0.231431771226633 |
| ACTTGCTACTGA  | 840.895685274825 | 0.16698342886642  |
| CCGTCATGGTCG  | 840.898879055986 | 0.186179198482932 |
| TACTCTTGCTCA  | 840.90269114181  | 0.237643043168522 |
| CTTATGGACTCA  | 840.904720846262 | 0.267801771834531 |
| CTCGATTACGCA  | 840.908575786019 | 0.112181391043412 |
| ATTACTAAGACC  | 840.911286252257 | 0.185008555997099 |
| CATGAGCAACAA  | 840.920616848934 | 0.181126697774876 |
| AATCGTGACAAC  | 840.922420945038 | 0.194071146376777 |
| GGTTGTCATCAC  | 840.931284126325 | 0.298893605758054 |
| GGAAATCCGTCOA | 840.937474260757 | 0.246248677691485 |
| GCGTCAGACTAA  | 840.941473418913 | 0.232326876151718 |
| GTGACACTGTAA  | 840.944219935058 | 0.199141733215043 |
| GTCACACTGCTA  | 840.946472931187 | 0.198404066965698 |
| GAATCGTGACAA  | 840.947267966313 | 0.210402970960732 |
| GTAGGTGGTGAC  | 840.949415522775 | 0.220424484665308 |
| AGAGAAGGTGAC  | 840.956585987141 | 0.16420408257286  |
| AACAATTACACA  | 840.966702270346 | 0.210931944178013 |
| GTATGAGCATTAA | 840.975336482929 | 0.170362011860069 |
| GTCACATTACCA  | 840.976541330544 | 0.233611089635552 |
| CTACCCTAGTCA  | 840.977250062138 | 0.194027986383126 |
| CTCCGATTACTC  | 840.979596133139 | 0.168002647764145 |
| CTTGTTTGAGTC  | 840.985281367887 | 0.346760011829348 |
| ACTCATCGTACG  | 840.995375829267 | 0.212945067522512 |
| AAGTCAGCGTCA  | 840.999235581145 | 0.186774736278746 |
| AGTGGCTCACTC  | 841.004751387046 | 0.191470905557394 |
| ACGTAACGTACT  | 841.005339000757 | 0.208223857026446 |
| GACGTGTGACCA  | 841.014575865796 | 0.149941202824566 |
| ATGATCCGTCAG  | 841.017037462447 | 0.220522157798251 |
| ACAGTATTGTCA  | 841.017793053875 | 0.254524067514996 |
| AGTAGCGACTCA  | 841.023934633967 | 0.208947000965556 |
| ACTTGTCACCAT  | 841.027739289963 | 0.19278870980364  |
| GAAGCCCGTCA   | 841.033034449013 | 0.209432538803526 |
| CTCAGTCGTGAC  | 841.037348576673 | 0.159171858962215 |
| CATTTTGCTCAC  | 841.043982280963 | 0.211013304317357 |
| ACGCGTCAGACG  | 841.045450752851 | 0.221897409855177 |
| CCACACCAGTCA  | 841.053134613051 | 0.190762938535527 |
| AGAGTGTGATGC  | 841.062640722098 | 0.184536249968053 |
| TCAGCGTAATAA  | 841.06481896743  | 0.172051374677181 |
| GGGTCATCTACA  | 841.065673825534 | 0.187737581100311 |
| AAGGATTAATAA  | 841.069609070726 | 0.187394093586561 |
| CTGACGTGACAA  | 841.07705402237  | 0.195532040190432 |

|              |                  |                    |
|--------------|------------------|--------------------|
| ATAATTATTCAT | 841.083525697698 | 0.153851894472495  |
| ACGTATTGTCAC | 841.087919787829 | 0.175622388250854  |
| CTGACATATTAC | 841.093884701625 | 0.163176772887734  |
| TCACTCATTGGA | 841.098114771719 | 0.172391956721582  |
| AAGAATTACTCG | 841.098370747504 | 0.211825902456742  |
| AATACACGTAAC | 841.098842878416 | 0.233939126137875  |
| TAGTGACAGACA | 841.105100052669 | 0.226613902739256  |
| TCGAGTCAAGCA | 841.105234557742 | 0.0651602277614293 |
| ACTCATCGGTAC | 841.117950228063 | 0.175854535065006  |
| GTGAGTCTGCTA | 841.120574819749 | 0.145654489612944  |
| GTCACCGTCCAC | 841.122060341147 | 0.170705309130452  |
| CCTTCAGTGACG | 841.12226331357  | 0.25972627234082   |
| GGACAGCTCATA | 841.129220665454 | 0.230216100878792  |
| GGAGATACGTCA | 841.13200945009  | 0.15774734802244   |
| CTGAGTCGAAAA | 841.133222104398 | 0.195370056903217  |
| TATGAGTGTTCA | 841.133223616429 | 0.142267486530999  |
| TGACGGAGCTAA | 841.137629058522 | 0.183964074692146  |
| GACCTGACTCA  | 841.138880917493 | 0.344843994178291  |
| CTAGTTCGTAC  | 841.144302902218 | 0.215120808311923  |
| AAGTATATGTCA | 841.149326939578 | 0.194345809765934  |
| AAGCGTCAGAGC | 841.150680248426 | 0.206094810175513  |
| CAAAGTGACCCA | 841.153987967767 | 0.28639662817508   |
| AATGATGAATCG | 841.163996525916 | 0.207122364385218  |
| TAGCATGGGTCA | 841.166961901216 | 0.24770869405033   |
| TACGATCACTCA | 841.175065435297 | 0.218085244454421  |
| AGCATATGACCG | 841.178085024661 | 0.195708762754835  |
| AGCCGTGATGAC | 841.181387768846 | 0.243109148631479  |
| GCTGTGGAGTCA | 841.186497139919 | 0.206271522665843  |
| TATTGCATCACA | 841.193776955583 | 0.166995541360341  |
| GATGCATGACAA | 841.197321709457 | 0.202750689332462  |
| CAGCCATGAGTC | 841.206139261046 | 0.278537154083623  |
| AAGGGACTCACA | 841.206252854188 | 0.171904136121985  |
| GCCCTTTATGAC | 841.209512337669 | 0.265674114928798  |
| CTAACAGTGACA | 841.222650176905 | 0.196710536936498  |
| ATGTCACATCAC | 841.223541314481 | 0.165672933528489  |
| CCGACAGACTCA | 841.224737336166 | 0.169082807160564  |
| CGAGTCAAGCCA | 841.228042655687 | 0.223934251156842  |
| CATCGAAATGAC | 841.249245702328 | 0.135224404187489  |
| AGGGCTGCGTCA | 841.252050429953 | 0.166258298112672  |
| ATGACGGGGTGA | 841.255411660069 | 0.174799376775584  |
| ATCTAGGTGTCA | 841.256256758593 | 0.227044413541594  |
| GTCACGAGTTTA | 841.257025605805 | 0.283977057640394  |
| AAGAAGTTGTCA | 841.257798650192 | 0.166118552084802  |
| TAGTCTGAATCA | 841.258350826097 | 0.200421822419264  |
| TAGTGTGAGCCA | 841.260254096573 | 0.170501040124739  |
| ATTGAGTCTAAC | 841.263272553408 | 0.16401012716458   |
| ACGCGTACTCAT | 841.266148258109 | 0.188749326037553  |
| ATGATATTACTC | 841.270179702895 | 0.188577060117676  |
| GGTCATACGCAC | 841.274891921766 | 0.158906681068479  |
| TAGGGTGAGCAA | 841.28283147752  | 0.122836449879757  |
| ATTACTCGTGAC | 841.283025981957 | 0.160666621822114  |
| ACCGCATGACG  | 841.294229830983 | 0.252352294365487  |
| ACTCATTAAGAT | 841.295345026513 | 0.232700931818821  |
| GCCATACTGTCA | 841.302504410947 | 0.20378268355805   |

|               |                  |                   |
|---------------|------------------|-------------------|
| ATGACAATGAAG  | 841.303434640444 | 0.17657402886739  |
| CCATATCTGTCA  | 841.306239537063 | 0.183615162751536 |
| GTCACACGGCAC  | 841.306970180445 | 0.19353756377609  |
| GGCCAGTCTGAC  | 841.310499704327 | 0.263876275732014 |
| GTCATGCGGCTA  | 841.310907404296 | 0.325094275715177 |
| ACTTACTCGTCA  | 841.322805958712 | 0.110356038630367 |
| CACTGAGTGACG  | 841.334743013906 | 0.115737877796003 |
| ATTCGTC AATTA | 841.336497549455 | 0.219778322107098 |
| ACTTGTCACCCA  | 841.346633252659 | 0.157852072964405 |
| ATTAGTCTCGG   | 841.348075876299 | 0.259106022794454 |
| ACCGACTCGTCA  | 841.350676971106 | 0.177979487210238 |
| GCTTAAGGTGAC  | 841.35120459173  | 0.205987929771514 |
| CCCTCGTGACAC  | 841.35850045128  | 0.222103987063997 |
| CACAGCTATGAG  | 841.362098649572 | 0.178533786200891 |
| ATTAACATCA    | 841.371580293195 | 0.213827478053851 |
| TGACTACTGGAA  | 841.372673841749 | 0.185990703931663 |
| CAGTCAGGCCTA  | 841.37373819871  | 0.286164154010774 |
| ACCCCTCTGACT  | 841.374437283477 | 0.181203878268597 |
| AGTGATTAATA   | 841.383204585273 | 0.162935397538191 |
| GTAAGTACCCA   | 841.392799363894 | 0.242524672133584 |
| ACGAAGCGTGAC  | 841.396924296039 | 0.322832924673753 |
| TCTCATGACAGA  | 841.427523191789 | 0.157314089548392 |
| TAACACATCATA  | 841.436340753996 | 0.190424321064117 |
| AAGTAACGTCAC  | 841.452953764443 | 0.182614160674439 |
| ATGACGCCGGTA  | 841.454101779927 | 0.242428077210003 |
| ACGTAATTGACT  | 841.460838516134 | 0.241268187216507 |
| CGGTGACATGGA  | 841.461514554161 | 0.202637651034852 |
| GGATGACTTGAA  | 841.462979390055 | 0.205920202758334 |
| ATTAGTAAGTCG  | 841.46893204067  | 0.200516843813165 |
| TCATGTATTACA  | 841.476244899237 | 0.320369995139996 |
| AGCGATTAGTCC  | 841.476861125335 | 0.223681027994719 |
| AGCGCAATGACA  | 841.484607318992 | 0.259340357949054 |
| GGTCTCGGTCA   | 841.489308909316 | 0.272124983330131 |
| ATTAACGTCACC  | 841.489446135231 | 0.184060120563936 |
| ATCGTAGTATCA  | 841.493862044538 | 0.213087634109397 |
| CGTCATCTGCGC  | 841.501964331227 | 0.257436444337107 |
| AGTCACGGCTCA  | 841.503142171155 | 0.220652438991674 |
| AGTCAGAGTTAA  | 841.50651984136  | 0.25471084924041  |
| GATGACAGGACC  | 841.51120867408  | 0.139210855933484 |
| GTCACGTCGGAC  | 841.518453132281 | 0.215813627533317 |
| CTCTTGACACAG  | 841.520589752098 | 0.267871291230321 |
| ATATGTCAGTGA  | 841.524471305347 | 0.264751953412272 |
| ATCTGTGACAGC  | 841.525493224103 | 0.218686457387407 |
| ACCTAGGTGACA  | 841.536000520072 | 0.146404099319786 |
| ATCGTGTGTC A  | 841.538680482848 | 0.288135892000684 |
| CTGGACTAGTCA  | 841.543498255999 | 0.204022791494407 |
| CATTGCCAGTCA  | 841.548185992694 | 0.184827527694846 |
| ATCCTGTGACGA  | 841.550657468093 | 0.162416538437082 |
| GCCGCGCGGTCA  | 841.556912969937 | 0.329552662121613 |
| ACTAACCAAGTG  | 841.560886281796 | 0.220409001862229 |
| GTCACAAGGCAC  | 841.569056655527 | 0.165823158706725 |
| ACCGTCATTAGT  | 841.573502356513 | 0.204957168428076 |
| TCATGGCGCTAA  | 841.589649069549 | 0.223998483285677 |
| CCATTTGACACA  | 841.591172883418 | 0.179944528742789 |

|               |                  |                    |
|---------------|------------------|--------------------|
| AGATGACGGCAC  | 841.59496623742  | 0.194768631752139  |
| GTCACCTTAGACA | 841.598770829656 | 0.229402084051023  |
| TCACGTAAGCGA  | 841.599381388074 | 0.184552742166817  |
| ATCACTGGGTCA  | 841.600729885496 | 0.283047330685999  |
| TGACGTGCGAAA  | 841.607510035547 | 0.376824594884697  |
| GTTGTGTCAACA  | 841.615782237774 | 0.126372705198744  |
| AGTACGTAGTCA  | 841.618908415806 | 0.216580485351047  |
| ACTCGACAATGA  | 841.620120526441 | 0.200065950328373  |
| CGATTTCTGTGAC | 841.627032763864 | 0.295075087499144  |
| CCTCACGCGTCA  | 841.637996047725 | 0.245402380652452  |
| AGACTCACGATC  | 841.639376262535 | 0.196102305618807  |
| AGGCAGTGTGAC  | 841.640628839225 | 0.115391090998428  |
| AGTCTCGACTCA  | 841.645521317233 | 0.228239604635361  |
| GGATTGCTAATA  | 841.65172941174  | 0.213288303603242  |
| GGCTTCAATGAC  | 841.659028241566 | 0.257594814111237  |
| AGAATTGTGACG  | 841.673982235237 | 0.219521750486788  |
| ACCTTTAATGAC  | 841.674296376345 | 0.194713278396214  |
| ATGAGTAGGAAC  | 841.675118865643 | 0.185921782978087  |
| ACCTGTACATC   | 841.686104543621 | 0.256540920856984  |
| AGTGGCTGACTG  | 841.687127861153 | 0.201934494960001  |
| CGTCATCTCACA  | 841.688137866212 | 0.182034388205184  |
| CTCGGTGATACA  | 841.695354336718 | 0.26710823555588   |
| AGTGTCAGAGGC  | 841.701234162701 | 0.161766540376999  |
| GCAACGTACTA   | 841.707121299711 | 0.0952661557744048 |
| GGTCAGTAGTCA  | 841.711399995435 | 0.17861648719393   |
| CAGGTATTACTA  | 841.714389897165 | 0.197331954495414  |
| ATTACAGACTCA  | 841.715166390776 | 0.201683095395755  |
| ATGACATTGTAC  | 841.716846285062 | 0.233514591694944  |
| AAGATCCGTGAC  | 841.723577391943 | 0.150852309546601  |
| AACCATGTGACG  | 841.733431586741 | 0.172728923101383  |
| GAATTAGGTGAC  | 841.740285594986 | 0.224428959455147  |
| TATCTGTGACCA  | 841.745617332051 | 0.285389180307302  |
| CTGACTCTCTCA  | 841.756799254583 | 0.217987245031822  |
| CAATGAGGTGAC  | 841.767256859792 | 0.268081222031709  |
| ACTAGGGTGACA  | 841.77078093343  | 0.122330046090147  |
| CAGATTAGTGAC  | 841.773427345092 | 0.192135447518237  |
| TGATCAGTGACA  | 841.788317303754 | 0.22949699374116   |
| GACTGTCTGACA  | 841.79418519396  | 0.162872828869955  |
| CGTACCCGGGA   | 841.795726837671 | 0.250236495292204  |
| ATGACGTCCGGC  | 841.797656695025 | 0.221983866246911  |
| ACTCATTGTGGG  | 841.797930559676 | 0.25974832019303   |
| GTGACGTGCTTA  | 841.799227614121 | 0.173587311451785  |
| GGCGTCCAGTCA  | 841.824202940387 | 0.14657835030935   |
| ACTAGTAGTCAG  | 841.824731045479 | 0.242357836992311  |
| GTCACACTCTAA  | 841.828594781275 | 0.272902603117054  |
| AGTCACGACGGG  | 841.829779716477 | 0.0969822752006256 |
| CCTAAATTGTCA  | 841.833633710164 | 0.235404202130947  |
| GACAATTAATA   | 841.840869709035 | 0.323512437242371  |
| GGCCAGAGTGAC  | 841.845196565819 | 0.21278880802185   |
| ATGAGTAGTAGA  | 841.850949605169 | 0.163891790360509  |
| TCATCTCTGTCA  | 841.857911351524 | 0.155916487929271  |
| CGTCCTACGTCA  | 841.863902560738 | 0.2123882940537    |
| AATTAGCAATCA  | 841.885704981224 | 0.205458968103656  |
| AGATTACTGACA  | 841.887282606415 | 0.172503131414529  |

|               |                  |                    |
|---------------|------------------|--------------------|
| AGTGACATACAT  | 841.890647212299 | 0.191084275668577  |
| CTATGGTGACCA  | 841.894062211936 | 0.166244307951282  |
| GTGACAGCGACA  | 841.897288956645 | 0.168294626787434  |
| ACGTGACGATAC  | 841.905003715521 | 0.199800903914785  |
| AGTCAGGGTCCC  | 841.906809152156 | 0.281724052886406  |
| AGCGTCACTAAT  | 841.912501395172 | 0.245034243625253  |
| GATTATGACCTA  | 841.919536133869 | 0.191333219071225  |
| ATTTACTTGTC   | 841.923593109442 | 0.192944703097143  |
| CAGCCTGTGACG  | 841.923744280275 | 0.225451830274946  |
| CACTTCTGACAC  | 841.923822056091 | 0.234464206984865  |
| AGGCATGACATA  | 841.924091907479 | 0.189042131336224  |
| AGTGATTAATAC  | 841.926576019642 | 0.189074005031195  |
| CAAGAGACTGAC  | 841.927096063594 | 0.345972618124843  |
| GAAGGTTGTGAC  | 841.927508996474 | 0.202518307024095  |
| ATATTAACATCAT | 841.927935640742 | 0.175801803734663  |
| ACTGTGCGTAAT  | 841.928153646434 | 0.176444185491249  |
| AGTTGGGTGACG  | 841.932117009236 | 0.138280032666159  |
| GAATCATTCGTC  | 841.93302002745  | 0.203528215239457  |
| CTCCCCGTGATA  | 841.947086280603 | 0.206669341631315  |
| AAACCTAAGTCA  | 841.947772358135 | 0.204530658667745  |
| CACGCTATGACC  | 841.95666692555  | 0.227625227336495  |
| AGGACTACTCAT  | 841.958098566102 | 0.214662472934426  |
| ATGACACCCGGC  | 841.959806433634 | 0.171749213259015  |
| AGGGATACGTCA  | 841.962830668611 | 0.216341783214251  |
| GCAGCTCCGTCA  | 841.994895573544 | 0.216683368731635  |
| AACTGATGACCG  | 842.002354705483 | 0.231135681157707  |
| AATTAGCCATAC  | 842.007765899382 | 0.207383215384529  |
| CTAAGCTGTCAC  | 842.009848003745 | 0.185796255904088  |
| CGCTGACATGTA  | 842.011791262039 | 0.239812496065509  |
| CCGAATCAATGA  | 842.012557970949 | 0.175596419052528  |
| CAGATTCGTGAC  | 842.024245443385 | 0.231538892205862  |
| GAGCGAGTCAAC  | 842.024584539756 | 0.0625613292772512 |
| AGGACAGATGAC  | 842.036717539584 | 0.0856278002084787 |
| TATCAATGACCA  | 842.044623722044 | 0.190689877789804  |
| ATGAGTAGGTGCG | 842.047296884268 | 0.265513139171182  |
| TGACTTACCTAA  | 842.04787700288  | 0.212422394984564  |
| TCGGTACAGTAA  | 842.070762098546 | 0.1840770065381    |
| CTGATTACGCAC  | 842.076100501102 | 0.211897035213984  |
| CGATCTTGTGAC  | 842.092994768146 | 0.197887391726048  |
| TGATGAGTTACA  | 842.104157661058 | 0.203637480048375  |
| ATGCGGTGATAG  | 842.105051201339 | 0.182291852195133  |
| AATGACAAGACG  | 842.107151229705 | 0.211580565173648  |
| ATGAGTGAGTTA  | 842.11445309413  | 0.139048075900505  |
| CGGTGGATGACC  | 842.115846840808 | 0.205114480272378  |
| CTGGTAACGTCA  | 842.123850362486 | 0.1690193053328    |
| GAATGAATAATA  | 842.126113787542 | 0.224937413396874  |
| GGTCATATGTTA  | 842.127784571235 | 0.299600941589054  |
| TGACGCTACTAA  | 842.128595890313 | 0.237644109937272  |
| GTAAGACACATA  | 842.132624525149 | 0.158364703358114  |
| CAAAACGCGTCA  | 842.141146924038 | 0.146230035414257  |
| AAATGTCATTTT  | 842.141181863046 | 0.130907591250305  |
| GGGTCATTCGTA  | 842.142537968887 | 0.318565495172319  |
| ATGGAATGATTC  | 842.147006166015 | 0.260361680746274  |
| GGGTGACCCAGA  | 842.153487600773 | 0.190515746690087  |

|                |                  |                   |
|----------------|------------------|-------------------|
| ATCATGACACTC   | 842.157848357075 | 0.165094358195796 |
| AAGTTGCGTAAC   | 842.160526294784 | 0.16557244909532  |
| CTACTCAATGAC   | 842.161771432444 | 0.182247758892064 |
| GTCACGATCTTA   | 842.166635033446 | 0.16110270274655  |
| AAAATGTCACCC   | 842.176469408021 | 0.158571179065334 |
| ATTGGTTGAGTC   | 842.177798669135 | 0.178478245698846 |
| AATTAATGACAT   | 842.19030324761  | 0.169259236668428 |
| CGTCACGAATCA   | 842.190353623799 | 0.169469910401252 |
| AGCGAATTAATC   | 842.192082911121 | 0.209119170657544 |
| GCTATTGTCACA   | 842.195942398305 | 0.191054210521538 |
| GGCGTAAGTCAC   | 842.196901420903 | 0.238645374810205 |
| ATAAGGGTCAGA   | 842.208779815302 | 0.174951925383615 |
| GTCACCGTGGAA   | 842.211472910299 | 0.166899746135376 |
| CACATGTGTGAC   | 842.224419187597 | 0.167743803176762 |
| AAGTCACGCCAG   | 842.226552529574 | 0.178445596260998 |
| AAATGTCATGAG   | 842.226628507886 | 0.224123902625811 |
| ATGAGACACGTG   | 842.235393644203 | 0.2983601047512   |
| AGGCTGGAGTCA   | 842.242917757465 | 0.180374864360424 |
| TGAAACTACTCA   | 842.246813917021 | 0.251850138608492 |
| CTCAAATCGTCA   | 842.247309678545 | 0.193321650273671 |
| AGAAATTAGTAC   | 842.252502483576 | 0.217043706770853 |
| GTCACGGCCTAA   | 842.255226943665 | 0.206902598604516 |
| TGACACTGCAAAA  | 842.259894203786 | 0.189492303376871 |
| GTTGTCACCTCA   | 842.264086642653 | 0.194894774662523 |
| AGTAATTGAGTC   | 842.274782797023 | 0.178428204350483 |
| ATGATGTATTAA   | 842.276788380762 | 0.216183060329993 |
| AAGGGTGAGCAA   | 842.29378258097  | 0.169531017424242 |
| CGGTGACAACGA   | 842.297081008205 | 0.158221843846486 |
| ATATGCGTGACA   | 842.297762408838 | 0.198128542868504 |
| GTCATTTATCAA   | 842.298939763618 | 0.205760975051838 |
| GCACGCTGTGAC   | 842.302779305513 | 0.149148846743301 |
| AAATGCACTCAT   | 842.316333682395 | 0.160572230464428 |
| CATTAAGTGTCA   | 842.324907797742 | 0.181033655033852 |
| GTCGGATGACCA   | 842.329194218471 | 0.190451052411665 |
| GAAGACAATGAC   | 842.33297421688  | 0.17267007101914  |
| ACTCATTCTCAG   | 842.336726246781 | 0.161254195446776 |
| CAGAGACAGTCA   | 842.339847906055 | 0.373433822426706 |
| CGTAGGTAGTCA   | 842.346298713688 | 0.167946363848589 |
| CCTGTCATGTGA   | 842.350853520606 | 0.246192703358608 |
| AGCAGTGGTCAT   | 842.351470333141 | 0.167052181427325 |
| ACATAGGACTCA   | 842.351996621156 | 0.226635017111682 |
| CGCTTATTGTCA   | 842.35617107271  | 0.172937353668437 |
| ACAATGCGTGAC   | 842.368790582514 | 0.263030462761082 |
| ACGAATTAGTAC   | 842.370361334941 | 0.252337035109774 |
| ACACTAATGAGT   | 842.371613576322 | 0.272157135219437 |
| GCCGACCTGTCA   | 842.371974776555 | 0.206311551438404 |
| CAACGCATGACA   | 842.373476562884 | 0.166212515006993 |
| GCACTTTACTCA   | 842.375847606582 | 0.211164977795341 |
| AAAGCCTGTGAC   | 842.380969555347 | 0.152612264603123 |
| ACACGTGAGCAA   | 842.383081323594 | 0.276459569418856 |
| CACAAATGACCA   | 842.386131868625 | 0.151435474309357 |
| AGTCCCAGTGTGAC | 842.415883547837 | 0.298161981776114 |
| ATAGTGTGACGTC  | 842.43585895386  | 0.203893822159253 |
| CGAGCAGTCAGA   | 842.438752031895 | 0.160552360609925 |

|              |                  |                   |
|--------------|------------------|-------------------|
| CAGGTATGAATC | 842.443134172724 | 0.173254578710087 |
| AATCCTCTGACT | 842.449440420124 | 0.19533937593574  |
| GTCAGCGTCCAA | 842.475102534666 | 0.236483068316846 |
| ATAGACTCAGCC | 842.486147363372 | 0.257095883775095 |
| ATCCGTGACGCG | 842.488543176567 | 0.257000128608105 |
| CGAATAGGTGAC | 842.492300981446 | 0.260963711373595 |
| GTCATGTTACAC | 842.510733611986 | 0.249907522977859 |
| CAAAATGAGTGA | 842.511195116195 | 0.209193067556801 |
| ATCCAATGACCA | 842.515759863185 | 0.273898388472142 |
| CTATGAGCTGTC | 842.516100494764 | 0.164417270549324 |
| CGTCACGACGGC | 842.52367946502  | 0.139337371199473 |
| GTTACTTCGTCA | 842.538532816926 | 0.291960265451654 |
| GATGAGTTAACC | 842.541303934201 | 0.185097541672083 |
| AGACAGACTCAC | 842.546980198503 | 0.136282386504019 |
| ACTCATCTATC  | 842.547046841555 | 0.185187992700474 |
| CAAGGAGATGAC | 842.578832986023 | 0.209917234022716 |
| CTCTGTTGGTCA | 842.583298807882 | 0.171132241573798 |
| CGTCGACTATGA | 842.593230025394 | 0.321986831956533 |
| CACTGCAATGAC | 842.597343879549 | 0.159989453357568 |
| TGACGTTTAGAA | 842.597882759088 | 0.174251488154521 |
| CGTGCGGCTGAC | 842.601627908113 | 0.17678940069568  |
| ATTTGCGGTGAC | 842.60723708826  | 0.211062551077083 |
| ATTTGGACTCAC | 842.633362431657 | 0.1491969324317   |
| AGTCTTGTGACG | 842.639072066906 | 0.161969665357134 |
| ACCTGCTGTGAC | 842.639978144551 | 0.195129641696681 |
| AACAGTCAATGC | 842.644578570083 | 0.248724563187501 |
| GCGAGTAATGAC | 842.644600634594 | 0.228149511947145 |
| AACTATGAGTTA | 842.651639011228 | 0.271199397046118 |
| AGTGTCTAGTCA | 842.662669629485 | 0.285915779752218 |
| ACCAATCTGACT | 842.662786362563 | 0.152776334034798 |
| CATACTCTGACA | 842.663376855578 | 0.265287458292603 |
| CGTCATGGATCC | 842.668752671934 | 0.175013895581401 |
| ACAAGTGAGTCT | 842.67531814648  | 0.162330392515524 |
| CGTCATTAGCAC | 842.680108581859 | 0.105414938980043 |
| AAAAGCATGACA | 842.689033847885 | 0.215260742691016 |
| TGCGTAATTCCA | 842.691214865931 | 0.167102049984412 |
| GATTGGTGACAA | 842.695458837882 | 0.161029763404832 |
| GTCACCGACTTA | 842.697662367494 | 0.300532778074325 |
| ACTCAGTCAAAG | 842.701554487505 | 0.189266686550459 |
| ACGACTGACGTG | 842.708001995135 | 0.290441450053561 |
| CGTCACTGACGA | 842.708253803398 | 0.182599224137525 |
| TGGGGTGACCCA | 842.714260673101 | 0.271500790712806 |
| TCTTACTTGTCA | 842.715456695156 | 0.210253983771233 |
| CCGACCGACTCA | 842.721796581679 | 0.157108094117492 |
| ATGACTTCTATC | 842.726892975298 | 0.182327073911787 |
| ATGAATCAAATA | 842.727179324211 | 0.269286269279587 |
| AGGAAGTACTC  | 842.728631314866 | 0.159428452036188 |
| ACGCCCTGTCAT | 842.728751547388 | 0.159518239293454 |
| ATATTTGTGACA | 842.731113905285 | 0.236728761209186 |
| GATATGCATGAC | 842.732833278773 | 0.191785611871597 |
| ACTCATGACAA  | 842.743309141045 | 0.196459133823861 |
| CGTCACCGCGCA | 842.744932856816 | 0.281592387386197 |
| ACGTCAGCCACG | 842.748334163228 | 0.327828218902388 |
| AGTCACGAGAGA | 842.751196752107 | 0.146612623755514 |



|              |                  |                   |
|--------------|------------------|-------------------|
| AACTTGATGACC | 842.75292814951  | 0.285106655411051 |
| CCTTTATATGAC | 842.760150190512 | 0.340682301809652 |
| GGCATAGGTGAC | 842.764596410246 | 0.193536124592418 |
| CAGTCAACGGAA | 842.766132301165 | 0.216785127603668 |
| TCATCGTTGAAA | 842.768974667266 | 0.249334634725676 |
| ATTCATTATGAG | 842.771434982033 | 0.30223567785778  |
| ATTACGTATGTC | 842.771741219929 | 0.17924190714957  |
| ATCACGTACTA  | 842.774925598085 | 0.163810800320881 |
| ACTATGGCTAAT | 842.781188056996 | 0.282263925098959 |
| AAGACATGACCA | 842.784271439075 | 0.164849783137754 |
| AGAGTAATAATA | 842.784307272151 | 0.168840783340607 |
| AGAGTCAAAGCT | 842.786385552888 | 0.206720283380697 |
| ATTACGACGTCA | 842.79696262534  | 0.157714359118501 |
| ACTGCGGTGACG | 842.796995189711 | 0.172639510266472 |
| AACATCGTCACG | 842.797341217999 | 0.17655061357171  |
| GCGCACATGACA | 842.806908149218 | 0.251436265736779 |
| CTTGTTTGTAC  | 842.806987065874 | 0.354171689229274 |
| ATGACACTCGCC | 842.809803200891 | 0.184936624335377 |
| ATGACAACGCGC | 842.810001609548 | 0.157821772737948 |
| AGCGCCGTGATA | 842.810403857277 | 0.208471492226809 |
| GGTCACATGATA | 842.837564173953 | 0.172947425716131 |
| CCACTGTGACAG | 842.838680286251 | 0.283113204909057 |
| AAGCCCCTGATA | 842.84385683391  | 0.216789265086929 |
| TCGGCGCAGTCA | 842.844689520789 | 0.297531499064318 |
| CACGTCAGAAAG | 842.845151026972 | 0.254476063680481 |
| GACCCTTGACTC | 842.857350148483 | 0.183366073554705 |
| AATGCTGACGTG | 842.867343405268 | 0.193395217341092 |
| CGCTTTTGTGCA | 842.872930406417 | 0.208232975032434 |
| ACTAGATGACGG | 842.873439200555 | 0.232945244363062 |
| CAAGTTGAGTAA | 842.881524951294 | 0.199046722532877 |
| AGTGTCACGGTA | 842.8921501227   | 0.163562813408822 |
| CTAATATGTCAG | 842.896826437898 | 0.252416551583495 |
| AACTCATGACCA | 842.898655762524 | 0.262223457358669 |
| TCCGAGGTGACA | 842.899654425831 | 0.210334349742313 |
| CCAAGTTGTAC  | 842.904841610436 | 0.22275543928277  |
| CTCAAGGTGTC  | 842.905523995782 | 0.253419601617281 |
| AGAGTCTGTGAC | 842.910019483539 | 0.233802390518251 |
| ATGACGTTGCAA | 842.911066054977 | 0.159745545819927 |
| CTTTGCTGTGAC | 842.916235267476 | 0.188627415161494 |
| GGACACTGTGAC | 842.9189522667   | 0.159425329039685 |
| TCAAGACAGTCA | 842.920592553771 | 0.238999180899726 |
| AGATTTGTGACG | 842.924975084862 | 0.184531334718816 |
| GCTCGGGTGACA | 842.925466462733 | 0.231061925529727 |
| TGAGTGATGCAA | 842.932097171567 | 0.211382822864966 |
| AACGAGCTGACT | 842.934086197354 | 0.191031410584646 |
| TCGGGATGACCA | 842.943007093725 | 0.211034659645415 |
| ATACATTAATA  | 842.943049439715 | 0.167234443871211 |
| ATGTTATGACCG | 842.955692362181 | 0.303207066822309 |
| AATCACGACTCA | 842.969807220635 | 0.191193052129245 |
| CTAAGCTGTGAC | 842.99498217303  | 0.210727189827483 |
| GATATGTCAGCA | 842.995162939356 | 0.193674019486342 |
| ACGGTCATAACG | 843.003950209414 | 0.163352533927201 |
| CCTTTATGTGAC | 843.012292413032 | 0.137729773924086 |
| CATGTGTGGTCA | 843.013377059636 | 0.178424538866455 |

|               |                  |                   |
|---------------|------------------|-------------------|
| CTTTCCAATGAC  | 843.017131944835 | 0.171172535595457 |
| ATGACGTTCTAA  | 843.023969281287 | 0.188816701075724 |
| ATGACATCTTAC  | 843.026763024849 | 0.19703044617153  |
| ATCAGATGACGG  | 843.03414085111  | 0.208143009721602 |
| CAGGCGTGAGTC  | 843.040514857075 | 0.318878795685592 |
| CAAGGAGAGTCA  | 843.041061406154 | 0.177667057470672 |
| ACATACTTGTCA  | 843.042223333044 | 0.224156253115536 |
| GCGCTTTGTGAC  | 843.045945168181 | 0.24826655624028  |
| ATGATTACATGA  | 843.046824860017 | 0.218898751345392 |
| AGACCATGACGC  | 843.055641365689 | 0.229184287612201 |
| CACCTGGTGACG  | 843.058508707818 | 0.182714506525156 |
| GTA AATTACGCA | 843.059582542687 | 0.157582384412865 |
| ATGATACA ACTC | 843.071707084654 | 0.206004341577482 |
| ACTCATTGCTAA  | 843.078330075611 | 0.173992339606679 |
| TCTATCATGACA  | 843.08293756476  | 0.169210005506575 |
| GCTATTGAATCA  | 843.084574463412 | 0.164013351701112 |
| TCTTGTTGGTCA  | 843.088563471822 | 0.244832572374933 |
| GTGTTGACTACA  | 843.089101646296 | 0.215605978865957 |
| GCTCGTGACGAA  | 843.090941100156 | 0.312083368697543 |
| AACTCCGGTGAC  | 843.094259457808 | 0.264883108972884 |
| GTCGATGTGACA  | 843.103190577566 | 0.158575175383896 |
| AATGAGCTGACT  | 843.107459393551 | 0.210692939026686 |
| AATGTGACCACT  | 843.112736812939 | 0.134721424523682 |
| AGTCAAATAGTC  | 843.121859298683 | 0.241930166244283 |
| AGAATGGTGACG  | 843.124946415748 | 0.229366931993296 |
| GCTAAAGGTGAC  | 843.130614665602 | 0.219743116081368 |
| ACGTGACTTCGA  | 843.13263486544  | 0.22708673392816  |
| ATGACAAGCTCG  | 843.145587965863 | 0.28473178033065  |
| ACTCATACCACA  | 843.15004114284  | 0.20421384916878  |
| CCTGACGTGACG  | 843.152021584972 | 0.225853151207845 |
| GTCACAACAATA  | 843.152055033815 | 0.169863013041384 |
| ACTCATTCACTA  | 843.152701197386 | 0.197547053055133 |
| TGACTTAAGGAA  | 843.167395882173 | 0.18243033829656  |
| CCGTGCTGTAC   | 843.168847104568 | 0.161693196926295 |
| GGAAAAGGTGAC  | 843.169076886396 | 0.241930202302014 |
| ATACTTAAGTCA  | 843.169617730719 | 0.203495565043204 |
| GTCACCTGACCA  | 843.189430698585 | 0.161242007944129 |
| TGACAGTCAAAA  | 843.193296823374 | 0.263256529062292 |
| GTTTAGTGCATA  | 843.19334703655  | 0.12300542725311  |
| GTGAGTCTCATA  | 843.193480566512 | 0.211247863672294 |
| AGGTGAGCAAAC  | 843.194401453758 | 0.233236838923869 |
| AATGACATCTAA  | 843.195122673426 | 0.233875807293657 |
| GTCACCCATCAC  | 843.204012149121 | 0.234476575627491 |
| CTGGTATGATTC  | 843.204933546431 | 0.201866028213641 |
| CATACACGTCAA  | 843.21348701003  | 0.259848376998316 |
| GGTTAACGTGAC  | 843.22828897911  | 0.165229921817739 |
| ATAGTTTGTGAC  | 843.236868646119 | 0.217625594182821 |
| ACACCCATGACA  | 843.2401145343   | 0.139922135192813 |
| ACTCATCTTTCT  | 843.244090631204 | 0.176751594070136 |
| GGCTTAGATGAC  | 843.244802682436 | 0.336334950153367 |
| GAGTGAGTCCAA  | 843.249237446578 | 0.16553600164488  |
| CTAATTGGGTCA  | 843.252382492511 | 0.338952351087374 |
| AATCTGGGTGAC  | 843.253320371045 | 0.222883455136554 |
| CGCGAGATGACA  | 843.268323926362 | 0.136832191126695 |

|              |                  |                   |
|--------------|------------------|-------------------|
| CATACGCTGTCA | 843.302884697681 | 0.17468637553895  |
| GAGCAACATGAC | 843.303193642634 | 0.197113505807941 |
| CATGTCATGTCA | 843.316416242877 | 0.161639352639097 |
| TACTAATTCGGA | 843.316963025896 | 0.257364951535079 |
| GTGACAAACAGA | 843.317976491861 | 0.192677880130467 |
| ACATTATGTGAC | 843.32082651229  | 0.116866735272084 |
| TTATGATTCGAA | 843.321771824222 | 0.102474276002998 |
| CGTCATTGGTTA | 843.349129793316 | 0.246051807762029 |
| AGTCAGAATCGG | 843.363697754024 | 0.222956729040645 |
| GGTACTTGTAC  | 843.375364697647 | 0.153685014938768 |
| AAATGTCACCAG | 843.382179204955 | 0.288920667541651 |
| AGGTAGTGACGC | 843.3887938728   | 0.22045691529619  |
| CTGTGTGGTGAC | 843.393663746461 | 0.225735877340865 |
| GTCACATTTCCA | 843.394495696743 | 0.157570245522398 |
| CAAATCTTGTCA | 843.401675230483 | 0.15772451321261  |
| CACGTCCATGAC | 843.410047847389 | 0.271149333209969 |
| CAACCAATGACG | 843.412198405738 | 0.228444092879572 |
| GCCGAATCGTCA | 843.415389833978 | 0.236631145524002 |
| CCGAACGCGTCA | 843.417837002016 | 0.281288758575394 |
| GACTAATTACAC | 843.423120337543 | 0.170099140793331 |
| CCAGACATGACA | 843.433554363293 | 0.263890957936928 |
| TCATTAGTCGCA | 843.438235437256 | 0.295940914461211 |
| ATCAGTTTGTCA | 843.43830289485  | 0.225231892351544 |
| TGACTCTCAACA | 843.439572710863 | 0.163572385125012 |
| CAACGTCATGGA | 843.43995223744  | 0.176653745289499 |
| AGAATCGCGTCA | 843.441931168333 | 0.199442709491538 |
| AACACTAGTGAC | 843.442942431002 | 0.165384617839084 |
| ATCTGGGTCACC | 843.447729962017 | 0.220100600456451 |
| GACTAATTAATA | 843.457917948279 | 0.20285556205794  |
| ATTAAGTCAGCA | 843.460109177505 | 0.200535504036605 |
| CAATCTGACGAA | 843.46075771703  | 0.254850650901585 |
| CAATGACCATGA | 843.464859184823 | 0.259386210855515 |
| ACGACTCAGAAA | 843.472554489288 | 0.225731145790338 |
| GCCGCATGTGAC | 843.474187802543 | 0.217245877759339 |
| ATGACCTAACCG | 843.478980206863 | 0.221738675810737 |
| CTGTCTGACGGA | 843.482160631062 | 0.243249374699935 |
| ACTGCGTGACAC | 843.485679465076 | 0.138646240673272 |
| ACGACGTCACAT | 843.493376582688 | 0.142491364612311 |
| TAACCGGTCATA | 843.494828796491 | 0.173501302700471 |
| TCGCCTGAATCA | 843.500178163481 | 0.25245160338751  |
| GCGTCACCCCAA | 843.50394683716  | 0.202298984681589 |
| GAGTGACGTGCA | 843.505494779507 | 0.105507951371103 |
| ACTCATCTTTAG | 843.514992304575 | 0.149552434914066 |
| GTGTCAGTGACA | 843.516336909473 | 0.181884852399723 |
| ACGTGCCATGAC | 843.523457481038 | 0.170233983237238 |
| GAATGTCTCACC | 843.524561400391 | 0.189276835900188 |
| AGTCAGCGACAA | 843.525436100725 | 0.18627469521583  |
| ATGGTTCATGAC | 843.525841202419 | 0.209156199890875 |
| AAGCGGACTCA  | 843.526175111497 | 0.200428704952674 |
| AACGGTGAGCAA | 843.527478882952 | 0.261333340392395 |
| ATGACGACCTTA | 843.528794921029 | 0.250003619850009 |
| ACAACGTCACCT | 843.534060283449 | 0.221632516247804 |
| CTGTAATTACTC | 843.534841167265 | 0.191151931366142 |
| ATATGGTGACCA | 843.541904223122 | 0.322954426389139 |

|              |                  |                   |
|--------------|------------------|-------------------|
| CACATAGCATGA | 843.546268204037 | 0.24522031537586  |
| ATCTGACACGTA | 843.552870583219 | 0.149875540589278 |
| AGTGGATTAGTC | 843.554094282283 | 0.206234590919502 |
| TGACGAAGATCA | 843.559470003799 | 0.181537174884945 |
| GGGTGTAATGAC | 843.566497752179 | 0.161047610875589 |
| CTGATGGTGACA | 843.567567498772 | 0.245063170990342 |
| CGTCTATGTGAC | 843.573292324983 | 0.243003611105714 |
| GTCACGGGTACA | 843.581160726907 | 0.182100300960391 |
| AGGTATATGTCA | 843.588035025592 | 0.222689529687496 |
| ATTGCTAATCTA | 843.589581059968 | 0.206644382093211 |
| ACGTCACGTGTA | 843.596493557433 | 0.157880967059732 |
| CTGAGGGTGACA | 843.600027311217 | 0.172808462013257 |
| AAGTAGTGACAC | 843.611244558092 | 0.226234500545952 |
| CCCTTGACTGAA | 843.615467215365 | 0.233908998064615 |
| GAGGATTACGCA | 843.619234696937 | 0.192930888862344 |
| AACTGACATATT | 843.62566093999  | 0.240384384445097 |
| AAAAGGTGACAG | 843.627223979149 | 0.105162953708531 |
| ACAGTCAGCGGG | 843.628901744931 | 0.246150768214379 |
| AACCGGTCATAG | 843.629286934908 | 0.125416576515177 |
| GGTGAGTATACA | 843.633919906093 | 0.162641807382822 |
| TTGGGTCACCAA | 843.636734382255 | 0.242730606388322 |
| CAGTCCGTGACA | 843.638183028314 | 0.123529813821835 |
| TAATATGTATCA | 843.641758968156 | 0.298553497166512 |
| AAGAGCTGTGAC | 843.644627569145 | 0.108654456602868 |
| ATGGTACTAATA | 843.659046628861 | 0.195499018546556 |
| GGGTCACACTGA | 843.660240761011 | 0.235910880573192 |
| CGGATAGGTGAC | 843.660885740934 | 0.279850343843399 |
| AATACATTAGTC | 843.661847851141 | 0.266702911100673 |
| ATGACGCTCAGG | 843.675003907349 | 0.220211419911087 |
| AACAATTAATCT | 843.675069832457 | 0.127790706679575 |
| TCCGCTGTGACA | 843.682429602408 | 0.162786795602979 |
| CGGAACATGACG | 843.686352970698 | 0.273391724267568 |
| AGCCGAGTCAAC | 843.687846021564 | 0.136497642997335 |
| CAGCGAGGTGAC | 843.68786565765  | 0.201875313407752 |
| GGTGTATCACAC | 843.693314934306 | 0.232286076176046 |
| CCTCGTGAGTCG | 843.69923936319  | 0.22605963224886  |
| CTGGCTATGACC | 843.699650825807 | 0.258044351056652 |
| AGAGCCTGTGAC | 843.704223671531 | 0.161525433763096 |
| GATTGCGGTGAC | 843.706552240203 | 0.165930419003704 |
| GTCATTGTGGTA | 843.709480485056 | 0.150208818149576 |
| GGTCATACCGTA | 843.711203067004 | 0.202418890033733 |
| ACTCATTACGAT | 843.714342173311 | 0.183720198517392 |
| GGGACTGTGTCA | 843.719584163805 | 0.18472195182289  |
| AGGACCGGTGAC | 843.722072088442 | 0.20571566325234  |
| ATGTAATGATGC | 843.726096441006 | 0.247417307839525 |
| AGTCAGATCCTA | 843.740541822457 | 0.175380690109497 |
| AGTCGTAATGAC | 843.744251645519 | 0.274779163530112 |
| AATTGGTACTCA | 843.74876613398  | 0.16659914749114  |
| CACGAGTTATGA | 843.749115303664 | 0.297330842913354 |
| AGACGTGGTGAC | 843.753950580127 | 0.157070213204243 |
| AGGTATTGTGAC | 843.759003678187 | 0.164371484568618 |
| CATTGTCTGACA | 843.759243296349 | 0.171705173757704 |
| ACTTTGTTGTCA | 843.762973727869 | 0.191249447397122 |
| ATTATCATGACA | 843.764577211994 | 0.236945904422965 |

|              |                  |                   |
|--------------|------------------|-------------------|
| TGACGACGTTAA | 843.772104988701 | 0.174311770363157 |
| GATTTTATGACC | 843.789270334179 | 0.240654275422942 |
| ATGACAATCTCG | 843.792359264736 | 0.254901388496751 |
| AATCACAGTCAG | 843.801583643339 | 0.214808949876788 |
| CCGTCATTAGTA | 843.805595538998 | 0.346440712786329 |
| TATGTTACATCA | 843.807052819162 | 0.222371721675138 |
| ATGTTAGTCTTA | 843.827849451778 | 0.158025955956403 |
| AGTTATGACCTA | 843.83474942017  | 0.202490708287631 |
| ATGACAAGGAAT | 843.834871279352 | 0.1956154456367   |
| GGTCATCGCGAA | 843.838188361056 | 0.241153953814554 |
| GTCATCGTCCCA | 843.843814408813 | 0.123611137620268 |
| GAAATGATGACC | 843.849379234226 | 0.186264996323634 |
| CGCCGCGAGTCA | 843.850707170257 | 0.233847881103595 |
| CGCGACGTCATC | 843.850822790732 | 0.225783952806332 |
| ATAAACCATGAC | 843.853611378494 | 0.168907640710385 |
| AGGATCAATGAC | 843.867997199619 | 0.282758175536466 |
| AACCCTGTCATG | 843.868741000612 | 0.19119516897082  |
| ACGGAATACTCA | 843.877417147902 | 0.256602594351687 |
| ATTGGAGGTGAC | 843.886171736378 | 0.166396507858927 |
| ACACTGTACCCC | 843.911073842003 | 0.179488797769573 |
| ATGACGGGGATC | 843.914853385673 | 0.208593856927979 |
| AAGTACCCGTCA | 843.915254322987 | 0.177709994654768 |
| ACAACAGTGACA | 843.915975176371 | 0.162022995527161 |
| GTGATAGTGTC  | 843.925303691503 | 0.150690848346633 |
| TACAGATGAGTA | 843.930416661893 | 0.210169202786393 |
| TGTGACGGGTAA | 843.936196631665 | 0.252050226407935 |
| CATGGTCTGTCA | 843.937091559219 | 0.252470857872872 |
| ATGACAAGCATC | 843.938179411204 | 0.141834952736583 |
| ATAATGTTGTCA | 843.943372283657 | 0.320070952917262 |
| AAGACTGATTAA | 843.949871796597 | 0.181875737385285 |
| TCTACGGTGACA | 843.952943067151 | 0.100317983138289 |
| CGGTGAAATGAC | 843.956211491862 | 0.219747534167805 |
| GATATGTATCAC | 843.960744002155 | 0.205595450921725 |
| CGATGCCATGAC | 843.965879957812 | 0.262283634138301 |
| CGCTCGCAGTCA | 843.968337300525 | 0.141798007301806 |
| CTACGCGTCAGA | 843.974814602433 | 0.165772102871994 |
| AGCCTGACTGTG | 843.987021064184 | 0.289914821104069 |
| CACTCCGGTGAC | 843.999690673393 | 0.119420881080798 |
| ATTCATGACAA  | 844.009194449018 | 0.312375238212908 |
| ACTCGTGACGAA | 844.012730969135 | 0.178176761180668 |
| ACTAATAGATTA | 844.020399944033 | 0.203953433323722 |
| TAGTGACGGAGA | 844.021084874843 | 0.16865631083009  |
| CCGCAGTGACAC | 844.023291064819 | 0.163878811509313 |
| AACGAACGTCAT | 844.027986294793 | 0.191745409062194 |
| TACAAATTATGA | 844.030752168406 | 0.184624027781763 |
| CGTTCCATATGA | 844.033899960926 | 0.172431308534647 |
| CACTCTGGGTCA | 844.037477759771 | 0.272572286123914 |
| TACCGTTGACTA | 844.038246381763 | 0.238769112692557 |
| ATTTACTCTGAC | 844.040322030768 | 0.207455434075493 |
| GCAGTCAGAATA | 844.042460587144 | 0.151295666867877 |
| GTCACATAGGGA | 844.046170424602 | 0.171927708958532 |
| ACGTCACGTCCA | 844.046292321966 | 0.178450010967011 |
| TCGGGTGAGCAA | 844.054379582686 | 0.160620621042758 |
| AGTCAGTACTTG | 844.054758832473 | 0.163529513105168 |

|               |                  |                    |
|---------------|------------------|--------------------|
| CCGTCATTACAA  | 844.057617600664 | 0.199016936977323  |
| ATTCTATGACCC  | 844.057658042636 | 0.131736326821188  |
| ACTCATCAGTCT  | 844.070248240615 | 0.0896694179617875 |
| AGTCAGCCGGTG  | 844.07896901078  | 0.309369073699937  |
| CCTACGTGACAC  | 844.080000262139 | 0.231628619384628  |
| GTCACAACCGAA  | 844.097272743261 | 0.201498398081694  |
| GGTGTTACGCAA  | 844.106920832827 | 0.159835942455195  |
| GGAGCAGTCAGA  | 844.108106125108 | 0.189796333234413  |
| AGGGGTTGTCAT  | 844.110072709054 | 0.188028187011354  |
| GTCATTGGAGCA  | 844.121110912939 | 0.227824996323699  |
| CATGACAGACTA  | 844.121438388556 | 0.274339728472744  |
| AGTCTTTGTGAC  | 844.127449343941 | 0.131949069166996  |
| ACGTGGGGTCAT  | 844.131182803139 | 0.214202288954883  |
| CGTCACCTTTTC  | 844.131487745952 | 0.173712643447187  |
| ACGTCATGCGAG  | 844.133081731271 | 0.168178848751663  |
| CTATAGGTGTCA  | 844.14289490822  | 0.20902794551645   |
| TGTCATGGTAAA  | 844.143158207416 | 0.151188391361926  |
| ACTCATTTAGAA  | 844.144207775533 | 0.171278019847585  |
| GTACAGTGTGAC  | 844.145151953114 | 0.224528319662338  |
| GACTGTTGTGAC  | 844.145218784871 | 0.188044698370728  |
| ATGACGGGACAG  | 844.145883759932 | 0.176696618615407  |
| CAAGCATAGTCA  | 844.146291988194 | 0.164499006946312  |
| TACTCATTAGGA  | 844.146494641088 | 0.214709170227278  |
| GGGAGGTGACAC  | 844.146509360895 | 0.149029273951121  |
| CTTTATTGAGTC  | 844.153531836525 | 0.219079559202379  |
| AAGAATTAATAA  | 844.153587641474 | 0.240859885571225  |
| CTGTGACCACGC  | 844.155318847789 | 0.35513106511838   |
| ACTGACTAGACA  | 844.157792424389 | 0.266384481272774  |
| CAACGGGTGACA  | 844.188034204873 | 0.237973325245971  |
| TGACCCATCACA  | 844.195181495939 | 0.137020787260489  |
| GGTTGACGTGAC  | 844.204130146068 | 0.164616820855299  |
| CGATGGGTGACA  | 844.208826237275 | 0.143672613143805  |
| GTCTGACAAAAC  | 844.209952561862 | 0.219277750911128  |
| CCTGACTCGGAA  | 844.21083261766  | 0.157299874582691  |
| AAGAATCATATT  | 844.214791706457 | 0.226095881883408  |
| GCTATGATTCTGA | 844.225896975339 | 0.144749586176483  |
| CAGTGTGAGTAC  | 844.237576308974 | 0.18167896409026   |
| GAAACCAATGAC  | 844.242509865894 | 0.214535622419381  |
| AAGTGTCAGCCT  | 844.244627495106 | 0.236480437236997  |
| ATATCGTCACTG  | 844.250975200559 | 0.216665601559125  |
| CCAGTAGTGACA  | 844.281311625976 | 0.2001293435639    |
| AGTTCGTCACGC  | 844.283752084206 | 0.266816592053966  |
| ACTCATTCAGGA  | 844.284923357664 | 0.177457568596528  |
| GTTCTTGACACA  | 844.286069710911 | 0.258226090633282  |
| CTTGATGATGAC  | 844.286167573808 | 0.184543019386171  |
| AGCTATGTGACA  | 844.287319673298 | 0.304340392410604  |
| ACTATGATGACC  | 844.292042498291 | 0.189630182359748  |
| CGATGAATCGAC  | 844.294872920826 | 0.208008297856528  |
| CCTGACTCGGAG  | 844.304403381122 | 0.14486160486431   |
| GATTCATCTGA   | 844.3057703928   | 0.167315953289611  |
| GAAATGTCATGC  | 844.306125645257 | 0.173982284231849  |
| ATTATTATTCAC  | 844.306316580415 | 0.203629719179232  |
| GGTCATAATCAA  | 844.311272965433 | 0.195770106805514  |
| ACACTACTCATC  | 844.320942952138 | 0.187264966138262  |

|              |                  |                   |
|--------------|------------------|-------------------|
| ACATTTACTAAT | 844.331849046462 | 0.15551194767455  |
| AACGATTAGCCA | 844.339119142859 | 0.243128818911608 |
| CCGATGTGGTCA | 844.344614786291 | 0.194344648915095 |
| TGACGCAGCACA | 844.360943236367 | 0.174421572459248 |
| ACCTGGTGACAG | 844.362303080624 | 0.166583044478589 |
| CAGTCACGCGCA | 844.363334703677 | 0.166178588149274 |
| CGTGACACGGTC | 844.370697249932 | 0.246877641915082 |
| ACTCATTTCCGG | 844.385628262096 | 0.168285146869995 |
| GGGCTAGACTCA | 844.392192002673 | 0.231601179433644 |
| ATCTTTGACTCG | 844.392530082195 | 0.302266670574302 |
| CCACGATTACTC | 844.397671383483 | 0.218542322306186 |
| GTCACCGCTCTA | 844.400434317085 | 0.134872716995762 |
| AAGACCGGTAC  | 844.402420074628 | 0.204055071439873 |
| AATGCACATGAC | 844.40524791155  | 0.126305184494946 |
| AACAAAGCGTCA | 844.409628168158 | 0.207018238959963 |
| GGTCCACAGTCA | 844.409935087504 | 0.179858107237697 |
| GTGGTCACGTCA | 844.414534374664 | 0.16195569437634  |
| GCGTCACTACAC | 844.425502804374 | 0.226176801127769 |
| TCATCGATAAGA | 844.434286038299 | 0.301528194203788 |
| GTCAGAGGCCCA | 844.43590168386  | 0.174313020255178 |
| CAGGGATGACGG | 844.441853048824 | 0.169199798416868 |
| CTGACTCCGCAC | 844.446790698708 | 0.166481080583407 |
| ACGTCACGTATC | 844.452563541846 | 0.183061752586726 |
| CTAGTGACGTGC | 844.453865980679 | 0.17407079440415  |
| CTGACAGATAGC | 844.45387482452  | 0.231942353813967 |
| AAGACTGACTGC | 844.457558491724 | 0.188253753680802 |
| GTATGTCACGTA | 844.464876299265 | 0.254005738108363 |
| ACTCACTCTGAC | 844.465889701112 | 0.147074530214304 |
| CGAGTCAAAGA  | 844.472132157323 | 0.19514863898313  |
| GGCCTTGTCA   | 844.473916298074 | 0.229869662021997 |
| TATATTGTCA   | 844.4832624723   | 0.132170902027293 |
| CAAGATAAGTCA | 844.490278617015 | 0.199397312248115 |
| AGAAGATTCATC | 844.496671784188 | 0.132969555204852 |
| ATGACAGGGAAC | 844.497635444591 | 0.188398326910814 |
| GATCCGACTGAC | 844.502965441204 | 0.164810564011363 |
| GACCGAATGACC | 844.514665152508 | 0.26753723114104  |
| CGTCACATTAGC | 844.529657878269 | 0.191172835961936 |
| AGCCTCTAGTCA | 844.535345409575 | 0.203834786145781 |
| GCACTATGTAC  | 844.538346987575 | 0.236057051772366 |
| ATTATTCATCCG | 844.546202456263 | 0.17243784272118  |
| CTAGGACTAATC | 844.549710342344 | 0.155990520294464 |
| TATGCAGTGACA | 844.552888889317 | 0.193283303280237 |
| TGAACTGATTCA | 844.562055172896 | 0.228540201633513 |
| CTATCTTCGTCA | 844.580115609277 | 0.145403001151954 |
| CTATCTAAGTCA | 844.581649939588 | 0.163680800858305 |
| ACTCATTAGGGG | 844.58475101752  | 0.157275736796481 |
| GGGATGCATGAC | 844.589761023533 | 0.195324936353221 |
| CGAGTCAGGACA | 844.596519860078 | 0.176042427333075 |
| CGACTAATCGAG | 844.596647207082 | 0.292363935765447 |
| CTACTTGTCA   | 844.600331243867 | 0.166741638198159 |
| TCAATGACCAGA | 844.610259913623 | 0.282469382383051 |
| AGCTGTCACCAC | 844.613732284408 | 0.229969534811324 |
| CATGAGGTGACG | 844.614893302892 | 0.210329947448839 |
| ATGACGACCAAT | 844.615439422616 | 0.23948212311192  |

|              |                  |                    |
|--------------|------------------|--------------------|
| GTCACCTAGACA | 844.62364276331  | 0.235468728701767  |
| TAATGAATAATA | 844.628492263853 | 0.222956169482226  |
| AAGGTGACAAGT | 844.631372149439 | 0.178640740415614  |
| AAGTATGGTCAT | 844.637641814367 | 0.0767398396857581 |
| GGAGTTTGTAC  | 844.641002099167 | 0.20344493161122   |
| ATCCTTGACTGA | 844.651773139773 | 0.208081810483069  |
| ACAATGTGACAA | 844.657647064809 | 0.130408846594079  |
| ACCGTGCGTCAA | 844.657699556741 | 0.224861881143223  |
| CTGACTACTTCA | 844.659277719661 | 0.17818994899142   |
| GTCAGTGACGGA | 844.67617596028  | 0.242256298022098  |
| CCCATAGTGACG | 844.679235344254 | 0.294106992956382  |
| CGCACTGATTCA | 844.67949969344  | 0.188767952637062  |
| CGAATGGACTCA | 844.685940770874 | 0.179566053932359  |
| AGTCAGTAACTC | 844.702293543297 | 0.188657263059113  |
| TAATTGAGTCGA | 844.70305550254  | 0.18259907127689   |
| AGACGTGACGCG | 844.704194130503 | 0.19602984301003   |
| AGTAATCGTCAG | 844.707747831339 | 0.17205898669427   |
| CTAAATATGACC | 844.712490144123 | 0.160151075071603  |
| CGTGATACATAC | 844.715753797996 | 0.188635123561329  |
| TGACCCACATCA | 844.719474118892 | 0.190136740834649  |
| AGAACACTCATC | 844.721294422029 | 0.19276030827659   |
| CTATGACCGCAA | 844.723315648663 | 0.202684884936551  |
| AGTACTTGTAC  | 844.723856164831 | 0.24035621409806   |
| ACCTGTCACCAC | 844.729488972141 | 0.129100220381884  |
| CACACTCGTGAC | 844.732165497744 | 0.160387306002636  |
| CGTGGTACATA  | 844.733028933029 | 0.20316831518082   |
| TACGCTTGGTCA | 844.747480776778 | 0.170638890882438  |
| CGTGACCCAACA | 844.749586991913 | 0.250935921035863  |
| TGACTAGAGGCA | 844.750605023736 | 0.156456905830443  |
| ATTAGGTACCC  | 844.752699704842 | 0.280631989380512  |
| ATGTTGCTCACC | 844.77685269902  | 0.197823576173639  |
| TGAGTAGTCCAA | 844.778550154202 | 0.296900134352624  |
| ACGTGACGCTGA | 844.779348264572 | 0.288067521643154  |
| AGCAGTCAGTAA | 844.782441631492 | 0.168022342009314  |
| ATGACATTTGCA | 844.788841201691 | 0.242635476503589  |
| ATGGATGAGCCA | 844.795700177275 | 0.175456051676663  |
| ATGTTGTCGTCA | 844.795930359326 | 0.170597129297556  |
| GATTCATAATGA | 844.809278218649 | 0.193379734686273  |
| GATGAGTTGGAC | 844.814005253651 | 0.23166515513803   |
| CTTATTGTCACA | 844.819040119305 | 0.194900329146053  |
| CGAGGCATGACA | 844.826584087797 | 0.182730255704597  |
| AACGTGACGAAC | 844.84088146564  | 0.144699000447274  |
| AGTCAGTCGATA | 844.847069078762 | 0.339373811718818  |
| TCAGTGTGGTCA | 844.860149066117 | 0.231462590419533  |
| CATGCAGTGTC  | 844.867848145659 | 0.318356160082069  |
| AGGTTAGTCTTA | 844.875490794531 | 0.167003218158464  |
| CCTCCGCGTCAC | 844.876654204751 | 0.179573094737375  |
| GGTGAGTGTAC  | 844.87807207747  | 0.253446256199017  |
| AATGCTGAGTAA | 844.893211610661 | 0.166626540355812  |
| CGCGTCACTTAG | 844.896095823604 | 0.171056199018168  |
| CATTTAGGTGAC | 844.904260293749 | 0.235972493557123  |
| TGTGCATCATAA | 844.907232732014 | 0.214138902762625  |
| ATAAAGAGTGAC | 844.910989469371 | 0.259832437487748  |
| CTCTAATTAGTC | 844.911347961999 | 0.178437503705495  |



|               |                  |                   |
|---------------|------------------|-------------------|
| GCTCACCGTGAC  | 844.930765960479 | 0.237261634954183 |
| ACTTTCACGTCA  | 844.93322279765  | 0.247183433738791 |
| ATCCCATAGTCA  | 844.939425034111 | 0.26108602713541  |
| GTGTGATACAAC  | 844.940210096316 | 0.217944277950069 |
| CTGCCGTCATAA  | 844.94029658721  | 0.218663642919814 |
| TGACGATTCTAA  | 844.943877105314 | 0.276558094502247 |
| AGAGGGTGACGA  | 844.954325680864 | 0.168195886944831 |
| CCATGACTTGGC  | 844.956045049437 | 0.176971575381335 |
| ACTCATCTAGTG  | 844.968967118946 | 0.200216125757294 |
| GTCACAAGCCCA  | 844.977444525696 | 0.214940755488879 |
| GCGGACTACTAA  | 844.984273788384 | 0.247793012858223 |
| CACTCAACGTCA  | 844.98850379782  | 0.216248445169258 |
| GTCACACAAACA  | 845.004366726624 | 0.228114236686696 |
| CTGTCATGATGC  | 845.006398518331 | 0.213674685111878 |
| CAGAGGTGACGA  | 845.010415288075 | 0.212345230042217 |
| GCGTCATGGATA  | 845.012331007278 | 0.117007743411085 |
| CTGTGACAGCAA  | 845.023694852007 | 0.16491054003222  |
| AACCCTGGTGAC  | 845.030284478317 | 0.16004131592999  |
| CGGACTCACTAA  | 845.03136020105  | 0.213022844579708 |
| ATTACGCAAATG  | 845.032768032461 | 0.228281773952885 |
| AGTCAGAGTGAG  | 845.050025028577 | 0.198475547868664 |
| TCCCACCACTCA  | 845.067686921418 | 0.220297346712406 |
| GCTCTTGGTCAC  | 845.070689705885 | 0.281721000515623 |
| CGTCACAGGGTC  | 845.073976414015 | 0.240533696188763 |
| GACACGTAGGTC  | 845.079407411846 | 0.215654893938038 |
| ATGACAAGATGC  | 845.084167623148 | 0.22144627810909  |
| ATGTCTGTGACA  | 845.104732861176 | 0.199784853586118 |
| AGATGTCATTGC  | 845.106840671654 | 0.19143955845421  |
| AGACTCAGCGCG  | 845.121261346675 | 0.220605917311738 |
| ATTACTAAACGA  | 845.121931532368 | 0.191038483146357 |
| GACGGTCATGAC  | 845.12398013242  | 0.155327280650271 |
| CACTTGACATGAC | 845.124580686834 | 0.18353951323516  |
| ATGATGTAACGG  | 845.128060064874 | 0.190991860164968 |
| TACTTGTGACGA  | 845.128060682454 | 0.240796379204114 |
| AATACGACGTCA  | 845.128190454624 | 0.182945620973186 |
| ACAATTAGCAAT  | 845.131844692605 | 0.272138234389441 |
| ACACATCATCGA  | 845.135439243576 | 0.139197587730344 |
| AGATCGACTCAG  | 845.140645537928 | 0.218451444618813 |
| CACCTGGTCATA  | 845.160564844311 | 0.205872431932452 |
| GTCATCTGCAAC  | 845.162015591399 | 0.203558912909662 |
| CGTCATCTCGCC  | 845.170365932067 | 0.157519836106839 |
| CCTAATGTGACG  | 845.182647736486 | 0.287358438176642 |
| ACTGAGTCGCAC  | 845.186690157362 | 0.24273095104941  |
| GTGTCACCTGCA  | 845.189002166438 | 0.246783217275809 |
| ACTCATTCTTAC  | 845.190088375025 | 0.217171956188008 |
| ACAGAGCGTCAT  | 845.193101077856 | 0.130105707216633 |
| GATCGGACTCAC  | 845.214184829528 | 0.171707041044152 |
| ATGAGTAGTCGG  | 845.214387936181 | 0.154331145216941 |
| TGAATCAGGCAA  | 845.222611454195 | 0.193049938523279 |
| ATTTCTTGACTC  | 845.223488749602 | 0.267578702436873 |
| GGTTGGACTCAC  | 845.226184104915 | 0.193773979313336 |
| AAATTGTCAGTC  | 845.228894674673 | 0.247552885483829 |
| GTATTAAGTGAC  | 845.236617444976 | 0.237173922457907 |
| AGCTTTTGACTC  | 845.240952827118 | 0.185925350169449 |

|               |                  |                    |
|---------------|------------------|--------------------|
| AAGTACATGACA  | 845.24325482939  | 0.205951621086211  |
| CGAGTGC GTGAC | 845.258988920326 | 0.196500538843647  |
| CATCCGTGT CAC | 845.268940890059 | 0.166445450504127  |
| GGTGACTTTTCA  | 845.269020180998 | 0.156099488177342  |
| CACGTGACACGC  | 845.275385486845 | 0.169922307787449  |
| ATCATGTGACCA  | 845.281207755378 | 0.167023713697625  |
| CTCATGACAATA  | 845.28974852316  | 0.274147848071818  |
| AGGAGTGACCAA  | 845.29102659799  | 0.202968729710031  |
| GTTGACTCAAC   | 845.291971032733 | 0.177537162984871  |
| ATTGTTTTGTCA  | 845.292422168503 | 0.128837539269054  |
| ATGAGCAACTGA  | 845.293512925298 | 0.164409038208293  |
| AATTAGTGACCC  | 845.297435982017 | 0.259435395565464  |
| AATTT CAGTGAC | 845.299824016815 | 0.230319183451495  |
| AATCATGGTCAT  | 845.30050432494  | 0.196556956763012  |
| GGTTGCTCACAC  | 845.30470896071  | 0.209213976127471  |
| AAGACACATCGT  | 845.308210787034 | 0.185989698782384  |
| AGTCAGAGAACC  | 845.314097565215 | 0.217685484028448  |
| CTGACTCGGTTA  | 845.32606936166  | 0.150423000732384  |
| GTGAGTAGTCAA  | 845.326394080772 | 0.113418076219897  |
| ACCCAGCATGAC  | 845.327124445276 | 0.164227953135558  |
| GTGACCATATGA  | 845.331255869857 | 0.219950813496833  |
| ACTGCGAGTGAC  | 845.337870844482 | 0.222778784406196  |
| GAAGATGACCGA  | 845.337989488914 | 0.258458143311176  |
| AATGGGTCAACC  | 845.34696468686  | 0.182257078401272  |
| AAGGTTGACACA  | 845.347499337298 | 0.200900336186709  |
| CACCGTGACGGA  | 845.35388050172  | 0.233879593274991  |
| ACCACACATGAC  | 845.354300036634 | 0.177410268008878  |
| GAGCCCCAGTCA  | 845.360794195782 | 0.212018506894166  |
| ACTCACTTCTGA  | 845.368091251956 | 0.234270197612779  |
| AACGTCGCTACT  | 845.373446811828 | 0.10522112174772   |
| ATAATTCATCAT  | 845.386198499176 | 0.16648844911605   |
| ACAGGCAATGAC  | 845.391709351084 | 0.224199040981136  |
| TAAAGGTGACGA  | 845.393987956456 | 0.164060882962768  |
| GTGTCACGGTGA  | 845.394350038011 | 0.0592109375882763 |
| TGAGATTGCTCA  | 845.399780994664 | 0.324528961637668  |
| CTGTGACGGGTC  | 845.410612379417 | 0.250002539990363  |
| TACTTCCAGTCA  | 845.414238896814 | 0.146608675340806  |
| ACAACCAAGTCA  | 845.430145801085 | 0.204716504231856  |
| GACAATCATGAC  | 845.43495927212  | 0.280670259101687  |
| ACGTCACAAACG  | 845.450700420652 | 0.189220935502763  |
| AGTCCTGGTGAC  | 845.458431965208 | 0.354486511828586  |
| AAGTCACGACTG  | 845.458743524342 | 0.0907222326970108 |
| GAAGTAGGTGAC  | 845.463640369448 | 0.226770868778056  |
| GCCCAACTATGA  | 845.464101573977 | 0.351937819116845  |
| ACTCAATGACGG  | 845.467575876859 | 0.223172812726488  |
| GTCACTTTTCGA  | 845.468599104954 | 0.205202575272422  |
| ATCCTCGTCACA  | 845.474491086225 | 0.175899722080181  |
| CTCCAGTGACAG  | 845.48076125395  | 0.203922831711705  |
| ATTATGAAGTCA  | 845.492914787622 | 0.165045317491757  |
| GACTCAATTTTA  | 845.493366793863 | 0.21388040071943   |
| ATCGGTCGTGAC  | 845.505916673481 | 0.254583349188833  |
| ACGCTCAATGAC  | 845.506669427152 | 0.247449503824716  |
| CCAGGAATGACC  | 845.507506326685 | 0.18762135294537   |
| CTTGCGACGTCA  | 845.509594428067 | 0.216001494043452  |

|               |                  |                   |
|---------------|------------------|-------------------|
| ACCGATGTGACA  | 845.513320550867 | 0.172709636733672 |
| CATCTCTTATGA  | 845.525735512797 | 0.197579683923671 |
| ATGACCAGGACA  | 845.526957278816 | 0.171209663797403 |
| ATGATCACGTCA  | 845.531210096119 | 0.147838794708935 |
| AAAGTCTGACAA  | 845.533089234323 | 0.160595685233274 |
| TAATTGACGTAA  | 845.547439137439 | 0.21551221561931  |
| AACGTGGTGTCA  | 845.554760534397 | 0.240154532456413 |
| AATGACAAGATA  | 845.558080755702 | 0.10150103609192  |
| AACTTGACTATT  | 845.560593351066 | 0.177481890901751 |
| AGCTGACGTGAC  | 845.564279143432 | 0.200378839196658 |
| CGTCATTGCTAC  | 845.565104338752 | 0.183839339115504 |
| AGTCACGGCGGG  | 845.56673233315  | 0.279511691672025 |
| CTGACTGTGTTT  | 845.569872469212 | 0.168273017484536 |
| ATGTCACATTTG  | 845.570163177735 | 0.301005259947541 |
| TGAGCGGTGACA  | 845.571865280027 | 0.213062613012248 |
| CCACTGAGTGAC  | 845.574283674929 | 0.23883961148772  |
| AGCTTTGACTCG  | 845.579542114842 | 0.18420485075668  |
| CTGAGTAAGTAC  | 845.579864403342 | 0.197752020666698 |
| GTCACAGGCTCA  | 845.593353510169 | 0.108875376746477 |
| ATATTCCGGTCAC | 845.596952803306 | 0.155536716697784 |
| AGAGGACTAATC  | 845.597475843735 | 0.171791472381667 |
| AGTCTATGATGA  | 845.603449017734 | 0.357630690252685 |
| ACTCATCGACAT  | 845.603851659273 | 0.119826911021539 |
| CGCGATATGTCA  | 845.60470086022  | 0.168951797121962 |
| CTACGGTGTAC   | 845.606021571787 | 0.157094238405887 |
| CATTCGTGACGA  | 845.60913227198  | 0.162970949433968 |
| AGGGGTTATGAC  | 845.619003446857 | 0.126769678583755 |
| CGTCCCATGACA  | 845.629300590083 | 0.156025290591354 |
| AGTAGGTGACGA  | 845.639792153182 | 0.168807659939055 |
| GTCACGATGTTA  | 845.653990740747 | 0.228797417286452 |
| CTCAAGAGTGAC  | 845.658056817642 | 0.163512857365815 |
| CGACGCGAGTCA  | 845.661494889156 | 0.303687446155417 |
| ATGACGAGAAAT  | 845.662549968654 | 0.202954075034587 |
| CACCTTTACTCA  | 845.667284875245 | 0.174015634754118 |
| ACTCTAGCGTCA  | 845.669843180206 | 0.17423366553499  |
| CCGTAATGTGAC  | 845.679089019675 | 0.214790310833762 |
| CAGATTGCTCAG  | 845.681852365758 | 0.202872011149    |
| AGTCAGAGAAGG  | 845.685330201698 | 0.17974877454103  |
| GTACAGGTGACA  | 845.690185389332 | 0.121215776929087 |
| GTTTATTACTGA  | 845.690341817981 | 0.126027093801338 |
| TGACTTGGTGAA  | 845.691571292341 | 0.161523590099102 |
| GACCGGGTGACA  | 845.693355353649 | 0.127660061927946 |
| CAAGTCGCGTCA  | 845.694069539986 | 0.199397957089983 |
| GCTACATGACGA  | 845.699751970476 | 0.203810170796464 |
| AAGGAGCGTCAT  | 845.700631384583 | 0.175856063675505 |
| AGGTTGAGTGAC  | 845.716108971115 | 0.171505332057233 |
| CTAGACATGACA  | 845.719007937899 | 0.151592793086845 |
| GAGTAATCGAAC  | 845.722049224385 | 0.311222360889775 |
| ATCGCGTACCGG  | 845.725641213827 | 0.168959750949852 |
| CGTCTTGCTCAC  | 845.734004589814 | 0.216323111179623 |
| GTTGTATTGATA  | 845.737580553793 | 0.176071182144421 |
| GCTAAGATTGAC  | 845.739980339549 | 0.227539024975361 |
| ATAACATGACAA  | 845.742136533799 | 0.191868069270825 |
| GTCATGGTAGAC  | 845.74741212801  | 0.251538073090026 |

|               |                  |                    |
|---------------|------------------|--------------------|
| ACTACCGACTCA  | 845.757919407165 | 0.172148538555231  |
| ATGTGCCTATGA  | 845.758263926182 | 0.240414862621038  |
| AAGGGTCAGAAA  | 845.75880681936  | 0.156386123937648  |
| CGGGCCTAGTCA  | 845.760621951461 | 0.251441170410383  |
| TGAACATCGTCA  | 845.763098643347 | 0.219045836774391  |
| AGTGTCCAGATCA | 845.767858289462 | 0.229693703291654  |
| AACGGTACTCAT  | 845.775918946038 | 0.214337382394118  |
| AAGATCTGTGAC  | 845.779167701655 | 0.132521955487844  |
| ATTCCCATGACA  | 845.789896691528 | 0.163949337905315  |
| ATTATTGTCATG  | 845.798803352378 | 0.205629409060935  |
| ACTGACAACTCA  | 845.804426976028 | 0.167036196689317  |
| ATGACCACGTCC  | 845.805298237497 | 0.161266233859516  |
| TAACGGGTGATA  | 845.808221505113 | 0.187773841068038  |
| ACAATGATTAGT  | 845.815143053352 | 0.164430302086824  |
| TAGTACCTGTCA  | 845.816934894441 | 0.213102236448786  |
| CGTCGCCAGTCA  | 845.828215621718 | 0.227846233949509  |
| ACTCATAGATAG  | 845.832634081364 | 0.173604332719257  |
| CGAGCTGGTGAC  | 845.834653213263 | 0.196533922594422  |
| TCTGTTCATGTAA | 845.859751709447 | 0.168418375143407  |
| TCATCACCGTCA  | 845.863183696475 | 0.195293858569538  |
| AAGACTGATTGG  | 845.863469414123 | 0.219444675380627  |
| GCACTGCGTCAA  | 845.86374011546  | 0.197588535679291  |
| ATGACATCGCAC  | 845.871733195081 | 0.254191919072857  |
| CAGTATGATTAA  | 845.873482012586 | 0.210545821947972  |
| TAAATGTACCCA  | 845.87459876597  | 0.172825932243903  |
| ACCTTGTTCATGA | 845.875394053155 | 0.272787350565046  |
| AATGAGTATGCA  | 845.882262613724 | 0.197606888158948  |
| ATCACTACTCAT  | 845.882592762696 | 0.188154718174662  |
| ATATGTTGAGTC  | 845.896797673056 | 0.178759402658919  |
| CTACACGCGTCA  | 845.897007263896 | 0.157596192055485  |
| AGCGTCACGTCG  | 845.898035886404 | 0.341328265740688  |
| CAGGTCGGTGAC  | 845.902317626306 | 0.16115371300739   |
| CTCACTCTATGA  | 845.904694604296 | 0.222427731566898  |
| AGTCAGAGCCCC  | 845.906380576336 | 0.243525555992337  |
| TACCCTACGTCA  | 845.923931041805 | 0.163968239113166  |
| CAACCTATGTCA  | 845.939598988553 | 0.282451269764777  |
| GCCCCGTCTGAC  | 845.944166318923 | 0.255687268814136  |
| GAGGACATGTCA  | 845.945397199382 | 0.225684586478092  |
| GCGAGGAATGAC  | 845.950890925734 | 0.0935648305982421 |
| ATGATTGAGTAA  | 845.955332473623 | 0.210073042635064  |
| AATACTGTGACA  | 845.957273670421 | 0.164097247815998  |
| AACGGATGACCC  | 845.973266858804 | 0.177475365667724  |
| ACACGAATGACC  | 845.982012685645 | 0.193637848935765  |
| ATGATACACATA  | 845.982223643708 | 0.267396665521677  |
| CTAATTCGTGAC  | 845.982654281979 | 0.232443153776128  |
| AGCTCTTCGTCA  | 845.985269391165 | 0.22942966603641   |
| ACATCCATGTCA  | 845.996967586362 | 0.127534517279565  |
| GTCACTAGTCGA  | 846.007252076826 | 0.19294774387627   |
| CGGGTTCGTAC   | 846.007770611567 | 0.213384420202583  |
| ACTCATCCGTAG  | 846.009116107206 | 0.161358120906372  |
| TGAGTCCGTTAA  | 846.019869131691 | 0.195495875415245  |
| ATTAGTAAGAAG  | 846.025072829373 | 0.189977428036521  |
| ACCAAAATGAGT  | 846.025939612315 | 0.227106139279072  |
| AGTCAGAGAGAT  | 846.029754818236 | 0.239266211433092  |

|               |                  |                    |
|---------------|------------------|--------------------|
| ACTCATCTCGGA  | 846.035025146957 | 0.0803297432263896 |
| TAACGCTCACTCA | 846.035694998409 | 0.189669781160475  |
| GATGCATCACTA  | 846.041707928537 | 0.190357920368428  |
| TCGAGGGTGACA  | 846.046999024908 | 0.220265454082521  |
| GCGCAGTGTAC   | 846.050942243326 | 0.225207395406382  |
| ACTCATATTGCA  | 846.05463244037  | 0.235463280237171  |
| CGACCTATGTCA  | 846.061637765472 | 0.241351450715449  |
| CAACATAATGAC  | 846.062413987419 | 0.238110375775277  |
| GGTGAGTCTCCA  | 846.074341932774 | 0.240269175786753  |
| AGAGGTAATGAC  | 846.090870778555 | 0.164122157696025  |
| AGTGACGTGCGA  | 846.09110286604  | 0.242058013369997  |
| GCGAAGTGACGC  | 846.098979192565 | 0.204606168588535  |
| CGTAACCTGTGA  | 846.108284102207 | 0.196805278193859  |
| AGGCTTACTCAG  | 846.117300541405 | 0.177368802874333  |
| TGAGTAGTACCA  | 846.120849431371 | 0.167632225024287  |
| CTCTTCATGACA  | 846.122707829733 | 0.217573007890487  |
| CGCTGTGTCAAC  | 846.124442133598 | 0.202835339040681  |
| ATGTATCACACA  | 846.124992194985 | 0.215851267026692  |
| GTAGCGGTGACA  | 846.13223899077  | 0.232914570350948  |
| GTAGACCCGTCA  | 846.135056982955 | 0.279358159587103  |
| ATTAGCCATACA  | 846.135241896239 | 0.196835336654965  |
| ACTAGTCAACGA  | 846.141030427841 | 0.194896157664816  |
| GGTATTAGTCCA  | 846.142294267103 | 0.26377097416668   |
| CGTGGTTGAGTC  | 846.145604113323 | 0.111535024893026  |
| ATGACACTCCGC  | 846.153207718612 | 0.126723226208587  |
| ACTCATTCTCAT  | 846.154942659848 | 0.152896916282775  |
| TACGCTACGTCA  | 846.157691761    | 0.236346817510107  |
| ATACGTAATTAC  | 846.16507145508  | 0.189005665111683  |
| ATAATCCTATGA  | 846.174566388814 | 0.212745935116759  |
| AGATGGTGTGAC  | 846.1802639218   | 0.165789360036226  |
| CCACCCGGTGAC  | 846.196026581477 | 0.191369110168924  |
| GATCGTGACAAA  | 846.207321335354 | 0.121581920506614  |
| AGTCTCTGACAC  | 846.21743707324  | 0.197802544756482  |
| TCATCCGAGGAA  | 846.218886870209 | 0.236795032811684  |
| GCTATCAGTGAC  | 846.221392967492 | 0.237074014230615  |
| CGACTAATCTTC  | 846.22669636484  | 0.189577333957678  |
| ATAGTCAGCTGC  | 846.228447695424 | 0.259044419912323  |
| AAAAGTTGAGTC  | 846.23189306317  | 0.211400618078859  |
| CATAGAAGTGAC  | 846.239668852672 | 0.220699840283455  |
| AGTGCTCACTCA  | 846.24434950782  | 0.151920435685767  |
| GTCATGATGTTA  | 846.245235003183 | 0.341171528069448  |
| ATTACATGACGC  | 846.247568011432 | 0.202545072441952  |
| ATGACGGTAATG  | 846.249000790224 | 0.21864037211173   |
| AGGTGTGAGTAC  | 846.249265587124 | 0.15911262670795   |
| CAGTGACAGACA  | 846.26543605984  | 0.128127371063878  |
| GTGCATTTGTCA  | 846.275373907054 | 0.262374091130497  |
| AACGTCACCACG  | 846.28034660781  | 0.203139221587399  |
| CGTATACATGAC  | 846.285283595472 | 0.246992257966528  |
| TCACAACATATGA | 846.299609866189 | 0.283653575425067  |
| TAAGAGTAGTCA  | 846.311903511195 | 0.164053396377595  |
| AGGGTTGACTGA  | 846.321630093438 | 0.229731940242389  |
| TCATCGGGAGCA  | 846.323806305387 | 0.246273826078445  |
| GCGTCAACATAA  | 846.332555860555 | 0.189246119754096  |
| GATTACATAATC  | 846.338798877491 | 0.21817392276389   |

|              |                  |                   |
|--------------|------------------|-------------------|
| CGAGCATGACCA | 846.342199343858 | 0.201268378219971 |
| ACTCATCTAGGC | 846.342502040431 | 0.209000031868847 |
| AGTGACGTGCAA | 846.345473099234 | 0.173978893488224 |
| AAGGTGACAAC  | 846.354612664736 | 0.14384314190794  |
| GCACTTGTGTCA | 846.363782818588 | 0.217931587658935 |
| AGATTTTGTGAC | 846.364275555086 | 0.202608763028357 |
| ACACGCGTGACA | 846.375767845675 | 0.307517368593301 |
| CGTGAGTCTCAC | 846.3761030007   | 0.184268389893623 |
| GTAATGCGTGAC | 846.379996262782 | 0.191817721897204 |
| CACAACGTCACC | 846.382259643987 | 0.161208289932289 |
| GAGTAATCTATA | 846.402580248588 | 0.234363009817374 |
| CTGTTGAGTAAC | 846.42917887296  | 0.102004817198902 |
| ATGAGTTGGTCG | 846.429457310533 | 0.186257322654458 |
| AGGGATTTGTCA | 846.431831546996 | 0.120620543892131 |
| TAGCAGACTCA  | 846.436291047949 | 0.104034287801614 |
| TGACTGCTGGAA | 846.43815648009  | 0.165079191609574 |
| AGTCAGACTCGC | 846.442830686156 | 0.222841134045429 |
| TACACTGAGTAA | 846.4470026928   | 0.252089896902427 |
| TAGTGAGTCCGA | 846.452263238799 | 0.209449631065543 |
| CGTCATGTCGGA | 846.458727221633 | 0.144131871043054 |
| AGTAGATGAGTA | 846.461810623055 | 0.165989838420639 |
| AAGACGGGTGAC | 846.46500746805  | 0.160701652544538 |
| ATGTATCGTCAG | 846.467435106938 | 0.273709589161942 |
| ACTCATTTAAAT | 846.467469520885 | 0.190223835133786 |
| AACCGTTGTCAT | 846.468038381357 | 0.206268637722574 |
| ACTCATCCACAG | 846.469732915641 | 0.214263623074668 |
| ATTGTCACAGTA | 846.473715694224 | 0.127816033947975 |
| AATGAGTAGTGC | 846.475587851642 | 0.27294330644068  |
| ACTGTGACGCC  | 846.486582454621 | 0.148477721397914 |
| AGCACAGATGAC | 846.492030015108 | 0.229545248362696 |
| CGGTGTCACGCA | 846.492583106216 | 0.243953230185863 |
| ACCAGTCAGCAG | 846.495267193484 | 0.197799991398112 |
| GAGTGACTTTAC | 846.507337467544 | 0.155474464712539 |
| GTTACTGAGTAA | 846.507674245613 | 0.155632522957616 |
| GTCACAGTTAGA | 846.513642261749 | 0.117299244741742 |
| ATCTGGTCATTG | 846.528045726339 | 0.153470243158497 |
| ATGACCCAGGCA | 846.52823243289  | 0.246829658939466 |
| CACTGACTGTGC | 846.530729920752 | 0.194498438437205 |
| GTCATGCATACA | 846.53207855225  | 0.167108630759175 |
| TCGTTGACGTAA | 846.54102079554  | 0.17137113169017  |
| CTGGCACTGTCA | 846.543712905693 | 0.268032753727211 |
| AATGTAATGACG | 846.546708753987 | 0.172651979946508 |
| CGGCTTGTGATC | 846.551775249158 | 0.137592400883189 |
| ACCTATTGTCAT | 846.552142767034 | 0.225136604811949 |
| TGACACTTTCAA | 846.552448809301 | 0.124156118229118 |
| AGTGCTGACGTG | 846.558600907353 | 0.278491504528831 |
| GTCACCTTGGCA | 846.567841455767 | 0.185558058977481 |
| GGTAGGTGTGAC | 846.579928323952 | 0.141535955415816 |
| AGTTCGAATGAC | 846.585494293944 | 0.189237173956603 |
| GTCTAGTGACAA | 846.58815666334  | 0.156498318888093 |
| GGAAAATGTCAC | 846.59098176832  | 0.153606428798224 |
| ATGACAGACCTC | 846.598327068609 | 0.159131406749419 |
| TACTGTTTGTCA | 846.60226584498  | 0.204075983241635 |
| CTAGGCGGTGAC | 846.617389850593 | 0.232653433844657 |

|              |                  |                    |
|--------------|------------------|--------------------|
| GCGTCACGCCTA | 846.621710586509 | 0.226598748746489  |
| ATATAGGTCACC | 846.622068660381 | 0.248285859056881  |
| AGTCATGGGACG | 846.627571914016 | 0.227637745727964  |
| AACAGACTCACT | 846.629796420892 | 0.14125566339873   |
| TCACCCGTATGA | 846.630503577409 | 0.207298224686945  |
| AGTCAGCGGTCA | 846.633137907093 | 0.231550486664215  |
| AGTGTCACGGTG | 846.640547077412 | 0.221738365047481  |
| AGACATTGGTCA | 846.64116898116  | 0.215389535884458  |
| CGGAATTAATA  | 846.644299387582 | 0.26506201768871   |
| GAATGCCGTGAC | 846.646009405554 | 0.229330877506188  |
| ATAGCGTCAGAG | 846.657389929782 | 0.144961045579854  |
| TGACTGGCCCA  | 846.664867229583 | 0.194100513167833  |
| ATATTTGACTCG | 846.673210737912 | 0.238109563809443  |
| GACGAGTAATCC | 846.689137519845 | 0.231940356983218  |
| GTCACATGCCTA | 846.689361568934 | 0.212996176983382  |
| TAGCTGGAGTCA | 846.697965736374 | 0.167939489653441  |
| AATTAGTACGTC | 846.701314051408 | 0.195849471340672  |
| CCTACGACGTCA | 846.701325154909 | 0.150491707972663  |
| CGTCACTGCCGA | 846.706011371509 | 0.22709480402169   |
| TGTCAGTCGACA | 846.708810116502 | 0.274774785575987  |
| CATGACCGAAAA | 846.711015960918 | 0.208535508180675  |
| CATTTGACGCAC | 846.725845868077 | 0.175331891558953  |
| ACTGAGTACTCA | 846.730110046042 | 0.20762438086319   |
| AACATCGTCACC | 846.732487595469 | 0.251039388226518  |
| GACTCAGTATTA | 846.745620016585 | 0.228349171430333  |
| GAGGCGAATGAC | 846.754631937129 | 0.154930185904864  |
| GGAGATAAGTCA | 846.757685169362 | 0.219604253953888  |
| CTACAGGTGACA | 846.761664324463 | 0.25099526036457   |
| CTACATCTGTCA | 846.779782341072 | 0.155363446793877  |
| ATGACGTTGGCG | 846.78283146203  | 0.222723693479561  |
| CCACTGCAGTCA | 846.783145854482 | 0.20539421106762   |
| CTAGGGGTGACA | 846.785181464626 | 0.17456821142859   |
| CTTGGGGTCATA | 846.787960121246 | 0.194106021027653  |
| CTCGGCTGACTA | 846.791391117994 | 0.228411027214892  |
| ATAATAGTAATC | 846.798822241137 | 0.20928399062063   |
| TGTCACGATGAA | 846.8108575406   | 0.165015462379352  |
| ATGACCGAAGAC | 846.817808248827 | 0.18012202896977   |
| GGTTGACTACAC | 846.8203055147   | 0.277847379814514  |
| GACTCACGATAA | 846.829181035691 | 0.0758239247462362 |
| CGTCATGCGATC | 846.835984031199 | 0.196299129576086  |
| ACATCTTTGTCA | 846.842093816587 | 0.149557258535746  |
| ATAGCATGACAA | 846.846998772943 | 0.17387431978044   |
| AAACCTTGACTC | 846.847971220652 | 0.10279590632894   |
| TATAATGTGACA | 846.856455301546 | 0.161864660837128  |
| GTCACGTTTACA | 846.858347623229 | 0.231138541060594  |
| AAATGTCATTTG | 846.864697519016 | 0.264228641649279  |
| TAATCTGTGACA | 846.86913445835  | 0.177839786555388  |
| CAAAGTGCAGC  | 846.87278910555  | 0.218421547828213  |
| ACCGCTTGGTCA | 846.875343175917 | 0.194818342585307  |
| ATCTGTCAGATC | 846.879647461698 | 0.260506000136065  |
| ACTAGTTTATGA | 846.891415878881 | 0.313986619017628  |
| ACAGTCAGCTAT | 846.90110504752  | 0.221539689723903  |
| ACAAAACGTGCA | 846.901195766195 | 0.242945927309982  |
| CCGTTATGACCC | 846.903031193177 | 0.11909176806496   |

|              |                  |                    |
|--------------|------------------|--------------------|
| TCGTCACCGCCA | 846.905587630642 | 0.140444799244191  |
| CACATACTGTCA | 846.9149722228   | 0.170579878879125  |
| ATGTGCATGACG | 846.92202941716  | 0.218734630322481  |
| CGAAGTGACGCG | 846.924281796083 | 0.159125831710824  |
| TCATCTAGTGGA | 846.927656812566 | 0.278105736451656  |
| CAACCCAGTGAC | 846.931763989235 | 0.216105597940035  |
| TACGTTTTGTCA | 846.940237184942 | 0.192445710262508  |
| AGAAGCGACTCA | 846.940912613828 | 0.307375366397218  |
| ATCTTGGTGACG | 846.945030549321 | 0.242616364482094  |
| AATTAGCCATAA | 846.954967902917 | 0.197015574835197  |
| GTAAGTGGTGAC | 846.962604567719 | 0.172153855470985  |
| GTGACACGCACA | 846.968621436511 | 0.141210651873984  |
| ATGGGTCAACGG | 846.972186237385 | 0.153095050548331  |
| AAGATGTCATTA | 846.976200943497 | 0.134642433590477  |
| AGGTAGTAGTCA | 846.980774655534 | 0.120562477864477  |
| GTCGGCGTCACA | 846.987538566487 | 0.225287426629331  |
| GTGACGGAGCAC | 846.989398077267 | 0.223229082398398  |
| ATCTCGCATGAC | 846.994524603384 | 0.207963825011617  |
| AATTACGCACCT | 846.995648790194 | 0.152453347344248  |
| AACGTCACCCCT | 846.99870165627  | 0.170292177400348  |
| ACCATGTCACTG | 846.998805503974 | 0.152445549485686  |
| AAGTACTCGTCA | 846.998913723998 | 0.175692644165751  |
| GACCCGCGTCAC | 847.000759875566 | 0.154159395346328  |
| ACACTGCTGACT | 847.00813530436  | 0.224524487744562  |
| TATTGTATACAA | 847.009496653225 | 0.223277262689199  |
| CTCACTGATTCA | 847.011043936979 | 0.17548302104345   |
| CAAAGTGAGTCC | 847.028744269786 | 0.186806664752039  |
| AGATGACATTTA | 847.031264110548 | 0.207862824714645  |
| GCGTCACCTCCA | 847.03917920405  | 0.165402137384749  |
| TCAGACCTGTCA | 847.046935559717 | 0.226567359298682  |
| ACTAACGTGTCA | 847.05502329115  | 0.241547727573367  |
| ACTAAGGTGACC | 847.059097358022 | 0.183205814360997  |
| GATGAGTGCCAC | 847.088275255706 | 0.215018971616586  |
| GGATATATGTCA | 847.0918038763   | 0.265535098059356  |
| CTAAGAGTGACA | 847.097099930432 | 0.230770467404636  |
| AGTCAGAGACAT | 847.097169879906 | 0.214210163719208  |
| CCTGCGGTGACG | 847.098095950858 | 0.0646476063790982 |
| TCGTGACTAGCA | 847.099631325358 | 0.242861462770849  |
| GAAATCTGTGAC | 847.10547204362  | 0.164397926201937  |
| CGACCCGTATGA | 847.121792645227 | 0.22141304293135   |
| ACGGTCATCGCG | 847.123456842046 | 0.242022584466765  |
| TGACGCGTACCA | 847.127046197188 | 0.239162942619675  |
| TGACACTCCCA  | 847.130095001664 | 0.294864285433009  |
| GCACGGTGTAC  | 847.131020095398 | 0.158115826604494  |
| GTCACGTGCAGA | 847.133658210715 | 0.189289875060424  |
| CGCTGACGAAAC | 847.134959153474 | 0.202804974970642  |
| GGTGACACGCAA | 847.13752805158  | 0.0964803400441758 |
| CAATTCCTATGA | 847.142704780603 | 0.209505948187236  |
| ATAATTCGGTCA | 847.168904108588 | 0.211302357396769  |
| AGTCAGCGAATG | 847.171488769794 | 0.224731017484723  |
| TCCCGTGACGAA | 847.1757807137   | 0.216327907921858  |
| ATCGGTGACAA  | 847.175865694937 | 0.199231486335953  |
| ATGACAATCCGA | 847.179635053869 | 0.176731612042927  |
| GAAATATTACTC | 847.18047369512  | 0.208561974879141  |



|                |                  |                   |
|----------------|------------------|-------------------|
| AGTTAGACTCAG   | 847.181759909642 | 0.160506198681235 |
| GTCACAAGCGAC   | 847.194840790625 | 0.258778406962048 |
| GGTCAGCATGAC   | 847.195276441296 | 0.15363687078712  |
| ATGACCTGACTG   | 847.205073718095 | 0.17003420095555  |
| GGCTTCATGACA   | 847.214297576482 | 0.229453542050795 |
| TGACTACCTGAA   | 847.21707649807  | 0.27603998775341  |
| GACTGATCATT    | 847.218662370823 | 0.214200782799869 |
| TACTAGTAGTCA   | 847.220401528969 | 0.363254632182044 |
| ACTCATCTATTA   | 847.224772864032 | 0.15774392750739  |
| AAAGTTCTGACT   | 847.225915601582 | 0.10500827856437  |
| AAGTGTCAACAA   | 847.228744084958 | 0.219873002234405 |
| AATCGAATCATA   | 847.241721101593 | 0.109021058244854 |
| TAGCGATAGTCA   | 847.24642145238  | 0.20598828097273  |
| AGTATGTCACTC   | 847.249741943644 | 0.202113306773589 |
| ACTACATCGTCA   | 847.250717362223 | 0.254022246223499 |
| GTCACATCGTAA   | 847.256912762468 | 0.244308391953641 |
| GAGTGAGCAACA   | 847.260350374062 | 0.169189091224488 |
| CTGTCACTCTGA   | 847.266086377559 | 0.175408564622255 |
| AGGCGTTGTGTCAT | 847.273981148904 | 0.162412120481857 |
| GCCCCGACATGAC  | 847.274698163724 | 0.243619761656567 |
| TGTCACCTTTAA   | 847.281696642068 | 0.235881132227961 |
| AATAGTCTGTCA   | 847.284580017563 | 0.206293335059507 |
| GATGAGGCATCA   | 847.287806528867 | 0.241625154363606 |
| ACTCATATCGAA   | 847.297696314744 | 0.139805530290926 |
| CAGGGTTCGTCA   | 847.30320426877  | 0.21438847250373  |
| CAGAATGCATA    | 847.304047162275 | 0.160918991865883 |
| GTCATGGATATA   | 847.319787090665 | 0.199283709199163 |
| CATCGGGTCATA   | 847.327698263721 | 0.180408575229041 |
| ACTCATCCTTGC   | 847.332544920733 | 0.173452787318368 |
| TAGAATGAGTGA   | 847.347191567397 | 0.234617536065819 |
| GACGAGGGTGAC   | 847.361409497715 | 0.156846414487254 |
| CGTGAATGTGTC   | 847.361489175766 | 0.271994714213099 |
| ATGTCGGTGACG   | 847.36415612836  | 0.212198846656678 |
| GATCATCGTCAC   | 847.365997606278 | 0.182128031075485 |
| GACTCGCAATGA   | 847.377287066971 | 0.229783169768668 |
| AGATGAGTGTAC   | 847.377391931275 | 0.201961848302039 |
| AGTGACAGGTTC   | 847.389548738437 | 0.166704564115264 |
| ATAGTCAACGTA   | 847.391567097856 | 0.220986182196452 |
| AGTGACGCCACT   | 847.413055858683 | 0.143680922277886 |
| ACGCGGTGATCG   | 847.417644926123 | 0.216100460184586 |
| CTGTACATGGA    | 847.417734405801 | 0.17390860396237  |
| AGTCCATGACGC   | 847.423834227735 | 0.225696664593883 |
| GGTFACTATTAC   | 847.425485294894 | 0.205571266082822 |
| AACCTGACTGGT   | 847.4259454318   | 0.196788578239676 |
| ATATGAGTGCAT   | 847.429380066661 | 0.144416881388091 |
| CCCTCAGACTCA   | 847.430669259129 | 0.200084352810383 |
| ATAACAACATCAT  | 847.441002707037 | 0.128802571138951 |
| ATGGTCACGTCA   | 847.44329104756  | 0.225953421313116 |
| ACGCAGCGTCAC   | 847.453726955672 | 0.238339882464824 |
| ATCATTCTGTGAC  | 847.454577913069 | 0.182364974368138 |
| TGTCATGCCATA   | 847.455883467338 | 0.218767466179993 |
| GGTCATATCGAA   | 847.456829894413 | 0.277733897357424 |
| CGCGTCACGTAA   | 847.45811636284  | 0.216394793865962 |
| TGACCGCAGTCA   | 847.463287553398 | 0.188372933921302 |

|               |                  |                    |
|---------------|------------------|--------------------|
| CTCGGCGTCACA  | 847.469604055874 | 0.186856665469837  |
| ATGAGGTGTCCA  | 847.47422092499  | 0.225065823256407  |
| GTCACACTCCCA  | 847.501568469898 | 0.228530350950482  |
| GTCATGATGCTA  | 847.50304533053  | 0.221544158211527  |
| CTCAGTGAATGA  | 847.505007256939 | 0.295901809435487  |
| GTCACCTTAAC   | 847.507405041498 | 0.201223807806047  |
| ACAGGTGAGCAA  | 847.507781395002 | 0.118258271624396  |
| AGAGTCAAGGAT  | 847.51684356305  | 0.158127018237558  |
| ACTCATTCTTCC  | 847.517589400419 | 0.163988192759678  |
| GATCGGTGTGAC  | 847.529573406633 | 0.178387860457774  |
| CTGTAACGTAC   | 847.532933821805 | 0.183985949136689  |
| GTCACGCAAATA  | 847.546025222277 | 0.183910294088311  |
| AACGCTAGTGAC  | 847.547812884851 | 0.369782622311336  |
| GCATGACACCCA  | 847.548435675957 | 0.207700651230859  |
| GTGTCACGGATA  | 847.556114753644 | 0.0649323183213347 |
| GAAGTCTGTAC   | 847.556410183168 | 0.177886385746464  |
| ACACATCATGGA  | 847.559925690605 | 0.195078605949941  |
| ACTATGACCGTG  | 847.569702528259 | 0.158640826095182  |
| TCCCCGTACATA  | 847.579555577239 | 0.21561577761116   |
| ACGGGTACATCAT | 847.591049422384 | 0.210286872402915  |
| ACACGGTCATAA  | 847.592182739826 | 0.20539120602856   |
| ATGAGCAACCCA  | 847.592793985155 | 0.168336271453138  |
| CGTCACGCTAAG  | 847.594403705425 | 0.176871512060312  |
| GTCATCCCACACA | 847.594744701592 | 0.0953595551548009 |
| GTCACAGGTGGA  | 847.601240873471 | 0.152131757838199  |
| ATTTAATGTGAC  | 847.60259018214  | 0.350637063341654  |
| GCGGTCCATGAC  | 847.606687233097 | 0.199740536116915  |
| CGTCATGGCGTA  | 847.610614298388 | 0.170124323548266  |
| GTCACTGGTGGA  | 847.623116111732 | 0.178665912321655  |
| CAGGGCTGTGAC  | 847.630331133296 | 0.188316910029238  |
| AAGTCACGGTGA  | 847.631950653693 | 0.163727167259659  |
| GACTCACGGGGC  | 847.636024341046 | 0.199124732857066  |
| GTCACAGATGGA  | 847.643478658289 | 0.205214333909283  |
| ATATTATTCATG  | 847.662571911832 | 0.180000340659711  |
| ATGCCGGTGACG  | 847.670391377897 | 0.230823099050134  |
| CACAACGCGTCA  | 847.673426024876 | 0.152978659080106  |
| AATTGAGTCTAA  | 847.678949460389 | 0.158345177757081  |
| ACGACTTGCTCA  | 847.683799147399 | 0.215771750691771  |
| AGTGTACAGAAC  | 847.694691281189 | 0.216452356562111  |
| ATTATTAGCAAT  | 847.706911793235 | 0.139508232406795  |
| AGTCAGTAACGA  | 847.708773330898 | 0.261011525175001  |
| CGCACTGGTGAC  | 847.714936093391 | 0.238084082089291  |
| CAAAAGGTGACG  | 847.717028992084 | 0.227997177275327  |
| CACTCAGTCAAC  | 847.72662691782  | 0.146658175977234  |
| ACGTCACGCAAC  | 847.726893859928 | 0.178547913438074  |
| GATGAGGTCAAC  | 847.736421174093 | 0.217536651525242  |
| TCGATGACCTCA  | 847.740881755553 | 0.202497957074571  |
| ATGACAAGGCC   | 847.744208611678 | 0.14788460382113   |
| AGTCAGACTTGG  | 847.751395646213 | 0.156721040267953  |
| ATCCTGTGACGC  | 847.752285262496 | 0.214927561921915  |
| AAGTCACCTCAT  | 847.753608401329 | 0.156545916590138  |
| GCCTCTGGTGAC  | 847.756230394553 | 0.132954497804727  |
| CGGTACATATCTA | 847.762928528655 | 0.219478541149699  |
| TCAGTCAATCCA  | 847.771931219662 | 0.178178415385702  |

|              |                  |                   |
|--------------|------------------|-------------------|
| ATGATGAATACA | 847.774041075327 | 0.134120992751374 |
| AAGAGTAAGTCA | 847.78685020161  | 0.189718686059864 |
| GATGACCTCACC | 847.801847749611 | 0.194848568846418 |
| GCTCCTGTGACA | 847.803100725532 | 0.153437603662588 |
| ACGTCGACACAT | 847.811534637003 | 0.243401830983544 |
| GAATTGAGTAAC | 847.811852106925 | 0.239452870392384 |
| CGTCATTACCGC | 847.812806609934 | 0.207577787439834 |
| CATTCCGTGTCA | 847.817670543307 | 0.134216117866339 |
| CGTCACTAGAAG | 847.846957022319 | 0.271482612780589 |
| AAGTTGGGTAC  | 847.847863450351 | 0.102586048808597 |
| CTAACGACGTCA | 847.848590280207 | 0.230010087499727 |
| CTGCTAGACTCA | 847.852610661558 | 0.322477225821228 |
| CGACATGTGACA | 847.856798262992 | 0.199344667121155 |
| GGCGTCACCCGA | 847.859202835561 | 0.242532207133179 |
| ATGTCACCGCAG | 847.862021769309 | 0.151093086426065 |
| AATGACATCGAC | 847.86330328663  | 0.271506320302266 |
| AGTCAATTGATC | 847.873090773276 | 0.265312385775867 |
| CTTAATCATGAC | 847.874395541952 | 0.211357298734723 |
| CTAGAAGCGTCA | 847.876772034573 | 0.200232779731926 |
| GCGAAAGTGTCA | 847.884747638375 | 0.212649335407865 |
| AAGTACTAATAC | 847.888754719452 | 0.114720209480622 |
| TACATTGTCACA | 847.894406601555 | 0.190599424008304 |
| GTCACCATACCA | 847.90106071113  | 0.16815215192408  |
| GCGTCCTGTGAC | 847.904385290653 | 0.210910080647268 |
| CACTAGAGTGAC | 847.907123564721 | 0.317935008036409 |
| CGACCTGTCACC | 847.912908600091 | 0.189978790387556 |
| ACGCACGCGTCA | 847.913194662599 | 0.173759705905292 |
| ACGAGTCAAATA | 847.913272730869 | 0.125781315583511 |
| CGAAGAGAGTCA | 847.913290624202 | 0.208908170454762 |
| TAGATGTGACCA | 847.9149597745   | 0.156655899665874 |
| GTGTGAATAATA | 847.926088411819 | 0.169713732589618 |
| ACTGTCACCAAT | 847.928106650764 | 0.184854638700402 |
| ACACGTGTCAGT | 847.93068087933  | 0.182271341202061 |
| CTCTGACACGTA | 847.931488030247 | 0.152590784634171 |
| GTGACCCTATGA | 847.945325384404 | 0.193858064995767 |
| ATGTCATGCTAA | 847.948668984205 | 0.251873077394799 |
| ACCAGGCGTGAC | 847.951036962327 | 0.154288288252939 |
| TGAGTTGTCCAA | 847.953387346674 | 0.182318528573846 |
| AAGAATCTGACT | 847.962732008906 | 0.155127616669283 |
| ATGACAACGGAC | 847.976140827642 | 0.251560858310196 |
| GGTGACCGACCA | 847.984035459468 | 0.219696839995512 |
| ACCTTATGACCC | 847.98587518831  | 0.154434463506742 |
| CCTTAAACGTCA | 847.987602577673 | 0.200646116603441 |
| GTCCAGCTCATA | 847.988561595215 | 0.171647242273013 |
| CCTCAACGTGAC | 847.989810103865 | 0.250247882340574 |
| AACTTTTGTGAC | 847.995615175443 | 0.303732059640463 |
| GATTCACCGTCA | 848.005849766298 | 0.245421928897802 |
| ACAGCTGTCATC | 848.006703099452 | 0.233275285129715 |
| GTGACAGTAATA | 848.028958758788 | 0.170643566796328 |
| GAGTCAGTATGC | 848.030892675474 | 0.271727378653967 |
| GCTCCACAGTCA | 848.035523785746 | 0.313388054245993 |
| AGTTAGTCTTAT | 848.037463964611 | 0.229585414455256 |
| TACGGCGTCACA | 848.043993224542 | 0.174630552916165 |
| ATAGCTAATGAC | 848.061971217942 | 0.136417898138697 |

|               |                  |                   |
|---------------|------------------|-------------------|
| GTTTGGGTGACA  | 848.068031450725 | 0.168089977992636 |
| AGTCAGTCCCTG  | 848.074747318215 | 0.236035875346452 |
| AGAGCTAATGAC  | 848.079464233818 | 0.178136536095602 |
| ACTCATACTCC   | 848.081186964096 | 0.150651832628681 |
| CCGTTTGGAGTAA | 848.081640872202 | 0.27032482350362  |
| AGTGTCAGACTA  | 848.084577829372 | 0.261624617643843 |
| ACTCATCTTCGG  | 848.087933883766 | 0.18798521112569  |
| CATTATTCATCG  | 848.118582467694 | 0.209858581604467 |
| ATGACAGCCTTA  | 848.120388958889 | 0.225515188777413 |
| TAAGCCGCATA   | 848.123404191991 | 0.174904119223779 |
| CTGTCATTGGTA  | 848.126408273415 | 0.226049088916753 |
| ACAGTCAGGGAT  | 848.129053445077 | 0.195231893274786 |
| GGAAATAGTGAC  | 848.129264125015 | 0.165673482514044 |
| ATGATAACAATAA | 848.131129112167 | 0.187588199265542 |
| GCGACAACGTCA  | 848.132117147589 | 0.153758244802153 |
| ATCTCGTCACAT  | 848.133747275371 | 0.175471379129818 |
| CGATGACCGTAC  | 848.14228610535  | 0.204243563334387 |
| GACAATGTGACA  | 848.143533031464 | 0.181812168627117 |
| GATCTACAGTCA  | 848.150856054631 | 0.141791655452705 |
| CCGAAATGACCA  | 848.150937561002 | 0.216567574252318 |
| GATTATTCATCC  | 848.153199476277 | 0.159255129632394 |
| GTGAGCAGTCA   | 848.1547326499   | 0.180843225188411 |
| AGTCAATGCTTA  | 848.159064579589 | 0.213995091238059 |
| ATGACAGGCACG  | 848.169315390726 | 0.152720169150289 |
| ACTCATTGTTAA  | 848.172261241356 | 0.157251281364254 |
| ATATGACGGTCA  | 848.174286767969 | 0.22702386132732  |
| ACTCATAGATCG  | 848.180892228683 | 0.153256295307456 |
| ATTACTCGACGG  | 848.186724286015 | 0.156132832769716 |
| TAGTGTGACCGA  | 848.187973492032 | 0.109684912701449 |
| ACGCTAGTGACG  | 848.193060462263 | 0.248760082774191 |
| CAGGCGAGTCAA  | 848.193475511547 | 0.155238980080147 |
| ATACATCATAGC  | 848.196237269707 | 0.225773264335772 |
| CGGTCATAATAA  | 848.197968484326 | 0.263028779839127 |
| GCAGACGACTCA  | 848.20274280313  | 0.313722282903997 |
| ACTCATAAGTCG  | 848.20438917171  | 0.181395025239236 |
| GGCTCATCGACA  | 848.209677573842 | 0.30810635707708  |
| ACTCATCGCTAT  | 848.215473766396 | 0.139874252027185 |
| GTCACACAACAA  | 848.219431039528 | 0.231806412601112 |
| ACTGACCCGTCA  | 848.225368219983 | 0.229447324971338 |
| GTCACCTTCA    | 848.228908180454 | 0.123890985079484 |
| CAGAGCTGTGAC  | 848.233939923654 | 0.194546109120339 |
| GGTGCCTCGTCA  | 848.236223354705 | 0.178690376455217 |
| AATGAAAGTGAC  | 848.243689992289 | 0.215291056598952 |
| ATTATGTCTCAC  | 848.247604450742 | 0.106627418928285 |
| AACTGGTCAGCA  | 848.248584397197 | 0.166470018488539 |
| TATTATGATGCA  | 848.252632399125 | 0.203434158457459 |
| ACAGTCAGGCTG  | 848.252767854992 | 0.22307197403035  |
| ACTCATCGACTC  | 848.261439699132 | 0.171717141087586 |
| CAGTCAGAAAGG  | 848.276192734807 | 0.174198311316208 |
| ACTCATTCTGG   | 848.279456972532 | 0.223854954267411 |
| AAAACGTGTGAC  | 848.284300767868 | 0.121577361886973 |
| GTCACCTATCAC  | 848.288278824277 | 0.183215669650597 |
| AAATTGCTCAGT  | 848.309064668979 | 0.181478212076129 |
| AGTGAGGTCATA  | 848.311061431417 | 0.180105112823954 |

|               |                  |                   |
|---------------|------------------|-------------------|
| CGTCACCCTAGA  | 848.31486005299  | 0.216948700162247 |
| CCTAGCGTGACG  | 848.326919602059 | 0.155669147790429 |
| CCTTGGAGTCAA  | 848.333669406745 | 0.285589615972627 |
| GATAATGGGTCA  | 848.334733024391 | 0.178442755161585 |
| GAGGCTGATGAC  | 848.345689246197 | 0.207724187140345 |
| CATATACATGAC  | 848.345757979768 | 0.170558117164213 |
| CATATGACGGTA  | 848.347760392399 | 0.209394381423166 |
| ATCTCTGACACG  | 848.359683501419 | 0.245246921629282 |
| CTGACTGTAGCA  | 848.364714269714 | 0.21200240674547  |
| ATAGTGCCTAAT  | 848.366824858107 | 0.202635128864177 |
| GTGACAGACTAA  | 848.369193691974 | 0.158358655945051 |
| ACCGAGTCAGGG  | 848.375037673569 | 0.137090358421847 |
| GCCTGTACGTCA  | 848.381539204096 | 0.231603262570041 |
| CGTGAATCAACG  | 848.392545672321 | 0.105981621995963 |
| GTGACCAAGAAA  | 848.419292094673 | 0.210043414290514 |
| AGTGTCAGACAC  | 848.420238609418 | 0.318588094650337 |
| CAATGACAGGGC  | 848.423916949345 | 0.20050709989833  |
| ACTCATCGACAA  | 848.424915405992 | 0.148482613502073 |
| AGTCAGAAGTGC  | 848.427836842708 | 0.129994075705628 |
| TGACAGAGCACA  | 848.445687599019 | 0.283150423220922 |
| GTCACACCTTAA  | 848.449151389242 | 0.15055144623781  |
| CATCAGGTGACG  | 848.457249106904 | 0.217670593751837 |
| AAGGGTATGAGT  | 848.469556690419 | 0.13632685521115  |
| CGAAATGACAAG  | 848.471361157464 | 0.244006185963418 |
| GCCAGTGACCCA  | 848.473470472591 | 0.147549042033594 |
| GGTCAGCAGTCA  | 848.47710448981  | 0.189999652905581 |
| ATGTCATGAGCA  | 848.478105065749 | 0.194633549089339 |
| GTGACATAGCAA  | 848.483407832841 | 0.15133036484719  |
| AGTCAGAGATTA  | 848.484528837498 | 0.19333114240009  |
| AAGAATCGTGAC  | 848.486952658945 | 0.150295396205839 |
| CCTGACTCGCAA  | 848.50651754774  | 0.192084490053891 |
| AACATTGTCACA  | 848.51492650422  | 0.220577333436026 |
| AGTCAGACCCCG  | 848.516256503274 | 0.308257357456851 |
| GCTTTGAGTAAAC | 848.520109584148 | 0.276750009494509 |
| CAGTTTTTCGTCA | 848.529537550928 | 0.178170849265136 |
| GGTGAGGTCATA  | 848.53706375154  | 0.191200248844843 |
| AATGAGTTGACT  | 848.539689584013 | 0.157436185860294 |
| CCATAACGTGAC  | 848.543068011977 | 0.269746787536792 |
| GGCCTTGACTGA  | 848.55901307416  | 0.162820201513576 |
| CGTCACCCGACA  | 848.56505538439  | 0.206620631837506 |
| ACATCACGTACAC | 848.565904579263 | 0.200714890204509 |
| ATGACAATAAGA  | 848.575373669829 | 0.245772596547313 |
| TCGACAGACTCA  | 848.576100805321 | 0.265861851251381 |
| ACATCATGTGAC  | 848.590001764085 | 0.309893666124536 |
| TGACTCTCCACA  | 848.592368766465 | 0.106779917317539 |
| ACTCATCCGGCA  | 848.603043019653 | 0.175735282151775 |
| ATTCAACGTACAC | 848.603725646132 | 0.153142757780228 |
| AGCGTGTCACTA  | 848.625015308656 | 0.251855129609577 |
| CCGGGATGTGAC  | 848.637535353971 | 0.240064585438694 |
| GACTCTCATGAC  | 848.638334125618 | 0.225129628536429 |
| ACGTCGTGACGC  | 848.644887817382 | 0.250181062539216 |
| ATCGTCCATGAC  | 848.651645356881 | 0.107142192336282 |
| AGTCAGTGACAG  | 848.664513181597 | 0.281335980146617 |
| GTGACAGTACCA  | 848.673781151257 | 0.193478056189494 |

|               |                  |                   |
|---------------|------------------|-------------------|
| CCAACAGTGACG  | 848.675267592443 | 0.224687538418914 |
| AGAACTTGTGACG | 848.680216911216 | 0.220690213860036 |
| AGATATGTGACA  | 848.68022433547  | 0.219615957445288 |
| GAGCTAGATGAC  | 848.682980640307 | 0.142751753971011 |
| GTCATTGGAAGA  | 848.687038042699 | 0.16675629716121  |
| CACGTATGAGTG  | 848.687064951287 | 0.284847509012329 |
| CTGTCATTAACA  | 848.689194205391 | 0.254710087391912 |
| AGTCAGAGAAAT  | 848.689251887531 | 0.238995205800253 |
| ATTATGTAATAA  | 848.696010119593 | 0.182600286999033 |
| GATATTGACTGA  | 848.716006768974 | 0.148895267164491 |
| AGTGACAAACCA  | 848.716390792196 | 0.132979358245887 |
| ACATTATGACCG  | 848.720164105567 | 0.171719536239187 |
| GAGTAATTATGA  | 848.728963528813 | 0.19854911764761  |
| CACGTTGTACC   | 848.734651787823 | 0.176079954820522 |
| CGATCTTGACTC  | 848.750620141563 | 0.150188240668116 |
| ATTAGCAATCCA  | 848.765201555607 | 0.267126145066597 |
| TCTGATGAGCCA  | 848.779633449957 | 0.220940331356276 |
| ATGAGTATGCTA  | 848.781807165925 | 0.103158274985373 |
| TCGATTGTATCA  | 848.78226098223  | 0.22774040706888  |
| CACGTATGTAC   | 848.793143176226 | 0.279899553843008 |
| CACTATTGACTA  | 848.795944956724 | 0.178058300085564 |
| AAGTCACCTCAG  | 848.796593901577 | 0.144867899836483 |
| GTGTAATCATCA  | 848.799661139452 | 0.199629298662861 |
| TCCGAATGACCA  | 848.800646206671 | 0.232021577085342 |
| CGGAACACGTAA  | 848.807453687459 | 0.181110733129839 |
| CGGTATGTGACA  | 848.807659118462 | 0.250489150796907 |
| ATGACGAGCATA  | 848.808835083291 | 0.176847054589983 |
| GCTGATGCATCA  | 848.809501822178 | 0.243136756699737 |
| CCGATATTGTCA  | 848.810824429594 | 0.171162477031765 |
| CAGGAATTACTC  | 848.812081052168 | 0.15296846204254  |
| GTCACCCATACA  | 848.81294061276  | 0.242197365204517 |
| GAATGCTGTAC   | 848.815813089845 | 0.194226842160354 |
| GATTGGGTGACA  | 848.833025642564 | 0.166745737945665 |
| CTGAATCAGAAA  | 848.833676125552 | 0.342637355307034 |
| GACCGGTACATA  | 848.837085184045 | 0.240826774892355 |
| CAAGTATTACTG  | 848.840220299395 | 0.205282562094833 |
| ATTTTGTGTCA   | 848.844922217613 | 0.212982111053494 |
| CCAAGTGACGCG  | 848.845879075608 | 0.233152542279625 |
| ATGACCAGGCC   | 848.846795258276 | 0.254714637140197 |
| AAGATGGTGA    | 848.848341290089 | 0.121554720480218 |
| CCCTCCTATGAC  | 848.850934227517 | 0.244194516129914 |
| CAGTCAGCCTAC  | 848.854623489938 | 0.250295557616023 |
| TCTGACCCTTAA  | 848.854990961845 | 0.224060652638968 |
| GAAAATGACCAC  | 848.856766362596 | 0.138114911705845 |
| CTGTGAGTACTA  | 848.860218030539 | 0.159495292321426 |
| ATAGCTCATGAC  | 848.872597285157 | 0.107126019446959 |
| ATGACATCTTCC  | 848.873862607804 | 0.207249375275302 |
| ATACGATGACCG  | 848.874043961717 | 0.176954107123832 |
| GTTGCATCATAA  | 848.8804478703   | 0.18717876548058  |
| CGTCATGAGACA  | 848.883506873082 | 0.156415972484055 |
| ATAAGTCGTAC   | 848.884301621107 | 0.164505777670682 |
| ACACTGTGACGT  | 848.897735756832 | 0.168702982198308 |
| CTCGCTGAATCA  | 848.904887680599 | 0.200916811053385 |
| CGCATAACGTCA  | 848.906327646671 | 0.229264240062012 |

|              |                  |                    |
|--------------|------------------|--------------------|
| GTCACGTAAGTA | 848.908140447384 | 0.231637568117023  |
| CAAAGTCCGTCA | 848.911378074995 | 0.19580449790188   |
| CCACTAGACTCA | 848.912923477611 | 0.193065637591998  |
| CCTACTTGACTC | 848.920412617552 | 0.257837204519869  |
| ATCTGATCTGAC | 848.925756761065 | 0.232402733691163  |
| AGTCAGAGCGCA | 848.936307263953 | 0.0978904664291666 |
| ATTACTGAATGA | 848.944893665437 | 0.199520490598994  |
| ATCTAAGGGTCA | 848.961869858765 | 0.187987418098206  |
| TGTAATGTCACA | 848.963464451383 | 0.215017555006626  |
| AATAGATGACGG | 848.965891482768 | 0.151969788057251  |
| GCATATGTCAGA | 848.969160522686 | 0.289892395533555  |
| GGTTAATGTGAC | 848.97003419616  | 0.220482707075628  |
| ATGGCTGACGTA | 848.980032738073 | 0.1546636189952    |
| GCCTTTCCGTCA | 848.981383577712 | 0.208927693754605  |
| ACGTCACGACGG | 848.98239931639  | 0.223481244649443  |
| TATGTGTCTTAA | 848.982499097613 | 0.197387072318622  |
| GTCATGTGTGAA | 848.983787226612 | 0.198490462230955  |
| CCGATGACCGCA | 848.983900671007 | 0.183318105449471  |
| GGTAATAGTGAC | 848.987510124603 | 0.171744844950513  |
| CCAGATAGTGAC | 848.989354017658 | 0.300311931056133  |
| AATAGTAATAAT | 848.992455990393 | 0.18264432494523   |
| ATCTGACTGCAC | 848.995089787392 | 0.176686523032872  |
| CCGACGGACTCA | 848.998480659198 | 0.250333593433045  |
| CAGGAGGGTGAC | 848.999795709401 | 0.160487398042355  |
| GCGGTGACGATA | 849.002615948021 | 0.21788522288918   |
| AAGCTAGATGAC | 849.004264034275 | 0.147302136402731  |
| ATGTCATGATCA | 849.00900006679  | 0.237969734101207  |
| CGACTATCGTCA | 849.018492952886 | 0.205447633873272  |
| TATGATGTAAGA | 849.019525642166 | 0.251032143069152  |
| AGAACTCTGACG | 849.028928920852 | 0.224610694609552  |
| AATAACAGTCAA | 849.035634336127 | 0.223655812763915  |
| AATATGTCTCAC | 849.037407719181 | 0.226958161783694  |
| GATGGTGACAAC | 849.039998229951 | 0.166378780349578  |
| GTCGGGTCAATA | 849.055371574881 | 0.189450193517976  |
| GGGTCTGACCCA | 849.059401894623 | 0.207790307711763  |
| GTCACGCAACTA | 849.085263794442 | 0.226019771327798  |
| ACACATTAGTCT | 849.086896945459 | 0.186744788643263  |
| TACGTTCTGTCA | 849.094562779803 | 0.162509600952063  |
| GGTACTAAGTCA | 849.096631372692 | 0.246839844302851  |
| GACACATTTCAA | 849.11175335935  | 0.234712241111402  |
| GAATCATTTGTC | 849.137528205618 | 0.248245240164097  |
| GACTAATTTCC  | 849.14542869941  | 0.0999023036272324 |
| CCCATATGACCA | 849.151138158922 | 0.124145262315482  |
| TATGACATTGGA | 849.154108724458 | 0.217175584932225  |
| AGTCAGAGAAAG | 849.156936613159 | 0.0564868648184867 |
| AGTCAGATCCAT | 849.158581982322 | 0.16748514854746   |
| AAGCTGTATGTC | 849.1600050423   | 0.249570283368134  |
| CCAGTGATGTCA | 849.164628235825 | 0.280019412481443  |
| AAGGAGACTCAT | 849.168293832046 | 0.201481649535048  |
| TGTTGGTGACAA | 849.169719707599 | 0.209135449251301  |
| CCGACTGTGAC  | 849.178792311776 | 0.240546498076293  |
| TAAATGCTGTCA | 849.202610230218 | 0.220050809127097  |
| GCGTTTCATGAC | 849.208525741066 | 0.346293232502575  |
| CCTTTTGCTCAC | 849.230440385443 | 0.155120751583339  |

|               |                  |                   |
|---------------|------------------|-------------------|
| CGTCACCTAAAG  | 849.230748040075 | 0.283299634574296 |
| GGGTCATAGCTA  | 849.234488212998 | 0.158803731701558 |
| ATGGCTAATTA   | 849.246281302273 | 0.266216983543398 |
| ATATGTCAGAAA  | 849.246297274358 | 0.161277505018274 |
| ACTCATTACTGA  | 849.251122795512 | 0.168847875455524 |
| CGTCATGCCAGC  | 849.253385742265 | 0.325673142417149 |
| CTCTTATGACCC  | 849.265084699872 | 0.176441955824718 |
| CAGTTGCATGAC  | 849.27111404122  | 0.231560619920539 |
| GGCGTGAGCCAC  | 849.275099396903 | 0.217144493108879 |
| CGTTGACTGTTA  | 849.27938335375  | 0.176023874314557 |
| ACGTCAGAAATGA | 849.281123417711 | 0.224221995681043 |
| GGTATACTCACA  | 849.283621557829 | 0.164488534907594 |
| CGTCTGGTGTCA  | 849.285667179889 | 0.177071593648785 |
| AACAACATCATCT | 849.289447634063 | 0.189835460790957 |
| CGTCATCCCTCA  | 849.292609568031 | 0.113332270817733 |
| ACCGACTAATTC  | 849.293754686597 | 0.15957893417143  |
| AGAAAGTCATAC  | 849.299777139285 | 0.198128201436879 |
| CTGATCCATGAC  | 849.299935130485 | 0.218056947649516 |
| GAGTAATTGACC  | 849.306397488498 | 0.129639581977633 |
| CTTCAGCAGTCA  | 849.312031737291 | 0.24016736830802  |
| AACACATCATAT  | 849.312130922592 | 0.202636740489224 |
| ACCTAGATGAGT  | 849.316642106917 | 0.123688779067635 |
| GGCGAAGATGAC  | 849.31875173022  | 0.182974245206575 |
| ACGCTCCAGTCA  | 849.318949628687 | 0.242157814926293 |
| AGGACCCGTGAC  | 849.321002201007 | 0.212121554454039 |
| GTGTGACGGTGA  | 849.328245515364 | 0.11794717084259  |
| ATCAGTGACCCA  | 849.331124372558 | 0.229537514094038 |
| TAAGCATGACAA  | 849.336546875675 | 0.353598606229521 |
| GGTCATTCTAAA  | 849.340082570452 | 0.179603234486665 |
| TATTAGCCATCA  | 849.343640309378 | 0.210864489797654 |
| ACAGTCAGCGGT  | 849.350367102209 | 0.276253343595482 |
| TATGACATTCAA  | 849.350501115969 | 0.188279244305413 |
| CACTCATAGTTA  | 849.35301679834  | 0.202417262284138 |
| GTCACCTCGAAC  | 849.357764007936 | 0.210959313070252 |
| CTGTGTATCATA  | 849.363246697672 | 0.233760005917198 |
| ATCAAGCCGTGA  | 849.367623923149 | 0.24029305236954  |
| GCTGCGTGTGAC  | 849.368088987104 | 0.166675480675133 |
| CGAGCCGTGTCA  | 849.371480202489 | 0.306058771539235 |
| GTGACGATAAAA  | 849.371582310786 | 0.173642869426785 |
| GCCCAGAGTGAC  | 849.374861622748 | 0.142517738486649 |
| ACTAATAGTAAG  | 849.390062512946 | 0.200152612830123 |
| GACTAATATGCC  | 849.393267576505 | 0.144973767360096 |
| GATGACGTCGGA  | 849.396967425338 | 0.224136740855981 |
| CTGTCATTACAC  | 849.398345593681 | 0.210092448809394 |
| AAGTCACTTCAT  | 849.403373399191 | 0.205966090254042 |
| GCGTGACATACA  | 849.408740063951 | 0.156858886151852 |
| CGTTTATGAGTA  | 849.413464842423 | 0.17564313899122  |
| CATGACGTTAAA  | 849.417304710437 | 0.215737807503295 |
| ATACTTGTACAG  | 849.429615626657 | 0.158727507066634 |
| CGTCAGAGTTGC  | 849.433735920944 | 0.329900171682933 |
| CCGTCATCTGAC  | 849.449089371675 | 0.202066682138866 |
| AGGCTGCATGAC  | 849.451326354173 | 0.167878094623592 |
| CGTCAACATACA  | 849.452911684103 | 0.176966986270463 |
| ACGTCACAAGGA  | 849.460083650478 | 0.173051155996879 |



|               |                  |                   |
|---------------|------------------|-------------------|
| CTGAGTCTAATC  | 849.471814623768 | 0.276787200313528 |
| ATTTGTCAATCA  | 849.4874444902   | 0.263055411237893 |
| CACTCATCGTGA  | 849.499362335128 | 0.217436982292424 |
| AACGTTAAGTCA  | 849.504182616648 | 0.163987692359802 |
| GAATTACGCAGA  | 849.504922803193 | 0.243273704585837 |
| TAGATAGTCAGA  | 849.504994565079 | 0.226214856557401 |
| ACTCAGTGACGA  | 849.529648418217 | 0.194188668964123 |
| CTGGACTGTGAC  | 849.532493387872 | 0.164650085138086 |
| GGGTTATATGAC  | 849.535124954235 | 0.14475634983045  |
| CGTCACACCGCA  | 849.537666830591 | 0.228216546264271 |
| CTTCTGACTGGA  | 849.54408609918  | 0.218067883170348 |
| CCAAAGTGACCA  | 849.548611926007 | 0.156730372270384 |
| GGACGCGTCAGA  | 849.550339806854 | 0.158366306750627 |
| CGTCACCTTGAA  | 849.551174955965 | 0.201583686858458 |
| CATGGGTAGTCA  | 849.558553678343 | 0.304760573808823 |
| GTTACACATACA  | 849.56137404883  | 0.259667330449838 |
| CGTCACTATTTA  | 849.565738662267 | 0.193356858223425 |
| GCCGTTGTGACA  | 849.577236808415 | 0.227561575619617 |
| AGTGACGCTGAT  | 849.578044013804 | 0.164008743746132 |
| AGGTGGTGACAT  | 849.583053960173 | 0.254097521085441 |
| AAGAGTGAGTCC  | 849.585589122238 | 0.223175299118133 |
| ATACTACGTAAT  | 849.5905796501   | 0.186717000331818 |
| AGGGGACTCACT  | 849.602558557926 | 0.157614712239431 |
| AGATTGACGTAT  | 849.605647051437 | 0.19696318063687  |
| ATGCATGACAAC  | 849.606379032707 | 0.147096819058161 |
| CCACATCCGTCA  | 849.607289990604 | 0.175566409908896 |
| CTGAGCAATTCC  | 849.607472549959 | 0.19148058560334  |
| ATTAAGTGACAC  | 849.608928194605 | 0.155172049586874 |
| ATTACACACATC  | 849.611724752407 | 0.205647025184897 |
| GAGTGTGACCGA  | 849.620712495659 | 0.334255590726883 |
| ACAGGACGTGAC  | 849.624876767437 | 0.201012096075355 |
| ACCCTGTGACGT  | 849.626325200176 | 0.139480115213006 |
| GCATCTTCGTCA  | 849.627341947145 | 0.218942278449668 |
| CCGACTAGTCAG  | 849.628799499748 | 0.182684537649849 |
| GGCAGTTGTGAC  | 849.630888725234 | 0.341435670622366 |
| ATGACGCTCCGG  | 849.633246687726 | 0.277361484369745 |
| CCATAAGGGTCA  | 849.640932887127 | 0.224127775996055 |
| AACTGCATGACA  | 849.643570512788 | 0.257793372789635 |
| CAATATGACCAG  | 849.643902329494 | 0.275163904039897 |
| CGTCATGGACCC  | 849.646871429903 | 0.226762643510469 |
| CTGACACAGAAG  | 849.650233682658 | 0.175910442473828 |
| ACTCTGTCACTA  | 849.658679611503 | 0.222187347664287 |
| ACGTCACGTGCA  | 849.660646361325 | 0.222366303657744 |
| CGCATCAGTGAC  | 849.671378315922 | 0.153526752778628 |
| ATGACATGCCCCG | 849.671386759116 | 0.154378608379559 |
| AGTGTATCATAC  | 849.682909352497 | 0.22720253233813  |
| CACGTGTGACAA  | 849.685509874082 | 0.150547006986439 |
| ATATGGTCACTC  | 849.697261785361 | 0.211484626830788 |
| ACCCGGTGACCA  | 849.705153099766 | 0.200301339291483 |
| ACCGGCAATGAC  | 849.706129277573 | 0.230383527005876 |
| CATGCACTCATA  | 849.716119894596 | 0.126772082352464 |
| GCCCATGTGACA  | 849.716536448776 | 0.127348504478293 |
| AGACTAATGTGCG | 849.717180396833 | 0.189921943569161 |
| TCATTGTTAAGA  | 849.723173854223 | 0.200183615113198 |

|               |                  |                   |
|---------------|------------------|-------------------|
| ATCGTCACCGTA  | 849.723522726186 | 0.143862512473229 |
| ATCCTCGACTCA  | 849.729326233645 | 0.174688009481325 |
| AATTAGTCCGCG  | 849.729659872545 | 0.193331254553061 |
| CGAGGCATGACG  | 849.736438174163 | 0.221231692330374 |
| GAGACTGGTGAC  | 849.744898589985 | 0.212139125784884 |
| CATGACAGCGTA  | 849.748102806898 | 0.179290345258327 |
| CACACTAGTGAC  | 849.751313975207 | 0.151560312055797 |
| ATTGTGATGACC  | 849.751554123758 | 0.200242659443432 |
| AGATTCTGTGAC  | 849.751783239368 | 0.134383217066039 |
| GAAGTTGTCACC  | 849.765344352387 | 0.195384044527615 |
| TCACTCAAATGA  | 849.773069931042 | 0.163424546701451 |
| ATGGACCAGTCA  | 849.807150278689 | 0.245844969179536 |
| GAGTAACTCATA  | 849.810151493104 | 0.148426992117922 |
| GCAGGGCATGAC  | 849.811697262308 | 0.280733409894511 |
| GCTAAAAGTGAC  | 849.832683866916 | 0.171871301867495 |
| TGACGTTTAAACA | 849.837003834014 | 0.167520220116711 |
| CGCTCAGACTCA  | 849.848845493652 | 0.178536413010098 |
| CGCTGACGCGTC  | 849.861983751586 | 0.131345290530705 |
| TCCAACATGACA  | 849.869933578166 | 0.174986883594053 |
| GAGAGAGAGTCA  | 849.87134044812  | 0.201936414578974 |
| GAGTCAAACAAC  | 849.873439211337 | 0.208900919941012 |
| ACCCTTCTGACT  | 849.880862475425 | 0.173831888133447 |
| CTAGCTTCTGCA  | 849.88563234547  | 0.213775875437393 |
| AATCATGTGACA  | 849.903628032744 | 0.27303175105434  |
| GGTTTCTAGTCA  | 849.91068964616  | 0.191316213916254 |
| ACGTCACAACCG  | 849.911435790055 | 0.114711971265292 |
| TAATTACTCGTA  | 849.916238476268 | 0.226998100994532 |
| CACTGACTGTAA  | 849.917315086397 | 0.248630114756705 |
| CAGCGCTGACAC  | 849.921820060071 | 0.239245874257975 |
| AGATCACGTGAC  | 849.923549116271 | 0.154256862201735 |
| CCCCTAATGACG  | 849.931994598728 | 0.240251558135835 |
| GTTACGTGTAAA  | 849.934717310522 | 0.20319871797025  |
| GCGTATATGACC  | 849.952268160068 | 0.195113555387406 |
| CTCAGATTAGTC  | 849.95289673168  | 0.161706113189158 |
| CGGTTGGGTAC   | 849.961258064299 | 0.198220070267361 |
| GTCATAGTACCA  | 849.962439088165 | 0.179182637677693 |
| ACGTGCCGTAC   | 849.979882840884 | 0.19298266346229  |
| ATGACATCGGAA  | 849.983898128286 | 0.16904377649626  |
| AACCGAGTCAAC  | 849.986351192807 | 0.202294354129449 |
| AGTCAGAGGGAT  | 849.986846307256 | 0.144026452576968 |
| ATCGTGGGTGAC  | 849.987847125534 | 0.264578175627568 |
| CTACCGAATGAC  | 849.988334345693 | 0.192058845106914 |
| CGTGAATGTGAC  | 849.994972909281 | 0.30045917032814  |
| CTAACTGGGTCA  | 850.005619691539 | 0.137615558672757 |
| AATGACAGGACG  | 850.010811666247 | 0.224761857643766 |
| GTCACCCTATAA  | 850.013285986177 | 0.174158197960696 |
| CAGAGCGACTCA  | 850.016258099203 | 0.201516863468944 |
| TGGTCACCAGAA  | 850.024670982741 | 0.15316615337652  |
| CGTCATGGCGAA  | 850.025954454156 | 0.220019233228647 |
| ACAGTTACATCA  | 850.027801535819 | 0.20446540052059  |
| GGCGTCACAAAA  | 850.035266904663 | 0.195863291505666 |
| ATAACATGTGAC  | 850.03534941349  | 0.21789009804185  |
| GTCACAATGAGA  | 850.053704125576 | 0.234863403530649 |
| ACTGACGACTGA  | 850.05812117436  | 0.159871867432589 |

|              |                  |                   |
|--------------|------------------|-------------------|
| TCATACACAAAA | 850.067848986961 | 0.224695990552605 |
| CGCTACAAGTCA | 850.068729467335 | 0.153288260404739 |
| GTCACCTTGGAC | 850.069615046785 | 0.262339105686897 |
| AGACTGGTCAGA | 850.079158989151 | 0.119738503859387 |
| GTCATTCGAGCA | 850.07954647595  | 0.165788289789557 |
| ATATACTCACTA | 850.090352885169 | 0.211386306387448 |
| AATGTTTTGTCA | 850.095210750908 | 0.144249766430929 |
| CCACAGCATGAC | 850.096502755044 | 0.238914125803827 |
| GGCACTATGTCA | 850.122420320389 | 0.149666768991115 |
| GGTGACACGGAA | 850.135611619963 | 0.11888344400709  |
| AATTATGTCAGT | 850.142141892217 | 0.195177352348806 |
| CTGTTAGTCTTA | 850.146236996706 | 0.169954434080921 |
| GCGTGACAAACA | 850.154634470802 | 0.273549939705696 |
| ACGTGAACGTCA | 850.162455480066 | 0.270442412982765 |
| AAAGCCAAGTCA | 850.163688322779 | 0.15281104067063  |
| ATCACGCGTGAC | 850.165225417022 | 0.185737180518586 |
| CTAGTTGTGACA | 850.175997286028 | 0.227669813428627 |
| GATGACAGTCCC | 850.176554056574 | 0.135544779989238 |
| ACTCATAAAGGA | 850.183464297995 | 0.230013020874007 |
| CGTCATCTCGCA | 850.195418971349 | 0.286211988767747 |
| AGTATATGTGAC | 850.197732635959 | 0.204067515733611 |
| CGTGATGTAACA | 850.197733513038 | 0.174713521718855 |
| CTGCGAGGTGAC | 850.200227473596 | 0.15083399456783  |
| AAGATTCATAAA | 850.20530517882  | 0.199891245195209 |
| AGAGTAATTCAA | 850.21326693761  | 0.260102574197403 |
| GTCATGGATCGA | 850.216482724539 | 0.308970246996908 |
| ATATAACATGAC | 850.240087633271 | 0.187620751958841 |
| ACTAACAGTCAA | 850.247249143424 | 0.206250554743085 |
| CGTCATTTCCAC | 850.255206791554 | 0.135052222424861 |
| TTCTTCAGTCAA | 850.258617357426 | 0.180680116501806 |
| AGTTAAGTCAGC | 850.260683978254 | 0.207106542874904 |
| ACTGAATCAGAG | 850.263119862642 | 0.23533915995663  |
| GAATTACGCAGC | 850.26596236311  | 0.159124666232269 |
| ACCCCAATGACA | 850.273759382115 | 0.184657028426969 |
| CTATAGTGACGA | 850.274604547196 | 0.170841372616888 |
| GTCACATACGAC | 850.276183035808 | 0.111473764494309 |
| CTCTGACATGAC | 850.277293956599 | 0.241414507497141 |
| TGACATATCCCA | 850.285470773284 | 0.231641855186786 |
| AATGACGTCCTC | 850.292679719733 | 0.113621244858299 |
| ATGAGTATCTGA | 850.294819699573 | 0.167648372673916 |
| ATTACTGAATGG | 850.308131116316 | 0.251741477092747 |
| AAGTGTTGTGAC | 850.309479123686 | 0.120787343965554 |
| ATTAGTAAGATG | 850.310114313646 | 0.192772287768439 |
| ATTGGTGACATC | 850.312443770438 | 0.158359631552894 |
| ATCCACTGTGAC | 850.315973864593 | 0.191120480934917 |
| CACGTCAGGGTC | 850.325614983512 | 0.202598363788558 |
| CGTCACCCGAGC | 850.331964447187 | 0.166591697834495 |
| GGAACTGTGACA | 850.342632595815 | 0.230864153807444 |
| AAATTCACGTCA | 850.35427948705  | 0.14846719788873  |
| CACAATGACCAC | 850.359775988142 | 0.158343244947464 |
| TAGGACGCGTCA | 850.360369649508 | 0.154044858077268 |
| GAAAGAGTCTTA | 850.360909843498 | 0.202334889274239 |
| AATGACAGGGAT | 850.369591856867 | 0.191445546665379 |
| ACATTATTCATA | 850.381242557222 | 0.148142643726726 |

|               |                  |                    |
|---------------|------------------|--------------------|
| GTTTGACTCGGA  | 850.381462584302 | 0.218734576421893  |
| GTGGACTAGTCA  | 850.386500594754 | 0.211273274675464  |
| TAGACTGCATA   | 850.392727620436 | 0.151359268033417  |
| GGAAAGTCATAC  | 850.395421956118 | 0.136130943246719  |
| ACGTCACTGGTA  | 850.421866369162 | 0.294168756792775  |
| AGTACGTGACGC  | 850.422727735098 | 0.221291061590257  |
| ACATGGCTGACT  | 850.424111440433 | 0.240771419710792  |
| TGAAGCGTGACA  | 850.427868804931 | 0.276370727722684  |
| GGACGGGCATA   | 850.436348421165 | 0.146200509099938  |
| GTCATCGCCAC   | 850.45056989927  | 0.165993559677502  |
| CTGTCATGCTGA  | 850.453719482261 | 0.136212744063894  |
| GTGACGTTAACA  | 850.469876055885 | 0.148782487169088  |
| CCCTTGGTGACA  | 850.477274969927 | 0.328112172126944  |
| GAGCGGAATGAC  | 850.481647860288 | 0.217134329552204  |
| AGCGACTGTCAT  | 850.48725915742  | 0.225021978167512  |
| CACGTGGTCACA  | 850.488234166931 | 0.217456517656643  |
| GTCACCTTATCA  | 850.489247220396 | 0.163101435572961  |
| GAGCCATGACCC  | 850.489762586369 | 0.106728231040233  |
| GTCACGTCGCCA  | 850.494931482996 | 0.163070225145911  |
| AGTTCTGACATA  | 850.505316377498 | 0.242624981173509  |
| TTCTGAGTACAA  | 850.513203306352 | 0.192009579814148  |
| ACGGTTGTGACA  | 850.521977768014 | 0.230483686702123  |
| AATGATTACTGA  | 850.522692719185 | 0.163525373293899  |
| AATTGTGACATG  | 850.52276622793  | 0.181289078771091  |
| CCTCTGGGTCAC  | 850.524235886814 | 0.212691729875606  |
| ATTGACGTGTAA  | 850.531284557113 | 0.299296808444269  |
| TAAACTGATTCA  | 850.53710234921  | 0.0946807428698666 |
| CCGTGCGACTCA  | 850.542871952472 | 0.238335580679689  |
| TGACACGTTCCA  | 850.54913268692  | 0.202671851869158  |
| GACTAATTAGGC  | 850.552311695182 | 0.176424459951339  |
| CCTAAGCATGAC  | 850.554648886711 | 0.292071384115266  |
| AGGCGAGATGAC  | 850.558661919503 | 0.20875180797234   |
| CATAGCGTGACG  | 850.564346404196 | 0.143364622735849  |
| AAACCTCTGACT  | 850.564715293112 | 0.11575368662485   |
| CGGAGTGACCAA  | 850.565244986212 | 0.141269079400986  |
| AAACTTTGGTCA  | 850.579279579827 | 0.0942665439090276 |
| TTCCGAGTCAAA  | 850.58371832497  | 0.351514957305162  |
| ATGACAGGCAAC  | 850.587353008904 | 0.183806952189824  |
| AGACTAATTAAC  | 850.610561052154 | 0.0998881382026969 |
| AGGCTGTGACAA  | 850.619942168181 | 0.310477990806416  |
| ACTAAGTGACAT  | 850.621933511953 | 0.212382597401577  |
| GACTAAATGTCA  | 850.626086222422 | 0.197141086193418  |
| AGATCCATGACA  | 850.626110053536 | 0.318625505699903  |
| AAGAATTAGTAC  | 850.626453280375 | 0.1957121917786    |
| CATGACATTACA  | 850.632835780578 | 0.327791175663579  |
| ATTTGTCAACGG  | 850.637854205952 | 0.0973282121184695 |
| GGGTGACAACCTA | 850.655258304708 | 0.138425435218464  |
| AGCCCATGACGC  | 850.660462464682 | 0.246502845375642  |
| GCTGATGCTGAC  | 850.661121832554 | 0.195043696870979  |
| ATTTGCTGTGCA  | 850.664817447597 | 0.219645390414137  |
| ATGACGTCTGAG  | 850.668116744753 | 0.254741210234194  |
| TCATGACAGAGA  | 850.67171539543  | 0.199373997658668  |
| TCATACCCATGA  | 850.674215862456 | 0.283860715842869  |
| AAGATGTCATTG  | 850.676537011701 | 0.123499398987311  |

|               |                  |                   |
|---------------|------------------|-------------------|
| GCGTCACATAGA  | 850.676612687706 | 0.186997096560803 |
| ATGCGTGACGAG  | 850.677952997543 | 0.194097913850649 |
| ACACCGTCACCG  | 850.684229789741 | 0.211378317412576 |
| GTGATTACGCCA  | 850.686484135185 | 0.172866683274711 |
| GCACCTAGTGAC  | 850.689888841741 | 0.338267112355234 |
| ATTACGTGACCC  | 850.691805884005 | 0.184787552503007 |
| CGAAGGGTGACG  | 850.708365518196 | 0.151934802040509 |
| GCAGGTCATGAC  | 850.71652971837  | 0.184036991484513 |
| GGTCATCGCGTA  | 850.717181390739 | 0.125832924908352 |
| AATTACCCGTCA  | 850.721064481239 | 0.208224068199015 |
| GGTGTGCATGGAA | 850.726226703941 | 0.15410849054325  |
| GATCGTACGTCA  | 850.728139999733 | 0.153326778543812 |
| TGAACTTGGTCA  | 850.729250979987 | 0.287638138517773 |
| CTCCACGGGTGA  | 850.729679365823 | 0.234579129379668 |
| GGCAATTAATAA  | 850.731008259824 | 0.147835836315859 |
| CGCGTGTACAGAC | 850.734974815353 | 0.21814246012777  |
| TATCCCTAGTCA  | 850.748822249099 | 0.191886290138744 |
| CCTTAGCAGTCA  | 850.749613872774 | 0.156361555967472 |
| AAGCTCCGTAC   | 850.755706424382 | 0.21976816995537  |
| CCATAGCTATGA  | 850.761465495243 | 0.202592341213034 |
| CACCTGAGTGAC  | 850.763083514334 | 0.305599043156271 |
| TATAATTACGCA  | 850.766929298076 | 0.231972720376509 |
| CGTCACCTGCTA  | 850.769408034985 | 0.12858585819115  |
| GGCGGAGAGTCA  | 850.799199673367 | 0.139429578877454 |
| TAGGGGTATCA   | 850.803949515358 | 0.194340646262203 |
| AGGACTATGACC  | 850.806404178824 | 0.19527429258517  |
| GTGTCACGCCTA  | 850.808754291084 | 0.19721945141604  |
| GGGCAGTGTAC   | 850.809793816255 | 0.170249027436507 |
| AACATGACCACG  | 850.815835165751 | 0.195911665147481 |
| ACGCAGTAGTCA  | 850.824140244679 | 0.152670507119329 |
| AATGTCCGGTGAC | 850.83088026116  | 0.208004334001274 |
| GGCCGGAATGAC  | 850.832807532969 | 0.214202861348703 |
| CGAGTCTGTCA   | 850.833836092456 | 0.194110871380036 |
| AATGGGAGTCAA  | 850.850472381726 | 0.176598069555627 |
| GGTCATACGCTA  | 850.859194788402 | 0.18062451177503  |
| AAGCAACATGAC  | 850.870889331651 | 0.183221758951771 |
| CTGAGCAATTGC  | 850.871584836209 | 0.186257864268388 |
| GGTCATAAATGA  | 850.872785470744 | 0.155863818283814 |
| GAATGTATCACA  | 850.874932023825 | 0.25286696788406  |
| CTGACTAGGGTC  | 850.875386666589 | 0.223149337138443 |
| CTGACACTTCCA  | 850.888066311485 | 0.14826375903582  |
| GTCAGGGACTCA  | 850.899609392765 | 0.182851835025893 |
| AGAGTCAAGAGG  | 850.911121720815 | 0.155412260557519 |
| ATGTCACCAACG  | 850.916928472944 | 0.218323238019696 |
| GACAGGTCACAA  | 850.919194849218 | 0.206158792334592 |
| GACTGATTCGCC  | 850.922248586183 | 0.308526356598326 |
| TGTCACACGACA  | 850.923252337161 | 0.175675756802714 |
| CATCTAGTCAGG  | 850.933294654001 | 0.223998960454447 |
| AGGCTCGTCATG  | 850.947469605459 | 0.251817982813744 |
| TCCTGCCAGTCA  | 850.96092909851  | 0.180648556678248 |
| TAGACTCAATGA  | 850.963418312812 | 0.198081886051164 |
| TTATGAGTGCAA  | 850.967706504262 | 0.220577519127566 |
| CACAATGACCAG  | 850.968224246501 | 0.183579938935154 |
| AGGCCATGTGAC  | 850.971510577394 | 0.175824182614326 |

|              |                  |                    |
|--------------|------------------|--------------------|
| ATTAGTGAGCAA | 850.991455082527 | 0.201927544700633  |
| GTGCGGGAGTCA | 851.007442098159 | 0.221763988627117  |
| CACTATGACCTA | 851.008394155859 | 0.163229268192806  |
| GTCACCCAGCA  | 851.01225326543  | 0.253570761615571  |
| AAATGACCACGC | 851.017444795881 | 0.168887063042663  |
| GTGCGTAATCAA | 851.020865623202 | 0.159375967746522  |
| GACCACGTAACC | 851.023279665342 | 0.0501128794206036 |
| AATGCATGACGA | 851.038991203091 | 0.162790964177311  |
| AGCGATCTGTCA | 851.039741050314 | 0.194680571867629  |
| AAGTCAGAGATC | 851.046022250532 | 0.147559077016734  |
| GAAGGGTCATA  | 851.059692445365 | 0.134454726529585  |
| ATGACGTCCGAA | 851.069119314391 | 0.195099832417173  |
| ACGTATATGAGT | 851.072509264185 | 0.152977454741189  |
| GTCATGGAAGAC | 851.080053023839 | 0.217175316345234  |
| AGAGTGACATAC | 851.084578347508 | 0.15717981502222   |
| CTCTTCTGTGAC | 851.109897531205 | 0.153446185506358  |
| GTCACTTTATA  | 851.110412760056 | 0.169496690855749  |
| CCGCATCCGTCA | 851.117711872293 | 0.261702157714592  |
| GATCTAAATGAC | 851.121281876595 | 0.139723456502611  |
| ACTCATAAAGAT | 851.125916822814 | 0.189140541820502  |
| CTACCAGGTGAC | 851.12779190898  | 0.214780555611339  |
| GATGATGTATAC | 851.128109822499 | 0.166861641300206  |
| ATGACATGAGTA | 851.130303487229 | 0.165872682720714  |
| CTGGTCATCTGA | 851.141781797044 | 0.166613455277093  |
| ATGAGTGAGCAC | 851.144402430818 | 0.161153717448025  |
| GTCACAAAGAAC | 851.147495171063 | 0.193287914698532  |
| GTTAGGCTCATA | 851.148084923471 | 0.154676618957027  |
| TCTCTGACGGAA | 851.148400824145 | 0.236819866166977  |
| GTTTCGGTCACA | 851.151482489108 | 0.158427397473295  |
| GTCGTCACATTA | 851.152741343024 | 0.203433318391298  |
| ATAGCCTGTGAT | 851.157526851905 | 0.269971817316496  |
| ACACGTAAGAGT | 851.160379782642 | 0.191734356374886  |
| GCTGAGCAGTCA | 851.166952592885 | 0.183259413667083  |
| TGCTAGGTGACA | 851.173789372724 | 0.218858799085074  |
| ATCCACCAGTCA | 851.17501457239  | 0.185460771567813  |
| AATCCAGGTGAT | 851.176393906423 | 0.123134943449358  |
| AGACATTGTGAC | 851.17890086665  | 0.152888311918872  |
| GTGATTAATACA | 851.187897525453 | 0.268928276611832  |
| GTACAGCTCATA | 851.206915754433 | 0.155656623284682  |
| ACTCATATACTA | 851.211134263589 | 0.16264091160548   |
| CTTGGTGACAAC | 851.218209102238 | 0.190869546015259  |
| TTACCGAGTCAA | 851.22425441733  | 0.188262893042079  |
| TGACAGTACTCA | 851.226240054115 | 0.214516951755454  |
| CGGTCATCGTAA | 851.230522632655 | 0.149866633742093  |
| GAAATGTCACCC | 851.232820342739 | 0.213867019206117  |
| CGATAACGTCAC | 851.251974443521 | 0.209941483807908  |
| GTCATGTTAATA | 851.253957556208 | 0.305575465205442  |
| TACCTTGACTGA | 851.257692909691 | 0.102032365977006  |
| CGTATTTGACTC | 851.266856953265 | 0.176229589668613  |
| CCACGTAAGTGA | 851.271932223597 | 0.198470163695313  |
| GCTATCGCATGA | 851.273533702704 | 0.163157169557481  |
| CGGTATGTCTCA | 851.275087801415 | 0.230117656734513  |
| CTGCATCGTCAC | 851.278147382941 | 0.203742352904216  |
| AGGCATTGTCAC | 851.287368843931 | 0.175712177645035  |

|               |                  |                   |
|---------------|------------------|-------------------|
| GGTGACAACCAC  | 851.292828435096 | 0.163418482645138 |
| CGTCATTAACTC  | 851.293208593544 | 0.202609799554453 |
| GGTCATGAGCAA  | 851.29331675303  | 0.144261270968655 |
| AGATGAGTAGAC  | 851.294203689834 | 0.173603591992321 |
| CTGCACAGTCAA  | 851.296402072409 | 0.152414178476942 |
| CTGTCAGTAATA  | 851.300420972806 | 0.187131727251789 |
| CAGAAATGGTCA  | 851.311892799344 | 0.20663205250193  |
| GTATTTGGTGAC  | 851.311897120134 | 0.218794923457582 |
| AATCAGTACATG  | 851.312992737857 | 0.163321047006275 |
| ATGAATAATAAG  | 851.316651234987 | 0.211798180911177 |
| ATGTCATGCACG  | 851.316995774859 | 0.236391229261865 |
| CGTCAGTTATGA  | 851.324550290206 | 0.267082364174575 |
| CCTCGACGTGAC  | 851.327637901531 | 0.202304861907604 |
| AACTCTGACACG  | 851.329206846781 | 0.203481965014761 |
| ACTCACACATGG  | 851.33775358731  | 0.211347588768681 |
| CAATAGCATGAC  | 851.347225413294 | 0.189151961217222 |
| ATCGCATGACGA  | 851.352786625533 | 0.163119652710519 |
| ACCCAGTCAGAT  | 851.364851267264 | 0.300697294640606 |
| CCAATTGTGAC   | 851.367379220566 | 0.144509973792887 |
| CACCTTGTGACA  | 851.376315915025 | 0.17403553436621  |
| AATGGATGTGAC  | 851.383511272114 | 0.176433384783536 |
| AGGGGAGAGTCA  | 851.39043783079  | 0.176619688741    |
| GCGGCGCATGAC  | 851.390841176369 | 0.217152760235284 |
| CGTCACCATCGA  | 851.39195064187  | 0.208714419818665 |
| AGTTGTGACCAC  | 851.398829682698 | 0.19002753402454  |
| CCCAGTGACAC   | 851.400464317597 | 0.148551975207238 |
| TAATTGTGACGA  | 851.403305067385 | 0.129428740571921 |
| GTAAAGGGTGAC  | 851.410297568056 | 0.197532074357338 |
| CATGTCATGCCG  | 851.411872083659 | 0.168814167582216 |
| CCCGGATTAICTC | 851.414594813592 | 0.219380804623105 |
| CTGACACAGTGC  | 851.415268273851 | 0.18874415442211  |
| ATATCTTTGTCA  | 851.423675123856 | 0.153482020800877 |
| ATGACCTAACTA  | 851.429997882768 | 0.165442161345507 |
| AACGTCACCAAC  | 851.442911733643 | 0.211716611602583 |
| GGAGCAAATGAC  | 851.446933224646 | 0.141917060730911 |
| ATCAGGTCTGAC  | 851.456687195557 | 0.255469770883025 |
| ACGTGTCAGAGG  | 851.468874248173 | 0.177332928173842 |
| GCAATTTGCTCA  | 851.475177295986 | 0.185358262265375 |
| CAGCGTGACAAC  | 851.480828258786 | 0.329634807545178 |
| AAAGAGCAGTCA  | 851.48309298209  | 0.148427088577985 |
| GCTTAGTGACAA  | 851.483850113932 | 0.301448616947349 |
| AGTGACGATATG  | 851.490533045421 | 0.175995503042732 |
| AACCGGGTGACG  | 851.499653160882 | 0.250092336657791 |
| ACGGTGAGTACT  | 851.510935656014 | 0.234389929413149 |
| ACGTCACCCGCG  | 851.517505590337 | 0.210555800437115 |
| GAGGTCTGACGC  | 851.521468144098 | 0.224726016268835 |
| ATACGAAGTCAT  | 851.52900302057  | 0.172529474370454 |
| ATTCCGTACCCC  | 851.531814953917 | 0.202221860616644 |
| GCATGACGAGCC  | 851.532255496799 | 0.22254512848191  |
| AGTGTCACGGAG  | 851.534261092992 | 0.17816149520911  |
| GTCACTCTGAC   | 851.535467956889 | 0.137209385355902 |
| ACGATTAGCCAT  | 851.537974333662 | 0.188727548727549 |
| CACTGAGTAAAA  | 851.539419954603 | 0.327236118294643 |
| CGTCATTTCCCA  | 851.545136408875 | 0.129043739950971 |

|               |                  |                   |
|---------------|------------------|-------------------|
| GTCACCGCGACA  | 851.556028751635 | 0.204716614559746 |
| GGTGACGGGTAA  | 851.559159582998 | 0.173331950702616 |
| ACACGCATGACA  | 851.559688660292 | 0.205945737118683 |
| CATCATCGAAGG  | 851.561614298424 | 0.222355067755892 |
| GTCACGAGACAC  | 851.569711277089 | 0.220435224495129 |
| ATGATACAACCG  | 851.577524744068 | 0.168313962698495 |
| AGCCTGTGACAA  | 851.583207263433 | 0.112061550706068 |
| ATGACCATAATG  | 851.583463886041 | 0.185833126369571 |
| AACGATTAGTAC  | 851.58577233192  | 0.234915027039335 |
| ACTCATTTTCGAG | 851.58609428221  | 0.213236004918419 |
| GGTGTGAGCAAA  | 851.592547211888 | 0.136488933879196 |
| CGTCACCCATTA  | 851.601352771734 | 0.169270861351674 |
| GAAGCAAATGAC  | 851.603336657224 | 0.22625530968027  |
| GTTATTGTCACA  | 851.63680885082  | 0.23678276003868  |
| CAAACGGTGACG  | 851.636906186601 | 0.291329227460897 |
| GTCATGTAATTA  | 851.642151249355 | 0.227788699608493 |
| GTGACATACCCA  | 851.646293154608 | 0.179939658213041 |
| TATTTTCCGTCA  | 851.647389906513 | 0.153759616012644 |
| GAGTCAGTTCCC  | 851.647627121192 | 0.187217815879925 |
| GTGACACGGCTA  | 851.66157447955  | 0.178165032370427 |
| ATGAGTGAGCAT  | 851.661704077641 | 0.181125931082969 |
| AGTCCCCTCATC  | 851.668763269564 | 0.158283238372144 |
| AACGTTGTACAG  | 851.675108663611 | 0.313332959928774 |
| ATGCTATGTCAC  | 851.678473400198 | 0.197494906756474 |
| CACGCGGTGACA  | 851.685838656721 | 0.193715291262148 |
| ATCCGGACTCAT  | 851.686680601606 | 0.171701436741303 |
| GATGCGTGACGA  | 851.688216254278 | 0.216606389693295 |
| ATTAGTCGCTTG  | 851.69339735581  | 0.203553875794625 |
| CTGCTGAGTCTA  | 851.695063661172 | 0.160646266394596 |
| ACTGCTAGTCAC  | 851.709203193853 | 0.183535310795329 |
| GGTGTGAGCCAC  | 851.715427121155 | 0.167219935137681 |
| GACTTTTGTGAC  | 851.724253027039 | 0.158684766911594 |
| CGTCATCTGGGA  | 851.730006173419 | 0.284510113905196 |
| CCGCGTCACTAC  | 851.731356090577 | 0.153401827477401 |
| GCGGACTCGTCA  | 851.734218569903 | 0.210945795620888 |
| ATAGTAGGTGAC  | 851.741667825189 | 0.179456535223733 |
| ATCCGTGGTCAT  | 851.742521452364 | 0.131949528837713 |
| TGAGTCTAGGCA  | 851.743507008418 | 0.201355223082949 |
| ACACAGTCAGTC  | 851.745103114334 | 0.197103476126318 |
| AGAGATGAGCCA  | 851.750175412067 | 0.172329677528039 |
| CAAAGTACGCTG  | 851.759558241825 | 0.202216498720634 |
| ACTCAGTCAACC  | 851.770160580715 | 0.207281498182919 |
| CCTCCGGATGAC  | 851.778769798493 | 0.127921353666439 |
| AGATTAGTACTA  | 851.784692832691 | 0.271485643286585 |
| AATGAGTTGTCT  | 851.785265732573 | 0.160436973898179 |
| GGTCATAGTGTA  | 851.785527549195 | 0.137947470575461 |
| CAAGCAGTCAGA  | 851.788462337132 | 0.193149416779392 |
| GAATTAGTACTA  | 851.798657043294 | 0.105663928392689 |
| GTCACGGGCCAC  | 851.801680024795 | 0.18167558765037  |
| CTATACTGTGAC  | 851.803112476483 | 0.163920529411739 |
| AACGTACTGTCA  | 851.811663620747 | 0.211111049471069 |
| AGTTGACACACG  | 851.816775125732 | 0.044793020882364 |
| GGCTAATGTGAC  | 851.825750737919 | 0.192238221552562 |
| CCCTATGAATGA  | 851.834291352163 | 0.184239458890619 |



|              |                  |                    |
|--------------|------------------|--------------------|
| ATGACACTCTGG | 851.841811710372 | 0.204508868752466  |
| CATAATGAGTGA | 851.849370937279 | 0.243569652025305  |
| ATTGTAGGTGAC | 851.84943201842  | 0.149071888799838  |
| CTGTCACAGTGA | 851.852530730605 | 0.232595956946685  |
| GTCATCCGCGTA | 851.854105868503 | 0.147820146852044  |
| ACGATTAGTCTG | 851.854560770708 | 0.149824976446408  |
| AGATAATGACAG | 851.855866432525 | 0.243818120691468  |
| AACATTCTGACT | 851.856178792718 | 0.159418244370719  |
| AGTTCGGGTGAC | 851.866316730332 | 0.272934117773565  |
| AGCCGATGTGAC | 851.873234630234 | 0.162232113836989  |
| ATGACAGTGAGC | 851.873500992155 | 0.18032199395708   |
| GGTGCGGTGACA | 851.881255233542 | 0.196445020692552  |
| CACGTCAGGGCA | 851.881984590551 | 0.178240181494292  |
| CTGACTCGCCCA | 851.890016071364 | 0.206290144322574  |
| TACGTATTGTCA | 851.894266627316 | 0.240809882935725  |
| CTGAGTGACGGA | 851.897815181184 | 0.230975064233026  |
| ATGGAGAGTCAG | 851.90557689331  | 0.20039480148671   |
| CTACCCGGTGAC | 851.926866187321 | 0.166528908373485  |
| AACGGATGTGAC | 851.928147001517 | 0.19002083210534   |
| CGATTAGTCGGA | 851.928977724947 | 0.291774495683519  |
| CTGACGCAGTGC | 851.934029242991 | 0.216370452609949  |
| ATGAGTAGGTAG | 851.934166058304 | 0.153536738486626  |
| CACCGTATGACC | 851.939516687217 | 0.21828970097619   |
| CAACCTCATGAC | 851.939942720239 | 0.159728783529005  |
| AGATCGTGTGAC | 851.945259897948 | 0.152246324083954  |
| ACTGGCTCATCG | 851.950986173421 | 0.16482070087491   |
| ATGATACACACG | 851.959552480316 | 0.181200544827956  |
| ACTCTTAATGAC | 851.961541709821 | 0.218883241832781  |
| GTCACCCGGATA | 851.96543966272  | 0.165631957717733  |
| TAGTCTGACCCA | 851.967751282876 | 0.1771829845053    |
| GAATCAGGTGAC | 851.972445770484 | 0.156094903569431  |
| AAGTCACTCTCA | 851.976843140088 | 0.219492669388646  |
| AGTCACGGGAAG | 851.978320423261 | 0.179402121507632  |
| CGAGAGGGTGAC | 851.983209164325 | 0.151472581290403  |
| ACGTCAGATCAC | 851.985124341458 | 0.157499133857631  |
| CAGAAATGACAG | 851.997615245386 | 0.158706315464447  |
| AGATTTACTAAT | 852.009789359786 | 0.201240101579294  |
| ACTTTGAGTAAC | 852.011205371213 | 0.161632481380534  |
| ACTCATACGGAT | 852.014083964108 | 0.25942540878924   |
| TATTGCCAGTCA | 852.020237916995 | 0.176134718005918  |
| AGTGAGTCCACA | 852.020696153283 | 0.0999376945362022 |
| GATGAGGGTGAC | 852.024235490503 | 0.0724403828329348 |
| ATTGGCGACTCA | 852.032580926272 | 0.171553041730309  |
| ACTCATTAGGTG | 852.034078246757 | 0.167681047432516  |
| AAGACGTGGCCA | 852.039465430347 | 0.168005354677188  |
| GGTCATCGACAC | 852.046477239842 | 0.155047248668934  |
| AGGGTCATGAAA | 852.04893899966  | 0.1816229773137    |
| ACATGATGTAAC | 852.062001819188 | 0.155934271552309  |
| CCCCTAGGTGAC | 852.067443606575 | 0.157516916403782  |
| AGGAGTGACCCA | 852.076337010143 | 0.197243558800193  |
| TAAGCATGACGA | 852.079328074442 | 0.187458636179545  |
| GAAGCCGTCATA | 852.082873461526 | 0.233887735484254  |
| TCATTGTCGTCA | 852.110515915953 | 0.175110739537738  |
| GATTTAATGACA | 852.112286700705 | 0.0900937338920748 |

|               |                  |                   |
|---------------|------------------|-------------------|
| ATTACACACGTG  | 852.12917234663  | 0.168595068602368 |
| ACAGTCAGGCAG  | 852.130387571587 | 0.24996804757986  |
| ATGACCACGGCA  | 852.135353201698 | 0.204809112766688 |
| ATACCTGAATCA  | 852.14047382681  | 0.183460553543076 |
| CCCGTCCAGTCA  | 852.142891481922 | 0.159661465991899 |
| ACTCATTCGGA   | 852.160113484244 | 0.352578868838297 |
| CCCTATGTGACA  | 852.160746916318 | 0.14060895695176  |
| ATGTCAATGACG  | 852.161156599552 | 0.197198975298756 |
| TCTAACGCGTCA  | 852.165805656286 | 0.114864868099625 |
| ATGGGTGACAAC  | 852.167950874295 | 0.224964400997858 |
| TCGCTGTGACGA  | 852.177212602672 | 0.170700165875462 |
| TATGATGCGTAA  | 852.194485670086 | 0.274661015901765 |
| GTCACCAGAAAA  | 852.196323133043 | 0.208870558174508 |
| TGTTGTGTCAAA  | 852.198314950296 | 0.189015118653925 |
| ACTCATTCATG   | 852.200948546278 | 0.253782571482292 |
| GACTAATGTATC  | 852.217003978294 | 0.17713237546991  |
| ATATAATGACAG  | 852.217670059379 | 0.165808733146313 |
| ATGACGAACTCG  | 852.218210034133 | 0.218488814240871 |
| ACTAGGTCATAG  | 852.239283754011 | 0.121783213735038 |
| CGGTGACATTC   | 852.242110238862 | 0.192280496650548 |
| GGCAAAGTGTCA  | 852.246225161332 | 0.21563140565218  |
| TCACGTCTGACA  | 852.248900094235 | 0.199213609689311 |
| ATGACGGTAAAG  | 852.253725043815 | 0.127182343822872 |
| CCGTA CTGGTCA | 852.253861711312 | 0.213379637803388 |
| CATATATTGTCA  | 852.255519272468 | 0.19731333855526  |
| AATCACATGACA  | 852.261033994141 | 0.165255281944922 |
| GAGCCATGTGAC  | 852.266823099571 | 0.15833426384188  |
| AAAATCAGTGAC  | 852.270186313343 | 0.140301963001087 |
| CTGTCACCAGACA | 852.289272366889 | 0.163018248608372 |
| AGACTCAGAGAA  | 852.303022008933 | 0.209557195475052 |
| GACTCAACCTAA  | 852.309188708839 | 0.132552127097036 |
| ATGTCACCGTTG  | 852.310183820943 | 0.239068296789718 |
| AGATGTCATTAC  | 852.325734841024 | 0.212473549977166 |
| AGTCAGACGCCA  | 852.331088564004 | 0.20363336980751  |
| ACGTCAGTACGA  | 852.331536147343 | 0.207555244676958 |
| AGAGTAATAGCT  | 852.335095382841 | 0.228651310712102 |
| ACAACCAATGAC  | 852.347764567219 | 0.137800070794904 |
| GGCCTGGGTGAC  | 852.361655324691 | 0.257520163616137 |
| GTCACATATGCA  | 852.36364452458  | 0.174288040602825 |
| ACGGGTGACAAC  | 852.369491443337 | 0.210662089869156 |
| AATGTATCACTA  | 852.37108700291  | 0.250900017952341 |
| ATATGATGAATC  | 852.372430460122 | 0.281608247695609 |
| AACCTTAAGTCA  | 852.372780121973 | 0.157561584351677 |
| GTGTCAGACTGA  | 852.377273815792 | 0.169857008426642 |
| AATTCTGACT    | 852.383906682021 | 0.196849454316595 |
| CCATCGGGTGAC  | 852.39227192805  | 0.185201615544135 |
| ATGTATACATAC  | 852.39328922841  | 0.147455655958704 |
| CGATTTGTCAAC  | 852.397579838101 | 0.183738867589604 |
| ATATTAGCAATC  | 852.399715274316 | 0.218799898850248 |
| ATAAGTGTGACG  | 852.400106962269 | 0.237397886194302 |
| CGGCCTGATTCA  | 852.408664866608 | 0.202608293618099 |
| ATGACAACGGAG  | 852.40923201364  | 0.208446163159514 |
| AGTGACACGACC  | 852.419751050619 | 0.230802847169726 |
| CGTCAGAATGAG  | 852.424377059275 | 0.32153078990772  |

|              |                  |                   |
|--------------|------------------|-------------------|
| CGTTGACGTATC | 852.426076203269 | 0.181408999872924 |
| TGACTCTCTCCA | 852.427074122929 | 0.146361438773715 |
| CGTCACATGCAC | 852.429301554976 | 0.148498948681931 |
| TGACAGAAAGAA | 852.440547763462 | 0.141968522223589 |
| TGACTGGGAAAA | 852.440734977329 | 0.241163239425342 |
| CAATATTGACTG | 852.442812332365 | 0.187681130429642 |
| AGCCATGAGCCA | 852.443076662562 | 0.167177758091017 |
| GTGACTTACGCA | 852.455111655233 | 0.223695284871829 |
| AGATTGTGTAAT | 852.46257122855  | 0.290600733263053 |
| GTCACCTCATTA | 852.466244421506 | 0.251653937322888 |
| CGTCACCACAGC | 852.482862272872 | 0.171903142549945 |
| ACTGACGGATCC | 852.491277033472 | 0.205851498117564 |
| CATACGGTCATA | 852.495573741615 | 0.226914946429052 |
| ACTCATAGGGAC | 852.496322042917 | 0.183019923054069 |
| AAGAGATGTGAC | 852.503657743852 | 0.230560781086274 |
| CACCCATGACAG | 852.506262560549 | 0.329515804994037 |
| ATGACAAGACGC | 852.520521970724 | 0.190895360165523 |
| AGTGGTTGTCAT | 852.521165420433 | 0.187505145037633 |
| GACTCACGTCCC | 852.524758287437 | 0.173903531805382 |
| CAAAGAGTGACG | 852.526528749743 | 0.163531584661935 |
| ATGTTGACTACA | 852.530554855027 | 0.160802211396488 |
| GGACCTAGTGAC | 852.533425079989 | 0.144303174029905 |
| AAGCGCTGTGAC | 852.543372141479 | 0.239333132950946 |
| GTGAATGTCATA | 852.553522645059 | 0.138781303298725 |
| AGTTAGCAGTCA | 852.558962706374 | 0.246524336272368 |
| AATGACGGGATG | 852.560381286858 | 0.155036426336333 |
| ATACTCATTGTG | 852.563595787164 | 0.150761767531091 |
| GTCATTGAGCGA | 852.564103078619 | 0.180740733830925 |
| GTCACCAGGCAA | 852.567009204803 | 0.174300406870419 |
| ATCCCGTCATCG | 852.578714499582 | 0.194813395783797 |
| GATTCATACAGA | 852.581959821131 | 0.268577233817088 |
| AAGAAATGACGG | 852.590306197493 | 0.183663798093933 |
| GCCTCACGTGAC | 852.598818804807 | 0.273327006715143 |
| GGTGAAATGAC  | 852.60003400892  | 0.1459190244794   |
| ACGTCACGAATC | 852.606970697213 | 0.154538602968477 |
| GAATCACTCTTA | 852.626193301338 | 0.206445532225816 |
| GATAAGGGTGAC | 852.642217767987 | 0.169425263625048 |
| CACATTGTCACA | 852.643119985357 | 0.269407550227591 |
| CGGTTAGTCTTA | 852.648321909195 | 0.151788113728563 |
| AGTCAGCTACGA | 852.657697360437 | 0.191975739573626 |
| AGATTGACGTAA | 852.665014443624 | 0.148807764426767 |
| ATACTATGACCG | 852.669100715368 | 0.162920016189039 |
| CGAGACTCAGTC | 852.673272221664 | 0.164438558782606 |
| AACCGTGACATG | 852.691253191035 | 0.17286625704648  |
| ATAGTTGTCACG | 852.70245078167  | 0.247781298815199 |
| ATTGACCATGAC | 852.705237258864 | 0.189704140411002 |
| CATGACGTGCTC | 852.720911260844 | 0.170153652426731 |
| ATCTAATTGTCA | 852.722080703984 | 0.181565156672246 |
| AATACGATTAGT | 852.74190008098  | 0.157745978789853 |
| GTCACCTGACAC | 852.757083220872 | 0.336620405641004 |
| GTCACGCTTATA | 852.757282252999 | 0.211829356924583 |
| CTTCGGTGTGAC | 852.761993711667 | 0.225274784445465 |
| CCTTCAGACTCA | 852.766634020193 | 0.187141425818953 |
| AGAATTAAGTCA | 852.768285070355 | 0.106799770225756 |

|              |                  |                    |
|--------------|------------------|--------------------|
| CGCGCTGTGACG | 852.771086700816 | 0.186380565526242  |
| CGTCATTCCCTA | 852.777556117635 | 0.147956587427876  |
| AGTGCTTGACTC | 852.785695389177 | 0.178280873892186  |
| AACAATGAGTGA | 852.789693448376 | 0.225090848940733  |
| TGACGGAGACCA | 852.791239703956 | 0.215182370651201  |
| CGCTGACACTTC | 852.799768670868 | 0.191088917553779  |
| TGACGCGCTGAA | 852.80832243754  | 0.229836948792871  |
| CGAAAAATATGA | 852.80870394697  | 0.168240500272501  |
| AAGATGTCACAT | 852.811697715734 | 0.145589329312883  |
| GTTGACTGAGCA | 852.812619126927 | 0.208280072508896  |
| CGATGATTTGTC | 852.826356933565 | 0.245271054623148  |
| GACTGTCTGTCA | 852.829550707972 | 0.188734254319655  |
| ATGACGAGAATA | 852.834907206224 | 0.135667488455215  |
| AGCTGTGTCAAC | 852.836620780694 | 0.171893529211157  |
| ATCCATATGTCA | 852.840279384553 | 0.276278836094237  |
| GCCATAATGTCA | 852.847337268681 | 0.211291064135529  |
| TAGATATACTCA | 852.865433177664 | 0.232123653477285  |
| TAATAAGGGTCA | 852.868469130772 | 0.248555877403069  |
| TAATTGGTGACA | 852.869762937158 | 0.141986502892907  |
| TCAAGCATGACA | 852.8754184806   | 0.208734925273856  |
| AATCGCATGACA | 852.880084804904 | 0.151768951701293  |
| GATCTGATGACC | 852.895942588031 | 0.213302458444755  |
| ACTTCGAGTGAC | 852.90064548243  | 0.182078856776488  |
| ATGAGTTACGCA | 852.906906943002 | 0.194365264479371  |
| CCACCCTGTGAC | 852.913637374288 | 0.213107751085529  |
| GCGTGGAATGAC | 852.918746840294 | 0.168970481191478  |
| ACGTCACGACTC | 852.922779180661 | 0.193054200882835  |
| AAATCCTGTCA  | 852.925415042936 | 0.132644861651258  |
| GCGACGCAGTCA | 852.926203636    | 0.230984337280161  |
| ATTGACTCAAT  | 852.929014032204 | 0.253974233405865  |
| CACCTGGTGTC  | 852.92941546559  | 0.265625898046262  |
| AAATTACACACA | 852.937295039707 | 0.159287009783721  |
| AGCGCGTGACT  | 852.940287439262 | 0.184870483444593  |
| CGTACTAATAC  | 852.94247354014  | 0.0685958750678756 |
| CGTTTGACGCAG | 852.944595156898 | 0.226211101709519  |
| AGAATCACTGAC | 852.948552345293 | 0.190905001183014  |
| CTGTCACATTAC | 852.963977150212 | 0.150971583558852  |
| ACAGTGTGAGAC | 852.981334137878 | 0.145164621666302  |
| GATCCGGGTGAC | 853.01310067567  | 0.192189121775989  |
| ATGACATCTATA | 853.013303421233 | 0.192362623477732  |
| TATTCCATGACA | 853.013415932033 | 0.219739835462023  |
| CCCTGGTGACGC | 853.022863653165 | 0.177681505234322  |
| ATGACGGCGACG | 853.023053321231 | 0.227592250359508  |
| ACCTGTCACCAT | 853.031771555957 | 0.133121639942531  |
| GACGCGTTGTCA | 853.036434773692 | 0.242522537751921  |
| AGAGTGGTGACA | 853.037494485617 | 0.0835988807271938 |
| ACCTGTCACGAG | 853.046610758855 | 0.162960328887982  |
| CCCCATGACCCA | 853.046658088    | 0.146558433536432  |
| ACTCATAACTAC | 853.054116114699 | 0.190037704306583  |
| AGCATGGTGACG | 853.055991437707 | 0.164314878712738  |
| TGACACTAAACA | 853.056173665979 | 0.151931813161236  |
| ATCGACTCAGCA | 853.061075135466 | 0.19204740390745   |
| AGTGAATGTGAC | 853.061576242147 | 0.151713401402184  |
| ACTCATCACATG | 853.062011278463 | 0.17987055071367   |

|              |                  |                    |
|--------------|------------------|--------------------|
| AAGGTTAAGTCA | 853.06593677784  | 0.160672625024416  |
| ACGTGAGTATAC | 853.068439980196 | 0.275294723137985  |
| AGCGCTGTGACA | 853.071844822984 | 0.272084028434484  |
| AACTACTCATTA | 853.078120255239 | 0.136411715994857  |
| ACATAATGACGG | 853.081212403132 | 0.286865731078458  |
| GTCACTGTCTTA | 853.090652192244 | 0.235692651574858  |
| CACATTTGTGAC | 853.096094255262 | 0.112647097699903  |
| CCCATATTAGTC | 853.101493169432 | 0.15091816177401   |
| GAGGTCGGTGAC | 853.107169816467 | 0.177438431910387  |
| CAAGGTGACAGC | 853.112911804525 | 0.189861600040658  |
| CCAGAGCATGAC | 853.113724690121 | 0.249726365410613  |
| CGATTACTCGAC | 853.121012070049 | 0.173610413827399  |
| GTCACGCGAATA | 853.133788076302 | 0.232456430235593  |
| CGTGAGCAGTCA | 853.135139967553 | 0.230469681895251  |
| ATAATGGTGACG | 853.142232738306 | 0.182194484814146  |
| CTGTAGGGTGAC | 853.143046764771 | 0.146098997373058  |
| AAAGTCCTGACT | 853.143417206215 | 0.11431821065337   |
| GAATGGTGTGAC | 853.152798135535 | 0.0925467485641595 |
| ATGTCCAGTGAC | 853.157634488119 | 0.276942968413803  |
| ATGCGCGACTCA | 853.166840073487 | 0.150025694466468  |
| CGTCAGCCGTGA | 853.178416999075 | 0.171893401159477  |
| AGTCAGCATATA | 853.178506124951 | 0.190210794795236  |
| TGTGACATGGAA | 853.187625277228 | 0.224183276663129  |
| CTGTGACGCCAC | 853.192126521087 | 0.133379095965212  |
| CTCTGACAGAAA | 853.19662115631  | 0.202289316359338  |
| CAGTATGTGTAA | 853.201634009317 | 0.166517940744825  |
| ATATGATGTGTA | 853.205363323152 | 0.167625379657316  |
| AGAGTTAATGAC | 853.206302169498 | 0.121373660701876  |
| TATGTCACTGAA | 853.206455727044 | 0.192533044748854  |
| GAACTACTCACA | 853.21323059565  | 0.180222598643556  |
| CGCACTATGACC | 853.21529625508  | 0.189490505292492  |
| GACTAATAGGTA | 853.216755787493 | 0.196763663876154  |
| CACTTAGATGAC | 853.247729506346 | 0.20687748752529   |
| ATATGTCGTGAC | 853.254696297245 | 0.245481525866735  |
| GTAGACTCAACA | 853.278037151643 | 0.183927483284379  |
| ACTGAAGTGACG | 853.281062520278 | 0.312495182804362  |
| AATCTGTGACAT | 853.283229333404 | 0.154036542432329  |
| GGGCCTGACACA | 853.287207834054 | 0.198399118073908  |
| ACGGTCATTAGT | 853.28816985503  | 0.201565900228669  |
| TCATAATGAGCA | 853.288809338374 | 0.159394645459209  |
| GTGGTCATTTCA | 853.298327435976 | 0.213702355401891  |
| CCGTCATCAGTC | 853.303742848865 | 0.211089045222083  |
| CTTCATTTGTCA | 853.309681192095 | 0.302234294738507  |
| ATCGGATGTGAC | 853.310225117453 | 0.128091458482663  |
| AGACAAATGACA | 853.310597632438 | 0.149715202670198  |
| GAGATGGGTGAC | 853.319363618029 | 0.156968220643701  |
| GTGACGCGAAAA | 853.319405094333 | 0.140348503555454  |
| GCGTAATGTGAC | 853.333116288371 | 0.197567940957767  |
| AGTTTCGCGTCA | 853.345308475229 | 0.171254168531677  |
| ACTCATTCACAA | 853.346992330128 | 0.117427875053079  |
| CACAGGATGACC | 853.347148421811 | 0.153363574115693  |
| CATGATGTATCA | 853.354030215093 | 0.141929300555591  |
| AATCGAGTGACG | 853.355650564109 | 0.156230839132951  |
| AAAGTGTCACA  | 853.356315034239 | 0.16540281627995   |

|               |                  |                    |
|---------------|------------------|--------------------|
| ATGACATTCTTA  | 853.361127518193 | 0.190947940920658  |
| GACACATGACAA  | 853.372996316961 | 0.163171687548246  |
| ATGCCTGTGACG  | 853.382858374513 | 0.229232859962294  |
| AGGTAGCAGTCA  | 853.384031335066 | 0.184397740173467  |
| TCGGACGTGTCA  | 853.388650587179 | 0.200913173049674  |
| CATGTAAAGTCA  | 853.393625866658 | 0.27337328461248   |
| TAACATTACTGA  | 853.394768601097 | 0.196515154746691  |
| CCATCCAAGTCA  | 853.403330270496 | 0.155018073138179  |
| CGATGGAGTCAA  | 853.405866594686 | 0.223521652387001  |
| GTCACCAGCCAA  | 853.414266267824 | 0.182985300171613  |
| TGTCACCTGTAA  | 853.414997044174 | 0.17681090073114   |
| CTAACCTGTGAC  | 853.418467615006 | 0.112630127657616  |
| GATTCTGTGACA  | 853.430509418994 | 0.155143428174126  |
| CGAAGGTGACCA  | 853.433463190842 | 0.220032156752792  |
| GTGGTCATTAAC  | 853.433885066538 | 0.238317558369881  |
| TCCACTATGTCA  | 853.433906633874 | 0.177383325655101  |
| GTCACACAGGGA  | 853.436242763608 | 0.18492929955357   |
| CTGACGACGTAA  | 853.437220112249 | 0.161860561939953  |
| ATGACAGTCAAG  | 853.43801782392  | 0.147816705328605  |
| AAGTACTATTAC  | 853.443143806118 | 0.213158572274969  |
| ACTCATCCACAT  | 853.448076113303 | 0.151786101217358  |
| AAAACGTGACGT  | 853.452528678628 | 0.23060239273054   |
| CGTCATGGTAAAC | 853.469540728103 | 0.174923863817642  |
| CTGCGTGTACC   | 853.473583855954 | 0.171450472300736  |
| CGTGACGTGCCG  | 853.474662991445 | 0.290197186001559  |
| GAGGAAGTGTCAC | 853.477292431652 | 0.149461850842185  |
| CGGACAACCTCAC | 853.48749977246  | 0.22591479051216   |
| AGATGACCGAGA  | 853.487740267049 | 0.18185634030705   |
| TCATTTATGTCA  | 853.497003524867 | 0.145626529102176  |
| GGAATTGATGAC  | 853.498440669062 | 0.194516051731413  |
| ACGTCACAAAGC  | 853.500904671029 | 0.181081745242809  |
| ACGTACTAATTC  | 853.505027346786 | 0.144696499251253  |
| AGTCACGAGGAG  | 853.505735066793 | 0.149721434589254  |
| GCATACTGTCCAC | 853.506406793825 | 0.0919462071287528 |
| ATTACGCACCAA  | 853.522880196695 | 0.188993778036534  |
| ACTGACACGTGA  | 853.524177804275 | 0.210792275977736  |
| GTCACCGAGGAA  | 853.529131951806 | 0.162754179594807  |
| TCACGCCTATGA  | 853.531661895292 | 0.156797451255783  |
| ATGAGTATGTAC  | 853.542655991415 | 0.241854144106716  |
| AATGACCAGATC  | 853.550583370513 | 0.172185499417361  |
| GGCAATGACCAC  | 853.550848085329 | 0.175686642256962  |
| ACTCATTGCATA  | 853.556166301223 | 0.17399906914616   |
| AGGCCAGATGAC  | 853.563716299506 | 0.220930414974992  |
| AAGGCGTCATGC  | 853.569863995284 | 0.11008892144254   |
| CGAACGGTGACG  | 853.586796569315 | 0.294798184723936  |
| ATGACAGGACAT  | 853.591539894216 | 0.201566634917208  |
| CCGCGGAGTCAG  | 853.596213585627 | 0.23177929385626   |
| AAGTATGATTTCG | 853.596978579112 | 0.121270374684278  |
| GCGACTAATCAC  | 853.597198720067 | 0.216668105708156  |
| TAGCAATGACCA  | 853.628310186764 | 0.156162104231673  |
| ACACGTTGTCCAC | 853.635798739967 | 0.171480829164572  |
| AGTCAGCACTAG  | 853.6380080487   | 0.214432024051318  |
| CCCACTGATTCA  | 853.64678095252  | 0.207488143777976  |
| GAGTGACAGCAC  | 853.648963541266 | 0.177160068647649  |

|              |                  |                   |
|--------------|------------------|-------------------|
| CATGCGTGTGTC | 853.6569420048   | 0.350117084590455 |
| ACATATTGTGAC | 853.659941806066 | 0.266466535808557 |
| ACGTCAGACAGT | 853.660028726624 | 0.186555028473239 |
| AAGGTATGTGAC | 853.6632346391   | 0.218041078675829 |
| GTAGTGACAAAC | 853.66440245723  | 0.183646592665857 |
| GTCAGACTTGTA | 853.665212184196 | 0.227972984082469 |
| GTCTTTCTGTCA | 853.665479521933 | 0.175292804102222 |
| ATTGTGACATGG | 853.669657114386 | 0.216626381683406 |
| ACTGTGGCTCAC | 853.670426345695 | 0.189005927985056 |
| ATTAGTTCGTCA | 853.673978722776 | 0.181955847777694 |
| CATCGTGAGTCC | 853.680600185589 | 0.254836914759959 |
| GTGACTTGCGAA | 853.681272361615 | 0.225896543576014 |
| GTGACCATGTCA | 853.696732799075 | 0.216925903591648 |
| GTCACAAAGTAA | 853.697245419729 | 0.212719074185501 |
| ATGACGTTCTAG | 853.69742360657  | 0.22968020825521  |
| ATGACGCCGGAA | 853.705250999027 | 0.149547962952188 |
| GCGGATATGTCA | 853.708270962994 | 0.1656209152594   |
| ATGACGATGGGA | 853.711768276206 | 0.167469199166732 |
| CCTTGGTGACCA | 853.717146067708 | 0.233748321338916 |
| AGGTGAGACATC | 853.720827977734 | 0.192033387219938 |
| ACGTTACTGACG | 853.72159429945  | 0.201045061274932 |
| GACGGTGGTGAC | 853.721876424704 | 0.199787293096736 |
| GCGTGCATGACC | 853.721889613218 | 0.277099210653097 |
| AATGACATTTTG | 853.723083329328 | 0.219743462959569 |
| ACTAAGACTGAT | 853.724348506348 | 0.145944549298526 |
| ACTGCTGACTAT | 853.725187104398 | 0.192945741489823 |
| CGAGGTGGTGAC | 853.728171762661 | 0.21251861928658  |
| ATTACGCGTATG | 853.729171760587 | 0.241892034175085 |
| GAGAGTGACAAA | 853.733791719965 | 0.157743584696054 |
| ATTAGGTGATGA | 853.739717868565 | 0.209824199813086 |
| AATCCGTGAGTG | 853.741070526098 | 0.233149186142914 |
| CTACTGTGACAA | 853.743419517894 | 0.156747656512832 |
| CGTCACGCGACG | 853.745819856109 | 0.28966792666864  |
| CCTACAGTCAGG | 853.754048756581 | 0.228640177619748 |
| ACGAGCTAGTCA | 853.768206665999 | 0.22390716653834  |
| AGCTACAGTGAC | 853.769959087539 | 0.171831708810981 |
| ATCCGTGACGTG | 853.769984492275 | 0.230449432549555 |
| GGCTGACACGCA | 853.77055869357  | 0.154469102687324 |
| AATGCTCATACT | 853.770834355817 | 0.153214466113562 |
| CTCAATTACGCA | 853.777265354288 | 0.20848952262493  |
| GACTAATATGGA | 853.780091559465 | 0.137540499893791 |
| AGATACTGTGAC | 853.781523425328 | 0.157395615368833 |
| ACGTCACGTCGC | 853.786690988282 | 0.1907723488532   |
| GGATCTATGTCA | 853.788693397238 | 0.226571343243029 |
| AACGACTCAATC | 853.789120186354 | 0.18064811038245  |
| CGGCTGTGTCAG | 853.794353447964 | 0.206080985890491 |
| GTACGCAGTGAC | 853.796530964541 | 0.16390897151737  |
| GAACTCGTCAGA | 853.802798694228 | 0.209710875944517 |
| GTCATAAAAGA  | 853.810484114643 | 0.289667456769442 |
| ATGACATTCATG | 853.813337494155 | 0.193256996508892 |
| CGACCGTGACAA | 853.815141219488 | 0.183077884933236 |
| TCTTAATGGTCA | 853.817228950236 | 0.200183684901924 |
| ACCAAATTGTCA | 853.817707172074 | 0.245874737446768 |
| CCAAAACGTGCA | 853.824223111167 | 0.267596642646491 |

|               |                  |                    |
|---------------|------------------|--------------------|
| TGACCGAACAAA  | 853.824471384768 | 0.200868100474495  |
| GCAACACGTGAC  | 853.827577954699 | 0.172875225049384  |
| ACGGGTCATAGT  | 853.835492236776 | 0.1835435184562    |
| TGTCACATTTAA  | 853.837824181901 | 0.18930010069118   |
| ATGACGGTCAAT  | 853.838412006956 | 0.193866287236258  |
| CAGTCAGTATAG  | 853.838676461376 | 0.184843024774481  |
| GTAGACGGTGAC  | 853.862842179776 | 0.181673783962685  |
| CCGATATGGTCA  | 853.864309002553 | 0.162552656008051  |
| ATTCGTC AATGG | 853.871509340039 | 0.243865523520466  |
| GGGTACCGTCAC  | 853.875397292243 | 0.176802468637494  |
| TATGTATACCA   | 853.875457180288 | 0.0899026461922917 |
| AGTGATTAGTCG  | 853.876954675301 | 0.307006729185887  |
| CTGCTTGGTCAC  | 853.879014891072 | 0.130831628306471  |
| AACTCCGCGTCA  | 853.882813066156 | 0.177170996035592  |
| GCGGTAATGACA  | 853.883942425667 | 0.151707513253348  |
| CCTCAAATGACG  | 853.893942677483 | 0.165723451923277  |
| CGACCGTGTGAC  | 853.895350664726 | 0.20558451111144   |
| ATCGAATCATT   | 853.895409951547 | 0.16823784402659   |
| CACTCATACCTG  | 853.900303997369 | 0.156358233001505  |
| GACGTTACTGAC  | 853.904219473614 | 0.161389321542653  |
| CGTCACACATGC  | 853.905440091639 | 0.216969102401424  |
| AGACCCGTCAAC  | 853.909313674914 | 0.176729904822163  |
| CACGCATGACCA  | 853.909346824016 | 0.151283916502181  |
| CCGACAACGTCA  | 853.919961755072 | 0.227847962576821  |
| ACCCGCATGACA  | 853.927017248371 | 0.195434480519258  |
| GATCTCTGTGAC  | 853.929643377009 | 0.149072476365439  |
| CTCTTGGTATGA  | 853.938012209974 | 0.127679751630353  |
| AACTCGGTCACA  | 853.940666000599 | 0.207058550501544  |
| ATTCATTGCTCA  | 853.962793430399 | 0.212811060700207  |
| GAGCGTGATGAC  | 853.965469135938 | 0.0928294153911463 |
| GTGACATAGAAA  | 853.97412213778  | 0.186469698548363  |
| AGCTTATGATGA  | 853.979927450326 | 0.175177174029769  |
| ATACGCCGTCAT  | 854.001977526125 | 0.270297268160887  |
| GAACCGCATGAC  | 854.008277572318 | 0.123342600351867  |
| ATGAGTCCGCC   | 854.012329836317 | 0.143344565408396  |
| GCTCAAAGTGAC  | 854.017873758751 | 0.201195387231587  |
| GACATTAGAGTC  | 854.019009536406 | 0.343172408981249  |
| CAGTGACGCGGA  | 854.020473689245 | 0.195608979193788  |
| CCCCGAAGTGAC  | 854.022613847624 | 0.161740035284046  |
| TGACAGAGCCCA  | 854.028154709043 | 0.192072041896738  |
| GTCACTGATGTA  | 854.045379821281 | 0.208676303698147  |
| AGTGGTCACAAC  | 854.049227675129 | 0.230487229083032  |
| ACTGACCTATGA  | 854.064577715728 | 0.184275962826903  |
| GGCCGAGGTGAC  | 854.070654465632 | 0.259926759510135  |
| GTCGTCACCACA  | 854.071051758839 | 0.192618742592976  |
| TGTCACCACAAA  | 854.071558224528 | 0.150958776031758  |
| CGTGACCGAATC  | 854.072251952688 | 0.152090620318421  |
| CCAACTGAGTCG  | 854.073655262118 | 0.236139063284431  |
| AAGGGTCAGAAT  | 854.086027085333 | 0.150227771046091  |
| GCGTCAGTAATA  | 854.09259647849  | 0.194173178621903  |
| GGTGAGATGAC   | 854.094987954803 | 0.224868417421612  |
| CCTGCTTCGTCA  | 854.096226655155 | 0.209146222214341  |
| GGTAGTAATGAC  | 854.099044923006 | 0.199753848254485  |
| CGGGAATGACA   | 854.104098985594 | 0.187214953057378  |



|               |                  |                   |
|---------------|------------------|-------------------|
| AATGTGGTGTC   | 854.104253146795 | 0.167079867523154 |
| TGACGTCAAGCA  | 854.11005545774  | 0.151999115350699 |
| GAAACTCCGTCA  | 854.118153546905 | 0.233847824745438 |
| ACTCATCTCTG   | 854.121043839346 | 0.155173869450646 |
| ATCTGACTGGTG  | 854.12385781778  | 0.1955592614758   |
| CGTAATTAATCA  | 854.125847602222 | 0.265418460197189 |
| CTATGCCAGTCA  | 854.127455857865 | 0.236233192644191 |
| ACACTCTGTGAC  | 854.127874947758 | 0.209613166109786 |
| TGTCACCTGAAA  | 854.130190329673 | 0.20697604221895  |
| CATGTCACCAGG  | 854.137300456255 | 0.181691869152259 |
| CCAAGATTACTC  | 854.138067515498 | 0.203081358300569 |
| TGACAAATCCCA  | 854.139937837478 | 0.226649329848876 |
| CGTCACGCATCA  | 854.147098225149 | 0.269845117364922 |
| AGTCAGCACGTG  | 854.15346775489  | 0.2626595401107   |
| CAATGTCACATG  | 854.153871953738 | 0.165813177750878 |
| ATGAATGATGCA  | 854.155446720158 | 0.285471754899158 |
| ACTCATATTAAT  | 854.157229864666 | 0.227089025897839 |
| AAGATTCATAAC  | 854.158838599697 | 0.214937056685576 |
| AATATGACCAGG  | 854.163262441775 | 0.194226149355026 |
| GTCACCTAGAAC  | 854.168333897782 | 0.231284108112461 |
| TCTCGGGTGTC   | 854.1814972684   | 0.26714541574744  |
| ACGCACTGGTCA  | 854.184455325463 | 0.246260045314008 |
| AGAACTCATGAC  | 854.184873090471 | 0.258343031299922 |
| CGTCAGACTGTA  | 854.198102928642 | 0.182626991209074 |
| AGTATTACGTAG  | 854.202188285531 | 0.165559295286604 |
| CGTCACCCTATA  | 854.208189935762 | 0.170223158289021 |
| ATACTGTCACTC  | 854.208312802936 | 0.21785724213417  |
| CCGTCACGTGAC  | 854.211401839624 | 0.287610275538115 |
| CTTGGGGACTCA  | 854.219235359208 | 0.203557498153663 |
| ATGAGCCAGACG  | 854.226979263782 | 0.177534633167008 |
| GACTAATCCCA   | 854.227640007052 | 0.196796965264324 |
| GTTGTCATGCCA  | 854.238548131789 | 0.15872665883085  |
| GGGTTTAATGAC  | 854.251610183041 | 0.217131549692774 |
| AGACCAATGACA  | 854.255315157668 | 0.150699712300338 |
| ACTCATCGAAGA  | 854.265437613063 | 0.15545074228549  |
| AGTTTCGTGAGC  | 854.274365723686 | 0.148221292617402 |
| CGTCACCACCAA  | 854.275668377571 | 0.147853898844837 |
| CGTCACGTTTGA  | 854.276498816128 | 0.167092357260554 |
| CGACTCAGGTGA  | 854.276627623995 | 0.202567247755132 |
| AATCGCGTCAGA  | 854.28046735341  | 0.218683220880919 |
| CCAGGACATGAC  | 854.281925582442 | 0.18822220371803  |
| CAGACCGTCATA  | 854.290039258495 | 0.212602707482443 |
| ACCCTTTGGTCA  | 854.309057396879 | 0.148200719803468 |
| GCATGACACCCC  | 854.311743066669 | 0.184070451716874 |
| AGCTGTTTGTCA  | 854.313010277137 | 0.233299107079252 |
| AACGTGGTGACA  | 854.313110859901 | 0.22195637592524  |
| GTCACCCCTTCA  | 854.317623679637 | 0.19025201368905  |
| ATGACTTGGGCG  | 854.317820636924 | 0.232502700113104 |
| GTCACGTTTAAAC | 854.322407847708 | 0.144608227841339 |
| GAACGTCACTCA  | 854.32760693624  | 0.175898003631238 |
| CGTCACAATGAG  | 854.331148304874 | 0.228689955270614 |
| ACGTCACGGCTC  | 854.331868094466 | 0.159069150978195 |
| GTGTGAGCCAAC  | 854.337294595432 | 0.148086078149168 |
| CACACGCGTGAC  | 854.340908117937 | 0.221930327529667 |

|               |                  |                    |
|---------------|------------------|--------------------|
| TACCAAGTGTC   | 854.352579073304 | 0.221203297372736  |
| CCCCGTGTGACG  | 854.354710674457 | 0.281947144507953  |
| CTATGCGGTGAC  | 854.358304327054 | 0.211574289017663  |
| TGACGTGCATAA  | 854.365227841236 | 0.197477370273005  |
| AGTCAGAAGCGC  | 854.368054987499 | 0.122402769822637  |
| GGATTGCGTAAC  | 854.373330121576 | 0.177422250951751  |
| CGTTGTGTCAA   | 854.381908770719 | 0.277139382189897  |
| ACGTGTAATACA  | 854.382053687266 | 0.159552326585548  |
| CGTTAGGGTGAC  | 854.386658708439 | 0.202325577880872  |
| TACGTGTCGTCA  | 854.390995898731 | 0.231876493713434  |
| ATGATGGTGACA  | 854.392609365626 | 0.145851267115341  |
| CACCGACAGTCA  | 854.39644442606  | 0.248823611285882  |
| TACGAGTAATCA  | 854.40153646383  | 0.160947258751465  |
| ACTCATCCTGAA  | 854.408922412322 | 0.212772566332522  |
| GCTGGCATGACA  | 854.411465940569 | 0.223688503227561  |
| CTGAGTAACGCA  | 854.414889084041 | 0.119843210448154  |
| ATGTCATTGCCA  | 854.431090074372 | 0.175574912838646  |
| ATGAGCAACGTG  | 854.433661684007 | 0.1998271441955    |
| ACTCATACTGTC  | 854.43559430446  | 0.164759371386855  |
| CGCATTATGACC  | 854.446102094766 | 0.184324684786326  |
| GTCACTCTACA   | 854.4547720763   | 0.112430376237851  |
| GTCACAGCAGCA  | 854.461886515301 | 0.180388751314693  |
| ACTCTGACACTA  | 854.463058074846 | 0.161127134587843  |
| ATGAGGGGTGAC  | 854.470445301607 | 0.157661948138368  |
| AATATTTGCTCA  | 854.478573102059 | 0.201254927935322  |
| CGCTATGTGACA  | 854.479293363872 | 0.271489410583427  |
| CAATGCTGACTG  | 854.482567305971 | 0.281427916964059  |
| GCTATTGCATCA  | 854.504029450597 | 0.189497711175589  |
| CTTAATATGACC  | 854.504451350081 | 0.0991552944014214 |
| GCTTAGAGTGAC  | 854.508137675525 | 0.158918906454196  |
| ACTAGTCTGACT  | 854.50827241552  | 0.115698622939714  |
| ATGATTGACGTG  | 854.509333347635 | 0.182930980203141  |
| ACTAAATCGGCA  | 854.519742205639 | 0.151746692695621  |
| GGTCATATTCAC  | 854.519916755361 | 0.154504051554387  |
| GTGTCACCTGGCA | 854.53629482912  | 0.16462320294249   |
| TATGACCGTACA  | 854.541539018058 | 0.131369955189817  |
| GTGACAGGTAAC  | 854.544575344869 | 0.228510251701497  |
| AAAATGCATCAC  | 854.555870240877 | 0.193954032188215  |
| ACCTGAAATGAC  | 854.556973767406 | 0.186151956831298  |
| ATGGGACAGTCA  | 854.562881497079 | 0.215698869986305  |
| TGCCATTAATAA  | 854.567476169233 | 0.16301843534025   |
| AGTCAGACGCGA  | 854.571165162247 | 0.19775495463937   |
| GAATTGGTGACA  | 854.579902044997 | 0.15260571149648   |
| AAACCATATGAC  | 854.586282414541 | 0.177156375526688  |
| AATAAGGTGACA  | 854.596511692666 | 0.2006616721017    |
| AAAGAGTGTAC   | 854.599317035824 | 0.0987677670849386 |
| ATATGATTTCGAT | 854.606085652133 | 0.216664055220814  |
| TGACGTTGTGCA  | 854.607211136963 | 0.0958789975565435 |
| GAAGGGGTCATC  | 854.61083350744  | 0.159618287342635  |
| GTTACTCAGGGA  | 854.61897502199  | 0.213836905113826  |
| GTATAGCAGTCA  | 854.621635882278 | 0.15019214005383   |
| AATGACGGCTAC  | 854.63158977742  | 0.198518402577837  |
| GTCACATCAAAA  | 854.649227904816 | 0.19636223067959   |
| GTGAGTCCGCTA  | 854.650910952618 | 0.125812793329496  |

|               |                  |                   |
|---------------|------------------|-------------------|
| AAGGTATGTCAC  | 854.651572009219 | 0.205664104905113 |
| AGTCAACACTTG  | 854.659488144072 | 0.175723294456456 |
| TCATACACATCA  | 854.659865008191 | 0.128128203330861 |
| AGCGGACTCACA  | 854.661103792815 | 0.17498030197039  |
| GTCACCGTTTAA  | 854.661818300598 | 0.23438885423939  |
| ACTAGATGACCA  | 854.66187139178  | 0.170127579995575 |
| GAGTAATAAGCA  | 854.670375585094 | 0.145391073685115 |
| CGTCACATTCTGA | 854.671041657975 | 0.191497074147045 |
| ATGATGTGGCGC  | 854.678883987737 | 0.191007679941179 |
| ACGTTTCATGAC  | 854.684197944079 | 0.160481383652135 |
| GGAGCGTGTGAC  | 854.687109068299 | 0.169693236380329 |
| AAACATGAGTAC  | 854.689177376975 | 0.129235686597271 |
| GTGGTCACACAA  | 854.689610853269 | 0.169739432239562 |
| GGGTGATGTGAC  | 854.693679391057 | 0.133515186977605 |
| GAGTCTGACAAC  | 854.710102016663 | 0.21142976581358  |
| AAGGCAAATGAC  | 854.7119156602   | 0.20178813823223  |
| ACTAAGTCGGTC  | 854.731266778192 | 0.230704438160456 |
| AGTCACGAGGGG  | 854.733358155665 | 0.137761924803602 |
| ACTCATATTGGG  | 854.734330058957 | 0.248869771377258 |
| AAGACTAACCGT  | 854.738415136304 | 0.144768783181134 |
| CATCTATGTCAC  | 854.740155726288 | 0.13373196285472  |
| AGCGCGTGAGTC  | 854.743498556361 | 0.122874451903972 |
| ATTCCGTAGTCA  | 854.754148931582 | 0.299996984109661 |
| CTCCTATGATGA  | 854.761593984948 | 0.252795485820362 |
| AACACGTGTCTA  | 854.76830525906  | 0.244775948364795 |
| TGGTCATTTTAA  | 854.773075436519 | 0.143497541268746 |
| ACATTTCTGTCA  | 854.791836988087 | 0.146132972519568 |
| AGAGTCAAGGCA  | 854.793250126083 | 0.19886683612326  |
| AGACGCGTGACA  | 854.796441114714 | 0.154023862158556 |
| AGCAACCATGAC  | 854.797993707841 | 0.180995939894686 |
| TCACCGTTGTCA  | 854.804414434624 | 0.18153953732545  |
| CGGTGACAATAA  | 854.807232288399 | 0.205515070338341 |
| GTTCTTACGTAA  | 854.809407771799 | 0.26773436688155  |
| GACACGTTATGA  | 854.809888236435 | 0.20970519234388  |
| ATGCGCTGACAC  | 854.812922321428 | 0.16475072801986  |
| ATGACGGTAAAT  | 854.813012092854 | 0.168238091478794 |
| ATCAGGCGTGAC  | 854.813370865275 | 0.218655362550777 |
| ACCATGACAGAG  | 854.815769148597 | 0.163915866487596 |
| CCACCGCGTCAC  | 854.816890430033 | 0.197456318343038 |
| GATGCGTGTGAC  | 854.819102493748 | 0.193018715481966 |
| AGAGTAACTCAT  | 854.827588053776 | 0.189442078137275 |
| ACCCAGGTGACA  | 854.828961034317 | 0.143496702612448 |
| AGGTGATTAATC  | 854.837143407986 | 0.139044034015122 |
| AGCTGTGACAA   | 854.838791050788 | 0.182554761224276 |
| TAATGACCACTA  | 854.844438307758 | 0.167747381727938 |
| GTTACACTCATA  | 854.85240261713  | 0.210231643855883 |
| CCCCTACAGTCA  | 854.85317715153  | 0.209752776897722 |
| GAAGGAGTAATC  | 854.85406332267  | 0.176194533051975 |
| GTCATGGGTCTA  | 854.859603304062 | 0.244144966997358 |
| GGAACTACTCAC  | 854.860211561798 | 0.246405526432811 |
| CTGACTAGTCTA  | 854.863030699532 | 0.251108844568999 |
| AGAATCTGTCAG  | 854.869648102338 | 0.21480704847612  |
| TGGATGTGACCA  | 854.870297123334 | 0.1616171804096   |
| GACTCAGGCTCA  | 854.877155870861 | 0.177454778222454 |

|              |                  |                   |
|--------------|------------------|-------------------|
| CTGATGCGTGAC | 854.87800905017  | 0.181827538515632 |
| ATCACACGTGAC | 854.880543769222 | 0.216398133232289 |
| CGTCACCCTTTC | 854.895911341747 | 0.167621315602357 |
| CGTGCGGCATA  | 854.904446938337 | 0.151844444148361 |
| GACGAAATGACC | 854.909218938799 | 0.19259830384143  |
| TACGGGTCATAA | 854.91898107025  | 0.213090530179262 |
| CAGGTCATATGA | 854.922528301279 | 0.185135581728074 |
| AATGAGTTACAC | 854.922772300752 | 0.172301009817801 |
| TATGCCAAGTCA | 854.932573010668 | 0.237794202283621 |
| ACGGAATTGTCA | 854.971276585467 | 0.275015331087209 |
| GGGGCACGTGAC | 854.974749523312 | 0.315107609926385 |
| GTGTGAGACATA | 854.98175009805  | 0.164967020627755 |
| GGGCATTCTGAC | 854.989963065648 | 0.251216786489423 |
| ACCGTGTCACTG | 854.99210280388  | 0.152943266652476 |
| CTCGTGGTGTCA | 854.995154998694 | 0.229197252447771 |
| CACGTCGACTGA | 855.000149428591 | 0.123551693970637 |
| CATACCCATGAC | 855.009492383413 | 0.167999333341111 |
| AATCAACGTGAC | 855.018975614726 | 0.215057825639547 |
| AATGACCACTGA | 855.02007165699  | 0.231873237926686 |
| GACTGGTGACAA | 855.024662456742 | 0.203860156714033 |
| GTTTGTACGCA  | 855.026924106768 | 0.208786519166993 |
| GTTGACAGATCA | 855.03080072357  | 0.214944085898239 |
| CTGAGCAGTGAC | 855.030971508022 | 0.146936129786046 |
| CGCCTCTGTGAC | 855.031684453864 | 0.234228548085263 |
| CTGTAAGAGTAA | 855.032538091069 | 0.190203941158736 |
| GCGCATGACGA  | 855.032695888294 | 0.267148217973194 |
| AGTCGGTGACAA | 855.033012140727 | 0.167525016112844 |
| TCACATCAGTGA | 855.047766352126 | 0.147844723325031 |
| CTAACCGTGTCA | 855.057109912649 | 0.121938862551224 |
| GCTCACGTGTCA | 855.061189901925 | 0.174142880741194 |
| AGCTCAAGTCAT | 855.062085385228 | 0.182694885624915 |
| ATGTCATGATGA | 855.068316168004 | 0.198273341536878 |
| ACGATCCGATGA | 855.075529595324 | 0.192445720875519 |
| CCGCGTGACTGC | 855.084013394502 | 0.251799072504037 |
| CTATGTACGTCA | 855.08523119373  | 0.168995711394981 |
| AAGACTGATCGT | 855.088849314102 | 0.266814272011633 |
| GAAATGCGTGAC | 855.092431188823 | 0.249853958082039 |
| CTGACAGATAAA | 855.10588047926  | 0.238312866247419 |
| ATTACTCTACCA | 855.115139871926 | 0.149377401137777 |
| CTGTACCATTA  | 855.116715254168 | 0.203899792269082 |
| ACGAGGATGAGT | 855.11932360032  | 0.094630274300328 |
| ATTTGCCAGTCA | 855.12145379023  | 0.168797406893129 |
| GAATCATCCAAA | 855.127207280039 | 0.19357836843332  |
| ATACTGTCATGG | 855.130065695308 | 0.176574702496302 |
| ATTCATTGAGTC | 855.131026295003 | 0.16041861327083  |
| GGTGATTGTGAC | 855.146113893437 | 0.226710887537572 |
| AGCTCTGACCCA | 855.149257878673 | 0.10671641707172  |
| ATGAGTGTATTC | 855.152015672153 | 0.218887147843635 |
| TAGGACGTGTCA | 855.153814259204 | 0.254085546445273 |
| ATGTCATGCAGG | 855.155000690241 | 0.212575883778992 |
| GTTACGGAGTCA | 855.158795802048 | 0.122622576481278 |
| GCAGCAGTCAGA | 855.165020464784 | 0.169443059227914 |
| GTCACAAGGTTA | 855.168094376527 | 0.143041055836935 |
| GTCACCATGCGA | 855.177424497356 | 0.201747122399586 |

|              |                  |                   |
|--------------|------------------|-------------------|
| CATCCTTGACTC | 855.177868299078 | 0.148908189527121 |
| AATCGTCGTAC  | 855.1811489101   | 0.21128040054564  |
| ACACCGTGTAC  | 855.186272521449 | 0.16542121087822  |
| TGTGATGCAACA | 855.200301667894 | 0.150036847022707 |
| AAGATCTGTGAC | 855.211355605113 | 0.153771323572823 |
| ATGAGTGAATAG | 855.218869412673 | 0.166016145984167 |
| CGCGCATGACAG | 855.223283278421 | 0.22927919273655  |
| CAGAATCGTGAC | 855.238256393198 | 0.142843655230832 |
| ACGTCACCTTCT | 855.238644090527 | 0.24300982343047  |
| CATTGAGTGACG | 855.242098748797 | 0.140479412724929 |
| AGTGCGGTCATC | 855.245079127831 | 0.161214889067095 |
| ATGTGGTGACAA | 855.252808680843 | 0.108958249317099 |
| AGTCAAGTCACC | 855.255860510641 | 0.232678843983487 |
| CTGAGCAATATA | 855.260186021801 | 0.157301368956286 |
| TCCGGTTTGTCA | 855.260794722979 | 0.15650081752549  |
| ATACCGTGTAC  | 855.262369278286 | 0.166875346542861 |
| CGTGGCATGACA | 855.263366767081 | 0.171768255311257 |
| GTAGACTTGTCA | 855.287637300295 | 0.154605601876077 |
| ACGTATGTGACA | 855.298150034802 | 0.150755720794079 |
| TCATATGTGTAA | 855.303770245    | 0.170634127487227 |
| ATGTTTATGACC | 855.306728177038 | 0.155237155045014 |
| GAACCAGGTGAC | 855.310374940109 | 0.20792655921315  |
| GAGATTGGTGAC | 855.314263674833 | 0.180989766960731 |
| AGCAGTGACGTC | 855.317646039185 | 0.205115813609473 |
| CAATGGACTCAC | 855.319935836816 | 0.172631123952516 |
| AATGACGTCTGA | 855.333305571605 | 0.138752812226438 |
| AGTACTAATACA | 855.334553738322 | 0.15426848732148  |
| GTAACACGTCAA | 855.3470107626   | 0.181871896876479 |
| TCAACGACGTCA | 855.348135953155 | 0.203510971873145 |
| GAAGATTACAC  | 855.348633247764 | 0.17857111525431  |
| TCTGACTGCGCA | 855.366904192812 | 0.192224788723356 |
| ACCCTTGACTCT | 855.367280851284 | 0.105584666690919 |
| GACCAGTCAATC | 855.385746967417 | 0.199580720256299 |
| ACAGTAAGAGTC | 855.391758414065 | 0.186027980944947 |
| GTTAAGCAGTCA | 855.396781445002 | 0.170291958534042 |
| ATGAACAATGAC | 855.399655233205 | 0.229922579181052 |
| GTCACCCAAACA | 855.402549531466 | 0.15095199949589  |
| CGAACCTGACTA | 855.402702024341 | 0.317781997350533 |
| AGTTATTAGTCC | 855.407826302537 | 0.199690387794148 |
| CGCAGTCAGAAC | 855.410248891078 | 0.166712603967172 |
| GCTCCGTGTAC  | 855.41030447938  | 0.162843163325798 |
| GATGTCATTTCA | 855.415418399491 | 0.158842700805075 |
| TCATAATTCGAA | 855.421227541693 | 0.178723610070444 |
| ATCGTAAGTCAC | 855.426709702508 | 0.242640520993019 |
| ATGTCACCTATG | 855.43156372826  | 0.1987427928003   |
| CTCACAGGATGA | 855.436250397849 | 0.194894362301997 |
| GTAATTGTCAGA | 855.445822262893 | 0.160695455043797 |
| GGGATGACCGAA | 855.44849662716  | 0.174560766861271 |
| ACTCATACGGAG | 855.45052789525  | 0.264743029093209 |
| CGATTTGACGCA | 855.45486764144  | 0.196843901960861 |
| ATGACAATGGTA | 855.464362770107 | 0.186303443815126 |
| GAGGACGTGTCA | 855.468553483486 | 0.245708795854695 |
| GTGACAGAGCCA | 855.469743924146 | 0.170650543848841 |
| CCCTAAAATGAC | 855.470906138997 | 0.216136898940476 |

|              |                  |                    |
|--------------|------------------|--------------------|
| GACTAATCAGGC | 855.473608643355 | 0.258193894680558  |
| GCGTGGAGTCAA | 855.477372053673 | 0.203872728425113  |
| AGCGTGACCCAA | 855.480417672922 | 0.304876832559893  |
| CCGGTGTGACCA | 855.483713028828 | 0.169587699765583  |
| GGATGACGGCAA | 855.490308116304 | 0.135632408642017  |
| GATTAATGACCC | 855.499532298842 | 0.156713560455919  |
| GCGCGACATGAC | 855.505681355211 | 0.202654901078244  |
| CTATCTGTCAGA | 855.508804624418 | 0.154501991396318  |
| AATCGATGAATC | 855.523679117931 | 0.235970290883258  |
| GTGACGCGCTAA | 855.526664882423 | 0.209545875823442  |
| TCATACCAGGAA | 855.526891025716 | 0.200138774586022  |
| GCCAGGTCATAA | 855.527806608153 | 0.146646425351775  |
| ATGAGATGTGAC | 855.52846867571  | 0.236516835316546  |
| AGTCTAATGACA | 855.536226673193 | 0.149603516028178  |
| ACGAAGTGACGC | 855.536804495789 | 0.259051562244922  |
| GGCCCAGAGTCA | 855.539155959958 | 0.264813399635033  |
| AATACGGTGACG | 855.540238424584 | 0.329989980735389  |
| CACTCGATATGA | 855.542514691546 | 0.194588950549633  |
| GAGGCGTCATGC | 855.543326744188 | 0.150759335423705  |
| CTTCTTGTCAC  | 855.543961860791 | 0.18702876719445   |
| GTCATTTACTGA | 855.554286364792 | 0.217087903238225  |
| GAGGTTTGTGAC | 855.55468864642  | 0.121762315395942  |
| CGTCATGAGCTA | 855.555182753035 | 0.305532459074395  |
| TCGACCATGACA | 855.568956182565 | 0.187150540550617  |
| GCGAGGTGACGC | 855.574462668786 | 0.151061557103559  |
| GGGTGACCTAAC | 855.574529823105 | 0.213260167103085  |
| AAAAGTGACGCG | 855.574678094869 | 0.160608635948778  |
| CCCGACTGACTA | 855.592890040485 | 0.181544291764323  |
| ATGACCACGTGC | 855.601177926856 | 0.142558865626996  |
| ACGATTACTCGA | 855.605737828166 | 0.236431383243406  |
| ATGACCCTCCG  | 855.606652706984 | 0.168977673536709  |
| ACGGTTCATGAC | 855.61453911372  | 0.104646309969941  |
| GACCAGTCAACA | 855.630557827777 | 0.189720335989182  |
| GTGACGCTGCTA | 855.630845309381 | 0.196238613352358  |
| ATGGTCATTCAA | 855.631468136783 | 0.245219070872762  |
| GAGGTATGTGAC | 855.632859712692 | 0.165697531688915  |
| CTTCTCTGACAC | 855.632872603703 | 0.192378822156623  |
| ATACCTAAGTCA | 855.634984575973 | 0.155554061835944  |
| AGGCATAATGAC | 855.649581727709 | 0.147468664219405  |
| TGACGGTTATAA | 855.656974318199 | 0.200201879267135  |
| ACTCATCCGAGT | 855.657638765479 | 0.240660271882949  |
| ATTGCATGACGA | 855.658478105268 | 0.145807348308434  |
| GCATAGGTGACA | 855.669507509366 | 0.165138362958542  |
| AGTTATTAGTAC | 855.670613510321 | 0.22089140876261   |
| AGGTATTGTGAC | 855.672810093153 | 0.179322455671041  |
| AACACAGTCAGG | 855.674752113761 | 0.21066662936028   |
| AGTCAGATGTAG | 855.68137313796  | 0.0573617945955814 |
| ATGACGTTCTAC | 855.68820307701  | 0.17478093792182   |
| GTCACCTAAAGA | 855.69456482537  | 0.155738589077441  |
| GATGAGCCAATA | 855.726894452752 | 0.17868971767742   |
| GTTGAGATGACA | 855.728959578715 | 0.151170406839991  |
| GCCGATATGACC | 855.729874568711 | 0.181690392640364  |
| CTGACTCTCAAG | 855.733362763736 | 0.176987820960719  |
| GATAAGTGACAC | 855.748692971123 | 0.14807957119562   |

|               |                  |                    |
|---------------|------------------|--------------------|
| TGTA CTGAGTAA | 855.767349390297 | 0.325262386148518  |
| AGTCAGCCATCG  | 855.776136112935 | 0.172197753526988  |
| CGTAGGAGTGAC  | 855.783693064824 | 0.18796354715489   |
| CACTGTGACATG  | 855.804725217038 | 0.176750946770448  |
| GAATAAGGTGAC  | 855.815387644337 | 0.177779242901548  |
| AAGTGTGAGATT  | 855.816921588321 | 0.150825182725308  |
| ACAACACAATGA  | 855.825047792952 | 0.201935016965454  |
| CGTCACACCCGA  | 855.825639606176 | 0.217622580444542  |
| GTGACAGACATA  | 855.835105334988 | 0.0877823547377743 |
| AATGAGTTGGAC  | 855.844098779414 | 0.133208282376797  |
| ATATCTGACTGG  | 855.845922032169 | 0.204879879455998  |
| GTCACACGTGCA  | 855.846657143879 | 0.21364699296273   |
| ATGGTTTGGTCA  | 855.848462139693 | 0.164694994902797  |
| ATGACTTGACCC  | 855.849139604197 | 0.25059670694964   |
| GCTTTGAATCAC  | 855.850833320315 | 0.253858807588743  |
| TGAGCAACACCA  | 855.852512957738 | 0.186882472206254  |
| ATGTAGAGTGAC  | 855.85890193465  | 0.227196179421415  |
| CGCTAATGTGAC  | 855.861651794537 | 0.166714254790697  |
| CCTCAAGTGACG  | 855.876398053924 | 0.128692759152544  |
| CGAGTCAAAGCG  | 855.883354296992 | 0.224522577325312  |
| AGTGAGGTCATC  | 855.883513365866 | 0.185568001022811  |
| ACAGATATGAGT  | 855.893353385403 | 0.154006853744142  |
| AAGTCAC TAGAC | 855.896271532471 | 0.254473883227496  |
| GTGTTCCAGTCA  | 855.910256229682 | 0.148452043095149  |
| GACTTGACGTCA  | 855.913015323027 | 0.281977462877183  |
| CACGTAATCGAA  | 855.915463021461 | 0.143050354237895  |
| ACCCATGACAGT  | 855.91610114313  | 0.20832634367749   |
| AATGAGTGAGTA  | 855.920056756482 | 0.148525884673739  |
| TGTTACTATTAA  | 855.920992669508 | 0.175294661402485  |
| ACTTCTGACGAA  | 855.922132918359 | 0.213051981736352  |
| GACGAGCATGAC  | 855.923748530367 | 0.19064658403941   |
| CTGACGGATTGC  | 855.926818606071 | 0.165353081547372  |
| GCGGATGACCGA  | 855.945845284393 | 0.163530297986624  |
| GTGACACGAAAA  | 855.953198136368 | 0.185309914486952  |
| ACGATTACTAAG  | 855.963997077527 | 0.270721423691559  |
| AGTTATCATGAC  | 855.965032971419 | 0.109877527648514  |
| CCAGCTACGTCA  | 855.967525613678 | 0.248037241414855  |
| CTGTGACACTAA  | 855.976823329152 | 0.18998464005257   |
| GGTGACCTATAC  | 855.984337943626 | 0.225973371252523  |
| GGAGCAATGACA  | 855.985277762034 | 0.155047696628037  |
| CATAGTTGACTA  | 855.995166446693 | 0.166983931392236  |
| ATTACACTGTCA  | 855.996367682294 | 0.214755278002787  |
| GATGAGATCATC  | 856.000935140539 | 0.215828303529559  |
| GTCAC TTACACA | 856.005192376746 | 0.206186606765485  |
| ATCGTCACCTAA  | 856.023259019746 | 0.201379014583117  |
| AGAATTACTGAC  | 856.024620145884 | 0.156876995147256  |
| ATAAGTACTCAC  | 856.037667470441 | 0.217780158990363  |
| GCGTTACGTGAC  | 856.041644022074 | 0.152628019384341  |
| GTGATGTGACGA  | 856.046325497587 | 0.0595955860161443 |
| GTAAGGCGTCAC  | 856.056240042116 | 0.1894409250865    |
| CGAGTGACGTGC  | 856.060896785007 | 0.161402705570939  |
| ACGTAATACTCT  | 856.067705803614 | 0.198192017708163  |
| CTATCTAGTGAC  | 856.069411663957 | 0.143755365335572  |
| GGGCAGCGTCAC  | 856.073256519421 | 0.159548386360698  |

|              |                  |                    |
|--------------|------------------|--------------------|
| GTGTCACGGGTA | 856.074570701425 | 0.190535504562257  |
| TGACAAAACAAA | 856.079972601418 | 0.103064587450276  |
| CGTCACCTACTA | 856.080762221587 | 0.168520000210727  |
| CCCGATAAATGA | 856.081927119676 | 0.199380302172091  |
| AACAAGTGACTT | 856.082993594301 | 0.22546494299655   |
| AGAAATTCTGAC | 856.099856149611 | 0.208790175346547  |
| ACATTTTGGTCA | 856.106165394934 | 0.163060037063679  |
| GGTCTAATGACA | 856.107148649634 | 0.183373008239992  |
| CAAAATTTGTGA | 856.11751026325  | 0.251261709418691  |
| ATCCAGGTCATC | 856.127597599719 | 0.231377372728254  |
| TGACTTAGCGCA | 856.136158180027 | 0.119166841646153  |
| CGGCACAGTCAG | 856.138919310902 | 0.153469958423224  |
| AACTAGGCATA  | 856.138989421042 | 0.140329491398601  |
| CACAGATCTGAC | 856.153039852181 | 0.158375540699903  |
| GCGAAGGGTGAC | 856.15945366865  | 0.221947609696692  |
| TGATGTGTTCCA | 856.16279293464  | 0.200516869921306  |
| CCTTTGACACAC | 856.170535037779 | 0.121762205766561  |
| TACAGGGTGACA | 856.171750299194 | 0.238331742362096  |
| AGTCAGCTGTGA | 856.175292870263 | 0.228198636755213  |
| GAATCTCGTCAC | 856.179736668231 | 0.19509716207248   |
| GAGTAATTCAC  | 856.203727060391 | 0.299551028064616  |
| CGTCACACACGA | 856.21428468769  | 0.237520677139694  |
| AACCTGTGACGA | 856.218488971753 | 0.186451215934378  |
| AACGTCACTGAG | 856.219326259219 | 0.169180218197762  |
| AATCATGACATG | 856.22354179559  | 0.177318068946508  |
| GCTAAATTGTCA | 856.226915927886 | 0.182805221414696  |
| GAATTGACTGAA | 856.228999943816 | 0.226531901675309  |
| CACTAATGGTCA | 856.233001033096 | 0.188005703630933  |
| CCCTCTGGTCA  | 856.241964081403 | 0.200817212929237  |
| AAGACTAACACG | 856.243009415433 | 0.228110224814     |
| ATGATGTGGACC | 856.243981279787 | 0.231504345327284  |
| ATGAGCTGGCAC | 856.245463362259 | 0.159047815049342  |
| CACCCTGAGTAA | 856.248018750003 | 0.172579319260077  |
| ACAGTGGTGACA | 856.249306377778 | 0.0537069724627623 |
| ATCTTTTGCTCA | 856.25046066774  | 0.157396020595802  |
| TCGCCTCAGTCA | 856.261804405289 | 0.16330791402125   |
| TTTAGTGACAAA | 856.263514943996 | 0.287680761765839  |
| GATAGGGTCACC | 856.266515521541 | 0.168256137162857  |
| AGGCGGAGTCAG | 856.270905004689 | 0.161058917153918  |
| GTCACAAGGTAA | 856.273277746828 | 0.150441899031492  |
| CTACTTGTACCC | 856.276478703658 | 0.142365865445478  |
| GCTCACGTGACA | 856.28196904736  | 0.232124359221943  |
| AACACCTGTGAC | 856.282816417297 | 0.184126005527549  |
| GTCACATGAATA | 856.291623772247 | 0.247168697998615  |
| ACACATCATATA | 856.293092245527 | 0.175674628668347  |
| ACAGAGTCAATG | 856.294457520648 | 0.168235219833487  |
| ATCTTGCTCACA | 856.295117248411 | 0.149413800559653  |
| TATTTACAGTCA | 856.301489488324 | 0.245833853414633  |
| CCGTCATCTAGA | 856.305224133698 | 0.234522841138286  |
| CACATCATCGTG | 856.305460524553 | 0.159192704836741  |
| GTGCACGTGTCA | 856.305525926795 | 0.187838080080982  |
| CGTCACACAAAA | 856.305535241452 | 0.290206277095393  |
| AAGTCACTCCGT | 856.308635082036 | 0.143152224625443  |
| CTGTGACGCCGA | 856.309287026775 | 0.172113685211784  |



|              |                  |                   |
|--------------|------------------|-------------------|
| TGACGAAGTAAA | 856.312946342082 | 0.236247225597221 |
| TATGACGGTCAA | 856.315394922077 | 0.146951926752615 |
| TAGACCATGTCA | 856.315762867872 | 0.16350940165479  |
| CGTCACACAATC | 856.326296712144 | 0.187271452488404 |
| GTCAGACAATGA | 856.34033410924  | 0.2097353930085   |
| GCGCTCCAGTCA | 856.340959404206 | 0.204791309475926 |
| CTGACTAGACTC | 856.346004912684 | 0.304146872579272 |
| TATGCGTGACCA | 856.347802514684 | 0.332635107462391 |
| ACACAATGAGTA | 856.354715168479 | 0.116144366092674 |
| AGCATATTAGTC | 856.35610379497  | 0.148107102395044 |
| AACGTGACACGC | 856.357586102465 | 0.200733272252657 |
| TATTTGGTGTCA | 856.360040141749 | 0.191702349185777 |
| GACTTTTGGTCA | 856.370518779021 | 0.1548264231943   |
| CCGGTAAGTGAC | 856.373323590341 | 0.215839880394069 |
| ACATTGCTGACT | 856.377523935397 | 0.198880260694016 |
| GTCATGCCAACA | 856.377745235703 | 0.215685485787393 |
| ATGCAGACTCAC | 856.388931718967 | 0.146927206103312 |
| AAGAGTCTTAGT | 856.389569307278 | 0.152316016677013 |
| GACTGTGACAGC | 856.390049019349 | 0.264079677771407 |
| CGAATCTGTCAG | 856.396736519495 | 0.246233268268264 |
| ATTACGCACATC | 856.399316296192 | 0.148598296416011 |
| GTCATGTAAGAA | 856.400868307738 | 0.140523034803863 |
| AGATTACTCCTA | 856.401603741277 | 0.151653329123015 |
| CCAGAATGACCA | 856.404739872477 | 0.189087554311979 |
| AGGTCTGACGAA | 856.411273819766 | 0.159235396054372 |
| ACTCATCTTGAC | 856.41708889045  | 0.160059795671315 |
| ATTACGCAACGG | 856.422081526034 | 0.218560229605149 |
| AGTAGTGGTCAC | 856.425261194481 | 0.192280555297796 |
| TAACTGCGTCAA | 856.428432027828 | 0.175760867885067 |
| CAACGGCGTCAC | 856.431501452959 | 0.226823398269634 |
| ATTGCATCATGA | 856.455072626086 | 0.149107298845312 |
| GCTGGAGATGAC | 856.461156552851 | 0.161558847236848 |
| ATGACGGTAGAG | 856.462423007191 | 0.124810788396576 |
| ACGTGTCAGTGC | 856.464595251979 | 0.272040261595826 |
| GTAGTAATGACA | 856.467570520659 | 0.174634055288343 |
| AATCTACTGACT | 856.474356222178 | 0.163077580828647 |
| AAGCGTGACGAA | 856.475782049039 | 0.247468691287145 |
| CAATGTGAGCAA | 856.477540668656 | 0.148328041180059 |
| CGTCACAATGTC | 856.479581723324 | 0.161963970752002 |
| CCCTTTCGATGA | 856.484736063694 | 0.191075889041255 |
| ATGAGTAGGCGC | 856.488820414008 | 0.203654749486479 |
| GCGTTGTAICTA | 856.491864182736 | 0.201679343157796 |
| GTCTCATCGTCA | 856.515339805947 | 0.216135676774387 |
| AATAGTCAAGGT | 856.51648212162  | 0.182410643246504 |
| CAGTGACGCCAC | 856.519953127368 | 0.148738480339473 |
| GTAICTATGTTA | 856.522424462836 | 0.191456612182561 |
| CCGAGGGTGACG | 856.525169198726 | 0.184026149866283 |
| ATTAGTACGTTC | 856.525682635727 | 0.17910420578844  |
| AATGCTCTGTCA | 856.53273361057  | 0.144267343193404 |
| GGTTGGGATGAC | 856.540044336705 | 0.168068363948538 |
| TCACCCCGATGA | 856.541273327276 | 0.167971987545077 |
| AGACTGACTTAA | 856.54277591717  | 0.212922622536755 |
| GTTTGTCACTTA | 856.547008281253 | 0.199321136896798 |
| ACGAACAAGTCA | 856.556231923044 | 0.162273695745702 |

|              |                  |                    |
|--------------|------------------|--------------------|
| GTGACGATGTAA | 856.55949907026  | 0.155137096144925  |
| GTCCTGTAGAA  | 856.559981032616 | 0.214787287392539  |
| AATTGTATACAT | 856.571670618687 | 0.213644485528706  |
| AACATCTGAGTC | 856.572544476899 | 0.201284665374248  |
| AGGCCTGACTCG | 856.580357855367 | 0.229709540950855  |
| ACAGTGACAAAC | 856.580852083124 | 0.146426909684518  |
| CACGAAAGTGAC | 856.583318884323 | 0.236502388714789  |
| GTCATTTGGAGA | 856.597158934472 | 0.217772751683346  |
| ACTTTATGTGAC | 856.599842834597 | 0.154927914151841  |
| AAACGACTCAGT | 856.600859447224 | 0.186670087133568  |
| TAATTGAGTACA | 856.610549251587 | 0.223538927468906  |
| ATTGGTTGACTA | 856.643230282021 | 0.126657771279952  |
| AGGCGGACTCAC | 856.647539892455 | 0.160320072494423  |
| AAAGCGTCAGAG | 856.649669371189 | 0.108458637186956  |
| ATGACAACCCTA | 856.652294855886 | 0.157484865422145  |
| GTGGATGAGCCA | 856.6547786408   | 0.21675138307191   |
| CTGGGTAGTGAC | 856.654879593571 | 0.204798202165611  |
| GGTTTGTACTA  | 856.660139629235 | 0.243536452569519  |
| GGTGCCATGTCA | 856.665941504176 | 0.210615927379783  |
| CCCCAAATGACG | 856.675706178918 | 0.186161168303814  |
| ATCTGTCACTGG | 856.677566181932 | 0.204576569826953  |
| CTGTCACCGGGC | 856.689556719803 | 0.167157488339085  |
| AGGCATGACATG | 856.691686997224 | 0.153211152331297  |
| AATGCGGTCATC | 856.698741401713 | 0.0998924287383424 |
| GCATGACAAGAC | 856.699514535356 | 0.146946523667373  |
| TGCATCATAAAA | 856.70163987288  | 0.193685802600421  |
| CTACGTAAGTCA | 856.70361729731  | 0.291286094600538  |
| CGATCGGACTCA | 856.707314011998 | 0.202041298610446  |
| TAGTACTCACAA | 856.720940719075 | 0.143154017097736  |
| GTCCTGTATCCA | 856.725444630222 | 0.175458312704488  |
| GTGACGTGAAAA | 856.742927690251 | 0.153094805395303  |
| AACTCGTCAGAG | 856.744712988404 | 0.258993945089704  |
| ACCTCTGACCCA | 856.745576961093 | 0.213464721344824  |
| AGCACTGAATCA | 856.74672096478  | 0.190528002510049  |
| TCATCGACGAGA | 856.751318900698 | 0.20049368591573   |
| TCCCCTGTGACA | 856.758759130697 | 0.155469110781523  |
| CCCCTACTGTCA | 856.769744769385 | 0.162643587303743  |
| GATCCTTGTGAC | 856.770150170427 | 0.213668375655214  |
| ACGTCACCTTAG | 856.77306879454  | 0.266233287011861  |
| CACGTCAGATAA | 856.77436430975  | 0.220859997803282  |
| AACTCGTGACTT | 856.795163155542 | 0.219658491970147  |
| AAAGCTGTCACT | 856.795767780819 | 0.18080989688872   |
| GAGTGACTTGCC | 856.814285251662 | 0.214667879238831  |
| AAATCAATGACG | 856.815133073659 | 0.193757201224457  |
| GATCATTGCTCA | 856.82324278786  | 0.18577858068194   |
| CCTCCATAGTCA | 856.82927085949  | 0.157544006669647  |
| CGTCACCATCAC | 856.834980716552 | 0.0946972331791009 |
| AATGAGTGAGAC | 856.852521834336 | 0.195876354016351  |
| CTTCTCAATGAC | 856.865240507906 | 0.157693289385517  |
| ACATTGACTAGG | 856.865245547096 | 0.229748057216228  |
| AGAGACTGTGAC | 856.865741585316 | 0.180949212833703  |
| ATCTGACGCGTC | 856.870929732904 | 0.170052610776498  |
| CATGACCACTAG | 856.879994577011 | 0.210473112858063  |
| AATCGTGACACG | 856.888736078271 | 0.236151612507575  |

|               |                  |                   |
|---------------|------------------|-------------------|
| GACGCATGCCAA  | 856.909778148326 | 0.227356016410377 |
| CAGTCAGAAAGA  | 856.912774671576 | 0.102752488588773 |
| ATGTCACCTGGTC | 856.914643264394 | 0.204644999976128 |
| TTAACATGACAA  | 856.920745647665 | 0.159549777036366 |
| TCCCTTTACTCA  | 856.921314531618 | 0.150414589531659 |
| GTCACGATCAGA  | 856.921342008484 | 0.13831512037075  |
| GACTAATTGCAC  | 856.923092732362 | 0.212508285806728 |
| GCCCATGACACC  | 856.933940265319 | 0.182322553523059 |
| CCGCCTGCATA   | 856.934128174958 | 0.150451664353891 |
| GTCACCACGCCA  | 856.950734673022 | 0.157074999228838 |
| GCATGCGAGTCA  | 856.960628021767 | 0.213914632603283 |
| CGTCACCTTGGC  | 856.963267218599 | 0.088995548608541 |
| GCGAATTACTGA  | 856.967168006776 | 0.251406240268826 |
| CGTCACCGATAG  | 856.968933647793 | 0.185622340677076 |
| GTGACACGACCA  | 856.97281587213  | 0.140011350666758 |
| ATGCATGACAGA  | 856.974261440564 | 0.11970135917001  |
| ACGGTCATAACA  | 856.974903587642 | 0.153424475286211 |
| TATCACGCGTCA  | 856.97559779865  | 0.190198730120093 |
| CCGTGTGACCAC  | 856.980262823613 | 0.208666898292233 |
| AGTGATGTGACA  | 856.980512605569 | 0.157750214990274 |
| GTCACATTTGGA  | 856.987438736899 | 0.236176561298949 |
| CGTTTGGACTCA  | 856.989166045725 | 0.28302171603534  |
| CGTCACAAC TAG | 856.994665456935 | 0.197821613226092 |
| ACCGTGGTGACA  | 856.99752642474  | 0.241561709663147 |
| ATGTCACAGATG  | 856.998307280413 | 0.224948745025026 |
| TCATCGGCGAGA  | 857.011649821954 | 0.245159326142085 |
| CTGATTGTATCA  | 857.013609985684 | 0.294395869044865 |
| CCCATGCGTGAC  | 857.021641575504 | 0.199683002178755 |
| AGTCTATTACTC  | 857.022469547099 | 0.197828593959077 |
| CAGTTACATCAC  | 857.022971509908 | 0.088261698750503 |
| ATGACATGAATA  | 857.023512847274 | 0.185872887079694 |
| AGACTCACG TAG | 857.027284425541 | 0.183324611872729 |
| TCCTTAGTG TCA | 857.034592102834 | 0.173605428389678 |
| AATAGTAATCGT  | 857.037884440906 | 0.241116017334511 |
| CAGTGACGCCAA  | 857.039821020423 | 0.158903339102563 |
| CCCGCTAATGAC  | 857.04612323392  | 0.195380104828924 |
| ACTATGTCACTA  | 857.048232602329 | 0.14915062213894  |
| ACTCATCTTTAC  | 857.056655270025 | 0.141636419898813 |
| AAATTACTGACA  | 857.064873567463 | 0.150277546495274 |
| ACCTATGACCTG  | 857.074776365471 | 0.222876423444387 |
| CCTCATGTGACA  | 857.079345538483 | 0.114043233129445 |
| AATGACGTCCTA  | 857.08460378723  | 0.147852606708579 |
| ACGGTTGAATCA  | 857.084931668482 | 0.224794044167799 |
| CGTCATCCCCTC  | 857.087175603165 | 0.191245619165781 |
| TGACTAGAGGAA  | 857.087699075729 | 0.286753124571087 |
| GCCTTATGATGA  | 857.093809688191 | 0.210802517676092 |
| TAAGATTACGTA  | 857.101867989444 | 0.215921235244748 |
| ATAATCACGTCA  | 857.114127074948 | 0.221029870379292 |
| CTATAACATGAC  | 857.135079176364 | 0.284673070190867 |
| TCATTGTGTCGA  | 857.151611075624 | 0.228221700263109 |
| ATCATCTTG TCA | 857.152127365639 | 0.187777224079234 |
| ATTGGACAGTCA  | 857.162664872962 | 0.202213189166801 |
| AAGAAACATGAC  | 857.16594772638  | 0.165174396535044 |
| CGCGACTGACTA  | 857.176478942169 | 0.293634721571907 |

|              |                  |                   |
|--------------|------------------|-------------------|
| AGGCAAAATGAC | 857.182301482739 | 0.15000722567563  |
| CGCAGGTGACAC | 857.18669918872  | 0.131016793870481 |
| CAGCCATGACAA | 857.188155951722 | 0.246030578785373 |
| GTTGACGTATAA | 857.194841423665 | 0.150574661512796 |
| CGCGTTTCGTCA | 857.198592262992 | 0.153305615692666 |
| ACTCATTCTCGG | 857.200981620766 | 0.235316850384681 |
| CCAAGCGAGTCA | 857.230145597787 | 0.140371518580409 |
| AAACCACTCATA | 857.231221889385 | 0.124390713829517 |
| TGACCAACGGCA | 857.239564078459 | 0.217401522241243 |
| ATGGTCATTATG | 857.24051337161  | 0.171583376023681 |
| CCGCGGTGTGAC | 857.245856442658 | 0.300634017593308 |
| TTCGGTGAGCAA | 857.257235431179 | 0.237458111159644 |
| CGAGTCAGGTAG | 857.257740052343 | 0.119277054079501 |
| TGACTCTCTGCA | 857.263559094187 | 0.147007942250182 |
| ACTTGCTACTAG | 857.263578739311 | 0.151899029200713 |
| ATGTCATTAAGC | 857.264470754002 | 0.163520964160466 |
| AGTGACGGGTCA | 857.277347023454 | 0.156017771451367 |
| GTTGACTTATCA | 857.278604838254 | 0.206277778132303 |
| GGCCGTTTGTCA | 857.28347141345  | 0.141930560273577 |
| GTGGTCATTACA | 857.283845091992 | 0.218512494058794 |
| ACGCCTAGTGAC | 857.285914608265 | 0.263220791486795 |
| CAATCTAGTCAG | 857.293277382514 | 0.181953916904618 |
| ACCGTCATTATG | 857.293811820549 | 0.200078634377077 |
| TCATCTCCGTCA | 857.294237331642 | 0.240158965172409 |
| GATCAACGTAC  | 857.294834860051 | 0.154876106803818 |
| TACTGGTGACGA | 857.29537893797  | 0.239766923988982 |
| GTCATGGACTAA | 857.297486053239 | 0.215250944669443 |
| ACTGTGAGCAAC | 857.301854102173 | 0.14869548206359  |
| CTCATTATGACC | 857.302179576645 | 0.197744229185545 |
| GTCACGCCATAA | 857.302487359961 | 0.179616945374115 |
| AACCACATCATA | 857.306922112983 | 0.153758627515841 |
| ATTACACACTAA | 857.311083041976 | 0.203157005470794 |
| AGAGTCAAGACG | 857.313413892796 | 0.12457234425584  |
| TATCCGAGTCAA | 857.315998001779 | 0.142343053597047 |
| CCGTCATGATTC | 857.320381435807 | 0.122603844818928 |
| GACGACTCTTAC | 857.329019390926 | 0.172679542544154 |
| GTCACCCAACCA | 857.330746791335 | 0.169463892691982 |
| CGCTACGCGTCA | 857.341414153826 | 0.167832317514953 |
| AGTGGCTCACAG | 857.346650406106 | 0.265602729672691 |
| AGCCCAGCGTCA | 857.356794529828 | 0.187723112824263 |
| GGTAATATGACC | 857.360416324221 | 0.179982547341596 |
| GCGCATGACATA | 857.361464735965 | 0.145431885120428 |
| GGCGTAGATGAC | 857.368118937418 | 0.106223358745314 |
| ATGTAATGACCA | 857.3793949539   | 0.197793612713904 |
| CGTCACGATTCA | 857.381918516658 | 0.171664645566404 |
| CGTCACAAATGA | 857.401456076214 | 0.168400456048782 |
| CACTAACGTGAC | 857.412656142676 | 0.15495790390008  |
| AATGGGTAGTCA | 857.41415977473  | 0.146476431817321 |
| TGACCCTCGTCA | 857.417593475453 | 0.163409251230845 |
| AGGTGACCTATC | 857.440348902457 | 0.239708042966158 |
| GATTCAGTCTTA | 857.453497641461 | 0.171451025576345 |
| CGTCACAAGCAC | 857.459175272059 | 0.206176281365855 |
| TCACTGTTGAGA | 857.461938548407 | 0.223793367025647 |
| CGGTGTGTGACG | 857.471928317814 | 0.131302799089892 |

|               |                  |                    |
|---------------|------------------|--------------------|
| GACATCACGTCA  | 857.472611045695 | 0.172898358138972  |
| AAGTCTCATGAC  | 857.473853053651 | 0.236701261681553  |
| ACTCATGGACGG  | 857.475394230109 | 0.204833945303915  |
| ACCACTGATTCA  | 857.475766859913 | 0.152982938695154  |
| AAGAGTAACACC  | 857.476208793103 | 0.121425921057353  |
| AATCATTCTGAC  | 857.47683557515  | 0.213396261640209  |
| CGTCACACAACA  | 857.477264130789 | 0.211602162395523  |
| CATGTCACCTGG  | 857.492825278719 | 0.163240877507211  |
| GCGTCACTTTTA  | 857.494894653242 | 0.23974507502904   |
| CGTACGGTCATA  | 857.500140206854 | 0.182377735707649  |
| CTGACTCTCAAC  | 857.517107000668 | 0.164976973511562  |
| CGTCATTTGAAC  | 857.531629644506 | 0.183264385975843  |
| ATTACGTATTTG  | 857.548594967801 | 0.0962488206732523 |
| CGTGACGCGCAA  | 857.553289108752 | 0.22677731600423   |
| GATGAAATGACA  | 857.554492813261 | 0.254861773044227  |
| ATGACAAGCTTG  | 857.558795457503 | 0.199951007233932  |
| TGACTTACACAA  | 857.569285569524 | 0.161609268030014  |
| CAGGCATGTGAC  | 857.580037909196 | 0.230534734042886  |
| ACTCATACCAAT  | 857.580743557087 | 0.183309355572902  |
| AATTAGTCGCCCT | 857.58909638784  | 0.164198967007562  |
| CCCAGGGGTGAC  | 857.596491253758 | 0.238397670948612  |
| GATCTGAGTCGA  | 857.604949297558 | 0.255156815011595  |
| GAGTACCATGAC  | 857.606204415015 | 0.215260725341976  |
| ACTGTTTGTAC   | 857.606234046684 | 0.105871925737621  |
| ATGCAGCGTGAC  | 857.619638271297 | 0.197480632119454  |
| CGTTGAGTCTAC  | 857.622075536342 | 0.20407718729723   |
| ATGATACACATG  | 857.622711025507 | 0.179011066535634  |
| CAATTAGGTGAC  | 857.626879889048 | 0.184637776818676  |
| CCCTTCAATGAC  | 857.630076034533 | 0.170144921981541  |
| ACTCATTGATA   | 857.637513099916 | 0.229620518960882  |
| GACCGAGTGACA  | 857.644157672885 | 0.167753445612371  |
| CTCCACACGTCA  | 857.652361826289 | 0.138593876170531  |
| ACAAGACGTGAC  | 857.654902854623 | 0.20435107007191   |
| TAAATTACGCCAA | 857.65599559471  | 0.197979051103041  |
| AGTGTGTCTCAT  | 857.656165785548 | 0.259185544370373  |
| ACGCTGGCGTCA  | 857.661182028684 | 0.259847852817828  |
| AACCATGACATG  | 857.672636740738 | 0.120541677736243  |
| AAGCCTACTCAT  | 857.673173977348 | 0.291542244504268  |
| CATAGGGTCACA  | 857.675141758384 | 0.122069537010926  |
| ACAGTCAGCTTA  | 857.681763188021 | 0.220360758017895  |
| TAACGCGTGACA  | 857.682231492256 | 0.312295702270715  |
| TGACAGCACGCA  | 857.68614620846  | 0.153680298383047  |
| CAAACACGTGAC  | 857.707741589021 | 0.214473711806058  |
| TGACATGGTAAA  | 857.709524062805 | 0.189499228017064  |
| TATTACTGACAA  | 857.709673660529 | 0.185975816963429  |
| ATTGCGTAACCA  | 857.719599053772 | 0.18872531320565   |
| GGCATGACAGAC  | 857.722613947567 | 0.146246800701824  |
| GTCATAGAACAA  | 857.740441733248 | 0.108373865060157  |
| CCTCTCAATGAC  | 857.745588937009 | 0.137038492261276  |
| ACACTGTGATGA  | 857.746143164273 | 0.143284934424786  |
| GTCACTACTCAA  | 857.756846076111 | 0.16992778332842   |
| ATGACCACCTCA  | 857.762036474114 | 0.153324371938825  |
| AGAACGTAGTCA  | 857.774099048945 | 0.137792666494093  |
| CAACAATGACGG  | 857.776108562262 | 0.154866867554507  |

|               |                  |                   |
|---------------|------------------|-------------------|
| ACAATGATGAGT  | 857.784433984123 | 0.157876896871496 |
| ACTGCCGCATA   | 857.793048369294 | 0.158099714676211 |
| AGACTCAGAAAA  | 857.795385514677 | 0.179132212645304 |
| CACGTCAGTAAG  | 857.795961364051 | 0.209959275081866 |
| AGTAATAGTAAC  | 857.812688919304 | 0.185617545077177 |
| TAACGTCATGTA  | 857.818392066859 | 0.116556325823017 |
| GATCCCACGTCA  | 857.819728386953 | 0.119341387821584 |
| CGAGAAGGTGAC  | 857.831750089511 | 0.14962350332649  |
| ACGCAATGACGG  | 857.837707615484 | 0.121058814645304 |
| CTGACTGGCAGC  | 857.840833964981 | 0.313333839161135 |
| ACCCTGTGACGA  | 857.841696928236 | 0.20451534773765  |
| CTGTGACCACTA  | 857.849945677031 | 0.131898818410359 |
| TCAACCAAGTCA  | 857.850457937183 | 0.184062918647449 |
| AGAAGTGAGTCC  | 857.851640913959 | 0.210109882012835 |
| ACGACTCAACAT  | 857.854088944878 | 0.18507525318423  |
| CGCATCATGACG  | 857.856909271108 | 0.294939333193535 |
| ACTCATACAAC   | 857.861190249171 | 0.170722752349991 |
| CAAGAGCAGTCA  | 857.866540149631 | 0.192146044676988 |
| GACATTCGTGAC  | 857.86742970951  | 0.188410565882894 |
| TGACACGTCCAA  | 857.872069194928 | 0.25685940928889  |
| GATCTGACTCA   | 857.879655899334 | 0.221339879394966 |
| GACTGATAGTCA  | 857.882892408962 | 0.211572540389575 |
| ATTTATTAATCA  | 857.886808370689 | 0.176625595030844 |
| AGACGTGTGAGA  | 857.899777635299 | 0.181057268984023 |
| GCCAGTACGTCA  | 857.902084247748 | 0.218359468482583 |
| ACACATGGGTCA  | 857.906589789027 | 0.245196291351542 |
| CGGAATGGGTCA  | 857.91853582723  | 0.207439023098658 |
| GTCACATCTGGA  | 857.924533000399 | 0.20731339042801  |
| GCACGATGTCAC  | 857.93339477724  | 0.21915559479783  |
| CTTTGCATCATA  | 857.937031028778 | 0.148870226442476 |
| ACGAATGACCTT  | 857.937297558247 | 0.294018831002282 |
| AGGTGACACGCA  | 857.941533597419 | 0.20656805838008  |
| CCAGTTGTGACG  | 857.942854795908 | 0.216960588889007 |
| GTAGTCAGTCGA  | 857.944682076575 | 0.176387255511589 |
| TATACCATGACA  | 857.952168360576 | 0.202626882421016 |
| GTCGAAGTCACA  | 857.961603443857 | 0.193079979314377 |
| GCATCGTGTGAC  | 857.963381166337 | 0.247367640103421 |
| GTAGCTTCGTCA  | 857.967035431879 | 0.150152016456268 |
| ATGGCGAGTCAA  | 857.97147161942  | 0.178314479816985 |
| GTCACAGCTCCA  | 857.971775049432 | 0.20331611512805  |
| GTCAATTAAGTGA | 857.976055984281 | 0.15094876353788  |
| AAGATGTCACCA  | 857.976961268723 | 0.226295480067556 |
| CAGCATCATGAC  | 857.980418465338 | 0.173879443733259 |
| CATGACCACGCA  | 857.984781817964 | 0.175466856293681 |
| CAGTGTTGTGAC  | 857.990423052937 | 0.158692485883428 |
| ATTAGTGACGGA  | 857.995112088998 | 0.141034295055492 |
| GCCGCGGTGACA  | 857.997314227204 | 0.203007606603607 |
| ACAATTATGACC  | 858.015604583229 | 0.197776287193572 |
| ATGTCATGTTTG  | 858.024572252383 | 0.15653639738478  |
| ACTCGTTTGTC   | 858.033245894385 | 0.159902182028043 |
| GATTCACGATGA  | 858.038860820863 | 0.13822653255681  |
| AAAGATTGTCAT  | 858.039720656975 | 0.125591329729419 |
| ATACATAATGAC  | 858.049269281722 | 0.209642646026369 |
| CCCGCAATGAC   | 858.055486924051 | 0.159172360541849 |

|              |                  |                   |
|--------------|------------------|-------------------|
| ACTTCGTGTGAC | 858.097138537871 | 0.173624961315279 |
| GAGTCAAGTGTA | 858.098638326655 | 0.192823776428677 |
| CATTGGCTGACG | 858.10293809173  | 0.216212303479053 |
| AATGACAGGGCA | 858.111087154237 | 0.152361831224089 |
| AGTGACAGCTCA | 858.114321592519 | 0.186301350881935 |
| AGGATAGTGTCA | 858.122472185804 | 0.207322703544756 |
| AATGAGGCATCC | 858.124927863647 | 0.157955099073115 |
| CCCGTATTAGTC | 858.140717195519 | 0.102484655635776 |
| TATACGGTCATA | 858.159040919972 | 0.162119807384678 |
| TCTTGCTCACAA | 858.165130839943 | 0.145273168380778 |
| ATGACGGTCACA | 858.174796621371 | 0.143516469245255 |
| AGCGTCACTGAT | 858.176865946502 | 0.226796410210128 |
| ACCCTAGTATGA | 858.17782964922  | 0.163508742796862 |
| ATCCAGGTGACA | 858.18446956379  | 0.153824977082286 |
| GCTGAGTAAACC | 858.193081314755 | 0.203682552216993 |
| AAGTGGTGACAT | 858.201493255933 | 0.1691468194982   |
| TCATTACAGTCA | 858.207431679175 | 0.224928104753359 |
| GTAATGGCTCA  | 858.221430271701 | 0.245386767576763 |
| CGTGATGTGTAA | 858.225330575859 | 0.274070277065211 |
| CTTATTACTGAC | 858.235236503948 | 0.117935410285271 |
| ACTCGGTGACCA | 858.242729841015 | 0.194023868254875 |
| GAACCCGTGACA | 858.263855403151 | 0.184799623585863 |
| GATCTATGACCC | 858.269949511551 | 0.149338573105578 |
| ATTACTCTATCA | 858.272296358906 | 0.174363733169963 |
| GTCATCCCTCAC | 858.282025817846 | 0.132091457724824 |
| ATACTAACTCAT | 858.284813123398 | 0.161010773798583 |
| CATATGGTCACC | 858.287180413321 | 0.175544340779813 |
| ATGAGTTACGTA | 858.306346347881 | 0.272798356818529 |
| CCGTTGAGTGAC | 858.312672166088 | 0.182952097987505 |
| GCGTGGGATGAC | 858.312749334906 | 0.248181220873764 |
| TGACTGGAAACA | 858.314190887585 | 0.164793660039628 |
| AACGTTGTCACC | 858.320532235767 | 0.207885261254459 |
| ATATTAGCCATC | 858.321449285668 | 0.175481040072928 |
| CATCATGACAAC | 858.325787484221 | 0.20752514270587  |
| AAGCTGACTGTA | 858.328780874392 | 0.153855152935789 |
| AGGGTGACGATA | 858.333736102154 | 0.156089873676171 |
| CATTACAGATGA | 858.339302060288 | 0.210135709888994 |
| AGGTGACGTTAA | 858.339381502258 | 0.147764803706587 |
| CGGAGAGAGTCA | 858.348536292756 | 0.156763018232936 |
| CCTCGAGTGACG | 858.363842939345 | 0.258787905403437 |
| GCTGACTAGGCA | 858.365574684999 | 0.15639876813239  |
| GTTATTGACACA | 858.377732903376 | 0.179290562206423 |
| CTTATGTGACGC | 858.383127836365 | 0.187031922610235 |
| CTAAATCAGTAA | 858.388767810176 | 0.183069780276465 |
| AGATCATCGTCA | 858.398984620753 | 0.158101659016795 |
| GAAACTACTCAC | 858.399552665178 | 0.221790802348856 |
| AGTCAGCTTTAG | 858.404592197549 | 0.157978365291485 |
| ACTTGGATGACC | 858.410437252244 | 0.225922235044913 |
| TCATAGGGATGA | 858.412235062052 | 0.18728395798953  |
| ATTTGCTCACTG | 858.423374135271 | 0.116742253265313 |
| AGTGACGCCACC | 858.432643387309 | 0.206238763275914 |
| GGTCATAACCTA | 858.435958874275 | 0.28403875229298  |
| CATTGAGTAAGC | 858.437750044741 | 0.195168694934986 |
| ACTCACGTCAGA | 858.44130425207  | 0.240650872576225 |

|              |                  |                   |
|--------------|------------------|-------------------|
| CATGTAGTGACG | 858.444719846624 | 0.195875420197796 |
| GAGTTCGGTGAC | 858.447325453482 | 0.259117374485782 |
| AATGGAGAGTCA | 858.448827967989 | 0.190145004107225 |
| CACGTAATACAC | 858.455107388957 | 0.161775433533788 |
| ATGTCACCAAAG | 858.469698878126 | 0.115746500989975 |
| CTACTATAGTCA | 858.471681354965 | 0.143542159091056 |
| CTGTCATTTCTC | 858.472367311806 | 0.162704749634461 |
| GTGAATCAATGA | 858.47857250229  | 0.140889952744779 |
| TGAATCAGCTCA | 858.489474638378 | 0.298919894633601 |
| GTGACACGAAAC | 858.494030051957 | 0.188937025045275 |
| CAAACATGACC  | 858.494248081632 | 0.168157171989622 |
| AGTATTACGCCA | 858.509639855074 | 0.173973731590363 |
| ATAAGAGTAACA | 858.510389267185 | 0.198075927526051 |
| AAGAGTCGTAC  | 858.512492157706 | 0.11623187646329  |
| GTTGACTCGCTA | 858.520988174472 | 0.104447738135442 |
| AGCCATTGTCAT | 858.526781032005 | 0.18783124333973  |
| ACTCATCCTTTC | 858.530590874504 | 0.167256518152118 |
| GTCATGTCCCTA | 858.539579072835 | 0.196837097030993 |
| AACTATGCTACT | 858.542573870821 | 0.181434000706647 |
| GTGACCCGCTCA | 858.55212949116  | 0.161347779921655 |
| AGTCAGTGATTA | 858.556008271197 | 0.206227633345685 |
| ACATAGTGACGA | 858.556311164209 | 0.245079144281381 |
| CTGTTATGAGTA | 858.559074562501 | 0.140592206557688 |
| GGTCATGGTCAC | 858.562205867443 | 0.152033062958959 |
| GACATGTCGTC  | 858.5664130051   | 0.192010525988621 |
| ACATCTACTCAT | 858.580364533795 | 0.139731805537297 |
| CAATTCACGTCA | 858.580794901213 | 0.223282188694619 |
| ATTGATTGATGG | 858.585740710321 | 0.152391142501348 |
| GTCGTCACTCAA | 858.586702939156 | 0.205561562379845 |
| AAATGTATCACG | 858.586748964336 | 0.226353297226169 |
| GTCACAATGCTA | 858.597113136796 | 0.203558169162089 |
| AGTGTAATACTC | 858.603079340502 | 0.269473755084861 |
| AGTCAGCGGTAA | 858.609198886131 | 0.156803542948514 |
| CTAGTTGTCACC | 858.614018988999 | 0.144564517454948 |
| AGTTTGTGACAA | 858.621832100605 | 0.213396008287203 |
| ATACTCACACTA | 858.621910660867 | 0.199958892056921 |
| CTATTTGACTGA | 858.623044082303 | 0.19357641543858  |
| AGGTTCTGACTG | 858.631118093981 | 0.264461290974073 |
| GTCACGTCTTAA | 858.634480296599 | 0.208091523085017 |
| GTCAAGCATGAC | 858.63519623817  | 0.158259824358988 |
| CGGGAATGACCC | 858.636892730346 | 0.167178157717832 |
| ATGACTTGAAAG | 858.638170881459 | 0.150728472358632 |
| GTATAGGTGACA | 858.638737362052 | 0.162743559156255 |
| AAGTCTTGTGAC | 858.639690093247 | 0.17950538803449  |
| ATGCAAGGTGAC | 858.650016001741 | 0.140909364735212 |
| GCAGAAGTGTC  | 858.653909223055 | 0.234167326370829 |
| TCAGTGACGCCA | 858.660547266422 | 0.180129932396314 |
| CTAACTAATGAC | 858.669753381186 | 0.158795040537772 |
| ACAACGTGACCA | 858.674705430158 | 0.154670636950114 |
| AGACAAGGTGAC | 858.677430230777 | 0.18732562438943  |
| CGAATTAGTCGC | 858.683356434367 | 0.175225073493601 |
| AAGTCACTCTAA | 858.688221060963 | 0.155619446342707 |
| TGATTCCGCTAA | 858.695364846968 | 0.226656888775237 |
| CCCGCATGACA  | 858.704571560751 | 0.23513729386584  |



|              |                  |                    |
|--------------|------------------|--------------------|
| CTATTCTAGTCA | 858.706104904728 | 0.221887629310987  |
| TGAGTGATAAAA | 858.708112593556 | 0.227921555281026  |
| ACAAGGATGAGT | 858.7086804878   | 0.179921877148246  |
| AGCATGAGTACC | 858.709517852563 | 0.185384882191925  |
| ATGAGTGAATTA | 858.71365382523  | 0.0810801331134678 |
| GACTAATACACC | 858.717589004171 | 0.146195988527268  |
| GCCTCCTAGTCA | 858.7218858108   | 0.20849626497947   |
| ACCCTCGTGACT | 858.73399467351  | 0.174639838333866  |
| ATGACAAGCCTG | 858.740166063723 | 0.164576747915954  |
| ATTACTAAATTC | 858.744142498678 | 0.212813726295142  |
| TACCACACGTCA | 858.74617516636  | 0.211745093329569  |
| CCCCATTCGTCA | 858.751587851184 | 0.164415789428888  |
| ATATGCTGACTA | 858.764998717915 | 0.192018044885976  |
| AATCAGTCTTGG | 858.76678032551  | 0.236948591249714  |
| GTATGCCTCATA | 858.77622155727  | 0.213508234854698  |
| ATCACAACGTCA | 858.784710435906 | 0.200730469024906  |
| ATCCGCTGTGAC | 858.788024196862 | 0.180320549565869  |
| ATACCGTGACAG | 858.792078316327 | 0.205811417542408  |
| TCTAACTGGTCA | 858.802529472079 | 0.301186315526548  |
| ATGACAGTCCGC | 858.806165097525 | 0.190578137628791  |
| CTGACTGTGAAA | 858.807139847179 | 0.192133705636636  |
| TCGCTTGCCTCA | 858.807665911852 | 0.149821305363165  |
| ACTCATAATCAG | 858.827422105987 | 0.156331083856167  |
| GTCAAAGTCACA | 858.827789458492 | 0.158873192286353  |
| TGACTATCGTAA | 858.839192154728 | 0.271628619387602  |
| TATTACTTGTC  | 858.845974124662 | 0.1046702774564    |
| ACTCATATAAGA | 858.850580099006 | 0.204423861496924  |
| ATGATTCTTACG | 858.857990740419 | 0.164316267419846  |
| GCCTTAGATGAC | 858.859655292396 | 0.262168881666801  |
| CGCACAGTCAAA | 858.87758335539  | 0.168573199464207  |
| TGGTCAGTGACA | 858.879525565798 | 0.165453814782352  |
| AAGACGTACACG | 858.879984116926 | 0.167766385821246  |
| AGCGTCATGGTG | 858.879993902748 | 0.14633321604306   |
| TCTTCGTTGTCA | 858.893206140358 | 0.181728631336182  |
| GTCATTGCGGGA | 858.914869003318 | 0.176648395148237  |
| AGTCAGATTGAA | 858.920259138777 | 0.133940077313647  |
| GCAACTGATTCA | 858.931461667125 | 0.142656858660539  |
| AACCCAAGTCAT | 858.936071729316 | 0.241149513201511  |
| AGTGACGTTACA | 858.943218916027 | 0.131877350651765  |
| AACTATTACTCC | 858.94490643089  | 0.17529524990997   |
| ATGTTACTGTCA | 858.946885296217 | 0.224100882268025  |
| GACGTAACACGC | 858.947009540352 | 0.204872843464589  |
| AAGTTTGGTGAC | 858.947034527229 | 0.162400128537419  |
| ATGACGTCTCTC | 858.949720131325 | 0.134786248446557  |
| GTCACCTTCCTA | 858.950548592543 | 0.141617624129925  |
| ACTCATTCTGAG | 858.954102163553 | 0.138727452263751  |
| ACCTCTGACAGA | 858.96470433784  | 0.167195457529835  |
| CATCAGAGTGAC | 858.976299666919 | 0.310903156891588  |
| CTGACTCTCTGA | 858.976533321396 | 0.219361253787615  |
| CCGCCAAGTCAC | 858.979233260668 | 0.181586670411533  |
| CAAGAGAGTCAG | 858.980927120569 | 0.146148495686503  |
| GAATTAGCAATA | 858.985940441187 | 0.156546343857797  |
| CGGATTACTGAC | 858.989872886159 | 0.181154224462131  |
| GCCTGAGTGTC  | 859.005522367284 | 0.258504592196902  |

|              |                  |                   |
|--------------|------------------|-------------------|
| CAGTTCAGTCA  | 859.006635261016 | 0.281037952837743 |
| ATACATGACAGC | 859.026089303449 | 0.154772918187614 |
| AAGTATCGTCAG | 859.030201141841 | 0.308042558028113 |
| CGAAGGCGTGAC | 859.031007320621 | 0.148346434221907 |
| AAGACTATTATT | 859.034876828931 | 0.254800437012086 |
| CGTTGACAAATA | 859.040481897647 | 0.14194551137392  |
| CGGTGACAGCAG | 859.042491982786 | 0.208376503429211 |
| GGTTCGTCACTA | 859.048070626778 | 0.171223048297263 |
| CAGTTTGTGACG | 859.05101177495  | 0.2242976246444   |
| TCTTACAAGTCA | 859.051090365634 | 0.26662890604057  |
| ATCAACATGACA | 859.058780332001 | 0.2214434377414   |
| CAAACAACGTCA | 859.063074833525 | 0.166290061793579 |
| AATATGATGCAA | 859.076300838574 | 0.110908073146357 |
| TATACTCTGTCA | 859.077088060689 | 0.277595628621432 |
| GGTGGATGACCA | 859.094550917302 | 0.153410265280187 |
| GACTTGAATCAC | 859.096389158512 | 0.148384269214861 |
| ATGACTTGGGTA | 859.098654636578 | 0.140255002772167 |
| AATATGACCCGT | 859.100467077088 | 0.169220698823827 |
| AAGTGACGCGCT | 859.104318974972 | 0.22303728016633  |
| AAGTGCGTAATT | 859.106289753897 | 0.215252608187978 |
| CTCTATGAGACA | 859.115138639782 | 0.152677346094637 |
| ATTGACTGTGCC | 859.120189625849 | 0.203767597096896 |
| TCTTAATGACAA | 859.121939438357 | 0.218597801969073 |
| GTCACAAATCCA | 859.125940514691 | 0.205694406574377 |
| CCATCCGACTCA | 859.127650434492 | 0.185033119751838 |
| CGTGACTAGCTC | 859.1304762623   | 0.146234442157854 |
| ATGATACAATCA | 859.131428196358 | 0.149104845893102 |
| GGGTTACATGAC | 859.139038613466 | 0.175955752044726 |
| TGTATTGTGACA | 859.140433684407 | 0.15782634640274  |
| ATACACGTCAAA | 859.143326454903 | 0.156351117787232 |
| GTCATGATCAAA | 859.147440975191 | 0.151957653767751 |
| AGGGGCGATGAC | 859.148763520755 | 0.154904761918158 |
| GCGCGGACTCAC | 859.152616794208 | 0.202877247427689 |
| TGACGTTACGAA | 859.153188932308 | 0.200338050954989 |
| ATATCAGTCTTA | 859.163785230862 | 0.147377243208658 |
| TGACTCGCTGCA | 859.170555668581 | 0.290854830368085 |
| TCAGTAATACCA | 859.171225790819 | 0.206706347066237 |
| GCCTTATGTGAC | 859.176828844895 | 0.291889812129521 |
| CAATAGGTCACA | 859.190521824305 | 0.270828511467295 |
| AGATCAAGTCAT | 859.192266482086 | 0.205658348699313 |
| ATAGGGCGTGAC | 859.195697633751 | 0.16110804984433  |
| ACGAAGAGTGAC | 859.206457184581 | 0.148283387936871 |
| CAGTTGTCACCG | 859.208379999031 | 0.202143524767691 |
| GTCAGAATACAC | 859.220231420898 | 0.127923890466063 |
| CGACTAATCGCC | 859.222483536953 | 0.3017944902973   |
| GAAGTGCATGAC | 859.225236298833 | 0.188319237765313 |
| ATGTCACTCGTA | 859.22742613525  | 0.230793103724218 |
| CGACATCGTCAC | 859.23182354037  | 0.184249445010487 |
| ATGTGTCTTATG | 859.234144880464 | 0.180353566924873 |
| GTGCAGTCAGAA | 859.243825641488 | 0.190389109412143 |
| CGTCACACAAGC | 859.245570151489 | 0.224334900257095 |
| AGTGTGAGAGAA | 859.251797310601 | 0.187103904289543 |
| ATTCTTAATGAC | 859.260087606372 | 0.150934889064014 |
| CCGAGTGACATA | 859.264274726607 | 0.173010071047832 |

|              |                  |                    |
|--------------|------------------|--------------------|
| ACCCGCGACTCA | 859.265552988257 | 0.166138329341125  |
| GTCACGGTACCA | 859.278375722053 | 0.198960066721878  |
| ACCTCAAGTGAC | 859.287295019768 | 0.216238898811729  |
| CCGGTCATCGTA | 859.287335742964 | 0.169441789261272  |
| ATGTGACGCCAG | 859.287564481114 | 0.171802003644662  |
| CGGCTGAGTAAA | 859.289381791946 | 0.16054287218533   |
| GACGTAATAGTC | 859.304188719883 | 0.174795009091316  |
| AGTCAGCATGCG | 859.304412278417 | 0.197300356419627  |
| CAATGCGTCTTA | 859.307235563152 | 0.185556033357115  |
| GAAGTGTCAGCA | 859.307372477255 | 0.129292077157435  |
| AGATATAATGAC | 859.308139698299 | 0.170296993793687  |
| ACCAATGACCAG | 859.31766519029  | 0.208117328166932  |
| ATGAGTAGGATG | 859.318270118397 | 0.152688862145025  |
| TCCTAATTGTCA | 859.319003412451 | 0.200727282761146  |
| CCACGTGGCTCA | 859.330212162997 | 0.222330818201455  |
| GATATATACTCA | 859.350213993939 | 0.190753743902809  |
| ACTGGGTGACGC | 859.357095295922 | 0.194258082832199  |
| CGGCTTGACTGA | 859.357287943948 | 0.208486182796239  |
| ATTCATACAGTG | 859.35801373947  | 0.336728106710125  |
| AAGACAATGACG | 859.364283837557 | 0.0799992472232063 |
| GCTGACTGCATA | 859.367726048084 | 0.150255176531769  |
| GAGTCTTGACTA | 859.370663604915 | 0.221068496749273  |
| CAGGCATATGAC | 859.371066669656 | 0.174918133593764  |
| AGCTCCGCGTCA | 859.378010298478 | 0.248159720404542  |
| GACTTTGACTGA | 859.383200626484 | 0.19211578702078   |
| CTACTAGTATGA | 859.387750532657 | 0.153834966583637  |
| AACTCTGGGTCA | 859.387911164199 | 0.189188953157289  |
| GCGTCGAGTGAC | 859.391536124832 | 0.155413874170388  |
| CCATCTGATGAG | 859.395894334505 | 0.155634801369024  |
| AAGTCACGGAAT | 859.398033115857 | 0.18807563634002   |
| TATGCCTCATAA | 859.407066262164 | 0.165583004106805  |
| AGGAACGGTGAC | 859.408672342523 | 0.163724752934625  |
| GGGTAGCATGAC | 859.408997488029 | 0.233543804742691  |
| CATCAAGTCACA | 859.416659154651 | 0.167358611547911  |
| GTCAGTCGTCCA | 859.424853947355 | 0.189447164436693  |
| GCCTTGTCATGA | 859.43046679368  | 0.231505477340273  |
| GAAAATTCTGAC | 859.445260496328 | 0.183822478469599  |
| GTTATTACTCTA | 859.450337657402 | 0.183961972629613  |
| GATAATTGTGAC | 859.450538710771 | 0.1890763951338    |
| TACCGTGACATA | 859.457180781112 | 0.183316934174313  |
| GTCACTGCTTTA | 859.467537434904 | 0.226793721132501  |
| CACTGGTGACAG | 859.468517037585 | 0.16969520988196   |
| CCGCATGACACC | 859.470011216703 | 0.111902268526451  |
| ATGACATTAGAA | 859.472676768894 | 0.194671725422705  |
| ACGTAATCGTTC | 859.486524128235 | 0.275372130614084  |
| AGGCGTGACCCA | 859.487616489108 | 0.292481735347737  |
| ACCGATCGTGAC | 859.49640465098  | 0.243562524395417  |
| AAGGGTCAGAGT | 859.509197603747 | 0.139628870182701  |
| GTCACAGTGAGA | 859.512905995007 | 0.134791330955144  |
| GATATCCGTGAC | 859.516338530428 | 0.143760451023047  |
| AAAGAAGGTGAC | 859.521661920395 | 0.210929330204911  |
| AGCGATCATGAC | 859.525733197432 | 0.221111417388697  |
| AGCTTGAGACGC | 859.53267499119  | 0.185426625829352  |
| ATAGTCAGTCCC | 859.536847958393 | 0.165953158711802  |

|              |                  |                   |
|--------------|------------------|-------------------|
| GATGACAAGAAC | 859.550851133878 | 0.122682450290355 |
| ACGTCACGACAT | 859.554168937667 | 0.159420828557327 |
| ACCCATATGAGT | 859.561641251871 | 0.205833482786893 |
| AGTTGTCACCCC | 859.56294526902  | 0.106310875017779 |
| ATAAAGCGTGAC | 859.565641442541 | 0.242124195100584 |
| ACGATGTCATTG | 859.565802168877 | 0.218932465402971 |
| ACTTCACGTGAC | 859.569392255104 | 0.117108835211959 |
| CCTTGCAATGAC | 859.569995950846 | 0.219094224206357 |
| GAGCATGACCGA | 859.570760309809 | 0.14811948728549  |
| GACTGCCAGTCA | 859.570805246091 | 0.241686370158018 |
| GTCACTATCTAA | 859.576022736565 | 0.187423277138937 |
| TGGTCATCTGAA | 859.583443141678 | 0.187675342981265 |
| GGTCTGGAGTCA | 859.584668955354 | 0.171578226658157 |
| GATGACAGCGGA | 859.588310462864 | 0.139353107948843 |
| ATGACCCGTTGA | 859.598564316477 | 0.22237022089208  |
| CGTCACGGTTAC | 859.601767252018 | 0.205038493619807 |
| CATGTCACAGAC | 859.602538448962 | 0.157406500367421 |
| CCTATGATGCAA | 859.604913718015 | 0.22322370845388  |
| TAGTGACGTGCA | 859.611159453797 | 0.174578942214865 |
| CTTACTCCGTCA | 859.619027278104 | 0.201763818710522 |
| ACTCATCTTCTA | 859.625155159288 | 0.153979521350209 |
| CTTCGGATGACC | 859.629264307318 | 0.184317887910182 |
| AGGCCTGAATCA | 859.630477256769 | 0.236713101968301 |
| AGTGACGTTATG | 859.632842248711 | 0.197988745683439 |
| GCCTTATGAGTA | 859.633107657003 | 0.178256993720469 |
| CTTCAGGACTCA | 859.647140970518 | 0.159277955319613 |
| GAATGAGTGAGC | 859.649037324785 | 0.149856125211201 |
| CCGTCATTTCGA | 859.659820334352 | 0.2132402119989   |
| AATACGTCAACT | 859.666073923367 | 0.149416014158137 |
| CTCCCGGAGTCA | 859.667599256409 | 0.147668848386365 |
| TGACGCGAACCA | 859.671588535676 | 0.196427813747947 |
| TCACAGAAATGA | 859.677154824359 | 0.23458644934021  |
| TGACGGATGTAA | 859.680146047162 | 0.12215029552557  |
| AAATGACCATAT | 859.681691896496 | 0.138492297051045 |
| TGGGTCACTTAA | 859.682595971899 | 0.184303457284113 |
| GTACCTGGTGAC | 859.690768778573 | 0.146119604571858 |
| AGTGACAGCATA | 859.692074294851 | 0.112553991078021 |
| CCGTAAGACTAA | 859.692591768438 | 0.2453597396872   |
| CTATAATGACCA | 859.695283391375 | 0.142788593647012 |
| GAATCATGACCA | 859.707728672902 | 0.217234416516797 |
| GAGAGCCATGAC | 859.711204107848 | 0.234252775057366 |
| GGTGAATGACA  | 859.717728788196 | 0.155690787536715 |
| CTTGTTGTGACA | 859.718474487266 | 0.20712899607602  |
| TGTTGTGAGCAA | 859.730890211914 | 0.15560604019064  |
| GCGTCATGGTGA | 859.744749507758 | 0.196964803077006 |
| CAGAATGATGCA | 859.745804361165 | 0.160351470979665 |
| GCGATTTGTGAC | 859.757171054064 | 0.258844105013039 |
| AACTCCGTGACT | 859.757229464321 | 0.154979895352447 |
| GACGTAGTCAAC | 859.760175834215 | 0.221385283453866 |
| CAACACATGACA | 859.761638329503 | 0.205498843352006 |
| GAAAAGGTGACA | 859.763238845179 | 0.162214715684704 |
| ACTGTGGGTGAC | 859.766923135505 | 0.124033711836588 |
| TGACAAACAGCA | 859.770493593786 | 0.176340729097133 |
| AGTCAGAAATAG | 859.779091281063 | 0.159459512993614 |

|               |                  |                   |
|---------------|------------------|-------------------|
| GTTAGTCTTACA  | 859.788596902447 | 0.186456577237922 |
| ATGTCACATTCA  | 859.789316565578 | 0.141856460007956 |
| GGTGTAGATGAC  | 859.792062124574 | 0.144533302615105 |
| GGCCGATGTGAC  | 859.801983570597 | 0.226067797256812 |
| AGCGGTCATACA  | 859.808511326648 | 0.160095291716312 |
| ACAGCAGGTGAC  | 859.808522195219 | 0.142009826359536 |
| GACGTCGGTGAC  | 859.809055856847 | 0.159385009757475 |
| TGACGCGCGCAA  | 859.812062190976 | 0.244941268291891 |
| ATAGATTGTGTC  | 859.814546868069 | 0.241847862054679 |
| GACGACATGACA  | 859.819990871928 | 0.208790296173675 |
| ATGTCACCCAAT  | 859.82161677514  | 0.130801865787909 |
| CGTGACAGGTAC  | 859.822195194433 | 0.226523294146775 |
| CTATGACCTGGA  | 859.82660079205  | 0.143288689533206 |
| ACAAATTAGTCG  | 859.830184292584 | 0.240148418409189 |
| ATTACGCACATA  | 859.832505449783 | 0.17073034664682  |
| AAGATTCATTCA  | 859.832813239871 | 0.204286895972836 |
| CTGGTTTGTGAC  | 859.833682851548 | 0.156616932498972 |
| GTAGAGGGTGAC  | 859.836824953441 | 0.096253227913334 |
| AGAACTGATTCA  | 859.837582021363 | 0.1450380547542   |
| ATGAGTGGTTCC  | 859.838941522496 | 0.142452336615804 |
| ACCATGTCACCG  | 859.851113960055 | 0.172205748214901 |
| CCAGAGTCGTCA  | 859.859309813794 | 0.230281218941575 |
| ACTAGTCAGTAT  | 859.868999205706 | 0.174766869234545 |
| TCCAGTGACCAA  | 859.872861417312 | 0.139837000542157 |
| ACTCATTATCT   | 859.874797951221 | 0.159790518155387 |
| ACTAGATGTCAT  | 859.876358734056 | 0.195172211536428 |
| AGTAGCAGTCAG  | 859.876462274243 | 0.117530710833913 |
| CGGTTGATTACAC | 859.877812269059 | 0.170615407425769 |
| ACTCATAAATGG  | 859.895476983095 | 0.21092963457611  |
| CCGCGATAGTCA  | 859.899299439664 | 0.150949475466067 |
| CCAAGAGTGACG  | 859.913733227354 | 0.136640568219155 |
| TGCAATGTCACA  | 859.914648991593 | 0.203321933663942 |
| ACATTAACTCAT  | 859.917087601092 | 0.239100247235843 |
| ATGACATGCTAG  | 859.920017813602 | 0.216120313710039 |
| AGTCAGCAGTGA  | 859.921776837255 | 0.150554033957624 |
| AGTTAAGTGTCAC | 859.926542575719 | 0.154317137190998 |
| AAGTAATGACAA  | 859.928467334497 | 0.10728197579862  |
| GTGCGGTCATAA  | 859.932906103957 | 0.155689115964076 |
| ACTGTCACAAGA  | 859.944267598767 | 0.216172736132135 |
| TCGTAATTGTCA  | 859.945114936106 | 0.157482910536455 |
| AATACTTCGTCA  | 859.945470265549 | 0.195474436941508 |
| GTGACGAGGTAA  | 859.951604135869 | 0.138418620921817 |
| AGTTTGAGTAAC  | 859.953451623037 | 0.123112649432822 |
| AGCCATGACGCT  | 859.95495399348  | 0.229761912711634 |
| AAGACGTGTCTT  | 859.955541126758 | 0.267295390007055 |
| CAGCTACTATGA  | 859.970096084413 | 0.300431998970944 |
| GAGGCGTGTGAC  | 859.972242113095 | 0.219659670359287 |
| ACTCATTAGTAT  | 859.975195205596 | 0.147853108176268 |
| GACTCAGATAAA  | 859.994048138181 | 0.200596063976918 |
| AACTGACTGTAT  | 859.994949598886 | 0.198816842867957 |
| ACGTGACATACC  | 859.999550672115 | 0.208538216833944 |
| AACTTTGTGACA  | 860.011386901224 | 0.155578647014892 |
| ACAGTTGCTGAC  | 860.015157517571 | 0.179107351772415 |
| GCAGTTGCTCAC  | 860.028467469937 | 0.153353715396704 |

|              |                  |                    |
|--------------|------------------|--------------------|
| GGGAGACTCACC | 860.037249825755 | 0.262653856800293  |
| GTCATCCCTACA | 860.042394106191 | 0.147895570622395  |
| TGAATCAATAAA | 860.052773138764 | 0.255387873068098  |
| AGTACTGTCACC | 860.054444723132 | 0.169192639843917  |
| ACTCATTCTTA  | 860.055704042977 | 0.152939225943038  |
| GTCACCGCTACA | 860.056043536966 | 0.1509288238903    |
| CTGACACTATGA | 860.06310140858  | 0.135719523143701  |
| GATGGCTAATCA | 860.069085727189 | 0.0947921188045251 |
| TATAGTCGATGA | 860.070710354387 | 0.276958395760589  |
| GATATAGGTGAC | 860.071670741409 | 0.146933514455696  |
| GTCATTTCCCAA | 860.078137169139 | 0.152675543856997  |
| CCTGATGTGACG | 860.080399085738 | 0.151364677358218  |
| AACGTCATGCAT | 860.082037454961 | 0.155837183903813  |
| ATGTCACGTTAA | 860.099088091194 | 0.130529617332028  |
| CCTCTTGGTGAC | 860.100124426143 | 0.141937031125762  |
| GGTTACTCGTCA | 860.113953248234 | 0.157504919541667  |
| ACCCCGTCATCT | 860.119288798155 | 0.140649698062754  |
| GTCACGACGGAA | 860.123145439033 | 0.20558667328242   |
| ATGACGATCGCG | 860.139113033017 | 0.189536059624897  |
| AAGGCGCGTCAC | 860.140895219083 | 0.124498411205287  |
| AATACTAATACT | 860.141640337594 | 0.221666957394942  |
| CACGATGTGACG | 860.144620506441 | 0.189284658863156  |
| AGTGACAAGTTG | 860.156494530192 | 0.145688847434804  |
| CAGCTCAGTCAA | 860.157827643735 | 0.171770209541676  |
| AAGATTACTCGA | 860.161527271246 | 0.262086526127271  |
| GTAACGTCAGAC | 860.165311970729 | 0.147976952259779  |
| GTCACAATAGTA | 860.1759051891   | 0.218093013635182  |
| GTCACCATTCCA | 860.177457819956 | 0.251489196867401  |
| CTCTCCAGTCA  | 860.177621643167 | 0.198997331272802  |
| CTGCGGACTCAC | 860.180178423928 | 0.146656157153451  |
| CAGTGTCACGAC | 860.189812101699 | 0.28971862767099   |
| CGTTGACAAATC | 860.200467028519 | 0.128093892192975  |
| AAAACAAGTGAC | 860.205218113167 | 0.200654238187428  |
| ATGATACACGCA | 860.207072917421 | 0.196900407164165  |
| ACTCATAGGCGA | 860.212493471721 | 0.202515338684313  |
| AGCCCTCTGACT | 860.213943749461 | 0.16995429303645   |
| GCACATTGCTCA | 860.22349527926  | 0.16362943737255   |
| GTCACGCATCAA | 860.230947902388 | 0.15326182716461   |
| TCTAAACTGTCA | 860.234662549325 | 0.231096590995084  |
| GTGACGGAGCCA | 860.238281308334 | 0.0863656896499866 |
| ATACAGTGACAT | 860.245329832288 | 0.203821152674327  |
| GTCACCGGTGTA | 860.249288346701 | 0.210734596145887  |
| ATGACCACGGTA | 860.252450327079 | 0.204588731100727  |
| CGGTAATGACAA | 860.257442734888 | 0.117090883536876  |
| ACGACTGACTGC | 860.257575756985 | 0.222987505651992  |
| CCTCATTTGTCA | 860.258645889709 | 0.206136517774251  |
| GCACGGCATGAC | 860.260098320625 | 0.175718306524062  |
| AGTCTTGTCA   | 860.260623432472 | 0.286131623599909  |
| AGTGGCTCACCG | 860.262089983778 | 0.214177464664457  |
| ATCCAAGTGACA | 860.262675384154 | 0.112978199801706  |
| ACCCCATGACGT | 860.272520956967 | 0.183005891425284  |
| TCATAATCTGGA | 860.27321260555  | 0.181778908201495  |
| GCGCTCTGACAC | 860.279596877569 | 0.159945012368951  |
| ACCTAATGAGTA | 860.280965938965 | 0.218467087164601  |

|              |                  |                    |
|--------------|------------------|--------------------|
| ATGAGTTGTAAC | 860.281168301205 | 0.166967783644857  |
| ATGACCTGGACA | 860.283748866376 | 0.205019280943011  |
| ACAGAATGACCC | 860.296217175947 | 0.156652906413586  |
| ACTATACGTCAA | 860.303292322107 | 0.189096194644201  |
| ATTGACACAACC | 860.314405393604 | 0.155522865156073  |
| ATTGCTCAGGCA | 860.320408739394 | 0.187532767602297  |
| CAGATTATTGAC | 860.321436221414 | 0.162543214090879  |
| ACGTCATGGGTA | 860.342723666495 | 0.14929630627396   |
| CGTCAAACGTCA | 860.346154669541 | 0.229973432809879  |
| AGTCAGCTTCAT | 860.353336343915 | 0.254897635401299  |
| ACTCTGCATGAC | 860.357983864809 | 0.198349112322075  |
| AGTCAGTTGTTT | 860.369179508328 | 0.206364150938075  |
| AATAGTGACAGA | 860.373033687589 | 0.238202906489464  |
| CCGATACATGAC | 860.376650007368 | 0.233724682942656  |
| CAGAGTCAATTA | 860.393628345643 | 0.186597919473186  |
| GTACTACTACA  | 860.396709700896 | 0.172106357869804  |
| GTCATTGAGATA | 860.399029147169 | 0.145916773018647  |
| TGACGTGATCCA | 860.402849366207 | 0.225582347646413  |
| ATGAGTTGTATA | 860.407998511738 | 0.168647074554371  |
| GGTGACCCAGAA | 860.414199300556 | 0.145961678657368  |
| CTTACCCATGAC | 860.418141536932 | 0.14491602973148   |
| AGTCAGCGATAG | 860.424051315055 | 0.202984056438157  |
| CGGATAGTCAGA | 860.424572367148 | 0.199466935306187  |
| AAGAGTAACATT | 860.432152995117 | 0.0863768278907091 |
| ACCTGGTGACAA | 860.436667923822 | 0.224330993620841  |
| GAAGACTGAGTC | 860.437493965318 | 0.171048100466729  |
| ACCGAGCGTCAT | 860.456372524202 | 0.146862079914366  |
| CCTCATGACAGA | 860.456403311623 | 0.19486991538368   |
| AGTGTCGGTGAC | 860.456664596613 | 0.125431959449629  |
| ATGACCGTGATG | 860.465297786726 | 0.16347715084983   |
| ACCCGTCACCGA | 860.465707354244 | 0.169236662301796  |
| ATGTCACCTGAC | 860.466856188527 | 0.20104377438355   |
| ATTAAAACGTCA | 860.471243949143 | 0.190811042834191  |
| TATGACGGGAGA | 860.484856972087 | 0.185761222187923  |
| TAACTGAGTCGA | 860.488053666759 | 0.219028155571002  |
| ATAGGTGACACG | 860.488572996704 | 0.177445956107855  |
| TATGAGTGTACA | 860.505046197716 | 0.202912267442243  |
| GGTATTAATCAC | 860.508407284931 | 0.168004309014332  |
| ATTACTATTACC | 860.512547369946 | 0.152865393380929  |
| CTGAGGGGTGAC | 860.515797504577 | 0.151112011466692  |
| AGTTGATGACCA | 860.521179344986 | 0.1878935268269    |
| GCGTGACCCAAA | 860.530709909408 | 0.191367709318039  |
| CGAATCAGTGAC | 860.531421080613 | 0.173616865694035  |
| ACTCATCTTCG  | 860.53336084737  | 0.124033462506313  |
| GCATGCATGACA | 860.537069326982 | 0.129221659488685  |
| AGTGACGCGCTA | 860.544560830974 | 0.204451285944426  |
| GTCACGCAGCCA | 860.563024584975 | 0.281631359404744  |
| CACATTCATGAC | 860.570940287503 | 0.205143060531476  |
| CGTCACTGAGTA | 860.574393297862 | 0.228769959642884  |
| CGGGTCATCTAA | 860.574433811535 | 0.136501048940504  |
| AGCCGCAATGAC | 860.578963525164 | 0.232415721608355  |
| TGAGTGATCAAA | 860.581229809776 | 0.16009181882998   |
| AAGTCACGGTTG | 860.596880274015 | 0.139625532689883  |
| ACCAGTCAGTAG | 860.598282003718 | 0.156711169180981  |

|               |                  |                   |
|---------------|------------------|-------------------|
| GGTCATGCTCAC  | 860.599014173675 | 0.194681933917417 |
| ATGACCGGATTA  | 860.601490416401 | 0.175786057044996 |
| CAAGGTGAGTAC  | 860.608441456958 | 0.174514744223063 |
| GTCACGCAGCTA  | 860.608736571428 | 0.150461986210476 |
| CATGAATCAATA  | 860.62376145658  | 0.199342565606324 |
| GGACGTGCAGA   | 860.63152042505  | 0.207030465001798 |
| CCGCGTGACCCA  | 860.648029576604 | 0.112597403255914 |
| CCCGATGACCTA  | 860.648205938767 | 0.159063362362161 |
| AGATGCCATGAC  | 860.649405583227 | 0.177821078071169 |
| AGTGATCACTCA  | 860.650725240521 | 0.202479522334689 |
| AGTCAGTCTTCA  | 860.656102032675 | 0.29165819334631  |
| ATGAGTCCCTGC  | 860.659337998113 | 0.237885454189456 |
| TCGCTGACTTAA  | 860.663306425706 | 0.198711028326933 |
| ATTACACACCTG  | 860.663483385779 | 0.11827884362599  |
| GACTCACGAACA  | 860.665935176847 | 0.171467873057628 |
| AGCATCGTCATG  | 860.673455697673 | 0.168386394511182 |
| TCGTCACCGGAA  | 860.675790932708 | 0.175798373113426 |
| AGGCTCTGAGTC  | 860.693653942052 | 0.141590143749601 |
| GCGGTAAGTCAC  | 860.7020460198   | 0.156032785110524 |
| ACTCATACTGCC  | 860.704217700933 | 0.147266095515745 |
| ATTTCTTAGTGA  | 860.716455797337 | 0.211366109726911 |
| CTAAAATCGTCA  | 860.721375836226 | 0.206117126719813 |
| GTCACCACCAGA  | 860.723518992939 | 0.152717317064946 |
| TACACGTGACGA  | 860.72684062338  | 0.146895016688533 |
| ACTAAATTGTCA  | 860.738351726257 | 0.275121496230651 |
| CCGTAGTGACGC  | 860.739064648537 | 0.125422412744996 |
| AGGACTAATCGG  | 860.754052823004 | 0.189338601388131 |
| CTTATGATGCAA  | 860.756214353544 | 0.228283822984784 |
| CAGACAGGTGAC  | 860.764624691232 | 0.104138578194247 |
| CGTCATTGAAAC  | 860.769066717097 | 0.190962482445872 |
| AGGGTGACCTAT  | 860.774226529508 | 0.230534741961252 |
| GTGACGGAGCGA  | 860.79055824351  | 0.147714365946886 |
| GTTTGACTCGCA  | 860.79454264175  | 0.161473833416253 |
| CGAATATTACTC  | 860.797100255453 | 0.249040814904593 |
| CATCGACTGACA  | 860.800711398852 | 0.152555891429664 |
| CGTAGACTCAAA  | 860.808433400661 | 0.201273192434795 |
| GCGTCACAGGAA  | 860.81371235754  | 0.180559332530921 |
| TGCAGTCAGCCA  | 860.823588907071 | 0.240722775318583 |
| GGTGAAAATGAC  | 860.833961182863 | 0.151815691468761 |
| ACTCATATCATA  | 860.85018138951  | 0.201218858525781 |
| ATTCCGCATGAC  | 860.85738972391  | 0.148996626418423 |
| AATGAGTTGGTC  | 860.857433178844 | 0.139295865512277 |
| GTGACGTCGAAA  | 860.861818006112 | 0.235256588172365 |
| GTTAGTCTGACA  | 860.862534936245 | 0.301928448999999 |
| ACCTGTCACCTT  | 860.8626255226   | 0.191446205598652 |
| ACTAATGACCAT  | 860.867111121929 | 0.203406627648161 |
| GTGTCATGTGAA  | 860.876935124677 | 0.207378174058663 |
| CTTACAGATGA   | 860.877126137053 | 0.228275734190514 |
| ATTACAGGTGACG | 860.879172018691 | 0.151448889654412 |
| TCCGTGCTGTCA  | 860.887714484326 | 0.143518142850826 |
| CAGTTTGTGACA  | 860.893039255096 | 0.202281268924029 |
| GGTGACTTGAAA  | 860.90470050886  | 0.16322590685684  |
| CAGTGACAGTCA  | 860.910782721006 | 0.240754344539652 |
| ATACTAATGTCA  | 860.932048211747 | 0.203770862503195 |



|              |                  |                    |
|--------------|------------------|--------------------|
| AGGCCGTGACGC | 860.934686050973 | 0.249023842036847  |
| ATGTCATCTGTA | 860.934942883598 | 0.158398075090179  |
| ATCTCTCCGTCA | 860.938391763027 | 0.160904690094482  |
| TCGGTTCGTACA | 860.942164748602 | 0.248134665529873  |
| GCAGAATGACCC | 860.942896849485 | 0.160288859621965  |
| ATGAGTGTACCA | 860.945648422643 | 0.157071152364011  |
| CGAGCTGAATCA | 860.946860432143 | 0.16643945749603   |
| ATAGGTGACATG | 860.954395764059 | 0.202838184348019  |
| GTGTGACCTATA | 860.956304010828 | 0.234746731124125  |
| AGCAAGGGTGAC | 860.962979355472 | 0.134796604636155  |
| GGTCACTAATGA | 860.966309650047 | 0.205772924474954  |
| AAAGCTGATTCA | 860.968813204567 | 0.183575319326501  |
| ATGACATTTAGA | 860.971397515062 | 0.142878142340982  |
| GGTGACATTTAA | 861.003292852842 | 0.109938631414174  |
| ACTCATCTTCGA | 861.003961327947 | 0.183194436866229  |
| CTATGCCATGAC | 861.015751988579 | 0.245557209128063  |
| ACCCCGTCATAA | 861.02009992617  | 0.202866547722871  |
| GATTGACACAGA | 861.024094893292 | 0.194232431300234  |
| GCCGAGCATGAC | 861.034861239067 | 0.140679538239407  |
| TCGGTCATTCAA | 861.036948316103 | 0.139630655574428  |
| GCCCTTTACTCA | 861.038285560756 | 0.164088299702622  |
| CAGCGGGTGACG | 861.047210516413 | 0.243298309286741  |
| CTTGATCATAAC | 861.060197466833 | 0.171660365346946  |
| AGGTTACACATC | 861.064644478503 | 0.199754564896048  |
| GATCTCGTGTC  | 861.070161218078 | 0.212145450895024  |
| AGTGTCACGAGG | 861.079370371439 | 0.166225113252458  |
| ATTGACACAGAG | 861.090018868983 | 0.199527927626652  |
| GTCTATCGGTCA | 861.097246221832 | 0.16222466701818   |
| CGTGACGAACCA | 861.114231041774 | 0.247701977561227  |
| ACTAATCGAAAG | 861.117256067012 | 0.193652251290675  |
| GACTACTGAGTC | 861.118473813335 | 0.268407182000854  |
| AACGCCGTCATC | 861.129420791023 | 0.139257027893045  |
| CTGACTTAATAC | 861.13167289334  | 0.243440992641284  |
| ACCCGCGGTGAC | 861.135819137872 | 0.0914926804003337 |
| GGGTGAGCAACA | 861.137392470515 | 0.190886674021503  |
| ACTCATCGATTC | 861.140441503782 | 0.127040211021139  |
| CCGTCATGTGTC | 861.145415721456 | 0.172059764911947  |
| CCGAGGCAGTCA | 861.149432480667 | 0.183809199517905  |
| AATCCAGTCAAT | 861.152573251602 | 0.11278465849151   |
| AGAGTCAAGATA | 861.158975709099 | 0.188362670482927  |
| CCGCTATGACCC | 861.165923283965 | 0.190433875571117  |
| TCGCATGGCTCA | 861.167123859851 | 0.14586167724772   |
| CGACTATTAGTA | 861.168851952646 | 0.32048291823559   |
| TCCACTGATTCA | 861.17208614584  | 0.106459145422984  |
| GTTGACTACAAA | 861.1731407732   | 0.194286804851915  |
| AGGGGTGACAAC | 861.180205428045 | 0.149573242623755  |
| ACTTAGGCGTCA | 861.18059076042  | 0.197194121725117  |
| TCTAGCCAGTCA | 861.187765765275 | 0.176398578700879  |
| AGTCAGAGTGAA | 861.191607848154 | 0.0924221829185601 |
| AATGAGTAGGCT | 861.196255555306 | 0.16685466020971   |
| ACTCATCCGGCT | 861.202058588384 | 0.139584585634993  |
| AAAGACTGATCC | 861.204572194664 | 0.232483579467421  |
| CGTCATGCTTAC | 861.209260414032 | 0.13921219594614   |
| AGCGTTGACACA | 861.210523751345 | 0.146633515286854  |

|              |                  |                    |
|--------------|------------------|--------------------|
| CCGACTCTGTCA | 861.211166890312 | 0.18599849339404   |
| GTTTGCATCATA | 861.222359479686 | 0.165452274248082  |
| GCTGGTGAGCCA | 861.223459186333 | 0.171369275958263  |
| AATCTCCGTAC  | 861.226749033197 | 0.174212862512034  |
| ACCCGTCGTAT  | 861.227525535756 | 0.212528307536722  |
| GTCATGGTAGCA | 861.231078523066 | 0.197047446450984  |
| CGGCCACGTGTC | 861.241915411569 | 0.135232283536002  |
| ATGAGACACACC | 861.242176647849 | 0.235683831951562  |
| ACTCACACTCAT | 861.254207826087 | 0.147234295779195  |
| GATAAGCATGAC | 861.258140599484 | 0.1330785945281    |
| ATTGGTGAGCAA | 861.26065728089  | 0.147659711959382  |
| GAATCATCTACA | 861.260723132807 | 0.142692704258336  |
| GTCACTCTCGTA | 861.26845679142  | 0.207950096814634  |
| AGACCAGATGAC | 861.27032656259  | 0.218969570818502  |
| ATGTATTCATAA | 861.276562324023 | 0.152015198374398  |
| CATCGTCACTAG | 861.290423544306 | 0.176136951699804  |
| CACGATGATGCA | 861.295600328294 | 0.16264190382865   |
| CAATCTCCGTCA | 861.301940809275 | 0.160674255619491  |
| GAGTCTGCCAGC | 861.305707765095 | 0.155277759294959  |
| AAGAATGTGACG | 861.321358352518 | 0.178822347285582  |
| AGGAATGACCAC | 861.321957259159 | 0.166229960007088  |
| GCGGTTTGTGAC | 861.332409961354 | 0.15327046319858   |
| TACAGTGACGGA | 861.334769193739 | 0.198533067678929  |
| CCAGTCGCGTGA | 861.337116345473 | 0.147848707952324  |
| GAGTCTGACAAA | 861.355689151664 | 0.111839698456196  |
| CGATCGATGACC | 861.362468329559 | 0.226228950407277  |
| ACTATTCATGAC | 861.36710355582  | 0.168406613706288  |
| GTAAGAGTCGAA | 861.374794218561 | 0.153145042043275  |
| TGAGTATTGCAA | 861.376056822812 | 0.197351130763334  |
| CGTCACCGCCTA | 861.379349315315 | 0.220680441940052  |
| GAGCCAAATGAC | 861.383260501379 | 0.219915395679057  |
| CGTCACCCAGTC | 861.387067770573 | 0.140799593878688  |
| AGTCAGGCTTAC | 861.394011408251 | 0.147754796406253  |
| CATTGGTGACAA | 861.412405101635 | 0.159754456155988  |
| GTGAATCAATCA | 861.412982833181 | 0.198176987933147  |
| TAGTGTTGCTCA | 861.418651428681 | 0.158253269147467  |
| GTCATGTTGTAA | 861.426352757327 | 0.200275247104099  |
| ATCTTAGTAATC | 861.43774526277  | 0.073838051909369  |
| AGTACTACCGA  | 861.440920769325 | 0.182044853092955  |
| ACTGACACGTAC | 861.455073175068 | 0.170024415324405  |
| GACGTCACATCC | 861.463470560938 | 0.192231062549563  |
| ACTCGATGAATC | 861.464035983761 | 0.235908337402518  |
| AAAGTGAGTCCC | 861.466245917939 | 0.149603535876467  |
| GTCACATAAGTA | 861.473236944077 | 0.140803843432763  |
| AACTCCGAATGA | 861.480156820467 | 0.168260923479118  |
| TACAGACTCACA | 861.480165563896 | 0.121434796476951  |
| GCTTGGTGTGAC | 861.484073366676 | 0.141475736920308  |
| AGGCGCGGTGAC | 861.489081658575 | 0.233537842451837  |
| CAGCATGTGACG | 861.499872092649 | 0.323420637540293  |
| ATTACATAATTA | 861.514393275423 | 0.136745894353192  |
| GGTCATTCCACA | 861.526708324101 | 0.279634128855296  |
| AACTGTGACCCT | 861.52676148554  | 0.156852613940142  |
| ATGTATCACGTG | 861.529486012136 | 0.248742332458008  |
| AGTGACGCGGAA | 861.530864318039 | 0.0989453092167139 |

|               |                  |                    |
|---------------|------------------|--------------------|
| GTATTAGTGACA  | 861.534524527578 | 0.145954569377777  |
| TCCAGTGAGCAA  | 861.542320651318 | 0.206369260543066  |
| AAAGTGGTGACA  | 861.542862197306 | 0.0939597348107792 |
| GTAGTATGTGAC  | 861.54455298453  | 0.14407858572512   |
| ATAGTTGCATCA  | 861.54727472665  | 0.15962597675298   |
| GTACATCATGAC  | 861.551467058327 | 0.168392282852994  |
| AGTATAATGACA  | 861.551688696038 | 0.144290152792224  |
| ATGAGTAGTGTG  | 861.55782509127  | 0.151311826352119  |
| ATGAGTCCGGCC  | 861.56008461558  | 0.187851818038989  |
| CTCGAGCATGAC  | 861.576386284306 | 0.200770146949511  |
| ATTTTCAGGTGAC | 861.579065669865 | 0.193429253270652  |
| CACGCCGACTCA  | 861.592555579271 | 0.150990365906027  |
| CGTCAGTCGTCA  | 861.602049712214 | 0.149331475949293  |
| ACGTGTCAGCTG  | 861.604437348319 | 0.176880564213297  |
| CCTTAGTTATGA  | 861.60531206044  | 0.195726291172042  |
| AAAATACTGTCA  | 861.628980005998 | 0.285142887658154  |
| ATGTAATGACGG  | 861.633841707423 | 0.185568612282534  |
| GAAGCAGTCAGC  | 861.639038311084 | 0.128254439551934  |
| AGGTCGCTGACT  | 861.641138712013 | 0.281018795802062  |
| CTATAGCGTGAC  | 861.645861235247 | 0.196399149730758  |
| ATAGTGTGTGAC  | 861.65968449105  | 0.310545548451647  |
| AGTGTGACCCTA  | 861.662978390141 | 0.140075825660969  |
| GAGGAGTAATAA  | 861.663445452881 | 0.146125787863511  |
| TCAATTCGTCAA  | 861.665295416616 | 0.214690809257775  |
| CAGGGTGACAAC  | 861.666353671802 | 0.228389284570353  |
| AGTCAATCATCG  | 861.673045540388 | 0.241978061483705  |
| ACTACTGTCACA  | 861.678131831992 | 0.249488772603246  |
| GTCGTAAGTCAC  | 861.68745893106  | 0.234173743000463  |
| TCATCACAGGCA  | 861.688859237093 | 0.213975634599754  |
| CAGCATGACAGC  | 861.713112087035 | 0.230295304014976  |
| TCCGGCATGACA  | 861.71808645917  | 0.154780354927679  |
| GGTATCCATGAC  | 861.722879044179 | 0.181294252194444  |
| ACATTGACGTAA  | 861.72591042897  | 0.165389471147747  |
| GTGACACGGCCA  | 861.736160041927 | 0.161829737278452  |
| GTAAGATGAGTA  | 861.736966925078 | 0.125581462113008  |
| GTAGTCGGTGAC  | 861.753930265705 | 0.222597828565014  |
| CGAAATCGTGAC  | 861.757229802793 | 0.199514232219746  |
| ATCATGACCATG  | 861.758097054886 | 0.194066452040096  |
| ATGACAGTCTCG  | 861.758154995534 | 0.170821285867044  |
| TGACGATTTTAA  | 861.761618655569 | 0.206764108884302  |
| TCAGAGGTATGA  | 861.765902887449 | 0.207652917940784  |
| CTATACTGTCAC  | 861.76739038694  | 0.163807407064706  |
| AAGTAAGAGTAA  | 861.770733686728 | 0.139361946070461  |
| AGCCTGACGCAG  | 861.771013817181 | 0.214192522801094  |
| ATCAATCAGTAA  | 861.781288961345 | 0.148070242661532  |
| ACTCACACTGAC  | 861.784150913449 | 0.153583335764236  |
| CTTATCCGTGAC  | 861.788144349327 | 0.139727840595828  |
| CAGAGTGACCAC  | 861.792505234023 | 0.177735421522363  |
| ACCTGTGATACA  | 861.796152005891 | 0.183996203377758  |
| ATAATGTCATGA  | 861.797488299049 | 0.164079006400541  |
| GGGGTGGATGAC  | 861.7975169238   | 0.221800292942509  |
| ATGACAACCGAG  | 861.804989501249 | 0.131788947806233  |
| GAATGTGTCGAC  | 861.80945828425  | 0.144017731957404  |
| GTATGAGTGTC   | 861.823736969107 | 0.181302327881259  |

|              |                  |                    |
|--------------|------------------|--------------------|
| GTCACCAACGTA | 861.828369460339 | 0.199357574948064  |
| CCGCCGTAGTCA | 861.830903686365 | 0.249318676421989  |
| GATGGCAATGAC | 861.831406407485 | 0.231754415186788  |
| CGACTAATTCTC | 861.841078314657 | 0.143184369420879  |
| ACTCATAGTAGA | 861.842791665438 | 0.107997527407407  |
| GCCAATGACCAC | 861.843742176881 | 0.187975174059541  |
| GTCACCTTGCAC | 861.844299869939 | 0.212165753787721  |
| ACGTCCTAATGA | 861.847607882963 | 0.255446142449843  |
| CGTCATGTAAGA | 861.848735470384 | 0.187330662729877  |
| ACCGAGATGAGT | 861.856849612054 | 0.142727376347044  |
| TATGTCACGCGA | 861.86233931556  | 0.125600985058525  |
| CATGCTCCGTCA | 861.864035050219 | 0.192401577678853  |
| ATGAGCCAACGG | 861.866788109006 | 0.199744340372833  |
| TATAAGTGACAA | 861.873932510568 | 0.180175735355528  |
| CGTCACCGAAAC | 861.876116961191 | 0.221259961870599  |
| ATGAGTACCGGG | 861.881204466705 | 0.136579466054451  |
| CCAAATGACGGG | 861.884404195351 | 0.203476232169171  |
| AATCTTCTGTCA | 861.887155953468 | 0.12008889668763   |
| AAGTCGTGACAC | 861.887199685472 | 0.278818874875606  |
| ACATGGCGTGAC | 861.889720343714 | 0.111404640956481  |
| AAGGATAATGAC | 861.90183774844  | 0.212769044151603  |
| AACCACAATGAC | 861.904874824078 | 0.181811065193829  |
| GGTCAACGTGAC | 861.923774308622 | 0.187165465291831  |
| TGACAAGTCGAA | 861.934628340436 | 0.200488929181     |
| TCACTTGTGACA | 861.946560393222 | 0.193911355334651  |
| AAAATATGATTC | 861.94965545812  | 0.180850719220398  |
| ACTATGTCACTC | 861.964332399896 | 0.178687342529059  |
| GGGAGTAATGAC | 861.969106828876 | 0.109911575495715  |
| AGTGACGGGTCC | 861.980705957685 | 0.130565058977187  |
| ATGTGACGTCTG | 861.984432520904 | 0.138977379834093  |
| TCAACATAATGA | 861.997374251154 | 0.259124194137716  |
| AAGAATGTCATC | 861.999695285816 | 0.135984796832838  |
| TAAATCGTGACA | 862.010591504416 | 0.207859345943238  |
| ACTCTTTAATGA | 862.01260971498  | 0.244449679360847  |
| ACGTCACCCAG  | 862.014747833923 | 0.143952535161906  |
| TCTACTGTGACA | 862.020234996247 | 0.0946623515768947 |
| ACGACTGACTAG | 862.037893956008 | 0.159169629005728  |
| GGCTGACTGTAA | 862.039724060922 | 0.227337696002262  |
| ACAAGTTGACTA | 862.041987196723 | 0.213161288807631  |
| CAACGTCATGCG | 862.044598846164 | 0.168486537462854  |
| GGTCATAGCTCA | 862.054482776191 | 0.243376182159891  |
| TGACATCGGTCA | 862.065755661052 | 0.141201474334758  |
| ATGACAAGCTAC | 862.076701180892 | 0.237267547958551  |
| ATGACGGGAACC | 862.079800884592 | 0.222328195491964  |
| GTCACCTTGTGA | 862.084508827824 | 0.236486422291605  |
| CCAGCGAGTCAG | 862.094408396588 | 0.175719805980512  |
| TGCATTCTGACA | 862.101781265068 | 0.15299336974676   |
| ATGATGCAACAC | 862.110156641409 | 0.167301410830361  |
| GCGTCATGTCGA | 862.114168314181 | 0.115594026959755  |
| GAGTAATATTAA | 862.116173799169 | 0.213326501973381  |
| CCCATGGCGTCA | 862.11680372311  | 0.211441685326451  |
| CTTAGTGACGGA | 862.118153296082 | 0.0847662765911536 |
| AACAAGTCAGAA | 862.120924748294 | 0.21634534512398   |
| CAATATCACTCA | 862.121500753415 | 0.193273482072953  |

|              |                  |                   |
|--------------|------------------|-------------------|
| ACTGGGCGTGAC | 862.121924827312 | 0.149761690246097 |
| ACCCCTGTGACA | 862.131784150035 | 0.14572814293458  |
| CTGACTATGATC | 862.132989075251 | 0.150852652984799 |
| GTCATGTTGGCA | 862.136984879439 | 0.158812269045923 |
| AGTTTACAGTCA | 862.142637838177 | 0.261615920580018 |
| ACTGAGCGTGAC | 862.154769199095 | 0.156712608569919 |
| GACACCGTCACC | 862.162925463821 | 0.163682287532104 |
| CGTCACGTGGAC | 862.163788456814 | 0.218070506240964 |
| ATTCCCGTCATA | 862.168873934845 | 0.18597451637499  |
| GGTCATTTTACA | 862.171557722959 | 0.194473306754864 |
| TAACTTTACTCA | 862.172231899566 | 0.214335179240605 |
| AATTACGCACCA | 862.174900200311 | 0.238467883549512 |
| AACCGTGGTCAT | 862.175142498742 | 0.162453238991572 |
| GCTAGTGACAAA | 862.179332832312 | 0.241508727398729 |
| CACTGTGAGCAA | 862.193526286018 | 0.163125847544547 |
| ATGACGGTAATA | 862.19354776685  | 0.100049786892146 |
| ACTCGTGCATGA | 862.193996288661 | 0.223004595761825 |
| CCGAATCGGTCA | 862.206993105775 | 0.132213134062018 |
| CGCTCTTTGTCA | 862.207668082289 | 0.1309255755657   |
| AGCTCTGACACT | 862.211558492818 | 0.284268957732442 |
| CTGAAATGACAG | 862.212772793381 | 0.138636855385423 |
| CGTCATGTGTGA | 862.242944645242 | 0.174183556968259 |
| ATCTCGTCATGG | 862.24411490765  | 0.185330413931764 |
| ATGACGGCAGAC | 862.244252901458 | 0.257937309150419 |
| GCACACTCATA  | 862.251632527093 | 0.140196694904997 |
| GTGACATTACAC | 862.258261588191 | 0.14531680083956  |
| AGAGTGACGGAG | 862.263363959525 | 0.137091945346989 |
| ATCAGTACGTCA | 862.268839931926 | 0.178116797312149 |
| ACAGTGTACGCT | 862.272927345329 | 0.223476420675216 |
| GAGTAACCGTCA | 862.285764426177 | 0.211065505987815 |
| GGCGTCACGCAC | 862.295252592405 | 0.247989035365861 |
| AGTCACGACCCC | 862.295688999769 | 0.162878981895453 |
| CGCTGACTGGTA | 862.301663397968 | 0.220412795927647 |
| GTCACTGTCTAA | 862.30858710488  | 0.195362142590036 |
| ATGGATGACCGA | 862.31527212398  | 0.167863955087006 |
| GTCACCTTCTTA | 862.33235939282  | 0.181705546879053 |
| ATTAGTCTTACA | 862.333905629904 | 0.207034714383036 |
| GCGTAGGTGACA | 862.340413384812 | 0.179492970642589 |
| ACTGTTGAGTAA | 862.344608895843 | 0.209715548604981 |
| CATGGCATGACC | 862.345257652314 | 0.117379228050961 |
| GTGTGTAATTTA | 862.346763286886 | 0.261824258047243 |
| TGACGGGTTCCA | 862.351338540046 | 0.173737551393948 |
| CTACAGTGTAC  | 862.361118994319 | 0.156185923317664 |
| GTAGACTCAGCA | 862.362805685036 | 0.182479717953219 |
| GACTGACGTCCA | 862.369648760022 | 0.269257064900692 |
| CGTCACTCAGAC | 862.371098999502 | 0.154141843945309 |
| GAGTAATCAATC | 862.382637048164 | 0.289837495158825 |
| ATTGACTCTGTA | 862.394433707217 | 0.152549833618559 |
| TCGTGCTAGTCA | 862.39934350325  | 0.23509751626174  |
| GATGAGTGGTCA | 862.401684654899 | 0.137844968441637 |
| CATCTGAGTCTA | 862.406000121742 | 0.157224045214076 |
| CGACAGACTCAC | 862.409926213033 | 0.160563930162617 |
| AGTTACAGTCAG | 862.410054018865 | 0.198243952295942 |
| GATGTCATTATA | 862.410063794244 | 0.129075015746279 |

|               |                  |                    |
|---------------|------------------|--------------------|
| AGACGGGCATC   | 862.413559515028 | 0.146336869551913  |
| ATGTCATGATCC  | 862.414993221126 | 0.162427761406001  |
| CAACATGAGTAC  | 862.415916600987 | 0.155315365564291  |
| ACGTACTGTCAC  | 862.421422640281 | 0.182726402863361  |
| ACATTGACTGAG  | 862.421587960347 | 0.211955499125492  |
| AATTGACTGGAT  | 862.421881036332 | 0.148733279455592  |
| CCATGACAATAA  | 862.423699544887 | 0.241802587066644  |
| CCGACAGTGACG  | 862.443625779371 | 0.142202548767721  |
| CGAATCATTACG  | 862.45608615931  | 0.186991791521572  |
| CTAATGATGTAA  | 862.457013213208 | 0.258261174083895  |
| AGAGAAGTGTCA  | 862.457949505017 | 0.180027408051262  |
| GGACTCAGTGAC  | 862.459324356879 | 0.146714482167301  |
| AGTCACTAGCCC  | 862.462840896338 | 0.198549206112086  |
| ACTAGTGACCCA  | 862.464624122217 | 0.210855398453062  |
| AGGCATGACGCC  | 862.469554807027 | 0.20120020766259   |
| AGTCAGCAGCTA  | 862.470274747402 | 0.198806643739288  |
| GACTAATCTCCA  | 862.47240249862  | 0.194745133351187  |
| GACGTAGGACTC  | 862.474855096915 | 0.211968975477263  |
| CTGACTCTCCTA  | 862.477459570944 | 0.153160114780938  |
| ACTGTTGACTAT  | 862.482006632718 | 0.11662572763112   |
| ATGACATCCGGA  | 862.48378299225  | 0.195389421543698  |
| CACGTCAGCTAC  | 862.498400468274 | 0.246550301788287  |
| AGTACTGGTGAC  | 862.505912825761 | 0.249080404801042  |
| AGAGTCAAGGAA  | 862.524427309977 | 0.168723611255109  |
| GTCACCTATTAA  | 862.529118969138 | 0.245837826628215  |
| GTCACCATACAC  | 862.529773670949 | 0.175796978141573  |
| CGTCACAACCAG  | 862.533458889348 | 0.196521624368181  |
| AAGTCACTTCAG  | 862.535012653358 | 0.174744619846525  |
| ACCCGGAATGAC  | 862.539942077823 | 0.225579930387211  |
| CCGACCTTGTC   | 862.544507930245 | 0.219510692028342  |
| ACTCATCTAAGG  | 862.547394399808 | 0.13849685745103   |
| AATTAGTCGCC   | 862.547820179778 | 0.164594992374958  |
| CATTAGAGTGAC  | 862.552213509888 | 0.190388652024872  |
| GTGTCACCTGAA  | 862.553461604263 | 0.155505500042538  |
| ACTCTGTCACTC  | 862.553790501521 | 0.140690542228292  |
| ATTAGTAAGATC  | 862.555561097631 | 0.184583021475407  |
| ATTAGGTAGTCA  | 862.558825831738 | 0.214674967051442  |
| TCATGGTGGTCA  | 862.57098542886  | 0.155656737848089  |
| CTCGTCGCGTCA  | 862.574428029384 | 0.153942760598171  |
| CCACGCGACTCA  | 862.588707730284 | 0.165913074510951  |
| GTCACACCTAA   | 862.589343813513 | 0.114882635615176  |
| CCGCTGAGTAA   | 862.592230408577 | 0.191697920455695  |
| GCCACCGACTCA  | 862.605337737213 | 0.128347741534191  |
| CGGGCCTGTGAC  | 862.606727452256 | 0.234696484451991  |
| ATGGCATGTGAC  | 862.614633260944 | 0.107528656424573  |
| GGGTCCAATGAC  | 862.614794782042 | 0.248947586328894  |
| ACACAACCTGTGA | 862.618593435786 | 0.23233600187415   |
| CATATTACTGAA  | 862.624375875994 | 0.202373283615345  |
| AACGATTGAGTC  | 862.64593911302  | 0.124895189209983  |
| GTGACGGCGTCA  | 862.650711051397 | 0.161289466249034  |
| GAGGCCTGTGAC  | 862.657508605945 | 0.208416772623731  |
| AGACTCAGCGAG  | 862.661925111196 | 0.0633506856227026 |
| ATGACGGGGTTA  | 862.670612751756 | 0.116632322254212  |
| GTCACTCTCAGA  | 862.67204987455  | 0.144088342379024  |

|              |                  |                    |
|--------------|------------------|--------------------|
| AGTGCCATGAC  | 862.678831572652 | 0.214265818734879  |
| AGTGACTAGCGC | 862.680840616267 | 0.0959267808223871 |
| CTGACTAGTATC | 862.686580528197 | 0.214487107716859  |
| AGCGGTATGACC | 862.689559971122 | 0.129218921592583  |
| ATATCCGGTGAC | 862.695612474115 | 0.204630640540936  |
| TAGGACTGGTCA | 862.701292284181 | 0.1580522681993    |
| ATGCCCGTGACG | 862.728858416953 | 0.21173978939209   |
| TGTCTGACATAA | 862.75412493347  | 0.21651794630281   |
| ATGACGACTAAC | 862.769245498741 | 0.169720344282158  |
| ATTACTCTGACA | 862.771660522233 | 0.144388712732868  |
| CGATCCCTATGA | 862.771970760717 | 0.208782892626184  |
| TGAGTAGTCCCA | 862.780032266916 | 0.171180606459364  |
| CCTGCAGTGACA | 862.78610418374  | 0.169546924245063  |
| GATCGAGGTGAC | 862.798021498925 | 0.188725386382776  |
| GGATCCTGTGAC | 862.806735447467 | 0.264589325381249  |
| CGATTAGTATGA | 862.810493860426 | 0.250215671701986  |
| TAGCCTGAATCA | 862.818767616793 | 0.152437690113735  |
| CTCGATTAGTC  | 862.82563962871  | 0.136542823644603  |
| AAGGCATGTCAT | 862.831019858025 | 0.149854244541466  |
| GATTACATGACA | 862.835063062856 | 0.182015835942457  |
| GCGTCATGCCCC | 862.835383734261 | 0.136566497430564  |
| ACCATGACGTTA | 862.838146724049 | 0.207733107283515  |
| ATGTCATTGCAC | 862.838260015703 | 0.16107154439611   |
| GTCACCCTACTA | 862.84066639307  | 0.177756498665509  |
| GACTCACGCCTA | 862.844961388894 | 0.158761571514116  |
| ACGTGGTGACAT | 862.850772182311 | 0.188728485533421  |
| GACTAATGTCTC | 862.85256038855  | 0.222545671060565  |
| GACTAACTCACA | 862.855754813953 | 0.236188362262147  |
| AAAAGTGGGTCA | 862.861641978962 | 0.165360436128574  |
| GGATGAGTTAAC | 862.868937136779 | 0.139237659582368  |
| TCCACTGAGTAA | 862.873428305016 | 0.204605398308226  |
| AGTTAATGACAG | 862.875432731104 | 0.161935578523565  |
| GTCATGCTCTTA | 862.886413373124 | 0.263768290334436  |
| ACATGACGTTGA | 862.892168628799 | 0.149371238047639  |
| CGGTCATATTAC | 862.896096422055 | 0.174843835429641  |
| GTCACTGGATTA | 862.902523892905 | 0.190886059308011  |
| GACTCAATTTAA | 862.903109992033 | 0.257650971920327  |
| ATAGTAATGACC | 862.903512583809 | 0.175225532014845  |
| ACTCAATCGTCA | 862.910016722412 | 0.149072867718578  |
| ACTAATCAGTCT | 862.912055102059 | 0.148705577920161  |
| ATACCTGACTAT | 862.917410146015 | 0.223510827491015  |
| TGACAGCGATCA | 862.920023630078 | 0.189384440312615  |
| CGTCACTACTAA | 862.922369320735 | 0.146251842209592  |
| ACTCATACGAGC | 862.933899988544 | 0.208918050682598  |
| ACACATTACGTG | 862.943616346762 | 0.212861923020659  |
| CTGAATAACTCA | 862.950083462409 | 0.147958487036655  |
| AGCTTGGTGACG | 862.951328312595 | 0.185070918231464  |
| ATGTCATGTCAC | 862.95979349113  | 0.100674198317973  |
| CTTCAAGCGTCA | 862.961993531444 | 0.195517394091202  |
| CTGTGACAATAC | 862.969396784627 | 0.188250529405597  |
| ACTCATACTGGG | 862.976131728653 | 0.247103523181342  |
| AAGCTGACATAT | 862.978144618809 | 0.20837492078332   |
| CAGCAGAGTGAC | 862.979545614739 | 0.114631886302645  |
| CAGCTTCTGACG | 862.98167037223  | 0.305585743928542  |

|              |                  |                    |
|--------------|------------------|--------------------|
| AATACAGTCAAA | 862.99023896833  | 0.176932581684114  |
| CATTTGACTGAG | 862.999787292335 | 0.109334741287502  |
| GTCACTAAGGAA | 863.000528330985 | 0.213721764607333  |
| AAGAAATGTGAC | 863.024993160861 | 0.143167314335684  |
| CGGGAGTGTGAC | 863.032240071187 | 0.0576212911727474 |
| GTGACGCGGAGA | 863.037114440161 | 0.139004379803981  |
| CATCTGTCAGAG | 863.037650664396 | 0.15001903202681   |
| CCAACACAGTGA | 863.044960840497 | 0.19006041150888   |
| ACTCATTATGTC | 863.050501362731 | 0.18234672030971   |
| CATGCTTGACTC | 863.055232273772 | 0.216429330495715  |
| ACTCATCAGTAG | 863.057881836892 | 0.21352648566469   |
| GTCATTAGACTA | 863.060871023266 | 0.211484229768826  |
| CTTGTAAGTCA  | 863.069742850729 | 0.203669928551362  |
| GCATCGCGTCAC | 863.070165322067 | 0.206914126852176  |
| CCCGATCACTCA | 863.072288222339 | 0.187645785248178  |
| AGCGGTCATACT | 863.076026736098 | 0.141493026720468  |
| TGACCAACAAA  | 863.076124196829 | 0.176283996623333  |
| AACCAGTCAGGT | 863.078058879922 | 0.223787184866093  |
| CCCAGCAATGAC | 863.078422555441 | 0.242652709543765  |
| GTCATGGAGTAA | 863.080253962468 | 0.19461077840899   |
| CTGTGTCAATGA | 863.093967302571 | 0.217336462233275  |
| GGTCATATCAAA | 863.096833375335 | 0.214344839653439  |
| ATAGGGCATGAC | 863.098917641321 | 0.185213897493739  |
| CGAGTAAATGAC | 863.102444606559 | 0.153987350914354  |
| AGTGACGGGTTT | 863.104569400112 | 0.145526144694191  |
| GGTGTCATGTGA | 863.118099662003 | 0.195536621680146  |
| AAGAGTCTTTCA | 863.130738980277 | 0.14243723481562   |
| ACTCATTGACA  | 863.134359949607 | 0.180154494074686  |
| GAGAATGAGCCA | 863.14013694219  | 0.177823725056225  |
| CGTAAAATATGA | 863.153223861413 | 0.260689047645028  |
| CTGACTTAATTA | 863.161882409662 | 0.12030974032452   |
| ATGAGTATGCAG | 863.167672981228 | 0.197831216550305  |
| CTGTACTCTTA  | 863.169318707625 | 0.156376774634895  |
| ATGAGTATCCTG | 863.179533928769 | 0.196839365698456  |
| GTCACCGCCTCA | 863.181590282478 | 0.224508632383973  |
| ACACATTGACTG | 863.184572552839 | 0.148601712460082  |
| AAGGCTCACTCG | 863.191325367195 | 0.210384127618784  |
| GGGGTTGTGTCA | 863.202499918117 | 0.109602117323985  |
| CACGACGTCACA | 863.203132312537 | 0.1540392283959    |
| CTTGCGTGAGTC | 863.215876738215 | 0.178786102831942  |
| AATATGACCTCA | 863.219901439168 | 0.260601464542258  |
| GCCCGTACGTCA | 863.225982483271 | 0.147304992005464  |
| ATGACGGCGAAA | 863.23264552321  | 0.165628107016907  |
| GACGTAATAATA | 863.235404767001 | 0.266404711366346  |
| CGTACTTGTAC  | 863.241569572535 | 0.179790593641213  |
| ATGACTTCGCCG | 863.241748230565 | 0.273750323314839  |
| ATCTACGCGTCA | 863.256483980955 | 0.152697678576976  |
| ATCTGTCAGACA | 863.261363304738 | 0.191250069676129  |
| AGGGTCGGTGAC | 863.264450158941 | 0.170110569955112  |
| GTCATGAGATGA | 863.268356809922 | 0.110032938654489  |
| GTGAAGCAGTCA | 863.271420045119 | 0.226124686552191  |
| CCGGTCTGTCA  | 863.271970323806 | 0.165769110482848  |
| GGGGTCAATGAC | 863.285344446772 | 0.148294803197451  |
| TGCTCTGACGAA | 863.290755939232 | 0.222413274128071  |



|               |                  |                    |
|---------------|------------------|--------------------|
| ACGTCACCTCGGG | 863.299139937858 | 0.222606867843242  |
| ACTCATCGTGAT  | 863.301060915173 | 0.301620287063889  |
| AACAAGTCATGG  | 863.303323624672 | 0.101331715786882  |
| AGGGTTTCGTCA  | 863.305055435525 | 0.201359904387895  |
| GTAAGAGAGTCA  | 863.307460737523 | 0.100409676813931  |
| AATTCGTAATAC  | 863.313546575769 | 0.174585767168224  |
| AGTATTACTGTG  | 863.316893460323 | 0.149604081554485  |
| ATTTGAGACTCA  | 863.317260184517 | 0.142811448456174  |
| AGCATTGTGACA  | 863.341066929507 | 0.15882066021466   |
| GTGACAATACAC  | 863.341716324613 | 0.27063879952435   |
| CTATTGTGACAG  | 863.349359167058 | 0.189110285850596  |
| TGGATTGAGTAA  | 863.349391338935 | 0.17983703868065   |
| AGCACGCATGAC  | 863.350078767843 | 0.138132474550801  |
| TAAACACTCATA  | 863.35684844541  | 0.175833684144954  |
| ATTGACGTGGAC  | 863.357059761448 | 0.154306837491082  |
| GTCATGTCCGGAC | 863.372561333367 | 0.184841798773186  |
| GGCCGTGGTGAC  | 863.380869975243 | 0.172987975735061  |
| ACAGTCAATCAG  | 863.389122032256 | 0.136489051690079  |
| TGACATAATGCA  | 863.391944224312 | 0.176406040904962  |
| AGGATGATGACC  | 863.409462206171 | 0.281808668821429  |
| AAGCAGTCAGCT  | 863.413800328294 | 0.180677659237156  |
| CTGACTCGCTCC  | 863.414048099949 | 0.159993890995471  |
| CTAAGACTAACA  | 863.418461798344 | 0.243858113295661  |
| CGTCACCCGTGA  | 863.437429059275 | 0.206457692024431  |
| AGTAACTCATCG  | 863.439890747283 | 0.141129341224229  |
| ACTGACTATGAT  | 863.441926154716 | 0.170320175053774  |
| CGGATTGGTGAC  | 863.443590140604 | 0.205243924743047  |
| ACTGACGATTAC  | 863.444795729736 | 0.30467277158999   |
| AGTCAGAGCGGC  | 863.451116785831 | 0.23526220835069   |
| GATCCACAGTCA  | 863.453461777093 | 0.17784545417897   |
| AATATAGGTGAC  | 863.454497155718 | 0.139876562216934  |
| ATTGGTCAACAA  | 863.458511884326 | 0.190632506647885  |
| ATTGTCACCGTA  | 863.460132808034 | 0.179534932897909  |
| AAGCCACGTGTC  | 863.464800398388 | 0.182914925866117  |
| ACGTGTAATCGC  | 863.465130636981 | 0.204970444510307  |
| AGTCACGCTGCC  | 863.472965392314 | 0.162438286641592  |
| AAAATTGTCAGA  | 863.476370534043 | 0.156796370737649  |
| ACGTCAGCTCGA  | 863.478014941026 | 0.168689453104806  |
| ATGACAGCCATG  | 863.478577298827 | 0.142069678298477  |
| ATGACCATGAGA  | 863.487379201895 | 0.140830049088524  |
| AGCGTCATGCTG  | 863.487724859583 | 0.203945968871982  |
| GACCCGCTCAGA  | 863.489025057447 | 0.155998907696796  |
| CATGATATGACC  | 863.490036792938 | 0.198347460420429  |
| AGCGCCAGTGAC  | 863.505230990807 | 0.205094930620807  |
| TCTATCGTGTC   | 863.511298083925 | 0.152626153287396  |
| AACCATGACTTG  | 863.514217726938 | 0.0732763224418778 |
| ACCAAGTCAGAG  | 863.52446288669  | 0.178670623211227  |
| CAGGCAATGACA  | 863.527467851705 | 0.136159277506323  |
| GTCACCAGGGCA  | 863.528073452436 | 0.139270050929954  |
| GCCACCTCGTCA  | 863.528769209618 | 0.283559324546672  |
| TGACCCATTCCA  | 863.531258199351 | 0.218331982844401  |
| AATAGTAATAGC  | 863.533389461191 | 0.218302495752508  |
| GTCACGCACACA  | 863.533982971329 | 0.171497907627011  |
| TAATTTTCGTCA  | 863.544312837747 | 0.152570728413768  |

|              |                  |                   |
|--------------|------------------|-------------------|
| ATTCGTGACGAA | 863.547739795275 | 0.250098599560625 |
| CTTTCCGGTGAC | 863.556472639339 | 0.16656070102147  |
| AGAATCTGACTG | 863.560852680154 | 0.288788612746199 |
| AGTCAGAAGGTA | 863.561480537809 | 0.200198898368448 |
| ATGACAACGAGC | 863.565404101106 | 0.167496816259666 |
| TAGAAACTGTCA | 863.580762818535 | 0.233154014950201 |
| ATGTCATGCATA | 863.587797542007 | 0.141139657510932 |
| CCGGGTGAGCCA | 863.593481608424 | 0.182636607463301 |
| AAGTCACGCCAA | 863.600626679593 | 0.223289117552618 |
| TATGCATGACAA | 863.603901460578 | 0.154840548594532 |
| ACTCATTTTCCG | 863.612364600233 | 0.178207210785259 |
| AATATCCGTGAC | 863.614101693076 | 0.217008155057206 |
| AAGTGAGTCCAC | 863.621144966274 | 0.193068462556282 |
| CGTACTAATTTA | 863.622419131995 | 0.182375879415313 |
| GTCATTTCCAC  | 863.636091242731 | 0.175881486289936 |
| GTTTACCCGTCA | 863.648959665528 | 0.266001646050671 |
| TATGTCACGCAA | 863.654659376484 | 0.251697417774253 |
| GAAGGCAATGAC | 863.65479510844  | 0.209802650005278 |
| CGTCATGCATAC | 863.672661712926 | 0.245633401933746 |
| GGGCACAATGAC | 863.68148852305  | 0.141070452621599 |
| GCATCATGACGA | 863.685434366296 | 0.211726533004511 |
| GCTGACTTAAAC | 863.685434780814 | 0.139993583004085 |
| AGTGACAAGTAT | 863.686246949653 | 0.157064986636326 |
| CTCAGTAATGAG | 863.687510344833 | 0.155513761469927 |
| ACAGTCAGTCGG | 863.691756598666 | 0.244097799047072 |
| GTATTACGAATA | 863.69848632814  | 0.104375168653447 |
| AACTGACTGTGA | 863.699501013401 | 0.201163197469744 |
| GGTCACCGACAA | 863.701391531047 | 0.188671814911711 |
| GTCCCATATGA  | 863.702649750402 | 0.156206359995517 |
| TGACTGCCAAAA | 863.703353648252 | 0.219044653739801 |
| TACATTGTGACA | 863.713400364716 | 0.14988736390604  |
| CGAAGTGAGTAC | 863.717245276728 | 0.141426960659543 |
| ATTCGGTTAGTC | 863.723601969986 | 0.198970467395457 |
| TCAACGTGACGA | 863.725530394261 | 0.236852105400452 |
| GATGACCTAAAA | 863.733474321353 | 0.152542776861964 |
| AGGCTATATGAC | 863.738514507082 | 0.112920367091692 |
| AATATGACCCCA | 863.738565203598 | 0.157222571849489 |
| GCGTCAGTCTGA | 863.739409888373 | 0.20343418321096  |
| ATAAATGTCAAC | 863.740665271609 | 0.155787444101168 |
| CTTATATTGTCA | 863.746133926662 | 0.154910475313632 |
| GACCATTGAGTC | 863.750862629347 | 0.245414896865153 |
| CTGCATGAGCAA | 863.751520808836 | 0.181666908923249 |
| AATGACGGCTCA | 863.765109957191 | 0.210233532725421 |
| ACCAATTACACA | 863.76637389206  | 0.251090712367953 |
| CAGTCAGGGCAG | 863.773157016599 | 0.169947319023584 |
| ATGTGACCTGTC | 863.776225053102 | 0.151986881908766 |
| CCAATTGAGTCG | 863.779337059521 | 0.251201052578601 |
| ATGGCTATGACC | 863.78094399304  | 0.187899273736492 |
| AGTCAGAGGACC | 863.788682855764 | 0.185208188351865 |
| AGTCAGAGGGAG | 863.792031178616 | 0.128916210365878 |
| GGTCATAATTGA | 863.792704220595 | 0.194514484891044 |
| ACTCAGTCAAAT | 863.794091149143 | 0.207516592992072 |
| TACAAGGACTCA | 863.79602179983  | 0.16955606257273  |
| ACTGACTGGTTA | 863.798284402593 | 0.171420292289157 |

|                |                  |                    |
|----------------|------------------|--------------------|
| ACCAGTGACAAA   | 863.806872249251 | 0.140916973274942  |
| GTCACATCTTTA   | 863.808198454004 | 0.181874245721531  |
| GACCTGTCACGC   | 863.811956162702 | 0.19803288128348   |
| AGAAATGTGACG   | 863.815815747211 | 0.142253609443106  |
| GACTAATCCAC    | 863.818955824935 | 0.143585207230175  |
| ATTCAGTAATAC   | 863.82715155999  | 0.193420380147403  |
| GAGGGGAATGAC   | 863.84046533283  | 0.139567915228947  |
| AGTGACTAGCTA   | 863.840721332595 | 0.164653646294809  |
| ATGATGCTATCG   | 863.848796286004 | 0.160837358004319  |
| ATGACCGAACTG   | 863.850919531941 | 0.119561124494908  |
| ATGTCACCGCCA   | 863.855383066261 | 0.157330331535965  |
| GTCATTTGAAGA   | 863.855928027492 | 0.155308335956339  |
| GGTTGCTCATGA   | 863.856601164225 | 0.20929807433426   |
| ATCAAATGACAG   | 863.858823477397 | 0.120528967628287  |
| GGGCATAATGAC   | 863.85934534662  | 0.264055609108231  |
| ATACGCAGTCAG   | 863.86101173905  | 0.148822502171852  |
| AATGTGTCTGAC   | 863.862503969656 | 0.200419438014552  |
| GACGATTCATAC   | 863.870963862001 | 0.183908024162572  |
| ACATGACAGTGA   | 863.882604516718 | 0.178093398338378  |
| CCACTATGACCC   | 863.885581312566 | 0.140166295461715  |
| ACCATGTACCC    | 863.886303486146 | 0.142464486383655  |
| ATATTAGTCTGC   | 863.887440485394 | 0.195469099571085  |
| GAATGTGTAACA   | 863.889001545729 | 0.133762277840498  |
| GTCATTGAGAGA   | 863.891687540546 | 0.176894423810485  |
| AGATGAATCTTC   | 863.894688157993 | 0.181505427053206  |
| CGTTTTGAATCA   | 863.905679717928 | 0.24220627198537   |
| GAATGAGTTACC   | 863.908411533346 | 0.272334740275362  |
| CCGGCATGACAG   | 863.91393832588  | 0.216707926747955  |
| ATTAGTAAATTA   | 863.916295657985 | 0.119632133845835  |
| CTCCTGCCTCAG   | 863.936353568173 | 0.161840933604463  |
| GGAGTAATATCC   | 863.939100030317 | 0.143349194521958  |
| ATGACTTGCAAG   | 863.94333782701  | 0.247629519730247  |
| TGACGGACACAA   | 863.946852018163 | 0.183301615518645  |
| GATTACGCACGC   | 863.957011011569 | 0.183777367213128  |
| GATTCATCATCC   | 863.966050222602 | 0.201140842577774  |
| GTACTIONGAGTAC | 863.995388174984 | 0.228557256872299  |
| ATCGTACCAAG    | 864.001659252317 | 0.165039564706415  |
| CTAGCCAATGAC   | 864.0061694184   | 0.225986518564414  |
| CGATCCATGACG   | 864.008454136905 | 0.278640449271921  |
| ATTGCGTAACTA   | 864.013030140891 | 0.184795360814539  |
| AGTGACGTTACG   | 864.015136546538 | 0.216042757193299  |
| ACTCATCTATA    | 864.015136560279 | 0.142537584916084  |
| TACGTAGTGACA   | 864.023003622989 | 0.231132152500997  |
| GGGCGCATGAC    | 864.027416363556 | 0.133909439176153  |
| ATGTCGTGAGTC   | 864.031367856306 | 0.136289453429515  |
| AGTCAGCTATAT   | 864.031901126314 | 0.19374861442106   |
| AGTACTGTGACG   | 864.031911265941 | 0.155208161071671  |
| GTCATTCGTAGA   | 864.032023550571 | 0.0846318717511635 |
| CTTTGGCGTGAC   | 864.033233010979 | 0.159513042226109  |
| TATTATTCATAA   | 864.033448792175 | 0.262319461525728  |
| ACCGTTGGTGAC   | 864.042258280449 | 0.280190330721001  |
| AACTTTGTGACG   | 864.042656590041 | 0.264013376584434  |
| CGCTACCTGTCA   | 864.051423225886 | 0.180649291328428  |
| ACCGTCATTTAG   | 864.052540583855 | 0.198630383766026  |

|              |                  |                    |
|--------------|------------------|--------------------|
| ACTTAATAATGA | 864.06157040435  | 0.252305241025175  |
| ATGACGATGGAA | 864.062905353484 | 0.176738835133104  |
| GCAGAGATGACC | 864.071326348963 | 0.17091382157523   |
| CGTAATAACTCA | 864.075962557595 | 0.134227438505458  |
| GTCATCTCCAAC | 864.09595026444  | 0.201602680820018  |
| GAGTTACATCAC | 864.100029221878 | 0.154280614939736  |
| CGTACTTGCTCA | 864.105640873519 | 0.162131477486546  |
| ATGAAGCAGTCA | 864.107698562928 | 0.191413541986931  |
| ACCTCGTACCC  | 864.114743152977 | 0.151070557139966  |
| AGATTAATGACA | 864.127794328251 | 0.124678997034142  |
| ATGTCACGTCAG | 864.133678417816 | 0.111981491887248  |
| CCTCCGTGATGA | 864.138769184414 | 0.192637094814231  |
| GATTAGTCCGAA | 864.139310678837 | 0.175770636324856  |
| AATGAGTGAATT | 864.147268545855 | 0.196480092272857  |
| TGACACCATGCA | 864.151817365413 | 0.313938440555527  |
| CGTCACTGCTCA | 864.163879535827 | 0.225533244439389  |
| TATTTTGAATCA | 864.164229920206 | 0.19146089924265   |
| CCTATTATGACC | 864.179372986459 | 0.0947552212286377 |
| CACTTTGAATCA | 864.181531982194 | 0.139097408413338  |
| ACTAATATGACC | 864.184216011967 | 0.153067113699296  |
| GTCTAAGCGTCA | 864.186922674927 | 0.197777027377284  |
| AGATGTCATTTG | 864.187996412759 | 0.204760904046132  |
| GCTCACGTGAGC | 864.193466393408 | 0.161291075897259  |
| TATAACGCGTCA | 864.205132450797 | 0.210256282661708  |
| CAGTCAACGGAC | 864.205550233712 | 0.201208246822633  |
| ACTTGTCACCAA | 864.207808483888 | 0.126414526139488  |
| CAACATCGTCAC | 864.213043982905 | 0.194686288438847  |
| ATGACTTTTAAC | 864.219751640933 | 0.115442189084752  |
| AGTGCGCGTGAC | 864.222088199065 | 0.189717101414976  |
| TAAGCCATGACA | 864.225864648381 | 0.195361437783075  |
| AACTACATGACA | 864.226117814773 | 0.201063365360638  |
| ACGTCACATCTG | 864.249845389787 | 0.192555379923303  |
| AGTCGTGGTGAC | 864.253340173549 | 0.144361440161633  |
| CAGCCAGTGACG | 864.25481322734  | 0.228630828619431  |
| AGTTTGCATGAC | 864.256624778431 | 0.136428422811053  |
| CTCTGGGTCACC | 864.261516997141 | 0.10984478669744   |
| ACGTCACTGCAA | 864.270063987171 | 0.182024022262237  |
| ACCTATTGTGAC | 864.273805709357 | 0.154282174500594  |
| AGTCAGAGAGTG | 864.277231086653 | 0.189047537435169  |
| ACTCACTCAGTG | 864.292013303223 | 0.263684099040987  |
| CAGGAGCATGAC | 864.293742467624 | 0.231893772807489  |
| CGATGACGGGGA | 864.297314215909 | 0.215870526708346  |
| GATGCTGCGTCA | 864.306092284022 | 0.175992136776549  |
| AAGAACAATCAT | 864.307791182796 | 0.20369265716234   |
| GTAAGATCTGAC | 864.312536075061 | 0.21058443565823   |
| CGTCATGGGTTA | 864.319665000298 | 0.201035585435008  |
| CATCGTGACACC | 864.324033182933 | 0.234391434360521  |
| ATTCCGAGTGAC | 864.334848432118 | 0.226602878317791  |
| GATGATAGTGAC | 864.344302400008 | 0.135825116783645  |
| ACATCGACTCAG | 864.347816822004 | 0.247294224622423  |
| GATTCATCCAAA | 864.356837175171 | 0.205816330005466  |
| ATGGTCATGTCA | 864.357530252257 | 0.192004082590733  |
| GTCACGCACTTA | 864.360126390769 | 0.153555569395841  |
| ATGAGTGAATC  | 864.365678410745 | 0.15195073157596   |

|              |                  |                   |
|--------------|------------------|-------------------|
| AGATTAGTCTGC | 864.36671143549  | 0.196442101463171 |
| GGACGGTGTAC  | 864.372817176597 | 0.17657741928197  |
| CAGTCAACGTAC | 864.377326925714 | 0.179083554466868 |
| CAACGTCACCAG | 864.390548045537 | 0.186570425171287 |
| CCTGACTCGCAC | 864.391551964033 | 0.159590478268193 |
| GGCTCACATGAC | 864.391629112151 | 0.141186476542452 |
| CTGACTCCGTAA | 864.395001959161 | 0.152827870811398 |
| AAACACTGTAC  | 864.396015204849 | 0.137371824658509 |
| ATGACATGCGCA | 864.399269600624 | 0.22472004919653  |
| GGTTATCGTCAC | 864.404519115242 | 0.194827189173401 |
| GGTGAGACATCA | 864.407308663892 | 0.195300730018824 |
| AGTCAGACGACA | 864.407617284428 | 0.109277123424169 |
| AATCAGGTGACG | 864.410067733504 | 0.168468990952068 |
| ACGTCACCCAGC | 864.415462050335 | 0.239190844341845 |
| ACCGGGTGACAA | 864.417683451404 | 0.137633984819052 |
| ACGATGACCGAG | 864.423308567336 | 0.20273366780238  |
| AGGAGACGTCAT | 864.427367258079 | 0.136676055394479 |
| GTCATGCAAGTA | 864.428211731451 | 0.163054693326808 |
| TACCATGACATA | 864.433127586313 | 0.204452970603123 |
| CTGAGTAAACAG | 864.435451188796 | 0.147600234224812 |
| GAATCAGTCGAC | 864.435905175673 | 0.204642300522328 |
| AACCCGAGTGAC | 864.438922714677 | 0.194472078456184 |
| AGAGGAGAGTCA | 864.441598158528 | 0.124694498382181 |
| AACCCGTGTGAC | 864.441986003403 | 0.120619266232821 |
| AATGACAGGATG | 864.443161073494 | 0.202692824003162 |
| ATCGGTTGACTA | 864.444286822839 | 0.217543138641058 |
| ATCGAATCATCC | 864.450836585606 | 0.19662956681272  |
| TCTTAGTACTCA | 864.460799761122 | 0.171415867535873 |
| AATAGTTGACTA | 864.485016304913 | 0.250007943152282 |
| AATGCGAGTGAC | 864.490277607957 | 0.155035325496599 |
| TCTAATGGCTCA | 864.495656897935 | 0.144394382351414 |
| AACTGGGTCATG | 864.504412329979 | 0.126607227594941 |
| ATGACCACGTAG | 864.510669938046 | 0.269156135053313 |
| ATGACCAGCAC  | 864.515050046062 | 0.185223214588427 |
| ATGAGTCCCGAC | 864.524929377427 | 0.260108935694999 |
| CCCATGACATGA | 864.534969927172 | 0.162433305029651 |
| GTCATGAGATAA | 864.535872925779 | 0.196913739679727 |
| GCTTCGGCGTCA | 864.539901047589 | 0.21736065443927  |
| ATATCGTGACAA | 864.544053618075 | 0.213589904265677 |
| CCATGACGAGAC | 864.547658719624 | 0.162111739010355 |
| GGGGAGAATGAC | 864.55240021113  | 0.151987906661281 |
| AGTATGACCTAG | 864.552758110033 | 0.172717483446463 |
| CGACGTGCAGA  | 864.558163677443 | 0.22182148612412  |
| AATGACGTCTGT | 864.564678564563 | 0.168378517729928 |
| ACGCTCGGTCAT | 864.565776741569 | 0.127385383088422 |
| ACTATTCTATC  | 864.567375294694 | 0.167383621279543 |
| ATGGGGTGACAT | 864.575668785226 | 0.170062725008324 |
| ATGACGGGGTGC | 864.57577606967  | 0.143761565135889 |
| CATGACTTGGCC | 864.583590089232 | 0.174080116847354 |
| AATTACACACAC | 864.583619070018 | 0.170924926181989 |
| GTTACTCAGGAA | 864.585065034718 | 0.165875527135841 |
| CTGGTTGTGACA | 864.591466160475 | 0.232282851675072 |
| GATGCATGACCA | 864.595183073854 | 0.197818565479255 |
| GAGCACCAGTCA | 864.601593892696 | 0.179779473801328 |

|              |                  |                    |
|--------------|------------------|--------------------|
| GGGTGACGATGA | 864.610624833561 | 0.143244565377628  |
| CACTATCACTCA | 864.613658306473 | 0.18445922786371   |
| CGGTCATACCAG | 864.617192770456 | 0.19425925623829   |
| CGGTTGTGACAG | 864.62070327749  | 0.179240534850859  |
| GTCATTGGAATA | 864.623325413458 | 0.10543614741774   |
| CATGACCACGAG | 864.634772026831 | 0.1726532726947    |
| AATCTACGTGAC | 864.635701005372 | 0.181423459867228  |
| CCGTCGAGTGAC | 864.642855677764 | 0.168976662699199  |
| GGTGACAGTAAC | 864.649647591632 | 0.149294032096142  |
| AACGGATGAATC | 864.659422324909 | 0.191245548688177  |
| CGCCAGGCATA  | 864.661647446567 | 0.0973074932777938 |
| CTTCGTGGTCAC | 864.665938991282 | 0.138939893687327  |
| ACTCATCTTCAG | 864.673313013103 | 0.216556389073413  |
| AGAATTACTCGA | 864.673873866795 | 0.201533019517696  |
| ACTCATCTTGGC | 864.675323339786 | 0.143964272402526  |
| TCGAGTAATTAA | 864.684060032014 | 0.154573908854053  |
| GAAATTTGGTCA | 864.68873487311  | 0.18792814157791   |
| TAACTTGACACA | 864.693249524088 | 0.112699724905304  |
| ACTTTGGTGACA | 864.695341276764 | 0.158463099981014  |
| ATTACGAATCTG | 864.704245577938 | 0.208270408703329  |
| AAGTACCATGAC | 864.716593244093 | 0.184758089160664  |
| GTCACTAACGGA | 864.719835012363 | 0.226032792846102  |
| GGTATGTATCAC | 864.728097031563 | 0.140689568119789  |
| CGTCACCACGTC | 864.747383468473 | 0.292014249711865  |
| CTTGCCGCATA  | 864.748985596429 | 0.170100465562826  |
| GTTAGTGACGAA | 864.75620628927  | 0.215295931183434  |
| ACGGCGTCATGC | 864.76801428164  | 0.165816137360782  |
| GATCCAGTCAGA | 864.775191976283 | 0.180271371557522  |
| GATGTTGGTGAC | 864.779181851788 | 0.201782909174317  |
| ACAACCTGTGAC | 864.785994093464 | 0.193987904738706  |
| TCGCCGTATAA  | 864.788468904553 | 0.0664702753816594 |
| ATCCCAAGTCAT | 864.790476276865 | 0.181291674634868  |
| ACTGGTGACGTC | 864.791000501745 | 0.192241800387407  |
| ATTACGTATTAG | 864.805291236398 | 0.150477701340395  |
| ATGACATTAAG  | 864.807972639487 | 0.200414843053588  |
| ATATAATTAGTC | 864.824738593819 | 0.188549964200757  |
| AACAGTCAACCG | 864.825987929138 | 0.196945448643149  |
| ACGTCACCTGAA | 864.826739170354 | 0.214465089934767  |
| GTATGGACTCAC | 864.832368511293 | 0.216939154368429  |
| CTGACGCGAATC | 864.838185392383 | 0.324705313459922  |
| GTGAAATGACAA | 864.840006593835 | 0.20569091887464   |
| ATGAAGAGTGAC | 864.841013517434 | 0.131650103896099  |
| ATTGAGTGACGA | 864.846415045292 | 0.270985341598634  |
| ATCCTTGACTCG | 864.848322173321 | 0.242209910446799  |
| AAAGTATTAATA | 864.861539897692 | 0.19046733569981   |
| TCAATAACGTCA | 864.863232290733 | 0.1998576150813    |
| CTAAGGTGACCA | 864.869980599426 | 0.151061224488177  |
| GCACCCACGTCA | 864.871105521263 | 0.148661004085096  |
| GTCACATCGATA | 864.871106098964 | 0.273860195267633  |
| AAGTCAGAGTAT | 864.878490389775 | 0.18798913024297   |
| GCGACACGTCGC | 864.88006070447  | 0.174652570504256  |
| ACTCATCTTTTA | 864.890554453497 | 0.0884602552278772 |
| ACTCATACAGTG | 864.897388163218 | 0.15530813514935   |
| AGTCAGTATTGG | 864.907655269299 | 0.169890020617309  |

|               |                  |                    |
|---------------|------------------|--------------------|
| GTCATTGTGGGA  | 864.919542576444 | 0.162385465831357  |
| ACTTCGTCGTCA  | 864.923468161926 | 0.194352198787305  |
| ATGACTTCTAAC  | 864.929490318711 | 0.155772417000552  |
| CACTCTAATGAC  | 864.940500678702 | 0.177291086594147  |
| CGTGACGCGGTA  | 864.943178164723 | 0.177013786978678  |
| ACTCATTCTGTT  | 864.94549924374  | 0.173901624072373  |
| AAACGGTGACGA  | 864.95057431535  | 0.0883932639703758 |
| CAGAGTGGTCAC  | 864.954791860898 | 0.16488339001042   |
| CTGGTCATCACA  | 864.955929204319 | 0.0823990114956996 |
| AGATTAGCAATA  | 864.956326129744 | 0.178261346640356  |
| ACGTCACAAAA   | 864.956456279977 | 0.196724732520145  |
| GACACAGTATGA  | 864.960319477754 | 0.114169708995381  |
| CGACGCGTCAGA  | 864.962831021397 | 0.163808123579166  |
| ACGTAAACTGAC  | 864.967241659886 | 0.134743327312345  |
| AGTATCGTGACA  | 864.983173259834 | 0.268185982091259  |
| GAGTAATAGGAC  | 864.985025151482 | 0.142751421519898  |
| CTAATACTGTCA  | 864.988806623583 | 0.174394819135787  |
| AGGTACCCTCAC  | 864.991014499177 | 0.178030212044439  |
| GGTCATAATCCA  | 864.99350837348  | 0.240300281704646  |
| ACTCATTGTAAT  | 865.005369133695 | 0.198929548993444  |
| ACTCATCTGTAA  | 865.008213774903 | 0.172498000439974  |
| CGTTAAAATGAC  | 865.013011179377 | 0.268740490134992  |
| GCGGTCTAGTCA  | 865.015350725952 | 0.143790528927135  |
| CACTTCCGTCA   | 865.018325680664 | 0.143929188626429  |
| CGAACTCGGTCA  | 865.023213804588 | 0.163278725024823  |
| GTCACCGTGCTA  | 865.026125800152 | 0.199916255795443  |
| GCACCGAGTGAC  | 865.027510013135 | 0.255152366793544  |
| GGCGTGAATGAC  | 865.034119462397 | 0.230491767278016  |
| TCTGTGACCGAA  | 865.038107107906 | 0.173916474823693  |
| TGAGTCGCGTAA  | 865.038684178574 | 0.194947337245307  |
| CAGACTAATCGG  | 865.044379000238 | 0.178716436951709  |
| AGCAATGACATC  | 865.046490598889 | 0.14821972773261   |
| TACAGTCAGCAA  | 865.047654805043 | 0.141047153445017  |
| GGTGTCATGTTA  | 865.053458215153 | 0.185243611911697  |
| CTCTAACGTGAC  | 865.06797836377  | 0.187163501220621  |
| CTGTCACAGCAA  | 865.078664301952 | 0.173154974033653  |
| CTGAGTAAGCGC  | 865.079782931302 | 0.219169482453336  |
| AGTCTGAGTCTA  | 865.085279167546 | 0.147243022963252  |
| CCTATGATGACC  | 865.089275950462 | 0.216228150204843  |
| ACGTCACCTGGAG | 865.090214703132 | 0.188174756858278  |
| CATACGTGACGC  | 865.096472606694 | 0.168166583419036  |
| CACTTTGTGACA  | 865.101169177695 | 0.178585285072241  |
| GTTTTACTGTCA  | 865.101912920803 | 0.257302948357608  |
| CGGTATGTGACG  | 865.102856019452 | 0.202242089795504  |
| AGGATGCATGAC  | 865.123420602844 | 0.143551992719421  |
| ACGTCATGCGCC  | 865.1269944969   | 0.116523344022161  |
| GACATTGGTGAC  | 865.132846136986 | 0.14715443019195   |
| ATTACTAAGAAA  | 865.141369677797 | 0.158641745284715  |
| GGCTTAGACTCA  | 865.141756422441 | 0.143342390345222  |
| GCGTCACCAGGA  | 865.16563045502  | 0.140102963161661  |
| CGTCACCTTGTA  | 865.169776475071 | 0.205680892549646  |
| AGTTACTCTTAG  | 865.180221151901 | 0.192499193072138  |
| AAGTGTACGTCA  | 865.197947036019 | 0.173436425371216  |
| ACGTCACATACG  | 865.204291815912 | 0.298408049939691  |

|               |                  |                   |
|---------------|------------------|-------------------|
| GACGGAGAGTCA  | 865.223264828318 | 0.205918882188634 |
| AATGTCATTACT  | 865.229221334233 | 0.138706313924859 |
| TGAACTGAATCA  | 865.241667921921 | 0.259040066946533 |
| AACTTACTGACT  | 865.242648743561 | 0.15365741265299  |
| AATGACAAGGAT  | 865.250078545561 | 0.112695334483052 |
| ACGTTGACGTAT  | 865.255854822618 | 0.140021558097845 |
| AAGAGATGACGG  | 865.25896642747  | 0.143539095958825 |
| AGTGACGTGAAC  | 865.265703368758 | 0.191087052346537 |
| CTAAAGAGTGAC  | 865.271057760865 | 0.138167800387128 |
| GTGACATGGAAC  | 865.275230665962 | 0.131737821785956 |
| AAATGTGAGCAA  | 865.277913232971 | 0.169124600129865 |
| AAGCTGTCACCG  | 865.278302309257 | 0.207604669811254 |
| CCAAATGACAAG  | 865.282640398092 | 0.137722023780694 |
| CTGACTACTCAG  | 865.284697580577 | 0.18488348717427  |
| AGTACGTGACAC  | 865.285234133888 | 0.186637619178439 |
| GACACCGACTCA  | 865.300590304202 | 0.174565141594609 |
| ATGACAGGGAAT  | 865.30730581159  | 0.123819426499475 |
| ATCCACATGACA  | 865.309750545451 | 0.197152947709286 |
| AATCTTATGAGT  | 865.315121844762 | 0.187979790251849 |
| CCTCACATGACG  | 865.321823607492 | 0.122884756544975 |
| CGTCACATAAGC  | 865.322141586084 | 0.259385155690004 |
| ACACATGTGACA  | 865.334929314245 | 0.243816871603292 |
| GCTGCGTCAGGA  | 865.337558845054 | 0.151288715535943 |
| ATACATATGTAT  | 865.339056342439 | 0.179087335336787 |
| ATGTAACATCATC | 865.344473677573 | 0.182904622120977 |
| AGTCAACTTGTA  | 865.365489665317 | 0.179778975095989 |
| AGACACCTCATA  | 865.37385517963  | 0.164218659939615 |
| AAGTGACTTGGC  | 865.374523948119 | 0.13517451871185  |
| GGAAACTTGTC   | 865.374724995199 | 0.199656908092716 |
| GAATTAGTGACA  | 865.376694292529 | 0.19689041504454  |
| GACTCCTCGTCA  | 865.384694727444 | 0.279168058046616 |
| CGTGACGAACTA  | 865.389201899542 | 0.153983396290838 |
| ACACTGACTGGT  | 865.38971312377  | 0.18168990388649  |
| CCCTCTAAGTCA  | 865.395039206824 | 0.171418742440115 |
| AGTGGTACATA   | 865.425157206146 | 0.148840981332753 |
| GATTAGGTGACA  | 865.429152596189 | 0.139751317376547 |
| ACTCACTCATTA  | 865.429761409681 | 0.108017770300012 |
| GACACATTGACA  | 865.434954110242 | 0.275445107041141 |
| GTTACAGTGACA  | 865.442549958852 | 0.227278905205777 |
| ATTACACTCTCA  | 865.450261984666 | 0.193202013278079 |
| ACTCATCGATCC  | 865.468762684994 | 0.192010567857527 |
| AGTTCTCCGTCA  | 865.468827638049 | 0.103093949409796 |
| AGTCAGACAACT  | 865.475148841939 | 0.126446854185824 |
| ACGCCACGTGAC  | 865.477408312094 | 0.284461999744307 |
| ACCTGGTCATAT  | 865.48364547202  | 0.159423757159819 |
| CTATCCATGACA  | 865.492209204747 | 0.11490421745608  |
| AACAAATTGTC   | 865.50159811956  | 0.126991067330151 |
| ACTCGCAGTGAC  | 865.503746691431 | 0.138762132747128 |
| AGTCAATACTTG  | 865.506094115658 | 0.208134940183426 |
| ATGAGGTACCCG  | 865.508493414269 | 0.2836715604093   |
| ATTATTCATATC  | 865.515219515955 | 0.191105138906055 |
| CAGACTCACTTC  | 865.52105701891  | 0.193292071665492 |
| ACGCCACGTAAC  | 865.53539976633  | 0.182267624250508 |
| CTATCCGCGTCA  | 865.535990603328 | 0.153877559295369 |



|              |                  |                   |
|--------------|------------------|-------------------|
| CTCAGATTACTC | 865.538288358912 | 0.201700965776737 |
| GTGACGTCTTTA | 865.571017976597 | 0.231990241388044 |
| TCCATCGTGTCA | 865.572672107008 | 0.15808160549267  |
| CGACCGGCATA  | 865.590069772487 | 0.135108184310157 |
| ATTCCGAGTCAA | 865.591989386271 | 0.164924874869988 |
| TAGAGGTGACCA | 865.595734508674 | 0.132143913071824 |
| AAGCTGTCACTC | 865.596961132169 | 0.140698732868829 |
| CATCTATGAATC | 865.597280547894 | 0.207171114454269 |
| CGTGGGTGACGC | 865.597702716113 | 0.164481910268275 |
| AGTGTCACGGAT | 865.599792004435 | 0.138386116702663 |
| GGTACTGTGACA | 865.612601368758 | 0.18876984044436  |
| GGGTGACAAGTA | 865.613122157682 | 0.13972630899479  |
| ATAACGTTGTCA | 865.613351501108 | 0.207312880003848 |
| GTCACGGACCAA | 865.61500404778  | 0.223629914602421 |
| AGACGCCGTGAC | 865.618813588371 | 0.169442830369568 |
| CCGTCAACGTCA | 865.620031967342 | 0.173907473454325 |
| ACTGCGTAATCG | 865.623406667955 | 0.166449690866746 |
| CCGTCATCTCTA | 865.626957120284 | 0.17816559646386  |
| ATAGTTCGTGCA | 865.627001276805 | 0.291226332995014 |
| CGTTGGTGACGA | 865.627351812343 | 0.194712845262142 |
| TGACGATGATAA | 865.628300981027 | 0.191460796321562 |
| CGCCATAATGA  | 865.629390855235 | 0.291180010566783 |
| CGTCATGAATGC | 865.638234740029 | 0.207264356869804 |
| CAGTCAGTTAA  | 865.642028714666 | 0.267448268476636 |
| ACTCATAACAAG | 865.64914548844  | 0.176750908691767 |
| AAGGGTGACGAT | 865.666307907602 | 0.142122842672349 |
| ACGCCTTGTGAT | 865.66684344094  | 0.150936220016785 |
| ACTACCAATGAC | 865.674364058257 | 0.160781656468368 |
| AGAATATCGTCA | 865.677123457527 | 0.161180051739759 |
| ACACCTGTGACG | 865.679309697593 | 0.15550249521306  |
| GTAGCATGACGA | 865.679477621888 | 0.174878669221901 |
| ACTCGGACTCA  | 865.680003748305 | 0.175958976899474 |
| CATCTATGGTCA | 865.680799109203 | 0.184776843307565 |
| GTACGTCGTGAC | 865.69288564959  | 0.156585187641481 |
| ATGACGACGAGC | 865.698675196602 | 0.148695477264209 |
| GGACAGGAGTCA | 865.703785071827 | 0.243246836405813 |
| TAGGGCGACTCA | 865.706322024556 | 0.22170949260152  |
| ATTATTGTGACA | 865.708482322853 | 0.208211718915468 |
| GGTGACATCGAC | 865.72350428091  | 0.173178333827852 |
| AGACAATGAGTA | 865.726945491012 | 0.108068259413108 |
| AGTCGTTGACGC | 865.7309881833   | 0.148273552205117 |
| CTATGCAGTCAG | 865.767632364845 | 0.150086418515137 |
| GACTCTTGACAA | 865.769628335872 | 0.145104520761308 |
| CGGTGAGCAAGC | 865.772440262819 | 0.219536403669053 |
| ACCCCATAGTCA | 865.774403364138 | 0.230427723437303 |
| ATGAGTAGGCTA | 865.776703707555 | 0.153456752314882 |
| ACAACGTATGT  | 865.776923587006 | 0.151357944534948 |
| CTGTGGTGACCA | 865.792273893675 | 0.176488825938182 |
| AATAGGTCACCG | 865.80379813461  | 0.14902323390198  |
| ACATGCGTGACG | 865.808806254843 | 0.158735009100249 |
| CTGTCACCTAAG | 865.810584789034 | 0.181395360910982 |
| GTCACCAGGAGA | 865.820244342693 | 0.223714463745203 |
| ACAGTGTACCGA | 865.827772590814 | 0.149002842037188 |
| TAACTCCAGTCA | 865.829020359691 | 0.172609931057333 |

|              |                  |                    |
|--------------|------------------|--------------------|
| GGCAATCATGAC | 865.840823952428 | 0.204537107631762  |
| CAGTGCATGAC  | 865.84219541214  | 0.145227834376499  |
| CAGCCTTGTGAC | 865.852920057464 | 0.110926006808987  |
| AAAATCAGTACA | 865.864289651733 | 0.109130321119192  |
| AAGAATTAGTCC | 865.866156689474 | 0.252607579465696  |
| TCATATGTCTCA | 865.869098841454 | 0.183674904706253  |
| GTCATGAGGAAC | 865.875643600721 | 0.14382163697604   |
| CGTGACTAGCAA | 865.876527438604 | 0.150034963570121  |
| CACTCACTGTCA | 865.88725535706  | 0.109020477032345  |
| AACACAGTCAAT | 865.893979053824 | 0.210439108863976  |
| AGATGGGTGACA | 865.897938997394 | 0.146277568800763  |
| TAAGGTGAGCAA | 865.900707554302 | 0.188275912505913  |
| ATGCGTATGACC | 865.908056286252 | 0.140981749535448  |
| CAGTCAGTTGGC | 865.916034805567 | 0.17343703574001   |
| AGTCACGAGCTC | 865.929107099966 | 0.198760851719169  |
| ACTAGGTGACAA | 865.929572817831 | 0.163720380105509  |
| AATTCATGACCA | 865.933986524118 | 0.24798412682179   |
| GAAGATATGTCA | 865.942738490651 | 0.267883479013228  |
| CCTCCTTACTCA | 865.944338562937 | 0.108405572290508  |
| CCGTTGACTGAG | 865.946882166041 | 0.15282049580726   |
| ACTCACAAAGAA | 865.953022049036 | 0.199773373881632  |
| ACGGCAGTGTCA | 865.95322505175  | 0.249722669045221  |
| CTGTCATTTCAA | 865.957713054901 | 0.108072903008981  |
| ATGACCGTGAAC | 865.96343413053  | 0.149504858612268  |
| CGATGAGACACC | 865.969398756351 | 0.219229406088819  |
| CCAGGTCATATA | 865.971125101513 | 0.21872207527497   |
| AGTAGTGACATA | 865.978064472692 | 0.17627093079024   |
| CACATGCGTGAC | 865.984362488415 | 0.298733549632106  |
| AGTATGTTGACT | 865.984437588198 | 0.155878515886107  |
| AGTCACGCTGGG | 865.997756270994 | 0.151297473225959  |
| GTGACAGACCGA | 866.008098099488 | 0.170279747279042  |
| AATGGAGGTGAC | 866.009314824508 | 0.154640929906507  |
| ACATATGTCAGA | 866.015604848666 | 0.191362294645129  |
| AATACCCATGAC | 866.015695568247 | 0.190714504870975  |
| CACGAGTCAAAA | 866.022060331655 | 0.0987558741821069 |
| CTATAGTGACAA | 866.022903642001 | 0.113300973409763  |
| CTATTGTGACCA | 866.027828940061 | 0.138335322728736  |
| CGTGACATGGAC | 866.045233356509 | 0.212974010867714  |
| GTCAGACCTTTA | 866.059464230987 | 0.13183124275659   |
| ATACTACTAATA | 866.063426989097 | 0.2393408511867    |
| AAATGAGGTGAT | 866.070696760932 | 0.142590612842096  |
| ATGACGACTCCC | 866.071294675288 | 0.176824051847428  |
| TGTCACGAGCAA | 866.074158257313 | 0.165118204472628  |
| AAATTTATGAGT | 866.075508949506 | 0.155100839953182  |
| GCAAGTGCACGC | 866.077223738848 | 0.156356533506228  |
| AAGCTGTACCTT | 866.083726369956 | 0.189953614235274  |
| GACTGTGAGTAC | 866.08825745152  | 0.131525431580963  |
| AGAATAATGAC  | 866.08830595434  | 0.180018872413365  |
| AACAGGTGACAC | 866.092144208496 | 0.184202972169089  |
| GTCACGATGAAA | 866.093226888265 | 0.140213359909435  |
| GACTCATGGGCA | 866.106731018459 | 0.231123080223377  |
| CCAGCAGGTGAC | 866.113592892239 | 0.267233632009779  |
| ACCATATATGAC | 866.121686222568 | 0.157818683192397  |
| ACTGATTAATCA | 866.124353628672 | 0.138891555179115  |

|              |                  |                    |
|--------------|------------------|--------------------|
| GTCATCCCTGCA | 866.128875870504 | 0.193006165371082  |
| AGTCAGAGGCTG | 866.130395391564 | 0.128043529824189  |
| ATGACCAGATCC | 866.133673786962 | 0.133650627796604  |
| CTAGTCTGAGTC | 866.135668133964 | 0.194625374532415  |
| AAATGTCATCTC | 866.142112459727 | 0.156225228770949  |
| CGTCATTGCGGC | 866.146359416402 | 0.185181218685757  |
| CGTCATCTACCC | 866.154468963712 | 0.165670137175034  |
| GACCCAGTGACA | 866.162354874582 | 0.231452366295773  |
| GACCACATGACA | 866.163949977992 | 0.132730333186438  |
| ACAGTGACGCGG | 866.165973859582 | 0.194106744968951  |
| CGAGACAATGAC | 866.167848756277 | 0.208035069941008  |
| AGAGTGAGCCAC | 866.174961756851 | 0.117255995288942  |
| TGGAATGTGACA | 866.192715642646 | 0.139200292150972  |
| TGGACGGTGACA | 866.200868561974 | 0.177573181584464  |
| CTGACTCGCCCC | 866.206778376559 | 0.113948760438805  |
| ACTCATTGCAAC | 866.207887949452 | 0.217995421297515  |
| GTCACAGCCATA | 866.213425478435 | 0.164129702537434  |
| AGTGATTAGTAC | 866.218037850679 | 0.185856855181309  |
| CTGCCAAGTCAC | 866.218048882561 | 0.200119596542529  |
| GTCACATGTAGA | 866.226742982482 | 0.214771445315786  |
| AATGAGCCAGAA | 866.22708953632  | 0.17314098864512   |
| TCGCATCTGTCA | 866.24439720223  | 0.134933807166885  |
| ACCTACTCATTA | 866.24545151788  | 0.135647678732026  |
| ACTCATAATCTA | 866.250030264096 | 0.248432069589612  |
| AGATAGGTCACC | 866.250648722287 | 0.185088313356564  |
| ATCCGACGTCAT | 866.265052477833 | 0.189365081465522  |
| ACCCTGATGAGT | 866.270588545498 | 0.15921115750556   |
| AGTATATCGTCA | 866.277062756621 | 0.199973291664012  |
| AATGACATCGGT | 866.277785288589 | 0.18406979580986   |
| ACTCATCCAGTC | 866.282460066451 | 0.132863145739717  |
| ACAAGTCTATGA | 866.285548068997 | 0.191718103134807  |
| TACGCCGACTCA | 866.296459999339 | 0.189150677131165  |
| GAATATGATACA | 866.313542263741 | 0.24449742279523   |
| ACGTAATCTAAG | 866.330586220585 | 0.158766191152801  |
| AGAGTCTTACGG | 866.332896361671 | 0.154159843077337  |
| GGATGTAATGAC | 866.333274927218 | 0.232332017772872  |
| GATGATGTGTTA | 866.336169162531 | 0.132314898961117  |
| TGGGAGATGACA | 866.33778362783  | 0.17354486743715   |
| CTGAGTCTATTC | 866.340964280062 | 0.0987191072264079 |
| ATGCAGTCAGCC | 866.344758224915 | 0.158847239032634  |
| ACTATTAGTACT | 866.345209411059 | 0.100531313715844  |
| CTTGCGGTCATA | 866.349245582526 | 0.0884341425165797 |
| TGAAGGGTGACA | 866.35471401985  | 0.174009493684936  |
| CTCATGCTGTCA | 866.356101052575 | 0.177840523016528  |
| TCTTCCGACTCA | 866.356999107435 | 0.203179137045071  |
| AAAAGTTTGTC  | 866.361515748638 | 0.11161677613065   |
| CGACGGCGTCAC | 866.363494591279 | 0.193068333660185  |
| AGTGACACGACG | 866.363924404008 | 0.171692314001363  |
| GAATGTGACGCC | 866.364937092495 | 0.200339998437858  |
| TCAGTAATCGGA | 866.37116490617  | 0.147655790932347  |
| ATAGCGCGTCAC | 866.372815586419 | 0.182725605864879  |
| CATAGTCAGTGA | 866.376199217669 | 0.147469614294856  |
| GTCATTTCAAAC | 866.377366586702 | 0.219610715019413  |
| AGTATTAGTCCG | 866.377554481206 | 0.158579894525078  |

|                 |                  |                    |
|-----------------|------------------|--------------------|
| AGCGAGCGTCAT    | 866.382648707201 | 0.0946186389568413 |
| AGTGACGCTGAA    | 866.383593549713 | 0.163804721635219  |
| GTAGCAAATGAC    | 866.396847964725 | 0.0832719353919808 |
| GATATGTCAAAC    | 866.40249004569  | 0.173634109635907  |
| AGTGGCTGTCAT    | 866.404755349451 | 0.283699159508307  |
| AGTCAGTCGTAT    | 866.418820479992 | 0.13277524268296   |
| TGACTGTCACCA    | 866.421131435627 | 0.243743214822293  |
| AGAGTAGGTGAC    | 866.424407112558 | 0.14159071423967   |
| ATTACACAATTA    | 866.424802377934 | 0.255671721399861  |
| CTAAAACATGAC    | 866.427768420437 | 0.179751324901382  |
| AGATGCTAGTCA    | 866.43161181594  | 0.316274978635665  |
| CGTGAGCAAATA    | 866.434069435613 | 0.155190509319907  |
| AATTTTCGTAGT    | 866.436860420704 | 0.16944561840368   |
| AATTACGTATTC    | 866.438655595629 | 0.144464212510927  |
| CCCTCCTGACTC    | 866.447378834283 | 0.148670613995646  |
| AGTCAGCCATTA    | 866.458384816562 | 0.212479270421079  |
| GGAAGATTCATA    | 866.458947461817 | 0.158027034009371  |
| GTTGAATACTCA    | 866.468565897174 | 0.15595338346829   |
| GTAACCCGTGAC    | 866.470328586389 | 0.163962740135569  |
| TAATATGTCTCA    | 866.472624141407 | 0.178335749670829  |
| GCACATATGACC    | 866.477573186685 | 0.20089033993468   |
| CGATCTCGTCAC    | 866.483839998841 | 0.13862445639415   |
| CATGACGTTATA    | 866.485778381214 | 0.170114239831887  |
| GTTTATGTGACA    | 866.487213248512 | 0.202647504809606  |
| GCGTCACTACGA    | 866.488618497596 | 0.154677733113864  |
| GTATGATTACAA    | 866.494590375933 | 0.203514525195075  |
| TAGTCCATGACA    | 866.4966407149   | 0.14487006190297   |
| ATGACAACCAAG    | 866.516299240772 | 0.247025767423945  |
| TCCGTTGAGTAA    | 866.520254629808 | 0.139231241462973  |
| ATGAATAATAAT    | 866.553990748202 | 0.259597775208311  |
| CGACCTGAGTAA    | 866.555435097938 | 0.159622243953221  |
| CGTCATTTCTC     | 866.559798544054 | 0.138592235937461  |
| ACGTCACCTGCC    | 866.575670572038 | 0.172783115957123  |
| ATCTAGGTGACG    | 866.589553054299 | 0.100810184014433  |
| CTCGGTGACATC    | 866.59026679432  | 0.217999909356213  |
| ACTCATCCAGGA    | 866.592029177519 | 0.0960102939200895 |
| TCTGACATATCA    | 866.598304023003 | 0.204444866213563  |
| AGTAGATGTCAT    | 866.600196807561 | 0.162522244902198  |
| ACTCATCATTCA    | 866.602553160084 | 0.19349837786848   |
| AAGGTTTGTGAC    | 866.602571309121 | 0.23090093400395   |
| TGACAGGTTGAA    | 866.604729974915 | 0.214895683817838  |
| ACTCATCATTCT    | 866.61622744746  | 0.160916258662765  |
| AATAAATGAGT     | 866.624326696367 | 0.160924840356058  |
| AACGGCCATGAC    | 866.629090292207 | 0.197029353063386  |
| CGCATGACCGAA    | 866.640346540206 | 0.186787969750276  |
| GTACTIONCACCATA | 866.640867868422 | 0.156585831417319  |
| GTCATGCCACAA    | 866.648348815704 | 0.17307986775767   |
| ACTCATGACCAT    | 866.651523426049 | 0.166999908548146  |
| AGTCAGACACTC    | 866.658860785729 | 0.17881048776733   |
| CCATGTGACGTC    | 866.662245093077 | 0.132541621818316  |
| ATTACACACCGC    | 866.669204036502 | 0.201839810954349  |
| CGGACCCATGAC    | 866.671531872742 | 0.171442671510699  |
| AGTCACGGCGGA    | 866.674214785003 | 0.134603396892255  |
| CTAATGGACTCA    | 866.67944953599  | 0.189205076310284  |

|               |                  |                    |
|---------------|------------------|--------------------|
| CGTCATTATAGC  | 866.681879815445 | 0.239189844234675  |
| GCTCAGTGTGAC  | 866.689388597421 | 0.157834291819303  |
| ATTTCCGGTGTCA | 866.699957781069 | 0.165535090806546  |
| AATAATGTCACT  | 866.702261590542 | 0.159179118556055  |
| AACAAGTAGTCA  | 866.704670919294 | 0.182488879867303  |
| ATCTAATGACAA  | 866.712107491908 | 0.149029089240427  |
| TAATCTTTGTCA  | 866.712259081824 | 0.218502998804917  |
| CACGTCAGATAG  | 866.714601489531 | 0.204549013686278  |
| ACCGCGTCACTG  | 866.736972929561 | 0.19921984461022   |
| GATTCACTAAGA  | 866.756951328153 | 0.186124902259539  |
| ACTATACCGTCA  | 866.758264310538 | 0.183754979046066  |
| GCGCTTGGTGAC  | 866.759034573133 | 0.189041979577836  |
| CTGGGTCACCAA  | 866.765027624065 | 0.213728315555446  |
| CGATTACGCAAG  | 866.778760237677 | 0.257333648498216  |
| GCTTTGGTGACA  | 866.779543828205 | 0.252812636370526  |
| GATCGGGTCATA  | 866.785076660448 | 0.134867615593228  |
| GAGTAATCCGTA  | 866.79015344241  | 0.245824094365651  |
| GGAGAAATGACA  | 866.801830698255 | 0.132718311069775  |
| TATGACCGGACA  | 866.807780223924 | 0.213078162085391  |
| AGAACCATGACG  | 866.81574318879  | 0.14407468805001   |
| CTGACCCGTAC   | 866.816122034086 | 0.151881573400359  |
| CGTCGTATGACC  | 866.816320136998 | 0.211089576100329  |
| CTTGCTCACTCA  | 866.821078348886 | 0.160624975675947  |
| TCATCATACTCA  | 866.829781166115 | 0.136221191854532  |
| ACTTATGACCTA  | 866.830832583112 | 0.11960164607997   |
| CACCATGACATA  | 866.836037908199 | 0.0993375719972294 |
| CTCAACTTGTC   | 866.841714782512 | 0.165120993891678  |
| GTATTTTCATGAC | 866.842744932012 | 0.129181076757501  |
| AGAGGGGTCATA  | 866.855769922783 | 0.134051713400929  |
| TGTGGGAGTCAA  | 866.855968941462 | 0.147964306777828  |
| AATCTTGCTCAC  | 866.858851953206 | 0.166900000245987  |
| AAGAGATGACCA  | 866.861289947826 | 0.132689307408676  |
| GACTCACGTCAA  | 866.874545800284 | 0.148136809925571  |
| AATAGCATGACA  | 866.879608068862 | 0.195753866615659  |
| CGGCGTGGTCA   | 866.900231977012 | 0.165494957741543  |
| CCAGACTAGTCA  | 866.906592147642 | 0.243264470801298  |
| ATTGTGGTGTCA  | 866.909013651021 | 0.24523265002172   |
| CACCGCTGACTG  | 866.910489278649 | 0.176695132151074  |
| AGCACTGAGTAA  | 866.910573373057 | 0.151719980382697  |
| CAGCAGATGACG  | 866.91097985454  | 0.234732307702813  |
| AGATGTAATCAT  | 866.915886578772 | 0.163293419671039  |
| GATATTTTCGTCA | 866.91701828432  | 0.131180226539163  |
| ACTGACACAGCA  | 866.918902228317 | 0.158937509298593  |
| TAATCAGTGACA  | 866.920422952628 | 0.15501453648145   |
| AGTCAGAGAGCA  | 866.923744823588 | 0.163261702236659  |
| ATTGACTAGGTC  | 866.923779167915 | 0.287365133357157  |
| GAGGAGTAATCC  | 866.924142607694 | 0.148352670328832  |
| TGACATGGACAA  | 866.936037851024 | 0.147917750150606  |
| AGTGACGCCGAA  | 866.939985356035 | 0.191931423940574  |
| GAGTCAAACCAC  | 866.940627788069 | 0.17556031560993   |
| ATAAAGTGACAC  | 866.948410976001 | 0.206881269487559  |
| ACGGAGGGTGAC  | 866.955162107175 | 0.13235010146233   |
| GAGTCCTACTCA  | 866.956991774333 | 0.195536932660113  |
| AGTTACTCGTCA  | 866.959116518068 | 0.103234354919886  |

|               |                  |                    |
|---------------|------------------|--------------------|
| GCTTCGCATGAC  | 866.959988412701 | 0.168764426187533  |
| TCTAAAGCGTCA  | 866.963165244046 | 0.161484699095013  |
| AGACTCCGTAC   | 866.967611665227 | 0.176940406534942  |
| CCCCTGCAGTCA  | 866.97293640182  | 0.258037856749881  |
| AGTCGAGTAATC  | 866.978009391804 | 0.199658396373373  |
| TCTGACTGCAGA  | 866.983470818606 | 0.171071759747699  |
| ACATTAGTGTCA  | 866.983905738708 | 0.211327489614239  |
| AATGCGGTGACG  | 866.992933579746 | 0.153231452891998  |
| CGTCATGGCACA  | 866.997263588177 | 0.246756503664271  |
| CACCGTGTACC   | 866.998567726546 | 0.132592330061889  |
| ACGTGACTTGAT  | 867.004414336812 | 0.211076625961545  |
| CACGTCAATGCG  | 867.009567297913 | 0.187464373997814  |
| CATGCGAGTCA   | 867.010423875501 | 0.27548182142515   |
| TGATTTGTGACA  | 867.017405156879 | 0.0602452030144617 |
| CATATGACCTGG  | 867.024512914707 | 0.154935564713791  |
| CACTGATGACCC  | 867.033659774366 | 0.163629404698973  |
| ACGAAGTTAGTC  | 867.034897275825 | 0.146879710298689  |
| GGGTGACATTAC  | 867.041749640778 | 0.158308988702171  |
| TAACTCGTGACA  | 867.042959263933 | 0.24158585572026   |
| TGTCATGTA AAA | 867.04905559225  | 0.195374747223473  |
| AGCCGCGGTGAC  | 867.067487763629 | 0.197601892229321  |
| GAAGCTGTGACA  | 867.068659040459 | 0.140510080467388  |
| GCCTAACATGAC  | 867.078860337675 | 0.180461910860569  |
| ACTAATTCGTAG  | 867.084770957335 | 0.174617705760499  |
| CGCGTCACGAAC  | 867.095532025455 | 0.248848030260924  |
| CTGACTCCGCAG  | 867.096969532561 | 0.23579577389468   |
| AAGCTGGGTGAC  | 867.112263271476 | 0.205990306520009  |
| AATCCCATGACG  | 867.114932914911 | 0.165244897511497  |
| GTCACTGCAAAA  | 867.124059260029 | 0.147924365509024  |
| AGAAGCCGTCAT  | 867.126970949132 | 0.177798584487112  |
| AATCCTGTCAAT  | 867.127346990555 | 0.141651409048153  |
| GTCACAGCGGAA  | 867.128091796835 | 0.263498205365206  |
| CTAGGGTGACGA  | 867.128246629753 | 0.112526686146994  |
| ACGTCACCGAGC  | 867.133799837652 | 0.142392519982527  |
| ATCATCGTGTC   | 867.133927786429 | 0.132554893722937  |
| AGATGTGTAACC  | 867.13961275083  | 0.128135301131592  |
| CGTGGGAGTCAA  | 867.140580920623 | 0.129802132706998  |
| AATGAGCCCTAAC | 867.163008197055 | 0.210276147761469  |
| GTCACAGTAA    | 867.171079995958 | 0.223488362952873  |
| CGTCGGTGTAC   | 867.172540148978 | 0.161405221546097  |
| ACAAAAGTCATA  | 867.181305614355 | 0.15128717616332   |
| CAATGAGTAGTA  | 867.190383081511 | 0.187871100557308  |
| TACTAGTACTCA  | 867.192468685291 | 0.162664272281999  |
| CATTAACGTGAC  | 867.197321254154 | 0.152921741407015  |
| GGTCGTAATGAC  | 867.198707669521 | 0.188362710381654  |
| CGACTCTAGTCA  | 867.198753791264 | 0.212597394500572  |
| ACTCATAGATCC  | 867.199851821254 | 0.154939696207569  |
| AGTTGTCACCTA  | 867.216473658    | 0.17820423502998   |
| AGCATGTCGTCA  | 867.220893163771 | 0.204053479090317  |
| GTCATATGTCTA  | 867.225736212741 | 0.181111109860968  |
| CTAGCACGTAC   | 867.238305601331 | 0.118598353206018  |
| ACCCATAATGAC  | 867.2400143441   | 0.176271042170161  |
| GGACCGAGTGAC  | 867.240781042644 | 0.146057252187482  |
| GAGAATTACACA  | 867.268764148375 | 0.145022422348896  |

|              |                  |                   |
|--------------|------------------|-------------------|
| CGTCACATAACA | 867.26990626539  | 0.166928009667451 |
| CACTTTAGTGAC | 867.27123387094  | 0.250736595486483 |
| ATGACCATCTAA | 867.280412035703 | 0.132837705329302 |
| ACAGAACTGACT | 867.296007875719 | 0.211328052459907 |
| GTCACCTAACTA | 867.3046532691   | 0.133006979717677 |
| TATCGTCACTAA | 867.305725555851 | 0.192691813617396 |
| AGGATGAATAAT | 867.31835839253  | 0.172916228587516 |
| ACTCATCGGACA | 867.319885889776 | 0.205905817707524 |
| CACACACATGAC | 867.335625415226 | 0.259900374451835 |
| ATGACAGCCTAG | 867.339770192911 | 0.147129927494021 |
| CTTACCTGTGAC | 867.342983629402 | 0.215082985955827 |
| TAGTAGGTGTCA | 867.362397411039 | 0.224134290926286 |
| TGACATGATGCA | 867.383016063948 | 0.164787342540705 |
| TACAGTCAGGTA | 867.388625649312 | 0.225403957206866 |
| GTAGACGCTGAC | 867.392094982431 | 0.196556827104387 |
| AAGGCTACGTCA | 867.394861257838 | 0.119577537327252 |
| GTACGAGTAATA | 867.404404478521 | 0.143301671199575 |
| GCTGACTGGACA | 867.404450191657 | 0.139261172254187 |
| CGTCACCGATAC | 867.405292570191 | 0.11223081929797  |
| ATAGTTAAGTCA | 867.413448392429 | 0.196578832514723 |
| ACGATCTTGTC  | 867.4212271696   | 0.145105015236574 |
| CTGAGCTAGTCA | 867.424523551021 | 0.221460522206755 |
| GTGATACATCAA | 867.431607622191 | 0.180201920524116 |
| ACTCATCGGGCA | 867.432078555153 | 0.15335652999521  |
| GAATCATTCTGA | 867.434894209819 | 0.103124221036598 |
| CATGGGCGTGAC | 867.440489877844 | 0.164005705290748 |
| TGTCATTGCCAA | 867.449518219138 | 0.264058463557894 |
| AGTAATTGACTA | 867.453532776177 | 0.157142293659761 |
| ACTCATCACTAT | 867.464450013102 | 0.19345319523915  |
| CTCTCTGGTCA  | 867.465190752514 | 0.214618230987614 |
| AGGAGGTGTGAC | 867.479690464295 | 0.18353689718178  |
| ATTCTGAATCA  | 867.485211404417 | 0.188223596215029 |
| AGTCAGAAGAGA | 867.486185330375 | 0.144837847009414 |
| AGGTGGAGTCAA | 867.500951161291 | 0.139660617584818 |
| GTCACGTCCGAC | 867.516725963534 | 0.196466532274747 |
| ACGAAGTTGACT | 867.519233229444 | 0.13989176844803  |
| ACACGTGAGTCG | 867.529640545609 | 0.183707789373271 |
| CAGTGACCAAGC | 867.533835436581 | 0.130734800134874 |
| GAATGAGTGAAC | 867.535960828973 | 0.172274053145014 |
| ATTCATGAGCAA | 867.539998092135 | 0.169621280979429 |
| AAGAGTACGTCA | 867.543334774917 | 0.225269621998137 |
| CAGTCAGAAACA | 867.553681737895 | 0.177674547164255 |
| GATGACAGCTGA | 867.554132587772 | 0.226599120489453 |
| ACGTCATGCCCG | 867.556861378012 | 0.138796561493174 |
| CGTCACCGACTC | 867.561539120917 | 0.297943495481522 |
| AATTGACTGTGT | 867.573635525563 | 0.183690060076461 |
| TGAGTGATAACA | 867.575097464984 | 0.190328420341396 |
| ACTCATTTCGCA | 867.579008678162 | 0.14283245473507  |
| AGAACCTCGTCA | 867.583061644945 | 0.161303121707732 |
| TGCGTAATCCCA | 867.588807411496 | 0.196551596027648 |
| AGTGAATCGTCA | 867.589485413466 | 0.262065346217711 |
| CTACCTAATGAC | 867.594787103175 | 0.20970004144378  |
| GGGCCGACTCAC | 867.596458598851 | 0.199657233342824 |
| GTAACCATGTCA | 867.604867957943 | 0.231885995813592 |

|              |                  |                    |
|--------------|------------------|--------------------|
| TCGTCTCCGTCA | 867.607013797822 | 0.208560457460484  |
| CCGTAGCTGTCA | 867.628376971768 | 0.26180117151285   |
| CGGATGCCGTCA | 867.636815376965 | 0.174011000381923  |
| GGGTCATTACAA | 867.641062178714 | 0.191535055198934  |
| GGTGAAGTCACA | 867.642101044661 | 0.134068386108599  |
| GCGCGTCACTTA | 867.65018968152  | 0.15281854266368   |
| ACGGCCCATGAC | 867.650922583832 | 0.182661260232359  |
| ATGTCACGCAAC | 867.654874957723 | 0.142447931087825  |
| TCTGTCACTGAA | 867.656899280337 | 0.227981552855697  |
| ACGATGTCACTC | 867.660843949576 | 0.132760542948839  |
| ATCGTCATGATG | 867.661927778629 | 0.183738559179128  |
| AGTACTATTACG | 867.662547324737 | 0.181523152196242  |
| ACTGATTAGTCG | 867.667527798388 | 0.138118123489974  |
| AAGTGAGTCTGC | 867.680930439168 | 0.192246639578478  |
| GGTCATGAGCCA | 867.688392161308 | 0.23389079609621   |
| ATTGACGTGTTA | 867.692682525633 | 0.181069919919002  |
| GTCACGTTGGCA | 867.692799827635 | 0.126890310968328  |
| GTCACCAATACA | 867.703180106013 | 0.194493354629522  |
| ACTATGAGTGTC | 867.704415634024 | 0.135403607840618  |
| GAGTAATCCGGA | 867.708810948706 | 0.177766151633697  |
| CTCGTTGAATCA | 867.726792116937 | 0.253696031030132  |
| GATTCATACATA | 867.730639792615 | 0.198643167060092  |
| GTATCGTGTGAC | 867.733341050981 | 0.115575624546042  |
| ATGTGTAACATG | 867.740472477502 | 0.134261912961441  |
| TGTGACATTTAA | 867.740512303395 | 0.212414190319134  |
| GTGACAAGTAAA | 867.745286609962 | 0.134265751602351  |
| CGTGACATGAC  | 867.749761074592 | 0.264962897485376  |
| TCATGACATGCA | 867.753217783585 | 0.195339974038343  |
| TGACTAGGATAA | 867.754569541446 | 0.167463440239379  |
| ATCTCGTGACAC | 867.756572588468 | 0.235845387519074  |
| CTGGGTCACCAC | 867.758092394253 | 0.182482079331094  |
| CACTGAGTATGA | 867.764443645052 | 0.0866090239805981 |
| TGACTGGGAGCA | 867.765727270563 | 0.161777917518433  |
| CATGATGCAATC | 867.76868521915  | 0.130533281736775  |
| GCTCGACTCAGA | 867.775627660815 | 0.156059390748372  |
| GGTGACCGTTTA | 867.778819539995 | 0.203674792827226  |
| ACTCATACAGGG | 867.780793112465 | 0.16626444346997   |
| CCTTACTGACTA | 867.780945014311 | 0.192825066379544  |
| AGCCACGTAAC  | 867.78292402174  | 0.149708188762057  |
| TCGAACATGTCA | 867.783061626792 | 0.115089757276753  |
| CTTTTACATGAC | 867.785364581502 | 0.173397614546496  |
| TGACCAAGCCAA | 867.789068676885 | 0.140098818299698  |
| CTATGACCTCAC | 867.796918717277 | 0.139984502839523  |
| ACTGATTACGTG | 867.819530696823 | 0.135829512478869  |
| ATGACGCTCTCC | 867.824456950325 | 0.140215197413737  |
| AGTAATGAGCCA | 867.828439620316 | 0.15966967009098   |
| AGACCTGTCACC | 867.830913999903 | 0.1498458510134    |
| CGTCATTGCCAA | 867.841787320001 | 0.146248458945813  |
| GCTGAATGTGAC | 867.845749266631 | 0.182715741942796  |
| AGTATTGTCATG | 867.853673200917 | 0.179402668854082  |
| CGTATGTGACCA | 867.858206617103 | 0.232465381927795  |
| AAGTCCGGTGAC | 867.86053717802  | 0.146074008376029  |
| AGGCGGGATGAC | 867.874163320937 | 0.143334949873998  |
| ACCAGTGGTCAT | 867.877898369646 | 0.162556579832709  |



|              |                  |                    |
|--------------|------------------|--------------------|
| GACAATCGACTC | 867.878732925105 | 0.179242664555679  |
| GGCTCCGACTCA | 867.882921759547 | 0.180943989936766  |
| ACTTGCTGACTA | 867.895692073527 | 0.190004173414815  |
| AACGGCAGTCAC | 867.904926079854 | 0.142267809723879  |
| ACTCATATTGAC | 867.90839563605  | 0.169495867210757  |
| ACCAGTCAACAG | 867.912401525591 | 0.127213194226481  |
| GAATACTCGTCA | 867.913230331128 | 0.174525496247535  |
| ATGAGTATGAAG | 867.914936173641 | 0.100640589018817  |
| GTGGGAGAGTCA | 867.918815725531 | 0.132076668152326  |
| CACCGACTAATC | 867.920330254869 | 0.158345320961545  |
| AATTACACACAG | 867.925173781505 | 0.163326351202964  |
| CGTAACCGTGAC | 867.92965490582  | 0.0984615701191981 |
| CGATCAGTCTTA | 867.946785989337 | 0.144549513188072  |
| ACTCATAAAAGT | 867.964230806528 | 0.136339954144088  |
| GACCTGTCACTC | 867.966631545132 | 0.143950574143892  |
| GTCAGAATCATA | 867.972680160765 | 0.203945751249882  |
| AGGAGTAATCCA | 867.976157720631 | 0.196771637909883  |
| TAGGTGGTGACA | 867.97859787493  | 0.145492980328545  |
| ACGGGTGGTGAC | 867.992868558955 | 0.194164017924133  |
| TGGTAAGACTAA | 867.994863102532 | 0.16400404166457   |
| ACGTCAGTGACG | 867.995059166311 | 0.220876929250866  |
| CGTTGCAGTCAG | 868.002527186662 | 0.133861912131704  |
| GATGTCTCACAC | 868.008072390475 | 0.267367410228951  |
| ATCAGTGACACG | 868.01350187847  | 0.145133280878065  |
| CCTCAAATGAC  | 868.016071342943 | 0.149076563965517  |
| AGTGCGTAATCC | 868.021880698191 | 0.195811050363074  |
| GACTCACGTGCA | 868.022047366762 | 0.176413159090475  |
| AGTCAGCACGAT | 868.037607627967 | 0.141492540493916  |
| AACCACTGTCAT | 868.037679800257 | 0.187180970716715  |
| GTCATCCAAAC  | 868.042752168435 | 0.140550157984106  |
| TCTGTGTTGTCA | 868.053897139945 | 0.251524985175043  |
| AATGGGACTCAC | 868.055136999712 | 0.195419720731468  |
| GGAGCCGAGTCA | 868.069136905802 | 0.12983214372235   |
| ATCGTCTGACAC | 868.070502319955 | 0.105711251370637  |
| GGTGAGCAAGCA | 868.074336065161 | 0.189460573348157  |
| TAGTCAACGTGA | 868.079464386853 | 0.12319061124416   |
| CGTCACAGGTAG | 868.085604530278 | 0.0927313289271255 |
| TAGACATCGTCA | 868.087936099138 | 0.203578573776599  |
| AGCGTCATGTAG | 868.092239298938 | 0.139026770760671  |
| GACGTGGTCTCA | 868.097855691067 | 0.229948020341657  |
| GTCATGCGGGAC | 868.103829806826 | 0.154843427498373  |
| ATCAGGGTGACG | 868.10757667175  | 0.179106549360869  |
| GAGGCATGTGAC | 868.108086439025 | 0.199210620902412  |
| AGTGAGTCCATC | 868.113282341141 | 0.182566640423765  |
| ACGTCACAGAAA | 868.114283405159 | 0.216769161067299  |
| ACGGTGAGCAAA | 868.115875352655 | 0.183414729016559  |
| AGCGTTGGTGAC | 868.116571214817 | 0.198154196471386  |
| CAAACTACTCA  | 868.153690692036 | 0.116604986274092  |
| GTTCCGGTGACA | 868.164362510813 | 0.245616561577416  |
| ATGAGTCTCTGG | 868.166779832027 | 0.139846076091785  |
| GCGTCAGACCGA | 868.168296895594 | 0.157690924679251  |
| GTCACGCATTCA | 868.168441234316 | 0.153942868545461  |
| TATGCCATGTCA | 868.171355058969 | 0.157827092198389  |
| GTCATTGGGCGA | 868.178263909909 | 0.169583833648572  |

|              |                  |                    |
|--------------|------------------|--------------------|
| GCCTCGTGACGC | 868.183615146634 | 0.193319085362272  |
| ACACAGTCAGTA | 868.185292047996 | 0.10205640466841   |
| AATGAGTATCAT | 868.18609708028  | 0.188046696177734  |
| TGACAAACCAAA | 868.186273824578 | 0.159958094026969  |
| AATAGGTCACCA | 868.187076451248 | 0.150488381426548  |
| TCGCAAGTCACA | 868.208924183653 | 0.213130745291717  |
| ACTTGCTACTAA | 868.216931042184 | 0.165135529444478  |
| ACAGTCAGGTCA | 868.21806836543  | 0.0907643962586876 |
| GTCACCTGACCA | 868.220695069441 | 0.143090144281399  |
| AGGTGAGCAAGA | 868.24285702527  | 0.122147691326331  |
| GAGTGGTAGTCA | 868.250054656382 | 0.166707494624083  |
| AAGTGACGTGCA | 868.26573034176  | 0.146795006433541  |
| AATGACCTCATC | 868.266531942056 | 0.1509613532755    |
| GGTAGAGGTGAC | 868.283084756797 | 0.146526522413374  |
| CTTCATGAGCAA | 868.287384046119 | 0.229996206019603  |
| ATGACCGAGCAG | 868.294818540703 | 0.276969487409848  |
| AGGAGTAATAGC | 868.295258510835 | 0.158290723487183  |
| AACGTCACCATG | 868.301177170798 | 0.208655020023547  |
| CTAGGCTGTGAC | 868.307581836052 | 0.131757897893054  |
| GGGCTGGATGAC | 868.316874932751 | 0.153604329677102  |
| CACAGTCAACAG | 868.31935884906  | 0.136736998191309  |
| CGGTTAGGTGAC | 868.322274083817 | 0.272742432133527  |
| ATACATGGCTCA | 868.322441673655 | 0.200390776950805  |
| ACGATTGACTGA | 868.334512961564 | 0.184900663033301  |
| CAGTAAATGACG | 868.351460051533 | 0.209670398019475  |
| ACGGCAGACTCA | 868.364134252954 | 0.192818455387126  |
| ATTAGCCATCAG | 868.364471640656 | 0.208678966177982  |
| CTAGCGCTCAC  | 868.36896217202  | 0.180104562723128  |
| ACCCGGTCTGAC | 868.37124581176  | 0.193272522593823  |
| ACAGGTCACACA | 868.372390488425 | 0.14609981987103   |
| TATAGTGTGAGA | 868.376101362804 | 0.176637243942763  |
| AAACGTGGTCAC | 868.379166937428 | 0.170360124000455  |
| CGTCAGTAATAA | 868.391144918125 | 0.184990434880621  |
| GCGTCACAGCAC | 868.396445606001 | 0.18528080772114   |
| AGATGATGAATC | 868.396970528799 | 0.132172614080573  |
| GCCCCGTGTAC  | 868.40456074805  | 0.18022238803538   |
| CCTAATTGAGTC | 868.41693220796  | 0.20712536627423   |
| AAGACTAACCGA | 868.424006695782 | 0.244774487384425  |
| GCGACATAGTCA | 868.43003115959  | 0.203280918440213  |
| ATTAAGGCTCAC | 868.434097083607 | 0.121618311846035  |
| CTGTAACATGAC | 868.434965630644 | 0.277603354928591  |
| AGTCAGAATGGC | 868.439275341053 | 0.232025381507264  |
| AAGATCAGTGAC | 868.44057260341  | 0.17473041007529   |
| GCAGGGGAGTCA | 868.446056062731 | 0.128860702481524  |
| CTGTCACATTTT | 868.448595560497 | 0.194945617760515  |
| GCTGACACTTCC | 868.453801102461 | 0.173931040199273  |
| GTATAGTACTCA | 868.465874854013 | 0.263549959581802  |
| AGTCACGGAGCG | 868.471285581718 | 0.168448796367011  |
| AGTCAGCGGTTA | 868.482509246824 | 0.210321191688847  |
| AAATTAGTCCTC | 868.497012384204 | 0.204344491258157  |
| AGAAGACGTCAC | 868.510856727737 | 0.178189430911092  |
| CAGTCAGCAAGG | 868.516091398096 | 0.158526326412255  |
| CAATGACCACTC | 868.519073893013 | 0.193140310763309  |
| ACTCATATTTTA | 868.522327185115 | 0.159110161977223  |

|              |                  |                   |
|--------------|------------------|-------------------|
| GGTAGACTCAAC | 868.53298326657  | 0.150138999358187 |
| CAATGAGTTGGC | 868.534909746818 | 0.146315232436873 |
| ATAGGGTCACAC | 868.554190311362 | 0.196495911682128 |
| CCGATCCGTGAG | 868.562707469943 | 0.217271973737044 |
| ATAGGATGTGAC | 868.563342378597 | 0.162646719031243 |
| ATGAGTGAGCGC | 868.572526367235 | 0.187282182312993 |
| CGTCACGCATGC | 868.579482377721 | 0.168145767611822 |
| TGACGTGCCCAA | 868.581542362926 | 0.177878487029869 |
| GTGAGTCTGCGA | 868.600064032127 | 0.138137060712417 |
| TCGGCCCAGTCA | 868.601025868518 | 0.213433622473319 |
| GTGACATGGTTA | 868.604042185246 | 0.128877255370321 |
| GAATCAGTCTAC | 868.606238079228 | 0.168737619252556 |
| CGTCATTGCGCC | 868.617613799413 | 0.143953392493477 |
| AGTCGTGGTCAC | 868.620970703121 | 0.139015004907574 |
| GCTAACTGGTCA | 868.626658350691 | 0.171966258425817 |
| AATGGCGTGTCA | 868.634314318179 | 0.219427904734899 |
| AGATGATGTGTA | 868.642777048481 | 0.135939403920005 |
| ATCTCCAAGTCA | 868.649857358206 | 0.179823975334229 |
| CAGTCAGTTGTC | 868.651638780828 | 0.167699526861745 |
| ACTCACCGTGAC | 868.651857126601 | 0.181262383566611 |
| CGTGGGGTCATA | 868.653241684395 | 0.159848618578283 |
| ACACTTGCTCAC | 868.671027892793 | 0.16431408456223  |
| ACACTTACTAAT | 868.678845156098 | 0.188936042281013 |
| GTCAAATTGTCA | 868.679573389552 | 0.287530397354338 |
| CACGTTGAGTAA | 868.682777696103 | 0.133665985402929 |
| AGCATCCATGAC | 868.701911245094 | 0.176773853831786 |
| TCACATAAATGA | 868.712358333793 | 0.129430981234032 |
| ACCGTCTGTGAC | 868.715299616061 | 0.160759259769533 |
| AACGAGCGTCAT | 868.718562387375 | 0.160006382929388 |
| AGCTGACACTTA | 868.723228397029 | 0.223918042786395 |
| CACAGTCAGCTA | 868.739636183259 | 0.140263707644902 |
| ATAGTAATAGTC | 868.745476834504 | 0.164218764009569 |
| GTCACCATAGTA | 868.754760233752 | 0.135447923334255 |
| ATCCGGTGACAA | 868.764670605419 | 0.164926152933876 |
| AGTCACGGTAAC | 868.769193295447 | 0.165235738700433 |
| CAATGACCTGGC | 868.775709427115 | 0.21914752675078  |
| GTAGGCTCATCA | 868.777198933264 | 0.180219127792878 |
| ATCCAGGTCATA | 868.782287511528 | 0.135988742644508 |
| AGAGTAATTCGC | 868.786096871413 | 0.122275713353171 |
| ACTACGAAGTCA | 868.792139813187 | 0.146451004658239 |
| AGTGACGAGGTC | 868.793206285477 | 0.130799143634011 |
| AACTTCATGACG | 868.81474764794  | 0.133012187564292 |
| TCACGTGAGTGA | 868.825163958165 | 0.13099030470158  |
| CGCAGACGTGAC | 868.835025514631 | 0.1925522028138   |
| GGTAAAGTCACC | 868.841161275926 | 0.162738176979541 |
| GCGTGACTTCAC | 868.84201220112  | 0.166744595422153 |
| GCGTCATGTAGA | 868.842710101006 | 0.154290926074816 |
| GAGTAATCTTCA | 868.853727756035 | 0.181801260031552 |
| AGTCAGAGGCGA | 868.853993935589 | 0.144476767156446 |
| GTCAGTACCTA  | 868.856783503924 | 0.168550671211896 |
| TGATGCAATGCA | 868.864107943331 | 0.142871531097966 |
| TCACGATACTGA | 868.867079072041 | 0.237519289321838 |
| AGCAGTCAGATC | 868.875281480488 | 0.180982161845111 |
| CTATGAATCTTC | 868.875963585466 | 0.147017410356866 |

|               |                  |                    |
|---------------|------------------|--------------------|
| AAGAATCATAGT  | 868.885038724359 | 0.128491200039455  |
| CAGTCTCATGAC  | 868.887364127082 | 0.150237159165044  |
| GAGTAATAGCGC  | 868.889054349843 | 0.137931844582295  |
| GACACGTGTTCA  | 868.900002348252 | 0.141739646224852  |
| AACGTCACCGAT  | 868.91013134772  | 0.254913228506008  |
| GACTCCTTGGA   | 868.911626327655 | 0.171150934507348  |
| CTTACGTCGTCA  | 868.915822372929 | 0.159398978873024  |
| CCAGCTATGACC  | 868.917354135719 | 0.225426200250906  |
| CCATGAGTCCGA  | 868.922259363237 | 0.20020979943539   |
| AGCGTCACTGCA  | 868.92688752384  | 0.131354494428428  |
| CATGCGCTGTCA  | 868.936035446586 | 0.187827040899598  |
| GCGGCCGGTGAC  | 868.936259672807 | 0.201306804616049  |
| GGGGATTTGTCA  | 868.941956622278 | 0.192151691962701  |
| ATCAGATGTGAC  | 868.948533229022 | 0.163295227250354  |
| AAGACTCTGACA  | 868.951273883465 | 0.187254705923351  |
| CTGCGATTACTC  | 868.953825611998 | 0.161953338772776  |
| CTTATGCTGTCA  | 868.964365282052 | 0.26132726585114   |
| CGAACCGCTCAG  | 868.979905030903 | 0.29223960828636   |
| ATTAGTAAGAAT  | 868.98552212034  | 0.15598130451572   |
| CATGAGTCCCAC  | 868.986138489422 | 0.174569114358812  |
| GTAGCTCATGAC  | 868.99172971779  | 0.1659133851839    |
| AACACGTCAATC  | 868.994091349471 | 0.14911814489767   |
| ACGTCACCTTAT  | 868.995470691493 | 0.135555669924943  |
| AAGGGAAATGAC  | 868.996573300301 | 0.135171269522756  |
| GTGAATCAATTA  | 868.997508074528 | 0.207018098172331  |
| GTCACTGTCCAA  | 869.008094557803 | 0.164948091112237  |
| GGGATGACCTCA  | 869.02182688334  | 0.203519686406678  |
| ATGACTTCGAGC  | 869.042392238977 | 0.235987459065408  |
| TGAGCCACACAA  | 869.045130505859 | 0.175575420080584  |
| GAACCTCGTCAC  | 869.051188191106 | 0.228830500463225  |
| ATACGGTGCATC  | 869.05710940976  | 0.166164525756923  |
| GTCACAAGTGTA  | 869.058960253733 | 0.163005079931379  |
| CTGGCGTGTAC   | 869.061902122889 | 0.161687145193587  |
| GCAAGATGAGTA  | 869.066666965893 | 0.145507658970804  |
| AAAGACGTGTCA  | 869.072823972438 | 0.125482665189781  |
| GTTAAGTCAGCA  | 869.083510513635 | 0.155855241689052  |
| GATTGAGCTAA   | 869.085675573648 | 0.144725403281859  |
| AAGATGGTGACG  | 869.094503631908 | 0.14927405856474   |
| CGTCGAGGTGAC  | 869.097225625591 | 0.249187455165898  |
| AGTCCCTGTGAC  | 869.097614497524 | 0.23076484855121   |
| GACTCACGGCGA  | 869.10448542905  | 0.233233033570344  |
| CTGTAAGGTGAC  | 869.129189990154 | 0.144445051914211  |
| AGGATTAGCCAT  | 869.134487949482 | 0.19197945141094   |
| GTCACCAACGAC  | 869.143253619308 | 0.0842012134410309 |
| ACTCATATATAT  | 869.159361195479 | 0.193164259609387  |
| CGGTCATGTAC   | 869.16993979146  | 0.20585443109829   |
| CAGATGTGACGA  | 869.183510155108 | 0.2073072085977    |
| CGTCACCTAATA  | 869.184467843385 | 0.136981850482671  |
| GTAGCCTGTGAC  | 869.185998626139 | 0.170035990398014  |
| CTGACTAGTCCC  | 869.186999351313 | 0.133353723269345  |
| CTATAAGTGACA  | 869.188364992845 | 0.179169789726737  |
| AGCGTCACTGTTA | 869.197265896593 | 0.202756237487165  |
| GTTTAGTAATCA  | 869.198985325712 | 0.213029375950598  |
| GGTTTTGGTGAC  | 869.201611221617 | 0.199514422893585  |

|              |                  |                    |
|--------------|------------------|--------------------|
| GGTGCCTCGTCA | 869.201968635956 | 0.156565485877626  |
| AACCTGAGTAAC | 869.203511050845 | 0.244001557151774  |
| CAACATGTGACG | 869.210088147592 | 0.23977510671096   |
| AAGAAAGGTGAC | 869.214176369777 | 0.0989830351836377 |
| TACCTAGACTCA | 869.218712831735 | 0.174523857972053  |
| CTCCAGGATGAC | 869.229855078019 | 0.134664303948941  |
| CGTCATGATCAC | 869.235869083186 | 0.155059560663553  |
| ACCTATGATGCA | 869.246291105752 | 0.200850681182608  |
| AGGTAAGCGTCA | 869.250894027638 | 0.187904307579024  |
| ACTATGAGGCAT | 869.253316097441 | 0.132467323448514  |
| CCGAGTGGTCA  | 869.253369245644 | 0.13411402627669   |
| ACGTCGGTGACA | 869.254766181341 | 0.132164472288939  |
| ATATGATACAAT | 869.268363986988 | 0.12418923781438   |
| TCAACCGACTCA | 869.268465612628 | 0.101484400784509  |
| ACGCGTGACTGC | 869.271446526362 | 0.175937252804806  |
| GTCACATATAGA | 869.277144658608 | 0.133224201722099  |
| GGTCATCAGTAC | 869.282985643597 | 0.193179186814439  |
| CGGAAAGGTGAC | 869.285145774786 | 0.156903015682351  |
| GTTACGTATTCA | 869.28657780334  | 0.178346988161488  |
| CAATGAGTGAGC | 869.290091582976 | 0.175428580932376  |
| CGGTCATACGCA | 869.294361249405 | 0.211906319520423  |
| GCGCAATGACCA | 869.294475137492 | 0.129859796939751  |
| GCGCATCGTCA  | 869.29897160972  | 0.149596664672527  |
| GAATATATGTCA | 869.304126755363 | 0.111659537548471  |
| AAGACTGTGACA | 869.306714600951 | 0.0735164451871552 |
| AAGCGGGATGAC | 869.315602490435 | 0.173426745716369  |
| AAGGTGCAGTCA | 869.316917105151 | 0.182809913674793  |
| ATGAGTCCGGAA | 869.323058541116 | 0.151390754385425  |
| ACCTCATGACGC | 869.328029095707 | 0.131798383799216  |
| ACATACGTAATC | 869.329670874888 | 0.146337198500237  |
| TACTCATTATAA | 869.329806324509 | 0.179641701799957  |
| AATGACAAGCCG | 869.331943859831 | 0.175862461209497  |
| ATGAGTTGACTA | 869.340778294763 | 0.186198772305022  |
| AAGACTATGACC | 869.356452576101 | 0.128404547597242  |
| TGAATAACATCA | 869.360527168077 | 0.162370209519544  |
| CACCCCGTCATC | 869.363572239325 | 0.130238341455647  |
| GTACCCGCGTCA | 869.376002398776 | 0.158330736167121  |
| TAACAAGTGTC  | 869.383952855763 | 0.187033694487546  |
| ATGTCACGCGAG | 869.384999929931 | 0.216185600314352  |
| ACCATCGCGTCA | 869.389906518167 | 0.111293907503706  |
| GTTTTGACTCGA | 869.395690435439 | 0.188181108936398  |
| TGACATAATGAA | 869.409446983552 | 0.170151895585729  |
| CCGCCGAATGAC | 869.414918604693 | 0.162938908127433  |
| CCAGGTGAGTAC | 869.416168491414 | 0.215769340439381  |
| AATTGCGTGACA | 869.420191587804 | 0.194355652412928  |
| AGTGTGAGACAT | 869.434275937303 | 0.168264874972911  |
| CGTCAACATTGA | 869.438631083101 | 0.187634316744317  |
| ATGACAACGGCG | 869.445799934332 | 0.182063628535737  |
| GTCATTGACTA  | 869.452445626201 | 0.188239858241912  |
| GTTGTGTCAATA | 869.463222935151 | 0.128453176348845  |
| GGTCATCAATGA | 869.463346827722 | 0.16370709725966   |
| TGGTCATCCCAA | 869.470275782317 | 0.173078083935718  |
| ACTCATCTTTGC | 869.471394776382 | 0.202876267419689  |
| ATATAATGAGTA | 869.480928536958 | 0.185339576077175  |

|              |                  |                    |
|--------------|------------------|--------------------|
| ACATTGTATCAC | 869.493045494214 | 0.150886927454653  |
| ATCCATCCGTCA | 869.497031915632 | 0.206096050536276  |
| TGTCACGTCAAA | 869.497671810452 | 0.143504535324417  |
| CCAATATTACTC | 869.503474840498 | 0.162252415420741  |
| CGTCATTTCAAC | 869.504801050319 | 0.104674665493407  |
| CGTCAGTGTCAA | 869.509097446667 | 0.234646220115285  |
| GTGATTGTGACA | 869.512172425702 | 0.181937559089793  |
| GACTATTACGTA | 869.517773516375 | 0.114801219613861  |
| ATTAGTAAATCG | 869.521046725897 | 0.0928364758673877 |
| GTGTGACGGTTA | 869.521534259209 | 0.152380496556827  |
| CTGACGCAGCTC | 869.527769318463 | 0.165668682243862  |
| AACTAACGTCAT | 869.530361137723 | 0.190713970100178  |
| CCGATTCGGTCA | 869.54285780172  | 0.281584222485109  |
| CTCGTACTAGC  | 869.544517265052 | 0.140883711741661  |
| CCGTCATTTAGC | 869.551577622923 | 0.17767944565655   |
| AAATGTGGTGAC | 869.552718763484 | 0.128962152973147  |
| CGGTCATACCAA | 869.561896923142 | 0.158811495023083  |
| CAACACATCATA | 869.565018401583 | 0.133725641891972  |
| ACTCATTTAGCG | 869.56642332938  | 0.145330211689538  |
| ATGGGCAGTCAC | 869.568847323121 | 0.169784984571218  |
| CATAGTGACGTC | 869.570554564478 | 0.198564465342286  |
| ATGAGATTAGTC | 869.574413776125 | 0.26886158618396   |
| ACTCAGTGACAT | 869.574525106321 | 0.167902946589794  |
| GTATTCCGTGAC | 869.580760731634 | 0.193341597580035  |
| CGAGTTTGTGAC | 869.587303188341 | 0.20770159115122   |
| CAGGGCCGTGAC | 869.592643389606 | 0.19862737160361   |
| ACGGCATGACAG | 869.593241976303 | 0.0976457837344594 |
| TCTCGCCAGTCA | 869.597373616416 | 0.15352490725769   |
| ATTTACAGTGAC | 869.599582831677 | 0.146519967416373  |
| GTTGACTCGGAA | 869.610644622408 | 0.145307130762986  |
| AAATGTCATGAA | 869.639613000266 | 0.149165138193694  |
| GTGTGATGCAAC | 869.642252608078 | 0.132194204204407  |
| GTCATTAAGGCA | 869.645103281803 | 0.0928665614309308 |
| CAAGCCGGTGAC | 869.647115283007 | 0.210199670314167  |
| GGTCATCCGTAC | 869.673857515885 | 0.173905916777494  |
| ATGACGGCAAAT | 869.679835162576 | 0.220870677640224  |
| GTGAGCAACTTA | 869.682867440278 | 0.19004163619843   |
| ATGACGACGCTC | 869.703991052419 | 0.2325523495537    |
| AAGAATCATACG | 869.708450591997 | 0.27351475152144   |
| AGTCACGGTGGG | 869.711418360226 | 0.186259181044533  |
| ACACGGATGAGT | 869.712385044024 | 0.148801326746239  |
| GCAATTAGTGAC | 869.715012422869 | 0.153753572148548  |
| CTCCCCTAGTCA | 869.715280208124 | 0.15087548950778   |
| CTAGCATGACAA | 869.718644648225 | 0.130983214712148  |
| TATGCTGAGTAA | 869.723396896669 | 0.160670606942166  |
| GTAAGTTGTAC  | 869.72339821548  | 0.223789010399088  |
| GTGAGTACCATA | 869.725938113731 | 0.122646628390178  |
| AGTACTTGACTC | 869.726463540167 | 0.192285717099985  |
| ACCGAATGAGT  | 869.730147236616 | 0.142963307605148  |
| CAGTGACACGGA | 869.741783110343 | 0.112584009424545  |
| CGTCACATCTAC | 869.742502456272 | 0.168591908925263  |
| ATGATGGTGACG | 869.745874857701 | 0.220634913004683  |
| GTGACGTCGATA | 869.747369813398 | 0.158303254580288  |
| CGTCACCACTTC | 869.752532174073 | 0.138842992398022  |

|               |                  |                    |
|---------------|------------------|--------------------|
| CTGACTGTGTCC  | 869.753056966112 | 0.229809898796746  |
| AACGGTGACGTT  | 869.759542950094 | 0.138281807451376  |
| AAACCTGTCACT  | 869.77076150939  | 0.0935556699228495 |
| GTCACAGAAAAC  | 869.774842435852 | 0.144501385047904  |
| CACGAACTGTCA  | 869.777457429839 | 0.184233047654874  |
| CACGGGGTGACG  | 869.782627878679 | 0.153732703077017  |
| AGACCGGCATA   | 869.786037013829 | 0.158968671206557  |
| ACTGCGGTGACA  | 869.787933879277 | 0.270673231963469  |
| GGATAGGTCACC  | 869.801153343719 | 0.13381057148268   |
| CGGCACGCGTCA  | 869.805352698003 | 0.166547151488411  |
| CTAGCTTGTGAC  | 869.811413261859 | 0.209796013019705  |
| ATGCCAGGTGAC  | 869.820251667666 | 0.157487546937294  |
| CATGACAGAGAC  | 869.820351896379 | 0.128831798993097  |
| TCGTACCCACA   | 869.82473333547  | 0.136743732089028  |
| AAACCTGAATCA  | 869.829706997098 | 0.0905449505385839 |
| ATGATGACCGAG  | 869.831187905711 | 0.22751553536285   |
| CATAAGCGTCAG  | 869.835765354458 | 0.151240833067335  |
| GCATCTTATGAC  | 869.839758356094 | 0.0887961330687745 |
| ATCCGTCAGTTA  | 869.854689400443 | 0.176195922185898  |
| GACTTTAGTCAA  | 869.855450960036 | 0.107321389060651  |
| GTCATGGAGGCA  | 869.858446338485 | 0.161219275284878  |
| ATTTCCGGTGACG | 869.859874089273 | 0.151239427461984  |
| GTATGTCACGAA  | 869.860096291866 | 0.155807983673094  |
| GATGACAGGGAA  | 869.866195161794 | 0.130690453393753  |
| GGTCATCGGGAC  | 869.868182790593 | 0.123463379542366  |
| ATTAGCAATATG  | 869.871473914985 | 0.176691263393625  |
| CCACCTGACTCG  | 869.871537326887 | 0.13838981886583   |
| ATGAGCAACGTA  | 869.876551471221 | 0.138902786756427  |
| GTGATGCAACAC  | 869.883621510141 | 0.151034443646316  |
| ACTCATCGATAA  | 869.900360839922 | 0.176906072619268  |
| GATTCATGTCAA  | 869.901971698028 | 0.186862558142736  |
| GTATCAGTCTTA  | 869.902951187533 | 0.192472541211791  |
| TATGAGTTGGAA  | 869.904085666495 | 0.115022592615565  |
| CATCTTTGTGAC  | 869.906722134328 | 0.244016726980239  |
| GACGTCACCATC  | 869.908350734798 | 0.102481355491646  |
| GTTGAGCAGTCA  | 869.90894838196  | 0.182888738077643  |
| GCAAGCCAGTCA  | 869.912103688123 | 0.174289191808054  |
| ATTACTCCTCGG  | 869.924332657486 | 0.172865758602301  |
| GTCACTGTGTAA  | 869.926580905202 | 0.150543820084448  |
| CAGTCAGTTTTA  | 869.927782527242 | 0.190569688275306  |
| GACCAGGTCATC  | 869.933932656045 | 0.187106738340263  |
| CGGTTGGCTGAC  | 869.937955498134 | 0.149953186383476  |
| CGTCTCGACTCA  | 869.939898260961 | 0.151168181806326  |
| ACCGTAAAGTCA  | 869.941179724584 | 0.176068783171758  |
| GGTCCTGAATCA  | 869.943297451113 | 0.196690476054736  |
| GTCAGACGTAAA  | 869.946102732199 | 0.18120164658487   |
| GACGTACGTGAC  | 869.947272853471 | 0.174617946359587  |
| CGTCACAGTTTC  | 869.962186121166 | 0.180135761202437  |
| GCGTCACCAAAC  | 869.967008375507 | 0.132080021940795  |
| TATACAGTGACA  | 869.973041738797 | 0.133650945777599  |
| ACTCATATGGCA  | 869.981188001433 | 0.200397156668639  |
| TAACCGTAGTCA  | 869.987109636888 | 0.250689335510032  |
| CAGCGTCACTGA  | 869.988844448348 | 0.146975958515824  |
| ATTACGGTCATA  | 869.989018887578 | 0.155094830174443  |

|               |                  |                   |
|---------------|------------------|-------------------|
| AGAATCCGTGAC  | 869.989626064566 | 0.128612417893289 |
| ACTGCATGACAG  | 869.989957488249 | 0.139986369311407 |
| ATGCACGTGACA  | 869.989992684975 | 0.191399995510269 |
| TGACCACGAAAA  | 869.990543837532 | 0.150778550661426 |
| CTGTCACGTGCA  | 870.000852074216 | 0.153030497521517 |
| ATTGAGTCGTCG  | 870.011520766594 | 0.145631203997473 |
| GGGAACGGTGAC  | 870.012895002079 | 0.118158817344858 |
| ACCTCTGACGGA  | 870.013185244967 | 0.130269560009356 |
| GACCCTGAGTAA  | 870.024101427873 | 0.195493981758529 |
| CTGTCACATACA  | 870.030699090218 | 0.291737333385008 |
| ACGGTCATACAC  | 870.032004357778 | 0.193430594782783 |
| GGTCATAATCTA  | 870.032946426307 | 0.167404701514384 |
| CGATCTACGTCA  | 870.034806594825 | 0.128862228121528 |
| ATGACAACGGGC  | 870.041428480025 | 0.214118995114142 |
| GTCACAAACAAA  | 870.041677763239 | 0.167829601190751 |
| TGTCACGCAACA  | 870.045960038423 | 0.12746678559796  |
| ACTCTGGCTCAT  | 870.046815607138 | 0.141687318387835 |
| AATTATGACCGG  | 870.051728631697 | 0.128834426087673 |
| GCCGGGTGTGAC  | 870.052396841215 | 0.255351633357673 |
| TGAGTACACAAA  | 870.054917918025 | 0.192870733294164 |
| ACTCATTGTACA  | 870.05512161017  | 0.176544096668845 |
| TGACGAACTAAA  | 870.0552169207   | 0.162269292011814 |
| ACTCATACCTTA  | 870.069825894517 | 0.152630758912491 |
| TGACTTGTGCAA  | 870.087061356368 | 0.133635830036047 |
| GATGACCGCGAA  | 870.099788010097 | 0.19332849244598  |
| GGTCATCAGTGA  | 870.099846589733 | 0.179573728275672 |
| GGGGTCATAGCA  | 870.10585244564  | 0.197825999023691 |
| AAGTACGGTGAC  | 870.113903035204 | 0.170926308727669 |
| GACTCAGATAAC  | 870.114539259402 | 0.214232474968015 |
| AGGCGACTGACT  | 870.118863795061 | 0.227035871158932 |
| CATATTAGGTCA  | 870.122520882183 | 0.185797788666906 |
| CTCAACTCGTCA  | 870.125091784529 | 0.195750837575609 |
| AACTCAGTCTGA  | 870.133604239809 | 0.284015207085642 |
| TTAACTCATAAA  | 870.136366911855 | 0.162141811691282 |
| GTCATGTACGGA  | 870.148651985692 | 0.133901476358468 |
| ATAATGACCACG  | 870.15934275807  | 0.182826914847228 |
| TCTGCTGAATCA  | 870.160880298744 | 0.130387826259863 |
| TATAGGGTCACA  | 870.168008144525 | 0.146999098652037 |
| AATTAGTACCAC  | 870.17266829556  | 0.198872991523885 |
| CGTCACGCTGAC  | 870.179223919088 | 0.156607522033406 |
| ACGATTATGAGT  | 870.180234685282 | 0.101631192969336 |
| CTGCTTCATGAC  | 870.195551728346 | 0.113852330766773 |
| TAATTATTATGA  | 870.198449254663 | 0.158981867004077 |
| GTGACATAGTAA  | 870.19847461741  | 0.191757097129218 |
| AATTGCTAATCA  | 870.204855488393 | 0.142251851517298 |
| AGTCAGAGGAAG  | 870.209038517339 | 0.12780115787289  |
| AGGGATTACGCA  | 870.221594572775 | 0.160746385857709 |
| CCGCTGAGTGAC  | 870.222958776011 | 0.137218367911374 |
| AACTTACTCAGC  | 870.225884929725 | 0.18865800717623  |
| AGCCTATTATGA  | 870.226629892293 | 0.17095092808634  |
| AATCGGGTGACA  | 870.226799538432 | 0.131596884864664 |
| AGACTCACGGCC  | 870.230665136787 | 0.16178887595277  |
| ATGACTTGCCCTC | 870.233945590108 | 0.136616119349195 |
| ACCGATTGTGAC  | 870.240721440987 | 0.156103336211164 |



|               |                  |                    |
|---------------|------------------|--------------------|
| AGCATTATTCAT  | 870.244693332068 | 0.105179786980923  |
| GTCTGACAAACA  | 870.245480941163 | 0.127353069831568  |
| CATGTATGATGC  | 870.252279423429 | 0.180334943959252  |
| CTCGCTATGACC  | 870.255941675083 | 0.183028066156809  |
| CCCTCATGACAC  | 870.257821606298 | 0.168707495373975  |
| AAAGGAGTAATC  | 870.265120930318 | 0.131035457452025  |
| GTCATGTAACTA  | 870.265466080769 | 0.138150588254079  |
| ATGACAGTCGAC  | 870.269269485144 | 0.179296625594449  |
| GGCCATGACACC  | 870.27440137934  | 0.224692049520241  |
| AATGGTGACGAT  | 870.281948805557 | 0.146190530804964  |
| AGTCAACTCATG  | 870.284354417429 | 0.148645001258863  |
| CCAGAGTGACGA  | 870.286366199012 | 0.132257385098986  |
| CCTTTGACTGAG  | 870.287447739992 | 0.236661336132253  |
| GTCACCCGATAA  | 870.291284278788 | 0.18959998363692   |
| ATAATGTCATGC  | 870.295978485597 | 0.158573831607834  |
| GTGACCACTCAA  | 870.301030595052 | 0.16681469709274   |
| ACAGTCAGTCCT  | 870.301748937831 | 0.199834724970757  |
| CATGAGTCCGCA  | 870.310261739636 | 0.17404967129778   |
| GAGCTTTGGTCA  | 870.316619182347 | 0.213784837663188  |
| CATAAATTAGCA  | 870.317235715336 | 0.186367197969061  |
| ATGCCTGATGAC  | 870.328120286185 | 0.138304255223628  |
| CATTATTAGTAC  | 870.335888009431 | 0.163908515443303  |
| AGAGGCAATGAC  | 870.336569259913 | 0.179815821081718  |
| GGTCATTAGTAA  | 870.344065030823 | 0.176002080586852  |
| GTCACCACAGCA  | 870.346878251417 | 0.135703212434682  |
| AGTCAGCGACTC  | 870.356008579143 | 0.167335411378027  |
| ATGAGTGTACCG  | 870.365182105294 | 0.13993396017111   |
| GACTCGGTTGAC  | 870.368134899935 | 0.164728000000058  |
| AATTTGACACAC  | 870.371692598371 | 0.179417287833211  |
| ACTCATTAGCCA  | 870.371735210994 | 0.157912632613772  |
| ACATGTGACCAC  | 870.372493849664 | 0.172786843115598  |
| GAAATAGGTGAC  | 870.373482963484 | 0.213381336056426  |
| AGACCGAGTGAC  | 870.383614205506 | 0.165975636288691  |
| ACCCGGCATGAC  | 870.385912380949 | 0.149661901165664  |
| ATAACGAGTAAT  | 870.391271812248 | 0.266627682624197  |
| GTATGATTACAC  | 870.411633373729 | 0.273969801041386  |
| GGTAAAGGTGAC  | 870.416626908712 | 0.17730183969454   |
| ATTGCTATGACC  | 870.419342107989 | 0.16121683421072   |
| CCCGGCGTCATA  | 870.426803140938 | 0.132239699759779  |
| GATTCACTGTCA  | 870.429007999468 | 0.173839037010912  |
| CAGTGCCTAATC  | 870.429089448698 | 0.164539603836454  |
| GCACTATTGTCA  | 870.441160609802 | 0.182609108999795  |
| GATGACGCTGAC  | 870.442131615433 | 0.225835630243988  |
| TCAGCGGACTCA  | 870.444447576111 | 0.199524638957558  |
| GTTGACTACTCA  | 870.453076160202 | 0.0838788539943865 |
| ATGTGCCATGAC  | 870.459842540555 | 0.161791275098313  |
| GACATTGTCACC  | 870.464391868279 | 0.223083069670064  |
| TGACATGGCTAA  | 870.464675001556 | 0.133886313498195  |
| AGAGATGTGACG  | 870.478548632413 | 0.192475155292663  |
| AGTCACTTGGGG  | 870.480522826914 | 0.181677551555435  |
| AAGAGACGTCAT  | 870.486926400744 | 0.136306520565928  |
| GTGGAAGTGTC   | 870.495679605142 | 0.153946717354797  |
| AGTCTGACCCAC  | 870.502794131059 | 0.170084056524023  |
| GTCACCTCGACCA | 870.505985282873 | 0.181628531346396  |

|               |                  |                   |
|---------------|------------------|-------------------|
| CTGACTCGCAGC  | 870.511021094064 | 0.110037818059134 |
| ACCCGTATGACC  | 870.517627314034 | 0.160822829812966 |
| GTCATGTAGAAA  | 870.520683941818 | 0.235897610756302 |
| ATGACGAGGGAA  | 870.521567303239 | 0.15326440168073  |
| TGACTAGAATAA  | 870.536692235532 | 0.176021468483184 |
| AAATTGAGTCGA  | 870.540052271151 | 0.1682755563524   |
| CGTCACCATATA  | 870.554000138806 | 0.185343093406463 |
| ATGACGTGAGGA  | 870.559208825524 | 0.156131315553789 |
| ATGTCATGTCTG  | 870.563669386041 | 0.173167662453573 |
| ACTATGTATCAC  | 870.573833279232 | 0.196535899859862 |
| AATTAAGTCAGC  | 870.578709176282 | 0.157914732171337 |
| GTCATTGAAAAC  | 870.596862916059 | 0.237067090360864 |
| AGTCAGCACACT  | 870.606954620917 | 0.142944826589408 |
| ACGTCACCGCCC  | 870.613243561833 | 0.143619281164502 |
| GGTCATCCACGA  | 870.614770204924 | 0.253487620214732 |
| CCTGCACTATGA  | 870.619567220179 | 0.183601278980526 |
| ATGACAATGTAG  | 870.62127109578  | 0.17559709093638  |
| ACTCATACACCA  | 870.633661058073 | 0.118474121629707 |
| GACACATTCATA  | 870.639489894964 | 0.172970585347679 |
| ATTGCCGGTGAC  | 870.643442159372 | 0.115837350593388 |
| ATCCCATGACGA  | 870.644882708346 | 0.133336328918366 |
| TAGTGAGACTCA  | 870.646893727769 | 0.193861044496172 |
| AGGGCAAATGAC  | 870.647328724345 | 0.19902398087552  |
| AAGAGTCGACCG  | 870.658925617681 | 0.179900350368306 |
| CGAGTCAAAGC   | 870.669030029303 | 0.233693788313291 |
| AATTATGACCTA  | 870.6693274765   | 0.228092900423706 |
| CTAATTATGACC  | 870.670470974539 | 0.174088751200482 |
| CCCGGTGGCTCA  | 870.671025859995 | 0.231640688869587 |
| GTACCCGTGACA  | 870.67243637683  | 0.220225990490579 |
| GAAATTTTGTC   | 870.674413474991 | 0.168541382337012 |
| ACGGTTGAGTAA  | 870.676121994741 | 0.236535245319145 |
| AGTCAGAGTAGG  | 870.67807431104  | 0.143274009281908 |
| TGTCACGACACA  | 870.680079605155 | 0.198051400384143 |
| CACAACCTCGTCA | 870.688336605785 | 0.189618442191158 |
| AATGACAAGCAT  | 870.694220043198 | 0.142598572557955 |
| GCAAGTACTGAC  | 870.697713316305 | 0.109731159088345 |
| GCGCTTCATGAC  | 870.702986067111 | 0.189599631637023 |
| ACTCACACTTAT  | 870.708850051956 | 0.204482851977739 |
| AATGACATTAGT  | 870.715101840942 | 0.148069312819767 |
| AATTAGTTGTCA  | 870.726394398291 | 0.198236995590347 |
| AGCGTCCGTCAT  | 870.727238991523 | 0.125833381742206 |
| CATCTGTCAGAC  | 870.72740245375  | 0.233629428701744 |
| ATGCATGTCACA  | 870.727801325343 | 0.162977546191003 |
| AGTCAGTGTCTC  | 870.730982736096 | 0.187759449776867 |
| TGTCATTTGAAA  | 870.733312619972 | 0.140971488651111 |
| TAGTGTTTGTC   | 870.759085602757 | 0.167992976819543 |
| AACAGTCAACTC  | 870.760270831454 | 0.159832652338594 |
| ACGCGTAATCGA  | 870.763530967214 | 0.150964857788512 |
| ACTCATCACGGA  | 870.766044055407 | 0.172384919649355 |
| GTCACGGGCTAA  | 870.766535472088 | 0.171805938861076 |
| CAAAGTCTGAC   | 870.785512784371 | 0.18808633646933  |
| ACATGAGGTCAT  | 870.789073103885 | 0.152284413585427 |
| TACTCACTGTGA  | 870.796344181194 | 0.179870722067553 |
| ATTCCGCGTGAC  | 870.798365054544 | 0.125556133551705 |

|               |                  |                   |
|---------------|------------------|-------------------|
| AACATGACACTC  | 870.800090101444 | 0.16099165183904  |
| GAGAGTGACGGA  | 870.804363306169 | 0.128281538883872 |
| GTTCAATTGGTCA | 870.80925123744  | 0.139988860362555 |
| ACACATGAGCCA  | 870.817465144903 | 0.136032175151837 |
| CTGACGATATGA  | 870.819849649478 | 0.165509143777902 |
| ATCCGTGTCACC  | 870.820631613054 | 0.138537062998104 |
| ACTCATAAAGCG  | 870.820871719208 | 0.173378854516457 |
| GACCTTGTCCACC | 870.822970597763 | 0.167554399767805 |
| ACTATCTGTGAC  | 870.832552739117 | 0.158245978769093 |
| AATCAGTCTTAT  | 870.839429644917 | 0.158837723857444 |
| TGCCAGTCAGAA  | 870.842883491873 | 0.137408444502586 |
| ACTCATGTGACA  | 870.845809347099 | 0.229435855205366 |
| CCGCTATGTGAC  | 870.849377753538 | 0.260243764832401 |
| TACTCATGACAA  | 870.852634328672 | 0.155024077597916 |
| CGCACATGTGAC  | 870.8534331513   | 0.24598336883879  |
| GGTAGTGGTGAC  | 870.859744466431 | 0.112201318475072 |
| ATGTCATTTCTA  | 870.862710691336 | 0.205502962132855 |
| GCACACGTCAAC  | 870.864631941705 | 0.221356535444012 |
| GTCACCTACGAA  | 870.868184865288 | 0.139131260318154 |
| GTCATTAATCGA  | 870.882890258171 | 0.154626364139455 |
| CCGATTGGGTCA  | 870.884740056815 | 0.159937864527353 |
| CGTGACACGATC  | 870.88620887173  | 0.177120684758376 |
| ACTGCAGTGACG  | 870.887103377478 | 0.162143207052792 |
| GCGAACGTGTCA  | 870.888785934384 | 0.257084120040939 |
| AGTCAGAGTGCC  | 870.891955900022 | 0.256696239400302 |
| AATAGAAGTCAT  | 870.898102638796 | 0.239870774563747 |
| AACCAATGAGTA  | 870.902703820837 | 0.13829893856498  |
| CTGAGTCGTTTC  | 870.91141157372  | 0.155879673919382 |
| GGCCACTGACTA  | 870.9188505378   | 0.244873983050533 |
| CGGACGTGAATC  | 870.919668265516 | 0.279560591693545 |
| GCCATCAATGAC  | 870.922224525084 | 0.140864652561513 |
| GTCAGAACGTTA  | 870.926638638925 | 0.177245279636546 |
| ACTCATACCATC  | 870.929254044373 | 0.136812127662524 |
| CCCTCTGACAAA  | 870.931783921333 | 0.13683487495642  |
| GGTGACGTCTAA  | 870.941730548728 | 0.127717945441988 |
| ACACATCATAAT  | 870.942283482521 | 0.176705769913496 |
| ACTCCTGTGATA  | 870.947854822845 | 0.104450997397332 |
| CGGCAAATGACG  | 870.947954346346 | 0.146645621011018 |
| CATGACAGACCA  | 870.961028673473 | 0.109935184959824 |
| ACGCACAAGTCA  | 870.961956485462 | 0.259602218487677 |
| GACCCCGAGTCA  | 870.973065730674 | 0.161566891016582 |
| ACGGTCATAGGC  | 870.97387114185  | 0.259340262424488 |
| GCACTCTGTCCAC | 870.976393022406 | 0.181963432944728 |
| AAGTGCCGTCAT  | 870.97947053139  | 0.193906615458343 |
| ACGGGCTGTGAC  | 870.98162616168  | 0.210894677423247 |
| GACTCAGACCAC  | 870.985055488702 | 0.121097898693869 |
| CCACGCCAGTCA  | 870.991505886888 | 0.195512950379973 |
| ACAGGTAGTGAC  | 870.993004933947 | 0.154239975061766 |
| CCTTGTCATTTTC | 871.00260229061  | 0.127836340021835 |
| AGGCGGGAGTCA  | 871.003720297253 | 0.190117483815225 |
| GGTCATCACCTA  | 871.018189378667 | 0.231638608542415 |
| AAAGATTCATAA  | 871.023449257527 | 0.110894752958426 |
| ATGAGCAAGCGC  | 871.026822234444 | 0.200784908432275 |
| GTGACAATACCA  | 871.027846586013 | 0.131299486043774 |

|               |                  |                   |
|---------------|------------------|-------------------|
| CGTCATGGGACC  | 871.029215532752 | 0.213107843578156 |
| ACATTTAGTAAT  | 871.029312522668 | 0.180408252687729 |
| CTGGCTTGCTCA  | 871.034221012299 | 0.191704315611734 |
| GGTCCGTAGTCA  | 871.038613042918 | 0.159154828256281 |
| ATTAATGACCGA  | 871.03924746016  | 0.15880883435875  |
| GGCTAACGTCAC  | 871.039251638804 | 0.204359726509531 |
| GACCCGGCTGAC  | 871.041981527675 | 0.189406182852384 |
| TAGGTCGCGTCA  | 871.04507328775  | 0.186880097796108 |
| CGTCTCGGTGAC  | 871.049116701404 | 0.15819684239657  |
| GTCTTGCTCACA  | 871.060902700217 | 0.19498862384009  |
| AGTGACGATGTC  | 871.089340921857 | 0.167369362219706 |
| GTCACCAGCCA   | 871.093064217675 | 0.177196654260434 |
| GTTCTGGTGACA  | 871.09685473087  | 0.221042378101758 |
| AAGACTAACAGT  | 871.099770867518 | 0.116425970506702 |
| CGTAGGTCATAC  | 871.10911316181  | 0.148624127595037 |
| AGTCAGCGCTGA  | 871.109700019888 | 0.122150845189008 |
| CAGTGACCTGTC  | 871.114710647996 | 0.182457336999661 |
| GGTCACTCGTCA  | 871.117654498955 | 0.286621870407176 |
| ACTGACACTTTA  | 871.139949400347 | 0.139623242755806 |
| ACTCATTGTTC   | 871.146553224977 | 0.154986258816439 |
| AGTCGTTGTGAC  | 871.151075909672 | 0.121624777559648 |
| TAACCATGACAA  | 871.159699092244 | 0.273164771777218 |
| ATATCAGACTCA  | 871.160436148452 | 0.177418277466172 |
| CAGTACCGTCA   | 871.165737576793 | 0.166104439293484 |
| ACACGTGTACTG  | 871.167589887736 | 0.178297044492146 |
| AACCGGAGTGAC  | 871.169880660615 | 0.157938328764138 |
| ATATATACTCAC  | 871.184077929377 | 0.130111076410473 |
| ATTAAGACGTCA  | 871.202830662705 | 0.1774021053639   |
| GATATGCGTGAC  | 871.204045977287 | 0.178532742880596 |
| CTTGTTCTGTGAC | 871.206416371081 | 0.187004199719347 |
| AGCGCTTTGTCA  | 871.214081312471 | 0.138743996292753 |
| ATAGTGACGCTG  | 871.217397153972 | 0.221483237620068 |
| GAATGAGCCAGC  | 871.219722354956 | 0.129377292980872 |
| ATTCCCAGTCA   | 871.222582857537 | 0.143973925367735 |
| ATATGTTGTGAC  | 871.224298948253 | 0.152715241949484 |
| GATTGGTGACCA  | 871.226116429917 | 0.220030773003418 |
| AACTGACACAGC  | 871.234899870495 | 0.192986814205475 |
| TGATGGGTGACA  | 871.240063773645 | 0.143804093027153 |
| ATGGTCTGACA   | 871.241338004049 | 0.246107497241552 |
| ACATGCTGACTA  | 871.247960462702 | 0.254665293403468 |
| CTGTGATACATC  | 871.258140767528 | 0.148778887508967 |
| ATACATACATGA  | 871.264542530192 | 0.226608805605403 |
| AACATTGTGACA  | 871.273447706687 | 0.214576561073023 |
| AGCTGGTGACAA  | 871.279195960599 | 0.114334720478602 |
| CTACGACATGAC  | 871.281907839899 | 0.162854052150617 |
| ATGCGTCGTCAC  | 871.282854980792 | 0.135315168731839 |
| TAGTCAGCAACA  | 871.283169316249 | 0.215183766330263 |
| GTCACCAAGAAA  | 871.2840763615   | 0.131033358712644 |
| ATGAGTAGACTG  | 871.285202094768 | 0.144568382224131 |
| AGATAGAGTGAC  | 871.287109802971 | 0.173469178061477 |
| AGTCTGACATAA  | 871.309451587453 | 0.213992299020558 |
| ATGAGTAGCACA  | 871.309491443846 | 0.100336655635681 |
| CTGACGGCTGAC  | 871.314260681094 | 0.148052546204665 |
| AACGTCACCGAC  | 871.315515225358 | 0.13140993217196  |

|              |                  |                    |
|--------------|------------------|--------------------|
| TGTGACGTCGAA | 871.318740972119 | 0.12637074455112   |
| CGTCACTGAGCA | 871.318748345932 | 0.217568154984996  |
| CTTGCCATGACA | 871.32062183852  | 0.171480352806673  |
| AAACTAGGTCAT | 871.321210350747 | 0.135685889687172  |
| CAAGACTCTGAC | 871.327833941433 | 0.194565966957161  |
| AGGTTGGCTCAT | 871.329790179943 | 0.14724075109058   |
| GGTCATCCAGCA | 871.331516508359 | 0.135422505312149  |
| ACTTCATGACAA | 871.333292037121 | 0.161355598723063  |
| TCTTTTCTGTCA | 871.333840710742 | 0.149853071037148  |
| CGTAGACTCTTA | 871.33499166482  | 0.152211690079353  |
| AAATTGGGTGAC | 871.337943934514 | 0.0926885854372107 |
| CAAAGTGCAGA  | 871.35142550288  | 0.185682792354075  |
| GCTGTCCGCTCA | 871.355427488983 | 0.145098750436017  |
| CTGGTCTGACAC | 871.366215249456 | 0.126895720104702  |
| AGAGATCGTCAT | 871.371885912493 | 0.130529253953159  |
| AGTACCATGTCA | 871.380587758334 | 0.147814112378071  |
| AATCTGACATCA | 871.3819593325   | 0.101047091613584  |
| ATTCACTGTCAC | 871.383792413378 | 0.159386920808491  |
| GATGACCGTAAA | 871.396523134457 | 0.150777702086533  |
| CGTAGCTGACAC | 871.399961538527 | 0.24877898349009   |
| CTGACTGTAACA | 871.400720766174 | 0.127799264117699  |
| GACTAATGTTGA | 871.403320368482 | 0.18176055338279   |
| AGGTGATACATA | 871.404751700073 | 0.243710167766633  |
| TCACAAGCGTCA | 871.408598207515 | 0.196990600034267  |
| GGTAATTGCTCA | 871.409167040592 | 0.0850306326117636 |
| AAGTGTCAGCGA | 871.410526839949 | 0.171413780626365  |
| AAGTCAGTGACG | 871.420485833716 | 0.138669327836372  |
| ATGTCATTAACC | 871.42874531418  | 0.166890076245075  |
| CTCATATTGTCA | 871.435971498911 | 0.213226530038487  |
| TAATTATACTCA | 871.437673590781 | 0.179808003003477  |
| AATAGTGACGAA | 871.437852818782 | 0.154328658855714  |
| GTGACCACTAGA | 871.440976405907 | 0.167697496949309  |
| GGGTTTGATGAC | 871.448665126815 | 0.0902336849839368 |
| GCTCCGCGTCAC | 871.452820019188 | 0.166718106039416  |
| GTAATAATCTTA | 871.457568722484 | 0.17431806702627   |
| AAAGTCGGTGAC | 871.464934914218 | 0.129933160295471  |
| AATGAGTAGGGC | 871.465589910286 | 0.138901269184986  |
| AATGAGTAGATA | 871.468391887029 | 0.143260184541488  |
| CAGCTGACTGTA | 871.471660870333 | 0.144562954691621  |
| CTGATGGCGTCA | 871.474415186987 | 0.238521760747699  |
| CAGTCCACGTAA | 871.4749860525   | 0.114911672354233  |
| CCGCTCATGACA | 871.498767032828 | 0.158594582204282  |
| AGTCAGAATTCA | 871.506391479212 | 0.175052298608345  |
| TGACAAGTCCAA | 871.516817701566 | 0.220526937611179  |
| AGCGCGAGTCAG | 871.518581728015 | 0.238309671301325  |
| CCGAATGTGTAA | 871.521213782543 | 0.1658411978283    |
| CGAGTCTGAGTC | 871.526962544435 | 0.176956251075104  |
| AGCCTTGACACA | 871.543033883902 | 0.159548925629686  |
| ACGTTCTGAGTC | 871.543632441725 | 0.159926972914654  |
| CCGCCCTGACTC | 871.543818440282 | 0.0516768319567266 |
| GCCGCCTAGTCA | 871.566939316614 | 0.144559934456001  |
| AGACGTCACTCA | 871.568540379368 | 0.209289458082166  |
| GTGAGCAAACAC | 871.57191767602  | 0.215855005323486  |
| TCGTGTCACGAA | 871.581896530373 | 0.218300240722401  |

|               |                  |                    |
|---------------|------------------|--------------------|
| ACTGCATGACGG  | 871.586389233687 | 0.14268780597284   |
| TAGTAATGACAA  | 871.590955454423 | 0.17327308370674   |
| CCCCGTTGTGAC  | 871.597735520666 | 0.229257308016065  |
| CTCATACTTTGA  | 871.605430986594 | 0.249966971544013  |
| ATGTGTCGACAC  | 871.607950001025 | 0.189537991861623  |
| AAGTGTAATACT  | 871.609061349973 | 0.125622506874448  |
| ACTAATGAGTAG  | 871.612255463198 | 0.169627270352886  |
| GAAGGCTCACAC  | 871.614544328349 | 0.14288079851756   |
| GGTCATACCTGA  | 871.629227909905 | 0.174529357547217  |
| ATATACACTCAT  | 871.640113736687 | 0.144391704892678  |
| GCTTGGCGTCAC  | 871.642890769779 | 0.165103937801708  |
| TTCCGGTGACAA  | 871.643402516765 | 0.143561448010343  |
| GACGCTGACGTA  | 871.649725598129 | 0.243209559888453  |
| GTAATTCTGACA  | 871.651362569001 | 0.145399006541449  |
| CTAGGCTGACTA  | 871.663298598858 | 0.0935135900579437 |
| GGCAAGCATGAC  | 871.696833915828 | 0.281731816341053  |
| TCCCTCGACTCA  | 871.699379438063 | 0.167713469985669  |
| TATTACTCTACA  | 871.699761432335 | 0.160689920030501  |
| CAATCTTTATGA  | 871.702876160527 | 0.248027066667387  |
| TATGGTCATTCA  | 871.708418551427 | 0.129534943408341  |
| GACTCATGGGTA  | 871.714586950299 | 0.154603521624385  |
| TAAACACGTCAA  | 871.741154902622 | 0.143956053514154  |
| GATTCAATTATTA | 871.741389479617 | 0.147193005736174  |
| AAGGCTCCGTCA  | 871.742161377229 | 0.212931558408217  |
| TCCTTTATGTCA  | 871.742422162729 | 0.188733560565225  |
| GACAGGTACACAC | 871.743704469316 | 0.137455893238073  |
| GACAGCTAGTCA  | 871.744600415939 | 0.203839249867515  |
| GCTGTCCTATGA  | 871.746952461312 | 0.237872696177087  |
| AGTTACTGATTC  | 871.753041305632 | 0.136909612089778  |
| CCGTCATGAGTA  | 871.758799949851 | 0.211248071900053  |
| CACGCTTGACTC  | 871.766282074295 | 0.154184295932517  |
| GTGCATTGGTCA  | 871.773033679887 | 0.220654384535675  |
| TCAACCAGTCAA  | 871.774333687096 | 0.129019884154406  |
| CTACTTAATGAC  | 871.779247231744 | 0.182937672004762  |
| ACACATCGGTCA  | 871.782942265206 | 0.143691777221699  |
| GTCAGCAGATGA  | 871.789973101156 | 0.189217369386739  |
| ATTAGTGAGTCC  | 871.795833872187 | 0.161877631154911  |
| CAGCTGCGTGAC  | 871.796402271429 | 0.204464005090829  |
| AGATTACTGTCA  | 871.799647716078 | 0.151541370557227  |
| GTGACGGTACCA  | 871.801718631168 | 0.231735153119528  |
| ATGTCATGTGTC  | 871.802061506006 | 0.247176538714895  |
| GCCACATGACGA  | 871.81420975893  | 0.131621547331468  |
| GACGCTCGTGAC  | 871.819340854311 | 0.136531673136035  |
| ATCGTCATGTAA  | 871.822897234036 | 0.229928475781627  |
| TGCGGTCATAAA  | 871.834686220709 | 0.139539995515477  |
| CGTCACCTTGAC  | 871.844579489234 | 0.154720828026362  |
| CTACCTGTGACA  | 871.853010594984 | 0.128938238512663  |
| AGCGTGTACCT   | 871.865446612363 | 0.183570599811425  |
| CTGTGACGGTTC  | 871.875441281933 | 0.157459853655772  |
| AAGTCACGCCGA  | 871.892616653813 | 0.155338322383125  |
| ACACTGTATGTC  | 871.900867804011 | 0.162148905606694  |
| CGTTCTTGTGAC  | 871.917658828492 | 0.218000607445009  |
| CTGACTACTAA   | 871.919902479518 | 0.165265218365759  |
| AATTGTTGAGTC  | 871.932925354152 | 0.193552370979419  |

|               |                  |                   |
|---------------|------------------|-------------------|
| CGTCATGGAGTA  | 871.933728909653 | 0.16044380193038  |
| AGTGATGACCGA  | 871.93489098729  | 0.101311357902424 |
| ACAGCCTGACTG  | 871.940930207517 | 0.272742264991045 |
| AGATTCTGACGC  | 871.955520402153 | 0.205467538916564 |
| AGAATATGACCC  | 871.957817116461 | 0.168654950827653 |
| GCCATCCATGAC  | 871.969150666583 | 0.135720892201143 |
| CTAACTCTGTCA  | 871.982787657821 | 0.141464787706424 |
| ATGACAATAGGG  | 871.992364825051 | 0.107732256214079 |
| CTTGTCATGAGA  | 871.998272977886 | 0.229056253367594 |
| GTCACAGCAATA  | 872.001408006078 | 0.155337404028752 |
| AACTGGCTCATC  | 872.004663501645 | 0.159620123166146 |
| AGGCAGTGTAC   | 872.016809376032 | 0.162574646094371 |
| AGTGACAACTA   | 872.021809014858 | 0.163671487753417 |
| ATATGAGGCATA  | 872.027667547462 | 0.139539510810209 |
| AGGCCTCGTCAC  | 872.028591362165 | 0.107037929097395 |
| ACCTGATGACCC  | 872.037590974536 | 0.211366009964799 |
| AGGGCTAATGAC  | 872.043096132408 | 0.146890217117696 |
| GCTGACTGCTTA  | 872.050663185446 | 0.176672625265864 |
| GTCACTAGAGGA  | 872.05204933216  | 0.153388089438635 |
| ACTGGTCAGATG  | 872.05744191075  | 0.176189848658847 |
| GGCTCATTCTGA  | 872.06011128806  | 0.212763121731436 |
| ACGGATCGTCAT  | 872.069159228861 | 0.187231097822601 |
| AATTAGTCCTCG  | 872.076132072268 | 0.127092857631509 |
| CGGATGATGTAA  | 872.081148814973 | 0.302059761627923 |
| CCGAGTCAAACA  | 872.09064792305  | 0.16246981034055  |
| CGTCACTCGTGC  | 872.094108897849 | 0.209449195494175 |
| GGATGTCTCACC  | 872.094352417383 | 0.141813057692857 |
| ATGACAATAGAG  | 872.095302659342 | 0.146928774768411 |
| ATAATTGGTGAC  | 872.105476234438 | 0.188842355567779 |
| ATACGTAATACG  | 872.106937474097 | 0.125777278270433 |
| ATAGGGTGACCA  | 872.106987240324 | 0.133237385528111 |
| AGTTGTGACAGC  | 872.108523064981 | 0.161191110552451 |
| CACGTCAGCAAA  | 872.124495188196 | 0.289855040948299 |
| ATTGTCATGCTA  | 872.125418393683 | 0.187461078287536 |
| GAGTCAAAGCGA  | 872.127383727174 | 0.162672139344375 |
| ATGAGTAGACCA  | 872.140143153006 | 0.215158970401165 |
| CCAAGACAGTCA  | 872.143969850838 | 0.152438132978408 |
| AGTCACGGTGGA  | 872.14555376028  | 0.131066066682777 |
| TCCAACCTGGTCA | 872.16465917134  | 0.183790191492091 |
| GAATTGTATCAC  | 872.165905049389 | 0.136932845308766 |
| ATTACTGACTGG  | 872.170940188002 | 0.163012037437287 |
| CATCCCCTCATC  | 872.174075544791 | 0.129817293124005 |
| GGTGACAGTCA   | 872.176755913288 | 0.120157399913824 |
| GATTATAGTGAC  | 872.182813801405 | 0.115201656977809 |
| ACGAACTGACTG  | 872.183015588114 | 0.159262556409216 |
| TGATTCACTACA  | 872.190561516945 | 0.151071029833445 |
| AGCAATGAGTAT  | 872.197344813839 | 0.178524721561145 |
| GTACAGCGTCAC  | 872.201101128192 | 0.152094104912672 |
| GTCACCGCCACA  | 872.205789109001 | 0.199753207209502 |
| ACTTTACGATGA  | 872.215222592596 | 0.152091786161281 |
| ATGGCAATGACG  | 872.217677902558 | 0.242295593502606 |
| AAGCACTGTAC   | 872.244631129523 | 0.161984944454965 |
| ACACACGACGTG  | 872.247505154648 | 0.230639992203819 |
| AATATACGTGAC  | 872.254632732979 | 0.178580257967029 |

|              |                  |                   |
|--------------|------------------|-------------------|
| CTATCATGACGC | 872.263330129226 | 0.174684532912295 |
| ATTACGCACAAC | 872.276436176464 | 0.174229895184528 |
| AATGAGTGGGTC | 872.280472735209 | 0.134623659123912 |
| TCAGAGCTAAAA | 872.283778225019 | 0.15360626027132  |
| ATGATGAGCCAA | 872.284303225731 | 0.181816562511711 |
| ATGGGTGACGCC | 872.284355504439 | 0.152157273896341 |
| CGAACAACGTCA | 872.290719527758 | 0.155632241036815 |
| ATGACGGGATTA | 872.299422845322 | 0.188599951755366 |
| GGTGAGCATGAC | 872.311725983544 | 0.10903911015163  |
| ACGTAATGACCG | 872.326717380838 | 0.156043663188356 |
| AAGCCGTGACGC | 872.329723838978 | 0.177963424517317 |
| ACAAAATTAGTC | 872.345512140822 | 0.130089273459882 |
| CTAATCACGTCA | 872.345594530568 | 0.151012068695317 |
| TCAGTTGTGACA | 872.347628935886 | 0.17561670211956  |
| CTCACTTGTGAC | 872.355254419816 | 0.127892843443085 |
| TCCCAGGTGACA | 872.362270420231 | 0.205073701944976 |
| GTGATTCAAAGA | 872.373063273563 | 0.145619065874545 |
| CACGACTGGTCA | 872.379718627417 | 0.114596966153299 |
| ACTCATTATAT  | 872.384111200456 | 0.130577277456821 |
| GACACGTGACCC | 872.386599652794 | 0.148938658107821 |
| GTCAGTAATAGA | 872.393309468905 | 0.137640716185047 |
| CAATGCTCTGAC | 872.402158871346 | 0.209583739661267 |
| ATTCATGACGTC | 872.411043054226 | 0.101353663086866 |
| GTGACGGAGTTA | 872.426678082679 | 0.140990537915786 |
| GTAATCGGTCA  | 872.427732908795 | 0.162013683983526 |
| ACCGCCATGACA | 872.428377478804 | 0.175499016242403 |
| CGCATCAAGTCA | 872.428871027116 | 0.234285505937489 |
| CATCGATTGATA | 872.433103769099 | 0.207328594017634 |
| CTCTCGGTGTC  | 872.439854344738 | 0.203303642139941 |
| CAGTGACAAACG | 872.44164566956  | 0.110506169896009 |
| ACTCATACAAAA | 872.471134675593 | 0.102063290975265 |
| GACTCAGATTTA | 872.48626600509  | 0.304825688580693 |
| ACGTGGTCACAC | 872.490186103481 | 0.146974047154229 |
| AGTCAGACGGAT | 872.491035924423 | 0.179728365706439 |
| TGACTACGAGCA | 872.494062508959 | 0.142802400842379 |
| ACCATGTGACAG | 872.494351379636 | 0.154326189327653 |
| CGATGACCTCAC | 872.50046629499  | 0.241265057944085 |
| TATCTCATGACA | 872.511474053225 | 0.120351401077853 |
| ACGTGTCAGATA | 872.51636905794  | 0.146117624662552 |
| AGTCAGCTTCAA | 872.534049429078 | 0.24504068277931  |
| TAATAGTAATCA | 872.542639636916 | 0.132849876826483 |
| ACGTCATGTCTT | 872.560344100455 | 0.123693228829053 |
| GGTTATTCATAC | 872.566944984651 | 0.263939928910742 |
| GTTTAATGACAA | 872.571681007026 | 0.165227740401114 |
| TGGATTGTGACA | 872.581479664369 | 0.177371936961637 |
| AATCCTGGTCAT | 872.582126306187 | 0.102136767824348 |
| ATGCATGAGTAC | 872.583141132971 | 0.185583589092322 |
| ATGTCATGTCGA | 872.58525711433  | 0.169229562997285 |
| GACTATTAATGA | 872.590925097235 | 0.151787748388195 |
| AGTCAGATAGAA | 872.59561913969  | 0.144704925559883 |
| ATCGCTGACTGG | 872.599854034344 | 0.128503186187534 |
| ACGTCACGCTAC | 872.606822908288 | 0.14759085558727  |
| GGACATCATGAC | 872.607018125569 | 0.147445241698297 |
| CAGAGTTACTAA | 872.609813118263 | 0.126776326050937 |



|               |                  |                    |
|---------------|------------------|--------------------|
| CTGGTCACAAGA  | 872.610582279875 | 0.200309726239933  |
| GAACGCGTCAGA  | 872.618542151495 | 0.199443253306149  |
| GCACTCATAATA  | 872.622627793792 | 0.167180157320935  |
| CGTCACCCTATC  | 872.624386559119 | 0.12304083551288   |
| ACTCATCCGCGG  | 872.626460059983 | 0.178309307053565  |
| TCAATGTGACGA  | 872.626827909078 | 0.144817243603543  |
| GTTAGTGACGGA  | 872.634022484116 | 0.0832007124222518 |
| TATGTCAGAAGA  | 872.635752480653 | 0.201917443524197  |
| AATATGTGTAAC  | 872.64624673995  | 0.234618903591867  |
| CCAATGTGACAA  | 872.648342082724 | 0.12244766243872   |
| TGAGTCGTGAAA  | 872.653499735563 | 0.165826082684237  |
| ACAGACTCACTG  | 872.654626321197 | 0.145939413130242  |
| ACGACAACATCAT | 872.660261802911 | 0.128624027318618  |
| CGCATGTGTGAC  | 872.660844430514 | 0.201555439158575  |
| TAATCGGTCAGA  | 872.668683035192 | 0.195472054069253  |
| TCATTTGGGTCA  | 872.67204432452  | 0.225295639004034  |
| GACATTTGAGTC  | 872.676674170644 | 0.215386678970548  |
| CTAATATTACTC  | 872.67995062811  | 0.190120792558753  |
| TAGTCGGTGACA  | 872.680408552354 | 0.108226927982726  |
| CGGTCATCAAAG  | 872.696371696607 | 0.0795294935362744 |
| TAGAATGTGACA  | 872.707852142811 | 0.139966686280815  |
| ATTGCAATCATA  | 872.709933482687 | 0.168149231915366  |
| GTGGCTCTGTCA  | 872.710463225944 | 0.200902265247466  |
| GTCGTGCGTCAA  | 872.711008597574 | 0.157619875323622  |
| GTCACCACGCTA  | 872.712439894349 | 0.148691179950487  |
| CTGATGACCTCA  | 872.727121949203 | 0.109146037249247  |
| GATGACCCATA   | 872.728332777247 | 0.13450709476502   |
| GTCCGCGTCAGA  | 872.73083084242  | 0.19238993881313   |
| GGTTAATGACA   | 872.731157270584 | 0.187409582662792  |
| ACTCATTTGAC   | 872.743327636999 | 0.137799332501461  |
| AGGGTCACTGTC  | 872.746274564703 | 0.194020471500643  |
| GATGATATCACA  | 872.747331131376 | 0.155289498589186  |
| ACCATTGAGTCG  | 872.749805343004 | 0.135711354045812  |
| GGCTAAGGTGAC  | 872.757815322983 | 0.232914886584803  |
| TGCAGTCAGTAA  | 872.769613095395 | 0.186131896647488  |
| CTCACCGTGTC   | 872.77016736658  | 0.1496915656648    |
| AGTCAGACAGAG  | 872.770723656789 | 0.188467559218851  |
| ACAGTCGGTGAC  | 872.774051026405 | 0.186212929959997  |
| GAACATGACACA  | 872.788224076568 | 0.228468217030986  |
| AGACTGTGACCA  | 872.788664648362 | 0.25119674895601   |
| ATGTGACGAGAC  | 872.790793821725 | 0.177029781369982  |
| CCTCATTGCTCA  | 872.791621374737 | 0.0956793637974923 |
| ACTATGTCACTG  | 872.791948186766 | 0.157644392930311  |
| AGTCAGACTCTC  | 872.796997816681 | 0.154249339848142  |
| ACGGACTGACTA  | 872.806367692043 | 0.16968483522818   |
| TCTGGCACGTCA  | 872.813113777389 | 0.180333429356832  |
| ACGAATTACTGA  | 872.816238626479 | 0.192905045515631  |
| AGTCAGTACTAA  | 872.816520773401 | 0.181566737478653  |
| CGATATGACCTA  | 872.822240967827 | 0.1499702675917    |
| AGACTAATCTTC  | 872.828753124448 | 0.154033015617773  |
| GTCACGCGATCA  | 872.836988942303 | 0.150684549238157  |
| TATGACTTTTGA  | 872.839768466771 | 0.204880839705692  |
| AACATATTAGTAC | 872.840833681471 | 0.15507307425389   |
| ACGATGATACAA  | 872.849542454675 | 0.277319238869954  |

|              |                  |                    |
|--------------|------------------|--------------------|
| GAATCCCATGAC | 872.850388861086 | 0.0934728182675437 |
| GACTTATTACAC | 872.858745790073 | 0.136674257979928  |
| CCGTCATTGCAA | 872.863256056749 | 0.142773440268377  |
| GAGTAATCACCC | 872.871583853029 | 0.207857309688905  |
| ACTGTGTCAATA | 872.877349471336 | 0.156358728584485  |
| TCTTGGTGACCA | 872.881818840099 | 0.142928976920038  |
| CATATGTATCAC | 872.881984678298 | 0.196044350962183  |
| TATGTGACAATA | 872.882643822653 | 0.175903889703455  |
| GAGTAATAATGC | 872.884118075754 | 0.16850756841008   |
| GACTTTACGTCA | 872.898322383971 | 0.199266974570318  |
| ACCCGGATGAGT | 872.901317848071 | 0.160253215108331  |
| CTCAATGGCTCA | 872.909418927051 | 0.132406348101922  |
| AACACCAGTGAC | 872.911452959898 | 0.299680787245369  |
| ATGATTACTAAA | 872.915182946699 | 0.18478922722505   |
| GTCATGCTGGAA | 872.928154615134 | 0.147292370092257  |
| AGCCAATCAGTC | 872.933724324008 | 0.184936758570807  |
| GCGTCATGTATA | 872.936573309108 | 0.136746080830139  |
| AATGACCGAAAC | 872.952818855422 | 0.283351314646553  |
| AGTCAGAAATTG | 872.961130962004 | 0.159425591008922  |
| GACGTTCTGTAC | 872.971627000222 | 0.150317531062202  |
| TGACGCCATAAA | 872.974391629349 | 0.161771795870782  |
| ATTGTGACCGAA | 872.979152674568 | 0.169854577644443  |
| GCGCCTGATTCA | 872.980449016645 | 0.179035141172285  |
| GTGTACATGTCA | 872.984966912416 | 0.13239457889786   |
| AACGGCTGACTA | 872.987116241204 | 0.145149345440069  |
| GAGTAATTTGGC | 872.990670624658 | 0.160015439596947  |
| ATGAGTATGTAA | 872.991006619075 | 0.187674201262589  |
| CGTACCAGTGAC | 873.010750535424 | 0.143741270739605  |
| CGTGTGAATCAA | 873.012452597765 | 0.186520772906588  |
| CACCCAAGTGAC | 873.012764051333 | 0.152683881979843  |
| GCAGACTAATCA | 873.027836546625 | 0.219045620440755  |
| ACATCTAATGAC | 873.032997327863 | 0.161106680286579  |
| CGCTGGGGTGAC | 873.044262291872 | 0.268224374173929  |
| GAGGGAGAGTCA | 873.045758186992 | 0.154436823272069  |
| ATGACTTCTTCC | 873.057931324948 | 0.135479079978733  |
| GACAACCCGTCA | 873.063259000946 | 0.223370312583488  |
| TAGTGTCAGAAA | 873.066995800532 | 0.166875613177132  |
| CGGGTGAGCAAA | 873.094314002648 | 0.168726979578172  |
| TGGGGTGAGCAA | 873.095803085261 | 0.232803613078555  |
| ACAAGAGTGACA | 873.099395874886 | 0.179485398177321  |
| ATCATGATGACC | 873.102204722712 | 0.257714778390469  |
| TGATAGGTGACA | 873.105973185613 | 0.11940013536054   |
| CCTATTGCGTAA | 873.109864045903 | 0.218877560175034  |
| ACAGCTCGTGAC | 873.113713122663 | 0.206527273030398  |
| ACTCATTGCTGA | 873.122699741724 | 0.131669692629272  |
| ATCCCGTCATTA | 873.127276849123 | 0.128293054033033  |
| CACAGTCAGGTA | 873.127842792462 | 0.221036388044484  |
| ACCGGCGTCATC | 873.128603151334 | 0.169145880127401  |
| CGTGTAGTGACA | 873.135069832914 | 0.167787057987936  |
| CGTGAAGTCACA | 873.135201829992 | 0.127116332259276  |
| AATTACGCAGAC | 873.136462424027 | 0.108636091622991  |
| ATAAAGGTGACG | 873.138441670682 | 0.121461318610143  |
| TCGAGTGACAGA | 873.149652940023 | 0.164713191838089  |
| ATCTGACACTTC | 873.152567283463 | 0.139753431295994  |

|              |                  |                   |
|--------------|------------------|-------------------|
| GTCAGATCTTGA | 873.152714860919 | 0.30312599585882  |
| CACGAAGTCACC | 873.152925262538 | 0.173261348033063 |
| ATGCGTGACACC | 873.171744126372 | 0.161051614380863 |
| ATTGACACAACG | 873.175685693217 | 0.101222918769966 |
| ATGACCTGGACG | 873.177743186609 | 0.154052341171155 |
| CGCGCGTGTAC  | 873.178120006005 | 0.137175089281884 |
| CTCACCTTATGA | 873.180024189156 | 0.199745498621374 |
| TCTGATCACTCA | 873.18329601649  | 0.178470012016617 |
| GATCTGAGTCGC | 873.191226086366 | 0.146940641030607 |
| CTGACGTCAAAC | 873.193254572623 | 0.164575590319296 |
| AGCCAATGAGTA | 873.194480161803 | 0.127012507999729 |
| ATACTCGTCAGA | 873.205589049617 | 0.150212337346835 |
| CACGGATGATTC | 873.213883061736 | 0.102749948238398 |
| GGTCATAATGCA | 873.217368952328 | 0.150018938627319 |
| TCCCTAGTGACA | 873.221498634178 | 0.195718788092489 |
| GCGTCACATAAA | 873.226537964666 | 0.195016828489998 |
| GTCGCATGACCA | 873.227626560157 | 0.182974713465039 |
| CCGCTATGATGA | 873.229392520295 | 0.198925668193911 |
| CGGATCTCGTCA | 873.249389953979 | 0.149199756113646 |
| GAACCGGTCATC | 873.251140632878 | 0.136757422837685 |
| TGAATCTTGTC  | 873.252275215279 | 0.261240647798747 |
| ATGAGCCAATTC | 873.255236045079 | 0.246010691352852 |
| CTCGCTAATGAC | 873.255679590605 | 0.220562441287133 |
| AGAGAGAGTCAG | 873.26153018584  | 0.128627060416471 |
| GAGGACCAGTCA | 873.272949238746 | 0.224530361239387 |
| ATGAGTTGTCCG | 873.29800380035  | 0.09616829063079  |
| GACGTCACCAGA | 873.314520835037 | 0.129460345709467 |
| TACTCATTGCAA | 873.317145062429 | 0.206042330987286 |
| ATGACATTGAAT | 873.323007556374 | 0.158186769707387 |
| TACTCATTGAAA | 873.325764592777 | 0.185292642345865 |
| TGACGCGCACAA | 873.329755432979 | 0.176195331150321 |
| GTCACAGTTCCA | 873.330094672947 | 0.138794899589748 |
| GGCACAGTCAAC | 873.336216344464 | 0.186672025824775 |
| ACGCGAGTGACA | 873.343185191505 | 0.130643131818668 |
| CTCTGCCAGTCA | 873.348751316455 | 0.14704049708868  |
| CAGTGCTGACTA | 873.353424416288 | 0.142322118443478 |
| CCCACATGACAC | 873.356579177692 | 0.169012238367074 |
| ACTCATCCGGAC | 873.361268037761 | 0.141209426929456 |
| CCGTCGCGTCA  | 873.361490997885 | 0.181972716514175 |
| CATGCTCATGAC | 873.362969982702 | 0.130507432193536 |
| TACAATGAGCCA | 873.367738265092 | 0.161869139835416 |
| ATTGAGTCGATG | 873.375577317984 | 0.115098265665793 |
| ATGACGGCAAGA | 873.389540250412 | 0.142401775271401 |
| GGGTCATTCCAC | 873.390506825037 | 0.193781585578641 |
| AACGCGATGAGT | 873.400356474093 | 0.190042305583744 |
| AAGGGGTGACGC | 873.4098197627   | 0.122915463450708 |
| TGACGCGAACAA | 873.413397592001 | 0.194492893442548 |
| TACGTAATGTCA | 873.418512788106 | 0.210059292000677 |
| CGACTCACGCCA | 873.420529040424 | 0.12881088837134  |
| GGCGAGACTCAC | 873.453107815156 | 0.204336005577698 |
| GATGACCAGGCC | 873.454193067559 | 0.186255791296994 |
| AAAGTGTGACGT | 873.454277387726 | 0.128351172122702 |
| CATTAATGACGG | 873.455782733894 | 0.2376550886272   |
| CGTGTCCGCTCA | 873.464434066597 | 0.175536851106353 |

|              |                  |                    |
|--------------|------------------|--------------------|
| GTCACAGGAATA | 873.466596056482 | 0.109087663290073  |
| GTCACCCTACCA | 873.472332256498 | 0.170972571268342  |
| AGATGGGCAAC  | 873.473719626032 | 0.179943946663503  |
| GGATATCGTGAC | 873.481768340707 | 0.188237363916302  |
| GTGACTTCACGA | 873.483688935984 | 0.149133897827695  |
| ACTCATTGCACG | 873.484317611875 | 0.170386975786942  |
| AATTAGTCCAAC | 873.484519592922 | 0.142028640168136  |
| GTCACTATTCCA | 873.486588752592 | 0.146221356061679  |
| ACTCATTGCGAT | 873.490104517845 | 0.150897232466745  |
| ATGAGGTCATTC | 873.499590773483 | 0.10056485272855   |
| CTACAAATGACA | 873.499904403497 | 0.169703288209874  |
| CAATTCTGAGTC | 873.503232198731 | 0.151866692101569  |
| GTCACTCTATTA | 873.50396361202  | 0.165677244361427  |
| ACTCATCTAAT  | 873.509720694709 | 0.0914204789640087 |
| ACTCATTATTGC | 873.514693115148 | 0.14235639827801   |
| AATAATGACATC | 873.519342359721 | 0.174148402765996  |
| CTAGTGGTGTC  | 873.523813803341 | 0.146483432205793  |
| ACTCATTCTATA | 873.52735163407  | 0.182237080917119  |
| GATCAAGTCACA | 873.550597607709 | 0.231081672909156  |
| GTCACATCAGGA | 873.554001649583 | 0.133761931010317  |
| GACTCAATCGGA | 873.557656101142 | 0.157759197520189  |
| GGTGACGATGAA | 873.558416356996 | 0.131546546607378  |
| GCGGATGACCA  | 873.558446366777 | 0.176982883817482  |
| AGTCAGAGTGGG | 873.55956601303  | 0.190856338138047  |
| AATTTCTTATGA | 873.560825617986 | 0.194351259969595  |
| TCTCGCATGACA | 873.562787839918 | 0.137106872181349  |
| CAGTCAGAAGGG | 873.57009957892  | 0.165150554362541  |
| GTTGCTCACTGA | 873.570278939808 | 0.128048455285507  |
| TCGGACATGTCA | 873.573563361069 | 0.177295783312861  |
| TTTGTCAGAAAA | 873.575443365977 | 0.125584624736583  |
| ACGTAATGTCTG | 873.586936114157 | 0.172634400969542  |
| AGAAAGGTGACG | 873.602553635492 | 0.126776682122167  |
| CTCACCATATGA | 873.608154920662 | 0.150496366112093  |
| CGTCTCCGTAC  | 873.608895245867 | 0.16022778687512   |
| CAGCCGTGAGTC | 873.612713118948 | 0.128876249996696  |
| GGCTACTGTGAC | 873.624525779492 | 0.184605695593595  |
| AACGATGCATCA | 873.625674525952 | 0.166838301071835  |
| ATGACAGGAAGC | 873.633949641972 | 0.157991507765308  |
| ATGAGTTGTCCC | 873.634126156478 | 0.193522826978077  |
| GTCACTCGAAAC | 873.646302167851 | 0.202427005113075  |
| ACGCAGGTGACG | 873.646477123082 | 0.130654424157143  |
| GACGCATTACTC | 873.65569189504  | 0.149416511656054  |
| CGTCACAATTTA | 873.659847664805 | 0.141348746487418  |
| ATGTCACCACTA | 873.66221595665  | 0.152018146215523  |
| CTGATGTGTAAC | 873.679255911573 | 0.143075897712194  |
| GGCTGACGCTAC | 873.691013259627 | 0.189789985697834  |
| CATAAATACTCA | 873.69492219471  | 0.118853331121861  |
| AGTGACGAGATC | 873.697506317351 | 0.176855860535485  |
| ACTGAGTCGATG | 873.701524243448 | 0.22151658612349   |
| AAATAATGACAG | 873.722053983061 | 0.127834589931895  |
| ATATAACGTCAC | 873.723744170278 | 0.201792389343753  |
| GATGAGCCAACA | 873.724110195647 | 0.177606771720331  |
| GGTAATGACCAC | 873.726184418529 | 0.195969569238281  |
| CTGACATATGTA | 873.731207396366 | 0.208698032049882  |

|               |                  |                    |
|---------------|------------------|--------------------|
| CTATGATTCTTA  | 873.734164727893 | 0.15478072991472   |
| AAGTGTCAGCAG  | 873.734200006946 | 0.129553372426434  |
| TGTGACGACGAA  | 873.739146202579 | 0.14346588346387   |
| AGTATTAATCAC  | 873.743474276921 | 0.176389457884386  |
| AAGCGGGAGTCA  | 873.755447588983 | 0.15736975586863   |
| TAGATTCGGTCA  | 873.76280201082  | 0.168952356276756  |
| ATGCCAAATGAC  | 873.784619964479 | 0.169722963517194  |
| CGTCACTATGTA  | 873.787380196136 | 0.212321624782394  |
| ATTAACCTATTA  | 873.799494030461 | 0.212499916094067  |
| GTGATGTGACAA  | 873.802411420617 | 0.189775270970028  |
| GTA AACCTGAC  | 873.813442517147 | 0.262476230685216  |
| CCGCGTCACTAG  | 873.828050928785 | 0.198630944838436  |
| TAACATGAGCAA  | 873.837543302405 | 0.137730603603429  |
| AAGTCTATGAGT  | 873.841223520058 | 0.252276248736446  |
| CATGAGCAAGAC  | 873.8434730694   | 0.100853143594472  |
| ATGAGTATCATG  | 873.847690533932 | 0.176893115543624  |
| GACACGGCTGAC  | 873.869807640377 | 0.251596975674173  |
| CTGTCACCGTCA  | 873.872002221672 | 0.143873803236121  |
| CACAACATGTCA  | 873.877410239799 | 0.191997936825596  |
| GATACTCTGACA  | 873.886122099941 | 0.246447245222463  |
| CACTCATCGATG  | 873.889884009865 | 0.188717822770389  |
| ACGTCAGACATG  | 873.891243514956 | 0.203503054244149  |
| CGTCATCCACA   | 873.891387185544 | 0.177675606155006  |
| GTCACCTTCTGA  | 873.913572083911 | 0.123661859699774  |
| ACTCATCCACAA  | 873.927124000454 | 0.137762101303773  |
| ATGACAGTCGTA  | 873.928976822949 | 0.181877965431152  |
| ATTCTGTGTCACG | 873.93129266045  | 0.160698130677316  |
| AAGCCGACTAAT  | 873.933924998198 | 0.1337007559829    |
| GACTCACTACCA  | 873.935769089189 | 0.146250949723002  |
| CCCTGTGACAAG  | 873.938650813784 | 0.144518958733078  |
| AACTGACGACTG  | 873.939143931963 | 0.154147703222563  |
| ATGATAGGTCAC  | 873.946223912153 | 0.131925193963029  |
| GGGGTTTGTAC   | 873.946243203766 | 0.255569110990177  |
| CCCACCTGGTCA  | 873.950814050198 | 0.184645920795282  |
| CATATGGTCATG  | 873.951008185973 | 0.204702049846954  |
| ACCAAAACGTCA  | 873.954627820509 | 0.149909673932324  |
| GTCACTGAGCCA  | 873.954914017264 | 0.157499825496122  |
| GCGTGACCCATA  | 873.966291347256 | 0.274495815191677  |
| GAACGTCGTAC   | 873.966320001254 | 0.141800567110599  |
| CATACGTGTCAG  | 873.97288443616  | 0.174106448958265  |
| GAGCCCATGACA  | 873.979795296025 | 0.151353750386119  |
| AGAAGTGACCAA  | 873.996842415443 | 0.0892539443004738 |
| GGTAAAGTGTC   | 873.997226153791 | 0.18117434286111   |
| GAGTATGATACA  | 873.997984071242 | 0.123678751655171  |
| GGTCATCTGACA  | 874.004566584534 | 0.203272256970691  |
| GATTGTACGTCA  | 874.014926583729 | 0.123208211831412  |
| AACTTAAGAGTC  | 874.015094515947 | 0.231582722287501  |
| TGACTGGCATCA  | 874.016289663165 | 0.151082513709773  |
| ACTCATCCAAAG  | 874.032346690915 | 0.111242944430795  |
| ATTGAAGCGTCA  | 874.037271435481 | 0.126287074446797  |
| TCGTCACGTGAA  | 874.046951376637 | 0.144790422581483  |
| ATGACAACGGCC  | 874.047752693308 | 0.20514778876563   |
| ATGAGTGAACAT  | 874.049058812923 | 0.148267040586302  |
| GCCTACTGTGAC  | 874.052456737205 | 0.127818390777093  |

|               |                  |                    |
|---------------|------------------|--------------------|
| AGCCTGACTCGG  | 874.063049908346 | 0.127263638630051  |
| CAGTCAACGAGA  | 874.063222431169 | 0.137129217337714  |
| GCGAGAGAGTCA  | 874.065098031442 | 0.15633322111061   |
| AGATGGCTAATC  | 874.066193088973 | 0.117128105650885  |
| ACTCATTTGGAT  | 874.073136159192 | 0.186098758553179  |
| CGATTAGTCCTA  | 874.075758943689 | 0.145811799350798  |
| TAGCATCACTCA  | 874.085741757773 | 0.131253322068543  |
| ATGGCGTAATCA  | 874.089133503441 | 0.172723938823989  |
| TTGTCACCACAA  | 874.093364969802 | 0.129526608990416  |
| CTGACACCGTCA  | 874.099399708542 | 0.143733500883677  |
| AACAATAATGA   | 874.103255734856 | 0.199296154619489  |
| GATGTGACAGCA  | 874.116073494259 | 0.141534793039789  |
| TATGACCCCTCA  | 874.126570921627 | 0.177722335332009  |
| TAAATAGTGACA  | 874.133230001132 | 0.155416192689626  |
| ATAGTCAACAAA  | 874.135519716973 | 0.138679248439317  |
| GAGGAGTGTGAC  | 874.171635991427 | 0.125543984359069  |
| CAGGTATGTGAC  | 874.173441802455 | 0.271565566762262  |
| GAGCCACGTAAC  | 874.173939175339 | 0.170704180909727  |
| CCCGGTAGTCAC  | 874.178446309304 | 0.123066355925939  |
| GATTATTACATTA | 874.191380046293 | 0.221635097666375  |
| CAGGAGATGACG  | 874.192520552406 | 0.188924714034692  |
| TAAGGGTGACGA  | 874.194818389515 | 0.118164717447056  |
| CAAGACGCGTCA  | 874.195782116533 | 0.1452365180001    |
| AATAATGAGTGA  | 874.20633764551  | 0.209181579200853  |
| CGTCATGCCTCA  | 874.210664580562 | 0.158457727623106  |
| GGAAATCGTGAC  | 874.210835200895 | 0.183729931500391  |
| ATGTGTAACCGC  | 874.212248823737 | 0.184156264017634  |
| CAGTCAGGCACG  | 874.212859349533 | 0.2475265643513    |
| GTTAGAGAGTCA  | 874.215394409599 | 0.101570617955388  |
| CGTCACCGGCA   | 874.232727488697 | 0.181373702944879  |
| GCGTCACTTAAA  | 874.233396948246 | 0.1449988219088    |
| AACGGGTGACGC  | 874.234959096769 | 0.165697053877404  |
| TACTCTGTGACA  | 874.237591812374 | 0.157533594643441  |
| ATCTTGTGACAA  | 874.241704800898 | 0.188832436669679  |
| GTCATTGGCAAC  | 874.244155950776 | 0.162574862680427  |
| CTACTTGGTCAC  | 874.248949686178 | 0.143024234175084  |
| CGTCATGAAACA  | 874.252464083518 | 0.191082353693345  |
| CTCTGAAGTGAC  | 874.264924091216 | 0.14136158828174   |
| ATGACGACTGTC  | 874.269127052338 | 0.222235379997065  |
| CGTACCATCTC   | 874.26941903094  | 0.160305690764684  |
| AGTTGTATCATC  | 874.271919192906 | 0.131852505606116  |
| AACGACATGACA  | 874.275997021195 | 0.113709347337476  |
| GGTGATGCAACA  | 874.276116106493 | 0.202682937263532  |
| AGGGCGTGACAC  | 874.281857531052 | 0.201044028507682  |
| AGTTGTCACGGC  | 874.282694411203 | 0.18674205159993   |
| CCGGGTGGTGAC  | 874.284814163274 | 0.189646982876354  |
| CGTACCACAGA   | 874.287544115942 | 0.210447759784345  |
| GCAAATCATGAC  | 874.291474689625 | 0.170095250260237  |
| ACAACATGACAT  | 874.295841718549 | 0.184154563232431  |
| GCAGTATGTGAC  | 874.300290875114 | 0.134862471484685  |
| CTGTCATTATAC  | 874.302660991197 | 0.0947351056980891 |
| AGCACCATGACA  | 874.318476725313 | 0.200328848921699  |
| GCGGTCAATGAC  | 874.325029017675 | 0.142773202379134  |
| ATAGCTTGTGAT  | 874.325317232136 | 0.149527401922812  |

|              |                  |                    |
|--------------|------------------|--------------------|
| ATGTGACATTAC | 874.325605392818 | 0.204414242454377  |
| AATCATATTGAC | 874.328019000164 | 0.142514435268715  |
| ATGCTCTAGTCA | 874.332485460592 | 0.140971918074523  |
| CTCATGAGATGA | 874.362942394126 | 0.145039078605887  |
| GACGCTTATGAC | 874.363466897187 | 0.241807789461379  |
| TACATGTGACCA | 874.368590093906 | 0.246450458926847  |
| AGTCAGATTTGA | 874.376043388719 | 0.082131457943476  |
| ATTTAGTACAAC | 874.386596428669 | 0.147907232167367  |
| CTATTACTCGAC | 874.386698545482 | 0.15276630663348   |
| GACGTTGTGACA | 874.386834981887 | 0.259247954789795  |
| GTCACCAATAAC | 874.394410085377 | 0.0776924022800797 |
| AATGACGGGGAT | 874.409196783274 | 0.131709327840249  |
| GGAGACAATGAC | 874.414049443077 | 0.100140876678246  |
| GTAATCATCATA | 874.414269986975 | 0.157333366151425  |
| ATCGTATCGTCA | 874.420632020032 | 0.200957607385106  |
| ATGACGAGAGAA | 874.428051184348 | 0.177173996153448  |
| CCGTTGTCGTCA | 874.441869000762 | 0.168988938401384  |
| TCTAAAACGTCA | 874.442601096064 | 0.171556193385039  |
| AACAACATCA   | 874.442627203144 | 0.163680043556641  |
| GTCATAAGAAA  | 874.445680425374 | 0.239044301970483  |
| GGGTCACGTTTA | 874.448965131502 | 0.146482300535602  |
| GCTACGTAATAA | 874.450063226534 | 0.223800165096176  |
| GACTAATTCGAA | 874.450762079949 | 0.186479837939272  |
| GTGACGCTCATA | 874.452379183892 | 0.207322243319462  |
| GGTGACGCCTCA | 874.454357828921 | 0.206691593958572  |
| AGTCAGATTTGC | 874.454473406765 | 0.190455584635032  |
| AATTGGTGACCA | 874.467096409961 | 0.159934563901211  |
| AAGATGATGAGT | 874.467552413722 | 0.147105761393902  |
| ATGACGGCGCTG | 874.46795829334  | 0.175029723072163  |
| TGACGCTGATAA | 874.469871426731 | 0.250405534461269  |
| ACGGTCATACGA | 874.471906519534 | 0.242107163830775  |
| ATCAGAATGACC | 874.48308901393  | 0.195530573865938  |
| ATCTGTCAACGG | 874.48686082237  | 0.158989142422385  |
| GCGGGTGATGAC | 874.492383625733 | 0.117354434193999  |
| GCGACTCGTGAC | 874.495204502326 | 0.19049576266186   |
| ACTGTCATGAGG | 874.498788901416 | 0.178014268833554  |
| CATAGGTGACAA | 874.498831552923 | 0.14335121171588   |
| GCGCCATGACAC | 874.510036069708 | 0.203852999389253  |
| CGGTTTGTACCG | 874.514185041437 | 0.19367448657253   |
| CTTTAACGTCA  | 874.514247510936 | 0.163268860247373  |
| CTTTACTTGTC  | 874.514508844643 | 0.190152415863174  |
| TCGGCGTCACAA | 874.518350135996 | 0.135636808750681  |
| CCTAATGAGCCA | 874.519810459697 | 0.147970932258365  |
| TCACACCTGTCA | 874.524754878212 | 0.241188005438548  |
| ACGTCATGATAG | 874.531424656605 | 0.199757154850742  |
| GAATCATCGAAC | 874.540096268161 | 0.198857951817864  |
| TGAAACGCGTCA | 874.544218596309 | 0.130598858190171  |
| ATGACGGCAATA | 874.55108083055  | 0.128228814029767  |
| TGACGAACAGAA | 874.555155712929 | 0.176675589042286  |
| ATGATCTGACAC | 874.567366256792 | 0.191426767439828  |
| ATAACAGTTCAC | 874.568998144582 | 0.186584374572117  |
| GATTCTAGTGAC | 874.577033981384 | 0.179810850259804  |
| AGTGCCAGTCA  | 874.581320157746 | 0.147128414871775  |
| CAGTCAGCACCG | 874.588356329813 | 0.191811077132803  |

|               |                  |                    |
|---------------|------------------|--------------------|
| TGACCCATGTAA  | 874.599423434455 | 0.142197947782427  |
| ACGACATGACAA  | 874.600733707754 | 0.129847493329788  |
| ATCTCTGACGGA  | 874.610130179596 | 0.195281223282267  |
| ACGATGTACAT   | 874.612761339483 | 0.144727796476501  |
| CTGACTCCGTCC  | 874.634576717393 | 0.147161867295633  |
| GAGTGCGGTGAC  | 874.636214851364 | 0.162609209050082  |
| CCACCTTACTCA  | 874.637296536966 | 0.128401268500911  |
| GTGACACGGATA  | 874.64328383222  | 0.143207570401613  |
| CGTCAGTAAGAC  | 874.645894304816 | 0.192529007296729  |
| TCGACTTTGTCA  | 874.650361261676 | 0.182776377302736  |
| AATCGACTCAGT  | 874.654555357081 | 0.125950175531983  |
| GTCATGTGCAGA  | 874.659408452025 | 0.220260692065279  |
| ACTCATCTTCT   | 874.662806620238 | 0.169235647862282  |
| CCGAAATGACAA  | 874.671730159152 | 0.158769767990599  |
| CTCATGACAGAG  | 874.672576453655 | 0.148965039242617  |
| AGACCACGTAAC  | 874.672708354664 | 0.0980828062676042 |
| CGCCCGTACTA   | 874.676221577842 | 0.126282042840865  |
| ATTAGTCTGCTA  | 874.677351310795 | 0.11015162394455   |
| ACGGTCCATGAC  | 874.681130422793 | 0.132534024481195  |
| ACAATCCATGAC  | 874.682408540251 | 0.230433540242873  |
| AGCTAACAGTCA  | 874.715219630037 | 0.0995801714311231 |
| ATAGTGAATCC   | 874.719834875439 | 0.145231440962718  |
| TCTACCGGTCA   | 874.722704613317 | 0.16386972184332   |
| GATAGTGACAA   | 874.723109285032 | 0.127791558390939  |
| AAGTCACCC TTC | 874.724398649392 | 0.126161106617567  |
| AACGCGTACGCG  | 874.725284868299 | 0.137685888675825  |
| AATCCGGTCATC  | 874.737420175372 | 0.122101362033098  |
| ACTCATACACAC  | 874.742963627904 | 0.138188582686577  |
| TGACGCGATGCA  | 874.743585840485 | 0.230305775254733  |
| ATGCGTCTTACA  | 874.748904215013 | 0.158813796124077  |
| ATGCATGATTAA  | 874.755645504817 | 0.142404264451492  |
| CGACTAATCATC  | 874.768281292414 | 0.148622821649072  |
| CGATGACCGGTA  | 874.768539946941 | 0.141282369327938  |
| ACATTACGCAAC  | 874.772056493359 | 0.163129097708983  |
| TGACGACATAAA  | 874.778605838222 | 0.150106724920485  |
| ACACGCTAGTCA  | 874.778810732713 | 0.165351120889037  |
| GACTAATACCGC  | 874.7807412754   | 0.184011770856362  |
| CTGCTGACTTAA  | 874.783947394212 | 0.12320028688505   |
| AAGCAAATGACG  | 874.78697850789  | 0.265515600273684  |
| GCTAAGAGTGAC  | 874.791599144243 | 0.11606817394764   |
| GTTGATGAGCCA  | 874.798442411485 | 0.136656969823635  |
| AATGTGTAACAA  | 874.825048053641 | 0.242178856879511  |
| ACTCATCTGAT   | 874.826012073399 | 0.145489461650914  |
| GTATTGTCACGA  | 874.831914264673 | 0.129042581480783  |
| TCGACTTGCTCA  | 874.833874644308 | 0.155360109952818  |
| ATGCCGTATGAC  | 874.836148505686 | 0.157907158659626  |
| CGTAAACTGTCA  | 874.836186631112 | 0.167122359490235  |
| ATGCTAGGTGAC  | 874.840508042804 | 0.19544624356744   |
| AGGTGGTGACGA  | 874.845988055827 | 0.132908194799261  |
| AACCAAGTCAGA  | 874.850343715412 | 0.199122910284984  |
| AACGAGTAATAA  | 874.859472047099 | 0.194883701298781  |
| AGTCACGGGAGG  | 874.862269639303 | 0.190515148519887  |
| AATTGCACTCAT  | 874.869225206174 | 0.180637703134946  |
| AGCCCATGAGTC  | 874.870860652563 | 0.175254263698069  |



|               |                  |                    |
|---------------|------------------|--------------------|
| ACGTCGAGTAAT  | 874.875390667737 | 0.12329086414945   |
| GTAATAAGTGAC  | 874.896537599562 | 0.174997312229302  |
| GCTCATTGCTCA  | 874.898412221939 | 0.168655698484272  |
| CAGTCAGCGCGG  | 874.90547098983  | 0.151443025620639  |
| CCCATGGGTGAC  | 874.907147179386 | 0.19867436099076   |
| AGTAATGTCATG  | 874.908352184288 | 0.11332998572002   |
| AGCCCATGACGA  | 874.911916841227 | 0.140779376444787  |
| AGGCTGTGTCAG  | 874.91820221334  | 0.148899811131107  |
| ATGTATCACTTG  | 874.928167101828 | 0.12944635497322   |
| ATGTCACCTCGG  | 874.930400839204 | 0.150929977147244  |
| CCATGGTGTGAC  | 874.931457953872 | 0.216418048205741  |
| CCTGCTGACGAA  | 874.9363135016   | 0.193982548155666  |
| AGTCAGATCGCC  | 874.941821322954 | 0.136556072715412  |
| TATATGACCGCA  | 874.942430688657 | 0.146521577123916  |
| CGCTGAGCAATC  | 874.950182279712 | 0.226241954059466  |
| ACGTGACGAACT  | 874.952462524566 | 0.213789640234254  |
| GTTGTCACCCAA  | 874.95276401489  | 0.163095516942558  |
| AATTGGGGTGAC  | 874.953148232705 | 0.175652861711501  |
| AAGTCACCTTTC  | 874.95839751357  | 0.0907310582831781 |
| AAGGGTGTGACG  | 874.958494582557 | 0.130569594577008  |
| ATGACAAGGAAA  | 874.961520623218 | 0.144341131137539  |
| CTAACAGTCAAC  | 874.965606107279 | 0.151794489992127  |
| GAACGCCGTGAC  | 874.966660005293 | 0.18789136951235   |
| ACCGATTTATGA  | 874.968489434787 | 0.190258799664807  |
| AGTACAACCTCAC | 874.968885741119 | 0.187111900227182  |
| CCCCTGGATGA   | 874.972253266132 | 0.178260640038734  |
| AGTGCTACTCAT  | 874.978165851958 | 0.150128992341868  |
| ACGTGTGACAAG  | 874.978837725098 | 0.240481194413042  |
| CGCGGTGGTGAC  | 874.979528898565 | 0.243535275528143  |
| AGGGTCACATCA  | 874.979792303614 | 0.146759479112289  |
| AGCGTGGTCACA  | 874.988211132483 | 0.175931358443388  |
| CAATCTCGTGAC  | 874.993793020909 | 0.219046224448671  |
| GTAGATGGTGAC  | 874.997489663078 | 0.161325353454927  |
| CCGTGAAGTGAC  | 875.000166693147 | 0.171557553731637  |
| GATTGACTGTGC  | 875.002967870454 | 0.119730151617097  |
| CCGAGATGACCA  | 875.003300331441 | 0.12736134243688   |
| GACTTAGTCGGC  | 875.009320675225 | 0.203153445433825  |
| ACCTAGAGTGAC  | 875.012289328799 | 0.126330931823228  |
| ACTCATTGAGAT  | 875.017726900115 | 0.237499323086035  |
| TGAGTCTGTCCA  | 875.024562824086 | 0.210543253369518  |
| GATGTGTCTGAC  | 875.026131032882 | 0.186622337631223  |
| GGTGACAATAAC  | 875.032135436216 | 0.160918505001015  |
| ACCCTGGGTCAT  | 875.036621013995 | 0.134358061833285  |
| TGACGCTACAAA  | 875.047778745241 | 0.143285616034837  |
| ACTCATCGTCAG  | 875.062849194029 | 0.0675378680721904 |
| ACATGACAATAA  | 875.069939575413 | 0.216511670522754  |
| ACTTCTGACTGC  | 875.076600677508 | 0.141115807236142  |
| AGGCGTCACCCA  | 875.077315723963 | 0.149925010987374  |
| TCTACCCAGTCA  | 875.092907289983 | 0.138148551905313  |
| AAAAGTGTGACA  | 875.096870300881 | 0.122621087317397  |
| AGTCAGAGACGC  | 875.131849514514 | 0.151330208845621  |
| ATCAGTTGACTG  | 875.137349524722 | 0.205733000220243  |
| CACTGTGACAGC  | 875.147651822338 | 0.148375061006368  |
| TACACCGACTCA  | 875.147839435058 | 0.156024689331145  |

|               |                  |                    |
|---------------|------------------|--------------------|
| CGATATGTCAGC  | 875.151953765504 | 0.139058734430875  |
| AACGATGAGCCT  | 875.160364621449 | 0.187532782814668  |
| ACTCAACATGAC  | 875.161349347647 | 0.195329463243051  |
| ACTGCGTCAAAC  | 875.162302443458 | 0.201973405708768  |
| GGGACACAGTCA  | 875.165943058872 | 0.132264609947169  |
| CCAGGCCATGAC  | 875.167546005045 | 0.217463804569442  |
| ATCGATTAGTAC  | 875.171071592155 | 0.156583832210837  |
| AGACTAAGTGAC  | 875.176449083317 | 0.18441215929159   |
| AGATGAGTTGGC  | 875.188444241872 | 0.124511415156445  |
| AACTTAGTAATC  | 875.197701513189 | 0.148973699221686  |
| AAGACATCGTCA  | 875.202103622305 | 0.0873774365505586 |
| ACTCATTATCTG  | 875.203741175151 | 0.164973228526847  |
| ATTAAATTGTCA  | 875.209780140978 | 0.181725560037372  |
| CCCGTTTAATGA  | 875.210679223335 | 0.130277378583733  |
| AGTGTGATTAAT  | 875.212472954706 | 0.150017859406827  |
| CAAGGTCATAAC  | 875.214866077839 | 0.179201221770304  |
| CGTTCTATGACC  | 875.221953770313 | 0.163300385572693  |
| TATCGGAGTCAA  | 875.247245969589 | 0.127275405958635  |
| GGTTGCAATGAC  | 875.252844536193 | 0.170422925012603  |
| CGACTGACACAG  | 875.261688171924 | 0.121606897358908  |
| ATTCTAAGTGAC  | 875.266669647099 | 0.184990659014497  |
| ATGTATTATAG   | 875.272801647534 | 0.127137373013716  |
| ACAATTGAGTCT  | 875.273665459308 | 0.182034732196393  |
| CTCTTGTTGTCA  | 875.281068961042 | 0.134546905747652  |
| AGTGACCACTCA  | 875.282667863889 | 0.137387358534577  |
| GGAAATGGTGAC  | 875.283838085322 | 0.205694302957417  |
| GTCACGGCCAAC  | 875.291891434441 | 0.179597141888909  |
| CTATTGACACAA  | 875.296130390101 | 0.146614613036175  |
| CTCAGACTAATC  | 875.300650067687 | 0.173447218159564  |
| ATGAGTTAGTAC  | 875.304399040682 | 0.143660383778307  |
| GACTAGTAATAC  | 875.305585933876 | 0.150069668662963  |
| ACGGCAATGACA  | 875.316766199378 | 0.147997411230098  |
| CTACTCATCTTA  | 875.317945866174 | 0.123019026596381  |
| GGAAATAGGTGAC | 875.320504331323 | 0.13494835360091   |
| CAGTGAGTCCGA  | 875.35230313975  | 0.14398144141104   |
| AACTATAATGAC  | 875.354900810123 | 0.180524300521552  |
| GAGTCAAACCCA  | 875.368518418365 | 0.198286947665999  |
| CCGCATAGTCAG  | 875.369275836313 | 0.130538145901931  |
| AATCTAACTCAT  | 875.376415273048 | 0.185979779312127  |
| GAAGAATCATCA  | 875.383398969197 | 0.126126386306474  |
| CGATGGTGACAA  | 875.38871373676  | 0.243280246089845  |
| ATTTCATCTGTCA | 875.390485655566 | 0.157449424217347  |
| TGCTTTGACACA  | 875.396801090999 | 0.158929073584463  |
| TCCCATGTGACA  | 875.405184123226 | 0.112744111885142  |
| GAAGCCGGTGAC  | 875.407996618001 | 0.150039490805331  |
| CATGAGTCCGTC  | 875.411381437753 | 0.125672378462372  |
| CAGGACGTCATC  | 875.414597142069 | 0.159971632520342  |
| AATTTGGTCAGC  | 875.417466149015 | 0.14798769536316   |
| CAACCCATGACA  | 875.430798248478 | 0.164775886398139  |
| GCTAGGTCATAC  | 875.435479890257 | 0.193391379440359  |
| AATTAGTACGAC  | 875.437102039233 | 0.143847677367358  |
| CAAGTAATGACA  | 875.439580132188 | 0.210161085364062  |
| CGTCACTCAGGC  | 875.444316806458 | 0.135587575682219  |
| ATTACACAATTG  | 875.46957375125  | 0.159225275461666  |

|              |                  |                    |
|--------------|------------------|--------------------|
| GTCATTGATAGA | 875.479510075441 | 0.0916774486630889 |
| ATATCCATGACA | 875.47987570075  | 0.163897994813937  |
| CAACCGCGTCAC | 875.481421152476 | 0.08092741913921   |
| TGGGCAATGACA | 875.483165348867 | 0.143198244231694  |
| GGAACCGTCACA | 875.486488805198 | 0.18445082646039   |
| TACGCATCGTCA | 875.486646817032 | 0.122334217412607  |
| AAACTACTCACA | 875.489949732469 | 0.107410504825094  |
| CACATATTAGTA | 875.496735417952 | 0.283379818216123  |
| AGATCTGTCAGC | 875.517737945033 | 0.119067825082871  |
| CACGTCACGGCC | 875.526051750536 | 0.155488891934328  |
| GTCATGTTAGCA | 875.52613373625  | 0.137584662527571  |
| AGAAGAGCTTTA | 875.529201318921 | 0.123625822240448  |
| TGACGTTGTAAA | 875.53370100625  | 0.18126340075304   |
| ATGTCACCAGCG | 875.534152753249 | 0.0990809962825784 |
| CTATTACTCCTA | 875.553650376795 | 0.132461579024671  |
| ACGTGATGTAAC | 875.557076718526 | 0.129454034958006  |
| CTGTGCTGACTA | 875.565847224723 | 0.214205381529794  |
| AATGTGGTGACG | 875.56810632191  | 0.131566072486436  |
| ATGGGGTCATCA | 875.57017160181  | 0.153057101265139  |
| CGATAGTAGTCA | 875.58284952521  | 0.152061231117879  |
| ATGATGTGTGCA | 875.583220295396 | 0.272227876238857  |
| GTATAGCATGAC | 875.589473259329 | 0.226104819293099  |
| CGAGCCCGTCA  | 875.600149536776 | 0.218319124649046  |
| GGCTCATAGTTA | 875.60249664778  | 0.184762923467963  |
| ATGACATTAGCC | 875.606380504725 | 0.217872860479149  |
| GATTACTATTCA | 875.612302770721 | 0.197159550379081  |
| AAGTGACGATAC | 875.613863001607 | 0.213448121538265  |
| CGCGCTTGTGAC | 875.614678274326 | 0.168985123419998  |
| CTGTGGCGTGAC | 875.618903002833 | 0.135904956505834  |
| GTGGTCACACGA | 875.639095511177 | 0.179092443694801  |
| CTGTGTCAACTA | 875.654255521669 | 0.174465353620393  |
| GTCATCTGCGGA | 875.661247242735 | 0.209719666533288  |
| ATGTCATGCATC | 875.66904940358  | 0.198688883114023  |
| GCCTGATAGTCA | 875.669705835509 | 0.236204658635168  |
| CGTCACCCTGTC | 875.681711877537 | 0.088326566936627  |
| GATGAGTGTTC  | 875.68904162953  | 0.147039849541521  |
| ATTCCAAGTGAC | 875.689810734346 | 0.24888036100611   |
| TCATGGTGACGA | 875.697066750555 | 0.143978220970735  |
| AGCCGCTGAGTC | 875.703125965002 | 0.243291395163686  |
| TGTCACGCACAA | 875.719691021272 | 0.224284757472153  |
| ACTAATTA     | 875.722580985813 | 0.198741365278319  |
| ATGCTCTGTAC  | 875.748032539665 | 0.136650023416022  |
| CAGTGAGTCCGC | 875.748371367278 | 0.136297300304322  |
| AGTAAAAGTGAC | 875.75558625469  | 0.167509749744383  |
| CGAGTATCTGAC | 875.768552608238 | 0.165265845981455  |
| GCCGTGTACGC  | 875.775285354845 | 0.166524775210733  |
| GGATTAATGACA | 875.780193257818 | 0.128598507493708  |
| AGACTCAATGAG | 875.785197890031 | 0.165930455292937  |
| AGATTGGTGACG | 875.795216418843 | 0.16931190285615   |
| GTACAACATGAC | 875.807450843144 | 0.170651863392871  |
| AGGAATTACGCA | 875.808774135529 | 0.13625694455951   |
| ACGACTCAGTCT | 875.817870422475 | 0.153986631258621  |
| GTAGGTGACCCA | 875.819152107538 | 0.184659488895495  |
| ACGGTTGACTGA | 875.827436323492 | 0.230663529446574  |

|               |                  |                   |
|---------------|------------------|-------------------|
| ACGCAGCAGTCA  | 875.828126082276 | 0.178576987815703 |
| GTCACTGAATAA  | 875.838656178117 | 0.141509161901634 |
| ACTCCTTATGAC  | 875.850541839361 | 0.127008113904107 |
| GTCACGTTCCCTA | 875.858181743415 | 0.169971867879378 |
| AGATACGGTCAT  | 875.869804235587 | 0.142448864884308 |
| ACACCTTGACTC  | 875.871554166141 | 0.159936796127251 |
| AGATGTGTCTTA  | 875.876677301948 | 0.164542283834118 |
| CGTACTGTCACC  | 875.879309459336 | 0.146328773041647 |
| AGGACTTCGTCA  | 875.882715444588 | 0.165339180345792 |
| CATCGTGCACC   | 875.884520439139 | 0.136103040120683 |
| ATTCCATGAGTA  | 875.888291296527 | 0.13817092489477  |
| GAGTAATATCTA  | 875.893744767266 | 0.124909295183193 |
| TTGGTGAGCAAA  | 875.898057806115 | 0.200761591366187 |
| GCCTCGGTGTCA  | 875.903126851042 | 0.200205740433129 |
| CTGATTGAGTAA  | 875.90938333233  | 0.147378677556571 |
| AGTGTCACGTAG  | 875.909891099646 | 0.136838065696335 |
| TATCTCCAGTCA  | 875.910694487843 | 0.133040857776595 |
| GTCACCTCGGCA  | 875.910768599761 | 0.160341166602413 |
| GGGTGAGTACTA  | 875.912060455329 | 0.107413520412569 |
| ATGACAACCGTG  | 875.916745360426 | 0.186836169087216 |
| CAAGTGACGATG  | 875.922838902466 | 0.140990523971885 |
| AAGTCACTAGCA  | 875.930597875624 | 0.232686349719072 |
| CTAATTTGACTC  | 875.936180688548 | 0.123760578956317 |
| CTCGTACGTGAC  | 875.936859894334 | 0.181704497019327 |
| ACGTTACTCAAC  | 875.938942134953 | 0.230131444188856 |
| AATCGTGACAGT  | 875.942181791746 | 0.158446478693589 |
| TATGTCACTAGA  | 875.944015684554 | 0.13803708616284  |
| AAGACAACCTCAT | 875.944458717453 | 0.125072169248891 |
| ATGACATCTCTG  | 875.945162187307 | 0.172351559915123 |
| ACAGCGTGACGC  | 875.956421185504 | 0.131257737127913 |
| AGTACACATCAC  | 875.957468948273 | 0.131542371858546 |
| CGACTAATCCTC  | 875.961237622261 | 0.134659060334044 |
| TCCCTAGTGTC   | 875.966195075188 | 0.14704785474391  |
| TGACTGCTTCCA  | 875.967687910577 | 0.207207242902744 |
| CACAATGATACA  | 875.972018151198 | 0.190806573460649 |
| GTCACGACGAAA  | 875.977246672319 | 0.22788809595234  |
| ACTCATCATATA  | 875.990910324782 | 0.180926116136258 |
| CCTCCTGTGATA  | 875.995542387484 | 0.158924275214927 |
| CAACGGGGTGAC  | 875.99817816582  | 0.178296222004012 |
| AAGACTTCTCGT  | 875.999098078255 | 0.102785496568946 |
| AGTAGCCGTCAT  | 876.002903704431 | 0.141474189539413 |
| ATGACCTAATGG  | 876.008157650143 | 0.168058741689111 |
| CGTACTAAAGA   | 876.012142425822 | 0.23451016520108  |
| TACTTAGTGACA  | 876.016450013683 | 0.172474444248807 |
| GCTCTCGGTGAC  | 876.017627377002 | 0.141218598822217 |
| TCTTCCGCGTCA  | 876.017729982515 | 0.132248055320053 |
| ACGCTGTGACAA  | 876.017982738438 | 0.139560172627416 |
| CTTCTATTAGTC  | 876.018746239181 | 0.133846887133065 |
| GGAAGATGACCC  | 876.021769606362 | 0.194426769965518 |
| ATGAGCCAACTA  | 876.028244030716 | 0.138147692569832 |
| ATTTGCGGTGAC  | 876.042689784798 | 0.149744802569947 |
| CATCATGAGTAC  | 876.04303957444  | 0.160167133609584 |
| GGTTGGCGTAC   | 876.04663008949  | 0.188969391125984 |
| GCCCTTGACGCA  | 876.049114451552 | 0.186178833158533 |

|              |                  |                    |
|--------------|------------------|--------------------|
| CTACTGGATGAC | 876.050471162805 | 0.187537058916502  |
| CGTCACCAGCAA | 876.051401449111 | 0.239208585452582  |
| CAGCTTTGACTA | 876.053671830473 | 0.142575428058528  |
| AAGTCACTTCGA | 876.058128175653 | 0.126179904281258  |
| AGAGAGTGACGA | 876.076956542057 | 0.137749084834475  |
| AATACGAGTGAC | 876.085103578736 | 0.15137114198642   |
| GTGAGCAAGTTA | 876.087090502503 | 0.164475596851091  |
| ATGTCATGTTTC | 876.088769059647 | 0.282321837170217  |
| TCATACGGAAGA | 876.092448886411 | 0.146343735744216  |
| TCTGACTGCTAA | 876.093748681814 | 0.137268843156262  |
| AGTGTCAGAGCA | 876.098460247574 | 0.168955450653656  |
| ATGAGCCAGCGA | 876.105648473987 | 0.161092998896093  |
| ATTAGTCGCATC | 876.105851225219 | 0.147274564206698  |
| ATTAGTAAGGCA | 876.110531225228 | 0.199739576899439  |
| GAGTCAAACCCC | 876.115638309396 | 0.147649246284529  |
| GGTCATCTATCA | 876.118429975767 | 0.239903239563955  |
| GATTCGACTCAA | 876.126214941147 | 0.180101930654065  |
| ATGAGGATGACC | 876.127830225728 | 0.177057687059012  |
| GTGCAGATGACA | 876.132513320355 | 0.133943633196601  |
| ACTCATCAATGC | 876.133358370626 | 0.135453246000233  |
| CTGCGTGGTCAC | 876.133681016441 | 0.125632976404246  |
| GAGTGGGATGAC | 876.134074557964 | 0.14036378764569   |
| CCGTGTTGCTCA | 876.139023006352 | 0.170027127771897  |
| GTAAAACATGAC | 876.141030987387 | 0.129567948037575  |
| CGATTTTGGTCA | 876.143629640086 | 0.139098504901842  |
| ACTGAGGTGACA | 876.147997597039 | 0.134743447932857  |
| CAGCCGCTAGAG | 876.157010452933 | 0.24149650847794   |
| GACCCCAGTGAC | 876.17048404092  | 0.190710896269542  |
| ACTTACAAGTCA | 876.175652746049 | 0.125031306438589  |
| CTAACTATGACC | 876.185775498764 | 0.161676181274597  |
| GTGACATTTTAA | 876.191780857042 | 0.122776865067911  |
| CAGGCACGTAC  | 876.193790490456 | 0.0758131934887307 |
| ATATTGCATCAC | 876.197582348267 | 0.0995373938303669 |
| CACCTCGACTCA | 876.201961252457 | 0.166320697879998  |
| CTTCTGTGTGAC | 876.220428685978 | 0.138805160517268  |
| GCGGTGAGCCAC | 876.229668865122 | 0.178819127628456  |
| AAATGCTGTAC  | 876.232423328963 | 0.154478358193103  |
| GTCACCCTTCAC | 876.239702065295 | 0.167609100222939  |
| CATCGTCATGGG | 876.240774418789 | 0.156366678917914  |
| ACTCATTCTGCA | 876.243385392184 | 0.16377894039475   |
| TACTCATAAATA | 876.245424850185 | 0.105525481083728  |
| GAGTAATTCAAA | 876.252120799208 | 0.129199729705852  |
| CTGACTGGTAAG | 876.255656890017 | 0.128532748190595  |
| CGGTAGTTACTC | 876.266083153904 | 0.269309590684133  |
| ATGGGCGGTGAC | 876.275554108133 | 0.224880095252083  |
| GTGTCAGAGTTA | 876.279973418675 | 0.124655613779643  |
| TAGAACCCGTCA | 876.282220991725 | 0.126665922076321  |
| ACTCATCTTTCA | 876.288958783796 | 0.125996378492579  |
| TCTTCGCGTCA  | 876.306278608925 | 0.144246934444358  |
| GGACTAATACCA | 876.309025830491 | 0.228139238792785  |
| ACCGTTTTATGA | 876.315386929092 | 0.210365605107716  |
| GTGACTTTTACA | 876.31999480385  | 0.124326076503335  |
| CCGCAATGACAG | 876.33060185565  | 0.151880963946788  |
| ACACAAACGTCA | 876.332453545218 | 0.231329547442282  |

|               |                  |                    |
|---------------|------------------|--------------------|
| GAGTAATTCGAA  | 876.339671771785 | 0.179508581879148  |
| ATCGTCACTGAC  | 876.345009808925 | 0.132909779058204  |
| ACTCATGACGTC  | 876.350801966461 | 0.117918345181622  |
| GGTGACAGCACA  | 876.353195282597 | 0.212919741630868  |
| ATGACGTCTCCC  | 876.359147246051 | 0.137883405018877  |
| AAGTGGTGACCA  | 876.369451738688 | 0.196399098658911  |
| TACGATGACCGA  | 876.379649049778 | 0.141584389753193  |
| CGCGTAATGACC  | 876.402181522652 | 0.15608633326468   |
| AGTCAGCCTAGA  | 876.414464537053 | 0.100106371238433  |
| ACATTGCGTAAC  | 876.419196481851 | 0.195344467582983  |
| CATTGACTACTA  | 876.451757460182 | 0.123567144796845  |
| ATGCAATGAGTA  | 876.464553629014 | 0.171643461470437  |
| TATTCTTCGTCA  | 876.473048476721 | 0.130269055050028  |
| GTTGTTGTGACA  | 876.4771774656   | 0.198567396017045  |
| AACTGAGTCGTC  | 876.487032556474 | 0.106639407329576  |
| AGTCACGGGAAC  | 876.498183412085 | 0.157918425498928  |
| AGAATAGGTCAC  | 876.50186181167  | 0.0836567771881436 |
| GGTGGGAGTCAA  | 876.50227851765  | 0.127204502031027  |
| ATAGAGTAATAA  | 876.510492385176 | 0.124658109219266  |
| TCATAAGTGACA  | 876.515268479921 | 0.157296754975204  |
| ACTTGCTCACAC  | 876.51531363252  | 0.13625671307998   |
| CACAATCTGACG  | 876.52446313611  | 0.184650219683556  |
| ACTCTGACCAGT  | 876.526135687657 | 0.192861203842542  |
| CAATCTGACTGG  | 876.529287490982 | 0.125301040638978  |
| GAGTAATAAAAC  | 876.543070592514 | 0.196488574475057  |
| GTTCTGACAAAC  | 876.544562821432 | 0.134399750031785  |
| AATCCTACTCAT  | 876.549128382845 | 0.146173249122064  |
| TGACGTTAATCA  | 876.552258496748 | 0.206702720209637  |
| ACCATCACGTC   | 876.561218832716 | 0.0838695250705707 |
| AATGAGTAGTGT  | 876.561653174097 | 0.148623856331719  |
| ATGTGGCGTGAC  | 876.561790430189 | 0.203539850702636  |
| TGACTTGACATCA | 876.584049060719 | 0.134274798261982  |
| TACTCATGACCA  | 876.590798567473 | 0.16930275011591   |
| GAAAACCTGAGTC | 876.603775886721 | 0.147414125169913  |
| GTCATCAGACTA  | 876.604077472263 | 0.145429525560136  |
| TGAGCTGAATCA  | 876.615970340882 | 0.18169753737844   |
| AAAGTTGTCACG  | 876.617312620518 | 0.113070283141272  |
| CGACTGGAGTCA  | 876.618141978766 | 0.157565953980294  |
| CATGACGTTACC  | 876.631195021343 | 0.173008449587162  |
| GTCATGCAGAGA  | 876.65144599677  | 0.131457045252882  |
| CACCACATGACG  | 876.657387866245 | 0.140388113971979  |
| GTCACGGATTAA  | 876.662639724142 | 0.163601964713527  |
| ATTAGTACGATG  | 876.663444872245 | 0.173791731270231  |
| ATTGTCAGTGAC  | 876.66499219414  | 0.120094891168682  |
| GGGTGATGTAAC  | 876.669841551942 | 0.112524346221791  |
| AATGACGGGCAC  | 876.681900833003 | 0.12599226163608   |
| ACTCATCGCAAG  | 876.687217625924 | 0.129225492803995  |
| CTCACGAAATGA  | 876.695563078384 | 0.216512113625769  |
| CGAAGCTGTCAC  | 876.713819547795 | 0.140725929972304  |
| ACGGCTGACTAT  | 876.716197577972 | 0.162322917656838  |
| GCGTGACACTCA  | 876.719239821165 | 0.142700651195447  |
| GCGTCATGAACA  | 876.723979083366 | 0.22823732375486   |
| GGTACCGTCACA  | 876.726370525819 | 0.160217049399694  |
| GTTGCGTGGTCA  | 876.741869577613 | 0.28334336465732   |

|               |                  |                    |
|---------------|------------------|--------------------|
| GGTACCTGTGAC  | 876.744442300367 | 0.123710986866425  |
| TTATGACCTAAA  | 876.762635969976 | 0.152894595412747  |
| CGGTCATACAGA  | 876.763984226516 | 0.188593163525132  |
| AGTTAAATGACG  | 876.766307366709 | 0.150084203898739  |
| AACGGTCACACT  | 876.766985809846 | 0.171651713211188  |
| CCATTGACTATA  | 876.771350799777 | 0.129699038619534  |
| ATCGTCATGCCA  | 876.777645087144 | 0.232386315141881  |
| AAGACTAACCCA  | 876.789951386623 | 0.184541302712823  |
| GACCCCATGACA  | 876.798123567409 | 0.242754300298424  |
| AAGCTGTAGTCA  | 876.802287508853 | 0.222997168219958  |
| AGTACGGTGACG  | 876.81386736154  | 0.0892273994995548 |
| AACACCGTGTCA  | 876.819366715311 | 0.120542986135803  |
| ATCCAATGACA   | 876.824402275549 | 0.130294591934751  |
| GGGTCATTGAGA  | 876.825607029014 | 0.152733348071669  |
| GTGACAGACAAC  | 876.826232391185 | 0.158406230603156  |
| AGTCAGATCAAA  | 876.830074072548 | 0.1652654240569    |
| AATTGGAGTCAA  | 876.830919878351 | 0.167632349006133  |
| ATCTGATGAGTG  | 876.843762091525 | 0.134156590625675  |
| AACCGGATGAGT  | 876.84609486667  | 0.176487973694898  |
| AATTGACTACAA  | 876.851179915506 | 0.120383395702667  |
| CAGGGCGGTGAC  | 876.851766882631 | 0.250124627561853  |
| ATGAGTAGGTGG  | 876.852723542069 | 0.114436629296899  |
| TGACCCTTAGCA  | 876.854611954943 | 0.161926862184564  |
| ACGAATGAGTGA  | 876.856623235902 | 0.122813693317737  |
| GTGCGTAATCGA  | 876.866397086736 | 0.124664364371294  |
| GAGTAATCTACA  | 876.868453882206 | 0.18794238570432   |
| ATGTATCACTCG  | 876.877111806857 | 0.187314278638975  |
| ACCATTCTGACT  | 876.88227513572  | 0.118872130847419  |
| ATACATAAGTCA  | 876.883149885791 | 0.137498590708382  |
| AATGACCATCGT  | 876.883720922822 | 0.185816124892595  |
| AGATTGTGACAA  | 876.891307808476 | 0.190989274423102  |
| ATGAGATCATAC  | 876.898786894608 | 0.125730065779136  |
| ATGCGGTGACCA  | 876.910170232034 | 0.14494788112062   |
| AGTCAACGGCCC  | 876.912524353596 | 0.209362983420195  |
| AGGAGATGACAT  | 876.916977396923 | 0.11446069414569   |
| CTACATCCGTCA  | 876.923504066406 | 0.186497340254105  |
| AATCAGTCGAAT  | 876.929928645846 | 0.120674215471599  |
| CTATTTGAATCA  | 876.930304856505 | 0.153774272221938  |
| AAGTCGAGTGAC  | 876.943737599631 | 0.154007729725351  |
| AGTCAACGGAAC  | 876.943957690999 | 0.201870401010116  |
| AGCATGACGCCCT | 876.949790615755 | 0.166815937297562  |
| AGGAAAAGTCAT  | 876.95979856884  | 0.122349593022668  |
| CCGTCCAAGTCA  | 876.968017828694 | 0.226471730555132  |
| AGTCAACACTTA  | 876.980537921709 | 0.120147630605238  |
| ACACGTGTTCCG  | 876.98738879499  | 0.184538305187114  |
| ATGACGACGCGA  | 876.993110020321 | 0.137138685419967  |
| ATGGTAGGTGAC  | 876.995842239663 | 0.153098645569332  |
| CGAGTAATCATA  | 876.998033015488 | 0.123355798246768  |
| AGCGCATGACAA  | 877.005745696709 | 0.174041491773356  |
| ATGAGAGGTGAC  | 877.006384787323 | 0.0872275900715253 |
| GACTCACTGCAA  | 877.015062907744 | 0.175810154254894  |
| GTCATCTGAGAC  | 877.016264506491 | 0.131774064894892  |
| TCTCGTGACCCA  | 877.017662164353 | 0.136099839821805  |
| ACTCATTAATCG  | 877.017663648553 | 0.148703588694521  |

|               |                  |                    |
|---------------|------------------|--------------------|
| TAACTGTGACCA  | 877.022511903789 | 0.17159848316129   |
| ACTGGGTCACCC  | 877.027956297334 | 0.170762893000823  |
| ATATGTCAGGTC  | 877.031226640176 | 0.171865127433955  |
| ACGTTGTCACCT  | 877.036173451822 | 0.135455425479337  |
| CGCGTCACGCCA  | 877.036601117153 | 0.121967202184927  |
| ACTCATAATCAC  | 877.037793812628 | 0.176197585676995  |
| CTGAATCAGAAC  | 877.042166449618 | 0.182774188505776  |
| AAAGAGACTCAT  | 877.042566257206 | 0.127202345008641  |
| CAATTACGTGAC  | 877.05003767912  | 0.133181158863615  |
| GAAAGACTCTTA  | 877.051551790256 | 0.124101588576257  |
| CTCTGACGATAC  | 877.05669520487  | 0.132917613158605  |
| GTCATCTAAGAA  | 877.061309923005 | 0.175817354911062  |
| ATAGTGGTGACA  | 877.069510617299 | 0.165000582231982  |
| GACTAATCTGTC  | 877.071113215596 | 0.130778493634449  |
| GAGTAATAGACA  | 877.072671295222 | 0.16718408538292   |
| GCTGACTGCGAC  | 877.07471033309  | 0.203863849729344  |
| GGGACAACCTCAC | 877.088989215922 | 0.151183913722894  |
| GTGACTTGCCGA  | 877.089551800448 | 0.135569794556228  |
| AAGGCGTACCCA  | 877.099087629965 | 0.126943215202867  |
| ACTCATTCTACC  | 877.105854225339 | 0.168892661357665  |
| GTATCATAATTA  | 877.113805964147 | 0.280933734787385  |
| TGACTGGCCGAA  | 877.119310055729 | 0.153461653386511  |
| ATGACGGACGTA  | 877.122165962093 | 0.118649694333853  |
| GAGGTGACAGCA  | 877.125259450846 | 0.194977710463721  |
| ATGTATCACACC  | 877.13258442607  | 0.149423069297575  |
| GAATGGTGACAA  | 877.142915918639 | 0.172109736473193  |
| CGTCACCGTCTA  | 877.14609033412  | 0.148555528900166  |
| AGTCAGAACGAT  | 877.158611963073 | 0.178689010074868  |
| ATGACGGGGCGA  | 877.171657723798 | 0.123273641351376  |
| ATCAGGGTGACA  | 877.171936453516 | 0.0943225651241693 |
| AGCTATTACGTG  | 877.172511731648 | 0.197562129715918  |
| CGTCACGCTTTA  | 877.172608492604 | 0.139736146324835  |
| TAGCTGTCAAA   | 877.174873359122 | 0.128738081748739  |
| CTATAAAGTGAC  | 877.179813575605 | 0.204127623874628  |
| GTCGTA CTGCA  | 877.180031010501 | 0.175106488610672  |
| GTCACCTCAAGA  | 877.182758010672 | 0.202937359488588  |
| TAAAGGGTGACA  | 877.183537473897 | 0.159075557327553  |
| CGCACTCGTGAC  | 877.187326264519 | 0.127229295127899  |
| GCGACCGTGCA   | 877.192236794242 | 0.179838045114607  |
| GAAACTTGACTC  | 877.200635551696 | 0.144404344457492  |
| GGTTGAGTCTAC  | 877.209990837956 | 0.131391799805968  |
| GTCACCAAGGGA  | 877.213287458256 | 0.188396266773535  |
| CGAGCATGACGA  | 877.231087372109 | 0.130194939257099  |
| CGTGACACTGCC  | 877.234769241191 | 0.115153024386804  |
| CCCCATGACATA  | 877.237192932355 | 0.156162823970904  |
| ATTACTCTACGG  | 877.244760918421 | 0.138103382935588  |
| ACCCAATGACAT  | 877.248421672822 | 0.172245696496976  |
| TACGATGATACA  | 877.261482720167 | 0.242271605617025  |
| GTGGCGGAGTCA  | 877.267416660146 | 0.12458944546139   |
| AGGACACCTCAT  | 877.276866036902 | 0.119630958747959  |
| AACGCGTGACT   | 877.289957491688 | 0.136249415631944  |
| GAGTACTGGTCA  | 877.294396481038 | 0.125767221789296  |
| ACTAATACGTAA  | 877.300727451872 | 0.24878080664409   |
| CCATGTCACCGG  | 877.308630734084 | 0.101845549620745  |



|              |                  |                   |
|--------------|------------------|-------------------|
| CTCTTCTAGTCA | 877.31807214458  | 0.199104189007163 |
| ACCAGTGGGTCA | 877.318123497217 | 0.225171463183686 |
| ATGACCCGTCGA | 877.321703599337 | 0.153871343973772 |
| ATTCTAATGAC  | 877.323854005915 | 0.135746005447503 |
| CGGTGACCAGGC | 877.324635839044 | 0.179634042926333 |
| ATGACCATGAAC | 877.332812545432 | 0.284535189518996 |
| CAGTGAGCAACA | 877.33371313327  | 0.176759397649071 |
| GGTACCGACTCA | 877.34085505826  | 0.160665328856041 |
| CGTCACCAAGAC | 877.341667139501 | 0.188412595654078 |
| ATACTCATTACA | 877.342149923198 | 0.158839052858269 |
| GCTAGCTCGTCA | 877.358200110483 | 0.272803825299238 |
| AGTCCAGGTCAT | 877.360687730784 | 0.152603770915042 |
| GACTCACGCCGC | 877.3697171374   | 0.105116960319026 |
| ACGTTACATCAC | 877.371848231049 | 0.206285932974633 |
| ATATTGTATCAC | 877.376382425188 | 0.152810802490859 |
| GCTGCATGACCA | 877.376567535528 | 0.122241527794296 |
| TCGCTGACTGCA | 877.37946643406  | 0.131228346154875 |
| GAGTTACATGAC | 877.384314227752 | 0.261281314039159 |
| GTGACACCGAAC | 877.394561402894 | 0.201717862391038 |
| ACTCATGAGTAG | 877.403922550511 | 0.167844028434824 |
| GTAICTAGTCAA | 877.407106390167 | 0.21439992251937  |
| CCGTCATCAAGA | 877.411855894129 | 0.152317911466358 |
| CTTTCGGTCACA | 877.415227281752 | 0.219057179544483 |
| AAGTCACTTGGA | 877.431180407335 | 0.119183044062118 |
| ATGTCATTGGTA | 877.447651881501 | 0.166165231482485 |
| CCGAAAATGACC | 877.449002644215 | 0.180036383938673 |
| AGTGATACATTA | 877.449609954447 | 0.123294283569063 |
| AACGCTTGGTCA | 877.456004409795 | 0.137112744467036 |
| ATGCCTATGACC | 877.457773882059 | 0.122266919707205 |
| ATCGTCACCCTC | 877.461613320394 | 0.163874438589601 |
| CTCATAATGTCA | 877.467498495832 | 0.207962127739242 |
| AAGGACTGTGAC | 877.467780141078 | 0.12511394911985  |
| CCAGCTGTGATA | 877.467793216176 | 0.188287845699208 |
| ACTGGCTCATCA | 877.472263200821 | 0.158056504970703 |
| GTAAGACGCATA | 877.478006555777 | 0.210261149215372 |
| ATATGACCGTAA | 877.49946915771  | 0.136063811301988 |
| CCTGGTGACCGA | 877.499975702153 | 0.137218308032137 |
| GTAATTGAGTAA | 877.500736036149 | 0.234128343126983 |
| ACGGTGACGTAA | 877.508498666593 | 0.135782263464385 |
| GGTGTCTCATCA | 877.51032265791  | 0.162605034364307 |
| CGGTGACAGCTA | 877.512760330767 | 0.199883700179331 |
| AGGAGTAATATC | 877.521532745648 | 0.186038243723799 |
| ATTGTACATTG  | 877.528840759454 | 0.160000921712883 |
| GACTGACTATGC | 877.54469083112  | 0.178251288176049 |
| CCGTCACACATA | 877.546107402289 | 0.175575432348241 |
| GTAGTACTAATA | 877.547999644045 | 0.171940690441959 |
| GTCACGCATGCA | 877.549533926688 | 0.168865133412118 |
| GATTACGTATAA | 877.552769182682 | 0.153234121142975 |
| AGGATTATGTCA | 877.560065746779 | 0.125013501089017 |
| GCGACTAATCCA | 877.562056689251 | 0.191295621082598 |
| AATACATCATAC | 877.562336248672 | 0.138709134393441 |
| ATCAATGAGCCA | 877.562375506568 | 0.131887940877734 |
| AAGTGTGAGCCA | 877.562480463333 | 0.202625376130674 |
| CCAACGAGTGAC | 877.57631373884  | 0.180709458293853 |

|              |                  |                    |
|--------------|------------------|--------------------|
| AATGGTGAGCAA | 877.579239339734 | 0.21501763361437   |
| AAGTTTGACACA | 877.582969746242 | 0.122383032114611  |
| GTCATGATACTA | 877.584947772257 | 0.231886700099041  |
| ACGGCGAGTGAC | 877.588666689764 | 0.180648484280438  |
| ATTATCTGTGAC | 877.593266459923 | 0.271865592142538  |
| AGTTGGGATGAC | 877.597338774661 | 0.156815905273728  |
| AACCTGTACCGC | 877.60004844122  | 0.117068054486278  |
| CTAAAGGTGACA | 877.606746364414 | 0.154639087292272  |
| TACCCTGTGACA | 877.607235941827 | 0.130032733809788  |
| AGAATGTGACGA | 877.607948021575 | 0.137159419456349  |
| TAGGTCATGTCA | 877.608596475865 | 0.177357284895278  |
| GACTAATGGGCC | 877.612757701497 | 0.140060086502268  |
| ACGTACTGTGAC | 877.613416476224 | 0.163047527887524  |
| ACGTCATGGCCT | 877.618821763386 | 0.157626882674111  |
| ATGACAGTAGGG | 877.626607202823 | 0.12257205377296   |
| CAGTCAGCGAGA | 877.633847748137 | 0.191664595940588  |
| GTCATTCGTTCA | 877.638756298806 | 0.133614297547691  |
| CAGATGAAGTCA | 877.639306819554 | 0.119771332298906  |
| AAAAGTTGTCGA | 877.651856544897 | 0.162427786592778  |
| AGTCAGTGAAC  | 877.652587363648 | 0.146876191776117  |
| AGTCACGAGAGC | 877.661658626714 | 0.176919552325508  |
| ACGTCGGTGACG | 877.669503965088 | 0.149500458179369  |
| GATTCTAAGTCA | 877.679289021465 | 0.179012452187609  |
| ACACCAAGTCAC | 877.684930404931 | 0.109057789165702  |
| CATGTTGACACA | 877.700966244127 | 0.206259732253582  |
| ACCCAGTCAGTC | 877.702305049655 | 0.19091168630068   |
| ATGACAGGGTAC | 877.712394358516 | 0.107531426935692  |
| ATGACGGCACAA | 877.718104750218 | 0.168679948665935  |
| GAATCGGTCAGA | 877.718135379429 | 0.122670561677386  |
| CATATTGTCACC | 877.721507971964 | 0.13015411537613   |
| CCGATGAGCCAG | 877.725027078644 | 0.159841048065325  |
| CGTCACCGCTTC | 877.732836405931 | 0.120816931911169  |
| CATGACAGAGTA | 877.740233012457 | 0.145838345404129  |
| ACTAGGCATGAC | 877.745570361655 | 0.165240185590642  |
| CACTCTGACGCG | 877.749952512554 | 0.170058878026316  |
| AGTTTATGAGTA | 877.758506900804 | 0.133862134529753  |
| AACGTCATGATG | 877.763030614242 | 0.173493528986442  |
| GGTGATGTGACA | 877.765419716373 | 0.146138829853324  |
| AGACATGACGAT | 877.76753752134  | 0.0898703304449259 |
| CATGACGTTGCG | 877.786177768236 | 0.184079590834149  |
| TATAGTGGGTCA | 877.7988730513   | 0.230774848695559  |
| AGAGGTGAGCAA | 877.800895283772 | 0.168524731606628  |
| GTCACAGCGCAC | 877.801401184962 | 0.157643313764779  |
| GCGAATTAGTAC | 877.802696842576 | 0.133549474660211  |
| TGACGGCATTAA | 877.803729286542 | 0.179101037541493  |
| CTGACTGCAATA | 877.807141767067 | 0.103654339628509  |
| ACTGCCGGTGAC | 877.811039592445 | 0.135372058834293  |
| TAAACGCAGTCA | 877.815910795986 | 0.158248501726988  |
| GGCTGAGTCTAA | 877.816029356332 | 0.146241718162052  |
| GATACCATGACA | 877.821596380912 | 0.157655125345023  |
| CGTGACAGGTCC | 877.826484407603 | 0.178658117831401  |
| AGTAATTACGTG | 877.832406694952 | 0.151189860502481  |
| ATGAGCCAATTG | 877.832441749964 | 0.12945802895626   |
| GGATCTCCGTCA | 877.832546426356 | 0.126101870602101  |

|               |                  |                    |
|---------------|------------------|--------------------|
| GTAGACTGGTCA  | 877.833038838156 | 0.161318052234066  |
| GCCACGTCTTAC  | 877.837244015331 | 0.159519205638261  |
| GAGTGAGTCCCA  | 877.837259646158 | 0.213967729926464  |
| CCTGACATGACG  | 877.838950724206 | 0.190046705370897  |
| GCGAATGGTGAC  | 877.840721902002 | 0.124217784545035  |
| GTCACACCCCGA  | 877.847634396307 | 0.134028727819364  |
| AACGTCACCAGG  | 877.854651645565 | 0.20379339278356   |
| AAATTACGTATC  | 877.860456643229 | 0.129253561264451  |
| GTGACAGTCTTA  | 877.870898838508 | 0.129201035790501  |
| GTATTGGTGACA  | 877.877538745192 | 0.181143708869268  |
| GACAGATCATAC  | 877.88389855636  | 0.241645984500113  |
| AACCAGTCAACG  | 877.897429750343 | 0.138000620791008  |
| AGTATGACCGTC  | 877.899070022929 | 0.149551274404017  |
| ATATGTGTAACC  | 877.911822541159 | 0.140652550010319  |
| GTCACGCTACGA  | 877.91472933034  | 0.149228636161111  |
| GTCATGCACCGA  | 877.91724061396  | 0.192487815954799  |
| GTGCCGAGTCAA  | 877.918957254778 | 0.0926686966253347 |
| CCTTTTGTAGTAA | 877.928444554026 | 0.191153781320782  |
| CCTTAATGTGAC  | 877.953896601034 | 0.175789072598112  |
| AACCACTCATAC  | 877.955922065393 | 0.130537485246574  |
| GCGCTCTGTAC   | 877.960502581663 | 0.179346010179652  |
| AATTATGACCGT  | 877.963826734846 | 0.274590345459375  |
| GAAGTCAGTGAC  | 877.968113792843 | 0.208775774390731  |
| TAGGTTGAGTAA  | 877.968334591746 | 0.142837194974697  |
| CTATTGTACTCA  | 877.978175479808 | 0.0945340482691665 |
| GATGACCTAACC  | 877.979998178462 | 0.211046278564405  |
| GTCATGTATGTA  | 877.983339886697 | 0.17567796599562   |
| AGACAACCTCATC | 877.9856567111   | 0.161606037239275  |
| CATCGATGATGA  | 877.988345074552 | 0.231044590130296  |
| CCGCGTGACACG  | 878.014302708604 | 0.160963403380407  |
| ACCCAGGCATGA  | 878.016521366317 | 0.127352182514022  |
| AGAGATTAATAA  | 878.016812029703 | 0.106602819319586  |
| CGGTCATTGATC  | 878.020986277742 | 0.140997618745714  |
| CCATACTGTAC   | 878.022511716247 | 0.149762056106605  |
| GGAGTCGGTGAC  | 878.02326113157  | 0.172810634023737  |
| ACGTCAGATGCT  | 878.036378273361 | 0.210354465940216  |
| GGGCAGTGACAC  | 878.055226298499 | 0.188784058078386  |
| ACATCAGTGACA  | 878.055825977288 | 0.207593026320238  |
| TAAAACATGACA  | 878.058775835382 | 0.10950573911436   |
| CCTGTAGTGTC   | 878.065069823148 | 0.238531271374914  |
| CATGTCATGAGC  | 878.075355786785 | 0.109466859603612  |
| TCCTCGAGTCAA  | 878.079356601174 | 0.144027738452911  |
| AGAGTTTGTAC   | 878.084257897321 | 0.126087467933804  |
| AATGACGGGGCA  | 878.088043604007 | 0.174169201382772  |
| GTCACCTGGGCA  | 878.093458664261 | 0.136605902581498  |
| ACACAGTCAAAG  | 878.100498885855 | 0.228743533545002  |
| CATGACGCCATA  | 878.110097283233 | 0.145585398481814  |
| ATTGTCACCCGG  | 878.114639914442 | 0.221566980850993  |
| GGCGTGTCTGAC  | 878.116890316665 | 0.1423475089271    |
| CCCGATAATGAC  | 878.124230567913 | 0.161750783582578  |
| CACGGAATGACC  | 878.125268897295 | 0.135815158843918  |
| GGATGCCATGAC  | 878.129027643731 | 0.216292160371562  |
| GTCATTAACCAC  | 878.12928779687  | 0.134985243743706  |
| ATGGCTAATCCG  | 878.141267021453 | 0.122008372468148  |

|               |                  |                    |
|---------------|------------------|--------------------|
| CGTTACGTGGCC  | 878.144494654521 | 0.146994295180085  |
| GGAGGGGATGAC  | 878.14628075901  | 0.15259390323166   |
| CACCTCTGACAC  | 878.151240095339 | 0.123627309524043  |
| ACCTAGTCAACA  | 878.180348707681 | 0.192083920058068  |
| CTACAGAGTCAA  | 878.186286033519 | 0.141845340565129  |
| AATGAGTAGGAT  | 878.194007924401 | 0.134828309725568  |
| AGTATCGCGTCA  | 878.214496132899 | 0.16765298685973   |
| CGATTGACTATA  | 878.221877288347 | 0.215855485353762  |
| GAGTTACGCATC  | 878.22810460031  | 0.137484511256683  |
| ACCTATGACCTA  | 878.230237368513 | 0.149439931459291  |
| CTTTGACTCGCA  | 878.239116147188 | 0.104397806641543  |
| GAAGGGTGACGA  | 878.239573078206 | 0.123616459251735  |
| CATGTCTGACGG  | 878.242104050592 | 0.182438230259136  |
| ACGTAATATTAC  | 878.245705172375 | 0.203396219784548  |
| CGTATGATTCTGA | 878.253945639818 | 0.101050073105819  |
| GAGCCGAGTCA   | 878.260631192662 | 0.153980798930962  |
| ACTCATTTCCGGC | 878.261001377133 | 0.228444147903155  |
| ATGTCACCCCTTC | 878.271887463644 | 0.145566481054065  |
| GCACGTCACGGC  | 878.272888966961 | 0.213385016107643  |
| AGTCACGACGGG  | 878.28113478945  | 0.138445603879136  |
| ACTGACTGCATC  | 878.281430933166 | 0.132994276079322  |
| ACGCCGTGTGAC  | 878.283446191351 | 0.171475399425571  |
| TGACTGCGATAA  | 878.286763024006 | 0.155458069506609  |
| GTCGTAGACTCA  | 878.292444245248 | 0.156737402300321  |
| CGTCATTTGTCC  | 878.303486356266 | 0.155569142493667  |
| CTGTCACAGAGA  | 878.304268446609 | 0.0811350664661991 |
| CGCCACTGACTA  | 878.304402125192 | 0.142198376754062  |
| CGTGACACGGCA  | 878.307254255513 | 0.158259342781699  |
| AAGGACAATGAC  | 878.311044197005 | 0.14525290021094   |
| ACCTGTCACCTC  | 878.315125380268 | 0.120316976285237  |
| TATTATTCACAA  | 878.318500068011 | 0.171162015195903  |
| CTTCGGTGACGA  | 878.319718616031 | 0.105660146209995  |
| AGGTACTCGTCA  | 878.32097348953  | 0.121597678371566  |
| AGGACTAATACG  | 878.324304938357 | 0.201252540897874  |
| TCGGACCCGTCA  | 878.324535755494 | 0.283744442928033  |
| GTAATAATCCTA  | 878.324648030935 | 0.16608223005824   |
| ATACTACGTGAC  | 878.329371373671 | 0.187519707608986  |
| GTAATGTGACGA  | 878.330313211518 | 0.159203183055165  |
| ATATACTCACTC  | 878.345381929146 | 0.157737689539011  |
| GACATATTACTA  | 878.348384046911 | 0.140202124403841  |
| ACCTGACTAGTC  | 878.362392536841 | 0.212637026292791  |
| ATCGTTCATGAC  | 878.367460296677 | 0.223845610195969  |
| CGACGTCACCGA  | 878.384554019541 | 0.184346163867305  |
| ATTGTCACATAG  | 878.388263269912 | 0.187611425436185  |
| AACGTCGTCACC  | 878.388279934826 | 0.149714971482969  |
| ATATGCACTCAT  | 878.393581496981 | 0.134693739135801  |
| ATGAGGTCAATTA | 878.394348905091 | 0.144559013148447  |
| GTCACGTAGACA  | 878.398037058559 | 0.158107513647647  |
| CTATTTGAGTAA  | 878.39875432864  | 0.134422917352522  |
| GTGTTGGTGACA  | 878.407531211223 | 0.149024331183213  |
| ACGCTGACACGT  | 878.418027981114 | 0.222359342404151  |
| ATGTCACAGAA   | 878.43955360628  | 0.140818899969     |
| AGTTTTGCTCAC  | 878.45817847891  | 0.107298391175002  |
| ACGTTACTCAAA  | 878.47518950728  | 0.241677669115223  |

|               |                  |                   |
|---------------|------------------|-------------------|
| CGTCAGACGAGC  | 878.478107481867 | 0.131459681035065 |
| TGTCATTACCAA  | 878.478237298197 | 0.142273217457383 |
| GGGGCGTATGAC  | 878.478441601581 | 0.158934357948205 |
| GAACCTTGACTC  | 878.488162520431 | 0.175793832855791 |
| GAGCATGACATA  | 878.495378118412 | 0.147573902785792 |
| AGTCACGGGCTG  | 878.506127334652 | 0.145387507766531 |
| TCATTTTGCTCA  | 878.510891430453 | 0.114680779002743 |
| GGCCACCTCATA  | 878.536241446414 | 0.12224262345671  |
| ACATGACAGACT  | 878.566486040788 | 0.134445970917286 |
| CCATCCATGACG  | 878.568918392962 | 0.222827725633966 |
| AGCCACACGTCA  | 878.570935019401 | 0.133012564026302 |
| ATTATATGAGCC  | 878.583915756054 | 0.174250549908713 |
| AATGACAGGGCG  | 878.584191657785 | 0.146694701800889 |
| ATGACAAGCGAC  | 878.586083969196 | 0.162614720324698 |
| ACTCATTATTTA  | 878.612391245094 | 0.177361595871192 |
| AATGACAAGGGCG | 878.619243983071 | 0.110126428074774 |
| CAGTCAAAGTTC  | 878.620260570057 | 0.16168943187846  |
| ATATGTCAGTAA  | 878.620413388548 | 0.13288415338541  |
| GAGGTGTGACCA  | 878.633949810899 | 0.169482493243087 |
| GACTCTTATATA  | 878.63585011569  | 0.210137053414102 |
| ACTCATACAACA  | 878.639596242227 | 0.150281610635547 |
| CTCATCGGGTGA  | 878.657071475871 | 0.127489504373147 |
| GATGACAGGGAC  | 878.659093860938 | 0.188293943436231 |
| GGTCTGGTCTATA | 878.671116485972 | 0.151042915609988 |
| CGGACAGTGCTCA | 878.676449006864 | 0.179738711986891 |
| GCTAGCTCTGAC  | 878.679972270826 | 0.166767326215193 |
| ACAGACTGACTG  | 878.686107226738 | 0.151997045319757 |
| TAAAGCATGACA  | 878.686616991081 | 0.121445516061522 |
| ACTAATTACGGA  | 878.695283909229 | 0.24380016744507  |
| AATTCCTGTTCAT | 878.704598492242 | 0.142192935766182 |
| GTCCCTAGTCA   | 878.712617068153 | 0.224732720145788 |
| CGTCACAATAGA  | 878.713962488425 | 0.143938022485609 |
| ACGTGACGCGCA  | 878.725198917254 | 0.124093626559389 |
| ACTCATTCCGTC  | 878.727351470667 | 0.128766440065899 |
| ACGATCATGACG  | 878.727440019896 | 0.157858624467301 |
| GGACCGGTGACA  | 878.731281421758 | 0.117646246600937 |
| CGCATGACAGAG  | 878.734475709689 | 0.164558123795697 |
| ATCTCGATGACC  | 878.734895991409 | 0.166086474788678 |
| GCCTGACACAGA  | 878.741159605314 | 0.118700429100147 |
| ATTCCAATGACG  | 878.743229903947 | 0.164939291890471 |
| GATACCCATGAC  | 878.746016256133 | 0.168120582598508 |
| GAGTAATTTGCA  | 878.746601496257 | 0.132967141177259 |
| CGTCACAGAAAC  | 878.748674886793 | 0.11815901024384  |
| GTCATGCTGAAC  | 878.76409854035  | 0.181745164435593 |
| GCTCCATAGTCA  | 878.772296783961 | 0.233615693484683 |
| ACGTCAGCCTGA  | 878.774378903716 | 0.171760070354864 |
| GTCACGGATTGA  | 878.774882807344 | 0.166857502485615 |
| GTCACTGATTGA  | 878.779640152324 | 0.156399960894753 |
| GGTCTGACCCAC  | 878.780546520361 | 0.148532888688204 |
| CAGTCAGCGACA  | 878.781595950582 | 0.126000086581556 |
| AAGTCGTACCCC  | 878.811955832884 | 0.212706667926669 |
| GGAAACGGTGAC  | 878.814122779843 | 0.160394573850031 |
| GGCTCGCGTAC   | 878.818333014171 | 0.126429630635176 |
| GACGATTAGTAC  | 878.821081696995 | 0.179609478156005 |

|              |                  |                    |
|--------------|------------------|--------------------|
| AAATTAGCAATA | 878.822744919168 | 0.177069188227967  |
| AACAAAGGTGAC | 878.829036172506 | 0.161614394263181  |
| AAGCCCGGTGAC | 878.839464374472 | 0.131298161488062  |
| CTCTACATGTCA | 878.845201152798 | 0.21480131160727   |
| GGGTCATCTAAA | 878.858877668452 | 0.138757458084174  |
| GACAATGACCAC | 878.863926952178 | 0.218622785172982  |
| CGGTGACCGAAA | 878.865130001499 | 0.164905127329254  |
| ACGGGGTGACGA | 878.875272956572 | 0.14721786070624   |
| AGTCGGTGACAT | 878.879858110633 | 0.0942972472139891 |
| CCTCTGACATCA | 878.884274031855 | 0.140728278742485  |
| CAGCGGTGACAG | 878.886219048919 | 0.19052275714464   |
| ATGACAGGAAAA | 878.890719874352 | 0.160926511197264  |
| TCTCATGTGACA | 878.898497023889 | 0.214739994081439  |
| CCCAGTGACACG | 878.907531515266 | 0.0975910970010022 |
| CTGACTCTCCAA | 878.915092887601 | 0.119682836511813  |
| GCCTTCAATGAC | 878.930238283415 | 0.187318134741043  |
| AGTCAGTCTGAT | 878.937471456512 | 0.199071529453541  |
| CGTGACAGAGTC | 878.950178511261 | 0.154959152325571  |
| ACTCGTGACAGA | 878.957242041429 | 0.219512240806851  |
| GTGAGTTGGTCA | 878.962440463419 | 0.159801449528139  |
| CAGCATGACATG | 878.969888486966 | 0.131628318023141  |
| ATGACATCGGTC | 878.972867331002 | 0.136725009246047  |
| GTCACGTCCATA | 878.977059392549 | 0.254765783378037  |
| AACCGTGACCCA | 878.980032903323 | 0.211591782956956  |
| TGATGGAGTCAA | 878.981510069084 | 0.158237253694955  |
| GTCACCCTCCTA | 878.9839220333   | 0.181511851828992  |
| ACTTGACGATGA | 878.988144312053 | 0.146665375543492  |
| CGTCATTTGTGC | 878.99042597307  | 0.182708508758645  |
| TGACGAACTCAA | 878.993340557268 | 0.143133696631955  |
| ACCGACTAATCG | 878.993615757911 | 0.118687554525954  |
| GTCACCTACATA | 878.994325483753 | 0.170905899456918  |
| CGATAGGTGACG | 879.009356812252 | 0.169996851665111  |
| TCGACACTGTCA | 879.009682295433 | 0.131782214673397  |
| CATATCATGTCA | 879.01004988152  | 0.246351503161277  |
| GGTCATACGTTA | 879.012266038281 | 0.191562941949088  |
| CGGGTGTAGTCA | 879.027332710458 | 0.195115733535945  |
| ACCACGCTGACT | 879.028358292403 | 0.195401799420134  |
| AGTGACGCTGTA | 879.033737362847 | 0.156457071514468  |
| CTGCCCTGTGAC | 879.035267614673 | 0.242938041089736  |
| ATATTACGCCAT | 879.061794835903 | 0.189937471345951  |
| CCAATCAATGAC | 879.075831601491 | 0.172693967411865  |
| AATCAGTACTCA | 879.076730669733 | 0.240983483354934  |
| ATAGCTTGTGAC | 879.081284830659 | 0.127942833032126  |
| CCAGATCGAGTC | 879.082931040293 | 0.283316417291028  |
| CTATGACCCCTC | 879.083183236281 | 0.120905201628678  |
| ACTCGTCAGCGG | 879.086285734716 | 0.16570381890895   |
| GTTGGTGAGCAA | 879.094575526976 | 0.129386238692014  |
| ATGACCTCATAC | 879.119226012198 | 0.186592009540442  |
| ACAACGTGACGA | 879.123190695955 | 0.181868324548009  |
| GTCACAGGCGTA | 879.129772439223 | 0.189231287577704  |
| ACCGCGGTGACG | 879.137915245059 | 0.154654111559987  |
| TGTCACGAGTAA | 879.145169358892 | 0.12754258165645   |
| CCTTTATGAGTA | 879.151962512767 | 0.160095786850882  |
| AGCGGTGACCAT | 879.152193077214 | 0.229518119723754  |

|               |                  |                   |
|---------------|------------------|-------------------|
| TACTCATTGCTA  | 879.157966236408 | 0.140069592770834 |
| ATCAACGTCACC  | 879.158306563989 | 0.142760160815015 |
| ATGACGATGGCG  | 879.160819953643 | 0.175938894088464 |
| CTGTCACAAGAC  | 879.163584201698 | 0.150428290416548 |
| AGTGAAGTGTCA  | 879.165126287349 | 0.130896673583161 |
| GTGACAAGATTA  | 879.166451247215 | 0.120606617338351 |
| TCATCGACTCAA  | 879.203337096143 | 0.150163229212613 |
| CAGACATGACGA  | 879.204177407153 | 0.158560079991444 |
| ACGCCGGAGTCA  | 879.207678677519 | 0.197415472078973 |
| AACCGCACGTCA  | 879.222634384347 | 0.168743962602188 |
| GGAATCATGACA  | 879.239686575148 | 0.193230685581127 |
| CAATTGTATCAC  | 879.2433538487   | 0.146125730253496 |
| CGTACTCTGTCA  | 879.246630695933 | 0.140210389441585 |
| AGTCAGCAACAC  | 879.25607728205  | 0.147697877865954 |
| ACTCATCACGAT  | 879.2596528575   | 0.164135809465937 |
| GAAAGGTGACGA  | 879.264911578506 | 0.137063263556689 |
| ACAGCATCGTCA  | 879.275364378031 | 0.203176534528854 |
| CGTCACCCACGA  | 879.289122396958 | 0.13141387468291  |
| ACATGTGGCTCA  | 879.304210952503 | 0.150426945011745 |
| ATTTCGAGTAATA | 879.305440651539 | 0.124477830000328 |
| AGTATGAGTTAC  | 879.306666249081 | 0.145370299934453 |
| GTATTGTACTCA  | 879.312508950954 | 0.180016958428412 |
| GCATCGTACTA   | 879.319761971469 | 0.171222153143211 |
| ATGACAATGTGG  | 879.322871710072 | 0.151208193720454 |
| CTGCTACATGAC  | 879.32699350345  | 0.223718848374397 |
| CTGGTCATATAC  | 879.330520345112 | 0.142883534413883 |
| ATGACGGCAAAG  | 879.332157006052 | 0.139915192912324 |
| TGACTCTGGGCA  | 879.334590418496 | 0.268568636731787 |
| ATATCATGACCA  | 879.339814948748 | 0.147894490687899 |
| CTTTCGTGGTCA  | 879.341092039079 | 0.200057721852566 |
| GTTAGAGTAATA  | 879.341500155799 | 0.140955975058877 |
| ACGGTCATCGAT  | 879.344759041233 | 0.205534357855585 |
| AGTGAGTCCAC   | 879.363676752792 | 0.11157662687705  |
| TACGTGTTGTCA  | 879.365050203893 | 0.217567495410937 |
| GAGGTTGACACA  | 879.373573994191 | 0.200732014177656 |
| ACAAAACATATGA | 879.376370362691 | 0.190344715172753 |
| ATAAGCGTCAGA  | 879.378629638448 | 0.248996333369068 |
| CCGGCTATATGA  | 879.382858463215 | 0.182672302346056 |
| CTGTCATGCATA  | 879.383307618848 | 0.156550427688655 |
| CAGTGTCACGGA  | 879.388576881557 | 0.139493363384354 |
| CAGCGTGGTGAC  | 879.389110064834 | 0.142194055833888 |
| CTCATACCGTCA  | 879.391050189989 | 0.15754521954542  |
| GATAATGGTGAC  | 879.395764130663 | 0.131026783363399 |
| GTCACGCAGCAA  | 879.396804976288 | 0.118811485484553 |
| CACCCTAAGTCA  | 879.399996045979 | 0.141716475290223 |
| GGGCTAGATGAC  | 879.412321442953 | 0.219229807315406 |
| AGTATTGAGTAA  | 879.422138221396 | 0.141022236384677 |
| CTGACCGATTTA  | 879.427986077165 | 0.119678734865623 |
| GACTCAATCTGA  | 879.430029267763 | 0.158021539689056 |
| GATGAGTGCTAC  | 879.43344450029  | 0.177089361836962 |
| TCCGAGTAGTCA  | 879.436728178023 | 0.2044653590362   |
| CTAGTTCGTGAC  | 879.445297342436 | 0.18492096432648  |
| GGGTCACATTGA  | 879.452258059547 | 0.228118016922244 |
| GTCACAGATAGA  | 879.455406476772 | 0.167424593628901 |

|               |                  |                    |
|---------------|------------------|--------------------|
| AGGCTCGGTGAC  | 879.455438183224 | 0.158064990028755  |
| ATGACCTGGTTC  | 879.46231021971  | 0.146678356021214  |
| GATCTTGTGACA  | 879.469482165343 | 0.162614284994483  |
| CCAAAGTTAGTC  | 879.473810737685 | 0.170176031816269  |
| GCGTAGTGTGAC  | 879.474051782861 | 0.1434866810833    |
| TATGTCAGATGA  | 879.484987003471 | 0.132170709881596  |
| TGACTAGGGACA  | 879.493487543771 | 0.191849283860347  |
| ATTCTGGGTGAC  | 879.505219773691 | 0.218852297130847  |
| ACTGCACGTCAC  | 879.514620109067 | 0.135741499759969  |
| AAGACCATGACA  | 879.5174620565   | 0.146616965599234  |
| GTCACGCACCGA  | 879.517610551713 | 0.23043595762802   |
| GAGTCGTGACAC  | 879.532617048802 | 0.138381302220366  |
| ATCTTCGGATGA  | 879.544820235613 | 0.189336333852108  |
| GAAACATGTGAC  | 879.545508249706 | 0.167640802402352  |
| ATCCGACTAATC  | 879.548118545361 | 0.150883299126385  |
| CTTGCTCACAGA  | 879.56563555156  | 0.129333595775981  |
| CAGTTTGTACAG  | 879.566934635721 | 0.129885054341183  |
| ATAATATGTCAG  | 879.568060149046 | 0.155450196179212  |
| AATGACCTCATT  | 879.57782545443  | 0.171983726207221  |
| AAGTTGTACCGC  | 879.578778365564 | 0.1595232569234    |
| AAGACTAACATG  | 879.583680631047 | 0.177472953586525  |
| CTAGTCTGTGAC  | 879.585144200792 | 0.122951141851807  |
| AGGTACCAGTCA  | 879.594082045178 | 0.160866815012831  |
| GTCACTGAATTA  | 879.598795467148 | 0.204277447141585  |
| GTCACACTCCAC  | 879.599782415516 | 0.158743404079357  |
| ATTGATTCACTA  | 879.605438335536 | 0.124174930962389  |
| AGGTCGGGTGAC  | 879.614576242297 | 0.129274294864421  |
| AACGCTGTCACG  | 879.616214357646 | 0.195987171286453  |
| CGGTCATCGAAA  | 879.617182805834 | 0.168459200577253  |
| ACATTACTGACT  | 879.620305144166 | 0.148945535258609  |
| CTGACTAGGTCC  | 879.637019491654 | 0.0881930342548655 |
| GTGACAGTGCCA  | 879.644166527502 | 0.243099045633845  |
| GTCAGACTGAAC  | 879.644717547631 | 0.15702933265405   |
| TCGTCACCCAAA  | 879.645369869049 | 0.0999006215643511 |
| ATTCTAAGTCA   | 879.649749642501 | 0.153265924014283  |
| AACACCGTCACA  | 879.650250162996 | 0.157739063793218  |
| AGAAGTGGTCAG  | 879.652173883393 | 0.150481511240779  |
| AGGGTGCAGTCA  | 879.65318960292  | 0.235550209454858  |
| AATCAGCGTGAC  | 879.665121173784 | 0.155620476094722  |
| GCATATGACCTA  | 879.674692420431 | 0.177480716807261  |
| CAAAAGGTGACA  | 879.679938295817 | 0.141166616661229  |
| AGTTATGGTGAC  | 879.680140566377 | 0.158326733349669  |
| ATGGTGTGTAAT  | 879.683639179373 | 0.112439128816533  |
| ATACGTCAACAT  | 879.685053070218 | 0.189518996812943  |
| TATTACTGAATA  | 879.685250597995 | 0.155806329217403  |
| AGTGTACATGTCC | 879.688044759558 | 0.101682567020952  |
| ACAGTCAGTATG  | 879.693887017684 | 0.128155608325657  |
| CTCATTGTCACA  | 879.694784499614 | 0.125265264146567  |
| CATGACATTTAA  | 879.701176614358 | 0.152171409230331  |
| CTGGCGCGTCAC  | 879.710093436024 | 0.193201129012007  |
| CAACACCATGAC  | 879.712247751612 | 0.120437241413908  |
| ATTTGGGTGACG  | 879.72234454599  | 0.133137935244033  |
| CGTGACAGAGCC  | 879.723083437073 | 0.118740522925355  |
| GTCACCGCTCAC  | 879.729424474034 | 0.164082173757768  |



|               |                  |                    |
|---------------|------------------|--------------------|
| CTGACGGATGAA  | 879.739069774403 | 0.175770317551692  |
| CTGAAGTGACAA  | 879.741846060093 | 0.257323870507741  |
| AGCGTCACGCAT  | 879.742901781265 | 0.19134811455256   |
| ACTGCGTGACGC  | 879.744128464413 | 0.196605222241888  |
| AGGGCCTGTCTAT | 879.746422832606 | 0.190210499521521  |
| ATCAGGTGACCA  | 879.750832891104 | 0.137200025511218  |
| GCTCTCGACTCA  | 879.753826747482 | 0.165957216696748  |
| CATGACGGCATG  | 879.754402927438 | 0.210155968746781  |
| AACACATCATAA  | 879.757639227854 | 0.0944295335513557 |
| AGCGGGTGTCTAT | 879.761833663761 | 0.125479925691644  |
| GCTACTTGTCTAC | 879.762189989706 | 0.148384606423573  |
| GGTCATCGCATA  | 879.766567972439 | 0.147463880045205  |
| GCACAGCTATGA  | 879.77639550618  | 0.141900135349989  |
| TTGCTCACACAA  | 879.776588380123 | 0.160466290141289  |
| AGTCAGAGCGCG  | 879.777919879745 | 0.217706737939597  |
| ATAACATGACGA  | 879.784762528997 | 0.120688685395443  |
| GGCGGCGAGTCA  | 879.785347874462 | 0.150061463415967  |
| TTCGTGAGAGAA  | 879.791342137779 | 0.15374489350324   |
| CGAGTTGGTGAC  | 879.793060485653 | 0.188681365137422  |
| TACACATCATCA  | 879.79620432924  | 0.21037976862747   |
| AATATGATTACA  | 879.797912575038 | 0.139432005289538  |
| ATGACTTGACGG  | 879.80637252978  | 0.232659457145199  |
| ATGAGTACCCGG  | 879.807652455345 | 0.186072001614492  |
| AGTGCTCCGTCA  | 879.807868273698 | 0.139399701459182  |
| AGTACCGTCATG  | 879.809617626035 | 0.134467345646616  |
| TGAGATTACGCA  | 879.812837625063 | 0.127665198871201  |
| AACTTGACTCGT  | 879.819222448641 | 0.227729421333157  |
| GGTAAATGTGAC  | 879.824251359052 | 0.249399770152733  |
| GCCAATTGTGAC  | 879.837815490999 | 0.167768499300514  |
| ATGACATCTCAC  | 879.842822860427 | 0.187267341577144  |
| GTCATGAGTAGA  | 879.843192844479 | 0.134124700445199  |
| ACGGATATGAGT  | 879.844296980232 | 0.122020877720777  |
| ATGACGTTACGG  | 879.844863475949 | 0.147169062578416  |
| AATGTGACCTAT  | 879.878242516705 | 0.163426130326035  |
| TCCTGTACGTCA  | 879.883999931536 | 0.161447256513376  |
| ACTGCCATGACA  | 879.889926038896 | 0.145978602085335  |
| AGCACAGTCAAT  | 879.89500934773  | 0.139501282593858  |
| CTGTCAATTACGC | 879.900374708053 | 0.225059664482563  |
| AGGGTGACTTGG  | 879.905206073973 | 0.110695516854084  |
| CTGCGACTCAGA  | 879.923514445984 | 0.139057885720953  |
| TGACGTTTTCCA  | 879.930324503585 | 0.172956026488177  |
| GGTGATCATAC   | 879.931569288605 | 0.160485225986552  |
| TCGTGATGATCA  | 879.932933937198 | 0.208555824975102  |
| ACATCAGTGACG  | 879.941843638221 | 0.186904115902149  |
| TCGGCCACGTAA  | 879.943017766593 | 0.105027120825383  |
| GCTCTCAATGAC  | 879.945840519202 | 0.161857376906606  |
| CGGCTAAGACTC  | 879.946125480093 | 0.127420996250947  |
| GCGTGCGTCAAA  | 879.949699001535 | 0.17485239534732   |
| ATCGATGTCACC  | 879.954360364016 | 0.137280254933739  |
| CTTCCAGTGACA  | 879.955476532326 | 0.150112396620454  |
| AGCCGATGAATC  | 879.95693932911  | 0.160511153477919  |
| ACGCCGTATCG   | 879.957530510211 | 0.106757300555647  |
| AGCTTCTGACTG  | 879.961947328103 | 0.253329810634105  |
| ATGACCAGGCAA  | 879.963527550651 | 0.188828395965997  |

|               |                  |                   |
|---------------|------------------|-------------------|
| GAATCATCACTA  | 879.966544472252 | 0.122915294324463 |
| CATGTCATGAGA  | 879.976387876603 | 0.17619388164819  |
| ACTAATCATCAT  | 879.978807809029 | 0.15278159583674  |
| AAGTACGCGTCA  | 879.979953796068 | 0.124092264891018 |
| AAGCAGGGTGAC  | 879.987814065805 | 0.159792865119324 |
| CCGTGTCACGGA  | 879.993857591345 | 0.185695579377286 |
| ATGAGTTGACACA | 879.997889477923 | 0.139806838445802 |
| GCTCATGTGACA  | 880.016460599491 | 0.100561514502326 |
| ACTCATACTGAC  | 880.016620339563 | 0.142805485012684 |
| ATGAGTACGGTA  | 880.016652778388 | 0.157214762921512 |
| ATCCATGAGTAC  | 880.019525823537 | 0.122867693753766 |
| CACTTTATGTCA  | 880.02161475601  | 0.141255329746959 |
| GCGTCACGAAAC  | 880.027518966919 | 0.249966016880997 |
| CGCTTTTGCTCA  | 880.033496405625 | 0.146498824746513 |
| GGTAAAGTCACA  | 880.036649935136 | 0.151988073962742 |
| CATGAAGTCACA  | 880.039032455957 | 0.224945829766351 |
| GAACAATGAGTA  | 880.039209666774 | 0.165489649139952 |
| ATTTGAATCACG  | 880.052593049311 | 0.193945687343851 |
| CTATGGAGTCAA  | 880.058223920523 | 0.191246224539651 |
| TAATCTTTATGA  | 880.062420302275 | 0.122259660160798 |
| AGACTCAGCGAA  | 880.062789980068 | 0.120354188319791 |
| GTCACCTGGAAC  | 880.063022177388 | 0.178105667821539 |
| AGAGGTTGTCAT  | 880.0646551864   | 0.164078527128316 |
| CGACTAATGTCA  | 880.0671216663   | 0.146150203285059 |
| AAGACGTACCCA  | 880.067942952914 | 0.141506542147052 |
| TCATCAAAGTCA  | 880.069232062314 | 0.132625950860495 |
| GTCACAACCAAC  | 880.080316906857 | 0.164827561479598 |
| AAGAGTAACACA  | 880.082643118186 | 0.156742541386614 |
| TGACTACGACCA  | 880.092784246196 | 0.137388941553362 |
| AAGGCTGAGTAA  | 880.095435704632 | 0.143072986397368 |
| TCATAGTTTGGA  | 880.098614807866 | 0.173059926706154 |
| CAAGGGTGACAA  | 880.106249639602 | 0.126932835480073 |
| AGTGACAAACCG  | 880.117849085349 | 0.098173614967001 |
| CCCTACGCGTCA  | 880.118268184561 | 0.163316827927868 |
| ATGACATGAATG  | 880.120400860916 | 0.135925782198346 |
| CGAAACTCTGAC  | 880.132610759087 | 0.117974103948566 |
| ACGAGATTACTC  | 880.136281982181 | 0.27981264411342  |
| TAAATCAGTACA  | 880.139635401406 | 0.119413668103726 |
| CATCAATGACCA  | 880.141030094643 | 0.158761408235245 |
| AGGGTCATGCAA  | 880.143401068653 | 0.141188431149991 |
| AGTCAGACGCTA  | 880.153490217262 | 0.175760483469742 |
| TGACAATAACAA  | 880.159983704391 | 0.152021345995345 |
| ATTGAATCAGAC  | 880.160503584334 | 0.235101565180811 |
| AGTCAACTTTAC  | 880.173039753125 | 0.153707152122436 |
| GCTCTGACTCA   | 880.173418677508 | 0.175083444908525 |
| AACCCTGAATCA  | 880.179472466425 | 0.155133608593117 |
| ATTACTAAGTCG  | 880.180855008154 | 0.281443323201494 |
| TCTGCATCGTCA  | 880.185420965638 | 0.238771269721706 |
| CCGTATCACTCA  | 880.190315351416 | 0.138661926193944 |
| ATGACCTAATCC  | 880.1948289521   | 0.125365024061762 |
| ACTGCCTGTGAC  | 880.209722105876 | 0.202635592688348 |
| AGATATGACCTA  | 880.217302863202 | 0.150149391157347 |
| TGAAACCTGTCA  | 880.231481177963 | 0.161356715729701 |
| GTGTCACGAGGA  | 880.237567343546 | 0.111706713092806 |

|               |                  |                    |
|---------------|------------------|--------------------|
| CCTGATTACGCA  | 880.239426841807 | 0.217362449493349  |
| TGCTGATGACCA  | 880.254850589581 | 0.131269213064185  |
| CTATTCCAGTCA  | 880.277957924132 | 0.111796382629137  |
| ACTCATACCGAC  | 880.280148253641 | 0.124686770617378  |
| GAATAGGTGACA  | 880.281302424459 | 0.149068452866361  |
| TAATTAGTCGGA  | 880.288403938373 | 0.157946744376504  |
| CAGTGACGAACA  | 880.292586130986 | 0.116933150986099  |
| ACTCGGTACATCC | 880.297401788566 | 0.140354973421667  |
| CACGTCAAGTCA  | 880.303169936754 | 0.140059445379082  |
| GGTGACGTTGAA  | 880.306191068011 | 0.0960971226602222 |
| CTGCGTTGTAC   | 880.31989397804  | 0.212565923420173  |
| TTATCTGACAAA  | 880.339134964242 | 0.128265715254738  |
| ACGTCACATAGA  | 880.34944635477  | 0.133472699810892  |
| CTGTCATTAATC  | 880.349832211493 | 0.130657764333556  |
| CGTGACCGGGAG  | 880.351301335569 | 0.142728045184212  |
| AGAGATTGCTCA  | 880.355257520768 | 0.157766143223718  |
| AGTCAGAGAAGC  | 880.355368901883 | 0.150935742281078  |
| CTGTGAATCAAC  | 880.357081683855 | 0.117185135596652  |
| AGTCAGAGACCG  | 880.360579721942 | 0.149724910855264  |
| ACAGCATGACAG  | 880.360805215709 | 0.125213465691944  |
| AGTCAGCCTAAC  | 880.365675924282 | 0.177298350657996  |
| CAGCCTGGTGAC  | 880.368698085043 | 0.209775743220337  |
| ACTCATTTACAT  | 880.371715895001 | 0.170530629541403  |
| AACGTCACCAAT  | 880.395641444349 | 0.155416423628873  |
| CGCTACTTGTC   | 880.397565370127 | 0.173634560043821  |
| TCACGCGACTCA  | 880.400887855888 | 0.131313732562665  |
| GGCATATGTGAC  | 880.407771123418 | 0.126337085696784  |
| AACTGGTCTGAC  | 880.417393923891 | 0.160513281891548  |
| ACTACAACATCAT | 880.419699417727 | 0.151131696567936  |
| GCGCAGCGTGAC  | 880.420711226413 | 0.159763398283642  |
| CATTATAGTGAC  | 880.425995186157 | 0.164510544512176  |
| AACCCTGTCACA  | 880.428651937404 | 0.160567682327718  |
| GGGTGAGTATAC  | 880.440549962931 | 0.164767169137439  |
| AACGTCATGTCG  | 880.444554340485 | 0.128983796440722  |
| ATTGGCTGACTA  | 880.45783075915  | 0.223816821736104  |
| GCTAGAAATGAC  | 880.461863389749 | 0.0717418791732748 |
| CATGACGAGCAA  | 880.469284468262 | 0.248227616792376  |
| AAGGGTGACATG  | 880.472767032496 | 0.132664636150324  |
| CTGTCATGCTTA  | 880.475678877962 | 0.192961890277724  |
| GAGTGAGCAAAA  | 880.494589084797 | 0.141851628307961  |
| GGAGGGTGTGAC  | 880.498763910687 | 0.195732817699661  |
| AAGCTATGATTC  | 880.504942791362 | 0.210264683014459  |
| ACTCATAGTCGA  | 880.505501589101 | 0.0778956791515605 |
| TGACGAAGAGCA  | 880.50990951107  | 0.167144595883163  |
| CCTAGATAGTCA  | 880.516350008205 | 0.178794484646492  |
| ATTTGACTGTGC  | 880.517066190313 | 0.12979111492987   |
| ACTACAATGAG   | 880.524810010569 | 0.177298686305013  |
| CGCCATCCGTCA  | 880.524984756852 | 0.161072463602466  |
| GAGTAATCGGTA  | 880.525796970398 | 0.0817490754775505 |
| CACGGCACGTCA  | 880.526383623576 | 0.156380815765277  |
| AACTTATGAGTG  | 880.530187212006 | 0.274244011853648  |
| ACGAAATCTGAC  | 880.544717466745 | 0.104511965817294  |
| ATTACTGAATTC  | 880.550205555156 | 0.203019958050006  |
| AGATGACATTGA  | 880.564509891865 | 0.147687079234677  |

|              |                  |                    |
|--------------|------------------|--------------------|
| AACCTGTCACGT | 880.570227266795 | 0.129511871618832  |
| ATAAGAGTGACG | 880.588839856091 | 0.147253805945252  |
| AAGTCATGGTGC | 880.598238175088 | 0.163115140938746  |
| ATGACTTGCTAG | 880.600453362322 | 0.172542491528751  |
| CTGGGTAATGAC | 880.604154142444 | 0.135366348050168  |
| AATGCGTAACAT | 880.609369891733 | 0.132918443652447  |
| GCGGTGACAACC | 880.620501507324 | 0.157467932558805  |
| ACTACTCATCTC | 880.620980096798 | 0.123877071270908  |
| ATGCTATGACCG | 880.62169327265  | 0.116902236811318  |
| GTCACCTAACCA | 880.621739443841 | 0.232881178750418  |
| ATGAGTGAGTAG | 880.624410891849 | 0.125148180152216  |
| GGTTCGTCAGAC | 880.628051708859 | 0.170584456543551  |
| ATGGACAATGAC | 880.629682533056 | 0.17612070328637   |
| GTGACACGCATA | 880.638607558657 | 0.161745343435784  |
| CGTCACGGGACA | 880.642485187506 | 0.188620954624936  |
| AAGTCACGGATT | 880.644720188957 | 0.130280797365763  |
| CAATTATATGAC | 880.645491975523 | 0.0934934402719655 |
| GACTAATCTTAA | 880.646625747611 | 0.235877459613158  |
| GTCATCAACATA | 880.65113679259  | 0.206860842572892  |
| GCTCCTGGTGAC | 880.65941511985  | 0.104764647237346  |
| CAAACCTGTCTA | 880.669164820453 | 0.225208283290195  |
| TCCGGGGACTCA | 880.672555383696 | 0.219395375003958  |
| GGGTAGTGTGAC | 880.684998383845 | 0.172695848275892  |
| GACGAATGTGAC | 880.688430973032 | 0.15243920628548   |
| TGATGCGACTAA | 880.695735127556 | 0.118301898531667  |
| CGGTCATAGCAG | 880.724381499658 | 0.20741982441937   |
| AAGACACATTTA | 880.725294464924 | 0.174962634107695  |
| CATAGTCAGCTA | 880.725889966358 | 0.240024235047906  |
| AAGACGCGTGAC | 880.726127128055 | 0.166622867396011  |
| ACGGAAGTGTC  | 880.726433169565 | 0.148209299629152  |
| GATTTGACACAC | 880.734893147191 | 0.127263729552306  |
| ATGACAGGACTC | 880.744566362651 | 0.165628438069109  |
| ATGTGACAGTAA | 880.748328376947 | 0.129420807818105  |
| ATATTGTCACTA | 880.748619858255 | 0.127855048929423  |
| GTGGCAATGACA | 880.754787024763 | 0.133797896249481  |
| CTAATTACGCAA | 880.757501549001 | 0.160697725803913  |
| AAAACCCAGTCA | 880.768363680087 | 0.137418548004696  |
| CTCAACAAGTCA | 880.79516191196  | 0.282323417450934  |
| ATGAGTATGTTA | 880.795663056132 | 0.121704441009498  |
| GCAGTAGTGACA | 880.796414616295 | 0.2425155016916    |
| GGGTCACATCAC | 880.803585864387 | 0.226211795035198  |
| ACCATCAATGAC | 880.807011885038 | 0.145113847059235  |
| TCGTGACATACA | 880.81135657638  | 0.117947388505933  |
| AGATAGAGTAAT | 880.814015779837 | 0.100873831739239  |
| CTGACCAACTCA | 880.814020864267 | 0.181328089975912  |
| GTCACGACTTCA | 880.819672497385 | 0.220378390462219  |
| CTGACTACTTTA | 880.82878914308  | 0.148985679451765  |
| TACTTTGAATCA | 880.848837319834 | 0.161415660816443  |
| ATGATGCAACGC | 880.849594673805 | 0.138438718617744  |
| GACGTAGGTGAC | 880.852032534579 | 0.187540686196192  |
| ATGTTGCTCATG | 880.856786517097 | 0.147290484320303  |
| CGCCGAGATGAC | 880.856972726865 | 0.154903629605407  |
| AATGATACAAC  | 880.857643926022 | 0.174076041546752  |
| GTCATTGTGCAA | 880.861583229342 | 0.118142376282355  |

|               |                  |                    |
|---------------|------------------|--------------------|
| GTACCCAGTGAC  | 880.874036066168 | 0.175674371686931  |
| CCTATATGACCC  | 880.87512262009  | 0.139045866969913  |
| GGATGTGCTTA   | 880.878571849371 | 0.140300681796259  |
| ATCTAATGACAG  | 880.881847185414 | 0.158585395489642  |
| GTCATGGCTACA  | 880.890156232716 | 0.181930560993897  |
| ATGTCACCCGAC  | 880.902631292284 | 0.102681582444531  |
| GAGTCAAGAGAC  | 880.905163373331 | 0.216333816079542  |
| GCACTTACGTAA  | 880.906551723983 | 0.150457331297727  |
| GGTCATCATAAC  | 880.908289029249 | 0.185498754862721  |
| GAGTAATAGGCA  | 880.913531253585 | 0.148072122353052  |
| GCAAATGGGTCA  | 880.913860426338 | 0.1171130368807    |
| AGGATCTGACTG  | 880.917561551209 | 0.139039024546192  |
| GCCGTGTCACGA  | 880.923881104284 | 0.13165020618791   |
| CATTATGACCCG  | 880.930350539326 | 0.156917341731504  |
| GACGTGTCTCAC  | 880.930359642848 | 0.127492100866152  |
| CAGAATGAGTGA  | 880.933966277385 | 0.144040325689899  |
| GCCTTGTCATTA  | 880.936339932872 | 0.136300198627854  |
| CGCTGACTGCTC  | 880.938381518168 | 0.178607280497249  |
| CTATTGACTGAG  | 880.958520619948 | 0.159202066346654  |
| CTTTCTTGTCA   | 880.964293459549 | 0.217431487680882  |
| CGATCGACGTCA  | 880.968674880565 | 0.121044806235968  |
| CCTTTGGTGACA  | 880.975058825832 | 0.137164194035869  |
| AATTACGCACAC  | 880.986402804463 | 0.174064177765297  |
| CCTCCGAGTGAC  | 880.989114956275 | 0.133882277692669  |
| TCACTATCATGA  | 881.003616294331 | 0.17510200747804   |
| AGCATGACAGTG  | 881.008674676566 | 0.171426416414658  |
| CGGTTCTGTGACG | 881.00868987286  | 0.141411962197284  |
| GTGCAATGAGTA  | 881.009130678233 | 0.148311047864628  |
| AGTCAGACTACC  | 881.013792938991 | 0.10868373524565   |
| GGTCATACAGTA  | 881.018590260813 | 0.156122944276842  |
| AAGACGCTGACT  | 881.019077460204 | 0.156905693465228  |
| GTGACTTCAACA  | 881.029208718623 | 0.176894798261352  |
| GGCAATTGTGAC  | 881.033231623356 | 0.148953691894446  |
| ATCGGTGAGTAC  | 881.048871341659 | 0.133134471814469  |
| GCGTCATGCACC  | 881.05649322262  | 0.239729183890952  |
| AGCGTGACACTG  | 881.066376874958 | 0.144371320764631  |
| ATGGTCACAATA  | 881.071178914681 | 0.172946010163691  |
| AGATAGGTCACA  | 881.07486237847  | 0.0930115630091448 |
| AAGTGACATACA  | 881.077492539629 | 0.132093414889752  |
| CTATTGATGACC  | 881.104252705577 | 0.140412836139479  |
| TCACTGTACTCA  | 881.105071665887 | 0.206988093993441  |
| ACAGTCAGGTAT  | 881.121007177136 | 0.146639729976641  |
| TGATTGACTACA  | 881.131913829728 | 0.127746054889947  |
| CATGAGACTCAC  | 881.133615253753 | 0.23454165402737   |
| GTGTCAC TAGTA | 881.134456675329 | 0.129564653998838  |
| AAGCAAATGACA  | 881.137558397141 | 0.178191283966647  |
| GCGTGTATGACC  | 881.140765143925 | 0.233557897683041  |
| ATGTTTCTGTCA  | 881.14151177519  | 0.102866455776026  |
| AGAGAGTGTAC   | 881.143990442913 | 0.112625697337777  |
| AACAGTCAACCT  | 881.144732330667 | 0.12056492032157   |
| TCCGTCACTCGA  | 881.150827152421 | 0.144258362130059  |
| AGAGTGGGTGAC  | 881.169979959832 | 0.169133930738024  |
| AGTTTGGTGACG  | 881.189628626234 | 0.178317407818533  |
| AGTCACGGGCAC  | 881.189716378532 | 0.13940447312989   |

|               |                  |                    |
|---------------|------------------|--------------------|
| AACGATTAGTCC  | 881.192790325655 | 0.182253512955593  |
| GTTATGGTCACA  | 881.207728419886 | 0.15067812586232   |
| AGTATCATGACG  | 881.215172298537 | 0.133886445790994  |
| ATGCGCTGTAC   | 881.226562405121 | 0.158932396275666  |
| ATGACAGCGCGA  | 881.229892704333 | 0.125747017644017  |
| AAATGACAAGAT  | 881.239214464959 | 0.0837720870700476 |
| TAACACTTATGA  | 881.246044924542 | 0.239526797185467  |
| CGTTCGATGACC  | 881.261318757523 | 0.213910186549424  |
| GAATGACCAGGC  | 881.272061086956 | 0.139562319847425  |
| ATGACTTCGGCG  | 881.273052347381 | 0.185346402473069  |
| CTGTCCATGACA  | 881.280233729702 | 0.172410495797173  |
| ATTTGTGACCGA  | 881.28502254822  | 0.145565226832901  |
| CGATGATGTAAG  | 881.29238709874  | 0.131068622304555  |
| AATAACGCTGAC  | 881.317929543645 | 0.194840920047989  |
| GACGGCGTCACA  | 881.326443661073 | 0.120682967827542  |
| CTCGCGGCTCA   | 881.33095469155  | 0.159841245595086  |
| ACCGTCAAGTCA  | 881.333989283683 | 0.137586030068268  |
| GTGTCACCTCCA  | 881.355620473061 | 0.119299041861922  |
| ATGGTACTGTCA  | 881.357939660326 | 0.192233847226591  |
| CACTCATAGAGA  | 881.368734323377 | 0.177065099233463  |
| GTCACCATGCCA  | 881.384488213442 | 0.171011548129574  |
| CGTCACACGGTC  | 881.386681885589 | 0.146773036070606  |
| GTCGATTATCA   | 881.391930881553 | 0.117412174613492  |
| CACAGTCAGGTC  | 881.396345452713 | 0.125242880605965  |
| GTTACTCAAAGA  | 881.396573475946 | 0.154955922415024  |
| GGTGAGTACTAA  | 881.40433151973  | 0.170236096180183  |
| ATGTATACATCA  | 881.422903514725 | 0.24960546136192   |
| AAGGATATGTCA  | 881.438652346745 | 0.099065333713095  |
| GCTGTGGTGTCA  | 881.440224661153 | 0.155930939309831  |
| GAGTAATTCTGA  | 881.440939330049 | 0.125797126166667  |
| CGAATGGTGACG  | 881.44355332736  | 0.188074092982278  |
| CTTAGTGAGTCC  | 881.444357115412 | 0.137804082542794  |
| AGCCCGGTGACA  | 881.446583174578 | 0.216358508837188  |
| TGACTATCTGAA  | 881.453650903007 | 0.122390234523419  |
| AACGGTGACAAC  | 881.46767049743  | 0.204699610008868  |
| CTGACTCGGCGC  | 881.472864288325 | 0.120229676534723  |
| TGAAACATGACA  | 881.478724424631 | 0.153418510052061  |
| ATTGCTCAATTG  | 881.489937129787 | 0.188443489527925  |
| ACTGTCACCGAT  | 881.495833826697 | 0.134271285855239  |
| ATTAGTCGGCCC  | 881.501087824419 | 0.148203164076551  |
| TGATTACAGCGAA | 881.504316720696 | 0.121796240867045  |
| CTGACGAGTGAC  | 881.516499864604 | 0.192302607828126  |
| ATCTGTCAGATA  | 881.524700462985 | 0.227740389642363  |
| CGTATGATGCAA  | 881.527325449636 | 0.14342481215244   |
| GTCACCTAAGTA  | 881.538362298671 | 0.115472705855508  |
| GAGGTTGTGACA  | 881.553372118355 | 0.132978198381931  |
| ATGAGGGTGACA  | 881.556033858408 | 0.0975398608585958 |
| ATGAGGTACCCC  | 881.563389716638 | 0.168708752087239  |
| AACTGCCGTCAT  | 881.56972007449  | 0.205353146547854  |
| CCCGCTGACTC   | 881.569881973294 | 0.121258091633631  |
| AAGACGTCACTG  | 881.573286479336 | 0.121255981492549  |
| TACATTACGCAA  | 881.591493405893 | 0.133143141477128  |
| AGAATACGTCAA  | 881.593595284762 | 0.175531937668147  |
| ACTCATTACGA   | 881.594874867153 | 0.125469600251258  |

|              |                  |                   |
|--------------|------------------|-------------------|
| ACTGTCACAAAG | 881.61812801357  | 0.146430895356944 |
| CAGCGGTGACCC | 881.622657789903 | 0.198670428934856 |
| CAATGGGTGACC | 881.625921437249 | 0.170038349287388 |
| TCATCATAAGAA | 881.631263224982 | 0.224094892379576 |
| CATTCCGGATGA | 881.638800907661 | 0.184610195746376 |
| ACATCATAATGT | 881.64669994482  | 0.217707649604965 |
| ACGTGGCTGACG | 881.648391031966 | 0.177735607429201 |
| GTGAGACATTCA | 881.653672767692 | 0.123467656182905 |
| CTCAAAGTGACA | 881.659243671619 | 0.166803850772747 |
| ATCCGACTCACG | 881.661417961708 | 0.116343203699674 |
| CTGCAATGACCA | 881.662691092134 | 0.113167291876355 |
| ACGCAGTGACAC | 881.670646310202 | 0.178956920487826 |
| CTAGTGGTGACA | 881.676444914003 | 0.151484073390129 |
| CTGTCATTGGGC | 881.678698371614 | 0.167937917672803 |
| CACATTGAATCA | 881.694547829056 | 0.139925557641855 |
| ACGAACTGTGAC | 881.701980135241 | 0.162343347757806 |
| CGAATGTCGTCA | 881.702661693053 | 0.175623339758538 |
| TGACGTACGGAA | 881.709570971786 | 0.263606743346165 |
| AACACTCATCGT | 881.718747680869 | 0.207253669035176 |
| CAAGGGCATGAC | 881.719397808576 | 0.151041436805715 |
| GGCAAGGGTGAC | 881.727426680893 | 0.133959626521149 |
| GGATGACCGCAA | 881.737358125823 | 0.199716353287838 |
| GAGCGGTGACAA | 881.74559526631  | 0.158104093223335 |
| ATCGACTGTCAT | 881.746928793698 | 0.188381664277287 |
| ATTACGCAGTCG | 881.74919671     | 0.141048401584118 |
| AACAGTGACAAA | 881.749590042999 | 0.157310583365013 |
| TCTGACAACAAA | 881.757642691102 | 0.152860424857937 |
| CGTCATGCAAAG | 881.758539807898 | 0.191181954599565 |
| GTGTACACGTAA | 881.762154483834 | 0.25955363591867  |
| AGTCAGACAATG | 881.766798397298 | 0.221296008855548 |
| GCCGGATGACCC | 881.771567708221 | 0.127434115333427 |
| ACTATGAGTTAC | 881.773858543571 | 0.118540232725745 |
| GTAGAGGTGACA | 881.775738380236 | 0.131308206693427 |
| GGCAAATGTGAC | 881.792534704704 | 0.152638041701309 |
| ATAGCCTCGTCA | 881.800425938559 | 0.22970915263667  |
| ACTGACTGTATA | 881.801097043858 | 0.171333765989401 |
| CCTACTATATGA | 881.810464511383 | 0.159531700168747 |
| GCGGTGCATGAC | 881.816668429842 | 0.180262532359989 |
| AGCGGGATGACG | 881.82047313554  | 0.132507347651211 |
| AATTGCCGTGAC | 881.835956197406 | 0.207168493018214 |
| CCGCTTGCGTCA | 881.841783988171 | 0.190373096694263 |
| GATGACCCCTTA | 881.842251549019 | 0.131466555646372 |
| AGAGTCAAGAAG | 881.845274255261 | 0.144642602716336 |
| TGACTTGTTGAA | 881.866855104482 | 0.157168512975862 |
| ATGTATACAATG | 881.879708136834 | 0.135806067333357 |
| CGTCACACGACA | 881.889235036159 | 0.105079135009718 |
| GGCAGTGACGAA | 881.894175342605 | 0.192174386336439 |
| GGGTCACATTCA | 881.898285415253 | 0.118272211958041 |
| GTTTCTTTGTCA | 881.907730690522 | 0.162387134873812 |
| CGGATGATGCAA | 881.910768356513 | 0.127658780580339 |
| CGTCACGTGTAG | 881.918428603859 | 0.118159034996335 |
| AGTCAGAACAGA | 881.919759106472 | 0.15979441404987  |
| AGCTTGGGTGAC | 881.926095887942 | 0.167807541277467 |
| TATAGGTGACCA | 881.928767562133 | 0.153215252255562 |

|               |                  |                    |
|---------------|------------------|--------------------|
| CCCTGCTGACTA  | 881.928772465396 | 0.161402624926847  |
| ACTCATAGAAAC  | 881.93982569166  | 0.208339002492685  |
| TCGTGCATGACA  | 881.951822555432 | 0.1382786270755    |
| GGATTAGCCATA  | 881.953006669693 | 0.163846467112313  |
| AATTAGTCGCAG  | 881.95362645246  | 0.127223109513293  |
| GTCACGTACATA  | 881.955112614035 | 0.0998880858219838 |
| ATGAATCGACGA  | 881.9595550413   | 0.127322920339997  |
| ACTGACTACGAT  | 881.973170860372 | 0.115610268739244  |
| ATTGACCCGTCA  | 881.98278555475  | 0.114783422938427  |
| ATTGGGTGACAA  | 881.996762094868 | 0.106863274832511  |
| ACGTATTATTCA  | 881.996955087696 | 0.220506751540755  |
| GGTTGGAGTCAA  | 882.004472713154 | 0.135035126334162  |
| AAATTCTGACTT  | 882.007364927589 | 0.141965766318781  |
| ACGTCATGTTGG  | 882.008111395093 | 0.16229985200745   |
| AGTACTCACACA  | 882.009998141968 | 0.120927260834229  |
| CTAATAGTGACA  | 882.018741024321 | 0.110150633096722  |
| TGACGAACCAAA  | 882.019652002351 | 0.0788627880618047 |
| ATGAATAATCAA  | 882.033648970147 | 0.203483957030573  |
| GATTATTCTGAC  | 882.044662649851 | 0.229236937801244  |
| AGAAGTGACGCT  | 882.046536508986 | 0.172127265529169  |
| ACTCATCGAGAA  | 882.049433929188 | 0.191806528375458  |
| ATGAGTACGGGC  | 882.052775503301 | 0.179629499559384  |
| ATCCACGTCAAC  | 882.05572209479  | 0.10914967981907   |
| ATCGCTAAGTCA  | 882.057988334616 | 0.161985067355513  |
| GCACATGGGTCA  | 882.065438885944 | 0.252847228972986  |
| ATTATTCACATA  | 882.076610724462 | 0.167505659636447  |
| ACATATGACCGT  | 882.0934982814   | 0.109854708416822  |
| ACTTTGACTCGG  | 882.094283950972 | 0.106411096010164  |
| AACAGCCATGAC  | 882.100052429456 | 0.155878357761899  |
| CGAATTACTIONT | 882.113610241975 | 0.14643740265131   |
| AAGTCACCCCTA  | 882.117865340751 | 0.263576163158356  |
| AGTCTGGTCATA  | 882.119704562294 | 0.128604489855831  |
| GAAGACTGATTC  | 882.121411916474 | 0.157339230198368  |
| GACTAATCCGAA  | 882.124064336896 | 0.130325580987987  |
| GCCCACATGACA  | 882.135518958402 | 0.120917649968634  |
| ACTCATCGTATC  | 882.140138224698 | 0.217494942181763  |
| ATGAGCGTGACA  | 882.154889457739 | 0.166856624515992  |
| GTATGATACACA  | 882.164795703947 | 0.147628285886413  |
| ATGTCACCGTTC  | 882.169161307323 | 0.121911808366718  |
| ACTCATCTGTGC  | 882.185135996464 | 0.137638553782449  |
| AATTCAGTAATC  | 882.190687864288 | 0.112960666682888  |
| AAATGGGGTGAC  | 882.217201367585 | 0.140982938317088  |
| CGTCTGACGAAG  | 882.218186421198 | 0.203853955873086  |
| GGAGAGTGTGAC  | 882.223833598612 | 0.106391762572774  |
| TGTCACCCTAAA  | 882.227658594728 | 0.130938369249562  |
| ACTGACTGCATA  | 882.228616550874 | 0.168617125712159  |
| ACTCATAATCCA  | 882.254917341868 | 0.0868172435934103 |
| CCGTTATACTCA  | 882.259230206517 | 0.160610371168983  |
| GACTCAATTTGA  | 882.273530751345 | 0.247361325161461  |
| CTCATCCAATGA  | 882.274206923612 | 0.18023549161117   |
| ATCCTGACTATG  | 882.278800156294 | 0.120674999564868  |
| GGTATAATGACA  | 882.284433164271 | 0.117185657981917  |
| GCTCGGACTCA   | 882.296926219383 | 0.156995110212467  |
| TCCGAGTCAAAA  | 882.300236701139 | 0.147914680831669  |



|              |                  |                    |
|--------------|------------------|--------------------|
| AATGCTTGTGAC | 882.304111709807 | 0.157293899786006  |
| CATATGACGGTC | 882.308907390526 | 0.255095042757369  |
| CGATGTCATTGC | 882.310342226673 | 0.138165567638852  |
| ATTTTCTGAGTC | 882.317236285029 | 0.176436928252799  |
| ACGTCAGAGTAT | 882.318172710977 | 0.201504966935911  |
| GACTGACTGCTC | 882.321453181931 | 0.0851631170444288 |
| CGCTACAGTGAC | 882.322266796329 | 0.201908551757388  |
| CAACAGACTCAC | 882.325917787406 | 0.211767325670315  |
| AAGAAGAGTGAC | 882.340678516257 | 0.131491782650524  |
| GTCAGCGTCAAC | 882.343010752146 | 0.137920791361379  |
| CGTCACACACTA | 882.344798957488 | 0.221567534017025  |
| ACGCAAACGTCA | 882.349343172225 | 0.17126769241091   |
| TATGCGTGACAA | 882.354178463721 | 0.178395855209823  |
| ATGACGTTGGTA | 882.357093274881 | 0.112406844316333  |
| TATTAGCAATCA | 882.358458074418 | 0.172727332928864  |
| ATTAGTTACTGA | 882.361351935005 | 0.163671121531112  |
| TCTGATAGGTCA | 882.369890971242 | 0.170246865538558  |
| GATGACCGCGCA | 882.373317489794 | 0.220365286070766  |
| AGGCGTCATGAT | 882.383682003274 | 0.226351287093269  |
| ACATGACAGTAT | 882.401678931909 | 0.0998886814552177 |
| ATGATGATGCAA | 882.404689016414 | 0.101835734013707  |
| ACTGGGATGACC | 882.405026510133 | 0.201577107625134  |
| GCCACGTAACGA | 882.406204715461 | 0.143992089855565  |
| CGTCAACTAAAG | 882.407060071768 | 0.167596543866213  |
| ACTCATCCAGGC | 882.425654509216 | 0.183961210392917  |
| AAATGACAGGGT | 882.440523569672 | 0.108442955889295  |
| GAGGTGGCTCAC | 882.457347665962 | 0.138239349003605  |
| GTCACTGTACAA | 882.457830824268 | 0.20571639401519   |
| GATTATATCATA | 882.465819278662 | 0.140408859650144  |
| TATGAGTGACAA | 882.467483361981 | 0.191003867153521  |
| ATGACTTCTACC | 882.472831047999 | 0.147773016404958  |
| GGAGCCCAGTCA | 882.482610662192 | 0.137198996102924  |
| CGATCTGATTCA | 882.486388151675 | 0.174138746446137  |
| ATGAGGTGACCA | 882.4977470129   | 0.17308366473897   |
| AGCCTAGTCAGC | 882.507565651487 | 0.16477378599019   |
| CGTCACGAATGC | 882.517397746183 | 0.147587783596749  |
| ATAGCGTGACGC | 882.529755919904 | 0.10142871497616   |
| AATAATGACCTT | 882.533363731874 | 0.196467691779648  |
| GAAAGGGTGACA | 882.545455647276 | 0.144707354874648  |
| CTCGATGACCTA | 882.545726970747 | 0.181566947756329  |
| AAAATGATGTGT | 882.551049939173 | 0.176439741441489  |
| GCACGTCACTCA | 882.560157249612 | 0.142843401046686  |
| AATGACCATAGT | 882.569311129328 | 0.171223253598948  |
| ACAGCTTCGTCA | 882.569679391921 | 0.217699706130229  |
| GGGTCATCTCGA | 882.575859232886 | 0.114273147912549  |
| AGGCGTCACCAG | 882.577497230807 | 0.183288087728211  |
| GGGACGGAGTCA | 882.584175610312 | 0.124643059390534  |
| AGTCGAGTGACA | 882.585407197827 | 0.121096621394607  |
| GGAGGGGTCATA | 882.586324844356 | 0.113369929890468  |
| CCCGCAGACTCA | 882.590334405032 | 0.156891574056027  |
| AATCCGACTAAT | 882.593834266366 | 0.124322001599227  |
| GTCACGGTGGCA | 882.595358565723 | 0.173209605193672  |
| ATCAACTTGTCA | 882.604683779894 | 0.185774326498488  |
| CTCGTTCTGTCA | 882.607880645519 | 0.15651570754122   |

|              |                  |                    |
|--------------|------------------|--------------------|
| GCTGTGCAACC  | 882.635139764387 | 0.273109310733871  |
| CACGCCGTGACA | 882.635758759705 | 0.156700219391843  |
| TGAGATCACTCA | 882.638288847171 | 0.159331120447668  |
| AAACCACATCAT | 882.640302221164 | 0.098670040875255  |
| GAGCAATGAGTA | 882.640721185666 | 0.139744673676918  |
| GGCCTCTGACAC | 882.641334580043 | 0.170784437118263  |
| CGGCATGACAAC | 882.64159840239  | 0.135568130009434  |
| GATTCGCGTGAC | 882.642731719651 | 0.206301293024293  |
| ATGACGACGCC  | 882.64335313265  | 0.138566205006268  |
| CTCTGGTGACAG | 882.65064464721  | 0.131907941120221  |
| ATCCCGATGACC | 882.673195805682 | 0.146972420559138  |
| CACATAATGTGA | 882.673971683531 | 0.22148783270576   |
| ATGACAGGATAG | 882.681485374416 | 0.119922745059577  |
| TCTTATCGGTCA | 882.687365476925 | 0.147357948304643  |
| GAGAGAGGTGAC | 882.690077674768 | 0.189137631151287  |
| GGATTAGCAATA | 882.693084579956 | 0.153672816311727  |
| CGCCGCGTGACG | 882.697922738538 | 0.157341586617433  |
| GTTTCGTTGTC  | 882.701986199826 | 0.0824882618226953 |
| GGCTCGGGTGAC | 882.712485878212 | 0.180913735224498  |
| AAGTCACTTGAT | 882.716126439032 | 0.119169744363293  |
| GTCACGATTCGA | 882.732204157669 | 0.15750417862981   |
| GTCACAATTAAC | 882.737645286488 | 0.258856086219566  |
| AACAGATTAATC | 882.747421970839 | 0.215429128694355  |
| CGTCACCGTTCC | 882.748523524135 | 0.105232397296988  |
| GTCGCGCTGTCA | 882.748963780241 | 0.180777787801137  |
| ATGCAGCGTCAC | 882.761744227867 | 0.124750079705121  |
| AAGTCACTCCAT | 882.782346390203 | 0.184462249954781  |
| AGCGATCGTCAT | 882.790191746058 | 0.142657105615594  |
| GTCACAGGAGTA | 882.79208671417  | 0.118228247308383  |
| AGTATGAATACA | 882.792799515257 | 0.114801378726764  |
| AATTATGTAATC | 882.793769397952 | 0.154849354099624  |
| CACACTTGGTCA | 882.794838433882 | 0.1266610532258    |
| GCAGAATGTGAC | 882.819731741291 | 0.116610172491592  |
| CCAGTTCGTCAC | 882.821874736482 | 0.169767825850413  |
| GTCACAGGATCA | 882.826337507134 | 0.123574985378061  |
| AATCCTTTGAGT | 882.82833757648  | 0.265216520418793  |
| GTCATTTGTGGA | 882.840510561045 | 0.125601268076502  |
| AACTTGGCGTCA | 882.854356684442 | 0.229048699162656  |
| CTATGATGATTC | 882.86289437149  | 0.158630170105038  |
| GTCATCTGGATA | 882.867414798516 | 0.143198900660283  |
| CAATTTTAGTGA | 882.885505037722 | 0.13068558701315   |
| ATAGAGCAGTCA | 882.894278028108 | 0.134250195717875  |
| ATGACCTCTGAC | 882.896010211985 | 0.173468068361855  |
| TAGTGGGTGACA | 882.903967057364 | 0.167424248668749  |
| AGAATGTCTCAC | 882.909345432491 | 0.163430538993605  |
| ATGAGTAGCTTA | 882.910500865451 | 0.247785379198567  |
| ACGTCACGCGGA | 882.926842005594 | 0.167245918906885  |
| TATGTTGAATCA | 882.927061240676 | 0.158810801917261  |
| GTGAGTATATTA | 882.929311124008 | 0.207057428220084  |
| TCGTCACGAGAA | 882.939873683512 | 0.0997721691962251 |
| GCGTCACATCCC | 882.940994609627 | 0.137508082737488  |
| GCACGAAGTGAC | 882.944111362182 | 0.130224682002238  |
| ACTCATAAATTA | 882.947693633924 | 0.121819163971332  |
| GACATGCGTGAC | 882.949597656914 | 0.128316918862017  |

|               |                  |                    |
|---------------|------------------|--------------------|
| AAGATTAGCAAT  | 882.954154773825 | 0.132248251972021  |
| AGAGGTACTCAT  | 882.954818004819 | 0.128796111142612  |
| AACTAACTCATT  | 882.965675079686 | 0.160149069714896  |
| AGTCACGGCCGC  | 882.971467372647 | 0.182997127122629  |
| ACGGGTCATAGC  | 882.979672226786 | 0.182732470736026  |
| AACGATGATGCA  | 882.980060566929 | 0.130280775014751  |
| CCGGAAGCGTCA  | 882.981468935443 | 0.14824536539126   |
| TGCACGGTGACA  | 882.981694392478 | 0.238212444577543  |
| TCTATCGCGTCA  | 882.993762687832 | 0.146996341153428  |
| AGTCAGATCTAT  | 882.994907262901 | 0.119450434757362  |
| GCGTGACGCGAC  | 882.997788841236 | 0.0826712161478659 |
| AACACGTGACGT  | 883.012897313744 | 0.158603174410387  |
| CATTAACGTCAC  | 883.020522201202 | 0.131605643562015  |
| GACCGGTGACGA  | 883.022592819707 | 0.22051101416999   |
| CCTCGGACTCA   | 883.027411735553 | 0.142095106977716  |
| AGAGTGAGTCTC  | 883.043871845726 | 0.116752294468645  |
| CTACGGTGACGA  | 883.047975415504 | 0.149601335409096  |
| CGTCACAATCTC  | 883.058349454153 | 0.124455673769926  |
| GTCACGTCTCAC  | 883.058485526839 | 0.202699134704716  |
| CGTCACAGTGAG  | 883.078603509117 | 0.136279960289306  |
| AAGAGTGGTGAC  | 883.081642888357 | 0.193139157463271  |
| GAGCAGCATGAC  | 883.093200760227 | 0.160075690216058  |
| CTTTTGCTCACA  | 883.103680880794 | 0.149843766168714  |
| CTATAGAGTGAC  | 883.108340026058 | 0.138203349275817  |
| AGGAAGGGTGAC  | 883.111878953788 | 0.154840864431593  |
| GTATTAGGTCAC  | 883.122255562583 | 0.0916492985864174 |
| ATCAAGTCACTC  | 883.131571914265 | 0.161181391743425  |
| CACGTCAGACGC  | 883.142192729884 | 0.150921814814845  |
| AATCATGACCCCT | 883.143900629261 | 0.252172814034182  |
| AAGCCAGGTCAT  | 883.148474389923 | 0.196769335844502  |
| ATGACAACCTTG  | 883.150661857439 | 0.159576116740348  |
| CCGCGTCACGCA  | 883.160916608623 | 0.194431816180049  |
| ATGTCACATCGA  | 883.170729741648 | 0.140187595988555  |
| CGTCATTCGCCG  | 883.172159906087 | 0.142758521168313  |
| ACATTTGACTCG  | 883.174739957101 | 0.13952824516978   |
| CGGGTCTGTAC   | 883.176181932705 | 0.208669556916986  |
| GGGACCCGTCAC  | 883.199664497423 | 0.113461251614431  |
| GACAACATCATGA | 883.201253519163 | 0.168047355554228  |
| GTCATGAGGTCAC | 883.20470641255  | 0.114115190505168  |
| GCATTTGACACA  | 883.205344208115 | 0.147193744953443  |
| GGTGGGAATGAC  | 883.22608589648  | 0.17265289379433   |
| AGTCACGGAACG  | 883.231583499263 | 0.141763598272496  |
| CTAGGATGACCC  | 883.236945220175 | 0.183586387527004  |
| AAGAGTGACATA  | 883.238087478241 | 0.112333625315175  |
| GGTCATCTTCTA  | 883.24443464712  | 0.130427835551588  |
| AGTCAGCAGAGA  | 883.244569310889 | 0.170919389716796  |
| TCGACTGACCAA  | 883.249902148365 | 0.14382297985667   |
| AACGTTGTATCA  | 883.262631530426 | 0.167538175968281  |
| AACGCAGTCAGC  | 883.267210071189 | 0.139359142755044  |
| AATGAGTAGTCG  | 883.274489915718 | 0.113366326549586  |
| CGTTATTGTGAC  | 883.275518000136 | 0.117538011139616  |
| AACGTCAGAGTC  | 883.28220628494  | 0.160527259942507  |
| ATACTCACACAT  | 883.294820730683 | 0.200739407560131  |
| CAGTGTTTGTCAC | 883.302708943936 | 0.159705958953779  |

|               |                  |                    |
|---------------|------------------|--------------------|
| AACCGGTGACAG  | 883.311544279113 | 0.122776011288263  |
| ATTGACGAATTA  | 883.31616442728  | 0.165209931699711  |
| GCGTCATGCTCC  | 883.341028244821 | 0.123778962674239  |
| AATGACAAGGCA  | 883.342427400412 | 0.167518652595498  |
| AGAGTGAGTCTG  | 883.345365153135 | 0.100326494559055  |
| TGTGTGACCGAA  | 883.346237239008 | 0.112650182039314  |
| GTGTGACCTAAC  | 883.353729109586 | 0.121502215498029  |
| AGGGTCATGCGA  | 883.357591282528 | 0.243459071936641  |
| ATGACCGAGCGA  | 883.369566805799 | 0.170482332826268  |
| ATCCTGGGTGAT  | 883.379485956423 | 0.168415024461888  |
| GACTCAGAAGAA  | 883.380039435422 | 0.192960514561203  |
| CGAACTGAGTAA  | 883.396938097476 | 0.177428794582173  |
| CTAATAGCGTCA  | 883.400181872483 | 0.136171856956292  |
| TATGACCCCTAA  | 883.403044953259 | 0.19034852273949   |
| CGGCATGACGAC  | 883.40873479886  | 0.212352114148147  |
| ATACAACCGTGA  | 883.410094626803 | 0.178854720131578  |
| ATTACGTATTGC  | 883.422578643129 | 0.154692747216117  |
| ACTCCGTCCTC   | 883.441195358699 | 0.157754777020484  |
| AATGAGCTGTCA  | 883.457563749412 | 0.0936692966094018 |
| AAATATTAGTCC  | 883.460384132999 | 0.123105760108372  |
| CGCATGACCGCG  | 883.470494937711 | 0.150854906219858  |
| AATGACCATATC  | 883.476370030816 | 0.147442487331848  |
| TACGTGGCGTCA  | 883.489344592998 | 0.16729589999005   |
| GTGACGGAGAAC  | 883.498856534836 | 0.143927515150071  |
| GAACAGTGACAC  | 883.50552633764  | 0.188226868486825  |
| ATTGGGTCACTA  | 883.505738557174 | 0.165429482207934  |
| TTATCATGACAA  | 883.505901622302 | 0.179777534738835  |
| GAACCGAGTCAA  | 883.516701626214 | 0.125236051665495  |
| GAAGAGTCTGAC  | 883.517696141411 | 0.19181783616909   |
| GGGAAAGTGTC   | 883.517762524005 | 0.144210941135084  |
| CTATCGGACTCA  | 883.524113963637 | 0.0834506733408795 |
| GCGCAATATGAC  | 883.53586885276  | 0.133282954444262  |
| ACTCTATGTCAC  | 883.537658312053 | 0.0831118980666921 |
| GTCACCCCTCTA  | 883.544240873309 | 0.132122246651906  |
| TATTTTCATGACA | 883.547311793622 | 0.134285064870471  |
| GAGTGACGATAA  | 883.55391070768  | 0.23450766072345   |
| ATTTTCAGTGAC  | 883.564583403804 | 0.215724392426541  |
| TCTCTGACAGAA  | 883.569620359928 | 0.199239905606991  |
| GCCACTTGTGAC  | 883.570773379639 | 0.135563266456718  |
| GGTTACTTGTCA  | 883.577615831869 | 0.150400732342919  |
| TAGTCAACGGAA  | 883.583211160791 | 0.212391613757293  |
| CTGGCGTCACAG  | 883.589271670686 | 0.148460469392957  |
| ACATTGATGAGT  | 883.589762834503 | 0.161763462975312  |
| GAATGAGCCTAC  | 883.596330402668 | 0.177388247439822  |
| CAATGGTGACCA  | 883.596996403506 | 0.161446978438111  |
| ATGCCTCATAAG  | 883.598058920749 | 0.0965913845641353 |
| ACGACTCAGCCA  | 883.604272776742 | 0.187978778471632  |
| AACAGAAGTCAT  | 883.607345839794 | 0.218503697899915  |
| ACGTGACCCAAC  | 883.611286506312 | 0.100650927819715  |
| CGTCACACCGAG  | 883.614555881796 | 0.163489418059516  |
| GTATGTCCTGGA  | 883.651056650398 | 0.167482377114213  |
| CAATGCCGTGAC  | 883.651585574517 | 0.152341337368271  |
| ACACGAATGACG  | 883.653979900597 | 0.148557987726745  |
| CATGCATGTGAC  | 883.655557475245 | 0.243535968801496  |

|               |                  |                   |
|---------------|------------------|-------------------|
| ACTCATATTCGA  | 883.665452465801 | 0.130288919129632 |
| GCACACATGTCA  | 883.669039771037 | 0.226166727745785 |
| CTGATATTACTC  | 883.681319401124 | 0.178179773336084 |
| TGTGACAGCTAA  | 883.682399821866 | 0.147638352482468 |
| ACTCATCTCTTG  | 883.683972626154 | 0.115782185988402 |
| CGTCATTTGACC  | 883.703140694314 | 0.144869862815472 |
| TAGATGTGACGA  | 883.715848744782 | 0.121755011689182 |
| GATGCTGGTGAC  | 883.718662074492 | 0.11329448841457  |
| GCATAATTGTCA  | 883.720225118932 | 0.170291868799052 |
| CCTCCATGACAC  | 883.739961689336 | 0.129042729858573 |
| TATCTGTGACAA  | 883.743837603945 | 0.132881363087282 |
| ACTCAAACGTGA  | 883.748542854036 | 0.15822559058092  |
| ATATTTCTGTCAG | 883.75461503847  | 0.139969576468288 |
| GAATGATGAATC  | 883.764004900437 | 0.163036434347707 |
| CTGTAATGACAG  | 883.768417851533 | 0.135103181626693 |
| ACTCATATCTCG  | 883.783636880711 | 0.124251700951059 |
| TGACGATTTAAA  | 883.789072844645 | 0.155073758040169 |
| GGTAGTTGTGAC  | 883.793280378622 | 0.119517974201759 |
| AATTTACTGACT  | 883.798101880147 | 0.12416954794603  |
| ATTTGGAGTGAC  | 883.799994677858 | 0.136221184332431 |
| ACGTACACATCA  | 883.800662007203 | 0.156724870501839 |
| GCACTCACGTCA  | 883.804687267467 | 0.123523885266694 |
| GCGACAAATGAC  | 883.807986670793 | 0.138393922917001 |
| AATCCATGACGT  | 883.810262633454 | 0.149916931456136 |
| CGGTGATGCATA  | 883.813918314354 | 0.125666979792591 |
| ATACCGTCACAC  | 883.814839982881 | 0.163170506909591 |
| ACTGTCATGCTA  | 883.823069136717 | 0.122471680026875 |
| ATTATTCATAAC  | 883.823411312839 | 0.126642734954897 |
| CGCACTTTGTCA  | 883.833812499486 | 0.207754104412469 |
| TGATACATACCA  | 883.846577504937 | 0.247077884049735 |
| ACCCAGTGACGT  | 883.84773199961  | 0.189585682158523 |
| CATTGATTCACG  | 883.85773986292  | 0.144885045319517 |
| ATCATAGTCAGG  | 883.861882444116 | 0.15264336569909  |
| AGTCAATTATTA  | 883.863107111617 | 0.182141534989216 |
| GCGATACGTGAC  | 883.863750798064 | 0.134733963101045 |
| CCTAAGTTGTCA  | 883.866565433754 | 0.151871603807798 |
| AAGCGGTGTGAC  | 883.872164841104 | 0.178763155072643 |
| GAAAACCGTCAC  | 883.88334880388  | 0.165486989817469 |
| AGTTAGGGTGAC  | 883.88975482889  | 0.13496122851114  |
| GCAGCATAGTCA  | 883.893111864736 | 0.179886659158616 |
| GACGGTCGTGAC  | 883.913066142925 | 0.114821588315573 |
| ACTCATCGTTGC  | 883.916772745581 | 0.149634616640126 |
| TATTGCTCAGCA  | 883.928394830152 | 0.120253542489143 |
| CGGTATTGTAC   | 883.934393620294 | 0.115059758347296 |
| TATTATCACTCA  | 883.934938886065 | 0.13330447449766  |
| AGTCAGAACTG   | 883.936833345436 | 0.116815873114586 |
| CGCGTTGTGACG  | 883.938234684916 | 0.168510259162692 |
| CGATGTCATGTC  | 883.941699749299 | 0.154447838361237 |
| AGGTGACTTGGA  | 883.964746436153 | 0.178708716201238 |
| ATTTGTCTGTCA  | 883.967261400053 | 0.121770162987191 |
| ATGAGGTCAATTG | 883.98338892784  | 0.187688385255443 |
| GTCATGTTGGAC  | 883.998960791447 | 0.16324143980363  |
| AGTCAGAACGGA  | 884.004583063899 | 0.121093618070249 |
| ATACTCACTCAC  | 884.009310129976 | 0.124249735645188 |

|               |                  |                    |
|---------------|------------------|--------------------|
| GTCACCTTCAAA  | 884.017886236258 | 0.132629086825982  |
| AACTAATTCTGA  | 884.021449741504 | 0.166679758670363  |
| CAGTCAGCGTGG  | 884.030554571248 | 0.167916932460655  |
| ATTGCATGACGG  | 884.031368458536 | 0.201240302738341  |
| GCCTAAAGTGAC  | 884.035491113244 | 0.194297723179053  |
| ATACTGACTACG  | 884.044625421063 | 0.124891759909423  |
| GTCATTTAGGGA  | 884.047864638254 | 0.112571325837685  |
| CGATCATCGTCA  | 884.054878996307 | 0.134512555396514  |
| AGAAGTGGTGAC  | 884.061735849103 | 0.177916414447825  |
| GATGAAGTCACA  | 884.071888027485 | 0.185895938476031  |
| GTCACGACGCCA  | 884.078736808936 | 0.0962738422393058 |
| ACTCATCACTGC  | 884.080351953131 | 0.102016925243912  |
| AGAGTAATAACG  | 884.082327859169 | 0.117060073007518  |
| ATGACGGGGACC  | 884.091911967639 | 0.145869126691479  |
| CGCGTCACTATC  | 884.10435744575  | 0.0753387127344779 |
| CAAATGTATCAC  | 884.108030381422 | 0.159115341724751  |
| ATCTTAGCGTCA  | 884.11527420571  | 0.192796370005967  |
| AGATCCATGACG  | 884.117744887184 | 0.127664403313218  |
| GTCACTCTTCAC  | 884.118269538002 | 0.19098890398184   |
| GTCATTTGGGCA  | 884.120668048236 | 0.180888489753199  |
| GTGACATACAAA  | 884.122489115638 | 0.163741892792508  |
| TCTATGTGACAA  | 884.123966224297 | 0.0770660075578051 |
| TGACGACATACA  | 884.129669073374 | 0.126943790384261  |
| GGTGTTTGTGAC  | 884.135043661063 | 0.167599731140058  |
| CACGGCATGACA  | 884.135389634061 | 0.148388024897732  |
| GCGGTTGACACA  | 884.141787051233 | 0.156310720085044  |
| GGACTAATACTA  | 884.144942985565 | 0.135644251492551  |
| ATCTATAATGAC  | 884.14526402704  | 0.16534358762147   |
| GCTAACGCGTCA  | 884.156683275676 | 0.144560636853367  |
| ACGGTCAATCGAG | 884.15673620249  | 0.113634360931205  |
| ATGTTATTACTC  | 884.159179448618 | 0.207709925069656  |
| CAGTCGTGGTCA  | 884.167476737725 | 0.158787334754872  |
| GAACGCTAGTCA  | 884.183039236645 | 0.148089621730374  |
| TGACGGAGCGAA  | 884.187094131107 | 0.12572673016501   |
| GACCGGGAGTCA  | 884.188704445647 | 0.228007764536158  |
| AACCATTGTCAT  | 884.19081348296  | 0.0753342355591629 |
| CGTGCGTAATCA  | 884.192573406972 | 0.152635292403737  |
| ATATTGTGTAAT  | 884.204948330247 | 0.148653355631005  |
| CACCTGTGACGC  | 884.212420707951 | 0.124426162515174  |
| AGTCAGTACGAT  | 884.222089880628 | 0.236973706435092  |
| ACCTTTTGACTC  | 884.230833192239 | 0.12368112302461   |
| CGATGACTTTCA  | 884.230856345362 | 0.158953555348255  |
| TACAGTGACAAA  | 884.234683506453 | 0.142868682001348  |
| ATGAGCCAATTA  | 884.235781929648 | 0.146179835050851  |
| CCTATTACTCTA  | 884.241945756234 | 0.125969357068668  |
| AGCCACGTAAGA  | 884.250316986483 | 0.172186970285326  |
| ATGACATGCGGC  | 884.25413037455  | 0.168801986402748  |
| GGAA GTTGTAC  | 884.25529123778  | 0.219281159115269  |
| CACCTGGTCATC  | 884.261047776345 | 0.145893979703892  |
| AGTGACGCCGTA  | 884.263195595277 | 0.185975005837324  |
| AGTACGAGTAAT  | 884.269426387878 | 0.132937109243476  |
| AAGCTGTCATGT  | 884.274880250222 | 0.130660220209164  |
| AAGGTGGTGACA  | 884.290134915007 | 0.135228524636006  |
| AATCTGTGACGC  | 884.304761764509 | 0.142717679957619  |

|               |                  |                    |
|---------------|------------------|--------------------|
| GACACACCGTCA  | 884.314978556283 | 0.171605541233631  |
| GTCACGTGGACA  | 884.315218647281 | 0.135578511887452  |
| AGAGGAGTAATC  | 884.317308000618 | 0.133128415378506  |
| GACACATCTTAC  | 884.32052018148  | 0.251241043875926  |
| AACAGGTGACAT  | 884.322363840393 | 0.148792604546705  |
| AGCTTGAATGAC  | 884.323891548732 | 0.106673554993107  |
| AGTGACACGAAT  | 884.328856644328 | 0.166027993945842  |
| ACTGAGTCTACG  | 884.339006862769 | 0.168112531391861  |
| AGTGACATGGCA  | 884.343795890166 | 0.151522673417847  |
| GCGTACTACTCA  | 884.34602905646  | 0.208083202799161  |
| CTTGTCATTTGC  | 884.364095669912 | 0.138748985163603  |
| AATTGTAGTGAC  | 884.368555071679 | 0.20944889802393   |
| CGTGATTAGTAC  | 884.369048378264 | 0.114641648023178  |
| TATTAGTCTCA   | 884.370056231834 | 0.15576909640948   |
| TCAATACTGTCA  | 884.371476197891 | 0.12476543216059   |
| AGTGACGATATA  | 884.372645232857 | 0.0939768473573907 |
| ACGCTAATGACG  | 884.390594774095 | 0.125564637053742  |
| ATGAGGGTGACG  | 884.393563895883 | 0.10298134259408   |
| AGTCAACGCATA  | 884.411172543534 | 0.171084066506     |
| ACAAGGAGTGAC  | 884.411867831389 | 0.173754618213046  |
| AGGTGACGATAA  | 884.424008040459 | 0.269377844514987  |
| ATGACGGGGTAA  | 884.433311618779 | 0.163312642823094  |
| ATGTGACGGGTC  | 884.441081470242 | 0.130272157668048  |
| ACGTCACACTCGC | 884.442002638508 | 0.186771892963851  |
| CGGTGAGTTGTC  | 884.442849690321 | 0.151518814438857  |
| AACGCGGTCATA  | 884.44696146959  | 0.119012754588737  |
| CGAGGTGAGCAA  | 884.467007186141 | 0.137880480644709  |
| AAAAGGGTCAGA  | 884.469369934523 | 0.123776086515652  |
| TCGTCACAACCA  | 884.478125834687 | 0.208606727467079  |
| CTCTAACTGTCA  | 884.481925576441 | 0.188504916523294  |
| ATGACAATGGCG  | 884.489782209135 | 0.15658032641496   |
| GCAATGTCTGAC  | 884.490844498527 | 0.178015730607313  |
| CCAACTCATGAC  | 884.494487904256 | 0.147673425195321  |
| ACTGCGTCAGGA  | 884.495524038164 | 0.140664323173224  |
| ATCGCGGTCATA  | 884.497529429146 | 0.161844641881832  |
| CTACGTGACAGA  | 884.500910260473 | 0.171630520261015  |
| GACTAATCGGAA  | 884.501943145503 | 0.187853437388509  |
| CTAGTGACATGAC | 884.507996571724 | 0.137291830617527  |
| AAGTGGTCATTA  | 884.514615535258 | 0.117317289712631  |
| ACAGTGACAACT  | 884.517341214164 | 0.152101722328179  |
| AATGACCACGTC  | 884.519214435819 | 0.129884553138408  |
| ACGGTGACGACG  | 884.537670114519 | 0.151441148164906  |
| AGTGACTTGGCG  | 884.538384292929 | 0.140574275674045  |
| GACAGTGACCCA  | 884.539303801316 | 0.240597745474222  |
| ACGTGTGTGACG  | 884.540767718538 | 0.134469419525787  |
| GAGTCAAACCTGA | 884.541020424172 | 0.110260942072098  |
| AGTCAATGATAC  | 884.558817877954 | 0.171863194990611  |
| TACTAAACGTCA  | 884.567226527519 | 0.184127246643067  |
| ATAGGCTGTCAT  | 884.570047105271 | 0.224439577386355  |
| AAGAGTAAACCG  | 884.575102203179 | 0.119414518505181  |
| CGACTGCGTCAA  | 884.579504211017 | 0.103117401908737  |
| GTCATAATCCA   | 884.585000337502 | 0.120956511274334  |
| TGACTACGGACA  | 884.589157917006 | 0.141288044599389  |
| GTCATTGATCAA  | 884.591320359403 | 0.10586770458768   |

|              |                  |                   |
|--------------|------------------|-------------------|
| CGCTGTCACGGA | 884.596394025709 | 0.171870051722402 |
| GTGACACGAATA | 884.598285521356 | 0.228412269641945 |
| AGGCATGACGAT | 884.606445213145 | 0.176204122385302 |
| AGTCAACGAACT | 884.606958907903 | 0.136117187143262 |
| CTCATCTGAGAA | 884.615850434277 | 0.231854488426677 |
| CGTCACACCACC | 884.618631123663 | 0.143827549857137 |
| ACACCTATGACC | 884.634025967493 | 0.152441834697218 |
| TACTCAACTAA  | 884.63496794441  | 0.157700430928011 |
| AAAAGTGACGGA | 884.635504989747 | 0.159389721699466 |
| ACTTTTGCTCAC | 884.641416894557 | 0.12098974947068  |
| CCATCTAATGAC | 884.670987223744 | 0.188753175612508 |
| ACCACTTGACTC | 884.672170948231 | 0.142002854375152 |
| ACCGGGACTCAT | 884.674741360268 | 0.129221656346214 |
| AGATGGCTCAGA | 884.676130024441 | 0.169338616497693 |
| GATTACTGAACC | 884.68613264658  | 0.122539601867994 |
| ATAGGTGAGCAA | 884.707000169525 | 0.124116305662145 |
| CCGACTCACGAG | 884.708240132911 | 0.215762566888839 |
| TGACACCGACAA | 884.711153476897 | 0.15687388756873  |
| ACTCATCATACA | 884.714762493846 | 0.133355791216591 |
| ACTAATAGTTAG | 884.715267683703 | 0.117914384662693 |
| TGACAGTTACAA | 884.718012262762 | 0.128813386026356 |
| AGTCACGGGTGC | 884.723381493678 | 0.166932256015258 |
| AGGTGAATCAAT | 884.732720454183 | 0.201602557905809 |
| ACAAATGTCATC | 884.733758864231 | 0.196213562991902 |
| ACTCATGAGTTG | 884.738701781437 | 0.135697630686817 |
| GTCATGGAGTGA | 884.739732405596 | 0.148381217054097 |
| AATGACATCGCT | 884.748185321444 | 0.133012891300314 |
| GTCACGATCCGA | 884.75437471348  | 0.130020451453434 |
| AGTATGTCACGC | 884.787801378304 | 0.116777710028214 |
| AATGTGAATCAA | 884.794656746134 | 0.156695573894599 |
| GTGACAGCGAAA | 884.800275405502 | 0.199686426983127 |
| CAGACAAGTGAC | 884.823412124552 | 0.154333581314513 |
| AACTGGGTGACG | 884.825722325834 | 0.174583967570822 |
| CCTATTGCATGA | 884.826706321027 | 0.182353366364363 |
| GAGTAATTTTGA | 884.831338995433 | 0.127217658257681 |
| AGGACGGAGTCA | 884.84312439823  | 0.160634089217099 |
| AGTAATACACAT | 884.849512608624 | 0.190009051140512 |
| CGAGTTGTCACG | 884.85738272813  | 0.139120043388773 |
| CTACAGGTCAC  | 884.869984630091 | 0.1208543275252   |
| ATGACAGTCCTA | 884.872687351033 | 0.111835528207963 |
| AACATAGTCAGC | 884.876606751095 | 0.189284629462945 |
| AGGGTCACAGTC | 884.881209721695 | 0.161761861709096 |
| ATCTAACGTCAT | 884.884062947666 | 0.12397656700337  |
| ATGAGACACAAT | 884.90228669014  | 0.155002628431099 |
| GTGTATGATGCA | 884.904075349986 | 0.160054777604025 |
| ATGTGTATCATC | 884.90721321888  | 0.114325474448238 |
| GTCATGCTCGGA | 884.907418154554 | 0.165748536498886 |
| AGTACCGTACCC | 884.91025463642  | 0.204111609064005 |
| GACGTGTCAACA | 884.920326803753 | 0.116142387247729 |
| GAGTGACATACC | 884.929502158519 | 0.185636739336014 |
| GAACCTCCGTAC | 884.933735664501 | 0.138775924463603 |
| ATCTTCTGTGAC | 884.936322580945 | 0.194817868539247 |
| CCGGCGTGACGC | 884.93716332688  | 0.175504817542439 |
| ATGGCCTCGTCA | 884.958457001209 | 0.12112552474157  |



|               |                  |                    |
|---------------|------------------|--------------------|
| AGCGGGAATGAC  | 884.969928547199 | 0.231159784492588  |
| ACGTCATGGGAC  | 884.983339732052 | 0.216481719682664  |
| AGCGCTGACAAA  | 885.005800602824 | 0.135750159766651  |
| GACGTGTTATGA  | 885.00819422043  | 0.163273873177518  |
| ACCCTCCGTCAT  | 885.009771153954 | 0.134108291693717  |
| CCCATTTGTGAC  | 885.012049474918 | 0.137514054181612  |
| CGACGGAGTCAG  | 885.034557096747 | 0.194977788703787  |
| GCTACACTGTCA  | 885.037539578919 | 0.155901897852237  |
| AGAGTCAAGGAG  | 885.039591725095 | 0.178507387845143  |
| GCGTTAATGACA  | 885.042426818795 | 0.184513499859086  |
| GTCATGGCTATA  | 885.046052009592 | 0.185868098939581  |
| ATTCGTGACAAG  | 885.049034487901 | 0.135359839498043  |
| AGCTAAAATGAC  | 885.050995327139 | 0.196891671940785  |
| GTTGAATGACCA  | 885.05247085969  | 0.152388169230813  |
| ACGTTGGTGACC  | 885.053592246605 | 0.195584158806829  |
| CACCCTTGACTC  | 885.058364304713 | 0.114979629413569  |
| AAGAGTAACTT   | 885.069636262628 | 0.169731196413013  |
| CGTGACAGCACG  | 885.075185499382 | 0.13714451480474   |
| AGTGAGTACCAC  | 885.090967104467 | 0.160435578145399  |
| ACTTAATGACAA  | 885.101399882305 | 0.205874407542101  |
| CCTCTCTAGTCA  | 885.102002506883 | 0.119303809224182  |
| CGTCACAAGAGC  | 885.103341553534 | 0.152082540468967  |
| CATTTGTGACGA  | 885.11563603088  | 0.136951475702974  |
| ATTGACTAGTGC  | 885.125530440596 | 0.141842372929814  |
| GGACTGCGTGAC  | 885.138707676703 | 0.233650833483619  |
| TCTATGATACAA  | 885.145159788036 | 0.111378207802471  |
| CGGACGAGTGAC  | 885.151143034499 | 0.184835008900415  |
| AATAGTGACGGA  | 885.156894027413 | 0.164099469079127  |
| CAATAATGACCA  | 885.159613944489 | 0.128469989808834  |
| GTCATTTAGGAC  | 885.160728455557 | 0.167984253062577  |
| AGTGACGGAGCA  | 885.162147904333 | 0.137904440826987  |
| TCCGCTAAGTCA  | 885.16531857941  | 0.139822255055669  |
| ATGAATCTTCGA  | 885.166889174192 | 0.210961867804487  |
| ACTCATTCCACG  | 885.171495282397 | 0.13984762413908   |
| ATGACGGCAACC  | 885.18899649248  | 0.150507304232952  |
| GTAACCTGACTA  | 885.189015715031 | 0.122245134502089  |
| GTGAGCCACATA  | 885.18960958653  | 0.155620537166554  |
| CAACGTGTATGA  | 885.190292657687 | 0.183707494573924  |
| GGTGACGACGCA  | 885.201381211157 | 0.136864682552284  |
| AAGTGACGATAT  | 885.203752942283 | 0.159959579598913  |
| CGCTCTAAGTCA  | 885.204664363502 | 0.239663072862406  |
| ACTCATATCTAG  | 885.218865626916 | 0.154810784252597  |
| CGGGTGACGTTA  | 885.219310249276 | 0.170598384482509  |
| TCCTTTTGCTCA  | 885.228673988654 | 0.121710558637666  |
| ATGAACCCGTCA  | 885.229061573558 | 0.143195907195263  |
| ATGTCATTA CTG | 885.231276311417 | 0.167877917736827  |
| GTGAGCATGACA  | 885.232636963028 | 0.15885646573284   |
| GAAAATGTGACA  | 885.235302433854 | 0.157122706536986  |
| AGTCAGAGAGAG  | 885.239247108767 | 0.10919101766805   |
| GTGACCGAATCA  | 885.240706482972 | 0.136381005700641  |
| CGACCTTGTCAC  | 885.244639962137 | 0.137322943170757  |
| ATGACATTGCAA  | 885.252640051787 | 0.0893683624370626 |
| AACCAAATGACG  | 885.25288764738  | 0.123662080715258  |
| CCATCCCAGTCA  | 885.255658987009 | 0.135506779004103  |

|              |                  |                    |
|--------------|------------------|--------------------|
| ATGACAGTCCCA | 885.258331800446 | 0.167308330538711  |
| GATATGTCTCAC | 885.273361478604 | 0.149086570054523  |
| TGTAATCTGCAA | 885.28249384035  | 0.141611746113797  |
| ATGAGCAAAGCC | 885.283022346629 | 0.172228006258701  |
| AAGATTTGTGAC | 885.287003416039 | 0.112974503843957  |
| ACGTGACCACGA | 885.287261244915 | 0.128158786935557  |
| ACGTGTCAGTAA | 885.288829840618 | 0.153309470030218  |
| CTACTGCGTCAG | 885.298275079309 | 0.0764246427034429 |
| TACTCATCTTCA | 885.318642331927 | 0.12021903451914   |
| AGTCAACTTAGG | 885.330741009577 | 0.203573166733242  |
| AACAGCATGACG | 885.331139098252 | 0.169667416798047  |
| GGTGATGGTGAC | 885.332989234654 | 0.125514331943362  |
| CGGATAAGACTC | 885.333305241304 | 0.166874073742653  |
| GAACATGACCAC | 885.335438009452 | 0.189938073089695  |
| GATGAGCGTGAC | 885.339309868475 | 0.139539439571924  |
| GAGTTGAGTCA  | 885.340579338024 | 0.13730133799879   |
| GGAGGGAATGAC | 885.341631503407 | 0.119106548556919  |
| ACTACGCGTCAG | 885.341864605923 | 0.194386525538495  |
| ATGCTTTCGTCA | 885.346194242905 | 0.152268944340433  |
| GACTTGTGACCC | 885.346212952573 | 0.23089013808482   |
| ACAGATCACTCA | 885.346802402909 | 0.183965542342563  |
| AAGGGTCAGAGA | 885.366798542647 | 0.112521206834583  |
| TCATCGGTAAGA | 885.369002777122 | 0.186462220515276  |
| CGTCATGGACAC | 885.382307157303 | 0.112536510553178  |
| TGCATCATCGAA | 885.383368969605 | 0.154224311021063  |
| ACTCATTTGTAC | 885.387496625972 | 0.119226310142529  |
| AGGCTTCATGAC | 885.38894199847  | 0.123393720034696  |
| CCGCGGCTATGA | 885.396963395174 | 0.229705722012429  |
| CCCCGATTATGA | 885.404322831302 | 0.152251962019868  |
| TGACCAAGTGAA | 885.407663694939 | 0.162156213386609  |
| AGAGTGACAAC  | 885.41946118046  | 0.163493878858433  |
| ATAGACGTCACA | 885.421266888674 | 0.136370149267255  |
| CCCGCGGTATGA | 885.421922760208 | 0.236302877041574  |
| ACGGAGAGTCAG | 885.438449278383 | 0.138847574499546  |
| TCTTATGAGACA | 885.446872900308 | 0.240317060615562  |
| CAACAGGTCACA | 885.448054089474 | 0.127222596617541  |
| ATTAACGTGACA | 885.457126538896 | 0.186145179026593  |
| ATTACTGACTAG | 885.462816496508 | 0.168837145964205  |
| CTAATGTGGTCA | 885.464323108897 | 0.209440278373814  |
| AACAGTCAACTT | 885.465015142677 | 0.121983338577351  |
| ATACTGACTGCA | 885.466313285433 | 0.189595189019374  |
| ATGACCTAGTAA | 885.472121413331 | 0.112321920884547  |
| CCCCTGGTGACA | 885.473721880064 | 0.130693315133135  |
| ATATAACTCACA | 885.483659607336 | 0.153681880258534  |
| AGACTCAGATAA | 885.490031341644 | 0.163621218824763  |
| ACGCGGGTGACA | 885.495003512583 | 0.14406243515506   |
| ACTCATCTTGAG | 885.498328371403 | 0.112044466736129  |
| CCAAGGGAGTCA | 885.523774240438 | 0.0872599647148298 |
| CATATTGATTCA | 885.532907827294 | 0.15313290979188   |
| ACCCCGTCATCA | 885.533665050837 | 0.149951070885976  |
| ATAAGTGACCCA | 885.533910400531 | 0.136897411254257  |
| ACTCATAAAAGG | 885.536602770331 | 0.134347461751864  |
| CCCGCGAGTCAG | 885.542150763206 | 0.160599964329415  |
| CGTCACTGATAG | 885.545471462518 | 0.144916748357874  |

|              |                  |                   |
|--------------|------------------|-------------------|
| AAGGATTGAGTC | 885.546080704916 | 0.132931762164023 |
| CGTTGACCCATC | 885.546837016764 | 0.12708759376157  |
| AGAATCCATGAC | 885.551842399649 | 0.194988934019911 |
| AGCCACCGATGA | 885.576721471517 | 0.128554851424259 |
| CGTGTTCTGCAC | 885.577285937631 | 0.194835086982594 |
| AATTAGCCATAG | 885.583980274599 | 0.145828208730999 |
| CCGCGTCACTGC | 885.597561157393 | 0.132784022789144 |
| AACGTCACCCTA | 885.600040980797 | 0.182750202050623 |
| AGTAATGACCGA | 885.610837647996 | 0.120801005758152 |
| GACAATTACTGA | 885.613843096288 | 0.166875906175619 |
| GGTGTTGAGTAA | 885.617306129843 | 0.246078133010514 |
| TGGGTAATGACA | 885.625986916464 | 0.158335171926319 |
| GTATAACGTGAC | 885.627008510233 | 0.18587985150008  |
| ACTCATCTCTTA | 885.645093630685 | 0.135598592203326 |
| GACCTAGTGTC  | 885.646472731469 | 0.111281894227116 |
| AGTATCGTCACG | 885.649735752777 | 0.217234057387406 |
| CGCATTTTATGA | 885.650450464803 | 0.224933380938699 |
| CTAGGTGAGCAA | 885.65294244597  | 0.180436303991619 |
| CGTCTACTCATC | 885.657216952767 | 0.145381019370925 |
| AGTAGTGGTGAC | 885.659520376894 | 0.100740127499386 |
| GTGACTAGCTTA | 885.668857290948 | 0.159633405699193 |
| CTGAATCAGACC | 885.676115029383 | 0.204904675044887 |
| CTTCTTAAGTCA | 885.67735552926  | 0.140247186821242 |
| ATTACCTGACTA | 885.677940776725 | 0.156356528318513 |
| CCGTCATTTGCG | 885.680951416922 | 0.163534384551343 |
| CATTCACGTGAC | 885.693230194094 | 0.164696417903222 |
| CACCTAGTCAAC | 885.696121546534 | 0.175661971405455 |
| GGACACGTGACA | 885.717394583062 | 0.149386339110551 |
| GGGTACGCTGAC | 885.719764268851 | 0.218321511247543 |
| AGTAGTGACCAA | 885.720059689972 | 0.122884532691692 |
| GCTGAGTCGCAC | 885.723861618717 | 0.127523229869835 |
| TAAGTGTCAGCA | 885.733500554991 | 0.154886166190015 |
| ACTCATACCCAC | 885.736919205146 | 0.187852054828611 |
| TAAGAATCATCA | 885.738422170601 | 0.205411569889886 |
| CTGTGTATGACC | 885.748627115359 | 0.128962064621246 |
| AGTATCGGTGAC | 885.753896655069 | 0.185787984416103 |
| GCACTGTATGAC | 885.764649836196 | 0.113311104392679 |
| AAGTCACGCGGT | 885.767243792779 | 0.10686484731267  |
| AAGTCAGAAGAC | 885.771428231944 | 0.135869256969233 |
| CACGTCAGCTTA | 885.813207387299 | 0.150095381768656 |
| ACGCTGACTGCG | 885.820617007939 | 0.127834813561004 |
| GGCGGGGATGAC | 885.824414266024 | 0.165951853683428 |
| AATCCATGTGAC | 885.83350758852  | 0.150808820435147 |
| GACTGGACTCAC | 885.835609668796 | 0.101667826994256 |
| ATTACACACCGA | 885.838622963703 | 0.158268909979789 |
| TCCTCTTTGTCA | 885.858953378614 | 0.136980749334974 |
| GTGACGTTACGA | 885.863092723511 | 0.114732093501645 |
| GAATTATGTGAC | 885.867690495392 | 0.20298964907812  |
| AGTTCGTCACTA | 885.868372833727 | 0.124803248730227 |
| ATACCACTCATA | 885.877223236724 | 0.16306454053772  |
| CCCTAAGAATGA | 885.87860656911  | 0.136730801994913 |
| CCTTGCTGACTA | 885.882660641727 | 0.157801576707591 |
| ATGTCACCGCCG | 885.88618078658  | 0.148147704380785 |
| ACTCGTGAGCCA | 885.897951874795 | 0.16989820257264  |

|              |                  |                    |
|--------------|------------------|--------------------|
| ATACCGTCACAT | 885.90126832444  | 0.116670424003038  |
| AATCCCTGTCAT | 885.902798960274 | 0.120201633233461  |
| CGACTAATCAAG | 885.928871212164 | 0.156284113337201  |
| AGAAGGGGTGAC | 885.93029555688  | 0.144905010006878  |
| AAGCTGTACAG  | 885.933390395446 | 0.153964449612445  |
| CTCGGGTGACGA | 885.933532417904 | 0.157357211603069  |
| ATGCCTTTGTCA | 885.933584498449 | 0.240108674784578  |
| TCAGCCGTGACA | 885.950892050533 | 0.118618637797514  |
| GTCACGTCTGGA | 885.95604678429  | 0.118237222172877  |
| CCGAGGTACTCA | 885.958938042827 | 0.252560416043882  |
| ACTTGCTCATGA | 885.965995726764 | 0.155900508147684  |
| CACCGTGACACG | 885.968297176909 | 0.141952240586196  |
| ACCATGTACCT  | 885.984204667479 | 0.176008025764283  |
| GTCACCGCACCA | 885.99143652632  | 0.149117279192447  |
| TATGTCATGAGA | 885.991560505065 | 0.0949637227559515 |
| CAACAGCGTCAC | 885.995257807277 | 0.179938620155256  |
| AGACCTTCGTCA | 886.004263831419 | 0.120461166024935  |
| ATCGGCATGACG | 886.004608186061 | 0.175624361177381  |
| CAGATGACCGTA | 886.00566806522  | 0.175840323680892  |
| CAGACTCTGACA | 886.006727116389 | 0.165851078812979  |
| ACGTATTAATGA | 886.007785346305 | 0.218442525930119  |
| ACTCATACCTC  | 886.016869141264 | 0.14915092122578   |
| ACTCCGTACTA  | 886.017825836884 | 0.155048345636028  |
| ATCAGTGGCTCA | 886.021998808852 | 0.0948457949627264 |
| AGCAGTGACGCT | 886.023182014122 | 0.165713776314247  |
| TCACATGCGTGA | 886.045349237716 | 0.151140606583207  |
| ATGACCACTCCA | 886.04684268447  | 0.124174040285215  |
| GTTAGTCTTAAA | 886.053573801154 | 0.166413002728414  |
| GAGGGTGAGCAA | 886.054348581986 | 0.119977378968423  |
| TAATAGGTGTCA | 886.054378272314 | 0.114749676419034  |
| GCCTCGAATGAC | 886.063758248707 | 0.137652297520859  |
| ACTCATCCCTGA | 886.078555540725 | 0.167453893673657  |
| GATGACGGGGCA | 886.082143678278 | 0.15381921620695   |
| ACTCACAATAGG | 886.089713886797 | 0.236706097408949  |
| GGGACTACGTCA | 886.091246006337 | 0.138313757312606  |
| ATCTATGACCTA | 886.096425534712 | 0.12584630225312   |
| AATGACCATACT | 886.102388362338 | 0.151251713470231  |
| ACAGATGTCTCA | 886.102738320331 | 0.127793957975051  |
| ATCTAGGTGACA | 886.112172990857 | 0.121451980601068  |
| ATGACATGAGTG | 886.128897337064 | 0.131187997466085  |
| GTGACACGCTCA | 886.137146920958 | 0.147111347531807  |
| GGGACCTACTCA | 886.156856038193 | 0.14538285927453   |
| TGACGGTTTTAA | 886.157277056184 | 0.144431208245857  |
| GGTCATCTGTAA | 886.159226052908 | 0.221544338584949  |
| AAGGATCTGACT | 886.160001497759 | 0.0860299424085389 |
| GAGTCTCTGTCA | 886.162766442743 | 0.10611522718726   |
| TGGTTGTGTCAA | 886.164401212037 | 0.175602758113997  |
| GGTACGGTCATA | 886.172364871258 | 0.160702456056197  |
| CACGTGACGACG | 886.190259507727 | 0.171147741956884  |
| ATAGATTGACTG | 886.191917462577 | 0.12790000730896   |
| CATCATACATGA | 886.19197529359  | 0.132713025009244  |
| CCTGACAGTGAC | 886.197655576829 | 0.121806439771597  |
| CTGCGTATGACC | 886.199290189676 | 0.124191381813923  |
| AGTTGCACGTCA | 886.210996105278 | 0.122652155201914  |

|               |                  |                    |
|---------------|------------------|--------------------|
| CATGACAGTGCG  | 886.214590576674 | 0.155556581109339  |
| GGTCATAACTAC  | 886.215286624223 | 0.165606671224736  |
| AGCGGTGACATC  | 886.227818551046 | 0.150794536936389  |
| GTCATCATGCGA  | 886.234903227369 | 0.12115779485168   |
| ACGTCATGAAGA  | 886.242702961095 | 0.115042925191586  |
| GAGTGGTGACAA  | 886.266555458048 | 0.131052040206407  |
| CCAATGTGACGA  | 886.269719853528 | 0.189701666492338  |
| ACACAGCGTCAC  | 886.277545194498 | 0.175678234083709  |
| GACAAGTTGTCA  | 886.284612062164 | 0.165298695263508  |
| TCAGTGACACGA  | 886.293178242009 | 0.135848368270524  |
| CTCAGATGACCC  | 886.29399399127  | 0.123306904965171  |
| ATTCAAGTGACA  | 886.311094662221 | 0.205252972936762  |
| TAATTCTAGTCA  | 886.318849988018 | 0.151261709468107  |
| GTTGTCATGTAA  | 886.331663105326 | 0.150365057544967  |
| CAACTGACTATG  | 886.333971845777 | 0.155987914331609  |
| ATTATAATGACC  | 886.338202841535 | 0.192149061132837  |
| GAGTCAGGGGAC  | 886.353354484616 | 0.155977097589766  |
| CATAAGACGTCA  | 886.386313110728 | 0.152248011919827  |
| ATGGTCATTTCGC | 886.393392073597 | 0.131000154442147  |
| ACTCTGACGCTA  | 886.411243092035 | 0.112263588642849  |
| CGTCATTTCAAA  | 886.413297128715 | 0.159937555665327  |
| CCGATGACCTAC  | 886.417896133232 | 0.152319035528322  |
| GTCATGAACATA  | 886.420147165193 | 0.128690158813436  |
| ATTACGTATTTA  | 886.433118085782 | 0.157762291334227  |
| ACACCTGATTCA  | 886.438070033305 | 0.180501775352334  |
| CATAAACGTCAG  | 886.439743986864 | 0.209667828185793  |
| GATCGCGGTGAC  | 886.44737753789  | 0.130330746116463  |
| GGACAGATGACA  | 886.449652472421 | 0.118941996276187  |
| ATCATATCTGAC  | 886.449667492046 | 0.0963987688018492 |
| GTGACCACTTTA  | 886.452822353861 | 0.172527565371225  |
| GTTGATCTGTCA  | 886.463024358459 | 0.123105121903973  |
| ACTGACATATTC  | 886.466021008834 | 0.115953272685594  |
| GTGACGTGCGGA  | 886.470443072326 | 0.161691173840289  |
| AAGTGACAGTAT  | 886.472890233907 | 0.114494147343599  |
| ACACTCCGTCAC  | 886.475766021036 | 0.124111744966007  |
| AATGAGAGTGAC  | 886.481662147223 | 0.166879740543769  |
| ACGTCACTACCC  | 886.485200471795 | 0.155684570336009  |
| GTCCCGTCATCA  | 886.491356025394 | 0.128378430094371  |
| TGTCATGTCGAA  | 886.500581702409 | 0.166948936355442  |
| ATCAGTCTTAGA  | 886.509955219564 | 0.120258120112644  |
| CTGCCTGGTGAC  | 886.515662081362 | 0.138828703047159  |
| CGTCATGAGGAC  | 886.519377631663 | 0.138047269073133  |
| AACACGGTCATA  | 886.527818606358 | 0.163659115309136  |
| GTACGGACTCAC  | 886.533508387616 | 0.203450991207868  |
| TACGTCAGCGAA  | 886.539527227264 | 0.144378064660421  |
| GGGGCACAGTCA  | 886.545553996187 | 0.122462188115735  |
| TCGTCACGTGCA  | 886.554235485001 | 0.112654578883944  |
| CGTCACCTCTAC  | 886.563025372871 | 0.143805712462643  |
| GTAGGACTAATA  | 886.586198951422 | 0.17136734842318   |
| TCATTTCTGACA  | 886.58873790711  | 0.161746996890604  |
| CGATGAATCTTC  | 886.591892888326 | 0.182998245673969  |
| AATCTATGACCG  | 886.592431692108 | 0.152363924233397  |
| GCGTCGTACCA   | 886.599088826962 | 0.114723016625167  |
| CCGTCATCTATC  | 886.608810132351 | 0.122016733808585  |

|               |                  |                    |
|---------------|------------------|--------------------|
| ACTGCTCATGAC  | 886.620098209293 | 0.173834134254395  |
| ACTAATTAATCA  | 886.625529985982 | 0.11428315504013   |
| ATGTCACGTTTG  | 886.626968290053 | 0.115729323805442  |
| ACCAAGCTGACT  | 886.628782636585 | 0.181475285840626  |
| ACCAGGTCATCC  | 886.632938199641 | 0.121358840341845  |
| CACTCTTGCTCA  | 886.635549978447 | 0.122822046055248  |
| CGACGCAGTCAG  | 886.637539993452 | 0.135950386717063  |
| ATGTATGATTAA  | 886.650182110389 | 0.19317257667811   |
| CGATGACTTGCA  | 886.659978770797 | 0.145833529377703  |
| ACTCATCCAAAT  | 886.663830838568 | 0.154776159192108  |
| ATCTGTCAAGTA  | 886.676224874582 | 0.152413875913047  |
| TCATCGGTAGAA  | 886.681953151478 | 0.129098572595691  |
| GTCTATGATTAA  | 886.699944877332 | 0.113143588175113  |
| CATGAGTCCCAA  | 886.704250525056 | 0.206634253377377  |
| GATTGGAGTCAA  | 886.711578856082 | 0.136210741404666  |
| TGACAGTTTCCA  | 886.714330754864 | 0.203148539096776  |
| AAGAGCATGACA  | 886.718023481976 | 0.117105121706756  |
| GTGACATGGATA  | 886.719373812945 | 0.169493447784674  |
| ACTCATGCAGAA  | 886.719917783795 | 0.164664365926375  |
| CAAGCTCCGTCA  | 886.721716206745 | 0.136919225570213  |
| TGCTGTACCCAA  | 886.728494136829 | 0.140850209603233  |
| ACACGCTGACAC  | 886.745063808341 | 0.248489125764319  |
| ACTATTACGGAT  | 886.755344884206 | 0.144242574155809  |
| TATTCTTGGTCA  | 886.756854748484 | 0.162260423889683  |
| CATCCGATGACC  | 886.772931699621 | 0.106927316453275  |
| ACGTGACGTGCA  | 886.780903332987 | 0.160476864681901  |
| AATTTGACGCAA  | 886.812032269826 | 0.140296543305321  |
| GTAATCACTGAC  | 886.816269618092 | 0.152925697865278  |
| CTCCTCGACTCA  | 886.821424981032 | 0.168439965006882  |
| AGTCAGGTA AAA | 886.828039656046 | 0.15709277659969   |
| ACGGGCATGACA  | 886.832189637454 | 0.172304349827872  |
| CTTAATTGAGTC  | 886.840181857419 | 0.110051903944325  |
| CGTCACACATCC  | 886.844217594481 | 0.111035947225358  |
| AGTGTGATGTCA  | 886.861634533298 | 0.1177120754463    |
| ATCCTGTA CTCA | 886.872653731049 | 0.121332613321445  |
| GTCATTATGTGA  | 886.879013348472 | 0.171620175629211  |
| GTTGTACCCCGA  | 886.883269543859 | 0.126748904990363  |
| AGGGCGTGTAC   | 886.897266354227 | 0.137924103857308  |
| AACCACTGACTA  | 886.900340744493 | 0.146756909216335  |
| CTATTCAATGAC  | 886.905468785263 | 0.150568927153738  |
| ATTGACTGTTAC  | 886.915166983376 | 0.179393131240574  |
| GACGCGTCAGAA  | 886.920183418362 | 0.16056948882976   |
| ACCCGTCGTGAC  | 886.922388672979 | 0.132827949152725  |
| AGCATGACACTC  | 886.923813862896 | 0.0874048173475595 |
| CCAGGCAATGAC  | 886.927706343352 | 0.161562659588051  |
| TATTGGTAGTCA  | 886.933749771305 | 0.227549921484635  |
| CTATGACCGTAC  | 886.940321483273 | 0.108240224528093  |
| ACTCATTCAATA  | 886.941054102487 | 0.170672744430959  |
| ACTCATCCAAGA  | 886.952191079817 | 0.208837790261686  |
| GTACCCGAGTCA  | 886.955799193385 | 0.158171403230206  |
| AGACGACTCAAC  | 886.960284273421 | 0.162492086756948  |
| AGAGTCAAGCAC  | 886.962973347956 | 0.135459936019329  |
| ATGAGCTGTACG  | 886.963333960271 | 0.121673074211298  |
| TCAAACACATCA  | 886.964562245562 | 0.213093394103553  |

|               |                  |                   |
|---------------|------------------|-------------------|
| GTTAATGTGACA  | 886.968788167564 | 0.134546038771607 |
| ATTAGTTGTAC   | 886.976574825564 | 0.112553389115704 |
| ATGACACGGGGC  | 886.979550924033 | 0.192025021386859 |
| AGCTGACTATGA  | 886.986496814745 | 0.122865962037554 |
| AAGCCAGTCAGA  | 886.98665631061  | 0.187323481289    |
| ATCGTCATGTGA  | 886.989974228171 | 0.133713049695082 |
| TGACGGAGAACA  | 886.99220314799  | 0.128466259848885 |
| GACGCGTGACAA  | 887.000025769047 | 0.151823034995771 |
| GAGCCTGTGACA  | 887.002513821423 | 0.154148931463297 |
| ATCCAAGTCACA  | 887.003648906186 | 0.184581470522132 |
| CTGTAGTGACAA  | 887.027109051945 | 0.188001712416155 |
| AGGATTAGTGAC  | 887.033968255297 | 0.116207606664302 |
| GCATCGCAGTCA  | 887.036186753943 | 0.150004732637326 |
| AAGTTGTATCAT  | 887.056926427846 | 0.109887690281865 |
| ACCGAATACTCA  | 887.059983457378 | 0.124810529930773 |
| AACTGACTAGTC  | 887.062057105026 | 0.155863107572947 |
| AAGTCACCCCTCG | 887.073698377115 | 0.160163319194431 |
| CTTTCCGCGTCA  | 887.081038849361 | 0.119743206067545 |
| ACGATTGAGTAA  | 887.082522174658 | 0.160660678178493 |
| ATGACATTAGCA  | 887.089394037326 | 0.149474509553456 |
| CGGTGCGGTGAC  | 887.096406352143 | 0.139104501389142 |
| GGGCTCGTCACA  | 887.097021818168 | 0.146464492752235 |
| ACCATGACAATA  | 887.0985936035   | 0.195232986022335 |
| ATTTCGATCAGTC | 887.102531621272 | 0.145868735310801 |
| TCGACGCTGTCA  | 887.106250794383 | 0.163618824894522 |
| AAGTCTATGTCA  | 887.109508333663 | 0.144980437736066 |
| ATTTAGCATGAC  | 887.109682041596 | 0.218551676955752 |
| GTTGTATACAAC  | 887.115241636044 | 0.2342977115765   |
| CGTCACGCATAC  | 887.128121655784 | 0.175464794953671 |
| AAGTTCAATGAC  | 887.139023693232 | 0.211943385692968 |
| AAGAATCATACA  | 887.142386355819 | 0.146244237333752 |
| TATGCCGTCACA  | 887.142950439573 | 0.116042789367761 |
| AAGAATCATTCT  | 887.151541016704 | 0.157241299895567 |
| TCCGACTCGTCA  | 887.159148469812 | 0.164095777316537 |
| AGCATCTGAGTC  | 887.189717445198 | 0.206073067837884 |
| ACGTGACATACT  | 887.192902821278 | 0.155779093758251 |
| ACTCATAACACG  | 887.196956643608 | 0.158391613673167 |
| GATAAGAGTGAC  | 887.203011268192 | 0.139142674488555 |
| GATTGTTTCGTCA | 887.209574485699 | 0.20764258172373  |
| CTAGCGGACTCA  | 887.210941275963 | 0.142224222220992 |
| GAGATCGGTGAC  | 887.216325652314 | 0.107336643492766 |
| ACTTCTAGTGAC  | 887.225315316573 | 0.142066332091381 |
| GTCACAGCGATA  | 887.230500563298 | 0.124933235968358 |
| CGCCAGGTGTCA  | 887.230664427099 | 0.115383135581757 |
| ACTCATAAGGCC  | 887.248135913418 | 0.221769783012322 |
| ACGCACATGACA  | 887.250514967205 | 0.14364723641415  |
| GGTGATGTCAGA  | 887.251944650388 | 0.165796968800902 |
| ACACGTAAGCAG  | 887.264594872678 | 0.105878630068278 |
| ATGACCGTATTG  | 887.269518919461 | 0.191656842878627 |
| GACCACTCATAC  | 887.289238060578 | 0.178006817331796 |
| CTTTTGACACAA  | 887.296323113555 | 0.130552968079799 |
| ATGTCACCTTTA  | 887.300439693482 | 0.154788731857287 |
| AAGTGAGGTGAC  | 887.310158128714 | 0.14251046629578  |
| AACCATATGAGT  | 887.312211867057 | 0.16520329844152  |

|              |                  |                    |
|--------------|------------------|--------------------|
| ATATTGACTCTG | 887.326012917972 | 0.156148497020547  |
| ATTCACGTGTCA | 887.346121674443 | 0.16390383125444   |
| GAAGCACGTAC  | 887.348127765507 | 0.190722870764004  |
| AGTCAGAGGGCG | 887.355601104001 | 0.119408886873978  |
| CGGGTTGACTGA | 887.360174264212 | 0.113258970184026  |
| CATCTACTCATC | 887.363841093817 | 0.118305756280506  |
| TATCACGACTCA | 887.368502890206 | 0.112881108230077  |
| ACTTACGTATGA | 887.374791372419 | 0.129553737145341  |
| CGTGGTACTCAC | 887.386316963525 | 0.133040359445822  |
| ACGTCATGGCCC | 887.389425857831 | 0.157986223239468  |
| CTGGTCACAATA | 887.38964281005  | 0.12960237639543   |
| GTAGTGGTCACA | 887.406516318382 | 0.10018146979244   |
| GAGTGATTAATA | 887.411594443667 | 0.120738752598086  |
| CTTATGACCGCA | 887.421997685181 | 0.121859329932373  |
| CATTAATGACAG | 887.422121341253 | 0.111066131311899  |
| CGATCCTGTGAC | 887.422835585764 | 0.122692023258098  |
| ATCGTCACTGCG | 887.429969888835 | 0.117477215280209  |
| GCGTCACCATCA | 887.43489744395  | 0.152009593475266  |
| AGTCCGGTGACG | 887.454576181081 | 0.112146659156781  |
| AGGCGTCGTCAT | 887.457094352032 | 0.120813842350731  |
| CAGGTTAATGAC | 887.457949941757 | 0.0948316447664456 |
| AGATTGGTGACA | 887.463684207686 | 0.148804198590316  |
| TGGGTCAGAAAA | 887.477702109179 | 0.188898482772706  |
| GTCACTGACAAC | 887.479633370227 | 0.121601554831507  |
| ATTGAATCACGG | 887.480960946674 | 0.164642133273724  |
| ACTCATATTGGA | 887.492759268709 | 0.193594199236615  |
| CGTCTGACGAAC | 887.523694239675 | 0.112081853550609  |
| AGTTGACGTGAC | 887.524952082592 | 0.121377673602627  |
| GATTCGTGACGA | 887.52743391094  | 0.165838438786815  |
| GTCATTGCCAC  | 887.528526120278 | 0.159369771803651  |
| CATGGTACTCAC | 887.531374391377 | 0.165685457121279  |
| GCCAGGGGTGAC | 887.534510604289 | 0.169048490305597  |
| CGTCATGGGTAC | 887.550098082759 | 0.117147701494412  |
| ATGTTGGGTGAC | 887.581427353699 | 0.171474061476597  |
| GTCACGCTTACA | 887.585011064328 | 0.195046972544462  |
| AATGACGGCGAC | 887.587211493568 | 0.16481836445923   |
| CGTGACTAGCTA | 887.598923811055 | 0.110015972857183  |
| TGACTAGAAGAA | 887.599973039607 | 0.186734473390986  |
| CTGCTCAGTCAA | 887.600514328655 | 0.176525729406227  |
| CATTCTCATGAC | 887.605493164163 | 0.121596596280867  |
| AATGGCTAATCG | 887.613626079487 | 0.107100118025081  |
| CGTGATGTGACA | 887.619422376186 | 0.184216914708549  |
| AAGTCATGGTCT | 887.626164418699 | 0.0973489605561102 |
| AGTCAGTGATTG | 887.628957221648 | 0.136700611270769  |
| AGTCAGAAGGAC | 887.631630559061 | 0.12050421645272   |
| GTCATTAACCA  | 887.660685638246 | 0.243182746386232  |
| CTCTTTGTGAC  | 887.671905071568 | 0.196163619615559  |
| ACTCATGGTGCC | 887.673625553615 | 0.266425070796097  |
| AACAGTGAGTCC | 887.673915087298 | 0.117513017460717  |
| GACCATCGTGAC | 887.680817153529 | 0.103660206284695  |
| TATGAATACATA | 887.687019113954 | 0.12339972734554   |
| TATTCTCTGTCA | 887.691179044477 | 0.117416536392239  |
| TGACAACTCACA | 887.700571127236 | 0.174437979582737  |
| AAGATTCATCAA | 887.712598190109 | 0.092275439852464  |



|               |                  |                    |
|---------------|------------------|--------------------|
| CCGATGATGACC  | 887.712800512069 | 0.182544434109227  |
| AGTGAGACATCC  | 887.734294607488 | 0.113796269425185  |
| AGGCGATGTCAT  | 887.748674112117 | 0.151923454778976  |
| CTGACTGCAACC  | 887.751554328492 | 0.131820930337235  |
| AATCGTCAGAAA  | 887.755836693106 | 0.233237788277746  |
| GCGTGACACGCC  | 887.762105332562 | 0.18630849870166   |
| GTCACCGAGCTA  | 887.764687472136 | 0.12168915919605   |
| GCGGCAGCGTCA  | 887.766935087494 | 0.167711218657159  |
| TATGACCTAAGA  | 887.773245844475 | 0.194353009199193  |
| ACGTGTAATACT  | 887.776980003661 | 0.164208993767937  |
| GATTGGTCAACA  | 887.787464359114 | 0.089604793939483  |
| GGAACCCGTGCA  | 887.790850149857 | 0.125636364226559  |
| TAGCATCCGTCA  | 887.796369460346 | 0.11054699269      |
| ATAAGGCGTCAC  | 887.806893920023 | 0.170329487072144  |
| AAGAACCTGTCA  | 887.816800591981 | 0.136151925434878  |
| CATCGTTGACTA  | 887.830399632714 | 0.127191459507988  |
| CTCTCTGTGACA  | 887.830826846726 | 0.115576610078661  |
| GGACTGAGTAAC  | 887.834914314198 | 0.0822408606569179 |
| CTAGGTGACAAC  | 887.840340374898 | 0.175073940424158  |
| AACTGCTCATAG  | 887.863990598431 | 0.11978339496112   |
| CGTCACAACCTCA | 887.869089190187 | 0.22882380719358   |
| ACGTCTGAGTCG  | 887.875715868716 | 0.206230475589911  |
| ATGAGTAGACTA  | 887.878889739132 | 0.0986937223969734 |
| TATTACTCTGA   | 887.88340971107  | 0.136888903550954  |
| AAGACTCGTCAG  | 887.884041052908 | 0.183320027053192  |
| AGGATCTGTCAG  | 887.897955885466 | 0.129071131972675  |
| CGTCATGTTTAC  | 887.898322771231 | 0.166888468242625  |
| ACTGACTGCTAG  | 887.898919204897 | 0.164933684186751  |
| GATTGATTCACC  | 887.900989045109 | 0.140201142329828  |
| GGCGTAGGTGAC  | 887.910477953886 | 0.198591186505804  |
| CATGCATGACCG  | 887.912250305719 | 0.166124998770273  |
| GTGACATTATAA  | 887.913781927111 | 0.188427719571409  |
| ATGACAAGGAGG  | 887.929455090274 | 0.14177544050676   |
| GAATGACCAGAC  | 887.936824419822 | 0.139891411332287  |
| AATTGAAGTGAC  | 887.943289508451 | 0.179641972372875  |
| GGGTCACCGAAA  | 887.943787337801 | 0.154929195253768  |
| AATGAGCCAATG  | 887.96315354131  | 0.158422972791736  |
| CATGTTAGTAAC  | 887.967893213314 | 0.210054735145107  |
| ATTGTATCATCA  | 887.985302956036 | 0.161380734686619  |
| CGTCACTTATA   | 888.002427125671 | 0.116471655279344  |
| ACTCTGTCACGA  | 888.006747834349 | 0.108555383923803  |
| CGTCATGCTAGA  | 888.03122128464  | 0.11688437649364   |
| ATTACGCAAGAG  | 888.037231129086 | 0.123190630843972  |
| AACAGTCAAAGT  | 888.048698186934 | 0.138387453110714  |
| GCTGCCGTGACA  | 888.049185999021 | 0.190012427999899  |
| GTCACCCTATCA  | 888.078291017006 | 0.0888710691256031 |
| ACAACCTATACG  | 888.089213085941 | 0.199877461584558  |
| GAGCATAATGAC  | 888.106426077063 | 0.222614442492891  |
| GAAAACAAGTCA  | 888.113296433623 | 0.14145562500549   |
| CAGTGTCACGAA  | 888.115784562205 | 0.132714424495992  |
| ATGACTTTCTGA  | 888.122053841945 | 0.108749812688761  |
| CATATGTGACAG  | 888.129239442723 | 0.122877064700563  |
| ACTTACTTGTCA  | 888.132202938593 | 0.152505230044135  |
| GATGACGGGATA  | 888.150115059394 | 0.110401268712621  |

|              |                  |                    |
|--------------|------------------|--------------------|
| ATCGTCACGTGA | 888.153763783884 | 0.19961274844205   |
| CACTCTAAGTCA | 888.172855516602 | 0.115998330736755  |
| CGCACCATGACA | 888.181943058819 | 0.167416232459919  |
| CTGACGGATAAC | 888.196128238108 | 0.180435510539229  |
| AGAGGGGTCATC | 888.196919794491 | 0.158545446655128  |
| AACAAACGTGAC | 888.198216606001 | 0.155408968944336  |
| CCGGGCCATGAC | 888.199145142944 | 0.13393927227601   |
| TACACGGTGTCA | 888.20254907558  | 0.139882103815051  |
| ACGATGTTACGT | 888.209538421792 | 0.227880585327065  |
| ACGAACATGACC | 888.212742355002 | 0.166028498744479  |
| GCCACATCACAC | 888.213916247556 | 0.168970266741427  |
| CGTCACTTGAGA | 888.220156192576 | 0.133776489958614  |
| CATCGTCACCTA | 888.228647060305 | 0.135779542698697  |
| AGTCTCGTCACC | 888.237198123074 | 0.171574149167219  |
| GACATATTGTCA | 888.239689131222 | 0.160562990977939  |
| ATTGAGCAATTC | 888.246468545993 | 0.17417675636024   |
| CGTCATGAGTTA | 888.248760316923 | 0.195152646976838  |
| ACTCATACACGA | 888.251936411397 | 0.142943912180562  |
| GTGTTAGTAACA | 888.26168011875  | 0.174980832786956  |
| GTCACATTTTCA | 888.266887249274 | 0.195433822239043  |
| CTCTTCCATGAC | 888.270721927549 | 0.117322926008946  |
| GACTGAGTCGAA | 888.27273305623  | 0.0956646889623545 |
| ATGATGCCTAAC | 888.27563765442  | 0.199790507166097  |
| CTGACTGGTTAC | 888.282406877152 | 0.234786702988961  |
| GCGCGTGACAAA | 888.283024663544 | 0.1993857171382    |
| AGACTTGTACAG | 888.290992294714 | 0.0673194986733368 |
| GGGGACGATGAC | 888.294708434675 | 0.176575939060843  |
| CATAGGCCGTCA | 888.304087898518 | 0.179200659563345  |
| AGTCAGCTTGAT | 888.315810543573 | 0.198460881215753  |
| CCTTGGCGTGAC | 888.317483171821 | 0.128622451455866  |
| ACGCGTGTGACG | 888.320452816727 | 0.152375996111213  |
| ATAGTCAGTGTG | 888.322293542611 | 0.177682893014646  |
| GATGTGTCTTCA | 888.325438116135 | 0.145485461909995  |
| TGACGTACAGAA | 888.32589711736  | 0.1780193481471    |
| ACTCCGACTAAT | 888.329026544086 | 0.126706969150751  |
| AATGGGGTCATA | 888.331590121004 | 0.158137938707228  |
| CTTCGGACTCAC | 888.332620537641 | 0.114167373269536  |
| ACTAATTAATCG | 888.339590968046 | 0.110608743284959  |
| ACGTCACGTAGT | 888.342526803486 | 0.111728659352298  |
| ATGACAGCGGAA | 888.344896840455 | 0.122154034941851  |
| ATAACTTCTGAC | 888.350774237037 | 0.143855978440436  |
| TGTCAGACACAA | 888.353501633011 | 0.156109711996956  |
| TGAGTCGAGACA | 888.358894071215 | 0.163148159785211  |
| TAAAACACATCA | 888.360744414914 | 0.204282276918279  |
| CTTTGTTGAGTC | 888.378971761161 | 0.181312775375738  |
| GAATGGTGACGA | 888.383996191577 | 0.177061263857211  |
| ATTACTCGACTG | 888.390345509998 | 0.154493300282774  |
| TAATGAGTAGTA | 888.391927197961 | 0.16171855321809   |
| ACGGTGGGTGAC | 888.39244534594  | 0.20536839704921   |
| CGATGATACAAA | 888.402659993176 | 0.182637123320884  |
| GTTTGTCACTGA | 888.416745073179 | 0.112681056090374  |
| AGTGTGAGTATA | 888.42005449328  | 0.135208192562108  |
| CGTCATCTCCAC | 888.424392497137 | 0.162816944892312  |
| ACAATTATGAGT | 888.438326627442 | 0.181059160302117  |

|              |                  |                    |
|--------------|------------------|--------------------|
| TTCGTCAGAAAA | 888.452414983395 | 0.17284746403897   |
| AATTGCTCAGTA | 888.45822988402  | 0.137310531087836  |
| GCTACTATGACC | 888.458408196392 | 0.139453459310498  |
| ACGTCATGTCCG | 888.463268468522 | 0.206865681050977  |
| AACGGCATGACG | 888.465997327977 | 0.117826441279317  |
| GTCATTGCAGAA | 888.467840193715 | 0.15565228510922   |
| GTGAATAATACA | 888.468832062291 | 0.163293273876068  |
| ACGTAGGTGACG | 888.477635535501 | 0.188186022849148  |
| GTCACCATGCAC | 888.479829830978 | 0.126792284935349  |
| CAGTCAGTAAGA | 888.480208832097 | 0.127865020614095  |
| ACCGAGGTGTCA | 888.483406984521 | 0.152715064547471  |
| ACGCCAAGTCAC | 888.490291247982 | 0.14074281887305   |
| AGGGAATGACCC | 888.494125481728 | 0.0764106216675912 |
| ATGAGCAACCCC | 888.495799340298 | 0.116662979863175  |
| GTCACGGATCCA | 888.500489255815 | 0.116074141349973  |
| CAGTCAACCGGG | 888.505530514613 | 0.151069263767435  |
| AAGTAGGTGACG | 888.516553092899 | 0.118501930950492  |
| AGGACCGTCATA | 888.520975863767 | 0.126178770961323  |
| TCATAAGAAAGA | 888.521890297137 | 0.165289195770875  |
| ATTTGTGTGACC | 888.530508276639 | 0.162194539585066  |
| ATCTATTACTGA | 888.53527441931  | 0.140764439913427  |
| ATGACAGGGCAG | 888.545910678354 | 0.13138420213088   |
| ACGGAACTGACT | 888.54618305512  | 0.181467660394589  |
| GGTGCAGGTGAC | 888.55295998771  | 0.154175514635277  |
| TAAAGGTAGTCA | 888.561867138114 | 0.110511169649057  |
| GGGAATAATGAC | 888.56552407362  | 0.0879317820354798 |
| ACCGCCGACTCA | 888.596415636026 | 0.101108130896352  |
| AGATGGGTGACG | 888.596858497311 | 0.108823680375217  |
| ATGACCCGTACA | 888.610695217982 | 0.156397504359788  |
| AGATCGTGACGA | 888.613145121142 | 0.154680242851568  |
| ACCAGTCAGGCT | 888.628645490082 | 0.19251283196582   |
| CAACTAACGTCA | 888.62908368575  | 0.171142202662837  |
| CTCTGTTGTGAC | 888.629281875935 | 0.120494931805864  |
| AGACTCAGACAG | 888.633206869892 | 0.182975642448793  |
| ACTACATGACCA | 888.649901085399 | 0.12427229899823   |
| GACACTAAATGA | 888.656774502874 | 0.224314617325097  |
| AACGTCACTGAC | 888.656842492339 | 0.111506440085764  |
| CCGTAACGTGCA | 888.67330363985  | 0.14592054047858   |
| CATTGAGTCTAC | 888.678200216334 | 0.147995206189956  |
| ATCTATTGTGAC | 888.688740259616 | 0.117430658238124  |
| AACATTATTAGT | 888.703901415167 | 0.143694158004168  |
| AAATGATGTGTT | 888.705574559565 | 0.155062540889187  |
| AAATTCATGACG | 888.714352879841 | 0.208598911305666  |
| AGAAGACTGACT | 888.723954269601 | 0.152566750410976  |
| AACTTGTGTCGA | 888.737560881844 | 0.170766724028349  |
| TAGAATGACCGA | 888.759649576645 | 0.147661529595329  |
| GGATGACCTACA | 888.760380738339 | 0.143975194403832  |
| AGCTTGTGACCA | 888.765862126094 | 0.194086789959833  |
| TGACTCGGGTAA | 888.781529382188 | 0.120590943628196  |
| CTAAGGGTCAGA | 888.782556573482 | 0.181495912674563  |
| CAGACTCAATGA | 888.790461974713 | 0.126302846578959  |
| ATAAGGTGACAT | 888.806816257344 | 0.110551358725869  |
| AAATGTCACCC  | 888.811628194302 | 0.154390214050053  |
| GGCTGGGATGAC | 888.815695887392 | 0.164830494991768  |

|              |                  |                    |
|--------------|------------------|--------------------|
| CTAACTGAGTAA | 888.825093978974 | 0.127046899031513  |
| TCTACTTCGTCA | 888.835927067785 | 0.144119128356351  |
| ACATCGTCACGG | 888.849006536905 | 0.164999795335011  |
| GTTCCCGTATGA | 888.86116071604  | 0.231808059876524  |
| CGTCACAGGACG | 888.878617620347 | 0.238165187198606  |
| TCATGAGCAAGA | 888.879673230856 | 0.0760955984948317 |
| CTCGCTTTGTCA | 888.88732248571  | 0.144693942983339  |
| ATGACCGTACAA | 888.902506741775 | 0.196234683211375  |
| AGATGGTGACCA | 888.906900363501 | 0.166011145986368  |
| ACATCATTACTC | 888.926086514503 | 0.118669236165389  |
| ACTCATTATTTC | 888.927376102253 | 0.123959769038833  |
| CGGGACTCGTCA | 888.946984964255 | 0.169081943408753  |
| TCGACGTACCA  | 888.954936630242 | 0.162020114019769  |
| CCGGATATGACC | 888.954958929155 | 0.12032533714334   |
| ATCCAACTCATA | 888.962365268173 | 0.122128192756953  |
| TACTCTGACCCA | 888.963599091478 | 0.115019444418226  |
| AGTCAGTAGTGA | 888.963997718842 | 0.16189100631795   |
| ACGTCACCTCCG | 888.964501347328 | 0.145232045279098  |
| CCGACATGACGC | 888.965999274045 | 0.144109831612306  |
| TCGGGGTGACGA | 888.968298669186 | 0.173279645014576  |
| GATGACGTCCCA | 888.96908594255  | 0.122750240269578  |
| GATGTCACCGCC | 888.971154071134 | 0.111104569446788  |
| GAATCATTTGAC | 888.979579536079 | 0.109034887634905  |
| ATTGAGTCTAAA | 888.989330574018 | 0.156063952076719  |
| AGCGAGAGTGAC | 889.00645374496  | 0.147598089129408  |
| GAGTCAAGCGAA | 889.024289119628 | 0.135758061467542  |
| AGCCACGTAACC | 889.02602810366  | 0.173720480722305  |
| CTTCTCATGACA | 889.029193016187 | 0.125674236246884  |
| CGGTCATAAGAA | 889.031595222038 | 0.162447846504509  |
| CTTTCAACGTCA | 889.040034403611 | 0.117748520873446  |
| TGGCGTGACAAA | 889.043809322076 | 0.116893625280235  |
| AGTCAGGTAAT  | 889.044860441089 | 0.162839636002101  |
| ACTATGAGTTAG | 889.048009639553 | 0.123663756161598  |
| CGTCACAAGAAG | 889.051317161896 | 0.180680108069271  |
| GTCACGCGTGGA | 889.069591187118 | 0.124367861972021  |
| GTCACTATTCAA | 889.07274181837  | 0.194088222456701  |
| ACCTTGAGTCGA | 889.07413266513  | 0.19591042057589   |
| ATTCATCACTCA | 889.082321861573 | 0.150751406117229  |
| GTTGACCCGTCA | 889.089267597234 | 0.116258545297027  |
| TGGCTGTGACCA | 889.092159076679 | 0.14275889220317   |
| AAGCGACTAATC | 889.102068334532 | 0.101293485396314  |
| TAAGACTGATGA | 889.105149854678 | 0.213932445414661  |
| ACTGGCTGTGAT | 889.121523491198 | 0.133376305436259  |
| GATGTATTGATA | 889.124747745222 | 0.115247881134592  |
| AATGACGGTCAC | 889.141631037527 | 0.127274667957397  |
| TCACTGCAGTCA | 889.144869216593 | 0.204205112222035  |
| GAGGATAATGAC | 889.164539525826 | 0.113621479234956  |
| GGCGGTAATGAC | 889.170782454076 | 0.138046688488885  |
| CGTTCGACTCAA | 889.178222438987 | 0.145084313521372  |
| CATGGTGAGTAC | 889.186607571668 | 0.222801439033388  |
| GCTATAGGTGAC | 889.188691425072 | 0.109761440712227  |
| AGATTACTGAAT | 889.200649746668 | 0.128168055269405  |
| TGACAAGTAACA | 889.205252522582 | 0.139373430980921  |
| CGCCGTGTGACG | 889.205705308155 | 0.176032163245591  |

|              |                  |                    |
|--------------|------------------|--------------------|
| GGACCCATGACA | 889.218517651906 | 0.193520605955145  |
| ATGCAGGGTGAC | 889.22160269664  | 0.141979322918564  |
| CGATGAGCCAAA | 889.221768427114 | 0.160651960503436  |
| AAGTCAATGAGT | 889.226709344666 | 0.193652185951776  |
| GGGGTCATCCAA | 889.228041891027 | 0.191215180490597  |
| AAGAGTCGTATC | 889.2368207011   | 0.157867743798701  |
| ACAAGGTGATTC | 889.238802906715 | 0.163364328847449  |
| CTGTGACAAGCC | 889.240483114494 | 0.140328660550902  |
| AAATGACCATAC | 889.240767456452 | 0.0921104729026882 |
| AGTAATGCTCAT | 889.243725241963 | 0.187927822243806  |
| TAGGGATGACCA | 889.253711942298 | 0.225499504896236  |
| TCTACCGACTCA | 889.262321490649 | 0.126283777052175  |
| CTTTATCGTGAC | 889.268540935776 | 0.235821601088009  |
| GAGCCGTATCC  | 889.282461829667 | 0.219224618817417  |
| CAGTCAGCAACC | 889.285318103783 | 0.124102388566046  |
| GTGAGGTATCA  | 889.286158678444 | 0.143756933099679  |
| CACTCACGTGAC | 889.311421794557 | 0.114785936239085  |
| CTTGTTTGCTCA | 889.312951163311 | 0.130834702048011  |
| GTGAGACATAAC | 889.331437575996 | 0.140049804096674  |
| GCGACTCAATTA | 889.348551522388 | 0.212549531122655  |
| GGGCATGACGAC | 889.351687348082 | 0.170447714051566  |
| ACTGCTGGTGAC | 889.356210061898 | 0.144830257088858  |
| CACGTGGCAGTC | 889.357729411432 | 0.164580667183305  |
| ACGAGTCAAGGC | 889.359068070178 | 0.129040145024777  |
| TGTCACCTCTAA | 889.362943739347 | 0.148985753152341  |
| ATGTCACCTCAG | 889.370616864331 | 0.174135370022848  |
| AGAGTCTTAGCA | 889.390515321205 | 0.161876364591014  |
| ACTCATTCCGTG | 889.391480990677 | 0.125388699518858  |
| GCACTACGTGAC | 889.418339060229 | 0.166843784182232  |
| GTCATTTCCCCA | 889.429666702046 | 0.125768491212418  |
| AATTATTATTCA | 889.429756405807 | 0.140047750604587  |
| CCGTCATTAGAG | 889.430282356432 | 0.167165015226009  |
| CCGATGTCTGAC | 889.430340786181 | 0.164473669869347  |
| TGACGAACCCCA | 889.435115229045 | 0.139491643057276  |
| TGACAGCGTCAA | 889.441964018837 | 0.13011868541691   |
| AACGTGACGCGG | 889.443286720301 | 0.153619640800749  |
| AGCCATGACACC | 889.450886836874 | 0.21946888009613   |
| ACACGTGGCTCA | 889.453025497949 | 0.108390905216775  |
| GAATATCGTGAC | 889.454009851652 | 0.143683842123192  |
| CGTCACCGATCC | 889.456493021706 | 0.149782209625046  |
| GATCTCCGTAC  | 889.468014138395 | 0.189246205184052  |
| GTCTGCATGACA | 889.471584598608 | 0.14605264284145   |
| TGACTGCGGCCA | 889.476984758951 | 0.169790483593926  |
| ACGTCACAGGGA | 889.480711956007 | 0.157176831532775  |
| ACTCATACCACT | 889.483323061724 | 0.115718290812333  |
| AGTGTTTGTGAC | 889.484503717222 | 0.119011644148189  |
| ATCCCCACGTCA | 889.493777287745 | 0.145420407594599  |
| GAAACATGACAA | 889.496381806998 | 0.154872827625492  |
| CCTGTTGATTCA | 889.505160986746 | 0.169458706356107  |
| CATGACCACTCA | 889.516426324725 | 0.107415679516206  |
| CCTATGACCGTA | 889.516714248275 | 0.18827244306522   |
| CGCGACAGTGAC | 889.521758299948 | 0.214770249076799  |
| GTTACCATGACA | 889.527449984652 | 0.117863339269695  |
| CGATTGAGTCGA | 889.537674327477 | 0.099293964620281  |

|               |                  |                   |
|---------------|------------------|-------------------|
| GAGATCTGTGAC  | 889.544517242802 | 0.111485078040008 |
| AAGGTGACAGCT  | 889.54637484418  | 0.146902771229996 |
| TCACTCATTGCA  | 889.553857410424 | 0.163116114917892 |
| AAGGCTCACACG  | 889.567765120548 | 0.139646644917395 |
| GAGCTTGTACACA | 889.577470398716 | 0.143013931962852 |
| CGTCACCTTCAG  | 889.586008820167 | 0.189058936884144 |
| ATATTATGAGTG  | 889.596071953363 | 0.187126207838442 |
| GGTGTACAGCTA  | 889.596459616089 | 0.133319698676028 |
| TGACGAGGCCCA  | 889.598780391258 | 0.127105150128002 |
| CGTCATTAACCA  | 889.599182742385 | 0.11564556933499  |
| ATGTATCACAAT  | 889.607676541498 | 0.123344729738581 |
| ACTGCTTGACTC  | 889.609275561804 | 0.144092060204538 |
| ACGTGTAATAGT  | 889.610283884745 | 0.187545478471476 |
| ACGGTCATCATG  | 889.623948743915 | 0.137513790866461 |
| GTCACCTGTGCGA | 889.631811672754 | 0.141507397634828 |
| GCGGTGGCTCAC  | 889.646191457237 | 0.130317818828226 |
| AGTGACAGGTCC  | 889.660985524561 | 0.11717205856751  |
| AGAATTAGTCCA  | 889.661449855169 | 0.139744638201718 |
| CACTTATTACTC  | 889.666029095012 | 0.107819275720436 |
| TCTACTAAGTCA  | 889.668211254561 | 0.129913896774441 |
| TTATGTATACAA  | 889.669709369422 | 0.258758607776562 |
| AAGCCGAGTCAG  | 889.67239134406  | 0.113971369661715 |
| TACAGATTATGA  | 889.674261913572 | 0.135709726542483 |
| CAGTCAGCAGCA  | 889.676244475017 | 0.112440956917876 |
| GAATATGGTGAC  | 889.676374908728 | 0.11557751018139  |
| GCGTCACTAGTA  | 889.685816367589 | 0.126908929595952 |
| TTACCATGACAA  | 889.690173312648 | 0.254614077895049 |
| GTCAGCTTGACA  | 889.694422374378 | 0.208245164656218 |
| AAATTAGTCCTA  | 889.695601648818 | 0.14381927946563  |
| CATACACGTAAC  | 889.699546053406 | 0.135767084903335 |
| AGCATCGTCACC  | 889.703752710059 | 0.170128021565954 |
| GACTGAGTAAAA  | 889.704591576888 | 0.159313336911833 |
| GTCACCTGCAGA  | 889.712414749881 | 0.142133018051    |
| CGTGTCACTGTC  | 889.714992788755 | 0.18982098004946  |
| GTCCATCTCATA  | 889.717589888535 | 0.110434486996827 |
| AGAATGAGCCAG  | 889.733357890091 | 0.155030681917901 |
| AATTACGCAGAT  | 889.739032672742 | 0.182120253830606 |
| CCGGGGTGACCA  | 889.760264781495 | 0.213745771788693 |
| CGGAGATGATTC  | 889.762044891174 | 0.170312403839476 |
| GTGGATGGGTCA  | 889.772606170804 | 0.127286283106497 |
| GTTGTAATGTCA  | 889.773121146337 | 0.115351210022026 |
| AGAAATATGACC  | 889.779713882798 | 0.132169684829003 |
| GTCATTACTTCA  | 889.791973186079 | 0.145540201880623 |
| CGGCTGGATGAC  | 889.79982419174  | 0.206761055088716 |
| AAAGAGTAGTCA  | 889.80146205484  | 0.169524065253744 |
| ACATCCCGTCAT  | 889.812289459839 | 0.112487372936299 |
| CCGCTTGGTGAC  | 889.819757214004 | 0.173358574312386 |
| CAATGAGCCAAC  | 889.822843682309 | 0.194150023308523 |
| GTTCCGACTCA   | 889.82688875722  | 0.155362720495682 |
| CTTGCCATGTCA  | 889.827950015077 | 0.162153513957124 |
| CTAGTTGTGAC   | 889.832350726598 | 0.146287257743261 |
| CGTTAAGTGACA  | 889.837670097685 | 0.152450216278484 |
| AAGATTCATCAG  | 889.855686465429 | 0.174810616979353 |
| ATCTGACGGATG  | 889.859013548356 | 0.229688528938226 |

|               |                  |                    |
|---------------|------------------|--------------------|
| GAGTCAAGTAAC  | 889.859689629833 | 0.147845413553341  |
| TAATTAGTCGCA  | 889.874892594026 | 0.112607103320694  |
| CATGTCACATAA  | 889.878163804798 | 0.216472536374672  |
| GCGTCATGAAGA  | 889.880391221645 | 0.147278719564203  |
| AATTAACGTGCA  | 889.883654311295 | 0.128979884867824  |
| ATTAGATTACTC  | 889.884682021138 | 0.137605665925835  |
| CGAAGAGGTGAC  | 889.90765615155  | 0.120902732153464  |
| CCATTGAATCA   | 889.916826678463 | 0.215049727932495  |
| GTCACCCCAGAC  | 889.921299463345 | 0.116919309599052  |
| GGAGTCAAGTCA  | 889.925780639526 | 0.155909017690131  |
| ACTCATTCTTAA  | 889.926705091977 | 0.0881127453725557 |
| GTGACGTTGATA  | 889.933655954303 | 0.163796146369218  |
| AGATGACATTAA  | 889.937694252093 | 0.0787471492403142 |
| GGTATACTGTCA  | 889.938260458253 | 0.136651296714186  |
| CCTACGCATGAC  | 889.94599420021  | 0.15714827073248   |
| AGGCCGGTGACG  | 889.958026680109 | 0.0785896045799406 |
| CGACTCAGAAAC  | 889.96121715707  | 0.161961663352832  |
| ACAGTCAGCATG  | 889.968044013258 | 0.0632636072270786 |
| TGCCGAGTCAAA  | 889.970540773896 | 0.122668891303012  |
| CTAGTGTGTCGA  | 889.975475639944 | 0.191276953448292  |
| GGTGACACGGTA  | 889.980172227808 | 0.1085126342466    |
| ACGGGTCATAGG  | 889.982410441758 | 0.132411197855419  |
| CGATTGAGTGAC  | 889.984271601806 | 0.144445227123556  |
| AGTGACTGCCTC  | 889.984871844457 | 0.120964465793065  |
| ATGAGTTGTCTG  | 889.985065333754 | 0.121446964916853  |
| CACGCATGACCC  | 889.98884737017  | 0.155083244702658  |
| TCTTTGTGAGAA  | 889.989196445306 | 0.212741288047857  |
| ATTGCGCAATCG  | 889.991616605768 | 0.219584782314825  |
| AAGAGTCTTTTA  | 889.994379526613 | 0.108037768205538  |
| AAAACATGACAG  | 890.010513933964 | 0.107912407653322  |
| AAGCCTGATTCA  | 890.015239117872 | 0.145776827324069  |
| CTGATTCAGAAA  | 890.018507385337 | 0.178663765656941  |
| CTGTCACTGACA  | 890.021709049741 | 0.169615183334599  |
| TAATCAGTGTCGA | 890.029443705485 | 0.124156540245326  |
| GTCATCTGAGGA  | 890.030321285669 | 0.128884864489013  |
| AGAAAGAGTGAC  | 890.038715961014 | 0.114348342410169  |
| CATCTCGTCATG  | 890.039737190633 | 0.114171063362746  |
| GTCATGTCGAAA  | 890.064573421956 | 0.108206337623351  |
| ACACAATCGTCA  | 890.065754929451 | 0.143773053558978  |
| GTCCACGTGTCGA | 890.068091502421 | 0.121616943883355  |
| GCATGGTAGTCA  | 890.073199541504 | 0.149207827770559  |
| ACTCATCATCCG  | 890.078212728463 | 0.142616021481634  |
| GAGGGGTATCA   | 890.079541703983 | 0.124483158541743  |
| GGCTATCCGTCA  | 890.084290605907 | 0.181961153202549  |
| GGGCTCTGTAC   | 890.09021011286  | 0.111354554299656  |
| AGTGAGTCCAAG  | 890.114662757694 | 0.193113005363185  |
| ACATTCAATGAC  | 890.118348283714 | 0.165926587232912  |
| GAAAACAGTGAC  | 890.122806593529 | 0.143398613664108  |
| GACGTGGACTCA  | 890.127462124421 | 0.148304468959428  |
| CGAGGGGTCATA  | 890.129416863213 | 0.121112789415205  |
| TGTGAGCAAACA  | 890.137023199009 | 0.18051260078965   |
| CGTCGGGTCATA  | 890.143142870296 | 0.1730990168804    |
| ACTAATTTACTG  | 890.143354790069 | 0.158005342376468  |
| ACTCATCCGAAG  | 890.144530637854 | 0.188433884975242  |

|               |                  |                    |
|---------------|------------------|--------------------|
| GGCTGACTGCTA  | 890.154307204427 | 0.18138090123983   |
| GATTGCGTGACA  | 890.154972922807 | 0.159091679661929  |
| GCAGGTATGACC  | 890.162070402174 | 0.121426188556055  |
| CACGTGTCAGCA  | 890.168625505717 | 0.165742305304096  |
| TACCACCAGTCA  | 890.169601874344 | 0.118969156635587  |
| GTCACGGACAAC  | 890.181762434715 | 0.241522649230608  |
| CTGATATAATGA  | 890.186486863006 | 0.190165965406287  |
| ACATAATGTCAC  | 890.189982654832 | 0.13102891315397   |
| ATGGCTGACAAC  | 890.192584460826 | 0.193317784491637  |
| CAACCAGTGTCA  | 890.201298756644 | 0.155013121612313  |
| CGTCATGGGAAC  | 890.203012679776 | 0.21332224507967   |
| ACCGAGAATGAC  | 890.207191043035 | 0.138404049567843  |
| GGCGACTAATCA  | 890.207895488938 | 0.143671827288489  |
| GAGTAGGGTGAC  | 890.209425653306 | 0.1645091037894    |
| ACTCATAGGCTG  | 890.210710858793 | 0.22914403189826   |
| GTGTCACGGACA  | 890.212483579842 | 0.162748787800955  |
| GACTCAGCGGGC  | 890.217698692698 | 0.218877764540876  |
| ATGGTGCGTAAT  | 890.218417776428 | 0.104804847211606  |
| GTTAACAAGTCA  | 890.220022369386 | 0.106655806996338  |
| ACTGTGTCAGCC  | 890.220092965661 | 0.11608470616189   |
| AGCAGTCAGCCT  | 890.236147755707 | 0.114339263750394  |
| ATTATGACCCGA  | 890.240694310353 | 0.133508741426009  |
| ACGGTTACGCAT  | 890.244703570801 | 0.161774963553573  |
| GACGGTCATACA  | 890.253997669642 | 0.131117244087596  |
| CGAGATGGCTCA  | 890.257294546241 | 0.148500013915702  |
| AATGATTCTTAA  | 890.258494112205 | 0.117835018829419  |
| CATCCGAGTCA   | 890.259663901198 | 0.123524079617425  |
| GATGGGTGTCAC  | 890.271268763599 | 0.17056541951827   |
| AGCGCAATGACG  | 890.274826226554 | 0.114628424130376  |
| GCGTCAGAACGC  | 890.279399547103 | 0.17189411025719   |
| ATAAGTGAGCCA  | 890.290509103427 | 0.190641125384217  |
| CATTGGCCATGA  | 890.298869679155 | 0.168832160357042  |
| GGAGGAAATGAC  | 890.299122850377 | 0.103778350961021  |
| AGACGTCACCCCT | 890.305471274525 | 0.151475340815075  |
| AAGCGTGACACT  | 890.311914160065 | 0.129260126046217  |
| CGCTGACATATC  | 890.31228199651  | 0.126335890535963  |
| ATGAGCTCTGAC  | 890.324776396027 | 0.10706761562654   |
| CAGTCACGCCCC  | 890.324957549508 | 0.144247945886937  |
| AGTGACCCAACCT | 890.339001001516 | 0.126265490263469  |
| CCACCGACTCAC  | 890.342099781685 | 0.126148087924589  |
| GGTGGGTGTGAC  | 890.344624564966 | 0.121326931747586  |
| GTAGGAGGTGAC  | 890.353647835331 | 0.146658405135411  |
| ACGTCACAGGAC  | 890.360052609161 | 0.119559455090094  |
| AGATGACGGGAT  | 890.362390012551 | 0.120220672237601  |
| CATGACGTCTTA  | 890.374606867101 | 0.185001722248234  |
| GAGTCAAGGACC  | 890.394279566706 | 0.188899104650884  |
| GGAACGGTGACA  | 890.397465586876 | 0.172654526239739  |
| ACGTCATTGAC   | 890.407751844667 | 0.108379168707837  |
| CAGGATAAGTCA  | 890.41253639952  | 0.111774703058759  |
| GGAGATTGCTCA  | 890.41370380279  | 0.122846278568544  |
| GACCAAGCGTCA  | 890.417734580107 | 0.202789401494005  |
| ACTGACTGCTGA  | 890.424908597268 | 0.0839216116014234 |
| ACTCATCCGGGA  | 890.439012335098 | 0.0992500265420118 |
| GTCACCTCAAGA  | 890.439046876076 | 0.158299128420125  |



|               |                  |                    |
|---------------|------------------|--------------------|
| GAATTAGTCGGA  | 890.444158677149 | 0.150975930171133  |
| ATTTATCACTCA  | 890.445536550769 | 0.127195398375993  |
| ATGACAATAGTA  | 890.467955383124 | 0.113055933954886  |
| GTTGTCGCGTCA  | 890.47762908336  | 0.116564830823227  |
| CTTGATTAGTC   | 890.47860797555  | 0.148729037649993  |
| ATGTGTCGACTG  | 890.502310719192 | 0.123079782899836  |
| GAATCAGACTCA  | 890.503419983114 | 0.131029222652536  |
| CTATGTTGGTCA  | 890.512892527254 | 0.141766605438959  |
| ATTTGCTGTCAC  | 890.52024436274  | 0.0951319466130093 |
| TATCCCATGACA  | 890.55974297012  | 0.118272311911456  |
| AATGTAGCGTCA  | 890.562525837146 | 0.128884733726416  |
| TCACAGATCTGA  | 890.562849434037 | 0.134953954569108  |
| ACACGGTGTGAC  | 890.564558368363 | 0.12514491941405   |
| ACTCATCGTGGG  | 890.567696813288 | 0.137526071204581  |
| GTCACCCAACTA  | 890.576800555408 | 0.134215195076323  |
| GGAACACTCATA  | 890.584342128476 | 0.124621780848647  |
| CTGAGTGACGAC  | 890.584582923713 | 0.186205620273861  |
| GCGGCGGATGAC  | 890.592015011734 | 0.13347781168737   |
| GAGACCAATGAC  | 890.610400144851 | 0.143730903387032  |
| GGAGCCGGTGAC  | 890.625355582671 | 0.117440696893854  |
| GATCATGACGAC  | 890.630004900814 | 0.157909312176693  |
| TGACACTGATAA  | 890.64407084932  | 0.181288905520301  |
| ATACCGTACCCC  | 890.645638132843 | 0.129896278845156  |
| ACCGTGTACCT   | 890.647872637164 | 0.13287791218815   |
| AAGAGTCGACAC  | 890.649229159456 | 0.106093653276932  |
| AGCAAACGTGAC  | 890.650270706766 | 0.150796792794057  |
| CCAAACGTGACG  | 890.651382139825 | 0.192597647027552  |
| AGTGATACATAT  | 890.652007062093 | 0.182142689529965  |
| ATCGTTACTCAA  | 890.671833197763 | 0.108029469209113  |
| CCTACAATGACG  | 890.671910243561 | 0.146053214649997  |
| CCATTAGTGACG  | 890.677419088878 | 0.137845763780309  |
| CCAAATGACAGG  | 890.683685625996 | 0.124808851786392  |
| CGTCACACGTAG  | 890.689376137694 | 0.12981174455965   |
| GTGACATACCAC  | 890.699607102581 | 0.129813936075319  |
| TGGTCACCTCAA  | 890.701125353647 | 0.199094352226482  |
| AAGATGATGACC  | 890.706689081312 | 0.17850323509698   |
| TCCGTAACGTCA  | 890.709356091063 | 0.160236421418214  |
| GTCACTTTTAAC  | 890.721943022781 | 0.228216193049356  |
| ACCGTGAGTCTG  | 890.725674435909 | 0.1209458427699    |
| GACCCCGTCATC  | 890.737885463457 | 0.0912730164258244 |
| ACTTGGTCACTA  | 890.738438609952 | 0.16571903694015   |
| TATGCGGTGACA  | 890.750271331944 | 0.100088511249152  |
| CTCGGGGTGACA  | 890.763621225278 | 0.124935165774102  |
| CCTGACACAGAA  | 890.77424598777  | 0.117271645360607  |
| ACGTCACCTAACG | 890.778751518766 | 0.160808734750657  |
| CATGAGTTGGCC  | 890.789287710394 | 0.165131225846894  |
| ATCCGCGTCACG  | 890.791008142141 | 0.195221112089675  |
| TGACTTAACTCA  | 890.807063806596 | 0.101238885003142  |
| TATAGGTAGTCA  | 890.807748578449 | 0.19611948131383   |
| ATAATTAATCAC  | 890.811807555043 | 0.127942720219025  |
| AGTCAACATTTA  | 890.812291899613 | 0.139681226528174  |
| ATGAGTGCTACC  | 890.8314518627   | 0.135810094713043  |
| GTGACGATGCAC  | 890.839663965091 | 0.165046524144733  |
| CGTCACCGTATA  | 890.846263070845 | 0.112047078090998  |

|               |                  |                    |
|---------------|------------------|--------------------|
| GTCACGCTAGGA  | 890.858565383638 | 0.175372890460356  |
| ACACATAGTCAG  | 890.861209306155 | 0.232078267101251  |
| CCGTCATTTTCAG | 890.861343551113 | 0.114830526956795  |
| AGTTACCTGTCA  | 890.86278325986  | 0.0804078075185985 |
| GGTTCGGTGACA  | 890.863256698007 | 0.149279548452181  |
| TCCGAAACGTCA  | 890.863550767107 | 0.138929043978076  |
| GGATCATGACGA  | 890.870721009355 | 0.119993170504845  |
| CGATCGGTGACA  | 890.87233809668  | 0.0967945749058425 |
| CGGTGACGACTC  | 890.875933294308 | 0.159399870627701  |
| CAGGCTGACGTA  | 890.886308655538 | 0.202695392887358  |
| ATACCCGCGTCA  | 890.888519847457 | 0.122941092909788  |
| GAATACGTAATA  | 890.899716297144 | 0.0816404737226438 |
| ACGACCTTGTCA  | 890.91172848953  | 0.202653122845806  |
| GTCACTAGAATA  | 890.921466343737 | 0.0738239250246855 |
| ATCCCTGAATCA  | 890.92253192358  | 0.159829781477771  |
| CGTAAGCGTGAC  | 890.935694375049 | 0.137585305615857  |
| AATGATGCAACA  | 890.944599877812 | 0.145354511949365  |
| GCGTTAGTCTTA  | 890.945178530199 | 0.149607611804288  |
| ACTGGATGATTC  | 890.94637316681  | 0.123270212194021  |
| ACGTCACGCCCA  | 890.946593396847 | 0.138561530866723  |
| AGACTGGCTCAT  | 890.958558377526 | 0.114545076662048  |
| CGGTGGAGTCAA  | 890.958958901539 | 0.127202882171683  |
| ATGTGAATCAAT  | 890.961564554881 | 0.112079802310024  |
| CAGTCAGTCTTC  | 890.965923711973 | 0.134993739263393  |
| AATGTGTAACCC  | 890.969770928622 | 0.111436280759942  |
| ATGACGACCGTC  | 890.971945671894 | 0.158964017930858  |
| ACGCATCACTCA  | 890.972269007135 | 0.151007860218993  |
| CATGTCACCCGG  | 890.973002670657 | 0.180325942147157  |
| ACTCATCTACT   | 890.977015216815 | 0.142262350571749  |
| GTCATTAATGCA  | 890.986723662424 | 0.177017359020787  |
| CGGTGCTGACTA  | 890.987491909663 | 0.0848416924091745 |
| AGCGTGACGCGG  | 891.001369017794 | 0.108318265637042  |
| ACGCGTGACAAC  | 891.003267322681 | 0.173224828721312  |
| GATGTTGTGAGC  | 891.013294944228 | 0.136677583563241  |
| AGATGATACAAT  | 891.014303918378 | 0.175812847163859  |
| GCCCAGTCAGAA  | 891.015476003069 | 0.132165993784734  |
| CCTCCCACGTCA  | 891.036693746352 | 0.149221061563178  |
| AATCAGTCGAAA  | 891.038637802    | 0.133621883691384  |
| ATATCATCGTCA  | 891.04638301504  | 0.174004149914395  |
| GCTCCATGACAC  | 891.055727972089 | 0.209787714787288  |
| AATCATCGTCAA  | 891.059224699572 | 0.173171496679748  |
| AGAGCTGTGACA  | 891.065204406978 | 0.20225579154552   |
| GAGACGGGTGAC  | 891.068324151406 | 0.113429040593633  |
| ATGACGACTCGC  | 891.078645920669 | 0.164157272989045  |
| CCGGTGAGCAAG  | 891.081295473999 | 0.110217162782796  |
| GAGTGACAAGTA  | 891.114241221217 | 0.10597349387406   |
| CGGTTACGCAAC  | 891.146948727774 | 0.108398496386789  |
| TCCAATGAGCCA  | 891.148296120768 | 0.14803640846134   |
| TCACACGACTCA  | 891.15894603908  | 0.112614521028174  |
| AATGAATAATAG  | 891.159821721092 | 0.138783969356214  |
| GGTCATATCCAA  | 891.165222506261 | 0.132793808005532  |
| GTCACACGGACA  | 891.169119481979 | 0.140549369548852  |
| ACTACGATGACC  | 891.179056749414 | 0.238448986333959  |
| CCTTATATATGA  | 891.188686278889 | 0.175496776772865  |

|               |                  |                    |
|---------------|------------------|--------------------|
| TAATTGCTAATA  | 891.190747522991 | 0.129572810403676  |
| GCGTCACITTTCC | 891.194349382779 | 0.141849354028425  |
| TGTGAGCAAGAA  | 891.19561630404  | 0.15137145995901   |
| ACTCATTCTCTA  | 891.214617113932 | 0.147398805361832  |
| AGGTTTGTACAG  | 891.222316050901 | 0.114320206163712  |
| AAGTTCCATGAC  | 891.226569241437 | 0.12684158019304   |
| AAGCATTGTGAC  | 891.232415767098 | 0.111297935834266  |
| GATGAATCTTCC  | 891.234293497179 | 0.111519080433516  |
| AAGTGACGTGCT  | 891.241067079715 | 0.173407561616596  |
| GGAGCTGCACA   | 891.254031591684 | 0.0736152573763248 |
| TACTCATCTATA  | 891.262033844407 | 0.076290756237848  |
| GAGGCCCTGTCA  | 891.266705434635 | 0.153763624166214  |
| GTCTTTGAGTAA  | 891.276225835154 | 0.18534527535035   |
| CGTCACAGAAAG  | 891.281121378419 | 0.158408183395533  |
| GGGTGATGACCA  | 891.282205009657 | 0.145982061609026  |
| GACGCTAGTGAC  | 891.283293498398 | 0.124387323425472  |
| AATATGACCGGT  | 891.284566725003 | 0.12736809715266   |
| CTGACATATTTT  | 891.286098785762 | 0.182162391281654  |
| AAGGGTCAGACA  | 891.286121336481 | 0.0943155595470359 |
| CGGGAGAGTCAG  | 891.286694761251 | 0.0990545541392757 |
| AGTACGGGTGAC  | 891.289449303787 | 0.147828727648833  |
| AACGCACATGAC  | 891.292163076682 | 0.16211831071512   |
| CACCCTGTGTCA  | 891.316446285997 | 0.0896704364019227 |
| GGGCTGTGACAA  | 891.321794657169 | 0.147268381675785  |
| GGATTCCGGTGAC | 891.324586749033 | 0.226164735570379  |
| GCCCCTTACTCA  | 891.328815355407 | 0.133595879581081  |
| TACCATGACAGA  | 891.330987100828 | 0.100051315207888  |
| GCGACGCGTGAC  | 891.334380395177 | 0.140725065952337  |
| CAAGTCACTTGA  | 891.337719325653 | 0.21195252599721   |
| ATTGACTATTGC  | 891.338330328667 | 0.145360014829393  |
| ACGAATCATATC  | 891.346612157109 | 0.165988977241493  |
| CCATGCACGTCA  | 891.350514794697 | 0.155215313762131  |
| AGTACTAATCTG  | 891.352652173411 | 0.179944208742991  |
| TATTACACGTAA  | 891.355161261828 | 0.123269483565888  |
| CAAACATGACAA  | 891.358100961761 | 0.0862745070343456 |
| GTCACCGCAGTA  | 891.35811626745  | 0.134219677703085  |
| ATAGGGGTGACA  | 891.360067551355 | 0.12917526068647   |
| AACGTAATGAGT  | 891.361953313533 | 0.115062168933719  |
| GTGTAAGCGTCA  | 891.38335949129  | 0.119589594015158  |
| GATGATACACCA  | 891.383996956105 | 0.169107829673607  |
| ATGACGGTAACG  | 891.384050437405 | 0.172055119982307  |
| AATGGCAATGAC  | 891.386612270936 | 0.207191872696691  |
| GGTGTTATGTCA  | 891.388174071952 | 0.180881415099397  |
| CGAAATGAGCCA  | 891.391531242779 | 0.134053576030308  |
| ACGTCACGCCCT  | 891.419530280107 | 0.157956710279056  |
| AATTAGTACCAT  | 891.42285230204  | 0.168458570138029  |
| GTCACTGCTTCA  | 891.42739199302  | 0.134881647394755  |
| CGTCACCTGGTA  | 891.436002499174 | 0.15922100329411   |
| GTCGTGACCCAA  | 891.43627778589  | 0.155036283956847  |
| GTCTTTCCGTCA  | 891.469488352207 | 0.151101181105776  |
| AGACTGTGACGA  | 891.484660188231 | 0.126805606580505  |
| ATTGAATACTCA  | 891.486340799234 | 0.13921479344929   |
| GTAATGTCTCAC  | 891.495194390112 | 0.128386619841806  |
| TGCAATGAGCCA  | 891.504626943524 | 0.118725073555521  |

|              |                  |                    |
|--------------|------------------|--------------------|
| ATTACACACAGC | 891.511015452087 | 0.10986357090612   |
| CCTCAGGTGACG | 891.516402394455 | 0.146576641087079  |
| ACACGTGACGCG | 891.530913244522 | 0.108560647893436  |
| GTCATGATGAGA | 891.548326449293 | 0.199232100534872  |
| CCGAAATTGTCA | 891.548456799156 | 0.150077686164405  |
| ACTCATTCAAAT | 891.558970790395 | 0.158960007690649  |
| CCTTAGCATGAC | 891.560970950522 | 0.130858235031667  |
| CGTCACATTGGC | 891.572409335465 | 0.184170132806563  |
| CTCCTATGACCC | 891.573366549691 | 0.141526651353052  |
| ACGTCAGTGAGT | 891.574990911787 | 0.179359758461325  |
| ACATATGACGGG | 891.583668705459 | 0.107723358986802  |
| CCGTTTCGTGAC | 891.590590659402 | 0.0815544370189429 |
| ATGACGGGCATC | 891.59994693758  | 0.130141057873347  |
| CCTAGTCAGCAG | 891.601859927214 | 0.141678283509417  |
| ACTGAATTACTC | 891.610026893048 | 0.113991383333918  |
| CGTCATGGCTAG | 891.611618338343 | 0.125385190475344  |
| GTCACATAGCAA | 891.612148829631 | 0.136900819581292  |
| CACTCATACGAG | 891.614241138484 | 0.156442341358673  |
| AGATGAGTTGTA | 891.632358350187 | 0.112736521311205  |
| CAGTCAGTCGGG | 891.635963208328 | 0.143465327671167  |
| AATACCGTCACC | 891.639383153088 | 0.124374141247342  |
| AACGACTCTGAC | 891.639943907052 | 0.190496167407171  |
| GTCACTGTCTTA | 891.642760620158 | 0.160489830737352  |
| AGTTAGTAGTCA | 891.655781910916 | 0.139369714736243  |
| TAGAGGTGACGA | 891.659148730116 | 0.16564694413047   |
| CGGCATGACATA | 891.666541239128 | 0.144521249998097  |
| ACTGTCATGCAT | 891.670773883027 | 0.118350756014802  |
| ACTGTCATGCAA | 891.671050316949 | 0.147724253595842  |
| TCGTTGTTGTCA | 891.679251498071 | 0.116590158960981  |
| GGGCTACATGAC | 891.686105442669 | 0.250716627039407  |
| GTAATAATCAAC | 891.687413363032 | 0.18116744210682   |
| AGTAGGGTGACG | 891.708980244482 | 0.123660293627555  |
| CCCGGCCAGTCA | 891.709575086874 | 0.161598177654632  |
| CCCTCATATGAC | 891.717093620957 | 0.157221669929417  |
| CGTCTATGACCC | 891.718884232771 | 0.109485284866466  |
| GTCTCTGACCCA | 891.719181761729 | 0.151824190696581  |
| AGGTTAGGTCAT | 891.72288579996  | 0.137358112911731  |
| TAGAGTAATAGA | 891.727966753239 | 0.115390590478309  |
| ATCCTGTGTGAC | 891.731396988972 | 0.127223422709934  |
| ACGGTGAGCAAC | 891.741114078761 | 0.127194873521787  |
| AGTCAGAAGGGG | 891.744400357157 | 0.115828768880454  |
| AGTTTTGTGAGA | 891.745234221756 | 0.125799617147978  |
| AGACGACTCAGC | 891.758649530327 | 0.209146006567386  |
| TCGTCACCGAAA | 891.76499132428  | 0.189195502731377  |
| CATACGCAATGA | 891.766822011483 | 0.234571936091736  |
| ACACATGACACC | 891.771600732971 | 0.132578858330842  |
| AGTTCATGTCAT | 891.791323641994 | 0.110590715652601  |
| CCTTGGACTCAC | 891.796190358694 | 0.196995154639246  |
| ATTGTCTGAGTC | 891.800090408079 | 0.200197739271608  |
| ACGAGCTGACTA | 891.80257155928  | 0.167960352956921  |
| AGCGTTACTCAG | 891.808240939503 | 0.0762624913754885 |
| AGGTGACATGAT | 891.809659926906 | 0.0887145880053945 |
| TACTCACGGTGA | 891.814149516467 | 0.106979479085439  |
| AACGCTTGACTC | 891.834434441346 | 0.111805930731504  |

|               |                  |                    |
|---------------|------------------|--------------------|
| CAGTCAGTCCGG  | 891.836287419002 | 0.112389672790516  |
| AGTCAGCACTCA  | 891.839888965881 | 0.14203835740571   |
| TGACACCTCGAA  | 891.853972360545 | 0.15119133421473   |
| TCCCATTTGTCA  | 891.861015992994 | 0.143697675502912  |
| CGTGACACTCAC  | 891.878139529884 | 0.118404588252162  |
| ATAATCGTGACA  | 891.884281258332 | 0.112611880470326  |
| CGTTACTCAGTC  | 891.886180620327 | 0.18086722077594   |
| GTGACGTTGTAA  | 891.886993776778 | 0.131768090566231  |
| CGTCAGAGATAC  | 891.887106733156 | 0.140703620652608  |
| ATTCATTGACTA  | 891.890490130255 | 0.119536748816654  |
| CGATGACGGCGA  | 891.914355728709 | 0.154669683902536  |
| ATTACACAATAC  | 891.941141346915 | 0.197732141697752  |
| CCAGTCAGATGC  | 891.944321870582 | 0.142481349194866  |
| GACGTCACAGCC  | 891.946511487224 | 0.197936066459611  |
| AGGCGTCACCAA  | 891.963720555447 | 0.152013416107097  |
| AGTCGTCACCTG  | 891.974480048111 | 0.0834407961385837 |
| ACTAAATTA     | 891.981797327423 | 0.206966372643318  |
| CCAAGCGTGACG  | 891.984181472328 | 0.161570857231872  |
| TGGAACACGTAA  | 891.986999128962 | 0.160410032874295  |
| ACGGTCATGTCA  | 891.995505709097 | 0.141611993030946  |
| ACTCATCCA     | 891.99838872438  | 0.107693712582265  |
| AGATCTGACTGG  | 892.006623270745 | 0.225463671584824  |
| GTCAATTCCTA   | 892.03279977586  | 0.083278360070093  |
| AGACATGACATC  | 892.036748100195 | 0.119124639165825  |
| CGTCACATCACC  | 892.039612462655 | 0.133003271683133  |
| ATAGTGGGTGAC  | 892.041098411049 | 0.172176885229321  |
| CGGAGTTCTGAC  | 892.046316050938 | 0.205674998109502  |
| ATCGTCCGTCAT  | 892.058479548942 | 0.159188623091577  |
| GGCTCATCGTAA  | 892.060330526559 | 0.101383511441329  |
| GCCTTTATGTCA  | 892.061116518727 | 0.106679249411989  |
| CCTCTCGACTCA  | 892.061947341879 | 0.111610227658453  |
| AATGTCATTACA  | 892.065380901712 | 0.172115890899284  |
| AGTCAGACACCC  | 892.084277117885 | 0.168702546162882  |
| TCACTGAGTAAA  | 892.097390930114 | 0.137102591441832  |
| AAGATGAGTAGA  | 892.100093105966 | 0.10839791711094   |
| CCAGCAGTGACG  | 892.105339339032 | 0.108105237184369  |
| GTCACCCGTAGA  | 892.106055635982 | 0.10666341620427   |
| TATCGTGACATA  | 892.125715954543 | 0.129494221914116  |
| CAATCGCTGACA  | 892.126775546956 | 0.145622376705743  |
| CCCGGGTGACAA  | 892.12986505659  | 0.146411188542288  |
| GACACATCGCAA  | 892.131117869442 | 0.237141095619402  |
| ACTGGTGAGTAT  | 892.131329542725 | 0.143805487226335  |
| CGCACCAAGTGAC | 892.156204784948 | 0.185865772457648  |
| CCAACCATGTCA  | 892.1700350265   | 0.112863763272296  |
| AGACTAATGCAT  | 892.171698406585 | 0.128889077449278  |
| GAGTGATTAATC  | 892.178648814199 | 0.11230902707445   |
| AGTGAGCAACAC  | 892.18306792668  | 0.116058430053543  |
| ACTTGTTGCTCA  | 892.20081079048  | 0.125086984320414  |
| CAGCCGTTGTCA  | 892.202252307784 | 0.112021841261687  |
| CAGCCTGATTCA  | 892.214588260228 | 0.157655694437438  |
| TTCGTCAGACAA  | 892.218527687335 | 0.219021233529938  |
| CGTCACGTATAG  | 892.23563105971  | 0.155418865040192  |
| AGCAGTCAGTCG  | 892.246745215682 | 0.1565912653411    |
| AGTAACATGTCA  | 892.258665564988 | 0.194067212922939  |

|              |                  |                    |
|--------------|------------------|--------------------|
| ACTCATCGGCAT | 892.26470241862  | 0.170129687220372  |
| ATGAGCCAGAGC | 892.285719339316 | 0.115567650316523  |
| CGGCCGCATGAC | 892.291663564271 | 0.162235228596863  |
| ATACATATGTCA | 892.294127804464 | 0.115740392534059  |
| CTAGCCTGTGAC | 892.299252187927 | 0.215712412621482  |
| GGGGTGTAGTCA | 892.304718155669 | 0.0754508212809728 |
| CCGCATTCTGCA | 892.306528613078 | 0.229485014099126  |
| CGTCATCAAACG | 892.330107802503 | 0.117336385809088  |
| AACTGTGACAGC | 892.352218992216 | 0.162737365243814  |
| AATGATGACCTG | 892.35461226988  | 0.162661991036243  |
| AGATTACGCAGA | 892.361963339513 | 0.143432120529707  |
| GACTCTTACATC | 892.370608294563 | 0.100056226841792  |
| AGCGGTGGTGAC | 892.372738497196 | 0.18276273695572   |
| GGGGTGACCCA  | 892.385673091367 | 0.140862432217154  |
| AATGTGCATCAT | 892.404781749322 | 0.129219158564021  |
| AACCACGTAACA | 892.405653359469 | 0.150482397676765  |
| TGCATGAATCAA | 892.407170935578 | 0.149153156306285  |
| CTCTGACACTAA | 892.414406734889 | 0.109235928725955  |
| GTCACTCTAAAC | 892.414521692013 | 0.123540149376322  |
| ATCCTGTATGA  | 892.416508396691 | 0.144873273070414  |
| GATCTGATGTCA | 892.419395074712 | 0.204512167770797  |
| AAACCGTACAAA | 892.42027788529  | 0.0866454277046378 |
| GTAGGGAATGAC | 892.421153569524 | 0.113433844625686  |
| CTGACTCTCCCA | 892.423516510549 | 0.109415435123843  |
| AGTCAGAACGTG | 892.428146862951 | 0.138201807779734  |
| GTGACGGGTAAA | 892.429260886373 | 0.113466110710812  |
| AGTGCTGTCAAC | 892.430989580252 | 0.199404767569468  |
| GATCGTGACCAC | 892.433758198966 | 0.162218308100927  |
| GACACGTATTAA | 892.440243478772 | 0.170094292482727  |
| GAGTGACGGAGA | 892.441139851082 | 0.13004849671288   |
| ATGGCGTACCGG | 892.457954078322 | 0.141538488516425  |
| GAGAATGTGACA | 892.461971445258 | 0.155335356682441  |
| ATGACGACCAAA | 892.464144281088 | 0.0933164502691463 |
| ACTGGTACTCAC | 892.482215221713 | 0.117479650002984  |
| ACTAGTCAGTGG | 892.510035382763 | 0.130840207127588  |
| ACATCATAAGTC | 892.513305388954 | 0.156796498042457  |
| AGATAGGGTCAC | 892.515045466851 | 0.110383460716933  |
| CCAGCCGACTCA | 892.517931147652 | 0.174100364123492  |
| ACATTGACGAAT | 892.519978049812 | 0.207999048606299  |
| GATCCAGTCAGC | 892.528020067533 | 0.130635784273857  |
| GTTGACTTATGA | 892.528746299148 | 0.170348946264502  |
| GGCTTTTCTGAC | 892.533354046217 | 0.119169446049923  |
| GGGCGGAATGAC | 892.535402809465 | 0.15306224754552   |
| CGTCATTCCCCA | 892.538260727036 | 0.146930420781041  |
| CCAGCGAGTGAC | 892.544557117082 | 0.134381766191115  |
| CAATGATTCTTA | 892.545915398308 | 0.153560117366452  |
| AGGTATTACGTA | 892.554080294056 | 0.0907170367756107 |
| GATAGGGGTGAC | 892.563562462386 | 0.164321471609234  |
| GAGTAATGTCAC | 892.563935982851 | 0.19805846086688   |
| TTCAGTGACAAA | 892.5639943332   | 0.138252844717485  |
| ACAAGGCGTGAC | 892.568245820915 | 0.136840670812311  |
| TATGACGGTAGA | 892.572542069096 | 0.115803152260666  |
| CTATGAGTGGTC | 892.601408731897 | 0.125184237262693  |
| GTGGTGACGATA | 892.614300714734 | 0.141209042647942  |

|               |                  |                    |
|---------------|------------------|--------------------|
| AGGGGTCATAGA  | 892.618375306921 | 0.104700613727918  |
| CATAAATGGTCA  | 892.626385416095 | 0.132380243527049  |
| GACAAATCATAAC | 892.626678733343 | 0.181730507806795  |
| AATTATCTGACT  | 892.627210766389 | 0.171767317568038  |
| AGATGGTGACAT  | 892.628116602285 | 0.113735321712823  |
| TAGCGAGAGTCA  | 892.630547613443 | 0.169079577585599  |
| AGTCGTCACAAT  | 892.635664030121 | 0.12836776955699   |
| CTTGAACGTGCA  | 892.636216845416 | 0.107906079802018  |
| CTTCGAGGTGAC  | 892.63968471486  | 0.120623001363177  |
| CGACTAATTC    | 892.642956646976 | 0.125796768364245  |
| GCAGCCATGACA  | 892.645589939978 | 0.0756884700615775 |
| GCCTCGAGTCAA  | 892.650603837941 | 0.136059802949898  |
| CAGCGCATGACA  | 892.658140098026 | 0.136617326001199  |
| AGTGACACGATA  | 892.665434573763 | 0.118160289327696  |
| ATCAGTCGTCAG  | 892.66606125997  | 0.150059181787904  |
| GCAATGTGACGC  | 892.672176218874 | 0.151065540922926  |
| CAATTACTCCTC  | 892.675209323341 | 0.112202310496725  |
| CGCAGATAGTCA  | 892.678544951914 | 0.232580110661376  |
| GACTATTATCGA  | 892.680986261892 | 0.1517131158573    |
| GTCACATGGGAC  | 892.687217487091 | 0.15358695220957   |
| GACTCAGATCTA  | 892.690296407774 | 0.12735653190112   |
| AGCTCTTGACTC  | 892.705115549805 | 0.14295011612294   |
| GATAGTGACCAA  | 892.712869335797 | 0.073928232929638  |
| CGTCACCTCTAA  | 892.719512212383 | 0.21358982910898   |
| CTAAGCGTGTC   | 892.728782436078 | 0.237248735286981  |
| TTAGTAATGCAA  | 892.739108648824 | 0.148099602990539  |
| TGAAGAGAGTCA  | 892.748766216165 | 0.157782559784239  |
| AAGACTAAATGT  | 892.760028564521 | 0.162733792194728  |
| TCTGGGGTGACA  | 892.760728133017 | 0.107603978224489  |
| GTCATGCTTAGA  | 892.770142606576 | 0.146197354666028  |
| GTAGTGTCAGAA  | 892.772933634479 | 0.132717202137322  |
| GAACGTCTCACA  | 892.78052664024  | 0.144680351906716  |
| ACTGTGACAATC  | 892.785353992219 | 0.194968587058039  |
| TCAGTTACATCA  | 892.789851184822 | 0.223746175726727  |
| CGATCTTTGTCA  | 892.792214468547 | 0.124211620660573  |
| GATGAGCCTAAC  | 892.799537974932 | 0.135246943544017  |
| CCTACTCATGAC  | 892.809240478559 | 0.113085988573861  |
| AGAATCGTGACA  | 892.812836923982 | 0.118598613668752  |
| AGGACTAATAAC  | 892.813383886324 | 0.150806061015764  |
| GTCATGAGGTAA  | 892.822663078009 | 0.116697784204336  |
| TGCTAATACTAA  | 892.837983831645 | 0.1063373758847    |
| CGGCATGACAGC  | 892.842237304275 | 0.144414210764962  |
| AGACTGACTGTG  | 892.859290379515 | 0.143933953623367  |
| GCGATGATGTAA  | 892.861824772755 | 0.182856589283811  |
| CGCTGAGTAACG  | 892.864939777768 | 0.172877028906179  |
| ATCTCGGTCACA  | 892.865688209321 | 0.155476801403242  |
| CCGTCATCTCTC  | 892.867834488454 | 0.121033325340823  |
| GATACGTCAACC  | 892.869925252522 | 0.181360902436771  |
| ACACCGCTGACT  | 892.884572808589 | 0.100735244712968  |
| ACCGTCTGTGAT  | 892.884957402075 | 0.11652974525555   |
| CCCAGCGACTCA  | 892.887262931867 | 0.157830739824564  |
| TACACGTGGTCA  | 892.888834267005 | 0.15281657499529   |
| GAGTGAGCAAGA  | 892.89019606933  | 0.130599645709017  |
| TGAAGTCTGTCA  | 892.897827027072 | 0.120503848888867  |

|               |                  |                    |
|---------------|------------------|--------------------|
| ATGTGACGCCGA  | 892.900026431862 | 0.107648409821813  |
| AAGTAAGGTGAC  | 892.914625772822 | 0.139616482689392  |
| AGCTGTGACCCT  | 892.924612834832 | 0.110722766729025  |
| ATATGTCAGACC  | 892.92953964726  | 0.125412473514227  |
| TAACTATTAGTA  | 892.950202458582 | 0.133042340199933  |
| GACGTGCGTGAC  | 892.956116450151 | 0.118392902762835  |
| GTGCAGTCAACA  | 892.965191182563 | 0.138491576290455  |
| GTATAAAGTGAC  | 893.002494156507 | 0.138768728104244  |
| CGGCTTCATGAC  | 893.015630889361 | 0.209967895492422  |
| GGGTATAAGTCA  | 893.024037325033 | 0.122464076532921  |
| ATCATCTGATGA  | 893.027969154867 | 0.20160348583427   |
| AGGTGACGATGC  | 893.04123371268  | 0.152150307015084  |
| ACGTACCTGTCA  | 893.044655197844 | 0.138492044357913  |
| GGTCATCATTAA  | 893.062867645651 | 0.112596980393161  |
| GTAGGCATGACA  | 893.074318817404 | 0.165418511389223  |
| TAATTACGCACA  | 893.077101763024 | 0.133498133430682  |
| AGAGGCTGACTA  | 893.083737942093 | 0.139331533081725  |
| AGACTCAGTTG   | 893.084746199593 | 0.13197906419263   |
| CTGTCAGCGTGA  | 893.086483443698 | 0.128146687654489  |
| TCTGCCAAGTCA  | 893.097240442858 | 0.116555010425514  |
| AGTCAGCCACGC  | 893.103043526918 | 0.190432759936919  |
| CACTGATCGTCA  | 893.107615546121 | 0.136106144548874  |
| GGCCAATGTGAC  | 893.109609964108 | 0.159451708300504  |
| CGTACCTGTGAC  | 893.115633917459 | 0.107410863121463  |
| ATAATACGTCAA  | 893.13776587408  | 0.132498207071943  |
| ACGTGAGTCCCC  | 893.145393866247 | 0.147827641663602  |
| CGGTTATGAGTA  | 893.147095450012 | 0.144013450928906  |
| ACCCAGTTATGA  | 893.151092637917 | 0.146351950186976  |
| ATAGTCAGGCCGA | 893.153181450659 | 0.129287525748757  |
| TCTATTGAATCA  | 893.168464252938 | 0.113254003432728  |
| CATCAGACTGAC  | 893.17120051536  | 0.139381453157272  |
| CTGACCAGTTTC  | 893.189748508683 | 0.15180103625734   |
| GCGAAGACGTCA  | 893.196862136055 | 0.204541205329607  |
| AGTTGCGTGTC   | 893.203606589641 | 0.183118516794724  |
| ATCAGACGTCAT  | 893.204519355258 | 0.128877416036927  |
| TGAAAGCAGTCA  | 893.209555893226 | 0.242943261404246  |
| ACATACTCGTCA  | 893.21161279257  | 0.143336774757999  |
| AAGAATCATCAT  | 893.215668290778 | 0.228995064974182  |
| ATGACAATGAAA  | 893.219750615472 | 0.168036989059954  |
| CGTGCTCACTCA  | 893.221232993164 | 0.234509220413817  |
| GTCATGTGGCAC  | 893.234851122063 | 0.172502372661557  |
| GTGTCACGAGTA  | 893.24055762895  | 0.117834643999938  |
| GAATTACGCGTC  | 893.240811805056 | 0.15721879169997   |
| AACTTGACACAC  | 893.242229012204 | 0.119194806580517  |
| TGTAGTGACGAA  | 893.243557440349 | 0.195422904577209  |
| GATGACCGAGCA  | 893.244761908085 | 0.129511162074374  |
| AAGAAATGTGTC  | 893.247121008445 | 0.0868219609130169 |
| ATATGGTGACAA  | 893.248248632596 | 0.128105786441881  |
| ACTCATTTGGAC  | 893.25350109924  | 0.185785664045124  |
| ATGACGATCCCG  | 893.263250728557 | 0.125354345256136  |
| AGTCAGCCCTAA  | 893.271585870021 | 0.139507980082889  |
| GTCACCAAGGAA  | 893.271672342964 | 0.15211442035276   |
| TAACGTCACCTA  | 893.277429928292 | 0.111409189967899  |
| CTACTTTACTCA  | 893.280268275237 | 0.107372840316376  |



|              |                  |                    |
|--------------|------------------|--------------------|
| GTATGCATGACA | 893.290242640051 | 0.139893015042714  |
| GTCATCCCGCCA | 893.297854285763 | 0.105720637783072  |
| ATGGGTGACCGA | 893.301823160578 | 0.16025620418891   |
| CTACCATATGAC | 893.305321948067 | 0.12599241354597   |
| GTGACGTTGAAA | 893.305629894964 | 0.087538917736013  |
| ATTACGACATTA | 893.308236702453 | 0.15452483683103   |
| CGTCATGGGCTA | 893.313771637308 | 0.133221487573509  |
| CTCCCAGATGAC | 893.321910569869 | 0.233725706651747  |
| GGGAACTGTGAC | 893.322890028811 | 0.143451688516747  |
| AACGGTCACCCA | 893.327764760396 | 0.14059951665583   |
| TGAAAGGTGACA | 893.328060836924 | 0.143388618602101  |
| ATGACAGGGTGG | 893.333227648492 | 0.102832372192081  |
| AGTCAGAGCGGG | 893.359951506118 | 0.117935072104131  |
| ACGTCACTAGGC | 893.363295307995 | 0.181482891030408  |
| CTCTGACCGCTC | 893.363532580143 | 0.137915253891227  |
| ATGATTACATAC | 893.370228303855 | 0.132938100002851  |
| ACGATAGGTCAC | 893.379106788434 | 0.124952182083865  |
| ACGGTGTACTCA | 893.392205852175 | 0.163147691953416  |
| AGCAGAAGTCAT | 893.392666884578 | 0.18450925535538   |
| GCCCGTGACAAA | 893.396105356303 | 0.126296184074724  |
| AGAGTGACCAAG | 893.40096727308  | 0.119668709231338  |
| GCCGAGTGACGA | 893.401033097405 | 0.164334848273748  |
| TGACATAGAGCA | 893.409362273737 | 0.148327946855236  |
| AAGAAGTAGTCA | 893.415225282579 | 0.16896573431626   |
| CTGTCACCGCAC | 893.436043939746 | 0.151837547543701  |
| TCCTGGGACTCA | 893.441990376983 | 0.141818622752683  |
| ACACATCTGACT | 893.447424922575 | 0.188714758226251  |
| CTCGAATGACCA | 893.448020033346 | 0.133485963867437  |
| CTGCTAGTGTC  | 893.459325862886 | 0.144986232539866  |
| AAGTCACGGACC | 893.46195940504  | 0.0928406317115637 |
| AGTTTAGTGACA | 893.471162088652 | 0.209073201821678  |
| GACGTGACGAAC | 893.484918895049 | 0.0869222411544634 |
| ACCACTCTGACT | 893.488626268237 | 0.15296411723419   |
| ATCTCTGACCCA | 893.495901324106 | 0.173830281545532  |
| CAATTAGTCGCG | 893.500415862883 | 0.104655418649395  |
| GTGAGCAACATA | 893.51009940932  | 0.151045083384479  |
| CGGTCACCGTCA | 893.513049245555 | 0.143213913461629  |
| ACCATAATGAGT | 893.521934804815 | 0.1544494029669    |
| GGCCACTAGTCA | 893.524767120599 | 0.228859474833742  |
| CGGCGAGGTGAC | 893.529142296811 | 0.159229611480071  |
| ATCTGGTCATCA | 893.533020218854 | 0.150304237151165  |
| GAATCAGTCGCA | 893.533727060243 | 0.152388475382501  |
| CACTACAGTGAC | 893.535496265157 | 0.15847941551587   |
| CGTTACAGTCAG | 893.537230810688 | 0.155767064211094  |
| ATGACAGGACAA | 893.538388098627 | 0.098211545758266  |
| AAGCTGTGTGAC | 893.539800781187 | 0.193932563097117  |
| GTCATAGGGCGA | 893.545838981279 | 0.0755447899874903 |
| ATGAGTGCATTA | 893.547011183418 | 0.160060488219453  |
| GCCACGTAACAA | 893.548151866237 | 0.111798802719736  |
| AGTCACGGTACG | 893.549026712869 | 0.110007350214462  |
| ATGACGGAGGGG | 893.549363327394 | 0.106597068082936  |
| ACTGCGAGTCAA | 893.550015608478 | 0.131529987080344  |
| GGGGCTGTCATA | 893.570188430515 | 0.137929623116829  |
| GCTCTGACATAA | 893.571231907932 | 0.172326792872575  |

|               |                  |                    |
|---------------|------------------|--------------------|
| CCTTGATGACCA  | 893.575386004558 | 0.0696654081662458 |
| GTTCTAGCGTCA  | 893.585203664157 | 0.174348648865489  |
| GGGCCTCATGAC  | 893.593799416509 | 0.163202936140521  |
| AATATACTGACT  | 893.60245012778  | 0.15432104152279   |
| AAGTCACTCTAG  | 893.605401881874 | 0.176172183097906  |
| ATATTACAATGA  | 893.609044187077 | 0.117198235060381  |
| AGTCAGACCAAG  | 893.621641544282 | 0.123745482841909  |
| GTGACTGCCTGA  | 893.632099609421 | 0.203048952505466  |
| AGGGTTCTGACT  | 893.658076125257 | 0.140742537948211  |
| AGCTTATGAGTA  | 893.667492662262 | 0.118935699324275  |
| ACTGTCACATAT  | 893.670857040884 | 0.0685771244882713 |
| CACGTCGAATCA  | 893.685697198884 | 0.152412783347786  |
| AGTGACAGTACC  | 893.713876829667 | 0.0840302958145886 |
| TGTCAGACTAAA  | 893.739253223062 | 0.140201682267105  |
| CGTGTCACTTGC  | 893.750511779548 | 0.183719223962066  |
| CTGGTACATGAC  | 893.750620926799 | 0.119380920021273  |
| ACTCTGCTGACT  | 893.767463807573 | 0.104215027496088  |
| TACCATGTCACA  | 893.77464642459  | 0.103617466196277  |
| ACGGCATGACCA  | 893.779227561162 | 0.140057873767575  |
| ACTCATCACAAA  | 893.782012602254 | 0.128307839654701  |
| GTACGTAGTGAC  | 893.790016628014 | 0.115317932497142  |
| ACGTCAAAGTCA  | 893.796752304892 | 0.104130473167335  |
| TTACCTGACGAA  | 893.804418704002 | 0.1156919045237    |
| GACTAATAATCC  | 893.819436671478 | 0.0972556059540541 |
| GTCAGAACGACA  | 893.819928909859 | 0.152028696723302  |
| ATGGAATGTGAC  | 893.82450135927  | 0.13030762965792   |
| GCGGCTGTCATA  | 893.825463547513 | 0.132794327684139  |
| ATAGGGAGTGAC  | 893.825867740082 | 0.166277908711951  |
| ATGAGCTGTACC  | 893.830515253238 | 0.210499675405438  |
| ACTAATTTTCGAG | 893.831275203294 | 0.138123367683306  |
| ACGGAATGAGT   | 893.847635939994 | 0.10024614251306   |
| CGTCACATGTTC  | 893.849207542566 | 0.15806594711075   |
| ATTCAATGACCA  | 893.851169043099 | 0.159411900728863  |
| AGTCAGCCGGTA  | 893.858553037006 | 0.109224920036784  |
| AATTACTAAGGC  | 893.861912269748 | 0.158820988162443  |
| CCATTGACGTAA  | 893.865999899484 | 0.124957843922722  |
| GTAGTTGAGTAA  | 893.870016756904 | 0.149622137402567  |
| CGGGTCAGTGAC  | 893.883930119187 | 0.21842504190822   |
| ATAATCGCGTCA  | 893.889932756909 | 0.172536514410708  |
| AGTAGACTCAGC  | 893.894883374651 | 0.153590394174923  |
| GACCCGCATGAC  | 893.89566205949  | 0.120165834677887  |
| GATTTAGTCTTA  | 893.897311942942 | 0.117538752871793  |
| AGTCCAGGTGAC  | 893.903050967221 | 0.201623603922354  |
| AGCGGCATGACA  | 893.907848959406 | 0.18986318755899   |
| ACCGGCGTCACA  | 893.922625785933 | 0.143130984312111  |
| AACGTCACCCAA  | 893.924564864586 | 0.114057776481179  |
| ATATGACCGGAT  | 893.925730760003 | 0.136321001237846  |
| CGTCACACCTGC  | 893.94376156532  | 0.149321704292979  |
| CGTGGATAGTCA  | 893.952193492899 | 0.160416478694144  |
| CGTGTACAGTAC  | 893.954631523333 | 0.131933193323278  |
| CATGACAGAGCG  | 893.958267714965 | 0.131550174626521  |
| ATTGCCAGTCA   | 893.96019444923  | 0.148651799738416  |
| GATGGCTCAGAC  | 893.972671948644 | 0.1134040810174    |
| GAGTCAATAACA  | 893.979560027476 | 0.108116998049752  |

|               |                  |                    |
|---------------|------------------|--------------------|
| ACCCATCCGTC   | 893.981717117224 | 0.11408251612195   |
| AATAGTGACGCC  | 893.983464183302 | 0.119330333837303  |
| ACGTCACGCCAA  | 893.985436834182 | 0.218953332809693  |
| AGTCACGAGAAA  | 893.991032009546 | 0.172299100695858  |
| ACGCCGTACATCA | 893.995848364891 | 0.160358948788235  |
| AAGTCACCCCAA  | 894.005383136847 | 0.173291874581143  |
| CGAACCCGTAC   | 894.006118223069 | 0.126276236565949  |
| TCGGTCATCTCA  | 894.006848296947 | 0.114860660264721  |
| AAGTTGACTATA  | 894.011857405649 | 0.168711154975553  |
| CTATTACGTATA  | 894.014514323871 | 0.158113592500339  |
| CGTCACTCTAAA  | 894.014902149587 | 0.13734176589147   |
| CTTAAGTTGTCA  | 894.026646919307 | 0.151001222497881  |
| GGTGCGTGACAC  | 894.030770481337 | 0.112285653893998  |
| ACACGTAAGCCT  | 894.034925334547 | 0.135978096355982  |
| CTGATAAGACTC  | 894.045783214723 | 0.164647317832926  |
| CGATGATACAAC  | 894.057770437542 | 0.0858249490074254 |
| GTCATGGTAAAA  | 894.06257577055  | 0.156446761451101  |
| ATGACAGGGAGA  | 894.064685669431 | 0.105807837700531  |
| CGTAGAATGACC  | 894.066079702044 | 0.151650172875726  |
| ATGACTTGGGCA  | 894.090664724026 | 0.141758925208221  |
| ATAACTTGACTC  | 894.095399262597 | 0.0662989906176339 |
| AGCGTTAGTGAC  | 894.09713132269  | 0.155759907693946  |
| ACTCATATAGAG  | 894.101370506755 | 0.145207119547479  |
| GATGACAAGCGC  | 894.10637444677  | 0.1794929362311    |
| ACAGACTCACTA  | 894.109647659765 | 0.129321390556071  |
| ATGAAGTACCGA  | 894.111467432792 | 0.147446713190924  |
| GGTGACAACGCA  | 894.125331092538 | 0.129226715885597  |
| GTACCGTCACTA  | 894.125579680374 | 0.135026064065162  |
| GTGACGCCACAA  | 894.139021554886 | 0.116675687902064  |
| CATCGTCACTCA  | 894.16668798127  | 0.145716783311644  |
| GTTGGCATGACA  | 894.176583630934 | 0.112530714490138  |
| ATTAGTAAGCGG  | 894.177654396558 | 0.110767440263971  |
| GAAGACCTGTCA  | 894.178350311669 | 0.158464845593607  |
| GTAAGGTGACGA  | 894.180090799608 | 0.148336649133474  |
| AACGTCACCCAG  | 894.195514782479 | 0.119719124552515  |
| AAGCGTCAGAGT  | 894.202642497339 | 0.110440620856776  |
| AACTCATAATGA  | 894.203755180241 | 0.155615471858188  |
| ACGTCGCGGTCA  | 894.226207208327 | 0.211769164411799  |
| TATTACTCCTCA  | 894.232268826265 | 0.103726833501936  |
| ATTACGTATATA  | 894.232746149618 | 0.115911473578027  |
| GTCACCTCCGGA  | 894.255958844091 | 0.135621130151043  |
| ACTCATGCGACA  | 894.270399850515 | 0.247655889058819  |
| CCCCTGAATCA   | 894.274789526369 | 0.164398702505583  |
| ACCTCATATGAC  | 894.275730895885 | 0.155289477555646  |
| TCAGTCAATCAA  | 894.283345557631 | 0.168368826943642  |
| CTGCGGTGACGA  | 894.28980768423  | 0.118744342822504  |
| AGTTACACATAT  | 894.292206808106 | 0.0928178389517264 |
| TGAGCAACAAAA  | 894.293826900667 | 0.157269704079885  |
| GTGACATAGCTA  | 894.300641995596 | 0.157929391624405  |
| TAGACCTCGTCA  | 894.300956992412 | 0.155173781944244  |
| GAGCGGGATGAC  | 894.312088292915 | 0.149250819244636  |
| ACGGTGACGTCT  | 894.317372530466 | 0.140798465990928  |
| GATTACATAATA  | 894.318571096259 | 0.149014095541681  |
| ATGCCGTACAG   | 894.3209100769   | 0.134909200411704  |

|              |                  |                    |
|--------------|------------------|--------------------|
| TATTGTCATGGA | 894.322642329548 | 0.156176931243391  |
| AGTATAGTGTCA | 894.333641061866 | 0.12998489694276   |
| CTGACTGTGAGA | 894.343223622249 | 0.140411028492851  |
| ATACACATGACG | 894.359186529772 | 0.124788303636636  |
| GGATAGGGTGAC | 894.376230339298 | 0.121559391353119  |
| ACGTCATGAATG | 894.387565496587 | 0.146705287402875  |
| AGCCTATGTCAC | 894.395399424788 | 0.119769654724413  |
| ATGTCATGCTTA | 894.396040511716 | 0.149670174802002  |
| GGTTCTCCGTCA | 894.400983932228 | 0.144866497981234  |
| GGGATCAATGAC | 894.401541992444 | 0.14031241870608   |
| CTGCCTGTCATA | 894.407771129859 | 0.227864612739768  |
| ACATGGTACCA  | 894.416180099825 | 0.145196663584836  |
| GATCGGTGACCA | 894.422507845915 | 0.115103894156192  |
| AGTCAGCGACTA | 894.427189007518 | 0.128762862019807  |
| GTGACGGGTCAA | 894.427932253225 | 0.169637289824865  |
| ACTCAAGGTGAC | 894.428575034437 | 0.183884192979911  |
| TATTACGAATCA | 894.430239564701 | 0.148720759668834  |
| GGAAGAGAGTCA | 894.433883068379 | 0.119850957009203  |
| GGTGTACAGTGA | 894.435118158827 | 0.104639421658897  |
| ATTCCATGAGTC | 894.4594881502   | 0.110277561350111  |
| GTGACGCCGAAA | 894.461579529106 | 0.0784915488017778 |
| ATGATCTCATCA | 894.462646912101 | 0.17566503922402   |
| GGCGGGAATGAC | 894.476599153023 | 0.121907484725833  |
| AGTCAACCAATA | 894.48393424374  | 0.106103287840941  |
| AATATCCGTGAC | 894.515549521621 | 0.140528060546973  |
| CTGACATATAAG | 894.527507895752 | 0.0996452801333446 |
| CGTAAGTGTGAC | 894.547791806639 | 0.0998943477921611 |
| GAAGGAGTAATA | 894.548641161825 | 0.119973426111579  |
| GGGTCATTCCGA | 894.550235314236 | 0.107571909517823  |
| ATGAGTTAACTC | 894.553126314219 | 0.209458785881851  |
| ATTACGTATTCC | 894.565790278476 | 0.197745558803235  |
| ACAGGCTGAGTC | 894.569364302666 | 0.129460875387899  |
| ATGCGCTGACTG | 894.580804774559 | 0.150157885709946  |
| ACTTGATACAT  | 894.589844060143 | 0.131343307975061  |
| ACTTCATGACGC | 894.590056159874 | 0.1670391298739    |
| TAATCTCTGTCA | 894.594355172685 | 0.107767672384288  |
| CCGCCCTAGTCA | 894.595117011708 | 0.160774676683756  |
| GATCATGTCACC | 894.599837020099 | 0.163235583319073  |
| TCAGAGTGACAA | 894.606900840696 | 0.136178541232018  |
| CGCCATGACACC | 894.615277565899 | 0.133528914094488  |
| ACAAGGTTAGTC | 894.619705776553 | 0.106031177861158  |
| CACACTCATGAC | 894.62058184346  | 0.198502298066897  |
| GAGTAATTGTAA | 894.63793740521  | 0.0917650213078461 |
| GAATAATGTGAC | 894.664209693521 | 0.12066846875342   |
| CGTCACCGTTTA | 894.667838302025 | 0.173477407592762  |
| GCGACGGGTGAC | 894.668855020111 | 0.106697267471878  |
| GACAATGACCGA | 894.669622693811 | 0.147918648164694  |
| GGTGTATGGCA  | 894.681860589843 | 0.123165059379503  |
| ATGACGTTCTTC | 894.687942014312 | 0.182998302088367  |
| CTGGGATGAATC | 894.691660040302 | 0.140444057315282  |
| GGGTCATCCAGA | 894.69240130432  | 0.124429583524545  |
| CACCCGTAGTCA | 894.693956069871 | 0.200705259104779  |
| AGAGGGTGTGAC | 894.697613379595 | 0.112328536074107  |
| ACTCATCAGAAG | 894.706767950661 | 0.121750645796303  |

|              |                  |                    |
|--------------|------------------|--------------------|
| GTTACCGTGACA | 894.709004776697 | 0.243734624670943  |
| GCATCGTCATGC | 894.754370891516 | 0.142806960417821  |
| ACTGACACGTCC | 894.760969339382 | 0.150394505650991  |
| AGTTGAGTGACG | 894.775150891808 | 0.164946306841237  |
| GAGTGCTGTAC  | 894.775691069636 | 0.148600935196363  |
| GAAAAGTACCCC | 894.779833387728 | 0.120970826289813  |
| CGTCGCTGTGAC | 894.789357018933 | 0.165899157750529  |
| TCATAGTATAAA | 894.795901405717 | 0.156201407236418  |
| AACTCGCATGAC | 894.803779743548 | 0.109699475705147  |
| ACGGTGACATGG | 894.805184749127 | 0.144541714730419  |
| AAGTGTGAGTAT | 894.807750867226 | 0.148985911810089  |
| CATCAATGAGTA | 894.809025840299 | 0.0838278976552385 |
| CCAAAATGGTCA | 894.818072441655 | 0.152136688978939  |
| AATCTGTCAGTG | 894.826154328947 | 0.128294072507834  |
| ACACATCATCCG | 894.833083583614 | 0.213897128769412  |
| GACCCGCGTGAC | 894.83385902805  | 0.203267070664338  |
| CGGATGTGACGC | 894.840181886707 | 0.138875004518846  |
| TACGGGTGACAA | 894.858793995432 | 0.155077692504096  |
| ATGTCTGAGTCG | 894.859038561439 | 0.0875148354165346 |
| AGAGACGGTGAC | 894.873015070479 | 0.11012883273246   |
| GACTACTCACAC | 894.873666460302 | 0.119640081186719  |
| ATCGATGATACA | 894.875107367748 | 0.120812464032636  |
| ACCAATTTGTGA | 894.87904784223  | 0.232422572076775  |
| ATGTCACCTCCG | 894.883837404733 | 0.111616501900612  |
| GACTTACTGTCA | 894.884907385992 | 0.141672355834173  |
| ACTAAGTGACGC | 894.887400120669 | 0.180774434834037  |
| GTGACTTGATTA | 894.893345062685 | 0.163918269211574  |
| ACTAGTCAGCAG | 894.894719327741 | 0.0919891285449118 |
| GTGTGGAGTCAA | 894.897919196263 | 0.118223691317564  |
| GACACTGGCTCA | 894.910539266847 | 0.10763716428592   |
| AAGTGAGTCCAT | 894.918149156475 | 0.108465082717951  |
| AGGAGTGGTGAC | 894.923739658087 | 0.110439196763829  |
| AAGGTGACGCCA | 894.9309800474   | 0.1294641532141    |
| AAATGCTGAGTC | 894.936127741999 | 0.111565155247208  |
| AACCTTGTGATG | 894.946186504494 | 0.075762847614842  |
| GAGAACTCTGAC | 894.95116221543  | 0.106409705349673  |
| TAGCTCTAGTCA | 894.967246975345 | 0.129418958141445  |
| CTCGATCATGAC | 894.970516120843 | 0.152914667634081  |
| AGCGCGGTGACA | 894.971899741485 | 0.166718977302176  |
| CCTGCGTGAGTC | 894.997665167214 | 0.151554522704308  |
| CAACGTGACACG | 895.006302122935 | 0.112505482499765  |
| ATGACGAGCGAA | 895.028640678116 | 0.135796293557206  |
| ATTGAAGTGTC  | 895.031731520843 | 0.13882815554687   |
| GAGACCGTCATA | 895.035683515295 | 0.13688625695091   |
| CGTGACAACGCA | 895.052166967472 | 0.164877330530206  |
| CCCAATTACGCA | 895.054596974978 | 0.132982775297081  |
| AAGAGTAAACGC | 895.058217992167 | 0.139091032541606  |
| AATAGTAATATC | 895.070396263993 | 0.0647447014956765 |
| CGACCTAGTCAA | 895.072292160704 | 0.199912884303066  |
| CCCAACTGTGAC | 895.073232916896 | 0.0944626779080851 |
| ATGACAGCTGGA | 895.078749960059 | 0.0763447513636639 |
| ATTGTAATACG  | 895.089922175952 | 0.154901354736547  |
| ACTCATGACAGC | 895.091180933079 | 0.156623927080873  |
| GTGTGTGAGCAA | 895.092995550605 | 0.120826738948779  |

|               |                  |                    |
|---------------|------------------|--------------------|
| GGGCGAGATGAC  | 895.098418835562 | 0.181550424233067  |
| GAGTCAAATGCC  | 895.108139810916 | 0.147851079814121  |
| GAAAGGCATGAC  | 895.112657571527 | 0.111735743956346  |
| GACCATTACTAA  | 895.115573292225 | 0.113355290686319  |
| CAAGCTGTCACA  | 895.122926950852 | 0.12283008632926   |
| ATCAGTAAGATC  | 895.129717770433 | 0.160617537560814  |
| TGACAGAGCGAA  | 895.136831450415 | 0.121247631311978  |
| GAGCTGAGTGAC  | 895.1375803051   | 0.103729564568016  |
| GTCATGTTACACA | 895.140121032984 | 0.069202668741957  |
| CTTTGGTACTCA  | 895.14063883595  | 0.141802285606563  |
| TCACCGCATGA   | 895.145599686264 | 0.207498941045877  |
| ACTCATTACCGA  | 895.14849789125  | 0.113128234036326  |
| TGACGACGCGAA  | 895.15037365205  | 0.120471213505394  |
| CGGTCATAGGCC  | 895.16088969778  | 0.104535165626177  |
| TCCTCTGACAGA  | 895.17208691632  | 0.165976557182468  |
| AAAAGTGCAGC   | 895.182935644749 | 0.167184847035714  |
| CGTGTGTCTGAC  | 895.192938008586 | 0.203808298477995  |
| GTCACACCCAAC  | 895.196865506838 | 0.148913312433042  |
| AAGTCACGCGAA  | 895.203979782859 | 0.141150037179019  |
| ACTCATCGATCA  | 895.219515486375 | 0.205539716001093  |
| ATGTCATCTCCA  | 895.222386349082 | 0.136602127213388  |
| ACAGTCTGACAC  | 895.224176007525 | 0.186325752082533  |
| ATGACGCTCCAC  | 895.224935471522 | 0.134622050823655  |
| GTCAATAGTCAA  | 895.236719703601 | 0.177574917533764  |
| ACGTAATCACAC  | 895.240492200454 | 0.206443865045778  |
| ATCCGTCAGCAT  | 895.24143489296  | 0.137770312006359  |
| ATTCCAGTCAGA  | 895.244463605098 | 0.136250270398917  |
| GTCACACGGGCA  | 895.254847880134 | 0.187318647410353  |
| GCAAGGGATGAC  | 895.263478219312 | 0.135578739848892  |
| TAACAATGACCA  | 895.264303823714 | 0.150699969320298  |
| CTGTGTCAGTTA  | 895.269947505646 | 0.185556327247032  |
| ATGTGACATCGA  | 895.276641701053 | 0.101166070016689  |
| ATTTTATTACTC  | 895.287303200404 | 0.153661687849869  |
| ACGCATTAGTCT  | 895.291693023448 | 0.119553264726381  |
| GATGTCATTAGC  | 895.2965708083   | 0.102581123480286  |
| GAGTAATGAATC  | 895.309826482677 | 0.108310006969667  |
| CAGCATGACAGA  | 895.312994822956 | 0.0955673367319589 |
| CCCGTCATCTAG  | 895.31336229667  | 0.0875972206543081 |
| GCCTGGTGACAA  | 895.31404838849  | 0.116181422800114  |
| ATACGACGTCAC  | 895.32777970671  | 0.143428364966107  |
| CGTATTGCTCAA  | 895.330562264451 | 0.172712106087514  |
| AGGTGATGCAAT  | 895.331745094518 | 0.11955748450957   |
| GAATATGTCAAC  | 895.340147354699 | 0.110203327113553  |
| AATTAGTATATG  | 895.349752204006 | 0.116939585612926  |
| GTCATGTCGGGA  | 895.357842589921 | 0.104004138591215  |
| GCCCAGCATGAC  | 895.363347509434 | 0.150409173509558  |
| AGGTTGCGTGAC  | 895.364045139256 | 0.157923208518754  |
| AGTCAGATTTCA  | 895.368335666252 | 0.181654946659088  |
| TAGTTAATGACA  | 895.37123570199  | 0.154780323518096  |
| CGTCACTACAAG  | 895.379424568635 | 0.151481402420692  |
| ACACTTACTCAG  | 895.380411885371 | 0.151154489191643  |
| GGTCATAATAGA  | 895.385966414399 | 0.128964510655291  |
| AACACGTGTCAG  | 895.392942012715 | 0.171080357045997  |
| CACCTGACGCAG  | 895.40548783461  | 0.176110056437703  |

|               |                  |                    |
|---------------|------------------|--------------------|
| CTACTAAATGAC  | 895.413380727323 | 0.148574986101863  |
| CAGTCAGATATA  | 895.415019400136 | 0.144115540053885  |
| CGTCATGCAAAC  | 895.416891287213 | 0.128950024754694  |
| AATTCGTAATA   | 895.417317009595 | 0.131455021200881  |
| AAATTGTGTAAT  | 895.4223900928   | 0.166821619909959  |
| AATATGACCTAA  | 895.430133014074 | 0.0907271776514766 |
| CGTCACACCAAA  | 895.441953887155 | 0.205429235637698  |
| GTCATCTCCACA  | 895.443571381937 | 0.154542878294629  |
| AATAGTCAAGGG  | 895.444081925262 | 0.155267142765399  |
| ACTAGCGTGACG  | 895.450732773825 | 0.123563296646045  |
| ACGTAGGTTGAC  | 895.450763556634 | 0.116790762896706  |
| ACTCATACGTAG  | 895.4587205137   | 0.173490349707705  |
| AGGTCATTAGTC  | 895.463893208265 | 0.113010920915681  |
| GAGTGGTCATGC  | 895.472317925584 | 0.14032206163342   |
| GCGATAGTGTCA  | 895.485792470167 | 0.110696265840494  |
| TAGGTCATAACA  | 895.51126956683  | 0.216010086274446  |
| ATCGTGACCGAA  | 895.513181004108 | 0.108013761942302  |
| GTAGTCAACGGA  | 895.52181670478  | 0.116385382997033  |
| ACTCATCATCAG  | 895.522595937282 | 0.125205472562922  |
| AGTCAGATCTCC  | 895.532766989801 | 0.0998224590176371 |
| CTGCTCCGTAC   | 895.557785382782 | 0.1261239095809    |
| CATCTCGTGTCA  | 895.560283710174 | 0.161300337142666  |
| AAGGGATGACGG  | 895.561126995137 | 0.102976224682283  |
| CGAACTGATTCA  | 895.561471766132 | 0.163953992995528  |
| GCTAAGACTAAC  | 895.564489374251 | 0.23118057977732   |
| GCAAGTGGTACA  | 895.565909950495 | 0.173445527523946  |
| GGGAAGCAGTCA  | 895.566939560333 | 0.112955890660312  |
| AGACTCACGTCG  | 895.571504022912 | 0.127966138506368  |
| CGAATAGGTCAC  | 895.572057155997 | 0.132467898639725  |
| ATCTGTGACGAG  | 895.583583252197 | 0.130056677764104  |
| AGTATGAGTTAA  | 895.584140246134 | 0.133091197892783  |
| AGCACATGACGC  | 895.586917059516 | 0.1492429330253    |
| ACCAGGATGAGT  | 895.590754833544 | 0.171509117917553  |
| CTAATGACAAGA  | 895.600872568823 | 0.102152693515335  |
| CCGATGATTAATA | 895.611447495764 | 0.172657048921868  |
| GCCGAGGTGACA  | 895.614494256851 | 0.145165072312715  |
| AAATTAATAAAC  | 895.636956318335 | 0.134150535357157  |
| CACGGTCATAAC  | 895.641914623349 | 0.121355563896217  |
| CTGGGTGACGCC  | 895.654978239804 | 0.194932519787919  |
| GTCACATCTCCA  | 895.662364637303 | 0.158931858627294  |
| GACGCTGTACCC  | 895.669676599434 | 0.110691891486176  |
| AGTCAGTCCTTG  | 895.671964490338 | 0.142253402730601  |
| CTGTGACAGCTA  | 895.679291391221 | 0.180903881976643  |
| AACAGTAATAGT  | 895.717540906875 | 0.115089986704519  |
| TGACGAGGTTAA  | 895.725203702775 | 0.130283147326041  |
| ACTCATAACACA  | 895.737354225724 | 0.100535134688156  |
| TCGTGGTCACAA  | 895.742457281313 | 0.188295799021673  |
| GGCACACTCATA  | 895.748750778328 | 0.126697149320715  |
| GTCATGTACGTA  | 895.749312227635 | 0.154491392038299  |
| CCTAGAGTGACG  | 895.768761574203 | 0.18021054135609   |
| AGGTACCCGTCA  | 895.77564466369  | 0.163670091175058  |
| CGTCACTTTGC   | 895.786800691585 | 0.171701748095285  |
| CGGTGGACTCAC  | 895.789078585864 | 0.151073281662078  |
| TGACAAAGATCA  | 895.7943177048   | 0.111278206307545  |

|              |                  |                   |
|--------------|------------------|-------------------|
| ACGAATGTGACA | 895.796087125108 | 0.124944741070967 |
| GGTCATAAACTA | 895.803513001075 | 0.155760814415326 |
| CGACGTGGTCAC | 895.806162766155 | 0.109703361950471 |
| GTCACGTCTACA | 895.808189076434 | 0.150809690544012 |
| CACTGGGGTGAC | 895.811857837983 | 0.149741371970697 |
| GACTCAGAGCTA | 895.824589903457 | 0.206390332566606 |
| TGACAGCTCACA | 895.831261369823 | 0.143897183231139 |
| ATTACACACCCG | 895.84280930461  | 0.109964605709725 |
| CCGGCCGGATGA | 895.849722618287 | 0.16582635153184  |
| CGATCGGATGAC | 895.869448946543 | 0.183100241744313 |
| TCTAGTAAGTCA | 895.869864858432 | 0.198287098965021 |
| CAGTATGTATCA | 895.874815424816 | 0.106574009540849 |
| ATGATGTGGTAA | 895.875325379968 | 0.128928743451607 |
| ACGCTTGACGCA | 895.890978344675 | 0.172577814250676 |
| ACGTCACGACAA | 895.899743427495 | 0.133863536241302 |
| ATGTCACCTAAT | 895.939946685044 | 0.169293022959244 |
| AAGTAATGACGG | 895.940539330314 | 0.120871970866752 |
| GATGAGCATTAA | 895.952627205381 | 0.162401779839862 |
| CCAACCTTGTGA | 895.963501454945 | 0.159995896744869 |
| ACTGACTGCAAC | 895.964797785139 | 0.112796244919593 |
| TATATAGTGACA | 895.965826414077 | 0.12254333587012  |
| GATGTCTCACCC | 895.968585374529 | 0.111343478606412 |
| CGACCCAGTCAA | 895.971332526393 | 0.130538535271728 |
| TTACCGTGACAA | 895.973876998859 | 0.149410966595897 |
| CGTCACCGCAAG | 895.990232519836 | 0.181561284934013 |
| ACACCTGGTCAT | 896.001148414361 | 0.180707367620361 |
| CGTATTACTGAC | 896.002252439079 | 0.166052755516831 |
| AGAGTACTCACA | 896.015328584273 | 0.123640263021336 |
| GGTGTACGCGAA | 896.018713522583 | 0.185387391929406 |
| AGTCAATCTGAA | 896.03116716805  | 0.126786569351221 |
| AACAAAGTCACC | 896.045252387076 | 0.147507095210418 |
| ACTCATACACTC | 896.046083299913 | 0.136570276688481 |
| GACGACTCAGCC | 896.059957917472 | 0.133105516190039 |
| AGATACGTAATA | 896.078200670654 | 0.139761702327924 |
| GAACAGGGTGAC | 896.080842925616 | 0.173521194278938 |
| ATGACCCGGTGA | 896.092599595941 | 0.164255538482252 |
| CAGTCAACTGAA | 896.096576700986 | 0.148676078782017 |
| CCGTCATTTCCG | 896.103008390047 | 0.100302364388059 |
| TGACGAGGTAAA | 896.109139063842 | 0.156726433875902 |
| ATAGTCAGTCGA | 896.122234686108 | 0.115269387977117 |
| GGTCATATCTTA | 896.13065579656  | 0.172588008703426 |
| CTCGCTAGTGAC | 896.130771134021 | 0.143399256194008 |
| CGTCATGGCTCA | 896.133545930383 | 0.113091803379147 |
| TCCGCTTCGTCA | 896.142890255292 | 0.12347893602777  |
| CGTCACTTTAG  | 896.153748804142 | 0.117861343199304 |
| ACTGATTCAGCG | 896.155733500855 | 0.134150669793471 |
| CACAGGTGACAG | 896.160173723076 | 0.18848600320557  |
| ACTCATTTTAAT | 896.163292691726 | 0.122624461842604 |
| AAACATCGTCAC | 896.167399194296 | 0.100777487555408 |
| CGTCATGCGTCC | 896.170461914357 | 0.100838168266632 |
| TACCTTGACGCA | 896.17485097621  | 0.122361359990378 |
| CGTTCGTGTAC  | 896.18535685779  | 0.136642011945025 |
| CGTGACCCAGAG | 896.196333656256 | 0.136905675017007 |
| AATGACCACTTC | 896.206932364164 | 0.122038808494329 |



|               |                  |                   |
|---------------|------------------|-------------------|
| GCGCAGAGTCAA  | 896.215617962759 | 0.178227173480271 |
| ATTAGGGTGACG  | 896.217509244427 | 0.146438588214411 |
| CGTCACCATAACC | 896.220458996961 | 0.142287584570646 |
| AACGGAATGAGT  | 896.235761397681 | 0.148980617888391 |
| CCATTTGGGTCA  | 896.244820066806 | 0.121733148814355 |
| CAAGATTGACTA  | 896.24593471376  | 0.179213784765589 |
| ATTTTCGTCAGTA | 896.247141876715 | 0.15281864852926  |
| ACCTACCATCAT  | 896.251052803207 | 0.105934360221658 |
| GAGTAATTTACA  | 896.26084606859  | 0.17651886927463  |
| AATGACATCGGC  | 896.279201367691 | 0.12054825983555  |
| CTGCTTGTCAATC | 896.284828102093 | 0.15892356326841  |
| GATGAATACAAC  | 896.285223400996 | 0.129959410423081 |
| CAATACAGGTCA  | 896.291050120908 | 0.144376822231224 |
| GTCTGACGGATA  | 896.297970306899 | 0.130563857521986 |
| GTCGTCACCAGA  | 896.329704318043 | 0.163541310815189 |
| CTTCGACGTGAC  | 896.336956727279 | 0.138395436471583 |
| CTCGCATGACAG  | 896.38288798267  | 0.125414134264928 |
| ATCGGTGACGTC  | 896.394768400523 | 0.109888382992725 |
| ATGTGACAAATGC | 896.404612499117 | 0.181510142508606 |
| CTTGAGTGACGA  | 896.410921469387 | 0.133822848078037 |
| AATGTGACAAGT  | 896.41580552679  | 0.100975668696383 |
| AGTGACACGGTG  | 896.425514840588 | 0.132364758067298 |
| CTCTTAAATGAC  | 896.431266062657 | 0.144445244919984 |
| CACCTTGACGCA  | 896.437053910982 | 0.142079913661451 |
| ATGACGTCGAGG  | 896.438064421851 | 0.107392188595136 |
| ATGACGGTAGCG  | 896.440146802993 | 0.130764667100198 |
| ACTTTGTGACCA  | 896.441401232875 | 0.125242469550539 |
| GATGACGTCCTA  | 896.441612791489 | 0.202030610998515 |
| AGCAGTCAGCAT  | 896.442914167093 | 0.149071594587131 |
| CCGGTATGGTCA  | 896.446438518902 | 0.149403125428056 |
| GCTAGTGACCAA  | 896.448137243037 | 0.10477010700841  |
| AGTCAACCAATG  | 896.453544041309 | 0.182140841170621 |
| CTTGTGTACTCA  | 896.455557119249 | 0.16372651082734  |
| GTGATACATAAA  | 896.459965087751 | 0.121978893185244 |
| AACGTCATGAAT  | 896.459971395804 | 0.154499403268665 |
| AGATGACCGTAT  | 896.47785287063  | 0.152901151872835 |
| GTAACGCGTGAC  | 896.487795282652 | 0.141966146762954 |
| GGTGCGGAGTCA  | 896.48819244358  | 0.137941936200984 |
| GTCCGTGACCCA  | 896.504895228888 | 0.143702107581076 |
| CGGGCATGACGA  | 896.507449203001 | 0.175670343572322 |
| AAGCTCATGACA  | 896.512906477629 | 0.117577630183751 |
| CAGTTGACTATA  | 896.52774012988  | 0.207425643307604 |
| CCCTGATGACGG  | 896.542223651661 | 0.139132578298092 |
| AATGGTGACAGT  | 896.551345284038 | 0.2203873689374   |
| GAAGTGCGTGAC  | 896.556823119674 | 0.152232047196427 |
| CAAGGAGGTGAC  | 896.557121427756 | 0.1561705538608   |
| GGGTCATTATGA  | 896.558078975865 | 0.15624707606198  |
| CATGACAGCTGA  | 896.584396508772 | 0.102485376699336 |
| CTCCAAGTCACC  | 896.590198966064 | 0.102101165890242 |
| GATTGGACTCAC  | 896.591830651815 | 0.111279023990294 |
| AGGCAAATGACA  | 896.600680453948 | 0.149927956972294 |
| GGAAGATGAGTA  | 896.603215517122 | 0.113402311694955 |
| ATGGTCATTGAC  | 896.603248500629 | 0.194414205720147 |
| CCAAAGTGACGA  | 896.606863569615 | 0.191116902875909 |

|              |                  |                    |
|--------------|------------------|--------------------|
| AGTAATGTCTCA | 896.614346542463 | 0.137581293343484  |
| GACTCCATGTCA | 896.620329242412 | 0.198374725638313  |
| TGACAACGTTAA | 896.635005493792 | 0.117595158339155  |
| GACGTCGCACC  | 896.659277670705 | 0.128346087453119  |
| CATGTCACATCG | 896.667310520328 | 0.111797689487091  |
| ACTAATACTGTG | 896.671888555353 | 0.151801233774119  |
| GGTCATCGTCAA | 896.675051310656 | 0.104600812720734  |
| TAGATTGATTCA | 896.684504926797 | 0.121739362846159  |
| TAATACACATCA | 896.686842891511 | 0.179482830205778  |
| CCTTCAGGATGA | 896.693663978295 | 0.149798545522058  |
| CCAACGGCGTCA | 896.69463544395  | 0.105133683522317  |
| GCTCGGCGTGAC | 896.695452210891 | 0.119243351298253  |
| TCAGTCAATTA  | 896.700660141388 | 0.188915692320173  |
| ATTAGTCCGAAT | 896.709967545104 | 0.13102004965607   |
| GATGACCGCAA  | 896.715566236782 | 0.135356787061095  |
| ACCCAAGTCATC | 896.721721842005 | 0.123092176702718  |
| GTGTGACCATGA | 896.747566534749 | 0.117697301837673  |
| ACATGACATTAT | 896.749885829946 | 0.134859904521219  |
| ATATTGTATCAT | 896.764178402783 | 0.0994995711911451 |
| GAGAAACATGAC | 896.767702552693 | 0.112310146229331  |
| CGACTGACTGCA | 896.774484375842 | 0.162377297004576  |
| AAGTCACTAGGG | 896.779372976285 | 0.148511932809558  |
| TCACCGTCACAA | 896.780679747688 | 0.197606216265387  |
| GTATGACTTTCA | 896.781198750547 | 0.10025982061222   |
| AAATTTGACGCA | 896.783957029469 | 0.201685564709308  |
| TCACTTACGGGA | 896.785047929936 | 0.161026298729061  |
| ACTCATCCGCAA | 896.786557398356 | 0.132121896511239  |
| ACAGTCAACACG | 896.797298963695 | 0.105251828572172  |
| CCTAGTAGTGAC | 896.799330939471 | 0.222270460678515  |
| GCTGACATATCC | 896.811272152466 | 0.110499588422658  |
| AAGTTGACTGAA | 896.82607846144  | 0.145068457669456  |
| GACGCATAAGTC | 896.827998273659 | 0.123045488738946  |
| CTGTGACGAGAC | 896.831619199412 | 0.128165443909356  |
| ATGTCTGAGTCC | 896.838926080162 | 0.178316712048651  |
| CTTGGTGACGCC | 896.839402945885 | 0.146988607591955  |
| CTGACTACTTGA | 896.853946994846 | 0.114818215301299  |
| AGATCGAGTGAC | 896.857132114897 | 0.154421822431822  |
| AGGTCTGTCATG | 896.857488540134 | 0.165384212447072  |
| GACGAGTGACCA | 896.857868051536 | 0.156327565406478  |
| ACTAACCTGTCA | 896.858126929737 | 0.17233651639988   |
| ACTGTCACAGCG | 896.858159728457 | 0.167754607143038  |
| ATTGCGGTCATA | 896.861183743323 | 0.147122122474554  |
| AAGTGTCAGATG | 896.862580869828 | 0.11195350555375   |
| CTGACGGAAAC  | 896.868373851569 | 0.115533405164578  |
| ATATGAATCGAC | 896.876214961424 | 0.126741979177383  |
| CGTCACGATTAG | 896.880427550307 | 0.176949256032522  |
| ATGACTTGAATC | 896.881408048488 | 0.111139496731718  |
| ATACATGGGTCA | 896.88287732039  | 0.123168924144594  |
| GTGTGGTGACCA | 896.899061066015 | 0.114613691199096  |
| AGATTAATCACC | 896.911970985434 | 0.176586747365376  |
| GCGTGTTGGTCA | 896.913639991247 | 0.131962466870638  |
| AGTACGTCAGCG | 896.915443513948 | 0.153541602998696  |
| ATGCCGTCACGA | 896.923381922252 | 0.201449311493255  |
| AATGACCGAGAT | 896.925167984884 | 0.174155176734636  |

|               |                  |                    |
|---------------|------------------|--------------------|
| AACGACTGTCAT  | 896.935979413142 | 0.112021639169883  |
| ACCAATTAGTCG  | 896.940258299888 | 0.151406649316712  |
| GACCCAGTCAGC  | 896.952180995828 | 0.197401484189276  |
| CGTCATGTACTC  | 896.962213153815 | 0.118825358363313  |
| CAGTCAGTGTAC  | 896.962271679359 | 0.115904599970286  |
| GCTACTTCGTCA  | 896.968222407777 | 0.129093105251028  |
| ATTAGTACGAAG  | 896.968447292372 | 0.197785211788605  |
| CTTCCCCTCATA  | 896.975796573239 | 0.115510363506478  |
| GTATTACTGACA  | 896.979819331888 | 0.123735982348105  |
| ACACTGTCACCA  | 896.990712878965 | 0.118217403620794  |
| AATTGATAGTCA  | 896.998680168117 | 0.151723538457705  |
| ACATACCATGAC  | 897.001153800427 | 0.103628233335119  |
| GGCTTGTAGTCA  | 897.002237196582 | 0.109356749720357  |
| ATGTCACCGATC  | 897.018919848202 | 0.104419497139476  |
| GTGCGTAATCTA  | 897.023950218747 | 0.154017485095621  |
| ATGCGGTGACAT  | 897.02452966732  | 0.123952733372446  |
| CAAAAGTCATAG  | 897.034353631337 | 0.143008563206154  |
| AGATCGGGTGAC  | 897.035333400193 | 0.124592489228524  |
| AGAAACACTCAT  | 897.039255213549 | 0.120692429062528  |
| ATTAGTCTTACG  | 897.040031668765 | 0.192700033474203  |
| GTGACGGGTTAA  | 897.055469950987 | 0.117081260004341  |
| CGTCACACCCTA  | 897.05638218891  | 0.118648507508615  |
| TGTAGCGTGACA  | 897.059050778272 | 0.167277057691925  |
| CTGACTCTCCAC  | 897.067292357223 | 0.11099108568464   |
| CGTAAATTAICTC | 897.068249735534 | 0.163504966828504  |
| AAGTTGTGACGA  | 897.070245120436 | 0.103314038170088  |
| AGGTGTCTCATC  | 897.091345836268 | 0.11423323335068   |
| AACAAGAGTGAC  | 897.091824095342 | 0.137915813688222  |
| AACACGTCTGAC  | 897.103312556966 | 0.109213333356997  |
| TCGTCTGACCCA  | 897.117349912164 | 0.0780395749041441 |
| AGTCAGATCCAC  | 897.117682758117 | 0.119096357832245  |
| GTCACGTTGAAA  | 897.125082149902 | 0.217791477614852  |
| CCGTCATCAACA  | 897.127995669119 | 0.127472099781785  |
| AGTAATGAGTAG  | 897.133068323935 | 0.108219922080961  |
| CGTCACGTCTCA  | 897.136905483616 | 0.126640220824094  |
| GAGCGAGATGAC  | 897.14280515736  | 0.129960239414027  |
| GTCACTATTTGA  | 897.148479063994 | 0.150714194145087  |
| CAACTTACTCAG  | 897.164228384854 | 0.124226890786349  |
| CCCAAGATGACC  | 897.166428771411 | 0.100940850596309  |
| ACTGTAAGTGAC  | 897.167495416693 | 0.211203478807143  |
| TCCGACGTCACA  | 897.171417079359 | 0.170256919988265  |
| ATCTATTGTCAT  | 897.17537208156  | 0.112579959871323  |
| ACACGTAACCCA  | 897.190893891268 | 0.160264491317544  |
| AATTGTGACCAT  | 897.192885255076 | 0.119911206988457  |
| TCTTACAGTCAA  | 897.208795111713 | 0.135533682266555  |
| GGACAGGTCACA  | 897.209780413186 | 0.153905757464152  |
| TAGTCAGCATGA  | 897.212164360238 | 0.135449879869581  |
| AACTCTGTCACT  | 897.222114643121 | 0.113372073344727  |
| AGTCAGTAGCTG  | 897.225021822022 | 0.122512462304836  |
| AGCCGTCGTCA   | 897.234654252091 | 0.135084202593106  |
| AGGGAATGACCA  | 897.235742575883 | 0.108188440771604  |
| ACTAATACAGAT  | 897.243938589584 | 0.108012039814341  |
| GGTGATGCATCA  | 897.246726562546 | 0.146106564087445  |
| AGTCTTGATGAC  | 897.277545550756 | 0.127114396115533  |

|              |                  |                    |
|--------------|------------------|--------------------|
| ACTCATCCGACG | 897.284873845387 | 0.111627164260818  |
| ACTCATAACAGC | 897.287201125058 | 0.190878817525908  |
| ACAGTCAGTTTA | 897.296937632161 | 0.183214885581311  |
| CTTCTTACGTAA | 897.30408665402  | 0.130655835900875  |
| GTCATGATGTGA | 897.331103035053 | 0.0861550357618548 |
| ACTGTGACAGCG | 897.339376771685 | 0.101606044318819  |
| ATCATTGTCACA | 897.345233672821 | 0.164946692369858  |
| AGATAATGAGTA | 897.347737407324 | 0.113457371530194  |
| AATTGTGACAGG | 897.351151042517 | 0.142390504778446  |
| GTCATGCCTGCA | 897.355485106311 | 0.168960552484039  |
| CGTCACGCGTTC | 897.376748343393 | 0.0997248101083276 |
| GTCACTAGTAAA | 897.377912524617 | 0.169024770170859  |
| CGTGGTGACAGC | 897.397437433661 | 0.145530202533995  |
| AATGACAGGGGT | 897.410610646234 | 0.09930699844272   |
| GTGATCATGACA | 897.414600316312 | 0.157730196526511  |
| AGTGACAGGTAT | 897.421140849538 | 0.106787280852883  |
| CCATGACAGAGC | 897.421291253649 | 0.186414673891762  |
| CTCCCTGTCATC | 897.425355509749 | 0.115466957041827  |
| ATGTATCACAAG | 897.432496376884 | 0.102075086330528  |
| ACCTCCGCGTCA | 897.442008351859 | 0.122813796189425  |
| GGGGCTTATGAC | 897.448333651182 | 0.164623279204396  |
| CTCCTGCAGTCA | 897.450364963508 | 0.144981023426162  |
| AGTACTACAAC  | 897.45329630685  | 0.11211632565383   |
| ACGTGGTACTCA | 897.45476845321  | 0.0723804999232175 |
| ATGCATCGTCAC | 897.459662192243 | 0.112749184915731  |
| ACCCATGAGTGA | 897.466443975856 | 0.104114680596723  |
| AGTCAGACGGTG | 897.474652942972 | 0.111561704362368  |
| ACTCATACCGCC | 897.475413134989 | 0.144549311496872  |
| CGTCACCGTAAC | 897.489000438317 | 0.155435496077649  |
| ATGACAATCAAC | 897.489144386125 | 0.105949685037632  |
| ATGGCTAATTCC | 897.494145093009 | 0.181603706726929  |
| GACCAGGTGACA | 897.496581855137 | 0.241283529374726  |
| GTCATTCCGCCA | 897.504326622235 | 0.186941961091199  |
| AGCCATGACATG | 897.517874969934 | 0.134451807913626  |
| CCGATCTCGTCA | 897.538400723917 | 0.122023909324644  |
| TCATACATAGAA | 897.542339712378 | 0.222926726494945  |
| AGCGCGCGTCAC | 897.543408085538 | 0.117200737961018  |
| ACAAGTGTGACA | 897.553860642941 | 0.108935005862259  |
| AGTCAGCGGTAT | 897.556081937996 | 0.111996542972633  |
| CTACCATGTGAC | 897.56250355562  | 0.135942274389963  |
| ACAAGTTGTGAC | 897.585110023992 | 0.128788995861163  |
| CCCTCTGTGACA | 897.587626715475 | 0.117991511921219  |
| CACAACCGTGAC | 897.588189257739 | 0.148207731565705  |
| CGAAGATTCATA | 897.594039618326 | 0.136276053755624  |
| ATGAGTTGTCCG | 897.595485434197 | 0.150130299682825  |
| CAGCGACTAATC | 897.596569646854 | 0.139748631548025  |
| GCACTGTCAACC | 897.597598083421 | 0.111028044382559  |
| AACCATACTCAT | 897.603958137377 | 0.110099493981984  |
| CCGAAGTCTGAC | 897.604702863936 | 0.136237512292463  |
| ACTCATCCATTC | 897.608245086786 | 0.119888488032449  |
| CGAGGAGTAATC | 897.615298391982 | 0.192279987813515  |
| ACGCATGACAAG | 897.615808392971 | 0.161316988364459  |
| CCCACGGTGTC  | 897.616657245734 | 0.137117339299352  |
| GTACTAATTCAA | 897.624803780585 | 0.148893926039093  |

|               |                  |                    |
|---------------|------------------|--------------------|
| GGAAGTGGTGAC  | 897.625238940081 | 0.136116847524198  |
| ATCTTTGCTCAT  | 897.626532973837 | 0.215819114016658  |
| GTCACCAACACA  | 897.633295243867 | 0.153051212360862  |
| AAGTGCATGACG  | 897.63353922601  | 0.108437973468486  |
| AAGATTATGTCA  | 897.637665015078 | 0.148306172231573  |
| AGTCAGAATGCG  | 897.649297260555 | 0.0754802835893643 |
| CCGTCATTATTA  | 897.667178437114 | 0.136504350442064  |
| CTCCGTGACGGA  | 897.689608128921 | 0.130878725170487  |
| ACTTCTGACACT  | 897.689917158426 | 0.132446937983843  |
| AATCACCGTGAC  | 897.694111133472 | 0.126671995269768  |
| CCAGCTTTGTCA  | 897.69497708145  | 0.121255382389725  |
| AACGGTGACGAG  | 897.695327089729 | 0.1103326327891    |
| TAAGCGTGACAA  | 897.696804630703 | 0.129070041477745  |
| TGACTTAGAACA  | 897.705717081722 | 0.149801993071481  |
| CGGAAGTGACGC  | 897.707366845841 | 0.12974242419574   |
| CATTTGGGTACAC | 897.70947016872  | 0.137125774134337  |
| ACATGGTCACAC  | 897.715571249168 | 0.109286815757594  |
| AACGAAGCGTCA  | 897.718576600887 | 0.104148865918872  |
| CTAGATGACCGA  | 897.727493674355 | 0.135342362926489  |
| AATCCGTACAGT  | 897.729301782556 | 0.175881657852962  |
| CTCGCGGACTCA  | 897.734514898164 | 0.214453017795389  |
| CAGTTCGCGTCA  | 897.736881643561 | 0.124108877475867  |
| CCGTCATCAATC  | 897.73843613137  | 0.088399894133065  |
| GCATCATGTACAC | 897.741215116723 | 0.143510436682003  |
| ATTCTGACACGA  | 897.746299174447 | 0.108660551751642  |
| ATGACATTGCTA  | 897.765988554265 | 0.126398364240896  |
| AGCATGACGATG  | 897.771977113559 | 0.185934560185059  |
| TCTGCTCTGTCA  | 897.773568454253 | 0.158443395292447  |
| CGTAAATGGTCA  | 897.784016500983 | 0.108320229971269  |
| CCCATCATGACG  | 897.798723899578 | 0.0999574240877157 |
| ATTAGTAAGTGC  | 897.831528112888 | 0.117940927267615  |
| AATGAGGTCACC  | 897.832855192742 | 0.0910683034006041 |
| GACTTCCATGAC  | 897.833192582224 | 0.175870398317357  |
| AAGGGTGACTTC  | 897.837016562907 | 0.149296213560358  |
| AGGTGACAGTGA  | 897.84624729076  | 0.108745913247382  |
| ATTGTGACAGCA  | 897.847975264969 | 0.15795991538845   |
| GAAGTTGGTGAC  | 897.849945247416 | 0.144320386356299  |
| ACGCGGTCATAG  | 897.85434537197  | 0.0995785911415788 |
| TATTGTGAGTGA  | 897.860126772522 | 0.0999771042422359 |
| GCACAGTCAGTA  | 897.861436229012 | 0.231464638021867  |
| GACGACTCAACC  | 897.863454023235 | 0.100262199795721  |
| CATGTAGTAATC  | 897.870285018074 | 0.100330584957128  |
| AAGATAGTCAGA  | 897.873706589036 | 0.125070504873893  |
| AAGTCAGAAGCA  | 897.880794012518 | 0.117454897749175  |
| ACCTTGATTCAT  | 897.887904665855 | 0.16222821997565   |
| ATGAGCACTAGC  | 897.88988765875  | 0.140409876671853  |
| ATCCAGTCAGCG  | 897.890986784853 | 0.11060854170837   |
| AGTATGAATCGA  | 897.896307935157 | 0.172092805127908  |
| ATCAACGTCACG  | 897.901225357089 | 0.101724232619738  |
| ACTCATTACAC   | 897.904392270284 | 0.137624195107999  |
| ATGGTCATTCCA  | 897.908924493296 | 0.140909274626225  |
| ACGTCATGCTAG  | 897.909398938594 | 0.135190135131315  |
| ACTCCTTGTCAT  | 897.91054135532  | 0.15138602250851   |
| GCACAGTCAGGC  | 897.916838646761 | 0.106406028476291  |

|              |                  |                    |
|--------------|------------------|--------------------|
| AAGGCTCACCGG | 897.917152909697 | 0.0951395048786408 |
| TTACTAAGATAA | 897.917923954133 | 0.156329714432654  |
| AAAGTGAGTACT | 897.924465114609 | 0.131611535591055  |
| ATCGTACTCACA | 897.930630215667 | 0.147586644378019  |
| TGACCAACTCAA | 897.935619536829 | 0.150305144557922  |
| CTAAAATGTGAC | 897.936801217784 | 0.186258113174248  |
| ATACAGCTGTCA | 897.938198074965 | 0.135594575920744  |
| GTCACCGTCCTA | 897.942794819784 | 0.166262802997247  |
| AGCATATGACGG | 897.945973235    | 0.102097436291572  |
| CAGTCAGAACGC | 897.951212900008 | 0.140885437640007  |
| AGCCGTATGACC | 897.967935839727 | 0.0983075604262905 |
| AGCTCCCAGTCA | 897.968638378105 | 0.107299605826355  |
| ACTTACGTGGTC | 897.96897511705  | 0.153938439021016  |
| GAACTCTGACGC | 897.9697263393   | 0.117984542137999  |
| CGACTCAGCGTA | 897.974588705692 | 0.164654453811898  |
| CGTTATGTCTCA | 897.979100852709 | 0.209542068193531  |
| CGGGAGCATGAC | 897.981612308831 | 0.126669490296357  |
| CGTCACTGTTTC | 897.983051853936 | 0.213165725046389  |
| AGTCAGAGGGGA | 897.988685969714 | 0.119416436125919  |
| ACAATGATGACC | 897.989387969335 | 0.102010318377692  |
| ACGGCGTCACAG | 898.01027655523  | 0.137842413888382  |
| AACGTCAGTCTG | 898.016947558953 | 0.113856476548403  |
| GTTACACGTAAC | 898.020316357996 | 0.137496923941933  |
| AACCTATGTCAC | 898.020482842388 | 0.120276951146527  |
| GTCAATGTCTCA | 898.025458683473 | 0.0808628501545055 |
| ATAATTGGGTCA | 898.050343689182 | 0.200395734778944  |
| CCATTGTTGTCA | 898.054013617771 | 0.183449418253078  |
| TCTTGGGTGACA | 898.058720160544 | 0.11104203028209   |
| AGTGATTGAGTC | 898.07007726914  | 0.167177592719659  |
| AGGTGTCAGACT | 898.073260312162 | 0.110046069659564  |
| GGTCACGTCTGA | 898.078431504657 | 0.182813987914712  |
| GACATGGGTGAC | 898.091619861821 | 0.107908940325479  |
| CTCCGGTCATAC | 898.09786746121  | 0.0990827372648408 |
| AACTTATGAATC | 898.100359638026 | 0.136182437325472  |
| ACTCTGACGAAA | 898.100383692233 | 0.173462802495348  |
| AAGGTTACACAT | 898.106055090843 | 0.130943003686589  |
| TCATAGTTGAA  | 898.109728308749 | 0.0988831603379929 |
| ATGTCACATAGG | 898.112898254733 | 0.157881686742848  |
| TGCCATGAGCAA | 898.11348762247  | 0.0890409281313124 |
| TCGGTCCGGTCA | 898.122057109576 | 0.11038775252172   |
| AGATTAGTGTC  | 898.140410114158 | 0.129858986681899  |
| ACTCATCCGACT | 898.150253526668 | 0.151115793134841  |
| ATGCGTGACAAA | 898.156296216017 | 0.215938691658515  |
| ACTCATCCGTTT | 898.157640234996 | 0.156889362443023  |
| CTTGCTCGTGAC | 898.158479907823 | 0.147124901021167  |
| AGTCGAGATGAC | 898.161874037121 | 0.140869908375583  |
| CATTTAGTCTTA | 898.165092248045 | 0.117428712838047  |
| TCATACTACCCA | 898.183030051101 | 0.117959798365445  |
| AGGTCATCGCAC | 898.183981215074 | 0.186294398849387  |
| CAACGACTCAGA | 898.18466653388  | 0.123406926545515  |
| CAGCGGGTGACA | 898.199348453463 | 0.133030896854056  |
| TCTGACACCACA | 898.202261428413 | 0.107840706494566  |
| CAAATCTGTCAG | 898.207849321118 | 0.124639357925683  |
| AATCCTGATTCA | 898.211600123729 | 0.145642752269677  |

|              |                  |                    |
|--------------|------------------|--------------------|
| CAATTACACACC | 898.217521780155 | 0.143277806787387  |
| GGGCCCCGCATA | 898.230328719879 | 0.140261595971769  |
| TATCAGTGGTCA | 898.23770310526  | 0.128177551680951  |
| CGGTCGGTGACG | 898.251510936899 | 0.133873937646576  |
| GAAATGTGACAA | 898.256169841445 | 0.169988329548333  |
| TAAAGTGACGAA | 898.259342818168 | 0.187654722443907  |
| ACATGGAGTGAC | 898.261888487361 | 0.1273255825058    |
| ATGTATACAATA | 898.270253739635 | 0.12117337035012   |
| ACGTCACTAGCT | 898.283117977312 | 0.1618588917001    |
| CACACGGACTCA | 898.291057731741 | 0.220970749192349  |
| AATATAGTGTCA | 898.295757684519 | 0.146159523530079  |
| CCATTACGATGA | 898.299648023329 | 0.165103281294753  |
| CAGGCGGTGACA | 898.315211333015 | 0.158264311930911  |
| AACGCGCATGAC | 898.318335614616 | 0.113180693503019  |
| GTCACCTGGTAA | 898.335734376992 | 0.165214144606051  |
| ACGCACGGTCAT | 898.355571644313 | 0.124290753773029  |
| ACCTATCATGAC | 898.35889405451  | 0.164889699837851  |
| CGTCATGTATAG | 898.373954567222 | 0.122863523882928  |
| GACTAGGTCATC | 898.376009600028 | 0.155618894905164  |
| CGATGATACACA | 898.376252952188 | 0.135899906448655  |
| TCACAACGTGCA | 898.389545136692 | 0.0952774728425293 |
| CACAATTAGTAC | 898.397137085705 | 0.15377334881423   |
| GACCAATCTGGA | 898.426027216183 | 0.146367193714664  |
| GATGAGTAGGAA | 898.433597217271 | 0.110456794007187  |
| AGTGACACGATG | 898.439740769979 | 0.147700443800937  |
| GGCTTCTGTGAC | 898.441393938284 | 0.0991644736712256 |
| GGTCTTGACACA | 898.451930468264 | 0.15581266584653   |
| TAGTCAGCCAAA | 898.453497342454 | 0.14947004274756   |
| ATCTCAGTGACG | 898.478917420159 | 0.137205090407017  |
| ATGAATCAATGC | 898.479018522559 | 0.104014999309484  |
| ACTCATTGTTGC | 898.48360513448  | 0.102681204391716  |
| AAGAGTCTTAGA | 898.485175915424 | 0.100210350489932  |
| TCACCTTTGTCA | 898.499876500878 | 0.121176753390063  |
| TTATGACGGCAA | 898.516764466681 | 0.102455560281068  |
| ATCCCTCGTCAT | 898.522909430359 | 0.1405495205216    |
| GAGTCTAGTGAC | 898.52852326759  | 0.147060735332441  |
| GTGCTGACTGTA | 898.537657379008 | 0.109771964668528  |
| ACGGTGGCTCAC | 898.543861502369 | 0.139686131653944  |
| ATGACAGTGGCG | 898.548082582869 | 0.128451953085593  |
| GTCATCTGTAAA | 898.556266049901 | 0.102671497471908  |
| ATGCGGGAGTCA | 898.560144339904 | 0.159127346562409  |
| GATGATGATACA | 898.586756973989 | 0.103919416382835  |
| ACGTCATGCCCA | 898.587847456452 | 0.151401362735383  |
| ATGAATGAGTTA | 898.597914548722 | 0.142581885282824  |
| TCAGCGACGTCA | 898.604978356983 | 0.166432311154086  |
| GAATATTTGTCA | 898.606761377932 | 0.138667266564813  |
| ATGCATGACATG | 898.608682834678 | 0.148268710159267  |
| GACTGAGTAAAC | 898.614869755093 | 0.101822201805385  |
| CTCACCATGACA | 898.619669708668 | 0.139436023776834  |
| GATTTTGCTCAC | 898.64790999323  | 0.105691239256237  |
| ATGATGCAACAG | 898.654925767196 | 0.100554196870801  |
| TCACCGCAGTCA | 898.655304533413 | 0.107730992461947  |
| GCTGTGTGACCA | 898.658114740764 | 0.104230940775202  |
| CCCATCAATGAC | 898.674596491371 | 0.150310674365359  |

|              |                  |                    |
|--------------|------------------|--------------------|
| AAGCTGACTGCA | 898.682160482497 | 0.134397791341651  |
| AGCAGTCGTCAT | 898.685084471014 | 0.164265789296203  |
| AAACGCGAGTCA | 898.685104890753 | 0.11855562880148   |
| ATGACCGTGTCA | 898.697301099715 | 0.107801290191131  |
| ACTCATTCTGCC | 898.698365528818 | 0.133590649971053  |
| CGATGAGACACA | 898.699201810412 | 0.121763490788371  |
| GTAGTGACATAC | 898.713246894733 | 0.157137010445182  |
| GGGCTAAATGAC | 898.721203393825 | 0.151537838160453  |
| AGGTTGTGACAT | 898.724694719759 | 0.190963717872449  |
| ATAAATGAGTGA | 898.72865213243  | 0.131965307394877  |
| ATGAGATGACGG | 898.732196827575 | 0.141852415416203  |
| ACCATTCGTGAC | 898.73317440104  | 0.123973059550063  |
| AAGGTGACGATA | 898.740323530839 | 0.130633026123787  |
| GGCTATGACCTA | 898.740699366176 | 0.0869550177551417 |
| GTGACGACGACA | 898.742455695932 | 0.131240361839549  |
| AATTACGCACTG | 898.753958235106 | 0.107926705846863  |
| AATTGACTCTGC | 898.765364759714 | 0.10567840095606   |
| AGTCAGTAATGC | 898.77587357943  | 0.167702496344601  |
| AACGCTGACTGG | 898.776361865513 | 0.126223796598734  |
| ATAGGCGTCACA | 898.778952820729 | 0.108841470738622  |
| CAGTGACGTTGC | 898.786798421879 | 0.147319681712211  |
| GGAGTGACAAAC | 898.793910381108 | 0.100824922848924  |
| AACATATGTGAC | 898.81589500494  | 0.173547746899167  |
| ACTCATATGCAT | 898.839056558452 | 0.176932137255988  |
| CGGGTAATGACA | 898.843843859181 | 0.140770140124163  |
| AATTACTACTCA | 898.84799366011  | 0.113747997098195  |
| CACTCGGTGACA | 898.849617367376 | 0.182390399562662  |
| CCGAGGTGACAG | 898.869162646366 | 0.0984794172955811 |
| AACCTGGTGTCA | 898.870443055171 | 0.156021933230768  |
| ACCATGTCACTC | 898.889200433851 | 0.0986262261166286 |
| AAATTACTCCTA | 898.891420212585 | 0.0951285082441206 |
| GTCACGAAAGAC | 898.902805407712 | 0.156221301258057  |
| AAGATTGAGTAA | 898.90476471552  | 0.106744320329802  |
| CGTCACAAGGAA | 898.926051901146 | 0.150131072025644  |
| AAATTAAGAGTC | 898.930412711472 | 0.105813744812231  |
| GAGGAGGGTGAC | 898.93768399984  | 0.115316712871879  |
| GTCACAGAATAA | 898.95117902791  | 0.100299219964902  |
| AGCGTGTGACAA | 898.951386592446 | 0.131770022317915  |
| AGAGTAGACTCA | 898.957716692483 | 0.107177170386753  |
| ATTAGTCGGATG | 898.960042952286 | 0.118340517548029  |
| GAATGGGTGACA | 898.964572272821 | 0.142619507642422  |
| ATGACAGGGCGG | 898.970973471983 | 0.113101706507769  |
| TACACGCAGTGA | 898.989688354504 | 0.168510099194014  |
| AAGTTGCTCACA | 898.990916046975 | 0.202924880642471  |
| AGCAGTCAGAAA | 899.008466139143 | 0.118574640653384  |
| ACCCTATGACCC | 899.012798177029 | 0.10711164691751   |
| GCCATGAATCAA | 899.01587683018  | 0.121531896469187  |
| AGGAAAGGTGAC | 899.020288854342 | 0.101980913692597  |
| TCTGACGCCACA | 899.021702372844 | 0.110335868497783  |
| CGTCACCAACTA | 899.028867253342 | 0.164189259861092  |
| ATGAGTATGCGC | 899.039191046296 | 0.124092354347927  |
| CCATGATTACTC | 899.05094653991  | 0.104245071172424  |
| CATAATTAATAA | 899.052021300721 | 0.116877244648535  |
| GACCAGTAAGTC | 899.052508069995 | 0.12428755931731   |



|              |                  |                    |
|--------------|------------------|--------------------|
| AGTGATTACGTG | 899.052649786921 | 0.127675387856557  |
| AATAGTCGTGAC | 899.098268996354 | 0.0867389430137362 |
| TATGGGTGACCA | 899.104085900517 | 0.0886064770630993 |
| CGGATTTTGTCA | 899.105895326023 | 0.122953659241776  |
| CGTCACGATGCA | 899.126261832336 | 0.155685176595572  |
| TCTTCGCTGTCA | 899.130911175574 | 0.123269214980998  |
| AACCTTGCTCAT | 899.140788390319 | 0.165644817374705  |
| CCATCATGACGA | 899.157444901569 | 0.113903667663043  |
| CGTCATTACCTC | 899.163511266154 | 0.0991960413547161 |
| GAGTAATATACA | 899.166777446884 | 0.109126857117022  |
| TGACGGAGTAAA | 899.167929166009 | 0.138676541719017  |
| AATGAGTGAAC  | 899.189112218108 | 0.167871985868733  |
| AATTGATTACCA | 899.190580003885 | 0.163576135704337  |
| ATAGGCTCATA  | 899.206059510159 | 0.122800670029912  |
| AATGGCTAATTC | 899.211161578937 | 0.170852867340785  |
| ATGTCATTAGCC | 899.253613983972 | 0.163814277096434  |
| CTATCCAATGAC | 899.262627636204 | 0.14172808838357   |
| GTGAGTACTAGA | 899.271080867888 | 0.107701697767995  |
| CTGACTACTAAC | 899.274652094434 | 0.182679684512331  |
| AGGTCTTGCTCA | 899.279078589    | 0.133653999380839  |
| GTGACAGCTAAC | 899.283950603361 | 0.119715992209251  |
| TAGAACTACTCA | 899.285467677782 | 0.128269483740278  |
| ACCATTAGGTCA | 899.289945716212 | 0.135064609609728  |
| AATCTGTACTCA | 899.307574016198 | 0.125148372274268  |
| ACGTGAGTCCGA | 899.310346158945 | 0.142976580586147  |
| TCTCCTGTGACA | 899.310454148147 | 0.118429635852261  |
| AGTCACGCCGGG | 899.325904471771 | 0.152994498784395  |
| AGAATCTGTCAA | 899.342146822198 | 0.119162214058359  |
| AAGTCGGTGACA | 899.365841993832 | 0.124912297472401  |
| CGTCACTGGTGA | 899.376834124718 | 0.112941184910898  |
| CAGGTTGCGTAA | 899.385117107863 | 0.113682682219782  |
| CAACCTCGTCAC | 899.399699199277 | 0.124935720374985  |
| AGTCGGAGTGAC | 899.405077439679 | 0.0780231159542668 |
| GCACTGTCACAA | 899.410351938697 | 0.122149303334685  |
| ACTCATTAATAG | 899.430743128589 | 0.0882150774475722 |
| ATATCATGACAT | 899.43583035218  | 0.105845923309305  |
| ACTGACTGTAAC | 899.441584990039 | 0.163160970704522  |
| GTGACGGCATCA | 899.44230554007  | 0.107931155664315  |
| GAGGGGTCAATA | 899.450891487499 | 0.10872085581565   |
| AATAGCGGTGAT | 899.451258423806 | 0.123325395902325  |
| ATAGTTGTGACG | 899.463628882174 | 0.13960669896513   |
| CCGTTTACTCAG | 899.477169590713 | 0.110968682307938  |
| CTGACGCCGTCA | 899.488585186935 | 0.129119940496183  |
| GATTGACTACAC | 899.502010053284 | 0.11562289198495   |
| GTCATTAGCTCA | 899.504180789143 | 0.113167718462318  |
| TAGCCAGTCAGA | 899.505569801202 | 0.116534389155564  |
| ACGTCACGGTCT | 899.507183396544 | 0.0789079249216215 |
| GCGTTCAGTGAC | 899.509978941919 | 0.122021781076807  |
| CTGACTAGGCAA | 899.51228837424  | 0.117928237842087  |
| GGGTCATTTCCA | 899.519411041373 | 0.191377608547495  |
| AAGAGAGGTGAC | 899.525142685991 | 0.113785204184091  |
| TCTGACCCGTCA | 899.532895837946 | 0.172445109461245  |
| GTGCACCTGTCA | 899.540420450094 | 0.190648484438972  |
| GGTATGCGTGAC | 899.549615630511 | 0.10406398343564   |

|              |                  |                    |
|--------------|------------------|--------------------|
| GACCACCGTGAC | 899.561125988133 | 0.116554817377866  |
| CATTCAGTCTTA | 899.573158251197 | 0.125911138468648  |
| TGACAGGTGACA | 899.582892848212 | 0.172373869117307  |
| ACGTAATCTTTA | 899.587863288242 | 0.0978471026486836 |
| CGTAGACTCAAC | 899.587920150498 | 0.117840753080663  |
| GCAACCAGTGAC | 899.589428995668 | 0.1378223939893    |
| GTCACCCACCGA | 899.596186053443 | 0.151094967433786  |
| ACATTAGTGACA | 899.603480794075 | 0.139059312023223  |
| ACTTGCTCACCG | 899.605430594096 | 0.123427831394402  |
| TTGTCACAACAA | 899.612175296668 | 0.126940236107663  |
| CAAACACGTGTC | 899.617570053729 | 0.0975559286205101 |
| CGTGACTGCCGA | 899.618404069087 | 0.161837668150325  |
| GTGTCGGTGACA | 899.636840375796 | 0.124650678485126  |
| ATGACCACCACA | 899.645949627711 | 0.134030721650558  |
| ATTACACACTTA | 899.649838622764 | 0.135533437556534  |
| AATTGACCCATC | 899.653669743699 | 0.128948905552365  |
| GATGAGTGATA  | 899.661963817451 | 0.108173385553973  |
| CATTACTGACAC | 899.662072090804 | 0.119254155951875  |
| CCAGTGACACGG | 899.663915250766 | 0.172030272478951  |
| TTGACTCCCAA  | 899.668107602065 | 0.12013673891871   |
| CATACTATTAG  | 899.676337413445 | 0.0768257626621719 |
| CCGTCATCGGCG | 899.679312540768 | 0.182115498564804  |
| ATTGGTGACCGA | 899.680372020346 | 0.204889470630825  |
| CCAGTGACACGC | 899.689120341827 | 0.110508256570752  |
| GAACGTATGACC | 899.689684996842 | 0.09794767965363   |
| GATTGAGTCGAA | 899.694681775396 | 0.118649663884517  |
| CTAACTATGTCA | 899.704677134072 | 0.133503800154355  |
| CCTGTCAAGTCA | 899.705240461475 | 0.113237192238584  |
| ATGAGTAGATGG | 899.708039775602 | 0.102864387083064  |
| CAATAACTCACA | 899.71209089942  | 0.103482292201191  |
| CCTTGAGTGAC  | 899.722224876083 | 0.163256893392835  |
| CTATATCGGTCA | 899.743845335733 | 0.12560531049636   |
| GTTAACTCATCA | 899.747428483366 | 0.135454777879871  |
| TATGCCATGACA | 899.750975747726 | 0.110039134097314  |
| AGACGTACGTCA | 899.756357907581 | 0.138688506870467  |
| GGAATTGGTGAC | 899.757518288473 | 0.0987330984738049 |
| ATGGCCGACTCA | 899.76216673519  | 0.123223902911204  |
| ATGAATGTCATA | 899.77597649501  | 0.109899919529542  |
| CCAATTAGTCGC | 899.776036742176 | 0.138040362389148  |
| AACTAATGACGG | 899.79222472848  | 0.128884680209434  |
| ATTAGTATTGAC | 899.820505841728 | 0.163107965861068  |
| GTCACACTAAAC | 899.822133777673 | 0.115123889581444  |
| GTGTGAGTTATA | 899.834310101362 | 0.102429277312995  |
| TGTCACATATAA | 899.840709337795 | 0.0964901634669269 |
| CTAGTGACGCGA | 899.841483414513 | 0.119846920538031  |
| ACATATGACCTG | 899.84315079634  | 0.145427314449737  |
| CTGACTCCGCTC | 899.843703255353 | 0.1270272390031    |
| CTGTCATGCTCA | 899.852092689924 | 0.0969593226573536 |
| GGTTATTGTGAC | 899.852380430387 | 0.15144637056699   |
| ACGCAGTCAGAT | 899.859179300607 | 0.125609015240408  |
| GTCGGGTGACGA | 899.859597952066 | 0.127110106606724  |
| GGGTCAACGTCA | 899.863019737855 | 0.14636870291345   |
| GTCAGACCGGAC | 899.866410356444 | 0.190599083711124  |
| GTTGACTACGCA | 899.869313071527 | 0.127711748588858  |

|               |                  |                    |
|---------------|------------------|--------------------|
| ACTCATTACATA  | 899.876085156051 | 0.111914365326985  |
| CGTCTTGTCACA  | 899.876477653564 | 0.133183761977284  |
| ACTCATCTTGAA  | 899.88081802986  | 0.0985515264217789 |
| CGAAGACTAACA  | 899.896846161447 | 0.169569213396263  |
| AGGCATGGTGAC  | 899.901567051563 | 0.154647560019326  |
| TCGTCACCTCTCA | 899.901860505437 | 0.167694883203806  |
| CAGAGTTTGTCA  | 899.914459936728 | 0.125876690236086  |
| CACGTGTCAGAC  | 899.915861985404 | 0.128327241691247  |
| AGTGACACGCAT  | 899.926265686313 | 0.160789426972911  |
| ATATGACCTGGA  | 899.930048941553 | 0.0720988024816206 |
| GAACCTCTGACA  | 899.931234650197 | 0.144551490473494  |
| AATACCACGTAA  | 899.936484244247 | 0.100940155359073  |
| ATGAATTAGTCC  | 899.941367950365 | 0.195217952723336  |
| AGTGTACGTGAC  | 899.961114315705 | 0.186831643369391  |
| AGTCTACGTGAC  | 899.96740750212  | 0.186555486618067  |
| GAGAATATGACC  | 899.973955706494 | 0.129859632523209  |
| ACCCCTGTCATC  | 899.97408590155  | 0.113676106651594  |
| GTGAATCAATAA  | 899.980477123559 | 0.0905517792659744 |
| CATCCATGTCAC  | 899.983357941425 | 0.112544966547788  |
| AGAATGTGACAT  | 899.98990060858  | 0.197851102422502  |
| CCTTGTGATGA   | 899.990358790024 | 0.131510091737358  |
| GAACATAGTGAC  | 899.999277732515 | 0.086616704804854  |
| GCGGGATATGAC  | 900.004737728211 | 0.13179953757051   |
| TAGTTGTGACAA  | 900.020147310529 | 0.119648337249307  |
| AGGTTGTACTCA  | 900.026789820351 | 0.149680973527748  |
| AGCTAAGCGTCA  | 900.038805525933 | 0.132720009262106  |
| CGTGTGGTGACA  | 900.043368255826 | 0.150422194581546  |
| AATGCCTCGTCA  | 900.0449581498   | 0.159113944752552  |
| CAGGGACACGTC  | 900.048031243906 | 0.174188091666265  |
| AGGTGAGCAAGC  | 900.053131481555 | 0.116739828691459  |
| GTATTGCTCAAC  | 900.05348300986  | 0.169774485831119  |
| AATGACGTCTCG  | 900.05363054263  | 0.125669689736777  |
| CGTCAAATTGAC  | 900.054599002003 | 0.134011462801214  |
| TAGTTCATGACA  | 900.055641381604 | 0.106771002589469  |
| AATGGCTAATCC  | 900.068343218052 | 0.106404363625109  |
| CTGACTGTGTGC  | 900.068587892344 | 0.0986268993939483 |
| AAATATTACGTA  | 900.085407283716 | 0.0850475014559525 |
| ACTCATTCTACA  | 900.089741978565 | 0.140353489305585  |
| ATCCAATTATGA  | 900.095213373125 | 0.103647411910038  |
| GTCATTAGGGCA  | 900.098183243785 | 0.131735793071991  |
| GGGCTTACTCAA  | 900.120631728151 | 0.155384978951372  |
| GTCACCTCCCTA  | 900.123808435845 | 0.147923198988686  |
| CGTCACCCCTAA  | 900.135982562203 | 0.0996903077309307 |
| CAGCTTGACGCA  | 900.144459382559 | 0.211095416751242  |
| TATCGTCACTGA  | 900.151613843586 | 0.10035630564054   |
| AGCACGTCACTG  | 900.154642184367 | 0.125082647064852  |
| CTAATGACAGGA  | 900.154759014036 | 0.108308985846287  |
| AGTATACTCACA  | 900.159496566949 | 0.171694331374166  |
| CAAGCCGACTCA  | 900.160290472193 | 0.120694830541283  |
| CCAGCTAGTGAC  | 900.163797499692 | 0.136345145793645  |
| ATAGTCAACATA  | 900.192009302045 | 0.149525646088567  |
| AACTTTCGTGAC  | 900.209537814154 | 0.107684269829666  |
| AACTGACAGATC  | 900.216062733342 | 0.10615765935305   |
| ACTTTGGGTGAC  | 900.227509240286 | 0.112801988347401  |

|              |                  |                    |
|--------------|------------------|--------------------|
| TACTTTTGCTCA | 900.23207443111  | 0.109815761847269  |
| CCTGCCATGTCA | 900.243393982851 | 0.146596125741978  |
| ACGAATCATCCT | 900.244335387755 | 0.177205970346504  |
| AGTGACAGTATC | 900.245027278158 | 0.15484185763574   |
| ACTGAGTCTACA | 900.246596180441 | 0.171690565192598  |
| CTATTACGTATC | 900.256816878256 | 0.137518513019929  |
| CGTCATGAGAAA | 900.260587856819 | 0.100520687501216  |
| TAACCATTATGA | 900.26198359648  | 0.174526194865116  |
| GGATTATGAGTA | 900.267201821133 | 0.103815710327508  |
| ATGACATGCTCC | 900.26962419875  | 0.126508581710779  |
| AAGGACTAATCG | 900.271651181486 | 0.141199994493287  |
| CCAATCATGAC  | 900.282502955987 | 0.0701422019301175 |
| GTCCATGAGCAA | 900.284750036785 | 0.109199677036419  |
| AAAAGAGTCTTT | 900.290891100197 | 0.154568361598289  |
| CGACTAATGACC | 900.298012183361 | 0.113837075707588  |
| AAAAGTGCAGG  | 900.312664855031 | 0.118700779847281  |
| ACATACTCATTA | 900.32306768424  | 0.0991038327543787 |
| CACTAATTAGTG | 900.323424480219 | 0.217869427670866  |
| GTACATGACATA | 900.325624376064 | 0.0978692117890493 |
| GTTAGTTCGTCA | 900.33434205024  | 0.123899855154549  |
| GTGCACTCATGA | 900.347950667074 | 0.190921383918226  |
| ACCATCGGTGAC | 900.351903116328 | 0.126723594294892  |
| GATGTGACCCTA | 900.354904956837 | 0.184367650199872  |
| ACCTATGACCGT | 900.388005045017 | 0.113316750311057  |
| GACTAATAAGAC | 900.394201912068 | 0.10176374902955   |
| ATGACAGGGAGC | 900.396938192432 | 0.14827271440747   |
| ACTGGGGTGACG | 900.397013179317 | 0.143063903846858  |
| ATAAGATTACC  | 900.397109444058 | 0.0955970409290043 |
| TGACGAACGTAA | 900.397806258011 | 0.100030471601105  |
| ACACTTGTCA   | 900.398996944275 | 0.153956552246383  |
| CTGTAGTGAGTC | 900.418032254874 | 0.134184813775863  |
| ATCTGACCAGTC | 900.419877726424 | 0.158901345206278  |
| AGCGGTGTCACG | 900.424304746684 | 0.12364916558628   |
| TGACCGATTCCA | 900.435004169482 | 0.115431103587053  |
| GCGGGCAGTCAC | 900.437066040299 | 0.108042219411539  |
| ACTACTCATTGC | 900.438448382021 | 0.162649029797969  |
| TCACAGTGACCA | 900.443447804195 | 0.0977984221164977 |
| GTCAGCTAATGA | 900.458622167404 | 0.113306617225077  |
| ACCTGTCACTCT | 900.467174527482 | 0.100951041164869  |
| CAGTCACGCCCA | 900.477373267142 | 0.18381809483675   |
| CCAAGGTGACGG | 900.479994722329 | 0.206678865060787  |
| GGACCTGCGTCA | 900.482251661023 | 0.128642975871984  |
| GCCTCCATGACA | 900.509789691971 | 0.105378873353674  |
| GAAATAGGTCAC | 900.511657717382 | 0.162349483379328  |
| CGTGCAAAGTCA | 900.512472847119 | 0.201848615890908  |
| AGGGCGTGACGC | 900.51730517046  | 0.0947034103706013 |
| CGTCACAATATC | 900.521647580803 | 0.122456726050088  |
| CTGCGGGTGACA | 900.541739670866 | 0.127396862154956  |
| TCATAAGCAGCA | 900.552521729867 | 0.234220393333762  |
| GTGTTTCCGTCA | 900.557795654011 | 0.114775685600035  |
| ACTCGCCATGAC | 900.559201051398 | 0.148686729496918  |
| GTGACATAGACA | 900.566784551175 | 0.124774251686774  |
| AACAGGTACCT  | 900.569097414655 | 0.156100056531012  |
| ATACTCACTCAG | 900.57534441706  | 0.103570241237717  |

|              |                  |                    |
|--------------|------------------|--------------------|
| ATACGGACTCAC | 900.580616172459 | 0.108649939682255  |
| ATGACTTGTGTA | 900.58998293336  | 0.125506072521358  |
| CAGAAGGTGACC | 900.596586417973 | 0.110283802042979  |
| TATGATGCAAAA | 900.597547757819 | 0.161179147599987  |
| ATGACGTTCAGA | 900.599602332692 | 0.117341364068076  |
| CTCGGTGAGTAC | 900.607609252466 | 0.223966516142932  |
| TAGTCAGCTTGA | 900.622865494317 | 0.1690086001687    |
| CATTATGATACA | 900.624972419873 | 0.212603964664878  |
| ATGTCACCCCTG | 900.626543684261 | 0.112994074531407  |
| GTGACGTTGAAC | 900.632714098718 | 0.124364806284218  |
| CGGAGTGACGAA | 900.635799879312 | 0.0990515806195887 |
| CTACCGTGAGTC | 900.643145722638 | 0.109146634944542  |
| AACCACATGACA | 900.654900116305 | 0.116302213061804  |
| TGACGGGTCTAA | 900.67711631743  | 0.133443422050493  |
| GTCAGAGGTCAA | 900.680141808533 | 0.12372382197948   |
| CTAAATGTGTAA | 900.688358935196 | 0.112058341666478  |
| AGGCCTTGTGAC | 900.691140348003 | 0.172289339757933  |
| CAATGTCTCACC | 900.70185564924  | 0.117954599344085  |
| CGTCACCTTTGC | 900.712842419063 | 0.11151910063542   |
| AGTCAATGCATA | 900.721669345683 | 0.100959367501315  |
| CGTCATGTTAAG | 900.723259997334 | 0.124925067331596  |
| GTCACACGAGTA | 900.723629106834 | 0.119739100847283  |
| GCATTGAGTGAC | 900.73988927427  | 0.14396374125263   |
| CTTCATCTATGA | 900.744133685643 | 0.139378618927369  |
| GTTACTATGTCA | 900.748360874087 | 0.15202313240525   |
| CTGACACTTTCA | 900.754430627889 | 0.119671549605396  |
| AGACGGTGACGA | 900.760391899269 | 0.140722544530857  |
| ACCTGTCACCAA | 900.765948720854 | 0.13136677211042   |
| GCAGGCGTCACC | 900.76683637112  | 0.222143715923347  |
| AGGTATGAGTTA | 900.768054588515 | 0.0972802688755254 |
| ATTGTGAGCAAA | 900.774063456912 | 0.163746637096933  |
| TCACTTATGTCA | 900.779573331443 | 0.104889665806718  |
| AACCAACTCATA | 900.785946490913 | 0.151489322079086  |
| GACGTGAGTCCA | 900.786475530646 | 0.168870143804044  |
| AAGTCACTAGCG | 900.799032938968 | 0.144331876094335  |
| AGTCAGTTAGTA | 900.805637421186 | 0.139700777851027  |
| ACTCATTACAT  | 900.814981869426 | 0.114027340336458  |
| TCTAATGTGACA | 900.829401940712 | 0.124857823291828  |
| ATGACCTAACAC | 900.830235142987 | 0.110884236024306  |
| AGGGGACTCACA | 900.84001027773  | 0.128500705475728  |
| AGTATTCATCAT | 900.85973762242  | 0.171788238659629  |
| TCCATCATGACA | 900.860541790962 | 0.117163962800436  |
| ATGACAATCCTC | 900.862928732046 | 0.125530879713108  |
| CTGAGTCGGTAC | 900.867663576517 | 0.159987292533735  |
| GAACTCCAGTCA | 900.872482861417 | 0.142736223930484  |
| GTGACGTCGTTA | 900.872789349802 | 0.128392038446919  |
| CAAAGTGAGTAC | 900.874526017848 | 0.117548204226223  |
| GTCACCGCGCCA | 900.876908501806 | 0.119761363696741  |
| ACACAGAGTCAA | 900.879409518209 | 0.132514289515809  |
| CACCTCATGACG | 900.880725312907 | 0.145828259072834  |
| ACAGCTCGTCAT | 900.880994039617 | 0.105445660864119  |
| GTGACGCTAAA  | 900.882517382179 | 0.107958832628834  |
| GCGAGTGGTGAC | 900.89391939044  | 0.142407649460917  |
| GTGTCACCTTGA | 900.895643123507 | 0.154595027749616  |

|              |                  |                    |
|--------------|------------------|--------------------|
| CTACCGTCATAA | 900.915591323231 | 0.148549659521195  |
| GAACTCGTCAGC | 900.919603447886 | 0.116812807903531  |
| CATGTCATGTTA | 900.919867651032 | 0.128883627018463  |
| TGGTGACGTAA  | 900.924712018651 | 0.223649614541196  |
| ATCTTTCATGAC | 900.931283765018 | 0.128182605805477  |
| TAGTGACGATAA | 900.933439176325 | 0.06761162367834   |
| AGAAGTGCAGC  | 900.936253915508 | 0.163247046232578  |
| GAATCAACGTCA | 900.949527590271 | 0.100524509166149  |
| GGATTAGGTGAC | 900.967037996742 | 0.170538771967183  |
| AATGAGTTAGAC | 900.969351949061 | 0.107851699875748  |
| CCCAGTGACGCG | 900.973692882535 | 0.124578495301169  |
| GTCAGAAGATGA | 900.973876522171 | 0.144815849085541  |
| CGCCTAAATGAC | 900.995401527797 | 0.178913245398683  |
| GTGATGCAATGA | 900.998167196065 | 0.118243149155157  |
| CATGATCACTCA | 900.998698191631 | 0.127799100804552  |
| TCTATGTCGTCA | 900.999458272152 | 0.133389839838748  |
| AGTCTAGTCAGC | 901.017982149593 | 0.134402038835733  |
| GGTCATAGCCGA | 901.018284244815 | 0.1509124776183    |
| TAGAGGGTGACA | 901.02061409191  | 0.0634962713283017 |
| ACACCGCGTGAC | 901.030186243545 | 0.148150651544682  |
| GTCACCACCCCA | 901.033914597834 | 0.140503278997579  |
| CTCTGACAGTTA | 901.063590984701 | 0.1293073864548    |
| ATTGCTGTACC  | 901.066047459313 | 0.143654999986116  |
| AATGACATCGAG | 901.073553005611 | 0.133717336646944  |
| GAGTGTCATGCA | 901.081256530097 | 0.118210549834605  |
| ATGTCACCATTA | 901.082329807989 | 0.172276026663755  |
| GTAACGGTGTC  | 901.084377374909 | 0.151972198717245  |
| ATGAGTGTCCC  | 901.099628527221 | 0.113756984825092  |
| TAAATTACTCTA | 901.108327239776 | 0.116764124234092  |
| ACGATTATGACC | 901.124385960963 | 0.131602899508857  |
| ATGATTCTTAGA | 901.132316089907 | 0.111259319997026  |
| GGGAGGTGTGAC | 901.135882778024 | 0.149383269260194  |
| CAGCACCGATGA | 901.142903694423 | 0.217435081656843  |
| GGGCGCCATGAC | 901.143843252069 | 0.116410402582979  |
| AGTTGACGTCAG | 901.14608828504  | 0.127318435121431  |
| AGGTTATGACCG | 901.148514243686 | 0.0974827320607336 |
| ATGTATCACCTA | 901.148575606492 | 0.102304246813491  |
| GTTGAGTCTACA | 901.148944533001 | 0.133234883247622  |
| GCGTAGTACTCA | 901.168636510566 | 0.152863962286424  |
| CAGTGAGCAAGA | 901.178473054883 | 0.129055287014132  |
| CCGGAATGACCC | 901.179359469196 | 0.160226554847445  |
| AGTGATGTGACG | 901.190765869825 | 0.152448098602339  |
| TAATGCTCGTCA | 901.200482113184 | 0.14398883948931   |
| ATAAGTCAACCA | 901.216441615438 | 0.169306385864114  |
| AAGAATGTGACA | 901.219319102595 | 0.113251942611471  |
| TGTCAGACGTAA | 901.227170802165 | 0.0949005342210086 |
| ATAAAGTTGTCA | 901.232311047764 | 0.207136355469342  |
| AGACTGACAGAT | 901.256318591899 | 0.151750275253619  |
| CCTAAGACTAAC | 901.259994927737 | 0.0872690718249728 |
| GACTCAGCACAC | 901.264818336923 | 0.129568224227694  |
| ATGACCCGTTGG | 901.265981951785 | 0.0961107171833845 |
| TCGGGGTGACAA | 901.274140817862 | 0.118069647266139  |
| GCGTAGTGACGC | 901.274408682334 | 0.0733791456820745 |
| CGGTCATACGTC | 901.276148229809 | 0.0714545952859714 |

|              |                  |                    |
|--------------|------------------|--------------------|
| CGCGTCACTAAC | 901.286267113277 | 0.190263884317291  |
| CTTCTATGACCC | 901.288563837906 | 0.148453329858428  |
| AGTACGGTCATC | 901.289409193187 | 0.132937269760094  |
| GACTAATTCACC | 901.299045186256 | 0.152890967869848  |
| AATATACGTCAA | 901.299701265034 | 0.11152556124354   |
| GAAGGTGAGCAA | 901.302203659716 | 0.150833605583445  |
| CGGTCATACCGC | 901.323572005396 | 0.102931699114021  |
| AAGTCACTACTA | 901.331607442442 | 0.126004977690389  |
| GTCACTCGCGGA | 901.334465974436 | 0.125291591264515  |
| GTAGTTGACTGA | 901.33562788768  | 0.140413299279808  |
| AAGGACTAATTC | 901.346750040144 | 0.155751813080924  |
| AAAGGCGTCACA | 901.346868731724 | 0.111482856929964  |
| CTCATATAAGAA | 901.348954157431 | 0.105356700969611  |
| CGTCACGGGAAA | 901.354780834818 | 0.146495538072789  |
| CTAAGACTGTCA | 901.364831863569 | 0.125315026099578  |
| TGTGTGATACAA | 901.36776480348  | 0.131944262729665  |
| TAATGCGTAACA | 901.375803294603 | 0.137760708521831  |
| TGAGCCAACTCA | 901.376927106085 | 0.122759325692686  |
| AGATGACGGGAC | 901.379671963537 | 0.14276155981779   |
| AATCTTGAATCA | 901.380021213957 | 0.145525980888086  |
| ACTGGTAGTGAC | 901.38048884391  | 0.164852025250983  |
| ACTCATCACTAA | 901.389121794404 | 0.132497596946782  |
| AAGTAGGGTGAC | 901.389582693316 | 0.106143350449011  |
| CATACTCGTGAC | 901.42501760537  | 0.172252081929693  |
| ATGACGGCAGAG | 901.429689021356 | 0.139192755989511  |
| GTCTTGACGCAC | 901.432917365188 | 0.158667838344124  |
| GATGACCGGTAA | 901.43452268116  | 0.0881219016097637 |
| TACTCACCGTCA | 901.442424535811 | 0.169171601059483  |
| CGAACCGTGACA | 901.444010503793 | 0.160600176226238  |
| ACCACTGACGTA | 901.445652471506 | 0.116671115776096  |
| AGTGACCACTAA | 901.448479738285 | 0.131838852325122  |
| CGTATAAGTGAC | 901.451802848661 | 0.152927383663493  |
| ATGTGAGCAAGA | 901.453274041159 | 0.0814114301920831 |
| AATGAGTATGTA | 901.454618474023 | 0.130080829744834  |
| TTAGAGTAATAA | 901.459558672409 | 0.0829329070081165 |
| ACTTTGACTGTG | 901.469254837345 | 0.162630927034045  |
| GTGACGGAGCTA | 901.474498716317 | 0.115767162537644  |
| CGTCAGACACGC | 901.474776133384 | 0.132129940547269  |
| ACGTCACGGCAC | 901.477500820222 | 0.0984046111432876 |
| GTGACGAACCAA | 901.484181342515 | 0.109099588566654  |
| AGCTTGTGACGA | 901.484790277361 | 0.128153048055003  |
| ATCCGTTGTCAT | 901.487101181781 | 0.107249107754962  |
| GTCACCGTGGTA | 901.494382116579 | 0.0968722234769894 |
| CGACTGACATCA | 901.502498983647 | 0.111628622810372  |
| CCTACTATGTCA | 901.503106958483 | 0.134986854362018  |
| ATTACTCTAACG | 901.521519535478 | 0.157992458529237  |
| CAGTCAGTTTAC | 901.524529867343 | 0.114926564950345  |
| TGACGAGTAGAA | 901.527965302927 | 0.108474800948451  |
| AAGGGGTATAG  | 901.543121280214 | 0.102743452840764  |
| GTTGACTCGGTA | 901.546035745343 | 0.161087509875829  |
| CTGACACGTCGA | 901.552546127613 | 0.175231832038613  |
| ATCAGGTGACGA | 901.555775059337 | 0.095995806210704  |
| CACTCATATTTA | 901.55599174069  | 0.162529881142819  |
| ATGTCACAGTAA | 901.580398173759 | 0.149659003555872  |

|               |                  |                    |
|---------------|------------------|--------------------|
| CCATAATGACG   | 901.585002699682 | 0.111385412359848  |
| ATGACGGGATAG  | 901.585818578213 | 0.116885325786354  |
| ATGACAGTCAGG  | 901.589650965256 | 0.142224916240636  |
| AATGACAGGGTG  | 901.591108125064 | 0.105150530975638  |
| ACTAATAATGTG  | 901.600240817207 | 0.0977473729799345 |
| TGAGATGGCTCA  | 901.601579287989 | 0.104121308633445  |
| AGTATCTGAGTC  | 901.608519667192 | 0.128388102858194  |
| AACACGTCAATA  | 901.609920280811 | 0.184110158903133  |
| ATGATGTGACAG  | 901.612558014148 | 0.126235263622509  |
| AGGTGACGCCTA  | 901.616243957913 | 0.116074329307731  |
| TACAGTGACATA  | 901.619175212064 | 0.225639973655041  |
| TCTAAATGACCA  | 901.620053242207 | 0.159332121315008  |
| TGGTGAGTATAA  | 901.624931408301 | 0.17911205219829   |
| ACTCATAGTCTC  | 901.625520670826 | 0.17711030867802   |
| ACGTAATCATCT  | 901.625661759362 | 0.130040079599718  |
| ATCAAATTACTC  | 901.641287701545 | 0.0629825448298293 |
| AGTCCTCGTCAC  | 901.64222475115  | 0.102167403597929  |
| CGTCACTTTAC   | 901.649417972555 | 0.110026283834454  |
| GTCATGCCACCA  | 901.656851713395 | 0.135033981002498  |
| CGAGGGTGACGA  | 901.657644219113 | 0.109549181711472  |
| ATCCGTACTION  | 901.67642604556  | 0.135296613485793  |
| CTGACTGTGCTC  | 901.688821887455 | 0.163426375134069  |
| GAGTCTATGACC  | 901.692576871978 | 0.12713725969826   |
| GTTGCTAAGTCA  | 901.694132438444 | 0.101641224193954  |
| GGGTTGACTGAA  | 901.695625819599 | 0.159104728696657  |
| GATGACGGGACA  | 901.698044565002 | 0.100526223507929  |
| CTTTGGTGACGA  | 901.699989346836 | 0.09540675433964   |
| CTCATGACCCAG  | 901.702661335302 | 0.155434280913951  |
| AGTCTTGACTCG  | 901.704786224574 | 0.149883432736544  |
| ATTTATGTGACG  | 901.707703798179 | 0.174159505025372  |
| ACTAACGTCAAC  | 901.711080592552 | 0.109437727247145  |
| TAGTGACATGGA  | 901.737086989849 | 0.112485448917162  |
| ATCGGCTGACGC  | 901.737172422458 | 0.130398870671248  |
| ATGACATGAAGG  | 901.739958349903 | 0.146975763222196  |
| ATACTCATTGAC  | 901.739965741069 | 0.098832832939052  |
| AAGCGTGAGTCT  | 901.744064245322 | 0.127623015315437  |
| GCTTCGTGACGA  | 901.745989906351 | 0.153244420798051  |
| ATGAGCTGTCTG  | 901.753683360358 | 0.160400262504541  |
| CAATTGACTCTG  | 901.759280762831 | 0.118595583404087  |
| ATTGAGTAACGA  | 901.761473371732 | 0.100232995284217  |
| ATGTATTAATCA  | 901.7710630719   | 0.200386759171177  |
| GCGCATTGGTCA  | 901.784083308528 | 0.0583824725334947 |
| GTGACTTTACAC  | 901.78742363778  | 0.137543948149117  |
| CGTCTGTGTCAG  | 901.790179541149 | 0.100237363545924  |
| AGGGTGACGTTG  | 901.790229014469 | 0.112750996701797  |
| CTTCGTGAGTGA  | 901.791056649989 | 0.139898356663293  |
| ACGTGTAATCCG  | 901.791300205304 | 0.140858983584217  |
| ACTCATCCGTCT  | 901.791358184778 | 0.164384964868846  |
| CGCGGTGACAAAC | 901.793392807046 | 0.115031239921978  |
| ACCACTGTCATC  | 901.795340448832 | 0.0809548816614705 |
| ACTCATAGATTC  | 901.800211052131 | 0.184779331625466  |
| AACTCGCGTCAC  | 901.805607899816 | 0.145170405545191  |
| ATGTAACGTAC   | 901.815835831849 | 0.128480560267973  |
| AGTCAGCGAAAC  | 901.816619796781 | 0.148891864989034  |



|               |                  |                    |
|---------------|------------------|--------------------|
| TGACGAGGCAAA  | 901.817585140065 | 0.130881694280688  |
| CCTTGGCTATGA  | 901.820959361211 | 0.143064498223257  |
| CGTCTTGACACA  | 901.828901330829 | 0.0957338885842703 |
| CTTAGGCAGTCA  | 901.829293617576 | 0.165714999404138  |
| ATGTCATCTCCC  | 901.835040224251 | 0.104799450930895  |
| ATTACTGACAAA  | 901.843904951164 | 0.145840722444448  |
| ATAGGTCACAGA  | 901.846109082546 | 0.125075471471944  |
| AAGTTTGTGACA  | 901.849548151853 | 0.104923694788224  |
| GCATTTGACTGA  | 901.863191026908 | 0.10620338563918   |
| CACCCACAGTCA  | 901.866551449424 | 0.121026168309545  |
| GTGACGGGTTCA  | 901.867029288389 | 0.0992677087857418 |
| CACATCGTCAGG  | 901.872451229981 | 0.101064027574081  |
| TGCTTTAGTCAA  | 901.889655648438 | 0.144485258641074  |
| AAGAGGCATGAC  | 901.896075954615 | 0.109278922814475  |
| CTTGTTTGGTCA  | 901.908616222628 | 0.135222882326105  |
| AGTTGTATGACC  | 901.912809193289 | 0.105292800347456  |
| CATAATGACAGG  | 901.928071540911 | 0.106800146126349  |
| GGACTCATGGCA  | 901.929254745808 | 0.10889881840856   |
| CAGTCAGTGCAC  | 901.930597937462 | 0.0999601334958027 |
| ATTAGTCTGAGC  | 901.945087252114 | 0.159817784015945  |
| GACAATGAGCCA  | 901.946014558312 | 0.130353416185562  |
| TAGATCATGACA  | 901.958326860276 | 0.0991263822258753 |
| GGCTTTTGTGAC  | 901.964295323601 | 0.155478256235594  |
| ACCACGTAACCT  | 901.965145084882 | 0.101078612966654  |
| ATGACTTTTCGC  | 901.970442624968 | 0.108383441491783  |
| TGACCGACGTCA  | 901.982578759272 | 0.146064797825506  |
| ACAATTACGCAC  | 902.002509338114 | 0.0987303687383868 |
| CATCGGTGTCAC  | 902.027463915583 | 0.181694627992198  |
| AGTCAGCATACG  | 902.03937319684  | 0.0941471248359311 |
| AATGACGGTAAA  | 902.049017533947 | 0.103621112188561  |
| ATTCTGATGTCA  | 902.051378040215 | 0.125490310462988  |
| TAGTCAGGCATA  | 902.055742515496 | 0.131659900794872  |
| CTCATCGTCACC  | 902.059511518348 | 0.102293784949954  |
| GAGTAATGGTCA  | 902.068659749356 | 0.139901748901446  |
| ACTCAGGTATGA  | 902.103600112493 | 0.100511941028035  |
| CGCGTCACTTGA  | 902.116163365023 | 0.163542399946612  |
| TCAGAGTAATAA  | 902.126233569844 | 0.125238646602984  |
| AACCACATCATT  | 902.135557699219 | 0.130307628014785  |
| GTCACGTTTCGCA | 902.146701767006 | 0.101061463310315  |
| CTTGGTGACGTC  | 902.152825781529 | 0.154599951508908  |
| ACTCATTTTCGAT | 902.1530929506   | 0.127225890917413  |
| AACTTGTCACTT  | 902.163881354759 | 0.0870217583950377 |
| ACGTAGTGAGTC  | 902.165490667929 | 0.128751323777754  |
| CAGTCAGATACC  | 902.167238095543 | 0.161422949726583  |
| ACGTCAGCATAG  | 902.176796827793 | 0.134769267871096  |
| AGGATAGACTCA  | 902.182073307856 | 0.145243904884243  |
| CATGTCTGTAC   | 902.184867083985 | 0.185277700587991  |
| GTCACCTTATA   | 902.204479435926 | 0.125612971669657  |
| ATGGAGTAGTCA  | 902.211716057553 | 0.170476268423279  |
| GAATCGTGACGA  | 902.218227578721 | 0.104173267108262  |
| TCCCTTGACACA  | 902.230095714102 | 0.131925194726272  |
| CATCATACGTGA  | 902.236380366059 | 0.214320567374344  |
| GCGCGGTGACAA  | 902.237434260523 | 0.149090104360052  |
| ACGGGCTGACTA  | 902.237694951105 | 0.125065437614201  |

|               |                  |                    |
|---------------|------------------|--------------------|
| CGGAGACATGAC  | 902.23963980368  | 0.200540092483638  |
| ACAACATGACAA  | 902.243358496521 | 0.101907629762231  |
| GTATTACTGAAC  | 902.243400753856 | 0.0632008375458277 |
| TCATACTAATCA  | 902.245809802705 | 0.11764162243502   |
| AGATCATGTAC   | 902.250344008401 | 0.142315957595004  |
| AGCGCGTACGA   | 902.260264802597 | 0.124600623738681  |
| AAGGGCAGTCAC  | 902.264139549554 | 0.122759254233853  |
| CGATTACGCACC  | 902.291541797484 | 0.109133035646918  |
| CTAGTACTAATC  | 902.296020587964 | 0.075062999386734  |
| AGTACTCACACG  | 902.296801217371 | 0.169662930867219  |
| CTCTAGGTGACA  | 902.309770711486 | 0.109033518261347  |
| AAGCCACGTAAC  | 902.313433394511 | 0.16680976018058   |
| GCCAATTAATAA  | 902.324689494626 | 0.129149689004105  |
| ACTCATAACGAT  | 902.337459794317 | 0.108678062031156  |
| CCTCGGGGTGAC  | 902.345520593202 | 0.17349754080769   |
| TTGACTCCAAAA  | 902.34587365265  | 0.0998927586852259 |
| ATGAGTACCCGA  | 902.348634652065 | 0.120617997485782  |
| AAGAGAGTGACG  | 902.352022969703 | 0.102116847573286  |
| GTAGATCGTGAC  | 902.353009850766 | 0.114614370034778  |
| ATTGACTGGTCG  | 902.355983447804 | 0.19281862393271   |
| CGAAGCAGTCAG  | 902.368774968506 | 0.0940257512517568 |
| CATCTCATGACA  | 902.36912779252  | 0.124874715546828  |
| CCCGACTGTGAC  | 902.376184578172 | 0.155355663343479  |
| GGACCACATGAC  | 902.389548724577 | 0.148945113961869  |
| AGTATACTACCC  | 902.393548990734 | 0.196448543989351  |
| CTCAGTCAACAC  | 902.399404645284 | 0.156346996241309  |
| ATGACAGCCATA  | 902.401230288039 | 0.131047694881901  |
| ATTCAAGTCTTAC | 902.406641917124 | 0.140383850323099  |
| GTCCTGAGTAAC  | 902.408046055202 | 0.125116861290044  |
| CCAAGGGGTGAC  | 902.408454206189 | 0.099551865619116  |
| CTCGACTTGTCA  | 902.42653048093  | 0.102630178355317  |
| CATTGAATCACG  | 902.431620703949 | 0.10075666281502   |
| AAGATGTACCCC  | 902.432800345871 | 0.136323317659834  |
| ACTCATCGTTCC  | 902.4351944821   | 0.104031743648268  |
| CTCAAGTGACGA  | 902.452509653113 | 0.127444302853172  |
| GGTCATCCACTA  | 902.454017038763 | 0.10796025371447   |
| GCCCAACGTGAC  | 902.457598541258 | 0.12086245455682   |
| TGGTCACAGAAA  | 902.45936588298  | 0.0940869306982494 |
| CGGACAAGTGAC  | 902.483506533442 | 0.21203876083032   |
| ATGACCGAGGCC  | 902.500508138126 | 0.150865255862129  |
| TGACTGCCGGAA  | 902.503061746308 | 0.139613179098569  |
| AATAGCGTCAGA  | 902.505430490847 | 0.148013491211782  |
| AGTTCGCGTGAC  | 902.523635663485 | 0.104108691776292  |
| AGGACGGGTGAC  | 902.52425502142  | 0.216633761613962  |
| CGTCACAGACTA  | 902.538903688523 | 0.137899824394761  |
| GTCACCGTTTAC  | 902.553105241683 | 0.0690596212427477 |
| GAATCATGTAC   | 902.55343221927  | 0.0801957355206822 |
| GCAGCGAGTGAC  | 902.55552327184  | 0.146586894238069  |
| GTTTCATATGTCA | 902.560104644386 | 0.0968748302639965 |
| CACATGTGACCG  | 902.580344052735 | 0.131588624861293  |
| AGTGACCCAACC  | 902.597020806915 | 0.161666629436272  |
| TACGTGGTGACA  | 902.600103567717 | 0.0825137724560746 |
| CGCTGAGGTGTC  | 902.610585383917 | 0.177324532100427  |
| CTGACACAGCAA  | 902.617204285437 | 0.119671227049798  |

|              |                  |                    |
|--------------|------------------|--------------------|
| ACTCATCTTGCT | 902.625772269544 | 0.119486551692629  |
| TCCTCCGCGTCA | 902.648887070742 | 0.126223122114137  |
| CCTACTTGTGAC | 902.653698138245 | 0.144123650544293  |
| CGGCCAATGACA | 902.657088871505 | 0.196578376820266  |
| ACTGACAGATCT | 902.666656137335 | 0.11618898115308   |
| CTCCATGCACC  | 902.667600845912 | 0.10039134940545   |
| ATTGATTAGTCG | 902.668237049627 | 0.20894713152299   |
| GATGATTCTGAC | 902.668665043667 | 0.146137955259657  |
| TATATACTCACA | 902.673952490647 | 0.145124825359955  |
| CGTATGCTGTCA | 902.674126567909 | 0.105318627749415  |
| AAGTACTAATAT | 902.674177909908 | 0.119106213496938  |
| ATGACATCTCAA | 902.67981970551  | 0.105687061178905  |
| CCGCACTAGTCA | 902.680759096734 | 0.101006339118656  |
| GAGGAATGTGAC | 902.691200083475 | 0.112928816482163  |
| AGTGATGCAATC | 902.704074618333 | 0.126770965905357  |
| GCTGTCTGTAC  | 902.708999562895 | 0.111197362356972  |
| ACTCATCATTTT | 902.726369460157 | 0.125716263199185  |
| ATGACAGGCCCC | 902.729104197212 | 0.133846378357499  |
| CGACGTCACTCA | 902.729598291346 | 0.131919064630744  |
| AGCTCATGACGC | 902.75676493011  | 0.0874449178967575 |
| ACACGATGTCAT | 902.761977424728 | 0.115272946248935  |
| CGTCATGCTTGC | 902.762560662438 | 0.0934239097828259 |
| GACAAGGTACTC | 902.780026449132 | 0.143710039453135  |
| AAGTCACTAGCC | 902.783337768081 | 0.133669896130233  |
| ACAGACGCGTCA | 902.78470202502  | 0.117543932670785  |
| TCCTCTGACAAA | 902.786003899147 | 0.121579109241444  |
| ATATTGACACAA | 902.792224262718 | 0.130445625208044  |
| GACTGATTGAGA | 902.795408507341 | 0.164555128319504  |
| ATGTCAGACTAA | 902.79956832614  | 0.138426228238047  |
| ACGATGGGTGAC | 902.841528000475 | 0.119281401284439  |
| CTGTTGGTGACA | 902.847892360675 | 0.168836459247002  |
| GGATTATTCACA | 902.864655240515 | 0.0963155912371279 |
| GCGCGCTATGAC | 902.867968352638 | 0.136572910268522  |
| ACATGTGAGCAA | 902.868132428975 | 0.101260719424831  |
| CGACTAATCTCG | 902.877428644433 | 0.113101791325285  |
| CATGACATGATA | 902.884618618561 | 0.124740259496298  |
| AAAATGACCTCA | 902.897800869361 | 0.0660920207210043 |
| CAACGTCATGGG | 902.903403287321 | 0.10292355709106   |
| CTAACCTGTAC  | 902.911005596478 | 0.0966434506412738 |
| AATTAGCAATAA | 902.934707337034 | 0.140560375310491  |
| AATCCTGTCACA | 902.948986733348 | 0.0978203330707405 |
| CATGATGTCTCA | 902.95681432615  | 0.200094546614947  |
| ATTGTGACAGTG | 902.967755393319 | 0.118718034146729  |
| AGTGACAAGTTA | 902.971189488534 | 0.0862125804395514 |
| CGTCATGCCAGA | 902.976728197046 | 0.145926402140069  |
| TCGTCGTACTCA | 902.977374169421 | 0.124780332534503  |
| AATGAGTGTACG | 902.990216415843 | 0.10738355874323   |
| ATGAGCATTAA  | 902.998384703639 | 0.121992135824983  |
| GCTGAGTAAAC  | 903.011833559868 | 0.112869095739983  |
| ATGTCATGGCAC | 903.012713498268 | 0.116549710580318  |
| AAGGGTCAGAGC | 903.015502123655 | 0.0985177508119999 |
| CACCTCGTCACA | 903.026592998002 | 0.13194376495018   |
| ACGCACGTCACT | 903.036663003208 | 0.110084261468936  |
| ACTCATCTTAAC | 903.039782542284 | 0.135593068443923  |

|              |                  |                    |
|--------------|------------------|--------------------|
| CAGCGTCACTTA | 903.042673699273 | 0.127005629394676  |
| ACTTTGGACTCA | 903.049786420816 | 0.163302420388377  |
| AATAGTGCAGC  | 903.053765928065 | 0.119038607460668  |
| ACAGTCTGTCAT | 903.05679284174  | 0.118541807926573  |
| CACGTCACGAGC | 903.060694136722 | 0.16519915646512   |
| AGTCAGCGTACA | 903.073169705668 | 0.188414589744687  |
| ATTTTGTGACGG | 903.080926264257 | 0.136761227544009  |
| GGTGATAAGTCA | 903.083627733    | 0.139355989475959  |
| GGTATGTCACTA | 903.089060563218 | 0.109609257951606  |
| CGTCAATTACTC | 903.089080388136 | 0.169831530852271  |
| CGTGACGGGTCA | 903.092999917782 | 0.129994924271236  |
| GGCGCGTGACAC | 903.099611068249 | 0.199947670152385  |
| GGACTCACTCTA | 903.101940335687 | 0.111457438041956  |
| CGTCACAAATTC | 903.112098917414 | 0.120931172944266  |
| ACTCACCGCTGA | 903.116712453936 | 0.167284093132642  |
| GGAGCGTGACAC | 903.118750032722 | 0.180259744065736  |
| CCATTTCCGTCA | 903.125605313586 | 0.189925879286504  |
| CTGACGTGACCA | 903.126101019359 | 0.117618212305028  |
| GCGGTATGTGAC | 903.128170382968 | 0.141447279348016  |
| GACGGGTGACGA | 903.134848255336 | 0.110416558920736  |
| ACATATTACGTA | 903.1424730237   | 0.137372895082646  |
| ACTCGGTACAC  | 903.143151917551 | 0.103589221750823  |
| AAGTGATGTAAC | 903.146287990702 | 0.118737027326952  |
| CGACATGTGACG | 903.148331792047 | 0.176059428500255  |
| CGTAATAGGTCA | 903.158627799723 | 0.098087123449224  |
| TCGGTCATGGCA | 903.168964609531 | 0.145263287616684  |
| AATGATTGATG  | 903.171986769962 | 0.183869328986287  |
| CCATTTGACTCG | 903.182787183394 | 0.111042162159229  |
| GTGACGGAGTAA | 903.193843249051 | 0.112244623577892  |
| GTCATGGCACTA | 903.198100861743 | 0.13323391122474   |
| CAACAATCGTCA | 903.201195657596 | 0.17142871276532   |
| CGAGGCGAGTCA | 903.202909110642 | 0.165866423531509  |
| TACTCCTAGTCA | 903.214409066426 | 0.105393820426347  |
| CTACGGCATGAC | 903.228079014833 | 0.124118558027327  |
| AAGCACGATGAC | 903.240806797249 | 0.150770081787678  |
| AAGGTAGGTGAC | 903.24506075497  | 0.0861792492741423 |
| GGCATGCGTGAC | 903.248116147734 | 0.137160503286112  |
| GATGGGTGACGA | 903.251675178638 | 0.114993931827419  |
| GTCACAGAGGAC | 903.255932614364 | 0.140818944809413  |
| GACTAATATCCC | 903.257365828592 | 0.132598766655696  |
| CCTGTTCGTAC  | 903.261733435809 | 0.109155670058771  |
| GATAGCTGTGAC | 903.265624861587 | 0.108682966085099  |
| AGTCAATAGGTC | 903.301175524318 | 0.106116674132961  |
| AATTTGTGACGG | 903.313383220117 | 0.0798965578448737 |
| GTCATGGCAGAC | 903.32036530198  | 0.187699283204433  |
| ATACGTGACCGG | 903.324657155019 | 0.116237127523887  |
| ATCGGGTCATCA | 903.325512283828 | 0.119611483138928  |
| GCGTGACGAACC | 903.329772826306 | 0.112301983585698  |
| CGGTCATAACAG | 903.344636793609 | 0.0937818808541874 |
| ACTGACTGTGCC | 903.351789444158 | 0.125470760336132  |
| AAGTCACCTTAC | 903.362125440612 | 0.127998192860868  |
| GTGACAGTGTTA | 903.374434066984 | 0.0952151013403971 |
| AGTCAGAATCCA | 903.379839780985 | 0.162176410739212  |
| ACACATGACGTC | 903.382906774745 | 0.130663782375867  |

|               |                  |                    |
|---------------|------------------|--------------------|
| ACATGGATCATG  | 903.383122139316 | 0.221916601897086  |
| TTACGTGGCGAA  | 903.387025470399 | 0.166141355380022  |
| GACTAATAGGCA  | 903.388126415801 | 0.123222118077296  |
| GAGATGTGACAA  | 903.389371204459 | 0.099985585051086  |
| CATCTGTCAGAA  | 903.39387521967  | 0.123866802524186  |
| CTATATCATGAC  | 903.395827485101 | 0.118888175848179  |
| ACAGATCCGTCA  | 903.40793915167  | 0.123041077531475  |
| GATGTATCGTCA  | 903.407963162586 | 0.131053385407951  |
| ATAGATGAGTAG  | 903.409668235179 | 0.133446622313649  |
| CGGTGACCATGA  | 903.433036738855 | 0.107544476347856  |
| CCGATGACGGGA  | 903.464835510627 | 0.213253700475062  |
| CGGTAATGTGTC  | 903.46790860047  | 0.144645244518226  |
| AAGAGTCGACAT  | 903.468973540797 | 0.0929657962691008 |
| TGTAGTCAACAA  | 903.476644954442 | 0.136474695105171  |
| AGTTAGTCTTAA  | 903.47919392237  | 0.160675454169887  |
| CTCTCGAATGAC  | 903.48634920754  | 0.0961843875741666 |
| AAAGGCGTCACC  | 903.489705849064 | 0.0915085541675052 |
| CCTCGGTGTAC   | 903.497514653936 | 0.119558464331425  |
| TGACGAGCTAAA  | 903.509286674323 | 0.130749890584645  |
| CAGGCGTAGTCA  | 903.510695000907 | 0.17980793503896   |
| GAGCGCGACTCA  | 903.521323551957 | 0.137972569517305  |
| AATGATGCGTAA  | 903.523526405701 | 0.156866288339872  |
| TATGACCCGACA  | 903.548718953218 | 0.14614395854006   |
| ACACTGGGTAC   | 903.557386640741 | 0.127486731393708  |
| GCGGAATGACCA  | 903.563844935278 | 0.161167744864094  |
| TAGTCAGTTATA  | 903.569035983091 | 0.144514585364806  |
| ACGTGACGGAGC  | 903.569308864073 | 0.122887983710339  |
| AGATGACCGTCA  | 903.573817080127 | 0.103261461455664  |
| GCTTAGTACTCA  | 903.582173929091 | 0.100291412054041  |
| CGTCATGGTTTA  | 903.587359879363 | 0.106269161638649  |
| GCACACGCGTCA  | 903.58853505652  | 0.179687597968468  |
| CGTCACCATCTA  | 903.603365516167 | 0.0957554197705389 |
| AACGGTTGGTCA  | 903.615255347142 | 0.0673983848449131 |
| ATTACGTATCAC  | 903.618284505563 | 0.142975244077575  |
| TACGGGGTGACA  | 903.620165111514 | 0.178464315886517  |
| AGCTGACTGTGA  | 903.625931061165 | 0.137109106362513  |
| TGACCACTCACA  | 903.636039383302 | 0.0967116438249512 |
| TATTACTCTAAA  | 903.645335249953 | 0.170949964180764  |
| AAGCAGCTGACT  | 903.702253672533 | 0.132878950716584  |
| ATATACTAATAC  | 903.704718182428 | 0.0961459700190331 |
| AACACGTGGTCA  | 903.705448292905 | 0.093036670273346  |
| GGTACGGTGACA  | 903.711909836443 | 0.0942937092582705 |
| GCCGATGATGCA  | 903.727064353135 | 0.149681694548877  |
| CGGCAAAGTGAC  | 903.734240585996 | 0.173510697445197  |
| CCATGTCACAGA  | 903.736526430597 | 0.102865838066442  |
| ACGGTTCGTAC   | 903.738923929131 | 0.102218719822556  |
| ATCGTCATGGTG  | 903.748507976839 | 0.102656641696811  |
| AACGGTGACATG  | 903.756317503154 | 0.138060852863447  |
| TCATAATAGGAA  | 903.761876601816 | 0.108656701876311  |
| ATACAATGATTC  | 903.763120191597 | 0.111085779044994  |
| ATTGACCAATCA  | 903.764190670416 | 0.115133359318703  |
| CCATGACGAGGC  | 903.764244717531 | 0.149422569212063  |
| CGAACGTTCATGA | 903.766269082577 | 0.10060437786802   |
| AGAGTCAAGACA  | 903.773406725341 | 0.110170413460505  |

|              |                  |                    |
|--------------|------------------|--------------------|
| TACTTAGCGTCA | 903.775113151697 | 0.111222809766529  |
| AAGGTTACGTGT | 903.783140587548 | 0.133941279701549  |
| ATGACATTAGAG | 903.799947108691 | 0.140210157225621  |
| ATCTCTCGTCAT | 903.800696458637 | 0.11657982150887   |
| CGCTGACTTAAC | 903.807753719396 | 0.0869807676487123 |
| GAGAAGTAGTCA | 903.831064481553 | 0.131367906994157  |
| GTGACGGAGAGA | 903.835082544978 | 0.0943964796351229 |
| CGATGAGCCAGA | 903.838567256324 | 0.100703586448897  |
| GTGAGTAGGTCA | 903.841202496207 | 0.123834517727339  |
| ACTGAGTCTAAA | 903.851341887369 | 0.111082154799796  |
| CTCAACATGTCA | 903.863055247128 | 0.168411608605457  |
| ATTCATCATAGA | 903.878514059486 | 0.129196429767716  |
| ACCACATCATCT | 903.889089864382 | 0.0943270368412412 |
| AAAAGATTCATC | 903.892794106842 | 0.10805557695644   |
| GCTCTCTGTGAC | 903.893721605349 | 0.114130027682501  |
| GTATGAGTTACA | 903.899725091938 | 0.111097202209939  |
| AACCTCTAGTCA | 903.905630162628 | 0.0935133203106336 |
| GTCATGCGAGGA | 903.91352319529  | 0.169187804215636  |
| AACGCTGACGTA | 903.914316909498 | 0.162190413366738  |
| CGTCACACGTAC | 903.938229191602 | 0.11182817363802   |
| CCTGACTATGAG | 903.93830097432  | 0.0924467819474523 |
| AAGTGTCAGAAA | 903.950945846595 | 0.120990171648613  |
| AAGGATCGTCAT | 903.979886234583 | 0.143343052088575  |
| CTTCGCGTGACA | 903.982100757441 | 0.143471822716487  |
| GACCAGTCAGTA | 903.982189833274 | 0.107675414025853  |
| AATGACGTCGGA | 903.99446764333  | 0.101465985938187  |
| ATGAGTAGACCG | 903.997953113913 | 0.109750070772973  |
| CATGACAGTACC | 904.008165473086 | 0.140365957852067  |
| AGTCAGATACCA | 904.016900101888 | 0.118185285519638  |
| TGCGTAATTGAA | 904.021276426522 | 0.133680349013218  |
| CCTGAAGACTGA | 904.027265754732 | 0.133103898194319  |
| CATAGTCCGTCA | 904.032572321497 | 0.175775270188852  |
| GGTCATCATAGA | 904.033688483912 | 0.112514512844094  |
| CGTGACAAACAG | 904.048130472891 | 0.144820297908382  |
| AGCAGACTCACT | 904.051562521686 | 0.11693517540451   |
| GTCACCTCCACA | 904.064181680237 | 0.189941086766563  |
| AATGGTGGTCAT | 904.066468741757 | 0.122864735731221  |
| GGAAGCATGACA | 904.076027456158 | 0.100875677417565  |
| GAGATGTATCAC | 904.077555871095 | 0.131581552064459  |
| AGAACGTACCG  | 904.092979812006 | 0.212410898519386  |
| AATTGTGAGTAC | 904.101984101202 | 0.130709928792247  |
| ATGACAACCCTC | 904.107133111077 | 0.138797469513018  |
| CAAGACTGACAC | 904.112852842856 | 0.19286291511335   |
| ACTTCCCAGTCA | 904.115426514286 | 0.169953586154431  |
| GTGTGACGGGTA | 904.127030827811 | 0.125766407100926  |
| ATGTAATGAGTA | 904.127778228634 | 0.161715772675974  |
| ATAAATGAGCCA | 904.140023849453 | 0.14672062805578   |
| TCATAGTTACAA | 904.142935425988 | 0.142577721243365  |
| TCCGTATACTCA | 904.148388580566 | 0.204489450077939  |
| AGTACTGTCACA | 904.151483426468 | 0.111208466209341  |
| GTCACCTGTGTA | 904.154298414634 | 0.101284598157124  |
| GCACCATGACGA | 904.158586400166 | 0.106118160043014  |
| ACTCATAACCGA | 904.183978647061 | 0.106790211277849  |
| CACCCAGGTGAC | 904.203745401242 | 0.120456324387408  |

|               |                  |                    |
|---------------|------------------|--------------------|
| AAGGGTTGTCAT  | 904.215467736581 | 0.149074870378376  |
| ACCCTGACTCGC  | 904.223670074194 | 0.129276341001071  |
| AATGAGGTGTCA  | 904.223805882648 | 0.156361754726175  |
| AGCTTATGTGAC  | 904.231340101692 | 0.107836611307709  |
| CCGCTTGTGACA  | 904.232276151235 | 0.172656779171471  |
| TGACTTATCAAA  | 904.238285836539 | 0.132825096646524  |
| AGCTGAATCAGA  | 904.246445733081 | 0.183293940827816  |
| TAGAGTGACAGA  | 904.249887554654 | 0.120819912994845  |
| AAGAATATGAGT  | 904.257104826424 | 0.161409338895031  |
| TGTGTGAGCAAA  | 904.262131094315 | 0.103221861425351  |
| CCGTCATGCTTA  | 904.267661903296 | 0.11692136542534   |
| GGGTCATAGGGA  | 904.268105468515 | 0.105421315467788  |
| GCGTCACCACCC  | 904.268422540771 | 0.136298294799556  |
| TGCTCGTGACCA  | 904.271455628792 | 0.101555064295284  |
| CGGGCGTAGTCA  | 904.273361243853 | 0.102485575495992  |
| CATCCTGAATCA  | 904.280362978106 | 0.147350050122845  |
| CGTACTTGGTCA  | 904.281654024297 | 0.131343823078878  |
| CCTGTCATTTCA  | 904.292536253952 | 0.0927344434576427 |
| AGAGAGCATGAC  | 904.293512089594 | 0.13467762414824   |
| ACAATTAGTCCT  | 904.300146358292 | 0.148170231612258  |
| AATGAGTAGGCG  | 904.301367589721 | 0.105812325783498  |
| GGATCTTCGTCA  | 904.308058542274 | 0.117454248323796  |
| CCAAGTCACGAG  | 904.311258565737 | 0.0821679460671556 |
| AACAACATATAT  | 904.31229683273  | 0.178478714290364  |
| AATGGGTGTACAC | 904.31406723391  | 0.150424654228823  |
| CCGATTTGTCAA  | 904.324542729231 | 0.095869458629281  |
| ACTCATAACTAT  | 904.324697853045 | 0.0907885748544257 |
| GCTCACGGTGAC  | 904.330410922381 | 0.114643652639114  |
| GAAGTCGTCA    | 904.339633143459 | 0.124125670628046  |
| GTCACCTAGCAC  | 904.34069515618  | 0.0926668565552499 |
| CTCCGACTAATC  | 904.346559964957 | 0.110046396053235  |
| AAGACGTGGCTT  | 904.384771278661 | 0.13115930770184   |
| CAGTGACAGGTC  | 904.401646480415 | 0.175788314585611  |
| ACTCATTTTATC  | 904.402042373201 | 0.119502958452489  |
| AGTATGTACCGA  | 904.404916639556 | 0.0983531012628931 |
| CGTCACTGCCTA  | 904.420794126521 | 0.137568543826846  |
| AACCCCACGTCA  | 904.426913834718 | 0.164109499999837  |
| CGGTCATTACTC  | 904.427019419085 | 0.11069095019997   |
| ACGTCGTACAT   | 904.428989513    | 0.0787859793672741 |
| AATTGTGACAAG  | 904.431240596049 | 0.0942050376549363 |
| AGAAGTTGTGAC  | 904.431456531505 | 0.116166317694872  |
| TCGTGCGCGTCA  | 904.435465014023 | 0.144074802598318  |
| GGCTGGCATGAC  | 904.4435290148   | 0.103323076435578  |
| CCGTCATCAATA  | 904.444125920015 | 0.0964283507994101 |
| TCATCGATTACA  | 904.452623003989 | 0.127949486303961  |
| GGTAACTCATAA  | 904.455056079378 | 0.122548010281631  |
| TGACAAAGACAA  | 904.458007926623 | 0.109633723309165  |
| CCACTTTGTGAC  | 904.466154183698 | 0.148537294054735  |
| GCTACCCATGAC  | 904.469808962284 | 0.176949370947949  |
| ATGATTCGACGG  | 904.486605897617 | 0.10775121015593   |
| CGTGTGAGACAA  | 904.486743264958 | 0.143548918827038  |
| AGACTCAGACCG  | 904.491732857519 | 0.130567130829866  |
| CCAGGTCATACA  | 904.494231627333 | 0.133598088600201  |
| AAAGACGCATAC  | 904.510395589629 | 0.0618466532629192 |

|               |                  |                    |
|---------------|------------------|--------------------|
| ACCGTGACGCCA  | 904.511559512862 | 0.133473400177821  |
| GATGAGTGATACA | 904.512095582872 | 0.158545027494491  |
| ATAGATGACGGG  | 904.513951040901 | 0.135515750854837  |
| TGACCAACAAAA  | 904.517846191213 | 0.118552415035797  |
| AGCTTGTCATCC  | 904.518731372311 | 0.115579779112838  |
| TGACGATAGCAA  | 904.520093360384 | 0.14610669868077   |
| GTGTCACGTAGA  | 904.536485515221 | 0.112007741201702  |
| GGCGCGTCACGA  | 904.538574465682 | 0.138151996245844  |
| CGTCACTCAATC  | 904.546394333353 | 0.133682774072549  |
| ATACCGTCACCA  | 904.556509508763 | 0.114208872549255  |
| AGTGTCAGAGCG  | 904.557057328357 | 0.0916929944406223 |
| CGGCATGACCGA  | 904.560703771926 | 0.101673473821177  |
| CGTTACATCACC  | 904.566296053727 | 0.0976390935810109 |
| GGTCATCATCGA  | 904.568138844334 | 0.188210419291577  |
| AAATTGTGACAT  | 904.584986040311 | 0.101765704103968  |
| CTCCGAGTCAAA  | 904.586209522443 | 0.118513913204171  |
| ATGTGACCACTC  | 904.589859224018 | 0.13114888910765   |
| CCCACGTAGTCA  | 904.592839419805 | 0.10743857831683   |
| GGTGAATAATAC  | 904.607518506118 | 0.155488554394326  |
| ATCGGTGTCACG  | 904.613075313412 | 0.111146808127704  |
| GTCACCCGGTTA  | 904.623602779594 | 0.104380162095859  |
| AAGATTCACACA  | 904.667587654682 | 0.138183045839841  |
| GGATGAGGTGAC  | 904.668062189883 | 0.105911432899022  |
| TCACCTCTGTCA  | 904.680999271427 | 0.137167494308585  |
| AGAGTATGAGCC  | 904.683672597671 | 0.168462682476251  |
| AGTTTGACGTCA  | 904.692400356604 | 0.0922043059181464 |
| CGTAGCTGTGAC  | 904.712850760531 | 0.146880700813243  |
| ATGAGGCATACG  | 904.723806600682 | 0.139079228264671  |
| ACTGCGAGTCAG  | 904.754137272609 | 0.15140699850128   |
| GGTCATCAATCA  | 904.762380191114 | 0.1187709550604    |
| ACTTGTCACGAA  | 904.76703022608  | 0.134821637853649  |
| TACTGATTCAGA  | 904.771643043102 | 0.120680559052582  |
| ACACATCATCTG  | 904.775092163984 | 0.104633730313055  |
| GGCTAGCGTGAC  | 904.782778363067 | 0.140822549645819  |
| CAATACCGTCAC  | 904.797224871015 | 0.111289925633947  |
| AGCGTTATGACC  | 904.800840561137 | 0.14889206541518   |
| GATGTCTGTGAC  | 904.810087088425 | 0.163011781471406  |
| ACGGACTCGTCA  | 904.811452937212 | 0.18549499875918   |
| CTTCTTGATGAC  | 904.81241402619  | 0.106515135706093  |
| CAGTTTTGCTCA  | 904.81803276854  | 0.103485422808711  |
| AGACTCAACCGG  | 904.845474791113 | 0.091939884464492  |
| CGTCATGGGTAA  | 904.846580356591 | 0.126527804600556  |
| GCAGTCAGATCC  | 904.852372639948 | 0.182354642922945  |
| TGATTCAGGAAA  | 904.860495345044 | 0.133264486560768  |
| AATGGTGACAAAT | 904.870593051337 | 0.105023329525533  |
| AGACTAATAACC  | 904.880302574567 | 0.11082663546328   |
| AACTTATGACCG  | 904.888241750919 | 0.195660684380649  |
| ATGATGTGGATC  | 904.896794592432 | 0.1128510438343    |
| ACGTGTTACTAA  | 904.910695136087 | 0.151282670637985  |
| AAATCCGTCAAC  | 904.915723620019 | 0.0958847838586206 |
| ATCCGCGTGACG  | 904.921047788262 | 0.110765741415056  |
| CTGAGTAAGTGA  | 904.938680628478 | 0.103464755903592  |
| GGTTGCATCACA  | 904.95004748592  | 0.130937350404358  |
| ATTATAATGACG  | 904.951574450045 | 0.170174458410831  |



|               |                  |                    |
|---------------|------------------|--------------------|
| CTGACTACTACC  | 904.961657356944 | 0.110523767848114  |
| CGGCCGAGTCAA  | 904.962008532652 | 0.145172370366162  |
| CAAATATGAGTG  | 904.970485588527 | 0.160598356291525  |
| AAAACGAAGTCA  | 904.971523792612 | 0.15417967932359   |
| GCTTATAGTGAC  | 904.99601077234  | 0.175084845208986  |
| ACACAGTCAGCT  | 905.000416552374 | 0.198098610845062  |
| GCAAGTGGTGAC  | 905.010164229853 | 0.114660130709239  |
| ACTCATCGCTGG  | 905.012589529426 | 0.12395022561269   |
| GGATCTGTCAAC  | 905.015687427629 | 0.14238574447474   |
| CCTGACGCAGTA  | 905.024147851658 | 0.122382749015912  |
| CGTCACCTCAGA  | 905.041318202322 | 0.170295492477256  |
| AATACACATCAC  | 905.041542691229 | 0.127335564290174  |
| ATTGACACAAAA  | 905.043268471222 | 0.106976323183139  |
| AAATGCATCACA  | 905.05076442947  | 0.156520900436523  |
| AGTCACGGGCAA  | 905.066689576892 | 0.130486818844124  |
| GAGCTATATGAC  | 905.071234456673 | 0.152450224407934  |
| AGACTAATCTAG  | 905.094566801511 | 0.093668533199574  |
| GAATGATACGTC  | 905.102787022279 | 0.161855293018821  |
| AGTAACATGACG  | 905.118985855795 | 0.115570446077423  |
| AGTTGAGGTGAC  | 905.123419190286 | 0.128738450559775  |
| ACAGTCTGACGC  | 905.12651258649  | 0.136973068364556  |
| CATCATCACTCA  | 905.133867635403 | 0.117193780643341  |
| AGGCGCTGACTG  | 905.13728896883  | 0.107254222347182  |
| GTGAGCAAGAAA  | 905.143724598361 | 0.10840349538692   |
| ACTGTCAATGAA  | 905.156658051959 | 0.175207764857718  |
| CGCCTCAATGAC  | 905.156794237474 | 0.138019483783726  |
| GAGTGCAATGAC  | 905.161848179384 | 0.107415201354815  |
| AGATTAGTCGGA  | 905.165380503877 | 0.113720931668945  |
| ATGAGTAGGCAC  | 905.169949125802 | 0.0994540462242986 |
| GGGGTCATCATA  | 905.171270184785 | 0.11422754126605   |
| GGATATACTCAC  | 905.175344300806 | 0.15766278160548   |
| CAGTGACAACATA | 905.182434301295 | 0.117158849867636  |
| AACGTCGTCACA  | 905.195797731529 | 0.0964197157856049 |
| AAGAATGAGTTA  | 905.199144365586 | 0.107350967815645  |
| CCGTTATTACTC  | 905.208352041642 | 0.0936799998819895 |
| AATTGACACAGT  | 905.210313550595 | 0.131882808840557  |
| TCCCTTAAGTCA  | 905.216771095882 | 0.123640764446691  |
| AACCGGACTCAT  | 905.221756238245 | 0.081543168362652  |
| AAGCGGATGAGT  | 905.222932547419 | 0.122868453494844  |
| GGATCGGTGACA  | 905.227844569056 | 0.100522531019437  |
| AAAGTCGTCACA  | 905.233056741609 | 0.0769795255246211 |
| CCCTAGGACTCA  | 905.237577913554 | 0.145132422068685  |
| ATGACGATCCTC  | 905.238178737993 | 0.0958873337333098 |
| CTAATGTGTCGA  | 905.239187451618 | 0.13379406445821   |
| CAACGTCATGGC  | 905.241590021201 | 0.184393618083997  |
| ACGACTCAGCGG  | 905.246506781365 | 0.157365456431782  |
| GCCAATGTGACA  | 905.261137308643 | 0.0966618811930821 |
| ATTAGTCGGAGC  | 905.266178368861 | 0.207460751660817  |
| GTGCTGGTCATA  | 905.26840299664  | 0.149096434748233  |
| AACATCTGACTG  | 905.274648326502 | 0.11234002985551   |
| CCTGTCCGATGA  | 905.27952727742  | 0.170400457181844  |
| GGTGACGACGTA  | 905.280367704307 | 0.117095895117089  |
| GGGTTAAATGAC  | 905.284709336546 | 0.174356890021725  |
| AGTCAGACACAA  | 905.289945541376 | 0.10952220006912   |

|               |                  |                    |
|---------------|------------------|--------------------|
| AACAGGTCTGAC  | 905.292203001384 | 0.153708501425979  |
| CATGTGGTGACA  | 905.293926042807 | 0.105338861059208  |
| ATGCACTGACTA  | 905.304465540354 | 0.134791268251188  |
| ACCCATCATGAC  | 905.304824393721 | 0.14338823127621   |
| CGATGCGTGTCA  | 905.323932166588 | 0.0940440023235727 |
| GAGTTAGGTGAC  | 905.335239575586 | 0.135795490859144  |
| TGTAATCTGACA  | 905.340080488124 | 0.0996473998714018 |
| ACACGTCAACAA  | 905.340799265518 | 0.124512263719665  |
| ATCGGCTGACTA  | 905.342834235783 | 0.0854045933984649 |
| AAGCAATGAGTA  | 905.344538061757 | 0.117047252282078  |
| TGACTAGCATCA  | 905.356189245204 | 0.145422198507503  |
| TGATGTAACCAA  | 905.357950071542 | 0.145283162830349  |
| CTCACACATGAC  | 905.369018814549 | 0.125035715615678  |
| AATGACCACTCC  | 905.370516797358 | 0.0991019741863306 |
| CGATAGTGACGC  | 905.372567865949 | 0.131042803819187  |
| ACTTTAGGTCAT  | 905.382183390198 | 0.159306572148186  |
| ATCTGGGTGACG  | 905.395058603184 | 0.124390065047334  |
| AGTCAGTACCAA  | 905.399937704054 | 0.0968072973260037 |
| AAGTCATGGGTG  | 905.402650063041 | 0.108199914588452  |
| GTCTGACACCAC  | 905.40444110921  | 0.153090118962761  |
| ACTCATCAATTA  | 905.405060016559 | 0.118626826755196  |
| AGTCAGCAAGCG  | 905.405062389683 | 0.161112408688975  |
| AAGTGGATGAGT  | 905.40812790384  | 0.0924585871674896 |
| CGTTGGTGACAA  | 905.408305558492 | 0.0848129062711123 |
| GTCACGTTTCGTA | 905.421657990118 | 0.137241047554796  |
| AGTCAGCCAAAT  | 905.436158059117 | 0.114767803630198  |
| ATTCACTACCCG  | 905.438558734015 | 0.0954031637598772 |
| ACTCATACGGGA  | 905.445908564376 | 0.154223008661171  |
| ATTGGCATGACG  | 905.455484237292 | 0.103564003799251  |
| ATAACTGACTAT  | 905.500959392093 | 0.149716716874587  |
| ACACTACTGACT  | 905.50499820997  | 0.10322535382423   |
| ATGAGTAGACAC  | 905.506326103001 | 0.144581907987015  |
| GAGCAATGTGAC  | 905.521542596799 | 0.0985409538524743 |
| ATTAGGTCAATTG | 905.52923294115  | 0.166188384634581  |
| AGCGTCATGGAT  | 905.537516379008 | 0.141242348327445  |
| CAGTCAGTAAAC  | 905.548016929799 | 0.0954276701013309 |
| CGCAATTAGTAC  | 905.558949056776 | 0.16460504296207   |
| AGTGTCACGGGC  | 905.560052633583 | 0.135170592257842  |
| CATGTTCTATGA  | 905.566395971241 | 0.125681118111201  |
| TCGACGTGACGA  | 905.566755732978 | 0.108318510423244  |
| AGGTGACGATGA  | 905.580114488552 | 0.106118227860138  |
| CACGTAATAGGG  | 905.584941388072 | 0.138419576236062  |
| AATGTTGACGTG  | 905.600936886321 | 0.109749265398079  |
| ATATAATGTCAC  | 905.605000119516 | 0.139097307634988  |
| ATGACGTTGGGC  | 905.611835244314 | 0.1549552159781    |
| AGAAGAGGTGAC  | 905.631713756797 | 0.122659626961029  |
| GTCATGGAAAAC  | 905.637496369624 | 0.122546200793684  |
| GTGAGCAAGAGA  | 905.66897865259  | 0.110507180429356  |
| AATGTGTATCAT  | 905.688864496461 | 0.116064054268913  |
| ACGTTGCTGTCA  | 905.691502830491 | 0.132290591196113  |
| CAGTTTCTGTCA  | 905.702332049724 | 0.151708739203875  |
| CATAGTCAGCAG  | 905.706870027413 | 0.118584891978654  |
| CTGTGTGAGCCA  | 905.729721694909 | 0.101493653450302  |
| AAGACTAGTCAG  | 905.734904790003 | 0.0933448376595884 |

|                |                  |                    |
|----------------|------------------|--------------------|
| ACTGAGTAAGTG   | 905.736409927484 | 0.112162662617597  |
| AGTGATGGTGAC   | 905.737846747664 | 0.130567532693742  |
| ATTGGGCATGAC   | 905.742289605464 | 0.141348510203283  |
| AATTGACGTATC   | 905.763006260198 | 0.115572388025022  |
| ACAGCTCCGTCA   | 905.770345398699 | 0.111167192071236  |
| ATTGTCATGATA   | 905.77261304516  | 0.139118506520098  |
| CGTGACTGCCAA   | 905.772702314633 | 0.124733499460138  |
| GACACAGTCGTC   | 905.776066013142 | 0.173007480159025  |
| TCTACTAATGAGA  | 905.800721998838 | 0.142150989413085  |
| ACCAGACTATGA   | 905.803171125049 | 0.159175080728318  |
| ACACCCAATGAC   | 905.809106545484 | 0.0988749344419564 |
| CGTTGCAGTCAA   | 905.80989062499  | 0.208738058430939  |
| CTGATGTGACGA   | 905.810206057022 | 0.0692184987899513 |
| GATGATGACCCC   | 905.812724861882 | 0.0684703317536488 |
| ACTGAGTTGTCA   | 905.827519344472 | 0.136209643030777  |
| TCCAGGTGACAA   | 905.828037646201 | 0.101604688701699  |
| GCTACCTGTACAC  | 905.830754887874 | 0.11293383279242   |
| ATATTTTCATGAC  | 905.840101526756 | 0.123752263183035  |
| TACTTGTACAAA   | 905.84827502708  | 0.13456328657004   |
| GTGCAGTCAGCA   | 905.85780367263  | 0.168455577299199  |
| GTGATTGAGTAA   | 905.858696814406 | 0.105194783668998  |
| CTAGGCTAGTCA   | 905.868122553675 | 0.156918446532501  |
| AGGGTGAGACAT   | 905.869031438117 | 0.130740684327322  |
| ACGCGTAATCAT   | 905.88663901074  | 0.0990698942375907 |
| GAGAGGGGTGAC   | 905.887635831879 | 0.113567917839733  |
| ACGTCATGATCC   | 905.924742406742 | 0.131997608125742  |
| GCATATTAATCTGA | 905.93614502167  | 0.175020998648274  |
| TCAGAGGTGTCA   | 905.936706298946 | 0.105660012287115  |
| CACTACCATGAC   | 905.94521419185  | 0.15461474242409   |
| AGGAGAGAGTCA   | 905.955661539941 | 0.130202410105069  |
| GATTCATATCTA   | 905.957341877805 | 0.173679464338565  |
| ATGTCACCAGTA   | 905.959874464474 | 0.0659601468894248 |
| TAAGATCGGTCA   | 905.962990561778 | 0.082839641957305  |
| AACTCTCCGTCA   | 905.970624065329 | 0.194776163954657  |
| CGTGATTCAAAA   | 905.982403706763 | 0.104772851838343  |
| ATGACGGCTACG   | 905.997036145766 | 0.113249690956521  |
| ACACCCACGTCA   | 906.002486994316 | 0.197348252055569  |
| ATGACTTGAGTG   | 906.00729017333  | 0.118493476621181  |
| CACTTGCTCATG   | 906.027529972115 | 0.154139465777065  |
| CCATTCCAGTCA   | 906.030044336177 | 0.0653960544119572 |
| CCATAATGACCA   | 906.042051010587 | 0.107998584511821  |
| GCTTTCCAGTCA   | 906.048021010821 | 0.0964937881299011 |
| CAGCTCCGTACAC  | 906.048033088607 | 0.127984765850653  |
| CTGGAGTGACGA   | 906.065494114312 | 0.146818894496507  |
| GACTAATGCCCC   | 906.092160933501 | 0.134979415809908  |
| AATTCGTCGTCA   | 906.100914130407 | 0.100197963845611  |
| ATATGTCAGCAG   | 906.10335851234  | 0.118196731759275  |
| GATGCGTCTTCA   | 906.108192724874 | 0.140039662973159  |
| TCCTCAGTGTC    | 906.114618353412 | 0.125916270389294  |
| CCTGTCATTACA   | 906.116553254826 | 0.0907569840095358 |
| AAATTAGTCGGC   | 906.119565632345 | 0.113989556740157  |
| ATCTGGCTCATC   | 906.125034391235 | 0.09100062779734   |
| AATTCCTGTTCAT  | 906.129571858882 | 0.173889791628009  |
| AGTTATTGTAC    | 906.12963406436  | 0.095035542573097  |

|              |                  |                    |
|--------------|------------------|--------------------|
| GGTTACAGTCA  | 906.133458793343 | 0.133383282101082  |
| ACGGTCATCTAA | 906.133468028352 | 0.124482351365841  |
| CTGCCATGACAA | 906.138490449885 | 0.118054656719079  |
| AATCGCTGACGC | 906.142677994021 | 0.148822080198702  |
| GAATTGCTCAAC | 906.147142029403 | 0.12724566038966   |
| CGTAAAGGGTCA | 906.159946531757 | 0.10262169332715   |
| GATTAGTCTGCC | 906.159981166111 | 0.120384247695113  |
| CAGGCGGGTGAC | 906.162701951556 | 0.129237591048314  |
| AGCAGTCAGCCA | 906.164118053972 | 0.0971154195754077 |
| TGAACCGACTCA | 906.184252924335 | 0.11223371698327   |
| ACAGTATACTCA | 906.185783983736 | 0.15915351574755   |
| CGAAGTAGTCAG | 906.210988693009 | 0.15063214062391   |
| ACGGATGTGACA | 906.217064312595 | 0.137788342664652  |
| CGTATACTCACC | 906.217410496489 | 0.120155566408071  |
| CGCTTAGTAATC | 906.225454079658 | 0.129292309159252  |
| GCACTGGGTGAC | 906.23669034868  | 0.120814792677837  |
| AAGTCATGGTAA | 906.245521679861 | 0.115171082340562  |
| ACGTCAGACGTC | 906.251762401477 | 0.129067962625203  |
| GGTGACGGTTTA | 906.284485029347 | 0.152427737673376  |
| GACTTACTCAAC | 906.2872584758   | 0.0996001818234504 |
| CATATTACTCGA | 906.295686201854 | 0.10305652697662   |
| TCCCAGTGACA  | 906.299676098373 | 0.1565386148485    |
| CGTAATGTGACA | 906.306350300653 | 0.127433419366979  |
| GAAGATTAGTAC | 906.307324041379 | 0.199840509137566  |
| ACTCATTCTACT | 906.325006417311 | 0.125353416649694  |
| ACGACTCTGACA | 906.337359768144 | 0.186200999103046  |
| GTCACTGCAGTA | 906.359906284074 | 0.167810759221585  |
| TCTCTCCAGTCA | 906.362156590137 | 0.0933291647778104 |
| CACAGATGAGTA | 906.370647000644 | 0.15312524212664   |
| CTGTTAGTAACA | 906.376634866229 | 0.12890492871272   |
| TAGGTATCGTCA | 906.390782896376 | 0.101720034507617  |
| ATGACCGTAACG | 906.408024212734 | 0.170262297700706  |
| AATTATGTGACA | 906.409228497367 | 0.0837692013469793 |
| CAATACCTGTCA | 906.411013484263 | 0.134997571596726  |
| ACGCCGTATCC  | 906.416760734098 | 0.100363092540022  |
| CTTACCTGTAC  | 906.419028872761 | 0.104350948099777  |
| AGAAGATTGACT | 906.420123853307 | 0.11643843045935   |
| AGTGATACATCC | 906.448573372452 | 0.076356103039784  |
| AATGGGTCAACG | 906.458808257224 | 0.132598547869072  |
| GTTTTGACTCA  | 906.459366709577 | 0.0927345510063483 |
| TATCTGACTGGA | 906.462214700337 | 0.132038413829477  |
| GAAGAATGTGAC | 906.465331929858 | 0.134743863417672  |
| GGTACACTCATA | 906.467496798714 | 0.113250275081896  |
| CTCGTGACTCA  | 906.469518819003 | 0.123935705813018  |
| CATGTCACCACA | 906.472737106272 | 0.10217404998291   |
| CAACTCTGACAC | 906.475021867756 | 0.161142698971575  |
| GTCATAACCCCA | 906.495650931388 | 0.10386332432348   |
| TACGCTGTCACA | 906.508879506003 | 0.115676569541809  |
| TAAAGTGACAAA | 906.531882183893 | 0.1831190405679    |
| CGATTACTCTTA | 906.532011673489 | 0.133226600977065  |
| CAGTCAATGTTA | 906.533291708623 | 0.0934846459105785 |
| ATGAGTAGGATA | 906.533316175741 | 0.0921399869865153 |
| CACGCATTGTCA | 906.538680129386 | 0.101161415000874  |
| GACTCAATCTAA | 906.555334357789 | 0.105041253428756  |

|              |                  |                    |
|--------------|------------------|--------------------|
| AAGAGTCTTCT  | 906.569800304815 | 0.0653238244593303 |
| CATCCATGACAG | 906.569960686649 | 0.199846189809727  |
| CGTCACAGGATA | 906.57287900498  | 0.158500405341036  |
| AGAGTAATAAGG | 906.574215078514 | 0.149479636970835  |
| AACACGTGACGA | 906.582804918617 | 0.135062199817018  |
| ATTACAGTAATC | 906.586604930087 | 0.0951247122028695 |
| ACGGTTACACAT | 906.588933332062 | 0.131648058952084  |
| AATGTGTCGACG | 906.589233224598 | 0.138971503148748  |
| ATACGTAATATC | 906.590824357873 | 0.119277621253569  |
| CGAGCTGACGTA | 906.601883142988 | 0.126282255613348  |
| GTCACTATTGAA | 906.60378051185  | 0.111010048705578  |
| GGACGTGACGAA | 906.624638943615 | 0.132956731931662  |
| CACTTCATGACA | 906.630500681068 | 0.108114186917754  |
| GGCCTCGTGACA | 906.650686088749 | 0.0902421070490331 |
| GGGTCAGGTGAC | 906.652066185994 | 0.0920859024797388 |
| GATCAAGGTGAC | 906.654989169443 | 0.110902299843698  |
| CCTTGACGTGTA | 906.659424379969 | 0.127955131841742  |
| ACCTGTATGACC | 906.665015159106 | 0.110690010151394  |
| AGAGTGTGACCA | 906.667982195709 | 0.11449121953439   |
| ATTATTCATGCG | 906.678762033421 | 0.181307168338101  |
| GACGCACTCATC | 906.680458411356 | 0.103353062746655  |
| CGTCACAGTAGA | 906.686227836487 | 0.126147936346356  |
| ACTCATCACCTG | 906.695702736828 | 0.159078604816772  |
| ATCGGGTGACAG | 906.700557303419 | 0.123283602352157  |
| GACATGTGACAA | 906.708944762253 | 0.181537994278522  |
| AAGTCAGAGTAA | 906.711879039247 | 0.100797258245128  |
| ACTCATCACATA | 906.720102276669 | 0.202829894702808  |
| TAAGAGTGACCA | 906.72792071645  | 0.0992003169681486 |
| ATGACCTCATAA | 906.740361273661 | 0.128629258923001  |
| CGTCATGAATAC | 906.740372936083 | 0.146525371837715  |
| GAACCTCGTGAC | 906.760531682969 | 0.136394111929684  |
| ACTCATTGTTAC | 906.763469798436 | 0.0965694817668597 |
| CAGTGACACGAA | 906.800067085072 | 0.0943227720386813 |
| AGCTTTCTGTCA | 906.809527616586 | 0.156518725583356  |
| GTCACCTCCTCA | 906.811506380571 | 0.110824348938337  |
| CATAGCGTGACA | 906.82623414902  | 0.0904852301055754 |
| CAGCCGACGTCA | 906.829164305426 | 0.164384155699261  |
| ACGACTCAATTA | 906.841593137999 | 0.0681974982182351 |
| GTAGGTGACAAC | 906.856489600365 | 0.151907935809283  |
| AGATGAGTAGGA | 906.882151632593 | 0.101209275496976  |
| AAGGAGTGTGAC | 906.896908282833 | 0.107719342473696  |
| AGTCAGCGGTAG | 906.90806675562  | 0.0853123681481659 |
| TGGAGATGACCA | 906.927237347193 | 0.138213478535924  |
| ATGTGATACATA | 906.927668573881 | 0.0886232869541019 |
| GTCGACTAGTCA | 906.933466956254 | 0.0977025005613558 |
| GTTCTCGCTCA  | 906.943476557519 | 0.11993707141149   |
| CCGTTGACTATA | 906.949700785358 | 0.0895505733791861 |
| CGTCACCTCTTC | 906.953285762666 | 0.129222298028352  |
| GGGTCATCAAAA | 906.953561496918 | 0.0934141241522818 |
| CGGACACGTGAC | 906.955037491585 | 0.122876121749219  |
| AGGCTAACTCAT | 906.955570064356 | 0.159375967590968  |
| ATGACATCGTGG | 906.961602692877 | 0.104821210939777  |
| TAGTGGCTCACA | 906.968700978843 | 0.127423444999708  |
| AAGTAACATGAC | 906.971771432865 | 0.111281779372142  |

|              |                  |                    |
|--------------|------------------|--------------------|
| AGAAATCTGACT | 906.978640010036 | 0.0626017094613527 |
| TCCGTCACATAA | 906.979417463707 | 0.143526100875524  |
| ACGATGAGTTAA | 906.98367195273  | 0.107136197467788  |
| TCATATCATGAA | 907.001898753179 | 0.142934467647306  |
| ATGACACCCGAC | 907.005250283945 | 0.08656690338492   |
| ATGTAATAGTAA | 907.007263099975 | 0.132696240114312  |
| CTGGGTAGTCAC | 907.009600717045 | 0.109984143246735  |
| AGACATGACGTC | 907.011488944752 | 0.106344805639346  |
| AGTGATACATCA | 907.026682953399 | 0.124411027726689  |
| ATGTGTCTTACA | 907.031817422433 | 0.089970293839132  |
| AGCCGTGACGCT | 907.035471757812 | 0.130772537473262  |
| AGCAAGTGACGC | 907.043388111907 | 0.0932847933355046 |
| AGTCAACTCATA | 907.046070474232 | 0.0930747213784731 |
| ATGAGTGTTTAA | 907.04860090366  | 0.165405657650524  |
| CTACCTGGTGAC | 907.050736762729 | 0.113124847242727  |
| GTCACATAACAC | 907.062375471353 | 0.122528387529419  |
| ATGGCTCAGAGC | 907.068865840533 | 0.119369668546676  |
| ATATTACTCCTC | 907.07990902533  | 0.0944299643649471 |
| AATCTTTGATGA | 907.085445531343 | 0.165377925389403  |
| CACTAATCAGTC | 907.086311315053 | 0.112345176957317  |
| ACGGACTGTCAT | 907.086321805653 | 0.0750228891674345 |
| AAGACTGACACC | 907.089109709833 | 0.102634867634526  |
| CCGTCATTATCG | 907.090964233788 | 0.0907137048355836 |
| TATGTATCACAA | 907.093152763342 | 0.0896870242458806 |
| GTAATGACCAC  | 907.103866541823 | 0.0869604058482234 |
| ACTCATTCCGCA | 907.124707604353 | 0.121031551746536  |
| ACAATCATCAT  | 907.126540522073 | 0.108183321593383  |
| GAGTCGTCGTCA | 907.160946165914 | 0.102449369704322  |
| AGATACGTGACG | 907.169790212365 | 0.201628778931575  |
| GATTAGCAATGC | 907.170483722172 | 0.129211018077386  |
| CGTCACGAAGAG | 907.170850974895 | 0.130456027001912  |
| GTGACGAACGAA | 907.174362983593 | 0.080706673685206  |
| ACATTTATGACC | 907.188957450749 | 0.0904005365418709 |
| CTATTAGCAATC | 907.190930755958 | 0.136472377614779  |
| ACTTGCTACTCG | 907.193254388736 | 0.167677020010286  |
| AACCCTTGACTC | 907.193391993585 | 0.148535871759438  |
| GGGATCCATGAC | 907.193989945432 | 0.123835558669891  |
| AGCATGGTGACA | 907.210037520229 | 0.116500769725118  |
| ATGATGCAATGG | 907.214425492326 | 0.113229862741123  |
| ATAATGTACACG | 907.230076878534 | 0.11140395536604   |
| TCATTGCTGTCA | 907.23566124274  | 0.126461666123416  |
| ACTCATTCCGAT | 907.248137315878 | 0.152718473849003  |
| GTCGTCACCCGA | 907.271952759144 | 0.0983467632415765 |
| CTATCTATGTCA | 907.274869017135 | 0.100960561347154  |
| CCTTTGTACTCA | 907.28107542908  | 0.127504600622529  |
| AACGTCATGGCC | 907.298001274788 | 0.098483147475329  |
| ATGAGTATGGTG | 907.303779977808 | 0.13058497263832   |
| GAACGTGACGTC | 907.304308068761 | 0.124190038399607  |
| ATGACGGCGCAA | 907.311117196052 | 0.171472386491696  |
| GAGCCGATGAC  | 907.325476676186 | 0.199338549364772  |
| ACATGACCCAGT | 907.345406548838 | 0.0985835876132743 |
| GTCACTGGCCCA | 907.348935879939 | 0.135582686555276  |
| TCCGTGTGTCAA | 907.356249994514 | 0.107217118215815  |
| GAAAGATTGATA | 907.370801296559 | 0.132734452703451  |

|               |                  |                    |
|---------------|------------------|--------------------|
| ACTTGTCACGTA  | 907.387235939436 | 0.163068087890989  |
| ACTCATCCGATA  | 907.389407665343 | 0.182447099966589  |
| ATTAAATGACCC  | 907.410031543766 | 0.134234706498295  |
| CAGTCTGACATG  | 907.413190287552 | 0.102169583672621  |
| AGTCTGACAAAC  | 907.414920628183 | 0.11820206176861   |
| CTAGTGAGCAAA  | 907.422382878438 | 0.142028054216456  |
| AGTGACATGGAC  | 907.423839342443 | 0.105184365153261  |
| ACTCATTATCG   | 907.431276516513 | 0.113567796789682  |
| GTCACAGGGGAC  | 907.451166932388 | 0.115161585816975  |
| ACTTACTCAGTC  | 907.465845827217 | 0.149718835352719  |
| AGCCCTGAATCA  | 907.470147106132 | 0.131083918509868  |
| CTCGTATGATTC  | 907.472171241623 | 0.160584806607051  |
| CTCGTCATGTTA  | 907.476411265525 | 0.0985229515586945 |
| AAGACACATTCT  | 907.47901234934  | 0.136160244979027  |
| CCGGATGATGCA  | 907.483165263134 | 0.11804856880256   |
| CGTCACGAGAGA  | 907.500390465685 | 0.122380949339439  |
| GCGTAGGGTGAC  | 907.515147085991 | 0.140152627756117  |
| AATCTTAAGTCA  | 907.527920549828 | 0.0940950886081989 |
| GACTCACGGACA  | 907.538351507975 | 0.150004356347197  |
| ATGAATAATAGA  | 907.550172336707 | 0.130903725556771  |
| GTCACAAGGCTA  | 907.563190277211 | 0.118201081902792  |
| GTGACCACTCAC  | 907.568711941599 | 0.0914019724641464 |
| ATGTGTCGACTC  | 907.578076281271 | 0.129575257206816  |
| CGTCATGATAAC  | 907.578247920807 | 0.132659380183012  |
| CGTCACCTTAAC  | 907.599147889244 | 0.161414897953248  |
| ACACACGTGACA  | 907.602852596331 | 0.115409314991473  |
| ACGTCACCTGCC  | 907.620327871065 | 0.128122289354867  |
| ATTACGCACGCG  | 907.647024601243 | 0.134506562249166  |
| GACTCAGCGAAA  | 907.650924754368 | 0.103368717468686  |
| GTCACCTGGTAA  | 907.662150161116 | 0.104208242398344  |
| TCATTATAAGA   | 907.668011629132 | 0.111175359188619  |
| CGAAGTCCGTCA  | 907.678382023808 | 0.0863113520964073 |
| GTTGTCACGCTA  | 907.685569550918 | 0.127430932016634  |
| GCACCGTACCA   | 907.692344283686 | 0.0926992789741835 |
| ACCACAATGAGT  | 907.694366124205 | 0.102392899282083  |
| ACGTCAC TAGAT | 907.718317411043 | 0.098378470148966  |
| ATGATTCGATAG  | 907.723176403882 | 0.111395865947859  |
| ACTCATTGCGTC  | 907.735443354802 | 0.163850890358731  |
| ACTCATAGCACG  | 907.742880083599 | 0.128804238055915  |
| AAGTGCATGACA  | 907.749507724544 | 0.119457026521522  |
| CTATTGCTAATC  | 907.752601987737 | 0.111649911301152  |
| ACGCTCTGACAC  | 907.75317033855  | 0.109430708479939  |
| AGTTGTCACCTC  | 907.762248332599 | 0.109612240043488  |
| AGTGCGAGTCAA  | 907.768633748866 | 0.124329964235133  |
| AATCGGTTGACT  | 907.775321542256 | 0.0981426923930422 |
| AGACGGTGACCA  | 907.776460185825 | 0.140479651367164  |
| GGTCACATGTGA  | 907.81996530513  | 0.100536023797581  |
| TATACCGTGACA  | 907.823012111919 | 0.122111591883579  |
| GTGTCAC TAACA | 907.82793470343  | 0.185219225560857  |
| GGTCGAGGTGAC  | 907.831135989143 | 0.137685394042197  |
| TTACACAGTCAA  | 907.833528339401 | 0.119423390065122  |
| TGACTGCTTTAA  | 907.839589497939 | 0.185839673619626  |
| TCGTTGTGGTCA  | 907.84010389529  | 0.0744102389240233 |
| TAATCCCGATGA  | 907.841839381684 | 0.205490031408198  |

|               |                  |                    |
|---------------|------------------|--------------------|
| ACACATCATCAC  | 907.843076918458 | 0.15389162531006   |
| ATGTCACCGCTG  | 907.847461478202 | 0.120761587256148  |
| CAACGTAGTCAG  | 907.856955079457 | 0.0983018733443914 |
| ATTCGTGTACAC  | 907.85779841228  | 0.127461863483284  |
| GCACACGTGTCA  | 907.868976706333 | 0.103724909279309  |
| ATGATTCGACAC  | 907.878813884275 | 0.076932971403448  |
| GAAATATGACCC  | 907.888370944995 | 0.0769128774597046 |
| CTAGTGACGATA  | 907.91232340381  | 0.146142737149566  |
| ATTCGTAATAGG  | 907.923766667383 | 0.157812408263869  |
| AGTCAGAAGAGG  | 907.928523178178 | 0.103114742105659  |
| GCGTTACATGAC  | 907.930499409678 | 0.13077767140224   |
| AAAGTGACCCA   | 907.937824233759 | 0.121017111219378  |
| ATGCTGTGTACG  | 907.939313154866 | 0.0979051126522105 |
| GGTAAGTAGTCA  | 907.941219606665 | 0.120725732400324  |
| CAAACCGTCACA  | 907.956647146053 | 0.0905979467303011 |
| AATTCGTCAAAG  | 907.965573822465 | 0.111591678407704  |
| TACTAATCATCA  | 907.983685645555 | 0.14776534474898   |
| ATTAGTAAATAA  | 907.985623075202 | 0.176902027343048  |
| CTATACTTGTCA  | 907.992450717629 | 0.152598990514085  |
| GCTTGCTGTACAC | 908.007942894525 | 0.139534895319616  |
| GTCATGCAGCAA  | 908.009837245489 | 0.137832748898018  |
| ACTCATCCGAAT  | 908.020038879357 | 0.133570546433518  |
| TGACGTTTGACA  | 908.024671617124 | 0.188725803667215  |
| AATGTCATTGCA  | 908.025777988108 | 0.204163390137229  |
| AATGATCATGAC  | 908.029691366777 | 0.154449533000791  |
| ACAAACTCATGA  | 908.038992740774 | 0.129839166204845  |
| AGATTGCATGAC  | 908.048392703062 | 0.20303715067614   |
| AGAATGTATCAC  | 908.057020142237 | 0.114278059278608  |
| AGTGGTCACAAT  | 908.063863551924 | 0.117949580445912  |
| AAGTGCGGTCAAT | 908.077782732997 | 0.0965753783683604 |
| ATGTCTCACAAT  | 908.087017371513 | 0.171436771695326  |
| CTACCAAGTCAC  | 908.093182760087 | 0.103406527853775  |
| AACGCGTAATTC  | 908.097220016341 | 0.12524101635844   |
| CCGTCTTTGTCA  | 908.099996987942 | 0.121719715170968  |
| CATTGATTACTC  | 908.100527414146 | 0.0978871903183793 |
| AAGGGATGACCC  | 908.101592492987 | 0.157097641752208  |
| AAGCGACGTACAC | 908.103232675383 | 0.182788785874712  |
| CAGTCAGAAACC  | 908.114407636071 | 0.127361996777346  |
| CCGTGAGTCCGA  | 908.116801198284 | 0.10148423783792   |
| TATCGAGTAATA  | 908.116860710805 | 0.142489716153099  |
| ACTCATTGCGCA  | 908.11920031156  | 0.0986174597599731 |
| AGATGCTGTGAC  | 908.12253137738  | 0.120776694265826  |
| ATGCATGACAAAT | 908.130866175157 | 0.117972985807729  |
| AATGAGTAGACG  | 908.166037403763 | 0.095969525169678  |
| ATGTGACGCCTA  | 908.168561225537 | 0.182925695560842  |
| CTGTGATGTAAC  | 908.176931605086 | 0.104078900115021  |
| CTCACTCATGAC  | 908.191588694154 | 0.191232083795966  |
| GCAGCTGTACCC  | 908.203293622462 | 0.133345637258046  |
| AAGTACGCGATT  | 908.204438940105 | 0.0891275032300992 |
| ATGTGACCACTG  | 908.205813126834 | 0.11682089984036   |
| CCCGAATGGTCA  | 908.210674479003 | 0.135643002207494  |
| GTTGTGAATCAA  | 908.210726524013 | 0.137973128099314  |
| TATGAATGACCA  | 908.216908711759 | 0.135323980738041  |
| CCATAGGTGACA  | 908.217255291489 | 0.10629393164984   |



|               |                  |                    |
|---------------|------------------|--------------------|
| AGGAGTCAAGAT  | 908.218107508662 | 0.0971165208612138 |
| ATGAATAATTCG  | 908.219718548402 | 0.13659453433766   |
| CGTCACGCCAGC  | 908.220187204346 | 0.117180795307964  |
| GTCATTAGTTTA  | 908.233837031217 | 0.0858262148353023 |
| GTCAGACATATA  | 908.235974231057 | 0.116526416586443  |
| ATAGGTCACCAG  | 908.237795428373 | 0.096300984895252  |
| CGTCATGCATCC  | 908.241328110677 | 0.141324190528263  |
| CACGTAATAATA  | 908.258875674547 | 0.0964919443653273 |
| GCAACGTCACCC  | 908.267791112969 | 0.178114581456025  |
| TGTCATGCCACA  | 908.27364957543  | 0.151763052144842  |
| CAGTCAGCATAG  | 908.280486549874 | 0.197310349784372  |
| TCTTTAGTGTC   | 908.284518727972 | 0.125522218809465  |
| ATACTGTCACGC  | 908.288889272279 | 0.111257666134511  |
| GGCTTTGGTGAC  | 908.291775248122 | 0.164685924922985  |
| AGAGGGTGACAA  | 908.307885431936 | 0.121665342501423  |
| AGTCTTGACACA  | 908.318090148687 | 0.122427983904494  |
| AAGTATTCATAC  | 908.336740542716 | 0.138070555355696  |
| GTGTTTGTGAGA  | 908.352339009421 | 0.143127099977038  |
| CAGTCAACCAGG  | 908.358541640308 | 0.10273133557729   |
| GTGTGAGTACGA  | 908.359983753158 | 0.131590696493334  |
| CTTTGACATGAC  | 908.360486225279 | 0.126562436824638  |
| CAGGCCAAGTCA  | 908.376372238872 | 0.12545505657233   |
| ATAACGTACAGAG | 908.387178407423 | 0.0900667555538386 |
| ATCGGTGACGAG  | 908.399053458309 | 0.118825111122233  |
| ACTCATCAAGTA  | 908.409502879424 | 0.103388993836519  |
| AGACGACTGACT  | 908.416958609298 | 0.140847041429426  |
| GTGATAGTCAGA  | 908.429039720781 | 0.122109306763116  |
| AGTCAGATTCTC  | 908.446358148295 | 0.13497044634117   |
| GTAATGTCGTCA  | 908.455185263769 | 0.110613523464403  |
| CGTGAGTCTGTC  | 908.460484345075 | 0.100544331804683  |
| ACGTCACCAGGG  | 908.472922805003 | 0.123122537218406  |
| GCGATGAGTGCA  | 908.478609496902 | 0.102157908492383  |
| CAACGAAGTCAC  | 908.483288913713 | 0.133716953458467  |
| GTTCTGTGTCAA  | 908.484932667709 | 0.0954453120179214 |
| GGAAAACATGAC  | 908.487159580775 | 0.133101269318773  |
| CAGGATGATACA  | 908.496666952102 | 0.214351016795899  |
| ACCGACTCTGAC  | 908.496684803568 | 0.152405914536677  |
| GTCACCACACCA  | 908.504736122262 | 0.121280666171059  |
| ATGAGTTTGTCA  | 908.513534288567 | 0.0910639593345827 |
| GGACCATGACAC  | 908.52215661483  | 0.149453180325464  |
| CTCTGATGACCC  | 908.529501227352 | 0.0885378230992203 |
| ACGATTGTGACG  | 908.532450704608 | 0.11901026188829   |
| TCAAAACTGTCA  | 908.532571891267 | 0.106122230246791  |
| AAATATGACCCG  | 908.541954774964 | 0.143815147593058  |
| ATGACGATGGAG  | 908.543906464709 | 0.108311128299592  |
| AATCCGTCAACA  | 908.563227802736 | 0.131049690796599  |
| CAGCGGACTCAC  | 908.589564516356 | 0.138878045370549  |
| GTCACCTCCCGA  | 908.605756903843 | 0.131146738876552  |
| ACGAGGGTGACA  | 908.608756024266 | 0.132190842058343  |
| AAGAATCATCGG  | 908.621540342103 | 0.135586585681206  |
| CTGGTGACCCTA  | 908.629459872619 | 0.101577443509023  |
| AGACTAATATAG  | 908.629834110086 | 0.114486325039398  |
| ATGGAAGGTGAC  | 908.639258727926 | 0.135505207513736  |
| CTGGTCAGTGAC  | 908.646065804909 | 0.118430525921488  |

|               |                  |                    |
|---------------|------------------|--------------------|
| CTGTCACCTTGA  | 908.648321592236 | 0.175428822665524  |
| CGATTACGAATC  | 908.648954610069 | 0.211358652318739  |
| ATCCCGAGTCAG  | 908.654574633685 | 0.125939552484447  |
| ATTAGCCATAGA  | 908.67016605712  | 0.127780792524403  |
| ATGATATCACCG  | 908.674834541438 | 0.129385280417543  |
| ACGGCGGTGACA  | 908.679203578822 | 0.10354482127344   |
| ATTTTCAGTGTC  | 908.684363610858 | 0.1328044281101    |
| TCAGAAGCGTCA  | 908.688147453311 | 0.149033036986408  |
| AGTTTCAGTGAC  | 908.69050123275  | 0.10983826077344   |
| TAAGGGGTGATA  | 908.702231713851 | 0.145829324498976  |
| ACTGACTACTAT  | 908.711686918331 | 0.099990546029309  |
| ATGACGCCTCCG  | 908.7134989881   | 0.144148929080427  |
| ACAGTCAACAGA  | 908.714664172911 | 0.12224526335694   |
| CCCATGTGACAA  | 908.716896816306 | 0.122504967009917  |
| CCCTTGGTGTCA  | 908.728755707121 | 0.145753591745444  |
| GGTACTCACACA  | 908.729064313405 | 0.0974429580371598 |
| ACCGGGGTGACA  | 908.730388795947 | 0.137636253323868  |
| CCGAATATGTCA  | 908.741827242982 | 0.111846223987342  |
| CGTCCGAGTCAA  | 908.749775002495 | 0.112418621242153  |
| GATGATCGTGAC  | 908.756351988372 | 0.119354716597331  |
| ACAGGGTGACAT  | 908.765180858342 | 0.100524224557693  |
| CATCACATGACA  | 908.776662008112 | 0.0710433435796592 |
| CGCGTCACTTTC  | 908.781092469208 | 0.119934742438609  |
| AAAACAGTGACA  | 908.784293334705 | 0.0975379558897346 |
| CAACATCACTCA  | 908.803335984241 | 0.103443021618044  |
| GCGATCTGTGAC  | 908.805713830537 | 0.0893280861458848 |
| ATGTCACCCCTGC | 908.810635843234 | 0.133662663357754  |
| AGACCTGACTAT  | 908.822210209492 | 0.111891118152859  |
| CGCACGTCACTA  | 908.827349637338 | 0.165340624792803  |
| ATGTGACAAAGTA | 908.831139766569 | 0.0950173471367797 |
| CGACGTCTGACG  | 908.832082608511 | 0.110637076165227  |
| AGGTTTCCGTCA  | 908.833427140927 | 0.105323504037965  |
| GCTGACTGTGTA  | 908.848861035763 | 0.0912759396543617 |
| GACTGGCTCACC  | 908.850829190762 | 0.102300431938738  |
| AGTCAGAAGGAA  | 908.856101811776 | 0.0973670469662065 |
| CCCAGAGTGACG  | 908.861024761422 | 0.14874260610792   |
| ATGACAGGGGTG  | 908.869287627027 | 0.116043898243127  |
| AGTATCAGTGAC  | 908.870835346245 | 0.103189426998079  |
| AGCTGTCACGCG  | 908.872403462463 | 0.196446875333547  |
| GAGATGACCTAA  | 908.878111931468 | 0.09981931163083   |
| AGAGTTGGTGAC  | 908.879192992165 | 0.120419868874872  |
| GTCACCTCAATCA | 908.887662630965 | 0.112724829659452  |
| GAAAGAGAGTCA  | 908.901598636532 | 0.115659437650483  |
| GAAGCCAAGTCA  | 908.903602146316 | 0.134777898195459  |
| CTACGATTAGTC  | 908.912798545148 | 0.107799029001948  |
| GGCGATTACTAA  | 908.915180273576 | 0.130773913414869  |
| GTCACAATCATA  | 908.922463519299 | 0.133920943378273  |
| GAATCATAAGTC  | 908.931953627265 | 0.139269558872933  |
| ACGGTGACAGTC  | 908.938602327817 | 0.107667380478614  |
| ACGTAATTTTAG  | 908.947592580069 | 0.100971667738158  |
| CAGAGATGACCA  | 908.953508612937 | 0.177610312700504  |
| ATAGAATTACTC  | 908.961030445542 | 0.190723571281955  |
| GATTAGACTCAA  | 908.974370894613 | 0.163217706550401  |
| AAAGGATGATTC  | 908.984995178183 | 0.0966510219360135 |

|               |                  |                    |
|---------------|------------------|--------------------|
| GTCACCCTAGAA  | 908.991764340782 | 0.125863273782533  |
| ATGACATCGGTA  | 908.99467814462  | 0.178379088281323  |
| ACGTCACCTCCGC | 909.01018145475  | 0.0621948007977447 |
| CGCGACCATGAC  | 909.011372081318 | 0.113123125893722  |
| ATGATGCACTCA  | 909.013494220968 | 0.148790496306683  |
| ATAGTCAACTTG  | 909.014866894589 | 0.107933835601022  |
| AGTCGGTGACGA  | 909.021103769604 | 0.163344455762924  |
| ATCATGCCGTGA  | 909.039937335064 | 0.0993136319723314 |
| GAACATGACGCC  | 909.051544795403 | 0.101757270487659  |
| CAGAGGGTGACG  | 909.058897146584 | 0.132539979215805  |
| CGGTCATCGATA  | 909.067630180632 | 0.0983710242430464 |
| AGTGAGGTGTCA  | 909.085504106496 | 0.100679469561323  |
| ATTAGACTCTTA  | 909.089407250358 | 0.129860815137183  |
| CCATTATCGTCA  | 909.100978807866 | 0.178186674491214  |
| CGTCACCTCACG  | 909.112272657586 | 0.0939754009644154 |
| ACTTGACGCACG  | 909.117803103302 | 0.130869266953414  |
| GTCCACATCATA  | 909.121789590418 | 0.100831105481752  |
| CAATCGCGTGAC  | 909.122748042799 | 0.111847422246642  |
| CAAGATTACGTG  | 909.134787356874 | 0.108225230601723  |
| AAAGTGTCAGTT  | 909.146938822749 | 0.12854551205818   |
| AGGGTGACATGG  | 909.147543640099 | 0.122557115662976  |
| AGTCAGCCTCGA  | 909.165708881065 | 0.1359806231671    |
| CTGACTCGCTAC  | 909.171296369564 | 0.11840794860593   |
| AGTGAGTCCGCG  | 909.173441234696 | 0.0830616185862333 |
| ATTACGATACAA  | 909.175050355905 | 0.104042702438824  |
| GGTGAGTCTGTA  | 909.191385685353 | 0.16779606703795   |
| CAGATAATGACA  | 909.193321246816 | 0.161959287086487  |
| CATGACAGCTTA  | 909.194566405467 | 0.115414095044526  |
| AGGCTTGATGAC  | 909.194929345261 | 0.11225113045839   |
| ATGACCACGGTC  | 909.196119872317 | 0.100048399353378  |
| GACACTTGTGAC  | 909.208946764476 | 0.111320039005318  |
| GTAGTCGGTCA   | 909.212582622784 | 0.102752225507669  |
| ATTTGCTCACGC  | 909.212779767079 | 0.0954167716007767 |
| CACGATCGTGAC  | 909.216841704049 | 0.140326052077231  |
| CTATCTAATGAC  | 909.218420437321 | 0.108756416330038  |
| GTGTCAGTACCA  | 909.219697132688 | 0.104982287145342  |
| CGTAATATGACC  | 909.227484452859 | 0.103861512286345  |
| ATATCGTCAGAG  | 909.22957981079  | 0.120945111712494  |
| GCCACATCATTA  | 909.233938030084 | 0.137179687925862  |
| TCATACGAAAGA  | 909.239911636928 | 0.0995944387899086 |
| CGTCACCCTCGA  | 909.242155708967 | 0.130675607242869  |
| GCGTGACAATAC  | 909.247604907919 | 0.164982941010847  |
| ACTCATACAAGC  | 909.257365713322 | 0.129140378209942  |
| CTGAAACTGGTC  | 909.264172876346 | 0.0787331892964517 |
| CCCTCATGACGC  | 909.267277034742 | 0.122964088440019  |
| AGCCCAATGAC   | 909.285954712588 | 0.103254733021614  |
| CACCATGACGGG  | 909.286540607014 | 0.133245295980598  |
| CTATATAGTGAC  | 909.294213341332 | 0.131828318352654  |
| GGTGTCATGGTA  | 909.296501318927 | 0.0889266207743791 |
| CAAACACTCAC   | 909.29799645272  | 0.0903100351977611 |
| ATGTCATTAGGA  | 909.306578314069 | 0.148802569168752  |
| GCAACATGACAA  | 909.323549014815 | 0.100520979430202  |
| CCGATTACTAAA  | 909.323701645067 | 0.108704634616592  |
| GTGACAACCTCA  | 909.328349772488 | 0.152709786751318  |

|               |                  |                    |
|---------------|------------------|--------------------|
| AATGACGGGGCC  | 909.329820830523 | 0.170699951974102  |
| GTGGTTGAGTAA  | 909.333235970618 | 0.153969138133652  |
| TATATACGTCAA  | 909.333254077211 | 0.147218456997386  |
| GTAATTCGGTCA  | 909.337537485121 | 0.169091510338698  |
| TGGACTAGTCAA  | 909.342093071575 | 0.146301733655782  |
| AGTGACGCGAAT  | 909.345053502969 | 0.191897244278745  |
| CTCACTCTGACA  | 909.361326559613 | 0.134770083727488  |
| CCTCACTTATGA  | 909.376699000916 | 0.167104234742288  |
| GTGACTAGCAAC  | 909.377357993315 | 0.140764571191446  |
| CAAATACGAGTC  | 909.398540886378 | 0.102201321876785  |
| AACTGTGAGCCA  | 909.407401053309 | 0.126420271780906  |
| AGGAGTAATTAC  | 909.407925691087 | 0.188786633750433  |
| GTACCATGTAC   | 909.411862133119 | 0.113819055449251  |
| AGGGCGCGTCAC  | 909.414846039169 | 0.180147716977202  |
| CCATTTGTGACA  | 909.419621613247 | 0.127820531857157  |
| AACGTGGTGACG  | 909.445530922467 | 0.146952968834245  |
| GTGACAGACAGA  | 909.453338195739 | 0.142209535432786  |
| AATCGGCGTGAC  | 909.466300362974 | 0.123496846104998  |
| TGAGTACCACCA  | 909.467604488149 | 0.141222383466989  |
| ATGACATTTCCC  | 909.473351625911 | 0.155071455889115  |
| ACTGTGACAGCT  | 909.479327631571 | 0.157446128036692  |
| CAACGTCACCAA  | 909.483534867222 | 0.131300620062125  |
| AAGCGTGACACG  | 909.492445348545 | 0.125258703240545  |
| TGATGTAACACA  | 909.50109013707  | 0.159647838534441  |
| CACTGAGTCGTC  | 909.512781692482 | 0.0867210727462887 |
| AGACATGACAGA  | 909.519960291659 | 0.164318630697935  |
| GGTGAGCCACTA  | 909.520171757321 | 0.150779110655344  |
| ATGCACTCATTC  | 909.525218802385 | 0.173217818339077  |
| GTCGATGTATCA  | 909.526688051342 | 0.120429720872254  |
| ACCCAGTAGTCA  | 909.530536744699 | 0.0901281535727973 |
| TAACCCGTCACA  | 909.536419174583 | 0.0968883046289759 |
| GACCTGTACCGA  | 909.547760446118 | 0.0810732403987562 |
| GTACCGGTGACA  | 909.54916875449  | 0.0903185240404841 |
| CTACCATAGTCA  | 909.552319306036 | 0.0894526517247621 |
| AATGAGCCAACG  | 909.552884891309 | 0.131010374282659  |
| ATGACGGGGTCG  | 909.555354023694 | 0.13308803140348   |
| AGACTTGTGACA  | 909.556186963716 | 0.147753596187629  |
| CCCGTTGATTCA  | 909.5814737791   | 0.134701409359518  |
| ATGACATCTGAC  | 909.584434657223 | 0.0956563473527868 |
| CCATGAGTTGTC  | 909.595415128344 | 0.126555535745887  |
| ACTCATTGATAC  | 909.612745282027 | 0.0980442309084028 |
| CATCATAGTTTCG | 909.635528923373 | 0.127676297364737  |
| GTCGTCACCGGA  | 909.652487328676 | 0.110667032048875  |
| AGTCAGAATATA  | 909.652624888126 | 0.065915964805213  |
| AGCATGTGTGAC  | 909.6531405931   | 0.146475137257375  |
| TACGTGTATTGA  | 909.653780455263 | 0.148045733473414  |
| AGTCAGCAAGAG  | 909.654363197692 | 0.113598837959656  |
| AATGACATCGAA  | 909.657501422157 | 0.0915702913873602 |
| TGACCAGTCGAA  | 909.664477079682 | 0.0981419881313073 |
| AACAGGATGACC  | 909.66825678767  | 0.130132640759909  |
| TCACATACATGA  | 909.672578573772 | 0.114148910374343  |
| ATTACAGCGTCA  | 909.67282510322  | 0.131296205429983  |
| CTGACCCTGTCA  | 909.673566404281 | 0.098048310913988  |
| ACTTGTCACCTC  | 909.678141247629 | 0.111852638271682  |

|              |                  |                    |
|--------------|------------------|--------------------|
| TGACGAACAAAA | 909.683323640064 | 0.102023791727714  |
| TGACAGAGTAAA | 909.690466422686 | 0.122178208076318  |
| GGCCTACGTGAC | 909.695412658766 | 0.125915861687548  |
| CCGTCTAAGTCA | 909.720287422253 | 0.17560742084723   |
| CAACCCGTCACA | 909.727001426157 | 0.191375892025451  |
| AACTCACGAATG | 909.728044800209 | 0.118815205116586  |
| GTGGTGAGCAAC | 909.752745280722 | 0.128545151322952  |
| AGCGAGATGACG | 909.754488599945 | 0.118234087542611  |
| ACTCATTCCAGT | 909.757077106966 | 0.121783705843393  |
| AGACTGTGACAT | 909.761901721017 | 0.126007744981942  |
| CGTCACCGTCGA | 909.767914856761 | 0.0788000982402201 |
| GATTGGCTCACA | 909.771500547714 | 0.141372953850483  |
| GTGACGTTAGCA | 909.771674135484 | 0.10049320885665   |
| AGCATTGTGACG | 909.77666455679  | 0.106623087985674  |
| AAATTTACGCAT | 909.77850679037  | 0.133543895970725  |
| AGCCTGGTGACG | 909.78269901305  | 0.106146616387115  |
| AGACGGGAGTCA | 909.787549208539 | 0.1040867734947    |
| GACAGGTCACCC | 909.7924100513   | 0.127377492105378  |
| GTCTACTCGTCA | 909.792718894081 | 0.0975935124132791 |
| CTCGCTTGATGA | 909.796741775654 | 0.158140288560158  |
| AATAGTGTGAGT | 909.808237739431 | 0.139257786558625  |
| ACACATACGTAA | 909.809390312753 | 0.105555098277399  |
| AATCGTTGTGAC | 909.814314873261 | 0.0902310659931865 |
| ATTAGTCTGAGG | 909.815665277403 | 0.100288015371081  |
| CGGGTATTACGC | 909.816071768602 | 0.126417002179613  |
| AGACAGCATGAC | 909.822251684543 | 0.120404526992409  |
| AGTGACACGACA | 909.82394731869  | 0.164319472683435  |
| AACCCAGTGAC  | 909.83355836568  | 0.128403359205923  |
| AGTCAGATAGAT | 909.84352911274  | 0.0925659917369474 |
| CGGTGAATCAAA | 909.849665957072 | 0.0892807476603263 |
| CGTGCCAAGTCA | 909.872265866158 | 0.103192510048828  |
| GTTGACACAGAA | 909.886162307348 | 0.0744298211888203 |
| GAGAGATGAGTA | 909.888180822127 | 0.129527114904343  |
| TGCGTTGTGACA | 909.889010772786 | 0.102391491521285  |
| GCACTGTGACA  | 909.890550281978 | 0.0903424663411603 |
| GATCGTTGTCGA | 909.899550857523 | 0.111425166723743  |
| GACTAATGTTTA | 909.908408036513 | 0.113208438456277  |
| GACAGTGACGGA | 909.926804861542 | 0.0976825593595252 |
| AAGTCGGTGACG | 909.933172669824 | 0.12737900170284   |
| GATGACCCCTGC | 909.936782420451 | 0.118725192091073  |
| GAGGTAATGACA | 909.941313011631 | 0.12653948669901   |
| TATGTCATGTAA | 909.944344600086 | 0.0657364629250321 |
| AGATCGGTGACA | 909.944458015961 | 0.0947896591112399 |
| GTCACCTACTTA | 909.949903372073 | 0.10081144244198   |
| ATGAGTAGATGC | 909.956954405723 | 0.133299156820896  |
| ACCTTGACTGAA | 909.963482288249 | 0.0969029475723863 |
| ACCTATGTATGA | 909.989001444625 | 0.0971093551796311 |
| GGTCATATCTAA | 909.9906005138   | 0.109629130317357  |
| AGTGATGTCAGC | 909.990905847737 | 0.148823968776293  |
| GGTTTGGTGACA | 910.005839437058 | 0.0996841051179196 |
| ATGCACTCATCC | 910.00778884749  | 0.110820958681208  |
| AATCCGAGTCAA | 910.031026237912 | 0.105798581386854  |
| AGTGAGCAACAT | 910.038233611061 | 0.100435120736764  |
| GGTCATATGCTA | 910.041643915498 | 0.0884634263302757 |

|               |                  |                    |
|---------------|------------------|--------------------|
| CGCACTAATGAC  | 910.05052763554  | 0.113411945197801  |
| ATGACATTCTAC  | 910.059275919508 | 0.17090353692613   |
| AATAGCAGTCAG  | 910.064306927488 | 0.100363594374481  |
| ATTAGCAGTGAC  | 910.068477447397 | 0.130546501143361  |
| AGCACTGTCACA  | 910.077593900165 | 0.154388417570043  |
| AAAACAGGTGAC  | 910.089485458985 | 0.113555597178283  |
| ATGACATCGGGA  | 910.095378253801 | 0.0842142733145503 |
| TACCGCGACTCA  | 910.099108723454 | 0.0965738816808167 |
| ACGTCAGACTTG  | 910.111648986364 | 0.125356223642637  |
| ACTTATTACGTA  | 910.13634834896  | 0.126345704302856  |
| CGTAATGTCATC  | 910.137193882422 | 0.111964703356516  |
| CAGCTGTGTCAG  | 910.150075081633 | 0.170429880976259  |
| GGACTGGTGACA  | 910.161857175284 | 0.147204105140987  |
| ACGAGTCAAGCC  | 910.164248030794 | 0.104646356601174  |
| CGTCAGAGATTA  | 910.171494180245 | 0.114455035994152  |
| ATACCGCAGTCA  | 910.17270609937  | 0.0964874584055255 |
| TGACGAAGTCAA  | 910.174945743984 | 0.106209582556052  |
| ATGAGGTGTTTCG | 910.176748358955 | 0.130253924827438  |
| GCACTTACTCAA  | 910.189142296639 | 0.149343760696839  |
| ATTCTGTGACA   | 910.21960791512  | 0.105057330500329  |
| GTGACGCGAATA  | 910.220844448012 | 0.173081033364783  |
| AAAATGATGACC  | 910.223600750902 | 0.132275782085897  |
| AGATGCCTCATA  | 910.228236846001 | 0.179069597545464  |
| ATTGGTGACGCC  | 910.238294482645 | 0.120223653397472  |
| ACTACAGACTCA  | 910.240858722999 | 0.118971170861392  |
| AAGTGCTGACTA  | 910.256414924928 | 0.118133689783878  |
| ACAAAGGTGACG  | 910.263558364747 | 0.102628402288874  |
| CGTCACCGCGTC  | 910.263717454119 | 0.142181046117546  |
| ACTCATACGTTTC | 910.276232899009 | 0.139157978928021  |
| CGTCATTTACCC  | 910.2803626225   | 0.131222151301708  |
| GAACGTTCTGAC  | 910.280909741299 | 0.121370466248887  |
| AAGACTATTAAT  | 910.281451970702 | 0.123656137539474  |
| ATCTGAAGAGTC  | 910.304767928907 | 0.0943551861323991 |
| ATTTGTCCGTCA  | 910.306356835683 | 0.127196021200931  |
| GAGTTTGACTAC  | 910.333402065266 | 0.162314176446053  |
| ACTCATTATATA  | 910.341266877727 | 0.126264741727927  |
| ACAACATTGACT  | 910.345684889919 | 0.130218329596072  |
| CTTGGTGACGAC  | 910.346055130153 | 0.180662109817975  |
| AGATTGGCTCAT  | 910.347700853424 | 0.112430676854556  |
| AATAATGTCACA  | 910.356532718567 | 0.0925158046496116 |
| GTCATGTAAGCA  | 910.367764501365 | 0.0933987222125136 |
| CTGTCACGCGAA  | 910.378924355484 | 0.105465803549984  |
| CAGTCAGGACTC  | 910.380921419775 | 0.124733346709655  |
| TGCTGTCACTAA  | 910.41126075675  | 0.120531301775022  |
| CTAACATGACGA  | 910.419184165187 | 0.139406924646322  |
| CGTCATTAGCGA  | 910.430826576342 | 0.122624141969044  |
| AGTAGACTCAAC  | 910.446068369417 | 0.0911591296511205 |
| AGCTTGACACAC  | 910.461612546743 | 0.10345193110324   |
| AGGATAGGTGAC  | 910.462666096187 | 0.101612701738767  |
| GTCAGAGCAACA  | 910.472853165039 | 0.101656563844903  |
| CTCAGTGTGAGA  | 910.476832913667 | 0.157584991517084  |
| CCGCCGTGACAC  | 910.495750040388 | 0.151471265239249  |
| GGGTCATATGTA  | 910.500127493239 | 0.127168577781509  |
| TCATCTGGGTCA  | 910.504809581497 | 0.09664537816368   |

|               |                  |                    |
|---------------|------------------|--------------------|
| TGAACCAAGTCA  | 910.504899501198 | 0.1439330313652    |
| AAGAGAATGAGT  | 910.513763635    | 0.0978550183913083 |
| GCGTGATTCAAA  | 910.514596018313 | 0.0647536275612225 |
| ATTAATAGTAAT  | 910.528265427661 | 0.122583356648368  |
| ATGATTCGTAAG  | 910.534982141233 | 0.0919842480156798 |
| AGTGACGATGAT  | 910.537036899828 | 0.129047376046623  |
| GATGACAGTAGA  | 910.54216387265  | 0.0938709801256422 |
| CATCTGACATCA  | 910.545445607932 | 0.110250834137857  |
| CTATGATATCAC  | 910.560991620979 | 0.085675951074514  |
| GATGGGTGTGAC  | 910.564031474498 | 0.0591970001128867 |
| CGGTCCATGACA  | 910.568460012408 | 0.122466329429309  |
| GATGTCACCGCA  | 910.571855472254 | 0.0971781032728061 |
| ATTACAGTCAAC  | 910.582302014173 | 0.124768993060041  |
| ACACCGTGGTCA  | 910.583475464921 | 0.128586525860671  |
| ATACACTCATAC  | 910.592098705612 | 0.127851785434121  |
| GTCAGATTATCA  | 910.592704851785 | 0.113261475452003  |
| AGCGACGTCAACA | 910.606845777727 | 0.0914255925051978 |
| TCGATTCACCTCA | 910.613625875449 | 0.202560586599252  |
| GTCACGGTTAAA  | 910.622393398493 | 0.108545699270526  |
| CGACGGCATGAC  | 910.62321647585  | 0.0918250052455136 |
| GGTCATCTCGAC  | 910.626230884502 | 0.130436016737637  |
| AATGTATACAAC  | 910.635232870346 | 0.097569094742299  |
| ATGACGTGGAC   | 910.637482107238 | 0.0934127204910256 |
| GTCACCACTCAA  | 910.643673020998 | 0.0726108652689466 |
| AGTCAGATAGGA  | 910.653459603085 | 0.132146350649063  |
| ACTCATTCTGG   | 910.663473862802 | 0.124807173189535  |
| CAAGCATGTCAC  | 910.672200499221 | 0.137520155668888  |
| ATGACGACTTAG  | 910.677199229554 | 0.0910051687788255 |
| AAATTGAGTGAC  | 910.695226274383 | 0.110905440316631  |
| GCGTGCAATGAC  | 910.699290976181 | 0.112693766976755  |
| CACACGTGTCAA  | 910.705403879888 | 0.13176556699787   |
| CTGTCACAAATCA | 910.706137642357 | 0.105202842793647  |
| CGTCTTTCGTCA  | 910.717377888781 | 0.102650652543599  |
| ATTGACACAGAA  | 910.721426421149 | 0.159522288349826  |
| AAGGGTCAGAGG  | 910.735015390132 | 0.113550717816452  |
| GGAAAATTGTCA  | 910.736573013997 | 0.158418982558646  |
| AGTCAGAATTAA  | 910.738154857745 | 0.0890457560459225 |
| ATGATAGTGACG  | 910.745356807966 | 0.135939044465417  |
| TGACAGTAATAA  | 910.755518395129 | 0.0876184863398592 |
| GTCACCTCTCAC  | 910.759181447943 | 0.129056295260494  |
| TATTATGATTAA  | 910.767314846178 | 0.135473068753195  |
| AGTCACGGGGAA  | 910.770740050079 | 0.113412090996516  |
| ATGACGATCATC  | 910.776618777083 | 0.13572078940129   |
| GCGTGGTCATTA  | 910.781197298267 | 0.103899981616097  |
| ACGTAATAACTG  | 910.821222323035 | 0.144434995104656  |
| ACTCATTGTCTA  | 910.828884696832 | 0.12368318561832   |
| CACGCTGTCAAC  | 910.834419511819 | 0.138040308532401  |
| ATACGGTCATCC  | 910.847859889528 | 0.107063052368559  |
| CAGTCAGTCGTA  | 910.85699332917  | 0.0648037672058133 |
| GAGTCTGTGACA  | 910.85852524098  | 0.103045509273225  |
| ATTACTCTAAAT  | 910.863730786925 | 0.0961454939564711 |
| GTTTCGACTCAA  | 910.864669668495 | 0.129212098329847  |
| ACTAATACTTTA  | 910.89264277058  | 0.101203069623962  |
| CATCATATGAGC  | 910.906859838303 | 0.131641261447245  |

|               |                  |                    |
|---------------|------------------|--------------------|
| AAGTTAGGTGAC  | 910.910430059653 | 0.103550559853018  |
| ACAGACATGACA  | 910.916943880474 | 0.127984671308641  |
| ACAAGCGTGTCA  | 910.932647662883 | 0.105919155717241  |
| CGTAGCTAGTCA  | 910.933525614852 | 0.186981868630624  |
| AGAAAGCAGTCA  | 910.935665883712 | 0.114833158962935  |
| GTGACGGAGATA  | 910.942878333891 | 0.0854944044186549 |
| CAAAGACGTGTC  | 910.952418466237 | 0.0979791700170976 |
| CGCTGAGTAAAA  | 910.954606513795 | 0.106340664683211  |
| CGGTCATGGTCA  | 910.958669516817 | 0.132206750662808  |
| ACCAGTCAGTTG  | 910.964567036868 | 0.128322656463031  |
| AGACGGCGTGAC  | 910.981689066411 | 0.0900953819162403 |
| ACACGCGACTCA  | 910.982972428827 | 0.0931997503417204 |
| GAGGGATATGAC  | 910.986690874129 | 0.107353552925694  |
| CATGACCGAAAG  | 910.990206695023 | 0.0952792795513513 |
| TCATTAGTAAGA  | 910.994969593692 | 0.135297002184808  |
| AGGTTACGCAAC  | 910.999385221122 | 0.14487088561227   |
| AACGTATGCGTC  | 911.031867674971 | 0.131046372501527  |
| AAGTGACGCGGA  | 911.037010242996 | 0.0995643555140091 |
| CTTGTAATCATA  | 911.046220654427 | 0.124660437234345  |
| ATAGTCAATTCG  | 911.055382117711 | 0.131799710935358  |
| GAACTTCGTCAC  | 911.070930595284 | 0.125101272250427  |
| AAATTTACTCTT  | 911.07354576931  | 0.110473394481     |
| AGTATTACATAC  | 911.075905029948 | 0.12248897050384   |
| AGGTTACATGAC  | 911.089407861699 | 0.139232907676565  |
| ACTCATTCTAT   | 911.093488516507 | 0.10267811988115   |
| CAAATACACA    | 911.094093354398 | 0.162687162987765  |
| AAGTTTCGTCAG  | 911.096231796975 | 0.125365828683175  |
| ATTAGTAAGCAC  | 911.09787079647  | 0.136671483094172  |
| CTAATACTCA    | 911.10164524136  | 0.157692076262136  |
| GTCACGTTAATA  | 911.102588973789 | 0.0955866323489053 |
| GGGTGATACATA  | 911.11517888662  | 0.0902353143932056 |
| TAGGTTGTGACA  | 911.124782245396 | 0.120563203081517  |
| CTACATTGTGAC  | 911.128940332716 | 0.121631338401616  |
| GTGATTCAAAC   | 911.129937850115 | 0.16508945762538   |
| GATTACGCGTAA  | 911.141471464208 | 0.111557643893521  |
| ATCTGGCAGTCA  | 911.17011123537  | 0.171901135534739  |
| ACGTCACGCCCCG | 911.175152257191 | 0.140466397476679  |
| GGCTCACGATTA  | 911.177274368054 | 0.0974671518447391 |
| CTATGTCTGTCA  | 911.181310541804 | 0.104627584204623  |
| CGTCACCAACAA  | 911.19190275458  | 0.131560134601806  |
| TCAGTCTCATGA  | 911.1997388611   | 0.102885762479946  |
| CGTCATTATGCC  | 911.20153935035  | 0.0935991250268827 |
| CATGAATAATCC  | 911.208292887247 | 0.117205454783389  |
| GAGAATGTCATA  | 911.211049188204 | 0.102780618463714  |
| CGTACTAATCAG  | 911.22141403436  | 0.152615808330318  |
| CCTATGGACTCA  | 911.224875309714 | 0.0926048419285623 |
| CATGACATTATA  | 911.238117204835 | 0.109119596049272  |
| CTCAGTCAACGA  | 911.245018306375 | 0.123566005058647  |
| CAGTGAGTATAC  | 911.250071994977 | 0.125405561612685  |
| CAATTCGTCAG   | 911.250320207663 | 0.112360348076648  |
| CTCTGACAGTGA  | 911.253293056389 | 0.0933462842798575 |
| GTCTGGTGACAA  | 911.256105764893 | 0.098915312772095  |
| TAGCTTGACTGA  | 911.292898336866 | 0.0710344132206401 |
| GGTACCCGTCAC  | 911.297601442641 | 0.134436978086836  |



|               |                  |                    |
|---------------|------------------|--------------------|
| GCGGTGAGCAAA  | 911.297805200172 | 0.0871297818652481 |
| GACTAGGTGACA  | 911.314836955654 | 0.09441455001306   |
| ATGACGATCCAC  | 911.322359590628 | 0.120619455567833  |
| CCATTGAGTCGA  | 911.328727072831 | 0.147183671966569  |
| GTTATTTCACTCA | 911.331921584528 | 0.11664371752318   |
| ACAGATGATACA  | 911.341064271249 | 0.165128485731543  |
| GACAATTAGCCA  | 911.348329210499 | 0.14660440200927   |
| GATGACGTCCCC  | 911.348845110477 | 0.127196152306168  |
| GTGACGGACCCA  | 911.350932605343 | 0.193184204287121  |
| ATTTTGAGTAAC  | 911.35978280998  | 0.0980450403214038 |
| CTCATCTGACGA  | 911.367322828322 | 0.186685052597762  |
| GGAATCTGACAC  | 911.382528059659 | 0.114417139593401  |
| CGTCATCCCGCC  | 911.384433054189 | 0.0923552626705009 |
| AGTTACTGATCA  | 911.384493773365 | 0.141615479382337  |
| ATGACCCCTACG  | 911.399098988792 | 0.114723368440182  |
| CTAAATTACGCA  | 911.405265041059 | 0.0990462255474865 |
| AAGTGATGTGAC  | 911.421066803166 | 0.137559394465139  |
| ATTACGCACACC  | 911.424979905752 | 0.126119828032322  |
| ACCATTAGTGAC  | 911.426877969279 | 0.141011403889129  |
| AGTATGACCTTA  | 911.442639296106 | 0.114831325397271  |
| CAGGCACGTGAC  | 911.444342050216 | 0.132309288312181  |
| ACTGATGAGACA  | 911.454126818718 | 0.107954202494346  |
| TTCTGTCAGAAA  | 911.458773743095 | 0.169876143052237  |
| GATCACGTAATC  | 911.470033412226 | 0.112768244496935  |
| ACTCATCCCGTG  | 911.47392647938  | 0.0790353299677233 |
| ATCCTATGACCC  | 911.478318243786 | 0.113287372740125  |
| CTACTATGTCAC  | 911.480263079976 | 0.0967813527621752 |
| GGTCATCATGGA  | 911.490836155174 | 0.12745215074398   |
| CGAGTCAAATTA  | 911.491668720846 | 0.118284285380963  |
| AAGGACGTGTCA  | 911.497179443978 | 0.105326087068863  |
| CGTCACCCTTCC  | 911.511839061812 | 0.100134947862932  |
| AGATTGAGTGAC  | 911.513308952548 | 0.0914974678904647 |
| ACGGATGACCCC  | 911.522580093325 | 0.121186789921225  |
| CCAGTCAGAAGG  | 911.523579891793 | 0.100951008337832  |
| AGTTGTTCTGCA  | 911.529316586498 | 0.0884336391628321 |
| ATGTCACCTATA  | 911.53363348139  | 0.0858769585446665 |
| ATGACAAGGGCA  | 911.536200972105 | 0.11859398753577   |
| ATATGACCAGCC  | 911.55569940817  | 0.131342403919524  |
| AAAACCTTGTGAC | 911.564827178357 | 0.143728248239113  |
| AGTCAATCACTC  | 911.57459370238  | 0.127213176219284  |
| AGCTGTCACAAG  | 911.574872830097 | 0.117417689594832  |
| ACCTCTGACACT  | 911.575289526274 | 0.144532396677149  |
| AGTCAGCATTAG  | 911.581144618209 | 0.127058978397022  |
| GACAGATGACCC  | 911.602360414311 | 0.153849054678048  |
| ATGTGTAACCGG  | 911.6042931093   | 0.149941984901578  |
| TAGAAAGCGTCA  | 911.609795979832 | 0.12890477347319   |
| GTCCTTGTGACA  | 911.612596017562 | 0.117498286666743  |
| ATGACCTCATTG  | 911.638682889721 | 0.182773847463119  |
| AGAAGGTGACAA  | 911.639881390109 | 0.127904353304766  |
| AGAGTAATAGGG  | 911.644066034972 | 0.109624475952584  |
| CTCTATCGTGAC  | 911.656531331901 | 0.0985985089760683 |
| ACTCATACTGCT  | 911.66550703811  | 0.118240745402724  |
| ATTGTCATGAGC  | 911.723203811578 | 0.095796443483003  |
| TAAAGACTCTTA  | 911.741154651391 | 0.0878664195804412 |

|               |                  |                    |
|---------------|------------------|--------------------|
| GATTTGTGACAA  | 911.746821422816 | 0.115938602506786  |
| CGTCATGGCACC  | 911.752487150557 | 0.121307528178844  |
| GCCTAGTCAGCC  | 911.75412260047  | 0.100448548933581  |
| ACAGTCAGGGCT  | 911.755346814924 | 0.125146137977551  |
| AAGGCCAATGAC  | 911.778517210312 | 0.112044275176486  |
| GGTACTGATTCA  | 911.781667259503 | 0.132194928622957  |
| ATTGTCACAGGC  | 911.788535180043 | 0.093453570349785  |
| AAGTCACGGTAT  | 911.80474549555  | 0.0978014252166865 |
| GAGGCGTGACAC  | 911.810108336425 | 0.10345470004206   |
| GTCCCAGTCAGA  | 911.827446567652 | 0.0946558063314172 |
| CTGAGCCAGTCA  | 911.830625754946 | 0.193930575847824  |
| ATGTGTCGAATC  | 911.835796642194 | 0.110653557706438  |
| AAGAGTGACCCA  | 911.860110441359 | 0.10618374451978   |
| ATAATGAGTATG  | 911.860149027251 | 0.133665940945807  |
| ATGTCACCCTTA  | 911.873921058612 | 0.0931918465553742 |
| CCGTTGTGTCAA  | 911.878413242523 | 0.179658948415818  |
| CCTGACCGTGGA  | 911.900005230872 | 0.17336204376298   |
| GTGGCGTCACTA  | 911.90579972052  | 0.0694647799477829 |
| CGGTGACCCCTGA | 911.915309434532 | 0.0933673593072051 |
| GTCACGGCCAGA  | 911.916249524162 | 0.136533513827421  |
| CTGACACGTGGC  | 911.920542260308 | 0.0933324161064431 |
| CGTCATGATAAG  | 911.92234430344  | 0.12833558626917   |
| ATTGATAGTGAC  | 911.931096303013 | 0.123633210771469  |
| ATCGAATGAGTG  | 911.939248166875 | 0.12637668866858   |
| AACCTCTGACAC  | 911.940317612754 | 0.18172405588309   |
| AAGGTTGTGACG  | 911.951507961757 | 0.107133973141955  |
| GTGTCACGGAAA  | 911.978121370478 | 0.163529490570674  |
| ACTAGGGGTGAC  | 911.984905628437 | 0.121929697718655  |
| AGTCTCCAGTCA  | 911.996543751271 | 0.12106921523691   |
| CTGACTAGGCCGA | 911.999288840554 | 0.1282433202676    |
| GGTCATCACTGA  | 912.008891159645 | 0.164481921362254  |
| AGACCGTGACT   | 912.013107477795 | 0.101748561662882  |
| GTTGTCACCGTA  | 912.035745298945 | 0.0995354831821161 |
| CCTAAACGTGAC  | 912.038399772954 | 0.147874533021521  |
| CTCGTACTAATA  | 912.042787925012 | 0.183883800208226  |
| ACTTCGACTCAG  | 912.0542083166   | 0.11820861665393   |
| CGAGTCAAGTAA  | 912.059557909261 | 0.0909667587737502 |
| GGGCCAGACTCA  | 912.067404226368 | 0.1352739352306    |
| GATGCGTCTTAA  | 912.070756666761 | 0.147056305965289  |
| AGGTCGCATGAC  | 912.074238907113 | 0.167313558403933  |
| TACTCATCTCTA  | 912.081581248745 | 0.0978470974416851 |
| ATGAATAATCTA  | 912.09418378354  | 0.181141340760631  |
| TGTCACTGGAAA  | 912.100531372511 | 0.16835208842405   |
| ATCATCATGTCA  | 912.12304312304  | 0.132675784708291  |
| CAGTCAGCAATA  | 912.126994461951 | 0.10587150612525   |
| AACGTAATGACG  | 912.127511318065 | 0.111591507276131  |
| GTAAGCTGACTA  | 912.131506922631 | 0.100857158413052  |
| TATCCTGAATCA  | 912.165438236988 | 0.114362531323754  |
| AGGCACTGTCAC  | 912.165794249728 | 0.110792509409563  |
| CGATGCGTAAACA | 912.169495440098 | 0.0897518931479314 |
| ACTCATCTTCTC  | 912.178188096144 | 0.101981531130205  |
| ACGGTGTGACT   | 912.193369765803 | 0.127016657965571  |
| GAATACCGTCAC  | 912.195790577492 | 0.135237381795161  |
| AGGACAGGTCAC  | 912.19863058583  | 0.109214860788482  |

|               |                  |                    |
|---------------|------------------|--------------------|
| GTGAGCAAGACA  | 912.20026213547  | 0.113656312663935  |
| ACCCTTTGTGAC  | 912.210051377219 | 0.0677239417087076 |
| CAGAGATGACGG  | 912.2208485543   | 0.0532756605730724 |
| CCTGACTACTCA  | 912.224894094882 | 0.0854828693754411 |
| AGTCAGAAACTA  | 912.231109689942 | 0.136107797503594  |
| GTCACATCCACA  | 912.231658982325 | 0.137439296865752  |
| CGGGATGTGACG  | 912.237316502911 | 0.11993837723955   |
| CGGCGTCATGTC  | 912.245877011359 | 0.112983739564658  |
| CATGACGACGAC  | 912.257967949546 | 0.145485726484911  |
| ACTCATCACTTC  | 912.264901345594 | 0.141181218117441  |
| AGTCAGCTTTTA  | 912.273929398294 | 0.12622447612089   |
| AATTGACAAATC  | 912.27541401422  | 0.111543587114643  |
| AAGTCGGGTGAC  | 912.280131017199 | 0.0793202085601162 |
| GTCACTGTCGGA  | 912.282767677115 | 0.125624092231762  |
| TGTCACAAACAA  | 912.28755307388  | 0.118623115841336  |
| ACAGAAATGAGT  | 912.295145773103 | 0.156052577108429  |
| TATGTCATGGGA  | 912.299298309521 | 0.0654015998322918 |
| ACTGACTACTTG  | 912.3051908623   | 0.115450511698184  |
| ACTCCGCGTCAC  | 912.310469211151 | 0.0964324470372687 |
| CCTACTCAGTGA  | 912.318778240351 | 0.135796319932408  |
| CAAATGTGTAAC  | 912.319481616492 | 0.100789917777296  |
| GCCAGTGAGTCC  | 912.338943745182 | 0.115056987833153  |
| ACCTAAGTTGAC  | 912.348889549187 | 0.199827260761572  |
| ATTACTCTATAC  | 912.361276834448 | 0.114104282979488  |
| GTTGAGTCGAAA  | 912.366808215982 | 0.123783353637246  |
| GTTTAAGTGTC   | 912.38189262855  | 0.0853543324546307 |
| CATTGTCACAGA  | 912.382010143494 | 0.102057109720924  |
| AGTGACAGAGAC  | 912.390920086505 | 0.111372018474435  |
| CTACCGCAGTCA  | 912.394789982126 | 0.0953990210410185 |
| GAGTCAAGGCTA  | 912.395657562456 | 0.105333992275322  |
| GATATAAGTGAC  | 912.401054191391 | 0.129816843107593  |
| AGTTCGCGTCAC  | 912.402075895344 | 0.0964154828731167 |
| TCATGACACCCA  | 912.407728685592 | 0.0941723991832148 |
| ATCTGACTGCAT  | 912.427308614244 | 0.0931191505891704 |
| CTGCATCACTCA  | 912.431680115061 | 0.143948621378592  |
| TCACCGATGAGA  | 912.434415416023 | 0.0918037387011368 |
| ATTTTCGGGTGAC | 912.437182127193 | 0.098431622259389  |
| ATCGTCATGCTA  | 912.442196773704 | 0.148343896970346  |
| AAGACGGTGACA  | 912.450766355334 | 0.0868962553744881 |
| ACTTTAATATGA  | 912.454757873319 | 0.107118880436835  |
| GGGTGCCATGAC  | 912.488351933865 | 0.0969705285411807 |
| ATGAGTAGACGG  | 912.488837331573 | 0.130683429357259  |
| ATCTTGCTCACC  | 912.506390741245 | 0.0932203312220688 |
| TCAATTGATTCA  | 912.507390395598 | 0.115263017217064  |
| CAATTTTGGTCA  | 912.520060755759 | 0.115426977470234  |
| ATGAGTATGGGC  | 912.522703371981 | 0.177811411220987  |
| ATGACGAGCTAG  | 912.532044402847 | 0.08450350279256   |
| GCTTGAGTCAA   | 912.536016479372 | 0.098783100717127  |
| ATGAGTTGGAAC  | 912.571493385573 | 0.0959790824999614 |
| GTGACTGCCCTA  | 912.575133513991 | 0.108014984756094  |
| CAGGCTCATGAC  | 912.57526377834  | 0.106389642345992  |
| AGACGGCGTCAC  | 912.576373647365 | 0.129371552867247  |
| GGTGTGTCGTCA  | 912.577196664095 | 0.129621341234409  |
| CTCAGCGTATGA  | 912.577526688075 | 0.105463510439193  |

|               |                  |                    |
|---------------|------------------|--------------------|
| GGTCATATGCAC  | 912.579968603196 | 0.171630692814659  |
| AAATGTCTCACC  | 912.586672862016 | 0.161302236771142  |
| AGGTGACAACTA  | 912.597305373499 | 0.0840983649526141 |
| CTTACTTGTAC   | 912.603446572779 | 0.0857157260013924 |
| CTCCTCATGACA  | 912.606380108828 | 0.136578387065164  |
| CAGCAGTGACGA  | 912.621727739855 | 0.121548168618739  |
| AGACGTGACACT  | 912.631577080141 | 0.119191426812189  |
| CTGGGGAGTCAA  | 912.63366361243  | 0.187148604681833  |
| AGTCAATCTGAC  | 912.640614219498 | 0.126386973057073  |
| GTCACAGAGACA  | 912.654194576753 | 0.10540443353664   |
| CTGCTTGACACA  | 912.65720004287  | 0.0953749939352992 |
| ACACGGCTGACT  | 912.665308869684 | 0.119760400650447  |
| AGGTTATGAGTA  | 912.669103729711 | 0.0861458875236323 |
| ACTCATCGGTAT  | 912.671601365484 | 0.150899411147818  |
| AGAATTGAGTAA  | 912.678536827912 | 0.10788726226001   |
| ACGATGACCTCA  | 912.678957779836 | 0.114424497920844  |
| CTGTGACATCGC  | 912.70217339913  | 0.161515720347865  |
| AGTGTCCGTAC   | 912.720683356345 | 0.1212712418395    |
| ACATCTGTCAGA  | 912.739202863999 | 0.130623882996962  |
| AAGTAATCAGTC  | 912.753687719457 | 0.121628870606578  |
| ACTCATTAGTC   | 912.767888733892 | 0.0946334415382119 |
| CCATCTCTGACA  | 912.776855687522 | 0.134918399426132  |
| TCATTCTGAAGA  | 912.794249091311 | 0.118731374092682  |
| AGTTTGTCACTG  | 912.794607087632 | 0.128584125974004  |
| AGTTGACCCATC  | 912.809737278407 | 0.11523260749712   |
| GTGTCAGTGCCA  | 912.814657595805 | 0.12509962339392   |
| GTCACCAAACAC  | 912.823485049193 | 0.0971614655690169 |
| TGTAGGTGACAA  | 912.824264062275 | 0.112201067191749  |
| CGTCATGTCGAG  | 912.826567678819 | 0.0970170162483441 |
| GTGTCAGACAAA  | 912.82783823354  | 0.112579149022257  |
| CCATGTCACTAG  | 912.838485058268 | 0.173735858916297  |
| ACGTTTGCTCAC  | 912.862706896512 | 0.111806410373063  |
| ATCGTGACATAC  | 912.866668700668 | 0.124950059745291  |
| CCGCGCGATGAC  | 912.868824988222 | 0.105561933012129  |
| ACGTTATTATGA  | 912.886611100158 | 0.150682267295104  |
| CTTCCTGTCATC  | 912.889050137269 | 0.113044247328059  |
| GTAACGCAGTCA  | 912.898550219454 | 0.13267791336859   |
| CCAGTGGTGTC   | 912.914765396538 | 0.152386229390096  |
| GTCACTGTCGAA  | 912.917558048277 | 0.129248281596727  |
| GCTGGATGTGAC  | 912.931741615172 | 0.0642819883942762 |
| CACTCTCTGTGA  | 912.942143994214 | 0.136875726585834  |
| CGTGATTATTCA  | 912.948217366314 | 0.137620039999609  |
| ACTCATAGCAGC  | 912.950927597333 | 0.118472429425085  |
| AAATCTTGTGAC  | 912.959632804102 | 0.0650874854455195 |
| ACTAATAGGCTG  | 912.962934858461 | 0.161878922685459  |
| CGACGTGACGAA  | 912.970091003845 | 0.0950663211294462 |
| TGACAGAAGAAA  | 912.971866217973 | 0.121590358380745  |
| ATGCGTGACAGA  | 912.976560928778 | 0.119091088310738  |
| GGAAGCGGTGAC  | 912.983329331239 | 0.123292656616163  |
| GACAATGCGTAA  | 912.983453725536 | 0.142251107846778  |
| CCGCGGAGTCAA  | 913.037142722528 | 0.125175790503272  |
| ACCTTGTCAATTA | 913.067726380201 | 0.114807237270652  |
| GGTCATACGTGA  | 913.071816461285 | 0.105461250106936  |
| TGACAACAAGAA  | 913.077147482504 | 0.125449240519547  |

|              |                  |                    |
|--------------|------------------|--------------------|
| GTCACTGTATCA | 913.079261274196 | 0.0897678299978956 |
| AATGTCACAGCA | 913.079424799502 | 0.124521425513755  |
| AGTTATGGTCAC | 913.081379837025 | 0.107474539605907  |
| CCAGTCAGATTA | 913.109195845112 | 0.146716271899266  |
| GAACTAAGTGAC | 913.111105043691 | 0.16075479854391   |
| AGGATTAGTACT | 913.122583539221 | 0.0923323510969524 |
| GTCAGACCGAAC | 913.124108572811 | 0.1013164229016    |
| TAATGTCATGAA | 913.140143860515 | 0.199555276798958  |
| CGAAATTACTCG | 913.148318436136 | 0.0878682847697696 |
| AGTGGGGTCATA | 913.183576735865 | 0.107891755239071  |
| GAATTATGTGTC | 913.188973928116 | 0.100031496042386  |
| GATTCATCCTTA | 913.199497352743 | 0.0937874019498524 |
| CCGTATTACTGA | 913.20489034999  | 0.168105791061394  |
| GCATACTCATTA | 913.209936129208 | 0.094779132463955  |
| GTCAGAATTTGA | 913.215731476716 | 0.0932353304586395 |
| CACGTTGATTCA | 913.219961048277 | 0.0877874420495849 |
| ATGAGCCAGATA | 913.220715735336 | 0.0924701447876281 |
| ACTCATTGACT  | 913.232456212222 | 0.12313456388445   |
| CCGTCATTTAGA | 913.271003404311 | 0.103171940725785  |
| ATGACATCCTCG | 913.271500535235 | 0.078962696765955  |
| CGCTTTAGTGAC | 913.273635796725 | 0.121426670482894  |
| GACAACCTACAC | 913.283637829371 | 0.108450064969058  |
| GATATGGGTGAC | 913.288889255664 | 0.118511469087335  |
| AACGTCATGAGC | 913.302312331923 | 0.0986974533863718 |
| ACCTTATTGTCA | 913.3361946041   | 0.145597944465282  |
| CACTATGGTGAC | 913.336855001252 | 0.0960259833507929 |
| TCTCTGACATAA | 913.339198542771 | 0.143471492405063  |
| ATTGTCACTAAG | 913.346521092722 | 0.162014077192481  |
| GCCAGCTCATA  | 913.347651871732 | 0.160344384775658  |
| CTTGATGGCTCA | 913.357357668125 | 0.0735088059309426 |
| TAGATGACGGCA | 913.366087538322 | 0.141281594594958  |
| ATGAGTGCAACG | 913.368967846776 | 0.116427216704081  |
| CTGGGTTGCTCA | 913.37717341126  | 0.082812942698426  |
| ATGTTTCGTGAC | 913.391818530028 | 0.136688703105205  |
| GCGTATTACTGA | 913.40341584169  | 0.10930521473006   |
| GGTCATAGCTTA | 913.410862908495 | 0.110685101512484  |
| TATAGCATCATA | 913.41516775615  | 0.10174740214802   |
| TCATAAGATGAA | 913.424849227028 | 0.13840486708263   |
| GTCACCCTTCTA | 913.437222842237 | 0.0907234025189324 |
| CAGTCAGCCCCG | 913.447027119005 | 0.0902865034629024 |
| ACAAGGTGACAT | 913.456490330085 | 0.119490772763189  |
| CAATACTGGTCA | 913.477317930142 | 0.090250815291392  |
| TATGGTCACCGA | 913.484697830638 | 0.10963606507641   |
| TAAGGGGTGACA | 913.51324229041  | 0.12838976269124   |
| CGAAGAGTGACG | 913.513725403618 | 0.139225218484089  |
| CCTCGTCATGCA | 913.539017783797 | 0.124979533599808  |
| GTCACCTGTTCA | 913.552080003237 | 0.110064605300963  |
| TAAGAGTCTTGA | 913.574283552046 | 0.140491727492833  |
| GCGTCACTGGAA | 913.611477343222 | 0.160845234028464  |
| GTCGTTGATTCA | 913.653646190607 | 0.181397944976896  |
| AAGATTCACCGA | 913.657954181182 | 0.154125422020684  |
| TCGTCACCTAAA | 913.66000131236  | 0.107578022159336  |
| ATAGTGTACGCC | 913.683066910914 | 0.0916869485111177 |
| CTAGACGTCATC | 913.689783401901 | 0.139982832872649  |

|               |                  |                    |
|---------------|------------------|--------------------|
| TAACTCATAGGA  | 913.703001113374 | 0.127695072886576  |
| TACACAGACTCA  | 913.708326857089 | 0.121921322678897  |
| GATTCAGTCTGA  | 913.708835272812 | 0.0978122665398354 |
| CCTACCAGTCAG  | 913.71989710965  | 0.0855793282146751 |
| GACTGATTTGGA  | 913.738748089177 | 0.0877907075929371 |
| GGAAGAGGTGAC  | 913.751144707087 | 0.0910534175885489 |
| CGGTCATATTTT  | 913.751820532837 | 0.165792082883852  |
| GCCGTGGTCACA  | 913.780908279595 | 0.175398253498072  |
| CCGTCACCGATA  | 913.783382197376 | 0.139687438455526  |
| AACACTCATAAT  | 913.791967814024 | 0.0863764176399504 |
| GGTCAGCGTGAC  | 913.800889610262 | 0.163107834476079  |
| CGCTGGTCTGAC  | 913.804015044741 | 0.108019079227578  |
| AGTCAACTGACT  | 913.814155456137 | 0.131954141369873  |
| ATGTCATTGGCA  | 913.81733788593  | 0.0930509384729631 |
| GCTGGATGACCC  | 913.819795552309 | 0.118085886699114  |
| GAGAACAACCTCA | 913.836952429878 | 0.126902708597539  |
| CTGTCACAAAGC  | 913.847915232652 | 0.0978908516985781 |
| CGTCATTAATTC  | 913.849298601519 | 0.0824323980664584 |
| AGTGATGCATCG  | 913.853001085276 | 0.0980160366248824 |
| TGACAGAGCTCA  | 913.867897593178 | 0.123867816555205  |
| AGTGGTCACTTC  | 913.876627836479 | 0.0838715156335404 |
| ATGACAGGACGC  | 913.903260121177 | 0.092922324846501  |
| TGTATGAATACA  | 913.905881779827 | 0.146146544881556  |
| CGTTAGGTCATC  | 913.90717347828  | 0.119419471510212  |
| ATTGTCACTGCA  | 913.918428240717 | 0.162713524655369  |
| GAAGTATGATTC  | 913.930466206482 | 0.129853840889019  |
| AAGTCACCCTAG  | 913.942699932903 | 0.0942296635721808 |
| GTCGGGTGACAA  | 913.94525021726  | 0.144832093374409  |
| ACTTGTCACCCC  | 913.94674037412  | 0.0853587937221547 |
| CGTCTGGGTAC   | 913.948288717844 | 0.123874046525166  |
| GTTGGCTCATTA  | 913.951234140373 | 0.146054268180782  |
| AATAGCATCATA  | 913.991320886789 | 0.111865550131002  |
| GAACTGGTCAAC  | 914.004993748851 | 0.084648297400679  |
| AGTATGTGACAG  | 914.018545382215 | 0.128854902515503  |
| AATTTACAGTCA  | 914.044818958333 | 0.16074801204665   |
| ATGGACCTGTCA  | 914.060156309101 | 0.121858738017396  |
| GTCATGGAGACA  | 914.073764515647 | 0.123896664884197  |
| AGTAAAGTCACC  | 914.089835758416 | 0.118622990724949  |
| AGATGAGGTGAC  | 914.103440994534 | 0.157522857925963  |
| CCACATGACCCA  | 914.104928749637 | 0.124831803937563  |
| CCGTCATCAAAA  | 914.108423173575 | 0.130285248895272  |
| TGACGGACAAAA  | 914.118362463898 | 0.143533857406903  |
| ATATCAACGTCA  | 914.119993189023 | 0.123081470507371  |
| GTCTGACGAAAA  | 914.124337734989 | 0.104679443330945  |
| ATGACGGGGCTG  | 914.127668909996 | 0.121471116791923  |
| GGTGACAGTCAA  | 914.1292850889   | 0.123122666211157  |
| GACGCATCATGA  | 914.129676143626 | 0.0836335132338617 |
| AGACTAATCTGC  | 914.143059695857 | 0.129268280161078  |
| ACACCATGACGT  | 914.15042644388  | 0.0865434422755649 |
| GATGACAGCCTA  | 914.159396565789 | 0.09795156111761   |
| AACTGACTGTCA  | 914.172502130465 | 0.151415120868855  |
| GAGGAGCATGAC  | 914.174501444269 | 0.110995540360435  |
| ATGAGCAGTTCA  | 914.176114636326 | 0.122758021876176  |
| GTCGTAGTGACA  | 914.200887421052 | 0.133872335199364  |

|               |                  |                    |
|---------------|------------------|--------------------|
| AGTCAGTAATGG  | 914.211371022516 | 0.120428059760342  |
| ACTCATCTTAGA  | 914.21141471718  | 0.163750691079564  |
| GGCAGCGAGTCA  | 914.222366251774 | 0.0653358585861278 |
| CGTTAATTAGTC  | 914.237027424246 | 0.110617007905545  |
| CGTGACATACAC  | 914.247673392245 | 0.184479612327152  |
| GTCACGAATCAA  | 914.254727707814 | 0.168246140596755  |
| GCGTTTAGTGAC  | 914.25681933082  | 0.109714458095733  |
| TATATGGACTCA  | 914.285001365279 | 0.0770752398557251 |
| AGTCAGAGAGCC  | 914.293139296999 | 0.100556066995919  |
| ACGTCATGGCAA  | 914.293981118934 | 0.0976306611600867 |
| TAGTCAGCTATA  | 914.297366315073 | 0.160202569189717  |
| AATGTGTCGTAC  | 914.308240305334 | 0.0788166271717314 |
| CAGTCAGCCGCA  | 914.308327365588 | 0.102004844770242  |
| ATACCTCTGTCA  | 914.308597085817 | 0.133604411395604  |
| CGTCATTACTCC  | 914.311819569138 | 0.0942656056476821 |
| AGTCAGCAACCC  | 914.326822798507 | 0.0904039087699963 |
| AGAGCAGTCAGA  | 914.34097327817  | 0.0833656317867334 |
| ATGACATTAAGA  | 914.343424899618 | 0.109034287019358  |
| ACTCATATATCT  | 914.357662231954 | 0.065447384658735  |
| CAAGGTGACAAC  | 914.359218845299 | 0.0829536038039772 |
| GCGCATATGACC  | 914.363944862773 | 0.0934142190208372 |
| AGTCAGCAGATG  | 914.367382700729 | 0.0997589640568385 |
| CTGACGACTCAA  | 914.37810511756  | 0.121541638319198  |
| CGTGATTAATA   | 914.378279470437 | 0.094247477618178  |
| CGACCGTTCATC  | 914.380954521903 | 0.119447233093483  |
| ACTCATATTAGG  | 914.398137496186 | 0.0876660212113497 |
| AAGAGTCTTCAG  | 914.406951852186 | 0.105314879431805  |
| AATGACGGGCCG  | 914.40875602152  | 0.141850332964845  |
| AGTTAACTCATC  | 914.415833458254 | 0.087487211855599  |
| AATGACCTAATT  | 914.43133875767  | 0.104805358360558  |
| ACCTGTGACGAG  | 914.440383069029 | 0.121365139513671  |
| ATGAGCCAGAGA  | 914.450857691287 | 0.09415543453144   |
| GTCACGATTCCA  | 914.463776006659 | 0.0963401418481599 |
| TCTCCTACGTCA  | 914.464976780917 | 0.178759723360679  |
| TATCCGGTCATA  | 914.46721503529  | 0.119617334078142  |
| GACTGTTAGTAA  | 914.475085331709 | 0.144049248679607  |
| AGAATGAATAAT  | 914.475145852045 | 0.150572582212781  |
| ATGCAGTCAGCG  | 914.486176239689 | 0.0874616430389028 |
| AAGTATGATACA  | 914.486766927997 | 0.171138440892952  |
| GACTAAACGTCA  | 914.492776531812 | 0.096272865318127  |
| ACTCATTGCAGG  | 914.49300379058  | 0.0801046047763293 |
| GAGCATGTGACA  | 914.513326519792 | 0.098792244219109  |
| CCGTCATTTCTC  | 914.516217362203 | 0.137870739488361  |
| CATCAATTACTC  | 914.53295597098  | 0.0833597584982464 |
| GGCGTGTCACTA  | 914.534319012608 | 0.1225927826824    |
| GAGTGTGGTGAC  | 914.53568143998  | 0.112235917889556  |
| CTGTCACATTCA  | 914.536504965727 | 0.0913561244660951 |
| GATTTTGGTGAC  | 914.537205888133 | 0.147396742153019  |
| GAGATCTAGTCA  | 914.554105873239 | 0.114759809333845  |
| CGGACTAATACA  | 914.558033405162 | 0.119474690314294  |
| GACTTTGAGTAA  | 914.558454680537 | 0.10398650416144   |
| ACAGATGATTGCG | 914.56486788386  | 0.128130393123307  |
| ATGACCGTACAT  | 914.566338962645 | 0.118232736023006  |
| GTGATGGTGACA  | 914.579574647409 | 0.118251425385953  |

|              |                  |                    |
|--------------|------------------|--------------------|
| ACCCCTCGTCAT | 914.58466834041  | 0.0835331186352317 |
| CTATTTGTGACA | 914.592082891371 | 0.110270694568274  |
| ACTTGCTCACCC | 914.601250276945 | 0.0915831792716404 |
| GTCATGTACAAC | 914.604325830343 | 0.122440661421655  |
| ATGAGACGTGAC | 914.606369666886 | 0.124289594780825  |
| AAGAGCATGACG | 914.613252864793 | 0.115308698214362  |
| GTTGCCCTATGA | 914.616892733608 | 0.151765780837396  |
| GTCACTTTACGA | 914.639215161614 | 0.095949466273566  |
| AATTAATCACCG | 914.643967959928 | 0.162140091901736  |
| CTGACTCCGCC  | 914.646458219571 | 0.0848754419604935 |
| CAACATTACGCA | 914.649065925954 | 0.118447865339919  |
| ATTAGCAATATA | 914.65006518419  | 0.132462033903274  |
| CTGTCACCAGTA | 914.650269487074 | 0.0918867070559839 |
| GGAGACGACTCA | 914.653433734099 | 0.0937686495573079 |
| CATAATGACCAC | 914.674658621355 | 0.113100808725711  |
| CGTGTGACCGCA | 914.68551520503  | 0.12261134096884   |
| ACCCGGTGACAG | 914.687235607351 | 0.0879641886678586 |
| CTATGCCTCATC | 914.697338007889 | 0.106673946597976  |
| ACTCATTACAGG | 914.722480051902 | 0.136337497267026  |
| CTGATAACGTCA | 914.731121750887 | 0.0908416528158388 |
| AGTCAGCCTCTG | 914.733289512367 | 0.0958251673360366 |
| ACCGCTCTGACT | 914.75159039438  | 0.103081784967261  |
| GGTGTGCATGAC | 914.75191649027  | 0.165778382517191  |
| TGACATGATTAA | 914.755363137437 | 0.102861507085368  |
| ATCCAAAATGAC | 914.787297168142 | 0.0818644847538246 |
| GTCACTTTGCAA | 914.788564327533 | 0.122350774073762  |
| AGTCAGATAACG | 914.790070369822 | 0.0932698961956561 |
| GTCACTAAGGAC | 914.792052534137 | 0.131307067880826  |
| CATTGACACGTC | 914.802511525541 | 0.129116449064144  |
| CCGTCATCTCCA | 914.809112850393 | 0.0855440575653079 |
| GCTCTGTGACGA | 914.809253906297 | 0.146062749946148  |
| ATGAGTTACAAC | 914.811684368283 | 0.185066224716835  |
| ATGCTGCATGAC | 914.814752384937 | 0.101999975101812  |
| TCCAAGACGTCA | 914.822430881058 | 0.154280790886055  |
| AGTCTGTCACTC | 914.832609053105 | 0.0937825260912866 |
| GTATGACCGCCA | 914.837559541888 | 0.194127948205578  |
| CTAGACAGTGAC | 914.839158238001 | 0.111209697128752  |
| GCGGTCATACGA | 914.841355188032 | 0.119847885774279  |
| GAATCATCGTAC | 914.842349995673 | 0.128351387714929  |
| CTGCGAGTGACA | 914.842832118623 | 0.10317120261719   |
| CGGGTTTGTAC  | 914.851434542155 | 0.0850492288811706 |
| GATAGAGGTGAC | 914.860057390332 | 0.142398994409689  |
| CTAAACTGTGAC | 914.87709293324  | 0.112851395699622  |
| ATTGCTCAGCGC | 914.88082145879  | 0.095627794158857  |
| AGTCAGTGTGAC | 914.889396423339 | 0.0966475110927066 |
| ACTCATCAGAGC | 914.898085667302 | 0.119788959042003  |
| GTTCCCGTCATA | 914.908242107727 | 0.122055893417553  |
| TGACAATGAACA | 914.919167275696 | 0.151079209711907  |
| ACGAGTAATTGA | 914.929663740562 | 0.135651731443989  |
| CAGGTAGGTGAC | 914.934191323054 | 0.15204761405021   |
| ATTGACAAATCA | 914.945447568325 | 0.0670950465341317 |
| ATGACAGGAAGG | 914.955840023318 | 0.0835268003989304 |
| AAGTGTCAATCG | 914.960458664588 | 0.0997108394260997 |
| CTTACTATGACC | 914.976904745706 | 0.0897571167335884 |



|               |                  |                    |
|---------------|------------------|--------------------|
| AGATGATTACAT  | 914.982837828037 | 0.113871217978559  |
| CTCGTTCATGAC  | 914.986446753814 | 0.163765772729254  |
| CCACTCAATGAC  | 914.98823914816  | 0.10322424268323   |
| GTGATGACCGAA  | 914.993975243287 | 0.0632082178778248 |
| ATGTCATTGCTC  | 914.997034549186 | 0.0856079254400125 |
| CTGAGTAAACAA  | 914.997109913944 | 0.152971647117179  |
| GAAGTAAGAGTC  | 914.999969518538 | 0.122255511745185  |
| GCTGACTAGACA  | 915.0005053775   | 0.120127898803174  |
| TGTTCTGACAAA  | 915.002102713919 | 0.122061316135826  |
| GACAGCTCACAC  | 915.012221240635 | 0.10393427069785   |
| CGTCATGTCTAA  | 915.013588086162 | 0.0888868221794542 |
| ACTCATCATTCG  | 915.016799442603 | 0.124005503366789  |
| GGTCATCCAATA  | 915.025754586867 | 0.143900911622272  |
| ACTCATCACTAC  | 915.037946359847 | 0.10016646536651   |
| CCCAATTAATA   | 915.055301299415 | 0.113501825001564  |
| AGCGTCTGTGAC  | 915.060944767065 | 0.116080895586632  |
| TACTCTATGTCA  | 915.071412827868 | 0.0865870092063907 |
| ACACATGACGAT  | 915.086951489354 | 0.140126343629499  |
| GGTGAGACATAA  | 915.08957711225  | 0.125679609907319  |
| CACTGACTCTTA  | 915.093329195843 | 0.10612604502677   |
| CAGGTCCATGAC  | 915.098785481324 | 0.11473287548589   |
| ATGACCGCACAT  | 915.099102608218 | 0.0448786993186715 |
| CGTCATGTTCTA  | 915.104768422894 | 0.114276935258209  |
| GACTGACGATTA  | 915.104811529797 | 0.128342264707254  |
| CTGGACCATGAC  | 915.1197507912   | 0.0900146868100046 |
| GGGTCATCAGAC  | 915.121770245934 | 0.101625987652937  |
| CCGTGACTCTGA  | 915.122181274808 | 0.0826014137592867 |
| ACGTGGCGTCAC  | 915.139679987685 | 0.111359529265082  |
| GACTAATAACAC  | 915.158018078493 | 0.0614433233869073 |
| GTCACAAGCCAA  | 915.166755169821 | 0.127468141022365  |
| AACGCTTGTGAT  | 915.167658802411 | 0.0912808451955611 |
| ATGAGTAGACAA  | 915.176980544787 | 0.121062322325195  |
| AAGTCTGTGACA  | 915.182979849253 | 0.115246712231764  |
| GATTCAAGTGTA  | 915.183190231779 | 0.0816292543916789 |
| CCACCTCATGAC  | 915.187808650022 | 0.109271915466274  |
| ATCGAGGTGACA  | 915.194304029318 | 0.0712239888077581 |
| CGGCGTGTGACA  | 915.201220220519 | 0.172786707289926  |
| ACTACCTGTGAC  | 915.20595732914  | 0.104261139497378  |
| CTGATGTGACAG  | 915.208337882736 | 0.119545250119649  |
| GAACGAGAGTCA  | 915.216471733977 | 0.142510640968683  |
| ACTTTGACTGTA  | 915.217799313511 | 0.0613547989747134 |
| ACTCATCATCCT  | 915.222160413333 | 0.086359629093656  |
| TCTTTTGTGATA  | 915.222708443405 | 0.13320958470761   |
| ACTAATGACATC  | 915.224712914466 | 0.129052511166343  |
| GATTACTTGTA   | 915.240586934295 | 0.121707854601814  |
| GGTACTGATAC   | 915.247216319242 | 0.134545599078497  |
| CGACGAACATGC  | 915.25900504171  | 0.121397781387959  |
| ACCTGTCACCGC  | 915.30247167924  | 0.11550124892787   |
| ATGACGAACGCA  | 915.319922353623 | 0.118158035231592  |
| GTCACCAAGA    | 915.329415666781 | 0.12683131256598   |
| ACTCATACGCCCT | 915.331937347941 | 0.0868695602460071 |
| TCAGATGCATCA  | 915.355897376986 | 0.100799811028489  |
| GCGATAGGTGAC  | 915.356548755652 | 0.0999325713247895 |
| ACCTGTCACCCA  | 915.362073312913 | 0.0980951765061099 |

|               |                  |                    |
|---------------|------------------|--------------------|
| ACGAAGGTGACA  | 915.363291656011 | 0.115980312146526  |
| GTGACCACTTGA  | 915.387222201607 | 0.126442577388525  |
| CGATCTAAGTCA  | 915.407409364891 | 0.0915980974242184 |
| CAGTCTGACGTC  | 915.417051238741 | 0.127856494787154  |
| GTCACGGAGGAC  | 915.419781586293 | 0.153191741978729  |
| ATGACCGTATGC  | 915.422996592074 | 0.189909305250404  |
| GATCTGTGACAA  | 915.429868542347 | 0.111923358121693  |
| ACCGGTCATAGA  | 915.440605672051 | 0.0852747616622369 |
| CCGGACCTGTCA  | 915.456811689907 | 0.155245425240553  |
| AATGACCATAACC | 915.465095745614 | 0.144810640736676  |
| TCGTCACCAAAA  | 915.474719905056 | 0.0757664834193006 |
| AGAGTCAAGTAG  | 915.478634357342 | 0.114804026679706  |
| CGCTTCATGACG  | 915.488445594875 | 0.100152351879034  |
| GAGTTGAATCAC  | 915.502174690256 | 0.118367989677769  |
| AATGCGCTGACT  | 915.522868503554 | 0.150366425524092  |
| CCATGACAATAC  | 915.529013057996 | 0.0869385445423316 |
| AATGCTCATCGG  | 915.530106886029 | 0.129676651471377  |
| GTCTCTAAGTCA  | 915.538461014979 | 0.0960255172859677 |
| CACACTATGACC  | 915.550700869964 | 0.0932925451769603 |
| ATGACGTCGCGG  | 915.554727892035 | 0.103763471433163  |
| AAGCATGACCAC  | 915.566061679414 | 0.135239019150921  |
| ATGACAGTCTGG  | 915.576484358598 | 0.0831757582606158 |
| CCTCACATGACA  | 915.57833502005  | 0.177093894751862  |
| ATGAGTACGCGA  | 915.582704958253 | 0.103113877169523  |
| AGTAGTTGTAC   | 915.583445131576 | 0.114152855728221  |
| CTAAGACTAACC  | 915.588526116559 | 0.105192649854242  |
| CCGAGTCAGGGC  | 915.591881448501 | 0.174200157558913  |
| AAGTCTGACATA  | 915.593413330717 | 0.168889249051246  |
| ACTCATCAATA   | 915.610197431728 | 0.186003863790509  |
| AATCTTGAGTCT  | 915.618772507815 | 0.0994987941578314 |
| CGATTAAGTGA   | 915.62244387693  | 0.119566747287425  |
| TGACGGATGGAA  | 915.638972565287 | 0.0824632323779153 |
| CGTCACTTGTAC  | 915.644581846332 | 0.117868625463279  |
| TGACCAGTCTCA  | 915.657813925632 | 0.0956884758717337 |
| AGTCCTGTGACA  | 915.658104105542 | 0.0959508083821598 |
| ACTCATCCGTAC  | 915.700138206725 | 0.0871356789322024 |
| TGTCGGTGACAA  | 915.705380401933 | 0.114745869617718  |
| AAATTAATCACT  | 915.721443866553 | 0.13024866576963   |
| ACGATGATGCAC  | 915.72256971967  | 0.130149975929044  |
| CTTCTCCGTAC   | 915.730945651735 | 0.0816357163686099 |
| GGTCACCTTCGA  | 915.741243137623 | 0.109865226539686  |
| ACTAATGACCTT  | 915.747270410985 | 0.0830062146348298 |
| AATGACATTATG  | 915.752744436765 | 0.117847656185602  |
| CACCATGAGTCC  | 915.77702342331  | 0.126904585510201  |
| AATGTGTAACAG  | 915.778086110122 | 0.120032364976134  |
| AGTCGTGTGACA  | 915.801151411083 | 0.102829539520837  |
| AAAGCATGACAA  | 915.80147077737  | 0.113603725329175  |
| GTCACGTTTAGA  | 915.817985655212 | 0.104138136108537  |
| GTGACCTATTAA  | 915.822290036651 | 0.0950678944718351 |
| GTCACCTCTATA  | 915.838258748992 | 0.0967403259041019 |
| CAGTCAGCCTTA  | 915.853957949937 | 0.124698779253167  |
| TCCATTTTGTCA  | 915.855980167852 | 0.0830800566277581 |
| GGGTGACATGGA  | 915.858191541587 | 0.115666930074493  |
| ATTACACACCCA  | 915.860522785154 | 0.122291326626053  |

|               |                  |                    |
|---------------|------------------|--------------------|
| ATGAGCCAGCTA  | 915.869067040121 | 0.0947308859546182 |
| CTGTGAGCAAGA  | 915.881846243192 | 0.166335964234382  |
| ATAGTCAGCACA  | 915.886125983998 | 0.0872126335576826 |
| GCGGATTGTGAC  | 915.903220424612 | 0.103171935484105  |
| CGTGATACGTCA  | 915.908278075253 | 0.086938823383663  |
| ACCGACTAATCA  | 915.908940240093 | 0.0947335786919103 |
| AGACTGATCATA  | 915.919217233692 | 0.117636648552379  |
| GAGTAATTCTCA  | 915.928800640922 | 0.0888569086905894 |
| AGTCAGAGGAAA  | 915.960323338526 | 0.0673786164608863 |
| TGACGCGGCCA   | 915.976620789464 | 0.0970748753779768 |
| CCTCAGTGACAA  | 915.979025106308 | 0.114919001202382  |
| GGTGATTAATAA  | 915.982231829205 | 0.101069605497669  |
| AAGTATGGTGAC  | 915.985629546597 | 0.0840902443701539 |
| AACTGAGACTCA  | 915.987720603147 | 0.196141297447344  |
| ATGAGTGCCATC  | 915.996039634644 | 0.107853502869426  |
| TAATAAGACTAA  | 916.00821702131  | 0.160128121919182  |
| CCTTGGTGACG   | 916.008293635064 | 0.196167970507011  |
| GACGGAGGTGAC  | 916.008772429417 | 0.129885610593248  |
| GCGGAGTCAGGA  | 916.018352258863 | 0.124138758502633  |
| ACTCATTACTAT  | 916.023029073374 | 0.080274517859216  |
| AGCACTATGACC  | 916.032042192251 | 0.116946133781519  |
| CACCTTGATGAC  | 916.033586209952 | 0.136082417445812  |
| ACTCATGTAAGG  | 916.034887936451 | 0.10493623837449   |
| CGATGACCTACC  | 916.040005277357 | 0.159654814990628  |
| CATCGTCAACCGC | 916.042884280621 | 0.13852809569778   |
| GGATGACAAGAA  | 916.057925439988 | 0.106658332563219  |
| CATTGTGACGCC  | 916.060651063585 | 0.0956167040678703 |
| TGACTACACACA  | 916.098689753453 | 0.0803535928136059 |
| GGTGACAGTCCA  | 916.100358490466 | 0.130821929162077  |
| CTAACTCATGAC  | 916.103718047018 | 0.109925896356275  |
| AACGCAGTGACA  | 916.105302077206 | 0.103767221443119  |
| GGGAGACTCACA  | 916.106221399974 | 0.0887642243038297 |
| ATGACATGCTGC  | 916.113985338411 | 0.112496396189703  |
| GGTCATATACTA  | 916.122612017423 | 0.154498239238054  |
| GGTGACGCCGAA  | 916.128185477983 | 0.127375338679732  |
| ATACATCAATG   | 916.135493117389 | 0.191285218236893  |
| GATTGGTCAACC  | 916.137656245851 | 0.0839729893949128 |
| ATCACCCGTGAC  | 916.145807690289 | 0.0879729752893544 |
| GGTCATATGATA  | 916.159720086364 | 0.0815259769052783 |
| ATTAGTACGAAA  | 916.165853847697 | 0.0903278134543007 |
| GTGACCCAACTA  | 916.166096551106 | 0.0898015462373412 |
| ATTACAAGTGAC  | 916.171684291753 | 0.114924511230132  |
| ATAACCCATGAC  | 916.175342393063 | 0.125391955722177  |
| CATTGTGAGCAA  | 916.189860224603 | 0.187728977786676  |
| GACGTCACGTAA  | 916.190183622924 | 0.119974094979128  |
| GATGACGGCGAA  | 916.197954277358 | 0.0818085021922059 |
| GATGACAAGCCC  | 916.211419261598 | 0.121076333447256  |
| ACTCATATGCTA  | 916.230189337542 | 0.102503309598327  |
| ATGACCGTGCTC  | 916.231177032105 | 0.101032354894283  |
| TCTATGCTGTCA  | 916.232885532604 | 0.129202884235259  |
| AAGTCAGAGCAA  | 916.240299134739 | 0.126702242012301  |
| ACCTCAAATGAC  | 916.242759996023 | 0.0843359578851734 |
| GTCCACGTAACA  | 916.255241565839 | 0.124889483119811  |
| CGACATGGTGAC  | 916.258863458789 | 0.125605655811599  |

|               |                  |                    |
|---------------|------------------|--------------------|
| ATGACCAGGATA  | 916.261715741515 | 0.102497438942508  |
| TATGCTTGGTCA  | 916.2712993267   | 0.10873616098422   |
| CCATCTTGGTCA  | 916.282599661192 | 0.112972085400654  |
| TAGTCAGTCTCA  | 916.284657771735 | 0.0921274263203709 |
| CAGTAATAATCG  | 916.306035093893 | 0.160520824042155  |
| ATGAGTGAATC   | 916.308957794724 | 0.103140458281261  |
| TGACTAGTGCCA  | 916.321378798543 | 0.160139815427873  |
| AACTGGCATGAC  | 916.325511319816 | 0.115289571947917  |
| AAGACTCTTGCA  | 916.330759286181 | 0.190446312634567  |
| ATGTCCGACTGA  | 916.331355127275 | 0.112303536481025  |
| ACAGTCAGCTGG  | 916.346663927129 | 0.116787298153476  |
| GTGATGATACAC  | 916.34786047827  | 0.155376586791589  |
| AATGAGTGAGCG  | 916.359965395065 | 0.139691943108803  |
| GTCATTGGCGAA  | 916.368199269425 | 0.141779199119196  |
| CAGACTAATCAC  | 916.390388136736 | 0.11955718460435   |
| ACGAGTAATCCT  | 916.397919460293 | 0.0799213844188826 |
| CGAAGATTACGC  | 916.425407396301 | 0.120167778460283  |
| CATGACAGACTC  | 916.436687803505 | 0.136300465205063  |
| TGTGGTGAGCAA  | 916.441959681331 | 0.139182453195778  |
| CTCATCTCTGAC  | 916.44197928339  | 0.0950870128424935 |
| CAGGTGCGTGAC  | 916.470000469602 | 0.0977059474478805 |
| CACTCATTCTGA  | 916.474944060137 | 0.0834722867789768 |
| TAACTCGTCAGA  | 916.476445943356 | 0.126511370750319  |
| AACAACCCGTCA  | 916.478773308451 | 0.106127165128272  |
| CATGGAATGACC  | 916.482344317052 | 0.142477955678314  |
| TTGTGAGCAAAA  | 916.488960653084 | 0.101715642461881  |
| GACAGATGAGTA  | 916.497436270098 | 0.109306638338804  |
| AATCGTCAGAGA  | 916.529224620002 | 0.15662086865171   |
| GTGAGCCACCAA  | 916.545782905362 | 0.0915715433316681 |
| AACAAGATGAGT  | 916.555346972199 | 0.151377542767411  |
| GCGTCACTGGGA  | 916.558835208298 | 0.0932415196715547 |
| CCTTCGTGGTCA  | 916.565037630392 | 0.109693639051494  |
| ATTAGCAATAGA  | 916.569132586578 | 0.117108198230682  |
| ATGCATCGTGAC  | 916.573107035279 | 0.112380910386164  |
| ATTGGCTCATTC  | 916.589333821831 | 0.108014136510968  |
| GTCAGATTGGCA  | 916.591378226702 | 0.126629557926363  |
| ATGAATCAAATG  | 916.596894388295 | 0.098649125156275  |
| AGAATGTGTCGA  | 916.601615568158 | 0.120165818681208  |
| AATAGTAATAAC  | 916.610917523354 | 0.164158163938758  |
| ATTGAGTCCCTAC | 916.614797945834 | 0.119624154666421  |
| CGCTGCATGACA  | 916.62177675171  | 0.0609314570452792 |
| CCGAGCCTATGA  | 916.627089096525 | 0.0851892913514942 |
| CGGTAGGGTGAC  | 916.631004946737 | 0.111764627191581  |
| CCCAGAGTGAC   | 916.636063039766 | 0.172059642433288  |
| CTAAATTACACA  | 916.663980497037 | 0.0820884874340461 |
| ATTGGTCAACAG  | 916.677384444635 | 0.0841980299405366 |
| CTGCCGTGACAA  | 916.681672512601 | 0.105372502846597  |
| ACGCGGTGACCA  | 916.712557882392 | 0.106113057365973  |
| CTATTAGCCATA  | 916.718920288959 | 0.118871391742438  |
| CCGAATTACACA  | 916.7328338166   | 0.130908330820535  |
| AGTTTCCGTGAC  | 916.745383185547 | 0.0834813880232189 |
| AGTTGGATGACC  | 916.74718015148  | 0.144355490005597  |
| ATACAGTAATAC  | 916.755686873701 | 0.135499625225539  |
| CTGACTAGACAG  | 916.756122204462 | 0.0901698983285404 |

|                |                  |                    |
|----------------|------------------|--------------------|
| ACAGTCAGGGTC   | 916.762965572098 | 0.121533575727643  |
| ATTGTAAGACTC   | 916.777043605754 | 0.177675018134545  |
| TCGTCACTAAAA   | 916.779671755574 | 0.0889239175191483 |
| CACGAGATTGAC   | 916.787734812947 | 0.163200777588405  |
| CGTGTCCTACTACC | 916.789042487015 | 0.0878644645121869 |
| CATAGAGAGTCA   | 916.790523038488 | 0.112458633330819  |
| ACAACCTTGTCA   | 916.792886379248 | 0.134683100602739  |
| TGGCGTCACTAA   | 916.799339695415 | 0.085136146142884  |
| ACGTAATCATTAA  | 916.818349358521 | 0.141938991035096  |
| AGTACTAATTCG   | 916.843014854043 | 0.10732238179556   |
| ATGTAATGTAC    | 916.843232326682 | 0.180291005528963  |
| CCTGTGAGCAAAA  | 916.846643027303 | 0.16497855814035   |
| CAGCTGTGACCA   | 916.850144547206 | 0.092440941731076  |
| CGTCACTGATAC   | 916.875496594782 | 0.141425209381568  |
| TGAATCAGTGCA   | 916.88104086211  | 0.106695521101092  |
| ACCCGTCACAGT   | 916.88981774419  | 0.0654691924914494 |
| GAGCATGACAAC   | 916.895362261547 | 0.104981000855258  |
| GCCGGGGATGAC   | 916.902493466135 | 0.0834940657151862 |
| TATTGTTTGTCA   | 916.907879595752 | 0.0941499133169935 |
| AGGCTCGTCACA   | 916.91873471366  | 0.115422554249663  |
| CCTGACGCAGTC   | 916.919969302017 | 0.113527661277659  |
| GTGACGTCTCAC   | 916.923550433944 | 0.119676320717651  |
| CTTTTCGGTGAC   | 916.924016192167 | 0.115849648039227  |
| GTGACTTGACACA  | 916.9342342625   | 0.106094772054418  |
| ACTCATCCCATG   | 916.950592840203 | 0.10427430222146   |
| TAAATGATGCAA   | 916.972169623407 | 0.129119927946606  |
| AAATCGTCAGAA   | 916.975412413131 | 0.105592053926372  |
| ATGACATGAAAA   | 916.981053594219 | 0.0933773404765714 |
| ATGACAGGGCTA   | 916.984132586156 | 0.119603914826618  |
| GAGTTCCAGTCA   | 916.989566348761 | 0.115837073321924  |
| ATGTCTGACGCG   | 916.993476440516 | 0.141917251212635  |
| ATTAGCCATCGC   | 917.004589221607 | 0.154955134220794  |
| ATCATGACAGTG   | 917.006422531712 | 0.0828044654347472 |
| CATGTAATCATC   | 917.018854396162 | 0.110227963553861  |
| ATTTCGTCAAAA   | 917.020714140362 | 0.104775861324325  |
| GCGTGACACCGA   | 917.022819713774 | 0.0874445898093765 |
| CTGACGGATACC   | 917.023048004796 | 0.106419718406094  |
| TGATACATAGAA   | 917.023099726938 | 0.112656140045235  |
| CTGAATTAATAA   | 917.043745582953 | 0.121044097772942  |
| AGTCAGACAAAA   | 917.058656383142 | 0.186844834053101  |
| ATGGGTGACGAC   | 917.070226925399 | 0.104768273321271  |
| AGGAGTAATCGG   | 917.073477608795 | 0.0841925005911546 |
| AACCCCGACTCA   | 917.075786914001 | 0.113954836013013  |
| AGTGCATGACGA   | 917.083928633231 | 0.0996206588554542 |
| ATTATTCACATG   | 917.088138831815 | 0.102665442493659  |
| TCATAGGCGGGA   | 917.093017002036 | 0.0859779804864641 |
| AAGACTGATCAG   | 917.101087618794 | 0.103843220098548  |
| CTCATACTCTGA   | 917.108081676142 | 0.0959259414847878 |
| CACCTCGTCACC   | 917.10896514432  | 0.122894229360636  |
| AATCGTGACGGA   | 917.136620111013 | 0.0682767833103027 |
| GGCACCTTATGA   | 917.138682731954 | 0.119034906612803  |
| CCCTCTTTGTCA   | 917.152290311901 | 0.0999577169490678 |
| AGTCAGCAACGG   | 917.15544840012  | 0.0949836173216268 |
| CACTCATTGACG   | 917.169606943321 | 0.129872209833401  |

|               |                  |                    |
|---------------|------------------|--------------------|
| GAGTAATTCGTA  | 917.169737068799 | 0.130879062122157  |
| ATGACATCCATG  | 917.175725146987 | 0.132125044010033  |
| ATTAGTAAGTTG  | 917.182206872904 | 0.100995287522625  |
| GGGTGACCTAA   | 917.187292434937 | 0.0994815717871259 |
| GACGCGGAGTCA  | 917.211221812802 | 0.0826599802965822 |
| AAATCAGTAACC  | 917.228455243499 | 0.0673419954827795 |
| GCCGATCACTCA  | 917.235201890561 | 0.0965609426713631 |
| CAGCCTCATGAC  | 917.243770182197 | 0.156267765317327  |
| AGGTATGATGCA  | 917.2548411522   | 0.132930749518038  |
| AACCTCGTGACA  | 917.264370753573 | 0.108408943592491  |
| CAGGGCACGTCA  | 917.273510483729 | 0.167309606216247  |
| GTTGTCATGCAA  | 917.290420633269 | 0.0987712072013639 |
| ATCGAAGTCACG  | 917.301366110975 | 0.121881440857953  |
| GAAACGGGTGAC  | 917.30301518247  | 0.116757494343813  |
| CTGACTGTCACC  | 917.313059329945 | 0.160972826969116  |
| CGTCACCTCCTA  | 917.316697683317 | 0.114229605426634  |
| CTATGACCGCTA  | 917.326405655013 | 0.0811023739810284 |
| GCTTACGCTGAC  | 917.330960835492 | 0.117093966265927  |
| ACGCAACCGTCA  | 917.331908898497 | 0.0972240018854374 |
| ACGGATGACCAG  | 917.341375094844 | 0.0683622758468625 |
| GTAGTACATGAC  | 917.351666426437 | 0.0991526038151467 |
| CATGTGTGACGG  | 917.360021222578 | 0.122400522639919  |
| AGTTGCCGTGAC  | 917.360340387792 | 0.12286124580635   |
| GATGACAGTCTA  | 917.370356868314 | 0.0919918662965623 |
| ATTATGAGTTAC  | 917.371074664107 | 0.139557106039287  |
| CAGTCAGAACTC  | 917.37310434265  | 0.142050447275121  |
| CCGCGGTGACAA  | 917.373220907206 | 0.0915864932162334 |
| TAGTGAGCCACA  | 917.375423156522 | 0.136052251835653  |
| CCGTTAGGTGAC  | 917.378936665663 | 0.12522968976091   |
| TCTTAGTGGTCA  | 917.386285185186 | 0.0827617792571606 |
| CAAAACCTATGA  | 917.407170998361 | 0.121496979632363  |
| GTCACGCTTGCA  | 917.40870126961  | 0.100253640474893  |
| CCCTATCTATGA  | 917.418232495644 | 0.0857970912454368 |
| ATGACGAGCGTG  | 917.422338347345 | 0.128246311248357  |
| TCCCGCATGACA  | 917.425172011495 | 0.170798329418654  |
| ATGAGTAGTGAA  | 917.425371718141 | 0.0880116759795788 |
| CCACATAAGTCA  | 917.434865809377 | 0.108577111324609  |
| TCTGTGTACTCA  | 917.447820809352 | 0.15456358442386   |
| TATCTTGTATGA  | 917.452782737225 | 0.128181594342081  |
| AGCCGGGTGACA  | 917.459478096225 | 0.111113428992795  |
| ATGAGTCCGGAC  | 917.465541129657 | 0.114012515443696  |
| CGACTCTGAGTC  | 917.47806434884  | 0.1030575631198    |
| GTCAGTGACCAC  | 917.478241301888 | 0.106532341020019  |
| GTAGAGTGACGA  | 917.480220495881 | 0.0992879960486799 |
| ATCGACGCGTCA  | 917.490373477216 | 0.165870891127976  |
| ATCTACTGTGAC  | 917.491824355806 | 0.0838815720421304 |
| CGTCACCTATTC  | 917.491894775778 | 0.138074719355125  |
| CCCTGACTCTCA  | 917.492787994284 | 0.124728697347764  |
| CGGTACAGTGAC  | 917.521986591852 | 0.125279719747029  |
| GTGATGTCAGAA  | 917.527292259376 | 0.114448198953972  |
| ACTCATTCTCG   | 917.542369123564 | 0.131006972105711  |
| CGTCACTGTCAA  | 917.550114116197 | 0.117069890705994  |
| GATGATAACAATA | 917.552110199489 | 0.117399236384841  |
| AAAAGACTAACA  | 917.559311023371 | 0.151245561981979  |

|               |                  |                    |
|---------------|------------------|--------------------|
| AAGCAGATGACA  | 917.562095176623 | 0.0987483427611452 |
| GAGTGACAGTAC  | 917.563765340872 | 0.122880494775438  |
| ATTACGTAGTCG  | 917.570023568148 | 0.122522193345246  |
| AATTCACCTACC  | 917.573490620719 | 0.126420317081541  |
| ACTTATTGTGAC  | 917.57541824128  | 0.105445292234709  |
| ATGACCCGGTTGA | 917.576577392073 | 0.099022307693741  |
| AGTCTGTCATGA  | 917.584751147957 | 0.141354137620284  |
| GTGTGATGCATA  | 917.58622769535  | 0.136940299095949  |
| AGCTATGGTCAT  | 917.588913889944 | 0.132047134750019  |
| AAGTGAAGTCAC  | 917.596464444861 | 0.0943386051526006 |
| GACTCTGACACC  | 917.599368271462 | 0.094715235220267  |
| TACAGCTAGTCA  | 917.603962252217 | 0.0812836362240952 |
| GCACTGTCACCA  | 917.604389686795 | 0.117766172687439  |
| CTAGTGTACTCA  | 917.608346931495 | 0.0969509999222843 |
| CTGTCATGAGGC  | 917.612204181741 | 0.10585303424197   |
| CCAAGTGTGACA  | 917.613470263654 | 0.0980134579224768 |
| CCAAATGACATC  | 917.616309228252 | 0.104022739153311  |
| CGCTAGGTGACG  | 917.618858677436 | 0.114086757263953  |
| ACCGCTGTGACG  | 917.634630094034 | 0.0934116806139164 |
| CCCACCATGACA  | 917.635062800386 | 0.0850849892109793 |
| ACTCATCTTACG  | 917.645338814727 | 0.125329744613348  |
| GTCACATGAGGA  | 917.647692473474 | 0.0933883721907891 |
| GGTCGGAGTGAC  | 917.649642388651 | 0.108479617795923  |
| AATCATATGAAT  | 917.657657866805 | 0.140319138129925  |
| CTATGCGTGACA  | 917.657895558949 | 0.119437511469983  |
| GAAAGATGTGAC  | 917.661416363941 | 0.108103335792397  |
| TGGTGACAATAA  | 917.677520644417 | 0.059057511630344  |
| ACTCATACGTCC  | 917.678792482582 | 0.108853689081256  |
| ACTCATCTTCCG  | 917.707345619102 | 0.0882397754359068 |
| CGTCACAGGGTA  | 917.714384383697 | 0.106825714445896  |
| TGACAAAGCTAA  | 917.72382633896  | 0.0983052736045542 |
| CCCTGACTCGCA  | 917.731125458071 | 0.10393624425639   |
| ACTGAGTCGTCT  | 917.733434124287 | 0.109747730391523  |
| AATTGGCGTGAC  | 917.78159462155  | 0.0932813018183279 |
| AGTGTGACCATG  | 917.787144744806 | 0.156167461878174  |
| CACAGCTAGTCA  | 917.79196981653  | 0.151818865306314  |
| GACCTCTGACAC  | 917.794672915854 | 0.102658523066785  |
| CATTTCTGTGACG | 917.823947628958 | 0.10519602115101   |
| AGAAGATGTGAC  | 917.828847213721 | 0.0537129120788728 |
| GAATGAGGCATC  | 917.838177685335 | 0.0812923556306691 |
| ACGCCGTGACAC  | 917.84855467458  | 0.103149487462487  |
| ATGAGTCCGGGA  | 917.858853791833 | 0.0796958845935903 |
| AAGCGATGATTC  | 917.860518023086 | 0.105892456109883  |
| ACGAGTAATCCG  | 917.862596778446 | 0.0866087874594708 |
| GACTCAATTTGC  | 917.864531859169 | 0.136951954257861  |
| ATGTCATTATGC  | 917.871346521742 | 0.127114063190221  |
| ATCGATTGTCAT  | 917.872313169301 | 0.109247119118349  |
| CCTTGCGGTGAC  | 917.878995610452 | 0.1336471479536    |
| ACGAGTCGTAC   | 917.882283307259 | 0.106238106590651  |
| AACGACTCAGCG  | 917.891407092303 | 0.121639643368071  |
| AGAGTAATTGTG  | 917.897077429167 | 0.167708671219989  |
| CGGACTGTGACG  | 917.901695144915 | 0.0937619661055082 |
| ATACTCTAGTCA  | 917.907823423169 | 0.165190256133448  |
| TAATCATACTCA  | 917.908573344941 | 0.162106188089459  |

|              |                  |                    |
|--------------|------------------|--------------------|
| CATGACAATACC | 917.91014055278  | 0.0558018842814856 |
| GTGACGTGAGTA | 917.91134070422  | 0.119633249197282  |
| ATGAGTGAACGA | 917.920231604275 | 0.135657136780975  |
| CATGTCACAGTC | 917.921681279337 | 0.115723217568819  |
| CCGGTGACAGCG | 917.924195340474 | 0.117075561073019  |
| ACTCATGGAGCA | 917.931173325486 | 0.145462212976193  |
| CGCATGAGTACG | 917.946954973644 | 0.0916356295205646 |
| TGACGCTACTCA | 917.948021936439 | 0.12233780046592   |
| AGCCTCGTCATG | 917.953301422928 | 0.0730571512277461 |
| TGAGCAACACAA | 917.966931718766 | 0.117558154366328  |
| GTCACCACACAC | 917.969089232383 | 0.101066366692655  |
| CCGAAGGTGACA | 917.971411773976 | 0.184505948627321  |
| CATTATTGACTA | 917.977153647948 | 0.093212387805201  |
| ACCTGTCACCTA | 917.98770207289  | 0.10478258809405   |
| CCTCGGTGACCA | 917.988487950056 | 0.122530394894906  |
| GTCATGCCTGTA | 917.990513141077 | 0.112531161312359  |
| GGACCGGTGATA | 918.000058274401 | 0.136423318263371  |
| CGTGGGCATGAC | 918.000060185005 | 0.115247769657642  |
| ATAGACTCTTAC | 918.009945098605 | 0.12658285292753   |
| ATACGTCAATTA | 918.010541247672 | 0.141182987369057  |
| GACTGATCTAAC | 918.020528952668 | 0.0843449544815809 |
| CTCATATACTCA | 918.039340615366 | 0.0975693677218379 |
| CGTTGGGATGAC | 918.042869356322 | 0.122867218770707  |
| GGATGAGGCATA | 918.043979655819 | 0.103849503154663  |
| AGATATAGTGAC | 918.044837758247 | 0.0845977136526054 |
| ATGACGAGAGCG | 918.048161006372 | 0.155096179405896  |
| AAATGTCACCCG | 918.053792834975 | 0.0838971011407828 |
| CTCTTCGTGAGA | 918.057484483504 | 0.108415722950502  |
| GAATCATACCA  | 918.064344153627 | 0.160606910415156  |
| AGGAGGCATGAC | 918.067675259977 | 0.0523466602594743 |
| CAGCCATAGTCA | 918.07169008532  | 0.156724737726551  |
| AACACTCTGACT | 918.094438862783 | 0.0789996971327311 |
| AGTGACAGGTAA | 918.094487028048 | 0.0964003293062445 |
| AATTGGTGACAG | 918.10456074545  | 0.0821810609904204 |
| TAATGGTCAGAA | 918.10471175503  | 0.0672988074034804 |
| AAGACTATTACG | 918.117414994467 | 0.105305517197374  |
| GCAGGAGAGTCA | 918.121121827296 | 0.0870196661123797 |
| CACTTACTCAAC | 918.131104817186 | 0.115120467226879  |
| ACTTTCCATGAC | 918.131795129443 | 0.0941586451490976 |
| ACTTCTCTGTCA | 918.136645836573 | 0.122922100599154  |
| ACAACTCATAGA | 918.137297810705 | 0.10749860810653   |
| CCTTTGACGCAG | 918.138827936302 | 0.132989505936821  |
| GGTATGGGTGAC | 918.1436207988   | 0.0787308394970197 |
| ACGCAGTGAATC | 918.144259767038 | 0.134914057779534  |
| CTGTTTTATGAC | 918.149111881943 | 0.0606484204908312 |
| AAGGTAATGACG | 918.153606642568 | 0.0872457389590456 |
| CTTTAGGTGACA | 918.177123139254 | 0.084636231553955  |
| GAGAACACATCA | 918.190942287944 | 0.120115162638155  |
| CTCGATCAGTAA | 918.192151239911 | 0.0786665411441866 |
| ACAGATCATCGG | 918.211298630795 | 0.137618300503087  |
| AGTATTACTGTA | 918.212273322732 | 0.10403643540079   |
| AGTTATGTCAGC | 918.226236559163 | 0.116899478606     |
| CCATGTCACCCG | 918.227995525161 | 0.0789049205803228 |
| ATGACCATGTGA | 918.233768990655 | 0.0940781274833665 |



|              |                  |                    |
|--------------|------------------|--------------------|
| CTGTTTGGTGAC | 918.234210839351 | 0.137682140394512  |
| CTGAGTCTAACA | 918.236122406727 | 0.101786331619599  |
| TGAGTTGTACCA | 918.251134178443 | 0.0948837441197191 |
| CGTCATGGCCGA | 918.262548738535 | 0.0731735429293552 |
| AGATCATGACAT | 918.269726198585 | 0.0952561098148961 |
| ATTGTATCACAC | 918.274483676278 | 0.101883650365013  |
| GTCACAAAATAA | 918.305320515378 | 0.0979603517413086 |
| AGTCAGAACGCG | 918.316966379894 | 0.100349699817051  |
| ACAAGGTGACGT | 918.334388610031 | 0.121589908408425  |
| ACACTGTCACAA | 918.349206069938 | 0.124785321570716  |
| CGTCACATCTTC | 918.352189206379 | 0.0816346569291896 |
| ATCCTGACTGTA | 918.357721108319 | 0.094320757072286  |
| GATGTTATGACC | 918.361885722515 | 0.0958079776806274 |
| GTGTGAGTATGA | 918.365194721476 | 0.0975390081347448 |
| TATCTGGTCATA | 918.368246065057 | 0.111924026065922  |
| AAGATACGTAAT | 918.372634042486 | 0.0886602147253515 |
| TGACGAAAATAA | 918.382345697505 | 0.0898929024839277 |
| ACGTTGACCCAT | 918.38991324109  | 0.0809121605288784 |
| GCGGTCACTTAC | 918.392597208603 | 0.0874749949019493 |
| GCGCCATGTGAC | 918.3998711561   | 0.121956319793909  |
| CAATTAATAAAC | 918.409539227707 | 0.0862281577219203 |
| CTGACTAGCCAG | 918.410593704253 | 0.118274359339467  |
| CTATGGACTCAC | 918.420128608905 | 0.0582735714087192 |
| ATTTCGTTGTC  | 918.431596777489 | 0.111669755761711  |
| CACGCCCAGTCA | 918.43600591521  | 0.0955294052190562 |
| ATGACAAGCTAG | 918.457746564116 | 0.131238030254838  |
| GTCACTCTCGAC | 918.464707647007 | 0.0903007809321694 |
| CGTCACCCTTAC | 918.466738521353 | 0.123280228394284  |
| AAGGCTCACCTG | 918.477857762218 | 0.154141700856181  |
| GTCATCAAGCAC | 918.478655940326 | 0.122011406618828  |
| AGTTATGTGACG | 918.482214535672 | 0.117618827325255  |
| ACTCATACAGAC | 918.494537460193 | 0.0955049715822894 |
| ACGATGCGTGAC | 918.495470507011 | 0.0764392888607109 |
| ATATGTCGGTCA | 918.505447802848 | 0.118348239359117  |
| GTCAACGCGTGA | 918.505745314835 | 0.0974819140118803 |
| ACGCAAGCTGAC | 918.509244244524 | 0.0938806305287116 |
| GGGTTCAATGAC | 918.513379316286 | 0.1176741100911    |
| AGTCAGATTAGG | 918.52846539886  | 0.0997121986878988 |
| CACGTTGCGTAA | 918.533196351369 | 0.115281722086176  |
| AGATTGTGATGC | 918.534606267181 | 0.11670680276339   |
| TCTATATCGTCA | 918.535012106597 | 0.119670347650186  |
| TAATGCGTGACA | 918.537105952424 | 0.0969618517749299 |
| GTGACGAGATTA | 918.561388281237 | 0.134998726518571  |
| CGGTTGACTCA  | 918.569998632135 | 0.102451444415653  |
| ATTACTCGAACA | 918.570808635097 | 0.112907667707778  |
| CTATGTCTCACA | 918.575267410332 | 0.131126714303335  |
| GTAGGCGGTGAC | 918.586212027972 | 0.0888749271454245 |
| TGACCAGTCCAA | 918.589064248289 | 0.0674750621859215 |
| GACTCACTGGCC | 918.595073949277 | 0.125566209461969  |
| GTAATGTATACA | 918.59937503034  | 0.101194996341899  |
| CCTCTGTGTC   | 918.615108457047 | 0.0809878099173543 |
| GCGCTGCATGAC | 918.627728746379 | 0.11734651402853   |
| CTATCGGCGTCA | 918.628962795797 | 0.107300302877481  |
| GGGTCACCCTAA | 918.629577489976 | 0.166915127952574  |

|               |                  |                    |
|---------------|------------------|--------------------|
| ACTGACTGGATG  | 918.641585325451 | 0.120487457461932  |
| GACTACCTGTCA  | 918.664439152592 | 0.107725722955169  |
| ACTTAAAGTGAC  | 918.666864730264 | 0.150661863012882  |
| GAAGTGGTGAC   | 918.669631457415 | 0.0808169541819094 |
| ATTCTCTGACAC  | 918.677007960294 | 0.119148011484159  |
| ACGAGAGTGACA  | 918.68169405592  | 0.0908357950475664 |
| AGGGAGCGTCAT  | 918.686675473394 | 0.100061867356411  |
| CTGACATATTCC  | 918.691911448483 | 0.0884091666736355 |
| CATCTCCGTAC   | 918.720678963083 | 0.103492774926349  |
| GATGATCTGTCC  | 918.723017249253 | 0.0868063845130837 |
| CCGATGCATCAC  | 918.770377673582 | 0.0948542819455026 |
| TGACACTTATCA  | 918.770408200589 | 0.0734166673440686 |
| GTCATGAAGTGA  | 918.77311482068  | 0.162207299160285  |
| AACGGTCACTCA  | 918.773674690224 | 0.118251906004116  |
| GATTATCGGTCA  | 918.776005152173 | 0.167707143301522  |
| ACCTGACTCGCC  | 918.778587891779 | 0.0931923923481665 |
| CACCCAGTCAGA  | 918.784391182292 | 0.136658243001614  |
| ATTAGTACCATA  | 918.788422773082 | 0.111871513667665  |
| AGTCAGCCTTAC  | 918.788676778222 | 0.114022039577887  |
| GCGTCACAGGCA  | 918.801764133853 | 0.0942734074523382 |
| GTCACATTAGCA  | 918.802211426822 | 0.108412128520457  |
| ATGAATGACCAG  | 918.804974424812 | 0.110413888732566  |
| ACCGGTGACAAT  | 918.821236739536 | 0.0541085570302552 |
| CACGTGTACAGAG | 918.829542024388 | 0.109657426235594  |
| GTCACGATGCAA  | 918.833032634827 | 0.0862986486160786 |
| AAAAGAGTGACG  | 918.843937844448 | 0.107699111771222  |
| ATGTCACAGCAG  | 918.846989050726 | 0.0933033392723925 |
| GAATGGGGTGAC  | 918.849517032582 | 0.162141311164814  |
| ACTCATCTGTCT  | 918.860711053996 | 0.0835026989854693 |
| TATTTGACTGAA  | 918.870604474214 | 0.15558171396908   |
| CCCGCTTTGTCA  | 918.889876417211 | 0.0781712362942732 |
| GTGACGCGCGTA  | 918.90984600175  | 0.0912239440755684 |
| CGTCACAGACAA  | 918.916449518967 | 0.100593491335938  |
| ATGTATCAGTAA  | 918.928017389546 | 0.172568284480766  |
| TAGACTCTGTCA  | 918.942434876608 | 0.109226151924112  |
| GTCTGGGTGACA  | 918.943511035228 | 0.113026213857429  |
| TCAAGATAGTCA  | 918.946193790792 | 0.0889717824987321 |
| CGTAAAAGTCAC  | 918.951160925919 | 0.105404072053753  |
| CGTCACACCAGC  | 918.955362670915 | 0.0947041325197496 |
| ACTGACGTACTA  | 918.96676023002  | 0.11971611593863   |
| GCACGATGTGAC  | 918.985694368431 | 0.0848933810504729 |
| CACCGGTACATAC | 918.985748372571 | 0.142225039999461  |
| GTCACGTCCGGA  | 918.986141123006 | 0.116341680608972  |
| ATTACTCTAGA   | 918.999008821506 | 0.123006922689722  |
| ATGACAGTCCCG  | 919.007783682231 | 0.105471894051505  |
| AGTTAGTCGTCA  | 919.008410784314 | 0.167461513432227  |
| AGTGACAGTGTC  | 919.0251285836   | 0.123939778011811  |
| CCATCACGTGAC  | 919.030163257554 | 0.0927808798614644 |
| ATGTGACGGTAC  | 919.031140386351 | 0.15408122933684   |
| CAGCTGTGTCAA  | 919.034209942062 | 0.144199326578333  |
| ACGGTCATAGTA  | 919.038757990888 | 0.125948846531332  |
| GGTGACAGCGAA  | 919.057514791614 | 0.0945474379834984 |
| CATCGCGCGTCA  | 919.067354936032 | 0.114609548257375  |
| TATACATGACCA  | 919.070965240546 | 0.115577543367175  |

|                |                   |                    |
|----------------|-------------------|--------------------|
| ATGACCGTGTGA   | 919.079870843899  | 0.106012243657296  |
| GTGACGTGAAAC   | 919.10133483547   | 0.111227304569241  |
| GTGAATCAACAA   | 919.101384694944  | 0.1557508903867    |
| GCATGACCACTA   | 919.103038895299  | 0.089622056005633  |
| ATTGTCACCGTC   | 919.106709289714  | 0.14723500186787   |
| GATGAGTAGATA   | 919.107891154422  | 0.0893269064195553 |
| ATTACGCAATGG   | 919.113564488444  | 0.0908347219178552 |
| ACCTGACTCTCA   | 919.128479504494  | 0.0898133292470201 |
| GTACGGTGACGA   | 919.145854801532  | 0.160015469995601  |
| AGTGAGACATAT   | 919.173475888248  | 0.0849709605382371 |
| TGACACTACCAA   | 919.181038913969  | 0.100859787209443  |
| CTATTACTCTAA   | 919.181347518053  | 0.0935861578383244 |
| TGTCACCGATAA   | 919.184448454043  | 0.0939013936738564 |
| ACAGTCAGGACC   | 919.198340929788  | 0.0860234813022395 |
| ATTGTCAGAGTC   | 919.201993754855  | 0.134443208277454  |
| GTGACGCCAGCA   | 919.202877347069  | 0.134825527374322  |
| GAGAATGAGTGA   | 919.213707929223  | 0.0980363084037876 |
| ATGAGCCAATGG   | 919.21635361291   | 0.0998067994303275 |
| TCGTCGTCACCA   | 919.268569342552  | 0.100846718492869  |
| CCTTACAGTCAG   | 919.28291218934   | 0.115748563431742  |
| AGTGCAAGTCAC   | 919.288899356618  | 0.0790478946832312 |
| AACACAGCGTCA   | 919.292279601513  | 0.0987466633524298 |
| ATCGGTGGTCAT   | 919.296873812659  | 0.0925865440044185 |
| ATAGCCCGTCAT   | 919.298745859709  | 0.102532516260419  |
| CTGACACAGTCC   | 919.300403990066  | 0.136996596625602  |
| ATCCGGTCATCC   | 919.302973951262  | 0.105308835273246  |
| TATGGGTGACGA   | 919.313309140502  | 0.139669432148685  |
| GATGAGGTCACA   | 919.32390882245   | 0.121010718801075  |
| ACGTCACCTGTGTC | 919.333861990682  | 0.13063875373547   |
| CGTCATTTAACC   | 919.347555990001  | 0.106428944118008  |
| ACATCGCATGAC   | 919.3590335569788 | 0.108744125023868  |
| ACTATTACGTTG   | 919.359128384443  | 0.139452802657554  |
| GATCAATGAGTA   | 919.359355237566  | 0.0892384921375865 |
| CGATCAAGTCAC   | 919.360591552869  | 0.0846353836299728 |
| AGGTGACACGAA   | 919.361591977401  | 0.0682872951366953 |
| TCATTATGTCATA  | 919.364852543186  | 0.129565653102114  |
| AGTCAACCGTCA   | 919.374102546371  | 0.120794273884739  |
| CCTCCTGATGAC   | 919.384956963779  | 0.085728496555912  |
| CGTCACCGTTAC   | 919.38832772819   | 0.101874422766544  |
| CCGTGCGTGACA   | 919.40329459158   | 0.151372698128189  |
| AGCTGACTAGTA   | 919.411979695485  | 0.139931894858922  |
| AACTTGCTCACA   | 919.420071835609  | 0.101831244821748  |
| GAGGAGTAATCA   | 919.433882223026  | 0.146024030631207  |
| AAGACGTGTTCC   | 919.472540751073  | 0.121953979810681  |
| ACGTGACGGGTC   | 919.482461235953  | 0.154052314919955  |
| GTGTTATTCATA   | 919.491088511069  | 0.125692554176974  |
| ACATATGAGTGC   | 919.493059041399  | 0.105236052016989  |
| GCTACAAGTGAC   | 919.495998475665  | 0.115672495678303  |
| CCAGAGGTGACA   | 919.496336561733  | 0.118591147712411  |
| ATTATGTGATTC   | 919.499640599594  | 0.153861288894585  |
| GCCACGGTGTCATA | 919.500665187079  | 0.0919475986959772 |
| GTGAGACATCCA   | 919.506971870408  | 0.078940501148576  |
| CGAGTCAGGAAG   | 919.50718712335   | 0.103992880213775  |
| ACTCATTTGTAT   | 919.50748800278   | 0.113298196491243  |

|               |                  |                    |
|---------------|------------------|--------------------|
| ACTCGTGACGGA  | 919.510440895349 | 0.115709791217678  |
| AGAGCGTGTGAC  | 919.517703317286 | 0.146767375128799  |
| CTGACTGCTCAA  | 919.528461324689 | 0.137088033056422  |
| GAGTGGTCACAA  | 919.536802702641 | 0.113662968635503  |
| GAGTAATCACAA  | 919.54208710806  | 0.112206350510525  |
| CTAGGGTCTGAC  | 919.543741298745 | 0.102488394021225  |
| GGCTCTACGTCA  | 919.544351048412 | 0.0930868013371679 |
| ATCTGGAGTGAC  | 919.549957661056 | 0.086702013684376  |
| AGAACATGACCA  | 919.55466726575  | 0.114720916380768  |
| TCACGTTTGTCA  | 919.585651269976 | 0.0933703491026049 |
| GGGGCCGATGAC  | 919.60196651531  | 0.16945696506642   |
| ATGACGGGATGG  | 919.618597738437 | 0.100798635455845  |
| AAGTGTCAACGA  | 919.628798903139 | 0.103532017967138  |
| AACTGTCGTGAC  | 919.631094557113 | 0.0734388202379591 |
| AAGTCACTAGTG  | 919.651319294779 | 0.116134115140336  |
| GATGAGGCATAA  | 919.653459998861 | 0.0503413323915159 |
| ACGTCACATGAA  | 919.696634904158 | 0.136887505120539  |
| AAACCGTGACGT  | 919.697015013392 | 0.11870740108293   |
| CTGTCAATTTGTC | 919.698437048762 | 0.108461170033551  |
| CTCATAGGGTCA  | 919.69977872907  | 0.147842053771131  |
| GCCTGTGACAGC  | 919.705451769313 | 0.105605897896045  |
| ATAGTCTGAGTC  | 919.713476227708 | 0.166675749020383  |
| TATTAGACTCAA  | 919.728938590962 | 0.0902557864006969 |
| GTCACGCAGATA  | 919.731984259657 | 0.0924948673890242 |
| AAGTCATGGTAT  | 919.744079359209 | 0.087312650879522  |
| ACAAATTCTGAC  | 919.74997587413  | 0.110152256398232  |
| ACTGATCAGTAA  | 919.757493454093 | 0.134913927853119  |
| AACAAATGTCAT  | 919.76745749604  | 0.0891543959846349 |
| AGCCCGTGACT   | 919.767627891692 | 0.0759496114843927 |
| GGTAGGCATGAC  | 919.770422065522 | 0.125330076291191  |
| TACTCATCTCGA  | 919.78002721023  | 0.0921029923265581 |
| CGACTAATTGCA  | 919.784760604532 | 0.115711350733607  |
| CAGTCTGCTGAC  | 919.797121659283 | 0.122001660612966  |
| AGGATTAGTCCA  | 919.797213988212 | 0.10052116811372   |
| CAAGGCATGACC  | 919.805443723133 | 0.117559888760982  |
| AGTGTGACACGG  | 919.809088573525 | 0.152151386405126  |
| GATATTTGCTCA  | 919.813622389588 | 0.133106892644374  |
| CCACCTGAATCA  | 919.815340736209 | 0.115976977907833  |
| CGCGTACTAATA  | 919.827046779038 | 0.107151761741598  |
| AAGTCACCCGT   | 919.829251748262 | 0.1182568998626    |
| GTCATTGCTGGA  | 919.830724113564 | 0.168757296939399  |
| ATAATTAGTCGC  | 919.843159857197 | 0.120178662688895  |
| ACTGTGACATTA  | 919.861020921892 | 0.168589336974051  |
| GTCACCTCCATA  | 919.863320194698 | 0.106664651689122  |
| ATTGGCTCATCC  | 919.874482649544 | 0.104495055198799  |
| CATTGGAGTGAC  | 919.898364730247 | 0.0846927411445024 |
| GCGTCACAAGGA  | 919.912473394389 | 0.12420235212261   |
| ATGAGTATCACG  | 919.912651267993 | 0.110890730716425  |
| AAGTCACTTGAA  | 919.927387052613 | 0.112809128152973  |
| CTTGAGGTGACA  | 919.930533350055 | 0.111199617184956  |
| GGAGATGGTGAC  | 919.943531834753 | 0.0913302136214755 |
| GAAATCTCGTCA  | 919.9455956119   | 0.139591291240079  |
| ACTCATATTCTG  | 919.950321316053 | 0.0673115044642878 |
| ATGAGTAGGCTG  | 919.951030150354 | 0.102053377354676  |

|               |                  |                    |
|---------------|------------------|--------------------|
| ACAAATGACCGT  | 919.964267505181 | 0.121546937569144  |
| GTGAGTGAGCCA  | 919.97442708196  | 0.112257076339442  |
| CTCGTAAATGAC  | 919.989389141024 | 0.168466657837555  |
| CGTGACAACCTAC | 920.021585470266 | 0.118714265551407  |
| GCGACTCAGACC  | 920.034443991925 | 0.10976220689202   |
| CCACCTGTGACG  | 920.041899114802 | 0.138574901147471  |
| ACGCTCTGTGAC  | 920.058841501658 | 0.103361630178541  |
| GTATAATGAGTA  | 920.059741633235 | 0.162077638743762  |
| CCATCGTGACGC  | 920.061104491381 | 0.0858322244056531 |
| ACACGTCAACCA  | 920.072436370798 | 0.0977198103458925 |
| CCTTCCGCGTCA  | 920.080686280993 | 0.145239806199852  |
| GGTTCCAGTCA   | 920.082930280963 | 0.0842838177871852 |
| GCAGCACGTAC   | 920.086756972731 | 0.0881480657476426 |
| TAAGGGTGACAA  | 920.089926373622 | 0.105104741412917  |
| AGCTATCGTCAC  | 920.096276825221 | 0.108213380588302  |
| GATCTTGTACC   | 920.101655058217 | 0.116226307811205  |
| AGAAGTAGTCAG  | 920.127203212924 | 0.128357342489774  |
| ATTATGAGTTAA  | 920.136786021587 | 0.142635398407425  |
| GGTCATATCATA  | 920.13884807174  | 0.116188024481085  |
| ACTCATTATCC   | 920.154884734521 | 0.0942107616822628 |
| GCCACAACGTCA  | 920.180120900565 | 0.101117398706328  |
| ATGAGTATGTAG  | 920.180799582229 | 0.117145017112506  |
| ACTCATATTCAT  | 920.212682785485 | 0.0938490339347227 |
| CGGGACATGACG  | 920.233162456341 | 0.0904282114214694 |
| GTCACATGATAA  | 920.241236994816 | 0.124160386524907  |
| CTCTAATTGTCA  | 920.243159712121 | 0.082188132662925  |
| AAGTGACGTTAT  | 920.259943555235 | 0.0827723565330346 |
| TATCTTAAGTCA  | 920.270999057786 | 0.0996320578986741 |
| CGGAATTAGTCC  | 920.273274956785 | 0.107962073095668  |
| GGACCTGTGACA  | 920.291766411572 | 0.105060483471281  |
| CATGTGAGCAAC  | 920.296686621454 | 0.0895874612355589 |
| GATGCCTCATTA  | 920.306559767463 | 0.09450759647212   |
| TATGTAGTAATA  | 920.310975523386 | 0.132719108628071  |
| CCTCCCAATGAC  | 920.317071814606 | 0.101893836880922  |
| ACCGCCAAGTCA  | 920.325246537626 | 0.0803701166314281 |
| AATTACGTATGT  | 920.331669366312 | 0.068823570017148  |
| CGCTGAGTCTAC  | 920.335178334394 | 0.0928543154488509 |
| CGATGACTTGAG  | 920.346885141943 | 0.121513727144279  |
| ACTCATTCTCG   | 920.349808342905 | 0.108857572185154  |
| ATTAATATGACC  | 920.357749332966 | 0.120087738877733  |
| GCTGGTACTCAC  | 920.36107017646  | 0.144608220363449  |
| GATAGCTGACTA  | 920.373662887191 | 0.182166328470128  |
| AGTGCAATGACA  | 920.383207645102 | 0.11116578993823   |
| ACGGTGGTGACG  | 920.394454661387 | 0.1182607740192    |
| GTCATGGAACAC  | 920.39889189826  | 0.104500815603247  |
| ATGACCCGTACC  | 920.399231603737 | 0.0768978728046565 |
| AACTCGTGACAG  | 920.401185096192 | 0.0816574115947214 |
| AGTCAACGTGAG  | 920.403251690323 | 0.114906553918195  |
| AACGATGAGTTA  | 920.408158726944 | 0.144468381274984  |
| ATAGGACGTAC   | 920.418073430919 | 0.0847817381569574 |
| AATGAGTGAGTG  | 920.418159797275 | 0.112715417255241  |
| CGCGCGCGTCA   | 920.480651950589 | 0.139852095051836  |
| ACTCATCTTGCG  | 920.486059610986 | 0.0924268618113913 |
| GTAGTCTGTAC   | 920.488784836839 | 0.0900628436601025 |

|              |                  |                    |
|--------------|------------------|--------------------|
| GCATAATGAGTA | 920.491267174846 | 0.152229301451565  |
| GAGTGGTCATTA | 920.500337387453 | 0.101936807999561  |
| CTGAGATGAGTA | 920.50502541214  | 0.109126023651777  |
| ATTAGCAATCAA | 920.511778188705 | 0.126939606080722  |
| ACCCCTTGACTC | 920.517838719277 | 0.0807176117413086 |
| GTGACCTAATTA | 920.527691818068 | 0.093868792335127  |
| TCTTTCCAGTCA | 920.532941174666 | 0.115362007796927  |
| CCCATGCATGAC | 920.539252006704 | 0.146231924744455  |
| CCGACGACTCAA | 920.543322366158 | 0.158494646160114  |
| GGCGTCACTACA | 920.553519745729 | 0.115180669573408  |
| GAGGCGGTGACA | 920.5615923834   | 0.0970557048044066 |
| CGAAAGTGACGC | 920.576967075909 | 0.0822246750293386 |
| GTACAATGAGTA | 920.577908889711 | 0.122161541994886  |
| AAGCATGTCACC | 920.58424138585  | 0.116604063868707  |
| AAATTGCTGACT | 920.589006188585 | 0.102646975484738  |
| GTGAGGTCATAA | 920.598666348808 | 0.0837921940654854 |
| ACCCTGTGACGC | 920.604673874807 | 0.125309569038379  |
| AAGGTATGACCG | 920.609809703818 | 0.0787736285704975 |
| TGACAAAGCGCA | 920.611934284657 | 0.122121618158022  |
| GCTGACTGTGAA | 920.625613094609 | 0.0880744069384836 |
| AGTCACGGGTGG | 920.630453529342 | 0.103422209732916  |
| CTACTTGACGCA | 920.631227206551 | 0.108703990500077  |
| CGTTACGACTGA | 920.643517834558 | 0.0938139126599132 |
| ATGACGGCGTTA | 920.657848174298 | 0.0922894272836777 |
| AGGTGACGTTGA | 920.667510096731 | 0.131899930512609  |
| AGGGTCAGAGTC | 920.671624931767 | 0.106522723518544  |
| GATGGTTGTGAC | 920.678514485467 | 0.118271280375774  |
| CGTCATTGCATC | 920.683925649795 | 0.122663577405481  |
| CTCTCGTGACAC | 920.706843083589 | 0.100422297741101  |
| AGACATCATGAC | 920.708022319825 | 0.0772746494637469 |
| ATGACGTTCAAC | 920.713570895605 | 0.10382633023928   |
| AGTCTCATGACA | 920.720983561212 | 0.0839917875153162 |
| TGGAAGGTGACA | 920.723970986215 | 0.107816525498006  |
| CGATGAGTGGTC | 920.733813678372 | 0.164331078247886  |
| CGTACACTCATA | 920.745831865001 | 0.15418140393708   |
| TAGGAGTAATCA | 920.752465382567 | 0.0977857950659755 |
| GTCATTGGCCCA | 920.755457356618 | 0.139902096299478  |
| CGTCACTTCGAA | 920.758799967494 | 0.114142586309915  |
| AGCGTCACTACT | 920.760471112399 | 0.136370286763971  |
| ACTCATTGATCA | 920.770297442075 | 0.113297841924764  |
| AAGGAATGACCA | 920.771264284623 | 0.137777236507312  |
| AGTGTCACGCGA | 920.779884993753 | 0.0833286138316168 |
| GACTACTGACAC | 920.783927033091 | 0.0872958375050828 |
| GCTTATGTGACA | 920.78668152316  | 0.113640432523532  |
| AAGTGCCAGTCA | 920.791063298116 | 0.113240323072406  |
| CTCTTAGTCTTA | 920.792255427413 | 0.12870829695377   |
| CATGACGCTTTC | 920.794833685998 | 0.08814250596837   |
| GGTGGGACTCAC | 920.804903098538 | 0.0842100865819729 |
| CGTCACCTCGGA | 920.807501915941 | 0.168905279773997  |
| ACACGATTGACT | 920.825359618918 | 0.0989064659577434 |
| ATCGAATCTGAC | 920.829975618328 | 0.075469317411528  |
| GAGTCTTTGACA | 920.83599028081  | 0.155738741311265  |
| TGAAACCCGTCA | 920.842859887326 | 0.0815316783786542 |
| ACAGATGTCACC | 920.846985794625 | 0.0906088235862188 |

|               |                  |                    |
|---------------|------------------|--------------------|
| ACAGTACTCACA  | 920.851875684549 | 0.128448934016737  |
| CCCTTTGAATCA  | 920.856571024543 | 0.0672275088417705 |
| CGTCATGGTTAG  | 920.870510903864 | 0.131339084037809  |
| ACTGTCACAAAA  | 920.872687282843 | 0.079649826111892  |
| GTCACCTAGAAC  | 920.875375704502 | 0.108751900997272  |
| CTTTGTTGACTA  | 920.87544789706  | 0.0927884036860543 |
| ATCTCTTTGTCA  | 920.883740870679 | 0.0902755380727987 |
| GGTGATTACACC  | 920.884935819593 | 0.114430345117398  |
| TCATACATCGGA  | 920.898519105781 | 0.0991435556506943 |
| AGTCAACGTACC  | 920.902454156057 | 0.0906123698691876 |
| GCTGACATATGA  | 920.905471464192 | 0.0863793891434989 |
| GTATTACTTATA  | 920.925183074534 | 0.114520056571878  |
| GCGAGAGGTGAC  | 920.92630166196  | 0.13844136998885   |
| AGCGTTGAGTAA  | 920.930297512427 | 0.115473129443692  |
| GGTGACGTCGTA  | 920.940313997477 | 0.106766995516422  |
| GATTATTACACAC | 920.957465165724 | 0.135271391758544  |
| ATGACATGCCCA  | 920.969569051399 | 0.092852286387369  |
| TGGTCATCAACA  | 920.974542924689 | 0.0971631182038142 |
| GTCAGACTAAGA  | 920.987260220562 | 0.116947823040352  |
| CAATTATGTCAG  | 920.988000888875 | 0.111756355261657  |
| CCCAGACAGTCA  | 920.998437426248 | 0.149188243219484  |
| TCACACATGGGA  | 920.998982655972 | 0.0804751850746927 |
| TGACCAGTCAAA  | 920.999851136999 | 0.087419656351084  |
| AATGAGTAGGGT  | 921.002247505219 | 0.10130445094592   |
| AATTACGCAGCC  | 921.005790346163 | 0.111046788775482  |
| GCGTGACAAGTA  | 921.00726204716  | 0.0777739860853987 |
| CTCTAGCATGAC  | 921.016722510169 | 0.112073346452009  |
| AACCAGTCAAAG  | 921.025896205694 | 0.0872455041080184 |
| ATATGTCTCACA  | 921.04054716962  | 0.124445850756912  |
| AGAATTGCTCAG  | 921.041845388271 | 0.0929229203261852 |
| CGGGTTGGTGAC  | 921.045461340757 | 0.106697818533889  |
| ACACACAAGTCA  | 921.046752928455 | 0.151821413196859  |
| CAGTCAATTTAG  | 921.04743715555  | 0.119674068608292  |
| AGCTGACACGTC  | 921.052842093545 | 0.100662566525594  |
| ATGAATCGCCAG  | 921.064424567944 | 0.10546430794749   |
| TCAGGGTGACAA  | 921.070548146659 | 0.0545217961942836 |
| GATGTCAATGAC  | 921.10508321702  | 0.128449810483537  |
| ACGTTGTACCA   | 921.110700256426 | 0.119874035162156  |
| ACTCATCGAACG  | 921.110971531238 | 0.139188326954631  |
| AAGAGTAACTCG  | 921.131611116561 | 0.109078414319934  |
| ACTCATATAACG  | 921.140788340682 | 0.123745694626639  |
| GGTGATAGTGAC  | 921.141691157021 | 0.118241847232114  |
| CCGTCATCAGAA  | 921.142367941038 | 0.13791926424141   |
| AGTGACGTGCAG  | 921.145443875889 | 0.0801529732806061 |
| ATGACAGGATGG  | 921.151897493021 | 0.0939732506814553 |
| GATGTCACATCA  | 921.159583296741 | 0.0993576034847637 |
| GGTTCAAATGAC  | 921.159694977062 | 0.103180152308402  |
| AGTCAGGCAGTC  | 921.162435013736 | 0.0954060216262041 |
| GACTGACGCTGC  | 921.168331718978 | 0.0845113849275688 |
| AAAATGACCATA  | 921.178958537043 | 0.0696766701989964 |
| AGTGACCATATC  | 921.184439573689 | 0.105177436465572  |
| GATTGACTGTTA  | 921.205475883781 | 0.116288725673697  |
| AGTCAGAAATAA  | 921.211690092313 | 0.11481385538945   |
| GGTATTCATGAC  | 921.223435019264 | 0.0705383903471631 |

|                |                  |                    |
|----------------|------------------|--------------------|
| AACGTCATGCAC   | 921.241251152655 | 0.08846081851971   |
| TAGTCGTCATGA   | 921.253583934295 | 0.121087964525017  |
| AAGACCGGTGTCAT | 921.263287164198 | 0.114356549544066  |
| ATGAGTGCAC     | 921.2676764925   | 0.117320251533003  |
| GATGTCACAATC   | 921.289195674082 | 0.108200551539222  |
| ACTGATAGTGCA   | 921.291067418513 | 0.0861513583211047 |
| GGGGTAAATGAC   | 921.291170165264 | 0.100796390963075  |
| ACCCGTCACACG   | 921.299162373403 | 0.162543263695841  |
| GGATGACGGGGA   | 921.312285280199 | 0.112182203392306  |
| CATCTGTGACGG   | 921.312748681985 | 0.106197518768056  |
| GGATGACGGGAC   | 921.317749224722 | 0.123957769049309  |
| GTGACGCGGGTA   | 921.321779656207 | 0.100307244539978  |
| ATATTACTCGTC   | 921.322846890306 | 0.128551388563543  |
| TAAATGTCATTA   | 921.332317318783 | 0.102700674308909  |
| AAGAATTACGCA   | 921.339264192257 | 0.11076323530355   |
| AGACTAAATTAT   | 921.339585395106 | 0.106627863902887  |
| CGCTCCAAGTCA   | 921.35746497651  | 0.100499115057901  |
| AGCAAATGACGG   | 921.365120204737 | 0.0893847755467315 |
| ACTTCCATGACA   | 921.401547529412 | 0.0788526680105675 |
| AGCCTGTGACAT   | 921.403978617635 | 0.140743605024458  |
| CCAGGGGTGACA   | 921.411793595819 | 0.134436286206     |
| TACGAGTGACCA   | 921.413726411671 | 0.13394738920366   |
| CCTGTAGTGACG   | 921.424414920766 | 0.0990362007357391 |
| CTGTCACCGCAA   | 921.428001650623 | 0.11336990204771   |
| AGCTGAGTCTAT   | 921.448132340131 | 0.0818796605670643 |
| ACTACTGACGTA   | 921.449293514605 | 0.120566232787586  |
| TCTGACGAAGAA   | 921.456158638779 | 0.104383654556405  |
| GCTGTCACGGCA   | 921.462763373074 | 0.128405353508272  |
| AATAATCAGTCT   | 921.466660556615 | 0.12166619685712   |
| CCTGACGATGAG   | 921.482940230196 | 0.130896103740457  |
| CGGACGTCTGAC   | 921.487256049814 | 0.12187381840492   |
| GTATAACTCACA   | 921.498001126359 | 0.0860644207541325 |
| AAGAGTGACGAT   | 921.49821549023  | 0.089837451545192  |
| ACCTCGTACCA    | 921.500821760913 | 0.0996856515213559 |
| GTCATTGAGGGA   | 921.501486718623 | 0.114666674239244  |
| GATGACTTGAAA   | 921.503666528007 | 0.111075965334813  |
| CAGTTAGTCTTA   | 921.508154648444 | 0.146667172242994  |
| GTCACGTATTAA   | 921.51511642628  | 0.0963732292114489 |
| ACTCATTGCTA    | 921.535371239991 | 0.135829352790157  |
| GCGTCATGGGCA   | 921.542140863661 | 0.0967455475773145 |
| ATTTCATCTGACG  | 921.560379654983 | 0.0875194647153952 |
| GGTGACGCCAAC   | 921.562544146256 | 0.104360480307915  |
| ATACATGACAAG   | 921.562955192432 | 0.0888662458337715 |
| GGGGACGACTCA   | 921.568620876406 | 0.0907644838231058 |
| GCAGAGTGACGA   | 921.572186926026 | 0.134194664185592  |
| CTCGACTCAGAC   | 921.572269504643 | 0.0825760135093774 |
| ATGATATCACTC   | 921.587142149774 | 0.182591906574344  |
| AGTCAGAGCGTG   | 921.604147781775 | 0.139735368508659  |
| ACTCATCTTATC   | 921.619302589283 | 0.139202899410576  |
| AATCCGCATGAC   | 921.627743841659 | 0.112972507045435  |
| CTATGAGCTGGC   | 921.629335534424 | 0.121566176214609  |
| CGAATACCGTCA   | 921.641688985496 | 0.066493526058323  |
| ACCCTGTGACAA   | 921.642373561419 | 0.106212942291029  |
| ATGTGACAGCAG   | 921.654202588011 | 0.0896660604629274 |



|               |                  |                    |
|---------------|------------------|--------------------|
| GTTCCGGTCATTA | 921.666246503188 | 0.143638396819206  |
| ATAGGTCTGTCA  | 921.669014024151 | 0.152173001870534  |
| CAGAGGTAGTCA  | 921.669182032256 | 0.128623632691845  |
| ATGCGGAGTCAG  | 921.6711473565   | 0.091903606264873  |
| CAGAGCTGACTA  | 921.677479733501 | 0.0800951320377822 |
| TAGATACCGTCA  | 921.678101980579 | 0.116292753949959  |
| AGTGTCAGCGTG  | 921.685666747209 | 0.12136396497688   |
| ACCTTGTCACAG  | 921.687938723869 | 0.0975588533982734 |
| ACGTTGTCACTC  | 921.688576512133 | 0.110308258642165  |
| GCCGCAAATGAC  | 921.697257291825 | 0.137339918995149  |
| ATGACGGGGATG  | 921.702069137339 | 0.0852577288107399 |
| ACGTCACCCCGC  | 921.709076675092 | 0.0995805155619208 |
| AATTACTCTAAC  | 921.71012231727  | 0.109498113251543  |
| AAGGATGACCCC  | 921.728393178326 | 0.117475432113867  |
| ACGGCACGTGAC  | 921.729707973922 | 0.0857725642757696 |
| AAGGCTCACCGA  | 921.731543230757 | 0.128214333876306  |
| TATTTGTGACCA  | 921.747334652231 | 0.109470589108153  |
| CTAATACGATGA  | 921.752562116304 | 0.11572561965288   |
| GCCGCATGAGCC  | 921.777976982013 | 0.112992205580871  |
| AACGGTCACCGC  | 921.778957555566 | 0.107288655747434  |
| GAGCATGTCACC  | 921.795207614171 | 0.0958861139545394 |
| ACGGTCATCACT  | 921.79722990031  | 0.108946239443285  |
| CTGCAATGAGTA  | 921.809005561675 | 0.110753893000729  |
| AACTGTGGGTCA  | 921.818938047949 | 0.106100826616237  |
| CGTGCACTGTCA  | 921.825860573826 | 0.10979740728387   |
| ACATATTGTACAC | 921.837615699424 | 0.0838429524982139 |
| GTCACTCCTTTA  | 921.857372325672 | 0.120306902680109  |
| ACTATTAATCAC  | 921.859696276468 | 0.130149859617853  |
| ACGTGATGACCC  | 921.860768559807 | 0.112431083393249  |
| AGGCTGGTCATA  | 921.863955168536 | 0.11335047438527   |
| CTACCTTGTGAC  | 921.866098964815 | 0.089477091237872  |
| ACGAGTCAAGTA  | 921.870254584615 | 0.111984814353105  |
| AAGGTGACACGC  | 921.875720730066 | 0.0545571277559444 |
| TAAGACTCGTCA  | 921.912071695483 | 0.142878037051159  |
| ATCCGACATGAC  | 921.919694918759 | 0.0757629269265628 |
| ACTTCAAATGAC  | 921.939740321272 | 0.107830711420111  |
| ACGTGTCAGATG  | 921.944044790511 | 0.075547306619808  |
| ATTGCTAATTGG  | 921.953861635571 | 0.0792386700381863 |
| TTACGATTACAA  | 921.955303149102 | 0.106965776546302  |
| CTGTCACTAAGA  | 921.968232893388 | 0.113533713682287  |
| CTAGTGATGACC  | 921.969690595158 | 0.136987462099578  |
| GACTTTGATTCA  | 921.983216674103 | 0.16894366093454   |
| GAATCATACGTC  | 921.985727135063 | 0.0758495303398041 |
| CTATTGCATCAC  | 921.993175220196 | 0.102539564786017  |
| GGTCATACGGAA  | 922.000894345232 | 0.0770978418487858 |
| AGGGGTATGACC  | 922.00434229014  | 0.083579334546193  |
| GGTCATAGTAAA  | 922.043346037575 | 0.112539400794419  |
| GCGTGTACGTCA  | 922.074705090319 | 0.102702752989106  |
| CAGATAACTCAG  | 922.086105698638 | 0.112551155045732  |
| AATGACGGGATA  | 922.109499014028 | 0.0987203823830615 |
| AAAGGAGTAATA  | 922.109917797368 | 0.0692494924805704 |
| CAGAAAACGTCA  | 922.11127641103  | 0.11962780855234   |
| CGTGAATCAACA  | 922.118660449436 | 0.137913477471403  |
| CGTGAGTATATA  | 922.149275603311 | 0.110500220677358  |

|              |                  |                    |
|--------------|------------------|--------------------|
| GACCTGGGTCAC | 922.159777002517 | 0.116938948007764  |
| GACACATAATCA | 922.160459113915 | 0.0949888272610904 |
| GATGACGGCGTA | 922.16270895571  | 0.0892330944332696 |
| ACTGACATATTA | 922.170191125632 | 0.0546203407489701 |
| CGGTGATACATA | 922.17346781598  | 0.108422991355308  |
| ACTGACTGTGTG | 922.187712522693 | 0.12203335559832   |
| ACGGCCATGACA | 922.191366579409 | 0.108613089448115  |
| AAGTGATACATT | 922.194588884967 | 0.107236637049571  |
| GACTCTTACTTA | 922.202273112774 | 0.111050115886355  |
| CGTAAGGTGTCA | 922.212232073647 | 0.111726274627314  |
| AGTTGTGACGA  | 922.213416816683 | 0.0988477874052936 |
| CGCATGACAGTA | 922.231446447497 | 0.166755395403942  |
| GAAAATATGACC | 922.234788570618 | 0.0854525498843251 |
| AGTATGATGCAC | 922.235785114169 | 0.0941840988242269 |
| GGACCGGTGAC  | 922.25241762051  | 0.105708425470635  |
| CCCTATGATGCA | 922.258776931134 | 0.109063207418901  |
| AAGATTGACTGT | 922.263036690553 | 0.0866905643797149 |
| CCCATTTGCTCA | 922.27130860794  | 0.06868983670025   |
| GTCATGTATAGA | 922.273069905599 | 0.0987071938130112 |
| CTGATGAAGTCA | 922.277076479422 | 0.0936223773697154 |
| CAAACACTCATA | 922.295142287628 | 0.0908210415757715 |
| ACGAGTCAAGGG | 922.300333640393 | 0.0979379583870906 |
| CTACTCATCTTC | 922.30530137817  | 0.0885592279098273 |
| GTTGTGGTGACA | 922.307166531425 | 0.0944799972533406 |
| AACAATGAGTAG | 922.309969838186 | 0.089625544458295  |
| ATCTGTCGTGAC | 922.316116686981 | 0.152616786777696  |
| CTATACCTGTCA | 922.318301269324 | 0.11025039662049   |
| ACCGTTACTCAG | 922.323361669643 | 0.11490613040476   |
| GATGAATCCTCA | 922.323703079427 | 0.0937334933206381 |
| ACCATATGACCA | 922.333148548709 | 0.0916076535399143 |
| GGATACGTAATA | 922.337340339928 | 0.08936317044661   |
| CTTTACCTGTCA | 922.340586770774 | 0.0804370602026969 |
| CACAGATGAGTG | 922.3575061186   | 0.113680205539031  |
| AATCAAGTGTC  | 922.386908954647 | 0.133277598908391  |
| AGGGGAGATGAC | 922.399792025652 | 0.10782230191401   |
| GGTAAATTGTCA | 922.410724370758 | 0.0844354153792377 |
| ATGGAGGGTGAC | 922.425288473375 | 0.103596768037144  |
| CCTACGTTGTCA | 922.437322175    | 0.0935239587908522 |
| AGTTGAGTCTAT | 922.440949014285 | 0.131878637991073  |
| CCTACTCATCTA | 922.49909159876  | 0.0808356810270481 |
| ATTATGACCCGG | 922.502616401507 | 0.104053280335233  |
| TGACAGAAGTCA | 922.516458200198 | 0.102351335625243  |
| TGACCCGACTCA | 922.518855993658 | 0.118514056294889  |
| CCCAGGTGACCA | 922.522572419414 | 0.0753635967876484 |
| GGTAATTAGTAC | 922.534527676467 | 0.157827248086316  |
| CAGCTGTACTCA | 922.536178882912 | 0.0990027866020367 |
| TGACACCTCAAA | 922.540918542515 | 0.119826460450833  |
| CAGTGAGTCCAC | 922.55512397228  | 0.0756728819278093 |
| GTGAGTCCAAGA | 922.560041095333 | 0.0848990890469588 |
| ATCAAGTCGTCA | 922.579459264918 | 0.111917352939491  |
| CTTCTTAATGAC | 922.584124650829 | 0.111142027870497  |
| ATGGTCTGAGTC | 922.603458651407 | 0.123687483280686  |
| ACAGTCAGGACT | 922.612339215074 | 0.108222480356389  |
| GTTTTCCAATGA | 922.613651523368 | 0.0756446050962603 |

|               |                  |                    |
|---------------|------------------|--------------------|
| GTGACTTCAAAA  | 922.621063513798 | 0.054100612268307  |
| ACGTCACCGTAG  | 922.621373224216 | 0.149733450417516  |
| AATGTGAGTACC  | 922.634162822844 | 0.165745197150795  |
| CTTAATTGACTA  | 922.637496507053 | 0.0934497046653873 |
| ATGTCACCTGG   | 922.667257570459 | 0.10032251144578   |
| ACGTGTCAACCG  | 922.671023545868 | 0.069207607450912  |
| ACACCTGACTCG  | 922.671164638245 | 0.0883291392205969 |
| CTAATGTGACCA  | 922.671802643757 | 0.110059049677379  |
| CCAGATATGACC  | 922.67383398208  | 0.0764945219386743 |
| ATGTCATGGTTA  | 922.684100268638 | 0.128727315432735  |
| CTTCTCTGTAC   | 922.690408319762 | 0.0959532783939908 |
| AGTCAGTATGTC  | 922.701703398587 | 0.074849280512308  |
| ACGTACTCATGA  | 922.725917757253 | 0.09843056880595   |
| GTGACAGTCAAC  | 922.734549497891 | 0.0650145386642885 |
| ACGCTTGTCAATC | 922.741632189685 | 0.129407140764168  |
| AAGCCTTGACTC  | 922.745973243238 | 0.0902702293308187 |
| GCCTATATGACC  | 922.772738175726 | 0.0893837639244533 |
| AATCATGACATC  | 922.796957525171 | 0.115560474529799  |
| GACTGGGTCAAC  | 922.799090347799 | 0.110031895310044  |
| GCCTTAATGACA  | 922.830510267187 | 0.120338977166509  |
| ATTGTATACATA  | 922.838844676888 | 0.124710652736214  |
| ACGCGTTGACAC  | 922.849772959775 | 0.125429885056741  |
| GTTGAGTGACGA  | 922.890273490943 | 0.0838397935565837 |
| GTACGTCAGTAA  | 922.898175715625 | 0.10426434232523   |
| TACGACTTGTC   | 922.89828557386  | 0.13122164549777   |
| TACTCGTTGTC   | 922.898881878012 | 0.104515392291993  |
| GCGACGACTCAA  | 922.900584396248 | 0.120588904317829  |
| CGTCATGATAGA  | 922.906194813245 | 0.129518950884581  |
| CTATTATTACTC  | 922.909861526932 | 0.114258303430012  |
| CATCTGACGAAA  | 922.912288524216 | 0.097063951153014  |
| AAGCGAGATGAC  | 922.91501721545  | 0.0752104250631782 |
| GGTCATAGCGAA  | 922.922021586935 | 0.0736016968997849 |
| ATAGTAATCATA  | 922.936166601856 | 0.0818459748516329 |
| ATAAGACGTGGC  | 922.936820679357 | 0.103123599856533  |
| GGATTAGTACTA  | 922.947361643977 | 0.147276516420342  |
| GGTAGTGACAGA  | 922.960092065966 | 0.0971693257593827 |
| CGAAACTGCTCA  | 922.988848603125 | 0.104135896822567  |
| GAATACGTCAAA  | 922.989501671411 | 0.117836925394411  |
| GCGTCCTGACTA  | 923.010382984975 | 0.125373737840895  |
| ATGACCCTGAAC  | 923.02055541022  | 0.0824922440833637 |
| ACTGAATCAGAC  | 923.03345004503  | 0.081168670561333  |
| TCAAGGTGACAA  | 923.046140577267 | 0.111541341043395  |
| TGAAAAGCGTCA  | 923.052908995261 | 0.0834897657255166 |
| GTCACAGCGAGA  | 923.062577804762 | 0.076583917050404  |
| AAGTGGTGACAA  | 923.065042538942 | 0.104525483437659  |
| TAGGCTATGTCA  | 923.080243423145 | 0.118004794689749  |
| GGTGACGAGGTA  | 923.092911799567 | 0.0939120588009085 |
| CGACTAATCCCG  | 923.098602797619 | 0.099043681052234  |
| TCTGACTGGGCA  | 923.102940920257 | 0.0743039829333989 |
| GCTGAGTCTTAC  | 923.125751509485 | 0.130825488307406  |
| GTCACGCGTACA  | 923.143679343547 | 0.137335728168287  |
| GAATAGTAATCA  | 923.14664906545  | 0.119357377897792  |
| GGCACATGACCC  | 923.153864602509 | 0.12136681146982   |
| GATTCGGTGACA  | 923.154870441577 | 0.128184328071563  |

|              |                  |                    |
|--------------|------------------|--------------------|
| ACTCATCACGTC | 923.168423039657 | 0.0763016110089739 |
| CAGTAATGATTC | 923.171214236519 | 0.074231677191541  |
| CTATCGTGTGAC | 923.176827761623 | 0.0874312796386893 |
| ATTGACACTTTC | 923.185089491599 | 0.0963728932051994 |
| GTGACGCCAAAC | 923.186604001982 | 0.0755652303320959 |
| GCCAACTCATTA | 923.201580177996 | 0.14182692694395   |
| AAGTTACATGAC | 923.203490969892 | 0.12646140011724   |
| AAGCGTCAGACG | 923.217379796919 | 0.0952501227462854 |
| GCCACCTGTGAC | 923.264037024459 | 0.0972917439516312 |
| GTCACTGAGCTA | 923.264381984256 | 0.124364073907314  |
| CTCTGACGAGTA | 923.264918210252 | 0.0834817610654841 |
| CACCATCGGTCA | 923.30192625384  | 0.147550759476391  |
| ACAGTCAGTACT | 923.30283395508  | 0.123128875884034  |
| GAAATAATGACA | 923.304743852844 | 0.153581718660624  |
| ATTGCATGACCA | 923.308400343866 | 0.139875229302517  |
| CGCTGACGTGCA | 923.321081221884 | 0.0949874627082581 |
| CTGGCTCATTCA | 923.329758885994 | 0.0861822016657798 |
| AGTCAGCTGGTC | 923.334184475484 | 0.138834619427662  |
| AGTGACGAACTA | 923.336495374811 | 0.100710346188931  |
| GGCTAGTGACAC | 923.348312580272 | 0.108874285875905  |
| AGTGGTATGACC | 923.357071294237 | 0.0857152452396625 |
| GCGCATGACCGA | 923.368829731855 | 0.116077776921069  |
| AGTCAGTAAACA | 923.375249691668 | 0.1047458647905    |
| GTCATGAGCCTA | 923.377942732082 | 0.127548722537112  |
| CGTCACTGGATC | 923.401273025411 | 0.0961895733175852 |
| TGACTCCATACA | 923.4037648575   | 0.0584043888482673 |
| TGTCACTACTAA | 923.420998369115 | 0.0856050349656656 |
| CAGTCAACGTGG | 923.424448543067 | 0.0797514517432669 |
| AGTAGTCAGTAA | 923.425677119698 | 0.0851577098523393 |
| GTGTTAGTGTC  | 923.466913107831 | 0.0736493295987155 |
| GTCACGTGCCTA | 923.474880077254 | 0.100896700430022  |
| AACACTATGACC | 923.475362634727 | 0.0548791748658825 |
| TATGGGTGACAA | 923.480610957001 | 0.0937934411151952 |
| ATGTCACCTTTA | 923.492120576497 | 0.0923508613256683 |
| CCGGAGAGTCAG | 923.507470038984 | 0.0984775884013051 |
| AGAGGGTGACAG | 923.519703011476 | 0.102188053706078  |
| AGTCACGACCTC | 923.536927695738 | 0.0807948457164681 |
| AGGCGTGTACG  | 923.557444653151 | 0.128811385591033  |
| ATGACGCCGGGA | 923.558574188531 | 0.0945780077337984 |
| ATTGAATGGTCA | 923.558621247634 | 0.0751055730391046 |
| ATAGTCAGTACG | 923.575732206308 | 0.0874754986813445 |
| CATGTATGCGTC | 923.577333724636 | 0.10775733015455   |
| GTCACTCGTTCA | 923.589869259669 | 0.0800589206422022 |
| GATCTGGTCATC | 923.599674144409 | 0.0930531990349747 |
| GTCACCCCTCAA | 923.62108396606  | 0.117062621664104  |
| ATCATTGTCACC | 923.626620284648 | 0.131210044463056  |
| ATTATGCCGTCA | 923.635933898258 | 0.139917991270053  |
| GTGACATACCGA | 923.641714596762 | 0.0977008354146254 |
| GAATCATGAGTA | 923.653606072412 | 0.127185887398144  |
| TTATTGTCACAA | 923.655683851284 | 0.106115971591584  |
| AGACTCAGACTA | 923.658953726052 | 0.0815326569830918 |
| ACTCATTTTCCA | 923.6640626575   | 0.104502521200209  |
| ACATGTCAGAAA | 923.685058585878 | 0.0980785740741281 |
| ATTACGTATACA | 923.685235737992 | 0.0867735568208145 |

|               |                  |                    |
|---------------|------------------|--------------------|
| CACAATGACGGG  | 923.695277000803 | 0.0928888138035625 |
| ACTCATTATAC   | 923.69573662573  | 0.0989726708219143 |
| ACGCTGCGTCAG  | 923.701868029476 | 0.0922850471346553 |
| GTATTACACTGA  | 923.705182697534 | 0.0981476204726678 |
| TAAGTGTGTCA   | 923.721133870894 | 0.106895050015559  |
| CGTGTCAGACCA  | 923.723827922432 | 0.0989742342513505 |
| CACGTAATATCG  | 923.738220674058 | 0.108778839852371  |
| ATGAGTGAGTGC  | 923.756089024416 | 0.123441785804571  |
| ACTATGACCGCT  | 923.789655188425 | 0.0942438587458695 |
| GTTTTGACGTCA  | 923.792040319014 | 0.0824555673150983 |
| CGACCTAGGTCA  | 923.796180707826 | 0.0777607774016058 |
| CGCTGACTGCCG  | 923.796587724363 | 0.0779655732919112 |
| AGATTAAGTCAG  | 923.817988976974 | 0.0886114861304383 |
| TAGGCATGACGA  | 923.81851640295  | 0.0798171771769117 |
| ACACATCATCAT  | 923.820708579868 | 0.0560750106908685 |
| AGTTGATGACCC  | 923.865496735482 | 0.135856904159375  |
| ACCGACGTCACA  | 923.87076578354  | 0.116721322272509  |
| AGACTAATGTAA  | 923.906844658486 | 0.106092112064872  |
| TCATGACAATAA  | 923.913452207431 | 0.100070657881694  |
| CGTCAGATATGA  | 923.922781939925 | 0.098348492982252  |
| GGTGGTCACTCA  | 923.934330814764 | 0.157651477764064  |
| ATTACACACCTC  | 923.950276548726 | 0.127304493805265  |
| AATGAGCCAGAT  | 923.956732166636 | 0.0949011889841585 |
| CCGCTCCAGTCA  | 923.959043767568 | 0.0822462280457449 |
| CTTACATCATAC  | 923.975195472967 | 0.0905067563811464 |
| TCCGATGATGCA  | 923.982697332858 | 0.0798772318112957 |
| CGTCACACCGGA  | 923.986791157283 | 0.105215244968521  |
| ATGACGGTCTTA  | 923.989761238929 | 0.110097000611066  |
| AGACGTCACCAA  | 923.990518639881 | 0.104471318282009  |
| TCTCCGGTGACA  | 923.99303700613  | 0.0758039443788895 |
| ACGTAATACTAT  | 924.005348086941 | 0.0983764473442128 |
| CGTCACACCCCTC | 924.014975658271 | 0.0962358917982078 |
| CATAAAGTGACA  | 924.022346242438 | 0.13937857978341   |
| ATTACTCTAATA  | 924.027065752901 | 0.14531794045998   |
| AGGATTCATACA  | 924.05547671557  | 0.0758013003108722 |
| AATCACTGGTCA  | 924.058928871147 | 0.0898706207515883 |
| GCTGACGATTAC  | 924.081101741401 | 0.111724834302569  |
| GCTTGCCATGAC  | 924.110643207675 | 0.143739767964597  |
| AACTTCTAGTCA  | 924.127081120461 | 0.0753969289442027 |
| AGTCAGCACGGA  | 924.129034494105 | 0.0874467182791285 |
| AAATGATTCTTA  | 924.132339019044 | 0.0793026024112527 |
| GACTTGTGACCA  | 924.134513872037 | 0.0853458607479852 |
| ATGAGTAGACGA  | 924.14119657814  | 0.0755845618279679 |
| CAGAAGCGTGAC  | 924.144182093905 | 0.0883000851352677 |
| AGATGTCACCGC  | 924.166884600447 | 0.0832035548723437 |
| CTGGCTAGTGAC  | 924.167849948574 | 0.117399856586655  |
| CCGAGATGAGTA  | 924.167918273669 | 0.0782458709039268 |
| TGGCATGTGACA  | 924.173012776082 | 0.072862488309738  |
| CCTCGTTTGTCA  | 924.181562234532 | 0.069525609327284  |
| GATTACTGTCAC  | 924.183029043744 | 0.0771374223143147 |
| TGGGAAATGACA  | 924.183225075129 | 0.147858187012772  |
| AACGGTGACAGT  | 924.184979550931 | 0.146552799546902  |
| GGTTGCTGTGAC  | 924.190632858855 | 0.0862575657667114 |
| TGAGTCCGATAA  | 924.216709527328 | 0.112393586049142  |

|              |                  |                    |
|--------------|------------------|--------------------|
| CTGACCCGATGA | 924.219321134379 | 0.0803934354207342 |
| CATGCGTGACAG | 924.220792935253 | 0.151729874803557  |
| ATGGGAGGTGAC | 924.226007781445 | 0.114059396386856  |
| ACGGTGCTGACT | 924.242389092988 | 0.0994619913055326 |
| ACTCATCCATCC | 924.279316137247 | 0.0866746239981876 |
| CCTTCTTGACTC | 924.282113862737 | 0.116914458344875  |
| ACTCATACACCG | 924.290982279866 | 0.140466377495966  |
| AATGCCAGTGAC | 924.29887724164  | 0.106143055624197  |
| ACGGTGATGCAT | 924.306560944168 | 0.121003299668291  |
| AAGTCACGCGCG | 924.307935209259 | 0.075813179790612  |
| AACTCATTGTCA | 924.310565872989 | 0.117880354655017  |
| ATACTGACTGTC | 924.330821227646 | 0.104885655373012  |
| CGTTGACTACAC | 924.331539260297 | 0.175025101309342  |
| ATGACACCCGCG | 924.333987362658 | 0.130007160427622  |
| GGGGCGGATGAC | 924.338932531132 | 0.113593979004118  |
| ACAGGTCACACT | 924.350720684358 | 0.0938773034641623 |
| CGTCCATGTGAC | 924.363772576605 | 0.0982705211716308 |
| AATCATACTCAC | 924.370676111502 | 0.115741736196594  |
| AGGCCCGTCATC | 924.384948386466 | 0.108815713264602  |
| TACTCGGTGTCA | 924.396350742189 | 0.0964480548596108 |
| AATTTTACTCAG | 924.397128904369 | 0.0523576217649379 |
| GTGACAGAGATA | 924.39973362136  | 0.083950678484454  |
| CGGCATGACGTC | 924.411416393332 | 0.113584742686016  |
| TCTATTGGGTCA | 924.42280943233  | 0.0881087296011419 |
| GAACGGGTGACA | 924.423644607102 | 0.0727845702632338 |
| GGCTGAGCAATA | 924.423956085048 | 0.0964036433076844 |
| TGACGACGATCA | 924.428825339295 | 0.0950799167111798 |
| ACTCATACGCTA | 924.433151892905 | 0.115160402542177  |
| AGTGAGGGTGAC | 924.433323054946 | 0.0984394845856661 |
| GTGACAATAACA | 924.435988189342 | 0.107594515252617  |
| AAGGAGAGTCAG | 924.448339667397 | 0.0795148794100274 |
| ATGGCTAATAAC | 924.479727346587 | 0.080650174403096  |
| AGTGACGTTGAT | 924.490819295349 | 0.114235517457774  |
| CTATGATACACA | 924.501503894155 | 0.116217180908087  |
| ATGACCCTGAGA | 924.506895402546 | 0.0748006834085886 |
| ATATGACCGCAC | 924.514922641373 | 0.0973121750842086 |
| ATATGTCTCACC | 924.51758836279  | 0.0873264481275216 |
| ACGGCTATGAGT | 924.522881909241 | 0.100777606201236  |
| GACGCATGACGA | 924.531221974104 | 0.110465727201909  |
| TGACGAAAGAA  | 924.540265838094 | 0.0625094175610216 |
| AATTTGAGTAAC | 924.587391084881 | 0.108415278324851  |
| GTGACCACTAAA | 924.595108181661 | 0.089000636704601  |
| GATTCTCCGTCA | 924.641872586277 | 0.0847598154261971 |
| TAATAGTGACGA | 924.643124316263 | 0.105330617103764  |
| GGCCACGTATGA | 924.650642891695 | 0.0809834385682367 |
| ACGGATTGTCAT | 924.659106669353 | 0.138541833930188  |
| GTGACATGCTCA | 924.659557542623 | 0.0873568877210489 |
| ACTCACATTGCG | 924.682343860522 | 0.120113324644311  |
| ATTACGCGGTCA | 924.685279338399 | 0.173403225375032  |
| ATGACCATACCC | 924.706799996842 | 0.091485665837811  |
| GTATGGGTGACA | 924.727140891793 | 0.116958307902052  |
| AGGCGTCACAGA | 924.734594749764 | 0.13564109348438   |
| ATATCGATGTCA | 924.760896491376 | 0.102387522565105  |
| ATCTGCGTGACA | 924.76300953909  | 0.0876202789617472 |

|               |                  |                    |
|---------------|------------------|--------------------|
| CCCGCGCAGTCA  | 924.783193700269 | 0.054593849956634  |
| CGTCGTGACGAA  | 924.788480458461 | 0.0960316048624287 |
| ATTCTAGTCAG   | 924.813174610037 | 0.0907656061676854 |
| ACACCGGTGTCA  | 924.819504781239 | 0.16101221355838   |
| TCCAACTCATAA  | 924.825091298078 | 0.0896346211110784 |
| AGTCTGTCATGG  | 924.828158962701 | 0.0943112936668102 |
| AGGTTGCATGAC  | 924.828940964149 | 0.101315516946507  |
| GGGTGAGTATAA  | 924.849451661182 | 0.0725384182433498 |
| AGTAGTGACGAT  | 924.852620727503 | 0.0740786867430321 |
| AACCGTTGACTG  | 924.857729045083 | 0.1083884646888    |
| CAGAGGAGTGAC  | 924.891924576543 | 0.0962656024180181 |
| ATCTGAAGTGAC  | 924.89459541864  | 0.129202502953417  |
| ACCCACAGTCA   | 924.901973274232 | 0.131967072326422  |
| AAGTGTTCTGTCA | 924.927135277486 | 0.10263223302462   |
| AGTGACCAAGAT  | 924.934997199744 | 0.112904400375366  |
| GATCCATGACGA  | 924.940267662519 | 0.0873427251642969 |
| CACGTCAAGTGG  | 924.967647030171 | 0.0751360751201769 |
| GCGTGACGGACC  | 924.975976823714 | 0.0733346183198683 |
| CTAGTGATGTAA  | 925.003322871098 | 0.0816124900941799 |
| CTACTCTGTAC   | 925.003632010124 | 0.0750135107588311 |
| ACGACTGACATG  | 925.007640194345 | 0.0975504305456226 |
| CGCATGACGACG  | 925.02835598894  | 0.0897282921937707 |
| CGGTTACGATGA  | 925.030403104831 | 0.107575356251493  |
| ACGCTTACGTAA  | 925.035729671387 | 0.0801495704218299 |
| ACGACTGACTAC  | 925.041470312382 | 0.128592572679829  |
| AAGACTGAGTCT  | 925.06108443336  | 0.0963705154424593 |
| CGCCAGCTGTGA  | 925.072452822628 | 0.112084687448445  |
| ATCTGACAGATA  | 925.076637951984 | 0.0887506847939493 |
| GGACCGAGTCAA  | 925.076662804545 | 0.104198962982877  |
| GGTGACCTATCA  | 925.079624603984 | 0.11189671534917   |
| GTTGAAGTCACA  | 925.09539366371  | 0.145196879443407  |
| CAACGGTGACAG  | 925.095794701913 | 0.0994561596693379 |
| CCATGGACTCAC  | 925.102465702764 | 0.0968022779482317 |
| ATGTTTCATGAC  | 925.103935868791 | 0.116556634515115  |
| GTCACTGTTACA  | 925.116618159545 | 0.132527875417345  |
| ATTAGTACTAAC  | 925.121414446681 | 0.0861683992654789 |
| ATGACGATCCAA  | 925.124200296516 | 0.156017861390869  |
| CTGTGACCGAAC  | 925.143508125372 | 0.0987131080299023 |
| CGTCACTTTTAG  | 925.15011759371  | 0.0829005396183791 |
| ACTCATAAGATA  | 925.154419070769 | 0.10171102984182   |
| CTATATACTCAC  | 925.169636929488 | 0.0748751903610983 |
| TATGATGATTAA  | 925.169877146312 | 0.138076148110632  |
| TAGTGACGCCAA  | 925.179914704194 | 0.0904658911786536 |
| ACAATGTTGTCA  | 925.186554148296 | 0.0782538353078545 |
| GAAAACACGTAA  | 925.201716689384 | 0.0787007067611328 |
| ACTCATACATTC  | 925.204513828443 | 0.0816590969859404 |
| ACTCATCTTTAA  | 925.205715927949 | 0.115209995448786  |
| ATGATACACCGA  | 925.212322566623 | 0.146281494266711  |
| GTCACCTCTCCA  | 925.218081361619 | 0.0787298203535357 |
| ATGTATTGAGTC  | 925.222641996195 | 0.0898029166920129 |
| ACTATATTACTC  | 925.224364846501 | 0.0977402625252202 |
| CGACCATGGGTC  | 925.232444850746 | 0.15944724762272   |
| AATACGGTCACC  | 925.232582821157 | 0.133807094332731  |
| CGTACCTGTAC   | 925.234221307502 | 0.0889731770168677 |

|               |                  |                    |
|---------------|------------------|--------------------|
| GGGTCACACACA  | 925.234780796481 | 0.0925157083552203 |
| GCCAATGCATA   | 925.241801138475 | 0.0926289194139    |
| CCTGTCACATGA  | 925.244087986833 | 0.10834470346481   |
| GACAATTTAGTC  | 925.246970464481 | 0.0774932063867125 |
| AATGAATAATCT  | 925.253718444237 | 0.0906274108184339 |
| ATGTCACGTCAA  | 925.254627895776 | 0.122486193857505  |
| TAGATGTGACAA  | 925.268444748296 | 0.0788749020838056 |
| AAAAGTAGTCAG  | 925.276263112091 | 0.0765863362739612 |
| GTGACACTCAGA  | 925.279756890983 | 0.140756228528302  |
| CGGGTCATAATC  | 925.304697660834 | 0.106891276954393  |
| GTCACCCCGACA  | 925.318141095223 | 0.10575201567141   |
| CTGTCACATGA   | 925.322765729228 | 0.0752375562365764 |
| TCGTATGAGACA  | 925.32934236209  | 0.111786548287632  |
| ATACGTAATAGA  | 925.34223784043  | 0.12913557491212   |
| GTATGATGTGGA  | 925.349689724397 | 0.119024907591517  |
| CAGCGATTACGC  | 925.352739459487 | 0.173471392614621  |
| CTAACACGTCAA  | 925.38818693332  | 0.0970181985349803 |
| ACACGTAACACT  | 925.406442152263 | 0.0837667365805887 |
| CGTCAGACTGGA  | 925.418743693631 | 0.135076864118526  |
| ATAACGTACCGG  | 925.436469988648 | 0.0924762320051355 |
| ATGAGTAGATAG  | 925.447334760195 | 0.0999357738745345 |
| ACTAACTCATTG  | 925.449438673304 | 0.144252793778175  |
| CTGGTTGCGTAA  | 925.480074386219 | 0.0792312340832777 |
| ATGTTGTGACAA  | 925.487503223608 | 0.135633499239101  |
| CTGTCATTTCCG  | 925.519094412221 | 0.10452702774063   |
| GGTTGTGGTGAC  | 925.520203804399 | 0.0747582166424529 |
| AAACAACCTCATA | 925.521237047483 | 0.0757830808833823 |
| AATAGTCAAGGA  | 925.534509450894 | 0.108981984149138  |
| AGTGTGAGAGTG  | 925.546299804261 | 0.114391421019762  |
| GTCACCCACAA   | 925.546631417059 | 0.132368557845915  |
| AAAATACTGACT  | 925.564590597378 | 0.109236828194585  |
| CGCGACTAATCC  | 925.567521377475 | 0.0728036910520939 |
| ATGTCACATAAT  | 925.574652911582 | 0.108677081912364  |
| CTACCTGTCAAC  | 925.582339464377 | 0.0742575771821046 |
| AGTAATTGACTG  | 925.585186641332 | 0.0714339239294777 |
| GTCAGGTCGTCA  | 925.586175360351 | 0.0928512320831129 |
| AATTGATTCACC  | 925.587344433168 | 0.0488853747913316 |
| AAGTTGCGTGAC  | 925.592284524681 | 0.0899845836772746 |
| GAAGTAATGACA  | 925.60954822876  | 0.0876609378670343 |
| CAACCTCTGTCA  | 925.616659054252 | 0.0834600891529902 |
| CTGACAGCATGA  | 925.633272068389 | 0.0984955549320654 |
| TGTCACCCTCAA  | 925.644470673656 | 0.0715249779669883 |
| ATTGCGTGACCA  | 925.664005088168 | 0.0928977278874849 |
| TCCTCCCAGTCA  | 925.693782125554 | 0.0943781917050705 |
| AATAGAATGAGT  | 925.695862717006 | 0.100046264623636  |
| GTGCGTCAAGTA  | 925.698622817968 | 0.0926510997031761 |
| GTCATTGCCTAA  | 925.714350058555 | 0.122335104541964  |
| GTGATACATAGA  | 925.721050964177 | 0.0803453693918565 |
| AATCAGTAACAG  | 925.735978960458 | 0.11273117641295   |
| TGGCTCACCCAA  | 925.745545685578 | 0.13302750585886   |
| TCTGTCACTGCA  | 925.749358295535 | 0.0882257800261314 |
| ACTCAGTAATAC  | 925.768853979638 | 0.0950723610195561 |
| GGTCATTAGGAC  | 925.769760318984 | 0.0804595426018222 |
| CATCGACAGTCA  | 925.784761753451 | 0.109133407219893  |



|              |                  |                    |
|--------------|------------------|--------------------|
| AATTGATTCAC  | 925.788485237011 | 0.118973324731384  |
| AAAGCATGTCAC | 925.833494941348 | 0.118067149966713  |
| TCTTCGTCAGAA | 925.836577487088 | 0.0922630495541236 |
| CAAGGTACGTCA | 925.84012808202  | 0.121798893201171  |
| GCACAACGTAC  | 925.879863229833 | 0.0966270810402187 |
| ATACGATGAGCA | 925.879882378323 | 0.112838868210743  |
| ACCGGTCATAAC | 925.885965581069 | 0.102927229303914  |
| GATGAGTTGTTA | 925.901720712118 | 0.0741964198652792 |
| GTAAGCTGTGAC | 925.907366057129 | 0.0925361548623109 |
| ACAGGCTCGTCA | 925.913901843902 | 0.135877308105451  |
| GTACCTGTATGA | 925.938339463275 | 0.0895987108805948 |
| GCGAGTCAGGCC | 925.957957505146 | 0.0769946368476837 |
| ATGACATTGTGC | 925.976875085385 | 0.128746710998818  |
| CGTGTGATGTAA | 925.994419996764 | 0.125795013891437  |
| GTCACGCTGAAA | 926.009872629327 | 0.0937156745988611 |
| AGTGACAGGTCA | 926.014366280624 | 0.112481853927964  |
| GTCACCTGAAC  | 926.016666882411 | 0.109249089366382  |
| CTACCGTGTAC  | 926.022662349702 | 0.113782890383583  |
| GAAAGGCTCACC | 926.025524176207 | 0.0731585452709916 |
| ACCGACTCACGA | 926.028405790295 | 0.0766703477308927 |
| AAGTGACATGGC | 926.029363873463 | 0.118598726053338  |
| ATGTCACATGAG | 926.034266750498 | 0.0962132793678992 |
| ACTCATCTCAA  | 926.037577050692 | 0.0929024747273448 |
| AAGGGGTGACTT | 926.041202672051 | 0.0735924441277551 |
| TGGTGTTACTAA | 926.053977863693 | 0.108986255304334  |
| AGTCAGCAGTGC | 926.067218312409 | 0.0962844234532946 |
| ACTGACATGTAT | 926.091268505083 | 0.100943997105619  |
| TATATTTTGTC  | 926.096838984051 | 0.084606467269441  |
| CCGTCATCAAGC | 926.103556814634 | 0.148491950989562  |
| ATGATGCTATAC | 926.120955950456 | 0.0860958732620297 |
| GGCGGTCATGAC | 926.122636308176 | 0.108261795967172  |
| CAACAATTA    | 926.130149645175 | 0.100157135804605  |
| GTATACTACCA  | 926.13325734929  | 0.0722770679587656 |
| AATGAGTGTACC | 926.139479821576 | 0.159464897712941  |
| CTCATGAGCAAA | 926.14293031477  | 0.163727239873308  |
| GATCTATGTCAC | 926.151041742496 | 0.0710430177391015 |
| CTAGTGCGGTCA | 926.167642134424 | 0.106492996421402  |
| CTAATCAGTGAC | 926.17619168495  | 0.0854001655697785 |
| AGTCAGAGACTG | 926.201574613942 | 0.124610092060792  |
| CTCAGAAGTGAC | 926.209748552863 | 0.105431552111592  |
| AGGTGAGACATA | 926.211613824995 | 0.0799898572585837 |
| CGTCATTGGACC | 926.212115728662 | 0.131806265175727  |
| CGAACA       | 926.215288413632 | 0.081598294849286  |
| ACTCATCTTACT | 926.230684703808 | 0.0718193641888481 |
| CGCAATGACCGA | 926.235654798408 | 0.0893007576706909 |
| CAGCCTACGTCA | 926.258470780959 | 0.093113193093191  |
| ATTACGTTGACA | 926.272267109999 | 0.0973516446166627 |
| CAGAACATGACA | 926.286062416778 | 0.0780959383590036 |
| CTGCTCTGACAC | 926.294205657419 | 0.134579504367923  |
| ATATTGTCACTG | 926.302223334724 | 0.0893826797965248 |
| ACTCATCTGGGC | 926.310509178292 | 0.0671551780623408 |
| TGACATCACGCA | 926.315056305315 | 0.0713419991813717 |
| GCACCGTGTAC  | 926.326705996735 | 0.0851861050750789 |
| GTTGAATCACGA | 926.333017272597 | 0.132748100745093  |

|               |                  |                    |
|---------------|------------------|--------------------|
| GGTCATTCCTA   | 926.334002945983 | 0.072043604392485  |
| TTAGGGTGACAA  | 926.336764350933 | 0.0987474029524601 |
| AGTCAGCCTCAA  | 926.351175470092 | 0.0714973893553999 |
| ATGATGCAACGG  | 926.364884274813 | 0.154617534013454  |
| CCATGTCACCTA  | 926.372638582901 | 0.105922793657277  |
| GGAAGACTCTTA  | 926.373423862753 | 0.0989071289439005 |
| CATATTTTATGA  | 926.379286790861 | 0.100501976622999  |
| ACTCACTATTGA  | 926.379866366521 | 0.108109499010425  |
| ACGTGTGATTAC  | 926.392927822479 | 0.103916572257975  |
| ATTGCATCACCC  | 926.41334423733  | 0.0785676961026851 |
| GGGTGATGCAAC  | 926.415049690116 | 0.0887914676561492 |
| AACGTCATGTCT  | 926.416522418942 | 0.109253473720602  |
| CTGACTCTCAGC  | 926.429720108171 | 0.0820655259738288 |
| AGAAGAGTGACG  | 926.43573697998  | 0.0973330935004089 |
| GCGATTGAGTAA  | 926.441324367267 | 0.109070533625836  |
| GTCATGAGGCTA  | 926.453298873441 | 0.0740481698429291 |
| ATGACAGACGGA  | 926.457068151507 | 0.133650855726161  |
| CGTCACCTGGGC  | 926.494727492152 | 0.101994309263851  |
| GAATGCCTCATC  | 926.496887179342 | 0.0535589437684783 |
| AACTTCTTATGA  | 926.50620157799  | 0.111405596925373  |
| AAGTCACGAGAT  | 926.512814991561 | 0.0978981509182053 |
| ATGACATGCGTC  | 926.521705177807 | 0.0983548948043661 |
| GGACTTCGGTCA  | 926.524788740381 | 0.104963134621882  |
| TCGGGTTTGGTCA | 926.548295390617 | 0.133072319850042  |
| AGTGCGTGACAA  | 926.552842209863 | 0.0748198864285056 |
| AAGAGTGTGATG  | 926.553043083591 | 0.0711451706187929 |
| CGTCATTGAAAG  | 926.553157276994 | 0.0774383969129867 |
| CGTCGATTGATC  | 926.560671827648 | 0.110239812700453  |
| GGACGGTCATAC  | 926.573219645323 | 0.0813576868877217 |
| CACTCATACTAG  | 926.575991505211 | 0.147662975367314  |
| CTGGGTGACGAC  | 926.577450772585 | 0.100766359951557  |
| TAGACCATGACA  | 926.59485674245  | 0.131570177772075  |
| AAGCGGTGATAC  | 926.607314670424 | 0.0696723357027869 |
| AGACATGACAAAT | 926.632969444959 | 0.11637417708151   |
| CCTGCAGTCAGA  | 926.633740343196 | 0.10272297383484   |
| AGGCGTACTCAT  | 926.647452135518 | 0.0985672113587802 |
| ATAATGTGACAG  | 926.647954472239 | 0.112909194573501  |
| GATTCATCAACA  | 926.648658709952 | 0.147790076159006  |
| ACACTGTACCTT  | 926.651565692924 | 0.116370040707176  |
| GCGTCACTTCCC  | 926.657121883319 | 0.135690050136819  |
| ACTGTGTCAATG  | 926.666194469557 | 0.0928666537706142 |
| ATTAGTACTAGA  | 926.712474893423 | 0.0702496525012929 |
| AGTCAGAAACCA  | 926.715634609981 | 0.09535244664085   |
| TGTGACCGAACAA | 926.735999881873 | 0.0903295977193878 |
| CACCCCACGTCA  | 926.747805127067 | 0.0769123243033858 |
| CGTCACCGTTTC  | 926.753491852727 | 0.0744282677661449 |
| TACTACTGCACA  | 926.767290430973 | 0.0842738085052879 |
| GTGTGTCAAAGTA | 926.772829182146 | 0.0811182942251242 |
| AATACGTGACGA  | 926.776071679491 | 0.0976411345511991 |
| GCCGAAAGTGAC  | 926.780287121032 | 0.101723869821011  |
| CGAATAATGTCA  | 926.790585614163 | 0.0859861328630037 |
| ATGACAGTGGAC  | 926.818815224063 | 0.110582759293429  |
| ATGACCAGACCA  | 926.821781290229 | 0.0941175095719213 |
| AATGTGTAAGTC  | 926.829397558673 | 0.0742079279257324 |

|               |                  |                    |
|---------------|------------------|--------------------|
| ACTGACTAGTCC  | 926.839638034154 | 0.128213224206741  |
| GAGTAATTATAA  | 926.845705952144 | 0.115062905568093  |
| GACTTGACGCAC  | 926.847308849181 | 0.0985701466936598 |
| CGTGTATGATTC  | 926.855431730007 | 0.087723403702364  |
| CGGACAACGTCA  | 926.857621576205 | 0.107269105595375  |
| GCGCTGACTTAA  | 926.858973350822 | 0.0853500539362552 |
| TCGTCTTGCTCA  | 926.865941871608 | 0.0918898588989778 |
| ACTCATTCCGGC  | 926.879207178506 | 0.11499624287117   |
| CCTGTGACGCCA  | 926.882182158273 | 0.0967421407209917 |
| CGACGATTACAC  | 926.892062649168 | 0.0836764268436677 |
| CAGTCAACGATC  | 926.909133390309 | 0.11497496914359   |
| AGAGGATGTGAC  | 926.912164586302 | 0.0694638629715296 |
| AGTGACGGAGAA  | 926.912608699801 | 0.0781437554803725 |
| ACCGCACGTAC   | 926.931818951281 | 0.0931640853796646 |
| CGGATTGAGTAA  | 926.934725507301 | 0.101437940961577  |
| CGCCTACTCATC  | 926.938697119946 | 0.114747079933655  |
| ATCAGATGAGTA  | 926.943038210079 | 0.0817535277303186 |
| ATTAGACTCAAC  | 926.953006306086 | 0.0946903596570657 |
| AGGGTGATACAT  | 926.953526864447 | 0.111928198616593  |
| GGTTATCATGAC  | 926.959436332887 | 0.0991021349919627 |
| GAATTACTCTAC  | 926.964955267688 | 0.105311113704019  |
| GAGGCCATGACA  | 926.965728922989 | 0.106324493358331  |
| GAGTCAAGTCGA  | 926.975815938379 | 0.0765518800843765 |
| CCACGTCAACGG  | 926.982879899922 | 0.0844394913911809 |
| CCGTCATCTCAC  | 926.992513934384 | 0.0768393706199714 |
| CGGTAGGTGACG  | 926.993670930331 | 0.0929833700724294 |
| GGTCATCGCCAA  | 926.997390709397 | 0.120361720401918  |
| GTCTATCGTCAC  | 927.007830603131 | 0.0827300590756277 |
| ACTTGTCACCTCT | 927.027047413167 | 0.0764883337203156 |
| AGTCAGATCAAC  | 927.037552182379 | 0.0914162433480615 |
| ACTAAGACGCAT  | 927.041970928894 | 0.0781783918633571 |
| GTCACAGCTGAA  | 927.043209444504 | 0.110265651559371  |
| GTCATGGCACAA  | 927.046110799456 | 0.144549455477783  |
| GAGTCTTAGAAC  | 927.046146819022 | 0.103812508835293  |
| ATCAATTACGCA  | 927.057076341643 | 0.0817652640786048 |
| GTGAGTGAATGA  | 927.058716123189 | 0.094291240034722  |
| CCGTGACATGGA  | 927.063204690151 | 0.0892656150814944 |
| AGTCAGGCCTTG  | 927.074087435457 | 0.132056463276707  |
| ATCATGACGTCG  | 927.076429386663 | 0.0887635889935834 |
| CTACTAGTGTC   | 927.079274854063 | 0.0737497254361087 |
| ATGAGTATGGCA  | 927.090625872282 | 0.105087852740973  |
| GTCATCTCAAAC  | 927.092508899453 | 0.0687973794073502 |
| AAGTTACGTGAC  | 927.107028618111 | 0.109049611818993  |
| ACTTGTCACAAA  | 927.110465430426 | 0.0796950902088653 |
| CTATGACCTAAA  | 927.12035426377  | 0.0458803944455476 |
| TAAGCTTTGTCA  | 927.136178474886 | 0.0745024052496856 |
| CTATACGTCAAC  | 927.139036130725 | 0.130528951289005  |
| GTGACGAACCAC  | 927.142409322443 | 0.0775626251133939 |
| ACGGTCATACGT  | 927.146540360146 | 0.111200201427651  |
| ATGCGTAACACC  | 927.171771413273 | 0.151552632026605  |
| CGTCAACAGCCA  | 927.179593350474 | 0.116371098777091  |
| TCAAGCACGTCA  | 927.180774766599 | 0.0899113907687688 |
| GGACGTTGTGAC  | 927.219894963336 | 0.135192097768505  |
| AATTACTCTACC  | 927.23661067431  | 0.0834001932286209 |

|               |                  |                    |
|---------------|------------------|--------------------|
| ATATGTCAGCAT  | 927.256799336752 | 0.106802278391158  |
| AGAATAGTAATC  | 927.259187031244 | 0.0751181595897425 |
| ACTGTCACATTA  | 927.266499919248 | 0.121018711957537  |
| CGAATGACCATA  | 927.269429155419 | 0.131640748181736  |
| AAAGTCGCTACT  | 927.272091682293 | 0.0700024545362916 |
| ACGGTCATTATA  | 927.291255547793 | 0.0854355016319343 |
| ATATGACGGGCA  | 927.309097581651 | 0.0872003578835465 |
| CTGGCCAATGAC  | 927.313101057632 | 0.131589924815214  |
| GACCCATGTCAC  | 927.314330712776 | 0.0730782500711076 |
| TAGTGACCAAGA  | 927.319571008837 | 0.101184913966787  |
| ACAGGTGACGAT  | 927.342570357223 | 0.0969771028051246 |
| GGAGTAATCTTA  | 927.381563809317 | 0.0843887388713257 |
| CACCCTGTGACG  | 927.388418058011 | 0.100018612160413  |
| AACTAGATGAGT  | 927.406490807201 | 0.0855095296139763 |
| GATCTTAAGTCA  | 927.422108727741 | 0.0953994742988555 |
| TGACGCTGTCAA  | 927.424679313625 | 0.0899438672076109 |
| CAGGACATGACG  | 927.467162874856 | 0.0859906618271322 |
| CCGACCATGACG  | 927.485722273141 | 0.118317501559926  |
| CACGTAATATCC  | 927.499802230235 | 0.10276922340188   |
| AAGTTTCATGAC  | 927.541817784099 | 0.0828648421215052 |
| AGTGAATCAACA  | 927.550308238282 | 0.0980380444601947 |
| ACTAGGTCATCG  | 927.55086891101  | 0.0554067524452527 |
| ATGGGTGACAAT  | 927.576459555341 | 0.0885777807267763 |
| CCGGATTACTCG  | 927.592764925637 | 0.100232977770574  |
| AAATACGTCAAT  | 927.597193044728 | 0.121826555748832  |
| CCTGACTAGTAC  | 927.613000411877 | 0.0865687999648177 |
| GACTGACGAAAC  | 927.650962909387 | 0.0995258377411514 |
| ATGTCACTTTTG  | 927.657220492245 | 0.098451217251242  |
| AATATTCACCTCA | 927.657553848939 | 0.0948363029396126 |
| ATGACGTTGGAG  | 927.657641875024 | 0.106974031697027  |
| ATAGATAGACTC  | 927.658550090999 | 0.0995358870319718 |
| CCCTCAAATGAC  | 927.66346367507  | 0.0873327655716296 |
| CAGTCAGCGGGA  | 927.677416833427 | 0.138171267177543  |
| ACCGGTGTGAC   | 927.683164279229 | 0.102128433808688  |
| CGCTTTGTGACA  | 927.712608534192 | 0.102931057081244  |
| ATTGACTACAAT  | 927.7224099345   | 0.0903324942000957 |
| GCAGCATGACGA  | 927.726956577568 | 0.0898043381538836 |
| CTGAATGTGACA  | 927.735965130747 | 0.137511266100435  |
| AAGTGACCAAGT  | 927.737732467418 | 0.103435001792533  |
| TACATCATGACA  | 927.739158364441 | 0.0438032790064794 |
| CCGCCTGAGTAA  | 927.73970961531  | 0.111923655316675  |
| GTTGGACAGTCA  | 927.742928414584 | 0.0909056227362736 |
| AATTACGTAGTC  | 927.749669556935 | 0.0931874930165159 |
| GCCGTATTACTA  | 927.752949641608 | 0.127798651365953  |
| GGCTTCCGTGAC  | 927.786455356055 | 0.120591716429766  |
| CGACTCTTACTC  | 927.788562359513 | 0.0888395702493331 |
| ACCGGTGACAAG  | 927.788685534125 | 0.1088748450101    |
| AGTGACATAGCG  | 927.788985327546 | 0.0858298104466554 |
| AATCACGTAATA  | 927.797468398186 | 0.0838945068335635 |
| TACTCATTGACA  | 927.805335195302 | 0.115669383041276  |
| ATTTGATGAATC  | 927.811297753713 | 0.0964645728055224 |
| GATGACGGGGTA  | 927.821575297469 | 0.120848139436921  |
| TCTGACACTAAA  | 927.822846851088 | 0.0830502400889185 |
| GAGGACGGTGAC  | 927.828217177214 | 0.0785108086917279 |

|               |                  |                    |
|---------------|------------------|--------------------|
| GGCAAGTGACAC  | 927.832204189995 | 0.0851260465078265 |
| CAGCATGACAAC  | 927.832386706073 | 0.0855112672918514 |
| AAGCATAAGTCA  | 927.841701224883 | 0.043928403152207  |
| CAGTCAGCAGCG  | 927.845627457988 | 0.0865700608305784 |
| CATCTGGTCATC  | 927.855367729484 | 0.0861543955371706 |
| CCAGTCCATGAC  | 927.856288302023 | 0.123974923903892  |
| GGCGCACTGTCA  | 927.877883040134 | 0.081543470943664  |
| CGTCACTGATTC  | 927.88027924416  | 0.149569926324277  |
| CTACTGGGTGAC  | 927.885352849164 | 0.0955899724560169 |
| GGTCATCGAACC  | 927.900539780776 | 0.0862889301528138 |
| ATTACTCGTTTG  | 927.902588227341 | 0.0758096461167989 |
| CGTTAATGACCC  | 927.906151191997 | 0.113337823931145  |
| GTAACTCATTAC  | 927.909384384012 | 0.102602208842817  |
| ATGACGGACCTA  | 927.917357070844 | 0.0702967669956028 |
| AGTGTGACCGAG  | 927.926593316756 | 0.15597852279107   |
| AGGGCTGAGTAA  | 927.939010139329 | 0.0726132912869054 |
| CATATTGTATCA  | 927.980023169443 | 0.069210434256129  |
| ACTCATTGTGAA  | 927.997715567133 | 0.0868277004722437 |
| CGGCTAATGACA  | 928.000000994857 | 0.153184827147181  |
| ATTTTGTGACGA  | 928.045315364082 | 0.0983154874359334 |
| ACGGTAGGTGAC  | 928.066615045148 | 0.0975137708519598 |
| ACTTACTCCC    | 928.070626891411 | 0.0855518779085982 |
| ACCGTCATTGCA  | 928.089288261161 | 0.104930754051882  |
| GGAGTTGACACA  | 928.089532785583 | 0.109541082089774  |
| GTCACTACCTTA  | 928.101648319576 | 0.149003073689226  |
| CGTAGCATGACG  | 928.108457099343 | 0.129390595695227  |
| AGTCAGACCACC  | 928.110563899907 | 0.108467796188032  |
| GGACAGCATGAC  | 928.113308432709 | 0.0980146862832428 |
| AGCCCGACTCAC  | 928.115943473996 | 0.103441621541671  |
| TGACGATAATAA  | 928.139456673969 | 0.0989141803127994 |
| TTAATCATAGAA  | 928.140574411427 | 0.0948042281840649 |
| CGTCACATTTCC  | 928.142179637052 | 0.0962643673162568 |
| GATCTAGGTGAC  | 928.143958929758 | 0.0766437759274247 |
| ATGTCACCATGC  | 928.146679042028 | 0.103898381247872  |
| TAACTGACATCA  | 928.174705613858 | 0.0744987572568421 |
| CTACTTAAGTCA  | 928.188713456124 | 0.071006055417911  |
| ACTCATTAGGAT  | 928.189067984048 | 0.0989961251877971 |
| ATAGCGCATGAC  | 928.203764984389 | 0.0684726784811891 |
| CCGTACACGGGA  | 928.220337899883 | 0.129046355504033  |
| ACCTGCCGATGA  | 928.234400451809 | 0.0979399190866516 |
| ACGAGTAATAGG  | 928.239299606139 | 0.11055123721404   |
| CTTACTCAACTA  | 928.266953119463 | 0.0883329571630302 |
| CCAAGTCAGAGA  | 928.282986774668 | 0.0754805049525509 |
| AATTGACGTCAG  | 928.297737006345 | 0.0830098503861769 |
| AATACTAAGTCA  | 928.307455367319 | 0.162241645124303  |
| CTGTCTCCGTCA  | 928.308090360558 | 0.0696915702186786 |
| ATTCTTGACGCA  | 928.328119668763 | 0.0707350296965513 |
| ATCACTATATGA  | 928.338005340131 | 0.130305915236993  |
| CCAGAGCGTCAC  | 928.348465515114 | 0.0975052660648276 |
| CATCATTGTCAC  | 928.368092402419 | 0.084778722715496  |
| AGTCACTTGAGG  | 928.370867731865 | 0.0847718109108477 |
| AGAATTA CTCTA | 928.373028312017 | 0.0965350643952111 |
| CAGAAAGTCATA  | 928.382152477319 | 0.071213294247763  |
| GGAGGAGAGTCA  | 928.393343539336 | 0.0857643222095543 |

|              |                  |                    |
|--------------|------------------|--------------------|
| CTGACTGGGTCC | 928.395868904015 | 0.121137520409094  |
| GACTCAAATACC | 928.397299344638 | 0.0918236020629129 |
| GTATAACGTAC  | 928.406626013174 | 0.0867919552766755 |
| ATGCCTCATCGA | 928.433849582992 | 0.0707431879433968 |
| GGTCATCATTGA | 928.43402323725  | 0.0768295406115014 |
| AACGATTGACTA | 928.436129358108 | 0.102870500957182  |
| TGACAGTGAGCA | 928.449406973212 | 0.0867926469937111 |
| GTATGTAGTGAC | 928.449417714582 | 0.130022602959996  |
| TGAGTATGATCA | 928.45002577832  | 0.0933496187865083 |
| CCGAGTGACCGA | 928.460432695645 | 0.0678260009305269 |
| CATTCCATGACA | 928.471316969366 | 0.0808742022034071 |
| GGTACTATGACC | 928.479405786697 | 0.0840777929806754 |
| ATTACTAAGCGG | 928.493997001696 | 0.110046536904776  |
| AATGACCGGTCA | 928.502424341957 | 0.0686680928183426 |
| GTAGTGACCGCA | 928.50364039206  | 0.0855029107971048 |
| AGCAACTGTGAC | 928.508421759026 | 0.144242284201224  |
| GTGAGTCTCACA | 928.50886968399  | 0.0986008223764966 |
| CCTCGTCACTCA | 928.513627509344 | 0.101216183860749  |
| ATGAGTGTTGAG | 928.521874955864 | 0.120560249784235  |
| GTCACCTGTAAC | 928.542960275872 | 0.0854010200135952 |
| CGTGGTCAAAA  | 928.553944116814 | 0.0872497042500236 |
| GGATCGGGTGAC | 928.574511908645 | 0.0853199870997538 |
| AGTCAGATTTTA | 928.575715999071 | 0.0889402450344631 |
| CTGACAGATCGA | 928.590155862197 | 0.0936743040934085 |
| ACTCATTGGGTG | 928.615998637723 | 0.105104555916286  |
| TATGAGTTAGAA | 928.616724541638 | 0.1181639502735    |
| CCGACCGTGTC  | 928.627711209334 | 0.0987598390280356 |
| GTAAGACTGATA | 928.628051120154 | 0.0827230103776124 |
| CCAGCGCTCAC  | 928.646431494043 | 0.0842104129597425 |
| AGTTCGTACCGG | 928.658057814872 | 0.123672231192246  |
| GTCACCCGGAC  | 928.688458703661 | 0.0629103252357075 |
| CTCTCGGTATC  | 928.693552263312 | 0.0701305302363057 |
| CAATGTCATGCA | 928.69358076825  | 0.0907607672518596 |
| AATGATGTGGAC | 928.699482277988 | 0.118341883831042  |
| AAATGTCACATA | 928.70091667838  | 0.071192118318112  |
| CTCGTTGTGACA | 928.715952930597 | 0.110761471697767  |
| GATAGGGTGACA | 928.726163703871 | 0.106126353308424  |
| AAGGATTAGTCT | 928.736079136439 | 0.103514665315518  |
| GGTGACATGGTA | 928.745422801699 | 0.075460853109788  |
| ACCGTGATTCAA | 928.748080154421 | 0.112435549062475  |
| CGGTGAATAATA | 928.748371238559 | 0.0679540027252268 |
| ATTAGTCTTAGA | 928.753236642981 | 0.0987350709722786 |
| GCGTCCGACTCA | 928.75440161642  | 0.12515873997975   |
| CTGACTCGGCC  | 928.765270922068 | 0.122081588816606  |
| AACTAAATATGA | 928.765907343303 | 0.147876951075026  |
| AGCTGATGACGG | 928.799320198933 | 0.0550203109140503 |
| ACTCATCATCTC | 928.812542656481 | 0.0674855202589173 |
| CGCATGACACCC | 928.838105690757 | 0.0876021574877294 |
| AGTGACGATACA | 928.839727518303 | 0.0959035406086266 |
| ACAATTAAGTAC | 928.843296223023 | 0.0962539280031469 |
| GTCTCCAAGTCA | 928.846156757027 | 0.0896782661481248 |
| ACCCGTGTACCC | 928.847062653203 | 0.0999167102548593 |
| AGGTAATGACAA | 928.849093737863 | 0.108430005010148  |
| TTAATGACCTAA | 928.849581135824 | 0.0706020671514716 |

|               |                  |                    |
|---------------|------------------|--------------------|
| AGCAGGAGTGAC  | 928.853178388052 | 0.106512685127182  |
| GATTTGGGTGAC  | 928.854670824435 | 0.0808735744448143 |
| CGGACTAACTCA  | 928.864812650941 | 0.143280256074113  |
| CCTTCTGACAAA  | 928.875582697524 | 0.101072392947155  |
| TGACGTTTCAAA  | 928.880457940222 | 0.107910106422723  |
| AAGAGTGACCAC  | 928.888454714721 | 0.127433458228791  |
| ACTATGACCTAC  | 928.906288061486 | 0.09962007084453   |
| TACGACCTGTCA  | 928.927581203709 | 0.121539763221836  |
| GTCGAATCACAC  | 928.928812702288 | 0.0982961508019915 |
| TATTACTGACCA  | 928.939544911967 | 0.105716449931271  |
| TCTTGCACGTCA  | 928.939864391624 | 0.135931090365984  |
| AAGTCATGGTCG  | 928.955761029073 | 0.1363393296824    |
| CTTGAGTGACCA  | 928.984129140388 | 0.0678629215453715 |
| AGTCAGGCTATC  | 929.020109229282 | 0.0804090949210142 |
| ACTGATGACCTG  | 929.02155961266  | 0.105546285983399  |
| AGGACAATGACG  | 929.02564877567  | 0.0868454376829238 |
| TACATCGTGTCA  | 929.037482662633 | 0.14414961506876   |
| AGAGGGAGTCAA  | 929.086507180435 | 0.0756413006578935 |
| AACGGTGACATT  | 929.102546108634 | 0.0931872574771419 |
| GTATGCCGTAC   | 929.116830870186 | 0.085551686693324  |
| GACTCAGAAATGC | 929.143946273159 | 0.098755658697001  |
| AAGTGACAGTCA  | 929.150374568461 | 0.0793123562321573 |
| ATCTTGAATCAC  | 929.155183568158 | 0.0749731543365887 |
| GGACTAATCCAA  | 929.16339259429  | 0.0972985945591641 |
| GTGACAACCTCA  | 929.178307535614 | 0.109822514213502  |
| AATGATGACCTA  | 929.179464720652 | 0.103212241767873  |
| CTGTCACCACGA  | 929.182783273061 | 0.090826011444078  |
| ACTCATTATTCA  | 929.18305764386  | 0.11353044500385   |
| CTACGATTACTC  | 929.207830902455 | 0.0950295531149635 |
| AGTCAGTCGTTA  | 929.208683207341 | 0.102971007926218  |
| GGTGTGACCTAC  | 929.214413763859 | 0.129468830551139  |
| ACTCATTTACTA  | 929.221319244751 | 0.0750250042612099 |
| AAGGCTGTGACA  | 929.233756623837 | 0.0780106321473611 |
| GGGTCATAGGTA  | 929.25141564242  | 0.109649199785618  |
| CGGCGATGACGC  | 929.259854603629 | 0.087383677720356  |
| ACCGTGACACTG  | 929.260162751201 | 0.0736356184392376 |
| ATGACAGCGGAC  | 929.294923693981 | 0.0900817183865917 |
| GAGTGATGTGGC  | 929.297086345357 | 0.090179460532669  |
| AAGTCACGAGTG  | 929.306074287579 | 0.104637721622261  |
| GAGAATTAGTAC  | 929.307232074533 | 0.12088814434761   |
| AACCAATTACTC  | 929.317170364201 | 0.0999695061489264 |
| ATCAAGAGTGAC  | 929.319059479504 | 0.0821559409652786 |
| CATACTATTAC   | 929.327248237682 | 0.0925741042662203 |
| GATAAATGACCA  | 929.334069393153 | 0.080888992722474  |
| CTGTCATTGCAA  | 929.341867107976 | 0.0983965998120373 |
| GCTGATGTGACA  | 929.343756689251 | 0.125139728691017  |
| ACTCAGTCTGAC  | 929.353524575202 | 0.0514622324177662 |
| TGTCATTTGCAA  | 929.356775889449 | 0.129078134556909  |
| CAGAACTGACAC  | 929.368305004674 | 0.144380452228844  |
| ATGACAGGGAAG  | 929.387117487715 | 0.0976154648628609 |
| TCGAGGTAGTCA  | 929.389650150141 | 0.0758732472322213 |
| CCCTGGCAGTCA  | 929.39185096944  | 0.117826700682506  |
| GATGAGCCAAAC  | 929.392550044486 | 0.0837791571817147 |
| GAGATAGTGTCA  | 929.393727482257 | 0.101478492767165  |

|               |                  |                    |
|---------------|------------------|--------------------|
| TCGAATGTGACA  | 929.395664591407 | 0.0586255511707713 |
| CATTGGTGACCC  | 929.398536247899 | 0.112094403681558  |
| AGTGTCCGTGAC  | 929.407850600464 | 0.0886429045529094 |
| ATTGCGTGACGA  | 929.416270743233 | 0.0793629970539459 |
| CGCCTTTGTGAC  | 929.423749614504 | 0.131889314252883  |
| GGATTGTGTGAC  | 929.43380983323  | 0.126970086923995  |
| ATTGTCACCGGC  | 929.436045058293 | 0.0689001320569758 |
| ACTCATCACGCA  | 929.438257867673 | 0.107187626079029  |
| GGGTCATCAGAA  | 929.439926794367 | 0.0587533807477867 |
| AACCACCATGAC  | 929.446281242339 | 0.0847537271991825 |
| AAGATGTGTAAC  | 929.447211668931 | 0.0722282590986847 |
| GCTGTATACTCA  | 929.454014322388 | 0.137038465944565  |
| GACCACATGTCA  | 929.459237717398 | 0.148352155730685  |
| GCCGAATGACCA  | 929.461238140286 | 0.0668164417037891 |
| ACACTGATGACC  | 929.475111930903 | 0.122763511616753  |
| CACTCCTGTGAC  | 929.47938141863  | 0.0825552227199398 |
| TCGTCACCATCA  | 929.508127146258 | 0.0921625510697594 |
| CGTCATCAACCC  | 929.510925203309 | 0.0668646510836495 |
| GCCGATGCGTAA  | 929.515836968811 | 0.106186147688284  |
| ACTTTGACGTAT  | 929.518819106329 | 0.0733551191788928 |
| CATGACATTGCA  | 929.539797338959 | 0.0770414961067817 |
| CCCTTCTAGTCA  | 929.561704290133 | 0.0764799142209768 |
| CCAGACCATGAC  | 929.584533399028 | 0.0898434600213978 |
| CGGCACAAGTCA  | 929.585527821007 | 0.130825864410308  |
| ATCGTCATGGTA  | 929.592760006416 | 0.093943867144947  |
| TATGACATTCCA  | 929.595944646398 | 0.0833989895836776 |
| CACACCGACTCA  | 929.613786929437 | 0.143078474993402  |
| AAGTCTGACACG  | 929.615268828376 | 0.112555691470648  |
| AACACTGACGTG  | 929.626268193542 | 0.084374613532161  |
| AGTCAGGCAAAAC | 929.629200053248 | 0.134722138672464  |
| GTCGTATTATGA  | 929.631761777588 | 0.139111710240495  |
| GTATCCAGTCAA  | 929.635394192785 | 0.0933362401186771 |
| AGGTCTCGTCAC  | 929.639636010873 | 0.142005936196812  |
| GATGATCTCATA  | 929.644957967949 | 0.114518028280599  |
| ATGACGACTTGG  | 929.655383883439 | 0.126510957134311  |
| ACGTATGAGTTA  | 929.65971402797  | 0.0897102679812938 |
| GCCCCTTGTGAC  | 929.660413649477 | 0.100265880307554  |
| GATGATACACAA  | 929.661114125807 | 0.0780740686784717 |
| GTCTGGGAGTCA  | 929.663445370317 | 0.119064642246808  |
| GTCACGACCGAC  | 929.692587389114 | 0.123861882535802  |
| ACTTATTACTCT  | 929.695984609113 | 0.0422528637862153 |
| CTGACTAGGCAC  | 929.706534312733 | 0.0998627916603654 |
| ACAGCTGTATGA  | 929.729308087518 | 0.0937282217790453 |
| ACCCTGTGTGAC  | 929.760270128956 | 0.0869062066423728 |
| CGACCATGACGC  | 929.775738660623 | 0.117820077197307  |
| GTGAGTCCGAAA  | 929.785909215689 | 0.0837165088182781 |
| AAGACTAACTCG  | 929.789834872569 | 0.0793699665833748 |
| AAAACGCGTGAC  | 929.795788612033 | 0.103334958425563  |
| ATTACTCTACGA  | 929.824202104814 | 0.0874819858236517 |
| CATCGATCTGAC  | 929.833934408175 | 0.0742271449009718 |
| AGTCAGTGACCC  | 929.842371507776 | 0.112363238934651  |
| ACTCATTCAAGG  | 929.845882620256 | 0.0732161841053982 |
| CCGTCATTGGAG  | 929.869035165332 | 0.100034505431188  |
| GGACGGTGACGA  | 929.86914334923  | 0.111291535595265  |



|              |                  |                    |
|--------------|------------------|--------------------|
| CCGTCATCTCCG | 929.8751172186   | 0.105930497626981  |
| CTGTGAATAATC | 929.889772559883 | 0.0727834471793834 |
| AGTATGACCGGG | 929.894208267314 | 0.106393160018313  |
| GTATGGTGACCA | 929.897149440747 | 0.103959851338437  |
| GCCTGACTCGCA | 929.90114846761  | 0.121275381256408  |
| GATTAAGTGTCA | 929.920114826621 | 0.090666606109541  |
| GTGACATTAACA | 929.921953143575 | 0.126811360395925  |
| ATGACGGCTTTC | 929.945680604696 | 0.12046370157895   |
| TGAGTTATATAA | 929.947648265233 | 0.103144331431764  |
| CCGTATCGGTCA | 929.950213301568 | 0.137954841610404  |
| AGTATGTGTAAC | 929.952231286508 | 0.0878378329115386 |
| CAATCGACTCAG | 929.961504536217 | 0.0704636288642772 |
| GTACCACTCATA | 929.972473491891 | 0.0858895179796257 |
| ACGTAATGACCC | 929.975781826684 | 0.100050344861093  |
| GCCCCATGACGA | 929.989835601989 | 0.074128025777088  |
| AGTCAAATGACC | 930.006656129605 | 0.123450293589982  |
| TGACCCTAGTCA | 930.06872304314  | 0.102843544187232  |
| AGTCCGGTGACA | 930.077437069443 | 0.0948369336056662 |
| GTCATGGAGAAA | 930.099074993657 | 0.0808950206176935 |
| CCGTCATCCCGA | 930.101052306313 | 0.106462428172249  |
| GTCACTGATAAC | 930.104560865701 | 0.132755020670003  |
| CCTCGGGTGACA | 930.113341209415 | 0.0716706742816352 |
| AGTTCTGTGAGA | 930.114059468987 | 0.094846460221593  |
| CTGTGACCGAAA | 930.116040294552 | 0.0966045142521057 |
| ATACACGTGTTT | 930.12044026288  | 0.106815743555953  |
| CCTCTCCAGTCA | 930.128936521367 | 0.0992525983441581 |
| AACCTGTCACTC | 930.132268861153 | 0.0945648172551378 |
| CGTCATGTTGGA | 930.150650170197 | 0.116860713382239  |
| ATCGTCACCTGA | 930.164934370489 | 0.0939703514985186 |
| ACGTCACCAGGC | 930.175269799943 | 0.0717388150124814 |
| AGTAGATGACGG | 930.17568793822  | 0.0784687740902422 |
| CTTTGTGGGTCA | 930.17785753255  | 0.0938527921590413 |
| TCAGGCTCGTCA | 930.186776055788 | 0.0742135592232814 |
| CAACCAGTCAAA | 930.192957502319 | 0.104571395249778  |
| AGTTTTGTGACG | 930.208135143093 | 0.0977333501096718 |
| ACTCATCACGAG | 930.208247868362 | 0.120940139531994  |
| ACTCATTTTACT | 930.221283144917 | 0.0903269033997312 |
| CCGAACTGATGA | 930.240067977129 | 0.0868548896155072 |
| CAGGACTGACTG | 930.244477285858 | 0.0941310731480533 |
| AGAAGGTGACGA | 930.244953088602 | 0.0808538838893853 |
| GGTATCGTCAGA | 930.247673547813 | 0.0999001382906681 |
| CCTCGATTACTC | 930.249495024299 | 0.0911536517917068 |
| GGTGACGAGGAC | 930.25265417044  | 0.119943762928839  |
| ATTACTGAATTA | 930.28029620644  | 0.0942000849227039 |
| GGTCATTCTGTA | 930.287067306125 | 0.0938019058194813 |
| ATCCTTGACGCA | 930.290720412347 | 0.0919423925448596 |
| GTAAGTGTGAGA | 930.293372295647 | 0.0971862783355837 |
| CTCTGTGTCAAA | 930.295483265552 | 0.0956308885367261 |
| TACTAATAGTGA | 930.305330583283 | 0.0884990630211136 |
| GAGTGTGTGAC  | 930.310283702446 | 0.098596279094604  |
| AGAGTTGTGACG | 930.313013871193 | 0.0786883008613638 |
| ACCGTGACACGA | 930.321777591283 | 0.0721831467988448 |
| CCCGATATGACC | 930.327711924473 | 0.0895238717150028 |
| ACTCATGACGAC | 930.356503816921 | 0.0445990787926368 |

|              |                  |                    |
|--------------|------------------|--------------------|
| AGGTCATCAGTC | 930.360845308152 | 0.0921080056358385 |
| TGACTAGAGCAA | 930.365420566418 | 0.10484279200982   |
| AGGTTACACATA | 930.375193939416 | 0.0663533885694582 |
| AGACATTAATA  | 930.379145613864 | 0.0897296946069942 |
| AGCTCATGTGAC | 930.384882751104 | 0.132297260864039  |
| CATTGTCTGTCA | 930.38624792599  | 0.0738717335708463 |
| GAGTGGCTCACA | 930.400417000952 | 0.082206956331837  |
| GGGCTGTCTGAC | 930.417061573529 | 0.101212872496941  |
| AGTGACAGACCA | 930.417133598062 | 0.0744261816032507 |
| ATGAATCAAGCG | 930.423015187569 | 0.0985971881293838 |
| TACTATGAGACA | 930.423813723377 | 0.146433231239068  |
| ACTCATACGACC | 930.426329891337 | 0.0780996360865709 |
| ACTCATATGCGA | 930.426974835    | 0.103281062452848  |
| CGTCACGACTGA | 930.4293479907   | 0.117781625294338  |
| ACTCATATTTCC | 930.446776255071 | 0.069048123348494  |
| AGGAATATGACC | 930.455751302352 | 0.0971842919874868 |
| TCCCCGGTGACA | 930.474311918654 | 0.126891827367158  |
| ACGTTGTACCCC | 930.48638847441  | 0.0742732577655617 |
| AAGTGTCAGTAT | 930.487380665699 | 0.0736693528049125 |
| GTCACGGTAGAC | 930.491872434358 | 0.124930764312453  |
| CAGGTGACGATA | 930.502348816745 | 0.0823824374676052 |
| TGACCAAAACAA | 930.505192353031 | 0.0687083227536872 |
| GCAGCGTACGCG | 930.508415975869 | 0.0905003322652447 |
| CTGACGCGTCAA | 930.51383169286  | 0.0747308051794924 |
| GGGAGATGACCA | 930.515083282447 | 0.0764065445720858 |
| ATGAGTTACGTG | 930.526494971794 | 0.0998345997551597 |
| AATGAAGTCACA | 930.540880185752 | 0.0692797005669135 |
| AGTGAGTATATA | 930.543218919837 | 0.0881821099825416 |
| ATGACAGGGTAG | 930.556211878788 | 0.0733375061080163 |
| ACTCATACCAAA | 930.558939491771 | 0.0953401896115726 |
| TGAGTGACCCAA | 930.560479372263 | 0.139220177058903  |
| CGGACGACTCAG | 930.577076436377 | 0.0875295491475261 |
| AGGAGTGACAGA | 930.581021239373 | 0.091822047375486  |
| ACTCATCTTGAT | 930.587252692637 | 0.114107359749959  |
| GATTTGGTCAGC | 930.591566364922 | 0.128479954686601  |
| TAATTAAGTACA | 930.601293675091 | 0.118909458710443  |
| ATGCACTCGTCA | 930.615493551899 | 0.0889630543090901 |
| ATGACAGCCTAA | 930.621132996063 | 0.0725131247395937 |
| AATATGCCTCAT | 930.636226769284 | 0.0747782549395057 |
| TAATCACCGTCA | 930.651389155391 | 0.0886078892470872 |
| GATGCAGGTGAC | 930.664510350017 | 0.0727778525373287 |
| TCATTAGGGTCA | 930.675457492422 | 0.0810666406928648 |
| ACATGTGACGAG | 930.679603675328 | 0.118709455581769  |
| TACCTCGTCACA | 930.683809318952 | 0.0971025848114012 |
| ACGTTTGTGACG | 930.705206032078 | 0.0959422230141712 |
| CAACTACCGTGA | 930.724988511644 | 0.0828231824328942 |
| ATACCATCGTCA | 930.727126624041 | 0.140900421305322  |
| AGTCAGCAGTAG | 930.735669699813 | 0.0901174970188688 |
| ATGTCACCACCA | 930.735966559095 | 0.0693063467766032 |
| CCCAACTTATGA | 930.753415929522 | 0.0738973630953379 |
| ACATTGACACAA | 930.771027498237 | 0.108499434095603  |
| CAGTCAACCACG | 930.775775615966 | 0.0962833729866754 |
| ACATGACAGTGC | 930.798202553447 | 0.0908479849953182 |
| CACCGACTCAGC | 930.810054235908 | 0.0868349957767093 |

|               |                  |                    |
|---------------|------------------|--------------------|
| ACTCTCCAGTCA  | 930.824963544901 | 0.120521848954137  |
| TAAATCTTGTC   | 930.828858264435 | 0.115971495574948  |
| CGTCACTAGAAA  | 930.83732159525  | 0.0933111061966908 |
| AGTTTGGGTGAC  | 930.843386254608 | 0.136954637369671  |
| ACTTGCTACTAC  | 930.843706748687 | 0.0966212559323893 |
| AAGGCGTCACAT  | 930.844734492684 | 0.106945878364249  |
| TCGTGAGTCTCA  | 930.890570307502 | 0.111307778325124  |
| GTC AATTGACAC | 930.899930411177 | 0.08744862777098   |
| CAGTCTATGACC  | 930.908672632984 | 0.0757722761286359 |
| ACGTGACCTGTC  | 930.910561242646 | 0.0893546148559585 |
| AAGTCACGGTCTG | 930.91176317961  | 0.10238661359744   |
| CTATGTTTATGA  | 930.925578749844 | 0.142372570245925  |
| AGAGACGTGTCA  | 930.928191861057 | 0.0899502754464562 |
| GTC ACTACTGAC | 930.931062970872 | 0.126110353364816  |
| GAGTAATCGACA  | 930.943766279302 | 0.0796355877708238 |
| AAGAGTAAACCT  | 931.009564706448 | 0.0643352011197638 |
| ACTACTCATCTG  | 931.011846206234 | 0.0726764941492409 |
| CTTCTTGTCATC  | 931.023828305144 | 0.101731794953073  |
| CCTTAACATGAC  | 931.024821216527 | 0.101516109663495  |
| CTTCCGTGTAC   | 931.029029352853 | 0.0764419720313455 |
| CTTCTGTACTCA  | 931.03012053328  | 0.0724730298146686 |
| ACCTAATGACAG  | 931.03119042677  | 0.093329056657591  |
| TAGCACTGACTA  | 931.031370502551 | 0.127782204462741  |
| GCGTCACGTGAA  | 931.041128249834 | 0.0756652984039717 |
| ACACTTGACACA  | 931.072037787068 | 0.118151859563476  |
| CTAGTATGTCAC  | 931.084642049371 | 0.0917330331948391 |
| GACTCGTAATAC  | 931.087375168615 | 0.0861602206207579 |
| AATGGATAGTCA  | 931.103412356373 | 0.107063379312188  |
| TAATTAATCACA  | 931.146422181831 | 0.0783663097348854 |
| AACGCATGACAG  | 931.15791273974  | 0.0922200326831897 |
| TATCACTCGTCA  | 931.163137929664 | 0.09248726280234   |
| CGTGATACATGAC | 931.164523929785 | 0.146583856241054  |
| CTCAGATAATGA  | 931.166619074128 | 0.0765609592145694 |
| AGATGAGGCATA  | 931.168161490234 | 0.0725337847529058 |
| TCACTCTTATGA  | 931.168578563009 | 0.0653124361999878 |
| TAACAGTCAAAA  | 931.169397484402 | 0.0790850707670897 |
| GCTATGTGACAA  | 931.183384608206 | 0.0677700126330707 |
| ATGACCCGTCTC  | 931.195595206646 | 0.0703899998762576 |
| CTGACAGTGACA  | 931.209510262834 | 0.0883057912907413 |
| AGAGTAATTGGA  | 931.2099085369   | 0.0765200697038573 |
| CACGCACGTAC   | 931.23058208174  | 0.152894704410548  |
| AAATGAGCTGTC  | 931.238100302406 | 0.0757759176933584 |
| GAGTCAAGTGGA  | 931.248920988232 | 0.0938841068174932 |
| ATAAGACACATA  | 931.252058243638 | 0.106439674911587  |
| AGTCAGAACGGG  | 931.254437045529 | 0.0994168243141026 |
| CAAGAATCATCG  | 931.272144728021 | 0.0830277856968156 |
| AATTGTATCACT  | 931.274396056592 | 0.0448081149143664 |
| CCGGATTAGTAC  | 931.278089603834 | 0.0836464640729101 |
| CCTACGATGACC  | 931.289150207289 | 0.0942538302661244 |
| ATGACCAGCTGG  | 931.304085670929 | 0.0913144480315271 |
| AGACTAATAGAT  | 931.308509913953 | 0.100753853366233  |
| CACTTGACGCAC  | 931.313896528376 | 0.133255851283072  |
| CTGAGCAATAAG  | 931.320394997457 | 0.12984090285535   |
| GTTGTGATGTCA  | 931.353610444292 | 0.0779545612542518 |

|               |                  |                    |
|---------------|------------------|--------------------|
| AGGGTCCGTGAC  | 931.354729487364 | 0.098870831883257  |
| AAGAAGATGACC  | 931.398798220809 | 0.0792022833642962 |
| GAATCCCGTGAC  | 931.406070257071 | 0.0973670321866481 |
| CTGACAGATCAG  | 931.415282538187 | 0.0972855356843731 |
| AGTGACATGGCG  | 931.440981704701 | 0.0778666203156144 |
| CTCAAGGTGACA  | 931.444970600934 | 0.0822416176524414 |
| GGCTGAGTAAAA  | 931.454191402372 | 0.0796053087132573 |
| GAGCTGTGTGAC  | 931.457712293335 | 0.0983586782282767 |
| AACCAAAGTGAC  | 931.461967411214 | 0.0874656161002164 |
| CGGGGATGTGAC  | 931.462314765778 | 0.0676275429814256 |
| GGTGATAATGAC  | 931.465083074212 | 0.0993700858007441 |
| AGGTTAGGTGAC  | 931.47332661621  | 0.0990320296758115 |
| AGTTCTCGTGAC  | 931.474721597663 | 0.0870034527722044 |
| CTAGAGCATGAC  | 931.480657778224 | 0.0719061138011911 |
| AGGAATTGTGAC  | 931.485582986022 | 0.0876483381102429 |
| GTCACCTGAGA   | 931.489234707598 | 0.110024824530822  |
| ACTCATATCTTC  | 931.506045203875 | 0.0922524143322643 |
| CAGTCAGGCCAG  | 931.517558535117 | 0.124956010859257  |
| AAATAGTAATCC  | 931.558557117283 | 0.0928651181610153 |
| GAATCACGCACA  | 931.559307340182 | 0.118234402982764  |
| ACTCATATTATC  | 931.575342732645 | 0.0972205224593629 |
| GCTGTGCGTGAC  | 931.594574380066 | 0.0901497464811124 |
| GAGTAATCCTCC  | 931.604932249949 | 0.119416877294881  |
| CTAGTGACATAC  | 931.637608081865 | 0.128424322733156  |
| GCGCTAGGTGAC  | 931.648704137917 | 0.0677698255657904 |
| GAATGACCTCAC  | 931.649676274066 | 0.0719631893245133 |
| CTAAATTACTC   | 931.659340872002 | 0.0711097577995545 |
| ACTCATACACGC  | 931.665113144962 | 0.106534748912511  |
| TTGACGTGTAAA  | 931.670738342823 | 0.091402473885202  |
| GTGTCTCCGTCA  | 931.722227421734 | 0.0694064401216578 |
| AGGTCGTAGTCA  | 931.723653389265 | 0.0914865152366119 |
| ATGACGGCAAGC  | 931.731260548208 | 0.108384847171023  |
| CTGACTGCAACA  | 931.731308648184 | 0.0954953706987922 |
| GTCACCAAACCA  | 931.738556181906 | 0.070970573323212  |
| GAGCCACATCAC  | 931.742272701864 | 0.0868816420757897 |
| ACTCACCGAATG  | 931.743062097718 | 0.0988376162677605 |
| CTGCTCATGACA  | 931.769133981268 | 0.0750836982225258 |
| TGACAGGTAGAA  | 931.773415708774 | 0.106743824718007  |
| AATCCTCGATGA  | 931.784340199376 | 0.0719745375075781 |
| ACCACTTGGTCA  | 931.787564698729 | 0.115092950299319  |
| ATGACGTCCTTC  | 931.794707038099 | 0.113068758171788  |
| AGAGTTGTGACA  | 931.809662106454 | 0.097634640271504  |
| ACTACCATGACG  | 931.859444666087 | 0.102178453965706  |
| ACGATGACCGCG  | 931.869797100439 | 0.0661515038028346 |
| AAGATTACGCAC  | 931.871574489609 | 0.0944725711027222 |
| ACTCATAGAGAA  | 931.873756477801 | 0.108080120864901  |
| ACCCCGTCATTA  | 931.88031690555  | 0.0855721304305905 |
| ACTAAGTATTAC  | 931.884630442427 | 0.108622078291234  |
| GGGTGGTGACGA  | 931.890098071112 | 0.0989041878735753 |
| CGACTGAGTAAAG | 931.898626594009 | 0.133259190902813  |
| AAGTCAGTGACA  | 931.90019103932  | 0.15177121849322   |
| GAACTACTCACC  | 931.908805506147 | 0.110794663602388  |
| GGTGCTCCGTCA  | 931.918872882839 | 0.0818056742292871 |
| CAGCTGCGTCAG  | 931.927007871451 | 0.0819018275021383 |

|               |                  |                    |
|---------------|------------------|--------------------|
| AGGAGTAATGAC  | 931.929415187691 | 0.0737181277874439 |
| GGCTTGCCTCAA  | 931.939867926528 | 0.135773389733447  |
| AGATCACTGTCA  | 931.949871187699 | 0.108465697455521  |
| GTGGCCTGACTA  | 931.969319716921 | 0.07078702554692   |
| ATGACAATCCGC  | 931.971546740041 | 0.103946837419977  |
| ACGCTGGGTAC   | 931.990682206672 | 0.0939446727792221 |
| CATTATTTAGTC  | 931.992096165465 | 0.122806255691625  |
| ACTTTATTAGTC  | 931.996452022758 | 0.10690800355425   |
| GGTCATGCCTCA  | 932.011266966596 | 0.0724153843503109 |
| GCAAAGAGTGAC  | 932.020302254083 | 0.075966613530172  |
| GACTAATTGAGC  | 932.020384315573 | 0.11146736904835   |
| ATATGACGGTAG  | 932.031916451871 | 0.0744182693533358 |
| CGCAGTGCACG   | 932.046614459994 | 0.0971568399047464 |
| GTCATGGCCAC   | 932.052536027565 | 0.10020779129882   |
| GTCATGCTCCA   | 932.06048703708  | 0.0904858938581899 |
| ACTCGGCGTGAC  | 932.062478934254 | 0.104709217537329  |
| AGATGACCTCAC  | 932.069146536327 | 0.0859199124563735 |
| CTAGTAACGTCA  | 932.069833100914 | 0.0697244430614113 |
| CTAAGATGAGCA  | 932.079189336591 | 0.0697173524816961 |
| CGAGAGAGTCAG  | 932.0918481245   | 0.100077185685501  |
| CACATCATGTCA  | 932.10635155339  | 0.149826351957318  |
| CTACGTGACCCA  | 932.118309124574 | 0.0948474970971472 |
| AAGCGTCAGAGG  | 932.121770916751 | 0.0833487915928363 |
| CATGACATTACG  | 932.127061835972 | 0.119772255794229  |
| ACTTCTCGTCAT  | 932.150739162031 | 0.0799587548285286 |
| GTCATGCATAGA  | 932.152623957226 | 0.081342001116348  |
| AGATGAGGTGTC  | 932.159938298176 | 0.0846301607200221 |
| ACAGAAGTGACG  | 932.162746487531 | 0.078101803697186  |
| AGATTGTGACAG  | 932.168540363567 | 0.103375003896335  |
| CCAAGCTGACTA  | 932.175362494287 | 0.105647045481773  |
| AATTATGAGTTA  | 932.183001358657 | 0.106047703963541  |
| ATCATGACGAGG  | 932.184607048775 | 0.0998015857050697 |
| ACTCATAACCTG  | 932.217133664466 | 0.121019714507679  |
| TACTAATAGATA  | 932.218746589753 | 0.0961175678577566 |
| CAGACCTGTAC   | 932.223390866686 | 0.0842963037501685 |
| CTTTCTCCGTCA  | 932.23302973584  | 0.113258870648664  |
| AATAGGGGTGAT  | 932.238901832503 | 0.0755750264356132 |
| GCGTCGGGTGAC  | 932.241155138583 | 0.111071567719406  |
| ATGACCCGACTG  | 932.247598846878 | 0.0930127977154304 |
| ATGTCACCTCTA  | 932.249024924222 | 0.116378953507636  |
| AGTCAGAGAGAA  | 932.271201873588 | 0.0746214394809274 |
| CTGAGTAAACGAC | 932.2791807472   | 0.0776297550271524 |
| CACATGGTATGA  | 932.300759927937 | 0.116284244649045  |
| CAAAATTACGTC  | 932.325186491316 | 0.0913577225990897 |
| AAAGTGATGAGT  | 932.329458558102 | 0.0436780727002015 |
| CTCCTATGTGAC  | 932.358940243618 | 0.0723875488920315 |
| CAATATATCATA  | 932.35989506581  | 0.0784057575079598 |
| TATCTGAGTCGA  | 932.378723277621 | 0.0994429486392463 |
| AACTCAAGTCAT  | 932.387678635405 | 0.106125766914393  |
| ATGTGTAACCTC  | 932.400250893489 | 0.073946077653859  |
| CGATTGACACAG  | 932.400289821673 | 0.0783238724427976 |
| ATCGTCACTATG  | 932.430199064604 | 0.100863278540863  |
| AAGTCACTTGAC  | 932.431606447958 | 0.068136384657344  |
| TGATACATCGCA  | 932.447747032913 | 0.0858592790042638 |

|               |                  |                    |
|---------------|------------------|--------------------|
| TCTATTTGCTCA  | 932.455121701106 | 0.0736498038818472 |
| TGTGAGTAGTAA  | 932.463348694962 | 0.0923521918897936 |
| GTCTGTCATGTA  | 932.476056563468 | 0.096352535413877  |
| ATGGTGACAGCA  | 932.482818218106 | 0.0781577237870625 |
| TAACAGGTGACA  | 932.48403312613  | 0.0695000342206645 |
| CTGTCTCATGAC  | 932.497186394054 | 0.0442730507392674 |
| CGAAGGAGTGAC  | 932.531551880062 | 0.0794067069939533 |
| ACGGTGACAATA  | 932.541251720474 | 0.104442110522756  |
| AACTGATGACCA  | 932.544388455035 | 0.12994480366206   |
| CTTCGTTTGTCA  | 932.544414053968 | 0.0999291361928768 |
| AAGTATGTGACA  | 932.546874751932 | 0.0803294944837752 |
| TCTAGAGTGACA  | 932.585833840627 | 0.0969908003732387 |
| TATTGACTCTCA  | 932.604703597972 | 0.0837631432063515 |
| AGTACTACAAT   | 932.608503400871 | 0.0832093330850918 |
| ACTCTCAGTGAC  | 932.610512066282 | 0.0823699989505199 |
| ACTCATCTCTAA  | 932.614292409671 | 0.0660058252604005 |
| ACCATTCTATGA  | 932.61613712111  | 0.103749473055657  |
| ATTATTCATTGG  | 932.630481411642 | 0.106121970009496  |
| AAGTCACGACTC  | 932.640350998534 | 0.0669644979964106 |
| AGCTACTTGTCA  | 932.646602364649 | 0.0923742863452895 |
| CATAAGTGACGA  | 932.646928360383 | 0.115609806570195  |
| ATCGCGAGTCAG  | 932.665974721692 | 0.0984507308437751 |
| CCGATGTATCAC  | 932.690082083025 | 0.0978437111260592 |
| ACTCGTGGGTCA  | 932.697065213191 | 0.129967435060836  |
| TAGACAGACTCA  | 932.703032442841 | 0.0896974510302683 |
| CGAGTAGTGTC   | 932.706992272446 | 0.0822071847026838 |
| AGGGCAAGTCAT  | 932.721911990618 | 0.114909688522589  |
| AGTGACAGAGTA  | 932.72321123301  | 0.063635177139667  |
| CGCTTCGGTGAC  | 932.728815786605 | 0.0721925659187424 |
| AAGGACTAATCC  | 932.741304290075 | 0.0683452363727005 |
| CGTCACTCCAGA  | 932.747859284745 | 0.100406951724576  |
| AGTCTTGACGCA  | 932.752238340896 | 0.076251690382491  |
| GAGATTAATCAC  | 932.760432647852 | 0.086028931053893  |
| TCCTACCTGTCA  | 932.769008074263 | 0.0682622656725079 |
| CTAAGAATCATA  | 932.769383571768 | 0.080801057909819  |
| GGTTTGACTGAA  | 932.790524211639 | 0.0932326560634655 |
| ATGAGTGGATCC  | 932.804592281478 | 0.122266556267911  |
| GAGTGACAGACC  | 932.811625232275 | 0.0758312489617748 |
| ACGAGTAATAAA  | 932.827512295508 | 0.108437614978186  |
| GGTTATAATGAC  | 932.828501931903 | 0.146611946217938  |
| GTCTGACTCTGA  | 932.83188269665  | 0.0804524461344954 |
| GGTGACATGGAA  | 932.844757975643 | 0.0979690490394557 |
| AACCGTGACACG  | 932.864906006061 | 0.138785263773444  |
| AGTAACATGACC  | 932.873233603519 | 0.141118794057738  |
| ATTGCTGTCTAC  | 932.884729702313 | 0.0932030557246773 |
| TATCCTGAGTAA  | 932.88818231872  | 0.112826016739738  |
| AGCTCTATGACC  | 932.900528013943 | 0.128441701566955  |
| GGGTCAGCTGAC  | 932.901167354408 | 0.129112036512033  |
| ACCAGTGACGCT  | 932.905089941617 | 0.0769672631817844 |
| ATATTACTGACA  | 932.913728371184 | 0.0963186269633887 |
| ATGACGGCGATA  | 932.91937572757  | 0.146898609630364  |
| GTAGTGTGACAG  | 932.927145539601 | 0.105917058989275  |
| CAGTGAGTCCAA  | 932.945173092704 | 0.0687052234200167 |
| ACAACCTCATCGA | 932.959966145614 | 0.0713023549139826 |

|              |                  |                    |
|--------------|------------------|--------------------|
| AGCTAACTCATA | 932.985379844118 | 0.0940448221695472 |
| TCGATGACCGCA | 933.004845439542 | 0.0829539035359298 |
| ACCTGTCACTGG | 933.006920586159 | 0.0991370590066612 |
| AGAGTCGCACA  | 933.007586841297 | 0.0808883232039062 |
| AGTCAGCTATAG | 933.023090745279 | 0.108557563395278  |
| ATGACCCCTAGA | 933.026915953996 | 0.0801611041748519 |
| GTCACTCCCGAA | 933.052112932608 | 0.0637982966489455 |
| ATCACGTCACGC | 933.062526346584 | 0.0869134231813963 |
| AGGGTCATTGAC | 933.064810815592 | 0.0985320608359175 |
| ATCGGTTGTGAT | 933.095214028301 | 0.0714629196798809 |
| TCAGAGTTGACA | 933.099059252626 | 0.0670671951021049 |
| CGTGATGACAA  | 933.11717113492  | 0.100799658194232  |
| CTTACTCAGCGA | 933.121086816113 | 0.090963062405028  |
| GTCGAAGCGTCA | 933.124389805644 | 0.0965734200273672 |
| ACTCATAGGGGC | 933.129915665565 | 0.0809254594945182 |
| ATGGCCAAGTCA | 933.132606471521 | 0.120344446090747  |
| GTCACATCTAGA | 933.140990235263 | 0.0798378733601503 |
| GCCTGACTGTCA | 933.173304940374 | 0.0728309808402243 |
| ACTCATTTATAA | 933.211037135928 | 0.129295301006252  |
| GACTCACGAGTA | 933.236756539131 | 0.073237379246237  |
| GAGGTACATGAC | 933.264111411545 | 0.0836958601000184 |
| CTACGGAGTGAC | 933.264656732913 | 0.0819199424236909 |
| AGGTATCGTGAC | 933.267253709963 | 0.104538176795106  |
| CTGTCACAGATC | 933.270972521728 | 0.0810882115340749 |
| CCTGATAGTGAC | 933.294461908582 | 0.09919661220494   |
| GATGGGAGTCAA | 933.300798244873 | 0.0736385615745794 |
| AGTGTCAGAGAC | 933.304141268343 | 0.0701516189866521 |
| ACCAGTCAGGGG | 933.30679983276  | 0.119819365751573  |
| GAGTAATCGATA | 933.324864142291 | 0.0822467742816346 |
| AGCGAGTCAGGC | 933.336518620775 | 0.0887028673676729 |
| GCAATCTCGTCA | 933.342694234044 | 0.134959316963815  |
| ATCTAGCATGAC | 933.394124282897 | 0.101392936737387  |
| GGGAAATGACAA | 933.415777705776 | 0.0810580778636139 |
| AACCAATGACAT | 933.416124914579 | 0.0778997405049641 |
| CACTTACTCAGC | 933.417474216049 | 0.101529604918241  |
| ATGACGTTGGAA | 933.417563148574 | 0.0764571807746822 |
| GAAGGGAGTCAA | 933.426144120983 | 0.0907549603456612 |
| CCGAGTGACAGC | 933.453380669706 | 0.144076695774233  |
| GACTCAGTTCTA | 933.456090872199 | 0.0680595480469843 |
| AACATCGTCACT | 933.458049651876 | 0.0884910589684118 |
| AAGGCAATGACA | 933.511086233789 | 0.0919409556212897 |
| CGAGTCAAACAA | 933.524753946434 | 0.0796025857138694 |
| GTGACAAGTAGA | 933.529714452814 | 0.0645186504170908 |
| ACTACATGAGTA | 933.529829513252 | 0.118467190761236  |
| GCCGACTTGTC  | 933.533624472564 | 0.0814370181974761 |
| CCTTTATGACCC | 933.53755852069  | 0.100427617184865  |
| GTCACAGGGTTA | 933.538131217391 | 0.10389260834919   |
| GGTTTTGTCAGA | 933.540561748526 | 0.071498884418105  |
| ACGCTTTGACTG | 933.542219651315 | 0.147086819960009  |
| CGTACCCGGTGC | 933.542617783892 | 0.044262664050343  |
| AGATGATTCGAT | 933.545737885694 | 0.0681511010952022 |
| GAGAATGACCGA | 933.547127320773 | 0.124068876053394  |
| CAGGCCCGCTCA | 933.563765990819 | 0.145316178694269  |
| GACATAGCGTCA | 933.564834794731 | 0.0764382808251128 |

|               |                  |                    |
|---------------|------------------|--------------------|
| AGGAGATGAGTA  | 933.576612104397 | 0.0665911263335883 |
| GGCACGTA CTCA | 933.585312949085 | 0.0976468937271781 |
| ATATGATTACGC  | 933.585501896519 | 0.0816338559480582 |
| CAGCTGTACACAG | 933.594018262155 | 0.12980945928978   |
| AACTAGTGTGAC  | 933.609609847986 | 0.0953914385874727 |
| GAGATGTGACCA  | 933.647021329834 | 0.0825740463836819 |
| CATGACGGTATC  | 933.658701020817 | 0.109331588839697  |
| GATCGGGTCATC  | 933.679732898723 | 0.097415041405141  |
| CACATAGTGACA  | 933.700555466859 | 0.096804009854909  |
| TGTCATGTGGAA  | 933.700964272383 | 0.0760163125992037 |
| CATGAGTGAGTA  | 933.702801927199 | 0.0802195159811326 |
| ATGAAATTGTCA  | 933.732155324157 | 0.131792913956082  |
| CAGGTATGTCAC  | 933.740299354284 | 0.103581273702242  |
| ATGCAAGTCACC  | 933.74096336254  | 0.150922178231809  |
| ACATGACAGACA  | 933.742449410188 | 0.0962543280904803 |
| ACGCTCCGTACAC | 933.765242398659 | 0.117584860201998  |
| CCAGGACTATGA  | 933.780313450613 | 0.0942796472359229 |
| GGTCATCGAGTA  | 933.782814741394 | 0.0788438312061813 |
| AAGGCTCACACA  | 933.786351555678 | 0.0864682767068489 |
| GGTGACGGTATA  | 933.790497241664 | 0.0875118396058359 |
| GTGTGGGTGAGA  | 933.818472124006 | 0.0636756193318674 |
| AGAACCTGTGAC  | 933.829104653983 | 0.101853522773824  |
| CTTACATGTGAC  | 933.829928911301 | 0.0702158608994138 |
| GCAGGAGGTGAC  | 933.833328932482 | 0.104061823824158  |
| ACGCATGAGTGA  | 933.841529782182 | 0.0895339094134635 |
| CGCTATCGTCAC  | 933.842668015178 | 0.0942731659704713 |
| ATGGCTCGTGAC  | 933.853688952657 | 0.109028687909232  |
| AGGGTGTGATGA  | 933.861571899951 | 0.0676061320594054 |
| GAATCAGTAACA  | 933.86330221608  | 0.0718869773096815 |
| AAATGATCAGTC  | 933.914258387202 | 0.0627191723172843 |
| TGATGATACACA  | 933.926998598692 | 0.0920253630782089 |
| AAGACTAACCAAC | 933.934444631077 | 0.101748701699357  |
| GCCTTGTGACAA  | 933.936925661657 | 0.0925245997289647 |
| TACACCATGACA  | 933.937585018765 | 0.0647397943709862 |
| CACGAGTCAAAC  | 933.956406508389 | 0.0725606474199354 |
| CCTCTTGCTCAC  | 933.989050475826 | 0.0829587771151057 |
| GTCACCATCAAC  | 933.997794268062 | 0.0747013289464441 |
| GCCGGTTCTGAC  | 934.008598374252 | 0.114849130369959  |
| GGACTGTGACCC  | 934.019600074127 | 0.0795220919627489 |
| CTCTGATCTGAC  | 934.019771671536 | 0.127009569199593  |
| AATGTGTAACAT  | 934.051750436182 | 0.0931700311406788 |
| ACGGTGCCTAAT  | 934.059861468787 | 0.109278287587458  |
| ATTGCTAATAGA  | 934.060732888812 | 0.0899544522976636 |
| GATGACAGTCCA  | 934.08387535298  | 0.108641747832509  |
| GCGGCGAGTCAA  | 934.087729304574 | 0.0966731234795929 |
| AGGATGACCGAG  | 934.093434668541 | 0.103544291695667  |
| AACGTCACCTCT  | 934.093616407376 | 0.0874805159429347 |
| AGGGCCAATGAC  | 934.093803167334 | 0.072875745175704  |
| GGGATTACTCGA  | 934.135873336317 | 0.10695558767313   |
| ACTTATACTCAC  | 934.154814343939 | 0.0889581376959921 |
| ATGACAGGGAGG  | 934.166105457416 | 0.0839872669228964 |
| ACGAAAATGAGT  | 934.176915192506 | 0.0776204837821863 |
| ATTACTAAGAAG  | 934.179845148774 | 0.0927051079492796 |
| AAGACGGGTCAT  | 934.180972037322 | 0.0683535134262759 |



|              |                  |                    |
|--------------|------------------|--------------------|
| AGTCAACATCTA | 934.18252095145  | 0.111306801439779  |
| ATGTATCACCCA | 934.23295993978  | 0.0873732011710256 |
| GTCATTAATAGA | 934.261712187518 | 0.0536536240931272 |
| CCCACTCGTGAC | 934.269211313803 | 0.0915926626408768 |
| GAGGGGTGTGAC | 934.277717749996 | 0.0830836260835206 |
| GATTATGTGACA | 934.287536659545 | 0.0668507845467205 |
| GATCGACTCAAA | 934.295131858174 | 0.0903176161103649 |
| GACCGTAGTGAC | 934.313148137094 | 0.0659135333014206 |
| GTCATGCTCTCA | 934.318570387126 | 0.0952282386157746 |
| AGGGTAATGACA | 934.346851767306 | 0.0738906843221358 |
| AATGCTTCGTCA | 934.35560042152  | 0.0885123717872139 |
| AACTCACTGACT | 934.357761647991 | 0.0503164892216639 |
| GACTCAGTCTTA | 934.385386085165 | 0.0680749099794956 |
| CAGACGGTGACG | 934.391785451433 | 0.120386988730501  |
| GAACGGACTCAC | 934.398556815022 | 0.117496726342031  |
| GACGTCACCTTA | 934.415745835083 | 0.0784175791609492 |
| ACCGGCGTGTCA | 934.426584834368 | 0.121445568832199  |
| AGATAACATGAC | 934.435820793821 | 0.0656011032359582 |
| TCTATGACCGCA | 934.446497628975 | 0.0839891242234461 |
| GTCACGACTCAA | 934.448044692013 | 0.0824095954620455 |
| AACCCGTACCA  | 934.452307214268 | 0.0619621741140051 |
| GAAAGAATCATA | 934.456844100467 | 0.135665316011103  |
| ATTCATGCGTAA | 934.463622037885 | 0.0776236269181493 |
| TACTCATTATCA | 934.479254048486 | 0.130548120417211  |
| ACTACGGCGTCA | 934.497658000047 | 0.11121838734474   |
| CGATGAGGCATC | 934.50536522006  | 0.0711913633361231 |
| AGTCAGAACCGA | 934.50569407058  | 0.0592361583771215 |
| TCTATTGCGTAA | 934.509561503675 | 0.064123061586405  |
| ACCGAGTCAGGA | 934.571300590587 | 0.0811207012576344 |
| GCATTGTGACAA | 934.57586487083  | 0.0674250497694474 |
| CTCACACTATGA | 934.583548763709 | 0.0993800036565963 |
| GTCACCTACAAC | 934.596917940521 | 0.073955116167572  |
| AGATGACGGGGC | 934.616867575398 | 0.0828414269290573 |
| AATGCGGTGACC | 934.617591995157 | 0.0905447853376821 |
| GCCTTCAGTGAC | 934.621255565886 | 0.0901078116923133 |
| ACATGTCAGAAG | 934.624490725113 | 0.0862066275604162 |
| CACCACTGACTG | 934.62562504436  | 0.0972286634447472 |
| CGGAATTACGCA | 934.628448594915 | 0.0647122715434737 |
| ACGTCTGACCCA | 934.631293048049 | 0.0620866495352677 |
| AGGATCTGAGTC | 934.635965761781 | 0.102489680589808  |
| ACTCATCCCGAA | 934.649615154055 | 0.0702643920059646 |
| AACTTGTCAGCG | 934.676189717213 | 0.0928310550810226 |
| AGGTTTACTCAG | 934.677334027212 | 0.07579351626086   |
| AATTACTCGTAT | 934.681874756959 | 0.103232698476166  |
| GAGTAATAGACC | 934.688479095016 | 0.104511366584175  |
| ACGACTCAGTAA | 934.697823734024 | 0.116664092533455  |
| ACGTGATGCAAT | 934.705630796764 | 0.0877338192429188 |
| AATCGTTTGTCA | 934.726808007766 | 0.0916730816022774 |
| GACTCCGATTGA | 934.728783759683 | 0.076878743322924  |
| AACGTCACCATT | 934.734971091761 | 0.0741508785138778 |
| CGGTA CTGAC  | 934.757211273282 | 0.0890953839855703 |
| GCATGCATGACC | 934.804531846267 | 0.0979105055514476 |
| AAGTGAATCAAT | 934.814037358224 | 0.0649657096547598 |
| TAAGATTACTGA | 934.828329535713 | 0.0621285047329198 |

|              |                  |                    |
|--------------|------------------|--------------------|
| GACTTCTGACAC | 934.832183087017 | 0.0683868251335324 |
| GGATTACTCCGA | 934.83754230458  | 0.0879970449293009 |
| GAATTCGGTGAC | 934.84146592757  | 0.0717810790197364 |
| CACCCGCATGAC | 934.84390587878  | 0.0736254684974519 |
| CACAGTGACAGA | 934.895380723282 | 0.1124716161738    |
| AATCAGTCTTCA | 934.902895424022 | 0.0728114386934614 |
| GATGAATAATGC | 934.922872908546 | 0.120005010603912  |
| AAAAGCAGTGAC | 934.928007997061 | 0.0921535424848862 |
| GTCACCGGGCTA | 934.934640317048 | 0.0940439629084804 |
| GATAGTGACAGA | 934.943893278705 | 0.10195248237634   |
| GTCATGGAAGCA | 934.945574337602 | 0.0775175485173194 |
| ATTTCCAGTCA  | 934.960252350724 | 0.0814779308676974 |
| ATAATGACAAGG | 934.96123024173  | 0.114256768509033  |
| GTCACGTCAAC  | 934.971521588938 | 0.0845035391528225 |
| CCAGGTTGACTA | 934.998293218988 | 0.108147443627345  |
| TGTGACGGTTAA | 934.999565958742 | 0.100250181539496  |
| CGGTTACGCATC | 935.001769823296 | 0.0842350046504825 |
| CAGTGGTGACAG | 935.009594111094 | 0.0716349798272319 |
| ATGGAGCATGAC | 935.049154381137 | 0.0848685281286069 |
| CTGCCAGCGTCA | 935.05986682459  | 0.0817909967533965 |
| ATGTCACGCGAA | 935.068064067852 | 0.0975517167539773 |
| ACAACAGCGTCA | 935.072097068868 | 0.113315146995519  |
| GCGTCAGATACA | 935.081866887816 | 0.0879317668041788 |
| CATTTAGTGACA | 935.082763715431 | 0.105200239129078  |
| ACAGATCTGACA | 935.082880741008 | 0.0792449203367368 |
| ATGACATGCGAC | 935.087334251616 | 0.0834420059856535 |
| AGTGATGTGTAT | 935.096385239595 | 0.0618238333449969 |
| AGTCAGGTCATC | 935.100404935375 | 0.0682963101591446 |
| ACGTAATCCTGG | 935.101881504155 | 0.107734033205609  |
| GATTCCATGACA | 935.103035649917 | 0.0958742757823397 |
| AATTGTGACAGT | 935.117199889688 | 0.0752139506155172 |
| AGGCTCATTCTG | 935.118671227236 | 0.0636062199746328 |
| CCCCACGGTGAC | 935.121244772618 | 0.0783916054088181 |
| CGTTGACACTTA | 935.129108038673 | 0.0870818235454467 |
| GTGCTGTCACTA | 935.145268704665 | 0.0806604022555003 |
| GCAAGATGACCA | 935.146667930033 | 0.106448915646928  |
| CAGTAATGACCC | 935.159453773263 | 0.0716149682550654 |
| CGGCTCTGACGA | 935.167969875749 | 0.104995496073453  |
| CTACGTGACATA | 935.170175187378 | 0.098437015876622  |
| CAATTAATCACA | 935.180361199968 | 0.125757301200508  |
| ATCGAGTAATCA | 935.188402587711 | 0.0959777026223325 |
| GGTGACGGGTAC | 935.196198758067 | 0.0721602626742392 |
| GGTGATGTGGCA | 935.215691279458 | 0.0916467659090086 |
| TCTGACGATTAA | 935.233790852888 | 0.113008557456829  |
| GAGTCCTCGTCA | 935.233906132721 | 0.0918320642771206 |
| CGTGAGCAAACC | 935.242032876052 | 0.103354132437832  |
| ATTCTAGTGAC  | 935.248544590622 | 0.0916650317042284 |
| TGAGCAAGACAA | 935.262328671182 | 0.0936156896542137 |
| AGTCGTCACCAT | 935.267506930448 | 0.0763025026742041 |
| ACGCAATGACAG | 935.287618472885 | 0.0612861781167937 |
| GTCTGACGAAGA | 935.298394891417 | 0.0832744445537878 |
| CTCATACTGAAA | 935.313193051056 | 0.118256199893099  |
| AAGTTAGGTCAT | 935.315795178128 | 0.0934443295179646 |
| TATCTTTCGTCA | 935.317345796625 | 0.101665400489634  |

|              |                  |                    |
|--------------|------------------|--------------------|
| CGTCACATTCTC | 935.327332537462 | 0.0896670927810456 |
| AGTAGTCAGTCG | 935.354045265944 | 0.107745392089939  |
| ATGACGTCCCTC | 935.355028550588 | 0.0660189189634198 |
| ATGCCTCATAAA | 935.371934036803 | 0.140033500473667  |
| GTCAGTGCAGCA | 935.408280174717 | 0.0997196184685291 |
| CTAATGTATCAC | 935.412588546258 | 0.0892774740862489 |
| ATAGAGAGTGAC | 935.443154918501 | 0.0796223022211742 |
| AAAATAGTAATA | 935.464402997036 | 0.0609196329033478 |
| AGTACTCACATG | 935.467236383883 | 0.07566113424722   |
| CCGGTTTGCTCA | 935.479777865675 | 0.120441351236502  |
| ATAGTCAATGAT | 935.486998216845 | 0.0904599059853543 |
| ATGTAATCATCC | 935.529780789803 | 0.0928411010561955 |
| GAGTAATAGCAA | 935.530706037997 | 0.10108478694315   |
| TCTTGACAGTCA | 935.535167936877 | 0.115812479045645  |
| CTAAGTGACGGA | 935.541713784537 | 0.091998035473426  |
| TGAGTCCGACAA | 935.551615770311 | 0.0775548760816731 |
| AGTCGTGACAGA | 935.55898722576  | 0.134802994315501  |
| ATATGGGTGACA | 935.577570747792 | 0.0645457141193169 |
| CCCCACAATGAC | 935.592860824222 | 0.0661823224853944 |
| AGTGACAAGTAA | 935.594525011992 | 0.0854693987930104 |
| GAACAGGTGACA | 935.612340050959 | 0.054563471510587  |
| GTGACAGTACTA | 935.615280038999 | 0.0915105128923607 |
| CTCCGTGACCCA | 935.615519324167 | 0.0859158721189148 |
| CATGACATTTTA | 935.626370801253 | 0.117162000414176  |
| AGTCAGATGAGG | 935.626667748148 | 0.0980544181630588 |
| GGTCATCTATTA | 935.631098018125 | 0.0994625944541491 |
| ACTCACTCATGC | 935.642417856847 | 0.0857054206955435 |
| GAGTGATGCATC | 935.647903426012 | 0.0677336960460565 |
| ACCGCGGTGACC | 935.660749889191 | 0.0899694221048108 |
| ACGTCACAGGAG | 935.674034793917 | 0.0857897484976776 |
| AAGACGTGTCAA | 935.682774072565 | 0.108384864557572  |
| CTGAGTGATACA | 935.694091649494 | 0.0671422490401892 |
| AATGACGGCGCA | 935.701745993044 | 0.126407174141568  |
| TAGGGGAGTCAA | 935.70453192509  | 0.0993134306525337 |
| ACTCATTTTCTC | 935.716968713846 | 0.065182124820918  |
| AATCAGTAACTG | 935.728384187293 | 0.0650489259444862 |
| TAATGACCGAGA | 935.736627749891 | 0.109941090743415  |
| GAAAGTACGTCA | 935.738125115146 | 0.0749924418072806 |
| GCGTTGCTCACC | 935.738443408226 | 0.0776618419985562 |
| ATATAACTCACC | 935.75918270463  | 0.0909113950448166 |
| ATTTAAAATGAC | 935.768395057142 | 0.0899024602962212 |
| GGATATATGACC | 935.785806937573 | 0.132924440692892  |
| AATCAATGAGTA | 935.786070599749 | 0.0930609722770138 |
| GATTAGCCATCC | 935.791402006425 | 0.073747185884333  |
| AACCCCTGTGAT | 935.797499087681 | 0.0624551424016454 |
| ACGTCACCTGGA | 935.801345749282 | 0.0910951867988111 |
| GGTGACTTTATA | 935.816172117202 | 0.0989704265958686 |
| CTTTAAGACTGA | 935.826541621847 | 0.0670864439934396 |
| ATACGTATTACA | 935.833237527176 | 0.0593531723729755 |
| CCTTGATGACCC | 935.851447983045 | 0.066485103680765  |
| CCGTCATTGTAA | 935.852196796184 | 0.0927061776887231 |
| ACAGTTGTCACC | 935.858698484459 | 0.0848940828302698 |
| TCCTGGTCATCA | 935.875907423309 | 0.130057396862958  |
| AGAAACCGTCAC | 935.8860356678   | 0.0732160021825271 |

|               |                  |                    |
|---------------|------------------|--------------------|
| AGTGGACGTCAT  | 935.890071108928 | 0.0749329241051424 |
| GTCATGGATTGA  | 935.893381281026 | 0.0804204969781199 |
| CATTGACTGCAA  | 935.897587498958 | 0.120486770363578  |
| AGGACGGTGACG  | 935.906420896237 | 0.121042478360138  |
| CGACGCAATGAC  | 935.911047478241 | 0.0857030624222834 |
| CCTCCAAGTCAC  | 935.928231322313 | 0.0621846217274694 |
| GTCATCCCTTAA  | 935.940852967374 | 0.0700908216044907 |
| CGTCACCGGAAC  | 935.942771348514 | 0.100897193751119  |
| ATGACAATGAGG  | 935.960058577852 | 0.0541076095338402 |
| TGACACTGCACA  | 935.963108914532 | 0.121029534829977  |
| ATCAAGTGACAT  | 935.980325620148 | 0.104463570756579  |
| CAACTTGCTCAC  | 935.994123841302 | 0.0926455197568926 |
| ATGAGGCGTCAC  | 935.996172472677 | 0.0439716174896523 |
| ATGACATTGAAA  | 936.016710228365 | 0.0911089470764059 |
| ACCCCTAGTGAC  | 936.018778932963 | 0.074918735278937  |
| AATGCGGGTGAC  | 936.033440360424 | 0.0637504461786167 |
| AACAGTCAAAGA  | 936.03410172621  | 0.100272841372501  |
| CGGCTGGGTGAC  | 936.037829795136 | 0.0884604129470274 |
| AGTACACTGACT  | 936.063605799697 | 0.067905849021512  |
| GTCACGTGAGGA  | 936.09446071526  | 0.129464931576489  |
| AGGTGATCAGTC  | 936.099251494797 | 0.0853820592630183 |
| AACAACATGACG  | 936.105502422547 | 0.0777655450479413 |
| CGTATCCGGTCA  | 936.107115180662 | 0.101664735807026  |
| GATGACGGCAAC  | 936.115651602624 | 0.0642838882352335 |
| CTGTGCGTAATC  | 936.119332484574 | 0.0742134945844431 |
| AAAGTGACGCCA  | 936.1266449061   | 0.0563100309527865 |
| GTCACGCCGGAC  | 936.136401925387 | 0.0839598458415938 |
| ACACGTCAAAGGA | 936.167654771807 | 0.0642644348983762 |
| AACCTAGTCAAT  | 936.173207858795 | 0.100528348730761  |
| GACTAATTTAGA  | 936.181323701645 | 0.089339074639656  |
| AGAGTATGAGTG  | 936.183655852268 | 0.10445176321723   |
| GTGACAGACCAA  | 936.198901974073 | 0.0698021846192105 |
| AGTGACAAACAC  | 936.230029040414 | 0.0813225291799039 |
| CTCTGAGACTCA  | 936.235405306385 | 0.0775721632667964 |
| GCCATTGAGTAA  | 936.241015379938 | 0.0648270494378138 |
| TGACGGCATAAA  | 936.249987542853 | 0.0857581741879597 |
| CACGAATGATTC  | 936.253963520209 | 0.0742078137147226 |
| GACCGCGCTGAC  | 936.268623880254 | 0.0905733332290188 |
| ACCCGTCACACC  | 936.272559722344 | 0.11073609003442   |
| CACTTTGAGTGA  | 936.277413131676 | 0.120419787173779  |
| ATGTTGACACAG  | 936.296149317641 | 0.0723333971461671 |
| GTATTACGCGAC  | 936.311400100353 | 0.0673528901991573 |
| ATGACATCTAAA  | 936.322194096793 | 0.0887957292702937 |
| ACCTAGCAGTCA  | 936.340392754972 | 0.068455736583594  |
| ATTAACAGGTCA  | 936.350672207506 | 0.0987750208444808 |
| ACGTTGTGACAG  | 936.353465027502 | 0.0829457956142951 |
| GTCACTACACAC  | 936.358920328965 | 0.091100233040328  |
| GGTCATATTCAA  | 936.361358922835 | 0.0900402760435457 |
| AGAGTGCATGAC  | 936.368216398    | 0.111106475628585  |
| AAGTGACCAAGA  | 936.389976226216 | 0.089064489715839  |
| GAATTGTGACAA  | 936.403463035516 | 0.0854861932301581 |
| GGTAGACGTCAC  | 936.403545158806 | 0.091816367017594  |
| GTGTTATGAGTA  | 936.418559783    | 0.0783242399866377 |
| AGGGTCACACGG  | 936.434076851184 | 0.0899672891488766 |

|               |                  |                    |
|---------------|------------------|--------------------|
| AGATGTGAGCAA  | 936.440386397406 | 0.0768126864862492 |
| ACGGATGATTAC  | 936.458704113004 | 0.0795386309015257 |
| CATTGAGTCGCC  | 936.465740047969 | 0.0784709822762687 |
| ATTAGTGACGCC  | 936.46658894971  | 0.118935502975349  |
| ATCATTGACTGA  | 936.469759458708 | 0.131599724758813  |
| AGGAACTGTGAC  | 936.473518841952 | 0.0763755806142722 |
| ACACTGAGTAAC  | 936.476381213773 | 0.0576251952329834 |
| ATGACAACCGGC  | 936.494219222743 | 0.0946162367492046 |
| GTGATTAATTTA  | 936.504172982986 | 0.0929821690844073 |
| AATCATATGACC  | 936.517039211719 | 0.0971798079116969 |
| AGTGACTAGCAG  | 936.528410380646 | 0.0732874142998845 |
| ATTAGTCCTTAA  | 936.556887033977 | 0.0789102964110836 |
| AAGTAAGGGTCA  | 936.561577447874 | 0.0956238853284449 |
| CCGTGACACTCA  | 936.562424783442 | 0.0666610418491579 |
| AGAGGTGACACG  | 936.575577222092 | 0.0674362629651867 |
| AGGGTCATTTGA  | 936.594153567043 | 0.116341181246563  |
| AATGACCACTCT  | 936.600158086697 | 0.108091441927826  |
| ACCGTCACTAGT  | 936.600868996173 | 0.109267527917481  |
| ACAGCCATGTCA  | 936.601955859514 | 0.0852166048060224 |
| AATACTGACTAC  | 936.618977682566 | 0.0766509898895427 |
| ATGACCTACCG   | 936.63768476536  | 0.100490006108801  |
| CAGGCTGTGACA  | 936.645078611812 | 0.0628249070115496 |
| ATGTATCACAAC  | 936.658805599357 | 0.0748968332137902 |
| CACAAATGTGTC  | 936.686084607973 | 0.0714686572522482 |
| CACCTATGACCG  | 936.7086406723   | 0.124866726547259  |
| AACTCATACGCA  | 936.714084330971 | 0.103288376970015  |
| CGAAGATGTGAC  | 936.718750661483 | 0.0660752707931696 |
| GACTAATAACAA  | 936.735455458447 | 0.0890091039015622 |
| TCTGGTCTGTCA  | 936.758962148334 | 0.0869396408581388 |
| CCGTCATGGTTA  | 936.759479268627 | 0.0488715300212582 |
| CGTCACCCAGGA  | 936.788161513623 | 0.0603572717970471 |
| AATGACAGGGTA  | 936.809765832874 | 0.108347637362923  |
| CGTCACCACCAG  | 936.834389396064 | 0.124444426946987  |
| AATACAAGTGAC  | 936.837690062843 | 0.118211791465493  |
| AATGAGTAGATC  | 936.841660227308 | 0.0645121449449028 |
| CCTGTCACAAGC  | 936.849563694504 | 0.143154922230712  |
| CTTTTGAGTAAC  | 936.857518802322 | 0.0722042751312006 |
| CGGGCTTGACTC  | 936.861667057196 | 0.0704230783090036 |
| GACTTAGCATGC  | 936.873247176509 | 0.0906575351510075 |
| CGTCACATTA    | 936.873677130084 | 0.103036882120677  |
| TACGTCAGTAAA  | 936.898391309169 | 0.0622872932341917 |
| ATGATGACCGTG  | 936.933886480967 | 0.087381744149584  |
| AGAGTCAAGGAC  | 936.941077965752 | 0.0732622843979698 |
| CTCGCCGTCATA  | 936.944583975857 | 0.0796700584864191 |
| GACTCAATTA    | 936.967785293304 | 0.0624579954602155 |
| CTATGTTCTGCA  | 936.976107836058 | 0.0911077183253195 |
| TGACTTACAACA  | 936.976910848357 | 0.066711560893199  |
| CGGTTTGTGAGA  | 936.978288362951 | 0.078750445095983  |
| ATTTCGTACGTCA | 937.002696497918 | 0.0626591294658687 |
| AGGGGTCATTCC  | 937.013013624591 | 0.0605327907467905 |
| GCGTGATTACAC  | 937.014186043359 | 0.100260044647853  |
| TCCCCGGTGTCA  | 937.021974577625 | 0.0793319133689113 |
| CGTCACTCCGAC  | 937.039632307295 | 0.0865552720929768 |
| AAGACTAACCGG  | 937.042907349547 | 0.0736254297653579 |

|              |                  |                    |
|--------------|------------------|--------------------|
| AACAGGTCACCA | 937.043101706293 | 0.0778364965662297 |
| AACATAGGTGAC | 937.058895851325 | 0.107580602300563  |
| ACTCATCTACA  | 937.0628871424   | 0.0686450846111416 |
| ACTCATATGGTC | 937.070808634633 | 0.0748918670815386 |
| AATCATGACGAG | 937.086578718492 | 0.107309466341451  |
| CTCTGACAAAAC | 937.08948052865  | 0.0651458760124201 |
| AGCCCGTCATAA | 937.097210446775 | 0.0807628335399728 |
| GCTTACTCAACA | 937.111349972435 | 0.0666672658456826 |
| CGTGTCACGTTA | 937.113641439377 | 0.0716936574745391 |
| CAAGCATGACAG | 937.116569749281 | 0.139794135158686  |
| AGATTGATTAC  | 937.12084806951  | 0.0661729816072884 |
| GGTCATAAAACC | 937.137785181055 | 0.133705802966833  |
| TGATTTGACACA | 937.146349498922 | 0.0759973090048115 |
| AGTTGCTACTAC | 937.14864196088  | 0.0882773877391548 |
| CAGTGACAGAGC | 937.190572158298 | 0.0704957843489287 |
| TCTAGCTAGTCA | 937.202005367286 | 0.108000549787695  |
| CGTTTACTCAGC | 937.217708975131 | 0.0910825578148555 |
| TCGTCACAGAAA | 937.222827079785 | 0.0596586079037193 |
| CGTCACATACCC | 937.297751769366 | 0.108360466211428  |
| ACGAAACTGACT | 937.30231058838  | 0.0861589360589288 |
| CTGACTGGATCC | 937.312017653886 | 0.0642307920227705 |
| CGGTGCAATGAC | 937.33695045931  | 0.110300570594752  |
| ATGACCACCAGA | 937.349322755303 | 0.0993657358703117 |
| CACTATGAATCG | 937.349688002697 | 0.103357531000857  |
| AAGGTAGTGACG | 937.357287379997 | 0.0913926258736664 |
| CCAGTCAGCAGC | 937.358449531128 | 0.0761601597672491 |
| GAAACACGTAAC | 937.36554242607  | 0.0871637787539202 |
| CGTCATGAACAG | 937.373581886031 | 0.088599746547363  |
| GTGAGTTGTACA | 937.382187131437 | 0.0866199335329836 |
| CTAATTAATGAC | 937.387120610365 | 0.127451092961345  |
| ATTGACTAGTAC | 937.391943192456 | 0.0659773390136954 |
| ACTCTCTGTAC  | 937.394470511487 | 0.09986562906415   |
| AATCTTCCGTCA | 937.4100720879   | 0.0664349579828975 |
| CGACATCACTCA | 937.41209501377  | 0.0769241915373561 |
| GGTGACAGCTAA | 937.417061522465 | 0.104851908695261  |
| CTCTTCTGAGTC | 937.425850457433 | 0.0932412691590996 |
| TACCGTGACCCA | 937.432858114529 | 0.100762031862938  |
| ATGACACGGGGA | 937.43555477347  | 0.112942217325264  |
| ATTACTGACCCA | 937.450078811616 | 0.0631461722517294 |
| TATGCAGACTCA | 937.454945131695 | 0.0931741169914391 |
| AACGTCATGTAG | 937.457693099913 | 0.100151553317628  |
| ACGTCAGGTGAC | 937.470163879415 | 0.0747758388567072 |
| TCGGGGTCATAA | 937.489684983311 | 0.066880656179038  |
| CACTCATCAATG | 937.492580830135 | 0.111673605112239  |
| GCGGGGTGACGC | 937.496752225017 | 0.0972899125712856 |
| TCACAAAGCTGA | 937.499003710297 | 0.0832409924634497 |
| CATGTGACAATA | 937.503378935408 | 0.0966620677980881 |
| GTCACTCTTTAA | 937.508129027967 | 0.0745354210461698 |
| ATACACTCATCC | 937.511599991507 | 0.0822354926525304 |
| GCGTCGACTGAC | 937.525493455664 | 0.128036553196471  |
| CCCTCGCAGTCA | 937.530476216294 | 0.0880015010863673 |
| GAGCAGTGTAC  | 937.533907778212 | 0.129737506763185  |
| AGACTGTGACAA | 937.549339073591 | 0.112549716711575  |
| ATGATTCTGACG | 937.551452841624 | 0.119399029695287  |

|               |                  |                    |
|---------------|------------------|--------------------|
| TGGTGACAGTAA  | 937.556654858754 | 0.0627765995592477 |
| CCCGATGAGTTA  | 937.562437151594 | 0.0748497681135675 |
| GTCACCTCGCATA | 937.571384513465 | 0.114371606121592  |
| CCACCATGACAA  | 937.574752328967 | 0.0932779233451247 |
| CGCGCTTAGTGA  | 937.598244787792 | 0.134036062426597  |
| CTGTGGGACTCA  | 937.605564444605 | 0.0772395118931037 |
| GTCACTGTTAC   | 937.613806178792 | 0.0737583459854922 |
| CCTACCTGTAC   | 937.618405394691 | 0.0664086359437169 |
| AGGGTCATTCAA  | 937.621557099947 | 0.065733783182502  |
| AGTCACGGTGGC  | 937.673880442436 | 0.0668368419043473 |
| ATTGACTCTGCC  | 937.682759401587 | 0.0612562292671356 |
| TGACAACAAACA  | 937.691265358591 | 0.107526580061705  |
| CCAGCTAGTCAC  | 937.696832021578 | 0.0641650515654525 |
| CATCAGCGTCAC  | 937.701338704623 | 0.105617103264813  |
| CATGTCATGGCG  | 937.711381421327 | 0.0763682966438143 |
| AACTACGTGACA  | 937.722110226787 | 0.0859235645468715 |
| AATCAGTCTTCT  | 937.722177319468 | 0.0953343491853213 |
| CACTTCGTGACA  | 937.7425354746   | 0.0965299203045306 |
| AATGAGTGTTCG  | 937.753705717774 | 0.0971406778373837 |
| CGTCATGTTATA  | 937.777692434877 | 0.0648907827057584 |
| GTCACGACACCA  | 937.782282150627 | 0.105947647452747  |
| GCTTTGACTACA  | 937.788553708212 | 0.0634697108483976 |
| AACTGACCAGTT  | 937.796680538708 | 0.0887733283180664 |
| CGCGTAATAATA  | 937.814168007846 | 0.0879199402790968 |
| CAAGACTACTCC  | 937.815720504956 | 0.118417165731673  |
| AAACCCGTGTCA  | 937.838793928502 | 0.0668012375508355 |
| ATGATTAGTACC  | 937.853123911735 | 0.0746865956227668 |
| ATGACCCGATTA  | 937.858975051018 | 0.0637113668315658 |
| CGGTCATTTCGTA | 937.865608159021 | 0.0649499358764603 |
| GACGGGTGACAA  | 937.873361523617 | 0.0651411696583272 |
| AGCGTCATGAAG  | 937.87926186393  | 0.109334536818726  |
| ATCATGACATTA  | 937.882304912025 | 0.0791704398280995 |
| CTAGCTATGACC  | 937.885538532078 | 0.0718991895703134 |
| CGGGTCATGCCA  | 937.88977919124  | 0.0793300154317407 |
| TAGCGTGACGAA  | 937.903624166811 | 0.0797499986300732 |
| AGCATGACCGAA  | 937.907187033525 | 0.0704754783041783 |
| ATGTCGAGTAAT  | 937.921751222529 | 0.0677434381295983 |
| GTATTTGACTGA  | 937.941442657918 | 0.106716209787213  |
| GTCATTTGTAGA  | 937.947265589998 | 0.0707028408957045 |
| AATTAGCTGACT  | 937.95381866406  | 0.10386175717677   |
| ACTCTGACCCAC  | 937.962878662115 | 0.0620813239739806 |
| ATCGGGTGACAT  | 937.97950250192  | 0.0828017221348563 |
| GAGTTTATGACC  | 938.006208028963 | 0.108060987642205  |
| CAAATTGCGTAA  | 938.020045574163 | 0.0746546231605943 |
| AGTAGCGGTGAC  | 938.021206007884 | 0.0650519935859474 |
| AGTAGGTGACAT  | 938.032913033861 | 0.0725014994696569 |
| ATAGTCTTGTC   | 938.051239227005 | 0.0640707599780826 |
| ATTTAATCATAC  | 938.053427658808 | 0.0544313111265067 |
| GGATTTGACTGA  | 938.069215318201 | 0.116990875554932  |
| TAATCTCCGTCA  | 938.083073958768 | 0.0910512638705893 |
| ACATGCACTCAT  | 938.08523123345  | 0.0947885794441161 |
| ACTCATTTTAGC  | 938.096243469809 | 0.0771343376815057 |
| CGTGCTGTACAC  | 938.113533113775 | 0.0659730423568401 |
| AAGATGTCTCAC  | 938.142324655296 | 0.0894026500798524 |

|               |                  |                    |
|---------------|------------------|--------------------|
| CCCCGATTAGTC  | 938.155514481453 | 0.0827394321552199 |
| GACAAATGACCA  | 938.156157043935 | 0.0634482400185615 |
| ATGAGTACGGAA  | 938.156349052509 | 0.0797496631639422 |
| AGGTTTCAGTGAC | 938.176536327395 | 0.0813851890070355 |
| TACGAGGTGACA  | 938.191441980272 | 0.106546858945396  |
| ATCCATCAATGA  | 938.19851428607  | 0.130705865460276  |
| TACCCACAGTCA  | 938.2026136738   | 0.0673952864697961 |
| AGATCTAGTGAC  | 938.209610565637 | 0.118934996823607  |
| AGCGTCTGTGAT  | 938.220375181338 | 0.0856654610512847 |
| ACACGTGTACAG  | 938.254079783764 | 0.0679945637106102 |
| CGAAACATGTCA  | 938.270806945579 | 0.065523182106473  |
| CGGACGACTCAA  | 938.290725531012 | 0.0874128455873389 |
| AGTGATACATAG  | 938.29315559619  | 0.0601742181555409 |
| GTCATTGGGTAA  | 938.31816692214  | 0.0743296588279223 |
| CCTAATATGACC  | 938.346622820389 | 0.123537796869034  |
| GATGTATCACAA  | 938.379371934353 | 0.063175778295977  |
| GACTCAGTTTAC  | 938.389766490553 | 0.0730752163833955 |
| CGTCAGTACTGC  | 938.390007488656 | 0.0701824785324907 |
| AAAATTACTGAC  | 938.415611790877 | 0.0618908232668412 |
| GTATGAGTGCTA  | 938.417966384171 | 0.0829574849299482 |
| GAGTGACAGAGC  | 938.437133986742 | 0.0961436238307856 |
| TGACGGTTGACA  | 938.452989490341 | 0.058490340058736  |
| CAACCGGAGTCA  | 938.483915675575 | 0.0487999189547678 |
| AACGACATGACG  | 938.493721360042 | 0.0875225447291288 |
| GTGACGATGATA  | 938.516050032452 | 0.106114388588093  |
| GCGTGGTGTGAC  | 938.517482891952 | 0.0512556349465874 |
| CATAAGCAGTAC  | 938.548867153158 | 0.0853274523297079 |
| GATTATGTCTCA  | 938.549158434937 | 0.117744670705968  |
| GGTCATTAGTA   | 938.552918008141 | 0.0809625617680933 |
| GCAATGTGACCA  | 938.554652479034 | 0.0692356531903157 |
| GAGTGGAGTCAA  | 938.556024690298 | 0.104749815098021  |
| CGAATTCGTCAA  | 938.56742607722  | 0.0612545257066609 |
| CTTACACGTGAC  | 938.567576858933 | 0.0647015424874947 |
| GTAGAGAGTGAC  | 938.572183605181 | 0.123056757264283  |
| ACTCATCCAGAT  | 938.585185786309 | 0.0906268228618747 |
| ACTTCTTGACTC  | 938.587101696781 | 0.109102758231526  |
| ATCTATGATACA  | 938.59254657244  | 0.084479751671445  |
| AAGACGTCACTA  | 938.593878176537 | 0.0626340656739452 |
| GACTAGTGACAA  | 938.600448494051 | 0.0707992477034324 |
| GGCGAAGTACC   | 938.606839971722 | 0.0803971401953559 |
| AAGACGTGGCCC  | 938.620112670457 | 0.0954116247901349 |
| CATCACGCGTCA  | 938.627399024143 | 0.0679310333828482 |
| ACCGAATTACTC  | 938.654483170799 | 0.086804904319786  |
| CGTCATTACCAC  | 938.665090792143 | 0.0670855517772716 |
| TCGCTGAGTAAA  | 938.675391068672 | 0.0606831327118406 |
| GCTGTTGGTGAC  | 938.682439209372 | 0.0771298155431232 |
| ACGCTGATGACC  | 938.694281152235 | 0.141459648408294  |
| CTAAAGTATGAG  | 938.694899262848 | 0.11388329970337   |
| GCAAATGGCTCA  | 938.698648276334 | 0.0589088454529057 |
| CAGTCAGCTAAA  | 938.731383247233 | 0.0895761849215742 |
| AAATTGCGTGTC  | 938.733926956405 | 0.0919809790949523 |
| CATCGTCAGATC  | 938.737101397251 | 0.0830732867259733 |
| TAGTTGTTGTCA  | 938.737850166645 | 0.0853939099240364 |
| GGTTGAGTAAAC  | 938.75444031172  | 0.0734074655919833 |



|              |                  |                    |
|--------------|------------------|--------------------|
| ATTACACACCTA | 938.758868976033 | 0.0742525846237948 |
| ACGGTCATAATG | 938.763018562573 | 0.0938728228880107 |
| GTAATCCGTTGA | 938.77156641656  | 0.0644629976805711 |
| ATAACGTGTCAG | 938.775600213999 | 0.0874803115378495 |
| GTATTCGGTCAC | 938.780497151154 | 0.0651542089865783 |
| AGACGCATGACA | 938.801263505494 | 0.0891073536559624 |
| TCGCCCCGCTCA | 938.809976046113 | 0.0791687298110408 |
| CCCACGAGTCAA | 938.835963834357 | 0.0671076238187103 |
| AATACATGACAG | 938.854733790701 | 0.0999474155495695 |
| ACTAAGTGAAT  | 938.859695530704 | 0.0824451009806413 |
| AGTTGAGTAAGC | 938.86289726603  | 0.0810010345970623 |
| AGAGTGGTCACA | 938.86861278047  | 0.063182586109004  |
| ATTAACGTCATG | 938.875120167999 | 0.0734199113082614 |
| ATAGTGACCGAA | 938.879416221452 | 0.121285147192647  |
| GTGTGACCCCTA | 938.889599186719 | 0.0742517047257931 |
| GGTGACCGTTCA | 938.906739387759 | 0.0974076104368085 |
| CGTCACAAATAG | 938.908168877376 | 0.101957405903141  |
| ACTCATACTCGC | 938.925850622367 | 0.0372200864563761 |
| AGAATGGGTGAC | 938.928386214358 | 0.0631172992611302 |
| CAAATGACCACG | 938.939406771578 | 0.0783865357186416 |
| ATGACAAGAGCA | 938.949137768304 | 0.0859642743449779 |
| AATATTATTCAC | 938.954982811333 | 0.0766594471446354 |
| AAGAAGGTGACG | 938.991947799481 | 0.0620224954888271 |
| AATATTGCTCAG | 938.995088496745 | 0.0998309879551001 |
| ATAGGACTCAGA | 939.002536533329 | 0.0619915477588048 |
| ATCCGTTTATGA | 939.01122049115  | 0.0863797587113982 |
| AGTCAACGCAGC | 939.014636090235 | 0.0893988430522814 |
| AGTCAATCATAA | 939.01881035957  | 0.0918542912555387 |
| ACGCCATGACGA | 939.030792852896 | 0.0631334553499036 |
| CCGTCATATGCA | 939.036130932784 | 0.0644065266073104 |
| CGCCCTGTGACA | 939.046946267662 | 0.108711821589447  |
| AGTGAGCCACAT | 939.056619419066 | 0.0475564399914745 |
| ACCATGTACAT  | 939.069514764954 | 0.0637596338945896 |
| GTCACTGGTGTA | 939.069959021737 | 0.091446153522534  |
| CCACATCACTCA | 939.081343735884 | 0.0579196806212926 |
| AATGGCGTCACG | 939.102625497116 | 0.0919241805541776 |
| ATGAGTGTCCA  | 939.114292100231 | 0.0898055126852791 |
| CCAATAGTGACA | 939.118537369568 | 0.0803957189891042 |
| AGATGTGAGTAC | 939.131999475494 | 0.103361258883008  |
| TTCGTGAATCAA | 939.19211893481  | 0.0904276916698742 |
| CATAGCTGACAC | 939.19929036287  | 0.0601987833119114 |
| AAGAGTCTTTCG | 939.213515311697 | 0.0718429195476065 |
| AACTGTGACGGT | 939.21797198407  | 0.0583607605375579 |
| CCTGTGATGCAA | 939.233928799326 | 0.080225607714111  |
| ATAGTGATACAT | 939.266027525038 | 0.105498354483594  |
| AGAAGTCGTCAC | 939.275878438638 | 0.084328319330893  |
| ATATCTCGTCAC | 939.298346786959 | 0.10733105374966   |
| ACTCATCAATCG | 939.30423042651  | 0.071304326980938  |
| CGTCACAGCCAG | 939.343388071485 | 0.112954079934925  |
| AGGGTATGTGAC | 939.354422352797 | 0.0418527158052439 |
| ACTATTCTTTC  | 939.372148378997 | 0.0578518231763998 |
| CCGTCATCTGTC | 939.374168639454 | 0.077492422514797  |
| GCGATATGACCC | 939.383053654103 | 0.0713861730136996 |
| GGACTCACTTGA | 939.402380803311 | 0.0879828047914787 |

|               |                  |                    |
|---------------|------------------|--------------------|
| CTGGAGACTCAC  | 939.441455725715 | 0.109418826787147  |
| TGACATACCGAA  | 939.49405616223  | 0.0988431883577932 |
| CGATCTATGACC  | 939.494112999623 | 0.0744618800232496 |
| AGGTGACGAGAT  | 939.496594384225 | 0.0916529359699315 |
| ATTGGATGACCG  | 939.512879138408 | 0.077527883520564  |
| AGGCAGTGACAC  | 939.514154719113 | 0.0757924480210738 |
| AATGACAGGACT  | 939.535172963682 | 0.0786814704523902 |
| GTCACTACGCAA  | 939.538551997698 | 0.0921949134270747 |
| CGTCACCTTTAC  | 939.549550063092 | 0.121837119220947  |
| ACGCTGGTGACG  | 939.574690535298 | 0.0772872043785318 |
| GGTATTGTGACA  | 939.583429629385 | 0.0860485764587995 |
| CAGTCAGTAGGA  | 939.585733189949 | 0.0846452031291026 |
| CTATTTTGTGAC  | 939.587448258511 | 0.0689267285473564 |
| CAAGATGAGTAG  | 939.602148239741 | 0.0642674224551223 |
| ACGAAGTGACGA  | 939.607244912783 | 0.122841322126707  |
| AATCTGTACGCT  | 939.620157958839 | 0.136429982384341  |
| GGGTGAGACATA  | 939.647747644023 | 0.066861057642355  |
| GCGGTGAGCAAC  | 939.662952219673 | 0.0431941860678138 |
| GAATCATACTCA  | 939.674490662073 | 0.0672282500435444 |
| AAGGACGGTGAC  | 939.681775039963 | 0.071929960148491  |
| AATGCCTCATCG  | 939.710191045387 | 0.11298623994995   |
| TAAGATTCACAA  | 939.739786830031 | 0.109924483072466  |
| CAGGCTTGTGAC  | 939.748616642234 | 0.0933731728769024 |
| TGACAGCTAACA  | 939.770224018467 | 0.0616867163486693 |
| CGACTCACGCCG  | 939.775982768739 | 0.0683092963159778 |
| CTCATGACAGAC  | 939.778567060061 | 0.0764045773921033 |
| AGTGACGTGCTA  | 939.779918291195 | 0.0697071273095335 |
| ACGTAATTTAGT  | 939.787341328519 | 0.0813298119214581 |
| TAGTCAGTATAA  | 939.791799838382 | 0.0576658879561602 |
| ACGTGACAGCAA  | 939.803515359344 | 0.0665802690695704 |
| CGATAATTACTC  | 939.833180767813 | 0.118239166721726  |
| CCAGGTCATCAG  | 939.848030589803 | 0.06711509244943   |
| GTCATGTACCCA  | 939.870064241372 | 0.0945840110769509 |
| GAGAGTTGTGAC  | 939.88575729743  | 0.0629316553941861 |
| AAATTAGTGTC   | 939.894724094566 | 0.0623967313896259 |
| CGTGACACCGTA  | 939.910397935175 | 0.0631500672658492 |
| CTCAGTCAACTA  | 939.943079422268 | 0.0782664468196597 |
| GCTTACCGTGAC  | 939.956068308496 | 0.103182473719128  |
| ATTACGCACCGC  | 939.973712442006 | 0.0715138288169565 |
| CTATCTTGACTC  | 939.973816937411 | 0.0601208736992901 |
| AACGGGTGACAA  | 939.983548952987 | 0.0446817521313498 |
| GGATTACGTATA  | 940.010078946287 | 0.100753991549083  |
| TGACTCCGGCCA  | 940.01999449743  | 0.0675407062981758 |
| ACCTCAGGTGAC  | 940.036645965545 | 0.0691182500530292 |
| AAATGTCACAGG  | 940.04236085222  | 0.0948891000201046 |
| CGGTTGACACAA  | 940.060013016147 | 0.0904957749529367 |
| CGTCACATAACC  | 940.063353096724 | 0.102316333173609  |
| GAAGTGAGCCAC  | 940.074217629154 | 0.0711050076710198 |
| AGAATGACCATA  | 940.080373767527 | 0.082287320267511  |
| AGTCAGCTCTAT  | 940.080765433487 | 0.132306226565946  |
| CAGTGACGCGGG  | 940.085657524527 | 0.0862777630053234 |
| AACAACCTCATTC | 940.104001069531 | 0.0659719333505344 |
| AGTGCACGTGAC  | 940.107500741243 | 0.069974036600671  |
| CGCTATGATGCA  | 940.117436379169 | 0.123512897566721  |

|               |                  |                    |
|---------------|------------------|--------------------|
| ATATGTGACAAG  | 940.12988978774  | 0.10845491718498   |
| GGGTCATAAGAC  | 940.14475527186  | 0.108977767790734  |
| CGACGTGACGTC  | 940.160208496796 | 0.0835198930983266 |
| GTGCGTGACCGA  | 940.181118382403 | 0.0623543666484389 |
| GTGACAGTGTA   | 940.183875392501 | 0.11186618702392   |
| AAGGGTGACAGT  | 940.189064844746 | 0.0635093297685144 |
| AAGTCACGACACA | 940.197141584728 | 0.0830132025260232 |
| TACGGTCATAGA  | 940.211208145546 | 0.0814474368729939 |
| GGAGGCAGTCAC  | 940.21219171209  | 0.0630360638682063 |
| CGAGTGGGTGAC  | 940.232390381868 | 0.0706609634935912 |
| AGGTACTCAT    | 940.243229016199 | 0.0798067095202377 |
| ACCTAAGACTGA  | 940.251022721802 | 0.113726050598363  |
| CCCAGGTGACAG  | 940.263453863063 | 0.0742082727016822 |
| AAATTGTCAGAG  | 940.271694211215 | 0.0577639318701734 |
| AGGTAATGAGTA  | 940.275852819237 | 0.0830528910060119 |
| CGAAAATGACCC  | 940.276386124723 | 0.0707821134549756 |
| GACTCTGCCAGA  | 940.294450402491 | 0.0961029074232188 |
| ATTACGAATAAT  | 940.29630811801  | 0.0908693230012642 |
| TCACTCGAATCA  | 940.305260109376 | 0.0876685031649573 |
| AAGTCACGACAAA | 940.31154114936  | 0.0670871641474811 |
| ACCGACTGAGTC  | 940.342397810627 | 0.0612997282065195 |
| GTCATGTCCAAC  | 940.344656476852 | 0.0802480610920212 |
| CTCTCTTTGTCA  | 940.34559571645  | 0.131696896342465  |
| CGTCATTATCCC  | 940.347358760537 | 0.100899675640502  |
| ATGCATCACATG  | 940.35103038248  | 0.112378644419991  |
| GAGTAATAGGTA  | 940.394010284827 | 0.0824206237475983 |
| AGGTGACAGCGA  | 940.413536120149 | 0.0741237017449008 |
| AAGAACTGACTA  | 940.419021921684 | 0.0859174622014279 |
| GTCATTTGCGCA  | 940.422235792104 | 0.0877692653252618 |
| CCATCTCATGAC  | 940.42460132393  | 0.0845987082319014 |
| ACATAATTA     | 940.428185664105 | 0.112583097972063  |
| ACTCATTGTTCC  | 940.452753927331 | 0.0853683686095914 |
| TTCTTGACAAA   | 940.483263509394 | 0.0745796051777761 |
| AGCCACGGTGAC  | 940.497386592179 | 0.120463976308939  |
| CGCTGGGTGACA  | 940.515575609822 | 0.0927752837600587 |
| AGTGGTCATTAG  | 940.532533426127 | 0.0602443258046368 |
| CTATGACCCAC   | 940.542255070823 | 0.0796033727105636 |
| ACTCTTGACACA  | 940.549537743444 | 0.0663356153155003 |
| CTATTAATCACC  | 940.553806559009 | 0.0704709991952655 |
| ATTTTCGTC     | 940.62150303436  | 0.077539901696611  |
| AACTGAC       | 940.626876501027 | 0.0916092980921738 |
| TAACGATTAGTA  | 940.632437039873 | 0.0841390975166265 |
| CTCATGTGACCA  | 940.654661786687 | 0.0943957243314521 |
| AGTGACGGAGAT  | 940.661567091228 | 0.0998070093262289 |
| AGGGTGAGCAAA  | 940.672423896387 | 0.0633709451503818 |
| AGTACGATGACC  | 940.673819540533 | 0.0613519731098296 |
| AATTGCATCACT  | 940.701963032782 | 0.119074852727436  |
| CGTGTACGACCC  | 940.725036795421 | 0.0846774220601419 |
| GCTTCATGACAAA | 940.728371761447 | 0.0840380858178427 |
| GATAGGTACAAA  | 940.729580076296 | 0.0755343747253434 |
| GTTTGGTCAGCA  | 940.745593256509 | 0.0993435169316605 |
| AAATGATGCGTC  | 940.758754571877 | 0.0378523930554256 |
| ATGAGTGTACAT  | 940.775475552379 | 0.0743151025169311 |
| AGATGACGGGGA  | 940.795999254608 | 0.101820237499328  |

|              |                  |                    |
|--------------|------------------|--------------------|
| ACACAGTATGAG | 940.805656692495 | 0.0879152089560341 |
| GCGCTTAGTGAC | 940.806578150059 | 0.0766298826970713 |
| ACAGGGGTGACG | 940.821826234553 | 0.0752675683129622 |
| GTCACCGTCCAA | 940.837207284275 | 0.109539479145423  |
| GACGACTCAACA | 940.875623634203 | 0.102515229481392  |
| CGTCACAAAATA | 940.880036835725 | 0.0735388917532578 |
| ACTGTCAGAGCT | 940.892720193949 | 0.0971856326333256 |
| GGAGTAATAGTA | 940.897814046148 | 0.0934815692485531 |
| TCAGGCATGACA | 940.97234126347  | 0.0991350633136411 |
| ACGTCACCAGAC | 940.994943823176 | 0.068143524332148  |
| ACTAATAGGAAA | 940.999416812334 | 0.112965792829189  |
| ATGAGTAGTGTA | 941.012223066438 | 0.0607009804756047 |
| GTCACGTCTCGA | 941.015147788378 | 0.109113847211169  |
| CGGAAAGTCATA | 941.034468104857 | 0.127757268983161  |
| AATGACCACTAT | 941.043148170617 | 0.0605006281137552 |
| ACTCACTAGTGA | 941.048758360712 | 0.0594696958512856 |
| CATTCGTAATAC | 941.051265264705 | 0.131912773782549  |
| CAGAGTGACGGA | 941.058042444927 | 0.0748534082970343 |
| GACCCGTAGTCA | 941.072770552544 | 0.114706926768374  |
| CGGTGCAGTGAC | 941.0734024178   | 0.0806149737772893 |
| AAATGCGTGACA | 941.079098712193 | 0.0461352565281641 |
| TGATGACCGTAA | 941.079745584313 | 0.0730329188832416 |
| AGTCAGACGGTA | 941.085088249104 | 0.0712886798388369 |
| AGATCGACTCAA | 941.119680746006 | 0.0776485068802727 |
| ACGAGATGAGTA | 941.139499100984 | 0.081376375158215  |
| ATCCATGACAAT | 941.147186980391 | 0.0969841312478509 |
| CGTCATCAAGCC | 941.164814599105 | 0.0920388162503167 |
| CTTTGTTGGTCA | 941.167277637619 | 0.114195121482243  |
| ATTGATTGAGTC | 941.170430225236 | 0.0806254188095582 |
| GGATGATGTGTA | 941.211619551353 | 0.0685413465428737 |
| ACTCATCTTCAC | 941.223345049138 | 0.067620487494058  |
| AATACTACTCAC | 941.232501502216 | 0.0892255151969538 |
| CCTGATCACTCA | 941.253875977619 | 0.132265310744818  |
| AACCGGTATCC  | 941.285235490253 | 0.0968461813006133 |
| GAAGAGGTGACA | 941.312896775339 | 0.0995991357410571 |
| CGGCACTCGTCA | 941.313743708209 | 0.0556908424857046 |
| AACGAGTAATCG | 941.348354134342 | 0.0718052793404957 |
| CGAGTCAGGGGA | 941.356469394893 | 0.0720750621423826 |
| ACTCATACTCCC | 941.360120098034 | 0.0683269626750528 |
| ACTCTCCGTAC  | 941.36081998054  | 0.0700260592272192 |
| ATTATTAGGTCA | 941.362206017097 | 0.0941683241916719 |
| GGTCATAGGACC | 941.405897420115 | 0.084994512148786  |
| GTCACCCTAGAC | 941.42523874444  | 0.0829118928027371 |
| AAGCGAGTGACG | 941.428954794958 | 0.0835269221935709 |
| CGCACGGTGACG | 941.454162845818 | 0.0718745200834443 |
| GGTCATATCAGA | 941.464828616817 | 0.0583890640950033 |
| CCCGGTGACAGG | 941.485027892733 | 0.0847665173981196 |
| CATGACTTCGCG | 941.488858385748 | 0.0977924647636303 |
| ATTACGTATCTC | 941.490879576771 | 0.0810079091786735 |
| CCGGGATGACGG | 941.514498457398 | 0.0807340870805317 |
| AACCCGTCACTC | 941.524860032499 | 0.0838469223267597 |
| CCTGACTGCACG | 941.529848877263 | 0.0912066469195434 |
| AAGTCACGGTTA | 941.537096088731 | 0.0742344671564746 |
| TATGATTAATA  | 941.564202830019 | 0.0897142805479901 |

|              |                  |                    |
|--------------|------------------|--------------------|
| CGCAATCGGTCA | 941.564690596836 | 0.0815940121857168 |
| CAGTCCGTGTCA | 941.566860216692 | 0.0836952681128617 |
| ATCGATGATTAA | 941.600779069224 | 0.081260420195306  |
| CCGTCACTATTA | 941.601141348916 | 0.111859352056074  |
| CGATGATGCTAC | 941.60933643535  | 0.080270091573514  |
| GCCTCGTGACAC | 941.612158281354 | 0.0910781826849054 |
| TAAATCAGTCGA | 941.65053298021  | 0.0822385048218208 |
| GACTGAGCAATA | 941.687443315452 | 0.0675450642329591 |
| TGACAGTGCCAA | 941.69189891318  | 0.129050644613464  |
| CATAGTGACAGA | 941.715826932053 | 0.095641052343726  |
| GTGTCAACCAA  | 941.717179624916 | 0.0643003003440032 |
| AACCGTCACCGA | 941.736477827051 | 0.0908227390414505 |
| CGGACGCGTGAC | 941.745181471269 | 0.0685480495344203 |
| AGCAGTCAGTCC | 941.74796317015  | 0.0713567884421004 |
| GTCGTAATGACA | 941.754836655958 | 0.072088899971936  |
| GAACTCTCTGAC | 941.756106436514 | 0.060354045241812  |
| CACTAATGTTGA | 941.768910723323 | 0.0727404064790928 |
| AGTGTGTATCAT | 941.791852061102 | 0.0663264439359474 |
| CGATTGACACAA | 941.79427885335  | 0.0959743085013324 |
| TGACGGTGCTAA | 941.825378188144 | 0.0826853279791556 |
| ACGTGACGTTGA | 941.828599859258 | 0.068279897986938  |
| ACGGTCATAGAT | 941.840620135162 | 0.0565036916001751 |
| ATAGTGAGCCAC | 941.843974097903 | 0.0596511575930428 |
| ACTGAATGACCC | 941.844793035672 | 0.114064035925171  |
| ATTGCGTGTTC  | 941.85483491998  | 0.112449553225009  |
| ACTCATTTTCT  | 941.874831506469 | 0.0748951674021555 |
| TCGCCTGATTCA | 941.895669397637 | 0.0791279964540529 |
| GTGACAGTAACA | 941.906959469458 | 0.0670467364322555 |
| ACCCACTCATAC | 941.914132126188 | 0.0586855730837501 |
| TCTTACACGTAA | 941.920619290004 | 0.0677767070643902 |
| GTCAATGTCACA | 941.943024743404 | 0.0819156944040019 |
| AGTACTCACAGC | 941.957084909417 | 0.064895509416414  |
| GGTCGGTGACCA | 941.977569467347 | 0.0931318124914098 |
| AACATGAATCAA | 941.991180328083 | 0.0725570395771006 |
| AACGATACTGAC | 942.026342790045 | 0.0783830981562752 |
| AGAGTGTGATGA | 942.029997355921 | 0.101286754445064  |
| CATGACAGTCAA | 942.040400484163 | 0.0634905603152316 |
| GTCATTCCAAAC | 942.048931475083 | 0.072084246175694  |
| TGTAATCGTCAA | 942.049508952007 | 0.0984477431283201 |
| AAACTCATTC   | 942.065250627234 | 0.0597541401903721 |
| TATGTCACTCGA | 942.090682865298 | 0.0628647020741424 |
| CGTCATGTACAA | 942.106768163805 | 0.073848542558449  |
| AATCATGACCCG | 942.155116990627 | 0.128586457191513  |
| CGCCACTAGTCA | 942.188088681327 | 0.0668763465707434 |
| CCGATTACTCGA | 942.190288487909 | 0.0936716942512714 |
| GTCACCTGGAAA | 942.227890309161 | 0.0901960814680003 |
| AATATATTACAC | 942.238146254587 | 0.0864549624694067 |
| CATGTCACCCTA | 942.256163972646 | 0.11544619486791   |
| ACTCATATCTCA | 942.260614099912 | 0.061006851699374  |
| CGTTAGTGACGA | 942.264286097634 | 0.0934604355875154 |
| GACTCAAATAC  | 942.278708735076 | 0.0857165451427098 |
| ACTTAATTGTCA | 942.284448702985 | 0.060406687706972  |
| AATCATAGACCG | 942.317578575739 | 0.111408054520944  |
| CCTACGGTGACC | 942.353231569996 | 0.113490097170773  |

|               |                  |                    |
|---------------|------------------|--------------------|
| AGCTGTCATGCA  | 942.382346071017 | 0.0872272581031664 |
| AGTCAAGTCACT  | 942.396923356681 | 0.05697432894872   |
| ATTAACAGTCAA  | 942.397124536216 | 0.082551690728057  |
| ATACATCATCGA  | 942.397422516335 | 0.125415967188578  |
| CCTTTCCAGTCA  | 942.408561886155 | 0.0864067991372332 |
| GGCGTCATGCGA  | 942.437405777411 | 0.0554414681858413 |
| ATGATTCGAATG  | 942.450743940477 | 0.0764856481183809 |
| ATGGCATCATA   | 942.465096170647 | 0.0666760153193192 |
| TACTAGTCAGGA  | 942.473266434346 | 0.0607110211338809 |
| TACTCATTAAATA | 942.474647365279 | 0.0883814701916522 |
| ATTGTCACCGAA  | 942.480151419352 | 0.0944179129424765 |
| GTTGTCACCGGA  | 942.48063844945  | 0.104906340787091  |
| AAGTCACGGCAG  | 942.494462339551 | 0.0855964506043644 |
| AGAGTAATTTAC  | 942.503981748313 | 0.0619441192636172 |
| AAGCTTGACGCA  | 942.516023132541 | 0.13030152422877   |
| ACCAGTCAGTGG  | 942.52104786648  | 0.0678962828881555 |
| ACGTCATGGGGC  | 942.528578289517 | 0.0754677868882007 |
| CGATGACGGGCA  | 942.549143196908 | 0.113007600051935  |
| GGATGAGTGTAC  | 942.562914468334 | 0.0786167694644927 |
| AATTACAGTCAA  | 942.57646677658  | 0.0909169904117045 |
| CCATACGTGACG  | 942.58086584983  | 0.111356632952353  |
| ACTCATCCGTCG  | 942.582530962155 | 0.0705995687475126 |
| AGTCCACAGTCA  | 942.588001545041 | 0.0851458998770734 |
| TGACAAAGCCCA  | 942.614070958123 | 0.0669593169654206 |
| GTGCTGGTGACA  | 942.618945838488 | 0.0567975960652137 |
| GTGTCAGAGCTA  | 942.618970188572 | 0.0574791398416972 |
| AAAATGAGCCAG  | 942.639880991078 | 0.0384045472891147 |
| GTCGATTA      | 942.647245686152 | 0.0984958220543136 |
| CTACCGAGTCAA  | 942.652238244814 | 0.0659867292526475 |
| ATTAGTCTGATG  | 942.655225913116 | 0.074166114319178  |
| TGTCATGGAGAA  | 942.673983953098 | 0.0906068947877677 |
| CCCGAATGACCA  | 942.674820036144 | 0.0878250246197712 |
| CATGACACTCAA  | 942.684682853997 | 0.0816093174831698 |
| CTAGATATGACC  | 942.714717415978 | 0.102918646184808  |
| ACTTACTGGTCA  | 942.715658701209 | 0.0749452072301972 |
| ATGACAAGAGTA  | 942.721564316912 | 0.0792876840210462 |
| GCTGACGTAGCC  | 942.723285836346 | 0.0705343334124635 |
| GCA           | 942.727346219375 | 0.0859771872620947 |
| AATGATGGTCAT  | 942.760244422367 | 0.0821081566841029 |
| ACTCACCTGTCA  | 942.788197386675 | 0.0554290062893886 |
| CTTCACTGTGAC  | 942.798218474351 | 0.0636240102243771 |
| CAGTCAGGGCGA  | 942.799928185076 | 0.117815541053593  |
| CACACATGACGA  | 942.813161264473 | 0.107098383597459  |
| AGAATGAGTGAG  | 942.816161192789 | 0.0604361866152933 |
| AATTGTAATCAT  | 942.818890563893 | 0.0611722642149662 |
| GTGACACCATA   | 942.824599230391 | 0.0962093449977079 |
| ATTGTCACCGGA  | 942.839147599673 | 0.124073813399386  |
| CATCCCATGACA  | 942.861437702385 | 0.109254501200094  |
| ACTTTGACGAAT  | 942.86562254769  | 0.0928106940695424 |
| ATGCTGACTGGA  | 942.880265731861 | 0.103353569991423  |
| ACATCGTCACCA  | 942.901475239781 | 0.0801996686265984 |
| CTACGGAGTCAG  | 942.905055333689 | 0.104101822538542  |
| CCGTCATTTCCA  | 942.907720980157 | 0.0704043324659438 |
| GGCTGACTTAAC  | 942.915789477207 | 0.0772426260271388 |

|               |                  |                    |
|---------------|------------------|--------------------|
| CGATTAGCCATC  | 942.925666296182 | 0.0918115892772179 |
| CTGACTCTCTTC  | 942.928266729661 | 0.0578423821464053 |
| AAGAGTCTTGTC  | 942.933669172296 | 0.0518703028328324 |
| AATGTGACAGTA  | 942.93799568687  | 0.056060201217566  |
| GTCACGAAACCA  | 942.950065205378 | 0.124819401018984  |
| CGGTACTTATGA  | 943.008890382672 | 0.0547885158515377 |
| AAGCGTTGTCAC  | 943.025811434972 | 0.0713888382051865 |
| AAAAGCAGTCAA  | 943.088063036857 | 0.0712027269462865 |
| ATGACGGCTAAG  | 943.092274067656 | 0.0806806298761126 |
| ATGTTACGCAAC  | 943.113924012154 | 0.0937027933584556 |
| ACTCATCACACA  | 943.11651033789  | 0.0623166742763654 |
| ACTCATCGACAC  | 943.135547955334 | 0.09022788457832   |
| TGACCAGTTGCA  | 943.135875211498 | 0.0765804039513193 |
| GGATGAGTGCAA  | 943.192525766302 | 0.0624742230566858 |
| TAATGACGGGGA  | 943.209833645037 | 0.109528211677095  |
| ACACCGCATGAC  | 943.214322217532 | 0.0722987679161645 |
| AAAACGACTCAA  | 943.2522133471   | 0.0805523572929163 |
| TATCTGATGTCA  | 943.256247471539 | 0.0907909528671062 |
| CTTAGTAATTGA  | 943.260687685967 | 0.0405547786011418 |
| AGTGACCAAGAG  | 943.266687249765 | 0.0600876781309293 |
| CGTGACGGAGCA  | 943.297639112287 | 0.0645715459165997 |
| ATTTGACGTATC  | 943.297924160119 | 0.0735091857845895 |
| CACAACGTCATG  | 943.30296413909  | 0.0569615068998503 |
| ACTCATCCGCAC  | 943.315586922129 | 0.102404320024108  |
| ATGACGGGAAAT  | 943.321879642761 | 0.0535229056196488 |
| ACCAACTTATGA  | 943.33222125452  | 0.104205700879062  |
| ATGTCACGTAAC  | 943.349370187035 | 0.100110646185998  |
| ACGAGATGACGG  | 943.353577341079 | 0.0660309784733627 |
| ACTCATTGCAAG  | 943.429378732368 | 0.101959674808376  |
| CGACTCAGACTC  | 943.431603603654 | 0.0766691467798652 |
| ATAACGACGTCA  | 943.435725889378 | 0.0842032565381824 |
| CCTATTACTCGA  | 943.436508054345 | 0.0772086526267915 |
| ATTACTGACAGG  | 943.439050964479 | 0.074659957133288  |
| ACTGCGCGTGAC  | 943.450670826958 | 0.0701492830387207 |
| AAGTGAATCAAC  | 943.452566873815 | 0.0773840999452198 |
| CATATAAGAGTC  | 943.458307814596 | 0.0801969758876527 |
| CGTCACTGAGCC  | 943.459606574082 | 0.0644285724319465 |
| CTGTCACGGTCA  | 943.472513555115 | 0.0567248976048329 |
| ACCTCTCTGACT  | 943.478244722784 | 0.120637104729561  |
| ACGTCACGCCCA  | 943.484082719476 | 0.0895906039373894 |
| GACGCATGCTCA  | 943.490592555178 | 0.0934764034854053 |
| CACGTAACCTAG  | 943.495212246814 | 0.130051735343497  |
| ATTTGTTGCTCA  | 943.51678533775  | 0.0852323489642586 |
| CATGTCACCAAA  | 943.518303732169 | 0.0442501841751719 |
| ATTTCTGACGTG  | 943.521944406325 | 0.0736610161982428 |
| ACATCGTCACTC  | 943.539626085331 | 0.0544537693158542 |
| ACTGGGTCAATGG | 943.568588401265 | 0.0948846547795122 |
| TCCCCACAGTCA  | 943.588220122029 | 0.0774098204175721 |
| AAGTCACGGAAC  | 943.598325604222 | 0.0772787722224945 |
| CCATATCACTCA  | 943.605957080087 | 0.0618508690212735 |
| GAAGCGCGTCAC  | 943.61000031837  | 0.0570021439441464 |
| AGAACACGTAAG  | 943.610697008553 | 0.0953405435906324 |
| TGACATAGTACA  | 943.626110578252 | 0.103808752244456  |
| CCACAACGTCAC  | 943.627291985037 | 0.0651902618554412 |

|               |                  |                    |
|---------------|------------------|--------------------|
| CCCACATAGTCA  | 943.642043178071 | 0.082124927295995  |
| AGATTTGGTCAG  | 943.675646707704 | 0.110438983745624  |
| AGCCGACGTGAC  | 943.712051398246 | 0.129543295979077  |
| ATTACGTATGTA  | 943.736730847881 | 0.0696536524142332 |
| GACCGGTATCC   | 943.74008164389  | 0.0950070482905957 |
| CTGGCTCATCCA  | 943.743683966689 | 0.0562245242804505 |
| ATGTGGGTGACG  | 943.761657299078 | 0.0922276936047646 |
| ATATGGCTAATA  | 943.793155079157 | 0.0803158045486528 |
| AGTGACAGCGTC  | 943.811429073796 | 0.0645258069565267 |
| CCTGACTCGCTC  | 943.84362740328  | 0.0799862434266762 |
| GGACCAAATGAC  | 943.850767142312 | 0.0706229592168535 |
| GTGTCAACATGA  | 943.85325972612  | 0.0984382028995582 |
| TGAGGGTGACAA  | 943.870922121278 | 0.0723115130754394 |
| GCGGTGGTGACA  | 943.873509705803 | 0.0859572009368998 |
| ACTCATTTACAC  | 943.887473592909 | 0.049883995386894  |
| GAACACGTAAGA  | 943.906775190446 | 0.0621483939238498 |
| AGTCAGCCATAC  | 943.951184671221 | 0.0544122034656538 |
| CCCCTCGGTGAC  | 943.966092389989 | 0.0704568959428758 |
| ATAAGTGAGCAA  | 943.966163114808 | 0.080315704304689  |
| AGACGGGTGACA  | 943.973102949073 | 0.0857966535983961 |
| ATGATACACATC  | 943.979314228501 | 0.0881677096105544 |
| ATCCCTGTGACG  | 943.998603471712 | 0.10601569240007   |
| ATACTCGGTGAT  | 944.022474528891 | 0.0551306427523839 |
| AATTGTCAGAAT  | 944.026549475571 | 0.107418345788288  |
| CGTCATGTTAGA  | 944.030941108017 | 0.0655558690440778 |
| ACAGATTAGTAC  | 944.049657744973 | 0.0581382383769169 |
| GGTCATCTTAGA  | 944.052480232519 | 0.0548111511274378 |
| GTCATGTTCTTA  | 944.072542237697 | 0.0764802344040271 |
| AATGACGGTAAG  | 944.092672164831 | 0.0701221499213929 |
| ACTACTCGGTCA  | 944.116404239319 | 0.0712620077711314 |
| GAACTATTACGC  | 944.134005046806 | 0.0879703660026523 |
| AGTGTCAGAGAG  | 944.146609581651 | 0.0742219362929819 |
| ACTCCATGTCAC  | 944.17258277772  | 0.0858858036551365 |
| GCTGACACAGCA  | 944.192863661031 | 0.0835624202999609 |
| ACGATGAGCCAA  | 944.202425106787 | 0.0741943222061245 |
| TATGATGCAAGA  | 944.205794581572 | 0.0597452143940335 |
| GCCCCGAGAGTCA | 944.20877271999  | 0.0711620344781257 |
| GCTAGGGTGACA  | 944.218678064065 | 0.0587710545096038 |
| CTTTCGTGATGA  | 944.255140693331 | 0.0964119187972201 |
| TAACTCGCGTCA  | 944.30551815111  | 0.0817114908670258 |
| AAGAGTCTTCGT  | 944.323302956416 | 0.0635578569673059 |
| GATCTGGAGTCA  | 944.368758919229 | 0.0613502747063355 |
| CCTTTTCTGTCA  | 944.372277326078 | 0.116014353605149  |
| CAGTCCGCGTCA  | 944.378431897125 | 0.0859910004894854 |
| ATGGGGTTCATAG | 944.379649556114 | 0.0528161424701501 |
| ACGCGTCAGCGA  | 944.388044478759 | 0.0770179124352573 |
| GTGTACACGTGA  | 944.39079826331  | 0.066634606409438  |
| ACATCCCAGTCA  | 944.3988647366   | 0.0819127046431986 |
| GACTGATGCCTA  | 944.411378201733 | 0.0701119096607317 |
| GACATGACAGAC  | 944.459981448118 | 0.11420252657882   |
| CGGTACAGCTCA  | 944.460020869294 | 0.106660961502308  |
| TATCTCGTCACA  | 944.464916792186 | 0.079276639055145  |
| CGGTCGAGTGAC  | 944.475003276864 | 0.125428515722465  |
| GAAAGCGTCAGA  | 944.477218644969 | 0.0947242453512036 |



|                |                  |                    |
|----------------|------------------|--------------------|
| GATACAGTAATC   | 944.507872700119 | 0.0654755441996619 |
| GTCACCTTAGA    | 944.520660928263 | 0.0726665853438521 |
| CAGAGTGACATA   | 944.536594000092 | 0.0531182334530284 |
| ACAGTCAGTGGC   | 944.557617293708 | 0.0664423323452077 |
| AGGGGCAATGAC   | 944.573802426279 | 0.0576515880793777 |
| CCCAGGGTGTC    | 944.575075143024 | 0.0921561028830471 |
| CACTCACATGAC   | 944.576163035554 | 0.0594494933572688 |
| ATGACGGACTCC   | 944.581277442715 | 0.0651379974519597 |
| AGAGTGACAACG   | 944.589270313246 | 0.0821237557601728 |
| ACTCATTCCGAA   | 944.594171348494 | 0.0635226915866141 |
| AGCGTTGTCACC   | 944.60193442597  | 0.110719395492035  |
| CTACCGATGACC   | 944.6072220329   | 0.0978293500069194 |
| AGTCAGATATCA   | 944.609957368397 | 0.0725324885232666 |
| AAGACGTCATGA   | 944.615775146062 | 0.0611310550474221 |
| ACTGACTGCTAT   | 944.631635178207 | 0.0630992745025843 |
| AGTCAACGGACT   | 944.661309707052 | 0.0595856697878598 |
| GATCTACTCATC   | 944.674735020231 | 0.0624354886962733 |
| ACAATTACTCCT   | 944.686494732962 | 0.0760484472224033 |
| CTAATGACCGAA   | 944.697137456514 | 0.0731156277340143 |
| ATGCGTAACAGC   | 944.709135346647 | 0.0578819768782779 |
| AAGTATGTGACG   | 944.716045719201 | 0.0793016047194215 |
| AGTAGAGTGACG   | 944.723718011991 | 0.06186943406793   |
| TCCATGTACCGA   | 944.725507171865 | 0.0826211306729427 |
| TCCCCTACGTCA   | 944.726838148213 | 0.113398936519038  |
| AGTCAACACTCG   | 944.767972943911 | 0.0788699692984241 |
| AATCCTGACTGT   | 944.779226275049 | 0.0772316928934677 |
| AGCGTCTAGTCA   | 944.7895985335   | 0.083072819543699  |
| TTGTCACCCAAA   | 944.790072218998 | 0.107942038753835  |
| CTCTTTGAATCA   | 944.820801973176 | 0.0864597516527843 |
| CGTCACTTTGGC   | 944.821397880614 | 0.088437660392059  |
| AGTACATCGTCA   | 944.82347245885  | 0.0569102737394864 |
| ATGCATCACACG   | 944.826678209589 | 0.0812710865836945 |
| ACCTCATGACGT   | 944.830845854709 | 0.0762525703162853 |
| TCTTCCATGACA   | 944.83216221762  | 0.0664663407520905 |
| GACCAGTCAATA   | 944.835911694739 | 0.0519550970260934 |
| GTCACAATCCGA   | 944.844785282789 | 0.0680164249335384 |
| CGGTACTTGTC    | 944.845654368499 | 0.0995157155647981 |
| GGAGTGTGTCATGA | 944.870643935879 | 0.0581558832821462 |
| AGTACCCGTGAC   | 944.874639980962 | 0.0489398318692819 |
| GTCAGTAATATA   | 944.899596365147 | 0.0800176983624081 |
| CGAGTCGTCACA   | 944.901846454953 | 0.0678914650823193 |
| AACACGGTCATC   | 944.911682778742 | 0.0775950643909511 |
| GGTCATCCTTCA   | 944.919407998848 | 0.0777307140906918 |
| AGTCAGCGTAGA   | 944.921901090486 | 0.0594071205547718 |
| ACGTGACAGACT   | 944.929310886948 | 0.0816321827973929 |
| TCATGTCCGTCA   | 944.930074268041 | 0.0935042098125468 |
| AGATTTGGTGAC   | 944.930505567982 | 0.0640130377271546 |
| GGGAGTGACAAA   | 944.930957838366 | 0.0542511984351169 |
| GGCGTCACTTTA   | 944.950504242353 | 0.0767973573222958 |
| AGAGTGACAGCA   | 944.980824575484 | 0.0853488851416993 |
| GTAGTGGTGACA   | 944.986920205804 | 0.0454900369759281 |
| AGCTTGTGACAG   | 944.98996672102  | 0.0919583700152304 |
| AAATTACTGACG   | 944.996355788501 | 0.0692632379818645 |
| ACTCATACAGCA   | 944.997826008845 | 0.071033118267893  |

|               |                  |                    |
|---------------|------------------|--------------------|
| AATTGTTGTGAC  | 945.028579643575 | 0.0808032194194681 |
| TATCGTCACCCA  | 945.038632539893 | 0.0687831692549909 |
| ACTCATCCAGAA  | 945.056585340957 | 0.0664193934770852 |
| TGTTAGTCGTAA  | 945.08878205995  | 0.126284454900319  |
| AATGGCTAATCA  | 945.097339973632 | 0.0719623668662057 |
| CTATTGCGTGAC  | 945.1020934534   | 0.0707199204526989 |
| AAGATTGCTCAG  | 945.111783175033 | 0.10303148885424   |
| GCGTGATGACCC  | 945.117227504526 | 0.052511944262534  |
| ACACAGTCAACC  | 945.129410269814 | 0.105078630587762  |
| CACTTGCTCACC  | 945.131899081183 | 0.0671988963569176 |
| GACCTCATGACA  | 945.159164789718 | 0.107402587705073  |
| CATGTCACGTGA  | 945.179053912007 | 0.0757199258801952 |
| ATGAGCAACGAC  | 945.205555475061 | 0.0899482909582206 |
| GATGATTCTACC  | 945.226327597477 | 0.0999007261743572 |
| AGTCAGTAGTAA  | 945.229694594419 | 0.10230503665159   |
| CGTCGCTACTCA  | 945.244593520212 | 0.058636001437595  |
| ACAGCAGCGTCA  | 945.285033421092 | 0.0667460010613929 |
| GACCATGACCGA  | 945.286704074642 | 0.0665919523641784 |
| AAGTAGAGTGAC  | 945.29855511543  | 0.0589726871175608 |
| CACCCGGATGAG  | 945.310825599033 | 0.0851176256893345 |
| GGCGATGGGTCA  | 945.316213003675 | 0.0865764129372553 |
| CTATTAGTACTA  | 945.3388087217   | 0.0591746692526128 |
| CTTATGTCTGAC  | 945.359400794674 | 0.108073355960593  |
| AGCTCTGTCATG  | 945.36511119339  | 0.0779243373820711 |
| GACGCTTGGTCA  | 945.377751665539 | 0.0705454194399943 |
| AGATTGACAAAT  | 945.399156687951 | 0.0672041410083815 |
| TATCACGTGACA  | 945.424681718881 | 0.0810617797972544 |
| GCGGCGTGTAC   | 945.440702200602 | 0.11116683503492   |
| CTGATCGCTGAC  | 945.475600563229 | 0.123208822935739  |
| GGTGGGGATGAC  | 945.480749554695 | 0.0697848098891092 |
| AATGATACAATG  | 945.508398766205 | 0.0787854832974929 |
| ATGACCGTACTA  | 945.580912593157 | 0.0883305116578157 |
| CGAATTGAGTAA  | 945.60258342479  | 0.0722161535641123 |
| TCGTTCTTGTC   | 945.614467772979 | 0.0758500098938583 |
| GTCACCATCCAC  | 945.628006390727 | 0.114175407263151  |
| AGGAATGGTGAC  | 945.647278658319 | 0.0587912341680355 |
| AGTCAGCTTAAC  | 945.666653449936 | 0.0614436643621336 |
| AGTTGGGTGACA  | 945.711071784209 | 0.0746248601616445 |
| ACACGAGTTTCG  | 945.712448359433 | 0.110713940952684  |
| ACCATGGTGACA  | 945.747486699809 | 0.0867055980198246 |
| TCATTATGATAA  | 945.774865419771 | 0.0567668300714202 |
| ACTCATTGACGAC | 945.776201585058 | 0.0738855308807781 |
| ACCCTTGACGCA  | 945.789745332697 | 0.0741238469027401 |
| GTTAGATGAGTA  | 945.790265425272 | 0.0638842136191478 |
| CAGAATTCGGTC  | 945.802477833361 | 0.120396429967881  |
| GTCACGCAAAGA  | 945.805337884649 | 0.0496901795270098 |
| ATAGCCATGACA  | 945.83383756111  | 0.0828785878026065 |
| AGTCAGATATAA  | 945.841087970199 | 0.0628119605886734 |
| AAATTTGTGACA  | 945.848364787433 | 0.123225900138182  |
| AGTCAGTCTAGA  | 945.849185899914 | 0.0376428749826514 |
| GTCATTCTGAC   | 945.859915844514 | 0.0908652166870751 |
| CCATGACGACTA  | 945.865683706487 | 0.0773467846003331 |
| CGGACTCACTCA  | 945.884741487429 | 0.111766759830818  |
| AATAGTGACGAG  | 945.88790788927  | 0.0909648317121164 |

|               |                  |                    |
|---------------|------------------|--------------------|
| GTCAGACTTTGA  | 945.891394567067 | 0.0600840367307642 |
| CCATGACAGTAA  | 945.893962468437 | 0.0584840903569548 |
| CCGAGAGACTCA  | 945.905541960155 | 0.101138119606332  |
| ATGTGTGAGTGA  | 945.919098087186 | 0.0759657001423991 |
| AGTATGACCTGG  | 945.931529660935 | 0.0679453455678214 |
| CGGTGACAGCGA  | 945.934962685622 | 0.0550525935368348 |
| ATAATTACGCAC  | 945.952444127162 | 0.0533060579715161 |
| CTGGTCATTGTA  | 945.956973002566 | 0.101059521309604  |
| ACGTCATGGTGG  | 945.967302659587 | 0.0988811943251751 |
| GGTCATCGGCTA  | 945.979696763161 | 0.0612806372855168 |
| TGATACGTCAAA  | 946.017318286015 | 0.0991338778920086 |
| GCCGTTTGTATGA | 946.045983431773 | 0.115466834776327  |
| AGGCTGACATAT  | 946.060052601907 | 0.0649509963082036 |
| GTCTTGACACAA  | 946.064272658591 | 0.0707878267154571 |
| ACACTCACTCAT  | 946.066762971227 | 0.0726815772340112 |
| GATGACCGGACA  | 946.083194827098 | 0.0820107298422909 |
| GACGACTCAGTA  | 946.097614169033 | 0.0680571758513177 |
| CGGAAGGTGACA  | 946.098805397753 | 0.0799025905346342 |
| CCAAGGTGACCA  | 946.107221714382 | 0.109423161709433  |
| ACCAGTAAGTCA  | 946.127834781637 | 0.0792280875796471 |
| AGTCAGGTATAT  | 946.161388142694 | 0.0658168920243002 |
| TGATGAGTGCAA  | 946.174819167799 | 0.072597818741128  |
| GTCACAAGTGAA  | 946.203230920941 | 0.0782123998322094 |
| ATGCGTAACCGG  | 946.211055633839 | 0.0756138675967871 |
| AACGGCGTCACA  | 946.227130873413 | 0.0540813941262883 |
| GGGCAGTGTGAC  | 946.25669830814  | 0.109980647356704  |
| AGACTATGTGAC  | 946.270518208001 | 0.0976605421177623 |
| AGACTAATATCC  | 946.275681412379 | 0.103152452850505  |
| ATGGGATGATTC  | 946.283476914159 | 0.0717958651166478 |
| ATGAGTGGTTTC  | 946.284981434239 | 0.0929052204470323 |
| AGGAGTAATAGA  | 946.321419070609 | 0.0608204704303823 |
| GGATTCACTCAC  | 946.326903686518 | 0.113053667481662  |
| AGTATTAGTCCC  | 946.328331128374 | 0.0654689209144833 |
| ATGACGAGAGCC  | 946.34853986717  | 0.0587202625448396 |
| CCTGACTACTAA  | 946.388306031718 | 0.0784573150448735 |
| AGATTTACACAT  | 946.388378656946 | 0.0901351496395402 |
| AGACTCAATCTG  | 946.397946542514 | 0.106023549849426  |
| GTTACGGTGACA  | 946.403181861339 | 0.0678771811139832 |
| ATAATTCTATGA  | 946.424062639936 | 0.0821234961277312 |
| AACCTCGTCACT  | 946.43920171457  | 0.0707890964725742 |
| ATGCCTCATAAT  | 946.440831247735 | 0.0604990995656253 |
| AATTAGTACTAC  | 946.443247096503 | 0.0946629026752832 |
| GTCGTCGTCACA  | 946.445829177735 | 0.0753530263016504 |
| AGTGAGTTGTTC  | 946.452636007902 | 0.0942298624711881 |
| GTACCGCGTGAC  | 946.467642590425 | 0.0564435982082789 |
| ATGTCCGTCACG  | 946.469700291783 | 0.0845313885919969 |
| ACCGTTGTATGA  | 946.492202259191 | 0.0613835137389841 |
| AAGTATCATGAC  | 946.518591354765 | 0.0380579385316637 |
| ATGACAGGCGTC  | 946.571782277515 | 0.072608335752406  |
| GTCACTACCGAC  | 946.593694516008 | 0.0763833010430805 |
| GAACTGAGTCGA  | 946.60891867368  | 0.077202762985671  |
| CAGGAGAGTCAG  | 946.612903263273 | 0.051638097990771  |
| CGTCACATAAAA  | 946.618427435976 | 0.0757148869877522 |
| GGTCTGATTCA   | 946.621039573059 | 0.0588661995982998 |

|              |                  |                    |
|--------------|------------------|--------------------|
| CGCTTTAGTCAA | 946.621426975127 | 0.0563379088357986 |
| GCGTCACCTGCC | 946.62615065205  | 0.0567458418510201 |
| GAGTCAAGGTTA | 946.634034519167 | 0.101682064081911  |
| CTCACTGTCACC | 946.650862848795 | 0.0737548929336282 |
| GTTCCCTAGTCA | 946.656138076109 | 0.0757161018910331 |
| ACAACATGACCA | 946.715691406391 | 0.112340786543521  |
| CTTAACCCGTCA | 946.729507394073 | 0.0864991368986461 |
| ACCCCAGATGAC | 946.729884162662 | 0.0629536916707997 |
| CCGTCATCCCTC | 946.734782816602 | 0.074671229474985  |
| GCCGAAGATTCA | 946.741822958777 | 0.0977737830424495 |
| ACTCATACGTCT | 946.750616632252 | 0.0679623192976461 |
| ATGTGACGAGCC | 946.756072347084 | 0.0580075193473994 |
| ATTTGATTACCC | 946.7708354554   | 0.0787903946646722 |
| CCGTACATGACA | 946.784643139241 | 0.0925299338579635 |
| CGTCGTACCAA  | 946.786871674872 | 0.0992682127678006 |
| GAGGACTGTGAC | 946.792324669601 | 0.0683233000703074 |
| ATCGTCACCGAC | 946.794192298148 | 0.0852930275189894 |
| ATCTAATCGTCA | 946.794361445886 | 0.081295125833146  |
| ACGGCGTCATGG | 946.818554431872 | 0.052620358234558  |
| GAGACTAGTGAC | 946.822385794217 | 0.0975404501568753 |
| ACTGATGCATCA | 946.846062560792 | 0.0811366364603405 |
| GACAGCCGTGAC | 946.850960413303 | 0.0739362871860448 |
| GATGATGTGGAA | 946.865916007359 | 0.0510300309952144 |
| AGCGCTGACGTA | 946.871423481363 | 0.0728432050312701 |
| ACACGTCTGACG | 946.872506736529 | 0.0838591118035217 |
| CACATTGACTGG | 946.877324941664 | 0.0765845373447135 |
| AGAAATGACAGG | 946.886038425549 | 0.076312319692963  |
| GAATTGCTAATA | 946.889081424643 | 0.0533046461603333 |
| GGCCATCTCATA | 946.893258104564 | 0.0683825245674689 |
| CGTGACATGGTC | 946.913924092117 | 0.0786283546665451 |
| TCAGTACTCACA | 946.93395195117  | 0.104673368275334  |
| GCGAGATGTGAC | 946.938030234031 | 0.101855297059868  |
| ACTCATTTACCG | 946.951764037404 | 0.0839995572052295 |
| AGAACTCGTGAC | 946.96302326734  | 0.086127476408768  |
| GATAACGTGTCA | 946.96536481506  | 0.0793103530712553 |
| TGTCACTCTGAA | 946.976361013403 | 0.0816371311439758 |
| AGGAAGTGACGC | 946.983077120518 | 0.0519457832593973 |
| CTTCGTATGACC | 947.011949182855 | 0.0681530202929481 |
| ATCACTCAGAGA | 947.020950828852 | 0.0567609920283006 |
| ATTCCGTGACAC | 947.029230354878 | 0.0790926685777379 |
| GCAATGACGGCA | 947.034462391855 | 0.0891889526158149 |
| AAATGTGTGAGT | 947.040849938895 | 0.0738698512047423 |
| GTCACAGCGACA | 947.06295306607  | 0.0986442032250365 |
| GGCGACGGTGAC | 947.063490717867 | 0.0953184630977456 |
| GGAAAGTACCA  | 947.064484438243 | 0.104411913435471  |
| CATAGACTATGA | 947.069263798865 | 0.0918820338637237 |
| TACTTGTCACTA | 947.091074488953 | 0.0726963729869879 |
| GATGAATAATTA | 947.114917332287 | 0.0742046055554865 |
| GTCGTCACCATA | 947.119609995492 | 0.0868361104794433 |
| ATGACGGCAGCC | 947.124314770419 | 0.0701497587652385 |
| AATGGAAGTGAC | 947.145843193745 | 0.0762573350303626 |
| GTTACGTGGTAA | 947.150712937902 | 0.0738427857632649 |
| AAATGTCATGTT | 947.22073834288  | 0.0828258354275286 |
| ATAACTGACCGC | 947.225845455968 | 0.0679417673889702 |

|              |                  |                    |
|--------------|------------------|--------------------|
| TAGAGACAGTCA | 947.260012669375 | 0.0714512061716127 |
| ACGGTCATCGGC | 947.27777821774  | 0.0689575861129894 |
| GTGACGATGAAA | 947.284377884577 | 0.0710443439169332 |
| AGAGGCTGTCAT | 947.30120242788  | 0.0662244542691312 |
| GGTTCACGTCAC | 947.301666092229 | 0.0506427208315778 |
| GGCTGGCGTCAC | 947.308090085234 | 0.111042949362027  |
| ACCGTGTGTCAC | 947.329053003333 | 0.0660354902370507 |
| ATAGTATTCATA | 947.337603177456 | 0.0776201004669852 |
| TGACATACTGAA | 947.341785169472 | 0.058201579357051  |
| TAACGTCACCCA | 947.351805483246 | 0.0644317529620308 |
| ACTCATTTCTAT | 947.377034643807 | 0.0626573903989388 |
| TCCGCGGACTCA | 947.389816833596 | 0.0759255880677782 |
| ATTTTGCTCACA | 947.395283253712 | 0.080317269196001  |
| CCCGAATTACTC | 947.403955047295 | 0.0592876180219126 |
| AGTCAGAAACAG | 947.41457734654  | 0.0558192545918288 |
| GTGAGGTGACGA | 947.445980393041 | 0.0583325057268853 |
| CTGACTAGAACA | 947.457046510826 | 0.11163856739462   |
| GGAAGATGTGAC | 947.458669075035 | 0.0633273965831471 |
| GTGATTACGCAA | 947.461435253675 | 0.0651115538995679 |
| AGGTGGTGACAA | 947.46468054226  | 0.0680628997547612 |
| GCGCAGCGTCAC | 947.499122332332 | 0.0833724747484976 |
| CAAGCGTGACCC | 947.528970813093 | 0.0802684661268297 |
| GTAACGTACTCA | 947.532867233373 | 0.0680173215842418 |
| ATGAATCTTAAC | 947.536874208034 | 0.0736310216550786 |
| AATAGACTCAGT | 947.541526316472 | 0.0739294669792771 |
| CATTCGTCGTCA | 947.546273860653 | 0.0797599865458214 |
| ACTCATCGGGGC | 947.564107413677 | 0.0630802102320259 |
| AAAAGTGGTCAC | 947.565756210535 | 0.090826569461787  |
| CGGTCATTCTAA | 947.57774045649  | 0.0726893420811016 |
| CTCGAATTACTC | 947.582587460824 | 0.0713280404072275 |
| GGTTAGGTTGAC | 947.586144978629 | 0.0612885192015779 |
| ACTTGCTCACCA | 947.59856220438  | 0.0796217991241701 |
| ATGACATCTATC | 947.599437459451 | 0.0735304409023244 |
| TAGTGGAGTCAA | 947.601757070972 | 0.0653304093500364 |
| AGTAATTACTGA | 947.618488917289 | 0.0492993562871564 |
| ATGAGTGTACAC | 947.661352355065 | 0.0867136177167943 |
| ACATGACGAGGC | 947.728618973828 | 0.101953622999514  |
| CTGACCAGTTAA | 947.741242062641 | 0.0746713896240677 |
| AGTCAGCCTAAG | 947.756496049291 | 0.0717127653395916 |
| AACGACTGATTC | 947.772644959199 | 0.0646328030623605 |
| GTCATTAGGGAA | 947.776103721882 | 0.0696531505545502 |
| CGTCTGTTGTCA | 947.777321322575 | 0.0564924982396856 |
| CATTCGTGTCAC | 947.827949814209 | 0.0749490281651081 |
| GTCTTACTGTCA | 947.834313084108 | 0.0767670367334678 |
| GTCACCCGTTCA | 947.835741298151 | 0.0902958273818768 |
| ATTGACGAAGTC | 947.872365154244 | 0.0994927858766824 |
| ATGAGTAGGCGG | 947.876244893508 | 0.0534399346203449 |
| ACTCATCATCCA | 947.934598184018 | 0.065051322303069  |
| ACACGTAAGACC | 947.939302152698 | 0.0522582588144454 |
| CCATCGATGACC | 947.943987014925 | 0.0754516521006387 |
| AGGCCATGACA  | 947.957830184414 | 0.10210845312701   |
| ACGGCAGTCACT | 947.960129632888 | 0.0643906380911021 |
| ACTCATCATCAT | 947.983046718877 | 0.058069617696969  |
| AAGTATTACTGT | 948.014834983946 | 0.0682869102337081 |

|               |                  |                    |
|---------------|------------------|--------------------|
| CCGTATTGTCAC  | 948.022029043273 | 0.0657818024875624 |
| ATCAGTCTTCAA  | 948.036702537    | 0.0813135063012613 |
| CGTCACATGATC  | 948.045898509614 | 0.0705727050089468 |
| AACACTCATACA  | 948.057227803305 | 0.0724659754351681 |
| ATTGAGTAAGTC  | 948.057563381639 | 0.0709907099991008 |
| ACTCATTCCTG   | 948.075605758769 | 0.0745727906006728 |
| ATTAGTCGGTTA  | 948.078007252198 | 0.110011095312237  |
| GCTTGAAGTCAC  | 948.112055824028 | 0.0821314159693722 |
| TGAAGTGACAAA  | 948.147315321747 | 0.0609199192492027 |
| CTCAGAGTATGA  | 948.149604408283 | 0.0713624329710026 |
| AGAATTACGTAT  | 948.160762219432 | 0.116694658927275  |
| ATGTCATGAGAC  | 948.17075954223  | 0.103641705711893  |
| ATATGACCAGAT  | 948.176851493112 | 0.0726082298371353 |
| GAATGACCATGA  | 948.180833091857 | 0.0735095434257008 |
| CAGCTGATGACC  | 948.188829547228 | 0.0880287007150382 |
| TGTCACTAGACA  | 948.191859157001 | 0.0997516002503688 |
| CCGTGACACGAA  | 948.203785362958 | 0.0927261175143023 |
| TGATCTGACAAA  | 948.244116232233 | 0.0935338740461008 |
| GGGTGAGTATGA  | 948.260217177981 | 0.0614869891556051 |
| TCCAAATACTCA  | 948.283933292357 | 0.0649158659098593 |
| AGATGCATGACG  | 948.285672942779 | 0.116347970935386  |
| GTATGCCAGTCA  | 948.306518358781 | 0.087093207620194  |
| AATTACTCTATC  | 948.332637316796 | 0.0702286847309364 |
| GTGGCTCACATA  | 948.350383207897 | 0.0646986255201903 |
| GGACGGTGACCA  | 948.359003815729 | 0.0509297878705109 |
| GCCCCTGACGCA  | 948.364672295551 | 0.085043485965725  |
| ATTCCGGTACCG  | 948.386966503786 | 0.0793511587933746 |
| AGGTTAACTCAT  | 948.395073697685 | 0.0597302880232452 |
| AGTGAGCAAAGAG | 948.410523832367 | 0.0808301898457757 |
| CTAATATGGTCA  | 948.420364107785 | 0.0758644847591075 |
| CTGACTACTTGC  | 948.433902708165 | 0.0945487764498051 |
| GTTGGCGTGTC   | 948.44654648423  | 0.0720917642267796 |
| CCCTGACTACTA  | 948.451818567663 | 0.0683586973542331 |
| ATAACGGGTCAT  | 948.455993123147 | 0.106180511672388  |
| GAGTCAAGATAC  | 948.464775940001 | 0.080936150061877  |
| AGACTCGGTCAT  | 948.510291177603 | 0.0645379736680902 |
| TGACAACTGACA  | 948.541973037825 | 0.0633944391468575 |
| AAGTCACTTGCA  | 948.589725615715 | 0.0643861129126757 |
| ATGACCCGTCTG  | 948.593907623132 | 0.0912135336018279 |
| AGTGAGTTGTCA  | 948.601296765978 | 0.0583853432383418 |
| AGGGTGACGATG  | 948.607672122941 | 0.0752390242380313 |
| ATCTCATGACAG  | 948.628749194637 | 0.0694298132376967 |
| GATGACCTGGTA  | 948.639468938197 | 0.0731972416571265 |
| ATCGGTGACATG  | 948.647920568463 | 0.0678183600948463 |
| CTGACTGCTCAC  | 948.652695781504 | 0.0739213618630781 |
| ATGACCTGGCGC  | 948.681841693127 | 0.0817253749054352 |
| ACTGACTACTTC  | 948.696314784535 | 0.0794022130854705 |
| ACGGACTGGTCA  | 948.702279476768 | 0.0832869473200781 |
| CCGTCATTA AAC | 948.704056750126 | 0.0842609287640998 |
| ACTGACGGATAC  | 948.717470087861 | 0.0742040438080875 |
| GTCATGCTTAAC  | 948.732654789888 | 0.0516702985689309 |
| CGTCACAGTAAA  | 948.738913330422 | 0.0956083532489919 |
| AAGTCAGACTAT  | 948.744595384914 | 0.0573982876710745 |
| GAGGGGAGTCAA  | 948.751003110549 | 0.0521033797995437 |

|              |                  |                    |
|--------------|------------------|--------------------|
| TGCTATGATTAA | 948.839423424759 | 0.0771811464659389 |
| GCTTGGTGACCA | 948.839936566202 | 0.0615880067625698 |
| AACCTGACTCGC | 948.841532587332 | 0.0489056423332437 |
| CATTCGACTCAG | 948.850776152287 | 0.0555010193936525 |
| TAGTCAATGTCA | 948.856952596614 | 0.0874809098759289 |
| ATGAGTGAGTGG | 948.861649284399 | 0.0649018755793584 |
| AATGTCATGTAA | 948.865365985748 | 0.0875626097051289 |
| CATGGGGTCATC | 948.872251125074 | 0.0661355454303936 |
| CTGGGGTGTAC  | 948.888199587093 | 0.0564776560782103 |
| TCATGAATTACA | 948.88821878163  | 0.0768864883732271 |
| AGACGGGTGACG | 948.888969423087 | 0.0680184948017046 |
| AAGTGACACGAT | 948.913622020564 | 0.0651526776737694 |
| CGAGAAGTGACG | 948.91964740408  | 0.0529377179363637 |
| TCTAGGTAGTCA | 948.932281464287 | 0.0718400299980019 |
| GGGGTAAGTCAC | 948.969069425385 | 0.070854595884126  |
| TAGCAGTCAGCA | 948.971415519715 | 0.065330044197683  |
| GCCTCATCTGAC | 948.984867811061 | 0.0498935885327067 |
| ACGTCAACAATG | 948.994243890172 | 0.115552507641398  |
| CACTTAAATGAG | 948.999465921109 | 0.0739702291574263 |
| CTGACGAAATCC | 949.032902584006 | 0.0508390160053415 |
| TATCTGACGTGA | 949.034272758716 | 0.113539447373847  |
| GTCATTAAGCA  | 949.041948414515 | 0.0775388516617597 |
| CAGTGTCACGTA | 949.091624657314 | 0.0734696800476492 |
| CGACGTCACCAC | 949.098714437965 | 0.0628044400461022 |
| GGTGACACGCTA | 949.135392119575 | 0.0627032234883597 |
| GAATGAGTGATC | 949.143643460372 | 0.0688890962269567 |
| ATTCATGTGACA | 949.15027079162  | 0.0720992113043543 |
| ATGAGTAGATCG | 949.156758467986 | 0.055891835912275  |
| GTTAGGTGACCA | 949.175466327303 | 0.0603795036691001 |
| CCAATCTTATGA | 949.178452725684 | 0.068615385210713  |
| ATGCGTGTGACG | 949.181631764226 | 0.0700823019883453 |
| CAGCGGAGTCAA | 949.182542192083 | 0.0639611580836799 |
| GTCATGCCAAAC | 949.201300878603 | 0.0793914463918317 |
| CTGACTTAATTC | 949.20896008449  | 0.0962006646111794 |
| ATTACACACTAG | 949.210084665374 | 0.0486002351497787 |
| GATGACAAGAGC | 949.215179007051 | 0.0489041023447532 |
| ACTAGTAGTCAA | 949.216120467275 | 0.11103546722584   |
| AATAATGACGGT | 949.23089217103  | 0.0688853435822175 |
| GGACGTCACCTA | 949.231616795897 | 0.0750570627946106 |
| AGACCATGACCA | 949.244050734732 | 0.0591205591530153 |
| GAAACCTGACTA | 949.246908888416 | 0.0738979612090444 |
| ACACATCATCTA | 949.280319423569 | 0.0616723063930461 |
| CGAGTTGTGACG | 949.280966681284 | 0.0599967038376099 |
| ATCAGTCTTAAA | 949.285213125748 | 0.0711948162870599 |
| CGATTACTATAA | 949.32641548715  | 0.051995325561645  |
| ATCATGACAGAG | 949.326496062186 | 0.060963118268216  |
| ACCGCCGTCATA | 949.330668972398 | 0.0362311445584203 |
| AAGGTAGTGACA | 949.345781343236 | 0.0919902881286167 |
| GACTCAACTTGA | 949.378443635683 | 0.0482528211577427 |
| ACAGCTCATAGG | 949.383470524122 | 0.0719749808714044 |
| CTCTCGGACTCA | 949.403983808633 | 0.0742370648069781 |
| GTCAACAGCTGA | 949.405858448932 | 0.0514422329839081 |
| TGTCCACGTCOA | 949.408894880277 | 0.0683580259818261 |
| ACCCGTGACCCA | 949.409941675928 | 0.0622235676677431 |

|              |                  |                    |
|--------------|------------------|--------------------|
| CGACACTGACTA | 949.458446119939 | 0.0565641408315231 |
| GCGTAATCTTAC | 949.459771450443 | 0.0766830517673242 |
| CTGCTAACGTGA | 949.473450172182 | 0.0793321467424909 |
| CCGGTACGTGAC | 949.473595399996 | 0.0744603405933794 |
| ATTCCGTCTGAC | 949.508918638633 | 0.057330699827281  |
| ACTACTCATTAT | 949.517641483098 | 0.0697857759614382 |
| GAATCACACATA | 949.52920234948  | 0.0571413858110689 |
| TCAACGTTGTCA | 949.532572441848 | 0.0726703048933904 |
| ACGTAATGACC  | 949.538970843492 | 0.0826564465349322 |
| GTGACCCAGAGA | 949.55290430071  | 0.0756092174280455 |
| GGATTTGGTGAC | 949.585219184208 | 0.0719798823381696 |
| CAGTCAGGTGAC | 949.589982307317 | 0.0793362784800204 |
| GCGACCGTCATA | 949.615340429458 | 0.0664615697531957 |
| GAGGCATGACAA | 949.645629795235 | 0.0713784496468032 |
| CGACTTGACTGA | 949.652424685025 | 0.062661554978588  |
| CTGTGTCAACAG | 949.680509440051 | 0.054726125351535  |
| ATGCGAGGTGAC | 949.694905546176 | 0.0587781857439949 |
| CAGGTATGCGTC | 949.710812290078 | 0.0751131163278769 |
| ACTAGTACTAAT | 949.722621861145 | 0.0449578648186725 |
| ACTCATAACCGG | 949.752586570719 | 0.0684820311603768 |
| ATCTCGTACTA  | 949.759841181062 | 0.064669976527289  |
| GTCACCAAGCTA | 949.761552984676 | 0.104425910677233  |
| AACTGACTAGGC | 949.786001701278 | 0.0617579402404529 |
| CCCGTAGTGACA | 949.78752513088  | 0.0744011164387429 |
| ATCTTGACACAC | 949.816732527099 | 0.0978047133373992 |
| CGTCACTCCTGA | 949.818189122656 | 0.0603802752298744 |
| AGTGAGGTGACA | 949.876467863727 | 0.0812951659958793 |
| AGGATATTACTC | 949.882850272566 | 0.0829666683711027 |
| GAGTTACTGATC | 949.883768317661 | 0.0778685459495234 |
| AACTAAGTGACG | 949.889748751009 | 0.0542750271438059 |
| ATAGTCAGCTAC | 949.891929982657 | 0.0600717617588568 |
| CTGTTGGGTGAC | 949.920846725626 | 0.0558223548002471 |
| ACTCATTGAGAG | 949.940836071141 | 0.0698077084643648 |
| AAGTGTCCGTCA | 949.942321411844 | 0.0606322497373721 |
| GTCGATCTGACA | 949.95969030163  | 0.0757636403571869 |
| AGTCAGTAAACT | 949.960870614605 | 0.0740445674598086 |
| AGATCGATGACC | 949.962558951704 | 0.0761497670514345 |
| TCACACGGATAA | 949.963975333558 | 0.0945525137547311 |
| CTGACTAGTAAA | 949.967563883439 | 0.101399389135399  |
| CAACGTCACCCA | 949.976911900412 | 0.0611220687914642 |
| GAACGACTCTTA | 949.999977441922 | 0.0534115884889216 |
| TCTAGTTTGTCA | 950.000698719376 | 0.0653159774194704 |
| TAGTCAATCTAA | 950.001062598574 | 0.0916778297140683 |
| GGAAGCGTCAGA | 950.026722976124 | 0.0699543234459893 |
| AGCGTCATGAGG | 950.027488055693 | 0.0861758097739602 |
| ATGAGTGAGTTG | 950.030483563241 | 0.100842502288384  |
| AATGACGTCTAA | 950.037312618912 | 0.0694279979121795 |
| TCTGACACCAAA | 950.064476746132 | 0.0857482855751985 |
| CTGCCACGTAAC | 950.072577754874 | 0.0706599339176826 |
| AAGAGTCTGACA | 950.104622020074 | 0.0618872873910722 |
| CTCAACTGGTCA | 950.114855701048 | 0.0614589634487256 |
| ACTCATAACCCG | 950.124686667105 | 0.0515666600006702 |
| GACTCAATCTCA | 950.130162831754 | 0.0537944169063372 |
| AGTCACGGGGAG | 950.136740653369 | 0.0600216697695859 |



|              |                  |                    |
|--------------|------------------|--------------------|
| GTCACCTTAATA | 950.148246071212 | 0.0761546525792211 |
| CGCGTCACTAGA | 950.167709561247 | 0.0800382338056319 |
| CATGAGTCCCTC | 950.181656357542 | 0.0699760909415404 |
| GAACACGTGGCA | 950.193744565452 | 0.0878157289101702 |
| ACTAGTCAGTTG | 950.211715875527 | 0.0520873014232731 |
| GTTACGCAACGA | 950.222499200342 | 0.04993751472607   |
| ATTACTCGATTC | 950.229391645616 | 0.0848657287550267 |
| GTGTTATCGTCA | 950.237893765023 | 0.069959117882312  |
| GTGGCGTACGA  | 950.239370984006 | 0.0856708882402333 |
| CTATGACCGCAC | 950.253461227496 | 0.0509674779244842 |
| TCATAGTATAGA | 950.302188460115 | 0.0910234258230615 |
| ATAGGCCAGTCA | 950.313928871999 | 0.06250899780781   |
| AGTCTTGTCAAC | 950.33973768793  | 0.0691063066585164 |
| CATAGACGTGTC | 950.349546198265 | 0.0639693563407832 |
| AATATAACTCAC | 950.359407122662 | 0.0723175446685439 |
| AAAAGATGTAC  | 950.383118508544 | 0.0714059068957178 |
| CTCTTACATGAC | 950.401915841996 | 0.0560952600661397 |
| CAGAGTCAATAA | 950.422108452334 | 0.0865864918029067 |
| CGTGTGTCAAGC | 950.454368280879 | 0.0564328504358669 |
| CGTCACACAGAG | 950.454494778896 | 0.090993282472564  |
| ACTCGTCAGATG | 950.470177034994 | 0.0507241252376892 |
| GCTGGGTCAACC | 950.49790407031  | 0.0874670545664072 |
| AGTGGCTCACTA | 950.498941527068 | 0.063840970896363  |
| ATGAGTAGGAAA | 950.504806408337 | 0.0790491849774537 |
| AGATGACGGCAA | 950.519671032742 | 0.0835800691655468 |
| AGTTAATGATTC | 950.521444507662 | 0.0876858821200948 |
| ACCAGTCAGCCG | 950.524262549228 | 0.0544376732105883 |
| CGTCATGATATC | 950.531530670381 | 0.0470131159506451 |
| ACGTTGATGAGT | 950.53365895871  | 0.0891565373498564 |
| TGTCGAATCACA | 950.535913607725 | 0.105062260236274  |
| CAGCTCTGTAC  | 950.55933783346  | 0.101258271430777  |
| ATGACCATCAAT | 950.559814571955 | 0.0961128140881729 |
| CGTCACTGTTGA | 950.587530753304 | 0.0617158836110906 |
| AGGTAATGACAG | 950.589228337438 | 0.0582727718737411 |
| CGTCACTCTTTA | 950.599193470809 | 0.0507150805484886 |
| AAGTCACTTGAG | 950.621889152747 | 0.0627329423642893 |
| TAAGTAGTGACA | 950.623946601669 | 0.0542904648088168 |
| GCCTGCTGACTA | 950.640806929217 | 0.070015886807087  |
| TCTACAGCGTCA | 950.645180274347 | 0.0486463222575564 |
| AATTGTGACGAG | 950.645282432461 | 0.0502070983774445 |
| AGACTTTGACTG | 950.650156013675 | 0.0774564505042197 |
| CCTCGCATGACG | 950.660364464882 | 0.0717945441961857 |
| ACTCATTCTCT  | 950.681387724215 | 0.0629978297199261 |
| GTCTGACAAAGA | 950.718330436928 | 0.0580163360702625 |
| AGTCGGGTGACG | 950.740125172229 | 0.0625462997150219 |
| GCAGCGGTGACA | 950.743665354706 | 0.0629590003360212 |
| TGGGTTGTGACA | 950.744147734235 | 0.0795379499606844 |
| ACGTGACAAACC | 950.75408555195  | 0.0718957852643254 |
| ATGACGACGGGA | 950.762927123057 | 0.0679643613684424 |
| CTATGAATACAA | 950.774095337805 | 0.0604146414053623 |
| CGCCTCATGACA | 950.774398935379 | 0.0773004284175473 |
| AGTCGTACTION | 950.774548207925 | 0.0584156015892875 |
| ATTACTGTATCG | 950.786963667152 | 0.0809284608171279 |
| CGTCACTGAAAG | 950.787363154463 | 0.0761918596696424 |

|               |                  |                    |
|---------------|------------------|--------------------|
| ATGATGTGTTGA  | 950.844619011346 | 0.0968706662062569 |
| ACGAGGTGACGC  | 950.878488994702 | 0.0738271758858512 |
| AGTGTCACGGCC  | 950.880695765204 | 0.0530445555854933 |
| GCTGACGCTTAC  | 950.893507149171 | 0.0716538043564185 |
| GTC AATGATACA | 950.978358878011 | 0.0500144564776368 |
| CCACGTTGT CAC | 950.981650689297 | 0.0786887477364887 |
| AACAGGT CACAT | 950.988989079426 | 0.0560487739011678 |
| ACTTCAGT GACG | 950.999046188319 | 0.0992815960662683 |
| GTTGTGACAGCA  | 951.017986020413 | 0.0747523803395314 |
| CGTCAGAGATGA  | 951.047325795512 | 0.0560246993527584 |
| CCAGGCATGACA  | 951.068636706972 | 0.0643968681081094 |
| ACTGCTGTCACA  | 951.081966001678 | 0.0844879128057061 |
| ACGTAGATGAGT  | 951.091358493652 | 0.0838762877370014 |
| ATCGAAGCGTCA  | 951.093068552116 | 0.0660539100516893 |
| CATGTCACATAG  | 951.114671058895 | 0.068826844725996  |
| AGTAAGGTGACA  | 951.128977157917 | 0.0487030969798241 |
| ATGGACTAATCC  | 951.130587309678 | 0.0605272928431318 |
| GACTAACCTATC  | 951.130670999279 | 0.0731650616306862 |
| ATGATGACCCGA  | 951.135045717461 | 0.0534938735383042 |
| CGCCACGTAACC  | 951.136064933424 | 0.0920400556882877 |
| ACGAGTAATCGG  | 951.136505509329 | 0.0696160120461482 |
| GGTCATAGGCCA  | 951.163998492645 | 0.0558048986223354 |
| CAAACCTCGTCA  | 951.176168243179 | 0.0662769149653794 |
| GACTAAATCATA  | 951.176699938974 | 0.0940858814829541 |
| GCTCCAGAGTCA  | 951.185364452613 | 0.0534261176804986 |
| GTGACGCCTGCA  | 951.195055256335 | 0.0458202295370408 |
| GCTGTGGTGACA  | 951.259264468288 | 0.0643268674558251 |
| CTTTGACACAAC  | 951.297905445466 | 0.102046858665073  |
| CTATCCTGTGAC  | 951.313750626086 | 0.0599060965943754 |
| AGTTGACGTGTA  | 951.330690323575 | 0.0509356734532079 |
| ATTTTCTGACAC  | 951.335992145299 | 0.0637633942448673 |
| AAGAATGGCTCA  | 951.343261478614 | 0.0900719897337361 |
| AGACAAATCATC  | 951.358185851574 | 0.105246996693564  |
| AGCTGTCACCTG  | 951.377954708611 | 0.0662871670080174 |
| AAGGCTCACACT  | 951.401540498057 | 0.0841638871391735 |
| AACGGTACGTCA  | 951.41668249515  | 0.095353654227593  |
| TACTGTTGACTA  | 951.424456970666 | 0.0703331610151417 |
| GCCCTCTGACAC  | 951.427401662727 | 0.0693352960707296 |
| GTCACATGCCAC  | 951.444312715823 | 0.0508035429837935 |
| ACTCATCTCGGG  | 951.458280197782 | 0.0484997552400061 |
| GATCCGTGACGC  | 951.462792292596 | 0.0538177947296958 |
| ACCGATTGACTA  | 951.462793012897 | 0.0522869270931976 |
| CGTTTGACTATA  | 951.477931734269 | 0.0518626452282012 |
| CGCTTCTGACAC  | 951.485223829155 | 0.0496815827523601 |
| ACTTACACATCA  | 951.499073734198 | 0.0616961622606222 |
| ATCAAGTACCCA  | 951.49972550262  | 0.0912930572968934 |
| ACTCATCCACAC  | 951.51764896514  | 0.0819838248433709 |
| GAGTAATAACGA  | 951.522439046788 | 0.054855058338791  |
| ATAATTGAGTAC  | 951.525060941003 | 0.0619163737505158 |
| CGGTCATCACTA  | 951.547022004017 | 0.0759690487826986 |
| ACATTGTGACAT  | 951.595378251831 | 0.055556926717185  |
| GATGAGTTAACA  | 951.603470601139 | 0.0696088879569039 |
| GTACACTGTGAC  | 951.604019830847 | 0.0969236507855393 |
| AGTGTCAGAAAA  | 951.606393808593 | 0.0818969447758958 |

|               |                  |                    |
|---------------|------------------|--------------------|
| GGAGCTAGTGAC  | 951.611212814937 | 0.1108999995151    |
| ATGAGCCAGCCA  | 951.647992362554 | 0.0534225497309286 |
| CGTCACCTTAGA  | 951.651614578151 | 0.0917549596342682 |
| CGGGATTACGCA  | 951.683038232301 | 0.0558094885148046 |
| ATCCACTGACTA  | 951.733600335493 | 0.0715053253196996 |
| ACTCATTTTACA  | 951.760721869687 | 0.0709725882117028 |
| AAGAGTCTTCGA  | 951.763320004423 | 0.0666608169469051 |
| ACACACCATGAC  | 951.784990937353 | 0.0790077953283291 |
| AATGCCTGACTG  | 951.795798206656 | 0.0837652190396081 |
| CGATTTATGTCA  | 951.80598028558  | 0.0545221479060154 |
| AGTCAAACGATG  | 951.851683745947 | 0.0715894723017541 |
| ATCACCGTCACC  | 951.853338806747 | 0.0557878923868763 |
| AGGGTGACCCAG  | 951.912028831517 | 0.0439226892907342 |
| AATTAGCAATCC  | 951.930662958499 | 0.0749946084237534 |
| GATAGATGAGTA  | 951.938623855218 | 0.0714361403029449 |
| AGACAGTCAGCG  | 951.947491751769 | 0.0757314803259529 |
| AGTGTCAGAGGG  | 951.953225548344 | 0.0557504894156801 |
| GGTGCCAGTGAC  | 951.957361151332 | 0.0522618935678763 |
| AAATGATGTGTA  | 951.964242059169 | 0.0453587505085053 |
| ACGTAACTTGCG  | 952.002021700047 | 0.0729459758988841 |
| GCTGACGAGTCC  | 952.022122428564 | 0.0609284841296324 |
| TACAACTTATGA  | 952.058337224485 | 0.0649284412393282 |
| CGTCACCACCAC  | 952.059648855243 | 0.0673872874631579 |
| AATGGGGTGACA  | 952.085811151265 | 0.0634687635245414 |
| CAGTATGAGTTA  | 952.119679131645 | 0.0524817074265021 |
| AGTGAATCAATG  | 952.155601006832 | 0.048772357692153  |
| CGATCTAATGAC  | 952.196555484764 | 0.0616473978192139 |
| ACACGTAACCAC  | 952.201230554261 | 0.0794244016846667 |
| CAATAGTCAATC  | 952.205946658131 | 0.0475727469020705 |
| GTCACAGCTCAA  | 952.218447567826 | 0.0772562761313789 |
| AATCGACTCTTA  | 952.222729446006 | 0.0614183653545338 |
| GCCTCTGACCCA  | 952.228130808186 | 0.0580633947399999 |
| AACCTTTCGTCA  | 952.253192397767 | 0.0790957070400393 |
| AATACCGTGTC   | 952.278117065916 | 0.077830257382179  |
| ATGACCGCATTA  | 952.284456718927 | 0.0510870512953646 |
| TGTCACTAGAAA  | 952.293610392766 | 0.0628393206815048 |
| ACTTGCTCACAT  | 952.30356246705  | 0.0765094072349907 |
| ATCACTGTCACC  | 952.310582355589 | 0.0572748929103375 |
| ATCAAGGTGACA  | 952.327468489453 | 0.0488278445507185 |
| GGAGTACATGAC  | 952.330273211577 | 0.0661382445601796 |
| TTAATTGAGTAA  | 952.333088130947 | 0.0625597275999654 |
| ACTCATACACCT  | 952.366645224005 | 0.0561603717234707 |
| CTAATCTGTGAC  | 952.387201443065 | 0.0671695495569118 |
| CCTTACTCGTCA  | 952.415299078871 | 0.0824872159558223 |
| ACTCATATCCGA  | 952.45038764504  | 0.0571574174984934 |
| AGGGAATGTGAC  | 952.503003429931 | 0.06234050952274   |
| GACTCTTACTGC  | 952.513440471395 | 0.0964335488485042 |
| ATTGAATTGTCA  | 952.519761693871 | 0.0482648980027907 |
| ACGTCAAAGGCT  | 952.520874155612 | 0.0864342811089697 |
| TATGTCAGAGCA  | 952.547261984077 | 0.10539762855884   |
| GTCACCTTATGTA | 952.570021430021 | 0.0453136123725445 |
| ATTACACACTAC  | 952.637508648249 | 0.0569478597403352 |
| GTTGGGTGACGA  | 952.64150116363  | 0.0709890909015731 |
| GTCACGCAGACA  | 952.642098089922 | 0.0581523709807049 |

|              |                  |                    |
|--------------|------------------|--------------------|
| CATCTGGTGACA | 952.688439512178 | 0.0534450688929849 |
| CCGTCATCTGCA | 952.715093878946 | 0.052956118040825  |
| AGACTCAGACCT | 952.724498063433 | 0.0658172060241546 |
| AGATTACGTATG | 952.732137523755 | 0.0499344770370494 |
| ACGAGAAGTGAC | 952.748564913344 | 0.0602688691438637 |
| CGAACACTCATA | 952.80926862268  | 0.0529030499317565 |
| ACCGGTGACAGG | 952.82009490739  | 0.047039205810736  |
| AACCAGTCAGGC | 952.857223252941 | 0.0756563616009352 |
| ATGGCAATGACA | 952.904449145302 | 0.0666348047485977 |
| GTCACCTTCGAC | 952.905136209149 | 0.0492023637881517 |
| ATCTGCAGTGAC | 952.915110467065 | 0.0664770666030273 |
| CTCGGGAGTCAA | 952.930954685927 | 0.0483059205288091 |
| CCTGGCTGTGAC | 952.961035204633 | 0.105372158475627  |
| ACCTGTCAGAGC | 952.972561809148 | 0.092513664492603  |
| ACGTCATGAAGG | 952.986976639287 | 0.0452891057578442 |
| CCAGCATATGAC | 952.993009717921 | 0.095536525215494  |
| AGTCGTGACACG | 952.994123800065 | 0.0784670378484384 |
| ACTAGGTCACAC | 953.001189383693 | 0.0779519880051841 |
| ATTAGAAGTGAC | 953.002188415934 | 0.0953275907695881 |
| ATCGATGTGTAA | 953.010302718444 | 0.0752226830231861 |
| AACTGAGCAATT | 953.021495165422 | 0.0718390864610228 |
| AGTTGACGTATA | 953.029399148832 | 0.0625205506834545 |
| ACGTAATACCTC | 953.035440448218 | 0.078513113977056  |
| AGTATTGTGACA | 953.051860589125 | 0.0776098496907839 |
| GAGTAATTGTGA | 953.055992708644 | 0.0582667257545032 |
| ATCCCTGATTCA | 953.066998163603 | 0.0926662425140938 |
| AAGAATCATAAG | 953.079874169705 | 0.0513312959458923 |
| CTTAGGGACTCA | 953.083617734055 | 0.0751728718643247 |
| ATGTCACAGGAC | 953.113913581167 | 0.0451530648677014 |
| CGTCCCTGTGAC | 953.127589403594 | 0.0499796813536686 |
| AGACCTTGACTC | 953.133789799429 | 0.0951626680032377 |
| CTCTTCTGACAC | 953.157552412558 | 0.0640042831392579 |
| CCATCTATGTCA | 953.18329942439  | 0.0576053144366826 |
| GGATTAAATGAC | 953.201879030986 | 0.0612380720374441 |
| GGGGTCATAGTA | 953.203096821105 | 0.0551211184306404 |
| GGTCATAGGCAC | 953.211179275585 | 0.056913641526163  |
| GTAAGACTCTAA | 953.224666502708 | 0.0893219920127817 |
| ACATGTGACAA  | 953.22949362039  | 0.0522965231273671 |
| TCCCTACAGTCA | 953.280435262781 | 0.0453532631635927 |
| AAGCGTCAGAAT | 953.280834003974 | 0.0567862034346901 |
| GTCACGAAGCGA | 953.292486077304 | 0.0494662373894302 |
| GTCACGCCATCA | 953.341483111142 | 0.0783997947184766 |
| GGTCACCCGTCA | 953.366398906209 | 0.0391078731627272 |
| AGAGAGGTGACG | 953.369622960827 | 0.0632566964402145 |
| CACGCGTGACGA | 953.371388281951 | 0.0627333514621293 |
| CTAGGACTCAGA | 953.37294215147  | 0.0843093848231168 |
| CAGTCCTTGTC  | 953.380299872645 | 0.0625686634506934 |
| CACATGACAGAG | 953.403881212457 | 0.105122416072183  |
| ATGTGACAAAGC | 953.425454575992 | 0.0886635908007656 |
| GCGATTACTGAC | 953.435672258549 | 0.087143792878442  |
| CTCAGTTGACTA | 953.438693007719 | 0.0815402247064563 |
| AAGTATTACGCG | 953.445254649905 | 0.0478255610395978 |
| CTATGTCTCACC | 953.486822173425 | 0.0473549129057444 |
| GACTGATCCGAC | 953.525523507656 | 0.0910033055103203 |

|               |                  |                    |
|---------------|------------------|--------------------|
| AAGAACTGTCA   | 953.538161741669 | 0.0843955297832829 |
| GTCTGACGAAA   | 953.553803021261 | 0.0651337119724737 |
| ATATGACCCCTC  | 953.579057421919 | 0.0513569108844745 |
| ACGTCACAAGGG  | 953.598412480228 | 0.0804901627717344 |
| AGTCTGACGCGA  | 953.612640294971 | 0.0504993614414202 |
| TGAATCAGCACA  | 953.636658650505 | 0.0715190642149083 |
| AGTCAGAGAGGC  | 953.638514212386 | 0.0524450515670937 |
| ATCATCGTCACG  | 953.656693778858 | 0.0775437270877546 |
| AACGCCACGTAA  | 953.667983252657 | 0.0628156227570768 |
| GATTGTGAGCAA  | 953.707283066067 | 0.0552959143045784 |
| ATGACAACCGAC  | 953.715512077084 | 0.0829413412399932 |
| AACAGATGTGAC  | 953.729827467137 | 0.0537435533524539 |
| GCGAAGCAGTCA  | 953.746131009889 | 0.0536456601392244 |
| AGTAAGGTGACG  | 953.774840310305 | 0.0545096591974536 |
| TATGTATACTCA  | 953.782226859937 | 0.0462928912290944 |
| GATTACGTAGAC  | 953.801000227301 | 0.0519326451064806 |
| CTGACTGCGCAA  | 953.809996403503 | 0.061755091682557  |
| ACGTCACGGATC  | 953.825545528279 | 0.064045802535259  |
| ACGACTCAGCCT  | 953.893542056672 | 0.0779008693315331 |
| GTCAGATTGTAA  | 953.893553266401 | 0.103793487149204  |
| CGCACGGTCATC  | 953.907635074859 | 0.0841558380381312 |
| ACCTCGTCACAG  | 953.925601972853 | 0.0703422604945969 |
| ATATGGTGACAG  | 953.939176292066 | 0.0601670722259417 |
| ACTCTACGATGA  | 953.949106721386 | 0.0690473705540068 |
| AGTCAGCCTGTC  | 953.972125864575 | 0.057653469250565  |
| TCTGCCGTGTCA  | 953.980851687149 | 0.0785337206052734 |
| ATCGCCTGTGAT  | 954.011416215783 | 0.0551327201088198 |
| GTATCAGTGACA  | 954.038742216944 | 0.052897236181399  |
| GTGACATTACTA  | 954.079228770533 | 0.052094080045534  |
| GTACACTCATCA  | 954.096504248296 | 0.0876295783773507 |
| ATGTCACAACAG  | 954.099923741983 | 0.0584296946169993 |
| ACCCCTACGTCA  | 954.10078583099  | 0.0576097745705289 |
| CGTCCGATGTCA  | 954.102660623223 | 0.0758595816886296 |
| AATGTGACAGCA  | 954.119051168593 | 0.0472561576227763 |
| AACCCGTACCT   | 954.187300057511 | 0.0894983729928391 |
| CCGCTGCAGTCA  | 954.201793125704 | 0.0750934762856306 |
| TCGACGTGACCA  | 954.21336557801  | 0.0489186525644465 |
| TCAGTTCTGTCA  | 954.221616715535 | 0.0859590169751945 |
| AACTGAGTCTAA  | 954.246451273422 | 0.0622679057195205 |
| GTTGACAAATCA  | 954.256472048273 | 0.0564793904949089 |
| AACGTCACCCAT  | 954.260273957236 | 0.0567174893507584 |
| CTCAGTGACATA  | 954.271877734715 | 0.0459340303141016 |
| CCGTCATGCTCA  | 954.275332630773 | 0.0674433235850889 |
| TTAATTGCGTAA  | 954.312712517021 | 0.0530980631350441 |
| ATACTAGGTCAT  | 954.321362130062 | 0.0942631998270616 |
| GGTTGAGTCGAA  | 954.338516442007 | 0.102491386961558  |
| AGGAGTAATTG   | 954.342305136042 | 0.0750622086581779 |
| TCGTCACCTGGAA | 954.344548613392 | 0.0608959036253345 |
| AACACATCATTC  | 954.352573252383 | 0.0541435035511053 |
| GCGAGACGTGAC  | 954.355351708166 | 0.0595611121817862 |
| GGTGGGGTCATA  | 954.357825328151 | 0.0822990283081042 |
| CGGGCTGTGTCA  | 954.37669674606  | 0.0677645667761265 |
| GTAAGTACGTCA  | 954.392096861775 | 0.0607603157226165 |
| AGTCAGTATTAG  | 954.392582409806 | 0.0481377898845843 |

|               |                  |                    |
|---------------|------------------|--------------------|
| GTGGTAATGACA  | 954.398043819056 | 0.0642652426413593 |
| TGACGCTAAGAA  | 954.409020367556 | 0.0537181993410391 |
| GATCATGAGCCA  | 954.4107298345   | 0.0467434517522225 |
| AAAAGAGTAACC  | 954.441616894815 | 0.0933772546494416 |
| ACGCATGACGCC  | 954.452599337183 | 0.0739539554382791 |
| ATGGTCACACAT  | 954.457957298883 | 0.0778493625969043 |
| CGTCACTCTTTC  | 954.485382579143 | 0.0831622036097596 |
| GAAAATCATGAC  | 954.552316651605 | 0.0695490106725276 |
| CCACTACATGAC  | 954.5686733696   | 0.0599219149902873 |
| GAGATTCACCTCA | 954.570581961316 | 0.0603079488631467 |
| ACTGTCACGCAT  | 954.583776548303 | 0.0785850196876716 |
| ACTGACAGATTC  | 954.641599287725 | 0.0644607415371792 |
| GTATGAGTTAGA  | 954.672723625397 | 0.0597966232529861 |
| AGTTTAGTGTC   | 954.672762833674 | 0.0583884673947474 |
| AAGTCTGACACC  | 954.676947960392 | 0.0559935899122863 |
| CAGGAAAGTGAC  | 954.686766036833 | 0.0894137490911366 |
| ATTAGTAAGTTA  | 954.688989095157 | 0.0581598887601932 |
| GAGCTTGTGACA  | 954.692685119111 | 0.0601857454024609 |
| CTGGTTATGACC  | 954.699318325942 | 0.0589930446825902 |
| CGCGTCACGGTC  | 954.70207831025  | 0.061063363174945  |
| GTCATGCTGCCA  | 954.708570129211 | 0.0599819805987216 |
| AGGATAGTCAGA  | 954.727110828367 | 0.0576265562118087 |
| GAGTTGAGTGAC  | 954.737889825253 | 0.0786216087295792 |
| AGCGAGTCAGGA  | 954.739527713631 | 0.0696600903070861 |
| CACTTGTCACCA  | 954.748883360102 | 0.048298690900292  |
| ATGAGTAGGAGC  | 954.750949231352 | 0.0611799941481423 |
| ACGTCACGCCGA  | 954.766952833736 | 0.0434778222709659 |
| CTCATGTTGTGA  | 954.769018046883 | 0.0619075980935127 |
| GTGTCACGGAGA  | 954.776062538601 | 0.0577086895166244 |
| CTAGAGAGTCAG  | 954.77703095225  | 0.0631638636227045 |
| ACGGCTGTCATC  | 954.785098233892 | 0.060697111741338  |
| GAAATCCATGAC  | 954.785515995328 | 0.054502311184846  |
| CAGTGACGCTGA  | 954.806007564572 | 0.062295331475007  |
| AACGTTGACTGT  | 954.826847522611 | 0.0677760995622213 |
| GTCAGTTTCGCA  | 954.831803930731 | 0.0642356734993727 |
| ATGACGTTGAGC  | 954.835060822021 | 0.0657858526113061 |
| GGTTATTCACAC  | 954.853259307257 | 0.0677856864648037 |
| AGGTGATTAATA  | 954.874943034306 | 0.0541896911738887 |
| CGGAGATGAGTA  | 954.908277090244 | 0.0638327591865877 |
| CTGACTCTCCCC  | 954.939507123844 | 0.0484529984866932 |
| CTGACGCTTAAA  | 954.959673259485 | 0.0725590235020267 |
| CTCTGACGAAAA  | 954.98223938938  | 0.0663294822108103 |
| GGTGACAGCGAC  | 955.002699939225 | 0.0642400415623542 |
| CGAGTGACAGAC  | 955.021726976906 | 0.0784739997125458 |
| TGTGACATCGAA  | 955.046832276074 | 0.0422166199529374 |
| GGTGACGGGTTA  | 955.047598917744 | 0.0553717700112658 |
| ACGTAGATGACC  | 955.079204427567 | 0.086501116317535  |
| ACACTCATGACG  | 955.097189686538 | 0.0463051984159663 |
| AGTCAGAAGGAG  | 955.097282815909 | 0.0424875032486093 |
| ATAAGTCAACGG  | 955.104032206379 | 0.0482025017392971 |
| GTGACACGAGCA  | 955.118576002781 | 0.0719979779893399 |
| ACGTGTCAGCGG  | 955.136957591941 | 0.0999692642858319 |
| CGTACCACGAA   | 955.13837427806  | 0.0578354178397641 |
| AGAGGTGACATG  | 955.199757123538 | 0.062828010616391  |

|              |                  |                    |
|--------------|------------------|--------------------|
| AGTTGTTGTGAC | 955.20368021732  | 0.0730374351854124 |
| CTGGGCAGTGAC | 955.218058234828 | 0.0473544622598636 |
| AGAAGTGACCCA | 955.218629905115 | 0.0581437684652864 |
| TACAGCCAGTCA | 955.247496557599 | 0.0548515091798506 |
| AAGAATGTCATT | 955.26646560371  | 0.0629976346384119 |
| CAAAGATTGCTC | 955.2685336437   | 0.0465393507342769 |
| AAGACTAACCTT | 955.282231244282 | 0.0508095850163675 |
| AGACTGCGTGAC | 955.28652820739  | 0.0726981191903911 |
| TAGCGGTGACAA | 955.337341174839 | 0.0477043078485441 |
| TACTTCATGACA | 955.344226636172 | 0.0676987337506218 |
| GCGGACTCACTA | 955.353682905454 | 0.0776856416573496 |
| TACCGAGTCAAA | 955.356729939873 | 0.0420644744733417 |
| GTATTTGTCAAA | 955.387136660986 | 0.0493462591647704 |
| ACTCATTTTGCC | 955.397227928998 | 0.0437817637852744 |
| CACTAAGTGTGA | 955.408049499613 | 0.0488089500257941 |
| ACAATGGCGTCA | 955.434336325924 | 0.0625740433757234 |
| GACGTACTCACA | 955.462126172676 | 0.0482822191780467 |
| TCCGTATTGTCA | 955.47709815555  | 0.0420207985409605 |
| ATAGGGAGTCAA | 955.496029515362 | 0.0681505795831219 |
| CGACTGACGTAC | 955.509591523154 | 0.0431532166345991 |
| AGTCGGGTGACA | 955.513697143723 | 0.0505937496365744 |
| GATTCCTGAC   | 955.548069942151 | 0.0633120941868781 |
| GCTGACTTAACC | 955.564769168322 | 0.0496241034923145 |
| ACACGTCAATCT | 955.576551776262 | 0.0592568212265986 |
| GAAAGGTGACAA | 955.626803277539 | 0.0531308759529676 |
| CTGTGACGGGTA | 955.64376148345  | 0.0538328902450468 |
| CGGGGTCATGAC | 955.670289003432 | 0.0938785460571841 |
| TCTCTGACATCA | 955.672340187817 | 0.0456186795500259 |
| CACCTGAGTAAC | 955.68467053839  | 0.0547136096768693 |
| CAGTGATTACAC | 955.721347113196 | 0.0787073233687769 |
| TCTTCCCAGTCA | 955.725405026738 | 0.0357684073708424 |
| TAGTGACGTGCA | 955.759713910098 | 0.0647408555708302 |
| GTCATAATAATA | 955.781297145987 | 0.0452437070271128 |
| TGACATAGAGAA | 955.783471973602 | 0.0526075917842312 |
| AGTCAGTGTGAT | 955.790134959881 | 0.0642740471593867 |
| AATGACCATACG | 955.791633863787 | 0.0462361152983189 |
| AGTTGACTAGTC | 955.803420840839 | 0.0633413014109997 |
| ATGAGCCAGTTC | 955.814304761129 | 0.036472152999234  |
| ATGACGACCTGG | 955.815098613394 | 0.0468663170134412 |
| CGGACTAATCGC | 955.828086517769 | 0.0513160199301768 |
| GCGTCAGACAAC | 955.851727915703 | 0.0841251714039157 |
| AGACTAATCTAC | 955.8560485106   | 0.0421771560566722 |
| CGGTTACACATA | 955.861675084066 | 0.0455269100478455 |
| TGAGTCCTCACA | 955.878845931713 | 0.0495339056864142 |
| CGCCACATCACA | 955.884655113701 | 0.0632172439472499 |
| TAATCTTGATGA | 955.928963877421 | 0.0619694969324082 |
| ACATGACGAGGA | 955.940126460473 | 0.0725644810350811 |
| GTGCGTAATTGA | 955.950988665228 | 0.0428432473149582 |
| ATTGATTTCATA | 955.960113629638 | 0.072496456528095  |
| CGGTGACGACTA | 955.969352092801 | 0.0711351702812461 |
| ATGAGTGTATAC | 955.984684904339 | 0.0616376738576805 |
| TCCCATTGCTCA | 956.017854379246 | 0.0510089084872839 |
| CAACGTCACCCG | 956.06664756602  | 0.0469582263514627 |
| CGACTGTGACAG | 956.067561268399 | 0.0555528699502071 |

|              |                  |                    |
|--------------|------------------|--------------------|
| CTAGCGATGACC | 956.068429181917 | 0.0567421297323183 |
| ATAAACAGTGAC | 956.068635962223 | 0.0593639173845058 |
| AAGACCAGTCAA | 956.07555095896  | 0.0641984632287297 |
| ACTCATGTCACC | 956.087766393763 | 0.0416711727672083 |
| ACTCGTTGACTG | 956.096371991943 | 0.0553379792844104 |
| CATCGTCACCGA | 956.120737492479 | 0.0610563686181787 |
| CGTCACAATACC | 956.147491843759 | 0.0886955977274731 |
| CGGTCATAGCGC | 956.157908624359 | 0.0822449880847767 |
| GATGTGTCTCAC | 956.158963918278 | 0.0632134598343607 |
| AACGTGTAATCC | 956.164794581418 | 0.0485344467464549 |
| CTTGTCATTAGA | 956.172914975057 | 0.0481466147273185 |
| AAGAGTCTTCTA | 956.178059532278 | 0.0463195125863153 |
| ACGCGCGTCACT | 956.19129957258  | 0.0590910916837553 |
| GACATCATCATA | 956.215065987723 | 0.072277515720199  |
| CATGGGGTCATA | 956.267287547356 | 0.0423072261851455 |
| ATCGCTCCGTCA | 956.279270082531 | 0.0555983359745708 |
| CTGGACATGACA | 956.29336274104  | 0.0491886569211198 |
| ATGACAAGAAGG | 956.327805155945 | 0.0416422749347258 |
| AATGAAATGACG | 956.367426185064 | 0.0650708487813547 |
| ACGGATGATACA | 956.374924390575 | 0.0611667765944738 |
| GAGTCAAGACGA | 956.39402155902  | 0.0738332980517993 |
| GCAAATGACCGA | 956.41106475892  | 0.0686998741958954 |
| GTCAGTAATAAC | 956.443876856436 | 0.0434376710890221 |
| GTGACGAGGACA | 956.482566551743 | 0.0568268221198564 |
| GTAGAAGGTGAC | 956.500302806738 | 0.0448295963512181 |
| GGGGACTAATAC | 956.515055270622 | 0.0755841507783389 |
| GTTGCTGATTCA | 956.516209209425 | 0.0686775715544944 |
| CCGGTGTGTCGA | 956.544582365916 | 0.065714842612712  |
| CCTCAAGTCATA | 956.553807171748 | 0.0608296931197855 |
| CTCACCCGTGAC | 956.591924202366 | 0.0410670089482717 |
| ACGTCACGCTCG | 956.659856416677 | 0.0837455108686035 |
| CACTGACTAGAC | 956.661445123905 | 0.0574287973745701 |
| ACGTCAGACTCT | 956.678022841416 | 0.0700578666781224 |
| GCGATGAGACAC | 956.710835464564 | 0.0616641792154899 |
| ATGAGTAGCGCA | 956.715400800965 | 0.061330724676326  |
| ACAACGAATCAT | 956.765041737236 | 0.0714354950383007 |
| AATAGGTGACAG | 956.795328751163 | 0.0837338926903691 |
| ATGACCGTATCC | 956.88760600495  | 0.0491166723648818 |
| CTACTTGACACA | 956.900966187468 | 0.0509194080648748 |
| CATCGTGAGTGA | 956.966284754969 | 0.0882690910642331 |
| GACTACGGTGAC | 956.966428519243 | 0.0720711647723507 |
| CGCAGTGACCCA | 956.968974665445 | 0.0429274655680733 |
| AAACCGAGTCAA | 956.978066557889 | 0.0455180439044513 |
| CAGTCAATTGTC | 956.985228838443 | 0.052591023841947  |
| CGTCATGATGTC | 957.01588818491  | 0.0455269190305897 |
| CTAGCCGCGTCA | 957.028509918308 | 0.051871002653003  |
| GTGATGCAACTA | 957.069254059446 | 0.0752518455554243 |
| AGTCAGAGCGAG | 957.094903512298 | 0.0601050086925077 |
| AGTCAACGGTTG | 957.137998934314 | 0.0817682506738767 |
| GGCCATACTGAC | 957.155413366277 | 0.0975173211225408 |
| CCGTCTGACCCA | 957.195396925416 | 0.0803837780450261 |
| CAGAGTGGCTCA | 957.228588288762 | 0.0516088967805952 |
| CTATGCGTCTTA | 957.22931800062  | 0.0747336984728291 |
| TGCATGTGACAA | 957.280457787854 | 0.0723970918931021 |



|              |                  |                    |
|--------------|------------------|--------------------|
| CTATTATCGTCA | 957.310522552217 | 0.0589235693587684 |
| AAGTCTCGTCAC | 957.33019351682  | 0.0702494316757399 |
| ATACACTCATCG | 957.339362858888 | 0.0511539786782202 |
| TGTCACTCTAAA | 957.359319062058 | 0.0593086252987599 |
| ACTAGGTGACAG | 957.365234664399 | 0.0477058519761203 |
| CATACTCCGTCA | 957.367461664851 | 0.0404907840410237 |
| GATGGGGTGACA | 957.37475702616  | 0.0604021556711307 |
| GGCCACGTGAC  | 957.383120460481 | 0.0497074710733175 |
| GAATTAGTCCTC | 957.394890238511 | 0.0408254419200806 |
| AGTCGCTGACCA | 957.415131742293 | 0.0972947378648329 |
| ACGTGTATCATC | 957.443069771877 | 0.0715640787018607 |
| AAGTCACGCGTA | 957.485925490352 | 0.0658970642270556 |
| AGTTGACACAAA | 957.51251863419  | 0.0497115317401549 |
| AATGAGTATGCG | 957.515767210705 | 0.0492297139820641 |
| CTATCGGTGACC | 957.528793098653 | 0.0494785028820599 |
| GGTTTAGGTGAC | 957.549551291587 | 0.0918622909216585 |
| CAACGAGTGACC | 957.557656143609 | 0.0594850625814509 |
| AAGTGTCAGTGC | 957.564674056853 | 0.0617273254905688 |
| GATCGAATGACC | 957.564926839437 | 0.0596120483809614 |
| AAGAGTGACGTC | 957.571975402346 | 0.0570421726415033 |
| ACGACAGTGACG | 957.572199240461 | 0.0636164731760042 |
| ACTAATGTCACA | 957.59292740384  | 0.0603437729818123 |
| TCTGACATAAGA | 957.616981367381 | 0.0766564117431205 |
| ACGCATGACATG | 957.625477191252 | 0.0814932819352412 |
| AGACGTCACAGG | 957.628516152868 | 0.0618723844359613 |
| AGACATGTCAGA | 957.635749302882 | 0.0460420447177407 |
| ATGACACGGGCG | 957.642468461899 | 0.0645055386663225 |
| CATGTGACTAA  | 957.647284597852 | 0.0590767516339867 |
| AGGACTTGACTC | 957.648368222782 | 0.0588197921655321 |
| TGAATCCGTCAA | 957.66003607877  | 0.0500431069945376 |
| AAGTGAGTACTA | 957.726350867759 | 0.0306448387815789 |
| AGCAAGTCAGTC | 957.747156207216 | 0.0648703635057508 |
| GGATGGGTCAAC | 957.790728257721 | 0.0420251928353665 |
| GCGAGGGGTGAC | 957.811748807509 | 0.0706028952874593 |
| CAGCTGGTCATA | 957.817985925942 | 0.0410901526161609 |
| GTAAGTACTACT | 957.834918070743 | 0.0682802962312751 |
| ACTCTGTGTC   | 957.841568399865 | 0.0552391476238642 |
| ACGTCATGGAAG | 957.857481631989 | 0.0846372040305441 |
| CGTGAGGGTGAC | 957.85889686516  | 0.0686562908019494 |
| CATGCCGTATGA | 957.864596989633 | 0.0491477838168982 |
| TACAATGTGACA | 957.870105182847 | 0.055051854936107  |
| TCATTGTGGTCA | 957.877888569224 | 0.0547320165018428 |
| GTTTACGTGACA | 957.892658284902 | 0.0443352883171662 |
| GGGTGCGGTGAC | 957.894906277484 | 0.0766650616206948 |
| GGGGAGCATGAC | 957.896639548941 | 0.0741777922345714 |
| ATGGTGACGTCG | 957.901292662636 | 0.0760816181881195 |
| AAAGAAGTCACA | 957.908923939749 | 0.0383230670954041 |
| AGTCCAATGACG | 957.925024461351 | 0.0528301127952461 |
| ACTAATGTCACC | 957.941705959443 | 0.0597243784372918 |
| AATTATTCATTC | 957.985170685539 | 0.0756031959402197 |
| CAACCATGACAG | 958.017720527464 | 0.0605393998969645 |
| GTGTCAGTATGA | 958.022573769437 | 0.050468394886987  |
| CACTAATGTGTC | 958.041634550683 | 0.0528485493377605 |
| AGAACACCTCAT | 958.056701331601 | 0.0397912509546618 |

|              |                  |                    |
|--------------|------------------|--------------------|
| CACATCATACTA | 958.072541974988 | 0.0650611613480821 |
| ATGAGCAACGAG | 958.091006115409 | 0.0473613957006153 |
| AAGTCACGGTGT | 958.131109544882 | 0.0729518093559402 |
| GCGGCGTGTGAC | 958.168993929018 | 0.0700342030958085 |
| CGAGACTTGTCA | 958.185449837309 | 0.0547934333339462 |
| AATCCACATGAC | 958.189042031803 | 0.0842297631324729 |
| GAGCTTGGTCAC | 958.1973187396   | 0.0678622117095952 |
| ACTCACAGTTTG | 958.209907470939 | 0.0565087102221311 |
| ACATTGGCTCAT | 958.21157758871  | 0.0546417375738863 |
| TCGACACATTCA | 958.229112695734 | 0.0434919011821961 |
| TGATGTGTACAA | 958.235710336583 | 0.0793358759327353 |
| TACTCATCTCAA | 958.243178955159 | 0.0516042003474063 |
| GAGGACAAGTCA | 958.245245651539 | 0.0755213130392194 |
| CGAGTAATCATC | 958.272411557779 | 0.0408150163098618 |
| GTCACTAGATCA | 958.277294220245 | 0.0258469983898785 |
| AATGTATTACAC | 958.301042769823 | 0.0586626480541183 |
| GTCACAGACCAC | 958.331097082465 | 0.0488204133804271 |
| CGTGGTGACCGA | 958.362701362844 | 0.055452208801079  |
| CATTGGTTGACG | 958.413667345996 | 0.0718265290431294 |
| AGTGGTGTGAGA | 958.451184446719 | 0.0402775932410636 |
| CCATATAGTCA  | 958.481600436736 | 0.0904882216679332 |
| AGCGAGATGACA | 958.506378144289 | 0.0879099613180538 |
| TAGAATGTCATA | 958.509553710993 | 0.0452154067859753 |
| AGTTAGGTGACA | 958.549915391711 | 0.0630294170188019 |
| CTAGCCATGACA | 958.577176728632 | 0.0522820566048967 |
| ACTCACCTAGGG | 958.580688711775 | 0.0533958403741974 |
| CGTCATGAACAC | 958.633455780613 | 0.0944633864628921 |
| GTCACGTGCTTA | 958.637674903474 | 0.0704422002683061 |
| ACTCATCAACAC | 958.652457860833 | 0.0520217682972594 |
| CATATCCGTGAC | 958.657200893195 | 0.0599842226439102 |
| AGAGCTCATGAC | 958.725545881886 | 0.0432068697336455 |
| ATGACAACCGAA | 958.731824746672 | 0.0840251282244767 |
| AGCGTTCGTGAC | 958.761970089556 | 0.0795579696799828 |
| ACGCCTGTCATA | 958.782915570448 | 0.0479143229954474 |
| ACAGTCAACGTC | 958.785493097984 | 0.0573136980704333 |
| AACCTATGACCC | 958.837107635628 | 0.043679037354835  |
| GGGAGAGAGTCA | 958.837344740385 | 0.0861578155117459 |
| CAGGTTCGTGAC | 958.860769635613 | 0.049446528314782  |
| GGGTAATGACAA | 958.909880017135 | 0.0559661829125013 |
| GGGTCATAAAGA | 958.911541450087 | 0.0766085388451696 |
| ACTCATCCGAGA | 958.944623586014 | 0.0497621521599891 |
| ACTCATAGGTAG | 958.948366493407 | 0.0794014279669105 |
| GTCTCCTAGTCA | 959.007253746825 | 0.0815450648557232 |
| CGGACTGAGTAA | 959.04223884047  | 0.0557317239114491 |
| CCTGACTGGTAA | 959.081329026074 | 0.0638374916379841 |
| ATAAGTCAATAT | 959.086834427045 | 0.0666044124050874 |
| AACTACGTTGAC | 959.104497271022 | 0.0926346135706472 |
| TATCCTGTGACA | 959.115381085891 | 0.0589902078794946 |
| TACCGTGACAGA | 959.116222307831 | 0.0604521793708422 |
| AGATGAGTAGTG | 959.14667426422  | 0.0643560650400734 |
| GTGACAAACAAC | 959.199834834901 | 0.0706652078689416 |
| ATCTCGTCGTCA | 959.210862201612 | 0.0483854401878535 |
| CATCCACGGTGA | 959.220645587266 | 0.091876312363637  |
| AGCGCAGTCAGA | 959.238604722475 | 0.0440433628990398 |

|               |                  |                    |
|---------------|------------------|--------------------|
| ATCACTCAGAGC  | 959.23994080175  | 0.053148651422471  |
| TATACGTCAACA  | 959.289786257398 | 0.0539226251460719 |
| CGTGTCACGTAG  | 959.324185780261 | 0.0589785819784792 |
| TACTCATTGAGA  | 959.33153241389  | 0.0584194514426865 |
| AATGACGGGGTA  | 959.336844064645 | 0.0460948574831    |
| GATGAGACACAA  | 959.337811635891 | 0.042219730230925  |
| AGTACCCTGTCA  | 959.361555320188 | 0.0573781143114553 |
| GTCACGTTTGGA  | 959.364898879503 | 0.0561676942205813 |
| ATATTGTGACGG  | 959.410932798025 | 0.0498469034489812 |
| GGTCATAGTAGA  | 959.411821861456 | 0.0413393197765207 |
| AACGCGGTCACT  | 959.431971325079 | 0.0541361786380342 |
| GTGACGCCTTTA  | 959.433639969232 | 0.0390638556555358 |
| CAATACTTGTC   | 959.447512399723 | 0.0508870384127903 |
| ACTCACCGTCA   | 959.458210579391 | 0.0545941597726497 |
| AGCTGTCATGTC  | 959.45952388251  | 0.0568099523088472 |
| ATGTCACTATAA  | 959.476867210321 | 0.0456868495305876 |
| ACCGTGACGGAG  | 959.489141756226 | 0.073156076234582  |
| GACAAGGTGACA  | 959.489535216089 | 0.0412849694136541 |
| TAGTCAACGATA  | 959.491212890646 | 0.0386609844935922 |
| ATTACACGTAAG  | 959.502203535729 | 0.0914454849438162 |
| ACATTGTATCAT  | 959.525749792141 | 0.0545598650012079 |
| ATGCGAACTGAC  | 959.561406240756 | 0.0565445818023053 |
| ATGAGTAGAGCC  | 959.56431103374  | 0.0567809981140225 |
| AGTGGTCACAGA  | 959.564396702985 | 0.0510615626189665 |
| GTAAATGACCGA  | 959.570071602141 | 0.0406982260068279 |
| AAACGCGTGACA  | 959.595118258529 | 0.0539179175072581 |
| GAGTCAAGGGAC  | 959.606745816278 | 0.0731051876316461 |
| AACGTGAGCCAC  | 959.606759075286 | 0.0594928628715702 |
| AGTGACAGCACG  | 959.644817671531 | 0.0554428523023011 |
| GATGATGCAAAAC | 959.653763016843 | 0.0466241843089382 |
| ATGACAGCTGAG  | 959.655702958488 | 0.0503586652942928 |
| AGTCAACTATCA  | 959.684076995738 | 0.0651838329061544 |
| GGAGAATGACCA  | 959.733847857631 | 0.0710780853674833 |
| AGTGACAGAGAA  | 959.777874835794 | 0.0536501133757619 |
| ACTGGTCAGAAA  | 959.780108101593 | 0.0410630485820191 |
| AAGTCTGACACT  | 959.785979466521 | 0.042356412502745  |
| GCAGTGTAGTCA  | 959.79196779374  | 0.073877358385741  |
| ATGACCTAGTGA  | 959.803878772114 | 0.0872763282502565 |
| CGTAAGCGAATC  | 959.810642532933 | 0.0673477575054371 |
| GTAGAAGTCACA  | 959.812482885219 | 0.0782590863432936 |
| CGTACTAATTCA  | 959.814259274654 | 0.0537652956610086 |
| ATGGGACTCACA  | 959.902340666941 | 0.0744863399190255 |
| ACGTCATGGTAG  | 959.925615401337 | 0.0687380733980014 |
| ATGGGTGAGTAC  | 959.944437657071 | 0.0523078552740746 |
| GATACCCTGACA  | 959.947518249293 | 0.0511272686330235 |
| TAATGTGAGCAA  | 960.039241842739 | 0.0394006477495234 |
| ACCCTCATGACA  | 960.076577206112 | 0.0410047115034395 |
| GTCACAAAAGGA  | 960.092851495164 | 0.0440510882909993 |
| ATCATTCTGACA  | 960.123036696928 | 0.0535606604645721 |
| GAAGTGTGACCA  | 960.150377201875 | 0.0564036399018016 |
| GTCACGTGATA   | 960.154508620773 | 0.0652790084064003 |
| AGAGTGACAGAG  | 960.169148522797 | 0.0402344270821537 |
| ACCAGTAATACT  | 960.179861509062 | 0.0708532408395478 |
| ACACATCATCCT  | 960.182916630952 | 0.0407560694754744 |

|               |                  |                    |
|---------------|------------------|--------------------|
| AAGTGGTGACAG  | 960.230671831716 | 0.0438663213632145 |
| CCGAGCGTGTCA  | 960.292552908963 | 0.0686022238481084 |
| ACTTTCACATCAT | 960.298657032359 | 0.0567110716489998 |
| CCTGTGACCATA  | 960.327188083406 | 0.0646602843028859 |
| AAAAGTGACACG  | 960.330273620735 | 0.0397689531208497 |
| CTGTCACCAGCA  | 960.331828645867 | 0.0529171073753039 |
| GCTGACTGGAAC  | 960.331850821099 | 0.0607324443852977 |
| CGCATTCCGTGAC | 960.33344006713  | 0.0499797530588615 |
| CAAGTCACTCCG  | 960.372343958197 | 0.0737634740207235 |
| CCTAGCACGTCA  | 960.402161910601 | 0.0537219377463146 |
| CTACACATGACA  | 960.418821579786 | 0.063959860981735  |
| CTACTGTGACAG  | 960.431077956982 | 0.0528098528081344 |
| ACTCATTGTCAA  | 960.442038963506 | 0.0509855437166475 |
| ATCCCTTGACTC  | 960.453960003538 | 0.0502830065199979 |
| ATTTAGGTCATA  | 960.48213261888  | 0.058477825038521  |
| AGGGCCTAGTCA  | 960.49864725673  | 0.0511785735911881 |
| TGACGAGGTCCA  | 960.518491946796 | 0.041011051393597  |
| GGTTGACTGTTA  | 960.521763692356 | 0.055135027913043  |
| CCCTCGGACTCA  | 960.525434307481 | 0.0675826662229156 |
| GTCATGTGTGTA  | 960.531480894983 | 0.0825528321202911 |
| GAGTGACAGGTA  | 960.570710034022 | 0.04891685962948   |
| AGGAGATTAGTC  | 960.597602107829 | 0.0352258253643426 |
| ATGACATCTAGC  | 960.630411221051 | 0.050097939341532  |
| CTGTCACCTTC   | 960.656265361491 | 0.0415199569222876 |
| ATGGTCATGGTC  | 960.683662458313 | 0.071820513237886  |
| AGTCAGCAACTA  | 960.686297449675 | 0.0461835685115281 |
| GATGATGCAAGA  | 960.708001783905 | 0.0409599664766393 |
| ACTCAGTCAATA  | 960.735455091892 | 0.0507014095100016 |
| CCTACCGTGACA  | 960.750910179492 | 0.0630238790283317 |
| AGGGATGACCAG  | 960.781266687219 | 0.0607611429653863 |
| CGCATTGCGTAA  | 960.808338390281 | 0.0406086590438753 |
| GTCATGCCCTCA  | 960.811860092245 | 0.0595447244476401 |
| GGTTCTGAATCA  | 960.921048387165 | 0.0379445815695996 |
| ATTAACCGTGAC  | 960.922384612983 | 0.0642119030334798 |
| AAGGGAGGTGAC  | 960.962690074314 | 0.0715231788506988 |
| AACAGTCAAACC  | 961.00675571178  | 0.0534116933998446 |
| ATATGAGTTAAT  | 961.146015151049 | 0.066314221431636  |
| ACTCATTCTCA   | 961.184285782837 | 0.0473243842248984 |
| TATTAGTACGGA  | 961.187993670844 | 0.051676371002144  |
| CTTTTCTAGTCA  | 961.194038657537 | 0.0505534641675515 |
| CTACTCTGACAC  | 961.248258779487 | 0.036490099552355  |
| ACCGGTGACGAC  | 961.257336162782 | 0.0577216913411241 |
| GTCGATGCATCA  | 961.310695531862 | 0.049509995434147  |
| CGCTGACACCAC  | 961.312766980719 | 0.0691903755900562 |
| ACTCATCCCGGC  | 961.3252846495   | 0.0643992227899296 |
| AATGAGTGCAAT  | 961.344869030968 | 0.0386312566055425 |
| ACCACATCATCC  | 961.396803196248 | 0.0602478761003213 |
| GAACAGCTCACC  | 961.411063849352 | 0.0576686095679931 |
| ACTGCCATGTCA  | 961.420162784037 | 0.0878645907864694 |
| AGACTAAGTCAG  | 961.423444537924 | 0.0413178011235755 |
| AAGAGTGACATG  | 961.425674709633 | 0.0806815357874296 |
| CTCGGTGACAG   | 961.435018755138 | 0.0456736852000203 |
| CGGCGTCACGAA  | 961.450255547215 | 0.0509312565012164 |
| GATGACCCGATA  | 961.458674281483 | 0.0421292282348331 |

|              |                  |                    |
|--------------|------------------|--------------------|
| GCGTCTTCGTCA | 961.463012633699 | 0.0569614134459093 |
| GGTGACCTGTAA | 961.466290817886 | 0.0494978508850437 |
| TGACAGACAGAA | 961.541907914302 | 0.0472259268123371 |
| CGTAGTGACAGA | 961.564290739944 | 0.0441640544751054 |
| CTGTCACAATAC | 961.564559570289 | 0.0509966341626977 |
| ATTGTGAGTACC | 961.579449182244 | 0.0659020056334547 |
| GTCACTACTAAA | 961.580753193209 | 0.0600829228049853 |
| TGACATCCGTAA | 961.6385634359   | 0.0576490901591135 |
| ATTAGTCGGTGG | 961.663862662517 | 0.0480658104140825 |
| TGTCACGAGAAA | 961.66748302949  | 0.0535984372426721 |
| TCAACTCCGTCA | 961.669369824739 | 0.0392562019755263 |
| TACCCGTCACCA | 961.678815985138 | 0.0772899602051636 |
| AGTCAATTTAGG | 961.68425494557  | 0.0621899610117525 |
| ATGATGATGCAC | 961.72451255674  | 0.0450270564199894 |
| GATGAACTCATC | 961.741454111339 | 0.0732819483868874 |
| TCATCGCCGTCA | 961.744484979977 | 0.0434716902188753 |
| TACGTAATCGAA | 961.747403394744 | 0.0737396509234103 |
| GATGATGCTATA | 961.751003913138 | 0.0561276897739014 |
| ATGGGATTACTC | 961.767763508285 | 0.0377938428517036 |
| AAGCGTGACGGA | 961.771212533352 | 0.0515349498948424 |
| ATCAGCGTCAGA | 961.788660473703 | 0.0811718323091857 |
| TACACGTCAATA | 961.851733818781 | 0.0636340994766107 |
| AATGCATCACCC | 961.852275398129 | 0.046120529871052  |
| CATGACGATGCG | 961.919803067925 | 0.0465711771880794 |
| CCGCGCGTGTC  | 961.923247971605 | 0.0705147330208513 |
| ACTCATCCGTCC | 961.959056165384 | 0.0471528940456818 |
| GACCCATTAGTA | 962.0002915077   | 0.0579041209121781 |
| GTAGATTCTGAC | 962.002453979456 | 0.0419380182487176 |
| TACGTCGTCA   | 962.028978481691 | 0.0485438458862112 |
| CGTAATGACATC | 962.054067841942 | 0.0581375881463634 |
| CTCGACTCAGAA | 962.063424004023 | 0.043481297785921  |
| AACTTACTCAAC | 962.076081344768 | 0.0686561914508268 |
| ATGACCTAACCA | 962.077682175864 | 0.0652212343168214 |
| TGCTATGTGACA | 962.113650673582 | 0.0495451537827117 |
| AGTCGCGTCAGA | 962.117957985076 | 0.0543883212284871 |
| GACTCACGTCTA | 962.135971928047 | 0.0402062815278146 |
| CGTCGTACCCA  | 962.160403948714 | 0.0646714618801488 |
| GATGACCAGGTA | 962.179373598357 | 0.0462971727329224 |
| TAGGCGTCACCA | 962.183028491968 | 0.0386686053493305 |
| GCGAAGAGTGAC | 962.190617704707 | 0.0531193639896758 |
| AGGTGAGCCTTC | 962.223501502266 | 0.0393908243725474 |
| GCATGACGAGAC | 962.233999379335 | 0.0574116659326899 |
| GGTGTGATGAGA | 962.249393451329 | 0.0425066637442239 |
| ACAGCCTCGTCA | 962.255387891319 | 0.0454761059307073 |
| CAGGGGTGACAA | 962.264155629779 | 0.0860129753315991 |
| AACACTCTGTCA | 962.29866078853  | 0.0628795453850556 |
| CAAATGTGACCA | 962.303824368487 | 0.0449299315553937 |
| ACTCATCGCCTG | 962.329107305924 | 0.0452881438507143 |
| AACCCTACTCAT | 962.37043594211  | 0.0537758722962455 |
| AACTCGTCAGCA | 962.3873354384   | 0.0426746845696211 |
| GCACAGCGTCAC | 962.402863193785 | 0.0785706887068978 |
| AGGGCCGACTCA | 962.426431898741 | 0.0479186630555147 |
| TCTGCTGTCA   | 962.482092618672 | 0.0338711590155712 |
| ACTATTAGTCCA | 962.509849487584 | 0.0683979906719566 |

|               |                  |                    |
|---------------|------------------|--------------------|
| AAGAGGATGACC  | 962.510765445435 | 0.0591473128974913 |
| AGGCCACGTGTC  | 962.510958648078 | 0.0843266542484581 |
| AGTCAATCATAG  | 962.528937891764 | 0.052349647287056  |
| ATGTGGGTGACA  | 962.531871680112 | 0.0395249471606639 |
| ACTCATTACGGA  | 962.56813736602  | 0.0665174872959139 |
| CTAAATGATGCA  | 962.584525108549 | 0.0664032875862653 |
| CGAATTGAGTCG  | 962.59104898437  | 0.0600122743933045 |
| AGGTTATGTGAC  | 962.596111367792 | 0.0497570866385374 |
| CAGGGGAGTCAA  | 962.601599731571 | 0.0595232489206223 |
| AAGATGATGCAA  | 962.635367053201 | 0.0469587558951449 |
| ACCCGTCACATG  | 962.641442612961 | 0.0564709636742824 |
| CAGTCAACTTCA  | 962.672836932222 | 0.0613699261060517 |
| CATAATGAGTAG  | 962.679772506165 | 0.0676723011803545 |
| CCACTCTGTGAC  | 962.793415985606 | 0.0708488373154471 |
| AGATTAGGTGAC  | 962.805611974647 | 0.0465086183062184 |
| GCCCATTGCTCA  | 962.826833959373 | 0.050931150395172  |
| ACGAAATGACCA  | 962.844085141827 | 0.0535166505506396 |
| CTTCGTGTATGA  | 962.844391276287 | 0.0645810392401969 |
| ATTAGTAAACGG  | 962.890205991012 | 0.0475980679158402 |
| GTCATGAATAGA  | 962.914865896078 | 0.0442888934796822 |
| ATGTGACAATGA  | 963.001738341193 | 0.0439263051161324 |
| GTCACGCACGAA  | 963.017038396691 | 0.051953844607926  |
| TGGATGGTGACA  | 963.071335057027 | 0.0699589044673876 |
| GGTCATCTTTGA  | 963.100899947742 | 0.0577465947820858 |
| CTACTCATTGAC  | 963.119967173136 | 0.0343883230780204 |
| GGAGCTAATGAC  | 963.202673160757 | 0.0485438175681784 |
| AGTCAGAGTGCG  | 963.202769156053 | 0.0439068100190146 |
| ACAGTCAAATGA  | 963.204833347329 | 0.0580354261998146 |
| GTGAACAACCTCA | 963.229951113807 | 0.0580581464039254 |
| AAGGGACTCATG  | 963.276151687121 | 0.0523016931244076 |
| CTCTGTCACGCA  | 963.32337874481  | 0.0488028327222089 |
| CTCATTCATGAC  | 963.336579928422 | 0.0508665034161101 |
| GGAGCGTGTGAC  | 963.348317679752 | 0.0451383652260066 |
| AGAGTCTTAAGC  | 963.35189118998  | 0.0375697206543868 |
| GTGACGTCGTGA  | 963.391353900249 | 0.0634393765946739 |
| CCTTCCTGTGAC  | 963.417806363233 | 0.0756431923150504 |
| ATACGTGACGTC  | 963.429596992231 | 0.0573941720572383 |
| GCGTGACGGAGA  | 963.434657378785 | 0.0693475819738008 |
| GTGTGACGGGGA  | 963.435203610973 | 0.0373508121796405 |
| ACTAACGTGACC  | 963.454028991924 | 0.0390999175842572 |
| AGTTATATCATC  | 963.46299515459  | 0.0571372631494723 |
| CGTGACATAGAC  | 963.481489190598 | 0.0353319983061945 |
| GACGCCTGTGAC  | 963.50078834157  | 0.0708734210831022 |
| AGTCAGAAAAGTG | 963.60481433714  | 0.0389274602054528 |
| ACCTAGTCAACT  | 963.617217187301 | 0.0511964345405055 |
| GTACGTCAGCGA  | 963.638136321155 | 0.0749049028412583 |
| ACAGATGAGTAG  | 963.683440389329 | 0.0812101188347129 |
| ACTATTACTCGC  | 963.790114924303 | 0.0514484038240796 |
| CTCTGACACCAC  | 963.817982830077 | 0.0520849598035217 |
| CCGTCACCTGAG  | 963.822496765168 | 0.0613096699084624 |
| AGTCAGTAAGAT  | 963.852203731832 | 0.0671269425740921 |
| ACTCATCAGGTC  | 963.909178659023 | 0.0549652294127339 |
| GGGAGACAGTCA  | 963.948591280826 | 0.063529670833596  |
| CTGGTACTAATA  | 963.960873091427 | 0.0342325726761605 |

|               |                  |                    |
|---------------|------------------|--------------------|
| ACGTGCAGTCAG  | 963.976599094683 | 0.0555861373245593 |
| AACGGATGTCAT  | 964.002079127681 | 0.0622981049393115 |
| ATACGTGTAATC  | 964.056243106814 | 0.0454241098079552 |
| ATGCTCGTCACC  | 964.056403369261 | 0.0403479866010282 |
| CTTGTCATTTC   | 964.057179057461 | 0.0367252447193523 |
| GCATTGTCACAA  | 964.07945336902  | 0.0389421213432944 |
| GACTCAGTTACC  | 964.082327111356 | 0.0395668020996926 |
| AGAGTCAAGCTA  | 964.101766168787 | 0.0414684420327108 |
| ACGTTGTCTGAC  | 964.115160641049 | 0.0666215613895625 |
| AATCCACATCAT  | 964.149511202586 | 0.0531502942542829 |
| ACTCATACAACC  | 964.162095178942 | 0.037803812924382  |
| CTGACTATGTAC  | 964.16535911812  | 0.0464396576827152 |
| ATGTAAGGGTCA  | 964.204344362935 | 0.0736898663814103 |
| CAGTCAGGCGGG  | 964.231556201495 | 0.0452457147687198 |
| GTCACGTTTCTA  | 964.291414978794 | 0.0725713477193277 |
| GAGTGACATGGA  | 964.373000247811 | 0.0426837978309559 |
| ATAATTAGTACG  | 964.399914566215 | 0.0394708664011936 |
| GTCACTAATCTA  | 964.415942223032 | 0.0374883552308443 |
| AGCAGATGACGG  | 964.426531362452 | 0.0340152023860989 |
| AGTTTGACGCAG  | 964.582445268278 | 0.0600704482304418 |
| GCGTGTGTCAAA  | 964.58376224547  | 0.0743165401521512 |
| ATATTACTCGAT  | 964.602954858016 | 0.0560122869650447 |
| CACTATGTATCA  | 964.607007687896 | 0.0425833076488082 |
| GCGACTCAGCAC  | 964.627578718836 | 0.0460016482265467 |
| GGAAATTTGCTCA | 964.648718014728 | 0.0234462183068005 |
| ATGGGTGTGACG  | 964.760876533201 | 0.037829541145886  |
| GGAGGTGACCCA  | 964.778650032256 | 0.0595577079620098 |
| CGCCCCGTCATC  | 964.800889190743 | 0.0392595663605982 |
| TAGAAACCGTCA  | 964.822802520906 | 0.0502561955613291 |
| GGTGAGTACCAA  | 964.832013946458 | 0.0497738866067466 |
| GGATCGTGACCA  | 964.856181110846 | 0.0326709550998571 |
| TGACATACATCA  | 964.893539193489 | 0.0340022766544594 |
| CCACGTGGTCAC  | 964.923891864737 | 0.0495366638004531 |
| ACGGCGATGACC  | 964.978365721153 | 0.0406365149627342 |
| CGTCACCCGTTT  | 964.989979773997 | 0.0576681154844361 |
| GTCACTGCTCAC  | 965.020526597022 | 0.0419150021952334 |
| TAATGTCACAGA  | 965.053584593996 | 0.0633347896527044 |
| AGTAGTGACACG  | 965.055486774276 | 0.0459626943983524 |
| ATAATGACATCG  | 965.05686827049  | 0.0483051505834383 |
| CTACTCTAGTCA  | 965.128235764523 | 0.051732402740799  |
| GATATGCATCAC  | 965.148996129422 | 0.0369294376092953 |
| ACTCTGTGACAT  | 965.15286446043  | 0.0601610811789638 |
| ATCCCGCAGTCA  | 965.196938583853 | 0.0395442964662818 |
| CGACTATTACGC  | 965.205316136551 | 0.0471804787239659 |
| GGGTCATGAGCA  | 965.235867658313 | 0.039985085036541  |
| ACTTGTCACGCC  | 965.33199731327  | 0.0406487682817033 |
| GAGTGAGTATGA  | 965.366991461971 | 0.0365586541364411 |
| AAAACAGTAATA  | 965.375179627473 | 0.041190084932563  |
| GCGCCCGGTGAC  | 965.494831209527 | 0.0484770838929873 |
| CTTTGACGTGAC  | 965.500559088612 | 0.0426262859399527 |
| AGGGCGTACCCC  | 965.502858928374 | 0.035115937549979  |
| CGTACACATGAC  | 965.536227282331 | 0.046414244440954  |
| CGCAACGAATGA  | 965.622166222128 | 0.053243203750476  |
| ACTCATACCCCT  | 965.62571733104  | 0.0344708274217973 |

|              |                  |                    |
|--------------|------------------|--------------------|
| AAGGATGACCTT | 965.630597292261 | 0.0782033215589717 |
| AGTCAGCGTTGG | 965.693415430241 | 0.0341744313730211 |
| ATTGCGTCAGA  | 965.726164511671 | 0.0390822930750743 |
| AATTACTCGACT | 965.729521870556 | 0.0357276644993482 |
| CCGACTCACGAA | 965.74708569594  | 0.0416670674322297 |
| AATGACAGGGAA | 965.762424290991 | 0.0457602868995757 |
| TCAGACCCGTCA | 965.791462465355 | 0.0467408371949508 |
| GGACTCACTCCA | 965.791729682006 | 0.0558045337845847 |
| ACCCCGGTGAGT | 965.837162396432 | 0.0548436526415775 |
| GGTCATAGCCTA | 965.887891179827 | 0.0551786379408424 |
| AGCCCCTAGTCA | 965.908213723657 | 0.0517273174820916 |
| AACGTCACTTAC | 965.958926626776 | 0.050054261158551  |
| CCTGAGTGACCA | 965.980469800014 | 0.0253885400410745 |
| GTCACGCTCTAA | 965.986409905038 | 0.0531404145531299 |
| ATGTCACATTCG | 966.022041397546 | 0.0697933056229866 |
| AGCCGTGTGACG | 966.031100107265 | 0.0488825247280384 |
| ATATGCGTGACG | 966.05424242934  | 0.0637565984798602 |
| ACGTCAGAAAAC | 966.0571213481   | 0.0473606679199892 |
| GCATGGTGACGA | 966.068862756876 | 0.0490041746785627 |
| AGTCAGTCGACC | 966.098150921444 | 0.0556160219151309 |
| CTATCCGTCAGA | 966.156893799299 | 0.0367255758667712 |
| TATGCTGTCAGA | 966.189071966165 | 0.0377691250834735 |
| GTAAGACTGACA | 966.203615713611 | 0.0528432831380101 |
| AGCAGCAGTGAC | 966.209287827214 | 0.038843016176518  |
| CTAGGTGAGCCA | 966.215824206279 | 0.0452229981327864 |
| GACAGGTCACTA | 966.218840291566 | 0.0518900218295505 |
| CCCAATGAGCCA | 966.258660932636 | 0.0382620783113955 |
| GACTGACTACGA | 966.259842255578 | 0.0491007613913558 |
| CTGACACTATAA | 966.268846728411 | 0.0408932642840991 |
| GTGACAGTGCAA | 966.275527425096 | 0.0641805476992676 |
| CCTGATGTGTAA | 966.281995559072 | 0.0467142697021043 |
| GTTGTCACGCAA | 966.283536874096 | 0.0547399395500331 |
| CGTAGATGAATC | 966.28551708602  | 0.0687478568590752 |
| CGGTGATACGTC | 966.288020488018 | 0.0766781655570895 |
| ATTCTGACGCTA | 966.308607197527 | 0.0559481691875637 |
| ATCTATGATGCA | 966.346510382098 | 0.0380400667416764 |
| ATAAGTCAACGA | 966.374599605354 | 0.0530866320510694 |
| AAGTCACTCTTC | 966.411896776827 | 0.0411214317219976 |
| AAGTGGCGTCAC | 966.460854859998 | 0.0446383431355179 |
| CCGTGACGGAGA | 966.507229779178 | 0.0498835720887494 |
| GGATAAGTCAAC | 966.513788724325 | 0.0314980492429879 |
| GTCATGATTAGA | 966.52054414512  | 0.0404563289117891 |
| CATCTTGACACA | 966.526275767724 | 0.0405678696254434 |
| GAGTGACGAGGC | 966.540400852212 | 0.0478295467974537 |
| GAGACGCGTGAC | 966.620182142619 | 0.0384813773192446 |
| AATGGGTGACCC | 966.627603871637 | 0.0590876893390859 |
| AGTCTTCGTCAG | 966.635933270564 | 0.0331134628981226 |
| GGTGACGGTTAA | 966.721848104537 | 0.0382513128906722 |
| AGGGCTACTCAT | 966.72729200607  | 0.0315453792620438 |
| GATCTATGTGAC | 966.770796333573 | 0.0468194530692762 |
| CATGATTACTCC | 966.777535155348 | 0.0744157830697189 |
| AAATGTCTCACT | 966.814361226354 | 0.0588381641924167 |
| AGGCGTCACAA  | 966.843789037063 | 0.0461853417168145 |
| ATGATATCATGA | 966.866795189483 | 0.0335808600231162 |



|               |                  |                    |
|---------------|------------------|--------------------|
| GGTTACATGACA  | 966.871515083312 | 0.0322810656307913 |
| ATGACATGCCCC  | 966.914494951657 | 0.0448414725744892 |
| CTTCAACGTCAC  | 966.921534288941 | 0.0397373788708513 |
| AGGGTACGTGAC  | 966.94469373782  | 0.0438365447887792 |
| GAAGTGACGTGC  | 966.958695108743 | 0.0425535990927444 |
| ATGTCATTATAC  | 966.981035040668 | 0.0450183636131717 |
| TATCGCACGTCA  | 966.981651659578 | 0.0533749278620365 |
| ACTCATATTAAC  | 966.987893802888 | 0.0456761330370865 |
| AAGTCACGGTTC  | 967.067613246305 | 0.0461405698694679 |
| ACGTCATGGGAG  | 967.096274723413 | 0.0479279384145367 |
| GCGAGTGACATA  | 967.158968553625 | 0.0540250457659638 |
| AAGTCAAGTCAC  | 967.164185799493 | 0.0317883764699631 |
| AATCCATGACCA  | 967.175730921229 | 0.038174823707811  |
| ACTTATCACTCA  | 967.253611993951 | 0.0320046033628306 |
| CACGTAAGAATG  | 967.262733962894 | 0.0381366484927439 |
| TCGTCACCGTAA  | 967.29757191184  | 0.0588288386198474 |
| AGGTTTATGACC  | 967.318526649227 | 0.0632352482531858 |
| ATTAATGACCAC  | 967.327054277017 | 0.0687552950432322 |
| CGTGACATTATA  | 967.332281488909 | 0.0673858277714847 |
| ACCTGGTCATCT  | 967.401640267688 | 0.041541052058702  |
| ACTCATATAGTA  | 967.419964154335 | 0.0448172967810222 |
| ACTCATTTACTG  | 967.436207891141 | 0.0399173551594345 |
| GGAGTATGTCAC  | 967.448401524187 | 0.051719452781143  |
| ACAAGTCAGAGC  | 967.517789218514 | 0.053653933725629  |
| CTCCATGACACC  | 967.543160519885 | 0.0329284117364681 |
| ACGGGTGTGACG  | 967.563046358318 | 0.0478767640044067 |
| AGTGACACGGTA  | 967.582246370741 | 0.0329467333847882 |
| CGTCAGTAATAG  | 967.583057617605 | 0.042094601635546  |
| GGAGTGACCCAA  | 967.590558036781 | 0.0309551476670304 |
| ACTTTATTACTC  | 967.607040576135 | 0.0385498354191883 |
| AGAAGCAGTCAG  | 967.626902563837 | 0.036277426514704  |
| CCGGACCGTGAC  | 967.654935755753 | 0.0395968486614765 |
| GTCACACGTGAA  | 967.655901660548 | 0.064290591845295  |
| CTATCATGACGA  | 967.685959229465 | 0.0384772683460354 |
| AAGGCGATGACC  | 967.690012888208 | 0.0539127822971627 |
| AAGTGTGAGTGA  | 967.691523933168 | 0.0469217538761799 |
| AAGGTTTCATGAC | 967.711089971039 | 0.0340494915259105 |
| GTCACTTCTCTA  | 967.713045149569 | 0.0341868766656601 |
| ACTCATCTATCA  | 967.714288402211 | 0.0320927680803173 |
| CGATTCACTCAC  | 967.786070371056 | 0.0504168450157358 |
| CACCAGCATGAC  | 967.824229217963 | 0.0448150747802724 |
| AAGTCTCTGTCA  | 967.830860662059 | 0.050704067169361  |
| GACTGTATCACA  | 967.854286277951 | 0.0371487093258756 |
| CGTCACCCAATA  | 967.857134206945 | 0.0593039537897953 |
| AACCGCCGTCAT  | 967.871533591449 | 0.0420962616692692 |
| CCTAAGCGTGAC  | 967.910261449298 | 0.060518408512058  |
| CTCTGACATAAC  | 967.913522867247 | 0.0483238720350294 |
| CGTCACATCACA  | 967.913661365022 | 0.0603227711620634 |
| ATAACACTCATA  | 967.914219546422 | 0.0308366601217441 |
| ACTCATCGACCT  | 967.924588103626 | 0.033940667358655  |
| ATCGGAGGTGAC  | 968.02677883097  | 0.0495669271845596 |
| GATGTCACCGGA  | 968.074490492564 | 0.0649168660491492 |
| ACGATTCAATA   | 968.115285117031 | 0.0390929549414294 |
| AATGGGGTGACG  | 968.133981164711 | 0.0437315320181698 |

|              |                  |                    |
|--------------|------------------|--------------------|
| ATGAGTGTATGA | 968.189791795627 | 0.0372911188961406 |
| CTATGACCGGTC | 968.217687150037 | 0.0401189364173645 |
| ACGCCCCGTCAT | 968.230200206899 | 0.0385743071700431 |
| ACTCATCTTGGG | 968.234217664654 | 0.0615973517178824 |
| ACTGTCATGAGC | 968.253702517977 | 0.0367387681800474 |
| AACTGACTGTGT | 968.260282707241 | 0.0432722800877575 |
| AAGTCACGATA  | 968.278505638851 | 0.0603234621299606 |
| AATCAAGTCACC | 968.287291815922 | 0.05613270393392   |
| CTATGTGGCTCA | 968.301782531202 | 0.0341724526509234 |
| CATACTGACTAC | 968.343335651911 | 0.055802404719156  |
| ATTATTGTCACC | 968.423577389545 | 0.0427628073078168 |
| AAGGCTCACCAT | 968.430260742229 | 0.0509972628236268 |
| CTTTGACTACAA | 968.434647732855 | 0.0576784138904811 |
| TATCCACGTCAA | 968.468049573331 | 0.0393883751292981 |
| AGTCAGGCTATA | 968.469821421038 | 0.044788144669769  |
| ATGATAACTCAC | 968.483664683523 | 0.0449630171466376 |
| CGGCTGTGTGAC | 968.496437840848 | 0.0447567395616637 |
| CGTGACAGTCAA | 968.534174405265 | 0.0390706157146238 |
| GACGTCACAGGA | 968.542960847087 | 0.0368108425827578 |
| TACTTGTGACAA | 968.595647720297 | 0.0529479661038594 |
| GAGGTTGGTGAC | 968.61189764639  | 0.0429981911254832 |
| ATACTATCTGAC | 968.636266774873 | 0.0605057759695147 |
| CCTCGTCATGCG | 968.666703306504 | 0.0482625580076045 |
| TCTGACACCTCA | 968.670051315332 | 0.0294660725332898 |
| TGGATGTACCA  | 968.777224547069 | 0.0437199031991207 |
| CGTCACAAAGAC | 968.779058935879 | 0.0324355346926528 |
| ATGATTACTCGG | 968.809351030561 | 0.0442426198602711 |
| AGGTGACGGTAT | 968.817768134497 | 0.038039217119623  |
| CACTCATCGGTA | 968.828052385226 | 0.0534499741040078 |
| ATGTCACGTCCG | 968.980199165597 | 0.0610320387655945 |
| ATGGCTAATAAT | 968.994955260685 | 0.0422290030325596 |
| ATGACATTCTAA | 969.041854002596 | 0.0574461538875708 |
| GATAGTGACAGC | 969.044295697599 | 0.0570671399041556 |
| AGCCGTAGTGAC | 969.052683279311 | 0.0426854270046083 |
| TAGGATGATACA | 969.064780742249 | 0.0532272445447646 |
| TAAGACTAACGA | 969.071159863733 | 0.0321369115004254 |
| AGATATGGTGAC | 969.076319785754 | 0.0320009636109085 |
| ATCTACATGACG | 969.077267544171 | 0.051536315271644  |
| CCCTACAATGAC | 969.19094193215  | 0.0558090608674789 |
| ATAGCGTCAGAA | 969.193993799349 | 0.0669249665203967 |
| CGCTAACGGTCA | 969.242753370616 | 0.0429272818636902 |
| TCATGTATCACA | 969.310033007069 | 0.0435060364106201 |
| GAAGTTGTGACA | 969.40008256289  | 0.0306286141549038 |
| AGTCAGCAAGCA | 969.439220638408 | 0.0369163366408984 |
| AGACATGGCTCA | 969.496101263072 | 0.0523146660661129 |
| CACTCATCATTA | 969.500543867825 | 0.0660098886218715 |
| AGTCACGGTGCG | 969.509581643308 | 0.0257403099635729 |
| ACTCATCACGTA | 969.51692993262  | 0.0440215090976612 |
| ACATGCATGACC | 969.61395714856  | 0.0659017755594684 |
| GATTACTACAAC | 969.658042640339 | 0.0539188111717643 |
| GGTGGGTGACAA | 969.681754726865 | 0.0407960478477296 |
| GGGTCATGATGA | 969.755453255147 | 0.0379492539512022 |
| GAAAGTTGAGTC | 969.767119066122 | 0.0587055909954786 |
| AGTCAGATTATC | 969.821272100073 | 0.0367816711614576 |

|               |                  |                    |
|---------------|------------------|--------------------|
| CGTGTCTGACAG  | 969.858174052608 | 0.0501013507369999 |
| CTATGACCCCAA  | 969.884264577235 | 0.0452663844708798 |
| CTGTCACCTGGA  | 969.956900041386 | 0.0401213805388275 |
| ACTCATTACTTG  | 970.033995534204 | 0.0432795836305943 |
| GACTCTGACCGA  | 970.069608310396 | 0.0347958594038916 |
| GACGCGCGTCAC  | 970.079311813969 | 0.0435428407833238 |
| ATTTACCCGTCA  | 970.098431002471 | 0.0485073116066168 |
| CTAATTACTAAG  | 970.148575700404 | 0.0344350478844161 |
| GTCACGGATGGA  | 970.168736832269 | 0.0624982550617251 |
| ATGAATACATAA  | 970.215166659197 | 0.0370928342299466 |
| ACGTGAATGACC  | 970.34182148447  | 0.043703679523252  |
| ATGACGACCCGC  | 970.347426106099 | 0.0348434988078103 |
| TAGGCTGAATCA  | 970.357063601712 | 0.0312582888571418 |
| TCACATGGCAGA  | 970.382437230052 | 0.0402834715189729 |
| ATGCGTCTTATA  | 970.436291256808 | 0.0579853838672257 |
| ATATACGTCAAC  | 970.457853727679 | 0.0398723725913427 |
| GCATTCCAGTCA  | 970.484662900916 | 0.0276705639476216 |
| TATTAGTTATGA  | 970.525990789585 | 0.0363664385270171 |
| AACGGTCACATT  | 970.527646965146 | 0.0436163138105239 |
| TATGTCAGAGGA  | 970.542036745856 | 0.0452888762419243 |
| AACGTCACTGTC  | 970.620876690254 | 0.0648688013542208 |
| AACGAATGACCC  | 970.635952925483 | 0.0426942960383781 |
| TGACGGTACTAA  | 970.638327248452 | 0.0477236069835322 |
| CCTCTCCGTAC   | 970.640155456496 | 0.037310539776928  |
| AGAGTGACGATG  | 970.646358925645 | 0.0375719952146425 |
| TAAAAGTGACGA  | 970.742394313587 | 0.0306250926479606 |
| AGGGTGACAGTG  | 970.744134997484 | 0.0345237119940794 |
| ATTGAGGTGACA  | 970.893511691212 | 0.0310760321940848 |
| TAGTCAGGCAGA  | 970.92440840857  | 0.0300369672017892 |
| GTTTAATGCTCA  | 971.008606965945 | 0.0589243765301475 |
| AAGCCCCGTAC   | 971.041173641585 | 0.0360651832391737 |
| CCTGACTCGGTC  | 971.041853340441 | 0.0554187999526696 |
| CTAAGTGGTCAC  | 971.072658983726 | 0.0336671899728116 |
| GAGCTGTGACAA  | 971.083124893363 | 0.0301625541552065 |
| CCCTAGTTATGA  | 971.116945738604 | 0.0540034205164673 |
| GGATCGAGTGAC  | 971.120254793081 | 0.061141811408091  |
| GGTCATCTTCCA  | 971.129910472583 | 0.034704851443167  |
| AACGAATCATAG  | 971.142759305415 | 0.0524013848096871 |
| CGAGAGCGTGAC  | 971.17721910954  | 0.0381341943524563 |
| ACCGAGTCAAGT  | 971.18228979267  | 0.0396834586406067 |
| ATAAAAGTGACA  | 971.25404590278  | 0.0560197055982379 |
| AGTGTGATGCAT  | 971.27174897266  | 0.0456122474960363 |
| AGTCAGCGCCGA  | 971.328945404224 | 0.0305780113664217 |
| AGTGACGATGTA  | 971.328953582924 | 0.0405028314794538 |
| CGTCACCGTAGA  | 971.347837545337 | 0.0317487266590379 |
| AATGACAGGGAG  | 971.359497350406 | 0.0405666418850018 |
| CTGACTGTAAGA  | 971.387062152425 | 0.0369735305846055 |
| AGGATTGGTGAC  | 971.422236972705 | 0.0427331287126373 |
| TGCTAAGAGTAA  | 971.432117147877 | 0.0545449799423909 |
| GTCACCTCAGCA  | 971.46448722032  | 0.0354143014655811 |
| ATGACGGCACCC  | 971.495760496083 | 0.0464325833886929 |
| CGTCACAACCTAC | 971.557353319206 | 0.0502282356425334 |
| CCCATGACAGTA  | 971.569491928769 | 0.0297720930008959 |
| GTCACCACCAC   | 971.577024017992 | 0.03830303592087   |

|               |                  |                    |
|---------------|------------------|--------------------|
| AGCTGTCACATG  | 971.602178860431 | 0.0393379071476132 |
| ATAATGAGTAGA  | 971.604258764596 | 0.0405400507844852 |
| AACAAAGTCACA  | 971.673734464185 | 0.0329397240479193 |
| GTCACGCGAAGA  | 971.706437546985 | 0.0222145385522248 |
| GCTACTGATTCA  | 971.725099049444 | 0.0613743989658627 |
| TGTGATAACAACA | 971.737157073433 | 0.0324281142210379 |
| ATACGGAGTGAC  | 971.742619484267 | 0.03073173838377   |
| ACGTCGTCACCT  | 971.779049855323 | 0.0328596712601224 |
| AATCGCTGTACAC | 971.796424271863 | 0.032422128346515  |
| GTCATGCCCTTA  | 971.808564468764 | 0.0561405068086034 |
| AAAGACTAACCG  | 971.884028991908 | 0.0260402591710292 |
| TATCTGTGTCAA  | 971.929191379482 | 0.0448992268887621 |
| GAATGGACTCAC  | 971.94818900109  | 0.0373129429705161 |
| CGCTAAGGGTCA  | 971.956157264875 | 0.0513216369182258 |
| GGGTTATGAGTA  | 971.966351637093 | 0.0309044769880798 |
| ACAGGGATGAGT  | 971.979282810532 | 0.039054936196228  |
| AGGACTGAGTAA  | 972.019652517845 | 0.0381030544658622 |
| AGATTCGTGACA  | 972.165714328921 | 0.0554349002235022 |
| ACGTCAACGAGC  | 972.27200910081  | 0.0385096868125156 |
| ATGACGTCTGCC  | 972.305380838152 | 0.0401958802824106 |
| CATCGTCACTGG  | 972.359349629964 | 0.0378568267555029 |
| TACGAGCAGTCA  | 972.382470967722 | 0.0385165233154996 |
| ATAGGACTAATA  | 972.40730901578  | 0.0285345007729062 |
| CCTGCTGACTAG  | 972.443206522109 | 0.0402858367782854 |
| GAGTGTCTCATA  | 972.445669131479 | 0.0282220025753052 |
| AACGTCACTCTT  | 972.463015825964 | 0.0372932707191155 |
| ACTATTACGTAG  | 972.491084717944 | 0.0366375253681286 |
| GTGACATCGATA  | 972.499867359482 | 0.0476062433912911 |
| CGACTTTTGTCAC | 972.525390172716 | 0.0279138791818144 |
| ACTTTGGGTACAC | 972.541214501424 | 0.0310252418347897 |
| CGTGTGTTGGTCA | 972.541948787451 | 0.0381252715935222 |
| GAGCCAGTCAGA  | 972.560791000982 | 0.0381043155546666 |
| AGAAATGATGCA  | 972.592293475125 | 0.043201306206536  |
| TGACAAACAGAA  | 972.601278218294 | 0.0305859363882465 |
| ACGTCACGTGCC  | 972.635056387329 | 0.0268174069841854 |
| CTGTACCCTCAC  | 972.650695939238 | 0.0499195042610888 |
| CATTGTATCACA  | 972.657284611698 | 0.0526328629761154 |
| ATGAAGTGTGAG  | 972.657915834322 | 0.0300097200961811 |
| CCGTGTGTCAAC  | 972.662372029947 | 0.0379075607396664 |
| ACTGCTGACTTA  | 972.743092311997 | 0.041301979148374  |
| GGCAGAGTCAAA  | 972.758419110113 | 0.0380043938654402 |
| CCGCATTGTACAC | 972.765408150479 | 0.0474424054557969 |
| GATGATTAATA   | 972.785089778061 | 0.0500056678508564 |
| TGCACCCTCACA  | 972.803328011492 | 0.0368339874709209 |
| GTGAGCAACAAC  | 972.853487421645 | 0.0344238196131025 |
| GTCAGACCAGAGA | 972.912863310209 | 0.0405965706106934 |
| GTAATACTGACA  | 972.997200040194 | 0.0560916328236993 |
| ATGTCATGTTTA  | 972.997633360185 | 0.0612082428568381 |
| GTCATGGTGAAA  | 973.024755970971 | 0.0388618047501512 |
| CGACCTGATTCA  | 973.032080746412 | 0.042268792392819  |
| GCTTTTCATGAC  | 973.233803085511 | 0.0450595525612628 |
| CTAGTGACACGC  | 973.242531578317 | 0.0443840142800944 |
| CGTCACTAAATC  | 973.262485874026 | 0.033296018528716  |
| AGAGTAATTCAG  | 973.273889974855 | 0.0325956418300061 |

|               |                  |                    |
|---------------|------------------|--------------------|
| CCCACCGGTGAC  | 973.286921030392 | 0.0241540392291921 |
| TCATCCGGGTCA  | 973.291518897167 | 0.025122050986005  |
| AACAGTAATACA  | 973.34100560683  | 0.0370486979503999 |
| CCGTAGTCAGTC  | 973.359270326323 | 0.0445100997488493 |
| ACTCATCCAAA   | 973.368657700706 | 0.0371737178092866 |
| ACCCTACTCATC  | 973.381013297008 | 0.028336131447091  |
| ACTCATATGTAG  | 973.444301870805 | 0.0479628820066641 |
| ACGCGGATGAGT  | 973.482614623743 | 0.0274297284614273 |
| CCTGTTGGGTCA  | 973.500763812231 | 0.0410582639406805 |
| AGCTGCTGTGAC  | 973.521702036811 | 0.0280590272083347 |
| AAGTCGTACAT   | 973.624233437544 | 0.0357274798396573 |
| CAAGAAGTGTCA  | 973.630584412993 | 0.048986595118217  |
| AGAGGCTGACGC  | 973.647593097484 | 0.0593354225933593 |
| AACCGCGTAATA  | 973.752932664133 | 0.0263622248535564 |
| AGATGAGTGTTT  | 973.785284333648 | 0.054129477585947  |
| CTGTCATGCAGC  | 973.827247915853 | 0.0592781307701334 |
| GTGACAATACTA  | 973.861682114357 | 0.0345846775811695 |
| AAGGAGTAATAG  | 973.874214630766 | 0.0242212391098428 |
| AGTGAATAATCG  | 973.884332335952 | 0.0359410701863294 |
| TCATTGGACGAA  | 973.965654964149 | 0.0262566103378275 |
| CTATTACTCGTC  | 973.967861974197 | 0.0303447629916599 |
| GACAACCTGGTCA | 973.983528932552 | 0.0583176057845847 |
| AGCATGTATGTC  | 973.98967729686  | 0.0358997146143178 |
| CGTCACCATGTC  | 973.995337361336 | 0.039734339782479  |
| TCCCTTGTGACA  | 974.016421055895 | 0.0573280779776827 |
| ACTTGCTCACCT  | 974.024340362354 | 0.0366377406037972 |
| ATCGTCACGTTG  | 974.034791543012 | 0.0362520972363096 |
| TACTCACTGTCA  | 974.043280854183 | 0.0329856173706887 |
| ATTATGACCTGG  | 974.04402962582  | 0.0351268107673141 |
| CTATACGTAATC  | 974.084700555218 | 0.0451527843461095 |
| AATGCAGCGTCA  | 974.112370183281 | 0.042024198975467  |
| CCGTCATGCTTC  | 974.11320500242  | 0.0326606095336276 |
| GTCAGTGAGTGA  | 974.130524042086 | 0.0245509590190625 |
| CAGTGGAGTGAC  | 974.298574749324 | 0.0290542527310839 |
| GGTCATCCAAGA  | 974.303123352833 | 0.0376916882150169 |
| CTCCGCTACTAC  | 974.338055953566 | 0.0391357154229822 |
| AATTAGCCATCA  | 974.363139699621 | 0.0374848648205592 |
| CACGTGACAACG  | 974.406497981794 | 0.0294628107548745 |
| CGTTCGTGACAC  | 974.437629160381 | 0.0406206642411021 |
| CACTGATGCGTC  | 974.442951791275 | 0.043020312620523  |
| CATGTTGACTGG  | 974.458916949946 | 0.0464746631530753 |
| ATGACATGAGAC  | 974.509298426163 | 0.0348208708194446 |
| ATACTATTACTA  | 974.543007147901 | 0.0390368904966472 |
| ACTCATCCTCCT  | 974.579315585224 | 0.048874335654846  |
| ACTCACACTTTG  | 974.609122454006 | 0.0327061448402697 |
| ATGTCACTAATC  | 974.68322425659  | 0.0360811065420828 |
| CATCTACGTCAG  | 974.704514469006 | 0.0483577924610343 |
| AGGAAGTGACAC  | 974.768953800746 | 0.0442327699921748 |
| ACTATGTCACGG  | 974.778689851533 | 0.0339278560309468 |
| CGAGTAATAGTA  | 974.813799331031 | 0.0503008237371413 |
| AGTGTGACAGGC  | 974.815607507809 | 0.0570254696273644 |
| CAGGCCAGTGAC  | 974.818676288149 | 0.0287427497750834 |
| CAACATGACCGA  | 974.819409261146 | 0.0570264274546451 |
| AGATGAGTAGAT  | 974.84526662517  | 0.0348880524219856 |

|              |                  |                    |
|--------------|------------------|--------------------|
| CCTCACAGTCAG | 974.868443421787 | 0.0279947530398376 |
| ATGACATCTAGG | 974.985351551769 | 0.0288091526694171 |
| ACCACCTTATGA | 975.052825366322 | 0.0537447544819472 |
| TAGGGACTCACA | 975.053154525261 | 0.0345524544446917 |
| GAGACTGTGACA | 975.119956893897 | 0.0558295927587837 |
| TACCAACTCATA | 975.128601974602 | 0.0249695172025578 |
| ACCAGCCATGAC | 975.156925702691 | 0.030529742678941  |
| ATGAGTTGGTAC | 975.172999438099 | 0.0259280128252748 |
| ATGAGTCCCGCA | 975.176660005449 | 0.0337204792048822 |
| AAGACACATTTT | 975.183780545141 | 0.0383045399228884 |
| TGAGAGGTGACA | 975.319529445217 | 0.0357984063279082 |
| GTCACGAAAAGA | 975.53523357322  | 0.0385885138957581 |
| CCTCCATGACGC | 975.563259532181 | 0.0368413080143718 |
| GAATAATGTGAC | 975.573648877726 | 0.0468081923023491 |
| GACCTTGACACA | 975.584206233426 | 0.0289563799839935 |
| ATGAGTGAGCGA | 975.619598407863 | 0.0231618711862592 |
| GTCACGTTGGGA | 975.693763073493 | 0.0417517032401188 |
| CTTGGTGCTGAC | 975.731442633117 | 0.0518051633745996 |
| AGTAGGGTGACA | 975.794496684885 | 0.0353975617363383 |
| TGAGTCTGTTAA | 975.848842381297 | 0.0343252392994331 |
| CATCATGACATC | 975.889533723033 | 0.0342380038802999 |
| AGTCAGAGGGGC | 975.890595897383 | 0.0457850256348006 |
| AATGCTACTCAT | 975.904674975764 | 0.0545378392269967 |
| ACAACGTCACTC | 975.914735612903 | 0.0322736272645698 |
| AAGATGATGTAA | 976.082694958134 | 0.0281405145098773 |
| CCGTCATTTTAC | 976.189630636785 | 0.0355258361353124 |
| TACAATCGGTCA | 976.195978809294 | 0.0285694605200888 |
| GTGATTAATAAC | 976.362369699741 | 0.0276478612976358 |
| AGTCAGATCGTG | 976.376311005216 | 0.0476490915553391 |
| AGTCAGCAGTTA | 976.379142614694 | 0.0276835739471862 |
| GTAGCAGGTGAC | 976.409641661088 | 0.0319721394497619 |
| CTTAATGTCATC | 976.579021101431 | 0.0239310890287956 |
| CTGACTAGGCAG | 976.62794807808  | 0.0273060663964361 |
| ATGACAGTCCAC | 976.632194288358 | 0.0357449556098119 |
| TCTACAGTGACA | 976.661917979077 | 0.0247955311795514 |
| ACTCTAGTGTC  | 976.678898307046 | 0.0402548866856192 |
| GCTTTAAGTGAC | 976.707173473767 | 0.0342224991358953 |
| ATACGTCAAATG | 976.916325235303 | 0.0347947403904544 |
| CGTAAAGTGACG | 977.012833521396 | 0.0483583365946293 |
| GATTGAGCAATA | 977.06731296863  | 0.0518757030925696 |
| ATGGGCATGACG | 977.068788465153 | 0.0237955336319073 |
| AGTCAGCATGTA | 977.165279773011 | 0.0372931501466601 |
| GTCATGTTGGGA | 977.185054917472 | 0.024212255263446  |
| AATTGCTAATCG | 977.309676301164 | 0.0283844310636955 |
| ACTCACACAATG | 977.316727323141 | 0.038059843932926  |
| CATAACATGTCA | 977.347883488021 | 0.0282929732274293 |
| ATGAGTACGGGG | 977.480971318006 | 0.0296754206484149 |
| ATATGTCAATCG | 977.757526586533 | 0.026990662726851  |
| ATGACTTCTGTG | 977.760727775123 | 0.0307615718563958 |
| CTGGCCTCGTCA | 977.814482317137 | 0.0498774308973212 |
| GGGGGGATGAC  | 977.81493084508  | 0.0258295566296211 |
| ATAAGTCAATCA | 977.82967832709  | 0.0388172319215643 |
| ATTGTTGTGACG | 977.957335007073 | 0.0298584643004581 |
| ACTCACACATTA | 978.01768012606  | 0.0324516663508883 |

|               |                  |                    |
|---------------|------------------|--------------------|
| CAAGCATGACCC  | 978.103993543996 | 0.037795277569809  |
| GCTAATTACACA  | 978.363973632847 | 0.0489104366985773 |
| CCGTATTACGTA  | 978.379576894449 | 0.0353141918753916 |
| ATTGAGTCGCAA  | 978.418486131985 | 0.0399219903386587 |
| GTCCGCCAGTCA  | 978.453911150777 | 0.0299729027410939 |
| CCTTCTTGCTCA  | 978.504063240475 | 0.0383102586930424 |
| GAGACATGACGA  | 978.504784636329 | 0.0310288317994833 |
| ACGTCACAAAAG  | 978.512398168749 | 0.0295664825293913 |
| CGTCACGTCCCA  | 978.542467594924 | 0.0485006121238599 |
| GCTGATCGTCAC  | 978.551381174086 | 0.048481816857553  |
| GGCCAGGAGTCA  | 978.567449941605 | 0.0330905497406929 |
| AACCCACTCATA  | 978.627559179127 | 0.045868459651385  |
| TCGCACATGACA  | 978.630364732692 | 0.0380902384988881 |
| CGGCATTGAGTC  | 978.783692975467 | 0.0335601117769474 |
| TACCACGTAACA  | 978.801447506299 | 0.0399037713938672 |
| ACTGAGTGTAC   | 978.875931324848 | 0.0241268302615361 |
| GACTCAACAACC  | 978.958368076934 | 0.0449046835645422 |
| ACAGTCAATCGA  | 978.995795697649 | 0.0291110257828434 |
| ATCTACATGACA  | 979.018153208698 | 0.023576346692848  |
| CACGATGAATCG  | 979.019597166167 | 0.0257698429825931 |
| GGTTGCGTGTCA  | 979.06270624514  | 0.047313747039539  |
| CCCCTGAGTGAC  | 979.116506618691 | 0.0259193812129472 |
| CATAATGACATC  | 979.118570320393 | 0.0389501203450698 |
| GAATCATTTCCA  | 979.128477290093 | 0.031959346985597  |
| GACGGCTGACTA  | 979.138254434034 | 0.0276162440233022 |
| TCGTCACGATCA  | 979.206034658641 | 0.0289096868728719 |
| AGAAGTGAGCAA  | 979.222071882618 | 0.02353029788572   |
| GAGTAATTAATA  | 979.241828932361 | 0.0278362447454043 |
| TCGTGGGTGACA  | 979.267298718359 | 0.0244258982333257 |
| TATGACCCATA   | 979.295613153017 | 0.0301190682984929 |
| GTGATGATGTAA  | 979.318000237617 | 0.0267704493579982 |
| TGACACGGCCAA  | 979.337600837232 | 0.0339980827356341 |
| CATATTTCTGAC  | 979.375997245855 | 0.0285432727173334 |
| CTAACATGATGA  | 979.456455519491 | 0.0286255465903081 |
| AGTCAGTACACG  | 979.51209474947  | 0.0415058669343453 |
| GATGACTTTTGA  | 979.554696929063 | 0.0226666437840541 |
| GGAAGGGGTGAC  | 979.562983064013 | 0.0317641280539178 |
| CTGTCAACACTC  | 979.595455895118 | 0.0260341332894957 |
| GGTGAGGGTGA   | 979.622632411684 | 0.0245239338136905 |
| ATCGGGTACGGA  | 979.629762453332 | 0.0362790498300986 |
| TACCCCATGACA  | 979.659460191038 | 0.0275826887724902 |
| GCGTAGTGACAC  | 979.708338421488 | 0.0281192088041129 |
| ACTCATATATGC  | 979.714354556735 | 0.0231272342022246 |
| TCTCGGTAGTCA  | 979.741743055717 | 0.0269767843682839 |
| ACGTAATCACGA  | 979.792511333758 | 0.0318749237989028 |
| ATAGCGGTGAC   | 979.801401097324 | 0.0308538304379403 |
| ACGTCACGCCAC  | 979.806151820786 | 0.0252622376656016 |
| ACTGACTGGGTC  | 979.81119539883  | 0.0267820736245962 |
| AATTACTCTCC   | 979.988080580547 | 0.0350994130519245 |
| GACTGACTACTAC | 980.029836680713 | 0.0213858931512034 |
| CGACTAATCACC  | 980.212700177319 | 0.0279265177083753 |
| GTGTCACGCTCA  | 980.279659514021 | 0.0264087322542271 |
| GTAGGGTGACAA  | 980.327471981943 | 0.0282403278387604 |
| ACGAGTAATCTG  | 980.377468544758 | 0.0290985475663089 |

|               |                  |                    |
|---------------|------------------|--------------------|
| TGATTCAACAAA  | 980.442322870293 | 0.034180427396665  |
| CAATCTTGTAC   | 980.536939708902 | 0.0209284584760071 |
| CTATGACCGGTA  | 980.615713668126 | 0.0267217224976386 |
| AGGGACGCGTCA  | 980.650859163489 | 0.032476999596503  |
| ATGACCGCACTA  | 980.757070350522 | 0.0182448289667205 |
| ATTACTGACCGA  | 980.825909751899 | 0.0294902839756048 |
| ATGTCACCATAG  | 980.857764587315 | 0.0182729718061689 |
| AAGACTATTATC  | 980.916276675953 | 0.0309227149322944 |
| CTAGGTGATACA  | 980.919336175757 | 0.0242480522176394 |
| GGAACGCGTGAC  | 980.968828818545 | 0.019431772171542  |
| GAGTAATAGATC  | 981.03606099946  | 0.029631893770154  |
| ACCAATGAGTAG  | 981.082300607923 | 0.0260387839293592 |
| AACGACTGTAC   | 981.121517054792 | 0.0426159058781265 |
| GGAAAAGTCACC  | 981.324331113304 | 0.0261395815161469 |
| ATGGTGTACAGAG | 981.395639827523 | 0.0193704007804618 |
| CATTGACACAGC  | 981.470187949261 | 0.0174633635511532 |
| CAGCATTGACTA  | 981.472225224047 | 0.0279275387631445 |
| AGACAACCTACT  | 981.557574260597 | 0.0244928605356234 |
| AACCGTGACATA  | 981.600835087653 | 0.0235949475052078 |
| ATGACCGGACCG  | 981.644325455995 | 0.0214469524005328 |
| AGGTGACGAGAC  | 981.783665983894 | 0.0257462938215868 |
| CAGTCAGTACTA  | 981.917528147893 | 0.0295354543385224 |
| CTCGTCACCTTC  | 981.923072523629 | 0.0253946979213467 |
| GAACCGCAGTCA  | 981.933826681238 | 0.0258755516177131 |
| ATTAGGTCACTC  | 982.093570130933 | 0.0300845935722115 |
| CGAATGTGACAG  | 982.098593078037 | 0.0210720784429147 |
| ACATCATGACAT  | 982.107425614049 | 0.0311092156390688 |
| AGTGAGTCTGTG  | 982.172312126224 | 0.0248245778472033 |
| TCAATGATTCTGA | 982.412689973574 | 0.0247442060114601 |
| AGCTACAGTCAG  | 982.453493651017 | 0.0247827717026227 |
| AACTGACTACGT  | 982.472757553966 | 0.0190000421038936 |
| ACAAGATGTAC   | 982.48208886464  | 0.0217609370431229 |
| ATCGTCATGGGG  | 982.569061098667 | 0.0304589251293418 |
| ATCGTCATGCTC  | 982.656207433148 | 0.0200193149687881 |
| GTAATCACTCA   | 982.657508865183 | 0.0288094611303907 |
| AGATTGTGACGG  | 982.704517122749 | 0.028062219589857  |
| CGCTGAGTGACC  | 982.710072800018 | 0.028592976529836  |
| TCTGTGACTAA   | 982.725752779991 | 0.016924621491265  |
| CAACGTCACCTC  | 982.753057828399 | 0.0213697245362949 |
| ACTCATAGAACC  | 982.757905703932 | 0.021345914043676  |
| GCTAGTACTCAC  | 982.801230439943 | 0.0237649706445482 |
| CAATGCGTGACG  | 983.047463641642 | 0.0246518832056572 |
| AACTACGTCAGC  | 983.096397253699 | 0.0365402533160447 |
| GGAAATGTGACA  | 983.107046282619 | 0.0189687785711083 |
| CCTAAGACTAAA  | 983.175529681208 | 0.0185703145148402 |
| CCGGCTGACACG  | 983.227768562436 | 0.0231969573027219 |
| AGGAATGACCGA  | 983.311045564108 | 0.0299717944358885 |
| AGTCAGCCATGC  | 983.328677056434 | 0.0261905469620462 |
| TGCCCCGTCACA  | 983.431984094498 | 0.0358244264115226 |
| CGATACTCATTA  | 983.532435539396 | 0.0190434934150629 |
| CGTCAGGCGTCA  | 983.613833984635 | 0.0184818175953597 |
| TCATAGGTGCGA  | 983.762868634535 | 0.0365984752027842 |
| ATGTCACCTACC  | 983.823331646637 | 0.0236938173315998 |
| ATACATGAGTAC  | 983.86199790912  | 0.0221410426039508 |



|               |                  |                    |
|---------------|------------------|--------------------|
| AACTGTGAGTAT  | 983.972646875532 | 0.0180090431980453 |
| AATGAGTGTTC   | 984.03817622318  | 0.0223487205989404 |
| AGTGACGCGCAC  | 984.069842808444 | 0.0223231781428248 |
| AAGTGTAATCAT  | 984.134066819101 | 0.0157465038689991 |
| ACAACCTCATATG | 984.240898763731 | 0.0183091829557868 |
| CGATGTATACAA  | 984.416625821602 | 0.0292116081008124 |
| ATGACGGGGTAG  | 984.636339465109 | 0.0276524773185633 |
| AGGACTAATAAAA | 984.670438135646 | 0.0217231922948731 |
| GGAGAGTGTAC   | 984.713437788168 | 0.0181376174752308 |
| ACAATGATGCAA  | 984.713515843891 | 0.0201578780511267 |
| AAGCGTCAGACA  | 985.091983389022 | 0.0207890325970585 |
| CCGTCATTAATA  | 985.137915527766 | 0.0191157216980169 |
| GGTGACAGGCAC  | 985.271965491346 | 0.0204228783931161 |
| TATTACTGACGA  | 985.279961163286 | 0.021303668430486  |
| ACTCATCACTAG  | 985.282894894581 | 0.0259580191027813 |
| ATTATTCATTCG  | 985.474534590559 | 0.0198943791492818 |
| ACTGACGAAAAC  | 985.59766457101  | 0.0319335621770628 |
| GTCACTGTGAAA  | 985.617036400195 | 0.0323944311843018 |
| GTCACTAGGGGA  | 985.680711648002 | 0.0239361003260031 |
| GTTGAGTAACGA  | 985.704262060195 | 0.0229748917128572 |
| CTCCCCTGTGAC  | 985.853340804606 | 0.013028167147795  |
| GCGAAGACTGAC  | 985.957883868818 | 0.0243230998714354 |
| ACTCATGCGATG  | 986.069394539875 | 0.01334198028783   |
| ATTGATTGACTA  | 986.083857797349 | 0.0245963764181189 |
| ATAGTTGAGTCG  | 986.13963356226  | 0.0135875987777093 |
| GTCTGACAACAC  | 986.287899543615 | 0.0259925357829611 |
| AAGATCCTGACT  | 986.289179512039 | 0.0152408798614998 |
| GAAACACGTGAC  | 986.382081401874 | 0.0212515766246635 |
| GCATTGATTAC   | 986.571654341804 | 0.0262162016696933 |
| TGGCTCGTCACA  | 986.646589102319 | 0.0152525095183281 |
| TCAGATTATTCA  | 986.647535783749 | 0.0206543862198967 |
| AGCGTCATGTCC  | 986.684317605822 | 0.0295396729760693 |
| GCCGATTGACAA  | 986.972300763835 | 0.029317665365174  |
| ACTCATATCGAT  | 987.154652171188 | 0.0177504177294689 |
| CCCGTCATCAAG  | 987.175422343022 | 0.0246266896019148 |
| GATTGAGTAAAC  | 987.304123773708 | 0.0175283826065936 |
| CATGCGTCTTAC  | 987.360433707193 | 0.0177966829776593 |
| CGTCACCCACTC  | 987.440383360868 | 0.0170381437069632 |
| CTTTAACATGAC  | 987.603064259937 | 0.0210256649237679 |
| AGGTAGTGACGA  | 987.645993812809 | 0.0221746516141457 |
| ACATGACAAATCA | 987.712789599812 | 0.0143674156200032 |
| CCCTCCAATGAC  | 987.826720376386 | 0.024446704964569  |
| ATATACGTGTCC  | 987.916687688023 | 0.0218161831700295 |
| GAAAGATCTGAC  | 987.95323879374  | 0.0217155738999141 |
| TCGTGACGCGCA  | 987.955610728796 | 0.0150662611967764 |
| GTCACCTACCCA  | 987.967479379507 | 0.0202838863492477 |
| CGTTTCGGATGA  | 988.120609238027 | 0.016273288821068  |
| GAAATGTGTAAC  | 988.154618268807 | 0.0165767385936444 |
| GAATGAAGTGAC  | 988.184037750046 | 0.0182621592405029 |
| ATAACGCCGTCA  | 988.264133869132 | 0.0180715293969677 |
| AGTTATAGTGAC  | 988.393209414026 | 0.017274756463475  |
| ACGTCAGAGGCA  | 988.668546534624 | 0.0166668445093934 |
| ATTGACTACCAG  | 988.985273680756 | 0.0247654928055733 |
| GGTGAGTGAGTA  | 989.095319308043 | 0.0160361354429688 |

|               |                  |                     |
|---------------|------------------|---------------------|
| ATTACTTTATGA  | 989.446664936433 | 0.0235521945572255  |
| AATGACATCCTA  | 989.483294298668 | 0.0152083444881695  |
| CTGTTGACTGTA  | 989.593935588763 | 0.0233884544884096  |
| TCATCAGAGGAA  | 989.594206767526 | 0.0193661599512026  |
| CTACTCATCTAA  | 989.621589715008 | 0.016481718064463   |
| AGACTCGTCAGC  | 990.207575731216 | 0.0122862999675933  |
| ACTCATCGCCCT  | 990.512244152818 | 0.0152761390161162  |
| GTGGATTAATAA  | 990.576522560482 | 0.01420755887715    |
| AAGACGTGGTCA  | 990.58629062107  | 0.0195897872456258  |
| ACGGGTCACCCCT | 991.225746182748 | 0.0197063094293463  |
| ATTCCCGTATGA  | 991.236166165069 | 0.0144374348401163  |
| GTATCATAATCA  | 991.255825685204 | 0.0151796308551665  |
| GCAGGAGACTCA  | 991.476784940859 | 0.0191370728371588  |
| GAGTAATATCAA  | 991.786595328959 | 0.00808821066393128 |
| GATGACCTACGA  | 991.977747367163 | 0.0113274598499373  |
| CTGTCACCCATC  | 992.067368140913 | 0.0110749521657241  |
| AGTCAGACGGCC  | 992.843651149752 | 0.0100257833746873  |
| GTGGCAGACTCA  | 992.863114203225 | 0.0110259090991809  |
| CGAGGCGGTGAC  | 992.937706454606 | 0.0112237236242069  |
| ATGTTGTGTAAT  | 993.012159283773 | 0.0145167341849935  |
| CCATGACAGTAC  | 993.110212851715 | 0.0146752302193138  |
| TCAGCATCGTCA  | 993.397521485704 | 0.0102048029822421  |
| GCGGTCATCTAC  | 993.578694214444 | 0.0123601927285158  |
| ACTCTTATGACC  | 994.139191201757 | 0.00685863736341555 |
| TAGTGACATAGA  | 994.611741498941 | 0.00697444803821539 |
| CACGCCGTGTCA  | 994.730689290883 | 0.0118058258449889  |
| ATTGTCACAAGG  | 994.899426545224 | 0.0114272456487963  |
| AAAACGGGTCAC  | 995.298696813773 | 0.00869326682244025 |
| CACTGCATCATA  | 995.54357122511  | 0.00990467681069449 |
| CGACCAGCTGAC  | 995.65801428236  | 0.00788046050203581 |
| CGGGTGACCCGA  | 995.865307516198 | 0.00925801924428321 |
| CACGGTCATTGA  | 996.240576426248 | 0.00841681890896875 |
| AGAGATTAICTCG | 996.267263557162 | 0.00836179015905908 |
| CAGTCAGCGACC  | 996.390951505075 | 0.00808390802980837 |
| ACCTCTTGACTC  | 996.469778204285 | 0.00489175141375188 |
| CGAAAAGTCACC  | 996.809611206563 | 0.00713150537010551 |
| AACACGTAACCTT | 997.616350350312 | 0.00341086458364433 |
| ATGTGACGCCGC  | 999.105331189409 | 0.00129202199991698 |
| 1000          | 0                |                     |

| name      | HiTS-FLIP 8mer occupancy | PBM occupancy score |
|-----------|--------------------------|---------------------|
| Q0010     | 0 81699.5728940341       |                     |
| Q0017     | 0 71842.909562858        |                     |
| Q0032     | 0 137638.986575187       |                     |
| Q0045     | 0 99142.8092017129       |                     |
| Q0050     | 0 99142.8092017129       |                     |
| Q0055     | 0 99142.8092017129       |                     |
| Q0060     | 0 99142.8092017129       |                     |
| Q0065     | 0 99142.8092017129       |                     |
| Q0070     | 0 99142.8092017129       |                     |
| Q0080     | 0 103338.612967884       |                     |
| Q0085     | 0 173486.499370855       |                     |
| Q0092     | 0 88200.9787071191       |                     |
| Q0105     | 1.51273673697494e-05     | 169468.877764252    |
| Q0110     | 1.51273673697494e-05     | 169468.877764252    |
| Q0115     | 1.51273673697494e-05     | 169468.877764252    |
| Q0120     | 1.51273673697494e-05     | 169468.877764252    |
| Q0130     | 0 184457.609059279       |                     |
| Q0140     | 0 185368.334260817       |                     |
| Q0142     | 0 20526.545589388        |                     |
| Q0143     | 0 0                      |                     |
| Q0144     | 0 20526.545589388        |                     |
| Q0160     | 0 76249.2223433739       |                     |
| Q0182     | 0 51390.4401879816       |                     |
| Q0250     | 0 79101.7540067826       |                     |
| Q0275     | 0 82106.182357552        |                     |
| Q0297     | 4.89771848678489e-05     | 284196.652024118    |
| R0010W    | 0 14561.0942411687       |                     |
| R0020C    | 0 180625.191872094       |                     |
| R0030W    | 0 180625.191872095       |                     |
| R0040C    | 0 12868.5163816436       |                     |
| YAL001C   | 2.81873641155839e-05     | 397515.751036537    |
| YAL002W   | 7.08542286020908e-05     | 198959.016999654    |
| YAL003W   | 4.17310205413912e-06     | 127019.408968453    |
| YAL005C   | 4.17310205413912e-06     | 127019.408968453    |
| YAL007C   | 5.38940412164735e-06     | 75741.1626619846    |
| YAL008W   | 1.22142095154709e-05     | 208300.256563548    |
| YAL009W   | 0 0                      |                     |
| YAL010C   | 0 0                      |                     |
| YAL011W   | 0 0                      |                     |
| YAL012W   | 5.08735902016166e-06     | 24418.0145479279    |
| YAL013W   | 0 32986.7315538222       |                     |
| YAL014C   | 0 32986.7315538222       |                     |
| YAL015C   | 3.13542262171396e-05     | 153306.245291394    |
| YAL016C-B | 0 13119.8571187186       |                     |
| YAL016W   | 0 68805.7555967324       |                     |
| YAL017W   | 0.000167980193552131     | 610263.210270851    |
| YAL018C   | 0.000191518013460734     | 684109.632729191    |
| YAL019W   | 0 0                      |                     |
| YAL020C   | 0 47339.875935654        |                     |
| YAL021C   | 0 23823.0901065114       |                     |
| YAL022C   | 0 28825.9048972689       |                     |
| YAL023C   | 4.60395430157412e-06     | 277468.252137499    |
| YAL024C   | 2.46877055888328e-05     | 84232.7098631253    |

YAL025C 0 28829.7367513008  
YAL026C 0 22993.3634626783  
YAL027W 0 23102.4908958793  
YAL028W 0 22815.30433675  
YAL029C 0 22815.30433675  
YAL030W 0 0  
YAL031C 0 0  
YAL031W-A 4.82378033590525e-05 171667.001370719  
YAL032C 4.82378033589415e-05 171667.001370719  
YAL033W 5.23257606495076e-05 220021.762246094  
YAL034C 5.68754870383659e-05 220021.762246094  
YAL034W-A 0 146926.145565633  
YAL035W 0 15557.1714862061  
YAL036C 0 15557.1714862061  
YAL037C-A 3.12482580099305e-05 352395.256842152  
YAL037C-B 0 0  
YAL037W 3.12482580098195e-05 352395.256842152  
YAL038W 0 104400.498318661  
YAL039C 0 46545.3329016358  
YAL040C 0 25727.2724656059  
YAL041W 7.53874876380234e-06 201023.240816549  
YAL042W 1.41727154492344e-05 232236.466105302  
YAL043C 4.74360644908689e-06 71937.3846887801  
YAL044C 9.74403492518539e-05 455277.349303306  
YAL044W-A 2.88610792728017e-05 161906.162955466  
YAL045C 0 140358.30715417  
YAL046C 2.88610792729127e-05 161906.162955466  
YAL047C 0 0  
YAL048C 2.40601154816167e-05 141697.262731626  
YAL049C 7.94032908613129e-06 18458.7609019638  
YAL051W 8.29361117016258e-06 105338.342243631  
YAL053W 6.93131470042019e-06 132016.022171615  
YAL054C 2.13553466350547e-05 284750.119433183  
YAL055W 2.43670328562429e-05 165816.007073477  
YAL056C-A 2.18032829975012e-05 180484.141583991  
YAL056W 2.18032829975012e-05 180484.141583991  
YAL058W 0 19360.0219750821  
YAL059C-A 0 19360.0219750821  
YAL059W 0.000101015667364091 582563.5664641  
YAL060W 4.75985430792303e-06 238193.819964383  
YAL061W 4.35442507396022e-06 161540.157165226  
YAL062W 7.65212649437297e-05 469740.427622909  
YAL063C 2.72611666547462e-05 235716.077038986  
YAL063C-A 9.73098890874047e-05 468066.571110062  
YAL064C-A 3.15742604840574e-05 359870.767248455  
YAL064W 7.26217405125906e-05 219470.828075769  
YAL064W-B 0 0  
YAL065C 0 0  
YAL066W 7.48834913844032e-06 302229.226684982  
YAL067C 4.64216881486124e-05 428057.107751338  
YAL067W-A 0 31550.9575920178  
YAL068C 0 31550.9575920178  
YAL068W-A 0 44588.5204968475  
YAL069W 0 44588.5204968475

|           |                      |                  |
|-----------|----------------------|------------------|
| YAR002C-A | 0                    | 12048.8812048575 |
| YAR002W   | 6.4296606601788e-05  | 302414.738693629 |
| YAR003W   | 0                    | 12048.8812048575 |
| YAR007C   | 0                    | 101030.144442033 |
| YAR008W   | 0                    | 101030.144442033 |
| YAR009C   | 1.95485095358938e-05 | 321329.911696286 |
| YAR010C   | 8.58405261290329e-05 | 537122.123028095 |
| YAR014C   | 5.38137034952202e-05 | 299456.605434485 |
| YAR015W   | 5.38137034952202e-05 | 299456.605434485 |
| YAR018C   | 0                    | 121039.038561844 |
| YAR019C   | 1.92705507132684e-05 | 219456.669933833 |
| YAR020C   | 3.55212776840252e-05 | 113052.108679936 |
| YAR023C   | 0                    | 133922.459848835 |
| YAR027W   | 0                    | 55904.5393977222 |
| YAR028W   | 4.26523664642797e-06 | 149994.354923013 |
| YAR029W   | 9.04589159865798e-05 | 162510.081685036 |
| YAR031W   | 0                    | 0                |
| YAR033W   | 7.21742505364054e-05 | 587353.729978241 |
| YAR035C-A | 0                    | 0                |
| YAR035W   | 0.000173660872645698 | 989458.582056964 |
| YAR042W   | 0                    | 0                |
| YAR047C   | 0                    | 51603.9486170699 |
| YAR050W   | 7.68106600004259e-05 | 359160.297472626 |
| YAR053W   | 1.44039126169782e-05 | 79779.4492647881 |
| YAR060C   | 0                    | 53852.2293096158 |
| YAR061W   | 7.39705086882925e-06 | 200923.700927864 |
| YAR062W   | 0                    | 104462.428946383 |
| YAR064W   | 4.30970794507157e-06 | 147348.512384454 |
| YAR066W   | 1.17027753305798e-05 | 294294.461593297 |
| YAR068W   | 5.87449472403412e-05 | 498871.434167746 |
| YAR069C   | 5.10201801429133e-06 | 279808.101491537 |
| YAR070C   | 4.16635747656491e-05 | 526714.835185061 |
| YAR071W   | 4.16635747656491e-05 | 531344.368275151 |
| YAR073W   | 1.20886789319874e-05 | 138738.789952102 |
| YBL001C   | 3.02973163730513e-05 | 277539.019450193 |
| YBL002W   | 2.80558712819623e-05 | 289489.475735948 |
| YBL003C   | 2.80558712819623e-05 | 231491.561653659 |
| YBL004W   | 4.54996446919154e-06 | 143949.020275583 |
| YBL005W   | 1.23118051295057e-05 | 89221.1141261056 |
| YBL005W-A | 4.90818830568562e-05 | 574207.616748578 |
| YBL005W-B | 4.90818830568562e-05 | 574207.616748578 |
| YBL006C   | 1.23118051295057e-05 | 89221.1141261056 |
| YBL006W-A | 0.000190393465237748 | 598459.673151238 |
| YBL007C   | 1.41753043673143e-05 | 110842.011221449 |
| YBL008W   | 0                    | 0                |
| YBL008W-A | 0                    | 33708.2801269802 |
| YBL009W   | 0                    | 0                |
| YBL010C   | 0                    | 0                |
| YBL011W   | 6.01151260248844e-06 | 100655.041459209 |
| YBL013W   | 0                    | 47472.2306610963 |
| YBL014C   | 0                    | 47472.2306610963 |
| YBL015W   | 5.28270790609575e-05 | 276556.770321157 |
| YBL016W   | 0                    | 94929.1138998289 |
| YBL017C   | 3.79312325778924e-05 | 213018.915904303 |

YBL018C 4.0495651388861e-05 374942.459685919  
YBL019W 0 54305.5228882809  
YBL020W 0 38409.164171517  
YBL021C 0 38409.164171517  
YBL022C 0 65532.2255809275  
YBL023C 0 15058.4907836468  
YBL024W 1.82354214245395e-05 203427.007679864  
YBL025W 2.52014178568905e-05 335936.766930777  
YBL026W 1.41916891236438e-05 314358.353654853  
YBL027W 1.03379135288906e-05 95965.24768046  
YBL028C 2.51858885456091e-05 216091.066720867  
YBL029C-A 0.000125477541803476 463602.294287053  
YBL029W 4.57159940403518e-06 73583.0914087404  
YBL030C 0 36047.2882031262  
YBL031W 1.65098233824157e-05 60294.0411738329  
YBL032W 0.000249574671926989 416128.954416595  
YBL033C 0.000249574671926878 416128.954416595  
YBL034C 0 0  
YBL035C 3.31251431404667e-05 212389.27900718  
YBL036C 6.85498718244748e-06 44000.0013799314  
YBL037W 0 94930.6801997297  
YBL038W 6.9587383803027e-06 69009.039467944  
YBL039C 6.9587383803027e-06 69009.039467944  
YBL039W-B 0 34375.7731075067  
YBL040C 0 34375.7731075067  
YBL041W 3.71380521950737e-05 187488.916046036  
YBL042C 1.53541446418215e-05 265078.564301226  
YBL043W 1.592647951143e-05 170520.417933709  
YBL044W 0 169073.061604485  
YBL045C 0 169073.061604485  
YBL046W 0 43981.5537684378  
YBL047C 0 43981.5537684378  
YBL048W 0 0  
YBL049W 9.39534577737433e-06 33289.2219689049  
YBL050W 1.1670748664816e-05 160500.205609686  
YBL051C 1.1670748664816e-05 160500.205609686  
YBL052C 4.46337970749777e-06 47151.8862523862  
YBL053W 2.13520452420068e-05 117106.401842326  
YBL054W 0.000245299487136807 414648.634611517  
YBL055C 0 18377.3354830364  
YBL056W 0 26032.2190884172  
YBL057C 0 26032.2190884172  
YBL058W 0 11693.9735305002  
YBL059C-A 0 0  
YBL059W 0 0  
YBL060W 1.64820554398037e-05 308868.328853273  
YBL061C 1.64820554398037e-05 308868.328853273  
YBL062W 0 0  
YBL063W 0 31491.6915500389  
YBL064C 0 57340.8529635791  
YBL066C 0 41944.4766689583  
YBL067C 3.04924454901379e-05 138801.509043657  
YBL068W 2.7966890622122e-05 178831.360938879  
YBL069W 2.56371962507052e-05 318039.526388629

YBL071C 5.0422375025283e-06 149895.85982296  
YBL071C-B 5.19139918608857e-06 90857.7138010439  
YBL071W-A 5.19139918608857e-06 90857.7138010439  
YBL072C 0 0  
YBL074C 0 54660.9791598646  
YBL075C 3.38457000669257e-05 290689.220417777  
YBL076C 0.000153611016073696 478010.540892704  
YBL077W 0 38668.9894310346  
YBL078C 8.28846059337529e-05 296167.964701507  
YBL079W 6.12618829243239e-06 187304.028014844  
YBL080C 6.12618829243239e-06 187304.028014844  
YBL081W 0 22566.2502101117  
YBL082C 0.000105527563330599 398494.51024085  
YBL084C 2.23296808080642e-05 141487.177717585  
YBL085W 5.05754317725593e-06 112776.914393852  
YBL086C 4.77732003115738e-05 394693.022380605  
YBL087C 3.59934651739113e-05 197207.881831161  
YBL088C 0.000155501392883006 375691.179619677  
YBL089W 1.96314202589587e-05 161826.17160674  
YBL090W 4.42652020726797e-06 66776.2225137325  
YBL091C 4.42652020726797e-06 66776.2225137325  
YBL091C-A 1.40821004486202e-05 189070.088762108  
YBL092W 0 67112.2749145719  
YBL093C 4.54996446919154e-06 93845.6174741947  
YBL094C 0 0  
YBL095W 5.30447951112567e-05 622524.362243253  
YBL097W 0 117924.713724637  
YBL098W 4.06545882265519e-05 207629.219111654  
YBL099W 2.34651082094972e-05 356363.051829456  
YBL100W-A 9.72555730122115e-05 730045.163619518  
YBL100W-B 9.72555730122115e-05 730045.163619518  
YBL100W-C 9.83476781268866e-05 221756.250902448  
YBL101C 9.83476781268866e-05 221756.250902448  
YBL102W 8.13294032738776e-05 319824.55137781  
YBL103C 8.13294032738776e-05 338107.535795821  
YBL104C 4.46337970749777e-06 175531.621886408  
YBL105C 0 52546.5383968486  
YBL106C 4.42652020726797e-06 47432.0865602974  
YBL107C 0 44996.9949067983  
YBL107W-A 0.000231996248687194 1092478.95927914  
YBL108C-A 5.96575480330541e-05 357174.879841968  
YBL108W 5.96575480331651e-05 357174.879841968  
YBL109W 2.19965686882873e-05 230950.053100754  
YBL111C 0 43741.8888544748  
YBL112C 0 0  
YBL113C 2.88036077989995e-05 139318.500146147  
YBL113W-A 0 0  
YBR001C 1.86163083670809e-05 184428.823961899  
YBR002C 0 120726.676789369  
YBR003W 0 120726.676789369  
YBR004C 4.22596669136244e-06 72799.7424498663  
YBR005W 4.22596669136244e-06 72799.7424498663  
YBR006W 0 135948.825202892  
YBR007C 5.53663239368785e-05 370555.489629572

YBR008C 0.000202587999041381 529674.081074423  
YBR009C 0 14493.6601238649  
YBR010W 0 0  
YBR011C 6.46483892461358e-05 464570.710159371  
YBR012C 2.35482012704846e-05 362988.661474038  
YBR012W-A 2.35482012704846e-05 362988.661474038  
YBR012W-B 2.35482012704846e-05 362988.661474038  
YBR013C 0 11208.2152509106  
YBR014C 5.95996854302339e-05 329152.362178714  
YBR015C 8.16726256336331e-05 320633.560506571  
YBR016W 8.60437793555047e-05 318395.67108652  
YBR017C 6.53614717843753e-05 478980.920704838  
YBR018C 1.14539721624007e-05 134254.162152651  
YBR019C 0 14886.3225023767  
YBR020W 1.27506959423096e-05 187076.259308304  
YBR021W 2.7165526079551e-05 363027.387250626  
YBR022W 0 28627.5624425457  
YBR023C 0 42315.7941757805  
YBR024W 2.02588791132774e-05 319385.974809003  
YBR025C 1.03625820707665e-05 163718.261032866  
YBR026C 0 0  
YBR027C 0 13727.114568387  
YBR028C 0.000137389776186159 464312.512858845  
YBR029C 5.65589633713115e-05 521941.374940556  
YBR030W 4.21297241662844e-05 330773.893887761  
YBR031W 5.64841013828143e-06 151147.219498448  
YBR032W 0 0  
YBR033W 5.99221340900069e-05 191324.783092977  
YBR034C 0 36590.7624619393  
YBR035C 0.000155906935726424 297560.207653807  
YBR036C 0 16630.0812108027  
YBR037C 0.000152656739124013 419949.065603059  
YBR038W 0.000152656739123902 419949.065603059  
YBR039W 0 104439.94565965  
YBR040W 2.47491701589331e-05 104949.243069071  
YBR041W 0 146551.708842765  
YBR042C 0 31234.7745724624  
YBR043C 0.00038154793377787 565419.473996611  
YBR044C 0 21582.211050086  
YBR045C 2.2602387429238e-05 341119.44270759  
YBR046C 5.61011608870565e-05 227055.900524609  
YBR047W 5.61011608870565e-05 227055.900524609  
YBR048W 1.39691065181857e-05 33351.7769894087  
YBR049C 0 57232.6103576667  
YBR050C 5.08735902016166e-06 76217.7672067481  
YBR052C 4.20689085868231e-05 422206.737691894  
YBR053C 2.12998355796357e-05 108064.915088985  
YBR054W 9.70364932983969e-06 202667.490687681  
YBR055C 1.06993349960893e-05 201725.491902999  
YBR056C-B 1.67160090176477e-05 158785.462774784  
YBR056W 1.06993349960893e-05 81482.6802567251  
YBR056W-A 0 154982.164650333  
YBR057C 0 180129.311698939  
YBR058C 8.8333981985711e-06 274090.499559077



|           |                      |                  |
|-----------|----------------------|------------------|
| YBR058C-A | 2.2037849668366e-05  | 381452.64240185  |
| YBR059C   | 2.46982606777468e-05 | 238997.70885263  |
| YBR060C   | 8.52750895663501e-06 | 328249.922867544 |
| YBR061C   | 1.08859573376696e-05 | 80969.5379959471 |
| YBR062C   | 1.78980048070043e-05 | 186152.681768848 |
| YBR063C   | 3.82230570590281e-05 | 243345.218836623 |
| YBR065C   | 2.67366219518506e-05 | 339256.173206074 |
| YBR066C   | 1.59352620872077e-05 | 383668.215145111 |
| YBR067C   | 4.46337970749777e-06 | 47857.2358243213 |
| YBR068C   | 0.000120296490302096 | 306064.112397685 |
| YBR069C   | 1.37183855858369e-05 | 41132.0948810631 |
| YBR070C   | 1.04556465997385e-05 | 221812.562834393 |
| YBR071W   | 1.04556465997385e-05 | 221812.562834393 |
| YBR072C-A | 0                    | 0                |
| YBR072W   | 0                    | 0                |
| YBR073W   | 0                    | 0                |
| YBR074W   | 2.68274065661211e-05 | 192107.731968074 |
| YBR076C-A | 0                    | 0                |
| YBR076W   | 5.39210137546764e-05 | 358109.104597528 |
| YBR077C   | 0                    | 27189.42752185   |
| YBR078W   | 0                    | 15415.6174571574 |
| YBR079C   | 1.39849889949639e-05 | 286860.725464987 |
| YBR080C   | 0                    | 213255.821889594 |
| YBR081C   | 0                    | 34461.0214086298 |
| YBR082C   | 2.17653179972466e-05 | 250443.008059178 |
| YBR083W   | 2.06433773547454e-05 | 183506.050616579 |
| YBR084C-A | 3.04163875557428e-05 | 229311.226164944 |
| YBR084W   | 7.52700530097794e-05 | 235717.469990466 |
| YBR085C-A | 0                    | 46713.9211704762 |
| YBR085W   | 3.04163875557428e-05 | 276999.504400892 |
| YBR086C   | 0                    | 22566.2502101117 |
| YBR087W   | 1.57786560953666e-05 | 138090.070173332 |
| YBR088C   | 0                    | 19077.0325650059 |
| YBR089C-A | 5.38940412164735e-06 | 46630.1407387421 |
| YBR089W   | 3.33887520774789e-05 | 358666.689537777 |
| YBR090C   | 0                    | 14561.0942411687 |
| YBR091C   | 0                    | 0                |
| YBR092C   | 1.79945606708642e-05 | 75049.7495646575 |
| YBR093C   | 2.36150486740971e-05 | 229260.459024318 |
| YBR094W   | 5.38940412164735e-06 | 99849.196937758  |
| YBR095C   | 1.05757398509709e-05 | 154500.433515215 |
| YBR096W   | 1.05757398509709e-05 | 154500.433515215 |
| YBR097W   | 0                    | 25519.1362952004 |
| YBR098W   | 2.56599316937889e-05 | 138210.130581321 |
| YBR099C   | 0                    | 28023.8239900841 |
| YBR101C   | 1.79460368584516e-05 | 174530.03253178  |
| YBR102C   | 2.96461352161659e-05 | 189417.657751907 |
| YBR103C-A | 0                    | 25357.6291387705 |
| YBR103W   | 2.96461352161659e-05 | 189417.657751907 |
| YBR104W   | 0                    | 25357.6291387705 |
| YBR105C   | 4.62082549126386e-05 | 447760.415984715 |
| YBR106W   | 1.37877206234371e-05 | 207952.432232856 |
| YBR107C   | 3.28777835886251e-05 | 81023.245890204  |
| YBR108W   | 3.28777835886251e-05 | 81023.245890204  |

YBR109C 2.07096950284313e-05 166971.037205986  
YBR109W-A 2.07096950285424e-05 166971.037205985  
YBR110W 0 18684.0473317648  
YBR111C 1.67160090176477e-05 200364.037605764  
YBR111W-A 1.67160090176477e-05 200364.037605764  
YBR112C 0 0  
YBR114W 0 30043.554692019  
YBR115C 0.00020273688649608 712973.949003671  
YBR117C 2.28056606798033e-05 544486.280020891  
YBR118W 0 63300.3093463427  
YBR119W 0 13930.6859273356  
YBR120C 3.6990723305208e-05 102463.21623309  
YBR121C 3.32255564217121e-05 224827.627771998  
YBR122C 0 13137.5014877074  
YBR123C 0 10535.7175391463  
YBR125C 1.15701220543274e-05 197205.579300148  
YBR126C 0 166072.730435054  
YBR126W-A 0 166072.730435054  
YBR126W-B 0 134330.601769284  
YBR127C 7.58284221469285e-05 243922.333841554  
YBR128C 1.44298471306259e-05 141779.133135653  
YBR129C 0 42491.443660093  
YBR130C 1.61583749948013e-05 242395.757890473  
YBR131W 1.61583749948013e-05 242395.757890473  
YBR132C 1.72740716330999e-05 198287.557989159  
YBR133C 0 28447.2485105335  
YBR135W 0 46825.9766996708  
YBR136W 0 41839.1835109913  
YBR137W 2.04763590436752e-05 293598.257725735  
YBR138C 2.21365952733921e-05 292640.776175781  
YBR139W 2.21365952733921e-05 292640.776175781  
YBR140C 5.10201801429133e-06 47296.4221225581  
YBR141C 1.44039126169782e-05 70749.065930138  
YBR141W-A 5.10201801429133e-06 47296.4221225581  
YBR142W 1.44039126169782e-05 70749.065930138  
YBR143C 6.31009540319472e-06 106380.646063975  
YBR144C 0 212338.818854694  
YBR145W 0 212338.818854694  
YBR146W 0 23956.1220242143  
YBR147W 0.000418608334888271 861986.49166025  
YBR148W 6.02570686784043e-05 401514.047400063  
YBR149W 0 12269.2922084005  
YBR150C 0 76942.7206156495  
YBR151W 0 48624.4381324377  
YBR152W 6.9587383803027e-06 94457.5992450949  
YBR153W 0 13532.1718965343  
YBR154C 5.08735902016166e-06 10388.5810129985  
YBR155W 0 30116.9815672936  
YBR156C 0 49973.5673716367  
YBR157C 1.43052532501908e-05 165531.68455859  
YBR158W 0 67156.4291483059  
YBR159W 5.19139918608857e-06 77913.406947512  
YBR160W 0 92690.8627165931  
YBR161W 2.86224499986831e-05 368798.542743577

YBR162C 3.15117670572906e-05 229862.391558649  
YBR162W-A 4.08731765727532e-05 222069.799495963  
YBR163W 1.73986707340257e-05 188333.721912664  
YBR164C 5.49062673174117e-05 304046.28553619  
YBR165W 5.49062673175227e-05 304046.28553619  
YBR166C 7.87255259423469e-05 374640.639304518  
YBR167C 1.99415266476377e-05 392862.91688197  
YBR168W 1.99415266475267e-05 392862.91688197  
YBR169C 0 56667.6457951079  
YBR170C 0 24666.4930884852  
YBR171W 0 24666.4930884852  
YBR172C 4.42652020726797e-06 124889.204486514  
YBR173C 8.88179268287992e-06 33351.7769894087  
YBR175W 2.07665083972186e-05 167683.113317428  
YBR176W 3.53729270239356e-05 164008.779506828  
YBR177C 1.15518161630801e-05 82141.7846340823  
YBR179C 5.08735902016166e-06 92585.0784605254  
YBR180W 5.08735902016166e-06 102973.659473524  
YBR181C 3.56041870827051e-05 74367.3490056509  
YBR182C 7.94032908613129e-06 60503.9914896108  
YBR182C-A 1.24843722575374e-05 168823.75259425  
YBR183W 7.39705086882925e-06 168823.75259425  
YBR184W 3.32120493203858e-05 201586.970656495  
YBR185C 9.61170641446962e-05 360487.212426664  
YBR186W 6.47048659546678e-05 408320.687120734  
YBR187W 4.73098516406978e-06 27924.7984984462  
YBR188C 0 61907.9955569957  
YBR189W 0 61907.9955569957  
YBR190W 0.000106372563208001 697556.171237938  
YBR191W 0 15291.9857776969  
YBR191W-A 0 0  
YBR192W 5.57759802036761e-05 406805.896200299  
YBR193C 1.39588250673839e-05 133563.874447453  
YBR194W 1.39588250673839e-05 133563.874447453  
YBR195C 0 65564.2543157779  
YBR196C 0 0  
YBR196C-A 0 137148.008294466  
YBR196C-B 2.70377066234895e-05 86118.5915002624  
YBR197C 6.37118387482039e-05 227357.821932163  
YBR198C 0 15118.6149519874  
YBR199W 0 15118.6149519874  
YBR200W 0 205757.840118707  
YBR200W-A 0 106587.535466649  
YBR201C-A 0 132941.703077359  
YBR201W 1.07808133287257e-05 147253.718965258  
YBR202W 5.48495395483739e-05 357559.38789601  
YBR203W 0 111965.217480765  
YBR204C 0 0  
YBR205W 0 0  
YBR207W 0 26177.2238752991  
YBR208C 2.38304339471584e-05 148846.608114365  
YBR209W 2.38304339471584e-05 148846.608114365  
YBR210W 0 27056.1729606549  
YBR211C 6.04720485137822e-05 191948.37914639

YBR212W 6.15599216634566e-05 320227.990868482  
YBR213W 6.30500805565148e-05 460621.596293221  
YBR214W 0 0  
YBR215W 9.0162021949336e-05 243437.259274847  
YBR216C 4.46337970749777e-06 71494.254100393  
YBR217W 4.46337970749777e-06 71494.254100393  
YBR218C 0 74486.4960018068  
YBR220C 0 13145.636491516  
YBR221C 2.47065077964015e-05 151976.023771356  
YBR221W-A 2.47065077964015e-05 151976.023771356  
YBR222C 0 0  
YBR223C 0 25734.4725819267  
YBR223W-A 9.7438057278243e-06 202254.524704862  
YBR226C 0 0  
YBR227C 2.06665492289426e-05 162577.148413024  
YBR228W 2.06665492289426e-05 162577.148413024  
YBR229C 0 28559.5424832766  
YBR230C 1.30959848269052e-05 130523.86917977  
YBR230W-A 1.30959848269052e-05 130523.86917977  
YBR231C 0 35413.9623271973  
YBR233W 4.10792947325156e-06 284882.226395968  
YBR233W-A 1.99320377676226e-05 120393.423748879  
YBR234C 0 117400.444488006  
YBR235W 0 117400.444488006  
YBR236C 3.28777835886251e-05 163331.829793678  
YBR237W 3.28777835886251e-05 163331.829793678  
YBR238C 0 26239.7142374372  
YBR239C 2.62670008266408e-05 191071.208995709  
YBR240C 0.000102575055696219 651041.360831311  
YBR241C 5.97839686159451e-05 379505.122632407  
YBR242W 5.97839686159451e-05 404236.703834986  
YBR243C 7.07732035460928e-05 419671.037566104  
YBR244W 7.07732035463149e-05 417026.893435865  
YBR245C 0 0  
YBR246W 0 0  
YBR247C 3.41366725040704e-05 211285.49448488  
YBR248C 0.000315069712912508 555008.18198253  
YBR249C 0.000263114122554975 534373.405198277  
YBR250W 4.83420549129976e-05 502317.397954703  
YBR251W 0 38022.558185729  
YBR252W 0 13967.2761073352  
YBR253W 0 62102.5043878419  
YBR254C 2.46877055888328e-05 113146.846975457  
YBR255C-A 2.92718251171387e-05 313373.470543549  
YBR255W 2.46877055888328e-05 113146.846975457  
YBR256C 0.000184175104512629 614636.713476955  
YBR257W 3.0810357304345e-05 444884.144262199  
YBR258C 0 29054.7543650336  
YBR259W 0 29054.7543650336  
YBR260C 0 0  
YBR261C 0 21680.3049982834  
YBR262C 2.66711638439165e-05 90578.7773640927  
YBR263W 2.66711638438055e-05 90578.7773640927  
YBR264C 0 0

|           |                      |                  |
|-----------|----------------------|------------------|
| YBR265W   | 0                    |                  |
| YBR267W   | 3.49431209524242e-05 | 147774.707946401 |
| YBR268W   | 4.85677365884563e-05 | 184128.060243196 |
| YBR269C   | 4.82493730059597e-05 | 121973.731570014 |
| YBR270C   | 0                    | 30943.1628416637 |
| YBR271W   | 0                    | 30943.1628416637 |
| YBR272C   | 5.25950794724173e-05 | 220168.08268873  |
| YBR273C   | 4.17310205413912e-06 | 153293.028974831 |
| YBR274W   | 4.17310205413912e-06 | 153293.028974831 |
| YBR275C   | 4.72278150353e-05    | 352570.877185131 |
| YBR276C   | 4.35442507396022e-06 | 118869.368283702 |
| YBR277C   | 0                    | 15278.0488344899 |
| YBR278W   | 1.91179710172795e-05 | 159944.452435703 |
| YBR279W   | 5.45597952472665e-06 | 247966.438764286 |
| YBR280C   | 0                    | 8354.7664614836  |
| YBR281C   | 1.15371572634304e-05 | 43506.9273133167 |
| YBR282W   | 1.15371572634304e-05 | 43506.9273133167 |
| YBR283C   | 9.90108624765451e-06 | 240927.012910801 |
| YBR284W   | 5.7280080970612e-06  | 104524.913546767 |
| YBR285W   | 4.25289971228704e-06 | 145581.368650324 |
| YBR286W   | 6.00808816075826e-06 | 38024.9319752804 |
| YBR287W   | 0                    |                  |
| YBR288C   | 0                    | 16554.6914981094 |
| YBR289W   | 0                    | 16554.6914981094 |
| YBR290W   | 0                    | 8803.9799601005  |
| YBR291C   | 0                    | 145986.629128135 |
| YBR292C   | 3.30269145978335e-05 | 421452.834131447 |
| YBR293W   | 0                    | 21619.5588167235 |
| YBR294W   | 0.000166825402474258 | 526516.354819555 |
| YBR295W   | 0                    | 41858.8632815835 |
| YBR296C   | 0.000103800927120257 | 1088838.82906208 |
| YBR296C-A | 0                    | 121754.431038062 |
| YBR297W   | 0                    | 121754.431038062 |
| YBR298C   | 0                    | 49616.9999303676 |
| YBR298C-A | 2.37937704459235e-05 | 32319.0836643744 |
| YBR299W   | 2.37937704459235e-05 | 32319.0836643744 |
| YBR300C   | 0                    | 40273.2746887528 |
| YBR301W   | 0                    |                  |
| YBR302C   | 5.0422375025283e-06  | 329225.674733118 |
| YCL001W   | 1.65098233824157e-05 | 64353.2518094096 |
| YCL001W-A | 1.57278275162431e-05 | 193064.915869174 |
| YCL001W-B | 0                    | 0                |
| YCL002C   | 1.65098233824157e-05 | 64353.2518094096 |
| YCL004W   | 0                    | 55939.4136811527 |
| YCL005W   | 8.88179268287992e-06 | 30009.2541222736 |
| YCL005W-A | 3.34610016041736e-05 | 62385.0049715682 |
| YCL007C   | 8.88179268287992e-06 | 109529.847584845 |
| YCL008C   | 0                    |                  |
| YCL009C   | 0                    |                  |
| YCL010C   | 3.41090149139633e-05 | 242492.859860679 |
| YCL011C   | 1.37877206234371e-05 | 171944.838624368 |
| YCL012C   | 0                    | 30929.6930380945 |
| YCL014W   | 2.93524008223578e-05 | 348467.795821933 |
| YCL016C   | 2.93524008222468e-05 | 348467.795821933 |

YCL017C 5.84404881111e-05 509244.11812756  
YCL018W 0.000138570269644589 570569.736410237  
YCL019W 8.58405261290329e-05 499332.754930104  
YCL020W 8.58405261290329e-05 499332.754930104  
YCL021W-A 5.96851933876152e-06 120337.293342951  
YCL022C 0 13119.8571187186  
YCL024W 5.48864915459468e-05 250095.921428406  
YCL025C 0.000128271595509655 411205.752351984  
YCL026C-A 0.000147532308278908 749978.82645686  
YCL026C-B 1.65887623391203e-05 204741.86714694  
YCL027W 2.91808942208815e-05 379120.983947361  
YCL028W 0 11693.9735305002  
YCL029C 0 11693.9735305002  
YCL030C 0.000379757103327827 1081964.72902245  
YCL031C 1.66768442457776e-05 232711.05110381  
YCL032W 0 0  
YCL033C 0 0  
YCL034W 1.26202717977142e-05 252063.797556033  
YCL035C 1.26202717977142e-05 252063.797556034  
YCL036W 0 11207.1867062294  
YCL037C 0 11207.1867062294  
YCL038C 2.22200664306005e-05 349836.797241921  
YCL039W 0 76140.7310093327  
YCL040W 0 20526.545589388  
YCL041C 1.08860134405697e-05 166651.355417196  
YCL042W 1.08965125723559e-05 56827.5397234075  
YCL043C 0 92369.455152246  
YCL044C 1.14490924841837e-05 131771.627560189  
YCL045C 0 63072.9499067728  
YCL047C 2.27488986598301e-05 332187.623264683  
YCL048W 4.09126309666163e-05 349603.01655796  
YCL048W-A 0 27963.0912319162  
YCL049C 5.10201801429133e-06 19100.4298512039  
YCL050C 2.01167787292622e-05 452242.247558723  
YCL051W 0 30083.3671257801  
YCL052C 0 30083.3671257801  
YCL054W 8.88179268287992e-06 53736.598581988  
YCL055W 3.64968557062806e-05 488703.980733195  
YCL056C 1.63495326174212e-05 270073.424150175  
YCL057C-A 0 235420.445902517  
YCL057W 0 235420.445902517  
YCL058C 0 10263.272794694  
YCL058W-A 2.5108021082576e-05 398790.53629535  
YCL059C 0 91307.074497748  
YCL061C 7.11683479293068e-06 191248.667042423  
YCL063W 2.33830290378156e-05 216098.185008875  
YCL064C 2.33830290377046e-05 216098.185008875  
YCL065W 0 0  
YCL066W 0 78515.4118944587  
YCL067C 0 78515.4118944587  
YCL068C 0 51316.36397347  
YCL069W 0 99885.9175026589  
YCL073C 1.63255280074548e-05 368440.436633968  
YCL074W 0.000141728112332484 619954.983845743

YCL076W 8.16583789582381e-05 610190.927755133  
YCR001W 1.10710722971419e-05 312502.672481994  
YCR002C 0 24353.5808455379  
YCR003W 0 24353.5808455379  
YCR004C 5.08735902016166e-06 87509.9430349646  
YCR005C 2.48731674125091e-05 250858.932666462  
YCR006C 0 92332.0786792903  
YCR007C 4.98493038694203e-05 376582.638646177  
YCR008W 2.51233334785939e-05 149212.986164429  
YCR009C 1.74358314789513e-05 163958.604494505  
YCR010C 7.70701927021999e-06 193329.730163676  
YCR011C 1.5634279316834e-05 190564.176658925  
YCR012W 9.70867771454831e-06 315710.641582442  
YCR013C 0 10263.272794694  
YCR014C 4.30896169401063e-06 125265.945145289  
YCR015C 0 171335.69648218  
YCR016W 6.70413731496122e-06 172003.242864584  
YCR017C 4.50671958042159e-05 240622.308841136  
YCR018C 8.00362197661553e-05 357476.057260639  
YCR018C-A 2.26618609123763e-05 372867.088598943  
YCR019W 1.1486843935038e-05 203040.245281435  
YCR020C 0 0  
YCR020C-A 1.55641053831701e-05 81814.7235048545  
YCR020W-B 1.55641053831701e-05 81814.7235048545  
YCR021C 5.08735902016166e-06 28765.9164960349  
YCR022C 1.65741445175005e-05 196151.47155114  
YCR023C 7.54122265359536e-05 333515.562645037  
YCR024C 8.83490248548835e-05 317962.21807596  
YCR024C-A 1.47960053697993e-05 140429.274746433  
YCR024C-B 0 0  
YCR025C 1.17260482449533e-05 199998.38778155  
YCR026C 0 164045.97548918  
YCR027C 6.19995827312314e-05 680994.790627413  
YCR028C 6.50027769066863e-06 47334.2506888955  
YCR028C-A 2.5627033693465e-05 114473.87730611  
YCR030C 0 40317.4800828798  
YCR031C 2.00756806135738e-05 114224.146137525  
YCR032W 1.15435741641079e-05 271819.348969516  
YCR033W 4.54549484104616e-05 245935.445988169  
YCR034W 4.30896169401063e-06 201373.251578686  
YCR035C 2.28561023577489e-05 227048.585828269  
YCR036W 2.285610235786e-05 227048.585828269  
YCR037C 1.7603641896069e-05 183908.541380735  
YCR039C 0 78515.4118944587  
YCR040W 0 78515.4118944587  
YCR041W 0 0  
YCR042C 2.08364484609591e-05 205264.242050186  
YCR043C 0 9792.6185015359  
YCR044C 0 153458.504279147  
YCR045C 2.33498614196082e-05 225791.217808086  
YCR046C 0 35285.8232437727  
YCR047C 0 21964.8663846551  
YCR048W 1.28241789940642e-05 285702.292831539  
YCR050C 1.78495990241778e-05 396889.62111803

|           |                      |                  |
|-----------|----------------------|------------------|
| YCR051W   | 1.78495990240668e-05 | 396889.62111803  |
| YCR052W   | 0                    | 0                |
| YCR053W   | 0.0001508746800295   | 381959.68070138  |
| YCR054C   | 1.55476222801765e-05 | 233123.664244014 |
| YCR057C   | 0                    | 18375.8462863071 |
| YCR059C   | 5.13140769101694e-05 | 251385.62717381  |
| YCR060W   | 5.13140769101694e-05 | 251385.62717381  |
| YCR061W   | 0                    | 28333.4746139889 |
| YCR063W   | 0                    | 12973.0482128422 |
| YCR064C   | 1.00400594269523e-05 | 63693.0247639396 |
| YCR065W   | 3.31334001408834e-05 | 130420.774144695 |
| YCR066W   | 1.59460895685637e-05 | 133353.644902422 |
| YCR067C   | 1.55399709591553e-05 | 167806.370507649 |
| YCR068W   | 1.11134999459805e-05 | 169746.010138319 |
| YCR069W   | 1.37183855858369e-05 | 201517.174076852 |
| YCR071C   | 4.26523664642797e-06 | 111578.004883115 |
| YCR072C   | 0                    | 56030.2361507051 |
| YCR073C   | 1.17027753305798e-05 | 216872.078983236 |
| YCR073W-A | 1.17027753305798e-05 | 216872.078983236 |
| YCR075C   | 0                    | 13119.8571187186 |
| YCR075W-A | 0                    | 13119.8571187186 |
| YCR076C   | 0                    | 21998.2922312724 |
| YCR077C   | 0                    | 0                |
| YCR079W   | 0                    | 0                |
| YCR081C-A | 2.89221689322439e-05 | 217849.62774976  |
| YCR081W   | 0                    | 0                |
| YCR082W   | 2.89221689322439e-05 | 217849.62774976  |
| YCR083W   | 5.38940412164735e-06 | 78069.4689145729 |
| YCR084C   | 6.44983105591024e-06 | 0                |
| YCR085W   | 6.44983105591024e-06 | 0                |
| YCR086W   | 0                    | 41852.1293485149 |
| YCR087C-A | 4.79239585123858e-05 | 334492.390828881 |
| YCR087W   | 0                    | 0                |
| YCR088W   | 4.79239585123858e-05 | 334492.390828881 |
| YCR089W   | 9.1127505926214e-05  | 338766.536102279 |
| YCR090C   | 2.91298868216883e-05 | 188258.697534846 |
| YCR091W   | 2.11797935570912e-05 | 340509.021277186 |
| YCR092C   | 1.13249801479975e-05 | 164134.477467109 |
| YCR093W   | 1.13249801479975e-05 | 164134.477467109 |
| YCR094W   | 6.8303300183814e-05  | 251717.3098044   |
| YCR095C   | 1.28074260996591e-05 | 207475.857155506 |
| YCR095W-A | 1.28074260996591e-05 | 207475.857155506 |
| YCR096C   | 3.14142308435184e-05 | 66557.1830624842 |
| YCR097W   | 3.14142308435184e-05 | 66557.1830624842 |
| YCR097W-A | 6.50027769066863e-06 | 18693.6424111651 |
| YCR098C   | 2.44511289565486e-05 | 148657.479875733 |
| YCR100C   | 2.96912219773793e-05 | 416772.16889098  |
| YCR101C   | 9.61671243363549e-05 | 316496.016458496 |
| YCR102C   | 5.67537124249728e-05 | 363637.153967364 |
| YCR102W-A | 4.73098516406978e-06 | 52332.0944221794 |
| YCR104W   | 1.71957329677674e-05 | 211981.77941916  |
| YCR105W   | 9.32399977110476e-05 | 458482.913978266 |
| YCR106W   | 6.46005424530527e-05 | 299944.436685157 |
| YCR107W   | 9.30267410748087e-06 | 156362.718449995 |



|           |                      |                  |  |
|-----------|----------------------|------------------|--|
| YCR108C   | 0                    | 12555.6063219131 |  |
| YDL001W   | 0                    | 43196.495917863  |  |
| YDL002C   | 0                    | 43196.495917863  |  |
| YDL003W   | 0                    | 232155.922204266 |  |
| YDL004W   | 0                    | 35571.5135958026 |  |
| YDL005C   | 0                    | 165729.531416498 |  |
| YDL006W   | 0                    | 52603.55727875   |  |
| YDL007C-A | 0                    | 140438.975784912 |  |
| YDL007W   | 3.06486756810331e-05 | 539237.903523677 |  |
| YDL008W   | 0                    |                  |  |
| YDL009C   | 0                    |                  |  |
| YDL010W   | 4.90727220443521e-05 | 352852.803324859 |  |
| YDL011C   | 8.88179268287992e-06 | 80983.7890379762 |  |
| YDL012C   | 1.67568810589547e-05 | 74807.0167471488 |  |
| YDL013W   | 2.37440140675726e-05 | 392585.066206821 |  |
| YDL014W   | 0                    | 27033.734315422  |  |
| YDL015C   | 0                    | 27033.734315422  |  |
| YDL016C   | 0                    |                  |  |
| YDL017W   | 9.42915372836861e-06 | 187534.998773054 |  |
| YDL018C   | 3.25225085502368e-05 | 384625.285840409 |  |
| YDL019C   | 0                    | 40149.3656341971 |  |
| YDL020C   | 5.08735902016166e-06 | 9873.5063439597  |  |
| YDL021W   | 1.3913430198631e-05  | 250070.181500236 |  |
| YDL022C-A | 3.07781413549923e-05 | 119406.054008207 |  |
| YDL022W   | 0                    | 37053.6507483276 |  |
| YDL024C   | 3.07781413549923e-05 | 119406.054008207 |  |
| YDL025C   | 0.000270369104128365 | 670602.176378417 |  |
| YDL025W-A | 2.06648764208284e-05 | 171199.975660873 |  |
| YDL027C   | 2.66762647962437e-05 | 211215.099583495 |  |
| YDL028C   | 1.44296299483537e-05 | 353893.357651269 |  |
| YDL029W   | 5.08735902016166e-06 | 41344.4221386113 |  |
| YDL030W   | 1.59823212836363e-05 | 164894.1767556   |  |
| YDL031W   | 1.7960765140046e-05  | 188587.194221079 |  |
| YDL033C   | 1.7960765140046e-05  | 188587.194221079 |  |
| YDL035C   | 2.76513044757953e-05 | 370985.061689089 |  |
| YDL036C   | 1.05079234018479e-05 | 192097.008731307 |  |
| YDL037C   | 1.06653957584468e-05 | 413602.49218344  |  |
| YDL039C   | 5.08131344387763e-05 | 298467.214559289 |  |
| YDL040C   | 0                    | 125682.921979923 |  |
| YDL042C   | 2.00579892355446e-05 | 130550.281485302 |  |
| YDL043C   | 0                    | 29105.1435081897 |  |
| YDL044C   | 0                    | 111855.727540046 |  |
| YDL045C   | 0                    | 27963.8836909283 |  |
| YDL045W-A | 1.52456937362322e-05 | 458743.695673021 |  |
| YDL046W   | 1.00400594269523e-05 | 359697.250910878 |  |
| YDL047W   | 0                    | 26637.9069801399 |  |
| YDL048C   | 0                    | 169985.957071172 |  |
| YDL049C   | 1.28418488615223e-05 | 271103.270974789 |  |
| YDL050C   | 0                    | 20441.3436902172 |  |
| YDL051W   | 0                    | 42552.1263216777 |  |
| YDL052C   | 0                    | 42552.1263216777 |  |
| YDL053C   | 8.12812071857572e-05 | 275437.005890926 |  |
| YDL054C   | 6.01118267484768e-06 | 108578.351633989 |  |
| YDL055C   | 1.93244611915722e-05 | 208153.61628749  |  |

YDL056W 6.01151260248844e-06 85977.1732978532  
YDL057W 0 54255.0351739712  
YDL058W 5.08735902016166e-06 15278.0488344899  
YDL059C 1.07357404229846e-05 267054.032983477  
YDL060W 0 72165.7764546643  
YDL061C 0 72165.7764546643  
YDL063C 2.44511289566596e-05 192541.942914968  
YDL064W 0 0  
YDL065C 0 0  
YDL066W 0.00012103298328503 451406.558437748  
YDL067C 0.000121032983285141 451406.558437748  
YDL068W 0 0  
YDL069C 2.6210255937853e-05 139981.668175346  
YDL070W 0 50883.4674172103  
YDL072C 1.53043859323354e-05 227346.167075309  
YDL073W 1.65939954186456e-05 152870.967405495  
YDL074C 1.65939954186456e-05 152870.967405495  
YDL075W 2.0547518810643e-05 63898.9159824623  
YDL076C 0 114951.370882946  
YDL077C 5.0422375025283e-06 140663.723579933  
YDL078C 9.80885755262895e-05 526193.046392946  
YDL079C 2.18128649456251e-05 257644.327066151  
YDL080C 6.16259110328699e-05 350302.217626202  
YDL081C 0 172712.735277111  
YDL082W 5.38940412164735e-06 73039.5664776754  
YDL083C 5.38940412164735e-06 73039.5664776754  
YDL084W 1.00400594269523e-05 82556.0846528633  
YDL085C-A 0.000127087397737036 583711.644663328  
YDL085W 0.000127087397737147 568689.867317318  
YDL086C-A 1.10710722971419e-05 215910.525382488  
YDL086W 1.30959848269052e-05 172659.349352329  
YDL087C 1.30959848269052e-05 172659.349352329  
YDL088C 0 0  
YDL089W 0 15291.9857776969  
YDL090C 0 15291.9857776969  
YDL091C 0 18969.8017439098  
YDL092W 0 28411.8428964155  
YDL093W 0 17026.6416965433  
YDL095W 0 39456.9702418671  
YDL097C 0 39456.9702418671  
YDL098C 0 72601.377677726  
YDL099W 0 29089.3433827404  
YDL100C 0 29089.3433827404  
YDL101C 4.32165982089394e-06 109285.121066549  
YDL102W 0 20126.179753506  
YDL103C 0 20126.179753506  
YDL104C 6.9587383803027e-06 65349.8565626408  
YDL105W 4.90050428479938e-05 218504.799095814  
YDL106C 4.90050428481048e-05 218504.799095814  
YDL107W 0 49700.9672556581  
YDL108W 1.65535423696239e-05 155779.767383989  
YDL109C 1.65535423696239e-05 155779.767383989  
YDL110C 1.83835396133647e-05 293200.322882479  
YDL111C 3.25763519345434e-05 310666.848045998

|           |                      |                  |
|-----------|----------------------|------------------|
| YDL112W   | 5.26634279797156e-05 | 349418.505430188 |
| YDL113C   | 5.26634279798266e-05 | 349418.505430188 |
| YDL114W   | 1.54474691074213e-05 | 313011.605165512 |
| YDL115C   | 1.54474691073103e-05 | 313011.605165512 |
| YDL116W   | 0                    | 63729.2063437038 |
| YDL117W   | 0                    | 0                |
| YDL119C   | 6.84615931511035e-05 | 218302.72200615  |
| YDL120W   | 4.30970794507157e-06 | 103444.366573487 |
| YDL121C   | 4.30970794507157e-06 | 103444.366573487 |
| YDL122W   | 4.60395430157412e-06 | 335475.041271202 |
| YDL123W   | 8.94554399206715e-05 | 341460.198568628 |
| YDL124W   | 0                    | 130139.870258795 |
| YDL125C   | 0                    | 69013.9119085005 |
| YDL126C   | 3.99781298966451e-05 | 313156.92488223  |
| YDL127W   | 2.42411296843548e-05 | 258499.085492952 |
| YDL128W   | 2.90587181760449e-05 | 430624.837021815 |
| YDL129W   | 7.76215121042201e-05 | 293925.867607393 |
| YDL130W   | 2.16935961058207e-05 | 203791.408732992 |
| YDL130W-A | 3.85731817332813e-05 | 313922.709043163 |
| YDL131W   | 0.000146123965224509 | 411067.682832584 |
| YDL132W   | 1.76975901458043e-05 | 121621.264332612 |
| YDL133C-A | 6.13885490270416e-05 | 494074.630880149 |
| YDL133W   | 1.85117829200054e-05 | 257021.362217626 |
| YDL134C   | 4.32669651151407e-06 | 49584.3171956715 |
| YDL135C   | 0                    | 55730.3611671715 |
| YDL136W   | 2.05434305142749e-05 | 455046.329382651 |
| YDL137W   | 4.20993804024494e-05 | 252401.714554663 |
| YDL138W   | 3.19503635449747e-05 | 306945.001911732 |
| YDL139C   | 4.66031559243074e-06 | 185715.088748212 |
| YDL140C   | 6.85498718244748e-06 | 60808.9569659681 |
| YDL141W   | 4.17692188058316e-05 | 189238.387839554 |
| YDL142C   | 4.17692188057206e-05 | 189238.387839554 |
| YDL143W   | 0                    | 11208.2152509106 |
| YDL144C   | 0                    | 11208.2152509106 |
| YDL145C   | 0                    | 90745.4292536836 |
| YDL146W   | 0.000128194353284927 | 611145.159821296 |
| YDL147W   | 0                    | 0                |
| YDL148C   | 0                    | 0                |
| YDL149W   | 5.74382579633381e-05 | 253272.108713391 |
| YDL150W   | 4.26523664642797e-06 | 176845.246554167 |
| YDL153C   | 0                    | 72240.6005469553 |
| YDL154W   | 4.61678548577815e-05 | 333306.973848999 |
| YDL155W   | 0                    | 0                |
| YDL156W   | 3.79998949235905e-05 | 158054.018378918 |
| YDL157C   | 3.79998949235905e-05 | 158054.018378918 |
| YDL158C   | 0                    | 0                |
| YDL159W   | 0                    | 39837.907123563  |
| YDL159W-A | 4.50671958042159e-05 | 274284.306003363 |
| YDL160C   | 4.50671958042159e-05 | 274284.306003363 |
| YDL160C-A | 3.43325200542477e-05 | 277451.24304071  |
| YDL161W   | 5.03352043934591e-06 | 161119.894013781 |
| YDL164C   | 5.03352043934591e-06 | 161119.894013781 |
| YDL165W   | 0                    | 31742.1286657701 |
| YDL166C   | 0                    | 31742.1286657701 |

|         |                      |                  |
|---------|----------------------|------------------|
| YDL167C | 1.0815337976755e-05  | 214896.715275665 |
| YDL168W | 1.55020397000216e-05 | 322882.745065698 |
| YDL169C | 4.73872120919649e-05 | 400667.564898777 |
| YDL170W | 0.000376596198871759 | 1018650.22061404 |
| YDL171C | 0.000111083687726832 | 562762.831377806 |
| YDL172C | 0                    | 11207.1867062294 |
| YDL173W | 2.14514672161048e-05 | 358754.629718322 |
| YDL174C | 1.63495326174212e-05 | 217703.003884798 |
| YDL175C | 5.66096780764136e-05 | 249823.305646633 |
| YDL176W | 1.68679873004951e-05 | 126382.849403075 |
| YDL177C | 1.68679873004951e-05 | 126382.849403075 |
| YDL178W | 1.12769264550838e-05 | 96745.9563754762 |
| YDL179W | 0                    | 111886.504565966 |
| YDL180W | 8.9067267343701e-05  | 372585.898841179 |
| YDL181W | 0                    | 29371.0025436605 |
| YDL182W | 0.000114133649170567 | 648932.173743905 |
| YDL183C | 0                    | 26218.6797068615 |
| YDL184C | 0                    | 24600.9519558536 |
| YDL185W | 0                    | 0                |
| YDL186W | 2.05557298421644e-05 | 225529.362695832 |
| YDL188C | 2.05557298421644e-05 | 225529.362695832 |
| YDL189W | 3.7480014171476e-05  | 319258.300681349 |
| YDL190C | 3.74800141713649e-05 | 319258.300681349 |
| YDL191W | 4.13590494521276e-05 | 196431.638372555 |
| YDL192W | 3.23016862180392e-05 | 162291.173125574 |
| YDL193W | 4.16120613303539e-05 | 156762.526584991 |
| YDL194W | 0.000112382100900477 | 415319.650781109 |
| YDL195W | 2.46273107211703e-05 | 218398.911201422 |
| YDL196W | 1.5525786786208e-05  | 92323.8798429311 |
| YDL197C | 1.5525786786208e-05  | 92323.8798429311 |
| YDL198C | 0.000258683125271997 | 663475.830769404 |
| YDL199C | 2.12998355796357e-05 | 120727.411007486 |
| YDL200C | 3.1165087973406e-05  | 184019.77295004  |
| YDL201W | 3.30926946130461e-05 | 253829.082268091 |
| YDL202W | 4.27623374810171e-06 | 97319.6390230619 |
| YDL203C | 4.27623374810171e-06 | 97319.6390230619 |
| YDL204W | 3.97112194290283e-05 | 290319.455409401 |
| YDL205C | 6.4397944638972e-05  | 303000.53217041  |
| YDL206W | 4.87535062734246e-05 | 241689.542076383 |
| YDL207W | 5.19139918608857e-06 | 97258.8309993364 |
| YDL208W | 0                    | 50736.7386823191 |
| YDL209C | 0                    | 50736.7386823191 |
| YDL210W | 1.24843722575374e-05 | 132017.725926127 |
| YDL211C | 5.08735902016166e-06 | 29492.1226845559 |
| YDL212W | 0                    | 0                |
| YDL213C | 0                    | 0                |
| YDL214C | 2.31841781427322e-05 | 427783.887606934 |
| YDL215C | 7.98366323867539e-05 | 459330.472187945 |
| YDL216C | 0                    | 9359.1112814068  |
| YDL217C | 3.43014438246581e-05 | 365685.538862007 |
| YDL218W | 6.34845798189732e-05 | 466052.861166719 |
| YDL219W | 1.13171021255409e-05 | 228836.220822976 |
| YDL220C | 1.13171021255409e-05 | 228836.220822976 |
| YDL221W | 0                    | 0                |

YDL222C 3.6117937394553e-05 154514.162405634  
YDL223C 0 180834.797460825  
YDL224C 5.17233275838525e-05 329886.548145821  
YDL225W 6.44983105591024e-06 18282.984418011  
YDL226C 6.44983105591024e-06 18282.984418011  
YDL227C 5.08735902016166e-06 203206.630477578  
YDL228C 0 18709.5833076081  
YDL229W 1.08859573376696e-05 164145.788511595  
YDL230W 0 174557.573214171  
YDL231C 0 174557.573214171  
YDL232W 5.0422375025283e-06 390643.726839873  
YDL233W 0.000120296490302096 285404.032961724  
YDL234C 0.000120296490302096 285404.032961724  
YDL235C 8.29361117016258e-06 89205.2303041943  
YDL236W 5.03352043934591e-06 339558.618726429  
YDL237W 9.06337670600887e-05 348052.479902936  
YDL238C 9.06337670600887e-05 348052.479902936  
YDL239C 5.61117156444579e-05 122444.426770537  
YDL240C-A 0 13119.8571187186  
YDL240W 0 13119.8571187186  
YDL241W 1.4782297872884e-05 220579.247404893  
YDL242W 1.87105130730059e-05 229464.72495804  
YDL243C 1.87105130731169e-05 229464.72495804  
YDL244W 2.51233334785939e-05 251136.708146755  
YDL245C 0 79455.263636486  
YDL246C 0 56287.541829403  
YDL247W 0.000121858898620264 521783.534874496  
YDL247W-A 6.5142897635373e-05 297472.060015242  
YDL248W 5.0422375025283e-06 329225.674733118  
YDR001C 2.37937704459235e-05 83382.7778563145  
YDR002W 2.37937704459235e-05 83382.7778563145  
YDR003W 5.08735902016166e-06 114179.557581543  
YDR003W-A 0 0  
YDR004W 9.56815938657485e-06 46557.5777534207  
YDR005C 3.89564513798568e-05 348398.68423084  
YDR006C 5.27645237849983e-05 358999.994023567  
YDR007W 8.56324491913529e-05 510412.620163209  
YDR008C 3.4487329754529e-05 253770.455221109  
YDR009W 3.4487329754529e-05 264527.525628701  
YDR010C 0.00011863306345461 348401.828872585  
YDR011W 2.46956834549783e-05 163233.843567402  
YDR012W 3.26345399960237e-05 179851.75585142  
YDR013W 0 32610.7106990572  
YDR014W 2.11797935570912e-05 181840.033689754  
YDR014W-A 3.14142308435184e-05 106940.423976834  
YDR015C 0 0  
YDR016C 0.000101884582558109 418333.558299886  
YDR017C 0 50114.7167704534  
YDR018C 0 0  
YDR019C 1.92789994138964e-05 220878.9538233  
YDR020C 0 11693.9735305002  
YDR021W 0 11693.9735305002  
YDR022C 5.19361307178556e-05 262122.968483489  
YDR023W 2.5625743059976e-05 298143.120718321

YDR024W 0 123936.92481523  
YDR025W 0 0  
YDR026C 2.62670008266408e-05 149045.925024346  
YDR027C 0 16578.7378637055  
YDR028C 0 14126.8063403392  
YDR029W 0 14126.8063403392  
YDR030C 0 0  
YDR031W 0 0  
YDR032C 4.14787020736052e-05 224019.820288703  
YDR033W 0 122787.062967642  
YDR034C 0.000173694574524541 821561.116498965  
YDR034C-A 0 36503.371044638  
YDR034C-C 9.97981529634595e-05 573157.616576181  
YDR034C-D 9.97981529634595e-05 573157.616576181  
YDR034W-B 0 22230.9234455659  
YDR035W 0.000135354052718362 471298.901569293  
YDR036C 0 70740.7095662054  
YDR037W 0.000119713322932369 269937.672167368  
YDR038C 9.6652196847069e-06 222119.213633429  
YDR039C 9.6652196847069e-06 222119.213633429  
YDR040C 3.73629465602043e-05 461099.5535923  
YDR041W 0.000240244062030603 834377.317662651  
YDR042C 7.14164216943924e-05 606171.821949387  
YDR043C 2.17998041114331e-05 226286.64127967  
YDR044W 4.79073683534725e-06 137291.493405941  
YDR045C 1.86872510463676e-05 236616.364396155  
YDR046C 0.00010425727445762 462404.908376043  
YDR047W 0 100674.235205407  
YDR049W 1.69701931740374e-05 303175.275834274  
YDR050C 0 25121.0897079988  
YDR051C 6.9587383803027e-06 104582.231940593  
YDR052C 0 0  
YDR054C 1.0129570870987e-05 179336.072816347  
YDR055W 0 64718.2463207262  
YDR056C 8.88179268287992e-06 41216.440828503  
YDR057W 8.88179268287992e-06 41216.440828503  
YDR058C 9.75733853614269e-06 158294.583939914  
YDR059C 7.27788311449817e-05 246970.501469277  
YDR060W 5.08735902016166e-06 28805.6097128359  
YDR061W 4.01750632266218e-05 233039.463760519  
YDR062W 0 43041.3038802797  
YDR063W 0 54653.2719541607  
YDR064W 2.37937704459235e-05 46286.3597717096  
YDR065W 0 10791.105525043  
YDR066C 0 33195.5503579466  
YDR067C 1.69508982458266e-05 108504.706712653  
YDR068W 1.69508982458266e-05 108504.706712653  
YDR069C 0.000120114320870224 557448.511036289  
YDR070C 0 14544.5082039682  
YDR071C 1.27506959423096e-05 211811.788090962  
YDR072C 0 18603.7188395449  
YDR073W 1.11416650403484e-05 256012.095617598  
YDR074W 3.46746612941429e-05 319150.751274499  
YDR075W 3.19678796451006e-05 210148.797833185

|           |                      |                  |
|-----------|----------------------|------------------|
| YDR076W   | 8.98726144602513e-05 | 313447.843147088 |
| YDR077W   | 1.48693800967603e-05 | 335500.200284866 |
| YDR078C   | 5.19139918608857e-06 | 145709.604974383 |
| YDR079C-A | 0 0                  |                  |
| YDR079W   | 5.19139918608857e-06 | 145709.604974383 |
| YDR080W   | 0 0                  |                  |
| YDR081C   | 7.03480304065085e-06 | 180229.633714253 |
| YDR082W   | 7.03480304065085e-06 | 180229.633714253 |
| YDR083W   | 0 25351.5439967265   |                  |
| YDR084C   | 2.35548309198697e-05 | 208652.796032943 |
| YDR085C   | 1.11416650403484e-05 | 214909.421219419 |
| YDR086C   | 0 0                  |                  |
| YDR087C   | 1.39407076406028e-05 | 125208.226165322 |
| YDR088C   | 1.47960053697993e-05 | 268070.146549394 |
| YDR089W   | 3.18856666847722e-05 | 61096.0464062013 |
| YDR090C   | 3.84990986964651e-05 | 383770.909733947 |
| YDR091C   | 0.000105938060200428 | 492644.111811228 |
| YDR092W   | 1.67160090176477e-05 | 114789.823140629 |
| YDR093W   | 0 120034.296222031   |                  |
| YDR095C   | 0 29223.138298522    |                  |
| YDR096W   | 0 29223.138298522    |                  |
| YDR097C   | 9.06879549189554e-06 | 299892.668019895 |
| YDR098C   | 2.62670008266408e-05 | 347580.955320517 |
| YDR098C-A | 0.000129755102411089 | 928980.212206633 |
| YDR098C-B | 0.000129755102411089 | 928980.212206633 |
| YDR099W   | 2.50208843119992e-05 | 357279.665958685 |
| YDR100W   | 5.886479185091e-06   | 115718.267936224 |
| YDR101C   | 4.27623374810171e-06 | 30043.8172864395 |
| YDR102C   | 1.31539251303492e-05 | 215389.824823194 |
| YDR103W   | 1.31539251303492e-05 | 215389.824823194 |
| YDR104C   | 2.94185739556641e-05 | 70575.6291944504 |
| YDR105C   | 0 17396.8090203141   |                  |
| YDR106W   | 0 17396.8090203141   |                  |
| YDR107C   | 3.50165497016164e-05 | 318271.43572761  |
| YDR108W   | 3.50165497016164e-05 | 318271.435727611 |
| YDR109C   | 1.44039126169782e-05 | 153109.129796074 |
| YDR110W   | 1.44039126169782e-05 | 153109.129796074 |
| YDR111C   | 2.85619038352669e-05 | 281603.119620958 |
| YDR113C   | 0 34417.5109759304   |                  |
| YDR114C   | 0 41053.091178776    |                  |
| YDR115W   | 0 34417.5109759304   |                  |
| YDR116C   | 2.06665492289426e-05 | 206608.169410962 |
| YDR117C   | 2.37526365006735e-05 | 154055.845054813 |
| YDR118W   | 2.37526365006735e-05 | 154055.845054813 |
| YDR119W   | 4.23240566282956e-06 | 163143.693169677 |
| YDR119W-A | 5.78604370486957e-05 | 427173.783159209 |
| YDR120C   | 5.24013883651531e-05 | 184267.275322114 |
| YDR121W   | 5.24013883651531e-05 | 184267.275322114 |
| YDR122W   | 1.31792078832405e-05 | 188990.961857139 |
| YDR123C   | 4.02474810248243e-05 | 443813.632752824 |
| YDR124W   | 3.43990725736321e-05 | 265083.882785955 |
| YDR125C   | 1.97190165353023e-05 | 212173.137440145 |
| YDR126W   | 1.97190165353023e-05 | 212173.137440145 |
| YDR127W   | 0.000392457616973707 | 652677.511095428 |

YDR128W 3.18107699508463e-05 274277.105457863  
YDR129C 0 12269.2922084005  
YDR130C 4.30896169401063e-06 167306.853866768  
YDR131C 0 24573.3359088984  
YDR132C 3.61915541411406e-05 187106.484008821  
YDR133C 9.73941543660484e-05 282289.044811759  
YDR134C 9.73941543660484e-05 282289.044811759  
YDR135C 0 8706.5289492158  
YDR138W 4.54197309451843e-05 431011.548961669  
YDR139C 0 13707.9240725777  
YDR140W 0 13707.9240725777  
YDR141C 3.56418073033105e-05 144980.446779454  
YDR142C 3.97112194290283e-05 229854.559751264  
YDR143C 0 72357.2519841175  
YDR144C 1.39011045223736e-05 284480.3135637  
YDR145W 9.75733853614269e-06 165491.79160384  
YDR146C 9.3097326628877e-06 174865.084505459  
YDR147W 9.31504678225448e-06 108512.156444891  
YDR148C 9.7639646938763e-06 162686.798474934  
YDR150W 9.7639646938763e-06 162686.798474934  
YDR151C 5.7280080970612e-06 182159.845567769  
YDR152W 5.7280080970612e-06 182159.845567768  
YDR153C 0 28502.2772516776  
YDR154C 1.0286293083972e-05 177909.327280882  
YDR155C 1.0286293083972e-05 194464.018778991  
YDR156W 1.0286293083972e-05 194464.018778991  
YDR157W 0 0  
YDR158W 0 0  
YDR159W 1.78551751266465e-05 110125.799472346  
YDR160W 4.46337970749777e-06 0  
YDR161W 0 78219.8519381728  
YDR162C 8.332714437842e-05 379468.886609399  
YDR163W 8.332714437842e-05 379468.886609399  
YDR164C 3.94434562112078e-05 430147.295732732  
YDR165W 3.94434562112078e-05 386943.608781895  
YDR166C 0 0  
YDR167W 0 0  
YDR168W 0 37803.167417874  
YDR169C 1.65098233824157e-05 95420.9029423835  
YDR169C-A 2.6982787383778e-05 230711.527831752  
YDR170C 4.15368468159594e-05 97174.0002286686  
YDR170W-A 6.49523136708741e-05 553826.111411642  
YDR171W 2.47777859234688e-05 350891.98502574  
YDR172W 8.08931586601114e-05 685912.890813235  
YDR173C 0 36301.8604391371  
YDR174W 0 36301.8604391371  
YDR175C 3.6207646860853e-05 132983.150919458  
YDR176W 3.6207646860742e-05 132983.150919458  
YDR177W 3.94825779916896e-05 412344.216469279  
YDR178W 2.54724860843103e-05 59904.7556807123  
YDR179C 0 125139.477447123  
YDR179W-A 0 125139.477447123  
YDR180W 5.7280080970612e-06 236449.224865544  
YDR181C 0 0



|           |                      |                  |
|-----------|----------------------|------------------|
| YDR182W   | 0                    |                  |
| YDR182W-A | 0                    | 0                |
| YDR183W   | 4.95941499800701e-06 | 184949.089628427 |
| YDR184C   | 3.0936696172934e-05  | 334387.904107474 |
| YDR185C   | 0.000164030756853784 | 388402.492270157 |
| YDR186C   | 5.08735902016166e-06 | 76901.1760613197 |
| YDR188W   | 2.07826475885353e-05 | 205889.693450018 |
| YDR189W   | 5.82507366337914e-05 | 388916.608901501 |
| YDR190C   | 0                    | 136179.063060811 |
| YDR191W   | 0                    | 136179.063060811 |
| YDR192C   | 4.32669651151407e-06 | 210007.122356124 |
| YDR194C   | 0                    | 0                |
| YDR194W-A | 0                    | 0                |
| YDR195W   | 1.06854852351956e-05 | 135730.751110468 |
| YDR196C   | 0                    | 17026.6416965433 |
| YDR197W   | 0                    | 17026.6416965433 |
| YDR198C   | 4.14027185047239e-06 | 56667.2803337581 |
| YDR199W   | 4.14027185047239e-06 | 56667.2803337581 |
| YDR200C   | 2.24142475138134e-05 | 168348.355146121 |
| YDR201W   | 2.24142475139244e-05 | 168348.355146121 |
| YDR202C   | 0                    | 10263.272794694  |
| YDR204W   | 0                    | 10263.272794694  |
| YDR205W   | 2.30935725747949e-05 | 86248.4701007386 |
| YDR206W   | 3.31165808290512e-05 | 499676.799595375 |
| YDR207C   | 1.49249183452049e-05 | 320904.347869402 |
| YDR208W   | 9.96867036673343e-06 | 243793.623124243 |
| YDR209C   | 8.58405261289219e-05 | 542687.37123734  |
| YDR210C-C | 8.58405261290329e-05 | 443455.044290091 |
| YDR210C-D | 8.58405261290329e-05 | 443455.044290091 |
| YDR210W   | 0                    | 65437.5557394151 |
| YDR210W-A | 8.58405261290329e-05 | 459317.318432943 |
| YDR210W-B | 8.58405261290329e-05 | 459317.318432943 |
| YDR211W   | 0                    | 28944.1223343812 |
| YDR212W   | 5.08735902016166e-06 | 50299.1905941414 |
| YDR213W   | 9.43147688836632e-06 | 114529.720618734 |
| YDR214W   | 0                    | 15058.4907836468 |
| YDR215C   | 2.55802904676194e-05 | 242855.615242779 |
| YDR216W   | 2.55802904676194e-05 | 271071.01381517  |
| YDR217C   | 1.15518161630801e-05 | 36375.7717872902 |
| YDR218C   | 8.16594106234358e-05 | 370255.721338067 |
| YDR219C   | 0                    | 0                |
| YDR220C   | 0                    | 0                |
| YDR221W   | 0                    | 0                |
| YDR222W   | 8.77157439451715e-05 | 609052.033787639 |
| YDR223W   | 0.00015232985056568  | 357073.83921641  |
| YDR224C   | 0                    | 12824.4957852458 |
| YDR225W   | 0                    | 30186.3734906481 |
| YDR226W   | 2.19043104900951e-05 | 473052.507627421 |
| YDR227W   | 2.88414253010183e-05 | 142108.868641755 |
| YDR228C   | 0                    | 8321.0022946096  |
| YDR229W   | 1.7603641896069e-05  | 153719.383231608 |
| YDR230W   | 0                    | 0                |
| YDR231C   | 1.00400594269523e-05 | 68527.0059796331 |
| YDR232W   | 1.00400594269523e-05 | 68527.0059796331 |

YDR233C 1.54354980779203e-05 205092.126069384  
YDR234W 9.64497091066052e-05 515964.288977888  
YDR235W 0 93732.6359173722  
YDR236C 4.92939167068274e-05 181946.485001559  
YDR237W 3.55212776840252e-05 100142.711262223  
YDR238C 1.94270818117959e-05 186866.554422071  
YDR239C 1.06629196435781e-05 167382.313212434  
YDR240C 3.84613392836464e-05 429579.026404499  
YDR242W 0.000149438908673361 765732.170327723  
YDR243C 4.32669651151407e-06 94356.9218774401  
YDR244W 4.32669651151407e-06 94356.9218774401  
YDR245W 0 249682.718475817  
YDR246W 0 24476.2939010256  
YDR246W-A 0 9856.6633311761  
YDR247W 2.67412574230796e-05 288470.526792622  
YDR248C 0 69311.6937207672  
YDR249C 6.04089278763986e-05 178424.949433548  
YDR250C 7.48834913844032e-06 88315.3004390622  
YDR251W 7.48834913844032e-06 88315.3004390622  
YDR252W 1.00400594269523e-05 157882.73449044  
YDR253C 1.1486843935038e-05 282316.66663632  
YDR254W 1.1486843935038e-05 300958.201516226  
YDR255C 4.27623374810171e-06 33364.0413157184  
YDR256C 5.08735902016166e-06 90328.7753517942  
YDR257C 9.21189830983549e-05 469111.314629321  
YDR258C 0.000153169042946488 516630.766080822  
YDR259C 2.17106425605129e-05 197410.554358297  
YDR260C 0 94589.7810553414  
YDR261C 5.43961307196694e-05 251184.215434924  
YDR261C-C 0.000115035608098779 876075.732044922  
YDR261C-D 0.000115035608098779 876075.732044922  
YDR261W-A 0.00014483036052293 807324.198214125  
YDR261W-B 0.00014483036052293 807324.198214125  
YDR262W 3.39410562533171e-05 598786.005453744  
YDR263C 0 254769.325679839  
YDR264C 0 30762.4121769548  
YDR265W 0 131182.229997562  
YDR266C 1.27368402924599e-05 323368.371272238  
YDR267C 2.03681733264016e-05 302737.836294159  
YDR268W 2.03681733262906e-05 302737.836294159  
YDR270W 6.90595318197929e-06 56605.9991130369  
YDR271C 0 10388.5810129985  
YDR272W 0 10388.5810129985  
YDR273W 8.88624540285043e-06 179919.679473858  
YDR274C 2.62887861659511e-05 237590.25290782  
YDR275W 2.62887861660621e-05 237590.25290782  
YDR276C 0 0  
YDR277C 4.38841557641734e-05 282641.759904889  
YDR278C 6.16967491027243e-05 285985.617132614  
YDR279W 0 35800.9599839021  
YDR280W 0 256387.786261025  
YDR281C 4.463832892454e-05 623420.413820178  
YDR282C 9.75733853614269e-06 141358.483287713  
YDR283C 1.68261348492127e-05 347891.696240309

|           |                      |                  |
|-----------|----------------------|------------------|
| YDR284C   | 4.77743006171982e-05 | 434936.183586334 |
| YDR285W   | 5.65579293514418e-05 | 268549.095777532 |
| YDR286C   | 4.7469580917392e-05  | 312946.288541332 |
| YDR287W   | 4.7469580917392e-05  | 312946.288541332 |
| YDR288W   | 8.48424091057787e-05 | 282674.639960422 |
| YDR289C   | 0                    | 0                |
| YDR291W   | 0                    | 0                |
| YDR292C   | 2.05950625933315e-05 | 226871.992339224 |
| YDR293C   | 3.22226891978916e-05 | 271803.563751185 |
| YDR294C   | 0                    | 52715.9189042252 |
| YDR295C   | 2.10995193272723e-05 | 102870.651640711 |
| YDR296W   | 2.10995193272723e-05 | 102870.651640711 |
| YDR297W   | 1.2387256408064e-05  | 218352.361291798 |
| YDR298C   | 1.66217624208986e-05 | 145041.079551219 |
| YDR299W   | 1.67185080951482e-05 | 156311.723452831 |
| YDR300C   | 9.8849328853956e-05  | 905876.903841375 |
| YDR301W   | 5.269724701773e-05   | 623487.480237141 |
| YDR302W   | 0                    | 33422.9419145044 |
| YDR303C   | 3.23016862180392e-05 | 69780.9333711159 |
| YDR304C   | 0                    | 20868.052191989  |
| YDR305C   | 3.60507999012105e-05 | 107736.589412094 |
| YDR306C   | 8.9601823013874e-05  | 508335.993272101 |
| YDR307W   | 8.53547384120912e-05 | 325355.56699507  |
| YDR308C   | 0                    | 13820.5099621349 |
| YDR309C   | 6.01151260248844e-06 | 61783.7783307818 |
| YDR310C   | 6.28149485542018e-05 | 343030.730231628 |
| YDR311W   | 6.28149485543128e-05 | 387214.47147011  |
| YDR312W   | 6.50882794517305e-05 | 223786.466431026 |
| YDR313C   | 0                    | 26791.5893631974 |
| YDR314C   | 1.00400594269523e-05 | 70555.3719000275 |
| YDR315C   | 0                    | 24880.6805183796 |
| YDR316W   | 0                    | 24880.6805183796 |
| YDR316W-A | 2.35482012704846e-05 | 362988.661474038 |
| YDR316W-B | 2.35482012704846e-05 | 362988.661474038 |
| YDR317W   | 7.29962104957238e-05 | 843742.26563801  |
| YDR318W   | 1.15546005945433e-05 | 47821.4175832749 |
| YDR319C   | 0                    | 49667.8153905007 |
| YDR320C   | 1.47607835068175e-05 | 54848.9942285182 |
| YDR320C-A | 3.06084816303898e-05 | 314087.048812054 |
| YDR320W-B | 1.47607835068175e-05 | 54848.9942285182 |
| YDR321W   | 2.03223975885347e-05 | 182451.656366914 |
| YDR322C-A | 0                    | 10635.5636494832 |
| YDR322W   | 0                    | 53695.2994170203 |
| YDR323C   | 0                    | 53203.4272846852 |
| YDR324C   | 1.15518161630801e-05 | 30644.4732605074 |
| YDR325W   | 1.15518161630801e-05 | 30644.4732605074 |
| YDR326C   | 1.65098233824157e-05 | 209063.491534794 |
| YDR327W   | 1.65098233824157e-05 | 209063.491534794 |
| YDR328C   | 0                    | 193016.016058095 |
| YDR329C   | 5.33317358285545e-05 | 343225.815252494 |
| YDR330W   | 5.33317358286656e-05 | 343225.815252494 |
| YDR331W   | 0                    | 13532.1718965343 |
| YDR332W   | 4.73098516406978e-06 | 67697.2237288766 |
| YDR333C   | 1.65098233824157e-05 | 55606.1963010408 |

YDR334W 1.65098233824157e-05 55606.1963010408  
YDR335W 1.18247702939334e-05 261666.1778338  
YDR336W 0 13081.1782191541  
YDR337W 0 13081.1782191541  
YDR338C 0 36462.0366771426  
YDR339C 6.28659814111421e-05 380457.738876665  
YDR340W 6.28659814111421e-05 380457.738876665  
YDR341C 0.000222231160897812 475979.327812971  
YDR342C 1.03625820707665e-05 117240.718140874  
YDR343C 2.46982606777468e-05 83808.6686326427  
YDR344C 4.89830836841731e-05 217782.285704251  
YDR345C 3.23630927885343e-05 308336.226137947  
YDR346C 6.4230645752783e-05 284592.565569817  
YDR347W 6.4230645752783e-05 284592.565569817  
YDR348C 7.86758652976394e-05 553438.587733719  
YDR349C 1.26479648853151e-05 189020.084070075  
YDR350C 0 158161.106795837  
YDR351W 0 158161.106795837  
YDR352W 0 144637.683201733  
YDR353W 8.38165882748321e-05 405516.130112579  
YDR354W 0.000203007808995515 690407.925255208  
YDR356W 4.59755347997914e-05 306368.535816828  
YDR357C 1.92460489750745e-05 281965.549114901  
YDR358W 1.92460489751856e-05 281965.549114901  
YDR359C 1.71639260886369e-05 257995.772638572  
YDR361C 0 221542.518784794  
YDR362C 4.17310205413912e-06 115054.939393914  
YDR363W 4.17310205413912e-06 115054.939393914  
YDR363W-A 0.000149722817463172 392562.002776568  
YDR364C 0 0  
YDR365C 8.58405261289219e-05 497063.960250607  
YDR365W-A 8.58405261290329e-05 482120.593193723  
YDR365W-B 8.58405261290329e-05 482120.593193723  
YDR366C 0 0  
YDR367W 0 0  
YDR368W 0 221875.213667993  
YDR369C 5.10201801429133e-06 19100.4298512039  
YDR370C 0 61365.0579573222  
YDR371W 0 61365.0579573222  
YDR372C 4.54996446919154e-06 45867.1140123577  
YDR373W 4.54996446919154e-06 45867.1140123577  
YDR374C 7.5098783829386e-06 267810.408076108  
YDR374W-A 7.5098783829386e-06 267810.408076108  
YDR375C 0 42185.528128238  
YDR376W 0 42185.528128238  
YDR377W 0 0  
YDR378C 0 33072.0799330142  
YDR379C-A 4.24744714155878e-06 197329.475682584  
YDR379W 0 33072.0799330142  
YDR380W 4.24744714155878e-06 272129.939307937  
YDR381C-A 4.19135966064355e-05 307320.817621859  
YDR381W 1.18848212727896e-05 130963.881147903  
YDR382W 4.19135966064355e-05 307320.817621859  
YDR383C 2.87310803668284e-05 407895.840072091

|         |                      |                  |
|---------|----------------------|------------------|
| YDR384C | 0.0001738199563599   | 547207.474783031 |
| YDR385W | 0                    | 18282.984418011  |
| YDR386W | 1.98146971871482e-05 | 234747.06690237  |
| YDR387C | 2.30935725747949e-05 | 111790.086013377 |
| YDR388W | 2.30935725747949e-05 | 111790.086013377 |
| YDR389W | 0                    | 69765.9015203485 |
| YDR390C | 1.15518161630801e-05 | 44230.3877318502 |
| YDR391C | 0                    | 94533.6941998562 |
| YDR392W | 0                    | 13820.5099621349 |
| YDR393W | 0                    | 21329.1624262395 |
| YDR394W | 0                    | 71612.7133339061 |
| YDR395W | 6.38725092597658e-05 | 363833.563575069 |
| YDR396W | 0                    | 0                |
| YDR397C | 8.52750895663501e-06 | 142452.05274346  |
| YDR398W | 8.52750895663501e-06 | 142452.05274346  |
| YDR399W | 2.24461455948788e-05 | 349991.673629697 |
| YDR400W | 3.65674814640782e-05 | 249947.568071983 |
| YDR401W | 0                    | 10263.272794694  |
| YDR402C | 5.60859062650465e-05 | 483017.705266089 |
| YDR403W | 3.7478820634429e-05  | 245723.633774673 |
| YDR404C | 0                    | 38736.1620934937 |
| YDR405W | 0                    | 38736.1620934937 |
| YDR406W | 2.8487190930182e-05  | 222878.180504202 |
| YDR407C | 5.0422375025283e-06  | 153994.941153316 |
| YDR408C | 5.04920471023906e-05 | 578815.118124657 |
| YDR409W | 5.04920471025017e-05 | 566766.236919799 |
| YDR410C | 0                    | 76820.28712292   |
| YDR411C | 4.22770926999938e-06 | 121302.895170283 |
| YDR412W | 0                    | 15557.1714862061 |
| YDR413C | 0                    | 13119.8571187186 |
| YDR414C | 3.04779745221584e-05 | 228582.304616837 |
| YDR415C | 4.74360644908689e-06 | 36465.3214720747 |
| YDR416W | 4.74360644908689e-06 | 36465.3214720747 |
| YDR417C | 0                    | 10259.2317142687 |
| YDR418W | 0                    | 78590.0157109711 |
| YDR419W | 0                    | 13930.6859273356 |
| YDR420W | 4.75968062475518e-05 | 281373.311447487 |
| YDR421W | 1.69738622096682e-05 | 146828.560446288 |
| YDR422C | 5.44027766558042e-06 | 205998.437146308 |
| YDR423C | 0                    | 11233.7237268193 |
| YDR424C | 1.5525786786208e-05  | 80520.0159634089 |
| YDR425W | 1.5525786786208e-05  | 80520.0159634089 |
| YDR426C | 0                    | 10791.105525043  |
| YDR427W | 0                    | 10791.105525043  |
| YDR428C | 0                    | 0                |
| YDR429C | 8.87123742698837e-06 | 38013.5676876737 |
| YDR430C | 4.42652020726797e-06 | 43991.0833526786 |
| YDR432W | 0                    | 10263.272794694  |
| YDR434W | 8.52750895663501e-06 | 166380.474630428 |
| YDR435C | 4.56240498095672e-05 | 246333.019744867 |
| YDR436W | 5.0422375025283e-06  | 125311.171798512 |
| YDR437W | 0                    | 0                |
| YDR438W | 7.19687132425539e-05 | 414257.724150487 |
| YDR439W | 0                    | 32368.7460822686 |

|           |                      |                  |                  |
|-----------|----------------------|------------------|------------------|
| YDR440W   | 0                    | 124579.873765119 |                  |
| YDR441C   | 0                    | 114766.514959144 |                  |
| YDR442W   | 0                    | 114766.514959144 |                  |
| YDR443C   | 0                    | 35648.2664911189 |                  |
| YDR444W   | 0                    | 35648.2664911189 |                  |
| YDR445C   | 0.00011864908528203  |                  | 621887.616632682 |
| YDR446W   | 5.41243592376839e-05 |                  | 429554.266236268 |
| YDR447C   | 0                    | 13119.8571187186 |                  |
| YDR448W   | 0                    | 13119.8571187186 |                  |
| YDR449C   | 1.88152963169763e-05 |                  | 204725.949535002 |
| YDR450W   | 2.06192272760308e-05 |                  | 199653.032530037 |
| YDR451C   | 3.77012116046238e-05 |                  | 343602.04077907  |
| YDR452W   | 1.30032720849771e-05 |                  | 278140.306968272 |
| YDR453C   | 0.00010446598540903  |                  | 380526.417458605 |
| YDR454C   | 2.92972042087447e-05 |                  | 263063.725469083 |
| YDR456W   | 2.53426343822527e-05 |                  | 302451.050318267 |
| YDR457W   | 0                    | 43580.1946322499 |                  |
| YDR458C   | 0                    | 13137.5014877074 |                  |
| YDR459C   | 0                    | 37773.7045003302 |                  |
| YDR460W   | 0                    | 37773.7045003302 |                  |
| YDR461C-A | 1.8574099033053e-05  |                  | 180345.988460439 |
| YDR461W   | 0                    | 40725.1206311352 |                  |
| YDR462W   | 1.85740990329419e-05 |                  | 180345.988460439 |
| YDR463W   | 6.03095892115491e-05 |                  | 375229.315728115 |
| YDR464C-A | 0                    | 0                |                  |
| YDR464W   | 0.000143839130923862 |                  | 387757.25844552  |
| YDR465C   | 4.87237466415547e-05 |                  | 482811.752434197 |
| YDR466W   | 4.87237466415547e-05 |                  | 544003.480883543 |
| YDR467C   | 0                    | 0                |                  |
| YDR468C   | 0                    | 0                |                  |
| YDR469W   | 0                    | 0                |                  |
| YDR470C   | 0                    | 52138.0654979193 |                  |
| YDR471W   | 2.46308027550546e-05 |                  | 166679.514231704 |
| YDR472W   | 1.00361808060834e-05 |                  | 148760.326361775 |
| YDR473C   | 0.000273660139497145 |                  | 679984.990216963 |
| YDR475C   | 1.03625820707665e-05 |                  | 64956.6306707116 |
| YDR476C   | 0                    | 10263.272794694  |                  |
| YDR477W   | 0.000177793982488628 |                  | 829615.041270376 |
| YDR478W   | 1.08859573376696e-05 |                  | 48205.1822282451 |
| YDR479C   | 4.30896169401063e-06 |                  | 202431.726402374 |
| YDR480W   | 4.30896169401063e-06 |                  | 202431.726402374 |
| YDR481C   | 0                    | 13119.8571187186 |                  |
| YDR482C   | 0                    | 42477.66869851   |                  |
| YDR483W   | 0                    | 42477.66869851   |                  |
| YDR484W   | 0                    | 0                |                  |
| YDR485C   | 0                    | 0                |                  |
| YDR486C   | 1.02034804879692e-05 |                  | 60495.7136959684 |
| YDR487C   | 5.61011608870565e-05 |                  | 142779.751409734 |
| YDR488C   | 0                    | 63039.3648060622 |                  |
| YDR489W   | 0                    | 63039.3648060622 |                  |
| YDR490C   | 1.52318095613113e-05 |                  | 224341.7437327   |
| YDR492W   | 0                    | 0                |                  |
| YDR493W   | 5.35479908868597e-05 |                  | 232225.068283989 |
| YDR494W   | 0                    | 11693.9735305002 |                  |

|           |                      |                  |
|-----------|----------------------|------------------|
| YDR495C   | 1.46228271118432e-05 | 178837.178027274 |
| YDR496C   | 0                    | 0                |
| YDR497C   | 0                    | 0                |
| YDR498C   | 4.39885702085974e-06 | 41103.934977149  |
| YDR499W   | 4.31622335674842e-05 | 119354.060669173 |
| YDR500C   | 4.46337970749777e-06 | 66964.6819777807 |
| YDR501W   | 4.46337970749777e-06 | 66964.6819777807 |
| YDR502C   | 6.22241214485175e-05 | 426890.114205951 |
| YDR503C   | 1.17027753305798e-05 | 177488.783695548 |
| YDR505C   | 1.45902475308102e-05 | 206334.311836054 |
| YDR506C   | 4.40206683587352e-05 | 263718.055364257 |
| YDR507C   | 1.57527005198999e-05 | 242817.951906579 |
| YDR508C   | 0                    | 57251.5397117794 |
| YDR510C-A | 5.10201801429133e-06 | 19100.4298512039 |
| YDR510W   | 0.000112156609009095 | 626141.247315036 |
| YDR511W   | 5.10201801429133e-06 | 19100.4298512039 |
| YDR512C   | 1.15518161630801e-05 | 52820.9087738221 |
| YDR514C   | 6.9587383803027e-06  | 126005.624756494 |
| YDR515W   | 6.9587383803027e-06  | 126005.624756494 |
| YDR516C   | 5.0422375025283e-06  | 132784.298448634 |
| YDR517W   | 5.0422375025283e-06  | 163857.087882235 |
| YDR518W   | 0                    | 78929.5638500266 |
| YDR519W   | 0                    | 0                |
| YDR520C   | 1.06854852351956e-05 | 80811.3077841346 |
| YDR522C   | 1.18692951576183e-05 | 189793.635265009 |
| YDR523C   | 0.000144480333588604 | 630657.753184157 |
| YDR524C   | 3.23360773454295e-05 | 291327.563473275 |
| YDR524C-A | 0                    | 0                |
| YDR524C-B | 0                    | 14943.3670568837 |
| YDR524W-C | 3.23360773455406e-05 | 291327.563473274 |
| YDR525W   | 0                    | 14943.3670568837 |
| YDR525W-A | 3.65607093132381e-05 | 226818.236582052 |
| YDR527W   | 6.0954436466476e-05  | 155977.253538538 |
| YDR528W   | 5.45597952472665e-06 | 207634.068267817 |
| YDR529C   | 0                    | 61454.6929597005 |
| YDR530C   | 3.4019965343135e-05  | 317424.500499812 |
| YDR531W   | 3.4019965343135e-05  | 317424.500499812 |
| YDR532C   | 2.10137575078484e-05 | 179002.542719949 |
| YDR533C   | 0.000118220557827731 | 251153.514953591 |
| YDR534C   | 3.35694952522392e-05 | 397808.38724585  |
| YDR535C   | 6.61863446137501e-05 | 459053.798382348 |
| YDR536W   | 2.68632143127778e-05 | 181864.884412321 |
| YDR537C   | 2.95384944020149e-05 | 172414.798264757 |
| YDR538W   | 3.35379660260093e-05 | 402301.187395379 |
| YDR539W   | 2.95384944020149e-05 | 248597.729376694 |
| YDR540C   | 5.64841013828143e-06 | 158147.930644931 |
| YDR541C   | 1.54978313824383e-05 | 157793.360114723 |
| YDR542W   | 6.82834000286237e-05 | 441345.06797772  |
| YDR543C   | 0                    | 23791.6687493491 |
| YDR544C   | 2.19965686882873e-05 | 230950.053100754 |
| YDR545C-A | 0                    | 0                |
| YDR545W   | 0                    | 43741.8888544748 |
| YEL001C   | 3.54456823361549e-05 | 480824.995635794 |
| YEL002C   | 0                    | 37061.3828148012 |

YEL003W 0 80617.1391502291  
YEL004W 1.15435741641079e-05 191771.522830278  
YEL005C 1.15435741641079e-05 191771.522830278  
YEL006W 2.0547518810643e-05 228913.733296529  
YEL007W 0 16554.6914981094  
YEL008C-A 2.11797935570912e-05 174446.785635132  
YEL008W 0 32565.6303200173  
YEL009C 5.08735902016166e-06 16527.1051589396  
YEL009C-A 2.4780908895683e-05 301441.471402814  
YEL010W 0.000105080885375752 764557.042956956  
YEL011W 2.73668966811469e-05 392094.190702325  
YEL012W 0 18189.7845365328  
YEL013W 1.47750332457619e-05 119861.259256548  
YEL014C 1.47750332457619e-05 119861.259256548  
YEL015W 7.76948033350822e-05 527343.475824661  
YEL016C 7.76948033348601e-05 527343.475824662  
YEL017C-A 5.80930342031216e-06 124466.713465365  
YEL017W 1.72583293932549e-05 334553.930096343  
YEL018C-A 0 0  
YEL018W 0 43555.2235454368  
YEL019C 0 22442.7748505109  
YEL020C 0 62125.3836195625  
YEL020C-B 5.03352043934591e-06 157515.017103934  
YEL020W-A 5.73812272917085e-05 568935.498369614  
YEL021W 0 29479.0474072769  
YEL022W 0 31227.6379923382  
YEL023C 1.49615223670185e-05 278895.838825379  
YEL024W 1.95346010670727e-05 220522.486651423  
YEL025C 5.3591121237484e-05 170641.600010066  
YEL026W 0 24781.7963641528  
YEL027W 1.02536941054554e-05 29348.8330000074  
YEL028W 3.18856666847722e-05 191444.254380756  
YEL029C 0.000131886747754661 433978.807281649  
YEL030W 0 64039.1763880874  
YEL031W 2.34935356269173e-05 372631.430623002  
YEL032W 0 15959.9641392694  
YEL034C-A 0 0  
YEL034W 0 0  
YEL035C 5.68859167292546e-05 122919.833828859  
YEL036C 1.55928870304578e-05 138472.092989519  
YEL037C 0 74380.9719163988  
YEL038W 4.44994970594248e-06 233364.611379282  
YEL039C 4.44994970594248e-06 233364.611379283  
YEL040W 4.14957528340754e-05 326141.920359703  
YEL041W 0 129950.172211636  
YEL042W 0 82290.2994355501  
YEL043W 0 14246.3897166115  
YEL044W 3.11461435802407e-05 461939.741215687  
YEL045C 3.11461435804627e-05 461939.741215687  
YEL046C 0 0  
YEL047C 8.0738409462433e-05 424008.15628142  
YEL048C 2.62670008266408e-05 114181.080851389  
YEL049W 3.37370108873802e-05 179387.729827075  
YEL050C 0 17159.4251039962



|           |                      |                  |
|-----------|----------------------|------------------|
| YEL050W-A | 5.35421631508992e-05 | 201088.443629193 |
| YEL051W   | 4.20993804024494e-05 | 120033.413153065 |
| YEL052W   | 1.03625820707665e-05 | 225591.844505352 |
| YEL053C   | 1.03625820707665e-05 | 225591.844505352 |
| YEL053W-A | 3.4487329754529e-05  | 209651.901995592 |
| YEL054C   | 0                    | 0                |
| YEL055C   | 0                    | 44245.1024872908 |
| YEL056W   | 0.000122119642653074 | 628744.991241708 |
| YEL057C   | 5.0123978234673e-06  | 182393.802050015 |
| YEL058W   | 9.33249015211413e-06 | 74721.8116983777 |
| YEL059C-A | 0                    | 0                |
| YEL059W   | 0                    | 0                |
| YEL060C   | 3.07781413549923e-05 | 114351.323365883 |
| YEL061C   | 0                    | 120137.58877128  |
| YEL062W   | 0                    | 81184.9441218129 |
| YEL063C   | 0.0003408413549848   | 548093.617369189 |
| YEL064C   | 8.0805199894507e-05  | 789392.570554457 |
| YEL065W   | 2.6210255937853e-05  | 116227.483357752 |
| YEL066W   | 0                    | 0                |
| YEL067C   | 0                    | 15058.4907836468 |
| YEL068C   | 0                    | 14886.3225023767 |
| YEL069C   | 2.96838052818993e-05 | 280770.363053676 |
| YEL070W   | 4.42447536616042e-05 | 306551.291439782 |
| YEL071W   | 6.09552980327388e-05 | 520372.418771874 |
| YEL072W   | 1.59978230021007e-05 | 191497.979584472 |
| YEL073C   | 4.58532607108264e-05 | 304177.366903415 |
| YEL074W   | 0                    | 43741.8888544748 |
| YEL075C   | 0                    | 43741.8888544748 |
| YEL076C   | 0                    | 102502.264104647 |
| YEL076C-A | 0                    | 102502.264104647 |
| YEL077C   | 5.0422375025283e-06  | 259657.24442253  |
| YEL077W-A | 0                    | 0                |
| YER001W   | 1.18865636606902e-05 | 93137.7177713607 |
| YER002W   | 5.886479185091e-06   | 110241.585552961 |
| YER003C   | 0                    | 80866.2929766203 |
| YER004W   | 0                    | 80866.2929766203 |
| YER005W   | 7.5098783829386e-06  | 231221.520401907 |
| YER006W   | 2.67323686830023e-05 | 295256.739074946 |
| YER007C-A | 1.63495326174212e-05 | 240564.90537834  |
| YER007W   | 4.72881470615638e-05 | 316679.134290997 |
| YER008C   | 4.30896169401063e-06 | 221170.537560189 |
| YER009W   | 4.30896169401063e-06 | 221170.537560189 |
| YER010C   | 9.77409684600472e-05 | 354335.324428165 |
| YER011W   | 1.14539721624007e-05 | 155113.27305527  |
| YER012W   | 7.48834913844032e-06 | 115733.909716331 |
| YER013W   | 4.66031559243074e-06 | 193633.941304389 |
| YER014W   | 0                    | 0                |
| YER016W   | 0                    | 28201.5523228391 |
| YER017C   | 0                    | 16554.6914981094 |
| YER018C   | 0                    | 14030.690694095  |
| YER019C-A | 6.61195239911594e-05 | 328384.749215411 |
| YER019W   | 0                    | 14030.690694095  |
| YER020W   | 7.25689285873132e-05 | 328384.749215411 |
| YER021W   | 3.09861060383554e-05 | 219312.39495825  |

YER022W 0 82106.182357552  
YER023C-A 0.000151037546532562 933727.796644212  
YER023W 0.000153688945764507 373072.55963549  
YER024W 0.000151037546532562 933727.796644212  
YER025W 0 22242.2724810811  
YER026C 8.52750895663501e-06 156145.091447516  
YER027C 0 12131.901431101  
YER028C 1.8797953669436e-05 70750.9327256517  
YER029C 0 13213.2243532871  
YER030W 0 13213.2243532871  
YER031C 0 14459.9137365191  
YER032W 0 14459.9137365191  
YER033C 0 25129.1885630093  
YER034W 0 25129.1885630093  
YER035W 1.04556465997385e-05 108241.309699668  
YER036C 1.06854852351956e-05 97739.4412854247  
YER037W 1.52354010858335e-05 164244.791815192  
YER038C 1.11385554090182e-05 204100.633920021  
YER038W-A 1.11385554090182e-05 204100.633920021  
YER039C 0 0  
YER039C-A 0.00012928856082528 454507.928445538  
YER040W 0.000129288560825169 454507.928445537  
YER041W 3.47123417053785e-05 199534.773326835  
YER042W 2.46877055888328e-05 141369.929947283  
YER043C 0 46368.1645790338  
YER044C 7.52700530097794e-05 181124.230454695  
YER044C-A 8.51168349040865e-05 314809.075317795  
YER045C 0 23825.1439012032  
YER046W 0 107229.126717783  
YER046W-A 0 58289.8508337474  
YER047C 1.54652037274161e-05 256958.500805313  
YER048C 1.58677704016341e-05 355801.84532537  
YER048W-A 4.80619706858532e-05 512855.254789482  
YER049W 6.71616494681837e-05 450254.134972127  
YER050C 3.65845307609414e-05 233100.141193578  
YER051W 3.65845307609414e-05 233100.141193578  
YER052C 0.000300276367405594 606355.485330306  
YER053C 9.30305619448735e-05 403116.692169785  
YER053C-A 4.74360644908689e-06 77738.2423028106  
YER054C 4.30800867357028e-06 57162.3046875789  
YER055C 0.000408844520584761 1011575.92966632  
YER056C 8.49179276061207e-05 399260.604478444  
YER056C-A 2.6102957487173e-05 271809.07392135  
YER057C 0.000291299616213991 558679.786438468  
YER058W 0.000291299616213991 542176.366933346  
YER059W 3.53365707457254e-05 294046.524721511  
YER060W 4.1297582291655e-05 360361.251542485  
YER060W-A 0.000118238544828508 537316.718083732  
YER061C 4.26908030426443e-05 260510.183097817  
YER062C 6.05670037393535e-05 575081.309804737  
YER063W 8.16311492817245e-05 349052.569924929  
YER064C 2.05529807767446e-05 496162.043379513  
YER065C 0.000180070450990555 865540.046909227  
YER066W 3.49536962362951e-05 350033.348057825

YER067C-A 0 29349.4926963412  
YER067W 5.4927992661713e-05 376153.92087567  
YER068W 0 29349.4926963412  
YER069W 0.000537930570884249 1090238.09638676  
YER070W 1.33905833212822e-05 183628.608952251  
YER071C 0 45482.9376043964  
YER072W 0 45482.9376043964  
YER073W 0.000205403366166479 391302.145399984  
YER074W 2.43478571350098e-05 276455.306200697  
YER074W-A 1.91506155154952e-05 292531.16063982  
YER075C 1.04900461227464e-05 222493.206179269  
YER076C 1.82894389607613e-05 242124.757900283  
YER077C 0 13299.4902414958  
YER078C 8.44149660024218e-05 367000.226226322  
YER078W-A 8.44149660025328e-05 367000.226226322  
YER079W 0 0  
YER080W 1.34085245535598e-05 59172.457773244  
YER081W 7.8255573194399e-05 290577.259081199  
YER082C 0 18255.6762565315  
YER083C 0 0  
YER084W 0 0  
YER084W-A 0 0  
YER085C 0.00012928856082528 462804.282485798  
YER086W 0.000129288560825169 462804.282485798  
YER087C-A 1.65098233824157e-05 90687.0057618644  
YER087C-B 2.8487190930182e-05 251342.056098179  
YER087W 5.18461912591972e-05 329004.157083902  
YER088C 0 20136.2805683454  
YER088W-B 0 0  
YER089C 0.000210759053515641 416736.453721118  
YER090W 0.000282380614763933 599550.130010488  
YER091C 0 26584.2432438227  
YER091C-A 3.89149194004457e-05 238465.533946153  
YER092W 3.89149194004457e-05 238465.533946153  
YER093C 0 41744.5333567284  
YER093C-A 0 31563.440790657  
YER094C 3.71987897771486e-05 454845.167717675  
YER095W 3.71987897770376e-05 454845.167717675  
YER096W 6.26759343893557e-05 491389.542822923  
YER097W 2.46768100964356e-05 434503.678164471  
YER098W 0 54657.630134485  
YER099C 2.11793119986314e-05 181241.613440447  
YER100W 2.11793119985204e-05 181241.613440447  
YER101C 6.93379237007852e-05 334255.401787593  
YER102W 2.70251924527898e-05 288312.003224961  
YER103W 0 129686.992690583  
YER104W 7.7457760172206e-05 590286.982905037  
YER105C 1.44296299483537e-05 177748.222315509  
YER106W 1.44296299483537e-05 177748.222315509  
YER107C 4.10792947325156e-06 315466.079326215  
YER109C 1.07089246668135e-05 122502.248184849  
YER110C 8.94442904012527e-05 318363.362848037  
YER111C 8.23863521181023e-05 268518.919305625  
YER112W 0 159182.729469227

YER113C 0 52802.9223808225  
YER114C 3.86620740613353e-05 217753.099171354  
YER115C 0 10791.105525043  
YER116C 3.83689336866944e-05 212705.64188561  
YER117W 0 27740.5323581462  
YER118C 4.11831920040795e-05 112614.48399321  
YER119C 0 0  
YER120W 0 36232.5872795783  
YER121W 5.83199522796729e-06 98661.8575085215  
YER122C 7.03106397735853e-05 349914.796399073  
YER123W 7.03106397736963e-05 349914.796399073  
YER124C 7.17168108822497e-05 873045.807067658  
YER125W 8.6807934129296e-05 272736.991063112  
YER126C 2.30935725747949e-05 113294.94031643  
YER127W 2.30935725747949e-05 113294.94031643  
YER128W 8.20915569149649e-05 222887.640519022  
YER129W 6.23571833805459e-05 439318.333175454  
YER130C 0 39848.823528641  
YER131W 0 23616.0716174614  
YER132C 0.00010978693300745 376313.795446651  
YER133W 9.54805266917269e-06 158524.037702318  
YER133W-A 4.94884696244924e-06 95348.1888892441  
YER134C 0 0  
YER135C 7.74518485335829e-05 534632.626157658  
YER136W 4.46337970749777e-06 12269.2922084005  
YER137C 0 22566.2502101117  
YER137C-A 0.000171673683661888 886910.088580182  
YER137W-A 9.75733853614269e-06 69689.323561339  
YER138C 0.000171673683661888 886910.088580182  
YER138W-A 0.000171673683661888 886910.088580182  
YER139C 0 0  
YER140W 0 0  
YER141W 0 0  
YER142C 2.14599996788412e-05 260524.909043982  
YER143W 2.14599996787301e-05 260524.909043982  
YER144C 0 12048.8812048575  
YER145C 1.66677904757107e-05 236434.715185167  
YER145C-A 0 0  
YER146W 1.06993349960893e-05 67384.9386962905  
YER147C 3.64955311582538e-05 56906.1375193967  
YER147C-A 0 0  
YER148W 3.64955311581427e-05 56906.1375193967  
YER148W-A 0 0  
YER149C 8.87123742698837e-06 265757.33200794  
YER150W 1.55773517762636e-05 176813.136877329  
YER151C 3.28777835886251e-05 109984.052793489  
YER152C 0 0  
YER153C 1.47433887336401e-05 49491.4661883429  
YER154W 1.47433887336401e-05 49491.4661883429  
YER155C 7.9280912498314e-06 74181.368481067  
YER156C 0 39537.6962623576  
YER157W 0 39537.6962623576  
YER158C 2.05427337648389e-05 334203.875821362  
YER158W-A 1.02059205960847e-05 113383.51372573

YER159C 2.92847911059768e-05 384751.283531309  
YER159C-A 8.60119213500488e-05 921784.385938206  
YER160C 8.60119213500488e-05 921784.385938206  
YER161C 0 24209.0909751334  
YER162C 0 0  
YER163C 0 235587.910176858  
YER164W 3.07781413549923e-05 111775.699844898  
YER165W 3.24506965545535e-05 401569.662276778  
YER166W 0 157145.42306815  
YER167W 4.40206683587352e-05 293287.798329669  
YER168C 4.8403532725283e-06 123607.366674558  
YER169W 0 16532.7716465228  
YER170W 0 10263.272794694  
YER171W 4.41838396831873e-05 304425.114854803  
YER172C 0 15557.1714862061  
YER173W 5.53144502667413e-05 171903.114877582  
YER174C 0 13119.8571187186  
YER175C 0.00032421877641331 669185.847962987  
YER175W-A 0.00032421877641331 669185.847962987  
YER176W 5.04600959571055e-05 610887.607093232  
YER177W 0 76390.6029638502  
YER178W 5.94962555681144e-05 372834.475089184  
YER179W 0 13727.114568387  
YER180C 2.88358879746431e-05 217325.846903916  
YER180C-A 0 66053.2862834064  
YER181C 6.32461742954282e-05 426147.956764035  
YER182W 5.77905100745957e-05 222558.715272261  
YER183C 6.31009540319472e-06 133844.139785907  
YER184C 9.67090273292781e-05 313009.093527976  
YER185W 0.000106465422242685 373177.120006469  
YER186C 9.72798011822373e-06 74902.9585536912  
YER187W 2.36568160505435e-05 285118.402453098  
YER188C-A 4.30896169401063e-06 147530.826769293  
YER188W 1.46317319520417e-05 185891.242945708  
YER189W 0 43741.8888544748  
YER190C-B 0 0  
YER190W 0 29921.3788923399  
YFL001W 0 0  
YFL002C 0 0  
YFL002W-A 0.000109386706009462 834524.57430872  
YFL002W-B 0.000109386706009462 834524.57430872  
YFL003C 4.82836566505496e-05 403230.647424335  
YFL004W 0.000119713322932369 318213.460076839  
YFL005W 0 27746.6221242565  
YFL007W 1.27692692839521e-05 242791.506896001  
YFL008W 6.24199655185897e-05 479248.847803407  
YFL009W 9.31894777124187e-05 374468.611528886  
YFL010C 9.31894777124187e-05 374468.611528886  
YFL010W-A 4.22596669136244e-06 98609.977606162  
YFL011W 3.12819414083343e-05 250687.288386998  
YFL012W 7.83598187718004e-05 602235.329959639  
YFL013C 5.71600096710423e-05 454864.397383418  
YFL013W-A 0 53235.823574696  
YFL014W 0 0

YFL015C 0 0  
YFL015W-A 3.59492482164825e-05 91783.761290579  
YFL016C 3.59492482165935e-05 91783.761290579  
YFL017C 4.30800867357028e-06 38441.8133124291  
YFL017W-A 0.000215969106582725 936754.460291659  
YFL018C 0.00021166200975109 935225.507638962  
YFL019C 0 179606.265029946  
YFL020C 6.44983105591024e-06 109071.52223593  
YFL021W 7.35259705128e-05 191037.53986993  
YFL022C 0 70500.3689729129  
YFL023W 6.01118267484768e-06 112235.64306819  
YFL024C 1.6734895735171e-05 228994.807194859  
YFL025C 2.90493340854292e-05 240156.897267725  
YFL026W 9.48572757952793e-06 189407.569029388  
YFL027C 2.10557398828692e-05 344285.994564902  
YFL028C 0.000264288776239741 566956.432403515  
YFL029C 1.04556465997385e-05 29282.8587046095  
YFL030W 0.000140383874769778 653942.886564787  
YFL031C-A 5.17233275838525e-05 326471.773987917  
YFL031W 1.07237775228697e-05 232346.730307627  
YFL032W 1.07237775228697e-05 282532.917709002  
YFL033C 1.07237775228697e-05 282532.917709002  
YFL034C-A 2.62670008266408e-05 160277.27367326  
YFL034C-B 4.30896169401063e-06 175317.035255424  
YFL034W 2.62670008266408e-05 160277.27367326  
YFL036W 0 41074.4436955088  
YFL037W 4.30896169401063e-06 165453.851511014  
YFL038C 4.30896169401063e-06 165453.851511014  
YFL039C 0 109175.346322275  
YFL040W 4.25289971228704e-06 327814.780404654  
YFL041W 0 0  
YFL041W-A 2.68035673464118e-05 140593.965788982  
YFL042C 1.13413655802308e-05 454080.251956656  
YFL044C 0 0  
YFL045C 0 121011.27055194  
YFL046W 0.000151599580145212 275504.709411721  
YFL047W 4.35442507396022e-06 190645.467318389  
YFL048C 4.35442507396022e-06 190645.467318389  
YFL049W 0 114156.64906086  
YFL050C 0 27245.7118673071  
YFL051C 0 0  
YFL052W 1.02435628959174e-05 101709.849279907  
YFL053W 3.25989339051702e-05 354083.068118632  
YFL054C 1.81952833714361e-05 284633.736454337  
YFL055W 0 40849.2346281227  
YFL056C 2.37937704459235e-05 43137.7042008813  
YFL057C 0 0  
YFL058W 3.27406793018126e-05 289577.297336017  
YFL059W 2.86885873711507e-05 307177.437472059  
YFL060C 2.86885873710396e-05 307177.437472059  
YFL061W 2.07494598593039e-05 163347.156017441  
YFL062W 5.0422375025283e-06 317390.04891383  
YFL063W 4.30896169401063e-06 141532.546234524  
YFL064C 0 43741.8888544748

|           |                      |                  |
|-----------|----------------------|------------------|
| YFL066C   | 7.39705086882925e-06 | 198863.397127862 |
| YFL067W   | 1.0149425400563e-05  | 169226.583975541 |
| YFL068W   | 0                    | 16808.9555860367 |
| YFR001W   | 0                    | 49981.6053624672 |
| YFR002W   | 1.95952370266594e-05 | 211619.716199268 |
| YFR003C   | 1.35515496557659e-05 | 153137.813697411 |
| YFR004W   | 1.35515496557659e-05 | 153137.813697411 |
| YFR005C   | 6.35832200636122e-05 | 413927.616469417 |
| YFR006W   | 6.35832200636122e-05 | 413927.616469417 |
| YFR007W   | 0                    | 128229.635344642 |
| YFR008W   | 0                    | 0                |
| YFR009W   | 2.35482012704846e-05 | 376955.937581373 |
| YFR010W   | 1.03625820707665e-05 | 73316.6924790926 |
| YFR010W-A | 0                    | 0                |
| YFR011C   | 1.28175463428581e-05 | 204958.419897342 |
| YFR012W   | 4.30896169401063e-06 | 163489.86007382  |
| YFR012W-A | 0                    | 47760.7609497174 |
| YFR013W   | 1.98670053604966e-05 | 192116.894554226 |
| YFR014C   | 1.07190688873882e-05 | 63114.2309056573 |
| YFR015C   | 4.97444086258181e-05 | 294490.338435479 |
| YFR016C   | 1.54682163820974e-05 | 174768.015480874 |
| YFR017C   | 3.14142308435184e-05 | 117088.497600135 |
| YFR018C   | 4.57159940403518e-06 | 89900.9117497673 |
| YFR019W   | 4.57159940403518e-06 | 89900.9117497673 |
| YFR020W   | 0                    | 69310.0580887455 |
| YFR021W   | 0.000186156538769966 | 929523.721532473 |
| YFR022W   | 2.22159051526116e-05 | 430673.384186608 |
| YFR023W   | 2.82520208118031e-05 | 236442.459125136 |
| YFR024C-A | 5.44027766558042e-06 | 163759.377492207 |
| YFR025C   | 0                    | 35319.6112621719 |
| YFR026C   | 0                    | 46967.6832024075 |
| YFR027W   | 5.38450315723527e-05 | 192193.813963881 |
| YFR028C   | 0.000341246315453181 | 721565.046760403 |
| YFR029W   | 7.31211847896374e-05 | 463960.613627659 |
| YFR030W   | 6.16346812226665e-05 | 345109.892913655 |
| YFR031C   | 4.3673057439797e-05  | 195200.328650215 |
| YFR031C-A | 1.46387715060925e-05 | 80824.2111375148 |
| YFR032C   | 4.25289971228704e-06 | 142250.022061874 |
| YFR032C-A | 0                    | 0                |
| YFR032C-B | 2.44018031534399e-05 | 193401.197028766 |
| YFR033C   | 0                    | 11453.4787901798 |
| YFR034C   | 5.10201801429133e-06 | 19100.4298512039 |
| YFR034W-A | 5.10201801429133e-06 | 19100.4298512039 |
| YFR035C   | 0.000149722817463172 | 369645.16623087  |
| YFR036W   | 0.000149722817463172 | 369645.16623087  |
| YFR036W-A | 0                    | 0                |
| YFR037C   | 5.0422375025283e-06  | 143097.967923826 |
| YFR038W   | 5.0422375025283e-06  | 143097.967923826 |
| YFR039C   | 2.31338147567151e-05 | 193556.499440188 |
| YFR040W   | 2.68534253652364e-05 | 283238.867388696 |
| YFR041C   | 0                    | 56159.6867307485 |
| YFR042W   | 0                    | 56159.6867307485 |
| YFR043C   | 2.93021012696126e-05 | 241637.306817581 |
| YFR044C   | 9.55000577110843e-05 | 484424.974032653 |

|           |                      |                  |
|-----------|----------------------|------------------|
| YFR045W   | 9.55000577109733e-05 | 484424.974032653 |
| YFR046C   | 4.60744173068628e-05 | 235212.283781061 |
| YFR047C   | 0.000101367135642572 | 859893.178020439 |
| YFR048W   | 7.28090049217922e-06 | 253407.093062897 |
| YFR049W   | 0.000209254701407313 | 670290.678773345 |
| YFR050C   | 0                    | 20526.545589388  |
| YFR051C   | 0                    | 44076.7399341517 |
| YFR052W   | 0                    | 0                |
| YFR053C   | 0                    | 0                |
| YFR054C   | 2.00986317745455e-05 | 394432.141920704 |
| YFR055W   | 0                    | 0                |
| YFR057W   | 4.30800867357028e-06 | 181720.841400212 |
| YGL001C   | 0                    | 29489.5896786335 |
| YGL002W   | 5.0422375025283e-06  | 126756.26354519  |
| YGL003C   | 5.0422375025283e-06  | 126756.26354519  |
| YGL004C   | 2.446885880103e-05   | 304063.366220429 |
| YGL005C   | 0                    | 0                |
| YGL006W   | 2.30935725747949e-05 | 79012.2049546661 |
| YGL006W-A | 0                    | 33142.1985693318 |
| YGL007C-A | 4.94884696244924e-06 | 214612.659264956 |
| YGL007W   | 4.94884696244924e-06 | 214612.659264956 |
| YGL008C   | 0                    | 0                |
| YGL009C   | 0.000287834309593449 | 758528.258642792 |
| YGL010W   | 0                    | 37988.3761029414 |
| YGL011C   | 0                    | 37988.3761029414 |
| YGL012W   | 1.87309834879246e-05 | 109089.746757148 |
| YGL013C   | 1.87309834879246e-05 | 109089.746757148 |
| YGL014W   | 0                    | 87834.1680431045 |
| YGL015C   | 8.08699916141631e-05 | 541994.24135361  |
| YGL016W   | 0                    | 0                |
| YGL017W   | 0                    | 25368.4512684213 |
| YGL018C   | 0                    | 25368.4512684213 |
| YGL019W   | 1.37877206234371e-05 | 239163.627231986 |
| YGL020C   | 1.37877206234371e-05 | 239163.627231985 |
| YGL021W   | 8.79152394206439e-05 | 244319.951994534 |
| YGL022W   | 8.26794305563983e-05 | 494898.015060612 |
| YGL023C   | 8.26794305562872e-05 | 494898.015060612 |
| YGL025C   | 3.73583279448253e-05 | 272527.758964909 |
| YGL026C   | 0.000173156338506675 | 471893.93822169  |
| YGL027C   | 2.64490211560053e-05 | 250388.505811327 |
| YGL028C   | 0                    | 155273.131298282 |
| YGL029W   | 0                    | 56489.7435504828 |
| YGL030W   | 0                    | 30458.6545669951 |
| YGL031C   | 0                    | 57315.8002645797 |
| YGL032C   | 0.000176076125366409 | 431506.850748255 |
| YGL033W   | 0.000123994906852332 | 456039.820120509 |
| YGL034C   | 8.29361117016258e-06 | 66904.0482285337 |
| YGL035C   | 1.08965125723559e-05 | 56200.0711830848 |
| YGL036W   | 7.39705086882925e-06 | 253189.932445262 |
| YGL037C   | 6.42825468101238e-05 | 417390.280818884 |
| YGL038C   | 0                    | 26757.3105342295 |
| YGL039W   | 1.18247702939334e-05 | 199876.192115842 |
| YGL040C   | 4.48578480952699e-05 | 350636.300015276 |
| YGL041C   | 2.98584082671915e-05 | 347119.992198437 |



|           |                      |                  |
|-----------|----------------------|------------------|
| YGL041C-B | 0                    | 0                |
| YGL041W-A | 0                    | 0                |
| YGL042C   | 0                    | 9856.6633311761  |
| YGL043W   | 7.12336837660477e-05 | 538180.158218245 |
| YGL044C   | 7.12336837660477e-05 | 538180.158218245 |
| YGL045W   | 2.80809751774802e-05 | 184449.302059041 |
| YGL047W   | 1.7763543983973e-05  | 138624.164576759 |
| YGL048C   | 1.7763543983973e-05  | 138624.164576759 |
| YGL049C   | 4.54996446919154e-06 | 27421.3938630485 |
| YGL050W   | 2.05330887628197e-05 | 271185.912088225 |
| YGL051W   | 1.8804772946468e-05  | 232071.33848182  |
| YGL052W   | 1.8804772946468e-05  | 213815.662225288 |
| YGL053W   | 0                    | 91535.4526083624 |
| YGL054C   | 4.39183462561665e-05 | 489204.303712689 |
| YGL055W   | 1.43072586097359e-05 | 231924.598264853 |
| YGL056C   | 7.1764713733713e-05  | 611442.416664476 |
| YGL057C   | 0                    | 0                |
| YGL058W   | 4.13609482798893e-05 | 364296.379961496 |
| YGL059W   | 0.000256893625626309 | 434033.711078038 |
| YGL060W   | 0.00026096700975542  | 658465.20025162  |
| YGL061C   | 0.00026096700975542  | 658465.20025162  |
| YGL062W   | 3.09521949494185e-05 | 368956.268828082 |
| YGL063C-A | 3.09521949495295e-05 | 368956.268828082 |
| YGL063W   | 4.14027185047239e-06 | 92949.1135009288 |
| YGL064C   | 4.14027185047239e-06 | 92949.1135009288 |
| YGL065C   | 0                    | 105492.719236159 |
| YGL066W   | 5.14185205809925e-05 | 325049.658996164 |
| YGL067W   | 0                    | 38498.9479030342 |
| YGL068W   | 4.96024673394269e-05 | 427984.395001747 |
| YGL069C   | 0                    | 38498.9479030342 |
| YGL070C   | 0                    | 33863.3951367324 |
| YGL071W   | 1.69295123945146e-05 | 229849.753073818 |
| YGL072C   | 4.48994980950523e-05 | 409100.146511109 |
| YGL073W   | 7.24834896557169e-05 | 398213.623300245 |
| YGL075C   | 7.2483489655828e-05  | 437848.055638684 |
| YGL076C   | 1.47960053697993e-05 | 211794.392728315 |
| YGL077C   | 4.57988591023861e-05 | 243586.790366834 |
| YGL078C   | 2.41897515286249e-05 | 156839.053751924 |
| YGL079W   | 6.53873672807892e-05 | 366961.737832274 |
| YGL080W   | 8.52750895663501e-06 | 157098.717388702 |
| YGL081W   | 9.50623930440209e-06 | 139951.482333058 |
| YGL082W   | 1.37183855858369e-05 | 42899.6538736893 |
| YGL083W   | 2.62670008266408e-05 | 171034.21476438  |
| YGL084C   | 4.03506237129925e-05 | 296636.309799569 |
| YGL085W   | 1.92527993682079e-05 | 287310.749308428 |
| YGL086W   | 0                    | 0                |
| YGL087C   | 0                    | 0                |
| YGL088W   | 1.52315372040635e-05 | 206895.154691457 |
| YGL089C   | 1.0129570870987e-05  | 114357.434284182 |
| YGL090W   | 2.31591096813144e-05 | 189193.790050004 |
| YGL091C   | 2.31591096813144e-05 | 189193.790050004 |
| YGL092W   | 4.83195802021275e-05 | 226458.884714568 |
| YGL093W   | 0                    | 38130.6895460968 |
| YGL094C   | 0                    | 38130.6895460968 |

|         |                      |                  |
|---------|----------------------|------------------|
| YGL095C | 3.40806276206695e-05 | 499390.369321723 |
| YGL096W | 4.21929368797924e-05 | 323263.034655657 |
| YGL097W | 2.80969254465857e-05 | 365755.241500237 |
| YGL098W | 6.62813081099278e-05 | 320287.501371937 |
| YGL099W | 9.75733853614269e-06 | 142071.246045447 |
| YGL100W | 0                    | 23910.9626437616 |
| YGL101W | 0                    | 0                |
| YGL102C | 0                    | 0                |
| YGL103W | 0                    | 68555.2980643923 |
| YGL104C | 0                    | 95155.9608676208 |
| YGL105W | 0.000160373815097703 | 714980.752501092 |
| YGL106W | 3.14761947498576e-05 | 202619.080659244 |
| YGL107C | 3.14761947499687e-05 | 202619.080659244 |
| YGL108C | 0                    | 15415.6174571574 |
| YGL109W | 0                    | 20647.7688562191 |
| YGL110C | 0                    | 20647.7688562191 |
| YGL111W | 0                    | 0                |
| YGL112C | 0                    | 0                |
| YGL113W | 2.9729818610047e-05  | 234049.653259639 |
| YGL114W | 0.000166790155393781 | 516688.014236909 |
| YGL115W | 0                    | 71740.3211885492 |
| YGL116W | 0.00010471053662664  | 462708.07981635  |
| YGL117W | 0                    | 0                |
| YGL118C | 0                    | 0                |
| YGL119W | 3.65618727850014e-05 | 116921.993509468 |
| YGL120C | 3.65618727850014e-05 | 116921.993509468 |
| YGL121C | 0                    | 46395.9437907674 |
| YGL122C | 0                    | 9094.8922682664  |
| YGL123W | 1.02572429392378e-05 | 200523.069985217 |
| YGL124C | 5.08735902016166e-06 | 0                |
| YGL125W | 0.000119399681042132 | 529394.592962619 |
| YGL126W | 0                    | 19849.2300661148 |
| YGL127C | 0                    | 19849.2300661148 |
| YGL128C | 0                    | 61704.9449864685 |
| YGL129C | 0                    | 9359.1112814068  |
| YGL130W | 0                    | 51995.9146862524 |
| YGL131C | 0                    | 51995.9146862524 |
| YGL132W | 0                    | 9856.6633311761  |
| YGL133W | 0                    | 34861.6945201647 |
| YGL134W | 0.0001270808608832   | 333092.611710162 |
| YGL135W | 4.46337970749777e-06 | 61564.5991026237 |
| YGL136C | 3.09861060383554e-05 | 215240.023476849 |
| YGL137W | 2.01620454367557e-05 | 178428.608250008 |
| YGL138C | 2.01620454367557e-05 | 178428.608250008 |
| YGL139W | 5.03352043934591e-06 | 186427.940735947 |
| YGL140C | 0                    | 45230.1395023    |
| YGL141W | 6.79408572221707e-05 | 309277.689761747 |
| YGL142C | 6.79408572221707e-05 | 309277.689761747 |
| YGL143C | 3.14142308435184e-05 | 62609.1309123093 |
| YGL144C | 1.0866817216737e-05  | 70951.5746087536 |
| YGL145W | 4.55952332674148e-05 | 300541.091682303 |
| YGL146C | 6.18310158051472e-05 | 387244.200373117 |
| YGL147C | 1.7960765140046e-05  | 158686.089403386 |
| YGL148W | 0.000176670616966024 | 727879.277506792 |

|           |                      |                  |
|-----------|----------------------|------------------|
| YGL150C   | 4.25289971228704e-06 | 159845.464937727 |
| YGL151W   | 2.54724860843103e-05 | 160409.661802652 |
| YGL152C   | 2.54724860843103e-05 | 160409.661802652 |
| YGL153W   | 0.000102123552752631 | 300304.507813159 |
| YGL154C   | 0.000102123552752631 | 300304.507813159 |
| YGL155W   | 3.0742168742437e-05  | 289138.12245033  |
| YGL156W   | 0                    | 15557.1714862061 |
| YGL157W   | 2.74935710811164e-05 | 258376.738775093 |
| YGL158W   | 0.00012631006966457  | 559444.533791892 |
| YGL159W   | 0                    | 34804.7025762412 |
| YGL160W   | 1.18974888122514e-05 | 68241.8043635702 |
| YGL161C   | 1.18974888122514e-05 | 68241.8043635702 |
| YGL162W   | 5.95335029697219e-05 | 571737.180714647 |
| YGL163C   | 3.4487329754529e-05  | 255248.095274127 |
| YGL164C   | 1.1486843935038e-05  | 268464.515128825 |
| YGL166W   | 0                    | 27796.8420954222 |
| YGL167C   | 0                    | 24602.0192080935 |
| YGL168W   | 0                    | 0                |
| YGL169W   | 0.000149722817463172 | 327469.862512663 |
| YGL170C   | 0.000174447861120752 | 668985.66320499  |
| YGL171W   | 3.99390132614919e-05 | 166229.928823382 |
| YGL172W   | 0                    | 58823.4544521461 |
| YGL173C   | 7.52700530097794e-05 | 163234.770413111 |
| YGL174W   | 0                    | 0                |
| YGL175C   | 0                    | 0                |
| YGL176C   | 0                    | 29487.8752608519 |
| YGL177W   | 2.00579892355446e-05 | 82938.0720500841 |
| YGL178W   | 5.2709780499649e-05  | 284469.012208814 |
| YGL179C   | 2.14229731734239e-05 | 173237.892095296 |
| YGL180W   | 1.05079234018479e-05 | 151018.418454953 |
| YGL181W   | 6.85498718244748e-06 | 44000.0013799314 |
| YGL182C   | 6.85498718244748e-06 | 44000.0013799314 |
| YGL183C   | 0                    | 0                |
| YGL184C   | 0.000304115897719726 | 844641.499972855 |
| YGL185C   | 1.04556465997385e-05 | 48890.1683509232 |
| YGL186C   | 0.000104263562828999 | 418456.614751632 |
| YGL187C   | 0                    | 112901.154990352 |
| YGL188C   | 2.25845053324347e-05 | 177887.39438638  |
| YGL188C-A | 0                    | 33617.4148316789 |
| YGL189C   | 0                    | 33617.4148316789 |
| YGL190C   | 0                    | 129878.660683779 |
| YGL191W   | 0                    | 178294.093010233 |
| YGL192W   | 0                    | 0                |
| YGL193C   | 0                    | 0                |
| YGL194C   | 3.14142308435184e-05 | 52626.4971351486 |
| YGL194C-A | 9.42366136325035e-06 | 331438.418909373 |
| YGL195W   | 1.79460368585627e-05 | 144181.561581044 |
| YGL196W   | 4.46337970749777e-06 | 81433.5039277391 |
| YGL197W   | 0                    | 45484.8082632752 |
| YGL198W   | 1.90382294502633e-05 | 385893.584148772 |
| YGL199C   | 0                    | 24958.2626738872 |
| YGL200C   | 4.30896169401063e-06 | 165870.481511842 |
| YGL201C   | 2.90727365487298e-05 | 389390.058034457 |
| YGL202W   | 0.000167533576808765 | 339109.717065321 |

|           |                      |                  |
|-----------|----------------------|------------------|
| YGL203C   | 5.58584246915794e-05 | 638145.931119692 |
| YGL204C   | 1.05607541367458e-05 | 145280.891235661 |
| YGL205W   | 2.89750322611804e-05 | 151188.926989583 |
| YGL206C   | 2.89750322610693e-05 | 111941.427079194 |
| YGL207W   | 3.49431209524242e-05 | 165598.371981753 |
| YGL208W   | 0                    | 202513.536636226 |
| YGL209W   | 4.54996446919154e-06 | 67059.8092499525 |
| YGL210W   | 0                    | 10263.272794694  |
| YGL211W   | 0                    | 11693.9735305002 |
| YGL212W   | 1.64820554398037e-05 | 123536.192265791 |
| YGL213C   | 1.64820554398037e-05 | 123536.192265791 |
| YGL214W   | 6.70413731496122e-06 | 236584.55968025  |
| YGL215W   | 0                    | 0                |
| YGL216W   | 1.65535423696239e-05 | 172702.429859481 |
| YGL219C   | 0.000121551487451632 | 375396.084212228 |
| YGL220W   | 0                    | 20526.545589388  |
| YGL221C   | 0                    | 20526.545589388  |
| YGL222C   | 0                    | 71718.7460770812 |
| YGL223C   | 1.41025015736318e-05 | 314389.42284867  |
| YGL224C   | 2.0547518810643e-05  | 264009.945220772 |
| YGL225W   | 4.67250706054356e-05 | 326151.504931496 |
| YGL226C-A | 0                    | 14141.0733741927 |
| YGL226W   | 0                    | 14141.0733741927 |
| YGL227W   | 0                    | 30789.818384082  |
| YGL228W   | 0                    | 51276.8001041692 |
| YGL229C   | 0                    | 51276.8001041692 |
| YGL230C   | 0                    | 138667.036185259 |
| YGL231C   | 0                    | 9856.6633311761  |
| YGL232W   | 0                    | 23786.0630840745 |
| YGL233W   | 0                    | 10388.5810129985 |
| YGL234W   | 0.000128772460542881 | 506083.956996251 |
| YGL236C   | 0.000118121789079217 | 417864.095802157 |
| YGL237C   | 0                    | 13119.8571187186 |
| YGL238W   | 4.54996446919154e-06 | 50423.1557110232 |
| YGL240W   | 0                    | 0                |
| YGL241W   | 1.75694047700459e-05 | 226181.456321769 |
| YGL242C   | 1.75694047700459e-05 | 226181.456321769 |
| YGL243W   | 0                    | 0                |
| YGL244W   | 4.4728072590261e-05  | 375078.445144289 |
| YGL245W   | 1.63495326174212e-05 | 121493.448166687 |
| YGL246C   | 1.63495326174212e-05 | 121493.448166687 |
| YGL247W   | 1.94758706822951e-05 | 108598.015277911 |
| YGL248W   | 1.48821205249172e-05 | 241147.867638381 |
| YGL249W   | 2.84513948308751e-05 | 317601.903560308 |
| YGL250W   | 0                    | 37678.4955042358 |
| YGL251C   | 0                    | 37678.4955042358 |
| YGL252C   | 0.000139111284342852 | 540477.132568412 |
| YGL253W   | 0                    | 8879.3207056173  |
| YGL254W   | 1.36148245943879e-05 | 148303.904909894 |
| YGL255W   | 0.000104011181852659 | 553475.358329364 |
| YGL256W   | 1.04556465997385e-05 | 109558.599557236 |
| YGL257C   | 4.54996446919154e-06 | 84954.9053411331 |
| YGL258W   | 4.76467349752596e-06 | 200126.677252258 |
| YGL258W-A | 0                    | 0                |

|           |                      |                  |  |
|-----------|----------------------|------------------|--|
| YGL259W   | 0                    | 37381.7671847222 |  |
| YGL260W   | 8.37354912335275e-05 | 214810.53361276  |  |
| YGL261C   | 8.37354912335275e-05 | 214810.53361276  |  |
| YGL262W   | 2.97805014315422e-05 | 212589.439134448 |  |
| YGL263W   | 0                    | 68475.0418905243 |  |
| YGR001C   | 0.000142791859211622 | 569979.01102899  |  |
| YGR002C   | 9.75733853614269e-06 | 72216.9076833509 |  |
| YGR003W   | 9.75733853614269e-06 | 72216.9076833509 |  |
| YGR004W   | 2.80809751774802e-05 | 206904.503855493 |  |
| YGR005C   | 0                    | 0                |  |
| YGR006W   | 0                    | 0                |  |
| YGR007W   | 0                    | 0                |  |
| YGR008C   | 1.35697034614468e-05 | 234556.202349128 |  |
| YGR009C   | 6.39306611714963e-05 | 516688.897851275 |  |
| YGR010W   | 6.39306611714963e-05 | 495737.305964684 |  |
| YGR012W   | 0                    | 9094.8922682664  |  |
| YGR013W   | 0                    | 11207.1867062294 |  |
| YGR014W   | 0                    | 17938.9358619681 |  |
| YGR015C   | 0                    | 0                |  |
| YGR016W   | 0                    | 0                |  |
| YGR017W   | 4.70554691315295e-05 | 390176.003898215 |  |
| YGR018C   | 4.20993804024494e-05 | 161412.333993288 |  |
| YGR019W   | 4.20993804024494e-05 | 161412.333993288 |  |
| YGR020C   | 1.95823516697669e-05 | 106455.161476394 |  |
| YGR021W   | 1.95823516697669e-05 | 106455.161476394 |  |
| YGR023W   | 3.84613392835353e-05 | 190795.998537807 |  |
| YGR024C   | 0                    | 0                |  |
| YGR025W   | 0                    | 0                |  |
| YGR026W   | 0                    | 0                |  |
| YGR027C   | 6.44983105591024e-06 | 0                |  |
| YGR027W-A | 4.01013538339212e-05 | 513652.113998686 |  |
| YGR027W-B | 4.01013538339212e-05 | 513652.113998686 |  |
| YGR028W   | 4.52878782160049e-05 | 300529.188945934 |  |
| YGR029W   | 0.00010425727445762  | 336410.690038021 |  |
| YGR030C   | 8.87123742698837e-06 | 161838.855994253 |  |
| YGR031C-A | 7.39705086882925e-06 | 194258.367048411 |  |
| YGR031W   | 8.87123742698837e-06 | 161838.855994253 |  |
| YGR032W   | 1.84246801374632e-05 | 302600.232266329 |  |
| YGR033C   | 6.72097416080097e-05 | 541543.37387998  |  |
| YGR034W   | 1.13069246320263e-05 | 181198.413151032 |  |
| YGR035C   | 0                    | 96161.4653943206 |  |
| YGR035W-A | 0                    | 96161.4653943206 |  |
| YGR036C   | 2.2218219748793e-05  | 246969.846156501 |  |
| YGR037C   | 0                    | 133982.991916854 |  |
| YGR038C-A | 8.58405261290329e-05 | 453718.317084785 |  |
| YGR038C-B | 8.58405261290329e-05 | 453718.317084785 |  |
| YGR038W   | 0                    | 67485.847086121  |  |
| YGR039W   | 0.000118311598802601 | 709016.5924801   |  |
| YGR040W   | 0                    | 13119.8571187186 |  |
| YGR041W   | 4.94884696244924e-06 | 147664.660399967 |  |
| YGR042W   | 7.28090049217922e-06 | 98330.4232663104 |  |
| YGR043C   | 0.000110619938259227 | 754732.933452917 |  |
| YGR044C   | 0                    | 0                |  |
| YGR045C   | 4.94884696244924e-06 | 166348.893150971 |  |

|         |                      |                  |  |
|---------|----------------------|------------------|--|
| YGR046W | 0                    | 95805.8075651233 |  |
| YGR047C | 0                    | 21760.5101545995 |  |
| YGR048W | 0                    | 21760.5101545995 |  |
| YGR049W | 4.42652020726797e-06 | 82243.3957607743 |  |
| YGR050C | 9.81599530445187e-05 | 683606.6217198   |  |
| YGR051C | 4.85654614026387e-05 | 281869.802376375 |  |
| YGR052W | 4.85654614026387e-05 | 281869.802376376 |  |
| YGR053C | 3.13922488549556e-05 | 281223.565453743 |  |
| YGR054W | 1.95345759328447e-05 | 222225.893004072 |  |
| YGR055W | 0.000113138589245998 | 553579.074202669 |  |
| YGR056W | 0                    | 14030.690694095  |  |
| YGR057C | 0.000118441774259903 | 528048.341359125 |  |
| YGR058W | 0.000114177024605366 | 430799.911153469 |  |
| YGR059W | 5.12808824213451e-05 | 375368.215813605 |  |
| YGR060W | 9.33074758235897e-06 | 42516.2122160832 |  |
| YGR061C | 9.30941724216483e-05 | 289475.134549567 |  |
| YGR062C | 0                    | 35871.3312681575 |  |
| YGR063C | 0                    | 54502.7745348568 |  |
| YGR064W | 3.81064395023056e-05 | 268248.836105423 |  |
| YGR065C | 0.000128935968389476 | 454565.760339725 |  |
| YGR066C | 0                    | 40861.0406328537 |  |
| YGR067C | 5.12920858329879e-05 | 282302.718388668 |  |
| YGR068C | 2.13240378210688e-05 | 332841.528901075 |  |
| YGR070W | 2.64112883582301e-05 | 367299.549909817 |  |
| YGR071C | 0                    | 0                |  |
| YGR072W | 0                    | 0                |  |
| YGR073C | 0                    | 34992.0960803187 |  |
| YGR074W | 5.99431470610368e-05 | 226926.489019026 |  |
| YGR075C | 0                    | 13213.2243532871 |  |
| YGR076C | 2.81630928188337e-05 | 124760.788713396 |  |
| YGR077C | 0                    | 14561.0942411687 |  |
| YGR078C | 4.30970794507157e-06 | 65358.1001045332 |  |
| YGR079W | 4.30970794507157e-06 | 65358.1001045332 |  |
| YGR080W | 7.39705086882925e-06 | 158658.131391935 |  |
| YGR081C | 2.71162071429076e-05 | 205267.196958798 |  |
| YGR082W | 2.71162071429076e-05 | 205267.196958798 |  |
| YGR083C | 1.38305956907114e-05 | 134012.458729351 |  |
| YGR084C | 0                    | 178088.233123097 |  |
| YGR085C | 0                    | 66404.0289527457 |  |
| YGR086C | 4.54996446919154e-06 | 161737.999466331 |  |
| YGR087C | 0                    | 181115.567579617 |  |
| YGR088W | 2.58684842340262e-05 | 326816.754621671 |  |
| YGR089W | 2.00579892355446e-05 | 57944.8839916947 |  |
| YGR090W | 0                    | 36137.9728112561 |  |
| YGR091W | 0                    | 0                |  |
| YGR092W | 0                    | 167959.651486117 |  |
| YGR093W | 0                    | 129284.582895571 |  |
| YGR094W | 9.95708869084844e-05 | 507772.40387276  |  |
| YGR095C | 5.0422375025283e-06  | 121069.796554    |  |
| YGR096W | 5.0422375025283e-06  | 121069.796554    |  |
| YGR097W | 6.36793821557902e-05 | 378827.994344887 |  |
| YGR098C | 0                    | 27752.5519181955 |  |
| YGR099W | 0                    | 27752.5519181955 |  |
| YGR100W | 0                    | 17036.6268441609 |  |

|           |                      |                  |
|-----------|----------------------|------------------|
| YGR101W   | 4.30896169401063e-06 | 152796.371111251 |
| YGR102C   | 4.7665178788292e-05  | 377535.696618693 |
| YGR103W   | 4.7665178788292e-05  | 377535.696618693 |
| YGR104C   | 5.08735902016166e-06 | 13137.5014877074 |
| YGR105W   | 5.08735902016166e-06 | 13137.5014877074 |
| YGR106C   | 7.69694682978272e-05 | 523434.297248527 |
| YGR107W   | 4.35442507396022e-06 | 201819.1130251   |
| YGR108W   | 0                    | 32261.5650259664 |
| YGR109C   | 0                    | 83881.81640542   |
| YGR109W-A | 5.84526585432066e-05 | 625774.088534926 |
| YGR109W-B | 5.84526585432066e-05 | 625774.088534926 |
| YGR110W   | 4.17908330633265e-05 | 564786.010222924 |
| YGR111W   | 0                    | 0                |
| YGR112W   | 6.4296606601788e-05  | 274142.622661782 |
| YGR113W   | 0                    | 28968.9398480978 |
| YGR116W   | 0.00011464406857209  | 620566.624291641 |
| YGR117C   | 5.03352043934591e-06 | 285366.136669413 |
| YGR118W   | 5.03352043934591e-06 | 285366.136669413 |
| YGR119C   | 2.46982606777468e-05 | 132684.668215601 |
| YGR120C   | 5.66293765887904e-05 | 295029.009150903 |
| YGR121C   | 2.27205339574654e-05 | 320239.551667014 |
| YGR121W-A | 2.27205339573544e-05 | 320239.551667014 |
| YGR122C-A | 7.43277090685668e-05 | 692523.926743576 |
| YGR122W   | 0                    | 53127.1426282148 |
| YGR123C   | 2.13744061344778e-05 | 321118.070175997 |
| YGR124W   | 0.000160952479996257 | 453649.888257942 |
| YGR125W   | 8.95693968080424e-05 | 459724.640395926 |
| YGR126W   | 3.0611482213283e-05  | 177332.75029167  |
| YGR127W   | 0                    | 0                |
| YGR128C   | 3.18145456494889e-05 | 487254.031574997 |
| YGR129W   | 3.18145456496e-05    | 487254.031574997 |
| YGR130C   | 1.83694768316478e-05 | 323714.791643313 |
| YGR131W   | 1.15518161630801e-05 | 19100.4298512039 |
| YGR132C   | 7.70579905555735e-05 | 473346.766458649 |
| YGR133W   | 7.70579905554625e-05 | 473346.766458649 |
| YGR134W   | 2.00579892355446e-05 | 119421.662443562 |
| YGR135W   | 1.59061909354996e-05 | 138606.658863209 |
| YGR136W   | 0                    | 0                |
| YGR137W   | 0                    | 0                |
| YGR138C   | 0                    | 0                |
| YGR139W   | 0                    | 0                |
| YGR140W   | 4.56171213910617e-05 | 135711.550952408 |
| YGR141W   | 0                    | 0                |
| YGR142W   | 0                    | 149106.45223005  |
| YGR143W   | 0                    | 0                |
| YGR144W   | 5.03352043934591e-06 | 167551.08406741  |
| YGR145W   | 0                    | 172373.829398535 |
| YGR146C   | 0                    | 49579.603920361  |
| YGR146C-A | 1.08965125723559e-05 | 177689.413468099 |
| YGR147C   | 1.13171021255409e-05 | 205440.653594899 |
| YGR148C   | 0                    | 10572.5754929834 |
| YGR149W   | 6.93131470042019e-06 | 187836.215551818 |
| YGR150C   | 1.27506959423096e-05 | 287026.81707203  |
| YGR152C   | 8.54771578613356e-05 | 341793.260653038 |

|           |                      |                  |
|-----------|----------------------|------------------|
| YGR153W   | 9.05640820284548e-05 | 371281.13591389  |
| YGR154C   | 0.000112298007532541 | 477324.350413342 |
| YGR155W   | 0.000112298007532652 | 452402.821335692 |
| YGR156W   | 1.22142095154709e-05 | 245378.199408581 |
| YGR157W   | 5.0422375025283e-06  | 156798.937474548 |
| YGR158C   | 0                    | 55432.4311282473 |
| YGR159C   | 0                    | 34935.9818148997 |
| YGR161C   | 6.56773616041217e-05 | 464147.769213481 |
| YGR161C-C | 2.35482012704846e-05 | 389619.20636403  |
| YGR161C-D | 2.35482012704846e-05 | 389619.20636403  |
| YGR161W-A | 9.01491179393643e-05 | 592428.159173446 |
| YGR161W-B | 9.01491179393643e-05 | 592428.159173446 |
| YGR161W-C | 0.000116794300469514 | 677240.392397298 |
| YGR162W   | 5.10201801429133e-06 | 186994.616350123 |
| YGR163W   | 0                    | 49980.6667335292 |
| YGR164W   | 0                    | 0                |
| YGR165W   | 5.08735902016166e-06 | 0                |
| YGR166W   | 1.17027753305798e-05 | 216714.469170951 |
| YGR167W   | 3.07933326333387e-05 | 225892.718017964 |
| YGR168C   | 0                    | 0                |
| YGR169C   | 7.65854564492852e-05 | 340215.795458377 |
| YGR169C-A | 1.15435741641079e-05 | 225326.974354514 |
| YGR170W   | 1.15435741641079e-05 | 225326.974354514 |
| YGR171C   | 0                    | 0                |
| YGR172C   | 6.15682013394014e-06 | 248924.695736556 |
| YGR173W   | 6.15682013394014e-06 | 248924.695736556 |
| YGR174C   | 9.3297057144337e-06  | 72903.1591416343 |
| YGR174W-A | 9.3297057144337e-06  | 72903.1591416343 |
| YGR175C   | 0                    | 61579.636768164  |
| YGR176W   | 0                    | 61579.636768164  |
| YGR177C   | 2.93021012696126e-05 | 216073.024948994 |
| YGR178C   | 2.55329618653599e-05 | 192721.664087963 |
| YGR179C   | 5.66137982692672e-05 | 476511.453636818 |
| YGR180C   | 0                    | 0                |
| YGR181W   | 7.98296816972854e-05 | 331251.481109111 |
| YGR182C   | 9.06879549189554e-06 | 222030.022213582 |
| YGR183C   | 1.41753043673143e-05 | 333065.68146711  |
| YGR184C   | 1.04556465997385e-05 | 91459.861600412  |
| YGR185C   | 0.000151023551172025 | 321044.576347533 |
| YGR186W   | 0.000151023551172025 | 321044.576347533 |
| YGR187C   | 5.58448131831035e-05 | 419589.766150883 |
| YGR188C   | 1.71419984745791e-05 | 393107.179636629 |
| YGR189C   | 2.39877165525426e-05 | 386839.949154419 |
| YGR191W   | 0.000125828653829263 | 781474.775710063 |
| YGR192C   | 0.000123328952953528 | 412630.748580428 |
| YGR193C   | 5.58913164440122e-05 | 525482.966306845 |
| YGR194C   | 0                    | 261540.729568643 |
| YGR195W   | 9.64616858989409e-06 | 358141.680569897 |
| YGR196C   | 3.94434562112078e-05 | 260353.81327786  |
| YGR197C   | 8.74870504441461e-05 | 504602.033716131 |
| YGR198W   | 8.7487050444035e-05  | 486226.187429823 |
| YGR199W   | 2.03797043090148e-05 | 160583.599978215 |
| YGR200C   | 0                    | 30383.9581077262 |
| YGR201C   | 5.10201801429133e-06 | 34043.7969080876 |



|           |                      |                  |
|-----------|----------------------|------------------|
| YGR202C   | 6.49451931710177e-05 | 320463.732270393 |
| YGR203W   | 6.49451931709066e-05 | 320463.732270393 |
| YGR204C-A | 0 0                  |                  |
| YGR204W   | 0.000112942445410935 | 524381.43917776  |
| YGR205W   | 0 0                  |                  |
| YGR206W   | 0 92703.528152707    |                  |
| YGR207C   | 3.6117937394553e-05  | 99927.5702149536 |
| YGR208W   | 3.6117937394553e-05  | 99927.5702149536 |
| YGR209C   | 0 58234.9232433643   |                  |
| YGR210C   | 0 41173.943297016    |                  |
| YGR211W   | 0 41173.943297016    |                  |
| YGR212W   | 0 74543.6331281404   |                  |
| YGR213C   | 3.86378504377838e-05 | 253982.787335275 |
| YGR214W   | 0 20288.6498755903   |                  |
| YGR215W   | 5.19940891863246e-05 | 407023.649560188 |
| YGR216C   | 1.90176880231485e-05 | 222222.722563418 |
| YGR217W   | 1.90176880231485e-05 | 222222.722563418 |
| YGR218W   | 0 107478.050050456   |                  |
| YGR219W   | 0 10584.6803590411   |                  |
| YGR220C   | 0 17026.6416965433   |                  |
| YGR221C   | 3.44553582245499e-05 | 288130.53069615  |
| YGR222W   | 4.52020587434765e-05 | 278579.778292282 |
| YGR223C   | 5.08735902016166e-06 | 71705.3958536275 |
| YGR224W   | 5.08735902016166e-06 | 71705.3958536275 |
| YGR225W   | 3.29359829038811e-05 | 283462.248870767 |
| YGR226C   | 1.95871771083711e-05 | 292208.968416337 |
| YGR227W   | 1.95871771083711e-05 | 292208.968416337 |
| YGR228W   | 0 92494.7633705505   |                  |
| YGR229C   | 0 34412.4799799844   |                  |
| YGR230W   | 2.45132568654771e-05 | 547800.327198651 |
| YGR231C   | 5.68859167292546e-05 | 164867.154607092 |
| YGR232W   | 5.68859167293656e-05 | 164867.154607092 |
| YGR233C   | 0 11544.0434093035   |                  |
| YGR234W   | 5.08735902016166e-06 | 117678.576460456 |
| YGR235C   | 4.63612118776213e-05 | 307938.914409836 |
| YGR236C   | 0 45938.298306239    |                  |
| YGR237C   | 0 0                  |                  |
| YGR238C   | 2.0951215178977e-05  | 316455.430549789 |
| YGR239C   | 0.000104688966324651 | 523093.717675908 |
| YGR240C   | 1.0286293083972e-05  | 183495.474649502 |
| YGR240C-A | 0 0                  |                  |
| YGR241C   | 2.26987197404771e-05 | 188360.448123516 |
| YGR243W   | 2.42468244046057e-05 | 285776.08516253  |
| YGR244C   | 5.0886760833424e-05  | 356964.994041686 |
| YGR245C   | 0 99560.663169787    |                  |
| YGR246C   | 9.36323266863548e-05 | 567733.074365876 |
| YGR247W   | 1.02572429392378e-05 | 215812.541665572 |
| YGR248W   | 2.0775980453136e-05  | 147884.237714694 |
| YGR249W   | 4.57159940403518e-06 | 96577.5503519993 |
| YGR250C   | 0 24073.1192255046   |                  |
| YGR251W   | 4.17310205413912e-06 | 127505.584011233 |
| YGR252W   | 0 27425.2078571594   |                  |
| YGR253C   | 0 28741.4427690805   |                  |
| YGR254W   | 0 106232.537484415   |                  |

|           |                      |                  |  |
|-----------|----------------------|------------------|--|
| YGR255C   | 0                    | 82729.9688373916 |  |
| YGR256W   | 0                    | 138657.321556984 |  |
| YGR257C   | 4.65170362805578e-05 | 412155.716056683 |  |
| YGR258C   | 0.000125493155987644 | 658236.787942167 |  |
| YGR260W   | 4.0123663307301e-05  | 368463.540937021 |  |
| YGR261C   | 0                    | 32829.5230048057 |  |
| YGR262C   | 2.22637258592284e-05 | 312387.50535145  |  |
| YGR263C   | 3.14142308435184e-05 | 52626.4971351486 |  |
| YGR264C   | 0                    | 36374.5112665086 |  |
| YGR266W   | 0                    | 11616.1296341304 |  |
| YGR267C   | 0.000266410567508535 | 566981.40070335  |  |
| YGR268C   | 0                    | 0                |  |
| YGR270W   | 4.85568965528094e-05 | 189996.948078862 |  |
| YGR271C-A | 1.518127685185e-05   | 109639.035321466 |  |
| YGR271W   | 2.8961163993646e-05  | 163093.347461736 |  |
| YGR273C   | 2.70540006169773e-05 | 270561.957944641 |  |
| YGR274C   | 0                    | 31148.7645222934 |  |
| YGR275W   | 0                    | 31148.7645222934 |  |
| YGR276C   | 5.73485423445153e-05 | 195288.148982168 |  |
| YGR277C   | 1.51083234108951e-05 | 241797.273957913 |  |
| YGR278W   | 1.51083234108951e-05 | 241797.273957913 |  |
| YGR279C   | 5.15584024457505e-05 | 310681.831379449 |  |
| YGR280C   | 0.000149845045566699 | 456697.119390458 |  |
| YGR281W   | 2.11745495443116e-05 | 441981.850221281 |  |
| YGR282C   | 0                    | 77779.9547426032 |  |
| YGR283C   | 5.44027766558042e-06 | 268972.750698019 |  |
| YGR284C   | 0                    | 11508.9162511053 |  |
| YGR285C   | 2.41707194010843e-05 | 314123.525881166 |  |
| YGR286C   | 9.13756650847697e-05 | 472320.320533374 |  |
| YGR287C   | 2.9924282933913e-05  | 365606.711477228 |  |
| YGR288W   | 7.84401434956727e-05 | 402947.41571458  |  |
| YGR289C   | 8.52750895663501e-06 | 131474.907517902 |  |
| YGR291C   | 2.37937704459235e-05 | 32319.0836643744 |  |
| YGR292W   | 2.37937704459235e-05 | 32319.0836643744 |  |
| YGR293C   | 0                    | 40273.2746887528 |  |
| YGR294W   | 0                    | 0                |  |
| YGR295C   | 5.0422375025283e-06  | 291653.125402042 |  |
| YGR296C-B | 0                    | 0                |  |
| YGR296W   | 2.19965686882873e-05 | 230950.053100754 |  |
| YHL001W   | 0                    | 13119.8571187186 |  |
| YHL002W   | 6.45444743920809e-05 | 409573.673736545 |  |
| YHL003C   | 6.87719107869134e-05 | 409848.324000157 |  |
| YHL004W   | 2.37937704459235e-05 | 32319.0836643744 |  |
| YHL006C   | 0                    | 0                |  |
| YHL007C   | 3.5054243488597e-05  | 123353.315234855 |  |
| YHL008C   | 8.66702768420602e-06 | 127312.136211061 |  |
| YHL009C   | 2.62670008266408e-05 | 211351.665515828 |  |
| YHL009W-A | 8.23520801735977e-05 | 806072.875997331 |  |
| YHL009W-B | 8.23520801735977e-05 | 806072.875997331 |  |
| YHL010C   | 6.00808816075826e-06 | 56307.9163932914 |  |
| YHL011C   | 0                    | 42926.4772404539 |  |
| YHL012W   | 4.69127502089606e-06 | 68526.3835739336 |  |
| YHL013C   | 0                    | 8734.7746376553  |  |
| YHL014C   | 0                    | 0                |  |

YHL015W 6.13202664153656e-05 306223.752471892  
YHL015W-A 0.000104730042951195 499795.08933462  
YHL016C 0.000104730042951084 499795.08933462  
YHL017W 0 0  
YHL018W 0 0  
YHL019C 0 0  
YHL019W-A 3.84990986964651e-05 143187.835500431  
YHL020C 3.84990986964651e-05 143187.835500432  
YHL021C 0 14637.4020797229  
YHL022C 0 98040.8218737656  
YHL023C 9.74059999957477e-05 282277.96302832  
YHL024W 0 19067.2527547945  
YHL025W 4.22596669136244e-06 42621.7569778516  
YHL026C 0 25367.5708519124  
YHL027W 0.00010028873846657 524146.10077689  
YHL028W 1.08965125723559e-05 209366.921833628  
YHL029C 1.96478423465374e-05 164410.063252406  
YHL030W 1.46317319520417e-05 156544.564102935  
YHL030W-A 0 56667.5903008075  
YHL031C 1.46317319520417e-05 156544.564102935  
YHL032C 0 56667.5903008075  
YHL033C 3.38325430506714e-05 150423.455881574  
YHL034C 2.51645055823202e-05 315518.239770838  
YHL034W-A 1.46317319520417e-05 258547.488586676  
YHL035C 1.46317319520417e-05 258547.488586676  
YHL036W 0 0  
YHL037C 0 0  
YHL038C 2.52819474706456e-05 233489.470753971  
YHL039W 8.94147054990579e-05 308299.442032539  
YHL040C 0 30229.2757087594  
YHL041W 2.33498614196082e-05 311073.57016223  
YHL042W 0 14561.0942411687  
YHL043W 0 116513.787339949  
YHL044W 2.01476524935851e-05 315093.976392511  
YHL045W 8.37354912335275e-05 206075.758975105  
YHL046C 8.37354912335275e-05 206075.758975105  
YHL047C 1.5525786786208e-05 97556.6428075698  
YHL048C-A 5.0422375025283e-06 445096.696510341  
YHL048W 5.0422375025283e-06 336087.261591527  
YHL049C 0 97096.5761177158  
YHL050C 7.39705086882925e-06 198863.397127862  
YHL050W-A 0 0  
YHR001W 0.000142953577362936 353934.368478491  
YHR001W-A 6.36303246877024e-05 251158.031890267  
YHR002W 0 0  
YHR003C 0 273589.741078141  
YHR004C 0 0  
YHR005C 0 157399.913524037  
YHR005C-A 0 109147.325453198  
YHR006W 0.000163465553212117 586542.284566459  
YHR007C 9.83730688564055e-06 192278.128150602  
YHR007C-A 0 8734.7746376553  
YHR008C 5.08735902016166e-06 0  
YHR009C 1.18865636606902e-05 234242.002265864

YHR010W 1.18865636606902e-05 97204.7280731136  
YHR011W 5.08735902016166e-06 12959.5196231864  
YHR012W 0 96077.4549769518  
YHR013C 0 75656.0076407326  
YHR014W 0 84797.2713590474  
YHR015W 8.75050178851255e-05 707393.513459598  
YHR016C 0 17412.5820401908  
YHR017W 0 17412.5820401908  
YHR018C 0.00033559525292115 597840.941244432  
YHR019C 0.000254380110834229 611864.396541799  
YHR020W 0.000254380110834229 611864.396541799  
YHR021C 2.41575713733067e-05 100945.142022092  
YHR021W-A 2.41575713733067e-05 100945.142022092  
YHR022C 0 49321.4949277142  
YHR022C-A 6.6009880718032e-05 375942.465816953  
YHR023W 6.6009880718032e-05 375942.465816953  
YHR024C 0.000132434027441897 298532.896789458  
YHR025W 0.000132434027441897 298532.896789458  
YHR026W 3.77463386037613e-05 121713.245506076  
YHR027C 1.04556465997385e-05 95459.9451675544  
YHR028C 3.14142308435184e-05 114206.133903313  
YHR029C 0.000205644578736619 737205.664657044  
YHR030C 1.26716600912236e-05 46980.4022462271  
YHR031C 0 132244.318027935  
YHR032C-A 0 41580.923909125  
YHR032W 0 132244.318027935  
YHR032W-A 6.00808816075826e-06 72364.6680494579  
YHR033W 0 41580.923909125  
YHR034C 0 0  
YHR035W 0 0  
YHR036W 0 0  
YHR037W 0 101363.726190562  
YHR038W 3.47979361439155e-05 322406.378508394  
YHR039C 0 10388.5810129985  
YHR039C-A 0 10259.2317142687  
YHR040W 0 10259.2317142687  
YHR041C 0 141714.956675699  
YHR042W 0 189106.486911674  
YHR043C 2.48675772560603e-05 437278.82944088  
YHR044C 8.29361117016258e-06 102523.874399829  
YHR045W 1.83335873287227e-05 141726.417848085  
YHR046C 0.00021973666434516 720464.233793733  
YHR047C 9.459562451819e-05 402101.256127218  
YHR048W 5.08735902016166e-06 98910.7838067039  
YHR049C-A 0 0  
YHR049W 1.82354214245395e-05 183120.136083038  
YHR050W 0 0  
YHR050W-A 0 0  
YHR051W 2.00579892355446e-05 57944.8839916947  
YHR052W 0 236787.481835299  
YHR052W-A 3.14083319234992e-05 137354.739559533  
YHR053C 5.87665016572592e-05 371969.158735669  
YHR054C 0 13299.4902414958  
YHR054W-A 0 13299.4902414958

YHR055C 5.87665016572592e-05 371969.158735669  
YHR056C 2.47346856431241e-05 204532.548898292  
YHR057C 0 0  
YHR058C 0 29517.6375658514  
YHR059W 0 29517.6375658514  
YHR060W 0 26333.5236567308  
YHR061C 0 35083.0516489044  
YHR062C 0 56758.1300175561  
YHR063C 0.000156101451425528 483084.811030014  
YHR063W-A 0.000156101451425528 483084.811030014  
YHR064C 0 96034.0800371611  
YHR065C 4.30896169401063e-06 178478.766606637  
YHR066W 4.30896169401063e-06 178478.766606637  
YHR067W 0 0  
YHR068W 0 84122.9408578957  
YHR069C 2.68632143127778e-05 153876.1529133  
YHR070C-A 4.8403532725283e-06 37724.500558451  
YHR070W 6.39735545038267e-05 762876.744851671  
YHR071W 4.8403532725283e-06 37724.500558451  
YHR072W 4.66605762421413e-05 236674.596198829  
YHR072W-A 0 0  
YHR073C-B 2.29287730543204e-05 291746.133299164  
YHR073W 7.39705086882925e-06 180346.142291365  
YHR073W-A 0 20951.5918865905  
YHR074W 3.3266461710868e-05 342431.661422639  
YHR075C 4.20604427305848e-05 283319.38671962  
YHR076W 1.93351707001854e-05 233839.404990098  
YHR077C 0.000120294506418706 533591.552475357  
YHR078W 0.000120294506418595 533591.552475357  
YHR079C 4.54996446919154e-06 14544.5082039682  
YHR079C-A 9.74765090389074e-06 140327.825820982  
YHR080C 2.27084051290793e-05 374288.678684257  
YHR081W 2.27084051290793e-05 474450.913695846  
YHR082C 0 18212.50521934  
YHR083W 5.38940412164735e-06 49359.6628128807  
YHR084W 0 11207.1867062294  
YHR085W 4.25289971228704e-06 167626.037677557  
YHR086W 0 164078.229594771  
YHR086W-A 2.62095111230876e-05 268295.6339339  
YHR087W 7.52700530097794e-05 172256.522728043  
YHR088W 1.16529510996166e-05 255444.908665811  
YHR089C 8.0331308749737e-05 583384.054868032  
YHR090C 0 0  
YHR091C 0 165891.988853236  
YHR092C 6.87863647144127e-05 296603.27507177  
YHR093W 6.87863647145237e-05 296603.27507177  
YHR094C 2.54325185010673e-05 266822.125820842  
YHR095W 2.54325185010673e-05 266822.125820842  
YHR096C 0 10263.272794694  
YHR097C 5.08735902016166e-06 103463.61367504  
YHR098C 5.08735902016166e-06 14576.4653268694  
YHR099W 0 66411.1881548094  
YHR100C 0 105715.563336627  
YHR101C 0 38097.4531496822

|           |                      |                  |  |
|-----------|----------------------|------------------|--|
| YHR102W   | 0                    | 38097.4531496822 |  |
| YHR103W   | 0                    | 90113.9769150635 |  |
| YHR104W   | 2.86626249723643e-05 | 266976.641571135 |  |
| YHR105W   | 2.41709127868361e-05 | 290528.759835716 |  |
| YHR106W   | 0                    | 0                |  |
| YHR107C   | 0                    | 13569.0716588989 |  |
| YHR108W   | 0                    | 13569.0716588989 |  |
| YHR109W   | 0                    | 25993.6881017524 |  |
| YHR110W   | 1.08859573376696e-05 | 86359.3536442761 |  |
| YHR111W   | 1.13974223215907e-05 | 124554.083608558 |  |
| YHR112C   | 6.9587383803027e-06  | 87590.4931524387 |  |
| YHR113W   | 6.9587383803027e-06  | 138314.975191758 |  |
| YHR114W   | 2.62670008266408e-05 | 113653.24812104  |  |
| YHR115C   | 4.31622335674842e-05 | 119690.126773403 |  |
| YHR116W   | 4.31622335674842e-05 | 119690.126773403 |  |
| YHR117W   | 0                    | 0                |  |
| YHR118C   | 0                    | 45520.1611343881 |  |
| YHR119W   | 0                    | 45520.1611343881 |  |
| YHR120W   | 3.68099715781778e-05 | 299832.649979859 |  |
| YHR121W   | 0                    | 12868.5163816436 |  |
| YHR122W   | 0.000110596376919236 | 409128.71289807  |  |
| YHR123W   | 1.06854852351956e-05 | 67591.967487342  |  |
| YHR124W   | 8.10604218643984e-05 | 669981.396878953 |  |
| YHR125W   | 1.83916114470106e-05 | 207312.781067864 |  |
| YHR126C   | 1.26716600912236e-05 | 66686.9569525069 |  |
| YHR127W   | 0                    | 172276.230580098 |  |
| YHR128W   | 3.15512866471135e-05 | 199874.743361622 |  |
| YHR129C   | 0                    | 68660.2785753378 |  |
| YHR130C   | 0                    | 0                |  |
| YHR131C   | 9.95395058200899e-06 | 337374.886827674 |  |
| YHR132C   | 0                    | 0                |  |
| YHR132W-A | 0                    | 0                |  |
| YHR133C   | 0                    | 21738.9271557134 |  |
| YHR134W   | 0                    | 21738.9271557134 |  |
| YHR135C   | 1.93341338524666e-05 | 136159.523529466 |  |
| YHR136C   | 6.00208108890721e-05 | 426027.651803619 |  |
| YHR137W   | 5.10480246374012e-06 | 126951.074584357 |  |
| YHR138C   | 3.27919152953715e-05 | 223241.777313313 |  |
| YHR139C   | 2.95384944020149e-05 | 291191.231582754 |  |
| YHR139C-A | 6.31009540319472e-06 | 90483.4846582898 |  |
| YHR140W   | 6.31009540319472e-06 | 90483.4846582898 |  |
| YHR141C   | 0                    | 259239.072021166 |  |
| YHR142W   | 0                    | 262957.460006884 |  |
| YHR143W   | 7.8732772922474e-05  | 474389.550258465 |  |
| YHR143W-A | 2.25178123507419e-05 | 304294.410191452 |  |
| YHR144C   | 0                    | 28375.1370803438 |  |
| YHR145C   | 0.000132547842545461 | 838218.939434496 |  |
| YHR146W   | 1.89079031314154e-05 | 200491.994013584 |  |
| YHR147C   | 0                    | 0                |  |
| YHR148W   | 0                    | 0                |  |
| YHR149C   | 3.33491671501429e-05 | 519755.479250111 |  |
| YHR150W   | 0.000106819009310755 | 785026.181323684 |  |
| YHR151C   | 3.81859665643525e-05 | 323835.618915642 |  |
| YHR152W   | 3.81859665644635e-05 | 323835.618915641 |  |

|           |                      |                  |
|-----------|----------------------|------------------|
| YHR153C   | 4.99061779895005e-05 | 295592.163302029 |
| YHR154W   | 4.99061779893895e-05 | 295592.163302029 |
| YHR155W   | 4.8146116338299e-05  | 477524.169929004 |
| YHR156C   | 1.01660295369621e-05 | 194036.931814995 |
| YHR157W   | 1.01660295369621e-05 | 194036.931814995 |
| YHR158C   | 0                    | 17513.0198853221 |
| YHR159W   | 0                    | 17513.0198853221 |
| YHR160C   | 0                    | 21081.8933312009 |
| YHR161C   | 0.000228477647747583 | 775880.734769763 |
| YHR162W   | 0.000265790890484841 | 963850.143041669 |
| YHR163W   | 0                    | 27069.4608490818 |
| YHR164C   | 2.09364625975983e-05 | 337070.823139528 |
| YHR165C   | 0                    | 55505.0236571373 |
| YHR166C   | 0                    | 42079.4776749757 |
| YHR167W   | 0                    | 42079.4776749757 |
| YHR168W   | 0                    | 0                |
| YHR169W   | 0                    | 50494.1879837239 |
| YHR170W   | 0                    | 72003.8585873881 |
| YHR171W   | 0                    | 11693.9735305002 |
| YHR172W   | 2.47856865894791e-05 | 177178.194738662 |
| YHR173C   | 0                    | 0                |
| YHR174W   | 0                    | 0                |
| YHR175W   | 4.46337970749777e-06 | 27631.0556553705 |
| YHR175W-A | 5.0422375025283e-06  | 147345.741520674 |
| YHR176W   | 0                    | 17396.8090203141 |
| YHR177W   | 0                    | 31067.3175382559 |
| YHR178W   | 0                    | 0                |
| YHR179W   | 5.25058122036182e-06 | 225047.907195163 |
| YHR180C-B | 0                    | 29394.8243645879 |
| YHR180W   | 9.26818288560227e-06 | 237692.705485183 |
| YHR180W-A | 0.000142904420969314 | 938084.819108952 |
| YHR181W   | 0                    | 18603.7188395449 |
| YHR182W   | 4.35442507396022e-06 | 180624.462056139 |
| YHR183W   | 0                    | 16494.0377395355 |
| YHR184W   | 0                    | 79819.0086615669 |
| YHR185C   | 2.30752403910239e-05 | 253547.382106716 |
| YHR186C   | 0                    | 31623.7075414862 |
| YHR187W   | 0                    | 31623.7075414862 |
| YHR188C   | 0                    | 0                |
| YHR189W   | 0                    | 0                |
| YHR190W   | 1.39419744626945e-05 | 165844.202084386 |
| YHR191C   | 0                    | 12868.5163816436 |
| YHR192W   | 0                    | 12868.5163816436 |
| YHR193C   | 9.897269649628e-05   | 694804.152694172 |
| YHR194W   | 9.897269649628e-05   | 694804.152694172 |
| YHR195W   | 3.57693939885273e-05 | 317006.027729856 |
| YHR196W   | 7.48834913844032e-06 | 204450.014069774 |
| YHR197W   | 0                    | 110024.908209728 |
| YHR198C   | 0                    | 31595.8073469702 |
| YHR199C   | 5.08735902016166e-06 | 0                |
| YHR199C-A | 0                    | 0                |
| YHR200W   | 0                    | 0                |
| YHR201C   | 0.000152675465531993 | 494967.891594503 |
| YHR202W   | 1.32019674375927e-05 | 199298.343851093 |

|           |                      |                  |
|-----------|----------------------|------------------|
| YHR203C   | 2.08471249829589e-05 | 289751.084282046 |
| YHR204W   | 1.58983566990178e-05 | 203182.643460175 |
| YHR205W   | 4.22596669136244e-06 | 58665.4844204214 |
| YHR206W   | 2.04625808626346e-05 | 449779.936058182 |
| YHR207C   | 2.89937195659951e-05 | 199569.269899165 |
| YHR208W   | 0.000273006287561883 | 430975.404758507 |
| YHR209W   | 0                    | 48145.286284873  |
| YHR210C   | 0                    | 90970.783450876  |
| YHR211W   | 6.9587383803027e-06  | 53068.94014541   |
| YHR212C   | 0                    | 53852.2293096158 |
| YHR212W-A | 7.39705086882925e-06 | 200923.700927864 |
| YHR213W   | 0                    | 104462.428946383 |
| YHR213W-A | 4.30970794507157e-06 | 162436.783586487 |
| YHR213W-B | 0                    | 0                |
| YHR214C-B | 2.35482012704846e-05 | 416861.682489799 |
| YHR214C-C | 2.35482012704846e-05 | 416861.682489799 |
| YHR214C-D | 5.10201801429133e-06 | 279808.101491537 |
| YHR214C-E | 4.16635747656491e-05 | 526714.835185061 |
| YHR214W   | 1.17027753305798e-05 | 294294.461593297 |
| YHR214W-A | 5.87449472403412e-05 | 530337.794007643 |
| YHR215W   | 4.16635747656491e-05 | 531344.368275151 |
| YHR216W   | 1.63601029148364e-05 | 182159.489146937 |
| YHR217C   | 2.19965686882873e-05 | 230950.053100754 |
| YHR218W   | 0                    | 84255.8318115105 |
| YHR218W-A | 0                    | 0                |
| YHR219C-A | 0                    | 0                |
| YHR219W   | 5.0422375025283e-06  | 122892.131025108 |
| YIL001W   | 2.81269901752923e-05 | 368139.967049666 |
| YIL002C   | 2.81269901751813e-05 | 368139.967049666 |
| YIL002W-A | 0                    | 77760.1201293042 |
| YIL003W   | 0.000143294552255258 | 304106.676247202 |
| YIL004C   | 0                    | 15118.6149519874 |
| YIL005W   | 8.88179268287992e-06 | 93547.5799834963 |
| YIL006W   | 8.78304567802912e-05 | 270940.926502257 |
| YIL007C   | 8.78304567802912e-05 | 270940.926502257 |
| YIL008W   | 0                    | 53991.1461048309 |
| YIL009C-A | 3.79312325778924e-05 | 295319.065770701 |
| YIL009W   | 0                    | 36097.8374900002 |
| YIL010W   | 0                    | 119870.896380275 |
| YIL011W   | 0                    | 30509.1793665487 |
| YIL012W   | 0                    | 0                |
| YIL013C   | 0                    | 0                |
| YIL014C-A | 0                    | 0                |
| YIL014W   | 6.7457134163007e-06  | 26418.717515951  |
| YIL015W   | 1.11385554090182e-05 | 338409.269069553 |
| YIL016W   | 2.35721009325118e-05 | 220056.739725578 |
| YIL017C   | 2.35721009325118e-05 | 220056.739725578 |
| YIL018W   | 2.22406419092547e-05 | 248712.24983954  |
| YIL019W   | 0.000153419660811394 | 515054.993822299 |
| YIL020C   | 0.000153419660811505 | 515054.993822299 |
| YIL021C-A | 4.69127502089606e-06 | 84636.8796796451 |
| YIL021W   | 1.00400594269523e-05 | 59157.0464422537 |
| YIL022W   | 7.32271340707635e-05 | 257340.751095604 |
| YIL023C   | 4.27623374810171e-06 | 49527.2304490677 |



|           |                      |                  |
|-----------|----------------------|------------------|
| YIL024C   | 0                    | 0                |
| YIL025C   | 0                    | 0                |
| YIL026C   | 4.32165982089394e-06 | 119182.373034081 |
| YIL027C   | 1.44300568782896e-05 | 200771.866140648 |
| YIL028W   | 5.89989010835179e-05 | 382685.728208392 |
| YIL029C   | 1.38125987992899e-05 | 76513.7305921797 |
| YIL030C   | 0.000153948151430883 | 411800.882997176 |
| YIL031W   | 2.86118956849268e-05 | 359976.902188882 |
| YIL032C   | 2.86118956849268e-05 | 359976.902188882 |
| YIL033C   | 0                    | 15557.1714862061 |
| YIL034C   | 4.30896169401063e-06 | 103522.065609354 |
| YIL035C   | 1.592647951143e-05   | 168083.053518814 |
| YIL036W   | 8.07344657011155e-05 | 547486.570881383 |
| YIL037C   | 8.07344657011155e-05 | 560606.428000102 |
| YIL038C   | 1.98526544455957e-05 | 194605.591509055 |
| YIL039W   | 2.52378040191958e-05 | 338705.789970972 |
| YIL040W   | 3.14720340192087e-05 | 199324.432499791 |
| YIL041W   | 0.000102479095959618 | 341474.466842807 |
| YIL042C   | 0.000102479095959618 | 341474.466842807 |
| YIL043C   | 0                    | 0                |
| YIL044C   | 8.73068990006054e-05 | 245505.69844854  |
| YIL045W   | 0                    | 57669.5997228736 |
| YIL046W   | 0                    | 0                |
| YIL046W-A | 4.67420344673064e-05 | 454402.999023538 |
| YIL047C   | 4.67420344673064e-05 | 454402.999023538 |
| YIL048W   | 4.37287023821176e-05 | 238256.714037889 |
| YIL049W   | 0                    | 31272.6375727202 |
| YIL050W   | 0                    | 22395.174225795  |
| YIL051C   | 0.000103170019389087 | 304294.511020102 |
| YIL052C   | 4.94884696244924e-06 | 169744.349278697 |
| YIL053W   | 0                    | 49857.6396590688 |
| YIL054W   | 1.39419744626945e-05 | 344852.245285497 |
| YIL055C   | 0                    | 27529.1320708828 |
| YIL056W   | 3.67396391621755e-05 | 307898.854668808 |
| YIL057C   | 4.32669651151407e-06 | 35007.8518688021 |
| YIL058W   | 0                    | 0                |
| YIL059C   | 2.60878282667409e-05 | 243790.787005754 |
| YIL060W   | 9.0166851234641e-05  | 533883.811120962 |
| YIL061C   | 5.98568587280024e-05 | 512468.251892545 |
| YIL062C   | 7.94032908613129e-06 | 48334.3725802892 |
| YIL063C   | 0                    | 42654.3020781964 |
| YIL064W   | 0                    | 0                |
| YIL065C   | 0                    | 0                |
| YIL066C   | 1.15435741641079e-05 | 353696.406609998 |
| YIL067C   | 0                    | 0                |
| YIL068C   | 0                    | 0                |
| YIL068W-A | 2.12901927990616e-05 | 267569.363218972 |
| YIL069C   | 2.12901927989506e-05 | 268949.274227623 |
| YIL070C   | 0                    | 58378.1253316436 |
| YIL071C   | 4.22770926999938e-06 | 70062.3476148849 |
| YIL071W-A | 0                    | 14943.3670568837 |
| YIL072W   | 0                    | 91743.4120235813 |
| YIL073C   | 1.46317319520417e-05 | 196066.503555712 |
| YIL074C   | 3.40458902776675e-05 | 319026.381663943 |

YIL075C 0 22951.0897871041  
YIL076W 8.29361117016258e-06 119529.460321841  
YIL077C 2.00579892355446e-05 205924.472366092  
YIL078W 0.000203618238582726 780612.364977248  
YIL079C 0.00020361823858317 780612.364977248  
YIL080W 5.84526585432066e-05 625774.088534926  
YIL082W 5.84526585432066e-05 625774.088534926  
YIL082W-A 5.84526585432066e-05 625774.088534926  
YIL083C 3.20457109705963e-05 740421.660729787  
YIL084C 0 69051.0648895117  
YIL085C 0 27525.1739422581  
YIL086C 0 0  
YIL087C 0 0  
YIL088C 1.06197761535753e-05 105220.108071724  
YIL089W 0 104758.283214765  
YIL090W 6.01151260248844e-06 46574.1965602064  
YIL091C 6.01151260248844e-06 46574.1965602064  
YIL092W 1.27506959423096e-05 172057.149161893  
YIL093C 1.27506959423096e-05 172057.149161893  
YIL094C 0.000106646141504463 406494.820224118  
YIL095W 5.25058122036182e-06 115707.42078913  
YIL096C 2.17653179972466e-05 201342.200203643  
YIL097W 0 0  
YIL098C 0 0  
YIL099W 4.56240498095672e-05 236157.359712057  
YIL100C-A 4.56240498095672e-05 236157.359712057  
YIL100W 0 142677.408932792  
YIL101C 0 0  
YIL102C 3.7240702437713e-05 567521.850205466  
YIL102C-A 0.000112423915340942 523028.97238823  
YIL103W 0 50093.5171779232  
YIL104C 0 50093.5171779232  
YIL105C 1.43052532501908e-05 187308.426330424  
YIL105W-A 3.91736350784377e-05 444006.836832167  
YIL106W 2.09768018959444e-05 273994.262008392  
YIL107C 2.09768018959444e-05 273994.262008392  
YIL108W 1.12309594831883e-05 230423.712827844  
YIL109C 6.12618829243239e-06 207824.931467736  
YIL110W 1.30715566544204e-05 160637.340976882  
YIL111W 5.98710904132771e-05 532105.072900104  
YIL112W 2.14229731734239e-05 321606.117175054  
YIL113W 5.02473270876935e-05 222417.935693108  
YIL114C 5.02473270876935e-05 222417.935693108  
YIL115C 4.75985430792303e-06 204725.768126235  
YIL115W-A 0 92369.455152246  
YIL116W 0.000391342544597273 1363503.43806653  
YIL117C 9.80206781009407e-06 303231.118390374  
YIL118W 4.79073683534725e-06 117488.271823866  
YIL119C 3.58315999723358e-05 276577.541264627  
YIL120W 0 0  
YIL121W 8.48819170340409e-06 360528.729756213  
YIL122W 0 32532.9183587427  
YIL123W 0 117081.02096056  
YIL124W 0 128281.927485372

|           |                      |                  |
|-----------|----------------------|------------------|
| YIL125W   | 4.8403532725283e-06  | 227453.300071499 |
| YIL126W   | 1.07237775228697e-05 | 138111.959839311 |
| YIL127C   | 1.07237775228697e-05 | 138111.959839311 |
| YIL128W   | 0.000231688691589071 | 714630.526031342 |
| YIL129C   | 0.000231688691589071 | 714630.526031342 |
| YIL130W   | 1.54682163820974e-05 | 162831.847100531 |
| YIL131C   | 1.54682163820974e-05 | 162831.847100531 |
| YIL132C   | 2.17653179972466e-05 | 138301.248441806 |
| YIL133C   | 5.08735902016166e-06 | 32050.9886115974 |
| YIL134C-A | 2.02353725788917e-05 | 535092.221776692 |
| YIL134W   | 5.20438416743429e-05 | 315602.267989933 |
| YIL135C   | 0                    | 0                |
| YIL136W   | 1.65112453880401e-05 | 430554.802758067 |
| YIL137C   | 1.22460609739417e-05 | 199556.913470316 |
| YIL138C   | 1.15435741641079e-05 | 155123.121838349 |
| YIL139C   | 4.04789363828151e-05 | 150664.534339838 |
| YIL140W   | 3.05877571903368e-05 | 470202.718048863 |
| YIL141W   | 3.05877571903368e-05 | 457082.860930144 |
| YIL142W   | 1.2844801806744e-05  | 225400.564600475 |
| YIL143C   | 0                    | 31038.5459435037 |
| YIL144W   | 2.38304339471584e-05 | 162714.506108047 |
| YIL145C   | 2.09768018959444e-05 | 239239.171057536 |
| YIL146C   | 2.68022888213482e-05 | 258262.580985142 |
| YIL147C   | 0                    | 92033.3867941282 |
| YIL148W   | 5.08735902016166e-06 | 32444.3289331384 |
| YIL149C   | 5.08735902016166e-06 | 32444.3289331384 |
| YIL150C   | 7.30440551579559e-05 | 607109.418086637 |
| YIL151C   | 0                    | 40253.2725951783 |
| YIL152W   | 3.75334651880888e-05 | 359974.125473275 |
| YIL153W   | 0                    | 32314.7932714097 |
| YIL154C   | 0                    | 32314.7932714097 |
| YIL155C   | 0                    | 0                |
| YIL156W   | 4.30800867357028e-06 | 22055.4982420856 |
| YIL156W-A | 0                    | 0                |
| YIL156W-B | 0                    | 12860.2996218798 |
| YIL158W   | 0                    | 22566.2502101117 |
| YIL159W   | 1.44296299483537e-05 | 291914.374036589 |
| YIL160C   | 1.44296299483537e-05 | 291914.374036589 |
| YIL161W   | 1.61403137942662e-05 | 210173.728531659 |
| YIL162W   | 0                    | 0                |
| YIL163C   | 0                    | 0                |
| YIL164C   | 0.000298125403319749 | 675525.727097154 |
| YIL165C   | 0                    | 0                |
| YIL166C   | 7.48659032171473e-05 | 516028.964281009 |
| YIL167W   | 0                    | 17708.9817475262 |
| YIL168W   | 4.60516053384374e-05 | 443025.669279677 |
| YIL169C   | 3.06086046253373e-05 | 269409.06743839  |
| YIL171W   | 0                    | 201554.304844799 |
| YIL172C   | 0                    | 69830.6442984146 |
| YIL173W   | 6.00564386799007e-06 | 333229.100848759 |
| YIL174W   | 3.6457120320299e-05  | 65530.3274498227 |
| YIL175W   | 0                    | 0                |
| YIL176C   | 0                    | 0                |
| YIL177C   | 0                    | 43741.8888544748 |

YIL177W-A 4.39885702085974e-06 45407.8247201303  
YIR001C 2.990861881913e-05 414256.647282093  
YIR002C 6.9587383803027e-06 85715.6757057623  
YIR003W 6.9587383803027e-06 85715.6757057623  
YIR004W 5.45597952472665e-06 161114.981481255  
YIR005W 5.68859167293656e-05 230446.382192652  
YIR006C 4.83021977282228e-06 182607.670107273  
YIR007W 0 23635.0243866806  
YIR008C 0 11146.2458481482  
YIR009W 0 11146.2458481482  
YIR010W 0 53220.5381815699  
YIR011C 0 7292.7081589256  
YIR012W 0 7292.7081589256  
YIR013C 3.07206950024286e-05 319870.582226359  
YIR014W 3.68493190847641e-05 473044.892354571  
YIR015W 0 0  
YIR016W 0 10675.403921614  
YIR017C 0.000180032408032993 590954.428763175  
YIR017W-A 0 85680.2647409845  
YIR018C-A 3.67973427999324e-05 446607.01386936  
YIR018W 0.000180032408033104 590954.428763175  
YIR019C 3.03974202335855e-05 370619.888990975  
YIR020C 2.60580457122073e-05 179967.063472817  
YIR020C-B 0 0  
YIR020W-A 2.60580457120962e-05 179967.063472817  
YIR021W 3.54133099198517e-05 633531.66998984  
YIR021W-A 2.65636945022685e-05 187813.162941456  
YIR022W 0 0  
YIR023C-A 0 0  
YIR023W 5.38951078790095e-05 277026.80486714  
YIR024C 1.40875520928674e-05 203115.551763909  
YIR025W 1.40875520928674e-05 203115.551763909  
YIR026C 4.72344597075569e-05 265210.476217551  
YIR027C 0 49398.2268578243  
YIR028W 4.14027185047239e-06 105613.907908397  
YIR029W 1.17730135767991e-05 218935.778541386  
YIR030C 3.67889898882368e-05 303766.209656123  
YIR030W-A 5.08735902016166e-06 27680.9513598873  
YIR031C 7.89655944115619e-05 342846.284971537  
YIR032C 1.44314004186796e-05 340121.232006382  
YIR033W 1.44314004186796e-05 340121.232006382  
YIR034C 0.000308536113619695 713872.258903465  
YIR035C 0 21364.7310335262  
YIR036C 9.08681517075571e-06 150241.515962768  
YIR037W 4.66031559243074e-06 133322.66099082  
YIR038C 2.00917755217578e-05 213382.817073441  
YIR039C 0 37784.2916967667  
YIR040C 8.37354912335275e-05 214810.53361276  
YIR041W 8.37354912335275e-05 214810.53361276  
YIR042C 0 30035.0616026586  
YIR043C 1.47433402317709e-05 55149.2406034558  
YIR044C 2.52357758504518e-05 402306.878778748  
YJL001W 5.02734467594523e-05 353032.823736822  
YJL002C 5.02734467594523e-05 353032.823736822

|           |                      |                  |
|-----------|----------------------|------------------|
| YJL003W   | 7.52700530097794e-05 | 142356.184303994 |
| YJL004C   | 7.52700530097794e-05 | 142356.184303994 |
| YJL005W   | 1.3406269178895e-05  | 72413.4575135275 |
| YJL006C   | 2.54513728390471e-05 | 311934.076214345 |
| YJL007C   | 0                    | 14943.3670568837 |
| YJL008C   | 7.0405431342957e-05  | 460288.364996489 |
| YJL009W   | 0                    | 10263.272794694  |
| YJL010C   | 1.27506959423096e-05 | 219299.14828696  |
| YJL011C   | 0.000149722817463172 | 360351.804996341 |
| YJL012C   | 2.26743346825042e-05 | 244922.155050532 |
| YJL013C   | 0                    | 25274.9035153752 |
| YJL014W   | 0                    | 0                |
| YJL015C   | 0                    | 0                |
| YJL016W   | 0                    | 77610.6428250812 |
| YJL019W   | 1.05327871616767e-05 | 462845.714927753 |
| YJL020C   | 1.05327871616767e-05 | 462845.714927753 |
| YJL023C   | 6.44983105591024e-06 | 25331.9480698822 |
| YJL024C   | 7.2592846247943e-05  | 356302.113450074 |
| YJL025W   | 1.65098233824157e-05 | 149735.159089535 |
| YJL026C-A | 1.65098233824157e-05 | 136166.087430637 |
| YJL026W   | 0                    | 0                |
| YJL027C   | 0                    | 0                |
| YJL028W   | 0                    | 139091.552380351 |
| YJL029C   | 0                    | 139091.552380351 |
| YJL030W   | 0                    | 0                |
| YJL031C   | 0                    | 0                |
| YJL032W   | 0                    | 41212.3589467586 |
| YJL033W   | 2.26278830781634e-05 | 208722.389657628 |
| YJL034W   | 1.53282596078164e-05 | 139045.681702183 |
| YJL035C   | 1.53282596078164e-05 | 139045.681702183 |
| YJL036W   | 0                    | 75645.3016344095 |
| YJL037W   | 0.000104501937508106 | 729770.634023451 |
| YJL038C   | 2.38920363000439e-05 | 162771.738539032 |
| YJL039C   | 0                    | 59820.8156143056 |
| YJL041W   | 8.29361117016258e-06 | 75422.8055121485 |
| YJL042W   | 0                    | 9982.6337771607  |
| YJL043W   | 5.80930342031216e-06 | 79067.9413893741 |
| YJL044C   | 5.80930342031216e-06 | 79067.9413893741 |
| YJL045W   | 2.35000296896493e-05 | 208012.420760138 |
| YJL046W   | 3.40479946216998e-05 | 274112.593753253 |
| YJL047C   | 3.40479946218109e-05 | 274112.593753253 |
| YJL047C-A | 4.75985430792303e-06 | 201816.730584323 |
| YJL048C   | 1.04556465997385e-05 | 45526.8452990088 |
| YJL049W   | 0                    | 10263.272794694  |
| YJL050W   | 0.000160255296354106 | 400949.502657483 |
| YJL051W   | 3.48224246827789e-05 | 210144.027689067 |
| YJL052C-A | 1.00400594269523e-05 | 62630.6826571191 |
| YJL052W   | 1.00400594269523e-05 | 62630.6826571191 |
| YJL053W   | 2.0547518810643e-05  | 96220.0194150523 |
| YJL054W   | 1.59823212836363e-05 | 132455.584305681 |
| YJL055W   | 5.47523961719198e-05 | 331364.654173484 |
| YJL056C   | 5.47523961716978e-05 | 331364.654173484 |
| YJL057C   | 0                    | 238110.238249531 |
| YJL058C   | 2.9729818610047e-05  | 299631.820835437 |

|           |                      |                  |
|-----------|----------------------|------------------|
| YJL059W   | 5.08735902016166e-06 | 29926.4254176086 |
| YJL060W   | 7.82613439664903e-05 | 604611.41731058  |
| YJL061W   | 0                    | 21490.0392518307 |
| YJL062W   | 0                    | 90844.0529255196 |
| YJL062W-A | 5.10201801429133e-06 | 114861.948258521 |
| YJL063C   | 5.10201801429133e-06 | 114861.948258521 |
| YJL064W   | 2.48586402757933e-05 | 340015.299599173 |
| YJL065C   | 9.83730688564055e-06 | 169917.71148507  |
| YJL066C   | 1.63495326174212e-05 | 119942.70755308  |
| YJL067W   | 0                    | 93557.353942173  |
| YJL068C   | 2.54724860843103e-05 | 170271.065208922 |
| YJL069C   | 2.18782907581705e-05 | 300417.758530778 |
| YJL070C   | 9.28159293200892e-06 | 196219.524593963 |
| YJL071W   | 0.000189304021096404 | 585012.01841572  |
| YJL072C   | 0.000189304021096515 | 585012.01841572  |
| YJL073W   | 5.08735902016166e-06 | 97190.562766531  |
| YJL074C   | 5.08735902016166e-06 | 97190.562766531  |
| YJL075C   | 0                    | 0                |
| YJL076W   | 0                    | 21244.438728344  |
| YJL077C   | 0                    | 21244.438728344  |
| YJL077W-A | 0                    | 0                |
| YJL077W-B | 0                    | 0                |
| YJL078C   | 0                    | 0                |
| YJL079C   | 9.20624907090328e-05 | 238009.390615883 |
| YJL080C   | 2.08364484609591e-05 | 80757.3848386668 |
| YJL081C   | 0                    | 0                |
| YJL082W   | 1.05433107883135e-05 | 254007.942966982 |
| YJL083W   | 2.61741321193609e-05 | 518497.646201638 |
| YJL084C   | 8.77426845050655e-05 | 416724.071170442 |
| YJL085W   | 1.574886012079e-05   | 228875.9494583   |
| YJL087C   | 0                    | 29733.6185919743 |
| YJL088W   | 0.000350915203867985 | 952369.085444602 |
| YJL089W   | 0.000140267464689425 | 775292.727013088 |
| YJL090C   | 6.37334904178832e-05 | 378291.009180919 |
| YJL091C   | 4.14027185047239e-06 | 156465.852430628 |
| YJL092W   | 0                    | 122950.622190181 |
| YJL093C   | 0                    | 133213.894984875 |
| YJL094C   | 0                    | 22867.5017413644 |
| YJL095W   | 6.00808816075826e-06 | 80005.9933413044 |
| YJL096W   | 0                    | 0                |
| YJL097W   | 0                    | 62065.6506241916 |
| YJL098W   | 2.45182992641979e-05 | 136642.460346099 |
| YJL099W   | 0                    | 37145.6349487752 |
| YJL100W   | 0                    | 46422.4994236215 |
| YJL101C   | 0.000118574080462341 | 457629.454494253 |
| YJL102W   | 4.22770926999938e-06 | 62843.2407392039 |
| YJL103C   | 4.22770926999938e-06 | 62843.2407392039 |
| YJL104W   | 3.55212776840252e-05 | 266094.155616849 |
| YJL105W   | 0                    | 34159.9731724259 |
| YJL106W   | 0                    | 78525.9794309985 |
| YJL107C   | 6.19960458516644e-05 | 530488.439744731 |
| YJL109C   | 2.79596349851419e-05 | 224164.131880621 |
| YJL110C   | 1.19411821533078e-05 | 152908.327705908 |
| YJL111W   | 1.23989781883882e-05 | 241284.024512635 |

|           |                      |                  |
|-----------|----------------------|------------------|
| YJL112W   | 6.19027688729679e-05 | 380036.784327013 |
| YJL113W   | 0.000104145827627966 | 1112385.97669229 |
| YJL114W   | 0.000104145827627966 | 1112385.97669229 |
| YJL115W   | 0                    | 0                |
| YJL116C   | 0                    | 27757.7325572553 |
| YJL117W   | 0                    | 21337.4923434209 |
| YJL118W   | 0                    | 0                |
| YJL119C   | 0                    | 12602.7177057656 |
| YJL121C   | 0                    | 0                |
| YJL122W   | 4.27623374810171e-06 | 39920.3845019873 |
| YJL123C   | 4.27623374810171e-06 | 39920.3845019873 |
| YJL124C   | 1.592647951143e-05   | 174546.385051492 |
| YJL125C   | 4.30800867357028e-06 | 43938.088869929  |
| YJL126W   | 2.46877055888328e-05 | 81947.0922817984 |
| YJL127C   | 2.46877055888328e-05 | 81947.0922817984 |
| YJL127C-B | 6.76171209528231e-05 | 303298.890689363 |
| YJL127W-A | 0                    | 0                |
| YJL128C   | 0                    | 0                |
| YJL129C   | 3.76568481503803e-05 | 89525.5414365136 |
| YJL130C   | 0.000141562605748602 | 490018.116236266 |
| YJL131C   | 0                    | 14886.3225023767 |
| YJL132W   | 1.66781834883833e-05 | 306484.88694242  |
| YJL133C-A | 5.6921490153572e-05  | 576273.781892973 |
| YJL133W   | 3.56634144214052e-05 | 575074.585808558 |
| YJL134W   | 0                    | 0                |
| YJL135W   | 0                    | 0                |
| YJL136C   | 0                    | 0                |
| YJL136W-A | 0                    | 0                |
| YJL137C   | 0                    | 0                |
| YJL138C   | 0                    | 92499.2083144087 |
| YJL139C   | 4.42652020726797e-06 | 136413.547246637 |
| YJL140W   | 4.60550317825659e-05 | 413091.334229994 |
| YJL141C   | 5.25045657915335e-05 | 384210.022179122 |
| YJL143W   | 3.18856666847722e-05 | 69009.2017099492 |
| YJL144W   | 0                    | 0                |
| YJL145W   | 3.1165087973406e-05  | 185580.895466173 |
| YJL146W   | 4.53162453268874e-05 | 447763.22042836  |
| YJL147C   | 0.000102743938802052 | 764423.740464986 |
| YJL148W   | 2.67775699431816e-05 | 247358.914791418 |
| YJL149W   | 0                    | 0                |
| YJL150W   | 4.54996446919154e-06 | 0                |
| YJL151C   | 4.54996446919154e-06 | 0                |
| YJL152W   | 4.94884696244924e-06 | 112504.895041971 |
| YJL153C   | 4.94884696244924e-06 | 123712.0817482   |
| YJL154C   | 5.0422375025283e-06  | 108984.553622419 |
| YJL155C   | 0                    | 14264.6701988879 |
| YJL156C   | 0                    | 0                |
| YJL156W-A | 4.17310205413912e-06 | 140558.938849726 |
| YJL157C   | 4.17310205413912e-06 | 140558.938849726 |
| YJL158C   | 1.11104156741426e-05 | 124785.918441367 |
| YJL159W   | 0                    | 37827.9597872331 |
| YJL160C   | 0.00015727590355652  | 581364.469841312 |
| YJL161W   | 0                    | 27627.5761225436 |
| YJL162C   | 0                    | 13081.1782191541 |

|         |                      |                  |  |
|---------|----------------------|------------------|--|
| YJL163C | 0                    | 11616.1296341304 |  |
| YJL164C | 2.92603088130061e-05 | 376581.768049124 |  |
| YJL165C | 0                    | 27625.2927786002 |  |
| YJL166W | 1.13444806677521e-05 | 116613.782221612 |  |
| YJL167W | 5.0422375025283e-06  | 293268.237330219 |  |
| YJL168C | 5.0422375025283e-06  | 239060.065958993 |  |
| YJL169W | 9.03984015753201e-05 | 523616.938489346 |  |
| YJL170C | 9.03984015752091e-05 | 523616.938489346 |  |
| YJL171C | 0                    | 0                |  |
| YJL172W | 9.17183700545054e-05 | 565163.354877773 |  |
| YJL173C | 8.68931138781059e-05 | 689253.781472977 |  |
| YJL174W | 4.30896169401063e-06 | 116911.178683805 |  |
| YJL176C | 0                    | 0                |  |
| YJL177W | 9.414033520172e-06   | 124577.209609956 |  |
| YJL178C | 4.46337970749777e-06 | 89569.3577411538 |  |
| YJL179W | 0                    | 42084.7614056383 |  |
| YJL180C | 0                    | 42084.7614056383 |  |
| YJL181W | 9.72798011822373e-06 | 75723.4727792571 |  |
| YJL183W | 1.7960765140046e-05  | 162552.616687901 |  |
| YJL184W | 2.95384944020149e-05 | 111823.665603113 |  |
| YJL185C | 2.95384944020149e-05 | 111823.665603113 |  |
| YJL186W | 0                    | 27072.2283807307 |  |
| YJL187C | 0                    | 64528.701576118  |  |
| YJL188C | 0                    | 95226.0394762706 |  |
| YJL189W | 0                    | 43513.8849449224 |  |
| YJL190C | 2.12998355796357e-05 | 111245.405734885 |  |
| YJL191W | 0                    | 122685.911941383 |  |
| YJL192C | 0                    | 122685.911941383 |  |
| YJL193W | 9.06879549189554e-06 | 177681.946229126 |  |
| YJL194W | 1.05972291476464e-05 | 210325.498262533 |  |
| YJL196C | 1.05972291476464e-05 | 210325.498262533 |  |
| YJL197W | 0                    | 49211.4101728035 |  |
| YJL198W | 7.56933319963071e-05 | 444154.23676768  |  |
| YJL199C | 5.61702379717754e-05 | 226342.643431573 |  |
| YJL200C | 0.000263255652192651 | 452178.735787566 |  |
| YJL201W | 0                    | 0                |  |
| YJL202C | 0                    | 0                |  |
| YJL203W | 0                    | 0                |  |
| YJL204C | 0                    | 0                |  |
| YJL205C | 0                    | 13930.6859273356 |  |
| YJL206C | 0                    | 37313.8158407482 |  |
| YJL207C | 0                    | 0                |  |
| YJL208C | 6.01151260248844e-06 | 115795.24656562  |  |
| YJL209W | 0                    | 50952.6086804443 |  |
| YJL210W | 0.000136433483527543 | 438290.466026687 |  |
| YJL212C | 0.000136433483527543 | 565199.620312944 |  |
| YJL213W | 5.31275798445474e-05 | 497816.725320137 |  |
| YJL214W | 6.31009540319472e-06 | 88289.7678616096 |  |
| YJL215C | 6.31009540319472e-06 | 88289.7678616096 |  |
| YJL216C | 7.88945451184464e-05 | 337550.686605052 |  |
| YJL217W | 5.10201801429133e-06 | 128660.134850436 |  |
| YJL218W | 3.29015918303366e-05 | 595603.459351631 |  |
| YJL219W | 0                    | 201554.304844799 |  |
| YJL221C | 0                    | 69830.6442984146 |  |



YJL222W 6.00564386799007e-06 333229.100848759  
YJL222W-A 5.36522263812067e-05 272128.301034021  
YJL222W-B 1.71957329677674e-05 206597.973584199  
YJL223C 1.71957329677674e-05 206597.973584199  
YJL225C 0 43741.8888544748  
YJL225W-A 4.39885702085974e-06 45407.8247201303  
YJR001W 5.8492132073984e-05 270685.231533736  
YJR002W 4.30800867357028e-06 57839.791825518  
YJR003C 0 67586.9637623126  
YJR004C 8.63563956199354e-06 418631.385838014  
YJR005C-A 4.35442507396022e-06 216622.548238734  
YJR005W 0 25993.6881017524  
YJR006W 4.35442507396022e-06 216622.548238734  
YJR007W 0 199124.540783246  
YJR008W 7.12261482039844e-05 348133.284618299  
YJR009C 7.39705086882925e-06 473154.091787667  
YJR010C-A 2.59757966851737e-05 384321.585789849  
YJR010W 6.70824888064914e-05 685484.790179296  
YJR011C 0 62746.3042703371  
YJR014W 4.92506847160623e-06 115331.289688427  
YJR015W 0 39425.3851155518  
YJR016C 0.000287378131484939 582001.888357892  
YJR017C 0 57727.0815945086  
YJR018W 0.000287378131484939 582001.888357892  
YJR019C 5.10201801429133e-06 32220.2869699225  
YJR021C 0 15165.3508741794  
YJR022W 0 0  
YJR023C 0 0  
YJR024C 0 29506.1721890621  
YJR025C 0.000216582625629291 626204.015425048  
YJR026W 2.81520471572261e-05 495017.945573655  
YJR027W 2.81520471572261e-05 495017.945573655  
YJR028W 8.58405261290329e-05 471535.912834682  
YJR029W 8.58405261290329e-05 471535.912834682  
YJR030C 4.95629738617165e-06 214354.000699344  
YJR031C 0 23476.4789146299  
YJR032W 0 23476.4789146299  
YJR033C 0 0  
YJR034W 0 0  
YJR035W 2.02228704833107e-05 219630.298016371  
YJR036C 3.18856666847722e-05 174259.358013962  
YJR039W 3.18856666847722e-05 174259.358013963  
YJR040W 3.23016862180392e-05 106966.04766843  
YJR041C 3.83245803411425e-05 247733.201515641  
YJR042W 3.83245803410315e-05 247733.201515641  
YJR043C 0 176848.010426218  
YJR044C 1.83916114471216e-05 156216.948263162  
YJR045C 0 276816.027222177  
YJR046W 0 276816.027222177  
YJR047C 0 20375.6891173643  
YJR048W 4.12585849368652e-05 210250.869545027  
YJR049C 2.04376314145716e-05 217760.539398689  
YJR050W 2.04376314145716e-05 217760.539398689  
YJR051W 3.50181960871998e-05 242319.493381782

|           |                      |                  |
|-----------|----------------------|------------------|
| YJR052W   | 4.34293384092843e-05 | 273121.624885092 |
| YJR053W   | 7.52700530097794e-05 | 149046.879321113 |
| YJR054W   | 0                    | 51635.3214227238 |
| YJR055W   | 0                    | 96533.3426344693 |
| YJR056C   | 4.30896169401063e-06 | 137562.29155926  |
| YJR057W   | 3.65003425327748e-05 | 491191.361710799 |
| YJR058C   | 1.63495326174212e-05 | 159910.022030348 |
| YJR059W   | 1.63495326174212e-05 | 273599.31980325  |
| YJR060W   | 1.17027753305798e-05 | 228834.650961044 |
| YJR061W   | 0                    | 113508.439541615 |
| YJR062C   | 0                    | 130077.924526088 |
| YJR063W   | 0                    | 130077.924526088 |
| YJR064W   | 8.87123742698837e-06 | 113235.556713723 |
| YJR065C   | 0.000114948136326731 | 354391.963370419 |
| YJR066W   | 0.000114948136326842 | 354391.963370419 |
| YJR067C   | 0                    | 12824.4957852458 |
| YJR068W   | 0                    | 12824.4957852458 |
| YJR069C   | 0                    | 46977.972032199  |
| YJR070C   | 0                    | 16650.7465597878 |
| YJR072C   | 0                    | 0                |
| YJR073C   | 0                    | 82378.7709277683 |
| YJR074W   | 0                    | 82378.7709277683 |
| YJR075W   | 0                    | 44242.004931071  |
| YJR076C   | 5.10201801429133e-06 | 96237.238105574  |
| YJR077C   | 0                    | 128452.176100449 |
| YJR078W   | 4.12168010975877e-05 | 392418.144587694 |
| YJR080C   | 2.81630928187226e-05 | 174993.136404299 |
| YJR082C   | 0                    | 33893.5964209223 |
| YJR083C   | 0                    | 0                |
| YJR084W   | 0                    | 0                |
| YJR085C   | 5.48840875236323e-06 | 262543.320043542 |
| YJR086W   | 5.48840875236323e-06 | 357465.181843678 |
| YJR087W   | 0                    | 146402.507462575 |
| YJR088C   | 0                    | 136097.808140669 |
| YJR089W   | 0                    | 136097.808140669 |
| YJR090C   | 3.81102132698263e-05 | 270419.395426345 |
| YJR091C   | 1.43052532501908e-05 | 180221.073507041 |
| YJR092W   | 1.43052532501908e-05 | 180221.073507041 |
| YJR093C   | 7.39705086882925e-06 | 198480.422455107 |
| YJR094C   | 0.00014816860200606  | 424212.253525999 |
| YJR094W-A | 7.5098783829386e-06  | 285698.929112601 |
| YJR095W   | 0.000269030504816414 | 838045.001358298 |
| YJR096W   | 1.39691065181857e-05 | 65533.9039306074 |
| YJR097W   | 2.45182992641979e-05 | 243925.44835727  |
| YJR098C   | 2.17188088376119e-05 | 170155.098962728 |
| YJR099W   | 2.17188088376119e-05 | 170155.098962728 |
| YJR100C   | 0                    | 27072.2283807307 |
| YJR101W   | 0                    | 45241.183115554  |
| YJR102C   | 0                    | 106436.355264111 |
| YJR103W   | 5.10851219626129e-06 | 45235.2040529276 |
| YJR104C   | 3.90630294072603e-05 | 292702.922722156 |
| YJR105W   | 7.38471392480733e-05 | 490779.565779133 |
| YJR106W   | 0                    | 0                |
| YJR107W   | 7.48834913844032e-06 | 232929.072382882 |

YJR108W 0 15557.1714862061  
YJR109C 0.000523928648788363 1100778.73426578  
YJR110W 0.000518843929313784 1060029.32599071  
YJR111C 0.000157210070773406 361207.368048432  
YJR112W 0.000157210070773406 361207.368048432  
YJR112W-A 1.16536536822753e-05 142799.836926027  
YJR113C 0 198798.653037974  
YJR114W 0 0  
YJR115W 0 154963.518703532  
YJR116W 1.59585696803966e-05 192443.828304834  
YJR117W 1.82354214245395e-05 179267.380672568  
YJR118C 0 11317.608399709  
YJR119C 1.19634643599431e-05 222996.360500538  
YJR120W 2.54068899744331e-05 234971.989367651  
YJR121W 0 0  
YJR122W 0.000117689532262766 436504.074892465  
YJR123W 0 25455.963961193  
YJR124C 3.46031144776715e-05 212501.085836276  
YJR125C 4.75985430792303e-06 207893.769764805  
YJR126C 0 10337.3490092056  
YJR127C 9.97964568982823e-06 43792.536992549  
YJR129C 0 45461.331112274  
YJR130C 0.000195128424626767 795102.976988979  
YJR131W 0.000195128424626656 795102.97698898  
YJR132W 0 119116.927492218  
YJR133W 4.23240566282956e-06 71428.092319128  
YJR134C 0 31351.3228223546  
YJR135C 1.17027753305798e-05 131602.633789195  
YJR135W-A 1.17027753305798e-05 131602.633789195  
YJR136C 4.55544700258548e-05 253937.294517314  
YJR137C 0.000245841375513756 532392.555171736  
YJR138W 7.93780994329252e-05 555001.503907336  
YJR139C 8.3731485983618e-06 387091.619721046  
YJR140C 0 0  
YJR140W-A 4.26523664642797e-06 120853.532194847  
YJR141W 0 0  
YJR142W 1.57527005198999e-05 167859.736116485  
YJR143C 0 59297.8184247585  
YJR144W 0 59297.8184247585  
YJR145C 0 138839.571371673  
YJR146W 0.000163995471999523 704932.043686659  
YJR147W 0 7675.6630672741  
YJR148W 9.96867036673343e-06 260662.96187471  
YJR149W 9.83730688564055e-06 215575.140623804  
YJR150C 1.51726997243973e-05 105304.035142657  
YJR151C 0 109948.95267409  
YJR151W-A 0 17396.8090203141  
YJR152W 4.78533134466996e-05 204243.605690347  
YJR153W 5.36988762597224e-05 300317.90337359  
YJR154W 0.000255282272664914 719759.876926975  
YJR155W 8.542798683564e-06 182846.351150302  
YJR156C 2.51233334785939e-05 251136.708146755  
YJR157W 0.000186702575690201 681169.05466514  
YJR158W 0 79455.263636486

YJR159W 0 56287.541829403  
YJR160C 0.000121858898620264 521783.534874496  
YJR161C 5.0422375025283e-06 349656.333250426  
YJR162C 0 25111.2126438262  
YKL001C 2.52278436145836e-05 267271.204943964  
YKL002W 0 61145.0191850982  
YKL003C 0 61145.0191850982  
YKL004W 0 121686.334186606  
YKL005C 0 132081.637161784  
YKL006C-A 0 71267.8773680498  
YKL006W 0 42673.5465461261  
YKL007W 2.70731348115394e-05 263494.482529084  
YKL008C 1.63495326174212e-05 139628.912406385  
YKL009W 0 13569.0716588989  
YKL010C 0 13569.0716588989  
YKL011C 2.0677973229577e-05 142957.917389776  
YKL012W 1.02572429392378e-05 305832.257026766  
YKL013C 1.02572429392378e-05 305832.257026766  
YKL014C 4.42652020726797e-06 72210.9524773969  
YKL015W 0.000385839075322858 1033864.12944886  
YKL016C 0.000385839075322747 1024061.01582448  
YKL017C 9.74826290234265e-06 228321.813670174  
YKL018C-A 0 23197.0252707531  
YKL018W 0 23197.0252707531  
YKL019W 8.51037242999286e-06 313251.340195386  
YKL020C 8.51037242999286e-06 313251.340195387  
YKL021C 0 0  
YKL022C 0 0  
YKL023C-A 6.26427844837574e-05 446301.191931773  
YKL023W 6.26427844836464e-05 446301.191931773  
YKL024C 0 0  
YKL025C 5.10851219626129e-06 100879.618658452  
YKL026C 8.2091556915076e-05 218549.207585975  
YKL027W 0 10263.272794694  
YKL028W 0 107237.403737958  
YKL029C 5.38317219787032e-05 345534.600721977  
YKL030W 0 0  
YKL031W 4.25289971228704e-06 142956.707905457  
YKL032C 4.25289971228704e-06 142956.707905457  
YKL033W 0 16386.3150703435  
YKL033W-A 7.60049410883923e-05 462909.853482394  
YKL034W 2.04693133819545e-05 410907.396472764  
YKL035W 4.30800867357028e-06 22055.4982420856  
YKL037W 1.00400594269523e-05 102716.372425347  
YKL038W 1.31582461023738e-05 340555.500411813  
YKL039W 1.61039976802613e-05 177968.53333978  
YKL040C 2.12998355796357e-05 99654.4701365006  
YKL041W 2.75526194657427e-05 262193.516654376  
YKL042W 1.55641053831701e-05 242775.306319761  
YKL043W 0 34505.8472145529  
YKL044W 4.46337970749777e-06 25561.7264239907  
YKL045W 0 138572.067514141  
YKL046C 9.65603033520335e-06 145696.02116335  
YKL047W 0 42777.1089146705

|           |                      |                  |  |
|-----------|----------------------|------------------|--|
| YKL048C   | 0                    | 42777.1089146705 |  |
| YKL049C   | 0                    | 45424.9888397623 |  |
| YKL050C   | 0                    | 136046.470857356 |  |
| YKL051W   | 7.10559074542649e-05 | 451167.196708404 |  |
| YKL052C   | 5.17863546924957e-05 | 323985.701967049 |  |
| YKL053C-A | 0                    | 22188.7508871026 |  |
| YKL053W   | 0                    | 22188.7508871026 |  |
| YKL054C   | 4.72589576616667e-06 | 136317.369855181 |  |
| YKL055C   | 1.82324798644329e-05 | 321816.516713328 |  |
| YKL056C   | 0                    | 31393.1777442389 |  |
| YKL057C   | 0                    | 56285.4517475942 |  |
| YKL058W   | 0                    | 23381.0578275262 |  |
| YKL059C   | 4.30896169401063e-06 | 209020.419562544 |  |
| YKL060C   | 5.68415594036642e-05 | 545445.928264663 |  |
| YKL061W   | 0.000132434027441897 | 428257.37369134  |  |
| YKL062W   | 6.44983105591024e-06 | 133549.02509013  |  |
| YKL063C   | 3.95148861267458e-05 | 317886.927989213 |  |
| YKL064W   | 8.86651332415722e-05 | 267042.669838603 |  |
| YKL065C   | 0                    | 12131.901431101  |  |
| YKL065W-A | 0                    | 15377.0565375933 |  |
| YKL066W   | 0                    | 0                |  |
| YKL067W   | 7.94032908613129e-06 | 56112.2663285621 |  |
| YKL068W   | 1.7603641896069e-05  | 271555.113939394 |  |
| YKL068W-A | 0                    | 144966.926967808 |  |
| YKL069W   | 1.0286293083972e-05  | 187015.163183209 |  |
| YKL070W   | 5.7280080970612e-06  | 137470.108648028 |  |
| YKL071W   | 3.094046529728e-05   | 184115.308273846 |  |
| YKL072W   | 8.32892217378367e-05 | 411228.241489539 |  |
| YKL073W   | 0                    | 29053.058330973  |  |
| YKL074C   | 0                    | 29053.058330973  |  |
| YKL075C   | 5.25058122036182e-06 | 141612.293890163 |  |
| YKL077W   | 3.07781413549923e-05 | 84973.2020163052 |  |
| YKL078W   | 1.26716600912236e-05 | 74522.4224810416 |  |
| YKL079W   | 0                    | 0                |  |
| YKL080W   | 8.08702773045233e-05 | 412912.225922521 |  |
| YKL081W   | 1.43052532501908e-05 | 199292.50647476  |  |
| YKL082C   | 1.43052532501908e-05 | 199292.50647476  |  |
| YKL083W   | 0                    | 0                |  |
| YKL084W   | 0                    | 136803.160535136 |  |
| YKL085W   | 0                    | 29846.7806402505 |  |
| YKL086W   | 8.9268719346336e-05  | 264947.147991784 |  |
| YKL087C   | 8.9268719346447e-05  | 264947.147991784 |  |
| YKL088W   | 1.67160090176477e-05 | 141228.208738577 |  |
| YKL089W   | 0                    | 38624.8473828298 |  |
| YKL090W   | 2.47456940765112e-05 | 329236.159976907 |  |
| YKL091C   | 5.99960563775204e-05 | 305915.971845026 |  |
| YKL092C   | 3.14083319234992e-05 | 113761.86340354  |  |
| YKL093W   | 5.19139918608857e-06 | 118924.587525894 |  |
| YKL094W   | 1.44039126169782e-05 | 51291.6554645891 |  |
| YKL095W   | 0                    | 114388.977758113 |  |
| YKL096C-B | 0                    | 0                |  |
| YKL096W   | 2.45189201550922e-05 | 224026.763915648 |  |
| YKL096W-A | 0                    | 0                |  |
| YKL097C   | 0                    | 0                |  |

|           |                      |                  |
|-----------|----------------------|------------------|
| YKL098W   | 0                    |                  |
| YKL099C   | 0                    |                  |
| YKL100C   | 1.07764996609694e-05 | 101087.526111769 |
| YKL100W-A | 0                    | 0                |
| YKL101W   | 0                    | 83725.7401223403 |
| YKL102C   | 0                    | 83725.7401223403 |
| YKL103C   | 6.00808816075826e-06 | 48816.0375003234 |
| YKL104C   | 6.16011981592335e-05 | 352708.92023089  |
| YKL105C   | 0                    | 29143.4755325302 |
| YKL106C-A | 0                    | 14561.0942411687 |
| YKL106W   | 0                    | 14561.0942411687 |
| YKL107W   | 1.73457191500193e-05 | 208272.325019427 |
| YKL108W   | 8.29361117016258e-06 | 101220.681699886 |
| YKL109W   | 0                    | 64406.6242530711 |
| YKL110C   | 7.53160160241739e-05 | 798704.521093486 |
| YKL111C   | 0                    | 0                |
| YKL112W   | 7.12808032271584e-05 | 617317.65792917  |
| YKL113C   | 1.5784034723465e-05  | 246253.438534819 |
| YKL114C   | 1.92705507132684e-05 | 204753.234257187 |
| YKL115C   | 0                    | 38736.1620934937 |
| YKL116C   | 1.70719342141856e-05 | 208373.788118592 |
| YKL117W   | 0                    | 41680.8162837804 |
| YKL119C   | 1.76542179347594e-05 | 256278.442458174 |
| YKL120W   | 5.59319033789363e-05 | 307294.037407116 |
| YKL121W   | 3.14142308435184e-05 | 162767.276553258 |
| YKL122C   | 5.94361575321223e-05 | 677912.348731574 |
| YKL124W   | 6.18318889189506e-05 | 503106.573167862 |
| YKL125W   | 3.38307323792808e-05 | 256192.2542477   |
| YKL126W   | 1.40821004486202e-05 | 268756.643628054 |
| YKL127W   | 2.08017935406923e-05 | 432741.403939695 |
| YKL128C   | 3.50610756287839e-05 | 450456.873458859 |
| YKL129C   | 0                    | 117526.083087745 |
| YKL130C   | 0                    | 29158.3822797963 |
| YKL132C   | 3.89771817651541e-05 | 277574.616305299 |
| YKL133C   | 1.67160090176477e-05 | 211083.380000274 |
| YKL134C   | 7.5098783829386e-06  | 219768.146825852 |
| YKL135C   | 9.54200364465807e-05 | 560139.305794373 |
| YKL136W   | 0                    | 0                |
| YKL137W   | 0                    | 10388.5810129985 |
| YKL138C   | 0                    | 10388.5810129985 |
| YKL138C-A | 1.15518161630801e-05 | 44805.3728900875 |
| YKL139W   | 0                    | 37239.7531792898 |
| YKL140W   | 1.03625820707665e-05 | 202783.44281343  |
| YKL141W   | 0                    | 88811.2248059716 |
| YKL142W   | 0                    | 13213.2243532871 |
| YKL143W   | 0                    | 43240.9482285229 |
| YKL144C   | 0                    | 43240.9482285229 |
| YKL145W   | 8.94554399206715e-05 | 331943.916200371 |
| YKL146W   | 3.67602536457401e-05 | 168120.103952137 |
| YKL148C   | 3.67602536456291e-05 | 168120.103952137 |
| YKL149C   | 0.000152935121292885 | 468358.872907393 |
| YKL150W   | 2.13509636657339e-05 | 301749.658957838 |
| YKL151C   | 2.13509636656228e-05 | 301749.658957838 |
| YKL152C   | 0                    | 179376.43323785  |

YKL153W 0 400159.998013684  
YKL154W 0 52164.2668880206  
YKL155C 0 52164.2668880206  
YKL156C-A 1.67959768107018e-05 272011.365874844  
YKL156W 5.0422375025283e-06 159424.745690502  
YKL157W 3.6497537628688e-05 148335.841935452  
YKL159C 3.6497537628799e-05 129959.995649145  
YKL160W 4.30281959864498e-05 683026.099857347  
YKL161C 4.21213763011075e-05 256223.566414309  
YKL162C 4.99811094123448e-06 171561.625465465  
YKL162C-A 1.13852277845439e-05 139817.962371558  
YKL163W 5.45597952472665e-06 150693.7730445  
YKL164C 2.52184346827278e-05 392385.447138097  
YKL165C 0.000109891940282436 483776.104262994  
YKL165C-A 2.26840188550792e-05 440995.085928213  
YKL166C 0 10584.6803590411  
YKL167C 6.93371970317269e-05 420574.407943578  
YKL168C 0 43223.9345537764  
YKL169C 3.09449647011295e-05 296194.438479548  
YKL170W 1.22142095154709e-05 117581.611252632  
YKL171W 1.54673316355991e-05 247489.406475723  
YKL172W 2.48181594676433e-05 191253.348653587  
YKL173W 0 53048.8800433347  
YKL174C 0 53048.8800433347  
YKL175W 2.65076909208295e-05 275431.833306272  
YKL176C 2.00579892355446e-05 131350.821100808  
YKL178C 1.84193748024031e-05 334631.825523817  
YKL179C 5.6516535469564e-05 475477.757813478  
YKL180W 0 21458.503782317  
YKL181W 0 93963.0000331131  
YKL182W 0 78956.2907589959  
YKL183C-A 0 0  
YKL183W 0 0  
YKL184W 1.43052532501908e-05 137944.416347946  
YKL185W 0 91005.8845487192  
YKL186C 4.52470249345804e-05 352233.945881434  
YKL187C 2.0586871861239e-05 231155.482747155  
YKL188C 7.94032908613129e-06 51397.1906261689  
YKL189W 4.69127502089606e-06 101270.161484118  
YKL190W 0 18132.9827535025  
YKL191W 9.38584007531551e-05 631476.67633186  
YKL192C 9.38584007531551e-05 631476.67633186  
YKL193C 1.64430843889729e-05 406209.679978913  
YKL194C 0 82106.182357552  
YKL195W 0 0  
YKL196C 0 0  
YKL197C 1.10710722971419e-05 246288.76992181  
YKL198C 0 226351.475308614  
YKL201C 0 190645.385607315  
YKL202W 3.1165087973406e-05 440710.437741596  
YKL203C 3.1165087973406e-05 440710.437741596  
YKL204W 5.31280198375894e-05 454652.941054133  
YKL205W 2.95384944020149e-05 111600.28870166  
YKL206C 2.95384944020149e-05 111600.28870166

YKL207W 2.78701047470298e-05 253733.437715737  
YKL208W 3.14142308435184e-05 141569.239854699  
YKL209C 0 104282.761982245  
YKL210W 1.49040358140562e-05 231226.134065004  
YKL211C 0.000152474908304612 367128.620655496  
YKL212W 0 50149.8403591641  
YKL213C 0 50149.8403591641  
YKL214C 2.22406419091437e-05 280643.622250806  
YKL215C 0 32723.1019490636  
YKL216W 3.14142308435184e-05 89660.0954438255  
YKL217W 0 67210.8510944105  
YKL218C 0.000219225964080305 750112.24816941  
YKL219W 0 31633.5104661618  
YKL220C 5.47874022915895e-05 330194.678199261  
YKL221W 0 73094.8420682425  
YKL222C 0 73094.8420682425  
YKL223W 8.37354912335275e-05 214810.53361276  
YKL224C 8.37354912335275e-05 214810.53361276  
YKL225W 5.68859167293656e-05 284495.559821658  
YKR001C 0 45161.5318061584  
YKR002W 0 45161.5318061584  
YKR003W 9.3830591417432e-05 303578.943490501  
YKR004C 1.19569702224931e-05 92401.4470454124  
YKR005C 0 10263.272794694  
YKR006C 0 32404.6795173808  
YKR007W 0 32404.6795173808  
YKR008W 6.50027769066863e-06 34109.2598683225  
YKR009C 0 15881.5989033738  
YKR010C 2.5627033693465e-05 113925.218252274  
YKR011C 3.17691458732172e-05 282597.227682875  
YKR013W 0 15557.1714862061  
YKR014C 4.71923912644945e-05 210499.774830072  
YKR015C 8.66251756915792e-05 675479.855732082  
YKR016W 5.52120541130741e-05 400879.961703804  
YKR017C 0 29102.4096459022  
YKR018C 7.44716081831909e-05 568149.696363183  
YKR019C 1.65098233824157e-05 93299.8194024872  
YKR020W 1.65098233824157e-05 93299.8194024872  
YKR021W 4.43022634918355e-05 150174.49410454  
YKR022C 0 71973.6074268335  
YKR023W 0 71973.6074268335  
YKR024C 0 46552.7445853407  
YKR025W 0 46552.7445853407  
YKR026C 1.0129570870987e-05 288827.682682034  
YKR027W 4.5640201560504e-05 308247.527098397  
YKR028W 1.26712800390116e-05 216970.708956636  
YKR029C 1.42519873446156e-05 222994.771939204  
YKR030W 1.42519873446156e-05 222994.771939204  
YKR031C 0 20280.4390651335  
YKR032W 0 20280.4390651335  
YKR033C 5.0123978234673e-06 243331.417651215  
YKR034W 1.13914319215258e-05 161441.836479927  
YKR035C 5.886479185091e-06 229376.589928669  
YKR035W-A 1.3305967422772e-05 423178.859899816



YKR036C 6.86099698198328e-05 397324.254621668  
YKR037C 0 48302.8382694041  
YKR038C 0 107845.030779868  
YKR039W 5.7280080970612e-06 94517.2663069322  
YKR040C 0 69127.235314878  
YKR041W 1.76542179348704e-05 351241.162917374  
YKR042W 8.75142513423466e-06 94788.1431270216  
YKR043C 1.06854852351956e-05 97831.6270090404  
YKR044W 1.06854852351956e-05 97831.6270090404  
YKR045C 0 0  
YKR046C 0 42488.3637034402  
YKR047W 0 42488.3637034402  
YKR048C 0 0  
YKR049C 0 44111.9787747128  
YKR050W 0 77607.9292097366  
YKR051W 1.55641053831701e-05 58167.0780303816  
YKR052C 0.000145193060507087 442799.97719723  
YKR053C 9.43333662628554e-06 145740.035650308  
YKR054C 0 45729.0764630478  
YKR055W 0 45729.0764630478  
YKR056W 3.2939773448426e-05 459977.327198178  
YKR057W 0 21604.6577478966  
YKR058W 0.000129610563233573 292955.827244596  
YKR059W 2.88036077989995e-05 119384.782864693  
YKR060W 0 10263.272794694  
YKR061W 6.12618829243239e-06 162713.840012075  
YKR062W 7.52700530097794e-05 156657.163936229  
YKR063C 7.10656012921085e-05 282744.300681624  
YKR064W 7.10656012921085e-05 282744.300681624  
YKR065C 0 19913.5128047733  
YKR066C 0.000144395728157387 415117.517414679  
YKR067W 0 29792.960070188  
YKR068C 3.25398795485432e-05 317413.74717586  
YKR069W 5.98251367859293e-05 468545.052042497  
YKR070W 0 32008.2799633696  
YKR071C 2.64533043802251e-05 353312.314273492  
YKR072C 0 0  
YKR073C 2.08364484609591e-05 252197.471696618  
YKR074W 0 47057.7203096167  
YKR075C 3.97112194290283e-05 237152.12804577  
YKR075W-A 0 78403.4971995238  
YKR076W 0.000151082609092357 610175.672036292  
YKR077W 1.1486843935038e-05 223382.971162169  
YKR078W 0 0  
YKR079C 4.81362422178888e-05 189401.836344914  
YKR080W 5.42563702740084e-05 386054.359907035  
YKR081C 0 18255.6762565315  
YKR082W 0 18255.6762565315  
YKR083C 0 47623.5486605706  
YKR084C 5.7280080970612e-06 124049.666120244  
YKR085C 3.91601197606839e-05 169772.736252222  
YKR086W 3.91601197606839e-05 169772.736252222  
YKR087C 0 0  
YKR088C 0 31217.318982449

|           |                      |                  |
|-----------|----------------------|------------------|
| YKR089C   | 4.31594065630758e-05 | 407934.104783672 |
| YKR090W   | 4.31594065631868e-05 | 394814.247664953 |
| YKR091W   | 2.31226429433518e-05 | 298769.972137485 |
| YKR092C   | 3.6207646860742e-05  | 137586.846254741 |
| YKR093W   | 4.30800867357028e-06 | 176312.707731102 |
| YKR094C   | 2.65973536006658e-05 | 228935.22742415  |
| YKR095W   | 1.83958926646133e-05 | 291668.394884408 |
| YKR095W-A | 9.05329395062271e-06 | 103698.925748868 |
| YKR096W   | 3.3460441771882e-05  | 199228.917023569 |
| YKR097W   | 0                    | 26204.736631795  |
| YKR098C   | 0.00013316899691318  | 466986.761820878 |
| YKR099W   | 7.99943858236229e-05 | 256475.508398367 |
| YKR100C   | 9.39832037519794e-05 | 371617.79218984  |
| YKR101W   | 9.39832037518684e-05 | 371617.79218984  |
| YKR102W   | 3.09927724576609e-05 | 159743.764126944 |
| YKR103W   | 1.39849889949639e-05 | 337754.191366494 |
| YKR104W   | 0                    | 11207.1867062294 |
| YKR105C   | 3.65597906134552e-05 | 297446.619889439 |
| YKR106W   | 3.92944583523791e-05 | 411363.926317984 |
| YLL001W   | 0                    | 0                |
| YLL002W   | 5.08735902016166e-06 | 27422.6978986902 |
| YLL003W   | 0                    | 14943.3670568837 |
| YLL004W   | 6.21726650239518e-05 | 463731.30610922  |
| YLL005C   | 6.21726650238408e-05 | 463731.30610922  |
| YLL006W   | 4.23240566282956e-06 | 38190.0561515642 |
| YLL006W-A | 0                    | 0                |
| YLL007C   | 0                    | 0                |
| YLL008W   | 1.51119571768499e-05 | 175096.137440362 |
| YLL009C   | 1.51119571768499e-05 | 175096.137440362 |
| YLL010C   | 3.13481418218187e-05 | 393562.30970339  |
| YLL011W   | 2.05557298421644e-05 | 266988.288309933 |
| YLL012W   | 0                    | 115770.229434647 |
| YLL013C   | 4.26523664642797e-06 | 76746.0574274375 |
| YLL014W   | 6.44983105591024e-06 | 45040.0226200218 |
| YLL015W   | 1.15962478500764e-05 | 133933.505077708 |
| YLL016W   | 6.01151260248844e-06 | 38918.689856931  |
| YLL017W   | 9.49631976232546e-06 | 174733.791689787 |
| YLL018C   | 8.11154944261316e-05 | 611350.01179864  |
| YLL018C-A | 4.76793073290738e-05 | 144351.585391551 |
| YLL019C   | 4.46337970749777e-06 | 28313.9187665446 |
| YLL021W   | 2.1890988661899e-05  | 265767.184668119 |
| YLL022C   | 1.75694047700459e-05 | 157854.697071171 |
| YLL023C   | 5.49027071151675e-05 | 268066.701989934 |
| YLL024C   | 4.8403532725283e-06  | 69531.3751957649 |
| YLL025W   | 2.07494598593039e-05 | 210934.586686564 |
| YLL026W   | 5.0422375025283e-06  | 117184.652340923 |
| YLL027W   | 0.000245024447713571 | 684316.214274568 |
| YLL028W   | 0.000230272575032053 | 684282.302130264 |
| YLL029W   | 0.000135743419030998 | 388376.4041554   |
| YLL030C   | 5.19611041697177e-05 | 127496.469623678 |
| YLL031C   | 0                    | 0                |
| YLL032C   | 1.34077112063924e-05 | 175185.759060222 |
| YLL033W   | 4.165266028755e-06   | 284913.752459645 |
| YLL034C   | 4.165266028755e-06   | 284913.752459645 |

|           |                      |                  |
|-----------|----------------------|------------------|
| YLL035W   | 1.30715566544204e-05 | 136428.250001749 |
| YLL036C   | 1.30715566544204e-05 | 136428.250001749 |
| YLL037W   | 0                    | 16330.1178098952 |
| YLL038C   | 0                    | 16330.1178098952 |
| YLL039C   | 1.8804772946468e-05  | 290750.292514363 |
| YLL040C   | 6.94592352378232e-05 | 544388.352045335 |
| YLL041C   | 3.14083319234992e-05 | 64928.2576588266 |
| YLL042C   | 5.44758546938695e-05 | 289951.919119679 |
| YLL043W   | 2.75526194657427e-05 | 241463.072571076 |
| YLL044W   | 0                    | 19095.1099622143 |
| YLL045C   | 0                    | 109391.145783283 |
| YLL046C   | 0                    | 145217.792648278 |
| YLL047W   | 0.000200055595050874 | 620510.57167258  |
| YLL048C   | 0.000200055595050763 | 638887.907155617 |
| YLL049W   | 2.44136527034478e-05 | 317293.720884297 |
| YLL050C   | 2.44136527033367e-05 | 317293.720884297 |
| YLL051C   | 2.02301844915986e-05 | 462205.373698059 |
| YLL052C   | 5.63569860075885e-05 | 216503.828982545 |
| YLL053C   | 0                    | 0                |
| YLL054C   | 1.3642032454686e-05  | 211862.349881772 |
| YLL055W   | 0.00010584891282861  | 551632.00957727  |
| YLL056C   | 5.08735902016166e-06 | 256454.152361566 |
| YLL057C   | 4.75453202369858e-05 | 495825.845878702 |
| YLL058W   | 0                    | 143661.29455456  |
| YLL059C   | 0                    | 122588.022386059 |
| YLL060C   | 0                    | 48225.2365822016 |
| YLL061W   | 0                    | 26686.4454968899 |
| YLL062C   | 0                    | 26686.4454968899 |
| YLL063C   | 1.82120463578794e-05 | 277638.122175827 |
| YLL064C   | 1.71957329677674e-05 | 305375.758628433 |
| YLL065W   | 0                    | 25528.6545347553 |
| YLL066C   | 7.48834913844032e-06 | 203775.391887994 |
| YLL066W-A | 0                    | 0                |
| YLL066W-B | 2.19965686882873e-05 | 230950.053100754 |
| YLL067C   | 7.48834913844032e-06 | 203775.391887994 |
| YLL067W-A | 0                    | 0                |
| YLR001C   | 0                    | 102564.392535644 |
| YLR002C   | 0                    | 19914.2044688902 |
| YLR003C   | 4.26523664642797e-06 | 67868.7386761514 |
| YLR004C   | 3.58542016776209e-05 | 579610.131846153 |
| YLR005W   | 3.58542016776209e-05 | 562130.384876441 |
| YLR006C   | 4.57100180207837e-05 | 243487.112355506 |
| YLR007W   | 4.57100180206726e-05 | 243487.112355506 |
| YLR008C   | 0                    | 58913.3365529207 |
| YLR009W   | 0                    | 58913.3365529207 |
| YLR010C   | 8.17879136177924e-05 | 420091.932774459 |
| YLR011W   | 4.6055652961452e-05  | 521683.329560108 |
| YLR012C   | 0.00014486711073336  | 544920.007852696 |
| YLR013W   | 7.36944745458601e-05 | 288845.933437796 |
| YLR014C   | 0                    | 62954.3502840102 |
| YLR015W   | 0                    | 62954.3502840102 |
| YLR016C   | 0                    | 15291.9857776969 |
| YLR017W   | 0                    | 15291.9857776969 |
| YLR018C   | 0                    | 56697.084027244  |

|           |                      |                  |  |
|-----------|----------------------|------------------|--|
| YLR019W   | 0                    | 45011.6776990928 |  |
| YLR020C   | 1.81143574796705e-05 | 189335.939795328 |  |
| YLR021W   | 1.81143574797815e-05 | 189335.939795328 |  |
| YLR022C   | 2.88984514471569e-05 | 153783.854992857 |  |
| YLR023C   | 7.4778537400122e-05  | 508600.524003578 |  |
| YLR024C   | 0.000105129555974637 | 545156.840207716 |  |
| YLR025W   | 1.82514347215612e-05 | 454080.719465412 |  |
| YLR026C   | 0                    | 63798.929935671  |  |
| YLR027C   | 0.00013921265230965  | 385337.056468091 |  |
| YLR028C   | 0                    | 10263.272794694  |  |
| YLR029C   | 1.85599252899848e-05 | 522127.504203994 |  |
| YLR030W   | 1.27506959423096e-05 | 473206.061629882 |  |
| YLR031W   | 0                    | 12048.8812048575 |  |
| YLR032W   | 2.80952511736432e-05 | 224059.636931037 |  |
| YLR033W   | 9.65603033520335e-06 | 111944.585019097 |  |
| YLR034C   | 1.57684903969724e-05 | 369684.077583599 |  |
| YLR035C   | 0                    | 191064.190119736 |  |
| YLR035C-A | 1.95485095358938e-05 | 335150.421658421 |  |
| YLR036C   | 0                    | 44460.7146958513 |  |
| YLR037C   | 0                    | 75257.5514368057 |  |
| YLR038C   | 2.34818572293349e-05 | 264216.671374417 |  |
| YLR039C   | 0                    | 118139.992549185 |  |
| YLR040C   | 4.99811094123448e-06 | 181659.498668095 |  |
| YLR041W   | 0                    | 13524.3944963501 |  |
| YLR042C   | 6.689995782172e-05   | 596958.144398968 |  |
| YLR043C   | 0                    | 122451.368321124 |  |
| YLR044C   | 1.64685857828584e-05 | 312142.379092502 |  |
| YLR045C   | 5.08735902016166e-06 | 17479.7469697115 |  |
| YLR046C   | 1.13201828941811e-05 | 273453.932951348 |  |
| YLR047C   | 5.0422375025283e-06  | 243604.113347523 |  |
| YLR048W   | 5.0422375025283e-06  | 281896.949206728 |  |
| YLR049C   | 2.70585876405161e-05 | 474438.525874416 |  |
| YLR050C   | 0                    | 9873.5063439597  |  |
| YLR051C   | 0                    | 43107.3681392431 |  |
| YLR052W   | 0                    | 43107.3681392431 |  |
| YLR053C   | 6.00808816075826e-06 | 82308.0597054365 |  |
| YLR054C   | 4.69127502089606e-06 | 101028.657279649 |  |
| YLR055C   | 0                    | 145003.656128855 |  |
| YLR056W   | 0                    | 13820.5099621349 |  |
| YLR057W   | 0                    | 50991.9370598628 |  |
| YLR058C   | 7.89452091590759e-05 | 381014.733947541 |  |
| YLR059C   | 3.47854686664206e-05 | 259853.888183606 |  |
| YLR060W   | 3.47854686665316e-05 | 259853.888183606 |  |
| YLR061W   | 0                    | 20526.545589388  |  |
| YLR062C   | 1.65098233824157e-05 | 59570.0429319996 |  |
| YLR063W   | 1.65098233824157e-05 | 59570.0429319996 |  |
| YLR064W   | 3.79879641290159e-05 | 257422.613095114 |  |
| YLR065C   | 4.27623374810171e-06 | 90293.8947738321 |  |
| YLR066W   | 4.27623374810171e-06 | 90293.8947738321 |  |
| YLR067C   | 4.31510765663834e-06 | 137164.153768422 |  |
| YLR068W   | 4.31510765663834e-06 | 137164.153768422 |  |
| YLR069C   | 0                    | 55939.4136811527 |  |
| YLR070C   | 0                    | 112058.074092575 |  |
| YLR071C   | 0                    | 11838.4055551686 |  |

|           |                      |                  |  |
|-----------|----------------------|------------------|--|
| YLR072W   | 0                    | 11838.4055551686 |  |
| YLR073C   | 0                    | 16211.9912086338 |  |
| YLR074C   | 1.55447127387909e-05 | 82540.2834287415 |  |
| YLR075W   | 1.55447127387909e-05 | 82540.2834287415 |  |
| YLR076C   | 0                    | 0                |  |
| YLR077W   | 0                    | 0                |  |
| YLR078C   | 6.31009540319472e-06 | 89627.7223058585 |  |
| YLR079W   | 6.31009540319472e-06 | 89627.7223058585 |  |
| YLR080W   | 0                    | 26014.5747194284 |  |
| YLR081W   | 5.38940412164735e-06 | 76758.7147048349 |  |
| YLR082C   | 4.10458738109298e-05 | 629767.383319927 |  |
| YLR083C   | 1.06629196435781e-05 | 221194.328674686 |  |
| YLR084C   | 1.96904828055899e-05 | 412591.399125753 |  |
| YLR085C   | 0                    | 0                |  |
| YLR086W   | 0                    | 0                |  |
| YLR087C   | 0.00010620262030403  | 498645.25157025  |  |
| YLR088W   | 0.00010620262030403  | 498645.25157025  |  |
| YLR089C   | 3.03347088487227e-05 | 215691.57882525  |  |
| YLR090W   | 3.60293409755741e-05 | 133355.647749235 |  |
| YLR091W   | 0                    | 20651.8538076925 |  |
| YLR092W   | 0.000102123552752631 | 430501.97842087  |  |
| YLR093C   | 6.85498718244748e-06 | 115690.855318247 |  |
| YLR094C   | 0                    | 28056.802028449  |  |
| YLR095C   | 3.41079056750404e-05 | 441378.34236483  |  |
| YLR096W   | 3.41079056750404e-05 | 441378.342364831 |  |
| YLR097C   | 1.7960765140046e-05  | 143150.281082479 |  |
| YLR098C   | 0                    | 104753.726280324 |  |
| YLR099C   | 0                    | 0                |  |
| YLR099W-A | 0                    | 0                |  |
| YLR100W   | 0                    | 0                |  |
| YLR101C   | 0                    | 0                |  |
| YLR102C   | 5.0422375025283e-06  | 140182.245312446 |  |
| YLR103C   | 2.01318382082594e-05 | 165070.11961854  |  |
| YLR104W   | 3.64810416795258e-05 | 277945.480759558 |  |
| YLR105C   | 0                    | 26487.4104661872 |  |
| YLR106C   | 4.14027185047239e-06 | 114592.444845569 |  |
| YLR107W   | 4.14027185047239e-06 | 114592.444845569 |  |
| YLR108C   | 1.74307870989265e-05 | 310551.657868545 |  |
| YLR109W   | 1.74307870989265e-05 | 225941.890464382 |  |
| YLR110C   | 1.18848212727896e-05 | 119945.422767394 |  |
| YLR111W   | 1.18848212727896e-05 | 119945.422767394 |  |
| YLR112W   | 0                    | 0                |  |
| YLR113W   | 1.08936125280401e-05 | 160049.83851479  |  |
| YLR114C   | 0                    | 28105.3448468559 |  |
| YLR115W   | 7.94735373939037e-05 | 362222.318179059 |  |
| YLR116W   | 4.30896169401063e-06 | 131588.285735311 |  |
| YLR117C   | 1.87309834879246e-05 | 91151.7054980649 |  |
| YLR118C   | 0                    | 0                |  |
| YLR119W   | 0                    | 0                |  |
| YLR120C   | 0                    | 214676.545683709 |  |
| YLR120W-A | 0                    | 214676.545683709 |  |
| YLR121C   | 1.19112014547174e-05 | 198905.440237367 |  |
| YLR122C   | 1.0286293083972e-05  | 166295.459726866 |  |
| YLR123C   | 0                    | 18377.3354830364 |  |

|           |                      |                  |  |
|-----------|----------------------|------------------|--|
| YLR124W   | 0                    | 18377.3354830364 |  |
| YLR125W   | 4.44024700083645e-05 | 298772.421851983 |  |
| YLR126C   | 0                    | 14311.949588971  |  |
| YLR127C   | 0                    | 0                |  |
| YLR128W   | 0                    | 0                |  |
| YLR129W   | 0                    | 10337.3490092056 |  |
| YLR130C   | 0.000111958833222903 | 713819.049900098 |  |
| YLR131C   | 1.28074260996591e-05 | 199318.000773747 |  |
| YLR132C   | 0                    | 0                |  |
| YLR133W   | 0                    | 0                |  |
| YLR134W   | 1.28074260996591e-05 | 230649.450605759 |  |
| YLR135W   | 5.0422375025283e-06  | 123448.864336037 |  |
| YLR136C   | 0                    | 25075.3644520549 |  |
| YLR137W   | 0                    | 25075.3644520549 |  |
| YLR138W   | 0                    | 0                |  |
| YLR139C   | 0                    | 19184.0049994429 |  |
| YLR141W   | 0                    | 0                |  |
| YLR142W   | 0                    | 52742.0284651514 |  |
| YLR143W   | 1.08859573376696e-05 | 85538.3752390725 |  |
| YLR144C   | 1.08965125723559e-05 | 68156.6628459772 |  |
| YLR145W   | 1.08965125723559e-05 | 68156.6628459772 |  |
| YLR146C   | 4.42652020726797e-06 | 101613.575711553 |  |
| YLR146W-A | 4.42652020726797e-06 | 101613.575711553 |  |
| YLR147C   | 0                    | 0                |  |
| YLR148W   | 0                    | 0                |  |
| YLR149C   | 1.44296299483537e-05 | 314758.15539216  |  |
| YLR149C-A | 0                    | 0                |  |
| YLR150W   | 0                    | 0                |  |
| YLR151C   | 0                    | 0                |  |
| YLR152C   | 0.000347653403859449 | 665940.850295878 |  |
| YLR153C   | 2.83193867154363e-05 | 258150.60291538  |  |
| YLR154C   | 4.03395154725539e-05 | 353591.124110633 |  |
| YLR154C-G | 4.94884696244924e-06 | 175772.359260169 |  |
| YLR154C-H | 4.39885702085974e-06 | 128550.253593258 |  |
| YLR154W-A | 0                    | 34890.5722538263 |  |
| YLR154W-B | 4.46337970749777e-06 | 143577.173949172 |  |
| YLR154W-C | 0                    | 13727.114568387  |  |
| YLR154W-E | 1.05079234018479e-05 | 130401.002668224 |  |
| YLR154W-F | 0                    | 16808.9555860367 |  |
| YLR155C   | 7.96033897241255e-05 | 570556.7755079   |  |
| YLR156C-A | 4.39885702085974e-06 | 128550.253593258 |  |
| YLR156W   | 7.64378044902925e-05 | 696670.404633671 |  |
| YLR157C   | 7.96033897241255e-05 | 570556.7755079   |  |
| YLR157C-A | 8.58405261290329e-05 | 443455.044290091 |  |
| YLR157C-B | 8.58405261290329e-05 | 443455.044290091 |  |
| YLR157C-C | 4.39885702085974e-06 | 128550.253593258 |  |
| YLR157W-D | 7.64378044902925e-05 | 696670.404633671 |  |
| YLR157W-E | 8.58405261289219e-05 | 443455.044290091 |  |
| YLR158C   | 7.96033897241255e-05 | 570556.7755079   |  |
| YLR159C-A | 4.39885702085974e-06 | 128550.253593258 |  |
| YLR159W   | 7.64378044902925e-05 | 696670.404633671 |  |
| YLR160C   | 7.96033897241255e-05 | 570556.7755079   |  |
| YLR161W   | 7.64378044902925e-05 | 696670.404633671 |  |
| YLR162W   | 0                    | 22132.5802686321 |  |

|           |                      |                  |
|-----------|----------------------|------------------|
| YLR162W-A | 0                    | 34890.5722538263 |
| YLR163C   | 2.88886750989814e-05 | 142148.421891762 |
| YLR164W   | 2.40624522050981e-05 | 181997.020557834 |
| YLR165C   | 0                    | 0                |
| YLR166C   | 0.000104167291449131 | 539224.019571213 |
| YLR167W   | 5.19139918608857e-06 | 108701.47175354  |
| YLR168C   | 0                    | 0                |
| YLR169W   | 0                    | 0                |
| YLR170C   | 0                    | 13820.5099621349 |
| YLR172C   | 0                    | 13267.0625576767 |
| YLR173W   | 0                    | 13267.0625576767 |
| YLR174W   | 4.17310205413912e-06 | 310624.763626119 |
| YLR175W   | 1.17073884703389e-05 | 163520.495220892 |
| YLR176C   | 0                    | 128667.841407475 |
| YLR177W   | 0                    | 0                |
| YLR178C   | 0                    | 0                |
| YLR179C   | 5.08735902016166e-06 | 0                |
| YLR180W   | 0                    | 0                |
| YLR181C   | 0                    | 20922.0293682467 |
| YLR182W   | 0                    | 20922.0293682467 |
| YLR183C   | 0                    | 12048.8812048575 |
| YLR184W   | 0                    | 12048.8812048575 |
| YLR185W   | 0                    | 17513.0198853221 |
| YLR186W   | 2.30349434023891e-05 | 184840.975626916 |
| YLR187W   | 2.27083544965812e-05 | 182134.402905411 |
| YLR188W   | 0                    | 10791.105525043  |
| YLR189C   | 7.39877837842018e-05 | 446976.834186877 |
| YLR190W   | 1.08965125723559e-05 | 73483.6149483639 |
| YLR191W   | 3.26149914863239e-05 | 320312.846344552 |
| YLR192C   | 4.55316623125812e-05 | 342140.026859219 |
| YLR193C   | 7.32478013311111e-05 | 307597.138464536 |
| YLR194C   | 0                    | 71156.8453661313 |
| YLR195C   | 2.54479925196893e-05 | 464568.862633766 |
| YLR196W   | 0                    | 130810.556317358 |
| YLR197W   | 1.06653957584468e-05 | 211179.851207008 |
| YLR198C   | 1.64820554398037e-05 | 175732.16312921  |
| YLR199C   | 6.0401232950813e-06  | 171066.459973202 |
| YLR200W   | 6.0401232950813e-06  | 171066.459973202 |
| YLR201C   | 7.39705086882925e-06 | 173675.822333849 |
| YLR202C   | 0                    | 0                |
| YLR203C   | 0                    | 11544.0434093035 |
| YLR204W   | 0                    | 11544.0434093035 |
| YLR205C   | 0                    | 74131.2468809749 |
| YLR206W   | 1.20161402243912e-05 | 100364.765896534 |
| YLR207W   | 7.62603796709005e-05 | 418779.572363711 |
| YLR208W   | 0                    | 0                |
| YLR209C   | 0                    | 0                |
| YLR210W   | 0                    | 0                |
| YLR211C   | 1.65098233824157e-05 | 72824.8014578494 |
| YLR212C   | 8.00237553953975e-05 | 281178.804080362 |
| YLR213C   | 9.35489602815753e-06 | 140847.468229282 |
| YLR214W   | 9.35489602815753e-06 | 113639.181889726 |
| YLR215C   | 0                    | 28639.1190810011 |
| YLR216C   | 0                    | 13569.0716588989 |

YLR218C 0 0  
YLR219W 0 0  
YLR220W 1.01746921591372e-05 25773.4626838441  
YLR221C 0 19095.1099622143  
YLR222C 0 0  
YLR223C 0 15959.9641392694  
YLR224W 0 102511.850986904  
YLR225C 9.91727041821377e-06 150987.408234309  
YLR226W 9.91727041821377e-06 150987.408234309  
YLR227C 6.18710107583853e-05 542767.463572993  
YLR227W-A 0.000108948643484319 782488.098466207  
YLR227W-B 0.000108948643484319 782488.098466207  
YLR228C 6.5373187205342e-05 508618.066156484  
YLR229C 1.18848212727896e-05 161902.458369908  
YLR230W 0 10263.272794694  
YLR231C 5.9734448816684e-05 311360.243763657  
YLR233C 6.4296606601788e-05 245271.117051087  
YLR234W 6.4296606601788e-05 245271.117051086  
YLR235C 2.45182992641979e-05 152295.427619564  
YLR236C 2.45182992641979e-05 152295.427619564  
YLR237W 2.45182992641979e-05 152295.427619564  
YLR238W 1.02336105123335e-05 176007.421788128  
YLR239C 3.32722285840692e-05 241221.605241418  
YLR240W 3.32722285840692e-05 241221.605241418  
YLR241W 9.27552206175797e-06 142898.506521116  
YLR242C 3.84384921982006e-05 437555.892892932  
YLR243W 3.84384921982006e-05 437555.892892932  
YLR244C 0 0  
YLR245C 0 18282.984418011  
YLR246W 0 18282.984418011  
YLR247C 1.63495326174212e-05 121790.130970969  
YLR248W 0 120994.88636853  
YLR249W 0 113058.82517733  
YLR250W 9.37927421872375e-05 207429.758894634  
YLR251W 1.15435741641079e-05 261573.11061876  
YLR252W 0 0  
YLR253W 0 16988.8370919994  
YLR254C 0 138277.965704254  
YLR255C 1.02034804879692e-05 56604.5234673286  
YLR256W 1.02034804879692e-05 56604.5234673286  
YLR256W-A 0 21934.4766767461  
YLR257W 1.5741259262958e-05 84746.7825982  
YLR258W 4.72234601822663e-05 294892.12666902  
YLR259C 2.68937226548527e-05 341869.321094073  
YLR260W 0 12860.2996218798  
YLR261C 0 37311.3944255142  
YLR262C 0 133243.202439594  
YLR262C-A 5.86753180749078e-05 425932.85541744  
YLR263W 5.86753180746857e-05 451821.469124504  
YLR264C-A 2.04771732398301e-05 288283.247539273  
YLR264W 0 13524.3944963501  
YLR265C 2.62887861660621e-05 220637.603570331  
YLR266C 0.000252247026815811 551852.131165126  
YLR267W 0.000252247026815922 551852.131165126



YLR268W 1.13171021255409e-05 309699.042890968  
YLR270W 2.81480919116506e-05 446040.289766521  
YLR271W 1.25118921902034e-05 163041.639935626  
YLR272C 4.46337970749777e-06 200499.774433895  
YLR273C 0 47734.9972876178  
YLR274W 0 47734.9972876178  
YLR275W 1.57684903969724e-05 391298.190172933  
YLR276C 0 96113.3046758041  
YLR277C 1.03625820707665e-05 183696.69046286  
YLR278C 0.000111283710135357 345115.829906457  
YLR279W 0.000111283710135468 345115.829906457  
YLR280C 0 48430.0459892108  
YLR281C 0 20798.9903338403  
YLR283W 0 72549.942049782  
YLR284C 2.25278205947532e-05 261382.30734724  
YLR285C-A 9.75733853614269e-06 70535.1599571913  
YLR285W 2.25278205947532e-05 261382.30734724  
YLR286C 3.63377188018488e-05 244268.516673871  
YLR286W-A 9.75733853614269e-06 70535.1599571913  
YLR287C 4.27585035845945e-05 385151.618629781  
YLR287C-A 0 15165.3508741794  
YLR288C 0 32642.0056819243  
YLR289W 0 32642.0056819243  
YLR290C 0.000204319891641713 404240.343479305  
YLR291C 0 58847.9206308625  
YLR292C 0 34126.6515823669  
YLR293C 4.94884696244924e-06 122807.202712014  
YLR294C 2.17648017583061e-05 143719.950278158  
YLR295C 2.62280843212892e-05 154927.136984387  
YLR296W 4.46337970749777e-06 24344.6881939368  
YLR297W 5.08735902016166e-06 10263.272794694  
YLR298C 3.14142308435184e-05 123428.339292429  
YLR299C-A 3.01972401278716e-05 212317.485308292  
YLR299W 3.14142308435184e-05 146095.326109137  
YLR300W 2.36449469012134e-05 205966.654787092  
YLR301W 0 12131.901431101  
YLR303W 0 15351.0493103632  
YLR304C 1.30959848269052e-05 250735.24808747  
YLR305C 0 36814.6747810184  
YLR306W 0 36814.6747810184  
YLR307C-A 0.000168579974988758 430887.605389365  
YLR307W 3.83049481827991e-05 367626.143440664  
YLR308W 4.1578489613503e-05 297451.593595908  
YLR309C 0 74186.5474721006  
YLR310C 0 55746.800826635  
YLR311C 0 0  
YLR312C 5.85728784932016e-05 443963.820290048  
YLR312W-A 5.85728784932016e-05 415321.540467131  
YLR313C 0 10121.5487978853  
YLR314C 0 181756.844584872  
YLR315W 0 181749.067184688  
YLR316C 4.46703397064541e-05 254513.250845408  
YLR317W 0 0  
YLR318W 4.46703397064541e-05 273425.407882012

|           |                      |                  |                  |
|-----------|----------------------|------------------|------------------|
| YLR319C   | 0                    | 18068.1449296081 |                  |
| YLR320W   | 0                    | 18068.1449296081 |                  |
| YLR321C   | 1.03625820707665e-05 |                  | 105204.166208387 |
| YLR323C   | 0                    | 0                |                  |
| YLR324W   | 0                    | 0                |                  |
| YLR325C   | 5.0422375025283e-06  |                  | 291501.077783138 |
| YLR326W   | 4.11772437068914e-05 |                  | 411610.555248523 |
| YLR327C   | 0                    | 24293.963488789  |                  |
| YLR328W   | 3.25481136274064e-05 |                  | 497042.72863611  |
| YLR329W   | 2.49039355438851e-05 |                  | 287476.39569495  |
| YLR330W   | 0                    | 131099.970870587 |                  |
| YLR332W   | 1.75694047700459e-05 |                  | 144221.779354043 |
| YLR333C   | 2.70920264664465e-05 |                  | 268203.626688773 |
| YLR334C   | 0                    | 125352.678365599 |                  |
| YLR335W   | 0                    | 125352.678365599 |                  |
| YLR336C   | 0                    | 13119.8571187186 |                  |
| YLR337C   | 1.91947973051665e-05 |                  | 130747.489405357 |
| YLR339C   | 0                    | 0                |                  |
| YLR340W   | 3.70736325820964e-05 |                  | 83980.3059436418 |
| YLR341W   | 9.75733853614269e-06 |                  | 197413.16218906  |
| YLR342W   | 0                    | 134175.905833525 |                  |
| YLR342W-A | 0                    | 0                |                  |
| YLR343W   | 0                    | 14928.4954374648 |                  |
| YLR344W   | 0                    | 36137.9728112561 |                  |
| YLR345W   | 1.3642032454686e-05  |                  | 237512.398983297 |
| YLR346C   | 0                    | 9803.1136243809  |                  |
| YLR347C   | 0                    | 96303.8355911003 |                  |
| YLR348C   | 2.51538396545126e-05 |                  | 83101.3815072237 |
| YLR350W   | 2.51538396545126e-05 |                  | 72410.0972463515 |
| YLR351C   | 4.12841559825905e-05 |                  | 305909.998940716 |
| YLR352W   | 1.37909640643974e-05 |                  | 111495.840963353 |
| YLR353W   | 0                    | 33360.130707305  |                  |
| YLR354C   | 3.42340645265171e-05 |                  | 533765.857780337 |
| YLR355C   | 0.000333576513198541 |                  | 1151712.1513546  |
| YLR356W   | 0                    | 59298.6974690185 |                  |
| YLR357W   | 0                    | 98568.7222765431 |                  |
| YLR358C   | 1.34077112063924e-05 |                  | 145210.597869221 |
| YLR359W   | 1.34077112063924e-05 |                  | 145210.597869221 |
| YLR360W   | 0                    | 77792.387404977  |                  |
| YLR361C   | 0                    | 0                |                  |
| YLR361C-A | 0                    | 37590.045778695  |                  |
| YLR362W   | 0                    | 37590.045778695  |                  |
| YLR363C   | 0                    | 60752.920164533  |                  |
| YLR363W-A | 0                    | 60752.920164533  |                  |
| YLR364C-A | 7.48834913844032e-06 |                  | 108066.544249346 |
| YLR364W   | 0                    | 0                |                  |
| YLR365W   | 0.000132731442008538 |                  | 704840.19128598  |
| YLR367W   | 0                    | 0                |                  |
| YLR368W   | 4.30800867357028e-06 |                  | 22055.4982420856 |
| YLR369W   | 2.47491701589331e-05 |                  | 160264.463602066 |
| YLR370C   | 5.886479185091e-06   |                  | 199621.423311136 |
| YLR371W   | 5.886479185091e-06   |                  | 199621.423311136 |
| YLR372W   | 4.05196350210524e-05 |                  | 448445.972782012 |
| YLR373C   | 0                    | 0                |                  |

|           |                      |                  |  |
|-----------|----------------------|------------------|--|
| YLR375W   | 0                    | 19341.7450585675 |  |
| YLR376C   | 0                    | 85109.9721205347 |  |
| YLR377C   | 0                    | 37925.3661373143 |  |
| YLR378C   | 0                    | 18212.50521934   |  |
| YLR380W   | 1.07713382965224e-05 | 312259.681522487 |  |
| YLR381W   | 0                    | 23651.4051469228 |  |
| YLR382C   | 1.06993349960893e-05 | 89349.9260354973 |  |
| YLR383W   | 1.06993349960893e-05 | 89349.9260354973 |  |
| YLR384C   | 0                    | 23348.4881640687 |  |
| YLR385C   | 0                    | 0                |  |
| YLR386W   | 0                    | 0                |  |
| YLR387C   | 0.000169944159023272 | 685561.170967075 |  |
| YLR388W   | 0.000169944159023605 | 685561.170967075 |  |
| YLR389C   | 5.0725452641176e-05  | 382735.133625656 |  |
| YLR390W   | 5.0725452641287e-05  | 382735.133625656 |  |
| YLR390W-A | 0                    | 0                |  |
| YLR392C   | 8.39591840539056e-05 | 168291.702580738 |  |
| YLR393W   | 8.39591840539056e-05 | 146981.62696234  |  |
| YLR394W   | 0                    | 12440.4587682435 |  |
| YLR395C   | 4.30800867357028e-06 | 48101.3136262658 |  |
| YLR396C   | 0                    | 75139.2502873784 |  |
| YLR397C   | 0.000297129912583904 | 489419.021011802 |  |
| YLR398C   | 0                    | 37970.9451065714 |  |
| YLR399C   | 0                    | 15881.5989033738 |  |
| YLR400W   | 0                    | 15881.5989033738 |  |
| YLR401C   | 0                    | 14544.5082039682 |  |
| YLR402W   | 0                    | 14544.5082039682 |  |
| YLR403W   | 0                    | 75978.6872079852 |  |
| YLR404W   | 2.21592063832654e-05 | 190404.958585336 |  |
| YLR405W   | 0                    | 0                |  |
| YLR406C   | 0                    | 53704.9964472838 |  |
| YLR406C-A | 0                    | 71629.7917184172 |  |
| YLR407W   | 0                    | 171898.511838617 |  |
| YLR408C   | 0                    | 25103.055114014  |  |
| YLR409C   | 0                    | 10791.105525043  |  |
| YLR410W   | 0                    | 10791.105525043  |  |
| YLR410W-A | 0.000109729704277473 | 684891.802096923 |  |
| YLR410W-B | 0.000109729704277473 | 684891.802096923 |  |
| YLR411W   | 8.58405261290329e-05 | 499332.754930104 |  |
| YLR412C-A | 8.29361117016258e-06 | 70943.7690526032 |  |
| YLR412W   | 3.0682354280942e-05  | 149570.626048362 |  |
| YLR413W   | 1.06854852351956e-05 | 131016.173747338 |  |
| YLR414C   | 0                    | 55511.1521137797 |  |
| YLR415C   | 7.24072246660601e-05 | 499463.00911747  |  |
| YLR416C   | 3.34610016041736e-05 | 137487.408071039 |  |
| YLR417W   | 3.34610016041736e-05 | 137487.408071039 |  |
| YLR418C   | 0                    | 18255.6762565315 |  |
| YLR419W   | 0                    | 18255.6762565315 |  |
| YLR420W   | 4.46337970749777e-06 | 241199.838684502 |  |
| YLR421C   | 0.000176623068678383 | 660873.227081493 |  |
| YLR422W   | 0.000176623068678494 | 660873.227081493 |  |
| YLR423C   | 0                    | 18375.8462863071 |  |
| YLR424W   | 0                    | 18375.8462863071 |  |
| YLR425W   | 7.2530746492494e-05  | 476349.084637174 |  |

|           |                      |                  |  |
|-----------|----------------------|------------------|--|
| YLR426W   | 0                    | 24397.7856437117 |  |
| YLR427W   | 5.10201801429133e-06 | 51174.5439776947 |  |
| YLR429W   | 6.96401559687754e-05 | 310707.234365392 |  |
| YLR430W   | 2.39721697711248e-05 | 361206.209478672 |  |
| YLR431C   | 5.38940412164735e-06 | 33799.2061031141 |  |
| YLR432W   | 5.02380128564184e-05 | 371467.564880494 |  |
| YLR433C   | 0                    | 0                |  |
| YLR435W   | 0.000118243998872058 | 227538.33097749  |  |
| YLR436C   | 0                    | 13299.4902414958 |  |
| YLR437C   | 2.25282440176056e-05 | 175642.730603436 |  |
| YLR438C-A | 0                    | 0                |  |
| YLR438W   | 2.25282440176056e-05 | 175642.730603436 |  |
| YLR439W   | 0                    | 0                |  |
| YLR440C   | 0                    | 224410.100792483 |  |
| YLR441C   | 4.77116038432035e-05 | 393400.964046087 |  |
| YLR442C   | 7.85308338360213e-05 | 330721.880023767 |  |
| YLR443W   | 7.85308338361324e-05 | 330721.880023767 |  |
| YLR444C   | 0                    | 0                |  |
| YLR445W   | 0                    | 0                |  |
| YLR446W   | 1.60652323023536e-05 | 82104.2351885736 |  |
| YLR447C   | 1.16536536822753e-05 | 155656.070521254 |  |
| YLR448W   | 1.03625820707665e-05 | 177956.598110262 |  |
| YLR449W   | 1.52673397715297e-05 | 275217.940160199 |  |
| YLR450W   | 7.72553860359793e-05 | 373182.893539514 |  |
| YLR451W   | 5.78139424466384e-05 | 302355.958913392 |  |
| YLR452C   | 1.65098233824157e-05 | 92060.3864965313 |  |
| YLR453C   | 2.83872135139474e-05 | 249078.503939978 |  |
| YLR454W   | 0                    | 36135.3218690106 |  |
| YLR455W   | 0                    | 23513.2037126396 |  |
| YLR456W   | 3.29610600853236e-05 | 678227.33794613  |  |
| YLR457C   | 3.59907455219632e-05 | 425043.429153433 |  |
| YLR459W   | 3.59907455219632e-05 | 425043.429153433 |  |
| YLR460C   | 5.67537124249728e-05 | 366761.283443045 |  |
| YLR461W   | 8.37354912335275e-05 | 227770.053235946 |  |
| YLR462W   | 0                    | 43741.8888544748 |  |
| YLR464W   | 1.60157942381556e-05 | 230286.471987798 |  |
| YLR466C-A | 0                    | 0                |  |
| YLR466C-B | 2.19965686882873e-05 | 230950.053100754 |  |
| YLR467C-A | 0                    | 0                |  |
| YLR467W   | 0                    | 43741.8888544748 |  |
| YML001W   | 0                    | 133451.805712873 |  |
| YML002W   | 4.42652020726797e-06 | 33911.3527998985 |  |
| YML003W   | 3.04646572654166e-05 | 421214.150334728 |  |
| YML004C   | 7.04350889131344e-05 | 560681.124929841 |  |
| YML005W   | 0.000102157499847655 | 632894.065016048 |  |
| YML006C   | 0                    | 39846.3745050725 |  |
| YML007C-A | 9.43333662628554e-06 | 154474.189851827 |  |
| YML007W   | 9.43333662628554e-06 | 143117.903829798 |  |
| YML008C   | 0                    | 0                |  |
| YML009C   | 0                    | 34057.4507355021 |  |
| YML009C-A | 4.30896169401063e-06 | 152322.708386559 |  |
| YML010W   | 4.30800867357028e-06 | 152106.193103908 |  |
| YML011C   | 4.30800867357028e-06 | 152106.193103908 |  |
| YML012C-A | 0                    | 34126.6515823669 |  |

|           |                      |                  |  |
|-----------|----------------------|------------------|--|
| YML012W   | 0                    | 34126.6515823669 |  |
| YML013W   | 0                    | 0                |  |
| YML014W   | 0                    | 10791.105525043  |  |
| YML015C   | 0                    | 10791.105525043  |  |
| YML016C   | 2.64136511508584e-05 | 373630.040651034 |  |
| YML017W   | 0                    | 19916.5132046616 |  |
| YML018C   | 0                    | 0                |  |
| YML019W   | 1.65098233824157e-05 | 116933.451843475 |  |
| YML020W   | 1.0629193910483e-05  | 226673.394704895 |  |
| YML021C   | 1.0629193910483e-05  | 226673.394704895 |  |
| YML022W   | 8.48424091057787e-05 | 253894.133423888 |  |
| YML023C   | 8.48424091057787e-05 | 253894.133423888 |  |
| YML024W   | 2.4120286660767e-05  | 121606.95603079  |  |
| YML025C   | 2.4120286660767e-05  | 121606.95603079  |  |
| YML026C   | 5.08735902016166e-06 | 82792.2498488089 |  |
| YML027W   | 0                    | 92146.0198466386 |  |
| YML028W   | 1.29500668208937e-05 | 41259.8926212768 |  |
| YML029W   | 5.38557784296456e-05 | 469633.522959152 |  |
| YML030W   | 5.10201801429133e-06 | 33986.7523535806 |  |
| YML031W   | 0                    | 22141.5122567445 |  |
| YML032C   | 0                    | 0                |  |
| YML034W   | 0                    | 57450.878948541  |  |
| YML035C   | 0                    | 88202.3939984674 |  |
| YML036W   | 0                    | 39745.1805494404 |  |
| YML037C   | 0                    | 39745.1805494404 |  |
| YML038C   | 0.000129340550411583 | 492667.236524272 |  |
| YML039W   | 8.58405261290329e-05 | 473441.205609821 |  |
| YML040W   | 8.58405261290329e-05 | 473441.205609821 |  |
| YML041C   | 2.54724860843103e-05 | 156703.840732614 |  |
| YML042W   | 0.000105990659819755 | 478201.518726136 |  |
| YML043C   | 5.08735902016166e-06 | 75991.9161331471 |  |
| YML045W   | 2.35482012704846e-05 | 362988.661474038 |  |
| YML045W-A | 2.35482012704846e-05 | 362988.661474038 |  |
| YML046W   | 8.52750895663501e-06 | 170205.715941    |  |
| YML047C   | 8.52750895663501e-06 | 170205.715941    |  |
| YML047W-A | 0                    | 0                |  |
| YML048W   | 0                    | 0                |  |
| YML049C   | 0                    | 0                |  |
| YML050W   | 4.69127502089606e-06 | 59791.6089362783 |  |
| YML051W   | 0                    | 34169.6934627985 |  |
| YML052W   | 3.63894087498373e-05 | 535731.705597008 |  |
| YML053C   | 4.43294488920998e-05 | 533360.257456955 |  |
| YML054C   | 1.99879269685566e-05 | 230591.601859835 |  |
| YML054C-A | 9.30013969779875e-05 | 678674.186953548 |  |
| YML055W   | 1.30774346259743e-05 | 124561.204507045 |  |
| YML056C   | 4.54996446919154e-06 | 0                |  |
| YML057W   | 8.95835932801514e-06 | 236166.749979155 |  |
| YML058W   | 2.22984846335317e-05 | 216482.568215506 |  |
| YML058W-A | 2.00579892355446e-05 | 130176.940389053 |  |
| YML059C   | 2.00579892355446e-05 | 130176.940389053 |  |
| YML060W   | 9.75733853614269e-06 | 85430.132036638  |  |
| YML061C   | 9.75733853614269e-06 | 85430.132036638  |  |
| YML062C   | 0                    | 16330.1178098952 |  |
| YML063W   | 0                    | 46949.0304217927 |  |

YML064C 0 55621.7313851189  
YML065W 8.88179268287992e-06 116435.675794612  
YML066C 6.12187881291471e-05 517997.54530797  
YML067C 4.17310205413912e-06 132217.735739381  
YML068W 6.91773758249026e-05 492917.809705068  
YML069W 0 84790.860688708  
YML070W 5.3574066445683e-05 434415.866305812  
YML071C 5.08735902016166e-06 56421.8608975153  
YML072C 9.6836657283994e-06 160783.459402494  
YML073C 9.50729770199388e-06 60173.2983598784  
YML074C 9.44302720868873e-05 612372.806943158  
YML075C 0 28652.7564782913  
YML076C 0.000393608805495438 1304264.09461242  
YML077W 4.54996446919154e-06 54266.4791584801  
YML078W 0 0  
YML079W 0 0  
YML080W 0 39384.5558818404  
YML081C-A 1.06511246354968e-05 195327.667800989  
YML081W 1.06511246354968e-05 163831.266477149  
YML082W 0 15384.8816708456  
YML083C 1.62338744023049e-05 94568.8324879716  
YML084W 0 0  
YML085C 0 0  
YML086C 5.08735902016166e-06 50453.3092080092  
YML087C 4.86530827944476e-05 317235.238198258  
YML088W 6.0954436466476e-05 178396.566053424  
YML089C 6.0954436466476e-05 214982.691478384  
YML090W 0 0  
YML091C 0 0  
YML092C 1.1486843935038e-05 170654.729463989  
YML093W 0 71778.1600223399  
YML094C-A 2.46877055888328e-05 167835.723070515  
YML094W 3.49644499214596e-05 261024.492479712  
YML095C 5.38940412164735e-06 44102.2621824523  
YML096W 6.01237554501699e-05 276380.897459451  
YML097C 6.01237554502809e-05 276380.897459451  
YML098W 0.000119137275588987 229258.506272529  
YML099C 0.000119137275589098 229258.506272529  
YML099W-A 0 18282.984418011  
YML100W 1.23148584003641e-05 256769.942197374  
YML100W-A 0 0  
YML101C 0 0  
YML101C-A 0 0  
YML102W 0 54060.1697632813  
YML103C 0 39499.0755221126  
YML104C 0 30516.6661390327  
YML105C 6.85498718244748e-06 175588.64016239  
YML106W 4.43185376693966e-05 352315.560237534  
YML107C 4.43185376693966e-05 352315.560237534  
YML108W 0 40719.3944934674  
YML109W 0 327303.45651647  
YML110C 0 284764.996357013  
YML111W 0 57453.0918691084  
YML112W 6.44983105591024e-06 0

|           |                      |                  |
|-----------|----------------------|------------------|
| YML113W   | 1.18865636606902e-05 | 145258.93785572  |
| YML114C   | 1.18865636606902e-05 | 145258.93785572  |
| YML115C   | 3.89371728058974e-05 | 126312.822484108 |
| YML116W   | 0.000120956731390343 | 619298.00137858  |
| YML117W   | 1.05614497195594e-05 | 188220.031990341 |
| YML118W   | 2.72827672690434e-05 | 437875.031388436 |
| YML119W   | 0                    | 83455.709623647  |
| YML120C   | 0                    | 168201.50043951  |
| YML121W   | 2.26159514831181e-05 | 264252.02804946  |
| YML122C   | 2.26159514830071e-05 | 264252.02804946  |
| YML123C   | 0                    | 20526.545589388  |
| YML124C   | 0                    | 29158.3822797963 |
| YML125C   | 0                    | 124252.286763663 |
| YML126C   | 0                    | 19583.5078455565 |
| YML127W   | 1.16849509885775e-05 | 222452.911069853 |
| YML128C   | 1.16849509885775e-05 | 222452.911069853 |
| YML129C   | 0                    | 158441.550758986 |
| YML130C   | 5.66492139315589e-05 | 321317.545001678 |
| YML131W   | 6.8962426297059e-05  | 339448.945200551 |
| YML132W   | 5.0422375025283e-06  | 329225.674733118 |
| YML133C   | 0                    | 43741.8888544748 |
| YML133W-B | 0                    | 0                |
| YMR001C   | 0                    | 40397.7538053733 |
| YMR001C-A | 7.39705086882925e-06 | 176901.768463424 |
| YMR002W   | 7.39705086882925e-06 | 176901.768463424 |
| YMR003W   | 4.17310205413912e-06 | 183407.895303379 |
| YMR004W   | 0                    | 92703.373759736  |
| YMR005W   | 2.92718251171387e-05 | 289428.335817914 |
| YMR006C   | 0                    | 10388.5810129985 |
| YMR007W   | 0                    | 10388.5810129985 |
| YMR008C   | 6.15682013394014e-06 | 156005.750537615 |
| YMR009W   | 2.08364484609591e-05 | 137677.282437017 |
| YMR010W   | 9.23966783905605e-06 | 118051.330308409 |
| YMR011W   | 1.10710722971419e-05 | 222897.430011252 |
| YMR012W   | 0                    | 38689.4318815799 |
| YMR013C   | 2.12998355796357e-05 | 119300.806323277 |
| YMR013C-A | 2.12998355796357e-05 | 104182.19137129  |
| YMR013W-A | 3.75924257453031e-05 | 198495.18708252  |
| YMR014W   | 5.41590096205802e-05 | 426783.758664815 |
| YMR015C   | 2.46982606777468e-05 | 128038.910185831 |
| YMR016C   | 0                    | 31852.0560769099 |
| YMR017W   | 8.31250411073015e-05 | 545658.335865684 |
| YMR018W   | 3.11256997834741e-05 | 346722.220071154 |
| YMR019W   | 9.05216575259882e-05 | 468497.598325839 |
| YMR020W   | 5.57269331346033e-05 | 499292.698844486 |
| YMR021C   | 0                    | 0                |
| YMR022W   | 0                    | 0                |
| YMR023C   | 3.03127160610206e-05 | 203057.772085773 |
| YMR024W   | 0                    | 60542.67330097   |
| YMR025W   | 0                    | 20526.545589388  |
| YMR026C   | 0.000103288447982131 | 424073.722827952 |
| YMR027W   | 0.00010328844798202  | 424073.722827952 |
| YMR028W   | 1.75694047700459e-05 | 118879.523317821 |
| YMR029C   | 0                    | 47312.9782530211 |

|           |                      |                  |                  |
|-----------|----------------------|------------------|------------------|
| YMR030W   | 0                    | 47312.9782530211 |                  |
| YMR030W-A | 0                    | 0                |                  |
| YMR031C   | 0                    | 0                |                  |
| YMR032W   | 0                    | 0                |                  |
| YMR033W   | 3.83104696956016e-05 |                  | 218608.869632512 |
| YMR034C   | 5.72792918771547e-05 |                  | 391022.287672367 |
| YMR035W   | 5.72792918771547e-05 |                  | 391022.287672367 |
| YMR036C   | 4.1438064187771e-06  |                  | 59963.9716309595 |
| YMR037C   | 1.57794765953678e-05 |                  | 93898.3073822585 |
| YMR038C   | 0                    | 48672.7728780107 |                  |
| YMR039C   | 8.88179268287992e-06 |                  | 75823.4600086183 |
| YMR040W   | 8.88179268287992e-06 |                  | 102639.043954399 |
| YMR041C   | 5.04383111055162e-05 |                  | 520399.228639577 |
| YMR042W   | 6.69473017602673e-05 |                  | 578258.741779462 |
| YMR043W   | 0                    | 147544.544254603 |                  |
| YMR044W   | 0.000120035225587012 |                  | 529696.090594896 |
| YMR045C   | 0                    | 0                |                  |
| YMR046C   | 0                    | 0                |                  |
| YMR046W-A | 0                    | 0                |                  |
| YMR047C   | 2.75526194657427e-05 |                  | 381659.292514646 |
| YMR048W   | 2.75526194656317e-05 |                  | 381659.292514646 |
| YMR049C   | 2.22757952940134e-05 |                  | 312248.857808584 |
| YMR050C   | 5.50194941798532e-05 |                  | 522523.169071101 |
| YMR051C   | 5.50194941798532e-05 |                  | 522523.169071101 |
| YMR052W   | 0                    | 82171.5846914686 |                  |
| YMR053C   | 0                    | 70907.1633149967 |                  |
| YMR054W   | 0                    | 70907.1633149967 |                  |
| YMR055C   | 1.46317319520417e-05 |                  | 187975.919269406 |
| YMR056C   | 0                    | 0                |                  |
| YMR057C   | 0                    | 0                |                  |
| YMR058W   | 0                    | 0                |                  |
| YMR059W   | 3.16426852378093e-05 |                  | 427164.133133217 |
| YMR060C   | 1.68725275438986e-05 |                  | 261901.036474464 |
| YMR061W   | 1.68725275438986e-05 |                  | 261901.036474464 |
| YMR062C   | 0.000375785356983682 |                  | 940700.151515537 |
| YMR063W   | 6.00400361909781e-05 |                  | 375976.797737168 |
| YMR064W   | 6.4296606601788e-05  |                  | 247067.354173797 |
| YMR065W   | 2.53154863077976e-05 |                  | 223160.325870922 |
| YMR066W   | 7.5098783829386e-06  |                  | 148606.30184983  |
| YMR067C   | 4.46337970749777e-06 |                  | 14279.7712416383 |
| YMR068W   | 0                    | 14279.7712416383 |                  |
| YMR069W   | 0                    | 9359.1112814068  |                  |
| YMR070W   | 0                    | 139617.323490892 |                  |
| YMR071C   | 0                    | 31909.5805749269 |                  |
| YMR072W   | 0                    | 31909.5805749269 |                  |
| YMR073C   | 0                    | 0                |                  |
| YMR074C   | 0                    | 0                |                  |
| YMR075C-A | 0                    | 13119.8571187186 |                  |
| YMR075W   | 0                    | 0                |                  |
| YMR076C   | 6.31009540319472e-06 |                  | 87811.7654200826 |
| YMR077C   | 5.0422375025283e-06  |                  | 107310.486232775 |
| YMR078C   | 0                    | 28601.0862323385 |                  |
| YMR079W   | 0                    | 28601.0862323385 |                  |
| YMR080C   | 4.35442507396022e-06 |                  | 180817.893775672 |



|           |                      |                  |                  |
|-----------|----------------------|------------------|------------------|
| YMR081C   | 0                    | 14763.9662940161 |                  |
| YMR082C   | 0.000271919215985683 |                  | 449849.354215899 |
| YMR083W   | 6.90965918022091e-05 |                  | 477993.060345932 |
| YMR084W   | 8.29771643803268e-05 |                  | 240948.336298823 |
| YMR085W   | 4.54996446919154e-06 | 0                |                  |
| YMR086C-A | 0                    | 0                |                  |
| YMR086W   | 0                    | 153969.070125401 |                  |
| YMR087W   | 0                    | 0                |                  |
| YMR088C   | 0                    | 290569.668236939 |                  |
| YMR089C   | 2.79258588541387e-05 |                  | 378875.792678655 |
| YMR090W   | 0                    | 175210.794143696 |                  |
| YMR091C   | 0                    | 35208.272694947  |                  |
| YMR092C   | 3.96584068976802e-05 |                  | 249893.895968154 |
| YMR093W   | 3.96584068976802e-05 |                  | 260231.24497736  |
| YMR094W   | 5.83199522796729e-06 |                  | 72153.6504935636 |
| YMR095C   | 0.00042716883078231  |                  | 1143433.49093556 |
| YMR096W   | 0.000427168830782199 |                  | 1143433.49093556 |
| YMR097C   | 3.14142308435184e-05 |                  | 102680.340377875 |
| YMR098C   | 0                    | 71379.8726739345 |                  |
| YMR099C   | 7.39705086882925e-06 |                  | 187277.996271262 |
| YMR100W   | 4.39885702085974e-06 |                  | 66316.4825842073 |
| YMR101C   | 0                    | 10635.5636494832 |                  |
| YMR102C   | 5.47496133396219e-06 |                  | 146388.469914732 |
| YMR103C   | 0                    | 0                |                  |
| YMR104C   | 7.94032908613129e-06 |                  | 160219.545755883 |
| YMR105C   | 3.97112194290283e-05 |                  | 156568.790189572 |
| YMR105W-A | 3.97112194290283e-05 |                  | 156568.790189572 |
| YMR106C   | 0.000160176898614028 |                  | 491380.274324813 |
| YMR107W   | 7.13508532670382e-05 |                  | 731665.850322495 |
| YMR108W   | 3.88187491401348e-05 |                  | 401801.054899242 |
| YMR109W   | 5.48429152855689e-05 |                  | 569577.325962044 |
| YMR110C   | 2.37937704459235e-05 |                  | 91240.3876216273 |
| YMR111C   | 1.05827545981985e-05 |                  | 98825.8074368128 |
| YMR112C   | 1.08965125723559e-05 |                  | 104491.964141631 |
| YMR113W   | 1.08965125723559e-05 |                  | 104491.964141631 |
| YMR114C   | 1.06854852351956e-05 |                  | 60791.8317533291 |
| YMR115W   | 1.06854852351956e-05 |                  | 60791.8317533291 |
| YMR116C   | 5.50253420312785e-05 |                  | 400541.987263018 |
| YMR117C   | 0                    | 27451.1733006287 |                  |
| YMR118C   | 4.22054400506244e-05 |                  | 177350.404933917 |
| YMR119W   | 2.55703170309873e-05 |                  | 214250.097766619 |
| YMR120C   | 7.8541997153514e-05  |                  | 232774.547595066 |
| YMR121C   | 2.36531525245054e-05 |                  | 195439.295587293 |
| YMR122C   | 0                    | 0                |                  |
| YMR122W-A | 0                    | 0                |                  |
| YMR123W   | 2.57203088394053e-05 |                  | 383439.697375831 |
| YMR124W   | 1.58853017571126e-05 |                  | 147747.088208277 |
| YMR125W   | 0                    | 46642.0800011971 |                  |
| YMR126C   | 2.15218079507862e-05 |                  | 145616.554565707 |
| YMR127C   | 0                    | 67331.7906878761 |                  |
| YMR128W   | 0                    | 67331.7906878761 |                  |
| YMR129W   | 7.39705086882925e-06 |                  | 212831.130326318 |
| YMR130W   | 0                    | 11838.4055551686 |                  |
| YMR131C   | 0                    | 16361.1678401875 |                  |

|           |                      |                  |
|-----------|----------------------|------------------|
| YMR132C   | 6.99220723329175e-05 | 305892.24840792  |
| YMR133W   | 6.99220723329175e-05 | 305892.24840792  |
| YMR134W   | 6.9587383803027e-06  | 38507.8459042413 |
| YMR135C   | 0.000237703953811397 | 498227.8290451   |
| YMR136W   | 0 21853.8024000943   |                  |
| YMR137C   | 0.000123838178711866 | 420122.935173402 |
| YMR138W   | 0.000123838178711977 | 420122.935173402 |
| YMR139W   | 4.32669651151407e-06 | 87811.5642197069 |
| YMR140W   | 2.14806864488049e-05 | 273332.861897149 |
| YMR141C   | 4.25289971228704e-06 | 149957.815816298 |
| YMR142C   | 9.39534577737433e-06 | 86353.9499325295 |
| YMR143W   | 4.30800867357028e-06 | 100502.440645694 |
| YMR144W   | 3.99475851255993e-05 | 311029.429578034 |
| YMR145C   | 0 53292.123590313    |                  |
| YMR146C   | 0 41028.5433767376   |                  |
| YMR147W   | 5.10851219626129e-06 | 213157.21561629  |
| YMR148W   | 0.000123940526089217 | 292396.928508189 |
| YMR149W   | 0 13119.8571187186   |                  |
| YMR150C   | 2.81630928187226e-05 | 112247.7750188   |
| YMR152W   | 2.81630928188337e-05 | 112247.7750188   |
| YMR153C-A | 0 0                  |                  |
| YMR153W   | 0 140117.919063864   |                  |
| YMR154C   | 0 11207.1867062294   |                  |
| YMR155W   | 0 11207.1867062294   |                  |
| YMR156C   | 1.71476024444228e-05 | 168782.138267289 |
| YMR157C   | 0 26958.0114498423   |                  |
| YMR158C-A | 5.96851933876152e-06 | 81538.7902991626 |
| YMR158W   | 0 26958.0114498423   |                  |
| YMR158W-B | 1.67160090176477e-05 | 255562.720809193 |
| YMR159C   | 0 0                  |                  |
| YMR160W   | 0 0                  |                  |
| YMR161W   | 0 0                  |                  |
| YMR162C   | 0 89047.5902429755   |                  |
| YMR163C   | 4.92342378572985e-05 | 158278.024904395 |
| YMR164C   | 7.74309959450381e-05 | 363605.794612979 |
| YMR165C   | 4.42652020726797e-06 | 130319.227242232 |
| YMR166C   | 5.08735902016166e-06 | 10572.5754929834 |
| YMR167W   | 5.08735902016166e-06 | 10572.5754929834 |
| YMR168C   | 2.00986317744345e-05 | 202933.416722845 |
| YMR169C   | 0.000150293892353548 | 539968.405423122 |
| YMR170C   | 4.06133067710757e-05 | 302094.005277143 |
| YMR171C   | 4.35442507396022e-06 | 124464.001053759 |
| YMR172C-A | 4.39513491773402e-05 | 415505.803486138 |
| YMR172W   | 4.35442507396022e-06 | 124464.001053759 |
| YMR173W   | 4.39513491774512e-05 | 415505.803486138 |
| YMR173W-A | 1.96083411267978e-05 | 184250.329264918 |
| YMR174C   | 0 92266.0087035206   |                  |
| YMR175W   | 0 110950.056035285   |                  |
| YMR175W-A | 0 0                  |                  |
| YMR176W   | 0 29680.2876560453   |                  |
| YMR177W   | 2.54724860843103e-05 | 254951.888207093 |
| YMR178W   | 4.86464475385473e-05 | 412849.356132639 |
| YMR179W   | 6.98682666198103e-05 | 323972.399279947 |
| YMR180C   | 0 65698.0406274137   |                  |

YMR181C 1.52354010858335e-05 53476.230090581  
YMR182C 7.14711066562845e-06 178416.966146616  
YMR182W-A 0 15914.1463630269  
YMR183C 2.28857451537445e-05 267030.61023168  
YMR184W 2.28857451536335e-05 267030.61023168  
YMR185W 1.15435741641079e-05 204829.959000151  
YMR186W 4.30800867357028e-06 163513.268396069  
YMR187C 2.62887861660621e-05 319268.376867076  
YMR188C 0.000250166022058629 830860.036307586  
YMR189W 0.000250166022058629 830860.036307586  
YMR190C 5.93854621723233e-05 222729.419518718  
YMR191W 5.93854621723233e-05 222729.419518718  
YMR192W 0 123284.581754632  
YMR193C-A 0 35087.6398305567  
YMR193W 6.7457134163007e-06 291116.773940588  
YMR194C-A 7.43479487255172e-05 419295.855412647  
YMR194C-B 0 0  
YMR194W 4.17310205413912e-06 184956.451741725  
YMR195W 0.000258710405555473 920315.011879079  
YMR196W 0 125514.018874094  
YMR197C 2.7365700361881e-05 194667.549820303  
YMR198W 2.7365700361881e-05 213043.39610661  
YMR199W 4.94884696244924e-06 126424.307101949  
YMR200W 7.03937960961909e-05 651313.840992203  
YMR201C 0 53052.3265970298  
YMR202W 0 53052.3265970298  
YMR203W 7.3525970512911e-05 148541.213065144  
YMR204C 0 67121.5476579199  
YMR205C 4.79073683534725e-06 164815.318691263  
YMR206W 0 48186.6274043961  
YMR207C 1.7603641896069e-05 144654.618957544  
YMR208W 3.41447289574637e-05 512524.814665464  
YMR209C 0 0  
YMR210W 0 0  
YMR211W 0 41423.6170530726  
YMR212C 2.22406419092547e-05 242719.992854324  
YMR213W 2.22406419091437e-05 242719.992854324  
YMR214W 0 142327.549741709  
YMR215W 0 0  
YMR216C 5.84591844855487e-05 416602.508689016  
YMR217W 6.33465462541727e-05 457330.080324809  
YMR218C 0 18603.7188395449  
YMR219W 0 18603.7188395449  
YMR220W 0 122338.062789803  
YMR221C 4.1438064187771e-06 122496.902498537  
YMR222C 6.70413731496122e-06 170810.143612008  
YMR223W 6.70413731496122e-06 170810.143612008  
YMR224C 0 97176.6855855781  
YMR225C 0 0  
YMR226C 2.9030467454616e-05 232455.013597008  
YMR227C 1.0066549229637e-05 49263.754402403  
YMR228W 1.0066549229637e-05 49263.754402403  
YMR229C 3.30541984181476e-05 257167.947856648  
YMR230W 2.22696494418528e-05 262461.052889074

|           |                      |                  |
|-----------|----------------------|------------------|
| YMR230W-A | 0                    | 0                |
| YMR231W   | 0                    | 0                |
| YMR232W   | 8.57454115354983e-06 | 147094.962730018 |
| YMR233W   | 7.16140367805762e-05 | 195052.035937291 |
| YMR234W   | 2.45298877904476e-05 | 449932.843270718 |
| YMR235C   | 1.00400594269523e-05 | 201836.867705729 |
| YMR236W   | 1.00400594269523e-05 | 201836.867705729 |
| YMR237W   | 4.56055358610818e-05 | 227657.797763776 |
| YMR238W   | 6.9587383803027e-06  | 189203.458626694 |
| YMR239C   | 1.41753043673143e-05 | 206206.507099638 |
| YMR240C   | 2.50175844697109e-05 | 253689.519880168 |
| YMR241W   | 5.51011583230787e-05 | 486883.522002198 |
| YMR242C   | 0                    | 0                |
| YMR242W-A | 0                    | 0                |
| YMR243C   | 0.000152513719977598 | 916737.639499424 |
| YMR244C-A | 4.37151075460829e-06 | 39016.6906435326 |
| YMR244W   | 0                    | 42605.0449790074 |
| YMR245W   | 6.02303476223698e-05 | 648056.205629689 |
| YMR246W   | 0                    | 67135.5049341738 |
| YMR247C   | 4.30988147583911e-05 | 396484.060354025 |
| YMR247W-A | 5.70443337321036e-05 | 371318.129001242 |
| YMR250W   | 8.29361117016258e-06 | 61329.8717435115 |
| YMR251W   | 9.3067860530871e-05  | 342602.65659554  |
| YMR251W-A | 0.000112060854421059 | 600095.12829895  |
| YMR252C   | 3.25821389560721e-05 | 210934.77077     |
| YMR253C   | 0                    | 154555.775831866 |
| YMR254C   | 0                    | 0                |
| YMR255W   | 0                    | 0                |
| YMR256C   | 6.19558260785968e-05 | 348956.644619032 |
| YMR257C   | 0                    | 13213.2243532871 |
| YMR258C   | 1.82847642870021e-05 | 291419.61777075  |
| YMR259C   | 2.2300519767926e-05  | 400736.221552748 |
| YMR260C   | 0                    | 10584.6803590411 |
| YMR261C   | 4.46337970749777e-06 | 51817.3403126478 |
| YMR262W   | 4.46337970749777e-06 | 51817.3403126478 |
| YMR263W   | 0                    | 13081.1782191541 |
| YMR264W   | 0                    | 118947.336223317 |
| YMR265C   | 5.96851933876152e-06 | 112596.860804836 |
| YMR266W   | 1.10558479948786e-05 | 123101.896386519 |
| YMR267W   | 0                    | 74081.6073467637 |
| YMR268C   | 2.03223975885347e-05 | 258987.063570077 |
| YMR269W   | 2.03223975885347e-05 | 258987.063570077 |
| YMR270C   | 4.08472711287411e-05 | 269418.441899555 |
| YMR271C   | 0.000249419597694533 | 1129823.85966754 |
| YMR272C   | 1.30534260016635e-05 | 207514.645200302 |
| YMR272W-B | 1.30534260016635e-05 | 207514.645200302 |
| YMR273C   | 0                    | 52589.2736657728 |
| YMR274C   | 1.48195943671103e-05 | 181485.836710018 |
| YMR275C   | 6.00808816075826e-06 | 57449.541565307  |
| YMR276W   | 6.00808816075826e-06 | 57449.541565307  |
| YMR277W   | 0.000103170019389087 | 301110.660741929 |
| YMR278W   | 0                    | 25149.5952970707 |
| YMR279C   | 1.08936125280401e-05 | 136489.037028779 |
| YMR280C   | 5.0123978234673e-06  | 170219.715769398 |

YMR281W 3.60576765309206e-05 403761.452031057  
YMR282C 0 139768.371640719  
YMR283C 2.35814988731597e-05 306954.574955966  
YMR284W 5.86016461043837e-05 479734.119415359  
YMR285C 0 10818.6205365069  
YMR286W 0 10818.6205365069  
YMR287C 4.42652020726797e-06 44967.1497300153  
YMR288W 4.42652020726797e-06 44967.1497300153  
YMR289W 2.23418250430152e-05 250063.7388889  
YMR290C 1.83161976110569e-05 298696.374907694  
YMR291W 4.31298595910956e-05 480329.987020271  
YMR292W 1.08859573376696e-05 58642.3061837072  
YMR293C 1.63233394762097e-05 125855.64040426  
YMR294W 1.63233394762097e-05 125855.64040426  
YMR294W-A 2.09768018959444e-05 175511.454018377  
YMR295C 0 70192.8504965477  
YMR296C 0 106491.748707362  
YMR297W 1.94099826883454e-05 186253.618299115  
YMR298W 0 93938.3825065134  
YMR299C 0 55513.0049152951  
YMR300C 9.39239177799589e-05 426330.05744702  
YMR301C 2.9193454730736e-05 274896.134321491  
YMR302C 3.61413949788725e-05 197244.986544829  
YMR303C 1.13171021255409e-05 210031.591523382  
YMR304W 1.57804313205556e-05 219047.020859812  
YMR305C 0 98016.9012208913  
YMR306C-A 0 37981.8316812209  
YMR306W 1.37877206234371e-05 155298.402447728  
YMR307W 0 37981.8316812209  
YMR308C 3.68902282184003e-05 288374.780600706  
YMR309C 0 107807.344132595  
YMR310C 4.3401279982147e-06 100215.376641543  
YMR311C 3.70736325820964e-05 108962.517696262  
YMR312W 0 25704.9430388836  
YMR313C 5.89087867677307e-05 377424.719560051  
YMR314W 5.89087867677307e-05 377424.719560051  
YMR315W 0 39725.4298342228  
YMR315W-A 3.34610016041736e-05 110124.431299072  
YMR316C-A 2.19965686882873e-05 184477.139162522  
YMR316W 3.22373339669557e-05 300330.120703352  
YMR317W 0 65904.4275709078  
YMR318C 6.18834531815882e-05 482351.189649055  
YMR319C 7.94032908613129e-06 77369.284624827  
YMR320W 0 206321.009934722  
YMR321C 2.10812618652856e-05 326150.044189099  
YMR322C 4.91341438743076e-05 420677.849764368  
YMR323W 8.52750895663501e-06 282677.697860666  
YMR324C 1.43052532501908e-05 167459.207845397  
YMR325W 1.43052532501908e-05 167459.207845397  
YMR326C 0 53878.6229851448  
YNL001W 1.37188638730246e-05 226488.524319256  
YNL002C 1.37188638730246e-05 226488.524319256  
YNL003C 0 10388.5810129985  
YNL004W 0.000164978814373828 624209.815449927

|           |                      |                  |
|-----------|----------------------|------------------|
| YNL005C   | 0.000164978814373828 | 624209.815449926 |
| YNL006W   | 1.0175100485621e-05  | 173747.134380278 |
| YNL007C   | 1.0175100485621e-05  | 173747.134380278 |
| YNL008C   | 8.93398639122411e-05 | 443128.188561594 |
| YNL009W   | 8.95835932801514e-06 | 161619.345721067 |
| YNL010W   | 4.30896169401063e-06 | 187895.529005017 |
| YNL011C   | 4.30896169401063e-06 | 187895.529005017 |
| YNL012W   | 0                    | 0                |
| YNL013C   | 0                    | 0                |
| YNL014W   | 8.61964314768926e-06 | 261487.85851483  |
| YNL015W   | 8.52750895663501e-06 | 150744.608774731 |
| YNL016W   | 0                    | 35618.0650752949 |
| YNL017C   | 0                    | 35618.0650752949 |
| YNL018C   | 0                    | 22940.6151120883 |
| YNL019C   | 7.94032908613129e-06 | 48652.6156765328 |
| YNL020C   | 1.06993349960893e-05 | 68758.0151678792 |
| YNL021W   | 0                    | 38396.7291726514 |
| YNL022C   | 0                    | 38396.7291726514 |
| YNL023C   | 0                    | 0                |
| YNL024C   | 1.73271944968745e-05 | 330992.778632942 |
| YNL024C-A | 5.08735902016166e-06 | 43597.5665349412 |
| YNL025C   | 1.00400594269523e-05 | 201664.854631627 |
| YNL026W   | 0                    | 162034.97971587  |
| YNL027W   | 2.43670328562429e-05 | 189793.333652428 |
| YNL029C   | 2.43670328561318e-05 | 198598.418974301 |
| YNL030W   | 3.70937884202061e-05 | 326244.844865061 |
| YNL031C   | 4.22849950375559e-05 | 399968.821341272 |
| YNL032W   | 2.86857588333023e-05 | 242160.346380369 |
| YNL033W   | 7.94032908613129e-06 | 57359.1446257486 |
| YNL034W   | 4.60395430157412e-06 | 273493.049871956 |
| YNL035C   | 4.08114344639943e-05 | 362735.074983585 |
| YNL036W   | 0.000116298049983921 | 955727.500465585 |
| YNL037C   | 4.36233941742969e-05 | 435031.740948443 |
| YNL038W   | 0                    | 55049.5659666348 |
| YNL039W   | 0                    | 0                |
| YNL040W   | 7.69239196068972e-05 | 621815.058557335 |
| YNL041C   | 2.1193296354749e-05  | 316499.90969205  |
| YNL042W   | 2.4299501783287e-05  | 286420.679265309 |
| YNL042W-B | 0.000140529588428695 | 994101.63053867  |
| YNL043C   | 1.14490924841837e-05 | 121710.759365519 |
| YNL044W   | 5.0422375025283e-06  | 124479.399235817 |
| YNL045W   | 0                    | 147357.280613784 |
| YNL046W   | 3.57458128569244e-05 | 432182.967924912 |
| YNL047C   | 3.57458128569244e-05 | 432182.967924912 |
| YNL048W   | 2.12262539779351e-05 | 332288.305596295 |
| YNL049C   | 2.12262539779351e-05 | 332288.305596295 |
| YNL050C   | 1.30715566544204e-05 | 147988.339659931 |
| YNL051W   | 0                    | 136730.062619111 |
| YNL052W   | 5.72925553663506e-05 | 349379.097086386 |
| YNL053W   | 1.04556465997385e-05 | 42732.9240471322 |
| YNL054W   | 0                    | 60659.2087272758 |
| YNL054W-A | 8.58405261290329e-05 | 493038.411392213 |
| YNL054W-B | 8.58405261290329e-05 | 493038.411392213 |
| YNL055C   | 8.99909969760415e-05 | 524938.525420606 |

|           |                      |                  |
|-----------|----------------------|------------------|
| YNL056W   | 3.85817342307693e-05 | 297528.216928918 |
| YNL058C   | 3.85817342306582e-05 | 297528.216928918 |
| YNL059C   | 4.35442507396022e-06 | 318481.044972012 |
| YNL061W   | 0                    | 44861.9857844887 |
| YNL062C   | 0                    | 44861.9857844887 |
| YNL063W   | 1.4073145759963e-05  | 109813.520975905 |
| YNL064C   | 1.4073145760074e-05  | 109813.520975905 |
| YNL065W   | 7.30595945872548e-05 | 433456.969773609 |
| YNL066W   | 3.23016862180392e-05 | 63409.9595113139 |
| YNL067W   | 2.46308027549436e-05 | 114541.448733785 |
| YNL067W-A | 0                    | 23028.9515375263 |
| YNL067W-B | 2.53154863077976e-05 | 233036.612040329 |
| YNL068C   | 0                    | 23028.9515375263 |
| YNL069C   | 9.75733853614269e-06 | 94987.8945350707 |
| YNL070W   | 5.05754317725593e-06 | 109691.794733002 |
| YNL071W   | 2.63043485820846e-05 | 370622.822550543 |
| YNL072W   | 0                    | 0                |
| YNL073W   | 4.46337970749777e-06 | 108861.253117331 |
| YNL074C   | 4.46337970749777e-06 | 108861.253117331 |
| YNL075W   | 6.26477981802154e-05 | 419733.652856784 |
| YNL076W   | 0                    | 26692.9956722697 |
| YNL077W   | 4.15532990197809e-05 | 298876.213189486 |
| YNL078W   | 4.60395430157412e-06 | 125014.656146369 |
| YNL079C   | 4.60395430157412e-06 | 151897.145093773 |
| YNL080C   | 5.83199522796729e-06 | 98459.3061150078 |
| YNL081C   | 0                    | 91642.626087031  |
| YNL082W   | 0                    | 54090.4264458007 |
| YNL083W   | 0                    | 138748.171957955 |
| YNL084C   | 0                    | 138748.171957955 |
| YNL085W   | 5.61382682031653e-05 | 196197.576216858 |
| YNL086W   | 9.03830571901132e-05 | 334883.159315809 |
| YNL087W   | 6.06984540624245e-05 | 226117.979171382 |
| YNL088W   | 0                    | 34782.7814154711 |
| YNL089C   | 0                    | 34782.7814154711 |
| YNL090W   | 0                    | 0                |
| YNL091W   | 3.12583925788923e-05 | 319732.512290133 |
| YNL092W   | 0                    | 0                |
| YNL093W   | 1.75550173722172e-05 | 313933.55325357  |
| YNL094W   | 4.6610649503398e-05  | 370510.421113132 |
| YNL095C   | 0.000139124258281664 | 455651.435413425 |
| YNL096C   | 3.22840894980692e-05 | 258143.768462308 |
| YNL097C   | 2.23791522792061e-05 | 274562.694130924 |
| YNL097C-B | 2.97348578927048e-05 | 440273.091679406 |
| YNL097W-A | 2.97348578927048e-05 | 440273.091679406 |
| YNL098C   | 4.31622335674842e-05 | 86656.7505503303 |
| YNL099C   | 0.00012088605631011  | 370066.780737038 |
| YNL100W   | 4.35442507396022e-06 | 189539.17378147  |
| YNL101W   | 1.60465351258798e-05 | 548915.951148179 |
| YNL102W   | 2.90696634636101e-05 | 221099.844481282 |
| YNL103W   | 0.000129741928539207 | 432001.028791174 |
| YNL104C   | 0.000348160219839744 | 1393560.20340028 |
| YNL106C   | 9.99105951171586e-06 | 251060.982346571 |
| YNL107W   | 3.72627612019727e-05 | 464961.496240962 |
| YNL108C   | 3.72627612019727e-05 | 464961.496240962 |

|           |                      |                  |  |
|-----------|----------------------|------------------|--|
| YNL109W   | 0                    | 118506.253057377 |  |
| YNL110C   | 0                    | 118506.253057377 |  |
| YNL111C   | 0                    | 21081.8933312009 |  |
| YNL112W   | 0                    | 113683.417612411 |  |
| YNL113W   | 2.08364484609591e-05 | 138975.673702737 |  |
| YNL114C   | 0                    | 102139.374203108 |  |
| YNL115C   | 0                    | 19916.5132046616 |  |
| YNL116W   | 9.89481002868775e-05 | 368995.580116263 |  |
| YNL117W   | 2.95810449394418e-05 | 363108.990708265 |  |
| YNL118C   | 2.95810449393308e-05 | 252302.788302074 |  |
| YNL119W   | 1.34077112063924e-05 | 210681.350289956 |  |
| YNL121C   | 1.34077112063924e-05 | 210681.350289956 |  |
| YNL122C   | 1.7960765140046e-05  | 344009.414796689 |  |
| YNL123W   | 1.86638176251641e-05 | 397259.086874714 |  |
| YNL124W   | 0.000193383871790465 | 340164.919365339 |  |
| YNL125C   | 2.10788837280429e-05 | 284185.725099162 |  |
| YNL126W   | 1.3236179081777e-05  | 199133.058451797 |  |
| YNL127W   | 1.47995268398038e-05 | 224560.284104685 |  |
| YNL128W   | 0                    | 0                |  |
| YNL129W   | 0                    | 0                |  |
| YNL130C   | 2.07990394963664e-05 | 409308.775410937 |  |
| YNL130C-A | 0                    | 0                |  |
| YNL131W   | 1.5525786786208e-05  | 123432.833152315 |  |
| YNL132W   | 4.12426215516959e-05 | 273615.272339967 |  |
| YNL133C   | 1.54982700484307e-05 | 339721.836844591 |  |
| YNL134C   | 2.73587107216811e-05 | 200166.739242559 |  |
| YNL135C   | 0                    | 0                |  |
| YNL136W   | 0                    | 0                |  |
| YNL137C   | 0                    | 0                |  |
| YNL138W   | 2.96932366897762e-05 | 169139.360825747 |  |
| YNL138W-A | 0                    | 151539.478789503 |  |
| YNL139C   | 0                    | 151539.478789503 |  |
| YNL141W   | 2.03223975885347e-05 | 131485.405421002 |  |
| YNL142W   | 0                    | 54168.5989715407 |  |
| YNL143C   | 0                    | 54168.5989715407 |  |
| YNL144C   | 0                    | 0                |  |
| YNL144W-A | 1.04556465997385e-05 | 115233.039902858 |  |
| YNL145W   | 0                    | 196996.383655007 |  |
| YNL146C-A | 3.52855612087977e-05 | 186523.629291286 |  |
| YNL146W   | 3.52855612089087e-05 | 186523.629291286 |  |
| YNL147W   | 0                    | 0                |  |
| YNL148C   | 0                    | 0                |  |
| YNL149C   | 0                    | 0                |  |
| YNL150W   | 5.3823961633781e-05  | 452661.013647991 |  |
| YNL151C   | 4.33687684824324e-05 | 386828.714039031 |  |
| YNL152W   | 0.000152032180035122 | 463257.904329742 |  |
| YNL153C   | 0.000152032180035122 | 463257.904329742 |  |
| YNL154C   | 5.61117156444579e-05 | 177548.239780268 |  |
| YNL155W   | 1.87288943351849e-05 | 207735.329101447 |  |
| YNL156C   | 1.87288943352959e-05 | 207735.329101447 |  |
| YNL157W   | 0                    | 15557.1714862061 |  |
| YNL158W   | 7.48834913844032e-06 | 101850.052154386 |  |
| YNL159C   | 7.48834913844032e-06 | 101850.052154386 |  |
| YNL160W   | 5.08735902016166e-06 | 120517.653020974 |  |



YNL161W 0 83182.0700961154  
YNL162W 2.03351442296107e-05 301015.148089481  
YNL162W-A 2.76179120921594e-05 224167.250151529  
YNL163C 2.76179120921594e-05 224167.250151529  
YNL164C 3.07302632945872e-05 146132.828200435  
YNL165W 0 10337.3490092056  
YNL166C 0 10337.3490092056  
YNL167C 8.30135560256906e-05 220358.697283501  
YNL168C 7.94032908613129e-06 43508.881443602  
YNL169C 1.06854852351956e-05 76673.4306567029  
YNL170W 0 0  
YNL171C 0 23102.4908958793  
YNL172W 4.75557770311941e-05 350221.541037442  
YNL173C 4.75557770311941e-05 350221.541037442  
YNL175C 6.45175706116552e-05 417224.803097104  
YNL176C 5.08735902016166e-06 87458.6717938397  
YNL177C 1.81925284373774e-05 134252.440015279  
YNL178W 0 99219.4208123083  
YNL179C 3.35369369122152e-05 308841.477803516  
YNL180C 0 0  
YNL181W 4.25289971228704e-06 120667.541287517  
YNL182C 4.25289971228704e-06 160680.337706582  
YNL183C 0.000267806754131295 793960.446263148  
YNL184C 1.1486843935038e-05 222313.801287339  
YNL185C 1.59501723724365e-05 242163.031353454  
YNL186W 1.15435741641079e-05 185640.399228781  
YNL187W 2.34300006113353e-05 303826.253034248  
YNL188W 0 39510.9412821357  
YNL189W 0 52819.3925445009  
YNL190W 9.41649886232465e-06 112024.343798962  
YNL191W 6.44983105591024e-06 20101.7021019631  
YNL192W 7.43442035722186e-05 361997.643793737  
YNL193W 2.11797935570912e-05 211957.413097229  
YNL194C 0 43771.7028224455  
YNL195C 1.59352197860452e-05 225049.703055409  
YNL196C 2.29823962685227e-05 358117.616505862  
YNL197C 2.00986317745455e-05 364061.935810572  
YNL198C 1.48913173781962e-05 338978.631949017  
YNL199C 4.22596669136244e-06 102429.874608881  
YNL200C 0 132304.277776524  
YNL201C 0 103994.232524203  
YNL202W 0 151414.940063169  
YNL203C 2.62887861660621e-05 220356.231916731  
YNL204C 5.07641770682854e-05 368742.405623775  
YNL206C 1.33905833212822e-05 205281.68968652  
YNL207W 5.57948006495446e-05 329934.22436488  
YNL208W 6.14699654393203e-05 185104.979976812  
YNL209W 0 0  
YNL210W 6.31568733308052e-05 423096.736605683  
YNL211C 5.4582800199654e-05 273286.615180293  
YNL212W 2.15970984112079e-05 146067.60348457  
YNL213C 2.15970984112079e-05 146067.60348457  
YNL214W 0 27896.2400334274  
YNL215W 4.32669651151407e-06 49584.3171956715

|         |                      |                  |  |
|---------|----------------------|------------------|--|
| YNL216W | 0                    | 46995.5346613571 |  |
| YNL217W | 4.54996446919154e-06 | 27698.5957288761 |  |
| YNL218W | 0                    | 194507.910656389 |  |
| YNL219C | 0                    | 114735.367002941 |  |
| YNL220W | 0.000187221082155631 | 535634.130499508 |  |
| YNL221C | 1.94848397994107e-05 | 254764.116356039 |  |
| YNL222W | 0                    | 0                |  |
| YNL223W | 0                    | 60582.2514911735 |  |
| YNL224C | 0                    | 60582.2514911735 |  |
| YNL225C | 0                    | 89400.0361532161 |  |
| YNL227C | 2.87506011557026e-05 | 174329.400406519 |  |
| YNL228W | 0.000186085914064882 | 600872.592891127 |  |
| YNL229C | 0.000186085914064993 | 600872.592891127 |  |
| YNL230C | 2.54633532928983e-05 | 432697.524391079 |  |
| YNL231C | 5.40029857727387e-05 | 435806.983234732 |  |
| YNL232W | 9.75733853614269e-06 | 116275.242291204 |  |
| YNL233W | 0                    | 72813.8734176601 |  |
| YNL234W | 2.1866090726852e-05  | 67133.8764266223 |  |
| YNL235C | 2.1866090726852e-05  | 67133.8764266223 |  |
| YNL236W | 0                    | 34393.360963671  |  |
| YNL237W | 0                    | 52298.7623072803 |  |
| YNL238W | 1.39849889949639e-05 | 287560.263326915 |  |
| YNL239W | 8.53210898164036e-05 | 350797.212385511 |  |
| YNL240C | 0.000173978658052021 | 728670.543761661 |  |
| YNL241C | 9.07380859858087e-05 | 350175.827294666 |  |
| YNL242W | 0                    | 27660.0818150081 |  |
| YNL243W | 1.84778742187142e-05 | 201670.827502689 |  |
| YNL244C | 1.33905833212822e-05 | 201670.827502689 |  |
| YNL245C | 0                    | 13299.4902414958 |  |
| YNL246W | 0                    | 0                |  |
| YNL247W | 3.18856666847722e-05 | 76418.633135029  |  |
| YNL248C | 3.18856666847722e-05 | 76418.633135029  |  |
| YNL249C | 0                    | 0                |  |
| YNL250W | 1.83984822155203e-05 | 214586.3506125   |  |
| YNL251C | 5.67001671942791e-05 | 306083.056193962 |  |
| YNL252C | 5.10201801429133e-06 | 87683.3725849481 |  |
| YNL253W | 1.15962478500764e-05 | 222029.994607549 |  |
| YNL254C | 1.15962478500764e-05 | 205963.048618923 |  |
| YNL255C | 4.3401279982147e-06  | 231235.892533088 |  |
| YNL256W | 0                    | 139840.474723394 |  |
| YNL257C | 0                    | 139840.474723395 |  |
| YNL258C | 3.14083319234992e-05 | 133865.035581336 |  |
| YNL259C | 4.21364339781016e-05 | 191914.247321084 |  |
| YNL260C | 0                    | 0                |  |
| YNL261W | 0                    | 0                |  |
| YNL262W | 8.52750895663501e-06 | 206836.726966614 |  |
| YNL263C | 8.52750895663501e-06 | 206836.726966614 |  |
| YNL264C | 2.45189201550922e-05 | 237212.652084753 |  |
| YNL265C | 0                    | 67189.8109302509 |  |
| YNL266W | 8.6544151146617e-05  | 346648.934739031 |  |
| YNL267W | 8.52750895663501e-06 | 339985.579046532 |  |
| YNL268W | 7.40161525627503e-05 | 379159.828106766 |  |
| YNL269W | 0                    | 0                |  |
| YNL270C | 0                    | 0                |  |

|           |                      |                  |
|-----------|----------------------|------------------|
| YNL271C   | 2.03223975885347e-05 | 167120.856355141 |
| YNL272C   | 6.03780154713185e-05 | 685042.953779585 |
| YNL273W   | 8.88179268287992e-06 | 157240.538324462 |
| YNL274C   | 0                    | 82999.2668428317 |
| YNL275W   | 9.65603033520335e-06 | 96286.3713216456 |
| YNL276C   | 9.65603033520335e-06 | 96286.3713216456 |
| YNL277W   | 0.000119476118291661 | 582619.491444488 |
| YNL277W-A | 0                    | 8354.7664614836  |
| YNL278W   | 3.12583896259211e-05 | 458729.179584876 |
| YNL279W   | 6.21607796834622e-05 | 519641.689338786 |
| YNL280C   | 6.21607796833512e-05 | 519641.689338786 |
| YNL281W   | 0                    | 9982.6337771607  |
| YNL282W   | 3.54842622733997e-05 | 284354.106827872 |
| YNL283C   | 6.44983105591024e-06 | 31643.0790893636 |
| YNL284C   | 2.7586992731865e-05  | 164921.35326996  |
| YNL284C-A | 4.23944643139773e-05 | 615951.732641162 |
| YNL284C-B | 4.23944643139773e-05 | 615951.732641162 |
| YNL285W   | 0                    | 0                |
| YNL286W   | 3.6043634090599e-05  | 280208.471455073 |
| YNL287W   | 4.46703397064541e-05 | 293321.672344021 |
| YNL288W   | 0                    | 77496.7660787642 |
| YNL289W   | 0                    | 32492.8842267324 |
| YNL290W   | 0                    | 45411.6147626608 |
| YNL291C   | 0                    | 45411.6147626608 |
| YNL292W   | 0                    | 0                |
| YNL293W   | 8.9426206647647e-05  | 321392.532763638 |
| YNL294C   | 8.9426206647647e-05  | 321392.532763638 |
| YNL295W   | 3.23016862180392e-05 | 166126.251826565 |
| YNL297C   | 3.23016862180392e-05 | 166126.251826565 |
| YNL298W   | 1.70719342141856e-05 | 161453.164589587 |
| YNL299W   | 2.06910771244351e-05 | 164637.683112768 |
| YNL300W   | 3.7712746395191e-05  | 508390.730659693 |
| YNL301C   | 4.75985430792303e-06 | 261728.580776935 |
| YNL302C   | 0                    | 149743.822780518 |
| YNL304W   | 0                    | 121248.440969455 |
| YNL305C   | 0                    | 121248.440969455 |
| YNL306W   | 2.02928596793051e-05 | 408726.276258067 |
| YNL307C   | 2.02928596793051e-05 | 298772.012845228 |
| YNL308C   | 1.0629193910483e-05  | 202212.631440328 |
| YNL309W   | 4.23415678818539e-06 | 121114.715991481 |
| YNL310C   | 4.23415678818539e-06 | 121114.715991481 |
| YNL311C   | 0.000243528945738314 | 431692.447631951 |
| YNL312W   | 0                    | 0                |
| YNL313C   | 0                    | 0                |
| YNL314W   | 0                    | 14681.7672895427 |
| YNL315C   | 0                    | 14681.7672895427 |
| YNL316C   | 0.000118236662022042 | 504532.329207781 |
| YNL317W   | 4.80625176119132e-05 | 309585.428990338 |
| YNL318C   | 4.80625176119132e-05 | 309585.428990338 |
| YNL319W   | 0                    | 0                |
| YNL320W   | 0                    | 20288.6498755903 |
| YNL321W   | 0                    | 91196.9653560632 |
| YNL322C   | 0                    | 91196.9653560632 |
| YNL323W   | 0                    | 75365.830636557  |

|           |                      |                  |                  |
|-----------|----------------------|------------------|------------------|
| YNL325C   | 0                    | 75365.830636557  |                  |
| YNL326C   | 0.000144867110733471 |                  | 298943.296754137 |
| YNL327W   | 2.54724860843103e-05 |                  | 154022.556292423 |
| YNL328C   | 5.03352043934591e-06 |                  | 147962.16162313  |
| YNL329C   | 2.41575713733067e-05 |                  | 99756.7686207841 |
| YNL330C   | 0                    | 11207.1867062294 |                  |
| YNL331C   | 7.76767162613545e-05 |                  | 535812.151412244 |
| YNL332W   | 3.27406793018126e-05 |                  | 289577.297336017 |
| YNL333W   | 2.86885873711507e-05 |                  | 294122.457277619 |
| YNL334C   | 2.86885873710396e-05 |                  | 294122.457277619 |
| YNL335W   | 2.07494598593039e-05 |                  | 163347.156017441 |
| YNL336W   | 5.0422375025283e-06  |                  | 329225.674733118 |
| YNL337W   | 4.22596669136244e-06 |                  | 136907.66317038  |
| YNL338W   | 2.19965686882873e-05 |                  | 230950.053100754 |
| YNL339C   | 2.19965686882873e-05 |                  | 230950.053100754 |
| YNL339W-B | 0                    | 0                |                  |
| YNR001C   | 0                    | 15278.0488344899 |                  |
| YNR001W-A | 0                    | 15278.0488344899 |                  |
| YNR002C   | 0                    | 169488.334773931 |                  |
| YNR003C   | 1.98574557848108e-05 |                  | 135849.866490544 |
| YNR003W-A | 0                    | 169488.334773931 |                  |
| YNR004W   | 1.98574557848108e-05 |                  | 135849.866490544 |
| YNR006W   | 0                    | 60733.2073887389 |                  |
| YNR007C   | 4.1438064187771e-06  |                  | 90338.4287367732 |
| YNR008W   | 4.1438064187771e-06  |                  | 90338.4287367732 |
| YNR009W   | 9.52655543451364e-05 |                  | 294561.654036962 |
| YNR010W   | 0                    | 10675.403921614  |                  |
| YNR011C   | 1.47496268798619e-05 |                  | 153747.102424956 |
| YNR012W   | 1.47496268798619e-05 |                  | 153747.102424956 |
| YNR013C   | 1.18112505932411e-05 |                  | 234963.887078797 |
| YNR014W   | 0                    | 41729.6326345907 |                  |
| YNR015W   | 3.15444801166631e-05 |                  | 248856.061392332 |
| YNR016C   | 0                    | 51872.8703627944 |                  |
| YNR017W   | 7.14711066562845e-06 |                  | 174077.829643974 |
| YNR018W   | 0                    | 31576.7670523871 |                  |
| YNR019W   | 0                    | 35860.2077263263 |                  |
| YNR020C   | 6.44983105591024e-06 | 0                |                  |
| YNR021W   | 6.44983105591024e-06 | 0                |                  |
| YNR022C   | 0                    | 0                |                  |
| YNR023W   | 0                    | 0                |                  |
| YNR024W   | 0                    | 38571.1166569304 |                  |
| YNR025C   | 0                    | 86316.4119755915 |                  |
| YNR026C   | 1.06653957584468e-05 |                  | 179987.73001777  |
| YNR027W   | 1.06653957584468e-05 |                  | 179987.73001777  |
| YNR028W   | 0                    | 0                |                  |
| YNR029C   | 0                    | 0                |                  |
| YNR030W   | 0                    | 0                |                  |
| YNR031C   | 5.08735902016166e-06 |                  | 69188.8475021831 |
| YNR032C-A | 0                    | 98188.1232411416 |                  |
| YNR032W   | 1.49035358788518e-05 |                  | 139951.806954343 |
| YNR033W   | 0                    | 98188.1232411416 |                  |
| YNR034W   | 5.03352043934591e-06 |                  | 186748.148391461 |
| YNR034W-A | 1.85286221037195e-05 |                  | 188298.076201757 |
| YNR035C   | 0                    | 135238.131906143 |                  |

|           |                      |                  |  |
|-----------|----------------------|------------------|--|
| YNR036C   | 0                    | 83216.8778411778 |  |
| YNR037C   | 1.5454393877623e-05  | 133698.761740318 |  |
| YNR038W   | 1.5454393877623e-05  | 133698.761740318 |  |
| YNR039C   | 4.30800867357028e-06 | 154508.379410066 |  |
| YNR040W   | 4.30800867357028e-06 | 154508.379410066 |  |
| YNR041C   | 0                    | 18649.8113652655 |  |
| YNR043W   | 0                    | 0                |  |
| YNR044W   | 3.55212776840252e-05 | 272339.499539354 |  |
| YNR045W   | 0                    | 60936.23330885   |  |
| YNR046W   | 0                    | 132854.632928491 |  |
| YNR047W   | 5.3564927795513e-06  | 28273.1843314855 |  |
| YNR048W   | 3.4133117761681e-05  | 178400.687158257 |  |
| YNR049C   | 0                    | 23125.5829623614 |  |
| YNR050C   | 5.68859167293656e-05 | 161743.21454959  |  |
| YNR051C   | 0.000100802414115586 | 419989.295498677 |  |
| YNR052C   | 3.66864144148993e-05 | 232726.102215996 |  |
| YNR053C   | 4.17310205413912e-06 | 104850.667247771 |  |
| YNR054C   | 3.85035687824331e-05 | 300119.214519888 |  |
| YNR055C   | 0                    | 25145.5542166454 |  |
| YNR056C   | 0                    | 10263.272794694  |  |
| YNR057C   | 0                    | 10259.2317142687 |  |
| YNR058W   | 0                    | 10259.2317142687 |  |
| YNR059W   | 5.08735902016166e-06 | 94341.3393078413 |  |
| YNR060W   | 3.51939695246717e-05 | 233435.946151981 |  |
| YNR061C   | 4.35442507396022e-06 | 154638.224515734 |  |
| YNR062C   | 0                    | 86657.9429668151 |  |
| YNR063W   | 1.74676820053898e-05 | 356087.826472228 |  |
| YNR064C   | 3.26345399960237e-05 | 224658.959717539 |  |
| YNR065C   | 0                    | 0                |  |
| YNR066C   | 0.000160881846876459 | 576370.294838484 |  |
| YNR067C   | 1.592647951143e-05   | 128737.530400193 |  |
| YNR068C   | 4.30800867357028e-06 | 22055.4982420856 |  |
| YNR069C   | 0.000379272290471966 | 582718.258551218 |  |
| YNR070W   | 1.95823516697669e-05 | 86776.646091674  |  |
| YNR071C   | 0                    | 63393.8494433086 |  |
| YNR072W   | 3.00576427813004e-05 | 392022.007485329 |  |
| YNR073C   | 4.42447536616042e-05 | 336473.193707161 |  |
| YNR074C   | 5.39348570171017e-05 | 177302.66629603  |  |
| YNR075C-A | 0                    | 56783.8445151895 |  |
| YNR075W   | 0                    | 24935.3298192976 |  |
| YNR076W   | 0                    | 56783.8445151895 |  |
| YNR077C   | 1.03625820707665e-05 | 124149.657777821 |  |
| YOL001W   | 3.58454893497617e-05 | 151773.5611866   |  |
| YOL002C   | 5.10851219626129e-06 | 81788.255141314  |  |
| YOL003C   | 0                    | 19360.0219750821 |  |
| YOL004W   | 0                    | 0                |  |
| YOL005C   | 4.83021977282228e-06 | 281429.27772131  |  |
| YOL006C   | 0                    | 28601.0862323385 |  |
| YOL007C   | 0                    | 188840.088267836 |  |
| YOL008W   | 0                    | 0                |  |
| YOL009C   | 0                    | 0                |  |
| YOL010W   | 4.42652020726797e-06 | 210219.568626035 |  |
| YOL011W   | 0.000121573420422294 | 292393.95870552  |  |
| YOL012C   | 5.30475700434296e-05 | 252314.922422566 |  |

|           |                      |                  |                  |
|-----------|----------------------|------------------|------------------|
| YOL013C   | 0                    | 38891.2586005348 |                  |
| YOL013W-A | 0                    | 0                |                  |
| YOL013W-B | 9.35117746969638e-06 |                  | 319783.694284059 |
| YOL014W   | 0                    | 101118.968694112 |                  |
| YOL015W   | 1.55877364746981e-05 |                  | 132488.186693452 |
| YOL016C   | 2.04745569138964e-05 |                  | 207936.013020174 |
| YOL017W   | 1.1486843935038e-05  |                  | 150397.044291901 |
| YOL018C   | 1.1486843935038e-05  |                  | 150397.044291901 |
| YOL019W   | 5.25950794724173e-05 |                  | 266021.30958152  |
| YOL019W-A | 1.08859573376696e-05 |                  | 162880.030647563 |
| YOL020W   | 0.000127436429054328 |                  | 656731.448461177 |
| YOL021C   | 5.66203586611636e-05 |                  | 588180.389587788 |
| YOL022C   | 4.65732063579249e-05 |                  | 138917.917945803 |
| YOL023W   | 3.38325430505604e-05 |                  | 209612.49915306  |
| YOL024W   | 4.80625176119132e-05 |                  | 286213.559164308 |
| YOL025W   | 5.22786268245534e-05 |                  | 345984.245917123 |
| YOL026C   | 5.22786268245534e-05 |                  | 330925.755133477 |
| YOL027C   | 9.50393606882205e-05 |                  | 230674.667018144 |
| YOL028C   | 7.51736814741388e-05 |                  | 465697.76862125  |
| YOL029C   | 0                    | 0                |                  |
| YOL030W   | 2.30935725747949e-05 |                  | 79532.8790209133 |
| YOL031C   | 2.30935725747949e-05 |                  | 68526.8063049637 |
| YOL032W   | 4.39554899075434e-05 |                  | 371713.349018382 |
| YOL033W   | 9.43333662628554e-06 |                  | 150171.252608256 |
| YOL034W   | 4.12679781092162e-05 |                  | 375692.925163703 |
| YOL035C   | 0                    | 56059.6645481915 |                  |
| YOL036W   | 0.000121710247317441 |                  | 381336.73073475  |
| YOL038C-A | 0                    | 63132.0022150985 |                  |
| YOL038W   | 0                    | 63132.0022150985 |                  |
| YOL039W   | 0                    | 0                |                  |
| YOL040C   | 0                    | 0                |                  |
| YOL041C   | 3.97112194290283e-05 |                  | 283804.530767893 |
| YOL042W   | 0                    | 0                |                  |
| YOL043C   | 0                    | 0                |                  |
| YOL044W   | 2.03223975885347e-05 |                  | 301953.844541959 |
| YOL045W   | 4.73497405766299e-05 |                  | 297055.035000257 |
| YOL047C   | 6.01585117304682e-05 |                  | 323621.355606477 |
| YOL048C   | 0                    | 43909.6755028006 |                  |
| YOL049W   | 2.35356691454802e-05 |                  | 282984.392509956 |
| YOL050C   | 2.35356691453692e-05 |                  | 282984.392509956 |
| YOL051W   | 3.96366157573436e-05 |                  | 186162.157377749 |
| YOL052C   | 5.89408739126718e-06 |                  | 146074.738971092 |
| YOL052C-A | 0                    | 88357.9820965524 |                  |
| YOL053W   | 0                    | 110797.827385031 |                  |
| YOL054W   | 0                    | 19941.9613438847 |                  |
| YOL055C   | 0                    | 126873.233248209 |                  |
| YOL056W   | 1.16911360162897e-05 |                  | 241582.487116601 |
| YOL057W   | 0                    | 55113.1936818401 |                  |
| YOL058W   | 0.000565300240676025 |                  | 1278634.49451408 |
| YOL059W   | 6.92901256513778e-05 |                  | 364071.174902006 |
| YOL060C   | 5.48840875236323e-06 |                  | 302197.112573563 |
| YOL061W   | 0                    | 37745.0499161368 |                  |
| YOL062C   | 0                    | 37745.0499161368 |                  |
| YOL063C   | 5.7280080970612e-06  |                  | 105109.271035768 |

YOL064C 0.000253406087207697 396904.446522975  
YOL065C 1.1670748664816e-05 83916.9932190625  
YOL066C 0 44451.7505513598  
YOL067C 0 86117.7172322289  
YOL068C 1.12769264550838e-05 86899.6190991835  
YOL069W 0 10337.3490092056  
YOL070C 0 10337.3490092056  
YOL071W 0 10263.272794694  
YOL072W 4.1438064187771e-06 32018.758797723  
YOL073C 4.1438064187771e-06 32018.758797723  
YOL075C 0 59555.3027906609  
YOL076W 7.19655400259755e-05 161147.539270222  
YOL077C 7.19655400258645e-05 161147.539270222  
YOL077W-A 3.07781413549923e-05 98924.9820679806  
YOL078W 0 32892.2611739579  
YOL079W 0 0  
YOL080C 0 32892.2611739579  
YOL081W 4.32669651151407e-06 73268.28014796  
YOL082W 2.48177480703937e-05 340834.151477216  
YOL083C-A 0 0  
YOL083W 1.37183855858369e-05 71798.0522215548  
YOL084W 0 127839.642031828  
YOL085C 0 127839.642031828  
YOL085W-A 0 0  
YOL086C 2.43455447556107e-05 290804.092783936  
YOL086W-A 0 68447.4876872587  
YOL087C 0 68447.4876872587  
YOL088C 1.52508901982706e-05 184088.099882576  
YOL089C 0 32529.8816971812  
YOL090W 8.52750895663501e-06 168106.764160394  
YOL091W 1.23682224717481e-05 243333.300704665  
YOL092W 0.000118243998871947 298160.474670964  
YOL093W 0 54106.8963226078  
YOL094C 0 54106.8963226078  
YOL095C 7.09025419249887e-05 346367.230668177  
YOL096C 0 10121.5487978853  
YOL097C 9.43893500405801e-05 254357.545330046  
YOL097W-A 5.38940412164735e-06 52633.4825216677  
YOL098C 5.38940412164735e-06 52633.4825216677  
YOL099C 1.1670748664816e-05 45894.3164463536  
YOL100W 4.30970794507157e-06 74958.1172766354  
YOL101C 0 93848.5381441497  
YOL102C 3.30678491731184e-05 254435.271789739  
YOL103W 0 29105.1435081897  
YOL103W-A 3.54842855381232e-05 629840.125492085  
YOL103W-B 3.54842855381232e-05 629840.125492085  
YOL104C 3.54842855381232e-05 629840.125492085  
YOL105C 1.92420109911273e-05 237026.276903738  
YOL106W 0 61003.7815935353  
YOL107W 4.27623374810171e-06 23142.235676769  
YOL108C 4.27623374810171e-06 23142.235676769  
YOL109W 0 20526.545589388  
YOL110W 0 0  
YOL111C 0 0

|           |                      |                  |
|-----------|----------------------|------------------|
| YOL112W   | 2.62670008266408e-05 | 245263.803286773 |
| YOL113W   | 1.06653957584468e-05 | 208407.090460405 |
| YOL114C   | 1.06653957584468e-05 | 208407.090460405 |
| YOL115W   | 0                    | 25139.2603104532 |
| YOL116W   | 9.75733853614269e-06 | 72216.9076833509 |
| YOL117W   | 2.32855773674157e-05 | 224146.498195601 |
| YOL118C   | 8.88179268287992e-06 | 163873.544200816 |
| YOL119C   | 0.000159927550528072 | 378807.042907351 |
| YOL120C   | 4.23415678818539e-06 | 147530.372514285 |
| YOL121C   | 0.000101236311471298 | 516961.553239778 |
| YOL122C   | 6.12618829243239e-06 | 145022.993219326 |
| YOL123W   | 0                    | 45336.6389094041 |
| YOL124C   | 0                    | 53820.3257193873 |
| YOL125W   | 5.41963397057144e-05 | 524533.376232901 |
| YOL126C   | 1.37239888846619e-05 | 224827.765974108 |
| YOL127W   | 4.75947865967719e-05 | 201206.202492697 |
| YOL128C   | 5.38940412164735e-06 | 146047.949474217 |
| YOL129W   | 0                    | 179999.825443242 |
| YOL130W   | 0                    | 51994.2732143791 |
| YOL131W   | 2.34148412312507e-05 | 202820.807740162 |
| YOL132W   | 3.18856666847722e-05 | 149702.685220855 |
| YOL133W   | 1.88838098350574e-05 | 266059.312530308 |
| YOL134C   | 3.18856666847722e-05 | 154770.641246904 |
| YOL135C   | 1.88838098350574e-05 | 255383.908608694 |
| YOL136C   | 2.36195963968511e-05 | 81782.1902058764 |
| YOL137W   | 0                    | 56787.1601353911 |
| YOL138C   | 0                    | 56787.1601353911 |
| YOL139C   | 0                    | 40802.8170940645 |
| YOL140W   | 0.00024502799125059  | 627386.867222449 |
| YOL141W   | 0                    | 24263.7004354219 |
| YOL142W   | 5.00121110524887e-05 | 450684.510650734 |
| YOL143C   | 5.00121110522667e-05 | 450684.510650734 |
| YOL144W   | 5.79034024239533e-06 | 46608.4066389924 |
| YOL145C   | 5.79034024239533e-06 | 46608.4066389924 |
| YOL146W   | 3.08868400548112e-05 | 185000.895748413 |
| YOL147C   | 3.08868400548112e-05 | 185000.895748413 |
| YOL148C   | 1.03625820707665e-05 | 209890.65241994  |
| YOL149W   | 0                    | 24943.5988055673 |
| YOL150C   | 0                    | 24943.5988055673 |
| YOL151W   | 1.88838098350574e-05 | 360902.115372048 |
| YOL152W   | 2.17106425605129e-05 | 258444.338951532 |
| YOL153C   | 9.65256225869959e-05 | 515078.057579994 |
| YOL154W   | 6.44983105591024e-06 | 330496.654684695 |
| YOL155C   | 9.76108788464103e-05 | 380648.795683387 |
| YOL155W-A | 0                    | 12894.7176007098 |
| YOL156W   | 3.14142308435184e-05 | 237607.809427562 |
| YOL157C   | 0                    | 10818.6205365069 |
| YOL158C   | 5.62281686592447e-05 | 370787.42091362  |
| YOL159C   | 4.23240566282956e-06 | 46109.7343991355 |
| YOL159C-A | 0                    | 65220.7790040051 |
| YOL160W   | 3.41027467053445e-05 | 402585.337676318 |
| YOL161C   | 8.37354912335275e-05 | 260025.661113853 |
| YOL162W   | 0                    | 0                |
| YOL163W   | 9.8825663688018e-06  | 189666.941208087 |



YOL164W 2.87897076182153e-05 457845.046833288  
YOL164W-A 8.03580797489323e-05 629611.226096958  
YOL165C 0.000133553871413006 498084.107125608  
YOL166C 0 135397.969664727  
YOL166W-A 0 39613.6392836387  
YOR001W 2.0677973229577e-05 214452.450151174  
YOR002W 3.76839907356707e-05 247551.315234245  
YOR003W 1.79460368584516e-05 132641.189790504  
YOR004W 2.42967173872399e-05 264772.950378018  
YOR005C 5.0422375025283e-06 153458.551410348  
YOR006C 0 31438.7703895799  
YOR007C 1.08965125723559e-05 303399.041442911  
YOR008C 0 10432.0254934855  
YOR008C-A 0 92283.5349828025  
YOR008W-B 5.19139918608857e-06 234862.684409853  
YOR009W 7.48834913844032e-06 109853.722489374  
YOR010C 1.06854852351956e-05 96522.4385664043  
YOR011W 5.0123978234673e-06 201829.771843199  
YOR011W-A 6.08069258831723e-05 369007.479670496  
YOR012W 7.03842923568399e-05 409120.400314947  
YOR013W 5.0422375025283e-06 108539.758801687  
YOR014W 0 39162.2940690914  
YOR015W 0 0  
YOR016C 0 46762.5835339692  
YOR017W 0 46762.5835339692  
YOR018W 0 32549.6693141567  
YOR019W 0 57213.0871998157  
YOR020C 7.93776732789242e-05 343151.507511829  
YOR020W-A 0 40169.2128524811  
YOR021C 0 16330.1178098952  
YOR022C 0 103258.819718959  
YOR023C 0 8321.0022946096  
YOR024W 0 8321.0022946096  
YOR025W 0 0  
YOR026W 9.65603033520335e-06 51950.3411850745  
YOR027W 0 33292.2243322203  
YOR028C 0 14770.7560334907  
YOR029W 0 14770.7560334907  
YOR030W 0 55463.9382496693  
YOR031W 0 322013.418764339  
YOR032C 9.29303054099107e-05 406251.330105914  
YOR032W-A 4.25289971228704e-06 121693.012594216  
YOR033C 0 0  
YOR034C 0 12440.4587682435  
YOR034C-A 0 0  
YOR035C 5.08735902016166e-06 74836.9295491424  
YOR036W 5.08735902016166e-06 74836.9295491424  
YOR037W 0 25108.1050426963  
YOR038C 1.00400594269523e-05 114210.13852449  
YOR039W 1.00400594269523e-05 114210.13852449  
YOR040W 5.19325615387922e-05 251200.921532184  
YOR042W 1.06653957584468e-05 214836.495172578  
YOR043W 0.000130356637717099 420077.216108733  
YOR044W 0.000159913219917485 466689.845293051

YOR045W 5.0422375025283e-06 185643.608884162  
YOR046C 0 43825.5103985243  
YOR047C 0 56544.757982805  
YOR048C 0 11838.4055551686  
YOR049C 0 14544.5082039682  
YOR050C 4.48016025883513e-05 364179.33446672  
YOR051C 1.63495326174212e-05 111529.603470365  
YOR052C 1.89982900097307e-05 248464.338294034  
YOR053W 9.24104164157225e-06 172246.033206489  
YOR054C 2.2964838856776e-05 345684.697782699  
YOR056C 4.28666264662425e-05 289583.103039121  
YOR057W 5.2299558717217e-05 339635.90667814  
YOR058C 1.70719342141856e-05 153665.549285019  
YOR059C 0 0  
YOR060C 0 29400.2207910035  
YOR061W 0 29400.2207910035  
YOR062C 2.42777594018362e-05 341131.887149063  
YOR063W 8.10677010405492e-05 388507.370299774  
YOR064C 2.76802626352213e-05 118556.712483729  
YOR065W 0 10818.6205365069  
YOR066W 5.17233275838525e-05 315807.760720368  
YOR067C 0 0  
YOR069W 0 0  
YOR070C 0 74137.7491316686  
YOR071C 0 26893.290175337  
YOR072W 0 26893.290175337  
YOR072W-A 0 9856.6633311761  
YOR072W-B 0 151200.816714081  
YOR073W 0 0  
YOR074C 2.38684268371037e-05 470756.164348501  
YOR075W 8.63674882911614e-06 361057.989858561  
YOR076C 0 33547.0858964286  
YOR077W 0 33547.0858964286  
YOR078W 0 0  
YOR079C 5.45597952472665e-06 94057.1081672967  
YOR080W 5.45597952472665e-06 94057.1081672967  
YOR081C 0 23191.2702945883  
YOR083W 1.94758706822951e-05 125830.752801305  
YOR084W 4.30800867357028e-06 32318.7710367796  
YOR085W 5.80930342031216e-06 75161.1568115494  
YOR086C 4.54996446919154e-06 25961.9972729532  
YOR087W 4.81843415490735e-05 618294.227742803  
YOR089C 4.46337970749777e-06 140543.07477015  
YOR090C 1.44039126169782e-05 140613.450053608  
YOR091W 1.44039126169782e-05 140613.450053608  
YOR092W 1.37731282617848e-05 80858.5715929695  
YOR093C 6.9587383803027e-06 79722.9695824515  
YOR094W 6.9587383803027e-06 79722.9695824515  
YOR095C 0 184715.815861277  
YOR096W 5.0422375025283e-06 138540.906278859  
YOR097C 6.90595318197929e-06 42307.6429638714  
YOR098C 0.00010194007659714 481789.080085809  
YOR099W 2.4093041261497e-05 287894.435939206  
YOR100C 0.000239720984292369 1088174.66628662

YOR101W 0 33632.7327941248  
YOR102W 1.1486843935038e-05 197835.472109696  
YOR103C 0.000160023071082871 456626.247095065  
YOR104W 1.70719342141856e-05 192130.178859464  
YOR106W 0 27089.1659841337  
YOR107W 2.55454171737002e-05 348829.579197698  
YOR108C-A 5.70656413823034e-05 194970.078123221  
YOR108W 0.000388966149634684 831776.423611149  
YOR109W 5.70656413823034e-05 194970.078123221  
YOR110W 0 24193.9587220296  
YOR111W 0 0  
YOR112W 0 42132.7968659871  
YOR113W 0.000132434027441897 284709.195866919  
YOR114W 8.26136684153322e-05 268392.033950732  
YOR115C 3.38325430505604e-05 142319.359354817  
YOR116C 0 56305.7579199097  
YOR117W 6.31009540319472e-06 125148.607219172  
YOR118W 4.30896169401063e-06 113186.570395606  
YOR119C 4.76467349752596e-06 158092.836717061  
YOR120W 5.43350424647704e-05 483347.771597675  
YOR121C 2.56599316937889e-05 169944.50471242  
YOR122C 1.02572429392378e-05 222438.49611424  
YOR123C 3.32580718532816e-05 256532.237127146  
YOR124C 2.1366670532541e-05 352865.032894112  
YOR125C 0 0  
YOR126C 2.98051400118293e-05 121699.026663019  
YOR127W 2.98051400118293e-05 121699.026663019  
YOR128C 0.000169026846744025 508092.282049161  
YOR129C 0 27654.6547952081  
YOR130C 0.000230986733075866 699980.549661439  
YOR131C 5.23658036060137e-05 316816.863199981  
YOR132W 5.23658036059027e-05 316816.863199981  
YOR133W 0 0  
YOR134W 2.46982606777468e-05 119210.238199049  
YOR136W 6.22083886975267e-05 528132.456049687  
YOR137C 4.42652020726797e-06 51809.4272257742  
YOR138C 0 191748.897343155  
YOR140W 0 91978.8562402379  
YOR141C 1.75207310048053e-05 232460.033103847  
YOR142W 1.75207310048053e-05 232460.033103847  
YOR142W-A 2.94421498666653e-05 516836.942401015  
YOR142W-B 2.94421498666653e-05 516836.942401015  
YOR143C 6.01151260248844e-06 100896.272028704  
YOR144C 0 32953.8008099058  
YOR145C 5.0422375025283e-06 296875.865619313  
YOR147W 5.0422375025283e-06 296875.865619313  
YOR148C 2.02739702613863e-05 263372.420696511  
YOR149C 1.0629193910483e-05 113622.259339852  
YOR150W 1.0629193910483e-05 110668.270403261  
YOR151C 0 31428.620909527  
YOR152C 3.22912530785757e-05 322618.156174426  
YOR153W 6.44983105591024e-06 62572.2816639861  
YOR154W 4.30800867357028e-06 32874.1187785925  
YOR155C 0 0

YOR156C 3.55155519020656e-05 197551.668628415  
YOR157C 0 14928.4954374648  
YOR158W 0 14928.4954374648  
YOR159C 4.42652020726797e-06 45992.9449150019  
YOR160W 4.42652020726797e-06 45992.9449150019  
YOR161C 8.4517972407383e-06 221622.925415632  
YOR161C-C 9.75733853614269e-06 94382.0011544293  
YOR162C 2.37699494488597e-05 358094.507192954  
YOR163W 1.44298471306259e-05 290022.410564267  
YOR164C 0 59703.181287934  
YOR165W 0 59703.181287934  
YOR166C 0 13569.0716588989  
YOR167C 0 31733.6937983097  
YOR168W 0 31733.6937983097  
YOR169C 0 0  
YOR170W 0 0  
YOR171C 2.29169735073143e-05 325436.07846358  
YOR172W 2.29169735073143e-05 325436.07846358  
YOR173W 8.88179268287992e-06 276660.001081896  
YOR174W 4.1438064187771e-06 32018.758797723  
YOR175C 2.68614006411205e-05 237400.433161986  
YOR176W 2.25962603731533e-05 227206.668868068  
YOR177C 4.2909987708728e-05 310374.609309433  
YOR178C 0 44358.8900429809  
YOR179C 7.26479770609689e-05 292214.799312952  
YOR180C 0 93951.6023507407  
YOR181W 0 123987.97505146  
YOR182C 0 0  
YOR183W 0 0  
YOR184W 0 0  
YOR185C 0.000298714626770114 568069.048118228  
YOR186C-A 1.00400594269523e-05 137331.70469823  
YOR186W 3.4487329754529e-05 238715.153510468  
YOR187W 1.00400594269523e-05 137331.70469823  
YOR188W 3.09875766005829e-05 327460.639879967  
YOR189W 4.59935331723615e-05 261160.139915939  
YOR190W 0 68962.6171971123  
YOR191W 0 173335.800534137  
YOR192C 3.53584010941432e-05 371135.178278783  
YOR192C-A 8.58405261290329e-05 471535.912834682  
YOR192C-B 8.58405261290329e-05 471535.912834682  
YOR192C-C 8.58405261290329e-05 443455.044290091  
YOR193W 1.55641053831701e-05 151214.369558564  
YOR194C 0 113091.576153097  
YOR195W 0 113091.576153097  
YOR196C 9.06337670600887e-05 335146.328643197  
YOR197W 9.06337670600887e-05 335146.328643197  
YOR198C 0 105460.200591554  
YOR199W 0 105460.200591554  
YOR200W 0 105460.200591554  
YOR201C 0.000129839610821803 317851.083076755  
YOR202W 0.000129839610821914 317851.083076755  
YOR204W 0 33874.1877255096  
YOR205C 0 27783.6033529936

|         |                      |                  |  |
|---------|----------------------|------------------|--|
| YOR206W | 0                    | 27783.6033529936 |  |
| YOR207C | 1.65098233824157e-05 | 98758.824607112  |  |
| YOR208W | 1.65098233824157e-05 | 98758.824607112  |  |
| YOR209C | 5.12045014983142e-05 | 354687.27946291  |  |
| YOR210W | 3.97558641828111e-05 | 246189.744450678 |  |
| YOR211C | 5.19611041697177e-05 | 131142.830627333 |  |
| YOR212W | 4.61839293008914e-06 | 148660.412150737 |  |
| YOR213C | 8.20189024021145e-05 | 549290.086631459 |  |
| YOR214C | 2.73891832202056e-05 | 244234.365603479 |  |
| YOR215C | 0                    | 36154.2342655181 |  |
| YOR216C | 0                    | 63692.0362724466 |  |
| YOR217W | 0                    | 63692.0362724466 |  |
| YOR218C | 1.20009711147562e-05 | 191818.323427638 |  |
| YOR219C | 1.14539721624007e-05 | 134100.919664454 |  |
| YOR220W | 1.14539721624007e-05 | 134100.919664454 |  |
| YOR221C | 3.7567950758377e-05  | 402340.098067464 |  |
| YOR222W | 0.000265542008530573 | 486080.256858894 |  |
| YOR223W | 0                    | 62069.9661198499 |  |
| YOR224C | 0                    | 0                |  |
| YOR225W | 0                    | 0                |  |
| YOR226C | 7.92043157757938e-05 | 423769.418187451 |  |
| YOR227W | 8.42853841966917e-05 | 303803.942756382 |  |
| YOR228C | 2.05950625933315e-05 | 304577.992345536 |  |
| YOR229W | 2.47387836701529e-05 | 344851.146322562 |  |
| YOR230W | 2.54513728390471e-05 | 206142.591244621 |  |
| YOR231W | 6.31009540319472e-06 | 202587.733281817 |  |
| YOR232W | 0                    | 0                |  |
| YOR233W | 2.53645326206975e-05 | 318786.792800194 |  |
| YOR234C | 2.01952789151694e-05 | 372792.517173456 |  |
| YOR235W | 2.01952789151694e-05 | 372792.517173456 |  |
| YOR236W | 0.000101236738485388 | 417498.329630767 |  |
| YOR237W | 1.75207310048053e-05 | 169469.025741951 |  |
| YOR238W | 0                    | 21785.636206155  |  |
| YOR239W | 0                    | 29682.7841049873 |  |
| YOR241W | 0                    | 39115.4442274275 |  |
| YOR242C | 0                    | 130804.39724241  |  |
| YOR243C | 1.04556465997385e-05 | 33962.9529667992 |  |
| YOR244W | 1.04556465997385e-05 | 33962.9529667992 |  |
| YOR245C | 4.19657193905243e-05 | 274710.023312354 |  |
| YOR246C | 5.03352043934591e-06 | 232431.958333445 |  |
| YOR247W | 5.03352043934591e-06 | 146319.051617116 |  |
| YOR248W | 0                    | 0                |  |
| YOR249C | 0                    | 21292.6228612658 |  |
| YOR250C | 0                    | 18603.7188395449 |  |
| YOR251C | 0                    | 0                |  |
| YOR252W | 0                    | 0                |  |
| YOR253W | 0                    | 0                |  |
| YOR254C | 2.11582941171962e-05 | 283373.489611731 |  |
| YOR255W | 2.11582941171962e-05 | 283373.489611731 |  |
| YOR256C | 0                    | 0                |  |
| YOR257W | 0                    | 0                |  |
| YOR258W | 4.61545140519881e-05 | 221279.636252719 |  |
| YOR259C | 0                    | 32471.9582189294 |  |
| YOR260W | 0                    | 32471.9582189294 |  |

YOR261C 2.29839940055765e-05 162395.575176122  
YOR262W 2.29839940056875e-05 162395.575176122  
YOR264W 1.17073884703389e-05 157616.779563754  
YOR265W 5.48465931811126e-05 517323.937590473  
YOR266W 0 63059.567831154  
YOR267C 5.0422375025283e-06 146221.598171553  
YOR268C 0 34884.918299226  
YOR269W 0 34884.918299226  
YOR270C 0.000114322803714928 598038.583591151  
YOR271C 0 66680.3864975066  
YOR272W 0 52749.700570171  
YOR273C 6.92988980653952e-05 312666.915944132  
YOR274W 0 89244.1471827577  
YOR275C 5.83651665853058e-05 363818.701649487  
YOR276W 4.75985430792303e-06 73351.9080796835  
YOR277C 2.17106909167208e-05 169107.371311999  
YOR278W 0 89547.1484524394  
YOR279C 6.93131470042019e-06 110831.673616361  
YOR280C 2.11360015606177e-05 500671.301226526  
YOR281C 4.46337970749777e-06 103873.83925641  
YOR283W 4.46337970749777e-06 11101.4582388322  
YOR284W 0 22976.5204498947  
YOR285W 6.94353088983579e-05 381172.989626975  
YOR286W 9.06879549189554e-06 169634.77312622  
YOR287C 0 0  
YOR288C 4.48239328567634e-05 349629.808737491  
YOR289W 4.48239328566524e-05 349629.808737491  
YOR290C 7.5098783829386e-06 190104.650165738  
YOR291W 4.23240566282956e-06 92974.7106999012  
YOR292C 0 0  
YOR293C-A 0 10818.6205365069  
YOR293W 0 0  
YOR294W 0 10818.6205365069  
YOR295W 0 0  
YOR296W 4.73098516406978e-06 46370.7745992328  
YOR297C 3.14142308435184e-05 70106.2441048601  
YOR298C-A 1.2670265374104e-05 250472.223088889  
YOR298W 3.14142308435184e-05 70106.2441048601  
YOR299W 1.2670265374104e-05 252487.436713654  
YOR301W 0 0  
YOR302W 0.000190479380400288 778349.236403783  
YOR303W 0 0  
YOR304C-A 5.7280080970612e-06 97744.1381234112  
YOR304W 1.28074260996591e-05 253245.792088131  
YOR305W 5.7280080970612e-06 97744.1381234112  
YOR306C 0 0  
YOR307C 5.887058937315e-05 387341.547451638  
YOR308C 0 60135.2508502074  
YOR310C 5.0422375025283e-06 168805.995543583  
YOR311C 1.14539721624007e-05 259975.218293899  
YOR312C 1.27211385476667e-05 207956.823561156  
YOR313C 0 9856.6633311761  
YOR314W 0 9856.6633311761  
YOR314W-A 2.17106425605129e-05 215232.818476768

YOR315W 5.0422375025283e-06 110705.240377127  
YOR316C 0 0  
YOR316C-A 0 20798.9903338403  
YOR317W 5.90682847741997e-05 583213.859644017  
YOR318C 8.88179268287992e-06 46136.4547399529  
YOR319W 8.88179268287992e-06 46136.4547399529  
YOR320C 4.27623374810171e-06 141968.277262543  
YOR321W 1.26570578036223e-05 201162.649182509  
YOR322C 3.88222963703111e-05 224116.469925345  
YOR323C 0.000147903985058373 378594.827582079  
YOR324C 3.4487329754529e-05 205276.164123582  
YOR326W 6.73639794762648e-05 236008.872038093  
YOR327C 6.01151260248844e-06 137077.070006929  
YOR328W 1.14998883612438e-05 307020.624698815  
YOR329C 0 22395.174225795  
YOR330C 0 36325.495908152  
YOR331C 0 53971.1596103086  
YOR332W 4.7407820574441e-05 323771.306243678  
YOR334W 0 53971.1596103086  
YOR335C 6.19616843188231e-05 331455.484568657  
YOR335W-A 1.90950463525574e-05 159959.332062795  
YOR336W 3.00769766584663e-05 303298.030798317  
YOR337W 0.000371946982578253 682713.680086638  
YOR338W 5.0422375025283e-06 139665.011935072  
YOR339C 7.52700530097794e-05 368826.591044552  
YOR340C 1.15435741641079e-05 228704.469009213  
YOR341W 0 26669.6733842417  
YOR342C 1.15518161630801e-05 101250.492504584  
YOR343C 4.39792139780293e-05 263072.981603233  
YOR343W-A 9.60290025484589e-05 501003.403468097  
YOR343W-B 9.60290025484589e-05 501003.403468097  
YOR344C 0 37040.6100282514  
YOR346W 6.05274327614147e-05 180312.698117801  
YOR347C 2.75526194657427e-05 275008.129372954  
YOR348C 1.16849509885775e-05 193422.000051445  
YOR349W 0 340584.47256441  
YOR350C 0 13727.114568387  
YOR351C 9.90620324973213e-05 183337.893606431  
YOR352W 2.37937704459235e-05 74432.1411697903  
YOR353C 1.28074260996591e-05 225313.426703371  
YOR354C 0 77968.322442495  
YOR355W 0.000129065831542152 463302.459979051  
YOR356W 2.6837778965616e-05 242409.874170568  
YOR357C 3.57693939885273e-05 244202.493180062  
YOR358W 3.57693939885273e-05 244202.493180061  
YOR359W 2.13553466350547e-05 150313.303829076  
YOR360C 2.30373958371999e-05 157515.758314668  
YOR361C 0 63467.0008737539  
YOR362C 2.34410236480409e-05 218780.777086849  
YOR363C 0.000106645492090274 253367.617058075  
YOR364W 0 0  
YOR365C 6.18218851993202e-05 349313.342387934  
YOR367W 6.18218851994312e-05 349313.342387934  
YOR368W 0 0

YOR369C 1.68261348493237e-05 228191.882915238  
YOR370C 5.80053038793382e-05 388863.635900866  
YOR371C 2.47886098045935e-05 379647.752661497  
YOR372C 8.87123742698837e-06 66691.9278280698  
YOR373W 8.87123742698837e-06 66691.9278280698  
YOR374W 4.17310205413912e-06 335079.726333722  
YOR375C 3.28777835886251e-05 49642.4865782274  
YOR376W 3.28777835886251e-05 49642.4865782274  
YOR376W-A 3.03347539406529e-05 338593.480528492  
YOR377W 1.52218534993365e-05 248415.845640956  
YOR378W 1.10710722971419e-05 230004.740397743  
YOR379C 0 23365.0742012692  
YOR380W 0 23365.0742012692  
YOR381W 5.64841013828143e-06 195687.091229555  
YOR381W-A 1.41753043673143e-05 137713.812783119  
YOR382W 0 68108.4725277267  
YOR383C 4.30896169401063e-06 168042.686983726  
YOR384W 4.30896169401063e-06 168042.686983726  
YOR385W 2.01476524935851e-05 301007.166971756  
YOR386W 5.51295063661028e-05 428623.99555987  
YOR387C 0 75837.2706111226  
YOR388C 1.29825265516859e-05 200667.397895908  
YOR389W 0 132669.030042961  
YOR390W 6.51224484145008e-05 509767.039797245  
YOR391C 0 0  
YOR392W 0 0  
YOR393W 0 210093.314925285  
YOR394C-A 2.63054355998937e-05 370694.729697104  
YOR394W 0 27206.9126278158  
YOR396C-A 0 0  
YOR396W 0 43741.8888544748  
YPL001W 0 0  
YPL002C 0 0  
YPL003W 3.34427497600265e-05 192019.801215218  
YPL004C 3.34427497600265e-05 192019.801215218  
YPL005W 5.19497790266721e-05 455956.122239771  
YPL006W 0 171975.610019848  
YPL007C 9.7360290601145e-05 481889.100537293  
YPL008W 4.07546388708768e-05 379142.633787894  
YPL009C 4.07546388708768e-05 379142.633787894  
YPL010W 6.44983105591024e-06 31913.8427852806  
YPL011C 6.44983105591024e-06 31913.8427852806  
YPL012W 4.22770926999938e-06 97160.6467287576  
YPL013C 4.22770926999938e-06 97160.6467287576  
YPL014W 1.91445814765601e-05 344270.905770366  
YPL015C 1.91445814766711e-05 384396.419795348  
YPL016W 0.00010425727445762 323455.376469751  
YPL017C 0.000104257274457731 379703.267224818  
YPL018W 5.19520798327733e-05 266259.951560373  
YPL019C 2.95384944020149e-05 162586.163017787  
YPL020C 0 80025.5796330832  
YPL021W 5.04737725431914e-05 552239.954099452  
YPL022W 0 63439.5719359184  
YPL023C 0 63439.5719359184



|           |                      |                  |
|-----------|----------------------|------------------|
| YPL024W   | 4.46337970749777e-06 | 31931.4469161007 |
| YPL025C   | 4.46337970749777e-06 | 31931.4469161007 |
| YPL026C   | 3.26345399959127e-05 | 189337.16619761  |
| YPL027W   | 0                    | 37662.589583879  |
| YPL028W   | 5.64841013828143e-06 | 154462.232368275 |
| YPL029W   | 4.46337970749777e-06 | 54718.7226851787 |
| YPL030W   | 2.14206168774878e-05 | 204895.43571026  |
| YPL031C   | 2.14206168773767e-05 | 204895.43571026  |
| YPL032C   | 5.10480246374012e-06 | 94076.5438291929 |
| YPL033C   | 0.000190111096890599 | 885173.051208501 |
| YPL034W   | 0                    | 136339.711218249 |
| YPL035C   | 0                    | 124385.056798166 |
| YPL036W   | 0                    | 23765.0197328626 |
| YPL037C   | 2.92767344461931e-05 | 240331.624540986 |
| YPL038W   | 0                    | 0                |
| YPL038W-A | 0                    | 0                |
| YPL039W   | 0                    | 55511.1521137797 |
| YPL040C   | 0                    | 55511.1521137797 |
| YPL041C   | 0                    | 0                |
| YPL042C   | 5.08735902016166e-06 | 39847.332496961  |
| YPL043W   | 0                    | 75830.8538896679 |
| YPL045W   | 0                    | 28139.6477491871 |
| YPL046C   | 0                    | 28139.6477491871 |
| YPL047W   | 4.63612118776213e-05 | 274958.855129423 |
| YPL048W   | 5.38940412164735e-06 | 57390.3047178933 |
| YPL049C   | 5.38940412164735e-06 | 57390.3047178933 |
| YPL050C   | 0                    | 110628.834916656 |
| YPL051W   | 4.1438064187771e-06  | 32018.758797723  |
| YPL052W   | 4.18789872435044e-05 | 192866.869829775 |
| YPL053C   | 4.18789872435044e-05 | 192866.869829775 |
| YPL054W   | 4.24744714155878e-06 | 185688.418943403 |
| YPL055C   | 1.57687924822181e-05 | 233816.658904109 |
| YPL056C   | 1.47960053697993e-05 | 136579.776264688 |
| YPL057C   | 4.24744714155878e-06 | 194806.684126051 |
| YPL058C   | 4.54996446919154e-06 | 0                |
| YPL059W   | 3.19766053560322e-05 | 372475.473099437 |
| YPL060C-A | 5.0200368890696e-05  | 534191.53714101  |
| YPL060W   | 3.62543968805973e-05 | 385300.99656088  |
| YPL061W   | 3.4829643726364e-05  | 156971.830573879 |
| YPL062W   | 1.3520991493543e-05  | 411425.432001912 |
| YPL063W   | 0                    | 49186.2351971954 |
| YPL064C   | 0                    | 49186.2351971954 |
| YPL065W   | 0                    | 62571.5658844421 |
| YPL066W   | 0                    | 98519.5293396427 |
| YPL067C   | 0                    | 98519.5293396427 |
| YPL068C   | 0                    | 0                |
| YPL069C   | 0                    | 103149.302766507 |
| YPL070W   | 3.28777835886251e-05 | 95642.2704074553 |
| YPL071C   | 3.28777835886251e-05 | 95642.2704074553 |
| YPL072W   | 0                    | 9094.8922682664  |
| YPL074W   | 5.49788089103664e-05 | 335683.826143782 |
| YPL075W   | 5.0422375025283e-06  | 446637.433729675 |
| YPL076W   | 0                    | 132978.024355038 |
| YPL077C   | 0                    | 132978.024355038 |

|           |                      |                  |
|-----------|----------------------|------------------|
| YPL078C   | 2.19965686882873e-05 | 332196.274150101 |
| YPL079W   | 0                    | 12746.3243161677 |
| YPL080C   | 0                    | 12746.3243161677 |
| YPL081W   | 2.76961618698168e-05 | 182024.950548069 |
| YPL082C   | 2.76961618697058e-05 | 171903.401750184 |
| YPL083C   | 1.33905833212822e-05 | 232139.578710171 |
| YPL084W   | 4.20993804024494e-05 | 225925.914662479 |
| YPL085W   | 1.00400594269523e-05 | 138599.908527338 |
| YPL086C   | 1.00400594269523e-05 | 154462.18267019  |
| YPL087W   | 4.3401279982147e-06  | 314145.944195083 |
| YPL088W   | 4.94884696244924e-06 | 256785.994665614 |
| YPL089C   | 1.14355055396143e-05 | 190872.822862919 |
| YPL090C   | 3.89625898253865e-05 | 421431.787483359 |
| YPL091W   | 1.23434908745335e-05 | 217917.04993824  |
| YPL092W   | 5.12091632384193e-05 | 153523.186703196 |
| YPL093W   | 0                    | 7675.6630672741  |
| YPL094C   | 0                    | 7675.6630672741  |
| YPL095C   | 4.93744317598965e-05 | 282108.060554555 |
| YPL096C-A | 0                    | 0                |
| YPL096W   | 0                    | 0                |
| YPL097W   | 4.54996446919154e-06 | 10121.5487978853 |
| YPL098C   | 4.54996446919154e-06 | 10121.5487978853 |
| YPL099C   | 2.98062461889792e-05 | 125311.70114811  |
| YPL100W   | 9.24104164157225e-06 | 132689.672244179 |
| YPL101W   | 2.62887861660621e-05 | 221116.193498981 |
| YPL103C   | 3.86002676330266e-05 | 278591.645044477 |
| YPL104W   | 0                    | 34257.371717093  |
| YPL105C   | 0                    | 34257.371717093  |
| YPL106C   | 0                    | 69889.795525908  |
| YPL107W   | 9.33249015211413e-06 | 133149.206056021 |
| YPL108W   | 4.59742634378868e-05 | 558140.048637319 |
| YPL109C   | 8.56677373073378e-06 | 124017.763491909 |
| YPL110C   | 1.00844495809493e-05 | 384877.584308245 |
| YPL111W   | 0.00019412862888557  | 404260.956835656 |
| YPL112C   | 0                    | 11453.4787901798 |
| YPL113C   | 4.04355830649905e-05 | 420825.713902353 |
| YPL114W   | 5.10851219626129e-06 | 92692.8773475316 |
| YPL115C   | 5.10851219626129e-06 | 110516.541382883 |
| YPL116W   | 3.97500033736398e-05 | 206639.691036422 |
| YPL117C   | 3.44972107841901e-05 | 355789.582291663 |
| YPL118W   | 0                    | 78585.9780943297 |
| YPL119C   | 0                    | 78585.9780943297 |
| YPL119C-A | 5.67889068072702e-05 | 232523.323577044 |
| YPL120W   | 2.55614019567529e-05 | 286828.780505061 |
| YPL121C   | 2.5561401956864e-05  | 286828.780505061 |
| YPL122C   | 4.30800867357028e-06 | 85187.3642372019 |
| YPL123C   | 0                    | 29053.058330973  |
| YPL124W   | 4.30800867357028e-06 | 22055.4982420856 |
| YPL125W   | 0                    | 164470.661789311 |
| YPL126W   | 0                    | 228758.747432368 |
| YPL127C   | 0                    | 135620.18799883  |
| YPL128C   | 1.49616732896263e-05 | 88762.539897471  |
| YPL129W   | 4.00150211394834e-05 | 226820.277644914 |
| YPL130W   | 5.03352043934591e-06 | 255814.94667117  |

YPL131W 5.3788288750467e-05 311130.141061276  
YPL132W 4.72589576616667e-06 32068.1045987003  
YPL133C 4.72589576616667e-06 32068.1045987003  
YPL134C 1.49067341999043e-05 221714.79904272  
YPL135C-A 1.15435741641079e-05 246641.667658214  
YPL135W 0.000261348350478752 606092.523768589  
YPL137C 5.719888296285e-05 378259.902336234  
YPL138C 0 63383.8510942611  
YPL139C 0 55039.1824319895  
YPL140C 0 37460.8093937292  
YPL141C 1.39419744626945e-05 317088.588915461  
YPL142C 1.65093879402889e-05 93686.3992464083  
YPL143W 4.56694456478779e-05 275810.39908157  
YPL144W 3.55212776840252e-05 184355.089578268  
YPL145C 4.4761991072062e-05 157904.302781351  
YPL146C 7.37353348605474e-05 381196.172709792  
YPL147W 9.24104164157225e-06 168658.519353851  
YPL148C 9.24104164157225e-06 168658.519353851  
YPL149W 0 46089.639673181  
YPL150W 4.30247738318901e-05 538045.337844402  
YPL151C 2.38304339471584e-05 444057.268807568  
YPL152W 1.5039863780042e-05 182077.837913363  
YPL152W-A 9.36387553263085e-06 262798.335803213  
YPL153C 9.36387553263085e-06 262798.335803213  
YPL154C 0 27001.2714577963  
YPL155C 0 183066.850085617  
YPL156C 2.88036077989995e-05 110755.117815828  
YPL157W 0 153938.574445526  
YPL158C 0 153938.574445526  
YPL159C 1.41150895132114e-05 181345.152077692  
YPL160W 0.000172228065553726 608217.169567279  
YPL161C 0.000124992566904791 570649.162216495  
YPL162C 3.04977087539626e-05 293209.824698365  
YPL163C 0 0  
YPL164C 1.75694047700459e-05 233185.024198868  
YPL165C 0 86601.648108578  
YPL166W 4.88225518864294e-05 220782.606575789  
YPL167C 4.88225518864294e-05 220782.606575789  
YPL168W 0 14943.3670568837  
YPL169C 0 14943.3670568837  
YPL170W 0 25682.7363382751  
YPL171C 5.08735902016166e-06 30355.9342667173  
YPL172C 3.28777835886251e-05 135904.296541848  
YPL173W 3.03127160610206e-05 127279.676107512  
YPL174C 3.03127160610206e-05 127279.676107512  
YPL175W 9.65603033520335e-06 21986.940073717  
YPL176C 9.65603033520335e-06 21986.940073717  
YPL177C 9.16968474622415e-05 264057.672622943  
YPL178W 4.54197309451843e-05 244717.136184553  
YPL179W 0 77987.9097141253  
YPL180W 9.11656632218705e-06 67735.6820680569  
YPL181W 4.94884696244924e-06 117247.738901545  
YPL183C 1.00508397276045e-05 175495.529676955  
YPL183W-A 5.14312634829484e-05 350160.722828421

|           |                      |                  |
|-----------|----------------------|------------------|
| YPL184C   | 0.000148921758306719 | 400670.183317162 |
| YPL186C   | 0                    | 34782.7814154711 |
| YPL187W   | 0                    | 21998.2922312724 |
| YPL188W   | 0                    | 18591.4379688314 |
| YPL189C-A | 4.30970794507157e-06 | 54502.68738634   |
| YPL189W   | 2.71430170531994e-05 | 318301.789441879 |
| YPL190C   | 2.47456940765112e-05 | 292924.69418276  |
| YPL191C   | 9.3067860530871e-05  | 260372.250986814 |
| YPL192C   | 0                    | 212930.434175922 |
| YPL193W   | 0                    | 39273.6692948515 |
| YPL194W   | 2.31477912009392e-05 | 383955.2743958   |
| YPL195W   | 1.96015726190435e-05 | 329622.535268017 |
| YPL196W   | 0                    | 130856.537454442 |
| YPL197C   | 0                    | 130856.537454442 |
| YPL198W   | 0.000188798559446091 | 326372.719092661 |
| YPL199C   | 0.000188798559446202 | 326372.719092661 |
| YPL200W   | 2.53938275057708e-05 | 203303.325480699 |
| YPL201C   | 2.53938275057708e-05 | 203303.325480699 |
| YPL202C   | 4.93008910766868e-05 | 329909.410419501 |
| YPL203W   | 6.44983105591024e-06 | 75889.6998823684 |
| YPL204W   | 0                    | 0                |
| YPL205C   | 0                    | 0                |
| YPL206C   | 1.07237775228697e-05 | 126632.670470629 |
| YPL207W   | 1.54682163820974e-05 | 168978.834646789 |
| YPL208W   | 6.44983105591024e-06 | 0                |
| YPL209C   | 6.44983105591024e-06 | 0                |
| YPL210C   | 2.17106425605129e-05 | 253033.695881587 |
| YPL211W   | 9.99819960806336e-05 | 258710.645450584 |
| YPL212C   | 9.99819960807447e-05 | 258710.645450584 |
| YPL213W   | 1.38924913499761e-05 | 150687.411982051 |
| YPL214C   | 1.38924913499761e-05 | 150687.411982051 |
| YPL215W   | 2.38099781513235e-05 | 121658.926778248 |
| YPL216W   | 1.52353897456825e-05 | 399077.499614628 |
| YPL217C   | 1.52353897456825e-05 | 376131.455031497 |
| YPL218W   | 0                    | 18603.7188395449 |
| YPL219W   | 0.000162905986177075 | 460376.96323572  |
| YPL220W   | 5.10480246374012e-06 | 48802.7122621929 |
| YPL221W   | 3.02976741087813e-05 | 205614.10113362  |
| YPL222C-A | 4.65058665923834e-05 | 320998.761608582 |
| YPL222W   | 1.16536536822753e-05 | 347260.067377243 |
| YPL223C   | 2.91000200918212e-05 | 326694.41654606  |
| YPL224C   | 1.00400594269523e-05 | 139633.202454906 |
| YPL225W   | 0                    | 38753.5991791016 |
| YPL226W   | 4.30247738318901e-05 | 271567.418897901 |
| YPL227C   | 4.30247738320011e-05 | 286625.909681548 |
| YPL228W   | 3.1693047252479e-05  | 218015.905475998 |
| YPL229W   | 0.000160726267305233 | 455149.764242637 |
| YPL230W   | 0                    | 19026.8784704242 |
| YPL231W   | 1.65098233824157e-05 | 82333.0789017671 |
| YPL232W   | 0                    | 48603.0935099429 |
| YPL233W   | 0                    | 33261.3953870178 |
| YPL234C   | 0                    | 22442.7748505109 |
| YPL235W   | 2.47456940765112e-05 | 285413.480871398 |
| YPL236C   | 2.47456940765112e-05 | 271889.086375048 |

|           |                      |                  |
|-----------|----------------------|------------------|
| YPL237W   | 5.25058122036182e-06 | 111761.959562554 |
| YPL238C   | 0                    | 0                |
| YPL239W   | 1.77255033818602e-05 | 483492.668674329 |
| YPL240C   | 4.95629738617165e-06 | 321603.973757043 |
| YPL241C   | 6.19558260785968e-05 | 315646.021423436 |
| YPL242C   | 0                    | 44586.2169586153 |
| YPL243W   | 4.17310205413912e-06 | 127018.277475255 |
| YPL244C   | 4.17310205413912e-06 | 127018.277475255 |
| YPL245W   | 0                    | 11207.1867062294 |
| YPL246C   | 0                    | 11207.1867062294 |
| YPL247C   | 1.49246158598348e-05 | 198890.256411837 |
| YPL248C   | 7.48834913844032e-06 | 193534.718445787 |
| YPL249C   | 3.90751924967958e-05 | 148760.815068534 |
| YPL249C-A | 4.22596669136244e-06 | 76300.8363295713 |
| YPL250C   | 0.000138780286143225 | 605404.193158666 |
| YPL250W-A | 4.49953992390784e-05 | 524792.269609803 |
| YPL251W   | 7.28090049217922e-06 | 138820.723075788 |
| YPL252C   | 0.000189607483308762 | 537315.619330065 |
| YPL253C   | 7.28090049217922e-06 | 156117.477314646 |
| YPL254W   | 2.16546061020395e-05 | 343145.945037192 |
| YPL255W   | 3.30387765856699e-05 | 212292.430045154 |
| YPL256C   | 0                    | 102553.267641541 |
| YPL257W   | 0                    | 11233.7237268193 |
| YPL257W-A | 0.000187393498320754 | 1168118.23313715 |
| YPL257W-B | 0.000187393498320754 | 1168118.23313715 |
| YPL258C   | 0                    | 42048.1446519263 |
| YPL259C   | 0                    | 52704.4826570704 |
| YPL260W   | 6.9587383803027e-06  | 68993.6723605689 |
| YPL262W   | 0.000105178109717108 | 623915.845416752 |
| YPL263C   | 5.96851933876152e-06 | 138876.166667395 |
| YPL264C   | 0.000309871083662983 | 588289.446267422 |
| YPL265W   | 3.13138699031823e-05 | 389135.111709989 |
| YPL266W   | 1.38387396327877e-05 | 52638.8220244982 |
| YPL267W   | 0                    | 78151.859052534  |
| YPL268W   | 0                    | 109133.842153936 |
| YPL269W   | 6.70793799106839e-06 | 97854.5213707882 |
| YPL270W   | 3.09861060383554e-05 | 223926.863614359 |
| YPL271W   | 0                    | 24023.7322502388 |
| YPL272C   | 0.000121980692171397 | 647825.714002983 |
| YPL273W   | 0.000151599580145212 | 293354.032994715 |
| YPL274W   | 0.000132076669063674 | 466549.980596845 |
| YPL275W   | 0                    | 13137.5014877074 |
| YPL276W   | 5.0422375025283e-06  | 213501.306683955 |
| YPL277C   | 0                    | 203680.612538777 |
| YPL278C   | 0                    | 10791.105525043  |
| YPL279C   | 8.36448913537069e-05 | 559222.966531903 |
| YPL280W   | 4.96349697335363e-05 | 314404.286168039 |
| YPL281C   | 0                    | 171118.495929947 |
| YPL282C   | 0                    | 27206.9126278158 |
| YPL283C   | 2.19965686882873e-05 | 230950.053100754 |
| YPL283W-B | 0                    | 0                |
| YPR001W   | 9.96422976506928e-05 | 635521.602882207 |
| YPR002C-A | 7.73576574901735e-05 | 511330.366223142 |
| YPR002W   | 4.96980681519155e-05 | 347856.760840302 |

YPR003C 0 41116.2974913078  
YPR004C 0.000121405961363674 619623.213590475  
YPR005C 6.62678999852062e-06 209081.548571731  
YPR006C 0 14030.690694095  
YPR007C 3.18856666847722e-05 74812.0845800363  
YPR008W 3.99096065487603e-05 257065.278705439  
YPR009W 0.000106646141504352 352697.690364768  
YPR010C 4.15288886658205e-05 361931.808036296  
YPR010C-A 1.33905833212822e-05 285392.597239359  
YPR011C 0 0  
YPR012W 0 0  
YPR013C 3.06933229733408e-05 327695.337054831  
YPR014C 4.8403532725283e-06 248718.993243327  
YPR015C 0 121781.610651617  
YPR016C 0 0  
YPR016W-A 0 0  
YPR017C 3.34743539651683e-05 281300.017273572  
YPR018W 2.85494261015318e-05 226762.552931889  
YPR019W 4.69127502089606e-06 70761.764174465  
YPR020W 0 48705.6963278939  
YPR021C 1.43052532501908e-05 169134.480914269  
YPR022C 3.3567386847122e-05 316923.605413807  
YPR023C 5.08735902016166e-06 52617.7762575864  
YPR024W 5.08735902016166e-06 52617.7762575864  
YPR025C 8.6544151146617e-05 340215.456882391  
YPR026W 8.6544151146617e-05 253541.434247521  
YPR027C 1.52318095613113e-05 123118.639865882  
YPR028W 0 34250.6874500023  
YPR029C 0 32727.6110103865  
YPR030W 3.59492482164825e-05 168863.325214114  
YPR031W 0 20526.545589388  
YPR032W 9.79482689495992e-05 196651.54020339  
YPR033C 4.41914275504107e-05 272796.96045115  
YPR034W 4.86177521433762e-05 289715.815423098  
YPR035W 6.95373540384736e-05 341136.235891716  
YPR036W 5.99708030334378e-05 357259.437624814  
YPR036W-A 0.000155409545764984 904910.853359709  
YPR037C 0 52072.3373838253  
YPR038W 0 0  
YPR041W 1.39419744626945e-05 204459.214600964  
YPR042C 0 20227.0103202676  
YPR043W 0 20227.0103202676  
YPR044C 0 98998.7306556156  
YPR045C 1.35412273480906e-05 287397.263426217  
YPR046W 1.35412273480906e-05 287397.263426217  
YPR047W 0 35047.3884213103  
YPR048W 4.67871541034448e-05 248677.060809586  
YPR049C 0 0  
YPR050C 4.74360644908689e-06 76461.8553066118  
YPR051W 0 9856.6633311761  
YPR052C 1.11385554090182e-05 189525.364814199  
YPR053C 0 0  
YPR054W 0 0  
YPR055W 0 61416.5070842821

|           |                      |                  |  |
|-----------|----------------------|------------------|--|
| YPR056W   | 0                    | 24611.6154871779 |  |
| YPR057W   | 5.21830729138806e-05 | 398400.110647701 |  |
| YPR058W   | 0.000152135764731609 | 339449.58436571  |  |
| YPR059C   | 0                    | 0                |  |
| YPR060C   | 5.08735902016166e-06 | 10263.272794694  |  |
| YPR061C   | 0                    | 34532.716980777  |  |
| YPR062W   | 0                    | 34532.716980777  |  |
| YPR063C   | 8.20915569149649e-05 | 237859.977394435 |  |
| YPR064W   | 0.000104148521604785 | 434216.89943731  |  |
| YPR065W   | 4.30800867357028e-06 | 30790.2728797409 |  |
| YPR066W   | 0                    | 13119.8571187186 |  |
| YPR067W   | 5.08735902016166e-06 | 104494.68222841  |  |
| YPR068C   | 0                    | 29772.6450047534 |  |
| YPR069C   | 9.83094133677476e-06 | 61143.2416643978 |  |
| YPR070W   | 9.83094133677476e-06 | 61143.2416643978 |  |
| YPR071W   | 6.89511951741384e-05 | 286494.407928331 |  |
| YPR072W   | 2.13383856600968e-05 | 240996.409710471 |  |
| YPR073C   | 0                    | 48818.7224210392 |  |
| YPR074C   | 9.75733853614269e-06 | 115994.450247694 |  |
| YPR074W-A | 9.75733853614269e-06 | 115994.450247694 |  |
| YPR075C   | 5.10201801429133e-06 | 72870.8033172728 |  |
| YPR078C   | 0                    | 264049.626576762 |  |
| YPR079W   | 0                    | 249645.610890101 |  |
| YPR080W   | 5.10201801429133e-06 | 136967.117801347 |  |
| YPR081C   | 1.06854852351956e-05 | 127621.903171068 |  |
| YPR082C   | 7.38760266539851e-05 | 288943.322085786 |  |
| YPR083W   | 7.38760266539851e-05 | 288943.322085786 |  |
| YPR084W   | 6.48669067881968e-06 | 77340.1280742969 |  |
| YPR085C   | 2.46877055888328e-05 | 141981.569586497 |  |
| YPR086W   | 2.46877055888328e-05 | 141981.569586497 |  |
| YPR087W   | 0                    | 0                |  |
| YPR088C   | 2.88036077989995e-05 | 125707.544742613 |  |
| YPR089W   | 2.88036077989995e-05 | 125707.544742613 |  |
| YPR091C   | 0.000130299808100975 | 543294.67701545  |  |
| YPR093C   | 0                    | 11356.2860220295 |  |
| YPR094W   | 0                    | 11356.2860220295 |  |
| YPR095C   | 0                    | 9803.1136243809  |  |
| YPR096C   | 0                    | 0                |  |
| YPR097W   | 0                    | 0                |  |
| YPR098C   | 7.40152459671739e-05 | 207186.442290393 |  |
| YPR099C   | 0                    | 132048.302518198 |  |
| YPR100W   | 4.43929162650125e-05 | 159845.265666354 |  |
| YPR101W   | 0                    | 132048.302518198 |  |
| YPR102C   | 1.02034804879692e-05 | 161287.49335225  |  |
| YPR103W   | 1.02034804879692e-05 | 146726.399111081 |  |
| YPR104C   | 2.47130434937182e-05 | 342139.396606411 |  |
| YPR105C   | 5.07066191791639e-05 | 478460.978958838 |  |
| YPR106W   | 5.07066191792749e-05 | 478460.978958838 |  |
| YPR107C   | 0                    | 0                |  |
| YPR108W   | 0                    | 0                |  |
| YPR108W-A | 0                    | 39500.9387015325 |  |
| YPR109W   | 2.37520662923485e-05 | 241955.600146093 |  |
| YPR110C   | 8.9067267343701e-05  | 336161.288004384 |  |
| YPR111W   | 8.9067267343701e-05  | 336161.288004384 |  |

YPR112C 0 59400.9173432758  
YPR113W 0 59400.9173432758  
YPR114W 0 10584.6803590411  
YPR115W 0 43932.3085665499  
YPR116W 2.482178444696e-05 387970.88371957  
YPR117W 1.0175100485621e-05 151009.260867751  
YPR118W 0 33200.3164589527  
YPR119W 0 34094.0492667658  
YPR120C 3.17269381645557e-05 293222.527076956  
YPR121W 0 14886.3225023767  
YPR122W 2.0547518810643e-05 89031.496160931  
YPR124W 1.49392747097465e-05 207662.672515698  
YPR125W 0 22442.7748505109  
YPR126C 1.64286701548333e-05 176532.582199606  
YPR127W 4.78423849042953e-05 245363.855101952  
YPR128C 8.14129191769597e-05 621261.597092402  
YPR129W 8.14129191767377e-05 621261.597092402  
YPR130C 0 29585.970583302  
YPR131C 3.4415760509221e-05 157225.328183054  
YPR132W 3.4415760509221e-05 157225.328183054  
YPR133C 5.08735902016166e-06 48726.7159434263  
YPR133W-A 5.08735902016166e-06 48726.7159434263  
YPR134W 2.35435446961363e-05 207228.805773408  
YPR135W 7.5098783829386e-06 166178.094390113  
YPR137C-A 0.000102348932299434 574107.268240674  
YPR137C-B 0.000102348932299434 574107.268240674  
YPR137W 1.4531123635031e-05 219298.061867798  
YPR138C 0 108373.045343819  
YPR139C 4.59617917305533e-05 318298.314360434  
YPR140W 4.59617917305533e-05 318298.314360434  
YPR141C 8.87123742698837e-06 115324.382437332  
YPR142C 0 39176.8966438507  
YPR143W 8.87123742698837e-06 101357.106329997  
YPR144C 8.95835932801514e-06 169539.851674883  
YPR145C-A 0.000129153741834864 652826.246516078  
YPR145W 0.000229353756426076 844374.124929697  
YPR147C 6.11536702184168e-05 296174.567664486  
YPR148C 0 54421.8109500824  
YPR149W 4.63612118776213e-05 305840.038217124  
YPR150W 5.64841013828143e-06 137271.015932304  
YPR151C 1.47960053697993e-05 157755.490163562  
YPR152C 0 12440.4587682435  
YPR153W 0 12440.4587682435  
YPR154W 0 0  
YPR155C 4.09350455027324e-05 195795.578905046  
YPR156C 1.57684903969724e-05 227613.760347625  
YPR157W 0.000102491872029264 599404.617398979  
YPR158C-C 9.37307420385558e-05 1002453.37011881  
YPR158C-D 9.37307420385558e-05 1002453.37011881  
YPR158W 1.11416650403484e-05 222585.310165977  
YPR158W-A 6.86143358232805e-05 573147.441552462  
YPR158W-B 6.86143358232805e-05 573147.441552462  
YPR159C-A 2.08364484609591e-05 117654.595975104  
YPR159W 8.57454115354983e-06 169475.424139633



|           |                      |                  |
|-----------|----------------------|------------------|
| YPR160W   | 5.08735902016166e-06 | 38736.1620934937 |
| YPR161C   | 4.26523664642797e-06 | 111462.852892995 |
| YPR162C   | 0                    | 14770.7560334907 |
| YPR163C   | 2.16824074511512e-05 | 223106.559180126 |
| YPR164W   | 2.16824074511512e-05 | 209692.390712154 |
| YPR165W   | 0                    | 79351.8760100431 |
| YPR166C   | 0.000124596628266471 | 326571.152975593 |
| YPR167C   | 0.000238639126358797 | 470720.052173247 |
| YPR168W   | 0.000238639126358686 | 470720.052173247 |
| YPR169W   | 0                    | 31657.0380963423 |
| YPR169W-A | 0                    | 15881.5989033738 |
| YPR170W-B | 0                    | 15881.5989033738 |
| YPR171W   | 5.47496133396219e-06 | 198028.273886074 |
| YPR172W   | 0                    | 130096.245942118 |
| YPR173C   | 2.25845053324347e-05 | 173033.65564363  |
| YPR174C   | 1.90402067128392e-05 | 358696.157250827 |
| YPR175W   | 1.90402067129503e-05 | 358696.157250827 |
| YPR176C   | 7.46779883390447e-05 | 236955.780042741 |
| YPR178W   | 9.1186578801028e-05  | 306392.449930756 |
| YPR179C   | 0                    | 0                |
| YPR180W   | 0                    | 0                |
| YPR181C   | 5.10201801429133e-06 | 45527.5360252801 |
| YPR182W   | 1.2611858081657e-05  | 186525.877938734 |
| YPR183W   | 9.43333662628554e-06 | 183198.973490284 |
| YPR184W   | 5.0422375025283e-06  | 296133.663634282 |
| YPR185W   | 0                    | 84943.4611514389 |
| YPR186C   | 0                    | 23028.9515375263 |
| YPR187W   | 0                    | 23028.9515375263 |
| YPR188C   | 0                    | 11544.0434093035 |
| YPR189W   | 0                    | 11544.0434093035 |
| YPR190C   | 4.69127502089606e-06 | 80508.8075259634 |
| YPR191W   | 4.69127502089606e-06 | 80508.8075259634 |
| YPR192W   | 4.46337970749777e-06 | 29444.1775045853 |
| YPR193C   | 5.22540185711184e-05 | 420845.190445046 |
| YPR194C   | 1.59823212836363e-05 | 137726.00208424  |
| YPR195C   | 9.20579619840822e-05 | 453576.468655254 |
| YPR196W   | 4.95069142579796e-05 | 410072.852840734 |
| YPR198W   | 0                    | 10818.6205365069 |
| YPR199C   | 6.01151260248844e-06 | 69698.2361956298 |
| YPR200C   | 0                    | 25719.6009625078 |
| YPR201W   | 0                    | 25719.6009625078 |
| YPR202W   | 2.31086950557291e-05 | 243470.257676412 |
| YPR204C-A | 0                    | 0                |
| YPR204W   | 7.39705086882925e-06 | 217240.732610898 |

**Fig. S1**

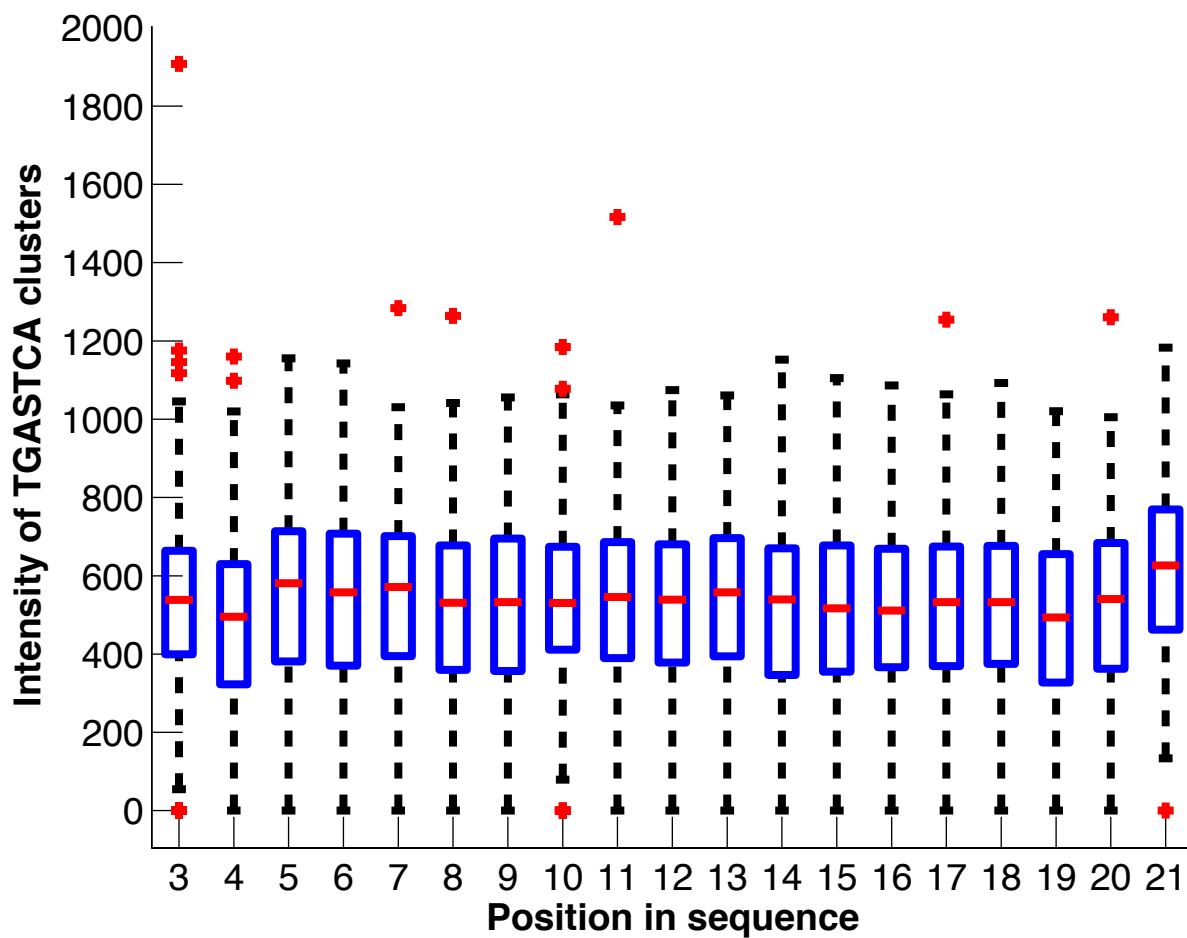

**Fig. S2**

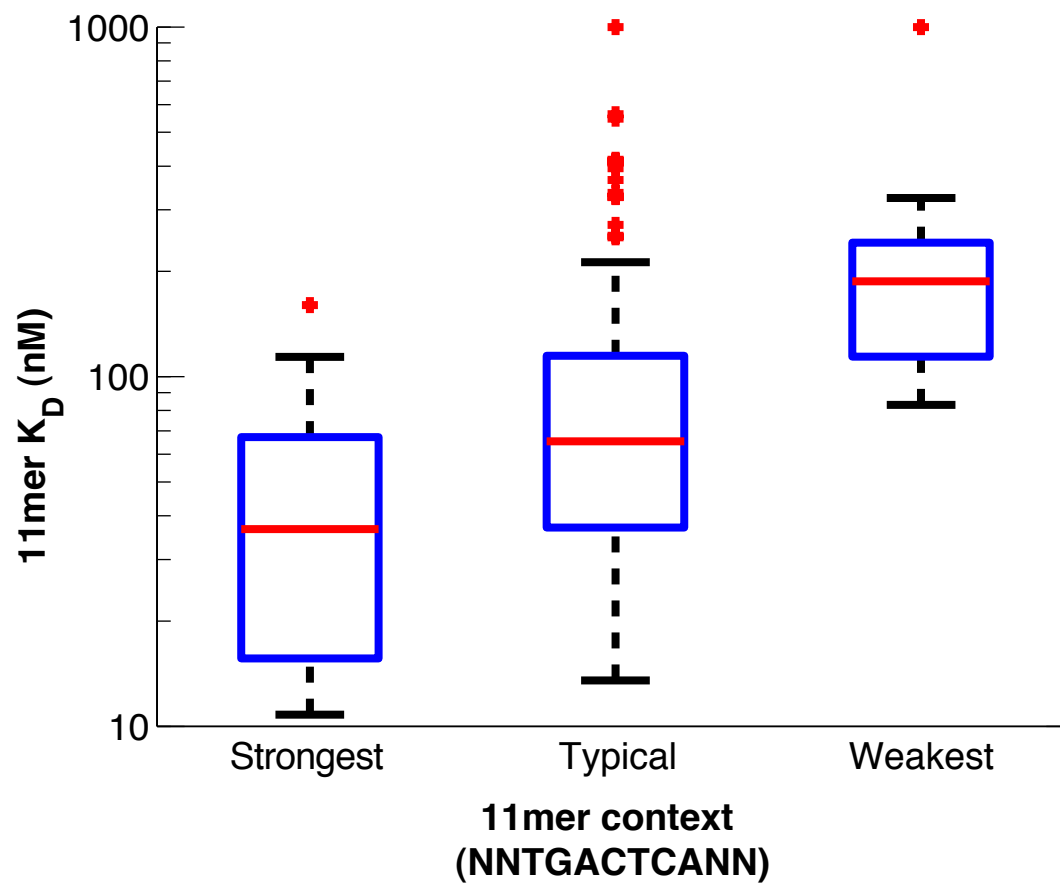

Fig. S3

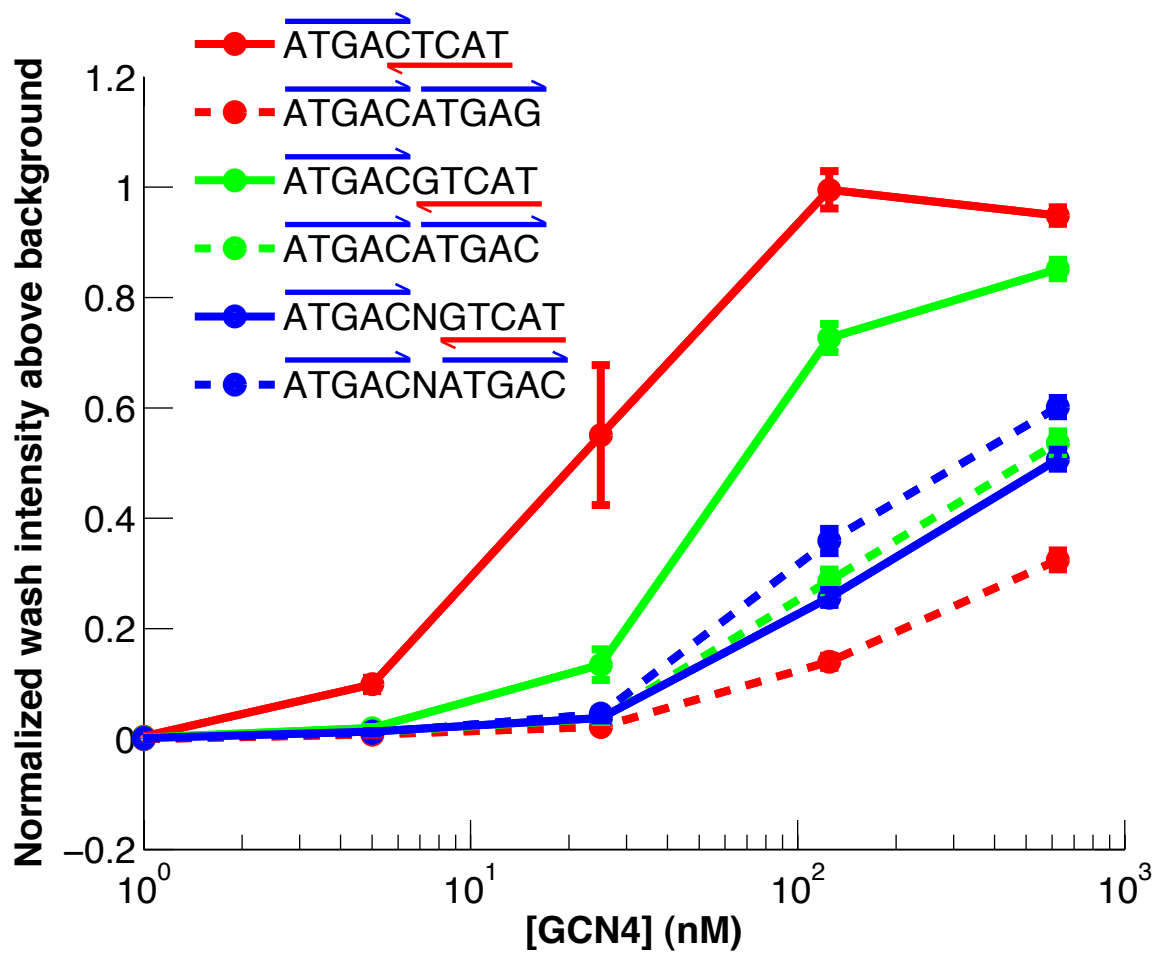

**Fig. S4**

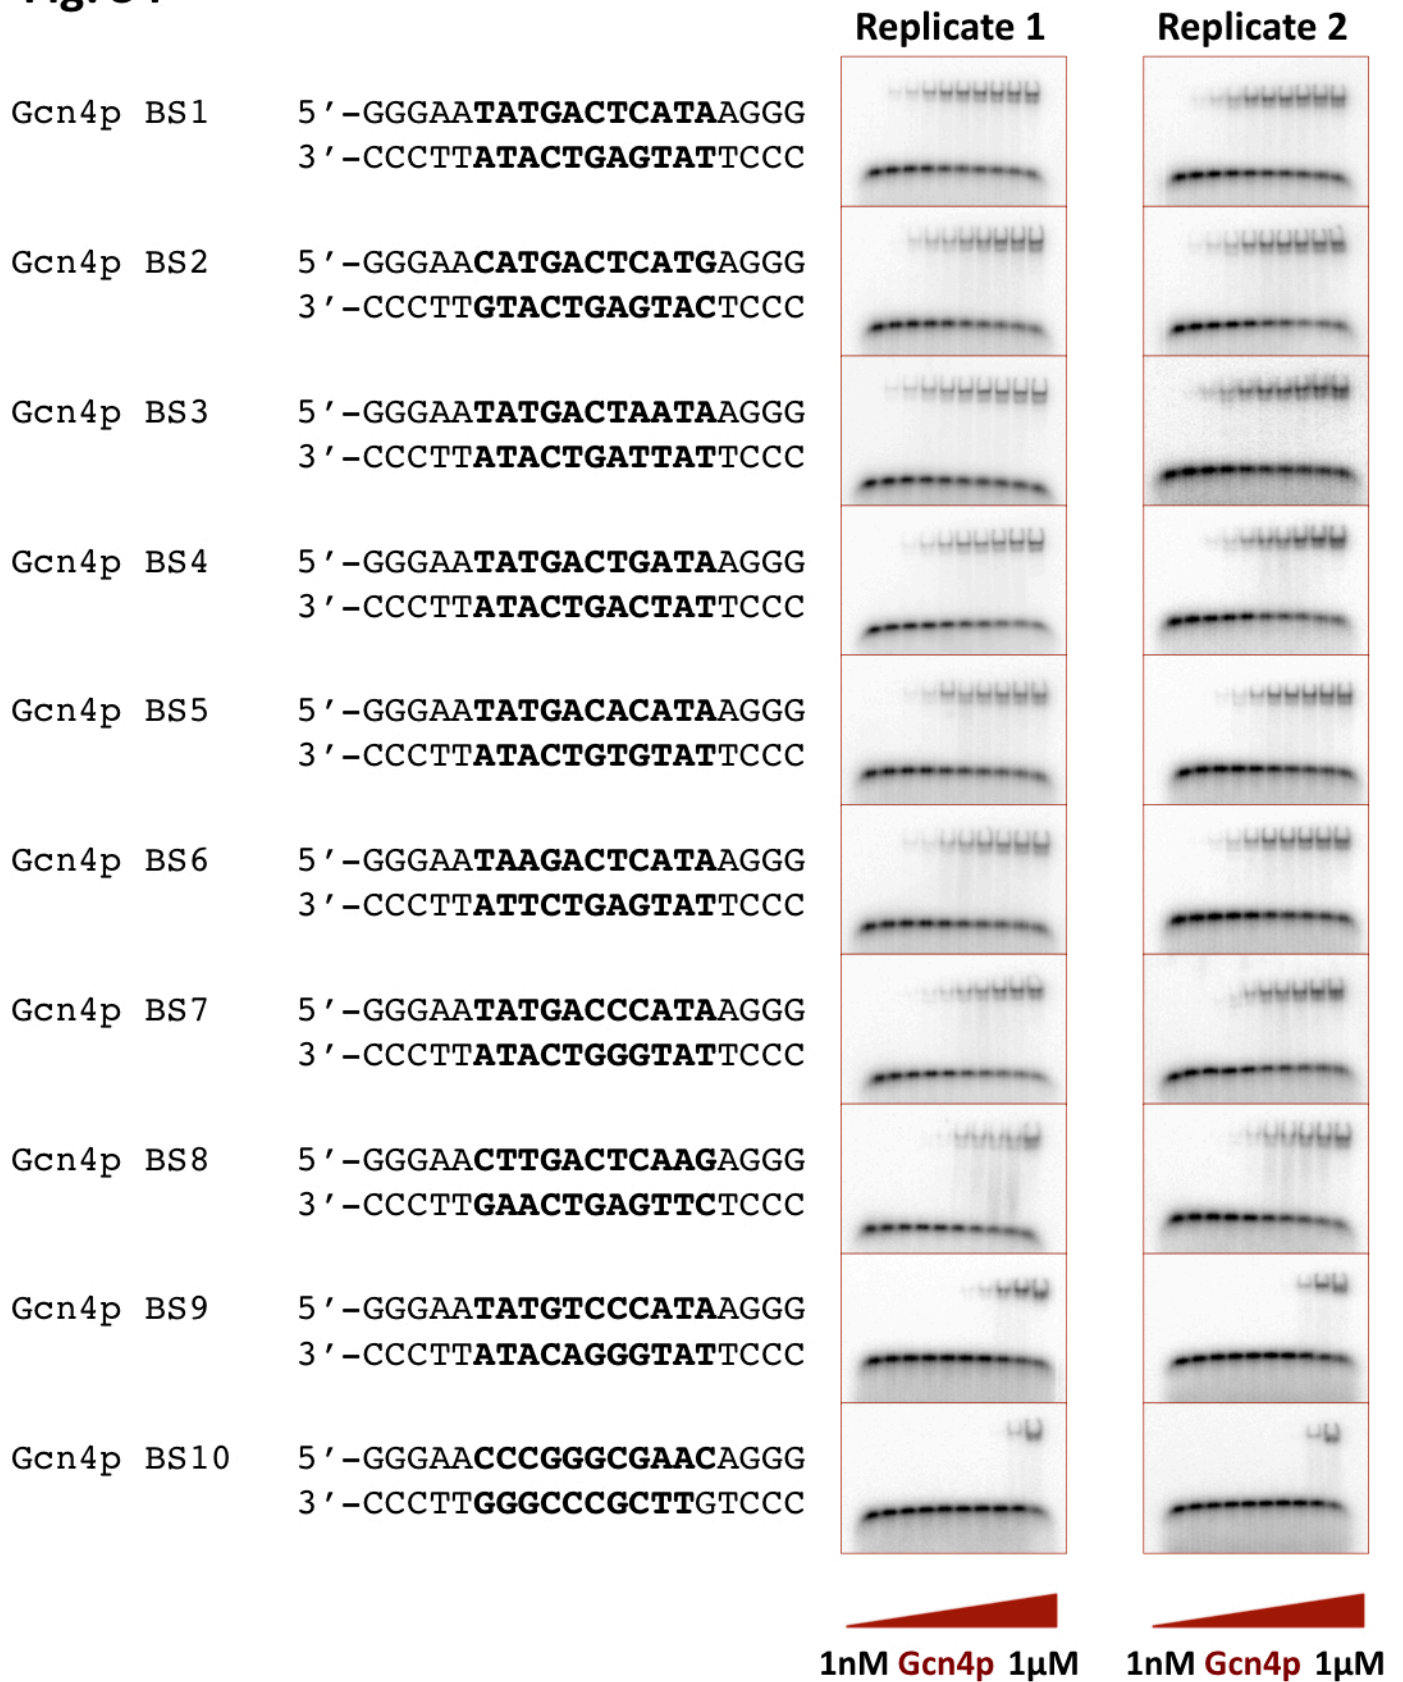

Fig. S5

A

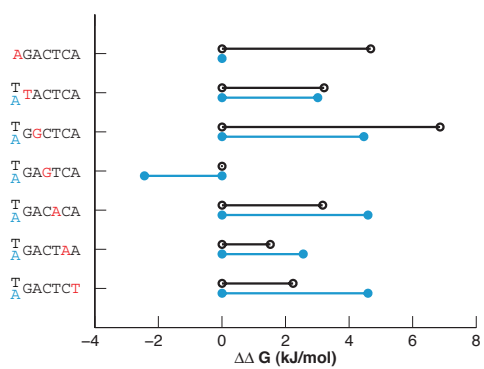

B

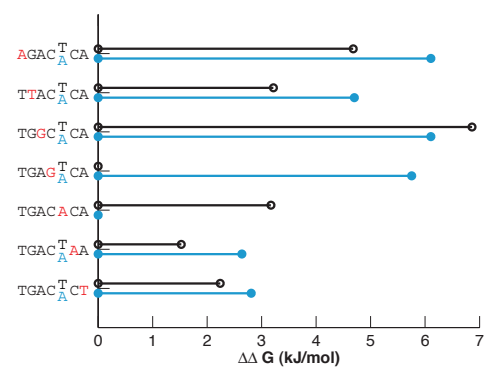

C

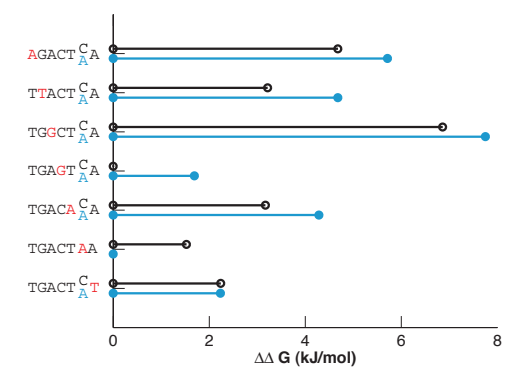

Fig. S6

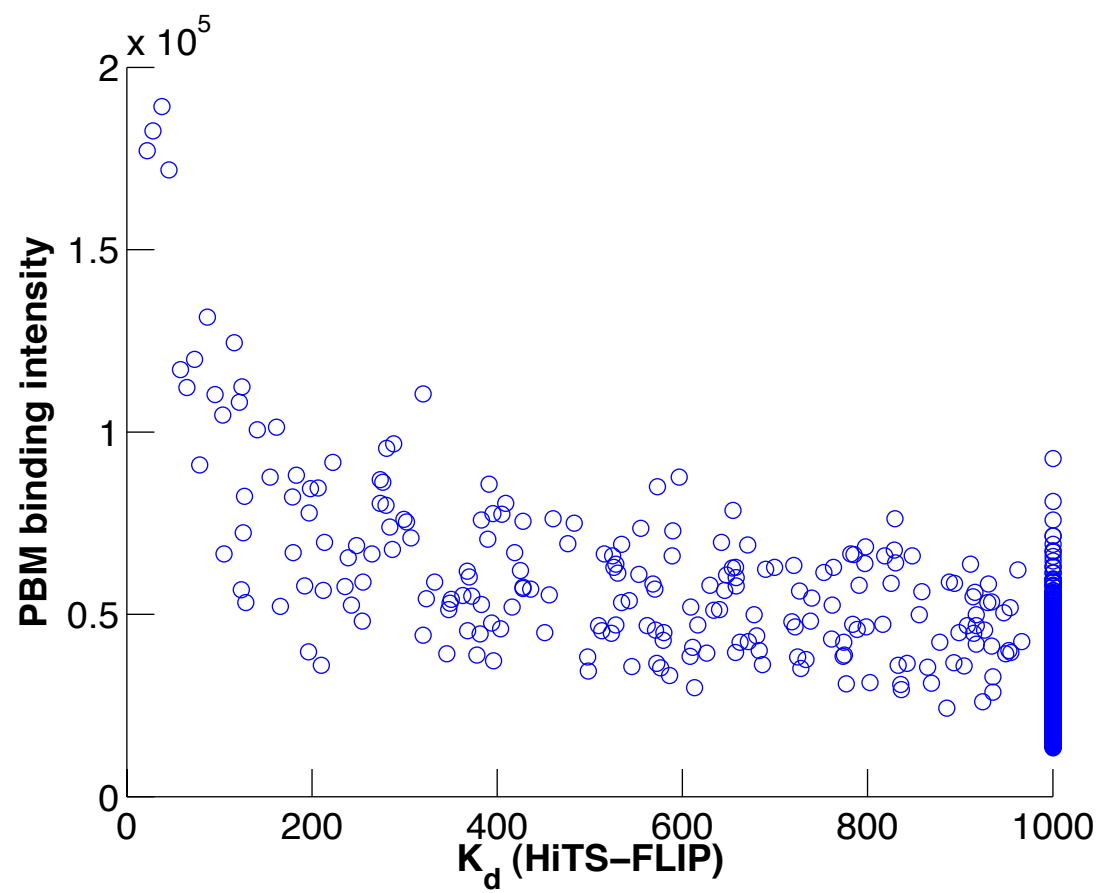

# Fig. S7

**A**

Gcn4p consensus: TGACTCA

...TTACTAATGACTTTT...

$K_d = 210\text{nM}$

Promoter percentile

|           |    |
|-----------|----|
| HiTS-FLIP | 78 |
| PBM       | 31 |
| PWM       | 14 |

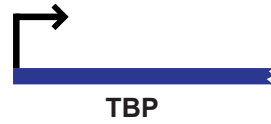

**B**

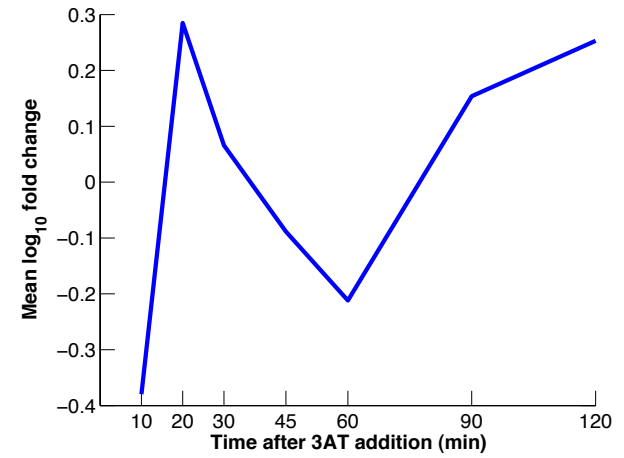



Fig. S8

A

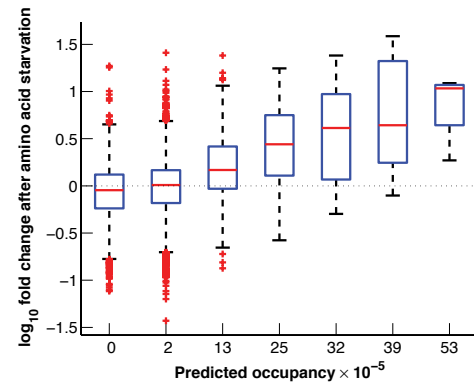

B

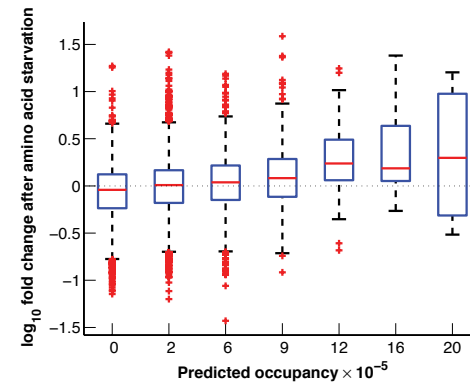

Fig. S9

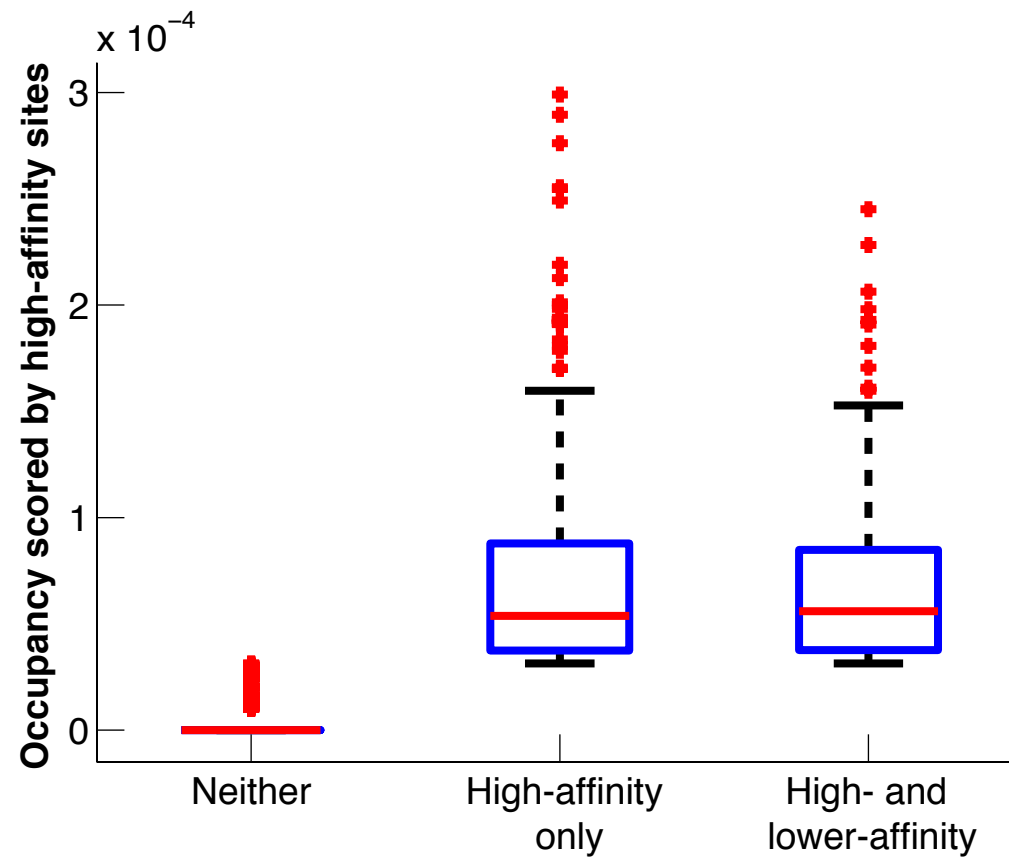

Fig. S10

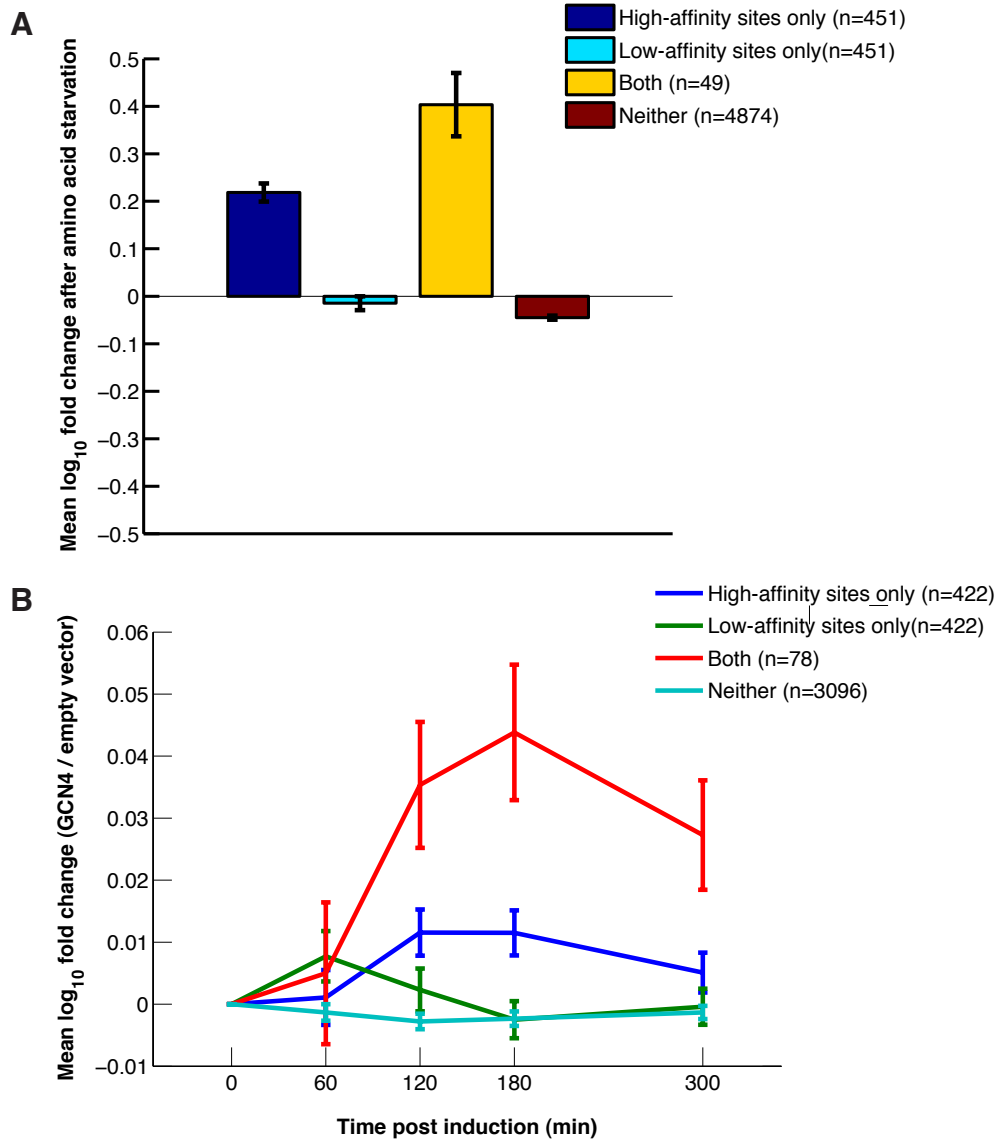

Fig. S11

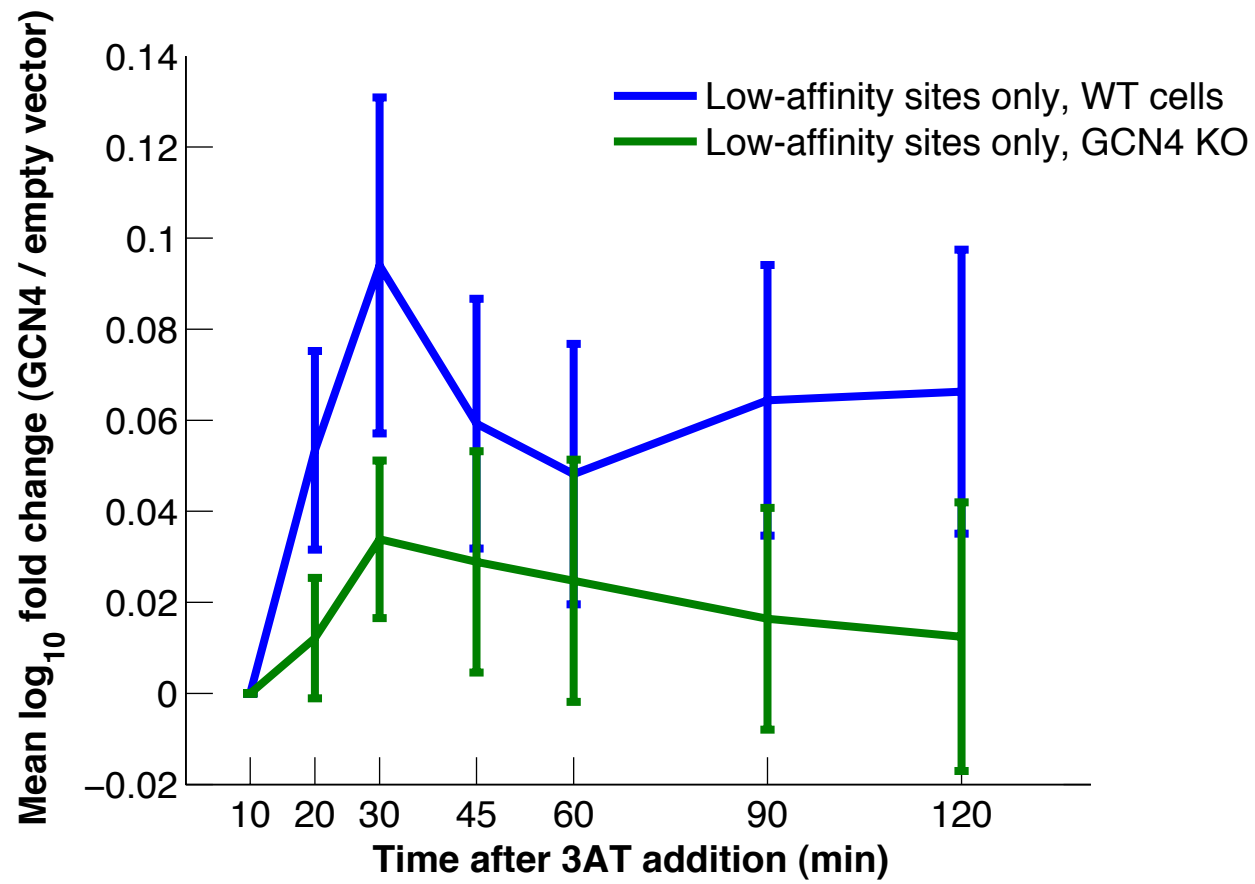
